# Supplementary material for: PTBP2 – a gene with relevance for both Anorexia nervosa and body weight regulation
Source: PubMed Central journal article supplement (PMC9184595; doi:10.1038/s41398-022-02018-5), 2022-06-09
Supplement: 41398_2022_2018_MOESM1_ESM.pdf [file 41398_2022_2018_MOESM1_ESM.pdf]

Tuesday, May 03, 2022 06:14 PM

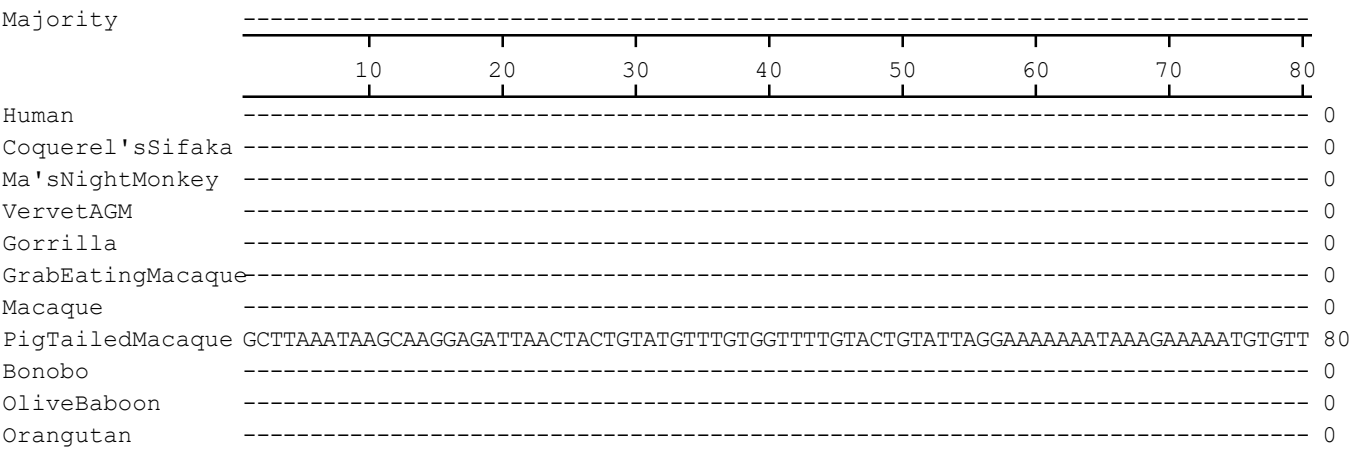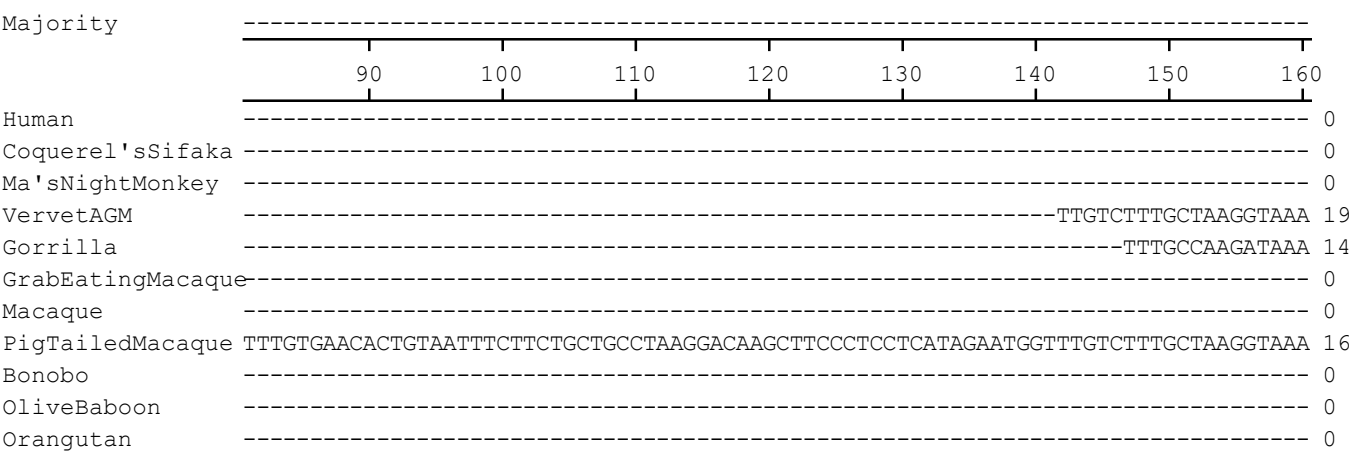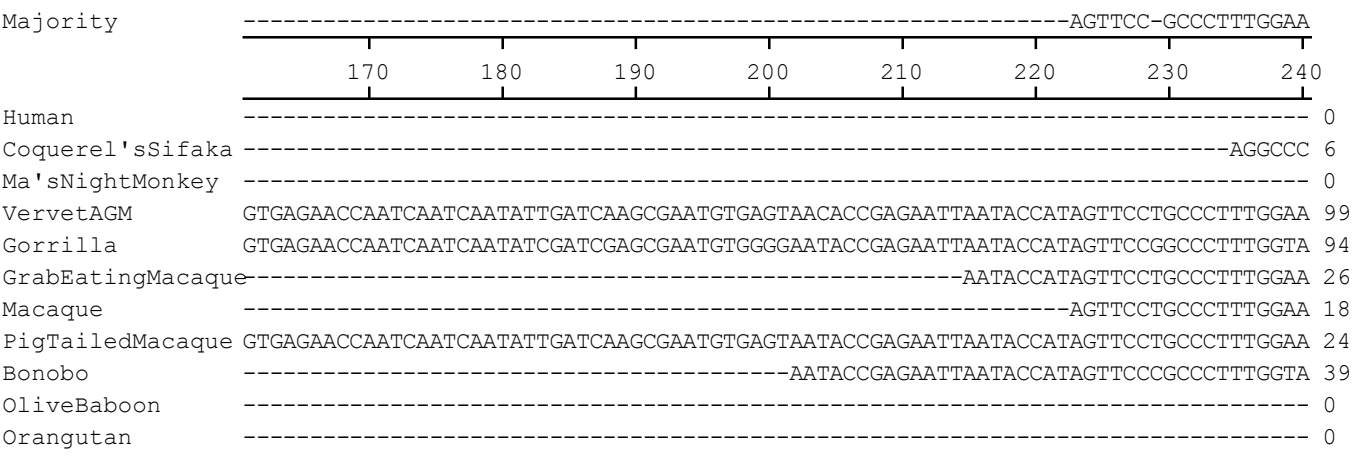

Tuesday, May 03, 2022 06:14 PM

| Majority          | GCTTGCATATTTAAGTGTGAGTGAAAACACATGTACGAAACCACAA-TATG--AAAAGTGATTATTA-ATGGCACCAAT    |                                 |
|-------------------|------------------------------------------------------------------------------------|---------------------------------|
|                   |                                                                                    | 250 260 270 280 290 300 310 320 |
| Human             | -----                                                                              | 0                               |
| Coquerel'sSifaka  | TATTTTAAATCCTATTTTCAGTAAAGGAAACTTTTCCAGGAAACATTAATGAACATACCTAATGTCACACAGTTATTAA    | 86                              |
| Ma'sNightMonkey   | -----CTGACCTCGTGATCCACCCGCTTGGCTCCTAAAGTCTGGGCTTACAGGCGTGAGCT-ACAGCGCCCAG          | 70                              |
| VervetAGM         | GCTTGCATATTTAAGTGTGAGTGAAAACACATGTACGAAACCACAA-CATGTGAAAAGTGATTATTA-ATGGCACCAAT    | 177                             |
| Gorilla           | GCTTGCACATTTAATTTGTTGAGTGAAAACACATGTATGAAACCACAAATATGTGAAAAGTGATTATTA-GTGGCACTAAT  | 173                             |
| GrabEatingMacaque | GCTTGCATATTTAAGTGTGAGTGAAAACACATGTACGAAACCACAA-TATG--AAAAGTGATTATTA-ATGGCACCAAT    | 102                             |
| Macaque           | GCTTGCATATTTAAGTGTGAGTGAAAACACATGTACGAAACCACAA-TATG--AAAAGTGATTATTA-ATGGCACCAAT    | 94                              |
| PigTailedMacaque  | GCTTGCATATTTAAGTGTGAGTGAAAACACATGTACGAAACCACAA-TATG--AAAAGTGATTATTA-ATGGCACCAA-    | 315                             |
| Bonobo            | GCTTGCACATTTCAATTTGTTGAGTGAAAACACATGTATGAAACCACAAATATGTGAAAAGTGATTATTA-GTGGCACTAAT | 118                             |
| OliveBaboon       | -----GACACAGCGAGACTCCGTCTCAAAAAAAAAAAAAA-AAAG--AAAAGTGATTATTA-ATGGCACCAAT          | 63                              |
| Orangutan         | -----TGTGAAAAGTGATTATTA-GTGGCACTAAT                                                | 29                              |

| Majority          | AACAGATCCTTTATTTTAAGGTTAAGGTGAAG-----                                           |                                 |
|-------------------|---------------------------------------------------------------------------------|---------------------------------|
|                   |                                                                                 | 330 340 350 360 370 380 390 400 |
| Human             | -----                                                                           | 0                               |
| Coquerel'sSifaka  | ATTAAAGAGCTCAAATCTGAACCCAAACTTAAATCAAATATTCCTGTATCTCTCCAGTTGTGTATACTTTGTTGCATTA | 166                             |
| Ma'sNightMonkey   | CCCGAAGACTCTATTTTCAG---CAAAGAAAGT-----TTCCA                                     | 106                             |
| VervetAGM         | AACAGATCCTTTATTTTAAGGTTAAGGTGAAG-----                                           | 210                             |
| Gorilla           | AACAGATCCTTTATTTTAAGGTTAAGGTGAAG-----                                           | 206                             |
| GrabEatingMacaque | AACAGATCCTTTATTTTAAGGTTAAGGTGAAG-----                                           | 135                             |
| Macaque           | AACAGATCCTTTATTTTAAGGTTAAGGTGAAG-----                                           | 127                             |
| PigTailedMacaque  | AACAGATCCTTTATTTTAAGGTTAAGGTGAAG-----                                           | 348                             |
| Bonobo            | AACAGATCCTTTATTTTAAGGTTAAGGTGAAGTGGTTATGTAGGAAATTTGATATGTGGTTTTTTTTTTTTTTTTTT   | 198                             |
| OliveBaboon       | AACAGATCCTTTATTTTAAGGTTAAGGTGAAG-----                                           | 96                              |
| Orangutan         | AACAGAACCTTTATTTTAAGGTTAAGGTGAAG-----                                           | 62                              |

| Majority          | -----G-GGGTTATTGTAGGAAATTTGACGTGTGTGTGTGTTTGTGTGTGTG-----T-----TTTC             |                                 |
|-------------------|---------------------------------------------------------------------------------|---------------------------------|
|                   |                                                                                 | 410 420 430 440 450 460 470 480 |
| Human             | -----                                                                           | 0                               |
| Coquerel'sSifaka  | GCCTCAATAGACTCATGTTATGC-TTTGTCCTCTGTTTTATTCTTATTTCACTTCATTTTTTTAATCTAGTACTTTATA | 245                             |
| Ma'sNightMonkey   | AGA---G-AGGTAAATG-AACATGTCTAATGTCACACAGGTATTAATGAAAG-----A-----GCTC             | 159                             |
| VervetAGM         | -----G-GGGTTATTGTAGGAAATTTGATGTGTGTGTGTG--T-----T-----TT-C                      | 249                             |
| Gorilla           | -----GGGTTATTGTAGGAAATTTGATATGTGGTTTTTTTTTTTGTTTTT-----TTTT                     | 254                             |
| GrabEatingMacaque | -----G-GGGTTATTGTAGGAAATTTGACGTGTGTGTGTGTGTGTGTGTGTGTGTGTGTGTGTGTGTGTGTGTGT     | 202                             |
| Macaque           | -----G-GGGTTATTGTAGGAAATTTGACGTGTGTGTGTGTGTGTGTGTGTGTGTGTGTGTGTGTGTGTGTGT       | 200                             |
| PigTailedMacaque  | -----G-GGGTTATTGTATGAAATTTGACGTGTGTGTGTGTGTGTGTGTGTGTGTGTGTGTGTGTGTGTGTGT       | 415                             |
| Bonobo            | GTTTTTA-GNNNNNNNNNNNNNNNNNNNNNNNNNNNNNNNNNNNNNNNNNNNNNNNNNNNNNNNNNNNNNNNNNNNN   | 253                             |
| OliveBaboon       | -----G-GGATTATTGTAGGAAATTTGACGTGTGTGTGTGTGTGTGTGTGTGTGTGTGTGTGTGTGTGTGTGT       | 155                             |
| Orangutan         | -----G-GGGTTATTGTAGGCAATTTGATATGTGTTTTTTTTTTTGTGTTT-----GTTT                    | 111                             |

Tuesday, May 03, 2022 06:14 PM

|                   |                                                                      |                                                                        |
|-------------------|----------------------------------------------------------------------|------------------------------------------------------------------------|
| Majority          | TTTCTTGAGGCG-GAGTTTCACTCTTGTGCCCCAGGCTGGAGTGCAATGGCACTATCTCGGCTCACC  | CGCAACCTCCGCCT                                                         |
|                   | 490      500      510      520      530      540      550      560   |                                                                        |
| Human             | ----- 0                                                              |                                                                        |
| Coquerel'sSifaka  | TGCCTTAACCTGTAAACTCCCTTACATCTTTTCTAGAAAAGTGTGGCTTACATAAAACAAGCATATTA | ACTATTGCATGTT 325                                                      |
| Ma'sNightMonkey   | AAATCTGAACCC-AGGCTCTAATCAATATGCTTCTGT--GTACACTGTTGCGTTAGCCTCATTCCTG  | ACTCATGCTATGC 236                                                      |
| VervetAGM         | TTTCTTGAGGCG-GAGTTTCGCTCTTGTGCCCCAGGCTGGAGTGCAATGGCACTATCTCGGCTCACC  | CGCAACCTCCGCCT 328                                                     |
| Gorilla           | TTTTTTGAGGCA-GAGTTTCGCTCTTGTGCCCCAGGCTGGAGTGCAATGGCGTGATCTTGGCTCACC  | CGCAACCTCCGCCT 333                                                     |
| GrabEatingMacaque | TTTCTTGAGGCG-GAGTTTCACTC--GTTGCCAGGCTGGAGTGCAATGGCACTATCTCGGCTCACC   | CGCAACCTCCGCCT 279                                                     |
| Macaque           | TTTCTTGAGGCG-GAGTTTCACTC--GTTGCCAGGCTGGAGTGCAATGGCACTATCTCGGCTCACC   | CGCAACCTCCGCCT 277                                                     |
| PigTailedMacaque  | TTTCTTGAGGCG-GAGTTTCACTCTTGTGCCCCAGGCTGGAGTGCAATGGCACTATCTCGGCTCACC  | CGCAACCTCCGCCT 494                                                     |
| Bonobo            | NNNNNNNNNNNNNNNNNNNNNNNNNNNNNNNNNNNNNNNNNNNNNNNNNNNNNNNNNNNNNNNNNN   | NNNNNNNNNNNNNNNNNNNNNNNNNNNNNNNNNNNNNNNNNNNNNNNNNNNNNNNNNNNNNNNNNN 332 |
| OliveBaboon       | TTTCTTGAGGCG-GAGTTTCACTCTTGTGCCCCAGGCTGGAGTGCAATGGCACTATCTCGGCTCACC  | CGCAACCTCCGCCT 234                                                     |
| Orangutan         | TTTTTTGAGACA-GAGTTTCGCTCTTGTGCCCCAGGCTGGAGTGCAATGGCGCGATCTTGGCTCACC  | CGCAACCTCCGCCT 190                                                     |

|                   |                                                                      |                                                                        |
|-------------------|----------------------------------------------------------------------|------------------------------------------------------------------------|
| Majority          | CCTGGGTTCAAGCGATTCTCCTGCCTCAG-CCTCCCGAGTAGCTGGGATTACAGGCATGCACCACCAC | CCCTGGCTAATTT                                                          |
|                   | 570      580      590      600      610      620      630      640   |                                                                        |
| Human             | ----- 0                                                              |                                                                        |
| Coquerel'sSifaka  | TGTAGTCTCGTACTTTATTAGGAGGAAAAAAGTGTGTTTTTGTGAACACTATAATATCTT-CTGCC   | CAGAGGACA 404                                                          |
| Ma'sNightMonkey   | TTTGTCTCTGTTTTATTCTTGTTC--CTTCTGTTTTAATCTAGTACTTTATGTGCTTTGACTTGT    | TAACTA-CCT 313                                                         |
| VervetAGM         | CATGGGTTCAAGCGATTCTCCTGCCTCAG-CCTCCCGAGTAGCTGGGATTACAGGCATGCACCACC   | ACCCTGGCTAATTT 407                                                     |
| Gorilla           | CCCAGGTTCAAGCGATTCTCCTGCCTCAG-CCTCCCGAGTAGCTGGGATTACAGACATGCACCACC   | ATCCCGCTAATTT 412                                                      |
| GrabEatingMacaque | CCTGGGTTCAAGCGATTCTCCTGCCTCAG-CCTGCCGAGTAGCTGGGATTACAGGCATGCACCACC   | ACCCTGGCTAATTT 358                                                     |
| Macaque           | CCTGGGTTCAAGCGATTCTCCTGCCTCAG-CCTCCCGAGTAGCTGGGATTACAGGCATGCACCACC   | ACCCTGGCTAATTT 356                                                     |
| PigTailedMacaque  | CCTGGGTTCAAGCGATTCTCCTGCCTCAG-CCTCCCGAGTAGCTGGGATTACAGGCATGCACCACC   | ACCCTGGCTAATTT 573                                                     |
| Bonobo            | NNNNNNNNNNNNNNNNNNNNNNNNNNNNNNNNNNNNNNNNNNNNNNNNNNNNNNNNNNNNNNNN     | NNNNNNNNNNNNNNNNNNNNNNNNNNNNNNNNNNNNNNNNNNNNNNNNNNNNNNNNNNNNNNNNNN 411 |
| OliveBaboon       | CCTGGGTTCAAGCGATTCTCCTGCCTCAG-CCTCCCGAGTAGCTGGGATTACAGGCATGCACCACC   | ACCCTGGCTAATTT 313                                                     |
| Orangutan         | CCCCGGTTCAAGCGATTCTCCTGGCTCAG-CCTCCCGAGTAGCAGGATTACAGACATGCACCACC    | ACCCAGCTAATTT 269                                                      |

|                   |                                                                      |                                                                        |
|-------------------|----------------------------------------------------------------------|------------------------------------------------------------------------|
| Majority          | TGTATTTTTAGTAGAAACGTGGTTTTCTCCATTTT-GGTCAGGCTGGTCTTGAACCTCCCGACCTCAG | GTGATCCACTTGCC                                                         |
|                   | 650      660      670      680      690      700      710      720   |                                                                        |
| Human             | ----- 0                                                              |                                                                        |
| Coquerel'sSifaka  | GGCTTCCCCCTCATGGAACAGTTTCTCTTTGCCAAGATAGAATGACAACCAATCAAAATCCACCAAG  | TGAATGTGAGGA 484                                                       |
| Ma'sNightMonkey   | TGCATTTTTTCAAGAAA-GTGTATCTTAA-AT--AAGCAAGCAGATTAACATTTGATGTTTGTGGTCT | TGACT-GTG 388                                                          |
| VervetAGM         | TGTATTTTTAGTAGAAACGTGGTTTTCTCCATTTT-GGTCAGGCTGGTCTTGAACCTCCCGACCTCAG | GTGATCCACTTGCC 486                                                     |
| Gorilla           | TGTATTTTTAGTAGAGACGGGTTTTCTCCATGTTTGGTCAGGCTGGTCTCGAACTCCCGAGCTCAGG  | TGATCTGCTTGCC 492                                                      |
| GrabEatingMacaque | TGTATTTTTAGTAGAAACGTGGTTTTCTCCATTTT-GGTCAGGCTGGTCTTGAACCTCCCGACCTCAG | GTGATCCACTTGCC 437                                                     |
| Macaque           | TGTATTTTTAGTAGAAACGTGGTTTTCTCCATTTT-GGTCAGGCTGGTCTTGAACCTCCCGACCTCAG | GTGATCCACTTGCC 435                                                     |
| PigTailedMacaque  | TGTATTTTTAGTAGAGACGTGGTTTTCTCCATTTT-GGTCAGGCTGGTCTTGAACCTCCCGACCTCAG | GTGATCCACTTGCC 652                                                     |
| Bonobo            | NNNNNNNNNNNNNNNNNNNNNNNNNNNNNNNNNNNNNNNNNNNNNNNNNNNNNNNNNNNNNNNN     | NNNNNNNNNNNNNNNNNNNNNNNNNNNNNNNNNNNNNNNNNNNNNNNNNNNNNNNNNNNNNNNNNN 491 |
| OliveBaboon       | TGTATTTTTAGTAGAAACGTGGTTTTCTCCATTTT-GGTCAGGCTGGTCTTGAACCTCCCGACCTCAG | GTGATCCACTTGCC 392                                                     |
| Orangutan         | TGTATGTTTAGTAGAGACGGGTTTTCCCATGTT-GGTCAGGCTGGTCTTGAACCTCCCGACCTCAGG  | TGATCTGCTTGCC 348                                                      |

Tuesday, May 03, 2022 06:14 PM

```

Majority      TCAGCCTCCCAAAGTGTGGCATTACAGG----AGTGAGCCACCGCTCCTGGTCTTT-----
                730      740      750      760      770      780      790      800
Human          ----- 0
Coquerel'sSifaka ATACAGAGAATTAATGCTATAGTTCTGTGCTTTGGTAGCTTACATATTTAATTGTTAAGTGAAAATACACGTACAAGCT 564
Ma'sNightMonkey TTAGAAAAAAAAAAAAAAAAAGAAAATGTG----TGAACACTGATATTTCTCTGCTAAGGACAAGCTTCCCTCTCA---- 460
VervetAGM       TCAGCCTCCCAAAGTGTGGCATTACAGG----AGTCAGCCAGCGCTACCTGTCTTT----- 539
Gorilla         TCGGCCTCCCAAATGCTGGGATTACAGG----CGGGAGCCACCGTGCCCGGCCTTTTTTTTTTTTTTTTTTTTTTTT 568
GrabEatingMacaque TCAGCCTCCCAAAGTGTGGCATTACAGG----AGTGAGTACCGCTCCTGGTCTTT----- 490
Macaque         TCAGCCTCCCAAAGTGTGGCATTACAGG----AGTGAGTACCGCTCCTGGTCTTT----- 488
PigTailedMacaque TCAGCCTCCCAAAGTGTGGCATTACAGG----AGTGAGCCACCGCTCCCGGTCTTT----- 705
Bonobo          NNNNNNNNNNNNNNNNNNNNNNNNNNNNNNNNNNNNNNNNNNNNNNNNNNNNNNNNNNNNNNNNNNNNNNNNNNNNN 567
OliveBaboon     TCAGCCTCCCAAAGTGTGGCATTACAGG----AGTGAGCCACCGCTCCTGGTCTTT----- 445
Orangutan       TCGGCCTCCCAAAGTGTGGGATTACAGG----CGTGAGCCACTGTGCCCGCATT-----T----- 402
    
```

```

Majority      ---T-----TTTTTTTTT-----GACAATCCCATAGGCAAA-TCAATAATTTGTAAAAATGTGGGTGCTTTGAAG
                810      820      830      840      850      860      870      880
Human          ----- 0
Coquerel'sSifaka GGGCGTGGCGGCTAACACCTGTAATCCTAGCACTTTGAAGGCCAAGGTAGGAGGAGGGCTTGAGCCCAGGAGTTTGAGG 644
Ma'sNightMonkey ---TAGAACGGTTTGCTTTGCCA-A--GACAAAGTGAGAAGCAA--TCAATCAATACTGATGGAGCGAATG--TGGGGA 530
VervetAGM       ---T-----TTTTTTTTTTTTTTTTTGAACAATCCCATAGGCAAA-TCAATAATTTGTAAAAATGTGGGTGCTTTGAAG 608
Gorilla         T--TTTTTTTTTTTTTTTTTAAAGGATTGACAATCCCATAGGCAAA-TCAAGAATTTGTAAAAATTTGGGTGGTTTGAAG 645
GrabEatingMacaque ---T-----TTTTTTT-----GACAATCCCATAGGCAAA-TCAATAATTTGTAAAAATGTGGGTGCTTTGAAG 549
Macaque         ---T-----TTTTTTTT-----GACAATCCCATAGGCAAA-TCAATAATTTGTAAAAATGTGGGTGCTTTGAAG 548
PigTailedMacaque ---T-----TTTTTTTTTTTT-----GACAATCCCATAGGCAAA-TCAATAATTTGTAAAAATGTGGGTGCTTTGAAG 768
Bonobo          N--NNNNNNNNNNNNNNNNNNNNNNNNNNNGACAATCCCATAGGCAAA-TCAAGAATTTGTAAAAATTTGGGTGCTTTGAAG 644
OliveBaboon     ---T-----TTTTTTTT-----GACAATCCCATAGGCAAA-TCAATAATTTGTAAAAATGTGGGTGCTTTGAAG 505
Orangutan       -----TTTGTTTGTTTGTGTTGAAGGATTGACAATCCCATAGGCAAA-TCAAGAATTTGTAAAAATTTGGGTGCTTTGAAG 476
    
```

```

Majority      --AGTTCATATAGCAAAGTGTTTGGACAA-ATGCTCTTTAAGGGTCTA----TCCAATTTAAAAGTAATATTATTTACTGC
                890      900      910      920      930      940      950      960
Human          ----- 0
Coquerel'sSifaka TTAAAGCTATGATAATACCACTGCACTCCAGCCCGTGTGACAGAGAGACCCTGTCTCAAAAACAAAACAAAACAAA-- 723
Ma'sNightMonkey --ATACCGAGAATTAATAGCATAGTTCC--TGCCCTTTGGTAGCTTA----CATATTTAATTATTGAGAGAAAACA-G-- 599
VervetAGM       --AGTTCATATAGCAAAGTGTTTGGACAA-ATGTTCTTTAAGTGTCTA----TCCAATTTAAAAGTAATATTATTTACTGC 681
Gorilla         --AGTTCGTAGCAAAGTGTTTGGACAAGATGCTCTTTAAGGGTCTA----TCCAATTTAAAAGTAATATTATTTATGGC 719
GrabEatingMacaque --AGTTCATATAGCAAAGTGTTTGGACAA-ATGCTCTTTAAGGGTCTA----TCCAATTTAAAAGTAGTATTATTTACTGC 622
Macaque         --AGTTCATATAGCAAAGTGTTTGGACAA-ATGCTCTTTAAGGGTCTA----TCCAATTTAAAAGTAATATTATTTACTGC 621
PigTailedMacaque --AGTTCATATAGCAAAGTGTTTGGACAA-ATGTTCTTTAAGGGTCTA----TCCAATTTAAAAGTAATATTATTTACTGC 841
Bonobo          --AGTTCATATAGCAAAGTGTTTGGACAAGATGCTCTTTAAGGGTCTA----TCCAATTTAAAAGTAATATTATTTATGGC 718
OliveBaboon     --AGTTCATAGCAAAGTGTTTGGACAA-ATGCTCTTTAAGGGTCTA----TCCAATTTAAAAGTAATATTATTTACTGC 578
Orangutan       --AGTTCATAGCAAAGTGTTTGGACAAGATGTTCTTTAAGGGTCTA----TCCAATTTAAAAATAATATTATTTATGGC 550
    
```

Tuesday, May 03, 2022 06:14 PM

|                   |                                                                                   |     |
|-------------------|-----------------------------------------------------------------------------------|-----|
| Majority          | CGGGCGCGGTGGCTCACAGCTGTAATCCCAGCACTTTGGGAGGCCGAGGAGGGCGGATCACCTGAGGTCCGGAGTTCGAG  |     |
|                   | 970      980      990      1000      1010      1020      1030      1040           |     |
| Human             | -----                                                                             | 0   |
| Coquerel'sSifaka  | -AAGTACAAAACCACAAATATGTGAA--AAGTGATTATTAATGGCACTGAAAACAGGTCCTTTATGTATCGTAAGTCAAT  | 800 |
| Ma'sNightMonkey   | -GAGCACAAAACCTCAAATATGTGAA--AGGTGATTATTAATGGCACTAATAACAGAT--CCTTTGTTTTAAGATTTAAG  | 674 |
| VervetAGM         | CGGGCGCGGTGGCTCACAGCTGTAATCCCAGCACTTTGGGAGGCCGAGGAGGGCGGATCACCCGAGGTCCGGAATTCGAG  | 761 |
| Gorilla           | CGGGCACGGTGGCTTACGCCTGTAATCCCAGCACTTTGGGAGGCCGAGGAGGGCGGATCACCTGAGGTCCAGGAGTTCGAG | 799 |
| GrabEatingMacaque | CGGGCGCGGTGGCTCACAGCTGTAATCCCAGCACTTTGGGAGGCCGAGGAGGGCGGATCACCTGAGGTCCGGAGTTCGAG  | 702 |
| Macaque           | CGGGCGCGGTGGCTCATAGCTGTAATCCCAGCACTTTGGGAGGCCGAGGAGGGCGGATCACCTGAGGTCCGGAGTTCGAG  | 701 |
| PigTailedMacaque  | CGGGCGCGGTGGCTCACAGCTGTAATCCCAGCACTTTGGGAGGCCGAGGAGGGCGGATCACCTGAGGTCCGGAGTTCGAG  | 921 |
| Bonobo            | CGGGCACGGTGGCTCACGCCTGTAATCCCAGCACTTTGGGAGGCCGAGGAGGGCGGATCACCTGAGGTCCAGGAGTTCGAG | 798 |
| OliveBaboon       | CGGGCGCGGTGGCTCACAGCTGTAATCCCAGCACTTTGGGAGGCCGAGGAGGGCGGATCACCTGAGGTCCGGAGTTCGAG  | 658 |
| Orangutan         | CGGGCGCGGTGGCTCACGCCTGTAATCCCAGCACTT-GGGAGGCCGAGGAGGGCGGATCACCTGAGGTCCAGGAGTTCGAG | 629 |

|                   |                                                                                  |     |
|-------------------|----------------------------------------------------------------------------------|-----|
| Majority          | ACCGGCCTCA-----                                                                  |     |
|                   | 1050      1060      1070      1080      1090      1100      1110      1120       |     |
| Human             | -----                                                                            | 0   |
| Coquerel'sSifaka  | GGTGAAGGTGA-----AGGAGAGGTATTGTAGGAAGTTTGT                                        | 836 |
| Ma'sNightMonkey   | GTGAAGGGGG-----TAATTGTAGGAGATTTGACAGGTGGGTTTT                                    | 714 |
| VervetAGM         | ACCGGCCTCA-----                                                                  | 771 |
| Gorilla           | ACCAACCTGACCAACATGGAGAAACCCTGTCTCTACTAAAAATACAAAGTTAGCTGGGCGTGGTGTACAGTGCCTGTAAT | 879 |
| GrabEatingMacaque | ACCGGCCTCA-----                                                                  | 712 |
| Macaque           | ACCGGCCTCA-----                                                                  | 711 |
| PigTailedMacaque  | ACCGGCCTCA-----                                                                  | 931 |
| Bonobo            | ACCAACCTGACCAACATGGAGAAACCCTGTCTCTACTAAAAATACAAAGTTAGCTGGGCGTGGTGGCGCTGCCTGTAAT  | 878 |
| OliveBaboon       | ACCGGCCTCA-----                                                                  | 668 |
| Orangutan         | ACCAACCTGACCAACATGGAGAAACCCTGTCTCTACTAAAAATACAAATTAGCCGGGCGTGGTGGCGCTGCCTGTAAT   | 709 |

|                   |                                                                                    |     |
|-------------------|------------------------------------------------------------------------------------|-----|
| Majority          | -----GGAGGCGGAAGTTGCGGTTAGCCGA-GATCGCGACA                                          |     |
|                   | 1130      1140      1150      1160      1170      1180      1190      1200         |     |
| Human             | -----                                                                              | 0   |
| Coquerel'sSifaka  | TTGATTTTCCTTTTAAAGGACTGACAATCTGTGGGGCAAATCAA-GAATTGTAAACATTTGGGTGCTTTGA-GAGATCCATA | 914 |
| Ma'sNightMonkey   | TTTTTTTTTTTTTAAAGATTGACAATCCCAGAGGCAAATCAAGAATTTGTAAAAATTTGGGTGCTTTGAAGAGTTCTCTA   | 794 |
| VervetAGM         | -----GGAGGCGGAAGTTGCGGTTAGCCGA-GATCGCGACA                                          | 806 |
| Gorilla           | CCCAGCTACTCGGGAGGCTGAGGCAGGAGAATCGCTTGAACCAGGGAGGCCGAGGTTGCAGTGAGCCGA-GATTGCGCCA   | 958 |
| GrabEatingMacaque | -----GGAGGAGGAAGTTGCGGTTAGCCGA-GATCGCGACA                                          | 747 |
| Macaque           | -----GGAGGCGGAAGTTGCGGTTAGCCGA-GATCGCGACA                                          | 746 |
| PigTailedMacaque  | -----GGAGGCGGAAGTTACGGTTAGCCGA-GATCGCGACA                                          | 966 |
| Bonobo            | CCCAGCTACTCGGGAGGCTGAGGCAGGAGAATCGCTTGAACCAGGGAGGCCGAGGTTGCAGTGAGCCGA-GATTGCGCCA   | 957 |
| OliveBaboon       | -----GTAGGCGGAAGTTGCGGTTAGCCGA-GATCGCGACA                                          | 703 |
| Orangutan         | CCCAGCTACTCGGGAGGCTGAGGCAGGAGAATCGCTTGAACCAGGGAGGCCGAGGTTGCAGTGAGCCGA-GATTGCGCCA   | 788 |

Tuesday, May 03, 2022 06:14 PM

```

Majority      TTGCACTCCAGCCCAGGCAACAAGAGC---GAGACTC-----AAAAATATATATGTATTTTAAGAATTATATAGAA-
              1210      1220      1230      1240      1250      1260      1270      1280
Human         ----- 0
Coquerel'sSifaka CCAAAGT---ATTTGGACAAGATGCTCTTCAAGGTTTTGTTC AATTTAAAGTAAT---ATTTTAAAAATTATACAGACA 987
Ma'sNightMonkey ACAAAGT---GTCTGGACAAGATGCTCTTTAAGGCTATCCAATTTAAAGTAATATTTTAAAGAATTATACAGAA- 870
VervetAGM      TTGCACTCCAGCCCAGGCAACAAGAGC---GAAACTC-----AAAAATATATATGTATTTTAAAGAATTATATAGAA- 874
Gorilla       TTGCACTTCAGCCCAGGCAACAAGAGC---GAGACTCGGTCTCAAAAAAAAAAATA---TTCTAAAAATTATACACAA- 1030
GrabEatingMacaque TTGCACTCCAGCCCAGGCAACAAGAGC---GAAACTC-----AAAAATATATATGTATTTTAAAGAATTATATAGAC- 815
Macaque       TTGCACTCCAGCCCAGGCAACAAGAGC---GAAACTC-----AAAAATATATATGTATTTTAAAGAATTATATAGAC- 814
PigTailedMacaque TTGCACTCCAGCCCAGGCAACAAGAGT---GAAACTC-----AAAAATATATATGTATTTTAAAGAATTATATAGAC- 1034
Bonobo       TTGCACTTCAGCCTGGGCAACAAGAGC---AAGACTCGGTCTACAAAAAAAAAAT-----TCTAAAAATTATACACAA- 1027
OliveBaboon   TTGCACTCCAGCCCAGGCAACAAGAGC---GAAACTC-----AAAAATATATATGTATTTTAAAGAATTATATAGAA- 771
Orangutan     TTGCACTTCAGCCTGGGCAACAAGAGA---GAGACTACGTCTCAAAAAAAAAAAAAAAAAAATTCTAAGAATTATACAGAA- 864
    
```

```

Majority      -TATAATTTAGTATAGTGAAATTCCAATTAGTAAAGGATAAGCGCTTTCCTGAAGGAGATATGGAAAAACCCAGAGT--
              1290      1300      1310      1320      1330      1340      1350      1360
Human         ----- 0
Coquerel'sSifaka CTACAATTTAGTATAGTGAAATTCCAATTAGTAAAGAGTAAGAGGTTTGTCTGAAGGAGATCTGGGAAAACACAGAGTGG 1067
Ma'sNightMonkey -TACCATTTGATATAGTGAAATTCCAATTAGTAAAGGGTGAGAGCTTTCCTGAAGGAGATGTGAGAAACCCCGGAGTGA 949
VervetAGM      -TATAATTTAGCATAGTGAAATTCCAATTAGTAAAGTATAAGCGCTTTCCTGAAGAAGATATGGAAAAACCCAGAGT-- 951
Gorilla       -TATCATTTAGTATA-TGAAATTCCAATTAGCAAAGGATAAGAGCTCTGCCTGAAGGAGATACGGAAAAACCCAGAGTGA 1108
GrabEatingMacaque -TATAATTTAGTATAGTGAAATTCCAATTAGTAAAGGATAAGCGCTTTCCTGAAGAAGATATGGAAAAACCCAGAGT-- 892
Macaque       -TATAATTTAGTATAGTGAAATTCCAATTAGTAAAGGATAAGCGCTTTCCTGAAGAAGATATGGAAAAACCCAGAGT-- 891
PigTailedMacaque -TATAATTTAGTATAGTGAAATTCCAATTAGTAAAGGATAAGCGCTTTCCTGAAGAAGATATGGAAAAACCCAGAGT-- 1111
Bonobo       -TATCATTTAGTATA-TGAAATTCCAATTAGCAAAGGATAAGAGCTTTCCTGAAGGAGATACAGAAAAACCCAGAGTGA 1105
OliveBaboon   -TATAATTTAGTATACTGAAATTCCAATTAGTAAAGGATAAGCGCTTTCCTGAAGAAGATATGGAAAAACCCAGAGT-- 848
Orangutan     -TATCATTTAGTATAGTGAAATTCCAATTAGCAAAGGATAAGAGCTTTCCTGAAGGAGACACGGAAAAACCCAGAGTGA 943
    
```

```

Majority      --ATTGAGAGTAACCTGGAGGGACACAGGGAGTATTTGTCAATTTTTCAGAATTATAAGTGCCCTTTGTGCTTGTGTGTGTTG
              1370      1380      1390      1400      1410      1420      1430      1440
Human         ----- 0
Coquerel'sSifaka GTAAGGAGAACAACCTGGAGAAACTGGAATATTTGTAATTTCTCAGGACTGGAAACACGTTTGTGTGC-----CGG 1140
Ma'sNightMonkey GTATTGAGAGTAACCTGGAGGGACGCAGGG-GTATTTGTCAATTTTCTGGATTAGAAGTGCATTTGTGCTTGTG--TGTTG 1026
VervetAGM      --ATTGAGAGTAACCTGGAGGGACACAGGGAGTATTTGTCAATTTTTCAGAATTATAAGTGCCCTTTGTGCTT-----GTTG 1023
Gorilla       GTATTGAGAGTAACCTGGAGGGACACAGGGAGTATTTGTCAATTTTTCAGAATTAGAAGTGCATTTGTGCTTGTGTGCGTTG 1188
GrabEatingMacaque --ATTGAGAGTAACCTGGAGGGACACAGGGAGTATTTGTCAATTTTTCAGAATTATAAGTGCCCTTTGTGCTTGTGTGTGTTG 970
Macaque       --ATTGAGAGTAACCTGGAGGGACACAGGGAGTATTTGTCAATTTTTCAGAATTATAAGTGCCCTTTGTGCTTGTGTGTGTTG 969
PigTailedMacaque --ATTGAGAGTAACCTGGAGGGACACAGGGAGTATTTGTCAATTTTTCAGAATTATAAGTGCCCTTTGTGCTTGTGTGTGTTG 1189
Bonobo       GTATTGAGAGTAACCTGGAGGGACACAGGGAGTATTTGTCAATTTTTCAGAATTAGAAGTGCATTTGTGCTTGTGAGTGTGTTG 1185
OliveBaboon   --ATTGAGAGTAACCTGGAGGGACACAGGGAGTATATGTCAATTTTTCAGAATTATAAGTGCCCTTTGTGCTTGTGTGTGTTG 926
Orangutan     GTATTGAGAGTAACCTGGAGGGACACAGGAAGTATTTGTCAATTTTTCAGAATTAGAAGTGCATTTGTGCTTGTGTATGTTG 1023
    
```

Tuesday, May 03, 2022 06:14 PM

|                   |                                                                                  |      |
|-------------------|----------------------------------------------------------------------------------|------|
| Majority          | GGGGTGGAGGTGAAGGGTGCAGGAGAAGGATGGGTACTGGCAAAGTCGTTACTCACTGAGCAGATTTTCAAGAAGTGGGT |      |
|                   | ----- ----- ----- ----- ----- ----- ----- -----                                  |      |
|                   | 1450      1460      1470      1480      1490      1500      1510      1520       |      |
| Human             | -----                                                                            | 0    |
| Coquerel'sSifaka  | GAGGTGG--GTGAAAGGTGCATAA--AGGAAACGTGCTGGCAAAGAAGTCACCCACTGAGCAAATTTTCCAGAAATGGTT | 1216 |
| Ma'sNightMonkey   | GGGGTGAAGTGAAGGGTGCAGGAGAAGGATGGATACTGGCAAAGTCATTACTCACTGAGCACATTTTCAAGAAGTGGGT  | 1106 |
| VervetAGM         | GGGGTGGAGGTGAAGGGTGCAGGAGAAGGAAGGGTACTGGCAAAGTCGTTACTCACTGAGCAGATTTTCAAGAAGTAGGT | 1103 |
| Gorilla           | GGGGTGGAGGTGAAGGGTGCAGGAGAAGGATGGGTACTGGCAAAGTCGTTACTCACTGAGCAAATTTTCAAG---CGGGT | 1265 |
| GrabEatingMacaque | GGGGTGGAGGTGAAGGGTGCAGGAGAAGGATGGGTACTGGCAAAGTCGTTACTCACTGAGCAGATTTTCAAGAAGTAGGT | 1050 |
| Macaque           | GGGGTGGAGGTGAAGGGTGCAGGAGAAGGATGGGTACTGGCAAAGTCGTTACTCACTGAGCAGATTTTCAAGAAGTAGGT | 1049 |
| PigTailedMacaque  | GGGGTGGAGGTGAAGGGTGCAGGA---GGATGGGTACTGGCAAAGTCGTTACTCACTGAGCAGATTTTCAAGAAGTAGGT | 1266 |
| Bonobo            | GGG-TGGAGGTGAAGGGTGCAGGAGAAGGATGGGTACTGGCAAAGTCGTTACTCACTGAGCAAATTTTCAAG---CGGGT | 1261 |
| OliveBaboon       | GGGGTGGAGGTGAAGGGTGCAGGAGAAGGATGGGTACTGGCAAAGTCGTTACTCACTGAGCAGATTTTCAAGAAGTAGGT | 1006 |
| Orangutan         | GGGGTGGAGGTGAAGGGTGCAGGAGAAGGATGGGTACTGGCAAAGTCGTTACTCACTGAACAAATTTTCAAG---CGGGT | 1100 |

|                   |                                                                                 |      |
|-------------------|---------------------------------------------------------------------------------|------|
| Majority          | GCCTCTCCCAATTTTGTGAGCCTCTGGTAAAAACACGTTAAAGTAAATGTCCACTATAGTATCAAGTAAAAATTGAGA  |      |
|                   | ----- ----- ----- ----- ----- ----- ----- -----                                 |      |
|                   | 1530      1540      1550      1560      1570      1580      1590      1600      |      |
| Human             | -----                                                                           | 0    |
| Coquerel'sSifaka  | GCCTTTTCAAACCTTTGTTGAGCCTCTGACAAAA-----TGT-----TAAATTTAAATTTGAGA                | 1270 |
| Ma'sNightMonkey   | TCCCTCTCGATTTTATTGAGCCTCTGATAAAAAACACCTCAAGGTAAATGTCCA-----TCAAGTTAAATTTGAGA    | 1178 |
| VervetAGM         | GCCTCTCCCAATTTTGTGAGCCTCTGGTAAAAACACGTTAAAGTAAATGTCCACTATAGTATCAAGTAAAAATTGAGA  | 1183 |
| Gorilla           | GCCTTTCCCAATTTTGTGAGCCTCTGATAAAAAACACGTTGAAGTAAATATCCACTATAGTGTCAAGTAAAAATTGAGA | 1345 |
| GrabEatingMacaque | GCCTCTCCCAATTTTGTGAGCCTCTGGTAAAAACACTTTAAAGTAAATGTCCACTATAGTATCAAGTAAAAATTGAGA  | 1130 |
| Macaque           | GCCTCTCCCAATTTTGTGAGCCTCTGGTAAAAACACTTTAAAGTAAATGTCCACTATAGTATCAAGTAAAAATTGAGA  | 1129 |
| PigTailedMacaque  | GCCTCTCCCAATTTTGTGAGCCTCTGGTAAAAACACTTTAAAGTAAATGTCCACTATAGTGTCAAGTAAAAATTGAGA  | 1346 |
| Bonobo            | GCCTTTCCCAATTTTGTGAGCGTCTGATAAAAAACACGTTGAAGTAAATGTCCACTATAGTATCAAGTAAAAATTGAGA | 1341 |
| OliveBaboon       | GCCTCTCCCAATGTGTTGAGCCTCTGGTAAAAACACGTTAAAGTAAATGTCCACTATAGTATCAAGTAAAAATTGAGA  | 1086 |
| Orangutan         | GCCTCTCCCAATTTTGTGAGCCTCTGATAAAAAACACGTTAAAGTAAATGTCCACTATAGTATCAAGTAAAAATTGAGA | 1180 |

|                   |                                                                                   |      |
|-------------------|-----------------------------------------------------------------------------------|------|
| Majority          | CCGTAAGATAT---AGCAAAGGGAGTCAATTTGCATAGGCCATTTTAAATGCTTCTACCTTCTCTAAACAATCTG--AAGA |      |
|                   | ----- ----- ----- ----- ----- ----- ----- -----                                   |      |
|                   | 1610      1620      1630      1640      1650      1660      1670      1680        |      |
| Human             | -----                                                                             | 0    |
| Coquerel'sSifaka  | CCGTGAGACATTACAGAAAAGGCAGCCAATTTGTGTGGCCCATTTTAAATGTTTCTACCTCTCTCGTCAATGAGGAAAGA  | 1350 |
| Ma'sNightMonkey   | CTGTAAATCT---AGCAAAGGGAGTCAATTTGCATAGGCCATTTTAAATGCTTCTACTCTCTAATCAATCTG--AAGA    | 1253 |
| VervetAGM         | CCGTAAGATAT---AGCAAAGGGAGTCAATTTGCATAGGCCATTTTAAATGCTTCTACCTTTTCTAAACAATCTG--AAGA | 1258 |
| Gorilla           | CCGTAAGATAT---AGCAAAGGGAGTCAATTTGCATAGGCCATTTTAAATGCTTCTACTTTCTCTAACCAATCTG--AAGA | 1420 |
| GrabEatingMacaque | CCGTAAGATAT---AGCAAAGGGAGTCAATTTGCATAGGCCATTTTAAATGCTTCTACCTTCTCCAAACAATCTG--AAGA | 1205 |
| Macaque           | CCGTAAGATAT---AGCAAAGGGAGTCAATTTGCATAGGCCATTTTAAATGCTTCTACCTTCTCTAAACAATCTG--AAGA | 1204 |
| PigTailedMacaque  | CCGTAAGATAT---AGCAAAGGGAGTCAATTTGCATAGGCCATTTTAAATGCTTCTACCTTCTCTAAACAATCTG--AAGA | 1421 |
| Bonobo            | CCGTAAGATAT---AGCAAAGGGAGTCAATTTGCATAGGCCATTTTAAATGCTTCTACTTTCTCTAACCAATCTG--AAGA | 1416 |
| OliveBaboon       | CCGTAAGATAT---AGCAAAGGGAGTCAATTTGCATAGGCCATTTTAAATGCTTCTACCTTCTCTAAACAATCTG--AAGA | 1161 |
| Orangutan         | CCGTAAGATAT---AGCAAAGGGAGTCAATTTGCATAGGCCATTTTAAATGCTTCTACTTTCTCTAACCAATCTG--AAGA | 1255 |

Tuesday, May 03, 2022 06:14 PM

|                   |                                                                                   |      |
|-------------------|-----------------------------------------------------------------------------------|------|
| Majority          | CTCAGTTGCTCCCACTCCCATCTCCACTTTCCTTTCATGCCTCCAAATGTTAAA-CTCCAAC TATTG-TAGCATTTTAA  |      |
|                   | ----- ----- ----- ----- ----- ----- ----- -----                                   |      |
|                   | 1690      1700      1710      1720      1730      1740      1750      1760        |      |
| Human             | -----TGCCTCCAAATGTTAAA-CTCCAAC TATTG-TAGCATTTTAA                                  | 40   |
| Coquerel'sSifaka  | CTCAGTTGCTCCACACCCACCCCACTTTCCTTTCAGCCCCAAATGTTAGC-CTCTAACAAATGGTAGTATTTTAA       | 1429 |
| Ma'sNightMonkey   | CTCAGTTGCTGTCACCTCCCATCTCCACTTTCCTTTCACGCCCTAAATGTTAAA-TTCCAAC TATTGTTAGCATTTGCAA | 1332 |
| VervetAGM         | CTCAGTTGCTCCCACTCCCATCTCCACTTTCCTTTCATGCCTCCAAATGTTAAA-CTCCAAC TATCG-TAGCATTTTAA  | 1336 |
| Gorilla           | CTTAGTTGTTCCCACTCCCATCTCCACTTTCCTTTCATGCCTCCAAATGTTAAA-CTCCAAC TATTG-TAGCATTTTAA  | 1498 |
| GrabEatingMacaque | CTCAGTTGCTCCCACTCCCATCTCCACTTTCCTTTCATGCCTCCAAATGTTAAA-CTCCAAC TATCG-TAGCATTTTAA  | 1283 |
| Macaque           | CTCAGTTGCTCCCACTCCCATCTCCACTTTCCTTTCATGCCTCCAAATGTTAAA-CTCCAAC TATCG-TAGCATTTTAA  | 1282 |
| PigTailedMacaque  | CTCAGTTGCTCCCACTCCCATCTCCACTTTCCTTTCATGCCTCCAAATGTTAAA-CTCCAAC TATCG-TAGCATTTTAA  | 1499 |
| Bonobo            | CTCAGTTGTTCCCACTCCCATCTCCACTTTCCTTTCATGCCTCCAAATGTTAAA-CTCCAAC TATTG-TAGCATTTTAA  | 1495 |
| OliveBaboon       | CTCAGTTGCTCCCACTCCCATCTCCACTTTCCTTTCATGCCTCCAAATGTTAAA-CTCCAAC TATCG-TAGCATTTTAA  | 1239 |
| Orangutan         | CTCAGTTGTTCCCACTCCCATCTCCACTTTCCTTTCATGCCTCCAAATGTTAAA-CTCCAAC TATTG-TAGCATTTTAA  | 1333 |

|                   |                                                                                   |      |
|-------------------|-----------------------------------------------------------------------------------|------|
| Majority          | CACATCGCTCCATTTGTGTCTATTT--CCACCTAGGGTATTGTGAATATTTTCTACAGGTGCACACTAATCACCAACTGA  |      |
|                   | ----- ----- ----- ----- ----- ----- ----- -----                                   |      |
|                   | 1770      1780      1790      1800      1810      1820      1830      1840        |      |
| Human             | CACATGGCTCCATTTGTGTCTATTT--CCACCTAGCGTATTGTGAATATTTTCTACAGGCGCACACTAATCACCAACTGA  | 118  |
| Coquerel'sSifaka  | CACACCGTTCAACCTCTGTCCGTTT--CCACCGAGGGTAGTGTGAATACTTTCTACTGGTGCATAGTAATCA---ACTCA  | 1504 |
| Ma'sNightMonkey   | CACATCGCTCCATTTGTATCCGTTTTTCCACCCAGGGTATTGCGAATATTTTCTACAGGTGCACACTAATCACCAACTGA  | 1412 |
| VervetAGM         | CACATCGCTCCATTTGTGTCTATTT--CCACCTAGGGTATCGTCAATATTTTCTACAGTTGTACACTAATCACCAACTGA  | 1414 |
| Gorilla           | CACATGGCTCCATTTGTGTCTATTT--CCACCTAGCGTATTGTGAATATTTTCTACAGGCGCACACTAATCACCAACTGA  | 1576 |
| GrabEatingMacaque | CACATCGCTCCATTTGTGTCTATTT--CCACCTAGGGTATCGTGAATATTTTCTACAGTTGCACACTAATCACCAACTGA  | 1361 |
| Macaque           | CACATCGCTCCATTTGTGTCTATTT--CCACG TAGGGTATCGTGAATATTTTCTACAGTTGCACACTAATCACCAACTGA | 1360 |
| PigTailedMacaque  | CACATCGCTCCATTTCTGTCTATTT--CCACCTAGGGTATCGTGAATATTTTCTACAGTTGCACACTAATCACCAACTGA  | 1577 |
| Bonobo            | CACATGGCTCCATTTGTGTCTATTT--CCACCTAGCGTATTGTGAATATTTTCTACAGGCGCACACTAATCACCAACTGA  | 1573 |
| OliveBaboon       | CACATCGCTCCATTTGTGTCTATTT--CCACCTAGGGTATCGTGAATATTTTCTACAGTTGCACACTAATCACCAACTGA  | 1317 |
| Orangutan         | CACATGGCTCCATTTGTGTCTATTT--CCACCTAGCGTATTGTGAATATTTTCTACAGGCGCACACTAATCACCAACTGA  | 1411 |

|                   |                                                                                  |      |
|-------------------|----------------------------------------------------------------------------------|------|
| Majority          | AGTGAGAATCACATTTTCTCCACTTGGCTTGGTACTACAGGTCTTGAAGCAAAGCCT-ATATTTTCAGTCTGAGGAGTT  |      |
|                   | ----- ----- ----- ----- ----- ----- ----- -----                                  |      |
|                   | 1850      1860      1870      1880      1890      1900      1910      1920       |      |
| Human             | AGTGAGAATCACATTTTCTCCACTTGGCTTGGTACTACAGGTCTTGAAGCAAAGCCT-GTATTTTCAGTCTGAGGAGTT  | 197  |
| Coquerel'sSifaka  | GGTGAGAATCACATTTTT-TCTCTTTGGCGTGGTACTACAGGTCTGGAAGCAAAGCCT-GTATTTTCAGTCTGATGAGTT | 1582 |
| Ma'sNightMonkey   | AGTGAGAATCACATTTTCTCCACTTGGCTTGGTACTACAGGTCTTGAAGCAAAGCCT-GCATTTTCAGTCTGAGGAGTC  | 1491 |
| VervetAGM         | AGTGAGGATCACATTTTCTCCACGTGGCTTGGTACTACAGGTCTTGAAGCAAAGCCTTATATTTTCAGTCTGAGGAGTT  | 1494 |
| Gorilla           | AGTGAGAATCACATTTTCTCCACTTGGCTTGGTACTACAGGTCTTGAAGCAAAGCCT-ATATTTTCAGTCTGAGGAGTT  | 1655 |
| GrabEatingMacaque | AGTGAGGATCACATTTTCTCCACGTGGCTTGGTACTACAGGTCTTGAAGCAAAGCCTTATATTTTCAGTCTGAGGAGTT  | 1441 |
| Macaque           | AGTGAGGATCACATTTTCTCCACGTGGCTTGGTACTACAGGTCTTGAAGCAAAGCCTTATATTTTCAGTCTGAGGAGTT  | 1440 |
| PigTailedMacaque  | AGTGAGGATCACATTTTCTCCACGTGGCTTGATACTACAGGTCTTGAAGTAAAAGCCTTATATTTTCAGTCTGAGGAGTT | 1657 |
| Bonobo            | AGTGAGAATCACATTTTCTCCACTTGGCTTGGTACTACAGGTCTTGAAGCAAAGCCT-GTATTTTCAGTCTGAGGAGTT  | 1652 |
| OliveBaboon       | AGTGAGGATCACATTTTCTCCACGTGGCTTGGTACTACAAGTCTTGAAGCAAAGCCTTATATTTTCAGTCTGAGGAGTT  | 1397 |
| Orangutan         | AGTGAGAATCACATTTTCTCCACTTGGCTTGGTACTACAGGTCTTGAAGCAAAGCCT-ATATTTTCAGTCTGAGGAGTT  | 1490 |



Tuesday, May 03, 2022 06:14 PM

| Majority          | CTACTTGCTTGAGAAAGTACTGTTGTTACCAAG---TGGTCTTGCTCAGTGGGGTAAAGATTTTTGTTTTAGAGGCTGGA  |      |      |      |      |      |      |      |      |
|-------------------|-----------------------------------------------------------------------------------|------|------|------|------|------|------|------|------|
|                   | 1930                                                                              | 1940 | 1950 | 1960 | 1970 | 1980 | 1990 | 2000 |      |
| Human             | CTACTTGCTTGAGAAAGTACTGTTGTTACCAAG---TGGTCTCGTTCAGTGGGGTAAAGATTTTTGTTTTAGAGGCTGGA  |      |      |      |      |      |      |      | 274  |
| Coquerel'sSifaka  | CTACTGGCATTAGAAAGTACTGTTTTACTAAGCAGTGGTCTTGTTCAATGAGATAAAGATTTTTGTTTTGTGCATGGA    |      |      |      |      |      |      |      | 1662 |
| Ma'sNightMonkey   | CTACTTGCTTGAGAAAGTACTGTTTCTACCAAG---TGGTCTTGCTCAATGGGGTAAAGGTTTTGTTTTAGAGTTTGA    |      |      |      |      |      |      |      | 1568 |
| VervetAGM         | CTACTTGCTTGAGAAAGTACTGTTGTTACCAAG---TGGTCTTGCTCAGTGGGGTAAAGATTTTTGTTTTAGAGGCTGGA  |      |      |      |      |      |      |      | 1571 |
| Gorilla           | CTACTTGCTTGAGAAAGTACTGTTGTTACCAAG---TGGTCTCGTTCAGTGGGGTAAAGATTTTTGTTTTAGAGGCTGGA  |      |      |      |      |      |      |      | 1732 |
| GrabEatingMacaque | CTACTTGCTTGAGAAAGTACTGTTGTTACCAAG---TGGTCTTGCTCAGTGGGGTAAAGATTTTTGTTTTAGAGGCCGGA  |      |      |      |      |      |      |      | 1518 |
| Macaque           | CTACTTGCTTGAGAAAGTAGTGTGTTACCAAG---TGGTCTTGCTCAGTGGGGTAAAGATTTTTGTTTTAGAGGCCGGA   |      |      |      |      |      |      |      | 1517 |
| PigTailedMacaque  | CTACTTGCTTGAGAAAGTACTGTTGTTACCAAG---TGGTCTTGCTCAGTGGGGTAAAGATTTTTGTTTTAGAGGCCGGA  |      |      |      |      |      |      |      | 1734 |
| Bonobo            | CTACTTGCTTGAGAAAGTACTGTTGTTACCAAG---TGGTCTCGTTCAGTGGGGTAAAGATTTTTGTTTTAGAGGCTGGA  |      |      |      |      |      |      |      | 1729 |
| OliveBaboon       | CTACTTGCTTGAGAAAGTACTGTTGTTACCAAG---TGGTCTTGCTCAGTGGGGTAAAGATTTTTGTTTTAGAGGCCGGA  |      |      |      |      |      |      |      | 1474 |
| Orangutan         | CTACTTGCTTGAGAAAGTACTGTTGTTACCAAG---TGGTCTTGTTCAAGTGGGGTAAAGATTTTTGTTTTAGAGGCTGGA |      |      |      |      |      |      |      | 1567 |

| Majority          | GCCGGTCTGCAAATAAAAAGATGGCTTAGGAGAAAAGCTATCCAATGTTTTTT-CCTTGGCCCGCATAGGTTGACGGTAGC   |      |      |      |      |      |      |      |      |
|-------------------|-------------------------------------------------------------------------------------|------|------|------|------|------|------|------|------|
|                   | 2010                                                                                | 2020 | 2030 | 2040 | 2050 | 2060 | 2070 | 2080 |      |
| Human             | GCCGGTCTGCAAATAAAAAGATGGCTTAGGAGAAAAGCTATCCAATGTTTTTT-CCTTGGCCCGCATAGGTTGACGGTAGC   |      |      |      |      |      |      |      | 353  |
| Coquerel'sSifaka  | GTGGGTTTGC--ATAAAAAGATGGCATAGGAGGAAAAGCTATAAATTTTTTTTTTTCCTTGGCCCACTTAGGTCGAGGGTAGC |      |      |      |      |      |      |      | 1740 |
| Ma'sNightMonkey   | GTCGGTCTGCAAATAAAAAGATGGCTTAGGAGAA--GCTATCCAATTTTTTTTTCCCTTGGCCCGCATAGGTTGACGGCAGA  |      |      |      |      |      |      |      | 1646 |
| VervetAGM         | GCCAGTCTGCAAATAAAAAGATGGCTTAGGAGAAAAGCTATCCAATGTTTTTTTCCTTGGCCCGCATAGGTTGACGGTAGC   |      |      |      |      |      |      |      | 1651 |
| Gorilla           | GCCGGTCTGCAAATAAAAAGATGGCTTAGGAGAAAAGCTATCCAAGTTTTTTT-CCTTGGCCCGCATAGGTTGACGGTAGC   |      |      |      |      |      |      |      | 1811 |
| GrabEatingMacaque | GCCAGTCTGCAAATAAAAAGATGGCTTAGGAGAAAAGCTATCCAACGTTTTTT-CCTTGGCCCGCATAGGTTGACGGTAGC   |      |      |      |      |      |      |      | 1597 |
| Macaque           | GCCAGTCTGCAAATAAAAAGATGGCTTAGGAGAAAAGCTATCCAACGTTTTTT-CCTTGGCCCGCATAGGTTGACGGTAGC   |      |      |      |      |      |      |      | 1596 |
| PigTailedMacaque  | GCCAGTCTGCAAATAAAAAGATGGCTTAGGAGAAAAGCTATCCAACGTTTTTT-CCTTGGCCCGCATAGGTTGACGGTAGC   |      |      |      |      |      |      |      | 1813 |
| Bonobo            | GCCGGTCTGCAAATAAAAAGATGGCTTAGGAGAAAAGCTATCCAATGTTTTTT-CGTGGCCCGCATAGGTTGACGGTAGC    |      |      |      |      |      |      |      | 1808 |
| OliveBaboon       | GCCAGTCTGCAAATAAAAAGATGGCTTAGGAGAAAAGCTATCCAACGTTTTTT-CCTTGGCCCGCATAGGTTGACGGTAGC   |      |      |      |      |      |      |      | 1553 |
| Orangutan         | GCCGGTCTGCAAATAAAAAGATGGCTTAGGAGAAAAGCTATCCAATGTTTTTT-CCTTGGCCCGCATAGGTTGACGGTAGT   |      |      |      |      |      |      |      | 1646 |

| Majority          | CAAGCTGGTACTTGGCTTGGAGTGAAAAGTGGAGGCTGCTTGGGGCCGTCCTGCAGTCAGGGC-----             |      |      |      |      |      |      |      |      |
|-------------------|----------------------------------------------------------------------------------|------|------|------|------|------|------|------|------|
|                   | 2090                                                                             | 2100 | 2110 | 2120 | 2130 | 2140 | 2150 | 2160 |      |
| Human             | CAAGCTGGTACTTGGCTTGGAGTGAAAAGTGGAGGCTGCCTGGGGGC-GTCCTGCAGTCAGGGC-----            |      |      |      |      |      |      |      | 416  |
| Coquerel'sSifaka  | CAAGCTGGTACTTGGATTGGAGGGAAAAGTGGAGGCTGCCTGGGGCAGTGCCTCAGCCCCAGGGCCACCCTCCTGAGGT  |      |      |      |      |      |      |      | 1820 |
| Ma'sNightMonkey   | CAAGTTGGTACTTGGCTTGGAGGGAAAAGTGGAGGCTGCTTGGGGCCCGTCCCGTAGTCAGGGCCATCCCCCTCAGGTCC |      |      |      |      |      |      |      | 1726 |
| VervetAGM         | CAAGCTGGTACTTGGCGTGGAGTGAAAAGTGGAGGCTGCTTGGGGCCGTCCTGCAGTCAGGGA-----             |      |      |      |      |      |      |      | 1715 |
| Gorilla           | CAAGCTGGTACTTGGCTTGGAGTGAAAAGTGGAGGCTGCCTGGGGGC-GTCCTGCAGTCAGGGC-----            |      |      |      |      |      |      |      | 1874 |
| GrabEatingMacaque | CAAGCTGGTACTTGGCGTGGAGTGAAAAGTGGAGGCTGCTTAGGGGCCGTCCTGCAGTCAGGGA-----            |      |      |      |      |      |      |      | 1661 |
| Macaque           | CAAGCTGGTACTTGGCGTGGAGTGAAAAGTGGAGGCTGCTTAGGGGCCGTCCTGCAGTCAGGGA-----            |      |      |      |      |      |      |      | 1660 |
| PigTailedMacaque  | CAAGCTGGTACTTGGCGTGGAGTGAAAAGTGGAGGCTGCTTAGGGGCCGTCCTGCAGTCAGGAA-----            |      |      |      |      |      |      |      | 1877 |
| Bonobo            | CAAGCTGGTATTTGGCTTGGAGTGAAAAGTGGAGGCTGCCTGGGGGC-GTCCTGCAGTCAGGGC-----            |      |      |      |      |      |      |      | 1871 |
| OliveBaboon       | CAAGCTGGTACTTGGCGTGGAGTGAAAAGTGGAGGCTGCTTGGGGCCGTCCTGCAGTCAGGGA-----             |      |      |      |      |      |      |      | 1617 |
| Orangutan         | CAAGCTGGTACTTGGCTTGGAGTGAAAAGTGGAGGCTGCTTGGGGGC-GTCCTGCAGTCAGGGC-----            |      |      |      |      |      |      |      | 1709 |

Tuesday, May 03, 2022 06:14 PM

```

Majority      -----AGAGACAGTGTGGAGGGCTGTTGGGAGGTGTCCCACCCACGCCCCCC--AAGGAGGGGAAACCAGGACGCCGCT
              2170      2180      2190      2200      2210      2220      2230      2240
Human         -----AGAGAGAGTGTGGAGAGCTGTTGGGAGGTGTCCCACCCACGCCCCCCAC--AAGGAGGGGAAACCAGGTCGCCGCG 489
Coquerel'sSifaka CCAAGGCAGACGGTGTAGAGG--GTTGGGAGGTGTCCCACCTCACACCGCTC--AGGGAGGTGAACCCAGGACGCCACG 1894
Ma'sNightMonkey  AGGGCAGATAGAGCGTAGAGTGTGTTGGGAGGT-TCCCACCCACACCCCTC--AAGGAGGGGAAACCAGGACGCCGGA 1802
VervetAGM       -----AGAGACAGTGTGGAGGGCTGTTGGGAGGTGTCCCACCCACGCCCCCC--AAGGAGTGGAAACCAGGACGCCGCT 1787
Gorilla         -----AGAGAGAGTGTGGAGAGCTGTTGGGAGGTGTCCCACCCACGCCCCCCCAAGGAGGGGAAACCAGGACGCCGCG 1949
GrabEatingMacaque -----AGAGACAGTGTGGAGGGCTGTTGGGAGGTGTCCCACCCACGCCCCCTC--AAGGAGTGGAAACCAGAACGCCGCT 1733
Macaque         -----AGAGACAGTGTGGAGGGCTGTTGGGAGGTGTCCCACCCACGCCCCCTC--AAGGAGTGGAAACCAGAACGCCGCT 1732
PigTailedMacaque -----AGAGACAGTGTGGAGGGCTGTTGGGAGGTGTCCCACCCACGCCCCCC--AAGGAGTGGAAACCAGAACGCCGCT 1949
Bonobo          -----AGAGAGAGTGTGGAGAGCTGTTGGGAGGTGTCCCACCCACGCCCCCC--AAGGAGGGGAAACCAGGACGCCGCG 1944
OliveBaboon     -----AGAGACAGTGTGGAGGGCTGTTGGGAGGTGTCCCACCCACGCCCCCC--AAGGAGTGGAAACCAGGACGCCGCT 1689
Orangutan       -----ACAGAGAGTGTGGAGAGCTGTTGGGAGGTGTCCCACCCACGCTCCCCC-AAGGAGGGGAAACCAGGACGCCGCG 1783
    
```

```

Majority      GTCTGCAGCAG---CAGGCCAGGTTCCAGAGGGCGG-----CAGGCGGAGGGCGGAGGGAGGAAGGCCG--GCGGAGG
              2250      2260      2270      2280      2290      2300      2310      2320
Human         GTCTGCAGCAG---AACGCCAGGTTCCAGAGGACGG-----CAGGCGGAGGGCGGAGGGAGAAAGGCCG--GCGAAGG 557
Coquerel'sSifaka CTATGCAGCAGTAGCAGGCCAGGTTCCAGAGAGCGGAGGAAGCTAGGAGCACGGCGGCGGAGGAGGCGACGGCGACGG 1974
Ma'sNightMonkey  GTCTGCAGCAG---TAGGCCAGGTTTCCAGAGGGCGG-----CAGGCGGAGGGCGGAGGGAGGAAGGCCG--GCGGAGG 1870
VervetAGM       GTCTGCAGCAG---CAGGCCAGGTTCCAGAGGGCGG-----CAGGCGGAGGGCGGAGGGAGGAAGGCCG--TCGGAGG 1855
Gorilla         GTCTGCAGCAG---AAGGCCAGGTTCCAGAGGACGG-----CAGGCGGAGGGCGGAGGGAGAAAGGCCG--GCGGAAG 2017
GrabEatingMacaque GTCTGCAGCAG---CAGGCCAGGTTCCAGAGGGCGG-----CAGGCGGAGGGCGGAGGGAGGAAGGCCG--GCGGAGG 1801
Macaque         GTCTGCAGCAG---CAGGCCAGGTTCCAGAGGGCGG-----CAGGCGGAGGGCGGAGGGAGGAAGGCCG--GCGGAGG 1800
PigTailedMacaque GTCTGCAGCAG---CAGGCCAGGTTCCAGAGGGCGG-----CAGGCGGAGGGCGGAGGGAGGAAGGCCG--GCGGAGG 2017
Bonobo          GTCTGCAGCAG---AACGCCAGGTTCCAGAGANN-----NNNNNNNNNNNNNNNN----- 1994
OliveBaboon     GTCTGCAGCAG---CAGGCCAGGTTCCAGAGGGCGG-----CAGGCGGAGGGCGGAGGGAGGAAGGCCG--GCGGAGG 1757
Orangutan       GTCTGCAGCAG---CAGGCCAGGTTCCAGAGGGCGG-----CAGGCGGAGGGCGGAAAGAGGAAGGCCG--GCGGAGG 1851
    
```

```

Majority      CG-CGGAGGAGGCGTCGGCGGCGGCCACTCCCCTAGTCCCCGCGCCCCGCCGCTCGCCTCCCGCTGCCGGGCGCCG
              2330      2340      2350      2360      2370      2380      2390      2400
Human         CG-CGGAGGAGGCGTCGGCTGCGGCGGCCACTCCCCTAGTCCCAGCGCCCTGCCGCTCGCCTCCCGCTGCCGGGCGCCG 636
Coquerel'sSifaka CGGCGGCGGCGGCGGCCGCGGCGGCCACTCCCCTCGTCCACGCGCCACAGCTCGCCTCCCGCTGCCGGGCGCCG 2054
Ma'sNightMonkey  CG-CGGAGGAGGCGTCGGCGGCGGCCACTCCCCTAGTCCCCGCGCCCCGCCACTCACCTCCCGCTGCCGGGCGCCG 1949
VervetAGM       CG-CGGAGGTGGCGTCGGCGGCGGCCACTCCCCTAGTCCCCGCGCCCCGCCGCTCGCCTCCTGCTGCCGGGCGCCG 1934
Gorilla         CG-CGGAGGAGGCGTCGGCTGCGGCGGCCACTCCCCTAGTCCCAGCGCCCCGCCGCTCGCCTCCCGCTGCCGGGCGCCG 2096
GrabEatingMacaque CG-CGGAGGAGGCGTCGGCGGCGGCCACTCCCCTAGTCCCCGCGCCCCGCCGCTCGCCTCCCGCTGTCGGGCGCCG 1879
Macaque         CG-CGGAGGAGGCGTCGGCGGCGGCCACTCCCCTAGTCCCCGCGCCCCGCCGCTCGCCTCCCGCTGTCGGGCGCCG 1879
PigTailedMacaque CG-CGGAGGAGGCGTCGGCGGCGGCCACTCCCCTAGTCCCCGCGCCCCGCCGCTCGCCTCCAGCTGTCGGGCGCCG 2096
Bonobo          -----C----- 1995
OliveBaboon     CG-CGGAGGAGGCGTCGGCGGCGGCCACTCCCCTAGTCCCCGCGCCCCGCCGCTCGCCTCCCGCTGCCGGGCGCCG 1836
Orangutan       CG-CCGAGGAGGCGTCGGCGGCGGCCACTCCCCTCGTCCCAGCGCCCCGCCGCTCGCCTCCCGCTGCCGGGCGCCG 1930
    
```

Tuesday, May 03, 2022 06:14 PM

|                   |                                                                                 |      |
|-------------------|---------------------------------------------------------------------------------|------|
| Majority          | GCGCGCTCGGCTCTTTCCGCCGCGCCGCTGCCGCGCGCTGCCCGTGCGCCTCGGCACCTTCGGCAATTTCCGTCGGGC  |      |
|                   | 2410      2420      2430      2440      2450      2460      2470      2480      |      |
| Human             | GCGCGCTCGGCTCTTTCCGCCGCGCCGCTGCCGCGCGGTGGCCCGTGCGCCTCGGCACCTTCGGCAATTTCCGTCGGGC | 716  |
| Coquerel'sSifaka  | GCGCGCTCGGCTTTTTCCGTCGCGCCGCTGCCGCGCGCTGCCCGTGCGCCTCGGCTCGTTCGGCAATTTCCGTCGGGC  | 2134 |
| Ma'sNightMonkey   | GCGCGCTCGGCTCTTTCCGCCGCGCTGCTGCCGCGCGCTGCCCGTGCGCCTCGGCACCTTCGGCAATTTCCGTCGGGC  | 2029 |
| VervetAGM         | GCGCGCTCGGCTCTTTCCGCCGCGCCGCTGCCGCGCGCTGCCCGTGCGCCTCGGCACCTTCGGCAATTTCCGTCGGGC  | 2014 |
| Gorilla           | GCGCGCTCGGCTCTTTCCGCCGCGCTGCTGCCGCGCGGTGGCCCGTGCGCCTCGGCACCTTCGGCAATTTCCGTCGGGC | 2176 |
| GrabEatingMacaque | GCGCGCTCGGCTCTTTCCGCCGCGCCGCTGCCGCGCGCTGCCCGTGCGCCTCGGCACCTTCGGCAATTTCCGTCGGGC  | 1959 |
| Macaque           | GCGCGCTCGGCTCTTTCCGCCGCGCCGCTGCCGCGCGCTGCCCGTGCGCCTCGGCACCTTCGGCAATTTCCGTCGGGC  | 1959 |
| PigTailedMacaque  | GCGCGCTCGGCTCTTTCCGCCGCGCCGCTGCCGCGCGCTGCCCGTGCGCTTCGGCACCTTCGGCAATTTCCGTCGGGC  | 2176 |
| Bonobo            | -----TCGGCACCTTCGGCAATTTCCGTCGGGC                                               | 2023 |
| OliveBaboon       | GCGCGCTCGGCTCTTTCCGCCGCGCCGCTGCCGCGCGCTGCCCGTGCGCCTCGGCACCTTCGGCAATTTCCGTCGGGC  | 1916 |
| Orangutan         | GCGCGCTCGGCTCTTTCCGCCGCGCCGCTGCCGCGCGCTGGCCCGTGCGCCTCGGCACCTTCGGCAATTTCCGTCGGGC | 2010 |

|                   |                                                                                  |      |
|-------------------|----------------------------------------------------------------------------------|------|
| Majority          | CCCAGCCGCCATTTTCTCGCCGCTTGTGTGGCTCGCTGGCTGCGTGGCTCGGTTCTTGTGAGCGAAGCTTTGTCCGGTTC |      |
|                   | 2490      2500      2510      2520      2530      2540      2550      2560       |      |
| Human             | CCCAGCCGCCATTTTCTCGCCGCTTGTGTGGCTCGCTGGCTGCGTGGCTCGGTTCTTGTGAGCGAAGCTTTGTCCGGTTC | 796  |
| Coquerel'sSifaka  | CCTAGCCGCCATTTTCTCGCCGCTTGTGTGGTTCGCTGGCTGCGTGGCTCGGTTCTTGTGAGCGAAGCTTTGTCCGGTTC | 2214 |
| Ma'sNightMonkey   | CCTAGCCGCCATTTTCTCGCCGCTTGTGTGGCTCGCTGGCTGCGTGGCTCGGTTCTTGTGAGCGAAGCTTTGTCCGGTTC | 2109 |
| VervetAGM         | CCCAGCCGCCATTTTCTCGCCGCTTGTGTGGCTCGCTGGCTGCGTGGCTCGGTTCTTGTGAGCGAAGCTTTGTCCGGTTC | 2094 |
| Gorilla           | CCCAGCCGCCATTTTCTCGCCGCTTGTGTGGCTCGCTGGCTGCGTGGCTCGGTTCTTGTGAGCGAAGCTTTGTCCGGTTC | 2256 |
| GrabEatingMacaque | CCCAGCCGCCATTTTCTCGCCGCTTGTGTGGCTCGCTGGCTGCGTGGCTCGGTTCTTGTGAGCGAAGCTTTGTCCGGTTC | 2039 |
| Macaque           | CCCAGCCGCCATTTTCTCGCCGCTTGTGTGGCTCGCTGGCTGCGTGGCTCGGTTCTTGTGAGCGAAGCTTTGTCCGGTTC | 2039 |
| PigTailedMacaque  | CCCAGCCGCCATTTTCTCGCCGCTTGTGTGGCTCGCTGGCTGCGTGGCTCGGTTCTTGTGAGCGAAGCTTTGTCCGGTTC | 2256 |
| Bonobo            | CCCAGCCGCCATTTTCTCGCCGCTTGTGTGGCTCGCTGGCTGCGTGGCTCGGTTCTTGTGAGCGAAGCTTTGTCCGGTTC | 2103 |
| OliveBaboon       | CCCAGCCGCCATTTTCTCGCCGCTTGTGTGGCTCGCTGGCTGCGTGGCTCGGTTCTTGTGAGCGAAGCTTTGTCCGGTTC | 1996 |
| Orangutan         | CCCAGCCGCCATTTTCTCGCCGCTTGTGTGGCTCGCTGGCTGCGTGGCTCGGTTCTTGTGAGCGAAGCTTTGTCCGGTTC | 2090 |

|                   |                                                                                  |      |
|-------------------|----------------------------------------------------------------------------------|------|
| Majority          | GGCAATGGACGGGTATGTAATCGGGCCGGCAGAAAGGTGTGTGTGAGAGAGGAGTTGGACCGTCTTCGGCCCGTCCCG   |      |
|                   | 2570      2580      2590      2600      2610      2620      2630      2640       |      |
| Human             | GGCAATGGACGGGTATGTAATCGGGCCGGCAGAAAGGTGTGTGTGAGAGAGGAGTTGGACCGTCTTCGGCCCGTCCCG   | 876  |
| Coquerel'sSifaka  | GGCAATGGACGGGTATGTAATCGGGCCGGCAGAAAGGTGTGTGTGGGAGAGGAGTTGGACTGTCCTTCCGTCCCGTCCCG | 2294 |
| Ma'sNightMonkey   | GGCAATGGACGGGTATGTAATCGGGCCGGCAGAAAGGTGTGTGTGAGAAAGGAGTTGGACAGTCTTCGGCCCGATCCCG  | 2189 |
| VervetAGM         | GGCAATGGACGGGTATGTAATCGGGCCGGCAGAAAGGTGTGTGTGAGAGAGGAGTTGGACCGTCTTCGGCCCGTCCCG   | 2174 |
| Gorilla           | GGCAATGGACGGGTATGTAATCGGGCCGGCAGAAAGGTGTGTGTGAGAGAGGAGTTGGACCGTCTTCGGCCCGTCCCG   | 2336 |
| GrabEatingMacaque | GGCAATGGACGGGTATGTAATCGGGTCGGCAGAAAGGTGTGTGTGAGAGAGGAGTTGGACCGTCTTCGGCCCGTCCCG   | 2119 |
| Macaque           | GGCAATGGACGGGTATGTAATCGGGCCGGCAGAAAGGTGTGTGTGAGAGAGGAGTTGGACCGTCTTCGGCCCGTCCCG   | 2119 |
| PigTailedMacaque  | GGCAATGGACGGGTATGTAATCGGGCCGGCAGAAAGGTGTGTGTGAGAGAGGAGTTGGACCGTCTTCGGCCCGTCCCG   | 2336 |
| Bonobo            | GGCAATGGACGGGTATGTAATCGGGCCGGCAGAAAGGTGTGTGTGAGAGAGGAGTTGGACCGTCTTCGGCCCGTCCCG   | 2183 |
| OliveBaboon       | GGCAATGGACGGGTATGTAATCGGGCCGGCAGAAAGGTGTGTGTGAGAGAGGAGTTGGACCGTCTTCGGCCCGTCCCG   | 2076 |
| Orangutan         | GGCAATGGACGGGTATGTAATCGGGCCGGCAGAAAGGTGTGTGTGAGAGAGGAGTTGGACTGTCCTTCGGCCCGTCCCG  | 2170 |

Tuesday, May 03, 2022 06:14 PM

| Majority          | GGCCGGGGAGAAACCCCTCCCGCGGCCCTCCAGGGCTGGGCTGCCGTTACCCAACCCCGCCCCATCGCACACACCCT |      |      |      |      |      |      |      |      |
|-------------------|-------------------------------------------------------------------------------|------|------|------|------|------|------|------|------|
|                   | 2650                                                                          | 2660 | 2670 | 2680 | 2690 | 2700 | 2710 | 2720 |      |
| Human             | GGCCGGGGAGAAACCCCTCCCGCGGCCCTCCAGGGCTGGGCTGCCGTTACCCAACCCCGCCCCATCGCACACACCCT |      |      |      |      |      |      |      | 956  |
| Coquerel'sSifaka  | GATCGGGCAGAAACCCCTCAGCCGCCCTCCAGGGTTGGGCTGCCGTTACCCAACCCCGCCCCATCGCACACACCCT  |      |      |      |      |      |      |      | 2374 |
| Ma'sNightMonkey   | GGCCGGCGAGAAACCCCTCCCGCGGCCCTCCAGGGCTGGGCTGCCGTTACCCAACCCCGCCCCATCGCACACACCCT |      |      |      |      |      |      |      | 2269 |
| VervetAGM         | GGCCGGGGAGAAACCCCTCCCGCGGCCCTCCAGGGCTGGGCTGCCGTTACCCAACCCCGCCCCATCGCACACACCCT |      |      |      |      |      |      |      | 2254 |
| Gorilla           | GGCCGGGGAGAAACCCCTCCCGCGGCCCTCCAGGGCTGGGCTGCCGTTACCCAACCCCGCCCCATCGCACACACCCT |      |      |      |      |      |      |      | 2416 |
| GrabEatingMacaque | GGCCGGGGAGAAACCCCTCCCGCGGCCCTCCAGGGCTGGGCTGCCGTTACCCAACCCCGCCCCATCGCACACACCCT |      |      |      |      |      |      |      | 2199 |
| Macaque           | GGCCGGGGAGAAACCCCTCCCGCGGCCCTCCAGGGCTGGGCTGCCGTTACCCAACCCCGCCCCATCGCACACACCCT |      |      |      |      |      |      |      | 2199 |
| PigTailedMacaque  | GGCCGGGGAGAAACCCCTCCCGCGGCCCTCCAGGGCTGGGCTGCCGTTACCCAACCCCGCCCCATCGCACACACCCT |      |      |      |      |      |      |      | 2416 |
| Bonobo            | GGCCGGGGAGAAACCCCTCCCGCGGCCCTCCAGGGCTGGGCTGCCGTTACCCAACCCCGCCCCATCGCACACACCCT |      |      |      |      |      |      |      | 2263 |
| OliveBaboon       | GGCCGGGGAGAAACCCCTCCCGCGGCCCTCCAGGGCTGGGCTGCCGTTACCCAACCCCGCCCCATCGCACACACCCT |      |      |      |      |      |      |      | 2156 |
| Orangutan         | GGCCGGGGAGAAACCCCTCCCGCGGTCCTCCAGGGCTGGGCTGCCGTTACCCAACCCCGCCCCATCGCACACACCCT |      |      |      |      |      |      |      | 2250 |

| Majority          | CCCTTGCTTCCCCCGCGGGCTTTGGTCGAGAAAATGAGAAGAAAGCGGGCTTGGAGGCTGGGGAGGCATTGGGGCGAT  |      |      |      |      |      |      |      |      |
|-------------------|---------------------------------------------------------------------------------|------|------|------|------|------|------|------|------|
|                   | 2730                                                                            | 2740 | 2750 | 2760 | 2770 | 2780 | 2790 | 2800 |      |
| Human             | CCCTTGCTTCCCCCGCGGGCTTTGGTCGAGAAAATGAGAAGAAAGCGGGCTTGGAGGCTGGGGAGGCATAGGGGCGAT  |      |      |      |      |      |      |      | 1036 |
| Coquerel'sSifaka  | CCCTTGCTTCCCCCGCGAGCTGTGGCCGAGAAAATGAGGAGAAAGCGGGCTTGGAGGCAGGGGAGGCATTGGGGCGAT  |      |      |      |      |      |      |      | 2454 |
| Ma'sNightMonkey   | CCCTTGCTTCCCCCGCGGGCTTTGGTCGAGAAAATGAGAAGAAAGCGGGCTTGCAGGCTGGGGAGGCATTGGGGAGAT  |      |      |      |      |      |      |      | 2349 |
| VervetAGM         | CCCTTGCTTCCCCCGCGGGCTTTGGTCGAGAAAATGAGAAGAAAGCGGGCTTGGAGGCTGGGGAGGCACTGGGGCGAT  |      |      |      |      |      |      |      | 2334 |
| Gorilla           | CCCTTGCTTCCCCCGCGGGCTTTGGTCGAGAAAATGAGAAGAAAGCGGGCTTGGAGGCTGGGGAGGCATTGGGGCGAT  |      |      |      |      |      |      |      | 2496 |
| GrabEatingMacaque | CCCTTGCTTCCCCCGCGGGCTTTGGTCGAGAAAATGAGAAGAAAGCGGGCTTGGAGGCTGGGGAGGCACTGGGGCGAT  |      |      |      |      |      |      |      | 2279 |
| Macaque           | CCCTTGCTTCCCCCGCGGGCTTTGGTCGAGAAAATGAGAAGAAAGCGGGCTTGGAGGCTGGGGAGGCACTGGGGCGAT  |      |      |      |      |      |      |      | 2279 |
| PigTailedMacaque  | CCCTTGCTTCCCCCGCGGGCTTTGGTCGAGAAAATGAGAAGAAAGCGGGCTTGGAGGCTGGGGAGGCACTGGGGCGAT  |      |      |      |      |      |      |      | 2496 |
| Bonobo            | CCCTTGCTTCCCCCGCGAGCTTTGGTCGAGAAAATGAGAAGAAAGCGGGCTTGGAGGCTGGGGAGGCATTGGGGCGAT  |      |      |      |      |      |      |      | 2343 |
| OliveBaboon       | CCCTTGCTTCCCCCGCGGGCTTTGGTCGAGAAAATGAGAAGAAAGCGGGCTTGGAGGCTGGGGAGGCACTGGGGCGAT  |      |      |      |      |      |      |      | 2236 |
| Orangutan         | CCCTTGCTTCCCCCGGCCGGCTTTGGTCGAGAAAATGAGAAGAAAGCGGGCTTGGAGGCTTGGGAGGCATTGGGGCGAT |      |      |      |      |      |      |      | 2330 |

| Majority          | GGCGGGG-GTGAGGATCCCGAGTGGGAGCGGGCACC GGCTTGGCGCGGGGGATGGGGTGGGAACCCCAT AACGTCTCG |      |      |      |      |      |      |      |      |
|-------------------|----------------------------------------------------------------------------------|------|------|------|------|------|------|------|------|
|                   | 2810                                                                             | 2820 | 2830 | 2840 | 2850 | 2860 | 2870 | 2880 |      |
| Human             | GGCGGGG-GTGAGGATCCCGAGTGGGAGCGGGCACC GGCTTGGCGCGGGGGATGGGGTGGGAACCCCAT AACGTCTCC |      |      |      |      |      |      |      | 1115 |
| Coquerel'sSifaka  | GGCGGGGTGGGACGACCCCGAGAGGGAGCGGGCATCGGCTTGGCGCGGGG-ATGGGGTGGGAACCCAGAACGTCTCT    |      |      |      |      |      |      |      | 2533 |
| Ma'sNightMonkey   | GGCGGGG-GTGAGGATCCCGAGTGGCAGCGGGCTCCGGCTTGGCGCGGGGGATGGGGTGGGAACCTCATAACGTCTTG   |      |      |      |      |      |      |      | 2428 |
| VervetAGM         | GGCGGGG-GTGAGGATCCCGAGTGGGAGCGGGCACC GGCTTGGCGCGGGGGATGGGGTGGGAACCCCTAACGTCTCG   |      |      |      |      |      |      |      | 2413 |
| Gorilla           | GGCGGGG-GTGAGGATCCCGAGTGGGAGCGGGTACC GGCTTGGCGCGGGGGATGGGGTGGGAACCCCAT AACGTCTCG |      |      |      |      |      |      |      | 2575 |
| GrabEatingMacaque | GGCGGGG-GTGAGGATCCCGAGTGGGAGCGGGCACC GGCTTGGCGCGGGGGATGGGGTGGGAACCCCAT AACGTCTCG |      |      |      |      |      |      |      | 2358 |
| Macaque           | GGCGGGG-GTGAGGATCCCGAGTGGGAGCGGGCACC GGCTTGGCGCGGGGGATGGGGTGGGAACCCCAT AACGTCTCG |      |      |      |      |      |      |      | 2358 |
| PigTailedMacaque  | GGCGGGG-GTGAGGATCCCGAGTGGGAGCGGGCACC GGCTTGGCGCGGGGGATGGGGTGGGAACCCCAT AACGTCTCG |      |      |      |      |      |      |      | 2575 |
| Bonobo            | GGCGGGG-GTGAGGATCCCGAGTGGGAGCGGGCACC GGCTTGGCGCGGGGGATGGGGTGGGAACCCGT AACGTCTCG  |      |      |      |      |      |      |      | 2422 |
| OliveBaboon       | GGCGGGG-GTGAGGATCCCGAGTGGGAGCGGGCACC GGCTTGGCGCGGGGGATGGGGTGGGAACCCCAT AACGTCTCG |      |      |      |      |      |      |      | 2315 |
| Orangutan         | GGCGGGG-GTGAGGATCCCGAGTGGGAGCGGGCACC GGCTTGGCGCGGGGGATGGGGTGGGAACCCCAT AACGTCTCG |      |      |      |      |      |      |      | 2409 |

Tuesday, May 03, 2022 06:14 PM

|                   |                                                                                   |      |
|-------------------|-----------------------------------------------------------------------------------|------|
| Majority          | CCGGTCCGTCCTGCCCCCTCTAGGAGCCATTTTCGATCCGTACCCCTGGGACCCGACCCTTGGGTAGCGGTGCCTGTGAG  |      |
|                   | 2890      2900      2910      2920      2930      2940      2950      2960        |      |
| Human             | CCGGTCTGTCCCTGCCCCCTCTAGGAGCCATTTTCGATCCGTACCCCTGGGACCCGACCCTTGGGTAGCGGTGCCTGTGAG | 1195 |
| Coquerel'sSifaka  | CATGTCCCTGCC--CCCTCTAGGAGCCATTTTCGATCTGCACCCTGGGACCCGACCCTGGGGTAGCGGTGGCTGTGGG    | 2610 |
| Ma'sNightMonkey   | CCGGTCCGTCCTGCCCCCTCTAGGAGCCATTTTCGATCCGTACCCCTGGGACCCGACCCTTGGGGTAGCGGTGCCTATGAG | 2508 |
| VervetAGM         | CCGGTCCGTCCTGCCCCCTCTAGGAGCCATTTTCGATCCGTACCCCTGGGACCCGACCCTTGGGTAGCGGTGCCTGTGAG  | 2493 |
| Gorilla           | CCGGTCTGTCCCTGCCCCCTCTAGGAGCCATTTTCGATCCGTACCCCTGGGACCCGACCCTTGGGTAGCGGTGCCTGTGAG | 2655 |
| GrabEatingMacaque | CCGGTCCGTCCTGCCCCCTCTAGGAGCCATTTTCGATCCGTACCCCTGGGACCCGACCCTTGGGTAGCGGTGCCTGTGAG  | 2438 |
| Macaque           | CCGGTCCGTCCTGCCCCCTCTAGGAGCCATTTTCGATCCGTACCCCTGGGACCCGACCCTTGGGTAGCGGTGCCTGTGAG  | 2438 |
| PigTailedMacaque  | CCGGTCCGTCCTGCCCCCTCTAGGAGCCATTTTCGATCCGTACCCCTGGGACCCGACCCTTGGGTAGCGGTGCCTGTGAG  | 2655 |
| Bonobo            | CCGGTCTGTCCCTGCCCCCTCTAGGAGCCATTTTCGATCCGTACCCCTGGGACCCGACCCTTGGGTAGCGGTGCCTGTGAG | 2502 |
| OliveBaboon       | CCGGTCCGTCCTGCCCCCTCTAGGAGCCATTTTCGATCCGTACCCCTGGGACCCGACCCTTGGGTAGCGGTGCCTGTGAG  | 2395 |
| Orangutan         | CTGGTCTGTCCCTGCCCCCTCTAGGAGCCATTTTCGATCCGTACCCCTGGGACCCGACCCTTGGGTAGCGGTGCCTGTGAG | 2489 |

|                   |                                                                                    |      |
|-------------------|------------------------------------------------------------------------------------|------|
| Majority          | AGCGAGTGGGATGGGCAGAGACAGGCCCTTTGGAGTGGGGG-AGCCTCTAGGGGAAGAGGAGAGAGGCCACCCCTTGTGGAC |      |
|                   | 2970      2980      2990      3000      3010      3020      3030      3040         |      |
| Human             | AGCGAGTGGGATGGGCAGAGACAGGCCCTTTGGAGTGGGGG-AGCCTCTAGGGGAAGAGGAGAGAGGCCACCCCATGTGGAC | 1274 |
| Coquerel'sSifaka  | ATCGAGTGAGGTGGGCAGAGACAGGCC--GGGGCGGGGGAGGCCCT-GGGGAAGAGGAGGGAGGCACCCTTGTGGAC      | 2687 |
| Ma'sNightMonkey   | AGCCAGTGGGATGGGCAGACACAGGCCCTGTGGGTGGGGG-AGGCCCTAGGGGAAGAGGAGAGAGGCCACCCCATGTGGAC  | 2587 |
| VervetAGM         | AGCGAGTGGGATGGGCAAGACAGGCCCTTTGGAGTGGGGG-AACCTCTAGGGGAAGAGAAGAGAGCCACCCCTTGTGGAC   | 2572 |
| Gorilla           | AGCGAGTGGGATGGGCAGAGACAGGCCCTTTGGAGTGGGGG-AGCCTCTAGGGGAAGAGGAGAGAGGCCACCCCTTGTGGAC | 2734 |
| GrabEatingMacaque | AGCGAGTGGGATGGGCAAGACAGGCCCTTTGGAGTGGGGG-AACCTCTAGGGGAAGAGAAGAGAGCCACCCCTTGTGGAC   | 2517 |
| Macaque           | AGCGAGTGGGATGGGCAAGACAGGCCCTTTGGAGTGGGGG-AACCTCTAGGGGAAGAGAAGAGAGCCACCCCTTGTGGAC   | 2517 |
| PigTailedMacaque  | AGCGAGTGGGATGGGCAAGACAGGCCCTTTGGAGTGGGGG-AACCTCTAGGGGAAGAGAAGAGAGCCACCCCTTGTGGAC   | 2734 |
| Bonobo            | AGCGAGTGGGATGGGCAGAGACAGGCCCTTTGGATTGGGGG-AGCCTCTAGGGGAAGAGGAGAGAGGCCACCCCATGTGGAC | 2581 |
| OliveBaboon       | AGCGAGTGGGATGGGCAAGACAGGCCCTTTGGAGTGGAGG-AACCTCTAGGGGAAGAGAAGAGAGCCACCCCTTGTGGAC   | 2474 |
| Orangutan         | AGCGAGTGGGATGGGCAGAGACAGGCCCTTTGGAGTGGGGGAGCGTCTAGGGGAAGAGGAGAGAGGCCACCCCTTGTGGAC  | 2569 |

|                   |                                                                                  |      |
|-------------------|----------------------------------------------------------------------------------|------|
| Majority          | CCCAGCCATCCGC-AGCCTCTCCGGCCTCGCCCGCCCGCGTGGTCTGGGAGAGATGCCGGTGGCGGGAGCTCCGGGGAA  |      |
|                   | 3050      3060      3070      3080      3090      3100      3110      3120       |      |
| Human             | CCCAGCCATGAGC-AACCTCTCCGGCCTCGCCCGCCCTCCGTGGTCTGGGAGAGATGCCGGTGGCGGGAGCTCCGGGGAA | 1353 |
| Coquerel'sSifaka  | CCCAGCCATCCCTAGCCTGCCGGCCTCGCCCGCCCGCC-TGGTTGGGAGAGATGCAGGTGGCGGGAGCTCCGGGGAA    | 2766 |
| Ma'sNightMonkey   | CCCAGCCATCTGC-AACCTCCCCGCCCTCGCCCGCCCGCGTGGTCTGGGAGAGATGCCGGTGGCGGGAGCTCCGGGGAA  | 2666 |
| VervetAGM         | CCCAGCCGTCGC-AGCCTCTCCGGCCTCGCCCGCCCGCGTGGTCTGGGAGAGATGCCGGTGGCGGGAGCTCCGGGGAA   | 2651 |
| Gorilla           | CCCAGCCATGAGC-AACCTCTCCGGCCTCGCCCGCCCGCGTGGTCTGGGAGAGATGCCGGTGGCGGGAGCTCCGGGGAA  | 2813 |
| GrabEatingMacaque | CCCAGCCGTCGC-AGCCTCTCCGGCCTCGCCCGCCCGCGTGGTCTGGGAGAGATGCCGGTGGCGGGAGCTCCGGGGAA   | 2596 |
| Macaque           | CCCAGCCGTCGC-AGCCTCTCCGGCCTCGCCCGCCCGCGTGGTCTGGGAGAGATGCCGGTGGCGGGAGCTCCGGGGAA   | 2596 |
| PigTailedMacaque  | CCCAGCCGTCGC-AGCCTCTCCGGCCTCGCCCGCCCGCGTGGTCTGGGAGAGATGCCGGTGGCGGGAGCTCCGGGGAA   | 2813 |
| Bonobo            | CCCAGCCATGAGC-AACCTCTCCGGCCTCGCCCGCCCTCCGTGGTCTGGGAGAGATGCCGGTGGCGGGAGCTCCGGGGAA | 2660 |
| OliveBaboon       | CCCAGCCGTCGC-AGCCTCTCCGGCCTCGCCCGCCCGCGTGGTCTGGGAGAGATGCCGGTGGCGGGAGCTCCGGGGAA   | 2553 |
| Orangutan         | CCCAGCCATGCGC-AACCTCTTGGCCTCGCCCGCCCGCGTGGTCTGGGAGAGATGCCGGTGGCGGGAGCTCCGGGGAA   | 2648 |

Tuesday, May 03, 2022 06:14 PM

| Majority          | AGCCTAGTGGGAGCCGCTGGGGAAGGGGGAGGGCGTGCGGCGCGGGAGGAAGGGGGAGGGCAGATGTCATACTCCTTT |      |
|-------------------|--------------------------------------------------------------------------------|------|
|                   | 3130 3140 3150 3160 3170 3180 3190 3200                                        |      |
| Human             | AGCCTAGTGGGAGCCGCTGGGGAAGGGGGAGGGCGTGCGGCGCGGGAGGAAGGGGGAGGGCAGATGTCATACTCCTTT | 1433 |
| Coquerel'sSifaka  | AGCCGAGTGGGAGCCGCTGGGGAAGTGGGG-----GA-----GGGCAGATGTCATACTCCTTT                | 2819 |
| Ma'sNightMonkey   | AGCCTAGTGGGAGCCGCTGGGGAAGGGGGAGGGCGTGCGGCGCGGGAGGAAGGGGGAGGGCAGATGTCATACTCCTTT | 2746 |
| VervetAGM         | AGCCTAGTGGGAGCCGCTGGGGAAGGGGGAGGGCGTGCGGCGCGGGAGGAAGGGGGAGGGCAGATGTCATACTCCTTT | 2731 |
| Gorilla           | AGCCTAGTGGGAGCCGCTGGGGAAGGGGGAGGGCGTGCGGCGCGGGAGGAAGGGGGAGGGCAGATGTCATACTCCTTT | 2893 |
| GrabEatingMacaque | AGCCTAGTGGGAGCCGCTGGGGAAGGGGGAGGGCGTGCGGCGCGGGAGGAAGGGGGAGGGCAGATGTCATACTCCTTT | 2676 |
| Macaque           | AGCCTAGTGGGAGCCGCTGGGGAAGGGGGAGGGCGTGCGGCGCGGGAGGAAGGGGGAGGGCAGATGTCATACTCCTTT | 2676 |
| PigTailedMacaque  | AGCCTAGTGGGAGCCGCTGGGGAAGGGGGAGGGCGTGCGGCGCGGGAGGAAGGGGGAGGGCAGATGTCATACTCCTTT | 2893 |
| Bonobo            | AGCCTAGTGGGAGCCGCTGGGGAAGGGGGAGGGCGTGCGGCGCGGGAGGAAGGGGGAGGGCAGATGTCATACTCCTTT | 2740 |
| OliveBaboon       | AGCCTAGTGGGAGCCGCTGGGGAAGGGGGAGGGCGTGCGGCGCGGGAGGAAGGGGGAGGGCAGATGTCATACTCCTTT | 2633 |
| Orangutan         | AGCCTAGTGGGAGCCGCTGGGGAAGGGGGAGGGCGTGCGGCGCGGAGGAAGGGGGAGGGCAGATGTCATACTCCTTT  | 2728 |

| Majority          | GTTTTCAATTTGAGTCTGGTAGTGGGGCGGGAGGGAGGAAAAATGCCTTTTTGTGGGGACTGAAAACATTCAAGGCTTG  |      |
|-------------------|----------------------------------------------------------------------------------|------|
|                   | 3210 3220 3230 3240 3250 3260 3270 3280                                          |      |
| Human             | GTTTTCAATTTGAGTCTGGTAGTGGGGCGGGAGGGAGGAAAAATGCCTTTTTGTGGGGACTGAAAACATTCAAGGCTTG  | 1513 |
| Coquerel'sSifaka  | GTTTTCAATTCGAGTCTGGAAGTGGGGCGGGAGGCAGAAAAA-TGCCTTTTTGTGGGGCATGAGAACATTCAAGGCTTG  | 2898 |
| Ma'sNightMonkey   | GTTTTCAATTTGAGTCTGGTAGTGGGGCGGGAGAGAGGAAAAATGCCTTTTTGTGGGGACTTAAAACATTCAAGGCTTG  | 2826 |
| VervetAGM         | GTTTTCAATTTGAGTCTGGTAGTGGGGCGGGAGGGAGGAAAAA-TGCCTTTTTGTGGGGACTGAAGACATTCAAGGCTTG | 2810 |
| Gorilla           | GTTTTCAATTTGAGTCTGGTAGTGGGGCGGGAGGGAGGAAAAATGCCTTTTTGTGGGGACTGAAAACATTCAAGGCTTG  | 2973 |
| GrabEatingMacaque | GTTTTCAATTTGAGTCTGGTAGTGGGGCGGGAGGGAGGAAAAA-TGCCTTTTTGTGGGGACTGAAGACATTCAAGGCTTG | 2755 |
| Macaque           | GTTTTCAATTTGAGTCTGGTAGTGGGGCGGGAGGGAGGAAAAA-TGCCTTTTTGTGGGGACTGAAGACATTCAAGGCTTG | 2755 |
| PigTailedMacaque  | GTTTTCAATTTGAGTCTGGTAGTGGGGCGGGAGGGAGGAAAAATGCCTTTTTGTGGGGACTGAAGACATTCAAGGCTTG  | 2973 |
| Bonobo            | GTTTTCAATTTGAGTCTGGTAGTGGGGCGGGAGGGAGGAAAAATGCCTTTTTGTGGGGACTGAAAACATTCAAGGCTTG  | 2820 |
| OliveBaboon       | GTTTTCAATTTGAGTCTGGTAGTGGGGCGGGAGGGAGGAAAAA-TGCCTTTTTGTGGGGACTGAAGACATTCAAGGCTTG | 2712 |
| Orangutan         | GTTTTCAATTTGAGTCTGGTAGTGGGGTGGGAGGGAGGAAAAATGCCTTTTTGTGGGGACTGAAAACATTCAAGGCTTG  | 2808 |

| Majority          | GCAAAAGGGCCAGAAATTAATCATCTAAAAACGAAGTGTGTTGAGGCCGACATCAGTCACATGGGCAAAGGCCAACAG  |      |
|-------------------|---------------------------------------------------------------------------------|------|
|                   | 3290 3300 3310 3320 3330 3340 3350 3360                                         |      |
| Human             | GCAAAAGGGCCAGAAATTAATCATCTAAAAACGAAGTGTGTTGAAAGCCGACATCAGTCACATGGGCAAAGGCCAACAG | 1593 |
| Coquerel'sSifaka  | GCAAAAGGGCCAGAAATTAATCATCTAAAAACGAAGTGTGTTGAGGTCCACATCAGTCACATGGGCAAAGGCCAACGG  | 2978 |
| Ma'sNightMonkey   | GCAAAAGGGCCAGAAATTAATCATCTAAAAACGAAGTGTGTTGAGGCCGACATCAGTCACATGGGCAAAGGCCAACAG  | 2906 |
| VervetAGM         | GCAAAAGGGCCAGAAATTAATCATCTAAAAAGCGAAGTGTGTTGAGGCCGACATCAGTCACATGGGCAAAGGCCAACAG | 2890 |
| Gorilla           | GCAAAAGGGCCAGAAATTAATCATCTAAAAACGAAGTGTGTTGAAAGCCGACATCAGTCACATGGGCAAAGGCCAACAG | 3053 |
| GrabEatingMacaque | GCAAAAGGGCCAGAAATTAATCATCTAAAAAGCGAAGTGTGTTGAGGCCGACATCAGTCACATGGGCAAAGGCCAACAG | 2835 |
| Macaque           | GCAAAAGGGCCAGAAATTAATCATCTAAAAAGCGAAGTGTGTTGAGGCCGACATCAGTCACATGGGCAAAGGCCAACAG | 2835 |
| PigTailedMacaque  | GCAAAAGGGCCAGAAATTAATCATCTAAAAAGCGAAGTGTGTTGAGGCCGACATCAGTCACATGGGCAAAGGCCAACAG | 3053 |
| Bonobo            | GCAAAAGGGCCAGAAATTAATCATCTAAAAACGAAGTGTGTTGAAAGCCGACATCAGTCACATGGGCAAAGGCCAACAG | 2900 |
| OliveBaboon       | GCAAAAGGGCCAGAAATTAATCATCTAAAAAGCGAAGTGTGTTGAGGCCGACATCAGTCACATGGGCAAAGGCCAACAG | 2792 |
| Orangutan         | GCAAAAGGGCCAGAAATTAATCATCTAAAAACGAAGTGTGTTGAAAGCCGACATCAGTCACATGGGCAAAGGCCAACAG | 2888 |

Tuesday, May 03, 2022 06:14 PM

```
Majority      CAATGGCAGAAACAAGAGCAGATAGTCAACACAGGGCTATCTCTTT-AGCTACTTTGGTCAGTTTCTGGAAAAACGACTA
              3370      3380      3390      3400      3410      3420      3430      3440
Human         CAATGGCAGAAACAAGAGCAGATAGTCAACAAAGGGCTATCTCTTT-AGCTACTTTGGTCAGTTTCTGGAAAAACGACTA 1672
Coquerel'sSifaka CCATGGCCAAAACAAGAGCAGATAGTCAACACAGGGCCATCTTTTTTAGCTACTTTCGGCCAGTTTCTGGAAAAACAAAAA 3058
Ma'sNightMonkey CAATGGCAGAAACAAGAGCAGATAGTCAACACAGGGCCATCTCTTT-AGCTACTTTGGTCAGTTTCTGGAAATAACGACTA 2985
VervetAGM      CAATGGCAGAAACAAGAGCAGATAGTCAACACAGGGCTATCTCTTT-AGCTACTTTGGTCAGTTTCTGGAAAAATGACTA 2969
Gorilla        CAATGGCAGAAACAAGAGCAGATAGTCAACAAAGGGCTATGTCTTT-AGCTACTTTGGTCAGTTTCTGGAAAAACGACTA 3132
GrabEatingMacaque CAATGGCAGAAACAAGAGCAGATAGTCAACACAGGGCTATCTCTTT-AGCTACTTTGGTCAGTTTCTGGAAAAATGACTA 2914
Macaque        CAATGGCAGAAACAAGAGCAGATAGTCAACACAGGGCTATCTCTTT-AGCTACTTTGGTCAGTTTCTGGAAAAATGACTA 2914
PigTailedMacaque CAATGGCAGAAACAAGAGCAGATAGTCAACACAGGGCTATCTCTTT-AGCTACTTTGGTCAGTTTCTGGAAAAATGACTA 3132
Bonobo         CAATGGCAGAAACAAGAGCAGATAGTCAACAAAGGGCTATCTCTTT-AGCTACTTTGGTCAGTTTCTGGAAAAACGACTA 2979
OliveBaboon    CAATGGCAGAAACAAGAGCAGATAGTCAACACAGGGCTATCTCTTT-AGCTACTTTGGTCAGTTTCTGGAAAAATGACTA 2871
Orangutan      CAATGGCAGAAACAACAGCAGATAGTCAACAAAGGGCTATCTCTTT-AGCTACTTTGGTCAGTTTCTGGAAAAACGACTA 2967
```

```
Majority      CAA--AAACCCAGAACCATGCTGCATCTTTGCGAACCT--GAGTGAAGACAGAATGCTGAG-TGAGGTGAGAGGCAAGA-
              3450      3460      3470      3480      3490      3500      3510      3520
Human         TAA--AAACCCAGAACCATGCTGCATCTTTGCGAACCT--GAGTCAAGACCGGAATGCTGAG-TGAGGTGAGAGGCAAGA- 1746
Coquerel'sSifaka CTACAAAAGCGAGAACCATGCTGCATCTTTGAGAGCATAAGAGTGAAGATAGAATGCTGAGGTGAGGCTAGGGCTCAGG- 3137
Ma'sNightMonkey CAA--AAAGCCAGAACCATGCTGCATCTTTGTGAACCT--GAGTGAAGACAGAATGCTGAG-TGAGGTGAGAGGCAAGAG 3060
VervetAGM      CAA--AAACCCAGAACCATGCTACATCTTTGCGAACCT--GAGTGAAGACAGAATGCTGAG-TGAGGTGAGAGGCAAGA- 3043
Gorilla        TAA--AAACCCAGAACCATGCTGCATCTTTGCGAACCT--GAGTGAAGACCGGAATGCTGAG-TGAGGTGAGAGGCAAGA- 3206
GrabEatingMacaque CAA--AAACCCAGAACCATGCTACATCTTTGCGAACCT--GAGTGAAGAC-----TGAG-TGAGGTGAGAGGCAAGA- 2981
Macaque        CAA--AAACCCAGAACCATGCTACATCTTTGCGAACCT--GAGTGAAGACAGAATGCTGAG-TGAGGTGAGAGGCAAGA- 2988
PigTailedMacaque CAA--AAACCCAGAACCATGCTACATCTTTGCGAACCT--GAGTGAAGACAGAATGCTGAG-TGAGGTGAGAGGCAAGA- 3206
Bonobo         TAA--AAACCCAGAACCATGCTGCATCTTTGCGAACCT--GAGTGAAGACCGGAATGCTGAG-TGAGGTGAGAGGCAAGA- 3053
OliveBaboon    CAA--AAACCCAGAACCATGCTACATCTTTGCGAACCT--GAGTGAAGACAGAATGCTGAA-TGAGGTGAGAGGCAAGA- 2945
Orangutan      CAA--AAACCCAGAACCATGCTGCATCTTTGCGAACCT--GAGTGAAGACAGGATGCTGAG-TGAGGTGAGAGGCAAGA- 3041
```

```
Majority      --CTGTGAAATGGTAGGGACCAATGTCTCTCTGAT----ACGCTTCACACCTGAAAAGACTCAGTAATTTAACTCATCGT
              3530      3540      3550      3560      3570      3580      3590      3600
Human         --CTGTGAAATGGTAGGGACCGATGTCTCTGCTCAT----ATGCTTCACACCTGAAAAGACTCAGTAATTTAACTCAATGT 1820
Coquerel'sSifaka -----GAAATGATACGGACCAATGTCTCGCTGGTGCTAACGCTCCACATCTGAACACACTCAGTAGTTTAACTCACCT 3211
Ma'sNightMonkey CTCCGGGAAATGATAGGGACCGATGTCTCTGCTGAT----AAGCTTCACACCTGAAAAGAGTAATTTATTTAACTCCTCT 3136
VervetAGM      --CTGTGAAATGGTAGGGACCAATGTCTCTCTGAC----ACGCTTCACACCTGAAAAGACTCAGTAATTTAAGTCATCGT 3117
Gorilla        --CTGTGAAATGGTAGGGACCGATGTCTCTCTCAT----ACGCTTCACACCTGAAAAGACTCAGTAATTTAACTCATTGT 3280
GrabEatingMacaque -CTGTGAAATGGTAGGGACCAATGTCTCTCTGAC----ACGCTTCACACCTGAAAAGACTCAGTAATTTAAGTCATCGT 3055
Macaque        --CTGTGAAATGGTAGGGACCAATGTCTCTCTGAC----ACGCTTCACACCTGAAAAGACTCAGTAATTTAAGTCATCGT 3062
PigTailedMacaque --CTGTGAAATGGTAGGGACCAATGTCTCTCTGAC----ACGCTTCACACCTGAAAAGACTCAGTAATTTAAGTCATCGT 3280
Bonobo         --CTGTGAAATGGTAGGGACCGATGTCTCTCTCAT----ACGCTTCACACCTGAAAAGACTCAGTAATTTAACTCATTGT 3127
OliveBaboon    --CTGTGAAATGGTAGGGACCGATGTCTCTCTGAC----ACGCTTCACACCTGAAAAGACTCAATAATTTAAGTCATCGT 3019
Orangutan      --CTGTGAAATGGTAGGGACCGATGTCTCTCTGAT----AGGCTTCACACCTGAAAAGATTGAGTAATTTAACTCATTGT 3115
```

Tuesday, May 03, 2022 06:14 PM

|                   |                                                                                  |      |
|-------------------|----------------------------------------------------------------------------------|------|
| Majority          | TAGAAA--GGGGGCACGCTTAAGGTCGAAAATA-TAGCAGTATGCAGCTCTTTTGGGAGTGTAACATAGTATCATTTAA  |      |
|                   | 3610      3620      3630      3640      3650      3660      3670      3680       |      |
| Human             | TAGAAA--GGGGGCACGCTTAAGGTCAAAATA-CAGCAGTATGCAGCTCTTTTGGGAGTGTAACATAGTATCATTTAA   | 1897 |
| Coquerel'sSifaka  | TAGAAA--GGGAGCACGCTTTAAGGCGAAAATA-CAGCAGTA---AGCCCGTTTAGGGGTATAAAAACAGTACCATTTAA | 3285 |
| Ma'sNightMonkey   | TATAAA--CGGGGCACGCTTAGGGGCGAAAATA-TAGCAGTATGCAGCTCTTTTGGGAGTGTAACGTAGTATCATTTAA  | 3213 |
| VervetAGM         | TAGAAA--GGGGGCAGACTTAAGGTCGAAAATA-TAGCAGTATGCAGCTCTTTTGGGAGTGTAACATAATATCATTTAG  | 3194 |
| Gorilla           | TAGAAA--GGGGGCACGCTTAAGGTCAAAATA-CAGCAGTATGCAGCTCTTTTGGGAGTGTAAC--AGTATCATTTAA   | 3355 |
| GrabEatingMacaque | TAGAAA--GGGGGCAGGCTTAAGGTCGAAAATA-TAGCAGTATGCAGCTCTTTTGGGAGTGTAACATAATATCATTTAG  | 3132 |
| Macaque           | TAGAAA--GGGGGCAGGCTTAAGGTCGAAAATA-TAGCAGTATGCAGCTCTTTTGGGAGTGTAACATAATATCATTTAG  | 3139 |
| PigTailedMacaque  | TAGAAA--GGGGGCAGGCTTAAGGTCGAAAATA-TAGCAGTATGCAGCTCTTTTGGGAGTGTAACATAATATCATTTAG  | 3357 |
| Bonobo            | TAGAAA--GGGGGCACGCTTAAGGTCAAAATA-CAGCAGTATGCAGCTCTTTTGGGAGTGTAACATAGTATCATTTAA   | 3204 |
| OliveBaboon       | TAGAAA--GGGGGCAGGCTTAAGGTCGAAAATA-TAGCAGTATTCAGCTCTTTTGGGAGTGTAACATAATATCATTTAG  | 3096 |
| Orangutan         | TAGAAACCGGGGCACGCTTAAGGTCAAAATAACAGCAGTATGCAGCTCTTTTGGGAGTGTAACACAGTATCATTTAA    | 3195 |

|                   |                                                                                   |      |
|-------------------|-----------------------------------------------------------------------------------|------|
| Majority          | CAAGTACATTTATTTAAAATCAGTGA--GTATTTGAAGAATCAAAAATTTGGTTAAGC-----GCCTA-----GAGTTT   |      |
|                   | 3690      3700      3710      3720      3730      3740      3750      3760        |      |
| Human             | CAAGTACATTTATTTAAAATCAGTGA--GTATTTGAAGAATCAACAATTTGGTTAAGC-----GCCTA-----GAGTTT   | 1963 |
| Coquerel'sSifaka  | CAAGTACATTTATTTGAAATCAATGACAATATTTGAAGAGTCAAAAGTAAAATGAATTTATTTTGCTTAAGGGTTGAGTTT | 3365 |
| Ma'sNightMonkey   | CAAGCACATTTATTTAAAATCAGCGACAGTATTTGAAGAATCAAAAATTTGGTTAAGC-----GCCTA-----GAGTTT   | 3281 |
| VervetAGM         | CAAATACATTTATTTAAAATCAGTGA--GTATTTGAAGAATCAAAAATTTGGTTAAGC-----GCCTA-----GAGTTT   | 3260 |
| Gorilla           | CAAGTACATTTATTTAAAATCAGTGA--GTATTTGAAGAATCAAAAATTTGGTTAAGC-----GCCTA-----GAGTTT   | 3421 |
| GrabEatingMacaque | CAAATACATTTATTTAAAATCAGTGA--GTATTTGAAGAATCAAAAATTTGGTTAAGC-----GCCTA-----GAGTTT   | 3198 |
| Macaque           | CAAATACATTTATTTAAAATCAGTGA--GTATTTGAAGAATCAAAAATTTGGTTAAGC-----GCCTA-----GAGTTT   | 3205 |
| PigTailedMacaque  | CAAATACATTTATTTAAAATCAGTGA--GTATTTGAAGAATCAAAAATTTGGTTAAGC-----GCCTA-----GAGTTT   | 3423 |
| Bonobo            | CAAGTACATTTATTTAAAATCAGTGA--GTATTTGAAGAATCAAAAATTTGGTTAAGC-----GCCTA-----GAGTTT   | 3270 |
| OliveBaboon       | CAAATACATTTATTTAAAATCAGTGA--GTATTTGAAGAATCAAAAATTTGGTTAAGC-----GCCTA-----GAGTTT   | 3162 |
| Orangutan         | CAAGCACATTTATTTAAAATCAGTGA--GTATTTGAAGAATCAAAAATTTGGTTAAGC-----GCCTA-----GAGTCT   | 3261 |

|                   |                                                                                    |      |
|-------------------|------------------------------------------------------------------------------------|------|
| Majority          | GGTG-TTTTTTAAAAGATATTTAAAAGAAGATTTTATAAAAAGTTAACACAGTCTTACAGAATTCAAATCGTCTAGATGT   |      |
|                   | 3770      3780      3790      3800      3810      3820      3830      3840         |      |
| Human             | GGTG-TGTTTTAAAAGGTTACTAAAACAAGATTTTATAAAAAGTTAACACAGTCTCACAGAATTCAAATCATCTAGATGT   | 2042 |
| Coquerel'sSifaka  | GGTGATTTTTTTTAAAGATATTG-AATGAAGATCTTATAAAAAGTAAAC--AGACTTATACAATTTAAATCTTCTTTGAGGT | 3442 |
| Ma'sNightMonkey   | GGTG-TTTTTTAAAATATATTTAAAAGAAGATTTTATAAAAAGTTAAC--GGTCTTACAGAATTTAAATCATCTAGATGT   | 3358 |
| VervetAGM         | GGTG-TGTTTTAAAAGATGTTAAAAGAAGATTT-ATAAAAAGTTAACACAGTTTTACAGAATTCAAATCGTCTAGATGT    | 3338 |
| Gorilla           | GGTG-TGTTTTAAAAGGTTACTAAAACAAGATTTTATAAAAAGTTAACACAGTCTTACAGAATTCAAATCATCTAGATGT   | 3500 |
| GrabEatingMacaque | GGTG-TTTTTTAAAAGATGTTATAAAGAAGATTTTATAAAAAGTTAACACAGTTTTACAGAATTCAAATCGTCTAGATGT   | 3277 |
| Macaque           | GGTG-TTTTTTAAAAGATGTTATAAAGAAGATTTTATAAAAAGTTAACACAGTTTTACAGAATTCAAATCGTCTAGATGT   | 3284 |
| PigTailedMacaque  | GGTG-TTTTTTAAAAGATGTTATAAAGAAGATTTTATAAAAAGTTAACACAGTTTTACAGAATTCAAATCGTCTAGATGT   | 3502 |
| Bonobo            | GGTG-TGTTTTAAAAGGTTACTAAAACAAGATTTTATAAAAAGTTAACACAGTCTTACAGAATTCAAATCATCTAGATGT   | 3349 |
| OliveBaboon       | GGTG-TTTTTTAAAAGATGTTATAAAGAAGATTTTATAAAAAGTTAACACAGTTTTACAGAATTCAAATCGTCTAGATGT   | 3241 |
| Orangutan         | GGTG-TGTTTTAAAAGGTTACTAAAACAAGATTTTATAAAAAGTTAACACAGTCTTACAGAATTCAAATCATCTAGATGT   | 3340 |



Tuesday, May 03, 2022 06:14 PM

|                   |                                                                                   |      |
|-------------------|-----------------------------------------------------------------------------------|------|
| Majority          | TACCTAAAGATTATTTTCCAGATGAAACA--GATCCAGAGAAGTTCAGTATTCACCCAGATCAACACGGAAATTGATGT   |      |
|                   | 3850      3860      3870      3880      3890      3900      3910      3920        |      |
| Human             | TACCTAAAGATTATTTTCCAGATGAAACA--AATCCAGAGAAGTTCAGTATTCACCCAGATCAACACGGAAATTGATGT   | 2120 |
| Coquerel'sSifaka  | TATCTAGAGATTATTTTGGTGACACA--ACTCCAGAGAAGTTTTGTATTCCTCCC-GATCAACA-GAAGATTGAT--     | 3516 |
| Ma'sNightMonkey   | TATCTAAAGATTATTTGCCAGATGAAACATAGATCCAGAGAAGTTCAGTATTCACCCAGATCAACACAGAAATTGATGG   | 3438 |
| VervetAGM         | TACCTTA-GATTATTTTCCAGATGAAACA--GATCCAGAGAATTTTCAGTTTTCCACCCAGATCAACACGGCAATTGATGT | 3415 |
| Gorilla           | TACCTAAAGATTATTTTCCAGGTGAAACA--GATCCAGAGAAGTTCAGTATTCACCCAGGTCAACACGGAAATTGATGT   | 3578 |
| GrabEatingMacaque | TACCTTAAGATTATTTTCCAGATGAAACA--GATCCAGAGAATTTTCAGTTTTCCACCCAGGTCAACACGGCAATTGATGT | 3355 |
| Macaque           | TACCTTAAGATTATTTTCCAGATGAAACA--GATCCAGAGAATTTTCAGTTTTCCACCCAGGTCAACACGGCAATTGATGT | 3362 |
| PigTailedMacaque  | TACCTTAAGATTATTTTCCAGATGAAACA--GATCCAGAGAATTTTCAGTTTTCCACCCAGGTCAACACGGCAATTGATGT | 3580 |
| Bonobo            | TACCTAAAGATTATTTTCCAGATGAAACA--GATCCAGAGAAGTTCAGTATTCACCCAGATCAACACGGAAATTGATGT   | 3427 |
| OliveBaboon       | TACCTTAAGATTATTTTCCAGATGAAACA--GATCCAGAGAATTTTCAGTTTTCCACTCAGGTCAACACGGCAATTGATGT | 3319 |
| Orangutan         | TACCTAAAGATTATTTTCCAGATGAAACA--GATCCAGAGAAGTTCAGTATTCACCCAGATCAACACGGAAATTGATGT   | 3418 |

|                   |                                                                                   |      |
|-------------------|-----------------------------------------------------------------------------------|------|
| Majority          | CAAAACTTGCACTAGAATTCATGTTTCCCTGATTCTCGTTCCTATGGAGACTACTAAAGAGTTTAAAGCGTTAAATTATTA |      |
|                   | 3930      3940      3950      3960      3970      3980      3990      4000        |      |
| Human             | CAAAACTTGCACTAGAATTCATGTTTCCCTGATTCTCGTTCCTGTGGAGACTACTAAAGAGTTTAAAGCGTTAAATTATTA | 2200 |
| Coquerel'sSifaka  | -----TGCCTGGAATTCATGTTTCCCTGATTCTATAGATTCATCCAGACTACTAAAGATTTTATGTGTGCATTATAA     | 3589 |
| Ma'sNightMonkey   | CAAAACTTGCACTAGAATTCATGTTTCCCTGATTCTCGTTCCTATGGAGACAAGTAAAGAATTGAAGAGTTAAATTATTA  | 3518 |
| VervetAGM         | CAAAACTTGCACTAGAATTCATGTTTCCCTGATTCTCGTTCCTATGGAACTACTAAAGAGTTTAAAGCGTTAAATTATTA  | 3495 |
| Gorilla           | CAAAACTTGCACTAGAATTCATGTTTCCCTGATTCTCGTTCCTGTGGAGACTACTAAAGAGTTTAAAGCGTTAAATTATTA | 3658 |
| GrabEatingMacaque | CAAAACTTGCACTAGAATTCATGTTTCCCTGATTCTCGTTCCTATGGAACTACTAAAGAGTTTAAAGCGTTAAATTATTA  | 3435 |
| Macaque           | CAAAACTTGCACTAGAATTCATGTTTCCCTGATTCTCGTTCCTATGGAACTACTAAAGAGTTTAAAGCGTTAAATTATTA  | 3442 |
| PigTailedMacaque  | CAAAACTTGCACTAGAATTCATGTTTCCCTGATTCTCGTTCCTATGGAACTACTAAAGAGTTTAAAGCGTTAAATTATTA  | 3660 |
| Bonobo            | CAAAACTTGCACTAGAATTCATGTTTCCCTGATTCTCGTTCCTGTGGAGACTACTAAAGAGTTTAAAGCGTTAAATTATTA | 3507 |
| OliveBaboon       | CAAAACTTGCACTAGAATTCATGTTTCCCTGATTCTCGTTCCTATGGAACTACTAAAGAGTTTAAAGCGTTAAATTATTA  | 3399 |
| Orangutan         | CAAAACTTGCACTAGAATTCATGTTTCCCTGATTCTCGTTCCTATGGAGACTACTAAAGAGTTTAAAGCGTTAAATTATTA | 3498 |

|                   |                                                                                    |      |
|-------------------|------------------------------------------------------------------------------------|------|
| Majority          | ATCTCAGTATACTGGCATTGTAGAAATGGCA---TAGTGTFTTTGGGTTTTGTTC-TTTTGGCTATTGAATGTGTTGTTAA  |      |
|                   | 4010      4020      4030      4040      4050      4060      4070      4080         |      |
| Human             | ATCTCAGTATACTGGCATTGTAGAAATGGCA---TAGTGTFTTTGGGTTTTGTTC-TTTTGGCTATTGAATGTGTTGTTAA  | 2277 |
| Coquerel'sSifaka  | ATTTAAGTGTACTAACATTGTAGAAATGGCACTATAGTGTGTTGGGTTTTGTTC-TTTTGGCTTTTGAAGTCTTGCTAA    | 3668 |
| Ma'sNightMonkey   | ATCTCAGTATACTGGCATTGTAGAAATGGCA---TGGTGTFTTTGGGTTTTGTTC-TTTTGGCTATTGAATGTGTTGTTAA  | 3595 |
| VervetAGM         | ATTTCCGGTATACTGGCATTGTGGAAATGGCA---TAGTGTFTTTGGGTTTTGTTC-TTTTGGCTATTGAATATGTTGCTAA | 3571 |
| Gorilla           | ATCTCAGTATACTGGCATTGTAGAAATGGCA---TAGTGTFTTTGGGTTTTGTTC-TTTTGGCTATTGAATGTGTTGTTAA  | 3735 |
| GrabEatingMacaque | ATCTCAGTGTATTGGTATTGTGGAAATGGCA---TAGTGTFTTTGGGTTTTGTTC-TTTTGGCTATTGAATATGTTGCTAA  | 3511 |
| Macaque           | ATCTCAGTGTATTGGTATTGTGGAAATGGCA---TAGTGTFTTTGGGTTTTGTTC-TTTTGGCTATTGAATATGTTGCTAA  | 3518 |
| PigTailedMacaque  | ATCTCAGTGTATTGGCATTGTGGAAATGGCA---TAGTGTFTTTGGGTTTTGTTC-TTTTGGCTATTGAATATGTTGCTAA  | 3736 |
| Bonobo            | ATCTCAGTATACTGGCATTGTAGAAATGGCA---TAGTGTFTTTGGGTTTTGTTC-TTTTGGCTATTGAATGTGTTGTTAA  | 3584 |
| OliveBaboon       | ATCTCAGTGTATTGGCATTGTGGAAATGGCA---TAGTGTFTTTGGGTTTTGTTC-TTTTGGCTATTGAATATGTTGCTAA  | 3475 |
| Orangutan         | ATCTCAGTATACTGGCATTGTAGAAATGGCA---TAGTGTFTTTGGGTTTTGTTC-TTTTGGCTATTGAATGTGTTGTTAA  | 3575 |

Tuesday, May 03, 2022 06:14 PM

|                   |                                                                                    |      |
|-------------------|------------------------------------------------------------------------------------|------|
| Majority          | AA--GATACCACAAGTTACTGAATTT-TGTCTCACGTTTCAAAGTTACTTTTAGAAAACCAGGTTGATAACAGTAC--A    |      |
|                   | 4090      4100      4110      4120      4130      4140      4150      4160         |      |
| Human             | AA--AATACCACAAG-----T---TGTCTCACATTTGAAAGTTACTTTTAGAAAACCAGGTTGGTAAACAGTAC--A      | 2341 |
| Coquerel'sSifaka  | AAAAGATAGCGTAAGTTTACTGAGTTT-CATTTTCATATT-GAAAGTTATTTCTAGAAAAGTCAAGTAGATAATAGTGCTAA | 3746 |
| Ma'sNightMonkey   | AA--TATACCACAAGTTTATTGAATTT-TGTCTCAGGTTTCAAAGTTATTTTGTAGTAA-CCAGGTTGATAACAGTA----  | 3667 |
| VervetAGM         | AA--GATACCACGAGGTTACTGAATTTTTGCCTCACGTTTCAAAGTTACTTTTAGAAAACCAGGTTGATAACAGTAC--A   | 3647 |
| Gorilla           | AA--AATACCACAAG-----T---TGTCTCACATTTGAAAGTTACTTTTAGAAAACCAGGTTGGTAAACAGTAC--A      | 3799 |
| GrabEatingMacaque | AA--GATACCACGAGGTTACTGAATTTTTGCCTCACGTTTCAAAGTTACTTTTAGAAAACCAGGTTGATAACAGTAC--A   | 3587 |
| Macaque           | AA--GATACCACGAGGTTACTGAATTTTTGCCTCACGTTTCAAAGTTACTTTTAGAAAACCAGGTTGATAACAGTAC--A   | 3594 |
| PigTailedMacaque  | AA--GATACCACGAGGTTACTGAATTTTTGCCTCACGTTTCAAAGTTACTTTTAGAAAACCAGGTTGATAACAGTAC--A   | 3812 |
| Bonobo            | AA--AATACCACAAG-----T---TGTCTCACATTTGAAAGTTACTTTTAGAAAACCAGGTTGGTAAACAGTAC--A      | 3648 |
| OliveBaboon       | AA--GATACCATGAGGTTACTGAATTTTTGCCTCACGTTTCAAAGTTACTTTTAGAAAACCAGATTGATAACAGTAC--A   | 3551 |
| Orangutan         | AA--AATACCACAAG-----T---TGTCTCACATTTGAAAGTTAGTTTTAGAAAACCAGGTTGGTAAACAGTAC--A      | 3639 |

|                   |                                                                                   |      |
|-------------------|-----------------------------------------------------------------------------------|------|
| Majority          | GGTAAGTCACTGACC-ATCTGTGGTATTTTTTTT---CCCATCTGTGTGTGAGTGGCTGGAAGATTTATGAATGATGAA   |      |
|                   | 4170      4180      4190      4200      4210      4220      4230      4240        |      |
| Human             | GGTAAGTCACTGACC-ATCTGTGGTATTTTTTTTAT---CCCATCTGTGTGTGAGTGGCTGGAAGATTTATGAATGATGGA | 2417 |
| Coquerel'sSifaka  | GAAGTGTCACTGACC-ATCTGTGTGGTTTTTTTC-----CATCTGCAC---TGTGTCTG-AAGATTTATGAACGGTGAG   | 3814 |
| Ma'sNightMonkey   | GGTAAGTCACTGACCATCTGTGGTATTTTTTTTTTTTCCCATCTGTATGTGAGTGGCTGGAAGACTTATGAATGATGAA   | 3747 |
| VervetAGM         | GGTAAGTCACTGACC-ATCTGTGGTATTTTTTTT---CCCATCCGTGTGTGAGTGGCTGGAAGATTTATGAATGATGAA   | 3723 |
| Gorilla           | GGCAAGTCACTGATC-ATCTGTGGTATTTTTTTTT---CCCATCTGTGTGTGAGTGGCTGGAAGATTTATGAATGGTGGA  | 3876 |
| GrabEatingMacaque | GGTAAGTCACTGACC-ATCTGTGGTATTTTTTTT---CCCATCTGTGTGTGAGTGGCTGGAAGATTTATGAATGATGAA   | 3662 |
| Macaque           | GGTAAGTCACTGACC-ATCTGTGGTATTTTTTTT---CCCATCTGTGTGTGAGTGGCTGGAAGATTTATGAATGATGAA   | 3669 |
| PigTailedMacaque  | GGTAAGTCACTGACC-ATCTGTGGTATTTTTTTT---CCCATCTGTGTGTGAGTGGCTGGAAGATTTATGA-TGATGAA   | 3887 |
| Bonobo            | GGTAAGTCACTGATC-ATCTGTGGTATTTTTTTTT---CCCATCTGTGTGTGAGTGGCTGGAAGATTTATGAATGATGGA  | 3724 |
| OliveBaboon       | GGTAAGTCACTGACC-ATCTGTGGTATTTTTTTTT---CCCATCTGTGTGTGAGTGGCTGGAAGATTTATGAATGATGAA  | 3627 |
| Orangutan         | GGTAAGTCACTGATC-ATCTGTGGTATTTTTTTTT---CCCATCTGTGTGTGAGTGGCTGGAAGATTTATGAATGATGAA  | 3716 |

|                   |                                                                                   |      |
|-------------------|-----------------------------------------------------------------------------------|------|
| Majority          | CTATCCTAAAAAGTTTTAGAGCCAAAGAG---TGATTAGAAGAATAACAAGAAGTTGAAACTATTTATTTTTTCTTTGC   |      |
|                   | 4250      4260      4270      4280      4290      4300      4310      4320        |      |
| Human             | CTATCCTAAAAAGTTTTAGAGCCAAAGAGTGTGAGTATTAGAAGAATAACAGGAGGTTGAAACTACTTATTTTTTCTTTGC | 2497 |
| Coquerel'sSifaka  | AGCTACCCTAAAAAGTTTTAGAGTCAAACAG---TGATCAGTAGAAAAATAATGAGTTGAAACTATTTATTTTTTCTTTTC | 3890 |
| Ma'sNightMonkey   | CTGTCTAAAAAGTTTTAGAGCCA--G-----TGATTAGAAGAATAACAAGAAGTTGAAACTATTTATTTTTTCTTTAC    | 3819 |
| VervetAGM         | CTATCCTAAAAAGTTGTAGAGCCAAAGAG---TGATTAGAAGAATAACAAGAAGTTGAAACTATTTATTTTTTCTTTGC   | 3799 |
| Gorilla           | CTATCCTAAAAAGTTTTAGAGCCAAAGAGTGTGAGTATTAGAAGAATAACAGGAAGTTGAAACTACTTGTTTTTTCTTTGC | 3956 |
| GrabEatingMacaque | CTATCTTAAAAAGTTGTAGAGCCAAAGAG---TGATTAGAAGAATAACAAGAAGTTGAAACTATTTATTTTTTCTTTGC   | 3738 |
| Macaque           | CTATCTTAAAAAGTTGTAGAGCCAAAGAG---TGATTAGAAGAATAACAAGAAGTTGAAACTATTTATTTTTTCTTTGC   | 3745 |
| PigTailedMacaque  | CTATCTTAAAAAGTTGTAGAGCCAAAGAG---TGATTAGAAGAATAACAAGAAGTTGAAACTATTTATTTTTTCTTTGC   | 3963 |
| Bonobo            | CTATCCTAAAAAGTTTTAGAGCCAAAGAGCGAGTATTAGAAGAATAACAGGAAGTTGAAACTACTTATTTGTTTCTTTGC  | 3804 |
| OliveBaboon       | CTATGCTAAAAAGTTGTAGAGCCAAAGAG---TGATTAGAAGAATAACAAGAAGTTGAAACTATTTATTTTTTCTTTGC   | 3703 |
| Orangutan         | CTATCCTAAAAAGTTTTAGAGCCAAAGAGTGTGAGTATTAGAAGAATAACAGGAAGTTGAAACTATTTATTTTTTCTTTGC | 3796 |

Tuesday, May 03, 2022 06:14 PM

|                   |                                                                                 |      |
|-------------------|---------------------------------------------------------------------------------|------|
| Majority          | AGAATCGTCACTGAGGTTGCAGTTGGTGTGAAGGTAGGAAAAGATTATGTTTGAAACTG-----GGATTGTTGG      |      |
|                   | 4330      4340      4350      4360      4370      4380      4390      4400      |      |
| Human             | AGAATCGTCACTGAGGTTGCAGTTGGCGTGAAGGTAGGAAAATACTATGTTTGAAACTG-----GGATTGTTGG      | 2566 |
| Coquerel'sSifaka  | AGAATTGTCACTGAGGTTGCAGTTGGTGTGAAGGTAGGAAAAGATTATGTTTGAAACTAATACGAAAACGGATTGTTGA | 3970 |
| Ma'sNightMonkey   | AGAATCGTCACTGAAGTTGCAGTTGGTGTGAAGGTAGGAAAAGATTATGTTTGAAACTG-----GGATTGTTGG      | 3888 |
| VervetAGM         | AGAATCGTCACTGAGGTTGCAGTTGGTGTGAAGGTAGGAAAAGATTATGTTTGAAACTG-----GGATCGTTGG      | 3868 |
| Gorilla           | AGAATCGTCACTGAGGTTGCAGTTGGCGTGAAGGTAGGAAAATACTATGTTTGAAACTG-----GGATTGTTGG      | 4025 |
| GrabEatingMacaque | AGAATCGTCACTGAGGTTGCAGTTGGTGTGAAGGTAGGAAAAGATTATGTTTGAAACTG-----GGATCGTTGG      | 3807 |
| Macaque           | AGAATCGTCACTGAGGTTGCAGTTGGTGTGAAGGTAGGAAAAGATTATGTTTGAAACTG-----GGATCGTTGG      | 3814 |
| PigTailedMacaque  | AGAATCGTCACTGAGGTTGCAGTTGGTGTGAAGGTAGGAAAAGATTATGTTTGAAACTG-----GGATCGTTGG      | 4032 |
| Bonobo            | AGAATCGTCACTGAGGTTGCAGTTGGCGTGAAGGTAGGAAAATACTATGTTTGAAACTG-----GGATTGTTGG      | 3873 |
| OliveBaboon       | AGAATCGTCACTGAGGTTGCAGTTGGTGTGAAGGTAGGAAAAGATTCTGTTTGAAACTG-----GGATCGTTGG      | 3772 |
| Orangutan         | AGAATCGTCACTGAGGTTGCAGTTGGCGTGAAGGTAGGAAAATACTATGTTTGAAACTG-----GGATTGTTGG      | 3865 |

|                   |                                                                                    |      |
|-------------------|------------------------------------------------------------------------------------|------|
| Majority          | ATCTACTGTTATCATAATTACTGGAAAATTTTAGCTTTTGCTTTTGAAAACCTATAATGTAGCTAACAAAACCCAAGTGTA  |      |
|                   | 4410      4420      4430      4440      4450      4460      4470      4480         |      |
| Human             | ATCTA---TTATCATAATTACTGGAAAATTTTAGCTTTTGCTTTTGAAAACCTATAACGTAGCTAACAAAACCCAAGTGTA  | 2643 |
| Coquerel'sSifaka  | ATCTACTCTTA---TAATTAATGAAAATTTTCAG--TTAGCTTTTGAAAACCTATAAGGTACCTAATAAAAACCCAAGTATA | 4045 |
| Ma'sNightMonkey   | ATCTATTATTATGATAATTACTGGAAAATTTTAG--TTAGCTTTTGAAAACCTATAATGTAGCTAACAAAACCCAAGTGTA  | 3966 |
| VervetAGM         | ATCTACTGTTA---TAATGACTGGAAAATTTTAGCGTTTGCTTTTGAAAACCTATACTGTAGCTAACAAAACCCAAGTGTA  | 3945 |
| Gorilla           | ATCTA---TTATCATAATTACTGGAAAATTTTAGCTTTTGCTTTTGAAAACCTATAACGTAGCTAACAAAACCCAAGTGTA  | 4102 |
| GrabEatingMacaque | ATCTACTGTCATCATAATTACTGGAAAATTTTAGCTTTTGCTTTTGAAAACCTATACTGTAGCTAACAAAACCCAAGTGTA  | 3887 |
| Macaque           | ATCTACTGTCATCATAATTACTGGAAAATTTTAGCTTTTGCTTTTGAAAACCTATACTGTAGCTAACAAAACCCAAGTGTA  | 3894 |
| PigTailedMacaque  | ATCTACTGTCATCATAATTACTGGAAAATTTTAGCTTTTGCTTTTGAAAACCTATACTGTAGCTAACAAAACCCAAGTGTA  | 4112 |
| Bonobo            | ATCTA---TTATCATAATTACTGGAAAATTTTCAGCTTTTGCTTTTGAAAACCTATAACGTAGCTAACAAAACCCAAGTGTA | 3950 |
| OliveBaboon       | ATCTACTGTTATCATAATTACTGGAAAATTTTAGCTTTTGCTTTTGAAAACCTATACTGTAGCTAACAAAACCCAAGTGTA  | 3852 |
| Orangutan         | ATCTACTATTATCATAATTACTGGAAAATTTTAGCTTTTGCTTTTGAAAACCTATAATGTAGTTAACAAAACCCAAGTGTA  | 3945 |

|                   |                                                                                     |      |
|-------------------|-------------------------------------------------------------------------------------|------|
| Majority          | AAATGTTTCCTTTTCATTTGTAAAGTTGGACCATATAA---ACAGTTTGTAAATCACCA-TAAGTTTTTCTAGAACTGGCAA  |      |
|                   | 4490      4500      4510      4520      4530      4540      4550      4560          |      |
| Human             | AAATGTTTCCTTTTCATTTGTAAAGTTGGACCATATAA---ACAGTTTGTAAATCACCA-TAAGTTTTTCTAGAACTGTCAG  | 2719 |
| Coquerel'sSifaka  | AAATGTTTCCTTTTAATTTGTAAAGTTGC-CTATATAGTTAATAATCTAAATAAACAACCTAAGTTTTTCTAGAATTGGTAA  | 4124 |
| Ma'sNightMonkey   | AAATGTTTCCTTTTAATTTGTAAAGTTGGACCATATAA---AGAGTTTGCAGTCACCA-TAAGTTTTTCTAGAACTGTCAC   | 4042 |
| VervetAGM         | AAATGTTTCCTTTTCATTTCTAAAGTTGGACCATATTA---ACAGTTTGTAAATCACCA-TAAGTTTTTCTAGAACTGGCCA  | 4021 |
| Gorilla           | AAATGTTTCCTTTTCATTTGTGAAGTTGGACCATATAA---ACAGTTTGTAAATCACCA-TAAGTTTTTCTAGAACTGGCAG  | 4178 |
| GrabEatingMacaque | AAATGTTTC-----ATTTCTAAAGTTGGACCATATTA---ACAGTTTGTAAATCACCA-TAAGTTTTTCTAGAACTGGCCA   | 3958 |
| Macaque           | AAATGTTTC-----ATTTCTAAAGTTGGACCATATTA---ACAGTTTGTAAATCACCA-TAAGTTTTTCTAGAACTGGCCA   | 3965 |
| PigTailedMacaque  | AAATGTTTT-----ATTTCTAAAGTTGGACCATGTTA---ACAGTTGGTAATCACCA-TAAGTTTTTCTAGAACTGGCCA    | 4183 |
| Bonobo            | AAATGTTTCCTTTTCATTTGTAAAGTTGGACCATATAA---ACAGTTTGTAAATCACCA-TAAGTTTTTCTAGAACTGTCAG  | 4026 |
| OliveBaboon       | AAATGTTTC-----ATTTCTAAAGTTGGACCATATTA---ACAGTTTGTAAATCACCA-TAAGTTTTTCTAGAACTGGCCA   | 3923 |
| Orangutan         | AAGTATTTTCCTTTTCATTTGTAAAGTTGGACCATATA-----CAGTTTGTAAATCACCA-TAAGTTTTTCTAGAACTGGCAG | 4019 |

Tuesday, May 03, 2022 06:14 PM

|                   |                                                                                       |
|-------------------|---------------------------------------------------------------------------------------|
| Majority          | TCTGTAAGAATAACCTTT-TAAAGTAAGTATGAATGAT---CAGGAAATTAAAAATGCTTT-CACACATGGCTTCTTGT-      |
|                   | 4570      4580      4590      4600      4610      4620      4630      4640            |
| Human             | TCTGTAAGAATAACCTTT-TAAAGTAAGTATGAATGAT---CAAGAAATTGAAAATGCTTT-CACACATGGCTTCTTGT- 2793 |
| Coquerel'sSifaka  | TCTGTAAGAGCATTTTAAACAAAGTATGTATGAATGGTGTTCAGTGAATTAAAAATGCTTTTCATACATGGCTTCTTGTG 4204 |
| Ma'sNightMonkey   | TGTGTAAGAATAACCTTT-TAAAGTAAGTATGAATGAT---CAAGGAATTAAAAATGCTTT-CACACATGGCTTCTTGTG 4117 |
| VervetAGM         | TCTGTAAGAATAACCTTT-TAAAGTAAGTATGAATGAT---CAGGAAATTAAAAATGCTTT-CACACATGGCTTCTTGT- 4095 |
| Gorilla           | TCTGTAAGAATAACCTTT-TAAAGTAAGTATGAATGAT---CAAGAAATTGAAAATGCTTT-TACACATGGCTTCTTGT- 4252 |
| GrabEatingMacaque | TCTGCAAGAATAACCTTT-TAAAGTAAGTATGAATGAT---CAGGAAATTAAAAATGCTTT-CATACATGGCTTCTTGT- 4032 |
| Macaque           | TCTGCAAGAATAACCTTT-TAAAGTAAGTATGAATGAT---CAGGAAATTAAAAATGCTTT-CATACATGGCTTCTTGT- 4039 |
| PigTailedMacaque  | TCTGCAAGAATAACCTTT-TAAAGTAAGTATGAATGAT---CAGGAAATTAAAAATGCTTT-CATACATGGCTTCTTGT- 4257 |
| Bonobo            | TCTGTAAGAATAACCTTT-TAAAGTAAGTATGAATGAT---CAAGAAATTGAAAATGCTTT-CACACATGGCTTCTTGT- 4100 |
| OliveBaboon       | TCTGCAAGAATAACCTTT-TAAAATAAGTATGAATGAT---CAGGAAATTAAAAATGCTTT-CATACATGGCTTCTTGT- 3997 |
| Orangutan         | TCTGTAAGAATAACCTTT-TAAAGTAAGTATGAATGAT---CAAGAAATTGAAAATGCTTT-CACACATGGCTTCTTGT- 4093 |

|                   |                                                                                       |
|-------------------|---------------------------------------------------------------------------------------|
| Majority          | AATATAAAATGATACCCCAATTTTCTGAGGGGAAATAATG-ATTTTAAATGGATGGTAAGTGGTTTGACCTATATCTTAT      |
|                   | 4650      4660      4670      4680      4690      4700      4710      4720            |
| Human             | AATATAAAACGATACCCCAATTTTCTGAGGGGAAATAATG-ATTTTAAATGGATGGTAAGTGGTTTGACCTATATCTTAT 2872 |
| Coquerel'sSifaka  | AACACAAAATAATATCCTGGTTTTTGGAGTGGAAACAATGGAGTTTGAATGGACGATAAGTGGTTTGACTTAAATCATAT 4284 |
| Ma'sNightMonkey   | AATATAAAATGATATCGCAGTTTTCTGAGGGGAAATAATG-ATTTTAAATGGATGGTAAGTGGTTTGACTTGTATCTTAT 4196 |
| VervetAGM         | AATATAAAATGATACCCCAATTTTCTGAGGGGAAATAATG-ATTTTAAATGGATGGTAAGTGGTTTGACCTATATCTTAT 4174 |
| Gorilla           | AATATAAAACGATACCCCAATTTTCTGAGGGGAAATAATG-ATTTTAAATGGATGGTAAGTGGTTTGACCTATATCTTAT 4331 |
| GrabEatingMacaque | AATATAAAATGATACCCCAATTTTCTGAGGGGAAATAATG-ATTTTAAATGGATGGTAAGTGGTTTGACCTATATCTTAT 4111 |
| Macaque           | AATATAAAATGATACCCCAATTTTCTGAGGGGAAATAATG-ATTTTAAATGGATGGTAAGTGGTTTGACCTATATCTTAT 4118 |
| PigTailedMacaque  | AATATAAAATGATACCCCAATTTTCTGAGGGGAAATAATG-ATTTTAAATGGATGGTAAGTGGTTTGACCTATATCTTAT 4336 |
| Bonobo            | AATATAAAACGATACCCCAATTTTCTGAGGGGAAATAATG-ATTTTAAATGGATGGTAAGTGGTTTGACCTATATCTTAT 4179 |
| OliveBaboon       | AATATAAAATGATACCCCAATTTTCTGAGGGGAAATAATG-ATTTTAAATGGATGGTAAGTGGTTTGACCTATATCTTAT 4076 |
| Orangutan         | AATATAAAACGATACCCCAATTTTCTGAGGGGAAATAATG-ATTT-AAAGGGACGGTAAGGGGTTTGACCTATATCTTAT 4171 |

|                   |                                                                                       |
|-------------------|---------------------------------------------------------------------------------------|
| Majority          | AATTTTGTTAATCTAAGTTTTTTTGT---TTTTGTTTTTTTTTTACTTTTGTGCATATGAAAATGAAT                  |
|                   | 4730      4740      4750      4760      4770      4780      4790      4800            |
| Human             | AATTTTGTTAATCTAAGTTTTTTTGT---TTTTATT-----ACTTTTGTGCAT--GAAAATGAAT 2927                |
| Coquerel'sSifaka  | AATTTTGTTAATCTAAGATTTTT-----TTTT-----ACTCCTGTGTTATGAAAATGAAA 4334                     |
| Ma'sNightMonkey   | AATTTTGTTAATCTAAGATTTTTCTT-----TTTTTTTTTCTACTTTTGTCTTATGAAAATGAAT 4259                |
| VervetAGM         | AATTTTGTTAATCTGT-TTTTTTGT-----GTTTTTTTTTAACTTTTGTGCATATGAAAATGAAT 4235                |
| Gorilla           | AATTT-GTTAATCTAAGTTTTTTTGT---TTTTGTTTTTTTT--ACTTTTGTGCAT--GAAAATGAAT 4392             |
| GrabEatingMacaque | AATTTTGTTAATCTAAGTTTTTTT---TTTTTTTTTTTACTTTTGTGCATATGAAAATGAAT 4169                   |
| Macaque           | AATTTTGTTAATCTAAGTTTTTTTGT---TTTTTTTTTTTACTTTTGTGCATATGAAAATGAAT 4179                 |
| PigTailedMacaque  | AATTTTGTTAATCTAAGTTTTTTTT---GTTTGTTTTTTGTACTTTTGTGCATATGAAAATGAAT 4403                |
| Bonobo            | AATTTTGTTAATCTAAGTTTTTTTGT---TTTTGTT-----ACTTTTGTGCAT--GAAAATGAAT 4234                |
| OliveBaboon       | AATTTTGTTAATCTAAGTTTTTTTTTTTTTTTTTTTTTTTTTTTTTTTTTTTTTTTACTTTTGTGCATATGAAAATGAAT 4156 |
| Orangutan         | AATTTTGTTAATCTAAGTTTTTTTGT---TTTTGTTTTTTTTTTACTTTTGTGCATATGAAAATGAAT 4237             |

Tuesday, May 03, 2022 06:14 PM

| Majority          | A-TATTTTGGTCAATAATAAGGCACATTAGAAATGAATTATCCTGATCCTTAAAAA-----GAAAGTTGTTGAGGCAATT  |      |
|-------------------|-----------------------------------------------------------------------------------|------|
|                   | 4810 4820 4830 4840 4850 4860 4870 4880                                           |      |
| Human             | A-TATTTTGGTTAATAATAAAGGCACATTAGAAATGAATTACACTGATCCTTAAAAA-----GGAAGTTGTTGAGGCAGTT | 3001 |
| Coquerel'sSifaka  | AATATTTTGGTCAATAATAAGGCACATTAGAAACGAGTTGTCCTGACCCCTTAAAAAGACAAGAAAGTTGTTTAGGCAATT | 4414 |
| Ma'sNightMonkey   | A-TATTTTAGTCAATAATAAGGCACATTAGAAATGAATTATCCTGATCCTTAAAAA-----GAAAGTTGTTGAGGCAATT  | 4333 |
| VervetAGM         | A-TATTTTGGTCAATAAAGAAGGCACATTAGAAATGAATTATCCTGATCCTTAAAAA-----GAAAGTTGTTGAGGCAGTT | 4309 |
| Gorilla           | A-TATTTTGGTTAATAATAAAGGCACATTAGAAATGAATTATACTGAGCCTTAAAA-----GGAAGTTGTTGAGGCAGTT  | 4465 |
| GrabEatingMacaque | A-TATTTTGGTCAATTAGAAGGCACATTAGAAATGAATTATCCTGATCCTTAAAAA-----GAAAGTTGTTGAGGCAATT  | 4243 |
| Macaque           | A-TATTTTGGTCAATTAGAAGGCACATTAGAAATGAATTATCCTGATCCTTAAAAA-----GAAAGTTGTTGAGGCAATT  | 4253 |
| PigTailedMacaque  | A-TATTTTGGTCAATAAAGAAGGCACATTAGAAATGAATTATCCTGATCCTTAAAAA-----GAAAGTTGTTGAGGCAATT | 4477 |
| Bonobo            | A-TATTTTGGTTAATAATAAAGGCACATTAGAAATGAATTATACTGATCCTTAAAAA-----GGAAGTTGTTGAGGCAGTT | 4308 |
| OliveBaboon       | A-TATTTTGGTCAATAAAGAAGCCACATTAGAAATGAATTATCCTGATCCTTAAAAA-----GAAAGTTGTTGAGGCAATT | 4230 |
| Orangutan         | A-TATTTTGGTCAATAATAAGGCACATTAGAAATGAATTATCCTGATCCTTAAAAA-----GAAAGTTGTTGAGGCAGTT  | 4311 |

| Majority          | AGCTTCAAATTTGAATCAGAAGTTAAGAGCTGGTTTGTCT-----ATTAAAGAAAGGCTTTATGGTAGAGATCCTTT    |      |
|-------------------|----------------------------------------------------------------------------------|------|
|                   | 4890 4900 4910 4920 4930 4940 4950 4960                                          |      |
| Human             | AGCTTCAAATTTGAATTAGAAGTTAAGAGCTGGTTTGTCT-----ATTAAAGAAAGTCTTTATGGTAGAGATCCTTT    | 3073 |
| Coquerel'sSifaka  | ACCTTCAAATTTGAGTCAGAAGGTAAGAGTTGATTTGTCTTTCTATTAATGAAAGATAGACCTTATGGTAGAGATCCTTT | 4494 |
| Ma'sNightMonkey   | AGCTTCAAATTTGAAACAGAAGTTGAGAGCTGGTTTG-----TTAAAGAAAGGCTTTATGGTAGAGATCGTTT        | 4401 |
| VervetAGM         | AGCTTCAAATTTGAATCAGAAGTTAAGAGCTGGTTTGTCT-----ATTAAAGAAAGGCTTTATGGTAGAGATCCTTT    | 4381 |
| Gorilla           | AGCTTCAAATTTGAATTAGAAGTTAAGAGCTGGTTTGTCA-----ATTAAAGAAAGTCTTTATGGTAGAGATCCTTT    | 4537 |
| GrabEatingMacaque | AGCTTCAAATTTGAATCAGAAGTTAAGAGCTGGTTTTTCT-----ATTAAAGAAAGGCTTTATGGTAGAGATCCTTT    | 4315 |
| Macaque           | AGCTTCAAATTTGAATCAGAAGTTAAGAGCTGGTTTTTCT-----ATTAAAGAAAGGCTTTATGGTAGAGATCCTTT    | 4325 |
| PigTailedMacaque  | AGCTTCAAATTTGAATCAGAAGTTAAGAGCTGGTTTTTCT-----ATTAAAGAAAGGCTTTATGGTAGAGATCCTTT    | 4549 |
| Bonobo            | AGCTTCAAATTTGAATTAGAAGTTAAGAGCTGGTTTGTCT-----ATTAAAGAAAGTCTTTATGGTAGAGATCCTTT    | 4380 |
| OliveBaboon       | AGCTTCAAATTTGAATCAGAAGTTAAGAGCTGGTTTTTCT-----ATTAAAGAAAGGCTTTATGGTAGAGATCCTTT    | 4302 |
| Orangutan         | AGCTTCAAATTTGAATTAGAAGTTAAGAGCTGGTTTGTCT-----ATTAAAGAAAGTCTTTATGGTAGAGATCCTTT    | 4383 |

| Majority          | GGAATCCTTCCT-----TTTGGCCAAGAAAACACTACTCATCGTTTAAACTTTAGTTCTAATGCTTAACATTTTCTTG |      |
|-------------------|--------------------------------------------------------------------------------|------|
|                   | 4970 4980 4990 5000 5010 5020 5030 5040                                        |      |
| Human             | GGAATCCTTCCT-----TTTGGCTAAGAAAACACTACTCATCGTTTAAACTTTAGTTCTAATGCTTAACATTTTCTTG | 3145 |
| Coquerel'sSifaka  | GAAATCCTTCCTCACTCACTTTTGGCCAGGAAAACATTTATCCTTTAAACTTTAGTTGTAATGCTTAGGTTTTTC--- | 4571 |
| Ma'sNightMonkey   | GGAATCCTTCCT-----TTTGGCTAAGAAAACACTACTCATCCTTTAAACTTTAGTTCTAATGCTTACCATTTCTTT  | 4473 |
| VervetAGM         | GGAATCCTTCCT-----TTTGGCCAAGAAAACACTACTCATCGTTTAAACTTTAGTTCTAATGCTTAACATTTTCTTG | 4452 |
| Gorilla           | GGAATCCTT-----TTTGGCTAAGAAAACACTACTCATCGTTTAAACTTTAGTTCTAATGCTTAACATTTTCTCG    | 4605 |
| GrabEatingMacaque | GGAATCCTTCCT-----TTTGGCCAAGAAAACACTACTCATCGTTTAAACTTTAGTTCTAATGCTTAACATTTTCTTG | 4386 |
| Macaque           | GGAATCCTTCCT-----TTTGGCCAAGAAAACACTACTCATCGTTTAAACTTTAGTTCTAATGCTTAACATTTTCTTG | 4396 |
| PigTailedMacaque  | GGAATCCTTCCT-----TTTGGCCAAGAAAACACTACTCATCGTTTAAACTTTAGTTCTAATGCTTAACATTTTCTTG | 4620 |
| Bonobo            | GGAATCCTTCCT-----TTTGGCTAAGAAAACACTACTCATCGTTTAAACTTTAGTTCTAATGCTTAACATTTTCTTG | 4452 |
| OliveBaboon       | GGAATCCTTCCT-----TTTGGCCAAGAAAACACTACTCATCGTTTAAACTTTAGTTCTAATGCTTAACATTTTCTTG | 4373 |
| Orangutan         | GGAATCCTTCCT-----TTTGGCTAAGAAAACACTACTCATCATTTAAACTTTAGTTCTAATGCTTAACATTTTCTTG | 4455 |

Tuesday, May 03, 2022 06:14 PM

| Majority          | AGTACTTGCAAGTTTTTAATGTCA-TGATGTATTGTAATTTTTTTTTTTTTTTTGG-----                    |      |
|-------------------|----------------------------------------------------------------------------------|------|
|                   | 5050 5060 5070 5080 5090 5100 5110 5120                                          |      |
| Human             | AGTACTTGCAACTTTTTAATGTCA-TGATGTATTGTAATTTTTTTTTTGTTTTTTGT-----                   | 3200 |
| Coquerel'sSifaka  | -----ATTTTAACATCA-TGATATATTATAA---TTTTT---TGTTTG-----                            | 4607 |
| Ma'sNightMonkey   | AGTACTTAAAACTTTTTAATGTCA-TAATGTATTGTAATTTTTCTCCTCTTTTTTT-----                    | 4528 |
| VervetAGM         | AGTACTTGCAAGTTTTTAATGTCAACGATGTATTGTAATTTTTTTTTTTTTTTTGG-----                    | 4506 |
| Gorilla           | AGTACTTGCAACTTTTTAATGTCA-TGATGTATTGTAATTTTTTTTTTTTTTTTTTTGAGATGGAGCCTCACTGTGTGCC | 4684 |
| GrabEatingMacaque | AGTACTTGCAAGTTTTTAATGTCA-CGATGTATTGTAA-TTTTTTTTTTTTTTTTGG-----                   | 4438 |
| Macaque           | AGTACTTGCAAGTTTTTAATGTCA-CGATGTATTGTAA-TTTTTTTTTTTTTTTTGG-----                   | 4448 |
| PigTailedMacaque  | AGTACTTGCAAGTTTTTAATGTCA-CGATATATTGTAA-TTTTTTTTTTTTTTTTGG-----                   | 4672 |
| Bonobo            | AGTACTTGCAACTTTTTAATGTCA-TGATGTATTGTAATTTTTTTTTTTTTTTTTTT-----                   | 4507 |
| OliveBaboon       | AGTACTTGCAAGTTTTTAATGTCA-CGATGTATTGTAAATTTTTTTTTTTTTTTTGG-----                   | 4426 |
| Orangutan         | AGTACTTGCAACTTTTTAATGTCA-TGATGTATTGTAATTTTTTTTAGTTTTTTTTTT-----                  | 4510 |

| Majority          | -----                                                                          |      |
|-------------------|--------------------------------------------------------------------------------|------|
|                   | 5130 5140 5150 5160 5170 5180 5190 5200                                        |      |
| Human             | -----                                                                          | 3200 |
| Coquerel'sSifaka  | -----                                                                          | 4607 |
| Ma'sNightMonkey   | -----                                                                          | 4528 |
| VervetAGM         | -----                                                                          | 4506 |
| Gorilla           | CAGGCTGGATGCAGTGGCAGCATCTGGCCACTGCAACCTCTGCCTCCTGGGTTCAAGCAGTTCTCCTGCCTCAGCCTC | 4764 |
| GrabEatingMacaque | -----                                                                          | 4438 |
| Macaque           | -----                                                                          | 4448 |
| PigTailedMacaque  | -----                                                                          | 4672 |
| Bonobo            | -----                                                                          | 4507 |
| OliveBaboon       | -----                                                                          | 4426 |
| Orangutan         | -----                                                                          | 4510 |

| Majority          | -----                                                                          |      |
|-------------------|--------------------------------------------------------------------------------|------|
|                   | 5210 5220 5230 5240 5250 5260 5270 5280                                        |      |
| Human             | -----                                                                          | 3200 |
| Coquerel'sSifaka  | -----                                                                          | 4607 |
| Ma'sNightMonkey   | -----                                                                          | 4528 |
| VervetAGM         | -----                                                                          | 4506 |
| Gorilla           | CTGAGTAGCTGGGATTACAGGTGCGCACCACCAGCCAGCTAATTTGTATTTTGTAGTAAATGGCATTTCACCCCTGTT | 4844 |
| GrabEatingMacaque | -----                                                                          | 4438 |
| Macaque           | -----                                                                          | 4448 |
| PigTailedMacaque  | -----                                                                          | 4672 |
| Bonobo            | -----                                                                          | 4507 |
| OliveBaboon       | -----                                                                          | 4426 |
| Orangutan         | -----                                                                          | 4510 |

Tuesday, May 03, 2022 06:14 PM

| Majority          | 5290              | 5300            | 5310            | 5320           | 5330          | 5340    | 5350 | 5360 |      |
|-------------------|-------------------|-----------------|-----------------|----------------|---------------|---------|------|------|------|
| Human             | -----             |                 |                 |                |               |         |      |      | 3200 |
| Coquerel'sSifaka  | -----             |                 |                 |                |               |         |      |      | 4607 |
| Ma'sNightMonkey   | -----             |                 |                 |                |               |         |      |      | 4528 |
| VervetAGM         | -----             |                 |                 |                |               |         |      |      | 4506 |
| Gorrilla          | GGTCAGGCTGGTCTCAA | ACTCCTGACCTCATG | ATCTGCCTGCCTCTT | TATGATCTGCCTGC | CTTGACTTCCCAA | AGTGCTG |      |      | 4924 |
| GrabEatingMacaque | -----             |                 |                 |                |               |         |      |      | 4438 |
| Macaque           | -----             |                 |                 |                |               |         |      |      | 4448 |
| PigTailedMacaque  | -----             |                 |                 |                |               |         |      |      | 4672 |
| Bonobo            | -----             |                 |                 |                |               |         |      |      | 4507 |
| OliveBaboon       | -----             |                 |                 |                |               |         |      |      | 4426 |
| Orangutan         | -----             |                 |                 |                |               |         |      |      | 4510 |

| Majority          | 5370           | 5380           | 5390           | 5400          | 5410          | 5420         | 5430 | 5440 |      |
|-------------------|----------------|----------------|----------------|---------------|---------------|--------------|------|------|------|
| Human             | -----          |                |                |               |               |              |      |      | 3200 |
| Coquerel'sSifaka  | -----          |                |                |               |               |              |      |      | 4607 |
| Ma'sNightMonkey   | -----          |                |                |               |               |              |      |      | 4528 |
| VervetAGM         | -----          |                |                |               |               |              |      |      | 4506 |
| Gorrilla          | GGATTACAAGTGTG | AGCCACCGTGCCCG | CGCTGTATTGTCAT | TTTTTCATTTGCA | AGTCTCTCTGTCT | CAGAGGCTATCT |      |      | 5004 |
| GrabEatingMacaque | -----          |                |                |               |               |              |      |      | 4438 |
| Macaque           | -----          |                |                |               |               |              |      |      | 4448 |
| PigTailedMacaque  | -----          |                |                |               |               |              |      |      | 4672 |
| Bonobo            | -----          |                |                |               |               |              |      |      | 4507 |
| OliveBaboon       | -----          |                |                |               |               |              |      |      | 4426 |
| Orangutan         | -----          |                |                |               |               |              |      |      | 4510 |

| Majority          | 5450          | 5460           | 5470          | 5480         | 5490         | 5500         | 5510     | 5520 |      |
|-------------------|---------------|----------------|---------------|--------------|--------------|--------------|----------|------|------|
| Human             | -----         |                |               |              |              |              |          |      | 3200 |
| Coquerel'sSifaka  | -----         |                |               |              |              |              |          |      | 4607 |
| Ma'sNightMonkey   | -----         |                |               |              |              |              |          |      | 4528 |
| VervetAGM         | -----         |                |               |              |              |              |          |      | 4506 |
| Gorrilla          | GCTTAGTCCAGTG | ATGCTGACTGTTCA | AAACATTTTTTTT | TGAATTCTTAAA | ATTGTATCCATA | AATGGGGGAGAT | GGGTAAGA |      | 5084 |
| GrabEatingMacaque | -----         |                |               |              |              |              |          |      | 4438 |
| Macaque           | -----         |                |               |              |              |              |          |      | 4448 |
| PigTailedMacaque  | -----         |                |               |              |              |              |          |      | 4672 |
| Bonobo            | -----         |                |               |              |              |              |          |      | 4507 |
| OliveBaboon       | -----         |                |               |              |              |              |          |      | 4426 |
| Orangutan         | -----         |                |               |              |              |              |          |      | 4510 |





Tuesday, May 03, 2022 06:14 PM

| Majority          | 5770                                                                             | 5780 | 5790 | 5800 | 5810 | 5820 | 5830 | 5840 |      |
|-------------------|----------------------------------------------------------------------------------|------|------|------|------|------|------|------|------|
| Human             | -----                                                                            |      |      |      |      |      |      |      | 3200 |
| Coquerel'sSifaka  | -----                                                                            |      |      |      |      |      |      |      | 4607 |
| Ma'sNightMonkey   | -----                                                                            |      |      |      |      |      |      |      | 4528 |
| VervetAGM         | -----                                                                            |      |      |      |      |      |      |      | 4506 |
| Gorrilla          | TAATGAGAGTCATGTAATTTAAAAAATATTTTGTAAAGTTTATAAGAAAAAGTCATTTTGGAAATTTGAAGATAAAAACA |      |      |      |      |      |      |      | 5404 |
| GrabEatingMacaque | -----                                                                            |      |      |      |      |      |      |      | 4438 |
| Macaque           | -----                                                                            |      |      |      |      |      |      |      | 4448 |
| PigTailedMacaque  | -----                                                                            |      |      |      |      |      |      |      | 4672 |
| Bonobo            | -----                                                                            |      |      |      |      |      |      |      | 4507 |
| OliveBaboon       | -----                                                                            |      |      |      |      |      |      |      | 4426 |
| Orangutan         | -----                                                                            |      |      |      |      |      |      |      | 4510 |

| Majority          | 5850                                                                             | 5860 | 5870 | 5880 | 5890 | 5900 | 5910 | 5920 |      |
|-------------------|----------------------------------------------------------------------------------|------|------|------|------|------|------|------|------|
| Human             | -----                                                                            |      |      |      |      |      |      |      | 3200 |
| Coquerel'sSifaka  | -----                                                                            |      |      |      |      |      |      |      | 4607 |
| Ma'sNightMonkey   | -----                                                                            |      |      |      |      |      |      |      | 4528 |
| VervetAGM         | -----                                                                            |      |      |      |      |      |      |      | 4506 |
| Gorrilla          | TTTAAACAAAGTCGACCTAAGTAAAATGGAACATCAAACCCTAGATGATAAGAAACACCAAAGTAAATAGCATGAGATTG |      |      |      |      |      |      |      | 5484 |
| GrabEatingMacaque | -----                                                                            |      |      |      |      |      |      |      | 4438 |
| Macaque           | -----                                                                            |      |      |      |      |      |      |      | 4448 |
| PigTailedMacaque  | -----                                                                            |      |      |      |      |      |      |      | 4672 |
| Bonobo            | -----                                                                            |      |      |      |      |      |      |      | 4507 |
| OliveBaboon       | -----                                                                            |      |      |      |      |      |      |      | 4426 |
| Orangutan         | -----                                                                            |      |      |      |      |      |      |      | 4510 |

| Majority          | 5930                                                                              | 5940 | 5950 | 5960 | 5970 | 5980 | 5990 | 6000 |      |
|-------------------|-----------------------------------------------------------------------------------|------|------|------|------|------|------|------|------|
| Human             | -----                                                                             |      |      |      |      |      |      |      | 3200 |
| Coquerel'sSifaka  | -----                                                                             |      |      |      |      |      |      |      | 4607 |
| Ma'sNightMonkey   | -----                                                                             |      |      |      |      |      |      |      | 4528 |
| VervetAGM         | -----                                                                             |      |      |      |      |      |      |      | 4506 |
| Gorrilla          | GAGTAGGAAGTGAATGCTTTTCATAATACTTTTCCTGCCTTTTCTTCCTGGAGCTGCTTCTTGAGAATGAAATAGCTTTTC |      |      |      |      |      |      |      | 5564 |
| GrabEatingMacaque | -----                                                                             |      |      |      |      |      |      |      | 4438 |
| Macaque           | -----                                                                             |      |      |      |      |      |      |      | 4448 |
| PigTailedMacaque  | -----                                                                             |      |      |      |      |      |      |      | 4672 |
| Bonobo            | -----                                                                             |      |      |      |      |      |      |      | 4507 |
| OliveBaboon       | -----                                                                             |      |      |      |      |      |      |      | 4426 |
| Orangutan         | -----                                                                             |      |      |      |      |      |      |      | 4510 |

Tuesday, May 03, 2022 06:14 PM

| Majority          | 6010                                                                            | 6020 | 6030 | 6040 | 6050 | 6060 | 6070 | 6080 |      |
|-------------------|---------------------------------------------------------------------------------|------|------|------|------|------|------|------|------|
| Human             | -----                                                                           |      |      |      |      |      |      |      | 3200 |
| Coquerel'sSifaka  | -----                                                                           |      |      |      |      |      |      |      | 4607 |
| Ma'sNightMonkey   | -----                                                                           |      |      |      |      |      |      |      | 4528 |
| VervetAGM         | -----                                                                           |      |      |      |      |      |      |      | 4506 |
| Gorrilla          | AACTGNNNNNNNNNCTGAGGGGAAATAATGATTTTAAATGGATGGTAAGTGGTTTGACCTATATCTTATAATTTGTTAA |      |      |      |      |      |      |      | 5644 |
| GrabEatingMacaque | -----                                                                           |      |      |      |      |      |      |      | 4438 |
| Macaque           | -----                                                                           |      |      |      |      |      |      |      | 4448 |
| PigTailedMacaque  | -----                                                                           |      |      |      |      |      |      |      | 4672 |
| Bonobo            | -----                                                                           |      |      |      |      |      |      |      | 4507 |
| OliveBaboon       | -----                                                                           |      |      |      |      |      |      |      | 4426 |
| Orangutan         | -----                                                                           |      |      |      |      |      |      |      | 4510 |

| Majority          | 6090                                                                            | 6100 | 6110 | 6120 | 6130 | 6140 | 6150 | 6160 |      |
|-------------------|---------------------------------------------------------------------------------|------|------|------|------|------|------|------|------|
| Human             | -----                                                                           |      |      |      |      |      |      |      | 3200 |
| Coquerel'sSifaka  | -----                                                                           |      |      |      |      |      |      |      | 4607 |
| Ma'sNightMonkey   | -----                                                                           |      |      |      |      |      |      |      | 4528 |
| VervetAGM         | -----                                                                           |      |      |      |      |      |      |      | 4506 |
| Gorrilla          | TCTAAGTTTTTTGTTTTTTGTTTTTTTTACTTTTTGTGCATGAAAATGAATATATTTTGTTAATAATAAAGCACATTAG |      |      |      |      |      |      |      | 5724 |
| GrabEatingMacaque | -----                                                                           |      |      |      |      |      |      |      | 4438 |
| Macaque           | -----                                                                           |      |      |      |      |      |      |      | 4448 |
| PigTailedMacaque  | -----                                                                           |      |      |      |      |      |      |      | 4672 |
| Bonobo            | -----                                                                           |      |      |      |      |      |      |      | 4507 |
| OliveBaboon       | -----                                                                           |      |      |      |      |      |      |      | 4426 |
| Orangutan         | -----                                                                           |      |      |      |      |      |      |      | 4510 |

| Majority          | 6170                                                                             | 6180 | 6190 | 6200 | 6210 | 6220 | 6230 | 6240 |      |
|-------------------|----------------------------------------------------------------------------------|------|------|------|------|------|------|------|------|
| Human             | -----                                                                            |      |      |      |      |      |      |      | 3200 |
| Coquerel'sSifaka  | -----                                                                            |      |      |      |      |      |      |      | 4607 |
| Ma'sNightMonkey   | -----                                                                            |      |      |      |      |      |      |      | 4528 |
| VervetAGM         | -----                                                                            |      |      |      |      |      |      |      | 4506 |
| Gorrilla          | AAATGAATTATACTGAGCCTTAAAAGGAAGTTGTTGAGGCAGTTAGCTTCAAATTTGAATTAGAAGTTAAGAGCTGGTTT |      |      |      |      |      |      |      | 5804 |
| GrabEatingMacaque | -----                                                                            |      |      |      |      |      |      |      | 4438 |
| Macaque           | -----                                                                            |      |      |      |      |      |      |      | 4448 |
| PigTailedMacaque  | -----                                                                            |      |      |      |      |      |      |      | 4672 |
| Bonobo            | -----                                                                            |      |      |      |      |      |      |      | 4507 |
| OliveBaboon       | -----                                                                            |      |      |      |      |      |      |      | 4426 |
| Orangutan         | -----                                                                            |      |      |      |      |      |      |      | 4510 |

Tuesday, May 03, 2022 06:14 PM

| Majority          | -----G                                                   |                        |      |      |      |      |      |      |      |      |
|-------------------|----------------------------------------------------------|------------------------|------|------|------|------|------|------|------|------|
|                   | 6250                                                     | 6260                   | 6270 | 6280 | 6290 | 6300 | 6310 | 6320 |      |      |
| Human             | -----                                                    |                        |      |      |      |      |      |      | 3200 |      |
| Coquerel'sSifaka  | -----                                                    |                        |      |      |      |      |      |      | 4607 |      |
| Ma'sNightMonkey   | -----                                                    |                        |      |      |      |      |      |      | 4528 |      |
| VervetAGM         | -----                                                    |                        |      |      |      |      |      |      | 4506 |      |
| Gorilla           | GTCAATTAAGAAAGTCTTTATGGTAGAGATCCTTTGGAATCCTTTTGGCTAAGAAA | ACTACTCATCGTTTAAACTTTA |      |      |      |      |      |      |      | 5884 |
| GrabEatingMacaque | -----                                                    |                        |      |      |      |      |      |      | 4438 |      |
| Macaque           | -----                                                    |                        |      |      |      |      |      |      | 4448 |      |
| PigTailedMacaque  | -----                                                    |                        |      |      |      |      |      |      | 4672 |      |
| Bonobo            | -----                                                    |                        |      |      |      |      |      |      | 4507 |      |
| OliveBaboon       | -----                                                    |                        |      |      |      |      |      |      | 4426 |      |
| Orangutan         | -----                                                    |                        |      |      |      |      |      |      | 4510 |      |

| Majority          | -----G       |                                                                       |      |      |      |      |      |      |      |      |
|-------------------|--------------|-----------------------------------------------------------------------|------|------|------|------|------|------|------|------|
|                   | 6330         | 6340                                                                  | 6350 | 6360 | 6370 | 6380 | 6390 | 6400 |      |      |
| Human             | -----TTTTT-G |                                                                       |      |      |      |      |      |      | 3206 |      |
| Coquerel'sSifaka  | -----        |                                                                       |      |      |      |      |      |      | 4607 |      |
| Ma'sNightMonkey   | -----TTG     |                                                                       |      |      |      |      |      |      | 4531 |      |
| VervetAGM         | -----A       |                                                                       |      |      |      |      |      |      | 4507 |      |
| Gorilla           | GTTCTAATGC   | TAAACATTTTCTCGAGTACTTGCAACTTTTAAATGCATGATGATTGTAATTTTTTTTTTTTTTTTTTTT |      |      |      |      |      |      |      | 5964 |
| GrabEatingMacaque | -----A       |                                                                       |      |      |      |      |      |      | 4439 |      |
| Macaque           | -----A       |                                                                       |      |      |      |      |      |      | 4449 |      |
| PigTailedMacaque  | -----A       |                                                                       |      |      |      |      |      |      | 4673 |      |
| Bonobo            | -----TTTTTTG |                                                                       |      |      |      |      |      |      | 4514 |      |
| OliveBaboon       | -----A       |                                                                       |      |      |      |      |      |      | 4427 |      |
| Orangutan         | -----TT-G    |                                                                       |      |      |      |      |      |      | 4513 |      |

| Majority          | -GATGGTGCTTCACTCTGTTGCCAGGCTGGA-TGCAGTGGCGCATCTTGGCCCGCTGCAACCTCTGCCTCCTGGGTTC  |                                         |      |      |      |      |      |      |      |      |
|-------------------|---------------------------------------------------------------------------------|-----------------------------------------|------|------|------|------|------|------|------|------|
|                   | 6410                                                                            | 6420                                    | 6430 | 6440 | 6450 | 6460 | 6470 | 6480 |      |      |
| Human             | AGACGGAGCCTCACTCTGTTGCCAGGCTGGA-TGCAGTGGC                                       | CACGATCTTGGCCCACTGCAACCTCTGCCTCCTGGGTTC |      |      |      |      |      |      |      | 3285 |
| Coquerel'sSifaka  | -----                                                                           |                                         |      |      |      |      |      |      | 4607 |      |
| Ma'sNightMonkey   | AGACTGAGTCTCCCTCTGTTGCCAGGCTGGAGTGCAGT                                          | GATGCAGTTTCGCCTCACTGCGGCCTCCGCTCCAGGTTC |      |      |      |      |      |      |      | 4611 |
| VervetAGM         | -GATGGTGCTTCACTCTATCGCCAGGCTGGA-TGCAGTGGCGCATCTTGGCCCGCTGCAACCTCTGCCTCCTGGGTTC  |                                         |      |      |      |      |      |      | 4585 |      |
| Gorilla           | AGATGGAGCCTCACTGTTGCCAGGCTGGA-TGCAGTGGC                                         | CACGATCTTGGCCCACTGCAACCTCTGCCTCCTGGGTTC |      |      |      |      |      |      |      | 6043 |
| GrabEatingMacaque | -GATGGTGCTTCACTCTGTTGCCAGGCTGGA-TGCAGTGGCGCATCTTGGCCCGCTGCAACCTCTGCCTCCTGGGTTC  |                                         |      |      |      |      |      |      | 4517 |      |
| Macaque           | -GATGGTGCTTCACTCTGTTGCCAGGCTGGA-TGCAGTGGCGCATCTTGGCCCGCTGCAACCTCTGCCTCCTGGGTTC  |                                         |      |      |      |      |      |      | 4527 |      |
| PigTailedMacaque  | -GATGGTGCTTCACTCTGTTGCCAGGCTGGA-TGCAGTGGC                                       | CACGATCTTGGCCCGCTGCAACCTCTGCCTCCTGGGTTC |      |      |      |      |      |      |      | 4751 |
| Bonobo            | AGACGGAGCCTCACTCTGTTGCCAGGCTGGA-TGCAGTGGC                                       | CACGATCTTGGCCCACTGCGACCTCTGCCTCCTGGGTTC |      |      |      |      |      |      |      | 4593 |
| OliveBaboon       | -GATGGTGCTTCACTCTGTTGCCAGGCTGGA-TGCAGTGGCGCATCTTGGCCCGCTGCAACCTCTGCCTCCTGGGTTC  |                                         |      |      |      |      |      |      | 4505 |      |
| Orangutan         | AGACGGAGCCTCGCTCGGTCACCCAGGCTGGA-TGCAGTGGCGCATCTTGGCCCACTGCAACCTCTGCATCCTGGGTTC |                                         |      |      |      |      |      |      | 4592 |      |

Tuesday, May 03, 2022 06:14 PM

|                   |                                                                                  |      |
|-------------------|----------------------------------------------------------------------------------|------|
| Majority          | AAGCAATTCTCCTGCCTCAGCCTCCTGAGTAGCTGGGATTACAGGTGCTCACCACCACGCC-AGCTAATTT--GTATTT  |      |
|                   | 6490      6500      6510      6520      6530      6540      6550      6560       |      |
| Human             | AAGCAGTTCTCCTGCCTCAGCCTCCTGAGTAGCTGGGATTACAGGTGCGCACCACCACGCC-AGCTAATTT--GTATTT  | 3362 |
| Coquerel'sSifaka  | -----CAAG-----                                                                   | 4611 |
| Ma'sNightMonkey   | AGGCAATTCTCCTGCCTTAGCCTCCTGAGTAGCTGGGATTACAGGCACATGCCATTACACCCTGGCTAATTTTTGTATTT | 4691 |
| VervetAGM         | AAGCAATTCTCCTGCCTCAGCCTCCTGAGTAGCTGGGATTACAGGTGCTCACCACCACGCC-AACTAATTT--GTATTT  | 4662 |
| Gorilla           | AAGCAGTTCTCCTGCCTCAGCCTCCTGAGTAGCTGGGATTACAGGTGCGCACCACCACGCC-AGCTAATTT--GTATTT  | 6120 |
| GrabEatingMacaque | AAGCAATTCTCCTGCCTCAGCCTCCTGAGTAGCTGGGATTACAGGTGCTCACCACCACGCC-AACTAATTT--GTATTT  | 4594 |
| Macaque           | AAGCAATTCTCCTGCCTCAGCCTCCTGAGTAGCTGGGATTACAGGTGCTCACCACCACGCC-AACTAATTT--GTATTT  | 4604 |
| PigTailedMacaque  | AAGCAATTCTCCTGCCTCAGCCTCCTGAGTAGCTGGGATTACAGGTGCTCACCACCACGCC-AACTAATTT--GTATTT  | 4828 |
| Bonobo            | AAGCAATTCTCCTGCCTCAGCCTCCTGAGTAGCTGGGATTACAGGTGCGCACCACCACGCC-AGCTAATTT--GTATTT  | 4670 |
| OliveBaboon       | AAGCAATTCTCCTGCCTCAGCCTCCTGAGTAACGGGATTACAGGTGCTCACCACCACGCC-AACTAATTT--GTATTT   | 4582 |
| Orangutan         | AAGCAGTTCTTCTGCCTCAGCCTCCTGAGTAGCTGGGATTACAGGTGCGCACCACCACGCC-AGCTAATTT--GTATTT  | 4669 |

|                   |                                                                                 |      |
|-------------------|---------------------------------------------------------------------------------|------|
| Majority          | TTAGTAGAGATTGGGTTTCACTCTGTTGGTCAGGCTGGTCTCGAACTCCTTACCTCATGATCTGCCTGCCTC-----   |      |
|                   | 6570      6580      6590      6600      6610      6620      6630      6640      |      |
| Human             | TTAGTAGAAATGGCATTTCACCTGTGGTCAGGCTGGTCTCAAACCTCTGACCTCATGATCTGCCTGCCTCTTATGATC  | 3442 |
| Coquerel'sSifaka  | -----CCT-----GCTGCTCT-----                                                      | 4623 |
| Ma'sNightMonkey   | TTAGTAGAGGCGAGGTTTACCATCTGGTCAGGCTGGTCTCGAACTCCTGACCTTGTGATCCGCCACCTT-----      | 4763 |
| VervetAGM         | TTAGTAGAGATTGGGTTTCACTCTGTTGGTCAGGCTGGTCTCGAACTCCTTACCTCATGATCTGCCTGCCTC-----   | 4734 |
| Gorilla           | TTAGTAGAAATGGCATTTCACCTGTGGTCAGGCTGGTCTCAAACCTCCTGACCTCATGATCTGCCTGCCTCTTATGATC | 6200 |
| GrabEatingMacaque | TTAGTAGAGATTGGGTTTCACTCTGTTGGTCAGGCTGGTCTCGAACTCCTTACCTCATGATCTGCCTGCCTC-----   | 4666 |
| Macaque           | TTAGTAGAGATTGGGTTTCACTCTGTTGGTCAGGCTGGTCTCGAACTCCTTACCTCATGATCTGCCTGCCTC-----   | 4676 |
| PigTailedMacaque  | TTAGTAGAGATTGGGTTTCACTCTGTTGGTCAGGCTGGTCTCGAACTCCTTACCTCATGATCTGCCTGCCTC-----   | 4900 |
| Bonobo            | TTAGTAGAAATGGCATTTCACCTGTGGTCAGGCTGGTCTCAAACCTCCTGACCTCATGATCTGCCTGCCTCTTATGATC | 4750 |
| OliveBaboon       | TTAGTAGAGATTGGGTTTCACTCTGTTGGTCAGGCTGGTCTCGAACTCCTTACCTCATGATCTGCCTGCCTC-----   | 4654 |
| Orangutan         | TTAGTAGAGACGGCGTTTACCCTGTGGTCAGGCTGGTCTCAAACCTCCTGACCTCATGATCTGCCTGCCTCTCATGATC | 4749 |

|                   |                                                                                  |      |
|-------------------|----------------------------------------------------------------------------------|------|
| Majority          | -----GACCTCCCAAAGTTTTGGGATTACAGGTGTGAGCCACCGTGCCAGCCTGTATTGTCATTTTTTCATTTGC      |      |
|                   | 6650      6660      6670      6680      6690      6700      6710      6720       |      |
| Human             | TGCCTGCCTTGACCTCCCAAAGTGCTGGGATTACAAGTGTGAGCCACCGTGCCCGGCTGTATTGTCATTTTTTCATTTGC | 3522 |
| Coquerel'sSifaka  | -----GAGAGGCTGTGTGCTTAGTCCA---GTGATGTT-----                                      | 4653 |
| Ma'sNightMonkey   | -----GGCCTCCCAAAGTGCTGGGATTACAGGTGTGAGCTGCGGCGTCTGGCTATATTGTAATTTTTTCATTTGC      | 4833 |
| VervetAGM         | -----GACCTCCCAAAGTTTTGGGATTACAGGCCGTGAGCCACTGTGCCAGCCTGTATTGTCATTTTTTCATTTGC     | 4804 |
| Gorilla           | TGCCTGCCTTGACTTCCCAAAGTGCTGGGATTACAAGTGTGAGCCACCGTGCCCGGCTGTATTGTCATTTTTTCATTTGC | 6280 |
| GrabEatingMacaque | -----GACCTCCCAAGTGTGGGATTACAGGCGTGAGCCACCGTGCCAGCCTGTATTGTCGTTTTTCATTTGC         | 4736 |
| Macaque           | -----GACCTCCCAAGTGTGGGATTACAGGCGTGAGCCACCGTGCCAGCCTGTATTGTCATTTTTTCATTTGC        | 4746 |
| PigTailedMacaque  | -----GACCTCCCAATGTTTTGGGATTACAGGCGTGAGCCACCGTGCCAGCCTGTATTGTCATTTTTTCATTTGC      | 4970 |
| Bonobo            | TGCCTGCCTTGACCTCCCAAAGTGCTGGGATTACAAGTGTGAGCCACCGTGCCCGGCTGTATTGTCATTTTTTCATTTGC | 4830 |
| OliveBaboon       | -----GACCGCCCAAAGTTTTGGGATTACAGGCGTGAGCCACTGTGCCAGCCTGTATTGTCATTTTTTCATTTGC      | 4724 |
| Orangutan         | TGCCTGTCTGACCTCCCAAAGTGCTGGGATTACAGATGTGAGCCACCGTGCCCGGCTGTATTGTCATTTTTTCATTTGC  | 4829 |

Tuesday, May 03, 2022 06:14 PM

|                   |                                                                                  |      |
|-------------------|----------------------------------------------------------------------------------|------|
| Majority          | AAGCCTGTCTGTCCTGAGAGGCTATCTGCTTAGTCCAGTGATGCTGACTGTTCAA-ACATTTTTTGGAAATCTTAAAATT |      |
|                   | 6730      6740      6750      6760      6770      6780      6790      6800       |      |
| Human             | AAGCCTCTCTGTCCTGAGAGGCTTTCTGCTTAGTCCAGTGATGCTGACTGTTCAA-ACATTTTTTTCGAATCTTAAAATT | 3601 |
| Coquerel'sSifaka  | -----GACCGGTGATGCTGACCGTTTCACTATATTTATTGTAATCTTAAAATT                            | 4701 |
| Ma'sNightMonkey   | CAGCCTTTCTGCCTGAGAGGCTGTCTGCTTAGTCCAGTGATGCTAACTGTTCAA-ACACTTTTTGGAACTCTTGAAATT  | 4912 |
| VervetAGM         | AAACCTGTCTGTCCTGAGAGGCTATCTGCTTAGTCCATTGATGCTGACTGTTCAA-ACATTTTTTGGAAATCTTTTTTTT | 4883 |
| Gorilla           | AAGTCTCTCTGTCCTCAGAGGCTATCTGCTTAGTCCAGTGATGCTGACTGTTCAA-ACATTTTTTGAATCTTAAAATT   | 6359 |
| GrabEatingMacaque | AAACCTGTCTGTCCTGAGAGGCTATCTGCTTAGTCCATTGATGCTGACTGTTCAA-ACATTTTTTGGAAATCTTAAAATT | 4815 |
| Macaque           | AAACCTGTCTGTCCTGAGAGGCTATCTGCTTAGTCCATTGATGCTGACTGTTCAA-ACATTTTTTGGAAATCTTAAAATT | 4825 |
| PigTailedMacaque  | AAACCTGTCTGTCCTGAGAGGCTATCTGCTTAGTCCATGGATGCTGACTGTTCAA-ACATTTTTTGGAAATCTTAAAATT | 5049 |
| Bonobo            | AAGCCTCTCTGTCCTGAGAGGCTATCTGCTTAGTCCAGTGATGCTGACTGTTCAA-ACAGTTTTTTCGAATCTTAAAATT | 4909 |
| OliveBaboon       | AAACCTGTCTGTCCTGAGAGGCTATCTGCTTAGTCCATTGATGCTGACTGTTCAA-ACATTTTTTGGAAATCTTAAAATT | 4803 |
| Orangutan         | AAGCCTCTGTGTCCGGAGAGGCTATCTGCTTAGTCCAGTGATGCTGACTGTTCAA-ACATTTTTTGGAAATCTTAAAATT | 4908 |

|                   |                                                                                  |      |
|-------------------|----------------------------------------------------------------------------------|------|
| Majority          | GTA-TCCAT-----AATGGTGTGATG-TTGTTCGAATA-CTTTTGGGGATAT--TAGTGTGTTTTCTTGCTTATTTTCT  |      |
|                   | 6810      6820      6830      6840      6850      6860      6870      6880       |      |
| Human             | GTA-TCCAT-----AATGGGGGG-AG-GGGGAAGGGATAGCATTGGGAGATATAGGGGGGAGGGGGAGGGATAGCTTTA  | 3673 |
| Coquerel'sSifaka  | GCAATTCAT-----AGTGGTGTGATAATCTTCAGAATA-CTTTTGGAGATAT--TATTGTGTTTTCTTGCTTATTTTCT  | 4773 |
| Ma'sNightMonkey   | GCA-TCCAT-----AATGATGTGATG-TTTTTTAGAATA-CTTTTGGGGATGG--TACTGTGTTTTCTTGCTTATTTTCT | 4982 |
| VervetAGM         | TTT-TTTTTTTTGAGACGGAGTCTCG-CTCTGTCGCCA-GGCTGGAGTGTAG--TGGCCGATCTCA-GCTNNNNNNNN   | 4957 |
| Gorilla           | GTA-TCCAT-----AATGGGGGGGAG-GGGGAAGGGATAGCATTGGGAGATATAGGGGGGAGGGGGAGGGATAGCTTTA  | 6432 |
| GrabEatingMacaque | GTA-TCCAT-----AATGATGTTATG-TTCTTCGAATA-CTTTTGGGGATGT--TACTGTGTTTTCTTGCTTATTTTCT  | 4885 |
| Macaque           | GTA-TCCAT-----AATGATGTTATG-TTCTTCGAATA-CTTTTGGGGATGT--TACTGTGTTTTCTTGCTTATTTTCT  | 4895 |
| PigTailedMacaque  | GTA-TCCAT-----AATAATGTTATG-TTGTTCGAATA-CTTTTGGGGATGT--TACTGTGTTTTCTTGCTTATTTTCT  | 5119 |
| Bonobo            | GTA-TCCAT-----AATGGGGGGGAG-GGGGAAGGGATAGCATTGGGAGATATAGGGGGGAGGGGGAGGGATAGCTTTA  | 4982 |
| OliveBaboon       | GTA-TCCAT-----AATGATGTTATG-TTCTTCGAATA-CTTTTGGGGATGT--TACTGTGTTTTCTTGCTTATTTTCT  | 4873 |
| Orangutan         | GTA-TCCAT-----AATGGGGGG-----GGGAGGGATAGCATTAGGAGATAC--GGGGGAGAGGGGAGGGATAGCTTTA  | 4974 |

|                   |                                                                                  |      |
|-------------------|----------------------------------------------------------------------------------|------|
| Majority          | GTCGTCTTACCTA-TAGTGAAGTACATATTTGTCATTCTTTAG-ACCTGTA--TG-GTTCTTGAATTCATATTTTACAG  |      |
|                   | 6890      6900      6910      6920      6930      6940      6950      6960       |      |
| Human             | GGAGATATACCTAATGCTAAATGACAAGTTAATGGGTGCAGCAC-ACCAACA--TG-GCACATGTATACATATGTAACAA | 3749 |
| Coquerel'sSifaka  | GTCCTCTGCCCTA-CAGTGAAGTACACTTGTCCATCCTTTAATATTTAGCCTTGTTTTTTTGAATTTATATTTTGCAT   | 4852 |
| Ma'sNightMonkey   | GTGAAGTACCTA-TAGTGAAGTACACTTGTCCATCCTTTAATATCTAGGCTTG-TTTCTTGAGTTCAGATTATACAG    | 5060 |
| VervetAGM         | NNCCCCAAGTGC-TGGGATTACAGGCTTGAGCCACCGCCCG-GCCTGGA-----ATTCTTAAA---ATTGTATCCAT    | 5027 |
| Gorilla           | GGAGATATACCTAATGCTAAATGACAAGTTAATGGATGCAGCAC-ACCAACA--TG-GCACATGTATACATATGTAACAA | 6508 |
| GrabEatingMacaque | GTCGTCTTACCTA-TAGTGAAGTACATATTTGTCATTCTTTAG-GCTTGT-----TTCTTTAGTTCATTTTGTACAG    | 4956 |
| Macaque           | GTCGTCTTACCTA-TAGTGAAGTACATATTTGTCATTCTTTAG-GCTTGT-----TTCTTTAGTTCATTTTGTACAG    | 4966 |
| PigTailedMacaque  | GTCGTCTTACCTA-TAGTGAAGTACATATTTGTCATTCTTTAG-GCTTGT-----TTCTTTAGTTCATTTTGTACAG    | 5190 |
| Bonobo            | GGAGATATACCTAATGCTAAATGACAAGTTAATGGGTGCAGCAC-ACCAGCA--TG-GCACATGTATACATATGTAACAA | 5058 |
| OliveBaboon       | GTCGTCTTACCTA-TAGTGAAGTACATATTTTCTCATTCTTTAG-GCTTGT-----TTCTTTAGTTCATTTTGTACAG   | 4944 |
| Orangutan         | GGAGATACCTAATGCTAAATGACGAGTTAATGGGTGCAGCAC-ACCAACA--TG-GCACATGTATACATATGTAGCAA   | 5050 |

Tuesday, May 03, 2022 06:14 PM

| Majority          | ACTGACGGAGAAATAATAAGCATCTTTTTGGTGATA-GTATTATAATTTTTTT--T-----TATCCATAATGTT       |      |
|-------------------|----------------------------------------------------------------------------------|------|
|                   | 6970 6980 6990 7000 7010 7020 7030 7040                                          |      |
| Human             | ACCTGCACGTTGTACTCATGTACCCTAAAACCTAAA-GTATAATAATGATAATAATAAT-----TGTATCCATAATGAT  | 3822 |
| Coquerel'sSifaka  | ACTGGGAGAGAAATAACAACTGTTTTGGAGAG-----                                            | 4885 |
| Ma'sNightMonkey   | ACTGAGGGAAAAATAATAAGC-TCTTTGTGGTG-----                                           | 5092 |
| VervetAGM         | AATGATGTTATGTTCTTTCGAATACTTTTGGGGATG-TTACTGTGTTTTCTT-----GCTTTT                  | 5084 |
| Gorilla           | ACCTGCACGTTGTACACATGTACCCTAAAACCTAAA-GTATAATAATAATAATAATAATAATAATGTATCCATAATGAT  | 6587 |
| GrabEatingMacaque | ACTGAAGGAGAAATAATAAGC-TCTTTTTGGTGTTA-GTATTTTTCTTTTTTT-----GAGCCGGAGTCTT          | 5020 |
| Macaque           | ACTGAAGGAGAAATAATAAGC-TCTTTTTGGTGTTA-GTATTTTTCTTTTTTTTT-----GAGCCGGAGTCTC        | 5034 |
| PigTailedMacaque  | ACTGAAGGAGAAATAATAAGC-TCTTTTTGGTGATA-GTATTTTTCTTTTTTTTTTTTTTTT--TTTTGCGGAGTCTC   | 5266 |
| Bonobo            | ACCTGCACGTTGTACTCATGTACCCTAAAACCTAAA-GTATAATAATAATAATAATAATAAT---TGTATCCATAATGAT | 5134 |
| OliveBaboon       | ACTGAAGGAGAAATAATAAGC-TCTTTTTGGTG-----                                           | 4976 |
| Orangutan         | ACCTGCACATTGTGCACATGTACCCTAAAACCTAAAAGTATAATAATAATAATAATAAAC---TTGTATCCATAATGAT  | 5126 |

| Majority          | GTTCGTGTTGTTTAGA--ATAGTTTTGGGGCTGGTCTGTGTT---T-----TCTTGCTTATTTTCTG           |      |
|-------------------|-------------------------------------------------------------------------------|------|
|                   | 7050 7060 7070 7080 7090 7100 7110 7120                                       |      |
| Human             | GTGGTGTCTCTTCAA--ATACTTTTGGGGATGGTACTGTGTT---T-----TCTTGCTTATTTTCTG           | 3879 |
| Coquerel'sSifaka  | -----                                                                         | 4885 |
| Ma'sNightMonkey   | -----                                                                         | 5092 |
| VervetAGM         | TTTCTGTCGTCCTACCTATAGTG-AA---CTAGATATTTGTA-----CATTCT--                       | 5128 |
| Gorilla           | GTGATGTTCTTTCGA--ATACTTTTGGGGATGGTACTGTGTT---T-----TCTTGCTTATTTTCTG           | 6644 |
| GrabEatingMacaque | GCTCTGTCGCCAGGCTGGAGTGCAGTGGCCGGATCTCAGCTCAGTCAAGCTCTGCCTCCAGGTTACGCCATTTCTCT | 5100 |
| Macaque           | GCTCTGTCGCCAGGCTGGAGTGCAGTGGCCGGATCTCAGCTCAGTCAAGCTCTGCCTCCGGGTTACGCCATTTCTCT | 5114 |
| PigTailedMacaque  | GCTCTGTCGCCAGGCTGGAGTGCAGTGGCTGGATCTCAGCT--C-----CGCCTCCTGGGTTACGCCATTTCTCT   | 5336 |
| Bonobo            | GTGATGTTCTTCAA--ATACTTTTGGGGATGGTACTGTGTT---T-----TCTTGCTTATTTTCTG            | 5191 |
| OliveBaboon       | -----A-----                                                                   | 4977 |
| Orangutan         | GTGATGTTCTTAGA--ATACTTTTAGGAATGGTACTGTGTT---T-----TCTTGCTTATTTTCTG            | 5183 |

| Majority          | TCCTC----TT-CCTATAGTTAA-TA-ATATTTGCC--ATTTTTTAGGCTTGTTTCTTTAGTTCATTTTGTACAGA--  |      |
|-------------------|---------------------------------------------------------------------------------|------|
|                   | 7130 7140 7150 7160 7170 7180 7190 7200                                         |      |
| Human             | TCCTC----TTTCTATAGTGAAATAGATATTTGCC--ATTCTTTAGGCTTGTTTCTTGAGTTCATTTTGTACAGA--   | 3950 |
| Coquerel'sSifaka  | -----AGCACATTTAGT-----                                                          | 4897 |
| Ma'sNightMonkey   | -----                                                                           | 5092 |
| VervetAGM         | ---TTAG-----GCT-----TGT-----TTCTTTAGTTCATTTTGTACAGA--                           | 5161 |
| Gorilla           | TCCTC----TTACCTATAGTGAAATAGATATTTGCC--ATTCTTTAGGCTTGTTTCTTGAGTTCATTTTGTACAGA--  | 6715 |
| GrabEatingMacaque | GCCTCAGCCTCCCGAGTAGCTGGGACTACAGGCGCC---ACCTCGCCCGGCTAGTTTTTTGTATTTTTTAGTAGAGATG | 5176 |
| Macaque           | GCCTCAGCCTCCCGAGTAGCTGGGACTACAGGCGCCGCCACCTCGCCCGGCTAGTTTTTTGTATTTTTTAGTAGAGACG | 5194 |
| PigTailedMacaque  | GCCTCAGCCTCCCGAGTAGCTGGGACTACAGGCGCCGCCACCTCTCCCGGCTAGTTTTTTGTATTTTTTAGTAGAGACG | 5416 |
| Bonobo            | TCCTC----TTACCTATAGTGAAATAGATATTTGCC--ATTCTTTAGGCTTGTTTCTTGAGTTCATTTTGTACAGA--  | 5262 |
| OliveBaboon       | -----                                                                           | 4977 |
| Orangutan         | TCCTC----TTACCTATAGTGAACACATATTTGCC--ATTCTTTAGGCTTGTTTCTTGAGTTCATTTTGTACAGA--   | 5254 |

Tuesday, May 03, 2022 06:14 PM

| Majority          | -----CTGAAGGA-----G---GAA                                                       |      |      |      |      |      |      |      |      |
|-------------------|---------------------------------------------------------------------------------|------|------|------|------|------|------|------|------|
|                   | 7210                                                                            | 7220 | 7230 | 7240 | 7250 | 7260 | 7270 | 7280 |      |
| Human             | -----CTAAAGGA-----G---GAA                                                       |      |      |      |      |      |      |      | 3962 |
| Coquerel'sSifaka  | -----G---GAA                                                                    |      |      |      |      |      |      |      | 4897 |
| Ma'sNightMonkey   | -----G---GAA                                                                    |      |      |      |      |      |      |      | 5092 |
| VervetAGM         | -----CTGAAGGA-----G-----AAA                                                     |      |      |      |      |      |      |      | 5173 |
| Gorrilla          | -----CTAAAGGA-----G---GAA                                                       |      |      |      |      |      |      |      | 6727 |
| GrabEatingMacaque | GGGTTTCACCGTGTAGCCAGGACGGTCTCGATCTCCTGACCTCGTGATCCGCCCATCTCAGCCTCCCAAAGTGCTGGGA |      |      |      |      |      |      |      | 5256 |
| Macaque           | GGGTTTCACCGTGTAGCCAGGACGGTCTCGATCTCCTGACCTCGTGATCCGCCCATCTCAGCCTCCCAAAGTGCTGGGA |      |      |      |      |      |      |      | 5274 |
| PigTailedMacaque  | GGGTTTCACCGTGTAGCCAGGATGGTCTCGATCTCCTGACCTCGTGATCCGCCCATCTCAGCCTCCCAAAGTGCTGGGA |      |      |      |      |      |      |      | 5496 |
| Bonobo            | -----CTAAAGGA-----G---GAA                                                       |      |      |      |      |      |      |      | 5274 |
| OliveBaboon       | -----G---GAA                                                                    |      |      |      |      |      |      |      | 4977 |
| Orangutan         | -----CTGAAGGA-----G---AAA                                                       |      |      |      |      |      |      |      | 5266 |

| Majority          | TAATAGGCT-----CTTTTTGGTGATAGTATTTTCCAAGTTGAGTTAGTCATGGGATTTAAAATCAGGAATA        |      |      |      |      |      |      |      |      |
|-------------------|---------------------------------------------------------------------------------|------|------|------|------|------|------|------|------|
|                   | 7290                                                                            | 7300 | 7310 | 7320 | 7330 | 7340 | 7350 | 7360 |      |
| Human             | TAATACGCT-----CTTTTTGGTGATAGTATTTTCCAAGTTGAGTTAGTCATGGGATTTAAAATCAGGAATA        |      |      |      |      |      |      |      | 4029 |
| Coquerel'sSifaka  | -----T-----TTAGTTGGCAATTATATTTTCCAGGTTGGGATAGCTATAGGATTAGAAATCAGGAATA           |      |      |      |      |      |      |      | 4956 |
| Ma'sNightMonkey   | -----A--TACTATTTTCCCAGTTGAGATAGTCATGGGATTTAAAATCAGGAATA                         |      |      |      |      |      |      |      | 5140 |
| VervetAGM         | TAATAAGCT-----CTTTTTGGTGATAGTATTTTCCAAGTTGAGTTAGTCATGGGGTTAAAATCAGGAATA         |      |      |      |      |      |      |      | 5240 |
| Gorrilla          | TAATACGCT-----CTTTTTGGTGATAGTATTTTCCAAGTTGAGTTAGTCATGGGATTTAAAATCAGGAATA        |      |      |      |      |      |      |      | 6794 |
| GrabEatingMacaque | TTACAGGCTTGAGCCACCGCGCCCGCCGGTGATAGTATTTTCCAAGTTGAGTTAGTCATGGGATTTAAAATCAGGAATA |      |      |      |      |      |      |      | 5336 |
| Macaque           | TTACAGGCTTGAGCCACCGCGCCCGCCGGTGATAGTATTTTCCAAGTTGAGTTAGTCATGGGATTTAAAATCAGGAATA |      |      |      |      |      |      |      | 5354 |
| PigTailedMacaque  | TTACAGGCTTGAGCCCGCGCCCTGGCCGGTGATAGTATTTTCCAAGTTGAGTTAGTCATGGGATTTAAAATCAGGAATA |      |      |      |      |      |      |      | 5576 |
| Bonobo            | TAATACGCT-----CTTTTTGGTGATAGTATTTTCCAAGTTGAGTTAGTCATGGGATTTAAAATCAGGAATA        |      |      |      |      |      |      |      | 5341 |
| OliveBaboon       | -----T---AGTATTTTCCAAGTTGAGTTAGTCATGGGATTTAAAATCAGGAATA                         |      |      |      |      |      |      |      | 5024 |
| Orangutan         | TAATATGCT-----CTTTTTGGTGATAATATTTTCCAAGTTGAGTTAGTCATGGGATTTAAAATCAGGAATA        |      |      |      |      |      |      |      | 5333 |

| Majority          | GCTAAAGAGTGCAAAATGGTAGATGTTGTAGTTCCATCCAAACAGATTTCTTCTGTGAATTTTGTAAGAATAAATGA     |      |      |      |      |      |      |      |      |
|-------------------|-----------------------------------------------------------------------------------|------|------|------|------|------|------|------|------|
|                   | 7370                                                                              | 7380 | 7390 | 7400 | 7410 | 7420 | 7430 | 7440 |      |
| Human             | GCTAAAGATTGCAAAATGGTAGATGTTGTAGTTCCATCCAAACAGATTTCTTCTGTGAATTTTGTAAGAATAAATGA     |      |      |      |      |      |      |      | 4106 |
| Coquerel'sSifaka  | GCTGAAGAGTGCAAAATG-TAGATGTTGTAGTTACCATCCAAACAGATTTCTTCTGTGAATTTTATGAAAGAATAAATGA  |      |      |      |      |      |      |      | 5035 |
| Ma'sNightMonkey   | GCTAAAGAGTGCAAAATGGTAGATGTTGTAGTTACCATCCAAACAGATTTCTCGTCTAAATTTTGTAAGAATAAATAA    |      |      |      |      |      |      |      | 5220 |
| VervetAGM         | GCTAAAGAGTACAAAATGGTAGATGTTGTAGTTCCCTCCAAACAGATTTCTTCTGTGAATTTCTGGAAAAATAAATAA    |      |      |      |      |      |      |      | 5320 |
| Gorrilla          | GCTAAAGAGTGCAAAATGGTAGATGTTGTAGTTCCATCCAAACAGATTTCTTCTGTGAATTTTGTAAGAATAAATGA     |      |      |      |      |      |      |      | 6871 |
| GrabEatingMacaque | GCTAAAGAGTGCGAATGGTAGATGTTGTAGTTCCATCCAAACAGATTTCTTCTGTGAATTTCTGGAAAAATAGTAAATGA  |      |      |      |      |      |      |      | 5416 |
| Macaque           | GCTAAAGAGTGCGAATGGTAGATGTTGTAGTTCCATCCAAACAGATTTCTTCTGTGAATTTCTGGAAAAATAGTAAATGA  |      |      |      |      |      |      |      | 5434 |
| PigTailedMacaque  | GCTAAAGAGTGCGAATGGTAGATGTTGTAGTTCCATCCAAACAGATTTCTTCTGTGAATTTCTGGAAAAATAGTAAATGA  |      |      |      |      |      |      |      | 5656 |
| Bonobo            | GCTAAAGAGTGCAAAATGGTAGATGTTGTAGTTCCATCCAAACAGATTTCTTCTGTGAATTTTGTAAGAATAAATGA     |      |      |      |      |      |      |      | 5418 |
| OliveBaboon       | GCTAAAGAGTGCAAAATGGTAGATGTTGTAGTTCCGTCCAAACAGATTTCTTCTGTGAATTTCTGGAAAAATAGTAAATGA |      |      |      |      |      |      |      | 5104 |
| Orangutan         | GCTAAAGAGTGCAAAATGGTAGATGTTGTAGTTCCATCCAAACAGATTTCTTCTGTGAATTTTGTAAGAATAAATGA     |      |      |      |      |      |      |      | 5410 |

Tuesday, May 03, 2022 06:14 PM

| Majority          | TACAAGTGTGAGTTGTCCACTGTTAGTGGAAAAGGAGAGTAGTTTGTAGACAAGGCTCAGAATGAGTAGACAGAAAAAA  |      |
|-------------------|----------------------------------------------------------------------------------|------|
|                   | 7450 7460 7470 7480 7490 7500 7510 7520                                          |      |
| Human             | TACAAGTGTGAGTTGTCCACTGTTAGTGGAAAAGGAGAGGAGTTTGTAGACAAGGCTCAGAATGAGTAGACAGGAAAAAA | 4186 |
| Coquerel'sSifaka  | TACAAGTCTAAGTTGTCCACTGTTAGTGGATAAGGAGAG-AGTTAATAGACAAGACCTAGAGTGAGTAGGCAGAAAAAGG | 5114 |
| Ma'sNightMonkey   | TACAAGTGTGACTTGTCCACTATTAGTGGAAAAGGAAAGGAGGTTGTAGGCAAGGCTCAGAATGAGTAGACAGAAGAAAA | 5300 |
| VervetAGM         | TACAAGTGTAGT-GTCCACTGTTAGAGGAAAAGGAGAGTAGTTTGTAGATAACGCTCAGAATAAGTAGACAGAAAAAA   | 5399 |
| Gorilla           | TACAAGTGTGAGTTGTCCACTGTTAGTGGAAAAGGAGAGGAGTTTGTAGACAAGGCTCAGAATGAGTAGACAGGAAAAAA | 6951 |
| GrabEatingMacaque | TACAAGTGTGAGT-GTCCACTGTTAGAGGAAAAGGAGAGTAGTTTGTAGATAACGCTCAGAATGAGTAGACAGAAAAAA  | 5495 |
| Macaque           | TACAAGTGTGAGT-GTCCACTGTTAGAGGAAAAGGAGAGTAGTTTGTAGATAACGCTCAGAATGAGTAGACAGAAAAAA  | 5513 |
| PigTailedMacaque  | TACAAGTGTGAGT-GTCCACTGTTAGAGGAAAAGGAGAGTAGTTTGTAGATAACGCTCAGAATGAGTAGACAGAAAAAA  | 5735 |
| Bonobo            | TACAAGTGTGAGTTGTCCACTGTTAGTGGAAAAGGAGAGGAGTTTGTAGACAAGGCTCAGAATGAGTAGACAGGAAAAAA | 5498 |
| OliveBaboon       | TACAAGTGTGAGT-GTCCACTGTTAGAGGAAAAGGAGAGTAGTTTGTAGATAACGCTCAGAATGAGTAGACAGAAAAAAT | 5183 |
| Orangutan         | TACAAGTGTGAGTTGTCCACTATTAGTGGAAAAGGAGAAGAGTTTGTAGACAAGACTCAGAATGAGTAGACAGAAAAAA  | 5490 |

| Majority          | -CTGAGGAGACTAGGAATAGGATGTCCAGATG---TAATGTATTGGTTACACCAGTTTT-----                   |      |
|-------------------|------------------------------------------------------------------------------------|------|
|                   | 7530 7540 7550 7560 7570 7580 7590 7600                                            |      |
| Human             | -CTGAGGAGACTTGGAAATAGGATGTCCAGGTG---TAATGTATTGGTTACACCAGTTTTTTTTTTTTTTTTTTT--GAGAC | 4260 |
| Coquerel'sSifaka  | --TGAGGAGACTCCGAAGAGAATGTCCAGATACAATGATGTATTGGTTACATCAATTTT-----                   | 5171 |
| Ma'sNightMonkey   | -CTGAGGAGACTCAGAATAGGATGTCCAGATG---TAATACATTGGTTACACCAGTTTT-----                   | 5355 |
| VervetAGM         | -CCGAGGAGACTAGGAGTAGGATGTCCAGATG---TAATGTATTGGTTACACCAGTTT-----                    | 5453 |
| Gorilla           | -CTGAGGAGACTTGGAAATAGGATGTCCAGGTG---TAATGTATTGGTTACACCAGTTTTTTTTTTTTTTTTTTTGAGAC   | 7027 |
| GrabEatingMacaque | -CTGAGGAGACTAGGAGTAGGATGTCCAGATG---TAATGTATTGGTTACACCAGTTT-----                    | 5549 |
| Macaque           | -CTGAGGAGACTAGGAGTAGGATGTCCAGATG---TAATGTATTGGTTACACCAGTTT-----                    | 5567 |
| PigTailedMacaque  | ACTGAGGAGACTAGGAGTAGGATGTCCAGATG---TAATGTATTGGTTACACCAGTTT-----                    | 5790 |
| Bonobo            | -CTGAGGAGACTTGGAAATAGGATGTCCAGGTG---TAATGTATTGGTTACACCAGTTTTTTTTTTTTTTTTTT--GAGAC  | 5570 |
| OliveBaboon       | -CTGAGGAGACTAGGAGTAGGATGTCCAGATG---TAATGTATTGGTTACACCAGTTT-----                    | 5237 |
| Orangutan         | -CTGAGGAGACTCGGAATAGTATGTCCAGATG---TTATGTATTGGTTACGCCAGTTGTTTTTTTTTTTTTTT-----     | 5558 |

| Majority          | -----                                                                           |      |
|-------------------|---------------------------------------------------------------------------------|------|
|                   | 7610 7620 7630 7640 7650 7660 7670 7680                                         |      |
| Human             | AGAGTCTCACTCT-TCGCCAGG-TGGAGTGCAGTGGCACGATCCTGGCTCACTACAAGCTCCGCCTTCCGGGTTCACTC | 4338 |
| Coquerel'sSifaka  | -----                                                                           | 5171 |
| Ma'sNightMonkey   | -----                                                                           | 5355 |
| VervetAGM         | -----                                                                           | 5453 |
| Gorilla           | GGAGTCTCACTCTGTGCCAGG-TGGAGTGCAGTGGCACAAATCCCGCTCACTACAAGCTCCGCCTTCCGGGTTCACTC  | 7106 |
| GrabEatingMacaque | -----                                                                           | 5549 |
| Macaque           | -----                                                                           | 5567 |
| PigTailedMacaque  | -----                                                                           | 5790 |
| Bonobo            | GGAGTCTCACTCT-TCGCCAGG-TGGAGTGCAGTGGCACGATCCTGGCTCACTACAAGCTCCGCCTTCCGGGTTCACTC | 5648 |
| OliveBaboon       | -----                                                                           | 5237 |
| Orangutan         | -----T--TTTGTGCCAGGCTGGAGTGCAGTGGCACGATCCAGCTCACTACAAGCTCCGCCTTCTGGGTTCACTC     | 5629 |



Tuesday, May 03, 2022 06:14 PM

| Majority          | -----                                                                          |      |      |      |      |      |      |      |      |
|-------------------|--------------------------------------------------------------------------------|------|------|------|------|------|------|------|------|
|                   | 7690                                                                           | 7700 | 7710 | 7720 | 7730 | 7740 | 7750 | 7760 |      |
| Human             | CATTCTTCTGCCTCAGCCTCCCAGTAGCTGGGACTACAGGCGCCACCACCACGCCCGGCTAATTTTTGTATTTTATAG |      |      |      |      |      |      |      | 4418 |
| Coquerel'sSifaka  | -----                                                                          |      |      |      |      |      |      |      | 5171 |
| Ma'sNightMonkey   | -----                                                                          |      |      |      |      |      |      |      | 5355 |
| VervetAGM         | -----                                                                          |      |      |      |      |      |      |      | 5453 |
| Gorilla           | CATTCTTCTGCCTCAGCCTCCCAGTAGCTGGGACTACAGGTGCCACCACCACGCCCGGCTAATTTTTGTATTTTATAG |      |      |      |      |      |      |      | 7186 |
| GrabEatingMacaque | -----                                                                          |      |      |      |      |      |      |      | 5549 |
| Macaque           | -----                                                                          |      |      |      |      |      |      |      | 5567 |
| PigTailedMacaque  | -----                                                                          |      |      |      |      |      |      |      | 5790 |
| Bonobo            | CATTCTTCTGCCTCAGCCTCCCAGTAGCTGGGACTACAGGCGCCACCACCACGCCCGGCTAATTTTTGTATTTTATAG |      |      |      |      |      |      |      | 5728 |
| OliveBaboon       | -----                                                                          |      |      |      |      |      |      |      | 5237 |
| Orangutan         | CATTCTCTGCCTCAGCCTCCCAGTTGCTGGGACTACAAGCGCCGTCACCACGCCTGGCTAATTTTTGTATTTTATAG  |      |      |      |      |      |      |      | 5709 |

| Majority          | -----T-----TTATGTTAG                                                           |      |      |      |      |      |      |      |      |
|-------------------|--------------------------------------------------------------------------------|------|------|------|------|------|------|------|------|
|                   | 7770                                                                           | 7780 | 7790 | 7800 | 7810 | 7820 | 7830 | 7840 |      |
| Human             | T-AGAGAC-GGGGTTTACCCTGTTAGCCAGGATGGTCTTGTATCTCCT--GACCTTGTGGTTACACCAGTTTTTGTAG |      |      |      |      |      |      |      | 4494 |
| Coquerel'sSifaka  | -----GTATATTAG                                                                 |      |      |      |      |      |      |      | 5180 |
| Ma'sNightMonkey   | -----TTATGTTAG                                                                 |      |      |      |      |      |      |      | 5364 |
| VervetAGM         | -----T-----TTATGTTAA                                                           |      |      |      |      |      |      |      | 5463 |
| Gorilla           | T-AGAGAC-CGGGTTTACCCTGTTAGCCAGGATGGTCTTGTATCTCCT--GACCTTGTGGTTACACCAGTTTCTGTAG |      |      |      |      |      |      |      | 7262 |
| GrabEatingMacaque | -----T-----TTATGTTAG                                                           |      |      |      |      |      |      |      | 5559 |
| Macaque           | -----T-----TTATGTTAG                                                           |      |      |      |      |      |      |      | 5577 |
| PigTailedMacaque  | -----T-----TTATGTTAG                                                           |      |      |      |      |      |      |      | 5800 |
| Bonobo            | TTAGAGAC-CGGGTTTACCCTGTTAGCCAGGATGGTCTTGTATCTCCT--GACCTTGTGGTTACACCAGTTTTTGTAG |      |      |      |      |      |      |      | 5805 |
| OliveBaboon       | -----T-----TTTTGTTAG                                                           |      |      |      |      |      |      |      | 5247 |
| Orangutan         | T-AGAGACAGGGGTTTACCCTGTTAGCCAGGATGGTCTCGATCTCCTCTGACCTTGTGGTTACACCAGTTTTTGTAG  |      |      |      |      |      |      |      | 5788 |

| Majority          | TTGTTTGAGGAGAACACTTTAGAAGATGATAAAAAAAG-TTGCAAACCATTTTTAAAAATCCATTGTTTAAATATAAAAAG   |      |      |      |      |      |      |      |      |
|-------------------|-------------------------------------------------------------------------------------|------|------|------|------|------|------|------|------|
|                   | 7850                                                                                | 7860 | 7870 | 7880 | 7890 | 7900 | 7910 | 7920 |      |
| Human             | TTGTTTGAGGAGAACACTTTAGAAGATGATAAAAAAAG-TTGCAAATCGTTTTTAAAAATCCATTGTTTAAATATAAAAAG   |      |      |      |      |      |      |      | 4573 |
| Coquerel'sSifaka  | TTGTTTGAGGGAAAAACATTAGAAAATGATAAAAAAAG-TTGCTTACCATTT-AAAAATCCATTGTTTAAATATAAAAAG    |      |      |      |      |      |      |      | 5253 |
| Ma'sNightMonkey   | TTGTTTGAGGAGAATACTTTAGAAGATGATAAAAAAATAATTGCACATCATTTTTTAAAAATCCATTGTTTAAATATAAAAAG |      |      |      |      |      |      |      | 5444 |
| VervetAGM         | TTGTTTGAGGAGAACACTTTAGAAGATGATAAAAAAAG-TTGCAAACCATTTTTTAAAAATCCATTGTTTAAATATAAAAAG  |      |      |      |      |      |      |      | 5542 |
| Gorilla           | TTGTTTGAGGAGAACACTTTAGAAGATAAATAAAAAAAG-TTGCAAACCATTTTTTAAAAATCCATTGTTTAAATATAAAAAG |      |      |      |      |      |      |      | 7341 |
| GrabEatingMacaque | TAATTTGAGGAGAACACTTTAGAAGATGATAAAAAAAG-TTGCAAACCATTTTTTAAAAATCCATTGTTTAAATATAAAAAG  |      |      |      |      |      |      |      | 5638 |
| Macaque           | TAATTTGAGGAGAACACTTTAGAAGATGATAAAAAAAG-TTGCAAACCATTTTTTAAAAATCCATTGTTTAAATATAAAAAG  |      |      |      |      |      |      |      | 5656 |
| PigTailedMacaque  | TAATTTGAGGAGAACACTTTAGAAGATGATAAAAAAAG-TTGCAAACCATTTTTTAAAAATCCATTGTTTAAATATAAAAAG  |      |      |      |      |      |      |      | 5879 |
| Bonobo            | TTGTTTGAGGAGAACACTTTAGAAGATGATAAAAAAAG--TTGCAAATCGTTTTTAAAAATCCATTGTTTAAATATAAAAAG  |      |      |      |      |      |      |      | 5883 |
| OliveBaboon       | TAATTTGAGGAGAACACTTTAGAAGATGATAAAAAAAG-TTGCAAACCATTTTTTAAAAATCCGTTGTTTAAATATAAAAAG  |      |      |      |      |      |      |      | 5326 |
| Orangutan         | TTGCTTGA---GAACACTTTAGAAGATGATAAAAAAAGTTGCAAACCATTTTTTAAAAATCCATTGTTTAAATATAAAAAG   |      |      |      |      |      |      |      | 5865 |

Tuesday, May 03, 2022 06:14 PM

|                   |                                                                                    |      |
|-------------------|------------------------------------------------------------------------------------|------|
| Majority          | TCTGAATAAATTAAGTT-AATTTAATTTTCTGGAATAATGGTTAAGAATTTTGGCTTTGGTGTTCAGGCCTGTGTACAAGT  |      |
|                   | 7930      7940      7950      7960      7970      7980      7990      8000         |      |
| Human             | TCTGAATAAATTAAGTT-AATTTAATTTTCTGGAATAATGGTTAAGAATTTTGGCTTTGGTGTTCAGGCCTGTGTACAAGT  | 4652 |
| Coquerel'sSifaka  | TTTGAATAAATTAAGTTTATCTAATTTTCTAGAGTAATGGTTAAGAATTTTGGCTGTGGTGTTCAGGCCTATGTACAAGT   | 5333 |
| Ma'sNightMonkey   | TCTGAATAAATTAAGTT-AATTTAATTTTCTAGAATAATGGTTAAGAATTTTGGCTTTAGTGTTCAGGCCTGTGTACAAGC  | 5523 |
| VervetAGM         | TCTGAATAAATTAAGTTAATTTAATTTTCTGGAATAATGGTTAA--TTTGGCTTTGGTGTTCGGGCCTGTGTACAAGT     | 5619 |
| Gorilla           | TCTGAATAAATTAAGTT-AATTTAATTTTCTGGAATAATGGTTAAGAATTTTGGCTTTGGTGTTCAGGCCTGTGTACAAGT  | 7420 |
| GrabEatingMacaque | TCTGAATAAATTAAGTT-AATTTAATTTTCTGGAATAATGGTTAAGAATTTTGGCTTTGGCGTTCAGGCCTGTGTACAAGT  | 5717 |
| Macaque           | TCTGAATAAATTAAGTT-AATTTAATTTTCTGGAATAATGGTTAAGAATTTTGGCTTTGGCGTTCAGGCCTGTGTACAAGT  | 5735 |
| PigTailedMacaque  | TCTGAATAAATTAAGTT-AGTTTAAATTTTCTGGAATAATGGTTAAGAATTTTGGCTTTGGCGTTCAGGCCTGTGTACAAGT | 5958 |
| Bonobo            | TCTGAATAAATTAAGTT-AATTTAATTTTCTGGAATAATGGTTAAGAATTTTGGCTTTGGTGTTCAGGCCTGTGTACAAGT  | 5962 |
| OliveBaboon       | TCTGAATAAATTAAGTT-AATTTAATTTTCTGGAATAATGGTTAAGAATTTTGGCTTTGGCGTTCAGGCCTGTGTACAAGT  | 5405 |
| Orangutan         | TCTGAATAATGAAGTT-AATTTAATTTTCTGGAATAATGGTTAAGAATTTTGGCTTTGGTGTTCAGGCCTGTGTACAAGT   | 5944 |

|                   |                                                                                |      |
|-------------------|--------------------------------------------------------------------------------|------|
| Majority          | AATTAAGTGTCTTTAAAA-----ACATTTGTG-----GC-----G--CA----TG-A----CA----T-----A---  |      |
|                   | 8010      8020      8030      8040      8050      8060      8070      8080     |      |
| Human             | AATTAAGTGTCTTTAAAACTTAAACATTTGTGAATTTGCTTTAAAG-ACACTGATGCATGTGCATATTTAAAAAAATT | 4731 |
| Coquerel'sSifaka  | AATTGAGCTTGCTTTAAAA-----AAGTTTTT-----                                          | 5360 |
| Ma'sNightMonkey   | AACTAAGTGTCTTTAAAA-----CATTCGTA-----                                           | 5550 |
| VervetAGM         | AGTTAAGTGTCTTTAAAA-----ACATTTGT-----                                           | 5646 |
| Gorilla           | AATTAAGTGTCTTTAAAACTTAAACATTTGTGAATTTGCTTTAAAG-TCACTGATGCACGTGCATATTTAAAAAAATT | 7499 |
| GrabEatingMacaque | AGTTAAGTGTCTTTAAAA-----ACATTTGTGGCCGGGCACGGTGGCTCAAGCCTGTAATCCCAGCACTTTGGGAGGC | 5791 |
| Macaque           | AGTTAAGTGTCTTTAAAA-----ACATTTGTGGCCGGGCACGGTGGCTCAAGCCTGTAATCCCAGCACTTTGGGAGGC | 5809 |
| PigTailedMacaque  | AGTTAAGTGTCTTTAAAA-----ACATTTGT-----                                           | 5985 |
| Bonobo            | AATTAAGTGTCTTTAAAACTTAAACATTTGTGAATTTGCTTTAAAG-ACACTGATGCATGTGCATATTTAAAAAAATT | 6041 |
| OliveBaboon       | AGTTAAGTGTCTTTAAAA-----ACATTTGT-----                                           | 5432 |
| Orangutan         | AATGAAGTGTCTTTAAAACTTAAACATTTGTGAATTTGCTTTAAAG-ACACTGATGCATGTGCATATTTAAAAAAATT | 6023 |

|                   |                                                                                  |      |
|-------------------|----------------------------------------------------------------------------------|------|
| Majority          | C--G-CGGGCG-----G-----A-----A-CA---TGG---C---G-----C-----T-A--A-A--              |      |
|                   | 8090      8100      8110      8120      8130      8140      8150      8160       |      |
| Human             | CAGGCCGGGCGCGTGGGTACACCTGTAATCCCAGCACTTTGGGAGGCCGAGGCGGGCGGATCACGAGTTCAGGAGA--   | 4809 |
| Coquerel'sSifaka  | -----                                                                            | 5360 |
| Ma'sNightMonkey   | -----                                                                            | 5550 |
| VervetAGM         | -----                                                                            | 5646 |
| Gorilla           | CAGGCCGGGCGCGTGGGTACAGCCTGTAATCCCAGCACTTTGGGANNNNNNNNNNNNNNNNNNNNNNNNNNNNNNN--   | 7577 |
| GrabEatingMacaque | CGAGACGGGCGGATCACGAGGTACAGAGATCGAGACCAGCCTGGCTAACACGGTGAAACCCCGTCTCTACTAAAAATATA | 5871 |
| Macaque           | CGAGACGGGCGGATCACGAGGTACAGAGATCGAGACCAGCCTGGCTAACACGGTGAAACCCCGTCTCTACTAAAAATATA | 5889 |
| PigTailedMacaque  | -----                                                                            | 5985 |
| Bonobo            | CAGGTCGGGCGCGTGGGTACGCCTGTAATCCCAGCACTTTGGGAGGCCGAGGCGGGCGGATCACGAGTTTAGGAGATT   | 6121 |
| OliveBaboon       | -----A                                                                           | 5433 |
| Orangutan         | CAGGCTGGGCGCAGTGGGTACGCCTGTAATCCCAGCACTCTGGGAGGCTGAGGCGGGCAGATCACGAGTTCAGGAGATC  | 6103 |

Tuesday, May 03, 2022 06:14 PM

|                   |                                                                                  |      |
|-------------------|----------------------------------------------------------------------------------|------|
| Majority          | -----GT-----C---A-T---A---T-AG-C-GG-----G-----C--                                |      |
|                   | ----- ----- ----- ----- ----- ----- ----- -----                                  |      |
|                   | 8170 8180 8190 8200 8210 8220 8230 8240                                          |      |
| Human             | --GACCATCCTGGCTAACACGGTGAAACCTGTCTTTACTAAAAATACAAAAAATTAGCCGGGTGTGGTGACGGGTGCCT  | 4887 |
| Coquerel'sSifaka  | -----                                                                            | 5360 |
| Ma'sNightMonkey   | -----                                                                            | 5550 |
| VervetAGM         | -----                                                                            | 5646 |
| Gorrilla          | -----NNN---NNNNNNNNNNNNNNNNNNNNNNNNNNNNNNNNNNNNNNNNNNNNNNNNNNNNNNNN              | 7623 |
| GrabEatingMacaque | AAAA-CTAGCCGGGCGAGGTGGCGAA-GCCTGTAGTCCCAGCTATTTGGGAGGCTGAGGCAGGAGAATGGC--AAACCTG | 5947 |
| Macaque           | AAAAACTAGCCGGGCGAGGTGGCAGGCGCTGTAGTCCCAGCTATTTGGGAGGCTGAGGCAGGAGAATGGCGTAAACCTG  | 5969 |
| PigTailedMacaque  | -----                                                                            | 5985 |
| Bonobo            | GAGACCATCCTGGCTAACACGGTGAAACCTGTCTTTACTAAAAATACAAAAAATTAGCCAGGTGTGGTGACGGGTGCCT  | 6201 |
| OliveBaboon       | -----                                                                            | 5433 |
| Orangutan         | GAGACCATCCTGGCTAACACAGTGAAACCCCGTCTCTACTAAAAATACAAAAAATTAGCCAGGCATGGTGGCGGGCGCCT | 6183 |

|                   |                                                                                  |      |
|-------------------|----------------------------------------------------------------------------------|------|
| Majority          | G-AG-C--AGCT-----TG-G-GAC-GAG-----                                               |      |
|                   | ----- ----- ----- ----- ----- ----- ----- -----                                  |      |
|                   | 8250 8260 8270 8280 8290 8300 8310 8320                                          |      |
| Human             | GTAGTCCCAGCTACTCGGGAGGCTGAGGCAGGAGAATG-GCATGAACCTGCGAGGCAGAGGTTGCAGTAAGCGGAGATTG | 4966 |
| Coquerel'sSifaka  | -----                                                                            | 5360 |
| Ma'sNightMonkey   | -----                                                                            | 5550 |
| VervetAGM         | -----A-----                                                                      | 5647 |
| Gorrilla          | NNNNTTTTTTTTTTT-----T-----TTTGAGACGGAG-----                                      | 7651 |
| GrabEatingMacaque | GGAGGCAGAGCT-----GAGATCCG-CCACTGCACTCCAGCCTGGGTGACAGAGCGAGACTCTGTCTCAAAAAA       | 6015 |
| Macaque           | GGAGGCAGAGCTTGTAGTGACCTGAGATCCGGCCACTGCACTCCAGCCTGGGTGACAGAGCGAGACTCTGTCTCAAAAAA | 6049 |
| PigTailedMacaque  | -----                                                                            | 5985 |
| Bonobo            | GTAGTCCCAGCTACTCGGGAGGCTGAGGCAGGAGAATG-GCATGAACCTGCGAGGCAGAGGTTGCAGTAAGCGGAGATTG | 6280 |
| OliveBaboon       | -----                                                                            | 5433 |
| Orangutan         | GTAGTCCCAGCTACTCGGGAGGCTGAGGCAGGAGAATG-GCGTGAACCCGGGAGGCGGAGGTTGCAGTAAGCCGAGATTG | 6262 |

|                   |                                                                                 |      |
|-------------------|---------------------------------------------------------------------------------|------|
| Majority          | -----A-----AATTTGCTTTAAAGACACTGA-TGCATGTTTAAAAAATTCAAACTGATTCA----              |      |
|                   | ----- ----- ----- ----- ----- ----- ----- -----                                 |      |
|                   | 8330 8340 8350 8360 8370 8380 8390 8400                                         |      |
| Human             | CACCACTGCA-----CTCCAGCCTGGGCGACAGAGACAGACTCTATCTCAAAAAAAAAAAAAAAAAAAAAAAAAAAAA  | 5036 |
| Coquerel'sSifaka  | -----AATTTCTTTAAAGA-----AAGTAA-----                                             | 5381 |
| Ma'sNightMonkey   | -----AATTTGCTTTACAGA-----AACTGA-----                                            | 5571 |
| VervetAGM         | -----AATTTGCTTTAAAGGCACTGA-TGCATGTTTAAAAATATTCAAACTGATTCA----                   | 5698 |
| Gorrilla          | -----TCTCGCCCG-----TCTC-----                                                    | 7665 |
| GrabEatingMacaque | AAAAAAT-----TTGTAAATTTGCTTTAAAGACACTGA-TGCATGTTTAAAAAATTCAAACTGATTCA----        | 6081 |
| Macaque           | AAAAAAAAAAAAAAAAAATTTGTAAATTTGCTTTAAAGACACTGA-TGCATGTTTAAAAAATTCAAACTGATTCA---- | 6124 |
| PigTailedMacaque  | -----A-----AATTTGCTTTAAAGACACTGA-TGCATGTTTAAAAAATTCAAACTGATTCA----              | 6037 |
| Bonobo            | CACCACTGCA-----CTCCAGCCTGGGCGACAGAGACAGACTCTATCTCAAAAAAAAAAATAATAANN-----       | 6343 |
| OliveBaboon       | -----AATTTGCTTTAAAGACACTGA-TGCATGTTTAAAAAATTCAAACTGATTCA----                    | 5484 |
| Orangutan         | TGCCACTGCA-----CTCCAGCCTGGGCAACAGAGCGAGACTCCATCTCAAAAAAAGAAAAAATTCAAACT         | 6332 |

Tuesday, May 03, 2022 06:14 PM

|                   |                                                                              |      |
|-------------------|------------------------------------------------------------------------------|------|
| Majority          | -----CAGGTTTTTT---TTATTTCTTAGGTGTAGGTAATTGTGTAAAAATTTGTGCCTT                 |      |
|                   | 8410 8420 8430 8440 8450 8460 8470 8480                                      |      |
| Human             | AAAAAAAAAATTCAAAGCTTCACAGCTTTTTTGTCTATTTCTTAGGTGTAGGTAATTGTGTAAAAATTTGTGCCTT | 5116 |
| Coquerel'sSifaka  | -----                                                                        | 5381 |
| Ma'sNightMonkey   | -----                                                                        | 5571 |
| VervetAGM         | -----CAGGTTTTTT---TTATTTCTTAGGTGTAGGTAATTGTGTAAAAATTTGTGCCTT                 | 5751 |
| Gorrilla          | -----                                                                        | 7665 |
| GrabEatingMacaque | -----CAGGTTTTTT---TTATTTCTTAGGTGTAGGTAATTGTGTAAAAATTTGTGCCTT                 | 6134 |
| Macaque           | -----CAGGTTTTTT---TTATTTCTTAGGTGTAGGTAATTGTGTAAAAATTTGTGCCTT                 | 6177 |
| PigTailedMacaque  | -----CAGGTTTTTT---TTATTTCTTAGGTGTAGGTAATTGTGTAAAAATTTGTGCCTT                 | 6090 |
| Bonobo            | -----                                                                        | 6343 |
| OliveBaboon       | -----CAGGTTTTTT---TAATTTCTTAGGTGTAGGTAATTGTGTAAAAATTTGTGCCTT                 | 5537 |
| Orangutan         | GATTCA-----CAGTTTTTTTAAATTTATTTGTTAGGTGTAGGTAATTGTGTAAAAATTTGTGCCTT          | 6395 |

|                   |                                                                                    |      |
|-------------------|------------------------------------------------------------------------------------|------|
| Majority          | TTTACCTGAAATTATTGAT---ATATTACCACACATATAAACATCTTTATTTACATAATTGGATTTAAACTATTGTTCT    |      |
|                   | 8490 8500 8510 8520 8530 8540 8550 8560                                            |      |
| Human             | TTTTCTTGAAATTATTAATTTATATATATTAGCACACATATAAACATCTTTATTTACGTGATTGAATTCAAACTATTGTTTT | 5196 |
| Coquerel'sSifaka  | -----                                                                              | 5381 |
| Ma'sNightMonkey   | -----                                                                              | 5571 |
| VervetAGM         | TTTACCTGAAATTATTGAT---ATATTACCACACATATAAACATCTTTATTTACATAATTGGATTCAAACTATTGTTCT    | 5827 |
| Gorrilla          | -----                                                                              | 7665 |
| GrabEatingMacaque | TTTACCTGAAATTATTGAT---ATATTACCACACATATAAACATCTTTATTTACATAATTGGATTTAAACTATTGTTCT    | 6210 |
| Macaque           | TTTACCTGAAATTATTGAT---ATATTACCACACATATAAACATCTTTATTTACATAATTGGATTTAAACTATTGTTCT    | 6253 |
| PigTailedMacaque  | TT-ACCTGAAATTATTGAT---ATATTACCACACATATAAACATCTTTATTTACATAATTGGATTTAAACTATTGTTCT    | 6165 |
| Bonobo            | -----                                                                              | 6343 |
| OliveBaboon       | TTTACCTGAAATTATTGAT---ATATTACCACACATATAAACATCTTTATTTACATAATTGGATTTAAACTATTGTTCT    | 5613 |
| Orangutan         | TTTTCTTGAAATCATTAATTTATATATATTAGCACACATATAAACATCTTTATTTACGTGATTGAATTCAAACTATAGTTTT | 6475 |

|                   |                                                                                 |      |
|-------------------|---------------------------------------------------------------------------------|------|
| Majority          | GGCCACATCTTGCCTTTTTTTTTT--TTTTTTGAATGGGAGTC-CCCTCTGTCACCAGGCTGGAGTGCAGTGGCACGAT |      |
|                   | 8570 8580 8590 8600 8610 8620 8630 8640                                         |      |
| Human             | GGCCACATCTTGCCTTTTTTTTTT--TTTTTTGAGTCGGAGTCTCCCTCTGTCATCAGGCTGGAGTGCAGTGGCATGAT | 5274 |
| Coquerel'sSifaka  | -----TACATGTGTATGTTAAAAAA---AAT                                                 | 5405 |
| Ma'sNightMonkey   | -----TGGACGTGCATGTTAAAAAAGTTCAA                                                 | 5599 |
| VervetAGM         | GGCCACATCTTGCCTTTTTTTTTT--TTTTTTGAATGGGAGTC-CCCTCTGTCACCAGGCTGGAGTGCAGTGGCACGAC | 5904 |
| Gorrilla          | -----CCAGGCTGGAGTGCAGTGGCGCGAT                                                  | 7690 |
| GrabEatingMacaque | GGCCACATCTTGCCTTTTTTTTTT-GTTTTTTGAATGGGAGTC-CCCTCTGTCACCAGGCTGGAGTGCAGTGGCACGAT | 6288 |
| Macaque           | GGCCACATCTTGCCTTTTTTTTTT-GTTTTTTGAATGGGAGTC-CCCTCTGTCACCAGGCTGGAGTGCAGTGGCACGAT | 6331 |
| PigTailedMacaque  | GGCCACATCTTGCCTTTTTTTTTT-GTTTTTTGAATGGGAGTC-CCCTCTGTCACCAGGCTGGAGTGCAGTGGCACGAT | 6243 |
| Bonobo            | -----NNNNNNNNNNNNNNNNNNNGCAGTGGCGCGAT                                           | 6374 |
| OliveBaboon       | GGCCACATCTTGCCTTTTTTTTTTGTTTTTTTGAATGGGAGTC-CCCTCTGTCACCAGGCTGGAGTGCAGTGGCACGAT | 5692 |
| Orangutan         | GGCCACATCTTGCCTTTTTTTTTT--TTTTT-GAGTCGGAGTCTCCTTCTGTCATCAGGCTGGAGTGCAGTGGCACGAT | 6552 |

Tuesday, May 03, 2022 06:14 PM

| Majority          | -----                                                                             |      |      |      |      |      |      |      |      |
|-------------------|-----------------------------------------------------------------------------------|------|------|------|------|------|------|------|------|
|                   | 8650                                                                              | 8660 | 8670 | 8680 | 8690 | 8700 | 8710 | 8720 |      |
| Human             | CTCAGC-----                                                                       |      |      |      |      |      |      |      | 5354 |
| Coquerel'sSifaka  | TTGA-----                                                                         |      |      |      |      |      |      |      | 5409 |
| Ma'sNightMonkey   | CTGA-----                                                                         |      |      |      |      |      |      |      | 5603 |
| VervetAGM         | CTCCGC-----                                                                       |      |      |      |      |      |      |      | 5910 |
| Gorilla           | CTCTGC-----                                                                       |      |      |      |      |      |      |      | 7696 |
| GrabEatingMacaque | CTCAGC-----                                                                       |      |      |      |      |      |      |      | 6294 |
| Macaque           | CTCAGC-----                                                                       |      |      |      |      |      |      |      | 6337 |
| PigTailedMacaque  | CTCAGC-----                                                                       |      |      |      |      |      |      |      | 6249 |
| Bonobo            | CTCG-----                                                                         |      |      |      |      |      |      |      | 6378 |
| OliveBaboon       | CTCCGC-----                                                                       |      |      |      |      |      |      |      | 5698 |
| Orangutan         | CTTGGGCTACTGCAACCTCTGCCTCCTGGGTTTCAGGCGATTCTCCTGCCTCAGCCTCCCTAGTAGCTGGGACTACAGGCG |      |      |      |      |      |      |      | 6632 |

| Majority          | -----                                                                           |      |      |      |      |      |      |      |      |
|-------------------|---------------------------------------------------------------------------------|------|------|------|------|------|------|------|------|
|                   | 8730                                                                            | 8740 | 8750 | 8760 | 8770 | 8780 | 8790 | 8800 |      |
| Human             | CACGCCCCATGCCAGACTAATTTTTTTTTTTTTTTC-GAGACGGAGTCTCGCCCGGTCTCCCAGGCTGGAGTGCAGTGT |      |      |      |      |      |      |      | 5433 |
| Coquerel'sSifaka  | -----                                                                           |      |      |      |      |      |      |      | 5409 |
| Ma'sNightMonkey   | -----                                                                           |      |      |      |      |      |      |      | 5603 |
| VervetAGM         | -----                                                                           |      |      |      |      |      |      |      | 5910 |
| Gorilla           | -----                                                                           |      |      |      |      |      |      |      | 7696 |
| GrabEatingMacaque | -----                                                                           |      |      |      |      |      |      |      | 6294 |
| Macaque           | -----                                                                           |      |      |      |      |      |      |      | 6337 |
| PigTailedMacaque  | -----                                                                           |      |      |      |      |      |      |      | 6249 |
| Bonobo            | -----                                                                           |      |      |      |      |      |      |      | 6378 |
| OliveBaboon       | -----                                                                           |      |      |      |      |      |      |      | 5698 |
| Orangutan         | CACGCCACCATGCCAGACTAATTTTTTTTTTTTTTTTGAGATGGAGTCTCGCCCTGTCTCCCAGGCTGGAGTGCAGTGG |      |      |      |      |      |      |      | 6712 |

| Majority          | -----TCACTGCAACCTCCGCCTCCC-----                                                   |      |      |      |      |      |      |      |      |
|-------------------|-----------------------------------------------------------------------------------|------|------|------|------|------|------|------|------|
|                   | 8810                                                                              | 8820 | 8830 | 8840 | 8850 | 8860 | 8870 | 8880 |      |
| Human             | CGCGATCTCTGCTCACTGCAACCTCTGCCTCCTGGGTTTCAGGCCATTCTCCTGTCTCAGCCTCCCAAGTAGCTGGGACTA |      |      |      |      |      |      |      | 5513 |
| Coquerel'sSifaka  | -----AGTGAAA-----                                                                 |      |      |      |      |      |      |      | 5416 |
| Ma'sNightMonkey   | -----                                                                             |      |      |      |      |      |      |      | 5603 |
| VervetAGM         | -----TCACTGCAACCTCCGCCTCCCAGGGTTCAAGTGATTCTC-----                                 |      |      |      |      |      |      |      | 5949 |
| Gorilla           | -----TCACTGCAACCTCTGCCTCCTGGGTTTCAGGCCATTCTCCTATCTCAGCCTCCCGAGTAGCTGGGACTA        |      |      |      |      |      |      |      | 7764 |
| GrabEatingMacaque | -----TCACTGCAACCTCCGCCTCCC-----                                                   |      |      |      |      |      |      |      | 6315 |
| Macaque           | -----TCACTGCAACCTCCGCCTCCC-----                                                   |      |      |      |      |      |      |      | 6358 |
| PigTailedMacaque  | -----TCACTGCAACCTCCGCCTCCC-----                                                   |      |      |      |      |      |      |      | 6270 |
| Bonobo            | -----TCACTGCAACCTCTGCCTCCTGGGTTTCAGGCCATTCTCCTGTCTCAGCCTCCCAAGTAGCTGGGACTA        |      |      |      |      |      |      |      | 6446 |
| OliveBaboon       | -----TCACTGCAACCTCTGCTTCCC-----                                                   |      |      |      |      |      |      |      | 5719 |
| Orangutan         | TGCGATCT--GCTCACTGCAACCTCCACCTCCTGGGTTTCATGCCATTCTCC--TCTCAGCCTCCCGAGTAGCTGGGACTA |      |      |      |      |      |      |      | 6788 |

Tuesday, May 03, 2022 06:14 PM

```

Majority      -----GGGGTTCAA-----
              8890      8900      8910      8920      8930      8940      8950      8960
Human         CAGGCGCCTGCCACCACGCCTGGCTTCTTTTTGTATATTCAGTAGAGACAGAGTTTCACCATGTTAGCCAGGATAGTCT 5593
Coquerel'sSifaka ----- 5416
Ma'sNightMonkey ----- 5603
VervetAGM    -----CTGCCTCAGCCTCCCGAATAACTGGGACTACAGGGGTCAA----- 5990
Gorilla      CAGGCGCCCCGCCACCACGCCTGGCTTATTTTTGTATTTTCAGTAGAGACAGAGTTTCACCATGTTAGCCAGGATAGTCT 7844
GrabEatingMacaque -----GGGGTTCAA----- 6324
Macaque      -----GGGGTTCAA----- 6367
PigTailedMacaque -----GGGGTTCAA----- 6279
Bonobo       CAGGCGCCTGCCACCACGCCTGGCTTCTTTTTGTATATTCAGTAGAGACAGAGTTTCACCATGTTAGCCAGGATAGTCT 6526
OliveBaboon  -----GGGGTTCAA----- 5728
Orangutan    CAGGCACCTGCCACCATGCCAGCTAAGTTTTGTATTTTCAGTAAAGACAGAGTTTCACCATGTTAGCCAGGATAGTTT 6868
    
```

```

Majority      -----GTGATTCTCCTGCCTCAGCCTCCCAAATAACTGGGACTACAGGCGCCCGCCACC-----
              8970      8980      8990      9000      9010      9020      9030      9040
Human         CTATCTCCTGACCTCGTGATCTGCCTGCCTCGGCTCCCAAAGTGTGGGATTACAAGCGTGAGCCACCGCGCCTAGCCA 5673
Coquerel'sSifaka -----GATATTCTCCCT-G-----A-----TT----- 5433
Ma'sNightMonkey -----TT----- 5605
VervetAGM    -----GTGATTCTCCTGCCTCAGCCTCCCGAATAACTGGGACTACAGGCGCCCGCCACC----- 6044
Gorilla      CGATCTCCTGACCTCGTGATCTGCCTGCCTCGGCTCCCAAAGTGTGGGATTACAAGCGTGAGCCACCGCGCCTAGCCA 7924
GrabEatingMacaque -----GTGATTCTCCTGCCTCAGCCTCCCGAATAACTGGGACTACAGGCGCCCGCCACC----- 6378
Macaque      -----GTGATTCTCCTGCCTCAGCCTCCCGAATAACTGGGACTACAGGCGCCCGCCACC----- 6421
PigTailedMacaque -----GTGATTCTCCTGCCTCAGCCTCCCGAATAACTGGGACTACAGGCGCCCGCCACC----- 6333
Bonobo       CGATCTCCTGACCTCGTGATCTGCCTGCCTCGGCTCCCAAAGTGTGGGATTACAAGCGTGAGCCACCGCGCCTAGCCA 6606
OliveBaboon  -----GTGATTCTCCTGCCTCAGCCTCCCAAATAACTGGGACTACAGGCGCCCGCCACC----- 5782
Orangutan    CGATCTCCTGACCTCATGATCCGTCTGCCTCAGCCTCCCAAAGTGTGGGATTACAAGCGTGAGCCACCACGCCTGGCCA 6948
    
```

```

Majority      --ACGCCAGACTAATTTTTGTATTTTGTAGTACTGACGGGGTTTC--ACCATTTTGGCCAGGATGGTCTTGATCTCTTGAC
              9050      9060      9070      9080      9090      9100      9110      9120
Human         AAATGCCAGACTAATTTTTGTATTTTGTAGTACTGACGGGGTTTC--ACCATTTTGGCCAGGATGGTCTTGATCTCTTGAC 5751
Coquerel'sSifaka -----CA---TTGTATTTATTTCTTAGGTATAGATAATTTTGTAAATTTTTTGTGCATTTTTTCTGAAATTATTGA 5504
Ma'sNightMonkey -----CACAGTTTTTCTTTTTATTAGGTGTGGTAATTTTGT--GCCTTTT-----TCTTGAAATTATTAA 5666
VervetAGM    --ACGCCAGACTAACTTTTGTATTTTGTAGTACTGACGGGGTTTC--ACCATGTTGGCCAGGATGGTCTTGTTCTCTTGAC 6120
Gorilla      AAACGCCAGACTAATTTTTGTATTTTGTAGTACTGACGGGGTTTC--ACCATTTTGGCCAGGATGGTCTTGATCTCTTGGC 8002
GrabEatingMacaque --ACGCCAGACTAACTTTTGTATTTTGTAGTACTGACGGGGTTTC--ACCATGTTGGCCAGGATGGTCTTGTTCTCTTGAC 6454
Macaque      --ACGCCAGACTAACTTTTGTATTTTGTAGTACTGACGGGGTTTC--ACCATGTTGGCCAGGATGGTCTTGTTCTCTTGAC 6497
PigTailedMacaque --ATGCCAGACTAACTTTTGTATTTTGTAGTACTGACGGGGTTTC--ACCATGTTGGCCAGGATGGTCTTGTTCTCTTGAC 6409
Bonobo       AAACGCCAGACTAATTTTTGTATTTTGTAGTACTGACGGGGTTTC--ACCATTTTGGCCAGGATGGTCTTGATCTCTTGAC 6684
OliveBaboon  --ACGCCAGACTAACTTTTGTATTTTGTAGTACTGACGGGGTTTC--ACCATGTTGGCCAGGATGGTCTTGTTCTCTTGAC 5858
Orangutan    AAACGCCAGACTAATTTTTGTATTTTGTAGTACTGACGGGGTTTC--ACCATTTTGGCCAGGATGGTCTTGATCTCTTGAC 7026
    
```

Tuesday, May 03, 2022 06:14 PM

|                   |                                                                                  |      |
|-------------------|----------------------------------------------------------------------------------|------|
| Majority          | TCCATG-AT-CCGCC-CGCCTTGACCTCCCAAAGTGTTGGGATTACAGGCTTGAGCCACTGTGCCCGGCCATATCTTGC  |      |
|                   | 9130 9140 9150 9160 9170 9180 9190 9200                                          |      |
| Human             | TCCATC-AT-CCGCC-CGCCTTGACTTCCCAAAGTGTTGGGATTACAGGCTTGAGCCACCGCGTCCGGCCCATATCTTGC | 5828 |
| Coquerel'sSifaka  | TTTATGTATTACGTACACATATGAACACCTT----CGTTTATACAAGGGATTCAAACATTTTGTCTGGCTCACATTTTGC | 5580 |
| Ma'sNightMonkey   | TTTATG-TTACCATC-CATATAAACATCTTTACATAAATTAGATT-----CAAACATTTGT-TCTGGCCACATCTTGC   | 5736 |
| VervetAGM         | TCCATG-AT-CCGCC-CGCCTTGACCTCCCAAAGTGCTGGGATTACAGGCGTGAGCTGCTGCGCCAGCCCGTCTCTTG-  | 6196 |
| Gorilla           | TCCATC-AT-CCGCC-CGCCTTGACTTCCCAAAGTGTTGGGATTACAGGCTTGAGCCACCGCGCCCGGCCACATCTTGC  | 8079 |
| GrabEatingMacaque | TCCTTG-AT-TCGCC-CGCCTTGACCTCCCAAAGTGCTGGGATTACAGGCGTGAGCCGCTGTGCCAGCCCGTCTCTTG-  | 6530 |
| Macaque           | TCCTTG-AT-TCGCC-CGCCTTGACCTCCCAAAGTGCTGGGATTACAGGCGTGAGCCGCTGTGCCAGCCCGTCTCTTG-  | 6573 |
| PigTailedMacaque  | TCCATG-AT-CCGCC-CGCCTTGACCTCCCAAAGTGCTGGGATTACAGGCGTGAGCCGCTGTGCCAGCCTGTCTCTTG-  | 6485 |
| Bonobo            | TCCATC-AT-CCGCC-CGCCTTGACTTCCCAAAGTGTTGGGATTACAGGCTTGAGCCACCGCGTCCGGCCCATATCTTGC | 6761 |
| OliveBaboon       | TCCATG-AT-CCGCC-CGCCTTGACCTCCCAAAGTGCTGGGATTACAGGCGTGAGCCGCTGTGCCAGCCCGTCTCTTG-  | 5934 |
| Orangutan         | CCCATG-AT-CCGCC-CGCCTTGATCTCCCAAAGTGTTGGGATTACAGGCTTGAGCCACCGCGCTGGCCACATCTTGC   | 7103 |

|                   |                                                                                    |      |
|-------------------|------------------------------------------------------------------------------------|------|
| Majority          | CTTT-----TTGAGATATAAATTTGACATAAAATAAACTACCCATATTTAAATATACAATGTTTTGTCTCA            |      |
|                   | 9210 9220 9230 9240 9250 9260 9270 9280                                            |      |
| Human             | CTTTAAAAAATAGCTTTATTGAGATATAAATTTGACATAAAATAAACTACCCATATTTAAATATACAATGTTTTATCTCA   | 5908 |
| Coquerel'sSifaka  | CTCT-----TTTAAAAAAA--TAGCTTTACATACACTACTCATTACCCTATATATTGTTTTGACATA                | 5642 |
| Ma'sNightMonkey   | CTTTTAAAAAATAGCTTTATTGAGATATAAATTTGACATAAAATAAAAGTACCCATATTTAAATATACAATGTTTTATCTCA | 5816 |
| VervetAGM         | -----AGAGATAAATTTGACATAAAATAAACTACTCATATTTAAATATACAATGTTTTGTCTCA                   | 6253 |
| Gorilla           | CTTTAAAAAATAGCTTTATTGAGATATAAATTTAACATAAAGTAACTACCCATATTTAAATATACAATGTTTTATCTCA    | 8159 |
| GrabEatingMacaque | -----AGATAAATTTGACATAAAATAAACTACCCATATTTAAATATACAATGTTTTGTCTCA                     | 6587 |
| Macaque           | -----AGATAAATTTGACATAAAATAAACTACCCATATTTAAATATACAATGTTTTGTCTCA                     | 6630 |
| PigTailedMacaque  | -----AGATAAATTTGACATAAAATAAACTACCCATATTTAAATATACAATGTTTTGTCTCA                     | 6542 |
| Bonobo            | CTTTAAAAAAA-TAGCTTTATTGAGATATAAATTTGACATAAAATAAACTACCCATATTTAAATATACAATGTTTTATCTCA | 6840 |
| OliveBaboon       | -----AGATAAATTTGACATAAAATAAACTACCTATATTTAAATATACAATGTTTTGTCTCA                     | 5991 |
| Orangutan         | CTTTAAAAAAA-TAGGTTTATTGAGATACAATGTGACATAAAATAAACTACCCATATTTAAATATACAGTGTTTTTGTCTCA | 7182 |

|                   |                                                                                  |      |
|-------------------|----------------------------------------------------------------------------------|------|
| Majority          | TATATACTCTGTGAAACCATCACCACAATCAAGATAATGAACATCTATCACTCCCCACAATATCATCTTGCGCCTTTGT  |      |
|                   | 9290 9300 9310 9320 9330 9340 9350 9360                                          |      |
| Human             | TATATACCCTTGTGAAACCA---CTGCAATCAAGATAATGAACATCTATCACTCCCTACAGTATCATCTTGCGCCTTTAT | 5985 |
| Coquerel'sSifaka  | TGTACACATCTGTGAAATCA---CCACAATCAAGATAATGAACAT----CACTCCCCAAAATATCATCTTGCCCTTTGT  | 5715 |
| Ma'sNightMonkey   | TGTATACCCTTGTGAAACCATCACCACAATGAAGATAATGAACATCTATCACTGCCACAATATCATCTTGCGCCTTTGT  | 5896 |
| VervetAGM         | TACATACTCTGTGAAACCATCACCACAATCAAGATAATGAACATCAATCACTCCCCACAATATCATCTTGACCTTTGT   | 6333 |
| Gorilla           | TATATACCCTTGTGAAACCA---CCACAATGAAGATAATGAACATCTATCACTCCCCACAGTATCATCTTGCGCCTTTAT | 8236 |
| GrabEatingMacaque | TACATACTCTGTGCAACCATCACCACAATCAAGATAATGAACATCAGTCACCTCCGCACAATATCATCTTGACCTTTGT  | 6667 |
| Macaque           | TACATACTCTGTGCAACCATCACCACAATCAAGATAATGAACATCAGTCACCTCCGCACAATATCATCTTGACCTTTGT  | 6710 |
| PigTailedMacaque  | TACATACTCTGTGCAACCATCACCACAATCAAGATAATGAACATCAGTCACCTCCGCACAATATCATCTTGACCTTTGT  | 6622 |
| Bonobo            | TATATACCCTTGTGAAACCA---CCACAATCAAGATAATGAACATCTATCACTCCCTACAGTATCATCTTGCGCCTTTAT | 6917 |
| OliveBaboon       | TACATACTCTGTGAAACCATCACCACAATCAAGATAATGAACATCAGTCACCTCCGCACAATATCATCTTGACCTTTGT  | 6071 |
| Orangutan         | TATATACCCTTGTGAAACCATCACCACAATCAAGATAATGAACATCTATCACTCCCCGAGTATCGTCTTGCGCCTTTAT  | 7262 |

Tuesday, May 03, 2022 06:14 PM

|                   |                                                                               |      |
|-------------------|-------------------------------------------------------------------------------|------|
| Majority          | AGTCCCTCCCTTC-TGCTTTTCTTTCCCCAAGCAACCCTGATCTGCTTTCTGTCAGTATAGATTAGTTCACACTTTT |      |
|                   | 9370      9380      9390      9400      9410      9420      9430      9440    |      |
| Human             | AGTCCCTCCCTTC-TGCTTTTCTTTCCCCAAGCAACCCTGATCTGCTTTCTGTCAGTATAGATTAGTTCACACTTTT | 6064 |
| Coquerel'sSifaka  | AATTCCTCTCTTT-TGACTTTCTTTCCCCAAACAACCCTGATCTGCTTTCTGTCAGTATAGATTAGTTTGTATTTT  | 5794 |
| Ma'sNightMonkey   | AGTCCCTCCCTTCCTGCTTCTCTTTCCCCAAGCAGCCCTGATCTGCTTTCTGTCAGTATAGATTAGTTCACAGTGT  | 5976 |
| VervetAGM         | ACTCCATCCCTTC-TGCTTTTCTTTCCCCAAGCAACCCTGATCTGCTTTCTGTCAGTATAGATTAGTTCACACTTTT | 6412 |
| Gorilla           | AGTCCCTCCCTTC-TGCTTTTCTTTCCCCAAGCAACCCTGATCTGCTTTCTGTCAGTATAGATTAGTTCACACTTTT | 8315 |
| GrabEatingMacaque | ACTCCATCCCTTC-TGCTTTTCTTTCCCCAAGCAACCCTGATCTGCTTTCTGTCAGTATAGATTAGTTCACACTTTT | 6746 |
| Macaque           | ACTCCATCCCTTC-TGCTTTTCTTTCCCCAAGCAACCCTGATCTGCTTTCTGTCAGTATAGATTAGTTCACACTTTT | 6789 |
| PigTailedMacaque  | ACTCCATCCCTTC-TGCTTTTCTTTCCCCAAGCAACCCTGATCTGCTTTCTGTCAGTATAGATTAGTTCACAGTTT  | 6701 |
| Bonobo            | AGTCCCTCCCTTC-TGCTTTTCTTTCCCCAAGCAACCCTGATCTGCTTTCTGTCAGTATAGATTAGTTCACACTTTT | 6996 |
| OliveBaboon       | ACTCCATCCCTTC-TGCTTTTCTTTCCCCAAGCAACCCTGATCTGCTTTCTGTCAGTATAGATTAGTTCACACTTTT | 6150 |
| Orangutan         | AGTCCCTCCCTTC-TGCTTTTCTTTCCCCAAGCAACCCTGATCTGCTTTCTGTCAGTATAGATTAGTTCACACTTTT | 7341 |

|                   |                                                                                   |      |
|-------------------|-----------------------------------------------------------------------------------|------|
| Majority          | GAATTTTAGGTAAATGTAATCATATGGTATGTACATTTTT-GGTCTGGGTAGTCCACTCAGAATAATTATTTTGAGATT   |      |
|                   | 9450      9460      9470      9480      9490      9500      9510      9520        |      |
| Human             | GAATTTTAGATAAATGTAATCATATGGTATGTACATTTTT-GGTCTGGGTAGTCCACTCAGAATAATTATTTTGAAATT   | 6143 |
| Coquerel'sSifaka  | GAATTTTAAATAACTGTAAT--TATGATATGTACCCTTTTTTGTCTAGGTTATTTTCATGCAGCGTAATTATTTTGAAATT | 5872 |
| Ma'sNightMonkey   | GAATTTTAGGTAAATGTAATCATATAGTATGTACTTTTTTGGTCTAGGTAAGTCCACTCAGAATAATTATTTTGAGATT   | 6056 |
| VervetAGM         | GAATTTTAGGTAAATGTGATCATGTGGTATGTACATTTTT-GGCCTGGGT-----ATTTTGAGATT                | 6473 |
| Gorilla           | GAATTTTAGGTAAATGTAATCATATGGTATGTACATTTTT-GGTCTGGGTAGTCCACTCAGAATAATTATTTTGAAATT   | 8394 |
| GrabEatingMacaque | GAATTTTAGGTAAATGTAATCATGTGGTATGTACATTTTT-GGCCTGTGTTAGTCCACTCAGAAT---TATTTTGAGATT  | 6822 |
| Macaque           | GAATTTTAGGTAAATGTAATCATGTGGTATGTACATTTTT-GGCCTGTGTTAGTCCACTCAGAAT---TATTTTGAGATT  | 6865 |
| PigTailedMacaque  | GAATTTTAGGTAAATGTAATCATGTGGTATGTACATTTTT-GGCCTGTGTTAGTCCACTCAGAAT---TATTTTGAGATT  | 6777 |
| Bonobo            | GAATTTTAGATAAATGTAATCATATGGTATGTACATTTTT-GGTCTGGGTAGTCCACTCAGAATAATTATTTTGAAATT   | 7075 |
| OliveBaboon       | GAATTTTAGGTAAATGTAATCATGTGGTATGTACATTTTT-GGCCTGTGTTAGTCCACTCAGAAT---TATTTTGAGATT  | 6226 |
| Orangutan         | GAATTCAGGTAAATGTAATCATATGGTATGTACATTTTT-GGTTGGGTAGTCCACTCAGAATAATTATTTTGAGATT     | 7420 |

|                   |                                                                                  |      |
|-------------------|----------------------------------------------------------------------------------|------|
| Majority          | CACCCATGTTGTGTTTCAATAGTCCATTCTCTTTTATTGCTTAGTAATATTACACTTTATGGCTATACAGCAATTTGTTA |      |
|                   | 9530      9540      9550      9560      9570      9580      9590      9600       |      |
| Human             | CACCCATGTTGTGTTTCAATAGTCCATTCTGTTTTATTGCTTAGTAATAGTACACTTTATGGCTATACAGCAATTTGTTA | 6223 |
| Coquerel'sSifaka  | -ACCTACGCTGTGATCTCTAGTCCATTCTCTTTTATTGCTTAATAATATTACACTGTATGGCTATATGGG-----CA    | 5944 |
| Ma'sNightMonkey   | CACCCATGTCGTGTTTCAATAGTCCATTCTCTTTTGTGCTTAGTAATAATACACTTTATGGCTATACGGCAGTTTGT    | 6136 |
| VervetAGM         | CACCCATGTTGTGTTTCAATAGTCCATTCTCTTTTATTGCTTAGTAATATTACACTTAATGGCTATACAGCAATTTGT   | 6553 |
| Gorilla           | CAGCCATGTTGTGTTTCAATAGTCCATTCTCTTTTATTGCTTAGTAATATTACTTTATGGCTATACAGCAATTTGT     | 8474 |
| GrabEatingMacaque | CACCCATGTTGTGTTTCAATAGTCCATTCTCTTTTATTGCTTAGCAATATTACACTTAATGGCTATACAGCAATTTGT   | 6902 |
| Macaque           | CACCCATGTTGTGTTTCAATAGTCCATTCTCTTTTATTGCTTAGCAATATTACACTTAATGGCTATACAGCAATTTGT   | 6945 |
| PigTailedMacaque  | CACCCATGTTGTGTTTCAATAGTCCATTCTCTTTTATTGCTTAGCAATATTACACTTAATGGCTATACAGCAATTTGT   | 6857 |
| Bonobo            | CACCCATGTTGTGTTTCAATAGTCCATTCTCTTTTATTGCTTAGTAATAGTACACTTTATGGCTATACAGCAATTTGT   | 7155 |
| OliveBaboon       | CACCCATGTTGTGTTTCAATAGTCCATTCTCTTTTATTGCTTAGCAATATTACACTTAATGGCTATACAGCAATTTGT   | 6306 |
| Orangutan         | CACCCATGTTGTGTTTCAATAGTCCATTCTCTTTTATTGCTTAGTAATATTACACTTTATGGCTATACAGCAATTTGT   | 7500 |



Tuesday, May 03, 2022 06:14 PM

| Majority          | ATCCATTCAAGTCTTGAGGGACATTTGTATTGTTTTCTGTTTTGAGCTA-TAAAA-TATAGTTGT-----           |      |      |      |      |      |      |      |      |
|-------------------|----------------------------------------------------------------------------------|------|------|------|------|------|------|------|------|
|                   | 9610                                                                             | 9620 | 9630 | 9640 | 9650 | 9660 | 9670 | 9680 |      |
| Human             | ATCCATTCAAGTCTTGAGGGACATTTGTATTGTTTTCCGTTTTGAGCTAATAAAAAATATAGTTGT-----          |      |      |      |      |      |      |      | 6288 |
| Coquerel'sSifaka  | ATTTGTGCAACTCTTGATGGACGTGTATATTGTTTTCCAGTTTTTGCTATTAAAA-TATAGTTAC-----           |      |      |      |      |      |      |      | 6008 |
| Ma'sNightMonkey   | ATCCATTCAAGTCTTGAGGGATATTTGTATTGTTTTCCATTTTGGGCTATTAAAAATATAGTTGTCAACGCACTGGTGGC |      |      |      |      |      |      |      | 6216 |
| VervetAGM         | ATCCATTCAAGTCTTGAGGGACATTTGT-----TTTCTGTTTTGAGCTA-----                           |      |      |      |      |      |      |      | 6597 |
| Gorilla           | ATCCATTCAAGTCTTGAGGGACATTTGTATTGTTTTCCGTTTTGAGCTAATAAAAAATATAGTTGT-----          |      |      |      |      |      |      |      | 8539 |
| GrabEatingMacaque | ATCCATTCAAGTCTTGAGGGACATTTGT-----TTTCTGTTTTGAGCTA-----                           |      |      |      |      |      |      |      | 6946 |
| Macaque           | ATCCATTCAAGTCTTGAGGGACATTTGT-----TTTCTGTTTTGAGCTA-----                           |      |      |      |      |      |      |      | 6989 |
| PigTailedMacaque  | ATCCATAACAAGTCTTGAGGGACATTTGT-----TTTCTGTTTTGAGCTA-----                          |      |      |      |      |      |      |      | 6901 |
| Bonobo            | ATCCATTCAAGTCTTGAGGGACATTTGTATTGTTTTCCGTTTTGAGCTAATAAAAAATATAGTTGT-----          |      |      |      |      |      |      |      | 7220 |
| OliveBaboon       | ATCCATTCAAGTCTTGAGGGACAGTTGT-----TTTCTGTTTTGAGCTA-----                           |      |      |      |      |      |      |      | 6350 |
| Orangutan         | ATCCATTCAAGTCTTGAGGGACATTTGTATTGTTTTCCGTTTTGAGCTAATAAAAAATATAGTTGT-----          |      |      |      |      |      |      |      | 7565 |

| Majority          | -----TTCCTGTACAAGTCTTTGTATGGAC                                                |      |      |      |      |      |      |      |      |
|-------------------|-------------------------------------------------------------------------------|------|------|------|------|------|------|------|------|
|                   | 9690                                                                          | 9700 | 9710 | 9720 | 9730 | 9740 | 9750 | 9760 |      |
| Human             | -----GAACATTACTGTACAAGTCTTTGTATGGAC                                           |      |      |      |      |      |      |      | 6318 |
| Coquerel'sSifaka  | -----TGTTCAATAAGTCCTTTTGTGTAT                                                 |      |      |      |      |      |      |      | 6033 |
| Ma'sNightMonkey   | GCAGTGGGTAACGAGTCTGACCGTAGATCAAAAAAATATAGTTGTGTGAGCATTCCTATACCAGTCTTTGTGTGGAC |      |      |      |      |      |      |      | 6296 |
| VervetAGM         | -----TACCTGTACAAGTCTTTGTATGGAC                                                |      |      |      |      |      |      |      | 6622 |
| Gorilla           | -----GAACATTACTGTACAAGTCTCTGTATGGAC                                           |      |      |      |      |      |      |      | 8569 |
| GrabEatingMacaque | -----TACCTGTACAAGTCTTTGTATGGAC                                                |      |      |      |      |      |      |      | 6971 |
| Macaque           | -----TACCTGTACAAGTCTTTGTATGGAC                                                |      |      |      |      |      |      |      | 7014 |
| PigTailedMacaque  | -----TACCTGTACAAGTCTTTGTATGGAC                                                |      |      |      |      |      |      |      | 6926 |
| Bonobo            | -----GAACATTACTGTACAAGTCTTTGTATGGAC                                           |      |      |      |      |      |      |      | 7250 |
| OliveBaboon       | -----TACCTGTACAAGTCTTTGTATGGAC                                                |      |      |      |      |      |      |      | 6375 |
| Orangutan         | -----GAACATTCTGTACAAGTCTTTGTATGGAC                                            |      |      |      |      |      |      |      | 7595 |

| Majority          | ATATGCTTTCATTTCTCTTGGTGGGGGGG-CTATGATTGGAAAGTCTGGATCATGTGGTAGGCATATGTTTAACTTTTT  |      |      |      |      |      |      |      |      |
|-------------------|----------------------------------------------------------------------------------|------|------|------|------|------|------|------|------|
|                   | 9770                                                                             | 9780 | 9790 | 9800 | 9810 | 9820 | 9830 | 9840 |      |
| Human             | ATATGCTTTCATTTCTCTTGGTGGGGCAGG-CTATGATTGGAAAGTCTGGATCATGTGATAGGCATATGTTTAACTTTTT |      |      |      |      |      |      |      | 6397 |
| Coquerel'sSifaka  | ATATGCTTTCATTTCTTTT---GGGGAGGCCGTGATTAGAAATGGTTGAATCATATGGTAGGCATATGTTTAACTTTTT  |      |      |      |      |      |      |      | 6109 |
| Ma'sNightMonkey   | ATATGCTT-CATTTCTCTTGGTGGGGCAG--CTGTGATTGGAAAGTCTGGATCTTATGGTAGGCATATGTTTAACTTTTT |      |      |      |      |      |      |      | 6373 |
| VervetAGM         | ATAGGCTTTCATTTCTCTTCGTCGGGGGAG-CTATGATTGGAAAGTCTGGATCATGTGGTAGGCATATGTTTAACTTTTT |      |      |      |      |      |      |      | 6701 |
| Gorilla           | ATATGCTTTCATTTCTCTTGGTGGGGCAGG-CTATGATTGGAAAGTCTGGATCATGTGATAGGCATATGTTTAACTTTTT |      |      |      |      |      |      |      | 8648 |
| GrabEatingMacaque | ATAGGCTTTCATTTCTCTTCGTCGGCGGGG-CTATGATTGGAAAGTCTGGATCATGTGGTAGGCATATGTTTAACTTTTT |      |      |      |      |      |      |      | 7050 |
| Macaque           | ATAGGCTTTCATTTCTCTTCGTCGGCGGGG-CTATGATTGGAAAGTCTGGATCATGTGGTAGGCATATGTTTAACTTTTT |      |      |      |      |      |      |      | 7093 |
| PigTailedMacaque  | ATAGGCTTTCATTTCTCTTCGTCGGCGGGG-CTATGATTGGAAAGTCTGGATCATGTGGTAGGCATATGTTTAACTTTTT |      |      |      |      |      |      |      | 7005 |
| Bonobo            | ATATGCTTTCATTTCTCTTGGTGGGGCAGG-CTATGATTGGAAAGTCTGGATCATGTGATAGGCATATGTTTAACTTTTT |      |      |      |      |      |      |      | 7329 |
| OliveBaboon       | ATAGGCTTTCATTTCTCTTCGTCGGCGGGG-CTATGATTGGAAAGTCTGGATCATGTGGTAGGCATATGTTTAACTTTTT |      |      |      |      |      |      |      | 6454 |
| Orangutan         | ATATGCTTTCATTTCTCTTGGTGGGGGGGGCTATGATTGGAAAGTCTGGATCATGTGGTAGGCATATGTTTAACTTTTT  |      |      |      |      |      |      |      | 7675 |

Tuesday, May 03, 2022 06:14 PM

| Majority          | AAGGA | ACTG | CAA  | ACT--  | TTTT | AAA  | AGT  | AGT  | TGT | TAC | CAT | CTT | AC | ATT | GCC | AT  | CAG | CAG | GGT | AT  | GAA | ATT | TCC | AGT | CC | CT | C |      |
|-------------------|-------|------|------|--------|------|------|------|------|-----|-----|-----|-----|----|-----|-----|-----|-----|-----|-----|-----|-----|-----|-----|-----|----|----|---|------|
|                   | 9850  | 9860 | 9870 | 9880   | 9890 | 9900 | 9910 | 9920 |     |     |     |     |    |     |     |     |     |     |     |     |     |     |     |     |    |    |   |      |
| Human             | AAGGA | ACTG | CAA  | ACT--  | TTTT | AAA  | AGT  | AGT  | TGT | TAC | CAT | CTT | AC | ATT | GCC | AT  | CAG | CAG | GGT | AT  | GAA | ATT | TCC | AGT | CC | CT | C | 6475 |
| Coquerel'sSifaka  | AAGGA | ACTG | AAA  | ATT    | TTTT | AAA  | AGT  | AGT  | TGT | TAC | CAT | TTT | AT | AT  | TG  | CAT | CAG | TAG | TG  | AT  | GAG | ATT | TCC | AGT | CC | CT | C | 6189 |
| Ma'sNightMonkey   | A---  | AACT | GCG  | AACT-- | TTTT | AGA  | AGT  | AGT  | TGT | TCC | AT  | CTT | AC | ATT | GCC | AT  | CAG | CAG | GGT | AT  | GAA | ATT | TCC | AGT | CC | CT | C | 6448 |
| VervetAGM         | AAGGA | ACTG | CAA  | ACT--  | TTTT | AAA  | AGT  | AGT  | TCT | TAC | CAT | CTT | AC | ATT | GCC | AT  | CAG | C   | GGG | TAT | GAA | ATT | TCC | AGT | CC | CT | C | 6779 |
| Gorilla           | AAGGA | ACTG | CAA  | ACT--  | TTTT | AAA  | AGT  | AGT  | TGT | TAC | CGT | CTT | AC | ATT | GCC | AT  | CAG | CAC | GGT | AT  | GAA | ATT | TCC | AGT | CC | CT | C | 8726 |
| GrabEatingMacaque | AAGGA | ACTG | CAA  | ACT--  | TTTT | AAA  | AGT  | AGT  | TCT | TAC | CAT | CTT | AC | ATT | GCC | AT  | CAG | C   | GGG | TAT | GAA | ATT | TCC | AGT | CC | CT | C | 7128 |
| Macaque           | AAGGA | ACTG | CAA  | ACT--  | TTTT | AAA  | AGT  | AGT  | TCT | TAC | CAT | CTT | AC | ATT | GCC | AT  | CAG | C   | GGG | TAT | GAA | ATT | TCC | AGT | CC | CT | C | 7171 |
| PigTailedMacaque  | AAGGA | ACTG | CAA  | ACT--  | TTTT | AAA  | AGT  | AGT  | TCT | TAC | CAT | CTT | AC | ATT | GCC | AT  | CAG | C   | GGG | TAT | GAA | ATT | TCC | AGT | CC | CT | C | 7083 |
| Bonobo            | AAGGA | ACTG | CAA  | ACT--  | TTTT | AAA  | AGT  | AGT  | TGT | TAC | CAT | CTT | AC | ATT | GCC | AT  | CAG | CAC | GGT | AT  | GAA | ATT | TCC | AGT | CC | CT | C | 7407 |
| OliveBaboon       | AAGGA | ACTG | CAA  | ACT--  | TTTT | AAA  | AGT  | AGT  | TCT | TAC | CAT | CTT | AC | ATT | GCC | AT  | CAG | C   | GGG | TAT | GAA | ATT | TCC | AGT | CC | CT | C | 6532 |
| Orangutan         | AAGGA | ACTG | CAA  | ACT--  | TTTT | AAA  | AAT  | AGT  | TGT | TAC | TAT | CTT | GC | ACT | GCC | AT  | CAG | CAC | GGT | AT  | GAA | ATT | TCC | AGT | CC | CT | C | 7753 |

| Majority          | ACAT | CCT  | CT   | TA   | TGC  | CT   | GTT  | TAT-- | CTT   | GT  | CT | TTTT | GAT  | TAT | AG  | AC  | ATT | CT  | AG  | TG  | TAT | AT  | GAA | GT  | AT | TT | CAT | TG  | TG  |      |      |      |
|-------------------|------|------|------|------|------|------|------|-------|-------|-----|----|------|------|-----|-----|-----|-----|-----|-----|-----|-----|-----|-----|-----|----|----|-----|-----|-----|------|------|------|
|                   | 9930 | 9940 | 9950 | 9960 | 9970 | 9980 | 9990 | 10000 |       |     |    |      |      |     |     |     |     |     |     |     |     |     |     |     |    |    |     |     |     |      |      |      |
| Human             | ACAT | CCT  | CT   | TA   | TGC  | CT   | GTT  | TAT-- | CTT   | GT  | CT | TTTT | GAT  | TAT | AG  | AC  | ATT | CT  | AG  | TG  | TAT | AT  | GAA | GT  | AT | TT | CAT | TG  | TG  | 6552 |      |      |
| Coquerel'sSifaka  | ACAT | CCT  | CT   | CT   | AG   | GC   | CT   | GTT   | TAT   | TG  | CT | TG   | CT   | AT  | TT  | GG  | TAT | AG  | AC  | ATT | CT  | AG  | TGG | TG  | TG | AG | TGG | TAT | CT  | TACT | TG   | 6269 |
| Ma'sNightMonkey   | ACAT | CCT  | CT   | CT   | AG   | GC   | CT   | GTT   | TGT-- | CTT | GT | CT   | TTTT | GAT | TAT | AG  | GC  | ATT | CT  | AG  | TAT | AT  | AT  | AT  | AG | TG | AT  | AG  | TTC | CAT  | TG   | 6525 |
| VervetAGM         | ACAT | CCT  | TT   | CT   | AA   | TGC  | CT   | GTT   | TAT-- | CTT | GT | CT   | TTTT | GAT | TG  | CAG | AC  | GT  | TCT | CG  | TG  | TAT | AT  | GAA | GT | AT | TT  | CAT | TG  | TG   | 6856 |      |
| Gorilla           | ACAT | CCT  | CT   | TT   | AA   | TGC  | CT   | GTT   | TAC-- | CTT | GT | CT   | TTTT | GAT | TAT | AG  | AC  | ATT | CT  | AG  | TG  | TAT | AT  | GAA | GT | AT | TT  | CAT | TG  | TG   | 8803 |      |
| GrabEatingMacaque | ACAT | CCT  | TT   | CT   | AA   | TGC  | CT   | GTT   | TAT-- | CTT | GT | CT   | TTTT | GAT | TG  | CAG | AC  | ATT | CT  | AG  | TG  | TAT | AT  | GAA | GT | AT | TT  | CAT | TG  | TG   | 7205 |      |
| Macaque           | ACAT | CCT  | TT   | CT   | AA   | TGC  | CT   | GTT   | TAT-- | CTT | GT | CT   | TTTT | GAT | TG  | CAG | AC  | ATT | CT  | AG  | TG  | TAT | AT  | GAA | GT | AT | TT  | CAT | TG  | TG   | 7248 |      |
| PigTailedMacaque  | ACAT | CCT  | TT   | CT   | AA   | TGC  | CT   | GTT   | TAT-- | CTT | GT | CT   | TTTT | GAT | TG  | CAG | AC  | ATT | CT  | AG  | TG  | TAT | AT  | GAA | GT | AT | TT  | CAT | TG  | TG   | 7160 |      |
| Bonobo            | ACAT | CCT  | CT   | TT   | AA   | TGC  | CT   | GTT   | TAT-- | CTT | CT | TTTT | GAT  | TAT | AG  | AC  | ATT | CT  | AG  | TG  | TAT | AT  | GAA | GT  | AT | TT | CAT | TG  | TG  | 7484 |      |      |
| OliveBaboon       | ACAT | CCT  | TT   | CT   | AA   | TGC  | CT   | GTT   | TAT-- | CTT | GT | CT   | TTTT | GAT | TG  | CAG | AC  | ATT | CT  | AG  | TG  | TAT | AT  | GAA | GT | AT | TT  | CAT | TG  | TG   | 6609 |      |
| Orangutan         | ACAT | CCT  | CT   | CT   | AA   | TGC  | CT   | GTT   | TAT-- | CTT | GT | CT   | TTTT | GAT | TAT | AG  | AC  | ATT | CT  | AG  | TG  | TAT | AT  | GAA | GT | AT | TT  | CAT | TG  | TG   | 7830 |      |

| Majority          | GTTT  | TA    | ATT   | TG    | CA    | TTC   | CT    | CT    | TA | AT | CT | AT | AT | CT | AT | CT | TTT | CA | TG | CT   | TTTT | TG | CA | ACT  | GT  | TAC | CT  | TT  | GG | TG | AA |      |      |    |      |    |      |   |    |      |
|-------------------|-------|-------|-------|-------|-------|-------|-------|-------|----|----|----|----|----|----|----|----|-----|----|----|------|------|----|----|------|-----|-----|-----|-----|----|----|----|------|------|----|------|----|------|---|----|------|
|                   | 10010 | 10020 | 10030 | 10040 | 10050 | 10060 | 10070 | 10080 |    |    |    |    |    |    |    |    |     |    |    |      |      |    |    |      |     |     |     |     |    |    |    |      |      |    |      |    |      |   |    |      |
| Human             | GTTT  | TA    | ATT   | TG    | CA    | TTC   | CT    | CT    | TA | AT | CT | AT | AT | CT | AT | CT | TTT | CA | TG | CT   | TTTT | TG | CA | ACT  | GT  | TAC | CT  | TT  | GG | TG | AA | 6632 |      |    |      |    |      |   |    |      |
| Coquerel'sSifaka  | GTTT  | T     | CAT   | T     | TG    | CA    | T     | T     | CT | TA | AT | CT | TG | AT | TG | AA | C   | AG | CT | TTTT | T    | AT | G  | C    | ACT | TTT | TG  | G   | C  | AG | CT | AT   | TAC  | CT | TT   | G  | AT   | G | AA | 6349 |
| Ma'sNightMonkey   | -TTT  | TA    | ATT   | TG    | CT    | TT    | CT    | CT    | CA | TG | G  | CT | TG | AT | TG | AA | C   | AT | CT | TTT  | CA   | TG | CT | TTTT | TG  | CA  | ACT | GT  | T  | AG | CT | TT   | G    | G  | TG   | AA | 6604 |   |    |      |
| VervetAGM         | GTTT  | TA    | ATT   | TG    | CA    | TTC   | CT    | CT    | TA | AT | CT | AT | AT | CT | AT | CT | TTT | CA | TG | CT   | TTTT | T  | AT | G    | C   | ACT | GT  | TAC | CT | TT | G  | G    | TG   | AA | 6936 |    |      |   |    |      |
| Gorilla           | GTTT  | TA    | ATT   | TG    | CA    | TTC   | CT    | CT    | TA | AT | CT | AT | AT | CT | AT | CT | TTT | CA | TG | CT   | TTTT | TG | CA | ACT  | GT  | TAC | CT  | TT  | G  | G  | TG | AA   | 8883 |    |      |    |      |   |    |      |
| GrabEatingMacaque | GTTT  | TA    | ATT   | TG    | CA    | TTC   | CT    | CT    | TA | AT | CT | AT | AT | CT | AT | CT | TTT | CA | TG | CT   | TTTT | TG | CA | ACT  | GT  | TAC | CT  | TT  | G  | G  | TG | AA   | 7285 |    |      |    |      |   |    |      |
| Macaque           | GTTT  | TA    | ATT   | TG    | CA    | TTC   | CT    | CT    | TA | AT | CT | AT | AT | CT | AT | CT | TTT | CA | TG | CT   | TTTT | TG | CA | ACT  | GT  | TAC | CT  | TT  | G  | G  | TG | AA   | 7328 |    |      |    |      |   |    |      |
| PigTailedMacaque  | GTTT  | TA    | ATT   | TG    | CA    | TTC   | CT    | CT    | TA | AT | CT | AT | AT | CT | AT | CT | TTT | CA | TG | CT   | TTTT | TG | CA | ACT  | GT  | TAC | CT  | TT  | G  | G  | TG | AA   | 7240 |    |      |    |      |   |    |      |
| Bonobo            | GTTT  | TA    | ATT   | TG    | CA    | TTC   | CT    | CT    | TA | AT | CT | AT | AT | CT | AT | CT | TTT | CA | TG | CT   | TTTT | TG | CA | ACT  | GT  | TAC | CT  | TT  | G  | G  | TG | AA   | 7564 |    |      |    |      |   |    |      |
| OliveBaboon       | GTTT  | TA    | ATT   | TG    | CA    | TTC   | CT    | CT    | TA | AT | CT | AT | AT | CT | AT | CT | TTT | CA | TG | CT   | TTTT | TG | CA | ACT  | GT  | TAC | CT  | TT  | G  | G  | TG | AA   | 6689 |    |      |    |      |   |    |      |
| Orangutan         | GTTT  | TA    | ATT   | TG    | CA    | TTC   | CT    | CT    | TA | AT | CT | AT | AT | CT | AT | CT | TTT | CG | GT | CT   | TTTT | TG | CA | ACT  | GT  | TAC | CT  | TT  | G  | G  | TG | AA   | 7910 |    |      |    |      |   |    |      |

Tuesday, May 03, 2022 06:14 PM

|                   |                                                                                 |      |
|-------------------|---------------------------------------------------------------------------------|------|
| Majority          | GTGCTGTTTATATCTTTTGCCCAATTTTTATTTGGTTATTTATTTTAAATGAGTTTGGAGAGGTCTTCATTGTGGTT   |      |
|                   | 10090 10100 10110 10120 10130 10140 10150 10160                                 |      |
| Human             | GTGCTGTTTATATCTTTAGCCCAATTTTTATTTGGTTATTTATTTTAAATGAGTTTGGAGAGGTCTTCATTGTGGTT   | 6712 |
| Coquerel'sSifaka  | GTGCTGTTTAAAT-T---CCCACTTCTTAT-GGGTTATTTCTTTTTCTTGAGTTTGGACAGGTCTTCATTGTGGTT    | 6423 |
| Ma'sNightMonkey   | GTGCTGTTTATATCTTTTGCCCAATTTTTATTTGGTTATTTATTTTAAATGTGTTTGGAGAGGTCTTCATTCTGGTT   | 6684 |
| VervetAGM         | GTGTGTGTTTATATCTTTTGCCCAATTTTTATTTGGTTGTTTATTTTAAATGAGTTTGGAGAGGTCTTCATTGTGGTT  | 7016 |
| Gorrilla          | GTGCTGTTTATATCTTTAGCCCAATTTTTATTTGGTTATTTATTTTAAATGAGTTTGGAGAGGTCTTCATTGTGGTT   | 8963 |
| GrabEatingMacaque | GTGTGTGTTTATATCTTTTGCCCAATTTTTATTTGGTGGTTTATTTTAAATGAGTTTGGAGAGGTCTTCATTGTGGTT  | 7365 |
| Macaque           | GTGTGTGTTTATATCTTTTGCCCAATTTTTATTTGGTGGTTTATTTTAAATGAGTTTGGAGAGGTCTTCATTGTGGTT  | 7408 |
| PigTailedMacaque  | GTGTGTGTTTATATCTTTTGCCCGATTTTTATTTGGTGGTTTATTTTAAATGAGTTTGGAGAGGTCTTCATTGTGGTT  | 7320 |
| Bonobo            | GTGCTGTTTATATCTTTAGCCCAATTTTTATTTGGTTATTTATTTTAAATGAGTTTGGAGAGGTGTTTATTGTGGTT   | 7644 |
| OliveBaboon       | GTGCTGTTTATATCTTTTGCCCAATTTTTATTTGGTTGTTTATTTTAAATGAGTTTGGAGAGGTCTTCATTGTGGTT   | 6769 |
| Orangutan         | GTGCTGTTTATATCTTTTGCCCAATTTATTTATTTGGTTATTTATTTTAAATGAGTTTGGAGAGGTCTTCATTGTGGTT | 7990 |

|                   |                                                                                  |      |
|-------------------|----------------------------------------------------------------------------------|------|
| Majority          | ATAAGTCCTTTATCAGATATATGGCCTGCAAATATTTTCTGCCACTCGTCTTCTCGTTCTCAGCATTGCTCTTTGAAGAG |      |
|                   | 10170 10180 10190 10200 10210 10220 10230 10240                                  |      |
| Human             | ACAAGTCCTTTATCAGCCATAAAGCCTGCAAATATTTTCTGCCACTCATCTTCTTATTCTC-GCATTGCTCTTTGAAGAG | 6791 |
| Coquerel'sSifaka  | ACAAGTCCTGTGCCAGATAAATGGTTTGCATATATTTTCTGCCACTGTCTTTTCTTCTCAGCAGTGTCTTTGAAGAG    | 6503 |
| Ma'sNightMonkey   | GTAAGTCCTTTATCAGATATATGGCCTGCAAATATTTTCTGCCACTTATCTTTTATTCTCAGCATTGCTCTTTGAAGAA  | 6764 |
| VervetAGM         | ATAAGTCCTTTATCAGATATATGGCCTGCAAATCTTTTCTGCCACTCGTCTTCTCGTTCTCAGCATTGCTCTTTGAAGAG | 7096 |
| Gorrilla          | ATAAGTCCTTTATCAGCTATATGGCCTGCAAATATTTTCTGCCACTCATCTTCTTCTTCTC-GCATTGCTCTTTGAAGAG | 9042 |
| GrabEatingMacaque | ATAAGTCCTTTATCAGATATATGGCCTGCAAATCTTTTCTGCCACTCGTCTTCTCGTTCTCAGCATTGCTCTTTGAAGAG | 7445 |
| Macaque           | ATAAGTCCTTTATCAGATATATGGCCTGCAAATCTTTTCTGCCACTCGTCTTCTCGTTCTCAGCATTGCTCTTTGAAGAG | 7488 |
| PigTailedMacaque  | CTAAGTCCTTTATCAGATATATGGCCTGCAAATCTTTTCTGCCACTCGTCTTCTCGTTCTCAGCATTGCTCTTTGAAGAG | 7400 |
| Bonobo            | ACAAGTCCTTTATCAGCTATATGGCCTGCAAATATTTTCTGCCACTCATCTTCTTATTCTC-GCATTGCTCTTTGAAGAG | 7723 |
| OliveBaboon       | ATAAGTCCTTTATCAGATATATGGCCTGCAAATCTTTTCTGCCACTCGTCTTCTCGTTCTCAGCATTGCTCTTTGAAGAG | 6849 |
| Orangutan         | ATAAGTCCTTTATCAGATATATGGCCTGGAAATATTTTCTGCCACTCATCTTCTCATTCTCAGCATTGCTCTTTGAAGAG | 8070 |

|                   |                                                                                 |      |
|-------------------|---------------------------------------------------------------------------------|------|
| Majority          | CAACAGTTATTAATCTTATGGACTCCAGTTTACCAATTTTTCTTTTATGGATTGTGGTTTTGGGGTCTTGTCTGAGCC  |      |
|                   | 10250 10260 10270 10280 10290 10300 10310 10320                                 |      |
| Human             | CAACAGTTATTAATCTGATGGACTCCAGTTTACCAATTTTTCTTTTATGGATTGTAGTTTTGGGGTCTTGTCTGAGCC  | 6871 |
| Coquerel'sSifaka  | CAGCAGTTA---TTCTCATGGACTCCGGTTTACCAGTTTTTCTTTTGTGGATTGTGCTTTTGGTGTACATCTAAAAC   | 6579 |
| Ma'sNightMonkey   | CAACAGTTATTAATTATGATGGAGTCCAGTTTACCAATTTTTCTTTTATGGATTATACTTTCGTGGTTTTGTCTGAGCC | 6844 |
| VervetAGM         | CAACTGTTACTAATCTTGTGGACTCCAGTTTACCAGTTTTTCTTTTATGGATTGTGGTTTTGGGGTCTTGCCTGAGCC  | 7176 |
| Gorrilla          | CAACAGTTATTAATCTGATGGACTCCAGTTTACCAAGTTTTTCTTTTATGGATTGTAGTTTTGGGGTCTTGTCTGAGCC | 9122 |
| GrabEatingMacaque | CAACTGTTACTAATCTTGTGGACTCCAGTTTACCAAGTTTTTCTTTTATGGATTGTGGTTTTGGGGTCTTGCCTGAGCC | 7525 |
| Macaque           | CAACTGTTACTAATCTTGTGGACTCCAGTTTACCAAGTTTTTCTTTTATGGATTGTGGTTTTGGGGTCTTGCCTGAGCC | 7568 |
| PigTailedMacaque  | CAACTGTTACTAATCTTGTGGACTCCAGTTTACCAAGTTTTTCTTTTATGGATTGTGGTTTCGGGGTCTTGCCTGAGCC | 7480 |
| Bonobo            | CAACAGTTATTAATCTGATGGACTCCAGTTTACCAATTTTTCTTTTATGGATTGTAGTTTTGGGGTCTTGTCTGAGCC  | 7803 |
| OliveBaboon       | CAACTGTTACTAATCTTGTGGACTCCAGTTTACCAAGTTTTTCTTTTATGGATTGTGGTTTTGGGGTCTTGCCTGAGCC | 6929 |
| Orangutan         | CAACAGTTATTAATCTGATGGACTCCAGTTTACCAATTTTTCTTTTATGGATTGTAGTTTTGGGGTCTTGTCTGAGCC  | 8150 |

Tuesday, May 03, 2022 06:14 PM

|                   |                                                                                     |      |
|-------------------|-------------------------------------------------------------------------------------|------|
| Majority          | AT-TTTTGCCTAACTGTAAGCCATGAAGATTTTTT-CCTTTTGTGTTGTTAATAATAATA---A--A---TAATT--TTTT   |      |
|                   | 10330 10340 10350 10360 10370 10380 10390 10400                                     |      |
| Human             | AT-TTTTGCCTGACTGTAAGCCATGAAGATTTTTTTCCTTTTGTGTTGTTAATAATAATA---A-----TAATT--TTTT    | 6939 |
| Coquerel'sSifaka  | TTCTTTTGCCTAACCTAAATTCACAAAGATTTTCT--CCTTTGTTTTCTAATA-----                          | 6630 |
| Ma'sNightMonkey   | AT-CTTTGCCTAACTGTAAGTCATGAAGATTTTTT-CCTTTTGTGTTAATAATAATAATT-----T---TTTTTTTTTTT    | 6912 |
| VervetAGM         | AT-TTTTGCCTAACTGTAAGCCATGAAGATTTTTT-CCTTTTGTGTTGTTAATAATAATAAAAAATAATAATAATAATTTTT  | 7254 |
| Gorilla           | AT-TTTTGCCTGACTGTAAGCCATGAAGATTTTTTTCCTTTTGTGTTGTTAATAATAATA---A-----TAATT--TTTT    | 9190 |
| GrabEatingMacaque | AT-TTTTGCCTAACTGTAAGCCATGAAGATTTTTT-CCTTCTGTTTGTGTTAATAATAATAAAAAATAATAATAATAATATT  | 7603 |
| Macaque           | AT-TTTTGCCTAACTGTAAGCCATGAAGATTTTTT-CCTTCTGTTTGTGTTAATAATAATAAAAAATAATAATAATAATATT  | 7646 |
| PigTailedMacaque  | AT-TTTTGCCTAACTGTAAGCCATGAAGATTTTTT-CCTTCTGTTTGTGTTAATAATAATAAAAAATAATAATAATT---TTT | 7555 |
| Bonobo            | AT-TTTTGCCTGACTGTAAGCCATGAAGATTTTTTTCCTTCTGTTTGTGTTAATAATAATA---A-----TAATT--TTTT   | 7871 |
| OliveBaboon       | AT-TTTTGCCTAACTGTAAGCCATGAGGATTTTTT-CCTTCTGTTTGTGTTAATAATAATAAAAAATAATAATAATAATTTTT | 7007 |
| Orangutan         | AT-TTTTGCCTGACTGTAAGCCATGAAGATTTTTTTCCTTTTGTGTTGTTAATAATAAT-----TT--TTTT            | 8213 |

|                   |                                                                                  |      |
|-------------------|----------------------------------------------------------------------------------|------|
| Majority          | TTTAGAGACAGGGCCTGACT--GTCACCCAGGCTGGAGTGCAGTGGTGAATCGTAGCTCAGGATAATCTTGAACTCCTG  |      |
|                   | 10410 10420 10430 10440 10450 10460 10470 10480                                  |      |
| Human             | TTTAGAGACAGGACCTGACTCTGTACACCCAGCTGGAGTGCAGTGGTGAATCGTAGCTCATGATAACCTTGAACTCCTG  | 7019 |
| Coquerel'sSifaka  | -----GCA---GT-----                                                               | 6635 |
| Ma'sNightMonkey   | TTAAGAGACAGGGTCTGACTCTGTCAATCAGGCTGGAGTACAGTGGTGAATCATAGCTCACAATTACCTTGAACTCCTG  | 6992 |
| VervetAGM         | TTTAGAGACAGGGCCTG-----TCACCCAGGCTGAAGTGAATGGTGAATCGTAGCTCAGAATAATCTTGAACTCCTG    | 7328 |
| Gorilla           | TTTAGAGACAGGACCTGACT--GTCACCCAGCTGGAGTGCAGTGGTGAATCGTAGCTCATGATAACCTTGAACTCCTG   | 9268 |
| GrabEatingMacaque | TTTAGAGACAGGGCCTG-----TCACCCAGGCTGAAGTGAATGGTGAATCGTAGCTCAGGATAATCTTGAACTCCTG    | 7677 |
| Macaque           | TTTAGAGACAGGGCCTG-----TCACCCAGGCTGAAGTGCAGTGGTGAATCGTAGCTCAGGATAATCTTGAACTCCTG   | 7720 |
| PigTailedMacaque  | TTTAGAGACAGGGCCTGACT--GTCACCCAGGCTGAAGTGCAGTGGTGAATCGTAGCTCAGGATAATCTTGAACTCCTG  | 7633 |
| Bonobo            | TTTAGAGACAGGACCTGACTCTGTACACCCAGCTGGAGTGCAGTGGTGAATCGTAGCTCATGATAACCTTGAACTCCTG  | 7951 |
| OliveBaboon       | TTTAGAGACAGGGCCTGACT--GTCACCCAGGCTGAAGTGAATGGTGAATCGTAGCTCAGGATAATCTTGAACTCCTG   | 7085 |
| Orangutan         | TTTAGAGACAGGGCCTGACTCTGTACACCCAGGCTGGAGTGCAGTGGTGAATCGTAGCTCAGGATAATCTTGAACTCCTG | 8293 |

|                   |                                                                                  |      |
|-------------------|----------------------------------------------------------------------------------|------|
| Majority          | GACACAAGGGCTCCTGCTTCAGCCTCCCAAGTAGCTAGTACTACAGGCACACAGCACCATGCTCAGCTAATTTTTAAATT |      |
|                   | 10490 10500 10510 10520 10530 10540 10550 10560                                  |      |
| Human             | GACACAAGGGCTCCTGCTTCAGCCTCCCAAGTAGCTAGGACTATAGGCACACAGCACCATGCCAGCTAACTTTTTAAATT | 7099 |
| Coquerel'sSifaka  | -----                                                                            | 6635 |
| Ma'sNightMonkey   | G-----G-----CCTTGGCCTCCCAAGTAGCTAGGACTACAGGCACACAGCACCAGCCAGCTCATTTTTACTTT       | 7058 |
| VervetAGM         | GACACAAGGGCTTCTGCTTCAGCCTCCCAAGTAGCTAGTACTACAGGCACACAGCACCATGCTCAGCTGATTTTTAAATT | 7408 |
| Gorilla           | GACACAAGGGCTCCTGCTTCAGCCTCCCAAGTAGCTAGGACTATAGGCACACAGCACCATGCCAGCTAATTTTTAAATT  | 9348 |
| GrabEatingMacaque | GACACAAGGGCTCCTGCTTCAGCCTCCCAAGTAGCTAGTACTACAGGCACACAGCACCATGCTCAGCTAATTTTTAAATT | 7757 |
| Macaque           | GACACAAGGGCTCCTGCTTCAGCCTCCCAAGTAGCTAGTACTACAGGCACACAGCACCATGCTCAGCTAATTTTTAAATT | 7800 |
| PigTailedMacaque  | GACACAAGGGCTCCTGCTTCAGCCTCCCAAGTAGCTAGTACTACAGGCACACAGCACCATGCTCAGCTAATTTTTAAATT | 7713 |
| Bonobo            | GACACAAGGGCTCCTGCTTCAGCCTCCCAAGTAGCTAGGACTATAGGCACACAGCACCATGCCAGCTAATTTTTAAATT  | 8031 |
| OliveBaboon       | GACACAAGG-CTCCTGCTTCAGCCTCCCAAGTAGCTAGTACTACAGGCACACAGCACCATGCTCAGCTAATTTTTAAATT | 7164 |
| Orangutan         | GACACAAGGGCTCCTACTTCAGCCTCCCAAGTAGGACTACAGGCACACACCACCATGCCAGCTAATTTTTAAATT      | 8373 |

Tuesday, May 03, 2022 06:14 PM

|                   |                                                                                  |      |
|-------------------|----------------------------------------------------------------------------------|------|
| Majority          | TTTTATAGACCTGGTGTCTGTCTGTTTTGCCAGGCTGGTCTTGAACCTCTGGCCTCAAGCAGTCTTTCTGCCTCAGCCT  |      |
|                   | 10570 10580 10590 10600 10610 10620 10630 10640                                  |      |
| Human             | TTTTATAGACCCGGGTCTCTCTGTTTTGCCAGGCTGGTGTGAACCTCTGGCCTCAAGCGATCTTTCTGCCTCAGCCT    | 7179 |
| Coquerel'sSifaka  | -----                                                                            | 6635 |
| Ma'sNightMonkey   | TTTTATAGACCTGGTGTCTCTATATTTTGGCCAGGCTAGTCTTGAACCCCTGGCCTCAAGCCATCTTTCTGCCTCAGCCT | 7138 |
| VervetAGM         | TTTTATAGACCTAGTGTCTGTCTGTTTTGCCAGGCTGGTCTTGAACCTCTGGCCTCAAGCAGTCTTTCTGCCTCAGCCT  | 7488 |
| Gorilla           | TTTTATAGACCTAGGGTCTCTCTGTTTTGCCAGGCTGGTGTGAACCTCTGGCCTCAAGCGATCTTTCTGCCTCAGCCT   | 9428 |
| GrabEatingMacaque | TTTTATAGACCTGGTGTCTGTCTGTTTTGCCAGGCTGGTCTTGAACCTCTGGCCTCAAGCAGTCTTTCTGCCTCAGCCT  | 7837 |
| Macaque           | TTTTATAGACCTGGTGTCTGTCTGTTTTGCCAGGCTGGTCTTGAACCTCTGGCCTCAAGCAGTCTTTCTGCCTCAGCCT  | 7880 |
| PigTailedMacaque  | TTTTATAGACCTGGTGTCTGTCTGTTTTGCCAGGCTGGTCTTGAACCTCTGGCCTCAAGCAGTCTTTCTGCCTCAGCCT  | 7793 |
| Bonobo            | TTTTATAGACCCGGGTCTCTCTGTTTTGCCAGGCTGGTGTGAACCTCTGGCCTCAAGTATCTTTCTGCCTCAGCCT     | 8111 |
| OliveBaboon       | TTTTATAGACCTGGTGTCTGTCTGTTTTGCCAGGCTGGTCTTGAACCTCTGGCCTCAAGCAGTCTTTCTGCCTCAGCCT  | 7242 |
| Orangutan         | TTTTATAGACCCGGGTCTCT--GTTTTGCCAGGCTGGTGTGAACCTCTGGCCTCAAGCGATCTTTCTGCCTCAGCCT    | 8451 |

|                   |                                                                                |      |
|-------------------|--------------------------------------------------------------------------------|------|
| Majority          | TCCAAAGTGTGGGATTAAGGCATGAGCCACTGCCCTTGGCCACCTTT-TTTTCTAATAGAAGTTTTATACTTTGGTTT |      |
|                   | 10650 10660 10670 10680 10690 10700 10710 10720                                |      |
| Human             | TCCAAAGTGTGGGATTAAGGCATGAGCCACTACACTTGGCCACCTTTGTTTTCTAATAGAAGTTTTATACTTTGGTTT | 7259 |
| Coquerel'sSifaka  | -----TT-----TTTGATTCTGATGT                                                     | 6652 |
| Ma'sNightMonkey   | TCCAAAGTGTGGGATTAAGGCATGAGCCACTGCACTTGGCCACCTTTGTTTTCTAATGGAAGTTTTATACTTCGGTTT | 7218 |
| VervetAGM         | TCCAAAGTGTGGGATTAAGGAATGAGCCACTGCCCTTGGCCACCTTT-TTTTCTAATAGAAGTTTTTACTTTGGTTT  | 7567 |
| Gorilla           | TCCAAAGTGTGGGATTAAGGCATGAGCCACTACACTTGGCCACCTTTGTTTTCTAATAGAAGTTTTATGCTTTGGTTT | 9508 |
| GrabEatingMacaque | TCCAAAGTGTGGGATTAAGGAATGAGCCCGTGCCCTTGGCCACCTTT-TTTTCTAATAGAAGTTTTATACTTTGGTTT | 7916 |
| Macaque           | TCCAAAGTGTGGGATTAAGGAATGAGCCCGTGCCCTTGGCCACCTTT-TTTTCTAATAGAAGTTTTATACTTTGGTTT | 7959 |
| PigTailedMacaque  | TCCAAAGTGTGGGATTAAGGAATGAGCCCGTGCCCTTGGCCACCTTT-TTTTCTAATAGAAGTTTTATACTTTGGTTT | 7872 |
| Bonobo            | TCCAAAGTGTGGGATTAAGGCATGAGCCACTACACTTGGCCACCTTTGTTTTCTAATAGAAGTTTTATACTTTGGTTT | 8191 |
| OliveBaboon       | TCCAAAGTGTGGGATTAAGGAATGAGCCACTGCCCTTGGCCACCTTT-TTTTCTAATAGAAGTTTTATACTTTGGTGT | 7321 |
| Orangutan         | TCCAAAGTGTGGGATTAAGGCATGAGCCACTATACTTGGCCACCTTTGTTTTCTAATAGAAGTTTTATACTTTGGTTT | 8531 |

|                   |                                                                                   |      |
|-------------------|-----------------------------------------------------------------------------------|------|
| Majority          | AACATTTAGG-TCTCTTTCATTTTGACTTAATATTTTGAATATGGTACAAAAGTGTGGGTCAGAAGTATTTGGTTTTGCAT |      |
|                   | 10730 10740 10750 10760 10770 10780 10790 10800                                   |      |
| Human             | AACATTTGGG-TCTCTTTCATTTTGACTTAATATTTTGAATATGGTACAAAAGTGTGGGTCAGAAGTATTTGGTTTTGCAT | 7338 |
| Coquerel'sSifaka  | AACATTAGGTCTCTGTCCATTTTGGATTAATATTTTGGATATGGTACAAAAG---GGGTC-----TTGGTTTGAGAT     | 6721 |
| Ma'sNightMonkey   | AGCATTTAGG-TCTCTTTCATTTTGACTTAATATTTTGAATATGGTACAAAATTTGGGTCAGAAGTATTTAGTTTTGCAT  | 7297 |
| VervetAGM         | AACATTTAGG-TCTCTTTCATTTTGACTTAATATTTTGAATATGGCACAAGTGTGGGTCAGAAGTATTTGGTTTTGCAT   | 7646 |
| Gorilla           | AACATTTGGG-TCTCTTTCATTTTGACTTAATATTTTGAATATGGTACAAAAGTGTGGGTCAGAAGTATTTGGTTTTGCCT | 9587 |
| GrabEatingMacaque | AACATTTAGG-TCTCTTTCATTTTGACTTAATATTTTGAATATGGTACAAAAGTGTGGGTCAGAAGTATTTGGTTTTGCAT | 7995 |
| Macaque           | AACATTTAGG-TCTCTTTCATTTTGACTTAATATTTTGAATATGGTACAAAAGTGTGGGTCAGAAGTATTTGGTTTTGCAT | 8038 |
| PigTailedMacaque  | AACATTTAGG-TCTCTTTCATTTTGACTTAATATTTTGAATATGGTACAAAAGTGTGGGTCAGAAGTATTTGGTTTTGCAT | 7951 |
| Bonobo            | AACATTTGGG-TCTCTTTCATTTTGACTTAATATTTTGAATATGGTACAAAAGTGTGGGTCAGAAGTATTTGGTTTTGCAT | 8270 |
| OliveBaboon       | AACATTTAGG-TCTCTTTCATTTTGACTTAATATTTTGAATATGGTACAACTGTGGGTCAGAAGTATTTGGTTTTGCAT   | 7400 |
| Orangutan         | AACATTTAGG-TCTCTTTCATTTTGACTTAATATTTTGAATATGGTACAAAAGTGTGGGTCAGAAGTATTTGGTTTTGCAT | 8610 |

Tuesday, May 03, 2022 06:14 PM

|                   |                                                                                 |      |
|-------------------|---------------------------------------------------------------------------------|------|
| Majority          | GGGGACATCCAGTGTTTACAGCATCATTGTTGAAAAGACTATCCTTTCTCCATTCACTTGGCTTTGCAGCTTCATGAAA |      |
|                   | 10810 10820 10830 10840 10850 10860 10870 10880                                 |      |
| Human             | GGGGATATCCAGTGTTTACAGCATCATTGTTGAAAAGACTATCCTTTCTCCATTCACTTGGCTTTGCAGCTTCATGAAA | 7418 |
| Coquerel'sSifaka  | GTGGACATCTAGTGTTTCCAGCATCATTGGTAAAAAGACTATCCTTTCTCCATTGAATTGGCTTTGCAGCTTTGTCAA  | 6801 |
| Ma'sNightMonkey   | GTTGACATCCAGTGTTTACAACGTCATTTATTGAAAAGACTGTCTTTCTCCATTCACTTGTCTTTGCAACTTCATGAAA | 7377 |
| VervetAGM         | GGGGACATCCAGTGTTTACAGCATATTGTTGAAAAGACTATCCTTTCTCCATTCACTTGGCTTTGCAGCTTCATGAAA  | 7726 |
| Gorilla           | GGGGATATCCAGTGTTTACAGCATCATTGTTGAAAAGACTATCCTTTCTCCATTCACTTGGCTTTGCAGCTTCATGAAA | 9667 |
| GrabEatingMacaque | GGGGACATCCAGTGTTTACAGCATATTGTTGAAAAGACTATCCTTTCTCCATTCACTTGGCTTTGCAGCTTCATGAAA  | 8075 |
| Macaque           | GGGGACATCCAGTGTTTACAGCATATTGTTGAAAAGACTATCCTTTCTCCATTCACTTGGCTTTGCAGCTTCATGAAA  | 8118 |
| PigTailedMacaque  | GGGGACATCCAGTGTTTACAGCATATTGTTGAAAAGACTATCCTTTCTCCATTCACTTGGCTTTGCAGCTTCATGAAA  | 8031 |
| Bonobo            | GGGGATATCCAGTGTTTACAGCATCATTGTTGAAAAGACTATCCTTTCTCCATTCACTTGGCTTTGCAGCTTCATGAAA | 8350 |
| OliveBaboon       | GGGGACATCCAGTGTTTACAGCATATTGTTGAAAAGACTATCCTTTCTCCCTTCACTTGGCTTTGCAGCTTCATGAAA  | 7480 |
| Orangutan         | GGGGACATCCAGTATTACAGCATCATTGTTGAAAAGACTATCCTTTCTCCATTCACTTAGCTTTGCAGCTTCATGAAA  | 8690 |

|                   |                                                                                  |      |
|-------------------|----------------------------------------------------------------------------------|------|
| Majority          | AATCAGTTATCTCTGTATGTATGATTATATGTCTGTACTCTATTCTTTTGTATTGACCCATTTTCCTTTATCTAGATGTT |      |
|                   | 10890 10900 10910 10920 10930 10940 10950 10960                                  |      |
| Human             | AATCACTTATGTCTGTATGTGTGATTTTATGTCTGTACTCT---TTTTTGTATTGACCCATTTTCCTTTATCTAGATGCT | 7495 |
| Coquerel'sSifaka  | AATCAAT--TCTCTATACGT---ATTGTATTTCTGTACTCT---TTTTCCATTGACTATTTTCTTTACCTAGATGTC    | 6872 |
| Ma'sNightMonkey   | AATCGGTTATCTCTATATGTATGATTATGTGTCTGTACTCTACTCTTTTGTGTTGACCCATTTTCCTTTATCTAGATGCT | 7457 |
| VervetAGM         | AATCAGTTATCTCTGTATGTATGATTATATGTCTGTACTCTATTCTTTTGTATTGACCCATTTTCCTTTA---GATGTT  | 7802 |
| Gorilla           | AATCAGTAATCTCTGTATGTGTGATTTTATGTCTGTACTCTACTTTTTTGTATTGACCCATTTTCCTTTATCTAGATGCT | 9747 |
| GrabEatingMacaque | AATCAGTTATCTCTGTATGTATGATTATATGTCTGTACTCTATTCTTTTGTATTGACCCATTTTCCTTCA---GATGTT  | 8151 |
| Macaque           | AATCAGTTATCTCTGTATGTATGATTATATGTCTGTACTCTATTCTTTTGTATTGACCCATTTTCCTTCA---GATGTT  | 8194 |
| PigTailedMacaque  | AATCAGTTATCTCTGTATCTATGATTATATGTCTGTACTCTATTCTTTTGTATTGACCCATTTTCCTTTA---GATGTT  | 8107 |
| Bonobo            | AATCAGTTATCTCTGTATGTGTGATTTTATGTCTGTACTCTACTTTTTTGTATTGACCCATTTTCCTTTATCTAGATGCT | 8430 |
| OliveBaboon       | AATCAGTTATCTCTGTATGTATGATTATATGTCTGTACTCTATTCTTTTGTATTGACCCATTTTCCTTTA---GATGTT  | 7556 |
| Orangutan         | AATCAGTTATCTGTGTGTATGATTTTATGTCTGTACTCTACTTTTTTGTATTGACCCATTTTCCTTTATCTAGATGCT   | 8770 |

|                   |                                                                                     |      |
|-------------------|-------------------------------------------------------------------------------------|------|
| Majority          | AGAAACATACTGTCTTAAATCATTGTAGCTTTTATATTGAGTCTTGAAACCACTTA--CTTAGTCTTGGCCCTCCAACCTCTG |      |
|                   | 10970 10980 10990 11000 11010 11020 11030 11040                                     |      |
| Human             | GGAAACATACTGTCTTAAATCATTGTAGCTTTTATATTGAGTCTTGAAACCACTTA--CTTAGTCTTGGCCCTCCAACCTCTG | 7573 |
| Coquerel'sSifaka  | AAAAACATACTGTCTTAAATCACTGTAGCTTTTATATTGAGTCTTGAAACCACTTGAATTTGATTTTGGTCTTCAACTTAG   | 6952 |
| Ma'sNightMonkey   | AGAAACATACTGTCTTAAATCATTGTAGCTTTGATTGAGTCTTGAAA---CCA--CTTAGTCTGGACCTCCAGCTCTG      | 7531 |
| VervetAGM         | AGAAACATACTGTCTTAAATCATTGTAGCTTTATGTCGAGTCTTGAA---CCA--CTTAGTCTTGGCCCTCCAACCTCTG    | 7875 |
| Gorilla           | GGAAACATACTGTCTTAAATCATTGTAGCTTTTATATTGAGTCTTGAAACCACTTA--CTTAGTCTTGGCCCTCCAACCTCTG | 9825 |
| GrabEatingMacaque | AGAAACATACTGTCTTAAATCATTGTAGCTTTTATCAAGTCTTGAAACCACTTA--CTTAGTCTTGGCCCTCCAACCTCTG   | 8229 |
| Macaque           | AGAAACATACTGTCTTAAATCATTGTAGCTTTTATCAAGTCTTGAAACCACTTA--CTTAGTCTTGGCCCTCCAACCTCTG   | 8272 |
| PigTailedMacaque  | AGAAACATACTGTCTTAAATCATTGTAGCTTTTATCAAGTCTTGAAACCACTTA--CTTAGTCTTGGCCCTCCAACCTCTG   | 8185 |
| Bonobo            | GGAAACATACTGTCTTAAATCATTGTAGCTTTTATATTGAGTCTTGAAACCACTTA--CTTAGTCTTGGCCCTCCAACCTCTG | 8508 |
| OliveBaboon       | AGAAACATACTGTCTTAAATCATTGTAGCTTTTATCAAGTCTTGAAACCACTTA--CTTAGTCTTGGCCCTCCAACCTCTG   | 7634 |
| Orangutan         | GGAAACATACTGTCTTAAATCATTGTAGCTTTTATATTGAGTCTTGAAACCACTTA--CTTAGTCTTGGCCCTCCAACCTCTG | 8848 |

Tuesday, May 03, 2022 06:14 PM

|                   |                                                                                   |      |
|-------------------|-----------------------------------------------------------------------------------|------|
| Majority          | TTCTTTTTCAAAAGTTGTTTTTAACTCTTCTGAGTCCTTTGTATTTTCATATGAGTCAGTTTTTACAAAACTGCTTGGAT  |      |
|                   | 11050 11060 11070 11080 11090 11100 11110 11120                                   |      |
| Human             | TTCTTTTTCAAAAGTTGTTTTTAACTCTTCTGAGTCCTTTGTATTTTCATATGAGTCAGTTCTTAGAAAACTGCTTGGAT  | 7653 |
| Coquerel'sSifaka  | TTCTTTTTCAAAAGTTATTTT-GACTCTTCTGAGTCCTTCGTATTTTCTTATGAGTAAGTTTTTAGAAAACTGTTGGAAT  | 7031 |
| Ma'sNightMonkey   | TTGTTTTTCAAAATGTTTTTAACTCTTCTGAGTCCTTGGTATTTTCAT--GAGTCAGTTTTTACAAAACTACTTGGAT    | 7609 |
| VervetAGM         | TTCTTTTTCAAAAGTTGTTTTTAACTCTTCTGAGTCCTTTGTGTTTTTCATATGAGTCAGTTTTTACAAAACTGCTTTGAT | 7955 |
| Gorilla           | TTCTTTTTCAAAAGTTGTTTTTAACTCTTCTGAGTCCTTTGTATTTTCATATGAGTCAGTTTTTACAAAACTGCTTGGAT  | 9905 |
| GrabEatingMacaque | TTCTTTTTCAAAAGTTGTTTTTAACTCTTCTGAGTCCTTTGTATTTTCATATGAGTCAGTTTTTACAAAACTGCTTGGAT  | 8309 |
| Macaque           | TTCTTTTTCAAAAGTTGTTTTTAACTCTTCTGAGTCCTTTGTACTTTTCATATGAGTCAGTTTTTACAAAACTGCTTGGAT | 8352 |
| PigTailedMacaque  | TTCTTTTTCAAAAGTTGTTTTTAACTCTTCTGAGTCCTTTGTATTTTCATATGAGTCAGTTTTTACAAAACTGCTTGGAT  | 8265 |
| Bonobo            | TTCTTTTTCAAAAGTTGTTTTTAACTCTTCTGAGTCCTTTGTATTTTCATATGAGTCAGTTCTTACAAAACTGCTTGGAT  | 8588 |
| OliveBaboon       | TTCTTTTTCAAAAGTTGTTTTTAACTCTTCTGAGTCCTTTGTGTTTTTCATATGAGTCAGTTTTTACAAAACTGCTTGGAT | 7714 |
| Orangutan         | TTCTTTTTCAAAAGTTGTTTTTAACTCTTCTGAATCCTTTATATTTTCATATGAGTCAGTTTTTACAAAACTGCTTGGAT  | 8928 |

|                   |                                                                                   |      |
|-------------------|-----------------------------------------------------------------------------------|------|
| Majority          | TTTACTGGATTTGACTTGAATCTGTAGAGCAA-TTTGGGGAAAATTGTTCATCTTAACAAGTGAGTCTTTCTAACCATGAC |      |
|                   | 11130 11140 11150 11160 11170 11180 11190 11200                                   |      |
| Human             | TTTACTGGATTTGACTTGAATCTGTAGAGCAAATTTGGGGAAAATTTGGCATC-----ATGAC                   | 7710 |
| Coquerel'sSifaka  | TTTATTGGATTTGACTTGAATCTTCAGAGCAA-TTTGGGGAAAATAGACATCTTAACAA-TGTTGAGTCTTATTCATGA-  | 7108 |
| Ma'sNightMonkey   | TTTAGTGGATTTGACTTGAATCTGTAGAGCAA-TTTGAGGAAAATTGTTCATCTTAACAAGTGAGTCTTTCTAACTATGAC | 7688 |
| VervetAGM         | TTTACCGGATTTGACTTGAATCTGTAGAGCAA-TTTGGGGAAAATCGTCATCTTAACAAGTGAGTCTTTCTAACCATGAC  | 8034 |
| Gorilla           | TTTACTGGATTTGACTTGAATCTGTAGAGCAA-TTTGGGGAAAATTTGGCATC-----ATGAC                   | 9961 |
| GrabEatingMacaque | TTTACCGGATTTGACTTGAATCTGTAGAGCAA-TTTGGGGAAAATTGTTCATCTTAACAAGTGAGTCTTTCTAACCATGAC | 8388 |
| Macaque           | TTTACCGGATTTGACTTGAATCTGTAGAGCAA-TTTGGGGAAAATTGTTCATCTTAACAAGTGAGTCTTTCTAACCATGAC | 8431 |
| PigTailedMacaque  | TTTACCGGATTTGACTTGAATCTGTAGAGCAA-TTTGGGGAAAATTGTTCATCTTAACAAGTGAGTCTTTCTAACCATGAC | 8344 |
| Bonobo            | TTTACTGGATTTGACTTGAATCTGTAGAGCAAATTTGGGGAAAGATTTGGCATC-----ATGAC                  | 8645 |
| OliveBaboon       | TTTACCGGATTTGACTTGAATCTGTAGAGCAA-TTTGGGGAAAATTGTTCATCTTAACAAGTGAGTCTTTCTAACCATGAC | 7793 |
| Orangutan         | TTTACTGGATTTGACTTGAATCTGTAGAGCAA-TTTGGGGAAAATTTGGCATC-----ATGAC                   | 8984 |

|                   |                                                                                   |       |
|-------------------|-----------------------------------------------------------------------------------|-------|
| Majority          | TACAGTTGATGTCCTATTA-----GGTCTTTAATTTCTTT-AAGCAGTGTTTTTTTTTTT---CAGTGCACAGGTT      |       |
|                   | 11210 11220 11230 11240 11250 11260 11270 11280                                   |       |
| Human             | TACAATTGATGTCCTATTA-----GGTCTTTAATTTCTTT-AAGCATTTTTTTTTTTTTTT-CAGTGCACACGTT       | 7780  |
| Coquerel'sSifaka  | -ACAGTATATCTCTCCATTTACTTAAGTCTTCTTTAATTTCTTT-AAGCAATGTTTCTAGTTTT---CAGCATAACAGATT | 7183  |
| Ma'sNightMonkey   | TACAATTTATGTCCTATTA-----GATCTTTAATTTCTTT-AAGCAGTGTTTTTATTTTT---CAGTGCACAGGTT      | 7756  |
| VervetAGM         | TACAGTTGATGTCCTATT-----GGTCTTTAATTTCTTTAAGCAGTGTTTTTTTTT-----CAGTGCACAGGTT        | 8099  |
| Gorilla           | TACAATTGATGTCCTATTA-----GGTCTTTAATTTCTTT-AAGCATGTTTTTTTTTTTTTTTCAGTGCACACGTT      | 10032 |
| GrabEatingMacaque | TACAGTTGATGTCCTATT-----GGTCTTTAATTTCTTT-AAGCAGTGTTTTTTTTT-----CAGTGCACAGGTT       | 8453  |
| Macaque           | TACAGTTGATGTCCTATT-----GGTCTTTAATTTCTTT-AAGCAGTGTTTTTTTTT-----CAGTGCACAGGTT       | 8496  |
| PigTailedMacaque  | TACAGTTGATGTCCTATT-----GGTCTTTAATTTCTTT-AAGCAGTGTTTTTTTTT-----CAGTGCACAGGTT       | 8409  |
| Bonobo            | TACAATTGATGTCCTATTA-----GGTCTTTAATTTCTTT-AAGCATGTTTTTTTTTTTT---CAGTGCACACGTT      | 8713  |
| OliveBaboon       | TACAGTTGATGTCCTATT-----GGTCTTTAATTTCTTT-AAGCAGTGTTTTTTTTT-----CAGTGCACAGGTT       | 7858  |
| Orangutan         | TAAAATTGATGTCCTGTTA-----GGTCTTTAATTTCTTT-AAGCATGTTTTTTTTTTTC---ATTGCACATGTT       | 9051  |

Tuesday, May 03, 2022 06:14 PM

|                   |                                                                                          |       |
|-------------------|------------------------------------------------------------------------------------------|-------|
| Majority          | TTGTGCATTGTTTGATTAGATTTATCCATAAGTATTTTATATATTTTGATGTTATTGTAAATGATATTTTAAAAACTT-A         |       |
|                   | 11290 11300 11310 11320 11330 11340 11350 11360                                          |       |
| Human             | TTGTGCATTGTTTGATTAGATTTACCCATAAGTATTTTATGTATTTTGAAGT- <u>ACTGTAAATGATATTTTAAAAACTT-A</u> | 7858  |
| Coquerel'sSifaka  | TTGCACATTTTTTGGTCAGATTTAACCTTGAGTATGTCACACCTTTTGATGT---TGTAATAGTATTTAAAAAATTCA           | 7260  |
| Ma'sNightMonkey   | TTGTTCAATTGAT-----AGATTTATCCATAAGTATTTTATATATTTTGATATATTGTAAAT---ATTTTAAAAACTT-A         | 7827  |
| VervetAGM         | TTGTGCATTGTTTGATTAGATTTATCCATAAGTATTTTATATATTTTGATGTTATTGTAAATGATATTTTAAAAACTT-A         | 8178  |
| Gorilla           | TTGTGCACTGTTTGATTAGATTTACCCATAAGTATTTTATATATTTTGAAGT- <u>ACTGTAAATGATATTTTAAAAACTT-A</u> | 10110 |
| GrabEatingMacaque | TTGTACATTGTTTGATTAGATTTATCCATAAGTATTTTATATATTTTGATGTTATTGTAAATGATATTTTAAAAACGT-A         | 8532  |
| Macaque           | TTGTACATTGTTTGATTAGATTTATCCATAAGTATTTTATATATTTTGATGTTATTGTAAATGATATTTTAAAAACGT-A         | 8575  |
| PigTailedMacaque  | TTGTGCATTGTTTGATTAGATTTATCCATAAGTATTTTATATATTTTGATGTTATTGTAAATGATATTTTAAAAACGT-A         | 8488  |
| Bonobo            | TTGTGCATTGTTTGATTAGATTTACCCATAAGTATTTTATGTATTTTGAAGT- <u>ACTGTAAATGATATTTTAAAAACTT-A</u> | 8791  |
| OliveBaboon       | TTGTGCATTGTTTGATTAGATTTATCCATACGTATTTTATATATTTTGATGTTATTGTAAATGATATTTTAAAAACGT-A         | 7937  |
| Orangutan         | TTGTGCATTGTTTGATTAGATTTATCCATAAGTATTTTATGTATTTTGAAGT- <u>ACTGTAAATGATATTTTAAAAACTT-A</u> | 9129  |

|                   |                                                                                  |       |
|-------------------|----------------------------------------------------------------------------------|-------|
| Majority          | ATTTCCAATTGTTTG---CTAGTATATAGAAA-----TGATTATGGCATAATTGCTCTTGTGTCTGATCCTTTGCTAA   |       |
|                   | 11370 11380 11390 11400 11410 11420 11430 11440                                  |       |
| Human             | ATTTCCAATTGTTTG---CTAGTGTATAGAAA-----TGATTATGGCATAATTGCTCATATGTTCTGAACCTTTGCTAA  | 7928  |
| Coquerel'sSifaka  | AGTTCCAATTGTTTGGTACTGATGTATAGAAGAAATAAGTGATTTTTGCATATTGTTCTTGTATTCTGCATCCTGGCTAA | 7340  |
| Ma'sNightMonkey   | ATTTCCAATTGTTTG---CTAGTATATAGAAA-----TGATTATGGCATAATTGCTCTTCTGTTTT-----          | 7884  |
| VervetAGM         | ATTTCCAGTGGTTTA---CTAGTATATAGAAA-----TGATTATGGCATAATCGCTCTTGTGTCTGATCCTTTGCTAA   | 8248  |
| Gorilla           | ATTTCCAATTGTTTG---CTAGTGTATAGAAA-----TGGTTATGGCATAATTGCTCTTATGTTCTGAACCTTTGCTAA  | 10180 |
| GrabEatingMacaque | ATTTCCAGTGGTTTA---CTAGTATATAGAAA-----TGATTATGGCATAATCGCTCTTGTGTCTGATCCTGTGGGAA   | 8602  |
| Macaque           | ATTTCCAGTGGTTTA---CTAGTATATAGAAA-----TGATTATGGCATAATCGCTCTTGTGTCTGATCCTTTGCGAA   | 8645  |
| PigTailedMacaque  | ATTTCCAGTGGTTTA---CTAGTATATAGAAA-----TGATTATGGCATAATCGCTCTTGTGTCTGATCCTTTGCGAA   | 8558  |
| Bonobo            | ATTTCCAATTGTTTG---CTAGTGTATAGAAA-----TGATTATGGCATAATTGCTCATATGTTCTGAACCTTTGCTAA  | 8861  |
| OliveBaboon       | ATTTCCAGTGGTTTA---CTAGTATATAGAAA-----TGATTATGGCATAATCGCTCTTGTGTCTGGTCCTTTGCGAA   | 8007  |
| Orangutan         | ATTTCCAATTGTTTG---CTAGTGTATAGAAA-----TGATTATGGCATAATTGCTCTTATGCTCTGAACCTTTGCTAA  | 9199  |

|                   |                                                                                  |       |
|-------------------|----------------------------------------------------------------------------------|-------|
| Majority          | ACTCATTTAGTAGGTCCTAATAGTTTTTTTT-ATATGTTCCATCAGATTTTCTTGAGAGGGA-GTCTCA---GTCACCCA |       |
|                   | 11450 11460 11470 11480 11490 11500 11510 11520                                  |       |
| Human             | ACTCATTTAGTAGATCTAATAGTTTTTTTT-ATATATTTTCATCAGATTTGCTTGAGAGGGA-GTCTCA---GTCACCCA | 8002  |
| Coquerel'sSifaka  | ACTCATTTAGTAGAGCTAATAGATTTTTTAAATATGTTCTATTGGATTTTCTACATAGACA-ATTTAT---GTCCAATT  | 7415  |
| Ma'sNightMonkey   | -----A-----TATATTCATCAGATTTTCTTGAGAGGGGCGTCTCACTGAGTCACCCA                       | 7933  |
| VervetAGM         | ACTCATTTAGTAGGTCCTAATAGTTTTTTTT-ATATGTCCCATCAGATTTTCTTGAGAGGGA-GTCTCA---GTCACCCA | 8322  |
| Gorilla           | ACTCATTTAGTAGATCTAATAGTTTTTTTT--ATGATTTTCATCAGATTTGCTTGAGAGGGA-GTCTCA---GTCACCCA | 10253 |
| GrabEatingMacaque | ACTCATTTAGTAGGTCCTAATAGTTTTTTTT-ATATGTCCCATCAGATTTTCTTGAGAGGGA-GTCTCA---GTCACCCA | 8676  |
| Macaque           | ACTCATTTAGTAGGTCCTAATAGTTTTTTTT-ATATGTCCCATCAGATTTTCTTGAGAGGGA-GTCTCA---GTCACCAA | 8719  |
| PigTailedMacaque  | ACTCATTTAGTAGGTCCTAATAGTTTTTTTT-ATATGTCCCATCAGATTTTCTTGAGAGGGA-GTCTCA---GTCACCCA | 8632  |
| Bonobo            | ACTCATTTAGTAGATCTAATAGTTTTTTTT--ATATATTTTCATCAGTTTCTTGAGAGGGA-GTCTCA---GTCACCCA  | 8934  |
| OliveBaboon       | ACTCATTTAGTAGGTCCTAATAGTTTTTTTT-ATATGTCCCATCAGATTTTCTTGAGAGGGA-GTCTCA---GTCACCCA | 8081  |
| Orangutan         | ACTCATTTAGTAGATCTAATAGTTTTTTTT-ATATATTCATCAGATTTTCTTGAGAGGGA-GTCTCA---GTCACCCA   | 9273  |



Tuesday, May 03, 2022 06:14 PM

| Majority          | GGCTGGAGTGCAGTGCACGATCTTGGCTCACTGCAACCTCTGCCTCCTGGGT-CAAGCAATTCTCCTGCCTCAGCCTCC  |       |
|-------------------|----------------------------------------------------------------------------------|-------|
|                   | 11530 11540 11550 11560 11570 11580 11590 11600                                  |       |
| Human             | GGCTGGAGTGCAGTGCACGATCTTGGCTCACTGCAACCTGCACCTCCTGGGT-CAAGCAATTCTCCTGCCTCAGCCTCA  | 8081  |
| Coquerel'sSifaka  | GTCTTTAG-ACAGTTCCTT--TCCTGTCTGGATGCCATTTTTTTCTTTT-----T-----CTTGCCTGTGGCA-TCTAG  | 7480  |
| Ma'sNightMonkey   | GGCTGGAGTGCAGTGGCACGGTCTTGGCTCACTGCAGCCTCTGCCTACTGGGTTCAAGCAATTCTCCTGCCTCAGCCTCC | 8013  |
| VervetAGM         | GGCTGGAGTGCAGTGCACGATCTTGGCTCACTGCAACCTCTGCCTCCTGGGT-CAAGAAATTCCTCCTGCCTCAGGCTCC | 8401  |
| Gorilla           | GGCTGGAGTGCAGTGCACGATCTTGGCTCACTGTAACCTGCACCTCCTGGGT-CAAGCAATTCTCCTGCCTCAGCCTCA  | 10332 |
| GrabEatingMacaque | GGCTGGAGTGCAGTGCACGATCTTGGCTCACTGCAACTTCTGCCTCCTGGGT-CAAGAAATTCCTCCTGCCTCAGCCTCC | 8755  |
| Macaque           | GGCTGGAGTGCAGTGCACGATCTTGGCTCACTGCAACTTCTGCCTCCTGGGT-CAAGAAATTCCTCCTGCCTCAGCCTCC | 8798  |
| PigTailedMacaque  | GGCTGGAGTGCAGTGCACGATCTTGGCTCACTGCAACCTCTGCCTCCTGGGT-CAAGAAATTCCTCCTGCCTCAGCCTCC | 8711  |
| Bonobo            | GGCTGGAGTGCAGTGCACGATCTTGGCTCACTGCAACCTGCACCTCCTGGGT-CAAGCAATTCTCCTGCCTCAGCCTCA  | 9013  |
| OliveBaboon       | GGCTGGAGTGCAGTGCACGATCTTGGCTCACTGCAACCTCTGCCTCCTGGGT-CAAGAAATTCCTCCTGCCTCAGCCTCC | 8160  |
| Orangutan         | GGCTGCAGTGCAGTGCACGATCTTGGCTCACTGCAACCTCCGCCTCGTGGGT-CAAGCAGTTCTCCTGCCTCAGCCTCC  | 9352  |

| Majority          | CAAGTAGCTGGGACTACTGGTGCA--TACCACCACGCC--TGGCTAATTTTTGTATTTTCAGTTGAGGCAGGGTTTCACCA |       |
|-------------------|-----------------------------------------------------------------------------------|-------|
|                   | 11610 11620 11630 11640 11650 11660 11670 11680                                   |       |
| Human             | TAAGTAGCTGGGACTGCAGGTGCA--CACCACCACGCC--CAGCTAATTTTTGCATTTTCAGTTGAGGCAGGGTTTCACCA | 8158  |
| Coquerel'sSifaka  | TACGATGTTGAAGCTATTAGAGTAGGTATCTTTACATTGTTCTTATTTTAGGGTGAACACTCAAATGGTATTATTCT     | 7560  |
| Ma'sNightMonkey   | CAAGTAGCTGGGACTACAGGTGTG--CACCACCACACC--CTGCTAATTTTTGTGTTTTAGTTGAGACAGAGTTTCCCA   | 8090  |
| VervetAGM         | CAAATAGCTGGGACTACTGGCGCA--TACCACCATGCC--TGGCTAATTTTTGTATTTTCAGTTGAGGCAGGGTTTCACCA | 8478  |
| Gorilla           | TAAGTAGCTGGGACTGCAGGTGCA--CACCACCACGCC--CAGCTAATTTTTGCATTTTCAGTTGAGGCAGGGTTTCACCA | 10409 |
| GrabEatingMacaque | CAAATAGCTGGGACTACTGGTGCA--TACCACCATGCC--TGGCTAATTTTTGTATTTTCAGTTGAGGCAGGGTTTCACCA | 8832  |
| Macaque           | CAAATAGCTGGGACTACTGGTGCA--TACCACCATGCC--TGGCTAATTTTTGTATTTTCAGTTGAGGCAGGGTTTCACCA | 8875  |
| PigTailedMacaque  | CAAATAGCTGGGACTACTGGTGCA--TACCACCATGCC--TGGCTAATTTTTGTATTTTCAGTTGAGGCAGGGTTTCACCA | 8788  |
| Bonobo            | TAAGTAGCTGGGACTGCAGGTGCA--CACCACCACGCC--CAGCTAATTTTTGCATTTTCAGTTGAGGCAGGGTTTCACCA | 9090  |
| OliveBaboon       | CAAATAGCTGGGACTACTGGTGCA--TACCACCATGCC--TGGCTAATTTTTGTATTTTCAGTTGAGGCAGGGTTTCACCA | 8237  |
| Orangutan         | TAAGTAGCTGGGACTACAGTTCA--CACCACCACAGC--CAGCTAATTTTTCTATTTTCAGTTGAGGCAGGGTTTCACCA  | 9429  |

| Majority          | TG-TTGGC-----G-TCTCGAACTCTTGACC--TCAAGTGATCTG--CCTGCCTAGGCCTCCCAAAGTGCTAAGATTAT  |       |
|-------------------|----------------------------------------------------------------------------------|-------|
|                   | 11690 11700 11710 11720 11730 11740 11750 11760                                  |       |
| Human             | TG-TTGGCCAGGCTGGTCTGGAACCTCTGACC--TCAAGTGATACA--CTTACCTAGGCCTCCCAAAGTGTTAAGATTAC | 8233  |
| Coquerel'sSifaka  | TCCTTAGTT-----G-TTTGGTACAATTCACCAGTGAAGCCATGTGAGCCTGATGTTTGTTTTCTTGTGGGGAGGTTTT  | 7634  |
| Ma'sNightMonkey   | T--TTGGCCAGGCTGGTCTTGAACCTCTGACC--TCAAGAGATCTG--CCTGCCTAGGTCTCCCAAATGCTGGGATTTT  | 8164  |
| VervetAGM         | TG-TTGGC-----CTCAAACCTCTTGACC--TCAAGTGATCTG--CCTGCCTAGGCCTCCCAAAGTGCTAAGATTAT    | 8544  |
| Gorilla           | TG-TTGGCCAGGCTGGTCTGGAACCTCTGACC--TCAAGTGATACA--CTTACCTAGGCCTCCCGAAGTGTTAAGATTAC | 10484 |
| GrabEatingMacaque | TG-TTGGC-----CTCAAACCTCTTGACC--TCAAGTGATCTG--CCTGCCTAGGCCTCCCAAAGTGCTAAGATGAT    | 8898  |
| Macaque           | TG-TTGGC-----CTCAAACCTCTTGACC--TCAAGTGATCTG--CCTGCCTAGGCCTCCCAAAGTGCTAAGATGAT    | 8941  |
| PigTailedMacaque  | TG-TTGGC-----CTCAAACCTCTTGACC--TCAAGTGATCTG--CCTGCCTAGGCCTCCCAAAGTGCTAAGATTAT    | 8854  |
| Bonobo            | TG-TTGGCCAGGCTGGTCTGGAACCTCTGACC--TCAAGTGATACA--CTTACCTAGGCCTCCCAAAGTGTTAAGATTAC | 9165  |
| OliveBaboon       | TG-TTGGC-----CTCAAACCTCTTGACC--TCAAGTGATCTG--CCTGCCTAGGCCTCCCAAAGTGCTAAGATTAT    | 8303  |
| Orangutan         | TG-TTGGCTAGGCTGGTCTCGAACTCTGACC--TCAAGTGATCCA--CTTGCCTAGGCCTCCCAAAGTGCTAAGATTAC  | 9504  |

Tuesday, May 03, 2022 06:14 PM

| Majority          | AGGCGTGAGCCT-TACCATTATTACCTATACCAGCCTATGCCATTAAATT--TTCTACATAGACAATTTATACCCAATTG |       |
|-------------------|----------------------------------------------------------------------------------|-------|
|                   | 11770 11780 11790 11800 11810 11820 11830 11840                                  |       |
| Human             | AGGCGTGAGCC-----ACCACCC---CCAGCCTATGCCATTAAATT--TTCTACATAGATAATTTATACCCAATTG     | 8299  |
| Coquerel'sSifaka  | AAACTACATATTTAATTTATTTAATAGATACAGGGCTATTCAGGTTATCTATCTCTTCTTGGGTGAGCTTTGGTAATTTG | 7714  |
| Ma'sNightMonkey   | AGGCGTGAGCC-----ACCATCC---CCAGCCTATTCATTAAATT--TTCTACATAGATGATATATACCCAATTG      | 8230  |
| VervetAGM         | AGGCGTCAGCCTATTCATTATTACCTATACCAGCCTATGCCATTAAATT--TTCTACATAGACAATTTATACCCAATTG  | 8622  |
| Gorilla           | AGGCGTGAGCC-----ACCACCC---CCAGCCTATGCCATTAAATT--TTCTACATAGACAATTTATACCCAATTG     | 10550 |
| GrabEatingMacaque | AGGCGTGAGTCTATACCATTATTACCTATACCAGCCTATGCCATTAAATT--TTCTACATAGACAATTTATACCCAATTG | 8976  |
| Macaque           | AGGCGTGAGTCTATACCATTATTACCTATACCAGCCTATGCCATTAAATT--TTCTACATAGACAATTTATACCCAATTG | 9019  |
| PigTailedMacaque  | AGGCGTGAGTCTGTACCATTATTACCTATACCAGCCTATGCCATTAAATT--TTCTACATAGACAATTTATACCCAATTG | 8932  |
| Bonobo            | AGGCGTGAGCC-----ACCACCC---CCAGCCTATGCCATTAAATT--TTCTACATAGACAATTTATACCCAATTG     | 9231  |
| OliveBaboon       | AGGCGTGAGCCTATACCATTATTACCTATACCAGCCTATGCCATTAAATT--TTCTACATAGACAATTTATACCCAATTG | 8381  |
| Orangutan         | AGGCGTGAGCC-----ACCACCC---CCAGCCTATGCCATTAAATT--TTCTACATAGACAATTTATACCCAATTG     | 9570  |

| Majority          | TTT--TTAAATAGTTTTCTTCTTTTCTATCTGGGTGCCATTTTTGTCTCCATTTTCTTGTCTGGTATC-CAGTACA    |       |
|-------------------|---------------------------------------------------------------------------------|-------|
|                   | 11850 11860 11870 11880 11890 11900 11910 11920                                 |       |
| Human             | TTT--TTAAATAGTTTTCTTCTTTTCTATCTGGATGCCATTTTTGTCTCCTTTTT--TTGTCTGGTATC-CAGTACA   | 8375  |
| Coquerel'sSifaka  | TGTCCTCTGTAGAATTAGTCCATTTCTCTAAGTTGCCAAATTT-ATTTGCACAGGGTTGTCATGATATTACCTTTTT   | 7793  |
| Ma'sNightMonkey   | TTT--TCAGACAGTTTTCTTCTTTTCTATCTGGGTGCCATTTTTGGTCACTTTTTCTTGTCTGGCATC-CAGTACA    | 8307  |
| VervetAGM         | TTT--TTAAATAGTTTTCTTCTTTTCTATCTGGGTGCCATTTTTGTCTCCATTTTCTTGTCTGGTATC-CAGTACA    | 8699  |
| Gorilla           | TTT--TTAAATAGTTTTCTTCTTTTCTATCTGGATGCCATTTTTGTCTCCTTTTTCTTGTCTATGGTATC-CAGTACC  | 10627 |
| GrabEatingMacaque | TTT--TTAAATAGTTTTCTTCTTTTCTATCTGGGTGCCATTTTTGTCTCCATTTTCTTGTCTGGTATC-CAGTACA    | 9053  |
| Macaque           | TTT--TTAAATAGTTTTCTTCTTTTCTATCTGGGTGCCATTTTTGTCTCCATTTTCTTGTCTGGTATC-CAGTACA    | 9096  |
| PigTailedMacaque  | TTT--TTAAATAGTTTTCTTCTTTTCTATCTGGGTGCCATTTTTGTCTCCATTTTCTTGTCTGGTATC-CAGTACA    | 9009  |
| Bonobo            | TTT--TTAAATAGTTTTCTTCTTTTCTATCTGGATGCCATTTTTGTCTCCTTTTT--TTGTCTATGGTATC-CAGTACA | 9307  |
| OliveBaboon       | TTT--TTAAATAGTTTTCTTCTTTTCTATCTGGGTGCCATTTTTGTCTCCATTTTCTTGTCTGGTATC-CAGTACA    | 8458  |
| Orangutan         | TTT--TTAAATAGTTTTCTTCTTTTCTATCTGGATACCATTTTTGTCTCCTTTTTCTTGTCTGGTATC-CAGTACA    | 9647  |

| Majority          | ATGTTTAATAGAAGTGCTGAGAGAATATCTTTACCTTGCTCCTGATATT-GGGTGAAAACCTCTAAAATTTCTTCTTAAC  |       |
|-------------------|-----------------------------------------------------------------------------------|-------|
|                   | 11930 11940 11950 11960 11970 11980 11990 12000                                   |       |
| Human             | ATGTTTAATAGAAGTGTTGAGAGAATATCTTTTCTTGCTCCTGATATTAGGGTGAGAACTCTAAAATTTCTTCTTAAC    | 8455  |
| Coquerel'sSifaka  | ATACTTTCGATATCTGTAGTGATAACAGCT----CTCATCTCTGATATT--GATAATTTGTTTCATCTTTTTTTCTTG--  | 7865  |
| Ma'sNightMonkey   | ATGTTGAATAGAAGTGCTCAGAAAGGTATCTTTACCTTGCTCCTGATATTGGGGTGAACACTCTAAAATTTCTTCTTAAC  | 8387  |
| VervetAGM         | ATGTTTAATAGAAGTGCTGAGAGAATATCTTTACCTTGCTCCTGATACT-GCGTGAAAACCTCTAAAATTTCTTCTTAAC  | 8778  |
| Gorilla           | ATGTTTAATAGAAGTGCTGAGAGAATATCTTACCTTGCTCCTGATATTAGGGTGAGAACTCTAAAATTTCTTCTTAAC    | 10707 |
| GrabEatingMacaque | ATGTTTAATAGAAGTGCTGAGAGAATATCTTTACCTTGCTCCTGATACT-GGGTGAAAACCTCTAAAATTTCTTCTTAAC  | 9132  |
| Macaque           | ATGTTTAATAGAAGTGCTGAGAGAATATCTTTACCTTGCTCCTGATACT-GGGTGAAAACCTCTAAAATTTCTTCTTAAC  | 9175  |
| PigTailedMacaque  | ATGTTTAATAGAAGTGCTGAGAGAATATCTTTACCTTGCTCCTGATACT-GGGTGAAAACCTCTAAAATTTCTTCTTAAC  | 9088  |
| Bonobo            | ATGTTTAATAGAAGTGTTGAGAGAATATCTTTTCTTGCTCCTGATATTAGGGTGAGAACTCTAAAATTTCTTCTTAAC    | 9387  |
| OliveBaboon       | ATGTTTAATAGAAGTGCTGAGAGAATATCTTTACCTTGCTCCTGATACT-GGGTGAAAACCTCTAAAATTTCTTCTTAAC  | 8537  |
| Orangutan         | ATGTTTAATAGAAGTGCTAAGAGAATATCTTTAACCCTTGCTCCTGATATTAGGGTGAGAACTCTAAAATTTCTTCTTAAC | 9727  |

Tuesday, May 03, 2022 06:14 PM

| Majority          | TGATACAATTCACTAGTGAAGCCATGTGGGGCCAGATGTTTGTGTTTCTTTGTTGGGAGGTTTTAAACTACATATTTAACT  |       |       |       |       |       |       |       |  |       |
|-------------------|------------------------------------------------------------------------------------|-------|-------|-------|-------|-------|-------|-------|--|-------|
|                   | 12010                                                                              | 12020 | 12030 | 12040 | 12050 | 12060 | 12070 | 12080 |  |       |
| Human             | TGACACAGTTCACTAGTGAAGCCATGTGGGGCCAGATGTTTGTGTTT---GTCGGGAGGTTTTAAACTACATATTTCAACT  |       |       |       |       |       |       |       |  | 8531  |
| Coquerel'sSifaka  | -----TCATT-GTGGGTAGATGTTAATTGATTTTCATTAATGTCTAAAAGGTGAGCTTTTGGT---CATTGAGTT        |       |       |       |       |       |       |       |  | 7932  |
| Ma'sNightMonkey   | TGATACAATTCACTAGTGAAGCCATGTGGGGCCAGATGTTTGTGTTTCTTTGTTGGGAGGTTTTAAACTACATATTTCAACT |       |       |       |       |       |       |       |  | 8467  |
| VervetAGM         | TGATACAATTCACTAGTGAAGCCATGTGGGGCCAGATGTTTGTGTTTCTATGTTGGGAGGTTTTAAACTACATATTTAACT  |       |       |       |       |       |       |       |  | 8858  |
| Gorilla           | TGATACAGTTCACTAGTGAAGCCATGTGGGGCCAGATGTTTGTGTTTCTTTGTCGGGAGGTTTTAAACTACATATTTCAACT |       |       |       |       |       |       |       |  | 10787 |
| GrabEatingMacaque | TGATACAATTCACTAGTGAAGCCATGTGGGGCCAGATGTTTGTGTTTCTTTGTTGGGAGGTTTTAAACTACATATTTAACT  |       |       |       |       |       |       |       |  | 9212  |
| Macaque           | TGATACAATTCACTAGTGAAGCCATGTGGGGCCAGATGTTTGTGTTTCTTTGTTGGGAGGTTTTAAACTACATATTTAACT  |       |       |       |       |       |       |       |  | 9255  |
| PigTailedMacaque  | TGATACAATTCACTAGTGAAGCCATGTGGGGCCAGATGTTTGTGTTTCTTTGTTGGGAGGTTTTAAACTACATATTTAACT  |       |       |       |       |       |       |       |  | 9168  |
| Bonobo            | TGATACAGTTCACTAGTGAAGCCATGTGGGGCCAGATGTTTGTGTTT---GTCGGGAGGTTTTAAACTACATATTTCAACT  |       |       |       |       |       |       |       |  | 9463  |
| OliveBaboon       | TGATACAATTCACTAGTGAAGCCATGTGGGGCCAGATGTTTGTGTTTCTTTGTTGGGAGGTTTTAAACTACATATTTAACT  |       |       |       |       |       |       |       |  | 8617  |
| Orangutan         | TGATACAGTTCACTAATGAAGCCATGTGGGGCCAGATGTTTGTGTTTCTTTGTCGGGAGGTTTTAAACTACATATTTCAATT |       |       |       |       |       |       |       |  | 9807  |

| Majority          | TATTTAATAGATATAGGGCTATTCAGTTTGTGTTAGTTCTT---GAGTGAACCTTGGTAATTTGTCTCTTCTGTAGAACTA |       |       |       |       |       |       |       |  |       |
|-------------------|-----------------------------------------------------------------------------------|-------|-------|-------|-------|-------|-------|-------|--|-------|
|                   | 12090                                                                             | 12100 | 12110 | 12120 | 12130 | 12140 | 12150 | 12160 |  |       |
| Human             | TATTTAATAGATATAGGGCTATTCAGTTTGTGTTAGTTCTTCTTGAGTGAACCTTGGTAATTTGTATCTTCTGTAGAACTA |       |       |       |       |       |       |       |  | 8611  |
| Coquerel'sSifaka  | TTCTCTGTTGTTTTTTGTTTCT--ATTTTATTGATTTCT----GTTATTTTTATTTTTTCTGCTTTGTTGTTAATTT     |       |       |       |       |       |       |       |  | 8005  |
| Ma'sNightMonkey   | TATTTAGTAGGTATAGGGCTA-----G-----A-----GG--T-----TCTGTAGAACTA                      |       |       |       |       |       |       |       |  | 8505  |
| VervetAGM         | TATTTAATAGATACAGGGCTATTCAGTTTGTGTTAGTTCTT---GAGTGAACCTTGGTAATTTGTCTCTTCTGTAGGACTA |       |       |       |       |       |       |       |  | 8935  |
| Gorilla           | TATTTAATAGATATAGGGCTATTCAGTTTGTGTTAGTTCTTCTTGAGTGAACCTTGGTAATTTGTATCTTCTGTAGAACTA |       |       |       |       |       |       |       |  | 10867 |
| GrabEatingMacaque | TATTTAATAGATACAGGGCTATTCAGTTTGTGTTAGTTCTT---GAGTGAACCTCGGTAATTTGTCTCTTCTGTAGGACTA |       |       |       |       |       |       |       |  | 9289  |
| Macaque           | TATTTAATAGATACAGGGCTATTCAGTTTGTGTTAGTTCTT---GAGTGAACCTCGGTAATTTGTCTCTTCTGTAGGACTA |       |       |       |       |       |       |       |  | 9332  |
| PigTailedMacaque  | TATTTAATAGATACAGGGCTATTCAGTTTGTGTTAGTTCTT---GAGTGAACCTTGGTAATTTGTCTCTTCTGTAGGACTA |       |       |       |       |       |       |       |  | 9245  |
| Bonobo            | TATTTAATAGATATAGGGCTATTCAGTTTGTGTTAGTTCTTCTTGAGTGAACCTTGGTAATTTGTATCTTCTGTAGAACTA |       |       |       |       |       |       |       |  | 9543  |
| OliveBaboon       | TATTTAATAGATACAGGGCTATTCAGTTTGTGTTAGTTCTT---GAGTGAACCTTGGTAATTTGTCTCTTCTGTAGGACTA |       |       |       |       |       |       |       |  | 8694  |
| Orangutan         | TATTTAATAGATATAGGGCTATTCAGTTTGTGTTAGTTCTTCTTGAGTGAACCTCGGTAATTTGTAGCTTCTGTAGAACTA |       |       |       |       |       |       |       |  | 9887  |

| Majority          | GTCCATTTCCCTTT-AAGTTGCTGAATGTATTTGGGTAGA-GTTGTTTCATGATACTACTGTTTTTTTTTGTGTTTT----- |       |       |       |       |       |       |       |  |       |
|-------------------|------------------------------------------------------------------------------------|-------|-------|-------|-------|-------|-------|-------|--|-------|
|                   | 12170                                                                              | 12180 | 12190 | 12200 | 12210 | 12220 | 12230 | 12240 |  |       |
| Human             | GTCCATTTCCCTTT-AAGTTGCTGAATGTATTTGTGTAGA-GTTGTTTCATGATACTACTATTTTTTTTTTTTTTTTTTTT  |       |       |       |       |       |       |       |  | 8689  |
| Coquerel'sSifaka  | GCTC-TTCCATTT---CCACTTAGTATCATTGACATGTTACCTTTTCTTATAGAGGGGTTGGTGCTGTGTATTTCC--     |       |       |       |       |       |       |       |  | 8078  |
| Ma'sNightMonkey   | GTCTACTTCCCTCT-GAGTTGCTGAATGTATTTGCATAGA-GTTGTTTCATGCTACTGCTTTTTTTTTTTTTTTTTTTTTT  |       |       |       |       |       |       |       |  | 8583  |
| VervetAGM         | GTCCATTTCCCTTTAAGTTGCTGAATGTATTTGGGTAGA-GTTGTTTCATGATACTACAGTTTTTTTTTTGG-----      |       |       |       |       |       |       |       |  | 9003  |
| Gorilla           | GTCCATTTCCCTTT-AAGTTGCTGAATGTATTTGCGTAGAAGTTGTTTCATGATACTACTATTTTTTTTTTTTTTTTTTTT  |       |       |       |       |       |       |       |  | 10946 |
| GrabEatingMacaque | GTCCATTTCCCTTTAAGTTGCTGAATGTATTTGGGTAGA-GTTGTTTCATGATACTACAGTTTTTTTTTTG-----       |       |       |       |       |       |       |       |  | 9357  |
| Macaque           | GTCCATTTCCCTTTAAGTTGCTGAATGTATTTGGGTAGA-GTTGTTTCATGATACTACAGTTTTTTTTTTG-----       |       |       |       |       |       |       |       |  | 9400  |
| PigTailedMacaque  | GTCCATTTCCCTTTAAGTTGCTGAATGTATTTGGGTAGA-GTTGTTTCATGATACTACAGTTTTTTTTTTG-----       |       |       |       |       |       |       |       |  | 9313  |
| Bonobo            | GTCCATTTCCCTTT-AAGTTGCTGAATGTATTTGTGTAGA-GTTGTTTCATGATACTACTATTTTTTTTTTTTTTTT--T-- |       |       |       |       |       |       |       |  | 9617  |
| OliveBaboon       | GTCCATTTCCCTTTAAGTTGCTGAATGTATTTGGGTAGA-GTTGTTTCATGATACTACAGTTTTTTTTTTG-----       |       |       |       |       |       |       |       |  | 8762  |
| Orangutan         | GTCCATTTCCCTTT-AAGTTGCTGAATGTATTTGCGTAGA-GTTGTTTCATGATACTACTATTTTTTTTTTTTTTTT--    |       |       |       |       |       |       |       |  | 9960  |

Tuesday, May 03, 2022 06:14 PM

```

Majority      ---AGACGGAGTCTTGCTCTGTGCGCCCGGG-CTGGAGTGCAGTGGCGCAATCTCGGCTCACTGCAACCTCCGCGTCCCGG
              12250      12260      12270      12280      12290      12300      12310      12320
Human         T-GAGACGGAGCCTTGCTCTGTGCGCCCGGG-CTGGAGTGCAGTGGCACCATCTCGGCTCAATGCAACCTCCACGTCCCGG 8767
Coquerel'sSifaka ---CTATTAAGTACTGCTTTTCATGGCATCCCTCAAATTTTGTATGTGTGCATTTTCATTTCAGTTCAAAT--ACTTTCTAA 8153
Ma'sNightMonkey --GAGACAAAGTCTCATACTGTTGCCTGGG-CTGAAGTGCATGGGGCAATCTCGTCTCACTGTAACTCTGCGTCCCAG 8660
VervetAGM     ---AGACGGAGTCTTGATCTGTGCGCCAGG-CTGGAGTGCAGTAGCGCAATCTCGGCTCACTGCAACCTTCGCATCCTGG 9079
Gorilla       TTGAGACGGAGCCTCACTCTGTGCGCTGGGGCTGGAGTGCAGTGGCACCATCTCGGCTCAATGCAACCTCCATGTCCCGG 11026
GrabEatingMacaque ---AGACGGAGTCTTGATCTGTGCGCCAGG-CTGGAGTGCAGTAGCGCAGTCTCCGCTCACTGCAACCTCCGCGTCCCGG 9433
Macaque       ---AGACGGAGTCTTGATCTGTGCGCCAGG-CTGGAGTGCAGTAGCGCAATCTCTGCTCACTGCAACCTCCGCGTCCCGG 9476
PigTailedMacaque ---AGACGGAGTCTTGATCTGTGCGCCAGG-CTGGAGTGCAGTAGCGCAATCTCTGCTCACTGCAACCTCCGCGTCCCGG 9389
Bonobo        ---AGACGGAGCGTCTGCTCTGTACCTGGG-CTGGAGTGCAGTGGCACCATCTCGGCTCAATGCAACCTCTACGTCCCGG 9693
OliveBaboon   ---AGACGAAGTCTTGATCTGTGCGCCAGG-CTGGAGTGCAGTAGCGCAATCTCCGCTCACTGCAACCTCCGCGTCCCGG 8838
Orangutan     ---AGACGGAGCCTCGCTCTGTGCGCCCGGG-CTGGAGTACAGTGGCACCATCTCGGCTCAGTGCACCTCCACGTCCCGG 10036
    
```

```

Majority      GTTCACGCGATTCTCCTGCCTCAGCATCCCAAGTAGCTGGGATCACAGGCACACACCACCACACCTGGCTAATTTTTTTGT
              12330      12340      12350      12360      12370      12380      12390      12400
Human         GTTCACGCGGTTCTCCTGCCTCAGCATCCCAAGTAGCTGGGATCACAGGCACACACCACCACACCTGGCTAATTTTTTTGT 8847
Coquerel'sSifaka TCTT---TGCTTTTATTTCTTTGACCTATCAGTTA-TTGGGATGTATGTAATTTAATA--ATGTTGG--AATTTTTTAC 8225
Ma'sNightMonkey GTTCATGCGATTCTCCTGCCTCAGCCTCCTGAGTAGCTGGGATTACAGGCACCCAACACCACACCT-----TTAGT 8731
VervetAGM     GTTCACGTGATTCTCCTGCCTCAGCATCCCAAGTAGCTGGGATCGCAGGCATACACCACCACACCTGGCTAATATTTTTGT 9159
Gorilla       GTTCACGCGGTTCTCTGCTCAGCATCCCAAGTAGCTGGGATCACAGGCACACACCACCACACCTGGCTAATTTTTTTGT 11106
GrabEatingMacaque GTTCACGCGATTCTCCTGCCTCAGCATCCCAAGTAGCTGGGATCACAGGCACACACCACCACACCTGGCTAATATTTTTGT 9513
Macaque       GTTCACGCGATTCTCCTGCCTCAGCATCCCAAGTAGCTGGGATCACAGGCACACACCACCACACCTGGCTAATATTTTTGT 9556
PigTailedMacaque GTTCACGCGATTCTCCTGCCTCAGCATCCCAAGTAGCTGGGATCACAGGCACACACCACCACACCTGGCTAATATTTTTGT 9469
Bonobo        GTTCACGCGGTTCTCCTGCCTCAGCATCCCAAGTAGCTGGGATCACAGGCACACACCACCACACCTGGCTAATTTTTTTGT 9773
OliveBaboon   GTTCACGCGATTCTCCTGCCTCAGCATCCCAAGTAGCTGGGATCACAGGCACACACCACCACACCTGGCTAATATTTTTGT 8918
Orangutan     GTTCACGTGATTCTCCTGCCTCAGCATCCCAAGTAGCTGGGATCACAGGCACATACCACCACACCTGGCTAATTTTTTTGT 10116
    
```

```

Majority      ATTTTATAGTAGAGATGG-GGTTTCACTATG-TTGGCCAGGCTGGTCTCGAACTCCTGACCTTGCG-ATCTGCCTGCCCTG
              12410      12420      12430      12440      12450      12460      12470      12480
Human         ATTTTATAGTAGAGACGG-GGTTTCACTATG-TTGGCCAGGTTGGTCTCGAACT-----TGCG-ATCTGCCCGCCCTG 8916
Coquerel'sSifaka AAATCTGTTATGCATTTTAATTCATCTGACCAGAGAACATATTTTATAAACTTGAATCTTTGTAGATAACAAGACTTG 8305
Ma'sNightMonkey ATTTTATAGTA-AGACGG-GGTTTCACTGTG-TTGGCCAGGATGGTTTGAACCTTTGACCTCGTG-ATCTGCCACCTCG 8807
VervetAGM     ATTTTATAGGAGAGATGG-GGTTTCACTATG-TTGGCCAGGCTGGTCTCGAACTCCTGACCTTGCG-ATCTGCCTGCCCTG 9236
Gorilla       ATTTTATAGTAGAGACGG-GGTTTCACTATG-TTGGCCAGGTTGGTCTCGAACT-----CCTG 11161
GrabEatingMacaque ATTTTATAGTAGAGATGG-GGTTTCACTATG-TTGGCCAGGCTGGTCTCGAACTCCTGACCTTGCG-ATCTGCCTGCCCTG 9590
Macaque       ATTTTATAGTAGAGATGG-GGTTTCACTATG-TTGGCCAGGCTGGTCTCGAACTCCTGACCTTGCG-ATCTGCCTGCCCTG 9633
PigTailedMacaque ATTTTATAGTAGAGATGG-GGTTTCACTATG-TTGGCCAGGCTGGTCTCGAACTCCTGACCTTGCG-ATCTGCCTGCCCTG 9546
Bonobo        ATTTTATAGTAGAGACGG-GGTTTCACTATG-TTGGCCAGGTTGGTCTCGAACTCCTGAC-TTGTG-ATCCGCCCGCCCTG 9849
OliveBaboon   ATTTTATAGTAGAGATGG-GGTTTCACTATG-TTGGCCAGGCTGGTCTCGAACTCCTGACCTTGCG-ATCTGCCTGCCCTG 8995
Orangutan     ATTTTACTAGAGACGG-GGTTTCACTATA-TTGGCCAGGTTGGTCTCGAACTCCTGAC-TTGTG-ATCCGCCACCTTG 10192
    
```

Tuesday, May 03, 2022 06:14 PM

|                   |                                                                                   |       |
|-------------------|-----------------------------------------------------------------------------------|-------|
| Majority          | GCCTCCCAAAGTGCTGGGATTACAGGCGTGAGCCACTGTGCCAGCCATGATACTACATTTTTTACACTTTTGATA-TCTG  |       |
|                   | 12490 12500 12510 12520 12530 12540 12550 12560                                   |       |
| Human             | -CCTCACAAAGTGCTGGGATTACAGGCGTGAGCCACTGCGCCAGCCATGATACTACATTTTTTACACTTTTGGTA-TCTG  | 8994  |
| Coquerel'sSifaka  | GTTTATGGTCCAAATATAGTATATCTTGTAAATGTCTTAGATATCTTTGATAAGGGTGT-----GTATTCGGTTGTTGG   | 8380  |
| Ma'sNightMonkey   | GCCTCCCGAAGTGCTGGGATCACAGGTGTGAGCCGCCACACCCAGCCATGATACTACATTTTTTACACTTTTGATAATCTG | 8887  |
| VervetAGM         | GCTTCCCAAAGTGCTGGGATTACAGGCGTGAGCCACTGTGCCAGCCATGATACTACATTTTTTACACTTTTGATA-CCTG  | 9315  |
| Gorilla           | -ACTTGTGAT---CCGC-----CCGCACCCAGCCATGATACTACATTTTTTACACTTTTCGATA-TCTG             | 11218 |
| GrabEatingMacaque | GCCTCCCAAAGTGCTGGGATTACAGGCGTGAGCCACTGTGCCAGCCATGATACTACA-----CTTTTGATA-CC-G      | 9660  |
| Macaque           | GCCTCCCAAAGTGCTGGGATTACAGGCGTGAGCCACTGTGCCAGCCATGATACTACA-----CTTTTGATA-CC-G      | 9703  |
| PigTailedMacaque  | GCCTCCCAAAGTGCTGGGATTACAGGCGTGAGCCACTGTGCCAGCCATGATACTACATTTTTTACACTTTTGATA-CC-A  | 9624  |
| Bonobo            | -CCTCACGAAGTGCTGGGATTACAGGCGTGAGCCACTGCGCGCAGCCATGATACTGTATTTTTTACACTTTTGATA-TCTG | 9927  |
| OliveBaboon       | GCCTCCCAAAGTGCTGGGATTACAGGCGTGAGCCACTGTGCCAGCCATGATACTACATTTTTTACACTTTTGATA-CC-G  | 9073  |
| Orangutan         | GCCTCACAAAGTGCTGGGATTACAGGCGTGAGCCACTGTGCCAGCCATGATACTGCATTTTTTACACTTTTGATA-TCTG  | 10271 |

|                   |                                                                                    |       |
|-------------------|------------------------------------------------------------------------------------|-------|
| Majority          | TTGAATCCTTAGTGATGTCAGCTCTCTCATTCCCAGTAGGGATAAATTGTGTCATCTTTTTTCCTTGTCTGTCTGGATTG   |       |
|                   | 12570 12580 12590 12600 12610 12620 12630 12640                                    |       |
| Human             | TTGAATCCTTAGTGATGTCAGCTTTCTCATTCCCAGTAGGGATAAATTGTGTCATCTTTTTTCCTTGTCTGTCTGGATTG   | 9074  |
| Coquerel'sSifaka  | GTGGTAGTCTATAAATATCATTTAGGTCATTTTTATTGATAATG--TTGTTTCTTCTCTTTACTGACTT--TTGGTCTA    | 8456  |
| Ma'sNightMonkey   | TCGAATGCTT-GTGATGTCAGCTCTCTCATTCCCAACAGTGGTAATTGTGTTATCGTTTTTCCTTGTCTGTCTGGATTG    | 8966  |
| VervetAGM         | TTGAATCCTTAGTGATGTCAGCTCTCTCATTCCCAGTAGGGATAAATTATGTCATCTTTTTTCCTTGTCTGTCTGGATTG   | 9395  |
| Gorilla           | TTGAATCCTTAGTGATGTCAGCTCTCTCATTCCCAATAGGGATAAATTGTGTCATCTTTTTTCCTTGTCTGTCTGGATTG   | 11298 |
| GrabEatingMacaque | TTGAATCCTTAGTGATGTCAGCTCTCTCATTCTCAGTAGGGATAAATTATGTCATTTTTTTTTCCCTTGTCTGTCTGGATTG | 9740  |
| Macaque           | TTGAATCCTTAGTGATGTCAGCTCTCTCATTCTCAGTAGGGATAAATTATGTCATTTTTTTTTCCCTTGTCTGTCTGGATTG | 9783  |
| PigTailedMacaque  | TTGAATCCTTAGTGATGTCAGCTGTCTCATTCCCAGTAGGGATAAATTATGCCATTTTTTTTTCCCTTGTCTGTCTGGATTG | 9704  |
| Bonobo            | TTGAATCCTTAGTGATGTCAGCTCTCTCATTCCCAATAGGGATAAATTGTGTCATCTTTTTTCCTTGTCTGTCTGGATTG   | 10007 |
| OliveBaboon       | TTGAATCCTTAGTGATGTCAGCTCTCTCATTCCCAGTAGGGATAAATTATGTCATTTTTTTTTCCCTTGTCTGTCTGGATTG | 9153  |
| Orangutan         | TTGAATCCTTAGTGATGTCAGCTCTCTCATTCCCAATAGGGAGAATTGTGTCATCTTTTTTCCTTGTCT---GGATTG     | 10347 |

|                   |                                                                                  |       |
|-------------------|----------------------------------------------------------------------------------|-------|
| Majority          | AAGTT-TATTGATTTTATTAAT--CTCCAAAATATCAGC-----TTTTGGTTTCATTGAGTTTTCTCTGTGGTTTTTCT  |       |
|                   | 12650 12660 12670 12680 12690 12700 12710 12720                                  |       |
| Human             | AAGTT-TATTGATTTTATTAAT--CTCCAAAATACCAGC-----TTTTGGTTT---GAGTTTTCTCTGTGTTTTTCT    | 9141  |
| Coquerel'sSifaka  | TTGTTATATCAGTTGAAGAGAGGATATTAATAATTTCTGCCTATACTGTGGATTTGTCTATTTCTCTTTGCAGTTCTACT | 8536  |
| Ma'sNightMonkey   | AAGTT-TATTGATTTTATTAAT--CTCCAAAATAACAGC-----TTTTGGTTTCATTAGTTTTCTCT-----TTTTCT   | 9032  |
| VervetAGM         | AAGTT-TATTGATTTTATTAAT--CTCCAAAATGTCAGC-----TTTTGGTTTCATTGAGTTTTCTCTGTGGTTTTTCT  | 9466  |
| Gorilla           | AAGTT-TATTGATTTTATTAAT--CTCCAGAATACCAGC-----TTTTGGTTT---GAGTTTTCTCTGTGTTTTTCT    | 11365 |
| GrabEatingMacaque | AAGTT-TATTGATTTTATTAAT--CTCCAAAATATCAGC-----TTTTGGTTTCATTGAGTTTTCTCTGTGGTTTTTCT  | 9811  |
| Macaque           | AAGTT-TATTGATTTTATTAAT--CTCCAAAATATCAGC-----TTTTGGTTTCATTGAGTTTTCTCTGTGGTTTTTCT  | 9854  |
| PigTailedMacaque  | AAGTT-TATTGATTTTATTAAT--CTCCAAAATATCAGC-----TTTTGGTTTCATTGAGTTTTCTCTGTGGTTTTTCT  | 9775  |
| Bonobo            | AAGTT-TATTGATTTTATTAAT--CTCCAAAATACCAGC-----TTTTGGTTT---GAGTTTTCTCTGTGTTTTTCT    | 10074 |
| OliveBaboon       | AAGTT-TATTGATTTTATTAAT--CTCCAAAATATCAGC-----TTTTGGTTTCATTGAGTTTTCTCTGTGGTTTTTCT  | 9224  |
| Orangutan         | AAGTT-TATTGATTTTATTAAT--CTCCAAAATACCAGC-----TTTTGATTTTCATTGAGTTTTCTCTGTGTTTTTTT  | 10418 |

Tuesday, May 03, 2022 06:14 PM

| Majority          | GTTTCTATTTTATTGATTTCTGCTGTTTTATTTTGTGGCTTTGTGTTAGT-TTGATCTTCATTTTCTACTTAGTT      |       |       |       |       |       |       |       |       |
|-------------------|----------------------------------------------------------------------------------|-------|-------|-------|-------|-------|-------|-------|-------|
|                   | 12730                                                                            | 12740 | 12750 | 12760 | 12770 | 12780 | 12790 | 12800 |       |
| Human             | GTTTCTATTTTATTGATTTCTGCTGTTTTATTTTGTGGCTTTGTGTTAGT-TTGATCTTCATTTTCTACTTAGTT      |       |       |       |       |       |       |       | 9220  |
| Coquerel'sSifaka  | AGTTTTTGATTTATGTATTTTGA--AGTTTTATTATTAGTACCTAAATGTTTAGGATTACTATAATCCCCTTGATGCATT |       |       |       |       |       |       |       | 8614  |
| Ma'sNightMonkey   | GATTTCT----TATTGATTTCTCCTGTTTTATTTTGTGGCTTTCTGTTAGT-TTGATCTTTGTTTTCTACTTAGTT     |       |       |       |       |       |       |       | 9106  |
| VervetAGM         | GTCTTCTATTTTATTGATTTCTGCTGTTTTATTTTGTGGCTTTGTGTTAGT-TTGATCTTCATTTTCTACTTAGTT     |       |       |       |       |       |       |       | 9545  |
| Gorilla           | GTTTCTATTTTATTGATTTCTGCTGTTTTATTTTGTGGCTTTGTGTTAGT-TTGATCTTCATTTTCTACTTAGTT      |       |       |       |       |       |       |       | 11444 |
| GrabEatingMacaque | GTCTTCTATTTTATTGATTTCTGCTGTTTTATTTTGTGGCTTTGTGTTAGC-TTGATCTTCATTTTCTACTTAGTT     |       |       |       |       |       |       |       | 9890  |
| Macaque           | GTCTTCTATTTTATTGATTTCTGCTGTTTTATTTTGTGGCTTTGTGTTAGC-TTGATCTTCATTTTCTACTTAGTT     |       |       |       |       |       |       |       | 9933  |
| PigTailedMacaque  | GTCTT-----TTATTGATTTCTGCTGTTTTATTTTGTGGCTTTGTGTTAGC-TTGATCTTCATTTTCTACTTAGTT     |       |       |       |       |       |       |       | 9849  |
| Bonobo            | GTTTCTATTTTATTGATTTCTGCTGTTTTATTTTGTGG-----TGGTTAGT-TTGATCTTCATTTTCTACTTAGTT     |       |       |       |       |       |       |       | 10148 |
| OliveBaboon       | GTCTTCTGTTTTATTGATTTCTGCTGTTTTATTTTGTGGCTTTGTGTTAGT-TTGATCTTCATTTTCTACTTAGTT     |       |       |       |       |       |       |       | 9303  |
| Orangutan         | GTTTCTATTTAATTGATTTCTGCTGTTTTATTTTGTGGCTTTGTGTTAGC-TTGATCTTCATTTTCTACTTAGTT      |       |       |       |       |       |       |       | 10497 |

| Majority          | AACATTGAAGTTGATGT-CATTAACTTGATACTTTTACTTATGTAGGAGTTTAGTGCTGTATGTTCCCTTTTAAGTACC |       |       |       |       |       |       |       |       |
|-------------------|---------------------------------------------------------------------------------|-------|-------|-------|-------|-------|-------|-------|-------|
|                   | 12810                                                                           | 12820 | 12830 | 12840 | 12850 | 12860 | 12870 | 12880 |       |
| Human             | AACATTGAAGTTAATGT-CATTAACTTAGTACTTTTACTTATATAGGGATTTATTGCTGTATGTTCCCTTTTAAGTACC |       |       |       |       |       |       |       | 9299  |
| Coquerel'sSifaka  | ATCATTTTTAGTATTTTGCAGTGACCATAT--TTATCCCTGATAATAGTCTTTGCTTTAAAATCTACTTTTCTAATATT |       |       |       |       |       |       |       | 8692  |
| Ma'sNightMonkey   | AACATTGAAGTTAATAT-CACTAACTTGA-----TACTTATGTAGGGGTTTAGTGCTATATGTTCCCTTTTAAGTACT  |       |       |       |       |       |       |       | 9179  |
| VervetAGM         | AACATTGAAGTTGATGT-CATTAACTTGATACTTTTACTTATGTAGGAGTTTAGTGCTGTATGTTCCCTTTGAAGTACC |       |       |       |       |       |       |       | 9624  |
| Gorilla           | AACATTGAAGTTAATGT-CATTAACTTGGGACTTTTACTTATATAGGGATTTATTGCTGTATGTTCCCTTTTAAGTACC |       |       |       |       |       |       |       | 11523 |
| GrabEatingMacaque | AATGTTGAAGTTGATGT-CATTAACTTGATACTTTTACTTATGTAGGAGTTTAGTGCTGTAAGTTCCCTTTGAAGTACC |       |       |       |       |       |       |       | 9969  |
| Macaque           | AATGTTGAAGTTGATGT-CATTAACTTGATACTTTTACTTATGTAGGAGTTTAGTGCTGTAAGTTCCCTTTGAAGTACC |       |       |       |       |       |       |       | 10012 |
| PigTailedMacaque  | AACGTTGAAGTTGATGT-CATTAACTTGATACTTTTACTTATGTAGGAGTTTAGTGCTGTAAGTTCCCTTTGAAGTACT |       |       |       |       |       |       |       | 9928  |
| Bonobo            | AACATTGAAGTTAATGT-CATTAACTTGGTACTTTTACTTATATAGGGATTTATTGCTGTATGTTCCCTTTTAAGTACC |       |       |       |       |       |       |       | 10227 |
| OliveBaboon       | AACGTTGAAGTTGATGT-CATTAACTTGATACTTTTACTTATGTAGGAGTTTAGTGCTGTAAGTTCCCTTTGAAGTACC |       |       |       |       |       |       |       | 9382  |
| Orangutan         | AACGTTGAAGTTGATGT-CATTAACTTGGTACTTTTACTTATATAGGAGTTTAGTGCTGTATGTTCCCTTTTAAGTACC |       |       |       |       |       |       |       | 10576 |

| Majority          | GCTTTCATGGCATTCCCTCAAATTTTGACATGTATATTTTTATTCATTTCAAATACTTATTAATAAATTTTTTTT-GACC  |       |       |       |       |       |       |       |       |
|-------------------|-----------------------------------------------------------------------------------|-------|-------|-------|-------|-------|-------|-------|-------|
|                   | 12890                                                                             | 12900 | 12910 | 12920 | 12930 | 12940 | 12950 | 12960 |       |
| Human             | GCTTTCACGGCATTCCCTCAAATTTTGACACGTATATTTTTATTCATTTCAAATACTTTTTTAAATA-TTCTTTT-GACC  |       |       |       |       |       |       |       | 9377  |
| Coquerel'sSifaka  | AATACAACTGTCTCTGCCTTGTGTTTGAATAGG----TTATGTCTATTTTCATCCTTTTATTTTAAACTTATTTTT--ATC |       |       |       |       |       |       |       | 8766  |
| Ma'sNightMonkey   | GCTTTCATGGCATTCCCTCAAATTTTGATGAAT---TTTCATTCAGTTCAAATACTTTTTTAAACAATTTCTTT-GACC   |       |       |       |       |       |       |       | 9255  |
| VervetAGM         | GCTTTCATGGCATTCCCTCAAATTTTGACATGTATATTTTTATTCATTTCAAATACTTAAAAAAAATTTTTTTTTGACC   |       |       |       |       |       |       |       | 9704  |
| Gorilla           | GTTTTCACGGCATTCCCTCAAATTTTGACACGTATATTTTTATTCATTTCAAATACTTTTTTAAAAAATTTCTTT-GACC  |       |       |       |       |       |       |       | 11602 |
| GrabEatingMacaque | GCTTTCATGGTATTCCCTCAAATTTTGACATGTATATTTTTATTCATTTCAGAATACTTAAAAAAAATTTTTTTTT-GACC |       |       |       |       |       |       |       | 10048 |
| Macaque           | GCTTTCATGGTATTCCCTCAAATTTTGACATGTATATTTTTATTCATTTCAGAATACTTAAAAAAAATTTTTTTTTGACC  |       |       |       |       |       |       |       | 10092 |
| PigTailedMacaque  | GCTTTCATGGCATTCCCTCAAATTTTGACATGTATATTTTTATTCATTTCAGAATACTTAAAAAAAATTTTTTTTTGACT  |       |       |       |       |       |       |       | 10008 |
| Bonobo            | GCTTTCACGGCATTCCCTCAAATTTTGACACGTATATTTTTATTCATTTCAAATACTTTTTTAAATA-TTCTTTT-GACC  |       |       |       |       |       |       |       | 10305 |
| OliveBaboon       | GCTTTCATGGCATTCCCTCAAATTTTGACATGTGTATTTTTATTCATTTCAGAATACTTAAAAAAAATTTTTTTTTGACC  |       |       |       |       |       |       |       | 9462  |
| Orangutan         | GCTTTCATGGCATTCCCTCAAATTTTGACACATACATTTTTATTCATTTCAAATACTTTTTTAAAAAATTTCTTT-GACC  |       |       |       |       |       |       |       | 10655 |

Tuesday, May 03, 2022 06:14 PM

| Majority          | CATGGGTTATTGGGAAGTATGTTATTTATGTTATTTAATTTCCAAATATTTGGAGTTTTCTATATATCTTT-CTGTTATG  |       |
|-------------------|-----------------------------------------------------------------------------------|-------|
|                   | 12970 12980 12990 13000 13010 13020 13030 13040                                   |       |
| Human             | CATGGGTTATTGGAAAGTATGTTATTTATGTTATTTAATTTCCAAATATTTGGAGTTTTCCATATATCTTT-CTGTTATG  | 9456  |
| Coquerel'sSifaka  | CTTAGATTTAAAGTATGTTTCTTGTAGGCAGCATAAAGTTGGAAATTGCTTTT--TTTCCTACATCTTTTTTTTTTTTTT  | 8844  |
| Ma'sNightMonkey   | CATGGGTTATTGGGAAGCATGTTATTTA-----ATTCTAAATATTTGGAGTTTTCTACATATCTTT-CTGTTGTA       | 9325  |
| VervetAGM         | CAGGAGTTATTGACAAGTATGTTATTTATGTTATTTAATTTCCAAATATTTGGAGTTTTCTATATATCT----GTTATG   | 9779  |
| Gorilla           | CATGGGTTATTGGAAAGTATGTTATTTATGTTAATTTAATTTCCAAATATTTGGAGTTTTCTGTATATCTTT-CTGTTATG | 11681 |
| GrabEatingMacaque | CAGGAGTTATTGGGAAGTATGTTATTTATGTTATTTAATTTCCAAATATTTGGAGTTTTCTATATATCT----GTTATG   | 10123 |
| Macaque           | CAGGAGTTATTGGGAAGTATGTTATTTATGTTATTTAATTTCCAAATCTTTGGAGTTTTCTATATATCT----GTTATG   | 10167 |
| PigTailedMacaque  | CAGGAGTTATTGGGAAGTATGTTATTTATGTTATTTAATTTCCAAATATTTGGAGTTTTCTATATATCT----GTTATG   | 10083 |
| Bonobo            | CATGGGTTATTGGAAAGTATGTTATTTATGTTA---ATTCCAAATATTTGGAGTTTTCCATATATCTTT-CTGTTACG    | 10380 |
| OliveBaboon       | CAGGAGTTATTGGGGAGTATGTTATTTATGTTATTTAATTTCCAAATATTTGGAGTTTTCTATATATCT----GTTATG   | 9537  |
| Orangutan         | CATGGGTTATTGGGAAGTATGTTATTTATGTTATTTAATTTCCAAATATTTGGAGTTTTCTGTATATCTTTTCTGTTATG  | 10735 |

| Majority          | TATTCCTAATTTTAGTTT--TATTCTGGCCAGAGAATGTATTTTCTAAGACTTGGATCTTTGTAAACATGGAGACTTGTT |       |
|-------------------|----------------------------------------------------------------------------------|-------|
|                   | 13050 13060 13070 13080 13090 13100 13110 13120                                  |       |
| Human             | TATTCATAATTTTAGTTT--TATTCTGGCCAGAGAACATATTTTCTAAGACTTGGATCTTTGTAAACATGGAGACTTGTT | 9534  |
| Coquerel'sSifaka  | GAGACAGAGTCTCACTCTGTGCGCTGAGAGTGAGTG---CCGCGGCGTCAGCCTAGCTCACAGCAACCTCAAAC       | 8920  |
| Ma'sNightMonkey   | TATTTGTAATTTTAATTT--TATTCTGGCCAGAGAACATATTTTCTAAGACTTGGATCTTTGTAAACATGGAGACTTACT | 9403  |
| VervetAGM         | TATTCCTAATTTTAGTTT--TATTCTGGCCAGAGAATGTATTTTCTAAGACTTGGATCTTTGTAAACATGGAGACTTGTT | 9857  |
| Gorilla           | TATTCATAATTTTAGTTT--TATTCTGGCCAGAGAACATATTTTCTAAGACTTGGATCTTTGTAAACATGGAGACTTGTT | 11759 |
| GrabEatingMacaque | TATTCCTAATTTTAGTTT--TATTCTGGCCAGAGAATGTATTTTCTAAGACTTGAATCTTTGTAAACATGGAGACTTGTT | 10201 |
| Macaque           | TATTCCTAATTTTAGTTT--TATTCTGGCCAGAGAATGTATTTTCTAAGACTTGAATCTTTGTAAACATGGAGACTTGTT | 10245 |
| PigTailedMacaque  | TATTCCTAATTTTAGTTT--TATTCTGGCCAGAGAATGTATTTTCTAAGACTTGAATCTTTGTAAACATGGAGACTTGTT | 10161 |
| Bonobo            | TATTCATAATTTTAGTTT--TATTCTGGCCAGAGAACATATTTTCTAAGACTTGGATCTTTGTAAACATGGAGACTTGTT | 10458 |
| OliveBaboon       | TATTCCTAATTTTAGTTT--TATTCTGGCCAGAGAATGTATTTTCTAAGACTTGGATCTTTGTAAACATGGAAACTTGTT | 9615  |
| Orangutan         | TATTCGTAATTTTAGTTT--TATTCTGGCCAGAGAACGTATTTTCTAAGACTTGGATCTTTGTAAACATGGAGACTTGTT | 10813 |

| Majority          | TTATGGTCCAAATATTATATATCTTGTTAAGTATTCACTGAATACTCTGAT--TTCTCTGCAGATTTGGAGAGATCTCTG |       |
|-------------------|----------------------------------------------------------------------------------|-------|
|                   | 13130 13140 13150 13160 13170 13180 13190 13200                                  |       |
| Human             | TTGTGGTCCAAAT---ATATATGTTGTTAAGTATTCACTGAATACTCTGATGATTCTCTGCAGATTTGGAGAAATCTCTG | 9611  |
| Coquerel'sSifaka  | CCTGGGCTCAAGTG--ATCCTTTTGCCTCAGCCTC--CTGAGTAGCTGGGA---CTACAGGCATGTGCCACCATGCCG   | 8992  |
| Ma'sNightMonkey   | TTATGGTCCAAATATTAT-TATCTTGTAAGTATTTACTGAATACTCTGACG---ATTGCAGATTTGGAAAGCTCTTTG   | 9478  |
| VervetAGM         | TTATGGTCCAAATATTATATATCTTGTTAAGTATTCACTGAATACTCTGAT--TTCTCTGCAGATTTGGAGAGATCTCTG | 9935  |
| Gorilla           | TTGTGGTCCAAAT---ATATATGTTGTTAAGTATTCACTGAATACTCTGATGATTCTCTGCAGATCTGGGAAATCTCTG  | 11836 |
| GrabEatingMacaque | TTATGGTCCAAATATTATATATCTTGTTAAGTATTCACTGAATACTCTGAT--TTCTCTGCAGATTTGGAGAGATCTCTG | 10279 |
| Macaque           | TTATGGTCCAAATATTATATATCTTGTTAAGTATTCACTGAATACTCTGAT--TTCTCTGCAGATTTGGAGAGATCTCTG | 10323 |
| PigTailedMacaque  | TTATGGTCCAAATATTATATATCTTGTTAAGTATTCACTGAATACTCTGAT--TTCTCTGCAGATTTGGAGAGATCTCTG | 10239 |
| Bonobo            | TTGTGGTCCAAAT---ATATATGTTGTTAAGTATTCACTGAATACTCTGATGATTCTCTGCAGATTTGGAGAAATCTCTG | 10535 |
| OliveBaboon       | TTATGGTCCAAATATTATATATCTTGTTAAGTATTCACTGAATACTCTGAT--TTCTCTGCAGATTTGGAGAGATCTCTG | 9693  |
| Orangutan         | TTATGGTCCAAAT---ATATATGTTGTTAAGTATTCACTGAATACTCTGATGATTCTCTGCAGATTTGGAGAAATCTCTG | 10890 |

Tuesday, May 03, 2022 06:14 PM

| Majority          | -GCAGCTCTTTTCTCTGGTACTTTGACCTGTA---AACTCTAGTTACTTTGGTCTTCTCAGGCTCTTGGC---TCTTTC |       |       |       |       |       |       |       |       |
|-------------------|---------------------------------------------------------------------------------|-------|-------|-------|-------|-------|-------|-------|-------|
|                   | 13210                                                                           | 13220 | 13230 | 13240 | 13250 | 13260 | 13270 | 13280 |       |
| Human             | TGCAGTCTTTTCTCTGGTACTTTGACCTGATGTAAACTCTAGTTACTTTGGTCTTCTCAGGCTCTTGGC---TCTTTC  |       |       |       |       |       |       |       | 9688  |
| Coquerel'sSifaka  | -GCTAATTTTTTCTATA-TATTTTTAGTTGTC---CAGATAATTTCTTTCTATTTTTTTGTAGTAGAGACGG-GGTCTC |       |       |       |       |       |       |       | 9065  |
| Ma'sNightMonkey   | TGCAACTCTTTTCTCTGGTACTTTGACATGTA---AACTCTAGTTACTTTGGTCTTCTC-----T-----C         |       |       |       |       |       |       |       | 9536  |
| VervetAGM         | --CAGCTCTTTTCTCTGGTACTTTGACCTGTA---AACTCTAGTTACTTTGGTCTTCTCAGGCTCTTGGC---TGTTTC |       |       |       |       |       |       |       | 10006 |
| Gorilla           | TGCAGCTCTTTTCTCTGGTACTTTGACCTGATGTAAACTCTAGTTACTTTGGTTTTCTCAGGCTCTTGGCGGCTCTTTC |       |       |       |       |       |       |       | 11916 |
| GrabEatingMacaque | -CAGCTCTTTTCTCTGGTACTTTGACCTGTA---AACTCTAGTTACTTTGGTCTTCTCAGGCTCTTGGC---TCTTTC  |       |       |       |       |       |       |       | 10350 |
| Macaque           | --CAGCTCTTTTCTCTGGTACTTTGACCTGTA---AACTCTAGTTACTTTGGTCTTCTCAGGCTCTTGGC---TCTTTC |       |       |       |       |       |       |       | 10394 |
| PigTailedMacaque  | --CAGCTCTTTTCTCTGGTACTTTGACCTGTA---AACTCTAGTTACTTTGGTCTTCTCAGGCTCTTGGC---TCTTTC |       |       |       |       |       |       |       | 10310 |
| Bonobo            | TGCAGCTCTTTTCTCTGGTACTTTGACCTGATGTAAACTCTAGTTACTTTGGTCTTCTCAGGCTCTTGGC---TCTTTC |       |       |       |       |       |       |       | 10612 |
| OliveBaboon       | --CAGCTCTTTTCTCTGGTACTTTGACCTGTA---AACTCTAGTTACTTTGGTCTTCTCAGGCTCTTGGT---TCTTTC |       |       |       |       |       |       |       | 9764  |
| Orangutan         | TGCAGCTCTTTTCTTTGGTATTTGACCTGTA---AACTCTAGTTACTTTGGTCTTCTCAGGCTCTTGGC---TCTTTC  |       |       |       |       |       |       |       | 10963 |

| Majority          | ACAATTAAGTAGTCTTTGAGGCTCAGCCTGGTTTCTCATAGCTGTGCTGTGGCCTGGACACTCAAGGGAGTA--AGCT  |       |       |       |       |       |       |       |       |
|-------------------|---------------------------------------------------------------------------------|-------|-------|-------|-------|-------|-------|-------|-------|
|                   | 13290                                                                           | 13300 | 13310 | 13320 | 13330 | 13340 | 13350 | 13360 |       |
| Human             | ACAATTAAGTAGTCTTTGAGGCTCAGCCTGCTTTCTCATAGCTATGCTATGGCCTGGACACTCAAGGGAGTATAAGCT  |       |       |       |       |       |       |       | 9768  |
| Coquerel'sSifaka  | GCTCTTGGT-CAGGCT---GGTCTCGAACTCCTGAGCTCA-AACAATCCGCCCGCCTCGGCCTCCAGAGTGCT---GGG |       |       |       |       |       |       |       | 9137  |
| Ma'sNightMonkey   | ACAGTTAAAGTAGTCTTTGAAACTCAGCCTGGTTTCTCATAGCTGTGCTATGGCCTGGACACTCAAGGGAGTA--AGCT |       |       |       |       |       |       |       | 9614  |
| VervetAGM         | ACAATTAAGTAGACTTTGAGGCTCGGCGTGGTTTCTCATAGTTGTGCTGTGGCCTGGACACTTAAGGGAGTA--AGCT  |       |       |       |       |       |       |       | 10084 |
| Gorilla           | ACAATTAAGTAGTCTTAGAGGCTCAGCCTGCTTTCTCATAGCTGTGCTATGGCCTGGACACTCAAGGGAGTATAAGCT  |       |       |       |       |       |       |       | 11996 |
| GrabEatingMacaque | ACAATTAAGTAGACTTTGAGGCTCAGTGTGGTTTCTTATAGTTGTGCTGTGGCCTGGACACTTAAGGGAGTA--AGCT  |       |       |       |       |       |       |       | 10428 |
| Macaque           | ACAATTAAGTAGACTTTGAGGCTCAGTGTGGTTTCTTATAGTTGTGCTGTGGCCTGGACACTTAAGGGAGTA--AGCT  |       |       |       |       |       |       |       | 10472 |
| PigTailedMacaque  | ACAATTAAGTAGACTTTGAGGCTCAGTGTGGTTTCTTATAGTTGTGCTGTGGCCTGGACACTTAAGGGAGTA--AGCT  |       |       |       |       |       |       |       | 10388 |
| Bonobo            | ACAATTAAGTAGTCTTTGAGGCTCAGCCTGCTTTCTCATAGCTGTGCTATGGCCTGGACACTCAAGGGAGTATAAGCT  |       |       |       |       |       |       |       | 10692 |
| OliveBaboon       | ACAATTAAGTAGACTTTGAGGCTCAGCATGGTTTCTTATAGTTGTGCTGTGGCCTGGACACTTAAGGGAGTA--AGCT  |       |       |       |       |       |       |       | 9842  |
| Orangutan         | ACAATTAAGTAGTCTTTGAGGCTCAGCCTGCTTTCTCATAGCTGTGCTATGGCCTGGACACTCAAGGGAGTG--AGCT  |       |       |       |       |       |       |       | 11041 |

| Majority          | GAGGCAAACATGGACT--CATTTGTTTTCTAACTTTCAGGGATTATTGTCCATCATTGCCTGATCTCCAGTGTCTTGAAA |       |       |       |       |       |       |       |       |
|-------------------|----------------------------------------------------------------------------------|-------|-------|-------|-------|-------|-------|-------|-------|
|                   | 13370                                                                            | 13380 | 13390 | 13400 | 13410 | 13420 | 13430 | 13440 |       |
| Human             | GAGGCAAACATGGACT--CATTTGTTTTCTAACTTTCAGGGATTATTGTCCATCATTGCCTGATGTCCAGTGTCTTGAAA |       |       |       |       |       |       |       | 9846  |
| Coquerel'sSifaka  | ATTATAGGTGTGAGCC--ACCGCGCCGCCATTTTTCTACATCTTAACTCTTTTTTTTTTTGGTTAAGACCATTTAC     |       |       |       |       |       |       |       | 9215  |
| Ma'sNightMonkey   | GAGGCAAACATGGACTTACATTTGTTTTCTGACTTTCAGGGATTGTTGTCCATCATTGCCTGATGTCCAGTGTCTTGAAA |       |       |       |       |       |       |       | 9694  |
| VervetAGM         | GAGGCAAACATGGACT--CATTTGTTTTCTAACTTTCAGGGACTATTGTCCATCATTGCCTGATCTCCAGTGTCTTGAAA |       |       |       |       |       |       |       | 10162 |
| Gorilla           | GAGGCAAACATGGACT--CATTTGTTTTCTAACTTTCAGGGATTACTGTCCATCATTGCCTGATGTCCAGTGTCTTGAGA |       |       |       |       |       |       |       | 12074 |
| GrabEatingMacaque | GAGGCAAACATGGACT--CATTTGTTTTCTAACTTTCAGGGACTATTGTCCATCATTGCCTGATCTCCAGTGTCTTGAAA |       |       |       |       |       |       |       | 10506 |
| Macaque           | GAGGCAAACATGGACT--CATTTGTTTTCTAACTTTCAGGGACTATTGTCCATCATTGCCTGATCTCCAGTGTCTTGAAA |       |       |       |       |       |       |       | 10550 |
| PigTailedMacaque  | GAGGCAAACATGGACT--CATTTGTTTTCTAACTTTCAGGGACTATTGTCCATCATTGCCTGATCTCCAGTGTCTTGAAA |       |       |       |       |       |       |       | 10466 |
| Bonobo            | GAGGCAAACATGGACT--CATTTGTTTTCTAACTTTCAGGGATTATTGTCCATCATTGCCTGATGTCCAGTGTCTTGAAA |       |       |       |       |       |       |       | 10770 |
| OliveBaboon       | GAGGCAAACATGGACT--CATTTGTTTTCTAACTTTCAGGGGCTGTTGTCCATCATTGCCTGATCTCCAGTGTCTTGAAA |       |       |       |       |       |       |       | 9920  |
| Orangutan         | GAGGCAAACATGGACT--CATTTGTTTTCTAACTT-AGGGATTATTGTCCATCATTGCCTGATCTCCAGTGTCTTGAAA  |       |       |       |       |       |       |       | 11118 |



Tuesday, May 03, 2022 06:14 PM

| Majority          | ACCCATTGTTCTGTATATT-TGCTTGATTGTTT----GTTGTTGTTTCGGGAAGGCCAAATCTGGGTCATGTTATTCTATC |       |       |       |       |       |       |       |  |       |
|-------------------|-----------------------------------------------------------------------------------|-------|-------|-------|-------|-------|-------|-------|--|-------|
|                   | 13450                                                                             | 13460 | 13470 | 13480 | 13490 | 13500 | 13510 | 13520 |  |       |
| Human             | AGCAATTATTCTGTATAGT-TGCTTGATTGTTT----GGTGTGTTTCGGCGAGGCCAAATCTGGGTCATGTTATTCTGTC  |       |       |       |       |       |       |       |  | 9921  |
| Coquerel'sSifaka  | ATTTAGTGTGTTACTACTATGGTTAATTTTGAA---ACTACCACCTTGCTATTTTTAATTTGT-TCTTGGTGTCTTTG    |       |       |       |       |       |       |       |  | 9291  |
| Ma'sNightMonkey   | ACACATTGTTCTGTATATT-TGTTTGATTTTTTTGTTGCTGTGTTTCAGCAAGGCCAAATCTGGGTCATCTTATTCCATC  |       |       |       |       |       |       |       |  | 9773  |
| VervetAGM         | ACCCATTGTTCTGTGATT-TGCTTGATTGTTT----GTTGTTGTTTCGGGAAGGCCAAATCTGGGTCATGTTATTCTATC  |       |       |       |       |       |       |       |  | 10237 |
| Gorilla           | AGCAATTGTTCTGTATATT-TGCTTGATTGTTT----GGTGTGTTTCGGCAAGGCCAAATCTGGGTCATGTTATTCTGTC  |       |       |       |       |       |       |       |  | 12149 |
| GrabEatingMacaque | ACCCATTGTTCTGTATATT-TGCTTGATTGTTT----GTTGTTGTTTCGGGAAGGCCAAATCTGGGTCATGTTATTCTATC |       |       |       |       |       |       |       |  | 10581 |
| Macaque           | ACCCATTGTTCTGTATATT-TGCTTGATTGTTT----GTTGTTGTTTCGGGAAGGCCAAATCTGGGTCATGTTATTCTATC |       |       |       |       |       |       |       |  | 10625 |
| PigTailedMacaque  | ACCCATTGTTCTGTATATT-TGCTTGATTGTTT----GTTGTTGTTTCGGGAAGGCCAAATCTGGGTCATGTTATTCTATC |       |       |       |       |       |       |       |  | 10541 |
| Bonobo            | AGCAATTGTTCTGTATATT-TGCTTGATTGTTT----GGTGGTGTTCGGCAAGGCCAAATCTGGGTCATGTTATTCTGTC  |       |       |       |       |       |       |       |  | 10845 |
| OliveBaboon       | ACCCATTGTTCTGTATATT-TGCTTGATTGTTT----GTTGTTGTTTCGGGAAGGCCAAATCTGGGTCATGTTATTCTATC |       |       |       |       |       |       |       |  | 9995  |
| Orangutan         | AGCGATTGTTCTGTATATT-TGCTTGATTGTTT----GGTGTGTTTCGGCAAGGCAGATCTGGGTGATGTTATTCTATG   |       |       |       |       |       |       |       |  | 11193 |

| Majority          | TTGACTGGAAGTAGAAGTCCACTGTTTTTTTTT-----T--TT-----AT-----                            |       |       |       |       |       |       |       |  |       |
|-------------------|------------------------------------------------------------------------------------|-------|-------|-------|-------|-------|-------|-------|--|-------|
|                   | 13530                                                                              | 13540 | 13550 | 13560 | 13570 | 13580 | 13590 | 13600 |  |       |
| Human             | TTGACTGGAAGTAGAAGTCCACTGTTTTTTTTT-----                                             |       |       |       |       |       |       |       |  | 9954  |
| Coquerel'sSifaka  | TTCCCT--TTTCCTCCTTTCTGCTTCTTG-----T--GT-----AT-----                                |       |       |       |       |       |       |       |  | 9326  |
| Ma'sNightMonkey   | TTGACTGGAAGTAGAAGTCCACTGTTTTTTTTT-----                                             |       |       |       |       |       |       |       |  | 9805  |
| VervetAGM         | TTGACTGGAAGTAGAAGTCCACTGTTTTTTTTTTTTTATTATTTTTTAATTTTTTTTTTATTATACTTTAAGTTCTAGGGTA |       |       |       |       |       |       |       |  | 10317 |
| Gorilla           | TTGACTGGCAGTAGAAGTCCACTGTTTTTTTTT-----                                             |       |       |       |       |       |       |       |  | 12181 |
| GrabEatingMacaque | TTGACTGGAAGTAGAAGTCCACTGTTTTTTTAAA--ATTATTTTTTAATTTTTTTT--ATTATACATTAAGTTCTAGGGTA  |       |       |       |       |       |       |       |  | 10657 |
| Macaque           | TTGACTGGAAGTAGAAGTCCACTGTTTTTTTAAA--ATTATTTTTTAATTTTTTTT--ATTATACATTAAGTTCTAGGGTA  |       |       |       |       |       |       |       |  | 10701 |
| PigTailedMacaque  | TTGACTGGAAGTAGAAGTCCACTGTTTTTTTAAA--ATTATTTTTTAATTTTTTTT--ATTATACATTAAGTTCTAGGGTA  |       |       |       |       |       |       |       |  | 10617 |
| Bonobo            | TTGACTGGAAGTAGAAGTCCACTGTTTTTTTTT-----                                             |       |       |       |       |       |       |       |  | 10877 |
| OliveBaboon       | TTGACTGGAAGTAGAAGTCCACTGTTTTTTTAA--ATTGTTTTTAATTTTTTTT--ATTATACATTAAGTTCTAGGGTA    |       |       |       |       |       |       |       |  | 10071 |
| Orangutan         | TTGACTGGAGGTAGAAGTCAACTGTTTTTTTTT-----                                             |       |       |       |       |       |       |       |  | 11225 |

| Majority          | CATGTG-ACAACGTGCAGGTTTGTGCTTATGTATAC-TGTGCCATGTTGGTGTGCTGCACCCATTAACCTGCATTTAC   |       |       |       |       |       |       |       |  |       |
|-------------------|----------------------------------------------------------------------------------|-------|-------|-------|-------|-------|-------|-------|--|-------|
|                   | 13610                                                                            | 13620 | 13630 | 13640 | 13650 | 13660 | 13670 | 13680 |  |       |
| Human             | -----                                                                            |       |       |       |       |       |       |       |  | 9954  |
| Coquerel'sSifaka  | CGAGCACATTTTATTCCATTTTATTCTGTGTTAGCTGATTAGCTGTAACTTTTTGTTATTTTGGTGGCTGCTTCAGGATT |       |       |       |       |       |       |       |  | 9406  |
| Ma'sNightMonkey   | -----TA-----                                                                     |       |       |       |       |       |       |       |  | 9807  |
| VervetAGM         | CATGTGCACAACGTGCAGGTTTGTGCTTATGTATACGTGTGCCATGTTGGTGTGCTGCACCCATTAACCTGCATTTAC   |       |       |       |       |       |       |       |  | 10397 |
| Gorilla           | -----                                                                            |       |       |       |       |       |       |       |  | 12181 |
| GrabEatingMacaque | CATGTGTACAACGTGCAGGTTTGTGCTTATGTATACATGTGCCATGTTGGTGTGCTGCACCCATTAACCTGTGCATTTAC |       |       |       |       |       |       |       |  | 10737 |
| Macaque           | CATGTGTACAACGTGCAGGTTTGTGCTTATGTATACATGTGCCATGTTGGTGTGCTGCACCCATTAACCTGCATTTAC   |       |       |       |       |       |       |       |  | 10781 |
| PigTailedMacaque  | CATGTGCACAACGTGCAGGTTTGTGCTTATGTATACGTGTGCCATGTTGGTGTGCTGCACCCATTAACCTGCATTTAC   |       |       |       |       |       |       |       |  | 10697 |
| Bonobo            | -----                                                                            |       |       |       |       |       |       |       |  | 10877 |
| OliveBaboon       | CATGTGCACAACGTGCAGGTTTGTGCTTATGTATACGTGTGCCATGTTGGTGTGCTGCACCCATTAACCTGCATTTAC   |       |       |       |       |       |       |       |  | 10151 |
| Orangutan         | -----                                                                            |       |       |       |       |       |       |       |  | 11225 |

Tuesday, May 03, 2022 06:14 PM

|                   |                                                                                  |       |       |       |       |       |       |       |       |
|-------------------|----------------------------------------------------------------------------------|-------|-------|-------|-------|-------|-------|-------|-------|
| Majority          | ATTAGGTATATCTCCTAATGCTATCCCTCCCC-TCTC-----GAC-----CTGGTGTGTAATATTCCCCTTCC        |       |       |       |       |       |       |       |       |
|                   | 13690                                                                            | 13700 | 13710 | 13720 | 13730 | 13740 | 13750 | 13760 |       |
| Human             | -----                                                                            |       |       |       |       |       |       |       | 9954  |
| Coquerel'sSifaka  | TATAGCATAGTGCTGTAATCTTATCACAATCTTCCCT-----CAA-----TGGATATTTATACCACTTCCAAA        |       |       |       |       |       |       |       | 9469  |
| Ma'sNightMonkey   | -----                                                                            |       |       |       |       |       |       |       | 9828  |
| VervetAGM         | ATTAGGTATATCTCCTAATGCTATCCCTCCCC-TCTCTGCACACCCCACGACAGGCCCTGGTGTGTAATATTCCCCTTCC |       |       |       |       |       |       |       | 10476 |
| Gorilla           | -----                                                                            |       |       |       |       |       |       |       | 12181 |
| GrabEatingMacaque | ATTAGGTATATCTCCTAATGCTATCCCTCCCCCTCTCTGCACACCCCACGACAGGCCCTGGTGTGTAATATTCCCCTTCC |       |       |       |       |       |       |       | 10817 |
| Macaque           | ATTAGGTATATCTCCTAATGCTATCCCTCCCCCTCTCTGCACACCCCACGACAGGCCCTGGTGTGTAATATTCCCCTTCC |       |       |       |       |       |       |       | 10861 |
| PigTailedMacaque  | ATTAGGTATATCTCCTAATGCTATCCCTCCCCCTCTCTGCACACCCCACGACAGGCCCTGGTGTGTAATATTCCCCTTCC |       |       |       |       |       |       |       | 10777 |
| Bonobo            | -----                                                                            |       |       |       |       |       |       |       | 10877 |
| OliveBaboon       | ATTAGGTATATCTCCTAATGCTATCCCTCCCC-TCTCTGGACACCCCACGACAGGCCCTGGTGTGTAATATTCCCCTTCC |       |       |       |       |       |       |       | 10230 |
| Orangutan         | -----                                                                            |       |       |       |       |       |       |       | 11225 |

|                   |                                                                                    |       |       |       |       |       |       |       |       |
|-------------------|------------------------------------------------------------------------------------|-------|-------|-------|-------|-------|-------|-------|-------|
| Majority          | TGTGTCCAAGTGTTTCTCATTGTT-----CA-----GT-----GATAGT                                  |       |       |       |       |       |       |       |       |
|                   | 13770                                                                              | 13780 | 13790 | 13800 | 13810 | 13820 | 13830 | 13840 |       |
| Human             | -----                                                                              |       |       |       |       |       |       |       | 9954  |
| Coquerel'sSifaka  | TATGTATATACTATCTGATTATT-----AT-----AATAGT                                          |       |       |       |       |       |       |       | 9500  |
| Ma'sNightMonkey   | AGTTAGAGAGCAACCTCATTCTT-----TG-----                                                |       |       |       |       |       |       |       | 9853  |
| VervetAGM         | TGTGTCCAGGTGTTTCTCATTGTTCAATTTCCACCTACGAGTGAGAACATGTGGTGTGTTGGTTTTCTGTTCTTGTGATAGT |       |       |       |       |       |       |       | 10556 |
| Gorilla           | -----                                                                              |       |       |       |       |       |       |       | 12181 |
| GrabEatingMacaque | TGTGTCCAAGTGTTTCTCATTGTTTCAGTTCCACCTATGAGTGAGAACATGCAGTGTTTGGTTTTCTGTTCTTGTGATAGT  |       |       |       |       |       |       |       | 10897 |
| Macaque           | TGTGTCCAAGTGTTTCTCATTGTTTCAGTTCCACCTATGAGTGAGAACATGCAGTGTTTGGTTTTCTGTTCTTGTGATAGT  |       |       |       |       |       |       |       | 10941 |
| PigTailedMacaque  | TGTGTCCAAGTGTTTCTCATTGTTTCAGTTCCACCTATGAGTGAGAACATGCAGTGTTTGGTTTTCTGTTCTTGTGATAGT  |       |       |       |       |       |       |       | 10857 |
| Bonobo            | -----                                                                              |       |       |       |       |       |       |       | 10877 |
| OliveBaboon       | TGTGTCCAAGTGTTTCTCATTGTTTCAGTTCCACCTATGAGTGAGAACATGCGGTGTTTGGTTTTCTGTTCTTGTGATAGT  |       |       |       |       |       |       |       | 10310 |
| Orangutan         | -----                                                                              |       |       |       |       |       |       |       | 11225 |

|                   |                                                                                   |       |       |       |       |       |       |       |       |
|-------------------|-----------------------------------------------------------------------------------|-------|-------|-------|-------|-------|-------|-------|-------|
| Majority          | TTGCTGA---TGGTTTCCAGC-----CAT-TCCTACAA-----ATCCTTTTTTATGGCTGCATAGTATTC            |       |       |       |       |       |       |       |       |
|                   | 13850                                                                             | 13860 | 13870 | 13880 | 13890 | 13900 | 13910 | 13920 |       |
| Human             | -----                                                                             |       |       |       |       |       |       |       | 9954  |
| Coquerel'sSifaka  | ATGTTG---TGTTATTTACT-----TCTATCCTCTTGG-----CCTTAGTGCTGTTGTTATACATTT               |       |       |       |       |       |       |       | 9554  |
| Ma'sNightMonkey   | TTAATGA-----CTATGG-----ATACTCTTGTTAGTTGCACCACAGTG                                 |       |       |       |       |       |       |       | 9893  |
| VervetAGM         | TTGCTGAGAAATGGTTTCCAGCTTCATCCATGTCCCTACAAAGGACATGAACTCATCCTTTTTTATGGCTGCATAGTATTC |       |       |       |       |       |       |       | 10636 |
| Gorilla           | -----                                                                             |       |       |       |       |       |       |       | 12181 |
| GrabEatingMacaque | TTGCTGAGAAATGGTTTCCAGCTTCATCCATATCCCTACAAAGGACATGAACTCATCCTTTTTTATGGCTGCATAGTATTC |       |       |       |       |       |       |       | 10977 |
| Macaque           | TTGCTGAGAAATGGTTTCCAGCTTCATCCATATCCCTACAAAGGACATGAACTCATCCTTTTTTATGGCTGCATAGTATTC |       |       |       |       |       |       |       | 11021 |
| PigTailedMacaque  | TTGCTGAGAAATGGTTTCCAGCTTCATCCATATCCCTACAAAGGACATGAACTCATCCTTTTTTATGGCTGCATAGTATTC |       |       |       |       |       |       |       | 10937 |
| Bonobo            | -----                                                                             |       |       |       |       |       |       |       | 10877 |
| OliveBaboon       | TTGCTGAGAAATGGTTTCCAGCTTCATCCATGTCTCTACAAAGGACATGAACTCATCCTTTTTTATGGCTGCATAGTATTC |       |       |       |       |       |       |       | 10390 |
| Orangutan         | -----                                                                             |       |       |       |       |       |       |       | 11225 |

Tuesday, May 03, 2022 06:14 PM

| Majority          | CATGGTGTATATGTGCCACATTTTCTTAATCCAGTCTATCATTGATGGAGATTGGGTTG-GTTCCAAGTCTTTGCTATT  |       |
|-------------------|----------------------------------------------------------------------------------|-------|
|                   | 13930 13940 13950 13960 13970 13980 13990 14000                                  |       |
| Human             | -----                                                                            | 9954  |
| Coquerel'sSifaka  | TATT-TCTATGTATGGTATAAAGTACAACTACATTCTTTTTGTTTTGAATAACCAGTTATCTTTTAAAAAGATGTAAACA | 9633  |
| Ma'sNightMonkey   | TAGTTACTGGATATACCACAATTTAGT-----TTCTACCTTGATGGAGATTAGGTTGAGTCCAGTTTGTAGTTATA     | 9967  |
| VervetAGM         | CATGGTGTATATGTGCCACATTTTCTTAATCCAGTCTNNNNNNNNNGGCTAATTTTTTGTATTTTGTAGTAGACAGGG   | 10716 |
| Gorilla           | -----                                                                            | 12181 |
| GrabEatingMacaque | CATGGTGTATATGTGCCACATTTTCTTAATCCAGTCTATCATTGATGGAGATTGGGTTG-GTTCCAAGTCTTTGCTATT  | 11056 |
| Macaque           | CATGGTGTATATGTGCCACATTTTCTTAATCCAGTCTATCATTGATGGAGATTGGGTTG-GTTCCAAGTCTTTGCTATT  | 11100 |
| PigTailedMacaque  | CATGGTGTATATGTGCCACATTTTCTTAATCCAGTCTATCATTGATGGAGATTGGGTTG-GTTCCAAGTCTTTGCTATT  | 11016 |
| Bonobo            | -----                                                                            | 10877 |
| OliveBaboon       | CATGGTGTATATGTGCCACATTTTCTTAATCCAGTCTATCATTGATGGAGATTGGGTTG-GTTCCAAGTCTTTGCTATT  | 10469 |
| Orangutan         | -----                                                                            | 11225 |

| Majority          | GTGAATGGTGCCGCAATAAACATAC--G--CAT-TGTC-T-ATA-----TT---AA---T-GGGTA-            |       |
|-------------------|--------------------------------------------------------------------------------|-------|
|                   | 14010 14020 14030 14040 14050 14060 14070 14080                                |       |
| Human             | -----                                                                          | 9954  |
| Coquerel'sSifaka  | ATAAATGTAATATTTCTACATTTCTGTAATACAGTTACCCACA-----TTCCTGAATACTGGGGTGA            | 9697  |
| Ma'sNightMonkey   | ATGTATGGAAATATTTAGAATAGA-----                                                  | 9991  |
| VervetAGM         | TTTCACCATGTTAGCCAGGATGGTCTCGATCTTCTGACCTCGTGATCCACCCATCTGGCCTCCCAAAGTCTGGATTAC | 10796 |
| Gorilla           | -----                                                                          | 12181 |
| GrabEatingMacaque | GTGAATGGTGCCGCAATAAACATACCTGTGCATGTGTCTTTATAG-----CAGCATGATTTAT--AACCTTTGGGTAT | 11128 |
| Macaque           | GTGAATGGTGCCGCAATAAACATACCTGTGCATGTGTCTTTATAG-----CAGCATGATTTAT--AACCTTTGGGTAT | 11172 |
| PigTailedMacaque  | GTGAATGGTGCCGCAATAAACATACCTGTGCATGTGTCTTTATAG-----CAGCATGATTTAT--AACCTTTGGGTAT | 11088 |
| Bonobo            | -----                                                                          | 10877 |
| OliveBaboon       | GTGAATGGTGCCGCAATAAACATACCTGTGCATGTGTCTTTATAG-----CAGCATGATTTAT--AACCTTTGGGTAT | 10541 |
| Orangutan         | -----                                                                          | 11225 |

| Majority          | A--CC--AG-AAT---AT---T---TCA--AT--TATTTCTAGT--TA--T-----AG-AATC-CCA-A-----T--- |       |
|-------------------|--------------------------------------------------------------------------------|-------|
|                   | 14090 14100 14110 14120 14130 14140 14150 14160                                |       |
| Human             | -----                                                                          | 9954  |
| Coquerel'sSifaka  | TCCTCTGCAGATTTCTGGAGTTCTCTGTGCACTTCTTTTTTCTGGTACTTTGACATGAAAACACTGGTGGGT--T--- | 9771  |
| Ma'sNightMonkey   | -----                                                                          | 9991  |
| VervetAGM         | AGGCGTGAGCCATCATATTTCTTTCCAGTATTTTATGTCTAGTAACTCGTAAGAAAAAATGATCAGATAAGTATATTT | 10876 |
| Gorilla           | -----                                                                          | 12181 |
| GrabEatingMacaque | ATACCC-AGTAATGGGATCTCTGGGTCAA-ATGGTATTTCTAGTTCTAGATCCTTGAGGAATCGCCACAC----TGCT | 11201 |
| Macaque           | ATACCC-AGTAATGGGATCTCTGGGTCAA-ATGGTATTTCTAGTTCTAGATCCTTGAGGAATCGCCACAC----TGCT | 11245 |
| PigTailedMacaque  | ATACCC-AGTAATGGGATCTCTGGGTCAA-ATGGTATTTCTAGTTCTAGATCCTTGAGGAATCGCCACAC----TGCT | 11161 |
| Bonobo            | -----                                                                          | 10877 |
| OliveBaboon       | ATACCC-AGTAATGGGATCTCTGGGTCAA-ATGGTATTTCTAGTTCTAGATCCTTGAGGAATCGCCACAC----TGCT | 10614 |
| Orangutan         | -----                                                                          | 11225 |

Tuesday, May 03, 2022 06:14 PM

| Majority          | -----T-A-----TTT--AG-----AGTGTA--A-C-TTTCTA--T-----ATC-T-TCCAGCA                   |       |       |       |       |       |       |       |       |
|-------------------|------------------------------------------------------------------------------------|-------|-------|-------|-------|-------|-------|-------|-------|
|                   | 14170                                                                              | 14180 | 14190 | 14200 | 14210 | 14220 | 14230 | 14240 |       |
| Human             | -----                                                                              |       |       |       |       |       |       |       | 9954  |
| Coquerel'sSifaka  | -----T-A-----GTGTTCTCG-----GACTCTTGATTCCTTCTCAGTTCAAGGAGTGTTCGAGGCT                |       |       |       |       |       |       |       | 9822  |
| Ma'sNightMonkey   | -----AGTAAA-----A-----ATGC-                                                        |       |       |       |       |       |       |       | 10002 |
| VervetAGM         | TTAATATGCTGATTACAACATTATTTAAATATTTAGAAATAACAAATGTTTCAGTGATAAGGAAATGAATCTGTTTCATAAA |       |       |       |       |       |       |       | 10956 |
| Gorilla           | -----                                                                              |       |       |       |       |       |       |       | 12181 |
| GrabEatingMacaque | TCCACAA--TGTTTGAACCA--GTTTGCAGTCCCACCAGCAGTGTA AAAAGCGTTTCTATTTCTCCACATCCTCTCCAGCA |       |       |       |       |       |       |       | 11277 |
| Macaque           | TCCACAA--TGTTTGAACCA--GTTTGCAGTCCCACCAGCGTAAAAGCGTTTCTATTTCTCCACATCCTCTCCAGCA      |       |       |       |       |       |       |       | 11321 |
| PigTailedMacaque  | TCCACAA--TGTTTGAACCA--GTTTGCAGTCCCACCAACAGTGTA AAAAGCGTTTCTATTTCTCCACATCCTCTCCAGCA |       |       |       |       |       |       |       | 11237 |
| Bonobo            | -----                                                                              |       |       |       |       |       |       |       | 10877 |
| OliveBaboon       | TCCACAA--TGTTTGAACCA--GTTTGCAGTCCCACCAACAGTGTA AAAAGCGTTTCTATTTCTCCACATCCTCTCCAGCA |       |       |       |       |       |       |       | 10690 |
| Orangutan         | -----                                                                              |       |       |       |       |       |       |       | 11225 |

| Majority          | C-TTT----TGTTT-CT-ACTTTTT--TGATCGCCAT--TAA-TGG--T-AGATG--A--T---TG--TG--T-T-ATTT  |       |       |       |       |       |       |       |       |
|-------------------|-----------------------------------------------------------------------------------|-------|-------|-------|-------|-------|-------|-------|-------|
|                   | 14250                                                                             | 14260 | 14270 | 14280 | 14290 | 14300 | 14310 | 14320 |       |
| Human             | -----                                                                             |       |       |       |       |       |       |       | 9954  |
| Coquerel'sSifaka  | CAGCTTGATTTCTTATAGCTTTGCTATGGTCTGTACAATCCAGGAATAAGCTGAGGCATACATGGATTACCTTATTT     |       |       |       |       |       |       |       | 9902  |
| Ma'sNightMonkey   | -----TATGTCAA-----                                                                |       |       |       |       |       |       |       | 10010 |
| VervetAGM         | CATTACAAATGTTTTCTAAATATTTT-TCATATGTGTGAAAAGTAGGATTA AAAATAACTTTGACAAATGCATACAATTT |       |       |       |       |       |       |       | 11035 |
| Gorilla           | -----                                                                             |       |       |       |       |       |       |       | 12181 |
| GrabEatingMacaque | CCTTT----TGTTTCTGACTTTTTAATGATCGCCATTCTA ACTGGTGTGAGATGGTATCTCATG--TGTTTTGATTT    |       |       |       |       |       |       |       | 11351 |
| Macaque           | CCTTT----TGTTTCTGACTTTTTAATGATCGCCATTCTA ACTGGTGTGAGATGGTATCTCATG--TGTTTTGATTT    |       |       |       |       |       |       |       | 11395 |
| PigTailedMacaque  | CCTTT----TGTTTCTGACTTTTTAATGATCGCCATTCTA ACTGGTGTGAGATGGTATCTCATG--TGTTTTGATTT    |       |       |       |       |       |       |       | 11311 |
| Bonobo            | -----                                                                             |       |       |       |       |       |       |       | 10877 |
| OliveBaboon       | CCTTT----TGTTTCTGACTTTTTAATGATCGCCATTCTA ACTGGTGTGAGATGGTATCTCATG--TGTTTTGATTT    |       |       |       |       |       |       |       | 10764 |
| Orangutan         | -----                                                                             |       |       |       |       |       |       |       | 11225 |

| Majority          | G--TTT----CTGA---CTG--GG-CAGTG-----TTTTTC-----GT-TGT-GG-TGC-T--AT--C-T             |       |       |       |       |       |       |       |       |
|-------------------|------------------------------------------------------------------------------------|-------|-------|-------|-------|-------|-------|-------|-------|
|                   | 14330                                                                              | 14340 | 14350 | 14360 | 14370 | 14380 | 14390 | 14400 |       |
| Human             | -----                                                                              |       |       |       |       |       |       |       | 9954  |
| Coquerel'sSifaka  | GT-TTT----CTGACTTTCAGGGATCATTGT-----TTATCATTCCTGATGTCCAGCGTCTTGAAAACCT             |       |       |       |       |       |       |       | 9963  |
| Ma'sNightMonkey   | -----AT-----                                                                       |       |       |       |       |       |       |       | 10012 |
| VervetAGM         | ATATGTGTTC CCAAAAACCTGGAGGGCAGTATACCAAAAATAGAGTAGTCTCTTCAGGTTGATGGGATTCGTTTTTCATAA |       |       |       |       |       |       |       | 11115 |
| Gorilla           | -----                                                                              |       |       |       |       |       |       |       | 12181 |
| GrabEatingMacaque | GCATTTCT--CTGATGGCTGATGGCCAGTG----ATGAT-GAGCATTTTCTCACGTGTCTGTTGGCTGCATAAATGTCTT   |       |       |       |       |       |       |       | 11424 |
| Macaque           | GCATTTCT--CTGATGGCTGATGGCCAGTG----ATGAT-GAGCATTTTCTCACGTGTCTGTTGGCTGCATAAATGTCTT   |       |       |       |       |       |       |       | 11468 |
| PigTailedMacaque  | GCATTTCT--CTGATGGCTGATGGCCAGTG----ATGAT-GAGCATTTTCTCACGTGTCTGTTGGCTGCATAAATGTCTT   |       |       |       |       |       |       |       | 11384 |
| Bonobo            | -----                                                                              |       |       |       |       |       |       |       | 10877 |
| OliveBaboon       | GCATTTCT--CTGATGGCTGATGGCCAGTG----ATGAT-GAGCATTTTCTCATGTGTCTGTTGGCTGCATAAATGTCTT   |       |       |       |       |       |       |       | 10837 |
| Orangutan         | -----                                                                              |       |       |       |       |       |       |       | 11225 |

Tuesday, May 03, 2022 06:14 PM

|                   |                                                                                   |       |       |       |       |       |       |       |       |
|-------------------|-----------------------------------------------------------------------------------|-------|-------|-------|-------|-------|-------|-------|-------|
| Majority          | -TTTTGAGAAGTGTCTGTTTCATAT-CT-CG-T-TCT----T-A-AG-G-ACAGGT-----A-----               |       |       |       |       |       |       |       |       |
|                   | 14410                                                                             | 14420 | 14430 | 14440 | 14450 | 14460 | 14470 | 14480 |       |
| Human             | -----                                                                             |       |       |       |       |       |       |       | 9954  |
| Coquerel'sSifaka  | ATTGTTCTATATGTTTGCTTGTTTTTTCAGTTGTTT---CAACAGGGCAAATCT-----A-----                 |       |       |       |       |       |       |       | 10015 |
| Ma'sNightMonkey   | ----GAAATTTATTTATTTA--T-----TT-----ATTT-----                                      |       |       |       |       |       |       |       | 10035 |
| VervetAGM         | TTCTTTATATAT-TTTGTCTATATCCACATTTTA-AGTATTTTATGATAAAGTTATTAATATAGGTATTAATA--TTGC   |       |       |       |       |       |       |       | 11191 |
| Gorilla           | -----                                                                             |       |       |       |       |       |       |       | 12181 |
| GrabEatingMacaque | CTTTTGAGAAGTGTCTGTTTCATATCCTTCGCTCTCTACCATCAGAGTGAACAGGTATGGCAGAAAATTTTTCGAATCTAC |       |       |       |       |       |       |       | 11504 |
| Macaque           | CTTTTGAGAAGTGTCTGTTTCATATCCTTCGCTCTCTACCATCAGAGTGAACAGGTATGGCAGAAAATTTTTCGAATCTAC |       |       |       |       |       |       |       | 11548 |
| PigTailedMacaque  | CTTTTGAGAAGTGTCTGTTTCATATCCTTCGCTCTCTACCATCAGAGTGAACAGGTATGGCAGAAAATTTTTCGAATCTAC |       |       |       |       |       |       |       | 11464 |
| Bonobo            | -----                                                                             |       |       |       |       |       |       |       | 10877 |
| OliveBaboon       | CTTTTGAGAAGTGTCTGTTTCATATCCTTCGCTCTCTACCATCAGAGTGAACAGGTATGGCAGAAAATTTTTCGAATCTAC |       |       |       |       |       |       |       | 10917 |
| Orangutan         | -----                                                                             |       |       |       |       |       |       |       | 11225 |

|                   |                                                                                 |       |       |       |       |       |       |       |       |
|-------------------|---------------------------------------------------------------------------------|-------|-------|-------|-------|-------|-------|-------|-------|
| Majority          | -----CT-CAAA-AACTC---C-AA-TT---AG-A-AAA-C-ACCCCATCAAA                           |       |       |       |       |       |       |       |       |
|                   | 14490                                                                           | 14500 | 14510 | 14520 | 14530 | 14540 | 14550 | 14560 |       |
| Human             | -----A-----                                                                     |       |       |       |       |       |       |       | 9955  |
| Coquerel'sSifaka  | -----CTTCATGTTACTCTGTCTTGACTGAAAGTAGAAGTCCACCTTTTTTTTA                          |       |       |       |       |       |       |       | 10063 |
| Ma'sNightMonkey   | -----ATTTATTTTA                                                                 |       |       |       |       |       |       |       | 10045 |
| VervetAGM         | TTAATTGATTAACACTGACATTTTCTGTCTTCTTAAAAAACTTTGCATAACTT---GATATAAATCTTTTAAATTGCA  |       |       |       |       |       |       |       | 11268 |
| Gorilla           | -----A-----                                                                     |       |       |       |       |       |       |       | 12182 |
| GrabEatingMacaque | TCATCTGACAAAGGGCTAATAT---CCAGAATCTACAAAGAACTCAAACAAATTTACAAGAAAAAACAACCCCATCAAA |       |       |       |       |       |       |       | 11581 |
| Macaque           | TCATCTGACAAAGGGCTAATAT---CCAGAATCTACAAAGAACTCAAACAAATTTACAAGAAAAAACAACCCCATCAAA |       |       |       |       |       |       |       | 11625 |
| PigTailedMacaque  | TCATCTGACAAAGGGCTAATAT---CCAGAATCTACAAAGAACTCAAACAAATTTACCAGAAAAAACAACCCCATCAAA |       |       |       |       |       |       |       | 11541 |
| Bonobo            | -----A-----                                                                     |       |       |       |       |       |       |       | 10878 |
| OliveBaboon       | TCATCTGACAAAGGGCTAATAT---CCAGAATCTACAAAGAACTCAAACAAATTTACAAGAAAAAACAACCCCATCAAA |       |       |       |       |       |       |       | 10994 |
| Orangutan         | -----A-----                                                                     |       |       |       |       |       |       |       | 11226 |

|                   |                                                                                |       |       |       |       |       |       |       |       |
|-------------------|--------------------------------------------------------------------------------|-------|-------|-------|-------|-------|-------|-------|-------|
| Majority          | AAGT--GCAAAG-----AATTACATAATATGGTCTCAGCAGTTATAGT-TCTACCTCATT                   |       |       |       |       |       |       |       |       |
|                   | 14570                                                                          | 14580 | 14590 | 14600 | 14610 | 14620 | 14630 | 14640 |       |
| Human             | -----ATTACATAATATGGTCTCAGCAGTTGTAGA-TCTACCTCATT                                |       |       |       |       |       |       |       | 9996  |
| Coquerel'sSifaka  | AAAAAAAAAAG-----AATTGCATAAAATGGTCTCAGCAGTTACAGGGTCTACTTCATA                    |       |       |       |       |       |       |       | 10118 |
| Ma'sNightMonkey   | ATTT--GTACAC-----AATAGAAAT-TATTTCTCACAGTTCTGGT-GGCTGGGAAGT                     |       |       |       |       |       |       |       | 10095 |
| VervetAGM         | AAAAAAGCACATAAAATTTACCGTCTTAACCATTTTTAAAGTGTACT-TAAATGTTTCAGTTATCT-TATACGTACTT |       |       |       |       |       |       |       | 11346 |
| Gorilla           | -----ATTACATAATATGGTCTCAGCAGTTGTAGA-TCTACCTCATT                                |       |       |       |       |       |       |       | 12223 |
| GrabEatingMacaque | AAGTGGGCAAAGGATATGAACAGACACTGTTTTTTAAATACATAATGTGGTCTCAGCAGTTATAGT-TCTGCCTCATT |       |       |       |       |       |       |       | 11660 |
| Macaque           | AAGTGGGCAAAGGATATGAACAGACACTGTTTTTTAAATACATAATGTGGTCTCAGCAGTTATAGT-TCTGCCTCATT |       |       |       |       |       |       |       | 11704 |
| PigTailedMacaque  | AAGTGGGCAAAGGATATGAACAGACACTGTTTTTTAAATACATAATGTGGTCTCAGCAGTTATAGT-TCTGCCTCATT |       |       |       |       |       |       |       | 11620 |
| Bonobo            | -----ATTACATAATATGGTCTCAGCAGTTGTAGA-TCTACCTCATT                                |       |       |       |       |       |       |       | 10919 |
| OliveBaboon       | AAGTGGGCAAAGGATATGAACAGACACTGTTTTTTAAATACATAATGTGGTCTCAGCAGTTATAGT-TCTGCCTTATT |       |       |       |       |       |       |       | 11073 |
| Orangutan         | -----ATTACGTAATATGGTCTCAGCAGTTGCAGA-TCTACCTCATC                                |       |       |       |       |       |       |       | 11267 |

Tuesday, May 03, 2022 06:14 PM

| Majority          | CTTTGTTAATGACAATGGAGGATACTCT-TGTGTGGCTGCAC-CACAGTGTAGTTACTGGA----CATACCACAATTTAG  |       |       |       |       |       |       |       |       |
|-------------------|-----------------------------------------------------------------------------------|-------|-------|-------|-------|-------|-------|-------|-------|
|                   | 14650                                                                             | 14660 | 14670 | 14680 | 14690 | 14700 | 14710 | 14720 |       |
| Human             | CTTTGTTAATGACAATGGAGGATACTC---GTGTGGCTGCAC-CACAGTGTAGTTACTGGA----CATACCACAATTTAG  |       |       |       |       |       |       |       | 10068 |
| Coquerel'sSifaka  | CTTTGTTAACGACAACAGAGAATACTCT---CGTGTATGTAC-CACAGTGTAGTTACTGGA-----CATACACA        |       |       |       |       |       |       |       | 10183 |
| Ma'sNightMonkey   | CCAAAATCAAGGTATTGGCAGATTTCAGTGTCTGCTGAGGGCC-CAGTCTCTGCTTACAAGA---TGGTATCTTATTGCTA |       |       |       |       |       |       |       | 10171 |
| VervetAGM         | AATAAT--GCCACATTGCGAAACCCATC-TCCAGAACTTTTTTCATTTTGGAGA-ACTGAAACTCTATACTGATTTTAAA  |       |       |       |       |       |       |       | 11422 |
| Gorilla           | GTTTGTAAATGACAATGGAGGATACTCT-TGTGTGGCTGCAG-CACAGTGTAGTTACTGGA----CATACCACAATTTAG  |       |       |       |       |       |       |       | 12297 |
| GrabEatingMacaque | CTTTGTTAATGACAATGGAGGATACTCT-TGTGTGACTGCAC-CACAGTGTAGTTACTGGA----CATACCACAATTTAG  |       |       |       |       |       |       |       | 11734 |
| Macaque           | CTTTGTTAATGACAATGGAGGATACTCT-TGTGTGACTGCAC-CACAGTGTAGTTACTGGA----CATACCACAATTTAG  |       |       |       |       |       |       |       | 11778 |
| PigTailedMacaque  | CTTTGTTAATGACAATGGAGGATACTCT-TGTGTGACTGCAC-CACAGTGTAGTTACTGGA----CATACCACAGTTT    |       |       |       |       |       |       |       | 11694 |
| Bonobo            | CTTTGTTAATGACAATGGAGGATACTC---ATGTGGCTGCAC-CACAGTGTAGTTACTGGA----CATACCACAATTTAG  |       |       |       |       |       |       |       | 10991 |
| OliveBaboon       | CTTTGTTAATGACAATGGAGGATACTCT-TGTGTGACTGCAC-CACAGTGTAGTTACTGGA----CATACCACAATTTAG  |       |       |       |       |       |       |       | 11147 |
| Orangutan         | CTTTTTTAATGACAATGGAGGATACTGT-TGTGTGGCTGCAC-CACAGTGCAGTTACTGGA----CATACCACAATTTAG  |       |       |       |       |       |       |       | 11341 |

| Majority          | TTTCCTACATTGATGGACATTTAGGT---TTGATTCCAGTTTGTGTG-----G-TATAACGTGTGGACATATTTAGAA    |       |       |       |       |       |       |       |       |
|-------------------|-----------------------------------------------------------------------------------|-------|-------|-------|-------|-------|-------|-------|-------|
|                   | 14730                                                                             | 14740 | 14750 | 14760 | 14770 | 14780 | 14790 | 14800 |       |
| Human             | TTTCCTACATCGATGGACATTTAGGT---TTGATTCCAGTTTGTGTG-----TATAACATGTGGACATATTTAGAA      |       |       |       |       |       |       |       | 10136 |
| Coquerel'sSifaka  | GTTCCTA---TGTGGATATTTTGGG---TTGATTCCATTTGTAGT-----TATAAAGTGTGGAAATATTTAGAG        |       |       |       |       |       |       |       | 10248 |
| Ma'sNightMonkey   | TGCCTCATATGGTAGAAAGGGACAAAAAGGGAACACTGTATCCTCACAT---GGCAGAAGAGACTGAAGGACC--AGG    |       |       |       |       |       |       |       | 10245 |
| VervetAGM         | ACTCTCCCTTTTGTCCCTTGCCCTGGTAACCAGCATTCTGTTTCCCTGTGTCTGTAATTTGACTACTTTAAATACCTCATA |       |       |       |       |       |       |       | 11502 |
| Gorilla           | TTTCCTACATTGATGGACATTTAGGT---TTGATTCCAGTTTGTGCAT-----TATAATGTGTGGACATACTTAGAA     |       |       |       |       |       |       |       | 12365 |
| GrabEatingMacaque | TTTCCTACATTGATGGACATTTAGGT---TTGATTCCAGTTTGTGGT-----TGTTTATAACGTGTGGACATATTTAGAA  |       |       |       |       |       |       |       | 11806 |
| Macaque           | TTTCCTACATTGATGGACATTTAGGT---TTGATTCCAGTTTGTGGT-----TAGTTATAACGTGTGGACATATTTAGAA  |       |       |       |       |       |       |       | 11850 |
| PigTailedMacaque  | TTTCCTACATTGATGGACATTTAGGT---TTGATTCCAGTTTGTGGT-----TAGTTATAACGTGTGGACATATTTAGAA  |       |       |       |       |       |       |       | 11766 |
| Bonobo            | TTTCCTACATTGATGGACATTTAGGT---TTGATTCCAGTTTGTGTG-----TATAACGTGTGGACATATTTAGAA      |       |       |       |       |       |       |       | 11059 |
| OliveBaboon       | TTTCCTACATTGATGGACATTTAGGT---TTGATTCCAGTTTGTGGT-----TAGTTATAACATGTGGACATATTTAGAA  |       |       |       |       |       |       |       | 11219 |
| Orangutan         | TTTCCTACATTGCTGGACATTTAGGT---TTGATTCCAGTTTGTGCAT-----TATAATGTGTGGACATATTTAGAA     |       |       |       |       |       |       |       | 11409 |

| Majority          | TAGAAGTAAAAATGCTGTGTCAA--ATGAAATTTATACTTAAAGAGTTA---CTGAAAACCACAATGCCAGAACACTCA  |       |       |       |       |       |       |       |       |
|-------------------|----------------------------------------------------------------------------------|-------|-------|-------|-------|-------|-------|-------|-------|
|                   | 14810                                                                            | 14820 | 14830 | 14840 | 14850 | 14860 | 14870 | 14880 |       |
| Human             | TAGAAGTAAAAATGCTGTGTCAA--ATGAAATTTATACTTAAAGAGTTA---CTGAAAACCACAATGCCAGAACACTCA  |       |       |       |       |       |       |       | 10210 |
| Coquerel'sSifaka  | TAAAAGTAAATATGCTATGTCAA--ATGAAATTTATACTGAAAAAGTTA---CTTAAAAACCATAATGCCATAACACTCA |       |       |       |       |       |       |       | 10323 |
| Ma'sNightMonkey   | CAGCTCTAGAGTCTTCTTTTTTTT--TTGGAATTTATCTTAAAGAGTGA---TTGTAAACTACAATGCCAGAATATTCA  |       |       |       |       |       |       |       | 10319 |
| VervetAGM         | TAAGTGAATATACAAATATAGGTTAAGCATCCCTAATCTGAAAATCCAAAGTCTGAATGCTACAAAATGTGAA-ACTT-  |       |       |       |       |       |       |       | 11580 |
| Gorilla           | TAGAAGTAAAAATGCTGTGTCAA--ATGAAATTTATACTTAAAGAGTTA---CTGAAAACCACAATGCCAGAACACTCA  |       |       |       |       |       |       |       | 12439 |
| GrabEatingMacaque | TAGAAGTAAAAATGCTGTGTCAA--AAGAAATTTATGCTTAAAGAGTTA---CTAGAAAACCACACTGCCAGAACACTCA |       |       |       |       |       |       |       | 11880 |
| Macaque           | TAGAAGTAAAAATGCTGTGTCAA--AAGAAATTTATGCTTAAAGAGTTA---CTAGAAAACCACACTGCCAGAACACTCA |       |       |       |       |       |       |       | 11924 |
| PigTailedMacaque  | TAGAAGTAAAAATGCTGTGTCAA--AAGAAATTTATGCTTAAAGAGTTA---CTAGAAAACCACACTGCCAGAACACTCA |       |       |       |       |       |       |       | 11840 |
| Bonobo            | TAGAAGTAAAAATGCTGTGTCAA--ATGAAATTTATACTTAAAGAGTTA---CTGAAAACCACAATGCCAGAACACTCA  |       |       |       |       |       |       |       | 11133 |
| OliveBaboon       | TAGAAGTAAAAATGCTGTGTCAA--AAGAAATTTATGCTTAAAGAGTTA---CTAGAAAACCACACTGCCAGAACACTCA |       |       |       |       |       |       |       | 11293 |
| Orangutan         | TAGAAGTAAAAATGCTGTGTCAA--ATGAAATTTATACTTAAAGAGTTA---CTGAAAACCACAATGCCAGAACACTCA  |       |       |       |       |       |       |       | 11483 |

Tuesday, May 03, 2022 06:14 PM

| Majority          | TTTGTTTTTTACAAGTGTGTATGGGAGTGCCTGTTTTTCCATACCCTTGCCAATTCTAGGTTTTATCAAAATTTA-GAAT    |       |       |       |       |       |       |       |       |
|-------------------|-------------------------------------------------------------------------------------|-------|-------|-------|-------|-------|-------|-------|-------|
|                   | 14890                                                                               | 14900 | 14910 | 14920 | 14930 | 14940 | 14950 | 14960 |       |
| Human             | TTTGTTTTTTACAAGTGTGTATGGGAGTGCCTATTTTTCCATACCCTTGCCAATTCTAGGTTTTATCAAAATTTAAGAAT    |       |       |       |       |       |       |       | 10290 |
| Coquerel'sSifaka  | TTTGTTTTCTGTAAGTGTGTATGGGAGTGCCTGTTTTTCCATACCCTTGCCAATTCTAGGTTTTATCAAAATTTA-GAAT    |       |       |       |       |       |       |       | 10402 |
| Ma'sNightMonkey   | TTTGTTTTTTACAAGTGTGTATGGGAGTGCCTGTTTTTCCATGCCCTTGCCAATTCTAGGTTTTATCAAAAT-----T      |       |       |       |       |       |       |       | 10392 |
| VervetAGM         | TTTGTTTTATTAGTTTAGTTTAGTTTAGTTTAGTTTAGTTTAGTTTAGTTTAGTTTAGTTTAGTTTTG-----AGATG-GAGT |       |       |       |       |       |       |       | 11654 |
| Gorilla           | TTTGTTTTTTACAAGTGTGTATGGGAGTGCCTATTTTTCCATACCCTTGCCAATTCTAGGTTTTATCAAAATTTAAGAAT    |       |       |       |       |       |       |       | 12519 |
| GrabEatingMacaque | TTTGTTTTTTACAGGTGTGTATGGGAGTGCCTGTTTTTCCATACCCTTGCCAATTCTAGGTTTTATCAAAATTTA-GAAT    |       |       |       |       |       |       |       | 11959 |
| Macaque           | TTTGTTTTTTACAGGTGTGTATGGGAGTGCCTGTTTTTCCATACCCTTGCCAATTCTAGGTTTTATCAAAATTTA-GAAT    |       |       |       |       |       |       |       | 12003 |
| PigTailedMacaque  | TTTGTTTTTTACAGGTGTGTATGGGAGTGCCTGTTTTTCCATACCCTTGCCAATTCTAGGTTTTATCAAAATTTA-GAAT    |       |       |       |       |       |       |       | 11919 |
| Bonobo            | TTTGTTTTTTACAAGTGTGTATGGGAGTGCCTATTTTTCCATACCCTTGCCAATTCTAGGTTTTATCAAAATTTAAGAAT    |       |       |       |       |       |       |       | 11213 |
| OliveBaboon       | TTCGTTTTTTACAGGTGTGTATGGGAGTGCCTGTTTTTCCATACCCTTGCCAATTCTAGGTTTTATCAAAATTTA-GAAT    |       |       |       |       |       |       |       | 11372 |
| Orangutan         | TTTGTTTTTTACAAGTGTGTATAGGATGCCTATTTTTCCATACCCTTGCCAATTCTAGGTTTTATCAAAATTTA-GAAT     |       |       |       |       |       |       |       | 11562 |

| Majority          | ATTAGCTTA-TTTTACAC-TAAAAATGTATTTTGTAAATTTATATTTTTGAAATGGGTGAGGTTTTT-CAAAATTTG-GCTAT  |       |       |       |       |       |       |       |       |
|-------------------|--------------------------------------------------------------------------------------|-------|-------|-------|-------|-------|-------|-------|-------|
|                   | 14970                                                                                | 14980 | 14990 | 15000 | 15010 | 15020 | 15030 | 15040 |       |
| Human             | ACTAGCTTA-TTTTACAC-TAAAAAT-TATTTTGTAAATTTATATTTTTGAAATGGGTGAGGTTTTT-CAGATTTG-GTTAT   |       |       |       |       |       |       |       | 10365 |
| Coquerel'sSifaka  | ATTAGCTAA-TTTTAGTTTAAAAAAGTATTTTATAATTTATATTTTTGAAATGAGTGAGATTTTTTTAAATTTG-GCTTT     |       |       |       |       |       |       |       | 10480 |
| Ma'sNightMonkey   | ATTAGCTAAATTTTACAC--TGAATGTATTTTATAATTTATATTTTTGAAATGGGTGAGGTTTTT-CAAAATTTG-GCTAT    |       |       |       |       |       |       |       | 10468 |
| VervetAGM         | CTTGCTCTG-TCGCCAGGCTGGAGTGAGTGGCGCAATCTCGGCTCACTGCAAGCTCCAACCCC--CAGGTTTCATGCCAT     |       |       |       |       |       |       |       | 11731 |
| Gorilla           | ACTAGCTTA-TTTTACAC-TAAAAAT-TATTTTGTAAATTTATATTTTTGAAATGGGTGAGGTTTTT-CAAAATTTG-GCTAT  |       |       |       |       |       |       |       | 12594 |
| GrabEatingMacaque | ATTAGATTA-TTTTACAC-TAAAAATGTATTTTCGTAATTTATATTTTTGAAATGAGTGAAGTTTTT--CAAAATTTG-GCTAT |       |       |       |       |       |       |       | 12034 |
| Macaque           | ATTAGATTA-TTTTACAC-TAAAAATGTATTTTCGTAATTTATATTTTTGAAATGAGTGAAGTTTTT--CAAAATTTG-GCTAT |       |       |       |       |       |       |       | 12078 |
| PigTailedMacaque  | ATTAGATTA-TTTTACAC-TAAAAATGTATTTTCGTAATTTATATTTTTGAAATGAGTGAAGTTTTT--CAAATTTA-GCTAT  |       |       |       |       |       |       |       | 11994 |
| Bonobo            | ACTAGCTTA-TTTTACAC-TAAAAAT-TATTTTGTAAATTTATATTTCTGAAATGGGTGAGGTTTTT-CAAAATTTG-GCTAT  |       |       |       |       |       |       |       | 11288 |
| OliveBaboon       | ATTAGATTA-TTTTACAC-TAAAAATGTATTTTCGTAATTTATATTTTTGAAATGAGTGAAGTTTTT--CAAAATTTG-GCTAT |       |       |       |       |       |       |       | 11447 |
| Orangutan         | ACTAGCTTA-TTTTACAG-TAAAAAT-TATTTTGTAAATTTATATTTTTGAAATGGGTGAGGTTTTT-CAAAATTTG-GCTAT  |       |       |       |       |       |       |       | 11637 |

| Majority          | TTATATTTTC--ATTTTCTGTGAAGTGCCTGTTTGTGTA-----CTGGACCTAGTTTAAATGGTCACTTTTATC--   |       |       |       |       |       |       |       |       |
|-------------------|--------------------------------------------------------------------------------|-------|-------|-------|-------|-------|-------|-------|-------|
|                   | 15050                                                                          | 15060 | 15070 | 15080 | 15090 | 15100 | 15110 | 15120 |       |
| Human             | TTATATTTTC--ATTTTCTGTGAAGTGCCTGTTTGTGTA-----CTGGACCTAGTT-----                  |       |       |       |       |       |       |       | 10413 |
| Coquerel'sSifaka  | TCATGTTTTT-ATTTTCTGTGAAGTGCCTCTTTGTATA-----CCTAACCTATTTTAAATGATAATCTTTATTT-    |       |       |       |       |       |       |       | 10547 |
| Ma'sNightMonkey   | TTATATTTTC--ATTTTCTGTGAAGTGTCTGTTTGTCTG-----CTGGACCTAGTTTAAATGGTCACTTTAAT--    |       |       |       |       |       |       |       | 10533 |
| VervetAGM         | TCTCTTCTCTCAGCCTCCATCGAGTAGCTGGGACTATAAGCGGCTGCCACCACGCCCGCTAATTTTTTGTTTTTTT-- |       |       |       |       |       |       |       | 11809 |
| Gorilla           | TTATATTTTC--ATTTTCTGTGAAGTGCCTGTTTGTGTA-----CTGGACCTATTTTAAATGGTCACTTTATCTT    |       |       |       |       |       |       |       | 12661 |
| GrabEatingMacaque | CTGAATTTTC--ATTTTCTGTCAACTGCTTGTGTTTGTGTA-----CTGGACCTAGTTTAAATGGTCACTTTTATC-- |       |       |       |       |       |       |       | 12099 |
| Macaque           | CTGAATTTTC--ATTTTCTGTCAACTGCTTGTGTTTGTGTA-----CTGGACCTAGTTTAAATGGTCACTTTTATC-- |       |       |       |       |       |       |       | 12143 |
| PigTailedMacaque  | CTGAATTTTC--ATTTTCTGTCAACTGCTTGTGTTTGTGTA-----CTGGACCTAGTTTAAATGGTCACTTTTATC-- |       |       |       |       |       |       |       | 12059 |
| Bonobo            | TTATATTTTC--ATTTTCTGTGAAGTGCCTGTTTGTGTA-----CTGGACCTAGTTTAAATGGTCACTTTATCTT    |       |       |       |       |       |       |       | 11355 |
| OliveBaboon       | CTGAATTTTC--ATTTTCTGTCAACTGCTTGTGTTTGTGTA-----CTGGACCTAGTTTAAATGGTCACTTTTATC-- |       |       |       |       |       |       |       | 11512 |
| Orangutan         | TTATATTTTC--ATTTTCTGTGAAGTGCCTGTTTGTGTA-----CTGGACCTAGTTTAAATGGTCACTTTATCTT    |       |       |       |       |       |       |       | 11704 |

Tuesday, May 03, 2022 06:14 PM

```

Majority      ---ACAGTTCCTTTGTATAAAAAA--ATTGATTTTCATAT----GCATTGTAGGTATTTTTT--CTTTGAGGTTTTCT---
                15130      15140      15150      15160      15170      15180      15190      15200
Human          -----AATTC----- 10418
Coquerel'sSifaka GTTGTAGCTCTTTGTATAAAAAGACAGTTGATTTTCATAT----GCATTGTAGGTGTTTTT--CTTTGAGTTTTTAT--- 10616
Ma'sNightMonkey --CACAGTTCCTTGTATAAAAAA--ATTCATTTTGTAT----GCATTGTAGATATTTTTT--CCTTGAGGTTTTTTGTT 10602
VervetAGM      ---GTTTTCTTTTAGTAGAGAT--GGGGTTTCACTGTAGCCAGCATGGTCTCTATCTCCTGACCTCGTGATCCGCC--- 11881
Gorilla        ATCACAGTTCCTTTGTGTAATAAAA--TTGATTTTCATAT----GCCTTATAGATATTTTTT--CTTTGAGTTTTTTT--- 12728
GrabEatingMacaque---ACAGTTCCTTTGTATAAAAAA--ATTGATTTTCATAT----GCATTGTAGGTATTTTTT--CTTTGAGGTTTTCT--- 12164
Macaque        ---ACAGTTCCTTTGTATAAAAAA--ATTGATTTTCATAT----GCATTGTAGGTATTTTTT--CTTTGAGGTTTTCT--- 12208
PigTailedMacaque---ACAGTTCCTTTGTATAAAAAA--ATTGATTTTCATAT----GCATTGTAGGTATTTTTT--CTTTGAGGTTTTCT--- 12124
Bonobo         ATCACAGTTCCTTTGTGTAATAAAA--ATTGATTTTCATAT----GCATTGTAGATATTTTTT--CTTTGAGTTTTTTT--- 11423
OliveBaboon    ---ACAGTTCCTTTGTATAAAAAA--ATTGATTTTCATAT----GCATTGTGGGTATTTTTT--CTTTGAGGTTTTCT--- 11577
Orangutan      ATCACAGTTCCTTTGTATAAAAAA--ATTGATTTTCATAC----GCATTGTAGATATTTTTT--ATTTGAGTTTTTTT--- 11772
    
```

```

Majority      -----TTTTTGCTTTTTTGATATTCCTTTGT--TATAGTTTTAGGC-----ATATATATA---TTTGAATTAAGT
                15210      15220      15230      15240      15250      15260      15270      15280
Human          -----AAATATATA-TATTTGAATTAAGT 10441
Coquerel'sSifaka -----ATTTTTGATGTTCTTTGT---TAATCTTGGGCATG-----ATATATACT---TCTGAATTACTA 10670
Ma'sNightMonkey TTGTTTTGTTTTACTTTTTTGACATTCCTTTG---TATAGTCTTAGAC-----ATACACATA---TTTGAATTGAGT 10668
VervetAGM      -----TGCCTCGGCCTTCCAAAGTCTGGGATTACAGGCCGAGCCACC---ACACCTGAAACTTTTTGAACACTT 11949
Gorilla        -----TTTTTGCTTTTTTGATATTCCTTTG---TATAGTTTTAGGCATAT---ATATATATA-TATTTGAATTAAGT 12792
GrabEatingMacaque-----TTTTTGCTTTTTTGATATTCCTTTGTTGTATAGTTTTAGGC-----ATATATATA---TTTTGATTAAGT 12225
Macaque        -----TTTTTGCTTTTTTGATATTCCTTTGTTGTATAGTTTTAGGC-----ATATATATA---TTTTGATTAAGT 12269
PigTailedMacaque-----TTTTTGCTTTTTTGATATTCCTTTGTTGTATAGTTTTAGGC-----ATATATATA---TTTTGATTAAGT 12185
Bonobo         -----T---GCTTTTTTGATATTCCTTTG---TATAGTTTTAGGCATATATATATATATATA-TATTTGAATTAAGT 11487
OliveBaboon    -----TTTTTGCTTTTTTGATATTCCTTTGTTGTATAGTTTTAGGC-----ATATATATA---TTTTGATTAAGT 11638
Orangutan      -----T---GCTTTTTTGATATTCCTTTG---TATAGTTTTAGGC-----ATATATATA-TATTTGAATTAAGT 11828
    
```

```

Majority      GATTTTGCT-TTTAAATCCATTTGATATGTAAACATTTTTAGCCCTCAGCTTCTTCATCTTTAAAT--TAGGATTTTA-
                15290      15300      15310      15320      15330      15340      15350      15360
Human          GATTTTATGTTTAAAGTCCATTTGATGTGTAACATTTTTAGCCCTCAGCTTCTTCACCTTTTAAAT--TAGGATTTTA- 10518
Coquerel'sSifaka AATATTTTT--TTAAATCTATTTGATACTTTAAACATTTTTAGCTTCAGTTTCTTCATCTTTAAATGGGGGGTTAATAA 10748
Ma'sNightMonkey GATTTCACTTTTTAAATCCATTTGATAATTTAA--ATTTTTAACCTCAGCTTCTTCATCTTTAAAT--TGGGATTTTAA 10745
VervetAGM      ACACGTGAT-GCTCAAAGGAAGTCTTAGTGGAGCATTTTGGATTTTAGATT-TTCAGATTAGGAATGCTCAGGTTGTGT 12027
Gorilla        GATTTCACTGTTTAAATCCATTTGATGTGTAACATTTTTAGCCCTCAGCTTCTTCACCTTTAAAT--TAGGATTTTA- 12869
GrabEatingMacaqueGATTTTGCT-TTTAAATCCATTTGATATGTAAACATTTTTAGCCCGAGCTTCTTCATCTTTAAAT--TAGGATTTTAT 12302
Macaque        GATTTTGCT-TTTAAATCCATTTGATATGTAAACATTTTTAGCCCGAGCTTCTTCATCTTTAAAT--TAGGATTTTAT 12346
PigTailedMacaque GATTTTGCT-TTTAAATCCATTTGATATGTAAACATTTTTAGCCCGAGCTTCTTCATCTTTAAAT--TAGGATTTTA- 12261
Bonobo         GATTTCACTGTTTAAAGTCCATTTGATGTGTAACATTTTTAGCCCTCAGCTTCTTCACCTTTAAAT--TAGGATTTTA- 11564
OliveBaboon    GATTTTGCT-TTTAAATCCATTTGATATGTAAACATTTTTAGCCCGAGCTTCTTCATCTTTAAAT--TAGGATTTTA- 11714
Orangutan      GATTTCACTTTTTAAATCCATTTGATGTGTAACGTTTTAGCCCTCAGCTTCTTCATCTTTAAAT--TAGGATTTTA- 11905
    
```



Tuesday, May 03, 2022 06:14 PM

| Majority          |                                                                                 | ----- |       |       |       |       |       |       |       |       |
|-------------------|---------------------------------------------------------------------------------|-------|-------|-------|-------|-------|-------|-------|-------|-------|
|                   |                                                                                 | ----- |       |       |       |       |       |       |       |       |
|                   |                                                                                 | 15370 | 15380 | 15390 | 15400 | 15410 | 15420 | 15430 | 15440 |       |
|                   |                                                                                 | ----- |       |       |       |       |       |       |       |       |
| Human             |                                                                                 | ----- |       |       |       |       |       |       |       | 10518 |
| Coquerel'sSifaka  | TTAT-GA-----A-----A-----                                                        | ----- |       |       |       |       |       |       |       | 10756 |
| Ma'sNightMonkey   | TAGTTGT-----                                                                    | ----- |       |       |       |       |       |       |       | 10752 |
| VervetAGM         | TTGTCCTTTTGTGACTGGTTTACATTCACTTAACAATGTTCTCAAGGTCCATCCGTGTTGTAGCATGTGACAAGATTTC | ----- |       |       |       |       |       |       |       | 12107 |
| Gorilla           |                                                                                 | ----- |       |       |       |       |       |       |       | 12869 |
| GrabEatingMacaque | TTTTTATTTTATTTATTTATTTTGTGAGACGGAGTCTCGCTCTGTGCGCCAGGCTGGAGTGCAGTGGCCGGGTCTCAG  | ----- |       |       |       |       |       |       |       | 12382 |
| Macaque           | TTTTTATTTTATTTATTTATTTTGTGAGACGGAGTCTCGCTCTGTGCGCCAGGCTGGAGTGCAGTGGCCGGGTCTCAG  | ----- |       |       |       |       |       |       |       | 12426 |
| PigTailedMacaque  |                                                                                 | ----- |       |       |       |       |       |       |       | 12261 |
| Bonobo            |                                                                                 | ----- |       |       |       |       |       |       |       | 11564 |
| OliveBaboon       |                                                                                 | ----- |       |       |       |       |       |       |       | 11714 |
| Orangutan         |                                                                                 | ----- |       |       |       |       |       |       |       | 11905 |

| Majority          |                                                                                  | ----- |       |       |       |       |       |       |       |       |
|-------------------|----------------------------------------------------------------------------------|-------|-------|-------|-------|-------|-------|-------|-------|-------|
|                   |                                                                                  | ----- |       |       |       |       |       |       |       |       |
|                   |                                                                                  | 15450 | 15460 | 15470 | 15480 | 15490 | 15500 | 15510 | 15520 |       |
|                   |                                                                                  | ----- |       |       |       |       |       |       |       |       |
| Human             |                                                                                  | ----- |       |       |       |       |       |       |       | 10518 |
| Coquerel'sSifaka  |                                                                                  | ----- |       |       |       |       |       |       |       | 10762 |
| Ma'sNightMonkey   |                                                                                  | ----- |       |       |       |       |       |       |       | 10780 |
| VervetAGM         | TCCGTTTTTAAGGCTACATAGCATTCCATTGTGGTACACAAAAGTTGATTTGAAGCCCCCTGTGTCATCACTCATTCTTC | ----- |       |       |       |       |       |       |       | 12187 |
| Gorilla           |                                                                                  | ----- |       |       |       |       |       |       |       | 12869 |
| GrabEatingMacaque | CTCACTGCAAGCTCCGCCTCCCGGGTTCA----TTCTCCTGCCTCAGCCTCCCGAGTAGCTGGGACTACAGGC-CTCAC  | ----- |       |       |       |       |       |       |       | 12456 |
| Macaque           | CTCACTGCAAGCTCCGCCTCCCGGGTTACGCCATTCTCCTGCCTCAGCCTCCGGAGTAGCTGGGACTACAGGCGCCCGC  | ----- |       |       |       |       |       |       |       | 12506 |
| PigTailedMacaque  |                                                                                  | ----- |       |       |       |       |       |       |       | 12262 |
| Bonobo            |                                                                                  | ----- |       |       |       |       |       |       |       | 11564 |
| OliveBaboon       |                                                                                  | ----- |       |       |       |       |       |       |       | 11714 |
| Orangutan         |                                                                                  | ----- |       |       |       |       |       |       |       | 11905 |

| Majority          |                                                                                 | ----- |       |       |       |       |       |       |       |       |
|-------------------|---------------------------------------------------------------------------------|-------|-------|-------|-------|-------|-------|-------|-------|-------|
|                   |                                                                                 | ----- |       |       |       |       |       |       |       |       |
|                   |                                                                                 | 15530 | 15540 | 15550 | 15560 | 15570 | 15580 | 15590 | 15600 |       |
|                   |                                                                                 | ----- |       |       |       |       |       |       |       |       |
| Human             |                                                                                 | ----- |       |       |       |       |       |       |       | 10518 |
| Coquerel'sSifaka  |                                                                                 | ----- |       |       |       |       |       |       |       | 10763 |
| Ma'sNightMonkey   |                                                                                 | ----- |       |       |       |       |       |       |       | 10780 |
| VervetAGM         | CATAACAAAATACCATAGACTGAGTGACTTAAAAACAGAAATTCATTTTCTCACAGTTCTGGAAACTGGGAAGTCCAAG | ----- |       |       |       |       |       |       |       | 12267 |
| Gorilla           |                                                                                 | ----- |       |       |       |       |       |       |       | 12869 |
| GrabEatingMacaque | CACC----CGGCTAGTTTTTGTATTTTTTTTTTTAGTAGAGACAGGGTTTCACCATGTTAG--CCAGGATGGTCTCG   | ----- |       |       |       |       |       |       |       | 12528 |
| Macaque           | CACCTCGCCCGGCTAGTTTTTGTATTTTTTTTTTTAGTAGAGACAGGGTTTCACCATGTTAG--CCAGGATGGTCTCG  | ----- |       |       |       |       |       |       |       | 12583 |
| PigTailedMacaque  |                                                                                 | ----- |       |       |       |       |       |       |       | 12262 |
| Bonobo            |                                                                                 | ----- |       |       |       |       |       |       |       | 11564 |
| OliveBaboon       |                                                                                 | ----- |       |       |       |       |       |       |       | 11714 |
| Orangutan         |                                                                                 | ----- |       |       |       |       |       |       |       | 11905 |

Tuesday, May 03, 2022 06:14 PM

| Majority          | -----                                                                             |       |       |       |       |       |       |       |       |
|-------------------|-----------------------------------------------------------------------------------|-------|-------|-------|-------|-------|-------|-------|-------|
|                   | 15610                                                                             | 15620 | 15630 | 15640 | 15650 | 15660 | 15670 | 15680 |       |
| Human             | -----                                                                             |       |       |       |       |       |       |       | 10518 |
| Coquerel'sSifaka  | -----                                                                             |       |       |       |       |       |       |       | 10763 |
| Ma'sNightMonkey   | -----                                                                             |       |       |       |       |       |       |       | 10780 |
| VervetAGM         | ATCAAGGTACCAGCAAGGCAACTTTCCTCTCTGAGGCCACTTCTCTTGAAGCAAGGCCATCATTTTATTTTGTGTGCCTCA |       |       |       |       |       |       |       | 12347 |
| Gorilla           | -----                                                                             |       |       |       |       |       |       |       | 12869 |
| GrabEatingMacaque | ATCTCCTGACCTTGTGATCCGCCCGTCTCGGCCTCCCAAAGTCTGGGATTACAGGCTTGAGCCACAGCGCCTGGCTAAA   |       |       |       |       |       |       |       | 12608 |
| Macaque           | ATCTCCTGACCTTGTGATCCGCCCGTCTCGGCCTCCCAAAGTCTGGGATTACAGGCTTGAGCCACAGCGCCCGCTAAA    |       |       |       |       |       |       |       | 12663 |
| PigTailedMacaque  | -----T-----                                                                       |       |       |       |       |       |       |       | 12263 |
| Bonobo            | -----                                                                             |       |       |       |       |       |       |       | 11564 |
| OliveBaboon       | -----                                                                             |       |       |       |       |       |       |       | 11714 |
| Orangutan         | -----                                                                             |       |       |       |       |       |       |       | 11905 |

| Majority          | -----ATAGTTC-CACAAACTAGGTCCTT-GTTAATGTTAATGTAT-TTACATTT-----AGAATATCC             |       |       |       |       |       |       |       |       |
|-------------------|-----------------------------------------------------------------------------------|-------|-------|-------|-------|-------|-------|-------|-------|
|                   | 15690                                                                             | 15700 | 15710 | 15720 | 15730 | 15740 | 15750 | 15760 |       |
| Human             | -----ATAGTTC-CACAAACTAGGTC-----TAATGTTAATGTAT-TTACATTT-----AGAATATCC              |       |       |       |       |       |       |       | 10569 |
| Coquerel'sSifaka  | -----GTGATTAATGCATAAAAAGTATTTTCCTAA-GTTAATGTACGCTACATAT-----AGAATATAC             |       |       |       |       |       |       |       | 10821 |
| Ma'sNightMonkey   | -----GTATTTTCTGCAAACTAGGTC---TCAGTGTTAATATGT-TTACACTACATTT---AGACTATCC            |       |       |       |       |       |       |       | 10839 |
| VervetAGM         | CATGACCTTTTGTGTTGTCAGCACACTTTGGGGGAGTGGGTGGCACAAAGCTCTC-TTGTGTTTCTCTCATAAAGGCATTA |       |       |       |       |       |       |       | 12426 |
| Gorilla           | -----ATAGTTC-CACAAACTAGGTC-----TAATGTTAATGTAT-TTACATTT-----AGAATATCC              |       |       |       |       |       |       |       | 12920 |
| GrabEatingMacaque | ATTAGGATTTTAATAGTTC-CACAAACTAGGTCCTTAGTTAATGTTAATGTAT-TTGCATTT-----AGAATATCC      |       |       |       |       |       |       |       | 12677 |
| Macaque           | ATTAGGATTTTAATAGTTC-CACAAACTAGGTCCTTAGTTAATGTTAATGTAT-TTGCATTT-----AGAATATCC      |       |       |       |       |       |       |       | 12732 |
| PigTailedMacaque  | -----AGTTC-CACAAACTAGGTCCTTAGTTAATGTTAATTTAT-TTGCATTT-----AGAATATCC               |       |       |       |       |       |       |       | 12318 |
| Bonobo            | -----ATAGTTC-CACAAACTAGGTC-----TAATGTTAATGTAT-TTACATTT-----AGAATATCC              |       |       |       |       |       |       |       | 11615 |
| OliveBaboon       | -----ATAGTTC-CACAAACTAGGTCCTTAGTTAATGTTAATGTAT-TTGCATTT-----AGAATATCC             |       |       |       |       |       |       |       | 11771 |
| Orangutan         | -----ATAGTTC-CACAAACTAGGT-----AG-GTTAATGTAT-TTACATTT-----AGAATATCC                |       |       |       |       |       |       |       | 11953 |

| Majority          | AA-GTTTTTATGGCTTTAGGATACAAATGAAATCTCATTTTCCA-TTATTTTATAAATTTGCTGTA----TTCAG---CT |       |       |       |       |       |       |       |       |
|-------------------|----------------------------------------------------------------------------------|-------|-------|-------|-------|-------|-------|-------|-------|
|                   | 15770                                                                            | 15780 | 15790 | 15800 | 15810 | 15820 | 15830 | 15840 |       |
| Human             | AA-GTTTTTATGGCTTTAGGATACAAATGAAATCTCATTTTCCA-TTATTTTATAAATTTGCTGTA----TTCAG---CT |       |       |       |       |       |       |       | 10640 |
| Coquerel'sSifaka  | AA--ATTTTATGGCTTTAGGATAT-GTTGAAATCTCATTT--AATTTTAAAAATAAAGTTGTACTIONTTCAA-----   |       |       |       |       |       |       |       | 10890 |
| Ma'sNightMonkey   | AA-GTTTTTATGGCTTTAGGATACAAATGAAATCTCATTTTCCA-TTATTTTATAAATTTGTTGTAGTTATTCAGAATCT |       |       |       |       |       |       |       | 10917 |
| VervetAGM         | ATTAATATGAAGGCCCTACTCTCATGATCTCATAAAATCCTCCAGTTAACTCCTAAAGGCCCTATT---TCTAA---AT  |       |       |       |       |       |       |       | 12499 |
| Gorilla           | AA-GTTTTTATGGCTTTAGGATACAAATGAAATCTCATTTTCCA-TTATTTTATAAATTTTCTGTA----TTCAG---CT |       |       |       |       |       |       |       | 12991 |
| GrabEatingMacaque | AC-ATTTTATGGCTTCAGGATACAAATGAAATCTCATTTTCCA-TTATTTTATAAATTTGCTGTA----TTCGG---CT  |       |       |       |       |       |       |       | 12748 |
| Macaque           | AC-ATTTTATGGCTTCAGGATACAAATGAAATCTCATTTTCCA-TTATTTTATAAATTTGCTGTA----TTTGG---CT  |       |       |       |       |       |       |       | 12803 |
| PigTailedMacaque  | AC-ATTTTATGGCTTTAGGATACAAATGAAATCTCATTTTCCA-TTATTTTATAAATTTGCTGTA----TTCGG---CT  |       |       |       |       |       |       |       | 12389 |
| Bonobo            | AA-GTTTTTATGGCTTTAGGATACAAATGAAATCTCATTTTCCA-TTATTTTATAAATTTGCTGTA----TTCAG---CT |       |       |       |       |       |       |       | 11686 |
| OliveBaboon       | AC-ATTTTATGGCTTTAGGATACAAATGAAATCTCATTTTCCA-TTATTTTATAAATTTTCTGTA----TTCGG---CT  |       |       |       |       |       |       |       | 11842 |
| Orangutan         | AA-GTTTTTGTGGCGTTAGGATACAAATGAAATCTCATTTTCCA-TTATTTTATAAATTTGCTATA----TTCAG---CT |       |       |       |       |       |       |       | 12024 |

Tuesday, May 03, 2022 06:14 PM

|                   |                                                                                  |       |
|-------------------|----------------------------------------------------------------------------------|-------|
| Majority          | TTTCTTGATTTTAGACTTTTTTTTT-----GTTAGCTCAGTGAGACTATAA-GAAAGAATATTTGTGAGTTTGTAAATAG |       |
|                   | 15850 15860 15870 15880 15890 15900 15910 15920                                  |       |
| Human             | TTTCTTGATTTTAGACTTTTTTTTT-----GTTAGCTCAGTGAGACTATTAAGAAAGAATATTTGTGAGTTTGTAAATAG | 10713 |
| Coquerel'sSifaka  | CTCATTGA-TTTAGACT-----CTTAGTGAGACTAAGATAAGAAAGGAAAT-TGAGTTTTTAATAT               | 10949 |
| Ma'sNightMonkey   | CTTCTTGATTTTAGACTTTTTTTTTGTTTTGGTTACCCAGCGAGACTATAA-GAAAGCATATTTGTGAGTTTTTAATAG  | 10996 |
| VervetAGM         | TGCATCACGTTTGGGGTTAGGGCT-----TCAGCAT-GTGATTTTCGGG-GAAACATAAGCATTTCAGTTCATAGTAC   | 12569 |
| Gorilla           | TTTCTTGATTTTAGACTTTTTTTTT-----GTTAGCTCAGTGAGACTATTAAGAAAAAATATTTGTGAGTTTGTAAATAG | 13064 |
| GrabEatingMacaque | TTTCTTGATTTTAGACTTTTTTTTT-----GTTAGCTCAGTGAGACTATAA-GAAAGAATATTTGTGAGTTTGTAAATAG | 12820 |
| Macaque           | TTTCTTGATTTTAGACTTTTTTTTT-----GTTAGCTCAGTGAGACTATAA-GAAAGAATATTTGTGAGTTTGTAAATAG | 12875 |
| PigTailedMacaque  | TTTCTTGATTTTAGACTTTTTTTTT-----GTTAGCTCAGTGAGACTATAA-GAAAGAATATTTGTGAGTTTGTAAATAG | 12461 |
| Bonobo            | TTTCTTGATTTTAGACTTTTTTTTT-----GTTAGCTCAGTGAGACTATTAAGAAAGAATATTTGTGAGTTTGTAAATAG | 11759 |
| OliveBaboon       | TTTCTTGATTTTAGACTTTTTTTTT-----GTTAGCTCAGTGAGACTATAA-GAAAGAATATTTGTGAGTTTGTAAATAG | 11914 |
| Orangutan         | TTTCTTGATTTTAGACTGGTTTTT-----GTTAGCTCAGTGAGACTATTA-----GAATATTTGTGAGTTTGTAAATAG  | 12092 |

|                   |                                                                                   |       |
|-------------------|-----------------------------------------------------------------------------------|-------|
| Majority          | GAGATTTGTTGCATTTCTTTAAAATGGCTTTTTATATTCTTCGTAATTTGTAATTTTCAGGGGTGTCATTT---CTGTACT |       |
|                   | 15930 15940 15950 15960 15970 15980 15990 16000                                   |       |
| Human             | GAGATTTGTTGCATTTCTTTAAAATGGCTTTTTATATTCTTCGTAATTTGTAATATCAGGGGTGTCATTT---CTGTACT  | 10790 |
| Coquerel'sSifaka  | GAGATGAGTTGCTTTTCTTTAAAATAGCTTTT-----TCTTTGTAATTTGTAAATTCAGGGGTTTTGTTT---CTGTACT  | 11021 |
| Ma'sNightMonkey   | GAGATTTGTTGCATTTCTTTAAAATGGCTTTTTATATTCTTTGTAGTTTGTAAATTT-AGGGATGTCATTT---CTGTACT | 11072 |
| VervetAGM         | CCTGCATATAGT-TGACCATACTTCTCCCTCCAGGTGATTACTATACTAAATTTGATGTTTACCATTTCGCATCATTTT   | 12648 |
| Gorilla           | GAGATTTGTTGCATTTCTTTAAAATGGCTTTTTATATTCTTCGTAATTTGTAATATCAGGAGTGTCACTT---CTGTACT  | 13141 |
| GrabEatingMacaque | GAAATTTGTTAC-TTTTTTTAAAATGGCTTTTTATTTTGTTCGTAATTTGTAATTTTCAGTGGTGTCATTT---CAGTACT | 12896 |
| Macaque           | GAAATTTGTTAC-TTTTTTTAAAATGGCTTTTTATTTTGTTCGTAATTTGTAATTTTCAGTGGTGTCATTT---CAGTACT | 12951 |
| PigTailedMacaque  | GAAATTTGTTAC-TTTTTTTAAAATGGCTTTTTATTTTGTTCGTAATTTGTAATTTTCAGTGGTGTCATTT---CAGTACT | 12537 |
| Bonobo            | GAGATTTGTTGCATTTCTTTAAAATGGCTTTTTATATTCTTCGTAATTTGTAATATCAGGGGTGTCATTT---CTGTACT  | 11836 |
| OliveBaboon       | GAAATTTGTTAC-TTTTTTTAAAATGGCTTTTTATTTTGTTCGTAATTTGTAATTTTCAGTGGTGTCATTT---CTGTACT | 11990 |
| Orangutan         | GAGATTTGTTGCATTTCTTTAAAATGGCTTTTTATATTCTTCGTAATTTGTAATGTCAGGGGTGTCATTT---CTGTACT  | 12169 |

|                   |                                                                                  |       |
|-------------------|----------------------------------------------------------------------------------|-------|
| Majority          | CTTAACCATTTTGCCAATGTGAAATCCTTGCAAAGTAATGGGCC-TATTACTTGGGAAGACAGAATTGTATGAA-ATGAC |       |
|                   | 16010 16020 16030 16040 16050 16060 16070 16080                                  |       |
| Human             | CTTAACCATTTTGCCAATGTGAAATCCTTGCAAAGTAATCGGCC-TATTACTTGGGAAGACAGAATTGTATGAA-ATGAC | 10868 |
| Coquerel'sSifaka  | --TAATCATTTTGCTAATGTGAAATCCTTGCAAATAATGGGCC----TA-TTGGGAAGATGGAATGAGTGAA-ATGAT   | 11093 |
| Ma'sNightMonkey   | GTAAACCATTTTGCCAATGTGAAATCCATGCAGGGTAGTGGGCC-TGTTGCTTGGGAAAACAGAATTGTGTGAA-ATGAC | 11150 |
| VervetAGM         | CTCATTTACTACGTTTATGT-ATTTTATCTTAAGTAATATATGGTTTTGTTTTGCATGTTTAAACTATAGATGTACTAT  | 12727 |
| Gorilla           | CTTAACCATTTTGCCAATGTGAAATCCTTGCAAAGTAATCGGCC-TATTACTTGGGAAGACAGAATTGTGTGAA-ATGAC | 13219 |
| GrabEatingMacaque | CTTAACTGTTTTGCCAATGTGAAATCCTTGCAAAGTAATGGACC-TATTACTTGGGAAGACAGAATTGTATGAA-ATGAC | 12974 |
| Macaque           | CTTAACTGTTTTGCCAATGTGAAATCCTTGCAAAGTAATGGACC-TATTACTTGGGAAGACAGAATTGTATGAA-ATGAC | 13029 |
| PigTailedMacaque  | CTTAACTGTTTTGCCAATGTGAAATCCTTGCAAAGTAATGGACC-TATTACTTGGGAAGACAGAATTGTATGAA-ATGAC | 12615 |
| Bonobo            | CTTAACCATTTTGCCAATGTGAAATCCTTGCAAAGTAATCGGCC-TATTACTTGGGAAGACAGAATTGTATGAA-ATGAC | 11914 |
| OliveBaboon       | CTTAACTGTTTTGCCAATGTGAAATCCTTGCAAAGTAATGGACC-TATTACTTGGGAAGACAGAATTGTATGAA-ATGAC | 12068 |
| Orangutan         | CTTAACCATTTTGCCAATGTGAAATCCTTGCAAAGTAATGGGCC-TACTACTTGGGAAGACAGAATTGTATGAA-ATGAT | 12247 |

Tuesday, May 03, 2022 06:14 PM

|                   |                                                                                   |       |
|-------------------|-----------------------------------------------------------------------------------|-------|
| Majority          | TGTAGAATA-ATACAGGATGGTCC-CCAATACGGTAAAATGTTAACTTTTTAGATGTAGATTTTAAAGTATGGTGAAATTT |       |
|                   | 16090 16100 16110 16120 16130 16140 16150 16160                                   |       |
| Human             | TGTAGAATA-ATTCAGGATGGTCC-CCAATACGGTAAAATGTTAACTTTTTAGATGTAGATTTTAAAGTATGGTGAAATTT | 10946 |
| Coquerel'sSifaka  | TGCAGAATA-ATACACA--GGTAC-CCAATATGGTAAAATGTTAACTTTTACATGCAGATTTTAAAGTATGGTGAAATTT  | 11169 |
| Ma'sNightMonkey   | TATAGAATA-ATACAAGATGGTCC-CCAATATGGTAAAATGTTACCTTTTATAGATACGGATTTAAAATACGGTGAAATTT | 11228 |
| VervetAGM         | CATGCTATATGTATCCTGTAATTTGCTCTTTTGTTCAGTGTTATTTTGTTTTTTAAAGTTTATATGCATACCTCTAATT   | 12807 |
| Gorilla           | TGTAGAATA-ATTCAGGATGGTCC-CCAATACGGTAAAATGTTAACTTTTTAGATGTAGATTTTAAAGTATGGTGAAATTT | 13297 |
| GrabEatingMacaque | TGTAGAATA-ATAGAGGATGGTCC-CCAATACGGTAAAATGTTAACTTTTTAGATGTAGATTTTAAAGTATGGTGAAAGTT | 13052 |
| Macaque           | TGTAGAATA-ATAGAGGATGGTCC-CCAATACGGTAAAATGTTAACTTTTTAGATGTAGATTTTAAAGTATGGTGAAAGTT | 13107 |
| PigTailedMacaque  | TGTAGAATA-ATAGAGGATGGTCC-CCAATACGGTAAAATGTTAACTTTTTAGATGTAGATTTTAAAGTATGGTGAAAGTT | 12693 |
| Bonobo            | TGTAGAATA-ATTCAGGATGGTCC-CCAATACAGTAAAATGTTAACTTTTTAGATGTAGATTTTAAAGTATGGTGAAATTT | 11992 |
| OliveBaboon       | TGTAGAATA-ATAGAGGATGGTCC-CCAATACGGTAAAATGTTAACTTTTTAGATGTAGATTTTAAAGTATGGTGAAAGTT | 12146 |
| Orangutan         | TGTAGAATA-ATTCAGGATGGTCC-CCAATACGGTAAAATGTTAACTTTTTAGATGTAGAGTTTAAAGTATGGTGAAATTT | 12325 |

|                   |                                                                                   |       |
|-------------------|-----------------------------------------------------------------------------------|-------|
| Majority          | GTAGCAGTGTCTTTTAGTAAGTTAACTATTAATATATCAAGACCTA--TAACTGGACAACCTAATAAATA-----ACCTAT |       |
|                   | 16170 16180 16190 16200 16210 16220 16230 16240                                   |       |
| Human             | GTAGCAGTGTCTTTTAGTAAGTTAACTATTAATATATCAAGACCTA--TAACTGGACAACCTAATAAATA-----ACCTGT | 11019 |
| Coquerel'sSifaka  | GTAGCAGTACTTTTTTAGTAAGTTAAC-----TAAGTTAAGACGTTA-TAACTGGACAACCTAATAAAGG-----ACCTAT | 11237 |
| Ma'sNightMonkey   | ATAGTAGTGTCTTTTAGTAAGTTAAC--TTAATATATCAAGATGTTA-TAACTGGATAGCTAATAA-TA-----ACCTAT  | 11299 |
| VervetAGM         | TT--CATTGCCGTATAGTATATGTTATATGAATATATCATATCTTGTGGACAAATGAGTTAATATTTGTCGAGATTGAT   | 12885 |
| Gorilla           | GTAGCAGTGTCTTTTAGTAAGTTAACTATTAATATATCAAGACCTA--TAACTGGACAACCTAATAAATA-----ACCTAT | 13370 |
| GrabEatingMacaque | GTAGCAGTGTCTTTTAGGAAGTTAACTATTAATATCTCAAGACCTA--TAACTGGACAACCTAATAAATA-----ACCTAT | 13125 |
| Macaque           | GTAGCAGTGTCTTTTAGGAAGTTAACTATTAATATCTCAAGACCTA--TAACTGGACAACCTAATAAATA-----ACCTAT | 13180 |
| PigTailedMacaque  | GTAGCAGTGTCTTTTAGGAAGTTAACTATTAATATCTCAAGACCTA--CAACTGGACAACCTAATAAATA-----ACCTAT | 12766 |
| Bonobo            | GTAGCAGTGTCTTTTAGTAAGTTAACTATTAATATATCAAGACCTA--TAACTGGACAACCTAATAAATA-----ACCTGT | 12065 |
| OliveBaboon       | GTAGCAGTGTCTTTTAGGAAGTTAACTATTAATATCTCAAGACCTA--TAACTGGACAACCTAATAAATA-----ACCTAT | 12219 |
| Orangutan         | GTAGCAGTGTCTTTTAGTAAGTTAACTGTTAATATATCAAGACCTA--TAACTGGACAACCTAATAAATA-----ACCTAT | 12398 |

|                   |                                                                                |       |
|-------------------|--------------------------------------------------------------------------------|-------|
| Majority          | TTCTTAAA--ATGTTAGCTTTTTCTAA-----CTATTCTGAAAGTACTGGTTGTAAATTGCTGAACTCATA        |       |
|                   | 16250 16260 16270 16280 16290 16300 16310 16320                                |       |
| Human             | TTCTTAAA--ATGTTAGCTTTTTCTAA-----ATATTCTGAAAGTACTGGTTGTAAATTGCTGAACTCACA        | 11083 |
| Coquerel'sSifaka  | TTGTAAAATAAGTTAGCTTTTTCCAAGTTGGGTTTTATTAATATTTTGAAGCAGCGATTGTAAATGGGTGAACTCATA | 11317 |
| Ma'sNightMonkey   | TTCTTAAA--ATGTTAGCTTTT-CTAA-----GTATTCTGAAGTACTGGTTGTAAATTGCTGAACTCACA         | 11362 |
| VervetAGM         | TTGTCAAAT-ATTTTAAATTTTTTT-----CCATTAC-AACTGCT-GCTGTAAGCATTCATATGCATA           | 12946 |
| Gorilla           | TTCTTAAA--ATGTTAGCTTTTTCTAA-----GTATTCTGAAAGTACTGGTTGTAAATTGCTGAACTCACA        | 13434 |
| GrabEatingMacaque | TTCTTAAA--ATGTCAGCTTTTTCTAA-----CTATTCTGAAAGTACTAGTTGTAAATTGCTGAACTCATG        | 13189 |
| Macaque           | TTCTTAAA--ATGTCAGCTTTTTCTAA-----CTATTCTGAAAGTACTAGTTGTAAATTGCTGAACTCATG        | 13244 |
| PigTailedMacaque  | TTCTTAAA--ATGTCAGCTTTTTCTAA-----CTATTCTGAAAGTACTAGTTGTAAATTGCTGAACTCATG        | 12830 |
| Bonobo            | TTCTTAAA--ATGTTAGCTTTTTCTAA-----ATATTCTGAAAGTACTGGTTGTAAATTGCTGAACTCACA        | 12129 |
| OliveBaboon       | TTCTTAAA--ATGTCAGCTTTTTCTAA-----CTATTCTGAAAGTACTAGTTGTAAATTGCTGAACTCATG        | 12283 |
| Orangutan         | TTCTTAAA--ATGTTAGCTTTTTCTAA-----ATATTCTGAAAGTACTGGTTGTAAATTGCTGAACTCATG        | 12462 |

Tuesday, May 03, 2022 06:14 PM

| Majority          | ATTTAAATTATAATA----TGACTATTGAATTCA--CCATCATTGGCTTGCATAGAAAATTACAATCAAATAATGCTA--   |       |       |       |       |       |       |       |       |
|-------------------|------------------------------------------------------------------------------------|-------|-------|-------|-------|-------|-------|-------|-------|
|                   | 16330                                                                              | 16340 | 16350 | 16360 | 16370 | 16380 | 16390 | 16400 |       |
| Human             | ATTTAAATTATGATA----TGACTATTGAATTCA--TCCTCATTGGCTTGCATAGAAAATTACAATCAAATAATGCTA--   |       |       |       |       |       |       |       | 11155 |
| Coquerel'sSifaka  | ATTTAAATTGTAATATGGCTATTTATTGGATTTA--CCATCCTTGGCTTGCCTTAGATAAATTGCAATTAAGTATTGCTTTT |       |       |       |       |       |       |       | 11395 |
| Ma'sNightMonkey   | ATTTAAATTATGAC-----T-----ATTCA--CCATTATTGGCTTGCACAGAAAATTACAATCAAAGAATGCTA--       |       |       |       |       |       |       |       | 11424 |
| VervetAGM         | TTCTAAAGTGTTAGAG---TTTCTCATAGATTGTGTCTGTTTTCAAGTCG-ATTGAATATTAGCAT--ATTGCTTTCA--   |       |       |       |       |       |       |       | 13018 |
| Gorilla           | ATTTAAATTATGATA----TGACTATTGAATTCA--TCATCATTGGCTTGCACAGAAAATTACAATCAAATAATGCTA--   |       |       |       |       |       |       |       | 13506 |
| GrabEatingMacaque | ATTTAAATTATAATA----TGACTGTTGAATTCA--CTATCATTGGCTTGCATAGAAAATTACAATCAAATAATGCTA--   |       |       |       |       |       |       |       | 13261 |
| Macaque           | ATTTAAATTATAATA----TGACTGTTGAATTCA--CTATCATTGGCTTGCATAGAAAATTACAATCAAATAATGCTA--   |       |       |       |       |       |       |       | 13316 |
| PigTailedMacaque  | ATTTAAATTATAATA----TGACTGTTGAATTCA--CTATCATTGGCTTGCATAGAAAATTACAATCAAATAATGCTA--   |       |       |       |       |       |       |       | 12902 |
| Bonobo            | ATTTAAATTATGATA----TGACTATTGAATTCA--TCATCATTGGCTTGCATAGAAAATTACAATCAAATAATGCTA--   |       |       |       |       |       |       |       | 12201 |
| OliveBaboon       | ATTTAAATTATAATA----TGACTGTTGAATTCA--CTGTCATTGGCTTGCATAGAAAATTACAATCAAATAATGCTA--   |       |       |       |       |       |       |       | 12355 |
| Orangutan         | ATTTAAATTATAACA----TGACTATTGAATTCA--CCATCATTGGCTTGCATAGAAAATTACAATCAAATAATGCTA--   |       |       |       |       |       |       |       | 12534 |

| Majority          | -----AATGTAACTTTTTGGTAATAGT-TGAGTGTAAC-----GGTTGTTT--ATTATAG--ATGTGTTA-        |       |       |       |       |       |       |       |       |
|-------------------|--------------------------------------------------------------------------------|-------|-------|-------|-------|-------|-------|-------|-------|
|                   | 16410                                                                          | 16420 | 16430 | 16440 | 16450 | 16460 | 16470 | 16480 |       |
| Human             | -----AATGTAACTTTTTGGTAATAGT-TGTGTGTAAC-----GGTTGTTC--ATTATAG--ATGTGTTA-        |       |       |       |       |       |       |       | 11212 |
| Coquerel'sSifaka  | TTATACTAGAATGACTGGTT-TGTTATAATTGGTATGTTATTTCAGAACTTTGTGTTGTTTGGTTTTATTATTGCTTG |       |       |       |       |       |       |       | 11474 |
| Ma'sNightMonkey   | -----AATGTAACTTTTA-GGTAATAGT-TGAGTATAAATT-----GGTTGTTT--ATAATAG--ATGTGTT--     |       |       |       |       |       |       |       | 11479 |
| VervetAGM         | -----TAGGTGATTATACTAATTATACTGTTAGTGCCGGA-----TGTAGATT--CTTGTTCCTATACATTC-      |       |       |       |       |       |       |       | 13078 |
| Gorilla           | -----AATGTAACTTTTTGGTAATAGT-TGTGTGTAAC-----GGTTGTTC--ATTATAG--ATGTGTTA-        |       |       |       |       |       |       |       | 13563 |
| GrabEatingMacaque | -----AATGTAACTTTTCTGGTGATAGT-TGAGTATAACT-----GGTTGTTT--ATTATGG--ATGTGTTA-      |       |       |       |       |       |       |       | 13318 |
| Macaque           | -----AATGTAACTTTTCTGGTGATAGT-TGAGTATAACT-----GGTTGTTT--ATTATGG--ATGTGTTA-      |       |       |       |       |       |       |       | 13373 |
| PigTailedMacaque  | -----AATGTAACTTTTCTGGTGATAGT-TGAGTATAACT-----GGTT-----ATTATGG--ATGTGTTA-       |       |       |       |       |       |       |       | 12955 |
| Bonobo            | -----AATGTAACTTTTTGGTAATAGT-TGTGTGTAAC-----GGTTGTTC--ATTATAG--ATGTGTTA-        |       |       |       |       |       |       |       | 12258 |
| OliveBaboon       | -----AATGTAACTTTTCTGGTGATAGT-TGAGTATAACT-----GGTTGTTT--ATTATAG--ATGTGTTA-      |       |       |       |       |       |       |       | 12412 |
| Orangutan         | -----AATGTAACTTTTTGGTAATAGT-TGAGTGTAAC-----GGTTGTTC--ATTATAG--ATGTGTTA-        |       |       |       |       |       |       |       | 12591 |

| Majority          | -----TTCAAACTTTGGGTTTTAGGTTTTGACTTTTCTTA--AAATGCTTTTCTTAAATGCTACTTAAATGCTTT     |       |       |       |       |       |       |       |       |
|-------------------|---------------------------------------------------------------------------------|-------|-------|-------|-------|-------|-------|-------|-------|
|                   | 16490                                                                           | 16500 | 16510 | 16520 | 16530 | 16540 | 16550 | 16560 |       |
| Human             | -----TTCAAACTTTGGGTTTTAGGTTTTGACTTTTCTTA--AAATACTTTTCTTAAATGCTACTTAAATGCTTT     |       |       |       |       |       |       |       | 11281 |
| Coquerel'sSifaka  | AACCGCCTGTCAAGAAAAATGGGTTTTAGATTTTGTATTTTCTTA--AAATGCTTTTCTTAAATGCTACATAATGCTTG |       |       |       |       |       |       |       | 11552 |
| Ma'sNightMonkey   | -----CAAACTTTGGGTGTTTAGGTTTTGACTTTCCTCA--AAATGCTTTTCTTAAATGCTACTAAATGCTTG       |       |       |       |       |       |       |       | 11546 |
| VervetAGM         | -----TTTGAAAATCGACATTGTTGGACTT-AATTTTCAGATCAAATGTACATGGGAA-GGGTATCTTGTGGTTT     |       |       |       |       |       |       |       | 13147 |
| Gorilla           | -----TTCAAACTTTGGGTTTTAGGTTTTGACTTTTCTTA--AAATACTTTTCTTAAATGCTACTTAAATGCTTT     |       |       |       |       |       |       |       | 13632 |
| GrabEatingMacaque | -----TTCAAACTTTGGGTTTTAGGTTTTGACTTTTCTTA--AAATGCTTTTCTTA--TGCTACTTAAATGCTTT     |       |       |       |       |       |       |       | 13385 |
| Macaque           | -----TTCAAACTTTGGGTTTTAGGTTTTGACTTTTCTTA--AAATGCTTTTCTTA--TGCTACTTAAATGCTTT     |       |       |       |       |       |       |       | 13440 |
| PigTailedMacaque  | -----TTCAAACTTTGGGTTTTAGGTTTTGACTTTTCTTA--AAATGCTTTTCTTA--TGCTACTTAAATGCTTT     |       |       |       |       |       |       |       | 13022 |
| Bonobo            | -----TTCAAACTTTGGGTTTTAGGTTTTGACTTTCCTTA--AAATACTTTCTTAAATGCTACTTAAATGCTTT      |       |       |       |       |       |       |       | 12327 |
| OliveBaboon       | -----TTCAAACTTTGGGTTTTAGGTTTTGACTTTTCTTA--AAATGCTTTTCTTAAATGCTACTTAAATGCTTT     |       |       |       |       |       |       |       | 12481 |
| Orangutan         | -----TTCAAACTTTGGGTTTTAGGTTTTGACTTTTCTTA--AAATACTTTTCTTAAATGCTACTTAAATGCTTT     |       |       |       |       |       |       |       | 12660 |

Tuesday, May 03, 2022 06:14 PM

|                   |                                                                                   |       |
|-------------------|-----------------------------------------------------------------------------------|-------|
| Majority          | CTCTAGGGTATTTTATTAGAATTTCAATTAACAGATATTTTAA--TGTCTGCGAAATGACAGTACTATGTTAGAAATTG   |       |
|                   | 16570 16580 16590 16600 16610 16620 16630 16640                                   |       |
| Human             | CTCTAGGGTATTTTATTAGAATTTCAATTAACAGATATTTTGA--TGTCTGCGAAATGACAGTACTATGTTAGAAATTG   | 11359 |
| Coquerel'sSifaka  | C--TAGGGTATTTTATTAGAATTTCAATTTATAGACATTTTATTGTGTCTACTAAATGACAGCACTGTGTTAGAAGTTG   | 11630 |
| Ma'sNightMonkey   | CTCTAGGGTGTTTTATTGGAATTTCAATTAACAGATATTTTAA--TGTCTACGAAATGACAGTACTATGTTAAAAATTG   | 11624 |
| VervetAGM         | TAATTTGCATTC CCTATTAATGCTTTATTTTAATGATACATTT---TATTAGTTTATTGGCCAT-TGATATTTCTTCTCT | 13223 |
| Gorilla           | CTCTAGGGTATTTTATTAGAATTTCAATTAACAGATATTTTGA--TGTCTGTGAAATGACAGTACTATGTTAGAAATTG   | 13710 |
| GrabEatingMacaque | CTCTAGGGTATTTTATTAGAATTTCAATTAACAGATATTTTAA--TGTCTGCGAAATGACAGTACTATGTTAGATATTG   | 13463 |
| Macaque           | CTCTAGGGTATTTTATTAGAATTTCAATTAACAGATATTTTAA--TGTCTGCGAAATGACAGTACTATGTTAGATATTG   | 13518 |
| PigTailedMacaque  | CTCTAGGGTATTTTATTACAGAATTTCAATTAACAGATATTTTAA--TGTCTGCGAAATGACAGTACTATGTTAGATATTG | 13100 |
| Bonobo            | CTCTAGGGTATTTTATTAGAATTTCAATTAACAGATATTTTGA--TGTCTGCGAAATGACAGTACTATGTTAGAAATTG   | 12405 |
| OliveBaboon       | CTCTAGGGTATTTTATTAGAATTTCAATTAACAGATATTTTAA--TGTCTGCGAAATGACAGTACTATGTTAGATATTG   | 12559 |
| Orangutan         | CACTAGGGTATTTTATTAGAATTTCAATTAAC--ATATTTTAA--CGTCTGCGAAATGACAGTACTATGTTAGAAATTT   | 12736 |

|                   |                                                                                    |       |
|-------------------|------------------------------------------------------------------------------------|-------|
| Majority          | ATGTATTGG-----CTCCTTGAGGGCAGTGACCCTATTTGTTAT-----GTTTGTTCCTCCA                     |       |
|                   | 16650 16660 16670 16680 16690 16700 16710 16720                                    |       |
| Human             | ATGTATTGG-----CTCCTTGAGGGCAGTGACCCTATTTGTTAT-----GTTTGTTCCTCAA                     | 11411 |
| Coquerel'sSifaka  | ATCCAAAACA-----CTCGACAGAATATATGCTTCTGGAGGGCAGTGATCTTAATTAATAT-----TTAA             | 11691 |
| Ma'sNightMonkey   | ATGTTTCAGAAATATTC AAGGCAGAATACATGTTCCCTTGAGGGCAGTGACCCTATTTGTTAT-----ATTTGTTGCTCCA | 11699 |
| VervetAGM         | GTGAAATGC-----CTGTTTATAGTTTGTTCATTTTCTTTTGGACTGTAGTTTATCTTTTT                      | 13280 |
| Gorilla           | ATGTATTGG-----CTCCTTGAGGGCAGTGACCCTATTTGTTAT-----GTTTGTTCCTCAA                     | 13762 |
| GrabEatingMacaque | ATGTATTGT-----CTCCTTGAGGGCAGTGACCCTAGTTGTTGT-----GTTTGTTCCTCCA                     | 13515 |
| Macaque           | ATGTATTGT-----CTCCTTGAGGGCAGTGACCCTAGTTGTTGT-----GTTTGTTCCTCCA                     | 13570 |
| PigTailedMacaque  | ATGTATTGT-----CTCCTTGAGGGCAGTGACCCTAGTTGTTGT-----GTTTGTTCCTCCA                     | 13152 |
| Bonobo            | ATGTATTGG-----CTCCTTGAGGGCAGTGACCCTATTTGTTAT-----GTTTGTTCCTCAA                     | 12457 |
| OliveBaboon       | ATGTATTGT-----CTCCTTGAGGGCAGTGACCCTAGTTGTTGT-----GTTTGTTCCTCCA                     | 12611 |
| Orangutan         | ATGTATTGG-----CTCCTTGAGGGCAGTGACCCTATTTGTTAT-----GTTTTTTCCTCCA                     | 12788 |

|                   |                                                                                  |       |
|-------------------|----------------------------------------------------------------------------------|-------|
| Majority          | TCATTAATAGTACACGTGTTAAATAGTGCATACACACTTAATATTTAATAACTCTTAGAAGTGCATAGGCTTTAATATG  |       |
|                   | 16730 16740 16750 16760 16770 16780 16790 16800                                  |       |
| Human             | TCATTAATAGTACACATATTAATAGTACATATACACTTAATATTTAATAACTCTTAGAAGTGCATAGGCTTTAATATG   | 11491 |
| Coquerel'sSifaka  | TGACTAGAAGT-----GTCATGGGCTTCAG-TATGCTTATAATCTCATGAGCCATTTAGCAACAAAAGATAAATGCCA   | 11764 |
| Ma'sNightMonkey   | TCATTAATAGTACACGTATTAAGTAGTGTGTACACACATAATATTTAATAACTCTTAGAAGTATCACAGGCTTTAATATG | 11779 |
| VervetAGM         | TTAAATTTGATTCCTGCTCGGCATGGTGGCT-CACGCCTATAATCC--CAACACTTGGGGAGGCCGAGGCAGGTGGATCA | 13357 |
| Gorilla           | TCATTAATAGTACACATATTAATAGTGCATACACTTAATATTTAATAACTCTTAGACGTGCATAGGCTTTAATATG     | 13842 |
| GrabEatingMacaque | ACATTAATAGTACATGTGTTAAATAGTGCATACACACTTAATATTTAATAACTCTTAGAAGTGCATAGGCTTTAATATG  | 13595 |
| Macaque           | ACATTAATAGTACATGTGTTAAATAGTGCATACACACTTAATATTTAATAACTCTTAGAAGTGCATAGGCTTTAATATG  | 13650 |
| PigTailedMacaque  | ACATTAATAGTACATGTGTTAAATAGTGCATACACACTTAATATTTAATAACTCTTAGAAGTGCATAGGCTTTAATATG  | 13232 |
| Bonobo            | TCATTAATAGTACACATATTAATAGTGCATACACTTAATACTTAATAACTCTTAGAAGTGCATAGGCTTTAATATG     | 12537 |
| OliveBaboon       | ACATTAATAGTACACGTGTTAAATAGTGCATACACACTTAATATTTAATAACTCTTAGAAGTGCATAGGCTTTAATATG  | 12691 |
| Orangutan         | TCATTAATAGTACACGTATTAATAGTACATACACTT-----TAATAACTCTTAGAAGTGCATAGGCTTTAATATG      | 12862 |

Tuesday, May 03, 2022 06:14 PM

```

Majority      CTTTACTCTAATGAGCCATTTATCAATAAAAAGATGAATACCAAGACTATGTCTTT--TAGGACTTCATCTAGTTAGAG
                16810      16820      16830      16840      16850      16860      16870      16880
Human         CTCATACTCTAATGAGCCATTTATCAATAAAAAGATAAATAACAAGACTATGTCTTT--TAGGACTT----TAGTTAGAG 11565
Coquerel'sSifaka GTTTTATTGT-ACAATATTCCCTTCGCTGGAA-----AT-CCAAGAGTCTGTCTTT--TAAGACCT-ATCTTGTTGGAA 11833
Ma'sNightMonkey CTCTTAATCTTATGAGCCATTTATCAATAAAAAGATGAATACCAAGACTATGTCTTA--CAGGACCTCATCTAGTTGGAG 11857
VervetAGM      TTTGAGGTC--AGGAGTTCTAGACCAGCCTAGCCA-ACATGGCAAACCCCGTCTCTACTAAAAGTGCAAAAAATTAGCT 13434
Gorilla        CTCATACTCTAATGAGCCATTTATCAATAAAAAGATAAATAACAAGACTATGTCTTT--TAGGACTT----TAGTTAGAG 13916
GrabEatingMacaque CTTTACTCTAATGAACCATTTATCAATAAAAAGTGAATCCAAGACTATGTCTTT--TAGGACTTCATCTAGTTAGAG 13673
Macaque        CTTTACTCTAATGAACCATTTATCAATAAAAAGTGAATCCAAGACTATGTCTTT--TAGGACTTCATCTAGTTAGAG 13728
PigTailedMacaque CTTTACTCTAATGAACCATTTATCAATAAAAAGTGAATCCAAGACTATGTCTTT--TAGGACTTCATCTAGTTAGAG 13310
Bonobo         CTCATACTCTAATGAGCCATTTATCAATAAAAAGATAAATAACAAGACTATGTCTTT--TAGGACTT----TAGTTAGAG 12611
OliveBaboon    CTTTACTCTAATGAACCATTTATCAATAAAAAGTGAATCCAAGACTATGTCTTT--TAGGACTTCATCTAGTTAGAG 12769
Orangutan      CTCATACTCTAATGAGCCATTTATCAATAAAA-GATAAATAACAAGACTATGTCTTT--TAGGACTT----TAGTTAGAG 12935
    
```

```

Majority      AAATAAGGACCCAAGGTTTTAATTAAGTGCTATATGGCTACAGTAGGAAAGATTGGTTTGGGTTGGTAGGCTCAGAAT--
                16890      16900      16910      16920      16930      16940      16950      16960
Human         AAATAAGGACTCAAGGTTTTAATTAAGTGCTATATGGCTACAGTAGGAAAGATTGGTTTGGGTTGGTAGGCTCAGAAT-- 11643
Coquerel'sSifaka AGATAAGAACCCAAGATTTTAAGTA---CCTTATGTCTACAGTAGGAAAGATTAGTTTCAGTTGGTAGGATCAGAGTAG 11909
Ma'sNightMonkey AAATACGGACCAAAGCTTTTAATTAAGTGCTATATAGCTATAGTAGAAAATACTGGTTTGGGTTGGTAGGCTCA-ACT-- 11934
VervetAGM      GGGTGTCTGGTGGGTGTCTGCCTA---CTTGGGAGGCTGAGGCAGGAGA-ATTGCTTGAACCCAGGAGGTGGAGGTTG- 13509
Gorilla        AAATAAGGACTCAAGGTTTTAATTAAGTGCTATATGGCTACAGTAGGAAAGATTGGTTTGGGTTGGTAGGCTCAGAAT-- 13994
GrabEatingMacaque AAATAAGGATCCAAGGTTTTAATTAAGTGCTATGTGGCTACAGTAGGAAAGATTGATTTGGGTTGGTAGGCTCAGAAT-- 13751
Macaque        AAATAAGGATCCAAGGTTTTAATTAAGTGCTATGTGGCTACAGTAGGAAAGATTGATTTGGGTTGGTAGGCTCAGAAT-- 13806
PigTailedMacaque AAATAAGGATCCAAGGTTTTAATTAAGTGCTATGTGGCTACAGTAGGAAAGATTGGTTTGGGTTGGTAGGCTCAGAAT-- 13388
Bonobo         AAATAAGGACTCAAGGTTTTAATTAAGTGCTATATGGCTACAGTAGGAAAGATTGGTTTGGGTTGGTAGGCTCAGAAT-- 12689
OliveBaboon    AAATAAGGATCCAAGGTTTTAATTAAGTGCTATGTGGCTACAGTAGGAAAGATTGGTTTGGGTTGGTAGGCTCAGAAT-- 12847
Orangutan      AAATAAGGACTCAGGGTTTTAATTAAGTGGTATATGGCTACAGTAGGAAAGATTGGTTTGGGTTGGTAGGCTCAGAAT-- 13013
    
```

```

Majority      -----AGTGATCTGTGACCTAG-----CTAGAT---TGGGAGATA-GGGGAAGGAGTGGAGAGCAATAGGCA
                16970      16980      16990      17000      17010      17020      17030      17040
Human         -----AGTGGTCTGTGACCTAG-----CTAGAT---TGGGAGATA-GGAGAAAGAGTGGAGAGCAACAGGCG 11701
Coquerel'sSifaka GTTTTATTAAAGTAGTGGCTGTGACCTGTGCTTTATAGATAGTTGGGGGATGTGGAGAGGGAGTGGAGGGCAATACACA 11989
Ma'sNightMonkey -----GTGAAGTGTCTGTTA-----TAGAA---TGGGTGATA-GAGGAAGGAGTGGAGAGCAACAGGCA 11989
VervetAGM      -----CAGTGAGCCGCAATCCA-----TTGCAC---TCCAACCTG-GGCGACAGAGCAAGACTCTGTTCCCC 13567
Gorilla        -----AGTGGTCTGTGACCTAG-----CTAGAT---TGGGAGATA-GGAGAAAGAGTGGAGACCAATAGGCA 14052
GrabEatingMacaque -----AGTGATCTGTGACCTAG-----CCAAAT---TGGGAGATA-GGGGAAGGAGTGGAGAGCATTAGGCA 13809
Macaque        -----AGTGATCTGTGACCTAG-----CCAAAT---TGGGAGATA-GGGGAAGGAGTGGAGAGCAATAGGCA 13864
PigTailedMacaque -----AGTGATCTGTGACCTAG-----CCAAAT---TGGGAGATA-GGGGAAGGAGTGGAGAGCAATAGGCA 13446
Bonobo         -----AGTGGTCTGTGACCTAG-----CTAGAT---TGGGAGATA-GGAGAAAGAGTGGAGAGCAACAGGCG 12747
OliveBaboon    -----AGTGATCTGTGACCTAG-----CCAAAT---TGGGAGATA-GGGGAAGGAGTGGAGAGCAATAGGCA 12905
Orangutan      -----AGTGGTCTGTGATCTAG-----CTAGAT---TGGGAGATA-GGAGAAGGAGTGGAGAGCAATAGGCA 13071
    
```

Tuesday, May 03, 2022 06:14 PM

| Majority          | TTGAGAGAATGACAT-AACCAAAGTTGTGTCTATAGGTTGGCATAAAATTTACAGCCATTGATCAGTGAGTTGAATAATTT |       |       |       |       |       |       |       |  |       |
|-------------------|-----------------------------------------------------------------------------------|-------|-------|-------|-------|-------|-------|-------|--|-------|
|                   | 17050                                                                             | 17060 | 17070 | 17080 | 17090 | 17100 | 17110 | 17120 |  |       |
| Human             | TTGAGAGAAGGACGT-AACCAAAGTTGTGTCTATAGGTTGGCATAAAATTTACAGCCATTGATCAGTGAGTTGAATAGTTT |       |       |       |       |       |       |       |  | 11780 |
| Coquerel'sSifaka  | TTGAGAGAATGACAT-GACCGAAGTCGTATCTATAGGCCAGTACAAATTCACAGCCATTGAGCAGTGAGTTGAATAATTT  |       |       |       |       |       |       |       |  | 12068 |
| Ma'sNightMonkey   | TTGAGAGAGTGACGT-AACCAAAGTTGTGTCTTTAGGATCGCATAAGTTTACAGCTATTGAGCACGGAGTTGAATACTTT  |       |       |       |       |       |       |       |  | 12068 |
| VervetAGM         | CGCCAAAAAAA-----AAAATTGGATTCCTAGGATG---T---TTTATATACTCTGCACACTTAATTGTTTTTGT-      |       |       |       |       |       |       |       |  | 13632 |
| Gorilla           | TTGAGAGAATGACAT-AACCAAAGTTGTGTCTATAGGTTGGCATAAAATTTACAGCCATTGATCAGTGAGTTGAATCGTTT |       |       |       |       |       |       |       |  | 14131 |
| GrabEatingMacaque | TTGAGAGAATGACATTAATAAAAGTTGTGTGTGTAGGTTGGCATAATTTTACAACCATTGATCAGTGAGTTGAATAATTT  |       |       |       |       |       |       |       |  | 13889 |
| Macaque           | TTGAGAGAATGACATTAATAAAAGTTGTGTGTGTAGGTTGGCATAATTTTACAACCATTGATCAGTGAGTTGAATAATTT  |       |       |       |       |       |       |       |  | 13944 |
| PigTailedMacaque  | TTGAGAGAATGACATTAATAAAAGTTGTGTGTGTAGGTTGGCATAATTTTACAACCATTGATCAGCGAGTTGAATAATTT  |       |       |       |       |       |       |       |  | 13526 |
| Bonobo            | TTGAGAGAATGACGT-AACCAAAGTTGTGTCTATAGGTTGGCATAAAATTTACAGCCATTGATCAGTGAGTTGAATAGTTT |       |       |       |       |       |       |       |  | 12826 |
| OliveBaboon       | TTGAGAGAATGACATTAATAAAAGTTGTGTGTGTAGGTTGGCATAATTTTACAACCATTGATCAGTGAATTGAATAATTT  |       |       |       |       |       |       |       |  | 12985 |
| Orangutan         | TTGAGAGAATGACAT-AACCAAAGTTGTGTCTATAGGTTGGCATAAAATTTACAGCCATTGATCAGTGAGTTGAATAATTT |       |       |       |       |       |       |       |  | 13150 |

| Majority          | GGCCTTTATGGCTAACAGTTTGTATATGGATATGAGAGAAAAGATAGAATGGCAG----GTTATATAGAAGGCCTCAATT |       |       |       |       |       |       |       |  |       |
|-------------------|----------------------------------------------------------------------------------|-------|-------|-------|-------|-------|-------|-------|--|-------|
|                   | 17130                                                                            | 17140 | 17150 | 17160 | 17170 | 17180 | 17190 | 17200 |  |       |
| Human             | GGCCTTTATGGCTAACAGCTTGTATATGGATATGAGAGAAAAGATAGAATGGCAGATAGGTTATATAGAAGACCTCAATT |       |       |       |       |       |       |       |  | 11860 |
| Coquerel'sSifaka  | GGCTTTTGTGGCTAAGGGTTTGTATAAGGCTACAAGAGAAAAGATAGGATGGCAG----ATTATAG--AAGGCCTCAATT |       |       |       |       |       |       |       |  | 12142 |
| Ma'sNightMonkey   | GGCTTTTATGGCTAACGATTTATATATGGATATGAGAGAAAAGATAGAATGGCAGATAGGTTATAT--AAGGCCTCAATT |       |       |       |       |       |       |       |  | 12146 |
| VervetAGM         | AGTTTCTTTTGTTTTGTTTTGTTTGAGGGAAGGGGTCTCACTACGTCACCCAGG----CTGGAGTGCAGTGGCACAGTC  |       |       |       |       |       |       |       |  | 13708 |
| Gorilla           | GGCCTTTATGGCTAACAGCTTGTATATGGATATGAGAGAAAAGATAGAATGGCAGATAGGTTATATAGAAGACCTCAATT |       |       |       |       |       |       |       |  | 14211 |
| GrabEatingMacaque | GGCCTTTATGGCTAAGAGTGTGTATATGGATATAAGAGAAAAGATAGAATGGCAG----GTTATATAGAAGGCCTCAATT |       |       |       |       |       |       |       |  | 13965 |
| Macaque           | GGCCTTTATGGCTAAGAGTGTGTATATGGATATAAGAGAAAAGATAGAATGGCAG----GTTATATAGAAGGCCTCAATT |       |       |       |       |       |       |       |  | 14020 |
| PigTailedMacaque  | GGCCTTTATGGCTAACAGTGTGTATATGGATATAAGAGAAAAGATAGAATGGCAG----GTTATATAGAAGGCCTCAATT |       |       |       |       |       |       |       |  | 13602 |
| Bonobo            | GGCCTTTATGGCTAACAGCTTGTATATGGATATGAGAGAAAAGATAGAATGGCAGATAGGTTATATAGAAGACCTCAATT |       |       |       |       |       |       |       |  | 12906 |
| OliveBaboon       | GGCCTTTATGGCTAACAGTGTGTTTATGGATATAAGAGAAAAGATAGAATGGCAG----GTTATATAGAAGGCCTCAATT |       |       |       |       |       |       |       |  | 13061 |
| Orangutan         | GGCCTTTATGGCTAACAGCTTGTATATGGATATGAGAGAAAAGATAGAATGGCAGATAGGTTATATAGAAGGCCTCAATT |       |       |       |       |       |       |       |  | 13230 |

| Majority          | ACAGGTTGTGAAATTTGTA CTCTCA-----TCTAGTAGGCATTAT-TCTATATACCTGTAATTTTCCA--CATAAAAGTAG  |       |       |       |       |       |       |       |  |       |
|-------------------|-------------------------------------------------------------------------------------|-------|-------|-------|-------|-------|-------|-------|--|-------|
|                   | 17210                                                                               | 17220 | 17230 | 17240 | 17250 | 17260 | 17270 | 17280 |  |       |
| Human             | ACAGGTAGTGAAATTTGTA CTCTCA-----TCTGGTAGGCATTAT-TCTATATACCTGTAATTTTCCA--CATAAAAGTAG  |       |       |       |       |       |       |       |  | 11932 |
| Coquerel'sSifaka  | ACAGGTTATGGCATTGTA CTCTCA-----TCTAGTAGGTGCTAT-TCTGTATACCTGAAAGTTTCCATACATAAAAAGTAG  |       |       |       |       |       |       |       |  | 12216 |
| Ma'sNightMonkey   | ACAAGTTGTGAAATTTGTA CTCTCA-----TCTAGTAGGCATCCT-TCTATATACCTGTAAGTTTCCA--CATAAAAGTAG  |       |       |       |       |       |       |       |  | 12218 |
| VervetAGM         | ACAGTCAGTGCAGTCTTGACATCCAGGCTCTAGCAATCCTCCACCTTTGTTTCTGAGTAGCTGG--AACTACAGGAA       |       |       |       |       |       |       |       |  | 13786 |
| Gorilla           | ACAGGTAGTGAAATTTGTA CTCTCA-----TCTGGTAGGCATTAT-TCTATATACTTGTAAATTTTCCA--CATAAAAGTAG |       |       |       |       |       |       |       |  | 14283 |
| GrabEatingMacaque | ACAGGTTGTGAAATTTGTA CTCTCA-----TCTAGTAGGCATTAT-TCTATATACCTGTAATTTCTCA--CATAAAAGTAG  |       |       |       |       |       |       |       |  | 14037 |
| Macaque           | ACAGGTTGTGAAATTTGTA CTCTCA-----TCTAGTAGGCATTAT-TCTATATACCTGTAATTTCTCA--CATAAAAGTAG  |       |       |       |       |       |       |       |  | 14092 |
| PigTailedMacaque  | ACAGGTTGTGAAATTTGTA CTCTCA-----TCTAGTAGGCATTAT-TCTATATACCTGTAATTTCTTG--CATAAAAGTAG  |       |       |       |       |       |       |       |  | 13674 |
| Bonobo            | ACAGGTAGTGAAATTTGTA CTCTCA-----TCTGGTAGGCATTAT-TCTATATACCTGTAATTTTCCA--CATAAAAGTAG  |       |       |       |       |       |       |       |  | 12978 |
| OliveBaboon       | ACAGGTTGTGAAATTTGTA CTCTCA-----TCTAGTAGGCATTAT-TCTATATACCTGTAATTTCTCA--CATAAAAGTAG  |       |       |       |       |       |       |       |  | 13133 |
| Orangutan         | ACAGGTTGTGAAATTTGTA CTCTCA-----TCTAGTAGGCATTAT-TCTATATATCTGTAATTTTCCA--TATAAAAAGTAG |       |       |       |       |       |       |       |  | 13302 |



Tuesday, May 03, 2022 06:14 PM

| Majority          | CTCATTATTCTGCTTTCTTTTCTTTT-----TTGCTATA-ACAAATTTATTGTAACAACACAAAGT                    |       |       |       |       |       |       |       |       |
|-------------------|---------------------------------------------------------------------------------------|-------|-------|-------|-------|-------|-------|-------|-------|
|                   | 17290                                                                                 | 17300 | 17310 | 17320 | 17330 | 17340 | 17350 | 17360 |       |
| Human             | CTCATTACTCTGCTTTCTTTCTTTCTTT-----TTTTTTTTTTTTTGGCTATA-GCAAATTTATTGTAACAACACAAAGT      |       |       |       |       |       |       |       | 12004 |
| Coquerel'sSifaka  | GTCATTATTC-----                                                                       |       |       |       |       |       |       |       | 12226 |
| Ma'sNightMonkey   | CTCATTATTC-----                                                                       |       |       |       |       |       |       |       | 12228 |
| VervetAGM         | TACACCACTATGCCAGCTAATTTTCA-----C-----TTTTTTGTAGAGATGGAGCTGACTGTATTACCC                |       |       |       |       |       |       |       | 13850 |
| Gorilla           | CTCATTATTCTGCTTTCTTTCTTTCTTT--TTT--TTTTTTTTTTTTTGGCTATA-GCAAATTTATTGTAACAACGCAAAGT    |       |       |       |       |       |       |       | 14358 |
| GrabEatingMacaque | CTCATTATTCTGCTTTCTTTTCTTTT-----ATGCTATA-ACAAATTTATTGTAACAACACAAAGG                    |       |       |       |       |       |       |       | 14099 |
| Macaque           | CTCATTATTCTGCTTTCTTTTCTTTT-----T-----ATGCTATA-ACAAATTTATTGTAACAACACAAAGG              |       |       |       |       |       |       |       | 14155 |
| PigTailedMacaque  | CTCATTATTCTGCTTTCTTTTCTTTT-----ATGCTATA-ACAAATTTATTGTAACAACACAAAGG                    |       |       |       |       |       |       |       | 13735 |
| Bonobo            | CTCATTATTCTGCTTTCTTTCTTTCTTTCTTTT-----TTTTTTTTTTTTTGGCTATA-GCAAATTTATTGTAACAACACAAAGT |       |       |       |       |       |       |       | 13057 |
| OliveBaboon       | CTCATTATTCTGCTTTCTTTTCTTTT-----ATGCTATA-ACAAATTTATTGTAACAACACAAAGG                    |       |       |       |       |       |       |       | 13194 |
| Orangutan         | CTCGTTATTC---TTTCTTTTCTTTT-----TTTTTTTTTTTGGCTATA-GCAAATTTATTGTAACAACACAAATT          |       |       |       |       |       |       |       | 13369 |

| Majority          | TATTATCTTACAGTTTGTAGGT--GAGAAAT---CTGACACAGGTGGGCTAAAATGA-----AGGTGTTAG----    |       |       |       |       |       |       |       |       |
|-------------------|--------------------------------------------------------------------------------|-------|-------|-------|-------|-------|-------|-------|-------|
|                   | 17370                                                                          | 17380 | 17390 | 17400 | 17410 | 17420 | 17430 | 17440 |       |
| Human             | -ATTATCTTATAGTTTGTAGGT--GAGAAAT---CTGACACAGGTGGGCTAAAATCA-----AGGTGTTAG----    |       |       |       |       |       |       |       | 12065 |
| Coquerel'sSifaka  | -----                                                                          |       |       |       |       |       |       |       | 12226 |
| Ma'sNightMonkey   | -----T-----                                                                    |       |       |       |       |       |       |       | 12229 |
| VervetAGM         | AGGTTGGTTGCGAACTCCTGGGCTCAAGCAGTCTCTCGCATTGGCCTCTAAAATGCTGGGATTACAGGCGTGAGTCAC |       |       |       |       |       |       |       | 13930 |
| Gorilla           | -ATTATCTTATAGTTTGTAGGT--GAGAAAT---CTGACACAGGTGGGCTAAAATCA-----AGGTGTTAG----    |       |       |       |       |       |       |       | 14419 |
| GrabEatingMacaque | TATTATCTTACAGTTTGTAGGT--GAGAAAT---CTGACACAGGTGGGCTAAAATGA-----AGGTGTTAG----    |       |       |       |       |       |       |       | 14161 |
| Macaque           | TATTATCTTACAGTTTGTAGGT--GAGAAAT---CTGACACAGGTGGGCTAAAATGA-----AGGTGTTAG----    |       |       |       |       |       |       |       | 14217 |
| PigTailedMacaque  | TATTATCTTACAGTTTGTAGGT--GAGAAAT---CTGACACAGGTGGGCTAAAATGA-----AGGTGTTAG----    |       |       |       |       |       |       |       | 13797 |
| Bonobo            | -ATTATCTTATAGTTTGTAGGT--GAGAAAT---CTGACACAGGTGGGCTAAAATCA-----AGGTGTTAG----    |       |       |       |       |       |       |       | 13118 |
| OliveBaboon       | TATTATCTTACAGTTTGTAGGT--GAGAAAT---CTGACACAGGTGGGCTAAAATGA-----AGGTGTTAG----    |       |       |       |       |       |       |       | 13256 |
| Orangutan         | TATTATCTTATAGTTTGTAGGT--GAGAAAT---CTGACACAGGTGGGCTAAAATCA-----AGGTGTTAG----    |       |       |       |       |       |       |       | 13431 |

| Majority          | -----CAGGGCTGTGTTCTTTTTCAGGATCTGGGGGGAA-----TTTGTTCCTTG-ACATACTC            |       |       |       |       |       |       |       |       |
|-------------------|-----------------------------------------------------------------------------|-------|-------|-------|-------|-------|-------|-------|-------|
|                   | 17450                                                                       | 17460 | 17470 | 17480 | 17490 | 17500 | 17510 | 17520 |       |
| Human             | -----CAGGGCTGTGTTCTTTTTCAGGATCTGGGGGGAA-----TTTGTTCCTTG-ACATAACTC           |       |       |       |       |       |       |       | 12122 |
| Coquerel'sSifaka  | -----                                                                       |       |       |       |       |       |       |       | 12226 |
| Ma'sNightMonkey   | -----                                                                       |       |       |       |       |       |       |       | 12229 |
| VervetAGM         | TGTGCCTGGCCTGTTTGTAGTTATATGTCCTACAGATAACTCCTTCTCTCTGACCTGTTTTTTTTTACACTGATG |       |       |       |       |       |       |       | 14010 |
| Gorilla           | -----CAGGGCTGTGTTCTTTTTCAGGATCTGGGGGGAA-----TTTGTTCCTTG-ACATAACTC           |       |       |       |       |       |       |       | 14476 |
| GrabEatingMacaque | -----CAGGGCTGTGTTCTTTTTCAGGATCTGGGGGGGA-----ATTTGTTTTCTTC-ACATACTC          |       |       |       |       |       |       |       | 14219 |
| Macaque           | -----CAGGGCTGTGTTCTTTTTCAGGATCTGGGGGGGA-----ATTTGTTTTCTTC-ACATACTC          |       |       |       |       |       |       |       | 14275 |
| PigTailedMacaque  | -----CAGGGCTGTGTTCTTTTTCAGGATCTGGGGGGGA-----ATTTGTTTTCTTC-ACATACTC          |       |       |       |       |       |       |       | 13855 |
| Bonobo            | -----CAGGGCTGTGTTCTTTTTCAGGATCTGGGGGGAA-----TTTGTTCCTTG-ACATAACTC           |       |       |       |       |       |       |       | 13175 |
| OliveBaboon       | -----CAGGGCTGTGTTCTTTTTCAGGATCTAGGGGGGA-----ATTTGTTTTCTTC-ACATACTC          |       |       |       |       |       |       |       | 13314 |
| Orangutan         | -----CAGGGCTGTGTTCTTTTTCAGGATCTGGGGGGAA-----TTTGTTCCTTG-ACATAACTC           |       |       |       |       |       |       |       | 13488 |

Tuesday, May 03, 2022 06:14 PM

|                   |                                                                                 |       |
|-------------------|---------------------------------------------------------------------------------|-------|
| Majority          | AGCTGTTAGCTTCATCTTCAAAGAAGCAATGGC-----AAAGAAGAC----TCTCACATCA--CCTCACTGACAC     |       |
|                   | 17530 17540 17550 17560 17570 17580 17590 17600                                 |       |
| Human             | GGCTGTTAGCTTCATCTTCAAAGAAGGAATGGC-----AAAGAAGACTCTGTCTCACATCACATCACTCCGACAC     | 12192 |
| Coquerel'sSifaka  | -----                                                                           | 12226 |
| Ma'sNightMonkey   | -----G----                                                                      | 12230 |
| VervetAGM         | AATAGAAGTTGTAATTTTAAATGTAACATTTATGTTTTTCTTTAAAAAATA----TTTAACCTAAGTCCTTACATATAG | 14086 |
| Gorilla           | GGCTGTTAGCTTCATCTTCAAAGAAGCAATGGC-----AAAGAAGACTGTGTCTCACATCACATCACTCCGACAC     | 14546 |
| GrabEatingMacaque | AGCTGTTAGCTTCATCTTCAAAGAAGCAATGGC-----AAAGAAGAC----TCTCACATCA--CATCACTGACAC     | 14283 |
| Macaque           | AGCTGTTAGCTTCATCTTCAAAGAAGCAATGGC-----AAAGAAGAC----TCTCACATCA--CATCACTGACAC     | 14339 |
| PigTailedMacaque  | AGCTGTTAGCTTCATCTTCAAAGAAGCAATGGC-----AAAGAAGAC----TCTCACATCA--CATCACTGACAC     | 13919 |
| Bonobo            | GGCTGTTAGCTTCATCTTCAAAGAAGGAATGGC-----AAAGAAGACTCTGTCTCACATCACATCACTCCGACAC     | 13245 |
| OliveBaboon       | AGCTGTTAGCTTCATCTCAAAGAAGCAATGGC-----AAAGAAGAC----TCTCACATCA--CATCACTGACAC      | 13378 |
| Orangutan         | AGCTGTTAGCTTCATCTTCAAAGAAGCAATGGC-----AAAGAAGAC--TGTCTCACATCACATCACTCTGACAC     | 13556 |

|                   |                                                                                  |       |
|-------------------|----------------------------------------------------------------------------------|-------|
| Majority          | ATTCTTGTGCCTCCCTTTCCCACTTATAGGAACCTTGTGATTACACT--GGGCCAA--CTACAT--AATTCAGGATAAA  |       |
|                   | 17610 17620 17630 17640 17650 17660 17670 17680                                  |       |
| Human             | ATTCTTGTGCCTCCGTTTCCCACTTACAGGGACCTTGTGATTACAAT--GGGCCAA--CTACAT--AATAGAGGATAAA  | 12266 |
| Coquerel'sSifaka  | -----TGCTGTCTTC-----                                                             | 12236 |
| Ma'sNightMonkey   | -----TTTTCTTT-----A-----                                                         | 12239 |
| VervetAGM         | GCTTGTGTATTTTATTTTGAAGTTTAAATTTTGAATTTTACATTTAGGGCCTTAATCTACCTGGAATGTATTCCTTTG   | 14166 |
| Gorilla           | ATTCTTGTGCCTCCGTTTCCCACTTACAGGGACCTTGTGATTACAAT--GGGCCAA--CTACAT--AATAGAGGATAAA  | 14620 |
| GrabEatingMacaque | ATTCTTGTGCCTCCCTTTCCCACTTATAGGAACCTTGTGATTACACT--GGGCCAA--CTACAT--AATTCAGGATAAA  | 14357 |
| Macaque           | ATTCTTGTGCCTCCCTTTCCCACTTATAGGAACCTTGTGATTACACT--GGGCCAA--CTACAT--AATTCAGGATAAA  | 14413 |
| PigTailedMacaque  | ATTCTTGTGCCTCCCTTTCCCACTTATAGGAACCTTGTGATTACACT--GGGCCAA--CTACAT--AATTCAGGATAAA  | 13993 |
| Bonobo            | ATTCTTGTGCCTCCATTTCCCACTTACAGGGACCTTGTGATTACAGT--GGGCCAA--CTACAT--AATAGAGGATAAA  | 13319 |
| OliveBaboon       | ATTCTTGTCTCCTCCCTTTCCCACTTATAGGAACCTTGTGATTACACT--GGGCCAA--CTACAT--AATTCAGGATAAA | 13452 |
| Orangutan         | ATTCTTGTGCCTCCGTTTCCCACTTACAGGGACCTTGTGATTACAGT--GGGCCAA--CTACAT--AATTCAGGATAAA  | 13630 |

|                   |                                                                                   |       |
|-------------------|-----------------------------------------------------------------------------------|-------|
| Majority          | TGTT---TAAATTACAAATT-AATGAAGTGCCAACCT--GAA--ACAAGTTTTA-ACCTATTCTCAAGAAAGG----GCTT |       |
|                   | 17690 17700 17710 17720 17730 17740 17750 17760                                   |       |
| Human             | TGTT---TAAATTACAAATT-AATGAAGTGCCAACCT--GAA--ACAAGTTTTA-ACCTATTCTCAAGAAAGG----GCTT | 12333 |
| Coquerel'sSifaka  | -----                                                                             | 12236 |
| Ma'sNightMonkey   | -----                                                                             | 12239 |
| VervetAGM         | TGTAGCATATGGTACAGGTTTAAATATTTTCTATATGGATAGCAAGTTTAGTACCTACTTGATTGAATAGTTCAGCTT    | 14246 |
| Gorilla           | TGTT---TAAATTACAAATT-AATGAAGTGCCAACCT--GAA--ACAAGTTTTA-ACCTATTCTCAAGAAAGG----GCTT | 14687 |
| GrabEatingMacaque | TGTT---TAAATTACAAATT-AATGAAGTGCCAACCTGTGAA--ACAAGTTTTA-ACCTATTCTCAAGAAAGG----GCTT | 14426 |
| Macaque           | TGTT---TAAATTACAAATT-AATGAAGTGCCAACCT--GAA--ACAAGTTTTA-ACCTATTCTCAAGAAAGG----GCTT | 14480 |
| PigTailedMacaque  | TGTT---TAAATTACAAATT-AATGAAGTGCCAACCT--GAA--ACAAGTTTTA-ACCTATTCTCAAGAAAGG----GCTT | 14060 |
| Bonobo            | TGTT---TAAATTACAAATT-AATGAAGTGCCAACCT--GAA--ACAAGTTTTA-ACCTATTCTCAAGAAAGG----GCTT | 13386 |
| OliveBaboon       | TGTT---TAAATTACAAATT-AATGAAGTGCCAACCT--GAA--ACAAGTTTTA-ACCTATTCTCAAGAAAGG----GCTT | 13519 |
| Orangutan         | TGTT---TAAATTACCAATT-AATGAAGTGCCAACCT--GAA--ACAAGTTTTA-ACCTATTCTCAAGAAAGG----GCTT | 13697 |

Tuesday, May 03, 2022 06:14 PM

|                   |                                                                                  |       |
|-------------------|----------------------------------------------------------------------------------|-------|
| Majority          | TGCTGGAGTGGTGGCTCACACCTATAATCCCAGAACTTAGGGAGGC-TGAGGCAGGCAGATCGCT-TGAGCC-CAGGAGT |       |
|                   | 17770 17780 17790 17800 17810 17820 17830 17840                                  |       |
| Human             | TGCTGGAATGGTGGCTCACACCTGTAATCCCAGAACTTAGGGAGGC-TGAGGCAGGCAGATCACT-TGAGCC-CAGGAGT | 12410 |
| Coquerel'sSifaka  | -----                                                                            | 12236 |
| Ma'sNightMonkey   | -----GA-----                                                                     | 12241 |
| VervetAGM         | TTATCCAGTGTCTGCTTTATTAGCCCTCAGGTTCCATATATTCATAGAAGTGTCTGTGCTATGTGTGGTAGCAGT      | 14326 |
| Gorilla           | TGCTGGAGTGGTGGCTCACACCTGTAATCCCAGAACTTAGGGAGGC-TGAGGCAGGCAGATCACT-TGAGCC-CAGGAGT | 14764 |
| GrabEatingMacaque | TGCTGGAGTGGTGGCTCACACCTATAATCCCAGAACTTAGGGAGGC-TGAGGCAGGCAGATCGCT-TGAGCC-CAGGAGT | 14503 |
| Macaque           | TGCTGGAGTGGTGGCTCACACCTATAATCCCAGAACTTAGGGAGGC-TGAGGCAGGCAGATCGCT-TGAGCC-CAGGAGT | 14557 |
| PigTailedMacaque  | TGCTGGAGTGGTGGCTCACACCTATAATCCCAGAACTTAGGGAGGC-TGAGGCAGGCAGATCGCT-TGAGCC-CAGGAGT | 14137 |
| Bonobo            | TGCTGGAATGGTGGCTCACACCTGTAATCCCAGAACTTAGGGAGGC-TGAGGCAGGCAGATCACT-TGAGCC-CAGGAGT | 13463 |
| OliveBaboon       | TGCTGGCGTGGTGGCTCACACCTATAATCCCAGAACTTAGGGAGGC-TGAGGCAGGCAGATCGCT-TGAGCC-CAGGAGT | 13596 |
| Orangutan         | TGCTGGAGTGGTGGCTCACACCTATAATCCCAGAACTTAGGGAGGC-TGAGGCAGGCAGATCGCT-TGAGCC-CAGGAGT | 13774 |

|                   |                                                                                    |       |
|-------------------|------------------------------------------------------------------------------------|-------|
| Majority          | TTGAGACCAGCCTGGTCCTCATAGCA--AGACCCCATCTCTACAACAACCTTATAAAAAATTAGATAGATCTGGTGCCATGG |       |
|                   | 17850 17860 17870 17880 17890 17900 17910 17920                                    |       |
| Human             | TTGAGACCAGCCTGGTCCTCATAGCA--AGACCCCATCTCTACAAAAACTTTTAAAAAATTAGATAGATCTGGTGCCATGG  | 12488 |
| Coquerel'sSifaka  | -----                                                                              | 12236 |
| Ma'sNightMonkey   | --A-----                                                                           | 12242 |
| VervetAGM         | ACAACAGTGTCTTAATTACTATGGCATCAGCATTAAGTTTGGAACTCTGTACAGCGAGTGTCAAAACTTTGGTTTCAA     | 14406 |
| Gorilla           | TTGAGACCAGCCTGGTCCTCATAGCA--AGACCCCATCTCTACAAAAACTTTTAAAAATCAGATAGATCTGGTGCCATGG   | 14842 |
| GrabEatingMacaque | TTGAGACCAGCCTGGTCCTCATAGCA--AGACCCCATCTCTACAACAACCTTAAAAAATTAGATAGATCTGGTGCCATGG   | 14581 |
| Macaque           | TTGAGACCAGCCTGGTCCTCATAGCA--AGACCCCATCTCTACAACAACCTTAAAAAATTAGATAGATCTGGTGCCATGG   | 14635 |
| PigTailedMacaque  | TTGAGACCAGCCTGGTCCTCATAGCA--AGACCCCATCTCTACAACAACCTTAAAAAATTAGATAGATCTGGTGCCATGG   | 14215 |
| Bonobo            | TTGAGACCAGCCTGGTCCTCATAGCA--AGACCCCATCTCTACAAAAACTTTTAAAAAATTAGATAGATCTGGTGCCATGG  | 13541 |
| OliveBaboon       | TTGAGACCAGCCTGGTCCTCATAGCA--AGACCCCATCTCTACAACAACCTTAAAAAATTAGATAGATCTGGTGCCATGG   | 13674 |
| Orangutan         | TTGAGATCAGCCTGGTCCTCGTAGCA--AGACCCCATCTCTACAAAAACT--TACAAATTAGATAGATCTGGTGCCATGG   | 13850 |

|                   |                                                                                  |       |
|-------------------|----------------------------------------------------------------------------------|-------|
| Majority          | GCCTGTAGTCCCAGCTACTTGG--GAGGCTGAGACAAGAGGATC-ACCTGAGCCCAGGTGGCAGT----GAGCTGTGATT |       |
|                   | 17930 17940 17950 17960 17970 17980 17990 18000                                  |       |
| Human             | GCCTGTAGTCCCAGCTACTTGG--GAGGCTGAGACAAGAGGATC-ACCTGAGCCCAGGCGGCAGT----GAGCTATGATT | 12561 |
| Coquerel'sSifaka  | -----                                                                            | 12236 |
| Ma'sNightMonkey   | -----T-----G-----                                                                | 12244 |
| VervetAGM         | AATGTCTCTCGTGTCTTCTCGCTGCATTTATTTTAAAGATCATTTGGCTAAGTTCTGTGAAGACTTTTGGGTCTTATTT  | 14486 |
| Gorilla           | GCCTGTAGTCCCAGCTACTTGG--GAGGCTGAGACAAGAGGATC-ACCTGAGCCCAGGCGGCAGT----GAGCTGTGATT | 14915 |
| GrabEatingMacaque | GCCTGTAGTCCCAGCTACTTGG--GAGACTGAGACAAGAGGATC-ACCTGAGCCCAGGTGGCAGT----GAGCTGTGATC | 14654 |
| Macaque           | GCCTGTAGTCCCAGCTACTTGG--GAGACTGAGACAAGAGGATC-ACCTGAGCCTAGGTGGCAGT----GAGCTGTGATC | 14708 |
| PigTailedMacaque  | GCCTGTAGTCCCAGCTACTTGG--GAGACTGAGACAAGAGGATC-ACCTGAGCCCAGGTGGCAGT----GAGCTGTGATC | 14288 |
| Bonobo            | GCCTGTAGTCCCAGCTACTTGG--GAGGCTGAGACAAGAGGATC-ACCTGAGCCCAGGCGGCAGT----GAGCTATGATT | 13614 |
| OliveBaboon       | GCCTGTAGTCCCAGCTACTTGG--GAGACTGAGACAAGAGGATC-ACCTGAGCCCAGGTGGCAGT----GAGCTGTGATC | 13747 |
| Orangutan         | GCCTGTAGTCCCAGCTACTTGG--GAGGCTGAGACAAGAGGATC-ACCTGAGCCCAGGTGGCAGT----GAGCTATGATT | 13923 |

Tuesday, May 03, 2022 06:14 PM

|                   |                                                                                  |       |
|-------------------|----------------------------------------------------------------------------------|-------|
| Majority          | GTATCA--CTACAGTCCAGC--CTGGGCGAGAGGATATC-CAGTCTCAAAAAAAAA-----GGAAAAGGGCTTTC--C   |       |
|                   | 18010 18020 18030 18040 18050 18060 18070 18080                                  |       |
| Human             | GTATCA--CTACACTCCAGC--CTGGGCGAGAGGAGATC-CAGTCTCAAAAAAAAA-----GGAAAAGGGCTTTC--C   | 12627 |
| Coquerel'sSifaka  | -----                                                                            | 12236 |
| Ma'sNightMonkey   | -----TAG-----                                                                    | 12247 |
| VervetAGM         | ATACTTGCCTTAAATTTAGTAGTTAATTTGGGAGAACATTATAGTTGCATTATCAAATAAAATGGCAAATTTTTTTTAGC | 14566 |
| Gorilla           | GTATCA--CTACACTCCAGC--CTGGGCGAGAGGAGATC-CAGTCTCAAAAAAAAA-----GGAAAAGGGCTTTC--C   | 14981 |
| GrabEatingMacaque | GTATCA--CTACAGTCCAGC--CTGGGCGAGAGGATATC-CAGTCTCAAAAAAAAA-GAAAAAGGAAAAGGGCTTTC--C | 14726 |
| Macaque           | GTATCA--CTACAGTCCAGC--CTGGGCGAGAGGATATC-CAGTCTCAAAAAAAAA-GAAAAAGGAAAAGGGCTTTC--C | 14780 |
| PigTailedMacaque  | ATATCA--CTACAGTCCAGC--CTGGGCGAGAGGATATC-CAGTCTCAAAAAAAAAAGAAAAAGGAAAAGGGCTTTC--C | 14361 |
| Bonobo            | TTATCA--CTACACTCCAGC--CTGGGCGAGAGGAGATC-CAGTCTCAAAAAAAAA-----GGAAAAGGGCTTTC--C   | 13680 |
| OliveBaboon       | GTATCA--CTACAGTCCAGC--CTGGGCGAGAGGATATC-CAGTCTCAAAAAAAAAAGAAAAAGGAAAAGGGCTTTC--C | 13820 |
| Orangutan         | TTATCA--CTACACTCCAGC--CTGGGTGAGAGGAGATC-CAGTCTCAAAAAA-----GGAAAAGGGCTTTC--C      | 13987 |

|                   |                                                                                  |       |
|-------------------|----------------------------------------------------------------------------------|-------|
| Majority          | TGAGGGTCAAATGAAGTACAGTTGACCCTTGAACAACATG--ATTTTGAATTACACAGGTCCACTT-----ATGCATGG  |       |
|                   | 18090 18100 18110 18120 18130 18140 18150 18160                                  |       |
| Human             | TGAGGGTCAAATGAAGTACAGTTGACCCTTGAACAACATG--ATTTTGAATTACACAGGTCCACTT-----ATGCATAG  | 12699 |
| Coquerel'sSifaka  | -----                                                                            | 12236 |
| Ma'sNightMonkey   | -----                                                                            | 12247 |
| VervetAGM         | TGAAAGGCAGA-GAACTATAACATTTCTTTGAAGAATTTTCCACTTTCTAAGAGACATGCTTAATGCAGAAAATATGTTA | 14645 |
| Gorilla           | TGAGGGTCAAATGAAGTACAATTGACCCTTGAACAACATG--ATTTTGAATTACACAGGTCCACTT-----ATGCATGG  | 15053 |
| GrabEatingMacaque | TGAGGGTCAAATGAAGTACAGTTGACCCTTGAACAACATG--ATTTTGAAGTACACAGGTCCACTT-----ATGCATGG  | 14798 |
| Macaque           | TGAGGGTCAAATGAAGTACAGTTGACCCTTGAACAACATG--ATTTTGAAGTACACAGGTCCACTT-----ATGCATGG  | 14852 |
| PigTailedMacaque  | TGAGGGTCAAATGAAGTACAGTTGACCCTTGAACAACATG--ATTTTGAAGTACACAGGTCCACTT-----ATGCATGG  | 14433 |
| Bonobo            | TGAGGGTCAAATGAAGTACAGTTGACCCTTGAACAACATG--ATTTTGAATTACACAGGTCCACTT-----ATTCATAG  | 13752 |
| OliveBaboon       | TGAGGGTCAAATGAAGTACAGTTGACCCTTGAACAACATG--ATTTTGAAGTACACAGGTCCACTT-----ATGCTTGG  | 13892 |
| Orangutan         | TGAGGGTCAAATGAAGTACAGTTGACCCTTGAACAAGATG--ATTTTGAATTACACAGGTCCACTT-----ATGCATGG  | 14059 |

|                   |                                                                                  |       |
|-------------------|----------------------------------------------------------------------------------|-------|
| Majority          | ATCCACTTATACAGAATTTTCTTCTCCCTCTTCCAC--CTAAGACAGAAAGACCAACTCTTCCCTCTTCCCTC--AGCCT |       |
|                   | 18170 18180 18190 18200 18210 18220 18230 18240                                  |       |
| Human             | ATCCACTTATACAGAATTTTCTTCTCCCTCTTCCAC--CCAAGACAGAAAGACCAACTCGTCTCTTCCCTCTTAGCCT   | 12776 |
| Coquerel'sSifaka  | -----AGAAT-----                                                                  | 12241 |
| Ma'sNightMonkey   | -----AGAAT-----G-----                                                            | 12253 |
| VervetAGM         | AAAGGATTTTAAACAGCTTATTTGTAAGGGTTGAGGGGACAGGGATACTTGGACTAATATTTTCAGTTTTTCT--AAAAG | 14722 |
| Gorilla           | ATCCACTTACACAGAATTTTCTTCTCGCTCTTCCAC--CCAAGACAGA---CCAAGTCTCTCTTCCCTCTCAGCCT     | 15126 |
| GrabEatingMacaque | ATCCACTTATACAGAATTTTCTTCTCCCTCTTCCAC--CTAAGACAGAAAGACCAACTCTTCCCTCTTCCCTC--AGCCT | 14872 |
| Macaque           | ATCCACTTATACAGAATTTTCTTCTCCCTCTTCCAC--CTAAGACAGAAAGACCAACTCTTCCCTCTTCCCTC--AGCCT | 14926 |
| PigTailedMacaque  | ATCCACTTATACAGAATTTTCTTCTCCCTCTTCCAC--CTAAGACAGAAAGACCAACTCTTCCCTCTTCCCTC--AGCCT | 14507 |
| Bonobo            | ATCCACTTATACAGAATTTTCTTCTCTCTTCCAC--CCAAGACAGAAAGACCAACTCGTCTCTTCCCTCTTAGCCT     | 13829 |
| OliveBaboon       | ATCCACTTATACAGAATTTTCTTCTCCCTCTTCCAC--CTAAGACAGAAAGACCAACTCTTCCCTCTTCCCTC--AGCCT | 13966 |
| Orangutan         | ATCCACTTATACAGAATTTTCTTCTCCCTCTTCCAC--CCAAGACGAAAGACCAACTCGTCTCTTCCCTCTCGTCCC    | 14136 |

Tuesday, May 03, 2022 06:14 PM

|                   |                                                                                  |       |
|-------------------|----------------------------------------------------------------------------------|-------|
| Majority          | ACTCAGTGTAAAGACAGTG-AGGATGAAGACC--TTTATTATGA---CTGATCTCCAAAAAGATTG----GCTTCAATA  |       |
|                   | 18250 18260 18270 18280 18290 18300 18310 18320                                  |       |
| Human             | ACTCAGCGTGAAGACAGTC-AGGATGAAGACC--TTTATTATGA---CTGATCTCCAAAAAGATTG----GCTTCAGTA  | 12845 |
| Coquerel'sSifaka  | -----ATGGAGAC-----AGCTCCAAAAAGATTG----ACTTTGGTT                                  | 12275 |
| Ma'sNightMonkey   | -----ATCTCCAAAAAGATTG----GCTTCAATA                                               | 12278 |
| VervetAGM         | TATTGGTTTATTGAGTACGTACCTTGAAAAGTGTTTTATTGAGAGCTTCAAATTTCTCAGAATTGTATAACATTTTGGAA | 14802 |
| Gorilla           | ACTCAGCGTGAAGACAGTC-AGGATGAAGACC--TTTATTATGA---CTGATCTCCAAAAAGATTG----GCTTCAGTA  | 15195 |
| GrabEatingMacaque | ACTCAATGTAAAGACAGTG-AGGATGAAGACC--TTTATTATGA---CTGATCTCCAAAAAGATTG----GCTTCAATA  | 14941 |
| Macaque           | ACTCAATGTAAAGACAGTG-AGGATGAAGACC--TTTATTATGA---CTGATCTCCAAAAAGATTG----GCTTCAATA  | 14995 |
| PigTailedMacaque  | ACTCAATGTAAAGACAGTG-AGGATGAAGACC--TTTATTATGA---CTGATCTCCAAAAAGATTG----GCTTCAATA  | 14576 |
| Bonobo            | ACTTAGCGTGAAGACAGTC-AGGATGAAGACC--TTTATTATGA---CTGATCTCCAAAAAGATTG----GCTTCAATA  | 13898 |
| OliveBaboon       | ACTCAATGTAAAGACAGTG-AAGATGAAGACC--TTTATTATGA---CTGATCTCCAAAAAGATTG----GCTTCAATA  | 14035 |
| Orangutan         | ACTCAGCGTGAAGACATTG-AGGATGAAGACC--TTTATTATGA---CCGATCTCCAAAAAGATTG----GCTTCAATA  | 14205 |

|                   |                                                                                  |       |
|-------------------|----------------------------------------------------------------------------------|-------|
| Majority          | TTTCATGGAGTGCTATGAAT--TAGAATCCTGAGTCTCTATAT---TGTTAATTATTTTAGTCTCTTGGTCTGTGT---- |       |
|                   | 18330 18340 18350 18360 18370 18380 18390 18400                                  |       |
| Human             | TTTCATGGAGTGCTATGAAT--TAGAATCCTGAGTCTCTATAT---TGTTAATTATTTTAGTCTCTTGGTCTACGT---- | 12916 |
| Coquerel'sSifaka  | TTACATGGGGTGCTGTGACT--TAGAATAATGAATTTCTGTAA--TTTTTAGTTATTTTAGTTTCTTACCTCGTCT---- | 12347 |
| Ma'sNightMonkey   | TTTCATGGAATGCTATGAAT--TAGAATCCTGAGTCTCTGTAA--TTGTTCAATTATTTAATCTCTTGGTCTGTGT---- | 12350 |
| VervetAGM         | TTCTCTCTTTTATTACTAATATCAAGCACCTATGTTTCTTCTATTTCTTGATTTTTTTTGTACATAAATTTATTTTACT  | 14882 |
| Gorilla           | TTTCATGGAGTGCTATGAAT--TAGAATCCTGAGTCTCTATAT---TGTTAATTATTTTAGTCTCTTGGTCTACGT---- | 15266 |
| GrabEatingMacaque | TTTCATGGAGTGTTATGAAT--TAGAATCCTGAGTCTCTATAT---TGTTAATTATTTTCGTCTCTTGGTCTGTGT---- | 15012 |
| Macaque           | TTTCATGGAGTGTTATGAAT--TAGAATCCTGAGTCTCTATAT---TGTTAATTATTTTCGTCTCTTGGTCTGTGT---- | 15066 |
| PigTailedMacaque  | TTTCATGGAGTGTTATGAAT--TAGAATCCTGAGTCTCTATAT---TGTTAATTATTTTGGTCTCTTGGTCTGTGT---- | 14647 |
| Bonobo            | TTTCATGGAGTGCTATGAAT--TAGAATCCTGAGTCTCTATAT---TGTTAATTATTTTAGTCTCTTGGTCTACGT---- | 13969 |
| OliveBaboon       | TTTCATGGAGTGTTATGAAT--TAGAATCCTGAGTCTCTATAT---TGTTAATTATTTTAGTCTCTTGGTCTGTGT---- | 14106 |
| Orangutan         | TTTCATGGAGTGCTATGAAT--TAGAATCCTCAGTCTCTATAT---TGTTAATTATTTTAGTCTCTTGGTCTATGT---- | 14276 |

|                   |                                                                                |       |
|-------------------|--------------------------------------------------------------------------------|-------|
| Majority          | -GTGTTCTAAACTGT-AGTAGCTTTCTTAATTTAGTTCTAGGCATACTACATTAGGGGA-----TAAGGTGGTTAA   |       |
|                   | 18410 18420 18430 18440 18450 18460 18470 18480                                |       |
| Human             | -GTGTTCTAAACTGT-AGTAGCTTTCTTAATTTAGTTCTAGGCATACTACATTAGGGGA-----TAAGGTGGTTAA   | 12986 |
| Coquerel'sSifaka  | -GTGTTGTTAAACTGT-AATAGCTTTCTTAATTTAGTTCAAGGCATACTACATTAGGGGA-----TAAAGTGTGAA   | 12417 |
| Ma'sNightMonkey   | -GTGTTGCTAAATTGT-AGTAGCTTTCTTAACTTAATTTAGGCATACCACAGTAGGGGA-----TAAGGTGGTTAA   | 12420 |
| VervetAGM         | GGTCTTTTCAAAGAACCAATGTTTTATTTGTTTTCTTTTTTGTGAGGGCAGTGAAGGGGTTCACTTTAAGTTGATCCT | 14962 |
| Gorilla           | -GTGTTCTAAACTGT-AGTAGCTTTCTTAATTTAGTTCTAGGCATACTACATTAGGGGA-----TAAGGTGGTTAA   | 15336 |
| GrabEatingMacaque | -GTGTTCTAAACTGT-AGTAGCTTTCTTAATTTAGTTCCAGGCATACTACATTAGGGGA-----TAAGGTGGTTAA   | 15082 |
| Macaque           | -GTGTTCTAAACTGT-AGTAGCTTTCTTAATTTAGTTCCAGGCATACTACATTAGGGGA-----TAAGGTGGTTAA   | 15136 |
| PigTailedMacaque  | -GTGTTCTAAACTGT-AGTAGCTTTCTTAATTTAGTTCCAGGCATACTACATTAGGGGA-----TAAGGTGGTTAA   | 14717 |
| Bonobo            | -GTGTTCTAAACTGT-AGTAGCTTTCTTAATTTAGTTCTAGGCATACTACATTAGGGGA-----TAAGGTGGTTAA   | 14039 |
| OliveBaboon       | -GTGTTCCAAACTGT-AGTAGCTTTCTTAATTTAGTTCCAGGCATACTACATTAGGGGA-----TAAGGTGGTTAA   | 14176 |
| Orangutan         | -GTGTTTCTAAACTGT-AGTAGCTTTCTTAATTTAGTTCTAGGCATACTACATTAGGGGA-----TAAGGTGGTTAA  | 14346 |

Tuesday, May 03, 2022 06:14 PM

|                   |                                                                                  |       |
|-------------------|----------------------------------------------------------------------------------|-------|
| Majority          | G-----TGATATTTTCACTTTAAAAGTAATAAGGTGTCACAGAAAGTTATCACAA--GGGTTTTTTTGAGTAGTACTTC  |       |
|                   | 18490 18500 18510 18520 18530 18540 18550 18560                                  |       |
| Human             | G-----TGATATTTTCACTTTAAAAGTAATAAGGTGTCACAGAAAGTTATCACGA--GATTTTTTTTGAGCAGTACTTC  | 13057 |
| Coquerel'sSifaka  | G-----TAATATTTTCACTTTAAAAGTAATAAGGTATCACT--AATGTTATAAGAA--ATGTTTTTTTGAGCAAAGTT-- | 12486 |
| Ma'sNightMonkey   | G-----TGATATTTCTACTTTAAAAGTAATAAGGTGTCACAGAAAGTTA-----                           | 12464 |
| VervetAGM         | GAACCTCTTTATTTCTGTGTTTAAAATACATTCAAGGTTAAAGGTAATCA--GCTG--ATAGCTTTGGCAGTGGTTTTTT | 15039 |
| Gorilla           | G-----TGATACTTTCACCTTTAAAAGTAATAAGGTGTCACAGAAAGTTATCACGA--GATTTTTTTTGAGCAGTACTTC | 15407 |
| GrabEatingMacaque | G-----TGATATTTTCACTTTAAAAGTAATAAGGTGTCACAGAAAGTTACCACAA--GAGTTTTTTTGAGTAGTACTTC  | 15154 |
| Macaque           | G-----TGATATTTTCACTTTAAAAGTAATAAGGTGTCACAGAAAGTTACCACAA--GAGTTTTTTTGAGTAGTACTTC  | 15208 |
| PigTailedMacaque  | G-----TGATATTTTCTCTTTAAAAGTAATAAGGTGTCACAGAAAGTTATCACAA--GAGTTTTTTTGAGTAGTACTTC  | 14789 |
| Bonobo            | G-----TGATATTTTCACTTTAAAAGTAATAAGGTGTCACAGAAAGTTATCACGA--GATTTTTTTTGAGCAGTACTTC  | 14110 |
| OliveBaboon       | G-----TGATATTTTCACTTTAAAAGTAATAAGGTGTCACAGAAAGTTATCACAA--GAGTTTTTTTGAGTAGTACTTC  | 14248 |
| Orangutan         | G-----TGATATTTTCACTTTAAAAGTAGTAAGGTGTCACAGAAAGTTATCACACAGATTTTTTTTGAGCAGTACTTC   | 14419 |

|                   |                                                                                       |       |
|-------------------|---------------------------------------------------------------------------------------|-------|
| Majority          | TTTTTTATAACTATTGTAATGAATTTTAGA--CACAA--TAGTATCATGAAC--C--ATTGTGTGTGTATCATTTCAGTCCCAA  |       |
|                   | 18570 18580 18590 18600 18610 18620 18630 18640                                       |       |
| Human             | TTTTTTAAAAC TATTATAATGAATTTTAGA--CACAA--TAGTATCATGAAC--C--ATTGTGTATCTATCATTTCAGTCCCAA | 13132 |
| Coquerel'sSifaka  | CTTTTTATAAGTATTGTGGTGAATTTAAACACAGCAAGTATCACAGTAGACACCATTTCATTGTGTATCTATCAGTCTCAG     | 12566 |
| Ma'sNightMonkey   | -----                                                                                 | 12464 |
| VervetAGM         | TTTTTTTTTTTTTTTTTTTTTTTTTTTTTTAGAGTCTCT--TTTTATTATAAAC--TTAAAGGTTTTAAGCTACACAAAAGTAG  | 15117 |
| Gorilla           | TTTTTTAAAAC TATTATAATGAATTTTAGA--AACAA--TAGTATCGTGAAC--C--ATTGTGTATCTATCATTTCAGTCCCAA | 15482 |
| GrabEatingMacaque | TTTTTTATAACTATTGTAATGAATTTTAGA--CACAA--TAGTATCATGAAC--C--ATTGTGTGTGTATCATTTCAGTCCCAA  | 15229 |
| Macaque           | TTTTTTATAACTATTGTAATGAATTTTAGA--CACAA--TAGTATCATGAAC--C--ATTGTGTGTGTATCATTTCAGTCCCAA  | 15283 |
| PigTailedMacaque  | TTTTTTATAACTATTGTAATGAATTTTAGA--CACAA--TAGTATCATGAAC--C--ATTGTGTGTGTATCATTTCAGTCCCAA  | 14864 |
| Bonobo            | TTTTTTAAAAC TATTATAATGAATTTTAGA--CACAA--TAGTATCATGAAC--C--ATTGTGTATCTATCATTTCAGTCCCAA | 14185 |
| OliveBaboon       | TTTTTTATAACTATTGTAATGAATTTTAGA--CACAA--TAGTATCATGAAC--C--ATTGTGTGTGTATCATTTCAGTCCCAA  | 14323 |
| Orangutan         | TTTTTTAAAAC TATTATAATGAATTTTAGA--CACAA--TAGTATCATGAAC--C--ATTGTGTATCTATCATTTCAGTCCCAA | 14494 |

|                   |                                                                                |       |
|-------------------|--------------------------------------------------------------------------------|-------|
| Majority          | AAACCAT-----CAGCAACCCCTAGCTA-----AAATGATGATATCCACACTCTGCTTTTCTACTTCT--GTTATTT  |       |
|                   | 18650 18660 18670 18680 18690 18700 18710 18720                                |       |
| Human             | AAACCAT-----TAGTAACCCATAGCTA-----AAATGATGATATCCACACTCTGCTTTTCCACTTCT--GTTATTT  | 13197 |
| Coquerel'sSifaka  | CAATCA-----ACAGCGCACAGCTA-----AAGCTATGATATCTACACACTACTTTTCTCTTTCT--GTTATT--    | 12627 |
| Ma'sNightMonkey   | -----                                                                          | 12464 |
| VervetAGM         | AGGGAATGGTATATAATACACTCTTTTTTTTCTGTGATNTCGATCTCCTGACCCTGTGATCCGCCCGCCTCGGCCTCC | 15197 |
| Gorilla           | AAACCAT-----CAGCAACCCATAGCTA-----AAACGATGATATCCACACT--GCTTTTCCACTTCT--GTTATTT  | 15545 |
| GrabEatingMacaque | AAACCAT-----CAGCAACCCCTAGCTA-----AAATGATGATATCCAAACTCTGCTTTTCTACTTCT--GTTATTT  | 15294 |
| Macaque           | AAACCAT-----CAGCAACCCCTAGCTA-----AAATGATGATATCCAAACTCTGCTTTTCTACTTCT--GTTATTT  | 15348 |
| PigTailedMacaque  | AAACCAT-----CAGCAACCCCTAGCTA-----AAATGATGATATCCAAACTCTGCTTTTCTACTTCT--GTTATTT  | 14929 |
| Bonobo            | AAACCAT-----TAGCAACCCATAGCTA-----AAATGATGATATCCACACTCTGCTTTTCCACTTCT--GTTATTT  | 14250 |
| OliveBaboon       | AAACCAT-----CAGCAACCCCTAGCTA-----AAATGATGATATCCAAACTCTGCTTTTCTACTTCT--GTTATTT  | 14388 |
| Orangutan         | AAACCAT-----CAGCAACCCATAGCTA-----AAACGATGATATCCACACTCTGCTTTTCCATTCT--GTTATTT   | 14559 |

Tuesday, May 03, 2022 06:14 PM

| Majority          | TGAGATA---AATTCAGATAT---TCATATTGTTT-----TATCTGTAAAGGCTTCAGTGTATATCTTTAAA-       |       |
|-------------------|---------------------------------------------------------------------------------|-------|
|                   | 18730 18740 18750 18760 18770 18780 18790 18800                                 |       |
| Human             | TGAGATA---AATTCAGATAT---TCATATTGTTT-----TATCTGTAAAGGCTTCAGTGTATATCTTTAAAG       | 13260 |
| Coquerel'sSifaka  | -GAAATA---AATTCAGATAG---CCATATTGTTT-----CATCTGTAAATGTTTCA-TGTGTATCTATGAAA       | 12688 |
| Ma'sNightMonkey   | -----T-----                                                                     | 12465 |
| VervetAGM         | CAAAGTGCTGGGATTACAGGCATGAGCCACCGCGCCCGCCAGACACTGTTTTTTAAAATTACATAATGTGGTCTCAGC- | 15276 |
| Gorilla           | TGAGATA---AATTCAGATAT---TCATATTGTTT-----TATCTGTAAAGGCTTCAGTGTGTATCTTTAAAG       | 15608 |
| GrabEatingMacaque | TGAGATA---AATTCAGATAT---TCATATTGTTT-----TATCTGTAAAGGCTTCAGTGTATAACTTTAAA-       | 15356 |
| Macaque           | TGAGATA---AATTCAGATAT---TCATATTGTTT-----TATCTGTAAAGGCTTCAGTGTATAACTTTAAA-       | 15410 |
| PigTailedMacaque  | TGAGATA---AATTCAGATAT---TCATATTGTTT-----TATCTGTAAAGGCTTCAGTGTATAACTTTAAA-       | 14991 |
| Bonobo            | TGAGATA---AATTCAGATAT---TCATATTGTTT-----TATCTGTAAAGGCTTCAGTGTATATCTTTAAAG       | 14313 |
| OliveBaboon       | TGAGATA---AATTCAGATAT---TCATATTGTTT-----TATCTGTAAAGGCTTCAGTGTATAACTTTAAA-       | 14450 |
| Orangutan         | TGAGATA---AATATCAGATAT---TCATATTGTTT-----TATCTGTAAAGGCTTCAGTGTATATCTTTAAAG      | 14622 |

| Majority          | AATAAGGACTCTCTTT-----TCTTTTTAAAATATAATCAAAAAG-CTGTTAGGACAC-ACACACAAATTAAGTTA    |       |
|-------------------|---------------------------------------------------------------------------------|-------|
|                   | 18810 18820 18830 18840 18850 18860 18870 18880                                 |       |
| Human             | AATAGGGACTCTCCTCTC-----CTTTTTAAAATATAATCAAAAAG-CTGTTAGGACAC-ACACACA---AAGTTA    | 13326 |
| Coquerel'sSifaka  | GAAAGGGACTCTCTCT-----TCTTTTTAA--TATAACCACAAT-CTGTTAGAACACTAAAACAATTAACAATTA     | 12756 |
| Ma'sNightMonkey   | -----CAAAG-----AG---                                                            | 12473 |
| VervetAGM         | AGTTACAGTTCTACCTCAT-----TCTTTGTTAATGACAATGGAGGATACTCTGTGTGACTGCACCACAGTGTAGTTA  | 15350 |
| Gorilla           | AATAGGGACTCTCCTCTCTCTTTTTCTTTTTAAAATATAATCAAAAAG-CTATTAGGACAC-ACACACACATTAAGTTA | 15686 |
| GrabEatingMacaque | AATAAAGACTCTCTTT-----TCTTTTTAAAATATAATCAAAAAG-CTGTTAGGACAC-ACACACAAATTAAGTTA    | 15425 |
| Macaque           | AATAAAGACTCTCTTT-----TCTTTTTAAAATATAATCAAAAAG-CTGTTAGGACAC-ACACACAAATTAAGTTA    | 15479 |
| PigTailedMacaque  | AATAAAGACTCTCTTT-----TCTTTTTAAAATATAATCAAAAAG-CTGTTAGGACAC-ACACACAAATTAAGTTA    | 15060 |
| Bonobo            | AATAGGGACTCTCCTCTCT---TTTCTTTTTAAAATATAATCAAAAAG-CTGTTAGGACAC-ACACACA---AAGTTA  | 14383 |
| OliveBaboon       | AATAAGGACTCTCTTT-----TCTTTTTAAAATATAATCAAAAAG-CTGTTAGGACAC-ACACACAAATTAAGTTA    | 14519 |
| Orangutan         | AATAAGGAC-----TCTC-----TTTTAAAATATAATCAAAAAG-CTATTAGGACAC-ACACACACATTAAGTTA     | 14686 |

| Majority          | CTT--CATATTATAA---AATGTCAAATTTGTATTAATAATTT---CTAATT---GTCTCATAAAAAGTCATAGTATTTTT |       |
|-------------------|-----------------------------------------------------------------------------------|-------|
|                   | 18890 18900 18910 18920 18930 18940 18950 18960                                   |       |
| Human             | CCT--CATATTATAA---AATGTCAAATTTGTATTAATAATTT---CTAATT---GTCTCATAAAAAGTCATAGTATTTTT | 13394 |
| Coquerel'sSifaka  | CTTA--ATATTATCA---AATGTAAATTTGTGTTAAATTT---CTAATT---GCCTCCTAAAAGTCATGGTGTTTTT     | 12824 |
| Ma'sNightMonkey   | -----ATT-----                                                                     | 12477 |
| VervetAGM         | CTGGACATAACCACAATTTAGTTTCTACATTGATGGACATTTAGGTTTGATCCAGTTTGTGGTTAGTTATAAGGTGTGG   | 15430 |
| Gorilla           | CCT--CATATTATAA---AATGTCAAATTTGTATTAATAATTT---CTAATT---GTCTCATAAAAAGTCATAGTATTTTT | 15754 |
| GrabEatingMacaque | CTT--CATATTATAA---AATGTCAAATTTGTATTAATAATTT---CTAATT---GTCTCATAAAAAGTCATAGTATTTTT | 15493 |
| Macaque           | CTT--CATATTATAA---AATGTCAAATTTGTATTAATAATTT---CTAATT---GTCTCATAAAAAGTCATAGTATTTTT | 15547 |
| PigTailedMacaque  | CTT--CATATTATAA---AATGTCAAATTTGTATTAATAATTT---CTAATT---GTCTCATAAAAAGTCATAGTATTTTT | 15128 |
| Bonobo            | CCT--CATATTATAA---AATGTCAAATTTGTATTAATAATTT---CCAATT---GTCTCATAAAAAGTCATAGTATTTTT | 14451 |
| OliveBaboon       | CTT--CATATTATAA---AATGTCAAATTTGTATTAATAATTT---CTAATT---GTCTCATAAAAAGTCATAGTATTTTT | 14587 |
| Orangutan         | ATT--CATATTATAA---ACTGTCAAATTTGTATTAATAATTT---CTAGTT---GTCTCATAAAAAGTCATAGTATTTTT | 14754 |

Tuesday, May 03, 2022 06:14 PM

| Majority          | ATAGG---TTTTTTTT--AGTGGGGGAAG----GAGTCATGATAAAAATAAGATCAGCATATTTAACAGGT-CGTTATTA   |       |
|-------------------|------------------------------------------------------------------------------------|-------|
|                   | 18970 18980 18990 19000 19010 19020 19030 19040                                    |       |
| Human             | ATAGGGTTTTTTTTTTTT--AGTGGGGGAAG----GAGTCACGATAAAAATAAGATCAGCAAATTTAACAGGT-CGTTATTA | 13467 |
| Coquerel'sSifaka  | ATAGGGTTTTTTTT-----AGTGGGGGAGG----GAATCGAAATAAGACATGATCAGCACATTTTCTAGGT-TGATATTA   | 12892 |
| Ma'sNightMonkey   | -----                                                                              | 12477 |
| VervetAGM         | ACATA---TTTAGAAT---AGAAGTAAAAATCCTGTGTGCAAAAGAAATTTATGCTTAAAGAGTTACTGGAACCACACTG   | 15504 |
| Gorilla           | ATAGGGTTTTTTTTTTTT--AGTGGGGGAAG----GAGTCACGATAAAAATAAGATCAGCAAATTTAACAGGT-CGTTATTA | 15826 |
| GrabEatingMacaque | ATAGG---TTTTTTTT--AGAGGGGAAG----GAGTCATGATAAAAATAAGATCAGCATATTTAACAGGT-CGTTATTA    | 15562 |
| Macaque           | ATAGG---TTTTTTTT--AGAGGGGAAG----GAGTCATGATAAAAATAAGATCAGCATATTTAACAGGT-CGTTATTA    | 15616 |
| PigTailedMacaque  | ATAGG---TTTTTTTT--AGAGGGGAAG----GAGTCATGATAAAAATAAGATCAGCATATTTAACAGGT-CGTTATTA    | 15197 |
| Bonobo            | ATAGGGTTTTTTTTTTTTTAGTGGGGGAAG----GAGTCACGATAAAAATAAGATCAGCAAATTTAACAGGT-TGTTATTA  | 14526 |
| OliveBaboon       | ATAGG---TTTTTTTT--AGAGGGGAAG----GAGTCATGATAAAAATAAGATCAGCATATTTAACAGGT-CGTTATTA    | 14656 |
| Orangutan         | ATAGGGTTTTTTTTTTTT--AGTGGGGGAAG----GAGTCATGATAAAAATAAGATCAGCCAATTTAACAGGT-CGTTATTA | 14828 |

| Majority          | CCT----CTTAAATATCTTTTA-----ATGTACAAGT-TCTCCGTTCTGT-----TTTTTG-----                |       |
|-------------------|-----------------------------------------------------------------------------------|-------|
|                   | 19050 19060 19070 19080 19090 19100 19110 19120                                   |       |
| Human             | CCT----CTTAAATATCTTTTA-----ATGTACAAGC-TCTCCGTTCTGT-----TTTTTG-----                | 13514 |
| Coquerel'sSifaka  | TGT---CTTAAAAATATCTTTTA-----ATCTACAGGT-TCTCCCTCTATCCCTG-----TTTTTTGGGGTTTG---     | 12952 |
| Ma'sNightMonkey   | -----                                                                             | 12477 |
| VervetAGM         | CCAGAACACTCATTGTGTTTTTACAGGTGTGTATGGGAGTGCTTGTTTTTTCCATACCCTTGCCAATTCTAGGTTTTATCA | 15584 |
| Gorilla           | CCT----CTTAAATATCTTTTA-----ATGTACAAGT-TCTCCGTTCTGT-----TTTTTG-----                | 15873 |
| GrabEatingMacaque | CCT----CTTAAATATCTTTTA-----ATGTACAAGT-TCTCCGTTCTGT-----TTTTTTGGTTTTTGTGTTG        | 15631 |
| Macaque           | CCT----CTTAAATATCTTTTA-----ATGTACAAGT-TCTCCGTTCTGT-----TTTTTTGTTTTTTTTT-TGTTTTTTG | 15684 |
| PigTailedMacaque  | CCT----CTTAAATATCTTTTA-----ATGTACAAGT-TCTCCGTTCTGT-----TTTTTT-----                | 15244 |
| Bonobo            | CCT----CTTAAATATCTTTTA-----ATGTACAAGT-TCTCCGTTCTGT-----TTTTG-----                 | 14572 |
| OliveBaboon       | CCT----CTTAAATATCTTTTA-----ATGTACAAGT-TCTCCGTTCTGT-----TTTTTT-----                | 14703 |
| Orangutan         | CCT----CTTAAATATCTTTTA-----ATGTACAAGT-TCTCCGTTCTGT-----TTTTTG-----                | 14875 |

| Majority          | ---T-----TTTTT-----                                                               |       |
|-------------------|-----------------------------------------------------------------------------------|-------|
|                   | 19130 19140 19150 19160 19170 19180 19190 19200                                   |       |
| Human             | ---T-----TTTTT-----                                                               | 13520 |
| Coquerel'sSifaka  | ---TT-----TTTTTTTTTT-----                                                         | 12964 |
| Ma'sNightMonkey   | -----                                                                             | 12477 |
| VervetAGM         | AAATTTAGAATATTAGATTATTTTACACTAAAAATGTATTTTCGTAATTTATATTTTGAAATG-AGTGAAGTTTTCAAATT | 15663 |
| Gorilla           | ---T-----TTTTT-----                                                               | 15879 |
| GrabEatingMacaque | TTGTTGTTGTTGTTGTTGTTTTGTTGAGACAGAGTCTCGCTTTGTCGCCCAGACTGGAGTGCAGTGGCCGGATCTCAGC   | 15711 |
| Macaque           | TTGTTGTTGTTGTTGTTTGTGTTGAGACAGAGTCTCGCTTTGTCGCCCAGACTGGAGTGCAGTGGCCGGATCTCAGC     | 15764 |
| PigTailedMacaque  | -----TTTTT-----                                                                   | 15249 |
| Bonobo            | -----TTTTT-----                                                                   | 14577 |
| OliveBaboon       | -----TTT-----                                                                     | 14706 |
| Orangutan         | ---TG-----TTTTTT-----                                                             | 14883 |



Tuesday, May 03, 2022 06:14 PM

| Majority          | -----                                                                            |       |       |       |       |       |       |       |       |
|-------------------|----------------------------------------------------------------------------------|-------|-------|-------|-------|-------|-------|-------|-------|
|                   | 19210                                                                            | 19220 | 19230 | 19240 | 19250 | 19260 | 19270 | 19280 |       |
| Human             | -----                                                                            |       |       |       |       |       |       |       | 13520 |
| Coquerel'sSifaka  | -----                                                                            |       |       |       |       |       |       |       | 12964 |
| Ma'sNightMonkey   | -----                                                                            |       |       |       |       |       |       |       | 12477 |
| VervetAGM         | TGGCTATCTGTATTTTCATTTTCTGTCAACTGCTTGTGGTGTACTGGAC-CTAGTTTAAATGGTCATTTTATCACT--GT |       |       |       |       |       |       |       | 15740 |
| Gorrilla          | -----                                                                            |       |       |       |       |       |       |       | 15879 |
| GrabEatingMacaque | TCACTGCAAGCTCCGCCTCC-GGGTTACAGCCATTCTCCTGCCTCAGCCTCCCGAGTAGCTGGGACTACAGACGCC-GCC |       |       |       |       |       |       |       | 15789 |
| Macaque           | TCACTGCAAGCTCCGCCTCCCGGGTTACAGCCATTCTCCTGCCTCAGCCTCCCGAGTAGCTGGGACTACAGACGCCCGCC |       |       |       |       |       |       |       | 15844 |
| PigTailedMacaque  | -----                                                                            |       |       |       |       |       |       |       | 15249 |
| Bonobo            | -----                                                                            |       |       |       |       |       |       |       | 14577 |
| OliveBaboon       | -----                                                                            |       |       |       |       |       |       |       | 14706 |
| Orangutan         | -----                                                                            |       |       |       |       |       |       |       | 14883 |

| Majority          | -----                                                                             |       |       |       |       |       |       |       |       |
|-------------------|-----------------------------------------------------------------------------------|-------|-------|-------|-------|-------|-------|-------|-------|
|                   | 19290                                                                             | 19300 | 19310 | 19320 | 19330 | 19340 | 19350 | 19360 |       |
| Human             | -----                                                                             |       |       |       |       |       |       |       | 13520 |
| Coquerel'sSifaka  | -----                                                                             |       |       |       |       |       |       |       | 12964 |
| Ma'sNightMonkey   | -----                                                                             |       |       |       |       |       |       |       | 12477 |
| VervetAGM         | TCTTTGTATAAAAAAATTGATTTTCATATGCATTGTAGATATTTTTTCTTTGAGATTTTCTT--T---TTTGCTTTTTTGA |       |       |       |       |       |       |       | 15815 |
| Gorrilla          | -----                                                                             |       |       |       |       |       |       |       | 15879 |
| GrabEatingMacaque | ACCTCGCCCGGCTAGGTTTT--GTATTTTAGTAGAGACGGGGTTTACCCTGTTAGCCAGGATGGTCTCGATCTCCTGA    |       |       |       |       |       |       |       | 15866 |
| Macaque           | ACCTCGCCCGGCTAGGTTTTTGTATTTTTTAGTAGAGACGGGGTTTACCCTGTTAGCCAGGATGGTCTCGATCTCCTGA   |       |       |       |       |       |       |       | 15924 |
| PigTailedMacaque  | -----                                                                             |       |       |       |       |       |       |       | 15249 |
| Bonobo            | -----                                                                             |       |       |       |       |       |       |       | 14577 |
| OliveBaboon       | -----                                                                             |       |       |       |       |       |       |       | 14706 |
| Orangutan         | -----                                                                             |       |       |       |       |       |       |       | 14883 |

| Majority          | -----                                                                            |       |       |       |       |       |       |       |       |
|-------------------|----------------------------------------------------------------------------------|-------|-------|-------|-------|-------|-------|-------|-------|
|                   | 19370                                                                            | 19380 | 19390 | 19400 | 19410 | 19420 | 19430 | 19440 |       |
| Human             | -----                                                                            |       |       |       |       |       |       |       | 13520 |
| Coquerel'sSifaka  | -----                                                                            |       |       |       |       |       |       |       | 12964 |
| Ma'sNightMonkey   | -----                                                                            |       |       |       |       |       |       |       | 12477 |
| VervetAGM         | TATTCCTTGTGTATAGTTTTAGGCATATATGTATTCTGATTAAGTGATTTTGCCTTTTAAAATCCATTTGATATGTAAAC |       |       |       |       |       |       |       | 15895 |
| Gorrilla          | -----                                                                            |       |       |       |       |       |       |       | 15879 |
| GrabEatingMacaque | CCTTGTGATCCGCCCTCTCGGCCTCCCAAAGTGCTGGGATTACAGGCTTGAGCCACCGCGCCCGCCTGTTTTTTTTTT   |       |       |       |       |       |       |       | 15946 |
| Macaque           | CCTTGTGATCCGCCCTCTCGGCCTCCAGAGTGCTGGGATTACAGGCTTGAGCCACCGCACCCGGCCTGTTTTTTTTTT   |       |       |       |       |       |       |       | 16004 |
| PigTailedMacaque  | -----                                                                            |       |       |       |       |       |       |       | 15249 |
| Bonobo            | -----                                                                            |       |       |       |       |       |       |       | 14577 |
| OliveBaboon       | -----                                                                            |       |       |       |       |       |       |       | 14706 |
| Orangutan         | -----                                                                            |       |       |       |       |       |       |       | 14883 |

Tuesday, May 03, 2022 06:14 PM

|                   |                                                                                  |       |
|-------------------|----------------------------------------------------------------------------------|-------|
| Majority          | -TTTTAAGTTGCATTTT-ATTTGTTGAAGAAAACCTGG---TTGTTGGTCTTACACAGTTG-CC-----TATAGTCTACA |       |
|                   | 19450 19460 19470 19480 19490 19500 19510 19520                                  |       |
| Human             | -TTTTAAGTTGCATTTT-ATTTGTTGAAGAAAACCTGG---TTATTGGTCTTACACAGTTG-CC-----TATAGACTACA | 13588 |
| Coquerel'sSifaka  | -TTTTTGGTTGCATTTTATTTGTTGAAGAACATTTT---TTGTTGGTCTTATAGAGTTGCCACAGTCTGCATTCTGCA   | 13040 |
| Ma'sNightMonkey   | -----                                                                            | 12477 |
| VervetAGM         | ATTTTTAGCCGCAGCTT-CTCCATCTTTAAATTAGGATTTTAATAGTTCCACAAACTAGGTC-----CTCAGTTAATG   | 15968 |
| Gorilla           | -TTTTAAGTTGCATTTT-ATTTGTTGAAGAAAACCTGG---TTATTGGTCTTACACAGTTG-CC-----TATAGACTACA | 15947 |
| GrabEatingMacaque | TTTT-AAGTTGCATTTT-ATTTGTTGAAGAAAACCTGG---TTGTTGGTCTTACACAGTTG-CC-----TATAGTCTACA | 16014 |
| Macaque           | TTTTTAAGTTGCATTTT-ATTTGTTGAAGAAAACCTGG---TTGTTGGTCTTACACAGTTG-CC-----TATAGTCTACA | 16073 |
| PigTailedMacaque  | -----AAGTTGCATTTT-ATTTGTTGAAGAAAACCTGG---TTGTTGGTCTTACACAGTTG-CC-----TATAGTCTACA | 15313 |
| Bonobo            | -TTTTAAGTTGCATTTT-ATTTGTTGAAGAAAACCTGG---TTATTGGTCTTACACAGTTG-CC-----TATAGACTACA | 14645 |
| OliveBaboon       | -----AAGTTGCATTTT-ATTTGTTGAAGAAAACCTGG---TTGTTGGTCTTACACAGTTG-CC-----TATAGTCTACA | 14770 |
| Orangutan         | -TTTTAAGTTGCATTTT-GTTTGTGAAGAAAACCTGG---TTATTGGTCTTACACAGTTG-CC-----TATAGACTACA  | 14951 |

|                   |                                                                                    |       |
|-------------------|------------------------------------------------------------------------------------|-------|
| Majority          | TTTAC-TGATTGCGTTCTGATTTTGTAAATTTAGTATGTTCTCTATGTTTCCAGTAAATTGGTAGTTG-----GATCTAGA  |       |
|                   | 19530 19540 19550 19560 19570 19580 19590 19600                                    |       |
| Human             | TTTAC-TGATTGCGTTTATGATTTTGTAAATTTAGTATGTTTCCATATTTCCAGTAAATTGGTAGTTA-----GATCTAGA  | 13662 |
| Coquerel'sSifaka  | TTTAC-TGGTCTGTCTGATGTTGTAAATTTAGTATGTTCTCTATAAATCTGGTTAATTGGTTGTGG-----GATCTAGA    | 13114 |
| Ma'sNightMonkey   | -----                                                                              | 12477 |
| VervetAGM         | TTAATGTATTTGCACTTAGAATATCCACATTTTATGG-CTTTAGGATACAAATGAAATCTTATTTCCATTATTTTATA     | 16047 |
| Gorilla           | TTTAC-TGATTGCGTTTATGATTTTGTAAATTTAGTATGTTCTCCATATTTCCAGTAAATTGGTAGTTA-----GATCTAGA | 16021 |
| GrabEatingMacaque | TTTAC-TGATTGCATTCTGATTTTGTAAATTTAATATGTTCTCTATGTTTCCAGTAAATTGGTAGTTG-----GATCTAAA  | 16088 |
| Macaque           | TTTAC-TGATTGCATTCTGATTTTGTAAATTTAATATGTTCTCTATGTTTCCAGTAAATTGGTAGTTG-----GATCTAAA  | 16147 |
| PigTailedMacaque  | TTTAC-TGATTGCATTCTGATTTTGTAAATTTAATATGTTCTCTATGTTTCCAGTAAATTGGTAGTTG-----GATCTAAA  | 15387 |
| Bonobo            | TTTAC-TGATTGCGTTTATGATTTTGTAAATTTAGTATGTTCTCCATATTTCCAGTAAATTGGTAGTTA-----GATCTAGA | 14719 |
| OliveBaboon       | TTTAC-TGATTGCATTCTGATTTTGTAAATTTAATATGTTCTCTATGTTTCCAGTAAATTGGTAGTTG-----GATCTAAA  | 14844 |
| Orangutan         | TTTGC-TGATTGTGTTACGATTTTGTAAATTTAGTATGTTCTCCATATTTCCAGTAAATTGGTAGTTA-----GATCTAGA  | 15025 |

|                   |                                                                                     |       |
|-------------------|-------------------------------------------------------------------------------------|-------|
| Majority          | GACTTGGTCAGGATCTCTGTTT---TTTTGGTAATA---TTTTTAAGTGGTGGGTTTTTATTTTCC--TATTAGACATGGT-- |       |
|                   | 19610 19620 19630 19640 19650 19660 19670 19680                                     |       |
| Human             | GACTTGCTCAGGGTCTCTATTT---TTTTGGTAATA---TTTTTAAGTGGTGGGTTTTTATTTTCC--TGTTAGACATGGT-- | 13733 |
| Coquerel'sSifaka  | GACTTCCTCAAATCTCTTTTTGTTTTTGGTAATACTGTTTTTAAGTGGAGGTGATTTTTTTCATTAGAGGACATGGTA-     | 13193 |
| Ma'sNightMonkey   | -----T-----                                                                         | 12478 |
| VervetAGM         | AATTTGCT--GTATTCGGCTTT--TCTTGATTTTAG-ACTTTTTTTTGTAGCTCAGTAAAC--TATAAGAAAGAGTAT      | 16120 |
| Gorilla           | GACTTGCTCAGGGTCTCTATTT---TTTTGGTAATA---TTTTTAAGTGGTGGGTTTTTATTTTCC--TGTTAGACATGGT-- | 16092 |
| GrabEatingMacaque | GACTTGGTCAGGATCTCTGTTT---TTTTGGTAATA---TTTTTAAGTGGTGGGTTTTTATTTTCC--TATTAGACATGGT-- | 16159 |
| Macaque           | GACTTGGTCAGGATCTCTGTTT---TTTTGGTAATA---TTTTTAAGTGGTGGGTTTTTATTTTCC--TATTAGACATGGT-- | 16218 |
| PigTailedMacaque  | GACTTGGTCAGGATCTCTGTTT---TTTTGGTAATA---TTTTTAAGTGGTGGGTTTTTATTTTCC--TATTAGACATGGT-- | 15458 |
| Bonobo            | GACTTGCTCAGGGTCTCTATTT---TTT-GGTAATA---TTTTTAAGTGGTGGGTTTTTATTTTCC--TGTTAGACATGGT-- | 14789 |
| OliveBaboon       | GACTTGGTCAGGATCTCCGTTT---TTTTGGTAATA---TTTTTAAGTGGTGGGTTTTTATTTTCC--TATTAGACATGGT-- | 14915 |
| Orangutan         | GACTTGGTCAGGGTTTTCTATTT---TTTTGGTAAT---TTTTTAAGTGGTGGGTTTTTATTTTCC--TGTTAGACATGGT-- | 15095 |

Tuesday, May 03, 2022 06:14 PM

| Majority          | TTCTGACTTTTCAT---- | GTATGTGATGTTTT | CCCTAGGAACATTT | CTTATACTTTACCT | TGTTTGTGCTAGGC  | CATAGTC       |       |       |
|-------------------|--------------------|----------------|----------------|----------------|-----------------|---------------|-------|-------|
|                   | 19690              | 19700          | 19710          | 19720          | 19730           | 19740         | 19750 | 19760 |
| Human             | TTCTGACTTTTCGT---- | GTATGTCATGTTTT | CCAGGAACATTTCT | TATACTTTACCT   | TGTTTGTGCTAGGC  | CATAGTC       | 13809 |       |
| Coquerel'sSifaka  | -TCTGATTTTTTGT---  | GTATGTGATGTTAT | CCCAAGAAAATTT  | CTTATACCTTCAC  | CTTGTTTGTCTAGGC | CATAGTC       | 13269 |       |
| Ma'sNightMonkey   | -----              |                |                |                |                 |               | 12478 |       |
| VervetAGM         | TTGTGAGTTTGTAA     | TAGGAGATTGTTAC | TTTTTTTAAAAAT  | GGCTTTTTATTTT  | GTTCATAAATTGTA  | ATTTTCATTGGTG | 16200 |       |
| Gorilla           | TTCTGACTTTTCAT---- | GTATGTCATGTTTT | CCAGGAACATTTCT | TATACTTTACCT   | TGTTTGTGCTAGGC  | CATGGTC       | 16168 |       |
| GrabEatingMacaque | TTCTGACTTTTCAT---- | GTATGTGATGTTTT | CCCTAGGAACATTT | CTTATACTTTACCT | TGTTTGTGCTAGGC  | CATAGTC       | 16235 |       |
| Macaque           | TTCTGACTTTTCAT---- | GTATGTGATGTTTT | CCCTAGGAACATTT | CTTATACTTTACCT | TGTTTGTGCTAGGC  | CATAGTC       | 16294 |       |
| PigTailedMacaque  | TTCTGACTTTTCAT---- | GTATGTGATGTTTT | CCCTAGGAACATTT | CTTATACTTTACCT | TGTTTGTGCTAGGC  | CATAGTC       | 15534 |       |
| Bonobo            | TTCTGACTTTTCGT---- | GTATGTCATGTTTT | CCAGGAACATTTCT | TATACTTTACCT   | TGTTTGTGCTAGGC  | CATAGTC       | 14865 |       |
| OliveBaboon       | TTCTGACTTTTCAT---- | GTATGTGATGTTTT | CCCTAGGAACATTT | CTTATACTTTACCT | TGTTTGTGCTAGGC  | CATAGTC       | 14991 |       |
| Orangutan         | TTCTGACTTTTCGT---- | GTATGTCATGTTTT | CCAGGAACATTTCT | TATACTTTACCT   | TGTTTGTGCCAGGC  | CATAGTC       | 15171 |       |

| Majority          | TGTGCTCAATAATT | TATCTCTTTTTT  | TTTTTCTTTT   | -----         | TTTTTG-----   | AGAGATG-GAGTC-TTGCCC      |                      |              |
|-------------------|----------------|---------------|--------------|---------------|---------------|---------------------------|----------------------|--------------|
|                   | 19770          | 19780         | 19790        | 19800         | 19810         | 19820                     | 19830                | 19840        |
| Human             | TGTGCTCAATAATT | TGCTCCTTTTTT  | TTTTTCTTTTTT | TTTTTCTTTTTT  | TTTTTCTTTTTT  | TTTTTCTTTTTT              | TTTTTCTTTTTT         | TTTTTCTTTTTT |
| Coquerel'sSifaka  | TGTTCTCA--AATA | AATTGATCAATAT | TCTT-----    |               |               | AAAAGAT--A-----           | 13307                |              |
| Ma'sNightMonkey   | -----          |               | TTT-----     |               |               |                           | 12482                |              |
| VervetAGM         | TCATTTCTGTACT  | CTTAACTGTTT   | GGCAATGTGAA  | ATCCTTGC----- | A---AAGTAATG- | GATCTATTACTT              | 16265                |              |
| Gorilla           | TGTGCTCAATAATT | TGCTCCTTTTTT  | TTTTTCTTTTTT | TTTTTCTTTTTT  | -----         | TCCTGTTTTTTG              | AGAGACA-GAGTC-TTGCCC | 16244        |
| GrabEatingMacaque | TGTGCTCAATAATT | TATCTCTCTTTTT | TTTTTCTGT--- | TTTTTG-----   |               | AGAGATG-GAGTC-TTGCCC      | 16292                |              |
| Macaque           | TGTGCTCAATAATT | TATCTCTCTTTTT | TTTTTCTGT--- | TTTTTG-----   |               | AGAGATG-GAGTC-TTGCCC      | 16351                |              |
| PigTailedMacaque  | TGTGCTCAATAATT | TATCTCTCTTTTT | TTTTTCTGT--- | TTTTTG-----   |               | AGAGATG-GAGTC-TTGCCC      | 15591                |              |
| Bonobo            | TGTGCTCAATAATT | TGCTCCTTTTTT  | TTTTTCTGTTTT | -----         |               | TTTGTAGAGACA-GAGTC-TTGCCC | 14929                |              |
| OliveBaboon       | TGTGCTCAATAATT | TATCTCTCTTTTT | TTTTTCTGT--- | TTTTTG-----   |               | AGAGATG-AAGTC-TTGCCC      | 15048                |              |
| Orangutan         | TGTGCTCAATAATT | TGCTCCTTTTTT  | TTTTTCTGTTTT | -----         |               | TTTGTAGAGACG-GAGTC-TTGCCC | 15238                |              |

| Majority          | TGTTGCCCAGGCT | TGGAGTGCAGT    | TGGCCCAA---- | ATCTCAGTGCAT | CCTCTGCCTCCC | GGGTTCAAGT-AATT | CTCCTGC    |       |
|-------------------|---------------|----------------|--------------|--------------|--------------|-----------------|------------|-------|
|                   | 19850         | 19860          | 19870        | 19880        | 19890        | 19900           | 19910      | 19920 |
| Human             | TGTTGCCCAGGCT | TGGAGTGCAGT    | TGGCCCAATCTC | AGCTCAGTGCAC | CTCTGCCTCCC  | GGATTCAAGC-GATT | CTCCTGC    | 13967 |
| Coquerel'sSifaka  | -----         | TCTACAAAGAAATG | ---TGTCTTAA  | -----        |              | AGT---TCACTTAA  | 13340      |       |
| Ma'sNightMonkey   | -----         |                |              |              |              |                 | 12482      |       |
| VervetAGM         | GGGAAGACAGA   | AATTGTATGAA    | TGACTAGA---- | ATAATAGAGGAT | GGTCCCCAATAC | GGTAAAATGTTAA   | CTTTTTTAGA | 16341 |
| Gorilla           | TGTTGCCCAGGCT | TGGAGTGCAGT    | TGGCCCAATCTC | AGCTCAGTGCAC | CTCTGCCTCCC  | GGGTTCAAGC-GATT | CTCCTGC    | 16323 |
| GrabEatingMacaque | TGTTGCCCAGACT | TGGAGTGCAGT    | GTCCC-A----  | ATCTCAGCGAT  | TCTCTGCCTCCC | GGGTTCAAAT-AATT | CTCCTGC    | 16366 |
| Macaque           | TGTTGCCCAGACT | TGGAGTGCAGT    | GTCCC-A----  | ATCTCAGCGAT  | TCTCTGCCTCCC | GGGTTCAAAT-AATT | CTCCTGC    | 16425 |
| PigTailedMacaque  | TGTTGCCCAGACT | TGGAGTGCAGT    | GGCCT-A----  | ATCTCAGCGAT  | TCTCTGCCTCCC | GGGTTCAAAT-AATT | CTCCTGC    | 15665 |
| Bonobo            | TGTTGCCCAGGCT | TGGAGTGCAGT    | TGGCCCAATCTC | AGCTCAGTGCAC | CTCTGCCTCCC  | GGGTTCAAGT-GATT | CTCCTGC    | 15008 |
| OliveBaboon       | TATTGCCCAGGCT | TGGAGTGCAGT    | TGGCCC-A---- | ATCTCAGCGAT  | TCTCTGCCACCC | GGGTTCAAGT-AATT | CTCCTGC    | 15122 |
| Orangutan         | TGTTGCCCAGGCT | TGGAGTGCAGT    | TGGCCCAATCTC | AGCTCAGTGCAC | CTCTGCCTCCC  | TGGTTCAAGC-GATT | CTCCTGC    | 15317 |

Tuesday, May 03, 2022 06:14 PM

| Majority          | CTCAGCTTCCCAA-TTGCTGGAACTACAGGCGCCTGCCACCACGC--CTGGCTA-----ATTTTGTATTTTATAGTAGGG   |       |       |       |       |       |       |       |  |  |       |
|-------------------|------------------------------------------------------------------------------------|-------|-------|-------|-------|-------|-------|-------|--|--|-------|
|                   | 19930                                                                              | 19940 | 19950 | 19960 | 19970 | 19980 | 19990 | 20000 |  |  |       |
| Human             | CTCAGCTTCCCAAAGTAGCTGGAACTACAGGCGCCTGCCACTACAC--CTGGCTA-----ATTTTGTGTTTTTATAGTAGGG |       |       |       |       |       |       |       |  |  | 14040 |
| Coquerel'sSifaka  | TTCA-----TATAATAGA-                                                                |       |       |       |       |       |       |       |  |  | 13353 |
| Ma'sNightMonkey   | -----G-----                                                                        |       |       |       |       |       |       |       |  |  | 12483 |
| VervetAGM         | TGTAGATTTTAAAGTATGGTGAAGTTGTAGCAGTGTCTTTAGGAAGTTAACTATTAATATCTCAAGACCTATAACTGGA    |       |       |       |       |       |       |       |  |  | 16421 |
| Gorilla           | CTCAGCTTCCCAAAGTAGCTGGAACTACAGGCGCCTGCCACTACAC--CTGGCTA-----ATTTTGTGTTTTTATAGTAGGG |       |       |       |       |       |       |       |  |  | 16396 |
| GrabEatingMacaque | CTCAGCTTCCCTGA-GTGCTGGGACTACAGGCGCCTGCCACCACGC--CTGGCTA-----ATTTTGTATTTTATAGTAGGG  |       |       |       |       |       |       |       |  |  | 16438 |
| Macaque           | CTCAGCTTCCCGA-GTGCTGGGACTACAGGCGCCTGCCACCACGC--CTGGCTA-----ATTTTGTATTTTATAGTAGGG   |       |       |       |       |       |       |       |  |  | 16497 |
| PigTailedMacaque  | CTCAGCTTCCCAA-GTGCTGGGACTACAGGCGCCTGCCACCACGC--CTGGCTA-----ATTTTGTATTTTATAGTAGGG   |       |       |       |       |       |       |       |  |  | 15737 |
| Bonobo            | CTCAGCTTCCCAAAGTAGCTGGAACTACAGGCGCCTGCCACTACAC--CTGGCTA-----ATTTTGTGTTTTTATAGTAGGG |       |       |       |       |       |       |       |  |  | 15081 |
| OliveBaboon       | CTCAGCTTCCCGA-GTGCTGGGACTACAGGCGCCTGCCACCACGC--CTGGCTA-----ATTTTGTATTTTATAGTAGGG   |       |       |       |       |       |       |       |  |  | 15194 |
| Orangutan         | CTCAGCTTCCCAAAGTAGTTGGAACTACAGGCGCCTGCCACCACAC--CTGGCTA-----ATTTTGTATTTTATAGTAGGG  |       |       |       |       |       |       |       |  |  | 15390 |

| Majority          | ATAGGGTTTCACCAC--ATTGGCCAGGATGGC-----TTCGAACT--CCTGACCTTAA-----GTGATCTGCCACCTT  |       |       |       |       |       |       |       |  |  |       |
|-------------------|---------------------------------------------------------------------------------|-------|-------|-------|-------|-------|-------|-------|--|--|-------|
|                   | 20010                                                                           | 20020 | 20030 | 20040 | 20050 | 20060 | 20070 | 20080 |  |  |       |
| Human             | ATGGGGTTTCACCAC--GTTGGCCAGGCTGAC-----TTGGAAC--CCTGACCTCAA-----GTGATCTGCCACCTT   |       |       |       |       |       |       |       |  |  | 14105 |
| Coquerel'sSifaka  | -----A--AT-----                                                                 |       |       |       |       |       |       |       |  |  | 13356 |
| Ma'sNightMonkey   | -----C-----                                                                     |       |       |       |       |       |       |       |  |  | 12484 |
| VervetAGM         | CAACTAATAAATAACCTATTTCTTAAATGTCAGCTTTTTCTAACTATTCTGAAAGTACTAGTTGTAAATTGCTGAACTC |       |       |       |       |       |       |       |  |  | 16501 |
| Gorilla           | ATGGGGTTTCACCAC--GTTGGCCAGGCTGAC-----TTCGAACT--CCTGACCTCAA-----GTGATCTGCCACCTT  |       |       |       |       |       |       |       |  |  | 16461 |
| GrabEatingMacaque | ACAGGGTTTCACCAC--ATTGGCCAGGATGGC-----TTCAAAC--CCTGACCTTAA-----GTGATCTGCCACCTT   |       |       |       |       |       |       |       |  |  | 16503 |
| Macaque           | ACAGGGTTTCACCAC--ATTGGCCAGGATGGC-----TTCAAAC--CCTGACCTTAA-----GTGATCTGCCACCTT   |       |       |       |       |       |       |       |  |  | 16562 |
| PigTailedMacaque  | ACAGGGTTTCACCAC--ATTGGCCAGGATGGC-----TTCAAAC--CCTGACCTTAA-----GTGATCTGCCACCTT   |       |       |       |       |       |       |       |  |  | 15802 |
| Bonobo            | ATGGGGTTTCACCAC--GTTGGCCAGGCTGAC-----TTCGAACT--CCTGACCTCAA-----GTGATCTGCCACCTT  |       |       |       |       |       |       |       |  |  | 15146 |
| OliveBaboon       | ACAGGGTTTCACCAC--ATTGGCCAGGATGGC-----TTCAAAC--CCTGACCTTAA-----GTGATCTGCCACCTT   |       |       |       |       |       |       |       |  |  | 15259 |
| Orangutan         | ATGGGGTTTCACCAC--GCTGGCCAGGCTGAT-----TTGGAAC--CCTGACCTCAA-----GTGATCTTCCACCTT   |       |       |       |       |       |       |       |  |  | 15455 |

| Majority          | GGCTTCCCAA-----AGTGCTGGGATTACAGGCATGAGC---CACTGTGCCTGGCCAATAAATGTCTCTTAATG-AGTAT  |       |       |       |       |       |       |       |  |  |       |
|-------------------|-----------------------------------------------------------------------------------|-------|-------|-------|-------|-------|-------|-------|--|--|-------|
|                   | 20090                                                                             | 20100 | 20110 | 20120 | 20130 | 20140 | 20150 | 20160 |  |  |       |
| Human             | GGCTTCCCAA-----AGTGCTGGGATTATAGGCATGAGC---CACTGTGCCTGGCCAATAAAGTGTCTCTTAATG-AGTAT |       |       |       |       |       |       |       |  |  | 14176 |
| Coquerel'sSifaka  | -----ACTGTAC-----A-----                                                           |       |       |       |       |       |       |       |  |  | 13364 |
| Ma'sNightMonkey   | -A-----C-----                                                                     |       |       |       |       |       |       |       |  |  | 12486 |
| VervetAGM         | ATGATTTAAATATGACTGTTGAATTCACTATCATTGCCCTGCATAGAAAATTACAATCAAATAATGCTAAATGTAACCT   |       |       |       |       |       |       |       |  |  | 16581 |
| Gorilla           | GGCTTCCCAA-----AGTGCTGGGATTATAGGCATGAGC---CACTGTGCCTGGCCAATAAAGTGTCTCTTAATG-AGTAT |       |       |       |       |       |       |       |  |  | 16532 |
| GrabEatingMacaque | GGCTTCCCAA-----AGTGCTGGGATTACAGGCATGAGC---CACTGTGCCTGGCCAATAAATGTCTCTTAATG-AGTAT  |       |       |       |       |       |       |       |  |  | 16574 |
| Macaque           | GGCTTCCCAA-----AGTGCTGGGATTACAGGCATGAGC---CACTGTGCCTGGCCAATAAATGTCTCTTAATG-AGTAT  |       |       |       |       |       |       |       |  |  | 16633 |
| PigTailedMacaque  | GGCTTCCCAA-----AGTGCTGGGATTACAGGCATGAGC---CACTGTGCCTGGCCAATAAATGTCTCTTAATG-AGTAT  |       |       |       |       |       |       |       |  |  | 15873 |
| Bonobo            | GGCTTCCCAA-----AGTGCTGGGATTATAGGCATGAGC---CACTGTGCCTGGCCAATAAAGTGTCTCTTAATG-AGTAT |       |       |       |       |       |       |       |  |  | 15217 |
| OliveBaboon       | GGCTTCCCAA-----AGTGCTGGGATTACAGGCATGAGC---CACTGTGCCTGGCCAATAAATGTCTCTTAATG-AGTAT  |       |       |       |       |       |       |       |  |  | 15330 |
| Orangutan         | GGCTTCCCAA-----AGTGCTGGGATTACAGGCATGAGC---CACTGTGCCTGACCAATAAAGTGTCTCTTAATG-AGTAT |       |       |       |       |       |       |       |  |  | 15526 |

Tuesday, May 03, 2022 06:14 PM

| Majority          | TCTTAAAGGATATCTAAAAAGAAATG-TAACTTAAAATTCACATAATAGT-AATACTATGCAGTGTTAACATTTAATGTA  |       |       |       |       |       |       |       |  |       |
|-------------------|-----------------------------------------------------------------------------------|-------|-------|-------|-------|-------|-------|-------|--|-------|
|                   | 20170                                                                             | 20180 | 20190 | 20200 | 20210 | 20220 | 20230 | 20240 |  |       |
| Human             | TCTTAAAGGATATCTAAAAAGAAATG-TAACTTAAAATTCACATAATAGT-AATACTATACAGTATTAACATTTAATGTA  |       |       |       |       |       |       |       |  | 14254 |
| Coquerel'sSifaka  | -----ATAT-TAAAATTC AATG-TAAATGGAACTGT--TGATAGTGGATG-----AGTGTGTTT TTT--TTTT       |       |       |       |       |       |       |       |  | 13423 |
| Ma'sNightMonkey   | -----TA-----                                                                      |       |       |       |       |       |       |       |  | 12488 |
| VervetAGM         | TTTTTGGTGATAGTTGAGTATAACTGGTCGTTTATTATAGATGTATTATTCAA AACTTTGGGTTTTTAGGTTTTGACTTT |       |       |       |       |       |       |       |  | 16661 |
| Gorilla           | TCTTAAAGGATATCTAAAAAGAAATG-TAACTTAAAATTCACATAATAGT-AATACTATACAGTGTTAACATTTAATGTA  |       |       |       |       |       |       |       |  | 16610 |
| GrabEatingMacaque | TCTTAAAGGATATCTAAAAAGAAATG-TAACTTAAAATTCACATAATAGT-AATACTATGCAATGTTAACATTTAATGTA  |       |       |       |       |       |       |       |  | 16652 |
| Macaque           | TCTTAAAGGATATCTAAAAAGAAATG-TAACTTAAAATTCACATAATAGT-AATACTATGCAATGTTAACATTTAATGTA  |       |       |       |       |       |       |       |  | 16711 |
| PigTailedMacaque  | TCTTAAAGGATATCTAAAAAGAAATG-TAACTTAAAATTCACATAATAGT-AATACTATGCAATGTTAACATTTAATGTA  |       |       |       |       |       |       |       |  | 15951 |
| Bonobo            | TCTTAAAGGATATCTAAAAAGAAATG-TAACTTAAAATTCACATAATAGT-AATACTATACAGTGTTAACATTTAATGTA  |       |       |       |       |       |       |       |  | 15295 |
| OliveBaboon       | TCTTAAAGGATATCTAAAAAGAAATG-TAACTTACAATTCACATAATAGT-AATACTATGCAATGTTAACATTTAATGTA  |       |       |       |       |       |       |       |  | 15408 |
| Orangutan         | TCTTAAAGGATATCTAAAAAGAAATG-TAACTTAAAATTCACATAATAGT-AACACTATACAGTGTTAACATTTAATGTA  |       |       |       |       |       |       |       |  | 15604 |

| Majority          | AGTTGGAA--CTATTGATGGTGGACAAG-AATGTTTTGTC-AAGTTAAGAACATATGATTTAGAATGAAAAGATGAGGGT |       |       |       |       |       |       |       |  |       |
|-------------------|----------------------------------------------------------------------------------|-------|-------|-------|-------|-------|-------|-------|--|-------|
|                   | 20250                                                                            | 20260 | 20270 | 20280 | 20290 | 20300 | 20310 | 20320 |  |       |
| Human             | AGTTGGAA--CTATTGATGGTGGACAAG-AATGTTTTCTT---GTCAAGAACATACGATTTAGAATGAAAAGATGAGGGT |       |       |       |       |       |       |       |  | 14328 |
| Coquerel'sSifaka  | AATTGAAG-----GTCTTGTC-AAGTTAAGAACATGTGGTTTAGGATTAACAGACTAGAGT                    |       |       |       |       |       |       |       |  | 13478 |
| Ma'sNightMonkey   | -----A-----                                                                      |       |       |       |       |       |       |       |  | 12489 |
| VervetAGM         | TCTTAAAATGCTTTTCTTAAATGCTACTTAATGCTTTCTCTGGGGTATTTTTATTAGAATTTCAATTAACAGATATTTTA |       |       |       |       |       |       |       |  | 16741 |
| Gorilla           | AGCTGGAA--CTATTGATGGTGGACAAG-AATGTTTTCTT---GTCAAGAACATACGATTTAGAATGAAAAGATGAGGGT |       |       |       |       |       |       |       |  | 16684 |
| GrabEatingMacaque | AGTTGGAA--CTATTGATGGTGGACAAG-AATGTTTTGTC-AAGTTAAGAACATATGATTTGGAATGAAAAGATGAGGGT |       |       |       |       |       |       |       |  | 16728 |
| Macaque           | AGTTGGAA--CTATTGATGGTGGACAAG-AATGTTTTGTC-AAGTTAAGAACATATGATTTGGAATGAAAAGATGAGGGT |       |       |       |       |       |       |       |  | 16787 |
| PigTailedMacaque  | AGTTGGAA--CTATTGATGGTGGACAAG-AATGTTTTGTC-AAGTTAAGAACATATGATTTGGAATGAAAAGATGAGGGT |       |       |       |       |       |       |       |  | 16027 |
| Bonobo            | AGTTGGAA--CTATTGATGGTGGACAAG-AATGTTTTCTT---GTCAAGAACATACGATTTAGAATGAAAAGATGAGGGT |       |       |       |       |       |       |       |  | 15369 |
| OliveBaboon       | AGTTGGAA--CTATTGATGGTGGACAAG-AATGTTTTGTC-AAGTTAGGAACATATGATTTGGAATGAAAAGATGAGGGT |       |       |       |       |       |       |       |  | 15484 |
| Orangutan         | AGTTGGAA--CTATTGATGGTGGACAAG-AATGTTTTCTT---GTCAAGAACATACGATTTAGAATGAAAAGATGAGGGT |       |       |       |       |       |       |       |  | 15678 |

| Majority          | TTGACTTTTATAGCATTGAAC-AGGTTAACCTCTGAGCTTCAGTTTTAT-----ACATT--TTTAAATGGTTTCAGTTGT  |       |       |       |       |       |       |       |  |       |
|-------------------|-----------------------------------------------------------------------------------|-------|-------|-------|-------|-------|-------|-------|--|-------|
|                   | 20330                                                                             | 20340 | 20350 | 20360 | 20370 | 20380 | 20390 | 20400 |  |       |
| Human             | TTGACTTTTATAGCATTGAAC-AGGTTAACCTCTGAGCTTCAGTTTTAT-----ACAT--TTTTAAATGGTTTCAGTTGT  |       |       |       |       |       |       |       |  | 14400 |
| Coquerel'sSifaka  | TTGAACTCTA--ACATTGAGC-AAGTTAACTTCGGAGCCTTAGTTTTAC-----ACATT--TTTTAAATGGGCTTAATTCT |       |       |       |       |       |       |       |  | 13548 |
| Ma'sNightMonkey   | -----A--TC-----                                                                   |       |       |       |       |       |       |       |  | 12492 |
| VervetAGM         | ATGCTCGCAAATGACAGTACTATGTTAGAAATGATGTGTTGTCTCCTTGAGGGCAGTGACCCTAGTTGTTGTGTTTGT    |       |       |       |       |       |       |       |  | 16821 |
| Gorilla           | TTGACTTTTATAGCATTGAAC-AGGTTAACCTCTGAGCTTCAGTTTTAT-----ACAT--TTTTAAATGGTTTCAGTTGT  |       |       |       |       |       |       |       |  | 16756 |
| GrabEatingMacaque | TTGACTTTTATAGCATTGAAC-AGGTTAACCTCTGAGCTTCAGTTTTAT-----ACATT--TTTTAAATGGTTTAAATTGT |       |       |       |       |       |       |       |  | 16800 |
| Macaque           | TTGACTTTTATAGCATTGAAC-AGGTTAACCTCTGAGCTTCAGTTTTAT-----ACATT--TTTTAAATGGTTTAAATTGT |       |       |       |       |       |       |       |  | 16859 |
| PigTailedMacaque  | TTGACTTTTATAGCATTGAAC-AGGTTAACCTCTGAGCTTCAGTTTTAT-----ACATT--TTTTAAATGGTTTAAATTGT |       |       |       |       |       |       |       |  | 16099 |
| Bonobo            | TTGACTTTTATAGCATTGAAC-AGGTTAACCTCTGAGCTTCAGTTTTAT-----ACAT--TTTTAAATGGTTTCAGTTGT  |       |       |       |       |       |       |       |  | 15441 |
| OliveBaboon       | TTGACTTTTATAGCATTGAAC-AGGTTAACCTCTGAGCTTCAGTTTTAT-----ACATT--TTTTAAATGGTTTAAATTGT |       |       |       |       |       |       |       |  | 15556 |
| Orangutan         | TTGACTTTTATAGCATTGAAC-AGGTTAACCTCTGAGCTTCAGTTTTAT-----ACATATTTTTAAATGGTTTCAGTTGT  |       |       |       |       |       |       |       |  | 15752 |

Tuesday, May 03, 2022 06:14 PM

```

Majority      ACCTACCTCCAAAA-TTATTTTGAAGTGTAGATGAGGTAAGGAAAAGAC-----TTATGCTGAAATGATGAGA-
                20410      20420      20430      20440      20450      20460      20470      20480
Human         ACCTACTTCCAAAA-TTATTTTGAATGTAGATGAGATGAGGAAAAGAC-----TTATGCTGAAAGGATGAGA- 14467
Coquerel'sSifaka ACCTACCTCTAAAAGTTATTTTGAAGATTAGATAATGTGTAAAAAATACAGCACAGTGTATGACTCCTAAGTGCTCAAAT 13628
Ma'sNightMonkey -----T----- 12493
VervetAGM     TCCT-CCAACATTA-ATAGTACACGTGTAAATAGTGCATACACACTTA-----ATATTTAATAACTCTTAGA- 16887
Gorilla       ACCTACTTCCAAAA-TTATTTTGAATGTAGATGAGATGAGGAAAAGAC-----ATGCTGAAAGGATGAGA- 16821
GrabEatingMacaque ACCTACCTCCACAA-TTATTTTAAAGTGTAGATGAGGTAAGGAAAAGAC-----TTATGCTGAAATGATGAGA- 16867
Macaque       ACCTACCTCCACAA-TTATTTTAAAGTGTAGATGAGGTAAGGAAAAGAC-----TTATGCTGAAATGATGAGA- 16926
PigTailedMacaque ACCTACCTCCACAA-TTATTTTAAAGTGTAGATGAGGTAAGGAAAAGAC-----TTATGCTGAAATGATGAGA- 16166
Bonobo        ACCTACTTCCAAAA-TTATTTTGAATGTAGATGAGATGAGGAAAAGAC-----TTATGCTGAAAGGATGAGA- 15508
OliveBaboon   ACCTACCTCCACAA-TTATTTTAAAGTGTAGATGAGGTAAGGAAAAGAC-----TTATGCTGAAATGATGAGA- 15623
Orangutan     ACCTACCTCCAAAA-TTATTTTGAATGTAGATAA----GGAAAAGAC-----TTACGCTGAAAGGATGAGA- 15814
    
```

```

Majority      -ATGGTTGTTG-TTGTAGT-TCTTTAATCTGTAA-----ATCTACATTTGGAAGGAACACTT--ATGGAAATCAAA--T
                20490      20500      20510      20520      20530      20540      20550      20560
Human         -ATGGTTGTTG-TTGTAGT-TCTTTAATCTGTAA-----ATCTACATTTGGAAGGAACACTTTTATGGAAATCAAA--T 14536
Coquerel'sSifaka GATGGTTGTTA-TTGTAGT-TCTTTGTCTGTAA-----ATCCAAATTTGGAAGAAGCACTTTAATGGAAATCAAA--T 13698
Ma'sNightMonkey ----- 12493
VervetAGM     -AGTGT CATAGGCTTTAATATGCTTATACTCTAATAAACCATTTATCAATAAAAAGGTAAT--CCAAGACTCTGTCTT 16964
Gorilla       -ATGGTTGTTG-TTGTAGT-TCTTTAATCTGTAA-----ATCTACATTTGGAAGGAACACTTTTATGGAAATCAAA--T 16890
GrabEatingMacaque -ATGGTTGTTG-TTGTAGT-TCTTTAATCTGTAA-----ATCTACATTTGGAAGGAACACTT--ATGGAAATCAAA--T 16934
Macaque       -ATGGTTGTTG-TTGTAGT-TCTTTAATCTGTAA-----ATCTACATTTGGAAGGAACACTT--ATGGAAATCAAA--T 16993
PigTailedMacaque -ATGGTTGTTG-TTGTAGT-TCTTTAATCTCTAA-----ATCTACATTTGGAAGGAACACTT--ATGGAAATCAAA--T 16233
Bonobo        -ATGGTTGTTG-TTGTAGT-TCTTTAATCTGTAA-----ATCTACATTTGGAAGGAACACTTTTATGGAAATCAAA--T 15577
OliveBaboon   -ATGGTTGTTG-TTGTAGT-TCTTTAATCTGTAA-----ATCTACATTTGGAAGGAACACTT--ATGGTAATCAAA--T 15690
Orangutan     -ATGGTTGTTG-TTGTAGT-TCTTTAATCTGTAA-----ATCTACATTTGGAAGGAACACTTTTATAGAAATCAAA--T 15883
    
```

```

Majority      ACAGTAAATTAATTTCTAAGAGATCCTGGAGTTCAG-GTTAAAAATAGCTGCAG-----ACAGCACTAAATATCTTTA
                20570      20580      20590      20600      20610      20620      20630      20640
Human         ACAGTAAATTAATTTCTAAGAGGTCCTGGAGTTCAG-GTTAAAAATAGCCTCAG-----ACAGCACTAAATATCTTTA 14608
Coquerel'sSifaka ATGATAAATTAATTTCTAAGAGATCCTGGAATTCA--GATTAATAAGTGCCTA--G--GCAGCACTAAAGAGAATT- 13769
Ma'sNightMonkey -----G-----CACTAAATATCTTTG 12509
VervetAGM     TTAGGACTTCATCTAGTTAGAGAAATAAGGATCCAGAGTTTAAATTAAGTGCATATGTGGCTACAGTAGGAAAGATTGGTT 17044
Gorilla       ACAGTAAATTAATTTCTAAGAGATCCTGGAGTTCAG-GTTAAAAATAGCCTCAG-----ACAGCACTAAATATCTTTA 16962
GrabEatingMacaque ACAGTAAATTAATTTCTAAGAGATCCTGGAGTTCAG-GTTAAAAATAGCTGCAG-----ACAGGACTAAATATCTTTA 17006
Macaque       ACAGTAAATTAATTTCTAAGAGATCCTGGAGTTCAG-GTTAAAAATAGCTGCAG-----ACAGGACTAAATATCTTTA 17065
PigTailedMacaque ACAGTAAATTAATTTCTAAGAGATCCTGGAGTTCAG-GTTAAAAATAGCTGCAG-----ACAGGACTAAATATCTTTA 16305
Bonobo        ACAGTAAATTAATTTCTAAGAGATCCTGGAGTTCAG-GTTAAAAATAGCCTCAG-----ACAGCACTAAATATCTTTA 15649
OliveBaboon   ACAGTAAATTAATTTCTAAGAGATCCTGGAGTTCAG-GTTAAAAATAGCTGCAG-----ACAGGACTAAATATCTTTA 15762
Orangutan     ACAGTAAATTAATTTCTAAGAGATCCTGGAGTTCAG-GTTAAAAATAGCTGCAG-----ACAGCACTAAATATCTTTA 15955
    
```

Tuesday, May 03, 2022 06:14 PM

| Majority          | TT-AGTGAACAAAAAATAAAAAATGACTTAGAATTTAGC---ACAGAGAAACA-----AAGAGATGAAAATAGAAGAGGT  |       |
|-------------------|-----------------------------------------------------------------------------------|-------|
|                   | 20650 20660 20670 20680 20690 20700 20710 20720                                   |       |
| Human             | TT-AGTGAACAAAAAATAAAAAATAACTTAGAATTTAGC---ACAGAGAAGCA-----AAGAGATGAAAATAGGAGAAGC  | 14679 |
| Coquerel'sSifaka  | ---AATGAACTAAAAAATAAAAAATAACTCAGAATTTACC---ACGAAGCAATA-----GAGAGATGAAAATAGCAGAGGA | 13838 |
| Ma'sNightMonkey   | TTTAATGAATAAAAAAATAAACATTACTC--AATTCAGC---ACAGAGAG-----AGAGAAGAAAATAGCAGAAGG      | 12575 |
| VervetAGM         | TG-GGTTGGTAGGCTCAGAATAGTGATCTGTGACCTAGCCAAACTGGGAGATAGGGGAAGGAGTGAGAGCAATAGGCAT   | 17123 |
| Gorilla           | TT-AGTGAACAAAAAATAAAAAATAACTTAGAATTTAGC---ACAGAGAAGCA-----AAGAGATGAAAATAGGAGAAGG  | 17033 |
| GrabEatingMacaque | TT-AGTGAACAAAAAATAAAAGTGACTTAGAATTTAGC---ACAGAGAAACA-----AAGAGATGAAAATAGAAGGGTT   | 17077 |
| Macaque           | TT-AGTGAACAAAAAATAAAAGTGACTTAGAATTTAGC---ACAGAGAAACA-----AAGAGATGAAAATAGAAGGGTT   | 17136 |
| PigTailedMacaque  | TT-AGTGAACAAAAAATAAAAAATGACTTAGAATTTAGC---ACAGAGAAACA-----AAGAGATGAAAATAGAAGGGTT  | 16376 |
| Bonobo            | TT-AGTGAACAAAAAATAAAAAATAACTTAGAATTTAGC---ACAGAGAAGCA-----AAGAGATGAAAATAGGAGAAGG  | 15720 |
| OliveBaboon       | TT-AGTGAACAAAAAATAAAAAATGACTTAGAATTTAGC---ACAGAGAAACA-----AAGAGATGAAAATAGAAGAGTT  | 15833 |
| Orangutan         | TT-AGTGAACAAAAAATAAAAAATAACTTAGAATTTAGC---ACAGAGAAACA-----AAGAGATGAAAATAGCAGAAGA  | 16026 |

| Majority          | -GTTAAAAATATGTTGGAAAGGAAGAGAAGTTCTAACAAACATCTAATTAGAGTTCAGAA--AAGAAAGTTAAAGATTGCA |       |
|-------------------|-----------------------------------------------------------------------------------|-------|
|                   | 20730 20740 20750 20760 20770 20780 20790 20800                                   |       |
| Human             | -GTTAAAAATGTTGGAAAGGAAGAGAAGTTCTAACAAACATCTAATTAGCGTTCAGAA--AA----TTAAAGATTGCA    | 14752 |
| Coquerel'sSifaka  | --GTTAAAAGATGA-GGAAAGGAAGAGAAGTTCTAATGAACAACCTAATTAGAGTTACAGAAAGAAAAATTAAGATAGCA  | 13915 |
| Ma'sNightMonkey   | -GTTAAAAATATGTTGGAAAGGAAGAGAAGTTCTAACAAACATCTAATTAGAGTTCAGAA--AAGAAATTAACATTGCT   | 12652 |
| VervetAGM         | TGAGAGAAAGACATTAACATAAGTTGTGTGTGTAGGTTGGCATAATTTTACAACCATTGATCAGTGAGTTGAATAATTTG  | 17203 |
| Gorilla           | -GTTAAAAATGTTGGAAAGGAAGAGAAGTTCTAACAAACATCTAATTAGAGTTCAGAA--AAGAAATTAAGATTGCA     | 17110 |
| GrabEatingMacaque | ----AAAATACATTGGAAAGGAAGAGAAGTTCTAACAAACATCTAATTAGAATTCAGAA--AAGAAAGTTAAAGATTGCA  | 17151 |
| Macaque           | ----AAAATACATTGGAAAGGAAGAGAAGTTCTAACAAACATCTAATTAGAATTCAGAA--AAGAAAGTTAAAGATTGCA  | 17210 |
| PigTailedMacaque  | ----AAAATACATTGGAAAGGAAGAGAAGTTCTAACAAACATCTAATTAGAATTCAGAA--AAGAAAGTTAAAGATTGCA  | 16450 |
| Bonobo            | -GTTAAAAATGTTGGAAAGGAAGAGAAGTTCTAACAAACATCTAATTAGAGTTCAGAA--AAGAAATTAAGATTGCA     | 15797 |
| OliveBaboon       | ----AAAATACATTGGAAAGGAAGAGAAGTTCTAACAAACATCTAATTAGAATTCAGAA--AAGAAAGTTAAAGATTGCA  | 15907 |
| Orangutan         | -GTTAAAAATGTTGGAAAGGAAGAGAAGTTCTAACAAACATCTAATTAGAGTTCAGAA--AAGAAATTAAGATTGCA     | 16103 |

| Majority          | GA----AAGGCAAA-----ATTTGAAATGCTAAA--GGCTGATAATTTTT-TAGAATTGGTGAGCTATATG          |       |
|-------------------|----------------------------------------------------------------------------------|-------|
|                   | 20810 20820 20830 20840 20850 20860 20870 20880                                  |       |
| Human             | GA----AAGGCAAA-----ATTTGAAATGCTAAA--GGCTGATAATTTTT-CAGAATTGGTGAGCTATATG          | 14811 |
| Coquerel'sSifaka  | GA----GAGGCAAA-----ATTTGAAATGCTAAA--GGCTGATAATTTTC-TAGAATTGATGAGCTTCATG          | 13974 |
| Ma'sNightMonkey   | GA----AAGGCAAA-----ATTTGAAAGTCTAAA--AGCTGATAATTTTC-TAGAATTGGTGAGCTATGTG          | 12711 |
| VervetAGM         | GCCTTTATGGCTAACAGTGTGTATATGGATATGAGAGAAAAGATAGAATGGCAGGTTATATAGAAGGCCTCAATTACAGG | 17283 |
| Gorilla           | GA----AAGGCAAA-----ATTTGAAATGCTAAA--GGCTGATAATTTTC-CAGAATTGGTGAGCTATATG          | 17169 |
| GrabEatingMacaque | GA----AAGGCAAA-----ATATGAAACTCTAAA--GGCTGGTAAGTTTT-TAGAATTGGTGAGCTATATG          | 17210 |
| Macaque           | GA----AAGGCAAA-----ATATGAAACTCTAAA--GGCTGATAAGTTTT-TAGAATTGGTGAGCTATATG          | 17269 |
| PigTailedMacaque  | GA----AAGGCAAA-----ATATGAAACGCTAAA--GGCTGATAAGTTTT-TAGAATTGGTGAGCTATATG          | 16509 |
| Bonobo            | GA----AAGGCAAA-----ATTTGAAATGCTAAA--GGCTGATAATTTTT-CAGAATTGGTGGGCTATATG          | 15856 |
| OliveBaboon       | GA----AAGGCAAA-----ATATGAAATGCTAAA--GGCTGATAAGTTTT-TAGAATTGGTGAGCTATATG          | 15966 |
| Orangutan         | GA----AAGGCAAA-----ATTTGAAATGCTAAA--GGCTGATAATTTTT-CAGAATTGGTGAAGCTATATG         | 16162 |





Tuesday, May 03, 2022 06:14 PM

| Majority          | CC-ACCTATTATTTTATAGTCAGCTAAATTATCATATAAGGAGAAGAACAAAATAAAGACACTTTTGA----          | AACACTT |       |       |       |       |       |       |  |
|-------------------|-----------------------------------------------------------------------------------|---------|-------|-------|-------|-------|-------|-------|--|
|                   | 21130                                                                             | 21140   | 21150 | 21160 | 21170 | 21180 | 21190 | 21200 |  |
| Human             | CC-ACCTGTTATTTTATAGCCAGCCAAATTATCATATAAGGAGAAGAACAAAATAAAGACACTTTTGA----          | AACACGT | 15092 |       |       |       |       |       |  |
| Coquerel'sSifaka  | CT-----ATTATTTTATAGTCAGCTAAATTATCACATAAGGATAAGAACAAAATAAAGACATTTTCTGA----         | AACACTC | 14263 |       |       |       |       |       |  |
| Ma'sNightMonkey   | CC-ACCTATTATTTTATAGTTAGCTAAATTATCAT---ATGAGAAGAACAAAATAAAGACACTTTTGA----          | AACACTT | 12989 |       |       |       |       |       |  |
| VervetAGM         | CT-TCACATATCTCAGCTGTTAGCTTTCATCTTCAAAGAAGCAATGGCAAAGAAGACTCTCACATCACATCACTGACACAT | 17594   |       |       |       |       |       |       |  |
| Gorilla           | CC-ACCTGTTATTTTATAGTCAGCCAAATTATCATATAAGGAGAAGAACAAAATAAAGACACTTTTGA----          | AACACGT | 17450 |       |       |       |       |       |  |
| GrabEatingMacaque | CC-ACTTATTATTTTGTAGTCAACTAAATTATCATATAAGGAGAAGAACAAAATAAAGACGCTTTTGA----          | AACACTT | 17491 |       |       |       |       |       |  |
| Macaque           | CC-GCTTATTATTTTGTAGTCAACTAAATTATCATATAAGGAGAAGAACAAAATAAAGACGCTTTTGA----          | AACACTT | 17550 |       |       |       |       |       |  |
| PigTailedMacaque  | CC-ACTTATTATTTTATAGTCAACTAAATTATCATATAAGGAGAAGAACAAAATAAAGACGCTTTTGA----          | AACACTT | 16790 |       |       |       |       |       |  |
| Bonobo            | CC-ACCTGTTATTTTATAGCCAGCCAAATTATCATATAAGGGGAAGAACAAAATAAAGACACTTTTGA----          | AACACGT | 16137 |       |       |       |       |       |  |
| OliveBaboon       | CC-ACTTATTATTTTATAGTCAACTAAATTATCATATAAGGAGAAGAACAAAATAAAGACGCTTTTGA----          | AACACTT | 16247 |       |       |       |       |       |  |
| Orangutan         | CCCACCTATTATTTTATAGTCAGCTAACTTAT-----AAGGAGAAGAACAAAATAAAGACACTTTTGA----          | AACACGT | 16439 |       |       |       |       |       |  |

| Majority          | CATTCTGCCTCCEAAAAAGCAATTTAGGAAATTTAT-----CAACAGACCCACTGAAGGAATTTCTGG--AGTTTGTACT |       |       |       |       |       |       |       |  |
|-------------------|----------------------------------------------------------------------------------|-------|-------|-------|-------|-------|-------|-------|--|
|                   | 21210                                                                            | 21220 | 21230 | 21240 | 21250 | 21260 | 21270 | 21280 |  |
| Human             | CATTCTGCCTCCEAAAAAGCAATTTAGGAAATGTAT-----CAACAGACCCACTGAAGGAATTTCTGG--AGTTTGTACT | 15165 |       |       |       |       |       |       |  |
| Coquerel'sSifaka  | CATTCTCCC-----GCAATTGAAGAAATTTGT-----CAACAGACCCACTGAAGGTATTACTAG--AGGTTGTACT     | 14327 |       |       |       |       |       |       |  |
| Ma'sNightMonkey   | CATTCTGCCTCCEAAAAAGCAATTTAGGAAATTTAT-----CAACAGACCCACTGAAGGAGTTTCTGG--GGTTTGTATT | 13062 |       |       |       |       |       |       |  |
| VervetAGM         | TCTTGTGCCTCCCTTTCCCACTTATAGGAACCTTGTGATTACACTGGGCCCACTACATAATTCAGGATAAATGTTTAGA  | 17674 |       |       |       |       |       |       |  |
| Gorilla           | CATTCTGCCTCCEAAAAAGCAGTTTAGGAAATGTAT-----CAACAGACCCACTGAAGGAATTTCTGG--AGTTTGTACT | 17523 |       |       |       |       |       |       |  |
| GrabEatingMacaque | CATTCTGCCTCCEAAAAAGCAATTTAGGAAATTTAT-----CAACAGATCCACTGAAGGAATTTCTGG--AGTTTGTACT | 17564 |       |       |       |       |       |       |  |
| Macaque           | CATTCTGCCTCCEAAAAAGCAATTTAGGAAATTTAT-----CAACAGATCCACTGAAGGAATTTCTGG--AGTTTGTACT | 17623 |       |       |       |       |       |       |  |
| PigTailedMacaque  | CATTCTGTCTCCEAAAAAGCAATTTAGGAAATTTAT-----CAACAGATCCACTGAAGGAATTTCTGG--AGTTTGTACT | 16863 |       |       |       |       |       |       |  |
| Bonobo            | CATTCTGCCTCCEAAAAAGCAATTTAGGAAATGTAT-----CAACAGACCCACTGAAGGAATTTCTGG--AGTTTGTACT | 16210 |       |       |       |       |       |       |  |
| OliveBaboon       | CATTCTGCCTCCEAAAAAGCAATTTAGGAAATTTAT-----CAACAGATCCACTGAAGGAATTTCTGG--AGTTTGTACT | 16320 |       |       |       |       |       |       |  |
| Orangutan         | CATTCTGCCTCCEAAAAAGCAATTTAGGAAATGTAT-----CAACAGACTCACTGAAGGAATTTCTGG--AGTTTGTACT | 16512 |       |       |       |       |       |       |  |

| Majority          | TCAGGAAGAAAGCCCAATGACACCAGAAAGGAAGTCTGACGTAGAAGTGAGGCTAATCAAGAAA-TTGGTAGGCCTGTGAG  |       |       |       |       |       |       |       |  |
|-------------------|------------------------------------------------------------------------------------|-------|-------|-------|-------|-------|-------|-------|--|
|                   | 21290                                                                              | 21300 | 21310 | 21320 | 21330 | 21340 | 21350 | 21360 |  |
| Human             | TCAGGAAGAAAGCCCAATGACACCAGAAAGGAAGTCTGATATAGAAGTGAGGCTAATCAAGAAA-TTGGTAGGTCTGTGAG  | 15244 |       |       |       |       |       |       |  |
| Coquerel'sSifaka  | TCAGGAAGAAGGCCCAATGACACCAGAAAG---GTCTGAAGTAGAAGTAAGGCTAATCAAGAAA-TTGGTAAACCTGTGGG  | 14403 |       |       |       |       |       |       |  |
| Ma'sNightMonkey   | TCAGGAAGAAAGCCCAATGACACCAGAAAGGAGGTCTGAGGTAGAAGTTAGGCTAATTAAGAAA-TTGGTATGCCTGTGGG  | 13141 |       |       |       |       |       |       |  |
| VervetAGM         | TTACAAATTAATGAAGTGGAACCTGAAACAAGTTTAACTATTCCACAAGA-----AAGGGCTTTGCTAGAGTGGTGGC     | 17748 |       |       |       |       |       |       |  |
| Gorilla           | TCAGGAAGAAAGCCCAATGATACCAGAAAGGAAGTCTGATATAGAAGTGAAGCTAATCAAGAAA-TTGGTAGGTCTGTGAG  | 17602 |       |       |       |       |       |       |  |
| GrabEatingMacaque | TCAGGAAGAAAGCCCAATGACACCAGAAAGTAAGTCTGACGTAGAAGTGAGGCTAATCAAGAAAATTTGGTAGGCCTGTGAG | 17644 |       |       |       |       |       |       |  |
| Macaque           | TCAGGAAGAAAGCCCAATGACACCAGAAAGTAAGTCTGACGTAGAAGTGAGGCTAATCAAGAAAATTTGGTAGGCCTGTGAG | 17703 |       |       |       |       |       |       |  |
| PigTailedMacaque  | TCAGGAAGAAAGCCCAATGACACCAGAAAGTAAGTCTGACGTAGAAGTGAGGCTAATCAAGAAAATTTGGTAGGCCTGTGAG | 16943 |       |       |       |       |       |       |  |
| Bonobo            | TCAGGAAGAAAGCCCAATGACACCAGAAAGGAAGTCTGATATAGAAGTGAGGCTAATCAAGAAA-TTGGTAGGTCTGTGAG  | 16289 |       |       |       |       |       |       |  |
| OliveBaboon       | TCACGAAGAAAGCCCAATGACACCAGAAAGTAAGTCTGACGTAGAAGTGAGGCTAATCAAGAAAATTTGGTAGGCCTGTGAG | 16400 |       |       |       |       |       |       |  |
| Orangutan         | TCAGGAAGAAAGCCCAATGACACCAGAAAGGAAGTCTGATATAGAAGTGAGGCTAATCAAGAAA-TTGGTAGGTCTGTGAG  | 16591 |       |       |       |       |       |       |  |

Tuesday, May 03, 2022 06:14 PM

| Majority          | TAAATCTAATTACTG-ACCATATAAGAATGTAATA-----GCAGT--GATTG                             |       |       |       |       |       |       |       |       |
|-------------------|----------------------------------------------------------------------------------|-------|-------|-------|-------|-------|-------|-------|-------|
|                   | 21370                                                                            | 21380 | 21390 | 21400 | 21410 | 21420 | 21430 | 21440 |       |
| Human             | TAAATCTAATTACTG-ACCATATAAGAATGTAATA-----GCAGT--GATTG                             |       |       |       |       |       |       |       | 15288 |
| Coquerel'sSifaka  | TAAATCTAATTACTGAATGATATAAGAATGTAATA-----GCAGT--GATTG                             |       |       |       |       |       |       |       | 14448 |
| Ma'sNightMonkey   | TAAATCTAATTACTG-ACAATATAAGAATGTAATA-----ACAGT--GTTTG                             |       |       |       |       |       |       |       | 13185 |
| VervetAGM         | TCACACCTATAATCCCAGAACTTAGGGAGGCTGAG-----GCAGGCAGATCG                             |       |       |       |       |       |       |       | 17795 |
| Gorilla           | TAAATCTAATTACTG-ACCGTATAAGAATGTAATA-----GCTGT--GATTG                             |       |       |       |       |       |       |       | 17646 |
| GrabEatingMacaque | TAAATCTAATTATTG-ACCATATAAGAATGTAATA-----GCAGT--GATTG                             |       |       |       |       |       |       |       | 17688 |
| Macaque           | TAAATCTAATTATTG-ACCATATAAGAATGTAATA-----GCAGT--GATTG                             |       |       |       |       |       |       |       | 17747 |
| PigTailedMacaque  | TAAATCTAATTATTG-ACCATATAAGAATGTAATA-----GCAGT--GATTG                             |       |       |       |       |       |       |       | 16987 |
| Bonobo            | TAAATCTAATTACTG-ACCATATAAGAATGTAATA-----GCAGT--GATTG                             |       |       |       |       |       |       |       | 16333 |
| OliveBaboon       | TAAACCTAATTATTG-ACCATATAAGAATGTAATA-----GCAGT--GATTG                             |       |       |       |       |       |       |       | 16444 |
| Orangutan         | TAAATCTAATTACTG-ACCATATAAGAATGTAATATGGTCATTCTTACATATTACATTTCTATAATATGTAAG--AATTA |       |       |       |       |       |       |       | 16668 |

| Majority          | ATA-----AGGGGTTTAAAAATAGAAT-----TAAAAATATTTAAATCATAACAATA-TGTAA                |       |       |       |       |       |       |       |       |
|-------------------|--------------------------------------------------------------------------------|-------|-------|-------|-------|-------|-------|-------|-------|
|                   | 21450                                                                          | 21460 | 21470 | 21480 | 21490 | 21500 | 21510 | 21520 |       |
| Human             | ATA-----AGGGGTTTAAAAATAGAAT-----TAAAAATATTTAAATCATAACAATA-TGTGA                |       |       |       |       |       |       |       | 15339 |
| Coquerel'sSifaka  | ATG-----GGGATTTAAAAATAGAGC-----TAAAAATGTTTAAATCATGACAACA---TGT                 |       |       |       |       |       |       |       | 14497 |
| Ma'sNightMonkey   | ATA-----AGGGGGTTTAAAAATAGAAT-----TAAACATAATAAATTTATAACAATA-TGTAA               |       |       |       |       |       |       |       | 13236 |
| VervetAGM         | CTTGAGCCC-----AGGAATTTGAGACCAGCCTGGTCTCATAGCAAGACCCCATCTCTACAACAACCTAA         |       |       |       |       |       |       |       | 17861 |
| Gorilla           | ATA-----AGGGGTTTAAAAATAGAAT-----TAAAAATATTTAAATCATAACAATA-TGTGA                |       |       |       |       |       |       |       | 17697 |
| GrabEatingMacaque | TTA-----AGGGGTTTAAAAATAGAAT-----TAAAAATACTGAATTATAACAATA-TGTAA                 |       |       |       |       |       |       |       | 17739 |
| Macaque           | TTA-----AGGGGTTTAAAAATAGAAT-----TAAAAATACTGAATTATAACAATA-TGTAA                 |       |       |       |       |       |       |       | 17798 |
| PigTailedMacaque  | TTA-----AGGGGTTTAAAAATAGAAT-----TAAAAATACTGAATTATAACAATA-TGTAA                 |       |       |       |       |       |       |       | 17038 |
| Bonobo            | ATA-----AGGGGTTTAAAAATAGAAT-----TAAAAATATTTAAATCATAACAATA-TGTGA                |       |       |       |       |       |       |       | 16384 |
| OliveBaboon       | TTA-----AGGGGTTTAAAAATAGAAT-----TAAAAATACTGAATCATAACAATA-TGTAA                 |       |       |       |       |       |       |       | 16495 |
| Orangutan         | ATATTTCTTACATATTTAAATATTAAGGTTTAAAAATAGAAT-----TAAAAATATTTAAATCATAACAATA-TGTAA |       |       |       |       |       |       |       | 16739 |

| Majority          | GAGAGTGGTAGAGACTGGAGTTTGAGTTCTGATGATCTAGTATTGATTGGAGCTGTGTTGTCAGTTACAGTAGCTACT     |       |       |       |       |       |       |       |       |
|-------------------|------------------------------------------------------------------------------------|-------|-------|-------|-------|-------|-------|-------|-------|
|                   | 21530                                                                              | 21540 | 21550 | 21560 | 21570 | 21580 | 21590 | 21600 |       |
| Human             | GAGAGTGGTAGAGACTGGAGTTTGAGTTCTGATGATCTAGTATTGATTGGAGCTGTGTTGTCAGTTACAGTAGCTACT     |       |       |       |       |       |       |       | 15419 |
| Coquerel'sSifaka  | AGAGTTAGTAGAGTGACTAGAGTTTGTAGTTCCAATGATCTAATGTTGATTGGAGCTGCGTCATCCATTACAGTAGCTACT  |       |       |       |       |       |       |       | 14577 |
| Ma'sNightMonkey   | GAGAGCAGTAGGGTCCCTGGAG-TTAAGTTCTGATGATCTAATATTTGCTTGGAGTTTGTGTTGTCAGTTACAGTAGCTACC |       |       |       |       |       |       |       | 13315 |
| VervetAGM         | AAAAATTAGATAGAT-CTGGTGGCATGGCCTGTAGTCCCAGCTACTTGGGAGACTGAGATAAGAGGATCACCTGAGCCC    |       |       |       |       |       |       |       | 17940 |
| Gorilla           | GAGAGTGGTATAGACTGGAGTTTGAGTTCTGATGATCTAGTATTGATTGGAGCTGTGTTGTCAGTTACAGTAGCTACT     |       |       |       |       |       |       |       | 17777 |
| GrabEatingMacaque | GAGAGTACTATAA-----                                                                 |       |       |       |       |       |       |       | 17752 |
| Macaque           | GAGAGTGGTAGAGACTGGAGTTTAAAGTTCTGATGATGTAGTATTTATTGGAGCTGTGTTATCAGTTACAGTAGCTACT    |       |       |       |       |       |       |       | 17878 |
| PigTailedMacaque  | GAGAGTGGTAGAGACTGGAGTTTAAAGTTCTGATGATGTAGTATTTATTGGAGCTGTGTTATCAGTTACAGTAGCTACT    |       |       |       |       |       |       |       | 17118 |
| Bonobo            | GAGAGTGGTAGAGACTGGAGTTTGAGTTCTGATGATCTAGTATTGATTGGAGCTGTGTTGTCAGTTACAGTAGCTACT     |       |       |       |       |       |       |       | 16464 |
| OliveBaboon       | GAGAGTGGTAGAGACTGGAGTTTGAGTTCTGATGATGTAGTATTTATTGGAGCTGTGTTGTCAGTTACAGTAGCTACT     |       |       |       |       |       |       |       | 16575 |
| Orangutan         | GAGAGTGGTAGAGACTGGAGTTTGAGTTCTGATGATCTAGTATTGATTGGAGCTGTGTTGTCAGTTACAGTAGCTACT     |       |       |       |       |       |       |       | 16819 |

Tuesday, May 03, 2022 06:14 PM

| Majority          | AGTCAT-TTGTTAC---TGAGCACTTGACATGTATGTAGTTTAAGTTG----ATCTTCTACCTTAGTTGAAAAAT----A |       |
|-------------------|----------------------------------------------------------------------------------|-------|
|                   | 21610 21620 21630 21640 21650 21660 21670 21680                                  |       |
| Human             | AGTCAT-TTGTTAC---TGAGCACTTGACATGTATGTAGTTTAAGTTG----ATCTTCTAC-TTAATTGAAAAAT----A | 15486 |
| Coquerel'sSifaka  | AGTCATGTGGTTAT---TGAGCACTTGACATGTGTCTGGTCTAAATTG----ATCTCCT---TTAGTTGAAAAATGTAAA | 14647 |
| Ma'sNightMonkey   | TGTCATCTTGTTAC---TGAGCACTTGACATGTACATAGTTTAAGCTG----ATCTTCTACCTTAGTTGAAAAAT----A | 13384 |
| VervetAGM         | AGGCGG-CAGTGAGCTGTGATCGTATCACTACAGTCCAGCCTGGGCGAGAGGATATCCAGTCTCAA--AAAAAAA----A | 18013 |
| Gorilla           | AGTCAT-TTGTTAC---TGAGCACTTGACATGTATGTAGTTTAAGTTG----ATCTTCTAC-TTAATTGAAAAAT----A | 17844 |
| GrabEatingMacaque | -----TACTTGACATGAATGTAGTTTAAGTT-----                                             | 17778 |
| Macaque           | AGTCAT-TTGTTAC---TAAGCACTTGACATGAATGTAGTTTAAGTTG----ATTTTCTACCTTAGTTGAAAAAT----A | 17946 |
| PigTailedMacaque  | AGTCAT-TTGTTAC---TAAGCACTTGACATGAATGTAGTTTAAGTTG----ATTTTCTACCTTAGTTGAAAAAT----A | 17186 |
| Bonobo            | AGTCAT-TTGTTAC---TGAGCACTTGACATGTATGTAGTTTAAGTTG----ATCTTCTAC-TTAATTGAAAAAT----A | 16531 |
| OliveBaboon       | AGTCAT-TTGTTAC---TGAGCACTTGACATGAATGTAGTTTAAGTTG----ATTTTCTACCTTAGTTGAAAAAT----A | 16643 |
| Orangutan         | AGTGAT-TTGTTAC---TGAGCACTTGACATGTATGTAGTTTAAGTTG----ATCTTCTACCTTAGTTGAAAAAT----A | 16887 |

| Majority          | CAGATTTCTAAGCCTTAGTCTGAAAGAAGAATGTAAAATATCCCAAGTTTTCATAT--TGGTTACATGTAGAACTGATAA |       |
|-------------------|----------------------------------------------------------------------------------|-------|
|                   | 21690 21700 21710 21720 21730 21740 21750 21760                                  |       |
| Human             | CACATTTCTGAGCCTTAGTCTGAAAGAAGAATGTAAAATATCCCAAGTTTTCATAT--TGGTTACATGTACAGCGGATAA | 15564 |
| Coquerel'sSifaka  | CAGATTTCTAAGTCTTAGTATAAAGGAAGAATGTAAAATATGTCAATTTTTTATAT--TGGTTACATATTGAAGTATAA  | 14725 |
| Ma'sNightMonkey   | CAGATTTCTAAGCCTTAGTCTGAAAGATGAATGTA-----TTTT-----TTTTTTTTTTAAGAGATGG             | 13443 |
| VervetAGM         | AAAAAGGAAAAGGGCTTTCCTGAGGGTCAAATGAAGTACAGTTGACCCTTGAACAACATGATTTTGAAGTACACAGGTC- | 18092 |
| Gorilla           | CACATTTCTGAGCCTTAGTCTGAAAGAAGAATGTAAAATATCCCAAGTTTTCATAT--TGGTTACATGTAGAGCTGATAA | 17922 |
| GrabEatingMacaque | -----TAA-----TGAAAGAAGAATG-----ATTTT---AT--TGGTT-CATT---AACTGATA-                | 17818 |
| Macaque           | CAGATTTCTAAGCCGTAGTCTGAAAGAAGAATGTAAAATATCCCACATTTTCATAT--TGGTTACATGTAGAACTGATAA | 18024 |
| PigTailedMacaque  | CAGATTTCTAAGCCGTAGTCTGAAAGAAGAATGTAAAATATCCCACATTTTCATAT--TGGTTACATGTAGAACTGATAA | 17264 |
| Bonobo            | CACACTTCTGAGCCTTAGTCTGGAAGAAGAATGTAAAATATCCCAAGTTTTCATAT--TGGTTACATGTACAGCTGATAA | 16609 |
| OliveBaboon       | CAGATTTCTAAGCCGTAGTCTGAAAGAAGAATGTAAAATATCCCACATTTTCATAT--TGGTTACATGTAGAACTGATAA | 16721 |
| Orangutan         | CACATTTCTAAGCCTTAGTCTGAAAGAAGAATGTAAAATATCCCAAGTTTTCATAT--TGGTTACATGTAGAGCTGATAA | 16965 |

| Majority          | TATTTTTGTATT--TTGGGTTAAATGAAATACATTAT--GCGTTGCCTTTTCTCTTTTTTTCTTTC-T-T-TT--T-TC |       |
|-------------------|---------------------------------------------------------------------------------|-------|
|                   | 21770 21780 21790 21800 21810 21820 21830 21840                                 |       |
| Human             | TATTTTTGGTATT--TTGGGTTAAATGAAATACATTATGTGTGTTGCCTTTTCTCTTTTTTTCTTTC-----C       | 15630 |
| Coquerel'sSifaka  | TATTTT-----GGTAT-----                                                           | 14736 |
| Ma'sNightMonkey   | GGTTTCCCAT-----GTTGGCCAGGCTGGTCT-----CAAACCTGACCTCAGGTGATCCACC-----C            | 13499 |
| VervetAGM         | CACATATGCATGGATCCACTTATACAGAAATTTCTTTC--TCCCTCTCCACCAAGACAGAAAGACCAGCTCTTCTCTT  | 18170 |
| Gorilla           | TATTTTTGGTATT--TTGGGTTAAATGAAATACATTATGTGTGTTGCCTTTTCTCTTTTTTTCTTTC-----C       | 17988 |
| GrabEatingMacaque | -----TTTT-----GTTAAGGAA-----TTTTCTTTCATTCTCTCTTTC                               | 17853 |
| Macaque           | TATTTTTGTATT--TTGGGTTAAGTGAATGCATTAT--GCATTGCCTTTTCTCTTTCTTTCTTTCTTTCTTTCTTTT   | 18100 |
| PigTailedMacaque  | TATTTTTGTATT--TTGGGTTAAGTGAATGCATTAT--GCATTGCCTTTTCTCT---CTTCTTTCTTTCTTTCTTTCTT | 17336 |
| Bonobo            | TATTTTGGCATT--TTGGGTTAAATGAAATACATTATGTGTGTTGCCTTTTCTCTTTTTTTCTTCTGTC-----C     | 16675 |
| OliveBaboon       | TATTTTTGTATT--TTGGGTTAAGTGAATGCATTAT--GCATTGCCTTTTCTCTTTCTTTCTTTCTTTTCTTTT      | 16797 |
| Orangutan         | TATTTTTGGTATT--TTGGGTTAAATGAAATACATTATCTGCGTTGCCTTTTCTCTTTCTTCTTCTTTCTTTCTTTCC  | 17043 |

Tuesday, May 03, 2022 06:14 PM

|                   |                                                                                  |       |
|-------------------|----------------------------------------------------------------------------------|-------|
| Majority          | TTTTTTTA---AGA-AG-GTCT-GCT-T--C--CCAGGCTG-AGTGC-GTGGC--GATC---GCA--CT--AC-----   |       |
|                   | 21850 21860 21870 21880 21890 21900 21910 21920                                  |       |
| Human             | TTTTTTTA---AGATAGGGTCTTGCTCTGTCCACCAGGCTGGAGTGCCGTGGCATGATCATGGCAGCCTCAAC-----   | 15700 |
| Coquerel'sSifaka  | -TTT-----                                                                        | 14739 |
| Ma'sNightMonkey   | ACCTT-----                                                                       | 13504 |
| VervetAGM         | CCTCCTCAGCCTACTCAATGTAAAGACAATCAGGATGAAGACCTTTATTATGACTGACCTCCAAAAAGATTGGCTTCAAT | 18250 |
| Gorilla           | TTTTTTTA---AGATAGGGTCTTGCTCTGTCCACCAGGCTGGAGTGCCGTGGCATGATCATGGCAGCCTCAAC-----   | 18058 |
| GrabEatingMacaque | CCTT-----                                                                        | 17857 |
| Macaque           | CTTCTCTTT-----                                                                   | 18110 |
| PigTailedMacaque  | TCTCT-----                                                                       | 17341 |
| Bonobo            | TTTTTTTA---AGATAGGGTCTTGCTCTGTCCACCAGGCTGGAGTGCCGTGGCATGATCATGGCAGCCTCAAC-----   | 16745 |
| OliveBaboon       | TTTTTTTTTTGGAGACGGAGTCTCGCTCTGGCGCCAGGCTGAAGTGCAGTGGCCGGATCTCAGCTCACTGCAAGCTCCG  | 16877 |
| Orangutan         | TTTTTTTA---AGATAGGGTCTTGCTTTTCCACCAGGCTGGAGTGCTGTGGCATGATCATGGCAGCCTCAAC-----    | 17113 |

|                   |                                                                                  |       |
|-------------------|----------------------------------------------------------------------------------|-------|
| Majority          | -CTCC-GGG-TC--GT-A--CTCC--CCTCAGCCTCCCAAGTAGCTGGGACTACAGTTGTGTGCCACCACACCTGGCTAA |       |
|                   | 21930 21940 21950 21960 21970 21980 21990 22000                                  |       |
| Human             | -CTCCTGGGCTCCAGTGACCCTCCCACCTCAGCCTCCCAAGTAGCTGGGACTACAGTTGTGTGCCACCACACCTGGCTAA | 15779 |
| Coquerel'sSifaka  | -----                                                                            | 14739 |
| Ma'sNightMonkey   | -----G-----GTCTCCCAAAGTGCTAAGATTACAGGTGTGAGCCACCACCCAGCCAA                       | 13554 |
| VervetAGM         | ATTTTCATGGAGTGTGTATGAATTAGAATCCTGAGTCTCTGTATTGTTAATTTATTTAGTCTCTGGTCTGTGTGTGTTT  | 18330 |
| Gorilla           | -CTCCTGGGCTCCAGTGACCCTCCCACCTCAGCCTCCCAAGTAGCTGGGACTACAGTTATGTGCCACCACACCTGACTAA | 18137 |
| GrabEatingMacaque | -----                                                                            | 17857 |
| Macaque           | -----                                                                            | 18110 |
| PigTailedMacaque  | -----                                                                            | 17341 |
| Bonobo            | -CTCCTGGGCTCCAGTGACCCTCCCACCTCAGCCTCCCAAGTAGCTGGGACTACAGTTGTGTGCCACCACACCTGGCTAT | 16824 |
| OliveBaboon       | CCTCCCGGTTTCACGCCATTCTCCTGCCTCAGCCTCCCGAGTAGCTGGGACTACAGGCGCCGCCACCTCGCCCGGCTAG  | 16957 |
| Orangutan         | -CTCCTGGGCTCCAGTGACCCTCCCACCTCAGCCTCCCAAGTAGCTGGGACTACAGTTGTGTGCCACCACACCTGGCTAA | 17192 |

|                   |                                                                                  |       |
|-------------------|----------------------------------------------------------------------------------|-------|
| Majority          | TTT-T---AGTTTTTTT-----GT-----                                                    |       |
|                   | 22010 22020 22030 22040 22050 22060 22070 22080                                  |       |
| Human             | TTTTTG---AGTTTTTTTTT-----GT-----                                                 | 15798 |
| Coquerel'sSifaka  | -----                                                                            | 14739 |
| Ma'sNightMonkey   | --G-----AATGTATTT-----                                                           | 13564 |
| VervetAGM         | CTAAACTGTAGTAGCTTTCTTAATTTAGATCCAGGCATACTACGTTAGGGGATAAGGTGGTTAAGTGATATTTTCACTTT | 18410 |
| Gorilla           | TTTTTGA--GGTTTTTTT-----GT-----                                                   | 18155 |
| GrabEatingMacaque | -----                                                                            | 17857 |
| Macaque           | -----                                                                            | 18110 |
| PigTailedMacaque  | -----                                                                            | 17341 |
| Bonobo            | TTTGIGT--AGTTTTTTTTT-----GTTT-----                                               | 16846 |
| OliveBaboon       | TTTTTTTTTTGATTTTTTTAGTAGAGACGGGTTTACCCTGTTAGCCAGGATGGTCTCGATCTCCCGACCTCGTGATCCG  | 17037 |
| Orangutan         | TTTTTG---AGTTTTTTTTT-----GT-----                                                 | 17211 |

Tuesday, May 03, 2022 06:14 PM

```

Majority      -----AG-GA--GC-----G-T-T-T-----GCT--TCTCAAATCCTGGGCTCAAGTGA
               |   |   |   |   |   |   |   |   |   |   |   |   |   |
               22090 22100 22110 22120 22130 22140 22150 22160
Human          -----AGAGACAGCGTCTCGCTGTATCGCTTAGGCTGGTCTCAAACCTCTGGGCTCAAGTGA 15855
Coquerel'sSifaka ----- 14739
Ma'sNightMonkey -----T-----A---TCCCAGGTTTTTATATTGGTTACA 13590
VervetAGM     AAAAGTAATAAGGTGTACAGAGAGTTATCGCAAGAGGTTTTTGGAGTAGTACTTCTTTTTTATAACTATTGTAATGAAT 18490
Gorilla       -----AGAGACAGCGTCTCGCTATATTGCCTAGGCTGGTCTCAAACCTCTGGGCTCAAGTGA 18212
GrabEatingMacaque ----- 17857
Macaque       -----CTCTCTC 18117
PigTailedMacaque ----- 17341
Bonobo        -----AGAGACAGCGTCTCGCTATATCGCTTAGGCTGGTCTCAAATCCTGGGCTCAAGTGA 16903
OliveBaboon   CCCGCTCGGCTTCCAAAGTGCTGGGATTACAGGCTTGAGCCACCGCGCCCGGCTCTTTCTTTCTTTCTTTCTTTTC 17117
Orangutan     -----AGAGACAGCGTCTCGCTATATTGCCTAGGCTGATCTCAAACCTCTGGGCTCAAGTGA 17268

```

```

Majority      TCTTCTGCTTTAGCCTTGCAAAGTGCTGGGATTACATGACTGAGTCTGGCTACCTTTTTCTTTTTCTTTCTTTCT
               |   |   |   |   |   |   |   |   |   |   |   |   |   |
               22170 22180 22190 22200 22210 22220 22230 22240
Human          TCCTCCTGCTTTAGCCTTGCAAAGTGCTGGGATTACAGGACTGAGTCTGGCCACCTTTTTCTTTCTTTCTTTTTTTTTT- 15934
Coquerel'sSifaka ----- 14739
Ma'sNightMonkey TGTTGAACTGATAGCATTTTGGTATTTTGGG-TTAAATGAAATTATCT-GTTGCCTTTTCCT--TTTGCTTTCTTTTTTT 13666
VervetAGM     TTTAGACACAGTAGTATCATGAACCATGTGTGTGTATCATTCAGTCCCAAAAACCA-----TCAGCAACCCCTAACT 18563
Gorilla       TCCTCCCGCTTTAACCTTGCAAAGTGCTGGGATTACAGGACTGAGTCTGGCCACCTTTTTCTTTCTTTCTTTCTTTCTTT 18292
GrabEatingMacaque ----- 17857
Macaque       TCTCTCTCCCTCTCTCTCTCTCTCTCCCCCGCCTCCCTCCCTCCGCTCCTCTGCTCTCTCTCTCTCTCTCTCTCTCT 18197
PigTailedMacaque -----C-TCTCTCCCCCCCCCTCCCCCGCCTGCTCCCTCCGCTCCTCTGCTCTCTCTCTCTCTCTCTCTCTCTCT 17412
Bonobo        TCCTCCTGCTTTAGCCTTGCAAAGTGCTGGGATTACAGGACTGAGTCTGGCCACCTTTTTCTTTCTTTCTTTCTTTTCT 16983
OliveBaboon   TTTCTCTTTCTCTCTCTCTCTCTCTCTCTCTCTCTCTCTCTCTCTCTCTCTCTCTCTCTCT--TCTCTCTCTCT 17195
Orangutan     TACTCCCGCTTTAGCCTTGCAAAGTGCTGGGATTACAGGACTGAGTCTGGCCACCTTTTTCTTTCTTTCTTTTTTTTTTT 17348

```

```

Majority      CTTTTTTT---T-T-----T-T--AAGTCTG-----TTT-AGATA--AGTCTTGCTCTGTCC-C
               |   |   |   |   |   |   |   |   |   |   |   |   |   |
               22250 22260 22270 22280 22290 22300 22310 22320
Human          -----AGACGG-----AGTCTCCCTTTGTTG-C 15956
Coquerel'sSifaka ----- 14739
Ma'sNightMonkey CCTTTTTT-----AAAGATAG-----AGTCTTGCCCTGTCC-C 13698
VervetAGM     AAAATGATGATATCCAAACTCTGCTTTTCTACTTCTGTATTTTGGAGATAAAATTCAGATATTCATATGTTTTATCTGT 18643
Gorilla       TTTTTTTTTTTTTT-----TTT--AGACGG-----AGTCTCCCTTTGTTG-C 18331
GrabEatingMacaque -----TTAAGATAGG-GTCTGTTCTGTCC-T 17883
Macaque       CTCTTTCTTTCTCTCTCTCTCTCTCTCTCTCTCTCTCTCTCTCTCTCTCTCTCTTTTCTTTTTTAAGATAGG-GTCTTGTCTGTCC-T 18275
PigTailedMacaque CTCTCTTTCTCTCTCTCTCTCTCTCTCTCTCTCTCTCTCTCTCTCTCTCTCTTTTCTTTTTTAAGATAGG-GTCTTGTCTGTCC-T 17490
Bonobo        CTTTTTTTTCTTTTAGACGTTCTCCTTGTAAGACGGTAGGT-TCT--TACCCTTTCGGTTTAAGTCTCCCTTTGTTG-C 17059
OliveBaboon   CTCTTTCTTTCTCTCTCTCTCTCTCTCTCTCTCTCTCTCTCTCTCTCTCTCTTTTCTTTTTTAAGATAGG-GTCTTGTCTGTCC-C 17273
Orangutan     T-TTTTT-----AAGGCG-----AGTCTCCCTGTGCA-C 17377

```

Tuesday, May 03, 2022 06:14 PM

| Majority          | CCAGGCTGGAGTGCAGTGGC---AT---GATCATGGCAGCCTCTACCTCCTGGGTTCCAGTGATCCTCCTGCTTCAGCC   |       |
|-------------------|-----------------------------------------------------------------------------------|-------|
|                   | 22330 22340 22350 22360 22370 22380 22390 22400                                   |       |
| Human             | CCAGGCTGGAGTACAGTGGCTCTATCTCTGCTTCCTGCAAGCTCTGCCTCCTGGGTTCCAGCCATTCTCCTGCCTCAGCC  | 16036 |
| Coquerel'sSifaka  | -----GGGTTAAAA-----                                                               | 14748 |
| Ma'sNightMonkey   | CCAGGCTAGAGTTCAGTGGC---AT---GATCATGGCAGCCTCAACCTCCTGGGCTCCAGTGATCCTCCCATCTCAGCC   | 13771 |
| VervetAGM         | AAAGGCTTCAGTGT-ATAAC---TTTAAAAATAAGGACTCTCTTTTCTTTTTTAAAATAAATCAAAGACTGTTAGGACA   | 18719 |
| Gorilla           | CCAGGCTGGAGTACAGTGGCTCCATCTCTGCTTCCTGCAAGCTCTGCCTCCTGGGTTCCACACCATTCTCCTGCCTCAGCC | 18411 |
| GrabEatingMacaque | CCAGGCTGGAGTGGCCATGGC---AT---GATCATGGCAGCCTCAACCTCCTGTGCTCCAGTGACCTCCCCTCAGCC     | 17956 |
| Macaque           | CCAGGCTGGAGTGGCCATGGC---AT---GATCATGGCAGCCTCAACCTCCTGTGCTCCAGTGACCTCCCCTCAGCC     | 18348 |
| PigTailedMacaque  | CCAGGCTGGAGTGGCCATGGC---AT---GATCATGGCAGCCTCAACCTCCTGTGCTCCAGTGACCTCCCCTCAGCC     | 17563 |
| Bonobo            | CCAGGCTGGAGTACAGTGGCTCTATCTCTGCTTCCTGCAAGCTCTGCCTCCTGGGTTCCAGCCATTCTCCTGCCTCAGCC  | 17139 |
| OliveBaboon       | CCAGGCTGGAGTGGCCATGGC---AT---GATCATGGCAGCCTCAACTCCTGTGCTCCAGTGACCTCCCCTCAGCC      | 17346 |
| Orangutan         | CCAGGCTGGAGTGCAGTGGCTCTATCTCTGCTTACTGCAAGCTCTGCCTCCCAGGTTCCAGCCATTCTGCTGCCTCAGCC  | 17457 |

| Majority          | TCCCAAGTAGCTGGG--ACTACA-GTTGTGTGCCACCACACCTGGCT--AATTTTTGATTTTTTTGTAGAGACAGGGT   |       |
|-------------------|----------------------------------------------------------------------------------|-------|
|                   | 22410 22420 22430 22440 22450 22460 22470 22480                                  |       |
| Human             | TCCCGAGTAGCTGGG--ACTACA-GGCGCCTGCCACCACACCCGGCT--AATTTTTT-GTATTTTTAGTAGAGATGGGTT | 16110 |
| Coquerel'sSifaka  | -----TGT--G-----TGTTACC-----TTTTT-A---CTTT-----T-                                | 14770 |
| Ma'sNightMonkey   | TCCCAAGTAGCTGGG--ACTACC-GGTGTGTGCCACTACACCAGGCT--AATTTTTGAGTTTTTTGTAGAGACAGGGT   | 13845 |
| VervetAGM         | CACACACACATTAAGTTACTTCATATTATAAAATGTCAAATTTGTATTTAAATTTCTAATTGCTCATAAAAGTCATAGT  | 18799 |
| Gorilla           | TCCCGAGTAGCTGGG--ACTACA-GGCGCCCGCCACCACACACGGCT--AATTTTTT-GTATTTTTAGTAGAGACGGGTT | 18485 |
| GrabEatingMacaque | TCCCAAGTAGCTGGG--ACTACA-GTTGTGTGCCACCACACCTGGCT--AATTATTGAGTTTTTTGTAGAGACAGGGT   | 18030 |
| Macaque           | TCCCAAGTAGCTGGG--ACTACA-GTTGTGTGCCACCACACCTGGCT--AATTATTGAGTTTTTTGTAGAGACAGGGT   | 18422 |
| PigTailedMacaque  | TCCCAAGTAGCTGGG--ACTACA-GTTGTGTGCCACCACACCTGGCT--AATTATTGAGTTTTTTGTAGAGACAGGGT   | 17637 |
| Bonobo            | TCCCGAGTAGCTGGG--ACTACA-GGCGCCTGCCACCACACCCGGCT--AATTTTTT-GTATTTTTAGTAGAGACGGGTT | 17213 |
| OliveBaboon       | TCCCAAGTAGCTGGG--ACTACA-GTTGTGTGCCACCACACCTGGCT--AATTATTGAGTTTTTTGTAGAGACAGGGT   | 17420 |
| Orangutan         | TCTCGAGTAGCTGGG--ACTACA-GGCGCCCTCCACCAAGCCCGGCT--AATTTTTTGTATTTTTAGTGGAGACGGTTT  | 17532 |

| Majority          | CTC-CTATA---TTGCCTAGGCTGGTCTGAAACTCC--TGAAGTCAAGTGATCCTCCT-----GCTTTAGCCTTG      |       |
|-------------------|----------------------------------------------------------------------------------|-------|
|                   | 22490 22500 22510 22520 22530 22540 22550 22560                                  |       |
| Human             | -----TTACC---ATGGTCTCGATCTCC--TGACCTCC--TGATCTGCC-----ACCCTGGCCTCC               | 16160 |
| Coquerel'sSifaka  | -----T--A-----AATTACAGTGAATA-----G-----                                          | 14787 |
| Ma'sNightMonkey   | CTCACTGTG---TTGCCTAGGCTGGTCTCAAACCTCT--TGGGCTCAAGTGATCCTCCT-----GCTTTAGCCTTG     | 13910 |
| VervetAGM         | ATTTTTATAGGTTTTTTTTTAGAGGGGAAGGAGTCATGATAAAATAAGATCAGCATATTTAACAGGTCGTTATTACCTCT | 18879 |
| Gorilla           | -----TTACC---ATGGTCTCAATCTCC--TGACCT----GATCTGCC-----ACCCCGCCTCC                 | 18532 |
| GrabEatingMacaque | CTCGCTATA---TTGCCTAGGCTGGTCTGAAACTCC--TGGACTCAAGTGATCCTCCT-----GCTTTAGCCTTG      | 18095 |
| Macaque           | CTCGCTATA---TTGCCTAGGCTGGTCTGAAACTCC--TGGACTCAAGTGATCCTCCT-----GCTTTAGCCTTG      | 18487 |
| PigTailedMacaque  | CTCGCTATA---TTGCCTAGGCTGGTCTGAAACTCC--TGGACTCAAGTGATCCTCCT-----GCTTTAGCCTTG      | 17702 |
| Bonobo            | -----TTACC---ATGGTCTCGATCTCC--TGACCT----GATCTGCC-----ACCCCGCCTCC                 | 17260 |
| OliveBaboon       | CTCGCTATA---TTGCCTAGGCTGGTCTGAAACTCC--TGGACTCAAGTGATCCTCCT-----GCTTTAGCCTTG      | 17485 |
| Orangutan         | CA--CTGTG---TTAGCCAGGATGGTCTCAATCTCC--TGACCTCA--TGATCTGCC-----GCCCTGGCCTCC       | 17593 |

Tuesday, May 03, 2022 06:14 PM

| Majority          | CAAAGTGCTGGGATTACAGGAGTGAGTCT-----GGCCACCTTTTCTTTTACTTTTAAAAATGTGGCTAATAGA     |       |       |       |       |       |       |       |       |
|-------------------|--------------------------------------------------------------------------------|-------|-------|-------|-------|-------|-------|-------|-------|
|                   | 22570                                                                          | 22580 | 22590 | 22600 | 22610 | 22620 | 22630 | 22640 |       |
| Human             | CAAAGTGCTGGGATTACAGGCGTGAGCCACTGCGACCGGCCAC-TTTTCTTTTACTTTTAAAAATGTGGCTAATAGA  |       |       |       |       |       |       |       | 16239 |
| Coquerel'sSifaka  | -AAATTTGTAAGATTACATGTGTGGCTCA-----TGTTAC--ATTTCTTTTGGACAGTGCAAGTCTGGAGGGTAGA   |       |       |       |       |       |       |       | 14855 |
| Ma'sNightMonkey   | CAAAGTGCTGAGATTACAGGACTGAGCCT-----GGCCAGCTTTTCTTTTACTTTTCAAATGTGGCTAATAGA      |       |       |       |       |       |       |       | 13981 |
| VervetAGM         | TAAATATCTTTTAAATGTACAAGTTAAGTT-----CTCCGTTCAGTTTTTTTTTTTTTTTAAAGT-TGCATTTTCATT |       |       |       |       |       |       |       | 18949 |
| Gorilla           | CAAAGTGCTGGGATTACAGGTGTGAGCCACTGCGCCCGGCCAC-TTTTCTTTTACTTTTAAAAATGTGGCTAACAGA  |       |       |       |       |       |       |       | 18611 |
| GrabEatingMacaque | CAAAGTGCTGGGATTACAGGACTGAGTCT-----GGCCACCTTTTCTTTGTACAT----AAAT-TGACTAATAGA    |       |       |       |       |       |       |       | 18161 |
| Macaque           | CAAAGTGCTGGGATTACAGGACTGAGTCT-----GGCCACCTTTTCTTTGTACAT----AAAT-TGGCTAATAGA    |       |       |       |       |       |       |       | 18553 |
| PigTailedMacaque  | CAAAGTGCTGGGATTACAGGACTGAGTCT-----GGCCACCTTTTCTTTGTACTTTTAAAAATGTGGCTAATAGA    |       |       |       |       |       |       |       | 17773 |
| Bonobo            | CAAAGTGCTGGGATTACAGGCGTGAGCCACTGCGACCGGCCAC-TTTTCTTTTACTTTTAAAAATGTGGCTAACAGA  |       |       |       |       |       |       |       | 17339 |
| OliveBaboon       | CAAAGTGCTGGGATTACAGGACTGAATCT-----GGCCACCTTTTCTTTGTACTTTTAAAAATGTGGCTAATAGA    |       |       |       |       |       |       |       | 17556 |
| Orangutan         | CAAAGTGCTGGGATTACAGGCATGAGCCACTGCGCCCGGCCACCTTTTCTTTTACTTTTAAAAATGTGGCTAACAGA  |       |       |       |       |       |       |       | 17673 |

| Majority          | AATTTATGAGATTATATTTATGGTTCATACTACATTTCTTTTGGACAGTGC---CAGAGTGAATCAGATAAGCTTGCATT   |       |       |       |       |       |       |       |       |
|-------------------|------------------------------------------------------------------------------------|-------|-------|-------|-------|-------|-------|-------|-------|
|                   | 22650                                                                              | 22660 | 22670 | 22680 | 22690 | 22700 | 22710 | 22720 |       |
| Human             | AATTTATGAGATTATATTTATGGTTCATACTACGTTTCTTTTGGACAGTGC---CAGAGTGAATCAGATAAGCTTGCATT   |       |       |       |       |       |       |       | 16316 |
| Coquerel'sSifaka  | GATTTA-AAGTCCAAAGTGATAGATGATACGTTTGCATTTTAAAAATGTA----AGGGTGAA-----CATA            |       |       |       |       |       |       |       | 14916 |
| Ma'sNightMonkey   | AATTTATGAGATTATATATATATGGTTCATACTGCATTTCTTTTGAAGTGTGC---CAGAGTGAATCAGATAAGCTTGCATT |       |       |       |       |       |       |       | 14058 |
| VervetAGM         | TGTTGAAGAAAAC-TGGTTGTTGGTCTTACACAGTTGCCTATAGTCTGCATTTACTGATTGCATT--CTGATTTTGTAAAT  |       |       |       |       |       |       |       | 19026 |
| Gorilla           | AATTTATGAGATTATATTTATGGTTCATACTACATTTCTTTTGGACAGTGC---CAGAGTGAATCAGATAAGCTTGCATT   |       |       |       |       |       |       |       | 18688 |
| GrabEatingMacaque | AATTTATGAGATTATATTTGTGGTTCATACTACATTTCTTTTGGACAGTGC---CAGAGTGAATCAGATAAGCTTGCATT   |       |       |       |       |       |       |       | 18238 |
| Macaque           | AATTTATGAGATTATATTTGTGGTTCATACTACATTTCTTTTGGACAGTGC---CAGAGTGAATCAGATAAGCTTGCATT   |       |       |       |       |       |       |       | 18630 |
| PigTailedMacaque  | AATTTATGAGATTATATTTGTGGTTCATACTACATTTCTTTTGGACAGTGC---CAGAGTGAATCAGATAAGCTTGCATT   |       |       |       |       |       |       |       | 17850 |
| Bonobo            | AATTTATGAGATTATATTTATGGTTCATACTACGTTTCTTTTGGACAGTGC---CAGAGTGAATCAGATAAGCTTGCATT   |       |       |       |       |       |       |       | 17416 |
| OliveBaboon       | AATTTATGAGATTATATTTGTGGTTCATACTACATTTCTTTTGGACAGTGC---CAGAGTGAATCAGATAAGCTTGCATT   |       |       |       |       |       |       |       | 17633 |
| Orangutan         | AATTTATGAGATTATATTTATGGTTCATACTACATTTCTTTTGGACAGTGC---CAGAGTGAATCAGATAAGCTTGCATT   |       |       |       |       |       |       |       | 17750 |

| Majority          | TTAAAATC--CTAAGGGTG---AATACAATAGAGATAGAACCCAAAGAATTGGGGAG-----TGGGGTTGA           |       |       |       |       |       |       |       |       |
|-------------------|-----------------------------------------------------------------------------------|-------|-------|-------|-------|-------|-------|-------|-------|
|                   | 22730                                                                             | 22740 | 22750 | 22760 | 22770 | 22780 | 22790 | 22800 |       |
| Human             | TTAAAATC--CTAAGGGTA---AATGCAATAGAGATAGAACGCAAAATAATTGGGGAG-----GGGGTTGA           |       |       |       |       |       |       |       | 16377 |
| Coquerel'sSifaka  | GTGAAAAT----AGAGATG-----GAGTATATATATAACTTCTAAAATAATGGAG-----GGTGTGTGA             |       |       |       |       |       |       |       | 14971 |
| Ma'sNightMonkey   | TTAAAATC--CTAAGGGTG---AACACAATAGAGATAGAACCAAAAAATTGGAGAG-----GGAGGCTGA            |       |       |       |       |       |       |       | 14119 |
| VervetAGM         | TTAATATGTACTCTATGTTTCCAGTAAATTTGGTAGTTGGATCTAAAGACTTGGTCAGGATCTCTATTTTTTTGGTAATAT |       |       |       |       |       |       |       | 19106 |
| Gorilla           | TTAAAATC--CTAAGGGTA---AATGCAATAGAGATAGAACGCAAAATAATTGGGGAG-----AGGGTTGA           |       |       |       |       |       |       |       | 18749 |
| GrabEatingMacaque | TTGAAAATC--CTAAGGGTG---AACACAATAGAGATAGAACCCAAAGAATTGGGGAG-----TGGGGTTGA          |       |       |       |       |       |       |       | 18299 |
| Macaque           | TTGAAAATC--CTAAGGGTG---AACACAATAGAGATAGAACCCAAAGAATTGGGGAG-----TGGGGTTGA          |       |       |       |       |       |       |       | 18691 |
| PigTailedMacaque  | TTGAAAATC--CTAAGGGTGGTGAACACAATAGAGATAGAACCCAAAGAATTGGGGAG-----TGGGGTTGA          |       |       |       |       |       |       |       | 17914 |
| Bonobo            | TTAAAATC--CTAAGGGTA---AATGCAATAGAGATAGAACGCAAAATAATTGGGGAG-----GGGGTTGA           |       |       |       |       |       |       |       | 17477 |
| OliveBaboon       | TTGAAAATC--CTACGGGTG---AACACAATAGAGATAGAACCCAAAGAATTGGGGAG-----TGGGGTTGA          |       |       |       |       |       |       |       | 17694 |
| Orangutan         | TTAAAATC--CTAAGGGTG---AATGCAATAGAGGTAGAACAAGTAATTGGGGAG-----GGGAGTTGA             |       |       |       |       |       |       |       | 17811 |

Tuesday, May 03, 2022 06:14 PM

| Majority          | CTGAAATTAAGATGTATAATCCAAAAGAAGGCCAAAAAAAAAAAA-----GAGTAAGACAC-----AAAGTGAGC     |       |
|-------------------|---------------------------------------------------------------------------------|-------|
|                   | 22810 22820 22830 22840 22850 22860 22870 22880                                 |       |
| Human             | CTGAAATTAAGATGTATAATCCAAAAGAAGGCCAAAAAAAAAAAA-----GGAAAGACAC-----AAAGTGAGC      | 16438 |
| Coquerel'sSifaka  | CTAAAATTAATGATGTGTAATCTAAAGAAAGCAGAAAAAGAAAGGAAA-GAATAAGACAC-----AAAGTGAGC      | 15041 |
| Ma'sNightMonkey   | CTGAAATTACGTATGTGTAATCCAAAAGAAGGAAGAAAAAGGAAA-----GAATAAGACAC-----AAAGTGAGC     | 14186 |
| VervetAGM         | TTTTAAGTGGTGAAGTTTTATTCTATTAGACATGGTTTCTGACTTTTCATGTCTGTGATGTTTTTCTGGGAACATTTTC | 19186 |
| Gorilla           | CTGAAATTAAGATGTATAATCCAAAAGAAGGCCAAAAGAA-----GGAAAGACAC-----AAAGTGAGC           | 18809 |
| GrabEatingMacaque | CTGAAATTAAGATGTATAATCCAAAAGAAGGCCAAAAAAAAAAAA-----GAGTAAGACAC-----AAAATTAGC     | 18364 |
| Macaque           | CTGAAATTAAGATGTATAATCCAAAAGAAGGCCAAAAAAAAAAAA-----GAGTAAGACAC-----AAAATTAGC     | 18759 |
| PigTailedMacaque  | CTGAAATTAAGATGTATAATCCAAAAGAAGGCCAAAAAAAAAAAA-----GAGTAAGACAC-----AAAATTAGC     | 17983 |
| Bonobo            | CTGAAATTAAGATGTATAATCCAAAAGAAGGCCAAAAAAAAAAAA-----GGAAAGACAC-----AAAGTGAGC      | 17537 |
| OliveBaboon       | CTGAAATTAAGATGTATAATCCAAAAGAAGGCCAAAAAAAAAAAAAAGAATAAGACAC-----AAAATTAGC        | 17765 |
| Orangutan         | CTGAAATTACAGATGTATAATCCAAAAGAAGGCCAAAAAAAAAAAA-----GAGAAAGACAC-----AAAGTGAGC    | 17874 |

| Majority          | TTATATGTTAA-----TAGCGTGGAAGGTTCTGTG-----AAGGGTTCCTTA-----GAACCTTTAAAGGTA           |       |
|-------------------|------------------------------------------------------------------------------------|-------|
|                   | 22890 22900 22910 22920 22930 22940 22950 22960                                    |       |
| Human             | TTATATGTTAA-----TAGCGTGGAAGGTTCTATG-----AAGGGTGTGTTA-----GAGCCTTTAAGGGCA           | 16496 |
| Coquerel'sSifaka  | TTATATTTTAA-----TGGTGTCAAAGGCTCTATG-----AATGATTCCTTT-----TAACCTTTAAAAATA           | 15099 |
| Ma'sNightMonkey   | TTATGTGTTAA-----GAGTGTGGAAGGTTCTGTG-----AAGGGTTCCTTA-----GAACCTTTAAAGGTA           | 14244 |
| VervetAGM         | CTATACTTTACCTTGTGTGTGCTAGGCATAGTCTGTGCTCAATAATTGTCTCTCTTTTCTTTTCTCTGTTTTTTGAGAGATG | 19266 |
| Gorilla           | TTATATGTTAA-----TAGCGTGGAAGGTTCTATG-----AAGGGTGTGTTA-----GAGCCTTTAAAGGTA           | 18867 |
| GrabEatingMacaque | CTATATGTTAA-----TAGAGTGGAAGGTTCTGTG-----GAGGGTTCCTTA-----GAACCTTTAAAGGTA           | 18422 |
| Macaque           | CTATATGTTAA-----TAGAGTGGAAGGTTCTGTG-----AAGGGTTCCTTA-----GAACCTTTAAAGGTA           | 18817 |
| PigTailedMacaque  | CTATATGTTAA-----TAGAGTGGAAGGTTCTGTG-----AAGGGTTCCTTA-----GAACCTTTAAAGGTA           | 18041 |
| Bonobo            | TTATATGTTAA-----TAGCGTGGAAGGTTCTATG-----AAGGGTGTGTTA-----GAGCCTTTAAAGGTA           | 17595 |
| OliveBaboon       | CCATATGTTAA-----TAGAGTGGAAGGTTCTGTG-----AAGGGTTCCTTA-----GAACCTTTAAAGGTA           | 17823 |
| Orangutan         | TTATATGTTAA-----TAGCGTGGAAGGTTCTATG-----AAGAGTTCCTTA-----GAGCCTTTAAAGGTA           | 17932 |

| Majority          | GAATTTTCT---TGTCCTGGTT---GCAGGAAAG-AGTGGCATTGTT-TTTG-----TTCACCTTTAAAGCTACAAAAA    |       |
|-------------------|------------------------------------------------------------------------------------|-------|
|                   | 22970 22980 22990 23000 23010 23020 23030 23040                                    |       |
| Human             | AAATTTTCT---TGTCCTGGTT---GCAGGAAAG-AGTGGCATTGTT-TTTG-----TTCACCTTTAAAGCTACAAAAA    | 16561 |
| Coquerel'sSifaka  | GAATTTTCTGGTTGTCAGGTT---AGGGGCAAG-AGTGGAAATCATCTTTGTTTCATTTTCAGATAGAGAAAGCTACAATAA | 15175 |
| Ma'sNightMonkey   | GGATTTTCT---CGTCAGGTT---GCAGGAAAG-AGTGGCATTGTT-CTTGTTTCATTTTGGGTAGAGAAAGCTACAGTAA  | 14316 |
| VervetAGM         | GAGTCTTG---CCTGTTGCCAGGCTGGAGTGCAGTGGCCCAATC-TCAGCGATTCCCTCTGCCTCCCGGTTCAAGCAA     | 19342 |
| Gorilla           | GAATTTTCT---TGTCCTGGTT---GCAGGAAAG-AGTGGCATTGTT-TTTG-----TTCACCTTTAAAGCTACAAAAA    | 18932 |
| GrabEatingMacaque | GAATTTTCT---TGTCCTGGTT---GCAGGAAAG-AGTGGCATTGTT-TTTG-----TTCACCTTTGAAGCTACAAAAA    | 18487 |
| Macaque           | GAATTTTCT---TGTCCTGGTT---GCAGGAAAG-AGTGGCATTGTT-TTTG-----TTCACCTTTGAAGCTACAAAAA    | 18882 |
| PigTailedMacaque  | GAATTTTCT---TGTCCTGGTT---GCAGGAAAG-AGTGGCATTGTT-TTTG-----TTCACCTTTGAAGCTACAAAAA    | 18106 |
| Bonobo            | GAATTTTCT---TGTCCTGGTT---GCAGGAAAG-AGTGGCATTGTT-TTTG-----TTCACCTTTAAAGCTACAAAAA    | 17660 |
| OliveBaboon       | GAATTTTCT---TGTCCTGGTT---GCAGGAAAG-AGTGGCATTGTT-TTTG-----TTCACCTTTGAAGCTACAAAAA    | 17888 |
| Orangutan         | GAATTTTCT---TGTCCTGGTT---GCAGGAAAG-AGTGGCATTGTT-TTTG-----TTCACCTTTAAAGCTACAAAAA    | 17997 |



Tuesday, May 03, 2022 06:14 PM

| Majority          | -----CAAGT-----AATGATGAGGAAAATTGGGACATGTTGAGGAAGTAAGTAGTTT-TTTGGAATGTAGGTT        |       |       |       |       |       |       |       |
|-------------------|-----------------------------------------------------------------------------------|-------|-------|-------|-------|-------|-------|-------|
|                   | 23050                                                                             | 23060 | 23070 | 23080 | 23090 | 23100 | 23110 | 23120 |
| Human             | -----CAAGT-----AATGATGAGGAAAATTGGGACATGTTGAGGAAGTAAGTAATTT-TTTGGAATGTAGGTT        | 16624 |       |       |       |       |       |       |
| Coquerel'sSifaka  | -----CAA-----AATGAGAAGGAAAACCTGGGACATACTGAGGAAGTAAGTAGTTTGTGGGAATGTAGGTT          | 15237 |       |       |       |       |       |       |
| Ma'sNightMonkey   | -----CAAGT-----AATGATGAGGAAAATTGGGATATGTTGAGGAAGTAAGTAGGTT-GTTGGAATGTAGGTT        | 14379 |       |       |       |       |       |       |
| VervetAGM         | TTCTCCTGCCTCAGCTTCCCAGTGCTG--GGACTACAGGCGCCTGCCACCACGCCTGGCTAATT-TTTGTATTTTATAGTA | 19420 |       |       |       |       |       |       |
| Gorrilla          | -----CAAGT-----AATGATGAGGAAAATTGGGACATGTTGAGGAAGTAAGTAATTT-TTTGGAATGTAGGTT        | 18995 |       |       |       |       |       |       |
| GrabEatingMacaque | -----CAGGT-----AATGATGAGGAAAATTGGGACATGTTGAGGAAGGAAGTAGTTT-TTTGGAATGTAGGTT        | 18550 |       |       |       |       |       |       |
| Macaque           | -----CAGGT-----AATGATGAGGAAAATTGGGACATGTTGAGGAAGGAAGTAGTTT-TTTGGAATGTAGGTT        | 18945 |       |       |       |       |       |       |
| PigTailedMacaque  | -----CAGGT-----AATGATGAGGAAAATTGGGACATGTTGAGGAAGGAAGTAGTTT-TTTGGAATGTAGGTT        | 18169 |       |       |       |       |       |       |
| Bonobo            | -----CAAGT-----AATGATGAGGAAAATTGGGACATGTTGAGGAAGTAAGTAATTT-TTTGGAATGTAGGTT        | 17723 |       |       |       |       |       |       |
| OliveBaboon       | -----CAAGT-----AATGATGAGGAAAATTGGGACATGTTGAGGAAGGAAGTAGTTT-TTTGGAATGTAGGTT        | 17951 |       |       |       |       |       |       |
| Orangutan         | -----CAAGT-----AATGATGAGGAAAATTGGGACATGTTGAGGAAGTAAGTAATTT-TTTGGAATGTAGGTT        | 18060 |       |       |       |       |       |       |

| Majority          | GAGTTAGAGTAGCAGAAGACAAAATTTAAAAAGT-----AGTTTTTGGAC-----AGTAATATGGAGAGCTTTGAGTGCAAA |       |       |       |       |       |       |       |
|-------------------|------------------------------------------------------------------------------------|-------|-------|-------|-------|-------|-------|-------|
|                   | 23130                                                                              | 23140 | 23150 | 23160 | 23170 | 23180 | 23190 | 23200 |
| Human             | GAGTTAGAGTAGTAGAAGACAAAATTTAAAAAGT-----AGTTTTTGGAC-----AGTAATATGGAGAGCTTTGAGTGCAAA | 16695 |       |       |       |       |       |       |
| Coquerel'sSifaka  | GAGTTAGAGTAGTAGTAGACAAAATTTAAATAGT-----TTTTGGC-----AATAATATGGAAAGCTTTGAATACAAA     | 15305 |       |       |       |       |       |       |
| Ma'sNightMonkey   | GAGTTAGAGTAGCTGAAGACAAAATTTAAAAAGT-----AGGTTTTGGAC-----AGTAATATGGAGAGTTTTGAGTGCAAA | 14450 |       |       |       |       |       |       |
| VervetAGM         | GGGACAGGGTTTCACCACATTG--GCCAGGATGGCTTCAAACCTCCTGACCTTAAGTGATCTGCCACCTTGGCTTCCCAA   | 19498 |       |       |       |       |       |       |
| Gorrilla          | GAGTTAGAGTAGCAGAAGACAAAATTTAAAAAGT-----AGTTTTTGGAC-----AGTAATATGTAGAGCTTTGAGTGCAAA | 19066 |       |       |       |       |       |       |
| GrabEatingMacaque | GGGTTAGAGTAGCAGAAGACAA--TTTAAAGAGT-----AGTTTTTGGAC-----AGTAATATGGAGAGCTTTGAATGCAAA | 18619 |       |       |       |       |       |       |
| Macaque           | GGGTTAGAGTAGCAGAAGACAA--TTTAAAGAGT-----AGTTTTTGGAC-----AGTAATATGGAGAGCTTTGAATGCAAA | 19014 |       |       |       |       |       |       |
| PigTailedMacaque  | GGGTTAGAGTAGCAGAAGACAA--TTTAAAGAGT-----AGTTTTTGGAC-----AGTCATATGGAGAGCTTTGAATGCAAA | 18238 |       |       |       |       |       |       |
| Bonobo            | GAGTTAGAGTAGCAGAAGACAAAATTTAAAAAGT-----AGTTTTTGGAC-----AGTAATATGGAGAGCTTTGAGTGCAAA | 17794 |       |       |       |       |       |       |
| OliveBaboon       | GGGTTAGAGTAGCAGAAGACAA--TTTAAAGAGT-----AGTTTTTGGAC-----AGTAATATGGAGAGCTTTGAATGCAAA | 18020 |       |       |       |       |       |       |
| Orangutan         | GAGTTAGAGTAGCAGAAGACAAAATTTAAAAAGT-----AGTTTTTGGAC-----AGTAATATGGAGAGCTTTGAGTGCAAA | 18131 |       |       |       |       |       |       |

| Majority          | GGATTTGCAGTGAGGACCTTTGAAAATTGGACCTGCTT-----TCTCCTA-TCAGTATTT-----ATGTTTAAAT      |       |       |       |       |       |       |       |
|-------------------|----------------------------------------------------------------------------------|-------|-------|-------|-------|-------|-------|-------|
|                   | 23210                                                                            | 23220 | 23230 | 23240 | 23250 | 23260 | 23270 | 23280 |
| Human             | GGATTTGCAGTGAGGACCTTTGAAAATTGAACTGCTT-----TCTCCTA-TCAGTATTT-----ATGTTTAAAT       | 16759 |       |       |       |       |       |       |
| Coquerel'sSifaka  | GTATTTGCAGTGAGGACCTTTGAAAATTGAACTGCTTTCT----CTTTAGTA-TCAGTATTT-----ATGTTTAAAT    | 15373 |       |       |       |       |       |       |
| Ma'sNightMonkey   | GGATTTGCAGTGAGGACCTATGAAAATTTGATCCGTTT-----TCTCCTA-TCAGTATTT-----ATGTTTAAAT      | 14514 |       |       |       |       |       |       |
| VervetAGM         | AGTGCTGGGATTACAGGCATGAGCCACTGTGCCTGGCCAATAAGTGCTCTTAAATGAGTATTCTTAAAGGATATCTAAAA | 19578 |       |       |       |       |       |       |
| Gorrilla          | GGATTTGCAGTGAGGACCTTTGAAAATTGAACTGCTT-----TCTCCTA-TCAGTATTT-----ATGTTTAAAT       | 19130 |       |       |       |       |       |       |
| GrabEatingMacaque | GAATTTGCAGTGAGGACCTTTGAAAATTGGACCTGCTT-----TCTCCTA-TCTGTATTT-----ATGTTTAAAT      | 18683 |       |       |       |       |       |       |
| Macaque           | GAATTTGCAGTGAGGACCTTTGAAAATTGGACCTGCTT-----TCTCCTA-TCTGTATTT-----ATGTTTAAAT      | 19078 |       |       |       |       |       |       |
| PigTailedMacaque  | GAATTTGCAGTGAGGATCTTTGAAAATTGGACCTGCTT-----TCTCCTA-TCTGTATTT-----ATGTTTAAAT      | 18302 |       |       |       |       |       |       |
| Bonobo            | GGATTTGCAGTGAGGACCTTTGAAAATTGAACTGCTT-----TCTCCTA-TCAGTATTT-----ATGTTTAAAT       | 17858 |       |       |       |       |       |       |
| OliveBaboon       | GAATTTGCAGTGAGGACCTTTGAAAATTGGACCTGCTT-----TCTCCTA-TCTGTATTT-----ATGTTTAAAT      | 18084 |       |       |       |       |       |       |
| Orangutan         | GGATTTGCAGTGAGGACCTTTGAAAATTGAACTGCTT-----TCTGCTA-TCAGTATTT-----ATGTTTAAAT       | 18195 |       |       |       |       |       |       |

Tuesday, May 03, 2022 06:14 PM

|                   |                                                                                   |       |
|-------------------|-----------------------------------------------------------------------------------|-------|
| Majority          | A-----AACTTGATTCTT---TGTGAGTATTGTTA-TATATGTTTTTCATAACTACTGTTGTAGTAGCG--TTTCTTTT   |       |
|                   | 23290 23300 23310 23320 23330 23340 23350 23360                                   |       |
| Human             | A-----AACTTGATTCTT---TGTGAGTATTGTTA-TATATGTTTTTCATAACTACTGTTGTAGTAACG--TTTCTTTT   | 16826 |
| Coquerel'sSifaka  | A-----AACTTGATTCTT---CTTGAGTATTGTTA-CATATATTTTCATACGTA----GGTAGA-----TTTTT        | 15429 |
| Ma'sNightMonkey   | A-----AACTTGATTCTT---TGTGAGTATTGTTAATATATGTTTTTCATAACTACTGTTATAGTAGCA-----TTTTT   | 14579 |
| VervetAGM         | AGAAATGTAACCTAAAATTCACATAATAGTAATACTA-TGCA-ATGTTAACATTTAATGTGGAAGTTGGAACCTATTGATG | 19656 |
| Gorilla           | A-----AACTTGATTCTT---TGTGAGTATTGTTA-TATATGTTTACATAACTACTGTTGTAGTAACG--TTTCTTTT    | 19197 |
| GrabEatingMacaque | A-----AACTTGACTCTC---TGTGAGTATTGTTA-TATATGTTTTTCATAGCTACTGTTGTAGTAGCG--TTTCGTTT   | 18750 |
| Macaque           | A-----AACTTGACTCTC---TGTGAGTATTGTTA-TATATGTTTTTCATAGCTACTGTTGTAGTAGCG--TTTCGTTT   | 19145 |
| PigTailedMacaque  | A-----AACTTGACTCTC---TGTGAGTATTGTTA-TATATGTTTTTCATAGCTACTGTTGTAGTAGCG--TTTCGTTT   | 18369 |
| Bonobo            | A-----AACTTGATTCTT---TGTGAGTATTGTTA-TATATGTTTTTCATAACTACTGTTGTAGTAACG--TTTCTTTT   | 17925 |
| OliveBaboon       | A-----AACTTGACTCTT---TGTGAGTATTGTTA-TATATGTTTTTCATAGCTACTGTTGTAGTAGCG--TTTCGTTT   | 18151 |
| Orangutan         | A-----AACTTGATTCTT---TGTGAGTGTGTTA-TATATGTTTTTCGTAACTACTGTTGTAAT---G--TTTCTTTT    | 18259 |
| Majority          | TTTT-ACTAGCTTGCTTT--CAAGCCACG--CTGTTGATTAAATATTTATGGGCCATTTTAAGGCTTCTA-ATCTTTATT  |       |
|                   | 23370 23380 23390 23400 23410 23420 23430 23440                                   |       |
| Human             | TTTTACTAGCTTGCTTT--CATGCCACG--CTGTTGATTAAATATTTATGGGCCATTTTAAGGCTTCTA-ATCTTCATT   | 16901 |
| Coquerel'sSifaka  | TTTTACTAAC---CTTT--CAATCTACC--CTGTTGATTAAATATTTATGGGCTATTTTAAGGCTCTTAATCATCATT    | 15502 |
| Ma'sNightMonkey   | TTTTAACTAGCTTGCTTT--CAAGCCATG--CTATTAATTAATATTTGTGGGCCATTTTAAGGCTTCTG-TTCTTCATT   | 14654 |
| VervetAGM         | GTGG-ACAAGAATGTTTTGTCAAGTTAAGAACATATGATTTGGAATGAAAAGATGAGGGTTGACTTTTATAGCATTGAA   | 19735 |
| Gorilla           | TTTT-ACTAGCTTGCTTT--CATGCCACG--CTGTTGATTAAATATTTATGGGCCATTTTAAGGCTTCTA-ATCTTCATT  | 19271 |
| GrabEatingMacaque | TTTT-ACTAGCTTGCTTT--CAAGCCACG--CTGTTGATTAAATATTTGTGGGCCATTTTAAGACTTCTA-ATCTTTATC  | 18824 |
| Macaque           | TTTT-ACTAGCTTGCTTT--CAAGCCACG--CTGTTGATTAAATATTTGTGGGCCATTTTAAGACTTCTA-ATCTTTATC  | 19219 |
| PigTailedMacaque  | TTTT-ACTAGCTTGCTTT--CAAGCCACG--CTGTTGATTAAATATTTGTGGGCCATTTTAAGACTTCTA-ATCTTTATC  | 18443 |
| Bonobo            | TTTT-ACTAGCTTGCTTT--CATGCCACG--CTGTTGATTAAATATTTATGGGCCATTTTAAGGCTTCTA-ATCTTCATT  | 17999 |
| OliveBaboon       | TTTT-CCTAGCTTGCTTT--CAAGCCACG--CTGTTGATTAAATATTTGTGGGCCATTTTAAGACTTCTA-ATCTTTATC  | 18225 |
| Orangutan         | TTTT-ACTAGCTTGCTTT--CAAGCCACG--CTGTTGATTAAATATTTATGGGCCATTTTAAGGCTTCTA-ATCTTTATT  | 18333 |
| Majority          | TGTGATGAACTTTTGAGGAAGAGTTAGGT---TTTGTAAGTG--TTGAACT---CCAATAAACA-TAGTTCCACT----   |       |
|                   | 23450 23460 23470 23480 23490 23500 23510 23520                                   |       |
| Human             | TGTGATGAACTTTTGAGGAAGAGTTAGGT---TTTGTAAGTG--TTGAACT---CCAATAAACA-CAGTTCCACT----   | 16967 |
| Coquerel'sSifaka  | TATGATGAACTTTTGCA---GAGTGAGGT---TTTATACATG--TCGGACT---TCCTTTAATA---GTTCTACT----   | 15563 |
| Ma'sNightMonkey   | TGTGATGAACCTCTGAG-AAGAGTTAGGT---TTTTTAAGTG--TTGAACTCCCTCTAATAAACAGTAGTTCCACT----  | 14724 |
| VervetAGM         | CAGGTTAACCTCT-GAGCTTCAGTTTTATACATTTTTAAATGGTTTTAAATGTA-CCTACCTCCA-CAATTATTTTAAAGT | 19812 |
| Gorilla           | TGTGATGAACTTTTGAGGAAGAGTTAGGT---TTTGTAAGTG--TTGAACT---CCAATAAACA-CAGTTCCACT----   | 19337 |
| GrabEatingMacaque | TGTGATGAACTTT-GAGGAAGAGTTAGGT---TTTGTAAGTG--TTGAACT---CCAATAAACA-TAGTTCCACT----   | 18889 |
| Macaque           | TGTGATGAACTTT-GAGGAACAGTTAGGT---TTTGTAAGTG--TTGAACT---CCAATAAACA-TAGTTCCACT----   | 19284 |
| PigTailedMacaque  | TGTGATGAACTTT-GAGGAAGAGTTAGGT---TTTGTAAGTG--TTGAACT---CCAATAAACA-TAGTTCCACT----   | 18508 |
| Bonobo            | TGTGATGAACTTTTGAGGAAGAGTTAGGT---TTTGTAAGTG--TTGAACT---CCAATAAACA-CAGTTCCACT----   | 18065 |
| OliveBaboon       | TGTGATGAACTTT-GAGGAAGAGTTAGGT---TTTGTAAGTG--TTGAACT---CCAATAAACA-TAGTTCCACT----   | 18290 |
| Orangutan         | TGTGATGAACTTTTGAGGAAGAGTTAGGT---TTTATAAGTG--TTGAACT---CCAGTAAACA-CAGTTCCACT----   | 18399 |

Tuesday, May 03, 2022 06:14 PM

|                   |            |            |           |          |            |           |          |           |           |                    |
|-------------------|------------|------------|-----------|----------|------------|-----------|----------|-----------|-----------|--------------------|
| Majority          | -TTCCTTAAC | TCTCTCAAAA | AGATACTTT | TGCTATTT | GATACAGAT  | -----     | AGTTGTCT | AGGCAAGCT | TATTA---- | GCA                |
|                   | 23530      | 23540      | 23550     | 23560    | 23570      | 23580     | 23590    | 23600     |           |                    |
| Human             | -TTCCTTAAC | TCTCTCAGAA | AGATACTTT | TGCTATTT | GATACAGAT  | -----     | AGTTGTCT | AGGCAAGCT | TATTA---- | GCA 17034          |
| Coquerel'sSifaka  | -----T     | -TTCCTTCT  | CAGAAAGAT | CTTTTGCA | ATTTGATAC  | AGTTGTCT  | AGTCAAAC | TATTTGTCT | AGTCAAAG  | TATTT----GCA 15633 |
| Ma'sNightMonkey   | -TTCCTAAAC | TCTCTCAAAA | AGGTATTTT | TGCTATTT | GATACAGAT  | -----     | AGTTGTGT | AGGCAAGCT | TGTTA---- | CCA 14791          |
| VervetAGM         | GTTAGATG   | AGGTAAGG   | AAAAGACT  | TATGCTGA | AATGATG    | AAGT----- | GGTGGT   | TGTTGTAG  | TTCTTTA   | ATCTGTA 19884      |
| Gorilla           | -TTCCTTAAC | TCTCTCAGAA | AGATACTTT | TGCTATTT | GATACGGAT  | -----     | AGTTGTCT | AGGCAAGCT | TATTA---- | GCA 19404          |
| GrabEatingMacaque | -TTCCTTAAC | TCTCTCAAAA | AGATTGCT  | GTT----  | TGATACAGAT | -----     | AGTTGTCT | AGGCAAGCT | TATTA---- | GCA 18952          |
| Macaque           | -TTCCTTAAC | TCTCTCAAAA | AGATTGCT  | GTT----  | TGATACAGAT | -----     | AGTTGTCT | AGGCAAGCT | TATTA---- | GCA 19347          |
| PigTailedMacaque  | -TTCCTTAAC | TCTCTCAAAA | AGATTGCT  | GTT----  | TGATACAGAT | -----     | AGTTGTCT | AGGCAAGCT | TATTA---- | GCA 18571          |
| Bonobo            | -TTCCTTAAC | TCTCTCAGAA | AGATACTTT | TGCTATTT | GATACAGAT  | -----     | AGTTGTCT | AGGCAAGCT | TATTA---- | GCA 18132          |
| OliveBaboon       | -TTCCTTAAC | TCTCTCAAAA | AGATTGCT  | GTT----  | TGATACAGAT | -----     | AGTTGTCT | AGGCAAGCT | TATTA---- | GCA 18353          |
| Orangutan         | -TTCCTTAAC | TCTCTCAGAA | AGATACTTT | TGCTATTT | GATACAGAT  | -----     | AGTTGTCT | AGGCAAGCT | TATTA---- | GCA 18466          |

|                   |           |           |          |           |          |         |           |           |          |              |                 |
|-------------------|-----------|-----------|----------|-----------|----------|---------|-----------|-----------|----------|--------------|-----------------|
| Majority          | GGGTTTCAG | GTAAGACA  | TATGTGTT | ---TGCTAT | TTGTTTTA | AGCAAAC | --CTTCCCT | CATTTACT  | CAAATTG  | TAGCAA       |                 |
|                   | 23610     | 23620     | 23630    | 23640     | 23650    | 23660   | 23670     | 23680     |          |              |                 |
| Human             | GGGTTTCAG | GTAAGACAT | ATGTGTT  | ---TGCTAT | TTGTTTTA | AGCAAAC | --CT--    | CTTCCCT   | CATTTATT | CAAATTG      | TAGCAA 17107    |
| Coquerel'sSifaka  | ATGTTTTAT | GTAAGAGG  | CAAGTAT  | TATTATGG  | CTGTTTT  | TATTAAG | AGAAAT--  | ATCCCTC   | ATTTATT  | TCAATTG      | TAGCAG 15711    |
| Ma'sNightMonkey   | GGGTTTCAG | -TAAGACA  | TACGTGTT | ---CGCTAT | TTGTTTTA | AGCAAAC | --CTTTCC  | CATTTACT  | CAAATTG  | TAGCAA 14865 |                 |
| VervetAGM         | AATCTACAT | TTGGAAG   | GAA-CAC  | TTA--TG   | GAAATCA  | AATACAG | TAAATTA   | ATTTCTA   | AGAGATC  | CTGGAG       | TTCAGGTTA 19961 |
| Gorilla           | AGGTTTCAG | GTAAGACA  | TATGTGTT | ---TGCTAT | TTGTTTTA | AGCAAAC | --CTTCCCT | CATTTATT  | CAAATTG  | TAGCAA 19479 |                 |
| GrabEatingMacaque | GGGTTTCAG | GTAAGACA  | TATGTGTT | ---TGCTAT | TTGTTTTA | AGCAAAC | --CTTCCT  | TCACTTACT | CAAATTG  | TAGCAA 19026 |                 |
| Macaque           | GGGTTTCAG | GTAAGACA  | TATGTGTT | ---TGCTAT | TTGTTTTA | AGCAAAC | --CTTCCT  | TCACTTACT | CAAATTG  | TAGCAA 19421 |                 |
| PigTailedMacaque  | GGGTTTCAG | GTAAGACA  | TATGTGTT | ---TGCTAT | TTGTTTTA | AGCAAAC | --CTTCCT  | TCACTTACT | CAAATTG  | TAGCAA 18645 |                 |
| Bonobo            | GGGTTTCAG | GTAAGACA  | TATGTGTT | ---TGCTAT | TTGTTTTA | AGCAAAC | --CTTCCCT | CATTTATT  | CAAATTG  | TAGCAA 18205 |                 |
| OliveBaboon       | GGGTTTCAG | GTAAGACA  | TATGTGTT | ---TGCTAT | TTGTTTTA | AGCAAAC | --CTTCCT  | TCACTTACT | CAAATG   | TAGCAA 18427 |                 |
| Orangutan         | GGGTTTCAG | GTAAGACA  | TATGTGTT | ---TGCTAT | TTGTTTTA | AGCAAAC | --CTTCCCT | CATTTATT  | CAAATTG  | TAGCAA 18541 |                 |

|                   |           |          |          |          |          |          |           |          |        |         |                |
|-------------------|-----------|----------|----------|----------|----------|----------|-----------|----------|--------|---------|----------------|
| Majority          | ACATCTACT | TACACCC  | ATTTCCAG | TCTTTGCT | TTAATAGT | TCAACTAT | TATAAAA   | AAG----  | GA---  | GTGGTAT | TATATGTA       |
|                   | 23690     | 23700    | 23710    | 23720    | 23730    | 23740    | 23750     | 23760    |        |         |                |
| Human             | ACATCTACT | TACACCC  | ATTTCCAG | TCTTTGCT | TTAATAGT | TCAACTAT | TATAAAAA  | ----GGA  | ---    | GTGGTAT | TATATATA 17180 |
| Coquerel'sSifaka  | ACATCTACT | TATAACCA | ATTTCTAG | TCTTTATT | TGTAATAG | TCCACTAT | TATAAAA   | AAG----  | GA---  | ATGGTAT | GTAA--- 15781  |
| Ma'sNightMonkey   | ACACATACT | TATAACCA | ATTTCCAG | TCTTTGCT | TTAATAGT | TCAACTAT | TAAAAAA   | AGGAGT   | GATACG | TAATATA | TATATGTA 14945 |
| VervetAGM         | AAAATAG   | CTGCAG   | ACAGGACT | AAATATCT | TATTAGT  | GAACAAAA | AAAAAT    | GACTT    | AGA--- | ATTTAG  | CACAGAGA 20038 |
| Gorilla           | ACATCTACT | TACACCA  | ATTTCCAC | TCTTTGCT | TTAATAGT | TCAACTAT | TATAAAAA  | ----GGA  | ---    | GTAGTAT | TATATATA 19552 |
| GrabEatingMacaque | ACATCTTCT | TACACCC  | ATTTCCAG | TCTTTGCT | TTAATAGT | TCAACTAT | TGTA AAAA | AAG----  | GA---  | GTGGTAT | TATATGTA 19099 |
| Macaque           | ACATCTTCT | TACACCC  | ATTTCCAG | TCTTTGCT | TTAATAGT | TCAACTAT | TGTA AAAA | AAG----  | GA---  | GTGGTAT | TATATGTA 19494 |
| PigTailedMacaque  | ACATCTACT | TACACCC  | ATTTCCAG | TCTTTGCT | TTAATAGT | TCAACTAT | TGTA AAAA | AAG----  | GA---  | GTGGTAT | TATATGTA 18718 |
| Bonobo            | ACATCTACT | TACACCC  | ATTTCCAG | TCTTTGCT | TTAATAGT | TCAACTAT | TATAAAAA  | ----GGA  | ---    | GTGGTAT | TATATGTA 18278 |
| OliveBaboon       | ACATCTACT | TACACCC  | ATTTCCAG | TCTTTGCT | TTAATAGT | TCAACTAT | TGTA AAAA | AAG----  | GA---  | GTGGTAT | TATATGTA 18500 |
| Orangutan         | ACATCTACT | TACACCC  | ATTTCCAG | TCTTTGCT | TTAATAGT | TCCACAAT | TATAATA   | ACA--GGA | ---    | GTGGT   | TATATATA 18616 |

Tuesday, May 03, 2022 06:14 PM

| Majority          | T----                         | ACTCTTGGTTGGCTTTGGTTT           | GATTGAATTAATAAGGTG-GTTTTTTT | TGTTTGT         | ----          | TTTGG    | ----     | AGACGGAG |  |
|-------------------|-------------------------------|---------------------------------|-----------------------------|-----------------|---------------|----------|----------|----------|--|
|                   | 23770                         | 23780                           | 23790                       | 23800           | 23810         | 23820    | 23830    | 23840    |  |
| Human             | TATAAACTCTTGGCTTTGGCTTTGGTTT  | GATTGAATTAATAAGGTGAGTTTTTTT     | TGTTTGT                     | TTTGG           | ----          | AGATGGAG | 17256    |          |  |
| Coquerel'sSifaka  | -----ACTCTTGTGTGGCTTTTGGTTT   | TAGTGAATTTATAAGGTAGTTTTAAAAA    | ACACTTTG                    | --TTT           | TACATTGACAGGG | 15854    |          |          |  |
| Ma'sNightMonkey   | TATATATTCTTGGCTTTGG---G-TTGA  | ATTGTAAAGGTGTTTTTAAAAA          | ATACTTTAGATTGGCCGGGCGCGGTG  | 15021           |               |          |          |          |  |
| VervetAGM         | A----ACAAAGAGATGAAAATAGAAGGGT | TAAA--AATACATTG-GAAAGGAAGAGAAGT | ----                        | TCT-----AACAAAC | 20101         |          |          |          |  |
| Gorilla           | T--AAACTCTTGGCTTTGGCTTTGGTTT  | GATTGAATTAATAAGGTGAGTTCTTTT     | TGTTTGT                     | ----            | TTTGG         | ----     | AGATGGAG | 19622    |  |
| GrabEatingMacaque | A----ACTCTTGGTAGGCTTTGGTTT    | GATTGAATTAATAAGGTG-GTTTTTTT     | TGTTTGT                     | ----            | TTTGG         | ----     | AAACGGAG | 19166    |  |
| Macaque           | A----ACTCTTGGTAGGCTTTGGTTT    | GATTGAATTAATAAGGTG-GTTTTTTT     | TGTTTGT                     | ----            | TTTGG         | ----     | AAACGGAG | 19561    |  |
| PigTailedMacaque  | A----ACTCTTGGTAGGCTTTGGTTT    | GATTGAATTAATAAGGTG-GTTTTTTT     | TGTTTGT                     | ----            | TTTGG         | ----     | AAACGGAG | 18785    |  |
| Bonobo            | T--AAACTCTTGGCTTTGGCTTTGGTTT  | GATTGAGTTAATAAGGTGAGTTTTTTT     | TGTTTGT                     | TTTGG           | ----          | AGATGGAG | 18352    |          |  |
| OliveBaboon       | A----ACTCTTGGTAGGCTTTGGTTT    | GATTGAATTAATAAGGTG-GTTTTTTT     | TGTTTGT                     | ----            | TTTGG         | ----     | AAACGGAG | 18567    |  |
| Orangutan         | TATAAACTCTTGGCTTTGGCTTTGGTTT  | GATTGAATTAATAAGGTGGTTTTTTT      | TGTTTGT                     | TTTGG           | ----          | AGATGGAG | 18692    |          |  |

| Majority          | TCTTGC-TCTGTTGCCAGGC----                                                        | TGGAGTGCAGTGGTGCA--                                 | ATCTC--GGCTCACTG--CAACCTCC----      | G-CTC |       |       |       |       |  |
|-------------------|---------------------------------------------------------------------------------|-----------------------------------------------------|-------------------------------------|-------|-------|-------|-------|-------|--|
|                   | 23850                                                                           | 23860                                               | 23870                               | 23880 | 23890 | 23900 | 23910 | 23920 |  |
| Human             | TCTCGC-TCTGTTGCCAGGC----                                                        | TGGAGTGCAGTGGTGGG--                                 | ATCTC--GGCTCACTG--CAG-----          | 17310 |       |       |       |       |  |
| Coquerel'sSifaka  | TTTGAG--CCCTTGCTTTACT--                                                         | TCTTCATATGATTATGAACAAATCATT-GATTCTTTG               | ---AACCTC-----T--                   | 15916 |       |       |       |       |  |
| Ma'sNightMonkey   | GCTCACGCCTATAATCCAGCACTTTGGGAGGCCGAGGCGGGTGGATCACGAGGCCAAGAGATTGAGACCATCCTGGTCA | 15101                                               |                                     |       |       |       |       |       |  |
| VervetAGM         | ATCTAA-TTAGAGTTCAGAA----                                                        | AGAAATTAAGATTGCA--GAAA--GGCAAATA--TGAAATGCTAAAGGCTC | 20168                               |       |       |       |       |       |  |
| Gorilla           | TCTCGC-TCTGTTGCCAGGC----                                                        | TGGAGTGCAGTGGTGGG--                                 | ATGTC--GGCTCACTG--CAG-----          | 19676 |       |       |       |       |  |
| GrabEatingMacaque | TCTTGC-TCTGTCGCCAGGC----                                                        | TGGAGTGCAGTGGTGCA--                                 | ATCTC--GGCTCACTG--CAACCTCC----GCCTC | 19230 |       |       |       |       |  |
| Macaque           | TCTTGC-TCTGTCGCCAGGC----                                                        | TGGAGTGCAGTGGTGCA--                                 | ATCTC--GGCTCACTG--CAACCTCC----GCCTC | 19625 |       |       |       |       |  |
| PigTailedMacaque  | TCTTGC-TCTGTCGCCAGGC----                                                        | TGGAGTGCAGTGGTGCA--                                 | ATCTC--GGCTCACTG--CAACCTCC----GCCTC | 18849 |       |       |       |       |  |
| Bonobo            | TCTCGC-TCTGTTGCCAGGC----                                                        | TGGAGTGCAGTGGTGGG--                                 | ATCTC--GGCTCACTG--CAG-----          | 18406 |       |       |       |       |  |
| OliveBaboon       | TCTTGC-TCTGTCGCCAGGC----                                                        | TGGAGTGCAGTGGTGCA--                                 | ATCTC--CGCTCACTG--CAACCTCC----GCCTC | 18631 |       |       |       |       |  |
| Orangutan         | TCTCAC-TCTGTTGCCAGGC----                                                        | TGGAGTGCAGTGGTGCG--                                 | ATCTC--GGCCACTG--AAGCTCGC-----CTC   | 18754 |       |       |       |       |  |

| Majority          | CCGGGTTACGCCATTCTCCTGCCTCA----                                                | ACCTCCCAAGTAGCTGGGACTACAGGT--GCCTGCTGCCATACCT--- |       |       |       |       |       |       |  |
|-------------------|-------------------------------------------------------------------------------|--------------------------------------------------|-------|-------|-------|-------|-------|-------|--|
|                   | 23930                                                                         | 23940                                            | 23950 | 23960 | 23970 | 23980 | 23990 | 24000 |  |
| Human             | -----GCCATTCTCCTGCCTCA----                                                    | GCCTCCCGAGTAGCTGGGACTGCAGGT--GCCTGCCACCACACCT--- | 17370 |       |       |       |       |       |  |
| Coquerel'sSifaka  | -----CCTA-ATTTGTAATATAA----                                                   | GAATAATAATT--CCTAACTCACATGG---TTGTTGTGAAGATT---  | 15972 |       |       |       |       |       |  |
| Ma'sNightMonkey   | ACATGGTGAAACCCGCTCTACTAAAAATACAAAAATTAGCTAGGCAGGGCTGCAGCGTGGCCTGTAATCCAGCTACT | 15181                                            |       |       |       |       |       |       |  |
| VervetAGM         | ATAAGTTTTTAGAATTGGTGAGCTATATG---                                              | AATTCTTAGATTAGGAGACAAAAGAA--AACC-TGGACATATAA---  | 20239 |       |       |       |       |       |  |
| Gorilla           | -----GCCATTCTCCTGCCTCA----                                                    | GCCTCCCGAGTAGTGGGACTGCAGGC--GCCTGCCACCACACCT---  | 19736 |       |       |       |       |       |  |
| GrabEatingMacaque | CCGGGTTACGCCATTCTCCTGCCTCA----                                                | ACCTCCCAAGTAGCTGGGACTACAGGT--GCCTGCTGCCATGCCT--- | 19300 |       |       |       |       |       |  |
| Macaque           | CCGGGTTACGCCATTCTCCTGCCTCA----                                                | ACCTCCCAAGTAGCTGGGACTACAGGT--GCCTGCTGCCATGCCT--- | 19695 |       |       |       |       |       |  |
| PigTailedMacaque  | CCGGGTTACGCCATTCTCCTGCCTCA----                                                | ACCTCCCAAGTAGCTGGGACTACAGGT--GCCTGCTGCCATGCCT--- | 18919 |       |       |       |       |       |  |
| Bonobo            | -----GCCATTCTCCTGCCTCA----                                                    | GCCTCCCGAGTAGCTGGGACTGCAGGT--GCCTGCCACCACACCT--- | 18466 |       |       |       |       |       |  |
| OliveBaboon       | CCGGGTTACGCCATTCTCCTGCCTCA----                                                | ACCTCCCGAGTAGCTGGGACTACAGGT--GCCTGCTGCCATGCCT--- | 18701 |       |       |       |       |       |  |
| Orangutan         | CTGGGTTACGCCATTCTCCTGCCTCA----                                                | GCCTCCCGAGTAGCTAGGACTGCAGGC--ACCTGCCACCACACCT--- | 18824 |       |       |       |       |       |  |

Tuesday, May 03, 2022 06:14 PM

|                   |                                                                                     |       |
|-------------------|-------------------------------------------------------------------------------------|-------|
| Majority          | -----GGCTAATTTTTGTATTTTTAGTAGAGACAGGGTTTCACCGTGTAGCCAGGATGGTCTCGAT---CTCCTGACC      |       |
|                   | 24010 24020 24030 24040 24050 24060 24070 24080                                     |       |
| Human             | -----GGCTAATTTTTGTATTTTTAGTAGAGATGGGGTTTCACCGTGTAGCCAGGATGGTCTAGAT---CTCCTGACC      | 17442 |
| Coquerel'sSifaka  | -----AAATAAGACAATAAGGTA--GGTAGAAGCAGTTTATAATCTTTCTCGT--GAGCAGTGCAAAT---ATATGAGG     | 16039 |
| Ma'sNightMonkey   | CAGGAGGCTGAGGCAGAGAATTGCGTGAACCAGGAGCGGAGCTTGCGGTAAGCCGAGATCGCGCCATTGCACTCCAGCCT    | 15261 |
| VervetAGM         | -----CAGTGAAAGAGCAGAGACACCAA--AGATATAGAGATCTTTAAAGC--AGCCAGAGAAAATCAGAT---TCCCTAAAG | 20309 |
| Gorilla           | -----GGCTAATTTTTGTATTTTTAGTAGAGATGGGGTTTCACCGTGTAGCCAGGATGGTCTCGAT---CTCCTGACC      | 19808 |
| GrabEatingMacaque | -----GGCTAATTTTTGTATTTTTAGTAGAGACAGGATTTACAGTGTAGCCAGGATGGTCTTGAT---CTCCTGACC       | 19372 |
| Macaque           | -----GGCTAATTTTTGTATTTTTAGTAGAGACAGGATTTACAGTGTAGCCAGGATGGTCTTGAT---CTCCTGACC       | 19767 |
| PigTailedMacaque  | -----GGCTAATTTTTGTATTTTTAGTAGAGACAGGGTTTCACCATGTTAGCCAGGATGGTCTCGAT---CTTCTGACC     | 18991 |
| Bonobo            | -----GGCTAATTTTTGTACTTTTAGTAGAGATGGGGTTTCACCGTGTAGCCAGGATGGTCTCGAT---CTCCTGACC      | 18538 |
| OliveBaboon       | -----GGCTAATTTTTGTATTTTTAGTAGAGACAGGATTTACAGTGTAGCCAGGATGATCTTGAT---CTCCTGACC       | 18773 |
| Orangutan         | -----GGCTAATTTTTGTATTTTTAGTAGAGACGGGGTTTCACCGTCTTAGCCAGGATGGTCTCAAT---CTCCTGACC     | 18896 |

|                   |                                                                                       |       |
|-------------------|---------------------------------------------------------------------------------------|-------|
| Majority          | TCGTG--ATCCGC-----CCGCCTCGGAAA-----TACTTTGCATTGTTG--CATTGATTGGGT--TTGAGCCCC           |       |
|                   | 24090 24100 24110 24120 24130 24140 24150 24160                                       |       |
| Human             | TTGTG--ATCCGC-----CCGCCTCGGAAA-----TACTTTGCATTGTTG--GATTGATTGGGT--TTGAGCCCC           | 17501 |
| Coquerel'sSifaka  | GTTTA--AATAGCAAATGCCACTTTAAAA-----AATGTGG--ACTGA--AA----TGGATACT                      | 16089 |
| Ma'sNightMonkey   | GGGTAACAAGAGCGAAACTCCGCCTCAAAAAAAAAAAAAAAAAAATACTTTGCATTGTTG--TATTGATTGGGT--TTCAGCCCC | 15338 |
| VervetAGM         | AATAAGAATTAGA-----AAGCCCAATAT-----GCTTCATCAGCATGGGCATCCAGAAGATAGTGGAATAAT             | 20373 |
| Gorilla           | TCATG--ATCTGC-----CCGCCTCGGAAA-----TACTTTGCATTGTTG--GATTGATTGGGT--TTGAGCCCC           | 19867 |
| GrabEatingMacaque | TCGTG--ATCCAC-----CCACCTCGGAAA-----TACTTTGCATTGTTG--CATTGATTGGGT--TTGAGCCCC           | 19431 |
| Macaque           | TCGTG--ATCCAC-----CCACCTCGGAAA-----TACTTTGCATTGTTG--CATTGATTGGGT--TTGAGCCCC           | 19826 |
| PigTailedMacaque  | TTGTGTGATCCAC-----CCATCTCGG-----CCTCCCAAAGTGCTG--GATTA--CAGGC--GTGAGC--C              | 19045 |
| Bonobo            | TCGTG--ATCCGC-----CCGCCTCGGAAA-----TACTTTGCATTGTTG--GATTGATTGGGT--TTGAGCCCC           | 18597 |
| OliveBaboon       | TCGTG--ATCCGC-----CCACCTCGGAAA-----TACTTTGCATTGTTG--CATTGATTGAGT--TTGAGCCCC           | 18832 |
| Orangutan         | TCGTG--ATCCGC-----CCGCCTTGGA---TACTTTGCATTGTTG--CATTGATTGG--T--TTGAGCCCC              | 18954 |

|                   |                                                                                   |       |
|-------------------|-----------------------------------------------------------------------------------|-------|
| Majority          | TGTTGTAAGTGAATTATGAACAAGTCTTTTATTCTCTGAATTTCCCTTTCTAGTTTGTAAATATTGAGGATAAT---     |       |
|                   | 24170 24180 24190 24200 24210 24220 24230 24240                                   |       |
| Human             | TGTTGTAAGTGAATTATGAACAAGTCTTTTATAATCTGAATTTCCCTTTCTAGTTTGTAAATATTGAGGATAATAAT     | 17581 |
| Coquerel'sSifaka  | TCTAATATAAGAGTAATATTTAGAAACACATAAATATCTTATATAATGTCTTATAACTT--AATAGTATA-ATAA----   | 16162 |
| Ma'sNightMonkey   | TTTTGTAAGTGAATTATGAACAAGTCTTTTATTCTCTTAATTTCCCTTTCTAGTTTGTAAATATTGAGGATTATTAT     | 15418 |
| VervetAGM         | ATTTTCAGTGTATTGAGGGAAAATA--GCTGTCCACTTATTTATTTATAGTCAACTAAATATCATATAAGGAGAAGA---  | 20449 |
| Gorilla           | TGTTGTAAGTGAATTATGAACAAGTCTTTTATAATCTGAATTTCCCTTTCTAGTTTGTAAATATTGAGGATAATAAT     | 19947 |
| GrabEatingMacaque | TGTTGTAAGTGAATAATGAACAAGCCTTTTATTCTCTGAATTTCCCTTTCTAGTTTGTAAATATTGAGGATAAT---     | 19508 |
| Macaque           | TGTTGTAAGTGAATAATGAACAAGCCTTTTATTCTCTGAATTTCCCTTTCTAGTTTGTAAATATTGAGGATAAT---     | 19903 |
| PigTailedMacaque  | -----ATC-----ATATTCTTTCCAGTATTTTATGTCTAG-----                                     | 19077 |
| Bonobo            | TGTTGTAAGTGAATTATGAACAAGTCTTTTATAATCTGAATTTCCCTTTCTAGTTTGTAAATATTGAGGATAATAAT     | 18677 |
| OliveBaboon       | TGTTGTAAGTGAATAATGAACAAGCCTTTTATTCTCTGAATTTCCCTTTCTAGTTTGTAAATATTGAGGATAAT---     | 18909 |
| Orangutan         | TGTTATACTTAAGTGAATTATGAACAAGTCTTTTATTCTCTGAATTTCCCTTTCTAGTTTGTAAATATTGAGGATAATAAT | 19034 |

Tuesday, May 03, 2022 06:14 PM

| Majority          | TCCTAACTTGCATGATTGTTGTGAAGATTAAATAAGAC--ATAATATTGGTAGGAGCTGTTTATAATCTTTCTCTCTTA  |       |
|-------------------|----------------------------------------------------------------------------------|-------|
|                   | 24250 24260 24270 24280 24290 24300 24310 24320                                  |       |
| Human             | TTCTAACTTGCATGATTGTTGTGAAGATTAAATAAGAC--AATGATATTGGTAGGAGCTCTTTATAATCTTTCTCTCTTA | 17659 |
| Coquerel'sSifaka  | ----AATGCACATGGAAGTC-----TTTTATAGCTT--AGTAAGATT--TGGG---TACTTGCAAATAGTCTGGTTTA   | 16224 |
| Ma'sNightMonkey   | TCCTAACTTGTATGATTGTTTGAAGATTGAATAAGAC--ATAATATTGGTAGGAGCTATTTATAATCTTTCTCTCTTA   | 15496 |
| VervetAGM         | ACAAAATAAAGACGCTTTTTGAAACACTTCATCTGCCTCCAAAAAGCAATTTAGGAAATTTATCAACAGATCCACTGA   | 20529 |
| Gorilla           | TCCTAACTTGCATGATTGTTGTGAAGATTAAATAAGAC--AATGATATTGGTAGGAGCTCTTTATAATCTTTCTCTCTTA | 20025 |
| GrabEatingMacaque | TCCTAACTTGCACGATTGTTGTGAAGATTAAATAAGAC--ATAATATTGGTAGGAGCTGTTTATAATCTTTCTCTCTTA  | 19586 |
| Macaque           | TTCTAACTTGCACGATTGTTGTGAAGATTAAATAAGAC--ATAATATTGGTAGGAGCTGTTTATAATCTTTCTCTCTTA  | 19981 |
| PigTailedMacaque  | ---TAACTCAGAAAAAAT-----GATCAGATAAG---TATATTTTAAATATG--CTGATTACAACATTATTTAAATA    | 19142 |
| Bonobo            | TCCTAACTTGCATGATTGTTGTGAAGATTAAATAAGAC--AATGATATTGGTAGGAGCTCTTTATAATCTTTCTCTCTTA | 18755 |
| OliveBaboon       | TCCTAACTTGCACGATTGTTGTGAAGATTAAATAAGAC--ATAATATTGGTAGGAGCTGTTTATAATCTTTCTCTCTTA  | 18987 |
| Orangutan         | TCCTAACTTGCCTGATTGTTGTGAAGATTAAATAAGAC--AATGATATTGGTAGGAGCTCTTTATAATCTTTCTCTCTTA | 19112 |

| Majority          | TGTACAAT-TCAAATATATGTGGGTTTAAATACCCAAAATACCACTTTAAAA-AATCTGGGC-TGAAATGGACACTTCTAA |       |
|-------------------|-----------------------------------------------------------------------------------|-------|
|                   | 24330 24340 24350 24360 24370 24380 24390 24400                                   |       |
| Human             | TGTACAAT-TCAAATATATGTGGGTTTAAATACCCAAAATACCACTTTAAAA-AATCTGGGC-TGAAATGGACACTTCTAA | 17736 |
| Coquerel'sSifaka  | TTTTTGATTT---TTTAT-TAGGTTTTACAATGCATTTCTTCAGTGAAATACTCT--ATTTGAGATTGTTGTTTT--A    | 16295 |
| Ma'sNightMonkey   | TGTACAAT-TCAAATATATGTGGGTTTAAATACCCAAAATACCTCTTTAAAA-AGTCTGAGC-TGAAATGGACACTTTTTA | 15573 |
| VervetAGM         | AGGAGTTTCTGGAGTTTGTACTTCAGGAAGAAAGCCAATGACACCAGAAAGTAAGTCTGACGTAGAAGTGAGGCTAATCA  | 20609 |
| Gorilla           | TGTACAAT-TCAAATATATGTGGGTTTAAATACCCAAAATACCACTTTAAAA-AATCTGGGC-TGAAATGGACACTTCTAA | 20102 |
| GrabEatingMacaque | TGTACAAT-TCAAATATATGTGGGTTTAAATACCCAAAATACCACTTTAAAA-AATCTAGGC-TGAAATGGACACTTCTAA | 19663 |
| Macaque           | TGTACAAT-TCAAATATATGTGGGTTTAAATACCCAAAATACCACTTTAAAA-AATCTAGGC-TGAAATGGACACTTCTAA | 20058 |
| PigTailedMacaque  | TTTAGAAA-TAACAAATGTTTCAGTGATAAGGAAATGAATCTGTTTCATAAAC-ATTACAATGTTTTCTAAATGTTTTTCA | 19220 |
| Bonobo            | TGTACAAT-TCAAATATATGTGGGTTTAAATACCCAAAATACCACTTTAAAA-AATCTGGGC-TGAAATGGACACTTCTAA | 18832 |
| OliveBaboon       | TGTACAAT-TCAAATATATGTGGGTTTAAATACCCAAAATACCACTTTAAAA-AATCTAGGC-TGAAATGGACACTTCTAA | 19064 |
| Orangutan         | TGTACAAT-TCAAATATATGTGGGTTTAAATACCCAAAATACCACTTTAAAA-AATCTGGGC-TGAAATGGACACTTCTAA | 19189 |

| Majority          | TGTAGA--AGTA-GTGCTTTAGAAAAT---AATGCTTTGTT-----A-A---A-T-T--                              |  |
|-------------------|------------------------------------------------------------------------------------------|--|
|                   | 24410 24420 24430 24440 24450 24460 24470 24480                                          |  |
| Human             | TGTAGG--AGTA-GTGCTTTAGAAAAT---AATGCTTTGTT----- 17771                                     |  |
| Coquerel'sSifaka  | TCAAGACCTTTATGTGCTTTAGAAAAG---AATGTTTTGTT----- 16333                                     |  |
| Ma'sNightMonkey   | TGTAGA--AGTA-GTATTTAAGAAACATTTAAATATGGTA-----T-----ATAATGTCTTATA 15625                   |  |
| VervetAGM         | AGAAAATTGGTA-GGCCTGTGAGTAAATCTAATATTGACCATATAAGAATGTAATAGCAGTGATTGTTAAGGAGTTTAA 20688    |  |
| Gorilla           | TGTAGG--ATTA-GTGCTTTAGAAAAT---AATGCTTTGTT----- 20137                                     |  |
| GrabEatingMacaque | TGTAGA--AGTA-GTGCTTTAGAAAAG---AATGCTTTGTTTCATACTCTTTTTTTTTTTTTTTT-TTGAGATGGAGTCTTG 19736 |  |
| Macaque           | TGTAGA--AGTA-GTGCTTTAGAAAAG---AATGCTTTGTTTCATACTCTTTTTTTTTTTTTTTT--GAGACGGAGTCTTG 20129  |  |
| PigTailedMacaque  | TATGTG--TGAA-AAGTAGGATTAAAA---ATAACTTTGACAAATGC-----ATAC--AATTTGT 19272                  |  |
| Bonobo            | TGTAGG--AGTA-GTGCTTTAGAAAAT---AATGCTTTGTT----- 18867                                     |  |
| OliveBaboon       | TGTAGA--AGTA-GTGCTTTAGAAAAG---AATGCTTTGTTTCATACTCTTTTTTTTTTTTTTTT-T-GAGACGGAGTCTTG 19136 |  |
| Orangutan         | TGTAGG--AGTA-GTGCTATAGAAAAT---AATGCTTTGTT----- 19224                                     |  |

Tuesday, May 03, 2022 06:14 PM

| Majority          | --GT-----A-----C-GT--GC--T-T-----AT-----G-----T-                                  |       |       |       |       |       |       |       |       |
|-------------------|-----------------------------------------------------------------------------------|-------|-------|-------|-------|-------|-------|-------|-------|
|                   | 24490                                                                             | 24500 | 24510 | 24520 | 24530 | 24540 | 24550 | 24560 |       |
| Human             | -----T-----                                                                       |       |       |       |       |       |       |       | 17772 |
| Coquerel'sSifaka  | -----                                                                             |       |       |       |       |       |       |       | 16333 |
| Ma'sNightMonkey   | ACGTACTAGTATAATAAAATGCACAGTGAAGCTTTTATAGCTTTGTGTGTTTCAAATGTCTGG-----TT            |       |       |       |       |       |       |       | 15692 |
| VervetAGM         | AAATAGAATTAATAAATACTGAATCATAACAATATGTAAGAGAGTGGTAGAGACACTGGAGTTTGAGTTCTGATGATGTAG |       |       |       |       |       |       |       | 20768 |
| Gorilla           | -----T-----                                                                       |       |       |       |       |       |       |       | 20138 |
| GrabEatingMacaque | CTGTGTCGCCCAGGCTGGAGTGTCTGTGGCGCAATCTCTGCT--CACTACAAGCTTCGCCTCCCGGGTTC--ACGCCATTC |       |       |       |       |       |       |       | 19812 |
| Macaque           | CTGTGTCGCCCAGGCTGGAGTGTCTGTGGCGCAATCTCTGCT--CACTACAAGCTTCGCCTCCCGGGTTC--ACGCCATTC |       |       |       |       |       |       |       | 20205 |
| PigTailedMacaque  | ATGTGTCGCCAAAA-----ACTGGAGGGCAGTAT-----ACCAAAA-----TAGAGTA-----GTTC               |       |       |       |       |       |       |       | 19319 |
| Bonobo            | -----T-----                                                                       |       |       |       |       |       |       |       | 18868 |
| OliveBaboon       | CTGTGTCGCCCAGGCTGGAGTGTCTGTGGCGCAATCTCTGCT--CACTGCAAGCTCCGCCTCCCGGGTTC--ACGCCATTC |       |       |       |       |       |       |       | 19212 |
| Orangutan         | -----T-----                                                                       |       |       |       |       |       |       |       | 19225 |

| Majority          | T-----G-----TTT--T-TAT-TTTAGT--A-                                                |       |       |       |       |       |       |       |       |
|-------------------|----------------------------------------------------------------------------------|-------|-------|-------|-------|-------|-------|-------|-------|
|                   | 24570                                                                            | 24580 | 24590 | 24600 | 24610 | 24620 | 24630 | 24640 |       |
| Human             | -----                                                                            |       |       |       |       |       |       |       | 17772 |
| Coquerel'sSifaka  | -----                                                                            |       |       |       |       |       |       |       | 16333 |
| Ma'sNightMonkey   | T-----G-----A--TTT--TGAATTGTTAGCAGGT                                             |       |       |       |       |       |       |       | 15714 |
| VervetAGM         | TATTTATTGGAGCTGTGTTGTCAGTTACAGTA--GCTACTAGTCATTTGTTACCGAGCACTTGACATGAATGTAGTTTAA |       |       |       |       |       |       |       | 20846 |
| Gorilla           | -----                                                                            |       |       |       |       |       |       |       | 20138 |
| GrabEatingMacaque | TCCTGCCTCAGCCTCCAGAGTAGCTGGGACTACAGGC--TCGCCACC-----GGCTAATTTTTTGTATTTTTAGTAGAG  |       |       |       |       |       |       |       | 19884 |
| Macaque           | TCCTGCCTCAGCCTCCAGAGTAGCTGGGACTACAGGCGCCGCCACCACGCCCGGCTAATTTTTTGTATTTTTAGTAGAG  |       |       |       |       |       |       |       | 20285 |
| PigTailedMacaque  | TC---TTCAG-----GTTGATGGGATT---CGTTTTTCA-----TAATTCTTTATATATTTTGTCTAT             |       |       |       |       |       |       |       | 19371 |
| Bonobo            | -----                                                                            |       |       |       |       |       |       |       | 18868 |
| OliveBaboon       | TCCTGCCTCAGCCTCCAGAGTAGCTGGGACTACAGACGCCGCCACCACGCCCGGCTAATTTTTTGTATTTTTAGTAGAG  |       |       |       |       |       |       |       | 19292 |
| Orangutan         | -----                                                                            |       |       |       |       |       |       |       | 19225 |

| Majority          | -----TT--AT-TTA-----AT--C--T-TT--GA-----T-AT-----T-----C-----                     |       |       |       |       |       |       |       |       |
|-------------------|-----------------------------------------------------------------------------------|-------|-------|-------|-------|-------|-------|-------|-------|
|                   | 24650                                                                             | 24660 | 24670 | 24680 | 24690 | 24700 | 24710 | 24720 |       |
| Human             | -----C-----                                                                       |       |       |       |       |       |       |       | 17773 |
| Coquerel'sSifaka  | -----                                                                             |       |       |       |       |       |       |       | 16333 |
| Ma'sNightMonkey   | TTTAAAAATATGTTTATGAAGTGAATA--CTCATTTTGAGATTGTTGTTTATCAGTGGGCCTTGAGATACT-----      |       |       |       |       |       |       |       | 15784 |
| VervetAGM         | GTTGA--TTTCTACCTTAGTTGAAAAATACAGATTTCTAAGCCTTAGTCTGAAAGAAGAATGTAAAACATCCACATTT    |       |       |       |       |       |       |       | 20924 |
| Gorilla           | -----C-----                                                                       |       |       |       |       |       |       |       | 20139 |
| GrabEatingMacaque | ACAGGGTTTCACCATGTTAGCCAGGATGGTCTCGATCTTCTGACCTTGTGTGATCCACCCATCTCGGCC-TCCCAAAGTG  |       |       |       |       |       |       |       | 19963 |
| Macaque           | ACAGGGTTTCACCATGTTAGCCAGGATGGTCTCGATCTTCTGACCTTGTGTGATCCACCCATCTCGGCC-TCCCAAAGTG  |       |       |       |       |       |       |       | 20364 |
| PigTailedMacaque  | A-----TTCCACATTTTAA-----GTA-----TTTTATGATAGTTATTAATA--T-----TCAGTT-ATTAATATTG     |       |       |       |       |       |       |       | 19425 |
| Bonobo            | -----C-----                                                                       |       |       |       |       |       |       |       | 18869 |
| OliveBaboon       | ACAGGGTTTCACCATGTTAGCCAGGATGGTCTCGATCTTCTGACCTCGGGTGTATCCACCCATCTTGGCC-TCCCAAAGTG |       |       |       |       |       |       |       | 19371 |
| Orangutan         | -----C-----                                                                       |       |       |       |       |       |       |       | 19226 |

Tuesday, May 03, 2022 06:14 PM

| Majority          | -----T---TT---G---A---TCATATTCTTTTCCTAGTATTTTATGTCTAGTAACTCAT--GGAAAAAATGATCA  |       |       |       |       |       |       |       |       |
|-------------------|--------------------------------------------------------------------------------|-------|-------|-------|-------|-------|-------|-------|-------|
|                   | 24730                                                                          | 24740 | 24750 | 24760 | 24770 | 24780 | 24790 | 24800 |       |
| Human             | -----G-----TATTCTTTTCCTAGTATTTTATGTCTAGTAACTCATAAGGAAAAAATGATCA                |       |       |       |       |       |       |       | 17826 |
| Coquerel'sSifaka  | -----TCATATTCTGTGCCAGTATTTTATGTCTTGTA-----GGAAAAGATGATCA                       |       |       |       |       |       |       |       | 16381 |
| Ma'sNightMonkey   | -----TTACAAAAGAATGCTTTGTTCATATTCTTTCTCAGTATTTTATGTCTAGTAACTCATA-TGAAAAAATGATTA |       |       |       |       |       |       |       | 15858 |
| VervetAGM         | TCATATTGGTTACATGTAGAAGTATAATATTTTGTATTT-TGGGTTAAGTGAAATACGTTAT--GCATTGCCTTTTCC |       |       |       |       |       |       |       | 21001 |
| Gorilla           | -----G-----TATTCTTTTCCTAGTATTTTATGTCTAGTAACTTATAAGGAAAAAATGATCA                |       |       |       |       |       |       |       | 20192 |
| GrabEatingMacaque | C---TGGATTACAGGCGTGAGCCATCATATTCTTTCCAGTATTTTATGTCTAGTAACTCA---GAAAAAATGATCA   |       |       |       |       |       |       |       | 20036 |
| Macaque           | C---TGGATTACAGGCGTGAGCCATCATATTCTTTCCAGTATTTTATGTCTAGTAACTCA---GAAAAAATGATCA   |       |       |       |       |       |       |       | 20437 |
| PigTailedMacaque  | C---TTAATT---GATTAACACTGACATTTTCTTGT---TTCTTTA-----AAAACTTA---GCATAACTTGAT--   |       |       |       |       |       |       |       | 19484 |
| Bonobo            | -----G-----TATTCTTTTCCTAGTATTTTATGTCTAGTAACTCATAAGGAAAAAATGATCA                |       |       |       |       |       |       |       | 18922 |
| OliveBaboon       | C---TGGATTACAGGCGTGAGCCATCATATTCTTTCCAGTATTTTATGTCTAGTAACTCA---GAAAAAATGATCA   |       |       |       |       |       |       |       | 19444 |
| Orangutan         | -----A-----TATTCTTTTCCTAGTATTTTATGTCTAGTAACTCATAAGGAAAAAATGATCA                |       |       |       |       |       |       |       | 19279 |

| Majority          | GATAAGTATATTTTTTATA-----TGCTGATTACAGCATTATTTAAATA--GTAGAAATAACAATGTTTCAGTGATA   |       |       |       |       |       |       |       |       |
|-------------------|---------------------------------------------------------------------------------|-------|-------|-------|-------|-------|-------|-------|-------|
|                   | 24810                                                                           | 24820 | 24830 | 24840 | 24850 | 24860 | 24870 | 24880 |       |
| Human             | GATAAGTATATTTTTTATA-----TGCTGATTACAGCATTATTTAAATA--GTAGAAATAACAATGTTTCAGTGATA   |       |       |       |       |       |       |       | 17896 |
| Coquerel'sSifaka  | GATAAATGTACTTTTTATATATAAAGATGTTGATTACAGCATTATTTACATTTAAATGAAATAACAATGTACAGTGATA |       |       |       |       |       |       |       | 16461 |
| Ma'sNightMonkey   | GATAAGTGTATTTTT-ATA-----TGCTGATTACAGCATTATTTAAATA--GTAGAAACAATAAATGTACAGTGATA   |       |       |       |       |       |       |       | 15927 |
| VervetAGM         | TCTTCTTTCTTTCTTTTC-----TTTTCTTTCTCTCTCTCTCTCTCC-CCCTCTCTCTCTCTCTCTCCCCC         |       |       |       |       |       |       |       | 21072 |
| Gorilla           | GATAAGTATATTTTTTATA-----TGCTGATTACAGCATTATTTAAATA--GTAGAAATAACAATGTTTCAGTGATA   |       |       |       |       |       |       |       | 20262 |
| GrabEatingMacaque | GATAAGTATATTTTTAATA-----TGCTGATTACAACATTATTTAAATAT-TTAGAAATAACAATGTTTCAGTGATA   |       |       |       |       |       |       |       | 20107 |
| Macaque           | GATAAGTATATTTTTAATA-----TGCTGATTACAACATTATTTAAATAT-TTAGAAATAACAATGTTTCAGTGATA   |       |       |       |       |       |       |       | 20508 |
| PigTailedMacaque  | -ATAA--ATCTTTTTAAT-----TGC-AAAAAACAT---AAAATTT-ACCGTCTTAAACATTTTTAAGTGT--       |       |       |       |       |       |       |       | 19544 |
| Bonobo            | GATAAGTATATTTTTTATA-----TGCTGATTACAGCATTATTTAAATA--GTAGAAATAA---CTGTTTCAGTGATA  |       |       |       |       |       |       |       | 18989 |
| OliveBaboon       | GATAAGTATATTTTTAATA-----TGTTGATTACAACATTATTTAAATAT-TTAGAAATAACAATGTTTCAGTGATA   |       |       |       |       |       |       |       | 19515 |
| Orangutan         | GATAAGTATATTTTTTATA-----TGCTGATTACAGCATTATTTAAATA--GTAGAAATAACAATGTTTCAGTGATA   |       |       |       |       |       |       |       | 19349 |

| Majority          | AGAAAATGAATAAATCTGTTTCATA-----AACATTACAAATGTT---TTTTAAATATTTTTTCATATG----           |       |       |       |       |       |       |       |       |
|-------------------|-------------------------------------------------------------------------------------|-------|-------|-------|-------|-------|-------|-------|-------|
|                   | 24890                                                                               | 24900 | 24910 | 24920 | 24930 | 24940 | 24950 | 24960 |       |
| Human             | AGACAATGAATAAATCTGTTTCATA-----AACATTACAAATGTT---TTTTAAATATTTTTTCATATG----           |       |       |       |       |       |       |       | 17956 |
| Coquerel'sSifaka  | TGAAAATGGCTAAATTTATGTTTCATACAGGGAACATAATAACATTACAAATGATATATTTTTAAATATTTTTAATACA---- |       |       |       |       |       |       |       | 16537 |
| Ma'sNightMonkey   | AGAAAATGGATAAATCTGTTTCATA-----ACCATTACAAATGGT---GTTTCCTAAATTTTTTTGTAT---            |       |       |       |       |       |       |       | 15988 |
| VervetAGM         | CCTCTGTCTCC----CTCTCTCC-----CTCTCTCTCTCTCTCT---CTCTCTTTCTTTCTCTCTTTCTCC             |       |       |       |       |       |       |       | 21131 |
| Gorilla           | AGAAAATGAATAAATCTGTTTCATA-----AACATTACAAATGTT---TTTTAAATATTTTTTCATATG----           |       |       |       |       |       |       |       | 20322 |
| GrabEatingMacaque | AGGAAATGAAT----CTGTTTCATA-----AACATTACAAATGTT---TTCTAAATGTTTTTCATATG----            |       |       |       |       |       |       |       | 20162 |
| Macaque           | AGGAAATGAAT----CTGTTTCATA-----AACATTACAAATGTT---TTCTAAATGTTTTTCATATG----            |       |       |       |       |       |       |       | 20563 |
| PigTailedMacaque  | --ACACTTAAA----TTGTTC-----GTTATCTTTTT---TTTTTTTTTTTTTTTATTTA----                    |       |       |       |       |       |       |       | 19592 |
| Bonobo            | AGACAATGAATAAATCTGTTTCATA-----AACATTACAAATGTT---TTTTAAATATTTTTTCATATG----           |       |       |       |       |       |       |       | 19049 |
| OliveBaboon       | AGGAAATGAAT----CTGTTTCGTA-----AACATTACAAATGTT---TTCTAAATACTTTTCTTATG----            |       |       |       |       |       |       |       | 19570 |
| Orangutan         | ACAAAA-GAATAAATCTGTTTCATA-----AACATTACAAATGTT---TTTTAAATATTTTTTCATATG----           |       |       |       |       |       |       |       | 19408 |



Tuesday, May 03, 2022 06:15 PM

```

Majority      -TGTGAAAA--GTAGGATTA AAAATAACTTTGACAAATGCATACAATTTATATGTGTCCCCAAAAGCTGGAGGGCAGTA
                24970      24980      24990      25000      25010      25020      25030      25040
Human         -TGTGAAAA--GTAGGATTA AAAATAACTTTGACAAATGCATACAATTTATATGTGTCCCCAAAAGCTGGAGGGCAGTG 18032
Coquerel'sSifaka -TGTGAAAAAAGTAAGATTA AAAAGTAGCTTTGACAAATATATACAGTTTATATGTGTCCCCAAAAGCTTGAGGGCAGTA 16616
Ma'sNightMonkey ATGTGAAAA--GTAGGATTA AAAATAACTTTGACAAATACATACAATTTATATGTGTCCCCAAAAGCTGGAGGGCAGTA 16065
VervetAGM      CTGTCTGTCT--TCTCTCTGTCTTTCCCTTTTTTTAAGATAGGGTCTTGCTCTGTCCCC--AGGCTGGAGTGCCATG 21205
Gorilla        -TGTGAAAA--GTAGGATTA AAAATAACTTTGACAAATGCATACAATTTATATGTGTGTCCCCAAAAGCTGGAGGGCAGTG 20398
GrabEatingMacaque -TGTGAAAA--GTAGGATTA AAAATAACTTTGACAAATGCATACAATTTGTATGTGTCCCCAAAAGCTGGAGGGCAGTA 20238
Macaque        -TGTGAAAA--GTAGGATTA AAAATAACTTTGACAAATGCATACAATTTGTATGTGTCCCCAAAAGCTGGAGGGCAGTA 20639
PigTailedMacaque -TTT-----TTTTTTTTTGGAGCGGAGTCTCGCTCTGTAGCCC--AGGCTGGAGTGCCAGTA 19647
Bonobo         -TGTGAAAA--GTAGGATTA AAAATAACTTTGACAAATGCATACAATTTATATGTGTCCCCAAAAGCTGGAGGGCAGTG 19125
OliveBaboon    -TGTGAAAA--GTAGGATTA AAAATAACTTTGACAAATGCATACAATTTATATGTGTCCCCAAAAGCTGGAGGGCAGTA 19646
Orangutan      -TGTGAAAA--GTAGGATTA AAAATAACTTTGACAAATGCATACAATTTATATGTGTCCCCAAAAGCTGGAGGGCAGTG 19484
    
```

```

Majority      -TACCAAAATAGAG----TAGTTTTCTTCAGGTTGATGGGATTAGTTTTTTCATAATCTTT--ATATATTTTGTCTATA
                25050      25060      25070      25080      25090      25100      25110      25120
Human         -TACCAAAATAGAG----TAGTTTTCTTCAGGTTGATGGGATTAGTTTTTGTAAATCTTT--ATATATTTTCTCTATA 18104
Coquerel'sSifaka -CACAAAACAGAG----TAGTTTTCTTCAGGTTGATGACACTAATCTTAAAAATCTTTCCTATATATTTTTTATATA 16691
Ma'sNightMonkey -TACCAAAATAGAG----TATTTTTCTTCAGGTTGATGGGAATAAGTTTTTCATAATCTTT--TCATTTTTTATAATTG 16137
VervetAGM      GCATGATCATGGCAGCCTCAACCTCCTGTGCTCCAGTGACCCTCCCCTTCA--GCCTCCA--AGTAGCTGGGACTACA 21281
Gorilla        -TACCAAAATAGAG----TAGTTTTCTTCAGGTTGATGGGATTAGTTTTTGTAAATCTTT--ATATATTTTCTCTATA 20470
GrabEatingMacaque -TACCAAAATAGAG----TAGTCTCTTCAGGTTGATGGGATTCGTTTTTTCATAATCTTT--ATATATTTTGTCTATA 20310
Macaque        -TACCAAAATAGAG----TAGTCTCTTCAGGTTGATGGGATTCGTTTTTTCATAATCTTT--ATATATTTTGTCTATA 20711
PigTailedMacaque -GCCGGATCT-----CAGCTCACTGCAAGCT-----CCGCCTCCCG--GGTTCAG--CCATTCCTCCGGC---- 19702
Bonobo         -TACCAAAATAGAG----TAGTTTTCTTCAGGTTGATGGGATTAGTTTTTGTAAATCTTT--ATATATTTTCTCTATA 19197
OliveBaboon    -TACCAAAATAGAG----TAGTCTCTTCAGGTTGATGGGATTCGTTTTTTCATAATCTTT--ATATATTTTGTCTATA 19718
Orangutan      -TACCAAAATAGAG----TAGTTTTCTTCAGGTTGATGGGATTAGTTTTTATAATCTTT--ATATATTTTCTCTATA 19556
    
```

```

Majority      ----TTCCACATTTTAAGTATTTT--ATGATAAAGTTATTAATATTGATA--AGTTATTAATATTTTC---TTAATTGAT
                25130      25140      25150      25160      25170      25180      25190      25200
Human         ----TTCCACATTTTAAGTATTTT--ATGATAAAGTTATTAATATTGATA--AAGTTATTAATGTTGC---TTAATTGAT 18173
Coquerel'sSifaka ----GTCCACATTTCTAATATGTCTATATTTATAAATTTAATATCTA----ATCTAATGATAATTTAGCTTAATTGGT 16763
Ma'sNightMonkey TTTTCTATTTATTTTCTCTATATTTCCCATTTTTAAGTATTTTATGATTA----AGTTATTAATATTTGC---TTAATTGGT 16210
VervetAGM      GTTGTGTGCCACCACACCTGGCTA--ATTATTGAGTTTTTTTTGTAGAGACAGGGTCTTGCTATATTGCGTAGGCTGGT 21358
Gorilla        ----TTCCACATTTTAAGTATTTT--ATGATAAAGTCATTAATATTGATA--AAGTTATTAATATTTGC---TTAATTGAT 20539
GrabEatingMacaque ----TTCCACATTTTAAGTATTTT--ATGATAAAGTTATTAATATTCA----GTTATTAATATTTTC---TTAATTGAT 20375
Macaque        ----TTCCACATTTTAAGTATTTT--ATGATAAAGTTATTAATATTCA----GTTATTAATATTTTC---TTAATTGAT 20776
PigTailedMacaque ----CTCAGCCTCCCAAGTAGCTG--GGGCTACAGGCGCTGCCACCTC----GCC--CGGCTATTTT---TTGTATTTT 19766
Bonobo         ----TTCCACATTTTAAGTATTTT--ATGATAAAGTTATTAATATTGATA--AAGTTATTAATATTTGC---TTAATTGAT 19266
OliveBaboon    ----TTTCACATTTTAAGTATTTT--ATGATAAAGTTATTAATATTGATA--GTTATTAATATTTGC---TTAATTGAT 19785
Orangutan      ----TTCCACATTTTAAGTATTTT--ATGATAAAGTTATTAATAT--GATA--ATGTTATTAATATT--C---TTACTTGAT 19623
    
```

Tuesday, May 03, 2022 06:15 PM

| Majority          | TAAACACT---GAC---ATTTTCTTGTTTCTTTA-----AAAACTTTGCATAACTTGATATAAA-----           |       |
|-------------------|---------------------------------------------------------------------------------|-------|
|                   | 25210 25220 25230 25240 25250 25260 25270 25280                                 |       |
| Human             | TAAACCT---GAT---ATTTTCTTGTTTCTTTA-----AAAACTTTGCATAACTTGATATAAA-----            | 18227 |
| Coquerel'sSifaka  | TAAACAGC-----TTTCTTGTTTCTTTA-----AAAACTTAGTATAACTTGACATAAA-----                 | 16813 |
| Ma'sNightMonkey   | TAAACATT---GAC---TTTTTCTTGTTTCTTTA-----AAAACTTTGCATATTATAACTTAATATA---AA--T     | 16270 |
| VervetAGM         | CTGAAACTCCTGGACTCAAGTGATCTTCTGCTTTAGCCTTGCAAAGTGCTGGGATTACAGGACTGAGTCTGGCCACCTT | 21438 |
| Gorilla           | TAAACCT---GAC---ATTTTCTTGTTTCTTTA-----AAAA-GTTGCATAACTTGATATAAA-----            | 20592 |
| GrabEatingMacaque | TAAACACT---GAC---ATTTTCTTGTTTCTTTA-----AAAACTTAGCATAACTTGATATAAA-----           | 20429 |
| Macaque           | TAAACACT---GAC---ATTTTCTTGTTTCTTTA-----AAAACTTAGCATAACTTGATATAAA-----           | 20830 |
| PigTailedMacaque  | TTAGTAGA---GAC---GGGGTTTCCACCGTGTTA-----GCCAGGATGGTCTCGATCTCCTGACC-----         | 19820 |
| Bonobo            | TAAACCT---GAT---ATTTTCTTGTTTCTTTA-----AAAACTTTGCATAACTTGATATAAA-----            | 19320 |
| OliveBaboon       | TAAACACT---GAC---ATTTTCTTGTTTCTTTA-----AAAACTTTGCATAACTTGATATAAA-----           | 19839 |
| Orangutan         | TAAACACT---GAC---ATT--TTGTTTCTTTA-----AAAACTTTGCATAACTTGATATAAA-----            | 19674 |

| Majority          | --TCTTTTTAATTGTAAAAAAAC--CACATAAAATTTACTATCTTAACCATTTTTAAGTGACACTTAAATTGTTTAAT    |       |
|-------------------|-----------------------------------------------------------------------------------|-------|
|                   | 25290 25300 25310 25320 25330 25340 25350 25360                                   |       |
| Human             | --TCTTTTTAATTGTACAAAAAAAC--CACATAAAATTTACTATCTTAACCATTTTTAAGTGACACTTAAATTGTTTAAT  | 18303 |
| Coquerel'sSifaka  | TCTTTCTAAAATTGTGGTAAAAAT--ACATAAAATTTACCATCTCAACTGCTTTTAAGTATACACGTAATAGTTTAAG    | 16890 |
| Ma'sNightMonkey   | C-TTTTTGTGGTAAAAAACAATAAAATTTACCATCTTAACCATTTCTAAGTGACACTAAA--GTTTAAG             | 16346 |
| VervetAGM         | TTTCTTTGTACTTTCAAAAATGTGG-CTAATAGAAGTTTATGAGATTATATTTGTGGTTCATACTACATTTCTTTTGGAC  | 21517 |
| Gorilla           | --TCTTTTTAATTGTACAAAAAAAC--CACATAAAATTTACTATCTTAACCATTTTTAAGTGACACTTAAATTGTTTAAT  | 20667 |
| GrabEatingMacaque | --TCTTTTTAATTGTACAAAAAAAC-----ATAAAATTTACTGTCTTAACCATTTTTAAGTGACACTTAAATTGTTTCAGT | 20502 |
| Macaque           | --TCTTTTTAATTGTACAAAAAAAC-----ATAAAATTTACTGTCTTAACCATTTTTAAGTGACACTTAAATTGTTTCAGT | 20903 |
| PigTailedMacaque  | --TCGTGATCCGCCATCTCGGCC-----TCCCAAAGTGCTGGGATTACAGGCTTGAGCCACCGCGCCGCTGTTTCAGT    | 19893 |
| Bonobo            | --TATTTTTAATTGTACAAAAAAAC--CACATAAAATTTACTATCTTAACCATTTTTAAGTGACACTTAAATTGTTTAAT  | 19395 |
| OliveBaboon       | --TCTTTTTAATTGTACAAAAAAAC-----ATAAAATTTACCATCTTAACCATTTTTAAGTGACACTTAAATTGTTTCAGT | 19912 |
| Orangutan         | --TCTTTTTAATTGTACAAAAAAAC--CACATAAAATTTACCATC--AACATTTTTAAGTGACACTTCAATTGTTTAAT   | 19747 |

| Majority          | TATTCCTTATACGTA---CTTAATAATGTTACATTGC---GAAACCCATC--TCCAGAACTTTTTTCATTTTGGG-----  |       |
|-------------------|-----------------------------------------------------------------------------------|-------|
|                   | 25370 25380 25390 25400 25410 25420 25430 25440                                   |       |
| Human             | TATTCCTTATACGTA---CTTAATAATATTTACATTGC---AAAACCCATC--TCCAGAACTTTTT-----GGA-----   | 18362 |
| Coquerel'sSifaka  | TACCTGTAATTCCAACCTTTTGGATGCTGAGATGG-GAGGATCTCTTGAGGCCAGGAGTTCAGACCTGCCTGAGCAAC    | 16969 |
| Ma'sNightMonkey   | TATTCCTTATATGTA---CTTAATAATAATCCATTGTTGTGAAACCCATC--TCCAGAACGTTTTTCATTTTGGG-----  | 16415 |
| VervetAGM         | AGTGCCAGAGTGAA---TCAGATAAGCTTGGGTTTT--GAAATCTTAA--GGGTGAACACAATAGAGATAGAACCCAAA   | 21589 |
| Gorilla           | TATTCCTTATACGTA---CTTAATAATATTTACATTGC---AAAACCCATC--TCCAGAACTTTTT-----GGA-----   | 20726 |
| GrabEatingMacaque | TATTCCTTATACGTA---CTTAATAATGTTACATTGC---GAAACCCATC--TCCAGAACTTTTTTCATTTTGGG-----  | 20568 |
| Macaque           | TATTCCTTATACGTA---CTTAATAATGTTACATTGC---GAAACCCATC--TCCAGAACTTTTTTCATTTTGGG-----  | 20969 |
| PigTailedMacaque  | TATTCCTTATACGTA---CTTAATAATGTTACATTGC---GAAACCCATC--TCCAGAACTTTTTTCATTTTGGG-----  | 19959 |
| Bonobo            | TATTCCTTATACGTA---CTTAATAATATTTACATTGC---AAAACCCATC--TCCAGAACTTTTT-----GGA-----   | 19454 |
| OliveBaboon       | TATTCCTTATACGTA---CTTAATAATGTTACATTGC---GAAACCCATC--TCCAGAACTTTTTTCATTTTGGG-----  | 19978 |
| Orangutan         | TATTCCTTATATGTA---CTTAATAATATTTACATTGT---GAAACCCATA--TCCAGAACTTTTTTCATTTTGGG----- | 19813 |

Tuesday, May 03, 2022 06:15 PM

| Majority          | GAACTGAGACTCTATACTGATT-----TTAAAACCTCT---CCCTTTTGCCTTGCCCTGGTAAC-----             |       |       |       |       |       |       |       |       |
|-------------------|-----------------------------------------------------------------------------------|-------|-------|-------|-------|-------|-------|-------|-------|
|                   | 25450                                                                             | 25460 | 25470 | 25480 | 25490 | 25500 | 25510 | 25520 |       |
| Human             | GAACTGAAACTCTATACTGATT-----TTAAAACCTCC---CTCTTTTGCCTTCTGCTGGTAAC-----             |       |       |       |       |       |       |       | 18418 |
| Coquerel'sSifaka  | ATAGTGAGACCCTGTCTCTACAAAAAATTCAAAAAATGAGGGCGTGGTGGTACATGCCCCAGCTACTTGGGA--GGCTG   |       |       |       |       |       |       |       | 17047 |
| Ma'sNightMonkey   | GAACTGAAACCCTATGCCAATT-----TTAAAACCTC---CCCTTTTGTCTTCCCT-----                     |       |       |       |       |       |       |       | 16464 |
| VervetAGM         | GAATTGGGGAGTGGGGTTGACTGAAA---TTAAAGATGT---ATAATCCAAAAGAAGGCAAAAAAAAAAAAAAAAAGAATA |       |       |       |       |       |       |       | 21662 |
| Gorilla           | GAACTGAAACTCTATACTGATT-----TTAAAACCTCC---CCCTTTTGCCTTCCGCTGGTAAC-----             |       |       |       |       |       |       |       | 20782 |
| GrabEatingMacaque | GAACTGAGACTCTATACTGATT-----TTAAAACCTCT---CCCTTTTGCCTTGCCCTGGTAAC-----             |       |       |       |       |       |       |       | 20624 |
| Macaque           | GAACTGAGACTCTATACTGATT-----TTAAAACCTCT---CCCTTTTGCCTTGCCCTGGTAAC-----             |       |       |       |       |       |       |       | 21025 |
| PigTailedMacaque  | GAACTGAGACTCTATACTGATT-----TTAAAACCTCT---CCCTTTTGCCTTGCCCTGGTAAC-----             |       |       |       |       |       |       |       | 20015 |
| Bonobo            | GAACTGAAACTCTATACTGATT-----TTAAAACCTCC---CTCTTTTGCCTTCCGCTGGTAAC-----             |       |       |       |       |       |       |       | 19510 |
| OliveBaboon       | GAACTGAGACTCTATACTGATT-----TTAAAACCTCT---CCCTTTTGCCTTGCCCTGGTAAC-----             |       |       |       |       |       |       |       | 20034 |
| Orangutan         | GAACTGAAGCTCTATACTGATT-----TTAAAACCTCC---CCCTTTTGCCTTCCCTGGTAAC-----              |       |       |       |       |       |       |       | 19869 |

| Majority          | ---CAGCATTCTATTTTCTGTGTCTATGAATTTGAC---TACTTTAAA---TACCTCA-----TATAAGTGGAATTAT   |       |       |       |       |       |       |       |       |
|-------------------|----------------------------------------------------------------------------------|-------|-------|-------|-------|-------|-------|-------|-------|
|                   | 25530                                                                            | 25540 | 25550 | 25560 | 25570 | 25580 | 25590 | 25600 |       |
| Human             | ---CAGCATTCTATTTTCTGTGTCTATGAATTTGAC---TACTTTAAA---TACCTCA-----CATAAGTGGAATTAT   |       |       |       |       |       |       |       | 18482 |
| Coquerel'sSifaka  | AAGCAGGAGGAT--CACTTGAGTCCAGGAGTTTGGAG-GTTGCAATGAGGC-AGGATGATGCTGCTGCACCCCAACCCAG |       |       |       |       |       |       |       | 17123 |
| Ma'sNightMonkey   | -----T-----TC-----C--C-----C-TGA-----TAA                                         |       |       |       |       |       |       |       | 16476 |
| VervetAGM         | AGACACAAAATTAGCCTATAGGTTAATAGAGTGGAAAGGTTCTGTGAAGGTTCTTAGAACCTTTAAAGGTAGAATTTT   |       |       |       |       |       |       |       | 21742 |
| Gorilla           | ---CAGCATTCTATTTTCTGTGTCTATGAATTTGAC---TACTTTAAA---TACCTCA-----CATAAGTGGAATTAT   |       |       |       |       |       |       |       | 20846 |
| GrabEatingMacaque | ---CAGCATTCTGTTTCTGTGTCTATGAATTTGAC---TACTTTAAA---TACCTCA-----TATAAGTGGAATTAT    |       |       |       |       |       |       |       | 20688 |
| Macaque           | ---CAGCATTCTGTTTCTGTGTCTATGAATTTGAC---TACTTTAAA---TACCTCA-----TATAAGTGGAATTAT    |       |       |       |       |       |       |       | 21089 |
| PigTailedMacaque  | ---CAGCTTCTGTTTCTGTGTCTATGAATTTGAC---TACTTTAAA---TACCTCA-----TATAAGTGGAATTAT     |       |       |       |       |       |       |       | 20079 |
| Bonobo            | ---CAGCATTCTATTTTCTGTGTCTATGAATTTGAC---TACTTTAAA---TACCTCA-----CATAAGTGGAATTAT   |       |       |       |       |       |       |       | 19574 |
| OliveBaboon       | ---CAGCATTCTGTTTCTGTGTCTATGAATTTGAC---TACTTTAAA---TACCTCA-----TATAAGTGGAATTAT    |       |       |       |       |       |       |       | 20098 |
| Orangutan         | ---CAGCATTCTATTTTCTGTGTCTATGAATTTGAC---TACTTTAAA---TACCTCA-----CATAAGTGGAATTAT   |       |       |       |       |       |       |       | 19933 |

| Majority          | ACAATATAGGTTAAGCA-----TCCCTAATC-----TGAAAATCCAAGTCTG--AATGCT-ACAAAATGTG         |       |       |       |       |       |       |       |       |
|-------------------|---------------------------------------------------------------------------------|-------|-------|-------|-------|-------|-------|-------|-------|
|                   | 25610                                                                           | 25620 | 25630 | 25640 | 25650 | 25660 | 25670 | 25680 |       |
| Human             | ACAGTATAGGTTAAGCA-----TCCCTAATC-----TGAAAATCCAAGTCTG--AATGCT-ACAAAATCTG         |       |       |       |       |       |       |       | 18541 |
| Coquerel'sSifaka  | ACAATAGAGAGAGATGC-----CGTCTCAAAGAATAGTTTAATT---ATATGTACATATGCT--TAAAATACT       |       |       |       |       |       |       |       | 17187 |
| Ma'sNightMonkey   | CCAGCACAGAAATAACA-----AATGTCCA--G-TGATAAGAAAATGTG                               |       |       |       |       |       |       |       | 16517 |
| VervetAGM         | CTTGCTGTTGTCAGGAAAGAGTGGCATTGTTTTTGTTCACCTTTTGAAGCTACAAAACAGGTAATGATGAGGAAAATTG |       |       |       |       |       |       |       | 21822 |
| Gorilla           | ACAATATAGGTTAAGCA-----TCCCTAATC-----TGAAAATCCAAGTCTG--AATGCT-ACAAAATCTG         |       |       |       |       |       |       |       | 20905 |
| GrabEatingMacaque | ACAATATAGGTTAAGCA-----TCCCTAATC-----TGAAAATCCAAGTCTG--AATGCT-ACAAAATGTG         |       |       |       |       |       |       |       | 20747 |
| Macaque           | ACAATATAGGTTAAGCA-----TCCCTAATC-----TGAAAATCCAAGTCTG--AATGCT-ACAAAATGTG         |       |       |       |       |       |       |       | 21148 |
| PigTailedMacaque  | ACAATATAGGTTAAGCA-----TCCCTAATC-----TGAAAATCCAAGTCTG--AATGCT-ACAAAATGTG         |       |       |       |       |       |       |       | 20138 |
| Bonobo            | ACAGTATAGGTTAAGCA-----TCCCTAATC-----TGAAAATCCAAGTCTG--AATGCT-ACAAAATCTG         |       |       |       |       |       |       |       | 19633 |
| OliveBaboon       | ACAATATAGGTTAAGCA-----TCCCTAATC-----TGAAAATCCAAGTCTG--AATGCT-ACAAAATGTG         |       |       |       |       |       |       |       | 20157 |
| Orangutan         | ACAATATAGGTTAAGCA-----TCCCTAATC-----TGAAAATCCAAGTCTG--AATGCT-ACAAAATCTG         |       |       |       |       |       |       |       | 19992 |



Tuesday, May 03, 2022 06:15 PM

|                   |                                                                                      |       |
|-------------------|--------------------------------------------------------------------------------------|-------|
| Majority          | GCTAATTTTTT-TGTTTTTTTGTTTTT---CTTTTAGTAGAGATGGGGTTTTCACTGTAGCCAGGATGGTCTCT-ATCTC     |       |
|                   | 25930      25940      25950      25960      25970      25980      25990      26000   |       |
| Human             | GCTAATTTTTTGTATATATATATATATATAT---TTTTTAGTAGAGACGGGGTTTTCACTGTAGCCAGGATGGACTCTTATCTC | 18787 |
| Coquere'l'sSifaka | ACGAATTTGACCACCTTATAGATAA-----CTCATATAAATGGAGT---CAGTA--CAGGTTGAGCATC-----C          | 17415 |
| Ma'sNightMonkey   | GTGAATTATAC-----AATATAGATTAAG-----AATC-----C                                         | 16582 |
| VervetAGM         | GCTAATTTTTT-TGTTTTTTTGTTTTT---CTTTTAGTAGAGATGGGGTTTTCACTGTAGCCAGCATGGTCTCT-ATCTC     | 22136 |
| Gorilla           | GCTAATTTTTTGTATATATATATATATTT---TTTTTAGTAGAGACGGGGTTTTCACTGTAGCCAGGATGGACTCT-ATCTC   | 21152 |
| GrabEatingMacaque | GCTAATTTTTT-TGTTTTTTT-GTTTTT---CTTTTAGTAGAGATGGGGTTTTCACTGTAGCCAGCATGGTCTCT-ATCTC    | 21031 |
| Macaque           | GCTAATTTTTT-TGTTTTTTT-GTTTTT---CTTTTAGTAGAGATGGGGTTTTCACTGTAGCCAGCATGGTCTCT-ATCTC    | 21432 |
| PigTailedMacaque  | GCTAATTTTTT-TGTTTTTTT-GTTTTT---CTTTTAGTAGAGATGGGGTTTTCACTGTAGCCAGCATGGTCTCT-ATCTC    | 20422 |
| Bonobo            | GCTAATTTTTTGTATATATATATATATATAT---TTTTTAGTAGAGACGGGGTTTTCACTGTAGCCAGGATGGACTCT-ATCTC | 19864 |
| OliveBaboon       | GCTAATTTTTT-TGTTTTTTT-GTTTTT---CTTTTAGTAGAGATGGGGTTTTCACCCTAGCCAGCATGGTCTCT-ATCTC    | 20441 |
| Orangutan         | GCTAATTTTTTGTGTATATATATATATATATTTTTTTTAGTAGAGATGGGGTTTTCACCCTAGCCAGGATGGACTC--ATCTC  | 20236 |

|                   |                                                                                    |       |
|-------------------|------------------------------------------------------------------------------------|-------|
| Majority          | CTGACCTCGTGATCCGCCTGCCTCGGCCTTCCAAAGTCTGGGATTACAGGCCCTGAGCCACCACACC-----TGAA       |       |
|                   | 26010      26020      26030      26040      26050      26060      26070      26080 |       |
| Human             | CCGACCTCGTGATCCGCCTGCCTCGGCCTCCCAAAGTCTGGGATTACAGGCCCTGAGCCACCCTGCGCCTGGCCAATCTGAA | 18867 |
| Coquere'l'sSifaka | CTAATATGAAAC-----CCAAA--TCTGAAAT-----GCTCCAAAATC-----TGAA                          | 17456 |
| Ma'sNightMonkey   | CTAATCTGAAAAT-----CCAAAGTCT--GAAT---G-----CTACAAAATC-----TGAA                      | 16623 |
| VervetAGM         | CTGACCTCGTGATCCGCCTGCCTCGGCCTTCCAAAGTCTGGGATTACAGGCCCTGAGCCACCACACC-----TGAA       | 22207 |
| Gorilla           | CCGACCTCGTGATCCGCCTGCCTCGGCCTCCCAAAGTCTGGGATTACAGGCCCTGAGCCACCCTGCGCCCGGCCAGTCTGAA | 21232 |
| GrabEatingMacaque | CTGACCTCGTGATCCGCCTGCCTTGGCCTTCCAAATTTCTGGGATTACAGGCCCTGAGCCACCACACC-----TGAA      | 21102 |
| Macaque           | CTGACCTCGTGATCCGCCTGCCTTGGCCTTCCAAATTTCTGGGATTACAGGCCCTGAGCCACCACACC-----TGAA      | 21503 |
| PigTailedMacaque  | CTGACCTCGTGATCCGCCTGCCTTGGCCTTCCAAAGTCTGGGATTACAGGCCCTGAGCCACCACACC-----TGAA       | 20493 |
| Bonobo            | CCGACCTCGTGATCCGCCTGCCTCGGCCTCCCAAAGTCTGGGATTACAGGCCCTGAGCCACCCTGCGCCCGGCCAATCTGAA | 19944 |
| OliveBaboon       | CTGACCTCGTGATCCGCCTGCCTCGGCCTTCCAAAGTCTGGGATTACAGGCCCTGAGCCACCACACC-----TGAA       | 20512 |
| Orangutan         | CTGACCTCGTGATCAGCCACCTCGGCCTCCCAAAGTCTGGGATTACAGGCCCTGAGCCACCCTGCGCCAGCCA-TCTGAA   | 20315 |

|                   |                                                                                      |       |
|-------------------|--------------------------------------------------------------------------------------|-------|
| Majority          | ACTTTTTGAGCACTTAC--TTGATGCTCAAAGGAAGTCTTACTGTTGGAGCATTTTGGATTTTATAGATTTTCAGATTAGGAAT |       |
|                   | 26090      26100      26110      26120      26130      26140      26150      26160   |       |
| Human             | ACTTTTTGAGCACTTAC--TTGATGCTCAAAGGAAGTCTTACTGTTGGAGCATTTTGGATTTTATAGATTTTCAGATTAGGAAT | 18945 |
| Coquere'l'sSifaka | ACTTTTTGAGCACCAAC--ATGGTGCTCAAAGGAAATGCTCATCAGAGCATTTTGCATTTTCAGATTTTCAGATTAGGGAT    | 17534 |
| Ma'sNightMonkey   | ACTTTTTGAGCACTTAT--GTGATGCTCAAAGGAGGTACTTAATGGAACATTTTGGATTTTATAGATTTTCAGATTAGGAAT   | 16701 |
| VervetAGM         | ACTTTTTGAACTTACACGTGATGCTCAAAGGAAGTCTTACTGTTGGAGCATTTTGGATTTTATAGATTTTCAGATTAGGAAT   | 22287 |
| Gorilla           | ACTTTTTGAGCACTTAC--TTGATGCTCAAAGGAAGTCTTACTGTTGGAGCATTTTGGATTTTATAGATTTTCAGATTAGGAAT | 21310 |
| GrabEatingMacaque | ACTTTTTGAGCACTTACACATGATGCTCAAAGGAAGTCTTACTGTTGGAGCATTTTGGATTTTATAGATTTTCAGATTAGGAAT | 21182 |
| Macaque           | ACTTTTTGAGCACTTACACATGATGCTCAAAGGAAGTCTTACTGTTGGAGCATTTTGGATTTTATAGATTTTCAGATTAGGAAT | 21583 |
| PigTailedMacaque  | ACTTTTTGAGCACTTACACGTGATGCTCAAAGGAAGTCTTACTGTTGGAGCATTTTGGATTTTATAGATTTTCAGATTAGGAAT | 20573 |
| Bonobo            | ACTTTTTGAGCACTTAC--TTGATGCTCAAAGGAAGTCTTACTGTTGGAGCATTTTGGATTTTATAGATTTTCAGATTAGGAAT | 20022 |
| OliveBaboon       | ACTTTTTGAGCACTTACACGTGATGCTCAAAGGAAGTCTTACTGTTGGAGCATTTTGGATTTTATAGATTTTCAGATTAGGAAT | 20592 |
| Orangutan         | ACTTTTTGAGCACTTAA--TTGATGCTCAAAGGAAGTCTTACTGTTGGAGCATTTTGGATTTTATAGATTTTCGGGTTAGGAAT | 20393 |

Tuesday, May 03, 2022 06:15 PM

|                   |                                                                                  |       |
|-------------------|----------------------------------------------------------------------------------|-------|
| Majority          | GCTCAGGTTGTGTTTGCCTTTTGTGACTGGCTTATATTCACCTTAACATAATGTCCTCAAGGTCCATCCGTTGTAGCA   |       |
|                   | 26170 26180 26190 26200 26210 26220 26230 26240                                  |       |
| Human             | GCTCAGGTTGTGTTTGCCTTTTGTGACTGGCTTATATTCACCTTAATATAATGTCCTCAGGGTCCATCCATTTTGTAGCA | 19025 |
| Coquerel'sSifaka  | GCTCAGCCTATTATTGCCTTGTGTAAGTGGCTTAT-TTCACCTTAGCATAATGTCCTCAAGGTACATGCATGTTGCAGCT | 17613 |
| Ma'sNightMonkey   | GCTCAGATTGTGTTTGCCTTGTGACTGGCTTATTTTACCTTAATATAATGTCCTCAAGGTCCATTTGTGTTGTAGCA    | 16781 |
| VervetAGM         | GCTCAGGTTGTGTTTGCCTTTTGTGACTGGTTTACATTCACCTTAACA--ATGTTCTCAAGGTCCATCCGTTGTAGCA   | 22365 |
| Gorilla           | GCTCAGGTTGTGTTTGCCTTTTGTGACTGGCTTATATTCACCTTAATATAATGTCCTCAGGGTCCATCCATTTTGTAGCA | 21390 |
| GrabEatingMacaque | GCTCAGGTTGTGTTTGCCTTTTGTGACTGGTTTACATTCACCTTAACA--ATGTTCTCAAGGTCCATCCGTTGTAGCA   | 21260 |
| Macaque           | GCTCAGGTTGTGTTTGCCTTTTGTGACTGGTTTACATTCACCTTAACA--GTGTTCTCAAGGTCCATCCGTTGTAGCA   | 21661 |
| PigTailedMacaque  | GCTCAGGTTGTGTTTGCCTTTTGTGACTGGTTTACATTCACCTTAACA--ATGTTCTCAAGGTCCATCCGTTGTAGCA   | 20651 |
| Bonobo            | GCTCAGGTCGTGTTTGCCTTTTGTGACTGGCTTATATTCACCTTAATATAATGTCCTCAGGGTCCATCCATTTTGTAGCA | 20102 |
| OliveBaboon       | GCTCAGGTTGTGTTTGCCTTTTGTGACTGGTTTACATTCACCTTAACA--ATGTTCTCAAGGTCCATCCGTTGTAGCA   | 20670 |
| Orangutan         | GCTCAGGTTGTGTTTGCCTTTTGTGACTGGCTTATATTCACCTTAATATAATGTCCTCAGGGTCCATCTGTGTTGTAGCA | 20473 |

|                   |                                                                                    |       |
|-------------------|------------------------------------------------------------------------------------|-------|
| Majority          | TGTGACAAGATTTCCCTCCCTTTTAAAGGCTACATAGCATTCCATTGTGGTACACAAAAGTTGATTTGAAGCCCCCTGTGT  |       |
|                   | 26250 26260 26270 26280 26290 26300 26310 26320                                    |       |
| Human             | TGTGACAAGATTTCCCTCCCTTTTAAAGGCTACATAGCATTCCATTGTGGTACACAAAAGTTGATTTGAAGCCCCCTGTGT  | 19105 |
| Coquerel'sSifaka  | TGTGACAGAATTTCCCTCCCTTTTAAAGGCTGCATAACATTCCATCGTG-TAC-----CAATTTGAAGTCCTTTGTGT     | 17684 |
| Ma'sNightMonkey   | TGTAACAAGATTTCCCTCCCTTTTAAAGGCCGCATAGCATTCCATTGTGGTACACGAAAGTTCGTTTGAAGCCCCCTGTGT  | 16861 |
| VervetAGM         | TGTGACAAGATTTCCCTCCGTTTTTAAAGGCTACATAGCATTCCATTGTGGTACACAAAAGTTGATTTGAAGCCCCCTGTGT | 22445 |
| Gorilla           | TGTGACAAGATTTCCCTCCCTTTTAAAGGCTACATAGCATTCCATTGTGGTACACAAAAGTTGATTTGAAGCCCCCTGTGT  | 21470 |
| GrabEatingMacaque | TGTGACAAGATTTCCCTCCGTTTTTAAAGGCTACATAGCATTCCATTGTGGTACACAAAAGTTGATTTGAAGCCCCCTGTGT | 21340 |
| Macaque           | TGTGACAAGATTTCCCTCCGTTTTTAAAGGCTACATAGCATTCCATTGTGGTACACAAAAGTTGATTTGAAGCCCCCTGTGT | 21741 |
| PigTailedMacaque  | TGTGACAAGATTTCCCTCCGTTTTTAAAGGCTACATAGCATTCCATTGTGGTACACAAAAGTTGATTTGAAGCCCCCTGTGT | 20731 |
| Bonobo            | TGTGACAAGATTTCCCTCCCTTTTAAAGGCTACATAGCATTCCATTGTGGTACACAAAAGTTGATTTGAAGCCCCCTGTGT  | 20182 |
| OliveBaboon       | TGTGACAAGATTTCCCTCCGTTTTTAAAGGCTACATAGCATTCCATTGTGGTACACAAAAGTTGATTTGAAGCCCCCTGTGT | 20750 |
| Orangutan         | TGTCACAAGATTTCCCTTTTAAAGGCTACATAGCATTCCATTATGGTACACAAAAGTTGATTTGAAGCCCC--GTGT      | 20551 |

|                   |                                                                                  |       |
|-------------------|----------------------------------------------------------------------------------|-------|
| Majority          | CATAACTCAGTCTTCCATAACAAAATACCATAGACTGAGTGACTTAAAAAACAGAAATTCATTTTCTCACAGTTCTGGAA |       |
|                   | 26330 26340 26350 26360 26370 26380 26390 26400                                  |       |
| Human             | CATAACTCAGACTTCCATAACAAAATACCATAGACTGAGTGACTTAAAAAACAGAGATTCGTTTTCTCACAGTTCTGGAA | 19185 |
| Coquerel'sSifaka  | CTTAACTCAGGATACCATAATAAAAACACCATAGATCAAGTGGCTTAAAAACA--AATTTATTTCTCACAGTTCTGAAG  | 17762 |
| Ma'sNightMonkey   | CATAACTCAGGTTTCCATAAGAAAATACCATAGACTGAGTGACTTAAAAAACAGAAATTTATTTTCTCCCAATTTTGGAA | 16941 |
| VervetAGM         | CATCACTCATTCTTCCATAACAAAATACCATAGACTGAGTGACTTAAAAAACAGAAATTCATTTTCTCACAGTTCTGGAA | 22525 |
| Gorilla           | CATAACTCAGACTTCCATAACAAAATACCATAGACTGAGTGACTTAAAAAACAGAAATTTATTTTCTCACAGTTCTGGAA | 21550 |
| GrabEatingMacaque | CATCACTCATTCTTCCATAACAAAATACCATAGACTGAGTGACTTAAAAAAGAGAAATCTTTTTCTCACAGTTCTGGAA  | 21420 |
| Macaque           | CATCACTCATTCTTCCATAACAAAATACCATAGACTGAGTGACTTAAAAAAGAGAAATCTTTTTCTCACAGTTCTGGAA  | 21821 |
| PigTailedMacaque  | CATCACTCATTCTTCCATAACAAAATACCATAGACTGAGTGACTTAAAAAAGAGAAATCTTTTTCTCACAGTTCTGGAA  | 20811 |
| Bonobo            | CATAACTCAGACTTCCATAACAAAATACCATAGACTGAGTGACTTAAAAAACAGAAATTTGTTTTCTCACAGTTCTGGAA | 20262 |
| OliveBaboon       | CATCACTCATTCTTCCATAACAAAATACCATAGACTGAGTGACTTAAAAAAGAGAAATTCATTTTCTCACAGTTCTGGAA | 20830 |
| Orangutan         | CATAACTCAGGCTTCCATAACAAAATACCATAGATTGAGTG-----GACAGAAATTTATTTTCTCACAGTTCTGGAA    | 20623 |

Tuesday, May 03, 2022 06:15 PM

|                   |                                                                                   |       |
|-------------------|-----------------------------------------------------------------------------------|-------|
| Majority          | ACTGGGAAGTCCAAGATCAAGGTACCAGCAAGGCAACTTTTCCTTCTGAGGCCACTTCTCTTGAAGTGAGG----CCACCA |       |
|                   | 26410 26420 26430 26440 26450 26460 26470 26480                                   |       |
| Human             | ACTGGGAAGTCCAAGATCAAGGTACCAGCAAGGCAACTTTTCCTTCTGAGGCCACTTCTCTTGAAGTGAGG----CCACCA | 19261 |
| Coquerel'sSifaka  | ACTGGGAAGTTCAAAATCAAGGTCTGGCAAGCTAAATTTTCATTCTGAGGTCACTTCTCTTGGTTTGTAGACAGCCACCA  | 17842 |
| Ma'sNightMonkey   | ACTGGGAAGTCCAAGATCAAGGTATCAGCAAAGCAGTTTTTCCTTCAGAGGCCACTTCTTTTGAAGTGAAG----CCACTG | 17017 |
| VervetAGM         | ACTGGGAAGTCCAAGATCAAGGTACCAGCAAGGCAACTTTTCCTTCTGAGGCCACTTCTCTTGAAGCAAGG----CCATCA | 22601 |
| Gorilla           | ACTGGGAAGTCCAAGATCAAGGTACCAGCAAGGCAACTTTTCCTTCTGAGGCCACTTCTCTTGAAGTGAGG----CCACCA | 21626 |
| GrabEatingMacaque | ACTGGGAAGTCCAAGATCAAGGTACCAGCAAGGCAACTTTTCCTTCTGAGGCCACTTCTCTTGAAGCGAGG----CCATCA | 21496 |
| Macaque           | ACTGGGAAGTCCAAGATCAAGGTACCAGCAAGGCAACTTTTCCTTCTGAGGCCACTTCTCTTGAAGCGAGG----CCATCA | 21897 |
| PigTailedMacaque  | ACTGGGAAGTCCAAGATCAAGGTACCAGCAAGGCAACTTTTCCTTCTGAGGCCACTTCTCTTGAAGCGAGG----CCATCA | 20887 |
| Bonobo            | ACTGGGAAGTCCAAGATCAAGGTACCAGCAAGGCAACTTTTCCTTCTGAGGCCACTTCTCTTGAAGTGAGG----CCACCA | 20338 |
| OliveBaboon       | ACTGGGAAGTCCAAGATCAAGGTACCAGCAAGGCAGTTTTTCCTTCTGAGGCCACTTCTCTTGAAGCGAGG----CCATCA | 20906 |
| Orangutan         | ACTGGGAAGTCCAAGATCAAGGTACCAGCAAGGCAACTTTACTTCTGAGGCCACTTCTCTTGAAGTGAGG----CCACCA  | 20699 |

|                   |                                                                                  |       |
|-------------------|----------------------------------------------------------------------------------|-------|
| Majority          | TTTTACTTTGT---GTGCCTCACATGACCTTTTCTTTGTGAGC-----ACACTTTGG--                      |       |
|                   | 26490 26500 26510 26520 26530 26540 26550 26560                                  |       |
| Human             | TTTTACTTTGT---GTGCCTCACATGACCTTTTCTTTGTGAGC-----ACACTTTGG--                      | 19310 |
| Coquerel'sSifaka  | TCTTATCTTGTTTTGTGCCTCACATGACCTTTTCTTTGTGAGCCACCATCTTGCTTTGTGCCTCACATGACCTTTTGTTA | 17922 |
| Ma'sNightMonkey   | TTTTACTTTGT---GTGCTTCACATGATCTTTTCTTTGTGAGC-----ACACTTAGG--                      | 17066 |
| VervetAGM         | TTTTATTTTGT---GTGCCTCACATGACCTTTTGTTTGTCAGC-----ACACTTTGG--                      | 22650 |
| Gorilla           | TTTTACTTTGT---GTGCCTCACATGACCTTTTCTTTGTGAGC-----ACACTTTGG--                      | 21675 |
| GrabEatingMacaque | TTTTACTTTGT---GTGCCTTACATGACCTTTTCTTTGTCAGC-----ACACTTTGG--                      | 21545 |
| Macaque           | TTTTACTTTGT---GTGCCTCACATGACCTTTTCTTTGTCAGC-----ACACTTTGG--                      | 21946 |
| PigTailedMacaque  | TTTTACTTTGT---GTGCCTCACATGACCTTTTCTTTGTCAGC-----ACACTTTGG--                      | 20936 |
| Bonobo            | TTTTACTTTGT---GTGCCTCACATGACCTTTTCTTTGTGAGC-----ACACTTTGG--                      | 20387 |
| OliveBaboon       | TTTTACTTTGT---GTGCCTCACATGACCTTTTCTTTGTCAGC-----ACACTTTGG--                      | 20955 |
| Orangutan         | TTTTACTTTGT---GTGCCTCACATGACCTTTTCTTTGTGAGC-----ACACTTCGG--                      | 20748 |

|                   |                                                                                 |       |
|-------------------|---------------------------------------------------------------------------------|-------|
| Majority          | -----GGGAGTGGGTGGCACAAGCTCTCTGGTGTTCCTTCTCATAAAGGCATTAATCCCATCATGAAGGCCCTACTCT  |       |
|                   | 26570 26580 26590 26600 26610 26620 26630 26640                                 |       |
| Human             | -----GGGAGTGGGTGGCAGAAGCTCTCTGGTATTTCTTCTCATAAAGGCATTAATCCCATCATGAAGGCCCTACTCT  | 19383 |
| Coquerel'sSifaka  | GCGCGCTGAGGGTGGGGGAACCAGCTCTCTGATGTTTCCCTTTACAA--GTGTTAATCCCGTCATGACTGCCCTACTCT | 18000 |
| Ma'sNightMonkey   | -----GGGAGTGGGTGGCACAAGCTCTATGGAGTTTCTTCTCATAAAGGCATTAACCCCATCATGAAGACCCTACTTT  | 17139 |
| VervetAGM         | -----GGGAGTGGGTGGCACAAGCTCTCTTGTGTTTCTTCTCATAAAGGCATTAAT--AATATGAAGGCCCTACTCT   | 22721 |
| Gorilla           | -----GGGAGTGGGTGGCAGAAGCTCTCTGGTGTTCCTTCTCATAAAGGCATTAATCCCATCATGAAGGCCCTACTCT  | 21748 |
| GrabEatingMacaque | -----GGGAGTGGGTGGCACAAGCTCTCTTGTGTTTCTTCTCATAAAGGCATTAAT--AATATGAAGGCCCTGCTCT   | 21616 |
| Macaque           | -----GGGAGTGGGTGGCACAAGCTCTCTTGTGTTTCTTCTCATAAAGGCATTAAT--AATATGAAGGCCCTGCTCT   | 22017 |
| PigTailedMacaque  | -----GGGAGTGGGTGGCACAAGCTCTCTTGTGTTTCTTCTCATAAAGGCATTAAT--AATATGAAGGCCCTGCTCT   | 21007 |
| Bonobo            | -----GGGAGTGGGTGGCAGAAGCTCTCTGGTGTTCCTTCTCATAAAGGCATTAATCCCATCATGAAGGCCCTACTCT  | 20460 |
| OliveBaboon       | -----GGGAGTGGGTGGCACAAGCTCTCTTGTGTTTATTTCTCATAAAGGCATTAAT--AATATGAAGGCCCTGCTCT  | 21026 |
| Orangutan         | -----GGGAGTGGATGGCAGAAGCTCTCTGGTGTTCCTTCTCATAAAGGCATTAATCCCATCATGAAGGCCCTACTCT  | 20821 |

Tuesday, May 03, 2022 06:15 PM

| Majority          | CATGATCTCATGAAATCCTCCA-GTAACTCCTAAAGGC-CCTATTTCTAAATTGCATCACATTT-GGGGTTAGGGCTTC  |       |
|-------------------|----------------------------------------------------------------------------------|-------|
|                   | 26650 26660 26670 26680 26690 26700 26710 26720                                  |       |
| Human             | CATGATCTCATGAAATCCTCCA-GTAACTCCTAAAGGC-CCTGTTTCAAAATTGCATCACATTT-GGGGTTAGGACTTC  | 19460 |
| Coquerel'sSifaka  | CATGACCTCATGAAACCCTA---ATTACCTCCAAAGGCTCCCATCTCTAAATACTGTCACATTG-GGTGTTAGGGCTTC  | 18076 |
| Ma'sNightMonkey   | C-TGATCTCATGAAATCCTCCCCGTTAACTCCCAAAGGC-CCTATTTCTAAACTGCATCACATTTTGGGGTTAGGGTTTC | 17217 |
| VervetAGM         | CATGATCTCATAAAATCCTCCA-GTAACTCCTAAAGGC-CCTATTTCTAAATTGCATCACGTTT-GGGGTTAGGGCTTC  | 22798 |
| Gorilla           | CATGATCTCATGAAATCCTCCA-GTAACTCCTAAAGGC-CCTGTTTCAAAATTGCATCACATTT-GGGGTTAGGACTTC  | 21825 |
| GrabEatingMacaque | CGTGATCTCATGAAATCCTCCA-GTAACTCCTAAAGGC-CCTATTTCTAAATTGCATCACATTT-GGGGTTAGGGCTTC  | 21693 |
| Macaque           | CGTGATCTCATGAAATCCTCCA-GTAACTCCTAAAGGC-CCTATTTCTAAATTGCATCACATTT-GGGGTTAGGGCTTC  | 22094 |
| PigTailedMacaque  | CGTGATCTCATGAAATCCTCCA-GTAACTCCTAAAGGC-CCTATTTCTAAATTGCATCACATTT-GGGGTTAGGGCTTC  | 21084 |
| Bonobo            | CATGATCTCATGAAATCCTCCA-GTAACTCCTAAAGGC-CCTGTTTCAAAATTGCATCACATTT-GGGGTTAGGACTTC  | 20537 |
| OliveBaboon       | CGTGATCTCATGAAATCCTCCA-GTAACTCCTAAAGGC-CCTATTTCTAAATTGCATCACATTT-GGGGTTAGCGCTTC  | 21103 |
| Orangutan         | CATGATCTTATGAAATCCTCCA-GTAACTCTTAAAGGC-CCTATTTCTAAATTGCATTACATTT-GGGGTTAGGATTTTC | 20898 |

| Majority          | AGCATGTGATTTTCGGGGAAACATAAGCATTTCAGTTCATAATACCCTGCATATAGTTGACCATACTTCTCCACTCCAGG   |       |
|-------------------|------------------------------------------------------------------------------------|-------|
|                   | 26730 26740 26750 26760 26770 26780 26790 26800                                    |       |
| Human             | AGCATGTGATTTTCGGGGAAACATAAGCATTTCAGTTCATAATACCCTGCATATAGTTGACCATACTTCTCCACTCCAGG   | 19540 |
| Coquerel'sSifaka  | A-----ACA----CATTCAGTTCATGACACCTTGCATATACTTTACCCCTCCTT--TCACCCAGG                  | 18131 |
| Ma'sNightMonkey   | AGCATGTGGCTTTCGGGGAAACATAAGCATTTCAGTTCATAATACTCTGCATGTAGTTGACCTGTATTT--CCTACTCCAGG | 17295 |
| VervetAGM         | AGCATGTGATTTTCGGGGAAACATAAGCATTTCAGTTCATAGTACCCTGCATATAGTTGACCATACTTCTCCCCTCCAGG   | 22878 |
| Gorilla           | AGCATGTGATTTTCGGGGAAACATAAGCATTTCAGTTCATAATAACCCTGCATATAGTTGACCATACTTCTCCACTCCAGG  | 21905 |
| GrabEatingMacaque | AGCATGTGATTTTCGGGGAAACATAAGCATTTCAGTTCATAATAACCCTGCATATAGTTGACCATACTTCTCTCCTCCAGG  | 21773 |
| Macaque           | AGCATGTGATTTTCGGGGAAACATAAGCATTTCAGTTCATAATAACCCTGCATATAGTTGACCATACTTCTCTCCTCCAGG  | 22174 |
| PigTailedMacaque  | AGCATGTGATTTTCGGGGAAACATAAGCATTTCAGTTCATAATAACCCTGCATATAGTTGACCATACTTCTCTCCTCCAGG  | 21164 |
| Bonobo            | AGCATGTGATTTTCGGGGAAACATAAGCATTTCAGTTCATAATAACCCTGCATATAGTTGACCATACTTCTCCACTCCAGG  | 20617 |
| OliveBaboon       | AGCATGTGATTTTCGGGGAAACATAAGCATTTCAGTTCATAATAACCCTGCATATAGTTGACCATACTTCTCCCCTCCAGG  | 21183 |
| Orangutan         | AGCATGTGATTTTCGGGAAACATAAGTATTCAGTTCATAATAACCCTGCATATAGTTGACCATACTTCTCCACTCCAGG    | 20978 |

| Majority          | TAATTACTATACTAAATTTGATGTTTACCATTCCCATAAAATTTCTCATTTACTACAT-----                   |       |
|-------------------|-----------------------------------------------------------------------------------|-------|
|                   | 26810 26820 26830 26840 26850 26860 26870 26880                                   |       |
| Human             | TAATTACTATACTAAATTTGATGTTTACCATTCCCATAAAATTTCTCATTTACTACAT-----                   | 19597 |
| Coquerel'sSifaka  | TAACAACCATCCGGAATTTGGTGTTTACCTTTCCTGTGAATTTTCTTTTACTACAT-----                     | 18188 |
| Ma'sNightMonkey   | TAATTACTATCCTTAAATTTGATGTTTACCATTCCATAAAATTTCTCTTTTACTACAT-----                   | 17352 |
| VervetAGM         | TGATTACTATACTAAATTTGATGTTTACCATTCCGATCATTTTCTCATTTACTACGT-----                    | 22935 |
| Gorilla           | TAATTACTATAACAAATTTGATGTTTACCATTCCCATAAAATTTCTCATTTACTACAT-----                   | 21962 |
| GrabEatingMacaque | TGATTACTATACTAAATTTGATGTTTACCATTCCGATCATTTTCTCATTTACTACGT-----                    | 21830 |
| Macaque           | TGATTACTATACTAAATTTGATGTTTACCATTCCGATCATTTTCTCATTTACTACGT-----                    | 22231 |
| PigTailedMacaque  | TGATTACTATACTAAATTTGATGTTTACCATTCCGATCATTTTCTCATTTACTACGT-----                    | 21221 |
| Bonobo            | TAATTACAATACTAAATTTGATGTTTACCATTCCCATAAAATTTCTCATTTACTACAT-----                   | 20674 |
| OliveBaboon       | TGATTACTATACTAAATTTGATGTTTACCATTCCGATCATTTTCTCATTTACTACGT-----                    | 21240 |
| Orangutan         | TAATTACTATACTAAATTTGATGTTTACCATTCCCATAAAATTTCTCATTTACTACATTTTTTTTTTTTTTTTTTTTGGAG | 21058 |



Tuesday, May 03, 2022 06:15 PM

| Majority          | -----                                                                      |       |       |       |       |       |       |       |       |
|-------------------|----------------------------------------------------------------------------|-------|-------|-------|-------|-------|-------|-------|-------|
|                   | 26890                                                                      | 26900 | 26910 | 26920 | 26930 | 26940 | 26950 | 26960 |       |
| Human             | -----                                                                      |       |       |       |       |       |       |       | 19597 |
| Coquerel'sSifaka  | -----                                                                      |       |       |       |       |       |       |       | 18188 |
| Ma'sNightMonkey   | -----                                                                      |       |       |       |       |       |       |       | 17352 |
| VervetAGM         | -----                                                                      |       |       |       |       |       |       |       | 22935 |
| Gorrilla          | -----                                                                      |       |       |       |       |       |       |       | 21962 |
| GrabEatingMacaque | -----                                                                      |       |       |       |       |       |       |       | 21830 |
| Macaque           | -----                                                                      |       |       |       |       |       |       |       | 22231 |
| PigTailedMacaque  | -----                                                                      |       |       |       |       |       |       |       | 21221 |
| Bonobo            | -----                                                                      |       |       |       |       |       |       |       | 20674 |
| OliveBaboon       | -----                                                                      |       |       |       |       |       |       |       | 21240 |
| Orangutan         | ACAGAGTCTCGGTCTGTTGCCAGGCTGGAGTGCAGTGGTGCATCTCAGCTACTGCAAGCTCCGCTCCAGGTTAC |       |       |       |       |       |       |       | 21138 |

| Majority          | -----T-GTTTATGTATTTTTATCTTAAGCAATATATGGTT                                       |       |       |       |       |       |       |       |       |
|-------------------|---------------------------------------------------------------------------------|-------|-------|-------|-------|-------|-------|-------|-------|
|                   | 26970                                                                           | 26980 | 26990 | 27000 | 27010 | 27020 | 27030 | 27040 |       |
| Human             | -----GTTTATGTATTTTTATCTTAAGCAATATATGGTT                                         |       |       |       |       |       |       |       | 19631 |
| Coquerel'sSifaka  | -----TTGTTTATGTACTTTCATCTCAAGCAGTATATGGCT                                       |       |       |       |       |       |       |       | 18224 |
| Ma'sNightMonkey   | -----GTTTATGTATTTTTATCTTAAGCGATATATGGTT                                         |       |       |       |       |       |       |       | 17386 |
| VervetAGM         | -----T---TATGTATTTTTATCTTAAGTAATATATGGTT                                        |       |       |       |       |       |       |       | 22967 |
| Gorrilla          | -----GTTTATGTATTTTTATCTTAAGCAATATATGGTT                                         |       |       |       |       |       |       |       | 21996 |
| GrabEatingMacaque | -----T---TATATATTTTTATCTTAAGTAATACATGGTT                                        |       |       |       |       |       |       |       | 21862 |
| Macaque           | -----T---TATATATTTTTATCTTAAGTAATACATGGTT                                        |       |       |       |       |       |       |       | 22263 |
| PigTailedMacaque  | -----T---TATATATTTTTATCTTAAGTAATACATGGTT                                        |       |       |       |       |       |       |       | 21253 |
| Bonobo            | -----GTTTATGTATTTTTATCTTAAGCAATATATGGTT                                         |       |       |       |       |       |       |       | 20708 |
| OliveBaboon       | -----T---TATATATTTTTATCTTAAGTAATACATGGTT                                        |       |       |       |       |       |       |       | 21272 |
| Orangutan         | GCCATTCTCCTGCCTCAGCCTCCGAGTAGCTGGGACTTACTACATGTTTATGTATTTTTATCTTAAGCAATATATGGTT |       |       |       |       |       |       |       | 21218 |

| Majority          | TTGTTTTGCATGTTTAAACTATA--GATGTAATCATGCTGTATGTATTCTGT-AATTTGCTCTTTTTGTTTCAGT-GTT   |       |       |       |       |       |       |       |       |
|-------------------|-----------------------------------------------------------------------------------|-------|-------|-------|-------|-------|-------|-------|-------|
|                   | 27050                                                                             | 27060 | 27070 | 27080 | 27090 | 27100 | 27110 | 27120 |       |
| Human             | TTGTTTTGCATGTTTAAACTATA--GATGTAATCATGCTGTATGTATTCTGT-AATTTGCTCTTTTTGTTTCAGT-GTT   |       |       |       |       |       |       |       | 19707 |
| Coquerel'sSifaka  | TTGTTTTGCATGTTTGAAGTATATAGGTGACTGTCATGCCGAATGTATTCTGTAACTTGCTCTTTTTGTTTCATTGCT    |       |       |       |       |       |       |       | 18304 |
| Ma'sNightMonkey   | TTGTTTTGCATGTTTAAACTATG--GAT-TACTGTGATGCCGTATGTATTCTGT-AACTTGCTCTTTTTGTTTCAGT-GTT |       |       |       |       |       |       |       | 17461 |
| VervetAGM         | TTGTTTTGCATGTTTAAACTATA--GATGTAATCATGCTATATGTATCTGT-AATTTGCTCTTTTTGTTTCAGT-GTT    |       |       |       |       |       |       |       | 23043 |
| Gorrilla          | TTGTTTTGCATGTTTAAACTATA--GATGTAATCATGCTGTATGTATTCTGT-AATTTGCTCTTTTTGTTTCAGT-GTT   |       |       |       |       |       |       |       | 22072 |
| GrabEatingMacaque | TTGTTTTGCATATTTAAACTATA--GATGTAATCATGCTATATGTATTCTGT-AATTTGCTCTTTTTGTTTCAGT-GTT   |       |       |       |       |       |       |       | 21938 |
| Macaque           | TTGTTTTGCATATTTAAACTATA--GATGTAATCATGCTATATGTATTCTGT-AATTTGCTCTTTTTGTTTCAGT-GTT   |       |       |       |       |       |       |       | 22339 |
| PigTailedMacaque  | TTGTTTTGCATGTTTAAACTATA--GATGTAATCATGCTATATGTATTCTGT-AATTTGCTCTTTTTGTTTCAGT-GTT   |       |       |       |       |       |       |       | 21329 |
| Bonobo            | TTGTTTTGCATGTTTAAACTATA--GATGTAATCATGCTGTATGTATTCTGT-AATTTGCTCTTTTTGTTTCAGT-GTT   |       |       |       |       |       |       |       | 20784 |
| OliveBaboon       | TTGTTTTGCATGTTTAAACTATA--GATGTAATCATGCTATATGTATTCTGT-AATTTGCTCTTTTTATTCAGT-GTT    |       |       |       |       |       |       |       | 21348 |
| Orangutan         | TGGTTTTGCATGTTTAAACTATA--GATATACTATCATGTTGTATGTATTCTGT-AATTTGCTCTTTTTGTTTCAGT-GTT |       |       |       |       |       |       |       | 21294 |

Tuesday, May 03, 2022 06:15 PM

| Majority          | ATTTTGTGTTTTTAAGTTTATATGCATACCTC---TAATTTTCATTGCCATATAGTATATGAT-ATATGAATATATCATT  |       |       |       |       |       |       |       |       |
|-------------------|-----------------------------------------------------------------------------------|-------|-------|-------|-------|-------|-------|-------|-------|
|                   | 27130                                                                             | 27140 | 27150 | 27160 | 27170 | 27180 | 27190 | 27200 |       |
| Human             | ATTTTGTGTT----AAGTTTATATATATA--TA---TA-TTTTCATTGCCATATAGTATATGAT-ATATGAATATATCATC |       |       |       |       |       |       |       | 19776 |
| Coquerel'sSifaka  | GTTTCTATCTTTTTAATTCATATGTAGCTCTTGATTAATTTTCATTGCCATATAAATATGTGATTATATCATTACCCTACT |       |       |       |       |       |       |       | 18384 |
| Ma'sNightMonkey   | ATTTTGTGTTTCTAAGTTTATATACATATCTC---TAATTTTCATTGCCATGTAGTACATGAT-ATATGAATATCTTGTT  |       |       |       |       |       |       |       | 17537 |
| VervetAGM         | ATTTTGTGTTTTTAAGTTTATATGCATACCTC---TAATTTTCATTGCCGTATAGTATATGTT-ATATGAATATATCATT  |       |       |       |       |       |       |       | 23119 |
| Gorilla           | ATTTTGTGTTTTTAAGTTTGTATATA--TA---G--TTTTCATTGCCATATAGTATATGAT-ATATGAATATATCATC    |       |       |       |       |       |       |       | 22144 |
| GrabEatingMacaque | ATTTTGTGTTTTTAAGTTTATATGCATACCTC---TAATTTTCATTGCCATATAGTATATGTT-ATATGAATATATCATT  |       |       |       |       |       |       |       | 22014 |
| Macaque           | ATTTTGTGTTTTTAAGTTTATATGCATACCTC---TAATTTTCATTGCCATATAGTATATGTT-ATATGAATATATCATT  |       |       |       |       |       |       |       | 22415 |
| PigTailedMacaque  | ATTTTGTGTTTTTAAGTTTATATGCATACCTC---TAATTTTCATTGCCATATAGTATATGTT-ATATGAATATATCATT  |       |       |       |       |       |       |       | 21405 |
| Bonobo            | ATTTTGTGTTTTTAAGTTTATATATATA--TA---TAATTTTCATTGCCATATATTATATGAT-ATATGAATATATCATC  |       |       |       |       |       |       |       | 20858 |
| OliveBaboon       | ATTTTGTGTTTTTAAGTTTATATGCATACCTC---TAATTTTCATTGCTGTATAGTATATGTT-ATATGAATATATCATT  |       |       |       |       |       |       |       | 21424 |
| Orangutan         | ATTTTGTGTTTTTAAGTTTATATATATA--TA---TAATTTTCATTGCCATATAGTATGTGAT-ATATGAATATATCATC  |       |       |       |       |       |       |       | 21368 |

| Majority          | A-----TCTTGTGACAAAT-GAGTT----AATATTTGACGAGATTGATTTGTCAAATATTTTAAATTTTTTTTCCA     |       |       |       |       |       |       |       |       |
|-------------------|----------------------------------------------------------------------------------|-------|-------|-------|-------|-------|-------|-------|-------|
|                   | 27210                                                                            | 27220 | 27230 | 27240 | 27250 | 27260 | 27270 | 27280 |       |
| Human             | -----TTGACAAAT-GAGTT----AATATTTGACGAGATTGATTTGTCAAATATTTTAAATTTTTTTTCCA          |       |       |       |       |       |       |       | 19836 |
| Coquerel'sSifaka  | GACAAATATACCCTACTGACAAATTGAGGTTGTCGATATTTGACAAAGTTGATTTGCCAAATATTTCTAGTTTTTTTCTA |       |       |       |       |       |       |       | 18464 |
| Ma'sNightMonkey   | -----GACACAT-GAGGC----AATATTTGACAAGATTGACTTGTGACAGATATTTTAAATTTTTTTTCAA          |       |       |       |       |       |       |       | 17595 |
| VervetAGM         | A-----TCTTGTGACAAAT-GAGTT----AATATTTGTCGAGATTGATTTGTCAAATATTTTAAATTTTTTTTCCA     |       |       |       |       |       |       |       | 23185 |
| Gorilla           | -----TTGACAAAT-GAGTT----AATATTTGACGAGATTGATTTGTCAAATATTTTAAATTTTTTTTCCA          |       |       |       |       |       |       |       | 22204 |
| GrabEatingMacaque | A-----TCTTGTGACAAAT-GAGTT----AATATTTGTTGAGATTGATTTGTCAAATATTTTAACTTTTTTTTCCA     |       |       |       |       |       |       |       | 22080 |
| Macaque           | A-----TCTTGTGACAAAT-GAGTT----AATATTTGTCGAGATTGATTTGTCAAATATTTTAAATTTTTTTTCCA     |       |       |       |       |       |       |       | 22481 |
| PigTailedMacaque  | A-----TCTTGTGACAAAT-GAGTT----AATATTTGTCGAGATTGATTTGTCAAATATTTTAAATTTTTTTTCCA     |       |       |       |       |       |       |       | 21471 |
| Bonobo            | -----TTGACAAAT-GAGTT----AATATTTGACGAGATTGATTTGTCAAATATTTTAAATTTTTTTTCCA          |       |       |       |       |       |       |       | 20918 |
| OliveBaboon       | A-----TCTTGTGACAAAT-GAGTT----AATATTTGTCGAGATTGATTTGTCAAATATTTTAAATTTTTTTTCCA     |       |       |       |       |       |       |       | 21490 |
| Orangutan         | -----TTGACAAAT-GAGT----AATATTTGACGAGGTTGATTTGTCAAATATTTTAAATTTTTTTTCCA           |       |       |       |       |       |       |       | 21427 |

| Majority          | TTACAAACTGCTGCTGTAAGCATTTCATATGCATATTCTAACGTGT--TAATATTAGAGTTTC-----               |       |       |       |       |       |       |       |       |
|-------------------|------------------------------------------------------------------------------------|-------|-------|-------|-------|-------|-------|-------|-------|
|                   | 27290                                                                              | 27300 | 27310 | 27320 | 27330 | 27340 | 27350 | 27360 |       |
| Human             | TTACAAACTGCTACTGTAAGCATTTCATATGCATATTCTAACGTGT--TAATATTAGAGTTTC-----               |       |       |       |       |       |       |       | 19896 |
| Coquerel'sSifaka  | TCACAAACTACTGCTATAAACATTCTTATGCATATTCCGACATGTATTAATATTAGAGTTTCAC TAGAAGTGGAAC TGCT |       |       |       |       |       |       |       | 18544 |
| Ma'sNightMonkey   | TTACAAACTGCTGCTGTAGGCATTTCATATGGATGTTCTAACATGT--TAATATTAGAGTTTC-----               |       |       |       |       |       |       |       | 17655 |
| VervetAGM         | TTACAAACTGCTGCTGTAAGCATTTCATATGCATATTCTAAAGTGT--T-----AGAGTTTC-----                |       |       |       |       |       |       |       | 23239 |
| Gorilla           | TTACAAACTGCTACTGTAAGCATTTCATATGCATATTCTAACATGT--TAATATTAGAGTTTC-----               |       |       |       |       |       |       |       | 22264 |
| GrabEatingMacaque | TTACAAACTGCTGCTGTAAGCATTTCATATGCATATTCTAACGTGT--TAATATTAGAGTTTC-----               |       |       |       |       |       |       |       | 22140 |
| Macaque           | TTACAAACTGCTGCTGTAAGCATTTCATATGCATATTCTAACGTGT--TAATATTAGAGTTTC-----               |       |       |       |       |       |       |       | 22541 |
| PigTailedMacaque  | TTACAAACTGCTGCTGTAAGCATTTCATATGCATATTCTAACGTGT--TAATATTAGAGTTTC-----               |       |       |       |       |       |       |       | 21531 |
| Bonobo            | TCACAAACTGCTACTGTAAGCATTTCATATGCATATTCTAACGTGT--TAATATTAGAGTTTC-----               |       |       |       |       |       |       |       | 20978 |
| OliveBaboon       | TTACAAACTGCTGCTGTAAGCATTTCATATGCATATTCTAACGTGT--TAATATTAGAGTTTC-----               |       |       |       |       |       |       |       | 21550 |
| Orangutan         | TTACAAACTGCTGCTGTAAGCATCAATGTGCATATTCTAACGTGT--TAATATTAGAGTTTC-----                |       |       |       |       |       |       |       | 21487 |

Tuesday, May 03, 2022 06:15 PM

|                   |                                                                                        |       |       |       |       |       |       |       |
|-------------------|----------------------------------------------------------------------------------------|-------|-------|-------|-------|-------|-------|-------|
| Majority          | ---TCATAGATTGTGTCT--TTTCAAGTCGATTGAATATTAGCATATTGCTTTCATAGGTGATTATACTAATTA---TAC       |       |       |       |       |       |       |       |
|                   | 27370                                                                                  | 27380 | 27390 | 27400 | 27410 | 27420 | 27430 | 27440 |
| Human             | ---TCATAGATTGTGTCT--TTTCAAATCGATTGAATATTAACATATTGCTTTCATAGGTAATTATATTAATTA---TAC 19968 |       |       |       |       |       |       |       |
| Coquerel'sSifaka  | GGGTAAAGGGTGTGTCTGTTTTCAAGTCAGTCAAATACTGGCATGTGCTTTTCTAGGTGGTTGTGCTAATTTACTCTC 18624   |       |       |       |       |       |       |       |
| Ma'sNightMonkey   | ---TCATAGATTGTGTATGTTTTTAAATCAATTGAATATTAACATAGTGCTTTCATAGGCGATTATACCAATTA---TAC 17729 |       |       |       |       |       |       |       |
| VervetAGM         | ---TCATAGATTGTGTCTGTTTTCAAGTCGATTGAATATTAGCATATTGCTTTCATAGGTGATTATACTAATTA---TAC 23313 |       |       |       |       |       |       |       |
| Gorilla           | ---TCATAGATTGTGTCT--TTTCAAATCGATTGAATATTAACATATTGCTTTCATAGGTAATTATACTAATTA---TAC 22336 |       |       |       |       |       |       |       |
| GrabEatingMacaque | ---TCATAGATTGTGTCT--TTTCAAGTCGATTGAATATTAGCATATTGCTTTCATAGGTGATTATACTAATTA---CAC 22212 |       |       |       |       |       |       |       |
| Macaque           | ---TCATAGATTGTGTCT--TTTCAAGTCGATTGAATATTAGCATATTGCTTTCATAGGTGATTATACTAATTA---CAC 22613 |       |       |       |       |       |       |       |
| PigTailedMacaque  | ---TCATAGATTGTGTCTGTTTTCAAGTCGATTGAATATTAGCATATTGCTTTCATAGGTGATTATACTAATTA---CAC 21605 |       |       |       |       |       |       |       |
| Bonobo            | ---TCATAGATTGTGTCT--TTTCAAATCGATTGAATATTAACATGTGCTTTCATAGGTAATTATATTAATTA---TAC 21050  |       |       |       |       |       |       |       |
| OliveBaboon       | ---TCATAGATTGTGTCTGTTTTCAAGTCGATTGAATATTAGCATATTGCTTTCATAGGTGATTATACTAATTA---TAC 21624 |       |       |       |       |       |       |       |
| Orangutan         | ---TCA--GATTGTGTCT--TTTCAAATCGATTGAATGTTAACATATTGCTTTTATAAGTGATTATACTAATTA---TAC 21557 |       |       |       |       |       |       |       |

|                   |                                                                                        |       |       |       |       |       |       |       |
|-------------------|----------------------------------------------------------------------------------------|-------|-------|-------|-------|-------|-------|-------|
| Majority          | TGTTAGTGCTGGATGTAGA---TTCTTGTTTCT-----ATACATTCCTTTGAAAATCGGCATTGTTGGACTTTTTAATT-       |       |       |       |       |       |       |       |
|                   | 27450                                                                                  | 27460 | 27470 | 27480 | 27490 | 27500 | 27510 | 27520 |
| Human             | TGTTAGCGCTGCATGTAGA---TTCTTGTTTCT-----ATACATTCCTTTGAAAATCGGCATTGTTGGACTTTTTAATT- 20038 |       |       |       |       |       |       |       |
| Coquerel'sSifaka  | TGTTAGTGGTAGATGTGAA---TTCCTATTCTTACTACATATCTTTCTGAAAATGGCATTGTTGGACTTTTTAACTG 18701    |       |       |       |       |       |       |       |
| Ma'sNightMonkey   | TGTTAGTGCTGGATGTACAACATTCTTGTTTCT-----ATACATTCCTTTGAAAATGGGATTGTTGGACTTTTTAATTG 17803  |       |       |       |       |       |       |       |
| VervetAGM         | TGTTAGTGCCGGATGTAGA---TTCTTGTTTCT-----ATACATTCCTTTGAAAATCGACATTGTTGGAC---TTAATT- 23380 |       |       |       |       |       |       |       |
| Gorilla           | TGTTAGCGCTGCATGTAGA---TTTTTGTTTCT-----ATACATTCCTTTGAAAATGGCATTGTTGGACTTTTTAATT- 22406  |       |       |       |       |       |       |       |
| GrabEatingMacaque | TGTTAGTGCTGGATGTAGA---TTCTTGTTTCT-----GTACATTCCTTTGAAAATCGGCATTGTTGGACTTTTTAATT- 22282 |       |       |       |       |       |       |       |
| Macaque           | TGTTAGTGCTGGATGTAGA---TTCTTGTTTCT-----GTACATTCCTTTGAAAATCGGCATTGTTGGACTTTTTAATT- 22683 |       |       |       |       |       |       |       |
| PigTailedMacaque  | TGTTAGTGCTGGATGTAGA---TTCTTGTTTCT-----GTACATTCCTTTGAAAATCGGCATTGTTGGACTTTTTAATT- 21675 |       |       |       |       |       |       |       |
| Bonobo            | TGTTAGCGCTGCATGTAGA---TTCTTGTTTCT-----ATACATTCCTTTGAAAATCGGCATTGTTGGACTTTTTAATT- 21120 |       |       |       |       |       |       |       |
| OliveBaboon       | TGTTAGTGCTGGATGTAGA---TTCTTGTTTCT-----GTACATTCCTTTGAAAATCGGCATTGTTGGACTTTTTAATT- 21694 |       |       |       |       |       |       |       |
| Orangutan         | TGTTAGTGCTGCATGTAGA---TTCTTGTTTCT-----ACACGTTCCTTTGAAAATCGGCATTGTTGGACTTTTTAATT- 21627 |       |       |       |       |       |       |       |

|                   |                                                                                         |       |       |       |       |       |       |       |
|-------------------|-----------------------------------------------------------------------------------------|-------|-------|-------|-------|-------|-------|-------|
| Majority          | TTGCCGATCAAATGTACATGGGAAGGATATCTTGTTGGTTTTAATTTGCATTCCTTATTAATGCTTTATTTTAATGATACA       |       |       |       |       |       |       |       |
|                   | 27530                                                                                   | 27540 | 27550 | 27560 | 27570 | 27580 | 27590 | 27600 |
| Human             | TTGCTGATCAAATGTACATGGGAAGGATATCTTGTTGGTTTTAATTTGCATTCCTTATTAATGCA-----AAAAAAAAA 20111   |       |       |       |       |       |       |       |
| Coquerel'sSifaka  | TTGCCAGTCTAATGTGCATGGGAATGATATCTTGTTGAGCTTAATTTGAATTCCTCAATTGATG----- 18763             |       |       |       |       |       |       |       |
| Ma'sNightMonkey   | TTGCCAATCAAATGTATATGGGAAGGATATCTTGTTGGTTTT---TGTATTCCTTATTAATGCTTTCTTCTTATTATT-- 17877  |       |       |       |       |       |       |       |
| VervetAGM         | TTGCAGATCAAATGTACATGGGAAGGGTATCTTGTTGGTTTTAATTTGCATTCCTTATTAATGCTTTATTTTAATGATACA 23460 |       |       |       |       |       |       |       |
| Gorilla           | TTGCCGATCAAATGTACATGGGAAGGATATCTTGTTGGTTTTAATTTGCATTCCTTATTAATGCA-----AAAAAAA-- 22477   |       |       |       |       |       |       |       |
| GrabEatingMacaque | TTGCCGATCAAATGTACATGGGAAGGATATCTTGTTGGTTTTAATTTGCATTCCTTATTAATGCTTTATTTTAATGATACA 22362 |       |       |       |       |       |       |       |
| Macaque           | TTGCCGATCAAATGTACATGGGAAGGATATCTTGTTGGTTTTAATTTGCATTCCTTATTAATGCTTTATTTTAATGATACA 22763 |       |       |       |       |       |       |       |
| PigTailedMacaque  | TTGCCGATCAAATGTACATGGGAAGGATATCTTGTTGGTTTTAATTTGCATTCCTTATTAATGCTTTATTTTAATGATACA 21755 |       |       |       |       |       |       |       |
| Bonobo            | TTGCTGATCAAATGTACATGGGAAGGATATCTTGTTGGTTTTAATTTGCATTCCTTATTAATGCA-----AAAAAAAAA 21193   |       |       |       |       |       |       |       |
| OliveBaboon       | TTGCCGATCAAATGTACATGGGAAGGATATCTTGTTGGTTTTAATTTGCATTCCTTATTAATGCTTTATTTTAATGATACA 21774 |       |       |       |       |       |       |       |
| Orangutan         | TTGCCAATCAAATGTACATGGGAAGGATATCTTGTTGGTTTTAATTCGCATTCCTTATTAATGCTTTATTTTAATGATATA 21707 |       |       |       |       |       |       |       |

Tuesday, May 03, 2022 06:15 PM

| Majority          | TTTTATTAGTTTATTGGCCATTGATATTTCTTCTCTGTGAAATGC--TGTTTATAGTTTGTTTCATTTTCTTTTGACTG  |       |       |       |       |       |       |       |       |
|-------------------|----------------------------------------------------------------------------------|-------|-------|-------|-------|-------|-------|-------|-------|
|                   | 27610                                                                            | 27620 | 27630 | 27640 | 27650 | 27660 | 27670 | 27680 |       |
| Human             | -----AAACATTGAT---TCCTGGGAGTT-----TTTATATACTGTGCAGACT-----AATTG                  |       |       |       |       |       |       |       | 20156 |
| Coquerel'sSifaka  | -----A-----TACATTTTAATGATG-----                                                  |       |       |       |       |       |       |       | 18779 |
| Ma'sNightMonkey   | -----TTTTGAGACGAAGTTTGTCTTGTGCCCCAGACT--GGAGTGCAGTGGCGTGATCTCAGTTC--ACTG         |       |       |       |       |       |       |       | 17942 |
| VervetAGM         | TTTTATTAGTTTATTGGCCATTGATATTTCTTCTCTGTGAAATGCC--TGTTTATAGTTTGTTTCATTTTCTTTTGACTG |       |       |       |       |       |       |       | 23538 |
| Gorilla           | -----CATTGAT---TCCTGAGAGTT-----TTTATATACTGTGCAGACT-----AATTG                     |       |       |       |       |       |       |       | 22519 |
| GrabEatingMacaque | TTTTATTAGTTTATTGGCCATTGATATTTCTTCTCTGTGAAATGCG--TGTTTATAGTTTGTTTCATTTTCTTTTGACTG |       |       |       |       |       |       |       | 22440 |
| Macaque           | TTTTATTAGTTTATTGGCCATTGATATTTCTTCTCTGTGAAATGCG--TGTTTATAGTTTGTTTCATTTTCTTTTGACTG |       |       |       |       |       |       |       | 22841 |
| PigTailedMacaque  | TTTTATTAGTTTATTGGCCATTGATATTTCTTCTCTGTGAAATGCC--TGTTTATAGTTTGTTTCATTTTCTTTTGACTG |       |       |       |       |       |       |       | 21833 |
| Bonobo            | -----A--CATTGAT---TCCTGGGAGTT-----TTTATATACTGTGCAGACT-----AATTG                  |       |       |       |       |       |       |       | 21236 |
| OliveBaboon       | TTTTATTAGTTTATTGGCCATTGATATTTCTTCTCTGTGATATGCC--TGTTTATAGTTTGTTTCATTTTCTTTTGACTG |       |       |       |       |       |       |       | 21852 |
| Orangutan         | TTTTATTAGTTTATTGGCCATTAATGTTTCTCTCTGTAAATGCCTGTTTATATAGTTTGTTTCATTTTCTTTTGACTG   |       |       |       |       |       |       |       | 21787 |

| Majority          | TAGTTTTATCTTTTTTAAAATTGATTCCTGCTCGGCATGGTGGCTCACGCCTATAATCCCAACACTTTGGGAG-CCGAG  |       |       |       |       |       |       |       |       |
|-------------------|----------------------------------------------------------------------------------|-------|-------|-------|-------|-------|-------|-------|-------|
|                   | 27690                                                                            | 27700 | 27710 | 27720 | 27730 | 27740 | 27750 | 27760 |       |
| Human             | TTTTGTTATTTTTTTT-----GGTTTGT-----                                                |       |       |       |       |       |       |       | 20179 |
| Coquerel'sSifaka  | -----                                                                            |       |       |       |       |       |       |       | 18779 |
| Ma'sNightMonkey   | CAACTTCTCCCTCCC-A-----GGTTCAG--GTATTCTCCA-GCTT-----                              |       |       |       |       |       |       |       | 17980 |
| VervetAGM         | TAGTTTTATCTTTTTTAAAATTGATTCCTGCTCGGCATGGTGGCTCACGCCTATAATCCCAACACTTTGGGAGGCCGAG  |       |       |       |       |       |       |       | 23618 |
| Gorilla           | TTTTGTTAGTTTTTTT-----GGTTTGT-----                                                |       |       |       |       |       |       |       | 22542 |
| GrabEatingMacaque | TAGTTTTATCTTTTTTAAAATTGATTCCTGCTCGGCATGGTGGCTCACGCCTATAATCCCAACACTTTGGGAGACCGAG  |       |       |       |       |       |       |       | 22520 |
| Macaque           | TAGTTTTATCTTTTTTAAAATTGATTCCTGCTCGGCATGGTGGCTCACGCCTATAATCCCAACACTTTGGGAGACCGAG  |       |       |       |       |       |       |       | 22921 |
| PigTailedMacaque  | TAGTTTTATCTGTTTTTAAAATTGATTCCTGCTCGGCATGGTGGCTCACGCCTATAATCCCAACACTTTGGGAGACCGAG |       |       |       |       |       |       |       | 21913 |
| Bonobo            | TTTTGTTATTTTTTTT-----GGTTGGT-----                                                |       |       |       |       |       |       |       | 21258 |
| OliveBaboon       | TAGTTTTATCTTTTTTAAAATTGATTCCTGCTCGGCATGGTGGCTCACGCCTATAATCCCAACACTTTGGGAGGCCGAG  |       |       |       |       |       |       |       | 21932 |
| Orangutan         | TAGTTTTATCTTTTTTAAAATTGATTCCTGCTCAGCGCGGTGGCTTGCCTATAATCTCAACACTTTGGGAGGCCGAG    |       |       |       |       |       |       |       | 21867 |

| Majority          | GC-GGTGGATCATTGAGGTCAGGAGTTCTAGACCAGCCTAGCCAACATGGCAAACCCCGTCTCTACTAAAAATGCA-A   |       |       |       |       |       |       |       |       |
|-------------------|----------------------------------------------------------------------------------|-------|-------|-------|-------|-------|-------|-------|-------|
|                   | 27770                                                                            | 27780 | 27790 | 27800 | 27810 | 27820 | 27830 | 27840 |       |
| Human             | -----                                                                            |       |       |       |       |       |       |       | 20179 |
| Coquerel'sSifaka  | -----                                                                            |       |       |       |       |       |       |       | 18779 |
| Ma'sNightMonkey   | -----C---AGCCT-----                                                              |       |       |       |       |       |       |       | 17986 |
| VervetAGM         | GCAGGTGGATCATTGAGGTCAGGAGTTCTAGACCAGCCTAGCCAACATGGCAAACCCCGTCTCTACTAAAAATGCAAA   |       |       |       |       |       |       |       | 23698 |
| Gorilla           | -----                                                                            |       |       |       |       |       |       |       | 22542 |
| GrabEatingMacaque | GCGGGTGGATCATTGAGGTCAGGAGTTCTAGACCAGCCTAGCCAACATGGCAAACCCCGTCTCTACTAAAAATGCAGA   |       |       |       |       |       |       |       | 22600 |
| Macaque           | GCGGGTGGATCATTGAGGTCAGGAGTTCTAGACCAGCCTAGCCAACATGGCAAACCCCGTCTCTACTAAAAATGCAGA   |       |       |       |       |       |       |       | 23001 |
| PigTailedMacaque  | GCGGGTGGATCATTGAGGTCAGGAGTTCTAGACCAGCCTAGCCAACATGGCAAACCCCGTCTCTACTAAAAATGCAGA   |       |       |       |       |       |       |       | 21993 |
| Bonobo            | -----                                                                            |       |       |       |       |       |       |       | 21258 |
| OliveBaboon       | GCAGGTGGATCATTGAGGTCAGGAGTTCTAGACCAGCCTAGCCAACATGGCAAACCCCGTCTCTACTAAAAATGCAAA   |       |       |       |       |       |       |       | 22012 |
| Orangutan         | GCAGGTGGATCACTTGAGATCAGAAGTTTGTAGACCAGCCTAGCCAACATGGCAAACCCCGTCTCTACTAAAAATACAAA |       |       |       |       |       |       |       | 21947 |

Tuesday, May 03, 2022 06:15 PM

|                   |                                                                                   |       |
|-------------------|-----------------------------------------------------------------------------------|-------|
| Majority          | A-ATTAGCTGGGTGTCGTGGTGGGTGTCCTGT--T-----TACTTGGGAGGCTGAGGCAGGAGAATTGCTTGAACCCAGG  |       |
|                   | 27850 27860 27870 27880 27890 27900 27910 27920                                   |       |
| Human             | -----                                                                             | 20179 |
| Coquerel'sSifaka  | -----                                                                             | 18779 |
| Ma'sNightMonkey   | -----CCCAAG                                                                       | 17992 |
| VervetAGM         | AAATTAGCTGGGTGTCGTGGTGGGTGTCCTGT--C-----TACTTGGGAGGCTGAGGCAGGAGAATTGCTTGAACCCAGG  | 23770 |
| Gorilla           | -----                                                                             | 22542 |
| GrabEatingMacaque | AGATTAGCTGGGTGTCGTGGTGGGTGTCCTGTAATCCCAGTTACTTGGGAGGCTGAGGCAGGAGAATTGCTTGAACCCAGG | 22680 |
| Macaque           | AGATTAGCTGGGTGTCGTGGTGGGTGTCCTGTAATCCCAGTTACTTGGGAGGCTGAGGCAGGAGAATTGCTTGAACCCAGG | 23081 |
| PigTailedMacaque  | AGATTAGCTGGGTGTCGTGGTGGGTGTCCTGTAATCCCAGTTACTTGGGAGGCTGAGGCAGGAGAATTGCTTGAACCCAGG | 22073 |
| Bonobo            | -----                                                                             | 21258 |
| OliveBaboon       | AAATTAGCTGGGTGTCGTGGTAGGCGTCTGTAATCCCAATTACTTGGGAGGCTGAGGCAGGAGAATTGCTTGAACCCAGG  | 22092 |
| Orangutan         | AAATTAGTTGGGCTTGGTGGTGGGTGTCCTGTAATCTCAACTACTTGGGAGGCTGAGGCAGGAGAATTGCTTGAACCCAGG | 22027 |

|                   |                                                                                  |       |
|-------------------|----------------------------------------------------------------------------------|-------|
| Majority          | AGGTGGAGGTTGCAGTGAGC-GCAATCCATTGCA-----T----GACAGAGCAAGACTCTGT---CCCGCCAAAAAA    |       |
|                   | 27930 27940 27950 27960 27970 27980 27990 28000                                  |       |
| Human             | -----                                                                            | 20179 |
| Coquerel'sSifaka  | -----                                                                            | 18779 |
| Ma'sNightMonkey   | TAGC-----TGGG---AAT-----ACAG-----                                                | 18007 |
| VervetAGM         | AGGTGGAGGTTGCAGTGAGCCGCAATCCATTGCACTCCAACCTGGGCGACAGAGCAAGACTCTGTGCCCCCGCCAAAAAA | 23850 |
| Gorilla           | -----                                                                            | 22542 |
| GrabEatingMacaque | AGGTGGAGGTTGCAGTGAGCCGCAATCCATTGCACTCCAACCTGGGCGACAGAGCAAGACTCTGTCCCCCGCCAAAAAA  | 22760 |
| Macaque           | AGGTGGAGGTTGCAGTGAGCCGCAATCCATTGCACTCCAACCTGGGCGACAGAGCAAGACTCTGTCCCCCGCCAAAAAA  | 23161 |
| PigTailedMacaque  | AGGTGGAGGTTGCAGTGAGCCGCAATCCATTGCACTCCAACCTGGGCGACAGAGCAAGACTCTGTCCCCCGCCAAAAAA  | 22153 |
| Bonobo            | -----                                                                            | 21258 |
| OliveBaboon       | AGGTGGAGGTTGCAGTGAGCTGCAATCCATTGCACTCCAACCTGGGCGACAGAGCAAGACTCTGTCCCCCGCCAAAAAA  | 22172 |
| Orangutan         | AGGCGGAGGTTGCAGTGAGCTGTGATCCATTGCA-----T----GACAGAGCGAGACTCTGT---CTCAAAAAAA      | 22092 |

|                   |                                                                                  |       |
|-------------------|----------------------------------------------------------------------------------|-------|
| Majority          | AAAAA-----TGG-TTCCTAGGAGGTTTTATATACTCTG-ACACT-AAATTGTTTTGTTAGT--TTGTTTTG-----TTT |       |
|                   | 28010 28020 28030 28040 28050 28060 28070 28080                                  |       |
| Human             | -----TTGTTTTGTT-----TTGTTT-----CATTTT                                            | 20201 |
| Coquerel'sSifaka  | -----                                                                            | 18779 |
| Ma'sNightMonkey   | -----GCA-TGC-----ATCACCATGCC-----TGGCTAA-----TTT                                 | 18034 |
| VervetAGM         | AAAAA---TTGGATTCCTAGGATGTTTTATATACTCTGCACACTTAATTGTTTTGTTAGT--TTGTTTTG-----TTT   | 23919 |
| Gorilla           | -----TTGTTTTGTT-----TTGTTTTGTTTCGTTTT                                            | 22569 |
| GrabEatingMacaque | AAAAA---TTGGTTCCTAGGAGGTTTTATATACTCTGAACACTTAATTGTTTTGTTAGT--TTTTTTTG-----TTT    | 22828 |
| Macaque           | AAAAA---TTGGTTCCTAGGAGGTTTTATATACTCTGAACACTTAATTGTTTTGTTAGT--TTTTTTTG-----TTT    | 23229 |
| PigTailedMacaque  | AAAAA---TTGGATTCCTAGGAGGTTTTATATACTCTGCACACTTAATTGTTTTGTTAGT--TTTTTTTG-----TTT   | 22221 |
| Bonobo            | -----TTGTTTTGTT-----TTGTTT-----CGTTTT                                            | 21280 |
| OliveBaboon       | AAAAAAAATTGGATTCCTAGGAGGTTTTATATACTCTGCACACTTAATTGTTTTGTTAGT--TTGTTTTG-----TTT   | 22244 |
| Orangutan         | AAAAA---TTGATTCCTAGGAGTTTTATATACTGTGCACACT-AAATTGTTTTGTTAGTTTTTGTGTTTTGTTTT      | 22166 |

Tuesday, May 03, 2022 06:15 PM

|                   |                                                                                    |       |
|-------------------|------------------------------------------------------------------------------------|-------|
| Majority          | TGTTTTTGTTT-GAGAGACGGGGTCTCACTATGTCACCCAGGCTGGAGTGCAGTGGCTCGGTACACAG-TCAGTGCAGTCT  |       |
|                   | 28090 28100 28110 28120 28130 28140 28150 28160                                    |       |
| Human             | TGTTTTTGTTTGGAGAGACAGAGTCTCACTGTGTCCATCCAGGCTGGAGTGCAGTGGCTCGGTACACAG-TCAGTGCAGTCT | 20280 |
| Coquerel'sSifaka  | -----TTTT-----A-----T                                                              | 18785 |
| Ma'sNightMonkey   | TGTATTT-TTAGTAGAGACAGGGTTTCTCCATGTTGGTCCAGGCTGG-----TCT                            | 18082 |
| VervetAGM         | TGTTTTTGTTT-GAGGGAAGGGGTCTCACTACGTACCCAGGCTGGAGTGCAGTGGCCGGATCTCAGTCACTGCAAGCT     | 23998 |
| Gorilla           | TGTTTTTGTTTGGAGAGACAGAGTCTCACTATGTCATCCAGGCTGGAGTGCAGTGGCTCGGTACACAG-TCAGTGCAGTCT  | 22648 |
| GrabEatingMacaque | TGTTTTTGTTT-GAGAGAAGGGATCTCACTACGTACCCAGGCTGGAGTGCAGTGGCACAGTACACAG-TCAGTGCAGTCT   | 22906 |
| Macaque           | TGTTTTTGTTT-GAGAGAAGGGGTCTCACTACGTACCCAGGCTGGAGTGCAGTGGCACAGTACACAG-TCAGTGCAGTCT   | 23307 |
| PigTailedMacaque  | TGTTTTTGTTT-GAGAGAAGGGGTCTCACTACGTACCCAGGCTGGAGTGCAGTGGCACAGTACACAG-TCAGTGCAGTCT   | 22299 |
| Bonobo            | TGTTTTTGTTTGGAGAGACAGAGTCTCACTATGTCATCCAGGCTGGAGTGCAGTGGCTCGGTACACAG-TCAGTGCAGTCT  | 21359 |
| OliveBaboon       | TGTTTTTGTTT-GAGAGAAGGGGTCTTACTACGTACCCAGGCTGGAGTGCAGTGGCACAGTACACAG-TCAGTGCAGTCT   | 22322 |
| Orangutan         | TGTTTTTGTTTGGAGAGACAGAGTCTCACAATGTCATCCAGGCTGGAGTGCAGTGGCTCGGTACACAG-TCAGTGCAGTCT  | 22245 |

|                   |                                                                                   |       |
|-------------------|-----------------------------------------------------------------------------------|-------|
| Majority          | TGACATCCCAGGCTCTAGCAATTCTCCACCTTTGTTTCCCTGAGTAGCTGGGACTACAGGAATACACCCTATGCCCAGC   |       |
|                   | 28170 28180 28190 28200 28210 28220 28230 28240                                   |       |
| Human             | TGACATCCCAGGCTCTAGCAATTCTCTCACCTTTGTTTCCCTGAGTAGCTGGGACTACAGGAATACACCCTATGCCCAGC  | 20360 |
| Coquerel'sSifaka  | TAGTTTATTGGCCATTGATGTTTCTTCTCCATTAATGCCTGTTTA-----TATAG-----TTTGTCCA--            | 18844 |
| Ma'sNightMonkey   | TGAACCTCTGACCTCAGGTGATCCACCTGCCTCAGCCTCCCAAAGTGTGGGATTACAGGCATGAGCCACTGCGCCAGG    | 18162 |
| VervetAGM         | CCGTCTCCCGGGTTTACGCCATTCTCTACCTCAGCCTCCCGAGCAGCTGGGACTACAGGCGCCCGCCACCTCGCCCGGC   | 24078 |
| Gorilla           | TGACATCCCAGGCTCTAGCAATTCTCTCACCTTTGTTTCCCTGAGTAGCTGGGACTACAGGAATACACCCTATGCCCAGC  | 22728 |
| GrabEatingMacaque | TGACATCCCAGGCTCTAGCAATCCTCCACCTTTGTTTCCCTGAGTAGCTGGAACTACAGGAATACACCCTATGCCCAGC   | 22986 |
| Macaque           | TGACATCCCAGGCTCTAGCAATCCTCCACCTTTGTTTCCCTGAGTAGCTGGAACTACAGGAATATACCCTATGCCCAGC   | 23387 |
| PigTailedMacaque  | TGACATCCCAGGCTCTAGCAATCCTCCCGCCTTTGTTTCCCTGAGTAGCTGGAACTACAGGAATACACCCTATGCCCAGC  | 22379 |
| Bonobo            | TGACATCCCAGGCTCTAGCAATTCTCTCACCTTTGTTTCCCTGAGTAGCTGGGACTACAGGAATACATCACTATGCCCAGC | 21439 |
| OliveBaboon       | TGACATCCCAGGCTCTAGCAATCCTCCACCTTTGTTTCCCTGAGTAGCTGGAACTACAGGAATACACCCTATGCCCAGC   | 22402 |
| Orangutan         | TGACATCCCAGGCTCTAGCAATTCTCCACCTTTGTTTCCCTGAGTAGCTGGGACTACAGAAATACACCCTATGCCCGGC   | 22325 |

|                   |                                                                                   |       |
|-------------------|-----------------------------------------------------------------------------------|-------|
| Majority          | TAATTTTTCA-ATTTTTTTGTAGAGATGGAGTCTCACTGTATTACCCAGGTTGGTTGCGAACTCCTAGGCTCAAGCAGTT  |       |
|                   | 28250 28260 28270 28280 28290 28300 28310 28320                                   |       |
| Human             | TAATTTTTCA-ATTTTTTTGTAGAGATGGAGTCTCACTGTATTACCCAGGTTGGTTGCGAACTCCAGGCTCAAGCAGTT   | 20439 |
| Coquerel'sSifaka  | -----TTTTG--TTTTTTTGT---G---TGGTTTATCTTTTTAAAAAATGATTG-----CTAGG-----AGAT         | 18897 |
| Ma'sNightMonkey   | AAATTTTTCA--ATTTTTTTGTAGAGATGAAGTCTCACTATATTACCCAGGTTGGTTGTGAATGCCTAGGCTCAAACAGTT | 18240 |
| VervetAGM         | TAGTTTTTTGTATTTTTTAGTAGAGACAGGGTTTACCCGGTTAGCCAGGATGGTCTTGATCTCCTGACCTC--GTGATC   | 24156 |
| Gorilla           | TAATTTTTCA-ATTTTTTTGTAGAGATGGAGTCTCACTATATTACCCAGGTTGGTTGCGAACTCCAGGCTCAAGCAGTT   | 22807 |
| GrabEatingMacaque | TAATTTTTCA-ATTTTTTTGTAGAGATGGAGTCTCACTGTATTACCCAGGTTGGTTGCGAACTCCTAGGCTCAAGCAGTT  | 23065 |
| Macaque           | TAATTTTTCA-ATTTTTTTGTAGAGATGGAGTCTCACTGTATTACCCAGGTTGGTTGCGAACTCCTAGGCTCAAGCAGTT  | 23466 |
| PigTailedMacaque  | TAATTTTTCA-ATTTTTTTGTAGAGATGGAGTCTCACTGTATTACCCAGGTTGGTTGCGAACTCCTAGGCTCAAGCAGTT  | 22458 |
| Bonobo            | TAATTTTTCA-ATTTTTTTGTAGAGATGGAGTCTCACTGTATTACCCAGGTTGGTTGCGAACTCCAGGCTCAAGCAGTT   | 21518 |
| OliveBaboon       | TAATTTTTCA-ATTTTTTTGTAGAGGTTGGAGTCTCACTGTATTACCCAGGTTGGTTGCGAACTCCTAGGCTCAAGCAGTT | 22481 |
| Orangutan         | TCATTTTTCA-GTTTTTTTGTAGAGATGGAGTCTCACTATATTACCCAGGTTGGTTGCGAACTCCTGGGCTCAAGCAGTT  | 22404 |

Tuesday, May 03, 2022 06:15 PM

| Majority          | CTCCCGCATTTGGCCTCCTAAATGCTGGGATTACAGGCGTGAGTCACTGTGCCTGGCCTGTTTTGTTAGTTATATGTCCT |       |
|-------------------|----------------------------------------------------------------------------------|-------|
|                   | 28330 28340 28350 28360 28370 28380 28390 28400                                  |       |
| Human             | CTCCCGCATTTGGCCTCCTAAAGTGTGAGATTACAGGCGTGAGTCGCTGTGCCTGGCCTGTTTTGTTAGTTACATGTCCT | 20519 |
| Coquerel'sSifaka  | TT-----T--ATA-TACTA---TA-----GTTACTA-----ATT---GTTATGTGTCCT                      | 18932 |
| Ma'sNightMonkey   | CTCTCAAACGATCTCCTGAAATGCTGGG-TTACAGGAATGAGTCACTGTGCCTGGCCTGTTTT---GTTATATGTCCT   | 18315 |
| VervetAGM         | CACCCGCCTCAGCCTCCCAAAGTGTGGGATTACAGACTGGAGCCACCGCGCCCGCCTGTATTATGTTAAATA----     | 24232 |
| Gorilla           | CT---GCATTTGGCCTCCTAAAGTGTGAGATTACAGGCGTGAGTCACTGTGCCTGGCCTGTTTTGTTAGTTACATGTCCT | 22884 |
| GrabEatingMacaque | CTCCCTCATTTGGCCTCCTAAATGCTGGGATTACAGGCGTGAGTCACTGTGCCTGGCCTGTTTTGTTAGTTATATGTCCT | 23145 |
| Macaque           | CTCCCTCATTTGGCCTCCTAAATGCTGGGATTACAGGCGTGAGTCACTGTGCCTGGCCTGTTTTGTTAGTTATATGTCCT | 23546 |
| PigTailedMacaque  | CTCCCTCATTTGGCCTCCTAAATGCTGGGATTACAGGCGTGAGTCACTGTGCCTGGCCTGTTTTGTTAGTTATATGTCCT | 22538 |
| Bonobo            | CTCCCGCATTTGGCCTCCTAAAGTGTGAGATTACAGGCGTGAGTCGCTGTGCCTGGCCTGTTTTGTTAGTTACATGTCCT | 21598 |
| OliveBaboon       | CTCCCTCATTTGGCCTCCTAAATGCTGGGATTACAGGCGTGAGTCACTGTGCCTGGCCTGTTTTGTTAGTTATATGTCCT | 22561 |
| Orangutan         | CTCCCGCATTTGGCCTCCTAAATGCTGAGATTACAGGCGTGAGTCACTGTGCCTGGCCTGTTTTGTTAGTTACGTCCT   | 22484 |

| Majority          | ACAGATAACTCCTTCCTCTCTCTGACCTGTTTTTTTTTACACTGATGAATAGAAGTTGTAAATTTAATGTAACATTTATG |       |
|-------------------|----------------------------------------------------------------------------------|-------|
|                   | 28410 28420 28430 28440 28450 28460 28470 28480                                  |       |
| Human             | ACAGATAACTCCTTCCTCTCTCTGACCTGTTTTTTTTTACACTGATGAATAG---TTGTAAATTTAATGGGACATTTATG | 20596 |
| Coquerel'sSifaka  | ACAGATAATTCCTTCCTCTCTG----TGGTTTTTTTTACATTGATGAATAGAAGTTGCAAATGTTAATGTAACATTTTTC | 19007 |
| Ma'sNightMonkey   | ACAGATAACTCCTTCCTCTCTGACCTGTTTTCTTTTTTACACTGATGAATAGAAGTTGTAAATCTAATGTAACATTTATG | 18395 |
| VervetAGM         | -----AACTTGACTCTTTGTGAGTATTGTATATGTGTTTTTCATAGCTA---CTGT---TGTA--GTAGCGTTTCTT    | 24296 |
| Gorilla           | ACAGATAACTCCTTCCTCTCTCTGACCTGTTTTTTTTTACACTGATGAATAG---TTGTAAATTTAATGGGACATTTATG | 22961 |
| GrabEatingMacaque | ACAGATAACTCCTTCCTCTCTCTGACCTGTTTTTTTTTACACTGATGAATAGAAGTTGTAAATTTAATGTAACATTTATG | 23225 |
| Macaque           | ACAGATAACTCCTTCCTCTCTCTGACCTGTTTTTTTTTACACTGATGAATAGAAGTTGTAAATTTAATGTAACATTTATG | 23626 |
| PigTailedMacaque  | ACAGATAACTCCTTCCTCTCTCTGACCTGTTTTTTTTTACACTGATGAATAGAAGTTGTAAATTTAATGTAACATTTATG | 22618 |
| Bonobo            | ACAGATAACTCCTTCCTCTCGCTGACCTGTTTTTTTTTACACTGATGAATAG---TTGTAAATTTAATGGGACATTTATG | 21675 |
| OliveBaboon       | ACAGATAACTCCTTCCTCTCTCTGACCTGTTTTTTTTTACACTGATGAATAGAAGTTGTAAATTTAATGTAACATTTATG | 22641 |
| Orangutan         | ACAGATAACTCTTTCCTCTCTCTGACCTGTTTTTTTTTACACTGATGAATAG---TTGTAAATTTAATGTGACATTTATG | 22561 |

| Majority          | TTTTTCTTT-AAAAAATATTTAACCTAAGGCCTTACATATAGGCTTGTGTATTTTATTTTGAAAGTTTTAAAATTTTGA |       |
|-------------------|---------------------------------------------------------------------------------|-------|
|                   | 28490 28500 28510 28520 28530 28540 28550 28560                                 |       |
| Human             | TTTTTCTTTTAAAAAACATTTAACCTAAGGCCTTACGTATAGGCTTGTGTATTTTATTTTGAAAGTTTTAAAATTTTGA | 20676 |
| Coquerel'sSifaka  | TTTTAAAA---AATTTTCTTTAACTCACGGCTTACATGATAGGCTTGTGGATTTTATTTT--A--TTTTAAAATTTTGA | 19080 |
| Ma'sNightMonkey   | TTTTTCTTTTAAAAAATATTTCAACCTAAGGCCTTACATACAGGCTTGTGGATTTTATTTTGAAAGTTT-----A     | 18465 |
| VervetAGM         | TTTTTACT---AACTTGCTTTCAAGCCACGCTGTTGATTAATATTTGTGGT--CATTTAAGACTTCTAATCTTTATC   | 24371 |
| Gorilla           | TTTTTCTTTTAAAAAACATTTAACCTAAGGCCTTACATATAGGCTTGTGTATTTTATTTTGAAAGTTTTAAAATTTTGA | 23041 |
| GrabEatingMacaque | TTTTTCTTT-AAAAAATATTTAACCTAAGTCCTTACATACAGGCTTGTGTATTTTATTTTGAAAGTTTTAAAATTTTGA | 23304 |
| Macaque           | TTTTTCTTT-AAAAAATATTTAACCTAAGTCCTTACATACAGGCTTGTGTATTTTATTTTGAAAGTTTTAAAATTTTGA | 23705 |
| PigTailedMacaque  | TTTTTCTTT-AAAAAATATTTAACCTAAGTCCTTACATACAGGCTTGTGTATTTTATTTTGAAAGTTTTAAAATTTTGA | 22697 |
| Bonobo            | TTTTTCTTTTAAAAAACATTTAACCTAAGGCCTTACGTATAGGCTTGTGTATTTTATTTTGAAAGTTTTAAAATTTTGA | 21755 |
| OliveBaboon       | TTTTTCTTT-AAAAAATATTTAACCTAAGTCCTTACATACAGGCTTGTGTATTTTATTTTGAAAGTTTTAAAATTTTGA | 22720 |
| Orangutan         | TTTTTCTTTTAAAAAATATTTAACCTAAGGCCTTACATATAGGCTTGTGTATTTTATTTTGAAAGTTTTAAAATTTTGA | 22641 |

Tuesday, May 03, 2022 06:15 PM

| Majority          | TTT--TCACATTTAGGGCCTTAATCTACCTGGAATTTATTCT-TTGTGTAGCATATGGTACAGGTTTAATTATTTTTTCT  |       |       |       |       |       |       |       |       |
|-------------------|-----------------------------------------------------------------------------------|-------|-------|-------|-------|-------|-------|-------|-------|
|                   | 28570                                                                             | 28580 | 28590 | 28600 | 28610 | 28620 | 28630 | 28640 |       |
| Human             | TTT--TCACATTTATGGCGTTAATCTACCTGGAATTTATTCT-TTGTGTAGCATATGTTACAGGTTTAATTATTTTTTCT  |       |       |       |       |       |       |       | 20753 |
| Coquerel'sSifaka  | TTT--TCACATTTAGGGCCTCAGTCTACCTGGAATTTAATTTTTTGTGTAGTATGTTGATAGGTTTAATTATTTTTTCT   |       |       |       |       |       |       |       | 19158 |
| Ma'sNightMonkey   | TTT---CACATTTAGGGCCATAATCTACCTGGCATTTTTTTTT-TTGTGTAGCATATGGTACAGGTTTAATTATTTTTTCT |       |       |       |       |       |       |       | 18541 |
| VervetAGM         | TGTGATGGACTTTGAGGAAGAGTTAGGTTTTGTAAGTGTGAACCTCAATAAACATAGTTCACCTTTCCTAACTTCTCA    |       |       |       |       |       |       |       | 24451 |
| Gorilla           | TTT--TCACATTTATGGCCTTAATCTACCTGGAATTTATTCT-TTGTGTAGCATATGTTACAGGTTTAATTATTTTTTCT  |       |       |       |       |       |       |       | 23118 |
| GrabEatingMacaque | TTT--TCACATTTAGGGCCTTAATCTACCTGGAATGTATTCT-TTGTGTAACATATGGTACAGGTTTAATTATTTTTTCT  |       |       |       |       |       |       |       | 23381 |
| Macaque           | TTT--TCACATTTAGGGCCTTAATCTACCTGGAATGTATTCT-TTGTGTAACATATGGTACAGGTTTAATTATTTTTTCT  |       |       |       |       |       |       |       | 23782 |
| PigTailedMacaque  | TTT--TCACATTTAGGGCCTTAATCTACCTGGAATGTATTCT-TTGTGTAACATATGGTACAGGTTTAATTATTTTTTCT  |       |       |       |       |       |       |       | 22774 |
| Bonobo            | TTT--TCACATTTATGGCGTTAATCTACCTGGAATTTATTCT-TTGTGTAGCGTATGTTACAGGTTTAATTATTTTTTCT  |       |       |       |       |       |       |       | 21832 |
| OliveBaboon       | TTT--TCACATTTAGGGTCTTAATCTACCTGGAATGTATTCT-TTGTGTAGCATATGGTACAGGTTTAATTATTTTTTCT  |       |       |       |       |       |       |       | 22797 |
| Orangutan         | TTT--TCACATTTGTGGCCTTAATCTACCTGGAATTTATTCT-TTGTGTAGCATATGGTACAGGTTTAATTATTTTTTCT  |       |       |       |       |       |       |       | 22718 |

| Majority          | ATATGGATAGCAAGTTTAGTACCTACTTGATTGAATAGTTCAGCTTTTCTCCAGTGATCTGCTTTCTCAGCTCTTC-AGG  |       |       |       |       |       |       |       |       |
|-------------------|-----------------------------------------------------------------------------------|-------|-------|-------|-------|-------|-------|-------|-------|
|                   | 28650                                                                             | 28660 | 28670 | 28680 | 28690 | 28700 | 28710 | 28720 |       |
| Human             | ATATGGATAGCAAGCTTAGTATGTACTTGATTGAATAGCTCAGCTTTTCTCCAATGATCTGCTTTCTCAGCTCTTC-AGG  |       |       |       |       |       |       |       | 20832 |
| Coquerel'sSifaka  | GTGTGGATGATAAATTTAGTACCCACTCAATTAAGTTCATCTTTTCTCCAATAAGCTGCATTTCTCAGCTCTTCCAAG    |       |       |       |       |       |       |       | 19238 |
| Ma'sNightMonkey   | ATATGGATAGCAAGTTTAGTACTTACTTGATTA--T---TCAGCTTTTCTCCAATGATCTGCATTTCTCAGCTCTTC-AGG |       |       |       |       |       |       |       | 18615 |
| VervetAGM         | A-AAAGATTGCT-GTTTGATACAGA--TAGTTGTCTAGGCAAGCTATTAGCAGGGTTTTCAGGTAAGACATAGTGTC-TGC |       |       |       |       |       |       |       | 24526 |
| Gorilla           | ATATGGATAGCAAGTTTAGTACGTACTTGATTGAATAGCTCAGCTTTTCTCCAGTGATCTGCTTTCTCAGCTCTTC-AGG  |       |       |       |       |       |       |       | 23197 |
| GrabEatingMacaque | ATAAGGATAGCAAGTTTAGTACCTACTTGATTGAATAGTTCAGCTTTTATCCAGTGATCTGCTTTATTAGCCCTTC-AGG  |       |       |       |       |       |       |       | 23460 |
| Macaque           | ATAAGGATAGCAAGTTTAGTACCTACTTGATTGAATAGTTCAGCTTTTATCCAGTGATCTGCTTTATTAGCCCTTC-AGG  |       |       |       |       |       |       |       | 23861 |
| PigTailedMacaque  | ATAGGGATAGCAAGTTTAGTACCTACTTGATTGAATAGTTCAGCTTTTATCCAGTGATCTGCTTTATTAGCCCTTC-AGG  |       |       |       |       |       |       |       | 22853 |
| Bonobo            | ATATGGATAGCAAGTTTAGTATGTACTTGATTGAATAGCTCAGCTTTTCTCCAATGATCTGCTTTCTCAGCTCTTC-AGG  |       |       |       |       |       |       |       | 21911 |
| OliveBaboon       | GTAGGGATAGCAAGTTTAGTACCTACTTGATTGAATAGTTCAGCTTTTATCCAGTGATCTGCTTTATTAGCCCTTC-AGG  |       |       |       |       |       |       |       | 22876 |
| Orangutan         | ATGTGGATAGCAAGTTTAGTACCTACTTGATTGAATAGCTCAGCTTTTCTCCAATGATCTGCTTTCTCAGCTCTTC-AGG  |       |       |       |       |       |       |       | 22797 |

| Majority          | TTTCCATATATTCATAGAAGTCTTTCTGTGCTATGTGTT--GTAGCAGTA-----CAA-----CAGTGTCTTAAT-   |       |       |       |       |       |       |       |       |
|-------------------|--------------------------------------------------------------------------------|-------|-------|-------|-------|-------|-------|-------|-------|
|                   | 28730                                                                          | 28740 | 28750 | 28760 | 28770 | 28780 | 28790 | 28800 |       |
| Human             | TTTCCGTATATTCACAGAACCATTCTGTGCTATGTCTT--GTAGCAGTA-----CAA-----CAGTGTCTTAAT-    |       |       |       |       |       |       |       | 20895 |
| Coquerel'sSifaka  | TTTCCATATATTCATGGAAGTCTTTCTGGTGTATGTATCTGTTTATATTTGTCAATTTCTGTACCAATATCACAGTG  |       |       |       |       |       |       |       | 19318 |
| Ma'sNightMonkey   | TTTCCATAGATTCACAGAAGTCTTTCTGTGCTGCGTGTT--GTAGCGCTA-----CAA-----CAGTGTCTTAAT-   |       |       |       |       |       |       |       | 18678 |
| VervetAGM         | TATT--TGTTTTAAGCAAAGTCTTCTTCACTTATTCAA--ATTGTAGCA-----AACAT-----CTACTACATCCAT- |       |       |       |       |       |       |       | 24590 |
| Gorilla           | TTTCCGTATATTCACAGAACCATTCTGTGCTATGTGTT--GTAGCAGTA-----CAA-----CAGTGTCTTAAT-    |       |       |       |       |       |       |       | 23260 |
| GrabEatingMacaque | TTTCCATATATTCATAGAAGTCTTTCTGTGCTATGTGTG--GTAGCAGTA-----CAA-----CAGTGTCTTAAT-   |       |       |       |       |       |       |       | 23523 |
| Macaque           | TTTCCATATATTCATAGAAGTCTTTCTGTGCTATGTGTG--GTAGCAGTA-----CAA-----CAGTGTCTTAAT-   |       |       |       |       |       |       |       | 23924 |
| PigTailedMacaque  | TTTCCATATATTCATAGAAGTCTTTCTGTGCTATGTGTG--GTAGCAGTA-----CAA-----CAGTGTCTTAAT-   |       |       |       |       |       |       |       | 22916 |
| Bonobo            | TTTCCGTATATTCACAGAACCATTCTGTGCTATGTCTT--GTAGCAGTA-----CAA-----CAGTGTCTTAAT-    |       |       |       |       |       |       |       | 21974 |
| OliveBaboon       | TTTCCATATATTCATAGAAGTCTTTCTGTGCTATGTGTG--GTAGCAGTA-----CAA-----CAGTGTCTTAAT-   |       |       |       |       |       |       |       | 22939 |
| Orangutan         | TTTCCATATATTCACAGAACCATTCTGTGCTATGTGTT--GTAGCAGTA-----CAA-----CAGTGTCTTAAT-    |       |       |       |       |       |       |       | 22860 |



Tuesday, May 03, 2022 06:15 PM

|                   |          |                     |         |                |           |            |           |          |          |          |         |        |       |
|-------------------|----------|---------------------|---------|----------------|-----------|------------|-----------|----------|----------|----------|---------|--------|-------|
| Majority          | ---      | TACT                | -       | ATGGCATCAGCATT | AAGTTTT   | GGAATCTT   | GTACAGTG- | AGTGTCAA | AACTTT   | GTTTTT   | CAAAATT | TGCTTG |       |
|                   |          | 28810               |         | 28820          |           | 28830      |           | 28840    |          | 28850    |         | 28860  |       |
| Human             | ---      | TACTTATGGCATCAGCATT | AAGTTTT | GGAATCTT       | GTACAGTG- | AGTGTCAA   | AACTTT    | GTTTTT   | CAAAATT  | TGCTTG   |         |        | 20971 |
| Coquerel'sSifaka  | TCTTAATT | TATGGTGT            | TAGAAT- | AAATCTT        | GGAATCTT  | TATAGAGTG- | AATTTCAA  | AACTTT   | GTTCTTT  | AAAACTG  | ----    | GG     | 19392 |
| Ma'sNightMonkey   | ---      | TACT                | -       | ATAGCATCAGCAT- | AAATCTT   | GGAATCTT   | GTACAGTG- | AGTGTCAA | AACTTT   | GTTTTT   | CAAAATT | TGCTTG | 18752 |
| VervetAGM         | ---      | TTCC-A-             | GTTCTTT | GTCTTAAT       | AGTTCAACT | GTTGTAAAA  | AGGAGTGGT | TATATAT  | GTAACCTT | GGTAGGCT | TTGG    |        | 24665 |
| Gorilla           | ---      | TACTTATGGCATCAGCATT | AAGTTTT | GGGATCTT       | GTACAGTG- | AGTGTCAA   | AACTTT    | GTTTTT   | CAAAATT  | TGCTTG   |         |        | 23336 |
| GrabEatingMacaque | ---      | TACT                | -       | ATGGCATCAGCATT | AAGTTTT   | GGAATCTT   | GTACAGCG- | AGTGTCAA | AACTTT   | GTTTTT   | CAAAATT | TGCTTG | 23598 |
| Macaque           | ---      | TACT                | -       | ATGGCATCAGCATT | AAGTTTT   | GGAATCTT   | GTACAGCG- | AGTGTCAA | AACTTT   | GTTTTT   | CAAAATT | TGCTTG | 23999 |
| PigTailedMacaque  | ---      | TACT                | -       | ATGGCATCAGCATT | AAGTTTT   | GGAATCTT   | GTACAGCG- | AGTGTCAA | AACTTT   | GTTTTT   | CAAAATT | TGCTTG | 22991 |
| Bonobo            | ---      | TACTTATGGCATCAGCATT | AAGTTTT | GGAATCTT       | GTACAGTG- | AGTGTCAA   | AACTTT    | GTTTTT   | CAAAATT  | TGCTTG   |         |        | 22050 |
| OliveBaboon       | ---      | TACT                | -       | ATGGCATCAGCATT | AAGTTTT   | GGAATCTT   | GTACAGCG- | AGTGTCAA | AACTTT   | GTTTTT   | CAAAATT | TGCTTG | 23014 |
| Orangutan         | ---      | TACTTATGGCATCAGCATT | AAGTTTT | GGAATCTT       | GTACAGTG- | AGTGTCAA   | AACTTT    | GTTTTT   | CAAAATT  | TGCTTG   |         |        | 22936 |

|                   |           |            |             |           |           |                  |             |            |           |       |
|-------------------|-----------|------------|-------------|-----------|-----------|------------------|-------------|------------|-----------|-------|
| Majority          | TGTTTTCTT | CACTGCATT  | TATTTA      | AAGATCATT | TGGCTAAGT | TCTGTGAAGACT     | TTTTGGGTCTT | TATTTATACT | TGCCTT    |       |
|                   | 28890     | 28900      | 28910       | 28920     | 28930     | 28940            | 28950       | 28960      |           |       |
| Human             | TGTTTTCTT | CACTGCATT  | TATTTA      | AAGATCATT | TGGCTAAGT | TCTGTGAAGGCTCTT  | GGGTCTT     | TATTTATACT | TGCCTT    | 21051 |
| Coquerel'sSifaka  | CATTTTCTT | TACTACATG  | TATTTA      | AAGATCAGT | TGGCTGAGT | TCTGTGAGGACTTTCT | GGGTTTT     | GTTTATAA   | TGTATA    | 19472 |
| Ma'sNightMonkey   | TGTTTTCTT | CACTGTATG  | TATTTA      | AAGATCATT | TGGATAAGT | TTTGTGAAGACT     | TTTTGGGTCTT | TATTTATACT | TGCCTT    | 18832 |
| VervetAGM         | T-----    | TTGATTGAAT | AATAAGGTGGT | TTTTTGTG  | TTTGTGTTT | TGAAACGGAGTCTTG  | ---         | CTCTGTCAC  | -CCAGGCTG | 24735 |
| Gorilla           | TGTTTTCTT | CACTGCATT  | TATTTA      | AAGATCATT | TGGCTAAGT | TCTGTGAAGGCTCTT  | GGGTCTT     | TATTTATACT | TGCCTT    | 23416 |
| GrabEatingMacaque | TGTTTTCTT | CGCTGCATT  | TATTTA      | AAGATCATT | TGGCTAAGT | TCTATGAAGACT     | TTTTGGGTCTT | TATTTATACT | TGCCTT    | 23678 |
| Macaque           | TGTTTTCTT | CGCTGCATT  | TATTTA      | AAGATCATT | TGGCTAAGT | TCTATGAAGACT     | TTTTGGGTCTT | TATTTATACT | TGCCTT    | 24079 |
| PigTailedMacaque  | TGTTTTCTT | CGCTGCATT  | TATTTA      | AAGATCATT | TGGCTAAGT | TCTGTGAAGACT     | TTTTGGGTCTT | TATTTATACT | TGCCTT    | 23071 |
| Bonobo            | TGTTTTCTT | CACTGCATT  | TATTTA      | AAGATCATT | TGGCTAAGT | TCTGTGAAGGCTCTT  | GGGTCTT     | TATTTATACT | TGCCTT    | 22130 |
| OliveBaboon       | TGTTTTCTT | CGCTGCATT  | TATTTA      | AAGATCATT | TGGCTAAGT | TCTGTGAAGACT     | TTTTGGGTCTT | TATTTATACT | TGCCTT    | 23094 |
| Orangutan         | TGTTTTCTT | CGCTGCTTT  | TATTTA      | AAGATCATT | TGGCTAAGT | TCTGTGAAGGCTCTT  | GGGTCTT     | TATTTATACT | TGCCTT    | 23016 |

|                   |               |            |             |             |             |                    |                |             |       |       |
|-------------------|---------------|------------|-------------|-------------|-------------|--------------------|----------------|-------------|-------|-------|
| Majority          | AAATTTAGTAGTT | -----      | AATTGGGAGA  | AACATTATAGT | TGCATTATCAA | ---                | AATAAAATGGCAAT | TTTTTT      | --TTT |       |
|                   | 28970         | 28980      | 28990       | 29000       | 29010       | 29020              | 29030          | 29040       |       |       |
| Human             | AAATTTAGTAGTT | -----      | AATTGGGAGA  | AACATTATAGT | TGCATTATCAA | ---                | AATAAAATGGCAAT | TTTTTT      | ---TT | 21116 |
| Coquerel'sSifaka  | AAATTTAGTAGTT | CAATTAAGTA | AATTGGGAGAG | CACTGTATTT  | TGCATTATCA  | ATAAAATAAAATGGCAGT | GTTTA          | ----        |       | 19547 |
| Ma'sNightMonkey   | AA-TTTAGTAGTT | -----      | AATTGGGAGA  | AACATTATAT  | TTCATTATCAA | ---                | AATAAAATGGTGAT | TATTGT      | --TTT | 18897 |
| VervetAGM         | GAGTGCAGTGGTG | -----      | CAATCTCGGCT | CACTGCAACCT | CCACCTCCC   | ---                | AGATTCATGCCAT  | TCTCCTGCCTC |       | 24803 |
| Gorilla           | AAATTTAGTAGTT | -----      | AATTGGGAGA  | AACATTATAGT | TGCATTATCAA | ---                | AATAAAATGGCAAT | TTTTTT      | ---TT | 23481 |
| GrabEatingMacaque | AAATTTAGTAGTT | -----      | AATTGGGAGA  | AACATTATAGT | TGCATTATCAA | ---                | AATAAAATGGCAAT | TTTTTT      | --TTT | 23744 |
| Macaque           | AAATTTAGTAGTT | -----      | AATTGGGAGA  | AACATTATAGT | TGCATTATCAA | ---                | AATAAAATGGCAAT | TTTTTT      | --TTT | 24145 |
| PigTailedMacaque  | AAATTTAGTAGTT | -----      | AATTGGGAGA  | AACATTATAGT | TGCATTATCAA | ---                | AATAAAATGGCAAT | TTTTTT      | --TT- | 23136 |
| Bonobo            | AAATTTAGTAGTT | -----      | AATTGGGAGA  | AACATTATAGT | TGCATTATCAA | ---                | AATAAAATGGCAAT | TTTTTT      | ---TT | 22195 |
| OliveBaboon       | AAATTTAGTAGTT | -----      | AATTGGGAGA  | AACATTATAGT | TGCATTATCAA | ---                | AATAAAATGGCAAT | TTTTTT      | --TTT | 23160 |
| Orangutan         | AAATTTAGTAGTT | -----      | AATTGGGAGA  | ACAGTATAGT  | TGCATTATCAA | ---                | AATAAAATGGCAAT | TTTTTT      | ---TT | 23081 |

Tuesday, May 03, 2022 06:15 PM

| Majority          | -AGCTGAAAGGCAG--AGAACTATAA-CATTTCTTTGAAGAATTTTCCACTTCTTCTTCATG-TATTTTC-----CT   |       |       |       |       |       |       |       |       |
|-------------------|---------------------------------------------------------------------------------|-------|-------|-------|-------|-------|-------|-------|-------|
|                   | 29050                                                                           | 29060 | 29070 | 29080 | 29090 | 29100 | 29110 | 29120 |       |
| Human             | GAGCTGAAAGGCAG--AGAACTATAA-CATTTCTTTGAAGAATTTTCCACTTCTTCTTCATGGTATTTTCC-----CT  |       |       |       |       |       |       |       | 21187 |
| Coquerel'sSifaka  | -AGCTGAAAGGCAG--AGAATTATAA-CATTTCTTTGAAAATTTTTCACTTCCTTCTACACAATATTTTCTGTAATGAT |       |       |       |       |       |       |       | 19623 |
| Ma'sNightMonkey   | GAGGGGAAAGGCAG--AGAACTATAA-CATTTCTTTGAAGAATTTTCTACTTCTTCCCTCATGATATTTTCT-----CT |       |       |       |       |       |       |       | 18968 |
| VervetAGM         | AACCTCCCAGTAGCTGGGACTACAGGTGCCTGCTGCCATGCCTGGCTAATTTTTT-----                    |       |       |       |       |       |       |       | 24859 |
| Gorilla           | TAGCTGAAAGGCAG--AGAACTATAA-CATTTCTTTGAAGAATTTTCCACTTCTTCTTCATGGTATTTTCC-----CT  |       |       |       |       |       |       |       | 23552 |
| GrabEatingMacaque | -AGCTGAAAGGCAG--AGAACTATAA-CATTTCTTTGGAGAATTTTCCACTTCTTT-----                   |       |       |       |       |       |       |       | 23799 |
| Macaque           | TAGCTGAAAGGCAG--AGAACTATAA-CATTTCTTTGGAGAATTTTCCACTTCTTT-----                   |       |       |       |       |       |       |       | 24201 |
| PigTailedMacaque  | -AGCTGAAAGGCAG--AGAACTATAA-CATTTCTTTGGAGAATTTTCCACTTT-----                      |       |       |       |       |       |       |       | 23187 |
| Bonobo            | GAGCTGAAAGGCAG--AGAACTATAA-CATTTCTTTGAAGAATTTTCCACTTCTTCTTCATGGTATTTTCC-----CT  |       |       |       |       |       |       |       | 22266 |
| OliveBaboon       | -AGCTGAAAGGCAG--AGAACTATAA-CATTTCTTTGAAGAATTTTCCACTTT-----                      |       |       |       |       |       |       |       | 23211 |
| Orangutan         | TAGCTGAAAGGCAG--AGAATTATAA-CATTTCTTTGAAGAATATTCCTACTTCTTCTTCATGGTATTTTCC-----CT |       |       |       |       |       |       |       | 23152 |

| Majority          | AAGAGACATGCTTAATGCAGAAAATA-TGTT-----AAAAGGAT-----                               |       |       |       |       |       |       |       |       |
|-------------------|---------------------------------------------------------------------------------|-------|-------|-------|-------|-------|-------|-------|-------|
|                   | 29130                                                                           | 29140 | 29150 | 29160 | 29170 | 29180 | 29190 | 29200 |       |
| Human             | AAGAGACATGCTTAATGCAGAAAATA-TATT-----AAAAGGAT-----                               |       |       |       |       |       |       |       | 21225 |
| Coquerel'sSifaka  | AAAAGACATGCTTAATGTAGAAAACTTAATTTAGGCAAAGAGGAAAATAAATCACCAATAATCCTGTCTACCACCAAGC |       |       |       |       |       |       |       | 19703 |
| Ma'sNightMonkey   | AAGAGACATGCTTAATGCAGAAAATAATGTT-----AAAAGGAT-----                               |       |       |       |       |       |       |       | 19007 |
| VervetAGM         | -----GTATTTTGTAGTAGAGACTGGA-TTTC-----ACAGTGTAG-----                             |       |       |       |       |       |       |       | 24894 |
| Gorilla           | AAGAGACATGCTTAATGCAGAAAATA-TGTT-----AAAAGGAT-----                               |       |       |       |       |       |       |       | 23590 |
| GrabEatingMacaque | AAGAGACATGCTTAATGCAGAAAATA-TGTT-----AAAAGGAT-----                               |       |       |       |       |       |       |       | 23837 |
| Macaque           | AAGAGACATGCTTAATGCAGAAAATA-TGTT-----AAAAGGAT-----                               |       |       |       |       |       |       |       | 24239 |
| PigTailedMacaque  | AAGAGACATGCTTAATGCAGAAAATA-TGTT-----AAAAGGAT-----                               |       |       |       |       |       |       |       | 23225 |
| Bonobo            | AAGAGACATGCTTAATGCAGAAAATA-TGTT-----AAAAGGAT-----                               |       |       |       |       |       |       |       | 22304 |
| OliveBaboon       | AAGAGACATGCTTAATGCAGAAAATA-TGTT-----AAAAGGAT-----                               |       |       |       |       |       |       |       | 23249 |
| Orangutan         | AAGAGACATGCTTAACGCAGAAAATA-TGTT-----AAAAGGAT-----                               |       |       |       |       |       |       |       | 23190 |

| Majority          | -----TTTAAACAGCTTATATGTAAGGGATGAGG                                               |       |       |       |       |       |       |       |       |
|-------------------|----------------------------------------------------------------------------------|-------|-------|-------|-------|-------|-------|-------|-------|
|                   | 29210                                                                            | 29220 | 29230 | 29240 | 29250 | 29260 | 29270 | 29280 |       |
| Human             | -----TTTAAACAGCTTATATGTAAGGGATGAGG                                               |       |       |       |       |       |       |       | 21254 |
| Coquerel'sSifaka  | TAGTCATCTTTGTATGTACTTGCCATCATTTTCCCTATATATTACTATGATTTTACATACCTTATATGTAAGGGAGGAGG |       |       |       |       |       |       |       | 19783 |
| Ma'sNightMonkey   | -----TTTAAACAGCTTATATGTAAGGAGTGAGG                                               |       |       |       |       |       |       |       | 19036 |
| VervetAGM         | -----CCAGGATGGTCTTGATCTCCTGACCTCGT                                               |       |       |       |       |       |       |       | 24923 |
| Gorilla           | -----TTTAAACAGCTTATATGTAAGGGATGAGG                                               |       |       |       |       |       |       |       | 23619 |
| GrabEatingMacaque | -----TTTAAACAGCTTATATGTAAGGGTTGAGG                                               |       |       |       |       |       |       |       | 23866 |
| Macaque           | -----TTTAAACAGCTTATATGTAAGGGTTGAGG                                               |       |       |       |       |       |       |       | 24268 |
| PigTailedMacaque  | -----TTTAAACAGCTTATATGTAAGGGTTGAGG                                               |       |       |       |       |       |       |       | 23254 |
| Bonobo            | -----TTTAAACAGCTTATATGTAAGGGATGAGG                                               |       |       |       |       |       |       |       | 22333 |
| OliveBaboon       | -----TTTAAACAGCTTATATGTAAGGGTTGAGG                                               |       |       |       |       |       |       |       | 23278 |
| Orangutan         | -----TTTAAACAGCTTATATGTAAGGGATGAGG                                               |       |       |       |       |       |       |       | 23219 |

Tuesday, May 03, 2022 06:15 PM

| Majority          | GAACAGGGATACTTGGACTAATACTTTCAGTTTTTC-TAAAATTATTGGTTTATTGAGT-----ACATTCTAGAAAA   |       |       |       |       |       |       |       |  |       |
|-------------------|---------------------------------------------------------------------------------|-------|-------|-------|-------|-------|-------|-------|--|-------|
|                   | 29290                                                                           | 29300 | 29310 | 29320 | 29330 | 29340 | 29350 | 29360 |  |       |
| Human             | GAACAGGGATACTTGGACTAATAATTTCAATATTTTC-TAAAATTATTGGTTTATTGAGT-----ACGTTCTAGAAAA  |       |       |       |       |       |       |       |  | 21325 |
| Coquerel'sSifaka  | TAACAGGGATATTTTTACAAGTAGTTTCAGCTTTTCTGAATGTATTGGTTTATTGAGTATTCAATACTATTCCAGAAAT |       |       |       |       |       |       |       |  | 19863 |
| Ma'sNightMonkey   | GAACAGTCATACTTTGACAAATAGTTCAATTTTTG-TAAAACATAT-----ACATTCTAAAAAA                |       |       |       |       |       |       |       |  | 19094 |
| VervetAGM         | GATCCACCCACCTTGGGA--AATACTTT-GCATTGT-TGCATTGATTGGGT--TTGAGC-----CCCTGTTGTACTTA  |       |       |       |       |       |       |       |  | 24989 |
| Gorilla           | GAACAGGGATACTTGGACTAATAATTTCAATATTTTC-TAAAATTATTGGTTTATTGAGT-----ACGTTCTAGAAAA  |       |       |       |       |       |       |       |  | 23690 |
| GrabEatingMacaque | GAACAGGGATACTTGGACTAATACTTTCAGTTTTTC-TAAAAGTATTGGTTTATTGAGT-----ACATACTTGAAAA   |       |       |       |       |       |       |       |  | 23937 |
| Macaque           | GAACAGGGATACTTGGACTAATACTTTCAGTTTTTC-TAAAAGTATTGGTTTATTGAGT-----ACATACTTGAAAA   |       |       |       |       |       |       |       |  | 24339 |
| PigTailedMacaque  | GAACAGGGATACTTGGACTAATACTTTCAGTTTTTC-TAAAAGTATTGGTTTATTGAGT-----ACATACTTGAAAA   |       |       |       |       |       |       |       |  | 23325 |
| Bonobo            | GAACAGGGATACTTGGACTAATAATTTCAATATTTTC-TAAAATTATTGATTTATTGAGT-----ACGTTCTAGAAAA  |       |       |       |       |       |       |       |  | 22404 |
| OliveBaboon       | GAACAGGGATACTTGGACTAATACTTTCAGTTTTTC-TAAAAGTATTGGTTTATTGAGT-----ACATACTTGAAAA   |       |       |       |       |       |       |       |  | 23349 |
| Orangutan         | GAACAGGGATACTTGGACTAATAATTTCAATATTTTC-TAAAATTATTGGTTTATTGAGT-----ACGTTCTAGAAAA  |       |       |       |       |       |       |       |  | 23290 |

| Majority          | CT----GTTTTATTGAG--AGCTTCAAATTTCTCAGAATTGTATAGCATTTTTGAATTCTCTCTTTTGTACTAATATCA   |       |       |       |       |       |       |       |  |       |
|-------------------|-----------------------------------------------------------------------------------|-------|-------|-------|-------|-------|-------|-------|--|-------|
|                   | 29370                                                                             | 29380 | 29390 | 29400 | 29410 | 29420 | 29430 | 29440 |  |       |
| Human             | CT----GTTTTATTGAA--AGCTTCAAATTTCTCAGAATTGTATAGCATTTTTGAATTCTCTCTTTTATTACTAATATCA  |       |       |       |       |       |       |       |  | 21399 |
| Coquerel'sSifaka  | TTATCTGTTTTATTGAG--AATTGAAATTTCTCAAATTTGTAT---AATTTTTAGTT-----TTTTATTATTAACGTC    |       |       |       |       |       |       |       |  | 19933 |
| Ma'sNightMonkey   | TT----GTTTCATCGAG--AGCTTCAAATTTCTCAGAATTTTATAGCATTCTCGAATTTCTCGCTTTTATTACTAATATCA |       |       |       |       |       |       |       |  | 19168 |
| VervetAGM         | A-----GTGATAATGAACAAGCCTTTTATT-CTCTGAATTTTC---CCTTTCCTAGTTGTAATATTGAGGATAATTCCT   |       |       |       |       |       |       |       |  | 25059 |
| Gorilla           | CT----GTTTTATTGAA--AGCTTCAAATTTCTCAGAATTGTGTAGCATTTTTGAATTCTCTCTTTTATTACTAATATCA  |       |       |       |       |       |       |       |  | 23764 |
| GrabEatingMacaque | CT----GTTTTATTGAG--AGCTTCAAATTTCTCAGAATTGTATAACATTTTGAATTCTCTCTTTTGTACTAATATCA    |       |       |       |       |       |       |       |  | 24011 |
| Macaque           | CT----GTTTTATTGAG--AGCTTCAAATTTCTCAGAATTGTATAACATTTTGAATTCTCTCTTTTGTACTAATATCA    |       |       |       |       |       |       |       |  | 24413 |
| PigTailedMacaque  | C-----TTTTATTGAG--AGCTTCAAATTTCTCAGAATTGTATAACATTTTGAATTCTCTCTTTTGTACTAATATCA     |       |       |       |       |       |       |       |  | 23397 |
| Bonobo            | CT----GTTTTATTGAA--AGCTTCAAATTTCTCAGAATTGTATAGCATTTTTGAATTCTCTCTTTTGTACTAATATCA   |       |       |       |       |       |       |       |  | 22478 |
| OliveBaboon       | CT----GTTTTATTGAG--AGCTTCAAATTTCTCAGAATTGTATAACATTTTGAATTCTCTCTTTTGTACTAATATCA    |       |       |       |       |       |       |       |  | 23423 |
| Orangutan         | CT----TTTTTATTGA---GCTTCAAATTTCTCAGAATTGTATAGCATTTTTGAATTCTCTCTTTTATTACTAATATCA   |       |       |       |       |       |       |       |  | 23362 |

| Majority          | AGCACCTATGTTTTCTCCTATTTCTTGATTTGTCTTGTCATAGAATTTATTTTACTGGTCTTTTCAAAGAACCAACCTTT    |       |       |       |       |       |       |       |  |       |
|-------------------|-------------------------------------------------------------------------------------|-------|-------|-------|-------|-------|-------|-------|--|-------|
|                   | 29450                                                                               | 29460 | 29470 | 29480 | 29490 | 29500 | 29510 | 29520 |  |       |
| Human             | AGCACCTATGTTTTCTCCTATTTCTTGATTTGTCTTGTCACAGAATTTATTTTACTGGTCTTTTCAAAGAACCAACCTTT    |       |       |       |       |       |       |       |  | 21479 |
| Coquerel'sSifaka  | AGCATTTATGTTTTCTCCTATCTTTTGATTTGTCTGTCACAAAATTTACTTTACTGGTCTTTTCAAAGAAGTCTTTT       |       |       |       |       |       |       |       |  | 20013 |
| Ma'sNightMonkey   | AGTACCTATGTTTTCTCTGTTTCTTGATTTG----TCATAGAATTTATTTTACTAATCTTTTCAAAGAAGCAACCTTT      |       |       |       |       |       |       |       |  | 19243 |
| VervetAGM         | AACTTGAGGATTTGTGGAAGATTAATAAG---ACAATAATATTGGTAGGA--GCTGTTTATAATCTTTCTCTCTTA        |       |       |       |       |       |       |       |  | 25133 |
| Gorilla           | AGCACCTATGTTTTCTCCTATTTTGTGATTTGTCTTGTCACAGAATTTATTTTACTGGTCTTTTCAAAGAACCAGCGTTT    |       |       |       |       |       |       |       |  | 23844 |
| GrabEatingMacaque | AGCACCTATGTTTTCTCTATTTCTTGATTTGTTTTGTCTGTCATAGAATTTATTTTACTGGTCTTTTCAAAGAACCAACCTTT |       |       |       |       |       |       |       |  | 24091 |
| Macaque           | AGCACCTATGTTTTCTCTATTTCTTGATTTGTTTTGTCTGTCATAGAATTTATTTTACTGGTCTTTTCAAAGAACCAACCTTT |       |       |       |       |       |       |       |  | 24493 |
| PigTailedMacaque  | AGCACCTATGTTTTCTCTATTTCTTGATTTGTTTTGTATAGAATTTATTTTACTGGTCTTTTCAAAGAACCAACCTTT      |       |       |       |       |       |       |       |  | 23477 |
| Bonobo            | AGCACCTATGTTTTCTCCTATTTCTTGATTTGTCTTGTCACAGAATTTATTTTACTGGTCTTTTCAAAGAACCAACCTTT    |       |       |       |       |       |       |       |  | 22558 |
| OliveBaboon       | AGCACCTATGTTTTCTCTATTTCTTGATTTGTTTTGTCTGTCATAGAATTTATTTTATTGGTCTTTTCAAAGAACCAACCTTT |       |       |       |       |       |       |       |  | 23503 |
| Orangutan         | GGCACCTATGTTTTCTCCTATTTCTTGATTTGTCTTGTCACAGAATTTATTTTACTGGTCTTTTCAAAGAACCAACCTTT    |       |       |       |       |       |       |       |  | 23442 |

Tuesday, May 03, 2022 06:15 PM

| Majority          | TTACTTGTCTTTCTTTTGTGGGGCAGTGAAGG---GAT-TCACTTTAAGTTGATCCTGAACTCCTTTATTTCTTGT    |       |       |       |       |       |       |       |
|-------------------|---------------------------------------------------------------------------------|-------|-------|-------|-------|-------|-------|-------|
|                   | 29530                                                                           | 29540 | 29550 | 29560 | 29570 | 29580 | 29590 | 29600 |
| Human             | TTACTTGTCTTTCTTTTGTGGGGCAGTGGAGG---GAT-TCACTTTAATTTGATCCTGAACTCCTTTATTTCTT--    | 21553 |       |       |       |       |       |       |
| Coquerel'sSifaka  | GTGCTTGCTTCTTTTGTTCATAATCACTAATTTTGTTTTATCTTTTGTGCCTTACACTAGATTTATTTGCTGT       | 20093 |       |       |       |       |       |       |
| Ma'sNightMonkey   | TTACTTATTTAATTTTCGTGGGGCAGGGGAGG---GAT-TCACTTTAATTTGATCCTCAACTTCTTTCTTTCTTGT    | 19319 |       |       |       |       |       |       |
| VervetAGM         | TGTACAATCAAAATATATGTGGGTTAAATACCAA---AATATCACTTTAAA--AAATCTAGGCTGAAATGGACACT--- | 25205 |       |       |       |       |       |       |
| Gorilla           | TTACTTGTCTTTCTTTTGTGGGGCAGTGGAGG---GAT-TCACTTTAAGTTGATCCTGAACTCCTTTATTTCTTGT    | 23920 |       |       |       |       |       |       |
| GrabEatingMacaque | TTATTTGTCTTTCTTTTGTGAGGGCAGTGAAG---GGT-TCACTTTAAGTTGATCCTGAACCCCTTTATTTCTTGT    | 24167 |       |       |       |       |       |       |
| Macaque           | TTATTTGTCTTTCTTTTGTGAGGGCAGTGAAG---GGT-TCACTTTAAGTTGATCCTGAACCCCTTTATTTCTTGT    | 24569 |       |       |       |       |       |       |
| PigTailedMacaque  | TTATTTGTCTTTCTTTTGTGAGGGCAGTGAAG---GGT-TCACTTTAAGTTGATCCTGAACCCCTTTATTTCTTGT    | 23553 |       |       |       |       |       |       |
| Bonobo            | TTACTTGTCTTTCTTTTGTGGGGCAGTGGAGG---GAT-TCACTTTAATTTGATCCTGAACTCCTTTATTTCTTGT    | 22634 |       |       |       |       |       |       |
| OliveBaboon       | TTATTTGTCTTTCTTTTGTGAGGGCAGTGAAG---GGT-TCACTTTAAGTTGATCCTGAACTCCTTTATTTCTTGT    | 23579 |       |       |       |       |       |       |
| Orangutan         | TTACTTGTCTTTCTTTTGGTTGGGG-----TC-----CTGAACTCCTTTATTTCTTGT                      | 23492 |       |       |       |       |       |       |

| Majority          | TTTAAAATGCATTCAAGGTTAAAGGTAATCAGCTGATAGCTTTGGCAGTGTTTTTTT-----TT                |       |       |       |       |       |       |       |
|-------------------|---------------------------------------------------------------------------------|-------|-------|-------|-------|-------|-------|-------|
|                   | 29610                                                                           | 29620 | 29630 | 29640 | 29650 | 29660 | 29670 | 29680 |
| Human             | -TTAAAATGCATTCAAGGTTAAAGGTAATCAGCTGATAGCTTTGG---CTTTTTTTT-----TT                | 21609 |       |       |       |       |       |       |
| Coquerel'sSifaka  | TTTTTGTCTTTTCGTACACTTCAGGTTGATCC--CGAACTCTTTATTTTCTTGTTTA--AAAATGATTTCAAGGTTAAG | 20169 |       |       |       |       |       |       |
| Ma'sNightMonkey   | TTTAAAATGGATTTGAGTTTAAAGGTGATCA--T---AGCTTTGGCAATTTTTTTTT-----TT                | 19373 |       |       |       |       |       |       |
| VervetAGM         | TCTGATGTAGAAGTAGTGCTTTAGAAAAGAA--TGCTTTGTTTCATACTCTTTTTTT-----TTTTTTTTTTTTTT    | 25274 |       |       |       |       |       |       |
| Gorilla           | TTTAAAATGCATTCAAGGTTAAAGGTAATCAGCTGATAGCTTTGG--C--ATTTTT-----TT                 | 23974 |       |       |       |       |       |       |
| GrabEatingMacaque | TTTAAAATACATTCAAGGTTAAAGGTAATCAGCTGATAGCTTTGGCAGTGTTTTTTT-----TGTTTGTTTGTT      | 24236 |       |       |       |       |       |       |
| Macaque           | TTTAAAATACATTCAAGGTTAAAGGTAATCAGCTGATAGCTTTGGCAGTGTTTTTTT-----TGTTTGTTTGTT      | 24638 |       |       |       |       |       |       |
| PigTailedMacaque  | TTTAAAATACATTCAAGGTTAAAGGTAATCAGCTGATAGCTTTGGCAGTGTTTTTTGTTTGTTTGTTTGTTTTTT     | 23633 |       |       |       |       |       |       |
| Bonobo            | TTTAAAATGCATTCAAGGTTAAAGGTAATCAGCTGATAGCTTTGGTCCTTTTTTTTT-----TT                | 22693 |       |       |       |       |       |       |
| OliveBaboon       | TTTAAAATACATTCAAGGTTAAAGGTAATCAGCTGATAGCTTTGGCAGTGTTTTTTT-----TT                | 23638 |       |       |       |       |       |       |
| Orangutan         | TTTAAAATGCATTCAAGGTTAAAGGTAATCAGCTGATAGCTTTGG--CAATTTTT-----TT                  | 23548 |       |       |       |       |       |       |

| Majority          | TTTTTTACTTTTAGAGTTCTCTTTTATTGT--AAACTTC-TT-TAAAGGTTTTAAGCTACACAAAAGTAGAGGGAATGG |       |       |       |       |       |       |       |
|-------------------|---------------------------------------------------------------------------------|-------|-------|-------|-------|-------|-------|-------|
|                   | 29690                                                                           | 29700 | 29710 | 29720 | 29730 | 29740 | 29750 | 29760 |
| Human             | TTTTTTACTTTTAGAGTTCTCTTTTATTGT--AAACTTCATT-TAAAGGTTTTAAGCTACACAAAAGTAGAGGGAATGG | 21686 |       |       |       |       |       |       |
| Coquerel'sSifaka  | GATGGATCAGTTGGAGTTCTCTTTTCATTTTAAAACCTCCTTATAAAAGTTTCAAATATACAAAAGTAGAGGGAATGG  | 20249 |       |       |       |       |       |       |
| Ma'sNightMonkey   | ACTTTTAGAGTTCT-GTTTTTCTTTTTTGT--AAACTTATTTATAAAGGCTTTAAGCTATACAAAAGTAGAGGGAATAG | 19450 |       |       |       |       |       |       |
| VervetAGM         | TTTTTTACTTTTAGAGTTCTCTTTTATTAT--AAACTT-----AAAGTTTTAAGCTACACAAAAGTAGAGGGAATGG   | 25346 |       |       |       |       |       |       |
| Gorilla           | TTTTTTACTTTTATAGTTCTCTTTTATTGT--AAACTTCGTTATAAAGGTTTTAAGCTACACAAAAGTAGAGGGAATGG | 24052 |       |       |       |       |       |       |
| GrabEatingMacaque | TGTTTTACTTTTAGAGTTCTCTTTTATTAT--AAACTT-----AAAGTTTTAAGCTACACAAAAGTAGAGGGAATGG   | 24308 |       |       |       |       |       |       |
| Macaque           | TGTTTTACTTTTAGAGTTCTCTTTTATTAT--AAACTT-----AAAGTTTTAAGCTACACAAAAGTAGAGGGAATGG   | 24710 |       |       |       |       |       |       |
| PigTailedMacaque  | TGTTTTACTTTTAGAGTTCTCTTTTATTAT--AAACTT-----AAAGTTTTAAGCTACACAAAAGTAGAGGGAATGG   | 23705 |       |       |       |       |       |       |
| Bonobo            | TTTTTTACTTTTAGAGTTCTCTTTTATTGT--AAACTTCATTATAAAGGTTTTAAGCTACACAAAAGTAGAGGGAATGG | 22771 |       |       |       |       |       |       |
| OliveBaboon       | ---TTTACTTTTAGAGTTCTCTTTTATTAT--AAACTT-----AAAGTTTTGAGCTACACAAAAGTAGAGGGAATGG   | 23707 |       |       |       |       |       |       |
| Orangutan         | TTTTTTACTTTTAGAGTTCTCTTTTATTGT--AAACTTCATTATAAAGGTTTTAAGCTACACAAAAGTAGAGGGAATGG | 23626 |       |       |       |       |       |       |

Tuesday, May 03, 2022 06:15 PM

| Majority          | TATATAATACACTTTTTTTT---TTCTGTTGGATAAATATTAATGCAAATCTCAGATCATTTTCATATCATCTGCAGATAT    |       |
|-------------------|--------------------------------------------------------------------------------------|-------|
|                   | 29770 29780 29790 29800 29810 29820 29830 29840                                      |       |
| Human             | TATATAATACACTTTTTTTT-----CTGTTGGATAAATATTAATGCAAATCTCAGATCATTTTCATATAATCTGCAGATAT    | 21758 |
| Coquerel'sSifaka  | TATAAAACCAGTTTTTTTTTCTTTTTCTCTGGAGAATATTAAGCAAATCTCAGATAATTTTCATATCATCCCCAGATAC      | 20329 |
| Ma'sNightMonkey   | TATATA-----CTTTTGT-----TCTGTTGGAGAATATTAATGCAAATGTCAGA-----TCATATCATCCTCAGATAT       | 19514 |
| VervetAGM         | TATATAATACACTCTTTTTTTT---TTCTGTTGGATAGTATTTATGCAAATCTCATATCATTTTCATTTTCATCAGCAGCTAT  | 25422 |
| Gorilla           | TATATAATACACTTTTTTTT-----CTGTTGGATAAATATTAAGTCAAATCTCAGATCATTTTCGTATAATCTGCAGATAT    | 24125 |
| GrabEatingMacaque | TATATAATACACTCTTTTTTTT---TTCTGTTGGATAGTATTTATGCAAATCTCATATCATTTTCATTTTCATCTGCAGCTAT  | 24384 |
| Macaque           | TATATAATACACTCTTTTTTTT---TTCTGTTGGATAGTATTTATGCAAATCTCATATCATTTTCATTTTCATCTGCAGCTAT  | 24786 |
| PigTailedMacaque  | TATATAATACACTCTTTTTTTT---TTATGTTGGATAGTATTTATGCAAATCTCATA---TTTCATTTTCATCTGCAGCTAT   | 23778 |
| Bonobo            | TATATAATACACTTTTTTTT-----CTGTTGGATAAATATTAATGCAAATCTCAGATCATTTTCGTATAATCTGCAGATAT    | 22844 |
| OliveBaboon       | TATATAATACACTCTTTTTTTT---TTCTGTTGGGATAGTATTTATGCAAATCTCATATCATTTTCATTTTCATCTGCAGCTAT | 23783 |
| Orangutan         | TATATAATACACTTTTTTTT-----CTGTTGGATAAATATTAATGCATATCTCAGATCATTTTCATATAATCTGCAGATAT    | 23699 |

| Majority          | ATCAGAATGTGTCTCTAGCAGATATAAATTTCTCTTTTAAATGTGACATTGGTACCATTA-----TAAAGTTTAAA     |       |
|-------------------|----------------------------------------------------------------------------------|-------|
|                   | 29850 29860 29870 29880 29890 29900 29910 29920                                  |       |
| Human             | ATCAGAATGTGTGTCT-----CTCTATTAATGTGACATTGGTACCATTA-----TAAAGTTTAAA                | 21814 |
| Coquerel'sSifaka  | ATCAGTATGTATCTCTAACAAATATTAT--CTCTCTCAAAGGTGATATTGATACTATTAATATACCTAGTAAAATTTAAA | 20407 |
| Ma'sNightMonkey   | GTCAGAATGTGTCTCTAGCAGATATAAATTTCTCTTTTAAAGTGAACATTGGTACCATTA-----TAAAATTTAAA     | 19584 |
| VervetAGM         | AACAGAATGTGCCTCTAGCAGATACAATTTCTCTTTTAAATGTGACATTGGTACCGTTA-----TAAAGTTTAAA      | 25492 |
| Gorilla           | ATCAGAATGTGTCTCT-----CTCTATTAATGTGACATTGGTACCATTA-----TAAAGTTTCAA                | 24181 |
| GrabEatingMacaque | AACAGAATGTGCCTCTAGCAGATATAAATTTCTCTTTTAAATGTGACATTGGTACTGTTA-----TAAAGTTTAAA     | 24454 |
| Macaque           | AACAGAATGTGCCTCTAGCAGATATAAATTTCTCTTTTAAATGTGACATTGGTACTGTTA-----TAAAGTTTAAA     | 24856 |
| PigTailedMacaque  | AAC--AATGTGCCTCTAGCAGATATAAATTTCTCTTTTAAATGTGACATTGGTACTGTTA-----TAAAGTTTAAA     | 23846 |
| Bonobo            | ATCAGAATGTGTGTCT-----CTCTATTAATGTGACATTGGTACCATTA-----TAAAGTTTAAA                | 22900 |
| OliveBaboon       | AACAGAATGTGCCTCTAGCAGATACAATTTCTCTTTTAAATGTGACATTGGTACCGTTA-----TAAAGTTTAAA      | 23853 |
| Orangutan         | ATCAGAATGTGTCTCT-----CTCTTTTAAATGTGACATTGGTACCATTA-----TAAAGTTTAAA               | 23755 |

| Majority          | ATAATTTCTTAATGTCATCTAATCTCCA---GTATTCAGAATACTTTTTTTTCATTATTTT---TTCTTGCCCTTTTCTC  |       |
|-------------------|-----------------------------------------------------------------------------------|-------|
|                   | 29930 29940 29950 29960 29970 29980 29990 30000                                   |       |
| Human             | ATAATTTCTTAATGTCATCTAATCTCCA---GTATTCAGAATACTTTCTTTTTCATTATTTTATTTTCTTGCCCTTTTCTT | 21891 |
| Coquerel'sSifaka  | ATAATTTCTTAATGTCATCTAATCTCCAACAGTATTCAGAATACTTTTTTCTTTTCATTTT-----CCTTGCCCTT---   | 20478 |
| Ma'sNightMonkey   | ATAATTTCTTAATGTCATTTAATCTCCA---GTATTCAGAATACTTTTTTTTCATTATTTT---TTCTTGCCCTTTTCTC  | 19657 |
| VervetAGM         | ATAATTTACTAATGTCATCTAATCCCA---GTATTCAAAATACTTTTTTTTCATTATTTTATTTTCTTACCTTTTCTC    | 25569 |
| Gorilla           | ATAATTTCTTAATGTCATCTAATCTCCA---GTATTCAGAATACTTTTTTTTCATTATTTTATTTTCTTGCCCTTTTCTC  | 24258 |
| GrabEatingMacaque | ATAATTTACTAATGTCATCTAATCTCCA---GTATTCAAAATACTTTTTTTT-CATTATTTT-----TCTTACCTTTTCTC | 24525 |
| Macaque           | ATAATTTACTAATGTCATCTAATCTCCA---GTATTCAAAATACTTTTTTTT-CATTATTTT-----TCTTACCTTTTCTC | 24927 |
| PigTailedMacaque  | ATAATTTACTAATGTCATCTAATCTCCA---GTATTCAAAATACTTTTTTTTCATTATTTT---TCTTACCTTTTCTC    | 23918 |
| Bonobo            | ATAATTTCTTAATGTCATCTAATCTCCA---GTATTCAGAATACTTTTTTTTCATTATTTTATTTTCTTGCCCTTTTCTA  | 22977 |
| OliveBaboon       | ATAATTTACTAATGTCATCTAATCTCCA---GTATTCAAAATACTTTTTTTTCATTATTTT---TCTTACCTTTTCTC    | 23925 |
| Orangutan         | ATAATTTCTTAATGTCATCTAATCTCCA---GTATTCAGAATACTTTTTTTTCATTATTTTATTTTCTTGCCCTTTTCTC  | 23832 |

Tuesday, May 03, 2022 06:15 PM

| Majority          | TTTTGTTGTTGTTAGATAAACTGAGTCATCTGTACAATTTCCACTTTCTGG-----                           |       |
|-------------------|------------------------------------------------------------------------------------|-------|
|                   | 30010 30020 30030 30040 30050 30060 30070 30080                                    |       |
| Human             | TTTTGTTGTTGTTAGATAAAAGTGAAGTCATCTGTACAATTTCCACTTTCTGGCTGGGCGTGGTGGCTCACGCCTGTAATCC | 21971 |
| Coquerel'sSifaka  | -----GT---TAGAGAACTGAGTCATTTGTACAGTTTCTACTTTCTGA-----                              | 20519 |
| Ma'sNightMonkey   | TATTGTTGTTG-TTGTAAACTGAGTCATATGTA---TTTCCACTTTCTGG-----                            | 19704 |
| VervetAGM         | TCTTGTGTTGTTAGATAAACTGAGTCATCTGTACAATTTCCACTTTCTGG-----                            | 25620 |
| Gorilla           | TTTTGTTGT---TAGATAAACTGAGTCATCTGTACAATTTCCACTTTCTGGCTGGGCGTGGTGGCTCACGCCTGTAATCC   | 24335 |
| GrabEatingMacaque | TGTTGTTGTTGTTAGATAAACTGAGTCATCTGTACAATTTCCACTTTATGG-----                           | 24576 |
| Macaque           | TGTTGTTGTTGTTAGATAAACTGAGTCATCTGTACAATTTCCACTTTATGG-----                           | 24978 |
| PigTailedMacaque  | TGTTGTTGTTGTTAGATAAACTGAGTCATCTGTACAATTTCCACTTTATGG-----                           | 23969 |
| Bonobo            | TTTTGTTGTTGTTAGATAAACTGAGTCATCTGTACAATTTCCACTTTCTGGCTGGGCGTGGTGGCTCACGCCTGTAATCC   | 23057 |
| OliveBaboon       | TGTTGTTGTTGTTAGATAAACTGAGTCATCTGTACAATTTCCACTTTATGG-----                           | 23976 |
| Orangutan         | TTTTGTTGTTGTTAGATAAACTGAGTCATCTGTACAATTTCCACTTTCTGGCCAAGCGCGGTAGCTCACGCCTGTAATCC   | 23912 |

| Majority          | -----                                                                            |       |
|-------------------|----------------------------------------------------------------------------------|-------|
|                   | 30090 30100 30110 30120 30130 30140 30150 30160                                  |       |
| Human             | CAGCACTTCGGGAGGCTGAGGCGGGCAGATCACGAGGTCAGGAGATCAAGACCATTTTGGCTAACACAGTGAAAACCTGT | 22051 |
| Coquerel'sSifaka  | -----                                                                            | 20519 |
| Ma'sNightMonkey   | -----                                                                            | 19704 |
| VervetAGM         | -----                                                                            | 25620 |
| Gorilla           | CAGCACTTTGGGACGCTGAGGCGGGCAGATCACGAGGTCAGGAGATCAAACCATCTTGGCTAACACAGTGAAAACCTGT  | 24415 |
| GrabEatingMacaque | -----                                                                            | 24576 |
| Macaque           | -----                                                                            | 24978 |
| PigTailedMacaque  | -----                                                                            | 23969 |
| Bonobo            | CAGCACTTCGGGAGGCTGAGGCGGGCAGATCACGAGGTCAGGAGATCAAGACCATTTTGGCTAACACAGTGAAAACCTGT | 23137 |
| OliveBaboon       | -----                                                                            | 23976 |
| Orangutan         | CAGCACTTTGGGAGGCCGAGGCGG-CAGATCACGAGGTCAGGAGATCAAGACCATCTTGGCTAACACAGTGAAAACCTGT | 23991 |

| Majority          | -----                                                                           |       |
|-------------------|---------------------------------------------------------------------------------|-------|
|                   | 30170 30180 30190 30200 30210 30220 30230 30240                                 |       |
| Human             | CTCTACTAAAAATACGAAAAAATTAGCCAGGCGTGGTGGGGGACCTGTAGTCCCAGCTACTCGGGAGGCTGAGGCAGG  | 22131 |
| Coquerel'sSifaka  | -----                                                                           | 20519 |
| Ma'sNightMonkey   | -----                                                                           | 19704 |
| VervetAGM         | -----                                                                           | 25620 |
| Gorilla           | CTCTACTAAAAATACGAAAAAATTAGCCGGGGTGGTGGCGGGACCTGTAGTCCCAGCTACTCGGGAGGCTGAGGCAGG  | 24495 |
| GrabEatingMacaque | -----                                                                           | 24576 |
| Macaque           | -----                                                                           | 24978 |
| PigTailedMacaque  | -----                                                                           | 23969 |
| Bonobo            | CTCTACTAAAAATACGAAAAAATTAGCCAGGCGTGGTGGGGGACCTGTAGTCCCAGCTACTCGGAAGGCTGAGGCAGG  | 23217 |
| OliveBaboon       | -----                                                                           | 23976 |
| Orangutan         | CTCTACTGAAAATACGAAAAAATTAGCCAGGCATGGTAGCAGGCGCTGTAGTCCCAGCTACTCGGGAGGCTGAGGCAGG | 24071 |

Tuesday, May 03, 2022 06:15 PM

| Majority          | -----                                                                             |       |       |       |       |       |       |       |       |
|-------------------|-----------------------------------------------------------------------------------|-------|-------|-------|-------|-------|-------|-------|-------|
|                   | 30250                                                                             | 30260 | 30270 | 30280 | 30290 | 30300 | 30310 | 30320 |       |
| Human             | AGAAATGGTGTGAACCCGGGAGGCGGAGCTTGCAGTGGCGCCACTGGACTCCAGCCTGGGTGACAGAGCAAGACTCCGTCT |       |       |       |       |       |       |       | 22211 |
| Coquerel'sSifaka  | -----                                                                             |       |       |       |       |       |       |       | 20519 |
| Ma'sNightMonkey   | -----                                                                             |       |       |       |       |       |       |       | 19704 |
| VervetAGM         | -----                                                                             |       |       |       |       |       |       |       | 25620 |
| Gorilla           | AGAAATGGTGTGAACCCGGGAGGCGGAGCTTGCAGTGGCGCCACTGGACTCCAGCCTGGGTGACAGAGCAAGACTCCGTCT |       |       |       |       |       |       |       | 24575 |
| GrabEatingMacaque | -----                                                                             |       |       |       |       |       |       |       | 24576 |
| Macaque           | -----                                                                             |       |       |       |       |       |       |       | 24978 |
| PigTailedMacaque  | -----                                                                             |       |       |       |       |       |       |       | 23969 |
| Bonobo            | AGAAATGGTGTGAACCCGGGAGGCGGAGCTTGCAGTGGCGCCACTGGACTCCAGCCTGGGTGACAGAGCAAGACTCCGTCT |       |       |       |       |       |       |       | 23297 |
| OliveBaboon       | -----                                                                             |       |       |       |       |       |       |       | 23976 |
| Orangutan         | AGAAATGGTGTGAACCCGGGAGGCGGAGCTTGCAGTGGCGCCACTGGACTCCAGCCTGGGCAACAGAGCAAGACTCTGTCT |       |       |       |       |       |       |       | 24151 |

| Majority          | -----A-----ATTCTGCTGATTATACCTCCATGTTGTCATTTTCATATGTTCCCTCATG                       |       |       |       |       |       |       |       |       |
|-------------------|------------------------------------------------------------------------------------|-------|-------|-------|-------|-------|-------|-------|-------|
|                   | 30330                                                                              | 30340 | 30350 | 30360 | 30370 | 30380 | 30390 | 30400 |       |
| Human             | TAAAAAAAAAAAAAAAAA--TTCCACTTCTCGATTCTGCTGATTGTACCGCTGTGTTGTCATTTTCATATGTTCTTCATG   |       |       |       |       |       |       |       | 22288 |
| Coquerel'sSifaka  | -----ATTCTGCTGATTCTACCTCCGACTGTCATTTTCATACGTTCC-CATG                               |       |       |       |       |       |       |       | 20565 |
| Ma'sNightMonkey   | -----ATTCTGCTGATTATACCTCCATGTTGTCGTTTCATATGTTCCCTCATG                              |       |       |       |       |       |       |       | 19751 |
| VervetAGM         | -----A-----TTCTGCTGATTATACCTCCATGTTGTCATTTTCATATGTTCCCTCATG                        |       |       |       |       |       |       |       | 25667 |
| Gorilla           | TAAAAAAAAAAAAAAAAAATTCCTACTTCTCGATTCTGCTGATTGTACACTATGTTGTCATTTTCATATGTTCTTCATG    |       |       |       |       |       |       |       | 24655 |
| GrabEatingMacaque | -----A-----TTCTGCTTATTATACCTCCATGTTATCATTTCATATGTTCCCTCATG                         |       |       |       |       |       |       |       | 24623 |
| Macaque           | -----A-----TTCTGCTTATTATACCTCCATGTTATCATTTCATATGTTCCCTCATG                         |       |       |       |       |       |       |       | 25025 |
| PigTailedMacaque  | -----A-----TTCTGCTTATTATACCTCCATGTTATCATTTCATATGTTCCCTCATG                         |       |       |       |       |       |       |       | 24016 |
| Bonobo            | TAAAAAAAAAAAAA-----TTCCACTTCTTAGATTCTGCTGATTGTACCGCTATGTTGTCATTTTCATATGTTCTTCATG   |       |       |       |       |       |       |       | 23370 |
| OliveBaboon       | -----A-----TTCTGCTTATTATACCTCCATGTTGTCATTTTCATGTTCCCTCATG                          |       |       |       |       |       |       |       | 24023 |
| Orangutan         | TAAAAAAAAAAAAAAAAAAT--TCCACTTCTCGATTCTGCTGATTATACCGCTATGTTGTCATTTTCATATGTTCCCTCATG |       |       |       |       |       |       |       | 24228 |

| Majority          | TAAACAAGTTTACCTGAAA-----TACAGGGGGT-TGATCAGACTCTGGTTTAAATTTTATCAAGAATATTTTGCA     |       |       |       |       |       |       |       |       |
|-------------------|----------------------------------------------------------------------------------|-------|-------|-------|-------|-------|-------|-------|-------|
|                   | 30410                                                                            | 30420 | 30430 | 30440 | 30450 | 30460 | 30470 | 30480 |       |
| Human             | TAAACAAGTTTACCTGAAA-----TACAGGGGGT-TGATCAGACTCTGGTGTAATTTTACCAAGAATATTTTGCA      |       |       |       |       |       |       |       | 22358 |
| Coquerel'sSifaka  | TCCTCTGAATTTCTGTAAACTTCTAGTTAAATGAGGTGTGATGTGATTAAGGCTTAAATTTTAAACAAGAATATTTTGTA |       |       |       |       |       |       |       | 20645 |
| Ma'sNightMonkey   | TAGACAAGTTTACCTGAAA-----TACATGGGGT-TGATCAGACTCTGGTTTAAATTTTATCAAGAATATTTTGCA     |       |       |       |       |       |       |       | 19821 |
| VervetAGM         | TAAACTAGTTTACCTGAAA-----TACGGGGGGT-TGATCAGACTCTGGTTTAAATTTTATCAAGAGTATTTTGCA     |       |       |       |       |       |       |       | 25737 |
| Gorilla           | TAAACAAGTTTACCTGAAA-----TACAGGGGGT-TGATCAGACTCTGGTGTAATTTTACCAAGAATATTTTGCA      |       |       |       |       |       |       |       | 24725 |
| GrabEatingMacaque | TAAACAAGTTTACCTGAAA-----TACGGGGGGT-TGATCAGACTCTGGTTTAAATTTTATCAAGAGTATTTTGCA     |       |       |       |       |       |       |       | 24693 |
| Macaque           | TAAACAAGTTTACCTGAAA-----TACGGGGGGT-TGATCAGACTCTGGTTTAAATTTTATCAAGAGTATTTTGCA     |       |       |       |       |       |       |       | 25095 |
| PigTailedMacaque  | TAAACAAGTTTACCTGAAA-----TACGGGGGGT-TGATCAGACTCTGGTTTAAATTTTATCAAGAGTATTTTGCA     |       |       |       |       |       |       |       | 24086 |
| Bonobo            | TAAACAAGTTTACCTGAAA-----TACAGGGGGT-TGATCAGACTCTGGTGTAATTTTACCAAGAATATTTTGCA      |       |       |       |       |       |       |       | 23440 |
| OliveBaboon       | TAAACAAGTTTACCTGAAA-----TACGGGGGGT-TGATCAGACTCTGGTTTAAATTTTATCAAGAGTACTTTGCA     |       |       |       |       |       |       |       | 24093 |
| Orangutan         | TAAACAAGTTTACCTGAAA-----TACAGAGGGT-TGATCAGACT--GGTTTAAATTTTACCAAGAATATTTTGCA     |       |       |       |       |       |       |       | 24296 |

Tuesday, May 03, 2022 06:15 PM

| Majority          | GATGTACTCTATGTAATTCCTGTTGTATCTCACTAAGAGGATCAGAACGTCATGTTACCTCTTCATAATGTTAACATTTA |       |       |       |       |       |       |       |       |
|-------------------|----------------------------------------------------------------------------------|-------|-------|-------|-------|-------|-------|-------|-------|
|                   | 30490                                                                            | 30500 | 30510 | 30520 | 30530 | 30540 | 30550 | 30560 |       |
| Human             | GATGTACTCTATGTAATTCCTGTTGTAT-----                                                |       |       |       |       |       |       |       | 22386 |
| Coquerel'sSifaka  | GATGTACTCTATGTAATGCCTATTGTATTT-ATCACACTAAGAGGAACAGAATGCTATCTCTTTGTGATGTTAACATTTA |       |       |       |       |       |       |       | 20724 |
| Ma'sNightMonkey   | GATATACTTTGTGTAATTCCTATTGTATCTCGCTAAGGGGATCAGAATGTGTCCTTACCTCTTCCTGGTGTAAACATTTA |       |       |       |       |       |       |       | 19901 |
| VervetAGM         | GATGTACTCTATGTAATTCCTGTTGTATCTCACTAAGACGATCAGAACCTCATGTTACCTCTTCATAATGTTAACATTTA |       |       |       |       |       |       |       | 25817 |
| Gorilla           | GATGTACTCTATGTAATTGCTGTTGTAG-----                                                |       |       |       |       |       |       |       | 24753 |
| GrabEatingMacaque | GATGTACTCTATGTAATTCCTGTTGTATCTCACTAAGAGGATCAGAACGTCATGTTACCTCTTCATAATGTTAACATTTA |       |       |       |       |       |       |       | 24773 |
| Macaque           | GATGTACTCTATGTAATTCCTGTTGTATCTCACTAAGAGGATCAGAACGTCATGTTACCTCTTCATAATGTTAACATTTA |       |       |       |       |       |       |       | 25175 |
| PigTailedMacaque  | GATGTACTCTATGTAATTCCTGTTGTATCTCACTAAGAGGATCAGAACGTCATGTTACCTCTTCATAATGTTAACATTTA |       |       |       |       |       |       |       | 24166 |
| Bonobo            | GATATACTCTATGTAATTCCTGTTGTAT-----                                                |       |       |       |       |       |       |       | 23468 |
| OliveBaboon       | GATGTACTCTATGTAATTCCTGTTGTATCTCACTAAGAGGATCAGAACGTCATGTTACCTCTTCATAATGTTAACATTTA |       |       |       |       |       |       |       | 24173 |
| Orangutan         | GATGTACTCTATGTAATTCCTATTGTATCTCACTAAGAGGATCAGAATGTCTCGTTACCTCTTCATGATGTTAACATTTA |       |       |       |       |       |       |       | 24376 |

| Majority          | TCAGTAGGTTACAGGTGTCAGCTT-GATGCATCTGTTACAGAG---TGCATCATCCTTTACCTAATAGTTTTTAGTAGCT   |       |       |       |       |       |       |       |       |
|-------------------|------------------------------------------------------------------------------------|-------|-------|-------|-------|-------|-------|-------|-------|
|                   | 30570                                                                              | 30580 | 30590 | 30600 | 30610 | 30620 | 30630 | 30640 |       |
| Human             | -----GTCAGCTT-GCTCCATCTATTACAGAG---CGCATCATCCTTTACCTAATAGTTTTTAGTAGCT              |       |       |       |       |       |       |       | 22447 |
| Coquerel'sSifaka  | TCAATAGGTTGAAGTGTGTCAGCTTTGATGCATTCATTATAGAGAGCTGCATCATCCTTTACGCTAATAGTTTTTAGTAACT |       |       |       |       |       |       |       | 20804 |
| Ma'sNightMonkey   | TCAGTAGGTTACAGGTGTCAGCTT-GATGCATCTGTTAAAGAG---TGCATCATCCTTTCTCCTAATAGTTTTTAGTAGCT  |       |       |       |       |       |       |       | 19977 |
| VervetAGM         | TCAGTAGGTTACAGGTGTCAGCTT-GATGCATCTGTTACAGAG---TGCATCATCCTTTTACCTGATAGTTTTTGGTAGCT  |       |       |       |       |       |       |       | 25893 |
| Gorilla           | -----GTCAGCTT-GCTCCATCTATTACAGAG---CGCATCATCCTTTACCTAATAGTTTTTAGTAGCT              |       |       |       |       |       |       |       | 24814 |
| GrabEatingMacaque | TCAGTAGGTTACAGGTGTCAGCTT-GATGCATCTGTTACAGAG---TGCATCATCCTTTTACCTGATAGTTTTTAGTAGCT  |       |       |       |       |       |       |       | 24849 |
| Macaque           | TCAGTAGGTTACAGGTGTCAGCTT-GATGCATCTGTTACAGAG---TGCATCATCCTTTTACCTGATAGTTTTTAGTAGCT  |       |       |       |       |       |       |       | 25251 |
| PigTailedMacaque  | TCAGTAGGTTACAGGTGTCAGCTT-GATGCATCTGTTACAGAG---TGCATCATCCTTTTACCTGATAGTTTTTAGTAGCT  |       |       |       |       |       |       |       | 24242 |
| Bonobo            | -----GTCAGCTT-GCTCCATCTATTACAGAG---TGCATCATCCTTTACCTAATAGTTTTTAGTAGCT              |       |       |       |       |       |       |       | 23529 |
| OliveBaboon       | TCAGTAGGTTACAGGTGTCAGCTT-GATGCATCTGTTACAGAG---TGCATCATCCTTTTACCTGATAGTTTTTAGTAGCT  |       |       |       |       |       |       |       | 24249 |
| Orangutan         | TCGGTAGGTTACAGGTGTCAGCTT-GCTCCATCTATTGTCAGAG---TGCATCATCCTTTACCTAATAGTTTTTAGTAGCT  |       |       |       |       |       |       |       | 24452 |

| Majority          | AATGATTGCATACTTTTATTAGGTATTGCAAAAAGTGGCGCTATTCTTTTTTTCTGCGTATATTAGAATTC-----TTAAG  |       |       |       |       |       |       |       |       |
|-------------------|------------------------------------------------------------------------------------|-------|-------|-------|-------|-------|-------|-------|-------|
|                   | 30650                                                                              | 30660 | 30670 | 30680 | 30690 | 30700 | 30710 | 30720 |       |
| Human             | AATGATTGCATACTTTTATTAGGTATTGCAAAAAGTGGCGCTATTCTTTTTTTCTGCGTATATTAGAATTC-----TTAAG  |       |       |       |       |       |       |       | 22522 |
| Coquerel'sSifaka  | AATGATTGCATAAATTTTATTGGGTATTTCAAAAATGACAATTTTTTTTTTGCATGTATTAATTTAAATTCATCTGTTAAG  |       |       |       |       |       |       |       | 20884 |
| Ma'sNightMonkey   | AGTGATTGCATAAATATATTGGGTATTGCAAAAAGTGGTGCCTATTCTTTTTTTGTGTGTATATTAGAATTC-----TTAAA |       |       |       |       |       |       |       | 20052 |
| VervetAGM         | AATAAATGCATACTTTTATTAGGTATTGCGAAAAGTGGTGCCTATTCTTTTTTTCTGCGTATATTAGAATAC-----TTAAG |       |       |       |       |       |       |       | 25968 |
| Gorilla           | AATGATTGCATAAATTTTATTAGGTATTGCAAAAAGTGGCGCTATTCTTTTTTTCTGCATATATTAGAATTC-----TTAAG |       |       |       |       |       |       |       | 24889 |
| GrabEatingMacaque | AATGATTGCATACTTTTATTAGGTGTTGCGAAAAGTGGTGCCTATTCT-----                              |       |       |       |       |       |       |       | 24894 |
| Macaque           | AATGATTGCATACTTTTATTAGGTGTTGCGAAAAGTGGTGCCTATTCTTTTTTTCTGCGTATATTAGAATTC-----TTAAG |       |       |       |       |       |       |       | 25326 |
| PigTailedMacaque  | AATGATTGCATACTTTTATTAGGTGTTGCGAAAAGTGGTGCCTATTCTTTTTTTCTGCGTATATTAGAATTC-----TTAAG |       |       |       |       |       |       |       | 24317 |
| Bonobo            | AATGATTGCATAAATTTTATTAGGTATTGCAAAAAGTGGCGCTATTCTTTTTTTCTGCGTATATTAGAATTC-----TTAAG |       |       |       |       |       |       |       | 23604 |
| OliveBaboon       | AATGATTGCATACTTTTATTAGGTGTTGCAAAAAGTGGTGCCTATTCTTTTTTTCTGCGTATATTAGAATTC-----TTAAG |       |       |       |       |       |       |       | 24324 |
| Orangutan         | AATGATTGCATAAATTTTATTAGGTATTGCAAAAAGTGGCGCTATTCTTTTTTTCTGCATATATTAGAATTC-----TTAAG |       |       |       |       |       |       |       | 24527 |



Tuesday, May 03, 2022 06:15 PM

| Majority          | AATTTTATCCATCAACTCTTTGGTCATATGTAAGTACCC-TTTTTATAAGAAAAGCAGGAGAGATTTT-GACTTTTTAAG  |       |       |       |       |       |       |       |       |
|-------------------|-----------------------------------------------------------------------------------|-------|-------|-------|-------|-------|-------|-------|-------|
|                   | 30730                                                                             | 30740 | 30750 | 30760 | 30770 | 30780 | 30790 | 30800 |       |
| Human             | AATTATATCCATCAACTGTTTGGTCATACGTAAGTACC--TTTTTATAAGAAAAGCAGGAGAGAATTT-GACTTCTTAAG  |       |       |       |       |       |       |       | 22599 |
| Coquerel'sSifaka  | AACTTTATCCATCAACTATTTGGTCACATTGAAGTACAC-TTTTTATAAGAAAAGCAGGACAGATTTTTGACTTTTTTAAA |       |       |       |       |       |       |       | 20963 |
| Ma'sNightMonkey   | AATTTTATCCATCAACTATTTGGTCATACTTAAGTACCCTTTTTTATAAGAAAACAGGAGAGATTTT-AACTTCTAAG    |       |       |       |       |       |       |       | 20131 |
| VervetAGM         | AATTTTATCCATCAACTCTTTGGTCATATGTAAGTACCC-TTTTTATAAGGAAAAGCAGGAGAGATTTT-GACTTTTTAAG |       |       |       |       |       |       |       | 26046 |
| Gorilla           | AATTATATCCATCAACTGTTTGGTCATACGTAAGTACCC-TTTTTATAAGAAAAGCAGGAGAGAATTT-GACTTCTTAAG  |       |       |       |       |       |       |       | 24967 |
| GrabEatingMacaque | -----AAG                                                                          |       |       |       |       |       |       |       | 24897 |
| Macaque           | AATTTTATCCATCAACTCTTTGGTCATATGTAAGTACCC-TTTTTATAAGGAAAAGCAGGAGAGATTTT-GACTTTTTAAG |       |       |       |       |       |       |       | 25404 |
| PigTailedMacaque  | AATTTTACCCATCAACTCTTTGGTCATATGTAAGTACCC-TTTTTATAAGGAAAAGCAGGAGAGATTTT-GACTTTTTAAG |       |       |       |       |       |       |       | 24395 |
| Bonobo            | AATTATATCCATCAACTGTTTGGTCATACGTAAGTACCC-TTTTTATACGAAAAGCAGGAGAGAATTT-GACTTCTTAAG  |       |       |       |       |       |       |       | 23682 |
| OliveBaboon       | AATTTTATCCATCAACTCTTTGGTCATATGTAAGTACCC-TTTTTATAAGGAAAAGCAGGAGAGATTTT-GGCTTTTTAAG |       |       |       |       |       |       |       | 24402 |
| Orangutan         | AATTATATCCATCAACTATTTGGTCATACATAAGTACCC-TTTTTATAAGAAAAGCAGGAGAGATTTT-GACTTTTTAAG  |       |       |       |       |       |       |       | 24605 |

| Majority          | ----TTTTCTGATGAGTTGGTACCCTAA----AACCTCCAGTATAACCAATATGAGTTCCTTTTTGTTGTTGTTAGTAT  |       |       |       |       |       |       |       |       |
|-------------------|----------------------------------------------------------------------------------|-------|-------|-------|-------|-------|-------|-------|-------|
|                   | 30810                                                                            | 30820 | 30830 | 30840 | 30850 | 30860 | 30870 | 30880 |       |
| Human             | ----TTTTCTGATGAGTTGTTACCCTAA----AACCTCCAGTATAATCAATATGAGTTCCTTTTTGTTGCTGTTAGTAT  |       |       |       |       |       |       |       | 22670 |
| Coquerel'sSifaka  | AACTTTTCCCTGAGGAGTTGGTACTCCAGC----AACCTCCA-CATAACCAATGTGAGTTCCTTTTTGTTGTT--AGTAT |       |       |       |       |       |       |       | 21035 |
| Ma'sNightMonkey   | ----TTTTCTGATGAGTTAGTACCCTAACAAACAACCTCCAGTATAACCAATATGAGTTCCTTTTTGTTGCTGTTAGTAC |       |       |       |       |       |       |       | 20207 |
| VervetAGM         | ----TTTTCTGATGAGTTGGTACCCTAA----AACCTCCAATATAACCAGTATGAGTTCCTTTTTGTTGTTGTTAGTAT  |       |       |       |       |       |       |       | 26117 |
| Gorilla           | ----TTTTCTGATGAGTTGTTACCCTAA----AACCTCCAGTATAATCAATATGAGTTCCTTTTTGTTGCTGTTAGTAT  |       |       |       |       |       |       |       | 25038 |
| GrabEatingMacaque | ----TTTTCTGATGAGTTGGTACCCTAA----AACCTCCAATATAACCAGTATGAGTTCCTTTTTGTTGTT--AGTAT   |       |       |       |       |       |       |       | 24965 |
| Macaque           | ----TTTTCTGATGAGTTGGTACCCTAA----AACCTCCAATATAACCAGTATGAGTTCCTTTTTGTTGTT--AGTAT   |       |       |       |       |       |       |       | 25472 |
| PigTailedMacaque  | ----TTTTCTGATGAGTTGGTACCCTAA----AACCTCCAATATAACCAGTATGAGTTCCTTTTTGTTGTT--AGTAT   |       |       |       |       |       |       |       | 24463 |
| Bonobo            | ----TTTTCTGATGAGTTGTTACCCTAA----AACCTCCAGTATAATCAATATGAGTTCCTTTTTGTTGCTGTTAGTAT  |       |       |       |       |       |       |       | 23753 |
| OliveBaboon       | ----TTTTCTGATGAGTTGGTACCCTAA----AACCTCCAATATAACCAGTATGAGTTCCTTTTTGTTGTT--AGTAT   |       |       |       |       |       |       |       | 24470 |
| Orangutan         | ----TTTTCTGATGAGTTGGTACCCTAA----CACCTCCAGTATAATCAAT--GAGTTCCTTTTTGTTGCTGTTAGTAT  |       |       |       |       |       |       |       | 24674 |

| Majority          | TGTCGCAAAAGCAAAGAGTTTAAATAACATTTATTTTCTAGTGTATTGTAGTAATCATTCTTTTTTTTT--AATTTCTAA    |       |       |       |       |       |       |       |       |
|-------------------|-------------------------------------------------------------------------------------|-------|-------|-------|-------|-------|-------|-------|-------|
|                   | 30890                                                                               | 30900 | 30910 | 30920 | 30930 | 30940 | 30950 | 30960 |       |
| Human             | CGTCGCAACAGCAAAGAGTTTAAATAACATTTATTTTCTAGTGTATTGCAGTAATCATTCTTCTTTTTTTTTAAATTTCTAA  |       |       |       |       |       |       |       | 22750 |
| Coquerel'sSifaka  | CATTATGAAAGCAAAGATTTTAA--CATTATTTTCTCATTCTATTATAGTGATCATTCTTTTTT-----AAATGCTTAA     |       |       |       |       |       |       |       | 21107 |
| Ma'sNightMonkey   | TGTCACAAAAGCAAAGATTTTAAATAACATTTATTTTCTAGTGTATTGCCGTGATCATTCTTAA-----AATTTCTAA      |       |       |       |       |       |       |       | 20279 |
| VervetAGM         | TGTTGCAAAAGCAAAGAGTTTAAATAATATTTATTTGCTAATGTATTGTAGTAATCATTCTTTTTTTTT--AATCTCTGA    |       |       |       |       |       |       |       | 26195 |
| Gorilla           | TGTCGCAACAGCAAAGAGTTTAAATAACATTTATTTTCTAGTGTATTGCAGTAATCATTCTTCTTTTTTTTT-AATTTCTAA  |       |       |       |       |       |       |       | 25117 |
| GrabEatingMacaque | TGTCGCAAAAGCAAAGAGTTTAAATAACATTTATTTGCTAATGTATTGTAGTAATCATTCTTTTTTTA--AATCTCTGA     |       |       |       |       |       |       |       | 25042 |
| Macaque           | TGTCGCAAAAGCAAAGAGTTTAAATAACATTTATTTGCTAATGTATTGTAGTAATCATTCTTTTTTTA--AATCTCTGA     |       |       |       |       |       |       |       | 25549 |
| PigTailedMacaque  | TGTCGCAAAAGCAAAGAGTTTAAATAACATTTATTTGCTAATGTATTGTAGTAATCATTCTTTTTTTA--AATCTCTGA     |       |       |       |       |       |       |       | 24540 |
| Bonobo            | CGTCGCGACAGCAAAGAGTTTAAATAACATTTATTTTCTAGTGTATTGCAGTAATCATTCTTCTTTTTTTTT--AATTTCTAA |       |       |       |       |       |       |       | 23831 |
| OliveBaboon       | TGTCGCAAAAGCAAAGAGTTTAAATAACATTTATTTGCTAATGTATTGTAGTAATCATTCTTTTTTTA--AATCTCTGA     |       |       |       |       |       |       |       | 24547 |
| Orangutan         | CGTCGCAACAGCAAAGAGTTTAAATAACGTTTATTTTCTGGTGTATTGCAGTAATCATTCTTTTTTTTT--AATTTCTAA    |       |       |       |       |       |       |       | 24750 |

Tuesday, May 03, 2022 06:15 PM

| Majority          | GCTGTTT-ATT----AAATGAAAAG----AGAACAGTGCTAAGCA----GCTTGTAT-GTGTGTGGGT-----       |       |       |       |       |       |       |       |       |
|-------------------|---------------------------------------------------------------------------------|-------|-------|-------|-------|-------|-------|-------|-------|
|                   | 30970                                                                           | 30980 | 30990 | 31000 | 31010 | 31020 | 31030 | 31040 |       |
| Human             | GCTGTTTTATT----AAATGAAAAG----AGAACAATGCTAAGCA----GCTTGTATGGTGTGTGTGT-----       |       |       |       |       |       |       |       | 22806 |
| Coquerel'sSifaka  | ATTGTTTCATCTTGGGCTCGCAAGATTCAGAACACCAATAGGTTTGATACTTGCTTAAAGTATCATTTTTGGCTCCAGA |       |       |       |       |       |       |       | 21187 |
| Ma'sNightMonkey   | GCTATTTTATT----AAATGAAAAG----AGAACAATGCTAAGCA----GCTTGTAT-----G--G-----         |       |       |       |       |       |       |       | 20326 |
| VervetAGM         | GCTGTT-----AAATGAAAAG----AGAACAGTGCTAAGCA----GCTTGTAT-----GGT-----              |       |       |       |       |       |       |       | 26238 |
| Gorilla           | GCTGTTTCATT----AAATGAAAAG----AGAACAATGCTAAGCA----GCTTGTATGGTGTGTGTGTG-----      |       |       |       |       |       |       |       | 25174 |
| GrabEatingMacaque | GCTGTT-----AAATGAAAAG----AGAACAGTGCTAAGCA----GCTTGTAT--GGGGGGGGT-----           |       |       |       |       |       |       |       | 25091 |
| Macaque           | GCTGTT-----AAATGAAAAG----AGAACAGTGCTAAGCA----GCTTGTAT--GGGGGGGGT-----           |       |       |       |       |       |       |       | 25598 |
| PigTailedMacaque  | GCTGTC-----AAATGAAAAG----AGAACAGTGCTAAGCA----GCTTGTATTGGGGGGGGG-----            |       |       |       |       |       |       |       | 24591 |
| Bonobo            | GCTGTTTTATT----AAATGAAAAG----AGAACAATGCTAAGCA----GCTTGTATGGTGTGTGTGTGTGT-----G  |       |       |       |       |       |       |       | 23894 |
| OliveBaboon       | GCTGTT-----AAATGAAAAG----AGAACAGTGCTAAGCA----GCTTGTAT--GGGGGGGGT-----           |       |       |       |       |       |       |       | 24596 |
| Orangutan         | GCTATTTTATT----AAAAGAAAAG----AGAACAGTGCTAAGCA----GCTTGTATGGTGTGTGTGTG-----      |       |       |       |       |       |       |       | 24807 |

| Majority          | -GTGTGTGTTTGTGTTTG-----TATGAATTGTTAA--AAACGCGGTGGCTCAAGCCTGTAATCCAGCACTTTGG      |       |       |       |       |       |       |       |       |
|-------------------|----------------------------------------------------------------------------------|-------|-------|-------|-------|-------|-------|-------|-------|
|                   | 31050                                                                            | 31060 | 31070 | 31080 | 31090 | 31100 | 31110 | 31120 |       |
| Human             | TGTGTGGGTTTTTATTTT-----GTATGAAT-GTTAA--AAACGCGGTGGCTAAAGCCTGTAATCCCAGCATTTTGG    |       |       |       |       |       |       |       | 22875 |
| Coquerel'sSifaka  | CCTTTGATCAGATATTTCTTTAAAAAGTCCTGGTTTCTGGCCGGGCGCGGTGGCTCACGCCTGTAATCCTAGCACTCTGG |       |       |       |       |       |       |       | 21267 |
| Ma'sNightMonkey   | --TATGG--TTTTTTTGG-----TGTGAAT-----                                              |       |       |       |       |       |       |       | 20347 |
| VervetAGM         | -GTGTGT----GTGTGTG-----TATGAATTGTGAA--AAACCGGTGACCCAAGCCTGTAATCCAGCACTTTGG       |       |       |       |       |       |       |       | 26302 |
| Gorilla           | TGTGTGGTTTTTTTTTTTTTTTTTTTGTATGAAT-GTTAA--AAACATGGTGGCTCAAGCCTGTAATCCCAGCATTTTGG |       |       |       |       |       |       |       | 25251 |
| GrabEatingMacaque | -GTGTGTGCTGTGTGTG-----TATGAATTGTGAA--AAACGCGGTGACTCAAGCCTGTAATCCAGCACTTTGG       |       |       |       |       |       |       |       | 25159 |
| Macaque           | -GTGTGTGCTGTGTGTG-----TATGAATTGTGAA--AAACGCGGTGACTCAAGCCTGTAATCCAGCACTTTGG       |       |       |       |       |       |       |       | 25666 |
| PigTailedMacaque  | -GTGTGTGCTGTGTGTG-----TATGAATTGTGAA--AAACGCGGTGACTCAAGCCTGTAATCCAGCACTTTGG       |       |       |       |       |       |       |       | 24659 |
| Bonobo            | TGTGTGGGTTTTTTTTTTTTTTTT--GTATGAAT-GTTAA--AAACGCGGTGGCTCAAGCCTGTAATCCCAGCATTTTGG |       |       |       |       |       |       |       | 23968 |
| OliveBaboon       | -GTGTGTGCTGTGTGTG-----TATGAATTGTGAA--AAACGCGGTGACTCAAGCCTGTAATCCAGCACTTTGG       |       |       |       |       |       |       |       | 24664 |
| Orangutan         | TGTGTGTGTGTGTTTA-----TATGAAT-GTTAA--AAACGCGGTGGCTCAAGCCTGTAATCCCAGCATTTTGG       |       |       |       |       |       |       |       | 24875 |

| Majority          | GAGGCCAAGGTGGGCGGATAAC--AAGATCAGGAGCTTGAGACCTGCCTGG-----CC-----                 |       |       |       |       |       |       |       |       |
|-------------------|---------------------------------------------------------------------------------|-------|-------|-------|-------|-------|-------|-------|-------|
|                   | 31130                                                                           | 31140 | 31150 | 31160 | 31170 | 31180 | 31190 | 31200 |       |
| Human             | GAGGCCAAGGTGGTGGATCAC--AAGGTCAGGAGCTTGAGACCAGCCTGG-----CTCTACTAAAAATAA          |       |       |       |       |       |       |       | 22939 |
| Coquerel'sSifaka  | GAGGCTGAGCGGGAGGATTGCTTGAGCTCAGGAGTTCGAGACCAGCCTGAGCAAGAGTGAGACCCTGTCTCTACTATGA |       |       |       |       |       |       |       | 21347 |
| Ma'sNightMonkey   | -----G-----                                                                     |       |       |       |       |       |       |       | 20348 |
| VervetAGM         | GAGGCCAAGGTGGGCGGATAAC--AAGATCAGGAGCTTGAGACCTGCCTGG-----CC-----                 |       |       |       |       |       |       |       | 26353 |
| Gorilla           | GAGGCCAAGGTGGTGGATCAC--AAGGTCAGGAGCTTGAGACCAGCCTGG-----CTCTGCTAAAAATGA          |       |       |       |       |       |       |       | 25315 |
| GrabEatingMacaque | GAGGCCAAGGTGGGCGGATAAC--AAGATCAGGAGCTTGAGACCTGCCTGG-----CC-----                 |       |       |       |       |       |       |       | 25210 |
| Macaque           | GAGGCCAAGGTGGGCGGATAAC--AAGATCAGGAGCTTGAGACCTGCCTGG-----CC-----                 |       |       |       |       |       |       |       | 25717 |
| PigTailedMacaque  | GAGGCCAAGGTGGGCGGATAAC--AAGATCAGGAGCTTGAGACCTGCCTGG-----CC-----                 |       |       |       |       |       |       |       | 24710 |
| Bonobo            | GAGGCCAAGGTGGTGGATCAC--AAGGTCAGGAGCTTGAGACCAGCCTGG-----CTCTACTAAAAATAA          |       |       |       |       |       |       |       | 24032 |
| OliveBaboon       | GAGGCCAAGGTGGGCGGATAAC--ATGATCAGGAGCTTGAGACCTGCCTGG-----CC-----                 |       |       |       |       |       |       |       | 24715 |
| Orangutan         | GAGGCCAAGGTGGTGGATCAC--AAGGTCAGGAGCTTGAGACCAGCCTGG-----C---C-----               |       |       |       |       |       |       |       | 24926 |

Tuesday, May 03, 2022 06:15 PM

| Majority          | AATGTGGTGAAACCC-CGTCTCTACTAAAAATACAGAAA-TTAGCCCTTTGTGGT-GCGCGCGCTATAGTCCCAGCTAC  |       |       |       |       |       |       |       |  |       |
|-------------------|----------------------------------------------------------------------------------|-------|-------|-------|-------|-------|-------|-------|--|-------|
|                   | 31210                                                                            | 31220 | 31230 | 31240 | 31250 | 31260 | 31270 | 31280 |  |       |
| Human             | AATGTGGTGAAACCC-CGTCTCTACTAAAAATACAAAA-TTAGCCCTTTGTGTTGCACGCGCTATAGTCCCAGCTAC    |       |       |       |       |       |       |       |  | 23017 |
| Coquerel'sSifaka  | AATAGAAAGAAATTAGCAAACAACCTAAAAATAGAAAAAATTAGCCGGGCACAGTGGGGCGTGCCTGTATTCCCAGCTAC |       |       |       |       |       |       |       |  | 21427 |
| Ma'sNightMonkey   | -----TT-----                                                                     |       |       |       |       |       |       |       |  | 20350 |
| VervetAGM         | AATGTGGTGAAACCC-CGTCTCTACTAAAAATACAGAAA-TTAGCCCTTTGTGGG-GCGCGCACCTGTAGTCCCAGCTAC |       |       |       |       |       |       |       |  | 26430 |
| Gorilla           | AATGTGGTGAAACCC-CGTCTCTACGAAAAATACAAAA-TTAGCCCTTTGTGTTGCACGCGCTATAGTCCCAGCTAC    |       |       |       |       |       |       |       |  | 25393 |
| GrabEatingMacaque | AATGTGGTGAAACCC-CGTCTCTACTAAAAATACAGAAA-TTAGCCCTTTGTGGG-GCGCGCGCTATAGTCCCAGCTAC  |       |       |       |       |       |       |       |  | 25287 |
| Macaque           | AATGTGGTGAAACCC-CGTCTCTACTAAAAATACAGAAA-TTAGCCCTTTGTGGG-GCGCGCGCTATAGTCCCAGCTAC  |       |       |       |       |       |       |       |  | 25794 |
| PigTailedMacaque  | AATGTGGTGAAACCC-CGTCTCTACTAAAAATACAGAAA-TTAGCCCTTTGTGGG-GCGCGCGCTGTAGTCCCAGCTAC  |       |       |       |       |       |       |       |  | 24787 |
| Bonobo            | AATGTGGTGAGACCC-CGTCTCTACTAAAAATACAAAA-TTAGCCCTTTGTGTTGCACGCGCTATAGTCCCAGCTAC    |       |       |       |       |       |       |       |  | 24110 |
| OliveBaboon       | AATGTGGTGAAACCC-CGTCTCTACTAAAAATACAGAAA-TTAGCCCTTTGTGGG-GCGCGCGCTGTAGTCCCAGCTAC  |       |       |       |       |       |       |       |  | 24792 |
| Orangutan         | AATGTGGTGAAACCC-CGTCTCTACTAAAAATACAAAA-TTAACTTTGTGGTGCACGTGCCTATAGTCCCAGCTAC     |       |       |       |       |       |       |       |  | 25002 |

| Majority          | TC-GGGAGGCTGAG-----GCGGAAAAATCGCTTGAACCTGGG-----AGAT                             |       |       |       |       |       |       |       |  |       |
|-------------------|----------------------------------------------------------------------------------|-------|-------|-------|-------|-------|-------|-------|--|-------|
|                   | 31290                                                                            | 31300 | 31310 | 31320 | 31330 | 31340 | 31350 | 31360 |  |       |
| Human             | TC-GGGAGGCTGAG-----GCAGAAAAATTGCTTGAACCTGGGGAGGCTGAGGCAGAAAAATTACTTGAACCCGGGAGAC |       |       |       |       |       |       |       |  | 23091 |
| Coquerel'sSifaka  | CCCCGGAGGCTGAGCTGAGGCAGGAGGATCGCTTGAAGCCAGAG-----AGTC                            |       |       |       |       |       |       |       |  | 21474 |
| Ma'sNightMonkey   | -----AAAA-----T-----                                                             |       |       |       |       |       |       |       |  | 20356 |
| VervetAGM         | TC-GGGAGGCTGAG-----GCGGAAAAATCGCTTGAACCTGGG-----AGAT                             |       |       |       |       |       |       |       |  | 26471 |
| Gorilla           | TT-GGGAGGCTGAG-----GCAGAAAAATTGCTTGAACCTGGGGAGGCTGAGGCAGAAAAATTACTTGAACCCGGGAGAC |       |       |       |       |       |       |       |  | 25467 |
| GrabEatingMacaque | TC-GGGAGGCTGAG-----GCGGAAAAATCGCTTGAACCTGGG-----AGAT                             |       |       |       |       |       |       |       |  | 25328 |
| Macaque           | TC-GGGAGGCTGAG-----GCGGAAAAATCGCTTGAACCTGGG-----AGAT                             |       |       |       |       |       |       |       |  | 25835 |
| PigTailedMacaque  | TC-GGGAGGCTGAG-----GCGGAAAAATCGCTTGAACCTGGG-----AGAT                             |       |       |       |       |       |       |       |  | 24828 |
| Bonobo            | TC-GGGAGGCTGAG-----GCAGAAAAATTGCTTGAACCTGGGGAGGCTGAGGCAGAAAAATTACTTGAACCCGGGAGAC |       |       |       |       |       |       |       |  | 24184 |
| OliveBaboon       | TC-GGGAGGCTGAG-----GCGGAAAAATCGCTTGAACCTGGG-----AGAT                             |       |       |       |       |       |       |       |  | 24833 |
| Orangutan         | TT-GGGAGGCTGAG-----GCAGAAAAATCGCTTGAACCTGGGGAGGCTGAAGCAGAAAAATCGCTTGAACCCGGGAGAC |       |       |       |       |       |       |       |  | 25076 |

| Majority          | GGAGGTTGCAGTGAGCCGAGATCGTGCCACTGCACTCCAGCCTGGGCAACAGACTGAGATTCC-ATCTC-AAAGACAAAA |       |       |       |       |       |       |       |  |       |
|-------------------|----------------------------------------------------------------------------------|-------|-------|-------|-------|-------|-------|-------|--|-------|
|                   | 31370                                                                            | 31380 | 31390 | 31400 | 31410 | 31420 | 31430 | 31440 |  |       |
| Human             | AGAGGTTGCAGCGAGCCGAGATTGCGCCACTGCACTCCAGCCTGGGCAACAGACTGAGATTCC-ATCTC-AAAGACAAAA |       |       |       |       |       |       |       |  | 23168 |
| Coquerel'sSifaka  | TGAGGTTGCTGTGAGCTAGGCTGATGCCATGGCACTCTAGCTCAGGCAAGAGAGTGAGACTCTTGTCTCAAAAAAAAAA  |       |       |       |       |       |       |       |  | 21554 |
| Ma'sNightMonkey   | -----                                                                            |       |       |       |       |       |       |       |  | 20356 |
| VervetAGM         | GGAGGTTGCAGTGAGCCGAGATCGTACCCTGCACTCCAGCCTGGGCAACAGACTGAGATTCC-ATCTC-AAAGACAAAA  |       |       |       |       |       |       |       |  | 26549 |
| Gorilla           | AGAGGTTGCAGCGAGCCGAGATTGCGCCACTGCACTCCAGCCTGGGCAACAGACTGAGATTCC-ATCTC-AAAGACAAAA |       |       |       |       |       |       |       |  | 25545 |
| GrabEatingMacaque | GGAGGTTGCAGTGAGCCGAGATCGTACCCTGCACTCCAGCCTGGGCAACAGACTGAGATTCC-ATCTC-AAAGACAAAA  |       |       |       |       |       |       |       |  | 25406 |
| Macaque           | GGAGGTTGCAGTGAGCCGAGATCGTACCCTGCACTCCAGCCTGGGCAACAGACTGAGATTCC-ATCTC-AAAGACAAAA  |       |       |       |       |       |       |       |  | 25913 |
| PigTailedMacaque  | GGAGGTTGCAGTGAGCCGAGATCGTACCCTGCACTCCAGCCTGGGCAACAGACTGAGATTCC-ATCTC-AAAGACAAAA  |       |       |       |       |       |       |       |  | 24906 |
| Bonobo            | AGAGGTTGCAGCGAGCCGAGATTGCGCCACTGCACTCCAGCCTGGGCAACAGACTGAGATTCC-ATCTC-AAAGACAAAA |       |       |       |       |       |       |       |  | 24262 |
| OliveBaboon       | GGAGGTTGCAGTGAGCCGAGATCGTACCCTGCACTCCAGCCTGGGCAACAGACTGAGATTCC-ATCTC-AAAGACAAAA  |       |       |       |       |       |       |       |  | 24911 |
| Orangutan         | GGAGGTTGCAGCAAGCCGAGATCGCGCCACTGCACTCCAGCCTGGGTGACAGACTGAGATTCC-ATCTC-AAAGACAAAA |       |       |       |       |       |       |       |  | 25154 |

Tuesday, May 03, 2022 06:15 PM

| Majority          | CCATGTATATATGTAAGTTTGAGGAAAAGAATTGTATGAAAATTCAGGATAATTAATGAAAGTAAATGAGAACTTCTTTA  |       |
|-------------------|-----------------------------------------------------------------------------------|-------|
|                   | 31450 31460 31470 31480 31490 31500 31510 31520                                   |       |
| Human             | CCATGTATATATGTAAGTTTGAGGAAAAGAGTTGTATGAAAATTCAGGATAATTAATAAAAAGTAAACGAGAACTTCTTTA | 23248 |
| Coquerel'sSifaka  | AAAAGTCCTGATTTCTATGGGTAGGAAATGGTCCTTAGAAA--CCACAATAATACGAGTACCAAGATGCTAATTGCTTTT  | 21632 |
| Ma'sNightMonkey   | ----GTATATATGTAAGTTTGAGGAAAATAATTGTATGAAAATTCAGAATAA---ACGAAAGTAAACAAGAACATCTTTA  | 20429 |
| VervetAGM         | CCATGTATATATGTAAGTTTGAGGAAAAGAATTGTATGAAAATTCAGGATAATTAATGAAAGTAAATGAGAACCTCTTTA  | 26629 |
| Gorilla           | CCATGTATGTATGTAAGTTTGAGGAAAAGAGTTGTATGAAAATTCAGGATAATTAATAAAAAGTAAATGAGAACTTCTTTA | 25625 |
| GrabEatingMacaque | CCATGTATATATGTAAGTTTGAGGAAAAGAATTGTATGAAAATTCAGGATAATTAATGAAAGTAAATGAGAACTTCTTTA  | 25486 |
| Macaque           | CCATGTATATATGTAAGTTTGAGGAAAAGAATTGTATGAAAATTCAGGATAA---TGAAAGTAAATGAGAACTTCTTTA   | 25989 |
| PigTailedMacaque  | CCATGTATATATGTAAGTTTGAGGAAAAGAATTGTATGAAAATTCAGGATAATTAATGAAAGTAAATGAGAACTTCTTTA  | 24986 |
| Bonobo            | CCGTGTATATATGTAAGTTTGAGGAAAAGAGTTGTATGAAAATTCAGGATAATTAATAAAAAGTAAACGAGAACTTCTTTA | 24342 |
| OliveBaboon       | CCATGTATATATGTAAGTTTGAGGAAAAGAATTGTATGAAAATTCAGGATAATTAATGAAAGTAAATGAGAACTTCTTTA  | 24991 |
| Orangutan         | CCATGTATATATGTAAGTTTGAGGAAAAGAATTGTATGAAAATTCAGGATAATTGATAAAAAGCAAACGAGAACTTCTTTA | 25234 |

| Majority          | TATTTTCTG-----TTTTTTTTTTT-----AATTTTCTCAGTAAATGTTTGAATTTTTTTAATGTAGAAAATGT        |       |
|-------------------|-----------------------------------------------------------------------------------|-------|
|                   | 31530 31540 31550 31560 31570 31580 31590 31600                                   |       |
| Human             | CATATATAT-----ATATTTTTT-----AATTTTCTCAGTAAATGTTTGAATTTTTTTAACGTAGAAAATGT          | 23310 |
| Coquerel'sSifaka  | AGGTGGTTGTTATTTCAAGGCTCTTTTAGTGGACAGTATTTTTTAAAGATAGAAATACATTATGAGCTCGTTTGTAAATTT | 21712 |
| Ma'sNightMonkey   | TATTTTCTG-----GGTGTAAA-----AATTTTCTCAGTAAATGGTTCATTTTTTTAATGTAAAAAATGT            | 20492 |
| VervetAGM         | TATTTTCTGGGTTTTTTTTTTTTTTTTTTTTTGAATTTTCTCAGTAAATGTTTGAATGTTTTTAATGTAGAAAATGT     | 26709 |
| Gorilla           | TATTTTCTG-----GTTTTTTTTTA-----AATTTTCTCAGTAAATGTTTGAATTTCTTTAATGTAGAAAATGT        | 25689 |
| GrabEatingMacaque | TATTTTCTG-----TTTTTTTTTTTTTTTTTAAATTTTCTCAGTAAATGTTTGAATGTTTTTAATGTAGAAAATGT      | 25557 |
| Macaque           | TATTTTCTG-----TTTTTTTT-----AATTTTCTCAGTAAATGTTTGAATGTTTTTAATGTAGAAAATGT           | 26050 |
| PigTailedMacaque  | TATTTTGTT-----TTGTTTTTTTTTT-----AATTTTCTCAGTAAATGTTTGAATGTTTTTAATGTAGAAAATGT      | 25052 |
| Bonobo            | TATATATAT-----ATATTTTT-----AATTTTCTCAGTAAATGTTTGAATTTTTTTAACGTAGAAAATGT           | 24403 |
| OliveBaboon       | TATTTTCTG-----TTGTTTTTTTTTT-----AATTTTCTCAGTAAATGTTTGAATGTTTTTAATGTAGAAAATGT      | 25058 |
| Orangutan         | TGGTTTTTT-----TTTTTTTTTTTT-----AATTTTCTCAGTAAATGTTTGAATTTTTTTAATGTAGAAAATGT       | 25298 |

| Majority          | CAGTGGGGTTCTCTGGGGAGAAAGATTATAGTCCATGATTCCTCCTATTGTATAT---ATACCTGTATTAAAAATATGC-A   |       |
|-------------------|-------------------------------------------------------------------------------------|-------|
|                   | 31610 31620 31630 31640 31650 31660 31670 31680                                     |       |
| Human             | CAATGGGGTTATCTCTGGGGAGAAAGATTATAGTCCATGAGTCCCCCTGTTGTATAT---ATACCTGTATTAAAAATATGC-A | 23386 |
| Coquerel'sSifaka  | CTATTCATATTTAAAGTTACACAGCTTTTACTTCTATCTTTAGAAGATTTTCTATTTTATATTTCTATCTCTGTAACTG     | 21792 |
| Ma'sNightMonkey   | CAGTGGGGTTATCTCTGGGCAGAAAGATTATAGTCCATGATGCCTCTGATTGTGTAT---ATGCCTGTATTAAAAATATGC-G | 20568 |
| VervetAGM         | CAGTGGGGTTCTCTGGAGAGAAAGATTATAGTATATGATTCCTCCTATTGTATAT---ATGCCTGTATTAAAAATATGC-A   | 26785 |
| Gorilla           | CAATGGGGTTATCTCTGGGGAGAAAGATTATAGTCCATGATTCCTCCTGTTGTATAT---ATACCTGTATTAAAAATATGC-A | 25765 |
| GrabEatingMacaque | CAGTGGGGTTCTCTGGAGAGAAAGATTATAGTACATGATTCCTCCTATTGTGTAT---ATACCTGTATTAAAAATATGC-A   | 25633 |
| Macaque           | CAGTGGGGTTCTCTGGAGAGAAAGATTATAGTACATGATTCCTCCTATTGTGTAT---ATACCTGTATTAAAAATATGC-A   | 26126 |
| PigTailedMacaque  | CAGTGGGGTTCTCTGGAGAGAAAGATTATAGTACATGATTCCTCCTATTGGTATAT---ATGCCTGTATTAAAAATATGC-A  | 25128 |
| Bonobo            | CAATGGGGTTATCTCTGGGGAGAAAGATTGTAGTCCATGAGTCCCCCTGTTGTATAT---ATACCTGTATTAAAAATATGC-A | 24479 |
| OliveBaboon       | CAGTGGGGTTCTCTGGAGAGAAAGATTATAGTACATGATTCCTCCTATTGTATAT---ATGCCTGTATTAAAAATATGC-A   | 25134 |
| Orangutan         | CAATGGGGTTATCTCTGGGGAGAAAGATTATAGTCCATGATTCCTCCTATTATATAT---ATACCTGTATTAAAAATATGC-A | 25374 |

Tuesday, May 03, 2022 06:15 PM

| Majority          | ATAAATGCTATTTTAAAAAATGTCTTATTACATAGAAAAGAA-GACCAGAATACTAGCTCTCCACGTC-TATGTCTTGAT |       |       |       |       |       |       |       |       |
|-------------------|----------------------------------------------------------------------------------|-------|-------|-------|-------|-------|-------|-------|-------|
|                   | 31690                                                                            | 31700 | 31710 | 31720 | 31730 | 31740 | 31750 | 31760 |       |
| Human             | ATAAATGCTATTTTAAAAAATGTCTTATTACATAGAACAGAA-GACCAGAATACTAGCTCTCCACGTC-TATGTCTTGAT |       |       |       |       |       |       |       | 23465 |
| Coquerel'sSifaka  | AAAAATCTTACTGGCATTGACATTATTACATATATAAACGAATAACTAGTTTTTTAAAAAGCAACGTC-AATATTATACT |       |       |       |       |       |       |       | 21871 |
| Ma'sNightMonkey   | ATAAATGCTATTTTAAAAAATGTCTTATTACATAGAAAAGAA-GACCAGAATACTAGCTCTCCAGGTCTCATATCTTGAT |       |       |       |       |       |       |       | 20647 |
| VervetAGM         | ATAAATGTGATTTTAAAAAATGTCTTATTACATAGAAAAGAA-GACCAGAATACTAGCTCTACACGT--TATGTCTTGAT |       |       |       |       |       |       |       | 26862 |
| Gorilla           | ATAAATGCTATTTTAAAAAATGTCTTATTACATAGAAAAGAA-GACCACAATACTAGCTCTCCACGTC-TATGTCTTGAT |       |       |       |       |       |       |       | 25844 |
| GrabEatingMacaque | ATAAATGTGATTTTAAAAAATGTCTTATTACATAGAAAAGAA-GACCAGAATACTAGCTCTACACGT--TATGTCTTGAT |       |       |       |       |       |       |       | 25710 |
| Macaque           | ATAAATGCGATTTTAAAAAATGTCTTATTACATAGAAAAGAA-GACCAGAATACTAGCTCTACACGT--TATGTCTTGAT |       |       |       |       |       |       |       | 26203 |
| PigTailedMacaque  | ATAAATGCGATTTTAAAAAATGTCTTATTACATAGAAAAGAA-GACCAGAATACTAGCTCTACACGT--TATGTCTTGAT |       |       |       |       |       |       |       | 25205 |
| Bonobo            | ATAAATGCTATTTTAAAAAATGTCTTATTACATAGAAAAGAA-GACCAGAATACTAGCTCTCCACGTC-TACGTCTTGAT |       |       |       |       |       |       |       | 24558 |
| OliveBaboon       | ATAAATGCGATTTTAAAAAATGTCTTATTACATAGAAAAGAA-GACCAGAATACTAGCTCTACACGT--TATGTCTTGAT |       |       |       |       |       |       |       | 25211 |
| Orangutan         | ATAAATGCTATTTTAAAAAATGTCTTATTGCATAGAAAAGAA-GACTGCAATACTAGCTCTCCACGTCATGTCTTGAT   |       |       |       |       |       |       |       | 25453 |

| Majority          | CA-GTGAAGATTAGCTAGCAAAAC--AACCATAACTTAGGGATAGCTTTATTTGTGGGAAGTGCATTTAGTATGCCATG |       |       |       |       |       |       |       |       |
|-------------------|---------------------------------------------------------------------------------|-------|-------|-------|-------|-------|-------|-------|-------|
|                   | 31770                                                                           | 31780 | 31790 | 31800 | 31810 | 31820 | 31830 | 31840 |       |
| Human             | CA-GTGAAGATTAGCTAGCAAAAC--AACCATAACTTAGGGATAGCTTTATTTGTGGGAAGTGCATTTAGTATGCCATG |       |       |       |       |       |       |       | 23542 |
| Coquerel'sSifaka  | AACATTGTAATTATTGAATATAGTTTAAAGTTTTTTGTCAGTCACTTTTGCCTTAAATTATATCTACAAAGAGTAGAC  |       |       |       |       |       |       |       | 21951 |
| Ma'sNightMonkey   | CA-GAGAAAATTAGCTAGCGAAAC--AACCCTAAGTTAGGGATAGCTTTATTTGTAGGAAGTGTATTTAGTATGCCATG |       |       |       |       |       |       |       | 20724 |
| VervetAGM         | CA-GTGAATATTAGCTAGCAAAAC--AACCATAACTTAGGGATAGCTTTATTTGTGGGAAGTGCATTTAGTATGCCATG |       |       |       |       |       |       |       | 26939 |
| Gorilla           | CA-GTGAAGATTAGCTAGCAAAAC--AACCATAACTTAGGGATAGCTTTATTTGTGGGAAGTGCATTTAGTATGCCATG |       |       |       |       |       |       |       | 25921 |
| GrabEatingMacaque | CA-GTGAAGATTAGCTAGCAAAAC--AACCATAACTTAGGGATAGCTCTATTTGTGGGAAGTGAATTCAGTATGCCATG |       |       |       |       |       |       |       | 25787 |
| Macaque           | CA-GTGAAGATTAGCTAGCAAAAC--AACCATAACTTAGGGATAGCTTTATTTGTGGGAAGTGAATTCAGTATGCCATG |       |       |       |       |       |       |       | 26280 |
| PigTailedMacaque  | CA-GTGAAGATTAGCTAGCAAAAC--AACCATAACTTAGGGATAGCTTTATTTGTGGGAAGTGAATTCAGTATGCCATG |       |       |       |       |       |       |       | 25282 |
| Bonobo            | CA-GTGAAGATTAGCTAGCAAAAC--AACCATAACTTAGGGATAGCTTTATTTGTGGGAGGTGCATTTAGTATGCCATG |       |       |       |       |       |       |       | 24635 |
| OliveBaboon       | CA-GTGAAGATTAGCTAGCAAAAC--AACCATAACTTAGGGATAGCTTTATTTGTGGGAAGTGCATTTAGTATGCCATG |       |       |       |       |       |       |       | 25288 |
| Orangutan         | CA-GTGAAGATTAGCTAGCAAAAC--AACCATAACTTAGGGATAGCTTTATTTGTGGGAAGTGCATTTAGTATGCCATG |       |       |       |       |       |       |       | 25530 |

| Majority          | T-----ATTAAAAATCATTTGTAAAGTCTTTAAAAGAGCATCTTATCTTTTTT-GT-----AGGTGATAATATTG       |       |       |       |       |       |       |       |       |
|-------------------|-----------------------------------------------------------------------------------|-------|-------|-------|-------|-------|-------|-------|-------|
|                   | 31850                                                                             | 31860 | 31870 | 31880 | 31890 | 31900 | 31910 | 31920 |       |
| Human             | T-----ATTAAAAATCATTTGT--AGTCTTTCAGAGAGCATCTTATCTTTCTT-GT-----AGGTGATAGTATTG       |       |       |       |       |       |       |       | 23604 |
| Coquerel'sSifaka  | AGTATAGTACAATTACAGA--ATTTTAAAATTTATTGAAATAATCTCTGTGTGGTCTACTGCCAAGTTAGTAGTTAGG    |       |       |       |       |       |       |       | 22029 |
| Ma'sNightMonkey   | TTCCAGTAAATATTTAAAAGTCAAT-GCAAAGTGTTTAAAAGAACATCTTATCTTTTTTTGT-----AGGTAATAATATTG |       |       |       |       |       |       |       | 20798 |
| VervetAGM         | T-----ATTAAAAATCATTTGTAAAGTCTTTAAA--GCATCTTATCTTTTTT-GT-----AGGTGATAATATTG        |       |       |       |       |       |       |       | 27001 |
| Gorilla           | T-----ATTAAAAATCATTTGT--AGTCTTTCAGAGAGCATCTTATCTTTCTT-GT-----AGGTGATAGTATTG       |       |       |       |       |       |       |       | 25983 |
| GrabEatingMacaque | T-----ATTAAAAATCATTTGTAAAGTCTTTAAAAGAGCATCTTATCTTTTTT-GT-----AGGTGATAATATTG       |       |       |       |       |       |       |       | 25851 |
| Macaque           | T-----ATTAAAAATCATTTGTAAAGTCTTTAAAAGAGCATCTTATCTTTTTT-GT-----AGGTGATAATATTG       |       |       |       |       |       |       |       | 26344 |
| PigTailedMacaque  | T-----ATTAAAAATCATTTGTAAAGTCTTTAAAAGAGCATCTTATCTTTTTT-GT-----AGGTGATAATATTG       |       |       |       |       |       |       |       | 25346 |
| Bonobo            | T-----ATTAAAAATCATTTGT--AGTCTTTCAGAGAGCATCTTATCTTTCTT-GT-----AGGTGATAGTATTG       |       |       |       |       |       |       |       | 24697 |
| OliveBaboon       | T-----ATTAAAAATCATTTGTAAAGTCTTTAAAAGAGCATCTTATCTTTTTT-GT-----AGGTGATAATATTG       |       |       |       |       |       |       |       | 25352 |
| Orangutan         | T-----ATTAAAAATCATTTGT--AGTCTTTCAGAGAGCATCTTATCTTTCTT-GT-----AGGTGATAGTATTG       |       |       |       |       |       |       |       | 25592 |

Tuesday, May 03, 2022 06:15 PM

| Majority          | GCTATCTATGTAATGTCTTAAGTTCTTTAAATTATCCTTTTTCTTATTTTTGTGTACATTGTTTATAAAATA----ATG     |       |       |       |       |       |       |       |       |
|-------------------|-------------------------------------------------------------------------------------|-------|-------|-------|-------|-------|-------|-------|-------|
|                   | 31930                                                                               | 31940 | 31950 | 31960 | 31970 | 31980 | 31990 | 32000 |       |
| Human             | GCTATCTATGTAAGTGTCTTAAGTTCTTTAAATTATCCTTATTCTTACTTTTTGTGTACATTGTTTATAAAATA----ATG   |       |       |       |       |       |       |       | 23680 |
| Coquerel'sSifaka  | TTTGTTTTCATTTTGTGTTAAATTTTATAGGATTTTTTTTTTTTTTACTTTAAAATAAAATTTCCAAAATC---AAAA      |       |       |       |       |       |       |       | 22106 |
| Ma'sNightMonkey   | GCTATCTGTGTAATGTCTTAAGTTAAATTAATTAATTAATCCTCACTTATTTTTTGTGTACATTGTTTATAAAATAGTTAATG |       |       |       |       |       |       |       | 20878 |
| VervetAGM         | GCTATCTATGTAATGTCTTAAGTTCTTAAATTATCCTTTTTCTTATTTTTGTGTACATTGTTTATAAAATA----ATG      |       |       |       |       |       |       |       | 27077 |
| Gorilla           | GCTATCTACGTAGTGTCTTAAGTTCTTTAAATTATCCTTATTCTTACTTTTTGTGTATATTGTTTATAAAATA----ATG    |       |       |       |       |       |       |       | 26059 |
| GrabEatingMacaque | GCTATCTATGTAATGTCTTAAGTTCTTAAATTATCCTTTTTCTTATTTTTGTGTACATTGTTTATAAAATA----ATG      |       |       |       |       |       |       |       | 25927 |
| Macaque           | GCTATCTATGTAATGTCTTAAGTTCTTAAATTATCCTTTTTCTTATTTTTGTGTACATTGTTTATAAAATA----ATG      |       |       |       |       |       |       |       | 26420 |
| PigTailedMacaque  | GCTATCTATGTAATGTCTTAAGTTCTTAAATTATCCTTTTTCTTATTTTTGTGTACATTGTTTATAAAATA----ATG      |       |       |       |       |       |       |       | 25422 |
| Bonobo            | GCTATCTATGTAAGTGTCTTAAGTTCTTTAAATTATCCTTATTCTTACTTTTTGTGTACATTGTTTATAAAATA----ATG   |       |       |       |       |       |       |       | 24773 |
| OliveBaboon       | GCTATCTATGTAATGTCTTAAGTTCTTAAATTATCCTTTTTCTTATTTTTGTGTACATTGTTTATAAAATA----ATA      |       |       |       |       |       |       |       | 25428 |
| Orangutan         | GCTATCTATGTAAGTGTCTTAAGTTCTTTAAATTATCCTTATTCTTACTTTTTGTGTACATTGTTTATAAAATA----ATG   |       |       |       |       |       |       |       | 25668 |

| Majority          | TGATCATCTTAATCTACCATTTT---GA-----TTATGGTTTGATCATTCTTTT-----ACTA--TTTCCACTTGT     |       |       |       |       |       |       |       |       |
|-------------------|----------------------------------------------------------------------------------|-------|-------|-------|-------|-------|-------|-------|-------|
|                   | 32010                                                                            | 32020 | 32030 | 32040 | 32050 | 32060 | 32070 | 32080 |       |
| Human             | TGATCATCTTAATCTACCATTTT---GA-----TTATGGTTTGATCATTCTTTT-----ACTA--TTTCCACTTGT     |       |       |       |       |       |       |       | 23741 |
| Coquerel'sSifaka  | CTATCATAACAAGCTTATAGTTTTCTGACAAGCTTCATAATATGCTACTTTTCTACAGAGAAATCTAGCCTTCCACTCCT |       |       |       |       |       |       |       | 22186 |
| Ma'sNightMonkey   | TCATCATCTTAATCTACCATTTT---GA-----TTGTGGTTTGATCATTCTTTT-----ACTA--TTTTTACTTGT     |       |       |       |       |       |       |       | 20939 |
| VervetAGM         | TGATCATCTTAATCTACCATTTT---GA-----TTATGGTTTGATCATTCTTTT-----ACTA--TTTCCACTTGT     |       |       |       |       |       |       |       | 27138 |
| Gorilla           | TGATCATCTTAATCTACCATTTT---GA-----TTATGGTTTGATCATTCTTTT-----ACTA--TTTCCACTTGT     |       |       |       |       |       |       |       | 26120 |
| GrabEatingMacaque | TGATCATCTTAATCTACCATTTT---GA-----TTATGGTTTGATCATTCTTTT-----ACTA--TTTCCACTTGT     |       |       |       |       |       |       |       | 25987 |
| Macaque           | TGATCATCTTAATCTACCATTTT---GA-----TTATGGTTTGATCATTCTTTT-----ACTA--TTTCCACTTGC     |       |       |       |       |       |       |       | 26480 |
| PigTailedMacaque  | TGATCATCTTAATCTACCATTTT---GA-----TTATGGTTTGATCATTCTTTT-----ACTA--TTTCCACTTGT     |       |       |       |       |       |       |       | 25482 |
| Bonobo            | TGATCATCTTAATCTATCATTTT---GA-----TTATGGTTTGATCATTCTTTT-----ACTA--TTTCCGCTTGT     |       |       |       |       |       |       |       | 24834 |
| OliveBaboon       | TGATCATCTTAATCTACCATTTT---GA-----TTATGGTTTGATCATTCTTTT-----ACTA--TTTCCACTTGT     |       |       |       |       |       |       |       | 25488 |
| Orangutan         | TGATCATCTTAATCTACCATTTT---GA-----TTATGGTTTGATCATTCTTTT-----ACTA--TTTCCACTTGT     |       |       |       |       |       |       |       | 25729 |

| Majority          | TAGTAAAGCCTTTGTACTTATTAATTTTGATAAAAATGATTATTATAACATGCCTGGTTT-----TACTTAAAGT--GTC  |       |       |       |       |       |       |       |       |
|-------------------|-----------------------------------------------------------------------------------|-------|-------|-------|-------|-------|-------|-------|-------|
|                   | 32090                                                                             | 32100 | 32110 | 32120 | 32130 | 32140 | 32150 | 32160 |       |
| Human             | TAGCAAAGCCTTTATACTTACTAAATTAATGATAAAAATGATTATTATAACATGCCCGGTTT-----TACTTAAAT--GTC |       |       |       |       |       |       |       | 23814 |
| Coquerel'sSifaka  | GTCTAGTCTACTTATTTCTCTCTGCCTTATCAGTATCTGTTTTTATAAAATTTTGGTTTATCCCTCTTTTATCAATA     |       |       |       |       |       |       |       | 22266 |
| Ma'sNightMonkey   | TAGTAAAGCCTTTGTACCTATTACATTTTGATAAAGATGAATTTTATAACATGCCTAGTTT-----TACTTAAAGT--GTC |       |       |       |       |       |       |       | 21012 |
| VervetAGM         | TAATAAAGACTTTGTACTTATTAATTTTGATGAAAATGATTATTATAACATGCCTGGTTT-----TACTTAAAGT--GCC  |       |       |       |       |       |       |       | 27211 |
| Gorilla           | TAGTAAAGCCTTTATACTTATTAATTTTGATAAAAATGATTATTATAACATGCCCGGTTT-----TACTTAAAT--GTC   |       |       |       |       |       |       |       | 26193 |
| GrabEatingMacaque | TAATAAAGACTTTGTACTTATTAATTTTGATAAAAAGGATTATTATAACATGCCTGGTTT-----TACTTAAAGT--GCC  |       |       |       |       |       |       |       | 26060 |
| Macaque           | TAATAAAGACTTTGTACTTATTAATTTTGATGAAAAGGATTATTATAACATGCCTGGTTT-----TACTTAAAGT--GCC  |       |       |       |       |       |       |       | 26553 |
| PigTailedMacaque  | TAATAAAGACTTTGTACTTATTAATTTTGGTAAAAGGATTATTATAACATGCCTGGTTT-----TACTTAAAGT--GCC   |       |       |       |       |       |       |       | 25555 |
| Bonobo            | TAGTAAAGCCTTTATACTTATTAATTTTGATAAAAATGATTATTATAACATGCCTGGTTT-----TACTTAAAT--ATC   |       |       |       |       |       |       |       | 24907 |
| OliveBaboon       | TAATAAAGACTTTGTACTTATTAATTTTGATGA---GGATTATTATAACATGCCTGGTTT-----TACTTAAAGT--GCC  |       |       |       |       |       |       |       | 25558 |
| Orangutan         | TAGTAAAGCCTTTATACTTACTAAATTTTGATAAAAATGATTATTATAACATGCCTGGTTT-----TACTTAAAGT--GTC |       |       |       |       |       |       |       | 25802 |

Tuesday, May 03, 2022 06:15 PM

| Majority          | TTATTTAAACTTTCTGATTGTTATTCTTTCTTAT----TCAGGTTTCTTATTGTCATGGTTTACATC-TGTTTTCAGGTG  |       |       |       |       |       |       |       |       |
|-------------------|-----------------------------------------------------------------------------------|-------|-------|-------|-------|-------|-------|-------|-------|
|                   | 32170                                                                             | 32180 | 32190 | 32200 | 32210 | 32220 | 32230 | 32240 |       |
| Human             | TTATTTAAACGTTCTGATTGTTATTCTTTCTTAT----TCAGGTTTCTTATTGTCATGTTTATGTC-TGTTTTCAGGTG   |       |       |       |       |       |       |       | 23889 |
| Coquerel'sSifaka  | TAATGTGAATTTCTTCCCTACCCTCTGCCTCCACAACATTAGGTGAAACGT-GGCACAATATACAGAATGTTTATAGCT   |       |       |       |       |       |       |       | 22345 |
| Ma'sNightMonkey   | TTATTTAAATTTCTCATTGTTATTCTTTCTTAC----TTAGGTTTCTTATTGTCATGGTTTATATC-TGTTTTCAGGTG   |       |       |       |       |       |       |       | 21087 |
| VervetAGM         | TTATTTAAACTTTCTGATTGTAATTCTT-----AGGTTTCTTATTGTCGTTGGTTTACATC-TGTTTTCAGGTG        |       |       |       |       |       |       |       | 27278 |
| Gorilla           | TTATTTAAACGTTCTGATTATTATTCTT----AT----TCAGGTTTCTTATTGTCATGGTTTATATC-TGTTTTCAGGTG  |       |       |       |       |       |       |       | 26264 |
| GrabEatingMacaque | TTATTTAAACTTTCTGATTGTAATTCTTTCTTTG----TCAGGTTTCTTATTGTTGTGGTTTACATC-TGTTTTCAGGTG  |       |       |       |       |       |       |       | 26135 |
| Macaque           | TTATTTAAACTTTCTGATTGTAATTCTTTCTTTG----TCAGGTTTCTTATTGTTGTGGTTTACATC-TGTTTTCAGGTG  |       |       |       |       |       |       |       | 26628 |
| PigTailedMacaque  | TTATTTAAACTTTCTGATTGTAATTCTTTCTTTG----TCAGGTTTCTTATTGTTGTGGTTTACATC-TGTTTTCAGGTG  |       |       |       |       |       |       |       | 25630 |
| Bonobo            | TTATTTAAACGTTCTGATTGTTATTCTTTCTTAT----TCAGGTTTCTTATTGTCATGTTTATGTC-TGTTTTCAGGTG   |       |       |       |       |       |       |       | 24982 |
| OliveBaboon       | TTATTTAAACTTTCTGATTGTAATTCTTTCTTTG----TCAGGTTTCTTATTGTCGTTGGTTTACATC-TGTTTTCAGGTG |       |       |       |       |       |       |       | 25633 |
| Orangutan         | TTATTTAAACTTTCTGATTGTTATTCTTTCTTAT----TCAGGTTTCTTATTATCATGGTTTACATC-TGTTTTCAGGTG  |       |       |       |       |       |       |       | 25877 |

| Majority          | TAATTGTCCTCTC-----ACAAATGTATCCCA-----TTTTGGGTGATAAAATACCTGA--TCACCTTATCCTTATAGTT  |       |       |       |       |       |       |       |       |
|-------------------|-----------------------------------------------------------------------------------|-------|-------|-------|-------|-------|-------|-------|-------|
|                   | 32250                                                                             | 32260 | 32270 | 32280 | 32290 | 32300 | 32310 | 32320 |       |
| Human             | TAATTGTCCTCTC-----ACAAATGTATCCCA-----TTTTGGGTGATAAAATACCTGA--TCACCTTATCCTTATAGTT  |       |       |       |       |       |       |       | 23957 |
| Coquerel'sSifaka  | TGGCTTTTTTACTTAAATGATAAATGTATCCTGGAAATCACTACATGGCAGTATATGGAAAATTTCTCATTTCTTCTCTGC |       |       |       |       |       |       |       | 22425 |
| Ma'sNightMonkey   | TAATAGTCCTTCC-----ACAAATGTATCCCA-----TTTTGGATGATAAAATATCTGA--TCACCTTATCCTTATAGTT  |       |       |       |       |       |       |       | 21155 |
| VervetAGM         | TAATTGTCCTCTC-----ACAAATGTATCCCA-----TTTTGGGTGATAAAATACTTGA--TCACCTTATCCTTATAGTT  |       |       |       |       |       |       |       | 27346 |
| Gorilla           | TAATTGTCCTCTC-----ACAAATGTATCCCA-----TTTTGGGTGATAAAATACCTGA--TCACCTTATCCTTATAGTT  |       |       |       |       |       |       |       | 26332 |
| GrabEatingMacaque | TAATTGTCCTCTC-----ACAAATGTATCCCA-----TTTTGGGTGATAAAATACCTGA--TCACCTTATCCTTATAGTT  |       |       |       |       |       |       |       | 26203 |
| Macaque           | TAATTGTCCTCTC-----ACAAATGTATCCCA-----TTTTGGGTGATAAAATACCTGA--TCACCTTATCCTTATAGTT  |       |       |       |       |       |       |       | 26696 |
| PigTailedMacaque  | TAATTGTCCTCTC-----ACAAATGTATCCCA-----TTTTGGGTGATAAAATACCTGA--TCACCTTATCCTTATAGTT  |       |       |       |       |       |       |       | 25698 |
| Bonobo            | TAATTGTCCTCTC-----ACAAATGTATCCCA-----TTTTGGGTGATAAAATACCTGA--TCACCTTATCCTTATAGTT  |       |       |       |       |       |       |       | 25050 |
| OliveBaboon       | TAATTGTCCTCTC-----ACAAATGTATCCCA-----TTTTGGGTGATAAAATACCTGA--TCACCTTATCCTTATAGTT  |       |       |       |       |       |       |       | 25701 |
| Orangutan         | TAATTGTCCTCTC-----ACAAATGTATCCCA-----TTTTGGGTGATAAAATACCTGA--TCACCTTATCCTTACAGTT  |       |       |       |       |       |       |       | 25945 |

| Majority          | TTCTCCCTAGAATCTTTTTGTTATATTAATCAAAGTTTATT--TGTGAGAA----TGTTATGAAATATAAGAAAACGAA  |       |       |       |       |       |       |       |       |
|-------------------|----------------------------------------------------------------------------------|-------|-------|-------|-------|-------|-------|-------|-------|
|                   | 32330                                                                            | 32340 | 32350 | 32360 | 32370 | 32380 | 32390 | 32400 |       |
| Human             | TTCTCCCTAGAATCTTTTTGTTATATTAATCAAAGTTTATT--TGTGAGAA----TGTTATGAAATATAAGAAAATGAA  |       |       |       |       |       |       |       | 24031 |
| Coquerel'sSifaka  | TGCTGCATAGTTCTTTTTAGACTGTTTTTTCCAGTCTCTTACTATTACAAATTATGTTATGGTGAATAGCTTTGTGCA   |       |       |       |       |       |       |       | 22505 |
| Ma'sNightMonkey   | TTCTCCCTAGAATCTTCTTTGTTATATTAATCAAAGTTTATA--TGTGAGAA----TGTTATGAAATACAAGAAAACAAA |       |       |       |       |       |       |       | 21229 |
| VervetAGM         | TTCTCCCTAGAATCTTTTTGTTATATTAATCAAAGTTTATT--TGTGAGAA----TGTTATGAAATGTAAGAAAACGAA  |       |       |       |       |       |       |       | 27420 |
| Gorilla           | TTCTCTCTAGAATCTTTTTGTTATATCAATCAAAGTTTATT--TGTGAGAA----TATTATGAAATATAAAAAAATGAA  |       |       |       |       |       |       |       | 26406 |
| GrabEatingMacaque | TTCTCCCTAGAATCTTTTTGTTATATTAATCAAAGTTTATT--TGTGAGAA----TGTTGTGAAATGTAAGAAAACGAA  |       |       |       |       |       |       |       | 26277 |
| Macaque           | TTCTCCCTAGAATCTTTTTGTTATATTAATCAAAGTTTATT--TGTGAGAA----TGTTGTGAAATGTAAGAAAACGAA  |       |       |       |       |       |       |       | 26770 |
| PigTailedMacaque  | TTCTCCCTAGAATCTTTTTGTCATATTAATCAAAGTTTATT--TGTGAGAA----TGTTGTGAAATGTAAGAAAACGAA  |       |       |       |       |       |       |       | 25772 |
| Bonobo            | TTCTCCCTAGAATCTTTTTGTTATATTAATCAAAGTTTATT--TGTGAGAA----TGTTATGAAATATAAGAAAATGAA  |       |       |       |       |       |       |       | 25124 |
| OliveBaboon       | TTCTCCCTAGAATCTTTTTGTTATATTAATCAAAGTTTATT--TGTGAGAA----TGTTGTGAAATGTAAGAAAACGAA  |       |       |       |       |       |       |       | 25775 |
| Orangutan         | TTCTCCCTAGAATCTTTTTGTTATATTAATCAAAGTTTATT--TGTGAGAA----TGTTATGAAATATAAGAAAATGAA  |       |       |       |       |       |       |       | 26019 |

Tuesday, May 03, 2022 06:15 PM

| Majority          | CATCATGAACCTGCCACTCAAATAAAAAA-----CTT-----GAATGCTACCAATACTGTTGTATATTCCATAT          |       |       |       |       |       |       |       |       |
|-------------------|-------------------------------------------------------------------------------------|-------|-------|-------|-------|-------|-------|-------|-------|
|                   | 32410                                                                               | 32420 | 32430 | 32440 | 32450 | 32460 | 32470 | 32480 |       |
| Human             | CATCATGAACCTGTCACCTCAAATAAAAAA-----CTT-----GAATGTTACCAATACTATTGTATATTCCATAT         |       |       |       |       |       |       |       | 24096 |
| Coquerel'sSifaka  | TAT-GTAATTTTGCTGGTATAAAAAAATACCAGTATATCTTTTCAGATAGAGTCCATAAAAGTGAAATTGCTGGGTCCAGTGT |       |       |       |       |       |       |       | 22584 |
| Ma'sNightMonkey   | CATCGTGAACCTACTACTCAAATAAAAAA-----CTT-----GAATGTTACCAATATTTGTTGTATATTCCATGT         |       |       |       |       |       |       |       | 21293 |
| VervetAGM         | CATCATGAACCTGCCACTCAAATAAAAAA-----CTT-----GAATGCTCCAATACTTTTGTATATTCCATAT           |       |       |       |       |       |       |       | 27484 |
| Gorilla           | CATCATGAACCTGCCACTCAAATAAAAAA-----CTT-----GAATGTTACCAATACTATTGTATATTCCATAT          |       |       |       |       |       |       |       | 26472 |
| GrabEatingMacaque | CATCATGAACCTGCCACTCAAATAAAAAA-----CTT-----GAATGCTACCAATACTGTTGTATATTCCATAT          |       |       |       |       |       |       |       | 26341 |
| Macaque           | CATCATGAACCTGCCACTCAAATAAAAAA-----CTT-----GAATGCTACCAATACTGTTGTATATTCCATAT          |       |       |       |       |       |       |       | 26834 |
| PigTailedMacaque  | CATCATGAACCTGCCACTCAAATAAAAAA-----CTT-----GAATGCTACCAATACTGTTGTATATTCCATAT          |       |       |       |       |       |       |       | 25836 |
| Bonobo            | CATCATGAACCTACCCTCAAATAAAAAA-----CTT-----GAATGTTACCAATACTATTGTATATTCCATAT           |       |       |       |       |       |       |       | 25189 |
| OliveBaboon       | CATCACGAACCTGCCACTCAAATAAAAAA-----CTT-----GAATGCTACCAATACTGTTGTATATTCCATAT          |       |       |       |       |       |       |       | 25839 |
| Orangutan         | CATCATGAACCTGCCATTCAAATAAAAAAG-----CTT-----GAATGTTACCAATACTGTTGTATATTCCATAT         |       |       |       |       |       |       |       | 26084 |

| Majority          | GCAG-----CAATATTGCTTTTTTTTTTTTTTTTTTTT---GAGAAAGAGTCTAGTTCCTGTCACCCAGGCTGG--AGTGCA    |       |       |       |       |       |       |       |       |
|-------------------|---------------------------------------------------------------------------------------|-------|-------|-------|-------|-------|-------|-------|-------|
|                   | 32490                                                                                 | 32500 | 32510 | 32520 | 32530 | 32540 | 32550 | 32560 |       |
| Human             | GCAG-----CAATATTGCTTTTTTTTTTTTTTTT-----AGAGTCTTGCTCTGATACCCACGCTGG--AGTGCA            |       |       |       |       |       |       |       | 24154 |
| Coquerel'sSifaka  | GTAATACATAAATTTTACTAGCTATTGCTGAGTTCCTTTTTGTTGTAGGAATTGTATTTGCTATCATAACAGGTAAGTTTG     |       |       |       |       |       |       |       | 22664 |
| Ma'sNightMonkey   | GCAA-----CAATATTGCTTTTTT-----                                                         |       |       |       |       |       |       |       | 21311 |
| VervetAGM         | GCAG-----CAATATTGCTTTTTTTTTTTTTTTTTTTTGG--GAGAAAGAGTCTAGTTCCTGTCACCCAGGCTGG--AGTGCA   |       |       |       |       |       |       |       | 27556 |
| Gorilla           | GCAG-----CAATATTGCTTTTTTNNNNNNNNNNNNNNN---NN---NNNNNNNNNNNNNNNNNNNNNNNNNNNNNNNNNNNNNN |       |       |       |       |       |       |       | 26539 |
| GrabEatingMacaque | GCAG-----CAGTATTGCTTTTTTTTTTTTTTTTTTTT---GGGAAAGAGTCTAGTTCCTGTCACCCAGGCTGG--AGTGCA    |       |       |       |       |       |       |       | 26409 |
| Macaque           | GCAG-----CAGTATTGCTTTTTTTTTTTTTTTTTTTT---GGGAAAGAGTCTAGTTCCTGTCACCCAGGCTGG--AGTGCA    |       |       |       |       |       |       |       | 26905 |
| PigTailedMacaque  | GCAG-----CAATATTGCTTTTTTTTTTTTTTTTTTTT---GAGAAAGAGTCTAGTTCCTGTCACCCAGGCTGG--AGTGCA    |       |       |       |       |       |       |       | 25906 |
| Bonobo            | GCAG-----CAATATTGCTTTTTTTTTTTTTTTTTTTT-----AGAGTCTTGCTGTGATACCCACGCTGG--AGTGCA        |       |       |       |       |       |       |       | 25252 |
| OliveBaboon       | GCAG-----CAATATTGCTTTTTTTTTTTTTTTTTTTTTTTTGGAGAAAGAGTCTAGTTCCTGTCACCCAGGCTGG--AGTGCA  |       |       |       |       |       |       |       | 25912 |
| Orangutan         | GCAA-----CAATATTGCTTTTTTTTTTTTTTTTTTTT---TAAGAAGAGTCTTGCTTTGATACCCACGCTGG--AGTGCA     |       |       |       |       |       |       |       | 26154 |

| Majority          | GTGA--TGCTATCTCAGCTCATTGCAAGCTCCGCCTCC-----CTGGTTCACACCATTCTCCTGCCTCAGCCTCC-TG |       |       |       |       |       |       |       |       |
|-------------------|--------------------------------------------------------------------------------|-------|-------|-------|-------|-------|-------|-------|-------|
|                   | 32570                                                                          | 32580 | 32590 | 32600 | 32610 | 32620 | 32630 | 32640 |       |
| Human             | GTGG--TGTCATCTCGGCTCACAGCAAGCTTCGCCTCC-----CTGGTTCACCCATTCTCCTGCCTCAGCCTCC-CG  |       |       |       |       |       |       |       | 24224 |
| Coquerel'sSifaka  | GTTGCCTATTTCCCATAGTCTATCAGGATATATTGTCAAAGTTTGGGGTTTTGCCAGGCAGATAGGTGAGACAGCATC |       |       |       |       |       |       |       | 22744 |
| Ma'sNightMonkey   | -----                                                                          |       |       |       |       |       |       |       | 21311 |
| VervetAGM         | GTGA--TGCTATCTCAGCTCATTGCAAGCTCCGCCTCC-----CTGGTTCACACCATTCTCCTGCCTCAGCCTCC-TG |       |       |       |       |       |       |       | 27626 |
| Gorilla           | NNNN--NNNNNNNNNNNNNNNNNNNNNNNNNNNNNNNNNNNNNNNNNNNNNNNNNNNNNNNNNNNNNNNNNNNNNNNN |       |       |       |       |       |       |       | 26609 |
| GrabEatingMacaque | GTGA--TGCTATCTCAGCTCATTGCAAGCTCCGCCTCC-----CTGGTTCACACCATTCTCCTGCCTCAGCCTCC-TG |       |       |       |       |       |       |       | 26479 |
| Macaque           | GTGA--TGCTATCTCAGCTCATTGCAAGCTCCGCCTCC-----CTGGTTCACACCATTCTCCTGCCTCAGCCTCC-TG |       |       |       |       |       |       |       | 26975 |
| PigTailedMacaque  | GTGA--TGCTATCTCAGCTCATTGCAAGCTCCGCCTCC-----CTGGTTCACACCATTCTCCTGCCTCAGCCTCC-TG |       |       |       |       |       |       |       | 25976 |
| Bonobo            | GTGG--CGTCATCTGGCTCACTGCAAGCTCCGCCTCC-----CTGGTTCACCCATTCTCCTGCCTCAGCCTCC-CG   |       |       |       |       |       |       |       | 25322 |
| OliveBaboon       | GTGA--TGCTATCTCAGCTCATTGCAAGCTCCGCCTCC-----CTGGTTCACACCATTCTCCTGCCTCAGCCTCC-TG |       |       |       |       |       |       |       | 25982 |
| Orangutan         | GTGG--CGTGATCTGGCTCACTGCAAGATCCGCCTCC-----CTGGTTCACCCATTCTCCTGCCTCAGCCTCC-CG   |       |       |       |       |       |       |       | 26224 |



Tuesday, May 03, 2022 06:15 PM

| Majority          | CATAGCTGGGACTACAGGCGCCACCACCACACCCGCCTAATTTTTTGTATATTTAGTAGAGGCGGGTTTCAGCATGTT     |       |
|-------------------|------------------------------------------------------------------------------------|-------|
|                   | 32650 32660 32670 32680 32690 32700 32710 32720                                    |       |
| Human             | AGTAGCTGGGACTTCAGGCACCCGCCACCACACCCGGCTAATTTTTTGAATTTTTAGTAGAGACGGGGTTTCACCCCTGTT  | 24304 |
| Coquerel'sSifaka  | TAAATGTAGTATTAATTTTCATTGTCTTAAATGTGAGCAAGGTGAAACAACCTTTTCAGTTTAAAAATAATTTCTCTTACCT | 22824 |
| Ma'sNightMonkey   | -----                                                                              | 21311 |
| VervetAGM         | CATAGCTGGGACTACAGGCGCCACCACCACACCCGCCTAATTTTTTGTATATT-AGTAGAGGTGGGGTTTCAGCATGTT    | 27705 |
| Gorilla           | NNNNNNNNNNNNNNNNNNNNNNNNNNNNNNNNNNNNNNNNNNNNNNNNNNNNNNNNNNNNNNNNNNNNNNNNNNNNNNNN   | 26689 |
| GrabEatingMacaque | CATAGCTGGGACTACAGGCGCCACCACCACACCCGCCTAATTTTTTGTATATTTAGTAGAGGCGGGTTTCAGCATGTT     | 26559 |
| Macaque           | CATAGCTGGGACTACAGGCGCCACCACCACACCCGCCTAATTTTTTGTATATTTAGTAGAGGCGGGTTTCAGCATGTT     | 27055 |
| PigTailedMacaque  | CATAGCTGGGACTACAGGCGCCACCACCACACCCGCCTAATTTTTTGTATATTTAGTAGAGGCGGGTTTCAGCATGTT     | 26056 |
| Bonobo            | AGTAGCTGGGACTACAGGCACCCGCCACCACACCCGGCTAATTTTTTGAATTTTTAGTAGAGACGGGGTTTCACCCCTGTT  | 25402 |
| OliveBaboon       | CATAGCTGGGACTACAGGCGCCACCACCACACCCACCTAATTTTTTGTATATTTAGTAGAGGCGGGTTTCAGCATGTT     | 26062 |
| Orangutan         | AGTAGCTGGGACTACAGGTGCCACCACCACACCCGGCTAATTTTTTGAATTTTTAGTAGAGACGGGGTTTCACCCCTGTT   | 26304 |

| Majority          | A-GCCAGGATGGTTTTCT-ATCTCCTGACCTCGTTATCCGTCCGC--GTCGGCC-----TCCCAAAGTGCTGGGATTATA |       |
|-------------------|----------------------------------------------------------------------------------|-------|
|                   | 32730 32740 32750 32760 32770 32780 32790 32800                                  |       |
| Human             | A-GCCAGGATGGTTTTG-ATCTCATGACCTCGTGATCCGTCTGC--CTCGGCC-----TCCCAAAGTGCTGGGATTATA  | 24374 |
| Coquerel'sSifaka  | ATACTGGGAATATCTTATCTCTTG-CCTGGTTCTCTGTAGGATAACTGGTCATCTTTTCTAAATTTTTGTAAGTCTG    | 22903 |
| Ma'sNightMonkey   | -----                                                                            | 21311 |
| VervetAGM         | A-GCTAAGATGGTCTCT-ATCTCCTGACCTCATTATATGCCCGC--ATCGGCC-----TCCCAAAGTGCTGCGATTACA  | 27775 |
| Gorilla           | N-NNNNNNNTGGTTTTG-ATCTCATGACCTCGTGATCCGTCCGC--CTTGGCC-----TCCCAAAGTGCTGGGATTATA  | 26759 |
| GrabEatingMacaque | A-GCCAGGATGGTCTCT-ATCTCCTGACCTCATTATACGCCCGC--GTCGGCC-----TCCCAGAGTGCTGGGATTACA  | 26629 |
| Macaque           | A-GCCAGGATGGTCTCT-ATCTCCTGACCTCATTATACGCCCGC--GTCGGCC-----TCCCAGAGTGCTGGGATTACA  | 27125 |
| PigTailedMacaque  | A-GCCAGGATGGTCTCT-ATCTCCTGACCTCATTATACGCCCGC--GTCGGCC-----TCCCAAAGTGCTGGGATTACA  | 26126 |
| Bonobo            | A-GCCAGGATGGTTTTG-ATCTCATGACCTCGTGATCTGTCCGC--CTCGGCC-----TCCCAAAGTGCTGGGATTATA  | 25472 |
| OliveBaboon       | A-GCCAGGATGGTCTCTTATCTCCTGACCTCATTATACGCTGC--GTCGGCC-----TCCCAAAGTGCTGGGATTACA   | 26133 |
| Orangutan         | A-GCCAGGATGGTTTTG-ATCTCATGACCTCGTGATCCATCCAC--CTCGGCC-----TCCCAAAGTGCTGGGATTATA  | 26374 |

| Majority          | -GGTGTGAGCTACTGTGCCAGCCCAATATTGCTTTTT---AATCCCCT---TCTTACCCTGTCATGGGTAGGT----  |       |
|-------------------|--------------------------------------------------------------------------------|-------|
|                   | 32810 32820 32830 32840 32850 32860 32870 32880                                |       |
| Human             | -GGTGTGAGCTACTGCGCCAGCCCAATATTGCTTTTT---AATCCCCT---TCTTACCCTGCCATGGGTAGGT----  | 24442 |
| Coquerel'sSifaka  | TGTTGGAAGTTAAGGTTCCCTTTTTGATCCAGTTATTTGGGAATTATTTCAAATTTTATCTCATTAATTTAAACACTT | 22983 |
| Ma'sNightMonkey   | -----A-----ATCTCCCT---TTTTACCCTATCATGGGTAGGT----                               | 21342 |
| VervetAGM         | -GGCGTGAGCCACTGCGCCAGCCCAATATTGCTTTTT---AATCCCCT---TCTTACCCTGTCATGGGTAGGT----  | 27843 |
| Gorilla           | -GGTGTGAGCTACTGCGCCAGCCCAACTGCTTTTT---AATCCCCT---TCTTACCCTGTCATCGGTAGGT----    | 26827 |
| GrabEatingMacaque | -GGCGTGAGCCACTGTGCCAGCCCAATATTGCTTTTT---AATCCCCT---TCTTACCCTGTCATGGGTAGGT----  | 26697 |
| Macaque           | -GGCGTGAGCCACTGTGCCAGCCCAATATTGCTTTTT---AATCCCCT---TCTTACCCTGTCATGGGTAGGT----  | 27193 |
| PigTailedMacaque  | -GGTGTGAGCCACTGTGCCAGCCCAATATTGCTTTTT---AATCCCCT---TCTTACCCTGTCATGGGTAGGT----  | 26194 |
| Bonobo            | -GGTGTGAGCTACTGCGCCAGCCCAATATTGCTTTTT---AATCCCCT---TCTTACCCTGTCATGGGTAGGT----  | 25540 |
| OliveBaboon       | -GACGTGAGCCACTGTGCCAGCCAGTATTGCTTTTT---AATCCCCT---TCTTACCCTGTCATGGGTAGGT----   | 26201 |
| Orangutan         | -GGTGTGAGCTACTGCGCCAGCCCAATATTGCTTTTT---AATCCCCT---TCTTACCCTGTCATGGGTAGGT----  | 26442 |

Tuesday, May 03, 2022 06:15 PM

|                   |                                                                                   |       |
|-------------------|-----------------------------------------------------------------------------------|-------|
| Majority          | ---GGCTGCCACAAC TTTTGCCTTATTTTTTCAATATGGATTTTTCATGTAAATGACAAAAATATATT-----TTTGTTT |       |
|                   | 32890 32900 32910 32920 32930 32940 32950 32960                                   |       |
| Human             | ---GGCTGCCACAAC TTTTGCCTTATTTTTTCAATATGGATTTTTCATGTAAATGACAAAAATATATT-----TAGTTT  | 24513 |
| Coquerel'sSifaka  | TACGATTGTTCCATTTTTTCTCTATTCTTCTCATTAAAAATGTCTTATTGTAGTTGCCCAAATATAT-AGTCTATACTT   | 23062 |
| Ma'sNightMonkey   | ---GACTGCCACAAC TTTTCCCTTAATTTTTCAATATGGATTTTTCATGTAAATGACAAAAATATATTTAGTTT       | 21419 |
| VervetAGM         | ---GGCTGCCACAAC TTTTGCCTTATTTTTTCAATATGGATTTTTCATGTAAATGACAAAAATATATT-----TTTGTTT | 27914 |
| Gorilla           | ---GGCTGCCACAAC TTTTGCCTTATTTTTTCAATATGGATTTTTCATGTAAATGAAAAAATATATATT-----TAGTTT | 26898 |
| GrabEatingMacaque | ---GGCTGCCACAAC TTTTGCCTTATTTTTTCAATATGGATTTTTCATGTAAATGACAAAAATATATTTTGT         | 26774 |
| Macaque           | ---GGCTGCCACAAC TTTTGCCTTATTTTTTCAATATGGATTTTTCATGTAAATGACAAAAATATATTTTGT         | 27270 |
| PigTailedMacaque  | ---GGCTGCCACAAC TTTTGCCTTATTTTTTCAATATGGATTTTTCATGTAAATGACAAAAATATATA-----TATATAT | 26266 |
| Bonobo            | ---GGCTGCCACAAC TTTTGCCTTATTTTTTCAATATGGATTTTTCATGTAAATGACAAAAATATATT-----TAGTTT  | 25611 |
| OliveBaboon       | ---GGCTGCCACAAC TTTTGCCTTATTTTTTCAATATGGATTTTTCATGTAAATGACAAAAATATATTTTGT-TTTTTTT | 26277 |
| Orangutan         | ---GGCTGCCACAAC TTTTGCCTTATTTTTTCAATATGAATTTTTCATGTCAATGACAAAAATATATT-----TAGGTT  | 26513 |

|                   |                                                                                   |       |
|-------------------|-----------------------------------------------------------------------------------|-------|
| Majority          | TTTTTT--AGTTTATGGAAATG-GTATGCC----CATATAATGTTTTCC----ATGCTTGTGT---TTT-AATTC AATA  |       |
|                   | 32970 32980 32990 33000 33010 33020 33030 33040                                   |       |
| Human             | TTTTTT--AGTTTATGGAAACG-GTATGCC----TATATAATGTTTTCC----ATGCTTGTGT---TTT-AATTC AATA  | 24578 |
| Coquerel'sSifaka  | CTTTATGGAATTCATTGACATATGCATCATATAGTATATGATTTTCTTTTGTGATTTCTCACGGACATTTAAATAGAATG  | 23142 |
| Ma'sNightMonkey   | TTTTTTTTCAGTTATGGAAATG-GTATGCC----CATATAATGTTTTCT----GTGTTTTGTGT---TTT-CATTC AATA | 21486 |
| VervetAGM         | TTGTTT--AGTTTATGGAAATG-GTATGCC----CATATGATGTTTTCC----ATGCTTGTGT---TTT-AATTC AATA  | 27979 |
| Gorilla           | TTTTTT--AGTTTATGGAAATG-GTATGCC----CATATAATGTTTTCC----ATGCTTGTGT---TTTTAATTC AATA  | 26964 |
| GrabEatingMacaque | TTTTTT--AGTTTATGGAAATG-GTATGCC----CATATAATGTTTTCC----ATGCTTGTGT---TTT-AATTC AATA  | 26839 |
| Macaque           | TTTTTTTATGTTTATGGAAATG-GTATGCC----CATATAATGTTTTCC----ATGCTTGTGT---TTT-AATTC AATA  | 27337 |
| PigTailedMacaque  | ATTTTT--AGTTTATGGAAATG-GTATGCC----CATATAATGTTTTCC----ATGCTTGTGT---TTT-AATTC AATA  | 26331 |
| Bonobo            | TTTTTT--AGTTTATGGAAATG-GTATGCC----CATATAATGTTTTCC----ATGCTTGTGT---TTT-AATTC AATA  | 25676 |
| OliveBaboon       | TTTTTT--AGTTTATGGAAATG-GTATGCC----CATATAATGTTTTCC----ATGCTTGTGT---TTT-AATTC AATA  | 26342 |
| Orangutan         | TTTTTT--AGTTTATGGAAATG-GTATGCC----CATATAATGTTTTCC----GTGCTTGTGT---TTT-AATTC AATA  | 26578 |

|                   |                                                                                 |       |
|-------------------|---------------------------------------------------------------------------------|-------|
| Majority          | ATTATTCTA---ATAAAT---AGCTGTATTTTTGGATAGTTT-----TATAATA-ATCATTGCTGTGGTATACTCTTT- |       |
|                   | 33050 33060 33070 33080 33090 33100 33110 33120                                 |       |
| Human             | ATGATTCTA---ATAAAT---AGCCGTATTTTTGGATAGTTT-----TATAATA-CTCATTGCTGTGATATACTCTTT- | 24645 |
| Coquerel'sSifaka  | GGTAAACTGCACATAACTTAAATGTGCATCAATAGGGGATTTTAAACTATGATATACCAACATAGTAGAATGCTGTGCG | 23222 |
| Ma'sNightMonkey   | ATGATTCTA---ATAAAT---AGCCATATTTGTGAGTAGTTA-----TATAATA-ATCATT---GTGGTATACTTTTT- | 21550 |
| VervetAGM         | ATTATTCTA---ATAAAT---AGCTGTATTTTTGGGTAGTTT-----TATAATA-ATCATTGCTGTGGTATACTCTTT- | 28046 |
| Gorilla           | ATGATTCTA---ATAAAT---AGCCGTATTTTTGGATAGTTT-----TGTAATA-CTCATTGCTGTGATATACTCTT-- | 27030 |
| GrabEatingMacaque | ATTATTCTA---ATAAAT---AGCTGTATTTTTGGATAGTTT-----TATAATA-ATCATTGCTGTGGTATACTCTTT- | 26906 |
| Macaque           | ATTATTCTA---ATAAAT---AGCTGTATTTTTGGATAGTTT-----TATAATA-ATCATTGCTGTGGTATACTCTTT- | 27404 |
| PigTailedMacaque  | ATTATTCTA---ATAAAT---AGCTGTATTTTTGGATAGTTT-----TATAATA-ATCATTGCTGTGGTATACTCTTT- | 26398 |
| Bonobo            | ATGATTCTA---ATAA-----GCCGTATTTTTGGATAGTTT-----TATAATA-CTCATTGCTGTGATATACTCTTT-  | 25740 |
| OliveBaboon       | ATTATTCTA---ATAAAT---AGCTGTATTTTTGGATAGTTT-----TATAATA-ATCATTGCTGTGGTATACTCTTT- | 26409 |
| Orangutan         | ATGATTCTA---ATAAAT---AGCCGTATTTTTGGGTAGTTT-----TATAATA-CTCATTGCTGTGATACACTCTTT- | 26645 |

Tuesday, May 03, 2022 06:15 PM

|                   |                                                                                  |            |      |                 |      |               |                |       |                  |       |  |       |  |       |  |       |
|-------------------|----------------------------------------------------------------------------------|------------|------|-----------------|------|---------------|----------------|-------|------------------|-------|--|-------|--|-------|--|-------|
| Majority          | ----                                                                             | T-GTGAAAAT | ---- | ACCCATTTTATCTCT | ---- | TTTATTGGACATT | -TGGGTTGATGGAC | --    | ATTTGAATATTTAAAG |       |  |       |  |       |  |       |
|                   |                                                                                  | 33130      |      | 33140           |      | 33150         |                | 33160 |                  | 33170 |  | 33180 |  | 33190 |  | 33200 |
| Human             | ----                                                                             | T-GTGAAAAT | ---- | ACCCATTTTATCT   | ---- | TTTATTGGACATT | -TGGGTTGATGGAC | --    | ATTTGAATATTTAAAG | 24709 |  |       |  |       |  |       |
| Coquerel'sSifaka  | GCTGTTGAAAGAATGAAACAGATTTTATATGATGATTTAAAAAAATTTCTAAGCTGTTTTCTTAATTGAAAAGAATAATG |            |      |                 |      |               |                |       |                  | 23302 |  |       |  |       |  |       |
| Ma'sNightMonkey   | ----                                                                             | TTGTGGAAAT | ---- | ACTCATTTTATCTCT | ---- | TTTACTGGAAATG | -TGGGTTGATGAAC | --    | ATTTCAATATTTAAAG | 21617 |  |       |  |       |  |       |
| VervetAGM         | ----                                                                             | T-GTGAAAAT | ---- | ACCCATTTTATCTCT | ---- | TTTATTGGACATT | -TGGGTTGATGGAC | --    | ATTTGAATATTTAAAG | 28112 |  |       |  |       |  |       |
| Gorilla           | -----                                                                            | GTGAAAAT   | ---- | ACCCATTTTATCT   | ---- | TTTATTGGACATT | -TGGGTTGATGGAC | --    | ATTTGAATATTTAAAG | 27093 |  |       |  |       |  |       |
| GrabEatingMacaque | ----                                                                             | T-GTGAAAAT | ---- | ACCCATTTTATCTCT | ---- | TTTATTGGACATT | -TGGGTTGATGGAC | --    | ATTTGAATATTTAAAG | 26972 |  |       |  |       |  |       |
| Macaque           | ----                                                                             | T-GTGAAAAT | ---- | ACCCATTTTATCTCT | ---- | TTTATTGGACATT | -TGGGTTGATGGAC | --    | ATTTGAATATTTAAAG | 27470 |  |       |  |       |  |       |
| PigTailedMacaque  | ----                                                                             | T-GTGAAAAT | ---- | ACCCATTTTATCTCT | ---- | TTTATTGGACATT | -TGGGTTGATGGAC | --    | ATTTGAATATTTAAAG | 26464 |  |       |  |       |  |       |
| Bonobo            | ----                                                                             | T-GTGAAAAT | ---- | ACCCATTTTATCT   | ---- | TTTATTGGACATT | -TGGGTTGATGGAC | --    | ATTTGAATATTTAAAG | 25804 |  |       |  |       |  |       |
| OliveBaboon       | ----                                                                             | T-GTGAAAAT | ---- | ACCCATTTTATCTCT | ---- | TTTATTGGACATT | -TGGGTTGATGGAC | --    | ATTTGAATATTTAAAG | 26475 |  |       |  |       |  |       |
| Orangutan         | ----                                                                             | T-GTGAAAAT | ---- | ACCCATTTTATCTCT | ---- | TTTATTGGACATT | -TGGGTTGATGGAC | --    | ATTTGAATATTTAAAG | 26711 |  |       |  |       |  |       |

|                   |                                                                                 |      |             |             |       |                  |       |  |       |  |       |  |       |  |       |
|-------------------|---------------------------------------------------------------------------------|------|-------------|-------------|-------|------------------|-------|--|-------|--|-------|--|-------|--|-------|
| Majority          | ATTTTGACTTAGGCCAGGCATGGTGGCTCACGCCTGT                                           | ---- | AATCACAGCAC | TTTGGGAGGCC | --    | AGGGCGGGTGGATCAC |       |  |       |  |       |  |       |  |       |
|                   | 33210                                                                           |      | 33220       |             | 33230 |                  | 33240 |  | 33250 |  | 33260 |  | 33270 |  | 33280 |
| Human             | ATTTTGACTTAGGCCGGGCGTGGTGGCTCAAGCTTGT                                           | ---- | AATCCCAGCAC | TTTGGGAGGCC | --    | AGGGCGGGCAGATCAC | 24784 |  |       |  |       |  |       |  |       |
| Coquerel'sSifaka  | CTTTTTTGTATGACAAAAACATATACATATATCAGTTTCGGAGGAAAGAATTGTATGAAACTTAAGGATAATTAATTTT |      |             |             |       |                  | 23382 |  |       |  |       |  |       |  |       |
| Ma'sNightMonkey   | ATTTTGACTTCGGCTGGGCATGGTGGGTACACCTGT                                            | ---- | AATCTCAGCAC | TTTGGGAGGCC | --    | AAGGAGGGTAGATCAC | 21692 |  |       |  |       |  |       |  |       |
| VervetAGM         | ATTTTGACTTACGCCAGGCATGGTGGCTCATGCCTGT                                           | ---- | AATCACAGCAC | TTTGGGAGACC | --    | AGGGCGGGTGGATCAC | 28187 |  |       |  |       |  |       |  |       |
| Gorilla           | ATTTTGACTTAGGCCGGGCGTGGTGGCTCAAGCTTGT                                           | ---- | AATCCCAGCAC | TTTGGGAGGCC | --    | AGGGCGGGCAGATCAC | 27168 |  |       |  |       |  |       |  |       |
| GrabEatingMacaque | ATTTTGACTTACGCCAGGCATGGTGGCTCACGCCTGT                                           | ---- | AATCACAGCAC | TTTGGGAGGCC | --    | AGGGCGGGTGGATCAC | 27047 |  |       |  |       |  |       |  |       |
| Macaque           | ATTTTGACTTACGCCAGGCATGGTGGCTCACGCCTGT                                           | ---- | AATCACAGCAC | TTTGGGAGGCC | --    | AGGGCGGGTGGATCAC | 27545 |  |       |  |       |  |       |  |       |
| PigTailedMacaque  | ATTTTGACTTACGCCAGGCATGGTGGCTCACGCCTGT                                           | ---- | AATCACAGCAC | TTTGGGAGACC | --    | AGGGCGGGTGGATCAC | 26539 |  |       |  |       |  |       |  |       |
| Bonobo            | ATTTTGACTTAGGCCGGGCGTGGTGGCTCAAGCTTGT                                           | ---- | AATCCCAGCAC | TTTGGGAGGCC | --    | AGGGCGGGCAGATCAC | 25879 |  |       |  |       |  |       |  |       |
| OliveBaboon       | ATTTTGACTTACGCCAGGCATGGTGGCTCACGCCTGT                                           | ---- | AATCACAGCAC | TTTGGGAGGCC | --    | AGGGCGGGTGGATCAC | 26550 |  |       |  |       |  |       |  |       |
| Orangutan         | ATTTTGACTTAGGCCGGGCGTGGTGGCTCAAGCTTGT                                           | ---- | AATCCAGCAC  | TTTGGGAGGCC | --    | AGGGCAGGCAGATCAC | 26786 |  |       |  |       |  |       |  |       |

|                   |                                                                                 |       |                                          |      |                 |   |              |       |       |  |       |  |       |  |       |
|-------------------|---------------------------------------------------------------------------------|-------|------------------------------------------|------|-----------------|---|--------------|-------|-------|--|-------|--|-------|--|-------|
| Majority          | AAGGTC                                                                          | ----  | AGGAGTTCGAGACCAGTGTGGCCAACATAGTGAAACCCC  | ---- | ATCTTTACTAAAAAT | - | ACAAAAATTAGC |       |       |  |       |  |       |  |       |
|                   | 33290                                                                           |       | 33300                                    |      | 33310           |   | 33320        |       | 33330 |  | 33340 |  | 33350 |  | 33360 |
| Human             | AAGGTC                                                                          | ----  | AGGAGTTTGAGACCAGCCTGGCCAACATAGTGAAACCCC  | ---- | ATCTCTACTAAAAAT | - | ACCATAATTAGC | 24857 |       |  |       |  |       |  |       |
| Coquerel'sSifaka  | GGGGTGAAGAGAACTTCCATTTTTCATTTTCTACTTTTTTGAATTTTCTAAATTAATACTTGAATTTGTTTTAATTTTT |       |                                          |      |                 |   | 23462        |       |       |  |       |  |       |  |       |
| Ma'sNightMonkey   | GAGGTT                                                                          | ----  | GGAAGTTCGAGACCAGCTTGGCTAACATAGTGAAACCCCT | --   | GTCTCTACTAAAAAT | - | ACAAAAATTAGC | 21765 |       |  |       |  |       |  |       |
| VervetAGM         | AAGATC                                                                          | ----  | AAGAGTTCGAGACCATTGTGGCCAACATAGTGAAACCCC  | ---- | ATCTTTACTAAAAAT | - | ACAAAAATTAGC | 28259 |       |  |       |  |       |  |       |
| Gorilla           | AAGGTC                                                                          | ----  | AGGAGTTCGAGACCAGCCTGGCCAACATAGTGAAACCCC  | ---- | ATCTCTACTAAAAAT | - | ACCATAATTAGC | 27241 |       |  |       |  |       |  |       |
| GrabEatingMacaque | AAGGTC                                                                          | ----  | AGGAGTTCGAGACCAGTGTGGCCAACATAGTGAAACCCC  | ---- | ATCTTTACTAAAAAT | - | ACAAAAATTAGC | 27119 |       |  |       |  |       |  |       |
| Macaque           | AAGGTC                                                                          | ----  | AGGAGTTCGAGACCAGTGTGGCCAACATAGTGAAACCCC  | ---- | ATCTTTACTAAAAAT | - | ACAAAAATTAGC | 27617 |       |  |       |  |       |  |       |
| PigTailedMacaque  | AAGGTC                                                                          | ----  | AGGAGTTCGAGACCAGTGTGGCCAACATAGTGAAACCCC  | ---- | ATCTTTACTAAAAAT | - | ACAAAAATTAGC | 26611 |       |  |       |  |       |  |       |
| Bonobo            | AAGGTC                                                                          | ----  | AGGAGTTCGAGACCAGCCTGGCCAACATAGTGAAACCCC  | ---- | ATCTCTACTAAAAAT | - | ACCATAATTAGC | 25952 |       |  |       |  |       |  |       |
| OliveBaboon       | AAGGTC                                                                          | ----  | AGGAGTTCGAGACCAGTGTGGCCTACATAGTGAAACCCC  | ---- | ATCTTTACTAAAAAT | - | ACAAAAATTAGC | 26622 |       |  |       |  |       |  |       |
| Orangutan         | A--G                                                                            | ----- | AGTTCGAGACCAGCCTGGCCAACATAGCGAAGCCCC     | ---- | GTCTCTACTAAAAAT | - | ACCATAATTAGC | 26851 |       |  |       |  |       |  |       |

Tuesday, May 03, 2022 06:15 PM

| Majority          | CAGGTGT-----GGTGGTGTGTGCCTGTAGTCCCAGCTACTCAGGAGGCTGAGGCAGGAGAATCGCTTGAACCTGGGA  |       |
|-------------------|---------------------------------------------------------------------------------|-------|
|                   | 33370 33380 33390 33400 33410 33420 33430 33440                                 |       |
| Human             | GGGGTAT-----GGTGGTGGGTGCCTGTAGTCCCAGCTACTCAGGAGGCTGAGACAGGAGAATCGCTTGAACCCAGGA  | 24930 |
| Coquerel'sSifaka  | AAAATGTCAGCAGGGTTATATGGACAGAAAGATTATGGTCCATGGTTCTTCTTTTTTGCATATATGCCTGTATTTAAAA | 23542 |
| Ma'sNightMonkey   | TGGGTGT-----GATGGAGGGTGCCTGTATTCTCAGCTACTTGAGAGGCTGAGGCAGGAGAATCGCTTGAACCTGGGA  | 21838 |
| VervetAGM         | CAGGTGT-----GGTGGTGTGCGCCTGTAGTCCCAGCTACTCAGGAAACTGAGGCAGGAGAATCGCTTGAACCTGGGA  | 28332 |
| Gorilla           | GGGGTAT-----GGTGGTGGGTGCCCAGTCCCAGCTACTCAGGAGGCTGAGACAGGAGAATCGCTTGAACCCAGGA    | 27314 |
| GrabEatingMacaque | CAGGTGT-----GGTGGTGTGCGCCTGTAGTCCCAGCTACTCAGGAGACTGAGGCAGGAGAATCGCTTGAACCTGGGA  | 27192 |
| Macaque           | CAGGTGT-----GGTGGTGTGCGCCTGTAGTCCCAGCTACTCAGGAGACTGAGGCAGGAGAATCGCTTGAACCTGGGA  | 27690 |
| PigTailedMacaque  | CAGGTGT-----GGTGGTGTGCGCCTGTAGTCCCAGCTACTCAGGAGACTGAGGCCGGAGAATCGCTTGAACCTGGGA  | 26684 |
| Bonobo            | GGGGTAT-----GGTGGTGGGTGCCTGTAGTCCCAGCTACTCAGGAGGCTGAGACAGGAGAATCGCTTGAACCCAGGA  | 26025 |
| OliveBaboon       | CAGGTGT-----GGTGGTGTGCGCCTGTAGTCCCAGCTACTCAGGAGACTGAGGCAGGAGAATCGCTTGAACCTGGGA  | 26695 |
| Orangutan         | CGGGTAT-----GGTGGTGGGTGCCTGTAGCCCAGCTACTCAGGAGGCTGAGACAGGAGAATCACTTGAACCCAGGA   | 26924 |

| Majority          | GGCGGAG-GTTGCAGTGAGCTGAGACTGCGCCATTGCACT-----CCAGCCTGGGTGACAGA---CTGAGACTCCA   |       |
|-------------------|--------------------------------------------------------------------------------|-------|
|                   | 33450 33460 33470 33480 33490 33500 33510 33520                                |       |
| Human             | GGCGGAG-GTTGCAGTGAGCTGAGACCGCGCCATTACACT-----CCAGCCTGTGTGACAGA---CTGAGACTCCA   | 24997 |
| Coquerel'sSifaka  | TACACAATATTATTTTTTAAAGTCTTTTTCCATAACTAGAAGAGATGATCAGAGTATGAGACAGAATCTTTGATTACC | 23622 |
| Ma'sNightMonkey   | GGCAGAG-GTTGCGGGGAGCTGAGGTGCCCCATTGCACT-----CCAGCCTGGGTGACAGA---ATGAGACTACG    | 21905 |
| VervetAGM         | GGTGGAG-GTTGCAGTGAGCTGAGACTGCGCCTTTGCACT-----CCAGCCTGGGCGACAGA---CCGAGACTCCA   | 28399 |
| Gorilla           | GGCGGAG-GTTGCAGTGAGCTGAGACTGCGCCATTACACT-----CCAGCCTGTGTGACAGA---CTGAGACTCCA   | 27381 |
| GrabEatingMacaque | GGTGGAG-GTTGCAGTGAGCTGAGACTGCGCCATTGCACT-----GCAGCCTGGGCGACAGA---CTGAGACTCCA   | 27259 |
| Macaque           | GGTGGAG-GTTGCAGTGAGCTGAGACTGCGCCATTGCACT-----CCAGCCTGGGCGACAGA---CTGAGACTCCA   | 27757 |
| PigTailedMacaque  | GGTGGAG-GTTGCAGTGAGCTGAGACTGCGCCATTGCACT-----CCAGCCTGGGCGACAGA---CTGAGACTCCA   | 26751 |
| Bonobo            | GGCGGAG-GTTGCAGTGAGCTGAGACCATGCCATTACACT-----CCAGCCTGTGTGACAGA---CTGAGACTCCA   | 26092 |
| OliveBaboon       | GGTGGAG-GTTGCAGTGAGCTGAGACTGCACCATTGCACT-----CCAGCCTGGGCGACAGA---CTGAGACTCCA   | 26762 |
| Orangutan         | GGCGGAG-GTTGCAGTGAGCTGAGACCGCGCCATTACTCT-----CCAGCCTGTGTGACAGA---CCAAGACTCCA   | 26991 |

| Majority          | TCTCAAAAAAAAA-A-A-AA-----AAAAAA-AGATT--TTGACTTTAAGAACAATACTGCTGTGAACTT--T        |       |
|-------------------|----------------------------------------------------------------------------------|-------|
|                   | 33530 33540 33550 33560 33570 33580 33590 33600                                  |       |
| Human             | TCTCAAAAACAAAACAAAAAAAC--AACAAACAAAAA-AGATT--TTGACTTTAAGAACAATACTGCTGTGAACTT--C  | 25070 |
| Coquerel'sSifaka  | TCTTCAGGTCTCATATCTTGTCACTGAAGATTAGAAGCAAAATAACTAACCCCTAGGGATAGCTTTGTGGGAAATGTCAT | 23702 |
| Ma'sNightMonkey   | TCTCAAAAAGAAAAAAGAA-----AAAAATAAGATT--TTGTCTTTAAGAACAATACTGCTGTGAACTT--T         | 21969 |
| VervetAGM         | TCTCAAAAAAAAA-----A--AAA--GATT--TTGACTTCAAGAACAATACTGCTGTGAACTT--T               | 28452 |
| Gorilla           | TCTCAAAAACAAAACAAAAAAAC--AACAA-AAAAA-AGATT--TTGACTTTAAGAACAATACTGCTGTGAACTT--C   | 27453 |
| GrabEatingMacaque | TCTCAAAAAA-----A--AAA--GATT--TTGACTTTAAGAACAATACTGCTGTGAACTT--T                  | 27310 |
| Macaque           | TCTCAAAAAATA-----A--AAA--GATT--TTGACTTTAAGAACAATACTGCTGTGAACTT--T                | 27810 |
| PigTailedMacaque  | TCTCAAAAAA-A-----A--AAA--GATT--TTGACTTTAAGAACAATACTGCTGTGAACTT--T                | 26803 |
| Bonobo            | TCTCAAAAACAAAACAAAAACAAC--AACAAACAAAAA-AGATT--TTGACTTTAAGAACAATACTGCTGTGAACTT--C | 26165 |
| OliveBaboon       | TCTCAAAAAA-----A--AAA--GATT--TTGACTTTGAGAACAATACTGCTGTGAACTT--T                  | 26813 |
| Orangutan         | TCTCAAAAAAAAAAAAAAAAAAAAAA--AAAAAAAAAACAGATT--TTGACTTTAAGAACAATACTGCTGTGAACTT--T | 27065 |

Tuesday, May 03, 2022 06:15 PM

```
Majority      TTTGTAC-TTGTTTCCTGGTACAT-----TTATGCAAGCGTTTTTGAGAGTGTATAT-----TTAAAGGTA-----
                33610      33620      33630      33640      33650      33660      33670      33680
Human          TTTGTAC-TTGTTTCCTGGTGCAT-----TTATGCAAGCGTTTTTGAGAGGGTATAT-----TTAAAGGTA----- 25130
Coquerel'sSifaka GTAGTATGTTATGTACCAATAAATATTAAGTCATTGTAAGTCTTTAAAAGAGCATATCATCTTCTTTGTAGGTAATAAC 23782
Ma'sNightMonkey TTTGTAC-TTGTTTCCTGGTGCAT-----TTATGCAAGTGTTTTTGAGAGTATATGT-----CTAAAGGTA----- 22029
VervetAGM      TTTGTAC-TTGTTTCCTGGTACAT-----TTATGCAAGCGTTTTTGAGAGTGTATAT-----TTAAAGGTA----- 28512
Gorilla        TTTGTAC-TTGTTTCCTGGTGCAT-----TTATGCAAGCGTTTTTGAGAGGGTATAT-----TTAAAGGTA----- 27513
GrabEatingMacaque TTTGTAC-TTGTTTCCTGGTACAT-----TTATGCAAGCGTTTATGAGAGTGTATAT-----TTAAAGGTA----- 27370
Macaque        TTTGTAC-TTGTTTCCTGGTACAT-----TTATGCAAGCGTTTATGAGAGTGTATAT-----TTAAAGGTA----- 27870
PigTailedMacaque TTTGTAC-TTGTTTCCTGGTACAT-----TTATGCAAGCGTTTATGAGAGTGTATAT-----TTAAAGGTA----- 26863
Bonobo         TTTGTAC-TTGTTTCCTGGTGCAT-----TTATGCAAGCGTTTTTGAGAGGGTATAT-----TTAAAGGTA----- 26225
OliveBaboon   TTTGTAC-TTGTTTCCTGGTACAT-----TTATGCAAGCGTTTTTGAGAGTGTATAT-----TTAAAGGTA----- 26873
Orangutan      TTTGTAC-TTGTTTCCTGGTGCAT-----TTATGCAAGCGTTTTTGAGAAGGTATAT-----TTAAAGGTA----- 27125
```

```
Majority      --TAGGTATATATTGCT--AGTGTGTAATAAATAAAGTTTACGAGATAGCACTAGATTATTTTCCAGTGTATTGTTCCCTATT
                33690      33700      33710      33720      33730      33740      33750      33760
Human          --TAGGTATATATTACT--AGTGTGTAATAAATAAAGTTTATGAGACAGTACTAGATTATTTTCCAGTGTATTGTTCCCTATT 25206
Coquerel'sSifaka ATTGGCTGCTATTTCTTAAGTTTATTAAGTTATCTTTTTTGTATACATT-GCTTATGAAATAATGTTATATCTTAATC 23861
Ma'sNightMonkey --TAGGTATGATTGCT--AGTATGTAGAGTAAAGTTTACGAGACAGTACTAGATTATTTTCCAGTGTATTGTTCCCTATT 22105
VervetAGM      --TAGATACGTATTGCT--AGTGTGTAATAAATAAAGTTTACGAGATAGCACTAGATTATTTTCCAGTATATTGTTCCCTATT 28588
Gorilla        --TTGGTATATATTACT--AGTGTGTAATAAATAAAGTTTACGAGACAGTACTAGATTATTTTCCAGTGTATTGTTCCCTATT 27589
GrabEatingMacaque --TAGATATATATTGCT--AGTGTGTAATAAATAAAGTTTACGAGATAGCACTAGATTATTTTCCAGTGTATTGTTCCCTATT 27446
Macaque        --TAGATACATATTGCT--AGTGTGTAATAAATAAAGTTTACGAGATAGCACTAGATTATTTTCCAGTGTATTGTTCCCTATT 27946
PigTailedMacaque --TAGATACATATTGCT--AGTGTGTAATAAATAAAGTTTACGAGATAGCACTAGATTATTTTCCAGTGTATTGTTCCCTATT 26939
Bonobo         --TAGGTATATATTACT--AGTGTGTAATAAATAAAGTTTATGAGACAGTACTAGATTATTTTCCAGTGTATTGTTCCCTATT 26301
OliveBaboon   --TGGATACATATTGCT--AGTGTGTAATAAATAAAGTTTACGAGATAGCACTAGATTATTTTCCAGTGTATTGTTCCCTATT 26949
Orangutan      --TAGGTATATATTACT--AATGTGTAATAAATAAAGTTTATGAGACAGTACTAGATTATTTTCCAGTGTATTGTTCCCTATT 27201
```

```
Majority      TATGTTCTCACCAGTAGTGCCTAGGAGTTCTTG---CTGTTTCA-----GATCCCCACCAGC---ACTTGGCTAAGTAT
                33770      33780      33790      33800      33810      33820      33830      33840
Human          TATGTTCTCACCAGTAGTGCCTAGGAGTTCTTG---CTGTTTCA-----GATCCCCACCAGC---ACTTGGCTAGGTAT 25274
Coquerel'sSifaka TACCATTTTGAGTATGGTTTGATTAATAACTGTTTCTGCTTGATAGTGGAACTCTACTTACTAAATTTTGGTAAATAT 23941
Ma'sNightMonkey TATGTTCTCACCAGTAGTGCATACTAGTCTTG---CTGTTTCA-----GATCCCTACCAGC---ACTTGGCTAAGTAT 22173
VervetAGM      TATGTTCTCACCAGTAGTGCCTAGGAGTTCTTG---CTGTTTCA-----GATCCCCACCAGC---ACTTGGCTAAGTA- 28655
Gorilla        TATGTTCTCACCAGTAGTGCCTAGGAGTTCTTG---CTGTTTCA-----GATCCCCACCAGC---ACTTGGCTAGGTAT 27657
GrabEatingMacaque TATGTTCTCACCAGTAGTGCCTAGGAGTTCTTG---CTTTTCA-----GATCCCCACCAGC---ACTTGGCTAAGTA- 27513
Macaque        TATGTTCTCACCAGTAGTGCCTAGGAGTTCTTG---CTTTTCA-----GATCCCCACCAGC---ACTTGGCTAAGTA- 28013
PigTailedMacaque TATGTTCTCACCAGTAGTGCCTAGGAGTTCTTG---CTGTTTCA-----GATCCCCACCAGC---ACTTGGCTAAGTA- 27006
Bonobo         TATGTTCTCACCAGTAGTGCCTAGGAGTTCTTG---CTGTTTCA-----GATCCCCACCAGC---ACTTGGCTAGGTAT 26369
OliveBaboon   TATGTTCTCACCAGTAGTGCCTAGGAGTTCTTG---CTGTTTCA-----GATCCCCACCAGC---ACTTGGCTAAGTA- 27016
Orangutan      TGTGTTCTCACCAGTAGTGCCTAGGAGTTCTTG---CTGTTTCA-----TATCCCCACCAGC---ACTTGGCTAGGTAT 27269
```

Tuesday, May 03, 2022 06:15 PM

| Majority          | T-AATTTCTTAATTTTTACC-AATTTGGTGTGTAGTATTTTCTCTGGTCTTCCTTTGTCTTTCCCTGATTATTAATGA-G  |                                                 |
|-------------------|-----------------------------------------------------------------------------------|-------------------------------------------------|
|                   |                                                                                   | 33850 33860 33870 33880 33890 33900 33910 33920 |
| Human             | TTAATTTCTTAATTTTTAAC-AATTTGGTGTGTAGTATATTTCTCTGGTCTTCCTTTGTCTTACCTGATTATTAATGA-G  | 25352                                           |
| Coquerel'sSifaka  | G-AATATTATAACGCATGTCTGGTTTTATTTG-AGTGTCTTATTTAAACTTATTGCCATTTCTTAGGGTCTTATTGTCA   | 24019                                           |
| Ma'sNightMonkey   | TTAATTTCTTAATTTTTAAC-AATGTGGTGTGTGTATCTTCTCTGGT----CTTTGTCTTTGCCTGATTATAAATGA-G   | 22247                                           |
| VervetAGM         | ---ATTTCTTAATTTTTACC-AATTTGGTGTGTAGTATTTTCTCTGGTCTTCCTTTGTCTTTCCCTGATTATTAATGA-G  | 28730                                           |
| Gorilla           | TTAATTTCTTAATTTTTAAC-AATTTGGTGTGTAGTATATTTCTCTGGTCTTCCTTTGTCTTTCCCTGATTATTAATGA-G | 27735                                           |
| GrabEatingMacaque | --ATTTCTTAATTTTTACC-AATTTGGTGTGTAGTATTTTCTCTGGTCTTCCTTTGTCTTTCCCTGATTATTAATGA-G   | 27588                                           |
| Macaque           | ---ATTTCTTAATTTTTACC-AATTTGGTGTGTAGTATTTTCTCTGGTCTTCCTTTGTCTTTCCCTGATTATTAATGA-G  | 28088                                           |
| PigTailedMacaque  | ---ATTTCTTAATTTTTACC-AATTTGGTGTGTAGTATTTTCTCTGGTCTTCCTTTGTCTTTCCCTGATTATTTATGA-G  | 27081                                           |
| Bonobo            | TTAATTTCTTAATTTTTAAC-AATTTGGTGTGTAGTATATTTCTCTGGTCTTCCTTTGTCTTTCCCTGATTATTAATGA-G | 26447                                           |
| OliveBaboon       | ---ATTTCTTAATTTTTACC-GGTTTGGTGTGTAGTATTTTCTCTGGTCTTCCTTTGTCTTTCCCTGATTATTAATGA-G  | 27091                                           |
| Orangutan         | TTAATTTCTTAATTTTTAAC-AATTTGGTGTGTAGTGTATTTCTCTGGTCTTCCTTTGTCTTTCCCTGATTATTAATAA-G | 27347                                           |

| Majority          | GTCTTACATCTTTTTTCCCCACATTTATGGCCAT-GGATGTTTCTCTTTTGTGAAATTCTGTGAAATGCCTATTTGTG   |                                                 |
|-------------------|----------------------------------------------------------------------------------|-------------------------------------------------|
|                   |                                                                                  | 33930 33940 33950 33960 33970 33980 33990 34000 |
| Human             | GTCTTACATCTTTTTTCCCCACATTTATGGCCAT-GGATGTTTCTCTTTTGTGAAATTCTGTGAAATGCCTATTTGTG   | 25431                                           |
| Coquerel'sSifaka  | GGTTTACATCTATTTTTAGGTGTAATTGTTCTTCACAGAAGTGTCCCATTTTGGGTGATTAAAGAGTCACCTTATCCTTA | 24099                                           |
| Ma'sNightMonkey   | GTCTTACATCTTTTTTCCCC-ACCTTTATGGCCTTTGGATGTTTCTGTTCGTGAAATTCTGTGAAATGCCTATTCGTG   | 22326                                           |
| VervetAGM         | GTCTTACGCTTTTTTCCCCACATTTATGGCCAT-GGATGTTTCTCTTTTGTGAAATTCTGTGAAATGCCTATTTGTG    | 28809                                           |
| Gorilla           | GTCTTACATCTTTTTTCCCCCGCATTTATGGCCAT-GGATGTTTCTCTTTTGTGAAATTCTGTGAAATGCCTATTTGTG  | 27814                                           |
| GrabEatingMacaque | GTCTTACGCTTTTTTCCCCACATTTATGGCCGT-GGATGTTTCTCTTTTGTGAAATTCTGTGAAATGCCTATTTGTG    | 27667                                           |
| Macaque           | GTCTTACGCTTTTTTCCCCACATTTATGGCCAT-GGATGTTTCTCTTTTGTGAAATTCTGTGAAATGCCTATTTGTG    | 28167                                           |
| PigTailedMacaque  | GTCTTACGCTTTTTTCCCCACATTTATGGCCGT-GGATGTTTCTCTTTTGTGAAATTCTGTGAAATGCCTATTTGTG    | 27160                                           |
| Bonobo            | GTCTTACATCTTTTTTCCCCCATATTTATGGCCAT-GGATGTTTCTCTTTTGTGAAATTCTGTGAAATGCCTATTTGTG  | 26526                                           |
| OliveBaboon       | GTCTTACGCTTTTTTCCCCACATTTATGGCCAT-GGATGTTTCTCTTTTGTGAAATTCTGTGAAATGCCTATTTGTG    | 27170                                           |
| Orangutan         | GTCTTACATCTTTTTTCCCCACATTTATGGACAT-GGGTGTCTCTCTCTGTGAAATTCTGTGAAATCCCTATTTGGTG   | 27426                                           |

| Majority          | TTTTTGTCTTGATCAAAATATGAGTTTATTATT-TAACTGATTTTGTAGTTTAAAAAATTGCTGGGGGCAG--TGGCTT  |                                                 |
|-------------------|----------------------------------------------------------------------------------|-------------------------------------------------|
|                   |                                                                                  | 34010 34020 34030 34040 34050 34060 34070 34080 |
| Human             | TTTTTGTCTTGAT-AAAATGTGAGCTTATTATT-TAACTGATTTTGTAGTTTAAAAAATTGCTGGGGGCAG--GTGGCTT | 25507                                           |
| Coquerel'sSifaka  | TTTATTGTTTTCT---TCCTAGAATCTTTTGTATAGCCCGCAAGATATATTTGTGAGGATACTGTGAAATATAAAATGA  | 24176                                           |
| Ma'sNightMonkey   | TTTTTGCCTGATAAAAAATTGAGTTTATTATT-TAACTGATTTTGTAGTTTAAAAAATTGCTGGGGGCAG-----TG    | 22399                                           |
| VervetAGM         | TTTTTGTCTTGATCAAAATATGAGTTTATTATT-TAACTGATTTTGTAGTTTAAAAACATTGCTGGAGGCAG--TGGCTT | 28886                                           |
| Gorilla           | TTTTTGTCTTGAT-AAAATGTGAGCTTATTATT-TAACTGATTTTGTAGTTTAAAAAATTGCTGGGGGCAG--GTGGCTT | 27890                                           |
| GrabEatingMacaque | TTTTTGTCTTGATCAAAATATGAGTTTATTATT-TAAATGATTTTGTAGTTTAAAAAATTGCCGGAGGCAG--TGGCTT  | 27744                                           |
| Macaque           | TTTTTGTCTTGATCAAAATATGAGTTTATTATT-TAAATGATTTTGTAGTTTAAAAAATTGCCGGAGGCAG--TGGCTT  | 28244                                           |
| PigTailedMacaque  | TTTTTGTCTTGATCAAAATATGAGTTTATTATT-TAAATGATTTTGTAGTTTAAAAAATTGCCGGAGGCAG--TGGCTT  | 27237                                           |
| Bonobo            | TTTTTGTCTTGAT-AAAATGTGAGCTTATTATT-TAACTGATTTTGTAGTTTAAAAAATTGCTGGGGGCAG--ATGGCTT | 26602                                           |
| OliveBaboon       | TTTTTGTCTTGATCAAAATATGAGTTTATTATT-TAACTGATTTTGTAGTTTAAAA--ATTGCCG-AGGTA-----TTT  | 27240                                           |
| Orangutan         | TTTTTGTCTTGAT-AAAGTGTGAGTTTATTATT-TAACTAATTTTGTAGTTTAAAAAATTGCCGGGGCAGCGGTGGCTT  | 27504                                           |

Tuesday, May 03, 2022 06:15 PM

| Majority          | GCGTCTGTAATCTCAGCTATTTGGGAGGCTGAGGGAGGAGGATTGCTTGTGGGGCCAGGAGTT-TGAGGCTGCAGTGAG |       |       |       |       |       |       |       |       |
|-------------------|---------------------------------------------------------------------------------|-------|-------|-------|-------|-------|-------|-------|-------|
|                   | 34090                                                                           | 34100 | 34110 | 34120 | 34130 | 34140 | 34150 | 34160 |       |
| Human             | GCGTCTGTAATCTCAGCTTTTTGGGAGGCTGAAGGAGGAGGATTGCTTGTGGGGCCAGGAGTT-TGAGGCTGCAGTGAG |       |       |       |       |       |       |       | 25586 |
| Coquerel'sSifaka  | ACACCATGAATCT--GCTACCCA--AATAAAAACTTGAATGTTACCAGTATATGTATATATCATATGGACCTTTTTTAT |       |       |       |       |       |       |       | 24252 |
| Ma'sNightMonkey   | CCCTCTGTAATCTTAGCTATTTGGGAGGCTGAGGCAGGAGGATTGCTTGTGGGGCCAGGAGTT-TGAGGCTGCAGTGAG |       |       |       |       |       |       |       | 22478 |
| VervetAGM         | GCGTCTGTAATCTCAGCTATTTGGGAGGCTGAGGGAGGAGGATTGCTTGTGGGGCCAGGAGTT-TGAGGCTGCAGTGAG |       |       |       |       |       |       |       | 28965 |
| Gorilla           | GCGTCTGTAATCTCAGCTTTTTGGGAGGCTGAAGGAGGAGGATTGCTTGTGGGGCCAGGAGTT-TGAGGCTGCAGTGAG |       |       |       |       |       |       |       | 27969 |
| GrabEatingMacaque | GCGTCTGTAATCTCAGCTATTTGGGAGGCTGAGGGAGGAGGATTGCTTGTGGGGCCAGGAGTT-TGAGGCTGCAGTGAA |       |       |       |       |       |       |       | 27823 |
| Macaque           | GCGTCTGTAATCTCAGCTATTTGGGAGGCTGAGGGAGGAGGATTGCTTGTGGGGCCAGGAGTT-TGAGGCTGCAGTGAA |       |       |       |       |       |       |       | 28323 |
| PigTailedMacaque  | GCGTCTGTAATCTCAGCTATTTGGGAGGCTGAGGGAGGAGGATTGCTTGTGGGGCCAGGAGTT-TGAGGCTGCAGTGAA |       |       |       |       |       |       |       | 27316 |
| Bonobo            | GCGTCTGTAATCTCAGCTTTTTGGGAGGCTGAAGGAGGAGGATTGCTTGTGGGGCCAGGAGTT-TGAGGCTGCAGTGAG |       |       |       |       |       |       |       | 26681 |
| OliveBaboon       | ATGCTGTAATTT-AGCTATTTG--AGGCTGAGG-AGGAGGATTGCTTG--GGGCCAGGAGTT-TGAGGCCGAGTGA-   |       |       |       |       |       |       |       | 27312 |
| Orangutan         | GCGTCTGTAATCTCAGCTTTTTGGGAGGCTGAAGGAGGAGGATTGCTTGTGGGGCCAGGAGTT-TGAGGCTGCAGTGAG |       |       |       |       |       |       |       | 27583 |

| Majority          | CTATGATTGT--TCCATTGCACTCTAGCTTGGTGACAGAGCAAGACCTTGTCTGA-----AAAAA-----AAAAA     |       |       |       |       |       |       |       |       |
|-------------------|---------------------------------------------------------------------------------|-------|-------|-------|-------|-------|-------|-------|-------|
|                   | 34170                                                                           | 34180 | 34190 | 34200 | 34210 | 34220 | 34230 | 34240 |       |
| Human             | CTATGATCGT--TCCATTGCACTCTAGCTTGGTGACAGAGCAAGACTTTGTCT-----GAAAAA-----AAAAA      |       |       |       |       |       |       |       | 25649 |
| Coquerel'sSifaka  | CCTCCCCCCTTCTTACCCGACCATGGGTAGATGACTGCCATAAATTTCTTATTCTTTCCAGTATGGTTTTGTTACGCAA |       |       |       |       |       |       |       | 24332 |
| Ma'sNightMonkey   | CTATGATCAT--TCCACTGCAGTCTAGTTTGGTGGCAGAGCAAGACCTTGTCTC-----AAAAA-----CA         |       |       |       |       |       |       |       | 22537 |
| VervetAGM         | CTATCATTGC--TCCATTGCACTCTAGCTTGGTGACAGAGCAAGACCTTGTCTGGGGGGGAGAAAAA-----AAAAA   |       |       |       |       |       |       |       | 29037 |
| Gorilla           | CTATGATCGT--TCCATTGCACTCTAGCTTGGTGACAGAGCAAGACTTTGTCTGAAA-----AAAAA-----AAAAA   |       |       |       |       |       |       |       | 28037 |
| GrabEatingMacaque | CTATGATTGT--TCCATTGCACTCTAGCTTGGTGACAGAGCAAGACCTTGTCTGA-----AAAAA-----AA        |       |       |       |       |       |       |       | 27883 |
| Macaque           | CTATGATTGT--TCCATTGCACTCTAGCTTGGTGACAGAGCAAGACCTTGTCTGA-----AAAAA-----AA        |       |       |       |       |       |       |       | 28383 |
| PigTailedMacaque  | CTATGATTGT--TCCATTGCACTCTAGCTTGGTGACAGAGCAAGACCTTGTCTGA-----AAAAA-----AA        |       |       |       |       |       |       |       | 27376 |
| Bonobo            | CTATGATCGT--TCCATTGCACTCTAGCTTGGTGACAGAGCAAGACTTTGTCTAG-----GAAAAA-----AAAAA    |       |       |       |       |       |       |       | 26746 |
| OliveBaboon       | TGGTGATTGAAACCGATTGTGACCCCATTT---ATGAGCAAGACCTTGTCTCA-----GCAGGT-----CTTTAC     |       |       |       |       |       |       |       | 27375 |
| Orangutan         | CTATGATTGT--TCCATTGCACTCTAGCTTGGTGACAGAGCAAGACCTTGTCT-----AAAAA-----GAAAAA      |       |       |       |       |       |       |       | 27640 |

| Majority          | AAAAAAGGTGTGTGTTTT-----ACGGTTAC-TGATT---GTTTTTTG-----GTTATTTGTG-TTGCTGG--TG--    |       |       |       |       |       |       |       |       |
|-------------------|----------------------------------------------------------------------------------|-------|-------|-------|-------|-------|-------|-------|-------|
|                   | 34250                                                                            | 34260 | 34270 | 34280 | 34290 | 34300 | 34310 | 34320 |       |
| Human             | AAAAAAGGTGTGTGTTTT-----ACAGTTAC-TGATT---GTCTTTTG-----GTTATTTGTG-TTGCTGG--TG--    |       |       |       |       |       |       |       | 25707 |
| Coquerel'sSifaka  | ATGACAAAAATGTATTTAGTTTTTTTTGAGTTGCATGAAAATGGTATACTCA-TATGTTTTCTGTGACTTGTGTTTTAAT |       |       |       |       |       |       |       | 24411 |
| Ma'sNightMonkey   | AAAAAAGGTGTGTGTTTT-----ACAGCTAC-TGGTT---GTCTTTTG-----GTTATTTGTG-TTGCTGG--TG--    |       |       |       |       |       |       |       | 22595 |
| VervetAGM         | AAAAAAGGTGTGTCTTTT-----AGGGTTAC-TGATT---GTTTTTTT-----GTTATTTGTG-TTGCTGG--TG--    |       |       |       |       |       |       |       | 29095 |
| Gorilla           | AAAAAAGGTGTGTGTTTT-----ACAGTTAC-TGATT---GTCTTTTG-----GTTATTTGTG-TTGCTGG--TG--    |       |       |       |       |       |       |       | 28095 |
| GrabEatingMacaque | AAAAAAGGTGTGTCTTTT-----ACGGTTAC-CG-----TTTTCTC-----ATT-----TTGCT-----            |       |       |       |       |       |       |       | 27926 |
| Macaque           | AAAAAAGGTGTGTCTTTT-----ACGGTTAC-CGATT---GTTTTTTG-----GTTATTTGTG-TTGCTGG--TG--    |       |       |       |       |       |       |       | 28441 |
| PigTailedMacaque  | AAAAAAGGTGTGTCTTTT-----ACGGTTAC-CGATT---GTTTTTTG-----GTTATTTGTG-TTGCTGG--TG--    |       |       |       |       |       |       |       | 27434 |
| Bonobo            | AAAAAAGGTGTGTGTTTT-----ACAGTTAC-TGACT---GTCTTTTG-----GTTATTTGTG-TTGCTGG--TG--    |       |       |       |       |       |       |       | 26804 |
| OliveBaboon       | CGGATTGTTTTGTTATTTTGTGCTGGTGTTCAC-CAGTTTTAGCTTCTGTCTTTGCTACTCTTT-ATGCTGTCTTG--   |       |       |       |       |       |       |       | 27451 |
| Orangutan         | AAAAA--GTGTGTGTTTT-----ACGGTTAC-TGATT---GTCTTTTG-----GTTATTTGTG-TTGCTAA--TG--    |       |       |       |       |       |       |       | 27696 |

Tuesday, May 03, 2022 06:15 PM

| Majority          | TCTTTTCCCAGTTTG-TAGCTTGCCCTTGTCAC-TCCTTTATGCTGTCTTGTG-TGTCTGTCTCT-----TTCTCCTCTTC |       |
|-------------------|-----------------------------------------------------------------------------------|-------|
|                   | 34330 34340 34350 34360 34370 34380 34390 34400                                   |       |
| Human             | TCTTTTCCCAGTTTG-TAGCTTGCCCTTGTCAC-TCCTTTATGCTGTCTTGTG-TGTCTGTCTGT-----CTGTCTCCCTC | 25779 |
| Coquerel'sSifaka  | TCAATAATGATTCTAATAGCTAACCATATTTTTTGTGTGTAATTGTGTAATAATACTTTTCTATGAAAATACCCAATTTA  | 24491 |
| Ma'sNightMonkey   | TCTTTTCCCAGTCTT-TATGCTGTCCTGTCTTGTTTCGATCGATTGATCGATC-TTCCTACCTAC-----CT-----     | 22659 |
| VervetAGM         | TCTTTTCCCAGTTTG-TAGCTTGCCCTTGTCAC-TCCTTTATGCTGTCTTGTCTTGACTCACTCT-----TTCTCCTCTC  | 29168 |
| Gorilla           | TCTTTTCCCAGTTTG-TAGCTTGCCCTTGTCAC-TCCTTTATGCTGTCTTGTG-TGTCTGTCTGT-----CTCCCTCCCTC | 28167 |
| GrabEatingMacaque | ---TTTCCCAGTT-----ACTTGCCCTCTTGA-----TGCTTGA-----                                 | 27957 |
| Macaque           | TCTTTTCCCAGTTTG-TAGCTTGCCCTTGTCAC-TCCTTTATGCTGTCTTGTCTTGACTCACTCT-----TTCTCCTCTC  | 28514 |
| PigTailedMacaque  | TCTTTTCCCAGTTTG-TAGCTTGCCCTTGTCAC-TCCTTTATGCTGTCTTGTCTTGACTCACTCT-----TTCTCCTCTC  | 27507 |
| Bonobo            | TCTTTTCCCAGTTTG-TAGCTTGCCCTTGTCAC-TCCTTTATGCTGTCTTGTG-TGTCTGTCT-----              | 26863 |
| OliveBaboon       | TCTTGACTCACTTTT-CTCCTTCCTTCCTTCC-TTCCTTCCTTCCTTCCTTCCTTCCTTCCCTC-----CCTCCTTCCTC  | 27524 |
| Orangutan         | TCTTTTCCCAGTTGG-TAGCTTGCCCTTGTCAC-TCCTTTATGCTGTCTTGTG-TGTCTGTCT-----              | 27755 |

| Majority          | CTTCCTTCCT-----TCC                                                            |       |
|-------------------|-------------------------------------------------------------------------------|-------|
|                   | 34410 34420 34430 34440 34450 34460 34470 34480                               |       |
| Human             | CCTCCCTCCCC-----CTC                                                           | 25793 |
| Coquerel'sSifaka  | TTTCTTTTCCTGGACCTTGGGTTGGTGACATTTGGATATTTAAAGTTTGTACTTTAAGAACAATACTGCAGTTAACA | 24571 |
| Ma'sNightMonkey   | -----TCA                                                                      | 22662 |
| VervetAGM         | CTTCCTTCCTC-----NNN                                                           | 29182 |
| Gorilla           | CCTCCNNTNNN-----NNN                                                           | 28181 |
| GrabEatingMacaque | -----TCA                                                                      | 27960 |
| Macaque           | CTTCCTTCCTTCCTTCCTTCCTTCCTTCCTTCCTTCCTTCCTTCCTTCCTTCCTTCCTTCCTTCCT-----TCC    | 28587 |
| PigTailedMacaque  | CTTCCTTCCTT-----CCTTCCTTCCT-----TCC                                           | 27532 |
| Bonobo            | -----                                                                         | 26863 |
| OliveBaboon       | CTCCCTCCCTCCCTCCCTCCCTCCCTCCCTTCCTCTTTTCTCTCTCTCTCTGTTTCTTTCTTTTGTAGATAATTCT  | 27604 |
| Orangutan         | -----                                                                         | 27755 |

| Majority          | TTTCTCTCTTT-----CTCTCTCTCTTTCT-----CTCTCT-----CC                                  |       |
|-------------------|-----------------------------------------------------------------------------------|-------|
|                   | 34490 34500 34510 34520 34530 34540 34550 34560                                   |       |
| Human             | CCTCCGTCCGT-----CTGTCCCTCCCTCC-----CTCCCT-----CC                                  | 25826 |
| Coquerel'sSifaka  | TTTTTGTGTGTTGTTTCTGGTGCAATTTATGCAAGAGTTTTTTTTAGCTTACATATCATAAGTGTATATATTGCTAGGGTG | 24651 |
| Ma'sNightMonkey   | TACCTATCTAT-----CTATCTACCTACG-----TACCT-----AC                                    | 22693 |
| VervetAGM         | NNNNNNNCTCT-----CTCTCTCTCTCTCT-----CTCTCT-----CT                                  | 29215 |
| Gorilla           | NNNNNNNNNN-----NNNNNNNNNN--NN-----NNNNNN-----NN                                   | 28213 |
| GrabEatingMacaque | TTTCTCTCTTT-----CTCT-----                                                         | 27975 |
| Macaque           | TTTCTCTCTCT-----CTCTTCTCTCTCT-----CTCTCT-----CT                                   | 28620 |
| PigTailedMacaque  | TTCTCTCTCT-----CTCTCTTCTTTCT-----CTCTCT-----CT                                    | 27565 |
| Bonobo            | -----CC-----CTCCCT-----CC                                                         | 26873 |
| OliveBaboon       | TTTTTTTTTTTGTAGACGGGAGTCTCGCTTCTGTGCTTCCAGGCTGGAGTGCAAGGCCAGATCTCAGCTCACTGCAAGCC  | 27684 |
| Orangutan         | -----                                                                             | 27755 |



Tuesday, May 03, 2022 06:15 PM

| Majority          | CTCCCTTCCTCCCTCCCTCCCTCCCTC-----                                                  |       |
|-------------------|-----------------------------------------------------------------------------------|-------|
|                   | 34570 34580 34590 34600 34610 34620 34630 34640                                   |       |
| Human             | CTCCCTTCCTCCCTCCCTCCCTCCCTC-----                                                  | 25853 |
| Coquerel'sSifaka  | TGGAGTATGTTAAACTGTACAAGACAGATTGTTTTCCAGTGTATAATTCCAATTTATGTTTTCCACCAGTGATGCTTAAGA | 24731 |
| Ma'sNightMonkey   | CTACCTACCTACCTACCTACCTACCTA-----                                                  | 22720 |
| VervetAGM         | CTCTCTT-CTTCTTCTCTCTCTCTCTC-----                                                  | 29241 |
| Gorilla           | NNNNNTCCATCCGTCCTCCCTCCCTC-----                                                   | 28240 |
| GrabEatingMacaque | -----                                                                             | 27975 |
| Macaque           | CTTTCTTTCTCTCTCTCTCTCTCTCTTTCTTTCTCTC-----                                        | 28659 |
| PigTailedMacaque  | CTCTCTTTCTTTCTCTCTCTCTCTCTCT-----CTCTC-----                                       | 27598 |
| Bonobo            | CTCCCTCCCTCCCTCCCTTCCTTCCTT-----                                                  | 26900 |
| OliveBaboon       | CGCCCTGGTTACGCCATTCTCCCTGCCTCAGCCTCCCCGAAAGTAGCTGGGATTACAGCGCCGCCACCGCCACTCGCT    | 27764 |
| Orangutan         | C--CCTCCCTCCCTCCCT--CTCCTC-----                                                   | 27778 |

| Majority          | --TCTCCCTTTCTTT-----                                                           |       |
|-------------------|--------------------------------------------------------------------------------|-------|
|                   | 34650 34660 34670 34680 34690 34700 34710 34720                                |       |
| Human             | --CCTTCCTTCCTTC-----                                                           | 25866 |
| Coquerel'sSifaka  | GTTCTTCTATCTCACTAGCACTTGGTTAAATATTTAATTTCTTAATTTTTGGCAGTCTGGTATGTAGTATCTTCTTTG | 24811 |
| Ma'sNightMonkey   | --CCTACCTACATGTG-----                                                          | 22734 |
| VervetAGM         | --TCTCTCTCTCTCT-----                                                           | 29254 |
| Gorilla           | --CCTCCCTCCCTTC-----                                                           | 28253 |
| GrabEatingMacaque | --CTCTGTTTCTTT-----                                                            | 27987 |
| Macaque           | --TCTCTGTTTCTTT-----                                                           | 28672 |
| PigTailedMacaque  | --TCTCTCTCTCTCT-----                                                           | 27611 |
| Bonobo            | --CCTTCCTTCCTTC-----                                                           | 26913 |
| OliveBaboon       | AGTTTTTGCATTTTTAGTAGAGACGGTTTACCCGCTAGCCAGGATGGTCTCGATCTCTGACCTCGTGATCCGCCGTC  | 27844 |
| Orangutan         | --CCTCCCTTCCTTC-----                                                           | 27791 |

| Majority          | -----CTTTCTTCC-----TTTCTACT--TTACTTT                                            |       |
|-------------------|---------------------------------------------------------------------------------|-------|
|                   | 34730 34740 34750 34760 34770 34780 34790 34800                                 |       |
| Human             | -----CTTCCTTCC-----TTCTACT--TTACTTT                                             | 25890 |
| Coquerel'sSifaka  | GTCTTTTCTGTCTTTCCCTGATTA----TTAAGGAGGTGTTTCATCTTTTTTCCCCACATTTGTGACCACTAGTGTT   | 24886 |
| Ma'sNightMonkey   | -----CAGGTTTGTTACG-----TGGGTA--TGGTATG                                          | 22760 |
| VervetAGM         | -----CTTTCTTTAAATAAATTTCAACT--TTACTTT                                           | 29284 |
| Gorilla           | -----CTTCCTTCC-----TTCTACT--TTACTTT                                             | 28277 |
| GrabEatingMacaque | -----CTTTCT-----GCTCT                                                           | 27998 |
| Macaque           | -----CTTTCTTTAAATAAATTTCAACT--TTACTTT                                           | 28702 |
| PigTailedMacaque  | -----CTTTCTTTAAATAAATTTCAACT--TTACTTT                                           | 27641 |
| Bonobo            | -----CTTCCTTCC-----TTCTACT--TTACTTT                                             | 26937 |
| OliveBaboon       | TGGGCCTCCAAAGTGCTGGGATTACAGGCTTGAGCCACCGTGCCCGCCCTCTTTTAGATAAATTTCAACT--TTACTTT | 27922 |
| Orangutan         | -----CTTCCTTCC-----TTCTACT--TTACTTT                                             | 27815 |

Tuesday, May 03, 2022 06:15 PM

| Majority          | AGATTC---AGGGTTACATGTGCAGGTTTGTACATGGGTATATGGCATGAAGCTGAAGTTTGCAATACAAGTGATCCT  |       |
|-------------------|---------------------------------------------------------------------------------|-------|
|                   | 34810 34820 34830 34840 34850 34860 34870 34880                                 |       |
| Human             | AGATTC---AGGGTTACATGTGCAGGTTTGTACATGGGTATATGGCATGAAGCTGAGGTTTGCAATACAAGTGATCCT  | 25966 |
| Coquerel'sSifaka  | ACTCTTTTGTGAAATTCATGAAATGCTTTTTGTGTCTTTAGCTTCATAAAAAATTTCAATTTATTATTTAACTGATTTT | 24966 |
| Ma'sNightMonkey   | ATGTT-----GAGTTACATGTGCAGGTTTGTACATGGATATATGGTATGATGTTGAGATTTGCAATACAAGTGATCCT  | 22834 |
| VervetAGM         | AGATTC---AGGGTTACATGTGCAGGTTTATTATATGGGTATATGGCATGAAACTGAAGTTTGCAATACAAGTGATCCT | 29360 |
| Gorilla           | AGATTC---AGGGTTACATGTGCAGGTTTGTACATGGGTATATGGCATGAAGCTGAGGTTTGCAATACAAGTGATCCT  | 28353 |
| GrabEatingMacaque | GGGT-----ATGATCTGAAGCTGAAGTTTT-----AGTGATC--                                    | 28030 |
| Macaque           | AGATTC---AGGGTTACATGTGCAGGTTTATTACATGGGTATATGGCATGAAGCTGAAGTTTGCAATACAAGTGATCCT | 28778 |
| PigTailedMacaque  | AGATTC---AGGGTTACATGTGCAGGTTTATTACATGGGTATATGGCATGAAGCTGAAGTTTGCAATACAAGTGATCCT | 27717 |
| Bonobo            | AGATTC---AGGGTTACATGTGCAGGTTTGTACATGGGTATATGGCATGAAGCTGAGGTTTGCAATACAAGTGATCCT  | 27013 |
| OliveBaboon       | AGATTC---AGGGTTACATGTGCAGGTTTATTACATGGGTATATGGTATGAAGCTGAAGTTTGCAATACAAGTGATCCT | 27998 |
| Orangutan         | AGATTC---AGGGTTACATGTGCAGGTTTGTACATGGGTATATGGCATGAAGCTGAGGTTTGCAATACAAGTGATCCT  | 27891 |

| Majority          | GTCAGCCAGATAGTGAGCTCAGTACCCAGCAGTTA---GATTTACAATC-CTTTCTCCCTTCCC---CTGCCACT---A |       |
|-------------------|---------------------------------------------------------------------------------|-------|
|                   | 34890 34900 34910 34920 34930 34940 34950 34960                                 |       |
| Human             | GTCAGCCAGAGAGTGAGCTCAGTACCCAACAGTTA---GATTTACAATC-CTTTCTCCCTCCCC---CCACCCT---A  | 26035 |
| Coquerel'sSifaka  | GT-AGTTGTATTATGA--TTATTTCTGTTGATTATATGTTTTGCTGTTACCTTCTCCCAGCTTGTGCTTGCAATTGTC  | 25043 |
| Ma'sNightMonkey   | GTCATCCAGATAGTGAGCACAGTACCCAACAGTTA---GGTTTACAATA-CTTTCCCCCACCACCCCGCCACT---A   | 22907 |
| VervetAGM         | GTCAGCCAGATAGTGAGCTCAGTACCCAGCAGTTA---GATTTACAATC-CTTTCTCCCTTCCC---CTGCCACT---A | 29429 |
| Gorilla           | GTCAGCCAGAGAGTGAGCTCAGTACCCAACAGTTA---GATTTACAATC-CTTTCTCCCTCCCC---CCACCCT---A  | 28422 |
| GrabEatingMacaque | --AGCCTGA-----GCATCGAGCAGTTA---GATTTACAATC-CTTTCTCCCTTCCC---CTGCCACT---A        | 28085 |
| Macaque           | GTCAGCCAGATAGTGAGCTCAGTACCGAGCAGTTA---GATTTACAATC-CTTTCTCCCTTCCC---CTGCCACT---A | 28847 |
| PigTailedMacaque  | GTCAGCCAGATAGTGAGCTCAGTACCCAGCAGTTA---GATTTACAATC-CTTTCTCCCTTCCC---CTGCCACT---A | 27786 |
| Bonobo            | GTCAGCCAGAGAGTGAGCTCAGTACCCAACAGTTA---GATTTACAATC-CTTTCTCCCTCCCC---CCACCCT---A  | 27082 |
| OliveBaboon       | GTCAGCCAGATAGTGAGCTCAGTACCCAGCAGTTA---GATTTACAATC-CTTTCTCCCTTCCC---CTACCCT---A  | 28067 |
| Orangutan         | GTCAGCCAGAGAGTGAGCTCAGTACTCAACAGTTA---GATTTACAATC-CTTTCTGCCTCCCC---CCGCCTCT---A | 27960 |

| Majority          | GTTCCAGTGCT-TATTGTTGCGGATT--AATACAAATCTTAATGTATAGAGTTTTAATGTGACCACAGATTCCTTTG   |       |
|-------------------|---------------------------------------------------------------------------------|-------|
|                   | 34970 34980 34990 35000 35010 35020 35030 35040                                 |       |
| Human             | GTTCCAGTGCA-TATTGTTGCGGATT--AATACAGATTCCTTAATGTATAG--TTTTAATGTGGCCACAAATTCCTTTG | 26110 |
| Coquerel'sSifaka  | CTTCTCTATGCTATCTTTTGATGAATAGAAGTTATTAATTTAATGTATAGAGTTTTAATATGGCTGCAGATTCCTTTG  | 25123 |
| Ma'sNightMonkey   | GTTCCAGTGTTATATGTTGCGAATT--AATACACATTCCTTAATGTATAGAGTGTTAATATGGCCACAAATTCCTTTG  | 22985 |
| VervetAGM         | GTTCCAGTGCT-TATTGTTGCGGATT--AATACAAATCTTAATGCATAGAGTTTTAATGTGACCACAGATTCCTTTG   | 29506 |
| Gorilla           | GTTCCAGTGCT-TATTGTTGCGGATT--AATACAGATTCCTGATGTATAGAGTTTTAATGTGGCCACAAATTCCTTTG  | 28499 |
| GrabEatingMacaque | GTTCCAGTGCT-TATTGTTGCGGATT--AATACAAATCTTAATGCATAGAGTTTTAATGTGACCACAGATTCCTTTG   | 28162 |
| Macaque           | GTTCCAGTGCT-TATTGTTGCGGATT--AATACAAATCTTAATGCATAGAGTTTTAATGTGACCACAGATTCCTTTG   | 28923 |
| PigTailedMacaque  | GTTCCAGTGCT-TATTGTTGCGGATT--AATACAAATCTTAATGCATAGAGTTTTAATGTGACCACAGATTCCTTTG   | 27863 |
| Bonobo            | GTTCCAGTGCA-TATTGTTGCGGATT--AATACAGATTCCTTAATGTATAGAGTTTTAATGTGACCACAAATTCCTTTG | 27159 |
| OliveBaboon       | GTTCCAGTGCT-TATTGTTGCGGATT--AATACAAATCTTAATGCATAGAGTTTTAATGTGACCACAGATTCCTTTG   | 28144 |
| Orangutan         | GTTCCAGTGCA-TATTGCTGCGGATT--AATACAGATTCCTTAATGTATAGAGTTTTAATGTGGCCACAAATTCCTTTG | 28037 |

Tuesday, May 03, 2022 06:15 PM

| Majority          | CATCTTAGATAAAAATCATTATATGATCCCATTCTTTACACATTCCAATTTTCCTTTGCTCTTGT-GGACATCTTCCA  |       |       |       |       |       |       |       |       |
|-------------------|---------------------------------------------------------------------------------|-------|-------|-------|-------|-------|-------|-------|-------|
|                   | 35050                                                                           | 35060 | 35070 | 35080 | 35090 | 35100 | 35110 | 35120 |       |
| Human             | CATCTTAGATAAAAATAATTTATATGATCCCATTCTTTACACATTCCAATTTTCCTTTGCTCTTCT-GGACATCTTCCA |       |       |       |       |       |       |       | 26189 |
| Coquerel'sSifaka  | CATCTTGGATAAAAATCATTATATGATCCCATTCTTTATCTATGCTTAATTTTCCTTAGCTCCCT--GGGTATCTTC-A |       |       |       |       |       |       |       | 25200 |
| Ma'sNightMonkey   | CATCTTAGACAAAAATCATTATATGATCCCATTCTTTATACATTCCAATTTTCCTTTGCTCTTCT-GGACATCTTCCA  |       |       |       |       |       |       |       | 23064 |
| VervetAGM         | CATCTTAGATAAAAATCATTATATGATCCCATTCTTTACACATTCCAATTTTCCTTTGCTCTTGTGGACGTCTTCCA   |       |       |       |       |       |       |       | 29586 |
| Gorilla           | CATCTTAGATAAAAATAATTTATATGATCCCATTCTTTACACATTCCAATTTTCCTTTGCTCTTCT-GGACATCTTCCA |       |       |       |       |       |       |       | 28578 |
| GrabEatingMacaque | CATCTTAGATAAAAATCATTATATGATCCCATTCTTTACACATTCCAATTTTCCTTTGCTCTTGTGGACATCTTCCA   |       |       |       |       |       |       |       | 28242 |
| Macaque           | CATCTTAGATAAAAATCATTATATGATCCCATTCTTTACACATTCCAATTTTCCTTTGCTCTTGTGGACATCTTCCA   |       |       |       |       |       |       |       | 29003 |
| PigTailedMacaque  | CATCTTAGATAAAAATCATTATATGATCCCATTCTTTACACATTCCAATTTTCCTTTGCTCTTGTGGACATCTTCCA   |       |       |       |       |       |       |       | 27943 |
| Bonobo            | CATCTTAGATAAAAATAATTTATATGATCCCATTCTTTACACATTCCAATTTTCCTTTGCTCTTTT-GGACATCTTCCA |       |       |       |       |       |       |       | 27238 |
| OliveBaboon       | CATCTTAGGTAAAAATCATTATATGATCCCATTCTTTACACATTCCAATTTTCCTTTGCTCTTGTGGACATCTTCCA   |       |       |       |       |       |       |       | 28224 |
| Orangutan         | CATCTTAGATAAAAATAATTTATATGATCCCATTCTTTACACATTCCAATTTTCCTTTGCTCTTGT-GGACATCTTCCA |       |       |       |       |       |       |       | 28116 |

| Majority          | TGTTGATTGTTGGAAGTCTTGAAGGCAATCTCTAATAACAGTTTTTAGCTTTTCAACTGTTGCTGTGATACTGTTTCTTA  |       |       |       |       |       |       |       |       |
|-------------------|-----------------------------------------------------------------------------------|-------|-------|-------|-------|-------|-------|-------|-------|
|                   | 35130                                                                             | 35140 | 35150 | 35160 | 35170 | 35180 | 35190 | 35200 |       |
| Human             | TGTTGATTGCTGGAAGTCTTGAAGGCAATCCCAATAACAGTTTTTAGCTTTTCAACTGTTGCTGTGATAACGGTTTCTTA  |       |       |       |       |       |       |       | 26269 |
| Coquerel'sSifaka  | TGTTAATTGTTGGAAGTCTT-----TGTCTAATAACAGTTTTTAGGTTTTCAACTGTTGCTCGCAATACAGTTTCTTA    |       |       |       |       |       |       |       | 25272 |
| Ma'sNightMonkey   | TGTTGATTGTTGTAAGTCTTGAAGAAATCCCTACTAACAGTTTTTAGCTTTTCACTGTTGCTGTGATA--GTTTATTA    |       |       |       |       |       |       |       | 23142 |
| VervetAGM         | TGTTGATTGTTGGAATCTTGAAGGCAATCTCTAATAACAGTTTTTAGCTCCCAACTGTTGCTATGATACTGTTTCTTA    |       |       |       |       |       |       |       | 29666 |
| Gorilla           | TATTTATTGCTGGAAGTCTTGAAGGCAATCCCTAATAACGGTTTTTAGCTTTTCAACTGTTGCTGTGATAACGGTTTCTTA |       |       |       |       |       |       |       | 28658 |
| GrabEatingMacaque | TGTTGATTGTTGGAAGTCTTGAAGGCAATCTCTAATAACAGTTTTTAGCTCCCAACTGTTGCTATGATACTGTTTCTTA   |       |       |       |       |       |       |       | 28322 |
| Macaque           | TGTTGATTGTTGGAAGTCTTGAAGGCAATCTCTAATAACAGTTTTTAGCTCCCAACTGTTGCTATGATACTGTTTCTTA   |       |       |       |       |       |       |       | 29083 |
| PigTailedMacaque  | TGTTGATTGTTGGAAGTCTTGAAGGCAATCTCTAATAACAGTTTTTAGCTCCCAACTGTTGCTATGATACTGTTTCTTA   |       |       |       |       |       |       |       | 28023 |
| Bonobo            | TGTTGATTGCTGGAAGTCTTGAAGGCAATCCCTAATAACAGTTTTTAGCTTTTCAACTGTTGCTGTGATAACGGTTTCTTA |       |       |       |       |       |       |       | 27318 |
| OliveBaboon       | TGTTGATTGTTGGAAGTCTTGAAGGCAATCTCTAATAACAGTTTTTAGCTCCCAACTGTTGCTATGATACTGTTTCTTA   |       |       |       |       |       |       |       | 28304 |
| Orangutan         | TGTTGATTACTGGAAGTCTTGAAGGCAATCCCTAATAACGGTTTTTAGCTTTTCAACTGTTGCTGTGATAACGGTTTCTTA |       |       |       |       |       |       |       | 28196 |

| Majority          | TAAAGAGATT-----TTTG-AGTAGAATTTATCAGTATTTTCTTTTCATATTCAGTTTCTTGTGTCTTAATTTAA      |       |       |       |       |       |       |       |       |
|-------------------|----------------------------------------------------------------------------------|-------|-------|-------|-------|-------|-------|-------|-------|
|                   | 35210                                                                            | 35220 | 35230 | 35240 | 35250 | 35260 | 35270 | 35280 |       |
| Human             | TA--GAGATT-----TTTGTAGTAGAATTTATCAGTATTTTCTTTTCATGTTTCAGTTTCTTGTGTCTTAATTTAA     |       |       |       |       |       |       |       | 26337 |
| Coquerel'sSifaka  | CATGGAGATTATGTAGCTATTTTGTAGTATAATTTATCCATATTTTCTTTTCATGTTAATTTTCTCGTGTCTTAATATAA |       |       |       |       |       |       |       | 25352 |
| Ma'sNightMonkey   | TAAAGAAAT-----TTGT-AGTAGAATTTATCAGTTTTTTTCTTTCATACTCAGTTTCTTGTGTCTTAATTTAA       |       |       |       |       |       |       |       | 23211 |
| VervetAGM         | TAAAGAGATT-----TTAA-GGTAGAATTTATCAGTATGTTCTTTTCATATTCAGTTTCTTGTATCTTAATTTAA      |       |       |       |       |       |       |       | 29735 |
| Gorilla           | TA--GAGATT-----TTTGTAGTAGAATTTATCAGTATTTTCTTTTCATGTTTCAGTTTCTTGTGTCTTAATTTAA     |       |       |       |       |       |       |       | 28726 |
| GrabEatingMacaque | TAAAGAGATT-----TTAA-GGTAGAATTTATCAGTATGTTCTTTTCATATTCAGTTTCTTGTATCTTAATTTAA      |       |       |       |       |       |       |       | 28391 |
| Macaque           | TAAAGAGATT-----TTAA-GGTAGAATTTATCAGTATGTTCTTTTCATATTCAGTTTCTTGTATCTTAATTTAA      |       |       |       |       |       |       |       | 29152 |
| PigTailedMacaque  | TAAAGAGATT-----TTAA-GGTAGAATTTATCAGTATGTTCTTTTCATATTCAGTTTCTTGTATCTTAATTTAA      |       |       |       |       |       |       |       | 28092 |
| Bonobo            | TA--GAGATT-----TTTGTAGTAGAATTTATCAGTATTTTCTTTTCATGTTTCAGTTTCTTGTGTCTTAATTTAA     |       |       |       |       |       |       |       | 27386 |
| OliveBaboon       | TAAAGAGATT-----TTAA-AGTAGAATTTATCAGTATGTTCTTTTCATATTCAGTTTCTTGTATCTTAATTTAA      |       |       |       |       |       |       |       | 28373 |
| Orangutan         | TAAAGAGATT-----TTTGTAGTAGAATTTATCAGTATTTTCTTTTCATGTTTCAGTTTCTTGTGTCTTAATTTGA     |       |       |       |       |       |       |       | 28266 |

Tuesday, May 03, 2022 06:15 PM

|                   |                                                                                    |       |
|-------------------|------------------------------------------------------------------------------------|-------|
| Majority          | AAATCCTTACATACTCAGAGTTCATAAAGGTA-----TATTTTCTTCTGAAATTTTAAAAATTTTGCTTTTTATGT       |       |
|                   | 35290 35300 35310 35320 35330 35340 35350 35360                                    |       |
| Human             | AAATCCTTACATACTCAGAGTTCATAAAGATACT-----ATATTTTCTTCTGAAATTTTAAAAATTTTGCTTTTTATAT    | 26412 |
| Coquerel'sSifaka  | AAAGTC-----CTTAGTGTTTCATAAAGATATTTTCATATATTTTCATCTAAAATTTTAAAAATTTTGCTTTTTACAT     | 25425 |
| Ma'sNightMonkey   | AAATTCCTTACATACTCAGAGTTCATAAAGGTATT-----ATATTTTCTTCTGAAATTTTAAAAACATTTTGCTTTTTATGT | 23286 |
| VervetAGM         | AAATCCTTACATACTAAGAGTTCATAAAGGTA-----TTTTCTTCTGAAATTTTAAAAATTTTGCTTTTTATGT         | 29805 |
| Gorilla           | AAATCCTTACATACTCAGAGTTCATAAAGATACT-----ATATTTTCTTCTGAAATTTTAAAAATTTTGCTTTTTATAT    | 28801 |
| GrabEatingMacaque | AAATCCTTACATACTAAGAGTTCATAAAGGTA-----TTTTCTTCTGAAATTTTCAAAAATTTGCCTTTTTATGT        | 28461 |
| Macaque           | AAATCCTTACATACTAAGAGTTCATAAAGGTA-----TTTTCTTCTGAAATTTTCAAAAATTTGCCTTTTTATGT        | 29222 |
| PigTailedMacaque  | AAATCCTTACATAGTAAGAGTTCATAAAGGTA-----TTTTCTTCTGAAATTTTCAAAAATTTGCCTTTTTATGT        | 28162 |
| Bonobo            | AAATCCTTACATACTCAGAGTTCATAAAGATACT-----ATATT-----CTGAAATTTTAAAAATTTTGCTTTTTATAT    | 27456 |
| OliveBaboon       | AAATCCTTACATACTAAGAGTTCATAAAGGTA-----TTTTCTTCTGAAATTTTAAAAATTTTGCTTTTTATGT         | 28443 |
| Orangutan         | AAATCCTTATATACTCAGAGTTCATAAAGATA-----TATTTTCTTCTGAAATTTTAAAAATTTTGCTTTTTATGT       | 28338 |
| Majority          | TTATCTCTATCAGAAAATTATTTTGTGTATTGTATTGGTAGGGATCTGGTTTCATTTTTTTT-GCCCTTATTAAGATAG    |       |
|                   | 35370 35380 35390 35400 35410 35420 35430 35440                                    |       |
| Human             | TTATC-----AGAAAATTATTTTGTGTATTGTATTAGTAGGGATCTGGTTTCATTTTTTTT-GCCCTTATTAAGATAG     | 26485 |
| Coquerel'sSifaka  | TTGTCTCT---ATCAGTTATTTTGTGTATTGTATTAGGTAGGGATCCAGTTTATTTTTTTTGGCCCTGTAGAGATAG      | 25502 |
| Ma'sNightMonkey   | TTATCTCTGTGAGAAAATTATTTTGTGTATTGTATTGGTAGGGATCCGGCTTATTTTTTTT--GCCTTATTAAGATAG     | 23364 |
| VervetAGM         | TTATCTCTATCAGAAAATTATTTTGTATATTGTATTGGTAGGGATCTGGTTTCATTTTTTTT-GCCCTTATTAAGATAG    | 29884 |
| Gorilla           | TTATC-----AGAAAATTATTTTGTGTATTGTATTAGTAGGGATCTGGTTTCATTTTTTTT-GCCCTTATTAAGATAG     | 28874 |
| GrabEatingMacaque | TTATCTCTATCA--AAATTACTTTTGTGTATTGTATTGGTAGGGATCTGGTTTCATTTTTTTT-GCCCTTATTAAGATAG   | 28538 |
| Macaque           | TTATCTCTATCA--AAATTACTTTTGTGTATTGTATTGGTAGGGATCTGGTTTCATTTTTTTT-GCCCTTATTAAGATAG   | 29299 |
| PigTailedMacaque  | TTATCTCTATCA--AAATTATTTTGTGTATTGTATTGGTAGGGATCTGGTTTCATTTTTTTT-GCCCTTATTAAGATAG    | 28239 |
| Bonobo            | TTATC-----AGAAAATTATTTTGTGTATTGTATTAGTAGGGATCTGGTTTCATTTTTTTT-GCCCTTATTAAGATAG     | 27529 |
| OliveBaboon       | TTATCTCTATCA--AAATTATTTTGTGTATTGTATTGGTAGGGATCTGGTTTCATTTTTTTT-GCCCTTATTAAGATAG    | 28520 |
| Orangutan         | TTATC-----AGAAAATTATTTTGTGT-----ATTTAGTAGGGATCTGGTTTCATTTTTTTT-GCCCTTATTAAGATAG    | 28406 |
| Majority          | TCAATTAAATTGAAATCTCTGTAGTGACTTTTT-----CATATTACAGGTGTATATATCATAAGGTCAAGGCTGAAAA     |       |
|                   | 35450 35460 35470 35480 35490 35500 35510 35520                                    |       |
| Human             | TCAATTAAATTGAAATCTCTGTAATGACTTTTT-----CATATTACAGGTGTATATATATCGTAAGGCAAAGGCTGAAAA   | 26558 |
| Coquerel'sSifaka  | GCAATTAAACTGAAATGTGCAGTGCCATTTTTTCCCTCCACATTTTCAGGTGTATATATCTTAGGGTAAAGGCTAAGCT    | 25582 |
| Ma'sNightMonkey   | TCAATTAAATGAAATCTCTGTAGTGACTTTTT-----CGTAGTACAGGTGTATATATCATAAGGTGAAGGCTGCGAA      | 23437 |
| VervetAGM         | TCAA----ATTGAAATCTCTGTAGTGACTTTTT-----CATATTACAGGTGTGTATATCGAAAGGTCAAGGCTGAAAA     | 29953 |
| Gorilla           | TCAATTAAATTGAAATCTCTGTAATGACTTTTT-----CATATTACAGGTGTATATATCGTAAGGCAAAGGCTGAAAA     | 28947 |
| GrabEatingMacaque | TCAA----ATTGAAATCTCTGTAGTGACTTTTT-----CATATTACAGGTGTGTATATCAAAAAGTCAAGGCTGAAAA     | 28607 |
| Macaque           | TCAA----ATTGAAATCTCTGTAGTGACTTTTT-----CATATTACAGGTGTGTATATCAAAAAGTCAAGGCTGAAAA     | 29368 |
| PigTailedMacaque  | TCAA----ATTGAAATCTCTGTAGTGACTTTTT-----CATATTACAGGTGTGTATATCAAAAAGTCAAGGCTGAAAA     | 28308 |
| Bonobo            | TCAATTAAATTGAAATCTCTGTAATGACTTTTT-----CATATTACAGGTGTATATATATCGTAAGGCAAAGGCTGAAAA   | 27602 |
| OliveBaboon       | TCAA----ATTGAAATCTCTGTAGTGACTTTTT-----CATATTACAGGTGTGTATATCAAAAAGTCAAGGCTGAAAA     | 28589 |
| Orangutan         | TCAATTAAATTGAAATCTCTGTAGTGACTTTTT-----CATATTACAGGTGTATATATCATAAGGTGAAGGCTGAAAA     | 28479 |

Tuesday, May 03, 2022 06:15 PM

| Majority          | A--ACTATCATAACAAAATGCAGAACATAGTGGCATAAATAGACTAGAAAGGTTTTTTT-----TGTTTCTTTTTCT    |       |
|-------------------|----------------------------------------------------------------------------------|-------|
|                   | 35530 35540 35550 35560 35570 35580 35590 35600                                  |       |
| Human             | A--ACTATCATAACAAAATGCAGAAATATGGTGGCATAAATAA--AGAGTTTTTTT-----TGTTTCTTTTTCT       | 26622 |
| Coquerel'sSifaka  | ACTGTAACATTAATAAAATGCAGAGCATAGTAGCATAAACAGATTAGAAGCTTAT-----TTCTTT               | 25643 |
| Ma'sNightMonkey   | A--ACTACCATAACAAAATGCAGAACATAGTGGCATAAATAGACGAGAAGGTTTTTTTTTGTTTATTTCTTTCTTTTTCT | 23515 |
| VervetAGM         | A--TCTATCATAACAAAATACAGAACATAGTGGCATAAATAGACTAGAAAGGTTTTTTT-----TGTTTCTTTTTCT    | 30022 |
| Gorilla           | A--ACTATCATAACAAAATGCAGAAATATGGTGGCATAAATAA----GAGTTTTTTT-----TGTTTCTTTTTCT      | 29009 |
| GrabEatingMacaque | A--ACTATCATAACAAAATGCAGAACATAGTGGCATAAATACTAGAAAGGTTTTTTT-----TGTTTCTTTTTCT      | 28676 |
| Macaque           | A--ACTATCATAACAAAATGCAGAACATAGTGGCATAAATACTAGAAAGGTTTTTTT-----TGTTTCTTTTTCT      | 29437 |
| PigTailedMacaque  | A--ACTATCATAACAAAATGCAGAACATAGTGGCATAAATACTAGAAAGGTTTTTTT-----TGTTTCTTTTTCT      | 28377 |
| Bonobo            | A--ACTATCATAACAAGATGCAGAAATATGGTGGCATAAATAA--AGAGTATTTT-----TGTTTCTTTTTCT        | 27666 |
| OliveBaboon       | A--ACTATCATAACAAAATGCAGAACATAGTGGCATAAATAGACTAGAAAGGTTTTTTT-----TGTTTCTTTTTCT    | 28658 |
| Orangutan         | A--ACTATCATAACAAAATGCAGAACATAGTGGCATAAATAGA--GGGTTTTTTTGTT-----TGTTTCTTTTTCT     | 28546 |

| Majority          | GTCATAGCAAAAGTCCTGCT---GGTATAAGAAAGTGGTATCAGTCTGCTCCATAAAG--TTATTCAGTGGGCCAAGTTTC |       |
|-------------------|-----------------------------------------------------------------------------------|-------|
|                   | 35610 35620 35630 35640 35650 35660 35670 35680                                   |       |
| Human             | GTCATAGCAGAAGTCCTGTT---GGTATAAGAAAGTGGTATCAGTCTGCTCCATAAAG--TTATTCAGTGGGCCAAGTTTC | 26698 |
| Coquerel'sSifaka  | CTCATAGCAAAAATCTTTCTCGTGGTTTAAGAAAATGTTATCAATCTGCTCCATAAGGGTTATTCAGTGGGCCAGGTTTC  | 25723 |
| Ma'sNightMonkey   | CTCATAGCAAAAATCCTTCT---G--ATAAGAAAGTGGTATCAATCTGCTCCATAAAG--TTATTCAGTGGGCCAAGTTTC | 23589 |
| VervetAGM         | GTCATAGCAAAAGTCCTGCT---GGTATAAGAAAGTGATATGAGTCTGCTCCATAAGA--TTATTCAGTGGGCCAGGTTTC | 30098 |
| Gorilla           | GTCATAGCAAAAGTCCTGTT---GGTATAAGAAAGTGGTATCAGTCTGCTCCATAAAG--TTATTTACTGGGCCAAGTTTC | 29085 |
| GrabEatingMacaque | GTCATAGCAAAAGTCCTGCT---GGTATAAGAAAGTGATATGAGTCTGCTCCATAAGA--TTATTCAGTGGGCCAAGTTTC | 28752 |
| Macaque           | GTCATAGCAAAAGTCCTGCT---GGTATAAGAAAGTGATATGAGTCTGCTCCATAAGA--TTATTCAGTGGGCCAAGTTTC | 29513 |
| PigTailedMacaque  | GTCATAGCAAAAGTCCTGCT---GGTATAAGAAAGTGATATGAGTCTGCTCCATAAGA--TTATTCAGTGGGCCAAGTTTC | 28453 |
| Bonobo            | GTCATAGCAAAAGTCCTGTT---GGTATAAGAAAGTGGTATCAGTCTGCTCCATAAAG--TTATTCAGTGGGCCAAGTTTC | 27742 |
| OliveBaboon       | GTCATAGCAAAAGTCCTGCT---GGTATAAGAAAGTGATATGAGTCTGCTCCATAAGA--TTATTCAGTGGGCCAAGTTTC | 28734 |
| Orangutan         | GTCATAGCAAAAGTCCTGCT---GGTACAAGAAAGTGGTATCAATCTGCTCCATAAAG--TTATTCAGTGGGCCAAGTTTC | 28622 |

| Majority          | TTTCATATTGTTGCTTCACTAATCCCTAGGCTTTTGTCTTGGCTATGTGGTCTGTTGATATGTGATTGTGCTCT---CC |       |
|-------------------|---------------------------------------------------------------------------------|-------|
|                   | 35690 35700 35710 35720 35730 35740 35750 35760                                 |       |
| Human             | TTTCATATTGTTGCTTCACTGATCCCTAGGCTTTTGTCTTGGCTATGTGGTCTGTTGATGTGTGATTGTGCTCTTCTCC | 26778 |
| Coquerel'sSifaka  | TTTCATCTTGTGCTTCACTAATCCCTAGGCTTTTGT-CTTTGTCTGTGATCTGTTTCTATAATAATTGTGCTGT---CC | 25799 |
| Ma'sNightMonkey   | TTTCATATTGTTACTTCACTAATCCCTAGGCTTTTGTCTTGGCTTCGATGCTGTTGATGTGTAATTGTGCTCT---CC  | 23666 |
| VervetAGM         | TTTCATATTGTTGCTTCACTAATCCCTAGGTTTTTGTCTTGGCTAAGTGGTCTGTTGATACGTGATTGTGCTCT---CC | 30175 |
| Gorilla           | TTTCATATTGTTGCTTCACTGATCCCTAGGCTTTTGTCTTGGCTATGTGGTCTGTTGATGTGTGATTGTGCTCTTCTCC | 29165 |
| GrabEatingMacaque | TTTGATATTGTTGCTTCACTAATCCCTAGGCTTTTGTCTTGGCTATGTGATCTGTTGATACGTGATTGTGCTCT---CC | 28829 |
| Macaque           | TTTGATATTGTTGCTTCACTAATCCCTAGGCTTTTGTCTTGGCTATGTGATCTGTTGATACGTGATTGTGCTCT---CC | 29590 |
| PigTailedMacaque  | TTTGATATTGTTGCTTCACTAATCCCTAGGCTTTTGTCTTGGCTATGTGATCTGTTGATACGTGATTGTGCTCT---CC | 28530 |
| Bonobo            | TTTCATATTGTTGCTTCACTGATCCCTAGGCTTTTGTCTTGGCTATGTGGTCTGTTGATGTGTGATTGTGCTCTTCTCC | 27822 |
| OliveBaboon       | TTTGATATTGTTGCTTCACTAATCCCTAGGCTTTTGTCTTGGCTCTGTGGTCTGTTGATACGTGATTGTGCTCT---CC | 28811 |
| Orangutan         | TTTCATATTGTTGCTTCACTGATCACTAGGCTTTTGTCTTGGCTATGTGGTCTGTTGATGTGTGATTGTGCTCT---CC | 28699 |

Tuesday, May 03, 2022 06:15 PM

|                   |                                                                                    |       |
|-------------------|------------------------------------------------------------------------------------|-------|
| Majority          | TTGTTTTTAAAAAATGTTTTCCCTGTAGTTGTCT-ATTTTCGTTGTCTTTTTTTT--AAAAAAAAGTTAGCTTTTGATTT-T |       |
|                   | 35770      35780      35790      35800      35810      35820      35830      35840 |       |
| Human             | TTGTTTAAAAAAAAGTTTTCCCTGTATTTGTGT-ATTTTCATTGTCTTTTTTTT----TTTAAAGTCAGCTTTTGATTT-T  | 26852 |
| Coquerel'sSifaka  | TAATTTTTTTTTTTTATCTCCCTGTAGGTTTGTCT-ATTTTATTGTCTTTTTTTTTTCTTTTAAAGTTAGCTTTTGTTTAT  | 25878 |
| Ma'sNightMonkey   | TTGTTTTTAAAAACAAGTTTTCCCTGTAGTTGTCTATTTTGTCTTTTTTTTTTTTTTAAAAAAAAGTCAGCTTTTGACTT-T | 23745 |
| VervetAGM         | TTGTTTTTAAAAAATGTTTTCCCTGTAGTTTTCT-ATTTTCGTTGTCTTTTTTTT--AAAAAAAAGTTAGCTTTTGATTT-T | 30251 |
| Gorilla           | TTGTTTAAAAAAAAGTTTTCCCTGTAGTTGTCT-ATTTTCGTTGTCTTTTTTTT----TTAAAAGTCAGCTTTTGATTT-T  | 29239 |
| GrabEatingMacaque | TTGTTTTTAAAAAATGTTTTCCCTGTAGTTTTCT-ATTTTCGTTGTCTTTTTTAA-AAAAAAAAGTTAGCTTTTGATTT-T  | 28906 |
| Macaque           | TTGTTTTTAAAAAATGTTTTCCCTGTAGTTTTCT-ATTTTCGTTGTCTTTTTTAA-AAAAAAAAGTTAGCTTTTGATTT-T  | 29667 |
| PigTailedMacaque  | TTGTTTTTAAAAAATGTTTTCCCTGTAGTTTTCT-ATTTTCGTTGTCTTTTTTTT-AAAAAAAAGTTAGCTTTTGATTT-T  | 28607 |
| Bonobo            | TTGTTTAAAAAAAAGTTTTCCCTGTATTTGTGT-ATTTTCATTGTCTTTTTTTA----AAAAAAGTCAGCTTTTGATTT-T  | 27896 |
| OliveBaboon       | TTGTTTTTAAAAAATGTTTTCCCTGTAGTTTTCT-ATTTTCATTGTCTTTTTTTA-AAAAAAAAGTTAGCTTTTGATTT-T  | 28888 |
| Orangutan         | TTGTTTAAAAAAGTGTTTTTCCCTGTAGTTGTCT-ATTTTGTGTCTTTTTTTG---AAAAAAGTCAGCTTTTGATTT-T    | 28773 |

|                   |                                                                                    |       |
|-------------------|------------------------------------------------------------------------------------|-------|
| Majority          | ACTGATC-----CTCTTCATTGTAC----CATTGTTTTCTCTATTTTTATTGGTTGCATGAGTCAGGGCTTTTGCAA      |       |
|                   | 35850      35860      35870      35880      35890      35900      35910      35920 |       |
| Human             | ACTGATC-----CTCTTCATTGTAC----CATTGTTTTCTCTATTTTTATTGGTTGCGTGAGTCAGGGCTTTTGCAA      | 26920 |
| Coquerel'sSifaka  | ACTAAGCAGACAAGACATGGTATTCTTCAGTGTACTGTTTCTGTTTTTATTGGTTGTGTGAGTTAGTGCTTTC-CCA      | 25957 |
| Ma'sNightMonkey   | TTTGATC-----GTCTTCATTGTCC----CATTGTTTTCTCTATTTTTATTGGTGTGTGAATCAGTGCTTTTGCAA       | 23813 |
| VervetAGM         | ACAGATC-----CTCTTCATTATAC----CATTGTCTTCTCTATTTTTATTGTTGCATGAGTCAGGGCTTTTGCAA       | 30319 |
| Gorilla           | ACTGATC-----CTCTTCATTGTAC----CATTGTTTTCTCTATTTTTATTGGTTGCGTGAGTCAGGACTTTTGCAA      | 29307 |
| GrabEatingMacaque | ACAGATC-----CTCTTCATTAT-----TGTCTTCTCTATTTTTATTGTTGCATGAGTCAGGGCTTTTGCAA           | 28969 |
| Macaque           | ACAGATC-----CTCTTCATTAT-----TGTCTTCTCTATTTTTATTGTTGCATGAGTCAGGGCTTTTGCAA           | 29730 |
| PigTailedMacaque  | ACAGATC-----CTCTTCATTATAC----CATTGTCTTCTCTATTTTTATTGTTGCATGAGTCAGGGCTTTTGCAA       | 28675 |
| Bonobo            | ACTGATC-----CTCTTCATTGTAC----CATTGTTTTCTCTATTTTTATTGGTTGCGTGAGTCAGGGCTTTTGCAA      | 27964 |
| OliveBaboon       | ACAGATC-----CTCTTCATTATACA-TACATTGTCTTCTCTATTTTTATTGTTGCATGAGTCAGGGCTTTTGCAA       | 28959 |
| Orangutan         | ACTGATC-----CTCTTCATTGTAC----CATTGTTTTCTCTATTTTTATTGGTTGCATGAGTCAGGGCTTTTGCAA      | 28841 |

|                   |                                                                                    |       |
|-------------------|------------------------------------------------------------------------------------|-------|
| Majority          | GCCTTTAATAGGTAGGTGGTATTCA-----GTCCACC                                              |       |
|                   | 35930      35940      35950      35960      35970      35980      35990      36000 |       |
| Human             | GTCTTTAATAGGTAGGTGGTATTCA-----GTCCACT                                              | 26952 |
| Coquerel'sSifaka  | GCCTTTAATAGGTAGGTAGCACTCA-----GCCTACC                                              | 25989 |
| Ma'sNightMonkey   | GCCTTTAATAGGTAGGTAGCATTACACTTGGTCTTAACCAAAAGGCCAAGAAGCGATGGTAGGTAGCATTAGTCCACC     | 23893 |
| VervetAGM         | GCCTTTAATAGGTAGGTGGTATTCA-----GTCCACC                                              | 30351 |
| Gorilla           | GTCTTTAATAGGTAGGTGGTATTCA-----GTCCACT                                              | 29339 |
| GrabEatingMacaque | GCCTTTAATAGGTAGGTGGTATTCA-----GTCCACC                                              | 29001 |
| Macaque           | GCCTTTAATAGGTAGGTGGTATTCA-----GTCCACC                                              | 29762 |
| PigTailedMacaque  | GCCTTTAATAGGTAGGTGGTATTCA-----GTCCACC                                              | 28707 |
| Bonobo            | GTCTTTAATAGGTAGGTGGTATTCA-----GTCCACT                                              | 27996 |
| OliveBaboon       | GCCTTTAATAGGTAGGTGGTATTCA-----GTCCACC                                              | 28991 |
| Orangutan         | GCCTTTAATAGGTAGGTGGTATGCA-----CCCCACG                                              | 28873 |

Tuesday, May 03, 2022 06:15 PM

|                   |                                                                                   |       |
|-------------------|-----------------------------------------------------------------------------------|-------|
| Majority          | TCTTCATCATCTTTGGTGGCACCTCTGT--TTAAGGAGACCAGGAATATTCACCTGGGTACGTACCTTTCTTCCTCTCTGA |       |
|                   | 36010 36020 36030 36040 36050 36060 36070 36080                                   |       |
| Human             | TCTTCATCATCTTTGGTGGCACCTCTGT--TTAAGGAGACCAGGAATACTCACCTGGGTACGTACCTTTCTTCCTCTCTGA | 27030 |
| Coquerel'sSifaka  | TCTTCATTTCCCTGGTAGCACCTCTGTGTTAAGGAGTCCAGGA-TAATCATGTCGGTGCATACCTTCCTCCATCTTGGA   | 26068 |
| Ma'sNightMonkey   | TCTTCATCACCTTCGTTGCACCTCTGTGTTAAGGAGAACAGAAATACCCACCTGGGTACGTATATTTCTTCCTCTCTGA   | 23973 |
| VervetAGM         | TCTTCATCATCTTTGGTGGCACCTCTGT--TTAAGGAGACCAGGAATATTCACCTAGGTACGTACCTTTCTTCCTCTCTGA | 30429 |
| Gorilla           | TCTTCATCATCTTTGGTGGCACCTCTGT--TTAAGGAGACCAGGAATACTCACCTGGGTACGTACCTTTCTTCCTCTCTGA | 29417 |
| GrabEatingMacaque | TCTTCATCATCTTTGGTGGCACCTCTGT--TTAAGGAGACCAGGAATATTCACCTAGGTACGTACCTTTCTTCCTCTCTGA | 29079 |
| Macaque           | TCTTCATCATCTTTGGTGGCACCTCTGT--TTAAGGAGACCAGGAATATTCACCTAGGTACGTACCTTTCTTCCTCTCTGA | 29840 |
| PigTailedMacaque  | TCTTCATCATCTTTGGTGGCACCTCTGT--TTAAGGAGACCAGGAATATTCACCTAGGTACGTACCTTTCTTCCTCTCTGA | 28785 |
| Bonobo            | TCTTCATCATCTTTGGTGGCACCTCTGT--TTAAGGAGACCAGGAATACTCACCTGGGTACGTACCTTTCTTCCTCTCTGA | 28074 |
| OliveBaboon       | TCTTCATCATCTTTGGTGGCACCTCTGT--TTAAGGAGACCAGGAATATTCACCTAGGTATGTACCTTTCTTCCTCTCTGA | 29069 |
| Orangutan         | TCTTCATCATCTTTGGTGGCACCTCTGT--TTAAGGAGACCAGGAATACTCACCTGGGTACGCACCTTTCTTCCTCTCTGA | 28951 |

|                   |                                                                                    |       |
|-------------------|------------------------------------------------------------------------------------|-------|
| Majority          | GAATCTGTTTTTCCCTCAGGAACTTATTATTTGTGTCCTTGCCCTGTGTCCTTTCTGTCAATGGTCCCTAGGCTGACATCTC |       |
|                   | 36090 36100 36110 36120 36130 36140 36150 36160                                    |       |
| Human             | TAATCTATTTTCCCTCAGGAACTTAATATTTGTGTCCTTGCCCGGTGTCCTTTCTGTCAATGGTCCCTAGGCTGCCATCTC  | 27110 |
| Coquerel'sSifaka  | GAATATGGTTTTCCCTTAGGAACTTGATACTCATGTCCTTG-GCCATGTTTTTCGGTCGTGGTCCCTAGGTTGACATCTC   | 26147 |
| Ma'sNightMonkey   | AAATCTACTTTTCCCTCAGGAACTTACTATTCATGTCCTTGCGCTGTGTCCTTTCTGTCAATGGTCCCTAGGCTGACATCTC | 24053 |
| VervetAGM         | GAATGTGTTTTTCCCTCAGGAACTTATTATTTGTGTCCTTGCCCTGTGTCCTTCTCAATGGTCCCTAGGCTGACATCTC    | 30509 |
| Gorilla           | TAATCTATTTTCCCTCAGGAACTTAATATTTGTGTCCTTGCCCTGTGTCCTTTCTGTCAATGGTCCCTAGGCTGCCATCTC  | 29497 |
| GrabEatingMacaque | GAATCTGTTTTTCCCTCAGGAACTTATTATTTGTGTCCTTGCCCTGTGTCCTTTCTCAATGGTCCCTAGGCTGACATCTC   | 29159 |
| Macaque           | GAATCTGTTTTTCCCTCAGGAACTTATTATTTGTGTCCTTGCCCTGTGTCCTTTCTCAATGGTCCCTAGGCTGACATCTC   | 29920 |
| PigTailedMacaque  | GAATCTGTTTTTCCCTCAGGAACTTATTATTTGTGTCCTTGCCCTGTGTCCTTTCTCAATGGTCCCTAGGCTGACATCTC   | 28865 |
| Bonobo            | TAATCTATTTTCCCTCAGGAACTTAATATTTGTGTCCTTGCCCTGTGTCCTTTCTGTCAATGGTCCCTAGGCTGCCATCTC  | 28154 |
| OliveBaboon       | GAATCTGTTTTTCCCTCAGGAACTTATTATTTGTGTCCTTGCCCTGTGTCCTTTCTCAATGGTCCCTAGGCTGACATCTC   | 29149 |
| Orangutan         | TAATCTACTTTTCCCTCGGAACTTAATATTTGTGTCCTTGCCCTGTGTCCTTTCTGTCAATGGTCCCTAGGCTGCCATCTC  | 29031 |

|                   |                                                                                  |       |
|-------------------|----------------------------------------------------------------------------------|-------|
| Majority          | CAGAGGAGAAAATGTTTGGTTAGCTCTCAGTCCCAAACCATAGCAGAGCCCAGAGACTCTTGTCACCCTCAGCCTTCAGT |       |
|                   | 36170 36180 36190 36200 36210 36220 36230 36240                                  |       |
| Human             | CACAGGAGAAAATGTTTGGTTAGTTCTCAGTCCCAAACCATAGCAGAGCCCAGAGACTCTTGTCACCCTCAGCCTTCAGT | 27190 |
| Coquerel'sSifaka  | CAGAGGAGAACGTGTTTGGTCAGCTCTCAGTGTGAACCCATAGCAGAGCCCAGGACTCTTGTCACCCTCAGCCTTCAGT  | 26227 |
| Ma'sNightMonkey   | CAGAGGAGAAAATGTTTGGTTAGCTCTCAGTCCCAAATCATAGCAGAGCCCAGAGACTCTTGTCACCCTCAGCCTTCAGT | 24133 |
| VervetAGM         | CAGAGAGAAAATGTTTGGTTAGCTCTCAGTCCCAAACCATAGCAGAGCCCAGAGACTGTTGTCACCCTCAGCCTTCAGT  | 30589 |
| Gorilla           | CACAGGAGAAAATGTTTGGTTAGTTCTCAGTCCCAAACCATAGCAGAGCCCAGAGACTCTTGTCACCCTCAGCCTTCAGT | 29577 |
| GrabEatingMacaque | CAGAGGAGAAAATGTTTGGTTAGCTCTCAGTCCCAAACCATAGCAGAGCCCAGAGACTGTTGTCACCCTCAGCCTTCAGT | 29239 |
| Macaque           | CAGAGGAGAAAATGTTTGGTTAGCTCTCAGTCCCAAACCATAGCAGAGCCCAGAGACTGTTGTCACCCTCAGCCTTCAGT | 30000 |
| PigTailedMacaque  | CAGAGGAGAAAATGTTTGGTTAGCTCTCAGTCCCAAACCATAGCAGAGCCCAGAGACTGTTGTCACCCTCAGCCTTCAGT | 28945 |
| Bonobo            | CACAGGAGAAAATGTTTGGTTAGTTCTCAGTCCCAAACCATAGCAGAGCCCAGAGACTCTTGTCACCCTCAGCCTTCAGT | 28234 |
| OliveBaboon       | CAGAGGAGAAAATGTTTGGTTAGCTCTCAGTCCCAAACCATAGCAGAGCCCAGAGACTGTTGTCACCCTCAGCCTTCAGT | 29229 |
| Orangutan         | CAGAGGAGAAAATGTTTGGTTAGTTCTCAGTCCCAAACCATAGCAGAGCCCAGAGACTCTTGTCACCCTCAGCCTTCAGT | 29111 |

Tuesday, May 03, 2022 06:15 PM

| Majority          | CCTTGGTTGCCTTCTTGGCAGACC-TGGCAGCTCTCCACCTGGAAGTGATACATGGTATTAATAGTTGGACTGGACTAT |       |
|-------------------|---------------------------------------------------------------------------------|-------|
|                   | 36250 36260 36270 36280 36290 36300 36310 36320                                 |       |
| Human             | CCTTGGTTGCCTTCTTCGCAGACC-TGGCAGCTCTCCACCTGAAAGTGATACATGGTATTAATAGTTGGACTAGACTAT | 27269 |
| Coquerel'sSifaka  | TCTTGTTTACCTTCTGGCAGCCCTAGCAGCTTTTCCACCTGGAATGATAGCTGGT-----AGTTGCATTAGATTAT    | 26301 |
| Ma'sNightMonkey   | TCTTGGTTGCCTTCTTGGCAGCCC-TAGCAGCTCTCCACCTGGAAGTGATACATGGTCTTAATAGTTGGACTGTACTAT | 24212 |
| VervetAGM         | CCTTGGTTGCCTTCTTGGCAAACC-TGGCAGCTCTCCACCTGGAAGTGATACATGGTATTAATAGTTGGACTGGACTAT | 30668 |
| Gorilla           | CCTTGGTTGCCTTCTTGGCAGACC-TGGCAGCTCTCCACCTGAAAGTGATACATGGTATTAATAGTTGGACTAGACTAT | 29656 |
| GrabEatingMacaque | CCTTGGTTGCCTTCTTGGCAGACC-TGGCATCTCTCCACCTGGAAGTGATACATGGTATTAATAGTTGGACTGGACTAT | 29318 |
| Macaque           | CCTTGGTTGCCTTCTTGGCAGACC-TGGCATCTCTCCACCGGAAGTGATACATGGTATTAATAGTTGGACTGGACTAT  | 30079 |
| PigTailedMacaque  | CCTTGGTTGCCTTCTTGGCAGACC-TGGCAGCTCTCCACCTGGAAGTGATACATGGTATTAATAGTTGGACTGGACTAT | 29024 |
| Bonobo            | CCTTGGTTGCCTTCTTCGCAGACC-TGGCAGCTCTCCACCTGAAAGTGATACATGGTATTAATAGTTGGACTAGACTGT | 28313 |
| OliveBaboon       | CCTTGGTTGCCTTCTTGGCAGACC-TGGCAGCTCTCCACCTGGAAGTGATACATGGTATTAATAGTTGGACTGGACTAT | 29308 |
| Orangutan         | CCTTGGTTGTCTTCTTGGCAGACC-TGGCAGCTCTCCACCTGAAAGTGATACATGGTATTAATAGTTGGACTAGACTAT | 29190 |

| Majority          | TATGATAAACAGAGTATCTAATAACCATGAGAAGAAAAACAAGAAATTTGTAACATTGAAATGAGTGCTAAATGGCCTT |       |
|-------------------|---------------------------------------------------------------------------------|-------|
|                   | 36330 36340 36350 36360 36370 36380 36390 36400                                 |       |
| Human             | TATGATAAACAGAGTATCTAATAACCATGAGAATAAAAACAAGAAATTTGTAACATTGAAATGAGTGCTAAATGGCCTT | 27349 |
| Coquerel'sSifaka  | TATGATGAAAAGAATATCTAATAACCATGAGAAGAAAAAFAAGACATTTATATCATTGAAATGAATGCCAAATGGCCTT | 26381 |
| Ma'sNightMonkey   | TATGA----CAGAATATCTAACAACTTGAGAAGAAAAACAAGAAATTTGTAACATTGAAATGAGTGCCAAATGGCATT  | 24288 |
| VervetAGM         | TATGATAAACAGAGTATCTAATAACCATGAAAAGAAAAACAAGAAATTTGTAACATTGAAATGAGTG---AATGGCCTT | 30745 |
| Gorilla           | TATGATAAACAGAGTATCTAATAACCATGAGAATAAAAACAAGAAATTTGTAACATTGAAATGAGTGCTAAATGGCCTT | 29736 |
| GrabEatingMacaque | TATGATAAACAGAGTATCTAATAACCATGAAAAGAAAAACAAGAAATTTGTAACATTGAAATGAGTG---AATGGCCTT | 29395 |
| Macaque           | TATGATAAACAGAGTATCTAATAACCATGAAAAGAAAAACAAGAAATTTGTAACATTGAAATGAGTG---AATGGCCTT | 30156 |
| PigTailedMacaque  | TATGATAAACAGAGTATCTAATAACCATGAAAAGAAAAACAAGAAATTTGTAACATTGAAATGAGTG---AATGGCCTT | 29101 |
| Bonobo            | TATGATAAACAGAGTATCTAATAACCATGAGAATAAAAACAAGAAATTTGTAACATTGAAATGAGTGCTAAATGGCCTT | 28393 |
| OliveBaboon       | TATGATAAACAGAGTATCTAATAACCATGAAAAGAAAAACAAGAAATTTGTAACATTGAAATGAGTG---AATGGCCTT | 29385 |
| Orangutan         | TAT-----AGAGTATCTAATAAACATAAGAATAAAAACAAGAAATTTGTAACATTGAAATGAGTGCTAAATGGCCTT   | 29263 |

| Majority          | TAATCTGTACTTTCTTTTGCATTTTTTTTTTT--AAGTCATTTCTTTCTCTGA---CGTGTAGAGTGTATCTTCCCTATT     |       |
|-------------------|--------------------------------------------------------------------------------------|-------|
|                   | 36410 36420 36430 36440 36450 36460 36470 36480                                      |       |
| Human             | TAATCTGTACTTTGCTTTTGCACATTTTTTTTTTT--AAGTGGTTTCTTTCTCTGA---CGTGTAGAGTGTATCTTCCCTATT  | 27423 |
| Coquerel'sSifaka  | TAATCTGAACTTACTTTTGCACATTTTTTTTA---AAGTCATTTCTTTCACTGATTGACTTACAACCTGTATCTTCGCGTA    | 26457 |
| Ma'sNightMonkey   | TAATCTGTACTTACTTTTGCACATTTTTTAAA---AAGTCATTTCTTTCTCTGA---CATGTAGAGTGTGTCTTCCCTGTT    | 24361 |
| VervetAGM         | TAATCTGTACTTTTGCATTTTTTTTTTTTTTT----AGTCATTTCTTTCTCTGA---CGTGTAGAGTGTATCTTCCCTATT    | 30816 |
| Gorilla           | TAATCTGTACTTTGCTTTTGCACATTTTTTTTTTTAAGTGGTTTCTTTCTCTGA---CGTGTAGAGTGTATCTTCGTATT     | 29812 |
| GrabEatingMacaque | TAATCTGTACTTTTGCATTTTTTTTTTTTTTTTTTT--AGTCATTTCTTTCTCTGA---CGTGTAGAGTGTATCTTCCCTATT  | 29469 |
| Macaque           | TAATCTGTACTTTTGCATTTTTTTTTTTTTTTTTTTAGTCATTTCTTTCTCTGA---CGTGTAGAGTGTATCTTCCCTATT    | 30232 |
| PigTailedMacaque  | TAATCTGTACTTTTGCATTTTTTTTTTTTTTTTTTT--AGTCATTTCTTTCTCTGA---CGTGTAGAGTGTATCTTCCCTATT  | 29176 |
| Bonobo            | TAATCTGTACTTTGCTTTTGCACATTTTTTTTTTT--AAGTGGTTTCTTTCTCTGA---CGTGTAGAGTGTATCTTCTTATT   | 28467 |
| OliveBaboon       | TAATCTGTACTTTTGGATTTTTTTTTTTTTTTTTTT--AGTCATTTCTTTCTCTGA---CGTGTAGAGTGTATCTTCCCTATT  | 29458 |
| Orangutan         | TAATCTGTACTTACTTTTGCATTTTTTTTTTTTTTT--AAGTGGTTTCTTTCTCTGA---CGTGTAGAGTGTATCTTCCCTATT | 29337 |



Tuesday, May 03, 2022 06:15 PM

| Majority          | TCTGCATTTTC----TTGTTTCTGTGGGATGTTAGTTTCTCTTGAAATGGTCATTGATATTACACAGGAAGAAAAGTTTC |       |
|-------------------|----------------------------------------------------------------------------------|-------|
|                   | 36490 36500 36510 36520 36530 36540 36550 36560                                  |       |
| Human             | TCTGAATTTTC----TTGTTTCTGTGGGATGTTAGTTTCTCTTGAAATGGTCATTGATATTACTCAGGAAGAAAAGTTTC | 27499 |
| Coquerel'sSifaka  | TCAGCATTTTCCTAATGTTTCTCTGGGATGCTGACT--TCTTCAGATGGTCATTGATATTATACAGGAAGAAAAGTTTC  | 26535 |
| Ma'sNightMonkey   | TCTGCATTTTC----TTGTTTCTGTGGGATGTTAGTGACTCTTGAAATAGTCATTGGTATTACACTGAAAGAAAAGTTTC | 24437 |
| VervetAGM         | TTTGCATTTTC----TTATTTCTGTGGGATGTTAGTTTCTCTTGAAATGATCATTGATATTACACAGGAAGAAAAGTTTC | 30892 |
| Gorilla           | TCTGAATTTTC----TTGTTTCTGTGGGATGTTAGTTTCTCTTGAAATGGTCATTGATATTACTCAGGAAGAAAAGTTTC | 29888 |
| GrabEatingMacaque | TTTGCATTTTC----TTATTTCTGTGGGATGTTAGTTTCTCTTGAAAT-ACCATTGATATTACACAGGAAGAAAAGTTTC | 29544 |
| Macaque           | TTTGCATTTTC----TTATTTCTGTGGGATGTTAGTTTCTCTTGAAAT-ATCATTGATATTACACAGGAAGAAAAGTTTC | 30307 |
| PigTailedMacaque  | TTTGCATTTTC----TTATTTCTGTGGGATGTTAGTTTCTCTTGAAATGATCATTGATATTACACAGGAAGAAAAGTTTC | 29252 |
| Bonobo            | TCTGAATTTTC----TTGTTTCTATGGGATGTTAGTTTCTCTTGAAATGGTCATTGATATTACTCAGGAAGAAAAGTTTC | 28543 |
| OliveBaboon       | TTTGCATTTTC----TTATTTCTGTGGGATGTTAGTTTCTCTTGAAATGATCATTGATATTACACAGGAAGAAAAGTTTC | 29534 |
| Orangutan         | TCTGCATTTTC----TTGTTTCTGTGGGATGTTAGTTTCTCTTGAAATGGTCATTGATATTACTCAGGAAGAAAAGTTTC | 29413 |

| Majority          | TGTGGTCAGATTTAATAAGAGATATCTATGCTAGTCTTAACATTTAATTTCTTTT----AGTTGAATCTAA----AATTG |       |
|-------------------|----------------------------------------------------------------------------------|-------|
|                   | 36570 36580 36590 36600 36610 36620 36630 36640                                  |       |
| Human             | TGTGGTCAGATTTAATAAGAGATATCTATGCTAGTCTTAACATTTAATTTCTTTT----AGTTGAATCTAA----AATTG | 27571 |
| Coquerel'sSifaka  | TTTGGTTAGATTTAACAAGAGACATCAATGCCAATCTTAAATTTAATTTCTTTT---TAGGTTGAATCCAAGATCAATTG | 26615 |
| Ma'sNightMonkey   | TGTGGTCAGATTTAATAAGAGACATCAATGCTAGTCTTAACATTTAATTTCTTTT----AGTTGAATCTGA----GATTG | 24509 |
| VervetAGM         | TATGGTCAGATTTAATAAGA-GTAT-TACGCTAGTCTTAACATTTAATTTCTTTT----AGTTGAATCTAA----AATTG | 30962 |
| Gorilla           | TGTGGTCAGATTTAATAAGAGATATCTGTGCTAGTCTTAACATTTAATTTCTTTT----AGTTGAATCTAA----AATTG | 29960 |
| GrabEatingMacaque | TATGGTCAGATTTAATAAGA-GTAT-TACGCTAGTCTTAACATTTAATTTCTTTT----AGTTGAATCTAA----AATTG | 29614 |
| Macaque           | TATGGTCAGATTTAATAAGA-GTAT-TACGCTAGTCTTAACATTTAATTTCTTTT----AGTTGAATCTAA----AATTG | 30377 |
| PigTailedMacaque  | TGTGGTCAGATTTAATAA---GTAT-TATGCTAGTCTTAACATTTAATTTCTTTT----AGTTGAATCTAA----AATTG | 29320 |
| Bonobo            | TGTGGTCAGATTTAATAAGAGATATCTATGCTAGTCTTAACATTTAATTTCTTTT----AGTTGAATCTAA----AATTG | 28615 |
| OliveBaboon       | TGTGGTCAGATTTAATAAGA-GTAT-TACGCTAGTCTTAACATTTAATTTCTTTT----AGTTGAATCTAA----AATTG | 29604 |
| Orangutan         | TGTGGTCAGATTTAATAAGAGATATCTGTGCTAGTCTTAACATTTAATTTCTTTT----AGTTGAATCTAA----AATTT | 29485 |

| Majority          | ACATCATTCTTAGATGAATTAATAAATTTT--AAAGAGCATATATTCTTTAGTAGGATTTTGTATTCT-----AAGTACC    |       |
|-------------------|-------------------------------------------------------------------------------------|-------|
|                   | 36650 36660 36670 36680 36690 36700 36710 36720                                     |       |
| Human             | ATATCATTCTTAGATTAATTAATAAATTTT---AAAGAGCATGTTATTCTTTAGTA----TTTTGATTCT-----AAGTACC  | 27641 |
| Coquerel'sSifaka  | ACATCTATCTTAGATGAATTAATAAATGTTT--AAAAAGTGTATATTCT-AGTTCAAATTTGATTCTGAGTTTAAGTACC    | 26692 |
| Ma'sNightMonkey   | ACAT---TCTTAGGTGAATTAATAAATTTT--AAAAAGCATGTTATTCTTTAGTAGATATTTGATTCT-----AAGTACC    | 24578 |
| VervetAGM         | ACATCATTCTTAGATGAATTAATAAATTT--AAAGAGCAGATATTCTTTTCGTAGGATTTTGTATTCT-----AAGTACC    | 31034 |
| Gorilla           | ATAT---TCTTAGATGAATTAATAAATTTT---AAAGAGCATGTTATTCTTTAGTA----TTTTGATTCT-----AAGTACC  | 30027 |
| GrabEatingMacaque | ACATCATTCTTAGATGAATTAATAAATTT--AAAGAGCAGATATTCTTTTCGTAGGATTTTGTATTCT-----AAGAACC    | 29686 |
| Macaque           | ACATCATTCTTAGATGAATTAATAAATTT--AAAGAGCAGATATTCTTTTCGTAGGATTTTGTATTCT-----AAGAACC    | 30449 |
| PigTailedMacaque  | ACATCATTCTTAGATGAATTAATAAATTT--AAAGAGCAGATATTCTTTTCGTAGGATTTTGTATTCT-----AAGAACC    | 29392 |
| Bonobo            | ATATCATTCTTAGATGAATTAATAAATTTT---AAAGAGCATGTTATTCTTTAGTA----TTTTGATTCT-----AAGTACC  | 28685 |
| OliveBaboon       | ACATCATTCTTAGATGAATTAATAAATTT--AAAGAGCAGATATTCTTTTCGTAGGATTTTGTATTCT-----AAGAACC    | 29676 |
| Orangutan         | CTATCGTTCTTAGATGAATAAATAAATTTT---AAAGAGCATGTTATTCTTTAGTAAGTATTTTGTATTCT-----AATTACC | 29559 |

Tuesday, May 03, 2022 06:15 PM

| Majority          | ACTAATTTGATTTGTTTCAGCAGTCATTAATGTGGGGCAGTCATCAATCACTACC-ATTGATCATTTATTTTCATATACAT |       |
|-------------------|-----------------------------------------------------------------------------------|-------|
|                   | 36730 36740 36750 36760 36770 36780 36790 36800                                   |       |
| Human             | ACTAATTTGATTTGTTTCAGCAGTCATTAATGTGGGGCAGTCATCAATCACTACC-ATTGATCATTTATTTTCATATACAT | 27720 |
| Coquerel'sSifaka  | ATTAATTTGATTTGTTTCAATAGTCACTAATGTGGAATAGCCATCAATCACTACT-ATGGATCATTCATTTTATATATAT  | 26771 |
| Ma'sNightMonkey   | ATTAATTTGATTTGCTTCAGCAGTCATTAACGTAGGGCAGTCATTAATCACTACC-ATTGATCATTTATTTTCATATACAG | 24657 |
| VervetAGM         | ACTAATTTGATTTGTTTCAGCAGTCATTAATGTGGGGCAGTCGTCAGTCACTACCCATTGATCATTTATTTTCATATACAT | 31114 |
| Gorilla           | ACTAATGTGATTTGTTTCAACAGTCATTAATGTGGGGCAGTCATCAATCACTACC-ATTGATCATTTATTTTCATATACAT | 30106 |
| GrabEatingMacaque | ACTAATTTGATTTGTTTCAGCAGTCATTAATGTGGGGCAGTCGTCAGTCACTACCCATTGATCATTTATTCCATATACAT  | 29766 |
| Macaque           | ACTAATTTGATTTGTTTCAGCAGTCATTAATGTGGGGCAGTCGTCAGTCACTACCCATTGATCATTTATTCCATATACAT  | 30529 |
| PigTailedMacaque  | ACTAATTTGATTTGTTTCAGCAGTCATTAATGTGGGGCAGTCGTCAGTCACTACCCATTGATCATTTATTCCATATACAT  | 29472 |
| Bonobo            | ACTAATTTGACTTGTTCACAGTCATTAATGTGGGGCAGTCATCAATCACTACC-ATTGATCATTTATTTTCATATACAT   | 28764 |
| OliveBaboon       | ACTAATTTGATTTGTTTTAGCAGTCATTAATGTGGGGCAGTCGTCAGTCACTACCCATTGATCATTTATTTTCATATATAT | 29756 |
| Orangutan         | ACTAATTTGATTTGCTTCAGCAGTCATTAATGTGGGGCAGTCATCAATCACTACC-ATTGATCATTTATTTTCATATACAT | 29638 |

| Majority          | TCTAAGTTAAATGACCAGGCTGAAATAATTTCAGGTGAAATTAATTCGTGTCAGTTAATGTGGTAATGTTAACATTTATCAGT |       |
|-------------------|-------------------------------------------------------------------------------------|-------|
|                   | 36810 36820 36830 36840 36850 36860 36870 36880                                     |       |
| Human             | TGTAAGTTAAATGACCAGGCTGAAATAATTTCAGATGAAATTAATTCGTGTCAGTTAATGTGGTAATGTTAACATTTATCAGT | 27800 |
| Coquerel'sSifaka  | TCCAAGTTAAACAACCTAGGCTTAGATAATTCAAGTGAACCTGTTCCATCAGTCAACGTGGTAATGTTAACATTTATCAAT   | 26851 |
| Ma'sNightMonkey   | TCTAAGTTAAATGACCAATCTGAAATAGTTCAGTGAACCTAATTCGTGTCAGTTAATGTGGTAATGTTAACATATATCAAT   | 24737 |
| VervetAGM         | TCTAAGTTAAATGATCAGACTGAAATAATTTCAGGTGAAATTAATTCGTGTCAGTTAATGTGGTAATGTTAACATTTATCAGT | 31194 |
| Gorilla           | TGTAAGTTAAATGACCAGGCTGAAATAATTTCAGATGAAATTAATTCGTGTCAGTTAATGTGGTAATGTTAACATTTATCAGT | 30186 |
| GrabEatingMacaque | TCTAAGTTAAATGATCAGACTGAAATAATTTCAGGTGAAATTAATTCATCAGTTAATGTGGTAATGTTAACATTTATCAGT   | 29846 |
| Macaque           | TCTAAGTTAAATGATCAAACCTGAAATAATTTCAGGTGAAATTAATTCATCAGTTAATGTGGTAATGTTAACATTTATCAGT  | 30609 |
| PigTailedMacaque  | TCTAAGTTAAATGATCAGACTGAAATAATTTCAGGTGAAATTAATTCATCAGTTAATGTGGTAATGTTAACATTTATCAGT   | 29552 |
| Bonobo            | TGTAAGTTAAATGACCAGGCTGAAATAATTTCAGATGAAATTAATTCGTGTCAGTTAATGTGGTAATGTTAACATTTATCAGT | 28844 |
| OliveBaboon       | TCTAAGTTAAATGATCAGACTGAAATAATTTCAGGTGAAATTAATTCATCAGTTAATGTGGTAATGTTAACATTTATCAGT   | 29836 |
| Orangutan         | TGTAAGTTAAATGACCAGGCTGAAATAATTTCAGGTGAAATTAATTCGTGTCAGTTAATGTGGTAATGTTAACATTTATCAGT | 29718 |

| Majority          | AGTGCTGAATCACTTCCTTTTGGGCATAAATAGTGGTAAGCTTTTT-GCTCATTTGGCAAAGACAGGCATAATTGCTTTTTTT- |       |
|-------------------|--------------------------------------------------------------------------------------|-------|
|                   | 36890 36900 36910 36920 36930 36940 36950 36960                                      |       |
| Human             | AGTGCTGAATCACTTCCTTTTGGGCATAAATAGTGGTAAGCTTTTT-GCTCAATG-CAAAGACAGGCATAATTGCTTTTTTTC  | 27878 |
| Coquerel'sSifaka  | AGGGCAGAATCACTTCCTTTTGGGCATAAATAATGGTAGACTTTTT-ACTCAGTGGAAAAGCAAACACAGTTGGTTTTGT-    | 26929 |
| Ma'sNightMonkey   | AGTGCTGAATCACTTCCTTTTGGGCATAAATAGTGGTAAGCTTTTT-GCTCATTTG-GAAAGACAGGCATAATTGCTTTTTTTA | 24815 |
| VervetAGM         | AGTGCTGAATCACTTCCTTTTGGGCATAAATAGTGGTAAGCTTTTTTGCTTATTGGCAAAGACAGGCATAATTGCTTTTTTT-  | 31273 |
| Gorilla           | AGTGCTGAATCACTTCCTTTTGGGCATAAATAGTGGTAAGCTTTTT-GCTCAATG-CAAAGGCAGGCATAATTGCTTTTTTT   | 30264 |
| GrabEatingMacaque | AGTGCTGAATCACTTCCTTTTGGGCATAAATAGTGGTAAGCTTTTTTGCTTATTGGCAAAGACAGGCATAATTGCTTTTTTT-  | 29925 |
| Macaque           | AGTGCTGAATCACTTCCTTTTGGGCATAAATAGTGGTAAGCTTTTTTGCTTATTGGCAAAGACAGGCATAATTGCTTTTTTT-  | 30688 |
| PigTailedMacaque  | AGTGCTGAATCACTACTTTTGGGCATAAATAGTGGTAAGCTTTTTTGCTTATTGGCAAAGACAGGCATAATTGCTTTTTTT-   | 29631 |
| Bonobo            | AGTGCTGAATCACTTCCTTTTGGGCATAAATAGTGGTAAGCTTTTT-GCTCAATG-CAAAGACAGGCATAATTGCTTTTTTT-  | 28921 |
| OliveBaboon       | AGTGCTGAATCACTTCCTTTTGGGCATAAATAGTGGTAAGCTTTTTTGCTTATTGGCAAAGACAGGCATAATTGCTTTTTTT-  | 29915 |
| Orangutan         | AGTGCTGAATCACTTCCTTTTGGGCATAAATAGTGGTAAGCTTTTT-GCTCAATG-CAAAGACAGGCATAATTGCTTTTTTT-  | 29795 |

Tuesday, May 03, 2022 06:15 PM

| Majority          | AAATAAAAAATGTAATTTGTAAAAATACTCC--AGTAATTTTTGTAAAATCTCAAATGCAAATAATTTGACATTATTCT  |       |       |       |       |       |       |       |       |
|-------------------|----------------------------------------------------------------------------------|-------|-------|-------|-------|-------|-------|-------|-------|
|                   | 36970                                                                            | 36980 | 36990 | 37000 | 37010 | 37020 | 37030 | 37040 |       |
| Human             | AAATAAAAAATGTAATTTGTAAAAATACTCC--AGTAATTTTTGTAAAATCTCAAATGCAAATAATTTGACGTTATTCT  |       |       |       |       |       |       |       | 27956 |
| Coquerel'sSifaka  | ----ATTAATGTAATTTATAAAAAAATCTTTAGTAATTTTGATGAAATCTCAAATGCGATAATTTGATATTCTTCT     |       |       |       |       |       |       |       | 27005 |
| Ma'sNightMonkey   | AAATAAAAAATGTAATTTGTAAAAATACTCC--AGTAATTTTTGTAAACATCTCAAATGCAAATAATTTGACATTATTCT |       |       |       |       |       |       |       | 24893 |
| VervetAGM         | AAATAAAAAATGTAATTTGTAAAAATACTCC--AGTAATTTTTGTAAAATCTCAAATGCAAATAATTTGACATTATTCT  |       |       |       |       |       |       |       | 31351 |
| Gorilla           | AAATAAAAAATGTAATTTGTAAAAATATTCC--AGTAATTTTTGTAAAATCTCAAATGCAAATAATTTGACGTTATTCT  |       |       |       |       |       |       |       | 30342 |
| GrabEatingMacaque | AAATAAAAAATGTAATTTGTAAAAATACTCC--AGTAATTTTTGTAAAATCTCAAATGCAAATAATTTGACATTATTCT  |       |       |       |       |       |       |       | 30003 |
| Macaque           | AAATAAAAAATGTAATTTGTAAAAATACTCC--AGTAATTTTTGTAAAATCTCAAATGCAAATAATTTGACATTATTCT  |       |       |       |       |       |       |       | 30766 |
| PigTailedMacaque  | AAATAAAAAATGTAATTTGTAAAAATACTCC--AGTAATTTTTGTAAAATCTCAAATGCAAATAATTTGACATTATTCT  |       |       |       |       |       |       |       | 29709 |
| Bonobo            | AAATAAAAAATGTAATTTGTAAAAATACTCC--AGTAATTTTTGTAAAATCTCAAATGCAAATAATTTGACGTTATTCT  |       |       |       |       |       |       |       | 28999 |
| OliveBaboon       | AAATAAAAAATGTAATTTGTAAAAATACTCC--AGTAATTTTTGTAAAATCTCAAATGCAAATAATTTGACATTATTCT  |       |       |       |       |       |       |       | 29993 |
| Orangutan         | AAATAAAAAATGTGATTTGTAAAAATACTTC--AGTAATTTTTGTAAAATCTCAAATGCAAATAATTTGACATTATTCT  |       |       |       |       |       |       |       | 29873 |

| Majority          | ----CAGTAATGAAGGCTGTAAATCTGCTCTCTTAACAGCAGGTATGAAATCATTGAGGAAGAAAAAGGTCATAAAT   |       |       |       |       |       |       |       |       |
|-------------------|---------------------------------------------------------------------------------|-------|-------|-------|-------|-------|-------|-------|-------|
|                   | 37050                                                                           | 37060 | 37070 | 37080 | 37090 | 37100 | 37110 | 37120 |       |
| Human             | ----CAGTAATGAAGGCTGTAAATCTCTCTCTTAACGGCAGGTATGAAATCATTGAGGAAGAAAAAGTTCATAAAT    |       |       |       |       |       |       |       | 28032 |
| Coquerel'sSifaka  | GACACACTTATGAAGGCTATTAGATCTACTCT--TAAGAGCAGGTATGAAATCACTCAAGAAGAAAAAGACCACAAAT  |       |       |       |       |       |       |       | 27083 |
| Ma'sNightMonkey   | ----CAGTAATGAAGATTGTAAATCTGCTCTCTTAACAGCAAGTATGAAATCATTGAGTAAGAAAAAGATTATAAAT   |       |       |       |       |       |       |       | 24969 |
| VervetAGM         | ----CAGTAATGAAGGCTGTAAATCTGCTCTCTTAACAGCAGGTATGAAACCATTGAGGAAGAAAAAGGGCATAAAT   |       |       |       |       |       |       |       | 31427 |
| Gorilla           | ----CAGTAATGAAGGCTGTAAATCTCTCTCTTAACGGCAGGTATGAAATCATTGAGGAAGAAAAAGTTCATAAAT    |       |       |       |       |       |       |       | 30418 |
| GrabEatingMacaque | ----CAGTAATGAAGGCTGTAAATCTGCTCTCTTAACAGCAGGTATGAAACCATTGAGCAAGAAAAA--GGTCATAAAT |       |       |       |       |       |       |       | 30078 |
| Macaque           | ----CAGTAATGAAGGCTGTAAATCTGCTCTCTTAACAGCAGGTATGAAACCATTGAGGAAGAAAAA--GGTCATAAAT |       |       |       |       |       |       |       | 30841 |
| PigTailedMacaque  | ----CAGTAATGAAGGCTGTAAATCTGCTCTCTTAACAGCAGGTATGAAACCATTGAGGAAGAAAAAAGGTCATAAAT  |       |       |       |       |       |       |       | 29785 |
| Bonobo            | ----CAGTAATGAAGGCTGTAAATCTCTCTCTTAACGGCAGGTATGAAATCATTGAGGAAGAAAAAGTTCATAAAT    |       |       |       |       |       |       |       | 29075 |
| OliveBaboon       | ----CAGTAATGAAGGCTGTAAATCTGCTCTCTTAACAGCAGGTATGAAACCATTGAGGAAGAAAGAAAGGTCATAAAT |       |       |       |       |       |       |       | 30069 |
| Orangutan         | ----CAGTAATGAAGGCCGTAAATCTGCTCTCTTAACGGCAGGTGTGAAATCATTGAGGAAGAAAAAGTTCATAAAT   |       |       |       |       |       |       |       | 29949 |

| Majority          | ACAAACTTAAAAATAAAA-----AGACTTTTCCATGCAAAAAGATGCATTGCAGGAAGGAGGAAGAGTGTCTTCATAG    |       |       |       |       |       |       |       |       |
|-------------------|-----------------------------------------------------------------------------------|-------|-------|-------|-------|-------|-------|-------|-------|
|                   | 37130                                                                             | 37140 | 37150 | 37160 | 37170 | 37180 | 37190 | 37200 |       |
| Human             | ACAAACTTAAAAATAAAA--TGGAAAGACTTTTCCATGCAAAAAGATGCATTGCAGGAAGGAGGAAGAGTGTCTTCATAG  |       |       |       |       |       |       |       | 28110 |
| Coquerel'sSifaka  | ACAAAATTCAAAGAAAAAATT--AAAGACTTTGCCATGCATAAAGATGCATTGTAGGAAGGAAGAAGAGAGCATCTCC--G |       |       |       |       |       |       |       | 27160 |
| Ma'sNightMonkey   | ATAAACTTAAAAATAAAA--TGGAAATACTTTTCCATGCAAAAAGATGCATTGCAGGAACAAGGAAGAGTGTATGCACAG  |       |       |       |       |       |       |       | 25047 |
| VervetAGM         | ACAAACTTAAAATGGAA-----AGACTTTTCCATGCAAAAAGATGCATTGCAGGAAGGAGGAAGAGTATCTTCATAG     |       |       |       |       |       |       |       | 31500 |
| Gorilla           | ACAAACTTAAAAATAAAAATGGAAAGACTTTTCCATGCAAAAAGATGCATTGCAGGAAGGAGGAAGAGTGTCTTCATAG   |       |       |       |       |       |       |       | 30498 |
| GrabEatingMacaque | ACAAGCTTAAAATGGAA-----AGACTTTTCCATGCAAAAAGATGCATTGCAGGAAGGAGGAAGAGTATCTTCATAG     |       |       |       |       |       |       |       | 30151 |
| Macaque           | ACAAGCTTAAAATGGAA-----AGACTTTTCCATGCAAAAAGATGCATTGCAGGAAGGAGGAAGAGTATCTTCATAG     |       |       |       |       |       |       |       | 30914 |
| PigTailedMacaque  | ACAAACTTAAAATGGAA-----AGACTTTTCCATGCAAAAAGATGCATTGCAGGAAGGAGGAAGAGTATCTTCATAG     |       |       |       |       |       |       |       | 29858 |
| Bonobo            | ACAAACTTAAAAATAAAA--TGGAAAGACTTTTCCATGCAAAAAGATGCATTGCAGGAAGGAGGAAGAGTGTCTTCATAG  |       |       |       |       |       |       |       | 29153 |
| OliveBaboon       | ACAAACTTAAAATGGAA-----AGACTTTTCCATGCAAAAAGATGCATTGCA-----                         |       |       |       |       |       |       |       | 30116 |
| Orangutan         | ACAAACTTAAAAATAAAA-----T-----GCAAAAAGGTGCATTGCAGGAAGGAGGAAGAGTGTCTTCATAG          |       |       |       |       |       |       |       | 30009 |

Tuesday, May 03, 2022 06:15 PM

|                   |                                                                                   |       |
|-------------------|-----------------------------------------------------------------------------------|-------|
| Majority          | CACACCACAAGTCAGTATTAGAGGCTTTCTTTTATACTTGAGTAGACCCAAGATTCCCCACCTATCATCT--TCCAAAA-  |       |
|                   | 37210 37220 37230 37240 37250 37260 37270 37280                                   |       |
| Human             | CACACCACAAGTCAGTATTAGAGGCTTGCTTTTCTACTTGAGTAGACCCAAGATTCCCCACCTATCGTCT--TCCAAAG-  | 28187 |
| Coquerel'sSifaka  | CACACCACAAGTCAGAATTAGAGGTTTTGTGTTTGTACTTGAGCAGATCCAAGATTCCCCACCTATCATCT--TCCAGAA- | 27237 |
| Ma'sNightMonkey   | CACACCACAAGTCAGAATTAGAGGCTTTCTTTTGTATTGTAATAGACTCAAGATTCCCTACCCATCATCTCTTCCAGAA-  | 25126 |
| VervetAGM         | CACACCACAAGTCAGTGTTAGAGGCTTTCTTTTATACTTGAGTAGGCCCAAGATTCCCCACCTATCATCT--TCCAAAA-  | 31577 |
| Gorilla           | CACACCACAAGTCAGTATTAGAGGCTTGCTTTTCTACTTGAGTAGACCCAAGATTCCCCACCTATCGTCT--TCCAAAG-  | 30575 |
| GrabEatingMacaque | CACACCACAAGTCAGTGTTAGAGGCTTTCTTTTATACTTGAGTAGGCCCAAGATTCCCCACCTATCATCT--TCCAAAA-  | 30228 |
| Macaque           | CACACCACAAGTCAGTGTTAGAGGCTTTCTTTTATACTTGAGTAGGCCCAAGATTCCCCACCTATCATCT--TCCAAAA-  | 30991 |
| PigTailedMacaque  | CACACCACAAGTCAATGTAGAGGCTTTCTTTTATACTTGAGTAGGCCCAAGATTCCCCACCTATCATCT--TCCAAAA-   | 29935 |
| Bonobo            | CACACCACAAGTCAGTATTAGAGGCTTGCTTTTCTACTTGAGTAGACCCAAGATTCCCCACCTATCGTCT--TCCAAAG-  | 29230 |
| OliveBaboon       | --CACCACAAGTCAGTGTAGAGGCTTTCTTTTATACTTGAGTAGGCCCAAGATTCCCCACCTATCATCT--TCCAAAA-   | 30191 |
| Orangutan         | CACACCACAAGTTAGTATTAGAGGCTTGCTTTTCTACTTGAGTAGACCCAAGATTCCCCACCTATCGTCT--TCCAAAGA  | 30087 |
| Majority          | --TTACCTGTGATCCACTGTAATCACAGTTTTTACAGTGG----TATACTGTAGGTGTAT---GGAAGGATTTGAATTCA  |       |
|                   | 37290 37300 37310 37320 37330 37340 37350 37360                                   |       |
| Human             | --TTACTTGTGATCCACTGCAATCACAGTTTTTACAGTGTG---TATACTCTAGGTGTAT---GGAAGGATTTGAATTCA  | 28259 |
| Coquerel'sSifaka  | --TTACGTGTGATCCACTGTAATCACAGTATTACAGTGAAGTATGTATTACAGTAGAAGTATGGAAGGATTTTGATTCT   | 27315 |
| Ma'sNightMonkey   | --TTACCTGTGACCCACTGTAATCACAGGTTTTACGGTGG----GATACTGTAGATTTATTTCCGGAAGGATTTGAATTCA | 25200 |
| VervetAGM         | --TTACCTGTGATCCAGTGTAAATCACAGGTTTTGCAGTGG----TATACTGTAGGTGTAT---GGAAGGATTTGAATTCA | 31648 |
| Gorilla           | --TTACTTGTGATCCACTGCAATCACAGTTTTTACAGTGT----TATACTCTAGGTGTAT---GGAAGGATTTGAATTCA  | 30646 |
| GrabEatingMacaque | --TTACCTGTGATCCACTGTAATCACAGTTTTTGCAGTGG----TATACTGTAGGTGTAT---GGAAGGATTTGAATTCA  | 30299 |
| Macaque           | --TTACCTGTGATCCACTGTAATCACAGTTTTTGCAGTGG----TATACTGTAGGTGTAT---GGAAGGATTTGAATTCA  | 31062 |
| PigTailedMacaque  | --TTACCTGTGATCCACTATAATCACAGTTTTTGCAGTGG----TATACTGTAGGTGTAT---GGAAGGATTTGAATTCA  | 30006 |
| Bonobo            | --TTACTTGTGATCCACTGCAATCACAGTTTTTACAGTGT----TATACTCTAGGTGTAT---GGAAGGATTTGAATTCA  | 29301 |
| OliveBaboon       | --TTACCTGTGATCCACTGTAATCACAGTTTTTGCAGTGG----TATACTGTAGGTGTAT---GGAAGGATTTGAATTCA  | 30262 |
| Orangutan         | AGTTACCTGTGATCCACTGCAATCACAGTTTTTACAGTGT----TATACTCCAGGTGTAT---GGAAGGATTTGAATTCA  | 30160 |
| Majority          | CAAATAGTCAAACATCTAAAGAATAAGCTGATAA-----TAATACATTTGAAAAGAGGTCAGGT---ATATTTTGGAA    |       |
|                   | 37370 37380 37390 37400 37410 37420 37430 37440                                   |       |
| Human             | CAAATAGTCAAACATCAGAAGAATAAGCTGATAA-----TAATACATTTGAAAAGAGGTCAGT---ATATTTTGGAA     | 28329 |
| Coquerel'sSifaka  | GCAA-----ACATCTAGAAAATAAAGCTGATAG-----TACACATTTGAAAAGAGGTCAGAT---GTAATTTTGGAA     | 27377 |
| Ma'sNightMonkey   | TAAATAGTTAAACATATAAAGAATAAGCTGATAACTGATAATAATACATTTGAAAAGAGGTCAGGTGGTATACTTTTGGAA | 25280 |
| VervetAGM         | CAAATAGTCAGACATCTAAAGAATACGCTGCTGA-----TAATGCATTTGAAAAGAGGTCAGGT---ATATTTTGGAA    | 31718 |
| Gorilla           | CAAATAGTCAAACATCAGAAGAATAAGCTGATAA-----TAATACATTTGAAAAGAGGTCAGT---ATATTTTGGAA     | 30716 |
| GrabEatingMacaque | CAAATAG----ACATCTAAAGAATAAGCTGATAA-----TAATGCATTTGAAAAGAGGTCAGGT---ATATTTTGGAA    | 30365 |
| Macaque           | CAAATAG----ACATCTAAAGAATAAGCTGATAA-----TAATGCATTTGAAAAGAGGTCAGGT---ATATTTTGGAA    | 31128 |
| PigTailedMacaque  | CAAATAG----ACATCTAAAGAATAAGCTGATAA-----TAATGCATTTGAAAAGAGGTCAGGT---ATATTTTGGAA    | 30072 |
| Bonobo            | CAAATAGTCAAACATCAGAAGAATAAGCTGATAA-----TAATACATTTGAAAAGAGGTCAGT---ATATTTTGGAA     | 29371 |
| OliveBaboon       | CAAATAG----ATATCTAAAGAATAAGCTGATAA-----TAATGCATTTGAAAAGAGGTCAGGT---ATATTTTGGAA    | 30328 |
| Orangutan         | CAAATAGTCAAACATCAAAGAATAAGCTGATAA-----TAATACATTTGAAAAGAGGTCAGGT---ATATTTTGGAA     | 30230 |

Tuesday, May 03, 2022 06:15 PM

| Majority          | AACTAGGAGAGTTAAAGTGTTTTT-GTGAACCTAAGGAACAAATAAGGCATTGACAATATTTTAAATTGATTAGGAATTTTG  |       |       |       |       |       |       |       |       |
|-------------------|-------------------------------------------------------------------------------------|-------|-------|-------|-------|-------|-------|-------|-------|
|                   | 37450                                                                               | 37460 | 37470 | 37480 | 37490 | 37500 | 37510 | 37520 |       |
| Human             | AACTAGGAGAGTTAAAGTGTTTTT-GTGAACCTAAGGAACAAATAAGGCATTGACAATATTTTACTTGATTAGGAATTTTG   |       |       |       |       |       |       |       | 28408 |
| Coquerel'sSifaka  | AACTAGGGGAATTAAGTGTTTTTTGAAAACCTAAGGAG---ATAAGACATTGAAAATATTTTAAAGGGTTAGAAATTTTG    |       |       |       |       |       |       |       | 27454 |
| Ma'sNightMonkey   | AACTTGAGAGTTAAAGTGTTTTT-GTGAAATAAGGAAAATACATGACACTGACAATATTTTAAAGGGACTAGGAATTTTG    |       |       |       |       |       |       |       | 25359 |
| VervetAGM         | AACTAGGAGAGT-----TATTTTTT-GTGAACCTAAGGAACAAATAACGCATTGACAATATTTTAAATGATTAGGAATTTTG  |       |       |       |       |       |       |       | 31792 |
| Gorilla           | AACTAGGAGAGTTAAAGTGTTTTT-GTGAACCTAAGGAACAAATAAGGCATTGACAATATTTTACTTGATTAGGAATTTTG   |       |       |       |       |       |       |       | 30795 |
| GrabEatingMacaque | AACTAGGAGAGTTAAAGTATTTTTT-GTGAACCTAAGGAACAAATAAGGCATTGACAATATTTTAAATTGATTAGGAATTTTG |       |       |       |       |       |       |       | 30444 |
| Macaque           | AACTAGGAGAGTTAAAGTATTTTTT-GTGAACCTAAGGAACAAATAAGGCATTGACAATATTTTAAATTGATTAGGAATTTTG |       |       |       |       |       |       |       | 31207 |
| PigTailedMacaque  | AACTAGGAGAGTTAAAGTATTTTTT-GTGAACCTAAGGAACAAATAAGGCATTGACAATATTTTAAATTGATTAGGAATTTTG |       |       |       |       |       |       |       | 30151 |
| Bonobo            | AACTAGGAGAGTTAAAGTGTTTTT-GTGAACCTAAGGAACAAATAAGGCATTGACAATATTTTACTTGATTAGGAATTTTG   |       |       |       |       |       |       |       | 29450 |
| OliveBaboon       | AACTAGGAGAGTTAAAGTATTTTTT-GTGAACCTAAGGAACAAATAAGGCATTGACAATATTTTAAATTGATTAGGAATTTTG |       |       |       |       |       |       |       | 30407 |
| Orangutan         | AACTAGGAGAGTTAAAGTGTTTTT-GTGAACCTAAGGAACAAATAAGGCATTGACAATATTTTACTTGATTAGGAATTTTG   |       |       |       |       |       |       |       | 30309 |

| Majority          | TTCAGGTGAGTAAACATTAAGGATCGTTTCAGTTTTGTTTTTGTGTTTTTACTTTTAGAATATCTGATCTGGACTT    |       |       |       |       |       |       |       |       |
|-------------------|---------------------------------------------------------------------------------|-------|-------|-------|-------|-------|-------|-------|-------|
|                   | 37530                                                                           | 37540 | 37550 | 37560 | 37570 | 37580 | 37590 | 37600 |       |
| Human             | TTCAGGTGAGTAAACATTAAGCATCACTTAAGTTTTGTTTTTGTGTTTC---TACTTTTAGAATATCTGATCTGGACTT |       |       |       |       |       |       |       | 28484 |
| Coquerel'sSifaka  | TTCAGGTGACTAAACATTAAGGACCTCTTTACAGTTTTATTTGGTT---TACTTTTAGCATGTCTGATGTGGAGTT    |       |       |       |       |       |       |       | 27530 |
| Ma'sNightMonkey   | TTCAGGTGAGTAAACATCAAGGATCGTTTCAGTTTTGTTTTTGTGTTTTTACTTTTAGAGTATCTGATCTGGACTT    |       |       |       |       |       |       |       | 25439 |
| VervetAGM         | TTCAGGTTAGTAAA-CATTAAGGATCGTTTCAGTTTTGTTTTTGTGTTTTTACTTTTAGAATATCTAATCTGGACTT   |       |       |       |       |       |       |       | 31871 |
| Gorilla           | TTCAGGTGAGTAAACATTAAGCATCGTTTAAGTTTTGTTTTTGTGTTT-----ACTTTTAGAATATCTGATCTGGACTT |       |       |       |       |       |       |       | 30867 |
| GrabEatingMacaque | TTCAGGTTGGTAAA-CATTAAGGATCGTTTCAGTTTTGTTTTTGTGTTTTTACTTTTAAAATATCTAATCTGGACTT   |       |       |       |       |       |       |       | 30523 |
| Macaque           | TTCAGGTTGGTAAA-CATTAAGGATCGTTTCAGTTTTGTTTTTGTGTTTTTACTTTTAAAATATCTAATCTGGACTT   |       |       |       |       |       |       |       | 31286 |
| PigTailedMacaque  | TTCAGGTTAGTAAA-CATTAAGGATCGTTTCAGTTTTGTTTTTGTGTTTTTACTTTTAAAATATCTAATCTGGACTT   |       |       |       |       |       |       |       | 30230 |
| Bonobo            | TTCAGGTGAGTAAACATTAAGC-----TAAAGTTTTGTTTTTGTGTTG---TACTGTTAGAATATCTGATCTGGACTT  |       |       |       |       |       |       |       | 29521 |
| OliveBaboon       | TTCAGGTTAGTAAA-CATTAAGGATCGTTTCAGTTTTGTTTTTGTGTTTTTACTTTTAAAATATCTAATCTGGACTT   |       |       |       |       |       |       |       | 30486 |
| Orangutan         | TTCAGGTGAGTAAACATCAAGCATCGTTTAAGTTTTGTTTTTGTGTTG---TACTTTTAGAATATCTGATCTGGACTT  |       |       |       |       |       |       |       | 30385 |

| Majority          | CTGTGGATTTATGGAAGGGCTGGCTTTATTT---CTCTATCCTGTGGTGGGGGGCCAACCTTTGATTTT-GTATACGGAG |       |       |       |       |       |       |       |       |
|-------------------|----------------------------------------------------------------------------------|-------|-------|-------|-------|-------|-------|-------|-------|
|                   | 37610                                                                            | 37620 | 37630 | 37640 | 37650 | 37660 | 37670 | 37680 |       |
| Human             | CTGTGGATTTATGGAAGAGCTGGCTTTATTT---CTCTATCCTGTGG-GAGGGGCAAACCTTTGATTTT-GTATGTGGAG |       |       |       |       |       |       |       | 28558 |
| Coquerel'sSifaka  | CTGTTAACTTATAGAAGGGCTGATTTTATTTACTTCTCATCCTATGG-GGGGGTTGACTTTTGCTTTTGTATGTGGAG   |       |       |       |       |       |       |       | 27609 |
| Ma'sNightMonkey   | CTGTGAATTTATGGAAGGGCTGGCTTTATTT---CCGTATCCTGTGGTGGGGGGCCAACCTTTGATTTT-ATATATGGAG |       |       |       |       |       |       |       | 25514 |
| VervetAGM         | CTGTGGGTTTATGGAAGGGCTGGCTTTATCT---CTCTATCCTGTGGTGGCGGGCCAACCTTGAGTTT-GTATACAGAG  |       |       |       |       |       |       |       | 31946 |
| Gorilla           | CTGTGGATTTATGGAAGGGCTGGCTTTATTT---CTCTATCCTGTGG-GAGGGGCAAACCTTTGATTTT-GTATGCGGAG |       |       |       |       |       |       |       | 30941 |
| GrabEatingMacaque | CTGTGGGTTTATGGAAGGGCTGGCTTTATCT---CTCTATCCTGTGGTGGCGGGCCAACCTTGATTTT-GTATACGGAG  |       |       |       |       |       |       |       | 30598 |
| Macaque           | CTGTGGGTTTATGGAAGGGCTGGCTTTATCT---CTCTATCCTGTGGTGGCGGGCCAACCTTGATTTT-GTATACGGAG  |       |       |       |       |       |       |       | 31361 |
| PigTailedMacaque  | CTGTGGGTTTATGGAAGGGCTGGCTTTATCT---CTCTATCCTGTGGTGGCGGGCCAACCTTGATTTT-GTATACGGAG  |       |       |       |       |       |       |       | 30305 |
| Bonobo            | CTGTGGATTTATGGAAGGGCTGGCTTTATTT---CTCTATCCTGTGG-GAGGGGCAAACCTTTGATTTT-GTATGCGGAG |       |       |       |       |       |       |       | 29595 |
| OliveBaboon       | CTGTGGGTTTATGGAAGGGCTGGCTTTATCT---CTCTATCCTGTGGTGGCGGGCCAACCTTGATTTT-GTATACGGAG  |       |       |       |       |       |       |       | 30561 |
| Orangutan         | CTGTGGATTTATGGAAGGGCTGGCTTTATTT---CTGTATCCTGTGGTGGGGGGCCAACCTTTGATTTT-GTATGCAGAG |       |       |       |       |       |       |       | 30460 |

Tuesday, May 03, 2022 06:15 PM

| Majority          | TAACCTGACCTTCAGTTTTTTT--GGTCTAAGAACAAAGGCCAAAAAATATGTAACAGTTAATAATAA----CGTTAATT |       |
|-------------------|----------------------------------------------------------------------------------|-------|
|                   | 37690 37700 37710 37720 37730 37740 37750 37760                                  |       |
| Human             | TAACCTGACCTTCAGTTTTTTT--GGTCTGAGAACAAAGGCCAAAAAATATGTAACAGTTAATAACG-----TAATT    | 28628 |
| Coquerel'sSifaka  | TAACCTGATTCACAGTTTTTTC---ATCAAAGAACAAAGGCCAAAAAATATGTAGCAGTTGTTATTAATCAGCATTTGTT | 27686 |
| Ma'sNightMonkey   | TAACCTGACCTTCAGTTTTTTT--GATTTAAGAACAAAGGCCAAAAAATATGTAACAGTTGTTAATAA-----TAG--   | 25583 |
| VervetAGM         | TAACCTGACCTTCAGTTTTTTTTTGGTCTAAGAACAAAGGCCAAAAAATATGTAACAGTTAATAATAA----CGTTAATT | 32022 |
| Gorilla           | TAGCTTGACCTTCAGTTTTTTT--GGTCTGAGGACAAAGGCCAAAAAATATGTAACAGTTAATAACG-----TAATT    | 31011 |
| GrabEatingMacaque | TAACCTGACCTTCAGTTTTTTT--GGTCTAAGAACAAAGGCCAAAAAATATGTAACAGTTAATAATAA----CGTTAATT | 30673 |
| Macaque           | TAACCTGACCTTCAGTTTTTTT--GGTCTAAGAACAAAGGCCAAAAAATATGTAACAGTTAATAATAA----CGTTAATT | 31436 |
| PigTailedMacaque  | TAACCTGACCTTCAGTTTTTTT--GGTCTAAGAACAAAGGCCAAAAAATATGTAACAGTTAATAATAA----CGTTAATT | 30380 |
| Bonobo            | TAACCTGACCTTCAGTTTTTTT--GGTCTGAGAACAAAGGCCAAAAAATATGTAACAGTTAATAACG-----TAATT    | 29665 |
| OliveBaboon       | TAACCTGACCTTCAGTTTTTTT--GGTCTAAGAACAAAGGCCAAAAAATATGTAACAGTTAATAATAA----CGTTAATT | 30636 |
| Orangutan         | TAACCTGACCTTCAGTTTTTTT--GGTCTGAGAACAAAGGCCAAAAAATATGTAACAGTTAATAATAA----CGTTAATT | 30534 |

| Majority          | CACTTACTTAGTCAGTAAATATGTGGGGACATTGTAAGTGGTTGACACTTGGGAATATTATAGTGAGCACTACTGATGTG |       |
|-------------------|----------------------------------------------------------------------------------|-------|
|                   | 37770 37780 37790 37800 37810 37820 37830 37840                                  |       |
| Human             | CACTTACTTAGTCAATAAATATGTGGGGACATTGTAAGTGGTTGACACTTGGGAATATTGTAGTGAGCACTACTGATGTG | 28708 |
| Coquerel'sSifaka  | AACTTATTTAGTCAATAAATATGTATGGGACACTGTATTTGGTTGACACTTGGGAATATTATAGTGAACTA-TGATGTG  | 27765 |
| Ma'sNightMonkey   | CATTAAGT-----ATT-----TGTTGACACTTGGGAATATTATAGTGAGCACTACTGATGTG                   | 25636 |
| VervetAGM         | CACTTACTGAGTCAGTAAATATGTGGGAACGTTGTAAGTGGTTGACACTTGGGAATATTATAGTGAGCACTACTGATGTG | 32102 |
| Gorilla           | CACTTACTTAGTCAATAAATATGTGGGGACATTGTAAGTGGTTGACACTTGGGAATATTATAGTGAGCACTACTGATGTG | 31091 |
| GrabEatingMacaque | CACTTACTGAGTCAGTAAATATGTGGGAACGTTGTAAGTGGTTGACACTTGGGAATATTATAGTGAGCACTACTGATGTG | 30753 |
| Macaque           | CACTTACTGAGTCAGTAAATATGTGGGAACGTTGTAAGTGGTTGACACTTGGGAATATTATAGTGAGCACTACTGATGTG | 31516 |
| PigTailedMacaque  | CACTTACTGAGTCAGTAAATATGTGGGAACGTTGTAAGTGGTTGACACTTGGGAATATTATAGTGAGCACTACTGATGTG | 30460 |
| Bonobo            | CACTTACTTAGTCAATAAATATGTGGGGACATTGTAAGTGGTTGACACTTGGGAATATTCTAGTGAGCACTACTGATGTG | 29745 |
| OliveBaboon       | CACTTACTGAGTCAGTAAATATGTGGGAACGTTGTAAGTGGTTGACACTTGGGAATATTATAGTGAGCACTACTGATGTG | 30716 |
| Orangutan         | CATTTACTTAGTCAATAAATATGTGGGGACATTGTAAGTGGTTGACACTTGGGAATATTATAGTGAGCACTACTGATGTG | 30614 |

| Majority          | GGCCAGGCACCTTGCCTGGTAATCACTGTTTCATGTATTATCACATTTAATCCCTAAGGGCTGTGATGTAGATGT-TAT--C |       |
|-------------------|------------------------------------------------------------------------------------|-------|
|                   | 37850 37860 37870 37880 37890 37900 37910 37920                                    |       |
| Human             | AGCCAGGCACCTTGCCTGGTAATCACTGTTTCATGTATTATCACATTTAATCCCTAAGGGCTGTGATGTAGATGT-TAT--C | 28780 |
| Coquerel'sSifaka  | GGCCATGTACTTTGGCAGGCAATCCCTATTTCATGTATTATCACATTTAATCCCTAAGGGCTGTGATGTAGGTGGATATTAC | 27845 |
| Ma'sNightMonkey   | GGCCATGCACCTTGCCTGGTAATCACTGTTTCATGTATTACCATATTTAATCCCTAAGGGCTGTGATGTAGATGT-TAT--C | 25713 |
| VervetAGM         | GGCCAGGCACCTTGCCTGGTAATCACTGTTTCATGTATTACCATATTTAATCCCTAAGGGCTGTGATGTGGATGT-TAT--C | 32179 |
| Gorilla           | AGCCAGGCACCTTGCCTGGTAATCACTGTTTCATGTATTATCACATTTAATCCCTAAGGGCTGTGATGTAGATGT-TAT--C | 31163 |
| GrabEatingMacaque | GGCCAGGCACCTTGCCTGGTAATCACTGTTTCATGTATTATCACATTTAATCCCTAAGGGCTGTGATGTGGATGT-TAT--C | 30830 |
| Macaque           | GGCCAGGCACCTTGCCTGGTAATCACTGTTTCATGTATTATCACATTTAATCCCTAAGGGCTGTGATGTGGATGT-TAT--C | 31593 |
| PigTailedMacaque  | GGCCAGGCACCTTGCCTGGTAATCACTGTTTCATGTATTATCACATTTAATCCCTAAGGGCTGTGATGTGGATGT-TAT--C | 30537 |
| Bonobo            | AGCCAGGCACCTTGCCTGGTAATCACTGTTTCATGTATTATCACATTTAATCCCTAAGGGCTGTGATGTAGATGT-TAT--C | 29817 |
| OliveBaboon       | GGCCAGGCACCTTGCCTGGTAATCACTGTTTCATATATTATCACATTTAATCCCTAAGGGCTGTGATGTGGATGT-TAT--C | 30793 |
| Orangutan         | AGCCAGGCACCTTGCCTGGTAATCACTGTTTCATGTATTACTTAATTTAATCCCTAAGGGCTGTGATGTAGATGT-TAT--C | 30691 |

Tuesday, May 03, 2022 06:15 PM

|                   |                                                                                  |       |
|-------------------|----------------------------------------------------------------------------------|-------|
| Majority          | CCTATTTTACAAATGAAGAACTTGAGGCTTAGAATGATTAAGTACTGTTA-CCTAACTGATAAGTGGAAGCTGAGCTTCA |       |
|                   | 37930 37940 37950 37960 37970 37980 37990 38000                                  |       |
| Human             | CCTGTTTTACAAATAAAGAACTTCAGGCTTAGAATGATTAAGTACTGTTA-CCTAACTGATAAGTGGAAGCTGAGCTCCA | 28859 |
| Coquerel'sSifaka  | CCTGTATTACAAATGAAGAATGTTAGGTTTAGAATGGTTAAGTACAGTTA-AATAGCTGATA-GTGGAAGCTGAACCTCA | 27923 |
| Ma'sNightMonkey   | CCTGTCTTACAAATGAAGAACTTTAGGCTTAGAATGATTAAGTACAGTTA-CCTAACTGATAAGTTGAAGCTGAGCTCCA | 25792 |
| VervetAGM         | CCTATTTTACAAATGAAGAACTTGAGGCTTAGAGTGATTAAGTACTGTTAACCTAACTGGTAAGTGGAAGTTGAGCTTCA | 32259 |
| Gorilla           | CCTGTTTTACAAATAAAGAACTTCAGGCTTAGAATGATTAAGTACTGTTA-CCTAACTGATAAGTGGAAGCTGAGCTCCA | 31242 |
| GrabEatingMacaque | CCTATTTTACAAATGAAGAACTTGAGGCTTAGAGTGATTAATACTGTTAACCTAACTGGTAAGTGGAAGTTGAGCTTCA  | 30910 |
| Macaque           | CCTATTTTACAAATGAAGAACTTGAGGCTTAGAGTGATTAATACTGTTAACCTAACTGGTAAGTGGAAGTTGAGCTTCA  | 31673 |
| PigTailedMacaque  | CCTATTTTACAAATGAAGAACTTGAGGCTTAGAGTGATTAATACTGTTAACCTAACTGGTAAGTGGAAGTTGAGCTTCA  | 30617 |
| Bonobo            | CCTGTGTTACAAATAAAGAACTTCAGGCTTAGAATGATTAAGTACTGTTA-CCTAACTGATAAGTGGAAGCTGAGCTCCA | 29896 |
| OliveBaboon       | CCTATTTTACAAATGAAGAACTTGAGGCTTAGAGTGATTAAGTACTGTTAACCTAACTGGTAAGTGGAAGTTGAGCTTCA | 30873 |
| Orangutan         | CCTATTTTACAAATAAAGAACTTCAGGCTTGGAATGATTAAGTACTGTTA-CCTAACTGATAAGTGGAAGCTCAGCTCCA | 30770 |

|                   |                                                                                   |       |
|-------------------|-----------------------------------------------------------------------------------|-------|
| Majority          | GAGCATCCTTTCTTAATACCATAATTTTCTACTTGTCATGAAAACATGAAGAAAGCTAGGAAACATTTTCTGT-GTTGATA |       |
|                   | 38010 38020 38030 38040 38050 38060 38070 38080                                   |       |
| Human             | GAGCACCTTTCTTAATACAGTATTTTCTACTTGTCATGAAAACATGAAGAAAGCTAGGAAACATTTTCTGT-GTTGATA   | 28938 |
| Coquerel'sSifaka  | GAGTAGTTTTATTTAAAACCATAATTATATA----TTGTGAAAACAT---AGAACTAGGAAACATTTTCTGTTGTATATA  | 27995 |
| Ma'sNightMonkey   | AAGCCCCCTTTCTTAATACCATAATGCTACTTGTCATGAAAACATGAAGAAAGCTAGGAAAGATTTTCTTTTGTGATA    | 25872 |
| VervetAGM         | GAGCATCCTTTCTTAATACCATAATTTTCTACTTGTCATGAAAACATGAAGAAAGCTAGGAAACATCTATTGT---TGATA | 32336 |
| Gorilla           | GAGCACCTTTCTTAATACAGTATTTTCTACTTGTCATGAAAACATGAAGAAAGCTAGGAAACATTTTCTTT-GTTGTTA   | 31321 |
| GrabEatingMacaque | GAGCATCCTTTCTTAATACCATAATTTTCTACTTGTCATGACAACATGAAGAAAGCTAGGAAACATCTATTGT---TGATA | 30987 |
| Macaque           | GAGCATCCTTTCTTAATACCATAATTTTCTACTTGTCATGACAACATGAAGAAAGCTAGGAAACATCTATTGT---TGATA | 31750 |
| PigTailedMacaque  | GAGCATCCTTTCTTAATACCATAATTTTCTACTTGTCATGAAAACATGAAGAAAGCTAGGAAACATCTATTGT---TGATA | 30694 |
| Bonobo            | GAGCACCTTTCTTAATACAGTATTTTCTACTTGTCATGAAAACATGAAGAAAGCTAGGAAACATTTTCTGT-GTTGATA   | 29975 |
| OliveBaboon       | GAGCATCCTTTCTTAATACCATAATTTTCTACTTGTCATGAAAACATGAAGAAAGCTAGGAAACATCTATTGT---TGATA | 30950 |
| Orangutan         | GAGCACCTTTCTTAATACCGTATTTTCTACTTGTCCTGAAAACACGAAGAAAGCTAGGAAACATTTTCTGTTGTTGATA   | 30850 |

|                   |                                                                                   |       |
|-------------------|-----------------------------------------------------------------------------------|-------|
| Majority          | ATGAGCCAATA--ATGTGTATCAGTGGTCTTAAACTTTAGCATGCATCAGAAACACTTGAGGATTTTTTTTTTA--AACC  |       |
|                   | 38090 38100 38110 38120 38130 38140 38150 38160                                   |       |
| Human             | ATGAGCCAATA--ATGTGTATCAGTGGTCTTAAACTTTAGCATGCATCAGAAACACTTGAGGATTTTTTTTTTTAAACC   | 29016 |
| Coquerel'sSifaka  | GTGGACCAATATAATGTATATCAGTGG-TCTTAAATGTTAGCACACATCAGAAACAGCAGGAGGATTTGTTAAA--A-TT  | 28071 |
| Ma'sNightMonkey   | TGGAGCCAGTA--AAGTATATCACTGATCTTAAACTTTAGCATGCGTCAGAAACACTTGAGG-TTTTTTTTAA--AACC   | 25947 |
| VervetAGM         | ATGAGCCAATA--ATGTGTATCAGTGGCTCTTAAACTTTTGCATGCATGAGAAACACTTGAGGATTTTTTTTTTA--AACC | 32412 |
| Gorilla           | ATGAGCCAATA--ATGTGTATCAGTGGTCTTAAACTTTAGCATGCATCAGAAACACTTGAGGATTTTTTTTTTA-AAACC  | 31398 |
| GrabEatingMacaque | ATGAGCCAATA--ATGTGTATCAGTGGCTCTTAAACTTTTGCATGCATGAGAAACACTTGAGGATTTTTTTTTTA--AACC | 31063 |
| Macaque           | ATGAGCCAATA--ATGTGTATCAGTGGCTCTTAAACTTTTGCATGCATGAGAAACACTTGAGGATTTTTTTTTTA--AACC | 31826 |
| PigTailedMacaque  | ATGAACCAATA--ATGTGTATCAGTGGCTCTTAAACTTTTGCATGCATGAGAAACACTTGAGGATTTTTTTTTTA--AACC | 30770 |
| Bonobo            | ATGAGCCAATA--ATGTGTATCAGTGGTCTTAAACTTTAGCATGCATCAGAAACACTTGAGGATTTTTTTTTTTTAAACC  | 30053 |
| OliveBaboon       | ATGAGCCAATA--ATGTGTATCAGTGGCTCTTAAACTTTTGCATGCATGAGAAACACTTGAGGATTTTTTTTTTA--AACC | 31026 |
| Orangutan         | ATGAGCCAATA--ATGTGTATCAGTGGTCTTAAACTTTAGCATGCATCAGAAACACTTGAGGATTTTTTTTTTTTAAACC  | 30928 |





Tuesday, May 03, 2022 06:15 PM

| Majority          | AGAGTATTCAATTAGATCTTAGGGACTACACTGTGAGAATCACTAATGTATACAATTCTGCTCATCATGTTCTTATAAAA |       |       |       |       |       |       |       |  |       |
|-------------------|----------------------------------------------------------------------------------|-------|-------|-------|-------|-------|-------|-------|--|-------|
|                   | 38410                                                                            | 38420 | 38430 | 38440 | 38450 | 38460 | 38470 | 38480 |  |       |
| Human             | AGAGTATTCAATTAGATCTTAGGGACTACACTGTGAGAATCAGTAATGTATACAATTCTGCTCATCATGTTCTTATAAAA |       |       |       |       |       |       |       |  | 29223 |
| Coquerel'sSifaka  | -----GATTTTAGGGACTACACTTTGAGAATCACTAAAATATCTAATTCTGCTCATTATA-CCTTATACAA          |       |       |       |       |       |       |       |  | 28231 |
| Ma'sNightMonkey   | AAAGTATACAATTAGATCTTAGGGACTACACTATGAGAATCACTAGAGTATACAGTTCTCCTCATCATGTCCTTATAAAA |       |       |       |       |       |       |       |  | 26148 |
| VervetAGM         | AGAGTATTCAATTAGATCTTAGGGACTACACTGTGAGAATCACTAATGTATACAATTCTGCTCATCATGTTCTTATAAAA |       |       |       |       |       |       |       |  | 32618 |
| Gorilla           | AGAGTATTCAATTAGATCTTAGGGACTACACTGTGAGAATCAGTAATGTATACAATTCTGCTCATCATGTTCTTATAAA- |       |       |       |       |       |       |       |  | 31603 |
| GrabEatingMacaque | AGAGTATTCAATTAGATCTTAGGGACTACACTGTGAGAATCACTAATGTATACAATTCTGCTCATCATGTTCTTATAAAA |       |       |       |       |       |       |       |  | 31269 |
| Macaque           | AGAGTATTCAATTAGATCTTAGGGACTACACTGTGAGAATCACTAATGTATACAATTCTGCTCATCATGTTCTTATAAAA |       |       |       |       |       |       |       |  | 32032 |
| PigTailedMacaque  | AGAGTATTCAATTAGATCTTAGGGACTACACTGTGAGAATCACTAATGTATACAATTCTGCTCATCATGTTCTTATAAAA |       |       |       |       |       |       |       |  | 30976 |
| Bonobo            | AGAGTATTCAATTAGATCTTAGGGACTACACTGTGAGAATCAGTAATGTATACAATTCTGCTCATCATGTTCTTATAAAA |       |       |       |       |       |       |       |  | 30259 |
| OliveBaboon       | AGAATATTCAATTAGATCTTAGGGACTACACTGTGAGAATCACTAATGTATACAATTCTGCTCATCATGTTCTTACAAAA |       |       |       |       |       |       |       |  | 31232 |
| Orangutan         | AGAGTATTCAATTAGATCTTAGGGACTACACTGTGAGAATCAGTAACGTATACAATTCTGCTCATCATGTTCTTATAAAA |       |       |       |       |       |       |       |  | 31248 |

| Majority          | CTA---TGCCATGCCAAATCTTCCATATCTTGATTAGAAATTGGTTAAGAAATTAGGCTTGGTGTAATAACGGTATCAA |       |       |       |       |       |       |       |  |       |
|-------------------|---------------------------------------------------------------------------------|-------|-------|-------|-------|-------|-------|-------|--|-------|
|                   | 38490                                                                           | 38500 | 38510 | 38520 | 38530 | 38540 | 38550 | 38560 |  |       |
| Human             | CTA---TGCCATGCCAGATCTTCCATATCTTGATTAGAAATTGGTTAAGAAATTAGGCTTGGTGTAATAACAGTATCAA |       |       |       |       |       |       |       |  | 29299 |
| Coquerel'sSifaka  | CTAAGCATGCCATGCCAAATCTTCCATATCTTGATTAGAAATT-----AGACTTAGTGCAAATACGGTATTAA       |       |       |       |       |       |       |       |  | 28299 |
| Ma'sNightMonkey   | CTA---TGCCATGCCAAATCTTCCATATCTTGATTAGAAATTGGTTTATAAATTAGACTTGGTGTAATAATAGTATTAA |       |       |       |       |       |       |       |  | 26224 |
| VervetAGM         | TTA---TACCATGCCAAATCTTCCATATCTAGTTTAGAAATTGGTTAAGAACTTAAGCCTGGTGTAATAACGGTATCAG |       |       |       |       |       |       |       |  | 32694 |
| Gorilla           | CTA---TGCCATGCCAGATCTTCCATATCTTGATTAGAAATTGGTTAAGAAATTAGGCTTGGTGTAATAACAGTATCAA |       |       |       |       |       |       |       |  | 31679 |
| GrabEatingMacaque | TTA---TGCCATGCCAAATCTTCCATATCTAGTTTAGAAATTGGTTAAGAAATTAGCCTGGTGTAATAACGGTATCAA  |       |       |       |       |       |       |       |  | 31345 |
| Macaque           | TTA---TGCCATGCCAAATCTTCCATATCTAGTTTAGAAATTGGTTAAGAAATTAGCCTGGTGTAATAACGGTATCAA  |       |       |       |       |       |       |       |  | 32108 |
| PigTailedMacaque  | TTA---TGCCATGCCAAATCTTCCATATCTAGTTTAGAAATTGGTTAAGAAATTAGCCTGGTGTAATAATGGTATCAA  |       |       |       |       |       |       |       |  | 31052 |
| Bonobo            | CTA---TGCCATGCCAGATCTTCCATATCTTGATTAGAAATTGGTTAAGAAATTAGGCTTGGTGTAATAACAGTATCAA |       |       |       |       |       |       |       |  | 30335 |
| OliveBaboon       | TTA---TGCCATGCCAAATCTTCCATATCTAGTTTAGAAATTGGTTAAGAAATTAGCCTGGTGTAATAACGGTATCAA  |       |       |       |       |       |       |       |  | 31308 |
| Orangutan         | CTA---TGCCATGCCAAATCTTCCATATCTTGATTAGAAATTGGTTAAGAAATTAGGCTTGGTGTAATAACAGTATCAA |       |       |       |       |       |       |       |  | 31324 |

| Majority          | TGTGGCTTGAAACT--GGTTGTATTTTTCTG-TTTTTTCTC---TGTGCATTTGATGCTAATAAGTAGAAAGCTCTTA   |       |       |       |       |       |       |       |  |       |
|-------------------|----------------------------------------------------------------------------------|-------|-------|-------|-------|-------|-------|-------|--|-------|
|                   | 38570                                                                            | 38580 | 38590 | 38600 | 38610 | 38620 | 38630 | 38640 |  |       |
| Human             | TGTGGCTTGAAACT--GGTTGTATTTTTCTG-TTTTTTTTTTCTTTGTGCATTTGATGCTAATAAGTAGAAAGCTCTTA  |       |       |       |       |       |       |       |  | 29376 |
| Coquerel'sSifaka  | TGTGGCATGAAACCATGCTTTAATTTTTCCGATCCAGTATTTCTCTGAGCATTTGATGCTGATGAGCAGAAAGCTTTTA  |       |       |       |       |       |       |       |  | 28379 |
| Ma'sNightMonkey   | TATGGCTTGAAACTATGGTTGTATTTTTCTG-TTTTGTTTTCCCTCTGTGCATTTGGTGCTAATAAGTAGAAAGCTCTTA |       |       |       |       |       |       |       |  | 26303 |
| VervetAGM         | TGTGACTTGAAACT--GGTTGTATTTTTGG-TTTTTTCTC---TGCGCATTTGATGCTAATAAGTAGAAAGC-----    |       |       |       |       |       |       |       |  | 32762 |
| Gorilla           | TGTGGCTTGAAACT--GGTTGTATTTTTCTG-TTTTTTTTTT-CTCTGTGCATTTGATGCTAATAAGTAGAAAGCTCTTA |       |       |       |       |       |       |       |  | 31755 |
| GrabEatingMacaque | TGTGACTTGAAACT--GGTTGTATTTTTGG-TTTTTTCTC---TGCGCATTTGATGCCAATAAGTAGAAAGCTCTTA    |       |       |       |       |       |       |       |  | 31418 |
| Macaque           | TGTGACTTGAAACT--GGTTGTATTTTTGG-TTTTTTCTC---TGCGCATTTGATGCCAATAAGTAGAAAGCTCTTA    |       |       |       |       |       |       |       |  | 32181 |
| PigTailedMacaque  | TGTGACTTGAAACT--GGTTGTATTTTTGG-TTTTTTCTC---TGCGCATTTGATGCCAATAAGTAGAAAGCTCTTA    |       |       |       |       |       |       |       |  | 31125 |
| Bonobo            | TGTGGCTTGAAACT--GGTTGTATTTTTCTG-TTTTTTTTTT-CTTTGTGCATTTGATGCTAATAAGTAGAAAGCTCTTA |       |       |       |       |       |       |       |  | 30411 |
| OliveBaboon       | TGTGACTTGAAACT--GGTTGTATTTTTGG-TTTTTTCTC---TGCGCATTTGATGCCAATAAGTAGAAAGCTCTTA    |       |       |       |       |       |       |       |  | 31381 |
| Orangutan         | CGTGGCTTGAAATT--GGTTGTATTTTTCTG-TTTTTTCTC---TGTGCATTTGATGCTAATAAGTAGAAAGCTCTTA   |       |       |       |       |       |       |       |  | 31397 |

Tuesday, May 03, 2022 06:15 PM

| Majority          | AAATATTTAAGGGAGATGACCTATGGATATCTGTTTACTGTTCTCATATTTGTTGTAATAC---AGTTTATTCATTATGA   |       |       |       |       |       |       |       |       |
|-------------------|------------------------------------------------------------------------------------|-------|-------|-------|-------|-------|-------|-------|-------|
|                   | 38650                                                                              | 38660 | 38670 | 38680 | 38690 | 38700 | 38710 | 38720 |       |
| Human             | AAATATTTAAGGGAGACAACCTATGGATATCTGTTTACTCTTCTCATATTTGTTGTAATAC---AGTTTATTCATTATGA   |       |       |       |       |       |       |       | 29453 |
| Coquerel'sSifaka  | AAACATTTAAGGGAGATGACCTA-GAATATCTGTTTACCATTTTCACATGTGTTGTAATATGAAAGCTTATTAATTATGA   |       |       |       |       |       |       |       | 28458 |
| Ma'sNightMonkey   | AAATATCGAGGAGATACGACCTATGAATATCTGTTTGCTGTTCTCACACTTGTGTAATAC---AATTTATTCATTATGA    |       |       |       |       |       |       |       | 26380 |
| VervetAGM         | -----AAGGGAGATGACCTATGGATATCTGTTTACTGTTCTCATATTTGTTGTAATAC---AGTTTATTCATTATGA      |       |       |       |       |       |       |       | 32831 |
| Gorilla           | AAATATTTAAGGGAGACAACCTATGGATATCTGTTTACTGTTCTCTCATATTTGTTGTAATAC---AGTTTATTCATTATGA |       |       |       |       |       |       |       | 31832 |
| GrabEatingMacaque | AAATATTTAAGGGAGATGACCTATGGATATCTGTTTACCCTTCTCATATTTGTTGTAATAC---AGTTTATTCATTATGA   |       |       |       |       |       |       |       | 31495 |
| Macaque           | AAATATTTAAGGGAGATGACCTATGGATATCTGTTTACCCTTCTCATATTTGTTGTAATAC---AGTTTATTCATTATGA   |       |       |       |       |       |       |       | 32258 |
| PigTailedMacaque  | AAATATTTAAGGGAGATGACCTATGGATATCTGTTTACCCTTCTCATATTTGTTGTAATAC---AGTTTATTCATTATGA   |       |       |       |       |       |       |       | 31202 |
| Bonobo            | AAATATTTAAGGGAGACAACCTATGGATATCTGTTTACTGTTCTCATATTTGTTGTAATAC---AGTTTATTCATTATGA   |       |       |       |       |       |       |       | 30488 |
| OliveBaboon       | AAATATTTAAGGGAGATGACCTATGGATATCTGTTTACCCTTCTCATATTTGTTGTAATAC---AGTTTATTCATTATGA   |       |       |       |       |       |       |       | 31458 |
| Orangutan         | AAATATTTAAGGGAGACAACCTATTGATATCTGTTTACTGTTTTCATGTTTGTGTAATAC---AGTTTATTCATTATGA    |       |       |       |       |       |       |       | 31474 |

| Majority          | GTTTAAATACAAATTAGCATAAAAGCTTATGGTTAA-TTTGGATTTT-TTGGACTTTCTGAAATGCTTTGATAATTCATTA |       |       |       |       |       |       |       |       |
|-------------------|-----------------------------------------------------------------------------------|-------|-------|-------|-------|-------|-------|-------|-------|
|                   | 38730                                                                             | 38740 | 38750 | 38760 | 38770 | 38780 | 38790 | 38800 |       |
| Human             | GTTTAAATACAAATTAGCGTAAAGCTTATGGTTAA-TTTGGATTTT-TTGGACTTTCTGAAATGCTTTGATAATTCATTG  |       |       |       |       |       |       |       | 29531 |
| Coquerel'sSifaka  | GTTTAA-CACAAATCAGCATAAAGCTTATGGTTAA-TTTGGATTTTCTTTGACTTTCTGAAATGCTTTGATAA---ATTA  |       |       |       |       |       |       |       | 28533 |
| Ma'sNightMonkey   | GTTTAAATATAAATTAGCATAAAAGCTTATGGTTAA-TTTGGATTTT-TTGGACTTTCTGAAATGCTTTGATAATTCATTA |       |       |       |       |       |       |       | 26458 |
| VervetAGM         | ATTTAAATACAAATTAGCATAAAAGCTTATGGTTAAATTGGATTTT-TTGGACTTTCTGAAATGCTTTGATAATTCATTA  |       |       |       |       |       |       |       | 32910 |
| Gorilla           | GTTTAAATACAAATTAGCGTAAAGCTTATGGTTAA-TTTGGATTTT-TTGGACTTTCTGAAATGCTTTGATAATTCATTG  |       |       |       |       |       |       |       | 31910 |
| GrabEatingMacaque | GTTTAAATACAAATTAGCATAAAAGCTTATGGTTAAATTGGATTTT-TTGGACTTTCTGAAATGCTTTGATAATTCATTA  |       |       |       |       |       |       |       | 31574 |
| Macaque           | GTTTAAATACAAATTAGCATAAAAGCTTATGGTTAAATTGGATTTT-TTGGACTTTCTGAAATGCTTTGATAATTCATTA  |       |       |       |       |       |       |       | 32337 |
| PigTailedMacaque  | GTTTAAATACAAATTAGCATAAAAGCTTATGGTTAAATTGGATTTT-TTGGACTTTCTGAAATGCTTTGATAATTCATTA  |       |       |       |       |       |       |       | 31281 |
| Bonobo            | GTTTAAATACAAATTAGCGTAAAGCTTATGGTTAA-TTTGGATTTT-TTGGACTTTCTGAAATGCTTTGATAATTCATTG  |       |       |       |       |       |       |       | 30566 |
| OliveBaboon       | GTTGAAATACAAATTAGCATAAAAGCTTATGGTTAAATTGGATTTT-TTGGACTTTCTGAAATGCTTTGATAATTCATTA  |       |       |       |       |       |       |       | 31537 |
| Orangutan         | GTTTAAATACTAATTAGCCTGAAGCTTATGGTTAA-TTTGGATTTT-TTGTACTTTCTGAAATGCTTTGATAATTCATTA  |       |       |       |       |       |       |       | 31552 |

| Majority          | TCTCCTTTGCACATTTTTTTT--CATTTTGATGGTTGCATTTAACTTCTTTGTACTGATTGGTT-TTTTAAATC-AGCCAG  |       |       |       |       |       |       |       |       |
|-------------------|------------------------------------------------------------------------------------|-------|-------|-------|-------|-------|-------|-------|-------|
|                   | 38810                                                                              | 38820 | 38830 | 38840 | 38850 | 38860 | 38870 | 38880 |       |
| Human             | CCTCCTTTGCACATTTTTTTT--CATTTTGATGGTTGCATTTAACTTCTTTGTACTGATT-----TTTTAAATC-AGCCAG  |       |       |       |       |       |       |       | 29603 |
| Coquerel'sSifaka  | TGTCCTTTATACATTTTTTTT--CATTTTGATGGTTGCATTTCACTTTTTTTGTACTGATTGGTTGTTTTAGATCCAGCCAG |       |       |       |       |       |       |       | 28612 |
| Ma'sNightMonkey   | TCTCCTTTGCACATTTTTTTTTCATTTTGATGGTTGCATTTAACTTTTTTTGTATTGATTGGTT-GTTTTAAATC-AGCCAG |       |       |       |       |       |       |       | 26536 |
| VervetAGM         | TCTCCTTTGCACATTTTTTTT--CATTTTGGTGGTTGCATTTAACTTCTTTGTACTGATTGGTT-ATTTAAATC-AGCCAG  |       |       |       |       |       |       |       | 32986 |
| Gorilla           | CCTCCTTTGCACATTTTTTTT--CATTTTGATGGTTGCATTTAACTTCTTTGTACTGATT-----TTTTAAATC-AGCCAG  |       |       |       |       |       |       |       | 31982 |
| GrabEatingMacaque | TCTCCTTTGCACATTTTTTTT--CATTTTGATGGTTGCATTTAACTTCTTTGTACTCATTGGTT-GTTTTAAATC-AGCCAG |       |       |       |       |       |       |       | 31650 |
| Macaque           | TCTCCTTTGCACATTTTTTTT--CATTTTGATGGTTGCATTTAACTTCTTTGTACTCATTGGTT-GTTTTAAATC-AGCCAG |       |       |       |       |       |       |       | 32413 |
| PigTailedMacaque  | TCTCCTTTGCACATTTTTTTT--CATTTTGATGGTTGCATTTAACTTCTTTGTACTGATTGGTT-GTTTTAAATC-AGCCAG |       |       |       |       |       |       |       | 31357 |
| Bonobo            | CCTCCTTTGCACATTTTTTTT--CATTTTGATGGTTGCATTTAACTTCTTTGTACTGATT-----TTTTAAATC-AGCCAG  |       |       |       |       |       |       |       | 30638 |
| OliveBaboon       | TCTCCTTTGCACATTTTTTTT--CATTTTGATGGTTGCATTTAACTTCTTTGTACTGATTGGTT-GTTTTAAATC-AGCCAG |       |       |       |       |       |       |       | 31613 |
| Orangutan         | TCTCCTTTGCACATTTTTTTT--CATTTTGATGGTTGCATTTAACTTTTTTTGTACTGATT-----TTTTAAATC-AGCCG  |       |       |       |       |       |       |       | 31624 |

Tuesday, May 03, 2022 06:15 PM

| Majority          | TATTGATTTAACCTATTTTAAATACTAATATCCATGTATGTAAATATA--CATAACCAAGGCCAAAACAGTTGATTTTAGC |       |
|-------------------|-----------------------------------------------------------------------------------|-------|
|                   | 38890 38900 38910 38920 38930 38940 38950 38960                                   |       |
| Human             | TATTAATTTAACCTATTTTCAATACTAATATCCATGTATGTAAATATC--CATAACTAAGGCCAAAACAGTTGATTTTAGC | 29681 |
| Coquerel'sSifaka  | TATTGAGTTAGC-TATTTTAAATATTAATACCCATGTATGTAAATATATACATAAAGTAGGCCAAAAGAGTTGATTT-AGC | 28690 |
| Ma'sNightMonkey   | TATTGATTGAACCTATTTTAAATACTAATACCCATGTATGTAAATATA--CATAACAAAGGCCAAAACAGTTGATTTTAGC | 26614 |
| VervetAGM         | TATTGATTTAACCTATTT-AAATACTAATATCCATGTATGTAAATATA--CATAGCCAAGGCCAAAACAGTTGATTTTAGT | 33063 |
| Gorilla           | TATTAATTTAACCTATTTTAAATACTAATATCCGTGTATGTAAATATC--CATAACTAAGGCCAAAACAGTTGATTTTAGC | 32060 |
| GrabEatingMacaque | TATTGATTTAACCTATTT-AAATACTAATATCCATGTATGTAAATATA--CATAGCCAAGGCCAAAACAGTTGATTTTAGT | 31727 |
| Macaque           | TATTGATTTAACCTATTT-AAATACTAATATCCATGTATGTAAATATA--CATAGCCAAGGCCAAAACAGTTGATTTTAGT | 32490 |
| PigTailedMacaque  | TATTGATTTAACCTATTT-AAATACTAATATCCATGTATGTAAATATA--CATAGCCAAGGCCAAAACAGTTGATTTTAGT | 31434 |
| Bonobo            | TATTAATTTAACCTATTTTAAATACTAATATCCATGTATGTAAATATC--CATAACTAAGTCAAAACAGTTGATTTTAGC  | 30716 |
| OliveBaboon       | TATTGATTTAACCTATTT-AAATACTAATAACCATGTATGTAAATATA--CATAGCCAAGGCCAAAACAGTTGATTTTAGT | 31690 |
| Orangutan         | TGTTGATTTAACCTATTTTAAATACTAATATCCATGTATGTAAATACA--CATAACCAAGGCCAAAACAGTTGATTTTAGC | 31702 |

| Majority          | TAGTTTAAATATTAGTCCATT----CATATTTTGTAAATACATAACATTTTCAAATAGCTAAAATGTCACTGGCTGGT  |       |
|-------------------|---------------------------------------------------------------------------------|-------|
|                   | 38970 38980 38990 39000 39010 39020 39030 39040                                 |       |
| Human             | TAGTTTAAATATTAGTCCATT----CATATTTTGTAAAGTACATAACATTTTCAAATAGCTAAAATGTCACTGGCTGGT | 29757 |
| Coquerel'sSifaka  | TAGTTTAAATAGTAGTCTACTCACATATATTTCTGTAAATACAT----TTGCAAATAACTAAAACATCACTAACTGGT  | 28765 |
| Ma'sNightMonkey   | TAGTTTAAATACTAGTCTATTTGTTTCATATTTTGTAAATACATAG-ATTATCAAACAGCTAAAATGTCACTGGCTAGT | 26693 |
| VervetAGM         | TAGTTTAAATATTAGTCCATT----CATATTTTGTAAATACATAACATTTTCAAATAGCTAAAATGTCACTGGCTGGT  | 33139 |
| Gorilla           | TAGTTTAAATATTAGTCCATT----CATATTTTGTAAATACATAACATTTTCAAATAGCTAAAATGTCACTGGCTGGT  | 32136 |
| GrabEatingMacaque | TAGTTTAAATATTAGTCCATT----CATATTTTGTAAATACATAACATTTTCAAATAGCTAAAATGTCACTGGCTGGT  | 31803 |
| Macaque           | TAGTTTAAATATTAGTCCATT----CATATTTTGTAAATACATAACATTTTCAAATAGCTAAAATGTCACTGGCTGGT  | 32566 |
| PigTailedMacaque  | TAGTTTAAATATTAGTCCATT----CATATTTTGTAAATACATAACATTTTCAAATAGCTAAAATGTCACTGGCTGGT  | 31510 |
| Bonobo            | TAGTTTAAATATTAGTCCATT----CATATTTTGTAAATACATAACATTTTCAAATAGCTAAAATGTCACTGGCTGGT  | 30792 |
| OliveBaboon       | TAGTTTAAATATTAGTCCATT----CATATTTTGTAAATACATAACATTTTCAAATAGCTAAAATGTCACTGGCTGGT  | 31766 |
| Orangutan         | TAGTTTAAATATTAGTCCATT----CATATTTTGTAAATACATAACATTTTCAAATAGCTAAAATGTCACTGGCTGGT  | 31778 |

| Majority          | TTGAACAACCTGTCAGTTCCCAAACAGATGAATGTATAACCTTTTCTCTAAAGAATTTTAAGACATGACCTTATTTTTTTT |       |
|-------------------|-----------------------------------------------------------------------------------|-------|
|                   | 39050 39060 39070 39080 39090 39100 39110 39120                                   |       |
| Human             | TTGAACAACCTGTCAGTTACCGAAGAGATGAATGTATAACCTTTTCTGTAAAGAATTTTAAGACATGACCTTATTTTTTTT | 29837 |
| Coquerel'sSifaka  | TAAACAACCTGTCAGTTCTAAAACATGTACATTTTAAACCTTTTCTTAAAGATGTTAGGGTATGACGTATCTGTTT      | 28845 |
| Ma'sNightMonkey   | ATGAAGAACCTGTCGGTTCCCAAACAGATGAATGTATAACCTTTTCTCTAAAGAATTTTAAGACATGACCTTATTTTTT-- | 26771 |
| VervetAGM         | TTGAACAACCTGTCAGTTCCCAAACAGATGAATGTATAACCTTTTCTCTAAAGAATTTTAAGACATAACCTTATTTTTTTT | 33219 |
| Gorilla           | TTGAACAACCTGTCAGTTCCCAAAGAGATGAATGTATAACCTTTTCTGTAAAGAATTTTAAGACATGACCTTATTTTTTTT | 32216 |
| GrabEatingMacaque | TAAACAACCTGTCAGTTCCCAAACAGATGAATGTATAACCTTTTCTCTA-----TTTAAAGACATAACCTTATTTTTTTT  | 31878 |
| Macaque           | TAAACAACCTGTCAGTTCCCAAACAGATGAATGTATAACCTTTTCTCTA-----TTTAAAGACATAACCTTATTTTTTTT  | 32641 |
| PigTailedMacaque  | TAAACAACCTGTCAGTTCCCAAACAGATGAATGTATAACCTTTTCTCTA-----TTTAAAGACATAACCTTATTTTTTTT  | 31585 |
| Bonobo            | TTGAACAACCTGTCAGTTACCGAAGAGATGAATGTATAACCTTTTCTGTAAAGAATTTTAAGACATGACCTTATTTTTTTT | 30872 |
| OliveBaboon       | TAAACAACCTGTCAGTTCCCAAACAGTTGAATGTATAACCTTTTCTCTA-----TTTAAAGACATAACCTTATTTTTTTT  | 31841 |
| Orangutan         | TTGAACAACCTGTCAGTTCCCAAAGAAATGAATGTATAACCTTTTCTGTAAAGAATTTTAAGACATGACCTTATTTTTTTT | 31858 |

Tuesday, May 03, 2022 06:15 PM

| Majority          | -----GCAGAAAGAAATCTC-TCATTCCAAAGATTTTGCTTTGCTTTTCAGTGTCTAGCCACTGAAGTATATACCT |       |       |       |       |       |       |       |       |
|-------------------|------------------------------------------------------------------------------|-------|-------|-------|-------|-------|-------|-------|-------|
|                   | 39130                                                                        | 39140 | 39150 | 39160 | 39170 | 39180 | 39190 | 39200 |       |
| Human             | -----GCAGAAAGAAATCTCTTCATTCCAAAGATTTTGCTTTGCTTTTCGGTGTCTAGCCACTGAAGTATATACCT |       |       |       |       |       |       |       | 29909 |
| Coquerel'sSifaka  | TTATTCTAACAGAAAGAAATTTTCATTCCATA--TTTTGCTTTTTCATTCAATGTTCTACCCC-----TATATGCC |       |       |       |       |       |       |       | 28916 |
| Ma'sNightMonkey   | -----GCAGAAAAAATTTTCTCATTCCATAGATTTTGCTTTGCTTTTCAACGTTCTAGCTACTGAAGTATATACCT |       |       |       |       |       |       |       | 26843 |
| VervetAGM         | -----GCAGAAAGAAATCTC-TCATTCCAAAGATTTTGCTTTGCTTTTCAGTGTCTAGCCACTGAAGTATATACCT |       |       |       |       |       |       |       | 33290 |
| Gorilla           | -----GCAGAAAGAAATCTCTTCATTCCAAAGATTTTGCTTTGCTTTTCAGTGTCTAGCCACTGAAGTATATACCT |       |       |       |       |       |       |       | 32288 |
| GrabEatingMacaque | -----GCAGAAAGAAATCTC-TCATTCCAAAGATTTTGCTTTGCTTTTCAGTGTCTAGCCACTGAAGTATATACCT |       |       |       |       |       |       |       | 31949 |
| Macaque           | -----GCAGAAAGAAATCTC-TCATTCCAAAGATTTTGCTTTGCTTTTCAGTGTCTAGCCACTGAAGTATATACCT |       |       |       |       |       |       |       | 32712 |
| PigTailedMacaque  | -----GCAGAAAGAAATCTC-TCATTCCAAAGATTTTGCTTTGCTTTTCAGTGTCTAGCCACTGAAGTATATACCT |       |       |       |       |       |       |       | 31656 |
| Bonobo            | -----GCAGAAAGAAATCTCTTCATTCCAAAGATTTTGCTTTGCTTTTCAGTGTCTAGCCACTGAAGTATATACCT |       |       |       |       |       |       |       | 30944 |
| OliveBaboon       | -----GCAGAAAGAAATCTC-TCATTCCAAAGATTTGTCTTTGCTTTTCAGTGTCTAGCCCTGAAGTATATACCT  |       |       |       |       |       |       |       | 31912 |
| Orangutan         | -----GCAGAAA----TTTCTCATTCCAAAGATTTTGCTTTGCTTTTCAGTGTCTAGCCACTGAAATATATACCT  |       |       |       |       |       |       |       | 31926 |

| Majority          | GTTTAATTTTAATAATGATGATGATATTGATATCTAACTCACCAGAATGAAGTTCTAATTTTCTAAAGACCTGAGTTATC |       |       |       |       |       |       |       |       |
|-------------------|----------------------------------------------------------------------------------|-------|-------|-------|-------|-------|-------|-------|-------|
|                   | 39210                                                                            | 39220 | 39230 | 39240 | 39250 | 39260 | 39270 | 39280 |       |
| Human             | GTTTAATTTTAATAATGATGAAGATATTGATATCTAACTCACCAGAATGAAGTTCTAATTTTCTAAAGACCTGAATTATC |       |       |       |       |       |       |       | 29989 |
| Coquerel'sSifaka  | GTTTAATTTTAATGATGATGATGA---TGATGTCCAACCTACCAATATGAAATTCTCATTTCCTAAGACTTGAGTTATC  |       |       |       |       |       |       |       | 28993 |
| Ma'sNightMonkey   | GTTTAATTTTAATAATGATGAT-ACGTTGATATCTAACTCACCAGAATGAAGTTCTAATTTTCTAAAGACCTGAGTTATC |       |       |       |       |       |       |       | 26922 |
| VervetAGM         | GCTTAATTTTAATAATGATGATGATACTCATATCTGACTCACCAGAATGAAGTTCTAATTTTATAAAGACTGAGTTATC  |       |       |       |       |       |       |       | 33370 |
| Gorilla           | GTTTAATTTTAATAATGATGATGATATTGATATCTAACTCACCAGAATGAAGTTCTAATTTTCTAAAGACCTGAATTATC |       |       |       |       |       |       |       | 32368 |
| GrabEatingMacaque | GCTTAATTTTAATAATGATGATGATACTGATATCTAACTCACCAGAATGAAGTTCTAATTTTATAAAAATCTGAGTTATC |       |       |       |       |       |       |       | 32029 |
| Macaque           | GCTTAATTTTAATAATGATGATGATACTGATATCTAACTCACCAGAATGAAGTTCTAATTTTATAAAAATCTGAGTTATC |       |       |       |       |       |       |       | 32792 |
| PigTailedMacaque  | GCTTAATTTTAATAATGATGATGATACTGATATCTAACTCACCAGAATGAAGTTCTAATTTTATAAAAATCTGAGTTATC |       |       |       |       |       |       |       | 31736 |
| Bonobo            | GTTTAATTTTAATAATGATGATGATATTGATATCTAACTCACCAGAATGAAGTTCTAATTTTCTAAAGACCTGAATTATC |       |       |       |       |       |       |       | 31024 |
| OliveBaboon       | GCTTAATTTTAATAATGATGATGATACTGATATCTAACTCACCAGAATGAAGTTCTAATTTTATAAAAATCTGAGTTATC |       |       |       |       |       |       |       | 31992 |
| Orangutan         | GTTTAATTTTAATAATGATGATGATATTGATATCTAACTCACCAGAATGAAGTTCTAATTTTCTAAAGACCTGAATTATC |       |       |       |       |       |       |       | 32006 |

| Majority          | TGGATGAATAAAGGACCATTGG-----GATGGAGGATTTATA-----GAGAACGTTTCTGAGA---AAGTCTAGCTGG- |       |       |       |       |       |       |       |       |
|-------------------|---------------------------------------------------------------------------------|-------|-------|-------|-------|-------|-------|-------|-------|
|                   | 39290                                                                           | 39300 | 39310 | 39320 | 39330 | 39340 | 39350 | 39360 |       |
| Human             | TGGATGAATAAAGGACCATTGG-----GATGGAGGATTTATA-----GA--ACGTTTCTGAGA---AAGTCTAGCTGT- |       |       |       |       |       |       |       | 30052 |
| Coquerel'sSifaka  | TGGATGAAGAAAGGGCCCTTGGTAAAAGGCAAGAGATTGTATGATCTGAAGAGGCCCTTGGGATGGAGGATTATATGGC |       |       |       |       |       |       |       | 29073 |
| Ma'sNightMonkey   | TGGATGAATAAAGGGCCATTGG-----GATGGAGGATTTATA-----GA--ACATTTCTGAGA---AAGTCTAGCTAG- |       |       |       |       |       |       |       | 26985 |
| VervetAGM         | TGGATGAATAAAGGACCATTGG-----GATGGAGGATGTAGA-----GAGAACGTTTCTGAGA---AAGTCTAGCTGG- |       |       |       |       |       |       |       | 33435 |
| Gorilla           | TGGATGAATAAAGGACCATTGG-----GATGGAGGATTTATA-----GA--ACGTTTCTGAGA---AAGTCTAGCTGT- |       |       |       |       |       |       |       | 32431 |
| GrabEatingMacaque | TGCATGAATAAAGGACCATTGG-----GATGGAGGATGTAGA-----GAGAACGTTTCTGAGA---AAGTCTAGCTGG- |       |       |       |       |       |       |       | 32094 |
| Macaque           | TGCATGAATAAAGGACCATTGG-----GATGGAGGATGTAGA-----GAGAACGTTTCTGAGA---AAGTCTAGCTGG- |       |       |       |       |       |       |       | 32857 |
| PigTailedMacaque  | TGCATGAATAAAGGACCATTGG-----GATGGAGGATGTAGA-----GAGAACGTTTCTGAGA---AAGTCTAGCTGG- |       |       |       |       |       |       |       | 31801 |
| Bonobo            | TGGATGAATAAAGGACCATTGG-----GATGGAGGATTTATA-----GA--ACGTTTCTGAGA---AAGTCTAGCTGT- |       |       |       |       |       |       |       | 31087 |
| OliveBaboon       | TGCATGAATAAAGGACCATTGG-----GATGGAGGATGTAGA-----GAGAACGTTTCTGAGA---AAGTCTAGCTAG- |       |       |       |       |       |       |       | 32057 |
| Orangutan         | TGGATGAATAAACGACCATTGG-----GATGGAGGATTTATA-----GA--ACATTTCTGAGA---AAGTCTAGCTGG- |       |       |       |       |       |       |       | 32069 |



Tuesday, May 03, 2022 06:15 PM

|                   |                                                                                   |       |
|-------------------|-----------------------------------------------------------------------------------|-------|
| Majority          | CATTTGTTT----AAGTGAAAGGCTTTTAGATTAATATTTTTAAATTTAAAGATGTCTTATGCTAATTTGTTTTGTTTT   |       |
|                   | 39610 39620 39630 39640 39650 39660 39670 39680                                   |       |
| Human             | CATTT-----AAGTGAAAGGCTTTTAGATTAATATTTTTAAATTTAAAGATGTCTTATGCTAATTTGTTTTGTTTT      | 30355 |
| Coquerel'sSifaka  | TATTTGCTTGCATGCATGACAGGCTTTCAGATTAATATTTTTAAAATTTAATATAACTTATGCTAGTTTGTGTTTTGTTTT | 29369 |
| Ma'sNightMonkey   | CATTTGTTT----AAGTGAAAGGCTTT-AGGTTAATATTTTTGAAATTTAAAGATGTCTTATGCTAATTTGTTTTGTTTT  | 27293 |
| VervetAGM         | CATTTGTTT----AAGTGAAAGACTTTTAGATTAATATTTTTAAATTTAAAGATGTCTTATGCTAATTTGTTTTGTTTT   | 33739 |
| Gorilla           | CATTT-----AAGTGAAAGGCTTTTAGATTAATATTTTTAAATTTAAAGATGTCTTATGCTAATTTGTTTTGTTTT      | 32734 |
| GrabEatingMacaque | CATTT-----AAGTGAAAGACTTTTAGATTAATATTTTTAAATTTAAAGATATCTTATGCTAATTTGTTTTGTTTT      | 32394 |
| Macaque           | CATTTGTTT----AAGTGAAAGACTTTTAGATTAATATTTTTAAATTTAAAGATATCTTATGCTAATTTGTTTTGTTTT   | 33161 |
| PigTailedMacaque  | CATTTGTTT----AAGTGAAAGACTTTTAGATTAATATTTTTAAATTTAAAGATATCTTATGCTAATTTGTTTTGTTTT   | 32105 |
| Bonobo            | CATTT-----AAGTGAAAGGCTTTTAGATTAATATTTTTAAATTTAAAGATGTCTTATGCTAATTTGTTTTGTTTT      | 31385 |
| OliveBaboon       | CATTTGTTT----AAGTGAAAGACTTTTAGATTAATATTTTTAAATTTAAAGATATCTTATGCTAATTTGTTTTGTTTT   | 32361 |
| Orangutan         | CATTT-----AAGTGAAAGGCTTTTAGATTAATATTTTTAAATTTAAAGATGTCTTATGCTAATTTGTTTTGTTTT      | 32372 |

|                   |                                                                                |       |
|-------------------|--------------------------------------------------------------------------------|-------|
| Majority          | TATAGAGAGGATCTGACGAACTACTCTCAGGCAGTGTTCAGTAGTCCAACTCTAATATGAGCAGCATGGTAGTTACA  |       |
|                   | 39690 39700 39710 39720 39730 39740 39750 39760                                |       |
| Human             | CATAGAGAGGATCTGACGAACTACTCTCAGGCAGTGTTCAGTAGTCCGAACTCTAATATGAGCAGCATGGTAGTTACA | 30435 |
| Coquerel'sSifaka  | TATAGAGAGGATCTGACGAACTACTCTCAGGCAGTGTTCAGTAGTCCAACTCTAATATGAGCAGCATGGTAGTTACA  | 29449 |
| Ma'sNightMonkey   | TATAGAGAGGATCTGACGAACTACTCTCAGGCAGTGTTCAGTAGTCCAACTCTAATATGAGCAGCATGGTAGTTACA  | 27373 |
| VervetAGM         | TATAGAGAGGATCTGACGAACTGCTCTCAGGCAGTGTTCAGTAGTCCAACTCTAATATGAGCAGCATGGTAGTTACA  | 33819 |
| Gorilla           | TATAGAGAGGATCTGACGAACTACTCTCAGGCAGTGTTCAGTAGTCCGAACTCTAATATGAGCAGCATGGTAGTTACA | 32814 |
| GrabEatingMacaque | TATAGAGAGGATCTGACGAACTGCTCTCAGGCAGTGTTCAGTAGTCCAACTCTAATATGAGCAGCATGGTAGTTACA  | 32474 |
| Macaque           | TATAGAGAGGATCTGACGAACTGCTCTCAGGCAGTGTTCAGTAGTCCAACTCTAATATGAGCAGCATGGTAGTTACA  | 33241 |
| PigTailedMacaque  | TATAGAGAGGATCTGACGAACTGCTCTCAGGCAGTGTTCAGTAGTCCAACTCTAATATGAGCAGCATGGTAGTTACA  | 32185 |
| Bonobo            | CATAGAGAGGATCTGACGAACTACTCTCAGGCAGTGTTCAGTAGTCCGAACTCTAATATGAGCAGCATGGTAGTTACA | 31465 |
| OliveBaboon       | TATAGAGAGGATCTGACGAACTGCTCTCAGGCAGTGTTCAGTAGTCCAACTCTAATATGAGCAGCATGGTAGTTACA  | 32441 |
| Orangutan         | TATAGAGAGGATCTGACGAACTACTCTCAGGCAGTGTTCAGTAGTCCAACTCTAATATGAGCAGCATGGTAGTTACA  | 32452 |

|                   |                                                                                    |       |
|-------------------|------------------------------------------------------------------------------------|-------|
| Majority          | GGTAAGTGTTACTCTCTTAGCAGTCTGTCATT---TGCCATTTTAGGGGCGAGAATGTTAAAACCTCAAATTTAACTCTGT  |       |
|                   | 39770 39780 39790 39800 39810 39820 39830 39840                                    |       |
| Human             | GGTAAGTGTTACTCTCTTAGCAGTCTGTCATT---TGCCATTTTAGGGGCGAGAATGTTAAAACCTCAAATTTAACCTGT   | 30512 |
| Coquerel'sSifaka  | GGTAAGTATTACTCTC--AGCAGTTTGTGTCATTATTTGCCATTTTATGGGGCAGAATGTTAAAGCAAAAATTTA-TTCTGT | 29526 |
| Ma'sNightMonkey   | GGTAAGTATTACTCTCTTAGCAGTCTGTCATT---TGCCATTTTAGGGGCGAGAATGTTAAAACCTCAAATTTGAACCTGT  | 27450 |
| VervetAGM         | GGTAAGTGTTACTCTCTTAGCAGTCTGTCATT---TACCATTTTAGGGGCGAGAGTGTAAAACCTCAAATTTAACTGTGT   | 33896 |
| Gorilla           | GGTAAGTGTTACTCTCTTAGCAGTCTGTCATT---TGCCATTTTAGGGGCGAGAATGTTAAAACCTCAAATTTAACCTGT   | 32891 |
| GrabEatingMacaque | GGTAAGTGTTACTCTCTTAGCAGTCTGTCATT---TACCATTTTAGGGGCGAGAATGTTAAAACCTCAAATTTAACTCTGT  | 32551 |
| Macaque           | GGTAAGTGTTACTCTCTTAGCAGTCTGTCATT---TACCATTTTAGGGGCGAGAATGTTAAAACCTCAAATTTAACTCTGT  | 33318 |
| PigTailedMacaque  | GGTAAGTGTTACTCTATTAGCAGTCTGTCATT---TACCATTTTAGGGGCGAGAATGTTAAAACCTCAAATTTAACTCTGT  | 32262 |
| Bonobo            | GGTAAGTGTTACTCTCTTAGCAGTCTGTCATT---TGCCATTTTAGGGGCGAGAATGTTAAAACCTCAAATTTAACCTGT   | 31542 |
| OliveBaboon       | GGTAAGTGTTACTCTCTTAGCAGTCTGTCATT---TACCATTTTAGGGGCGAGAATGTTAAAACCTCAAATTTAACTCTGT  | 32518 |
| Orangutan         | GGTAAGTGTTACTCTGTTAGCAGTCTGTCATT---TGCCATTTTAGGGGCGAGAATGTTAAAACCTCAAATTTAGCTCTGT  | 32529 |

Tuesday, May 03, 2022 06:15 PM

| Majority          | TATACCAGGAAAGCCTTT-----CTTTTAAATGCTGTGTTGAAACATTTTAGAGTAAAT                      |       |
|-------------------|----------------------------------------------------------------------------------|-------|
|                   | 39850 39860 39870 39880 39890 39900 39910 39920                                  |       |
| Human             | TATACCAGGAAAGCCTTT-----CTTTTAAATGCTGTGTTGAAACATTTTAGAGTAAAT                      | 30566 |
| Coquerel'sSifaka  | TACATCAGAGTAGCCTTT-----CTTTAAATGCTATGTTAAACATTTTAGAGGAAAT                        | 29579 |
| Ma'sNightMonkey   | TTTACCAGAAAAGCCTTT-----CTTTTAAATGCTGTGTTGAAACATTTTAGAGTAAAT                      | 27505 |
| VervetAGM         | TATACCAGGAAAGCCTTTTGTGTTGTTTGTGTTTTAAGCCTTCTTTTAAATGCTGTGTTGAAACATTTTAGAGTAAAT   | 33976 |
| Gorilla           | TATACCAGGAAAGCCTTT-----CTTTTAAATGCTGTGTTGAAACATTTTAGAGTAAAT                      | 32946 |
| GrabEatingMacaque | TATACTAGGAAAGCCTTTTTTTTTT-TT-----AAAGCCTTCTTTTAAATGCTGTGTTGAAACATTTTAGAGTAAAT    | 32623 |
| Macaque           | TATACTAGGAAAGCCTTTTTTTTTT-TTT-----AAAGCCTTCTTTTAAATGCTGTGTTGAAACATTTTAGAGTAAAT   | 33391 |
| PigTailedMacaque  | TATACTAGGAAAGCCTTTTTTTTTT-TTTTTTTTTTAAAGCCTTCTTTTAAATGCTGTGTTGAAACATTTTAGAGTAAAT | 32341 |
| Bonobo            | TATACCAGGAAAGCCTTT-----CTTTTAAATGCTGTGTTGAAACATTTTAGAGTAAAT                      | 31596 |
| OliveBaboon       | TATACTAGGAAAGCCTTTTTTTTTT-TTT---TTCAAGCCTTCTTTTAAATGCTGTGTTGAAACATTTTAGAGTAAAT   | 32593 |
| Orangutan         | TATACCAGGAAAGCCTTT-----CTTTTAAATGCTGTGTTGAAACATTTTAGAGTAAAT                      | 32584 |

| Majority          | TTT-ACTAGAGTATATATGAGCTGAGTGAAAACAAAC----AAAAAACCTGAAG-TGGTCACTTGG--GAGCAAGTTAC  |       |
|-------------------|----------------------------------------------------------------------------------|-------|
|                   | 39930 39940 39950 39960 39970 39980 39990 40000                                  |       |
| Human             | TTT-ACTAAAGTATATATGAGCCGAGTGGAAAAAAA-----AAAAAACCTGAAGCTGGTAACCTTGGTGAACAAGTTAC  | 30640 |
| Coquerel'sSifaka  | TTTTACTAGTATATAAATGAGTCCAGTG-----GGAAAACTTGAAGTGGTGACTTGT--GGCAAGTAAC            | 29644 |
| Ma'sNightMonkey   | TTT-ACTAGAGTATATATGAGCTGAGTGAAAACAAAC----AAAAACACCTTAAGATGGTGACTTTGATGAACAAGTTAC | 27578 |
| VervetAGM         | TTT-ACTAGAGTATATATGAGCTGAGTGAAAACAAAC----AAACAAA--AAAA--AAACACCTGA---AGTTGGTGAC  | 34044 |
| Gorilla           | TTT-ACTAAAGTATATATGAGCTGAGTGAAAACAAAC-----AAAAAACCTGAAGCTGGTAACCTTGGTGAACAAGTTAC | 33025 |
| GrabEatingMacaque | TTT-ACTAGAGTATATATGAGCTGAGTGAAAACAAAC----AAACAAA----A-----CCACCTGA---AGTTGGTGAG  | 32685 |
| Macaque           | TTT-ACTAGAGTATATATGAGCTGAGTGAAAACAAAC----AAACAAA----A-----CCACCTGA---AGTTGGTGAG  | 33453 |
| PigTailedMacaque  | TTT-ACTAGAGTATATATGAGCTGAGTGAAAACAAAC----AAACAAA----AAA--AACCACCTGA---AGTTGGTGAC | 32407 |
| Bonobo            | TTT-ACTAAAGTATATATGAGCCGAGTG--AAAA-----AAAAAACCTGAAGCTGGTAACCTTGGTGAACAAGTTAC    | 31667 |
| OliveBaboon       | TTT-ACTAGAGTATATATGAGCTGAGTGAAAACAAAC----AAACAAAACAAAAA--AACCACCTGA---AGTTGGTGAC | 32663 |
| Orangutan         | TTT-ACTAGAGTATATATGAGCTGAGTGAAAACAAAC-----AAAAAACCTGAAGCTGGTAACCTTGGTGAACAAGTTAC | 32663 |

| Majority          | TCTTAAGTTTGATTGCTTTTCATTTTTGAACCACAAAT--GTAATTCT-TCTCACAT-TATAGTCCCCTCATGTGCCCT  |       |
|-------------------|----------------------------------------------------------------------------------|-------|
|                   | 40010 40020 40030 40040 40050 40060 40070 40080                                  |       |
| Human             | TCTTAAATTTGATTGCTTTTCATTTTTGAACCACAAAT--GTAATTCTGTCTCACAT-TATAGTCCCCTTCATGTGCCCT | 30717 |
| Coquerel'sSifaka  | TCATAAGTCTGATTGCCTTT--TTTTGGATCACAAAGATATAATCCTTCTCTTTCATATAATCCCCTCA---CCCT     | 29718 |
| Ma'sNightMonkey   | TCTTGAGTTTGATTGCTTTTCATTTTTGAATCACAAATATGTAATTCTTCTCACAT-TATAGTCCCCTCAAGTGCCCT   | 27657 |
| VervetAGM         | TCTTAAGTTTGATTGCTTTTCATTTTTGAACCACAAAT--GTAATTCT---CACAT-TATAGTCCCCTCATGTGCCCT   | 34117 |
| Gorilla           | TCTTAAATTTGATTGCTTTTCATTTTTGAACCACAAAT--GTAATACTGTCTCACAT-TATAGTCCCCTTCATGTGCCCT | 33102 |
| GrabEatingMacaque | TCTTAAGTTTGATTGCTTTTCATTTTTGAACCACAAAT--GTAATTCT---CACAT-TATAGTCCCGTTCATGTGCCCT  | 32758 |
| Macaque           | TCTTAAGTTTGATTGCTTTTCATTTTTGAACCACAAAT--GTAATTCT---CACAT-TATAGTCCCCTCATGTGCCCT   | 33526 |
| PigTailedMacaque  | TCTTAAGTTTGATTGCTTTTCATTTTTGAACCACAAAT--GTAATTCT---CACAT-TATAGTCCCCTCATGTGCCCT   | 32480 |
| Bonobo            | TCTTAAATTTGATTGCTTTTCATTTTTGAACCACAAAT--GTAATTCTGTCTCACAT-TATAGCCCCTTCATGTGCCCT  | 31744 |
| OliveBaboon       | TCTTAAGTTTGATTGCTTTTCATTTTTGAACCACAAAT--GTAATTCT---CACAT-TATAGTCCCCTCATGTGCCCT   | 32736 |
| Orangutan         | -CTTAAGTTTGATTGCTTTTCATTTTTAAACCACAAAT--GTAATTCTTTATCACAT-TATAGTCCCCTTCATGTGCCCT | 32739 |

Tuesday, May 03, 2022 06:15 PM

|                   |                                                                                 |       |
|-------------------|---------------------------------------------------------------------------------|-------|
| Majority          | CTGGTATTTTTATTTTGTGTTTTATTTTTGTGTTGTGTGTCATATAATATTTTT-ACTTTAAGTATTT----ATGCCAC |       |
|                   | 40090 40100 40110 40120 40130 40140 40150 40160                                 |       |
| Human             | CTGGTATTTTTATTTTGTGTTTTATTTTTGTGTTGTGTGTCATATAATATTTTT-ACTTTAAGTATTT----ATGCCAC | 30792 |
| Coquerel'sSifaka  | TTTGTATT-----TTTTTTTAAT-----TTTTTAAATCATAGAATATTTTT-ACTTTAAGTATTTCTTTATGCCAT    | 29784 |
| Ma'sNightMonkey   | CTGTAT-----TTGTTTTT-----TGTTTGTGTGGCATAGAATGTTTTTACTTTAAGTATTTGTTTATACCAC       | 27722 |
| VervetAGM         | CTGGTTTTTTTATTTTGTGTTTTATTTTTGTGTTGTGTGTCATATAATATTTTT-ACT----GTATTT----ATGCCAC | 34188 |
| Gorilla           | CTGGTATTTTATTTTTGTGTTTTATTTTTGTGTTGTGTGTCATATAATATTTTC-ACTTTAAGTATTT----ATGCCAC | 33177 |
| GrabEatingMacaque | CTGGTATTTTTATTTTGTGTTTTATTTTTGTGTTGTGTGTCATATAATATTTTT-ACTTTAAGTATTT----ATGCCAC | 32833 |
| Macaque           | CTGGTATTTTTATTTTGTGTTTTATTTTTGTGTTGTGTGTCATATAATATTTTT-ACTTTAAGTATTT----ATGCCAC | 33601 |
| PigTailedMacaque  | CTGGTATTTTTATTTTGTGTTTTATTTTTGTGTTGTGTGTCATATAATATTTTT-ACTTTAAGTATTT----ATGCCAC | 32555 |
| Bonobo            | CTGGTATTTTTATTTTGTGTTTTATTTTTGTGTTGTGTGTCATATAATATTTTT-ACTTTAAGTATTT----ATGCCAC | 31819 |
| OliveBaboon       | CTGGTATTTTTATTTTGTGTTTCATTTTTGTGTTGTGTGTCATATAATATTTTT-ACTTTAAGTATTT----ATGCCAC | 32811 |
| Orangutan         | CTGGTATTTTTATTTTGTGTTTTATTTTTGTGTTGTGTGTCATA--ATATTTTT-ACTTTAAGTATTT----ATGCCAC | 32812 |

|                   |                                                                                   |       |
|-------------------|-----------------------------------------------------------------------------------|-------|
| Majority          | AAACCCATAAAACCCAAATTTTAAAGTAAAAACCAAAGAATTCAGCTACATAGTTG-----C                    |       |
|                   | 40170 40180 40190 40200 40210 40220 40230 40240                                   |       |
| Human             | AAACCCATAAAACCCAAATTTTAAAGTAAAAACCGAAGAATTCAGCTACATAGTTGTTTAAACCATTGCAACCATAGTTGC | 30872 |
| Coquerel'sSifaka  | AAACCCATAAAACCCAAACTTTAAATAAAACCCAAAAAATCTGCTACATAACTATTT-----T-----CTTTC         | 29847 |
| Ma'sNightMonkey   | AAACCCATAAAACCCAAATTTTGGTAAAAACCAAAGAATTCAGCAACATAGTTG-----C                      | 27776 |
| VervetAGM         | AA-CCCTAAAACCCACATTGTAAGTAAAAACCAAAGAATTCAGCTACATAGTTG-----C                      | 34242 |
| Gorilla           | AAACCGTAAAACCCAAATTTCAAGTAAAAACCAAAGAATTCAGCTACATAGTTGTTTAAACCATTGCAACCATAGTTGC   | 33257 |
| GrabEatingMacaque | AA-CCCTAAAACCCACATTGTAAGTAAAAACCAAAGAATTCAGCTACATAGTTG-----C                      | 32887 |
| Macaque           | AA-CCCTAAAACCCACATTGTAAGTAAAAACCAAAGAATTCAGCTACATAGTTG-----C                      | 33655 |
| PigTailedMacaque  | AA-CCCTAAAACCCACATTGTAAGTAAAAACCAAAGAATTCAGCTACATAGTTG-----C                      | 32609 |
| Bonobo            | AAACCCATAAAACCCAAATTTTAAAGTAAAAACCGAAGAATTCAGCTACATAGTTGTTTAAACCATTGCAACCATAGTTGC | 31899 |
| OliveBaboon       | AA-CCCTAAAACCCACATTGTAAGTAAAAACCAAAGAATTCAGCTACATAGTTG-----C                      | 32865 |
| Orangutan         | AAACCCATAAAACCCAAATTTTAAAGTAAAAACCAAAGAATTCAGCTACATAGTTGTTTAAACCATTGCAACCATAGTTGC | 32892 |

|                   |                                                                                 |       |
|-------------------|---------------------------------------------------------------------------------|-------|
| Majority          | TATGGTTTTAAC-TAATTTTTGCTGAAACAGTATTTTAAATCTTAGA-GTTGATCCTTTTATGTTGTCTACCTGCATAT |       |
|                   | 40250 40260 40270 40280 40290 40300 40310 40320                                 |       |
| Human             | TATGGTTTTAAC-TAATTTTTGCTGAAACAGTATTTTAAATCT--GA-GTTGATCCTTTTATGTTGTCTACCTGCATAT | 30948 |
| Coquerel'sSifaka  | TGCGGTTTGAACCTTTTTCTTTGCTGTAACAATCTTTGAAT-T--GA-TTTTTTTTTTTTATGTTGTTGACTTGCAAAT | 29923 |
| Ma'sNightMonkey   | -AAAATC-----ATTTTTTGTGCTGAAACAATATGTTAATCTTTGA-ATTGATCCTTTTATGTTGTCTACCTGCATAT  | 27848 |
| VervetAGM         | AATGGTTTTAAC-TAATTTCTGCTGAAACAGTATTTTAAATCTTAGAAGTTGATCCTTTTATGTTGTCTACCTGCATAT | 34321 |
| Gorilla           | TATGGTTTTAAC-TAATTTTTGCTGAAACAGTATTTTAAATCT--GA-GTTGATCCTTTTATGTTGTCTACCTGCATAT | 33333 |
| GrabEatingMacaque | AATGGTTTTAAC-TAATTTTTGCTGAAACAGTATTTTAAATCTTAGA-GTTGATCCTTTTATGTTGTCTACCTGCATAT | 32965 |
| Macaque           | AATGGTTTTAAC-TAATTTTTGCTGAAACAGTATTTTAAATCTTAGA-GTTGATCCTTTTATGTTGTCTACCTGCATAT | 33733 |
| PigTailedMacaque  | AATGGTTTTAAC-TAATTTTTGCTGAAACAGTATTTTAAATCTTAGA-GTTGATCCTTTTATGTTGTCTACCTGCATAT | 32687 |
| Bonobo            | TATGGTTTTAAC-TAATTTTTGCTGAAACAGTATTTTAAATCT--GA-GTTGATCCTTTTATGTTGTCTACCTGCATAT | 31975 |
| OliveBaboon       | AATGGTTTTAAC-TAATTTTTGCTGAAACAGTATTTTAAATCTTAGA-GTTGATCCTTTTATGTTGTCTACCTGCATAT | 32943 |
| Orangutan         | TATGGTTTTAAC-TAATTTTTGCTGAAACAGTATTTA-----TCCTTTTATGTTGTCTACCTGCATAT            | 32956 |



Tuesday, May 03, 2022 06:15 PM

| Majority          | TTAAGATGATTGTTTTAATCTTCAAAGTTAGAGTTA-AAAAAATTGTATATGTCTGAAATAATGTTGGTTGGTTGTAG  |       |       |       |       |       |       |       |       |
|-------------------|---------------------------------------------------------------------------------|-------|-------|-------|-------|-------|-------|-------|-------|
|                   | 40330                                                                           | 40340 | 40350 | 40360 | 40370 | 40380 | 40390 | 40400 |       |
| Human             | TTAAGATGATTGTTTTAATCTTCAAAGTTAGAGTTA-AAAAAATTGTATATGTCTGAAATAATGTTGTTT---GTAG   |       |       |       |       |       |       |       | 31023 |
| Coquerel'sSifaka  | TTAAGATGATTGTTT-AACTTTTCAGAGTTAGAGTTTCTTAAATTGTATATGTCTGAAATAACGTTGGTTGGTTGTAG  |       |       |       |       |       |       |       | 30002 |
| Ma'sNightMonkey   | TTAAGATGATTGTTT-AATCTTCAAACCTAGAGTTT-TAAAAAGTCGTATATGCCTGAAATAATGTTGGTTGTTTGTAG |       |       |       |       |       |       |       | 27926 |
| VervetAGM         | TTAAGATGATTGTTTTAATCTTCAAAGTTACAGTTA-AAAAAATT-TGTGTATCTGAAATAATGTTGGTTTGTGTAG   |       |       |       |       |       |       |       | 34399 |
| Gorilla           | TTAAGATGATTGTTTTAATCTTCAAAGTTAGAGTTA-AAAAAATTGTATATGTCTGAAATAATGTTGTTT---GTAG   |       |       |       |       |       |       |       | 33408 |
| GrabEatingMacaque | TTAAGATGATTGTTTTAATCTTCAAAGTTAGAGTTA-AAAAAATT-TGTTTATCTGAAATAATGTTGGTTGGTTGTAG  |       |       |       |       |       |       |       | 33043 |
| Macaque           | TTAAGATGATTGTTTTAATCTTCAAAGTTAGAGTTA-AAAAAATT-TGTTTATCTGAAATAATGTTGGTTGGTTGTAG  |       |       |       |       |       |       |       | 33811 |
| PigTailedMacaque  | TTAAGATGATTGTTTTAATCTTCAAAGTTAGAGTTA-AAAAAATT-TGTTTATCTGAAATAATGTTGGTTGGTTGTAG  |       |       |       |       |       |       |       | 32765 |
| Bonobo            | TTAAGATGATTGTTTTAATCTTCAAAGTTAGAGTTT-AAAAAATTGTATATGTCTGAAATAATGTTGTTT---GTAG   |       |       |       |       |       |       |       | 32050 |
| OliveBaboon       | TTAAGATGATTGTTTTAATCTTCAAAGTTAGAGTTA-AAAAAATT-TGTTTATCTGAAATAATGTTGGTTGGTTGTAG  |       |       |       |       |       |       |       | 33021 |
| Orangutan         | TTACGATGATTGTTTTAATCTTCAGAGTTAAA-----AAAAAATTGTATATGTCTGAAACAATGTTGTTT---GTAG   |       |       |       |       |       |       |       | 33027 |

| Majority          | GATCTGTCAGTAAACCAATATAGACCAAATTTTAGACCTTAGTTTTTATGGCTGATGGGCCAAATTTTTTTTTTTTTTT-T |       |       |       |       |       |       |       |       |
|-------------------|-----------------------------------------------------------------------------------|-------|-------|-------|-------|-------|-------|-------|-------|
|                   | 40410                                                                             | 40420 | 40430 | 40440 | 40450 | 40460 | 40470 | 40480 |       |
| Human             | CATCTGTCAGTAAACCAATATAGACCAAATTTTAGACCTTAGTTTTTATGGCTGATGGGCCAAATTTTTTTTTT-----   |       |       |       |       |       |       |       | 31095 |
| Coquerel'sSifaka  | ----TGCCTAGAAACCAATATAGACTAA-TTTTATACCTTAATTTTTATGGCTGATGAACCAA-----              |       |       |       |       |       |       |       | 30059 |
| Ma'sNightMonkey   | ----TATCAGTAAACCAATATAGACCAAATTTTAGACCTTAGTTTTTATGGCTGATGGACCAATTTTTTTTTCCTTAGTAT |       |       |       |       |       |       |       | 28002 |
| VervetAGM         | GATCTGTTAGTAAACCAATATAGACCAAATTTTAGACCTTAGTTTTTATGGCTGTTGGGCCAAATTTTTTTTTTTTTTT-T |       |       |       |       |       |       |       | 34478 |
| Gorilla           | CATCTGTCAGTAAACCAATATAGACCAAATTTTAGACCTTAGTTTTTATGGCTGATGGGCCAAATTTTTTTTTT-----   |       |       |       |       |       |       |       | 33481 |
| GrabEatingMacaque | GATCTGTTAGTAAACCAATATAGACCAAATTTTAGACCTTAGTTTTTATGGCTGTTGGGCCAAATTTTTTTTTTTTTTT-T |       |       |       |       |       |       |       | 33122 |
| Macaque           | GATCTGTTAGTAAACCAATATAGACCAAATTTTAGACCTTAGTTTTTATGGCTGTTGGGCCAAATTTTTTTTTTTTTTT-T |       |       |       |       |       |       |       | 33890 |
| PigTailedMacaque  | GATCTGTTAGTAAACCAATATAGACCAAATTTTAGACCTTAGTTTTTATGGCTGTTGGGCCAAATTTTTTTTTTTTTTT-T |       |       |       |       |       |       |       | 32844 |
| Bonobo            | CATCTGTCAGTAAACCAATATAGACCAAATTTTAGACCTTAGTTTTTATGGCTGATGGGCCAAATTTTTTTTTT-----   |       |       |       |       |       |       |       | 32122 |
| OliveBaboon       | GATCTGTTAGTAAACCAATATAGACCAAATTTTAGACCTTAGTTTTTATGGCTGTTGGGCCAAATTTTTTTTTTTTTTT-- |       |       |       |       |       |       |       | 33099 |
| Orangutan         | CATCTGTCAGTAAACCAATATAGACCAAATTTTAGAGCTTAGTTTTTATGGCTGATGGGCCAAATTTTTTTTTTTTTTT-T |       |       |       |       |       |       |       | 33106 |

| Majority          | TT-GTATTTTGTGTTTTGCTTGAATTAACGTGTTCTCATCTGAATGGGCCAAATTTTGAATTTGATGATTATTATTA       |       |       |       |       |       |       |       |       |
|-------------------|-------------------------------------------------------------------------------------|-------|-------|-------|-------|-------|-------|-------|-------|
|                   | 40490                                                                               | 40500 | 40510 | 40520 | 40530 | 40540 | 40550 | 40560 |       |
| Human             | ---GTATTTTGTGTTTAGTTTTGGCTTGAATTAACGTGTTCTCATCTGAATGGGCCAAATTTTGAATTTGATGATTATTATTA |       |       |       |       |       |       |       | 31172 |
| Coquerel'sSifaka  | -----ATTTTGAATCTG---ATTATTATTG                                                      |       |       |       |       |       |       |       | 30081 |
| Ma'sNightMonkey   | TTTGTTTTTTTTTTGTGTT-GTTTGAACCTACGTGTTCTCATCTGAATGGAACAAATTTTGAATCTGAGTATTATTACTA    |       |       |       |       |       |       |       | 28081 |
| VervetAGM         | TT-GTATTTTGTGTTTGTGTTTGGCTTGAATTAACGTGTTCTCATCTGAATGGGCCAAATTTTGAATTTGATGATTATTATTA |       |       |       |       |       |       |       | 34557 |
| Gorilla           | ---GTATTTTGTGTTTAGTTTTGGCTTGAATTAACGTGTTCTCATCTGAATGGGCCAAATTTTGAATTTGATGATTATTATTA |       |       |       |       |       |       |       | 33558 |
| GrabEatingMacaque | TTTGTATTTTGTGTTTTGCTTGAATTAACGTGTTCTCATCTGAATGGGCCAAATTTTGAATTTGATGATTATTATTA       |       |       |       |       |       |       |       | 33202 |
| Macaque           | TTTGTATTTTGTGTTTTGCTTGAATTAACGTGTTCTCATCTGAATGGGCCAAATTTTGAATTTGATGATTATTATTA       |       |       |       |       |       |       |       | 33970 |
| PigTailedMacaque  | TT-GTATTTTGTGTTTTGCTTGAATTAACGTGTTCTCATCTGAATGGGCCAAATTTTGAATTTGATGATTATTATTA       |       |       |       |       |       |       |       | 32923 |
| Bonobo            | ---GTATTTTGTGTTTAGTTTTGGCTTGAATTAACGTGTTCTCATCTGAATGGGCCAAATTTTGAATTTGACTATTATTATTA |       |       |       |       |       |       |       | 32199 |
| OliveBaboon       | ---GTATTTTGTGTTTTGCTTGAATTAACGTGTTCTCATCTGAATGGGCCAAATTTTGAATTTGATGATTATTATTA       |       |       |       |       |       |       |       | 33176 |
| Orangutan         | TT-GTATTTTGTGTTTAGTTTTCTTGAATTAACGTGTTCTCATCTGAATGGGCCAAATTTTGAATTTGATAATTATTATCA   |       |       |       |       |       |       |       | 33185 |

Tuesday, May 03, 2022 06:15 PM

| Majority          | TCAAATGAATTACCTCACAACTCAACATTTTACATTATTTACCTGAAACCAAAGTTCCTTTTT-CTGTATTTTAACTTT  |       |       |       |       |       |       |       |  |       |
|-------------------|----------------------------------------------------------------------------------|-------|-------|-------|-------|-------|-------|-------|--|-------|
|                   | 40570                                                                            | 40580 | 40590 | 40600 | 40610 | 40620 | 40630 | 40640 |  |       |
| Human             | TCAAATGAATTACCTCACAACTCCACATTTTACATTATTTACCTGAAACCAAAGTTCCTTTTT-CTGTATTTTAACTTT  |       |       |       |       |       |       |       |  | 31251 |
| Coquerel'sSifaka  | TTGAATGAATT-ACCTTATAACCCTGCATTTTACATTATTTACTTCAAACCGAAGTTCCTTTTTCTGTTATTTTTTCTT  |       |       |       |       |       |       |       |  | 30160 |
| Ma'sNightMonkey   | TCGAAGGAATTACCTCACAACTCAACATTTTACATTATTTACCTGAAACCAAAGTTCCTTTTT-CTGTATTTTAACTTT  |       |       |       |       |       |       |       |  | 28160 |
| VervetAGM         | TCAAATGAATTACCTCACAGCTCAACATTTTACATTATTTACCTGAAACTAAAGTTCCTTTTT-CTGTATTTTAACTTT  |       |       |       |       |       |       |       |  | 34636 |
| Gorilla           | TCAAATGAATTACCTCACAACTCCACATTTTACATTATTTACCTGAAACCAAAGTTCCTTTTT-CTGTATTTTAACTTT  |       |       |       |       |       |       |       |  | 33637 |
| GrabEatingMacaque | TCAAATGAATTACCTCACAGCTCAACATTTTACATTATTTACCTGAAACTAAAGTTCCTTTTT-CTGTATTTTAACTTT  |       |       |       |       |       |       |       |  | 33281 |
| Macaque           | TCAAATGAATTACCTCACAGCTCAACATTTTACATTATTTACCTGAAACTAAAGTTCCTTTTT-CTGTATTTTAACTTT  |       |       |       |       |       |       |       |  | 34049 |
| PigTailedMacaque  | TCAAATGAATTACCTCACAGCTCAACATTTTACATTATTTACCTGAAACTAAAGTTCCTTTTT-CTGTATTTTAACTTT  |       |       |       |       |       |       |       |  | 33002 |
| Bonobo            | TCAAATGAATTACCTCACAACTCCACATTTTACATTATTTACCTGAAACCAAAGTTCCTTTTT-CTGTATTTTAACTTT  |       |       |       |       |       |       |       |  | 32278 |
| OliveBaboon       | TCAAATGAATTACCTCACAGCTCAACATTTTACATTATTTACCTGAAACCAAAGTTCCTTTTT-CTGTATTTTAACTTT  |       |       |       |       |       |       |       |  | 33255 |
| Orangutan         | TCAAATGAATTACCTTACAACCTCCACATTTTACATTATTTACCTGAAACCAAAGTTCCTTTTT-CTGTATTTTAACTTT |       |       |       |       |       |       |       |  | 33264 |

| Majority          | GAATTATTTGCTTGAGGAACGAATTATATTTGGCAATAAAAAGGATCATATAAAGACTAGAAGACATTTTGATTTCCCTTAG |       |       |       |       |       |       |       |  |       |
|-------------------|------------------------------------------------------------------------------------|-------|-------|-------|-------|-------|-------|-------|--|-------|
|                   | 40650                                                                              | 40660 | 40670 | 40680 | 40690 | 40700 | 40710 | 40720 |  |       |
| Human             | GAATTATTTGCTTGAGGAACGAATTATATTTGGCAATAAAAAGGATCATATAAAGACTAGAAGACATTTTGATTTCCCTTAG |       |       |       |       |       |       |       |  | 31331 |
| Coquerel'sSifaka  | GAATTACTTGCTTGAGGAATTAATTATATTTGGCAATAAAAAGGATCTTAAAAGACTAGAAGACATTTTGATTTCCCTCAT  |       |       |       |       |       |       |       |  | 30240 |
| Ma'sNightMonkey   | GAATTATTTGCTTGAGGAACGAATTATATTTGGCAATAAAAAGGATGTAAAAGACTAGAAGACATTTTGATTTCCCTTAG   |       |       |       |       |       |       |       |  | 28239 |
| VervetAGM         | GAATTATTTGCTTGAGGAACGAATTATATTTGGCAATAAAAAGGATCGTAAAAGACTAGAAGACATTTGATTTCCCTTAG   |       |       |       |       |       |       |       |  | 34716 |
| Gorilla           | GAATTATTTGCTTGAGGAACGAATTATATCTGGCAATAAAAAGGATCATATAAAGACTAGAAGACATTTTGATTTACCTTAG |       |       |       |       |       |       |       |  | 33717 |
| GrabEatingMacaque | GAATTATTTGCTTGAGGAACGAATTATATTTGGCAATAAAAAGGATCATATAAAGACTAGAAGACATTTTGATTTCCCTTAG |       |       |       |       |       |       |       |  | 33361 |
| Macaque           | GAATTATTTGCTTGAGGAACGAATTATATTTGGCAATAAAAAGGATCATATAAAGACTAGAAGACATTTTGATTTCCCTTAG |       |       |       |       |       |       |       |  | 34129 |
| PigTailedMacaque  | GAATTATTTGCTTGAGGAACGAATTATATTTGGCAATAAAAAGGATCATATAAAGACTAGAAGACATTTTGATTTCCCTTAG |       |       |       |       |       |       |       |  | 33082 |
| Bonobo            | GAATTATTTGCTTGAGGAACGAATTATATTTGGCAATAAAAAGGATCATATAAAGACTAGAAGACATTTTGATTTCCCTTAG |       |       |       |       |       |       |       |  | 32358 |
| OliveBaboon       | GAATTATTTGCTTGAGGAACGAATTATATTTGGCAATAAAAAGGATCATATAAAGACTAGAAGACATTTTGATTTCCCTTAG |       |       |       |       |       |       |       |  | 33335 |
| Orangutan         | GAATTATTTGCTTGAGGAACGAATTATATTTGGCAATAAAAAGGATCATATAAAGACTAGAAGAGATTTTGATTTCCCTTAG |       |       |       |       |       |       |       |  | 33344 |

| Majority          | GTAGCTGTGCTTA-TGTATACATACATCTTGACACACATA--AACACAAA-CACACATCTCTGACAATTCAGTTAACTAA  |       |       |       |       |       |       |       |  |       |
|-------------------|-----------------------------------------------------------------------------------|-------|-------|-------|-------|-------|-------|-------|--|-------|
|                   | 40730                                                                             | 40740 | 40750 | 40760 | 40770 | 40780 | 40790 | 40800 |  |       |
| Human             | GTAGCTGTGCTTAATGTATACATACATCTTGACACACACA--AACACAAA-CACACATCTCTGACAATTCAGTTAACTAA  |       |       |       |       |       |       |       |  | 31408 |
| Coquerel'sSifaka  | AGAGCCAT---TA-CTGTACATACAT-----A-----CGCATCCCTTATGGTTCAGTTAACTAA                  |       |       |       |       |       |       |       |  | 30291 |
| Ma'sNightMonkey   | GTATCCGTGCTTA-TGTATACATACATCTTGACACA-----AACACA---CACACATCTCTGACAGTTCAGTTAACTAA   |       |       |       |       |       |       |       |  | 28309 |
| VervetAGM         | GTAGCTGTGCTTA-TGTATACATACATCTTGACACACATA--AACACAAAACACACATCTCTGACAATTCAGTTAACTAA  |       |       |       |       |       |       |       |  | 34793 |
| Gorilla           | GTAGCTGTGCTTAATGTATACATAAATCTTGACACACACACAAAACACAAA-CACACATCTCTGACAATTCAGTTAACTAA |       |       |       |       |       |       |       |  | 33796 |
| GrabEatingMacaque | GTATCTGTGCTTA-TGTATACATACATCTTGACACACATA--AACACAAAACACACATCTCTGACAATTCAGTTAACTAA  |       |       |       |       |       |       |       |  | 33438 |
| Macaque           | GTATCTGTGCTTA-TGTATACATACATCTTGACACACATA--AACACAAAACACACATCTCTGACAATTCAGTTAACTAA  |       |       |       |       |       |       |       |  | 34206 |
| PigTailedMacaque  | GTAGCTGTGCTTA-TGTATACATACATCTTGACACACATA--AACACAAAACACACATCTCTGACAATTCAGTTAACTAA  |       |       |       |       |       |       |       |  | 33159 |
| Bonobo            | GTAGCTGTGCTTAATGTATACATACATCTTGACACACACA--AACACAAA-CACACATCTCTGACAATTCAGTTAACTAA  |       |       |       |       |       |       |       |  | 32435 |
| OliveBaboon       | GTAGCTGTGCTTA-TGTATACATACATCTTGACACACATA--AACACAAAACACACATCTCTGACAATTCAGTTAACTAA  |       |       |       |       |       |       |       |  | 33412 |
| Orangutan         | GTAGCTGTGCTTA-TGTATACATATATCTTGACACACACA--AACACAAA-CACACATC--TGACAATTCAGTTAACTAA  |       |       |       |       |       |       |       |  | 33418 |

Tuesday, May 03, 2022 06:15 PM

| Majority          | AAATTATAAGGAC----TTAACAGATAA--TAGTCATGATGTGAAGATAAAATTTGTCAGCAGGTCATTATCATTGATTTT |                 |                |               |              |                 |            |       |  |
|-------------------|-----------------------------------------------------------------------------------|-----------------|----------------|---------------|--------------|-----------------|------------|-------|--|
|                   | 40810                                                                             | 40820           | 40830          | 40840         | 40850        | 40860           | 40870      | 40880 |  |
| Human             | AAATTATAAGGAC                                                                     | ----TTAACAGATAA | --TAGTCATGATGT | GAAGATAAAATTT | GTCAGCAGGTC  | ATTATCATTGATTTT | 31482      |       |  |
| Coquerel'sSifaka  | AAATTACAAGGAC                                                                     | GTATTTACCAAAAT  | ACAGTCATAATG   | ATGATGTGAAGAG | GAATTTGCCAAC | ACATCATTAT      | TACTGATTTT | 30371 |  |
| Ma'sNightMonkey   | AAATTATGAGGAC                                                                     | ----TTAACAGATA  | ---TAGTCATGAT  | GTGAAGATAAA   | TTTGTTCAGTAG | GGTCATCATC      | ACTGATTTT  | 28382 |  |
| VervetAGM         | AAATTATAAGGAC                                                                     | ----TTAACAGATAA | --TAGTCACGAT   | TTGAAGATAA    | AGTTGTCAGC   | AGGTCATTAT      | CATTGATTTT | 34867 |  |
| Gorilla           | AAATTATAAGGAC                                                                     | ----TTAACAGATAA | --TAGTCATGAT   | GTGAAGATAAA   | TTTGTCAAC    | AGGTCATTAT      | CATTGATTTT | 33870 |  |
| GrabEatingMacaque | AAATTGTAAGGAC                                                                     | ----TTAACAGATAA | --TAGTCACGAT   | TTGAAGATAAA   | TTTGTTCAGC   | AGGTCATTAT      | CATTGATTTT | 33512 |  |
| Macaque           | AAATTGTAAGGAC                                                                     | ----TTAACAGATAA | --TAGTCACGAT   | TTGAAGATAAA   | TTTGTTCAGC   | AGGTCATTAT      | CATTGATTTT | 34280 |  |
| PigTailedMacaque  | AAATTGTAAGGAC                                                                     | ----TTAACAGATAA | --TAGTCACGAT   | TTGAAGATAAA   | TTTGTTCAGC   | AGGTCATTAT      | CATTGATTTT | 33233 |  |
| Bonobo            | AAATTATAAGGAC                                                                     | ----TTAACAGATAA | --TAGTCATGAT   | GTGAAGATAAA   | TTTGTCAAC    | AGGTCATTAT      | CATTGATTTT | 32509 |  |
| OliveBaboon       | AAATTATAAGGAC                                                                     | ----TTAACAGATAA | --TAGTCACGAT   | TTGAAGATAAA   | TTTGTTCAGC   | AGGTCATTAT      | CATTGATTTT | 33486 |  |
| Orangutan         | AAATTATAAGGAC                                                                     | ----TTAACAGATAA | --TAGTCATGAT   | GTGAAGATAAA   | TTTGTCAAC    | AGGTCATTAT      | CATTGATTTT | 33492 |  |

| Majority          | GCTATGTAGTGATTACAAAGCAAATCACTGGGCCATGATTTTGATAGTCAAAGTACCATGTACACATAATTGAACAAAT |               |              |             |              |             |              |       |       |
|-------------------|---------------------------------------------------------------------------------|---------------|--------------|-------------|--------------|-------------|--------------|-------|-------|
|                   | 40890                                                                           | 40900         | 40910        | 40920       | 40930        | 40940       | 40950        | 40960 |       |
| Human             | GCTATGTAATG                                                                     | AATTACAAAGCAA | AATCACTGGGCC | ATGATTTTGAT | AGTCAAAGTACC | ATGTACACATA | AATTGAACAAAT | 31562 |       |
| Coquerel'sSifaka  | TCTATGTAGT                                                                      | GATTATAAAGTAA | AATCACAAAGGC | AGTGATTTTG  | ATAGTCAAAGT  | ACCATGTGCAA | AATAATTCAC   | CCAAT | 30451 |
| Ma'sNightMonkey   | GCTATGTAATA                                                                     | AATTATAAAGCAA | AATCACTGGACC | ATGATTTTG   | ATAGTTAAAGT  | ACCATGTACAG | CTAACTGAAT   | GAAT  | 28462 |
| VervetAGM         | GCTATGTAGT                                                                      | GATTACAAAGCAA | AATCACTGGGCC | CGTGATTTTG  | ATAGTCAAAGT  | ACCATGTACAC | ATACTGAACA   | AAAT  | 34947 |
| Gorilla           | GCTATGTAAT                                                                      | GATTACAAAGCAA | AATCACTGGGCC | CTTGATTTTG  | ATAGTCAAAGT  | ACGATGTACAC | ATAATTGAACA  | AAAT  | 33950 |
| GrabEatingMacaque | GCTATGTAGT                                                                      | GATTACAAAGCAA | AATCACTGGGCC | ATGATTTTG   | ATAGTCAAAGT  | ACCATGTACAC | GTAAATTGAACA | AAAT  | 33592 |
| Macaque           | GCTATGTAGT                                                                      | GATTACAAAGCAA | AATCACTGGGCC | ATGATTTTG   | ATAGTCAAAGT  | ACCATGTACAC | GTAAATTGAACA | GAT   | 34360 |
| PigTailedMacaque  | GCTATGTAGT                                                                      | GATTACAAAGCAA | AATCACTGGGCC | ATGATTTTG   | ATAGTCAAAGT  | ACCATGTACAC | GTAAATTGAACA | AAAT  | 33313 |
| Bonobo            | GCTATGTAAT                                                                      | GATTACAAAGCAA | AATCACTGGGCC | CTTGATTTTG  | ATAGTCAAAGT  | ACCATGTACAC | ATAATTGAACA  | AAAT  | 32589 |
| OliveBaboon       | GCTACGTAGT                                                                      | GATTACAAAGCAA | AATCACTGGGCC | ATGATTTTG   | ATAGTCAGAGT  | ACCATGTACAC | GTAAATTGAACA | AAAT  | 33566 |
| Orangutan         | GCTATGTAAT                                                                      | GATTACAAAGCAA | AATCACTGGGCC | CTTGATTTTG  | ATAGTCAAAGT  | ACCATGTACAC | ATAGTTGAACA  | AAAT  | 33572 |

| Majority          | AGGCTTAAGTGTGT--AACT--GGTTTGTGCGTTTCTCTTTTTGTTT----TTACAATGCATACTGTGATTGATAATGGG |              |            |              |             |             |            |            |       |       |
|-------------------|----------------------------------------------------------------------------------|--------------|------------|--------------|-------------|-------------|------------|------------|-------|-------|
|                   | 40970                                                                            | 40980        | 40990      | 41000        | 41010       | 41020       | 41030      | 41040      |       |       |
| Human             | AGGCAAGTGTGT                                                                     | --AACTCTGGTT | TTGTCGGTTT | CTCTTTTTGTTT | ----TTACAAT | GCATACTGTG  | ATCGATAAT  | GGG        | 31636 |       |
| Coquerel'sSifaka  | AGGCTCAAGT                                                                       | GCTTTAACTCT  | GCTTTGTCAG | TTTCTCTTTTA  | -----ATA    | ATATATATT   | GTGATTGATA | ACGGA      | 30522 |       |
| Ma'sNightMonkey   | AGGCATAAGT                                                                       | GTGT--AACT-- | GGTTTGTCA  | GTCTCTTTT    | GTTTGTGTT   | GTGTTCCAAT  | GCATATTGT  | GATTGTTAAT | GGG   | 28538 |
| VervetAGM         | AGGCTTAAGT                                                                       | GTGT--AACT-- | -----TGTC  | GGTTTCTCT    | CTCTGTTT    | ----TTACAAT | GCATACTGT  | GATTGATAAT | GGG   | 35015 |
| Gorilla           | AGGTAGAAGT                                                                       | GTGT--AACTCT | GGTTTGTG   | CTTTTTGTTT   | ----TTACAAT | GCATACTGT   | GATCGATAAT | GGG        | 34024 |       |
| GrabEatingMacaque | AGGCTTAAGT                                                                       | GTGT--AACT-- | -----TGTC  | GGTTTCTCT    | TTTTGTTT    | ----TTCCAAT | GCATACTGT  | GATTGATAAT | GGG   | 33660 |
| Macaque           | AGGCTTAAGT                                                                       | GTGT--AACT-- | -----TGTC  | GGTTTCTCT    | TTTTGTTT    | ----TTCCAAT | GCATACTGT  | GATTGATAAT | GGG   | 34428 |
| PigTailedMacaque  | AGGCTTAAGT                                                                       | GTGT--AACT-- | -----TGTC  | GGTTTCTCT    | TTTTGTTT    | ----TTACAAT | GCATACTGT  | GATTGATAAT | GGG   | 33381 |
| Bonobo            | AGGCAAGTGTGT                                                                     | --AACTCTGGTT | TTGTCGGTTT | CTCTTTTTGTTT | ----TTACAAT | GCATACTGT   | GATCGATAAT | GGG        | 32663 |       |
| OliveBaboon       | AGGCTTAAGT                                                                       | GTGT--ACCT-- | -----TGTC  | GGTTTCTCT    | TTTTGTTT    | ----TTACAAT | GCATACTGT  | GATTGATAAT | GGG   | 33634 |
| Orangutan         | AGGCAAGTGTGT                                                                     | --AACTCTGGTT | TTGTCGATTT | CTCTTTTTGTTT | ----TTACAAT | GCATACTGT   | GATCGATAAT | GGG        | 33646 |       |

Tuesday, May 03, 2022 06:15 PM

| Majority          | AAATTAA-TTCCAAATTAATTCCTA-ATATTTAGGGCTCATGACAGAGTAACTAGTAGCAGCCTTGACCCCTTTTTCAGT  |       |       |       |       |       |       |       |       |
|-------------------|-----------------------------------------------------------------------------------|-------|-------|-------|-------|-------|-------|-------|-------|
|                   | 41050                                                                             | 41060 | 41070 | 41080 | 41090 | 41100 | 41110 | 41120 |       |
| Human             | AAATTAA-TTTGGAATTAATTTCCAAATATTTAGGGCTAGTGACAGAGTAACTAGTAGCAGCCTTGCCCTTTTTCAGT    |       |       |       |       |       |       |       | 31715 |
| Coquerel'sSifaka  | AATGTTTTTTTAAATTAAT-----ATTTAGGGCT-ATGGCAGAGTAAATGGTAGCAGCCTTGCCCTCATTTCCAAT      |       |       |       |       |       |       |       | 30593 |
| Ma'sNightMonkey   | AATGTT--TTCCAAATTAAT-----AT--TTAGGGCTAATGACAGAG----TAGTAGCAGCCTTGACCCCTTTTTCAGT   |       |       |       |       |       |       |       | 28604 |
| VervetAGM         | AAATTAA-TTCCAAATTAATTCCTA-ATATTTAGGGCTCATGACAAAATAACTAGTAGTAGCCTTGACCCGTTTTCAGT   |       |       |       |       |       |       |       | 35093 |
| Gorilla           | AAATTAA-TTTGGAATTAATTTCCAAATGTTTAAAGGCTAGTGACAGAGTAACTAGTAGCAGCCTTGGCACCTTTTTCAGT |       |       |       |       |       |       |       | 34103 |
| GrabEatingMacaque | AAATTAA-TTCCAAATTAATTCCTA-ATATTTAGGGCTCATGACAGAATAACTAGTAGTAGCCTTGACCCCTTTTTCGGT  |       |       |       |       |       |       |       | 33738 |
| Macaque           | AAATTAA-TTCCAAATTAATTCCTA-ATATTTAGGGCTCATGACAGAATAACTAGTAGTAGCCTTGACCCCTTTTTCGGT  |       |       |       |       |       |       |       | 34506 |
| PigTailedMacaque  | AAATTAA-TTCCAAATTAATTCCTA-ATATTTAGGGCTCATGACAGAATAACTAGTAGTAGCCTTGACCCCTTTTTCGGT  |       |       |       |       |       |       |       | 33459 |
| Bonobo            | AAATTAA-TTTGGAATTAATTTCCAAATATTTAGGGCTAGTGACAGAGTAACTAGTAGCAGCCTTGCCCTTTTTCAGT    |       |       |       |       |       |       |       | 32742 |
| OliveBaboon       | AAATTAA-TTCCAAATTAATTCCTA-ATATTTAGGGCTCATGACAGAATAACTAGTAGTAGCCTTGACCCCTTTTTCGGT  |       |       |       |       |       |       |       | 33712 |
| Orangutan         | AAATTAA-TTTGGAATTAATTTCCACATATTTAGGGCTAGTGACAGAGTAACTAGTAGCAGCCTTGCCCTTTTTCAGT    |       |       |       |       |       |       |       | 33725 |

| Majority          | CTCCCCCAAACCAAAAACCTATGTAACGAATAAAAATATGTGGAACAACCTGTTGTTTGAAGTGATGAGCAGACGGTAT   |       |       |       |       |       |       |       |       |
|-------------------|-----------------------------------------------------------------------------------|-------|-------|-------|-------|-------|-------|-------|-------|
|                   | 41130                                                                             | 41140 | 41150 | 41160 | 41170 | 41180 | 41190 | 41200 |       |
| Human             | CTCCCCCAAACCAAAAAGTATGTAACGAATAAAAATACGTGGAACAACCTGTTGTTTGAAGTGATGAGCAGACGGTAT    |       |       |       |       |       |       |       | 31795 |
| Coquerel'sSifaka  | CTCCTCCCCGA-TCAAAACTGTATAAATGAATGAAACA--TGAAACAACCTGTTGTCTGGAATTGATGAGGAAACAATAC  |       |       |       |       |       |       |       | 30670 |
| Ma'sNightMonkey   | CTCCTCCCCAAACCAAAAACCTATGTAACGAATAAAAATATGTGGAACAACCTGTTGTTTGAAGTGATGAGCAGACAGTAT |       |       |       |       |       |       |       | 28684 |
| VervetAGM         | CTCCCCCAAACCAAAAACAATGTAACGAATAAAAATATGTGGAACAACCTGTTGTTTGAAGTGATGAGCAGACGGTAT    |       |       |       |       |       |       |       | 35173 |
| Gorilla           | CTCCCCCAAACCAAAAAGTATGTAACGAATAAAAATACGTGGAACAACCTGTTGTTTGAAGTGATGAGCAGACGGTAT    |       |       |       |       |       |       |       | 34183 |
| GrabEatingMacaque | CTCCCCCAAACCAAAAACCTGTAACGAATAAAAATATGTGGAACAACCTGTTGTTTGAAGTGATGAGCAGACGGTAT     |       |       |       |       |       |       |       | 33818 |
| Macaque           | CTCCCCCAAACCAAAAACCTGTAACGAATAAAAATATGTGGAACAACCTGTTGTTTGAAGTGATGAGCAGACGGTAT     |       |       |       |       |       |       |       | 34586 |
| PigTailedMacaque  | CTCCCCCAAACCAAAAACCTGTAACGAATAAAAATATGTGGAACAACCTGTTGTTTGAAGTGATGAGCAGACGGTAT     |       |       |       |       |       |       |       | 33539 |
| Bonobo            | CTCCCCCAAACCAAAAAGTATGTAACGAATAAAGATACGTGGAACAACCTGTTGTTTGAAGTGATGAGCAGACAGTAT    |       |       |       |       |       |       |       | 32822 |
| OliveBaboon       | CTCCCCCAAACCAAAAACCTATGTAACGAATAAAAATATGTGGAACAACCTGTTGTTTGAAGTGATGAGCAGACGGTAT   |       |       |       |       |       |       |       | 33792 |
| Orangutan         | CTCCCCCAAACCAAAAACCTATGTAACGAATAAAAATACGTGGAACAACCTGTTGTTTGAAGTGATGAGCAGACAGTAT   |       |       |       |       |       |       |       | 33805 |

| Majority          | AAGATCAT---CCTTGAGAGAAGG-----GTAGCATGTGAGGTA-----AG                             |       |       |       |       |       |       |       |       |
|-------------------|---------------------------------------------------------------------------------|-------|-------|-------|-------|-------|-------|-------|-------|
|                   | 41210                                                                           | 41220 | 41230 | 41240 | 41250 | 41260 | 41270 | 41280 |       |
| Human             | AAGATCAT---CCTTGAGAGAAGG-----GGTACACGTGAGGTA-----AG                             |       |       |       |       |       |       |       | 31833 |
| Coquerel'sSifaka  | AAGATCATGATCTTTGAGAGAAGGTAACCTTCTCTCAAAATAACCTGTGAACTACAAAGGGAAGGCTCATCTCCCTGAG |       |       |       |       |       |       |       | 30750 |
| Ma'sNightMonkey   | AAGATCAT---CCTTGAGGGAAGG-----GTAATGCCTGAGCTA-----AG                             |       |       |       |       |       |       |       | 28722 |
| VervetAGM         | AAGATCAT---CCTTGAGAGAAGG-----GTAGCATGTGAGGTA-----AG                             |       |       |       |       |       |       |       | 35211 |
| Gorilla           | AAGATCAT---CCTTGAGAGAAGG-----GGTACACGTGAGGTA-----AG                             |       |       |       |       |       |       |       | 34221 |
| GrabEatingMacaque | AAGATCAT---CCTTGAGAGAAGG-----GTAGCATGTGAGGTA-----AG                             |       |       |       |       |       |       |       | 33856 |
| Macaque           | AAGATCAT---CCTTGAGAGAAGG-----GTAGCATGTGAGGTA-----AG                             |       |       |       |       |       |       |       | 34624 |
| PigTailedMacaque  | AAGATCAT---CCTTGAGAGAAGG-----GTAGCATGTGAGGTA-----AG                             |       |       |       |       |       |       |       | 33577 |
| Bonobo            | AAGATCAT---CCTTGAGAGAAGG-----GGTACAGGTGAGGTA-----AG                             |       |       |       |       |       |       |       | 32860 |
| OliveBaboon       | AAGATCAT---GTTTGAGAGAAGG-----GTAGCATGTGAGGTA-----AG                             |       |       |       |       |       |       |       | 33830 |
| Orangutan         | AAGATCAT---CCTTGAGAGAAGG-----GGTGCACGTGAG-----AG                                |       |       |       |       |       |       |       | 33838 |

Tuesday, May 03, 2022 06:15 PM

|                   |                                                                                   |       |
|-------------------|-----------------------------------------------------------------------------------|-------|
| Majority          | TATCATGAACACTCTGGCTTTCTGCCTTGGACTGTTTTACTGCTGTAAACCACAGAGAAGTGGAGAGCTCAGAGTATACA  |       |
|                   | 41290 41300 41310 41320 41330 41340 41350 41360                                   |       |
| Human             | TATCATGAACACTCTGGCTTTCTGTCTTGGACTATTTTACTGCTCTAAACCACAGAGAAGTGGAGAGCCCAGAGTATACA  | 31913 |
| Coquerel'sSifaka  | CGTCATGATGACTCTGGCTTTCTGCTTTGGGCTACCTTACTCCTATAGCACAGGGAAAGAGAGCTCAAGCAGAGTATACC  | 30830 |
| Ma'sNightMonkey   | TATCGTAAACACTCTGGCGTTTTGCCTTAGACTACTTTACTGCTGTAAACCACA-AGAAGTGGAGAACCACAGAGTATACA | 28801 |
| VervetAGM         | TATCATGAACACTCTGGCTTTCTGCCTTGGACCGCTTTACTGCTGTAAACCACAGAGAAGTGGAGAGCTCAG--TATACA  | 35289 |
| Gorilla           | TATCATGAACGCTCTGGCTTTCTGTCTTGGACTGTTTTACTGCTCTAAACCACAGAGAAGTGGAGAGCCCAGAGTATACA  | 34301 |
| GrabEatingMacaque | TATCATGAACACTCTGGCTTTCTGCCTTGGACCGTTTACTGCTGTAAACCACAGAGAAGTGGAGAGCTCAG--TATACA   | 33934 |
| Macaque           | TATCATGAACACTCTGGCTTTCTGCCTTGGACCGTTTACTGCTGTAAACCACAGAGAAGTGGAGAGCTCAG--TATACA   | 34702 |
| PigTailedMacaque  | TATCATGAACACTCTGGCTTTCTGCCTTGGACCGTTTACTGCTGTAAACCACAGAGAAGTGGAGAGCTCAG--TATACA   | 33655 |
| Bonobo            | TATCATGAACACTCTGGCTTTCTGTCTTGGACTATTTTACTGCTCTAAACCACAGAGAAGTGGAGAGCCCAGAGTATACA  | 32940 |
| OliveBaboon       | TATCATGAACACTCTGGCTTTCTGCCTTGGACTGTTTTACTGTTGTAAACCACAGAGAAGTGGAGAGATCAG--TATACA  | 33908 |
| Orangutan         | TATCATGAACACTCTGGCTTTCTGCCTTGGACTATTTTACTGTTCTAAACCACAGAGAATTGGAGAGCTCAGAGTATACA  | 33918 |
| Majority          | GGTCTCACTGAGCTGAAGAGACTAAGAGTGGGTGTCAGAGCTGCTCAGTCATTTGGAATTTATGGGGAAG--TCCTGGAG  |       |
|                   | 41370 41380 41390 41400 41410 41420 41430 41440                                   |       |
| Human             | GGTCTCACTGAGCTGAAGAGACCAAGAGTGGGTGTCAGGGCTGCCAATCATTTGGAATTTATGGAGAAG--TCCTGGAG   | 31991 |
| Coquerel'sSifaka  | GGTGTACTGAGCTGAAGAGACTAAGAGTGTAAATCAAAGCTGTTCAAACAT--AAAATTTGTGGGGAAGGGCCCTGGAG   | 30908 |
| Ma'sNightMonkey   | GGTCTCACTGAGCTGAAGAGACCAAGACTGGGAATCAGAGCTGTTCACTCATTTGGAATTTGTGGGGAAG--TCTTGAGG  | 28879 |
| VervetAGM         | GGTCTCACTGAGCTGAAGAGACTAAGAGTGGGTGTCAGAACTGCTCAGTCATTTGGAATTTATGGGGAAG--TCCTGGAG  | 35367 |
| Gorilla           | GGTCTCACTGAGCTGAAGAGACCAAGAGTGGGTGTCAGGGCTGCCAATCATTTGGAATTTATGGAGAAG--TCCTGGAG   | 34379 |
| GrabEatingMacaque | GGTCTCACTGAGCTGAAGAGACTAAGAGTGGGTGTCAGAACTGCTCAGTCATTTGGAATTTATGGGGAAG--TCCTGGAG  | 34012 |
| Macaque           | GGTCTCACTGAGCTGAAGAGACTAAGAGTGGGTGTCAGAACTGCTCAGTCATTTGGAATTTATGGGGAAG--TCCTGGAG  | 34780 |
| PigTailedMacaque  | GGTCTCACTGAGCTGAAGAGACTAAGAGTGGGTGTCAGAACTGCTCAGTCATTTGGAATTTATGGGGAAG--TCCTGGAG  | 33733 |
| Bonobo            | GGTCTCACTGAGCTGAAGAGACCAAGAGTGGGTGTCAGGGCTGCCAATCATTTGGAATTTATGGAGAAG--TCCTGGAG   | 33018 |
| OliveBaboon       | GGTCTCACTGAGCTGAAGAGACTAAGAGTGGGTGTCAGAACTGCTCAGTCGTTTGGAAATTTATGGGGAAG--TCCTGGAG | 33986 |
| Orangutan         | GGTCTCACTGAGCTGAAGAGACCGAGAGTGGGTGTCAGAGCTGCTCAATCATTTGGAATTTATGGAGAAG--TCCTGGAG  | 33996 |
| Majority          | AAAAGAGAGCTGTCTAGGGGTTTAGGAATAGAGCAGGGGGCAGAATTTAGTATGGTCATT-CACTTCATTCAGAGTTTTG  |       |
|                   | 41450 41460 41470 41480 41490 41500 41510 41520                                   |       |
| Human             | AAAAGAGAGCTGTCTAGGGGTTTAGGAATAGAGCAGGGGGCAGAATTTAGTATGGTCATTTCACTTCATTCACAGTTTTG  | 32071 |
| Coquerel'sSifaka  | ATAAGGAAATGTCTGGGGGTTTATACATAGGGTAGGGGACAGAATTTGTTGTGGGGATT-CACTTCATTCAGAATTTTTG  | 30987 |
| Ma'sNightMonkey   | AAAATAAAGCTGTCTAGGGGTTTAGGAATACAGCAAGGGGCAGAATTTAGTGTGGTCATT-CACTTCATTCAGAGTTTTG  | 28958 |
| VervetAGM         | AAAAGAGAGCTGTCTAGGGGTTTAGGAGTAGAACAGGGGGCAGAATTTAGTATGGTCATT-CACTTCATTCAGAGTTTTG  | 35446 |
| Gorilla           | AAAAGAGAGCTGTCTAGGGGTTTAGGAATAGAGCAGGGGGCAGAATTTAGTATGGTCATTTCACTTCATTCAGAGTTTTG  | 34459 |
| GrabEatingMacaque | AAAAGAGAGCTGTCTAGGGGTTTAGGGGTAGAACAGAGGGGCAGAATTTAGTATGGTCATT-CACTTCATTCAGAGTTTTG | 34091 |
| Macaque           | AAAAGAGAGCTGTCTAGGGGTTTAGGGGTAGAACAGGGGGCAGAATTTAGTATGGTCATT-CACTTCATTCAGAGTTTTG  | 34859 |
| PigTailedMacaque  | AAAAGAGAGCTGTCTAGGGGTTTAGGGGTAGAACAGGGGGCAGAATTTAGTATGGTCATT-CACTTCATTCAGAGTTTTG  | 33812 |
| Bonobo            | AAAAGAGAGCTGTCTAGGGGTTTAGGAATAGAGCAGGGGGCAGAATTTAGTATGGTCATTTCACTTCATTCACAGTTTTG  | 33098 |
| OliveBaboon       | AAAAGAGAGCTGTCTAGGGGTTTAGGAGTAGAACAGGGGGCAGAATTTAGTATGGTCATT-CACTTCATTCAGAGTTTTG  | 34065 |
| Orangutan         | AAAAGAGAGCTGTCTAGAGGTTTAGGAATAGAGCAGGGGGCAGAATTTAGTATGGTCATT-CACTTCATTCAGAGTTTTG  | 34075 |

Tuesday, May 03, 2022 06:15 PM

| Majority          | GATAATGACTGGGTTACATGTGTGCAGGTTGAGACTTT-GCCAGGCTGTTCAGAAATTGCTGCTCTGGGGCTAA-----  |       |       |       |       |       |       |       |  |       |
|-------------------|----------------------------------------------------------------------------------|-------|-------|-------|-------|-------|-------|-------|--|-------|
|                   | 41530                                                                            | 41540 | 41550 | 41560 | 41570 | 41580 | 41590 | 41600 |  |       |
| Human             | GATAATGACTTGGTTACATGTGTGCAGGTTGAGGCTTT-GCCAGGCTGTTCAGAAATTGCTGCTCTGGGGCTAA-----  |       |       |       |       |       |       |       |  | 32145 |
| Coquerel'sSifaka  | GATAATGGCTGGTCTGTGTGTGTGCAGACTGAGACTTTTGCAAGGCTGTTCAGAAATCACCTGCTCTGGGGCTAAGAGCT |       |       |       |       |       |       |       |  | 31067 |
| Ma'sNightMonkey   | GATAATGACTGGGTTACATGTGTGCAGGT-----CTATCAGAAAGTTGCTGCTCTGGGGCTAA-----             |       |       |       |       |       |       |       |  | 29016 |
| VervetAGM         | GATAATGACTGGGTTACATGTGTGCAGGTTGAGACTTT-GCCAGGCTATCAGAAATTGCTGCTCTGGGGCTAA-----   |       |       |       |       |       |       |       |  | 35520 |
| Gorilla           | GATAATGACTGGGTTACATGTGTGCAGGTTGAGGCTTT-GCCAGGCTATCAGAAAGTTGCTGCTCCGGGGCTAA-----  |       |       |       |       |       |       |       |  | 34533 |
| GrabEatingMacaque | GATAATGACTGGGTTACATGTGTGCAGGTTGAGACTTT-GCCAGGCTGTTCAGAAATTGCTGCTCTGGGGCTAA-----  |       |       |       |       |       |       |       |  | 34165 |
| Macaque           | GATAATGACTGGGTTACATGTGTGCAGGTTGAGACTTT-GCCAGGCTGTTCAGAAATTGCTGCTCTGGGGCTAA-----  |       |       |       |       |       |       |       |  | 34933 |
| PigTailedMacaque  | GATGATGACTGGGTTACATGTGTGCAGGTTGAGACTTT-GCCAGGCTGTTCAGAAATTGCTGCTCTGGGGCTAA-----  |       |       |       |       |       |       |       |  | 33886 |
| Bonobo            | GATAATGACTGGGTTACATGTGTGCAGGTTGAGGCTTT-GCCAGGCTATCAGAAATTGCTGCTCTGGGGCTAA-----   |       |       |       |       |       |       |       |  | 33172 |
| OliveBaboon       | GATAATGACTGGGTTACATGTGTGCAGGTTGAGAGTTT-GCCAGGCTGTTCAGAAATTGCTGCTCTGGGGCTAA-----  |       |       |       |       |       |       |       |  | 34139 |
| Orangutan         | GATAATGACTGGGTTACATGTGTGCAGGTTGAGGTTTT-GCCAGGCTATCAGAAATTGTTGCTCTGGGGCTAA-----   |       |       |       |       |       |       |       |  | 34149 |

| Majority          | --ATGGTGATTCCATAGGTTGCATAGTACTCTGAAACATTG-----GAGTTCTGAGAAGTC                   |       |       |       |       |       |       |       |  |       |
|-------------------|---------------------------------------------------------------------------------|-------|-------|-------|-------|-------|-------|-------|--|-------|
|                   | 41610                                                                           | 41620 | 41630 | 41640 | 41650 | 41660 | 41670 | 41680 |  |       |
| Human             | --ATGGTGATTCCATAGGTTGCACGGTACTCTGAAACATTG-----GAGTTCTGAGAAGTC                   |       |       |       |       |       |       |       |  | 32199 |
| Coquerel'sSifaka  | AAATGGTAGTTCCTAGGTTGAGCAGTTCTCTAAGACATTGCAGTTGTGGGAAGTCAGACATTAAGAGTTCTGGAAAGTC |       |       |       |       |       |       |       |  | 31147 |
| Ma'sNightMonkey   | --ATGGTGATTCCATAAGTTGCATAGTACTCTGCAACATTG-----GAGTTCTGAGAAGTC                   |       |       |       |       |       |       |       |  | 29070 |
| VervetAGM         | --ATAGTGATTCCATAGGTTGCATAGTACTCTGAAACATTG-----GAGCTCTGAGAAGTC                   |       |       |       |       |       |       |       |  | 35574 |
| Gorilla           | --ATGGTGATTCCATAGGTTGCACAGTACTCTGAAACATTG-----GAGTTCTGAGAAGTC                   |       |       |       |       |       |       |       |  | 34587 |
| GrabEatingMacaque | --ACAGTGATTCCATAGGTTGCATAGTACTCTGAAACATTG-----GAGTTCTGAGAAGTC                   |       |       |       |       |       |       |       |  | 34219 |
| Macaque           | --ACAGTGATTCCATAGGTTGCATAGTACTCTGAAACATTG-----GAGTTCTGAGAAGTC                   |       |       |       |       |       |       |       |  | 34987 |
| PigTailedMacaque  | --ACAGTGATTCCATAGGTTGCATAGTACTCTGAAACATTG-----GAGTTCTGAGAAGTC                   |       |       |       |       |       |       |       |  | 33940 |
| Bonobo            | --ATGGTGATTCCATAGGTTGCACGGTACTCTGAAACATTG-----GAGTTCTGAGAAGTC                   |       |       |       |       |       |       |       |  | 33226 |
| OliveBaboon       | --ACAGTGATTCCATAGATTGCATAGTACTCTGAAACATTG-----GAGTTCTGAGAAGTC                   |       |       |       |       |       |       |       |  | 34193 |
| Orangutan         | --ATGGTGATTCCATAGGTTGCAGAGTACTCTGAAACATTG-----GAGTTCTGAGAAGTC                   |       |       |       |       |       |       |       |  | 34203 |

| Majority          | AGAATGCAGACATCTTGACAGGTTACTTCAAACACTCCATTTAGACTACAGAAAGCCTGGACCTGAATAGAAAGGATCACA |       |       |       |       |       |       |       |  |       |
|-------------------|-----------------------------------------------------------------------------------|-------|-------|-------|-------|-------|-------|-------|--|-------|
|                   | 41690                                                                             | 41700 | 41710 | 41720 | 41730 | 41740 | 41750 | 41760 |  |       |
| Human             | AGAATGCAGACATATTGCAGGTTACTTCAAACACTCCATTTAGACTACAGAAAGCCTGGACCTGAATAGAAAGGATCACA  |       |       |       |       |       |       |       |  | 32279 |
| Coquerel'sSifaka  | AGAATGCAGACATCTTGACAGTACCTCAGACATTCCATTTAGACTAC-GAAAGCTCAGTCCTTAA-----AGGATCA--   |       |       |       |       |       |       |       |  | 31219 |
| Ma'sNightMonkey   | AGAATGCAGACATCTTGTAGGGTACTTCCAGACACTCCATTTAGACTACAGAAAGCCAGGCCTGAATAAATAGGATCACA  |       |       |       |       |       |       |       |  | 29150 |
| VervetAGM         | AGAATGCAGACATCTTGACAGGTTACTTCAAACACTCCATTTAGACTACAGAAAGCCTGGACCTGAATAGAAAGGATCATA |       |       |       |       |       |       |       |  | 35654 |
| Gorilla           | AGAATGCAGACATATTGCAGGTTACTTCAAACACTCCATTTAGACTACAGAAAGCCTGGACCTGAATAGAAAGGATCACA  |       |       |       |       |       |       |       |  | 34667 |
| GrabEatingMacaque | AGAATGCAGACACCTTGACAGGTTACTTCAAACACTCCATTTAGACTACAGAAAGCCTGGACCTGAATAGAAAGGATCACA |       |       |       |       |       |       |       |  | 34299 |
| Macaque           | AGAATGCAGACACCTTGACAGGTTACTTCAAACACTCCATTTAGACTACAGAAAGCCTGGACCTGAATAGAAAGGATCACA |       |       |       |       |       |       |       |  | 35067 |
| PigTailedMacaque  | AGAATGCAGACACCTTGACAGGTTACTTCAAACACTCCATTTAGACTACAGAAAGCCTGGACCTGAATAGAAAGGATCACA |       |       |       |       |       |       |       |  | 34020 |
| Bonobo            | AGAATGCAGACATCTTGACAGGTTACTTCAAACACTCCATTTAGACTACAGAAAGCCTGGACCTGAATAGAAAGGATCACA |       |       |       |       |       |       |       |  | 33306 |
| OliveBaboon       | AGAATGCAGACATCTTGACAGGTTACTTCAAACACTCCATTTAGACTACAGAAAGCCTGGACCTGAATAGAAAGGATCACA |       |       |       |       |       |       |       |  | 34273 |
| Orangutan         | AGAATGCAGACATCTTGACAGGTTACTTCAAACACTCCATTTGACTACAGAAAGCCTGGACTTGAATAGAAAGGATCACA  |       |       |       |       |       |       |       |  | 34283 |

Tuesday, May 03, 2022 06:15 PM

| Majority          | CCCTATAGGAAGTGCCATCTATAAGACTGAGATAAAAAACCAAAACCTAACCCGATAGGAA-GTGAAGGATTCACCAGTT |       |
|-------------------|----------------------------------------------------------------------------------|-------|
|                   | 41770 41780 41790 41800 41810 41820 41830 41840                                  |       |
| Human             | CCCTATAGGAAGTGCCATCTATAAGACTGAGATAAAAAACCAAAACCTAACCCGATAGGAA-GTGAAGGATTCACCAGTT | 32358 |
| Coquerel'sSifaka  | CTCTATAGTAAGGCCATCCATAAGACT-AGTTAA--ACTGAAAATCTAATCTGACAGAAATGTAAAGGATTCACCAGT-  | 31295 |
| Ma'sNightMonkey   | CCCTATGGGAAGTGCCATCTATAAGACTAAGATAAAAAACCAAAACCTAACCCAATAGGAA-GTGAAGGATTCACCAGTT | 29229 |
| VervetAGM         | CCCCATAGGAAGTGCCATCTATAAGACTGAGATAAAAAACCAAAACCTAACCCAATAGGAA-GTGAAGGATTCACCAGTT | 35733 |
| Gorilla           | CCCTATAGGAAGTGCCATCTATAAGACTGAGATAAAAAACCAAAACCTAACCCGATAGGAA-ATGAAGGACTCACCAGTT | 34746 |
| GrabEatingMacaque | CCCCATAGGAAGTGCCATCTATAAGACTGAGATAAAAAACCAAAACCTAACCCGATAGGAA-GTGAAGGATTCACCAGTT | 34378 |
| Macaque           | CCCCATAGGAAGTGCCATCTATAAGACTGAGATAAAAAACCAAAACCTAACCCGATAGGAA-GTGAAGGATTCACCAGTT | 35146 |
| PigTailedMacaque  | CCCCATAGGAAGTGCCATCTATAAGACTGAGATAAAAAACCAAAACCTAACCCGATAGGAA-GTGAAGGATTCACCAGTT | 34099 |
| Bonobo            | CCCTATAGGAAGTGCCATCTATAAGACTGAGATAAAAAACCAAAACCTAACCCGATAGGAA-GTGAAGGATTCACCAGTT | 33385 |
| OliveBaboon       | CCCCATAGGAAGTGCCATCTATAAGACTGAGATAAAAAACCAAAACCTAACCCGATAGGAA-GTGAAGGATTCACCAGTT | 34352 |
| Orangutan         | CCCTGTAGGAAGTGCCATCTGTAAGACTGAGATAAAAAACCAAAACCTAACCCGATAGGAA-GTGAAGGATTCACCAGTT | 34362 |

| Majority          | AATCTAACCCAGTAACTGATGATGGATTAACCAATAATTTAGTTGCCTTCCAAAACA-AAACAACACCCCC-AAGAAAGAC |       |
|-------------------|-----------------------------------------------------------------------------------|-------|
|                   | 41850 41860 41870 41880 41890 41900 41910 41920                                   |       |
| Human             | AATCTAACCCAGTAACTGATGAAGGATTAATCAGTAATTTAGTTGCCTTCCAAAACA-AAACAACACCCCC-AAGAAAGA- | 32435 |
| Coquerel'sSifaka  | AATATAA-----TTGCCTGCCAAAACAGAAACACTACCCCTAAGGCAGAC                                | 31341 |
| Ma'sNightMonkey   | AATCTAA-----TTTAGTTGCCTTCCAAAACA-AAACAACACCCCTC-AAGGAAGAC                         | 29278 |
| VervetAGM         | AATCTAACCCAGTAACTGATGATGGATTAACCAATAATTTAGTTGCCTTCCAAAACA-AAATAACACCCCC-AAGAAAGAC | 35811 |
| Gorilla           | AATCTAACCCAGTAACTGATGAAGGATTAACCAATAATTTAGTTGCCTTCCAAAACA-AAACAACACCCCC-AAGAAAGA- | 34823 |
| GrabEatingMacaque | AATCTAACCCAGTAACTGATGATGGATTAACCAATAATTTAGTTGCCTTCCAAAACA-AAATAACACCCCC-AAGAAAGAC | 34456 |
| Macaque           | AATCTAACCCAGTAACTGATGATGGATTAACCAATAATTTAGTTGCCTTCCAAAACA-AAATAACACCCCC-AAGAAAGAC | 35224 |
| PigTailedMacaque  | AATCTAACCCAGTAACTGATGATGGATTAACCAATAATTTAGTTGCCTTCCAAAACA-AAATAACACCCCC-AAGAAAGAC | 34177 |
| Bonobo            | AATCTAACCCAGTAACTGATGAAGGATTAATCAGTAATTTAGTTGCCTTCCAAAACA-AAACAACACCCCC-AAGAAAGA- | 33462 |
| OliveBaboon       | AATCTAACCCAGTAACTGATGATGGATTAACCAATAATTTAGTTGCCTTCCAAAACA-AAATAACACCCCC-AAGAAAGAC | 34430 |
| Orangutan         | AATCTAACCCAGTAACTGATGAAGGATTAACCAATAATTTAGTTGCCTTCCAAAACA-AAACAACACCCCC-AAGAAAGA- | 34439 |

| Majority          | AACATGATATAGTTTTCTGCAACTATCTTCCAT-AATATCTAGCATACCATCAAAAATTACAAGTAATGTGAAGAAGCA  |       |
|-------------------|----------------------------------------------------------------------------------|-------|
|                   | 41930 41940 41950 41960 41970 41980 41990 42000                                  |       |
| Human             | --CATGATATAGTTTTCTGCAACTATCTTCCAT-AATATCTAGTATACCATCAAAAATTACAAGTGATGTGCAGAAGCA  | 32512 |
| Coquerel'sSifaka  | AGCATGATTCAGTGTTCCTGTAC--TTCT-CCAT-AATATCTAGCATACCATCAAAAATTACAGGTCATGTGAAGAAGCA | 31417 |
| Ma'sNightMonkey   | AACATGATACAAATTTCTGCAACTGCTTCCGTTAATATCTAGCATATCATCAAAAATTACAAGTAATGTGAAGAAGCA   | 29358 |
| VervetAGM         | AACATGATATAGTTTTCTGCTACTATCTTCCAT-AATATCTACCATACCATCAGAAATTACAAGTAATGTGAAGAAGCA  | 35890 |
| Gorilla           | --CATGATATAGTTTTCTGCAACTATCTTCCAT-AATATCTAGCATACCATCAAAAATTACAGGTGATGTGCAGAAGCA  | 34900 |
| GrabEatingMacaque | AACATGATATAGTTTTCTGCTACTATCTTCCAT-AATATCTACCATACCATCAGAAATTATAAGTAATGTGAAGAAGCA  | 34535 |
| Macaque           | AACATGATATAGTTTTCTGCTACTATCTTCCAT-AATATCTACCATACCATCAGAAATTATAAGTAATGTGAAGAAGCA  | 35303 |
| PigTailedMacaque  | AACATGATATAGTTTTCTGCTACTATCTTCCAT-AATATCTACCATACCATCAGAAATTACAAGAAATGTGAAGAAGCA  | 34256 |
| Bonobo            | --CATGATATAGTTGCTGCAACTATCTTCCAT-AATATCTAGTATACCATCAAAAATTACAAGTGATGTGCAGAAGCA   | 33539 |
| OliveBaboon       | AACATGATATAGTTTTCTGCTACTATCTTCCAT-AATATCTACCGTACCATCAGAAATTACAAGTAATGTGAAGAAGCA  | 34509 |
| Orangutan         | --CATGATACAGTTTTCTGCAACCATCTTCCAT-AATATCTAGCATACCATCAAAAATTACAAGTGATGTGAAGAAGCA  | 34516 |

Tuesday, May 03, 2022 06:15 PM

| Majority          | GGAAAGTAACCCATGAAATATAAAGA-CACATTTAATAGGAACAGATTCCAAAATGACCTAGA-GTTAGAATTAGCAGAC |       |       |       |       |       |       |       |  |       |
|-------------------|----------------------------------------------------------------------------------|-------|-------|-------|-------|-------|-------|-------|--|-------|
|                   | 42010                                                                            | 42020 | 42030 | 42040 | 42050 | 42060 | 42070 | 42080 |  |       |
| Human             | GGAAAGTAACCCATGAAATATAAAGAACACATTTAATAGGAACAGATTCCAAAATGACCTAGA-GTTAGAATTAGCAGAC |       |       |       |       |       |       |       |  | 32591 |
| Coquerel'sSifaka  | GGAAAATAAAATGTAAACTACAAAGA-GGCATTCAATAGGAGCGGACTTGAAAATTATCTAGATAACAGAATTAGCA--- |       |       |       |       |       |       |       |  | 31493 |
| Ma'sNightMonkey   | GGAAAATAAAACATTAACCATAAGGA-AACATTTAATAGGAACAGATTCCAAAATGACCTAGA-GTTAGAATTGGCAGAC |       |       |       |       |       |       |       |  | 29436 |
| VervetAGM         | GAAAAGTAACCCATGAAATATAAAGA-CACATTGAATAGGAACAGATTCCAAAATGACCTAGA-GTTAGAATTAGCAGAC |       |       |       |       |       |       |       |  | 35968 |
| Gorilla           | GGAAAGTAACCCATGAAATATAAAGAACACATTTAATAGGAACAGATTCCAAAATGACCTAGA-GTTAGAATTAGCAGAC |       |       |       |       |       |       |       |  | 34979 |
| GrabEatingMacaque | GGAAAGTAACCCATGAAATATAAAGA-CACATTGAATAGGAACAGATTCCAAAATGACCTAGA-GTTAGAATTAGCAGAC |       |       |       |       |       |       |       |  | 34613 |
| Macaque           | GGAAAGTAACCCATGAAATATAAAGA-CACATTGAATAGGAACAGATTCCAAAATGACCTAGA-GTTAGAATTAGCAGAC |       |       |       |       |       |       |       |  | 35381 |
| PigTailedMacaque  | GGAAAGTAACCCATGAAATATAAAGA-CACATTGAATAGGAACAGATTCCAAAATGACCTAGA-GTTAGAATTAGCAGAC |       |       |       |       |       |       |       |  | 34334 |
| Bonobo            | GGAAAGTAACCCATGAAATATAAAGAACACATTTAATAGGAACAGATTCCAAAATGACCTAGA-GTTAGAATTAGCAGAC |       |       |       |       |       |       |       |  | 33618 |
| OliveBaboon       | GGAAAGTAACCCATGAAATATAAAGA-CACATTGAATAGGAACAGATTCCAAAATGACCTAGA-GTTAGAATTAGCAGAC |       |       |       |       |       |       |       |  | 34587 |
| Orangutan         | GGAAAGTAACCCATGAAATATAAAGA-CACATTTAATAGGAACAGATTCCAAAATGACCTAGA-GTTAGAATTAGCAGAC |       |       |       |       |       |       |       |  | 34594 |

| Majority          | AAGGACGATAAGTATTTTAAGCTGTAAAGGAAAAGATTGAAATAATGAGTGA-----TGGAGGAGTGTG-TTAAGAGATA |       |       |       |       |       |       |       |  |       |
|-------------------|----------------------------------------------------------------------------------|-------|-------|-------|-------|-------|-------|-------|--|-------|
|                   | 42090                                                                            | 42100 | 42110 | 42120 | 42130 | 42140 | 42150 | 42160 |  |       |
| Human             | AAGGACGATAAGTATTTTAAGCTGTAAAGGAAAAGATTGAAATAATGAGTGA-----TGGAGGAGTGTGTTGAAGAGATA |       |       |       |       |       |       |       |  | 32666 |
| Coquerel'sSifaka  | -AAGATGATACATATGTTAAGCTATAAAGGAGAAGATTGACATAATGATTGAACACATGGAGGAATATG-TTAAGAGATA |       |       |       |       |       |       |       |  | 31571 |
| Ma'sNightMonkey   | AAGGACGGTAAGTATTTTAAGCTGTAAAGAAAAGATTGAAATAATGAGTGA-----TGGAGGAGTGTGTTAAGAGATA   |       |       |       |       |       |       |       |  | 29511 |
| VervetAGM         | AAGGACC-TAAGTATTTTAAGTTGTAAAGGAAAAGATTGAAATAATGAATGA-----TGGAGGAGTGT--TTAAGAGATA |       |       |       |       |       |       |       |  | 36040 |
| Gorilla           | AAGGACGATAAGTATTTTAAGCTGTAAAGGAAAAGATTGAAATAATGAGTGA-----TGGAGGAGTGTGTTGAAGAGATA |       |       |       |       |       |       |       |  | 35054 |
| GrabEatingMacaque | AAGGACG-TA----TTTTAAGTTGTAAAGGAAAAGATTGAAATAATGAATGA-----TGGAGGAGTGC--TTAAGAGATA |       |       |       |       |       |       |       |  | 34681 |
| Macaque           | AAGGACG-TA----TTTTAAGTTGTAAAGGAAAAGATTGAAATAATGAATGA-----TGGAGGAGTGC--TTAAGAGATA |       |       |       |       |       |       |       |  | 35449 |
| PigTailedMacaque  | AAGGACG-TA----TTTTAAGTTGTAAAGGAAAAGATTGAAATAATGAATGA-----TGGAGGAGTGT--TTAAGAGATA |       |       |       |       |       |       |       |  | 34402 |
| Bonobo            | AAGGACAATAAGTATTTTAAGCTGTAAAGGAAAAGATTGAAATAATGAGTGA-----TGGAGGAGTGTGTTGAAGAGATA |       |       |       |       |       |       |       |  | 33693 |
| OliveBaboon       | AAGGACG-TAAGTATTTTAAGTTGTAAAGGAAAAGATTGAAATAATGAATGA-----TGGAGGAGTGT--TTAAGAGATA |       |       |       |       |       |       |       |  | 34659 |
| Orangutan         | AAGGACGATAAGTATTTTAAGCTGTACAGGAAAAGATTGAAATAATGAGTGA-----TGGAGGAGTGTGGTTAAGAGATA |       |       |       |       |       |       |       |  | 34669 |

| Majority          | AAAA--CTATAAAGAAAGCATGTAGAAATATTCTAATTGAAAAATACAGTATTTGAAATAGTTGGGACTAATTCACTGG  |       |       |       |       |       |       |       |  |       |
|-------------------|----------------------------------------------------------------------------------|-------|-------|-------|-------|-------|-------|-------|--|-------|
|                   | 42170                                                                            | 42180 | 42190 | 42200 | 42210 | 42220 | 42230 | 42240 |  |       |
| Human             | AAAA--CTATAAAGAAAGCATGTAGAAATATTCTAATTGAAAAATACAGTATTTGAAATAGTTGGGACTGATTCACTGG  |       |       |       |       |       |       |       |  | 32744 |
| Coquerel'sSifaka  | A-----CTGTAAAGAC--TAACAACAAATCTATACTTAATGG-----GGAAATACT--GAAT--ATTTTCTCC        |       |       |       |       |       |       |       |  | 31629 |
| Ma'sNightMonkey   | AAAAG--CTATAAATAAAGCGTGTAGATATATTCTAATTAATAA---TAATATTTGAAATGGTTGGGGCGAATTCACTGG |       |       |       |       |       |       |       |  | 29586 |
| VervetAGM         | AAAC--CTATAAAGAAAGCATGTAGAAATATTCTAATTGAAAAATGAGTATTTGAAATAATTTGGGACTAATTCACTGG  |       |       |       |       |       |       |       |  | 36118 |
| Gorilla           | AAAA--CTATAAAGAAAGCATGTAGAAATATTCTAATTGAAAAATACAGTATTTGAAATAGTTGAGACTAATTCACTGG  |       |       |       |       |       |       |       |  | 35132 |
| GrabEatingMacaque | AAAA--CTATGAAGAAAGCATGTAGAAATATTCTAATTGAAAAATATAGTATTTGAAATAGTTGGGACTAATTCACTGG  |       |       |       |       |       |       |       |  | 34759 |
| Macaque           | AAAA--CTATGAAGAAAGCATGTAGAAATATTCTAATTGAAAAATATAGTATTTGAAATAGTTGGGACTAATTCACTGG  |       |       |       |       |       |       |       |  | 35527 |
| PigTailedMacaque  | AAAA--CTATGAAGAAAGCGTGTAGAAATATTCTAATTGAAAAATACAGTATTTGAAATAGTTGGGACTAATTCACTGG  |       |       |       |       |       |       |       |  | 34480 |
| Bonobo            | AAAA--CTATAAAGAAAGCATGTAGAAATATTCTAATTGAAAAATACAGTATTTGAAATAGTTGGGACTAATTCACTGG  |       |       |       |       |       |       |       |  | 33771 |
| OliveBaboon       | AAAA--CTATAAAGAAAGCATGTAGAAATATTCTAATTGAAAAATACAGTATTTGAAATAGTTGGGACTAATTCACTGA  |       |       |       |       |       |       |       |  | 34737 |
| Orangutan         | AAAAAACTATAAAGAAAGCATGTAGAAATATTCTAATTGAAAAATACAGTATTTGAAATAGTTGGGACTAATTCACTGG  |       |       |       |       |       |       |       |  | 34749 |



Tuesday, May 03, 2022 06:15 PM

| Majority          | TTGGAACTAATAGCAGATTGGAGACAA--GAAGAAATGTTAGTGAACT---TGAATACAGTTGAATACAGTGATTAAATC |       |
|-------------------|----------------------------------------------------------------------------------|-------|
|                   | 42250 42260 42270 42280 42290 42300 42310 42320                                  |       |
| Human             | TTGGAACTAGTAGCAGATTGGAGACAATAGAAGAAATGTTAGTGAACT---TGAATACTGTTGAATACAGTGATTAAATC | 32821 |
| Coquerel'sSifaka  | TTAAAAACAG---GAATT--AGGCAA--GGGTGTCTATTTCAAAAT-----TTTTTCTAGCCTTCTGTTTATATC      | 31694 |
| Ma'sNightMonkey   | TTGGAACTAATAGCAGATTGGACACAGTAGAAGAAATGTTAGTGAATT---TGAATGTAGTTGGATACAGTGATTAAATC | 29663 |
| VervetAGM         | TTGGAACTAATAGCAGATTGGAGACAA--GAAGATATGTTAGTGAACT---TGAATACACGTGAATACAATGATTAAATC | 36193 |
| Gorilla           | TTGGAACTAATAGCAGATTGGAGACAATAGAAGAAATGTTAGTGAATTCATTGAATACTGTTGAATACAGTGATTAAATC | 35212 |
| GrabEatingMacaque | TTGGAACTAATAGCAGATTGGAGACAA--GAAGAAATGTTAGTGAACT---TGAATACACATGAATACAATGATTAAATC | 34834 |
| Macaque           | TTGGAACTAATAGCAGATTGGAGACAA--GAAGAAATGTTAGTGAACT---TGAATACACATGAATACAATGATTAAATC | 35602 |
| PigTailedMacaque  | TTGGAACTAATAGCAGATTGGAGACAA--GAAGAAATGTTAGTGAACT---TGAATACACATGAATACAATGATTAAATC | 34555 |
| Bonobo            | TTGGAACTAATAGCAGATTGGAGACAATAGAAGAAATGTTAGTGAACT---TGAATACTGTTGAATACAGTGATTAAATC | 33848 |
| OliveBaboon       | TTGGAACTAATAGCAGATTGGAGACAA--GAAGAAATGTTAGTGAACT---TGAATACACATGAATACAATGATTAAATC | 34812 |
| Orangutan         | TCGGAACTAATAGCAGATTGGAGACAATAGAAGAAATGTTAGTGAACT---TGAATACAGATGAATACAGTGATTAAATC | 34826 |

| Majority          | TGTCAGAGAGGAGAAAAGTATACCTAATGGACAATGAAGCAGTCTGCATGTAATTTGAGTTTCAGTGTGAGAATGTGGGG  |       |
|-------------------|-----------------------------------------------------------------------------------|-------|
|                   | 42330 42340 42350 42360 42370 42380 42390 42400                                   |       |
| Human             | TGTCAGAGAGGAGAAAAGTATATCTAATGGACAATGAAGCAGTCTGCATGTAAGTTGAATTTTCAGAGTGAGAATGTGGGG | 32901 |
| Coquerel'sSifaka  | AGGCAAGTAAAATAAAAGGTATAAAGATTGCAAAGGAGAAGTAAACTCTTA-----TTCAGTATCAACATGTT---      | 31763 |
| Ma'sNightMonkey   | TGCCAGAGAGGAGAAAATACACCTCATGGGCAATGATGCAGTCTGCATGTAATTTGAGTTTCAGAGTGAGAATGTGGGG   | 29743 |
| VervetAGM         | TTTCAGAGAGGAGAAAAGTATACCTAATGGACAGTGAAGCAGTCTGCATATAAATTTGAGTTTCAGTGTGAGAATGTGGAG | 36273 |
| Gorilla           | TGTCAGAGAGGAGAAAAGTATACCTAATGGACAATGAAGCAGTCTGCATGTAAGTTGAATTTTCAGAGTGAGAATGTGGGG | 35292 |
| GrabEatingMacaque | TTTCAGAGAGGAGAAAAGTATACCTAATGGACAATGAAGCAGTCTGCATATAAATTTGAGCTTCAGTGTGAGAATGTGGAG | 34914 |
| Macaque           | TTTCAGAGAGGAGAAAAGTATACCTAATGGACAATGAAGCAGTCTGCATATAAATTTGAGCTTCAGTGTGAGAATGTGGAG | 35682 |
| PigTailedMacaque  | TTTCAGAGAGGAGAAAAGTATACCTAATGGACAATGAAGCAGTCTGCATATAAATTTGAGCTTCAGTGTGAGAATGTGGAG | 34635 |
| Bonobo            | TGTCAGAGAGGAGAAAAGTATACCTAATGGACAATGAAGCAGTCTGCATGTAAGTTGAATTTTCAGAGTGAGAATGTGGGG | 33928 |
| OliveBaboon       | TTTCAGAGAGGAGAAAAGTATACCTAATGGACAATGAAGCAGTCTGCATATAAATTTGAGCTTCAGTGTGAGAATGTGGAG | 34892 |
| Orangutan         | TGTCAGAGAGGAGAAAAGTATACCTAATGGACAATGAAGCTGTCTGCATGTAATTTGAATTTTCAGAGTGAGAATGTGGGG | 34906 |

| Majority          | GGAAAAACATATATCTGTTTGAGGTAGTAATGACTGAGAACTTCCAAAATTTGAATAAAAATATATCAACTTACATTCCT   |       |
|-------------------|------------------------------------------------------------------------------------|-------|
|                   | 42410 42420 42430 42440 42450 42460 42470 42480                                    |       |
| Human             | GAATAAAACATCTATCTGTTTGAGATAGTAATGACTGAGAACTTCTAAAATTTGAATAAAAATATATCAACTTACATTCCT  | 32981 |
| Coquerel'sSifaka  | -----TAT-----TTTAAAATAGAAAACCTGAAGGGATCCAC-----AAAAGATCATCTGGTAGAACT               | 31817 |
| Ma'sNightMonkey   | AAG-AAAGCATGTATCTCTTTGAGGTAGTCATGACAGAGAACTTCTACAATTTGAATAAAAATATATCAATTTGCAGTCTT  | 29822 |
| VervetAGM         | GGAAAAACATATATTTGTTTGAGGTAGTAATGACTGAGAACTTACAAAATTTGAATAAAAATATATCAACTTACATTCCT   | 36353 |
| Gorilla           | GAATAAAACATGTATCTGTTTGAGATAGTAATGACTGAGAACTTCTAAAATTTGAATAAAAATATATCAACTTACATTCCT  | 35372 |
| GrabEatingMacaque | GGAAAAACATAT--CTGTTTGAGGTAGTAATGACTGAGAACTTACAAAATTTGAATAAAAATATATCAACTTACATTCCT   | 34992 |
| Macaque           | GGAAAAACATATATCTGTTTGAGGTAGTAATGACTGAGAACTTACAAAATTTGAATAAAAATATATCAACTTACATTCCT   | 35762 |
| PigTailedMacaque  | GGAAAAACATATATCTGTTTGAGGTAGTAATGACTGAGAACTTACAAAATTTGAATAAAAATATATCAACTTACATTCCT   | 34715 |
| Bonobo            | GAATAAAACATGTATCTGTTTGAGATAGTAATGACTGAGAACTTCTAAAATTTGAATAAAAATATATCAACTTACATTCCT  | 34008 |
| OliveBaboon       | GGAAAAACATATATCTGTTTGAGGTAGTAATGACTGAGAACTTACAAAATTTGAATAAAAATATATCAACTTACATTCCT   | 34972 |
| Orangutan         | GAA-AAAACATGTATCTGTTTGAGATAGTAATGACTGAGAACTTCTAAAATTTAAAATAAAAATATATCAACTTA-ATTCCT | 34984 |

Tuesday, May 03, 2022 06:15 PM

| Majority          | AAGAAGCTCAGGTAAACTCCTCATGTAGGCTAAATAAAAAAGAACCATACTTAGACACATAGTAGTCAAAATATTGAAAAC |       |
|-------------------|-----------------------------------------------------------------------------------|-------|
|                   | 42490 42500 42510 42520 42530 42540 42550 42560                                   |       |
| Human             | AAGAAGCTCAGGTAAACTCCTCATGTAGGCTAAATAAAAAAGAACCATACTTAGACACATAGTAGTCAAAATATTGAAAAC | 33061 |
| Coquerel'sSifaka  | AATAAGT-----AACTT-----TAGAATGATTACAGGATACAAGTTCTATATATAAAA-----AGTGTATTGTTTC      | 31878 |
| Ma'sNightMonkey   | AAGAAGTTCAGGTAAACTCCCATGTAGGCTAAATGAAAAGAACCATACTTAGACACACAGT---CAAATACTGAAAAC    | 29899 |
| VervetAGM         | AAGAAGCTCAGGTAAACTCCTCATGTAGGCTAAATAAAAAAGAACCATACTTAGACACATAGTAGTCAAAATATTGAAAAC | 36433 |
| Gorilla           | AAGAAGCTCAGGTAAACTC---ATGTAGGCTAAATAAAAAAGAACCACACTTAGACACATAGTAGTCAAAATATTGAAAAC | 35449 |
| GrabEatingMacaque | AAGAACTCAGGTAAACTCCTCATGTAGGCTAAATAAAAAAGAACCATACTTAGACACATAGTGGTCAAAATATTGAAAAC  | 35072 |
| Macaque           | AAGAAGCTCAGGTAAACTCCTCATGTAGGCTAAATAAAAAAGAACCATACTTAGACACATAGTGGTCAAAATATTGAAAAC | 35842 |
| PigTailedMacaque  | AAGAAGCTCAGGTAAACTCCTCATGTAGGCTAAATAAAAAAGAACCATACTTAGACACATAGTGGTCAAAATATTGAAAAC | 34795 |
| Bonobo            | AAGAAGCTCAGGTAAACTCCTCATGTAGGCTAAATAAAAAAGAACCACACTTAGACACATAGTAGTCAAAATATTGAAAAC | 34088 |
| OliveBaboon       | AAGAAGCTCAGGTAAACTCCTCATGTAGGCTAAATAAAAAAGAACCATACTTAGACACATAGTGGTCAAAATATTGAAAAC | 35052 |
| Orangutan         | CAGAAGCTCAGGTAAACTCCTCAGGTAGGCTAAATAAAAAAGAACCATACTTAGACACATAGTAGTCAAAATATTGAAAAC | 35064 |

| Majority          | TAGAAATGAAGAGCAAATCTAAACAGCCGGAAAAAGACATCTAACAGGAGACCAATACCTTGTATTAAGGGGAAAAAAA   |       |
|-------------------|-----------------------------------------------------------------------------------|-------|
|                   | 42570 42580 42590 42600 42610 42620 42630 42640                                   |       |
| Human             | TAGAAATGAAGAGCAAATCTAAACAGCTGCGAAAAAACGCTCTAACAGGAGACCAACACCTCGTATTAAGGGGGAAAAA   | 33141 |
| Coquerel'sSifaka  | TTATACTAGC-AGCAAAT-T-----GTTGGAAATGAAATTTTAA---GAAATCCA-----TTTACAAAAGCATCAGAAA   | 31943 |
| Ma'sNightMonkey   | TAGCAGTGAAGAGCAAATCTAAACAGCTGGGAAAAAGACATCTAACAGGAGACCAACACCTTGTACAAAAGGGGAAAAAAA | 29979 |
| VervetAGM         | TAGAAATGAAGAGCAAATCTAAACAGCCAGGAAAAAGACATCTAACAGGAGACCAATACCTTGTATTAAGAGAAAAAAA   | 36513 |
| Gorilla           | TAGAAACGAAGAGCAAATCTAAACAGCTGCGAAAAAACGCTCTAACAGGAGACCAACACCTTGTATTAAGGGGGAAAAAAA | 35529 |
| GrabEatingMacaque | TAGAAATGAAGAGCAAATCTAAACAGCCAGGAAAAAGACATCTAACAGGAGACCAATACCTTGTATTAAGAGAAAAAAA   | 35152 |
| Macaque           | TAGAAATGAAGAGCAAATCTAAACAGCCAGGAAAAAGACATCTAACAGGAGACCAATACCTTGTATTAAGAGAAAAAAA   | 35922 |
| PigTailedMacaque  | TAGAAATGAAGAGCAAATCTAAACAGCCAGGAAAAAGACATTTAACAGGAGACCAATACCTTGTATTAAGAGAAAAAAA   | 34875 |
| Bonobo            | TAGAAATGAAGAGCAAAGCTAAACAGCTGCGAAAAAACGCTCTAACAGGAGACCAACACCTTGTATTAAGGGGGAAAAA   | 34168 |
| OliveBaboon       | TAGAAATGAAGAGCAAATCTAAACAGCCAGGAAAGAAGACATCTAACAGGAGACCAATACCTTGTATTAAGAGAAAAAAA  | 35132 |
| Orangutan         | TGGAATGA---GCAAATCTAAACAGCCGCGAAAAAACGCTCTAACAGGAGACCAACACCTTGTATTAAGGGGGAAAAAAA  | 35141 |

| Majority          | AAA-----GCGAATTTCTTTAGACTGAATGGAATGACATTAGATAACTTGGCTCTGCAGGAGATAAAGAGGAGTACTGGG  |       |
|-------------------|-----------------------------------------------------------------------------------|-------|
|                   | 42650 42660 42670 42680 42690 42700 42710 42720                                   |       |
| Human             | AA-----GCGAATTTCTTTAGACTGAATGGCAT-----AACTTGGCTCTACAGGGGATAA-GAGGAGTACTGGG        | 33204 |
| Coquerel'sSifaka  | GA-----CAAATATCAGGAACAAATTTAAC-A-----AA---AGATGTATAAGACATCT-----ATACCAAT          | 31997 |
| Ma'sNightMonkey   | AG-----CAAATTTCTTTAGAGTGAATGGGATGACATTAGATAACTTGGATCTACAGGAGATGAGGAGTAGTACTGGG    | 30052 |
| VervetAGM         | AAAAAA--GAGAATTTCTTTAGACTGAATGGAATGACATTAGGTAACCTTGGCTCTGCAGGAGAAAAAGAGGAGTACTGGG | 36591 |
| Gorilla           | AAA-----GCGAATTTGTTTAGACTGAATGGCAT-----AACTTGGCTCTACAGGGGATAA-GAGGAGTACTGGG       | 35593 |
| GrabEatingMacaque | AAAAAAAAGAGAATTTCTTTAGACTGAATGGAATGACATTAGATAACTTGGCTCTGCAGGAGATAAAGAGGAGTACTGGG  | 35232 |
| Macaque           | AAAAAAA-GAGAATTTCTTTAGACTGAATGGAATGACATTAGATAACTTGGCTCTGCAGGAGATAAAGAGGAGTACTGGG  | 36001 |
| PigTailedMacaque  | AAAAAAA-GAGAATTTCTTTAGACTGAATGGAATGACATTAGATAACTTGGCTCTGCAGGAGATAAAGAGGAGTACTGGG  | 34954 |
| Bonobo            | AA-----GCGAATTTCTTTAGACTGAATGGCAT-----AACTTGGCTCTACAGGGGATAA-GAGGAGTACTGGG        | 34231 |
| OliveBaboon       | AAAA---GAGAATTTCTTTAGACTGAATGGAATGACATTAGATAACTTGGCTCTGCAGGAGATAAAGAAGAGTACTGGG   | 35208 |
| Orangutan         | AAA-----GCGGATTTCTTTAGTCTGAATGGGATGACATTAGATAACTTGGCTCTGCAGGGGATAA-GAGGAGTACTGGG  | 35215 |

Tuesday, May 03, 2022 06:15 PM

| Majority          | AATGGTTAATATGTGTATAAAATTTAAAAGGGCTCTTCTTTTCCTCTCAATTTCTTTGAAAGACTTTATGTAACAACA  |       |       |       |       |       |       |       |       |
|-------------------|---------------------------------------------------------------------------------|-------|-------|-------|-------|-------|-------|-------|-------|
|                   | 42730                                                                           | 42740 | 42750 | 42760 | 42770 | 42780 | 42790 | 42800 |       |
| Human             | AATGGTTAATATGTGTATAAAATTTAAAAGGGCTCTCTCTTTTCCTATCAGTTTCTTTGAAAGCCTTTATGTAACAACA |       |       |       |       |       |       |       | 33284 |
| Coquerel'sSifaka  | AACTTTAAGATGCTGCCAGAAGTTTAAACAGACC-----TAAATAAAGGGAGAGA-----TAGACCATG           |       |       |       |       |       |       |       | 32056 |
| Ma'sNightMonkey   | AATGGTAAATACATGTATACATTTTAAAAGTCTCTGTCTTTTCCTCTCAATTTCTTTGAAAGACTTTGTATAAACGACA |       |       |       |       |       |       |       | 30132 |
| VervetAGM         | AGTGGTTAATATGTGTATAAAATTTAAAAGGGCTCTTCTTTTCCTCTCAATTTCTTTGAAAGACTTTATGTAACAACA  |       |       |       |       |       |       |       | 36671 |
| Gorilla           | AATGGTTAATATGTGTATAAAATTTAAAAGGGCTCTCTCTTTTCCTATCAGTTTCTTTGAAAGCCTTTATGTAACAACA |       |       |       |       |       |       |       | 35673 |
| GrabEatingMacaque | AGTGGTTAATATGTGTATAAAATTTAAAAGGGCTCTTCTTTTCCTCTCAATTTCTTTGAAAGACTTTATGTAACAACA  |       |       |       |       |       |       |       | 35312 |
| Macaque           | AGTGGTTAATATGTGTATAAAATTTAAAAGGGCTCTTCTTTTCCTCTCAATTTCTTTGAAAGACTTTATGTAACAACA  |       |       |       |       |       |       |       | 36081 |
| PigTailedMacaque  | AGTGGTTAATATGTGTATAAAATTTAAAAGGGCTCTTCTTTTCCTCTCAATTTCTTTGAAAGACTTTATGTAACAACA  |       |       |       |       |       |       |       | 35034 |
| Bonobo            | AATGGTTAATATGTGTATAAAATTTAAAAGGGCTCTCTCTTTTCCTATCAGTTTCTTTGAAAGCCTTTATGTAACAACA |       |       |       |       |       |       |       | 34311 |
| OliveBaboon       | AGTGGTTAATATGTGTATAAAATTTAAAAGGGCTCTTCTTTTCCTCTCAATTTCTTTGAAAGACTTTATGTAACAACA  |       |       |       |       |       |       |       | 35288 |
| Orangutan         | AATGGTTAATATGTGTATAAAATTTAAAAGGGCTCTCTCTTTTCCTGTCAGTTTCTTTGAAAGCTTTTATGTAACAGCA |       |       |       |       |       |       |       | 35295 |

| Majority          | ACTTTGTATTATGGGGTTTATTATGTAAATGGAT-TTTATATGACAACAGTTAGTACAAAGTGAAGGTAATGGAATTTT  |       |       |       |       |       |       |       |       |
|-------------------|----------------------------------------------------------------------------------|-------|-------|-------|-------|-------|-------|-------|-------|
|                   | 42810                                                                            | 42820 | 42830 | 42840 | 42850 | 42860 | 42870 | 42880 |       |
| Human             | ACTTTGTATTATGGGGTTTATTATGTAAATGGATGTTTATATGACAACAGTTAGTACAAAGTGAAGATAAATGGAATTCT |       |       |       |       |       |       |       | 33364 |
| Coquerel'sSifaka  | TTCATGAATTAGAAAGCTCAGTATATTAACA-----T-GT-----CAGTTCTTTCCAAAT-----TGGATGGCATTAA   |       |       |       |       |       |       |       | 32118 |
| Ma'sNightMonkey   | ACTTTGTATTACGGGGTTTAGTATGTAAATGGATGTTTATATGACAACAATTAGTACAAAGTGAAGATAAATGGAATTTT |       |       |       |       |       |       |       | 30212 |
| VervetAGM         | ACTTTGTATTATGGGGTTTATTATGTAAATGGAT-TTTATATGACAACAGTTAGTACAAAGTGAAGGTAAGTGAATTTT  |       |       |       |       |       |       |       | 36750 |
| Gorilla           | ACTTTGTATTATGGGGTTTATTATGTAAATAGATGTTTATATGACAACAGTTAGTACAAAGTGAAGATAAATGGAATTCT |       |       |       |       |       |       |       | 35753 |
| GrabEatingMacaque | ACTTTGTATTATGGGGTTTATTATGTAAATGGAT-TTTATATGACAACAGTTAGTACAAAGTGAAGGTAATGGAATTTT  |       |       |       |       |       |       |       | 35391 |
| Macaque           | ACTTTGTATTATGGGGTTTATTATGTAAATGGAT-TTTATATGACAGCTGTTAGTACAAAGTGAAGGTAATGGAATTTT  |       |       |       |       |       |       |       | 36160 |
| PigTailedMacaque  | ACTTTGTATTATGGGGTTTATTATGTAAATGGAT-TTTATATGACAACAGTTAGTACAAAGTGAAGGTAATGGAATTTT  |       |       |       |       |       |       |       | 35113 |
| Bonobo            | ACTTTGTATTATGGGGTTTATTATGTAAATGGATGTTTATATGACAACAGTTAGTACAAAGTGAAGATAAATGGAATTCT |       |       |       |       |       |       |       | 34391 |
| OliveBaboon       | ACTTTGTATTATGGGGTTTATTATGTAAATGGAT-TTTATATGACAACAGTTAGTACAAAGTGAAGGTAATGGAATTTT  |       |       |       |       |       |       |       | 35367 |
| Orangutan         | ACTTTGTATTATGGGGTTTATTATGTAAATGGATGTTTATATGACAACAGTTAGTACAAAGTGAAGATAAATGGAATTCT |       |       |       |       |       |       |       | 35375 |

| Majority          | TCAGTGGTAAGGTTCTTATATTTTACCTGAAGTGATG-CAGTGTTAACTTT-AATATGAAAAGATTCTG-----TTAAGG  |       |       |       |       |       |       |       |       |
|-------------------|-----------------------------------------------------------------------------------|-------|-------|-------|-------|-------|-------|-------|-------|
|                   | 42890                                                                             | 42900 | 42910 | 42920 | 42930 | 42940 | 42950 | 42960 |       |
| Human             | TCAGTGGTAAGGTTCTTATATTTTACCTGAAGTGATA-CAGTGTTAACTCT-AACATAAAAAGATTCTG-----TTAAGG  |       |       |       |       |       |       |       | 33437 |
| Coquerel'sSifaka  | TCTGTAATTA-----ATCAAGCCCAGTAGGCTT-TAAAGTTGAAATT---AGTGAGTAGATTCTA-----            |       |       |       |       |       |       |       | 32174 |
| Ma'sNightMonkey   | TCAGTGGTAAGGTTCTTGTATTTTACATAAAAATGTTA-CAGTGTTAAAGCT-AACATAAAAATATCTGATAAGTTAAAG  |       |       |       |       |       |       |       | 30290 |
| VervetAGM         | TCAGTGGTAAGATTCTTATATTTTACCTGAAGTGATG-CAGTGTTAACTTT-AATATGAAAAGATTCTG-----TTAAGG  |       |       |       |       |       |       |       | 36823 |
| Gorilla           | TTAGTGGTAAGGTTCTTATATTTTACCTGAAGTGATA-CAGTGTTAACTCT-AACATAAAAAGATTCTG-----TTAAGG  |       |       |       |       |       |       |       | 35826 |
| GrabEatingMacaque | TCAGTGGTAAGATTCTTATATTTTACCTGAAGTGATG-CAGTGTTAACTTT-AATATGAAAAGATTCTG-----TTAAGG  |       |       |       |       |       |       |       | 35464 |
| Macaque           | TCAGTGGTAAGATTCTTATATTTTACCTGAAGTGATG-CAGTGTTAACTTT-AATATGAAAAGATTCTG-----TTAAGG  |       |       |       |       |       |       |       | 36233 |
| PigTailedMacaque  | TCAGTGGTAAGATTCTTATATTTTACCTGAAGTGATG-CAGTGTTAACTTT-AATATGAAAAGATTCTG-----TTAAGG  |       |       |       |       |       |       |       | 35186 |
| Bonobo            | TCAGTGGTAAGGTTCTTATATTTTACCTGAAGTGATA-CAGTGTTAACTCT-AACATAAAAAGATTCCG-----TTAAGG  |       |       |       |       |       |       |       | 34464 |
| OliveBaboon       | TCAGTGGTAAGATTCTTATATTTTACCTGAAGTGATG-CAGTGTTAACTTTTAAATATGAGAAGATTCTG-----TTAAGG |       |       |       |       |       |       |       | 35441 |
| Orangutan         | TCAGTGGTAAGGTTCTTATATTTTACCTGAAGTGGTAACAGTGTTAACTCT-AACGTA AAAAGATTCTG-----TTAAGG |       |       |       |       |       |       |       | 35449 |

Tuesday, May 03, 2022 06:15 PM

|                   |                                                                                   |       |
|-------------------|-----------------------------------------------------------------------------------|-------|
| Majority          | TTGCATATCAAATTCCTAAGTGTAACTCTCATTAAAAAGATTTAAAGAA-GTATAGCTAAAAGCCAATAGAGGAAAAATT  |       |
|                   | 42970 42980 42990 43000 43010 43020 43030 43040                                   |       |
| Human             | TTGCATATCAAATTCCTAAGTGTAACTCTCATTAAAAAGATAAAAAGAA-GTATAACGAAAAGCCAATAGAGGAAAAATT  | 33516 |
| Coquerel'sSifaka  | -----AAATTAATTTGGAAATA---AAATGAGCTAAAACCATT--TTGAAAACGGAAAAGTT                    | 32226 |
| Ma'sNightMonkey   | TTGCATATCAAATTCCTAAGTGTAACTCACATTTAAAAAGATTTAAAGACTGTATAGCTAAAAGCCAGTAGAGGAAGAATT | 30370 |
| VervetAGM         | TTGCATATCAAATTCCTAAGTGTAACTCTCATTAAAAAGATTTAAAGAA-GTATAGCTAAAAGCCAATAGAGGAAAAATT  | 36902 |
| Gorilla           | TTGCATATCAAATTCCTAAGTGTAACTCTCATTAAAAAGATATAAAAGAA-GTATAACGAAAAGCCAATAGAGGAAAAATT | 35905 |
| GrabEatingMacaque | TTGCATATCAAATTCCTAAGTGTAACTCTCATTAAAAAGATTTAAAGAA-GTATAGCTAAAAGCCAATAGAGGAAAAATT  | 35543 |
| Macaque           | TTGCATATCAAATTCCTAAGTGTAACTCTCATTAAAAAGATTTAAAGAA-GTATAGCTAAAAGCCAATAGAGGAAAAATT  | 36312 |
| PigTailedMacaque  | TTGCATTTCAAATTCCTAAGTGTAACTCTCATTAAAAAGATTTAAAGAA-GTATAGCTAAAAGCCAATAGAGGAAAAATT  | 35265 |
| Bonobo            | TTGCATATCAAATTCCTAAGTGTAACTCTCATTAAAAAGATATAAAAGAA-GTATAACGAAAAGCCAATAGAGGAAAAATT | 34543 |
| OliveBaboon       | TTGCATATCAAATTCCTAAGTGTAACTCTCATTAAAAAGATTTAAAGAA-GTATAGCTAAAAGCCAATAGAGGAAAAATT  | 35520 |
| Orangutan         | TTGCATATCAAATTCCTAAGTGTAACTCTCATTAAAAAGATACAAAGAA-GTATAACGAAAAGCCAATAGAGGAAAAATT  | 35528 |

|                   |                                                                                  |       |
|-------------------|----------------------------------------------------------------------------------|-------|
| Majority          | GGAGCATTGA---CTACCTGTTTTCAAGAATTACTGCAAAGCTACAGTAATTA--AAAATAGCATCATAATGACATAAAG |       |
|                   | 43050 43060 43070 43080 43090 43100 43110 43120                                  |       |
| Human             | GGAGCATTGA---CTACCAGTTTTCAAGAATTACTGCAAAGCTACGGTAATTA--AAAATAGCATCATAATAACATAAAG | 33591 |
| Coquerel'sSifaka  | GAAACAC--A-----CTGACTTCAAGATTCCTGTAACCTTATAGTTAATT-----AAAGCA--ATATTAGCAT---G    | 32287 |
| Ma'sNightMonkey   | GAAGCATTGA---CTACCTGTTTTCAAGAATTGCTGCAAAGCTACAGTAATTA--AAAATAGCATCAGATTGACATAAAG | 30445 |
| VervetAGM         | GGAGCATTGATGACTACCTGTTTTCAAGAATTACTGCAAAGCTACAGTAATTA--AAAATAGCATCATAATGACATAAAG | 36980 |
| Gorilla           | GGAGCATTGA---CCACCAGTTTTCAAGAATTACTGCAAAGCTACGGTAATTATAAAAATAGCATCATAATGACATAAAG | 35982 |
| GrabEatingMacaque | GGAGCATTGATGACTACCTGTTTTCAAGAATTACTGCAAAGCTACAGTAATTA--AAAATAGCATCATAATGACATAAAG | 35621 |
| Macaque           | GGAGCATTGATGACTACCTGTTTTCAAGAATTACTGCAAAGCTACAGTAATTA--AAAATAGCATCATAATGACATAAAG | 36390 |
| PigTailedMacaque  | GGAGCATTGATGACTACCTGTTTTCAAGAATTACTGCAAAGCTACAGTAATTA--AAAATAGCATCATAATGACATAAAG | 35343 |
| Bonobo            | GGAGCATTGA---CTACCAGTTTTCAAGAATTACTGCAAAGCTACGGTAATTA--AAAATAGCATCATAATAACATAAAG | 34618 |
| OliveBaboon       | GGAGCATTGATGACTACCTGTTTTCAAGAATTACTGCAAAGCTACAGTAATTA--AAAATAGCATCATAATGACATAAAG | 35598 |
| Orangutan         | GGAACATTGA---CTACCAGTTTTCAAGAATTACTGCAAAGCTACAGTAATTA--CAAATAGCATCATAACGACATAAAG | 35603 |

|                   |                                                                                   |       |
|-------------------|-----------------------------------------------------------------------------------|-------|
| Majority          | A----TAAATAGGTCAGTGAGACAGAGCAGAGAGTTCAGAAATTAACCTCACACAATTATGGATAACTGATTTTTGACAAA |       |
|                   | 43130 43140 43150 43160 43170 43180 43190 43200                                   |       |
| Human             | A----TAAATAGGTCAGTGAGACAGAGCAGAGAGTTCAGAAATTAACCTCACACAATTATGGATAACTGATTTTTGACAAA | 33667 |
| Coquerel'sSifaka  | -----GTTAGTGCCAC--AGAATAGCGTTCAGAAATAAGCTCACAT--TTAAGGTCAGTTGATTATTTACAAA         | 32351 |
| Ma'sNightMonkey   | ATAAATAGGTCAGTGAGACAGAGCAGAGAAATTCAGAAATTAACCTACATAATTATGGATGACTGATTTTTGACAAA     | 30525 |
| VervetAGM         | A----TAAATAGGTCAGTGAGA---GCAGAGAGTTCGGAATTAACCTCACACAATTATGGATAACTGGTTTTTGACAGA   | 37052 |
| Gorilla           | A----TAAATAGGTCAGTGAGACAGAGCAGAGAGTTCAGAAATTAACCTCACACAATTATGGATAACTGATTTTTGACAAA | 36058 |
| GrabEatingMacaque | A----TAAATAGGTCAGTGAGACAGAGCAGAGAGTTCAGAAATTAACCTCACACAATTATGGATAACTGGTTTTTGACAGA | 35697 |
| Macaque           | A----TAAATAGGTCAGTGAGACAGAGCAGAGAGTTCAGAAATTAACCTCACACAATTATGGATAACTGGTTTTTGACAGA | 36466 |
| PigTailedMacaque  | A----TAAATAGGTCAGTGAGACAGAGCAGAGAGTTCAGAAATTAACCTCACACAATTATGGATAACTGGTTTTTGACAGA | 35419 |
| Bonobo            | A----TAAATAGGTCAGTGAGACAGAGCAGAGAGTTCAGAAATTAACCTCACACAATTATGGATAACTGATTTTTGACAAA | 34694 |
| OliveBaboon       | A----TAAATAGGTCAGTGAGACAGAGCAGAGAGTTCAGAAATTAACCTCACACAATTACGGATAACTGGTTTTTGACAGA | 35674 |
| Orangutan         | AAAGATAAATAGGTCAGTGAGATAGAGCAGAGAGTTCAGAAATTAACCTCACACAATTATGGATAACTGATTTTTGACAAA | 35683 |

Tuesday, May 03, 2022 06:15 PM

|                   |                                                                                    |       |
|-------------------|------------------------------------------------------------------------------------|-------|
| Majority          | GGTGCAAAGTCAATTCAGTGG-AGAAAGAGTAGACTTC--AACAAAGGGTACTATAGCAGTTGGATCTAT-CCATCTGCA   |       |
|                   | 43210 43220 43230 43240 43250 43260 43270 43280                                    |       |
| Human             | GGTGCAAAGTCAATTCAGTGG-AGAAAAAGTAGACTTCC--AACAAAGGGTGCCTACAGCAGTTGGAGCTAT-CCGTATGCA | 33744 |
| Coquerel'sSifaka  | GTTGCCTTGGTAACTCAAGGG--GAAAGAGAAGTCTTTTCAACAAATGGTGCCAGAACAGCTTGAACACATTAATAAATA   | 32429 |
| Ma'sNightMonkey   | GGTGCAAAGTCAATTCAGTGG-AGAAAGAGTAGACTTC--CACAAACGGTGTGTAGCAGTTGGATCTAT-CCATATGCA    | 30601 |
| VervetAGM         | GGTGCAAAGTCAATTCAGTGGGAAAAAGAGTAGACTTC--AACAAAGGGTACTATAGCAGTTGGATCTAT-CCATCTGCA   | 37129 |
| Gorilla           | GGTGCAAAGTCAATTCAGTGG-AGAAAAAGTAGACTTCC--AACAAAGGGTACTATAGCAGTTGGAGCTAT-CCGTATGCA  | 36135 |
| GrabEatingMacaque | GGTGCAAAGTCAATTCAGTGGGAAAAAGAGTAGACTTC--AACAAAGGTTACTATAGCAGTTGGATCTAT-CCATCTGCA   | 35774 |
| Macaque           | GGTGCAAAGTCAATTCAGTGGGAAAAAGAGTAGACTTC--AACAAAGGTTACTATAGCAGTTGGATCTAT-CCATCTGCA   | 36543 |
| PigTailedMacaque  | GGTGCAAAGTCAATTCAGTGGGAAAAAGAGTAGACTTC--AACAAAGGTTACTATAGCAGTTGGATCTAT-CCATCTGCA   | 35496 |
| Bonobo            | GGTGCAAAGTCAATTCAGTGG-AGAAAAAGTAGACTTCC--AGCAAAGGGTGCCTATAGCAGTTGGAGCTAT-CCGTATGCA | 34771 |
| OliveBaboon       | GGTGCAAAGTCAATTCAGTGGGAAAAAGAGTAGACTTC--AACAAAGGTTACTATAGCAGTTGGATCTAT-CCATCTGCA   | 35751 |
| Orangutan         | GGTGCAAAGTCAATTCAGTGG-AGAAAAAGTAGACTTC--AACAAAGGGTGCCTATAGCAGTTGGATCTAT-CCGTGTACA  | 35759 |

|                   |                                                                                    |       |
|-------------------|------------------------------------------------------------------------------------|-------|
| Majority          | AAAAA-TGATCTTGGATCTGTATCTCATACTACATATGAAAATTAACTCCAGATGGATCATGGCCTAAA-TGTA AAAACC  |       |
|                   | 43290 43300 43310 43320 43330 43340 43350 43360                                    |       |
| Human             | AAAAA-TGATCTTGGATCTGTATCTCACACTGCATATGAAAATTAACTCCAAATGGATCATGGCCTAA--TGTA AAAACC  | 33821 |
| Coquerel'sSifaka  | GAAAA--GAAACTTAAACTCTATGTCTACACCATACAAAAAAT-----GAGATTAATTATATACTAAACCGTAAAAAC     | 32501 |
| Ma'sNightMonkey   | AAAAGT--GATTTTGGATCTGTATCTCACACTACATATGAAAATTAACTCCAAATGGATCGTGGCCTAAA-TGTA AAAACC | 30678 |
| VervetAGM         | AAAAAATGATCTTGGATATGTATCTCATACTACATATGAAAATTAACTCCAGATGGATCATGACCTAAA-TGTA AAAACC  | 37208 |
| Gorilla           | AAAAA-TGATCTTGGATCTGTATCTCACACTGCATATGAAAATTAACTCCAAATGGATCATGGCCTAAA-TGTA AAAACC  | 36213 |
| GrabEatingMacaque | AAAAAAGATCTTGGATATGTATCTCATACTACATATGAAAATTAACTCCAGATGGATCATGACCTAAA-TGTA AAAACC   | 35853 |
| Macaque           | AAAAAAGATCTTGGATATGTATCTCATACTACATATGAAAATTAACTCCAGATGGATCATGACCTAAA-TGTA AAAACC   | 36622 |
| PigTailedMacaque  | AAAAAAGATCTTGGATATGTATCTCATACTACATATGAAAATTAACTCCAGATGGATCATGACCTAAA-TGTA AAAACC   | 35575 |
| Bonobo            | AAAAA-TGATCTTGGATCTGTATCTCACACTGCATATGAAAATTAACTCCAAATGGATCATGGCCTAA--TGTA AAAACC  | 34848 |
| OliveBaboon       | AAAAAATGATCTTGGATATGTATCTCATACTACATATGAAAATTAACTCCAGATGGATCATGACCTAAA-TGTA AAAACC  | 35830 |
| Orangutan         | AAAAA-TGATCTTGGATCTGTATCTCACACTACCTATGCAAATTAACTCGAAATGGATCATGGCCTAAA-TGTA AAAACC  | 35837 |

|                   |                                                                                  |       |
|-------------------|----------------------------------------------------------------------------------|-------|
| Majority          | AAAAATTATAAAACCTCTAGAAAAAACAC--AGAAAATCTTTGTGACTTTGGATTAAGCAGAAATGTATTTGATATGA   |       |
|                   | 43370 43380 43390 43400 43410 43420 43430 43440                                  |       |
| Human             | AAAAATTATAAAATCTCTAGAAAAAATAC--AGAAAATCTTCGTGACTTTGGATTAAGCAGGAATGTATTTGATATGA   | 33898 |
| Coquerel'sSifaka  | TA---TATAAAGCTTTTAAGAAAAATCACA--GGATAAACTCATAAACCTTGGGGTAAATG---ATTTCTTAGCAAAGA  | 32572 |
| Ma'sNightMonkey   | AAAAATTATAAAACCTCTAGAAAGAAACATGGTAGAAAATCTTTGTGACCTTGGATTAAGCAGAAATGTATTTGATATGA | 30758 |
| VervetAGM         | AAAAATTATAAAACCTCTAGAAAAAGACAC--AGAAAATCTTTGTGACTTTGGATTAAGCAGAAATGTATTTGATATAA  | 37285 |
| Gorilla           | AAAAATTATAAAATCTCTAGAAAAAATAC--AGAAAATCTTTGTCACTTTGGATTAAGCAGAAATGTATTTGATGTGA   | 36290 |
| GrabEatingMacaque | AAAAATTATAAAACCTCTAGAAAAAACAC--AGAAAATCTTTGTGACTTTGGATTAAGCAGAAATGTGTTTGATATAA   | 35930 |
| Macaque           | AAAAATTATAAAACCTCTAGAAAAAACAC--AGAAAATCTTTGTGACTTTGGATTAAGCAGAAAGTGTATTTGATATAA  | 36699 |
| PigTailedMacaque  | AAAAATTATAAAACCTCTAGAAAAAACAC--AGAAAATCTTTGTGACTTTGGATTAAGCAGAAATGTATTTGATATAA   | 35652 |
| Bonobo            | AAAAATTATAAAATCTCTAGAAAAAATAC--AGAAAATCTTTGTGACTTTGGATTAAGCAGAAATGTATTTGATATGA   | 34925 |
| OliveBaboon       | AAAAATTATAAAACCTCTAGAAAAAACAC--AGAAAATCTTTGTGACTTTGGATTAAGCAGAAATGTATTTGATATAA   | 35907 |
| Orangutan         | AAAAATTATAAAACCTCTAGAAAAAATAC--AGAAAATCTTTGTGACTTTGGATTAAGCAGAAATGTATTTGATATGA   | 35914 |

Tuesday, May 03, 2022 06:15 PM

| Majority          | CCCTAAAAGCACAACTCTATTAA-AAAATGGAATTTGACATCAGAATTAAAATCTTGTGCCCTTCAAAGAAACTGTTA-G  |       |
|-------------------|-----------------------------------------------------------------------------------|-------|
|                   | 43450 43460 43470 43480 43490 43500 43510 43520                                   |       |
| Human             | CCCTAAAAGCACAACTCTATTAA-AAAATGGAATTTGACATCAGAATTAAAATCTTGTGCCCTTCAAAGAAACTGTTA-G  | 33976 |
| Coquerel'sSifaka  | TACAAAAATCACTAATCATAAAGTAATTATAAACTGG-ATCAAAAGGGGAAATTT--GTCATCAAAGACA---TTAAG    | 32646 |
| Ma'sNightMonkey   | TCCTAAAAGCATAATCTATTAAAGAAAATGGATTTTGCATTTAGAATTAAAACTTGTGCCCTTTGAACCAAAGTGTAAAG  | 30838 |
| VervetAGM         | CCCTAAAAGTATAATCTGTAA-AAAATGGAATTTGACATCAGAATTAAAATCTTGTACCGTTCAAAGAAACTGTTA-G    | 37363 |
| Gorilla           | CCCTAAAAGCACAACTCTATTAA-AAAATGGAATTTGACATCAGAATTAAAATCTTGTGCCCTTCAAAGAAACTCTTA-G  | 36368 |
| GrabEatingMacaque | CCCTAAAAGTACAATCTGTAA-AAAATGGAATTTGACATCAGAATTAAAATCTTGTACCCCTCAAAGAAACTGTTA-G    | 36008 |
| Macaque           | CCCTAAAAGTACAATCTGTAA-AAAATGGAATTTGACATCAGAATTAAAATCTTGTACCCCTCAAAGAAACTGTTA-G    | 36777 |
| PigTailedMacaque  | CCCTAAAAGTACAATCTGTAA-AAAATGGAATTTGACATCAGAATTAAAATCTTGTACCCCTCAAAGAAACTGTTA-G    | 35730 |
| Bonobo            | CCCTAAAAGCACAACTCTATTAA-AAAATGGAATTTGACATCAGAATTAAAATCTTGTGCCCTTCAAAGAAACTGTTA-G  | 35003 |
| OliveBaboon       | CCCTAAAAGTACAATCTGTAA-AAAATGGAATTTGACATCAGAATTAAAATCTTGTACCCCTCAAAGAAACTGTTA-G    | 35985 |
| Orangutan         | CCCTAAAAGCACAACTCTATTAA-AAAATGGAATTTGACATTTAGAATTAAAATCTTCAGCCATTCAAAGAAACTGTTA-G | 35992 |

| Majority          | GGAATGAAAAGACAAGCCATA--GACTGGAAGAACAT---CATAACAAAGCATATAGCTGATAAAGGACTTCTATCCAGA |       |
|-------------------|----------------------------------------------------------------------------------|-------|
|                   | 43530 43540 43550 43560 43570 43580 43590 43600                                  |       |
| Human             | GGAATGAAAAGACAAGCCATA--AACTGGAAGAACAT---CATAACAAAGCATATAGCTGATAAAGGACTTCTATCCAGA | 34051 |
| Coquerel'sSifaka  | ACAATGAAAAGGAAGGCAAAACGAACAGAATGATATTCACATATGAATGCATATATATGACAAAGGGCTTGTAT-----  | 32721 |
| Ma'sNightMonkey   | GGAGTAAAAGACAAGCCGTA--GACTGGCAGAGCAT---CATAACAAA--ACAGAGCTGATACAGGACTTCTAT-TAGA  | 30910 |
| VervetAGM         | GGAATGAAAAGACAAGCCATA--GACTGGAAGAACAT---CATAACAAAGCATATAGCTGATAAAGGACTTCTATCCAGA | 37438 |
| Gorilla           | GGAATGAAAAGACAAGCCATA--AACTGGAAGAACAT---CATAACAAAGCATATAGCTGATAAAGGACTTCTATCCAGA | 36443 |
| GrabEatingMacaque | GGAATGAAAAGACAAGCCATA--GACTGAAAGAACAT---CATAACAAATCATATAGCTGATAAAGGACTTCTATCCAGA | 36083 |
| Macaque           | GGAATGAAAAGACAAGCCATA--GACTGAAAGAACAT---CATAACAAAGCATATAGCTGATAAAGGACTTCTATCCAGA | 36852 |
| PigTailedMacaque  | GGAATGAAAAGACAAGCCATA--GACTGGAAGAACAT---CATAACAAAGCATATAGCTGATAAAGGACTTCTATCTAGA | 35805 |
| Bonobo            | GGAATGAAAAGACAAGCCATA--AACTGGAAGAACAT---CATAACAAAGCATATAGCTGATAAAGGACTTCTATCCAGA | 35078 |
| OliveBaboon       | GGAATGAAAAGACAAGCCATA--GACTGGAAGAACAT---CATAACAAAGCATATAGCTGATAAAGGACTTCTATCCAGA | 36060 |
| Orangutan         | GGAATGAAAAGACAAGCCATA--AACTGGAAGAACAT---CATAACAAAGCATATAGCTGATAAAGGACTTCTATCCAGA | 36067 |

| Majority          | ATATTTAAAAGATTTCAGTATATGTAAACTCAGCAGTCAGGCAACAAACTACTCAATGAATTGGCCAAAATATTTGAACAGG |       |
|-------------------|------------------------------------------------------------------------------------|-------|
|                   | 43610 43620 43630 43640 43650 43660 43670 43680                                    |       |
| Human             | ATATTTAAAAGATTTCAGTATATGTAAACTCAGCAGTCAGGCAACAAACTACTCAATGAATTGGCCAAAATATTTGAACAGG | 34131 |
| Coquerel'sSifaka  | -----CCTCAAGTATTTGTAAAG--GACTCTTACACTGTTCATCAATATG---AACAGCCCAATT--TTAAAAAAG       | 32784 |
| Ma'sNightMonkey   | ATATTTAAAATTTTAAATATATGTAAACTCAACAGTAAGGCAACAAACAACCTCG---ATTGGCTAAAATATTTGAACAGA  | 30986 |
| VervetAGM         | ATATTTAAAAGATTTCAGTATATGTAAACTCAGCAGTCAGGCAACAGACTACTCAATGAATTGGCCAAAATATTTGAACAGG | 37518 |
| Gorilla           | ATATTTAAAAGATTTCAGTATATGTAAACTCAGCAGTCAGGCAACAAACTACTCAATGAATTGGCCAAAATATTTGAACAGG | 36523 |
| GrabEatingMacaque | ATATTTAAAAGATTTCAGTATATGTAAACTCAGCAGTCAGGCAACAGACTACTCAATGAATTGGCCAAAATATTTGAACAGG | 36163 |
| Macaque           | ATATTTAAAAGATTTCAGTATATGTAAACTCAGCAGTCAGGCAACAGACTACTCAATGAATTGGCCAAAATATTTGAACAGG | 36932 |
| PigTailedMacaque  | ATATTTAAAAGATTTCAGTATATGTAAACTCAGCAGTCAGGCAACAGACTACTCAGTGAATTGGCCAAAATATTTGAACAGG | 35885 |
| Bonobo            | ATATTTAAAAGATTTCAGTATATGTAAACTCAGCAGTCAGGCAACAAACTACTCAATGAATTGGCCAAAATATTTGAACAGG | 35158 |
| OliveBaboon       | ATATTTAAAAGATTTCAGTATATGTAAACTCAGCAGTCAGGCAACAGACTACTCAATGAATTGGCCAAAATATTTGACCAGG | 36140 |
| Orangutan         | ATATTTAAAAGATTTCAGTAAATGTAAACTCAACAATCAAGCAACAAACTACTCAATGAATTGGCCAAAATATTTGAACAGG | 36147 |

Tuesday, May 03, 2022 06:15 PM

| Majority          | TAGTACAGCACAAAAGATACACAGATGGTAAGTAAGCACATGAAAAAGCTGATCAGCATCATTAGTTATTAGGGAAATGA  |       |       |       |       |       |       |       |       |
|-------------------|-----------------------------------------------------------------------------------|-------|-------|-------|-------|-------|-------|-------|-------|
|                   | 43690                                                                             | 43700 | 43710 | 43720 | 43730 | 43740 | 43750 | 43760 |       |
| Human             | TAGTACAGCACAAAAGATACACAGATGGTAAGTAAGCACATGAAAAAGCTGGTCAGCATCATTAGTTATTAGGGAAATGA  |       |       |       |       |       |       |       | 34211 |
| Coquerel'sSifaka  | GGG--C--CAAACAAGTTATAAGAATGGGTAATAAGTACAT-AAAAAGAT-A-----TATTAGTTATGAAGTAAACAC    |       |       |       |       |       |       |       | 32851 |
| Ma'sNightMonkey   | TAGTTCAGCACAAAAGGTATAACAGATGGCAAATAAGCACATGAAAAAGACGATCAGCATCATTAGTCATTACGGAAATGA |       |       |       |       |       |       |       | 31066 |
| VervetAGM         | TAGTATTGCACAAGAGATACACAGATGGTAAGTAAGCACATGAAAAAGCTGATCAGCATCATTAGTTATTAGGGAAATGA  |       |       |       |       |       |       |       | 37598 |
| Gorilla           | TAGTACAGCACAAAAGATATAACAGATGGTAAGTAAGCACATGAAAAAGCTGGTCAGCATCATTAGTTATTAGGGAAATGA |       |       |       |       |       |       |       | 36603 |
| GrabEatingMacaque | TAATATTGCACAAGAGATACACAGATGGTAAGTAAGCACATGAAAAAGCTGATCAGCATCATTAGTTATTAGGGAAATGA  |       |       |       |       |       |       |       | 36243 |
| Macaque           | TAATATTGCACAAGAGATACACAGATGGTAAGTAAGCACATGAAAAAGCTGATCAGCATCATTAGTTATTAGGGAAATGA  |       |       |       |       |       |       |       | 37012 |
| PigTailedMacaque  | TAATAT-GCACAAGAGATACACAGATGGTAAGTAAGCACATGAAAAAGCTGATCAGCATCATTAGTTATTAGGGAAATGA  |       |       |       |       |       |       |       | 35964 |
| Bonobo            | TAGTACAGCACAAAAGATATAACAGATGGTAAGTAAGCACATGAAAAAGCTGGTCAGCATCATTAGTTATTAGGGAAATGA |       |       |       |       |       |       |       | 35238 |
| OliveBaboon       | TAGTATTGCACAAGAGATACACAGATGGTAAGTAAGCACATGAAAAAGCTGATCAGCATCATTAGTTATTAGGGAAATGA  |       |       |       |       |       |       |       | 36220 |
| Orangutan         | TAGTACAGCACAAAAGACATACAGATAGTAAGTAAGCACATGAAAAAGCTGATCAGCATCGTTAGTCATTAGGGAAATGA  |       |       |       |       |       |       |       | 36227 |

| Majority          | AAATTTAAAACCTACAGTGAGATAACATTACAACCTATTAATAGTGACTAAAAATTTAAAAAGAGTGCCATCTTGAAAGCAT |       |       |       |       |       |       |       |       |
|-------------------|------------------------------------------------------------------------------------|-------|-------|-------|-------|-------|-------|-------|-------|
|                   | 43770                                                                              | 43780 | 43790 | 43800 | 43810 | 43820 | 43830 | 43840 |       |
| Human             | AAATTTAAAACCTACAGTGAGATAACATTACAACCTATTAATAGTGACTAAAAATTTAAAAAGAGTGCCATCTTGAAAGCAT |       |       |       |       |       |       |       | 34291 |
| Coquerel'sSifaka  | AAGTTAAAACCATTATGAGATAGCCTT-CACACCAACTAG-AACAGCTAAAAATTAACAGATTGGCAACACCAAATG---   |       |       |       |       |       |       |       | 32926 |
| Ma'sNightMonkey   | AAATTTAAAACCTACAGTGAGATAACATTACAACCTATTAATGGTGACTAAAAATTA--GAGTGCCATCTTGAAAGCAT    |       |       |       |       |       |       |       | 31144 |
| VervetAGM         | AAATTTAAAACCTACAGTGAAATAACATTACAACCTATTAATAGTGACTAAGATTTAAAAAGAATGCCATCTTGAAAGCAT  |       |       |       |       |       |       |       | 37678 |
| Gorilla           | AAATTTAAAACCTACAATGAGATAATATTACAACCTATTAATAGTGACTAAAAATTTAAAAAGAGTGCCATCGTGAAAGCAT |       |       |       |       |       |       |       | 36683 |
| GrabEatingMacaque | AAATTTAAAACCTACAGTGAAATAACATTACAACCTATTAATAGTGACTAAGATTTAAAAAGAGTGCCATCTTGAAAGCAT  |       |       |       |       |       |       |       | 36323 |
| Macaque           | AAATTTAAAACCTACAGTGAAATAACATTACAACCTATTAATAGTGACTAAGATTTAAAAAGAGTGCCATCTTGAAAGCAT  |       |       |       |       |       |       |       | 37092 |
| PigTailedMacaque  | AAATTTAAAACCTACAGTGAAATAACATTACAACCTATTAATAGTGACTAAGATTTAAAAAGAGTGCCATCTTGAAAGCAT  |       |       |       |       |       |       |       | 36044 |
| Bonobo            | AAATTTAAAACCTACAGTGAGATAATATTACAACCTATTAATAGTGACTAAAAATTTAAAAAGAGTGCCATCTTGAAAGCAT |       |       |       |       |       |       |       | 35318 |
| OliveBaboon       | AAATTTAAAACCTACAGTGAAATAACATTACAACCTATTAATAGTGACTAAGATTTAAAAAGAGTGCCATCTTGAAAGCAT  |       |       |       |       |       |       |       | 36300 |
| Orangutan         | AAATTTAAAACCTACAGTGAGATAATATTACAACCTATTAATAGTGACTAAAAATTTAAAAAGAGTGCCATCTTGAAAGCGT |       |       |       |       |       |       |       | 36307 |

| Majority          | GATTTGGGAAGAATGTGGAAGAATCATAATATTCACAATACTGCTGATGGGAATGTAAAATCATAGAACTACTTTGGAAA |       |       |       |       |       |       |       |       |
|-------------------|----------------------------------------------------------------------------------|-------|-------|-------|-------|-------|-------|-------|-------|
|                   | 43850                                                                            | 43860 | 43870 | 43880 | 43890 | 43900 | 43910 | 43920 |       |
| Human             | GATTTGGGAAGAATGTGGAAGAATGTTAATATTCACAATACTGCTGATGGGAATGTAAAATCGTAG---TACTTTGGAAA |       |       |       |       |       |       |       | 34368 |
| Coquerel'sSifaka  | ---TTGATGAAGATACGAAACTATCTTA-----T---TGCTGCTGAGGGTATAGAATAGTTG-----GGAAG         |       |       |       |       |       |       |       | 32982 |
| Ma'sNightMonkey   | GAATAGGAAAGAATGTGGAAGAATCATAATATTCACAATACTGCTGATGGGAATGTAAAATCATAGAACTACTTTGGGAA |       |       |       |       |       |       |       | 31224 |
| VervetAGM         | GATTTGGGAAGAATGAGGAAGAATCATAATATTCACAATACTGCTGATGGGAATGTAAAATCGTAGAAGTACTTTGGAAA |       |       |       |       |       |       |       | 37758 |
| Gorilla           | GATTTGGGAAGAATGTGGAAGAATCATAATATTCACAATACTGCTGATGGGAATGTAAAATCGTAG---TACTTTGGAAA |       |       |       |       |       |       |       | 36760 |
| GrabEatingMacaque | GATTTGGGAAGAATGAGGAAGAATCATAATATTCACAATACTGCTGATAGGAATGTAAAATCATAGAACTACTTTGGAAA |       |       |       |       |       |       |       | 36403 |
| Macaque           | GATTTGGGAAGAATGAGGAAGAATCATAATATTCACAATACTGCTGATGGGAGTGTAAAATCATAGAACTACTTTGGAAA |       |       |       |       |       |       |       | 37172 |
| PigTailedMacaque  | GATTTGGGAAGAATGAGGAAGAATCATAATATTCACAATACTGCTGATGGGAATGTAAAATCATAGAACTACTTTGGAAA |       |       |       |       |       |       |       | 36124 |
| Bonobo            | GATTTGGGAAGAATGTGGAAGAATGTTAATATTCACAATACTGCTGATGGGAATGTAAAATCGTAG---TACTTTGGAAA |       |       |       |       |       |       |       | 35395 |
| OliveBaboon       | GATTTGGGAAGAATGAGGAAGAATCATAATATTCACAATACTGCTGATGGGAATGTAAAATCATAGAACTACTTTGGAAA |       |       |       |       |       |       |       | 36380 |
| Orangutan         | GATTTGGGAAGAATGTGGAAGAATCATAATATTCACAATACTGCTGATGGGAATGTAAAATCATAG---TACTTTGGAAA |       |       |       |       |       |       |       | 36384 |

Tuesday, May 03, 2022 06:15 PM

| Majority          | ACAATTTGGTAGTTTCTCCATGATCCAGATTATTTGTCTCCTAAGTATTTA----                           | CCCAAGAGAAAATGAAGGCATCTGTT |       |       |       |       |       |       |
|-------------------|-----------------------------------------------------------------------------------|----------------------------|-------|-------|-------|-------|-------|-------|
|                   | 43930                                                                             | 43940                      | 43950 | 43960 | 43970 | 43980 | 43990 | 44000 |
| Human             | ACAATCTGGTAGTTTCTCCATGATCCAGGTTATTTGTCTCCTAAGCATTTA----                           | CCCAAGAGAAAAGAAGGCATCTATT  | 34444 |       |       |       |       |       |
| Coquerel'sSifaka  | ATAGTCTGGCATTTTCTT-ATG--CCAAACTA-----ACTTA-----                                   |                            | 33016 |       |       |       |       |       |
| Ma'sNightMonkey   | ACAATTTGGCAGTTTCTCCATGATCCAGGTTATTTGTCTCCTAAGCATTTA----                           | CCCAAGAGAAACGAAGCCATCT-TT  | 31299 |       |       |       |       |       |
| VervetAGM         | ACAATTTGGTAGTTTCTCCATGATCCAGATTATTTGTCTCCTAAGTATTTATTTACCCAAGAGAAAATGAAGGCATCTGTT |                            | 37838 |       |       |       |       |       |
| Gorilla           | ACAATCCGGTAGTTTCTCCATGATCCAGGTTATTTGTCTCCTAAGCATTTA----                           | CCCAAGAGAAAATAAGGCATCTATT  | 36836 |       |       |       |       |       |
| GrabEatingMacaque | ACAATTTGATAGTTTCTTTCATGATCCAGATTATTTGTCTCCTAAGTATTTA----                          | CCCAAGAGAAAGTGAAGGCATCTGTT | 36479 |       |       |       |       |       |
| Macaque           | ACAATTTGATAGTTTCTTTCATGATCCAGATTATTTGTCTCCTAAGTATTTA----                          | CCCAAGAGAAAGTGAAGGCATCTGTT | 37248 |       |       |       |       |       |
| PigTailedMacaque  | ACAATTTGGTAGTTTCTTTCATGATCCAGATTATTTGTCTCCTAAGTATTTA----                          | CCCAAGAGAAAATGAAGGCATCTGTT | 36200 |       |       |       |       |       |
| Bonobo            | ACAATCTGGTAGTTTCTCCATGATCCAGGTTATTTGTCTCCTAAGCATTTA----                           | CCCAAGAGAAAAGAAGGCATCTATT  | 35471 |       |       |       |       |       |
| OliveBaboon       | ACAATTTGGTAGTTTCTTTCATGATCCAGATTATTTGTCTCCTAAGTATTTA----                          | CCCAAGAGAAAATGAAGGCATCTGTT | 36456 |       |       |       |       |       |
| Orangutan         | ACAATTTGGTAGTTTCTCTATGATCCAGGTTATTTGTCTCCTAAGCATTTA----                           | CCGAAGAGAAAATGAAGGCATCTGTT | 36460 |       |       |       |       |       |

| Majority          | CATTAaaaaactctcatgttaatgttccatagccattttatTTGTAAATCACCaaaatGTGAAACAAA-CATTCATCAACAG   |       |       |       |       |       |       |       |
|-------------------|--------------------------------------------------------------------------------------|-------|-------|-------|-------|-------|-------|-------|
|                   | 44010                                                                                | 44020 | 44030 | 44040 | 44050 | 44060 | 44070 | 44080 |
| Human             | CATTAaaaaactctcatgttaatgttccatagccattttatTTGTAAATCACCaaaatGTGAAACAAA-CATTCATCAACAG   | 34523 |       |       |       |       |       |       |
| Coquerel'sSifaka  | -----TGTAGT-----                                                                     | 33022 |       |       |       |       |       |       |
| Ma'sNightMonkey   | CATTAaaaaactctcatgttaatgttccatagccattttatTTGTAAATCACCaaaatGTGAAACAAA-CATTCATCAACAG   | 31378 |       |       |       |       |       |       |
| VervetAGM         | CATTAaaaaagctctcatgttaatattccatagccattttatTTGTAAATCACCaaaatGTGAAACAAA-CAAACATCAGCAG  | 37917 |       |       |       |       |       |       |
| Gorilla           | CATTAaaaaactctcatgttaatgttccatagccattttatTTGTAAATCACCaaaatGTGAAACAAAACATTCATCAACAG   | 36916 |       |       |       |       |       |       |
| GrabEatingMacaque | CATTAaaaaactctcatgttaatgttccatagccattttatTTGTAAATCACCaaaatGTGAAACATT-CATTCATCAACAG   | 36558 |       |       |       |       |       |       |
| Macaque           | CATTAaaaaactctcatgttaatgttccatagccattttatTTGTAAATCACCaaaatGTGAAACAAA-CATTCATCAACAG   | 37327 |       |       |       |       |       |       |
| PigTailedMacaque  | CATTAaaaaactctcatgttaatgttccatagccattttTTTTTTGTAAATCACCaaaatGTGAAACA--CATTCATCAACAG  | 36277 |       |       |       |       |       |       |
| Bonobo            | CATTAaaaaactctcatgttaatgttccatagccattttatTTGTAAATCACCaaaatGTGAAACAAA-CATTCATCAACAG   | 35550 |       |       |       |       |       |       |
| OliveBaboon       | CATTAaaaaactctcatgttaatgttccatagccattttatTTGTAAATCACCaaaatGTGAAACAAA-CATTCATCAACAG   | 36535 |       |       |       |       |       |       |
| Orangutan         | CATTAaaaaagctctcatgttaatgttccatagccattttatTTGTAGTACCACCaaaatGTGAAACAAA-CATTCATCAATGG | 36539 |       |       |       |       |       |       |

| Majority          | ATGAACTAATAAGTAGATTCCCTGTTTT-----GGCATCATATGCTTTTCTGTACAGTGGAAATATAAA             |       |       |       |       |       |       |       |
|-------------------|-----------------------------------------------------------------------------------|-------|-------|-------|-------|-------|-------|-------|
|                   | 44090                                                                             | 44100 | 44110 | 44120 | 44130 | 44140 | 44150 | 44160 |
| Human             | ATGAACTAATAAGTAGATTCCCTGTTTT-----GGCATCATATGCTTTTCCATACAGTGGAAATACAA-             | 34584 |       |       |       |       |       |       |
| Coquerel'sSifaka  | -----AC-----TTCTACTTT-----                                                        | 33033 |       |       |       |       |       |       |
| Ma'sNightMonkey   | ATGAACTAATAAATCGATTCCCTGTTTTTATTAGGGAATAAAAACAGGAATCATATGCTTTTCCATACAGTAGAATACAAC | 31458 |       |       |       |       |       |       |
| VervetAGM         | ATGAACTAATAAGTAGATTCCCTGTTTT-----GGCATCATATGCTTTTCTGTACAGTGGAAATATAAA             | 37979 |       |       |       |       |       |       |
| Gorilla           | ATGAACTAATAAGTAGATTCCCTGTTTT-----GGCATCATATGCTTTTCCATACAGTGGAAATACAA-             | 36977 |       |       |       |       |       |       |
| GrabEatingMacaque | ATGAACTAATAAGTAGATTCCCTGTTTT-----GGCATCATATGCTTTTCTGTACAGTGGAAATATAAA             | 36620 |       |       |       |       |       |       |
| Macaque           | ATGAACTAATAAGTAGATTCCCTGTTTT-----GGCATCATATGCTTTTCTGTACAGTGGAAATATAAA             | 37389 |       |       |       |       |       |       |
| PigTailedMacaque  | ATGAACTAATAAGTAGATTCCCTGTTTT-----GGCATCATATGCTTTTCTGTACAGTGGAAATATAAA             | 36339 |       |       |       |       |       |       |
| Bonobo            | ATGAACTAATAAGTAGATTCCCTGTTTT-----GGCATCATATGCTTTTCCATACAGTGGAAATAAAA-             | 35611 |       |       |       |       |       |       |
| OliveBaboon       | ATGAACTAATAAGTAGATTCCCTGTTTT-----GGCATCATATGCTTTTCTGTACAGTGGAAATATAAA             | 36597 |       |       |       |       |       |       |
| Orangutan         | ATGAACTAA--GTAGATTCCCTGTTTT-----GGCATCATATGCTTTTCCGTACAGTGGAAATACAA-              | 36597 |       |       |       |       |       |       |



Tuesday, May 03, 2022 06:15 PM

| Majority          | AACAGCCATATAGAATGAGCTATTGATAGACACAATAGCAAGAATGAATCTCCAACAATTATGTTGTGTAAAAGATGAG |       |       |       |       |       |       |       |       |
|-------------------|---------------------------------------------------------------------------------|-------|-------|-------|-------|-------|-------|-------|-------|
|                   | 44170                                                                           | 44180 | 44190 | 44200 | 44210 | 44220 | 44230 | 44240 |       |
| Human             | --CAGCCATGTAGAATGAGCTATTGATAGACACAACAGCAAGAATGAATCTCCAACAATTATGTTATGTAAAAGATGGG |       |       |       |       |       |       |       | 34662 |
| Coquerel'sSifaka  | -----TAGTTTTTATCCAATGACAATGTACAAA-----                                          |       |       |       |       |       |       |       | 33063 |
| Ma'sNightMonkey   | AACAGCCATATAGAGTGAAGTGTGATAGACACAACAGCAAGAATGAATCTCCAACAATTATGTTGTGTAAAAGAT-AC  |       |       |       |       |       |       |       | 31537 |
| VervetAGM         | AACAGCCATATAGAATGAGCTGTTGATACACACAATAGCAAGAATGAATCTCCAACAGTTATGTTGTGTAAAAGATGAG |       |       |       |       |       |       |       | 38059 |
| Gorilla           | --CAGCCATGTAGAATGAGCTATTGATAGACACAACAGCAAGAATGAATCTCCAACAATTATGTTATGTAAAAGATGGG |       |       |       |       |       |       |       | 37055 |
| GrabEatingMacaque | AACAGCCATATAGAATGAGCTGTTGATAAACACAATAGCAAGAATGAATCTCCAACAGTTATGTTGTGTAAAAGATGAG |       |       |       |       |       |       |       | 36700 |
| Macaque           | AACAGCCATATAGAATGAGCTATTGATAAACACAATAGCAAGAATGAATCTCCAACAGTTATGTTGTGTAAAAGATGAG |       |       |       |       |       |       |       | 37469 |
| PigTailedMacaque  | AACAGCCATATAGAATGAGCTATTGATAAACACAATAGCAAGAATGAATCTCCAACAGTTATGTTGTGTAAAAGATGAG |       |       |       |       |       |       |       | 36419 |
| Bonobo            | --CAGCCATGTAGAATGAGCTATTGATAGACACAACAGCAATAATGAATCTCCAACAATTATGTTATGTAAAAGATGGG |       |       |       |       |       |       |       | 35689 |
| OliveBaboon       | AACAGCCATATAGAATGAGCTATTGATAAACACAATAGCAAGAATGAATCTCCAACAGTTATGTTGTGTAAAAGATGAG |       |       |       |       |       |       |       | 36677 |
| Orangutan         | --CAGCCATATAGAATGAGCTGTTGATACACAGCAGCAAGAATGAATCTCCAACAATTATGTTATGTAAAAGATGGG   |       |       |       |       |       |       |       | 36675 |

| Majority          | AGAGAAAAAGAGTACATCCTGTATGATTCCATTTATATAAAACTCTGGGTAATGCAA-CTAAT--CTAAAGCAAATTCG  |       |       |       |       |       |       |       |       |
|-------------------|----------------------------------------------------------------------------------|-------|-------|-------|-------|-------|-------|-------|-------|
|                   | 44250                                                                            | 44260 | 44270 | 44280 | 44290 | 44300 | 44310 | 44320 |       |
| Human             | AGAAAAAAGACTACATCCTGTATGATTCCATTTATATAAAACTCTGGGAAATGCAA-CTAAT--CTAAAGCAAATTC    |       |       |       |       |       |       |       | 34739 |
| Coquerel'sSifaka  | -----CTT-----G---TACAA-----ATATGTG                                               |       |       |       |       |       |       |       | 33079 |
| Ma'sNightMonkey   | TGGGAATCAAAGTAGAAATAACGACTTTCAAAGAAAGTGGAAATATATGGAGTATAATAGTATAATGTAAATAATATAAA |       |       |       |       |       |       |       | 31617 |
| VervetAGM         | AGAGAAAAAGAGTACATCCTGTATGATTCCATTTATATAAAACTCTGGGTAATGCAA-CTAATATCTAAAGCAAATTCG  |       |       |       |       |       |       |       | 38138 |
| Gorilla           | AGAAAAAAGACTACATCCTGTATGATTCCATTTATATAAAACTGTGGGAAATGCAA-CTAAT--CTAAAGCAAATTC    |       |       |       |       |       |       |       | 37132 |
| GrabEatingMacaque | AGAGAAAAAGAGTACATCCTGTATGATTCCATTTATATAAAACTCTGGGTAATGCAA-CTAAT--CTAAAGCAAATTCG  |       |       |       |       |       |       |       | 36777 |
| Macaque           | AGAGAAAAAGAGTACATCCTGTATGATTCCATTTATATAAAACTCTGGGTAATGCAA-CTAAT--CTAAAGCAAATTCG  |       |       |       |       |       |       |       | 37546 |
| PigTailedMacaque  | AGAGAAAAAGAGTACATCCTGTATGATTCCATTTATATAAAACTCTGGGTAATGCAA-AGTAAT--CTAAAGCAAATTCG |       |       |       |       |       |       |       | 36496 |
| Bonobo            | AGAAAAAAGACTACATCCTGTATGATTCCATTTATATAAAACTCTGGGAAATGCAA-CTAAT--CTAAAGCAAATTC    |       |       |       |       |       |       |       | 35766 |
| OliveBaboon       | AGAGAAAAAGAGTACATCCTGTATGATTCCATTTATATAAAACTCTGGGTAATGCAA-CTAAT--CTAAAGCAAATTCG  |       |       |       |       |       |       |       | 36754 |
| Orangutan         | AGAAAAAAGAGTACATCCTGTATGATTCCATTTACATAAAACTCTGGGAAATGCAA-CTAAT--CTAAAGCAAATTCG   |       |       |       |       |       |       |       | 36752 |

| Majority          | TGGTTCCTAGGAGTTTAAGAGTGGGAAAGGACAGGCTGGAGG-----GGTGACAGAGGGACACAAGAAAACCTCAAGGGT |       |       |       |       |       |       |       |       |
|-------------------|----------------------------------------------------------------------------------|-------|-------|-------|-------|-------|-------|-------|-------|
|                   | 44330                                                                            | 44340 | 44350 | 44360 | 44370 | 44380 | 44390 | 44400 |       |
| Human             | TGGTTCCTAGGAGTTTAAGAGTGGGAAAGGACAGGCTGGAGG-----GGTGGCAAAGGGACACAGGAAAACCTCGGGAGT |       |       |       |       |       |       |       | 34813 |
| Coquerel'sSifaka  | T-----A-----TCAAG---                                                             |       |       |       |       |       |       |       | 33086 |
| Ma'sNightMonkey   | GTGGAGATAGCGCTTTCAAAAAAGTGGAGATATAGAGAATATAATAGGAAAATAAGGCAATGTTACAAATGTTAAGGCT  |       |       |       |       |       |       |       | 31697 |
| VervetAGM         | TGGTTCCTAGGAGTTTAAGAGTGGGAAAGGACAGGCTGGAGG-----GGTGACAGAGGGACACAAGAAAACCTCAAGGGT |       |       |       |       |       |       |       | 38212 |
| Gorilla           | TGGTTCCTAGGAGTTTAAGAGTGGGAAAGGACAGGCTGGAGG---GGTGGCAAAGGGACGCAAGAAAACCTCGGGGGT   |       |       |       |       |       |       |       | 37209 |
| GrabEatingMacaque | TGGTTCCTAGGAGTTTAAGAGTGGGAAAGGACAGGCTGGAGG-----GGTGACAGAGGGACACAAGAAAACCTCAAGGGT |       |       |       |       |       |       |       | 36851 |
| Macaque           | TGGTTCCTAGGAGTTTAAGAGTGGGAAAGGACAGGCTGGAGG-----GGTGACAGAGGGACACAAGAAAACCTCAAGGGT |       |       |       |       |       |       |       | 37620 |
| PigTailedMacaque  | TGGTTCCTAGGAGTTTAAGAGTGGGAAAGGACAGGCTGGAGG-----GGTGACAGAGGGACACAAGAAAACCTCAAGGGT |       |       |       |       |       |       |       | 36570 |
| Bonobo            | TGGTTCCTAGGAGTTTAAGAGTGGGAAAGGACAGGCTGGAGG-----GGTGGCAAAGGGACACAGGAAAACCTCGGGGGT |       |       |       |       |       |       |       | 35840 |
| OliveBaboon       | TGGTTCCTAGGAGTTTAAGAGTGGGAAAGGACAGGCTGGAGG-----GGTGACAGAGGGACACAAGAAAACCTCAAGGGT |       |       |       |       |       |       |       | 36828 |
| Orangutan         | TGGTTCCTAGGAGTTTAAGAGTGGGAAAGGACAGGCTGGAGG-----GGTGGCAAAGGGACACAAGAAAACCTCGGGGGT |       |       |       |       |       |       |       | 36826 |

Tuesday, May 03, 2022 06:15 PM

|                   |                                                                                   |       |       |       |       |       |       |       |       |
|-------------------|-----------------------------------------------------------------------------------|-------|-------|-------|-------|-------|-------|-------|-------|
| Majority          | GATGGACATATAAAATTATTGTGATGGTGGTTTTATGGATGTATAT-GTATGTCAAACCTTGTCAAATTTTATAATTTAAA |       |       |       |       |       |       |       |       |
|                   | 44410                                                                             | 44420 | 44430 | 44440 | 44450 | 44460 | 44470 | 44480 |       |
| Human             | GATGGACATATAAAATTATTGTGATGGTGGTTTTATGGATGTATGC-ATATGTCAAACCTTGTCAAATTTTATAATTTAAA |       |       |       |       |       |       |       | 34892 |
| Coquerel'sSifaka  | -----AACTTTATTGATAATGG-T-----CCCAAACCT----GAA----ATAACCCGAA                       |       |       |       |       |       |       |       | 33126 |
| Ma'sNightMonkey   | AACCAATTCAGCAACTTAAATGAGATTAAGTTTCTTTACGAATGCAGTTTACCAAAACCT----GAATCTGATTAGCTGTA |       |       |       |       |       |       |       | 31773 |
| VervetAGM         | GATGGACATATAAAATTATTGTGATGGTGGTTTTATGGATGTATAT-GTATGTCAAACCTTGTCAAATATTATAATTTAAA |       |       |       |       |       |       |       | 38291 |
| Gorilla           | GATGGACATATAAAATTATTGTGATGGTGGTTTTATGGATGTATGT-ATATGTCAAACCTTGTCAAATTTTATAATTTAAA |       |       |       |       |       |       |       | 37288 |
| GrabEatingMacaque | GATGGACATATAAAATTATTGTGATGGTGGTTTTATGGATGTATAT-GTATGTCAAACCTTGTCAAATTTTATAATTTAAA |       |       |       |       |       |       |       | 36930 |
| Macaque           | GATGGACATATAAAATTATTGTGATGGTGGTTTTATGGATGTATAT-GTATGTCAAACCTTGTCAAATTTTATAATTTAAA |       |       |       |       |       |       |       | 37699 |
| PigTailedMacaque  | GATGGACATATAAAATTATTGTGATGGTGGTTTTATGGATGTATAT-GTATGTCAAACCTTGTCAAATTTTATAATTTAAA |       |       |       |       |       |       |       | 36649 |
| Bonobo            | GATGGACATATAAAATTATTGTGATGGTGGTTTTATGGATGTATGT-AAATGTCAAACCTTGTCAAATTTTATAATTTAAA |       |       |       |       |       |       |       | 35919 |
| OliveBaboon       | GATGGACATATAAAATTATTGTGATGGTGGTTTTATGGATGTATAT-GTATGTCAAACCTTGTCAAATTTTATAATTTAAA |       |       |       |       |       |       |       | 36907 |
| Orangutan         | GATGGACATATAAAATTATTGTGATGGTGGTTTTATGGATGTATAT-ATATGTCAAACCTTGTCAAATTTTATAATTTAAA |       |       |       |       |       |       |       | 36905 |

|                   |                                                                                   |       |       |       |       |       |       |       |       |
|-------------------|-----------------------------------------------------------------------------------|-------|-------|-------|-------|-------|-------|-------|-------|
| Majority          | TACATGTACACATACTAGAATGGCCGAACCTTCAGAACATTGATAACACCAAATGCTGGCAAGGATGTGGAGCAGCAGGAA |       |       |       |       |       |       |       |       |
|                   | 44490                                                                             | 44500 | 44510 | 44520 | 44530 | 44540 | 44550 | 44560 |       |
| Human             | TACATATACACATCCTAGAATGGCCGAACCTTCAGAACATTGATAACACCAAATGCTGGCAAGGATGTGGAGCAACAGGAA |       |       |       |       |       |       |       | 34972 |
| Coquerel'sSifaka  | TGT-----CTA-----G-----CAGGACAATG-----GA-                                          |       |       |       |       |       |       |       | 33145 |
| Ma'sNightMonkey   | TAC---TAC-TGTATTATACAAATTGGAATTTATAATTAAGAGATTAGGCATAGGTGGTTTCACTATTGAACTTTGTGAA  |       |       |       |       |       |       |       | 31849 |
| VervetAGM         | TACATGTACACATACTAGAATGGCCGAACCTTCAGAACATTGATAACACCAAATGCTGGCAAGGATGTGGAGCAGCAGGAA |       |       |       |       |       |       |       | 38371 |
| Gorilla           | TACATGTACACATCCTAGAATGGCCGAACCTTCAGAACATTGATAACACCAAATGCTGGCAAGGATGTGGAGCAACAGGAA |       |       |       |       |       |       |       | 37368 |
| GrabEatingMacaque | TACATGTACACATACTAGAATGGCCGAACCTTCAGAACATTGATAACACCAAATGCTGGCAAGGATGTGGAGCAGCAGGAA |       |       |       |       |       |       |       | 37010 |
| Macaque           | TACATGTACACATACTAGAATGGCCGAACCTTCAGAACATTGATAACACCAAATGCTGGCAAGGATGTGGAGCAGCAGGAA |       |       |       |       |       |       |       | 37779 |
| PigTailedMacaque  | TACATGTACACATACTAGAATGGCCGAACCTTCAGAACATTGATAACACCAAATGCTGGCAAGGATGTGGAGCAGCAGGAA |       |       |       |       |       |       |       | 36729 |
| Bonobo            | TACATGTACACATCCTAGAATGGCCGAACCTTCAGAACATTGATAACACCAAATGCTGGCAAGGATGTGGAGCAACAGGAA |       |       |       |       |       |       |       | 35999 |
| OliveBaboon       | TACATGTACACATACTAGAATGGCCGAACCTTCAGAACATTGATAACACCAAATGCTGGCAAGGATGTGGAGCAGCAGGAA |       |       |       |       |       |       |       | 36987 |
| Orangutan         | TACATGTACACATACTAGAATGGCCGAACCTTCAGAACATAGATAACACCAAATGATGGCAAGGATGTGGAGCAGCAGGAA |       |       |       |       |       |       |       | 36985 |

|                   |                                                                                     |       |       |       |       |       |       |       |       |
|-------------------|-------------------------------------------------------------------------------------|-------|-------|-------|-------|-------|-------|-------|-------|
| Majority          | CTCTCACTTACTGCTTGGTGGAAATGCAGAGTGGTACAGCCACTTTGGAAGACAATTTGGCAGTTTCTTAGAAAACCTATAT  |       |       |       |       |       |       |       |       |
|                   | 44570                                                                               | 44580 | 44590 | 44600 | 44610 | 44620 | 44630 | 44640 |       |
| Human             | CTCTCACTTACTGCTCAGTGGAAATGCAGAGTGGTACAGCCACTTTGGAAGACAATTTGGCAATTTCTTAGAAAACCTATAC  |       |       |       |       |       |       |       | 35052 |
| Coquerel'sSifaka  | -----                                                                               |       |       |       |       |       |       |       | 33145 |
| Ma'sNightMonkey   | A-CTAAGAAAATAATAGCTGTCTTTGAAAATGGAGGAG-----GGAATACTACCCTGTTCACTTTATGAAGCCATTGT      |       |       |       |       |       |       |       | 31921 |
| VervetAGM         | CTCTCACTTATTGCTTGGTGGAAATGCAGAGTGGTACAGCCACTTTGGAAGACAATTTGGCAGTTTCTTAGAAAACCTATAT  |       |       |       |       |       |       |       | 38451 |
| Gorilla           | CTCTCACTTACTGCTCAGTGGAAATGCAGAGTGGTACAGCCACTTTGGAAGACAATTTGGCAATTTCTTAGAAAACCTATAC  |       |       |       |       |       |       |       | 37448 |
| GrabEatingMacaque | CTCTCACTTACTGCTTGGTGGAAATGCAGAGTGGTACAGCCACTTTGGAAGACAATTTGGCAGTTTCTTAGAAAACCTATAT  |       |       |       |       |       |       |       | 37090 |
| Macaque           | CTCTCACTTACTGCTTGGTGGAAATGCAGAGTGGTACAGCCACTTTGGAAGACAATTTGGCAGTTTCTTAGAAAACCTATAT  |       |       |       |       |       |       |       | 37859 |
| PigTailedMacaque  | CTCTCACTTACTGCTTGGTGGAAATGCAGAGTGGTACAGCCACTTTGGAAGACAATTTGGCAGTTTCTTAGAAAACCTATAT  |       |       |       |       |       |       |       | 36809 |
| Bonobo            | CTCTCACTTACTGCTCAGTGGAAATGCAGAGTGGTACAGCCACTTTGGAAGATAAATTTGGCAATTTCTTAGAAAACCTATAC |       |       |       |       |       |       |       | 36079 |
| OliveBaboon       | CTCTCACTTATTGCTTGGTGGAAATGCAGAGTAGTACAGCCACTTTGGAAGACAATTTGGCAGTTTCTTAGAAAACCTATAT  |       |       |       |       |       |       |       | 37067 |
| Orangutan         | CTCT--CTTATTGCTCGGTGGAAATGCAGAGTGGTACAGCCACTTTGGAAGACAATTTGGCAATTTCTTAGAAAACCTATAC  |       |       |       |       |       |       |       | 37063 |

Tuesday, May 03, 2022 06:15 PM

| Majority          | GGCCGGGCGCAGTGGCTCATGCCGTAATCCCA-CAGTTTGGGAAGCCGAGGCAGGCGGATCACCTGAGGTCGGGAGTTC    |       |
|-------------------|------------------------------------------------------------------------------------|-------|
|                   | 44650 44660 44670 44680 44690 44700 44710 44720                                    |       |
| Human             | GGCCGGGCACAGTGGCTTACGCTGTAAATCCCAGCGCTTTGGGAAGCCAAGGCAGGCGGATCACCTGAGGTCAGAAGTTC   | 35132 |
| Coquerel'sSifaka  | -----TAA-----AT                                                                    | 33150 |
| Ma'sNightMonkey   | AACTGACAGTAAAACCTAACAAAGGATAAT-----AGATTTAAAGATTTTCAGACTAGTATTTCTCATTACCT----AATGC | 31991 |
| VervetAGM         | GGCCGGGCGCAGTGGCTCATGCTGGTAATFCCA-CGGTTTGGGAAGCCGAGGCAGGCGGATCACCTGAGGTCGGGAGTTC   | 38530 |
| Gorilla           | GGCCGGGCACAGTGGCTCACGCTGTAAATCCCAGCACTTTGGGAAGCCAAGGCAGGCAGATCACCTGAGGTCGGAAGTTC   | 37528 |
| GrabEatingMacaque | GGCCGGGCGCAGTGGCTCATGCCGTAATCCCA-CAGTTTGGGAAGCCGAGGCAGGCGGATCACCTGAGGTCGGGAGTTC    | 37169 |
| Macaque           | GGCCGGGCGCAGTGGCTCATGCCGTAATCCCA-CAGTTTGGGAAGCCGAGGCAGGCGGATCATCTGAGGTCGGGAGTTC    | 37938 |
| PigTailedMacaque  | GGCCGGGCGCAGTGGCTCATGCCGTAATCCCA-CAGTTTGGGAAGCCGAGGCAGGCGGATCACCTGAGGTCGGGAGTTC    | 36888 |
| Bonobo            | AGCCGGGCACAGTGGCTCACGCTGTAAATCCCAGCACTTTGGGAAGCCAAGGCAGGCGGATCACCTGAGGTCGGAAGTTC   | 36159 |
| OliveBaboon       | GGCCAGGCGCAGTGGCTCATGCCGTAATCCCA-CAGTTTGGGAAGCCGAGGCAGGCGGATCACCTGAGGTCGGGAGGTC    | 37146 |
| Orangutan         | GGCCGGGCACAGTGGCTCACACCTGTAAATCCCAGCACTTTGGGAAGCCAAGGCAGGCAGATCACCTGAGGTCGGGAGTTC  | 37143 |

| Majority          | AAAACCAGCCTGGCCAACATGGAGAAACCCCTGTCTCTACTAAAACATACAAAATTAGCCAGGCGTGGTGGTGCATACCTG  |       |
|-------------------|------------------------------------------------------------------------------------|-------|
|                   | 44730 44740 44750 44760 44770 44780 44790 44800                                    |       |
| Human             | AAAACCAGCCTGGCCAACATGGAGAAACCCGATCTCTACTAAAAATACAAAATTAGCTAGGCGTGGTGGTGCATGCCTG    | 35212 |
| Coquerel'sSifaka  | T--GT--GGTATAGTCAGACAGTGGATTGCTACTCATTACTA-----TAAAAAGAA--T-----GGTTACTAATACATG    | 33214 |
| Ma'sNightMonkey   | A-AATATTCTTAAAGAAAATGTAGATAAATCACCTCCAGCAGTATATGAGAGACCGTTCCAAC--TGAGACTTATCGCAG   | 32068 |
| VervetAGM         | AAAACCAGCCTGGCCAACATGGAGAAACCCCTGTCTCTACTAAAACATACAAAATTAGCCAGGCGTGGTAGTGCATACCTG  | 38610 |
| Gorilla           | AAAACCAGCCTGGCCAACATGGAGAAACCCAATCTCTACTAAAAATACAAAATTAGCCAGGCGTGGTGGTGCATGCCTG    | 37608 |
| GrabEatingMacaque | AAAACCAGCCTGGCCAACATGGAGAAACCCCTGTCTCTACTAAAACATGCAAAAATTAGCCAGGCGTGGTGGTGCATACCTG | 37249 |
| Macaque           | AAAACCAGCCTGGCCAACATGGAGAAACCCCTGTCTCTACTAAAACATGCAAAAATTAGCCAGGCGTGGTGGTGCATACCTG | 38018 |
| PigTailedMacaque  | AAAACCAGCCTGGCCAACATGGAGAAACCCCTGTCTCTACTAAAACATGCAAAAATTAGCCAGGCGTGGTGGTGCATACCTG | 36968 |
| Bonobo            | AAAACCAGCCTGGCCAACATGGAGAAACCCGATCTCTACTAAAAATACAAAATTAGCCAGGCGTGGTGGTGCATGCCTG    | 36239 |
| OliveBaboon       | AGAACCAGCCTGGCCAACATGGAGAAACCCCTGTCTCTACTAAAACATACAAAATTAGCCAGGCGTGGTGGTGCATACCTG  | 37226 |
| Orangutan         | AAAACCAGCCTGGCCAACATGGAGAAACCTGATCGCTACTAAAAATACAAAATTAGCCAGGCGTGGTGGTGCATGCCTG    | 37223 |

| Majority          | TAATCCCAGCTACTCAGGAGCCTGAGGCAGGAGAAATGCTTGAACCCAGGAGGTGGAGGTTGCGGTGAGCCAAGATTGCG   |       |
|-------------------|------------------------------------------------------------------------------------|-------|
|                   | 44810 44820 44830 44840 44850 44860 44870 44880                                    |       |
| Human             | TAATCCCAGCCACTCAGGAGGCTGAAGCAGGAGAAATTACTTGAACCCAGGAGGTGGAGGTTGCAGTGAGCCAGGATCACG  | 35292 |
| Coquerel'sSifaka  | CAAT-----AACAA--TGAGTG--AAT-----A-----                                             | 33232 |
| Ma'sNightMonkey   | GATTATAAGATTT-----GTTTAAACATTTGGAAATGAACTCAATGTAATTTGTCACAACAAAAG-AATGAAGGAGGAAA   | 32141 |
| VervetAGM         | TAATCCCAGCTACCCAGGAGCCTGAGGCAGGAGAAATCGCTTGAACCCAGGAGGTGGAGGTTGCGGTGAGCCAAGATTGCG  | 38690 |
| Gorilla           | TAATCCCAGCCACTCAGGAGGCTGAAGCAGGAGAAATTAATTTGAACCCAGGAGGTGGAGGTTGCAGTGAGCCAGGATCACG | 37688 |
| GrabEatingMacaque | TAATCCCAGCTACCCAGGAGCCTGAGGCAGGAGAAATGCTTGAACCCAGGAGGTGGAGGTTGTGGTGAAGCAAGATTGTG   | 37329 |
| Macaque           | TAATCCCAGCTACCCAGGAGCCTGAGGCAGGAGAAATGCTTGAACCCAGGAGGTGGAGGTTGTGGTGAAGCAAGATTGTG   | 38098 |
| PigTailedMacaque  | TAATCCCAGCTACCCAGGAGCCTGAGGCAGGAGTATTGCTTGAACCCAGGAGGTGGAGGTTGTGGTGAAGCAAGATTGCG   | 37048 |
| Bonobo            | TAATCCCAGCCACTCAGGAGGCTGAAGCGGAGAAATTACTTGAACCCAGGAGGTGGAGGTTGCAGTGAGCCAGGATCACG   | 36319 |
| OliveBaboon       | TAATCCCAGCTACTCAGGAGCCTGAGGCAGGAGAAATCGCTTGAACCCAGGAGGTGGAGGTTGCGGTGAGCCAAGATTGCG  | 37306 |
| Orangutan         | TAATCCCAGGTACTCAGGAGGCTGAAGCAGGAGAAATCGCTTGAACCTCAGGAGGTGGAGGTTGTGGTGAAGCAAGATCGTG | 37303 |

Tuesday, May 03, 2022 06:15 PM

|                   |                                                                                    |       |
|-------------------|------------------------------------------------------------------------------------|-------|
| Majority          | CC-ATTTCACTCCAACCTGGGCAACGAGAGTGAGACTCCATCTCAAATATACTTTTATTG-TATGATCCAGCAGTTGTGC   |       |
|                   | 44890      44900      44910      44920      44930      44940      44950      44960 |       |
| Human             | CCCATTTCACTCCAACCTGGGCAACAAGAGCGAGACTCCATCTCAAATATACTTTTATTG-TATGATCCAGCAGTTGTGC   | 35371 |
| Coquerel'sSifaka  | -----C-----TAAACATTAAATG-----                                                      | 33246 |
| Ma'sNightMonkey   | ACTATCTCTCAGAAAAGTAGTAAGAGAAGGTCCTTTTACAAAGTAAATAAGGGGTATCTACTGAGAGCCTACAACAAATT   | 32221 |
| VervetAGM         | CC-ATTGCACTCCAACCTGGGCAACGAGAGTGAGACTCCATCTCAAATATACTTTTATTG-TATGATCCAGCAGTTGTGC   | 38768 |
| Gorilla           | CC-ATTTCACTCCAACCTGGGCAACAAGAGCGAGACTCCATCTCAAATATACTTTTATTG-TATGATCCAGCAGTTGTGC   | 37766 |
| GrabEatingMacaque | CC-ATTGCACTCCAACCTGGGCAACGAGAGTGAGACTCCATCTCAAATATACTTTTATTG-TATGATCCAGCAGTTGTGC   | 37407 |
| Macaque           | CC-ATTGCACTCCAACCTGGGCAACGAGAGTGAGACTCCATCTCAAATATACTTTTATTG-TATGATCCAGCAGTTGTGC   | 38176 |
| PigTailedMacaque  | CC-ATTGCACTCCAACCTGGGCAATGAGAGTGAGACTCCATCTCAAATATACTTTTATTG-TATGATCCAGCAGTTGTGC   | 37126 |
| Bonobo            | CC-ATTTCACTCCAACCTGGGCAACAAGAGCGAGACTCCATCTCAAATATACTTTTATTG-TATGATCCAGCAGTTGTGC   | 36397 |
| OliveBaboon       | CC-ATTGCACTCCAACCTGGGCAACGAGAGTGAGACTCCATCTCAAATATACTTTTATTG-TATGATCCAGCAGTTGTGC   | 37384 |
| Orangutan         | CC-ATTTCACTCCAACCTGGGCAACAAGAGCGAGACTCCATCTCAAATATACTTTTATTG-TGTGATCCAGCAGTTGTGC   | 37381 |

|                   |                                                                                    |       |
|-------------------|------------------------------------------------------------------------------------|-------|
| Majority          | TCCCTGGTATTTGCCTAA-AGGAGTTGAAAACCTTAGTCTGCACAGAAAGCAGCTC--ATGGATGTTTATA-GCACTTTTC  |       |
|                   | 44970      44980      44990      45000      45010      45020      45030      45040 |       |
| Human             | TCCCTGGTATTTGCCTAA-AGGAGTTGAAAACCTTAGTCTGCACAGAAAGTAGCAC--ATGGATGTTTATA-GCACCTTTC  | 35447 |
| Coquerel'sSifaka  | -----GAGTAA-----A---A-----                                                         | 33254 |
| Ma'sNightMonkey   | TCATACTTACTGGGAAATAGTGAATGTTTCTTTTAAAAACAGAAAGAAGCAAGGATGTCTGTTTTACAAATTTTTTC      | 32301 |
| VervetAGM         | TCCCTGGTATTTGCCTAA-AGGAGTTGAAAACCTTAGTCTGCACAGAAAGCAGCTC--ATGGATGTTTATA-GCACTTTTC  | 38844 |
| Gorilla           | TCCCTGGTATTTGCCTAA-AGGAGTTGAAAACCTTAGTCTGCACAGAAAGTAGCAC--ATGGATGTTTATA-GCACCTTTC  | 37842 |
| GrabEatingMacaque | TCCCTGGTATTTGCCTAA-AGGAGTTGAAAACCTTAGTCTGCACAGAAAGCAGCTC--ATGGATGTTTATA-GCACTTTTC  | 37483 |
| Macaque           | TCCCTGGTATTTGCCTAA-AGGAGTTGAAAACCTTAGTCTGCACAGAAAGCAGCTC--ATGGATGTTTATA-GCACTTTTC  | 38252 |
| PigTailedMacaque  | TCCCTGGTACTTGCCTAA-AGGAGTTGAAAACCTTAGTCTGCACAGAAAGCAGCTC--ATGGATGTTTATA-GCACTTTTC  | 37202 |
| Bonobo            | TCACTGGTATTTGCCTAA-AGGAGTTGAAAACCTTAGTCTGCACAGAAAGTAGCAC--ATGGATGTTTATA-GCACCTTTC  | 36473 |
| OliveBaboon       | TCCCTGGTATTTGCCTAA-AGGAGTTGAAAACCTTAGTCTGCACAGAAAGCAGCTC--ATGGATGTTTATA-GCACTTTTC  | 37460 |
| Orangutan         | TCCCTGGTATTTGCCTAA-AGGAGTTGAAAACCTTAGTCTGCACAGCAAGTAGCAC--GTGGATGTTTATA-GCACCTTTC  | 37457 |

|                   |                                                                                     |       |
|-------------------|-------------------------------------------------------------------------------------|-------|
| Majority          | TTTATAGTTGCCAGA--ACTTCATAGCAACCAAGAAGTCCCTTTAGTAGGTAATGGCCAAATAAACTGTGGTGTATATCC    |       |
|                   | 45050      45060      45070      45080      45090      45100      45110      45120  |       |
| Human             | TTTATAGTTGCCAGA--ACTTCATAGCAACCAAGAAGTCCCTTTAGTAGGTAATGGCCAAATAAACTGTGGTGTATATTC    | 35525 |
| Coquerel'sSifaka  | -----GATGCCAGA-----CAT-----AAGAGTACAT-----AACTCTGTGATTT-----                        | 33289 |
| Ma'sNightMonkey   | CCCCTAGCTTTCTGCTTACATTAAGGCAGGTGAAAGACATAAAGATTGGGAAGGAAGAAAGAAAAGTGTGATTTCA-CC     | 32380 |
| VervetAGM         | TTTATAATTGCCAGA--ACTTCATAGCAACCAAGAAGTCCCTTTAGTAGGTAATGGCCAAATAAACTGTGGTGTATATCC    | 38922 |
| Gorilla           | TTTATAGTTGCCAGA--ACTTCATAGCAACCAAGAAGTCCCTTTAGTAGGTAATGGCCAAATAAACTGTGGTGTATATTC    | 37920 |
| GrabEatingMacaque | TTTATAATTGCCAGA--ACTTCATAGCAACCAAGAAGTCCCTTTAGTAGGTAATGGCCAAATAAACTGTGGTGTATATCC    | 37561 |
| Macaque           | TTTATAATTGCCAGA--ACTTCATAGCAACCAAGAAGTCCCTTTAGTAGGTAATGGCCAAATAAACTGTGGTGTATATCC    | 38330 |
| PigTailedMacaque  | TTTATAATTGCCAGA--ACTTCATAGCAACCAAGAAGTCCCTTTAGTAGGTAATGGCCAAATAAACTGTGGTGTATATCC    | 37280 |
| Bonobo            | TTTATAGTTGCCAGA--ACTTCATAGCAACCAAGAAGTCCCTTTAGTAGGTAATGGCCAAATAAACTGTGGTGTATATTC    | 36551 |
| OliveBaboon       | TTTATAATTGCTAGA--ACTTCATAGCAACTAAGAAGTCCCTTT---AG-TAAATGGCCAAATAAACTGTGGTGTATATATCC | 37533 |
| Orangutan         | TTTATAGTTGCCAGA--ACTTCATAGCAACCAAGAAGTCCCTTTAGTAGGTAATGGCCAAATAAACTGTGGTGTATATTC    | 37535 |

Tuesday, May 03, 2022 06:15 PM

| Majority          | AAACAGTATAATGTTAATCAGCACTAAATGGAAATGAGCTATCA-AGCCATGGAGAACCTTCAGTGC GTATT---ACTAA  |       |       |       |       |       |       |       |       |
|-------------------|------------------------------------------------------------------------------------|-------|-------|-------|-------|-------|-------|-------|-------|
|                   | 45130                                                                              | 45140 | 45150 | 45160 | 45170 | 45180 | 45190 | 45200 |       |
| Human             | AGACAGTATAATGTTAATCAGCACTAAATGGAAATGAGCTATCA-AGCCATGGAGAACCTTCAGTGAACATT---ACTAA   |       |       |       |       |       |       |       | 35601 |
| Coquerel'sSifaka  | -----TATAGTATTT-----CTATGA-----A                                                   |       |       |       |       |       |       |       | 33306 |
| Ma'sNightMonkey   | ATTCAACATGATTTTTAAATAGAATACCTAAAGTAATCTACAACAGATTTGGTAGAACTAATAAGCGAATTTAGAATAA    |       |       |       |       |       |       |       | 32460 |
| VervetAGM         | AAACAGTATAATGTTAATCAGCACTAAATGGAAATGAGCTATCA-AGCCATGGAGAACCTTCAGTGC GTATT---ACTAA  |       |       |       |       |       |       |       | 38998 |
| Gorilla           | AGACAGTATAATGTTAATCAGCACTAAATGGAAATGAGCTATCA-AGCCATGGAGAACCTTCAGTGTACATT---ACTAA   |       |       |       |       |       |       |       | 37996 |
| GrabEatingMacaque | AAACAGTATAGTGTAAATCAGCACTAAATGGAAATGAGCTATCA-AGCCATGGAGAACCTTCAGTGC GTATT---ACTAA  |       |       |       |       |       |       |       | 37637 |
| Macaque           | AAACAGTATAGTGTAAATCAGCACTAAATGGAAATGAGCTATCA-AGCCATGGAGAACCTTCAGTGC GTATT---ACTAA  |       |       |       |       |       |       |       | 38406 |
| PigTailedMacaque  | AAACAGTATAGTGTAAATCAGCACTAAATGGAAATGAGCTATCA-AGCCATGGAGAACCTTCAGTGC GTATT---ACTAA  |       |       |       |       |       |       |       | 37356 |
| Bonobo            | AGACAGTATAATGTTAATCAGCACTAAATGGAAATGAGCTATCA-AGCCATGGAGAACCTTCAGTGTACATT---ACTAA   |       |       |       |       |       |       |       | 36627 |
| OliveBaboon       | AAACAGTATAGTGTAAATCAGCACTAAATGGAAATGAGCTATCA-AGCCATGGAGAACCTTCG GTGC GTATT---ACTAA |       |       |       |       |       |       |       | 37609 |
| Orangutan         | AGACAGTATAATGTTAATCAGCACTAAATGGAAATGAGCTATCA-AGCCATGGAGAACCTTCAGTGTATATT---ACTAA   |       |       |       |       |       |       |       | 37611 |

| Majority          | GTAAAAGAAGCCAGTTTGAAAATCTACATACCATGTGATTCCAACATATATGACATTCTGGAAAAAGCAA AATTATGGAA  |       |       |       |       |       |       |       |       |
|-------------------|------------------------------------------------------------------------------------|-------|-------|-------|-------|-------|-------|-------|-------|
|                   | 45210                                                                              | 45220 | 45230 | 45240 | 45250 | 45260 | 45270 | 45280 |       |
| Human             | ATAAAAAGAAGCCACTCTGAAAATCTGCATACCATATGATTCCAACATATATGACATTCTGGAAAAAGCAA AATTATGGAG |       |       |       |       |       |       |       | 35681 |
| Coquerel'sSifaka  | GTAAAAGA-----GCAGA-----TAATTGGCTTTTAGTT-----TAGAACTAGAATAATGGA-                    |       |       |       |       |       |       |       | 33354 |
| Ma'sNightMonkey   | TTATAGGATATAAGTTCTATG--TACAAATATAGTCTCCTTATACTAAAAGCAAATCTTGAAAATGAAATTTTTAAAA     |       |       |       |       |       |       |       | 32538 |
| VervetAGM         | GTAAAAGAAGCCAGTTTGAAAATCCTACATACCATGTGATTCCAACATATATGACATTCTGTAAAAGCAA AATTATGGAA  |       |       |       |       |       |       |       | 39078 |
| Gorilla           | ATAAAAAGAAGCCACTCTGAAAATCTGCATACCATATGATTCCAACATATATGACATTCTGGAAAAAGCAA AATTATGGAG |       |       |       |       |       |       |       | 38076 |
| GrabEatingMacaque | GTAAAAGAAGCCAGTTTGAAAATCCTATATACCATGTGATTCCAACATATATGAGATTCTGGAAAAAGCAA AATTATGGAA |       |       |       |       |       |       |       | 37717 |
| Macaque           | GTAAAAGAAGCCAGTTTGAAAATCCTATATACCATGTGATTCCAACATATATGAGATTCTGGAAAAAGCAA AATTATGGAA |       |       |       |       |       |       |       | 38486 |
| PigTailedMacaque  | GTAAAAGAAGCCAGTTTGAAAATCCTACATACCATGTGATTCCAACATATATGACATTCTGGAAAAAGCAA AATTATGGAA |       |       |       |       |       |       |       | 37436 |
| Bonobo            | ATAAAAAGAAGCCACTCTGAAAATCTGCATACCATGTGATTCCAACATATATGACATTCTGGAAAAAGCAA AATTATGGAG |       |       |       |       |       |       |       | 36707 |
| OliveBaboon       | GTAAAAGAAGCCAGTTTGAAAATCCTACATACCATGTGATTCTAACTATATGACATTCTGGAAAAAGCAA AATTATGGAA  |       |       |       |       |       |       |       | 37689 |
| Orangutan         | GTAAAAGAAGCCACTCTGAAAATCTACATACCATATGATTCCAACATATTGACATTCTGGAAAAAGCAA AATTATGGAG   |       |       |       |       |       |       |       | 37691 |

| Majority          | ACA-GTAAAAATCAGTGGTTGCTAGGATTTGCGAGTTGAGGGAGGGATGAATTGGTGGAGTACAGAGGATTT-TAGGGCA |       |       |       |       |       |       |       |       |
|-------------------|----------------------------------------------------------------------------------|-------|-------|-------|-------|-------|-------|-------|-------|
|                   | 45290                                                                            | 45300 | 45310 | 45320 | 45330 | 45340 | 45350 | 45360 |       |
| Human             | ACA-GTAAAAATCAGTGGTTGCTAGGATTTAGGGTTGAGGGAGGGATGAAC TGGTGGAGTACAGAGGATTT-TAGGGTA |       |       |       |       |       |       |       | 35759 |
| Coquerel'sSifaka  | -----TGGCTGTGATGT-----T---GGGAGCTTAACAGGAAGTAGAAAGGAATTTCTGGGGTG                 |       |       |       |       |       |       |       | 33406 |
| Ma'sNightMonkey   | ATTCATTTGTAAAAGTATCAGACAAAATAT-----CAGGAAGAAAATTTAACAAAAGATGTGTAAGACATCTGCACCAAT |       |       |       |       |       |       |       | 32613 |
| VervetAGM         | ACA-GTAAAAATCAGTGGTTGCTAGGATTTGCGAGTTGAGGGAGGGATGAATTGGTGGAGTACAGAGGATTT-TAGGGCA |       |       |       |       |       |       |       | 39156 |
| Gorilla           | ACA-GTAAAAATCAGTGGTTGCTAGGATTTAGGGTTGAGGGAGGGATGAATTGGTGGAGTACAGAGGATTT-TACGGCA  |       |       |       |       |       |       |       | 38154 |
| GrabEatingMacaque | ACA-GTAAAAATCAGTGGTTGCAAGGATTTGCGAGTTGAGGGAGGGATGAATTGGTGGAGTACAGAGGATTT-TAGGGCA |       |       |       |       |       |       |       | 37795 |
| Macaque           | ACA-GTAAAAATCAGTGGTTGCAAGGATTTGCGAGTTGAGGGAGGGATGAATTGGTGGAGTACAGAGGATTT-TAGGGCA |       |       |       |       |       |       |       | 38564 |
| PigTailedMacaque  | ACA-GTAAAAATCAGTGGTTGCAAGGATTTGCGAGTTGAGGGAGGGATGAATTGGTGGAGTACAGAGGATTT-TAGGGCA |       |       |       |       |       |       |       | 37514 |
| Bonobo            | ACA-GTAAAAATCAGTGGTTGCTAGGATTTAGGGTTGAGGGAGGGATGAATTGGTGGAGTACAGAGGATTT-TAGGGCA  |       |       |       |       |       |       |       | 36785 |
| OliveBaboon       | ACA-GTAAAAATCAGTGGTTGCTAGGATTTGCGAGTTGAGGGAGGGATGAATTGGTGGAGTACAGAGGATTT-TAGGGTA |       |       |       |       |       |       |       | 37767 |
| Orangutan         | ACA-GTAAAAATCTGTGGTTGCTAGGATTTGGGGTTGAGGGAGGGATGAATTGGTGGAGTACAGAGGATTT-TAGGGCA  |       |       |       |       |       |       |       | 37769 |

Tuesday, May 03, 2022 06:15 PM

| Majority          | ATGAAAATATTTCTGCATG----                                                           | CTATAATGATAGATACATATCATAAATTTTTCCAAACCCATAGAATGTAAGACACTTG |       |       |       |       |       |       |  |
|-------------------|-----------------------------------------------------------------------------------|------------------------------------------------------------|-------|-------|-------|-------|-------|-------|--|
|                   | 45370                                                                             | 45380                                                      | 45390 | 45400 | 45410 | 45420 | 45430 | 45440 |  |
| Human             | CTGAAAATATTTCTGCATGATA-                                                           | CTATAATGATAGATACATGTCATACATTTTTCCAAACCCATAGAATGTAAGACACTTG | 35838 |       |       |       |       |       |  |
| Coquerel'sSifaka  | ATGGAAATGTTCTATATC-----                                                           | -----AAT-----TAAGTTGTGAAA--C---                            | 33440 |       |       |       |       |       |  |
| Ma'sNightMonkey   | ATGAAACACTGCTAAGAGAAGTTTAAAAAGACTTAAATAAATGAAGACATAGACCATGTTTCATGAATTAGAAGGCTCAAT |                                                            | 32693 |       |       |       |       |       |  |
| VervetAGM         | ATGAAAATATTTCTGCATG----                                                           | CTATAATGATAAATACATATCATAAATTTTTCCAAACCCATAGAATGTAAGACACTTG | 39232 |       |       |       |       |       |  |
| Gorilla           | ATGAAAATATTTCTGCATGATA-                                                           | CTATAATGATAGATACATGTCATACATTTTCCAAACCCATAGAATGTAAGACACTTG  | 38233 |       |       |       |       |       |  |
| GrabEatingMacaque | ATGAAAATATTTCTGCATG----                                                           | CTATAATGATAGATACATATCATAAATTTTTCCAAACCCATAGAATGTAAGACACTTG | 37871 |       |       |       |       |       |  |
| Macaque           | ATGAAAATATTTCTGCATG----                                                           | CTATAATGATAGATACATATCATAAATTTTTCCAAACCCATAGAATGTAAGACACTTG | 38640 |       |       |       |       |       |  |
| PigTailedMacaque  | ATGAAAATATTTCTGCATG----                                                           | CTATAATGATAGATACATATCATAAATTTTTCCAAACCCATAGAATGTAAGACACTTG | 37590 |       |       |       |       |       |  |
| Bonobo            | CTGAAAATATTTCTGCATGATA-                                                           | CTATAATGATAGATACATGTCATACATTTTTCCAAACCCATAGAATGTAAGACACTTG | 36864 |       |       |       |       |       |  |
| OliveBaboon       | ATGAAAATATTTCTGCATG----                                                           | CTATAATGATAGATACATACCATAAATTTTTCCAAACCCATAGAATGTAAGACACTTG | 37843 |       |       |       |       |       |  |
| Orangutan         | ATGAAAATATTTCTGCATGATA-                                                           | CTATAATGATAGATACATGTGATACATTTTTCCAAACCCGTAAGACACTTG        | 37848 |       |       |       |       |       |  |

| Majority          | GAGTGAACCCCAAGGTAACACTACAGACTTTGAGTGATTATAATGTGTGTCAGTGTAGGTTTCATCAGTTGT-AACAATGTGCCA |       |       |       |       |       |       |       |  |
|-------------------|---------------------------------------------------------------------------------------|-------|-------|-------|-------|-------|-------|-------|--|
|                   | 45450                                                                                 | 45460 | 45470 | 45480 | 45490 | 45500 | 45510 | 45520 |  |
| Human             | GAGTGAACCTGGAGGTAACACTACAGACTTTGAGTGATTATAATGTGTGTCAGTGTAGGTTTCATCAGTTGT-AACAATGTGCCA | 35917 |       |       |       |       |       |       |  |
| Coquerel'sSifaka  | -----A-----TCCAAAAT-----T-----TGT-----                                                | 33453 |       |       |       |       |       |       |  |
| Ma'sNightMonkey   | ATGTTAACATTCCAGTTCTCCCTAAATGGAAATGGC-AT----TG--AATCTAAATTCATTAAGTCTCACAGACTTTTAA      | 32766 |       |       |       |       |       |       |  |
| VervetAGM         | GAGTGAACCCCAAGGTAACACTGCAGACTTTGAGTGATTATAATGTGTGTCAGTGTAGGTTTCATCAGTTGT-AACAATGTGCCA | 39311 |       |       |       |       |       |       |  |
| Gorilla           | GAGTGAACCTGGAGGTAACACTACAGACTTTGAGTGATTATAATGTGTGTCAGTGTAGGTTTCATCAGTTGT-AACAATGTGCCA | 38312 |       |       |       |       |       |       |  |
| GrabEatingMacaque | GAGTGAACCCCAAGGTAACACTACAGACTTTGAGTGATTATAATGTGTGTCAGTGTAGGTTTCATCAGTTGT-AACAATGTGCCA | 37950 |       |       |       |       |       |       |  |
| Macaque           | GAGTGAACCCCAAGGTAACACTACAGACTTTGAGTGATTATAATGTGTGTCAGTGTAGGTTTCATCAGTTGT-AACAATGTGCCA | 38719 |       |       |       |       |       |       |  |
| PigTailedMacaque  | GAGTGAACCCCAAGGTAACACTACAGACTTTGAGTGATTATAATGTGTGTCAGTGTAGGTTTCATCAGTTGTAAACAATGTGCCA | 37670 |       |       |       |       |       |       |  |
| Bonobo            | GAGTGAACCTGGAGGTAACACTACAGACTTTGAGTGATTATAATGTGTGTCAGTGTAGGTTTCATCAGTTGT-AACAATGTGCCA | 36943 |       |       |       |       |       |       |  |
| OliveBaboon       | GAGTGAACCCCAAGGTAACACTACAGACTTTGAGTGATTATAAGTGTGTCAGTGTAGGTTTCATCAGTTGT-AACAATGTGCCA  | 37922 |       |       |       |       |       |       |  |
| Orangutan         | GAGTGAACCCGAGGTAACACTACAGACT--GAGTGATTATAATGTGTGTCAGTGTAGGTTTCATCAGTTGT-AACAATGTGCCA  | 37925 |       |       |       |       |       |       |  |

| Majority          | TCTGG---TGGGAGATGTTGATAAAGGGGAGGCTATTTGGG-GCAGGAGGCAGGGA-AATCTCTCTGCTTTCTCTCCAT  |       |       |       |       |       |       |       |  |
|-------------------|----------------------------------------------------------------------------------|-------|-------|-------|-------|-------|-------|-------|--|
|                   | 45530                                                                            | 45540 | 45550 | 45560 | 45570 | 45580 | 45590 | 45600 |  |
| Human             | TCTGG---TGGGAGATGTTGATAAAGGGGAGGCTATTTGGG-GCAGGAGGCAGGGA-AATCTCTCTGCTTTCTCTCCAT  | 35992 |       |       |       |       |       |       |  |
| Coquerel'sSifaka  | ----T---GAAAGCAGTAGATTA-----TCTTTGGG-----AACAAAGTA-----GT                        | 33487 |       |       |       |       |       |       |  |
| Ma'sNightMonkey   | ATTGAAATTGAGAGTAGTTTCTAAAATA-----TATGTGGAAATGAAAAGGAGCTAGAATAAAACTATTTTGAAGTAAAT | 32841 |       |       |       |       |       |       |  |
| VervetAGM         | TCTGG---TGGGAGATGTTGATAAAGGGGAGGCTATTTGGGAGCAGGAGGCAGGGA-AATCTCTCTGCTTTCTCTCCAT  | 39387 |       |       |       |       |       |       |  |
| Gorilla           | TCTGG---TGGGAGATGTTGATAAAGGGGAGGCTGTTTGGG-GCAGGAGGCAGGGA-AATCTCTCTGCTTTCTCTCCAT  | 38387 |       |       |       |       |       |       |  |
| GrabEatingMacaque | TCTGG---TGGGAGATGTTGATAAAGGGGAGGCTATTTGGGGGCAGGAGGCAAGGA-AATCTCTCTGCTTTCTCTCCAC  | 38026 |       |       |       |       |       |       |  |
| Macaque           | TCTGG---TGGGAGATGTTGATAAAGGGGAGGCTATTTGGGGGCAGGAGGCAAGGA-AATCTCTCTGCTTTCTCTCCAC  | 38795 |       |       |       |       |       |       |  |
| PigTailedMacaque  | TCTGG---TGGGAGATGTTGATAAAGGGGAGGCTATTTGGGGGCAGGAGGCAAGGA-AATCTCTCTGCTTTCTCTCCAC  | 37746 |       |       |       |       |       |       |  |
| Bonobo            | TCTGG---TGGGAGATGTTGATAAAGGGGAGGCTATTTGGG-GCAGGAGGCAGGGA-AATCTCTCTGCTTTCTCTCCAT  | 37018 |       |       |       |       |       |       |  |
| OliveBaboon       | TCTGG---TGGGAGATGTTGATAAAGGGGAGGCTATTTGGGGGCAGGAGGCAAGGA-AATCTCTCTGCTTTCTCTCCG   | 37998 |       |       |       |       |       |       |  |
| Orangutan         | TCTGG---TGGGAGATGTTGATAAAGGGGAGGCTATTTGGG-GCAGGAGGCAGGGA-AATCTCTCTGCTTTCTCTCCAT  | 38000 |       |       |       |       |       |       |  |

Tuesday, May 03, 2022 06:15 PM

| Majority          | TTTGCTG-TGTACCTAA-ACTTACTCTGAAGAATGTCTTTGA--AAATTTATTCATGTGCTTGCATTGC-ATTTCTTTTG |       |
|-------------------|----------------------------------------------------------------------------------|-------|
|                   | 45610 45620 45630 45640 45650 45660 45670 45680                                  |       |
| Human             | TTTGCTG-TGTACCTAA-ACTTACTCTGAAAAATGTCTTTGA--AAATTTACTCATGCGCTTGCATTGC-ATTTCTTTTG | 36067 |
| Coquerel'sSifaka  | TTTGTTG-----                                                                     | 33495 |
| Ma'sNightMonkey   | TGTGCCACTGTTTTCAAGACTTAACCACAAACCTGTAGTTAATCAAACAATTTA-GTACTAGCATAGTTAGTGACATAG  | 32920 |
| VervetAGM         | TTTGCTG-TGTACCTAA-ACTTACTCTGAAGAATATCTTTGA--AAATTTATTCATGTGCTTGCATTGC-ATTTCTTTTG | 39462 |
| Gorilla           | TTTGCTG-TGTACCTAA-ACTTACTCTGAAAAATGTCTTTGA--AAATTTACTCATGTGCTTGCATTGC-ATTTCTTTTG | 38462 |
| GrabEatingMacaque | TTTGCTG-TGTACCTAA-ACTTACTCTGAAGAATATCTTTGA--AAATTTATTCATGTGCTTGCATTGC-ATTTCTTTTG | 38101 |
| Macaque           | TTTGCTG-TGTACCTAA-ACTTACTCTGAAGAATATCTTTGA--AAATTTATTCATGTGCTTGCATTGC-ATTTCTTTTG | 38870 |
| PigTailedMacaque  | TTTGCTG-TGTACCTAA-ACTTACTCTGAAGAATATCTTTGA--AAATTTATTCATGTGCTTGCATTGC-ATTTCTTTTG | 37821 |
| Bonobo            | TTTGCTG-TGTACCTAA-ACTTACTCTGAAAAATGTCATTGA--AAATTTACTCATGCGCTTGCATTGC-ATTTCTTTTG | 37093 |
| OliveBaboon       | TTTGCTG-TGTACCTAA-ACTTACTCTGAAGAATATCTTTGA--AAATTTATTCATGTGCTTGCATTGC-ATTTCTTTTG | 38073 |
| Orangutan         | TTTGCTG-TATACGTAA-ACTTACTCTGAAAAATGTCTTTGA--AAATTTACTCATTGCTTGCATTGC-ATTTCTTTTG  | 38075 |

| Majority          | GATATTACTGGTCTAAGTAGTCCAATTTAAAAGACAAAGATT-----G-----                            |       |
|-------------------|----------------------------------------------------------------------------------|-------|
|                   | 45690 45700 45710 45720 45730 45740 45750 45760                                  |       |
| Human             | GATATTACTGGTCTAAGTAGTCCAATTTAAAAGACAAAGATT-----G-----                            | 36109 |
| Coquerel'sSifaka  | AATAT-----                                                                       | 33500 |
| Ma'sNightMonkey   | AATAGGAATAAACTCATGTGTTA--AAGATGTCTTGGTTA-----C-----                              | 32960 |
| VervetAGM         | GATATTACTGGTCTAAGTAGTCCAATTTAAAAGACAAAGATT-----G-----                            | 39504 |
| Gorilla           | GGTATTACTGGTCTAAGTAGTCCAATTTAAAAGACAAAGATT-----G-----                            | 38504 |
| GrabEatingMacaque | GATATTACTGGTCTAAGTAGTCCAATTTAAAAGACAAAGATTGGGCGCGGCGGCTGGCTCAAGCCTGTAATCCCAGCACT | 38181 |
| Macaque           | GATATTACTGGTCTAAGTAGTCCAATTTAAAAGACAAAGATTGGGCGCGGCGGCTGGCTCAAGCCTGTAATCCCAGCACT | 38950 |
| PigTailedMacaque  | GATATTACTGGTCTAAGTAGTCCAATTTAAAAGACAAAGATTGGGCGCGGCGGCTGGCTCAAGCCTGTAATCCCAGCACT | 37901 |
| Bonobo            | GATATTACTGGTCTAAGTAGTCCAATTTAAAAGACAAAGATT-----G-----                            | 37135 |
| OliveBaboon       | GATATTACTGGTCTAAGTAGTCCAATTTAAAAGACAAAGATTGGGCGCGGCGGCTGGCTCAAGCCTGCAATCCCAGCACT | 38153 |
| Orangutan         | GATATTACTGGTCTAAGTAGTCCAATTTAAAAGACAAAGATT-----G-----                            | 38117 |

| Majority          | -----                                                                               |       |
|-------------------|-------------------------------------------------------------------------------------|-------|
|                   | 45770 45780 45790 45800 45810 45820 45830 45840                                     |       |
| Human             | -----                                                                               | 36109 |
| Coquerel'sSifaka  | -----                                                                               | 33500 |
| Ma'sNightMonkey   | -----                                                                               | 32960 |
| VervetAGM         | -----                                                                               | 39504 |
| Gorilla           | -----                                                                               | 38504 |
| GrabEatingMacaque | TTGGGAGGCCGAGACGGGCGGATCACGAGGTCAGGAGATCGAGACCATCCCAGGCTAACACGGTGAAACCCCTTCTCTACT   | 38261 |
| Macaque           | TTGGGAGGCCGAGACGGGCGGATCACGAGGTCAGGAGATCGAGACCATCCCAGGCTAACACGGTGAAACCCCTCGTCTCTACT | 39030 |
| PigTailedMacaque  | TTGGGAGGCCGAGACGGGCGGATCACGAGGTCAGGAGATGGAGACCATCCCAGGCTAACACGGTGAAACCCCTTCTCTACT   | 37981 |
| Bonobo            | -----                                                                               | 37135 |
| OliveBaboon       | TTGGGAGGCCGAGACGGGCGGATCACGAGGTCAGGAGATCGAGACTATCCTGGCTAACACGGTGAAACCCCGTCTCTACT    | 38233 |
| Orangutan         | -----                                                                               | 38117 |

Tuesday, May 03, 2022 06:15 PM

| Majority          | -----                                                                           |       |       |       |       |       |       |       |       |
|-------------------|---------------------------------------------------------------------------------|-------|-------|-------|-------|-------|-------|-------|-------|
|                   | 45850                                                                           | 45860 | 45870 | 45880 | 45890 | 45900 | 45910 | 45920 |       |
| Human             | -----                                                                           |       |       |       |       |       |       |       | 36109 |
| Coquerel'sSifaka  | -----                                                                           |       |       |       |       |       |       |       | 33500 |
| Ma'sNightMonkey   | -----                                                                           |       |       |       |       |       |       |       | 32960 |
| VervetAGM         | -----                                                                           |       |       |       |       |       |       |       | 39504 |
| Gorrilla          | -----                                                                           |       |       |       |       |       |       |       | 38504 |
| GrabEatingMacaque | AAAAAAAAATACAAAAAACTAGCCGGGGGAGATGGCGGGTGCCTGTAGTCCCAGCTACTCGGGAGGCTAAGGCAGGAGA |       |       |       |       |       |       |       | 38341 |
| Macaque           | AAAAAAAAATACAAAAAACTAGCCGGGGGAGATGGCGGGTGCCTGTAGTCCCAGCTACTCGGGAGGCTAAGGCAGGAGA |       |       |       |       |       |       |       | 39110 |
| PigTailedMacaque  | AAAAAAAAATACAAAAAACTAGCCGGGGGAGATGGCGGGCGCCTGTAGTCCCAGCTACTCGGGAGGCTAAGGCAGGAGA |       |       |       |       |       |       |       | 38061 |
| Bonobo            | -----                                                                           |       |       |       |       |       |       |       | 37135 |
| OliveBaboon       | AAAAAAAAATACAAAAAACTAGCCGGGGGAGATGGCGGGCGCCTGTAGTCCCAGCTACTCGGGAGGCTAAGGCAGGAGA |       |       |       |       |       |       |       | 38313 |
| Orangutan         | -----                                                                           |       |       |       |       |       |       |       | 38117 |

| Majority          | -----                                                                            |       |       |       |       |       |       |       |       |
|-------------------|----------------------------------------------------------------------------------|-------|-------|-------|-------|-------|-------|-------|-------|
|                   | 45930                                                                            | 45940 | 45950 | 45960 | 45970 | 45980 | 45990 | 46000 |       |
| Human             | -----                                                                            |       |       |       |       |       |       |       | 36109 |
| Coquerel'sSifaka  | -----                                                                            |       |       |       |       |       |       |       | 33500 |
| Ma'sNightMonkey   | -----                                                                            |       |       |       |       |       |       |       | 32960 |
| VervetAGM         | -----                                                                            |       |       |       |       |       |       |       | 39504 |
| Gorrilla          | -----                                                                            |       |       |       |       |       |       |       | 38504 |
| GrabEatingMacaque | ATGGCGTGAACCCGGGAGGCGGAGCTTGCAGTGAGCCGAGAT--CGCCACTGCACTCCAGCCTGGGTGACAGAGCAAGAC |       |       |       |       |       |       |       | 38419 |
| Macaque           | ATGGCGTGAACCCGGGAGGCGGAGCTTGCAGTGAGCCGAGATTGCGCCACTGCACTCCAGCCTGGGTGACAGAGCGAGAC |       |       |       |       |       |       |       | 39190 |
| PigTailedMacaque  | ATGGCGTGAACCCAGGAGGCGGAGCTTGCAGTGAGCCGAGATTGCGCCACTGCACTCCAGCCTGGGTGACAGAGCGAGAC |       |       |       |       |       |       |       | 38141 |
| Bonobo            | -----                                                                            |       |       |       |       |       |       |       | 37135 |
| OliveBaboon       | ATGGCGTGAACCCGGGAGGCGGAGCTTGCAGTGAGCCGAGATTGCGCCACTGCACTCCAGCCTGGGTGACAGAGCGAGAC |       |       |       |       |       |       |       | 38393 |
| Orangutan         | -----                                                                            |       |       |       |       |       |       |       | 38117 |

| Majority          | -----TCAGACTTGATTA AAAAGCAAGGCCTAACTACTG                                          |       |       |       |       |       |       |       |       |
|-------------------|-----------------------------------------------------------------------------------|-------|-------|-------|-------|-------|-------|-------|-------|
|                   | 46010                                                                             | 46020 | 46030 | 46040 | 46050 | 46060 | 46070 | 46080 |       |
| Human             | -----TCAGACTTGATTA AAAAGCAAGGCCTAACTACTG                                          |       |       |       |       |       |       |       | 36145 |
| Coquerel'sSifaka  | -----                                                                             |       |       |       |       |       |       |       | 33500 |
| Ma'sNightMonkey   | -----TCA---TTGAGGAAAGAG-AAGGCTTTTCAATAAAC                                         |       |       |       |       |       |       |       | 32992 |
| VervetAGM         | -----TCAGACTTGATTA AAAAGCAAGGCCTAACTACTG                                          |       |       |       |       |       |       |       | 39540 |
| Gorrilla          | -----TCAGACTTGATTA AAAAGCAAGGCCTAACTACTG                                          |       |       |       |       |       |       |       | 38540 |
| GrabEatingMacaque | TCCGTCTCAAAAAAAAAAAAAAAAAAAAAAAAAAGACAAAAGATTGTCAGACTTGATTA AAAAGCAAGGCCTAACTACTG |       |       |       |       |       |       |       | 38499 |
| Macaque           | TCCGTCTCAAAAAAAAAAAAAAAAAAGACAAA-----GATTGTCAGACTTGATTA AAAAGCAAGGCCTAACTACTG     |       |       |       |       |       |       |       | 39259 |
| PigTailedMacaque  | TCCGTCTCAAAAAAAAAAAAAAAAAAGACA-----AAGATTGTCGACTTGATTA AAAAGCAAGGCCTAACTACTG      |       |       |       |       |       |       |       | 38212 |
| Bonobo            | -----TCAGACTTGATTA AAAAGCAAGGCCTAACTACTG                                          |       |       |       |       |       |       |       | 37171 |
| OliveBaboon       | TCCATCTCAAAAAAAAAAAAAAAAAAGACAA-----AGATTGTCAGACTTGATTA AAAAGCAAGGCCTAACTACTG     |       |       |       |       |       |       |       | 38463 |
| Orangutan         | -----TCAGACTTGATTA AAAAGCAAGGCCTAACTACAC--                                        |       |       |       |       |       |       |       | 38151 |



Tuesday, May 03, 2022 06:15 PM

|                   |                                                                                    |       |
|-------------------|------------------------------------------------------------------------------------|-------|
| Majority          | TCTATACGAGGGTCAGGTGGAATACCAAGATGCAGGTTGAAAGTAAAAAGATGGAAAGTGATATTCCATGCAAACAGTA    |       |
|                   | 46090      46100      46110      46120      46130      46140      46150      46160 |       |
| Human             | TCAATACGAGGGTCAGGTAGAAATATCAAGATGCAGGTTGAAAGTAAAAAGATGGAAAATGATATTCCGTGCAAACAGTA   | 36225 |
| Coquerel'sSifaka  | -----                                                                              | 33500 |
| Ma'sNightMonkey   | GTGCCAGAACAGCTGAATATACATGCAAAAAGCAAA--AGAACTCAACCTACATTAC--ATATAGAACACTGGGATTA     | 33069 |
| VervetAGM         | TCTATACAAGGGTCAGGTGGAATACCAAGGTGCAGGTTGAAAGTAAAAAGATGGAAAGTGATACTCCATGCAAACAGTA    | 39620 |
| Gorilla           | TCAATACGAGGGTCAGGTAGAAATATCAAGATGCAGGTTGAAAGTAAAAAGATGGAAAATGATATTCCGTGCAAACAGTA   | 38620 |
| GrabEatingMacaque | CCTATAGGAGGGTCAGGTGGAATACCAAGATGCAGGTTGAAAGTAAAAAGATGGAAAGTGATATTCCATGCAAACAGTA    | 38579 |
| Macaque           | CCTATACGAGGGTCAGGTGGAATACCAAGATGCAGGTTGAAAGTAAAAAGATGGAAAGTGATATTCCATGCAAACAGTA    | 39339 |
| PigTailedMacaque  | CCTATACGAGGGTCAGGTGGAATACCAAGATGCAGGTTGAAAGTAAAAAGATGGAAAGTGATATTCCATGCAAACAGTA    | 38292 |
| Bonobo            | TCAATACGAGGGTCAGGTAGAAATATCAAGATGCAGGTTGAAAGTAAAAAGATGGAAAATGATACTTTGTGCAAACAGTA   | 37251 |
| OliveBaboon       | TCTATACGAGGATCAGGTGGAATACCAAGATGCAGGTTGAAAGTAAAAAGATGGAAAGTGATATTCCATGCAAACAGTA    | 38543 |
| Orangutan         | TCTATACGAGGGTCAGGTGGAATATCAAGATGCGGGTTGAAAGTAAAAAGATGGAAAATGATACTCCATGCAAACAGTA    | 38231 |

|                   |                                                                                    |       |
|-------------------|------------------------------------------------------------------------------------|-------|
| Majority          | AGCGCGAGAAAGTTGATATGATTATATTACTAGACAGA--AAAATTTAAGACAAGAAGTATTACCAGATATAAAAAAGCA   |       |
|                   | 46170      46180      46190      46200      46210      46220      46230      46240 |       |
| Human             | AGCACAAGAAAGTTGATATGATTATATTACTAGACAGA--AAAATTTAAGACAAA---TATTACCAGATATAAAAAAGCA   | 36300 |
| Coquerel'sSifaka  | -----                                                                              | 33500 |
| Ma'sNightMonkey   | ATTATATAAAAACCTTACCTAA--AACTAATATATAGA---GCTTTTAGGAAAAA-----TCCTAGGC--TATACTTGCA   | 33137 |
| VervetAGM         | AGCGTGAGAAAGTTGATATGATTATATTACTAGACAGA--AAAATTTAAGACAAGAAGTATTACCAAATATAAAAAAGCA   | 39698 |
| Gorilla           | AGCACAAGAAAGTTGATATGATTATATTACTAGACAGAGAAAAATTTAAGACAAG---TATTACCAGATATAAAAAAGCA   | 38697 |
| GrabEatingMacaque | AGCGCGAGAAAGTTGATATGATTATATTACTAGACAGA--AAAATTTAAGACAAGAAGTATTACCAAATATAAAAAAGCA   | 38657 |
| Macaque           | AGCGCGAGAAAGTTGATATGATTATATTACTAGACAGA--AAAATTTAAGACAAGAAGTATTACCAAATATAAAAAAGCA   | 39417 |
| PigTailedMacaque  | AGCGCGAGAAAGTTGATATGATTATATTACTAGACAGA--AACTTTAAGACAAGAAGTATTACCAAATATAAAAAAGCA    | 38370 |
| Bonobo            | AGCACAAGAAAGTTGATATGATTATATTACTAGACAGAGAAAAATTTAAGACAAA---TATTACCAGATATAAAAAAGCA   | 37328 |
| OliveBaboon       | AGCGTGAGCAAGTTGATATGATTATATTACTAGACAGA--AAAATTTAAGACAAGAAGTATTACCAAATATAAAAAAGCA   | 38621 |
| Orangutan         | AGCACAAGAAAGTTGATATGATTATATTACTAGACAGAGAAAAATTTGAGACAAGAAGTATTACCAGATATAAACAAGCA   | 38311 |

|                   |                                                                                    |       |
|-------------------|------------------------------------------------------------------------------------|-------|
| Majority          | TATTTACATAATGCTGAAGGGTCAGTTTATCAGAAAACATTTCTTAATTTGTATGCCA--ATAATAACAA-----AGTATA  |       |
|                   | 46250      46260      46270      46280      46290      46300      46310      46320 |       |
| Human             | TATTTACAAATGTTGAAGGGTCAGTTTATCAGAAAACATTTCTTAATTTGTATGCCA--ATAATAACAAATCAAAGTATA   | 36378 |
| Coquerel'sSifaka  | -----GAA-----ATG                                                                   | 33506 |
| Ma'sNightMonkey   | ATTTTGGGATAAATGAAGATTTCTTAAAACATAAAGGTATAGATAAACTTGACTCCATCAAATGGGAAATTTCTGCTTA    | 33217 |
| VervetAGM         | TATTTACATAATGCTGAAGGGTCAGTTTATCAGAAAACATTTCTTAATTTGTATGCCA--ATAATAACAA-----AGTATA  | 39771 |
| Gorilla           | TATTTACAAATGTTGAAGGGTCAGTTTATCAGAAAACATTTCTTAATTTGTATGCCA--ATAATAACAAATTAAGTATA    | 38775 |
| GrabEatingMacaque | TATTTACATAATGCTGAAGGGTCAGTTTATCAGAAAACATTTCTTAATTTGTATGCCA--ATAATAACAA-----AGTATG  | 38730 |
| Macaque           | TATTTACATAATGCTGAAGGGTCAGTTTATCAGAAAACATTTCTTAATTTGTATGCCA--ATAATAACAA-----AGTATG  | 39490 |
| PigTailedMacaque  | TATTTACATAATGCTGAAGGGTCAGTTTATCAGAAAACATTTCTTAATTTGTATGCCA--ATAATAACAA-----AGTATG  | 38443 |
| Bonobo            | TATTTACAAATGTTGAAGGGTCAGTTTATCAGAAAACATTTCTTAATTTGTATGCCA--ATAATAACAACCTTAAAGTATA  | 37406 |
| OliveBaboon       | TATTTACATAATGCTGAAGAGTCAGTTTATCAGAAAACATTTCTTAATTTGTATGCCA--ATAATAACAA-----AGTATA  | 38694 |
| Orangutan         | TATTTACAAATGTTGAAGGGTCAGTTTATCAGAAAACGTTTCTTAATTTGTATGCCA--ATAATAAGAAATTAAGTATA    | 38389 |

Tuesday, May 03, 2022 06:15 PM

|                   |                                                                                    |       |
|-------------------|------------------------------------------------------------------------------------|-------|
| Majority          | TTAAGAAAAAGATCACAGAGCTAAGTAGAGAAACAGAAATCCACAATCATAGCCTGATTTTTT-AACTATAATTTATA-    |       |
|                   | 46330      46340      46350      46360      46370      46380      46390      46400 |       |
| Human             | TTAAGAAAAACATCACAGAACCTAAGTAGAGAAACAAAAATCCACAATCATAGCCTGGTTTTTT-AAAACATAATTTATG-  | 36456 |
| Coquerel'sSifaka  | TTAAGAGAGAG-----AGAGAGAGAGAGAGAGA-----GAGAGCGTG---T-----                           | 33544 |
| Ma'sNightMonkey   | ATCAAAAGACTTTGTTAAGACAAATGAAAAGGCA-AGGCACAGACTTGAGAAATATAATATTTACATATCAATACTTATAT  | 33296 |
| VervetAGM         | TTAAGAAAAACATCACAGAGCTAAGTAGAGAAACAGAAATCCACAATCATAGCCTGATTTTTT-AACTATAATTTGGA-    | 39849 |
| Gorilla           | TTAAGAAAAACATCACAGAACCTAAGTAGAGAAACAGAAATCCACAATCATAGCCTGGTTTTTT-AAAACATAATTTATG-  | 38853 |
| GrabEatingMacaque | TTAAGAAAAAGATCACAGAGCTAAGTAGAGAAACAGAAATCCACAATCACAGCCTGATTTTTT-AACTATAATTTAGA-    | 38808 |
| Macaque           | TTAAGAAAAAGATCACAGAGCTAAGTAGAGAAACAGAAATCCACAATCATAGCCTGATTTTTT-AACTATAATTTAGA-    | 39568 |
| PigTailedMacaque  | TTAAGAAAAAGATCACAGAGCTAAGTAGAGAAACAGAAATCCACAATCATAGCCTGATTTTTT-TTTTTTTTTTTTGA-    | 38521 |
| Bonobo            | TTAAGAAAAACATCACAGAACCTAAGTAGAGAAACAGAAATCCACAATCATAGCCTGGTTTTTT-AAAACATAATTTATG-  | 37484 |
| OliveBaboon       | TTAAGAAAAAGATCACAGAGCTAAGTAGAGAAACAGAAATCCACAATCATAGCCTGATTTTTT-AACTATAATTTAGA-    | 38772 |
| Orangutan         | TTAAGAAAAGCATCACAGAACCTAAGTAGAGAAACAGAAATCCACAATCATAGCCTGATTTTTTTAAAACATAATTTATG-  | 38468 |

|                   |                                                                                    |       |
|-------------------|------------------------------------------------------------------------------------|-------|
| Majority          | GTCATTGATAGGACAGTTACAGTCTATCCCCCAAATAAAAA--GATACATAAATTTGAAAAGTGCTATCATGTTGGCTT    |       |
|                   | 46410      46420      46430      46440      46450      46460      46470      46480 |       |
| Human             | GCAATTGATAGGATAGT-ACAGTCTTAGCCCCCAAATAAAAA--GATACATAAATTTGAAAAGTGCTATCATGTTGGCTT   | 36532 |
| Coquerel'sSifaka  | GT-G-----                                                                          | 33547 |
| Ma'sNightMonkey   | GTGACTG-TA--TTAGT-CCATTTTCAGGCTGCTGATAAAGACA-TACCCGAGACTGGGCAATTTACAAAAGAAAGAGAT   | 33371 |
| VervetAGM         | GTCATTGATAGGACAGTTACAGTCTATCCCCCAAATAAAAA--GATACATAAATTTGAAAAGTGCTATCATGTTGGCTT    | 39926 |
| Gorilla           | GTAATTGATAGGACAGT-ACAGTCTTAGCCCCCAAATAAAAA--GAAACATAAATTTGAAAAGTGCTATCATGTTGGCTT   | 38929 |
| GrabEatingMacaque | GTCATTGATAGGACAGTTACAGTCTATCCCCCAAATAAAAA--GATACATAAATTTGAAAAGTGCTGTCATGTTGGCTT    | 38885 |
| Macaque           | GTCATTGATAGGACAGTTACAGTCTATCCCCCAAATAAAAA--GATACATAAATTTGAAAAGTGCTGTCATGTTGGCTT    | 39645 |
| PigTailedMacaque  | GACG-----GAGTCTC-GCTCTGTCGCCCAGGCTGGAGTGCAGTGGCCGGATCTCAGCTCACTGCAAGCTCCGCT        | 38591 |
| Bonobo            | GTAATTGATAGGATAGT-ACCGTCTTAGCCCCCAAATAAAAA--GATACATAAATTTGAAAAGTGCTATCATGTTGGCTT   | 37560 |
| OliveBaboon       | GTCATTGATAGGACAGTTACAGTCTATCCCCCAAATAAAAA--GATACATAAATTTGAAAAGTGCTGTCATGTTGGCTT    | 38849 |
| Orangutan         | GTAATTGATAGTACAGTTACAGTCTATCCCCCAAATAAAAA--GATATATAAATTTGAAAAGTGCTATCATGTTGGCTT    | 38545 |

|                   |                                                                                    |       |
|-------------------|------------------------------------------------------------------------------------|-------|
| Majority          | AACTCACATTTATAAAACTATAACCCAGTAACTGTAATAAATCAAGTGTACATAGAACATTCACAATGATAGACCA-T     |       |
|                   | 46490      46500      46510      46520      46530      46540      46550      46560 |       |
| Human             | AACTCACATTTATAAAACTATAACCCAGTAACTGTAATAAATCAAGTGTACATAGAACATTCACAATGATAGACCT-T     | 36611 |
| Coquerel'sSifaka  | ----TGTGTGTGTG--TGTGTG-----T--GTGTGTGTGNNNNNNNNN--N-----                           | 33586 |
| Ma'sNightMonkey   | TTAGTGGATTTACAGGTTTCATGTGAAGCCTCAGCATAATGGTGAAGGTAAGGAGGAACAACCTCACA-TCTTATATGG--  | 33448 |
| VervetAGM         | AACTCACATTTATAAAACTATAACCCAGTAACTGTAATAAATCAAGTGTACATAGAACATTCACAGTATAGACTA-T      | 40005 |
| Gorilla           | AACTCACATTTATAAAACTATAACCCAGTAACTGTAATAAATCAAGTGTGACATAGAAATTCACAATGATAGGCCT-T     | 39008 |
| GrabEatingMacaque | AACTCACATTTATAAAACTATAACCCAGTAACTGTAATAAATCAAGTGTACATAGAACATTCACAATGGTAGACCA-T     | 38964 |
| Macaque           | AACTCACATTTATAAAACTATAACCCAGTAACTGTAATAAATCAAGTGTACATAGAACATTCACAATGGTAGACCA-T     | 39724 |
| PigTailedMacaque  | CCCGGGTTCACGCCATTCTCCGGCTCAGCCTCCCGAGTAGCT--GGGACTACAGGCGCCGCCACCTCGCCCGGCTAGT     | 38669 |
| Bonobo            | AACTAACATTTATAAAACTATAACCCAGTAACTGTAATAAATCAAGTGTACATAGAACATTCACAATGGTAGACCT-T     | 37639 |
| OliveBaboon       | AACTCACATGATAAAACTATAACCCAGTAACTGTAATAAATCAAGTGTACATAGAGCATTCACAATGATAGACCA-T      | 38928 |
| Orangutan         | AACTTACATTTATAAAACTATAACCCAGTAACTGTAATAAATCAAGTGTACATAGAACATTCACAATGATAGACCT-T     | 38624 |



Tuesday, May 03, 2022 06:15 PM

| Majority          | -----                                       |                                                                    |       |       |       |       |       |       |       |       |
|-------------------|---------------------------------------------|--------------------------------------------------------------------|-------|-------|-------|-------|-------|-------|-------|-------|
|                   | 46810                                       | 46820                                                              | 46830 | 46840 | 46850 | 46860 | 46870 | 46880 |       |       |
| Human             | -----                                       |                                                                    |       |       |       |       |       |       | 36775 |       |
| Coquerel'sSifaka  | -----                                       |                                                                    |       |       |       |       |       |       | 33658 |       |
| Ma'sNightMonkey   | -----                                       |                                                                    |       |       |       |       |       |       | 33610 |       |
| VervetAGM         | -----                                       |                                                                    |       |       |       |       |       |       | 40163 |       |
| Gorrilla          | -----                                       |                                                                    |       |       |       |       |       |       | 39175 |       |
| GrabEatingMacaque | GGAGT-GCA--                                 | GTGGCGGATCTCGGCTCACTGCAAGCTCCGCCTCCCAGGTTACGCCATTCTCCTGCCTCAGCCTCC |       |       |       |       |       |       |       | 39262 |
| Macaque           | GGAGT-GCA--                                 | GTGGTGGATCTCGGCTCACTGCAAGCTCCGCCTCCCGGTTACGCCATTTCGCTGCCTCAGCCTCC  |       |       |       |       |       |       |       | 40027 |
| PigTailedMacaque  | TAACTCACATTTATAAACTATAACCCAGTAACTGTAAAATA-- | ACTTCAAGTGACATAGAACATTACAATGGTAGAC                                 |       |       |       |       |       |       |       | 38982 |
| Bonobo            | -----                                       |                                                                    |       |       |       |       |       |       | 37806 |       |
| OliveBaboon       | -----                                       |                                                                    |       |       |       |       |       |       | 39091 |       |
| Orangutan         | -----                                       |                                                                    |       |       |       |       |       |       | 38791 |       |

| Majority          | -----                                                                              |       |       |       |       |       |       |       |       |
|-------------------|------------------------------------------------------------------------------------|-------|-------|-------|-------|-------|-------|-------|-------|
|                   | 46890                                                                              | 46900 | 46910 | 46920 | 46930 | 46940 | 46950 | 46960 |       |
| Human             | -----                                                                              |       |       |       |       |       |       |       | 36775 |
| Coquerel'sSifaka  | -----                                                                              |       |       |       |       |       |       |       | 33658 |
| Ma'sNightMonkey   | -----T-----                                                                        |       |       |       |       |       |       |       | 33611 |
| VervetAGM         | -----                                                                              |       |       |       |       |       |       |       | 40163 |
| Gorrilla          | -----                                                                              |       |       |       |       |       |       |       | 39175 |
| GrabEatingMacaque | CGAGTAGCTGGGACTACAGGCGCCACAAACCGCGCTCGGCTAATTTTTTTTGTATTTTTTAGTAGA-GACGGGGTTTCACCG |       |       |       |       |       |       |       | 39341 |
| Macaque           | CGAGTAGCTGGGACTACAGGCGCCACAAACCGCGCCCGGCTAATTTTTT-GTATTTTTTAGTAGA-GACGGGGTTTCACCG  |       |       |       |       |       |       |       | 40105 |
| PigTailedMacaque  | CATGTA--TTGGATTACAAAATAGCTCAATAAATTTCAAGTGATTGACA-GTTCATATAGTATATGACTATAGTGAAT-    |       |       |       |       |       |       |       | 39058 |
| Bonobo            | -----                                                                              |       |       |       |       |       |       |       | 37806 |
| OliveBaboon       | -----                                                                              |       |       |       |       |       |       |       | 39091 |
| Orangutan         | -----                                                                              |       |       |       |       |       |       |       | 38791 |

| Majority          | -----                                                                            |                  |       |       |       |       |       |       |       |
|-------------------|----------------------------------------------------------------------------------|------------------|-------|-------|-------|-------|-------|-------|-------|
|                   | 46970                                                                            | 46980            | 46990 | 47000 | 47010 | 47020 | 47030 | 47040 |       |
| Human             | -----                                                                            |                  |       |       |       |       |       |       | 36775 |
| Coquerel'sSifaka  | -----                                                                            |                  |       |       |       |       |       |       | 33658 |
| Ma'sNightMonkey   | -----                                                                            |                  |       |       |       |       |       |       | 33611 |
| VervetAGM         | -----                                                                            |                  |       |       |       |       |       |       | 40163 |
| Gorrilla          | -----                                                                            |                  |       |       |       |       |       |       | 39175 |
| GrabEatingMacaque | TGGTCTCGATCTCCTGACCTTGTGATCCGCCCCGCTCGGCTCCCA-AAGTGCTGAGATT----                  | ACAG-GCGTGAGCCAC |       |       |       |       |       |       | 39415 |
| Macaque           | TGGTCTCGATCTCCTGACCTTGTGATCCGCCCCGCTCGGCTCCCA-AAGTGCTGAGATT----                  | ACAG-GCGTGAGCCAC |       |       |       |       |       |       | 40179 |
| PigTailedMacaque  | TAAATTAGAAATCAAAAATAGACATCTAGGAAAGTATGAAATATTAGAAATTATACAATTGTGAACAGCACATGGATTAT |                  |       |       |       |       |       |       | 39138 |
| Bonobo            | -----                                                                            |                  |       |       |       |       |       |       | 37806 |
| OliveBaboon       | -----                                                                            |                  |       |       |       |       |       |       | 39091 |
| Orangutan         | -----                                                                            |                  |       |       |       |       |       |       | 38791 |

Tuesday, May 03, 2022 06:15 PM

```

Majority      -----CCACAAGGACATATTTTTG---ACTGAATGAAAATATATCAAATTTGTTGGATACGACCCAAGGGTGTG
              47050   47060   47070   47080   47090   47100   47110   47120
Human         -----CCACAAGGACATATTTTTG---ACTGAATGAAAATATATCAAATTTGTTGGATACTACCCAAGGGTGTG 36842
Coquerel'sSifaka -----TG-----TGTTGTGTGTGTGTG 33674
Ma'sNightMonkey -----TCAGGAGGAGATTGGATGGGGACACAGCCAAACCATATCAATGACAAAGGACTTGTATTCCAAAGGACT 33681
VervetAGM     -----CCACAAGGACATATTTTTG---ACTGAATGAAAATATATCAAATTTGTTGGATACGACCCAAGGGCGTG 40230
Gorilla       -----CCACAAGGACATATTTTTG---ACTGAATGAAAATATATCAAATTTGTTGGATACTACCCAAGGGTGTG 39242
GrabEatingMacaque CGCGCCCGGCCACAAGGACATATTTTTG---ACTGAATGAAAATATATCAAATTTGTTGGATACGACCCAAGGGAGTG 39492
Macaque       CGCGCCCGGCCACAAGGACATATTTTTG---ACTGAATGAAAATATATCAAATTTGTTGGATACGACCCAAGGGAGTG 40256
PigTailedMacaque AGAAGTGTACCACAAGGACATATTTTTG---ACTGAATGAAAATATATCAAATTTGTTGGATACGACCCAAGGGCGTG 39215
Bonobo        -----CCACAAGGACATATTTTTG---ACTGAATGAAAATATATCAAATTTGTTGGATACTACCCAAGGGTATG 37873
OliveBaboon   -----CCACAAGGACATATTTTTG---ACTGAATGAAAATATATCAAATTTGTTGGATACGACCCAAGGGCGTG 39158
Orangutan     -----CCACAAGGACATATTTTTG---ACTGAATGAAAATATATCAAATTTGTTGGATACGACCCAAGGGTGTG 38858

```

```

Majority      TATGGTGTA--AAGTATGTCTTCAAATACCTATATTATAAAAAAAGGTTTAAACTCCCTATTTAAG--ACTGACCAAG-
              47130   47140   47150   47160   47170   47180   47190   47200
Human         TATGGTGAA--AAGTATGTCTTCAAATACCTATATTACAAAAAAGGTTTAAACTCCCAATTTAAG--ACTGACCAAGG 36918
Coquerel'sSifaka TGTATTGCTT---GAACTTACCAGAT--TTACATTATAGAAGAG---TTTTGTCCATTTGTATT-----TCA--- 33735
Ma'sNightMonkey TGTAAGGA-----CTCTTCCAATCACTATATATAAGCAGCCCAATTTTTTTTTATAAGAATGGGTAACAAGCACGT 33753
VervetAGM     TATGGTGTGTAAGTATGTCTTCAAATACCTATATTATAAAAAAAGGTTTAAACTCCCTATTTAAG--ACTGACCAAG- 40308
Gorilla       TATGGTGAA--AAGTATGTCTTCAAATACCTATATTACAAAAAAGGTTTAAACTCCCTATTTAAG--ACTGACCAAGG 39318
GrabEatingMacaque TATGGTGTG--AAGTATGTCTTCAAATACCTATATTATAAAAAAAGGTTTAAACTCCCTATTTAAG--ACTGACCAAG- 39568
Macaque       TATGGTGTG--AAGTATGTCTTCAAATACCTATATTATAAAAAAAGGTTTAAACTCCCTATTTAAG--ACTGACCAAG- 40332
PigTailedMacaque TATGGTGTG--AAGTATGTCTTCAAATACCTATATTATAAAAAAAGGTTTAAACTCCCTATTTAAG--ACTGACCAAG- 39291
Bonobo        TATGGTGAA--AAGTATGTCTTCAAATACCTATATTACAAAAAAGGTTTAAACTCCCAATTTAAG--AGTACCAAGG 37949
OliveBaboon   TATGGTGTA--AAGTATGTCTTCAAATACCTATATTATAAAAAAAGGTTGAAAACCTCCCTATTTAAG--ACTGACCAAG- 39234
Orangutan     TATGGTGAA--AAGCATGTCTTCAAATACCTATATTACAAAAAAGGTTTAAAGTCCCTATTTAAG--ACTGACCAAGA 38934

```

```

Majority      -AAAAGACATA--AATTACCAGTG---TGGGAATCAAAGTCGAGATAA--TCACTTTCACAGAAAGTGGAAATGTACAGA
              47210   47220   47230   47240   47250   47260   47270   47280
Human         AAAAAGACATA--AATTACCAATAC--TGGAAATCAAGGTCGAGATAA--TCACTTTCACAGAAAGTGGATATATGCAGA 36992
Coquerel'sSifaka -----GGGGCCAGGTCAGTA-----A-----T--GTATATAGG 33763
Ma'sNightMonkey GAAAAGATACATTAGTCATCAGGTGATCACAAGTCAAACCATTATGAGGTAGAATTTACACCAACTAGA--ATGGCTAAA 33832
VervetAGM     -AAAAGACATA--AATTACCAGTC---TGGGAATCAAAGTCGAGATAA--TCACTTTCACAGAAAGTGGAAATGTACAGA 40380
Gorilla       AAAAAGACATA--AATTACCAATAC--TGGAAATCAAAGTCGAGATAA--TCACTTTCGAGAAAGTGGAAATATGCAGA 39392
GrabEatingMacaque -AAAAGACATA--ATTTACCAGTG---TGGGAATCAAAGTCGAGATAA--TCACTTTCACAGAAAGTGGAAATGTACAGA 39640
Macaque       -AAAAGACATA--ATTTACCAGTG---TGGGAATCAAAGTCGAGATAA--TCACTTTCACAGAAAGTGGAAATGTACAGA 40404
PigTailedMacaque -AAAAGACATA--AATTACCAGTG---TGGGAATCAAAGTCGAGATAA--TCACTTTCACAGAAAGTGGAAATTTACAGA 39363
Bonobo        AAAAAGACATA--AATTACCAATAC--TGGAAATCAAGGTCGAGATAA--TCACTTTCACAGAAAGTGGATATATGCAGA 38023
OliveBaboon   -AAAAGACATA--AATTACCAGTG---TGGGAATCAAAGTCGAGATAA--TCACTTTCACAGAAAGTGGAAATGTACAGA 39306
Orangutan     AAAAAGACATA--AATTACCAATAC--TGGAAATCAAAGTCGAGATAA--TCACTTTCAGGAAAGTGGAAATATACAGA 39008

```



Tuesday, May 03, 2022 06:15 PM

| Majority          | ACAAAGATTACTCTAGGCATAGGTTGTTTTACTATTGAATTTTATGAAATTTTAAAGAAATAATAGCTGTCTTTGAAAAAT      |       |       |       |       |       |       |       |       |
|-------------------|----------------------------------------------------------------------------------------|-------|-------|-------|-------|-------|-------|-------|-------|
|                   | 47530                                                                                  | 47540 | 47550 | 47560 | 47570 | 47580 | 47590 | 47600 |       |
| Human             | ACAAAGATTACTCTAGTCATAGATGGTTTCACTATTGAATTTTATGAAATTTTAAAGGAATACTAGCTGTCTTTGAAAAAT      |       |       |       |       |       |       |       | 37308 |
| Coquerel'sSifaka  | TTTAGAATCACT--GG--GTGGATGATGGTACCATT-AA----CAAAGGGGAAAAGTGGAAAAGAAGATTTTGGTAG          |       |       |       |       |       |       |       | 33984 |
| Ma'sNightMonkey   | NNNNNNNNNNNNNNNNNNNNNNNNNNNNNNNNNNNNNNNNNNNNNNNNNNNNNNNNNNNNNNNNNNNNNNNNNNNNNNNNNNNNNN |       |       |       |       |       |       |       | 34152 |
| VervetAGM         | ACAAAGATTACTCTAGGCATAGGTTGTTTTACTATTGAATTTTATGAAATTTTAAAGAAATAATAGCTGTCTTTGAAAAAT      |       |       |       |       |       |       |       | 40693 |
| Gorilla           | ACAAAGATTACTCTAGGCATAGATGGTTTCACTATTGAATTTTATGAAATTTTAAAGGAATACTAGCTGTCTTTGAAAAAT      |       |       |       |       |       |       |       | 39710 |
| GrabEatingMacaque | ACAAAGATTACTCTAGGCATAGGTTGTTTTACTATTGAATTTTATGAAATTTTAAAGAAATAATAGCTGTCTTTGAAAAAT      |       |       |       |       |       |       |       | 39953 |
| Macaque           | ACAAAGATTACTCTAGGCATAGGTTGTTTTACTATTGAATTTTATGAAATTTTAAAGAAATAATAGCTGTCTTTGAAAAAT      |       |       |       |       |       |       |       | 40717 |
| PigTailedMacaque  | ACAAAGATTACTCTAGGCATAGGTTGTTTTACTATTGAATTTTATGAAATTTTAAAGAAATAATAGCTGTCTTTGAAAAAT      |       |       |       |       |       |       |       | 39673 |
| Bonobo            | ACAAAGATTACTCTAGTCATAGATGGTTTCACTATTGAATTTTATGAAATTTTAAAGGAATACTAGCTGTCTTTGAAAAAT      |       |       |       |       |       |       |       | 38337 |
| OliveBaboon       | ACAAAGATTACTCTAGGCATAGGTTGTTTTACTATTGAATTTTACGAAATTTTAAAGAAATAATAGCTGTCTTTGAAAAAT      |       |       |       |       |       |       |       | 39616 |
| Orangutan         | ACAAAGATTATTCTAGGCATAGATGGTTTCACTATTGAATTTTATGAAATTTTAAAGAAATAATAGCTGTCTTTGAAAAAT      |       |       |       |       |       |       |       | 39316 |

| Majority          | GGAGGAGGGAATACTGCCCTGTTCACTTTATGAAGCCACTATAAAGTACAGCAAACCTGACAAGGGTAATATATCAAGA        |       |       |       |       |       |       |       |       |
|-------------------|----------------------------------------------------------------------------------------|-------|-------|-------|-------|-------|-------|-------|-------|
|                   | 47610                                                                                  | 47620 | 47630 | 47640 | 47650 | 47660 | 47670 | 47680 |       |
| Human             | GGAGGAGGGAATACTACCCTGTTCACTTTATGAAGCCACTATAAAGTACAGCAAACCTGACAAGGGTAATATATCAAGA        |       |       |       |       |       |       |       | 37388 |
| Coquerel'sSifaka  | AAAGAATGAATCTATGACTCTCCGTTTTTAAAG---TATGTTTAGGAATGATACATAATGTGCTTTATGACCGAAGA          |       |       |       |       |       |       |       | 34060 |
| Ma'sNightMonkey   | NNNNNNNNNNNNNNNNNNNNNNNNNNNNNNNNNNNNNNNNNNNNNNNNNNNNNNNNNNNNNNNNNNNNNNNNNNNNNNNNNNNNNN |       |       |       |       |       |       |       | 34232 |
| VervetAGM         | GGAGGAGGAAATACTGCCCTGTTCACTTTATGAAGCCACTATAAAGTACAGCAAACCTGACAAGGGTAATATATCAAGA        |       |       |       |       |       |       |       | 40773 |
| Gorilla           | GGAGGAGGGAATACTACCCTGTTCACTTTATGAAGCCACTATAAAGTACAGCAAACCTGACAAGGGTAATATATCAAGA        |       |       |       |       |       |       |       | 39790 |
| GrabEatingMacaque | GGAGGAGGGAATACTGCCCTGTTCACTTTATGAAGCCACTATAAAGTACAGCAAACCTGACAAGGGTAATATATCAAGA        |       |       |       |       |       |       |       | 40033 |
| Macaque           | GGAGGAGGGAATACTGCCCTGTTCACTTTATGAAGCCACTATAAAGTACAGCAAACCTGACAAGGGTAATATATCAAGA        |       |       |       |       |       |       |       | 40797 |
| PigTailedMacaque  | GGAGGAGGGAATACTGCCCTGTTCACTTTATGAAGCCACTATAAAGTACAGCAAACCTGACAAGGGTAATATATCAAGA        |       |       |       |       |       |       |       | 39753 |
| Bonobo            | GGAGGAGGGAATACTACCCTGTTCACTTTATGAAGCCACTATAAAGTACAGCAAACCTGACAAGGGTAATATATCAAGA        |       |       |       |       |       |       |       | 38417 |
| OliveBaboon       | GGAGGAGGGAATACTGCCCTGTTCACTTTATGAAGCCACTATAAAGTACAGCAAACCTGACAAGGGTAATATATCAAGA        |       |       |       |       |       |       |       | 39696 |
| Orangutan         | GGAGGAGGGAATACTACCCTGTTCACTTTATGAAGCCACTATAAAGTACAGCAAACCTGACAAGGGTAATATATCAAGA        |       |       |       |       |       |       |       | 39396 |

| Majority          | TTTCAGACTAGTATTTCTCATTAACCTAAATGCATATATTTCTTAAGAAAATGTTGGTAAATCACCTCCAGTAGAATATGA      |       |       |       |       |       |       |       |       |
|-------------------|----------------------------------------------------------------------------------------|-------|-------|-------|-------|-------|-------|-------|-------|
|                   | 47690                                                                                  | 47700 | 47710 | 47720 | 47730 | 47740 | 47750 | 47760 |       |
| Human             | TTTCAGACTAGTATTTCTCATTAACCTAAATGCATATATTTCTTAAGAAAATGTTGGTAAATCACCTCCGGTAGAATATGA      |       |       |       |       |       |       |       | 37468 |
| Coquerel'sSifaka  | ATCCGTGTAATTTATTTGTAGTGATGGAATGAAATTC---CTTAAAGCCTGTTTAAACATA-----AGAAATTTA            |       |       |       |       |       |       |       | 34128 |
| Ma'sNightMonkey   | NNNNNNNNNNNNNNNNNNNNNNNNNNNNNNNNNNNNNNNNNNNNNNNNNNNNNNNNNNNNNNNNNNNNNNNNNNNNNNNNNNNNNN |       |       |       |       |       |       |       | 34312 |
| VervetAGM         | TTTCAGACTAGTATTTCTCATTAACCTAAATGCATATATTTCTTAAGAAAATGTTGGTAAATC-CCTCCAGTAGAATATGA      |       |       |       |       |       |       |       | 40852 |
| Gorilla           | TTTCAGACTAGTATTTCTTATTAACCTAAATGCATATATTTCTTAAGAAAATGTTGGTAAATCACCTCCAGTAGAATATGA      |       |       |       |       |       |       |       | 39870 |
| GrabEatingMacaque | TTTCAGACTAGTATTTCTCATTACCCTAAATGCATATATTTCTTAAGAAAATGTTGGTAAATCACCTCCAGTAGAATATGA      |       |       |       |       |       |       |       | 40113 |
| Macaque           | TTTCAGACTAGTATTTCTCATTACCCTAAATGCATATATTTCTTAAGAAAATGTTGGTAAATCACCTCCAGTAGAATATGA      |       |       |       |       |       |       |       | 40877 |
| PigTailedMacaque  | TTTCAGACTAGTATTTCTCATTAACCTAAATGCATATATTTCTTAAGAAAATGTTGGTAAATCACCTCCAGTAGAATATGA      |       |       |       |       |       |       |       | 39833 |
| Bonobo            | TTTCAGACTAGTATTTCTCATTAACCTCAATGCATATATTTCTTAAGAAAATGTTGGTAAATCACCTCCGGTAGAATATGA      |       |       |       |       |       |       |       | 38497 |
| OliveBaboon       | TTTCAGACTAGTATTTCTCATTAACCTAAATGCATAT--TCTTAAGAAAATGTTGATAAATCACCTCCAGTAGAATATGA       |       |       |       |       |       |       |       | 39774 |
| Orangutan         | TTTCAGACTAGTATTTCTCATTAACCTAAATGCATATATTTCTTAAGAAAATGTTGGTAAATCACCTCCAGTAGAATATGA      |       |       |       |       |       |       |       | 39476 |

Tuesday, May 03, 2022 06:15 PM

| Majority          | GAGGCAATTCTGAGACTTA-C---ACAGGATTGTAAGGTTTGTTTAAACATTTGAAAATGAACTCAGTGTAAATTTGTCAC      |       |       |       |       |       |       |       |       |
|-------------------|----------------------------------------------------------------------------------------|-------|-------|-------|-------|-------|-------|-------|-------|
|                   | 47770                                                                                  | 47780 | 47790 | 47800 | 47810 | 47820 | 47830 | 47840 |       |
| Human             | GAGACAATTCTGAGACTTATC---GCAGGATTGTAAGGTTTGTTTAAACATTTGAAAATGAACTCAGTGTAAATTTGTCAC      |       |       |       |       |       |       |       | 37544 |
| Coquerel'sSifaka  | CAGGCAATCAATTTATTTAAAC---CTCTATGTACAGAGAAAACCTTAAAGTGTTAAGATTT-TTCTGTTTTTTTCTAAC       |       |       |       |       |       |       |       | 34203 |
| Ma'sNightMonkey   | NNNNNNNNNNNNNNNNNNNNNNNNNNNNNNNNNNNNNNNNNNNNNNNNNNNNNNNNNNNNNNNNNNNNNNNNNNNNNNNNNNNNNN |       |       |       |       |       |       |       | 34386 |
| VervetAGM         | GAGGCAATTCTGAGACTTA-TC---ACAGGGTTGTAAGGTTTGTTTAAACATTTGAAAATGAACTCAGTGTAAATTTGTCAC     |       |       |       |       |       |       |       | 40928 |
| Gorilla           | GAGACAATTCTGAGACTTACC---GCAGGATTGTAAGGTTTGTTTAAACATTTGAAAATGAACTCAGTGTAAATTTGTCAC      |       |       |       |       |       |       |       | 39946 |
| GrabEatingMacaque | GAGGCAATTCTGAGACTTA-C---ACAGGATTGTAAGGTTTGTTTAAACATTTGAAAATGAACTCAGTGTAAATTTGTCAC      |       |       |       |       |       |       |       | 40188 |
| Macaque           | GAGGCAATTCTGAGACTTA-CC---ACAGGATTGTAAGGTTTGTTTAAACATTTGAAAATGAACTCAGTGTAAATTTGTCAC     |       |       |       |       |       |       |       | 40953 |
| PigTailedMacaque  | GAGGCAATTCTGAGACTTAACC---ACAGGATTGTAAGGTTTGTTTAAACATTTGAAAATGAACTCAGTGTAAATTTGTCAC     |       |       |       |       |       |       |       | 39910 |
| Bonobo            | GAGACAATTCTGAGACTTATCATAAGCAGGATTGTAAGGTTTGTTTAAACATTTGAAAATGAACTCAGTGTAAATTTGTCAC     |       |       |       |       |       |       |       | 38577 |
| OliveBaboon       | GAGGCAATTCTGAGACTTA-CC---ACAGGATTGTAAGGTTTGTTTAAACATTTGAAAATGAACTCAGTGTAAATTTGTCAC     |       |       |       |       |       |       |       | 39850 |
| Orangutan         | GAGACAATTGTGAGACTTACT---GCAGGTTTGTAAGGTTTGTTTAGCATTGAAAATGAATTCAGTGTAAATTTGTCAC        |       |       |       |       |       |       |       | 39552 |

| Majority          | AGTGATAGAATGAAGAAGGAAAAATATCTCTCAGAAAAC TAGTAAGAGAAGGAGCTTTTTACAATGTAATAAAGGGGTAT      |       |       |       |       |       |       |       |       |
|-------------------|----------------------------------------------------------------------------------------|-------|-------|-------|-------|-------|-------|-------|-------|
|                   | 47850                                                                                  | 47860 | 47870 | 47880 | 47890 | 47900 | 47910 | 47920 |       |
| Human             | AATGATAGAATGAAGAAAGAAGAATTTCTCTCAGAAAAC TAGGAAGAGAAGGAGCTTTT-ACAATGTAATAAAGGGGTAT      |       |       |       |       |       |       |       | 37623 |
| Coquerel'sSifaka  | AAAGAAAGATCAAAGTCTGCA---TATGTTCTAACACACCAATTTGAATA---CTGTACTCATAAGAACAGATAGCAT         |       |       |       |       |       |       |       | 34276 |
| Ma'sNightMonkey   | NNNNNNNNNNNNNNNNNNNNNNNNNNNNNNNNNNNNNNNNNNNNNNNNNNNNNNNNNNNNNNNNNNNNNNNNNNNNNNNNNNNNNN |       |       |       |       |       |       |       | 34466 |
| VervetAGM         | AGTGATAGAATGAAGAAGGAAAAATATCTCTCAGAAAAC TAGTAAGAGAAGGAGCTTTTTACACTGTAATAAAGGGGTAT      |       |       |       |       |       |       |       | 41008 |
| Gorilla           | AATGATAGAATGAAGAAAGAAGAATTTCTCTCAGAAAAC TAGGAAGAGAAGGAGCTTTT-ACAATGTAATAAAGGGGTAT      |       |       |       |       |       |       |       | 40025 |
| GrabEatingMacaque | AGTGATAGAATGAAGAAGGAAAAATATCTCTCAGAAAAC TAGTAAGAGAAGGAGCTTTTTACAATGTAATAAAGGGGTAT      |       |       |       |       |       |       |       | 40268 |
| Macaque           | AGTGATAGAATGAAGAAGGAAAAATATCTCTCAGAAAAC TAGTAAGAGAAGGAGCTTTTTACAATGTAATAAAGGGGTAT      |       |       |       |       |       |       |       | 41033 |
| PigTailedMacaque  | AGTGATAGAATGAAGAAGGAAAAATATCTCTCAGAAAAC TAGTAAGAGAAGGAGCTTTTTACAATGTAATAAAGGGGTAT      |       |       |       |       |       |       |       | 39990 |
| Bonobo            | AATGATAGAATGAAGAAAGAAGAATTTCTCTCAGAAAAC TAGGAAGAGAAGGAGCTTTT-ACAATGTAATAAAGGGGTAT      |       |       |       |       |       |       |       | 38656 |
| OliveBaboon       | AGTGATAGAATGAAGAAGGAAAAATATCTCTCAGAAAAC TAGTAAGAGAAGGAGCTTTTTACAATGTAATAAAGGGGTAT      |       |       |       |       |       |       |       | 39930 |
| Orangutan         | AATGATAGAATGAAGAAGGAAAGAATCTCTCTCAGAAAGCTAGGAAGAGAAGGAGCTTTT-ACAATGTAATAAAGGGGTAT      |       |       |       |       |       |       |       | 39631 |

| Majority          | CTA---AGAACCTACAACAAATTTTCATACTTAATGGAGAAATATTGAATGTTTTCTTCTTAAAAACAGAAATGGAGCAAG            |       |       |       |       |       |       |       |       |
|-------------------|----------------------------------------------------------------------------------------------|-------|-------|-------|-------|-------|-------|-------|-------|
|                   | 47930                                                                                        | 47940 | 47950 | 47960 | 47970 | 47980 | 47990 | 48000 |       |
| Human             | CTACTAAGAACCTACAACAAATTTTCATACTTAATGGAGAAATATTGAATGTTTTCTTCTTAAAAACAGAAATGAAGCAAG            |       |       |       |       |       |       |       | 37703 |
| Coquerel'sSifaka  | AAA---AGACCTTTAAAAAAC-----T-----GGT-GATTATATTTGCCT-----GGAAA-----AAT                         |       |       |       |       |       |       |       | 34320 |
| Ma'sNightMonkey   | NNN---NNNNNNNNNNNNNNNNNNNNNNNNNNNNNNNNNNNNNNNNNNNNNNNNNNNNNNNNNNNNNNNNNNNNNNNNNNNNNNNNNNNNNN |       |       |       |       |       |       |       | 34543 |
| VervetAGM         | CTA---AGAACCTACAACAAATTTTCATACTTAATGGAGAAATATTGAATATTTTCTTCTTAAAAACAGAAATGGAGCAAG            |       |       |       |       |       |       |       | 41085 |
| Gorilla           | CTACTAAGAACCTACAACAAATTTTCATACTTAATGGAGAAATATTGAATGTTTTCTTCTTAAAAACAGAAATGAAGCCAG            |       |       |       |       |       |       |       | 40105 |
| GrabEatingMacaque | CTA---AGAACCTACAACAAATTTTCATACTTAATGGGGAAATATTGAATGTTTTCTTCTTAAAAACAGAAATGGAGCAAG            |       |       |       |       |       |       |       | 40345 |
| Macaque           | CTA---AGAACCTACAACAAATTTTCATACTTAATGGGGAAATATTGAATGTTTTCTTCTTAAAAACAGAAATGGAGCAAG            |       |       |       |       |       |       |       | 41110 |
| PigTailedMacaque  | CTA---AGAACCTACAACAAATTTTCATACTTAATGGGGAAATATTGAATGTTTTCTTCTTAAAAACAGAAATGGAGCAAG            |       |       |       |       |       |       |       | 40067 |
| Bonobo            | CTACTAAGAACCTACAACAAATTTTCATACTTAATGGAGAAATATTGAATGTTTTCTTCTTAAAAACAGAAATGAAGCAAG            |       |       |       |       |       |       |       | 38736 |
| OliveBaboon       | CTA---AGAACCTACAACAAATTTTCATACTTAATGGGGAAATATTGAATGTTTTCTTCTTAAAAACAGAAATGGAGCAAG            |       |       |       |       |       |       |       | 40007 |
| Orangutan         | CTACTAAGAACCTACAACAAATTTTCATACTTAATGGAGAAATATTGAATGTTTTCTTCTTAAAAACAGAAATGAAGCAAG            |       |       |       |       |       |       |       | 39711 |



Tuesday, May 03, 2022 06:15 PM

| Majority          | GGTGTCTGTTTTCTCAATTTTTT--CCCTAGCTTTCTGCTTACATTAAGCAGGTGAAATAAAAGACATAAAGATTGTA   |       |       |       |       |       |       |       |       |
|-------------------|----------------------------------------------------------------------------------|-------|-------|-------|-------|-------|-------|-------|-------|
|                   | 48010                                                                            | 48020 | 48030 | 48040 | 48050 | 48060 | 48070 | 48080 |       |
| Human             | GATGTCTGTTTTCTCAATTTTTT--CCCTAGCTTTCTGCTTACATTAAGCAGGTGAAATAAAAGACATAAAGATTGTA   |       |       |       |       |       |       |       | 37781 |
| Coquerel'sSifaka  | ATTCCTATGGTTCAGATGACTC---AGAAGGACTTTTGTGACAATGTTACAAG-----AACACTTCCTGGTTATC      |       |       |       |       |       |       |       | 34389 |
| Ma'sNightMonkey   | NNNNNNNNNNNNNNNNNNNNNNNN--NNNNNNNNNNNNNNNNNNNNNNNNNNNNNNNNNNNNNNNNNNNNNNNN       |       |       |       |       |       |       |       | 34621 |
| VervetAGM         | GGTGTCTGTTTTCTCAATTTTTTCCCCCTAACTTTCTGCTTACATTAAGCAGGTGAAATAAAAGACATAAAGGTTGTA   |       |       |       |       |       |       |       | 41165 |
| Gorilla           | GATGTCTGTTTTCTCAATTTTTT--CCCTAGCTTTCTGCTTACATTAAGCAGGTGAAATAAAAGACATAAAGATTGTA   |       |       |       |       |       |       |       | 40183 |
| GrabEatingMacaque | GGTGTCTGTTTTCTCAATTTTTT--CCCCCTAACTTTCTGCTTACATTAAGCAGGTGAAATAAAAGACATAAAGATTGTA |       |       |       |       |       |       |       | 40424 |
| Macaque           | GGTGTCTGTTTTCTCAATTTTTT--CCCCCTAACTTTCTGCTTACATTAAGCAGGTGAAATAAAAGACATAAAGATTGTA |       |       |       |       |       |       |       | 41189 |
| PigTailedMacaque  | GGTGTCTGTTTTCTCAATTTTTTCCCCCTAACTTTCTGCTTACATTAAGCAGGTGAAATCAAAGACATAAAGATTGTA   |       |       |       |       |       |       |       | 40147 |
| Bonobo            | GATGTCTGTTTTCTCAATTTTTT--CCCTAGCTTTCTGCTTACATTAAGCAGGTGAAATAAAAGACATAAAGATTGTA   |       |       |       |       |       |       |       | 38814 |
| OliveBaboon       | GGTGTCTGTTTTCTCAATTTTTTCCCCCTAACTTTCTGCTTACATTAAGCAGGTGAAATAAAAGACATAAAGATTGTA   |       |       |       |       |       |       |       | 40087 |
| Orangutan         | GATGTCTGTTTTCTCAATTTTTT--CCCTAGCTTTTGTGCTTACATTAAGCAGGTGAAATAAAAGACATAAAGATTGTA  |       |       |       |       |       |       |       | 39789 |

| Majority          | AAGGAAGAAAGAAAACGTCTTATTCACTGTTCAACATGCTTTTTTAAATAGAAGACCTAAAGGAATCTACAACAGATTT  |       |       |       |       |       |       |       |       |
|-------------------|----------------------------------------------------------------------------------|-------|-------|-------|-------|-------|-------|-------|-------|
|                   | 48090                                                                            | 48100 | 48110 | 48120 | 48130 | 48140 | 48150 | 48160 |       |
| Human             | AAGGAAGAAAGAAAACGTCTTATTCACTGTTCAACATGCTTTTTTAAAGTAGAAGACCTGAAGGACTCTACAACAGATTT |       |       |       |       |       |       |       | 37861 |
| Coquerel'sSifaka  | AAATATACAACAGGATT-TCATTTTTATGTTTCAATGGCCAGCTTTATCCAAAATGTTT--C---TTCTAATTGATTT   |       |       |       |       |       |       |       | 34461 |
| Ma'sNightMonkey   | NNNNNNNNNNNNNNNNNNNNNNNNNNNNNNNNNNNNNNNNNNNNNNNNNNNNNNNNNNNNNNNNNNNNNNNN         |       |       |       |       |       |       |       | 34701 |
| VervetAGM         | AAGGAAGAAAGAAAACGTCTTATTCACTGTTCAACATGCTTTTTTAAATAGAAGACCTAAAGGAATCTACAACAGATTT  |       |       |       |       |       |       |       | 41245 |
| Gorilla           | AAGGAAGAAAGAAAACGTCTTATTCACTGTTCAACATGCTTTTTTAAAGTAGAAGACCTAAAGGAATCTACAACAGATTT |       |       |       |       |       |       |       | 40263 |
| GrabEatingMacaque | AAGGAAGAAAGAAAACGTCTTATTCACTGTTCAACATGCTTTTTTAAAGTAGAAGACCTAAAGGAATCTACAACAGATTT |       |       |       |       |       |       |       | 40504 |
| Macaque           | AAGGAAGAAAGAAAACGTCTTATTCACTGTTCAACATGCTTTTTTAAAGTAGAAGACCTAAAGGAATCTACAACAGATTT |       |       |       |       |       |       |       | 41269 |
| PigTailedMacaque  | AAGGAAGAAAGAAAACGTCTTATTCACTGTTCAACATGCTTTTTTAAATAGAAGACCTAAAGGAATCTACAACAGATTT  |       |       |       |       |       |       |       | 40227 |
| Bonobo            | AAGGAAGAAAGAAAACGTCTTATTCACTGTTCAACATGCTTTTTTAAAGTAGAAGACCTGAAG-ACTCTACAACAGATTT |       |       |       |       |       |       |       | 38893 |
| OliveBaboon       | AAGGAAGAAAGAAAACGTCTTATTCACTGTTCAACATGCTTTTTTAAATAGAAGACCTAAAGGAATCTACAACAGATTT  |       |       |       |       |       |       |       | 40167 |
| Orangutan         | AAGGAAGAAAGAAAACGTCTTATTCACTGTTCAACATGCTTTTTTAAATAGAAGACCTAAAGGTATCTACAACAGATTT  |       |       |       |       |       |       |       | 39869 |

| Majority          | GGTAGAACTAATAAGTGAATTTAGAATAATTATAGGATACAAGTCTCTGTATACAAAAATAGTCTCCTTATACTTG-CAGC |       |       |       |       |       |       |       |       |
|-------------------|-----------------------------------------------------------------------------------|-------|-------|-------|-------|-------|-------|-------|-------|
|                   | 48170                                                                             | 48180 | 48190 | 48200 | 48210 | 48220 | 48230 | 48240 |       |
| Human             | GGTAGAACTAATAAGTGAATTTAGAATAATTATAGGATACAAGTCTCTATGTACAGAAATAGTCTCCTTATACTTGGCAGC |       |       |       |       |       |       |       | 37941 |
| Coquerel'sSifaka  | -----TACTATAGAATTC-----TGTTTCCAAAATATCTCTCAACAGCCTTTCCTTATCTGTG----T              |       |       |       |       |       |       |       | 34517 |
| Ma'sNightMonkey   | NNNNNNNNNNNNNNNNNNNNNNNN--NNNNNNNNNNNNNNNNNNNNNNNNNNNNNNNNNNNNNNNNNNNNNN          |       |       |       |       |       |       |       | 34768 |
| VervetAGM         | GGTAGAACTAATAAGTGAATTTAGAATAATTATAGGATACAAGTCTCTGTGTACAAAAATAGTCTCCTTATACTAG-CAGC |       |       |       |       |       |       |       | 41324 |
| Gorilla           | GGTAGAACTAATAAGTGAATTTAGAATAATTATAGGATACAAGTCTCTATGTACAGAAATAGTCTCCTTATACTTG-CAGC |       |       |       |       |       |       |       | 40342 |
| GrabEatingMacaque | GGTAGAACTAATAAGTGAATTTAGAATAATTATAGGATACAAGTCTCTGTATACAAAAATAGTCTCCTTATACTAG-CAGC |       |       |       |       |       |       |       | 40583 |
| Macaque           | GGTAGAACTAATAAGTGAATTTAGAATAATTATAGGATACAAGTCTCTGTATACAAAAATAGTCTCCTTATACTAG-CAGC |       |       |       |       |       |       |       | 41348 |
| PigTailedMacaque  | GGTAGAACTAATAAGTGAATTTAGAATAATTATAGGATACAAGTCTCTGTATACAAAAATAGTCTCCTTATACTAG-CAGC |       |       |       |       |       |       |       | 40306 |
| Bonobo            | GGTAGAACTAATAAGTGAATTTAGAATAATTATAGGATACAAGTCTCTATGTACAGAAATAGTCTCCTTATACTTG-CAGC |       |       |       |       |       |       |       | 38972 |
| OliveBaboon       | GGTAGAACTAATAAGTGAATTTAGAATAATTATAGGATACAAGTCTCTGTATACAAAAATAGTCTCCTTATACTAG-CAGC |       |       |       |       |       |       |       | 40246 |
| Orangutan         | GGTAGAACTAATAAGTGAATT-----AT-ATACAAGTCTATATACAGAAATAGTCTCCTTATACTTG-CAGC          |       |       |       |       |       |       |       | 39935 |

Tuesday, May 03, 2022 06:15 PM

| Majority          | AAATTCTTAAAAAATGAAATTTTAAAAAATCTATTATTAAAAAGTATCAGACAAA--ATATCAGGAAAAAAA-CTTGACA       |       |       |       |       |       |       |       |       |
|-------------------|----------------------------------------------------------------------------------------|-------|-------|-------|-------|-------|-------|-------|-------|
|                   | 48250                                                                                  | 48260 | 48270 | 48280 | 48290 | 48300 | 48310 | 48320 |       |
| Human             | AAATTCTTAGAAAAATGAAATTTTAAAAAATCTGTTTAT-AAAAGTATCAGACAAA--ATATCAGGAAAAAAA-TTTGACA      |       |       |       |       |       |       |       | 38017 |
| Coquerel'sSifaka  | AGACTTTCCTTCTCTGTACCTATTGAACAGATACTTGTG-----TGTCAAAGAAA--AAATTGACTTTAGAA----GTGA       |       |       |       |       |       |       |       | 34585 |
| Ma'sNightMonkey   | NNNNNNNNNNNNNNNNNNNNNNNNNNNNNNNNNNNNNNNNNNNNNNNNNNNNNNNNNNNNNNNNNNNNNNNNNNNNNNNNNNNNNN |       |       |       |       |       |       |       | 34846 |
| VervetAGM         | AAATTCTTAAAAAATGAAATTTTAAAAAATCCATTATTAAAAAGTATCAGACAAAAAATATCAGGAAAAAAA-CTTGACA       |       |       |       |       |       |       |       | 41403 |
| Gorilla           | AAATTCTTAGAAAAATGAAATTTTAAAAAATCTGTTTAT-AAAAGTATCAGACAAA--ATATCAGGAAAAAAAATTTGACA      |       |       |       |       |       |       |       | 40419 |
| GrabEatingMacaque | AAATTCTTAAAAAATGAAATTTTAAAAAATCCATTATTAAAAAGTAGCAGACAAAAAATATCAGGAAAAAAA-CTTGACA       |       |       |       |       |       |       |       | 40662 |
| Macaque           | AAATTCTTAAAAAATGAAATTTTAAAAAATCCATTATTAAAAAGTAGCAGACAAAAAATATCAGGAAAAAAA-CTTGACA       |       |       |       |       |       |       |       | 41427 |
| PigTailedMacaque  | AAATTCTTAAAAAATGAAATTTTAAAAAATCCATTATTAAAAAGTAGCAGACAAAAAATATCAGGAAAAAAA-CTTGACA       |       |       |       |       |       |       |       | 40385 |
| Bonobo            | AAATTCTTAGAAAAATGAAATTTTAAAAAATCTGTTTAT-AAAAGTATCAGACAAA--ATATCAGGAAAAAAA-TTTGACA      |       |       |       |       |       |       |       | 39048 |
| OliveBaboon       | AAATTCTTAAAAAATGAAATTTTAGAAAAATCCATTATTAAAAAGTAGCAGACAAAAAATATCAGGAAAAAAA-CTTGACA      |       |       |       |       |       |       |       | 40325 |
| Orangutan         | AAATTCTTAGAAAAATGAAATTTAAAAAATCTGTTTGT-AAAAGTATCAGACAGA--ATATCAGGAAAAAAAATTTGACA       |       |       |       |       |       |       |       | 40012 |

| Majority          | AAAGATGTGTAAGACATCTGCACCAATATGAAACACTGCTAAGAGAAGTTTTTAAAAAGACTT-ACATGAAGACATAGACC      |       |       |       |       |       |       |       |       |
|-------------------|----------------------------------------------------------------------------------------|-------|-------|-------|-------|-------|-------|-------|-------|
|                   | 48330                                                                                  | 48340 | 48350 | 48360 | 48370 | 48380 | 48390 | 48400 |       |
| Human             | AAAGATATGTAAGACATCTACACCAATATGAAACACTGCTAAGAGAAGTTTTTAAAAAGACTT-ACATGAAGACGTAGACC      |       |       |       |       |       |       |       | 38096 |
| Coquerel'sSifaka  | GAAATATTATCAGAAACTTAATCTGAGGTAAATAGCTCATAAGTTGA--TATAATAAGA----ATATTTTGTAAATAAATT      |       |       |       |       |       |       |       | 34659 |
| Ma'sNightMonkey   | NNNNNNNNNNNNNNNNNNNNNNNNNNNNNNNNNNNNNNNNNNNNNNNNNNNNNNNNNNNNNNNNNNNNNNNNNNNNNNNNNNNNNN |       |       |       |       |       |       |       | 34926 |
| VervetAGM         | AAAGATGTGTAAGACATCTGCACCAATATGAAACACTGCTAAGAGAAGTTTTTAAAAAGACTTTACATGAAGACATAGACC      |       |       |       |       |       |       |       | 41483 |
| Gorilla           | AAAGATATGTAAGACATCTACACCAATATGAAACACTGCTAAGAGAAGTTTTTAAAAAGACTT-ACATGAAGACGTAGACC      |       |       |       |       |       |       |       | 40498 |
| GrabEatingMacaque | AAAGATGTGTAAGACATCTGCACCAATATGAAACACTGCTAAGAGAAGTTTTTAAAAAGACTT-ACATGAAGACATAGACC      |       |       |       |       |       |       |       | 40741 |
| Macaque           | AAAGATGTGTAAGACATCTGCACCAATATGAAACACTGCTAAGAGAAGTTTTTAAAAAGACTT-ACATGAAGACATAGACC      |       |       |       |       |       |       |       | 41506 |
| PigTailedMacaque  | AAAGATGTGTAAGACATCTGTACCAATATGAAACACTGCTAAGAGAAGTTTTTAAAAAGACTT-ACATGAAGACATAGACC      |       |       |       |       |       |       |       | 40464 |
| Bonobo            | AAAGATATGTAAGACATCTACACCAATATGAAACACTGCTAAGAGAAGTTTTTAAAAAGACTT-ACATGAAGATGTAGACC      |       |       |       |       |       |       |       | 39127 |
| OliveBaboon       | AAAGATGTGTAAGACATCTGCACCAATATGAAACACTGCTAAGAGAAGTTTTTAAAAAGACTT-ACATGAAGACATAGACC      |       |       |       |       |       |       |       | 40404 |
| Orangutan         | AAAGATGTGTAAGACATCTACACCAATATGAAACACTGCTAAGAGAAGTTTTTAAAAAGACTT-ACATGAAGACGTAGACC      |       |       |       |       |       |       |       | 40091 |

| Majority          | ATGTTTCATGAATTAGAAGGCTCAGTATGTTAACAATGCCAGTTCTCCCTAAATGGGATGGCATTGAATCTATAAGGACTT      |       |       |       |       |       |       |       |       |
|-------------------|----------------------------------------------------------------------------------------|-------|-------|-------|-------|-------|-------|-------|-------|
|                   | 48410                                                                                  | 48420 | 48430 | 48440 | 48450 | 48460 | 48470 | 48480 |       |
| Human             | ATGTTTCATGAATTAGAAGGCTCAATATGTTAACAATGCCAGTTCTCCCTAAATGGGATGGCATTGAATCTATAAAGACTT      |       |       |       |       |       |       |       | 38176 |
| Coquerel'sSifaka  | CCTTCAGGAGAAATAGAAGTAAAATATTTAAAAAATACAAGTAGCCCATCTAGCATTGGAATTAGATTT-T-----           |       |       |       |       |       |       |       | 34730 |
| Ma'sNightMonkey   | NNNNNNNNNNNNNNNNNNNNNNNNNNNNNNNNNNNNNNNNNNNNNNNNNNNNNNNNNNNNNNNNNNNNNNNNNNNNNNNNNNNNNN |       |       |       |       |       |       |       | 35006 |
| VervetAGM         | ATGTTTCATGAATTAGAAGGCTCAGTATGTTAACAATGCCAGTTCTCCCTAAATGGGATGACATTGAATCTATAAAGGACTT     |       |       |       |       |       |       |       | 41563 |
| Gorilla           | ATGTTTCATGAATTAGAAGGCTCAATATGTTAACAATGCCAGTTCTCCCTAAACTGGGATGGCATTGAATCTATAAAGACTT     |       |       |       |       |       |       |       | 40578 |
| GrabEatingMacaque | ATGTTTCATGAATTAGAAGGCTCAGTATGTTAACAATGCCAGTTCTCCCTCAATGGGATGGCATTGAATCTATAAAGGACTT     |       |       |       |       |       |       |       | 40821 |
| Macaque           | ATGTTTCATGAATTAGAAGGCTCAGTATGTTAACAATGCCAGTTCTCCCTAAATGGGATGGCATTGAATCTATAAAGGACTT     |       |       |       |       |       |       |       | 41586 |
| PigTailedMacaque  | ATGTTTCATGAATTAGAAGGCTCAGTATGTTAACAATGCCAGTTCTCCCTAAATGGGATGGCATTGAATCTATAAAGGACTT     |       |       |       |       |       |       |       | 40544 |
| Bonobo            | ATGTTTCATGAATTAGAAGGCTCAATATGTTAACAATGCCAGTTCTCCCTAAATGGGATGGCATTGAATCTATAAAGACTT      |       |       |       |       |       |       |       | 39207 |
| OliveBaboon       | ATGTTTCATGAATTAGAAGGCTCAGTATGTTAACAATGCCAGTTCTCCCTAAATGGGATGGCATTGAATCTGTAAGGACTT      |       |       |       |       |       |       |       | 40484 |
| Orangutan         | ATGTTTCATGAATTAGAAGGCTCAATATGTTAACAATGCCAGTTCTCCCTAAATGGGATGGCATTGAATCTGTAAGGACTT      |       |       |       |       |       |       |       | 40171 |



Tuesday, May 03, 2022 06:15 PM

| Majority          | GTGCTAGAACAGCTGAATATACATACAAAAAAG--CAAAGAAACTCAAACCCCTACCTTATTGTCATATAAAACAATGAGAT |       |
|-------------------|------------------------------------------------------------------------------------|-------|
|                   | 48730 48740 48750 48760 48770 48780 48790 48800                                    |       |
| Human             | GTGCTAGAACAGCTGAATATACATACAAAAAAG--CAAAGAAACTTAAACCCCTACATCATTCTGTATAAAACAATGAGAT  | 38492 |
| Coquerel'sSifaka  | CTGCTAAAAGTGTGACTTTTGTCTTAAAGTGAAG--GCACTGAAATCATCCCATACATTTTGGTACGTGTTACTCAGAAGT  | 34964 |
| Ma'sNightMonkey   | NNNNNNNNNNNNNNNNNNNNNNNNNNNNNNNNNNNNNNNNNNNNNNNNNNNNNNNNNNNNNNNNNNNNNNNNNNNNNNNN   | 35317 |
| VervetAGM         | GTGCTAGAACAGCTGAATATACATACAAAAAAG--CAAAGAAACTCAAACCCCTACCTTATTGTCATATAAAACAATGAGAT | 41874 |
| Gorilla           | GTGCTAGAACAGCTGAATATACATACAAAAAAG--CAAAGAAACTTAAACCCCTACATCATTCTGTATAAAACAATGAGAT  | 40894 |
| GrabEatingMacaque | GTGCTAGAACAGCTGAATATACGTACAAAAAAG--CAAAGAAACTCAAACCCCTACCTTATTGTCATATAAAACAATGAGAT | 41132 |
| Macaque           | GTGCTAGAACAGCTGAATATACGTACAAAAAAG--CAAAGAAACTCAAACCCCTACCTTATTGTCATATAAAACAATGAGAT | 41897 |
| PigTailedMacaque  | GTGCTAGAACAGCTGAATATACGTACAAAAAAG--CAAAGAAACTCAAACCCCTACCTTATTGTCATATAAAACAATGAGAT | 40855 |
| Bonobo            | GTGCTAGAACAGCTGAATATACATACAAAAAAG--CAAAGAAACTTAAACCCCTACATCATTCTGTATAAAACAATGAGAT  | 39526 |
| OliveBaboon       | GTGCTAGAACAGCTGAATATACATACAAAAAAGCAAAGAAACTCAAACCCCTACCTTATTGTCATATAAAACAATGAGAT   | 40796 |
| Orangutan         | GTGCTAGAACAGCTGAATATACGTACAAAAAAG--TAAAGAAACTCAAACCCGACATCATTCCATATAAAACAATGAGAT   | 40487 |

| Majority          | TA----TATAAAAACCTAATGTATAGAGTTTTTAGGAAAAAGCATAGGATATACTTGCCACTTTGGGATAAATGAAGATTT |       |
|-------------------|-----------------------------------------------------------------------------------|-------|
|                   | 48810 48820 48830 48840 48850 48860 48870 48880                                   |       |
| Human             | TAATTATATAAAAACCTAATGTATAGAGTTTTTAGGAAAAAGCATAGGATATACTTGCAACTTTGGGATAAATGAAGATTT | 38572 |
| Coquerel'sSifaka  | CT-----G---AGATTTTCATTTTAAATTTTACAGACATTTTGTATGTATGCCCTTTCATTTTGTATAATGC---TTT    | 35033 |
| Ma'sNightMonkey   | NN----NNNNNNNNNNNNNNNNNNNNNNNNNNNNNNNNNNNNNNNNNNNNNNNNNNNNNNNNNNNNNNNNNNNNNNNN    | 35393 |
| VervetAGM         | TAATTATATAAAAACCTAATGTATAGAGTTTTTAGGAAAAAGCATAGGATATACTTGCCACTTTGGGATAAATGAAGATT- | 41953 |
| Gorilla           | TAATTATATAAAAACCTAATGTATAGAGTTTTTAGGAAAAAGCATAGGATATACTTGCAACTTTGGGATAAATGAAGATTT | 40974 |
| GrabEatingMacaque | TA----TATAAAAACCTAATGTATAGAGTTTTTAGGAAAAAGCATAGGGTATACTTGCCACTTTGGGATAAATGAAGATTT | 41208 |
| Macaque           | TA----TATAAAAACCTAATGTATAGCGTTTTTAGGAAAAAGCATAGGGTATACTTGCCACTTTGGGATAAATGAAGATTT | 41973 |
| PigTailedMacaque  | TA----TATAAAAACCTAATGTATAGAGTTTTTAGGAAAAAGCATAGGGTATACTTGCCACTTTGGGATAAATGAAGATTT | 40931 |
| Bonobo            | TAATTATATAAAAACCTAATGTATAGAGTTTTTAGGAAAAAGCATAGGATATACTTGCAACTTTGGGATAAATGAAGATTT | 39606 |
| OliveBaboon       | TA----TATAAAAACCTAATGTATAGAGTTTTTAGGAAAAAGCATAGGGTATACTTGCCACTTTGGGATAAATGAAGATTT | 40872 |
| Orangutan         | TAATTATATAAAAACCTAATGTATAGAGTTTTTAGGAAAAAGCCTAGGATATACTTGCAACTTTGGGATAAATGAAGATTT | 40567 |

| Majority          | CTTAAAACA--AAAATTACTCATCTTAAAGGAATATATAAACTTGACTCCATCAACATGGGAAATTTCAA-----TTGT  |       |
|-------------------|----------------------------------------------------------------------------------|-------|
|                   | 48890 48900 48910 48920 48930 48940 48950 48960                                  |       |
| Human             | CTTAAAATAGAAAAAT-----CTTAAAGGAATATATAAACTTGACTCCATCAAAATGGGAAATTTCTGC-----TTCA   | 38640 |
| Coquerel'sSifaka  | T-----G-----A--GAGTATTCCAAAGAGATTATTTTACAGTTCGAA-----TGT                         | 35072 |
| Ma'sNightMonkey   | NNNNNNNN--NNNN-----NNNNNNNNNNNNNNNNNNNNNNNNNNNNNNNNNNNNNNNNNNNNNNNNNNNNNNNN      | 35455 |
| VervetAGM         | --TAAAACA--AAAATTACTCATCTTAAAGGAATATATAAACTTGACTCCATCAACATGGGAAATTTCAAAGACATTGT  | 42029 |
| Gorilla           | CTTAAAATAGAAAA-----AAAGGAATATATAAACTTGACTACTTCAAATGGGAAATTTCTGC-----TTAA         | 41038 |
| GrabEatingMacaque | CTTAAAACA--AAAATTACTCATCTTAAAGGAATATATAAACTTGACTCCATCAGCATGGGAAATTTCAAAGACATTGT  | 41286 |
| Macaque           | CTTAAAACA--AAAATTACTCATCTTAAAGGAATATATAAACTTGACTCCATCAGCATGGGAAATTTCAAAGACATTGT  | 42051 |
| PigTailedMacaque  | CTTAAAACA--AAAATTACTCATCTTAAAGGAATATATAAACTTGACTCCATCAGCATGGGAAATTTCAAAGACATTGT  | 41009 |
| Bonobo            | CTTAAAATAGAAAAAT-----CTTAAAGGAATATATAAACTTGACTCCATCAAAATGGGAAATTTCTGC-----TTAA   | 39674 |
| OliveBaboon       | CTTAAAACA--AAAATTACTCATCTTAAAGGAATATATAAACTTGACTCCATCAGCATGGGAAATTTCAAAGACATTGT  | 40950 |
| Orangutan         | CTTAAAATAGAAAAATTAATCATCTTAAAGGAATATATAAACTTGACTCCATCAAAATGGGAAATTTCTGC-----TTAC | 40642 |

Tuesday, May 03, 2022 06:15 PM

| Majority          | TCAAAAGACATTGTTAAGACAATGAAAAGGCAAGGCACAGACTTGGAGAATATAATATTTACATATCAGTACATATATAT |       |
|-------------------|----------------------------------------------------------------------------------|-------|
|                   | 48970 48980 48990 49000 49010 49020 49030 49040                                  |       |
| Human             | TCAAAAGACATTGTTAAGACAATGAAAAGGCAAGGCACAGACTTGGAGAATATAATATTTGTGTATCAATACATGCATAT | 38720 |
| Coquerel'sSifaka  | TTATGAGA----GTTCTAACAATGT-----GTCTTGCATATAGAGATAATGAGAGCCTTCCTTTAGGTGCCGTCTGT    | 35140 |
| Ma'sNightMonkey   | NNNNNNNNNNNNNNNNNNNNNNNNNNNNNNNNNNNNNNNNNNNNNNNNNNNNNNNNNNNNNNNNNNNNNNNNNNNNNNNN | 35535 |
| VervetAGM         | TCAAAAGACATTGTTAAGACAATGAAAAGGCAAGGCACAGACTTGGAGAATATAATATTTACATATCAGTACATATATAT | 42109 |
| Gorilla           | TCAAAAGACATTGTTAAGACAATGAAAAGGCAAGGCACAGACTTGGAGAATATAATATTTGCGTGTCAATACATACATAT | 41118 |
| GrabEatingMacaque | TCAAAAGACATTGTTAAGACAATGAAAAGGCAAGGCACAGACTTGGAGAATATAATATTTACATATCAGTACATATATAT | 41366 |
| Macaque           | TCAAAAGACATTGTTAAGACAATGAAAAGGCAAGGCACAGACTTGGAGAATATAATATTTACATATCAGTACATATATAT | 42131 |
| PigTailedMacaque  | TCAAAAGACATTGTTAAGACAATGAAAAGGCAAGGCACAGACTTGGAGAATATAATATTTACATATCAGTACATATATAT | 41089 |
| Bonobo            | TCAGAAGACATTGTTAAGACAATGAAAAGGCAAGGCACAGACTTGGAGAATATAATATTTGTGTATCAATACATACATAT | 39754 |
| OliveBaboon       | TCAAACGACATTGTTAAGACAATGAAAAGGCAAGGCACAGACTTGGAGAATATAATATTTACATATCAGTACATATATAT | 41030 |
| Orangutan         | TCAAAAGACATTGTTAAGACAATGAAAAGGCAAGGCACAGACTTGGAGAATATAATATTTGCATATCAATACATATATAT | 40722 |

| Majority          | GACTGTATTAGTCCATTTTTATGCTGCTGATAAAGACGTACCTGAGACTGGG-----CAATTTACAAAAGAAACCAG    |       |
|-------------------|----------------------------------------------------------------------------------|-------|
|                   | 49050 49060 49070 49080 49090 49100 49110 49120                                  |       |
| Human             | GACTGTATTAGTCCATTTTTATGCTGCTGATAAAGACGTACCCGAGACTGGG----CGGGCAATTTATGAAAGAAACCAG | 38796 |
| Coquerel'sSifaka  | -ATTTTTCTAGCTCATGCCTAAGGTACTTTTG-----GCATCTGGGCTTTGC-----AG-CCACTTGGAAATGCAGAGAG | 35208 |
| Ma'sNightMonkey   | NNNNNNNNNNNNNNNNNNNNNNNNNNNNNNNNNNNNNNNNNNNNNNNNNNNNNNNNNNNNNNNNNNNNNNNNNNNNNNNN | 35607 |
| VervetAGM         | GACTGTATTAGTCCATTTTTATGCTGCTGATAAAGACATACTTGAGACCGGG-----CAATTTACAAAAGAAACCAG    | 42181 |
| Gorilla           | GACTGTATTAGTCCATTTTTATGCTGCTGATAAAGACGTACCTGAGACTGGG----CAGGCAATTTATGAAAGAAACCAG | 41194 |
| GrabEatingMacaque | GACTGTATTAGTCCATTTTTATGCTGCTGATAAAGACATACTTGAGACCGGG-----CAATTTACAAAAGAAACCAG    | 41438 |
| Macaque           | GACTGTATTAGTCCATTTTTATGCTGCTGATAAAGACATACTTGAGACTGGG-----CAATTTACAAAAGAAACCAG    | 42203 |
| PigTailedMacaque  | GACTGTATTAGTCCATTTTTATGCTGCTGATAAAGACATACTTGAGACCGGG-----CAATTTACAAAAGAAACCAG    | 41161 |
| Bonobo            | GACTGTATTAGTCCATTTTTATGCTGCTGATAAAGACGTACCCGAGACTGGG----CGGGCAATTTATGAAAGAAACCAG | 39830 |
| OliveBaboon       | GACTGTATTAGTCCATTTTTATGCTGCTGATAAAGACATACTTGAGACCGGG-----CAATTTACAAAAGAAACCAG    | 41102 |
| Orangutan         | GACTGTATTAGTCCATTTTTATGCTGCTGATAAAGACGTACCTGAGACTGGGTGGGCGGCAATTTGTGAAAGAAACCAG  | 40802 |

| Majority          | TTTAATGGATTTACAGTTCATGTGACTGGGGAAGCCTCATAATCATGGTGAAGGCAAGGAGGAGCAAACTCTACATCTT  |       |
|-------------------|----------------------------------------------------------------------------------|-------|
|                   | 49130 49140 49150 49160 49170 49180 49190 49200                                  |       |
| Human             | TTTAATGAATTTACAATTTCTATGTGACTGGGGAAGCCTCATAATCATGGTGAAGGCAAGGAGGAGCAAGTC-ACATCTT | 38875 |
| Coquerel'sSifaka  | TTACGTCTTTTACAGT-----AAGTCTAGTGAGGCTTTTTA--TGTGGTGGTGTGGAGTTAACTAAACA-----GCC    | 35276 |
| Ma'sNightMonkey   | NNNNNNNNNNNNNNNNNNNNNNNNNNNNNNNNNNNNNNNNNNNNNNNNNNNNNNNNNNNNNNNNNNNNNNNNNNNNNNNN | 35687 |
| VervetAGM         | TTTAATGGATTTACAGTTCATGTGACTGGGGAAGCCTCACAATCATGGTGAAGGCAAGGAGGAGCAAACTCTGCATCTT  | 42261 |
| Gorilla           | TTTAATGAATTTACAATTTCTGTGTGACTGGGGAAGCCTCATAATCATGGTGAAGGCAAGGAGGAGCAAGTC-ACATCTT | 41273 |
| GrabEatingMacaque | TTTAATGGATTTACAGTTCATGTGACTGGGGAAGCCTCACAATCATGGTGAAGGCAAGGAGGAGCAAACTCTACATCTT  | 41518 |
| Macaque           | TTTAATGGATTTACAGTTCATGTGACTGGGGAAGCCTCACAATCATGGTGAAGGCAAGGAGGAGCAAACTCTACATCTT  | 42283 |
| PigTailedMacaque  | TTTAATGGATTTACAGTTCATGTGACTGGGGAAGCCTCACAATCATGGTGAAGGCAAGGAGGAGCAAACTCTACATCTT  | 41241 |
| Bonobo            | TTTAATGAATTTACAATTTCTATGTGACTGGGGAAGCCTCATAATCATGGTGAAGGCAAGGAGGAGCAAGTC-ACATCTT | 39909 |
| OliveBaboon       | TTTAATGGATTTACAGTTCATGTGACTGGGGAAGCCTCACAATCATGGTGAAGGCAAGGAGGAGCAAACTCTACATCTT  | 41182 |
| Orangutan         | TTTAATGAATTTACAGTTCATGTGACTGGGGAAGCCTCATAATCATGGTGAAGGCAAGGAGGAGTAAGTC-ACATCTT   | 40881 |

Tuesday, May 03, 2022 06:15 PM

| Majority          | ACATGGATGGCAACAGGCAAAGAAAAGAGAGCTTGTGCAGGGAAACTCTCCCCTTTTTTAAAACCGTGAGACTTACTTCAT  |       |
|-------------------|------------------------------------------------------------------------------------|-------|
|                   | 49210 49220 49230 49240 49250 49260 49270 49280                                    |       |
| Human             | ACGTAGATGGCAACAGGCAAAGAAAAGAGAGCTTGTGCAGGGAAACTCTCCCCTTTTTTAAAACCATGAGACTTACTTCAC  | 38955 |
| Coquerel'sSifaka  | AGTGGAAATGACAGAAGTACCA-----TCTATCTGTATGTATCTGCTCTTTTTTTTTTTTTTTTTTGGAAATTTCTGT TTC | 35350 |
| Ma'sNightMonkey   | NNNNNNNNNNNNNNNNNNNNNNNNNNNNNNNNNNNNNNNNNNNNNNNNNNNNNNNNNNNNNNNNNNNNNNNNNNNNNNNN   | 35767 |
| VervetAGM         | ACATGGATGGCAACAGGCAA-----GAGAGCTTGTGCAGGGAAACTCTCCCCTTTTTTAAAACCTGAGAGACATACTTCAT  | 42336 |
| Gorilla           | ACATAGATGGCAGCAGGCAAAGAAAAGAGAGCTTGTGCAGGGAAACTCTCCCCTTTTTTAAAACCTGTGAGACTTACTTCAC | 41353 |
| GrabEatingMacaque | ACATGGATGGCAACAGGCAAAGAAAAGAGAGCTTGTGCAGGGAAACTCTCCCCTTTTTTAAAACCGAGAGACATACTTCAT  | 41598 |
| Macaque           | ACATGGATGGCAACAGGCAAAGAAAAGAGAGCTTGTGCAGGGAAACTCTCCCCTTTTTTAAAACCGAGAGACATACTTCAT  | 42363 |
| PigTailedMacaque  | ACATGGATGGCAACAGGCAAAGAAAAGAGAGCTTGTGCAGGGAAACTCTCCCCTTTTTTAAAACCGAGAGACATACTTCAT  | 41321 |
| Bonobo            | ACGTAGATGGCAACAGGCAAAGAAAAGAGAGCTTGTGCAGGGAAACTCTCCCCTTTTTTAAAACCGTGAGACTTACTTCAC  | 39989 |
| OliveBaboon       | ACATGGATGGCAACAGGCAAAGAAAAGAGAGCTTGTGCAGGGAAACTCTCCCCTTTTTTAAAACCGAGAGACATACTTCAT  | 41262 |
| Orangutan         | ACATAGATGGCAACAGGCAAAGAAAAGAGAGTTTGTGCAGGGAAACTCTCCCCTTTTTTAAAACCGTGAGACTTACTTCAC  | 40961 |

| Majority          | TATCACGAGAACAGCATGGGAAAGACTTGCCCCATGATTTCAGTTACCTCCCACCAGGTCCCTCCCACAACACATGGGAA   |       |
|-------------------|------------------------------------------------------------------------------------|-------|
|                   | 49290 49300 49310 49320 49330 49340 49350 49360                                    |       |
| Human             | TGTCACGAGAACAGCATTTGGAAAGACCTTGCCCCATGATTTCAGTTAACTCCCACCAGGTCCCTCCCACAACACATGGGAA | 39035 |
| Coquerel'sSifaka  | TTGTGTAAGAAT-G-----AATACTGGCATTTCATTTTTT-----T-----TAGAGTCTTTTGTTTTATTTTTTTT       | 35410 |
| Ma'sNightMonkey   | NNNNNNNNNNNNNNNNNNNNNNNNNNNNNNNNNNNNNNNNNNNNNNNNNNNNNNNNNNNNNNNNNNNNNNNNNNNNNNNN   | 35847 |
| VervetAGM         | TATCACGAGAACACATGGGAAAGACTTGCCCCATGATTTCAGTTACCTCCCACCAGGTCCCTCCCACAACACATGGGAA    | 42416 |
| Gorilla           | TGTCACGAGAACAGCATTTGTAAGACCTTGCCCCATGATTTCAGTTAACTCCCACCAGGTCCCTCCCACAACACATGGGAA  | 41433 |
| GrabEatingMacaque | TATCACGAGAACACATGGGAAAGACTTGCCCCATGATTTCAGTTACCTCCCACCAGGTCCCTCCCACAACACATGGGAA    | 41678 |
| Macaque           | TATCACGAGAACACATGGGAAAGACTTGCCCCATGATTTCAGTTACCTCCCACCAGGTCCCTCCCACAACACATGGGAA    | 42443 |
| PigTailedMacaque  | CATCACGAGAACACATGGGAAAGACTTGCCCCATGATTTCAGTTACCTCCCACCAGGTCCCTCCCACAACACATGGGAA    | 41401 |
| Bonobo            | TGTCACGAGAACAGCATTTGGAAAGACCTTGCCCCATGATTTCAGTTAACTCCCACCAGGTCCCTCCCACAACACATGGCAA | 40069 |
| OliveBaboon       | TATCACGAGAACACATGGGAAAGACTTGCCCCATGATTTCAGTTACCTCCCACCAGGTCCCTCCCACAACACATGAGAA    | 41342 |
| Orangutan         | TGTCACGGAAACAGCATTTGGAAAGACCTTGCCCCGTGATTTCAGTTACCTCCCACCAGGTCCCTCCCACAACACATGGGAA | 41041 |

| Majority          | TTCAAGAGGAGATTTGGGTGGGGACACAGCCAAACCGTATCAATGATAAAGGACTTGTATCCCAAAGACTTGTAAAAA   |       |
|-------------------|----------------------------------------------------------------------------------|-------|
|                   | 49370 49380 49390 49400 49410 49420 49430 49440                                  |       |
| Human             | TTCAAGAGGAGATTTGGGTGGGGACACAGCCAAACCGTATCAATGATAAAGGACTTGTATCCCAAAGGACTTGTAAAAA  | 39114 |
| Coquerel'sSifaka  | TTTCCTAGA-----G-----CCAGCAGCTTCTGTAACACCGTGCTTTGCCCTTAAAG-----TCTAATTA           | 35464 |
| Ma'sNightMonkey   | NNNNNNNNNNNNNNNNNNNNNNNNNNNNNNNNNNNNNNNNNNNNNNNNNNNNNNNNNNNNNNNNNNNNNNNNNNNNNNNN | 35927 |
| VervetAGM         | TTCAAGAGGAGATTTGGGTGGGGACACAGCCAAACCGTATCAATGATAAAGGACTTGTATCCCAAAGGACTTGTAAAAA  | 42496 |
| Gorilla           | TTCAAGAGGAGATTTGGGTGGGG--CACAGCCAAACCGTATCAATGATAAAGGACTTGTATCCCAAAGGACTTGTAAAAA | 41511 |
| GrabEatingMacaque | TTCAAGAGGAGATTTGGGTGGGGACACAGCCAAACCGTATCAATGATAAAGGACTTGTATCCCAAAGGACTTGTAAAAA  | 41758 |
| Macaque           | TTCAAGAGGAGATTTGGGTGGGGACACAGCCAAACCGTATCAATGATAAAGGACTTGTATCCCAAAGGACTTGTAAAAA  | 42523 |
| PigTailedMacaque  | TTCAAGAGGAGATTTGGGTGGGGACACAGCCAAACCGTATCAATGATAAAGGACTTGTATCCCAAAGGACTTGTAAAAA  | 41481 |
| Bonobo            | TTCAAGAGGAGATTTGGGTGGGGACACAGCCAAACCGTATCAACGACAAAGGACTTGTATCCCAAAGGACTTGTAAAAA  | 40148 |
| OliveBaboon       | TTCAAGAGGAGATTTGGGTGGGGACACAGCCAAACCGTATCAATGATAAAGGACTTGTATCCCAAAGGACTTGTAAAAA  | 41422 |
| Orangutan         | TTCAAGAGGAGATTTGGGTGGGGACACAGCCAAACCGTATCAATGATAAAGGACTTGTATCCCAAAGGACTTGTAAAAA  | 41120 |

Tuesday, May 03, 2022 06:15 PM

| Majority          | AA-----A---CTCCAATCAATAAATATGAGCAGCCCAATTTTTTT--AAGTGGCAAAGAAGTGACATTATAA        |       |
|-------------------|----------------------------------------------------------------------------------|-------|
|                   | 49450 49460 49470 49480 49490 49500 49510 49520                                  |       |
| Human             | AAAA-----ACTCCTCCAATCAATAAATATGAGCAGCCCAATTTTTTTTAAAGTGGCAAAGAAGTGACATTATAA      | 39185 |
| Coquerel'sSifaka  | AA-----ACTGCTTT-----GCCTCTCAGTATCA                                               | 35488 |
| Ma'sNightMonkey   | NN-----NNNN-----NNNNNNNNNN--NNNNNNNNNNNNNNNNNNNNNNNN                             | 35971 |
| VervetAGM         | AA-----G---CTCAA-----TCAATTTTTTT--AAGTGGCAAAGAAGTGACATTATAA                      | 42542 |
| Gorilla           | AAAAGCTCCTCCAACCTCCTCCAATCAATACATATGAGCAGCCCAATTTTTTTTAAAGTGGCAAAGAAGTGACATTATAA | 41591 |
| GrabEatingMacaque | AA-----A---CTCCAATCAATAAATATGAGCAGCCCAATTTTTTT--AAGTGGCAAAGAAGTGACATTATAA        | 41822 |
| Macaque           | AA-----G---CTCCAATCAATAAATATGAGCAGCCCAATTTTTTT--AAGTGGCAAAGAAGTGACATTATAA        | 42587 |
| PigTailedMacaque  | AA-----A---CTCCA---ATAAATATGAGCAGCCCAATTTTTTT--AAGTGGCAAAGAAGTGACATTATAA         | 41541 |
| Bonobo            | AAAA-----ACTCCTCCAATCAATAAATATGAGCAGCCCAATTTTTTTTAAAGTGGCAAAGAAGTGACATTATAA      | 40219 |
| OliveBaboon       | AA-----A---CTCCAATCAATAAATATGAGCAGCCCAATTTTTTT--AAGTGGCAAAGAAGTGACATTATAA        | 41486 |
| Orangutan         | AA-----ACTCCTCCAATCAATAAATATGAGCAGCCCAATTTTTTT--AAGTGACAAAAGAAGTGACATTATAA       | 41188 |

| Majority          | GAATGGGTAACAAGCACACGGAAAGATTACACTAGCCATCAGGTAATCACAAGTCAAAACCATTATGAGACA--ATTTAC |       |
|-------------------|----------------------------------------------------------------------------------|-------|
|                   | 49530 49540 49550 49560 49570 49580 49590 49600                                  |       |
| Human             | GGATGGGTAACAAGCACATGAAAAGATAATGTTAGTCATCAGGTGATCACAAGTCAAAACCATTA-GAGATAGAATTTAC | 39264 |
| Coquerel'sSifaka  | TATCTGATAATAA-----AAGGAGTTAC---CAAACCTTTCAT-----A-----                           | 35524 |
| Ma'sNightMonkey   | NNNNNNNNNNNNNNNNNNNNNNNNNNNNNNNNNNNNNNNNNNNNNNNNNNNNNNNNNN--NNNNNN               | 36049 |
| VervetAGM         | GAATGGGTAACAAGCACACGGAAAGATTACACTAGCCATCAGGTAATCACAAGTCAAAACCATTATGAGACA--ATTTAC | 42620 |
| Gorilla           | GGATGGGTAACAAGCACATGAAAAGATAATGTTAGTCATCAGTTGATCACAAGTCAAAACCATTATGAGATAGAATTTAC | 41671 |
| GrabEatingMacaque | GAATGGGTAACAAGCACACGGAAAGATTACACTAGCCATCAGGTAATCACAAGTCAAAACCATTATGAGACA--ATTGAC | 41900 |
| Macaque           | GAATGGGTAACAAGCACACGGAAAGATTACACTAGCCATCAGGTAATCACAAGTCAAAACCATTATGAGACA--ATTGAC | 42665 |
| PigTailedMacaque  | GAATGGGTAACAAGCACACGGAAAGATTACACTAGCCATCAGGTAATCACAAGTCAAAACCATTATGAGACA--ATTTAC | 41619 |
| Bonobo            | GGATGGGTAACAAGCACATGAAAAGATAATGTTAGTCATCAGGTGATCACAAGTCAAAACCATTA-GAGATAGAATTTAC | 40298 |
| OliveBaboon       | GAATGAGTAACAAGCACACGGAAAGATTACACTAGCCATCAGGTAATCACAAGTCAAAACCATTATGAGACA--ATTTAC | 41564 |
| Orangutan         | GGATGGGTAACAAGCACATGAAAAGATAACATTAGTCATCAGGTAATCACAAGTCAAAACCATTATGAGATAGAATTTAC | 41268 |

| Majority          | ACCAACTAGAAATGGCTAAAATTAATAGATTGGCAATACCTAATGTTGATGAAGATGTGGAAGTGCCTTTGATTACTGCT  |       |
|-------------------|-----------------------------------------------------------------------------------|-------|
|                   | 49610 49620 49630 49640 49650 49660 49670 49680                                   |       |
| Human             | ACCAACTAGAAATGGCTAAAATTAATAGATTGGCAATACCGAATGTTGATGAAGATGTGGAAGTGCCTTTAATTACTGCT  | 39344 |
| Coquerel'sSifaka  | -----AATGCATGAGTCTGAAAGTCTGGAG-----AATGAAGATGTACTTATAATTTGCCAAATAGTTTTCTCT        | 35589 |
| Ma'sNightMonkey   | NNNNNNNNNNNNNNNNNNNNNNNNNNNNNNNNNNNNNNNNNNNNNNNNNNNNNNNNNN                        | 36129 |
| VervetAGM         | ACCAACTAGAAATGGCTAAAATCAAATAGGTTGGCAATACCTAATGTTGATGAAGATGTGGAAGTGCCTTTGATTACTGCT | 42700 |
| Gorilla           | ACCAACTAGAAATGGCTAAAATTAATAGATTGGCAACACCGAATGTTGATGAAGATGTGGAAGTGCCTTTAATTACTGCT  | 41751 |
| GrabEatingMacaque | ACCAACTAGAAATGGCTAAAATCAAATAGGTTGGCAATACCTAATGTTGATGAAGATGTGGAAGTGCCTTTGATTACTGCT | 41980 |
| Macaque           | ACCAACTAGAAATGGCTAAAATCAAATAGGTTGGCAATACCTAATGTTGATGAAAATGTGGAAGTGCCTTTGATTACTGCT | 42745 |
| PigTailedMacaque  | ACCAACTAGAAATGGCTAAAATCAAATAGGTTGGCAATACCTAATGTTGATGAAGATGTGGAAGTGCCTTTGATTACTGCT | 41699 |
| Bonobo            | ACCAACTAGAAATGGCTAAAATTAATAGATTGGCAACACCGAATGTTGATGAAGATGTGGAAGTGCCTTTAATTACTGCT  | 40378 |
| OliveBaboon       | ACCAACTAGAAATGGCTAAAATCAAATAGGTTGGCAATACCTAATGTTGATGAAGATGTGGAAGTGCCTTTGATTACTGCT | 41644 |
| Orangutan         | ACCAACTAGAAATGGCTAAAATTAATAGATTGGCAACACCGAATGTTGATGAAGATGTGGAAGTGCCTTTAATTACTGCT  | 41348 |

Tuesday, May 03, 2022 06:15 PM

| Majority          | GAGTATGTAACATAGTTGGGAAAATAGTTTGC-TTTTTTTTTTTTTTTT-----G-GACAGAGTCTTGTTCTG  |       |
|-------------------|----------------------------------------------------------------------------|-------|
|                   | 49690 49700 49710 49720 49730 49740 49750 49760                            |       |
| Human             | GAGTATATAACATAGTTGGGAAAATAGTTTGC-TTTTTTTTTTTTTTTT-----GAGACAGAGTCTTGCTCTG  | 39419 |
| Coquerel'sSifaka  | GGACAGATGAAGTAT-----AAAGT-----TTTTTTTTTTTTTT-----GACACAGAGTCTTGCTCTG       | 35642 |
| Ma'sNightMonkey   | NNNNNNNNNNNNNNNNNNNNNNNNNNNNNN-----NNNNNNNNNNNNNN-----NNNNNNNNNNNNNNNNNN   | 36184 |
| VervetAGM         | GAGTATGTAACATAGTTGGGAAAATAGTTTGC---CTTTTTTTTTTTG-----A-GACAGAGTCTTGTTCTG   | 42763 |
| Gorilla           | GAGTATATAACATAGTTGGGAAAATAGTTTGC-TTTTTTTTTTTTTTTT-----GAGACAGAGTCTTGCTCTG  | 41831 |
| GrabEatingMacaque | GAGTATGTAACATAGTTGGGAAAAT-----TTTTTTTTTTTTTTG-----A-GACAGAGTCTTGTTCTG      | 42036 |
| Macaque           | GAGTATGTAACATAGTTGGGAAAAT-----TTTTTTTTTTTTTTG-----A-GACAGAGTCTTGTTCTG      | 42801 |
| PigTailedMacaque  | GAGTATGTAACATAGTTGGGAAAATAGTTTGCCTTTTCTTTTTTTTTTTG-----A-GACAGAGTCTTGTTCTG | 41766 |
| Bonobo            | GAGTATATAACATAGTTGGGAAAATAGTTTGC-TTTTTTTTTTTTTTTT-----GAGACAGAGTCTTGCTCTG  | 40446 |
| OliveBaboon       | GAGTATGTAACATAGTTGGGAAAACAGTTTGCCTTTTTTTTTTTTTTTG-----A-GACAGAGTCTTGTTCTG  | 41711 |
| Orangutan         | GAGTATATAACATAGTTGGGAAAATAGTTTGC-TTTTTTTTTTTTTTTT-----GAGACAGAGTCTTGCTCTG  | 41422 |

| Majority          | TCACC-AGGCTGGAATG--CAGTGTGGCATGATCTTGGCTT--ACTGCAACCTCCGCCTCTTGGGTTCAAGTGATTCTCC |       |
|-------------------|----------------------------------------------------------------------------------|-------|
|                   | 49770 49780 49790 49800 49810 49820 49830 49840                                  |       |
| Human             | TCACC-AGGCTGGAATG--CAGT--GGCATGATCTCAGCTT--ACTGCAACCTCCGCCTCTGGGTTCAAGCGATTCTCC  | 39492 |
| Coquerel'sSifaka  | TTGCCCGGGCTAGAGTGAGTGCCGTGGCGTCAGCTAGCTC--ACAGCAACCTCAAACCTCTGGGCTCAAGCGATCCTC   | 35720 |
| Ma'sNightMonkey   | NNNNN-NNNNNNNNNNNNN--NNNN--NNNNNNNNNNNNNNNNNNNNNNNNNNNNNNNNNNNNNNNNNNNNNN        | 36257 |
| VervetAGM         | TCACC-AGGCTAGAATG--CAGTGTGGCATGATCTTGGCTT--ACTGCAACCTCCGCCTCTTGGGTTCAAGTGATTCTCC | 42838 |
| Gorilla           | TCACC-AGGCTGGAATG--CAGT--GGCATGATCTCAGCTT--ACTGCAACCTCTGCCTCTGGGTTCAAGCGATTCTCC  | 41904 |
| GrabEatingMacaque | TCACC-AGGCTGGAATG--CAGTGTGGCATGATCTTGGCTTAAACTGCAACCTCCGCCTCTTGGGTTCAAGTGATTCTCC | 42113 |
| Macaque           | TCACC-AGGCTGGAATG--CAGTGTGGCATGATCTTGGCTTAAACTGCAACCTCCGCCTCTTGGGTTCAAGTGATTCTCC | 42878 |
| PigTailedMacaque  | TCACC-AGGCTGGAATG--CAGTGTGGCATGATCTTGGCTTAAACTGCAACCTCCGCCTCTTGGGTTCAAGTGATTCTCC | 41843 |
| Bonobo            | TCACC-AGGCTGGAATG--CAGT--GGCATGATCTCAGCTT--ACTGCAACCTCCGCCTCTGGGTTCAAGTGATTCTCC  | 40519 |
| OliveBaboon       | TCACC-AGGCTGGAATG--CAGTGTGGCATGATCTTGGCTT--ACTGCAACCTCCGCCTCTTGGGTTCAAGTGATTCTCC | 41786 |
| Orangutan         | TCACC-AGGCTGGAATG--CAGT--GGCATGATCTCAGCTT--ACTGCAACCTCCACCTCTGGGTTCAAGCAATTCTCC  | 41495 |

| Majority          | TGCCTCAGGCTCTTGAGTAGCTGGCACTACAGGCGCACGCCACCACACCCAGCTAATTTTTTGTATTTTTAGTAGAGACT |       |
|-------------------|----------------------------------------------------------------------------------|-------|
|                   | 49850 49860 49870 49880 49890 49900 49910 49920                                  |       |
| Human             | TGCCTCAGGCTCTTGAGTAGCTGGAACTACAGGTGCACGCCACCACACCCGGCTAATTTTTTGTATTTTTAGTAGAGACT | 39572 |
| Coquerel'sSifaka  | TGCCTCAGGCTCCCGAGTAGCTGGGACTACAGGCATGCACCACCATGCCCTGCTAATTTTTCTAT----ATAGATATT   | 35795 |
| Ma'sNightMonkey   | NNNNNNNNNNNNNNNNNNNNNNNNNNNNNNNNNNNNNNNNNNNNNNNNNNNNNNNNNNNNNNNNNNNNNNNN         | 36337 |
| VervetAGM         | TGCCTCAGGCTCTTGAGTAGCTGGCACTACACGCGCACGCCACGACACCCAGCTAATTTTTTGTATTTTTAGTAGAGACT | 42918 |
| Gorilla           | TGCCTCAGGCTCTTGAGTAGCTGGAACTACAGGTGCACGCCACCACACCCAGCTAATTTTTTGTATTTTTAGTAGAGACT | 41984 |
| GrabEatingMacaque | TGCCTCAGGCTCTTGAGTAGCTGGCACTACACGCGCACGCCACGACACCCAGCTAATTTTTTGTATTTTTAGTAGAGACT | 42193 |
| Macaque           | TGCCTCAGGCTCTTGAGTAGCTGGCACTACACGCGCACGCCACAACACCCAGCTAATTTTTTGTATTTTTAGTAGAGACT | 42958 |
| PigTailedMacaque  | TGCCTCAGGCTCTTGAGTAGCTGGCACTACATGCGCACGCCACGACACCCAGCTAATTTTTTGTATTTTTAGTAGAGACT | 41923 |
| Bonobo            | TGCCTCAGGCTCCCGAGTAGCTGGAACTACAGGTGCACGCCACCACACCCGGCTAATTTTTTGTATTTTTAGTAGAGACT | 40599 |
| OliveBaboon       | TGCCTCAGGCTCTTGAGTAGCTGGCACTACACGCGCACGCCACGACACCCAGCTAATTTTTTGTATTTTTAGTAGAGACT | 41866 |
| Orangutan         | TGCCTCAGGCTCCCGAGTAGCTGGAACTACAGGTGCACGCCACCACACCCAGCTAATTTTTTGTATTTTTGGTAGAGACT | 41575 |



Tuesday, May 03, 2022 06:15 PM

|                   |                                                                                        |       |
|-------------------|----------------------------------------------------------------------------------------|-------|
| Majority          | GGGTTTCGCCATGTTGGCCAGGATGGTCTTGCTCTTTTGACCTTGTGATCCACCCACCTCGGCCTCCCAAAGTGCTGGGA       |       |
|                   | 49930      49940      49950      49960      49970      49980      49990      50000     |       |
| Human             | GGGTTTCGCCATGTTGGCCAGGATGGTCTTGCTCTTTGACGTTGTGATCTGCCACGTCGGCCTCCAGAGTGCTGGGA          | 39652 |
| Coquerel'sSifaka  | ---TTTAGTTGTCCAGATCA-----TTTCTTTCTAT-GTTTTAGTAGAGACGGGGTCTCGCTCTTGCTCAG-GCTGGTC        | 35864 |
| Ma'sNightMonkey   | NNNNNNNNNNNNNNNNNNNNNNNNNNNNNNNNNNNNNNNNNNNNNNNNNNNNNNNNNNNNNNNNNNNNNNNNNNNNNNNNNNNNNN | 36417 |
| VervetAGM         | GGGTTTCGCCATGTTGGCCAGGATGGTACTGCTCTTTTGACCTTGTGATCCACCCACCTTGGCCTCCCAAAGTGCTGGGA       | 42998 |
| Gorilla           | GGGTTTCACCATGTTGGCCAGGATGGTCTTGCTCTTTGACGTTGTGATCCACCCACGTCGGCCTCCAGAGTGCTGGGA         | 42064 |
| GrabEatingMacaque | GGGTTTCGCCATGTTGGCCAGGATGGTCTTGCTCTTTTGACCTTGTGATTACCCACCTCGGCCTCCCAAAGCGCTGGGA        | 42273 |
| Macaque           | GGGTTTCGCCATGTTGGCCAGGATGGTCTTGCTCTTTTGACCTTGTGATTACCCACCTCGGCCTCCCAAAGCGCTGGGA        | 43038 |
| PigTailedMacaque  | GGGTTTCGCCATGTTGGCCAGGATGGTCTTGCTCTTTTGACCTTGTGATCCACCCACCTCGGCCTCCCAAAGCGCTGGGA       | 42003 |
| Bonobo            | GGGTTTCGCCATGTTGGCCAGGATGGTCTTGCTCTTTGACGTTGTGATCCGCCACGTCGGCCTCCAGAGTGCTGGGA          | 40679 |
| OliveBaboon       | GGGTTTCGCCATGTTGGCCAGGATGGTCTTGCTCTTTTGACCTTGTGATCCACCCACCTCGGCCTCCCAAAGTGCTGGGA       | 41946 |
| Orangutan         | GGGTTTCGCCATGTTGGCCAGGATGGTCTTGCTCTTTGACCTTGTGATCCGCCACTTGGCCTCCAGAGTGCTGGGA           | 41655 |

|                   |                                                                                        |       |
|-------------------|----------------------------------------------------------------------------------------|-------|
| Majority          | TTACTGGCGTGAGCCACTGTGCCTGACCTAGTTTGCCATTTTCTTACGGAGTTAAACATAAACGTACTTTTATGGTCCATA      |       |
|                   | 50010      50020      50030      50040      50050      50060      50070      50080     |       |
| Human             | TTACAGGCCTGAGCCACTGCGTCTGACCTAGTTTACTATTTTCTTACGGAGTTAAACATTAACCTATTTTATGGTCCATA       | 39732 |
| Coquerel'sSifaka  | TTGAATTCCTGAGCTCAAACGATCCACCCGCTCGGC---CTCCAGAGTGCTAGG-A-----TTACAGGCGTGA              | 35930 |
| Ma'sNightMonkey   | NNNNNNNNNNNNNNNNNNNNNNNNNNNNNNNNNNNNNNNNNNNNNNNNNNNNNNNNNNNNNNNNNNNNNNNNNNNNNNNNNNNNNN | 36497 |
| VervetAGM         | TTACTGGCGTGAGCCACTGTGCCTGACCTAGTTTGCCATTTTCTTACGGCGTTAAACATAAACGTACTTTTATGGTCCATA      | 43078 |
| Gorilla           | TTACAAGCCTGAGCCACTGCATCTGGCCTAGTTTGCTATTTTCTTACGGAGTTAAACATTAACCTACTTTTATGGTCCATA      | 42144 |
| GrabEatingMacaque | TTACTGGCGTGAGCCACTGTGCCTGACCTAGTTTGCCATTTTCTTACGGAGTTAAACATAAACGTACTTTTATGGTCCATA      | 42353 |
| Macaque           | TTACTGGCGTGAGCCACTGTGCCTGACCTAGTTTGCCATTTTCTTACGGAGTTAAACATAAATGTACTTTTATGGTCCATA      | 43118 |
| PigTailedMacaque  | TTACTGGCGTGAGCCACTGTGCCTGACCTAGTTTGCCATTTTCTTCCGGAGTTAAACATAAACGTACTTTTATGGTCCATA      | 42083 |
| Bonobo            | TTACAGGCCTGAGCCACTGCGTCTGACCTAGTTTGCTATTTTCTTACGGAGTTAAACATTAACCTACTTTTATGGTCCATA      | 40759 |
| OliveBaboon       | TTACTGGCGTGAGCCACTGTGCCTGACCTAGTTTGCCATTTTCTTACGGAGTTAAACATAAACGTACTTTTATGGTCCGTA      | 42026 |
| Orangutan         | TTACAGGCCTGAGCCACTGCGCTGGCCTAGTTTGCTGTTTTCTTACAGAGTTAAACATTAACCTACTTTTATGGTCCATA       | 41735 |

|                   |                                                                                        |       |
|-------------------|----------------------------------------------------------------------------------------|-------|
| Majority          | ACTTCTACTTTTAGTTTTTTACCAGTAATAACATGTTTGCTGTAAAACCTTGTATGTGTATCAAAAACCTTGACTGATAAT      |       |
|                   | 50090      50100      50110      50120      50130      50140      50150      50160     |       |
| Human             | ACTTCTACTTTTAGTTTTTTACCAGTAAGAACATGTTTGCTGTAAAACCTTGTATGTGTATCAAAAACCTTTACTGATAAT      | 39812 |
| Coquerel'sSifaka  | ACCACCGCGCCCGCCTG-----AAGTATAAAGTTTTGAATTGTTACTACTTTTATGTGGGTATGCAATTGAAAGTATGTT       | 36005 |
| Ma'sNightMonkey   | NNNNNNNNNNNNNNNNNNNNNNNNNNNNNNNNNNNNNNNNNNNNNNNNNNNNNNNNNNNNNNNNNNNNNNNNNNNNNNNNNNNNNN | 36577 |
| VervetAGM         | ACTTCTACTTTTAGTTTTTTACCAGTAATAACATGTTTGCTGTAAAACCTTGTATGTGTATCAAAAACCTTGACTGATAAT      | 43158 |
| Gorilla           | ACTTCTACTTTTAGTTTTTTACCAGTAAGAACATGTTTGCTGTAAAACCTTGTATGTGTATCAAAAACCTTTACTGATAAT      | 42224 |
| GrabEatingMacaque | ACTTCTACTTTTAGTTTTTTACCAGTAATAACATGTTTGCTGTAAAACCTTGTATGTGTATCAAAAACCTTGACTGATAAT      | 42433 |
| Macaque           | ACTTCTACTTTTAGTTTTTTACCAGTAATAACATGTTTGCTGTAAAACCTTGTATGTGTATCAAAAACCTTGACTGATAAT      | 43198 |
| PigTailedMacaque  | ACTTCTACTTTTAGTTTTTTACCAGTAATAACATGTTTGCTGTAAAACCTTGTATGTGTATCAAAAACCTTGACTGATAAT      | 42163 |
| Bonobo            | ACTTCTACTTTTAGTTTTTTACCAGTAAGAACCTGTTTGCTGTAAAACCTTGTATGTGTATCAAAAACCTTTACTGATAAT      | 40839 |
| OliveBaboon       | ACTTCTACTTTTAGTTTTTTACCAGTAATAACATGTTTGCTGTAAAACCTTGTATGTGTATCAAAAACCTTGACTGATAAT      | 42106 |
| Orangutan         | ACTTCTACTTTTAGTTTTTTACCAGTAAAACATGTTTGCTGTAAAACCTTGTATGTGTATCAAAAACCTTTACTGATAAT       | 41815 |

Tuesday, May 03, 2022 06:15 PM

| Majority          | GGTCCCAAACCTGAAATAACACAAATGTTTATCAACAGGAAAATGGATAAAATGTGGTATGATCATACAGTATATTACTA       |       |       |       |       |       |       |       |       |
|-------------------|----------------------------------------------------------------------------------------|-------|-------|-------|-------|-------|-------|-------|-------|
|                   | 50170                                                                                  | 50180 | 50190 | 50200 | 50210 | 50220 | 50230 | 50240 |       |
| Human             | GGTCCCAAACCTGAAATAACCCAAATGTTTATCAACAGGAAAATGGATAAAATGTGGTATAATCATATAGTATATTACTA       |       |       |       |       |       |       |       | 39892 |
| Coquerel'sSifaka  | AGTGAACGCGTGGGACTAAAATAATAGATTTACA--AATTAATAAAGAGTTGATTGTAAAACCCAGTCTGGAGTGTT          |       |       |       |       |       |       |       | 36083 |
| Ma'sNightMonkey   | NNNNNNNNNNNNNNNNNNNNNNNNNNNNNNNNNNNNNNNNNNNNNNNNNNNNNNNNNNNNNNNNNNNNNNNNNNNNNNNNNNNNNN |       |       |       |       |       |       |       | 36657 |
| VervetAGM         | GGTCCCAAACCTGAAATAACACAAATGTTTATCAACAGGAAAATGGATAAAATGTGGTATGATCATACAATATATTACTA       |       |       |       |       |       |       |       | 43238 |
| Gorilla           | GGTCCCAAACCTGAAATAACCCAAATGTTTATCAACAGGAAAATGGATAAAATGTGGTATAATCATATAGTATATTACTA       |       |       |       |       |       |       |       | 42304 |
| GrabEatingMacaque | GGTCCCAAACCTGAAATAACACAAATGTTTATCAACAGGAAAATGGATAAAATGTGGTATGATCATACAATATATTACTA       |       |       |       |       |       |       |       | 42513 |
| Macaque           | GGTCCCAAACCTGAAATAACACAAATGTTTATCAGCAGGAAAATGGATAAAATGTGGTATGATCATACAATATATTACTA       |       |       |       |       |       |       |       | 43278 |
| PigTailedMacaque  | GGTCCCAAACCTGAAATAACACAAATGTTTATCAACAGGAAAATGGATAAAATGTGGTATGATCATACAATATATTACTA       |       |       |       |       |       |       |       | 42243 |
| Bonobo            | GGTCCCAAACCTGAAATAACCCAAATGTTTATCAACAGGAAAATGGATAAAATGTGGTATAATCATATAGTATATTACTA       |       |       |       |       |       |       |       | 40919 |
| OliveBaboon       | GGTCCCAAACCTGAAATAACACAAATGTTTATCAACAGGAAAATGGATAAAATGTGGTATGATCATACAATATATTACTA       |       |       |       |       |       |       |       | 42186 |
| Orangutan         | GGTCCCAAACCTGAAATAACCCAAATGTTTATCAACAGGAAAATGGATAAAATGTGGTATAATCATACAGTATATTACTA       |       |       |       |       |       |       |       | 41895 |

| Majority          | CTTACTAATAACAAAAGAGTGGTTAGTAGTACATGCGAAAACATGGGTGAATATTAAGCATTGTATGAAGCAAAGAAAC        |       |       |       |       |       |       |       |       |
|-------------------|----------------------------------------------------------------------------------------|-------|-------|-------|-------|-------|-------|-------|-------|
|                   | 50250                                                                                  | 50260 | 50270 | 50280 | 50290 | 50300 | 50310 | 50320 |       |
| Human             | CTTACTAATAACAAAAGAATGGTTAGTAGTACATGCGAAAACATGGGTGAATAGTAAGCATTGTATGAAGCAAAGAAAC        |       |       |       |       |       |       |       | 39972 |
| Coquerel'sSifaka  | TATAATGATCAGGGAAAGATAGGAAGGACCTGGGGCCAAAACAGCTTGGGAAATTAATAATTTTGGGGAATGAATGAGTA       |       |       |       |       |       |       |       | 36163 |
| Ma'sNightMonkey   | NNNNNNNNNNNNNNNNNNNNNNNNNNNNNNNNNNNNNNNNNNNNNNNNNNNNNNNNNNNNNNNNNNNNNNNNNNNNNNNNNNNNNN |       |       |       |       |       |       |       | 36737 |
| VervetAGM         | CTTACTAATAACAAAAGAGTGGTTAGTAATACATGCGAAAACATGGGTGAATATTAAGCATTGTATGAAGCAAAGAAAC        |       |       |       |       |       |       |       | 43318 |
| Gorilla           | CTTACTAATAACAAAAGAATGGTTAGTAGTACATGCGAAAACATGGGTGAGTAGTAAGCATTGTATGAAGCAAAGAAAC        |       |       |       |       |       |       |       | 42384 |
| GrabEatingMacaque | CTTACTGATAACAGAAGAGTGGTTAGTAATACATGCGAAAACATGGGTGAATATTAAGCATTGTATGAAGCAAATAAAC        |       |       |       |       |       |       |       | 42593 |
| Macaque           | CTTACTGATAACAGAAGAGTGGTTAGTAATACATGCGAAAACATGGGTGAATATTAAGCATTGTATGAAGCAAATAAAC        |       |       |       |       |       |       |       | 43358 |
| PigTailedMacaque  | CTTACTAATAACAGAAGAGTGGTTAGTAATACATGCGAAAACATGGGTGAATATTAAGCATTGTATGAAGCAAAGAAAC        |       |       |       |       |       |       |       | 42323 |
| Bonobo            | CTTACTAATAACAAAAGAATGGTTAGTAGTACATGCGAAAACATGGGTGAATAGTAAGCATTGTATGAAGCAAAGAAAC        |       |       |       |       |       |       |       | 40999 |
| OliveBaboon       | CTTACTAATAACAAAAGAGTGGTTAGTAGTACATGCGAAAACATGGGTGAATATTAAGCATTGTATGAAGCAAAGAAAC        |       |       |       |       |       |       |       | 42266 |
| Orangutan         | CTTACTAATAACAAAAGAATGGTTAGTAGTACATGCGAAAACATGGGTGAATATCAAGCATTGTATGAAGCAAAGAAAC        |       |       |       |       |       |       |       | 41975 |

| Majority          | CAGACAGACCTGAAAGAGTACATAGAGTGATTCAATTTCTTGAAAGTTTAAGAGCAGATCATTAGTTTTTTGTTTAGAAA       |       |       |       |       |       |       |       |       |
|-------------------|----------------------------------------------------------------------------------------|-------|-------|-------|-------|-------|-------|-------|-------|
|                   | 50330                                                                                  | 50340 | 50350 | 50360 | 50370 | 50380 | 50390 | 50400 |       |
| Human             | CAGACAGACCTGAAAGAGTACATAGTGTGATTCCATTTCTTGAAAGTTTAAGAGCAGATCATTAAATTTTTTGTTTAGAAA      |       |       |       |       |       |       |       | 40052 |
| Coquerel'sSifaka  | AGCAGAAGGTTCAAAGCACGTATCAAATGAGTCAGGG----GAAGTAAGAAAAGTAGA--AGTAGAAATGTTAGGGGTG        |       |       |       |       |       |       |       | 36237 |
| Ma'sNightMonkey   | NNNNNNNNNNNNNNNNNNNNNNNNNNNNNNNNNNNNNNNNNNNNNNNNNNNNNNNNNNNNNNNNNNNNNNNNNNNNNNNNNNNNNN |       |       |       |       |       |       |       | 36817 |
| VervetAGM         | CAGACAGACCTGAAAGAGTACATAGAGTGATTCAATT-CTTGAAAGTTTAAGAGCAGATCATTAGTTTTTTGTTTAGAAA       |       |       |       |       |       |       |       | 43397 |
| Gorilla           | CAGACAGACCTGAAAGAGTACGTAGTGTGATTCCATTTCTTGAAAGTTTAAGAGCAGATCATTAAATTTTTTGTTTAGAAA      |       |       |       |       |       |       |       | 42464 |
| GrabEatingMacaque | CAGACAGACCTGAAAGAGTACATAGAGTGATTCAATTTCTTGAAAGTTTAAGAGCAGATCATTAGTTTTTTGTTTAGAAA       |       |       |       |       |       |       |       | 42673 |
| Macaque           | CAGACAGACCTGAAAGAGTACATAGAGTGATTCAATTTCTTGAAAGTTTAAGAGCAGATCATTAGTTTTTTGTTTAGAAA       |       |       |       |       |       |       |       | 43438 |
| PigTailedMacaque  | CAGACAGACCTGAAAGAGTACATAGAGTGATTCAATTTCTTGAAAGTTTAAGAGCAGATCATTAGTTTTTTGTTTAGAAA       |       |       |       |       |       |       |       | 42403 |
| Bonobo            | CAGACAGACCTGAAAGAGTACATAGTGTGATTCCATTTCTTGAAAGTTTAAGAGCAGATCATTAAATTTTTTGTTTAGAAA      |       |       |       |       |       |       |       | 41079 |
| OliveBaboon       | CAGACAGACCTGAAAGAGTACATAGAGTGATTCAATTTCTTGAAAGTTTAAGAGCAGATCATTAGTTTTTTGTTTAGAAA       |       |       |       |       |       |       |       | 42346 |
| Orangutan         | CAGACAGACCTGAAAGAGTACATAGTGTGATTCCATTTCTTGAAAGTTTAAGAGCAGATTATTAATTTTTTGTTTAGTAA       |       |       |       |       |       |       |       | 42055 |

Tuesday, May 03, 2022 06:15 PM

| Majority          | CCAGAATGTTGGAGATTAACAGAAAGGGAATATGGTAGCATTTTCTGGTGTGATGGAAACGTCCTATGTTAATAAACTAA |       |
|-------------------|----------------------------------------------------------------------------------|-------|
|                   | 50410 50420 50430 50440 50450 50460 50470 50480                                  |       |
| Human             | CCAGAATGTTGGAGATTAACAGAAAGGGAATATGGTAGCATTTTCTGGTGTGATGGAAACGTCCTATGTTAATAAACTAA | 40132 |
| Coquerel'sSifaka  | CTGTGAGAACAGAGAAATTCATTAAGGAAGAGAGTTCACAGTTCCT----TG--G-----TCACTGGTGGATATGGTGA  | 36305 |
| Ma'sNightMonkey   | NNNNNNNNNNNNNNNNNNNNNNNNNNNNNNNNNNNNNNNNNNNNNNNNNNNNNNNNNNNNNNNNNNNNNNNNNNNNNNNN | 36897 |
| VervetAGM         | CCAGAATGTTGGAGATTAACAGAAAGGGAATATGGTAGCATTTTCTGGTGTGATGGAAACGTCCTGTGTTAATAAACTAA | 43477 |
| Gorilla           | CCAGAATGTTGGAGATTAACAGAAAGGGAATACCGTGGCATTTTCTGGTGTGATGGAAACGTCCTATGTTAATAAACTAA | 42544 |
| GrabEatingMacaque | CCAGAATGTTGGAGATTAACAGAAAGGGAATATGGTAGCATTTTCTGGTGTGATGGAAACGTCCTATGTTAATAAACTAA | 42753 |
| Macaque           | CCAGAATGTTGGAGATTAACAGAAAGGGAATATGGTAGCATTTTCTGGTGTGATGGAAACGTCCTATGTTAATAAACTAA | 43518 |
| PigTailedMacaque  | CCAGAATGTTGGAGATTAACAGAAAGGGAATATGGTAGCATTTTCTGGTGTGATGGAAACGTCCTATGTTAATAAACTAA | 42483 |
| Bonobo            | CCAGAATGTTGGAGATTAACAGAAAGGGAACCGTGGCATTTTCTGGTGTGATGGAAACGTCCTATGTTAATAAACTAA   | 41159 |
| OliveBaboon       | CCAGAATGTTGGAGATTAACAGAAAGGGAATATGGTAGCATTTTCTGGTGTGATGGAAACGTCCTATGTTAGTAACTAA  | 42426 |
| Orangutan         | CCAGAATTTTGGAGATTAACAGAAAGGGAACATGGTGGCATTTTCTGGTGTGATGGAAACGTCCTATGTTAATAAACTAA | 42135 |

| Majority          | GTTGCAAAACAAATCCAAAATTTGTTTGAAGCAGTAGATTATCTCTGAGAACTCTGAATTACCAGTAGTTGTGCTCTGCT   |       |
|-------------------|------------------------------------------------------------------------------------|-------|
|                   | 50490 50500 50510 50520 50530 50540 50550 50560                                    |       |
| Human             | GTTGCAAAACAAATCCAAAAGTTGTTTGAAGCAGTAGATTATCTCTGAGAACTCTGAATTTCCAGTAGTTGTGCTCTGCT   | 40212 |
| Coquerel'sSifaka  | TTTTAAAAATTACCCATGATCTTGATAAGACCCATTTATT----TGAAAATTGCGGGTAAAAGCGAATGGAGAACAAAG    | 36380 |
| Ma'sNightMonkey   | NNNNNNNNNNNNNNNNNNNNNNNNNNNNNNNNNNNNNNNNNNNNNNNNNNNNNNNNNNNNNNNNNNNNNNNNNNNNNN     | 36977 |
| VervetAGM         | GTTGCAAAACAAATCCAAAATTTGTTTGAAGCAGTAGATTATCTCTGAGAACTCTGAATTACCAGTAGTTGTGCTCTGCT   | 43557 |
| Gorilla           | GTTGCAAAACAAATCCAAAATTTGTTTGAAGCAGTAGATTATCTCTGAGAACTCTGAATTTCCAGTAGTGGTGTGCTCTGCT | 42624 |
| GrabEatingMacaque | GTTGCAGAACAATCCAAAATTTGTTTGAAGCAGTAGATTATCTCTGAGAACTCTGAATTACCAGTAGTTGTGCTCTGCT    | 42833 |
| Macaque           | GTTGCAAAACAAATCCAAAATTTGTTTGAAGTAGTAGATTATCTCTGAGAACTCTGAATTACCAGTAGTTGTGCTCTGCT   | 43598 |
| PigTailedMacaque  | GTTGCAAAACAAATCCAAAATTTGTTTGAAGCAGTAGATTATCTCTGAGAACTCTGAATTACCAGTAGTTGTGCTCTGCT   | 42563 |
| Bonobo            | GTTGCAAAACAAATCCAAAATTTGTTTGAAGCAGTAGATTATCTCTGAGAACTCTGAATTTCCAGTAGTTGTGCTCATGCT  | 41239 |
| OliveBaboon       | GTTGCAAAACAAATCCAAAATTTGTTTGAAGCAGTAGATTATCTCTGAGAACTCTGAATTACCAGTAGTTGTGCTCTGCT   | 42506 |
| Orangutan         | GTTGCAAAACAAATCCAAAATTTGTTTGAAGCAGTAGATTATCTCTGAGAACTCTGAATTACCAGTAGTTGTGCTCTGCT   | 42215 |

| Majority          | GTAATGCGAAATATGAGATTGGGAATGCCTAGGTGAGTCCATGTAAGCAGGGGCCTAGATATGGGATTTGGGGTGTGTGT  |       |
|-------------------|-----------------------------------------------------------------------------------|-------|
|                   | 50570 50580 50590 50600 50610 50620 50630 50640                                   |       |
| Human             | GTAATGAGAAATATGAGATTGGGAATGACTAGGTGAGTCCATGTAG--CAGGGGCCTAGATGTGGGATTTGATGTGTGTGT | 40291 |
| Coquerel'sSifaka  | ATAAGTCAGGAGGAGAAA-----AGTGATGGACTGAT--C-----AGAGGTGAAGATGG-----                  | 36427 |
| Ma'sNightMonkey   | NNNNNNNNNNNNNNNNNNNNNNNNNNNNNNNNNNNNNNNNNNNNNNNNNNNNNNNNNNNNNNNNNNNNNNNNNNNNNN    | 37051 |
| VervetAGM         | ATAATGCGAAATATGAGATTGGGAATGCCTAGGTGAGTCCATGTAAGCAGGGGCCTAGATACGGGATTTGGGGTGGGGT   | 43637 |
| Gorilla           | GTAATGAGAAATATGAGATTGGGAATGACTAGGTGAGTCCATGTAG--CAGGGGCCTAGATGTGGGATTTG-----ATGT  | 42697 |
| GrabEatingMacaque | ATAATGCGAAATATGAGATTGGGAATGCCTAGGTGAGTCCATGTAAGCAGGGGCCTAGATATGGGATTTGGGGTGTGTGT  | 42913 |
| Macaque           | ATAATGCGAAATACGAGATTGGGAATGCCTAGGTGAGTCCATGTAAGCAGGGGCCTAGATATGGGATTTGGGGTGTGTGT  | 43678 |
| PigTailedMacaque  | GTAATGCGAAATATGAGATTGGGAATGCCTAGGTGAGTCCATGTAAGCAGGGGCCTAGATATGGGATTTGGGGTGTGTGT  | 42643 |
| Bonobo            | GTAATGAGAAATATGAGATTGGGAATGACTAGGTGAGTCCATGTAG--CAGGGGCCTAGATGTGGGATTTG--GTGTGTGT | 41316 |
| OliveBaboon       | ATAATGCGAAATATGATATCGGGAAATGCCTAGGTGAGTCCATGTAAGCAGGGGCCTAGATATGGGATTTGGGGTGTGTGT | 42586 |
| Orangutan         | GTAATGCGAAATATGAGATTGGGAATGACTAGGTGAGTCCATGTAGGCAGGGGCCTAGATATGGGATTTG-----       | 42285 |

Tuesday, May 03, 2022 06:15 PM

| Majority          | GTGTGTGTGTGTGTGTGTGTGTGTGTGTGT                                              |       |
|-------------------|-----------------------------------------------------------------------------|-------|
|                   | -----                                                                       |       |
|                   | 50650 50660 50670 50680 50690 50700 50710 50720                             |       |
| Human             | GTGTGTGTGTGTGTGTGTGTGTGTGTGTGT-----                                         | 40319 |
| Coquerel'sSifaka  | -----                                                                       | 36427 |
| Ma'sNightMonkey   | G---GTGTGTGTGTGGTGGTGTGTGTGT-----                                           | 37076 |
| VervetAGM         | GTGTGTGTGTGTGTGTGTGTGTGTGTGT-----                                           | 43665 |
| Gorilla           | GTGTGTGTGTGTGTGTGTGTGTGTGTGT-----                                           | 42725 |
| GrabEatingMacaque | GTGTGTGTGTGTGTGTGTGTGTGTGTGT-----AGCTTGGACTTTGTGTGTGTGTGTGTGTG              | 42971 |
| Macaque           | GTGTGTGTGTGTGTGTGTGTGTGTGTGTGTGTGTGTGTGTGTGTGTAGCTTGGACTTTGTGTGTGTGTGTGTGTG | 43758 |
| PigTailedMacaque  | GTGTGTGTGTGTGTGTGTGTGTGTGTGT-----                                           | 42671 |
| Bonobo            | GTGTGTGTGTGTGTGTGTGCGTGTGT-----                                             | 41344 |
| OliveBaboon       | GTGTGTGTTTGTGTGTGT---GT-----                                                | 42608 |
| Orangutan         | ---ATGTGTGTGTGTGTGTGTGTGT-----                                              | 42309 |

| Majority          | -----GTGTGT-----                                                            |       |
|-------------------|-----------------------------------------------------------------------------|-------|
|                   | -----                                                                       |       |
|                   | 50730 50740 50750 50760 50770 50780 50790 50800                             |       |
| Human             | -----GTGTGT-----                                                            | 40325 |
| Coquerel'sSifaka  | -----                                                                       | 36427 |
| Ma'sNightMonkey   | -----                                                                       | 37076 |
| VervetAGM         | -----GT-----                                                                | 43667 |
| Gorilla           | -----GTGTAT-----                                                            | 42731 |
| GrabEatingMacaque | TGTAGCTTGGACTTTGTGTGTGTGTGTGTGT-----AGCTTGGACTTTGTTTTGTGTGTGTGTGTGTGTGTGTG  | 43045 |
| Macaque           | TGTAGCTTGGACTTTGTGTGTGTGTGTGTGTGTGTGTAGCTTGGACTTTGTTTTGTGTGTGTGTGTGTGTGTGTG | 43838 |
| PigTailedMacaque  | -G---T-----GTGTGTGTGT-----                                                  | 42683 |
| Bonobo            | -----GCGTAT-----                                                            | 41350 |
| OliveBaboon       | -----                                                                       | 42608 |
| Orangutan         | -----GTGTGT-----                                                            | 42315 |

| Majority          | -----AGCTTGGACTTTACCAGATTTACATTTTAGAAAGAATTTTGTTCATTGTATTTTCAGAGG-----CAG     |       |
|-------------------|-------------------------------------------------------------------------------|-------|
|                   | -----                                                                         |       |
|                   | 50810 50820 50830 50840 50850 50860 50870 50880                               |       |
| Human             | -----AGCTTGGACTTTAACAGATTTACATTTTAGAAAGAATTTTGTTCATTGTATTTTCACAGGTAGGATCAG    | 40396 |
| Coquerel'sSifaka  | -----TTGAC-----TTTAGAAT-----TG-----                                           | 36442 |
| Ma'sNightMonkey   | -----CTTGGACTTTAACAGATTTACATTTTAGAAA---T-TTGTTCCAATTTATTTTCAGAGGCAGGATCAG     | 37141 |
| VervetAGM         | -----AGCTTGGACTTTACCAGATTTACATTTTAGAAAGAATTTTGTTCATTGTATTTTCAGAGG-----CAG     | 43732 |
| Gorilla           | -----AGCTTGGACTTTAACAGATTTACATTTTAGAAAGAATTTTGTTCATTGTATTTTCACAGGTAGGATCAG    | 42802 |
| GrabEatingMacaque | TGTGTGTGTAGCTTGGACTTTACCAGATTTACATTTTAGAAAGAATTTTGTTCATTGTATTTTCAGAGG-----CAG | 43119 |
| Macaque           | TGTGTGT--AGCTTGGACTTTACCAGATTTACATTTTAGAAAGAATTTTGTTCATTGTATTTTCAGAGG-----CAG | 43910 |
| PigTailedMacaque  | -----AGCTTGGACTTTACCAGATTTACATTTTAGAAAGAATTTTGTTCATTGTATTTTCAGAGG-----CAG     | 42748 |
| Bonobo            | -----AGCTTGGACTTTAACAGATTTACATTTTAGAAAGA-TTTTTGTTCATTGTATTTTCACAGGTAGGATCAG   | 41420 |
| OliveBaboon       | -----AGCTTGGACTTTACCAGATTTACATTTTAGAAAGAATTTTGTTCATTGTATTTTCAGAGG-----CAG     | 42673 |
| Orangutan         | -----AGCTTGGACTTTACCAGATTTACATTTGAGAAAGAATTTTGTTCATTGTATTTTCAGAAGCAGGATCAG    | 42386 |

Tuesday, May 03, 2022 06:15 PM

| Majority          | TATTGTATAGAGGGGAGAATAGTTTTAAACATTACCGTAGTTCATTCCAAAGATACCAAGGCCTGAATTTTAGGGTCT  |       |
|-------------------|---------------------------------------------------------------------------------|-------|
|                   | 50890 50900 50910 50920 50930 50940 50950 50960                                 |       |
| Human             | TATTGTATAGAGGGGAGAATAGTTTTAAACATTACCGTAGTTCATTCCAAAGATACCAAGGCCTGAATTTTAGGGTCT  | 40476 |
| Coquerel'sSifaka  | -----AT-----                                                                    | 36444 |
| Ma'sNightMonkey   | TATTGTATAGAGGGGAGAATAGTTA-AAAACATTACAGTAGTTTATTCCAAAGATATCAAGGCCTGAATTTTAGGATCT | 37220 |
| VervetAGM         | TATTGTATAGAGGGGAGAATAGTTTTAAACATTACCGTAGTTCATTCCAGAGATACCAAGGCCTGAATTTTAGGGTCT  | 43812 |
| Gorilla           | TATTGTATAGAGGGGAGAATAGTTTTAAACATTACCGTAGTTCATTCCAAAGATACCAAGGCCTGAATTTTAGGGTTT  | 42882 |
| GrabEatingMacaque | TATTGTATACAGGGGAGAATAGTTTTAAACATTACCGTAGTTCATTCCAAAGATACCAAGGCCTGAATTTTAGGGTCT  | 43199 |
| Macaque           | TATTGTATACAGGGGAGAATAGTTTTAAACATTACCGTAGTTCATTCCAAAGATACCAAGTTCCTGAATTTTAGGGTCT | 43990 |
| PigTailedMacaque  | TATTGTATAGAGGGGAGAATAGTTTTAAACATTACCGTAGTTCATTCCAAAGATACCAAGGCCTGAATTTTAGGGTCT  | 42828 |
| Bonobo            | TATTGTATAGCGGGGAGAATAGTTTTAAACATTACCGTAGTTCATTCCAAAGATACCAAGGCCTGAATTTTAGGGTCT  | 41500 |
| OliveBaboon       | TATTGTATAGAGGGGAGAATAGTTTTAAACATTACCGTAGTTCATTCCAAAGATACCAAGGCCTGAATTTTAGGGTCT  | 42753 |
| Orangutan         | TATTGTATAGAGAGGAGAATAGTTTTAAACATTACAGTAGTTCATTCCAAAGATACCAAGGCCTGAATTTTAGGGTCT  | 42466 |

| Majority          | TG-GAAGGAGAATATGCAGGAAATGTTA-----AACGAG-----TTATCTGGAAGAAGACAAGTTTGAA           |       |
|-------------------|---------------------------------------------------------------------------------|-------|
|                   | 50970 50980 50990 51000 51010 51020 51030 51040                                 |       |
| Human             | TG-GAAGGAGAAT--GCAGGAAATGATA-----AACGAG-----TTATCTGGAAGAAGACAAGTTTGAA           | 40534 |
| Coquerel'sSifaka  | ---GTAGAAGTTCG-GTTTTGAGTTTCG-----AAGGAAG-----TGTTAAGTAGAAACAGTTTTAAAA           | 36500 |
| Ma'sNightMonkey   | TG-GAAGGAGAATATGCAGGAAATGATATATGTCAAGAAATGAGATGTTTTGAGTTATTTGGAATAAGACAAGTTTGAA | 37299 |
| VervetAGM         | TG-GAAGGAGAATATGCAGGAGATGTTA-----AACGAG-----TTATCCGGAAGAAGACAAGTTTGAA           | 43872 |
| Gorilla           | TTCAAGGAGAATATGCAGGAAATGATA-----AACGAG-----TTATCTGGAGAAAACAAGTTTGAA             | 42943 |
| GrabEatingMacaque | TG-GAAGGAGAATATGCAGGAGATGTTA-----AACGAG-----TTATCTGGAAGAAGACAAGTTTGAA           | 43259 |
| Macaque           | TG-GAAGGAGAATATGCAGGAGATGTTA-----AACGAG-----TTATCTGGAAGAAGACAAGTTTGAA           | 44050 |
| PigTailedMacaque  | TG-GAAGGAGAATATGCAGGAGATGTTA-----AACGAG-----TTATCTGGAAGAAGACAAGTTTGAA           | 42888 |
| Bonobo            | TG-GAAGGATAATATGCAGGAAATGATA-----AACGAG-----TTATCTGGAAGAAGACAAGTTTGAA           | 41560 |
| OliveBaboon       | TG-GAAGGAGAATATGCAGGAGATGTTA-----AACGAG-----TTATCTGGAAGAAGACAAGTTTGAA           | 42813 |
| Orangutan         | TG-GAAGGAGAAGATGCAGGAAATGATA-----AAATGAG-----TTACCTGGAAGAAGACAAGTTTGAA          | 42526 |

| Majority          | TAATATTAAGGAGTTTGTCTTAGAAT--CACTGGGTTGGTGGAAGAT-GATGCCATTAACAAAGG-GGGAAAAGTAGGA |       |
|-------------------|---------------------------------------------------------------------------------|-------|
|                   | 51050 51060 51070 51080 51090 51100 51110 51120                                 |       |
| Human             | TAATATTAAGGAGTTTGTCTTAGAAT--CACTGGGTTGGTGGAAGAT-GATGCCATTAACAAAGG-GGGAAAAGTAGGA | 40610 |
| Coquerel'sSifaka  | TTTTGTTTT-GAATTT-----A--T-----GAGTAGAT-GAACAT--CCTCCCTTAGCAAAAG-----G--         | 36548 |
| Ma'sNightMonkey   | GAATATTA--GAGTTTGTCTTAGAAT--CACTGGGTTGGTGGAAGAT-GATGCCGTTAACAAAGGAGGGAAAAGTAGGA | 37374 |
| VervetAGM         | TAATATGAAGGAGTTTGTCTTAGAAT--CACTCGGTTGGTGGAAGAT-GATGCCATTAACAAAGG-GGGAAAAGTAGGA | 43948 |
| Gorilla           | TAATATTAAGGAGTTTGTCTTAGAAT--CACTGGGTTGGTGGAAGATTGATGCCATTAACAAAGG-GGAAAAGTAGGA  | 43020 |
| GrabEatingMacaque | TAATATGAAGGAGTTTGTCTTAGAATCCACTGGGTTGGTGGAAGAT-GATGCCATTAACAAAGG-GGGAAAAGTAGGA  | 43337 |
| Macaque           | TAATATGAAGGAGTTTGTCTTAGAATCCACTGGGTTGGTGGAAGAT-GATGCCATTAACAAAGG-GGGAAAAGTAGGA  | 44128 |
| PigTailedMacaque  | TAATATGAAGGAGTTTGTCTTAGAAT--CACTGGGTTGGTGGAAGAT-GATGCCATTAACAAAGG-GGGAAAAGTAGGA | 42964 |
| Bonobo            | TAATATTAAGAG-----AAGAT-GATGCCATTAACAAAGG-GGGAAAAGTAGGA                          | 41608 |
| OliveBaboon       | TAATATGAAGGAGTTTGTCTTAGAAT--CACTGGGTTGGTGGAAGAT-GATGCCATTAACAAAGG-GGGAAAAGTAGGA | 42889 |
| Orangutan         | TAATATTAAGGAGTTTGTCTTAGAAT--CACTGGGTTGTGGAAGAT-GATGCCATTAACAAAGG-GGGAAAAGTAGGA  | 42602 |

Tuesday, May 03, 2022 06:15 PM

| Majority          | -----AAAGGAGACTCGTTTTTGGTGGAAAGAAAGAATAATCTGCTACTGTTCTATTTTTTCT-----            |       |       |       |       |       |       |       |       |
|-------------------|---------------------------------------------------------------------------------|-------|-------|-------|-------|-------|-------|-------|-------|
|                   | 51130                                                                           | 51140 | 51150 | 51160 | 51170 | 51180 | 51190 | 51200 |       |
| Human             | -----AAAGGAGACTCGTTTTTGGTGGGAAAAAAGAATAATCCGCTACTGTTCTGTTTTTTTTTGTGTTTTTTGTTTTT |       |       |       |       |       |       |       | 40686 |
| Coquerel'sSifaka  | -----CTTTT---AAAAGA-----G---CT-----                                             |       |       |       |       |       |       |       | 36562 |
| Ma'sNightMonkey   | -----AAAGGAGACTTGTTTTTGGTGGAAAGAAAGAATAATTTGCTACTGTTCTATTTTTTTT-----            |       |       |       |       |       |       |       | 37431 |
| VervetAGM         | GAAAAAAGGAGACTCGTTTTTGGTGGAAAGAAAGAATAATCTGCTACTGTTATATTTTTTCT-----             |       |       |       |       |       |       |       | 44009 |
| Gorilla           | -----AAAGGAGACTCGTTTTTGGTGGAAAAAAGAATAATCTGCTACTGTTCTGTTTTT-----T-----          |       |       |       |       |       |       |       | 43076 |
| GrabEatingMacaque | GAACAAAGGAGACTCGTTTTTGGTGGAAAGAAAGAATAATCTGCTACTGCTCTATTTTTTCT-----             |       |       |       |       |       |       |       | 43398 |
| Macaque           | GAACAAAGGAGACTCGTTTTTGGTGGAAAGAAAGAATAATCTGCTACTGCTCTATTTTTTCT-----             |       |       |       |       |       |       |       | 44189 |
| PigTailedMacaque  | GAACAAAGGAGACTCGTTTTTGGTGGAAAGAAAGAATAATCTGCTACTGCTCTATTTTTTCT-----             |       |       |       |       |       |       |       | 43025 |
| Bonobo            | -----AAAGGAGACTCGTTTTTGGTGGGAAAAAAGAATAATCTGCTACTGTTCTGTTTTT-----T-----         |       |       |       |       |       |       |       | 41664 |
| OliveBaboon       | GAACAAAGGAGACTCGTTTTTGGTGGAAAGAAAGAATAATCTGCTACTGCTCTATTTTTTCT-----             |       |       |       |       |       |       |       | 42950 |
| Orangutan         | -----AAAGGAAACTCGTTTTTGGTGGAAAAAAGAATAATCTGCTACTGTTCTATTTTTT-----T-----         |       |       |       |       |       |       |       | 42658 |

| Majority          | -----                                                                           |       |       |       |       |       |       |       |       |
|-------------------|---------------------------------------------------------------------------------|-------|-------|-------|-------|-------|-------|-------|-------|
|                   | 51210                                                                           | 51220 | 51230 | 51240 | 51250 | 51260 | 51270 | 51280 |       |
| Human             | TATTTTTTATTGATCATTCTTGGGTGTTTCTCGCAGAGGGGGATTGGCAGGGTCATAGGACAATAGTGGAGGGAAGGTC |       |       |       |       |       |       |       | 40766 |
| Coquerel'sSifaka  | -----                                                                           |       |       |       |       |       |       |       | 36562 |
| Ma'sNightMonkey   | -----                                                                           |       |       |       |       |       |       |       | 37431 |
| VervetAGM         | -----                                                                           |       |       |       |       |       |       |       | 44009 |
| Gorilla           | -----                                                                           |       |       |       |       |       |       |       | 43076 |
| GrabEatingMacaque | -----                                                                           |       |       |       |       |       |       |       | 43398 |
| Macaque           | -----                                                                           |       |       |       |       |       |       |       | 44189 |
| PigTailedMacaque  | -----                                                                           |       |       |       |       |       |       |       | 43025 |
| Bonobo            | -----T-----                                                                     |       |       |       |       |       |       |       | 41665 |
| OliveBaboon       | -----                                                                           |       |       |       |       |       |       |       | 42950 |
| Orangutan         | -----                                                                           |       |       |       |       |       |       |       | 42658 |

| Majority          | -----                                                                           |       |       |       |       |       |       |       |       |
|-------------------|---------------------------------------------------------------------------------|-------|-------|-------|-------|-------|-------|-------|-------|
|                   | 51290                                                                           | 51300 | 51310 | 51320 | 51330 | 51340 | 51350 | 51360 |       |
| Human             | AGCAGATAAACAGTGAACAAAGGTCTCTGTTTTTCTTAGGCAGAGGACCCTGCGGACTTCCGCAGTGTGTTGTGCCCTG |       |       |       |       |       |       |       | 40846 |
| Coquerel'sSifaka  | -----                                                                           |       |       |       |       |       |       |       | 36562 |
| Ma'sNightMonkey   | -----                                                                           |       |       |       |       |       |       |       | 37431 |
| VervetAGM         | -----                                                                           |       |       |       |       |       |       |       | 44009 |
| Gorilla           | -----T-----                                                                     |       |       |       |       |       |       |       | 43077 |
| GrabEatingMacaque | -----                                                                           |       |       |       |       |       |       |       | 43398 |
| Macaque           | -----                                                                           |       |       |       |       |       |       |       | 44189 |
| PigTailedMacaque  | -----                                                                           |       |       |       |       |       |       |       | 43025 |
| Bonobo            | -----                                                                           |       |       |       |       |       |       |       | 41665 |
| OliveBaboon       | -----                                                                           |       |       |       |       |       |       |       | 42950 |
| Orangutan         | -----T-----                                                                     |       |       |       |       |       |       |       | 42659 |



Tuesday, May 03, 2022 06:15 PM

| Majority          | -----                                                                        |       |       |       |       |       |       |       |       |
|-------------------|------------------------------------------------------------------------------|-------|-------|-------|-------|-------|-------|-------|-------|
|                   | 51610                                                                        | 51620 | 51630 | 51640 | 51650 | 51660 | 51670 | 51680 |       |
| Human             | CATCCGATTCTCAATCTTTCCCCACCTTTCCCCCTTCTATTCCACAAAACCGCCATTGTCATCATGGCCCGTTCTC |       |       |       |       |       |       |       | 41166 |
| Coquerel'sSifaka  | -----                                                                        |       |       |       |       |       |       |       | 36562 |
| Ma'sNightMonkey   | -----                                                                        |       |       |       |       |       |       |       | 37431 |
| VervetAGM         | -----                                                                        |       |       |       |       |       |       |       | 44009 |
| Gorilla           | -----                                                                        |       |       |       |       |       |       |       | 43077 |
| GrabEatingMacaque | -----                                                                        |       |       |       |       |       |       |       | 43398 |
| Macaque           | -----                                                                        |       |       |       |       |       |       |       | 44189 |
| PigTailedMacaque  | -----                                                                        |       |       |       |       |       |       |       | 43025 |
| Bonobo            | -----                                                                        |       |       |       |       |       |       |       | 41665 |
| OliveBaboon       | -----                                                                        |       |       |       |       |       |       |       | 42950 |
| Orangutan         | -----                                                                        |       |       |       |       |       |       |       | 42659 |

| Majority          | -----                                                                           |       |       |       |       |       |       |       |       |
|-------------------|---------------------------------------------------------------------------------|-------|-------|-------|-------|-------|-------|-------|-------|
|                   | 51690                                                                           | 51700 | 51710 | 51720 | 51730 | 51740 | 51750 | 51760 |       |
| Human             | AATGAGCTGTTGGGTACACCTCCAGACGGGGTGGTGGCCGGGCAGAGGGGCTCCTCACTTCCCAGTAGGGGCGGCCGGG |       |       |       |       |       |       |       | 41246 |
| Coquerel'sSifaka  | -----                                                                           |       |       |       |       |       |       |       | 36562 |
| Ma'sNightMonkey   | -----                                                                           |       |       |       |       |       |       |       | 37431 |
| VervetAGM         | -----                                                                           |       |       |       |       |       |       |       | 44009 |
| Gorilla           | -----                                                                           |       |       |       |       |       |       |       | 43077 |
| GrabEatingMacaque | -----                                                                           |       |       |       |       |       |       |       | 43398 |
| Macaque           | -----                                                                           |       |       |       |       |       |       |       | 44189 |
| PigTailedMacaque  | -----                                                                           |       |       |       |       |       |       |       | 43025 |
| Bonobo            | -----                                                                           |       |       |       |       |       |       |       | 41665 |
| OliveBaboon       | -----                                                                           |       |       |       |       |       |       |       | 42950 |
| Orangutan         | -----                                                                           |       |       |       |       |       |       |       | 42659 |

| Majority          | -----                                                                          |       |       |       |       |       |       |       |       |
|-------------------|--------------------------------------------------------------------------------|-------|-------|-------|-------|-------|-------|-------|-------|
|                   | 51770                                                                          | 51780 | 51790 | 51800 | 51810 | 51820 | 51830 | 51840 |       |
| Human             | CAGAGGCGCCCTCACTCCCCAGTAGGGGCAGCCGGGCAGAGGCGCCCTCACCTCCCGGATGGGGCGGCTGGCCGGGCG |       |       |       |       |       |       |       | 41326 |
| Coquerel'sSifaka  | -----                                                                          |       |       |       |       |       |       |       | 36562 |
| Ma'sNightMonkey   | -----                                                                          |       |       |       |       |       |       |       | 37431 |
| VervetAGM         | -----                                                                          |       |       |       |       |       |       |       | 44009 |
| Gorilla           | -----                                                                          |       |       |       |       |       |       |       | 43077 |
| GrabEatingMacaque | -----                                                                          |       |       |       |       |       |       |       | 43398 |
| Macaque           | -----                                                                          |       |       |       |       |       |       |       | 44189 |
| PigTailedMacaque  | -----                                                                          |       |       |       |       |       |       |       | 43025 |
| Bonobo            | -----                                                                          |       |       |       |       |       |       |       | 41665 |
| OliveBaboon       | -----                                                                          |       |       |       |       |       |       |       | 42950 |
| Orangutan         | -----                                                                          |       |       |       |       |       |       |       | 42659 |



Tuesday, May 03, 2022 06:15 PM

| Majority          | -----                                                                         |       |       |       |       |       |       |       |       |
|-------------------|-------------------------------------------------------------------------------|-------|-------|-------|-------|-------|-------|-------|-------|
|                   | 51850                                                                         | 51860 | 51870 | 51880 | 51890 | 51900 | 51910 | 51920 |       |
| Human             | GGGGGCTGACCCCCCACCTCCCTCCCGGATGGGGCAGCTGGCCGGGCGGGGGCTGACCCCCCACCTCCCTCCCGGAC |       |       |       |       |       |       |       | 41406 |
| Coquerel'sSifaka  | -----                                                                         |       |       |       |       |       |       |       | 36562 |
| Ma'sNightMonkey   | -----                                                                         |       |       |       |       |       |       |       | 37431 |
| VervetAGM         | -----                                                                         |       |       |       |       |       |       |       | 44009 |
| Gorrilla          | -----                                                                         |       |       |       |       |       |       |       | 43077 |
| GrabEatingMacaque | -----                                                                         |       |       |       |       |       |       |       | 43398 |
| Macaque           | -----                                                                         |       |       |       |       |       |       |       | 44189 |
| PigTailedMacaque  | -----                                                                         |       |       |       |       |       |       |       | 43025 |
| Bonobo            | -----                                                                         |       |       |       |       |       |       |       | 41665 |
| OliveBaboon       | -----                                                                         |       |       |       |       |       |       |       | 42950 |
| Orangutan         | -----                                                                         |       |       |       |       |       |       |       | 42659 |

| Majority          | -----                                                                           |       |       |       |       |       |       |       |       |
|-------------------|---------------------------------------------------------------------------------|-------|-------|-------|-------|-------|-------|-------|-------|
|                   | 51930                                                                           | 51940 | 51950 | 51960 | 51970 | 51980 | 51990 | 52000 |       |
| Human             | GGGGCGGCTGGCCGGGCTGGGGGCTGACCCCCGCACCTCCCTCCCGGACGGGGCGGCTGGCCGGGCTGGGGGCTGACCC |       |       |       |       |       |       |       | 41486 |
| Coquerel'sSifaka  | -----                                                                           |       |       |       |       |       |       |       | 36562 |
| Ma'sNightMonkey   | -----                                                                           |       |       |       |       |       |       |       | 37431 |
| VervetAGM         | -----                                                                           |       |       |       |       |       |       |       | 44009 |
| Gorrilla          | -----                                                                           |       |       |       |       |       |       |       | 43077 |
| GrabEatingMacaque | -----                                                                           |       |       |       |       |       |       |       | 43398 |
| Macaque           | -----                                                                           |       |       |       |       |       |       |       | 44189 |
| PigTailedMacaque  | -----                                                                           |       |       |       |       |       |       |       | 43025 |
| Bonobo            | -----                                                                           |       |       |       |       |       |       |       | 41665 |
| OliveBaboon       | -----                                                                           |       |       |       |       |       |       |       | 42950 |
| Orangutan         | -----                                                                           |       |       |       |       |       |       |       | 42659 |

| Majority          | -----                                                                            |       |       |       |       |       |       |       |       |
|-------------------|----------------------------------------------------------------------------------|-------|-------|-------|-------|-------|-------|-------|-------|
|                   | 52010                                                                            | 52020 | 52030 | 52040 | 52050 | 52060 | 52070 | 52080 |       |
| Human             | CCCGACCTCCTTCCCGGACGGGGCGGCTGGCCGGGCAGAGGGGCTCCTCACTTCCCAGTAGGGGCGGCCGGGCAGAGGCG |       |       |       |       |       |       |       | 41566 |
| Coquerel'sSifaka  | -----                                                                            |       |       |       |       |       |       |       | 36562 |
| Ma'sNightMonkey   | -----                                                                            |       |       |       |       |       |       |       | 37431 |
| VervetAGM         | -----                                                                            |       |       |       |       |       |       |       | 44009 |
| Gorrilla          | -----                                                                            |       |       |       |       |       |       |       | 43077 |
| GrabEatingMacaque | -----                                                                            |       |       |       |       |       |       |       | 43398 |
| Macaque           | -----                                                                            |       |       |       |       |       |       |       | 44189 |
| PigTailedMacaque  | -----                                                                            |       |       |       |       |       |       |       | 43025 |
| Bonobo            | -----                                                                            |       |       |       |       |       |       |       | 41665 |
| OliveBaboon       | -----                                                                            |       |       |       |       |       |       |       | 42950 |
| Orangutan         | -----                                                                            |       |       |       |       |       |       |       | 42659 |

Tuesday, May 03, 2022 06:15 PM

| Majority          | -----                                                                          |       |       |       |       |       |       |       |       |
|-------------------|--------------------------------------------------------------------------------|-------|-------|-------|-------|-------|-------|-------|-------|
|                   | 52090                                                                          | 52100 | 52110 | 52120 | 52130 | 52140 | 52150 | 52160 |       |
| Human             | CCCCTCACCTCCCAGGAGGGGCGGCTGGCCGGGCGGGGTCTGACCCCCCACCTCCCTCCTGGATGGGGCGGCTGGCCT |       |       |       |       |       |       |       | 41646 |
| Coquerel'sSifaka  | -----                                                                          |       |       |       |       |       |       |       | 36562 |
| Ma'sNightMonkey   | -----A-----                                                                    |       |       |       |       |       |       |       | 37432 |
| VervetAGM         | -----                                                                          |       |       |       |       |       |       |       | 44009 |
| Gorilla           | -----                                                                          |       |       |       |       |       |       |       | 43077 |
| GrabEatingMacaque | -----                                                                          |       |       |       |       |       |       |       | 43398 |
| Macaque           | -----                                                                          |       |       |       |       |       |       |       | 44189 |
| PigTailedMacaque  | -----                                                                          |       |       |       |       |       |       |       | 43025 |
| Bonobo            | -----                                                                          |       |       |       |       |       |       |       | 41665 |
| OliveBaboon       | -----                                                                          |       |       |       |       |       |       |       | 42950 |
| Orangutan         | -----                                                                          |       |       |       |       |       |       |       | 42659 |

| Majority          | -----                                                                            |       |       |       |       |       |       |       |       |
|-------------------|----------------------------------------------------------------------------------|-------|-------|-------|-------|-------|-------|-------|-------|
|                   | 52170                                                                            | 52180 | 52190 | 52200 | 52210 | 52220 | 52230 | 52240 |       |
| Human             | GGCGGGGGCTGACCCCCACCTCCCTCCCAGACGGGGTGACTGCCGGGCGGAGACGCTCCTCACTTCCCAGACGGCGTGGC |       |       |       |       |       |       |       | 41726 |
| Coquerel'sSifaka  | -----                                                                            |       |       |       |       |       |       |       | 36562 |
| Ma'sNightMonkey   | -----                                                                            |       |       |       |       |       |       |       | 37432 |
| VervetAGM         | -----                                                                            |       |       |       |       |       |       |       | 44009 |
| Gorilla           | -----                                                                            |       |       |       |       |       |       |       | 43077 |
| GrabEatingMacaque | -----                                                                            |       |       |       |       |       |       |       | 43398 |
| Macaque           | -----                                                                            |       |       |       |       |       |       |       | 44189 |
| PigTailedMacaque  | -----                                                                            |       |       |       |       |       |       |       | 43025 |
| Bonobo            | -----                                                                            |       |       |       |       |       |       |       | 41665 |
| OliveBaboon       | -----                                                                            |       |       |       |       |       |       |       | 42950 |
| Orangutan         | -----                                                                            |       |       |       |       |       |       |       | 42659 |

| Majority          | -----                                                                            |       |       |       |       |       |       |       |       |
|-------------------|----------------------------------------------------------------------------------|-------|-------|-------|-------|-------|-------|-------|-------|
|                   | 52250                                                                            | 52260 | 52270 | 52280 | 52290 | 52300 | 52310 | 52320 |       |
| Human             | TGCCGGGCGGAGGGGCTCCTCACTTCTCAGATGGGGCGGCTGCTGGGCGGAGGGACTCCTCGCTTCTCAGATGGGGCGGC |       |       |       |       |       |       |       | 41806 |
| Coquerel'sSifaka  | -----                                                                            |       |       |       |       |       |       |       | 36562 |
| Ma'sNightMonkey   | -----                                                                            |       |       |       |       |       |       |       | 37432 |
| VervetAGM         | -----                                                                            |       |       |       |       |       |       |       | 44009 |
| Gorilla           | -----                                                                            |       |       |       |       |       |       |       | 43077 |
| GrabEatingMacaque | -----                                                                            |       |       |       |       |       |       |       | 43398 |
| Macaque           | -----                                                                            |       |       |       |       |       |       |       | 44189 |
| PigTailedMacaque  | -----                                                                            |       |       |       |       |       |       |       | 43025 |
| Bonobo            | -----                                                                            |       |       |       |       |       |       |       | 41665 |
| OliveBaboon       | -----                                                                            |       |       |       |       |       |       |       | 42950 |
| Orangutan         | -----                                                                            |       |       |       |       |       |       |       | 42659 |

Tuesday, May 03, 2022 06:15 PM

| Majority          | -----                                                                            |       |       |       |       |       |       |       |       |
|-------------------|----------------------------------------------------------------------------------|-------|-------|-------|-------|-------|-------|-------|-------|
|                   | 52330                                                                            | 52340 | 52350 | 52360 | 52370 | 52380 | 52390 | 52400 |       |
| Human             | CGGGCCGAGACGCTCCTCACCTCCCAGACGGGGTCGCGGCCGGGTAGAGGCGCTCCTCACATCCCAGACGGGGCGGCGGG |       |       |       |       |       |       |       | 41886 |
| Coquerel'sSifaka  | -----                                                                            |       |       |       |       |       |       |       | 36562 |
| Ma'sNightMonkey   | -----                                                                            |       |       |       |       |       |       |       | 37432 |
| VervetAGM         | -----                                                                            |       |       |       |       |       |       |       | 44009 |
| Gorilla           | -----                                                                            |       |       |       |       |       |       |       | 43077 |
| GrabEatingMacaque | -----                                                                            |       |       |       |       |       |       |       | 43398 |
| Macaque           | -----                                                                            |       |       |       |       |       |       |       | 44189 |
| PigTailedMacaque  | -----                                                                            |       |       |       |       |       |       |       | 43025 |
| Bonobo            | -----                                                                            |       |       |       |       |       |       |       | 41665 |
| OliveBaboon       | -----                                                                            |       |       |       |       |       |       |       | 42950 |
| Orangutan         | -----                                                                            |       |       |       |       |       |       |       | 42659 |

| Majority          | -----                                                                           |       |       |       |       |       |       |       |       |
|-------------------|---------------------------------------------------------------------------------|-------|-------|-------|-------|-------|-------|-------|-------|
|                   | 52410                                                                           | 52420 | 52430 | 52440 | 52450 | 52460 | 52470 | 52480 |       |
| Human             | GCAGCGCGCTCCCCACATCTCAGACGATGGGCGGCCGGGCAGAGACGCTCCTCACTTCCTAGATGGGATGGCGGCCGGG |       |       |       |       |       |       |       | 41966 |
| Coquerel'sSifaka  | -----                                                                           |       |       |       |       |       |       |       | 36562 |
| Ma'sNightMonkey   | -----                                                                           |       |       |       |       |       |       |       | 37432 |
| VervetAGM         | -----                                                                           |       |       |       |       |       |       |       | 44009 |
| Gorilla           | -----                                                                           |       |       |       |       |       |       |       | 43077 |
| GrabEatingMacaque | -----                                                                           |       |       |       |       |       |       |       | 43398 |
| Macaque           | -----                                                                           |       |       |       |       |       |       |       | 44189 |
| PigTailedMacaque  | -----                                                                           |       |       |       |       |       |       |       | 43025 |
| Bonobo            | -----                                                                           |       |       |       |       |       |       |       | 41665 |
| OliveBaboon       | -----                                                                           |       |       |       |       |       |       |       | 42950 |
| Orangutan         | -----                                                                           |       |       |       |       |       |       |       | 42659 |

| Majority          | -----                                                                            |       |       |       |       |       |       |       |       |
|-------------------|----------------------------------------------------------------------------------|-------|-------|-------|-------|-------|-------|-------|-------|
|                   | 52490                                                                            | 52500 | 52510 | 52520 | 52530 | 52540 | 52550 | 52560 |       |
| Human             | AAGAGGCGCTCCTCACTTCCTAGATGGGATGGCGGCCGGGCAGAGACCTCCTTTCTTTCCAGACTGGGCAGCCAGGCAGA |       |       |       |       |       |       |       | 42046 |
| Coquerel'sSifaka  | -----                                                                            |       |       |       |       |       |       |       | 36562 |
| Ma'sNightMonkey   | -----                                                                            |       |       |       |       |       |       |       | 37432 |
| VervetAGM         | -----                                                                            |       |       |       |       |       |       |       | 44009 |
| Gorilla           | -----                                                                            |       |       |       |       |       |       |       | 43077 |
| GrabEatingMacaque | -----                                                                            |       |       |       |       |       |       |       | 43398 |
| Macaque           | -----                                                                            |       |       |       |       |       |       |       | 44189 |
| PigTailedMacaque  | -----                                                                            |       |       |       |       |       |       |       | 43025 |
| Bonobo            | -----                                                                            |       |       |       |       |       |       |       | 41665 |
| OliveBaboon       | -----                                                                            |       |       |       |       |       |       |       | 42950 |
| Orangutan         | -----                                                                            |       |       |       |       |       |       |       | 42659 |

Tuesday, May 03, 2022 06:15 PM

| Majority          | -----                                                                            |       |       |       |       |       |       |       |       |
|-------------------|----------------------------------------------------------------------------------|-------|-------|-------|-------|-------|-------|-------|-------|
|                   | 52570                                                                            | 52580 | 52590 | 52600 | 52610 | 52620 | 52630 | 52640 |       |
| Human             | GGGGCTCCTCACGTTCCAGACGATGGGCGGCCAGGCAGAGACGCTCCTCACTTCCCAAACGGGGTGGCGGCTGGGCAGAG |       |       |       |       |       |       |       | 42126 |
| Coquerel'sSifaka  | -----                                                                            |       |       |       |       |       |       |       | 36562 |
| Ma'sNightMonkey   | -----                                                                            |       |       |       |       |       |       |       | 37432 |
| VervetAGM         | -----                                                                            |       |       |       |       |       |       |       | 44009 |
| Gorilla           | -----                                                                            |       |       |       |       |       |       |       | 43077 |
| GrabEatingMacaque | -----                                                                            |       |       |       |       |       |       |       | 43398 |
| Macaque           | -----                                                                            |       |       |       |       |       |       |       | 44189 |
| PigTailedMacaque  | -----                                                                            |       |       |       |       |       |       |       | 43025 |
| Bonobo            | -----                                                                            |       |       |       |       |       |       |       | 41665 |
| OliveBaboon       | -----                                                                            |       |       |       |       |       |       |       | 42950 |
| Orangutan         | -----                                                                            |       |       |       |       |       |       |       | 42659 |

| Majority          | -----                                                                            |       |       |       |       |       |       |       |       |
|-------------------|----------------------------------------------------------------------------------|-------|-------|-------|-------|-------|-------|-------|-------|
|                   | 52650                                                                            | 52660 | 52670 | 52680 | 52690 | 52700 | 52710 | 52720 |       |
| Human             | GCTGCAATCTCGGCACTTTGGGAGGCCAAGGCAGGCGGCTGGGAGGTGGAGGTTGTAACGAGCCGAGATCACGCCACTGC |       |       |       |       |       |       |       | 42206 |
| Coquerel'sSifaka  | -----                                                                            |       |       |       |       |       |       |       | 36562 |
| Ma'sNightMonkey   | -----                                                                            |       |       |       |       |       |       |       | 37432 |
| VervetAGM         | -----                                                                            |       |       |       |       |       |       |       | 44009 |
| Gorilla           | -----                                                                            |       |       |       |       |       |       |       | 43077 |
| GrabEatingMacaque | -----                                                                            |       |       |       |       |       |       |       | 43398 |
| Macaque           | -----                                                                            |       |       |       |       |       |       |       | 44189 |
| PigTailedMacaque  | -----                                                                            |       |       |       |       |       |       |       | 43025 |
| Bonobo            | -----                                                                            |       |       |       |       |       |       |       | 41665 |
| OliveBaboon       | -----                                                                            |       |       |       |       |       |       |       | 42950 |
| Orangutan         | -----                                                                            |       |       |       |       |       |       |       | 42659 |

| Majority          | -----                                                                            |       |       |       |       |       |       |       |       |
|-------------------|----------------------------------------------------------------------------------|-------|-------|-------|-------|-------|-------|-------|-------|
|                   | 52730                                                                            | 52740 | 52750 | 52760 | 52770 | 52780 | 52790 | 52800 |       |
| Human             | ACTCCAGCCTGGGCACCATTGAGCACTGAGTGAACCAGACTCCGTCTGCAATTCCGGCACCTCGGGAGGCCGAGGCTGGC |       |       |       |       |       |       |       | 42286 |
| Coquerel'sSifaka  | -----                                                                            |       |       |       |       |       |       |       | 36562 |
| Ma'sNightMonkey   | -----                                                                            |       |       |       |       |       |       |       | 37432 |
| VervetAGM         | -----                                                                            |       |       |       |       |       |       |       | 44009 |
| Gorilla           | -----                                                                            |       |       |       |       |       |       |       | 43077 |
| GrabEatingMacaque | -----                                                                            |       |       |       |       |       |       |       | 43398 |
| Macaque           | -----                                                                            |       |       |       |       |       |       |       | 44189 |
| PigTailedMacaque  | -----                                                                            |       |       |       |       |       |       |       | 43025 |
| Bonobo            | -----                                                                            |       |       |       |       |       |       |       | 41665 |
| OliveBaboon       | -----                                                                            |       |       |       |       |       |       |       | 42950 |
| Orangutan         | -----                                                                            |       |       |       |       |       |       |       | 42659 |

Tuesday, May 03, 2022 06:15 PM

| Majority          | -----                                                                           |       |       |       |       |       |       |       |       |
|-------------------|---------------------------------------------------------------------------------|-------|-------|-------|-------|-------|-------|-------|-------|
|                   | 52810                                                                           | 52820 | 52830 | 52840 | 52850 | 52860 | 52870 | 52880 |       |
| Human             | GGATCACTCGCGGTTAGGAGCTGCAGACCAGCCCGCCAACACAGCGAAACCCCGTCTCCACCAAAAAAATACGAAAACC |       |       |       |       |       |       |       | 42366 |
| Coquerel'sSifaka  | -----                                                                           |       |       |       |       |       |       |       | 36562 |
| Ma'sNightMonkey   | -----                                                                           |       |       |       |       |       |       |       | 37432 |
| VervetAGM         | -----                                                                           |       |       |       |       |       |       |       | 44009 |
| Gorrilla          | -----                                                                           |       |       |       |       |       |       |       | 43077 |
| GrabEatingMacaque | -----                                                                           |       |       |       |       |       |       |       | 43398 |
| Macaque           | -----                                                                           |       |       |       |       |       |       |       | 44189 |
| PigTailedMacaque  | -----                                                                           |       |       |       |       |       |       |       | 43025 |
| Bonobo            | -----                                                                           |       |       |       |       |       |       |       | 41665 |
| OliveBaboon       | -----                                                                           |       |       |       |       |       |       |       | 42950 |
| Orangutan         | -----                                                                           |       |       |       |       |       |       |       | 42659 |

| Majority          | -----                                                                             |       |       |       |       |       |       |       |       |
|-------------------|-----------------------------------------------------------------------------------|-------|-------|-------|-------|-------|-------|-------|-------|
|                   | 52890                                                                             | 52900 | 52910 | 52920 | 52930 | 52940 | 52950 | 52960 |       |
| Human             | AGTCAGGCGTGGCGGCGCGTGCCTGCAATAGCAGGCACCTCGGCAGGCTGAGGCAGGAGAATCAGGCAGGGAGGTTGCAGT |       |       |       |       |       |       |       | 42446 |
| Coquerel'sSifaka  | -----                                                                             |       |       |       |       |       |       |       | 36562 |
| Ma'sNightMonkey   | -----                                                                             |       |       |       |       |       |       |       | 37432 |
| VervetAGM         | -----                                                                             |       |       |       |       |       |       |       | 44009 |
| Gorrilla          | -----                                                                             |       |       |       |       |       |       |       | 43077 |
| GrabEatingMacaque | -----                                                                             |       |       |       |       |       |       |       | 43398 |
| Macaque           | -----                                                                             |       |       |       |       |       |       |       | 44189 |
| PigTailedMacaque  | -----                                                                             |       |       |       |       |       |       |       | 43025 |
| Bonobo            | -----                                                                             |       |       |       |       |       |       |       | 41665 |
| OliveBaboon       | -----                                                                             |       |       |       |       |       |       |       | 42950 |
| Orangutan         | -----                                                                             |       |       |       |       |       |       |       | 42659 |

| Majority          | -----                                                                             |       |       |       |       |       |       |       |       |
|-------------------|-----------------------------------------------------------------------------------|-------|-------|-------|-------|-------|-------|-------|-------|
|                   | 52970                                                                             | 52980 | 52990 | 53000 | 53010 | 53020 | 53030 | 53040 |       |
| Human             | GAGTCGAGATGGCAGCAGTACAGTCCAGCTTCGGCTCGTTCATCAGAGGGAGACTGTGGAAAGAGAGGGAGAGGGAGACCG |       |       |       |       |       |       |       | 42526 |
| Coquerel'sSifaka  | -----                                                                             |       |       |       |       |       |       |       | 36562 |
| Ma'sNightMonkey   | -----                                                                             |       |       |       |       |       |       |       | 37432 |
| VervetAGM         | -----                                                                             |       |       |       |       |       |       |       | 44009 |
| Gorrilla          | -----                                                                             |       |       |       |       |       |       |       | 43077 |
| GrabEatingMacaque | -----                                                                             |       |       |       |       |       |       |       | 43398 |
| Macaque           | -----                                                                             |       |       |       |       |       |       |       | 44189 |
| PigTailedMacaque  | -----                                                                             |       |       |       |       |       |       |       | 43025 |
| Bonobo            | -----                                                                             |       |       |       |       |       |       |       | 41665 |
| OliveBaboon       | -----                                                                             |       |       |       |       |       |       |       | 42950 |
| Orangutan         | -----                                                                             |       |       |       |       |       |       |       | 42659 |

Tuesday, May 03, 2022 06:15 PM

| Majority          | -----AACTATGCTTTAGGGATGATATA                                                    |       |       |       |       |       |       |       |       |
|-------------------|---------------------------------------------------------------------------------|-------|-------|-------|-------|-------|-------|-------|-------|
|                   | 53050                                                                           | 53060 | 53070 | 53080 | 53090 | 53100 | 53110 | 53120 |       |
| Human             | TGGGGAGAGGAGGGAGGGGGAGGGGGAGGGGGAGGGGGAGGGCTGTTCTGTTTTTTAACTATGCTTTAGGGATGATATA |       |       |       |       |       |       |       | 42606 |
| Coquerel'sSifaka  | -----                                                                           |       |       |       |       |       |       |       | 36562 |
| Ma'sNightMonkey   | -----AACTATGCTTTAGAGATGATATG                                                    |       |       |       |       |       |       |       | 37455 |
| VervetAGM         | -----AACTATGCATTAGGGATGATATA                                                    |       |       |       |       |       |       |       | 44032 |
| Gorilla           | -----AACTATGCTTTAGGGATAATATA                                                    |       |       |       |       |       |       |       | 43100 |
| GrabEatingMacaque | -----AACTATGCATTAGGGATGATATA                                                    |       |       |       |       |       |       |       | 43421 |
| Macaque           | -----AACTATGCATTAGGGATGATATA                                                    |       |       |       |       |       |       |       | 44212 |
| PigTailedMacaque  | -----AACTATGCATTAGGGATGATATA                                                    |       |       |       |       |       |       |       | 43048 |
| Bonobo            | -----AACTGTGCTTTAGAGATGATATA                                                    |       |       |       |       |       |       |       | 41688 |
| OliveBaboon       | -----AACTGTGCATTAGGGATGATATA                                                    |       |       |       |       |       |       |       | 42973 |
| Orangutan         | -----AACTATGCTTTAGGGATGATATG                                                    |       |       |       |       |       |       |       | 42682 |

| Majority          | TGGTGTACTTCATGACCAAAGAATCAATCTAATCTTTTTGTAATGATGGCATAAAAATTCCTTTAAGCCTTGTTTTAACAC   |       |       |       |       |       |       |       |       |
|-------------------|-------------------------------------------------------------------------------------|-------|-------|-------|-------|-------|-------|-------|-------|
|                   | 53130                                                                               | 53140 | 53150 | 53160 | 53170 | 53180 | 53190 | 53200 |       |
| Human             | TAATGTACTTCATGACCAAAGGAATCAATCTAATCTTTTTGTAATGATGGCATAAAAATTCCTTTAAGCCTTGTTTTAATAC  |       |       |       |       |       |       |       | 42686 |
| Coquerel'sSifaka  | -----                                                                               |       |       |       |       |       |       |       | 36562 |
| Ma'sNightMonkey   | TAATGTATTTTCATGACCAAATAATCAATCTAATCTTTTTGTAAGTGGTGGCATAAAAATTCCTTAAAGCCTTGTTTTAACAT |       |       |       |       |       |       |       | 37535 |
| VervetAGM         | TGGTGTACTTCATGACCAAAGAATCAATCTAATCTTTTTGTAATGATGGCATAAAAATTCCTTTAAGCCTTGTTTTAACAC   |       |       |       |       |       |       |       | 44112 |
| Gorilla           | TAATGTACTTCATGACCAAAGGAATCAATCTAATCTTTTTGTAATGATGGCATAAAAATTCCTTTAAGCCTTGTTTTAATAC  |       |       |       |       |       |       |       | 43180 |
| GrabEatingMacaque | TGGTGTACTTCATGACCAAAGAATCAATCTAATCTTTTTGTAATGATGGCATAAAAATTCCTTTAAG-CCTTGTTTTAACAC  |       |       |       |       |       |       |       | 43500 |
| Macaque           | TGGTGTACTTCATGACCAAAGAATCAATCTAATCTTTTTGTAATGATGGCATAAAAATTCCTTTAAG-CCTTGTTTTAACAC  |       |       |       |       |       |       |       | 44291 |
| PigTailedMacaque  | TGGTGTACTTCATGACCAAAGAATCAATCTAATCTTTTTGTAATGATGGCATAAAAATTCCTTTAAG-CCTTGTTTTAACAC  |       |       |       |       |       |       |       | 43127 |
| Bonobo            | TAATGTACTTCATGACCAAAGGAATCAATCTAATCTTTTTGTAATGATGGCATAAAAATTCCTTTAAGCCTTGTTTTAATAC  |       |       |       |       |       |       |       | 41768 |
| OliveBaboon       | TGGTGTACTTCATGACCAAAGAATCAATCTAATCTTTTTGTAATGATGGCATAAAAATTCCTTTAAG-CCTTGTTTTAACAC  |       |       |       |       |       |       |       | 43052 |
| Orangutan         | TAATGTACTTCATGACCAAAGAATCAATCTAATCTTCTGTAGTATGGCATAAAAATTCCTTTAAGCCTTGTTTTAATAC     |       |       |       |       |       |       |       | 42762 |

| Majority          | AAGAAGTCAGTTTATTTAACCTCTGTGTACAGAGGAAATGCTGAGTTTAAAGATTTTCTATTTTTTT-----CTG   |       |       |       |       |       |       |       |       |
|-------------------|-------------------------------------------------------------------------------|-------|-------|-------|-------|-------|-------|-------|-------|
|                   | 53210                                                                         | 53220 | 53230 | 53240 | 53250 | 53260 | 53270 | 53280 |       |
| Human             | AAGAAGTCAGTTTATTTAACCTCCATGTACAGAGGAAATACTGAGTTTAAAGATTTTCTATTTTTTT-----CTG   |       |       |       |       |       |       |       | 42758 |
| Coquerel'sSifaka  | -----                                                                         |       |       |       |       |       |       |       | 36562 |
| Ma'sNightMonkey   | AAGAAGTCAGTTTATTTAACCTTGTGTACAGAGGAAATACTAAGTTTAAAGATTTTCTGTTTTTTTTTTTTTTTCTG |       |       |       |       |       |       |       | 37615 |
| VervetAGM         | AAGAAGTCAGTTTATTTAACCTCTGCGTACAGAGGAAATGCTGAGTTTAAAGATTTTCTATTTTTTT-----CTG   |       |       |       |       |       |       |       | 44183 |
| Gorilla           | AAGAAGTCAGTTTATTTAACCTCCATGTAGAGAGGAAATACTGAGTTTAAAGATTTTCTATTTTTTT-----CTG   |       |       |       |       |       |       |       | 43252 |
| GrabEatingMacaque | AAGAAGTCAGTTTATTTAACCTCTGCGTACAGAGGAAATGCTGAGTTTAAAGATTTTCTATTTTTTT-----CTG   |       |       |       |       |       |       |       | 43571 |
| Macaque           | AAGAAGTCAGTTTATTTAACTTCTGCGTACAGAGGAAATGCTGAGTTTAAAGATTTTCTATTTTTTT-----CTG   |       |       |       |       |       |       |       | 44362 |
| PigTailedMacaque  | AAGAAGTCAGTTTATTTAACCTCTGCGTACAGAGGAAATGCTGAGTTTAAAGATTTTCTATTTTTTT-----CTG   |       |       |       |       |       |       |       | 43198 |
| Bonobo            | AAGAAGTCAGTTTATTTAACCTCCATGTACAGAGGAAATACTGAGTTTAAAGATTTTCTATTTTTTT-----CTG   |       |       |       |       |       |       |       | 41840 |
| OliveBaboon       | AAGAAGTCAGTTTATTTAACCTCTGCGTACAGAGGAAATGCTGAGTTTAAAGATTTTCTATTTTTTT-----CTG   |       |       |       |       |       |       |       | 43123 |
| Orangutan         | AAGAAGTCAATTTATTTAACCTCCATGTACAGAGGAAATACTGAGTTTAAAGATTTTCTATTTTTTT-----CTG   |       |       |       |       |       |       |       | 42834 |

Tuesday, May 03, 2022 06:15 PM

| Majority          | ACAAAGA---TGAAAGTCTGCATATATTC-----                                             |       |
|-------------------|--------------------------------------------------------------------------------|-------|
|                   | 53290 53300 53310 53320 53330 53340 53350 53360                                |       |
| Human             | ACAAAAA---TGAAAGTCTGCATATATTC-----                                             | 42784 |
| Coquerel'sSifaka  | -----                                                                          | 36562 |
| Ma'sNightMonkey   | ACAAAGAAAGATGAAAGTCTGCATATATTC-----                                            | 37645 |
| VervetAGM         | ACAAAGA---TGAAAGTCTGCATATATTC-----                                             | 44209 |
| Gorilla           | ACAAAGA---TGAAAGTCTGCATATATTC-----                                             | 43278 |
| GrabEatingMacaque | ACAAAGA---TGAAAGTCTGCATATATTC-----                                             | 43597 |
| Macaque           | ACAAAGA---TGAAAGTCTGCATATATTC-----                                             | 44388 |
| PigTailedMacaque  | ACAAAGA---TGAAAGTCTGCATATATTCGGCCGGGCGCGGTGGCTCACGCCTGTAATCCAGCACTTTGGGAGGCCGA | 43274 |
| Bonobo            | ACAAAGA---TGAAAGTCTGCATATATTC-----                                             | 41866 |
| OliveBaboon       | ACAAAGA---TGAAAGTCTGCATATATTC-----                                             | 43149 |
| Orangutan         | ACAAAGA---TGAAAGTCTGCATATATTC-----                                             | 42860 |

| Majority          | -----                                                                            |       |
|-------------------|----------------------------------------------------------------------------------|-------|
|                   | 53370 53380 53390 53400 53410 53420 53430 53440                                  |       |
| Human             | -----                                                                            | 42784 |
| Coquerel'sSifaka  | -----                                                                            | 36562 |
| Ma'sNightMonkey   | -----                                                                            | 37645 |
| VervetAGM         | -----                                                                            | 44209 |
| Gorilla           | -----                                                                            | 43278 |
| GrabEatingMacaque | -----                                                                            | 43597 |
| Macaque           | -----                                                                            | 44388 |
| PigTailedMacaque  | GGCGGGCGGATCACAAAGTTCAGGAGATCGAGACCAGGTGAAACCCCGTCTCTACTAAAAATACAAAAAATTAGCCGGGC | 43354 |
| Bonobo            | -----                                                                            | 41866 |
| OliveBaboon       | -----                                                                            | 43149 |
| Orangutan         | -----                                                                            | 42860 |

| Majority          | -----                                                                            |       |
|-------------------|----------------------------------------------------------------------------------|-------|
|                   | 53450 53460 53470 53480 53490 53500 53510 53520                                  |       |
| Human             | -----                                                                            | 42784 |
| Coquerel'sSifaka  | -----                                                                            | 36562 |
| Ma'sNightMonkey   | -----                                                                            | 37645 |
| VervetAGM         | -----                                                                            | 44209 |
| Gorilla           | -----                                                                            | 43278 |
| GrabEatingMacaque | -----                                                                            | 43597 |
| Macaque           | -----                                                                            | 44388 |
| PigTailedMacaque  | GCGGTTGTGGGCGCCTGTAGTCCAGCTACTCGGGAGGCTGAGGCAGGAGAAATGGCGTGAACCCGGGAGGCGGAGCTTGC | 43434 |
| Bonobo            | -----                                                                            | 41866 |
| OliveBaboon       | -----                                                                            | 43149 |
| Orangutan         | -----                                                                            | 42860 |

Tuesday, May 03, 2022 06:15 PM

| Majority          | -----                                                                             |       |       |       |       |       |       |       |       |
|-------------------|-----------------------------------------------------------------------------------|-------|-------|-------|-------|-------|-------|-------|-------|
|                   | 53530                                                                             | 53540 | 53550 | 53560 | 53570 | 53580 | 53590 | 53600 |       |
| Human             | -----                                                                             |       |       |       |       |       |       |       | 42784 |
| Coquerel'sSifaka  | -----                                                                             |       |       |       |       |       |       |       | 36562 |
| Ma'sNightMonkey   | -----                                                                             |       |       |       |       |       |       |       | 37645 |
| VervetAGM         | -----                                                                             |       |       |       |       |       |       |       | 44209 |
| Gorrilla          | -----                                                                             |       |       |       |       |       |       |       | 43278 |
| GrabEatingMacaque | -----                                                                             |       |       |       |       |       |       |       | 43597 |
| Macaque           | -----                                                                             |       |       |       |       |       |       |       | 44388 |
| PigTailedMacaque  | AGTGAGCCGAGATCGCGCCACTGCACTCCAGCCTGGGCGACAGAGCGAGACTCCGTCTCAAAAAAAAAAAAAAAAAAGAAA |       |       |       |       |       |       |       | 43514 |
| Bonobo            | -----                                                                             |       |       |       |       |       |       |       | 41866 |
| OliveBaboon       | -----                                                                             |       |       |       |       |       |       |       | 43149 |
| Orangutan         | -----                                                                             |       |       |       |       |       |       |       | 42860 |

| Majority          | -----TAAGAGACACCAATTTGAATACTGTTGCTTATAAGAGCAAATAGCATAAAATACCTTTAAAAATTG          |       |       |       |       |       |       |       |       |
|-------------------|----------------------------------------------------------------------------------|-------|-------|-------|-------|-------|-------|-------|-------|
|                   | 53610                                                                            | 53620 | 53630 | 53640 | 53650 | 53660 | 53670 | 53680 |       |
| Human             | -----TAAGAGACACCAATTTGAATACTGTTGCTTATAAGAGCAAATAGCATAAAAGACCTTTAAAAATTG          |       |       |       |       |       |       |       | 42850 |
| Coquerel'sSifaka  | -----                                                                            |       |       |       |       |       |       |       | 36562 |
| Ma'sNightMonkey   | -----TAAGAGACAGCAATTTGAATACTGTTGCTTGTAAGAGCACATAGCATAAAAGACCTTTAAAACTG           |       |       |       |       |       |       |       | 37711 |
| VervetAGM         | -----TAAGAGACACTAGTTTGAATACTGTCGCTTATAAGAGCAAATAGCATAAAATACGTTTAAAAATTG          |       |       |       |       |       |       |       | 44275 |
| Gorrilla          | -----TAAGAGACACCCATTTGAATACTGTTGCTTATAAGAGCAAATAGCATAAAAGACCTTTAAAAATTG          |       |       |       |       |       |       |       | 43344 |
| GrabEatingMacaque | -----TAAGAGACACCAGTTTGAATACTGTCGCTTATAAGAGCAAATAGCATAAAATACCTTTAAAAATTG          |       |       |       |       |       |       |       | 43663 |
| Macaque           | -----TAAGAGACACCAGTTTGAATACTGTCGCTTATAAGAGCAAATAGCATAAAATACCTTTAAAAATTG          |       |       |       |       |       |       |       | 44454 |
| PigTailedMacaque  | GTCTGCATATATTCTAAGAGACACCAATTTGAATACTGTCGCTTATAAGAGCAAATAGCATAAAATACCTTTAAAAATTG |       |       |       |       |       |       |       | 43594 |
| Bonobo            | -----TAAGAGACACCAATTTGAATACTGTTGCTTATAAGAGCAAATAGCATAAAAGACCTTTAAAAATTG          |       |       |       |       |       |       |       | 41932 |
| OliveBaboon       | -----TAAGAGACACCAGTTTGAATACTGTCGCTTAGAAGAGCAAATAGCATAAAATACCTTTAAAAATTG          |       |       |       |       |       |       |       | 43215 |
| Orangutan         | -----TAAGAGACACCAATTTGAATACTGTTGCTTATAAGAGCAAATAGCATAACAGACCTTTAAAAATTG          |       |       |       |       |       |       |       | 42926 |

| Majority          | GTGATTATATTTGCCTGGAAAAATACTCCATGTAATTCAGATGACTCAAAGGACATTTGGTAGACAATGTTACAAGGACA  |       |       |       |       |       |       |       |       |
|-------------------|-----------------------------------------------------------------------------------|-------|-------|-------|-------|-------|-------|-------|-------|
|                   | 53690                                                                             | 53700 | 53710 | 53720 | 53730 | 53740 | 53750 | 53760 |       |
| Human             | GTGATTATATTTGCCTGGAAAAATACTCCATGTAATTCAGATGACTCAAAGGACGTTGGTAGACAATGTTACAAGGACA   |       |       |       |       |       |       |       | 42930 |
| Coquerel'sSifaka  | -----                                                                             |       |       |       |       |       |       |       | 36562 |
| Ma'sNightMonkey   | GTGATTATATTTGCCTGGAAAAATACTCCATGTAATTCAGATGACTCAAAGGACTTTGGTAGACAGTGTACAAGGACA    |       |       |       |       |       |       |       | 37791 |
| VervetAGM         | GTGATTATATTTGCCTGGAAAAATAATCCATGTAATTCAGATGACTCAAAGGACATTTGGTAGACAATGTTACAAGGACA  |       |       |       |       |       |       |       | 44355 |
| Gorrilla          | GTGATTATATTTGCCTGGAAAAATACTCCATGTAATTCAGATGACTCAAAGGACATTTGGTAGACAATGTTACAAGGACA  |       |       |       |       |       |       |       | 43424 |
| GrabEatingMacaque | GTGATTATATTTGCCTGGAAAAATAATCCATGTAATTCAGATGACTCAAAGGACATTTGGTAGACAATGTTACAAGGACA  |       |       |       |       |       |       |       | 43743 |
| Macaque           | GTGATTATATTTGCCTGGAAAAATAATCCATGAAATTCAGATGATTCAAAAGGACATTTGGTAGACAATGTTACAAGGACA |       |       |       |       |       |       |       | 44534 |
| PigTailedMacaque  | GTGATTATATTTGCCTGGAAAAATAATCCATGTAATTCAGATGACTCAAAGGACATTTGGTAGACAATGTTACAAGGACA  |       |       |       |       |       |       |       | 43674 |
| Bonobo            | GTGATTATATTTGCCTGGAAAAATACTCCATGTAATTCAGATGACTCAAAGGACGTTGGTAGACAATGTTACAAGGACA   |       |       |       |       |       |       |       | 42012 |
| OliveBaboon       | GTGATTATATTTACCTGGAAAAATAATCCATGTAATTCAGATGACTCAAAGGACATTTGGTAGACAATGTTACAAGGACA  |       |       |       |       |       |       |       | 43295 |
| Orangutan         | GTGATTATATTTGCCTGGAAAAATACTCCATGTAATTCAGATGACTCAAAGGACGTTGGTAGACAATGTTACAAGGACA   |       |       |       |       |       |       |       | 43006 |



Tuesday, May 03, 2022 06:15 PM

|                   |                                                                                  |       |
|-------------------|----------------------------------------------------------------------------------|-------|
| Majority          | CTTTT-ATGGTTATCAGATATAGTACAGGATTTTCATTTTTATGTTCCAGCTTCCAGCTTTATCTAAAATATTTCTTGTA |       |
|                   | 53770 53780 53790 53800 53810 53820 53830 53840                                  |       |
| Human             | CTTTT-ATGGTTATCAGATATAGTACAGGATTTTCATTTTTATGTTCCAGCTTCCAGCTTTATCTAAAATATTTCTTGTA | 43009 |
| Coquerel'sSifaka  | -----                                                                            | 36562 |
| Ma'sNightMonkey   | CTTTTATGGTTATCAGATATAGTACAGGATTTTCATTTTTATGTTCCAGCTTCCAGCTTTATCTAAAATATTTCTTCCA  | 37871 |
| VervetAGM         | CTTTT-ATGGTTATTAGATATAGTACAGGATTTTCATTTTTATGTTCCAGCTTCCAGCTTTATCTAAAATATTTCTTGTA | 44434 |
| Gorrilla          | CTTTT-ATGGTTATCAGATATAGTACAGGATTTTCATTTTTATGTTCCAGCTTCCAGCTTTATCTAAAATATTTCTTGTA | 43503 |
| GrabEatingMacaque | CTTTT-ATGGTTATCAGATATAGTACAGGATTTTCATTTTTATGTTCCAGCTTCCAGCTTTATCTAAAATATTTCTTGTA | 43822 |
| Macaque           | CTTTT-ATGGTTATCAGATATAGTACAGGATTTTCATTTTTATGTTCCAGCTTCCAGCTTTATCTAAAATATTTCTTGTA | 44613 |
| PigTailedMacaque  | CTTTT-ATGGTTATCAGATATAGTACAGGATTTTCATTTTTATGTTCCAGCTTCCAGCTTTATCTAAAATATTTCTTGTA | 43753 |
| Bonobo            | CTTTT-ATGGTTATCAGATATAGTACAGGATTTTCATTTTTATGTTGCAGCTTCCAGCTTTATCTAAAATATTTCTTGTA | 42091 |
| OliveBaboon       | CTTTT-ATGATTATCAGATATAGTACAGGATTTTCATTTTTATGTTCCAGCTTCCAGCTTTATCTAAAATATTTCTTGTA | 43374 |
| Orangutan         | CTTTT-ATGGTTATCAGATATAGCACAGGATTTTCATTTTTATGTTCCAGCTTCCAGCTTTATCTAAAATATTTCTTGTA | 43085 |

|                   |                                                                                  |       |
|-------------------|----------------------------------------------------------------------------------|-------|
| Majority          | TAGATTTTACTGTAGAATTGTTTCCTAAGGCATCTGTCTCAACAGCCTTTCTCTTATCTGTGCAGACTTTTCTTTCTCTG |       |
|                   | 53850 53860 53870 53880 53890 53900 53910 53920                                  |       |
| Human             | TAGATTTTACTGTAGAATTGTTTCCTAAGGCATCTGTCTCAACAGCCTTTCCCTTATCTGTGCAGACTTTTCTTTCTCTG | 43089 |
| Coquerel'sSifaka  | -----                                                                            | 36562 |
| Ma'sNightMonkey   | TATGTTTACTGTAGAATTGTTTCCAAAAGCATCTGTCTCAGCAGTGTCCCTTACCTGTGCAGACTTTTCTTTCTCTG    | 37951 |
| VervetAGM         | TAGATTTTACTGTAGAATTGTTTCCTAAGGCATCTGTCTCAACAGCCTTTCTCTTATCTATGCAGACTTTTCTTTCTCTG | 44514 |
| Gorrilla          | TAGATTTTACTGTAGAATTGTTTCCTAAGGCATCTGTCTCAACAGCCTTTCCCTTATCTGTGCAGACTTTTCTTTCTCTG | 43583 |
| GrabEatingMacaque | TAGATTTTACTGTAGAATTGTTTCCTAAGGCATCTGTCTCAACAGCCTTTCTCTTACCTATGCAGACTTTTCTTTCTCTG | 43902 |
| Macaque           | TAGATTTTACTGTAGAATTGTTTCCTAAGGCATCTGTCTCAACAGCCTTTCTCTTACCTATGCAGACTTTTCTTTCTCTG | 44693 |
| PigTailedMacaque  | TAGATTTTACTGTAGAATTGTTTCCTAAGGCATCTGTCTCAACAGCCTTTCTCTTACCTATGCAGACTTTTCTTTCTCTG | 43833 |
| Bonobo            | TAGATTTTACTGTAGAATTGTTTCCTAAGGCATCTGTCTCAACAGCCTTTCCCTTATCTGTGCAGACTTTTCTTTCTCTG | 42171 |
| OliveBaboon       | TAGATTTTACTGTAGAATTGTTTCCTAAGGCATCTGTCTCAACAGCCTTTCTCTTATCTATACAGACTTTTCTTTCTCTG | 43454 |
| Orangutan         | TAGATTTTACTGTAGAATTGTTTCCTAAGGCATCTGTGCAACAGCCTTTCCCTTATCTGTGCAGACTTTTCTTTCTCTG  | 43165 |

|                   |                                                                                 |       |
|-------------------|---------------------------------------------------------------------------------|-------|
| Majority          | TACCTGTTGAAT-AGGTGCTTTTTGTCAAAGAAAAA-TTAATTTTACAGGTTAGAAAAATTCATTTTATTAGAACTTA  |       |
|                   | 53930 53940 53950 53960 53970 53980 53990 54000                                 |       |
| Human             | TACTTGTTGAAT-AGGTGCTTTTTGTCAAAGAAAAA-ATAATTTTACAGGTTAGAAAAATTCATGTTATTAGAACTTA  | 43167 |
| Coquerel'sSifaka  | -----                                                                           | 36562 |
| Ma'sNightMonkey   | TGCCTATTGAAT-AGGTGCTTTTTATCAAAGAAAAAATTAATTTTATAGATGAGAAAAATTCGTGTTATTAGAACTTA  | 38030 |
| VervetAGM         | TACCAGTTGAAT-AGGTGCTTTTTGTCAAAGAAAAA-TTAATTTTACAGGTTAGAAAAATTCATTTTATTAGAAAC--A | 44590 |
| Gorrilla          | TACTTGTTGAAT-AGGTGCTTTTTGTCAAAGAAAAA-TTAATTTTACAAGTAAAAAATTCATGTTATTAGAACTTA    | 43661 |
| GrabEatingMacaque | TACCTGTTGAAT-AGGTGCTTTTTGTCAAAGAAAAA-TTAATTTTACAGGTTAGAAAAATTCATTTTATTAGAACTTA  | 43980 |
| Macaque           | TACCTGTTGAAT-AGGTGCTTTTTGTCAAAGAAAAA-TTAATTTTACAGGTTAGAAAAATTCATTTTATTAGAACTTA  | 44771 |
| PigTailedMacaque  | TACCTGTTGAAT-AGGTGCTTTTTGTCAAAGAAAAA-TTAATTTTACAGGTTAGAAAAATTCATTTTATTAGAACTTA  | 43911 |
| Bonobo            | TACTTGTTGAATTAGGTGCTTTTTGTGAAGAAAAA-TTAATTTTACAGGTTAGAAAAATTCATGTTATTAGAACTTA   | 42250 |
| OliveBaboon       | TACCTGTTGAAT-AGGTGCTTTTTGTCAAAGAAAAA-TTAATTTTACAGGTTAGAAAAATTCATTTTATTAGAACTTA  | 43532 |
| Orangutan         | TACCTGTTGAAT-AGGTGCTTTTTGTCAAAGAAAAA-TTAATTTTACAGGTTAGAAAAATTCATGTTATTAGAACTTA  | 43243 |

Tuesday, May 03, 2022 06:15 PM

| Majority          | ATCTCAGGTAAATAAATGTTTAATAAATTGATACAGTAAGGACATTTTCTAATGAATTGGTTCCTTCGAGAGATATAAAA |       |       |       |       |       |       |       |       |
|-------------------|----------------------------------------------------------------------------------|-------|-------|-------|-------|-------|-------|-------|-------|
|                   | 54010                                                                            | 54020 | 54030 | 54040 | 54050 | 54060 | 54070 | 54080 |       |
| Human             | ATCTCAGGTAAATAAATGTTTAATAAATTGATACAGTAAGGACATTTTCTAATGAATTGGTTCCTTCAGAGATATAAAA  |       |       |       |       |       |       |       | 43247 |
| Coquerel'sSifaka  | -----                                                                            |       |       |       |       |       |       |       | 36562 |
| Ma'sNightMonkey   | ATCTCAGGTAAATAA--ATCTAATAAATTAATATAGTAAGGACATTTTCTAATAAATGGTTCCTTCAGGAGATATAAAA  |       |       |       |       |       |       |       | 38108 |
| VervetAGM         | ATCTCAGGTAAATAAATGTTTAATAAATTGATACAGTAAGGACATTTTCTAATGAATTGGTTCCTTCGAGAGATATATAA |       |       |       |       |       |       |       | 44670 |
| Gorilla           | ATCTCAGGTAAATAAATGTTTAATAAATTGATACAGTAAGGACATTTTCTAATGAATTGGTTCCTTCAGAGATATAGAA  |       |       |       |       |       |       |       | 43741 |
| GrabEatingMacaque | ATCTCAGGTAAATAAATGTTTAATAAATTGATACAGTAAGGACATTTTCTAATGAATTGGTTCCTTCGAGAGATATAAAA |       |       |       |       |       |       |       | 44060 |
| Macaque           | ATCTCAGGTAAATAAATGTTTAATAAATTGATACAGTAAGGACATTTTCTAATGAATTGGTTCCTTCGAGAGATATAAAA |       |       |       |       |       |       |       | 44851 |
| PigTailedMacaque  | ATCTCAGGTAAATAAATGTTTAATAAATTGATACAGTAAGGACATTTTCTAATGAATTGGTTCCTTCGAGAGATATAAAA |       |       |       |       |       |       |       | 43991 |
| Bonobo            | ATCTCAGGTAAATAAATGTTTAATAAATTGATACAGTAAGGACATTTTCTAATGAATTGGTTCCTTCAGAGATATTA    |       |       |       |       |       |       |       | 42330 |
| OliveBaboon       | ATCTCAGGTAAA---TGTTTAATAAATTGATACAGTAAGGACATTTTCTAATGAATTGGTTCCTTCGAGAGATATAAAA  |       |       |       |       |       |       |       | 43608 |
| Orangutan         | ATCTCAGGTAAATAAATGTTTAATAAATTGATACAGTAAGAACATTTTCTAATGAATTGGTTCCTTCAGAGATATAAAA  |       |       |       |       |       |       |       | 43323 |

| Majority          | GTGAAATATTTTC-----                                                               |       |       |       |       |       |       |       |       |
|-------------------|----------------------------------------------------------------------------------|-------|-------|-------|-------|-------|-------|-------|-------|
|                   | 54090                                                                            | 54100 | 54110 | 54120 | 54130 | 54140 | 54150 | 54160 |       |
| Human             | GTGAAATATTTTC-----                                                               |       |       |       |       |       |       |       | 43259 |
| Coquerel'sSifaka  | -----                                                                            |       |       |       |       |       |       |       | 36562 |
| Ma'sNightMonkey   | GTGAAATATTTTCGGGCCGGGCACGGTGGCTCACGCCTGTAATCCCAGCACTTTGGGAGGCAGAGCGGGTGGATCACGAG |       |       |       |       |       |       |       | 38188 |
| VervetAGM         | GTGAAATATTTTC-----                                                               |       |       |       |       |       |       |       | 44682 |
| Gorilla           | GTGAAATATTTTC-----                                                               |       |       |       |       |       |       |       | 43753 |
| GrabEatingMacaque | GTGAAATATTTTC-----                                                               |       |       |       |       |       |       |       | 44072 |
| Macaque           | GTGAAATATTTTC-----                                                               |       |       |       |       |       |       |       | 44863 |
| PigTailedMacaque  | GTGAAATATTTTC-----                                                               |       |       |       |       |       |       |       | 44003 |
| Bonobo            | GTGAAATATTTTC-----                                                               |       |       |       |       |       |       |       | 42342 |
| OliveBaboon       | GTGAAATATTTTC-----                                                               |       |       |       |       |       |       |       | 43620 |
| Orangutan         | GTGAAATATTTTC-----                                                               |       |       |       |       |       |       |       | 43335 |

| Majority          | -----                                                                            |       |       |       |       |       |       |       |       |
|-------------------|----------------------------------------------------------------------------------|-------|-------|-------|-------|-------|-------|-------|-------|
|                   | 54170                                                                            | 54180 | 54190 | 54200 | 54210 | 54220 | 54230 | 54240 |       |
| Human             | -----                                                                            |       |       |       |       |       |       |       | 43259 |
| Coquerel'sSifaka  | -----                                                                            |       |       |       |       |       |       |       | 36562 |
| Ma'sNightMonkey   | GTTAAGAGATCGAGACCATCCTAGTCAACATGGTGAACCCCTGTCTCTTCTAAAAATACAAAAAATTAGCTGGGCATGGT |       |       |       |       |       |       |       | 38268 |
| VervetAGM         | -----                                                                            |       |       |       |       |       |       |       | 44682 |
| Gorilla           | -----                                                                            |       |       |       |       |       |       |       | 43753 |
| GrabEatingMacaque | -----                                                                            |       |       |       |       |       |       |       | 44072 |
| Macaque           | -----                                                                            |       |       |       |       |       |       |       | 44863 |
| PigTailedMacaque  | -----                                                                            |       |       |       |       |       |       |       | 44003 |
| Bonobo            | -----                                                                            |       |       |       |       |       |       |       | 42342 |
| OliveBaboon       | -----                                                                            |       |       |       |       |       |       |       | 43620 |
| Orangutan         | -----                                                                            |       |       |       |       |       |       |       | 43335 |

Tuesday, May 03, 2022 06:15 PM

| Majority          | -----                                                                            |       |       |       |       |       |       |       |       |
|-------------------|----------------------------------------------------------------------------------|-------|-------|-------|-------|-------|-------|-------|-------|
|                   | 54250                                                                            | 54260 | 54270 | 54280 | 54290 | 54300 | 54310 | 54320 |       |
| Human             | -----                                                                            |       |       |       |       |       |       |       | 43259 |
| Coquerel'sSifaka  | -----                                                                            |       |       |       |       |       |       |       | 36562 |
| Ma'sNightMonkey   | GGCGCATGCCTGTAATCCCAGCTCCTCAGGAGGCTGAGGCAGGAGAATTGCCTGAACCCAGGAGGCGGAGGTTGCGGTGA |       |       |       |       |       |       |       | 38348 |
| VervetAGM         | -----                                                                            |       |       |       |       |       |       |       | 44682 |
| Gorrilla          | -----                                                                            |       |       |       |       |       |       |       | 43753 |
| GrabEatingMacaque | -----                                                                            |       |       |       |       |       |       |       | 44072 |
| Macaque           | -----                                                                            |       |       |       |       |       |       |       | 44863 |
| PigTailedMacaque  | -----                                                                            |       |       |       |       |       |       |       | 44003 |
| Bonobo            | -----                                                                            |       |       |       |       |       |       |       | 42342 |
| OliveBaboon       | -----                                                                            |       |       |       |       |       |       |       | 43620 |
| Orangutan         | -----                                                                            |       |       |       |       |       |       |       | 43335 |

| Majority          | -----                                                                             |       |       |       |       |       |       |       |       |
|-------------------|-----------------------------------------------------------------------------------|-------|-------|-------|-------|-------|-------|-------|-------|
|                   | 54330                                                                             | 54340 | 54350 | 54360 | 54370 | 54380 | 54390 | 54400 |       |
| Human             | -----                                                                             |       |       |       |       |       |       |       | 43259 |
| Coquerel'sSifaka  | -----                                                                             |       |       |       |       |       |       |       | 36562 |
| Ma'sNightMonkey   | GCCGAGATCGTGCCATTGCACCTCCAGCCTGAGTAACAAGAGTGAAACTCCGTCTCAAAAATAAAAATAAAAATAAAAATA |       |       |       |       |       |       |       | 38428 |
| VervetAGM         | -----                                                                             |       |       |       |       |       |       |       | 44682 |
| Gorrilla          | -----                                                                             |       |       |       |       |       |       |       | 43753 |
| GrabEatingMacaque | -----                                                                             |       |       |       |       |       |       |       | 44072 |
| Macaque           | -----                                                                             |       |       |       |       |       |       |       | 44863 |
| PigTailedMacaque  | -----                                                                             |       |       |       |       |       |       |       | 44003 |
| Bonobo            | -----                                                                             |       |       |       |       |       |       |       | 42342 |
| OliveBaboon       | -----                                                                             |       |       |       |       |       |       |       | 43620 |
| Orangutan         | -----                                                                             |       |       |       |       |       |       |       | 43335 |

| Majority          | -----                                                                           |       |       |       |       |       |       |       |       |
|-------------------|---------------------------------------------------------------------------------|-------|-------|-------|-------|-------|-------|-------|-------|
|                   | -----AAAAATACAACCTGTTCCCAAGTAGCATTAGAATTTGATTTTGTAAATTTGTA                      |       |       |       |       |       |       |       |       |
|                   | 54410                                                                           | 54420 | 54430 | 54440 | 54450 | 54460 | 54470 | 54480 |       |
| Human             | -----AAAAATACAACCTGTTCCCTAAGTAGCATTAGAATTTGATTTTGTAAATTTGTA                     |       |       |       |       |       |       |       | 43312 |
| Coquerel'sSifaka  | -----                                                                           |       |       |       |       |       |       |       | 36562 |
| Ma'sNightMonkey   | AAAAAATAAAAAAAGTGAAATATTTCAAAAATACAACCTGTTCCCAAGTAGCATTAGAATTTGATTTTGTAAATCTGTA |       |       |       |       |       |       |       | 38508 |
| VervetAGM         | -----AAAAATACAACCTGTTCCCAAGTAGCATTAGAATTTGATTTTGTAAATTTGTA                      |       |       |       |       |       |       |       | 44735 |
| Gorrilla          | -----AAAAATACAACCTGTTCCCTAAGTAGCATTAGAATTTGATTTTGTAAATTTGTA                     |       |       |       |       |       |       |       | 43806 |
| GrabEatingMacaque | -----AAAAATACAACCTGTTCCCAAGTAGCATTAGAATTTGATTTTGTAAATTTGTA                      |       |       |       |       |       |       |       | 44125 |
| Macaque           | -----AAAAATACAACCTGTTCCCAAGTAGCATTAGAATTTGATTTTGTAAATTTGTA                      |       |       |       |       |       |       |       | 44916 |
| PigTailedMacaque  | -----AAAAATACAACCTGTTCCCAAGTAGCATTAGAATTTGATTTTGTAAATTTGTA                      |       |       |       |       |       |       |       | 44056 |
| Bonobo            | -----AAAAATACAACCTGTTCCCTAAGTAGCATTAGAATTTGATTTTGTAAATTTGTA                     |       |       |       |       |       |       |       | 42395 |
| OliveBaboon       | -----AAAAATACAACCTGTTCCCAAGTAGCATTAGAATTTGATTTTGTAAATTTGTA                      |       |       |       |       |       |       |       | 43673 |
| Orangutan         | -----AAAAATATGACTGTTCCCAAGTAGCATTAGAATTTGATTTTGTAAAGTTGTA                       |       |       |       |       |       |       |       | 43388 |

Tuesday, May 03, 2022 06:15 PM

|                   |                                                                                    |       |
|-------------------|------------------------------------------------------------------------------------|-------|
| Majority          | ACTATTTAGCAGTGACTAGGAGGCTTGACAATTCCTAAGGTATAGTCTCTTTAATTTTTT-AGTGATTTCTTTGTAGCTAT  |       |
|                   | 54490 54500 54510 54520 54530 54540 54550 54560                                    |       |
| Human             | ACTATTTAGCAGTGACTATGAGGCTTGACAATTCCTAAGGTACAGTCTCTTTAATTTTTCT-AGTGATTTCTTTGTAGCTAC | 43391 |
| Coquerel'sSifaka  | -----G-----GA----TAAGGTATAG-----AA-----                                            | 36577 |
| Ma'sNightMonkey   | ACTATTTAGCAGTGAGTAGGAGGCTTGACAATGTGAAGGCATGGTCTCTTTAATTTTTTTAGTGATTTTGTGTAGCCAT    | 38588 |
| VervetAGM         | ACTATTTAGCAGTGACTAGGAGACTTGACAATTCCTAAGGTATAGTCTCTTTAATTTTTT-AGTGATTTCTTTGTAGATAT  | 44814 |
| Gorilla           | ACTATTTAGCAGTGACTATGAGGCTTGGAATTCCTAAGGTACAGTCTCTTTAATTTTTCT-AGTGATTTCTTTGTAGCTAC  | 43885 |
| GrabEatingMacaque | ACTATTTAGCAGTGACTAGGAGACTTGACAATTCCTAAGATATAGTCTCTTTAATTTTTT-AGTGATTTCTTTGTAGATAT  | 44204 |
| Macaque           | ACTATTTAGCAGTGACTAGGAGACTTGACAATTCCTAAGATATAGTCTCTTTAATTTTTT-AGTGATTTCTTTGTAGATAT  | 44995 |
| PigTailedMacaque  | ACTATTTAGCAGTGACTAGGAGACTTGACAATTCCTAAGGTATAGTCTCTTTAATTTTTT-AGTGATTTCTTTGTAGATAT  | 44135 |
| Bonobo            | ACTATTTAGCAGTGACTGTGAGGCTTGACAATTCCTAAGGTACAGTCTCTATAATTTTTCT-AGTGATTTCTTTGTAGCTAC | 42474 |
| OliveBaboon       | ACTATTTAGCAGTGACTAGGAGACTTGACAATTCCTAAGGTATAGTCTCTTTAATTTTTT-AGTGATTTCTTTGTAGATAT  | 43752 |
| Orangutan         | ACTATTTAGCAGTGACTACGAGGCTTGACAATTCCTAAGGTACAGTCTCTTTAATTTTTCT-AGTGATTTCTTTGTAGCTAC | 43467 |

|                   |                                                                                   |       |
|-------------------|-----------------------------------------------------------------------------------|-------|
| Majority          | GGAAGTGGAAATATCCCTTTAGGTA----TACGTATTTCTGCCAGTGTGATTGTTACTCTGTAATAGCAGGATTTTTTGA  |       |
|                   | 54570 54580 54590 54600 54610 54620 54630 54640                                   |       |
| Human             | GGAAGTGGAAATATCCCTTTAGGTA----TACATATTTCTGCCAGTGGTGATTGTTACTCTGTAATAGCAGGATTTTCTGA | 43467 |
| Coquerel'sSifaka  | ---AATTGTATGTACTTAAAG-----ATTTCTACCA-----                                         | 36605 |
| Ma'sNightMonkey   | GGAAGTGGAAATATCCCTTTAGGTA----TACATATTTCTGCCAGTGTGATTGTTACTCTGTAA-AGCAGGACTTAAAA   | 38663 |
| VervetAGM         | GGAAGTGGAAATATCCCTTTAGGTA----TACGTATTTCTGCCAGTGTGATTGTTACTCTGTAATAGCAGGATTTTTTGA  | 44890 |
| Gorilla           | GGAAGTGGAAATATCCCTTTAGGTA----TACATATTTCTGCCAATGCTGATTGTTACTCTGTAATAGCAGGATTTTTTGA | 43961 |
| GrabEatingMacaque | GGAAGTGGAAATATCCCTTTAGGTA----TACGTATTTCTGCCAGTGTGATTGTTACTCTATAATAGCAGGATTTTTTGA  | 44280 |
| Macaque           | GGAAGTGGAAATATCCCTTTAGGTA----TACGTATTTCTGCCAGTGTGATTGTTACTCTATAATAGCAGGATTTTTTGA  | 45071 |
| PigTailedMacaque  | GGAAGTGGAAATATCCCTTTAGGTA----TACGTATTTCTGCCAGTGTGATTGTTACTCTATAATAGCAGGATTTTTTGA  | 44211 |
| Bonobo            | GGAAGTGGAAATATCCCTTTAGGTA----TACATATTTCTGCCAATGCTGATTGTTACTCTGTAATAGCAGGATTTTCTGA | 42550 |
| OliveBaboon       | GGAAGTGGAAATATCCCTTTAGGTA----TATGTATTTCTGCCAGTGTGATTGTTACTCTGTAATAGCAGGATTTTTTGA  | 43828 |
| Orangutan         | GGAACCGAAATATCCCTTTAGGTAGGTATACATATTTCTGCCATTGCCGATTGTTACTCTGTAATAGCAGGATTTTTTGA  | 43547 |

|                   |                                                                                  |       |
|-------------------|----------------------------------------------------------------------------------|-------|
| Majority          | AAA-TTATTGCTAAACATGACATTTTGCTCTACCTGAAAGCAGTTAAACCATTCCAAAGAGTCTGGAACATTTTACTTAG |       |
|                   | 54650 54660 54670 54680 54690 54700 54710 54720                                  |       |
| Human             | AAA-TTATTGCTAAACATGACATTTTGCTCTACCTGAAAGCAGTTAAACCATTCCATAGAGTCTGGAACATTTTACTTAG | 43546 |
| Coquerel'sSifaka  | -----T-T----                                                                     | 36607 |
| Ma'sNightMonkey   | AAAATTATTGCTAAAAATGACATTTTGCTCTACTGAAAGCAGTTAAACCATTCCATAGAGTCTGGAACATTTTACTTAG  | 38743 |
| VervetAGM         | AAA-TTATTGCTAAACATGACATTTTGCTCTACCTGAAAGCAGTTAAACGATTCCAAAGAGTCTGGAACATTTTACTTAG | 44969 |
| Gorilla           | AAA-TTATTGCTAAACATGACATTTTGCTCTACCTGAAAGCAGTTAAACCATTCCATAGAGTCTGGAACATTTTACTTAG | 44040 |
| GrabEatingMacaque | AAA-TTATTGCTAAACATGACATTTTGCTCTACCTGAAAGCAGTTAAACCATTCCAAAGAGTCTGGAACATTTTACTTAG | 44359 |
| Macaque           | AAA-TTATTGGTAAACATGACATTTTGCTCTACCTGAAAGCAGTTAAACCATTCCAAAGAGTCTGGAACATTTTACTTAG | 45150 |
| PigTailedMacaque  | AAA-TTATTGCTAAACATGACATTTTGCTCTACCTGAAAGCAGTTAAACCATTCCAAAGAGTCTGGAACATTTTACTTAG | 44290 |
| Bonobo            | AAA-TTATTGCTAAACATGACATTTTGCTCTACCTGAAAGCAGTTAAACCATTCCATAGAGTCTGGAACATTTTACTTAG | 42629 |
| OliveBaboon       | AAA-TTATTGCTAAACATGACATTTTGCTCCACCTGAAAGCAGTTAAACCATTCCAAAGAGTCTGGAACATTTTACTTAG | 43907 |
| Orangutan         | AAA-TTATTGCTAAACATGACAGTTTGCTCTACCTGAAAGTAGTTAAACCATTCCACAGAGTCTGGAACATTTTACTTAG | 43626 |

Tuesday, May 03, 2022 06:15 PM

| Majority          | AACTCTTTTAAGATTTTCATTTTGACTTTTACAGAC--ATATTTTGGAGGTGATGTCATTTGTTTTGCTATAATGTTTT  |       |       |       |       |       |       |       |       |
|-------------------|----------------------------------------------------------------------------------|-------|-------|-------|-------|-------|-------|-------|-------|
|                   | 54730                                                                            | 54740 | 54750 | 54760 | 54770 | 54780 | 54790 | 54800 |       |
| Human             | AACTCTTTTAAGATTTTCATTTTAACTTTTACAGAC--ATATTTTGGAGGTGATGTCATTCT-TTTTGCTATAATGTTTT |       |       |       |       |       |       |       | 43623 |
| Coquerel'sSifaka  | AG-----T--AC--A-----TTACTAC----ATGCCTGTTAATTGAACATAAAGTCCT                       |       |       |       |       |       |       |       | 36648 |
| Ma'sNightMonkey   | AACTCTTTTAAGATTTTCATTTTAACTTTTATAGACTTACATTTTTCGCGCAATGTCATTTGTTTTGTTACAGTGT     |       |       |       |       |       |       |       | 38823 |
| VervetAGM         | AACTCTTTCAAGATTTTCATTTTGACTTTTACAGAC--ATATTTTGGAGGTGATGTCATTTGTTTTGCTATAATGTTTT  |       |       |       |       |       |       |       | 45047 |
| Gorilla           | AACTCTTTTAAGATTTTCATTTTAACTTTTACAGAC--ATATTTTGGAGGTGATGTCATTCT-TTTTGCTATAATGTTTT |       |       |       |       |       |       |       | 44117 |
| GrabEatingMacaque | AACTCTTTTAAGATTTTCATTTTGACTTTTACAGAC--ATATTTTGGAGGTGATGTCATTTGTTTTGCTATAATGTTTT  |       |       |       |       |       |       |       | 44437 |
| Macaque           | AACTCTTTTAAGATTTTCATTTTGACTTTTACAGAC--ATATTTTGGAGGTGATGTCATTTGTTTTGCTATAATGTTTT  |       |       |       |       |       |       |       | 45228 |
| PigTailedMacaque  | AACTCTTTTAAGATTTTCATTTTGACTTTTACAGAC--ATATTTTGGAGGTGATGTCATTTGTTTTGCTATAATGTTTT  |       |       |       |       |       |       |       | 44368 |
| Bonobo            | AACTCTTTTAAGATTTTCATTTTAACTTTTACAGAC--ATATTTTGGAGGTGATGTCATTCT-TTTTGCTATAATGTTTT |       |       |       |       |       |       |       | 42706 |
| OliveBaboon       | AACTCTTTTAAGATTTTCATTTTGACTTTTACAGAC--ATATTTTGGAGGTGATGTCATTTGTTTTGCTATAATGTTTT  |       |       |       |       |       |       |       | 43985 |
| Orangutan         | AACTCTTTTAAGATTTTCATTTTAACTTTTACAGAC--ATATTTTGGAGGTGATGTCATTTGTTTTGCTATAATGTTTT  |       |       |       |       |       |       |       | 43704 |

| Majority          | GAGAGTATCCAGTAGATTATTTCATAGTTTTACTATTTATGAAGGTTTTAACAACTTA-TCTTCTTGC-----       |       |       |       |       |       |       |       |       |
|-------------------|---------------------------------------------------------------------------------|-------|-------|-------|-------|-------|-------|-------|-------|
|                   | 54810                                                                           | 54820 | 54830 | 54840 | 54850 | 54860 | 54870 | 54880 |       |
| Human             | GAAAGTATCCAGTAGATTATTTCATAGTTTTACTATTTATAAAGGTTTTAACAACTCA-TCTTCTTGCATATAAAGGTA |       |       |       |       |       |       |       | 43702 |
| Coquerel'sSifaka  | AATATTATT---TGAATTATTAC-TAGTTTTAC-----A-TACCCAA-----                            |       |       |       |       |       |       |       | 36685 |
| Ma'sNightMonkey   | GAGAGTATCCAGTAGATTATTTCAGAGTTTTAAGATTTATGAGCATTTAACAACTTAACCTTCTTGC-----        |       |       |       |       |       |       |       | 38892 |
| VervetAGM         | GAGAGTATCCAGTAGATTATTTCATGGTTTTACTATTTATGAAGGCTTTAACAACTTA-TCTTCTTGC-----       |       |       |       |       |       |       |       | 45115 |
| Gorilla           | GAAAGTATCCAGTAGATTACTTCATAGTTTTACTATTTATGAAGGTTTTAACAACTCA-TCTTCTTGCATATAAAGGTA |       |       |       |       |       |       |       | 44196 |
| GrabEatingMacaque | GAGAGTATCCAGTAGATTATTTCATAGTTTTACTATTTATGAAGGCTTTAACAACTTA-TCTTCTTGC-----       |       |       |       |       |       |       |       | 44505 |
| Macaque           | GAGAGTATCCAGTAGATTATTTCATAGTTTTACTATTTATGAAGGCTTTAACAACTTA-TCTTCTTGC-----       |       |       |       |       |       |       |       | 45296 |
| PigTailedMacaque  | GAGAGTATCCAGTAGATTATTTCATAGTTTTACTATTTATGAAGGCTTTAACAACTTA-TCTTCTTGC-----       |       |       |       |       |       |       |       | 44436 |
| Bonobo            | GAAAGTATCCAGTAGATTATTTCATAGTTTTACTATTTGTAAGGTTTTAACAACTCA-TCTTCTTGCATATAAAGGTA  |       |       |       |       |       |       |       | 42785 |
| OliveBaboon       | GAGAGTATCCAGTAGATTATTTCATAGTTTTACTATTTATGAAGGCTTTAACAACTTA-TCTTCTTGC-----       |       |       |       |       |       |       |       | 44053 |
| Orangutan         | GAAAGTATCCAGTATATTTATTTCATAGTTTTACTATTTATGAGGTTTTAACAACTTA-TCTTCTT-----         |       |       |       |       |       |       |       | 43770 |

| Majority          | -----ATATAAAGGTAGTGAGAGCC                                                        |       |       |       |       |       |       |       |       |
|-------------------|----------------------------------------------------------------------------------|-------|-------|-------|-------|-------|-------|-------|-------|
|                   | 54890                                                                            | 54900 | 54910 | 54920 | 54930 | 54940 | 54950 | 54960 |       |
| Human             | GTGAGAGCCTTATTTTCATAGTGTACTATTTATGAGGGTTTTAACAACTTATCTTCTTGTATATAAAGGTAGTGAGAGCC |       |       |       |       |       |       |       | 43782 |
| Coquerel'sSifaka  | -----                                                                            |       |       |       |       |       |       |       | 36685 |
| Ma'sNightMonkey   | -----ATATAAAGGTAGTGAGAGCC                                                        |       |       |       |       |       |       |       | 38912 |
| VervetAGM         | -----ATATAAAGGTAGTGAGAGCC                                                        |       |       |       |       |       |       |       | 45135 |
| Gorilla           | GTGAGAGCCTTATTTTCATAGTGTTA--TTTATGAGGGTTTTAACAACTTACCTTCTTGTATATAAAGGTAGTGAGAGCC |       |       |       |       |       |       |       | 44273 |
| GrabEatingMacaque | -----ATATAAAGGTAGTGAGAGCA                                                        |       |       |       |       |       |       |       | 44525 |
| Macaque           | -----ATATAAAGGTAGTGAGAGCA                                                        |       |       |       |       |       |       |       | 45316 |
| PigTailedMacaque  | -----ATATAAAGGTAGTGAGAGCA                                                        |       |       |       |       |       |       |       | 44456 |
| Bonobo            | GTGAGAGCCTTATTTTCATAGTGTACTATTTATGAGGGTTTTAACAACTTATCTTCTTGTATATAAAGGTAGTGAGAGCC |       |       |       |       |       |       |       | 42865 |
| OliveBaboon       | -----ATATAAAGGTAGTGAGAGCA                                                        |       |       |       |       |       |       |       | 44073 |
| Orangutan         | -----C-----ATATAAAGGTAGTGAGAGCC                                                  |       |       |       |       |       |       |       | 43791 |

Tuesday, May 03, 2022 06:16 PM

| Majority          | TTCTCTAGGTGCCTTCTGTGTTTTCCAGCTCATGCCTAATATACTTTTGACAACTAGGCCACACAACACTACTTGGAATA  |       |
|-------------------|-----------------------------------------------------------------------------------|-------|
|                   | 54970 54980 54990 55000 55010 55020 55030 55040                                   |       |
| Human             | TTCTCTAGGTGCCTTCTGTGTTTTCCAGCTCATGCCTAATATGCTTTTGACAACTACACCACACAACACTACTTGGAATA  | 43862 |
| Coquerel'sSifaka  | ----ACAAAAG-TTCTGGGTTT-----AATGGG-----GGAATG                                      | 36715 |
| Ma'sNightMonkey   | TTCTCTAGGTGCTTCTGTGTTTTCCAGCTCATGCCTGATATACTTTGGCAACTAGGCCACACAACACTACTTACAAATA   | 38992 |
| VervetAGM         | TTCTCTAGGTGCCTTCTGTGTTTTCCAGCTCATGCCTAACATACTTTGGACAACTAGGCCATAACAACACTACTTGGAATA | 45215 |
| Gorilla           | TTCTCTAGGTGCCTTCTGTGTTTTCCAGCTCATGCCTAATATGCTTTTGACAACTATGCCACACAACACTACTTGGAAGTA | 44353 |
| GrabEatingMacaque | TTCTCTAGGTGCCTTCTGTGTTTTCCAGCTCATGCCTAATATACTTTGGACAACTAGGCCACACAACACTACTTGGAATA  | 44605 |
| Macaque           | TTCTCTAGGTGCCTTCTGTGTTTTCCAGCTCATGCCTAATATACTTTGGACAACTAGGCCACACAACACTACTTGGAATA  | 45396 |
| PigTailedMacaque  | TTCTCTAGGTGCCTTCTGTGTTTTCCAGCTCATGCCTAATATACTTTGGACAACTAGGCCACACAACACTACTTGGAATA  | 44536 |
| Bonobo            | TTCTCTAGGTGCCTTCTGTGTTTTCCAGCTCATGCCTAATATGCTTTTGACAACTACGCCACACAACACTACTTGGAATA  | 42945 |
| OliveBaboon       | TTCTCTAGGTGCCTTCTTTGTTTTCCAGCTCATGCCTAATATACTTTGGACAACTAGGCCACACAACACTACTTGGAATA  | 44153 |
| Orangutan         | TTCTCTAGGTGCCTTCTGTGTTTTCCAGCTCATGCCTAATATACTTTTGACAACTAGGCCACACAACACTACTTGGAATA  | 43871 |

| Majority          | CAAGAGTTAATAG-TTTCCTTTTACGGAAACCTCGTGAGGCTTTTTGTGTGGTGGGTGTTGCAGA-AACAGCCAACAGAA  |       |
|-------------------|-----------------------------------------------------------------------------------|-------|
|                   | 55050 55060 55070 55080 55090 55100 55110 55120                                   |       |
| Human             | CAAGAGTTAATAG-TTACCTTTTACGGAAACCTGGTGAGGCTTTTTGCGTGGTGGCTGTTGCAGA-AACAGCCAACAGAA  | 43940 |
| Coquerel'sSifaka  | GAAGA---AAAGG----AT--CATGGGAAGAAATTCAGA-TTATCTGTAGT-----CTTCTGA-----A---GAA       | 36768 |
| Ma'sNightMonkey   | CAAGATTTAATAG-TTGCTTTTACGGAAACCTAGTGAGGCTTTTTGTGTGGTGGCTGTTGCAGTTAACAACCAGCAGAA   | 39071 |
| VervetAGM         | CAAGAGTTAATAGGTTTTCCTTTTATGGAAACCTCGTGAGGCTTTTTGTGTGGTGGGTGTTGCAGA-AACAGCCAACAGAA | 45294 |
| Gorilla           | CAAGAGTTAATAG-TTGCTTTTACGGAAACCTAGTGAGGCTTTTTGTGTGGTGGCTGTTGCAGA-AACAGCCAACAGAA   | 44431 |
| GrabEatingMacaque | CAAGAGTTAATAGGTTTTCCTTTTACGGAAACCTCGTGAGGCTTTTTGTGTGGTGGGTGTTGCAGA-AACAGCCAACAGAA | 44684 |
| Macaque           | CAAGAGTTAATAGGTTTTCCTTTTACGGAAACCTCGTGAGGCTTTTTGTGTGGTGGGTGTTGCAGA-AACAGCCAACAGAA | 45475 |
| PigTailedMacaque  | CAAGAGTTAATAGGTTTTCCTTTTACGGAAACCTCGTGAGGCTTTTTGTGTGGTGGGTGTTGCAGA-AACAGCCAACAGAA | 44615 |
| Bonobo            | TAAGAGTTAATAG-TTACCTTTTACGGAAACCTAGTGAGGCTTTTTGTGTGGTGGCTGTTGCAGA-AACAGCCAACAGAA  | 43023 |
| OliveBaboon       | CAAGAGTTAATAGGTTTTCCTTTTACGGAAACCTCGTGAGGCTTTTTGTGTGGTGGGTGTTGCAGA-AACAGCCAACAGAA | 44232 |
| Orangutan         | CAAGAGTTAATAA-TTACCTTTTACGGAAACCTAGTGAGGCTTTTTGTGTGGTGGCTGTTGCAGA-AACAGCCAACAGAA  | 43949 |

| Majority          | TAACAGAAGTACCACCTATCTGCATCTACCTGCTTTTTTCTT--GTTAAGTCTTCTTTGGAATTTGTTTCTCATAACAGG  |       |
|-------------------|-----------------------------------------------------------------------------------|-------|
|                   | 55130 55140 55150 55160 55170 55180 55190 55200                                   |       |
| Human             | TAGCAGAAGTACCACCTATCTGCACCTACCTGCTTTTTTCTC--TTTAACTCTTCTTTGGAATTTGTTTCTCATAACAGG  | 44018 |
| Coquerel'sSifaka  | TCATAGAAGTGAACC---CTG-ATAGACCCAATCT-----ACTTACTTCTCTGATAGG                        | 36819 |
| Ma'sNightMonkey   | AAACAGAAGTACCACCAATCTGCATCTACCTGCTTTTTTCTCTCGTTAAATCTTCCCTTGGAAATTTGTTTCTCATATAGG | 39151 |
| VervetAGM         | TAACAGAAGTACCACCTATCTGCATCTACCTGCTTTTTTCTT--GTTAAGTCTTCTTTGGAATTTGTTTCTTTTACAGG   | 45372 |
| Gorilla           | TAGCAGAAGTACCACCTATCTGCATCTACCTGCTTTTTTCTC--GTTAAGTCTTTTTGGAATTTGTTTCTCATAACAGG   | 44509 |
| GrabEatingMacaque | TAACAGAAGTACCACCTATCTGCATCTACCTGCTTTTTTCTT--GTTAAGTCTTCTTTGGAATTTGTTTCTCATAACAGG  | 44762 |
| Macaque           | TAACAGAAGTACCACCTATCTGCATCTACCTGCTTTTTTCTT--GTTAAGTCTTCTTTGGAATTTGTTTCTCATAACAGG  | 45553 |
| PigTailedMacaque  | TAACAGAAGTACCACCTATCTGAATCTACCTGCTTTTTTCTT--GTTAAGTCTTCTTTGGAATTTGTTTCTCATAACAGG  | 44693 |
| Bonobo            | TAGCAGAAGTACCACCTATCTGCATCTACCTGCTTTTTTCTC--TTTAACTCTTCTTTGGAATTTGTTTCTCATAACAGG  | 43101 |
| OliveBaboon       | TAACAGAAATACCACCTATCTGCATCTACCTGCTTTTTTCTT--GTTAAGTCTTCTTTGGAATTTGTTTCTCATAACAGG  | 44310 |
| Orangutan         | TAACAGAAGTACCACCTATCTGCATCTACCTGCTTTTTTCTC--GTTAAGTCTTCTTTAGAATTTGTTTCTCATAACAGG  | 44027 |

Tuesday, May 03, 2022 06:16 PM

| Majority          | AAAGAGTAGCAGCATTCAATTTTTTTTT-CTTAGCTTAGAGTCTTTTT-AT---TTTGTTTTTGTTTTTCTAAAGCTGGA |       |       |       |       |       |       |       |       |
|-------------------|----------------------------------------------------------------------------------|-------|-------|-------|-------|-------|-------|-------|-------|
|                   | 55210                                                                            | 55220 | 55230 | 55240 | 55250 | 55260 | 55270 | 55280 |       |
| Human             | AAAGAGTAGCAGCATTCAATTTTTTTTTCTTAGCTTAGAGTCTTTTT-AT---TTTGTTTTTGTTTTTCTAAAGCTAGA  |       |       |       |       |       |       |       | 44094 |
| Coquerel'sSifaka  | ----GTGATAA-ATGAATGGCCT-----GC-----ATGTTTCCTAAGCTGAG                             |       |       |       |       |       |       |       | 36856 |
| Ma'sNightMonkey   | AAAGAGTAGCAGCATTCAATGTTTTT--CTTAGCTTAGAGTTTTTTTTAT---TTTGTTTTTGTTTTTCTAAAGCTAGA  |       |       |       |       |       |       |       | 39226 |
| VervetAGM         | AAAGAGTAGCAGCATTCAATTTTTTTTTCTTAGCTTAGAGTCTTTT--ATTTATTTATTTATTTGTTTTCTAAAGCTGGA |       |       |       |       |       |       |       | 45450 |
| Gorilla           | AAAGAGTAGCAGCATTCAATTTTTTTTCTTAGCTTAGAGTCTTTTT-AT---TTTGTTTTTGTTTTTCTAAAGCTAGA   |       |       |       |       |       |       |       | 44583 |
| GrabEatingMacaque | AAAGAGTAGCAGCATTCAATTTTTTTTT-CTTAGG---AGTCTTTTT-ATTTATTTATTTTTGTTTTTCTAAAGCTGGA  |       |       |       |       |       |       |       | 44836 |
| Macaque           | AAAGAGTAGCAGCATTCAATTTTTTTTT-CTTAG----AGTCTTTTT-ATTTATTTATTTTTGTTTTTCTAAAGCTGGA  |       |       |       |       |       |       |       | 45626 |
| PigTailedMacaque  | AAAGAGTAGCAGCATTCAATTTTTTTT--CTTAG----AGTCTTTTT-ATTTATTTATTTTTGTTTTTCTAAAGCTGGA  |       |       |       |       |       |       |       | 44765 |
| Bonobo            | AAAGAGTAGCAGCATTCAATTTTTTTTT-CTTAGCTTAGAGTCTTTTT-AT---TTTGTTTTTGTTTTTCTAAAGCTAGA |       |       |       |       |       |       |       | 43176 |
| OliveBaboon       | AAAGAGTAGCAGCATTCAATTTTTTTTT-CTTAGCTTAGAGTCTTTTT-ATTTATTTATTTTTGTTTTTCTAAAGCTGGA |       |       |       |       |       |       |       | 44388 |
| Orangutan         | AAACAGTAGCAGCATTCTGTTTTTTTTCTTAGCTTAGAGTCTTTTT-AT---TTTGTTTTTGTTTTTCTAAAGCTAGA   |       |       |       |       |       |       |       | 44101 |

| Majority          | AAACACTGCTTTGCCTTGAAATCTAAAACCTGCTTAGAATTTAAAACCTGCTTTGCCTCTCAGTTTCGATTTTGATAAAGAGA   |       |       |       |       |       |       |       |       |
|-------------------|---------------------------------------------------------------------------------------|-------|-------|-------|-------|-------|-------|-------|-------|
|                   | 55290                                                                                 | 55300 | 55310 | 55320 | 55330 | 55340 | 55350 | 55360 |       |
| Human             | AAACACTGCTTTGCCTTGAAAGTCTAAAACCTGCTTAGAATTTAAAACCTGCTTTGCCTCTCAGTTTCATATTTGATAAAGAGA  |       |       |       |       |       |       |       | 44174 |
| Coquerel'sSifaka  | GGCCAC--CCTTTC-----TTTTGCCCCACCCCTTTTTTTTACTA----GG                                   |       |       |       |       |       |       |       | 36897 |
| Ma'sNightMonkey   | AAGCACTGCTTTGCCTTTAAATCTAAAACCTGCTTAGAATTTAAAACCTGCTTTGCCTCTCAGTTTCATATTTGATA----GA   |       |       |       |       |       |       |       | 39302 |
| VervetAGM         | AAACACTGCTTTGCCTTGAAATCTAAAACCTGCTTAGAATTTAAAACCTGCTTTGCCTCTCAGGTTTCGATTTTGATAAAGAGA  |       |       |       |       |       |       |       | 45530 |
| Gorilla           | AAACACTGCTTTGCCTTGAAAGTCTAAAACCTGCTTAGAATTTAAAACCTGCTTTGCCTCTCAGTTTCATATTTGATAAAGAGA  |       |       |       |       |       |       |       | 44663 |
| GrabEatingMacaque | AAACACTGCTTTGCTTTGAAATCTAAAACCTGCTTAGAATTTAAAACCTGCTTTGCCTCTCAGTTTCGATTTTGATAAAGAGA   |       |       |       |       |       |       |       | 44916 |
| Macaque           | AAACACTGCTTTGCTTTGAAATCTAAAACCTGCTTAGAATTTAAAACCTGCTTTGCCTCTCAGTTTCGATTTTGATAAAGAGA   |       |       |       |       |       |       |       | 45706 |
| PigTailedMacaque  | AAACACTGCTTTGCTTTGAAATCTAAAACCTGCTTAGAATTTAAAACCTGCTTTGCCTCTCAGTTTCGATTTTGATAAAGAGA   |       |       |       |       |       |       |       | 44845 |
| Bonobo            | AAACACTGCTTTGCCTTGAAAGTCTAAAACCTGCTTAGAATTTAAAACCTGCTTTGCCTCTCAGTTTCATATTTGATAAAGAGA  |       |       |       |       |       |       |       | 43256 |
| OliveBaboon       | AAACACTGCTTTGCCTTGAAATCTAAAACCTGCTTAGAATTTAAAACCTGCTTTGCCTCTCAGTTTCGATTTTGATAAAGAGA   |       |       |       |       |       |       |       | 44468 |
| Orangutan         | AAACACTGCTTTGCCTTGAAAGTCTAAAACCTGTTTAGAATTTAAAACCTGCTTTGCCTTTTCAGTTTCATATTTGATAAAGAGA |       |       |       |       |       |       |       | 44181 |

| Majority          | GTTAGGAAAACTTTTATAAATGTGTG--TCTCTGAAAGACTTGGAGAATGAAGATGTACTTAAGTTTTGTCAGTACTAGTTTT |       |       |       |       |       |       |       |       |
|-------------------|-------------------------------------------------------------------------------------|-------|-------|-------|-------|-------|-------|-------|-------|
|                   | 55370                                                                               | 55380 | 55390 | 55400 | 55410 | 55420 | 55430 | 55440 |       |
| Human             | GTTAGGAAAACTTTTATAAATGTGTG--TCTCTGAAAGACTTGGAGAATGAAGATGTACCTAAGTTTTGTCAGTACTAGTTTT |       |       |       |       |       |       |       | 44252 |
| Coquerel'sSifaka  | CTTGGG---TTTTTATATATGAAAA-----TA-GGCTTGGT-----TATGATTA--                            |       |       |       |       |       |       |       | 36939 |
| Ma'sNightMonkey   | GTTAGGAAAGCTTTTTATAAATGTATGAGTCTCTGAAAGACTTGGAGAATGAAGATGTACTTAAGTTTTGTCAGTACTAGTGT |       |       |       |       |       |       |       | 39382 |
| VervetAGM         | GTTAGGAAAACTTTTATAAATGTGTG--CCTCTGAAAGACTTGGAGAATTAAGATGTACTTAAGTTTTGTCGCTAGTTTT    |       |       |       |       |       |       |       | 45608 |
| Gorilla           | GTTAGGAAAACTTTTATAAATGTGTG--TCTCTGAAAGACTTGGAGAATGAAGATGTACTTAAGTTTTGTCAGTGGTTTT    |       |       |       |       |       |       |       | 44741 |
| GrabEatingMacaque | GTTAGGAAAACTTTTATAAATGTGTG--CCTCTGAAAGACTTGGAGAATGAAGATGTACTTAAGTTTTGTCAGTACTAGTTTT |       |       |       |       |       |       |       | 44994 |
| Macaque           | GTTAGGAAAACTTTTATAAATGTGTG--CCTCTGAAAGACTTGGAGAATGAAGATGTACTTAAGTTTTGTCAGTACTAGTTTT |       |       |       |       |       |       |       | 45784 |
| PigTailedMacaque  | GTTAGGAAAACTTTTATAAATGTGTG--CCTCTGAAAGACTTGGAGAATGAAGATGTACTTAAGTTTTGTCAGTACTAGTTTT |       |       |       |       |       |       |       | 44923 |
| Bonobo            | GTTAGGAAAACTTTCATAAATGTGTG--TCTCTGAAAGACTTGGAGAATGAAGATGTACCTAAGTTTTGTCAGTGGTTTT    |       |       |       |       |       |       |       | 43334 |
| OliveBaboon       | GTTAGGAAAACTTTTATAAATGTGTG--CCTCTGAAAGACTTGGAGAATGAAGATGTACTTAAGTTTTGTCAGTACTAGTTTT |       |       |       |       |       |       |       | 44546 |
| Orangutan         | GTTAGGAAAACTTTTATAAATGTGTG--TCTCTGAAAGACTTGGAGAATGAAGATGTACTTAAGTTTTGTCAGTGGTTTT    |       |       |       |       |       |       |       | 44259 |

Tuesday, May 03, 2022 06:16 PM

| Majority          | CATTGGACGGAAG-----CATAAGGTTTTGCAGTGTGTATTTTATATTGGTACACAGTT                      |       |
|-------------------|----------------------------------------------------------------------------------|-------|
|                   | 55450 55460 55470 55480 55490 55500 55510 55520                                  |       |
| Human             | CATTGGACAGAAG-----TATAAGGTTTTGCCGTGTCGTATTTTATATTGTACACAGTT                      | 44307 |
| Coquerel'sSifaka  | -----GGAATCCCGTTTCCTAGTTGCACATT-CT                                               | 36967 |
| Ma'sNightMonkey   | TGTTGGACAGAAGTTTAAAGACGTGTATAAGTATAAGACAGAAGTATTTACAACGTTGTATTTTATACTGGTACACAGTT | 39462 |
| VervetAGM         | CATTGGACGGAAG-----CATAAGTTTTTGCAGTGTGTATTTTATATTGGTACACAGTT                      | 45663 |
| Gorilla           | CATTGGACAGAAG-----TATAAGGTTTTGCCGTGTTGTATTTTATATTGTACACAGTT                      | 44796 |
| GrabEatingMacaque | CACTGGACGGAAG-----CATAAGGTTTTGCAGTGTGTATTTTATATTGGTACACAGTT                      | 45049 |
| Macaque           | CACTGGACGGAAG-----CATAAGGTTTTGCAGTGTGTATTTTATATTGGTACACAGTT                      | 45839 |
| PigTailedMacaque  | CACTGGATGGAAG-----CATAAGGTTTTGCAGTGTGTATTTTATATTGGTACACAGTT                      | 44978 |
| Bonobo            | CATTGGACAGAAG-----TATAAGGTTTTGCCGTGTTGTATTTTATATTGTACACAGTT                      | 43389 |
| OliveBaboon       | CATTGGAAGGAAG-----CATAAGGTTTTGCAGTGTGTATTTTATATTGGTACACAGTT                      | 44601 |
| Orangutan         | CATT-----A-GGTTTTGCAGTGTGTATTTTATATTGTACACAGTT                                   | 44301 |

| Majority          | GAAAGTATAATGGTGAATGAGTAGGACTAAA-TAATTTACACATTATATGAGAAAGTAGGCCAGGTGCTGTGGCTCATGC   |       |
|-------------------|------------------------------------------------------------------------------------|-------|
|                   | 55530 55540 55550 55560 55570 55580 55590 55600                                    |       |
| Human             | GAAAGTATAACGGTGAATGAGTAGGACTAAAATAATTTACAAATTATATGAGAAAGTAGGCCAGGTGCTGTGGCTCATGC   | 44387 |
| Coquerel'sSifaka  | CATAGTATCA----A-TTATTTGAAGTGAA--GACTTTCATAATATTT----AGTA--CTACG-----               | 37017 |
| Ma'sNightMonkey   | GAAAGTATGA---TGAATGAGTAGGACTAAGATAAATTTACAAATTATATGAGAAAGTATGCCAGGTGCCGTTGGCTCACGC | 39539 |
| VervetAGM         | GAAAGTATAATGGTGAATGAGTAGGACTAAA-TAATTTACACATTATATGAGAAAGTAGGCCAGGTGCTGTGCTCACGC    | 45742 |
| Gorilla           | GAAAGTATAACGGTGAATGAGTAGGACTAAAATAATTTACAAATTATCTGAGAAAGTAGGCCAGGTGCTGTGGCTCATGC   | 44876 |
| GrabEatingMacaque | GAAAGTATAATGGTGAATGAGTAGGACTAAA-TAATTTACACATTATATGAGAAAGTAGGCCAGGTCTGTGCTCATGC     | 45128 |
| Macaque           | GAAAGTATAATGGTGAATGAGTAGGACTAAA-TAATTTACACATTATATGAGAAAGTAGGCCAGGTCTGTGCTCATGC     | 45918 |
| PigTailedMacaque  | GAAAGTATAATGGTGAATGAGTAGGACTAAA-TAATTTACACATTATATGAGAAAGTAGGCCAGG---T-----         | 45043 |
| Bonobo            | GAAAGTATAACGGTGAATGAGTAGGACTAAAATAATTTACAAATTATATGAGAAAGTAGGCCAGGTGCTGTGGCTCATGC   | 43469 |
| OliveBaboon       | GAAAGTATAATGGTGAATGAGTAGGACTAAA-TAATTTACACATTATATGAGAAAGTAGGCCAGGTCTGTGCTCATGC     | 44680 |
| Orangutan         | GAAAGCATAATGGTGAATGAGTAGGACTAAAATAATTTACAAATTACATGAGAAAGTAGGCCAGGTGCTGTGGCTCATGC   | 44381 |

| Majority          | CTGTATTTTCAGCACTTTGGGAGGCTGAGGCAGGTGGATCACTTGAGGCCAGGAGTTGGAGACCAGCCT---GGCCAACAT  |       |
|-------------------|------------------------------------------------------------------------------------|-------|
|                   | 55610 55620 55630 55640 55650 55660 55670 55680                                    |       |
| Human             | CTGTATTTTCAGCACTTTGGGAGGCTGAGGCAGGTGGATCACTTGAGGCCAGGAGTTTCGAGACCAGCCT---GGCCAACAT | 44464 |
| Coquerel'sSifaka  | -----                                                                              | 37017 |
| Ma'sNightMonkey   | CTGTATTTTCAGCACTTTAGGAGGCTGAGGTGGGCAAAATCACTTGAGGCCAGGAGTTTGAGACCAGTCT---GGCCAACAT | 39616 |
| VervetAGM         | CTGTATTTTCAGCACTTTGGGAGGCTGAGGCAGGTGGATCACTTGAGGCCAGGAGTTGAAGACCAGCCTCCTGGCCAACAT  | 45822 |
| Gorilla           | CTGTATTTTCAGCACTTTGGGAGGCTGAGGCAGGTGGATCACTTGAGGCCAGGAGTTTCGAGACCAGCCT---GGCCAACAT | 44953 |
| GrabEatingMacaque | CTGTATTTTCAGCACTTTGGGAGGCTGAGGCAGGTGGATCACTTGAGGCCAGGAGTTGAAGACCAGCCT---GGCCAACAT  | 45205 |
| Macaque           | CTGTATTTTCAGCACTTTGGGAGGCTGAGGCAGGTGGATCACTTGAGGCCAGGAGTTGAAGACCAGCCT---GGCCAACAT  | 45995 |
| PigTailedMacaque  | -----AG-----A-TAGATAGAT-----                                                       | 45055 |
| Bonobo            | CTGTATTTTCAGCACTTTGGGAGGCTGAGGCAGGTGGATCACTTGAGGCCAGGAGTTTCGAGACCAGCCT---GGCCAACAT | 43546 |
| OliveBaboon       | CTGTATTTTCAGCACTTTGGGAGGCTGAGGCAGGTGGATCACTTGAGGCCAGGAGTTGAAGACCAGCCT---GGCCAACAT  | 44757 |
| Orangutan         | CTGTATTTTCAGCACTTTGGGAGGCTGAGGCAGGTGGATCACTTGAGGCCAGGAGTTAGAGACCAGCCT---GGCCGACAT  | 44458 |



Tuesday, May 03, 2022 06:16 PM

|                   |                                                                                  |       |
|-------------------|----------------------------------------------------------------------------------|-------|
| Majority          | GGTGAAACCCCATCTCTACTGAAAATACAAAAATTAGCTGGGTGTGGTGGTGCACGCCTGTATTCCCAGCTACATGGGAG |       |
|                   | 55690 55700 55710 55720 55730 55740 55750 55760                                  |       |
| Human             | GGTGAAACCCCATCTCTACTGAAAATAGAAAAATTAGCTGGGTGTGGTGGTGCACACCTGAATCCCAGCTACATGGGAG  | 44544 |
| Coquerel'sSifaka  | -----AT-----AAAAATA-----CTTAGT-----AGCCACCT-----                                 | 37040 |
| Ma'sNightMonkey   | GATAAA--CCTGTGTCTACTAAAAATACAAAAATTAGCTGGATGTGGTGGTGCACACCTGTAATCCCAGCTACTTGGGCG | 39694 |
| VervetAGM         | GGTGAAACCCCATCTCTACTGAAAATACAAAAATTAGCTGGGTGTGGTGGTGCACGCCTATATCCCAGCTACATGGGAG  | 45902 |
| Gorilla           | GGTGAAACCCCATCTCTACTGAAAATACAAAAATTAGCTGGGTGTGGTGGTGCACACCTGAATCCCAGCTACATGGGAG  | 45033 |
| GrabEatingMacaque | GGTGAAACCCCATCTCTACTGAAAATACAAAAATTAGCTGGGTGTGGTGGTGCACGCCTATATCCCAGCTACATGGGAG  | 45285 |
| Macaque           | GGTGAAACCCCATCTCTACTGAAAATACAAAAATTAGCTGGGTGTGGTGGTGCACGCCTATATCCCAGCTACATGGGAG  | 46075 |
| PigTailedMacaque  | -----AGAT--A-----GATAGAT-----AGATAGAT-----                                       | 45075 |
| Bonobo            | GATGAAACCCCATCTCTACTGAAAATACAAAAATTAGCTGGGTGTGGTGGTGCACACCTGAATCCCAGCTACATGGGAG  | 43626 |
| OliveBaboon       | GGTGAAACCCCATCTCTACTGAAAATACAAAAATTAGCGGGGTGTGGTGGTGCACGCCTATATCCCAGCTACATGGGAG  | 44837 |
| Orangutan         | GGTGAAACCCCATCTCTACTGAAAATACAAAAATTAGCTGGGTATGGTGGTGCACGCCTGAATCCCAGCTACATGGGAG  | 44538 |

|                   |                                                                                 |       |
|-------------------|---------------------------------------------------------------------------------|-------|
| Majority          | GCTGTGGCAGGAGAATCACCTAAACCTGGGAAGTGGAGGTTGTAGTCAACCAAGATCACGCCACTGCCTCCAGCCTGGC |       |
|                   | 55770 55780 55790 55800 55810 55820 55830 55840                                 |       |
| Human             | GCTGTGGCAGGAGAATCACTTAAACCTGGGAAGTGGAGGTTGTAGTCAACCAAGATCATGCCACTGCCTCCAGCCTGGC | 44624 |
| Coquerel'sSifaka  | -----TCTC-----GAAGCTAGT-----A-----                                              | 37054 |
| Ma'sNightMonkey   | GCTGTGGCATGAGAATCACCTAAACCTGGGAAGTGGAGGTTGTAGTGAAGTAAGAGCACGCCACTGCCTCCAGC----- | 39769 |
| VervetAGM         | GCTGTGGCAGGAGAATCACCTAAACCTGGGAAGTGGAGATTATAGTCAACCAAGATCACGCCACTGCCTCCAGCCTGGC | 45982 |
| Gorilla           | GCTGTGGCAGGAGAATCACTTAAACCTGGGAAGTGGAGGTTGTAGTCAACCAAGATCACGCCACTGCCTCCAGCCTGGC | 45113 |
| GrabEatingMacaque | GCTGTGGCAGGAGAATCACCTAAACCTGGGAAGTGGAGGTTGTAGTCAACCAAGATCACGCCACTGCCTCCAGCT---- | 45361 |
| Macaque           | GCTGTGGCAGGAGAATCACCTAAACCTGGGAAGTGGAGGTTGTAGTCAACCAAGATCACGCCACTGCCTCCAGCT---- | 46151 |
| PigTailedMacaque  | -----AG-----                                                                    | 45077 |
| Bonobo            | GCTGTGGCAGGAGAATCACTTAAACCTGGGAAGTGGAGGTTGTAGTCAACCAAGATCATGCCACTGCCTCCAGCCTGGC | 43706 |
| OliveBaboon       | GCTGTGGCAGGAGAATCACCTGAACCTGGGAAGTGGAGGTTGTAGTCAACCAAGATCACGCCACTGCCTCCAGCCTGGC | 44917 |
| Orangutan         | GCTGTGGCACAGAATCACTTAAACCTGGGAAGTGGAGGTTGTAGTCAACCAAGATCACGCCACTGTACTCCAGCCTGGC | 44618 |

|                   |                                                                                     |       |
|-------------------|-------------------------------------------------------------------------------------|-------|
| Majority          | AATACAGCAAGACTCTGTCT--ATAGAT-AGATAGATAGATAGATAGATAGATAGATAGAT-GAT-GATA----GATAGATAG |       |
|                   | 55850 55860 55870 55880 55890 55900 55910 55920                                     |       |
| Human             | AATACAGCAAGACTCTGTCT-----TAGATAGATAGATAGATAGATA----GATAGATAG                        | 44675 |
| Coquerel'sSifaka  | -----AC-----TAACTGAAACAGT-----                                                      | 37069 |
| Ma'sNightMonkey   | -----AAGACT--GTCTC---AGAT-AGATAGATAGATAGATAGATAGATAGATAGAT-----A-----               | 39813 |
| VervetAGM         | AATACAGCAAGACTCTGTCT--ATAGATTAGATAGATAGATAGATAGATGGATGGATGGATGGATGGATGGATGGATGG     | 46060 |
| Gorilla           | AATACAGCAAGACTCTGTCA---TAGAT-AGATAGATAGATAGATAGATAGATAGATAGATAGATA----GATAGATAG     | 45184 |
| GrabEatingMacaque | AGTACAGCAAGACTCTGTCT--ATAGATTAGATGGATGGATGGATGGATGGATGGATGGATGGATGGATGGATGGATGG     | 45417 |
| Macaque           | AGTACAGCAAGACTCTGTCT--ATAGATTAGATGGATGGATGGATGGATGGATGGATGGATGGATGGATAGATAGATAG     | 46229 |
| PigTailedMacaque  | -----A-----TAGAT-AGATAGAGAGAGAGAGAGAGAGAGAGAG-----                                  | 45111 |
| Bonobo            | AATACAGCAAGACTCTGTCTCAGATAGAT-AGATAGATAGATAGATAGATAGATAGATAGATAGATA----GATAGATAG    | 43781 |
| OliveBaboon       | AATACAGCAAGACTCTGTCT--ATAGATTAGATGGATGGATGGATGGATGGATGGATGGATGGATGGATGGATGGATGG     | 44973 |
| Orangutan         | AATACAGCAAGACTCTGTCATTGATAGAT-AGATAGATAGATAGATAGATAGATAGATAGATAGATAATAAGATAGATAG    | 44697 |



Tuesday, May 03, 2022 06:16 PM

| Majority          | ACAGTTTTGGGGAATTAATGAGTAATCGGGATTCAAAGCAAGTATCAGATGAGTCAGGGGAAATGAGAAAAGTAGAAGTG |       |
|-------------------|----------------------------------------------------------------------------------|-------|
|                   | 56170 56180 56190 56200 56210 56220 56230 56240                                  |       |
| Human             | ACAATTTTGGGGAATGAATGAGTAATCAGGATTCAAAGCAAGTATCAAATGAGTC--GGGAAATTAGAAAAGTAGAAATT | 44846 |
| Coquerel'sSifaka  | -----ATCAGGT-AGT---G-TAAATTCGGTAGTT-ACACA                                        | 37100 |
| Ma'sNightMonkey   | ACAATTTTGGGGAATGAGTGAGTAATCAGGATTCAAAGCAAGTATCAAATGAGTCAGGGGAAATGAGAAAAGTAGAAGTG | 39985 |
| VervetAGM         | ACAGTTTTGGGGAATTAATGAGTAATCGGGATTCAAAGCAAGTGTGATGAGTCAGGGGAAATGAGAAAAGTAGAAGTG   | 46377 |
| Gorilla           | ACAATTTTGGGGAATGAATGAGTAATCAGGATTCAAAGCAAGTATCAAATGAGTCAGGGGAAATTAGAAAAGTAGAAATT | 45357 |
| GrabEatingMacaque | ACAGTTTTGGGGAATTAATGAGTAATCGGGATTCAAAGCAAGTGTGATGAGTC-GGGGAAATGAGAAAAGTAGAAGTG   | 45607 |
| Macaque           | ACAGTTTTGGGGAATTAATGAGTAATCGGGATTCAAAGCAAGTGTGATGAGTC-GGGGAAATGAGAAAAGTAGAAGTG   | 46433 |
| PigTailedMacaque  | ACAGTTTTGGGGAATTAATGAGTAATCGGGATTCAAAGCAAGTGTGATGAGTC-GGGGAAATGAGAAAAGTAGAAGTG   | 45301 |
| Bonobo            | ACAGTTTTGGGGAATGAATGAGTAATCAGGATTCAAAGCAAGTATCAGATGAGTCAGGGGAAATTAGAAAAGTAGAAATT | 43954 |
| OliveBaboon       | ACAGTTTTGGGGAATTAATGAGTAATCGGGATTCAAAGCAAGTGTGATGAGTCAGGGGAAATGAGAAAAGTAGAAGTG   | 45156 |
| Orangutan         | ACAATTTTGGGGAATGAATGAGTAATCAGGATTCAAAGCAAGTATCAAATGAGTCAGGGGAAATTAGAAAAGTAGAAATT | 44951 |

| Majority          | GAAATTTT-AGGGGTGCTATTAGA-----GAAATTCAGTGAGGAAGAGAGGGTTACAGTTCCTTGTTGACTGATGGATG  |       |
|-------------------|----------------------------------------------------------------------------------|-------|
|                   | 56250 56260 56270 56280 56290 56300 56310 56320                                  |       |
| Human             | GAAGTTTTTAGGGGTGCTATTAGA-----GAAATTCAGTGAGGAAGAGAGGGTTACAGTTCCTTGTTGACTGATGGATG  | 44921 |
| Coquerel'sSifaka  | GTAGCT---GGCTTGGTCTTTGG-----GAGCAGAAG-----ACAGATCTTTTTTAGGCCATCCATG              | 37154 |
| Ma'sNightMonkey   | GAAATTTTLAGGGGTGCTATTAGAACAGAGAAATTCAGTGAGGAGGTGAGGGTTCCAAGTTCCTTGTTGACTGATGGATG | 40065 |
| VervetAGM         | GAAATTTT-AGGGGTGCTATTAGA-----GAAATTCAGTGAGGAAGAAAGGGTTACAGTTCCTTGTTGACTGATGGATG  | 46451 |
| Gorilla           | GAAGTTTTTAGGGGTGCTATTAGAACAGAGAAATTCAGTGAGGAAGAGAGGGTTACAGTTCCTTGTTGACTGATGGATG  | 45437 |
| GrabEatingMacaque | GAAATTTT-AGGGGTGCTATTAGA-----GAAATTCAGTGAGGAAGAAAGGGTTACAGTTCCTTGTCGACTGATGGATG  | 45681 |
| Macaque           | GAAATTTT-AGGGGTGCTATTAGA-----GAAATTCAGTGAGGAAGAAAGGGTTACAGTTCCTTGTCGACTGATGGATG  | 46507 |
| PigTailedMacaque  | GAAATTTT-AGGGGTGCTATTAGA-----GAAATTCAGTGAGGAAGAAAGGGTTACAGTTCCTTGTCGACTGATGGATG  | 45375 |
| Bonobo            | GAAGTTTTTAGGGGTGCTATTAGA-----GAAATTCAGTGAGGAAGAGAAGGGTTACAGTTCCTTGTTGACTGATGGATG | 44029 |
| OliveBaboon       | GAAATTTT-AGGGGTGCTATTAGA-----GAAATTCAGTGAGGAAGAAAGGGTTACAGTTCCTTGTCGACTGATGGATG  | 45230 |
| Orangutan         | GAAATTTTLAGGGGTGCTGTTAGA-----GAAATTCAGTGAGGAAGAGAGGGTTACAGTTCCTTGTTGACTGATGGATG  | 45026 |

| Majority          | TGGTGATTTTACAAATTACCCATGATC-TTGC-----CGACACCCATTTATGTAAAAATTGCA                    |       |
|-------------------|------------------------------------------------------------------------------------|-------|
|                   | 56330 56340 56350 56360 56370 56380 56390 56400                                    |       |
| Human             | TGGTGATTTTACAAATTACCCATGATCCTTGC-----CGACACCCATTTATGTAAAAATTGCA                    | 44979 |
| Coquerel'sSifaka  | TG-TAATGTGA-AGTTTGTCT-----TTGG-----GATTC---TT---TTGCA                              | 37189 |
| Ma'sNightMonkey   | TGGTGATTTTACAGATTACCCACGATC-TTGG-----CGACATCCATTTATGTAAAAATCGCA                    | 40122 |
| VervetAGM         | TGGTGATTTTAAAAATTACCCATGATC-TTGGTGCACACCCATTTATGTAAAAATTCGACACCCATTTATGTAAAAATTGCA | 46530 |
| Gorilla           | TGGTGATTTTACAAATTACCCATGATC-TTGC-----CGACACCCATTTATGTAAAAATTGCA                    | 45494 |
| GrabEatingMacaque | TGGTGATTTTAAAAATTACCCATGATC-TTGCCGACACCCATTTATGTAAAAATTCGACACCCATTTATGTAAAAATTGCA  | 45760 |
| Macaque           | TGGTGATTTTAAAAATTACCCATGATC-TTGCCGACACCCATTTATGTAAAAATTCGACACCCATTTATGTAAAAATTGCA  | 46586 |
| PigTailedMacaque  | TGGTGATTTTAAAAATTACCCATGATC-TTGCCGACACCCATTTATGTAAAAATTCGACACCCATTTATGTAAAAATTGCA  | 45454 |
| Bonobo            | TGGTGATTTTACAAATTACCCATGATC-TTGC-----CGACACCCATTTATGTAAAAATTGCA                    | 44086 |
| OliveBaboon       | TGGTGATTTTAAAAATTACCCATGATC-TTGCCGACACCCATTTATGTAAAAATTCGACACCCATTTATGTAAAAATTGCA  | 45309 |
| Orangutan         | TGGTGATTTTACAGATTACCCATGATC-TTGC-----CGACACCCATTTATGTAAAAATTGCA                    | 45083 |

Tuesday, May 03, 2022 06:16 PM

| Majority          | GGTAAAAGCTAGTGGAGAACAAAGGTCAGTCAGCAGGAGAAAAGTGATGTACTGAT-AGAGGTGAAGATGCTGGCTTTAG |       |       |       |       |       |       |       |  |       |
|-------------------|----------------------------------------------------------------------------------|-------|-------|-------|-------|-------|-------|-------|--|-------|
|                   | 56410                                                                            | 56420 | 56430 | 56440 | 56450 | 56460 | 56470 | 56480 |  |       |
| Human             | GGTAAAAGCTAGTGGAGAACAAAGGTCAGTCAGCAGGAGAAAAGTGATGTACTGATCAGAGGTGAAGATGCTGGCTTTAG |       |       |       |       |       |       |       |  | 45059 |
| Coquerel'sSifaka  | G--TGTAGCGGTTTAAAGAGCACAGGCCAG-----GTGGGGCA-TGGT----GGCTAACAC-----CTGT           |       |       |       |       |       |       |       |  | 37241 |
| Ma'sNightMonkey   | GGTAAAAGCTAGTGGAGAACAAAGGTCAGTCAGTATGAGAAAAGTGACGTACTGATCAGAGGCGAAGATGCTGGCTTTAG |       |       |       |       |       |       |       |  | 40202 |
| VervetAGM         | GGTAAAAGCTAGTGGAGAACAAAGGTCAGTCAGCAGGAGAAAAGTGATGTACTGAT-AGAGGTGAAGATGCTGGCTTTAG |       |       |       |       |       |       |       |  | 46609 |
| Gorilla           | GGTAAAAGCTAGTGGAGAACAAAGGTCAGTCAGCAGGAGAAAAGTGATGTACTGATCAGAGGTGAAGATGCTGGCTTTAG |       |       |       |       |       |       |       |  | 45574 |
| GrabEatingMacaque | GGTAAAAGCTAGTGGAGAACAAAGGTCAGTCAGCAGGAGAAAAGTGATGTACTGAT-AGAGGTGAAGATGCTGGCTTTAG |       |       |       |       |       |       |       |  | 45839 |
| Macaque           | GGTAAAAGCTAGTGGAGAACAAAGGTCAGTCAGCAGGAGAAAAGTGATGTACTGAT-AGAGGTGAAGATGCTGGCTTTAG |       |       |       |       |       |       |       |  | 46665 |
| PigTailedMacaque  | GGTAAAAGCTAGTGGAGAACAAAGGTCAGTCAGCAGGAGAAAAGTGATGTACTGAT-AGAGGTGAAGATGCTGGCTTTAG |       |       |       |       |       |       |       |  | 45533 |
| Bonobo            | GGTAAAAGCTAGTGGAGAACAAAGGTCAGTCAGCAGGAGAAAAGTGATGTACTGATCAGAGGTGAAGATGCTGGCTTTAG |       |       |       |       |       |       |       |  | 44166 |
| OliveBaboon       | GGTAAAAGCTAGTGGAGAACAAAGGTCAGTCAGCAGGAGAAAAGTGATGTACTGAT-AGAGGTGAAGATGCTGACTTTAG |       |       |       |       |       |       |       |  | 45388 |
| Orangutan         | G-TAAAAGCTAGTGGAGAACAAAGGTCAGTCAGCAGGAGAAAAGTGATGTACTGATCAGAGGTGAAGATGCTGGCTTTAG |       |       |       |       |       |       |       |  | 45162 |

| Majority          | AATTGAGGTAGAAAA-CTGGTTTTGAGTTTGGAAAGAGAAGTATTCAAGTAGAAAACCATTTTAAAAT-----TTTATTT |       |       |       |       |       |       |       |  |       |
|-------------------|----------------------------------------------------------------------------------|-------|-------|-------|-------|-------|-------|-------|--|-------|
|                   | 56490                                                                            | 56500 | 56510 | 56520 | 56530 | 56540 | 56550 | 56560 |  |       |
| Human             | AATTGAGGTAGAAAA-CTGGTTTTGAGTTTGGAAAGAGAAGTATTCAAGTAGAAAACCATTTTAAAAT-----TTTATTT |       |       |       |       |       |       |       |  | 45131 |
| Coquerel'sSifaka  | AATCCCAGC----A--CT--TTTGGAAAGCCGAGAAAGGAGGATC--GCTTGAGGCCA----GGAGT-----         |       |       |       |       |       |       |       |  | 37293 |
| Ma'sNightMonkey   | AATTGAAGTAGAAAA-CCGATTTTGAGTTTGGAAAAGAAGTGTTCAAGTAGAAAGCATTTTAAAATGGTTTATTTTATTT |       |       |       |       |       |       |       |  | 40281 |
| VervetAGM         | AATTGAGGTAGAAAA-CTGGTTTTGAGTTTGAAGAGAAGTATTCAAGTAGAAAACCATTTTAAAAT-----TTTATTT   |       |       |       |       |       |       |       |  | 46681 |
| Gorilla           | AATTGAGGTAAAAA-CTGGTTTTGAGTTTGGAAAGAGAAGTATTCAAGTAGAAACTATTTTAAAAT-----TTTATTT   |       |       |       |       |       |       |       |  | 45646 |
| GrabEatingMacaque | AATTGAGGTAGAAAA-CTGGTTTTGAGTTTGAAGAGAAAATATTCAAGTAGAAAACCATTTTAAAAT-----TTTATTT  |       |       |       |       |       |       |       |  | 45911 |
| Macaque           | AATTGAGGTAGAAAA-CTGGTTTTGAGTTTGAAGAGAAAATATTCAAGTAGAAAACCATTTTAAAAT-----TTTATTT  |       |       |       |       |       |       |       |  | 46737 |
| PigTailedMacaque  | AATTGAGGTAGAAAA-CTGGTTTTGAGTTTGAAGAGAAAATATTCAAGTAGAAAACCATTTTAAAAT-----TTTATTT  |       |       |       |       |       |       |       |  | 45605 |
| Bonobo            | AATTGAGGTGAAAAA-CTGGTTTTGAGTTTGAAGAGAAGTATTCAAGTAGAAAACCATTTTAAAAT-----TTTATTT   |       |       |       |       |       |       |       |  | 44238 |
| OliveBaboon       | AATTGAGGTAGAAAA-CTGGTTTTGAGTTTGAAGAGAAAATATTCAAGTAGAAAACCATTTTAAAAT-----TTTATTT  |       |       |       |       |       |       |       |  | 45460 |
| Orangutan         | AATTGAGGTAAAAAACTGGTTTTGAGTTTGGAAAGAGAAGTATTCAAGTAGAAAACCATTTTAAAAT-----TTTATTT  |       |       |       |       |       |       |       |  | 45235 |

| Majority          | GCTTTGAATCTTTGAGTACATGAACATCTTCCCTAAGCAAGAGGCTTTA-AAAGAGTTGAATAATATATGGAAAATGGTG |       |       |       |       |       |       |       |  |       |
|-------------------|----------------------------------------------------------------------------------|-------|-------|-------|-------|-------|-------|-------|--|-------|
|                   | 56570                                                                            | 56580 | 56590 | 56600 | 56610 | 56620 | 56630 | 56640 |  |       |
| Human             | GCTTTGAATCCGTGATTACATGAACATCTTCCCTAAGCAAGAGGCTTTG-AAAGAGTTGAATAATGTATGGAAAATGGTG |       |       |       |       |       |       |       |  | 45210 |
| Coquerel'sSifaka  | ---TTGAGACC-----AGCCTGAACAACATGGGAGAGCC--TGTCTCTACAAAAAATAGAAAAATAGCTGGGTGTGGTG  |       |       |       |       |       |       |       |  | 37363 |
| Ma'sNightMonkey   | GCTTTGAATC--TGAATACCTGAACATCTTCCCTTAGCA-GAGGCTTTA-AAAGAGTTGAGTAATATATGGAAAATGGTG |       |       |       |       |       |       |       |  | 40357 |
| VervetAGM         | GCTTTGAATCTTTGAGTACATGAACATCTTCCCTAAGCAAGAGGCTTTA-AAAGAGTTGAATAATATATGGAAAATGGTG |       |       |       |       |       |       |       |  | 46760 |
| Gorilla           | GCTTTGAATCCGTGATTACATGAACATCTTCCCTAAGCAAGAGGCTTTG-AAAGAGTTGAATAATATATGGAAAATGGTG |       |       |       |       |       |       |       |  | 45725 |
| GrabEatingMacaque | GCTTTGAATCTTTGAGTACATGAACATCTTCCCTAAGCAAGAGGCTTTA-AAAGAGTTGAATAATATATGGAAAATGGTG |       |       |       |       |       |       |       |  | 45990 |
| Macaque           | GCTTTGAATCTTTGAGTACATGAACATCTTCCCTAAGCAAGAGGCTTTA-AAAGAGTTGAATAATATATGGAAAATGGTG |       |       |       |       |       |       |       |  | 46816 |
| PigTailedMacaque  | GCTTTGAATCTTTGAGTACATGAACATCTTCCCTAAGCAAGAGGCTTTA-AAAGAGTTGAATAATATATGGAAAATGGTG |       |       |       |       |       |       |       |  | 45684 |
| Bonobo            | GCTTTGAATCCGTGATTACATGAATATCTTCCCTAAGCAAGAGGCTTTG-AAAGAGTT---TAATATATGGAAAATGGTG |       |       |       |       |       |       |       |  | 44314 |
| OliveBaboon       | GCTTTGAATCTTTGAGTACATGAACATCTTCCCTAAGCAAGAGGCTTTA-AAAGAGTTGAATAATATATGGAAAATGGTG |       |       |       |       |       |       |       |  | 45539 |
| Orangutan         | GCTTTGAATCCATGATTACATGAACATCTTCCCTAACAAGAGGCTTTA-AAAGAGTTGAATAATATATGGAAAATGGTG  |       |       |       |       |       |       |       |  | 45314 |

Tuesday, May 03, 2022 06:16 PM

| Majority          | TGCTTAAAGATTTTT-ACATTCATATGCAATGAATAAAATTTATATGCATAAAATAAAGCATTACCTCATGCCTTCTTAA |       |
|-------------------|----------------------------------------------------------------------------------|-------|
|                   | 56650 56660 56670 56680 56690 56700 56710 56720                                  |       |
| Human             | TGCTTAAAGATTTTTTACATTCATATACAATGAATAAAATTTATATGCATAAAATAAAGCATTACCTCATGCCTTCTTAA | 45290 |
| Coquerel'sSifaka  | CGC----ACATCTAT---AGTCCAGCTACTCAGGAA-----GCTGAGGCAGGAGGATT-----CC-----           | 37412 |
| Ma'sNightMonkey   | TGCTTAAAGATTTCT-ACATTCATATGCAATGAATAAAATTTATATGCATAAAATAAAGCATTACCTCATGCAT---TAG | 40433 |
| VervetAGM         | TACTTAAAGATTTTT-ACATTCATATGCAATGAATAAAATTTATATGCATAAAATAAAGCATTACCTCATACTTCTTAA  | 46839 |
| Gorilla           | TGCTTAAAGATTTTT-ACATTCATATGCAATGAATAAAATTTATATGCATAAAATAAAGCATTACCTCATGCCTTCTTAA | 45804 |
| GrabEatingMacaque | TGCTTAAAGATTTTT-ACATTCATATGCAATGAATAAAATTTATATGCATAAAATAAAGCATTACCTCATACTTCTTAA  | 46069 |
| Macaque           | TGCTTAAAGATTTTT-ACATTCATATGCAATGAATAAAATTTATATGCATAAAATAAAGCATTACCTCATACTTCTTAA  | 46895 |
| PigTailedMacaque  | TGCTTAAAGATTTTT-ACATTCATATGCAATGAATAAAATTTATATGCATAAAATAAAGCATTACCTCATACTTCTTAA  | 45763 |
| Bonobo            | TGCTTAAAGATTTTT-ACATTCATATACAATGAATAAAATTTATATGCATAAAATAAAGCATTACCTCATGCCTTCTTAA | 44393 |
| OliveBaboon       | TGCTTAAAGATTTTT-ACATTCATATGCAATGAATGAAATTTATATACATAAAATAAAGCATTACCTCATACTTCTTAA  | 45618 |
| Orangutan         | TGCTTAAAGATTTTT-----CATATGCAATGAATAAAATTTATATGCATAAAATAAAGCATTACCTCATGCCTTCTTAA  | 45388 |

| Majority          | TTGAACATAAACATTTGAATTATTACTGGTTTT-ACACACCCAAACAAAAGTTCTGGGTTTACTGGAGGAATGGAAGGGA |       |
|-------------------|----------------------------------------------------------------------------------|-------|
|                   | 56730 56740 56750 56760 56770 56780 56790 56800                                  |       |
| Human             | CTGAACATAAACATTTGAATTATTACTGGTTTT-ACACGCCCAAACAAAAGTTCTGGGTTTACTGGAGGAATGGAAGGGA | 45369 |
| Coquerel'sSifaka  | TTGAGCCCAAGAGTTTGAG--GTTGCTG---TGACCCGTGATGACACCA-CTGCACGCTAGCCAGGCAATAGAGCG--   | 37483 |
| Ma'sNightMonkey   | TTGAACGTAACATTTGAATTATTACTAGTTTT-ACACACCCAAACAAAAGTTCTAGGTTTACTATAGGAATGGAAGG-A  | 40511 |
| VervetAGM         | TTGAACATAAACATTTGAATTATTACTGGTTTT-ACACACCCAAACAAAAGTTCTGGGTTTACTGGAGGAATGGAAGGGA | 46918 |
| Gorilla           | CTGAACATAAACATTTGAATTATTACTGGTTTT-ACACGCCCAAACAAAAGTTCTGGGTTTACTGGAGGAATGGAAGGGA | 45883 |
| GrabEatingMacaque | TTGAACA--AACATTTGAATTATTACTGGTTTTTACACACCCAAACAAAAGTTCTGGGTTTCTGGAGGAATGGAAGGGA  | 46147 |
| Macaque           | TTGAACA--AACATTTGAATTATTACTGGTTTTTACACACCCAAACAAAAGTTCTGGGTTTCTGGAGGAATGGAAGGGA  | 46973 |
| PigTailedMacaque  | TTGAACATAAACATTTGAATTATTACTGGTTTTTACACACCCAAACAAAAGTTCTGGGTTTCTGGAGGAATGGAAGGGA  | 45843 |
| Bonobo            | CTGAACATAAACATTTGAATTATTACTGGTTTT-ACACGCCCAAACAAAAGTTCTGGGTTTACTGGAGGAATGGAAGGGA | 44472 |
| OliveBaboon       | TTGAACATAAACATTTGAATTATTACTGGTTTT-ACACACCCAAACAAAAGTTCTGGGTTTCTGGAGGAATGGAAGGGA  | 45697 |
| Orangutan         | CTGAACATAAACATTTGAATTATTACTGGTTTT-ACACACCCAAACAAAAGTTCTGGGTTTACTGGAGGAATGGAAGGGA | 45467 |

| Majority          | AAGATCTCTTTTCATCCCTCAGTAGACCTTTCCCATTCAGGATCATGGGAAGATGCTGAAGAATTGTAGAACTGTAACAC  |       |
|-------------------|-----------------------------------------------------------------------------------|-------|
|                   | 56810 56820 56830 56840 56850 56860 56870 56880                                   |       |
| Human             | AAGATCTCTTTTCATCCCCAGTAAACCTTTCCCATTCAGGATCATGGGAAGATGCTGAAGAATTGTAGAACTGTAACAC   | 45449 |
| Coquerel'sSifaka  | -----AGACCCTGTCTCT-----AAAACGTGAAAGAA-----AACCTCCACAG                             | 37521 |
| Ma'sNightMonkey   | AAGATTTCTTTTCATCCCTCAGTAAACCTTTCCCATTTAGGATCTTGGGAAGATGATGAAGAATCATAGAACTGTAGCAC  | 40591 |
| VervetAGM         | AAGATCTCTTTTCATCCCTCAGTAGACCTTTCCCATTCAGGATCATGGGAAGATGCTGAAGAACCCTAGAACTGTAACAC  | 46998 |
| Gorilla           | AAGATCTCTTTTCATCCCCAGTAAACCTTTCCCATTCGGGATCATGGGAAGATGCTGAAGAATTGTAGAACTGTAACAC   | 45963 |
| GrabEatingMacaque | AAGATCTCTTTTCATCCCTCAGTAGACCTTTCCATTCAGGATCGTGGGAAGATGCTGAAGAATTGTAGAACTGTAACAC   | 46227 |
| Macaque           | AAGATCTCTTTTCATCCCTCAGTAGACCTTTCCATTCAGGATCGTGGGAAGATGCTGAAGAATTGTAGAACTGTAACAC   | 47053 |
| PigTailedMacaque  | AAGATCTCTTTTCATCCCTCAGTAGACCTTTCCATTCAGGGTCTGGGAAGATGCTGAAGAATTGTAGAACTGTAACAC    | 45923 |
| Bonobo            | AAGATCTCTTTTCATCCCCAGTAAACCTTTCCCATTCAGGATCATGGGAAGATGCTGAAGAATTGTAGAACTGTAACAC   | 44552 |
| OliveBaboon       | AAGATCTCTTTTCATCCCTCAGTAGACCTTTCCCATTCAGGATCATGGGAAGATGCTGAAGAATTGTAGAACTGTAACAC  | 45777 |
| Orangutan         | AAGATCTCTTTTCATTCCTCCAGTAAACCTTTCCCATTCAGGATCATGGGAAGATGCTGAAGAATTGTAGAACTGTAACAC | 45547 |

Tuesday, May 03, 2022 06:16 PM

| Majority          | AGGCAGACCTAATGCTTCGTAAGTTGTGAAC-----CACACATTTTGGGCCCTTTTCGGTGTGCTGGAGTGTTTT  |       |       |       |       |       |       |       |       |
|-------------------|------------------------------------------------------------------------------|-------|-------|-------|-------|-------|-------|-------|-------|
|                   | 56890                                                                        | 56900 | 56910 | 56920 | 56930 | 56940 | 56950 | 56960 |       |
| Human             | AGGCAGACCTAATGCTTCATAAGCTA--ATG-----TTTCCATTTTGGACCCTTTTCGGTGTGCTGGAGTGTGTT  |       |       |       |       |       |       |       | 45521 |
| Coquerel'sSifaka  | ACTGTGGAGTCACACTCCCTGAGTTTAAATC-----CTTTTCTACTCCTCTCTCTTTCTTGCCTTGCCTTT      |       |       |       |       |       |       |       | 37590 |
| Ma'sNightMonkey   | AGTCAGACCTAATGTTTCATAAGCTGTGAAC-----CACACATTTTGGGCCCTTTTGGTGTGCTGGAGTGTTTT   |       |       |       |       |       |       |       | 40665 |
| VervetAGM         | AGGCAGACCTAATGCTTTGTAAGTTCACAACCTTTTTCACAAAATTTGGGCCCTTTTCAGTGTGCTGGAGTGTTTT |       |       |       |       |       |       |       | 47078 |
| Gorilla           | AGGCAGACCTAATGTTTCATAAGCTA--ATG-----TTTCCATTTTGGACCCTTTTCGGTGTGCTGGAGTGTTTT  |       |       |       |       |       |       |       | 46035 |
| GrabEatingMacaque | AGGCAGACCTAATGCTTTGTAAGTTGTGAAC-----CACAAAATTTGGGCCCTTTTCAGTGTGCTGGAGTGTTTT  |       |       |       |       |       |       |       | 46301 |
| Macaque           | AGGCAGACCTAATGCTTTGTAAGTTGTGAAC-----CACAAAATTTGGGCCCTTTTCAGTGTGCTGGAGTGTTTT  |       |       |       |       |       |       |       | 47127 |
| PigTailedMacaque  | AGGCAGACCTAATGCTTTGTAAGTTGTGAAC-----CACAAAATTTGGGCCCTTTTCAGTGTGCTGGAGTGTTTT  |       |       |       |       |       |       |       | 45997 |
| Bonobo            | AGGCAGACCTAATGCTTCATAAGCTA--ATG-----TTTCCATTTTGGACCCTTTTCGATGTGCTGGAGTGTTTT  |       |       |       |       |       |       |       | 44624 |
| OliveBaboon       | AGGCAGACCTAATGCTTTGTAAGTTGTGAAC-----CACAAAATTTGGGCCCTTTTCAGTGTGCTGGAGTGTTTT  |       |       |       |       |       |       |       | 45851 |
| Orangutan         | AGGCAGACCTAGTGTTCATAAGCTGTGAAC-----CACACATTTTGGACCCTTTTCGGTGTGCTGGAGTGTTTT   |       |       |       |       |       |       |       | 45621 |

| Majority          | ATATTTGAAAATAGGCTTTGTTATATTATTAAGGAGTCCCCATTCCCA-----CATTCTCATAGTATCATTTATTTAA |       |       |       |       |       |       |       |       |
|-------------------|--------------------------------------------------------------------------------|-------|-------|-------|-------|-------|-------|-------|-------|
|                   | 56970                                                                          | 56980 | 56990 | 57000 | 57010 | 57020 | 57030 | 57040 |       |
| Human             | ATATTTGAAAATAGGCTTTGTTATATTATTAAGGAGCCCCATTCCAGTTTCACATTCTCATAGTATCATTTATTTAA  |       |       |       |       |       |       |       | 45601 |
| Coquerel'sSifaka  | CCTTT-----TTCCTTTTCCCCTT-----CCTTTTCCC-----TTTTCCT---TCCTTTCTTT--              |       |       |       |       |       |       |       | 37636 |
| Ma'sNightMonkey   | GTGTTTGAAAATAGACTTTGTTGTTATTTAATGGAGTCCCCATTCCAGTTTCACATTCTCATAGTATCGTTATTTAA  |       |       |       |       |       |       |       | 40745 |
| VervetAGM         | ATATTTGAAAATAGGCTTTGTTATATTATTAAGGAGTCCCCATTCCCA-----CATTCTCATAGTATCATTTATTTAA |       |       |       |       |       |       |       | 47152 |
| Gorilla           | GTATTTGAAAATAGGCTTTGTTATATTATTAAGGAGCCCCATTCCAGTTTCACATTCTCATAGTATCATTTATTTAA  |       |       |       |       |       |       |       | 46115 |
| GrabEatingMacaque | ATATTAGAAAATAGGCTTTGTTATATTATTAAGGAGTCCCCATTCCCA-----CATTCTCATAGTATCATTTATTTAA |       |       |       |       |       |       |       | 46375 |
| Macaque           | ATATTAGAAAATAGGCTTTGTTATATTATTAAGGAGTCCCCATTCCCA-----CATTCTCATAGTATCATTTATTTAA |       |       |       |       |       |       |       | 47201 |
| PigTailedMacaque  | ATATTAGAAAATAAGCTTTGTTATATTATTAAGGAGTCCCCATTCCCA-----CATTCTCATAGTATCATTTATTTAA |       |       |       |       |       |       |       | 46071 |
| Bonobo            | ATATTTGAAAATAGGCTTTGTTATATTATTAAGGAGCCCCATTCCAGTTTCACATTCTCATAGTATCATTTATTTAA  |       |       |       |       |       |       |       | 44704 |
| OliveBaboon       | ATATTTGAAAATAGGCTTTGTTATATTATTAAGGAGTCCCCATTCCCA-----CATTCTCATAGTATCATTTATTTAA |       |       |       |       |       |       |       | 45925 |
| Orangutan         | ATATTTGAAAATAGGCTTTGTTATATTATTAAGGAGCCCCATTCCAGTTTCACATTCTCGTAGTATCATTTATTTAA  |       |       |       |       |       |       |       | 45701 |

| Majority          | AATGAAGACTTTTA--TAATATTTGGCCTAAGATATGAATACTTAGT-AGTCACCCTCTGGAAGCTATTTAACTAAGTGA  |       |       |       |       |       |       |       |       |
|-------------------|-----------------------------------------------------------------------------------|-------|-------|-------|-------|-------|-------|-------|-------|
|                   | 57050                                                                             | 57060 | 57070 | 57080 | 57090 | 57100 | 57110 | 57120 |       |
| Human             | AATGAAGACTTTTA--TAATATTTGGCCTAAGATATGAATACTTAGT-AGTCACCCTCATGGAAGCTATTTAACT---GA  |       |       |       |       |       |       |       | 45674 |
| Coquerel'sSifaka  | -----CTT-----TTCTTCCCT-----TCCTC-----CCCTT-----C-----                             |       |       |       |       |       |       |       | 37660 |
| Ma'sNightMonkey   | AATGAAGACTT-TA--TAGTATTTGACTAAGATACGAACACTTAGT-AGTCACCCTCTGGAAGCTTTTAGCTAACTAA    |       |       |       |       |       |       |       | 40821 |
| VervetAGM         | AATGAAGACTTAAAAATAATATTTGGCCTAAGATATGAATACTTAGT-AGTCACCCTCTGGAAGCTATTTAACTAAGTGA  |       |       |       |       |       |       |       | 47231 |
| Gorilla           | AATGAAGACT--TA--TAATATTTGGCCTAAGATATGAATACTTAGT-AGTCACCCTCATGGAAGCTATTTAACT---GA  |       |       |       |       |       |       |       | 46186 |
| GrabEatingMacaque | AATGAAGACTTTTA--TAATATTTGGCCTAAGATATGAATACTTAGT-AGTCACCCTCTGGAAGCTATTTAACTAAGTGA  |       |       |       |       |       |       |       | 46452 |
| Macaque           | AATGAAGACTTTTA--TAATATTTGGCCTAAGATATGAATACTTAGT-AGTCACCCTCTGGAAGCTATTTAACTAAGTGA  |       |       |       |       |       |       |       | 47278 |
| PigTailedMacaque  | AATGAAGACTTTTA--TAACATTTGGCCTAAGATATGAATACTTAGT-AGTCACCCTCTGGAAGCTATTTAACTAAGTGA  |       |       |       |       |       |       |       | 46148 |
| Bonobo            | AATGAAGACTTTTA--TAATATTTGGCCTAAGATATGAATACTTAGT-AGTCACCCTCATGGAAGCTATTTAACT---GA  |       |       |       |       |       |       |       | 44777 |
| OliveBaboon       | AATGAAGACTTTAA--TAATATTTGGCCTAAGATATGAATACTTAGT-AGAAACCCTCTGGAAGCTATTTAACTAAGTGA  |       |       |       |       |       |       |       | 46002 |
| Orangutan         | AATGAAGACTTTTA--TAATATTTGGCCTAAGATATGAATACTTAGT-AGTCACCCTCATGGAAGCTATTTAACTAAGTGA |       |       |       |       |       |       |       | 45779 |

Tuesday, May 03, 2022 06:16 PM

|                   |                                                                                   |       |
|-------------------|-----------------------------------------------------------------------------------|-------|
| Majority          | GGGAGTGTCAAGTGGTGTAAATGTTGATAGTTTACTACAGTAACTGGCTTGGTCTTTGGGAGAAAAGGACAGATCTTTTT  |       |
|                   | 57130 57140 57150 57160 57170 57180 57190 57200                                   |       |
| Human             | GGGAGTGTCAAGTGTAAATGTTGATAGTTTACTACAGTAACTGGCTTGGTCTTTGGGAGAAAAGGACAGATCTTTTT     | 45754 |
| Coquerel'sSifaka  | -----TTTT-----CTTCCTTTTTCCTT-----C-----CTTCCT                                     | 37685 |
| Ma'sNightMonkey   | GGAAGTGGCAGGTAATGTAGATGTTATTTGGTTAACTATATAACTGGCTTGGTCTTTGTAAGAAAAGGACAGATC-TTTT  | 40900 |
| VervetAGM         | GGGAGTGTCAAGTGGTGTAAATGTTGATAGTTTACTACAGTAACTGGCTTGGTCTTTGGGAGAAAAGGACAGATCTTTTT  | 47311 |
| Gorilla           | GGGAGTGTCAAGTGTAAATGTTGATAGTTTACTACAGTAACTGGCTTGGTCTTTGGGAGAAAAGGACAGATCTTTTT     | 46266 |
| GrabEatingMacaque | GGGAGTGTCAAGTGGTGTAAATGTTGATAGTTTACTACAGTAACTGGCTTGGTCTTTGGGAGAAAAGGACAGATCTTTTT  | 46532 |
| Macaque           | GGGAGTGTCAAGTGGTGTAAATGTTGATAGTTTACTACAGTAACTGGCTTGGTCTTTGGGAGAAAAGGACAGATCTTTTT  | 47358 |
| PigTailedMacaque  | GGGAGTGTCAAGTGGTGTAAATGTTGATAGTTTACTACAGTAACTGGCTTGGTCTTTGGGAGAAAAGGACAGATCTTTTT  | 46228 |
| Bonobo            | GGGAGTGTCAAGTGTAAATGTTGATAGTTTACTACAGTAACTGGCTTGGTCTTTGGGAGAAAAGGACAGATCTTTTT     | 44857 |
| OliveBaboon       | GGGAGTGTCAAGTGGTGTAAATGTTGATAGTTTACTACAGTAACTGGCTTGGTCTTTGGGAGAAAAGGACAGATCTTTTT  | 46082 |
| Orangutan         | GGGAGTGTCAAGTAGTGTAAATGTTGATAGTTTACTACAGTAACTGGCTTGGTCTTTGGGAGAAAAGGACAGATCTTTTT  | 45859 |
| Majority          | TAGGCAACCTGTATGTAATGTAAAGTTTGTATTTGAGTTCCTTCTATAGTGTAGTTGTTTAAAGAGCACAGACTA-GGAA- |       |
|                   | 57210 57220 57230 57240 57250 57260 57270 57280                                   |       |
| Human             | TAGGCAACCTGTATGTAATGTAAAGTTTGTATTTGAGTTCCTTCTATAGTGTAGTTGTTTAAAGAGCACAGACTATGGAA- | 45833 |
| Coquerel'sSifaka  | TTTCCTACCT-----TCCCTTTC---TTTCTTTT-----                                           | 37711 |
| Ma'sNightMonkey   | TAGGCAATCTGTATGTAATGTAAAGTTTGTATTTGAGTTCCTTCTATAGTGTAGTTGTTTAAAGAGCACAGACTATGGAAA | 40980 |
| VervetAGM         | TAGGCAACCTGTATGTAATGTAAAGTTTGTATCTGAGTTCCTTCTATAGTGTAGTTGTTTAAAGAGCACAGACTA-GGAA- | 47389 |
| Gorilla           | TAGGCAACCTGTATGTAATGTAAAGTTTGTATTTGAGTTCCTTCTATAGTGTAGTTGTTTAAAGAGCACAGACTATGGAA- | 46345 |
| GrabEatingMacaque | TAGGCAACCTGTATGTAATGTAAAGTTTGTATTTGAGTTCCTTCTATAGTGTAGTTGTTTAAAGAGCACAGACTA-GGAA- | 46610 |
| Macaque           | TAGGCAACCTGTATGTAATGTAAAGTTTGTATTTGAGTTCCTTCTATAGTGTAGTTGTTTAAAGAGCACAGACTA-GGAA- | 47436 |
| PigTailedMacaque  | TAGGCAACCTGTATGTAACGTAAAGTTTGTATTTGAGTTCCTTCTATAGTGTAGTTGTTTAAAGAGCACAGACTA-GGAA- | 46306 |
| Bonobo            | TAGGCAACCTGTATGTAATGTAAAGTTTGTATTTGAGTTCCTTCTATAGTGTAGTTGTTTAAAGAGCACAGACTATGGAA- | 44936 |
| OliveBaboon       | TAGGCAACCTGTATGTAATGTAAAGTTTGTATTTGAGTTCCTTCTATAGTGTAGTTGTTTAAAGAGCACAGACTA-GGAA- | 46160 |
| Orangutan         | TAGGCAACCTGTATGTAATGTAAAGTTTGTATTTGAGTTCCTTCTATAGTGTAGTTGTTTAAAGAGCACAGACTATGGAA- | 45938 |
| Majority          | -TCATACTCCCTGAGTTTAACTCTCTCTACTACTTCTT--GTCTGTACCACCTTAGTAACTATCTAATCTTGGGCATTT   |       |
|                   | 57290 57300 57310 57320 57330 57340 57350 57360                                   |       |
| Human             | -TCATGCTCCCTGAGTTTAACTCTCTCTACTACTTCTT--GTCTATACCACCTTAGTAACTATCTAATCTTGGGCATTT   | 45910 |
| Coquerel'sSifaka  | -----CTTCTCTCTTTT--CTTCTTTTCTACCACCTAGT-----A-ACTATCTGAC--CT---GACTTTGGGCGTTT     | 37770 |
| Ma'sNightMonkey   | ACCATACTCCCTGAATTTAACTCTCTCTACTACTTCTT--GTATGTACCATTTAGTAACT---AATCTTGACATTT      | 41054 |
| VervetAGM         | -TCATACTCCCTGAGTTTAACTCTCTCTACTACTTCTT--GTCTGTACCACCTTAGTAACTATCTAATCTTGGGCATTT   | 47468 |
| Gorilla           | -TCATGCTCCCTGAGTTTAACTCTCTCTACTACTTCTT--GTCTATACCACCTTAGTAACTATCTAATCTTGGGCATTT   | 46422 |
| GrabEatingMacaque | -TCATACTCCCTGAGTTTAACTCTCTCTACTACTTCTT--GTCTGTACCACCTTAGTAACTATCTAATCTTGGGCATTT   | 46687 |
| Macaque           | -TCATACTCCCTGAGTTTAACTCTCTCTACTACTTCTT--GTCTGTACCACCTTAGTAACTATCTAATCTTGGGCATTT   | 47513 |
| PigTailedMacaque  | -TCATACTCCCTGAGTTTAACTCTCTCTACTACTTCTT--GTCTGTACCACCTTAGTAACTATCTAATCTTGGGCATTT   | 46383 |
| Bonobo            | -TCATGCTCCCTGAGTTTAACTCTCTCTACTACTTCTT--GTCTATACCACCTTAGTAACTATCTAATCTTGGGCGTTT   | 45013 |
| OliveBaboon       | -TCATACTCCCTGAGTTTAACTCTCTCTACTACTTCTT--GTCTGTACCACCTTAGTAACTATCTAATCTTGGGCATTT   | 46237 |
| Orangutan         | -TCATGCTCCCTGAGTTTAACTCTCTCTAGTACTTCTT--ATCTATACCACCTTAGTAACTATTTAATCTTGGGCATTT   | 46015 |

Tuesday, May 03, 2022 06:16 PM

| Majority          | AACTAATTGTTACCT-GTAAATGGGGTTGATAGGTCATGATGATAGCAATCTGAGAGTTGTAAATTGCCTGGCATGTAGT |       |       |       |       |       |       |       |       |
|-------------------|----------------------------------------------------------------------------------|-------|-------|-------|-------|-------|-------|-------|-------|
|                   | 57370                                                                            | 57380 | 57390 | 57400 | 57410 | 57420 | 57430 | 57440 |       |
| Human             | AACTAATTGTTACCT-GTAAATGGGGTTGATAGGTCATAATGATAGCAATCTGAGAGTTGTAAATTGCCCGGCATGTAGT |       |       |       |       |       |       |       | 45989 |
| Coquerel'sSifaka  | AACTAGCTCTTACCG-ATAAATGA---CAATTGGTCATGATAATAGCGATCTTAGAGTTGTCAGTTGCCTGGCATGTAGT |       |       |       |       |       |       |       | 37846 |
| Ma'sNightMonkey   | AACTAATTGCTACCT-GTAAATGGGGTTGATAGGTCATGATGATAGCAATCTGAGAGTTGTAAATTGCCTGGCATGCGTT |       |       |       |       |       |       |       | 41133 |
| VervetAGM         | AACTAATTGTTACCT-GTAGATGGGGTTGATAGGTTGTGATGATAGCAATCTGAGAGTTATAAATTGCTTGGCATGTAGT |       |       |       |       |       |       |       | 47547 |
| Gorilla           | AACTAATTGTTACCT-GTAAATGGGGTTGATAGGTCATGATGATAGCAATCTGAGAGTTGTAAATTGCCTGGCATGTAGT |       |       |       |       |       |       |       | 46501 |
| GrabEatingMacaque | AACTAATTGTTACCT-GTAAATGGGGTTGATAGGTCGTGATGATAGCAATCTGAGAGTTATAAATTGCTTGGCATGTAGT |       |       |       |       |       |       |       | 46766 |
| Macaque           | AACTAATTGTTACCT-GTAAATGGGGTTGATAGGTCGTGATGATAGCAATCTGAGAGTTATAAATTGCTTGGCATGTAGT |       |       |       |       |       |       |       | 47592 |
| PigTailedMacaque  | AACTAATTGTTACCT-GTAAATGGGGTTGATAGGTCGTAATGATAGCAATCTGAGAGTTATAAATTGCTTGGCATGTAGT |       |       |       |       |       |       |       | 46462 |
| Bonobo            | AACTAATTGTTACCT-GTAAATGGGGTTGATAGGTCATAATGATAGCAATCTGAGAGTTGTAAATTGCCTGGCATGTAGT |       |       |       |       |       |       |       | 45092 |
| OliveBaboon       | AACTAATTGTTACCT-GTAAATGGGGTTGACAGGTCGTGATGATAGCAATCTGAGAGTTATAAATTGCTTGGCATGTAGT |       |       |       |       |       |       |       | 46316 |
| Orangutan         | AACTAATTGTTACCTGTAAATGGGGTTGATAGGTCATGATGATAGCAATCTGAGAGTTTAAATTGCCTGGCATGTAGT   |       |       |       |       |       |       |       | 46095 |

| Majority          | TAATTAGCAGTGAATGTTAAATATTGATGCAAAATAAAATATATATCTTTTCTGTATTTTT-CTAAGAAGTCAAGATCTTT |       |       |       |       |       |       |       |       |
|-------------------|-----------------------------------------------------------------------------------|-------|-------|-------|-------|-------|-------|-------|-------|
|                   | 57450                                                                             | 57460 | 57470 | 57480 | 57490 | 57500 | 57510 | 57520 |       |
| Human             | TAATTAGCAGTGAATATTTAAATATTGATGCAAAATAAAATACATCTTTTCTATATTTTTTCCAAGAAGTCAAGATCTTT  |       |       |       |       |       |       |       | 46069 |
| Coquerel'sSifaka  | TGACTTTCAGTGAATGTTAAATACTGCTGCAAAATAAAATATAT--TTTCTGTATTTTT-CTAAGAAACCAGATGTTT    |       |       |       |       |       |       |       | 37923 |
| Ma'sNightMonkey   | TAATTTGCAGTGAATATTTAAATATTGATGCAAAACAAAATACATCTTTTCTATATTTTT-CCAAGAAGTCAAGATCTTT  |       |       |       |       |       |       |       | 41212 |
| VervetAGM         | TAATTAGCAGTGAATGTTAAATATTGATGCAAAATAAAATATGCTTTTCTGTATTTTT-CTAAGACGTCAAGGTCTTT    |       |       |       |       |       |       |       | 47626 |
| Gorilla           | TAATTAGCAGTGAATGTTAAATATTGATGCAAAATAAAATACATTTTTTCTATATTTTTTCCAAGAAGTCAAGATCTTT   |       |       |       |       |       |       |       | 46581 |
| GrabEatingMacaque | TAATTAGCAGTGAATGTTAAATATTGATGCAAAATAAAATATGCTTTTCTGTATTTTT-CTAAGACGTCAAGATCTTT    |       |       |       |       |       |       |       | 46845 |
| Macaque           | TAATTAGCAGTGAATGTTAAATATTGATGCAAAATAAAATATGCTTTTCTGTATTTTT-CTAAGACGTCAAGATCTTT    |       |       |       |       |       |       |       | 47671 |
| PigTailedMacaque  | TAATTAGCAGTGAATGTTAAATATTGATGCAAAATAAAATATGCTTTTCTGTATTTTT-CTAAGACGTCAAGATCTTT    |       |       |       |       |       |       |       | 46541 |
| Bonobo            | TAATTAGCAGTGAATATTTAAATATTGATGCAAAATAAAATACATCTTTTCTATATTTTTTCCAAGAAGTCAAGATCTTT  |       |       |       |       |       |       |       | 45172 |
| OliveBaboon       | TAATTAGCAGTGAATGTTAAATATTGATGCAAAATAAAATATGCTTTTCTGTATTTTT-CTAAGACGTCAAGATCTTT    |       |       |       |       |       |       |       | 46395 |
| Orangutan         | TAATTAGCAGTGAATGTTAAATATTGATGCAAAATAAAATATATCTTTTCTATATTTTTTCCAAGAAGTCAAGATCTTT   |       |       |       |       |       |       |       | 46175 |

| Majority          | GTCTTATCCTTTGATTCTCAAAAGTTTCTACCTCTTTCTGTGTTATTTCAGCTGTTTTACTTCTGCTCAACATCCACTG  |       |       |       |       |       |       |       |       |
|-------------------|----------------------------------------------------------------------------------|-------|-------|-------|-------|-------|-------|-------|-------|
|                   | 57530                                                                            | 57540 | 57550 | 57560 | 57570 | 57580 | 57590 | 57600 |       |
| Human             | GTCTTATCCTTTGATTCTCAGAAGTTTCTACGTTCTTTCTGTGTTATTTCAGCTATTTTACTTCTGCTTAATATCCACTA |       |       |       |       |       |       |       | 46149 |
| Coquerel'sSifaka  | ATCTTAATCCTTGATTGTCAAAAGTATACCACCACCTTTCCATGTTATTTAGCTGTTTGATTCTGCCCGCCATGCACTG  |       |       |       |       |       |       |       | 38003 |
| Ma'sNightMonkey   | GTCTTATCCTTCAATTCTTAAAGGTCCTACCTCTTTCTGTATTATTTCAGCTGTTTTACTTCTGTTCAACATCCACTG   |       |       |       |       |       |       |       | 41292 |
| VervetAGM         | GTCTTATCCTTTGATTCTCAAAAGTTTCTACCTCTTTCTGTGTTATTTCAGCTGTTGACTTCTGCTCAACATCCGCTG   |       |       |       |       |       |       |       | 47706 |
| Gorilla           | GTCTTATCCTTTGATTCTCAGAAGTTTCTACCTCTTTCTGTGTTATTTCAGCTATTTTACTTCTGCTTAATATCCACTA  |       |       |       |       |       |       |       | 46661 |
| GrabEatingMacaque | GTCTT-----TTGATTCTCAAAAGTTTCTACCTCTTTCTGTGTTATTTCAGCTGTTGACTTCTGCTCAACATCCGCTG   |       |       |       |       |       |       |       | 46920 |
| Macaque           | GTCTT-----TTGATTCTCAAAAGTTCCTACCTCTTTCTGTGTTATTTCAGCTGTTGACTTCTGCTCAACATCCGCTG   |       |       |       |       |       |       |       | 47746 |
| PigTailedMacaque  | GTCTT-----TTGATTCTCAAAAGTTTCTACCTCTTTCTGTGTTATTTCAGCTGTTGACTTCTGCTCAACATCCGCTG   |       |       |       |       |       |       |       | 46616 |
| Bonobo            | GTCTTATCCTTTGATTCTCAGAAGTTTCTACGTTCTTTCTGTGTTATTTCAGCTATTTTACTTTTGCTTAATATCCACTA |       |       |       |       |       |       |       | 45252 |
| OliveBaboon       | GTCTTATCCTTTGATTCTCAAAAGTTTCTACCTCTTTCTGTGTTACTTCAGCTGTTGACTTCTGCTCAACATCCGCTG   |       |       |       |       |       |       |       | 46475 |
| Orangutan         | GTCTTATCCTTTAATTCTCAAAAGTTTCTATCTCTTTCTGTGTTATTTCAGCTGTTTTACTTCTGCTCAACATCCACTA  |       |       |       |       |       |       |       | 46255 |



Tuesday, May 03, 2022 06:16 PM

|                   |                                                                                   |       |
|-------------------|-----------------------------------------------------------------------------------|-------|
| Majority          | TCCAGAAAACATCCAATACAAATCCAAAGTAA---ATTATTTAATTTCCCTTAATAATAGGTTTAGGCAGGCTTTTGCCTT |       |
|                   | 57610 57620 57630 57640 57650 57660 57670 57680                                   |       |
| Human             | TCCAGAAAACATCCAACACAAATCCAAAATAA---ATTATTTAATTTCCCTTAATAATAGGTTTAGGCAGGCTTTTGCCTT | 46226 |
| Coquerel'sSifaka  | TCCAGAAAGTATCCAGTACCAATCCAAAACAA----TAAACTATTCCTTAATAACAAGTTTAGGTAGGTTTTGCATT     | 38078 |
| Ma'sNightMonkey   | TCCAGAAAACATCCAGCACAAATCCAAAATAATAAATTATTTGATTTCCCTTAATAATAGGTTTAGGCAGGCTTTTGCCTT | 41372 |
| VervetAGM         | TCCAGAAAACATCCAATACAAATCCAAAGTAA---ATTATTTAATTTCCGTAATAATAGGTTTAGGCAGGCTTTTGCCTT  | 47783 |
| Gorilla           | TCCAGAAAACATCCAACACAAATCCAAAGTAA---ATTATTTAATTTCCCTTAATAATAGGTTTAGGCAGGCTTTTGCCTT | 46738 |
| GrabEatingMacaque | TCCAGAAAACATCCAATACAAATCCAAAGTAA---ATTATTTAATTTCCGTAATAATAGGTTTAGGCAGGCTTTTGCCTT  | 46997 |
| Macaque           | TCCAGAAAACATCCAATACAAATCCAAAGTAA---ATTATTTAATTTCCGTAATAATAGGTTTAGGCAGGCTTTTGCCTT  | 47823 |
| PigTailedMacaque  | TCCAGAAAACATCCAATACAAATCCAAAGTAA---ATTATTTAATTTCCGTAATAATAGGTTTAGGCAGGCTTTTGCCTT  | 46693 |
| Bonobo            | TCCAGAAAACATCCAACACAAATCCAAAGTAA---ATTATTTAATTTCCCTTAATAATAGATTAGGCAGGCTTTTGCCTT  | 45329 |
| OliveBaboon       | TCCAGAAAACATCCAATACAAATCCAAAGTAA---ATTATTTAATTTCCGTAATAATAGGTTTAGGCAGGCTTTTGCCTT  | 46552 |
| Orangutan         | TCCAGAAAACATCCAACACAAATCCAAAGTAA---ATTATTTAATTTCCCTTAATAATAGGTTTAGGCAGGCTTTTGCCTT | 46332 |

|                   |                                                                                |       |
|-------------------|--------------------------------------------------------------------------------|-------|
| Majority          | TTGGAATTATTTTTGGAAAATCATTGAAAGGGGAAGCCTTTTTCTCCTTATGGGTACAGCGATAGGTAGTATCTTTA  |       |
|                   | 57690 57700 57710 57720 57730 57740 57750 57760                                |       |
| Human             | TTGGAATTATTTTTGGAAAATCATTGAAAGGGGAAGCCTTTTTCTCCTTATGGGTACAGTGATAGGTAGTATCTTTA  | 46306 |
| Coquerel'sSifaka  | TTGGATATTATAATCTGAAAATTGCATGAAAAG--AAGCCTTTTTCCCTTACAGGTACAGTGATAAGTAGTATCTTTA | 38157 |
| Ma'sNightMonkey   | TTGGAAGTATTTTCTGAAAATCATTGAAAGAGGAAGCCTTGTTCTTCTTATGGGTACAGTGATAT---TATCTTTA   | 41448 |
| VervetAGM         | TTGGAATTATTTTTGGAAAATCATTGAAAGGGGAAGCCTTTTTCTCCTTAAAGGTACAGCGATAGGTAGTAGCTTTA  | 47863 |
| Gorilla           | TTGGAATTATTTTTAGAAAATCATTGAAAGGGGAAGCCTTTTTCTCCTTATGGGTACAGCGATAGGTAGTATCTTTT  | 46818 |
| GrabEatingMacaque | TTGGAATTATTTTTGGAAAATCATTGAAAGGGGAAGCCTTTTTCTCCTTATGGGTACAGCGATAGGTAGTATCTTTA  | 47077 |
| Macaque           | TTGGAATTATTTTTGGAAAATCATTGAAAGGGGAAGCCTTTTTCTCCTTATGGGTACAGCGATAGGTAGTATCTTTA  | 47903 |
| PigTailedMacaque  | TTGGAATTATTTTTGGAAAATCATTGAAAGGGGAAGCCTTTTTCTCCTTATGGGTACAGCGATAGGTAGTATCTTTA  | 46773 |
| Bonobo            | TTGGAATTATTTTTGGAAAATCATTGAAAGGGGAAGCCTTTTTCTCCTTATGGGTACAGTGATAGGTAGTATCTTTA  | 45409 |
| OliveBaboon       | TTGGAATTATTTTTGGAAAATCATTGAAAGGGGAAGCCTTTTTCTCCTTATGGGTACAGCGATAGGTAGTATCTTTA  | 46632 |
| Orangutan         | TTGGAATTATTTTTCGAAAATCATTGAAAGGGGAAGCCTTTTTCTCCTTATGGGTACAGCGATAGGTGGTATCTTTA  | 46412 |

|                   |                                                                                   |       |
|-------------------|-----------------------------------------------------------------------------------|-------|
| Majority          | TTGGTGTTTTTTTTT---CCTTGTCTTTCTCCAGAAGGAAAAGGACAGACCAAATAGGAGAACTGAAATTTGCTT       |       |
|                   | 57770 57780 57790 57800 57810 57820 57830 57840                                   |       |
| Human             | TTGGTCTTTTTTTTTTCC----TTGTCTTTCTCCAGAAGGAAAAGGACAGACCAAATAGGAGAACTGAAATTTGCTT     | 46381 |
| Coquerel'sSifaka  | TTTTGGTGGGTTTTTT---C--TTACCTTTCTCCAAGAAGGAA--GGACAGATCATATTTGAAGAG--CTGAAATTTGCTG | 38229 |
| Ma'sNightMonkey   | TTCTGTGTTTTTTTT---CCTTGTCTTTGTCCAGAAGGAAAGTGGACAGACCAAATAGGAGAACTGAAATTTGCGT      | 41524 |
| VervetAGM         | TTGGTGGTTTTTTTT---CCTTGTCTTTCTCCAGAAGGAAAAGGACAGACCAAATAGGAGAACTGAAATTTACTT       | 47939 |
| Gorilla           | TTGGTCTTTTTTTTTTTTTTCTTGTCTTCTCCAGAAGGAAAAGGACAGACCAAATAGGAGAACTAAAATTTGCTT       | 46898 |
| GrabEatingMacaque | TTGGTGTTTTTTTTT---CCTTGTCTTTCTCCAGAAGGAAAAGGACAGACCAAATAGGAGAACTGAAATTTACTT       | 47152 |
| Macaque           | TTGGTGTTTTTTTTT---CCTTGTCTTTCTCCAGAAGGAAAAGGACAGACCAAATAGGAGAACTGAAATTTACTT       | 47978 |
| PigTailedMacaque  | TTGGTGTTTTTTTTTTTT--CCTTGTCTTTCTCCAGAAGGAAAAGGACAGACCAAATAGGAGAACTGAAATTTACTT     | 46851 |
| Bonobo            | TTGGTCTTTTTTTTTTCC---TTGTCTTTCTCCAGAAGGAAAAGGACAGACCAAATAGGAGAACTGAAATTTGCTT      | 45485 |
| OliveBaboon       | TTGGTGTTTTTTTTTTTTC--CCTTGTCTTTCTCCAGAAGGAAAAGGACAGACCAAATAGGAGAACTGAAATTTACTT    | 46710 |
| Orangutan         | TTGGTCTTTTTTTTTTCC---TTGTCTTTCTCCAGAAGGAAAAGGACAGACCAAATAGGAGAACTGAAATTTGCTT      | 46488 |

Tuesday, May 03, 2022 06:16 PM

| Majority          | TTTTGAGTATCGTGATACCATAACCTATAACACATGGGGCTTTAGGTTGGATTGTGAAGTATTTGTTCTTGTATTCAA  |       |
|-------------------|---------------------------------------------------------------------------------|-------|
|                   | 57850 57860 57870 57880 57890 57900 57910 57920                                 |       |
| Human             | TTTTGAGTATCCTGATACCATAAC-TATAACACATGGGGCTTTAGGTTGGATTGTGAAGTATTTGTTCTCGTTATTCAA | 46460 |
| Coquerel'sSifaka  | TTTTGAGTATCCTAATAACTGTAAC-TATAACACATGGGGCTCTAGGTTGGATTATGAAATATTTGTCCTTGTATTCAA | 38308 |
| Ma'sNightMonkey   | TTTTGAATATCTTGATACCATAACCTATAACACATGGGGCTTTAGTTTGCATTGTGAA-TATTTGTTGTTGTATTCAA  | 41603 |
| VervetAGM         | TTTTGAGTATCGTGATGCTATAACGTGTAACACATGGGGCTTTAGGTTGGATTATGAAGTAT----TCTTGTATTCAA  | 48015 |
| Gorilla           | TTTTGAGTATCCTGATACCATAAC-TATAACACATGGGGCTTTAGGTTGGATTGTGAAGTATTCGTTCTCGTTATTCAA | 46977 |
| GrabEatingMacaque | TTTTGAGTATCGTGATACCATAACCTATAACACATGGGGCTTTAGGTTGTACTGTGTAGTATTTGTTCTTGTATTCAA  | 47232 |
| Macaque           | TTTTGAGTATCGTGATACCATAACCTATAACACATGGGGCTTTAGGTTGAACTGTGTAGTATTTGTTCTTGTACTCAA  | 48058 |
| PigTailedMacaque  | TTTTGAGTATCGTGATACCATAACCTATAACACATGGGGCTTTAGGTTGGACTGTGAAGTATTTGTTCTTGTATTCAA  | 46931 |
| Bonobo            | TTTTGAGTATCCTGATACCATAAC-TATAACACATGGGGCTTTAGGTTGGATTGTGAAGTATTTGTTCTCGTTATTCAA | 45564 |
| OliveBaboon       | TT--GAGTATCGTGATACCATAACCTGTAACACATGGGGCTTTAGGTTGGATTGTGAAGTATTTGTTCTTGTATTCAA  | 46788 |
| Orangutan         | TTTTGAGTATCCTGATACCATAACCTATAACACATGGGACTTTAGGTTGGATTGTGAAGTATTTGTTCTTGTATTCAA  | 46568 |

| Majority          | CAAACCTAATGAACAAGAACAATATCAAGTTTCTGTACTCAGACTGCTTTG-TCAAAAAAGGCTTTAGTCTGTATCA    |       |
|-------------------|----------------------------------------------------------------------------------|-------|
|                   | 57930 57940 57950 57960 57970 57980 57990 58000                                  |       |
| Human             | CAAACCTAATGAACAAGAACAATATCAAGTTTCTGTACTCAGACTGCTTTG-TCAAAAAAGGCTTTAGTCTGTATCA    | 46539 |
| Coquerel'sSifaka  | C----TAATGAGTAAGAACAACAATATCAAGTTTCTGAACTAAGACGGTTTGGCCAAAAAAGGCTTTAGTCTACATTG   | 38384 |
| Ma'sNightMonkey   | CAAATAATGAACAAGAACAACAATATCAAGTTTCTATACTCAGTCTACTTTG-TCAAAAA-GATCTTAGTCTTACATCA  | 41681 |
| VervetAGM         | CAAACCTAATGAACGAGAACAGATTATCAAGTTTTCAGTATTCAGACTGCTTTG-TCAAAAAAGGCTTTAGTCTGTATCA | 48094 |
| Gorilla           | CAAACCTAATGAACAAGAACAATATCAAGTTTCTGTACTCAGACTGCTTTG-TCAAAAAAGGCTTTAGTCTGTATCA    | 47056 |
| GrabEatingMacaque | CAAACCTAATGAACGAGAACAGATTATCAAGTTTTCAGTATTCACACTGCTTTG-TCAAAAAAGGCTTTAGTCTGTATCA | 47311 |
| Macaque           | CAAACCTAATGAATGAGAACAGATTATCAAGTTTTCAGTATTCACACTGCTTTG-TCAAAAAAGGCTTTAGTCTGTATCA | 48137 |
| PigTailedMacaque  | CAAACCTAATGAACGAGAACAGATTATCAAGTTTTCAGTATTCAGACTGCTTTG-TCAAAAAAGGCTTTAGTCTGTATCA | 47010 |
| Bonobo            | CAAACCTAATGAACAAGAACAATATCAAGTTTCTGTACTCAGACTGCTTTG-TCAAAAAAGGCTTTAGTCTGTATCA    | 45643 |
| OliveBaboon       | CAAACCTAATGAACGAGAACAGATTATCAAGTTTTCAGTATTCAGACTGCTTTG-TCAAAAAAGGCTTTAGTCTGTATCA | 46867 |
| Orangutan         | CAAACCTAATGAACAAGAACAATATCAAGTTTCTGTACTCAGACTGCTTTG-TCAAAAAAGGCTTTAGTCTGTATCA    | 46647 |

| Majority          | GAAGAA-TATGTGTTCCCTTGTTGACTGATGCCAGTTGTTGTGTGTGCCAATTACATGTTTTAAAGTATATGTGTATTTTT |       |
|-------------------|-----------------------------------------------------------------------------------|-------|
|                   | 58010 58020 58030 58040 58050 58060 58070 58080                                   |       |
| Human             | GAATAA-TATGTGTTCCCTTGTTGACTGATGCCAGTTGTTGTGTGTGCCAATTATGTGTTTTAAAGTATATGTGTATTTTT | 46618 |
| Coquerel'sSifaka  | GAAGAA-----TATGC-----ATGTATGCCAGTTACATGTTTTAAGTTTTGTATGTATTTTT                    | 38436 |
| Ma'sNightMonkey   | GAAGAA-TATGTGTATTATGT-----G-----TGCGTGTGCCAATTATATGTTTTAAAGTATATGTGTATTTTT        | 41744 |
| VervetAGM         | GAAGAAATATGTGTTCCCTTGTTGACTGATGCCAGTTGTTGTGTGTGCCAATTACATGTTTTAAAGTATATGCATATTTTT | 48174 |
| Gorilla           | GAATAA-TATGTGTTCCCTTGTTGACTGATGCCAGTTGTTGTGTGTGCCAATTACGTGTTTTAAAGTATATGTGTATTTTT | 47135 |
| GrabEatingMacaque | GAAGAA-TATGTGTTCCCTTGTTGACTGATGCCAGTTGTTGTGTGTGCCAATTACATGTTTTAAAGTATATGCATATTTTT | 47390 |
| Macaque           | GAAGAA-TATGTGTTCCCTTGTTGACTGATGCCAGTTGTTGTGTGTGCCAATTACATGTTTTAAAGTATATGCATATTTTT | 48216 |
| PigTailedMacaque  | GAAGAA-TATGTGTTCCCTTGTTGACTGATGCCAGTTGTTGTGTGTGCCAATTACATGTTTTAAAGTATATGCATATTTTT | 47089 |
| Bonobo            | GAATAA-TAAGTGTTCCTTGTTGACTGATGCCAGTTGTTGTGTGTGCCAATTATGTGTTTTAAAGCATATGTGTATTTTT  | 45722 |
| OliveBaboon       | GAAGAA-TATGTGTTCCCTTGTTGACTGATGCCAGTTGTTGTGTGTGCCAATTACATGTTTTAAAGTATATGCATATTTTT | 46946 |
| Orangutan         | GAAGAA-T--GTGTTCCCTTATTGACTGATGCTGATTGTTGTGTGTGCCAATTACATGTTTTAAAG-----TGTATTTTT  | 46718 |

Tuesday, May 03, 2022 06:16 PM

| Majority          | TGGATTCTGTGCTTTAGCTTACATTTTCAGTTAACTGGCCTAGAGATGATTTTGTAGATAAGATACTACAAAATGCAA   |       |
|-------------------|----------------------------------------------------------------------------------|-------|
|                   | 58090 58100 58110 58120 58130 58140 58150 58160                                  |       |
| Human             | TGGATTCTGTGCTTTAGCTTACATTTTCATTAACGGGCCTAGAGATGATTTTGTAGATAAGATACTACAAAATGCAA    | 46698 |
| Coquerel'sSifaka  | TTCATTCCCTGTTTTAACTTACATTT-CAGTTAACAGACCCAATGATGATTTTGTAAATAAGATAACCACAAAATAGAAA | 38515 |
| Ma'sNightMonkey   | TGAATTCTGTGCTTTAGCTTACATTTTCATTAACGGGCCTAGAGATGATTTTGTAGATAAGATAACGACAAAATAGAAA  | 41824 |
| VervetAGM         | TGGATTCTGTGCTTTAGCTTACATTTTCGTGTTAACTGGCCTCGAGATGATTTTGTAGATAAGATACTACAAAATGCAA  | 48254 |
| Gorilla           | TGGATTCTGTGCTTTAGCTTACATTTTCATTAACGGGCCTAGAGATGATTTTGTAGATAAGATACTACAAAATGCAA    | 47215 |
| GrabEatingMacaque | TGGATTCTGTGCTTTAGCTTACATTTTCGTGTTAACTGGCCTCGAGATGATTTTGTAGATAAGATACTACAAAATGCAA  | 47470 |
| Macaque           | TGGATTCTGTGCTTTAGCTTACATTTTCGTGTTAACTGGCCTCGAGATGATTTTGTAGATAAGATACTACAAAATGCAA  | 48296 |
| PigTailedMacaque  | TGGATTCTGTGCTTTAGCTTACATTTTCGTGTTAACTGGCCTCGAGATGATTTTGTAGATAAGATACTACAAAATGCAA  | 47169 |
| Bonobo            | TGGATTCTGTGCTTTAGCTTACATTTTCATTAATGGGCCTAGAGATGATTTTGTAGATAAGATACTACAAAATGCAA    | 45802 |
| OliveBaboon       | TGGATTCTGTGCTTTAGCTTACATTTTCGTGTTAACTGGCCTCGAGATGATTTTGTAGATAAGATACTACAAAATGCAA  | 47026 |
| Orangutan         | TGGATTCTGTGCTTTGGCTTACATTTTCATTAACGGGCCTAGAGATGATTTTGTAGATAACATACTACAAAATGCAA    | 46798 |

| Majority          | GTTTCAGTCT----CTTCCTTTTGACAAATTCAGGTGCCCTGTGCACACACAAATCTTTGTCAGTAGTGAAAGGACATGTG |       |
|-------------------|-----------------------------------------------------------------------------------|-------|
|                   | 58170 58180 58190 58200 58210 58220 58230 58240                                   |       |
| Human             | GTTTCAGTCT----CTTCCTTTTGACAAATTCAGGTGCCCTGTGCACACACAAATCTTTGTCAGTAGTGAAAGGACATGTG | 46774 |
| Coquerel'sSifaka  | GTTTAGCCTCTTCTCTTTTGGACAAAGTTTCAGGTGCCCT-GTGCATGCACAAACCTTCTCGGTAATGAAAGGAGGTATG  | 38594 |
| Ma'sNightMonkey   | GTTTCAGTCTT---CTTCCTTTTGACAA-----GGTGCCA-GCGCACACACAAATCTTTGTTAGTAGTGAAAGGACATGTG | 41895 |
| VervetAGM         | GTTTCAGTCT----CTTCCTTTTGACAAATTCAGGTGCCCTGTGCACACACAAATCTTTGCCAGTAGTGAAAGGACATGGG | 48330 |
| Gorilla           | GTTTCAGTCT----CTTCCTTTTGACAAATTCAGGTGCCCTGTGCACACACAAATCTTTGTCAGTAGTGAAAGGACATGTG | 47291 |
| GrabEatingMacaque | GTTTCAGTCT----CTTCCTTTTGACAAATTCAGGTGCCCTGTGCACACACAAATCTTTGTCAGTAGTGAAAGGACATGGG | 47546 |
| Macaque           | GTTTCAGTCT----CTTCCTTTTGACAAATTCAGGTGCCCTGTGCACACACAAATCTTTGTCAGTAGTGAAAGGACATGGG | 48372 |
| PigTailedMacaque  | GTTTCAGTCT----CTTCCTTTTGACAAATTCAGGTGCCCTGTGCCACATAAATCTTTGTCAGTAGTGAAAGGACATGGG  | 47245 |
| Bonobo            | GTTTCAGCCT----CTTCCTTTTGACAAATTCAGGTGCCCTGTGCACACACAAATCTTTGTCAGTAGTGAAAGGACATGTG | 45878 |
| OliveBaboon       | GTTTAGTCT----CTTCCTTTTGACAAATTCAGGTGCCCTGTGCACACACAAATCTTTGTCAGTAGTGAAAGGACATGGG  | 47102 |
| Orangutan         | GTTTCAGTCC----CTTCCTTTTGACAAATTCAGATGCCCTGTGCACACACAAATCTTTGTCAGTAGTGAAAGGACATGTG | 46874 |

| Majority          | -ATAGCTTCCCTGTAGTTTTTTT-----                                                       |       |
|-------------------|------------------------------------------------------------------------------------|-------|
|                   | 58250 58260 58270 58280 58290 58300 58310 58320                                    |       |
| Human             | -ATAGCTTCCCTGTAGTTTTTTT-----                                                       | 46794 |
| Coquerel'sSifaka  | GATAGCTTCCCTATAGTTTTTTT-----                                                       | 38615 |
| Ma'sNightMonkey   | -ATAGCTTCCCTGTAGTTTTTTT-----                                                       | 41915 |
| VervetAGM         | -ATAGCTTCCCTGTAGTTTTTTTTTTTTT-----GAGACGTAGTCTCGCTCTATTGCCCTAGGCTGTAGTGCCTGGCGCG   | 48402 |
| Gorilla           | -ATAGCTTCCCTGTAGTTTTTTT-----                                                       | 47311 |
| GrabEatingMacaque | -ATAGCTTCCCTGTAGTTTTTTTTTTTTTTTTTTTGGAGACGTAGTCTCGCTCTGTTGCCAGGCTGGAGTGCCTGGCGCG   | 47625 |
| Macaque           | -ATAGCTTCCCTGTAGTTTTTTTTTTTTTTTTTTT--GAGACGTAGTCTCGCTCTGTTGCCAGGCTGGAGTGCCTGGCGCG  | 48448 |
| PigTailedMacaque  | -ATAGCTTCCCTGTAGTTTTTTTTTTTTTTTTTTT---GAGACGTAGTCTCGCTCTGTTGCCAGGCTGGAGTGCCTGGCGCG | 47320 |
| Bonobo            | -ATAGCTTCCCTGTAGTTTTTTT-----                                                       | 45898 |
| OliveBaboon       | -ATAGCTTCCCTGTAGTTTTTTTTTCTTTT-----GAGACGGAGTCTCGCTCTGTTGCCACGCTGGAGTGCCTGGCGCG    | 47175 |
| Orangutan         | -ATAGCTTCCCTGTAGTTTTTTT-----                                                       | 46894 |

Tuesday, May 03, 2022 06:16 PM

| Majority          | -----T-----                                                                    |       |       |       |       |       |       |       |       |
|-------------------|--------------------------------------------------------------------------------|-------|-------|-------|-------|-------|-------|-------|-------|
|                   | 58330                                                                          | 58340 | 58350 | 58360 | 58370 | 58380 | 58390 | 58400 |       |
| Human             | -----                                                                          |       |       |       |       |       |       |       | 46794 |
| Coquerel'sSifaka  | -----T-----                                                                    |       |       |       |       |       |       |       | 38616 |
| Ma'sNightMonkey   | -----                                                                          |       |       |       |       |       |       |       | 41915 |
| VervetAGM         | ACCTCCGCTCACTGCAAGCTCTGCCTCCCAGGTTACGCCATTCTCTGCCTCAGCCTCCGGAGTAGCTGGGACTACAGG |       |       |       |       |       |       |       | 48482 |
| Gorilla           | -----                                                                          |       |       |       |       |       |       |       | 47311 |
| GrabEatingMacaque | ACCTCCGCTCACTGCAAGCTCTGCCTCCCAGGTTACGCCATTCTCTGCCTCAGCCTCCCAGTAGCTGGGACTACAGG  |       |       |       |       |       |       |       | 47705 |
| Macaque           | ACCTCCGCTCACTGCAAGCTCTGCCTCCCAGGTTACGCCATTCTCTGCCTCAGCCTCCCAGTAGCTGGGACTACAGG  |       |       |       |       |       |       |       | 48528 |
| PigTailedMacaque  | ACCTCCGCTCACTGCAAGCTCTGTCTCCCAGGTTACGCCATTCTCTGCCTCAGCCTCCCAGTAGCTGGGACTACAGG  |       |       |       |       |       |       |       | 47400 |
| Bonobo            | -----                                                                          |       |       |       |       |       |       |       | 45898 |
| OliveBaboon       | ACCTCCGCTCACTGCAAGCTCTGCCTCCCAGGTTACGCCATTCTCTGCCTCAGCCTCCCAGTAGCTGGGACTACAGG  |       |       |       |       |       |       |       | 47255 |
| Orangutan         | -----                                                                          |       |       |       |       |       |       |       | 46894 |

| Majority          | -----                                                                            |       |       |       |       |       |       |       |       |
|-------------------|----------------------------------------------------------------------------------|-------|-------|-------|-------|-------|-------|-------|-------|
|                   | 58410                                                                            | 58420 | 58430 | 58440 | 58450 | 58460 | 58470 | 58480 |       |
| Human             | -----                                                                            |       |       |       |       |       |       |       | 46794 |
| Coquerel'sSifaka  | -----                                                                            |       |       |       |       |       |       |       | 38616 |
| Ma'sNightMonkey   | -----                                                                            |       |       |       |       |       |       |       | 41915 |
| VervetAGM         | CGCCTGCCACCACGCCCGCTAATTTTTTGTATTTTTTTTTTAGTAGAGACGGGGGTTTCACTGTGTTAGCCAAGATGGTG |       |       |       |       |       |       |       | 48562 |
| Gorilla           | -----                                                                            |       |       |       |       |       |       |       | 47311 |
| GrabEatingMacaque | CGCCTGCCACCACGCCAGCTAATTTTTTGTATTTTTTTTTTAGTAGAGACGGGGATTCACTGTGTTAGCCAGGATGGTG  |       |       |       |       |       |       |       | 47785 |
| Macaque           | CGCCTGCCACCACGCCAGCTAATTTTTTGTATTTTTTTTTTAGTAGAGACGGGGATTCACTGTGTTAGCCAGGATGGTG  |       |       |       |       |       |       |       | 48608 |
| PigTailedMacaque  | CGCCTGCCACCACGCCAGCTAATTTTTTGTATTTTTTTTTTAGTAGAGACGGGGGTTTCACTGTGTTAGCCAGGATGGTG |       |       |       |       |       |       |       | 47480 |
| Bonobo            | -----                                                                            |       |       |       |       |       |       |       | 45898 |
| OliveBaboon       | CACCTGCCACCACCCAGCTAATTTTTTGTATTTTTTTTTTAGTAGAGACGGGGGTTTCACTGTGTTAGCCAGGATGGTG  |       |       |       |       |       |       |       | 47335 |
| Orangutan         | -----                                                                            |       |       |       |       |       |       |       | 46894 |

| Majority          | -----                                                                            |       |       |       |       |       |       |       |       |
|-------------------|----------------------------------------------------------------------------------|-------|-------|-------|-------|-------|-------|-------|-------|
|                   | 58490                                                                            | 58500 | 58510 | 58520 | 58530 | 58540 | 58550 | 58560 |       |
| Human             | -----                                                                            |       |       |       |       |       |       |       | 46794 |
| Coquerel'sSifaka  | -----                                                                            |       |       |       |       |       |       |       | 38616 |
| Ma'sNightMonkey   | -----                                                                            |       |       |       |       |       |       |       | 41915 |
| VervetAGM         | TCGATCGCCAGACCTTGTGATCCCCCTCTGCCTCCCAAAGTGCTGGGATTACAGGCGTGAGCCACCGACCCCCGGCCAGC |       |       |       |       |       |       |       | 48642 |
| Gorilla           | -----                                                                            |       |       |       |       |       |       |       | 47311 |
| GrabEatingMacaque | TTGATCGCCTGACCTCGTGATCCCCCTCCGCTCCCAAAGTGCTGGGATTACAGGCGTGAGCCACCGACCCCCGGCCAGC  |       |       |       |       |       |       |       | 47865 |
| Macaque           | TTGATCGCCTGACCTCGTGATCCCCCTCCGCTCCCAAAGTGCTGGGATTACAGGCGTGAGCCACCGACCCCCGGCCAGC  |       |       |       |       |       |       |       | 48688 |
| PigTailedMacaque  | TTGATCGCCTGACCTCGTGATCCCCCTCTGCCTCCCAAAGTGCTGGGATTACAGGCGTGAGCCACCGACCCCCGGCCAGC |       |       |       |       |       |       |       | 47560 |
| Bonobo            | -----                                                                            |       |       |       |       |       |       |       | 45898 |
| OliveBaboon       | TCAATCGCCTGACCTCGTGATCCCCCTCCGCTCCCAAAGTGCTGGGATTACAGGCGTGAGCCACCGACCCCCGGCCAGC  |       |       |       |       |       |       |       | 47415 |
| Orangutan         | -----                                                                            |       |       |       |       |       |       |       | 46894 |

Tuesday, May 03, 2022 06:16 PM

|                   |                                                                                  |       |
|-------------------|----------------------------------------------------------------------------------|-------|
| Majority          | -----CATATTTCTGGAGTGGTGAAGAGCTAGCCAGCCAAGATTTTCAGGGTAATATATTCAGAAGCCAG           |       |
|                   | 58570 58580 58590 58600 58610 58620 58630 58640                                  |       |
| Human             | -----CATATTTCTGGAGTGGTGAAGAGCTACCCAGCCAAGATTTTCAGGGCAATATATTCAGAAGCCAG           | 46859 |
| Coquerel'sSifaka  | -----TATTTTGGAGTTATGCAGAGCTAGCCAGCCAAGATTTTCAGGGTAGTATGTTTCAGAAGCCAT             | 38679 |
| Ma'sNightMonkey   | -----CATATTTCTGGAGTGGTGAAGAGCTAGCCAGCCAAGATTTACAGGGTAATGTATTCAGAAGCCAG           | 41980 |
| VervetAGM         | TTCCGTAGTTTTTTCATATTTCTGGAGTGGTGAAGAGCTAGCCAGCCAAGATTTTCAGGGTAATATATTCAGAAGCCAG  | 48722 |
| Gorilla           | -----CATATTTGTGGAGTGGTGAAGAGCTACCCAGCCAAGATTTTCAGGGTAATATATTCAGAAGCCAG           | 47376 |
| GrabEatingMacaque | TTCCGTAGTTTTTTCATATTTCTGGAGTGGTGAAGAGCTAGCCAGCCAAGATTTTCAGGGTAATATATTCAGAAGCCAG  | 47945 |
| Macaque           | TTCCGTAGTTTTTTCATATTTCTGGAGTGGTGAAGAGCTAGCCAGCCAAGATTTTCAGGGTAATATATTCAGAAGCCAG  | 48768 |
| PigTailedMacaque  | TTCCGTAGTTTTTTCATATTTCTGGAGTGGTGAAGTGTCTAGCCAGCCAAGATTTTCAGGGTAATATATTCAGAAGCCAG | 47640 |
| Bonobo            | -----CATATTTCTGGAGTGGTGAAGAGCTACCCAGACAAGATTTTCAGGGTAATATATTCAGAAGCCAG           | 45963 |
| OliveBaboon       | TTCCGTAGTTTTTTCATATTTCTGGAGTGGTGAAGAGCTAGCCAGCCAAGATTTTCAGGGTAATATATTCAGAAGCCAG  | 47495 |
| Orangutan         | -----CATATTTCTGGAGTGGTGAAGAGCTAGCTAGCCAAGATTTTCAGGGTAGTATATTCAGAAGCCAG           | 46959 |

|                   |                                                                                 |       |
|-------------------|---------------------------------------------------------------------------------|-------|
| Majority          | AGCTTACT---CTTCTGTACAAAGACAACCTAAGGGGATTTTAAATGCATTGGCTAGCTGTTCAAGTATATAAACCTAA |       |
|                   | 58650 58660 58670 58680 58690 58700 58710 58720                                 |       |
| Human             | AGCTTACT---CTTCTGTACAAAGACAACCTAAGGGGATTTTAAATGCATTGGCTGCGGTTCAAGTATATAAACCTAA  | 46936 |
| Coquerel'sSifaka  | AGTTTACTTCTCTTTTGTACAAAGGCAACCTAAGGAGATTTTAAATGCATTGGCTGGCCATTCAAGTATACAAGCCTAA | 38759 |
| Ma'sNightMonkey   | AGCTCACT---CTTCTGTACAAAGACAACCTAAAGGGATTTTAAATGCATTGGTTAGCCATTCAAGTATATAAACCTAA | 42057 |
| VervetAGM         | AGCTTACT---CTTCTGTACAAAGACAACCTAAGGGAATTTTAAATGCATTGGCTGGCTGTTCAAGTATATAAACCTAA | 48799 |
| Gorilla           | AGCTTACT---CTTCTGTACAAAGACAACCTAAGGGGATTTTAAATGCATTGGCTTGCTGTTCAAGTATATAAACCTAA | 47453 |
| GrabEatingMacaque | AGCTTACT---CTTCTGTACAAAGACAACCTAAGGGAATTTTAAATGCATTGGCTAGCTGTTCAAGTATATAAACCTAA | 48022 |
| Macaque           | AGCTTACT---CTTCTGTACAAAGACAACCTAAGGGAATTTTAAATGCATTGGCTAGCTGTTCAAGTATATAAACCTAA | 48845 |
| PigTailedMacaque  | AGCTTACT---CTTCTGTACAAAGACAACCTAAGGGAATTTTAAATGCATTGGCTAGCTGTTCAAGTATATAAACCTAA | 47717 |
| Bonobo            | AGCCTACT---CTTCTGTACAAAGACAACCTAAGGGGATTTTAAATGCATTGGCTGCGGTTCAAGTATATAAACCTAA  | 46040 |
| OliveBaboon       | AGCTTACT---CTTCTGTACAAAGACAACCTAAGGGAATTTTAAATGCATTGGCTAGCTGTTCAAGTATATAAACCTAA | 47572 |
| Orangutan         | AGCTTACT---CTTCTATACAAAGACAACCTAAGGGGATTTTAAATGCATTGGCTGGCCATTGAAGTATATAAACCTAA | 47036 |

|                   |                                                                                  |       |
|-------------------|----------------------------------------------------------------------------------|-------|
| Majority          | GTGAAACTCCTAGAGTAAAATATGACTTAAAGTATAGCTTGA-----GTCCATATATTATCTCTTA-              |       |
|                   | 58730 58740 58750 58760 58770 58780 58790 58800                                  |       |
| Human             | GTGAAACTCCTAGAGTAAAATATGACTTAAAGTATAGCTTGA-----GTCCATATATTATCACTTA-              | 46996 |
| Coquerel'sSifaka  | GTGAAACTTTTAGAGTAGAATATGACTTAAAGTATAGCTTGACAGGTAATATATCGAGTGAGTGACATACTATCTCCTA- | 38838 |
| Ma'sNightMonkey   | GTGAAACTCCTAGGGTAAAATATGACTTAAAGTATAGCTTGA-----GTTTATATATTATCTCTTA-              | 42117 |
| VervetAGM         | GTGAAACTCCTACAGTAAAATATGACTTAAAGTATAGCTTGA-----GTCCATATATTATCTCTTA-              | 48859 |
| Gorilla           | GTGAAACTCCTAGAGTAAAATATGACTTAAAGTATAGCTTGA-----GTCCATATATTATCTCTTAA              | 47514 |
| GrabEatingMacaque | GTGAAACTCCTACAGTAAAATATGACTTAAAGTATAGCTTGA-----GTCCATATATTATCTCTTA-              | 48082 |
| Macaque           | GTGAAACTCCTACAGTAAAATATGACTTAAAGTATAGCTTGA-----GTCCATATATTATCTCTTA-              | 48905 |
| PigTailedMacaque  | GTGAAACTCCTACAGTAAAATATGACTTAAAGTATAGCTTGA-----GTCCATATATTATCTCTTA-              | 47777 |
| Bonobo            | GTGAAACTCCTAGAGTAAAATATGACTTAAAGTATAGCTTGA-----GTCCATATATTATCTCTTA-              | 46100 |
| OliveBaboon       | GTGAAACTCCTACAGTAAAATATGACTTAAAGTATAGCTTGA-----GTCCATATATTGTCTCTTA-              | 47632 |
| Orangutan         | GTGAAACTCCTGGAGTAAAATATGACTTAAAGTATAGCTTGA-----GTCCATATATTATCTCTTA-              | 47096 |

Tuesday, May 03, 2022 06:16 PM

| Majority          | GAGATACCTTCTCTGGTCATCCAATAAAGTCATTACTACCATCA-TCTTCCAGTCCTAGACAAAGTCACTTTTAAGCACA   |       |       |       |       |       |       |       |  |       |
|-------------------|------------------------------------------------------------------------------------|-------|-------|-------|-------|-------|-------|-------|--|-------|
|                   | 58810                                                                              | 58820 | 58830 | 58840 | 58850 | 58860 | 58870 | 58880 |  |       |
| Human             | GAGATACCTTCTCTGATCATCCAATAAAGTCATTACTACTATCAATCTTCCAGTCCTAGACAAAGTAACTTTTAAGCACA   |       |       |       |       |       |       |       |  | 47076 |
| Coquerel'sSifaka  | GAGATAACTTCTGTGATTATAACAATAAAGTCATTACCACCACTC-TATCCCAGTCATTGGCAAATTCACCTTTTAATCACA |       |       |       |       |       |       |       |  | 38917 |
| Ma'sNightMonkey   | GAGATACCTTCTCTGGTCATCAAATAAAGTCATTACTGCTAATCACCTTCTGTCCTAGACAAAGTCACTTTTAATCACA    |       |       |       |       |       |       |       |  | 42197 |
| VervetAGM         | GAGATACCTTCTCTGGTCATCCAGTAAAATCATTACTACCATCA-TCTTCCAGTCCTAGACAAAGTCACTTTTAAGCACA   |       |       |       |       |       |       |       |  | 48938 |
| Gorilla           | GAGATACCTTCTCTGATCATCCAATAAAGTCATTACTACTATCAATCTTCCAGTCCTAGACAAAGTCACTTTTAAGCACA   |       |       |       |       |       |       |       |  | 47594 |
| GrabEatingMacaque | GAGATACCTTCTCTGGTCATCCAGTAAAATCATTACTACCATCA-TCTTCAAGTCCTAGACAAAGTCACTTTTAAGCACA   |       |       |       |       |       |       |       |  | 48161 |
| Macaque           | GAGATACCTTCTCTGGTCATCCAGTAAAATCATTACTACCATCA-TCTTCCAGTCCTAGACAAAGTCACTTTTAAGCACA   |       |       |       |       |       |       |       |  | 48984 |
| PigTailedMacaque  | GAGATACCTTCTCTGGTCATCCAGTAAAATCATTACTACCATCA-TCTTCCAGTCCTAGACAAAGTCACTTTTAAGCACA   |       |       |       |       |       |       |       |  | 47856 |
| Bonobo            | GAGATACCTTCTCTGATCATCCAATAAAGTCATTACTACTATCAATCTTCCAGTCCTAGACAAAGTAACTTTTAAGCACA   |       |       |       |       |       |       |       |  | 46180 |
| OliveBaboon       | GAGATACCTTGTCTGGTCATCCAGTAAAATCATTACTACCATCA-TCTTCCAGTCCTAGACAAAGTCACTTTTAAGCACA   |       |       |       |       |       |       |       |  | 47711 |
| Orangutan         | GAGATACCTTCTCTGATCATCCAATAAAGCCATTACTACTATCA-TCTTCCAGTCCCAGACAAAGTCACTTTTAAGCACA   |       |       |       |       |       |       |       |  | 47175 |

| Majority          | TCACT--GTTTTACTT---CATAGCACATACC-AT---AGAAAGTATCTGGTTCAGGTAAGTACTAGTCCAGCTC-CC     |       |       |       |       |       |       |       |  |       |
|-------------------|------------------------------------------------------------------------------------|-------|-------|-------|-------|-------|-------|-------|--|-------|
|                   | 58890                                                                              | 58900 | 58910 | 58920 | 58930 | 58940 | 58950 | 58960 |  |       |
| Human             | TCACT--GTTTTACCT---CACAGCATATACC-GT---AGAAAGTATCTGGTTCAGGTAAGTACTAGTCCAGCTC-CC     |       |       |       |       |       |       |       |  | 47144 |
| Coquerel'sSifaka  | TCACTCCGTTTTACTTTCTTTCATAGTACTTACCCACTATAAGACATTATCTGGTTCATGTAGT--CCACCTCTCCACTA   |       |       |       |       |       |       |       |  | 38995 |
| Ma'sNightMonkey   | CCACT--GTTTTACTTTATTCATAGCACTTTTC-ACTATAAGAAAGTATCTGGTTCATGTACTAGTACTAGTCCAGCTCTCC |       |       |       |       |       |       |       |  | 42274 |
| VervetAGM         | TCACT--GTTTTACTT---CATAGCACGTACC-AC---AGAAAGTATCTGGTTCAGGTAAGTACTAGTCCAGCTC-CC     |       |       |       |       |       |       |       |  | 49006 |
| Gorilla           | TCACT--GTTTTACCT---CACAGCACATACC-GT---AGAAAGTATCTGGTTCAGGTAAGTACTAGTCCAGCTC-CC     |       |       |       |       |       |       |       |  | 47662 |
| GrabEatingMacaque | TCACT--GTTTTACTT---CATAACACATACC-AT---AGAAAGTATCTGGTTCAGGTAAGTACTAGTCCAGCTC-CC     |       |       |       |       |       |       |       |  | 48229 |
| Macaque           | TCACT--GTTTTACTT---CATAACACATACC-AT---AGAAAGTATCTGGTTCAGGTAAGTACTAGTCCAGCTC-CC     |       |       |       |       |       |       |       |  | 49052 |
| PigTailedMacaque  | TCACT--GTTTTACTT---CATAGCACATACC-AT---AGAAAGTATCTGGTTCAGGTAAGTACTAGTCCAGCTC-CC     |       |       |       |       |       |       |       |  | 47924 |
| Bonobo            | TCACT--GTTTTACCT---CACAGCACATACC-GT---AGAAAGTATCTGGTTCAGGTAAGTACTAGTCCAGCTC-CC     |       |       |       |       |       |       |       |  | 46248 |
| OliveBaboon       | TCACT--GTTTTACTT---CATAGCACATACC-AT---AGAAAGTATCTGGTTCAGGTAAGTACTAGTCCAGCTC-CC     |       |       |       |       |       |       |       |  | 47779 |
| Orangutan         | TCACT--GTTTTACCT---CACAGCACGTACC-AT---AGAAAGTATCTGGTTCAGGTAAGTACTAGTCCAGCTC-CC     |       |       |       |       |       |       |       |  | 47243 |

| Majority          | CACTATAAGGTATCAGGAATCATA--ATCATCTTGTTCACTCTGCTGTACCCCTCAGAACGTAACAAATGCTAGACACAT |       |       |       |       |       |       |       |  |       |
|-------------------|----------------------------------------------------------------------------------|-------|-------|-------|-------|-------|-------|-------|--|-------|
|                   | 58970                                                                            | 58980 | 58990 | 59000 | 59010 | 59020 | 59030 | 59040 |  |       |
| Human             | TACTATAAGGTATCAGGAATCATATAATCATCTTGTTCACTCT-CTGTACCCCTCAGAACGTAACAAATGCTAGACACAT |       |       |       |       |       |       |       |  | 47223 |
| Coquerel'sSifaka  | GACTATAGAGCATCAGGAATCATA--TTTATCTTGTTCACTCTGCTGTACCCCTCAGAACGTAACAAATGCTAGGACAT  |       |       |       |       |       |       |       |  | 39071 |
| Ma'sNightMonkey   | CACTATAGGGTATCAGGAATCATA--ATCATCTTGTTCACTCTGCTGTACCCCTCAGAACGTAACAAATGCTAGATGCAT |       |       |       |       |       |       |       |  | 42352 |
| VervetAGM         | CACTATAAGGTATCAGGAATCATA--ATCGTTTTGTTCACTCTGCTGTACCCCTCAGAACGTAACAAATGCTAGACACAT |       |       |       |       |       |       |       |  | 49084 |
| Gorilla           | TACTATAAGGTATCAGGAATCATATAATCATCTTGTTCACTCT-CTGTACCCCTCAGAACATAACAAATGCTAGACACAT |       |       |       |       |       |       |       |  | 47741 |
| GrabEatingMacaque | CACTATAAGGTATCAGGAATCATA--ATCGTTTTGTTCACTCTGCTGTACCCCTCAGAACGTAACAAATGCTAGACACAT |       |       |       |       |       |       |       |  | 48307 |
| Macaque           | CACTATAAGGTATCAGGAATCATA--ATCGTTTTGTTCACTCTGCTGTACCCCTCAGAACGTAACAAATGCTAGACACAT |       |       |       |       |       |       |       |  | 49130 |
| PigTailedMacaque  | CACTATAAGGTATCAGGAATCATA--ATCGTTTTGTTCACTCTGCTGTACCCCTCAGAACGTAACAAATGCTAGACACAT |       |       |       |       |       |       |       |  | 48002 |
| Bonobo            | TACTATAAGGTATCAGGAATCATATAATCATCTTGTTCACTCT-CTGTACCCCTCAGAACGTAACAAATGCTAGACACAT |       |       |       |       |       |       |       |  | 46327 |
| OliveBaboon       | CACTATAAGGTATCAGGAATCATA--ATCGTTTTGTTCACTCTGCTGTACCCCTCAGAACGTAACAAATGCTAGACACAT |       |       |       |       |       |       |       |  | 47857 |
| Orangutan         | CACTATAAGGTATCAGGAATCATA--ATCATCTTGTTCACTCTGCTGTACCCCTCAGAATGTAACAAATGCTAGACACAT |       |       |       |       |       |       |       |  | 47321 |

Tuesday, May 03, 2022 06:16 PM

| Majority          | CCCTGAATACCCAGTAAATGTTTAAAGGAATTAATGAGTGAATTAATTTTGAAGACACTTT--GGAGACCAAGATAATCTT |       |
|-------------------|-----------------------------------------------------------------------------------|-------|
|                   | 59050 59060 59070 59080 59090 59100 59110 59120                                   |       |
| Human             | CCCTGAATACCCAGTAAATGTTTAAAGGAATTAATGAGTGAATTAATTTTGAAGATACGTT--GGAGACCAAGATAATCTG | 47301 |
| Coquerel'sSifaka  | CCTCGA-TACTCAGTGAATGTTTAAAAAATTCATGAGTGAATGCATTTTGAAAAACTTAAAGAAGATCAAGACGATCTT   | 39150 |
| Ma'sNightMonkey   | CCCTGAATACTCAGTAAATGTTTAAAG-AATTAATGAGTGAATTGATTTTAAAGACACTT--AGAGACCAAGATAATCTT  | 42428 |
| VervetAGM         | CCCTGAATACCCAGTAAATGTTTAAAGGAATTAATGAGTGAATTAATTTTGAAGACACTTT--GGAGACCAAGATAATCTT | 49162 |
| Gorilla           | CCCTGAATACCCAGTAAATGTTTAAAGGAATTAATGAGTGAATTAATTTTGAAGATACTTG--GGAGACCAAGATAATCTG | 47819 |
| GrabEatingMacaque | CCCTGAATACCCAGTAAATGTTTAAAGGAATTAATGAGTGAATTAATTTTGAAGACACTTT--GGAGACCAAGATAATCTT | 48385 |
| Macaque           | CCCTGAATACCCAGTAAATGTTTAAAGGAATTAATGAGTGAATTAATTTTGAAGACACTTT--GGAGACCAAGATAATCTT | 49208 |
| PigTailedMacaque  | CCCTGAATACCCAGTAAATGTTTAAAGGAATTAATGAGTGAATTAATTTTGAAGACACTTT--GGAGACCAAGATAATCTT | 48080 |
| Bonobo            | CCCTGAATACCCAGTAGATGTTTAAAGGAATTAATGAGTGAATTAATTTTGAAGATACTTT--GGAGACCAAGATAATCTG | 46405 |
| OliveBaboon       | CCCTGAATACCCAGTAAATGTTTAAAGGAATTAATGAGTGAATTAATTTTGAAGACACTTT--GGAGACCAAGATAATCTT | 47935 |
| Orangutan         | CCCTGAATACCCAGTAAATGTTTAAAGGAATTAATGAGTGAATTAATTTTGAAGATACTTT--GGAGACCAAGATAATCTG | 47399 |

| Majority          | ACAGTCTTACAGATATTGTTGAACATACACAAACACATTATATTGTTTATAGGTTGTGTTGAATGTTTTGGGAAATACCA  |       |
|-------------------|-----------------------------------------------------------------------------------|-------|
|                   | 59130 59140 59150 59160 59170 59180 59190 59200                                   |       |
| Human             | ACAGTCTTATAGATGTTGTTGAACATACACAAACACATTATATAGTTTATAGGTTGTGTTGAATGTTTTAGGAAATACCA  | 47381 |
| Coquerel'sSifaka  | AGAGTTTTGTAGATATTGTTGAGTATACACA----CACGATATTGTTTATAGATTGTGTTGAATGTTTTGGCAAATACTA  | 39226 |
| Ma'sNightMonkey   | A--GTCTTACAGATATTGTTGAACATACACAAATACATTATATTGTTTATAGGTTGTGTTGAATGTATTGGGGAATACCA  | 42506 |
| VervetAGM         | ACAGTCTTACAGATATTGTTGAACATATACAAACACATTATATTGTTTATAGGTTGTGTTGAATGTTTTGGGAAATACCA  | 49242 |
| Gorilla           | ACAGTCTTATAGATGTTGTTGAACATACACAAACACATTATATAGTTTATAGGTTGTGTTTAAATGTTTTAGGAAATACCA | 47899 |
| GrabEatingMacaque | ACAGTCTTACAGATATTGTTGAACATATACAAACACATTATATTGTTTATAGGTTGTGTTGAATGTTTTGGGAAATACCA  | 48465 |
| Macaque           | ACAGTCTTACAGATATTGTTGAACATACACAAACACATTATATTGTTTATAGGTTGTGTTGAATGTTTTGGGAAATACCA  | 49288 |
| PigTailedMacaque  | ACAGTCTTACAGATATTGTTGAACATATACAAACACATTATATTGTTTATAGGTTGTGTTGAATGTTTTGGGAAATACCA  | 48160 |
| Bonobo            | ACAGTCTTATAGATGTTGTTGAACATACACAAACACATTATATAGTTTATAGGTTGTGTTGAATGTTTTAGGAAATACCA  | 46485 |
| OliveBaboon       | ACAGTCTTACAGATATTGTTGAACATATACAAACACATTATATTGTTTATAGGTTGTGTTGAATGTTTTGGGAAATACCA  | 48015 |
| Orangutan         | ACAGGCTTATAGATATTGTT-AACATACACAAACACATTATATTGTTTATAGGTTGTATTGAATGTTTTGGGAAATACCA  | 47478 |

| Majority          | TAAATTACCTAAAGTTTTATACAAAATGG-AGTATACATGTATATTTCTGAATGTGTCAAGATCCTTCATTTTAGCTACA |       |
|-------------------|----------------------------------------------------------------------------------|-------|
|                   | 59210 59220 59230 59240 59250 59260 59270 59280                                  |       |
| Human             | TAAATTACCTAAAGTTTTATACAAAATGG-AGTATACATGTATATTTCTGAATGTGTCAAGATCCTTCATTTTAGCTA-A | 47459 |
| Coquerel'sSifaka  | TAAAGTACCTACCATTTTATTCAAAATGG-ACTATCTATGTATATTTCTGAATGTGTAAGGATCCTTCATTTTAGTTAGA | 39305 |
| Ma'sNightMonkey   | TAAAGTACCTAAAATTTTACGCAAAGTGG-AGTATGCATGTATATTTCTGAATGTGTCGAGATCCTTCATTTTAACTACA | 42585 |
| VervetAGM         | TAAATTACCTAAAGGTTTATACAAAATGG-AGTATACATGTATATTTCTGAATGTGTCAAGATCCTTCATTTTAGCTACA | 49321 |
| Gorilla           | TAAATTACCTAAAGTTTTATACAAAATGG-AGTATACATGTATATTTCTGAATGTGTCAAGATCCTTCATTTTAGCTA-A | 47977 |
| GrabEatingMacaque | TAAATTACCTAAAGGTTTATACAAAATGG-AGTATACATGTATATTTCTGAATGTGTCAAGATCCTTCATTTTAGCTACA | 48544 |
| Macaque           | TAAATTACCTAAAGGTTTATACAAAATGGGAGTATACATGTATATTTCTGAATGTGTCAAGATCCTTCATTTTAGCTACA | 49368 |
| PigTailedMacaque  | TAAATTACCTAAAGGTTTATACAAAATGG-AGTATACATGTATATTTCTGAATGTGTCAAGATCCTTCATTTTAGCTACA | 48239 |
| Bonobo            | TAAATTACCTAAAGTTTTATACAAAATGG-AGTATACATGTATATTTCTGAATGTGTCAAGATCCTTCATTTTAGCTA-A | 46563 |
| OliveBaboon       | TAAATTACCTAAAGGTTTATACAAAATGG-AGTATATATGTATATTTCTGAATGTGTCAAGATCCTTCATTTTAGCTACA | 48094 |
| Orangutan         | TAAATTACCTAAAGTTTTATACAAAATGG-AGTATACATGTATATTTCTGAATGTGTCAAGATCCTTCATTTTAGCTACA | 47557 |

Tuesday, May 03, 2022 06:16 PM

| Majority          | GTCTCAGAAATATCCTTGAGATCCTAAAAGATTAAGAACCATTGATTTGGCATAGTAGATA-<br>ACTGCAAGTCCTTCAAAC |       |
|-------------------|--------------------------------------------------------------------------------------|-------|
|                   | 59290 59300 59310 59320 59330 59340 59350 59360                                      |       |
| Human             | GTCTCAGAAATATCCTTGAGATCCTAAAAGACTAAGAACCATTGATCTGGCATAGTAGATATACTGCAAGTCCTTCAAAC     | 47539 |
| Coquerel'sSifaka  | GTCTCAGAAATATCCTTGAGTCCATAGAAGGTTAAGAAACGTCAGTATGGCATAGTGAATAGACTACAAATTTCTTTAAAC    | 39385 |
| Ma'sNightMonkey   | GTCTCAGAAAT---CTTGAGTTGCTGAAAGATTAAGAACCATTTATCTGGCATAGTAGATAGACTGCAACTCCTTTAAAC     | 42662 |
| VervetAGM         | GTCTCAGAAATATCCTTGAGATCCTAAAAGATTGAGAACCATTGATTTGGCATAGTAGAT----TGCAAGTCCTTCAAAC     | 49397 |
| Gorilla           | GTCTCAGAAATATCCTTGAGATCCTAAAAGACTAAGAACCATTGATCTGGCATAGTAGATATGCTGCAAGTCCTTCAAAC     | 48057 |
| GrabEatingMacaque | GTCTCAGAAATATCCTTGAGATCCTAAAAGATTGAGAACCATTGATTTGGCATAGTAGAT----TGCAAGTCCTTCAAAC     | 48620 |
| Macaque           | GTCTCAGAAATATCCTTGAGATCCTAAAAGATTGAGAACCATTGATTTGGCATAGTAGAT----TGCAAGTCCTTCAGAC     | 49444 |
| PigTailedMacaque  | GTCTCAGAAATATCCTTGAGATCCTAAAAGATTGAGAACCATTGATTTGGCATAGTAGAT----TGCAAGTCCTTCAAAC     | 48315 |
| Bonobo            | GTCTCAGAAATATCCTTGAGATCCTAAAAGACTAAGAACCATTGATCTGGCGTAGTAGATATACTGCAAGTCCTTCAAAC     | 46643 |
| OliveBaboon       | GTCTCAGAAATATCCTTGAGATCCTAAAAGATTGAGAACCATTGATTTGGCATAGTAGAT----TGCAAGTCCTTCAAAC     | 48170 |
| Orangutan         | GTCTCAGAAATATCCTTGAGATCCTAAAAGACTAAGAACCATTGATCTGGCATAGTAGATATACTGCAAGTCCTTCAGAC     | 47637 |

| Majority          | AACTCTATTTAAA-TATTACCTATTTTATAGGCATTTTGAATAATGTTTTATTTTTTGGTGAAGATTTGGAATGAAGGC  |       |
|-------------------|----------------------------------------------------------------------------------|-------|
|                   | 59370 59380 59390 59400 59410 59420 59430 59440                                  |       |
| Human             | AACTGTATTTAAA-TATTACCTATTTTATAGGCATTTTGAATAATATTTTTATTTTTTGGTGAAGTTTTGGAATGAAGAC | 47618 |
| Coquerel'sSifaka  | AATTTACATAAAAACACCACCTATTTTATAGGCATCTTTAAACA---TTTTGCTTTT-GGTGTAGCTTTGGAATGAAGGC | 39461 |
| Ma'sNightMonkey   | AACTCCATTTAAA-TATTACCTATTTTATAGGCATTTTGAATA---TTTTATTTTTT-GGTGAATATTTGAAATGAAGAC | 42737 |
| VervetAGM         | AACTCTATTTAAA-TATTACCTGTTTTATAGGCATCTTGAATAATGTTTTATTTTTTGGTGAAGATTTGGAATGAAGGC  | 49476 |
| Gorilla           | AACTGTATTTAAA-TATTACCTATTTTATAGGCATTTTGAATAATATTTTTATTTTTTGGTGAAGTTTTGGAATGAAGAC | 48136 |
| GrabEatingMacaque | AACTCTATTTAAA-TATTACCTATTTTATAGGCATTTTGAATAATGTTTTATTTTTTGGTGAAGATTTGGAATGAAGGC  | 48699 |
| Macaque           | AACTCTATTTAAA-TATTACCTATTTTATAGGCATTTTGAATAATGTTTTATTTTTTGGTGAAGATTTGGAATGAAGGC  | 49523 |
| PigTailedMacaque  | AACTCTATTTAAA-TATTACCTATTTTATAGGCATTTTGAATAATGTTTTATTTTTTGGTGAAGATTTGGAATGAAGGC  | 48394 |
| Bonobo            | AACTGTATTTAAA-TATTACCTATTTTATAGGCATTTTGAATAATATTTTTATTTTTTGGTGAAGTTTTGGAATGAAGAC | 46722 |
| OliveBaboon       | AACTCTATTTAAA-TATTACCTATTTTATAGGCATTTTGAATAATGTTTTATTTTTTGGTGAAGATTTGGAATGAAGGC  | 48249 |
| Orangutan         | AACTATATTTAAA-TATTATCTATTTTATAGGCATTTTGAATAATATTTTTATTTTTTGGTGAAGATTTGGAATGAAGAC | 47716 |

| Majority          | AGTTAACTAATTTGTTGATTGAATTATATTACTTT-----AAATCTCATGGTAACAGAATAAGGTAATTAAGTTCATGAG  |       |
|-------------------|-----------------------------------------------------------------------------------|-------|
|                   | 59450 59460 59470 59480 59490 59500 59510 59520                                   |       |
| Human             | AGTTAACTAATTTGTTGATTGAATTATGTTACTTTACTTTAAATCTCACGGTAACAGAATAAGGTAATTAAGTTCATGAG  | 47698 |
| Coquerel'sSifaka  | AGGTAACATAATTTGTTGATTGAAATATATAGTTACTTTAACTTCAAGGTAACAGAATAAAGTAATTAATTTCTTGAG    | 39541 |
| Ma'sNightMonkey   | AGTTAACTAA-----TGAAGTATATAGTTT-----AAATCTCACAGTAACAGAATAAGGTAATTAAGTTCATGAG       | 42803 |
| VervetAGM         | CGTTAACTAATTTGTTGATTGAATTATATTACTTT-----AAATCTCATGCTAATAGAATAAGATAATTAAGTTCATGAG  | 49551 |
| Gorilla           | AGTTAACTAATTTGTTGATTGAGTTATGTTACTTTACTTTAAATCTCATGGTAACAGAATAAGGTAATTAAGTTCATGAG  | 48216 |
| GrabEatingMacaque | CATTAACATAATTTGTTGATTAAATTATATTACTTT-----AAATCTCATGGTAATAGAATAAGATAATTAAGTTCATGAG | 48774 |
| Macaque           | CATTAACATAATTTGTTGATTAAATTATATTACTTT-----AAATCTCATGGTAATAGAATAAGATAATTAAGTTCATGAG | 49598 |
| PigTailedMacaque  | CGTTAACTAATTTGTTGATTAAATTATATTACTTT-----AAATCTCATGGTAATAGAATAAGATAATTAAGTTCATGAG  | 48469 |
| Bonobo            | AGTTAACTAATTTGTTGATTGAATTATGTTACTTT-----AAATCTCACGATAACAGAATAAGGTAACATAAGTTCATGAG | 46797 |
| OliveBaboon       | CGTTAACTAATTTGTTGATTAAATTATATTACTTT-----AAATCTCATGGTAATAGAATAAGATAATTAAGTTCATGAG  | 48324 |
| Orangutan         | AGTTAACTAATTTGTTGATTGAATTATGTTAATTTACTTTAAATCTCACGGTAACAGAATAAGGTAATTAAGTTCATGAG  | 47796 |



Tuesday, May 03, 2022 06:16 PM

|                   |                                                                                    |       |
|-------------------|------------------------------------------------------------------------------------|-------|
| Majority          | TGATTTAGAGTATATT-GATGTTAATAGTCACAAAATATT-----AGGTAGTTTAGATGGTAATAGTAATATATTAGGAG   |       |
|                   | 59530      59540      59550      59560      59570      59580      59590      59600 |       |
| Human             | TGATTTAGAGTATATT-GATGTTAATAGTCACAAAATATT-----AGGTAGTTTAGACGGCAATAGTAATATATCAGGAG   | 47772 |
| Coquerel'sSifaka  | TGATTCATAGTATATT-GATGTTAATAGC-ACAAAATATTTAAGTAGATAGATTAGGTGGTAATATTAACATATTAGGAA   | 39619 |
| Ma'sNightMonkey   | AGATTTAGAGTATATT-----GAT-----GTAGTTTAGATGGTAATAGTAATATATTAGGAG                     | 42855 |
| VervetAGM         | TAATTTAGAGTATATA-GATCTTAATAGTCACAAAATATT-----AGGTAGTTTAGATGGTAATAGTAATATATTAGAAG   | 49625 |
| Gorilla           | TGATTTAGAGTATATT-GATGTTAATAGTCACAAAATATT-----AGGTAGTTTAGACGGTAATAGTAATATATCAGGAG   | 48290 |
| GrabEatingMacaque | TGATTTAGAATATATTTGATCTTAATAGTCACAAAATATT-----AGGTAGTTTAGATGGTAATAGTAATATATTAGAAG   | 48849 |
| Macaque           | TGATTTAGAGTATATT-GATCTTAATAGTCACAAAATATT-----AGGTAGTTTAGATGGTAATAGTAATATATTAGAAG   | 49672 |
| PigTailedMacaque  | TGATTTAGAGTATATT-GATCTTAATAGTCACAAAATATT-----AGGTAGTTTAGATGGTAATAGTAATATATTAGAAG   | 48543 |
| Bonobo            | TGATTTAGAGTATATT-GATGTTAATAGTCACAAAATATT-----AGGTAGTTTAGACGGTAATAGTAATATATCAGGAG   | 46871 |
| OliveBaboon       | TGATTTAGAGTATATT-GATCTTAATAGTCACAAAATATT-----AGGTAGTTTAGATGGTAATAGTAATATATTAGAAG   | 48398 |
| Orangutan         | TGATTTAGAGTATATT-GATGTTAATAGTCACAAAATATT-----AGGTACTTTAGATGGTAATAGTAATATATCAGGAG   | 47870 |

|                   |                                                                                    |       |
|-------------------|------------------------------------------------------------------------------------|-------|
| Majority          | AGGCTCATTGTAGATAAGCCATAATATGGATTGACTGCATTATCATTTTTATAAACTTTACATTCTTTGATCCACCTTC    |       |
|                   | 59610      59620      59630      59640      59650      59660      59670      59680 |       |
| Human             | AGGCTCATTGTAGATAAGCCATAATATGGATTGACTGCATTATCATTTTTATAAACTTTACATTCTTTGATCCACCTTC    | 47852 |
| Coquerel'sSifaka  | AGGCTCAGTGTAGATAAGCCATAATGTGGATTGACTACATAGTCATTTTT-TTAGCATTGCCCTCTTTGATCCACCTTTT   | 39698 |
| Ma'sNightMonkey   | AGGCTCATTGTAGGTAAGCCATAATATGGATTGACTGCATAATCATTTTTATAAGCTTTACATTCTTCGATCCACCTTC    | 42935 |
| VervetAGM         | AAGCTCATTGTAGATAAGCCATAAT-TGGATTGACTGCATTATCAGTTTATAAACTTTACATTCTTTGATCCACATTC     | 49704 |
| Gorilla           | AGGCTCATTGTAGATAAGCCATAATATGGATTGACTGCATTATCATTTTTATAAACTTTACATTCTTTGATCCACCTTC    | 48370 |
| GrabEatingMacaque | AAGCTCATTGTAGATAAGCCATAAT-TGGATTGACTGCATTATCAGTTTGTAACTTTACATTCTTTGATCCACATTC      | 48928 |
| Macaque           | AAGCTCATTGTAGATAAGCCATAAT-TGGATTGACTGCATTATCAGTTTGTAACTTTACATTCTTTGATCCACATTC      | 49751 |
| PigTailedMacaque  | AAGCTCATTGTAGATAAGCCATAAT-TGGATTGACTGCATTATCAGTTTGTAACTTTACATTCTTTGATCCACATTC      | 48622 |
| Bonobo            | AGGCTCATTGTAGATAAGCCATAATATGGATTGACTGCATTATCATTTTTATAAACTTTACATTCTTTGATCCACCTTC    | 46951 |
| OliveBaboon       | AAGCTCATTGTAGATAAGCCATAAT-TGGATTGACTGCATTATCAGTTTGTAACTTTACATTCTTTGATCCACATTC      | 48477 |
| Orangutan         | AGGCTCATTGTAGATAAGCCATAATATGGATTGACTGCATTATCATTTTTATAAACTTTACATTCTTTGATCCACCTTC    | 47950 |

|                   |                                                                                    |       |
|-------------------|------------------------------------------------------------------------------------|-------|
| Majority          | AAGTACA---TTTTTCAAATCAAACAATTTATAATTTCTCAGGTAATAATATAATCTTCCTAATTTTGTCAACCCAGTT    |       |
|                   | 59690      59700      59710      59720      59730      59740      59750      59760 |       |
| Human             | AAGTACA---TTTTTCAAATCAAACAATTTATAATTTCTCAGGTAATAATATAATCTTCCTAATTTTGGTCAAACCCAGTT  | 47929 |
| Coquerel'sSifaka  | GAGTACAACATTTTGAATGAACAATTTATAATTTTCTCAGGTAATAATATAATCTTCATAATTTTGTCTAACTCAGTT     | 39778 |
| Ma'sNightMonkey   | AAGTACA---TTTTCAAATGAACAATTTATAATTTCTCAGTTAAA-TTATAATCTCCCTAATTTTGTGACCCAGTT       | 43011 |
| VervetAGM         | AAGTACA---TTTTTCATATCGAACAATTTATCATTTCTCAGGTAATAATAT---CTTCCTAATTTTGTCAACCTAGTT    | 49778 |
| Gorilla           | AAGTACA---TTTTTCAAATCAAACAATTTATAATTTCTCAGGTAATAATATAATCTTCCTAATTTTGGTCAAACCCAGTT  | 48447 |
| GrabEatingMacaque | AAGTACG---TTTTTCAAATCAAACAATTTATCATTTCTCAGGTAATAATAT---CTTCCTAATTTTGTCAACCTAGTT    | 49002 |
| Macaque           | AAGTACG---TTTTTCAAATCAAACAATTTATCATTTCTCAGGTAATAATAT---CTTCCTAATTTTGTCAACCTAGTT    | 49825 |
| PigTailedMacaque  | AAGTACG---TTTTTCAAATCAAACAATTTATCATTTCTCAGGTAATAATAT---CTTCCTAATTTTGTCAACCTAGTT    | 48696 |
| Bonobo            | AAGTACA---TTTTTCAAATCAAACAATTTATAATTTCTCAGGTAATAATATAATCTTCCTAATTTTGGTCAAACCCAGTT  | 47028 |
| OliveBaboon       | AAGTACG---TTTTTCAAATGAACAATTTATCATTTCTCAGGTAATAATAT---CTTCCTAATTTTGTCAACCTAGTT     | 48551 |
| Orangutan         | AAGTACA---TTTTTCAAATCAAACAATTTATAATTTCTCAGGTAATAATATAATCTTCCTAATTTTGTCAACCCAGTT    | 48027 |

Tuesday, May 03, 2022 06:16 PM

| Majority          | TTTTCACTTTTTAAAAATATTCATATTAGTTCATTATAAGATGATTTAAATTACAAGATACAGTCATAAAATCTTGGAGATA  |       |
|-------------------|-------------------------------------------------------------------------------------|-------|
|                   | 59770 59780 59790 59800 59810 59820 59830 59840                                     |       |
| Human             | TTTTCACTTTTTAAAAATGTTTCATATTAGTTCATTATAAGATGATTTAAATTACAAGATACAGTCATAAAATCTTGGGGATA | 48009 |
| Coquerel'sSifaka  | TTTTCACTTTTTTTTGGTATTCTGTTAGTTTGTGCATAAAATGATTTAAATTGCAAGATACAGTCATGCCTC----ACTTA   | 39854 |
| Ma'sNightMonkey   | TTA-CACTTTTTAGAAATATT--TCTTAGTCCATTAAGATGATT-----ACAGTATACAGTCATAAATCTTGGAGATC      | 43083 |
| VervetAGM         | TTTTCACTTTT-AAAAATATTCATATTAGTTCATTATAAGATGATTCAGTTACAAGATACAGTCATAAAATCTTGGAGATA   | 49857 |
| Gorilla           | TTTTCACTTTTTAAAAATGTTTCATATTAGTTCATTATAAGATGATTTAAATTACAAGATACAGTCATAAAATCTTGGGGATA | 48527 |
| GrabEatingMacaque | TTTTCACTTTT-AAAAATATTCATATTAGTTCATTATAAGATGATTTAAATTACAAGATACAGTCATAAAATCTTGGAGATA  | 49081 |
| Macaque           | TTTTCACTTTT-AAAAATATTCATATTAGTTCATTATAAGATGATTTAAATTACAAGATACAGTCATAAAATCTTGGAGATA  | 49904 |
| PigTailedMacaque  | TTTTCACTTTT-AAAAATATTCATATTAGTTCATTATAAGATGATTTAAATTACAAGATACAGTCATAAAATCTTGGAGATA  | 48775 |
| Bonobo            | TTTTCACTTTTTAAAAATGTTTCATATTAGTTCATTATAAGATGATTTAAATTACAAGATACAGTCATAAAATCTTGGGGATA | 47108 |
| OliveBaboon       | TTTTCACTTTT-AAAAATATTCATATTAGTTCATTATAAGATGATTTAAATTACAAGATACAGTCATAAAATCTTGGAGATA  | 48630 |
| Orangutan         | TTTTCACTTTTTAAAAATGTTTCATATTAGTTCATTATAAGATGATTTAAATTACAAGATACAGTCATAAAATCTTGGGGATA | 48107 |

| Majority          | GTGATGGGGATACCCTCCGAGAAATGCATTGTTAGGTAATTTTGTCACTGCATAAAATGTCATAGAGT-ACATTTACACAA  |       |
|-------------------|------------------------------------------------------------------------------------|-------|
|                   | 59850 59860 59870 59880 59890 59900 59910 59920                                    |       |
| Human             | GTGATGAGGATACTCTCGGAGAAATGCATTGTTAGGTAATTTTGTCACTGCATAAAATGTCATAGAGT-ACATTTGCACAA  | 48088 |
| Coquerel'sSifaka  | ATGATGAGGTTATATTTCTGAGAAATGCTTTGTTAGGTGATTTTGTCACTGTACAAA---CATAGAATTGTACTTACACAA  | 39931 |
| Ma'sNightMonkey   | ATGGTGGGGATACCCTTAAAGAAACGCATTGTTAGGTAATTTTGTCACTGCGCAAATGTCATAGAGT-ACATTTACACAA   | 43162 |
| VervetAGM         | GTGATGGGGATACCCTCCGGGAAATGCATTGTTAGGTAATTTTGTCACTGCATAAAATGTCATAGAGT-ACATTTACACAA  | 49936 |
| Gorilla           | GTGATGAGGATACTCTTGGAGAAATGCATTGTTAGGTAATTTTGTCACTGCATAAAATGTCATAGAGT-ACATTTGCACAA  | 48606 |
| GrabEatingMacaque | GTGATGGGGATACCCTCCGGGAAAGTGCATTGTTAGGTAATTTTGTCACTGCATAAAATGTCATAGAGT-ACATTTACACAA | 49160 |
| Macaque           | GTGATGGGGATACCCTCCGGGAAATGCATTGTTAGGTAATTTTGTCACTGCATAAAATGTCATAGAGT-ACATTTACACAA  | 49983 |
| PigTailedMacaque  | GTGATGGGGATACCCTCCGGGAAATGCATTGTTAGGTAATTTTGTCACTGCATAAAATGTCATAGAGT-ACATTTACACAA  | 48854 |
| Bonobo            | GTGATGAGGATACTCTCGCAGAAATGCATTGTTAGGTAATTTTGTCACTGCATAAAATGTCATAGAGT-ACATTTGCACAA  | 47187 |
| OliveBaboon       | GTGATGGGGATACCCTCCGGGAAATGCATTGTTAGGTAATTTTGTCACTGCATAAAATGTCATAGAGT-ACATTTACACAA  | 48709 |
| Orangutan         | GTGATGAGGATAACCCTCCGAGAAATGCATTGTTAGGTAATTTTGTCACTGCATAAAATGTCATAGAGT-ACATTTACACAA | 48186 |

| Majority          | ACCT----GCTACACATGTAGGC-TATATGGTATATGTAG-----CCTTTTGCTCCTAGGCA----ACAACTTGTATAG  |       |
|-------------------|----------------------------------------------------------------------------------|-------|
|                   | 59930 59940 59950 59960 59970 59980 59990 60000                                  |       |
| Human             | ACCT----GCTACACATGTAGGC-TATATGGTATATGTAG-----CCTTTTGCTCCTAGGCA----ACAAATTTG-ACAG | 48153 |
| Coquerel'sSifaka  | ACCTAGATGGTATAGCTTAGTGCACACCTAGGCAATGTGGTGTAGTCTGTTGTGCCTACGCT----ACAAATCTGTGTGG | 40007 |
| Ma'sNightMonkey   | ACCT----GCTACACATGCAGGC-TATATGGTATATGTAGG-TAGCCTTTTGCTCCTAGGCAGGCAACAACTTGCACAG  | 43236 |
| VervetAGM         | ACAT----GCTACCCATGTAGGC-TATATGGTATATGTAG-----CCTTTTGCTCCTAGGCA----ACCAACTTGTATAG | 50002 |
| Gorilla           | ACCT----GCTACACGTGTAGGC-TATATGGTATATGTAG-----CCTTTTGCTCCTAGGCA----ACAACTTG-ACAG  | 48671 |
| GrabEatingMacaque | ACGT----GCTACCCATGTAGGC-TATATGGTATATGTAG-----CCTTTTGCTCCTAGGCA----ACCAACTTGTATAG | 49226 |
| Macaque           | ACGT----GCTACCCATGTAGGC-TATATGGTATATGTAG-----CCTTTTGCTCCTAGGCA----ACCAACTTGTATAG | 50049 |
| PigTailedMacaque  | ACAT----GCTACCCATGTAGGC-TATATGGTATATGTAG-----CCTTTTGCTCCTAGGCA----ACCAACTTGTATAG | 48920 |
| Bonobo            | ACCT----GCTACACATGTAGGC-TATATGGTATATGTAG-----CCTTTTGCTCCTAGGCA----ACAACTTG-ACAG  | 47252 |
| OliveBaboon       | ACAT----GCTACCCATGTAGGC-TATATGGTATATGTAG-----CCTTTTGCTCCTAGGCA----ACCAACTTGTATAG | 48775 |
| Orangutan         | ACCT----GCCACACATGTAGGC-AATGTGGTGTATGTAG-----CCTTTTGCTCCTAGGCA----ACAACTTG-ACAG  | 48251 |

Tuesday, May 03, 2022 06:16 PM

|                   |                                                                                  |       |
|-------------------|----------------------------------------------------------------------------------|-------|
| Majority          | CATGTTA-CTGTTCTGAATACTGGAGGCAGTTGTAACACAGTAGTAAGTATTGATGTATCTAAACAGAAA-AGGTACAAT |       |
|                   | 60010 60020 60030 60040 60050 60060 60070 60080                                  |       |
| Human             | CATGTTA-CTGTTCTGAATACTGGAGGCAGTTGCAACACAGTAATAAGTATTGATGTATCTAAACAGAAA-AGGTACAAT | 48231 |
| Coquerel'sSifaka  | CATGTTAACTGACTGAATACTGAAGGCGGTTATAACACGTTAAT---TATAATATGTATTTAAACATATCTAGATATAGA | 40084 |
| Ma'sNightMonkey   | CATGTTA-CTGTTCTGAATACTGGAGGCAGTTGTAACACAATAGGAAGCATTGGTATACTAAACAGAAA-AGGTACAAT  | 43314 |
| VervetAGM         | CATGTTA-CTGTTCTGAATACTGGAGGCAGTTGTAACACAGTAGTAAGTATTGATGTTTCTAAACAGAAA-AGGTACAAT | 50080 |
| Gorilla           | CATGTTA-CTGTTCTGAATACTGGAGGCAGTTGTAACACAGTAGTAAGTATTGATGTATCTAAACAGAAA-AGGTACAAT | 48749 |
| GrabEatingMacaque | CATGTTA-CTGTTCTGAATACTGGAGGCAGTTGTAACACAGTAGTAAGTATTGATGTTTCTAAACAGAAA-AGGTACAAT | 49304 |
| Macaque           | CATGTTA-CTGTTCTGAATACTGGAGGCAGTTGTAACACAGTAGTAAGTATTGATGTTTCTAAACAGAAA-AGGTACAAT | 50127 |
| PigTailedMacaque  | CATGTTA-CTGTTCTGAATACTGGAGGCAGTTGTAACACAGTAGTAAGTATTGATGTTTCTAAACAGAAA-AGGTACAAT | 48998 |
| Bonobo            | CATGTTA-CTGTTCTGAATACTGGAGGCAGTTGTAACACAGTAATAAGTATTGATGTATCTAAACAGAAA-AGGTACAAT | 47330 |
| OliveBaboon       | CATGTTA-CTGTTCTGAATACTGGAGGCAGTTGTAACACAGTAGTAAGTATTGATGTTTCTAAACAGAAA-AGGTACAAT | 48853 |
| Orangutan         | CATGTTA-CTCTTCTGAATACTGGAGGCAGTTGTAACACAGTAGTAAGTATTGATGTATCTAAACAGAAA-AGGTACAAT | 48329 |

|                   |                                                                                  |       |
|-------------------|----------------------------------------------------------------------------------|-------|
| Majority          | AAAAATATGGTAT---TATAATCTTATGGGACCACCATTGTATATGTGGCCTGTCAATGACCAAAATGTAGTTA-TGTGG |       |
|                   | 60090 60100 60110 60120 60130 60140 60150 60160                                  |       |
| Human             | AAAAATATGGTAT---TATAATCTTATGGGACCACCATTGTATATGTGGCCTGTCAATGACCAAAATGTAGTTA-TGTGG | 48307 |
| Coquerel'sSifaka  | AAAGGTACAGTAAAAACATAATCCTGTGGCACCACCATCATATATGTGGCCATTGTTGACCAAAATATAATTG-TGTGG  | 40163 |
| Ma'sNightMonkey   | AAAAATATTGATT---TATAATCTTATGGGACTACCATTGTATATGTGGCCTGTCAGTGACCAAAATGTAGTCA-TGTGT | 43390 |
| VervetAGM         | AAAAATACGGTAT---TATAATCTTATGGGACCACCATTGTATATGTGGCCTCTCAGTGACCAAAATGTAGTTAATGTGG | 50157 |
| Gorilla           | AAAAATATGGTAT---TATAATCTTATGGGACCACCATTGTATATGCGGCCTGTCAATGACCAAAATGTAGTTA-TGTGG | 48825 |
| GrabEatingMacaque | AAAAATATGGTAT---TATAATCTTATGGGACCACCATTGTATATGTGGCCTGTCAATGACCAAAATGTAGTTAATGTGG | 49381 |
| Macaque           | AAAAATATGGTAT---TATAATCTTATGGGACCACCATTGTATATGTGGCCTGTCAATGACCAAAATGTAGTTAATGTGG | 50204 |
| PigTailedMacaque  | AAAAATATGGTAT---TATAATCTTATGGGACCACCATTGTATATGTGGCCTGTCAATGACCAAAATGTAGTTAATGTGG | 49075 |
| Bonobo            | AAAAATATGGTAT---TATAATCTTATGGGACCACCATTGTATATGTGGCCTGTCAATGACCAAAATGTAGTTA-TGTGG | 47406 |
| OliveBaboon       | AAAAATACGGTAT---TATAATCTTATGGGACCACCATTGTATATGTGGCCTGTCAGTGACCAAAATGTAGTTAATGTGG | 48930 |
| Orangutan         | AAAAATATGGTAT---TATAATCTTATGGGACCACCATTGTAGATGCGGCCTGTCAGTGACCAAAATGTAGTTA-TGTGG | 48405 |

|                   |                                                                                   |       |
|-------------------|-----------------------------------------------------------------------------------|-------|
| Majority          | CACGTGACTGTGATTGTATTCTTTAGTC-----ATTGGACAGTTTCTTTATGAGATTACATTTTAATGTTGTTGCTTATT  |       |
|                   | 60170 60180 60190 60200 60210 60220 60230 60240                                   |       |
| Human             | CACATGACTGTGATTGTATTCTTTAGTC-----ATTGGACAGTTTCTTTATGAGATTACATTTTAATGTTGTTGCTTATT  | 48382 |
| Coquerel'sSifaka  | TACATGGCTGTAATTGTATTCTTTAGTC-----ATTGTGTAGTTTCTT--TGAGATTGCATTTTAATGTTTTTGTATTATC | 40236 |
| Ma'sNightMonkey   | TACATGACTGTGATAGTATTTTTCAGTC-----ATTGGACAGTTTCTTTATGAGATTACATTTTAATGTTGTTGCTTATT  | 43465 |
| VervetAGM         | CACGTGACTGTGATTGTATTCTTTAGTCCTAGTCATTGGACAGTTTCTTTATGAGATTACATTTTAATGTTTATT-----  | 50230 |
| Gorilla           | CACGTGACTGTGATTGTATTCTTTAGTC-----ATTGGACAGTTTCTTTATGAGATTACATTTTAATGTTGTTGCTTATT  | 48900 |
| GrabEatingMacaque | CACGTGACTGTGATTGTATTCTTTAGTC-----ATTGGACAGTTTCTTTATGAGATTACATTTTAATGTTGTT----ATT  | 49452 |
| Macaque           | CACGTGACTGTGATTGTATTCTTTAGTC-----ATTGGACAGTTTCTTTATGAGATTACATTTTAATGTTGTT----ATT  | 50275 |
| PigTailedMacaque  | CACGTGACTGTGATTGTATTCTTTAGTC-----ATTGGACAGTTTCTTTATGAGATTACATTTTAATGTTGTT----ATT  | 49146 |
| Bonobo            | CACATGACTGTGATTGTATTCTTTAGTC-----ATTGGACAGTTTCTTTATGAGATTACATTTTAATGTTGTTGCTTATT  | 47481 |
| OliveBaboon       | CACGTGACTGTGATTGTATTCTTTAGTC-----ATTGGACAGTTTCTTTATGAGATTACATTTTAATGTTGTTG-TTATT  | 49004 |
| Orangutan         | CACATGACTGTGATTGTATTCTTTAGTC-----ATTGGACAGTTTCTTTATGAGATTACATTTTAATGTTGTTGCTTATT  | 48480 |



Tuesday, May 03, 2022 06:16 PM

|                   |                                                                                   |       |       |       |       |       |       |       |       |
|-------------------|-----------------------------------------------------------------------------------|-------|-------|-------|-------|-------|-------|-------|-------|
| Majority          | -----TGGAAATTTG                                                                   |       |       |       |       |       |       |       |       |
|                   | 60490                                                                             | 60500 | 60510 | 60520 | 60530 | 60540 | 60550 | 60560 |       |
| Human             | -----TGGAAATTTG                                                                   |       |       |       |       |       |       |       | 48559 |
| Coquerel'sSifaka  | AGCTCTGCCTTGGGGTGGGGGACAAGGACAATGTAACCTAAATATTTGTACCCCATATAATATGCAGAAATAAAAAATTTG |       |       |       |       |       |       |       | 40554 |
| Ma'sNightMonkey   | -----TGGAAATTTG                                                                   |       |       |       |       |       |       |       | 43628 |
| VervetAGM         | -----TGGAAATTTG                                                                   |       |       |       |       |       |       |       | 50406 |
| Gorilla           | -----TGGAAATTTG                                                                   |       |       |       |       |       |       |       | 49077 |
| GrabEatingMacaque | -----TGGAAATTTG                                                                   |       |       |       |       |       |       |       | 49628 |
| Macaque           | -----TGGAAATTTG                                                                   |       |       |       |       |       |       |       | 50451 |
| PigTailedMacaque  | -----TGGAAATTTG                                                                   |       |       |       |       |       |       |       | 49322 |
| Bonobo            | -----TGGAAATTTG                                                                   |       |       |       |       |       |       |       | 47657 |
| OliveBaboon       | -----TGGAAATTTG                                                                   |       |       |       |       |       |       |       | 49180 |
| Orangutan         | -----TGGAAATTTG                                                                   |       |       |       |       |       |       |       | 48657 |

|                   |                                                                                   |       |       |       |       |       |       |       |       |
|-------------------|-----------------------------------------------------------------------------------|-------|-------|-------|-------|-------|-------|-------|-------|
| Majority          | T-----AGTTTTTT-ACACAAATA-GGAAAATTCATACATCTCTTTTATTGTTGATATATAAAGACTATTTTTT-AATGTC |       |       |       |       |       |       |       |       |
|                   | 60570                                                                             | 60580 | 60590 | 60600 | 60610 | 60620 | 60630 | 60640 |       |
| Human             | T-----AGTTTTTTTACACAAATA-GGAAAATTCATACATCTCTTTTATTGTTGATATATAAAGACTGTTTTTT-AATGTC |       |       |       |       |       |       |       | 48632 |
| Coquerel'sSifaka  | TTTTGTAGTTTTTT-GCACGAATAAGGAAAATTACTATATCTCTTTTATTGTTAATATATAGAGACTATTTTTTTAATGTC |       |       |       |       |       |       |       | 40633 |
| Ma'sNightMonkey   | TTTTGTAGGTTTTT-ACACAAATA-GGAAAATTCATACATCTCTTTTATTGTTGCTATATAAAGATTATTTTTT-AATGTC |       |       |       |       |       |       |       | 43705 |
| VervetAGM         | T-----AGTTTTTT-ACATAAATA-GGAAGATTCATACATCTCTTTTATTGTTGATATATAAAGACTATTTTTT-AATGTC |       |       |       |       |       |       |       | 50478 |
| Gorilla           | T-----AGTTTTTTTACACAAATA-GGAAAATTCATACATCTCTTTTATTGTTGATATATAAAGACTGTTTGTT-AATGTC |       |       |       |       |       |       |       | 49150 |
| GrabEatingMacaque | T-----AGTTTTTT-ACATAAATA-GGAAGATTCATACATCTCTTTTATTGTTGATATATAAAGACTATTTTTT-AATGTC |       |       |       |       |       |       |       | 49700 |
| Macaque           | T-----AGTTTTTT-ACATAAAGA-GGAAGATTCATACATCTCTTTTATTGTTGATATATAAAGACTATTTTTT-AATGTC |       |       |       |       |       |       |       | 50523 |
| PigTailedMacaque  | T-----AGTTTTTT-ACATAAATA-GGAAGATTCATACATCTCTTTTATTGTTGATATATAAAGACTATTTTTT-AATGTC |       |       |       |       |       |       |       | 49394 |
| Bonobo            | T-----AGTTTTTT-ACACAAATA-GGAAAATTCATACATCTCTTTTATTGTTGATATATAAAGACTGTTTTTT-AATGTC |       |       |       |       |       |       |       | 47729 |
| OliveBaboon       | T-----AGTTTTTT-ACATAAATA-GGAAGATTCATACATCTCTTTTATTGTTGATATATAAAGACTATTTTTT-AATGTC |       |       |       |       |       |       |       | 49252 |
| Orangutan         | T-----AGTTTTTTTACACAAATA-GGAAAATTCATACATCTCTTTTATTGTTGATGTATAAAGACTGTTTTTT-AATGTC |       |       |       |       |       |       |       | 48730 |

|                   |                                                                                   |       |       |       |       |       |       |       |       |
|-------------------|-----------------------------------------------------------------------------------|-------|-------|-------|-------|-------|-------|-------|-------|
| Majority          | TTTCAGCCAATGGTAATGATAGTAAAAAATTTAAAGGAGAAGATAAAAATGGATGGTGCTCCTTCTCGTGTACTTCATATT |       |       |       |       |       |       |       |       |
|                   | 60650                                                                             | 60660 | 60670 | 60680 | 60690 | 60700 | 60710 | 60720 |       |
| Human             | TTTCAGCCAATGGTAATGATAGTAAAAAATTTAAAGGAGAAGATAAAAATGGATGGTGCTCCTTCTCGTGTACTTCATATT |       |       |       |       |       |       |       | 48712 |
| Coquerel'sSifaka  | TTTCAGCCAATGGTAATGATAGTAAAAAATTTAAAGGAGAAGATAAAAATGGATGGTGACCTTCTCGTGTACTTCATATT  |       |       |       |       |       |       |       | 40713 |
| Ma'sNightMonkey   | TTTCAGCCAATGGTAATGATAGTAAAAAATTTAAAGGAGAAGATAAAAATGGATGGTGCTCCTTCTCGTGTACTTCATATT |       |       |       |       |       |       |       | 43785 |
| VervetAGM         | TTTCAGCCAATGGTAATGATAGCAAAAAATTTAAAGGAGAAGATAAAAATGGATGGTGCTCCTTCTCGTGTACTTCATATT |       |       |       |       |       |       |       | 50558 |
| Gorilla           | TTTCAGCCAATGGTAATGATAGTAAAAAATTTAAAGGAGAAGATAAAAATGGATGGTGCTCCTTCTCGTGTACTTCATATT |       |       |       |       |       |       |       | 49230 |
| GrabEatingMacaque | TTTCAGCCAATGGTAATGATAGTAAAAAATTTAAAGGAGAAGATAAAAATGGATGGTGCTCCTTCTCGTGTACTTCATATT |       |       |       |       |       |       |       | 49780 |
| Macaque           | TTTCAGCCAATGGTAATGATAGTAAAAAATTTAAAGGAGAAGATAAAAATGGATGGTGCTCCTTCTCGTGTACTTCATATT |       |       |       |       |       |       |       | 50603 |
| PigTailedMacaque  | TTTCAGCCAATGGTAATGATAGTAAAAAATTTAAAGGAGAAGATAAAAATGGATGGTGCGCCTTCTCGTGTACTTCATATT |       |       |       |       |       |       |       | 49474 |
| Bonobo            | TTTCAGCCAATGGTAATGATAGTAAAAAATTTAAAGGAGAAGATAAAAATGGATGGTGCTCCTTCTCGTGTACTTCATATT |       |       |       |       |       |       |       | 47809 |
| OliveBaboon       | TTTCAGCCAATGGTAATGATAGTAAAAAATTTAAAGGAGAAGATAAAAATGGATGGTGCTCCTTCTCGTGTACTTCATATT |       |       |       |       |       |       |       | 49332 |
| Orangutan         | TTTCAGCCAATGGTAACGATAGTAAAAAATTTAAAGGAGAAGATAAAAATGGATGGTGCTCCTTCTCGTGTACTTCATATT |       |       |       |       |       |       |       | 48810 |

Tuesday, May 03, 2022 06:16 PM

|                   |                                                                                 |       |
|-------------------|---------------------------------------------------------------------------------|-------|
| Majority          | CGAAAATTACCTGGGGAAGTAACAGAACTGAAGTTATTGCTTTAGGCTTACCTTTTGGTAAGGTGACCAACATCCTTAT |       |
|                   | 60730 60740 60750 60760 60770 60780 60790 60800                                 |       |
| Human             | CGAAAATTACCTGGGGAAGTAACAGAACTGAAGTTATTGCTTTAGGCTTACCTTTTGGTAAGGTGACCAACATCCTTAT | 48792 |
| Coquerel'sSifaka  | CGGAAATTACCTGGAGAAGTGACAGAACTGAAGTTATTGCTTTAGGCTTACCTTTTGGTAAGGTGACCAACATCCTTAT | 40793 |
| Ma'sNightMonkey   | CGAAAATTACCTGGGGAAGTAACAGAACTGAAGTTATTGCTTTAGGCTTACCTTTTGGCAAGGTGACCAACATCCTTAT | 43865 |
| VervetAGM         | CGAAAATTACCTGGGGAAGTAACAGAACTGAAGTTATTGCTTTAGGCTTACCTTTTGGTAAGGTGACCAACATCCTTAT | 50638 |
| Gorilla           | CGAAAATTACCTGGGGAAGTAACAGAACTGAAGTTATTGCTTTAGGCTTACCTTTTGGTAAGGTGACCAACATCCTTAT | 49310 |
| GrabEatingMacaque | CGAAAATTACCTGGGGAAGTAACAGAACTGAAGTTATTGCTTTAGGCTTACCTTTTGGTAAGGTGACCAACATCCTTAT | 49860 |
| Macaque           | CGAAAATTACCTGGGGAAGTAACAGAACTGAAGTTATTGCTTTAGGCTTACCTTTTGGTAAGGTGACCAACATCCTTAT | 50683 |
| PigTailedMacaque  | CGAAAATTACCTGGGGAAGTAACAGAACTGAAGTTATTGCTTTAGGCTTACCTTTTGGTAAGGTGACCAACATCCTTAT | 49554 |
| Bonobo            | CGAAAATTACCTGGGGAAGTAACAGAACTGAAGTTATTGCTTTAGGCTTACCTTTTGGTAAGGTGACCAACATCCTTAT | 47889 |
| OliveBaboon       | CGAAAATTACCTGGGGAAGTAACAGAACTGAAGTTATTGCTTTAGGCTTACCTTTTGGTAAGGTGACCAACATCCTTAT | 49412 |
| Orangutan         | CGAAAATTACCTGGGGAAGTAACAGAACTGAAGTTATTGCTTTAGGCTTACCTTTTGGTAAGGTGACCAACATCCTTAT | 48890 |

|                   |                                                                                    |       |
|-------------------|------------------------------------------------------------------------------------|-------|
| Majority          | GCTGAAAGGAAAAAATCAGGTACACTTCTTTTGGGGTTTATGAAATGTTAAACCCCAAACCT--ATCCAGCAGGTGTGAAT  |       |
|                   | 60810 60820 60830 60840 60850 60860 60870 60880                                    |       |
| Human             | GCTGAAAGGAAAAAATCAGGTACACTTCTTTTGGGGTTTATGAAATGTTAAACCCCAAACCT--ATCCAGCAGGTGTGAAT  | 48870 |
| Coquerel'sSifaka  | GCTGAAAGGAAAAAATCAGGTACAGTCTCTTTTAGGGTTTATGACATGTTAAACTCCAAACCT--ACCCAACAGATATGAAT | 40871 |
| Ma'sNightMonkey   | GCTGAAAGGAAAAAATCAGGTACACTTCTTTTGGGGTTTATAAAAATGTTAAACCCCAAACCTGTATCCAGCAG-TGTGAAT | 43944 |
| VervetAGM         | GCTGAAAGGAAAAAATCAGGTACACTTTTTTTGGGGTTTATGAAATGTTAAACCCCAAACCT--ATCCAGCAGATGTGAAT  | 50716 |
| Gorilla           | GCTGAAAGGAAAAAATCAGGTACACTTCTTTTGGGGTTTATGAAATGTTAAACCCCAAACCT--GTCCAGCAGGTGTGAAT  | 49388 |
| GrabEatingMacaque | GCTGAAAGGAAAAAATCAGGTACACTTTTTTTGGGGTTTATGAAATGTTAAACCCCAAACCT--ATCCAGCAGGTGTGAAT  | 49938 |
| Macaque           | GCTGAAAGGAAAAAATCAGGTACACTTTTTTTGGGGTTTATGAAATGTTAAACCCCAAACCT--ATCCAGCAGGTGTGAAT  | 50761 |
| PigTailedMacaque  | GCTGAAAGGAAAAAATCAGGTACACTTTTTTTGGGGTTTATGAAATGTTAAACCCCAAACCT--ATCCAGCAGGTGTGAAT  | 49632 |
| Bonobo            | GCTGAAAGGAAAAAATCAGGTACACTTCTTTTGGGGTTTATGAAATGTTAAACCCCAAACCT--ACCCAGCAGGTGTGAAT  | 47967 |
| OliveBaboon       | GCTGAAAGGAAAAAATCAGGTACACTTTTTTTGGGGTTTATGAAATGTTAAACCCCAAACCT--ATCCAGCAGGTGTGAAT  | 49490 |
| Orangutan         | GCTGAAAGGAAAAAATCAGGTATACTTCTTTTGGGGTTTATGAAATGTTAAACCCCAAACCT--ATCCAGCAGGTGTGAAT  | 48968 |

|                   |                                                                                  |       |
|-------------------|----------------------------------------------------------------------------------|-------|
| Majority          | TAA-T----TGTA-AAGGGAGAAAATAGTAGGTTATTTTTCTTAAAGAAC-----AGAAGTCTTATTCTCACTTTTTTCG |       |
|                   | 60890 60900 60910 60920 60930 60940 60950 60960                                  |       |
| Human             | TAA-T----TGTA-AAGGGAGAAAATAGTAGGTTATTTTTCTTAAAGAAC-----AGAAGTCTTATTCTCACTTTTTTCG | 48939 |
| Coquerel'sSifaka  | TAACTGCCACCTAATAAAAGGGTAGAAAATAGGTTAATTTTCTGGAAGAACGTAACAGAAGTCTTACTTTAACTTTTCTT | 40951 |
| Ma'sNightMonkey   | TAA-T----TGTA-AAGGGAGAAAATAGTAGGTTATTTTTCTT---GAAC-----AGAAGTCTTAGTCTCACTTTTTTCG | 44010 |
| VervetAGM         | TAA-T----TGTA-AAGGGAGAAAATAGTAGGTTATTTTTCTTAAAGAAC-----AGAAGTCAATATTCTCAGTTTTTCA | 50785 |
| Gorilla           | TAAAT----TGTA-AAGGGAGAAAATAGTAGGTTATTTTTCTTAAAGAAC-----AGAAGTCTTACTCTCACTTTTTTCG | 49458 |
| GrabEatingMacaque | TAA-T----TGTA-AAGGGAGAAAATAGGAGGTTATTTTTCTTAAAGAAC-----AGAAGTGTATTCTCAGTTTTTCA   | 50007 |
| Macaque           | TAA-T----TGTA-AAGGGAGAAAATAGGAGGTTATTTTTCTTAAAGAAC-----AGAAGTGTATTCTCAGTTTTTCA   | 50830 |
| PigTailedMacaque  | TAA-T----TGTA-AAGGGAGAAAATAGTAGGTTATTTTTCTTAAAGAAC-----AGAAGTGTATTCTCAGTTTTTCA   | 49701 |
| Bonobo            | TAA-T----TGTA-AAGGGAGAAAATAGTAGGTTATTTTTCTTAAAGAAC-----AGAAGTCTTATTCTCACTTTTTTCG | 48036 |
| OliveBaboon       | TAA-T----TGTA-AAGGGAGAAAATAGTAGGTTATTTTTCTTAAAGAAC-----AGAAGTCTGATTCTCAGTTTTTCA  | 49559 |
| Orangutan         | TAA-T----TGTA-AAGGGAGAAAATAGTAGGTTATTTTTCTTAAAGAAC-----AGAAGTCTTATTCTCACTTTTTTCG | 49037 |

Tuesday, May 03, 2022 06:16 PM

| Majority          | AGTAGATATCTGTGGGAAACTAATGCTAGGTAGCCAAAGTGAATGAATCACTATAGTTTTTAAACTTTGCCTTTTGAATT  |       |
|-------------------|-----------------------------------------------------------------------------------|-------|
|                   | 60970 60980 60990 61000 61010 61020 61030 61040                                   |       |
| Human             | AGTAGATGTCTGTGGGAAACTAATGCTAGGTAGCCAAAGTGAAGTGAATCACTATAGTTTTTAAACTTTGTCTTTTGAATT | 49019 |
| Coquerel'sSifaka  | GGTAGATATCGGTGGGAAACTAATGCTAGATAGCCAAATGAATGAGTCACCGTAGTGTGAGATTTTGCCTTTTGAATT    | 41031 |
| Ma'sNightMonkey   | AGTAGATGTCTGTGGGAAACAAATGCTAGGTAGCCAAAGTGAATGAGTCACCATAGTTTTTAAACTTTGCCTTTTGTATT  | 44090 |
| VervetAGM         | AGTAGGTATCTGTGGGAAACTAATGCTAGGTAGCCAAATGAATGAATCACTATAGTTTTTAAACTTTGCCTTTTGAATT   | 50865 |
| Gorilla           | AGTAGATGTCTGTGGGAAACTAATGCTAGGTAGCCAAAGTGAATGAATCACTATAGTTTTTAAACTTTGTCTTTTGAATT  | 49538 |
| GrabEatingMacaque | AGTAGGTATCTGTGGGAAACTAATGCTAGGTAGCCAAATGAAT----CACTATAGTGTTTAAACTTTGCCTTTTGAATT   | 50083 |
| Macaque           | AGTAGGTATCTGTGGGAAACTAATGCTAGGTAGCCAAATGAAT----CACTATAGTGTTTAAACTTTGCCTTTTGAATT   | 50906 |
| PigTailedMacaque  | AGTAGGTATCTGTGGGAAACTAATGCTAGGTAGCCAAATGAAT----CACTATAGTGTTTAAACTTTGCCTTTTGAATT   | 49777 |
| Bonobo            | AGTAGATGTCTGTGGGAAACTAATGCTAGGTAGCCAAAGTGAATGAATCACTATAGTTTTTAAACTTTGTCTTTTGAATT  | 48116 |
| OliveBaboon       | AGTAGGTATCTGTGGGAAACTAATGCTAGGTAGCCAAACTGAATGAATCACTGTAGTTTTTAAACTTTGCCTTTTGAATT  | 49639 |
| Orangutan         | AGTAGATGTCTGTGAGAAACTAATGCTAGGTAGCCAAAGTGAATGAATCACTATAGTTTTTAAACTTTGCCTTTTGAATT  | 49117 |

| Majority          | CACTTTA-----GGGCTGTAA-----TTGAGTAATTGTTATGAAATGTGGAAAATACAAAT                   |       |
|-------------------|---------------------------------------------------------------------------------|-------|
|                   | 61050 61060 61070 61080 61090 61100 61110 61120                                 |       |
| Human             | GACTTTA-----GGGCTCTAA-----TTGAATAATTGTTATGAAATGTGGAAAATACAAAT                   | 49071 |
| Coquerel'sSifaka  | TACTTTATGACTCGAACAGGGTTCTAAATTTAACTCTTTAGGACTTTACTTGTATAATGAAACTGTGGAAAATACGAAT | 41111 |
| Ma'sNightMonkey   | CACTTTA-----AGGCTCTAA-----TTGAATAATTGTTATGAAATGTGGAAAATACAAAT                   | 44142 |
| VervetAGM         | CACTTAA-----GGGCTGTGA-----TTGAGTAATTGTTATGAAATGTGGAAAATACAAAT                   | 50917 |
| Gorilla           | GACTTTA-----GGGCTTTAA-----GTGAATAATTGTTATGAAATGTGGAAAATACAAAT                   | 49590 |
| GrabEatingMacaque | CACTTTA-----GGGCTGTAA-----TTGAGTAATTGTTATGAAATGTGGAAAATACAAAT                   | 50135 |
| Macaque           | CACTTTA-----GGGCTGTAA-----TTGAGTAATTGTTATGAAATGTGGAAAATACAAAT                   | 50958 |
| PigTailedMacaque  | CACTTTA-----GGGCTGTAA-----TTGAGTAATTGTTATGAAATGTGGAAAATACAAAT                   | 49829 |
| Bonobo            | GACTTTA-----GGGCTCTAA-----TTGAATAATTGTTATGAAATGTGGAAAATACAAAT                   | 48168 |
| OliveBaboon       | CACTTTA-----GGGCTGTAA-----TTGAGTAATTGTTATGAAATGTGGAAAATACAAAT                   | 49691 |
| Orangutan         | CACTTTA-----GGGCTCTAA-----TTGAATAATTGTTATGAAATGTGGAAAATACAAAG                   | 49169 |

| Majority          | GAAGTATTTCTTTTACTGTGGCTCTGTTCTTTG--ATATCAGAAATCAGTAGAGGTA-CTAGTCGCAT-----        |       |
|-------------------|----------------------------------------------------------------------------------|-------|
|                   | 61130 61140 61150 61160 61170 61180 61190 61200                                  |       |
| Human             | GAAGTATTTCTTTTACTGTGGCTCTGTTCTTTG--GTATCAGAAATCAGCAGGGGTA-CTAGTCGCAT-----        | 49136 |
| Coquerel'sSifaka  | GAAGTATTTCTTTTATTGTGGCTGTGTTCTTTGTGATATCAGAAATCAGTAATGATATCTGGTAGCATTAGCAGAAATTA | 41191 |
| Ma'sNightMonkey   | GAAGTATATCTTTTACTGTGGCTCTGCTCTTTGTGATATCAGAAGTCAGTAGAGGTA-CTAGTCGCAT-----        | 44209 |
| VervetAGM         | GAAGTATTTCTTTTACTGTGGCTCTGT-C TTGG--ATATCAGAAATCAGTAGAAGTA-CTAGTCGCAT-----       | 50981 |
| Gorilla           | GAAGTGTTCCTTTTACTGTGGCTCTGTTCTTTG--ATATCAGAAATCAGTAGGGGTA-CTAGTCGCAT-----        | 49655 |
| GrabEatingMacaque | GAAGTATTTCTTTTACTGTGGCTCTGT-C TTGG--ATATCAGAAATCAGTAGAAGTA-CTAGTCGCAT-----       | 50199 |
| Macaque           | GAAGTATTTCTTTTACTGTGGCTCTGT-C TTGG--ATATCAGAAATCAGTAGAAGTA-CTAGTCGCAT-----       | 51022 |
| PigTailedMacaque  | GAAGTATTTCTTTTACTGTGGCTCTGT-C TTGG--ATACCAGAAATCAGTAGAAGTA-CTAGTCGCAT-----       | 49893 |
| Bonobo            | GAAGTATTTCTTTTACTGTGGCTCTGTTCTTTG--ATATCAGAAATCAGTAGGGGTA-CTAGTCGCAT-----        | 48233 |
| OliveBaboon       | GAAGTATTTCTTTTACTGTGGCTCTGT-C TTGG--ATATCAGAAATCAGTAGAAGTA-CTAGTCGCAT-----       | 49755 |
| Orangutan         | GAAGTATTTCTTTTACTGTGGCTCTGTTCTTTG--ATACTGAAATCAGTAGGGCTA-CTAGTCGCAT-----         | 49234 |

Tuesday, May 03, 2022 06:16 PM

|                   |                                                                                |       |
|-------------------|--------------------------------------------------------------------------------|-------|
| Majority          | -----CTTTCCTTAA-----GCTTACTTTTATGAG-----AATATGAAATTTTAT                        |       |
|                   | 61210 61220 61230 61240 61250 61260 61270 61280                                |       |
| Human             | -----CTTTCCTTAA-----GCTT---TATGAG-----AATATGAAATTTTAT                          | 49171 |
| Coquerel'sSifaka  | GGGAGTAATCTCGATATTCTTCTTTTAAATAGATGTAACATATCATTAGGGCCAAGGTATATTAATATGAAATTTTAT | 41271 |
| Ma'sNightMonkey   | -----CTTTCCTTAA-----GCTTACTTTTATGAG-----AATATGAAATTTTAT                        | 44248 |
| VervetAGM         | -----CTTTCCTTAA-----GCTTACTTTTATGAG-----AATATGCAATTTTGT                        | 51020 |
| Gorilla           | -----CTTTCCTTAA-----GCTT---TATGAG-----AATATGAAATTTTAT                          | 49690 |
| GrabEatingMacaque | -----CTTTCCTTAA-----GCTTACTTTTATGAG-----AATATGCAATTTTAT                        | 50238 |
| Macaque           | -----CTTTCCTTAA-----GCTTACTTTTATGAG-----AATATGCAATTTTAT                        | 51061 |
| PigTailedMacaque  | -----CTTTCCTGAA-----GCTTACTTTTATGAG-----AATATGCAATTTTAT                        | 49932 |
| Bonobo            | -----CTTTCCTTAA-----GCTT---TATGAG-----AATATGAAATTTTAT                          | 48268 |
| OliveBaboon       | -----CTTTCCTTAA-----GCTTACTTTTATGAG-----AATATGCAATTTTAT                        | 49794 |
| Orangutan         | -----CTTTCCTTAA-----GCTTACTTTTATGAG-----AATATGAAATTTTAT                        | 49273 |

|                   |                                                                                   |       |
|-------------------|-----------------------------------------------------------------------------------|-------|
| Majority          | TTAAAAATATTAATGATACCATTTAGAAGAATTTATGAAATTTAAC-ACTCCCTTTTATATACTTAATGTTAATCTGAC   |       |
|                   | 61290 61300 61310 61320 61330 61340 61350 61360                                   |       |
| Human             | TTAAAAATGTTAAATGATACCATTTAGAAGAATTTATGAAATTTAAC-ACTCCCTTTTATATACTTGAGGTTAATCTGAC  | 49250 |
| Coquerel'sSifaka  | TTTAAAATTTTAAATGGTATCATTTAAAAGAATTTATAAAGTTTAAATTAATAACATTCCTGTGATTATAGTTAATCTGAT | 41351 |
| Ma'sNightMonkey   | TTAAAATTTTAAATGATACCATTTAGAAGAATGTATGAAATTTAAC-ACTTCCTTTTATATAGTTAATGTTAATCTGAC   | 44327 |
| VervetAGM         | TTAAAAATATTAATGATGCCATTTAGAGTAATTTATGAAATTTAAC-ACTCCCTTTTATATACTTAATGTTAATCTGAC   | 51099 |
| Gorilla           | TTAAAAATGTTAAATGATACCATTTAGAAGAATTTATGAAATTTAAC-ACTTCCTTTTATATACTTGAGGTTAATCTGAC  | 49769 |
| GrabEatingMacaque | TTAAAAATATTAATGATGCCATTTAGAATAATTTATGAAATTTAAC-ACTCCCTTTTATATACTTAATGTTAATCTGAC   | 50317 |
| Macaque           | TTAAAAATATTAATGATGCCATTTAGAATAATTTATGAAATTTAAC-ACTCCCTTTTATATACTTAATGTTAATCTGAC   | 51140 |
| PigTailedMacaque  | TTAAAAATATTAATGATGCCATTTAGAATAATTTATGAAATTTAAC-ACTCCCTTTTATATACTTAATGTTAATCTGAC   | 50011 |
| Bonobo            | TTAAAAATGTTAAATGATACCATTTAGAAGAGTTTATGAAATTTAAC-ACTCCCTTTTATATACTTGAGGTTAATCTGAC  | 48347 |
| OliveBaboon       | TTAAAAATATTAATGATGCCATTTAGAATAATTTATGAAATTTAAC-ACTCCCTTTTATATACTTAATGTTAATCTGAC   | 49873 |
| Orangutan         | TTAAAAATGTTAAATGATACCATTTAGAAGAATTTATGAAATTTAAC-ACTCCCTTTTATATACTTAAGGTTAATCTGAC  | 49352 |

|                   |                                                                                  |       |
|-------------------|----------------------------------------------------------------------------------|-------|
| Majority          | ATTTAATTTGTAATTTTTTCTTTGTCTCTGTATAATTATACTGCTTTTTAAATGACTTG-GAAATCTTATATTCTCTAG  |       |
|                   | 61370 61380 61390 61400 61410 61420 61430 61440                                  |       |
| Human             | ATTTAATTTGTAATTTTGTCTTTGTCTCTATATAATTATACTGCTTTTTAAATGACTTG-GAAATCTTACATTCTCTAG  | 49329 |
| Coquerel'sSifaka  | GTTT--T-TTTAATTTTTTCTTTGTGATA---ATAATTATACTGCTTATCAAACGACTTTTGAGATCTCATATTCTTTAG | 41425 |
| Ma'sNightMonkey   | ATTTAATTTGTAATGTTTGTCTTTGTCTCTATAAAATTATATTGCTTTTGAAATGACTTT-GAAATCTTATATTCTCTAG | 44406 |
| VervetAGM         | ATTTAATTTGTAATGTTTTTCTTTGTCTCTGTATAATTATACTGCTTTTTAAATGACTTG-GAAATCTTATATTCTCTAG | 51178 |
| Gorilla           | ATTTAATTTGTAATTTTGTCTTTGTCTCTATATAATTATACTGCTTTTTAAATGACTTG-GAAATCTTACATTCTCTAC  | 49848 |
| GrabEatingMacaque | ATTTAATTTGTAATGTTTTTCTTTGTCTCTGTATAATTATACTGCTTTGTAATGATTG-GAAATCATATATTCTCTAG   | 50396 |
| Macaque           | ATTTAATTTGTAATGTTTTTCTTTGTCTCTGTATAATTATACTGCTTTGTAATGACTTG-GAAATCATATATTCTCTAG  | 51219 |
| PigTailedMacaque  | ATTTAATTTGTAATGTTTTTCTTTGTCTCTGTATAATTATACTGCTTTTTAAATGACTTG-GAAATCATATATTCTCTAG | 50090 |
| Bonobo            | ATTTAATTTGTAATTTTGTCTTTGTCTCTATATAATTATACTGCTTTTTAAATGACTTG-GAAATCTTACATTCTCTAG  | 48426 |
| OliveBaboon       | ATTTAATTTGTAATGTTTTTCTTTGTCTCTGTATAATTATACTGCTTTTTAAATGACTTG-GAAATCATATATTCTCTAG | 49952 |
| Orangutan         | ATTTAATTTGTAATTTTGTCTTTGTCTCTATATAATTATACTGCTTTTTAAATGACTTG-GAAATCTTATATTCTTTAG  | 49431 |



Tuesday, May 03, 2022 06:16 PM

| Majority          | GGTAGAAGTGGTAAAAATCTGATGCTAGAAAATGTTTACATTTTCTCTAGCATTTGTTGTGGGAA-TAGATTTGT-GGGT |       |       |       |       |       |       |       |       |
|-------------------|----------------------------------------------------------------------------------|-------|-------|-------|-------|-------|-------|-------|-------|
|                   | 61450                                                                            | 61460 | 61470 | 61480 | 61490 | 61500 | 61510 | 61520 |       |
| Human             | GGTAGAAGTGGTAAAAATCTGATGCTAGAAAATGTTTACATTTTCTCTAGCATTTGTTGCAAGAA-TAGATTTGT-GGGT |       |       |       |       |       |       |       | 49407 |
| Coquerel'sSifaka  | GGTAGAAATAGTAAAAATCTGATGCTG-----CATGTCCTCTAGCTTTTGTGGGGAAAAATAGATTTGTAGGGT       |       |       |       |       |       |       |       | 41494 |
| Ma'sNightMonkey   | GGTAGAAGTGGTAAAAATCTGATGCTAGAAAATGTTTACATTTTCTCTAGCATTTGTTATGGGAA-TAGATTTGT-GAGT |       |       |       |       |       |       |       | 44484 |
| VervetAGM         | GGTAGAAGTGGTAAAAATCTGATGCTAGAAAATATTTACATTTTCTCTAGCATTTGCTGTGGGAA-TAGATTTGT-GGGT |       |       |       |       |       |       |       | 51256 |
| Gorilla           | AGTAGAAGTGGTAAAAATCTGATGCTAGAAAATGTTTACATTTTCTCTAGCATTTGTTGCAAGAA-TAGATTTGT-GGGT |       |       |       |       |       |       |       | 49926 |
| GrabEatingMacaque | GGTAGAAGTGGTAAAAATCTGATGCTAGAAAATATTTACATTTTCTCTAGCATTTGCTGTGGGAA-TAGATTTGT-GGGT |       |       |       |       |       |       |       | 50474 |
| Macaque           | GGTAGAAGTGGTAAAAATCTGATGCTAGAAAATATTTACATTTTCTCTAGCATTTGCTGTGGGAA-TAGATTTGT-GGGT |       |       |       |       |       |       |       | 51297 |
| PigTailedMacaque  | GGTAGAAGTGGTAAAAATCTGATGCTAGAAAATATTTACATTTTCTCTAGCATTTGCTGTGGGAA-TAGATTTGT-GGGT |       |       |       |       |       |       |       | 50168 |
| Bonobo            | GGTAGAAGTGGTAAAAATCTGATGCTAGAAAATGTTTACATTTTCTCTAGCATTTGTTGCAAGAA-TAGATTTGT-GGGT |       |       |       |       |       |       |       | 48504 |
| OliveBaboon       | GGTAGAAGTGGTAAAAATCTGATGCTAGAAAATATTTACATTTTCTGTAGCATTTGCTGTGGGAA-TAGATTTGT-GGGT |       |       |       |       |       |       |       | 50030 |
| Orangutan         | GGTAGAAGTGGTAAAAATCTGATGCTAGAAAATGTTTACATTTTCTCTAGCATTTGTTGCGGGAA-TA-ATTTGT-GGGT |       |       |       |       |       |       |       | 49508 |

| Majority          | GTGAAAAATCATAGGTGGAAGGCAGAAGCAGCATGTACTCAGTT-----TTCTTCTGAGGTTAGCTTTAACTGTATACC   |       |       |       |       |       |       |       |       |
|-------------------|-----------------------------------------------------------------------------------|-------|-------|-------|-------|-------|-------|-------|-------|
|                   | 61530                                                                             | 61540 | 61550 | 61560 | 61570 | 61580 | 61590 | 61600 |       |
| Human             | GTGAAAAATCATAGGTGGAAGGCAGAAGCAGCGTGTACTCGGTT-----TTCTTCTGAGGTTAGCTTTAACTGTATACC   |       |       |       |       |       |       |       | 49481 |
| Coquerel'sSifaka  | GTAAAAATCGTAGGTGGAAGGCAGAAGCACCAGGTACTCAGCT-----TTCTTCTGAGATTAGGTTTAAATTGTATACC   |       |       |       |       |       |       |       | 41568 |
| Ma'sNightMonkey   | GTGAAA-TCGTAAGTGGAAGCAGAAGCAGCATGTACTTAGTT-----TTCTTCTAAGGTTATTTTAACTGTATACC      |       |       |       |       |       |       |       | 44557 |
| VervetAGM         | GTGAAAAATCATAGGTGGAAGGTAGAAGCAGCATGTACTCAGTTCTAACTTTTCTTCTGAGGTTAGCTTTAACTGTATACC |       |       |       |       |       |       |       | 51336 |
| Gorilla           | GTGAAAAATCATAGGTGGAAGGCAGAAGCAGCATGTACTCGGTT-----TTCTTCTGAGGTTAGCTTTAACTGTATACC   |       |       |       |       |       |       |       | 50000 |
| GrabEatingMacaque | GTGAAAAATCATAGGTGGAAG-----GTGTACTCAGTTCTAACTTTTCTTCTGAGGTTAGCTTTAACTGTATACC       |       |       |       |       |       |       |       | 50543 |
| Macaque           | GTGAAAAATCATAGGTGGAAG-----ATGTACTCAGTTCTAACTTTTCTTCTGAGGTTAGCTTTAACTGTATACC       |       |       |       |       |       |       |       | 51366 |
| PigTailedMacaque  | GTGAAAAATCATAGGTGGAAGGTAGAAGCAGCATGTACTCAGTTCTAACTTTTCTTCTGAGGTTAGCTTTAACTGTATACC |       |       |       |       |       |       |       | 50248 |
| Bonobo            | GTGAAAAATCATAGGTGGAAGGCAGAAGCAGCGTGTACTCGGTT-----TTCTTCTGAGGTTAGCTTTAACTGTATACC   |       |       |       |       |       |       |       | 48578 |
| OliveBaboon       | GTGAAAAATCATAGGTGGAAGGTAGAAGCAGCATGTACTCAGTTCTAACTTTTCTTCTGAGGTTAGCTTTAACTGTATACC |       |       |       |       |       |       |       | 50110 |
| Orangutan         | GTGAAAAATCATAGGTGGAAGGCAGAAGCAGCATGTACTCAGTT-----TTCTTCTGAGGTTAGCTTTAACTGTATACC   |       |       |       |       |       |       |       | 49582 |

| Majority          | TAAACTTCAACAAGAGATTTCTAATTCTACTTAT-AGAACATTTAAAAGTAACTTGAAAGATTATATTCTAGATAATTGA  |       |       |       |       |       |       |       |       |
|-------------------|-----------------------------------------------------------------------------------|-------|-------|-------|-------|-------|-------|-------|-------|
|                   | 61610                                                                             | 61620 | 61630 | 61640 | 61650 | 61660 | 61670 | 61680 |       |
| Human             | TAAACTTCAACAAGAGATTTCTAATTCTGCTTATCAGAACATTTAAAAGTAACTTGAAAGATTATATTCTAGATAATTGA  |       |       |       |       |       |       |       | 49561 |
| Coquerel'sSifaka  | TAAACTTCAATAAGAGATTTTCAGTTCTACTTATCAGAACATTTAAATGTAACCTTGAAAGATTATATTCTAGATAATTGA |       |       |       |       |       |       |       | 41648 |
| Ma'sNightMonkey   | TAAACTTCAATAAGAGATTTCTAATTCTACTTATAGAACATTTAAAAGTAACTTGAAAAAT---ATTTTAGATAATTGA   |       |       |       |       |       |       |       | 44634 |
| VervetAGM         | TAAACTTCAACAAGAGATTTCTAATTCTACTTAT-----TTAAAAGTAACTTGAAAGATTATATTCTAGATAATTGA     |       |       |       |       |       |       |       | 51408 |
| Gorilla           | TAAACTTCAACAAGAGATTTCTAATTCTACTTATAGAACACTTTAAAAGTAACTTGAAAGATTATATTCTAGATAATTGA  |       |       |       |       |       |       |       | 50080 |
| GrabEatingMacaque | TAAACTTCAACAAGAGATTTCTAATTCTACTTAT-----TTAAAAGTAACTTGAAAGATTATATTCTAGATAATTGA     |       |       |       |       |       |       |       | 50615 |
| Macaque           | TAAACTTCAACAAGAGATTTCTAATTCTACTTAT-----TTAAAAGTAACTTGAAAGATTATATTCTAGATAATTGA     |       |       |       |       |       |       |       | 51438 |
| PigTailedMacaque  | TAAACTTCAACAAGAGATTTCTAATTCTACTTAT-----TTAAAAGTAACTTGAAAGATTATATTCTAGATAATTGA     |       |       |       |       |       |       |       | 50320 |
| Bonobo            | TAAACTTCAACAAGAGATTTCTAATTCTACTTATAGAACATTTAAAAGTAACTTGAAAGATTATATTCTAGATAATTGA   |       |       |       |       |       |       |       | 48658 |
| OliveBaboon       | TAAACTTC--CAAGAGATTTCTAATTCTACTTAT-----TTAAAAGTAACTTGAAAGATTATATTCTAGATAATTGA     |       |       |       |       |       |       |       | 50180 |
| Orangutan         | TAAACTTCAACAAGAGATTTCTAATTCTACTTATAGAACATTTAAAAGTAACTTGAAAGATTATATTCTAGATAATTGA   |       |       |       |       |       |       |       | 49662 |

Tuesday, May 03, 2022 06:16 PM

| Majority          | TTA----AAATCAGCTGAATAGATTGCTCAGATA-----TTAATTTTATTTGAATTTATAGTATTAAAAATTGTGCTAC  |       |
|-------------------|----------------------------------------------------------------------------------|-------|
|                   | 61690 61700 61710 61720 61730 61740 61750 61760                                  |       |
| Human             | TTA----AAATCATCTGAATAGATTGCTTAGATA-----TTAATTTTATTTGAATTTATAGTATTAAAAATTGTGCTAC  | 49631 |
| Coquerel'sSifaka  | TTTTTCTAAGTCTGCTGAATAGATTACACAGATAATTGAAATTTATTTGAATTTAATGTATATTATTATAATTTTGTAT  | 41728 |
| Ma'sNightMonkey   | TTA----AAATCAGCTGAATAGATTGCACAGATACT----TTTATTTGAATTTAATTTATAGTATTAAAAATTTTGCTAC | 44706 |
| VervetAGM         | TTA----AAATCAGCTGAATAGATTGCTCAGATA-----TTAATTTTATTTGAATTTATAGTATTAAAAATTGTGCTAC  | 51478 |
| Gorilla           | TTA----AAATCATCTGAATAGATTGCTTAGATA-----TTAATTTTATTTGAATGTATAGTATTAAAAATTGTGCTAC  | 50150 |
| GrabEatingMacaque | TTA----AAATCAACTGAATAGATTGCTCAGATA-----TTAATTTTATTTGAATTTATAGTATTAAAAATTGTGCTAC  | 50685 |
| Macaque           | TTA----AAATCAACTGAATAGATTGCTCAGATA-----TTAATTTTATTTGAATTTATAGTATTAAAAATTGTGCTAC  | 51508 |
| PigTailedMacaque  | TTA----AAATCAACTGAATAGATTGCTCAGATA-----TTAATTTTATTTGAATTTATAGTATTAAAAATTGTGCTAC  | 50390 |
| Bonobo            | TTA----AAATCATCTGAATAGATTGCTTAGATA-----TTAATTTTATTTGAATTTATAGTATTAAAAATTGTGCTAC  | 48728 |
| OliveBaboon       | TTA----AAATCAGCTGAATAGATTGCTCAGATA-----TTAATTTTATTTGAATTTATAGTATTAAAAATTGTGCTAC  | 50250 |
| Orangutan         | TTA----AAATCAGCAGAATAGATTGCTTAGCTA-----TTAATTTTATTTGAATTTATAGTATTAAAAATTGTGTTAC  | 49732 |

| Majority          | TTAAATTTTCAGGCATTTTTGGAACTAGCAACCGAGGAAGCAGCTATTACTATGGTTAATTACTATTCTGCTGTGACACC |       |
|-------------------|----------------------------------------------------------------------------------|-------|
|                   | 61770 61780 61790 61800 61810 61820 61830 61840                                  |       |
| Human             | TTAAATTTTCAGGCATTTTTGGAACTAGCAACCGAGGAAGCAGCTATTACTATGGTTAATTACTATTCTGCTGTGACACC | 49711 |
| Coquerel'sSifaka  | TT-----TTCAGGCATTTTTGGAACTAGCAACAGAGGAAGCAGCTATTACTATGGTTAATTACTATTCTGCTGTGACACC | 41803 |
| Ma'sNightMonkey   | TTAAATTTTCAGGCATTTTTGGAGCTAGCAACTGAGGAAGCAGCTATTACTATGGTTAATTACTATTCTGCTGTGACACC | 44786 |
| VervetAGM         | TTAAATTTTCAGGCATTTTTGGAACTAGCAACTGAGGAAGCAGCTATTACTATGGTTAATTACTATTCTGCCGTGACACC | 51558 |
| Gorilla           | TTAAATTTTCAGGCATTTTTGGAACTAGCAACCGAGGAAGCAGCTATTACTATGGTTAATTACTATTCTGCTGTGACACC | 50230 |
| GrabEatingMacaque | TTAAATTTTCAGGCATTTTTGGAACTAGCAACCGAGGAAGCAGCTATTACTATGGTTAATTACTATTCTGCCGTGACACC | 50765 |
| Macaque           | TTAAATTTTCAGGCATTTTTGGAACTAGCAACCGAGGAAGCAGCTATTACTATGGTTAATTACTATTCTGCCGTGACACC | 51588 |
| PigTailedMacaque  | TTAAATTTTCAGGCATTTTTGGAACTAGCAACCGAGGAAGCAGCTATTACTATGGTTAATTACTATTCTGCCGTGACACC | 50470 |
| Bonobo            | TTAAATTTTCAGGCATTTTTGGAACTAGCAACCGAGGAAGCAGCTATTACCATGGTTAATTACTATTCTGCTGTGACACC | 48808 |
| OliveBaboon       | TTAAATTTTCAGGCATTTTTGGAACTAGCAACCGAGGAAGCAGCTATTACTATGGTTAATTACTATTCTGCCGTGACACC | 50330 |
| Orangutan         | TTAAATTTTCAGGCATTTTTGGAACTAGCAACCGAGGAAGCAGCTATTACTATGGTTAATTACTATTCTGCTGTGACACC | 49812 |

| Majority          | TCATCTTCGTAACCAACCGATATATATCCAGTACTCGAATCACAAGAAGCTAAAGACAGATAATACATTAACCAAGTAA |       |
|-------------------|---------------------------------------------------------------------------------|-------|
|                   | 61850 61860 61870 61880 61890 61900 61910 61920                                 |       |
| Human             | TCATCTTCGTAACCAACCAATATATATCCAGTACTCGAATCACAAGAAGCTAAAGACAGATAATACATTAACCAAGTAA | 49791 |
| Coquerel'sSifaka  | TCATCTTCGTAACCAACCAATTTATATCCAGTATTCCAATCACAAGAGCTAAAGACAGATAATACATTAACCAAGTGA  | 41883 |
| Ma'sNightMonkey   | TCATCTTCGTAACCAACCGATATATATCCAGTACTCCAATCACAAGAAGCTAAAGACAGATAACACATTAACCAAGTAA | 44866 |
| VervetAGM         | TCATCTTCGTAACCAACCGATATATATCCAGTACTCGAATCACAAGAAGCTAAAGACAGATAATACATTAACCAAGTAA | 51638 |
| Gorilla           | TCATCTTCGTAACCAACCAATATATATCCAGTACTCGAATCACAAGAAGCTAAAGACAGATAATACATTAACCAAGTAA | 50310 |
| GrabEatingMacaque | TCACCTTCGTAACCAACCGATATATATCCAGTACTCGAATCACAAGAAGCTAAAGACAGATAATACATTAACCAAGTAA | 50845 |
| Macaque           | TCACCTTCGTAACCAACCGATATATATCCAGTACTCGAATCACAAGAAGCTAAAGACAGATAATACATTAACCAAGTAA | 51668 |
| PigTailedMacaque  | TCACCTTCGTAACCAACCGATATATATCCAGTACTCGAATCACAAGAAGCTAAAGACAGATAATACATTAACCAAGTAA | 50550 |
| Bonobo            | TCATCTTCGTAACCAACCAATATATATCCAGTACTCGAATCACAAGAAGCTGAAGACAGATAATACATTAACCAAGTAA | 48888 |
| OliveBaboon       | TCATCTTCGTAACCAACCGATATATATCCAGTACTCGAATCACAAGAAGCTAAAGACAGATAATACATTAACCAAGTAA | 50410 |
| Orangutan         | TCATCTTCGTAACCAACCAATATATATCCAGTACTCGAATCACAAGAAGCTAAAGACAGATAATACATTAACCAAGTAA | 49892 |

Tuesday, May 03, 2022 06:16 PM

| Majority          | GTATGTGTAGGTACATAAATAAAATGGCTAGAACATATTATGAATCTCATAA-ACATTAATAGGAAG-GAAATGTTTAC     |       |       |       |       |       |       |       |  |       |
|-------------------|-------------------------------------------------------------------------------------|-------|-------|-------|-------|-------|-------|-------|--|-------|
|                   | 61930                                                                               | 61940 | 61950 | 61960 | 61970 | 61980 | 61990 | 62000 |  |       |
| Human             | GTATGTGTAGGTACATAAATAAAATGGCTAGAACATATTATGAATCTCATAA-ACATTAATAGGAAG-GAAATGTTTAC     |       |       |       |       |       |       |       |  | 49869 |
| Coquerel'sSifaka  | GTATGTGTAGGTACATAAATTAATAAAATGGCTAGAACATATTAAGAATCTTATAACATAGTAACGGGAAATAAAATATTTAA |       |       |       |       |       |       |       |  | 41963 |
| Ma'sNightMonkey   | GTATGTGTAGGTACATAAATAAAATGGCTAGAACGTATTATGAGTCTCATAA-ACATTAACAGGAAG-GAAATGTTAAC     |       |       |       |       |       |       |       |  | 44944 |
| VervetAGM         | GTATGTGTAGGTGCATAAATAAAATGGCTAGAACATATTATGAATCTCATAA-ACTTTAATAGGAAG-GAAATGTTTAC     |       |       |       |       |       |       |       |  | 51716 |
| Gorilla           | GTATGTGTAGGTACATAAATAAAATGGCTAGAACATATTATGAATCTCATAA-ACATTAATAGGAAG-GAAATGTTTAC     |       |       |       |       |       |       |       |  | 50388 |
| GrabEatingMacaque | GTATGTGTAGATGCATAAATAAAATGGCTAGAACATATTATGAATCTCATAA-ACATTAATAGGAAG-GAAATGTTTAC     |       |       |       |       |       |       |       |  | 50923 |
| Macaque           | GTATGTGTAGATGCATAAATAAAATGGCTAGAACATATTATGAATCTCATAA-ACATTAATAGGAAG-GAAATGTTTAC     |       |       |       |       |       |       |       |  | 51746 |
| PigTailedMacaque  | GTATGTGTAGGTGCATAAATAAAATGGCTAGAACATATTATGAATCTCATAA-ACATTAATAGGAAG-GAAATGTTTAC     |       |       |       |       |       |       |       |  | 50628 |
| Bonobo            | GTATGTGTAGGTACATAAATAAAATGGCTAGAACATATTGTGAATCTCATAA-ACATTAATAGGAAG-GAAATGTTTAC     |       |       |       |       |       |       |       |  | 48966 |
| OliveBaboon       | GTATGTGTAGGTGCATAAATAAAATGGCTAGAACATATTATAAATCTCATAA-ACATTAATAGGAAG-GAAATGTTTAC     |       |       |       |       |       |       |       |  | 50488 |
| Orangutan         | GTGTGTGTAGGTACATAAATAAAATGGCTAGAACATATTATGAATCTCATAA-ACATTAATAGGAAG-GAAATGTTTAC     |       |       |       |       |       |       |       |  | 49970 |

| Majority          | CTGTTCAGA---TGTTCCCTTATAGGCATTTTCTTGTTATTTTT-----                           |       |       |       |       |       |       |       |  |       |
|-------------------|-----------------------------------------------------------------------------|-------|-------|-------|-------|-------|-------|-------|--|-------|
|                   | 62010                                                                       | 62020 | 62030 | 62040 | 62050 | 62060 | 62070 | 62080 |  |       |
| Human             | CTGTTCAGA---TGTTCCCTTATAGGCATTTTCTTGTTATTTTT-----                           |       |       |       |       |       |       |       |  | 49909 |
| Coquerel'sSifaka  | CCACTGAGAAAATGTTTCT-ATAGACATTTTCTTATTATCTTT-----                            |       |       |       |       |       |       |       |  | 42005 |
| Ma'sNightMonkey   | CCATTCAGA---TGTTTCTTACAGACATTTTCTTGTAATTTTT-----                            |       |       |       |       |       |       |       |  | 44984 |
| VervetAGM         | CTGTTCAGA---TGTTCCCTTATAGGCATTTTCTTGTTATTTTT-----                           |       |       |       |       |       |       |       |  | 51756 |
| Gorilla           | CTGTTCAGA---TGTTCCCTTATAGGCATTTTCTTGTTATTTTT-----                           |       |       |       |       |       |       |       |  | 50428 |
| GrabEatingMacaque | CTGTTCAGA---TGTTCCCTTATAGGCATCTTCTTGTTATTTTT-----                           |       |       |       |       |       |       |       |  | 50963 |
| Macaque           | CTGTTCAGA---TGTTCCCTTATAGGCATCTTCTTGTTATTTTT-----                           |       |       |       |       |       |       |       |  | 51786 |
| PigTailedMacaque  | CTGTTCAGA---TGTTGCTTATAGGCATCTTCTTGTTATTTTT-----                            |       |       |       |       |       |       |       |  | 50668 |
| Bonobo            | CTGTTCAGA---TGTTCCCTTATAGGCATTTTCTTGTTATTTTT-----                           |       |       |       |       |       |       |       |  | 49006 |
| OliveBaboon       | CTGTTCAGA---TGTTCCCTTATAGGCATTTTCTTGTTATTTTT-----                           |       |       |       |       |       |       |       |  | 50528 |
| Orangutan         | CTGTTCAAA---TGTTCCCTTATAGGCATTTTCTTGTTATTTTTTTTATTTTTTTTATTTTTTTTAGATTAACCC |       |       |       |       |       |       |       |  | 50047 |

| Majority          | -----                                                                            |       |       |       |       |       |       |       |       |
|-------------------|----------------------------------------------------------------------------------|-------|-------|-------|-------|-------|-------|-------|-------|
|                   | 62090                                                                            | 62100 | 62110 | 62120 | 62130 | 62140 | 62150 | 62160 |       |
| Human             | -----                                                                            |       |       |       |       |       |       |       | 49909 |
| Coquerel'sSifaka  | -----                                                                            |       |       |       |       |       |       |       | 42005 |
| Ma'sNightMonkey   | -----AAGGTATTTT-----T-----                                                       |       |       |       |       |       |       |       | 44995 |
| VervetAGM         | -----                                                                            |       |       |       |       |       |       |       | 51756 |
| Gorilla           | -----                                                                            |       |       |       |       |       |       |       | 50428 |
| GrabEatingMacaque | -----                                                                            |       |       |       |       |       |       |       | 50963 |
| Macaque           | -----                                                                            |       |       |       |       |       |       |       | 51786 |
| PigTailedMacaque  | -----                                                                            |       |       |       |       |       |       |       | 50668 |
| Bonobo            | -----                                                                            |       |       |       |       |       |       |       | 49006 |
| OliveBaboon       | -----                                                                            |       |       |       |       |       |       |       | 50528 |
| Orangutan         | AGTCTTGGGTATGTCTTTATTAGCAGCATGAGAACGCACTAATACAAATAGAGTATTTTTTTTTTCTGTTACCATGGGTA |       |       |       |       |       |       |       | 50127 |

Tuesday, May 03, 2022 06:16 PM

| Majority          | -----                                                                              |       |       |       |       |       |       |       |       |
|-------------------|------------------------------------------------------------------------------------|-------|-------|-------|-------|-------|-------|-------|-------|
|                   | 62170                                                                              | 62180 | 62190 | 62200 | 62210 | 62220 | 62230 | 62240 |       |
| Human             | -----                                                                              |       |       |       |       |       |       |       | 49909 |
| Coquerel'sSifaka  | -----                                                                              |       |       |       |       |       |       |       | 42005 |
| Ma'sNightMonkey   | -----GT-----                                                                       |       |       |       |       |       |       |       | 44997 |
| VervetAGM         | -----                                                                              |       |       |       |       |       |       |       | 51756 |
| Gorrilla          | -----                                                                              |       |       |       |       |       |       |       | 50428 |
| GrabEatingMacaque | -----                                                                              |       |       |       |       |       |       |       | 50963 |
| Macaque           | -----                                                                              |       |       |       |       |       |       |       | 51786 |
| PigTailedMacaque  | -----                                                                              |       |       |       |       |       |       |       | 50668 |
| Bonobo            | -----                                                                              |       |       |       |       |       |       |       | 49006 |
| OliveBaboon       | -----                                                                              |       |       |       |       |       |       |       | 50528 |
| Orangutan         | AGTTGCAATAGAGTATTATTAACACTACAGTTACTGTGTTGTACATTAGATCTCCAGAACCTATTCATCCTGCATAACTGAA |       |       |       |       |       |       |       | 50207 |

| Majority          | -----                                                                           |       |       |       |       |       |       |       |       |
|-------------------|---------------------------------------------------------------------------------|-------|-------|-------|-------|-------|-------|-------|-------|
|                   | 62250                                                                           | 62260 | 62270 | 62280 | 62290 | 62300 | 62310 | 62320 |       |
| Human             | -----                                                                           |       |       |       |       |       |       |       | 49909 |
| Coquerel'sSifaka  | -----                                                                           |       |       |       |       |       |       |       | 42005 |
| Ma'sNightMonkey   | -----                                                                           |       |       |       |       |       |       |       | 44997 |
| VervetAGM         | -----                                                                           |       |       |       |       |       |       |       | 51756 |
| Gorrilla          | -----                                                                           |       |       |       |       |       |       |       | 50428 |
| GrabEatingMacaque | -----                                                                           |       |       |       |       |       |       |       | 50963 |
| Macaque           | -----                                                                           |       |       |       |       |       |       |       | 51786 |
| PigTailedMacaque  | -----                                                                           |       |       |       |       |       |       |       | 50668 |
| Bonobo            | -----                                                                           |       |       |       |       |       |       |       | 49006 |
| OliveBaboon       | -----                                                                           |       |       |       |       |       |       |       | 50528 |
| Orangutan         | CTTTGCAGACTTTGACCAACATCTCCCTATTTCTGCAACCTTTATCCCCTGAAAACCACCACTCCGCTTTCTGTTTCTG |       |       |       |       |       |       |       | 50287 |

| Majority          | -----                                                                          |       |       |       |       |       |       |       |       |
|-------------------|--------------------------------------------------------------------------------|-------|-------|-------|-------|-------|-------|-------|-------|
|                   | 62330                                                                          | 62340 | 62350 | 62360 | 62370 | 62380 | 62390 | 62400 |       |
| Human             | -----                                                                          |       |       |       |       |       |       |       | 49909 |
| Coquerel'sSifaka  | -----                                                                          |       |       |       |       |       |       |       | 42005 |
| Ma'sNightMonkey   | -----G-----                                                                    |       |       |       |       |       |       |       | 44998 |
| VervetAGM         | -----                                                                          |       |       |       |       |       |       |       | 51756 |
| Gorrilla          | -----                                                                          |       |       |       |       |       |       |       | 50428 |
| GrabEatingMacaque | -----                                                                          |       |       |       |       |       |       |       | 50963 |
| Macaque           | -----                                                                          |       |       |       |       |       |       |       | 51786 |
| PigTailedMacaque  | -----                                                                          |       |       |       |       |       |       |       | 50668 |
| Bonobo            | -----                                                                          |       |       |       |       |       |       |       | 49006 |
| OliveBaboon       | -----                                                                          |       |       |       |       |       |       |       | 50528 |
| Orangutan         | AATTCAACTTTTTACGTTATATAAATGAGATAATGCAGTATTTATCTTTCTGTGCTTGCTGATGTTTTTTTTCTTTTT |       |       |       |       |       |       |       | 50367 |

Tuesday, May 03, 2022 06:16 PM

| Majority          | -----                                                                           |                     |                        |                       |       |       |       |       |       |
|-------------------|---------------------------------------------------------------------------------|---------------------|------------------------|-----------------------|-------|-------|-------|-------|-------|
|                   | 62410                                                                           | 62420               | 62430                  | 62440                 | 62450 | 62460 | 62470 | 62480 |       |
| Human             | -----                                                                           |                     |                        |                       |       |       |       |       | 49909 |
| Coquerel'sSifaka  | -----                                                                           |                     |                        |                       |       |       |       |       | 42005 |
| Ma'sNightMonkey   | -----C--                                                                        | AGAATGTTTCTAAGTATTA | AAATACTATGTAAGTTTGAATT | TCCTTTAAAGCCCTGGTAAAT | GTAGT |       |       |       | 45064 |
| VervetAGM         | -----                                                                           |                     |                        |                       |       |       |       |       | 51756 |
| Gorilla           | -----                                                                           |                     |                        |                       |       |       |       |       | 50428 |
| GrabEatingMacaque | -----                                                                           |                     |                        |                       |       |       |       |       | 50963 |
| Macaque           | -----                                                                           |                     |                        |                       |       |       |       |       | 51786 |
| PigTailedMacaque  | -----                                                                           |                     |                        |                       |       |       |       |       | 50668 |
| Bonobo            | -----                                                                           |                     |                        |                       |       |       |       |       | 49006 |
| OliveBaboon       | -----                                                                           |                     |                        |                       |       |       |       |       | 50528 |
| Orangutan         | TTTCTTTTAATTTCTGAAGTATTTATTGATCATTCCTGGGTGTTTCTCGGAGAGGGGATATGGCAGGGTCATAGGATAA |                     |                        |                       |       |       |       |       | 50447 |

| Majority          | -----                                            |                                 |                       |        |       |       |       |       |       |
|-------------------|--------------------------------------------------|---------------------------------|-----------------------|--------|-------|-------|-------|-------|-------|
|                   | 62490                                            | 62500                           | 62510                 | 62520  | 62530 | 62540 | 62550 | 62560 |       |
| Human             | -----                                            |                                 |                       |        |       |       |       |       | 49909 |
| Coquerel'sSifaka  | -----                                            |                                 |                       |        |       |       |       |       | 42005 |
| Ma'sNightMonkey   | TTTTCTTGTTGCAAGTTAAAATTTT                        | TGTGTAGAACTATCAGGTGGGATTTAT     | TAGTAGCATAAACTATTTATA | CAGTTC |       |       |       |       | 45144 |
| VervetAGM         | -----                                            |                                 |                       |        |       |       |       |       | 51756 |
| Gorilla           | -----                                            |                                 |                       |        |       |       |       |       | 50428 |
| GrabEatingMacaque | -----                                            |                                 |                       |        |       |       |       |       | 50963 |
| Macaque           | -----                                            |                                 |                       |        |       |       |       |       | 51786 |
| PigTailedMacaque  | -----                                            |                                 |                       |        |       |       |       |       | 50668 |
| Bonobo            | -----                                            |                                 |                       |        |       |       |       |       | 49006 |
| OliveBaboon       | -----                                            |                                 |                       |        |       |       |       |       | 50528 |
| Orangutan         | TAGTGGAGAGAAAGTCAGGAGATAAACACATGAACAAAGGTCTCTGGT | TTTCTAGGCAGAGGACCCTGCGGCCTTCTGC |                       |        |       |       |       |       | 50527 |

| Majority          | -----                                                                           |       |       |       |       |       |       |       |       |
|-------------------|---------------------------------------------------------------------------------|-------|-------|-------|-------|-------|-------|-------|-------|
|                   | 62570                                                                           | 62580 | 62590 | 62600 | 62610 | 62620 | 62630 | 62640 |       |
| Human             | -----                                                                           |       |       |       |       |       |       |       | 49909 |
| Coquerel'sSifaka  | -----                                                                           |       |       |       |       |       |       |       | 42005 |
| Ma'sNightMonkey   | TC-----                                                                         |       |       |       |       |       |       |       | 45146 |
| VervetAGM         | -----                                                                           |       |       |       |       |       |       |       | 51756 |
| Gorilla           | -----                                                                           |       |       |       |       |       |       |       | 50428 |
| GrabEatingMacaque | -----                                                                           |       |       |       |       |       |       |       | 50963 |
| Macaque           | -----                                                                           |       |       |       |       |       |       |       | 51786 |
| PigTailedMacaque  | -----                                                                           |       |       |       |       |       |       |       | 50668 |
| Bonobo            | -----                                                                           |       |       |       |       |       |       |       | 49006 |
| OliveBaboon       | -----                                                                           |       |       |       |       |       |       |       | 50528 |
| Orangutan         | AGTGTTTGTGCCCTGAGTACTTGAGATTAGGGAGTGGTGATGACTCTTAAAGAGCATGCTGCCTTCAAGCATCTGTTTA |       |       |       |       |       |       |       | 50607 |

Tuesday, May 03, 2022 06:16 PM

| Majority          | -----                                                                            |       |       |       |       |       |       |       |       |
|-------------------|----------------------------------------------------------------------------------|-------|-------|-------|-------|-------|-------|-------|-------|
|                   | 62650                                                                            | 62660 | 62670 | 62680 | 62690 | 62700 | 62710 | 62720 |       |
| Human             | -----                                                                            |       |       |       |       |       |       |       | 49909 |
| Coquerel'sSifaka  | -----                                                                            |       |       |       |       |       |       |       | 42005 |
| Ma'sNightMonkey   | -----                                                                            |       |       |       |       |       |       |       | 45146 |
| VervetAGM         | -----                                                                            |       |       |       |       |       |       |       | 51756 |
| Gorrilla          | -----                                                                            |       |       |       |       |       |       |       | 50428 |
| GrabEatingMacaque | -----                                                                            |       |       |       |       |       |       |       | 50963 |
| Macaque           | -----                                                                            |       |       |       |       |       |       |       | 51786 |
| PigTailedMacaque  | -----                                                                            |       |       |       |       |       |       |       | 50668 |
| Bonobo            | -----                                                                            |       |       |       |       |       |       |       | 49006 |
| OliveBaboon       | -----                                                                            |       |       |       |       |       |       |       | 50528 |
| Orangutan         | ACAAAGCACATCTTGACCACCCCTTAATCCATTTAATCCTGAGTTGACACAGCACATGTTTCAGAGAGCAGGGGGCTGGG |       |       |       |       |       |       |       | 50687 |

| Majority          | -----                                                                           |       |       |       |       |       |       |       |       |
|-------------------|---------------------------------------------------------------------------------|-------|-------|-------|-------|-------|-------|-------|-------|
|                   | 62730                                                                           | 62740 | 62750 | 62760 | 62770 | 62780 | 62790 | 62800 |       |
| Human             | -----                                                                           |       |       |       |       |       |       |       | 49909 |
| Coquerel'sSifaka  | -----                                                                           |       |       |       |       |       |       |       | 42005 |
| Ma'sNightMonkey   | -----                                                                           |       |       |       |       |       |       |       | 45146 |
| VervetAGM         | -----                                                                           |       |       |       |       |       |       |       | 51756 |
| Gorrilla          | -----                                                                           |       |       |       |       |       |       |       | 50428 |
| GrabEatingMacaque | -----                                                                           |       |       |       |       |       |       |       | 50963 |
| Macaque           | -----                                                                           |       |       |       |       |       |       |       | 51786 |
| PigTailedMacaque  | -----                                                                           |       |       |       |       |       |       |       | 50668 |
| Bonobo            | -----                                                                           |       |       |       |       |       |       |       | 49006 |
| OliveBaboon       | -----                                                                           |       |       |       |       |       |       |       | 50528 |
| Orangutan         | GGAAAGGCCATAGATCAACAGCATCCCAAGGCAGAAGAATTTCTCCTAGTCAGAACAAAATGGAGTCTCCTATGCCACC |       |       |       |       |       |       |       | 50767 |

| Majority          | -----                                                                      |       |       |       |       |       |       |       |       |
|-------------------|----------------------------------------------------------------------------|-------|-------|-------|-------|-------|-------|-------|-------|
|                   | 62810                                                                      | 62820 | 62830 | 62840 | 62850 | 62860 | 62870 | 62880 |       |
| Human             | -----                                                                      |       |       |       |       |       |       |       | 49909 |
| Coquerel'sSifaka  | -----                                                                      |       |       |       |       |       |       |       | 42005 |
| Ma'sNightMonkey   | -----                                                                      |       |       |       |       |       |       |       | 45146 |
| VervetAGM         | -----                                                                      |       |       |       |       |       |       |       | 51756 |
| Gorrilla          | -----                                                                      |       |       |       |       |       |       |       | 50428 |
| GrabEatingMacaque | -----                                                                      |       |       |       |       |       |       |       | 50963 |
| Macaque           | -----                                                                      |       |       |       |       |       |       |       | 51786 |
| PigTailedMacaque  | -----                                                                      |       |       |       |       |       |       |       | 50668 |
| Bonobo            | -----                                                                      |       |       |       |       |       |       |       | 49006 |
| OliveBaboon       | -----                                                                      |       |       |       |       |       |       |       | 50528 |
| Orangutan         | CCTTCTACACAGACAGCAACAATCTGAACTCTCCTTCTTTCCCCACACTTCTCCCTTCTCTTCAACAAAACCGC |       |       |       |       |       |       |       | 50847 |

Tuesday, May 03, 2022 06:16 PM

| Majority          | -----                                                                          |       |       |       |       |       |       |       |       |
|-------------------|--------------------------------------------------------------------------------|-------|-------|-------|-------|-------|-------|-------|-------|
|                   | 62890                                                                          | 62900 | 62910 | 62920 | 62930 | 62940 | 62950 | 62960 |       |
| Human             | -----                                                                          |       |       |       |       |       |       |       | 49909 |
| Coquerel'sSifaka  | -----                                                                          |       |       |       |       |       |       |       | 42005 |
| Ma'sNightMonkey   | -----                                                                          |       |       |       |       |       |       |       | 45146 |
| VervetAGM         | -----                                                                          |       |       |       |       |       |       |       | 51756 |
| Gorrilla          | -----                                                                          |       |       |       |       |       |       |       | 50428 |
| GrabEatingMacaque | -----                                                                          |       |       |       |       |       |       |       | 50963 |
| Macaque           | -----                                                                          |       |       |       |       |       |       |       | 51786 |
| PigTailedMacaque  | -----                                                                          |       |       |       |       |       |       |       | 50668 |
| Bonobo            | -----                                                                          |       |       |       |       |       |       |       | 49006 |
| OliveBaboon       | -----                                                                          |       |       |       |       |       |       |       | 50528 |
| Orangutan         | CATCATCTCATGGCCCGCTCCCGATGGTGCCTGTCTCTCGGAGCTGTTGGGTACACCTCCCAGACAGGGCGGCTGGGC |       |       |       |       |       |       |       | 50927 |

| Majority          | -----                                                                         |       |       |       |       |       |       |       |       |
|-------------------|-------------------------------------------------------------------------------|-------|-------|-------|-------|-------|-------|-------|-------|
|                   | 62970                                                                         | 62980 | 62990 | 63000 | 63010 | 63020 | 63030 | 63040 |       |
| Human             | -----                                                                         |       |       |       |       |       |       |       | 49909 |
| Coquerel'sSifaka  | -----                                                                         |       |       |       |       |       |       |       | 42005 |
| Ma'sNightMonkey   | -----CTGCTTAGA-A---TT--T-----                                                 |       |       |       |       |       |       |       | 45159 |
| VervetAGM         | -----                                                                         |       |       |       |       |       |       |       | 51756 |
| Gorrilla          | -----                                                                         |       |       |       |       |       |       |       | 50428 |
| GrabEatingMacaque | -----                                                                         |       |       |       |       |       |       |       | 50963 |
| Macaque           | -----                                                                         |       |       |       |       |       |       |       | 51786 |
| PigTailedMacaque  | -----                                                                         |       |       |       |       |       |       |       | 50668 |
| Bonobo            | -----                                                                         |       |       |       |       |       |       |       | 49006 |
| OliveBaboon       | -----                                                                         |       |       |       |       |       |       |       | 50528 |
| Orangutan         | AGAGGCGCCCTCGCTTCCCAGATGGGGCCGCCGGGCAGAGGCGCTCCTCTCTCCCAGACGGGGCGGCCGGGCAGAGG |       |       |       |       |       |       |       | 51007 |

| Majority          | -----                                                                          |       |       |       |       |       |       |       |       |
|-------------------|--------------------------------------------------------------------------------|-------|-------|-------|-------|-------|-------|-------|-------|
|                   | 63050                                                                          | 63060 | 63070 | 63080 | 63090 | 63100 | 63110 | 63120 |       |
| Human             | -----                                                                          |       |       |       |       |       |       |       | 49909 |
| Coquerel'sSifaka  | -----                                                                          |       |       |       |       |       |       |       | 42005 |
| Ma'sNightMonkey   | -----AAGGTATGAAGTTGGGTGCCTTTGGTTATTTGACTTTTATAGGTCTTAATTTCTTAT                 |       |       |       |       |       |       |       | 45217 |
| VervetAGM         | -----                                                                          |       |       |       |       |       |       |       | 51756 |
| Gorrilla          | -----                                                                          |       |       |       |       |       |       |       | 50428 |
| GrabEatingMacaque | -----                                                                          |       |       |       |       |       |       |       | 50963 |
| Macaque           | -----                                                                          |       |       |       |       |       |       |       | 51786 |
| PigTailedMacaque  | -----                                                                          |       |       |       |       |       |       |       | 50668 |
| Bonobo            | -----                                                                          |       |       |       |       |       |       |       | 49006 |
| OliveBaboon       | -----                                                                          |       |       |       |       |       |       |       | 50528 |
| Orangutan         | CGCTCCTCACTTCCCCGACGGGGCCGCCGGGCAGAGGCGCTCCTCGCTTCCCAGACGGGGCCGCCGGGCAGAGGCGCT |       |       |       |       |       |       |       | 51087 |

Tuesday, May 03, 2022 06:16 PM

| Majority          | -----AAGGTATTTT                                                                 |       |       |       |       |       |       |       |       |
|-------------------|---------------------------------------------------------------------------------|-------|-------|-------|-------|-------|-------|-------|-------|
|                   | 63130                                                                           | 63140 | 63150 | 63160 | 63170 | 63180 | 63190 | 63200 |       |
| Human             | -----AAGGTATTTT                                                                 |       |       |       |       |       |       |       | 49919 |
| Coquerel'sSifaka  | -----ACGATATTTT                                                                 |       |       |       |       |       |       |       | 42015 |
| Ma'sNightMonkey   | GGAAAAATTTTTTTTGAAAATGTGTTAATGGTTTTCTCGAAAAGAAGTCTTAAGGTTGAAGAATATATGAATGTATTGA |       |       |       |       |       |       |       | 45297 |
| VervetAGM         | -----AAGGTATTTT                                                                 |       |       |       |       |       |       |       | 51766 |
| Gorrilla          | -----AAGGTATTTT                                                                 |       |       |       |       |       |       |       | 50438 |
| GrabEatingMacaque | -----AAGGTATTTT                                                                 |       |       |       |       |       |       |       | 50973 |
| Macaque           | -----AAGGTATTTT                                                                 |       |       |       |       |       |       |       | 51796 |
| PigTailedMacaque  | -----AAGGTATTTT                                                                 |       |       |       |       |       |       |       | 50678 |
| Bonobo            | -----AAGGTATTTT                                                                 |       |       |       |       |       |       |       | 49016 |
| OliveBaboon       | -----AAGGTATTTT                                                                 |       |       |       |       |       |       |       | 50538 |
| Orangutan         | CCCAGACCGGGTGGCAGCCGGGCAGAGGCGCTCCTCACCTCCAGACGGGGCGGCTTCTTGTTATTTTTAAGGTATTTT  |       |       |       |       |       |       |       | 51167 |

| Majority          | CATGCAGAATGTTTCTAAGTATTAAATACTATGTCAT-TTTGAATTCCTTTAAACCCCTGATCAAA--TGTTCCTTTTCT |       |       |       |       |       |       |       |       |
|-------------------|----------------------------------------------------------------------------------|-------|-------|-------|-------|-------|-------|-------|-------|
|                   | 63210                                                                            | 63220 | 63230 | 63240 | 63250 | 63260 | 63270 | 63280 |       |
| Human             | CATGCAGAATGTTTCTAAGTATTAAATACTATGTCAT-TTTGAATTCCTTTAAACCCCTGATCAAA--TGTTCCTTTTCT |       |       |       |       |       |       |       | 49996 |
| Coquerel'sSifaka  | CATGCAGAATGTCCT-AAGTATTACATGTCATAGAGT-TTTGAATTCCTTTAAAGCCCTGATCAAAAATGTTCTTTTCT  |       |       |       |       |       |       |       | 42093 |
| Ma'sNightMonkey   | TGTTTTAAAAATATA-ATGTAGAAGATACTGTTTTAAATTCATATATCTAAAAATTAGTATTAGAA--CGCTTTTGTTTT |       |       |       |       |       |       |       | 45374 |
| VervetAGM         | CATGCAGAATGTTTCTGAGTATTAAATACTATGTCAT-TTTGAATTCCTTTAAACCCCTGATCAAA--TGTTCCTTTTCT |       |       |       |       |       |       |       | 51843 |
| Gorrilla          | CATGCAGAATGTTTCTAAGTATTAAATACTATGTCAT-TTTGAATTCCTTTAAACCCCTGATCAAA--TGTTCCTTTTCT |       |       |       |       |       |       |       | 50515 |
| GrabEatingMacaque | CATGCAGAATGTTTCTGAGTATTAAATACTATGTCAT-TTTAAATTCCTTTAAACCCCTGATCAAA--TGTTCCTTTTCT |       |       |       |       |       |       |       | 51050 |
| Macaque           | CATGCAGAATGTTTCTGAGTATTAAATACTATGTCAT-TTTAAATTCCTTTAAACCCCTGATCAAA--TGTTCCTTTTCT |       |       |       |       |       |       |       | 51873 |
| PigTailedMacaque  | CATGCAGAATGTTTCTGAGTATTAAATACTATGTCAT-TTTAAATTCCTTTAAACCCCTGATCAAA--TGTTCCTTTTCT |       |       |       |       |       |       |       | 50755 |
| Bonobo            | CATGCAGAATGTTTCTAAGTATTAAATACTATGTCAT-TTTGAATTCCTTTAAACCCCTGATCAAA--TGTTCCTTTTCT |       |       |       |       |       |       |       | 49093 |
| OliveBaboon       | CATGCAGAATGTTTCTGAGTATTAAATACTATGTCAT-TTTGAATTCCTTTAAACCCCTGATCAAA--TGTTCCTTTTCT |       |       |       |       |       |       |       | 50615 |
| Orangutan         | CATGCAGAATGTTTCTAAGTATTAAATACTATGTCAT-TTTGAATTCCTTTAAACCCCTGATCAAA--TGTTCCTTTTCT |       |       |       |       |       |       |       | 51244 |

| Majority          | TGTTGCAAGTTAAAATTTTTGTGTAGAAAGCTTATCAGGTAGGATTTGTTATTAGCATAAACTATTTATACGACTCTCCTG   |       |       |       |       |       |       |       |       |
|-------------------|-------------------------------------------------------------------------------------|-------|-------|-------|-------|-------|-------|-------|-------|
|                   | 63290                                                                               | 63300 | 63310 | 63320 | 63330 | 63340 | 63350 | 63360 |       |
| Human             | TGTTGCAAGTTAAAATTTTTGTGTAGAAAGCTTATCAGGTAGGATTTGTTATTAGCATAAACTGTTTATACAACTCTCCTG   |       |       |       |       |       |       |       | 50076 |
| Coquerel'sSifaka  | TATTGCAAGTTAAAATTTTTATGTA AAAACTATTTAAGAGGTAGGACTTATTAACACAAATGATTTATACAGCTCTCTA    |       |       |       |       |       |       |       | 42173 |
| Ma'sNightMonkey   | TATTTTTGTTTTTTCTTTTGAGATAGAGTTTCACTCGTGTGCCCAG-GCTGGAGTGCAGTGTGCAATTGCGG-CTCA       |       |       |       |       |       |       |       | 45452 |
| VervetAGM         | TGTTGCAAGTTAAAATTTTTGTGGAGAAGCTTATCAGGTAGGATTTGTTATTAGCATAAACTATTTATACGACTCTCCTG    |       |       |       |       |       |       |       | 51923 |
| Gorrilla          | TGTTGCAAGTTAAAATTTTTGTGTAGAAAGCTTATCAGGTAGGATTTGTTATTAGCATAAACTATTTATACAACTCTCCTG   |       |       |       |       |       |       |       | 50595 |
| GrabEatingMacaque | TGTTGCAAGTTAAAATTTTTGTGGAGAAGCTTATCAGGTAGGATTTGTTATTAGCATAAACTATTTATACGACTCTCCTG    |       |       |       |       |       |       |       | 51130 |
| Macaque           | TGTTGCAAGTTAAAATTTTTGTGGAGAAGCTTATCAGGTAGGATTTGTTATTAGCATAAACTATTTATACGACTCTCCTG    |       |       |       |       |       |       |       | 51953 |
| PigTailedMacaque  | TGTTGCAAGTTAAAATTTTTGTGGAGAAGCTTATCAGGTAGGATTTGTTATTAGCATAAACTATTTATACGACTCTCCTG    |       |       |       |       |       |       |       | 50835 |
| Bonobo            | TGTTGCAAGTTAAAATTTTTGTGTAGAAAGCTTATCGGAGTAGGATTTATTTATTAGCATAAACTGTTTATACAACTCTCCTG |       |       |       |       |       |       |       | 49173 |
| OliveBaboon       | TGTTGCAAGTTAAAATTTTTGTGGAGAAGCTTATCAGGTAGGATTTGTTATTAGCATAAACTATTTGTACGACTCTCCTG    |       |       |       |       |       |       |       | 50695 |
| Orangutan         | TGTTGCAAGTTAAAATTTTTGTGTAGAAAGCTTATCAGGTAGGATTTATTTATTAGCATAAACTATTTATACAACTCTCCTG  |       |       |       |       |       |       |       | 51324 |



Tuesday, May 03, 2022 06:16 PM

Majority CTTAGAATTTAAGGTATGAAGTTCAGTGCCTTTGGTTATTTGACTTTTTTTTATAAGTTTAAATTTCTTATGGAAAAAATT  
 63370 63380 63390 63400 63410 63420 63430 63440  
 Human CTTAGAATTTAAGGTAAAGAAGTTCAGTGCCTTTGGTTATTTGACTTTTTTTTATAAGTCTTAATTTCTTACGGAAAAATTTT 50156  
 Coquerel'sSifaka CTTGGACTTTAAGGTATGAAGTTCAGTGCCTTTGGTTATTTGACTTTTT--ATAGGTCTTAATTTCTTGTGGAAAAATTC 42251  
 Ma'sNightMonkey CTGCAACCTCTGCCTCCTGGGTCAAGCGATTCTCCACCTCAGCCTCCAAGTAGCTGGGATTACAGGCGTATACCACC 45532  
 VervetAGM CTTAGAATTTAAGGTATGAAGTTCAGTGCCTTTGGTTATTTGACTTTTTTTTATAAGTTTAAATTTCTTATGGAAAAAATA 52003  
 Gorrilla CTTAGAATTTAAGGTAAAGAAGCTCAGTGCCTTTGGTTATTTGACTTTTTTTTATAAGTCTTAATTTCTTACGGAAAAATTTT 50675  
 GrabEatingMacaque CTTAGAATTTAAGGTATGAAGTTCAGTGCCTTTGGTTATTTGACTTTTTTTTATAAGTTTAAATTTCTTATGGAAAAAATA 51210  
 Macaque CTTAGAATTTAAGGTATGAAGTTCAGTGCCTTTGGTTATTTGACTTTTTTTTATAAGTTTAAATTTCTTATGGAAAAAATA 52033  
 PigTailedMacaque CTTAGAATTTAAGGTATGAAGTTCAGTGCCTTTGGTTATTTGACTTTTTTTTATAAGTTTAAATTTCTTATGGAAAAAATA 50915  
 Bonobo CTTAGAATTTAAGGTAAAGAAGTTCAGTGCCTTTGGTTATTTGACTTTTTTTTATAAGTCTTAATTTCTTACGGAAAAATTTT 49253  
 OliveBaboon CTTAGAATTTAAGGTATGAAGTTCAGTGCCTTTGGTTATTTGACTTTTTTTTATAAGTTTAAATTTCTTATGGAAAAAATA 50775  
 Orangutan CTTAGAATTTAAGGTATGAAGTTCAGTGCCTTTGGTTATTTGACTTTTTTTTATAAGTCTTAATTTCTTATGGAAAAATTTT 51404

Majority TTTTGAAGATGTGTTAAT-GGTTTTCCCTGGAAAAAGAAAT--CTTAAGGATGA--AGAATATATGAATGTATTGATGTTT  
 63450 63460 63470 63480 63490 63500 63510 63520  
 Human TTTTGAAGATGTGTTAAT-GGTTTTCCCTGGAAAAAGAAAT--CTTAAGGATGA--AGAATATATGAATGTATTGATGTTT 50231  
 Coquerel'sSifaka CTTGTGAAGATGTGTTAATTGATTTTCCCTGGAAAAACAT--CTTATGGATNN--NNNNNNNNNNNNNNNNNNNNNNNN 42327  
 Ma'sNightMonkey ACACC-TGGCTAATTTTGT-ATTTTCAATAGAGATGGGGTTCTCCATGTTGGTCGGCTGGTCTCGAACTCCTGACCTCA 45610  
 VervetAGM TTTTGAAGATGTGTTAAT-GGTTTTCCCTGGAAAAACAAAT--CTTCAAGATGA--AGAATATATGAATGTATTGATGTTT 52078  
 Gorrilla TTTTGAAGATGTGTTAAT-GGTTTTCCCTGGAAAAAGAAAT--CTTAAGGATGA--AGAATATATGAATGTATTGATGTTT 50750  
 GrabEatingMacaque TTTTG-AAGATGTGTTAAT-GGTTTTCCCTGGAAAAAGAAAT--CTTAAGGATGA--GGAATATATGAATGTATTGATGTTT 51284  
 Macaque TTTTG-AAGATGTGTTAAT-GGTTTTCCCTGGAAAAAGAAAT--CTTAAGGATGA--GGAATATATGAATGTATTGATGTTT 52107  
 PigTailedMacaque TTTTG-AAGATGTGTTAAT-GGTTTTCCCTGGAAAAAGAAAT--CTTAAGGATGA--GGAATATATGAATGTATTGATGTTT 50989  
 Bonobo TTTTGAAGATGTGTTAAT-GGTTTTCCCTGGAAAAAGAAAT--CTTAAGGATGA--AGAATATATGAATGTATTGATGTTT 49328  
 OliveBaboon TTTTG-AAGATGTGTTAAT-GGTTTTCCCTGGAAAAAGAAAT--CTTAAGGATGA--AGAATATATGAATGTATTGATGTTT 50849  
 Orangutan TTTTGAAGATGTGTTTTCAT-GGTTTTCCCTGGAAAAAGAAAT--CTTAAGGATGA--AGAATATATGAATGTATTGATGTTT 51479

Majority TAAAAATGTAATGTAGAAGATATT----GT-TTAAAAATTAATGTATTAAAAATAGCAT-----TAGAATGTTTTCT-G  
 63530 63540 63550 63560 63570 63580 63590 63600  
 Human TAAAAATGTAATATAGAAGATATT----GT-TTAAAAATTAATGTATTAAAAATAGCAT-----TAGAATGTTTTCT-G 50299  
 Coquerel'sSifaka NNNNNNNNNNNNNNNNNNNNNNNNNNNNNNNNNNNNNNNNNNNNNNNNNNNNNNNNNNNNNNNNNNNNNNNNNNNNNNN 42379  
 Ma'sNightMonkey GGTGATCCGACCACCTCAGCCTCCCGGAGTGTGGGATTACAGGGGTGAGCCACCATGCCTGGCCTAGAATATTTTTTTT 45690  
 VervetAGM TAAAAATGTAATGTAGAAGATATT----AT-TTAAAAATTAATGTATTAAAAATAGCAT-----TAGAATGTTTTCT-G 52146  
 Gorrilla TAAAAATGTAATATAGAAGATATT----GT-TTAAAAATTAATGTATTAAAAATAGCAT-----TAGAATGTTTTCT-G 50818  
 GrabEatingMacaque TAAAAATGTAATGTAGAGGATATT----AT-TTAAAAATTAATGTATTAAAAATAGCAT-----TAGAATGTTTTCT-G 51352  
 Macaque TAAAAATGTAATGTAGAAGATATT----AT-TTAAAAATTAATGTATTAAAAATAGCAT-----TAGAATGTTTTCT-G 52175  
 PigTailedMacaque TAAAAATGTAATGTAGAAGATATT----AT-TTAAAAATTAATGTATTAAAAATAGCAT-----TAGAATGTTTTCT-G 51057  
 Bonobo TAAAAATGTAATATAGAAGATATT----GT-TTAAAAATTAATGTATTAAAAATAGCAT-----TAGAATGTGTTCT-G 49396  
 OliveBaboon TAAAAATGTAATGTAGAAGATATT----AT-TTAAAAATTAATGTATTAAAAATAGCAT-----TAGAATGTTTTCT-G 50917  
 Orangutan TAAAAATGTAATATAGAAGATATT----GT-TTAAAAATTAATGTATTAAAAATAGCAT-----TAGAATGTTTTCT-G 51547



Tuesday, May 03, 2022 06:16 PM

| Majority          | GAAATTTACAGCTGTT---TTTTTAATTTGATGATGAATTTTAAATTTCTTTTGAAAAAGAATGTATGCTTCTAATAATTT      |       |       |       |       |       |       |       |       |
|-------------------|----------------------------------------------------------------------------------------|-------|-------|-------|-------|-------|-------|-------|-------|
|                   | 63850                                                                                  | 63860 | 63870 | 63880 | 63890 | 63900 | 63910 | 63920 |       |
| Human             | GAAATTTACAGCT-----TTTTTAATTTGATGATGAGTTTTTAATTTCTTTTGAAAAAGAATGTATGCTTCTAATAATTT       |       |       |       |       |       |       |       | 50598 |
| Coquerel'sSifaka  | NNNNNNNNNNNNNNNNNNNNNNNNNNNNNNNNNNNNNNNNNNNNNNNNNNNNNNNNNNNNNNNNNNNNNNNNNNNNNNNNNNNNNN |       |       |       |       |       |       |       | 42626 |
| Ma'sNightMonkey   | CAAATTTACAGCTGTTTTTTTTTAAATGTGTGATAAATTTTGTATT-TTTTGAAAAATGATGTACTTGTATAAATTT          |       |       |       |       |       |       |       | 46008 |
| VervetAGM         | GAAATTTACAGCTGTT---TTTTTAATTTGATGATGAATTTTAAATTTCTTTTGAAAAAGAATGTATGCTTCTAATAAAT-      |       |       |       |       |       |       |       | 52444 |
| Gorilla           | GAAATTTACAGCTGTT---TTTTTAATTTAATGATGAGTTTTTAATTTCTTTTGAAAAAGAATGTATGCTTCTAATAAATTT     |       |       |       |       |       |       |       | 51120 |
| GrabEatingMacaque | GAAATTTACAGCTGGT---TTTTTAATTTGATCATGAATTTTAAATTTCTTTTGAAAAAGAATGTACGCTTCTAATAAAT-      |       |       |       |       |       |       |       | 51653 |
| Macaque           | GAAATTTACAGCTGGT---TTTTTAATTTGATGATGAATTTTAAATTTCTTTTGAAAAAGAATGTACGCTTCTAATAAAT-      |       |       |       |       |       |       |       | 52476 |
| PigTailedMacaque  | GAAATTTACAGCTGTT---TTTTTAATTTGATGATGAATTTTAAATTTCTTTTGAAAAAGAATGTACGCTTCTAATAAAT-      |       |       |       |       |       |       |       | 51358 |
| Bonobo            | GAAATTTACAGCTGTT---TTTTTAATTTGATGATGAGTTTTTAATTTCTTTTGAAAAAGAATGTATGCTTCTAATAAATTT     |       |       |       |       |       |       |       | 49698 |
| OliveBaboon       | GAAATTTACAGCTGTT---TTTTTAATTTGATGATGAATCTTAATTTCTTTTGAAAAAGAATGCACGCTTCTAATAAAT-       |       |       |       |       |       |       |       | 51218 |
| Orangutan         | GAAATTCAGCTGTT---TTTTTAATTTGATGATGAGTTTTTAATTTCTTTTGAAAAAGAATGTATACTTCCAATAAATTT       |       |       |       |       |       |       |       | 51849 |

| Majority          | ATCAAGAGGAAGAATACCAAAGAAAATATCTGCTGTTCTTTCTTTTACTTAGATTTTTTTTTT-----GCATTTTTTAAC       |       |       |       |       |       |       |       |       |
|-------------------|----------------------------------------------------------------------------------------|-------|-------|-------|-------|-------|-------|-------|-------|
|                   | 63930                                                                                  | 63940 | 63950 | 63960 | 63970 | 63980 | 63990 | 64000 |       |
| Human             | ATCAAGAGGAAGAATACCAAAGAAAATATCTGCTCTTCTTTCTTTTACTTAGATTTTTTTT-----GCATTTTTTAAC         |       |       |       |       |       |       |       | 50671 |
| Coquerel'sSifaka  | NNNNNNNNNNNNNNNNNNNNNNNNNNNNNNNNNNNNNNNNNNNNNNNNNNNNNNNNNNNNNNNNNNNNNNNNNNNNNNNNNNNNNN |       |       |       |       |       |       |       | 42699 |
| Ma'sNightMonkey   | ATCAAGACTAAGTATACCAAAGAAAGTATCTGCTCTTCTTTCTTTTACTTAGATTTCTTTTTTGTGGCATTTTTAAC          |       |       |       |       |       |       |       | 46088 |
| VervetAGM         | ATCAAGAGGAAGAATACCAAAGAAAATATCTGCTGTTCTTTCTTTTACTTAGATTTTTTTTTT-----GCATTTTTTAAC       |       |       |       |       |       |       |       | 52519 |
| Gorilla           | ATCTAGAGGAAGAATACCAAAGAAAATATCTGCTCTTCTTTCTTTTACTTAGATTTTTTTT-----GCATTTTTTAAC         |       |       |       |       |       |       |       | 51193 |
| GrabEatingMacaque | ATCAAGAGGAAGAATACCAAAGAAAATATCTGCTGTTCTTTCTTTTACTTAGATTTTTTTTTT-----GCATTTTTTAAC       |       |       |       |       |       |       |       | 51728 |
| Macaque           | ATCAAGAGGAAGAATACCAAAGAAAATATCTGCTGTTCTTTCTTTTACTTAGATTTTTTTTTT-----GCATTTTTTAAC       |       |       |       |       |       |       |       | 52551 |
| PigTailedMacaque  | ATCAAGAGGAAGAATACCAAAGAAAATATCTGCTGTTCTTTCTTTTACTTAGATTTTTTTTTT-----GCATTTTTTAAC       |       |       |       |       |       |       |       | 51433 |
| Bonobo            | ATCAAGAGGAAGAATACCAAAGAAAATATCTGCTCTTCTTTCTTTTACTTAGATTTTTTTT-----GCATTTTTTAAC         |       |       |       |       |       |       |       | 49771 |
| OliveBaboon       | ATCAAGAGGAAGAATACCAAAGAAAATATCTGCTGTTCTTTCTTTTACTTAGATTTTTTTTTT---GCATTTTTTAAC         |       |       |       |       |       |       |       | 51295 |
| Orangutan         | ATCAAGAGGAAGAATACCAAAGAAAATATCTGCTCTTCTTTCTTTTACTTAGATTTTTTTT-----GCATTTTTTAAC         |       |       |       |       |       |       |       | 51922 |

| Majority          | TTATTTTTAACAAATAATGTATATACTTAATGGTGTACAATGTGATGTTTTAATACATATATA--TTGTGGAATGATCA        |       |       |       |       |       |       |       |       |
|-------------------|----------------------------------------------------------------------------------------|-------|-------|-------|-------|-------|-------|-------|-------|
|                   | 64010                                                                                  | 64020 | 64030 | 64040 | 64050 | 64060 | 64070 | 64080 |       |
| Human             | TTATTTTTAACAAATAATGTTTATACTTA-TGGTGTACAATGTGATGTTTTAATACATATATA--TTATGGAATGATCA        |       |       |       |       |       |       |       | 50748 |
| Coquerel'sSifaka  | NNNNNNNNNNNNNNNNNNNNNNNNNNNNNNNNNNNNNNNTGGGTACAGTGTGATGCTTGATACATATATACCTTGTGGAATGATCA |       |       |       |       |       |       |       | 42779 |
| Ma'sNightMonkey   | TTGTTTTAACAAACAATGTATATACTTA-TGGTTTACAATGTGATGTTCTGATACATATATA--TTGCGGGATGATCA         |       |       |       |       |       |       |       | 46165 |
| VervetAGM         | TTATTTTTAACAAATAATGGTATATACTTAACGGTGTTCAGGTGATGTTTTAATACATATATA--TAGTGAATGATCA         |       |       |       |       |       |       |       | 52597 |
| Gorilla           | TTATTTTTAACAAATAATGTTTATACTTA-TGGTGTACAATGTGATGTTTTAATACATATATA--TTATGGAATGATCA        |       |       |       |       |       |       |       | 51270 |
| GrabEatingMacaque | TTATTTTTAACAAATAATGGTATATACTTAACGGTGTTCAGGTGATGTTTTAATACATATATA--TAGTGAATGACCA         |       |       |       |       |       |       |       | 51806 |
| Macaque           | TTATTTTTAACAAATAATGGTATATACTTAACGGTGTTCAGGTGATGTTTTAATACATATATA--TAGTGAATGACCA         |       |       |       |       |       |       |       | 52629 |
| PigTailedMacaque  | TTATTTTTAACAAATAATGGTATATACTTAACGGTGTTCAGGTGATGTTTTAATACATATATA--TAGTGAATGACCA         |       |       |       |       |       |       |       | 51511 |
| Bonobo            | TTATTTTTAACAAATAATGTTTATACTTA-TGGTGTACAATGTGATGTTTTAATACATATATA--TTATGGAATGATCA        |       |       |       |       |       |       |       | 49848 |
| OliveBaboon       | TTATTTTTAACAAATAATAATATATACTTAACGGTGTTCAGGTGATGTTTTAATACATATATA--TAGTGAATGACCA         |       |       |       |       |       |       |       | 51373 |
| Orangutan         | TTATTTTTAACAAATAATGTATGTACTTA-TGGTGTACAATGCAATGTTTTAATACATATATA--TTATGGAATGATCA        |       |       |       |       |       |       |       | 51999 |

Tuesday, May 03, 2022 06:16 PM

| Majority          | AATCTGGCTAGTTAACATATTCATCACTTCCAATACTTACAATTTCTTTATGGTAAGAACATTTAAAAT---TCCTTTAG  |       |       |       |       |       |       |       |       |
|-------------------|-----------------------------------------------------------------------------------|-------|-------|-------|-------|-------|-------|-------|-------|
|                   | 64090                                                                             | 64100 | 64110 | 64120 | 64130 | 64140 | 64150 | 64160 |       |
| Human             | AATCTGGCTGGTTAACATATTCATCTCTTC-AGTACTTACAATTTCTTTATGGTAAGAACATTTAAAAT---TCCTTTAG  |       |       |       |       |       |       |       | 50824 |
| Coquerel'sSifaka  | AATTAGGCC----AACATATCCATCACCTA-AATAGTTA---TTTCTATGTGGTAAAGACATGTAAAATCCTTCTTTTAG  |       |       |       |       |       |       |       | 42851 |
| Ma'sNightMonkey   | AATCTGGTTAGTTAACATATTCATCACTTCAAATACTTACAATTTCTTTATGGTAAGAACATTTAAAAT---TCCTTTAG  |       |       |       |       |       |       |       | 46242 |
| VervetAGM         | AATATGGCTAGTTAACATGCTCATCATTTTCCAGTACTTACAATTTCTTTATGGTAAGAACATTTAAAAT---TCCTTTAG |       |       |       |       |       |       |       | 52674 |
| Gorilla           | AATCTGGCTGGTTAACGTATTCATCTCTTCCAATACTTAGAATTTCTTTATGGTAAGAACATTTAAAAT---TCCTTTAG  |       |       |       |       |       |       |       | 51347 |
| GrabEatingMacaque | AATATGGCTAGTTAACATGCTCATCATTTTCCAATACTTACAATTTCTTTATGGTAAGAACATTTAAAAT---TCCTTTAG |       |       |       |       |       |       |       | 51883 |
| Macaque           | AATATGGCTAGTTAACATGCTCATCATTTTCCAATACTTACAATTTCTTTATGGTAAGAACATTTAAAAT---TCCTTTAG |       |       |       |       |       |       |       | 52706 |
| PigTailedMacaque  | AATATGGCTAGTTAACATGCTCATCATTTTCCAATACTTACAATTTCTTTATGGTAAGAACATTTAAAAT---TCCTTTAG |       |       |       |       |       |       |       | 51588 |
| Bonobo            | AATCTGGCTGGTTAACATATTCATCTCTTCCAGTACTTACAATTTCTTTATGGTAAGAACATTTAAAAT---TCCTTTAG  |       |       |       |       |       |       |       | 49925 |
| OliveBaboon       | AATATGGCTAGTTAACATGCTCATCATTTTCCAATACTTACAATTTCTTTATGGTAAGAACATTTAAAAT---TCCTTTAG |       |       |       |       |       |       |       | 51450 |
| Orangutan         | AATCTGGCTAGT-AACATATTCATCACTTCCAATACTTACAATTTCTTTATGGTAAGAACATTTAAAAT---TCCTTTAG  |       |       |       |       |       |       |       | 52075 |

| Majority          | CTATTTTG-A-GTATACAGTGGGAATGTGGAAAAAC-----TGTTTTTCCTCTGCTCACACCACAACAATCAACACAG  |       |       |       |       |       |       |       |       |
|-------------------|---------------------------------------------------------------------------------|-------|-------|-------|-------|-------|-------|-------|-------|
|                   | 64170                                                                           | 64180 | 64190 | 64200 | 64210 | 64220 | 64230 | 64240 |       |
| Human             | CTATTTTGGGAAGTATACAGTGGGAATGTGGAAAAAC-----TGTTTTTCCTCTGCTCACACCACAACAATCAACACAG |       |       |       |       |       |       |       | 50896 |
| Coquerel'sSifaka  | CTATTTTG-AAATACGAGTTGAATGTGGAAAGACCCCAAGCTATTCTCTCTGCTCTCACACCAGACAATTAACATGG   |       |       |       |       |       |       |       | 42930 |
| Ma'sNightMonkey   | CTATTTGG-AGGTGTACAGCGGAATGTGGAAAAAC-----TTTTTCCTCTGCTCTCATACCACAACAATCAGCACAG   |       |       |       |       |       |       |       | 46313 |
| VervetAGM         | -----TATACAGTGGGAATGTGGAAAAAC-----TGTTTTTCCTCTGCTCACACCACAACAATCAACATAG         |       |       |       |       |       |       |       | 52734 |
| Gorilla           | CTATTTTG-AAGTATACAGTGGGAATGTGGAAAAAC-----TGTTTTTCCTCTGCTCACACCACAACAATCAACACAG  |       |       |       |       |       |       |       | 51418 |
| GrabEatingMacaque | -----TACACAGTGGGAATGTGGAAAAAC-----TGTTTTTCCTCTGCTCACACCACAACAATCAACACAG         |       |       |       |       |       |       |       | 51943 |
| Macaque           | -----TACACAGTGGGAATGTGGAAAAAC-----TGTTTTTCCTCTGCTCACACCACAGCAATCAACACAG         |       |       |       |       |       |       |       | 52766 |
| PigTailedMacaque  | -----TACACAGTGGGAATGTGGAAAAAC-----TGTTTTTCCTCTGCTCACACCACAACAATCAACACAG         |       |       |       |       |       |       |       | 51648 |
| Bonobo            | CTATTTTG-AAGTATACAGTGGGAATGTGGAAAAAC-----TGTTTTTCCTCTGCTCACACCACAACAATCAACACAG  |       |       |       |       |       |       |       | 49996 |
| OliveBaboon       | -----TATACAGTGGGAATGTGGAAAAAC-----TGTTTTTCCTCTGCTCACACCACAACAATCAACACAG         |       |       |       |       |       |       |       | 51510 |
| Orangutan         | CTATTTTG-AGGTATACAGTGGGAATGTGGAAAAAC-----TGTTTTTCCTCTGCTCACACCACAACAATCAACACAG  |       |       |       |       |       |       |       | 52146 |

| Majority          | AAGGCTTCTGTGGCCAGAAATGTGGGGGAATTTTTTTCC-ACATGCCAAGCAAGCAGTCAGGTCTACAGTG-----     |       |       |       |       |       |       |       |       |
|-------------------|----------------------------------------------------------------------------------|-------|-------|-------|-------|-------|-------|-------|-------|
|                   | 64250                                                                            | 64260 | 64270 | 64280 | 64290 | 64300 | 64310 | 64320 |       |
| Human             | AAGGCTTCTGTGGCCCTCAAATGTGGGGGAATTTTTTTCC--ACGCCAAGCAAGCAGTCAGGTCTGCAGTG-----     |       |       |       |       |       |       |       | 50964 |
| Coquerel'sSifaka  | AAAAC TTC-GTGACC--AAATATGGAGGAATTTTTTCCCG-ACATACCAAGCAAGCAA--A-----A-----        |       |       |       |       |       |       |       | 42985 |
| Ma'sNightMonkey   | AAGACTTCTGTGGCCACAAATGTGGGGGAGTTTTTTTCC-ACATGCCAAGCAAGCAGTCAGGACTACAGTGGACACTAGC |       |       |       |       |       |       |       | 46392 |
| VervetAGM         | AAGGCTTCTGCGTCCAGAAATGTGGGGGAATTTTTTTCCACATGGCAAGCAAGCAGTCAGGTCTACAGTG-----      |       |       |       |       |       |       |       | 52805 |
| Gorilla           | AAGGCTTCTGTGGCCCTCATGTGGGGGAATTTTTTTCT--ACGCCAAGCAAGCAGTCAGGTCTGCAGTG-----       |       |       |       |       |       |       |       | 51486 |
| GrabEatingMacaque | AAGGCTTCTGCGGCCAGAAATGTGAGGGGAATTTTTTTCCACATGGCAAGCAAGCAGTCAGGTCTACAGTG-----     |       |       |       |       |       |       |       | 52014 |
| Macaque           | AAGGCTTCTGCGGCCAGAAATGTGAGGGGAATTTTTTTCCACATGGCAAGCAAGCAGTCAGGTCTACAGTG-----     |       |       |       |       |       |       |       | 52837 |
| PigTailedMacaque  | AAGGCTTCTGCGGCCAGAAATGTGAGGGGAATTTTTTTCCACATGGCAAGCAAGCAGTCAGGTCTACAGTG-----     |       |       |       |       |       |       |       | 51719 |
| Bonobo            | AAGGCTTCTGTGGCCCTCAAATGTGGGGGAATTTTTTTCC--ACGCCAAGCAAGCAGTCAGGTCTGCAGTG-----     |       |       |       |       |       |       |       | 50064 |
| OliveBaboon       | AAGGCTTCTGCGGCCAGAAATGTGAGGGGAATTTTTTTCCACATGGCAAGCAAGCAGTCAGGTCTACAGTG-----     |       |       |       |       |       |       |       | 51581 |
| Orangutan         | AAGGCTTCTGTGGCCACAAATGTGGGGGAATTTTTTTCC--ACGCCAAGCAAGCAGTCAGGTCTGCAGTG-----      |       |       |       |       |       |       |       | 52214 |

Tuesday, May 03, 2022 06:16 PM

|                   |                                                                                    |       |
|-------------------|------------------------------------------------------------------------------------|-------|
| Majority          | -----TTCTCCAACCTTAGCTCAGTTTCAACACTATCTGCCAGGAGATAGCATCAGATCCCACAGGTTGAGGGCTCAGTCC  |       |
|                   | 64330 64340 64350 64360 64370 64380 64390 64400                                    |       |
| Human             | -----TTCTCCAACCTTAGCTCAGTTTCAACACTGTCTGCCGGGAGATAGCATCAGATCCCACAGGTTGAGGGCTCAGTCC  | 51039 |
| Coquerel'sSifaka  | -----CCTCCAACCCAGTTTCATTTCCAACACCACCTACTTGGATATAACATCAGATCCCACAGGTTGAGGGCTTAATCC   | 43059 |
| Ma'sNightMonkey   | CTGTGTTCTCCAACCTTAGCTCAGTTTCCAATGCTTTCTGCCAGGAGATAGCATCAGATCCCACAGGTCGAGGGCTCAGTCC | 46472 |
| VervetAGM         | -----TTCTCCAACCTTAGCTCAGTTTCAACACTATCTGCCAGGAGATAGCATCAGATCCCACAGGTTGAGGGCTCAGTCC  | 52880 |
| Gorilla           | -----TTCTCCAACCTTAGCTCAGTTTGAACACTGTCTGCCGGGAGATAGCATCAGATCCCACAGGTTGAGGGCTCAGTCC  | 51561 |
| GrabEatingMacaque | -----TTCTCCATCTTAGCTCAGTTTCAACACTATCTGCCAGGAGATAGCATCAGATCCCACAGGTTGAGGGCTCAGTCC   | 52089 |
| Macaque           | -----TTCTCCAACCTTAGCTCAGTTTCAACACTATCTGCCAGGAGATAGCATCAGATCCCACAGGTTGAGGGCTCAGTCC  | 52912 |
| PigTailedMacaque  | -----TTCTCCAACCTTAGCTCAGTTTCAACACTATCTGCCAGGAGATAGCATCAGATCCCACAGGTTGAGGGCTCAGTCC  | 51794 |
| Bonobo            | -----TTCTCCAACCTTAGCTCAGTTTCAATACTGTCTGCCGGGAGATAGCATCAGATCCCACAGGTTGAGGGCTCAGTCC  | 50139 |
| OliveBaboon       | -----TTCTCCAACCTTAGCTCAGTTTCAACACTATCTGCCAGGAGATAGCATCAGATCCCACAGGTTGAGGGCTCAGTCC  | 51656 |
| Orangutan         | -----TTCTCCAACCTTAGGTCAGTTTCAACACTGTCTGCCGGGAGATAGCATCAGATCCCACAGGTTGAGGGCTCAGTCC  | 52289 |

|                   |                                                                                   |       |
|-------------------|-----------------------------------------------------------------------------------|-------|
| Majority          | CACAAGAT---CTCCTCAGACACCAGCAAGTCAGGCTCTGGAACCTTCTGATTGACCAGCTTCAAGTTGGGGTTCCCACA  |       |
|                   | 64410 64420 64430 64440 64450 64460 64470 64480                                   |       |
| Human             | CACAAGAT---CTCCTGAGACACCAGCAAGTCAGGCTCTGGAACCTTCTGATTGACCAGCTTCAAGTTGGGGTTCCCACA  | 51116 |
| Coquerel'sSifaka  | CACAAAACAGACCCCTCCCCTTCTGACCCGTTGCAGGTGACGGCTCTGGAACCAACCGACTTCAATTGGTGGTTCCCGTG  | 43139 |
| Ma'sNightMonkey   | CACAAGAC---CTCCTCAGACACCAGCAAGTCAGACCTCCGGAACCTTCTCATTGACCAACTTCAAGTTGGGATTTCCACA | 46549 |
| VervetAGM         | CACAAGAT---GTCCTCAGACACCAGCAAGTCAGGCTGTGGAACCTTCTGATTGACCAGCTTTAAGTTAGGGTTCCCACA  | 52957 |
| Gorilla           | CACAAGAT---CTCCTGAGACACCAGCAAGTCAGGCTCTGGAACCTTCTGATTGACCAGCTTCAAGTTGGGGTTCCCACA  | 51638 |
| GrabEatingMacaque | CACAAGAT---GTCCTCAGACACCAGCAAGTCAGGCTCTGGAACCTTCTGATTGACCAGCTTTAAGTTAGGGTTCTTACA  | 52166 |
| Macaque           | CACAAGAT---GTCCTCAGACACCAGCAAGTCAGGCTCTGGAACCTTCTGATTGACCAGCTTTAAGTTAGGGTTCCCACA  | 52989 |
| PigTailedMacaque  | CACAAGAT---GTCCTCAGACACCAGCAAGTCAGGCTCTGGAACCTTCTGATTGACCAGCTTTAAGTTAGGGTTCCCACA  | 51871 |
| Bonobo            | CACAAGAT---CTCCTGAGACACCAGCAAGTCAGGCTCTGGAACCTTCTGATTGACCAGCTTCAAGTTGGGGTTCCCACA  | 50216 |
| OliveBaboon       | CACAAGAT---GTCCTCAGACACCAGCAAGTCAGGCTCTGGAACCTTCTGATTGACCAGCTTTAAGTTAGGGTTCCCACA  | 51733 |
| Orangutan         | CACAAGAT---CTCCTCAGACACCAGCAAGTCAGGCTCTGGAACCTTCTGATTGACCAGCTTCAAGTTGGGGTTCCCACA  | 52366 |

|                   |                                                                          |       |
|-------------------|--------------------------------------------------------------------------|-------|
| Majority          | ACCCCT-----TTTTGGATTTTCGTTAATTTGCTAGAGCAGCACAGAGAAC-TCAAGGAAACATTTACTGA  |       |
|                   | 64490 64500 64510 64520 64530 64540 64550 64560                          |       |
| Human             | ACCCCT-----TTTTGGATTTTCGTTAATTTGCTAGAGCAGCACAGAGAAC-TCAAGGAAACATTTACTGA  | 51181 |
| Coquerel'sSifaka  | ATCCCT-----CTTTGTTTTACAGATGTTTACCAGTTTATTAATAACAATATTACAAAGATGTAGATGAA   | 43205 |
| Ma'sNightMonkey   | ACCCCT-----TTTTGGATTTTGTTAATTAGCTAGACCAGCGCACAGAGAAC-TCAAGGAAACATTTACT-- | 46612 |
| VervetAGM         | GCCCCCT-----TATTGGATTTTCGTTAATTTGCTAGAGCAGCACAGAGAAC-TCAAGGAAACATTTACTGA | 53022 |
| Gorilla           | ACCCCT-----TTTTGGATTTTCGTTAATTTGCTAGAGCAGCACAGAGAAC-TCAAGGAAACATTTACTGA  | 51703 |
| GrabEatingMacaque | GCCCCCT-----TTTTGGATTTTCGTTAATTTGCTAGAGCAGCACAGAGAAC-TCAAGGAAACATTTACTGA | 52231 |
| Macaque           | GCCCCCT-----TTTTGGATTTTCGTTAATTTGCTAGAGCAGCACAGAGAAC-TCAAGGAAACATTTACTGA | 53054 |
| PigTailedMacaque  | GCCCCCT-----TTTTGGATTTTCGTTAATTTGCTAGAGCAGCACAGAGAAC-TCAAGGAAACATTTACTGA | 51936 |
| Bonobo            | ACCCCT-----TTTTGGATTTTCGTTAATTTGCTAGAGCAGCACAGAGAAC-TCAAGGAAACATTTACTGA  | 50281 |
| OliveBaboon       | GCCCCCT-----TTTTGGATTTTCGTTAATTTGCTAGAGCAGCACAGAGAAC-TCAAGGAAACATTTACTGA | 51798 |
| Orangutan         | ACCCCT-----TTTTGGATTTTCGTTAATTTGCTAGAGCAGCACAGAGAAC-TCAAGGAAACATTTACTGA  | 52445 |

Tuesday, May 03, 2022 06:16 PM

| Majority          | GATTTACTAGTTTATTGTATAGGATATTACAAAGGATAATAAGCCTCTA-ATCATGCCTTGGTCTTTCAGGTGACCAGTC |       |       |       |       |       |       |       |       |
|-------------------|----------------------------------------------------------------------------------|-------|-------|-------|-------|-------|-------|-------|-------|
|                   | 64570                                                                            | 64580 | 64590 | 64600 | 64610 | 64620 | 64630 | 64640 |       |
| Human             | GATTTACTAGTTTATTATATAGGATATTAAAAAGGATAATAAGCCTCTA-ATCATGCCTTGATCTTTCAGGTGACCAGTC |       |       |       |       |       |       |       | 51260 |
| Coquerel'sSifaka  | AA-----AATGCATAGGGCAAGATATGGGAAAGGGCAGGGAGCTTCCATGCCCTCTTTGGGTACGCTACCCCTCCAGGA  |       |       |       |       |       |       |       | 43279 |
| Ma'sNightMonkey   | -----AGTTTATTGTATAGGATATTATAGAGGATGATATGCCTCTA-ATTATGCCTAGGTCTTTCAGGTGACCAGCC    |       |       |       |       |       |       |       | 46683 |
| VervetAGM         | GATTTACTAGTTTATTGTATAGGATAGTACAAAGAATAATAAGCCTCTA-ATCATGCCTTGGTCTTTCAGGTGACCAGTC |       |       |       |       |       |       |       | 53101 |
| Gorilla           | GATTTACTAGTTTATTATATAGGATATTAAAAAGGATAATAAGCCTCTA-ATCATGCCTTGATCTTTCAGGTGACCAGTC |       |       |       |       |       |       |       | 51782 |
| GrabEatingMacaque | GATTTACTAGTTTATTGTATAGGATAGTACAAAGGATAATAAGCCTCTA-ATCATGCCTTGGTCTTTCAGGTGACCAGTC |       |       |       |       |       |       |       | 52310 |
| Macaque           | GATTTACTAGTTTATTGTATAGGATAGTACAAAGGATAATAAGCCTCTA-ATCATGCCTTGGTCTTTCAGGTGACCAGTC |       |       |       |       |       |       |       | 53133 |
| PigTailedMacaque  | GATTTACTAGTTTATTGTATAGGATAGTACAAAGGATAATAAGCCTCTA-ATCATGCCTTGGTCTTTCAGGTGACCAGTC |       |       |       |       |       |       |       | 52015 |
| Bonobo            | GATTTACTAGTTTATTATATAGGATATTAAAAAGGATCATAAGCCTCTA-ATCATGCCTTGATCTTTCAGGTGACCAGTC |       |       |       |       |       |       |       | 50360 |
| OliveBaboon       | GATTTACTAGTTTATTGTATAGGATAGTACAAAGGATAATAAGCCTCTA-ATCATGCCTTGGTCTTTCAGGTGACCAGTC |       |       |       |       |       |       |       | 51877 |
| Orangutan         | GATTTACTAGTTTATTATATAGGATATTACAAAGGATAATAAGCCTCTA-ATCATGCCTTGGTCTTTCAGGTGACCAGTC |       |       |       |       |       |       |       | 52524 |

| Majority          | CCCATCCTGAAGTGGGGCTGCCAGCCATCAGTCAACTCATTAGCATACAA-----TTTGAGATTATTAG            |       |       |       |       |       |       |       |       |
|-------------------|----------------------------------------------------------------------------------|-------|-------|-------|-------|-------|-------|-------|-------|
|                   | 64650                                                                            | 64660 | 64670 | 64680 | 64690 | 64700 | 64710 | 64720 |       |
| Human             | CCCATCTTAAAGTGGGGCTGCCAGCCATCAGTCAACTCATTAGCATACAAAATATATCA----TTTGGAGATTATTAG   |       |       |       |       |       |       |       | 51336 |
| Coquerel'sSifaka  | ACC-TCCACATGTTTAGCTATC--CTAGAAGCT--CTCCTAACCTGTCT-----TTTGGGGTTTTATGGA           |       |       |       |       |       |       |       | 43341 |
| Ma'sNightMonkey   | CCCATCCTGAAGTGGGGCTGTCAGCCATAAGTCAAGTCATTAGCATACGAAATATATCAATCACTTTGGAGATTATTAG  |       |       |       |       |       |       |       | 46763 |
| VervetAGM         | CCCATCCTGAAGTGGGGCTGCCAGCCATCAGTCAACTCATTAGCATACAA-----                          |       |       |       |       |       |       |       | 53151 |
| Gorilla           | CGCATCTTAAAGTGGGGCTGCCAGCCATCAGTCAACTCATTAGCATACAAAATATATCA----TTTGGAGATTATTAG   |       |       |       |       |       |       |       | 51858 |
| GrabEatingMacaque | CCCATCCTGAAGTGGGGCTGCCAGCCATCAGTCAACTCATTAGCATACAA-----                          |       |       |       |       |       |       |       | 52360 |
| Macaque           | CCCATCCTGAAGTGGGGCTGCCAGCCATCAGTCAACTCATTAGCATACAA-----                          |       |       |       |       |       |       |       | 53183 |
| PigTailedMacaque  | CCCATCCTGAAGTGGGGCTGCCAGCCATCAGTGAACTCATTAGCATACAA-----                          |       |       |       |       |       |       |       | 52065 |
| Bonobo            | CCCATCTTAAAGTGGGGCTGCCAGCCATCAGTCAACTCATTAGCATACAAAATATATCA----TTTGGAGATTATTAG   |       |       |       |       |       |       |       | 50436 |
| OliveBaboon       | CCCATCCTGAAGTGGGGCTGCCAGCCATCAGTCAACTCATTAGCATACAA-----                          |       |       |       |       |       |       |       | 51927 |
| Orangutan         | CCCATCCTAAAGTGGGGCTGCCAGCCATCAGTCAACTTATTAGCATACAAAATATATCA----CTTTGGAGACTTATTAG |       |       |       |       |       |       |       | 52600 |

| Majority          | GAATTTA---TTGTAT----G-----G-----ATATTATGCATT                                      |       |       |       |       |       |       |       |       |
|-------------------|-----------------------------------------------------------------------------------|-------|-------|-------|-------|-------|-------|-------|-------|
|                   | 64730                                                                             | 64740 | 64750 | 64760 | 64770 | 64780 | 64790 | 64800 |       |
| Human             | GAATTTAGAGTTGTATGCCAGGAAATGGGGTTGAGGACCAAAATGTCTATTTTACAATGTCACAATACAGTATTATGCATT |       |       |       |       |       |       |       | 51416 |
| Coquerel'sSifaka  | GGCTTCA---TTACAT----A-----G-----ACATGATTGATT                                      |       |       |       |       |       |       |       | 43368 |
| Ma'sNightMonkey   | GAATTTAGAGTTGTATGCCAGGAAATGGGTTTGGAGACTAAATGTTTATTTTACAGTGTCAACAACAAATATGCATT     |       |       |       |       |       |       |       | 46843 |
| VervetAGM         | -----TATTATGCATT                                                                  |       |       |       |       |       |       |       | 53162 |
| Gorilla           | GAATTTAGAGTTGTATGCCAGGAAATGGGGTTGAGGACCAAAATGTCTATTTTACAATGTCACAATACAATATTATGCATT |       |       |       |       |       |       |       | 51938 |
| GrabEatingMacaque | -----TATTATGCATT                                                                  |       |       |       |       |       |       |       | 52371 |
| Macaque           | -----TATTATGCATT                                                                  |       |       |       |       |       |       |       | 53194 |
| PigTailedMacaque  | -----TATTATGCATT                                                                  |       |       |       |       |       |       |       | 52076 |
| Bonobo            | GAATTTAGAGTTGTATGCCAGGAAATGGGGTTGAGGACCAAAATGTCTATTTTACAATGTCACAATACAATATTATGCATT |       |       |       |       |       |       |       | 50516 |
| OliveBaboon       | -----TATTATGCATT                                                                  |       |       |       |       |       |       |       | 51938 |
| Orangutan         | GAATTTGGAGTTGTATGACAGGAAATGGGGTTGAGGACCAAAATGTCTATTTTACAATGTCACAATACAATATTATGTATT |       |       |       |       |       |       |       | 52680 |



Tuesday, May 03, 2022 06:16 PM

| Majority          | AGTGTCTCTTAAAATGGCATTTAATATCCCATTCTATTTCATTATATTTAAGTAATTTGCAAGCACATTCTCATTTT     |       |       |       |       |       |       |       |       |
|-------------------|-----------------------------------------------------------------------------------|-------|-------|-------|-------|-------|-------|-------|-------|
|                   | 65050                                                                             | 65060 | 65070 | 65080 | 65090 | 65100 | 65110 | 65120 |       |
| Human             | AGTGTCTCTTAAAATGACATTTAATATCCCATTCTAGTTCGTTATATTTAAGTAATTTGCAAGTACATTCTCATTTT     |       |       |       |       |       |       |       | 51725 |
| Coquerel'sSifaka  | GTTGAAGACCAAAATATA-TATTTTACAGTATCACAACAATACATTATTATT-----A-ACTGTAGTTGCCATGCTATTT- |       |       |       |       |       |       |       | 43666 |
| Ma'sNightMonkey   | AGTGTCTCTTAAAATG--CTGTAATATCCTATTTGTATTTTCATTATATTTCAAGTAATTTGCGAACACATTATCATTTT  |       |       |       |       |       |       |       | 47152 |
| VervetAGM         | AGTGTCTCTTAAAATGGCATTTAATGTCCCATTCTATTTCATTATATTTT---AATTTGCAAGCACATTCTCATGTT     |       |       |       |       |       |       |       | 53467 |
| Gorilla           | AGTGTCTCTTAAAATGACATTTAATATCCCATTCTAGTTCGTTATATTTAAGTAATTTCCAAGTACATTCTCATTTT     |       |       |       |       |       |       |       | 52248 |
| GrabEatingMacaque | AGTGTCTCTTAAAATGGCATTTAATGTCCCATTCTATTTCATTATATTTAAGTAATTTGCAAGCACATTCTCATGTT     |       |       |       |       |       |       |       | 52685 |
| Macaque           | AGTGTCTCTTAAAATGGCATTTAATGTCCCATTCTATTTCATTATATTTAAGTAATTTGCAAGCACATTCTCATGTT     |       |       |       |       |       |       |       | 53508 |
| PigTailedMacaque  | AGTGTCTCTTAAAATGGCATTTAATGTCCATTTCTATTTCATTATATTTAAGTAATTTGCAAGCACATTCTCATGTT     |       |       |       |       |       |       |       | 52390 |
| Bonobo            | AGTGTCTCTTAAAATGACATTTAATATCCCATTCTAGTTCGTTATATTTAAGTAATTTGCAAGTACATTCTCATTTT     |       |       |       |       |       |       |       | 50825 |
| OliveBaboon       | AGTGTCTCTTAAAATGGCATTTAATGTCCCATTCTATTTCATTATATT-----AATTTGCAAGCACATTCTCATGTT     |       |       |       |       |       |       |       | 52249 |
| Orangutan         | AGTGTCTCTTAAAATGACATTTAATATCCCATTCTAGTTCATTATATTTAAGTAATTTGCAAGTACGTTCTCATTTT     |       |       |       |       |       |       |       | 52990 |

| Majority          | AAAAGATTAACGAAAGGAACATGTAAGAATAAAAGCTGGGGACTAGGCTTGGTGGCTCACACCAGTAATCCCAGCACTT  |       |       |       |       |       |       |       |       |
|-------------------|----------------------------------------------------------------------------------|-------|-------|-------|-------|-------|-------|-------|-------|
|                   | 65130                                                                            | 65140 | 65150 | 65160 | 65170 | 65180 | 65190 | 65200 |       |
| Human             | AAAAGATTAACGAAAGGAACATGTAAGAATAAAAGCTGGGGGCTGGGCTTGGTGGCTTATACTGGTAATCCCAGCACTT  |       |       |       |       |       |       |       | 51805 |
| Coquerel'sSifaka  | -----AGCAGAGCACCAGAACCTATTCTTCCTAA--CT-GAAACTGTACCTTTTGACCAACATC-----TCCCTTTTCCC |       |       |       |       |       |       |       | 43733 |
| Ma'sNightMonkey   | AAAAGATTAACAAAAGGAACATGTAAGAATAAAAGCTGGGGTCAGGTGTGGTGGCTCACGCCTGTAATCCCAGCACTT   |       |       |       |       |       |       |       | 47232 |
| VervetAGM         | AAAAGATTAACGAAAGGAACACGTAAGAATAAAAGCTGGGGACTAGGCTTGGTGGCTCACACCAGTAATCGCAGCACTT  |       |       |       |       |       |       |       | 53547 |
| Gorilla           | AAAAGATTAACGAAAGGAACATGTAAGAATAAAAGCTGGGGGCTGGGCTTGGTGGCTTATACTGGTAATCCCAGCACTT  |       |       |       |       |       |       |       | 52328 |
| GrabEatingMacaque | AAAAGATTAACAAAAGGAACACGTAAGAATAAAAGCTGGGGACTAGGCTTGGTGGCTCACACCAGTAATCCCAGCACTT  |       |       |       |       |       |       |       | 52765 |
| Macaque           | AAAAGATTAACAAAAGGAACACGTAAGAATAAAAGCTGGGGACTAGGCTTGGTGGCTCACACCAGTAATCCCAGCACTT  |       |       |       |       |       |       |       | 53588 |
| PigTailedMacaque  | AAAAGATTAACAAAAGGAACACGTAAGAAATAAAAGCTGGGGACTAGGCTTGGTGGCTCACACCAGTAATCCCAGCACTT |       |       |       |       |       |       |       | 52470 |
| Bonobo            | AAAAGATTAACGAAAGGAACATGTAAGAATAAAAGTGGGGGCTGGGCTTAGGGGCTTATACTGGTAATCCCAGCACTT   |       |       |       |       |       |       |       | 50905 |
| OliveBaboon       | AAAAGATTAACAAAAGGAACATGTAAGAATAAAAGCTGGGGACTAGGCTTGGTGGCTCACACCAGTAATCCCAGCACTT  |       |       |       |       |       |       |       | 52329 |
| Orangutan         | AAAAGATTAACGAAAGGAACATGTAAGAATAAAAGCTGGGGGCTGGGCTTGGTGGCTCATACTGGTAATCCCAGCACTT  |       |       |       |       |       |       |       | 53070 |

| Majority          | TGGGAGGCTGAGGCGGACGGATTACCTGAGGTCAGGAGTTCAAGACCCCCCT-----GACCAACATGG-CGAAA     |       |       |       |       |       |       |       |       |
|-------------------|--------------------------------------------------------------------------------|-------|-------|-------|-------|-------|-------|-------|-------|
|                   | 65210                                                                          | 65220 | 65230 | 65240 | 65250 | 65260 | 65270 | 65280 |       |
| Human             | TGGGAGGCTGAGGCGGCTGGATTACCTGAGGTCAGGAGTTCAAGACCCGCT-----GACCAACATGG-TGAAA      |       |       |       |       |       |       |       | 51873 |
| Coquerel'sSifaka  | TGCTACTTCTCCCTCCCTGTT--CCCAGCCTCTAGTAACCAGAACAATA-----ATTTATATGAATTCAA         |       |       |       |       |       |       |       | 43799 |
| Ma'sNightMonkey   | TGGGAGGCTGAGGCAGATGGATCACCTGAGGTCAGGAGTTTGAAGCAGCCT-----GGCCAACATGG-CAAAA      |       |       |       |       |       |       |       | 47300 |
| VervetAGM         | TGGGAGGCTGAGGCGGACGGATTACCTGAGGTCAGGAGTTCAAGACCCCCCCCACC-----GACCAACATGG-CAAAA |       |       |       |       |       |       |       | 53619 |
| Gorilla           | TGGGAGGCTGAGACGGGCGGATTACCTGAGGTCAGGAGTTCAAGACCTGCCT-----GACCAACATGG-TGAAA     |       |       |       |       |       |       |       | 52396 |
| GrabEatingMacaque | TGGGAGGCTGAGGCGGACGGATTACCTGAGGTCAGGAGTTCAAGACCCCCCCCC-----GACCAACATGG-CGAAA   |       |       |       |       |       |       |       | 52836 |
| Macaque           | TGGGAGGCTGAGGCGGACGGATTACCTGAGGTCAGGAGTTCAAGACCCCCCCCC-----GACCAACATGG-CGAAA   |       |       |       |       |       |       |       | 53662 |
| PigTailedMacaque  | TGGGAGGCTGAGGCGGACGGATTACCTGAGGTCAGGAGTTCAAGACCCCCCCCC-----GACCAACATGG-CGAAA   |       |       |       |       |       |       |       | 52542 |
| Bonobo            | TGGGAGGCTGAGGCGGCTGGATTACCTGAGGTCAGGAGTTCAAGACCCGCT-----GACCAACATGG-TGAAA      |       |       |       |       |       |       |       | 50973 |
| OliveBaboon       | TGGGAGGCTGAGGCGGACGGATTACCTGAGGTCAGGAGTTCAAGACCCCCCCCCCAGCCGACCAACATGG-CGAAA   |       |       |       |       |       |       |       | 52408 |
| Orangutan         | TGGGAGGCTGAGGTGGTGGATTACCTGAGGTCAGGAGTTCAAGACCTCCT-----GACCAACATGG-TGAAA       |       |       |       |       |       |       |       | 53138 |



Tuesday, May 03, 2022 06:16 PM

|                   |        |           |          |         |           |            |                                           |
|-------------------|--------|-----------|----------|---------|-----------|------------|-------------------------------------------|
| Majority          | CCCTG  | TCTCTACT  | AAAAATAC | AAAAAGG | AAAGAAAA  | ----A----- | AATTTAGCTGGGCATGG-TGCCAGATGTCTG           |
|                   |        | 65290     | 65300    | 65310   | 65320     | 65330      | 65340 65350 65360                         |
| Human             | CCCTG  | GAGTCTACT | AAAAATAC | AAAAA   | AAAAA     | -----      | AAATTTAGCCAGGCATGG-TGCCAGGTGCCTG 51936    |
| Coquerel'sSifaka  | CTTTTT | TAGGTTCC  | CACATATA | AAGTGAG | ATCATGTAG | -----      | TATTTGTCTCGCTCTGCCTGGCTTATTTTAC 43867     |
| Ma'sNightMonkey   | CCCTG  | TCTCTACT  | AAAAATAC | AAAAAG  | AAAAAG    | AAATTTAAAA | AAAAAATTTAGCTGATCATGG-TGGCAGGTGCCTG 47379 |
| VervetAGM         | CCCTG  | TCTCTACT  | AAAAATAC | AAAAAG  | AAAGAAAA  | ----A----- | ACTTTAGCTGGGCATGG-TGCCAGATGTCTG 53687     |
| Gorilla           | CCCTG  | GAGTCTACT | AAAAATG  | CAAAAA  | AAAAA     | -----      | AAATTTAGCCAGGCATGG-TGCCAGGTGCCTG 52465    |
| GrabEatingMacaque | CCCTG  | TCTCTACT  | AAAAATAC | AAAAAG  | AAAGAAAA  | ----A----- | A-TTTAGCTGGGCATGG-TGCCAGATGTCTG 52903     |
| Macaque           | CCCTG  | TCTCTACT  | AAAAATAC | AAAAAG  | AAAGAAAA  | ----A----- | AATTTAGCTGGGCATGG-TGCCAGATGTCTG 53730     |
| PigTailedMacaque  | CCCTG  | TCTCTACT  | AAAAATAC | GAAAAG  | GAAAGAAAA | ----A----- | AATTTAGCAGGGCATGG-TGCCAGATGTCTG 52610     |
| Bonobo            | CCCTG  | GAGTCTACT | AAAAATAC | AAAAA   | -----     | -----      | AAATTTAGCCAGGCATGG-TGCCAGGTGCCTG 51031    |
| OliveBaboon       | CCCTG  | TCTCTACT  | AAAAATAC | AAAAAG  | AAAGAAAA  | ----A----- | AATTTAGCTGGGCATGG-TGCCAGATGTCTG 52476     |
| Orangutan         | CCCTG  | GAGTCTACT | AAAAATAC | AAAAA   | AAAAA     | -----      | AAAAAATCAGCCAGGCATGG-TGCCAGGTGCCTG 53213  |

|                   |          |           |          |            |              |              |                                     |
|-------------------|----------|-----------|----------|------------|--------------|--------------|-------------------------------------|
| Majority          | TAATCCC  | CAGATACT  | CGGAGGCT | GAGGCA-GAG | AGAGTTGCTT   | GAAACCCGGG   | GAGG-CGGAGCTTGCAGTGATCCCAGAT-       |
|                   |          | 65370     | 65380    | 65390      | 65400        | 65410        | 65420 65430 65440                   |
| Human             | TAATCCC  | CAGC-TACT | TGGAGGCT | GAGGCAAG   | AGAGAATTGCTT | GAAACCCGGG   | GGGTGGAGCTTGCAGTGATCCCAGAT- 52014   |
| Coquerel'sSifaka  | TTAGCACA | ATGTCCTT  | AAAAATGG | CGTTTGATAT | TCCAGTTTTTTT | TATTAAT--GTA | ATTTA---TGAACACATTT- 43941          |
| Ma'sNightMonkey   | TAATCGC  | CAGC-TACT | TGGAGGCT | GAGGCA-AAG | AGAATTGCTT   | GAAACCCGGG   | GAGG-CAGAGCTTGCAGTGAACCCAGATC 47456 |
| VervetAGM         | TAATCCC  | CAGATACT  | AGGAGGCT | GAGGCA-GAG | AGAGTTGCTT   | GAAACCCGGG   | GAGG-CGGAGCTTGCAGTGATCCCAGAT- 53763 |
| Gorilla           | TAATCCC  | CAGG-TACT | CGGAGGCT | GAGGCAAG   | AGAGAATTGCTT | GAAACCCGGG   | GGG-TGGAGCTTGCAGTGATCCCAGAT- 52542  |
| GrabEatingMacaque | TAATCCC  | CAGATACT  | TGGAGGCT | GAGGCA-GAG | AGAGTTGCTT   | GAAACCTGGG   | GAGG-CGGAGCTTGCAGTGATCCCAGAT- 52979 |
| Macaque           | TAATCCC  | CAGATACT  | CGGAGGCT | GAGGCA-GAG | AGAGTTGCTT   | GAAACCCGGG   | GAGG-CGGAGCTTGCAGTGATCCCAGAT- 53806 |
| PigTailedMacaque  | TAATCCC  | CAGATACT  | CGGAGGCT | GAGGCA-GAG | AGAGTTGCTT   | GAAACCCGGG   | GAGG-CGGAGCTTGCAGTGATCCCAGAT- 52686 |
| Bonobo            | TAATCCC  | CAGC-TACT | CAGAGGCT | GAGGCAAG   | AGAGAATTGCTT | GAAACCCGGG   | GGGTGGAGCTTGCAGTGATCCCAGAT- 51109   |
| OliveBaboon       | TAATCCC  | CAGATACT  | CGGAGGCT | GAGGCA-GAG | AGAGTTGCTT   | GAAACCCGGG   | GAGG-CGGAGCTTGCAGTGATCCCAGAT- 52552 |
| Orangutan         | TAATCCC  | CAGC-TACT | CGGAGGCT | GAGGCA-GAG | AGAATTGCTT   | GAAACCCGGG   | GAGG-TGGACCTTGCAGTGATCCCAGAT- 53289 |

|                   |          |           |           |           |            |             |                                       |
|-------------------|----------|-----------|-----------|-----------|------------|-------------|---------------------------------------|
| Majority          | GCGCCACT | TGCCTCC   | GGCCTGGG  | TGACA---- | GAGCGAGACT | TCTGCC----- | AAAAAAAAGAAC----A                     |
|                   |          | 65450     | 65460     | 65470     | 65480      | 65490       | 65500 65510 65520                     |
| Human             | GCGTCA   | CTGCACTCC | CAGCCTGGG | TGACA---- | GAGCGAGACT | CTATCTCA    | AAAAA-----AAAAAAGAGTA 52087           |
| Coquerel'sSifaka  | -T--CAT  | TTTAA-AAG | TTTAAAGT  | GAAA----- | GGAACATGTA | -----       | AAGAATAAAGAT----- 43987               |
| Ma'sNightMonkey   | GTGCTG   | TGCCTCC   | CAGCCTGGG | TGACATCT  | AAAAA      | AAAAA       | AAAAAAGAAATA 47536                    |
| VervetAGM         | GCGCCA   | CTGCACTCC | GGCCTGGG  | TGACA---- | GAGCGAGACT | TCTGCC----- | AAAAAAAAGAAC----A 53819               |
| Gorilla           | GCGTCA   | CTGCACTCC | CAGCCTGGG | TGACA---- | GAGCGAGACT | TCTGCC----- | AAAAAAGAAAT----A 52611                |
| GrabEatingMacaque | GCGCCA   | CTGCACTCC | GGCCTGGG  | TGACA---- | GAGCGAGACT | TCTGCC----- | AAAAAAAAGAAC----A 53035               |
| Macaque           | GCGCCA   | CTGCACTCC | GGCCTGGG  | TGACA---- | GAGCGAGACT | TCTGCC----- | ATAAAAAGAAC----A 53862                |
| PigTailedMacaque  | GCGCCA   | CTGCACTCC | GGCCTGGG  | TGACA---- | GAGCGAGACT | TCTGCC----- | AAAAAAAAGAAC----A 52742               |
| Bonobo            | GCGTCA   | CTGCACTCC | CAGCCTGGG | TGACA---- | GAGCGAGACT | CTTAATCT    | CAAAAAA-----AAAAAAGAA-ATAA 51181      |
| OliveBaboon       | GCTCCA   | CTGCACTCC | GGCCTGGG  | TGACA---- | GAGCGAGACT | TCTGCC----- | AAAAAAAAGAAC----A 52608               |
| Orangutan         | GCGCCA   | CTGCACTAC | AGCCTGGG  | TGACA---- | GAGCGAGACT | TCTGTCTC    | -----AAAAA-----AAAAAAGAAAT----C 53353 |

Tuesday, May 03, 2022 06:16 PM

| Majority          | AAGCTGGCGCCTACACATGGATG--TGTGGAGG-AGGGGGACTT-----AGGATGACCGGTGGAAGCCCCATT         |       |
|-------------------|-----------------------------------------------------------------------------------|-------|
|                   | 65530 65540 65550 65560 65570 65580 65590 65600                                   |       |
| Human             | AAGCTGAGGCCTACACATGGATGGATGTGGAGG-AGGGGCACTT-----AGGATGACTAGTGGGAAGCCCCATT        | 52154 |
| Coquerel'sSifaka  | -AGT--GCGTCTACAGATAGATGTCTGTGTGAG-AGGAGGACTTGTAAATTTTAAATAGGATGACCAGTGCAGTCCCATT  | 44063 |
| Ma'sNightMonkey   | AAGCTGGAGCACCTACATAGATGTTTGTGGAAG-AGGGGGACTTGTAAATTTTAAATAGGATGACTGGTAGATGCCGCATT | 47615 |
| VervetAGM         | AAGCTGGCGCCTACACATGGAT---GTGGAGG-AGGGGGACTT-----AGGATGACCGTTGGAAGCCCCATT          | 53882 |
| Gorilla           | AAGCTGAGGCCTACCCATGGATGGATGTGGAGG-AGGGGCACTT-----AGGATGACTAGTGGGAAGCCCCATT        | 52678 |
| GrabEatingMacaque | AAGCTGGCGCCTACGCATGGAT---GTGGAGG-AGGGGGACTT-----AGGATGACCGTTGGAAGCCCCATT          | 53098 |
| Macaque           | AAGCTGGCGCCTACGCATGGAT---GTGGAGG-AGGGGGACTT-----AGGATGACCGTTGGAAGCCCCATT          | 53925 |
| PigTailedMacaque  | AAGCTGGCGCCTACGCATGGAT---GTGGAGG-AGGGGGACTT-----AGGATGACCGTTGGAAGCCCCATT          | 52805 |
| Bonobo            | AGACTGAGGCCTACACATGGATGGATGTGGAGGGAGGGGCACTT-----AGGATGACTAGTGGAAACCCCATT         | 51249 |
| OliveBaboon       | AAGCTGGCGCCTACGCATGGAT---GTGGAGG-AGGGGGACTT-----AGGATGACCGTTGGAAGCCCCATT          | 52671 |
| Orangutan         | AAGCTAGGGCCTACACATGGATAGATGTGGAGG-AGGGGCACTT-----AGGATGACCAGTGGACGCCCCATT         | 53420 |

| Majority          | GAGAGGGGATATTTGAATAATGATCTTCAAAGTGGTTAGGGAATAAGCCACTTATTCCAGACAGAAGGAATAATCAATGC |       |
|-------------------|----------------------------------------------------------------------------------|-------|
|                   | 65610 65620 65630 65640 65650 65660 65670 65680                                  |       |
| Human             | GAGAGGGGATATTTGAATAATGAACTTCAAAGTGGTTAGGGAATAAGCCACTTATTCCAGACAGAAGGAATAATCAATGC | 52234 |
| Coquerel'sSifaka  | GAGAAGGGATATTTGAATAATGACCTTCAAAGTGTGAAGGAATAAGCCACTTATTCCAGACAGAAGGAATAATCAATGT  | 44143 |
| Ma'sNightMonkey   | GAGAGGGGATATTTGAATAATGAACTTCAAAGTGGTTAGGGAATAAGCCACTTATTCCAGACAGAAGGAATAATCAAGGC | 47695 |
| VervetAGM         | GAGAGGGGATATTTGAATAATGATCTTCAAAGTGGTTAGGGAATAAGCCACTTACTTGAGACAGAAGGAATAATCAGTGC | 53962 |
| Gorilla           | GAG--GGGATATTTGAATAATGAACTTCAAAGTGGTTAGGGAATAAGCCACTTATTCCAGACAGAAGGAATAATCAATGC | 52756 |
| GrabEatingMacaque | GAGAGGGGATATTTGAATAATGATCTTCAAAGTGGTTAGGGAATAAGCCACTTACTTCAGACAGAAGGAATAATCAGTGC | 53178 |
| Macaque           | GAGAGGGGATATTTGAATAATGATCTTCAAAGTGGTTAGGGAATAAGCCACTTACTTCAGACAGAAGGAATAATCAGTGC | 54005 |
| PigTailedMacaque  | GAGAGGGGATATTTGAATAATGATCTTCAAAGTGGTTAGGGAATAAGCCACTTACTTCAGACAGAAGGAATAATCAGTGC | 52885 |
| Bonobo            | GAGAGGGGATATTTGAATAACGAACTTCAAAGTGGTTAGGGAATAAGCCACTTATTCCAGACAGAAGGAATAATCAATGC | 51329 |
| OliveBaboon       | GAGAGGGGATATTTGAATAATGATCTTCAAAGTGGTTAGGGAATAAGCCACTTACTTCAGACAGAAGGAATAATCAGTGC | 52751 |
| Orangutan         | GAGAGGGGATATTTGAATAATGAACTTCAAAGTGGTTAGGTAATAAGCCACTTATTCCAGACCGAAGGAATAATCAATGC | 53500 |

| Majority          | AAAGTTCCTTCTGTTG---AAAAAAATGCTTTTATAATTTTATTTTTCATTTTCTAAAGCCCTTCAATCTCCTT----- |       |
|-------------------|---------------------------------------------------------------------------------|-------|
|                   | 65690 65700 65710 65720 65730 65740 65750 65760                                 |       |
| Human             | AAAGTTCCTTCTGTTG---AAAAAAATGCTTTTATAATTTTATTTTTCATCTTCTAAAGCCCTTCAGTCTCCTT----- | 52305 |
| Coquerel'sSifaka  | AAAGTTCCTTCTGTTG---AAGAAAAAGTTTTGTAATCATATTTTATTTTCAAAGCCCTTCAGTCTTCTT-----     | 44214 |
| Ma'sNightMonkey   | AAAGTTCCTTGTGTTGGAAAAAAATGCTTTTATAATATATTTTTCCTTTTCTAAAGCCCTTCAATCTCCTT-----    | 47770 |
| VervetAGM         | AAAGTTC-TTCTGTTG---AAAAAAATGCTTTTACAATTTTATTTTAAATTTTCTAAAGCCCTTCAATCTCCTT----- | 54032 |
| Gorilla           | AAAGTTCCTTCTGTTG---AAAAAAATGCTTTTATAATTTTATTTTTCATTTTCTAAAGCCCTTCAGTCTCCTT----- | 52827 |
| GrabEatingMacaque | AAAGTTC-TTCTGTTG---AAAAAAATGCTTT-ACAATTTTATTTTTCATTTTCTAAAGCCCTTCAATCTCCTT----- | 53247 |
| Macaque           | AAAGTTC-TTCTGTTG---AAAAAAATGCTTT-ACAATTTTATTTTTCATTTTCTAAAGCCCTTCAATCTCCTT----- | 54074 |
| PigTailedMacaque  | AAAGTTC-TTCTGTTG---AAAAAAATGCTTT-ACAATTTTATTTTTCATTTTCTAAAGCCCTTCAATCTCCTT----- | 52954 |
| Bonobo            | AAAGTTCCTTCTGTTG---AAAAAAATGCTTTTATAATTTTATTTTTCATTTTCTAAAGCCCTTCAGTCTCCTT----- | 51400 |
| OliveBaboon       | AAAGTTC-TTCTGTTG---AAAAAAATGCTTTTACAATTTTATTTTTCATTTTCTAAAGCCCTTCAATCTCCTT----- | 52821 |
| Orangutan         | AAAGTTCCTTCTGTTG---AAAAAAATGCTTTTATAATTTTATTTTTCATTTTCTAAAGCCCTTCAATCTCCTTGATT  | 53576 |

Tuesday, May 03, 2022 06:16 PM

|                   |                                                                                   |       |
|-------------------|-----------------------------------------------------------------------------------|-------|
| Majority          | -----TGGTCATCT-----TTTTTTTTGTAGTTGGTTATGCTTATG-A--CAAC                            |       |
|                   | 65770 65780 65790 65800 65810 65820 65830 65840                                   |       |
| Human             | -----TGGTCAT-----TTTTTTTTGTAGTTGGTTATGCCTTAA-----CAAC                             | 52344 |
| Coquerel'sSifaka  | -----TGATTATCC-T-----TTTTCGATTGATTTGTTTCGTATCTTAGGGACTTTAC                        | 44261 |
| Ma'sNightMonkey   | -----TGGTCAT-----TTTTTTTTGTAGTTGGTTATGCTTACG-ACTTAAC                              | 47813 |
| VervetAGM         | -----TGGTCATCT-----TTTTTTTTGTAGTCAGTTATGCTTGTG-A--CAGC                            | 54075 |
| Gorilla           | -----TGGTCAC-----TTTTTTTTGTAGTTGGTTATGCCTTAAAG-A--CAAC                            | 52868 |
| GrabEatingMacaque | -----TGGTCATCT-----TTTTTTT--GTAGTCAGTTATGCTTGTG-A--CAGC                           | 53288 |
| Macaque           | -----TGGTCATCT-----TTTTTTTT--GTAGTCAGTTATGCTTGTG-A--CAGC                          | 54116 |
| PigTailedMacaque  | -----TGGTCATCT-----TTTTTTTT--GTAGTCAGTTATGCTTGTG-A--CAGC                          | 52996 |
| Bonobo            | -----TGGTCAT-----TTTTTTTTGTAGTTGGTTATGCCTTAAAG-A--CAAC                            | 51441 |
| OliveBaboon       | -----TGGTCATCT-----TTTTTTTT--GTAGTCAGTTATGCTTGTG-A--CAGC                          | 52863 |
| Orangutan         | TTTTTTTTGTAGTTGGTTATGCCTTAAAGACAACAGTATTTATATCTTTTTTTGTAGTTGGTTTTGCCTTACG-A--CAAC | 53653 |

|                   |                                                                                   |       |
|-------------------|-----------------------------------------------------------------------------------|-------|
| Majority          | AGTACTTTGAGGATACTAATTACAGTATTTAAAAAATACATCACTCTATGCTGAGTTAT---TTTTTCAGTGTTAGCATT  |       |
|                   | 65850 65860 65870 65880 65890 65900 65910 65920                                   |       |
| Human             | AGTACTTTGAGGATACTAGTTACAGTATTTAAAAAATACGTCACCTATATGCTGAGTTAT---TTTTTCAGTGTTAGCATT | 52421 |
| Coquerel'sSifaka  | AGTTCTTTGAGGATACTAATTATAGTATTTAAAAAATACCTTCAC----GATGAATTATCTTTTCTTCAGCATTAGGTTT  | 44336 |
| Ma'sNightMonkey   | GGTACTTTGAGGATACTAATTGGCGTATTTAAATAATACGTCAGTATATACTGAGTTATCATTTTTTCAGTGTTAGCATT  | 47893 |
| VervetAGM         | AGTACTTTGAGGATACTAATTACAGTATTTAAAAAATATATCACTCTATGCTGAGTTAT---TTTTTCAGTGTTAGCATT  | 54152 |
| Gorilla           | AGTACTTTGAGGATACTAGTTACAGTATTTAAAAAATACATCACTATATGCTGAGTTAT---TTTTTCAGTGTTAGCATT  | 52945 |
| GrabEatingMacaque | AGTACTTTGAGGATACTAATTACAGTATTTAAAAAATATATCACTCTATGCTGAGTTAT---TTTTTCAGTGTTAGCATT  | 53365 |
| Macaque           | AGTACTTTGAGGATACTAATTACAGTATTTAAAAAATATATCACTCTATGCTGAGTTAT---TTTTTCAGTGTTAGCATT  | 54193 |
| PigTailedMacaque  | AGTACTTTGAGGATACTAATTACAGTATTTAAAAAATATATCACTCTATGCTGAGTTAT---TTTTTCAGTGTTAGCATT  | 53073 |
| Bonobo            | AGTACTTTGAGGATACTAGTTACAGTATTTAAAAAATACGTCACCTATATGCTGAGTTAT---TTTTTCAGTGTTAGCATT | 51518 |
| OliveBaboon       | AGTACTTTGAGGATACTAATTACAGTATTTAAAAAATATATCACTCTATGCTGAGTTAT---TTTTTCAGTGTTAGCATT  | 52940 |
| Orangutan         | AGTATTTGAGGATACTAATTACAGTATTTAAAAAATACATCACTATATGCTGAGTTAT---TTTTTCAGTGTTAGCATT   | 53730 |

|                   |                                                                                  |       |
|-------------------|----------------------------------------------------------------------------------|-------|
| Majority          | TATGTTTATCTTGTTCTCACTCTCTT-CATCCCCCGTTTGTGTCTTTTCATATTTTCAGAATGGACAATTAGATTTTGTT |       |
|                   | 65930 65940 65950 65960 65970 65980 65990 66000                                  |       |
| Human             | TATGTTTATCTTGTTCTCATTCTCTT-CATCCCCCCTTTGTGTCTTTTCGTTGTTTCAGAATGGACAATTAGATTTTGTT | 52500 |
| Coquerel'sSifaka  | TATGTTTATCTTGTTCTCAGTCTCT---TTCCCCCTTTTTATCTGTTTCATATTTTATAATGGACAATTAGGGTTTACT  | 44413 |
| Ma'sNightMonkey   | TCTGTTTATCTTGTTCTTACTCTCTTTCATCCCCCCTCTGTGTCTTTTCATATTTTCAGAATGGACAATTAGATTTTGTT | 47973 |
| VervetAGM         | TATGTTTATCTTGTTCTCACTCTCTT-CATCCCCCGTTTGTGTCTTTCATATTTTCAGAATGGACAATTATATTTTGTT  | 54231 |
| Gorilla           | TATGTTTATCTTGTTCTCATTCTCTT-CATCCCCCCTTTGTGTCTTTTCGTTGTTTCAGAATGGACAATTGGATTTTGTT | 53024 |
| GrabEatingMacaque | TATGTTTATCTTGTTCTCACTCTCTT-CATCCCCCTGTTTGTGTCTTTCATATTTTCAGAATGGACAATTATATTTTGTT | 53444 |
| Macaque           | TATGTTTATCTTGTTCTCACTCTCTT-CATCCCCCTGTTTGTGTCTTTCATATTTTCAGAATGGACAATTATATTTTGTT | 54272 |
| PigTailedMacaque  | TATGTTTATCTTGTTCTCACTCTCTT-CATCCCCCTGTTTGTGTCTTTCATATTTTCAGAATGGACAATTATATTTTGTT | 53152 |
| Bonobo            | TATGTTTATCTTGTTCTCATTCTCTT-CATCCCCCCTTTGTGTCTTTTCGTTGTTTCAGAATGGACAATTAGATTTTGTT | 51597 |
| OliveBaboon       | TATGTGTATCTTGTTCTCACTCTCTT-CATCCCCCGTTTGTGTCTTTCATATTTTCAGAATGGACAATTATATTTTGTT  | 53019 |
| Orangutan         | TATGTTTATCTTGTTCTCATTCTCTT-CATCCCC--TTTGTGTCTTTTCGTTGTTTCAGAATGGACAATTAGATTTTGTT | 53808 |

Tuesday, May 03, 2022 06:16 PM

| Majority          | AAAGTTGTCTGCTTTTCCTCTAGGATAAAAGTAATGAAGAGTGTCTACTAAGCTGTTA-----CTCCCATTCCCCCAAAT   |       |
|-------------------|------------------------------------------------------------------------------------|-------|
|                   | 66010 66020 66030 66040 66050 66060 66070 66080                                    |       |
| Human             | AAAGTTGTATGCTTTTCCTCTAGGATAAAAGTAATGAAGAGCGTTTACTAAGCTGTTA-----CCCCCATTCCCCCAAAT   | 52574 |
| Coquerel'sSifaka  | GGACTTGCCTGCTTTTCCTCTCAGGATAAAAGTAATGAGT--TGGATCCTAAGCTGGNN-----NNNNNNNNNNNNNNNNNN | 44485 |
| Ma'sNightMonkey   | AGAGTTGTGTGCTTTTCCTCTAGGATAAAATACTGAAGAATGTATACTAAGCTGTTATCCCCACCCCATTTCTCCCTAAAT  | 48053 |
| VervetAGM         | AAAGTTGTCTGCTTTTCCTCTAGGATAAAAGTAATGAAGAGTGTCTACCAAGCTGTTA-----CTCCCATTCCCCCAAAT   | 54305 |
| Gorilla           | AAAGTTGTATGCTTTTCCTCTAGGATAAAAGTAATGAAGAGTGTCTACTAAGCTGTTA-----CCCCCATTCCCCCAGAT   | 53098 |
| GrabEatingMacaque | AAAGTTGTCTGCTTTTCCTCTAGGATAAAAGTAATGAAGAGTGTCTACCAAGCTGTTA-----CTCCCATTCCCCCAAAT   | 53518 |
| Macaque           | AAAGTTGTCTGCTTTTCCTCTAGGATAAAAGTAATGAAGAGTGTCTACCAAGCTGTTA-----CTCCCATTCCCCCAAAT   | 54346 |
| PigTailedMacaque  | AAAGTTGTCTGCTTTTCCTCTAGGATAAAAGTAATGAAGAGTGTCTACCAAGCTGTTA-----CTCCCATTCCCCCAAAT   | 53226 |
| Bonobo            | AAAGTTGTATGCTTTTCCTCTAGGATAAAAGTAATGAAGAGTGTCTACTAAGCTGTTA-----CCCCCATTCCCCCAAAT   | 51671 |
| OliveBaboon       | AAAGTTGTCTGCTTTTCCTCTAGGATAAAAGTAATGAAGAGTGTCTACCAAGCTGTTA-----CTCCCATTCCCCCAAAT   | 53093 |
| Orangutan         | AAAGTTGTATGCTTTTCCTCTAGGATAAAAGTAATGAAGAGCGTCTACTAAGCTGTTA-----CCCCCATTCCCCCAAAT   | 53882 |

| Majority          | ACCAAAGAG-CT-CTTATTCTGGGTCA-CAAAACTCCCTTTAGAATTTCTGGTACCA-----                         |       |
|-------------------|----------------------------------------------------------------------------------------|-------|
|                   | 66090 66100 66110 66120 66130 66140 66150 66160                                        |       |
| Human             | ACCAAAGAGGCT-CTTATTCTGGGTCAACAAAACCTCCCTTTAGAATTTCTGGTACCAGGCTGTGCGTGGTGGCTCACACT      | 52653 |
| Coquerel'sSifaka  | NNNNNNNNN---NNNNNNNNNNNNNNNNNNNNNNNNNNNNNNNNNNNNNNNNNNNNNNNNNNNNNNNNNNNNNNNNNNNNNNNNNN | 44537 |
| Ma'sNightMonkey   | ACCAAAGAGGCC-TTTATTCTGGGCCAACAAAACCTCCCTTTAGAATATCTGGTACCA-----                        | 48109 |
| VervetAGM         | ACCAAAGAG-CT-CTTATTCTGGGTCA-CAAAACTCCCTTTAGAATTTCTGGTACCA-----                         | 54359 |
| Gorilla           | ACCAAAGAGGCTGTTTATTCTGGGTCAACAAAACCTCCCTTTAGAATTTCTGGTACCATGCTGGGCGTGGTGGCTCACACT      | 53178 |
| GrabEatingMacaque | ACCAAAGAG-CT-CTTATTCTGGGTCA-CAAAACTCCCTTTAGAATTTCTGGTACCA-----                         | 53572 |
| Macaque           | ACCAAAGAG-CT-CTTATTCTGGGTCA-CAAAACTCCCTTTAGAATTTCTGGTACCA-----                         | 54400 |
| PigTailedMacaque  | ACCAAAGAG-CT-CTTATTCTGGGTCA-CAAAACTCCCTTTAGAATTTCTGGTACCA-----                         | 53280 |
| Bonobo            | ACCAAAGAGGCT-CTTATTCTGGGTCAACAAAACCTCCCTTTAGAATTTCTGGTACCAGGCTGGGCGTGGTGGCTCACACT      | 51750 |
| OliveBaboon       | ACCAAAGAG-CT-CTTATTCTGGGTCA-CAAAACTCCCTTTAGAATTTCTGGTACCA-----                         | 53147 |
| Orangutan         | ATCAAAGAGGCT-CTTATTCTGGGTCAACAAAACCTCCCTTTAGAATTTCTGGTACCAGGCTGGGCGTGGTGGCTCACACT      | 53961 |

| Majority          | -----                                                                             |       |
|-------------------|-----------------------------------------------------------------------------------|-------|
|                   | 66170 66180 66190 66200 66210 66220 66230 66240                                   |       |
| Human             | TGTAATCCCAGCACTTTGGGAGGCTGAGGTGGGCGGATCACGAGGTCAGGAGATCGAGACCATGGTGAAACCCCGTCTGT  | 52733 |
| Coquerel'sSifaka  | -----                                                                             | 44537 |
| Ma'sNightMonkey   | -----                                                                             | 48109 |
| VervetAGM         | -----                                                                             | 54359 |
| Gorilla           | TGTAATCCCAGCACTTTGGGAGGCTGAGGTGGGCGGATCATGAGGTCAGGAGATCGAGACCATGGTGAAACCCCGTCTCT  | 53258 |
| GrabEatingMacaque | -----                                                                             | 53572 |
| Macaque           | -----                                                                             | 54400 |
| PigTailedMacaque  | -----                                                                             | 53280 |
| Bonobo            | TGTAATCCCAGCACTTTGGGAGGCTGAGGTGGGCGGATCACGAGGTCAGGAGATCGAGACCATGGTGAAAACCCCGTCTCT | 51830 |
| OliveBaboon       | -----                                                                             | 53147 |
| Orangutan         | TGTAATCCAGCACTTTGGGAGGCCAAGGTGGGCGGATCACGAGGTCAGGAGATCAAGACCATGGTGAAACCCCGTCTCT   | 54041 |

Tuesday, May 03, 2022 06:16 PM

| Majority          | -----                                                                            |       |       |       |       |       |       |       |       |
|-------------------|----------------------------------------------------------------------------------|-------|-------|-------|-------|-------|-------|-------|-------|
|                   | 66250                                                                            | 66260 | 66270 | 66280 | 66290 | 66300 | 66310 | 66320 |       |
| Human             | ACTAAAAATACGAAATTAGCTGGGCGTGGTGGCGGGCGCCTGTAGTCCCAGCTACTCGGGAGGCTGAGGCAGGAGAATG  |       |       |       |       |       |       |       | 52813 |
| Coquerel'sSifaka  | -----                                                                            |       |       |       |       |       |       |       | 44537 |
| Ma'sNightMonkey   | -----                                                                            |       |       |       |       |       |       |       | 48109 |
| VervetAGM         | -----                                                                            |       |       |       |       |       |       |       | 54359 |
| Gorilla           | ACTAAAAATACGAAATTAGCTGGGCGTGGTGGTGGGCGCCTGTAGTCCCAGCTACTCGGAAGGCTGAGGCAGGAGAATG  |       |       |       |       |       |       |       | 53338 |
| GrabEatingMacaque | -----                                                                            |       |       |       |       |       |       |       | 53572 |
| Macaque           | -----                                                                            |       |       |       |       |       |       |       | 54400 |
| PigTailedMacaque  | -----                                                                            |       |       |       |       |       |       |       | 53280 |
| Bonobo            | ACTAAAAATACGAAATTAGCTGGGCGTGGTGGTGGGCGCCTGTAGTCCCAGCTACTCGGGAGGCTGAGGCAGGAGAATG  |       |       |       |       |       |       |       | 51910 |
| OliveBaboon       | -----                                                                            |       |       |       |       |       |       |       | 53147 |
| Orangutan         | ACTAAAAATACAAAAGTTAGCCGGACGTGGTGGCAGGCGCCTGTAGTCCCAGCTACTCGGGAGGCTGAGGCAGGAGAATG |       |       |       |       |       |       |       | 54121 |

| Majority          | -----                                                                             |       |       |       |       |       |       |       |       |
|-------------------|-----------------------------------------------------------------------------------|-------|-------|-------|-------|-------|-------|-------|-------|
|                   | 66330                                                                             | 66340 | 66350 | 66360 | 66370 | 66380 | 66390 | 66400 |       |
| Human             | GTGCAGACCCAGGAGGCGGAGCTTGCAGTGAGCCGAGATCGGCCACTGCAC TTCAGCCTGGGCGACAGAGCGAGACTCT  |       |       |       |       |       |       |       | 52893 |
| Coquerel'sSifaka  | -----                                                                             |       |       |       |       |       |       |       | 44537 |
| Ma'sNightMonkey   | -----                                                                             |       |       |       |       |       |       |       | 48109 |
| VervetAGM         | -----                                                                             |       |       |       |       |       |       |       | 54359 |
| Gorilla           | GTGCAGACCCGGGAGGCGAGAGCTTGCAGTGAGCCGAGATCGCGCTGCTGCATTCAGCCTGGGCGACAGAGCGAGACTCT  |       |       |       |       |       |       |       | 53418 |
| GrabEatingMacaque | -----                                                                             |       |       |       |       |       |       |       | 53572 |
| Macaque           | -----                                                                             |       |       |       |       |       |       |       | 54400 |
| PigTailedMacaque  | -----                                                                             |       |       |       |       |       |       |       | 53280 |
| Bonobo            | GTGCAGACCCAGGAGGCGAGAGCTTGCAGTGAGCCGAGATCGGCCACTGCAC TTCAGCCTGGGCGACAGAACGAGACTCT |       |       |       |       |       |       |       | 51990 |
| OliveBaboon       | -----                                                                             |       |       |       |       |       |       |       | 53147 |
| Orangutan         | GCGTGAACCCAGGAGGCGGAGCTTGCAGTGAGCTGAGATTGCCACTGCAC TCCAGCCTGGGTGACAGAGCGAGACTCT   |       |       |       |       |       |       |       | 54201 |

| Majority          | -----GCAGGGCACTTTGGCTCGTGCCTG                                                      |       |       |       |       |       |       |       |       |
|-------------------|------------------------------------------------------------------------------------|-------|-------|-------|-------|-------|-------|-------|-------|
|                   | 66410                                                                              | 66420 | 66430 | 66440 | 66450 | 66460 | 66470 | 66480 |       |
| Human             | GTCTCA---AAAAAAAAAAAAAAAAAAGAATTCTTGGTACCA-----GCAGGGCACTTTGGCTCATGCCTG            |       |       |       |       |       |       |       | 52955 |
| Coquerel'sSifaka  | -----                                                                              |       |       |       |       |       |       |       | 44537 |
| Ma'sNightMonkey   | -----GCAGAACACTTTGGCTCATGCCA                                                       |       |       |       |       |       |       |       | 48133 |
| VervetAGM         | -----GCAGGGCACTTTGGCTCGTGCCTG                                                      |       |       |       |       |       |       |       | 54383 |
| Gorilla           | GTCTCAAAAAAAAAAAAAAAAAAAGAATTTCTTGGTACCA-----GTGGGGCACTTTGGCTCATGCCTG              |       |       |       |       |       |       |       | 53484 |
| GrabEatingMacaque | -----GCAGGGCACTTTGGCTCGTGCCTG                                                      |       |       |       |       |       |       |       | 53596 |
| Macaque           | -----GCAGGGCACTTTGGCTCGTGCCTG                                                      |       |       |       |       |       |       |       | 54424 |
| PigTailedMacaque  | -----GCAGGGCACTTTGGCTCGTGCCTG                                                      |       |       |       |       |       |       |       | 53304 |
| Bonobo            | GTCT-----ACAAAAAAAAAAAAAAAAAAGAATTCTTGGTACCAAAGCAGGTACCAAAGCAGGGCACTTTGGCTCATGCCTG |       |       |       |       |       |       |       | 52064 |
| OliveBaboon       | -----GCAGGGCACTTTGGCTCGTGCCTG                                                      |       |       |       |       |       |       |       | 53171 |
| Orangutan         | GTATCA---AAAAAAAAAAAAAAAAAAGAATTTCTTGGTACCA-----GCAGGGCACTTTGGCTCATGCCTG           |       |       |       |       |       |       |       | 54264 |



Tuesday, May 03, 2022 06:16 PM

|                   |                                                                                    |       |
|-------------------|------------------------------------------------------------------------------------|-------|
| Majority          | TT-GTTAATGAACTAGACTTTCTGTTTCATCCATTTTTTCACGCACTCC-CTCCTCCTGTGAACCTGCCAATTTCTAATTTG |       |
|                   | 66730 66740 66750 66760 66770 66780 66790 66800                                    |       |
| Human             | TTTGTTAATGAACTAGACTTTCTGTTTCGCTGTTTTTCACCCACTCC-CTCCTCCTGTGAACCTGCCAATTTCTGATTTG   | 53250 |
| Coquerel'sSifaka  | TTTGTTTCATTAGCTAGACTTTCCATTTATCCTTTTGTGTTTGTCCCTC-TCCCGTCTGTGAACCTGCTAATTTCTGATCTG | 44795 |
| Ma'sNightMonkey   | TT-GTTAATGAGCTAGACTTTTCGGTTTCATCCTTTTTTCACCCACTCTTCTCCTCCTGTGAACCTGCCAATT-----     | 48421 |
| VervetAGM         | TT-GTTAATGAACTAGACTTTCTGTTTCATCCATTTTTTCACGCACTCC-CTCCTCCTGTGAACCTCCCAATTTCTAATTTG | 54683 |
| Gorilla           | TTTGTTAATGAGCTAGACTTTCTGTTTCGCTGTTTTTCACCCACTCC-CTCCTCCTGTGAACCTGCCAATTTCTGATTTG   | 53777 |
| GrabEatingMacaque | TT-GTTAATGAACTAGACTTTCTGTTTCATCCATTTTTTCACGCACTCC-CTCCTCCTGTGAACCTGCCAATTTCTAATTTG | 53902 |
| Macaque           | TT-GTTAATGAACTAGACTTTCTGTTTCATCCATTTTTTCACGCACTCC-CTCCTCCTGTGAACCTGCCAATTTCTAATTTG | 54730 |
| PigTailedMacaque  | TT-GTTAATGAACTAGACTTTCTGTTTCATCCATTTTTTCACGCACTCC-CTCCTCCTGTGAACCTGCCAATTTCTAATTTG | 53610 |
| Bonobo            | TTTGTTAATGAACTAGACTTTCTGTTTCGCTGTTTTTCACCCACTCC-CTCCTCCTGTGAACCTGCCAATTTCTGATTTG   | 52358 |
| OliveBaboon       | TT-GTTAATGAACTAGACTTTCTGTTTCATCCATTTTTTCACGCACTCC-CTCCTCCTGTGAACCTGCCAATTTCTAATTTG | 53478 |
| Orangutan         | TTTGTTAATGAACTAGACTTTCTGTTTCATCCGTTTTTCACCCACTCC-CTCCTCCTGTGAACCTGCCAATTTCTAATTTG  | 54557 |

|                   |                                                                                 |       |
|-------------------|---------------------------------------------------------------------------------|-------|
| Majority          | GTTCTGTGGCTGCTACCAGTATAACTCCTGTTTGCTGTGTGTTCACTGTGTCTCCAGTCTATTTGGTTCCATTCAATTT |       |
|                   | 66810 66820 66830 66840 66850 66860 66870 66880                                 |       |
| Human             | GTTCTGTGGCTGCTACCAGTATAACACCTGTTTGCTGTGTGTTCACTGTGTCTCCAGTCCATTTGGTTCCATTCAATTT | 53330 |
| Coquerel'sSifaka  | GTTCTGTGGCAA--ACCAGTGAACCCCTGTTTGCTATGATTAATCACTGTGCCTTCTGTCT----CTTTGGTTCCATT  | 44868 |
| Ma'sNightMonkey   | -----ACCA-----GT-----T-----TGGTTCCATTCAATTT                                     | 48444 |
| VervetAGM         | GTTCTGTGACTGCTACCAATATAACTCCTGTTTGCTGTGTGTTCACTGTGTCTCCAGTCTGTTTGGTTCCATTCAATTT | 54763 |
| Gorilla           | GTTCTGTGGCTGCTACCAGTATAACACCTGTTTGCTGTGTGTTCACTGTGTCTCCAGTCCATTTGGTTCCATTCAATTT | 53857 |
| GrabEatingMacaque | GTTCTGTGACTGCTACCAATATAACTCCTGTTTGCTGTGTGTTCACTGTGTCTCCAGTCTATTTGGTTCCATTCAATTT | 53982 |
| Macaque           | GTTCTGTGACTGCTACCAATATAACTCCTGTTTGCTGTGTGTTCACTGTGTCTCCAGTCTATTTGGTTCCATTCAATTT | 54810 |
| PigTailedMacaque  | GTTCTGTGACTGCTACCAATATAACTCCTGTTTGCTGTGTGTTCACTGTGTCTCCAGTCTATTTGGTTCCATTCAATTT | 53690 |
| Bonobo            | GTTCTGTGGCTGCTACCAGTATAACACCTGTTTGCTGTGTGTTCACTGTGTCTCCAGTCCATTTAGTTCCATTCAATTT | 52438 |
| OliveBaboon       | GTTCTGTGACTGCTACCAATATAACTCCTATTTGCTGTGTGTTCACTGTGTCTCCAGTCTATTTGGTTCCATTCAATTT | 53558 |
| Orangutan         | GTTCTGTGGCTGCTACCAGTATAACACCTGTTTGCTGTGTGTTCACTGTGTCTCCAGTCCGTTTGGTTCCATTCAATTT | 54637 |

|                   |                                                                                    |       |
|-------------------|------------------------------------------------------------------------------------|-------|
| Majority          | CTGTGTTCCAGGAATTTGATAAAAATTATTTCTCAGCTAATGATGACCTTCCCTCCCTTCAGT-----GTTTGTTT-ATTT  |       |
|                   | 66890 66900 66910 66920 66930 66940 66950 66960                                    |       |
| Human             | CTGTGTTCCAGGAATTTGATAAAAATTATTTCTCAGCTAATGATAACCTTCCCTCCCTTCAGT-----GTTTGTTT-ATTT  | 53403 |
| Coquerel'sSifaka  | CTGTGTTCTAAAAATTTAATAAAAATTATTTTTCAGCTAATGGTGACCTTTGCTCTGTTTCAGTGTTTTGTTTATTTTCATT | 44948 |
| Ma'sNightMonkey   | CTGTGTTCCAGGAATTTGATAAAAATTATTTCTTAGCTAATGATGACCTTAACTCCCTTCAGT-----GTTTGTTT-ATTT  | 48517 |
| VervetAGM         | CTGTGTTCCAGGAATTTGATAAAAATTATTTCTCAGCTAATGATGACCTTCCCTCCCTT-----GTTTGTTT-ATTT      | 54832 |
| Gorilla           | CTGTGTTCCAGGAATTTGATAAAAATTATTTCTCAGCTAATGATAACCTTCCCTCCCTTCAGT-----GTTTGTTT-ATTT  | 53930 |
| GrabEatingMacaque | CTGTGTTCCAGGAATTTGATAAAAATTATTTCTCAGCTAATGATGACCTTCCCTCCCTTCAGT-----GTTTGTTT-ATTT  | 54055 |
| Macaque           | CTGTGTTCCAGGAATTTGATAAAAATTATTTCTCAGCTAATGATGACCTTCCCTCCCTTCAGT-----GTTTGTTT-ATTT  | 54883 |
| PigTailedMacaque  | CTGTGTTCCAGGAATTTGATAAAAATTATTTCTCAGCTAATGATGACCTTCCCTCCCTTCAGT-----GTTTGTTT-ATTT  | 53763 |
| Bonobo            | CTGTGTTCCAGGAATTTGATAAAAATTATTTCTCAGCTAATGATAACCTTCCCTCCCTTCAGT-----GTTTGTTT-ATTT  | 52511 |
| OliveBaboon       | CTGTGTTCCAGGAATTTGATAAAAATTATTTCTCAGCTAATGATGACCTTCCCTCCCTTCAGT-----GTTTGTTT-ATTT  | 53631 |
| Orangutan         | CTGTATTCCAGGAATTTGATAAAAATTATTTCTCAGCTAATGATAACCTTCCCTCCCTTCAGT-----GTTTGTTT-ATTT  | 54710 |

Tuesday, May 03, 2022 06:16 PM

|                   |                                                                                   |       |
|-------------------|-----------------------------------------------------------------------------------|-------|
| Majority          | TATATTCATTCACTTCTAGGCATTTTAATAGGGTTTCATAATAGAAGACATGCAAATGAGTATGCATTAACCATGAATTC  |       |
|                   | 66970 66980 66990 67000 67010 67020 67030 67040                                   |       |
| Human             | TATATTCATTCACTTCTAGGCATTTTAATAGAGTTTCATAATAGAAGACATGCAAATGAGTATGCATTAACCATGAATTC  | 53483 |
| Coquerel'sSifaka  | TATATTCATTCACTTCTAGGCATTTTAATAGAATTTTCATAACCAAAGAGTGGCAAATGAATATGTGTTAACCATGAATTC | 45028 |
| Ma'sNightMonkey   | TATATTCATTTATTTCTAGGCATTTTAATAGGGTTTCATAATAGAAAACATGCACATGAGTATGCATTAACCATGAATTC  | 48597 |
| VervetAGM         | TATATTCATTCACTTCTAGGCATTTTAATAGGGTTTCATAATAGAAGACATGCAAATGAGTATGCATTAACCATGAATTC  | 54912 |
| Gorilla           | TATATTCATTCACTTCTAGGCATTTTAATAGAGTTTCATAATAGAAGACATGCAAATGAGTATGCATTAACCATGAATTC  | 54010 |
| GrabEatingMacaque | TATATTCATTCACTTCTAGGCATTTTAATAGGGTTTCATAATAGAAGACATGCAAATGGGTATGCATTAACCATGAATTC  | 54135 |
| Macaque           | TATATTCATTCACTTCTAGGCATTTTAATAGGGTTTCATAATAGAAGACATGCAAATGGGTATGCATTAACCATGAATTC  | 54963 |
| PigTailedMacaque  | TATATTCATTCACTTCTAGGCATTTTAATAGGGTTTCATAATAGAAGACATGCAAATGGGTATGCATTAACCATGAATTC  | 53843 |
| Bonobo            | TATATTCATTCACTTCTAGGCATTTTAATAGAGTTTCATAATAGAAGACATGCAAATGAGTATACATTAACCATGAATTC  | 52591 |
| OliveBaboon       | TATATTCATTCACTTCTAGGCATTTTAATAGGGTTTCATAATAGAAGACATGCAAATGGGTATGCATTAACCATGAATTC  | 53711 |
| Orangutan         | TATATTCATTCACTTCTAGGCATTTTAATAGAGTTTCATAATAGAAGACATGCAAATGAGTATGCATTAACCATGAATTC  | 54790 |

|                   |                                                                                  |       |
|-------------------|----------------------------------------------------------------------------------|-------|
| Majority          | TTCCACATCCCTTCATGAAATCACCAGGTCCTATTAGTTCACACTTTTTAATTATCTGCCTGGTTTTCTCCATCTTTCT  |       |
|                   | 67050 67060 67070 67080 67090 67100 67110 67120                                  |       |
| Human             | TTCCACATCCGTTTCATGAAATCACCAGGTCCTATTAGTTCACACTTTTTAATTATCTGCCTGGTTTTCTCCATCTTTCT | 53563 |
| Coquerel'sSifaka  | TTCCACAACCCCTTCATAAAATCACCAGGTCCTATTAGTTCACACTTTAATACTGCCTAGTTGTCTTCATCTCTCC-    | 45107 |
| Ma'sNightMonkey   | TTCCACATCTCTTCATGAAATCACCAGGTCCTATTAGTTCACACTTTTTAATTATCTGCCTAGTTGTCTTCATCTCTCC- | 48676 |
| VervetAGM         | TTCCACATCCCTTCTTGAATCACCAGGTCCTATTAGTTCACACTTTTTAATTATCTGCCTGGTTTTCTCCATCTTTCT   | 54992 |
| Gorilla           | TTCCACATCCCTTCATGAAATCACCAGGTCCTATTAGTTCACACTTTTTAATTATCTGCCTGGTTTTCTCCATCTTTCT  | 54090 |
| GrabEatingMacaque | TTCCACATCCCTTCTTGAATCACCAGGTCCTATTAGTTCACACTTTTTAATTATCTGCCTGGTTTTCTCCATCTTTCT   | 54215 |
| Macaque           | TTCCACATCCCTTCTTGAATCACCAGGTCCTATTAGTTCACACTTTTTAATTATCTGCCTGGTTTTCTCCATCTTTCT   | 55043 |
| PigTailedMacaque  | TTCCACATCCCTTCTTGAATCACCAGGTCCTATTAGTTCACACTTTTTAATTATCTGCCTGGTTTTCTCCATCTTTCT   | 53923 |
| Bonobo            | TTCCACATCCCTTCATGAAATCACCAGGTCCTATTAGTTCACACTTTTTAATTATCTGCCTGGTTTTCTCCATCTTTCT  | 52671 |
| OliveBaboon       | TTCCACATCCCTTCTTGAATCACCAGGTCCTATTAGTTCATACTTTTTAATTATCTGCCTGGTTTTCTCCATCTTTCT   | 53791 |
| Orangutan         | TTCCACATCCCTTCATGAAATCACCAGGTCCTGTTAGTTCACACTTTTTAATTACCTGCCTGGTTTTCTCCATCTTTCT  | 54870 |

|                   |                                                                                  |       |
|-------------------|----------------------------------------------------------------------------------|-------|
| Majority          | GCTACTTGTATTGCTCAAACACACTCATCTGTTGGCTATATTACTACAACAGTTCTCTTTATAAACTACTTTCTTTTTCT |       |
|                   | 67130 67140 67150 67160 67170 67180 67190 67200                                  |       |
| Human             | GCTACTTGTATTGCTCAAACACACTCACCTGTTGGCTATATTACTACGACAGTTCTCTTTATAAACTACTTTCTTTTTCT | 53643 |
| Coquerel'sSifaka  | --CACT-GTATTTCTCAGAC-TAGTCACCTCTGGCTCTGTTATTACAACAGTTCTCTTACTAATCTGCTTTCTT--ACT  | 45181 |
| Ma'sNightMonkey   | --TACTTGTATTACTCAAACACACTCATCTCTTGACTATGTTACTACAACATTTCTCTTTATAAACTACTTTCTTTTTCT | 48754 |
| VervetAGM         | GCTACTTGTATTGCTCAGACACACTCATCTGTTGGCTATATTACTACAACAGTTATCTTTATAAACTACTTTCTTTTTCT | 55072 |
| Gorilla           | GCTACTTGTATTGCTCAAACACACTCACCTGTTGGCTATATTACTACGACAGTTCTCTTTATAAACTACTTTCTTTTTCT | 54170 |
| GrabEatingMacaque | GCTACTTGTATTGCTCAAACACACTCATCTGTTGGCTATATTACTACAACAGTTATCTTTATAAACTACTTTCTTTTTCT | 54295 |
| Macaque           | GCTACTTGTATTGCTCAAACACACTCATCTGTTGGCTATATTACTACAACAGTTATCTTTATAAACTACTTTCTTTTTCT | 55123 |
| PigTailedMacaque  | GCTACTTGTATTGCTCAAACACACTCATCTGTTGGCTATATTACTACAACAGTTATCTTTATAAACTACTTTCTTTTTCT | 54003 |
| Bonobo            | GCTACTTGTATTGCTCAAACACACTCACCTGTTGGCTATATTACTACGACAGTTCTCTTTATAAACTACTTTCTTTTTCT | 52751 |
| OliveBaboon       | GCTACTTGTATTGCTCAAACACACTCATCTGTTGGCTATATTACTACAACAGTTATCTTTATAAACTACTTTCTTTTTCT | 53871 |
| Orangutan         | GCTACTTGTATTGCTCAAACACACTCACCTGTTGGCTATATTACTACGACAGTTCTCTTTATAAACTACTTTCTTTTTCT | 54950 |



Tuesday, May 03, 2022 06:16 PM

|                   |                                                                                  |       |
|-------------------|----------------------------------------------------------------------------------|-------|
| Majority          | TTTCCCTCTTGGAAATTTTT-CTCCCTAGTACAGCCAGTGCATCTTTCTCAAATGCACATATCTAAGTTACTCCCATG   |       |
|                   | 67210 67220 67230 67240 67250 67260 67270 67280                                  |       |
| Human             | TTTCCCTCTTGGAAATTTTTTCTCGCTAGTACAGCCAGTACGTATCTTTCTCAAATGCACATATCTAAGTTACTCCCATG | 53723 |
| Coquerel'sSifaka  | TTTCCCTCTTGAATTCCTTT--TCCCTAGTGCAGCTGGTGTATATCCTTCTGAAAT-----CTAAGTTACTCCCTG     | 45251 |
| Ma'sNightMonkey   | TTTCCCTCTTGGAGTTTTTT-CTCTCTAGTACAGCCAGTAAATATCTTTCTCAAATTCACCTATCTAAGTT-CTCCCATG | 48832 |
| VervetAGM         | TTTCCCTCTTGGAAATTTTT-CTGCCTAGTACAGCCAGTGCATCTTTCTCAAATGCACATATCTAAGTTACTCCCATG   | 55151 |
| Gorilla           | TTTCCCTCTTGGAAATTTTTTCTCGCTAGTACAGCCAGTACGTATCTTTCTCAAATGCACATATCTAAGTTACTCCCATG | 54250 |
| GrabEatingMacaque | TTTCCCTCTTGGAAATTTTT-CTCCCTAGTACAGCCAGTGCATCTTTCTCAAATGCACATATCTAAGTTACGCCCATG   | 54374 |
| Macaque           | TTTCCCTCTTGGAAATTTTT-CTGCCTAGTACAGCCAGTGCATCTTTCTCAAATGCACATATCTAAGTTACGCCCATG   | 55202 |
| PigTailedMacaque  | TTTCCCTCTTGGAAATTTTT-CTGCCTAGTACAGCCAGTGCATCTTTCTCAAATGCACATATCTAAGTTACGCCCATG   | 54082 |
| Bonobo            | TTTCCCTCTTGGAAATTTTTTCTCGCTAGTACAGCCAGTACGTATCTTTCTCAAATGCACATATCTAAGTTACTCCCATG | 52831 |
| OliveBaboon       | TTTCCCTCTTGGAAATTTTT-CTGCCTAGTACAGCCAGTGCATCTTTCTCAAATGCACATATCTAAGTTACTCCCATG   | 53950 |
| Orangutan         | TTTCCCTCTTGGAAATTTTTTCTCCCTAGTACAGCCAGTACATATCTTTCTCAAATGCACATATCTAAGTTACTCCCATG | 55030 |

|                   |                                                                                    |       |
|-------------------|------------------------------------------------------------------------------------|-------|
| Majority          | CAGTAGGTCCTGTTTCATGCTCAGGGTAAAGGCCCTTTTCTGAGATTACTGCT--TTTTGTCTCTGTT-T--GACTACTCC  |       |
|                   | 67290 67300 67310 67320 67330 67340 67350 67360                                    |       |
| Human             | CAGTAGGTCCTGTTTCATGCTCAGGGTAAAGGCCCTTTTCTGAGATTACTACT--TTTTGTCTTGCTTAT--GACTACTCC  | 53799 |
| Coquerel'sSifaka  | CAGTAGGTCCTTTTTCATGTTTCAGGATAAAGGCCCTTTTCTCAGATCACTGCTATTTTTGTCTCTGTCTTATGGCTGGTCC | 45331 |
| Ma'sNightMonkey   | CAGTATATCCTGTTTCATGCTTAGGGTAAAGGCCATTTTCTGAGATCACTACT--TTTTGTCTCTGTCTTATGACTACTCC  | 48910 |
| VervetAGM         | CAGTAGGTCCTGTTTCATGCTCAGGGTAAAGGCCCTTTTCTGAGATTACTGCT--CTTTGTCTCTGTT-----CTACTTC   | 55223 |
| Gorilla           | CAGTAGGTCCTGTTTCATGCTCAGGGTAAAGGCCCTTTTCTGAGATTACTACT--TTTTGTCTTGCTTAT--GATTACTCC  | 54326 |
| GrabEatingMacaque | CAGTAGGTCCTGTTTCATGCTCAGGGTAAAGGCCCTTTTCTGAGATTACTGCT--CTTTGTCTCTGTT-----CTACTTC   | 54446 |
| Macaque           | CAGTAGGTCCTGTTTCATGCTCAGGGTAAAGGCCCTTTTCTGAGATTACTGCT--CTTTGTCTCTGTT-----CTACTTC   | 55274 |
| PigTailedMacaque  | CAGTAGGTCCTGTTTCATGCTCAGGGTAAAGGCCCTTTTCTGAGATTACTGCT--CTTTGTCTCTGTT-----CTACTTC   | 54154 |
| Bonobo            | CAGTAGGTCCTGTTTCATGCTCAGGGTAAAGGCCCTTTTCTGAGATTACTACT--TTTTGTCTTGCTTAT--GACTACTCC  | 52907 |
| OliveBaboon       | CAGTAGGTCCTGTTTCATGCTCAGGGTAAAGGCCCTTTTCTGAGATTACTGCT--CTTTGTCTCTGTT-----CTACTTC   | 54022 |
| Orangutan         | CAGTAGGTCCTGTTTCATGCTCAGGGTAAAGGCCCTTTTCTGAGATTACTACT--TTTTGTCTTGCTTAT--GACTACTCC  | 55106 |

|                   |                                                                                   |       |
|-------------------|-----------------------------------------------------------------------------------|-------|
| Majority          | CACCCTATTTGCTTATGCTTCTGTGCCAAAAGTAATGGTGCATCCTGTAACCTGGCATGCTTTCTCCTGATGTCAGTTGT  |       |
|                   | 67370 67380 67390 67400 67410 67420 67430 67440                                   |       |
| Human             | CACCCTATTTGCTTATGCTTCTGTGCCAAAAGTAATGGTGCATCCTGTAACCTGGCATGCTTTCTCCTGATGTCAGTTCGT | 53879 |
| Coquerel'sSifaka  | TGTCCTATTTGCTTGTGCTTCTGTGCCAAAAGTAATGCTAGATCCTCAAACCTGGCATGCTTTCTGTTGATTTTCAGTCTT | 45411 |
| Ma'sNightMonkey   | CACCCTATTTGCTTATGCTTCTGTGCCAAAAGTAATGGTGCATCCTATAACCTGGAATGCTTTCTCTGATGTCAGTTAT   | 48990 |
| VervetAGM         | CACCCTATTTGCTTATGCTTCTGTGCCAAAAGTAATGGTGCATCCTGTAACCTGGCATGCTTTCTCCTGATGTTAGTTGT  | 55303 |
| Gorilla           | CACCCTATTTGCTTATGCTTCTGTGCCAAAAGTAATGGTGCATCCTGTAACCTGGCATGCTTTCTCCTGATGTCAGTTCGT | 54406 |
| GrabEatingMacaque | CACCCTATTTGCTTATGCTTCTGTGCCAAAAGTAATGGTGCATCCTGTAACCTGGCATGCTTTCTCCTGATGTTAGTTGT  | 54526 |
| Macaque           | CACCCTATTTGCTTATGCTTCTGTGCCAAAAGTAATGGTGCATCCTGTAACCTGGCATGCTTTCTCCTGATGTTAGTTGT  | 55354 |
| PigTailedMacaque  | CACCCTATTTGCTTATGCTTCTGTGCCAAAAGTAATGGTGCATCCTGTAACCTGGCATGCTTTCTCCTGATGTTAGTTGT  | 54234 |
| Bonobo            | CACCCTATTTGCTTATGCTTCTGTGCCAAAAGTAATGGTGCATCCTGTAACCTGGCATGCTTTCTCCTGATGTCAGTTCGT | 52987 |
| OliveBaboon       | CACCCTATTTGCTTATGCTTCTGTGCCAAAAGTAATGGTGCATCCTGTAACCTGGCATGCTTTCTCCTGATGTTAGTTGT  | 54102 |
| Orangutan         | CACCCTATTT-CTTATGCTTCTGCCAAAATAATGGTGCATCCTGTAACCTGGCATGCTTTCTCCTGATGTCAGTTGT     | 55185 |

Tuesday, May 03, 2022 06:16 PM

|                   |                    |                                                              |                                |
|-------------------|--------------------|--------------------------------------------------------------|--------------------------------|
| Majority          | TTGCTGCCATTATGTCAC | CTCTCATGCATGGAATATTGTGGGTTG                                  | GCCTGCCTTTTGCACCACCCTTCC       |
|                   | 67450              | 67460                                                        | 67520                          |
| Human             | TTGCTGCCATTATGTCAC | CTCTCATGCATGGAATATTGTGGGTTG                                  | GCCTGCCTTTTGCACCACCCTTCC 53950 |
| Coquerel'sSifaka  | TTGCTGCCATTATGTCAC | GTGTTCTCACTTACATGTGGAATATTGTGGCTTGCTGCCTGCCTT-TGCGCCACCCTTCC | 45490                          |
| Ma'sNightMonkey   | TT-CTGCTGTTATGTCAC | CTCTCATGCATGGAATATTGTGGGTTG                                  | GCCTGCCTTGTGCACCACACTTCC 49060 |
| VervetAGM         | TTGCTGCCATTATGTCAC | GTCTCATGCATGGAATATTGTGGGTTG                                  | GCCTGCCTTTTGCACCAACCTTCC 55374 |
| Gorilla           | TTGCTGCCATTATGTCAC | CTCTCATGCATGGAATATTGTGGGTTG                                  | GCCTGCCTTTTGCACCACCCTTCC 54477 |
| GrabEatingMacaque | TTGCTGCCATTATGTCAC | CTCTCATGCATGGAATATTGTGGGTTG                                  | GCCTGCCTTTTGCACCAACCTTCC 54597 |
| Macaque           | TTGCTGCCATTATGTCAC | CTCTCATGCATGGAATATTGTGGGTTG                                  | GCCTGCCTTTTGCACCAACCTTCC 55425 |
| PigTailedMacaque  | TTGCTGCCATTATGTCAC | CTCTCATGCATGGAATATTGTGGGTTG                                  | GCCTGCCTTTTGCACCAACCTTCC 54305 |
| Bonobo            | TTGCTGCCATTATGTCAC | CTCTCATGCATGGAATATTGTGGGTTG                                  | GCCTGCCTTTTGCACCACCCTTCC 53058 |
| OliveBaboon       | TTGCTGCCATTATGTCAC | CCCTCATGCATGGAATATTGTGGATTG                                  | GCCTGCCTTTTGTACCAACCTTCC 54173 |
| Orangutan         | TTGCTGCCATTATGTCAC | CTCTCATGCATGGAATATTGTGGGTTG                                  | GCCTGCCTTTTGCACCGCCCTTCC 55256 |

|                   |                                                                               |                                                             |
|-------------------|-------------------------------------------------------------------------------|-------------------------------------------------------------|
| Majority          | TCCACCTCACACTTCACATGGCCAGT                                                    | GTTAAATATCTTGAGGTCTCCCTTTAGCTATTTCTTCCCTA-AAAGCTATCC        |
|                   | 67530                                                                         | 67600                                                       |
| Human             | TCCACCTCACACTTCACATGGCCAGT                                                    | GTTAAATATCTTGAGGTCTCCCTTTAGCTATTTCTTCTCCTA-AAAGCTATCC 54028 |
| Coquerel'sSifaka  | ---ACCCACACTTTATGTGGCCATTGCTAAATATCTTTAGGTCTCCCTTTAGCTATTTTCTCCTTAGAAAGCCATCC | 45567                                                       |
| Ma'sNightMonkey   | ---ACCTCACACTTCACATGGCCAGT                                                    | GTTAAATATCTTGAGGTTTCCCTTTAGCTATTTCTTCTCCTA-AAAGCTATCC 49135 |
| VervetAGM         | TCCACCTCACATTTACATGACCAGT                                                     | GTTAAATATCTTGAGGTCTCCCTTTAGCTATTACTTCCCTG-AAAGCTATCC 55452  |
| Gorilla           | TCCACCTCACACTTCACATGGCCAGT                                                    | GTTAAATATCTTGAGGTCTCCCTTTAGCTATTTCTTCTCCTA-AAAGTTATCC 54555 |
| GrabEatingMacaque | TCCACCTCACACTTCACATGACCAGT                                                    | GTTAAATATCTTGAGGTCTCCCTTTAGCTATTACTTCCCTA-AAAGCTATCC 54675  |
| Macaque           | TCCACCTCACACTTCACATGACCAGT                                                    | GTTAAATATCTTGAGGTCTCCCTTTAGCTATTACTTCCCTA-AAAGCTATCC 55503  |
| PigTailedMacaque  | TCCACCTCACACTTCACATGACCAGT                                                    | GTTAAGTATCTTGAGGTCTCCCTTTAGCTATTACTTCCCTA-AAAGCTATCC 54383  |
| Bonobo            | TCCACCTCACACTTCACATGGCCAGT                                                    | GTTAAATATCTTGAGGTCTCCCTTTAGCTATTTCTTCTCCTA-AAAGCTATCC 53136 |
| OliveBaboon       | TCCACCTCACACTTCACATGACCAGT                                                    | GTTAAATATCTTGAGGTCTCCCTTTAGCTATTACTTCCCTA-AAAGCTATCC 54251  |
| Orangutan         | TCCATTTACACTTCACATGGCCAGT                                                     | GTTAAATATCTTGAGGTCTCCCTTTAGATATTTCTTCTCCTA-AAAGCTATCC 55334 |

|                   |                                                                                       |       |
|-------------------|---------------------------------------------------------------------------------------|-------|
| Majority          | CCTGATAAGCAAAGAGTAGATTAGGTTTGGATTGAGAGCCTTAACTCCAAATGAGATACTGCTATGCACATAACCAGAGT      |       |
|                   | 67610                                                                                 | 67680 |
| Human             | CCTGATAAGCAAAGAGTAGATTAGGTTTGGATTGAGAGTGTAACTCCGAATGAGATACTGCTATGCACATAACCAGAGT 54108 |       |
| Coquerel'sSifaka  | --TGATA--CACAGAGTGATTAGATTGGATTGAGGGCCTTAAATGCAAAT-----                               | 45615 |
| Ma'sNightMonkey   | CATGATAAGCAAAGAATAGATTAGGTTTGGATTGAGAGCCTTAACTCCAAATGAGATACTGCTATGCACATAACCAGAGT      | 49215 |
| VervetAGM         | CCTGATAAGCAAAGAGTAGATTAGGTTTGGATTGAGAGCCTTAACTCCAAATGAGATACTGCTATGCACATAACCAGAGT      | 55532 |
| Gorilla           | CCTGATAAGCAAAGAGTAGATTAGGTTTGGATTGAGAGTGTAACTCCGAATGAGATACTGCTATGCACATAACCAGAGT       | 54635 |
| GrabEatingMacaque | CCTGATAAGCAAAGAGTAGATTAGGTTTGGATTGAGAGCCTTAACTCCAAATGAGATACCGCTATGCACATAACCAGAGT      | 54755 |
| Macaque           | CCTGATAAGCAAAGAGTAGATTAGGTTTGGATTGAGAGCCTTAACTCCAAATGAGATACCGCTATGCACATAACCAGAGT      | 55583 |
| PigTailedMacaque  | CCTGATAAGCAAAGAGTAGATTAGGTTTGGATTGAGAGCCTTAACTCCAAATGAGATACCGCTATGCACATAACCAGAGT      | 54463 |
| Bonobo            | CCTGATAAGCAAAGAGTAGATTAGGTTTGGATTGAGAGTGTAACTCCGAATGAGATACTGCTATGCACATAACCAGAGT       | 53216 |
| OliveBaboon       | CCTGATAAGCAAAGAGTAGATTAGGTTTGGATTGAGAGCCTTAACTCCAAATGAGATACCGCTATGCACATAACCAGAGT      | 54331 |
| Orangutan         | CCTGATAAGCAAAGAGTAGATTAGGTTTGGATTGAGAGCATTAACTCCGAATGAGATACTGCTATGCACATAACCAGAGT      | 55414 |

Tuesday, May 03, 2022 06:16 PM

|                   |                                                                                  |       |
|-------------------|----------------------------------------------------------------------------------|-------|
| Majority          | GGCTAAAATTTAAAAGGATAGGTAATAAAAATATTGGTGACAG-----                                 |       |
|                   | 67690 67700 67710 67720 67730 67740 67750 67760                                  |       |
| Human             | GGCTAAAATTTAAAAGGATAGGTAATAAAAATACTGGTGACAA-----                                 | 54149 |
| Coquerel'sSifaka  | ---TAAAATCACAGGGG-----AA-TACTA---A-----                                          | 45637 |
| Ma'sNightMonkey   | GGTCAAATTTAAAAGGATAGGTAATAAAAATGTTGGTGACAATGTAGAAAAGCTTGAACCTCATATATATGATGAAAGGA | 49295 |
| VervetAGM         | GGCTAAAATTTAAAAGGATGGGTAATAAAAATATTGGTGACAG-----                                 | 55573 |
| Gorilla           | GGCTAAAATTTAAAAGGATAGGTAATAAAAATACTGGTGACAA-----                                 | 54676 |
| GrabEatingMacaque | GGCTAAAATTTAAAAGGATAGGTAGTAAAATATTGGTGACAG-----                                  | 54796 |
| Macaque           | GGCTAAAATTTAAAAGGATAGGTAATAAAAATATTGGTGACAG-----                                 | 55624 |
| PigTailedMacaque  | GGCTAAAATTTAAAAGGATAGGTAATAAAAATATTGGTGACAG-----                                 | 54504 |
| Bonobo            | GGCTAAAATTTAAAAGGATAGGTAATAAAAATACTGGTGACAA-----                                 | 53257 |
| OliveBaboon       | GGCTAAAATTTAAAAGGATAGGTAATAAAAATATTGGTGACAG-----                                 | 54372 |
| Orangutan         | GGCTAAAATTTAAAAGGATAGGTAATAAAAATACTGGTGACAA-----                                 | 55455 |

|                   |                                                                                  |       |
|-------------------|----------------------------------------------------------------------------------|-------|
| Majority          | CCATTTTTGAAAACCTGAAATATCTACTAAAGTTGAGCATATA-CTATTCTTTGACATA-----GT-----          |       |
|                   | 67770 67780 67790 67800 67810 67820 67830 67840                                  |       |
| Human             | CCATTTTTGAAAACCTCGAAATATCTACTAAAGTTGAGCATATAGCTATTCTTTGATGTA-----GT-----         | 54210 |
| Coquerel'sSifaka  | CCACGCGTATATACCAGA---CTGACTAAAATTTAAAAGAGA---AGT---AACATG-----                   | 45685 |
| Ma'sNightMonkey   | CCATTTTTGAAAACCTGAAATTTCTACTAAAGTTGAGCATGTATCTATT-TTTGACATA-----GT-----          | 49355 |
| VervetAGM         | CCAGTTTTGAAAACCTTGAATATCTGCTAAAGTTGAGCATATA-CTATTCTTTGACATAAACTCAAAGTTTACTCCTAGG | 55652 |
| Gorilla           | CCATTTTTGAAAACCTCGAAATATCTACTAAAGTTGAGCATATACCTATTCTTTGACGTA-----GT-----         | 54737 |
| GrabEatingMacaque | CCAGTTTTGAAAACCTTGAATATCTGCTAAAGTTGAGCATATA-CTATTCTTTGACATAAACTCAAAGT-----       | 54864 |
| Macaque           | CCAGTTTTGAAAACCTTGAATATCTGCTAAAGTTGAGCATATA-CTATTCTTTGACATAAACTCAAAGT-----       | 55692 |
| PigTailedMacaque  | CCAGTTTTGAAAACCTTGAATATCTGCTGAAGTTGAGCATATA-CTATTCTTTGACATAAACTCAAAGTTTACTCCTAGG | 54583 |
| Bonobo            | CCATTTTTGAAAACCTCGAAATATCTACTAAAGTTGAGCATATAGCTATTCTTTGACGTA-----GT-----         | 53318 |
| OliveBaboon       | CCAGTTTTGAAAACCTTGAATATCTGCTAAAGTTGAGCATATA-CTATTCTTTGACATAAACTCAAAGTTTACTCCTAGG | 54451 |
| Orangutan         | CCATTTTTGAAAACCTGAAATATCTATTGAAGTTGAGCATATACCTATTCTTTGATGTA-----GT-----          | 55516 |

|                   |                                                                                  |       |
|-------------------|----------------------------------------------------------------------------------|-------|
| Majority          | -----AAACTCGCTCCTAGTTAACATACCTGAGAATATATACATATGTATGTTAAAAGATATGTCCAAGAAAATTCATG  |       |
|                   | 67850 67860 67870 67880 67890 67900 67910 67920                                  |       |
| Human             | -----AAACTCGCTCCTAGTTAACATACCTGAGAACATGTACATAGGTATGTTAAAAGATATGTACAAGAAAGTTCATG  | 54284 |
| Coquerel'sSifaka  | -----ACAATGTAAAGAACTTGA---ATTTTCATATATAAGTGATGGGA-ATGT-----AATTGATA              | 45739 |
| Ma'sNightMonkey   | -----AAACTCGCTCCTAGTTA-CATACCTGAGAACATATACATAGGTATGTTAAAAGAGATGTACTAGAAAGTGAATG  | 49428 |
| VervetAGM         | AGGAGTAAACTCGCTCCTAGTTAACATACCTGAGAATATATACATATGTATGTTAAAAGATATGTCCAAGAAAATTCATG | 55732 |
| Gorilla           | -----AAACTCGCTCCTAGTTAACATACCTGAGAACATGTACATAGGTATGTTAAAAGATATGTACAAGAAAGTTCATG  | 54811 |
| GrabEatingMacaque | -----AAACTCGCTCCTAGTTAACATACCTGAGAATATATACATATGTATGTTAAAAGATATGTCCAAGAAAATTCATG  | 54938 |
| Macaque           | -----AAACTCGCTCCTAGTTAACATACCTGAGAATATATACATATGTATGTTAAAAGATATGTCCAAGAAAATTCATG  | 55766 |
| PigTailedMacaque  | AGGAGTAAACTCGCTCCTAGTTAACATACCTGAGAATATATACATATGTATGTTAAAAGATATGTCCAAGAAAATTCATG | 54663 |
| Bonobo            | -----AAACTCGCTCCTAGTTAACATACCTGAGAACATGTACATAGGTATGTTAAAAGATATGTACAAGAAAGTTCATG  | 53392 |
| OliveBaboon       | AGGAGTAAACTCGCTCCTAGTTAACATACCTGAGAATATATACATATGTATGTTAAAAGATATGTCCAAGAAAATTCATG | 54531 |
| Orangutan         | -----AAACTCGCTCCTAGTTAACATACCTGAGAACGTATACATATGTATATTTAAAAGATACGTACAAGAAAGTTCATG | 55590 |

Tuesday, May 03, 2022 06:16 PM

| Majority          | GAACACTGTATGTAATAGCCCAAAAACTATAAATGATCCAAATGTTCAACAGCAGCAGAATATGTTGTGGTGTATTCAT    |       |       |       |       |       |       |       |       |
|-------------------|------------------------------------------------------------------------------------|-------|-------|-------|-------|-------|-------|-------|-------|
|                   | 67930                                                                              | 67940 | 67950 | 67960 | 67970 | 67980 | 67990 | 68000 |       |
| Human             | GAACACTGTATGTAATAGCCCAAAAACTATAAATCATCCAAATGTTCAACAGCAGCAGAATATGTTGTGGTGTATTCAT    |       |       |       |       |       |       |       | 54364 |
| Coquerel'sSifaka  | TAGAACCATTTTAAAAACTTGAA-----ATATCTACTAAA-GTTGAGCAT-----GTATGTGTTCT-----TTGAC       |       |       |       |       |       |       |       | 45800 |
| Ma'sNightMonkey   | GAACACTGTATGTAATAGCCCAAA--GCCACAAATATCCAAATGTTCAACAGCAGCAGAATTTGTTGTGGTGTATTCAT    |       |       |       |       |       |       |       | 49506 |
| VervetAGM         | GAACACTGTATGTAGTAGTCCAAAAAATATAAATGATCCAAATGTTCAACAGCAGCAGAATATGTTATGGTGTATTCAT    |       |       |       |       |       |       |       | 55812 |
| Gorilla           | GAACACTGTATGTAATAGCCCAAAAACTATAAATCATCCAAATGTACAACAGCAGCAGAATATGTTGTGGTGTATTCAT    |       |       |       |       |       |       |       | 54891 |
| GrabEatingMacaque | GAACACTGTATGTAGTAGTCCAAAAAATATAAATGATCCAAATGTTCAACAGCAGCAGAATATGTTGTGGTGTATTCAT    |       |       |       |       |       |       |       | 55018 |
| Macaque           | GAACACTGTATGTAGTAGTCCAAAAAATATAAATGATCCAAATGTTCAACAGCAGCAGAATATGTTGTGGTGTATTCAT    |       |       |       |       |       |       |       | 55846 |
| PigTailedMacaque  | GAACACTGTA---GTAGTCCAAAAAATATAAATGATCCAAATGTTCAACAGCAGCAGAATATGTTGTGGTGTATTCAT     |       |       |       |       |       |       |       | 54739 |
| Bonobo            | GAACACTGTATGTAATAGCCCAAAAACTATAAATCATCCAAATGTTCAACAGCAGCAGAATATGTTGTGGTGTATTCAT    |       |       |       |       |       |       |       | 53472 |
| OliveBaboon       | CAACACTGTATGTAGTAGTCCAAAAAATGTAAGTATGATCCAAATGTTTCATCAGCAGCAGAATATGTTGTGGTGTATTCAT |       |       |       |       |       |       |       | 54611 |
| Orangutan         | GAACACTGTATGTAATAGCCCAAAAAATATAAATCATCCAAATGTTCAACAGCAGCAGAATATGTTGTGGTGTGTTTCAT   |       |       |       |       |       |       |       | 55670 |

| Majority          | TTAGTGGAATA-----TT-----G-----                                                    |       |       |       |       |       |       |       |       |
|-------------------|----------------------------------------------------------------------------------|-------|-------|-------|-------|-------|-------|-------|-------|
|                   | 68010                                                                            | 68020 | 68030 | 68040 | 68050 | 68060 | 68070 | 68080 |       |
| Human             | TTAGTGGAATA-----TT-----G-----                                                    |       |       |       |       |       |       |       | 54378 |
| Coquerel'sSifaka  | TTAGTA-ATTA-----                                                                 |       |       |       |       |       |       |       | 45810 |
| Ma'sNightMonkey   | TTAGCAGAATA-----CT-----                                                          |       |       |       |       |       |       |       | 49519 |
| VervetAGM         | TTAGTGGAATATTGCTTTTTTTTTT-----GAGATGGAGTTTCAAGCCTAGGTTGGAGTGCAATGG               |       |       |       |       |       |       |       | 55872 |
| Gorilla           | TTAGTGGAATA-----TT-----G-----                                                    |       |       |       |       |       |       |       | 54905 |
| GrabEatingMacaque | TTAGTGGAATATTGCTTTTTTTTTTTTTTTTTTTTTTTT-----GAGATGGAGTTTCAAGCCTAGGTTGGAGTGCAATGG |       |       |       |       |       |       |       | 55090 |
| Macaque           | TTAGTGGAATATTGCTTTTTTTTTTTTTTTTTTTTTTTTTTTTGGAGATGGAGTTTCAAGCCTAGGTTGGAGTGCAATGG |       |       |       |       |       |       |       | 55926 |
| PigTailedMacaque  | TTAGTGGAATATTGCTTTTTTTTTTTTTTTTTTTTTTTT-----GAGATGGAGTTTCAAGCCTAGGTTGGAGTGCAATGG |       |       |       |       |       |       |       | 54814 |
| Bonobo            | TTAGTGGAATA-----TT-----G-----                                                    |       |       |       |       |       |       |       | 53486 |
| OliveBaboon       | TTAGTGGAATATTGCTTTTTTTTTTTTTTTTTTTTTTTT-----GAGATGGAGTTTCAAGCCTAGGTTGGAGTGCAATGG |       |       |       |       |       |       |       | 54686 |
| Orangutan         | TTAGTGGAATA-----TT-----G-----                                                    |       |       |       |       |       |       |       | 55684 |

| Majority          | -----                                                                            |       |       |       |       |       |       |       |       |
|-------------------|----------------------------------------------------------------------------------|-------|-------|-------|-------|-------|-------|-------|-------|
|                   | 68090                                                                            | 68100 | 68110 | 68120 | 68130 | 68140 | 68150 | 68160 |       |
| Human             | -----                                                                            |       |       |       |       |       |       |       | 54378 |
| Coquerel'sSifaka  | -----                                                                            |       |       |       |       |       |       |       | 45810 |
| Ma'sNightMonkey   | -----                                                                            |       |       |       |       |       |       |       | 49519 |
| VervetAGM         | CGTGATCTCAGCTCACCGCAACCTCTGCCTCCCAGGTGCAAGCGATTCTCCTGCCTCAGCTCCTGAGTAGCTGGGATTA  |       |       |       |       |       |       |       | 55952 |
| Gorilla           | -----                                                                            |       |       |       |       |       |       |       | 54905 |
| GrabEatingMacaque | CGTGATCTCAGCTCACCGCAACCTCTGCCTCCCAGGTGCAAGCGATTCTCCTGCCTCAGCTCCCAGTAGCTGGGATTA   |       |       |       |       |       |       |       | 55170 |
| Macaque           | CGTGATCTCAGCTCACCGCAACCTCTGCCTCCCAGGTGCAAGCGATTCTCCTGCCTCAGCTCCCAGTAGCTGGGATTA   |       |       |       |       |       |       |       | 56006 |
| PigTailedMacaque  | CGTGATCTCAGCTCACCGCAACCTCTGCCTCCCAGGTGCAAGTAGATTCTCCTGCCTCAGCTCCCAAGTAGCTGGGATTA |       |       |       |       |       |       |       | 54894 |
| Bonobo            | -----                                                                            |       |       |       |       |       |       |       | 53486 |
| OliveBaboon       | CGTGATCTCAGCTCACCGCAACCTCTGCCTCCCAGGTGCAAGCGATTCTCCTGCCTCAGCTCCTGAGTAGCTGGGATTA  |       |       |       |       |       |       |       | 54766 |
| Orangutan         | -----                                                                            |       |       |       |       |       |       |       | 55684 |

Tuesday, May 03, 2022 06:16 PM

| Majority          | -----G-----                                                                       |       |       |       |       |       |       |       |       |
|-------------------|-----------------------------------------------------------------------------------|-------|-------|-------|-------|-------|-------|-------|-------|
|                   | 68170                                                                             | 68180 | 68190 | 68200 | 68210 | 68220 | 68230 | 68240 |       |
| Human             | -----                                                                             |       |       |       |       |       |       |       | 54378 |
| Coquerel'sSifaka  | -----                                                                             |       |       |       |       |       |       |       | 45810 |
| Ma'sNightMonkey   | -----G-----                                                                       |       |       |       |       |       |       |       | 49520 |
| VervetAGM         | CAGGCATGCACCACCATGCCAGGCTAATTTTGTATTTTGTAGTAAAGATGGGGTTTCTCTATGTTGGTCAGGCTGGTCTCG |       |       |       |       |       |       |       | 56032 |
| Gorilla           | -----                                                                             |       |       |       |       |       |       |       | 54905 |
| GrabEatingMacaque | CAGGCATGCACCACCATGCCAGGCTAATTTTGTATTTTGTAGTAAAGACGGTGTCTCTATGTTGGTCAGGCTGGTCTCG   |       |       |       |       |       |       |       | 55250 |
| Macaque           | CAGGCATGCACCACCATGCCAGGCTAATTTTGTATTTTGTAGTAAAGACGGTGTCTCTATGTTGGTCAGGCTGGTCTCG   |       |       |       |       |       |       |       | 56086 |
| PigTailedMacaque  | CAGGCATGCACCACCATGCCAGGCTAATTTTGTATTTTGTAGTAAAGACGGTGTCTCTATGTTGGTCAGGCTGGTCTCG   |       |       |       |       |       |       |       | 54974 |
| Bonobo            | -----                                                                             |       |       |       |       |       |       |       | 53486 |
| OliveBaboon       | CAGGCATGCACCACCATGCCAGGCTAATTTTGTATTTTGTAGTAAAGACGGGGTTTCTCTCTGTTGGTCAGGCTGGTCTCG |       |       |       |       |       |       |       | 54846 |
| Orangutan         | -----                                                                             |       |       |       |       |       |       |       | 55684 |

| Majority          | -----                                                                             |       |       |       |       |       |       |       |       |
|-------------------|-----------------------------------------------------------------------------------|-------|-------|-------|-------|-------|-------|-------|-------|
|                   | 68250                                                                             | 68260 | 68270 | 68280 | 68290 | 68300 | 68310 | 68320 |       |
| Human             | -----                                                                             |       |       |       |       |       |       |       | 54378 |
| Coquerel'sSifaka  | -----                                                                             |       |       |       |       |       |       |       | 45810 |
| Ma'sNightMonkey   | -----                                                                             |       |       |       |       |       |       |       | 49520 |
| VervetAGM         | AACTCCTGACCTCAGGTGATCCACCCACCTCGGCCTCCCAGAGTGC TGGGATTACAGGCGTGAGCCACCATGCCCGGTCG |       |       |       |       |       |       |       | 56112 |
| Gorilla           | -----                                                                             |       |       |       |       |       |       |       | 54905 |
| GrabEatingMacaque | AACTCCTGACCTCAGGTGATCCACCCACCTCGGCCTCCCAGAGTGC TGGGATTACAGGCGTGAGCCACCATGCCCGGTCG |       |       |       |       |       |       |       | 55330 |
| Macaque           | AACTCCTGACCTCAGGTGATCCACCCACCTCGGCCTCCCAGAGTGC TGGGATTACAGGCGTGAGCCACCATGCCCGGTCG |       |       |       |       |       |       |       | 56166 |
| PigTailedMacaque  | AACTCCTGACCTCAGGTGATCCACCCACCTCGGCCTCCCAGAGTGC TGGGATTACAGGCGTGAGCCACCATGCCCGGTCG |       |       |       |       |       |       |       | 55054 |
| Bonobo            | -----                                                                             |       |       |       |       |       |       |       | 53486 |
| OliveBaboon       | AACTCCTGACCTCAGGTGATCCACCCACCTCGGCCTCCCAGAGTGC TGGGATTACAGGCGTGAGCCACCATGCCCGGTCG |       |       |       |       |       |       |       | 54926 |
| Orangutan         | -----                                                                             |       |       |       |       |       |       |       | 55684 |

| Majority          | -----TATGGTAATAAAATGAACAAGCTACTGCT---ACCTGCAGAACATGGGTAGTGTACATCATAA--TTACT     |       |       |       |       |       |       |       |       |
|-------------------|---------------------------------------------------------------------------------|-------|-------|-------|-------|-------|-------|-------|-------|
|                   | 68330                                                                           | 68340 | 68350 | 68360 | 68370 | 68380 | 68390 | 68400 |       |
| Human             | -----TATAGTAATAAAATGAACAAGCTACTGCT---GCCTGCAAAACATGGGTAGTGTACATCATAA--TTATT     |       |       |       |       |       |       |       | 54444 |
| Coquerel'sSifaka  | -----TCTACTCCT---TAGTTAGATACCGGAGAAAACGTGTGTGTG--TATCT                          |       |       |       |       |       |       |       | 45856 |
| Ma'sNightMonkey   | -----TATGATAATAAAATGAACAAGCTACTGCTTGCTACCTGCAAAACATGGGTAGTGTACATCATAAATTTATT    |       |       |       |       |       |       |       | 49592 |
| VervetAGM         | GAATATTGTATGGTAAATAAAGTGGACAAGCTACTGCT---ACATGCAGAACATGGATAGTGTACATCATAA--TTACT |       |       |       |       |       |       |       | 56186 |
| Gorilla           | -----TATAGTAATAAAATGAACAAGCTACTGCT---GCCTGCAAAACATGGGTAGTGTACATCATAA--TTATT     |       |       |       |       |       |       |       | 54971 |
| GrabEatingMacaque | GAATATTGTATGGTAAATAAAGTGGACAAGCTACTGCT---ACGTGCAGAACATGGGTAGTGTACATCATAA--TTACT |       |       |       |       |       |       |       | 55404 |
| Macaque           | GAATATTGTATGGTAAATAAAGTGGACAAGCTACTGCT---ACGTGCAGAACATGGGTAGTGTACATCATAA--TTACT |       |       |       |       |       |       |       | 56240 |
| PigTailedMacaque  | GAATATTGTATGGTAAATAAAGTGGACAAGCTACTGCT---ACGTGCAGAACATGGGTAGTGTACATCATAA--TTACT |       |       |       |       |       |       |       | 55128 |
| Bonobo            | -----TATAGTAATAAAATGAACAAGCTACTGCT---GCCTGCAAAACATGGGTAGTGTACATCATAA--TTATT     |       |       |       |       |       |       |       | 53552 |
| OliveBaboon       | GAATATTGTATGGTAAATAAAGTGGACAAGCTACTGCT---ACGTGCAGAACATGGGTAGTGTACATCATAA--TTACT |       |       |       |       |       |       |       | 55000 |
| Orangutan         | -----TATAGTAATAAAATGAACAAGCTACTGCT---GCCTGCAAAACATGGGTAGTGTACATCATAA--TTATT     |       |       |       |       |       |       |       | 55750 |

Tuesday, May 03, 2022 06:16 PM

| Majority          | GAAAGAAGCCAAACCTAAGTAGAATACATCTGATACGATTCCATTTTGTAACTGGAGGAAGCATGAGTATGGCTTCCA   |       |       |       |       |       |       |       |  |       |
|-------------------|----------------------------------------------------------------------------------|-------|-------|-------|-------|-------|-------|-------|--|-------|
|                   | 68410                                                                            | 68420 | 68430 | 68440 | 68450 | 68460 | 68470 | 68480 |  |       |
| Human             | GGAAGAAGCCAAACCAAAAGTAGAATACATCTGATATGATTCCATTTATGTAACTGGAGGAAGCGTGAGTATGGCTTCTA |       |       |       |       |       |       |       |  | 54524 |
| Coquerel'sSifaka  | ATGCATATCAAACATATATATGAGGTAGCTCATGAAACACTGTAGTAGTCTCAAAGC-----TGGAAATGA--TCCA    |       |       |       |       |       |       |       |  | 45929 |
| Ma'sNightMonkey   | GAAAGAAGCCAAACCAAACTAGAACACATCTGATAAGATTCCATTTATGTAACTGGAGGAAGCATGAGTATGGCTTCTA  |       |       |       |       |       |       |       |  | 49672 |
| VervetAGM         | GAAAGAAGCCAAACCTAAGTAGAATACATCTGATACGATTCCATTTTGTAACTGCAGGAAGCATGAATATGGCTTACA   |       |       |       |       |       |       |       |  | 56266 |
| Gorilla           | GGAAGAAGCCAAACCAAAAGTAGAATACATCTGATATGATTCCATTTATGTAACTGGAGGAAGCGTGAGTATGGCTTCTA |       |       |       |       |       |       |       |  | 55051 |
| GrabEatingMacaque | GAAAGAAGCCAAACCTAAGTAGAATACATCTGATACGATTCCATTTTGTAACTGGAGGAAGCATGAGTATGGCTTACA   |       |       |       |       |       |       |       |  | 55484 |
| Macaque           | GAAAGAAGCCAAACCTAAGTAGAATACATCTGATACGATTCCATTTTGTAACTGGAGGAAGCATGAGTATGGCTTACA   |       |       |       |       |       |       |       |  | 56320 |
| PigTailedMacaque  | GAAAGAAGCCAAACCTAAGTAGAATACATCTGATACGATTCCATTTTGTAACTGGAGGAAGCATGAGTATGGCTTACA   |       |       |       |       |       |       |       |  | 55208 |
| Bonobo            | GGAAGAAGCCAAACCAAAAGTAGAATACATCTGATATGATTCCATTTATGTAACTGGAGGAAGCGTGAGTATGGCTTCTA |       |       |       |       |       |       |       |  | 53632 |
| OliveBaboon       | GAAAGAAGCCAAACCTAAGTAGAATACATCTGATACGATTCCATTTTGTAACTGGAGGAAGCATGATATGGCTTACA    |       |       |       |       |       |       |       |  | 55080 |
| Orangutan         | GAAAGAAGCCAAACCAAAAGTAGAATACATCTGATACGATTCCATTTATGTAACTGGAGGAAGCATGAGTATGGCTTCTA |       |       |       |       |       |       |       |  | 55830 |

| Majority          | GAGTGTGATAAATATGTTGTTTTTT-ATCTGGGTAGTTATTTTCACAGAGATGTCCAATTTGTGGTATTTTATGGAGCTTT  |       |       |       |       |       |       |       |  |       |
|-------------------|------------------------------------------------------------------------------------|-------|-------|-------|-------|-------|-------|-------|--|-------|
|                   | 68490                                                                              | 68500 | 68510 | 68520 | 68530 | 68540 | 68550 | 68560 |  |       |
| Human             | GAGTGTGATAAATATACTGTTTTTT-ATCTGGGTAATTATTTTCACAGAGATGTCCAATTTGTGGTATTTTATGGAGCTTT  |       |       |       |       |       |       |       |  | 54603 |
| Coquerel'sSifaka  | AATGTTTAGGAGCA-----GTAG-----AA--TAT---TTTGTGGTAT---AT-----TC                       |       |       |       |       |       |       |       |  | 45966 |
| Ma'sNightMonkey   | GAGGTTGATAAATATGCTGTTTTTT-ATCTGGGTAGTTACTTCACAAAGATGCCCAATTTGTGATATTTTATGGAGTTTT   |       |       |       |       |       |       |       |  | 49751 |
| VervetAGM         | GAGTGTGATAAATATGTCGTTTTTTATCTGGGTAGTTATTTTCACAGAAATGTCCAATTTGTGGTATTTTATGGAGCTTT   |       |       |       |       |       |       |       |  | 56346 |
| Gorilla           | GAATGTTGATAAATATGCTGTTTTTT-ATCTGGGTAATTATTTTCACAGAGATGTCCAATTTGTGGTATTTTATGGAGCTTT |       |       |       |       |       |       |       |  | 55130 |
| GrabEatingMacaque | GAGTGTGATAAATATGTCGTTTTTT-ATCTGGGTAGTTATTTTCACAGAGATGTCCAATTTGTGGTATTTTATGGAGCTTT  |       |       |       |       |       |       |       |  | 55563 |
| Macaque           | GAGTGTGATAAATATGTCGTTTTTT-ATCTGGGTAGTTATTTTCACAGAGATGTCCAATTTGTGGTATTTTATGGAGCTTT  |       |       |       |       |       |       |       |  | 56399 |
| PigTailedMacaque  | GAGTGTGATAAATATGTCGTTTTTT-ATCTGGGTAGTTATTTTCACAGAGATGTCCAATTTGTGGTATTTTATGGAGCTTT  |       |       |       |       |       |       |       |  | 55287 |
| Bonobo            | GAGTGTGATAAATATGCTGTTTTTT-ATCTGGGTAATTATTTTCACAGAGATGTCCAATTTGTGGTATTTTATGGAGCTTT  |       |       |       |       |       |       |       |  | 53711 |
| OliveBaboon       | GAGTGTGATAAATACGTTGTTTTTT-ATCTGGGTAGTTATTTTCACAGAGATGTCCAATTTGTGGTATTTTATGGAGCTTT  |       |       |       |       |       |       |       |  | 55159 |
| Orangutan         | GGGTGTGATAATA-----T-----TT                                                         |       |       |       |       |       |       |       |  | 55847 |

| Majority          | ATAC--TTAGGTTTTGTGTCCTTTTCT--GTGTGTGTGTAATATTTTGATAAGAAGTTTTATTTAAATCTAGGTTGGCAA  |       |       |       |       |       |       |       |  |       |
|-------------------|-----------------------------------------------------------------------------------|-------|-------|-------|-------|-------|-------|-------|--|-------|
|                   | 68570                                                                             | 68580 | 68590 | 68600 | 68610 | 68620 | 68630 | 68640 |  |       |
| Human             | ATAC--TTAGGTTTTGTGTCCTTTTGT--GTGTGTGTGTAATATTTTGATAAGAAGTTTTATTTAAATCTAGGTTTGGCAA |       |       |       |       |       |       |       |  | 54679 |
| Coquerel'sSifaka  | ATCCACTTAGGATTTGTGTCCTTTACT--GTGTATGTGCAATATTTTGATT---A-----ATTGAAATTTAGCTTGGCAA  |       |       |       |       |       |       |       |  | 46036 |
| Ma'sNightMonkey   | ATACACTTAGGATTTGTATCCTTTTCTGAGTGTGTGTAATATTTTGATAAGGAGTTTTATTTAAATACAGATTGGCAA    |       |       |       |       |       |       |       |  | 49831 |
| VervetAGM         | ATAC--TTAGGTTTTGTGTCCTTTTCT--CTCTGTGTGTAATATTTTGGTAAGAAGTTTTATTTAAAGTCTATGTTGGCAA |       |       |       |       |       |       |       |  | 56422 |
| Gorilla           | ATAC--TTAGGTTTTGTGTCCTTTTGT--GTGTGTGTGTAATATTTTGATA---AGTTTTATTTAAATCTAGGTTTGGCAA |       |       |       |       |       |       |       |  | 55203 |
| GrabEatingMacaque | ATAC--TTAGGTTTTGTGTCCTTTTCT--GTGTGTGTGTAATATTTTGGTAAGAAGTTTTATTTAAATCTATGTTGGCAA  |       |       |       |       |       |       |       |  | 55639 |
| Macaque           | ATAC--TTAGGTTTTGTGTCCTTTTCT--GTGTGTGTGTAATATTTTGGTAAGAAGTTTTATTTAAATCTATGTTGGCAA  |       |       |       |       |       |       |       |  | 56475 |
| PigTailedMacaque  | ATAC--TTAGGTTTTGTGTCCTTTTCT--GTGTGTGTGTAATATTTTGGTAAGAAGTTTTATTTAAATCTATGTTGGCAA  |       |       |       |       |       |       |       |  | 55363 |
| Bonobo            | ATAC--TTAGGTTTTGTGTCCTTTTGT--GTGTGTGTGTAATATTTTGATAAGAAGTTTTATTTAAATCTAGGTTTGGCAA |       |       |       |       |       |       |       |  | 53787 |
| OliveBaboon       | ATAC--TTAGGTTTTGTGTCCTTTTCT--GTGTGTGTGTAATATTTTGGTAAGAAGTTTTATTTAAATCTACGTTGGCAA  |       |       |       |       |       |       |       |  | 55235 |
| Orangutan         | ATAT--ATA-----T-----ATATGCTTGTA-----GATG-----TAGCTAATATCT-----                    |       |       |       |       |       |       |       |  | 55882 |

Tuesday, May 03, 2022 06:16 PM

| Majority          | GCCAACTCTGCTCCATGAATTATAAGAAAAA-TATATGAAGTCTTTAAAAAATGAAATCATAAAGAAATGTATGAAGT   |       |       |       |       |       |       |       |       |
|-------------------|----------------------------------------------------------------------------------|-------|-------|-------|-------|-------|-------|-------|-------|
|                   | 68650                                                                            | 68660 | 68670 | 68680 | 68690 | 68700 | 68710 | 68720 |       |
| Human             | GCCAACTCTGCTCCATGAATTATAAGAAAAA-TATATGAAGTCAATTAATAA--TGAAATCATAAAGAAATGTATGAAGT |       |       |       |       |       |       |       | 54756 |
| Coquerel'sSifaka  | GCCAACTGCAATCCATGAATTA---GAAAAAG--ACATG-----TGTGAAGT                             |       |       |       |       |       |       |       | 46078 |
| Ma'sNightMonkey   | GCCAACTCTGCTCCATGAATTA-GAGAAAAA-TATATGAAGTCAATTAATAAATGAAATCATAAAGAAATGTATGAAGT  |       |       |       |       |       |       |       | 49907 |
| VervetAGM         | GCCAACTCTGCTCCATGAATTATAAGAAAAAATATATGAAGTCTTTAAAAAATGAAATCATAAAGAAATGTATGAAGT   |       |       |       |       |       |       |       | 56502 |
| Gorilla           | GCCAACGCTGCTCCATGAATTATAAGAAAAA-TATATGAAGTCAATTAATAAATGAAATCATAAAGAAATGTATGAAGT  |       |       |       |       |       |       |       | 55282 |
| GrabEatingMacaque | GCCAACGCTGCTCCATGAATTATAAGAAAAA-TATATGAAGTCTTTAAAAAATGAAATCATAAAGAAATGTATGAAGT   |       |       |       |       |       |       |       | 55718 |
| Macaque           | GCCAACTCTGCTCCATGAATTATAAGAAAAA-TATATGAAGTCTTTAAAAAATGAAATCATAAAGAAATGTATGAAGT   |       |       |       |       |       |       |       | 56554 |
| PigTailedMacaque  | GCCAACTCTGCTCCATGAATTATAAGAAAAA-TATATGAAGTCTTTAAAAAATGAAATCATAAAGAAATGTATGAAGT   |       |       |       |       |       |       |       | 55442 |
| Bonobo            | GCCAACTCTGCTCCATGAATTATAAGAAAAA-TATATGAAGTCAATTAATAA--TGAAATCATAAAGCAATGTATGAAGT |       |       |       |       |       |       |       | 53864 |
| OliveBaboon       | GCCAACTCTGCTCCATGAATTATAAGAAAAA-TATATGAAGTCTTTAAAAAATGAAATCATAAAGAAATGTATGAAGT   |       |       |       |       |       |       |       | 55314 |
| Orangutan         | -----C-----                                                                      |       |       |       |       |       |       |       | 55883 |

| Majority          | AATTTGTTACTGGTGTGGGAGAACATGATTGTTAAGCCATAAAGGAAGATAGAGAACAATGAATAGTGTAAATAAAAAG |       |       |       |       |       |       |       |       |
|-------------------|---------------------------------------------------------------------------------|-------|-------|-------|-------|-------|-------|-------|-------|
|                   | 68730                                                                           | 68740 | 68750 | 68760 | 68770 | 68780 | 68790 | 68800 |       |
| Human             | AATTTGTTACTGATGTGAGAGAACATGATTGTTAAGCCATAAAGGAAGATAGAGAACAATGAATAGTGTAAATAAAAAG |       |       |       |       |       |       |       | 54836 |
| Coquerel'sSifaka  | CATTGTTACTGATATGGAACA-CATAA---TTAAGCTAAAAAGGAAGATGGAGAACAATAA-----              |       |       |       |       |       |       |       | 46137 |
| Ma'sNightMonkey   | AATTTGTTACTGATGTGGGAAAACATGATTGTTAAGCCATAAAGGAAGATAGAGAACAATGAATAGTGTAAATAAAAAG |       |       |       |       |       |       |       | 49987 |
| VervetAGM         | AATTTGTTACTGGTGTGGGAGAACATGATTGTTAAGCCATAAAGGAAGATAGAGAACAATAAATAGTGTAAATAAAAAG |       |       |       |       |       |       |       | 56582 |
| Gorilla           | AATTTGTTACTGATGTGAGAGAACATGATTGTTAAGCCATAAAGGAAGATAGAGAACAATGAGTAGTGTAAATAAAAAG |       |       |       |       |       |       |       | 55362 |
| GrabEatingMacaque | AATTTGTTACTGGTGTGGGAGAACATGATTGTTAAGCCATAAAGGAAGATAGAGAACAATGAATAGTGTAAATAAAAAG |       |       |       |       |       |       |       | 55798 |
| Macaque           | AATTTGTTACTGGTGTGGGAGAACATGATTGTTAAGCCATAAAGGAAGATAGAGAACAATGAATAGTGTAAATAAAAAG |       |       |       |       |       |       |       | 56634 |
| PigTailedMacaque  | AATTTGTTACTGGTGTGGTAGAACATGATTGTTAAGCCATAAAGGAAGATAGAGAACAATGAATAGTGTAAATAAAAAG |       |       |       |       |       |       |       | 55522 |
| Bonobo            | AATTTGTTACTGATGTGAGAGAACATGATTGTTAAGCCATAAAGGAAGATAGAGAACAATGAATAGTATT---AAAAG  |       |       |       |       |       |       |       | 53940 |
| OliveBaboon       | AATTTGTTACTGGTGTGGGAGAACATGATTGTTAAGCCATAAAGGAAGATAGAGAACAATGAATAGTGTAAATAAAAAG |       |       |       |       |       |       |       | 55394 |
| Orangutan         | -----TGGAAG---GA-----                                                           |       |       |       |       |       |       |       | 55891 |

| Majority          | TATGAATAGTATTGAATTAATAA-GTATGAATAGTATTGAATTAATAA-TATGAATAGTATTGGGAAAAA--TATGGAATAA    |       |       |       |       |       |       |       |       |
|-------------------|---------------------------------------------------------------------------------------|-------|-------|-------|-------|-------|-------|-------|-------|
|                   | 68810                                                                                 | 68820 | 68830 | 68840 | 68850 | 68860 | 68870 | 68880 |       |
| Human             | TATGAATAGTATTGAATTAATAA-----A-----TATGAATAGTATTG-AAAAAA--TACAGACTAA                   |       |       |       |       |       |       |       | 54889 |
| Coquerel'sSifaka  | -----ATCGTACTAAAAAAAAG--TACATAATAG                                                    |       |       |       |       |       |       |       | 46164 |
| Ma'sNightMonkey   | TATGAATAGTATTGAATTAATAA-GTATGAATAGTATTGAATTAATAAATAAGAAATAGTATTGGGAAAAAAG--TATGGAATAA |       |       |       |       |       |       |       | 50064 |
| VervetAGM         | TATGAATAGTATTGAATTAATAAAGTATGAATAGTATTGAATTAATAA-TATGAATAGTATTGGGAAAAAAGTATGGAATAA    |       |       |       |       |       |       |       | 56661 |
| Gorilla           | TATGAATACTATTGAATTAATAA-----A-----TATGAATAGTATTGGGAAAAA--TACGGAATAA                   |       |       |       |       |       |       |       | 55416 |
| GrabEatingMacaque | TATGAATAGTATTGAATTAATAAAGTATGAATAGTATTGAATTAATAA-TATGAATAGTATTGGGAAAAA-GTATGGAATAA    |       |       |       |       |       |       |       | 55876 |
| Macaque           | TATGAATAGTATTGAATTAATAAAGTATGAATAGTATTGAATTAATAA-TATGAATAGTATTGGGAAAAA-GTATGGAATAA    |       |       |       |       |       |       |       | 56712 |
| PigTailedMacaque  | TATGAATAGTATTGAATTAATAAAGTATGAATAGTATTGAATTAATAA-TATGAATAGTATTGGGAAAAA-GTATGGAATAA    |       |       |       |       |       |       |       | 55600 |
| Bonobo            | TATGAATAGTATTGAATTAATAA-----A-----TATGAATAGTATTG-AAAAAA--TACGACTAA                    |       |       |       |       |       |       |       | 53993 |
| OliveBaboon       | TATGAATAGTATTGAATTAATAAAGTATGAATAGTATTGAATTAATAA-TATGAATAGTATTGGGAAAAAAGTATGGAATAA    |       |       |       |       |       |       |       | 55473 |
| Orangutan         | -----TACCG-----                                                                       |       |       |       |       |       |       |       | 55896 |

Tuesday, May 03, 2022 06:16 PM

| Majority          | GTATAATATTTGTGT-----TATATATATGCTT-GTAGATGTAGCTAGTATCTCTGGAAGGATACCTA           |       |       |       |       |       |       |       |       |
|-------------------|--------------------------------------------------------------------------------|-------|-------|-------|-------|-------|-------|-------|-------|
|                   | 68890                                                                          | 68900 | 68910 | 68920 | 68930 | 68940 | 68950 | 68960 |       |
| Human             | GTATAATATTTATAT-----ATATAT--GCTT-GTAGATGTAGCTAGTATCTCTGGAAGGATATCGA            |       |       |       |       |       |       |       | 54948 |
| Coquerel'sSifaka  | ATATA-----TACATGTATGCTTTATATATGTAGATGATATCTCTGGAAGAATACCCA                     |       |       |       |       |       |       |       | 46217 |
| Ma'sNightMonkey   | GTATAAGATTAAT-----ACATATAACTT-GTAGATGTAGATAGTATCTTTGGAAGGATGCCTA               |       |       |       |       |       |       |       | 50123 |
| VervetAGM         | GTATAATATTTGTGTGTGTGTGTGTCTATATATATATATGCTT-GTAGATGTAGCTAGTGTCTCTGGAAGGATACCTA |       |       |       |       |       |       |       | 56740 |
| Gorilla           | GTATAATATTTATAT-----ATATAT--GCTT-GTAGATGTAGCTAGTATCTCTGGAAGGATACGGA            |       |       |       |       |       |       |       | 55475 |
| GrabEatingMacaque | GTATAATATTTGTGT-----GTATATATATGCTT-GTAGATGTAGCTAGTATCTCTGGAAGGATACCTA          |       |       |       |       |       |       |       | 55939 |
| Macaque           | GTATAATATTTGTGT-----ATATATATATGCTT-GTAGATGTAGCTAGTATCTCTGGAAGGATACCTA          |       |       |       |       |       |       |       | 56775 |
| PigTailedMacaque  | GTATAATATTTGTGT-----ATATATATATGCTT-GTAGATGTAGCTAGTATCTCTGGAAGGATACCTA          |       |       |       |       |       |       |       | 55663 |
| Bonobo            | GTATAATATTTATAT-----ATATATATGCTT-GTAGATGTAGCTAGTATCTCTGGAAGGATATCAA            |       |       |       |       |       |       |       | 54054 |
| OliveBaboon       | GTATAATATTTGTGT-----GTATATATATGCTT-GTAGATGTAGCTAGTATCTCTGGAAGGATACCTA          |       |       |       |       |       |       |       | 55536 |
| Orangutan         | -----A-----A-----G-ACTACTGA                                                    |       |       |       |       |       |       |       | 55906 |

| Majority          | AGATAAATACTG-TGAGGGGTTGGTAGGGGAAAATAGACTGGGTGACAGAGTTGCAGGGGAATTTTAACTCTTTACACCA  |       |       |       |       |       |       |       |       |
|-------------------|-----------------------------------------------------------------------------------|-------|-------|-------|-------|-------|-------|-------|-------|
|                   | 68970                                                                             | 68980 | 68990 | 69000 | 69010 | 69020 | 69030 | 69040 |       |
| Human             | AGATAAATACTG-TGAGGGGTTGGTAGGGGAAAATAGACTGGGTGACAGAGTTGCAGGGGAATTTTAACTCTTTAATACCA |       |       |       |       |       |       |       | 55027 |
| Coquerel'sSifaka  | AGATAAATACTGGTGAAGGGTTGGTAAGGAAAAGCAGACTGAGTAACAGAGTTGCCATG-A-----TC----AGGTGA    |       |       |       |       |       |       |       | 46284 |
| Ma'sNightMonkey   | AGATAAATACTG-TGAGGGGTTGGTAGGGGTAAGTAGACTAGGTGACAGCGTTGCAGGGGAATTTTCAACTCTTTACACCA |       |       |       |       |       |       |       | 50202 |
| VervetAGM         | AGATAAATACTG-TAAGGGGTTGGTAGGGGAAAATAGAATGGATGACAGAGTTACAGGGGAATTTTAACTCTTTACACCA  |       |       |       |       |       |       |       | 56819 |
| Gorilla           | AGATAAATACTG-CGAGGGGTTGGTAGGGGAAAATAGACTGGGTGACAGAGTTGCAGGGGAATTTTAACTCTTTAATACCA |       |       |       |       |       |       |       | 55554 |
| GrabEatingMacaque | AGATAAATACTG-TAAGGGGTTGGTAGGGGAAAATAGAATGGATGACAGAGTTGCAGAGGAATTTTAACTCTTTACACCA  |       |       |       |       |       |       |       | 56018 |
| Macaque           | AGATAAATACTG-TAAGGGGTTGGTAGGGGAAAATAGAATGGATGACAGAGTTGCAGAGGAATTTTAACTCTTTACACCA  |       |       |       |       |       |       |       | 56854 |
| PigTailedMacaque  | AGATAAATACTG-TAAGGGGTTGGTAGGGGAAAATAGAATGGATGACAGAGTTGCAGAGGAATTTTAACTCTTTACACCA  |       |       |       |       |       |       |       | 55742 |
| Bonobo            | AGATAATGCTG-TGAGGGGTTGGTAGGGGAAAATAGACTGGGTGACAGAGTTGCAGGGGAATTTTAACTCTTTAATACCA  |       |       |       |       |       |       |       | 54133 |
| OliveBaboon       | AGATAAATACTG-TAAGGGGTTGGTAGGGGAAAATAGAATGGATGACAGAGTTGCAGGGGAATTTTAACTCTTTACACCA  |       |       |       |       |       |       |       | 55615 |
| Orangutan         | AGATAAATACTG-TGAGGGATTGGTAGGGGAAAATGGACTAGGTGACAGAGTTGCAGGAGAATTTTAACTCTTTAATACCA |       |       |       |       |       |       |       | 55985 |

| Majority          | CTTTTATACCATGATCATGGATTCCATTTTAAAAACACATTTTATTATTTGAAGCAGTAGATGTTAGTGTTTTCTAA |       |       |       |       |       |       |       |       |
|-------------------|-------------------------------------------------------------------------------|-------|-------|-------|-------|-------|-------|-------|-------|
|                   | 69050                                                                         | 69060 | 69070 | 69080 | 69090 | 69100 | 69110 | 69120 |       |
| Human             | CTTTTATACCATGATCATGGATTCCATTTTAAAAACACATTTTATTATTTGAAGCAGTAGATGTTAGTGTTTTCTAA |       |       |       |       |       |       |       | 55102 |
| Coquerel'sSifaka  | CTGCTATTTTAAAAAC---AC--ATTTTT-----TTTTGTATTTGAAACAGTAGATGTTAGTGTTTTCTAC       |       |       |       |       |       |       |       | 46347 |
| Ma'sNightMonkey   | CTGTCGTATCATTATCATAGATTCCATTTTAAAAACACATTTTATTATTTGAAGCAGCAGATGTTAGTGTTTTCTAA |       |       |       |       |       |       |       | 50282 |
| VervetAGM         | CTTTTATACCATGATCCTGGATTCCATTTTAAAAACACATTTTATTATTTGAAGCAGTAGATGTTAGTGTTTTCTAA |       |       |       |       |       |       |       | 56899 |
| Gorilla           | CTTTTATACCATGATCATGGATTCCATTTTAAAAACACATTTTATTATTTGAAGCAGCAGATGTTAGTGTTTTCTAA |       |       |       |       |       |       |       | 55632 |
| GrabEatingMacaque | CTTTTATACCATGATCATGGATTCCATTTTAAAAACACATTTTATTATTTGAAGCAGTAGATGTTAGTGTTTTCTAA |       |       |       |       |       |       |       | 56098 |
| Macaque           | CTTTTATACCATGATCATGGATTCCATTTTAAAAACACATTTTATTATTTGAAGCAGTAGATGTTAGTGTTTTCTAA |       |       |       |       |       |       |       | 56934 |
| PigTailedMacaque  | CTTTTATACCATGATCATGGATTCCATTTTAAAAACACATTTTATTATTTGAAGCAGTAGATGTTAGTGTTTTCTAA |       |       |       |       |       |       |       | 55822 |
| Bonobo            | CTTTTATACCATGATCATGGATTCCATTTTAAAAACACATTTTATTATTTGAAGCAGTAGATGTTAGTGTTTTCTAA |       |       |       |       |       |       |       | 54208 |
| OliveBaboon       | CTTTTATACCATGATCATGGATTCCATTTTAAAAACACATTTTATTATTTGAAGCAGTAGATGTTAGTGTTTTCTAA |       |       |       |       |       |       |       | 55695 |
| Orangutan         | CTTTTATATCATGATCATGGATTCCGTTTTAAAAACACATTTTATTATTTGAAGCAGCAGATGTTAGTGTTTTCTAA |       |       |       |       |       |       |       | 56065 |



Tuesday, May 03, 2022 06:16 PM

| Majority          | GTTGTGGTAGTCT-ATGCTTGTATTATAGATAAAATACC-GTAAGAACATGTTCACTAATGAAGA---TAATATTGCAAT  |       |       |       |       |       |       |       |       |
|-------------------|-----------------------------------------------------------------------------------|-------|-------|-------|-------|-------|-------|-------|-------|
|                   | 69130                                                                             | 69140 | 69150 | 69160 | 69170 | 69180 | 69190 | 69200 |       |
| Human             | GTTGTGGTAGTCT-ATGCTTGTATTATAGATAAAATACA-GTAAGAACATGTTCACTAATGAAGAAGATAAATATTGCAAT |       |       |       |       |       |       |       | 55180 |
| Coquerel'sSifaka  | TTTGTGGTAGTCC-ATAGTTCCTGTTATAGATATATATTTGTAAGAACATGTTCACTAACGAAGAA-ATAAAATGGCCAT  |       |       |       |       |       |       |       | 46425 |
| Ma'sNightMonkey   | GTTGTGGTAGTCTTATGCTTGTATTATAGATAAAATATA-GTAAGAACATGTTCACTAATGAAGA---TAATATTGCAGT  |       |       |       |       |       |       |       | 50358 |
| VervetAGM         | GTTGTGGTAGTCT-ATGCTTGTATTATAGATAAAATACC-GTAAGAACATGTTCACTAATGAAGA---TAATATTGCAAT  |       |       |       |       |       |       |       | 56974 |
| Gorilla           | GTTGTCGTAGTCT-ATGCTTGTACTATAGATAAAATACA-GTAAGAACATGTTCACTAATGAAGAAGATAAATATTGCAAT |       |       |       |       |       |       |       | 55710 |
| GrabEatingMacaque | GTTGTGGTAGTCT-ATGCTTGTATTATAGGTAATACC-ATAAGAACATGTTCACTAATGAAGA---TAATATTGCAAT    |       |       |       |       |       |       |       | 56173 |
| Macaque           | GTTGTGGTAGTCT-ATGCTTGTATTATAGGTAATACC-ATAAGAACATGTTCACTAATGAAGA---TAATATTGCAAT    |       |       |       |       |       |       |       | 57009 |
| PigTailedMacaque  | GTTGTGGTAGTCT-ATGCTTGTATTATAGGTAATACC-ATAAGAACATGTTCACTAATGAAGA---TAATATTGCAAT    |       |       |       |       |       |       |       | 55897 |
| Bonobo            | GTTGTGGTAGTCT-ATGCTTGTATTATAGATAAAATACA-GTAAGAACATGTTCACTAATGAAGAAGATAAATATTGCAAT |       |       |       |       |       |       |       | 54286 |
| OliveBaboon       | GTTGTGGTAGTCT-GTGCTTGTATTATAGGTAATACC-ATAAGAACATGTTCACTAATGAAGA---TAATATTGCAAT    |       |       |       |       |       |       |       | 55770 |
| Orangutan         | GTTGTGGTAGTCT-ATGCTTGTATTATAGATAAAATACA-GTAAGAACATGTTCACTAATGAAGAAGATAAATATTGCAAT |       |       |       |       |       |       |       | 56143 |

| Majority          | GAGCTACTTAAAAATATTTAAA-TATATTTAAACATTTGAATAGATA---CTGCTCTATAAAATCTAATTTTACCAATTTA |       |       |       |       |       |       |       |       |
|-------------------|-----------------------------------------------------------------------------------|-------|-------|-------|-------|-------|-------|-------|-------|
|                   | 69210                                                                             | 69220 | 69230 | 69240 | 69250 | 69260 | 69270 | 69280 |       |
| Human             | GAGCTACTTAAAAATATTTAAA-TACATTTAAACATTTGAATAGATA---CTGCTCTATAAAACTAATTTTACCAATTTA  |       |       |       |       |       |       |       | 55255 |
| Coquerel'sSifaka  | GAGCTACTTAAAAATTTGAAGTATATTTCAAACATTTAAATAGATAAATGTTGCTCTAGAAATCTAATTTTACCTGTT--  |       |       |       |       |       |       |       | 46503 |
| Ma'sNightMonkey   | GAGCTACTTACAATATTTAAA-TATGTTTAAACATTTGAATAGATA---TTGCTCTCTAAATCTGATTTTACCAATTTA   |       |       |       |       |       |       |       | 50433 |
| VervetAGM         | GAGCTACTTAAAAATATTTAAA-TATATTTAAACATTTGAATAGCTA---CTGCTCTATAAAATCTAATTTTACCAATTTA |       |       |       |       |       |       |       | 57049 |
| Gorilla           | GCGCTACTTAAAAATATTTAAA-TATATTTAAACATTTGAATAGATA---CAGCTCTATAAAATCTAATTTTACCAATTTA |       |       |       |       |       |       |       | 55785 |
| GrabEatingMacaque | GAGCTACTTAAAAATATTTAAA-TATATTTAAACATTTGAATAGCTA---CTGCTCTATAAAATCTAATTTTACCAATTTA |       |       |       |       |       |       |       | 56248 |
| Macaque           | GAGCTACTTAAAAATATTTAAA-TATATTTAAACATTTGAATAGCTA---CTGCTCTATAAAATCTAATTTTACCAATTTA |       |       |       |       |       |       |       | 57084 |
| PigTailedMacaque  | GAGCTACTTAAAAATATTTAAA-TATATTTAAACATTTGAATAGCTA---CTGCTCTATAAAATCTAATTTTACCAATTTA |       |       |       |       |       |       |       | 55972 |
| Bonobo            | GAGCTACTT-----TAAA-TATATTTAAACATTTGAATAGATA---CTGCTCTATAAAATCTAATTTTACCAATTTA     |       |       |       |       |       |       |       | 54353 |
| OliveBaboon       | GAGCTACTTAAAAATATTTAAA-TATATTTAAACATTTGAATAGGTA---CTGCTCTATAAAATCTAATTTTACCAATTTA |       |       |       |       |       |       |       | 55845 |
| Orangutan         | GAGCTACTTAAAAATATTTAAA-TATATTTAAACATTTGAATAGATA---CTGGTCTATAAAATCTAATTTTACCAATTTA |       |       |       |       |       |       |       | 56218 |

| Majority          | CAATTATTTTTTCAATAATAGTATCAAGATGTCTACTAAAATAAATAATCTATCACATTTCAAATGTTGGGTTTTAATT |       |       |       |       |       |       |       |       |
|-------------------|---------------------------------------------------------------------------------|-------|-------|-------|-------|-------|-------|-------|-------|
|                   | 69290                                                                           | 69300 | 69310 | 69320 | 69330 | 69340 | 69350 | 69360 |       |
| Human             | CAATTATTTTTTCAATAATAGTATCAAGATGTCTACTAAAATAA---TCTATCACATTTCAAATGTTGAGTTTTAATT  |       |       |       |       |       |       |       | 55331 |
| Coquerel'sSifaka  | -AATAACTTCTT---AGTAATATAAAAGTGTCTGTAAAC-TA----TCTGTCATGTTTCAAATGTTGGGTTTTAATT   |       |       |       |       |       |       |       | 46572 |
| Ma'sNightMonkey   | CAGTTATTTTTTC---AATAATATCAAGATGTCTACTAAAATAAACAATA-ATCGTGTTCAAATGTTCTGTTTTAATT  |       |       |       |       |       |       |       | 50508 |
| VervetAGM         | CAATTAGTTTTTCAATAGTAGTATCAAGATGTCTACTAAAATAAATAATCTATTACATTTCAAATGTCGGGTTTTAGTA |       |       |       |       |       |       |       | 57129 |
| Gorilla           | CAATTATTTTTTCAATAATAGTATCAAGATGTCTACTAAAAT-----T--ATCACATTTCAAATGTTGAGTTTTAATT  |       |       |       |       |       |       |       | 55857 |
| GrabEatingMacaque | CAATTAGTTTTTCAATAATAGTATCAAGATGTCTACTAAAATAAATAATCTATTACATTTCAAATGTTGGGTTTTAGTA |       |       |       |       |       |       |       | 56328 |
| Macaque           | CGATTAGTTTTTCAATAATAGTATCAAGATGTCTACTAAAATAAATAATCTATTACATTTCAAATGTTGGGTTTTAGTA |       |       |       |       |       |       |       | 57164 |
| PigTailedMacaque  | CAATTAGTTTTTCAATAATAGTATCAAGATGTCTACTAAAATAAATAATCTATTACATTTCAAATGTTGGGTTTTAGTA |       |       |       |       |       |       |       | 56052 |
| Bonobo            | CAATTATTTTTTCAATAATAGTATCAAGATGTCTACTAAAATAA---TCTATCACATTTCAAATGTTGAGTTTTAATT  |       |       |       |       |       |       |       | 54429 |
| OliveBaboon       | CAATTAGTTTTTCAATAATAGTATCAAGATGTCTACTAAAATAAATAATCTATTACATTTCAAATGTTGGGTTTTAGTA |       |       |       |       |       |       |       | 55925 |
| Orangutan         | CAATTATTTTTTCAATAATAGTATCAAGATGTCTACTAAAATAA---TCTATCACATTTCAAATGTTGAGTTTTAATT  |       |       |       |       |       |       |       | 56294 |

Tuesday, May 03, 2022 06:16 PM

| Majority          | AG----TCATTTTGGCTAATACATAAAATTTATAGATAAAATTA---AGTAACATTTAAATGATTGTTTAGATATGTATCT |       |
|-------------------|-----------------------------------------------------------------------------------|-------|
|                   | 69370 69380 69390 69400 69410 69420 69430 69440                                   |       |
| Human             | AGTAAGTCATTTTGGCTAATACATAAAATTTATAGATAAAATTA---AGTAGCATTTAAATGATTGTTTAGATATATATCT | 55408 |
| Coquerel'sSifaka  | AA----TGATTC--ACAGTTACTTCAGTTTATTATTTAAATAGC--ATTTAAATGATGTAGTTGGTCTAGATGAATATGT  | 46644 |
| Ma'sNightMonkey   | AAGAAGTCATTTTGGCTAATATATACATTTATACATAAAATTTAAGTAGCATTTAAATGCTTGTAGATATGTATGT      | 50588 |
| VervetAGM         | AG----TCATTTTGGCTAATACATAAAATTTATAGATAAAATTA---AGTAACATTTAAATGATTGTGTAGATATGTATCT | 57202 |
| Gorilla           | AGTAAGTCATTTTGGCTAATACATAAAATTTATAGATAAAATTA---AGTAGCATTTAAATGATTGTTTAGATATGTATCT | 55934 |
| GrabEatingMacaque | AG----TCATTTTGGCTAATATATAAAATTTATAGATAAAATTA---AGTAACATTTAAATGATTGTGTAGATATGTATCT | 56401 |
| Macaque           | AG----TCATTTTGGCTAATATATAAAATTTATAGATAAAATTA---AGTAACATTTAAATGATTGTGTAGATATGTATCT | 57237 |
| PigTailedMacaque  | AG----TCATTTTGGCTAATATATAAAATTTATAGATAAAATTA---AGTAACATTTAAATGATTGTGTAGATATGTATCT | 56125 |
| Bonobo            | AGTAAGTCATTTTGGCTAATACATAAAATTTATAGATAAAATTA---AGTAGCATTTAAATGATTGTTTAGATATATATCT | 54506 |
| OliveBaboon       | AG----TCATTTTGGCTAATATATAAAATTTATAGATAAAATTA---AGTAACATTTAAATGATTGTGTAGATATGTATCT | 55998 |
| Orangutan         | AG----TCATTTTGGCTAATACATAAAATTTATAGATAAAATTA---AGTAGCATTTAAATGATCGTTTAGATATGTATCT | 56367 |

| Majority          | GGACTCT-----CAAGCCATGTGATCTGTGATTATATAAATATTTTAGTAAAATGACTGTTCTTGTTTATTCTCCTAA   |       |
|-------------------|----------------------------------------------------------------------------------|-------|
|                   | 69450 69460 69470 69480 69490 69500 69510 69520                                  |       |
| Human             | GGACTCT-----CAAGCCGTTGTGATCTGTGGTTATATAAATATTTTAGTAAAATGACTTTTCTTGTTTATTCTCCTGA  | 55480 |
| Coquerel'sSifaka  | GGACTCTTTGAGTCTCAAGCTCTATGATCCCTGGTTATATAAATATTTTAGTAAAATGACTGTTTATTATTCCATAA    | 46724 |
| Ma'sNightMonkey   | GGACTCTTTCATTCTCAAGCCATGTGATCTGTGATTTTATAAATATTTTAGTAAAATGACTGTTCTTGTTTTTCTCCCGA | 50668 |
| VervetAGM         | GGACTCT-----CAAGCCATGTGATCTGTGATTATATAAATGTTTLAGTAAAATGACTGTTCTTGTTTATTCTCCTAA   | 57274 |
| Gorilla           | GGACTCT-----CAAGCTATGTGATCTGTGGTTATATAAATATTTTAGTAAAATGACTTTTCTTGTTTATTCTCCTGA   | 56006 |
| GrabEatingMacaque | GGACTCT-----CAAGCCATGTGATCTGTGATTATATAAATATTTTAGTAAAATGACTGTTCTTGTTTATTCTCCTAA   | 56473 |
| Macaque           | GGACTCT-----CAAGCCATGTGATCTGTGATTATATAAATATTTTAGTAAAATGACTGTTCTTGTTTATTCTCCTAA   | 57309 |
| PigTailedMacaque  | GGACTCT-----CAAGCCATGTGATCTGTGATTATATAAATATTTTAGTAAAATGACTGTTCTTGTTTATTCTCCTAA   | 56197 |
| Bonobo            | GGACTCT-----CAAGCCGTTGTGATCTGTGGTTATATAAATATTTTAGTAAAATGACTTTTCTTGTTTATTCTCCTGA  | 54578 |
| OliveBaboon       | GGACTCT-----CAAGCCATGTGATCTGTGATTATATAAATATTTTAGTAAAATGACTGTTCTTGTTTATTCTCCTAA   | 56070 |
| Orangutan         | GAECTCT-----CAAGCCGTTGTGATCTGTGGTTATATA---TTTTAGTAAAATGACTGTTCTTGTTTATTCTCCTGA   | 56436 |

| Majority          | GTGTCCTAATCTTTTGTATTCTCTTT-----CATTAACCTGTTAATGTAGATTTTTCAAACCT--GTAAAGCTATGTAT     |       |
|-------------------|-------------------------------------------------------------------------------------|-------|
|                   | 69530 69540 69550 69560 69570 69580 69590 69600                                     |       |
| Human             | GTGTCCTAATCTTTTGTATTCTCTTT-----CATTAACCTGTTGATATAGATTTTTCAAACCT--GTAAACCTATGTAT     | 55552 |
| Coquerel'sSifaka  | ATGCCCTAAATCTTTTGTGTTCTCTTT--CC---CTTTTATTCATCACTGTGCAGTTTGTATTCTCT--ATTTATCTGCTAAT | 46799 |
| Ma'sNightMonkey   | GTGTCCTAATCTTTTGTATTTCTTTTCTTTTAACTGTTAATATAGATTTTTCAAACCTTTGTAAAGCTATGTGT          | 50748 |
| VervetAGM         | GTATCTTAATCTTTTGTATTCTCTTT-----CATTAAC--TGTTAATGTAGATTTTTCAAACCT--GTAAAGCTATGTAT    | 57345 |
| Gorilla           | GTGTCCTAATCTTTTGTATTCTCTTT-----CATTAACCTGTTAATATAGATTTTTCAAACCT--ATAAACCTATGTAT     | 56078 |
| GrabEatingMacaque | GTATCTTAATCTTTTGTATTCTCTTT-----CATTAAC--TGTTAATGTAGATTTTTCAAACCT--GTAAAGCTATGTAT    | 56544 |
| Macaque           | GTATCTTAATCTTTTGTATTCTCTTT-----CATTAAC--TGTTAATGTAGATTTTTCAAACCT--GTAAAGCTATGTAT    | 57380 |
| PigTailedMacaque  | GTATCTTAATCTTTTGTATTCTCTTT-----CATTAAC--TGTTAATGTAGATTTTTCAAACCT--GTAAAGCTATGTAT    | 56268 |
| Bonobo            | GTGTCCTAATCTTTTATATTCTCTTT-----CATTAACCTGTTGATATAGATTTTTCAAACCT--GTAAACCTATGTAT     | 54650 |
| OliveBaboon       | GTATCTTAATCTTTTGTATTCTCTTT-----CATTAAC--TGTTAATGTAGATTTTTCAAACCT--GTAAAGCTATGTAT    | 56141 |
| Orangutan         | GTGTCCTAATCTTTTGTATTCTCTTT-----CATTAACCTGTTAATATAGATTTTTCAAACCT--GTAAACCTATGTAT     | 56508 |

Tuesday, May 03, 2022 06:16 PM

|                   |                                                                                  |       |
|-------------------|----------------------------------------------------------------------------------|-------|
| Majority          | AGGTATTTGTGGTATTGTGCATTGTTATATTTTAGAACTATTTGCCTTTGTA-----TGTTTTTTGACCACAGATAAGGT |       |
|                   | 69610 69620 69630 69640 69650 69660 69670 69680                                  |       |
| Human             | AGGTATTTGTGGTATTGTGCATTGTTATATTTTAGAACTATTTGCCTTTGTA-----TGTTTTTTGACCACAGATAAGGT | 55627 |
| Coquerel'sSifaka  | ATAGATTTTCAAATT-A----TAAGGCAATGTAGAGGTATTTGCATTGTTATATATGTTTTCTGACCCAGATAAGGT    | 46874 |
| Ma'sNightMonkey   | AGGTATTTGTGGTATTGTGCGTTGTTATATTTTAGAACTATTTGCCTTTGTA-----TATTTTTTGCCACAGATAAGGT  | 50823 |
| VervetAGM         | AGGTATTTGTGGTATTGTGCATTGTTTACACTTTAGAACTATTTGCCTTTGT-----TGTTTTTTGACCACAGATAAGGT | 57419 |
| Gorilla           | AGGTATTTGTGGTATTGTGCATTGTTATATTTTAGAACTATTTGCCTTTGTA-----TGTTTTTTGACCACAGATAAGGT | 56153 |
| GrabEatingMacaque | AGGTATTTGTGGTATTGTGCATTGTTATACTTTAGAACTATTTGCCTTTGT-----TGTTTTTTGACCACAGATAAGGT  | 56618 |
| Macaque           | AGGTATTTGTGGTATTGTGCATTGTTATACTTTAGAACTATTTGCCTTTGT-----TGTTTTTTGACCACAGATAAGGT  | 57454 |
| PigTailedMacaque  | AGGTATTTGTGGTATTGTGCATTGTTATACTTTAGAACTATTTGCCTTTGT-----TGTTTTTTGACCACAGATAAGGT  | 56342 |
| Bonobo            | AGGTATTTGTGGTATTGTGCATTGTTATATTTTAGAACTATTTGCCTTTGTA-----TGTTTTTTGACCACAGATAAGGT | 54725 |
| OliveBaboon       | AGGTATTTGTGGTATTGTGCATTGTTATACTTTAGAACTATTTGCCTTTGT-----TGTTTTTTGACCACAGATAAGGT  | 56215 |
| Orangutan         | AGGTATTTGTGGTATTGTGCATTGTTATATTTTAGAACTATTTGCCTTAGTA-----TGTTTTTTGACCACAGATAAGGT | 56583 |

|                   |                                                                                   |       |
|-------------------|-----------------------------------------------------------------------------------|-------|
| Majority          | AGAAAGAAATTATTTCCCTTATCATAGACTGTGTCATAATAATAA---TAGGAAAGGGATAATAGTAATAAAGGCAGTCTT |       |
|                   | 69690 69700 69710 69720 69730 69740 69750 69760                                   |       |
| Human             | AGAAAGAAATTATTTCCCTTATCATAGACTG--TCATCATAATAA---CAGGAAAGGGATAATAGTAATAAAGGCAGTCTT | 55702 |
| Coquerel'sSifaka  | ---AGGAATTATTTCCCTTATCAGAGCATGTGTCACAATGATAA---TAAGAAAGGCATAATAGTAATAAAGCTTTCTT   | 46947 |
| Ma'sNightMonkey   | AAAAAGAAATTATTTCCCTTATAGAATCTGTCATAATAATAATAATAGGAAAGGGATAATAGTAATAAAGGCAGTCTT    | 50903 |
| VervetAGM         | AGAAAGAAATTATGTCCTTATCATAGACTCTGTCATAATAATAA---TAGGAAAGGGATAATAGTAATAAAGGCAGTCTT  | 57496 |
| Gorilla           | GGAAAGAAATTATTTCCCTTATCATAGACTG--TCATAATAATAA---CAGGAAAGGGATAATAGTAATAAAGGCAGTCTT | 56228 |
| GrabEatingMacaque | AGAAAGAAATTATATCCTTATCATAGACTCTGTCATAATAATAA---TAGGAAAGGGATAATAGTAATAAAGGCAGCCTT  | 56695 |
| Macaque           | AGAAAGAAATTATGTCCTTATCATAGACTCTGTCATAATAATAA---TAGGAAAGGGATAATAGTAATAAAGGCAGCCTT  | 57531 |
| PigTailedMacaque  | AGAAAGAAATTATGTCCTTATCATAGACTC--TCATAATAATAA---TAGGAAAGGGATAATAGTAATAAAGGCAGTCTT  | 56417 |
| Bonobo            | AGAAAGAAATTATTTCCCTTATCATAGACTG--TCATAATAATAA---CAGGAAAGGGATAATAGTAATAAAGGCAGTCTT | 54800 |
| OliveBaboon       | AGAAAGAAATTATGTCCTTATCATAGACTCTGTCATAATAATAA---TAGGAAAGGGATAATAGTAATAAAGGCAGTCTT  | 56292 |
| Orangutan         | AGAAAGAAATTATTTCCCTTATCATAGACTG--TCATAATAATAATAACAGGAAAGGGATAATAGTAATAAAGGCAGTCTT | 56661 |

|                   |                                                                                  |       |
|-------------------|----------------------------------------------------------------------------------|-------|
| Majority          | TTGG---AGCATTTAACATAATATTTGATTGACAGATTTC-CTACAAATACTGTGTTTATTCAATTTTATGGTTATATT  |       |
|                   | 69770 69780 69790 69800 69810 69820 69830 69840                                  |       |
| Human             | TTGG---AGCATTTAACATAATATTTGATTGACAGATTTC-CTACAAATACTGTGTTTATTCAATTTTATGGGTATATT  | 55777 |
| Coquerel'sSifaka  | TTGA---AGCATTTAACATTGATTGATTGACAGATTTC-CTAAAAATACTGATTTTATTCAATTATATA--TATTTT    | 47020 |
| Ma'sNightMonkey   | TTGG---AGCATTTAACATAATATTTGATCGACAGATTTTCTACAAATACTGTGTTTATTCAATTTTATGGGTATATT   | 50979 |
| VervetAGM         | TTGG---AGCATTTAACATAATATTTGATTGGAAGATTTC-CTACAAATACTGTGTTTATTCAATTTTATGGTTATATT  | 57571 |
| Gorilla           | TTGG---AGCATTTAACATAATATTTGATTGACAGATTTC-CTACAAATACTGTGTTTATTCAATTTTATGGGTATATT  | 56303 |
| GrabEatingMacaque | TTGGAGGGAGCATTTAACATAATATTTGATTGGAAGATTTC-CTACAAATACTATGTTTATTCAATTTTATGGTTATATT | 56774 |
| Macaque           | TTGGAGGGAGCATTTAACATAATATTTGATTGGAAGATTTC-CTACAAATACTATGTTTATTCAATTTTATGGTTATATT | 57610 |
| PigTailedMacaque  | TTGGAGGGAGCATTTAACATAATATTTGATTGGAAGATTTC-CTACAAATACTATGTTTATTCAATTTTATGGTTATATT | 56496 |
| Bonobo            | TTGG---AGCATTTAACATAATATTTGATTGACAGATTTC-CTACAAATACTGTGTTTATTCAATTTTATGGGTATATT  | 54875 |
| OliveBaboon       | TTGGAGGGAGCATTTAACATAATATTTGATTGGAAGATTTC-CTACAAATACTATGTTTATTCAATTTTATGGTTATATT | 56371 |
| Orangutan         | TTGG---AGCATTTAACATAATATTTGATTGACGGATTTC-CTACAAATACTGTGTTTATTCAATTTTATGGGTATATT  | 56736 |

Tuesday, May 03, 2022 06:16 PM

| Majority          | TTTTACATTTTAAAAATCTCAGAAATTTGATGTGTCTACAGTAGTCTATCTTCCATAGTTCAATTGGCAACATCT-ATT   |       |
|-------------------|-----------------------------------------------------------------------------------|-------|
|                   | 69850 69860 69870 69880 69890 69900 69910 69920                                   |       |
| Human             | TTTTCGCATTTTAAAAATCTCAGAAATTTGATGTGTCTGCAATAGTCTATCTTCCATAGTTCAATTGGCAACATCTTATT  | 55857 |
| Coquerel'sSifaka  | TTT-CACATTTTA----T-----TT-----TTTAT-----                                          | 47040 |
| Ma'sNightMonkey   | TTT-CACATTTTAAAAATC--AGAAATTTGATGTGTCTACAATAGTCTAT-----TTCAGTTGACAACATCTTATT      | 51047 |
| VervetAGM         | TTTTACATTTTAAAAATCTCAGAAATTTGATGTGTCTACAGTAGTCTATCTTCCGTTAGTTCAATTGGCAACATCT-ATT  | 57650 |
| Gorilla           | TTTTCGCATTTTAAAAATCTCAGAAATTTGATGTGTCTACAATAGTCTATCTTCCATAGTTCAAGTTGGCAACATCTTATT | 56383 |
| GrabEatingMacaque | TTTTACATTTTAAAAATCTCAGAAATTTGATGTGTCTACAGTAGTCTATCTTCCATAGTTCAATTGGCAACATCT-ATT   | 56853 |
| Macaque           | TTTTACATTTTAAAAATCTCAGAAATTTGATGTGTCTACAGTAGTCTATCTTCCATAGTTCAATTGGCAACATCT-ATT   | 57689 |
| PigTailedMacaque  | TTTTACATTTTAAAAATCTCAGAAATTTGATGTGTCTACAGTAGTCTATCTTCCATAGTTCAATTGGCAACATCT-ATT   | 56575 |
| Bonobo            | TTTTCGCATTTTAAAAATCTCAGAAATTTGATGTGTCTGCAATAGTCTATCTTCCATAGTTCAATTGGCAACATCTTATT  | 54955 |
| OliveBaboon       | TTTTACATTTTAAAAATCTCAGAAATTTGATGTGTCTACAGTAGTCTATCTTCCATAGTTCAATTGGCAACATCT-ATT   | 56450 |
| Orangutan         | TTTTACATTTTAAAGTCTCAGAAATTTGATGTGTCTACAATAGTCTATCTTCCATAGTTCAATTGGCAAAATCTTATT    | 56816 |

| Majority          | AGTCATACTTAAAACAATAGTGCATTTTATAAATTGATGGTGTATTTGATACCGTAAAATGTATGGGAAATATCCTTCATA  |       |
|-------------------|------------------------------------------------------------------------------------|-------|
|                   | 69930 69940 69950 69960 69970 69980 69990 70000                                    |       |
| Human             | AGTCATACATAAAAACAATAGTGCATTTTATAAATTAATGGTGTATTTGATACCATAAAATGTATGGGAAATATTCTTCATA | 55937 |
| Coquerel'sSifaka  | -----T-----TTTTTAATT----TT-TTTTTGACAC---AGAG---T-----CTCACT                        | 47074 |
| Ma'sNightMonkey   | AGTTGTACATAAAAACAATAGTGCATTTTATAAATTGATGGTGTATGTGATACCATAAAACGCATGAGAAATAGCCTTCATA | 51127 |
| VervetAGM         | AGTCATACTTAAAACAATAGTGCATTTTATAAATTGATGGTGTATTTGATACCGTAAAATGTATGGGAAATATCCTTCATA  | 57730 |
| Gorilla           | AGTCATACATAAAAACAATAGTGCATTTTATAAATTGATGGTGTATTTGATACCATAAAATGTATGGGAAATATTCTTCATA | 56463 |
| GrabEatingMacaque | AGTCATACTTAAAACAATAGTGCATTTTATAAATTGATGGTGTATTTGATACCGTAAAATGTATGGGAAATATCCTTCATA  | 56933 |
| Macaque           | AGTCATACTTAAAACAATAGTGCATTTTATAAATTGATGGTGTATTTGATACCGTAAAATGTATGGGAAATATCCTTCATA  | 57769 |
| PigTailedMacaque  | AGTTATACTTAAAACAATAGTGCATTTTATAAATTGATGGTGTATTTGATACCGTAAAATGTATGGGAAATATCCTTCATA  | 56655 |
| Bonobo            | AGTCATACATAAAAACAATAGTGCATTTTATAAATTAATGGTGTATTTGATACCATAAAATGTATGGGAAATATTCTTCATA | 55035 |
| OliveBaboon       | AGTCATACTTAAAACAATAGTGCATTTTATAAATTGATGGTGTATTTGATACTGTAATAATGTATGGGAAATATCCTTCATA | 56530 |
| Orangutan         | AGTCATACGTAAAACAATAGTGCATTTTATAAATTGATGGTGTATTTGATACCATAAAATGTATGGGAAATATCCTTCATA  | 56896 |

| Majority          | TTATATCTTGAAGTTTACCTGAGAATTTTTGGTTTTGGACTGGACTACACATCG-GTTTCTATTCTAAAAATTTTGGTG  |       |
|-------------------|----------------------------------------------------------------------------------|-------|
|                   | 70010 70020 70030 70040 70050 70060 70070 70080                                  |       |
| Human             | TTATATCTTGAAGTTTACCTGAGAATTTTTGGTTTTGGACTAGACTACACGTTG-GTTTCTATTCTAAAAATTTTGGTG  | 56016 |
| Coquerel'sSifaka  | CTGTTGCCTAGA-----CT--AGAGTGCCATGGCATCAGCCTAG--CTCACAGCA-----ACCTCAAACCTCTGGGCT   | 47138 |
| Ma'sNightMonkey   | TTATAACTTAAAGTTTACCTGAAAATTTTGT--TTTTGGACTGGAGTACACATCA-GTTTCTATTCTAAAAATTTTAGTC | 51204 |
| VervetAGM         | TAATATCTTGAAGTTTACCTGAGAATTTTTGATTTTGGACTGGACTACACATCG-ATTTCTATTCTAAAAATTTTGGTA  | 57809 |
| Gorilla           | TTATATCTTGAAGTTTACCTGAGAATTTTTGGTTTTGGACTAGACTACACGTCAGTTTCTTTCCAAAAATTTTGGTG    | 56543 |
| GrabEatingMacaque | TAATATCTTGAAGTTTACCTGAGAATTTTTGGTTTTGGACTGGACTACACATCG-ATTTCTAATCTAAAAATTTTGGTG  | 57012 |
| Macaque           | TAATATCTTGAAGTTTACCTGAGAATTTTTGGTTTTGGACTGGACTACACATCG-ATTTCTAATCTAAAAATTTTGGTG  | 57848 |
| PigTailedMacaque  | TAATATCTTGAAGTTTACCTGAGAATTTTTGGTTTTGGACTGGACTACACATCG-ATTTCTATTCTAAAAATTTTGGTG  | 56734 |
| Bonobo            | TTATATCTTGAAGTTTACCTGAGAATTTTTGGTTTTGGACTAGACTACACGTTG-GTTTCTATTCTAAAAATTTTGGTG  | 55114 |
| OliveBaboon       | TAATATCTTGAAGTTTACCTGAGAATTTTTGGTTTTGGACTGGACTACACATCG-ATTTCTATTCTAAAAATTTTGGTA  | 56609 |
| Orangutan         | TTGTATCTTGAAGTTTACCTGAGAATTTTTGGTTTTGGACTAGACTACACGTTG-GTTTCTATTCTAAAAATTTTGGTG  | 56975 |

Tuesday, May 03, 2022 06:16 PM

| Majority          | TCAGAAGTTAAGTGTAGTATGAAAAATGTATTTTCTGAACGTTCCCTATTTTAAGATTGTATTAGAAATAATAAGCTTTAT |       |
|-------------------|-----------------------------------------------------------------------------------|-------|
|                   | 70090 70100 70110 70120 70130 70140 70150 70160                                   |       |
| Human             | TCAGAAGTTAAGTGTAGTATGAAAAATGTATTTTCTGAATGTTCCCTATTTTAAGATTGTATTAGAAATAATAAGCTTTAT | 56096 |
| Coquerel'sSifaka  | CCAGCAATCC-----TACTGCCTTAGCCTCCC-----AA-----GTAGCTGGGACTACAGGCAT---               | 47187 |
| Ma'sNightMonkey   | TCAGAAGTTTGTAGTGTAGTATGAAAAATTTATATCTAATGTCTCCTGTTTAAAGATTGTATTAGAAATAATAAGCTTTCT | 51284 |
| VervetAGM         | TCAGAAGTTAAGTGTAGTATGAAAAATGTATTTTCTGCACGTTCCCTATTTTAAGATTGTATTAGAAATAATAAGCTTTAT | 57889 |
| Gorilla           | TCAGAAGTTAAGTGTAGTATGAAAAATGTATTTTCTGAATGTTCCCTATTTTAAGATTGTATTAGAAATAATAAGCTTTAT | 56623 |
| GrabEatingMacaque | TCAGAAGTTAAGTGTAGTATGAAAAATGTATTTTCTGCACGTTCCCTATTTTAAGATTGTATTAGAAATAATAAGCTTTAT | 57092 |
| Macaque           | TCAGAAGTTAAGTGTAGTATGAAAAATGTATTTTCTGCACGTTCCCTATTTTAAGATTGTATTAGAAATAATAAGCTTTAT | 57928 |
| PigTailedMacaque  | TCAGAAGTTAAGTGTAGTATGAAAAATGTATTTTCTGCACGTTCCCTATTTTAAGATTGTATTAGAAATAATAAGCTTTAT | 56814 |
| Bonobo            | TCAGAAGTTAAGTGTAGTATGAAAAATGTATTTTCTGAATGTTCCCTATTTTAAGATTGTATTAGAAATAATAAGCTTTAT | 55194 |
| OliveBaboon       | TCAGAAGTTAAGTGTAGTATGAAAAATGTATTTTCTGCACATAC--ATTT-----ATTAGAAATAATAAGCTTT--      | 56676 |
| Orangutan         | TCAGAAGTTAAGTGTAGTATGAAAAATGTATTTTCTGAATGTTCCCTATTTTAAGATTATATTAGAAATAATAAGCTTTAT | 57055 |

| Majority          | GGGAGTTCTTTTGGATAAATTCAGTAACCCCTTGTTGAGATTTACAATGTAACCTGTTTTATGGAGTGATTAATGTTAAAG |       |
|-------------------|-----------------------------------------------------------------------------------|-------|
|                   | 70170 70180 70190 70200 70210 70220 70230 70240                                   |       |
| Human             | GGGAGTTCTTTTGGATAAATTCAGTAACCCCTTGTTGAGATTTACAACGTACCTGTTTTATGGAGTGATTAATGTTAAAG  | 56176 |
| Coquerel'sSifaka  | -----GCGCCACCATG--CCCGGCTAATTT---TTTAT-ATATATATATATT-----T-----                   | 47229 |
| Ma'sNightMonkey   | GGGAGTTATTTTGGATAAATTTAGTAACCCCTCGTTGAGATTTATGATGTATCTGTTATATGGAGTGATTA-----AG    | 51358 |
| VervetAGM         | GGGAGTTCTTTTGGATAAATTCAGTAACCCCTTGTTGAGATTTACAATGTAACCTGTTTTATGGAGTGATTAATGTTAAAG | 57969 |
| Gorilla           | GGGAGTTCTTTTGGATAAATTCAGTAACCCCTTGTTGAGATTTACAATGTACCTGTTTTATGGAGTGATTAATGTTAAAG  | 56703 |
| GrabEatingMacaque | GGGAATTCTTTTGGATAAATTCAGTAACCCCTTGTTGAGATTTACAACGTCACTGTTTTTGGAGTGATTAATGTTAAAG   | 57172 |
| Macaque           | GGGAATTCTTTTGGATAAATTCAGTAACCCCTTGTTGAGATTTACAACGTCACTGTTTTTGGAGTGATTAATGTTAAAG   | 58008 |
| PigTailedMacaque  | GGGAATTCTTTTGGATAAATTCAGTAACCCCTTGTTGAGATTTACAACGTCACTGTTTTTGGAGTGATTTATGTTAAAG   | 56894 |
| Bonobo            | GGGAGTTCTTTTGGATAAATTCAGTAACCCCTTGTTGAGATTTACAATGTACCTGTTTTATGGAGTGATTAATGTTAAAG  | 55274 |
| OliveBaboon       | ----ATTCTTTTGGATAAATTCAGTAACCCCTTGTTGAGATTTACAATGTAACCTGTTTTATGGAGTGATTAATGTTAAAG | 56752 |
| Orangutan         | GGGAGTTCTTTTGGATAAATTCAGTAACCCCTTGTTGAGATTTACAATGTACCTGTTTTATGGAGTGATTAATGTTACAG  | 57135 |

| Majority          | TTTTATTGTTCTCTAAATTTCTGTTTAAAAACATTTTCTGATGATACATGTGTCTGTAAAACCTACATCTTGTT-TTTTGAG  |       |
|-------------------|-------------------------------------------------------------------------------------|-------|
|                   | 70250 70260 70270 70280 70290 70300 70310 70320                                     |       |
| Human             | TTGTATT---CTCTAAATTTCTGTTTAAAAACATTTTCTGATGGTACATGTATTTATAAAAACCTACATCTTGTTCTTTTGAG | 56253 |
| Coquerel'sSifaka  | TTTTTTT----TTTTAATTC-----AG-CATATTATGGTAGTACAGATGTT-----T-----                      | 47272 |
| Ma'sNightMonkey   | TGTTATT---CTCTAAATTTCTGTTTAAAAACATTTTTTGGAGTATAGAGGTGTCTGTAAAACCTATCTTGTTCTTTTGAG   | 51435 |
| VervetAGM         | TTTTATTGTTCTCTAAATTTCTGTTTAAAAACATTTTCTGATGATACATGTGTCTGTAAAACCTACATCTTGTT-TTTTGAG  | 58048 |
| Gorilla           | TTTTATTGTTCTCTAAATTTCTGTTTAAAAACATTTTCTGATGGTACATGTGTCTATAAAAACCTACATCTTGTTCTTTTGAG | 56783 |
| GrabEatingMacaque | TTTTATTGTTCTCTAGATTTCTGTTTAAAAACATTTTCTGATGATACATGTGTCTGTAAAACCTACATCTTGTT-TTTTGAG  | 57251 |
| Macaque           | TTTTATTGTTCTCTAGATTTCTGTTTAAAAACATTTTCTGATGATACATGTGTCTGTAAAACCTACATCTTGTT-TTTTGAG  | 58087 |
| PigTailedMacaque  | TTTTATTGTTCTCTAGATTTCTGTTTAAAAACATTTTCTGATGATACATGTGTCTGTAAAACCTACATCTTGTT-TTTTGAG  | 56973 |
| Bonobo            | TTTTATTGTTCTCTAAATTTCTGTTTAAAAACATTTTCTGATGGTACATGTGTTTCTAAAACCTACATCATGTTCTTTTGAG  | 55354 |
| OliveBaboon       | TTTTTTTGTCTCTAGATTTCTGTTTAAAAACATTTTCTGATGATACATGTGTCTGTAAAACCTACATCTTGTT-TTTTGAG   | 56831 |
| Orangutan         | TTTTATTGTTTCCAAATTTCTGTTTAAAAACATTTTCTGATGGTATATGTGTCTGTAAAACCTACATCTTGTTCTTTTGAG   | 57215 |

Tuesday, May 03, 2022 06:16 PM

|                   |                                                                                   |       |
|-------------------|-----------------------------------------------------------------------------------|-------|
| Majority          | AATAAATTACATATCGTATCTTTG--CTTGTTCAACATTGATCCCAAAGCCTGGATAATTTTTTTGAATGAAATACTAGT  |       |
|                   | 70330 70340 70350 70360 70370 70380 70390 70400                                   |       |
| Human             | AATAAATTACATATCATACTTTG--CATGTTCAACATTGATCCCAAAGCCTGGATAATTTTTTTGAATGAAATACTAGT   | 56331 |
| Coquerel'sSifaka  | -A--GGTTACGTATGTTGCCCTT-----C---CCACCCTCCCCCAAGTCCG---AGTTTC-----AAATAT--GT       | 47329 |
| Ma'sNightMonkey   | AATGAATTACATATCTATCTTTTCCCTGTTTAAACATTGATCCCAAAGCCTGGATACTTTTTTTGAACGAAATACTAGT   | 51515 |
| VervetAGM         | AATAAATTATATATCGTATCTTTG--CTTGTTCAACATTGATTC--AAAGCCTGGATAATTTTTTTGAATGAAATACTAGT | 58125 |
| Gorilla           | AATAAATTACATATCATACTTTG--CTTGTTCAACATTGATCCCAAAGCCTGGATAATTTTTTTGACTGAAATACTAGT   | 56861 |
| GrabEatingMacaque | AATAAATTATATATCGTATCTTTG--CTTGTTCAACATTGATTC--AAAGCCTGGATAATTTTTTTGAATGAAATACTAGT | 57328 |
| Macaque           | AATAAATTATATATCGTATCTTTG--CTTGTTCAACATTGATTC--AAAGCCTGGATAATTTTTTTGAATGAAATACTAGT | 58164 |
| PigTailedMacaque  | AATAAATTATATATCGTATCTTTG--CTTGTTCAACATTGATTC--AAAGCCTGGATAATTTTTTTGAATGAAATACTAGT | 57050 |
| Bonobo            | AATAAATTACATATCATACTTTG--CTTGTTCAACATTGATCCCAAAGCCTGGATAATTTTTTTGAATGAAATACTAGT   | 55432 |
| OliveBaboon       | AATAAATTATATATCGTGTCTTTG--CTTGTTCAACATTGATTC--AAAGCCTGGATAATTTTTTTGAATGAAATACTAGT | 56908 |
| Orangutan         | AATAAATTACATATCATACTTTG--CTTGTTCAACATTGATCCCAAAGCCTGGATAATTTTTTTGAATGAAATACTAGT   | 57293 |

|                   |                                                                               |       |
|-------------------|-------------------------------------------------------------------------------|-------|
| Majority          | AGAATATTTGATTTATTAACAGGTAGTACCTGGCTCATGG-----CAGGTGCTTAAAAATATTTGTTGAGTGG     |       |
|                   | 70410 70420 70430 70440 70450 70460 70470 70480                               |       |
| Human             | AGAATATTTGATTTATTAACAGGTAGTACCTGGCTCATGG-----CAGGTGCTTAAAAATATCTGTTGAGGGG     | 56400 |
| Coquerel'sSifaka  | GCATTCTTTG-----GGTGGTGCACATTGCACAC-----TTTGTGTATGCATATACCCGT-----             | 47379 |
| Ma'sNightMonkey   | AGAATATTTGACATATTAACAGCTAATACCTGGCTCATATACTCATAATCCAGGTGCTTAAAAATAATGTCGAGTGG | 51595 |
| VervetAGM         | AGAATATTTGATTTATTAACAGGTAGTACCTGGCTCATGG-----CAGGTGCTTAAAAATATTTGTTGAGTGG     | 58194 |
| Gorilla           | AGAATATTTGATTTATTAACAGGTAGTACCTGGCTCATGG-----CAGGTGCTTAAAAATATTTGTTGAGTGG     | 56930 |
| GrabEatingMacaque | AGAATATTTGATTTATTAAGCAGGTAGTACCTGGCTCATGG-----CAGGTGCTTAAAAATATTTGTTGGGTGG    | 57397 |
| Macaque           | AGAATATTTGATTTATTAAGCAGGTAGTACCTGGCTCATGG-----CAGGTGCTTAAAAATATTTGTTGGGTGG    | 58233 |
| PigTailedMacaque  | AGAATATTTGATTTATTAACAGGTAGTACCTGGCTCATGG-----CAGGTGCTTAAAAATATTTGTTGGGTGG     | 57119 |
| Bonobo            | AGAATATTTGATTTATTAACAGGTAGTACCTGGCTCATGG-----CAGGTGCTTAAAAATATTTGTTGAGTGG     | 55501 |
| OliveBaboon       | AGAATATTTGATTTATTAACAGGTAGTACCTGGCTCATGG-----CAGGTGCTTAAAAATATTTGTTGGGTGG     | 56977 |
| Orangutan         | AGAATATTTGATTTATTAACAGGTAGTACCTGGCTCATGG-----CAGGTGCTTAAAAATATTTGTTGAGTGG     | 57362 |

|                   |                                                                                 |       |
|-------------------|---------------------------------------------------------------------------------|-------|
| Majority          | CCATTAAATTTGTTTAACTGTGTAAGTTCTAGGAACAAAGTGAAGTAGTAGTGT---AACAGGTAGCAAAGTATGTGA  |       |
|                   | 70490 70500 70510 70520 70530 70540 70550 70560                                 |       |
| Human             | CCATTAAATTTGTTTAACTGTGTAAGTTCTAGGAACAAAGTGAAGTAGTAGTGT---AACAGGTAGCAAAGTATGTGA  | 56477 |
| Coquerel'sSifaka  | -C-----CCTCCCCAGCCCCGCCCAACAT---CCAATAG-----ATGTTA                              | 47417 |
| Ma'sNightMonkey   | GCATTAAATTTGTTTAACTGTGTAAGTTCTAGGAACAAAGTGAAGTAGTAGTGT---AACAGGTAGCAAATATATGA   | 51672 |
| VervetAGM         | CCATTAAATGTTGTTTAACTGTGTAAGTTCTAGGAACAAAGTGAAGTAGTAGTGT---AACAGGTAGCAAAGTATGTGA | 58271 |
| Gorilla           | CCATTAAATTTGTTTAACTGTGTAAGTTCTAGGAACAAAGTGAAGTAGTAGTGT---AACAGGTAGCAAAGTATGTGA  | 57007 |
| GrabEatingMacaque | CCATTAAATGTTGTTTAACTGTGTAAGTTCTAGGAACAAAGTGAAGTAGTAGTGT---AACAGGTAGCAAAGTATGTGA | 57474 |
| Macaque           | CCATTAAATGTTGTTTAACTGTGTAAGTTCTAGGAACAAAGTGAAGTAGTAGTGT---AACAGGTAGCAAAGTATGTGA | 58310 |
| PigTailedMacaque  | CCATTAAATGTTGTTTAACTGTGTAAGTTCTAGGAACAAAGTGAAGTAGTAGTGT---AACAGGTAGCAAAGTATGTGA | 57196 |
| Bonobo            | CCATTAAATTTGTTTAACTGTGTAAGTTCTAGGAACAAAGTGAAGTAGTAGTGT---AACAGGTAGCAAAGTATGTGA  | 55578 |
| OliveBaboon       | CCATTAAATGTTGTTTAACTGTGTAAGTTCTAGGAACAAAGTGAAGTAGTAGTGT---AACAGGTAGCAAAGTATGTGA | 57054 |
| Orangutan         | CCATTAAATTTGTTTAACTGTGTAAGTTCTAAGAACAAAGTGAAGTAGTAGTGTGTAACAGGTAGCAAAGTATGTGA   | 57442 |

Tuesday, May 03, 2022 06:16 PM

| Majority          | CAATAATGGGTATGTTTCTAAACTACATAATATTAATTTCCAGCGTGCTCAAGCAGTTCTTCAAGCTGTGACAGCTGTCC |       |
|-------------------|----------------------------------------------------------------------------------|-------|
|                   | 70570 70580 70590 70600 70610 70620 70630 70640                                  |       |
| Human             | CAATAATGGGTATGTTTCTAAACTACATAATCTTAATTTCCAGCGTGCTCAGGCAGTTCTTCAAGCTGTGACAGCTGTCC | 56557 |
| Coquerel'sSifaka  | TTCTCATATGTGCACTTATGTGTGTATA-TATATATTTTGTAGT-TGTCAGCTAATTTCT-----T-----TCT       | 47480 |
| Ma'sNightMonkey   | CATTAATAGATGTGTTTCTAAACTACTTAACTTAAATTTCCAGCGTGCTCAAGCAGTTCTTCAAGCTGTGACAGCTGTCC | 51752 |
| VervetAGM         | CAATAGTGGGTATGTTTCTAAACTACATAATATTAATTTCCAGCGTGCTCAAGCAGTTCTTCAAGCTGTGACAGCTGTCC | 58351 |
| Gorilla           | CAATAATGGGTATGTTTCTAAACTACATAATCTTAATTTCCAGCGTGCTCAAGCAGTTCTTCAAGCTGTGACAGCTGTCC | 57087 |
| GrabEatingMacaque | CGATAGTGGGTATGTTTCTAAACTACATAATATTAATTTCCAGCGTGCTCAAGCAGTTCTTCAAGCTGTGACAGCTGTCC | 57554 |
| Macaque           | CGATAGTGGGTATGTTTCTAAACTACATAATATTAATTTCCAGCGTGCTCAAGCAGTTCTTCAAGCTGTGACAGCTGTCC | 58390 |
| PigTailedMacaque  | CGATAGTGGGTATGTTTCTAAACTACATAATATTAATTTCCAGCGTGCTCAAGCAGTTCTTCAAGCTGTGACAGCTGTCC | 57276 |
| Bonobo            | CAATAATGGGTATGTTTCTAAACTACATAATCTTAATTTCCAGCGTGCTCAAGCAGTTCTTCAAGCTGTGACAGCTGTCC | 55658 |
| OliveBaboon       | CAATAGTGGGTATGTTTCTAAACTACATAATATTAATTTCCAGCGTGCTCAAGCAGTTCTTCAAGCTGTGACAGCTGTCC | 57134 |
| Orangutan         | CAATAATGGGTATGTTTCTAAACTACATAATCTTAATTTCCAGCGTGCTCAAGCAGTTCTTCAAGCTGTGACAGCTGTCC | 57522 |

| Majority          | AGACAGCAAATACTCCTCTTAGTGGCACCACAGTTAGCGAGAGTGCAAGTGACTCCAGCCAGAGTCCAGTACTTAGAATA |       |
|-------------------|----------------------------------------------------------------------------------|-------|
|                   | 70650 70660 70670 70680 70690 70700 70710 70720                                  |       |
| Human             | AGACAGCAAATACTCCTCTTAGTGGCACCACAGTTAGCGAGAGTGCAAGTGACTCCAGCCAGAGTCCAGTACTTAGAATA | 56637 |
| Coquerel'sSifaka  | --A-----TTTTTTTAGTGGAGACGGGGT---C-----TCGCTCTAGCTCAG-----                        | 47517 |
| Ma'sNightMonkey   | AGACAGCAAATACTCCTCTTAGTGGCACCACAGTTAGCGAGAGTGCAAGTGACTCCAGCCAGAGTCCAGTACTTAGAATA | 51832 |
| VervetAGM         | AGACAGCAAATACTCCTCTTAGTGGCACCACAGTTAGCGAGAGTGCAAGTGACTCCAGCCAGAGTCCAGTACTTAGAATA | 58431 |
| Gorilla           | AGACAGCAAATACTCCTCTTAGTGGCACCACAGTTAGCGAGAGTGCAAGTGACTCCAGCCAGAGTCCAGTACTTAGAATA | 57167 |
| GrabEatingMacaque | AGACAGCAAATACTCCTCTTAGTGGCACCACAGTTAGCGAGAGTGCAAGTGACTCCAGCCAGAGTCCAGTACTTAGAATA | 57634 |
| Macaque           | AGACAGCAAATACTCCTCTTAGTGGCACCACAGTTAGCGAGAGTGCAAGTGACTCCAGCCAGAGTCCAGTACTTAGAATA | 58470 |
| PigTailedMacaque  | AGACAGCAAATACTCCTCTTAGTGGCACCACAGTTAGCGAGAGTGCAAGTGACTCCAGCCAGAGTCCAGTACTTAGAATA | 57356 |
| Bonobo            | AGACAGCAAATACTCCTCTTAGTGGCACCACAGTTAGCGAGAGTGCAAGTGACTCCAGCCAGAGTCCAGTACTTAGAATA | 55738 |
| OliveBaboon       | AGACAGCAAATACTCCTCTTAGTGGCACCACAGTTAGCGAGAGTGCAAGTGACTCCAGCCAGAGTCCAGTACTTAGAATA | 57214 |
| Orangutan         | AGACAGCAAATACTCCTCTTAGTGGCACCACAGTTAGCGAGAGTGCAAGTGACTCCAGCCAGAGTCCAGTACTTAGAATA | 57602 |

| Majority          | ATTATTGACAACATGTACTACCCTGTAACACTTGATGTTCTTCCACCAAGTAAGTTTAACTGCATAATTACCTATAAATT   |       |
|-------------------|------------------------------------------------------------------------------------|-------|
|                   | 70730 70740 70750 70760 70770 70780 70790 70800                                    |       |
| Human             | ATTATTGACAACATGTACTACCCTGTAACACTTGATGTTCTTCCACCAAGTAAGTTTAACTGCATAATTACCTATAAATT   | 56717 |
| Coquerel'sSifaka  | -----G-----CTGGTCTCAAACCTCTGA-GTT-----CAAACAA--TCCACCCGCCTCAG--CCTCCCA---          | 47567 |
| Ma'sNightMonkey   | ATTATTGACAACATGTACTACCCTGTAACACTTGATGTTCTTCCACCAAGTAAGTTTAACTGCATAATTACCTATAA---   | 51909 |
| VervetAGM         | ATTATTGACAACATGTACTACCCTGTAACACTTGATGTTCTTCCACCAAGTAAGTTTAACTGCATAATTACCTATAAATT   | 58511 |
| Gorilla           | ATTATTGACAACATGTACTACCCTGTAACACTTGATGTTCTTCCACCAAGTAAGTTTAACTGCATAATTACCTATAAATT   | 57247 |
| GrabEatingMacaque | ATTATTGACAACATGTACTACCCTGTAACACTTGATGTTCTTCCACCAAGTAAGTTTAACTTTCATAATTACCTATAAATT  | 57714 |
| Macaque           | ATTATTGACAACATGTACTACCCTGTAACACTTGATGTTCTTCCACCAAGTAAGTTTAACTTTCATAATTACCTATAAATT  | 58550 |
| PigTailedMacaque  | ATTATTGACAACATGTACTACCCTGTAACACTTGATGTTCTTCCACCAAGTAAGTTTAACTTTCATAATTACCTATAAAGTT | 57436 |
| Bonobo            | ATTATTGACAACATGTACTACCCTGTAACACTTGATGTTCTTCCACCAAGTAAGTTTAACTGCATAATTACCTATAAATT   | 55818 |
| OliveBaboon       | ATTATTGACAACATGTACTACCCTGTAACACTTGATGTTCTTCCACCAAGTAAGTTTAGTCTGCATAATTACCTATAAATT  | 57294 |
| Orangutan         | ATTATTGACAACATGTACTACCCTGTAACACTTGATGTTCTTCCACCAAGTAAGTTTAACTGCATAAT-ACCTATAAATT   | 57681 |

Tuesday, May 03, 2022 06:16 PM

| Majority          | AGAGAAATAATAATATAGTAAATAAGTAATGTTTTGTTTTTAATGTTTTAACAGATATTTCTAAGTTGGTGCTGTTTT  |       |       |       |       |       |       |       |       |
|-------------------|---------------------------------------------------------------------------------|-------|-------|-------|-------|-------|-------|-------|-------|
|                   | 70810                                                                           | 70820 | 70830 | 70840 | 70850 | 70860 | 70870 | 70880 |       |
| Human             | AGAGAAATAATAATATAGTAAATAAGTAATGTTTTGATTTTAATGTTTTAACAGATATTTCTAAGTTGGTGCTGTATT  |       |       |       |       |       |       |       | 56797 |
| Coquerel'sSifaka  | -GAGTGCTAGGATTACAG-GAGTGAGCAA-----CCACACCCGGCC---TATTTTTACATTT--TAAATCTT        |       |       |       |       |       |       |       | 47629 |
| Ma'sNightMonkey   | -GATAAATAATAATATACTCAGTAAATAATGTTTTGATTTTAATGTTTTAACAGATATTTCTAAATTTGGTGCTGTATT |       |       |       |       |       |       |       | 51988 |
| VervetAGM         | AGAGAAATAATAATATAGTAAATAAGTAACGTTTTATTTTTAATGTTTTAACAGATATTTCTAAGTTGGTGCTGTTTT  |       |       |       |       |       |       |       | 58591 |
| Gorilla           | AGAGAAATAATAATATAGTAAATAAGTAATGTTTTGATTTTAATGTTTTAACAGATATTTCTAAGTTGGTGCTGTATT  |       |       |       |       |       |       |       | 57327 |
| GrabEatingMacaque | AGAGAAATAATAATATAGTAAATAAGTAACGTTTTATTTTTAATGTTTTAACAGATATTTCTAAGTTGGTGCTGTTTT  |       |       |       |       |       |       |       | 57794 |
| Macaque           | AGAGAAATAATAATATAGTAAATAAGTAACGTTTTATTTTTAATGTTTTAACAGATATTTCTAAGTTGGTGCTGTTTT  |       |       |       |       |       |       |       | 58630 |
| PigTailedMacaque  | AGAGAAATAATAATATAGTAAATAAGTAATGTTTTATTTTTAATGTTTTAACAGATATTTCTAAGTTGGTGCTGTTTT  |       |       |       |       |       |       |       | 57516 |
| Bonobo            | AGAGAAATAATAATATAGTAAATAAGTAATGTTTTGATTTTAATGTTTTAACAGATATTTCTAAGTTGGTGCTGTATT  |       |       |       |       |       |       |       | 55898 |
| OliveBaboon       | AGAGAAATAATAATATAGTAAATAAGTAACGTTTTATTTTTAATGTTTTAACAGATATTTCTAAGTTGGTGCTGTTTT  |       |       |       |       |       |       |       | 57374 |
| Orangutan         | CGAGAAATAATAATATAGTAAATAAATAATGTTTTGATTTTAATGTTTTAACAGATATTTCTAAGTTGGTGCTGTATT  |       |       |       |       |       |       |       | 57761 |

| Majority          | GAAGATAATCACATTTACAAAAAATAACCAGTTTCAAGCTTTGCTCCAGTATGGTGATCCAGTAAATGCTCAACAAGCAA |       |       |       |       |       |       |       |       |
|-------------------|----------------------------------------------------------------------------------|-------|-------|-------|-------|-------|-------|-------|-------|
|                   | 70890                                                                            | 70900 | 70910 | 70920 | 70930 | 70940 | 70950 | 70960 |       |
| Human             | GAAGATAATCACATTTACAAAAAATAACCAGTTTCAAGCTTTGCTCCAGTATGGTGATCCAGTAAATGCTCAACAAGCAA |       |       |       |       |       |       |       | 56877 |
| Coquerel'sSifaka  | GTAAAT-----CAAGATGTATCTTG-----CAGTG-GTTGATCCATCAGA-GTTTAATTGGCAA                 |       |       |       |       |       |       |       | 47681 |
| Ma'sNightMonkey   | GAAGATAATCACATTTACAAAAAATAACCAGTTTCAAGCTTTGCTCCAGTATGGTGATCCAGTAAATGCTCAACAAGCAA |       |       |       |       |       |       |       | 52068 |
| VervetAGM         | GAAGATAATCACATTTACAAAAACAACCAGTTTCAAGCTTTGCTCCAGTATGGTGATCCAGTAAATGCTCAACAAGCAA  |       |       |       |       |       |       |       | 58671 |
| Gorilla           | GAAGATAATCACATTTACAAAAAATAACCAGTTTCAAGCTTTGCTCCAGTATGGTGATCCAGTAAATGCTCAACAAGCAA |       |       |       |       |       |       |       | 57407 |
| GrabEatingMacaque | GAAGATAATCACATTTACAAAAACAACCAGTTTCAAGCTTTGCTCCAGTATGGTGATCCAGTAAATGCTCAACAAGCAA  |       |       |       |       |       |       |       | 57874 |
| Macaque           | GAAGATAATCACATTTACAAAAACAACCAGTTTCAAGCTTTGCTCCAGTATGGTGATCCAGTAAATGCTCAACAAGCAA  |       |       |       |       |       |       |       | 58710 |
| PigTailedMacaque  | GAAGATAATCACATTTACAAAAACAACCAGTTTCAAGCTTTGCTCCAGTATGGTGATCCAGTAAATGCTCAACAAGCAA  |       |       |       |       |       |       |       | 57596 |
| Bonobo            | GAAGATAATCACATTTACAAAAAATAACCAGTTTCAAGCTTTGCTCCAGTATGGTGATCCAGTAAATGCTCAACAAGCAA |       |       |       |       |       |       |       | 55978 |
| OliveBaboon       | GAAGATAATCACATTTACAAAAACAACCAGTTTCAAGCTTTGCTCCAGTATGGTGATCCAGTAAATGCTCAACAAGCAA  |       |       |       |       |       |       |       | 57454 |
| Orangutan         | GAAGATAATCACATTTACAAAAAATAACCAGTTTCAAGCTTTGCTCCAGTATGGTGATCCAGTAAATGCTCAACAGGCAA |       |       |       |       |       |       |       | 57841 |

| Majority          | AACTAGTAAGTCTTTCTTTTGAGATGGTGATTTTTTTTAAATTGAAATGTATATGTAAAAATATATATATA-----        |       |       |       |       |       |       |       |       |
|-------------------|-------------------------------------------------------------------------------------|-------|-------|-------|-------|-------|-------|-------|-------|
|                   | 70970                                                                               | 70980 | 70990 | 71000 | 71010 | 71020 | 71030 | 71040 |       |
| Human             | AACTAGTAAGTCTTTCTTTTGAGATGGTGATTTTTTTTAAATTGAAATGTATATGTAGAAAAATATATATATATATGTATGTA |       |       |       |       |       |       |       | 56957 |
| Coquerel'sSifaka  | ---CA-----TCTTATTAGT-----C-----A-----CACATAAAAT-----                                |       |       |       |       |       |       |       | 47705 |
| Ma'sNightMonkey   | AACTAGTAAGTCTTTCTTTTGAGCTACTGATGTTTTTTCATTGAGATGTATATGTAAAAAT-ATATATGTG----TATATA   |       |       |       |       |       |       |       | 52143 |
| VervetAGM         | AACTAGTAAGTCTTTCTTTTGAGATGGTGATTTTTTTTAAATTGAAATGTATATGTAAAAA-ATATATATA-----        |       |       |       |       |       |       |       | 58740 |
| Gorilla           | AACTAGTAAGTCTTTCTTTTGAGATGGTGATTTTTTTT-ATTGAAGTGTATATATAGAAAAATATATATATATATGTATGTA  |       |       |       |       |       |       |       | 57486 |
| GrabEatingMacaque | AACTAGTAAGTCTTTCTTTTGAGATAGTGATTTTTTTTAAATTGAAATGTATATGTAAAAATATATACATA-----        |       |       |       |       |       |       |       | 57944 |
| Macaque           | AACTAGTAAGTCTTTCTTTTGAGATAGTGATTTTTTTTAAATTGAAATGTATATGTAAAAATATATACATA-----        |       |       |       |       |       |       |       | 58780 |
| PigTailedMacaque  | AACTAGTAAGTCTTTCTTTTGAGATAGTGATTTTTTTTAAATTGAAATGTATATGTAAAAATATATACATA-----        |       |       |       |       |       |       |       | 57666 |
| Bonobo            | AACTAGTAAGTCTTTCTTTTGAGATGGTGATTTTTTTTAAATTGAAATGTATATGTAGAAAAATATATATATATGTATGTA   |       |       |       |       |       |       |       | 56058 |
| OliveBaboon       | AACTAGTAAGTCTTTCTTTTGAGATAGTGATTTTTTTT-AAATTGAAATGTATATGTAAAAATATATATATA-----       |       |       |       |       |       |       |       | 57523 |
| Orangutan         | AACTAGTAAGTCTTTCTTTTGAGATGGTGATTTTTTTT-ATTGAAATGTATATGTAGAAAAATATATATA--TGTATGTA    |       |       |       |       |       |       |       | 57918 |



Tuesday, May 03, 2022 06:16 PM

| Majority          | TACTTAATGATATCTTGCAGTAT---AGATAGTAGAAAATTGATAGCATTAAAATAATATTAAGAAACCTTAATATTTGTC |       |
|-------------------|-----------------------------------------------------------------------------------|-------|
|                   | 71050 71060 71070 71080 71090 71100 71110 71120                                   |       |
| Human             | TACTTAATGATATCTTGTAGCATTACAGATAGTAGAAAATTGATGGCATTAA-----TATTAAGAAACCTTAATATTTGTC | 57032 |
| Coquerel'sSifaka  | --AATAGCG-CATTTTACAATT---A-ATCGTA-TATTCGATACCATAAAAATGTATGGGAAATATCCTTCATATTA--T  | 47774 |
| Ma'sNightMonkey   | TACTTAATGATACCTTGTAGCATTATAGATAGTAGTAATTGATGGCATTAAAA---TATTAAGAAACCTTAATATTTGTC  | 52220 |
| VervetAGM         | TACTTAATGATATCTTGCAGTA---AGATAGTAGAACTGATAGCATTAAAATAATATTAAGAAACCTTAATATTTGTC    | 58816 |
| Gorilla           | TACTTAATGATATCTTGTAGCATTACAGATAGTAGAAAATTGATGGCATTAA-----TATTAAGAAACCTTAATATTTATC | 57561 |
| GrabEatingMacaque | TACTTAATGATATCTTGCAGTAT---AGATAGTAGAAAATTGATAGCATTAAAATAATATTAAGAAACCTTAATATTTGTC | 58021 |
| Macaque           | TACTTAATGATATCTTGCAGTAT---AGATAGTAGAAAATTGATAGCATTAAAATAATATTAAGAAACCTTAATATTTGTC | 58857 |
| PigTailedMacaque  | TACTTAATGATATCTTGCAGTAT---AGATAGTAGAAAATTGATAGCATTAAAATAATATTAAGAAACCTTAATATTTGTC | 57743 |
| Bonobo            | TACTTAATGATATCTTGTAGCATTACAGATAGTAGAAAATTGATGGCATTAA-----TATTAAGAAACCTTAATATTTGTC | 56133 |
| OliveBaboon       | TACTTAATGATATCTTGCAGTAT---AGATAGTAGAAAATTGATAGCATTAAAATAATATTAAGAAACCTTAATATTTGTC | 57600 |
| Orangutan         | TACTTAATGATATCTTGTAGCATTATAGATAGTAGAAAATTGATGGCATTAAAATAACATTAAGAAACCTTAATATTTGTC | 57998 |

| Majority          | ATAAAAAAGAAATATTTATTTTTAGGAAAATCATAGTTGTAGTTAACCATAAATGTAGGCTTCTATTATTTTTACTTTTTTTT |       |
|-------------------|-------------------------------------------------------------------------------------|-------|
|                   | 71130 71140 71150 71160 71170 71180 71190 71200                                     |       |
| Human             | ATAAAGA--AATATTTATTTTTAGGAAAATCATAGTTGTAGTTAACCATGATGTGGGTTTCTATTATTTTTACTTTTTTTT   | 57110 |
| Coquerel'sSifaka  | ATCTTAAAG-----TTTTCTGAAAAT---GTTCTGGTTTTGTACAGAGTACACATCAGT-----CTTTGTTC            | 47834 |
| Ma'sNightMonkey   | ATTAATAA--AATGTTTATTTTTAGGAAAATCATAGTTACAGTTAATCATAAATGTAGGCTTCTTTTTTTTTCACGTTTTTTG | 52298 |
| VervetAGM         | ATAAAAAAGAAATACTTATTTTTAGGAAAATCATAGTTGTAGTTAACCATAAATGTAGGCTTCTATTATTTTTGCTTTTTTTT | 58896 |
| Gorilla           | ATAAAGAGAAATATTTATTTTTAGGAAAATCATAGTTGTAGTTAACCATAAATGTGGGTTTCTATTATTTTTACTTTTTTTT  | 57641 |
| GrabEatingMacaque | ATAAAAAAGAAATACTTATTTTTAGGAAAATCATAGTTGTAGTTAACCATAAATGTAGGCTTCTATTATTTTTACTTTTTTTT | 58101 |
| Macaque           | ATAAAAAAGAAAT---ATTTTTAGGAAAATCATAGTTGTAGTTAACCATAAATGTAGGCTTCTATTATTTTTACTTTTTTTT  | 58933 |
| PigTailedMacaque  | ATAAAAAAGAAATACTTATTTTTAGGAAAATCATAGTTGTAGTTAACCATAAATGTAGGCTTCTATTATTTTTACTTTTTTTT | 57823 |
| Bonobo            | ATAAAGA--GAAATTTATTTTTAGGAAAATCATAGTTGTAGTTAACCATAAATGTGGGTTTCTATTATTTTTACTTTTTTTT  | 56211 |
| OliveBaboon       | ATAAAAAAGAAATACTTATTTTTAGGAAAAT---TTGTAGTTAACCATAAATGTAGGCTTCTATTATTTTTACTTTTTTTT   | 57674 |
| Orangutan         | ATAAAGAGAAATATTTATTTTTAGGAAAATCATAGTTGTAATTAACCATAAATATAGGCTTCTATTATTTTTACTTTTTTTT  | 58078 |

| Majority          | TTTTTTT--TAATTTAAGGACACAAGTTTGTACTCTTAAGAAAAAAGCAGGACTATATTGTGGATGTGCACCTGCATAAG |       |
|-------------------|----------------------------------------------------------------------------------|-------|
|                   | 71210 71220 71230 71240 71250 71260 71270 71280                                  |       |
| Human             | TTTTTTTTTTAATTTAAGGACAAAAGTTTGTACTCTTAAGAAAAAAGCAGGACTATATTGTGAATGTGCACCAGCATAAG | 57190 |
| Coquerel'sSifaka  | TAAA-----AATTTTGGTATCAGAAGTTAATAGTATGAAAAA-----G-ACT-TATT-----TGTATCC---TAAG     | 47891 |
| Ma'sNightMonkey   | TTTT-----AAATTTAAGGACAAAAGTCTGTGCTGTTAAGAAAAAAGCAGGACTACATTGTGGATGCACATCTGCGTAAG | 52373 |
| VervetAGM         | TTTTTTT---AATTAAGGACACAAGTTTGTACTCTTAAGAAAAAAGCAGGACTATGTTGGGGATGTGCACCTGCATAAG  | 58973 |
| Gorilla           | TTTTTT--TTAATTTAAGGACAAAAGTTTGTACTCTTAAGAAAAAAGCAGGACTGTATTGTGAATGTGCACCAGCAGAAG | 57719 |
| GrabEatingMacaque | TTTTTTTT-AAATTTAAGGACACAAGTTTGTACTCTTAAGAAAAAAGCAGGACTATGTTGGGGATGTGCACCTGCATAAA | 58180 |
| Macaque           | TTTTTTTT-AAATTTAAGGACACAAGTTTGTACTCTTAAGAAAAAAGCAGGACTATGTTGGGGATGTGCACCTGCATAAA | 59012 |
| PigTailedMacaque  | TTTTTTTT-TAATTTAAGGACACAAGTTTGTACTCTTAAGAAAAAAGCAGGACTATGTTGGGGATGTGCACCTGCATAAA | 57902 |
| Bonobo            | TTT-----TAATTTAAGGACAAAAGTTTGTACTCTTAAGAAAAAAGCAGGACTATATTGTGAATGTGCACCAGCATAAG  | 56285 |
| OliveBaboon       | TTTTTTTT-TAATTTAAGGACACAAGTTTGTACTCTCAAGAAAAAAGCAGGACTATGTTGGGGATGTGCACCTGCATAAA | 57753 |
| Orangutan         | TTTTTT--TTAATTTAAGGACAAAAGTTTGTACTCTTAAGAAAAAAGCAGGACTATATTGTGGATGTGCACCAGCATAAG | 58156 |

Tuesday, May 03, 2022 06:16 PM

| Majority          | ATTTGAAGTGGCTTTTAGTGGGAATTTCAAAGTAATTAGTTTTCAAGAGAGTTTGGCTGAAATACT-----CAGATGTG  |       |       |       |       |       |       |       |       |
|-------------------|----------------------------------------------------------------------------------|-------|-------|-------|-------|-------|-------|-------|-------|
|                   | 71290                                                                            | 71300 | 71310 | 71320 | 71330 | 71340 | 71350 | 71360 |       |
| Human             | ATTTGAAGTGGCTTTTCTGTTGGGAATTTCAAAGTAATTAGTTTTCAAAGAGTTTGGCTGAAATATA-----CAGATGTG |       |       |       |       |       |       |       | 57264 |
| Coquerel'sSifaka  | ATT-----C--C-----TTT-----                                                        |       |       |       |       |       |       |       | 47899 |
| Ma'sNightMonkey   | ATTTGAAGTGGCTTTTAGTGGGAGTTTCAAAGTAA---TTTCAAGACAGTTTGGCTGAAATACATCAATACAGATGTG   |       |       |       |       |       |       |       | 52449 |
| VervetAGM         | ATTTGAAGTGGCTTTTAGTGGGAATTTCAAAGTAATTAGTTTTCAAGAGAGTTTGGCTGAAATACT-----CAGATGCG  |       |       |       |       |       |       |       | 59047 |
| Gorilla           | ATTTGAAGTGGCTTTTGTGGGAATTTCAAAGTAATTAATTTCAAAGAGTTTGGCTGAAATATA-----CAGATGTG     |       |       |       |       |       |       |       | 57793 |
| GrabEatingMacaque | ATTTGAAGTGGCTTTCAGTGGGAATTTCAAAGTAATTAGTTTTCAAGAGAGTTTGGCTGAAATACT-----CAGATGTG  |       |       |       |       |       |       |       | 58254 |
| Macaque           | ATTTGAAGTGGCTTTCAGTGGGAATTTCAAAGTAATTAGTTTTCAAGAGAGTTTGGCTGAAATACT-----CAGATGTG  |       |       |       |       |       |       |       | 59086 |
| PigTailedMacaque  | ATTTGAAGTGGCTTTTAGTGGGAATTTCAAAGTAATTAGTTTTCAAGAGAGTTTGGCTGAAATACT-----CAGATGTG  |       |       |       |       |       |       |       | 57976 |
| Bonobo            | ATTTGAAGTGGCTTTTCTGTTGGGAATTTCAAAGTAATTAGTTTTCAAAGAGTTTGGCTGAAATATA-----CAGATGTG |       |       |       |       |       |       |       | 56359 |
| OliveBaboon       | ATTTGAAGTGACTTTTAGTGGGAATTTCAAAGTAACTAGTTTTCAAGAGAGTTTGGCTGAAATACT-----CAGATGTG  |       |       |       |       |       |       |       | 57827 |
| Orangutan         | ATTTGAAGTGGCTTTTACTGGGAATTTCAAAGTAATTAGTTTTCAAGAGAGTTTGGCTGAAATACA-----CAGATGTG  |       |       |       |       |       |       |       | 58230 |

| Majority          | GCTCAAATGCATGATAGGCTCTCAGTTTATTTAAAACATATATATCTCT- TAATGCTTTTTTTTT--AAAGGTTTTATG |       |       |       |       |       |       |       |       |
|-------------------|----------------------------------------------------------------------------------|-------|-------|-------|-------|-------|-------|-------|-------|
|                   | 71370                                                                            | 71380 | 71390 | 71400 | 71410 | 71420 | 71430 | 71440 |       |
| Human             | GCTCAAATGCATGATAGGCTCTCAGTTTATTTAAAACATATATATCTCTTTAATGCTTTTTTTTT--AAAGGTTTTATG  |       |       |       |       |       |       |       | 57342 |
| Coquerel'sSifaka  | --TTAAAGATTATATTAG-----AATTAAT--AAGCTTATA-----GGAGGCTTTTG                        |       |       |       |       |       |       |       | 47944 |
| Ma'sNightMonkey   | GCTCAAATGCATGATAGGTTCTCAGTTTATTTAAAACATATATCTCT- TAATGCTTTTTTTAAAAAAGTTTTATG     |       |       |       |       |       |       |       | 52528 |
| VervetAGM         | GCTCAAATGCATGATAGGCTCTCAGTTTATTTAAAATATGATATATCTTTAATGCTTTTTTTA--AAGATTTTATG     |       |       |       |       |       |       |       | 59124 |
| Gorilla           | GCTCAAATGCATGATAGGCTCTCAGTTTATTTAAAACATATATATCTCTTTAATGCTTTTTTTTT--AAAGGTTTTATG  |       |       |       |       |       |       |       | 57872 |
| GrabEatingMacaque | GCTCAAATGCATGATAGGCTCTCAGTTTATTTAAAATATATATT-----TAATGCTTTTTTTTT--AAAGATTTTATG   |       |       |       |       |       |       |       | 58327 |
| Macaque           | GCTCAAATGCATGATAGGCTCTCAGTTTATTTAAAATATATATT-----TAATGCTTTTTTTA--AAAGATTTTATG    |       |       |       |       |       |       |       | 59159 |
| PigTailedMacaque  | GCTCAAATGCATGATAGGCTCTCAGTTTATTTAAAATATATATT-----TAATGCTTTTTTTTT--AAAGATTTTATG   |       |       |       |       |       |       |       | 58049 |
| Bonobo            | GCTCAAATGCATGATAGGCTCTCAGTTTATTTAAAACATATATATCTCTTTAATGCTTTTTTTTT--AAAGGTTTTATG  |       |       |       |       |       |       |       | 56438 |
| OliveBaboon       | GCTCAAATGCATGATAGGCTCTCAGTTTATTTAAAATATATATT-----TAATGCTTTTTTTTTTAAAGATTTTATG    |       |       |       |       |       |       |       | 57902 |
| Orangutan         | GCTCAAATGCATGATAGGCTCTCAGTTTATTTAAAACATATATATCTCTTTAATGCTTTTTTTTT--AAAGGTTTTATG  |       |       |       |       |       |       |       | 58308 |

| Majority          | AATAGGTTTCTAGTCA-CTTTTTATTTATATCATTTATCTTTTTTT-GTCATTGTTATTTATGGAGGATGTGAGGTCATTG |       |       |       |       |       |       |       |       |
|-------------------|-----------------------------------------------------------------------------------|-------|-------|-------|-------|-------|-------|-------|-------|
|                   | 71450                                                                             | 71460 | 71470 | 71480 | 71490 | 71500 | 71510 | 71520 |       |
| Human             | AATAGGTTTCTAGTCA-CTTTTTATTTATATCATTTATCTTTTTTT-GTCATTGTTACATATGGAGGATGTAAGGTCATTG |       |       |       |       |       |       |       | 57420 |
| Coquerel'sSifaka  | AATAA---TCCAGTAATCTCCTTGTGAGATTTACCATGTATCT--GTTTTATTTA---GTGAATAATGTTAGATTA---   |       |       |       |       |       |       |       | 48013 |
| Ma'sNightMonkey   | AATATGTTTCTAGTCAACTTTTTATTTATATCATTTATCTTTTTTTGTTGTTGTC--TATGGAGGATATGAGGTCATTA   |       |       |       |       |       |       |       | 52606 |
| VervetAGM         | AATAGGTTTCTAGTCA-CTTTTTATTTATATCATTTATCTTTTTTT-GTCATTGTTATTTATGGAGGATGTGAGGTCATTG |       |       |       |       |       |       |       | 59202 |
| Gorilla           | AATAGGTTTCTAGTCA-CTTTTTATTTATATCATTTATCTTTTTTT-GTCATTGTTACATATGGAGGATGTAAGGTCATTG |       |       |       |       |       |       |       | 57950 |
| GrabEatingMacaque | AATAGGTTTCTAGACA-CATTTTATTTATATCATTTATCTTTTTTT-GTCATTGTTATTTATGGAGGATGTGAGGTCATTG |       |       |       |       |       |       |       | 58405 |
| Macaque           | AATAGGTTTCTAGACA-CATTTTATTTATATCATTTATCTTTTTTT-GTCATTGTTATTTATGGAGGATGTGAGGTCATTG |       |       |       |       |       |       |       | 59237 |
| PigTailedMacaque  | AGTAGGTTTCTAGTCA-CATTTTATTTATATCATTTATCTTTTTTT-GTCATTGTTATTTATGGAGGATGTGAGGTCATTG |       |       |       |       |       |       |       | 58127 |
| Bonobo            | AATAGGTTTCTAGTCA-CTTTTTATTTATATCATTTATCTTTTTTT-GTCATTGTTACATATGGAGGATGTAAGGTCATTG |       |       |       |       |       |       |       | 56516 |
| OliveBaboon       | AATAGGTTTCTAGTCA-CTTTTTATTTATATCATTTATCTTTTTTT-GTCATTGTTATTTATGGAGGATGTGAGGTCATTG |       |       |       |       |       |       |       | 57980 |
| Orangutan         | AATAGGTTTCTAGTCA-CTTTTTATTTATATCATTTATCTTTTTTT-GTCATTGTTATATATGGAGGATGTAAGGTCATTG |       |       |       |       |       |       |       | 58386 |

Tuesday, May 03, 2022 06:16 PM

| Majority          | AGAGATGTAAAATTTCC--TGTC AAGGCTGCCACTGAAAAC TGCAAACCACATCTTTGCTTCCAAGTACCTTAATCTTCT |       |       |       |       |       |       |       |       |
|-------------------|------------------------------------------------------------------------------------|-------|-------|-------|-------|-------|-------|-------|-------|
|                   | 71530                                                                              | 71540 | 71550 | 71560 | 71570 | 71580 | 71590 | 71600 |       |
| Human             | AGAGATGTAAAATTTCC--CATCAAGGCTGCCACTGAAAAC TGCGCACCACATCTTTGCTTCCAAGTACCTTAATCTTCT  |       |       |       |       |       |       |       | 57498 |
| Coquerel'sSifaka  | -AAGTTTTATTGTTCTC---TAAAAGTTTCTGTTTAAAAC-----ATTTTCTGGTT---ATGTACAT---C---T        |       |       |       |       |       |       |       | 48070 |
| Ma'sNightMonkey   | AGACATGTAAAATTTCCCTGT CAGGGCTGCTGCTGAAAACGGCATAACCACATCTTTGCTTCCAAGTACCTTAATCTTCT  |       |       |       |       |       |       |       | 52686 |
| VervetAGM         | AGAAATGTAAAATTTCC--TGTC AAGGCTGCCACTGAAAAC TGCAAACCACATCTTTGCTTCCAAGTACCTTAATCTTCT |       |       |       |       |       |       |       | 59280 |
| Gorilla           | AGAGATGTAAAATTTCC--CGTCAAGGCTGCCACTGAAAAC TGCAACCACATCTTTGCTTCCAAGTACCTTAATCTTCT   |       |       |       |       |       |       |       | 58028 |
| GrabEatingMacaque | AGAAATGTAAAATTTCC--TGTC AAGGCTGCCACTGAAAAC TGCAAACCACATCTTTGCTTCCAAGTACCTTAATCTTCT |       |       |       |       |       |       |       | 58483 |
| Macaque           | AGAAATGTAAAATTTCC--TGTC AAGGCTGCCACTGAAAAC TGCAAACCACATCTTTGCTTCCAAGTACCTTAATCTTCT |       |       |       |       |       |       |       | 59315 |
| PigTailedMacaque  | AGAAATGTAAAATTTCC--TGTC AAGGCTGCCACTGAAAAC TGCAAACCACATCTTTGCTTCCAAGTACCTTAATCTTCT |       |       |       |       |       |       |       | 58205 |
| Bonobo            | AGAGATGTAAAATTTCC--CGTCAAGGCTGCCACTGAAAAC TGCAACCACATCTTTGCTTCCAAGTACCTTAATCTTCT   |       |       |       |       |       |       |       | 56594 |
| OliveBaboon       | AGAAATGTAAAATTTCC--TGTC AAGGCTGCCACTGAAAAC TGCAAACCACATCTTTGCTTCCAAGCACCTTAATCTTCT |       |       |       |       |       |       |       | 58058 |
| Orangutan         | AGAGATGTAAAATTTTC--TGTC AAGGCTGCCACTGAAAAC TGCAACCACATCTTTGCTTCCAAGTACCTTAATCTTCT  |       |       |       |       |       |       |       | 58464 |

| Majority          | GTTTGTATATCTGAAATCTACTTTTGCTCTGTCTCTTTAACTTTTTGTGCCATAGTATCTCATTATTATTACTATTCCAT |       |       |       |       |       |       |       |       |
|-------------------|----------------------------------------------------------------------------------|-------|-------|-------|-------|-------|-------|-------|-------|
|                   | 71610                                                                            | 71620 | 71630 | 71640 | 71650 | 71660 | 71670 | 71680 |       |
| Human             | GTTTGTATATCTTAAATCTACTTTTGCTCTGTCTCTTTAACTTTTTGTGCCATAGTATCTCATTATTATTACTATTCCAT |       |       |       |       |       |       |       | 57578 |
| Coquerel'sSifaka  | GCC-----AACTAAATTTTGTCT-----TTTGAGAATAAATTA---CATTGC----CTATT--TT                |       |       |       |       |       |       |       | 48118 |
| Ma'sNightMonkey   | GTTTGTATGTCTTAAATCTACTTTTGCTTTGTCTCTCTAACTTTTTGTGCCATAGTATCTCATTATTATTACTATTCCAT |       |       |       |       |       |       |       | 52766 |
| VervetAGM         | GTTTGTATATCTGAAATCTACTTTTGCTCTGTCTCTTTAACTTTTTGTGCCATAGTATCTCATTATTATTACTATTCCAT |       |       |       |       |       |       |       | 59360 |
| Gorilla           | GTTTGTATATCTGAAATCTACTTTTGCTCTGTCTCTTTAACTTTTTGTGCCATAGTATCTTATTATTATTACTATTCCAT |       |       |       |       |       |       |       | 58108 |
| GrabEatingMacaque | GTTTGTATATCTGAAATCTACTTTTGCTCTGTCTCTTTAACTTTTTGTGCTATAGTATCTCATTATTATTACTATTCCAT |       |       |       |       |       |       |       | 58563 |
| Macaque           | GTTTGTATATCTGAAATCTACTTTTGCTCTGTCTCTTTAACTTTTTGTGCTATAGTATCTCATTATTATTACTATTCCAT |       |       |       |       |       |       |       | 59395 |
| PigTailedMacaque  | GTTTGTATATCTGAAATCTACTTTTGCTCTGTCTCTTTAACTTTTTGTGCCATAGTATCTTATTATTATTACTATTCCAT |       |       |       |       |       |       |       | 58285 |
| Bonobo            | GTTTGTATATCTTAAATCTACTTTTGCTCTGTCTCTTTAACTTTTTGTGCCATAGTATCTCATTATTATTACTATTCCAT |       |       |       |       |       |       |       | 56674 |
| OliveBaboon       | GTTTGTATATCTGAAATCTACTTTTGCTCTGTCTCTTTAACTTTTTGTGCCATAGTATCTCATTATTATTACTATTCCG  |       |       |       |       |       |       |       | 58138 |
| Orangutan         | GTTTGTATATCTTAAATCTACTTTTGCTCTGTCTCTTTAACTTTTTGTGCCATAGTATCTCATTATTATTACTATTCCAT |       |       |       |       |       |       |       | 58544 |

| Majority          | TATTAAGCCATTA---AAAATTCATTATTAAGCC-----                                |       |       |       |       |       |       |       |       |
|-------------------|------------------------------------------------------------------------|-------|-------|-------|-------|-------|-------|-------|-------|
|                   | 71690                                                                  | 71700 | 71710 | 71720 | 71730 | 71740 | 71750 | 71760 |       |
| Human             | TATTAAGCCATTA---AAAATTCATTATTAAGCC-----                                |       |       |       |       |       |       |       | 57609 |
| Coquerel'sSifaka  | TGC---CTGTTG---AATGTTGATCCCAAACC-----                                  |       |       |       |       |       |       |       | 48145 |
| Ma'sNightMonkey   | TATTAAGACATTATTATGAAACCATTGATAAACTTACCTTTGTCTTAACTGGTTTTCTTTCTTTTCTTTT |       |       |       |       |       |       |       | 52846 |
| VervetAGM         | TATTAAGCCATTA---AAAATTCATTATTAAGCC-----                                |       |       |       |       |       |       |       | 59391 |
| Gorilla           | TATTAAGCCATTA---AAAATTCATTATTAAGCC-----                                |       |       |       |       |       |       |       | 58139 |
| GrabEatingMacaque | TATTAAGCCATTA---AAAATTCGTTATTAAGCC-----                                |       |       |       |       |       |       |       | 58594 |
| Macaque           | TATTAAGCCATTA---AAAATTCGTTATTAAGCC-----                                |       |       |       |       |       |       |       | 59426 |
| PigTailedMacaque  | TATTAAGCCATTA---AAAATTCGTTATTAAGCC-----                                |       |       |       |       |       |       |       | 58316 |
| Bonobo            | TATTAAGCCATTA---AAAATTCATTATTAAGCC-----                                |       |       |       |       |       |       |       | 56705 |
| OliveBaboon       | TATTAAGCCATTA---AAAATTCATTATTAAGCC-----                                |       |       |       |       |       |       |       | 58169 |
| Orangutan         | TATTAAGCCATTA---AAAATTCATTATTAAGCC-----                                |       |       |       |       |       |       |       | 58575 |

Tuesday, May 03, 2022 06:16 PM

| Majority          | -----                                                                            |       |       |       |       |       |       |       |       |       |
|-------------------|----------------------------------------------------------------------------------|-------|-------|-------|-------|-------|-------|-------|-------|-------|
|                   | 71770                                                                            | 71780 | 71790 | 71800 | 71810 | 71820 | 71830 | 71840 |       |       |
| Human             | -----                                                                            |       |       |       |       |       |       |       | 57609 |       |
| Coquerel'sSifaka  | -----                                                                            |       |       |       |       |       |       |       | 48145 |       |
| Ma'sNightMonkey   | AATAGAGATGGGGTTTCTCCATGTTGGTCAGGCTGGTCTCGAACTCCCAACCTCAGGTGATCCGCCCATCTCAGCCTCCC |       |       |       |       |       |       |       |       | 52926 |
| VervetAGM         | -----                                                                            |       |       |       |       |       |       |       | 59391 |       |
| Gorilla           | -----                                                                            |       |       |       |       |       |       |       | 58139 |       |
| GrabEatingMacaque | -----                                                                            |       |       |       |       |       |       |       | 58594 |       |
| Macaque           | -----                                                                            |       |       |       |       |       |       |       | 59426 |       |
| PigTailedMacaque  | -----                                                                            |       |       |       |       |       |       |       | 58316 |       |
| Bonobo            | -----                                                                            |       |       |       |       |       |       |       | 56705 |       |
| OliveBaboon       | -----                                                                            |       |       |       |       |       |       |       | 58169 |       |
| Orangutan         | -----                                                                            |       |       |       |       |       |       |       | 58575 |       |

| Majority          | -----ATTATTA-----TGAAACCATT-----                                                |       |       |       |       |       |       |       |       |       |
|-------------------|---------------------------------------------------------------------------------|-------|-------|-------|-------|-------|-------|-------|-------|-------|
|                   | 71850                                                                           | 71860 | 71870 | 71880 | 71890 | 71900 | 71910 | 71920 |       |       |
| Human             | -----ATTATTA-----TGAAACCATT-----                                                |       |       |       |       |       |       |       | 57627 |       |
| Coquerel'sSifaka  | -----T-A-----                                                                   |       |       |       |       |       |       |       | 48147 |       |
| Ma'sNightMonkey   | AAAGTGCTGGGATTGCAGGCGTGAGCCACCGCGCCCGGCTAAATTTTTAGTTGTTTGAACATTTTTCTTTCTTTCTTTT |       |       |       |       |       |       |       |       | 53006 |
| VervetAGM         | -----ATTATTA-----TGAAACCATT-----                                                |       |       |       |       |       |       |       | 59409 |       |
| Gorilla           | -----ATTATTA-----TGAAACCATT-----                                                |       |       |       |       |       |       |       | 58157 |       |
| GrabEatingMacaque | -----ATTATTA-----TGAAACCATT-----                                                |       |       |       |       |       |       |       | 58612 |       |
| Macaque           | -----ATTATTA-----TGAAACCATT-----                                                |       |       |       |       |       |       |       | 59444 |       |
| PigTailedMacaque  | -----ATTATTA-----TGAAACCATT-----                                                |       |       |       |       |       |       |       | 58334 |       |
| Bonobo            | -----ATTATTA-----TGAAACCGTT-----                                                |       |       |       |       |       |       |       | 56723 |       |
| OliveBaboon       | -----ATTATTA-----TGAAACCATT-----                                                |       |       |       |       |       |       |       | 58187 |       |
| Orangutan         | -----ATTATTA-----TGAAACCATT-----                                                |       |       |       |       |       |       |       | 58593 |       |

| Majority          | -----AATA-----                                                                 |       |       |       |       |       |       |       |       |       |
|-------------------|--------------------------------------------------------------------------------|-------|-------|-------|-------|-------|-------|-------|-------|-------|
|                   | 71930                                                                          | 71940 | 71950 | 71960 | 71970 | 71980 | 71990 | 72000 |       |       |
| Human             | -----AATA-----                                                                 |       |       |       |       |       |       |       | 57632 |       |
| Coquerel'sSifaka  | -----GATA-----                                                                 |       |       |       |       |       |       |       | 48152 |       |
| Ma'sNightMonkey   | CTTTTCTTTTTCCTTCTTTTTTGTTTTTTTTTTTGGTTAACAGAAATCTTGCTCTGTCAACCAGGCTGGAGTGCAGTG |       |       |       |       |       |       |       |       | 53086 |
| VervetAGM         | -----AATA-----                                                                 |       |       |       |       |       |       |       | 59414 |       |
| Gorilla           | -----AATA-----                                                                 |       |       |       |       |       |       |       | 58162 |       |
| GrabEatingMacaque | -----AATA-----                                                                 |       |       |       |       |       |       |       | 58617 |       |
| Macaque           | -----AATA-----                                                                 |       |       |       |       |       |       |       | 59449 |       |
| PigTailedMacaque  | -----AATA-----                                                                 |       |       |       |       |       |       |       | 58339 |       |
| Bonobo            | -----AATA-----                                                                 |       |       |       |       |       |       |       | 56728 |       |
| OliveBaboon       | -----AATA-----                                                                 |       |       |       |       |       |       |       | 58192 |       |
| Orangutan         | -----AATA-----                                                                 |       |       |       |       |       |       |       | 58598 |       |

Tuesday, May 03, 2022 06:16 PM

|                   |                                                                                     |       |
|-------------------|-------------------------------------------------------------------------------------|-------|
| Majority          | -----GCTTAC-----ATTTGTCTTAACTGGTTTTCTTTCTTTTCGTTTCGTTCTTTTACTT                      |       |
|                   | 72010 72020 72030 72040 72050 72060 72070 72080                                     |       |
| Human             | -----GCTTAC-----ATTTATCTTAACTGGTTTTCTTCCTTTTCATTTCATTCTTTTACTT                      | 57682 |
| Coquerel'sSifaka  | -----GCTTAC-----ATTTATCTTAACTGGTTTTCTTCCTTTTCATTTCATTCTTTTACTT                      | 48152 |
| Ma'sNightMonkey   | GTGCAGTCTTGGCTCACTGCAACCTTCACCTCCTGGGTTTCGTTCTTAACTAGTTTTCTTCCTTTTCATTCTTTGTTTTACTT | 53166 |
| VervetAGM         | -----GCTTAC-----ATTTGTCTTAACTGGTTTTCTTTCTTTTCGTTTCCTTCTTTTACTT                      | 59464 |
| Gorilla           | -----GCTTAC-----ATTTGTCTTAACTGGTTTTCTTCCTTTTCATTTCATTCTTTTACTT                      | 58212 |
| GrabEatingMacaque | -----GCTTAC-----ATTTGTCTGTAACCTGGTTTTCTTTTCGTTTCGTTTCGTTCTTTTACTT                   | 58667 |
| Macaque           | -----GCTTAC-----ATTTGTCTGTAACCTGGTTTTCTTTTCGTTTCGTTTCGTTCTTTTACTT                   | 59499 |
| PigTailedMacaque  | -----GCTTAC-----ATTTGTCTGTAACCTGGTTTTCTTTTCGTTTCGTTTCGTTCTTTTACTT                   | 58389 |
| Bonobo            | -----GCTTAC-----ATTTATCTTAACTGGTTTTCTTCCTTTTCATTTCATTCTTTTACTT                      | 56778 |
| OliveBaboon       | -----GCTTAC-----ATTTGTCTTAACTGGTTTTCTTTTCGTTTCGTTTCGTTCTTTTACTT                     | 58242 |
| Orangutan         | -----GCTTAC-----ATTTGTCTTAACTGGTTTTCTTCCTTTTCATTTCATTCTTTTACTT                      | 58648 |

|                   |                                                                                  |       |
|-------------------|----------------------------------------------------------------------------------|-------|
| Majority          | TCAGATTAATTATTGTCTCTAATACTTAAATGCTTCTCCAGATCAAGATTACTTCTGTGGAGCCCAGACCATTTTTTAT  |       |
|                   | 72090 72100 72110 72120 72130 72140 72150 72160                                  |       |
| Human             | TCAGATTAATTATTGTCTCTAATACTTAAATGCTTCTCCAGATCAAGATTACTTCTGTGGAGCCCAGACCATTTTTTAC  | 57762 |
| Coquerel'sSifaka  | -----TTTTTTTTT                                                                   | 48161 |
| Ma'sNightMonkey   | TCAGACTAATTATTGTTTCTAATACTTAAATGCCTCCTCCAGATCAAGATCACTTCTGTGGAGCCCAGACCATTTTTAAT | 53246 |
| VervetAGM         | TCAGATTAATTATTGTCTCTAATACTTAAATGCTTCTCCAGATCAAGATTACTTCTGTGGAGCCCAGACCATTTTTTAT  | 59544 |
| Gorilla           | TCAGATTAATTATTGTCTCTAATACTTAAATGCTTCTCCAGATCAAGATTACTTCTGTGGAACCCAGACCATTTTTTAC  | 58292 |
| GrabEatingMacaque | TCAGATTAATTATTCT---AATACTTAAATGCTTCTCCAGATCAAGATTACTTCTGTGGAGCCCAGACCATTTTTTAT   | 58743 |
| Macaque           | TCAGATTAATTATTCT---AATACTTAAATGCTTCTCCAGATCAAGATTACTTGTGTGGAGCCCAGACCATTTTTTAT   | 59575 |
| PigTailedMacaque  | TCAGATTAATTATTCT---AATACTTAAATGCTTCTCCAGATCAAGATTACTTCTGTGGGGCCAGACCATTTTTTAT    | 58465 |
| Bonobo            | TCAGATTAATTATTGCTACTAATACTTAAATGCTTCTCCAGATCAAGATTACTTCTGTGGAGCCCAGACCATTTTTTAC  | 56858 |
| OliveBaboon       | TCAGATTAATTATTCTCTCTAATACTTAAATGCTTCTCCAGATCAAGATTACTTCTGTGGAGCCCAGACCATTTTTTAT  | 58322 |
| Orangutan         | TCAGATTAATTATTGTCTCTAATACTTAAATGCTTCTCCAGATCAAGATTACTTCTGTGGAGCCCAGACCATTTTTTAT  | 58728 |

|                   |                                                                                   |       |
|-------------------|-----------------------------------------------------------------------------------|-------|
| Majority          | AATTGTTTCATTGCATTTGCATCCTCACAACCTCATTTCTGGAGCAAATAGTTGTAGGTAGCAGAAAGGCTATACAAG    |       |
|                   | 72170 72180 72190 72200 72210 72220 72230 72240                                   |       |
| Human             | AATTGTTTCATTGCATTTCCATCCACACAACCTCATTTTGGGAGCAAATAGTTGTAGGTAGCAGAAAGGCTATACAAG    | 57842 |
| Coquerel'sSifaka  | AACT-----A--AACACT-----AGTAGAAT--ATTTAATTA--TGAA-----CAGA                         | 48198 |
| Ma'sNightMonkey   | AATTGTTTCATTGCATTTCCATCCTCACAACCTCATTTTCGGGAACAAAATAGTTTGTAGGTAGCAGAAAGGCTGTACAAG | 53326 |
| VervetAGM         | AATTGTTTCGTTGCGTTTGCATCCTCACAACCTCATTTCTGGAGCAAATAGTTGTAGGTAGCAGAAAGGCTATACAAG    | 59624 |
| Gorilla           | AATTGTTTCATTGCATTTCCATCCACACAACCTCATTTTGGGAGCAAATAGTTGTAGGTAGCAGAAAGGCTATACAAG    | 58372 |
| GrabEatingMacaque | AATTGTTTCATTGCATTTGCATCCTCACAACCTCATTTCTGGAGCAAATAGTTGTAGGTAGCAGAAAGGCTATACAAG    | 58823 |
| Macaque           | AATTGTTTCATTGCATTTGCATCCTCACAACCTCATTTCTGGAGCAAATAGTTGTAGGTAGCAGAAAGGCTATACAAG    | 59655 |
| PigTailedMacaque  | AATTGTTTCATTGCATTTGCATCCTCACAACCTCATTTCTGGAGCAAATAGTTGTAGGTAGCAGAAAGGCTATACAAG    | 58545 |
| Bonobo            | AATTGTTTCATTGCATTTCCATCCACACAACCTCATTTTGGGAGCAAATAGTTGTAGGTAGCAGAAAGGCTATACAAG    | 56938 |
| OliveBaboon       | AATTGTTTCATTGCATTTGCATCCTCACAACCTCATTTCTGGAGCAAATAGTTGTAGGTAGCAGAAAGGCTATACAAG    | 58402 |
| Orangutan         | AATTGTTTCATTGCATTTCCATCCTCACAACCTCATTTTGGGAGCAAATAGTTGTAGGTAGCAGAAAGGCTATACAAG    | 58808 |

Tuesday, May 03, 2022 06:16 PM

| Majority          | TAATAATAGCATAAATGTAATAGTTTACCAAGTGCTATAGTCTCATTTTTTCTGACCACTACTCTATGTTGTCAACAAA  |       |       |       |       |       |       |       |       |
|-------------------|----------------------------------------------------------------------------------|-------|-------|-------|-------|-------|-------|-------|-------|
|                   | 72250                                                                            | 72260 | 72270 | 72280 | 72290 | 72300 | 72310 | 72320 |       |
| Human             | TAATAATAGCATAAATGTAATAGTTTACCAAGTGCCGTAGTCTCATTTTTTCTGACCACTACTCTATATGTCAACAAA   |       |       |       |       |       |       |       | 57922 |
| Coquerel'sSifaka  | TAATACCTGCCTCATAGCAGATGCTCA-AAAATAC-ATAGT-----GAGCATTAA---ATTTTGTTTATGTA-        |       |       |       |       |       |       |       | 48260 |
| Ma'sNightMonkey   | TAATAGTAGCATAAATGTAATAGTTTACCAAGTGCTATAGTCAT-TTTTTCTGACTACTACTCTGTATTGTCTACAAA   |       |       |       |       |       |       |       | 53405 |
| VervetAGM         | TAATAATAGCATAAATGTAATAGTTTACAAAGTGCTATAGTCTCATTTTTTCTGACCACTACTCTATGTTATCAGCAAAA |       |       |       |       |       |       |       | 59704 |
| Gorilla           | TAATAATAGCATAAATGTAATAATTTACCAAGTGCCGTAGTCTCATTTTTTCTGACCACTACTCTATATGTCAACAAA   |       |       |       |       |       |       |       | 58452 |
| GrabEatingMacaque | TAATAATAGCATAAATGTAATAGTTTACCAAGTGCTATAGTCTCATTTTTTCTGACCACTACTCTATGTTATCAGCAAAA |       |       |       |       |       |       |       | 58903 |
| Macaque           | TAATAATAGCATAAATGTAATAGTTTACCAAGTGCTATAGTCTCATTTTTTCTGACCACTACTCTATGTTATCAGCAAAA |       |       |       |       |       |       |       | 59735 |
| PigTailedMacaque  | TAATAATAGCATAAATGTAATAGTTTACCAAGTGCTATAGTCTCATTTTTTCTGACCACTACTCTATGTTATCAGCAAAA |       |       |       |       |       |       |       | 58625 |
| Bonobo            | TAATAATAGCATAAATGTAATAGTTTACCAAGTGCTGTAGTCTCATTTTTTCTGACCACTACTCTATATGTCAACAAA   |       |       |       |       |       |       |       | 57018 |
| OliveBaboon       | TAATAATAGCATAAATGTAATAGTTTACCAAGTGCTATAGTCTCATTTTTTCTGACCACTACTCTATGTTATCAGCAAAA |       |       |       |       |       |       |       | 58482 |
| Orangutan         | TAATAATAGCATAAATGTAATAGTTTACCAAGTGCTGTAGTGTCAATTTTTCTGACCACTACTCTATATGTCAACAAA   |       |       |       |       |       |       |       | 58888 |

| Majority          | CAGGGGTTTCCCTGTGTTACAAGAGGATGCTAAGATTTAAAG--GTGAATTACTTATAATGAACACTACCTATAAGGTA |       |       |       |       |       |       |       |       |
|-------------------|---------------------------------------------------------------------------------|-------|-------|-------|-------|-------|-------|-------|-------|
|                   | 72330                                                                           | 72340 | 72350 | 72360 | 72370 | 72380 | 72390 | 72400 |       |
| Human             | CAGGGTTTTCCCTGCGTTACAAGAGGATGCTAAGATTTAAAGAGGTGAATTACTTACAGTGAACACCACCTATAAGGTA |       |       |       |       |       |       |       | 58002 |
| Coquerel'sSifaka  | -----TGTTCTAGAAAAGAA--ATGAA--CTAATA---GTATAGTATGTAGCAAAGTATATGACAATGATG         |       |       |       |       |       |       |       | 48319 |
| Ma'sNightMonkey   | GAGGGTTTTCTCTGTGTTACAAGGGGATGCTAAGATTTAAAGATGTGCATTACTTATAATGAACATTGCCTGTAAGGTC |       |       |       |       |       |       |       | 53485 |
| VervetAGM         | CAGGG-TTCCCTTTGTTACAAGATGATGCTAAGATTTAAAG--GTGAATTACTTATAATGAACACTACCTATAAGGTA  |       |       |       |       |       |       |       | 59781 |
| Gorilla           | CAGGGTTTTCCCTGCGTTACAAGAGGATGCTAAGATTTAAAGAGGTGAATTACTTACAGTGAACACCACCTATAAGGTA |       |       |       |       |       |       |       | 58532 |
| GrabEatingMacaque | CAGGGTTTTCCCTTTGTTACAAGAGGATGCTAAGATTTAAAG--GTGAATTACTTATAATGAACACTACCTATAAGGTA |       |       |       |       |       |       |       | 58981 |
| Macaque           | CAGGGTTTTCCCTTTGTTACAAGAGGATGCTAAGATTTAAAG--GTGAATTACTTATAATGAACACTACCTATAAGGTA |       |       |       |       |       |       |       | 59813 |
| PigTailedMacaque  | CAGGGTTTTCCCTTTGTTACAAGAGGATGCTAAGATTTAAAG--GTGAATTACTTATAATGAACACTACCTATAAGGTA |       |       |       |       |       |       |       | 58703 |
| Bonobo            | CAGGGTTTTCCCTGCGTTACAAGAGGATGCTAAGATTTAAAGAGGTGAATTACTTACAGTGAACACCACCTATAAGGTA |       |       |       |       |       |       |       | 57098 |
| OliveBaboon       | CAGGGTTTTCTCCTTTGTTACAAGAGGATGCTAAGTTTAAAG--GTGAATTACTTATAATGAACACTACCTATAAGGTA |       |       |       |       |       |       |       | 58560 |
| Orangutan         | CAGGGTTTTCCCTGCGTTACAGGAGGATGCTAAGATTTAAAGAGGTGAATTACTTACAGTGAACACCACCTATAAGGTA |       |       |       |       |       |       |       | 58968 |

| Majority          | GACATTTTTTCAGTCTT-----AGCCTTCTCTC-AGTATGCTGCTCCTCACTGGTTCTCAGGTATAATCTAATCT      |       |       |       |       |       |       |       |       |
|-------------------|----------------------------------------------------------------------------------|-------|-------|-------|-------|-------|-------|-------|-------|
|                   | 72410                                                                            | 72420 | 72430 | 72440 | 72450 | 72460 | 72470 | 72480 |       |
| Human             | GACATTTTTTCAGTCTT-----AGCCTTCTCTCAGTATGCTGCTTCTCACTGGTTCTCGGGTATAATCTAATCT       |       |       |       |       |       |       |       | 58073 |
| Coquerel'sSifaka  | GGTGTGTTTCTAAACTA-----CTTAATCTT-AATTTTCAGC-----GTGCTCAAGCAG-----T--              |       |       |       |       |       |       |       | 48368 |
| Ma'sNightMonkey   | AACATTTTTTCAGTCTTCTTTTCAGTACCCTTTCTCTCCAGTATGCTGCTCCTCACTGGCTCTCAGGTATAATCTAATCT |       |       |       |       |       |       |       | 53565 |
| VervetAGM         | GACATTTTTTCAGTCTC-----AGCCTTCTTTC-AGTATGCTGCTCCTCACTGGTTCTCAGGTATAATCTAATCT      |       |       |       |       |       |       |       | 59851 |
| Gorilla           | GACATTTTTTCAGTCTT-----AGCTTCTCTCAGTATGCTGCTTCTCACTGGTTCTCGGGTATAATCTAATCT        |       |       |       |       |       |       |       | 58603 |
| GrabEatingMacaque | GACGTTTTTTTCAGTCTC-----AGACTTCTTTC-AGTATGCTGCTCCTCACTGGTTCTCAGGTATAATCTAATCT     |       |       |       |       |       |       |       | 59051 |
| Macaque           | GACGTTTTTTTCAGTCTC-----AGACTTCTTTC-AGTATGCTGCTCCTCACTGGTTCTCAGGTATAATCTAATCT     |       |       |       |       |       |       |       | 59883 |
| PigTailedMacaque  | GACGTTTTTTTCAGTCTC-----AGACTTCTTTC-AGTATGCTGCTCCTCACTGGTTCTCAGGTATAATCTAATCT     |       |       |       |       |       |       |       | 58773 |
| Bonobo            | GACATTTTTTCAGTCTT-----AGCCTTCTCTCAGTATGCTGCTTCTCACTGGTTCTCGGGTATAATCTAATCT       |       |       |       |       |       |       |       | 57169 |
| OliveBaboon       | GACGTTTTTTTCAGTCTC-----AGCCTTCTTTC-AGTATGCTGCTCCTCACTGGTTCTCAGGTATAATCTAATCT     |       |       |       |       |       |       |       | 58630 |
| Orangutan         | GACATTTTTTCAGTCTT-----AGCCTTCTCTCAGTACGCTGCTTCTCACTGGTTCTCGGGTATAATCTAATCT       |       |       |       |       |       |       |       | 59039 |

Tuesday, May 03, 2022 06:16 PM

| Majority          | TATTATGCTTTCTCTTCAGGCATAGGTTGACAATTAGAATCTTTTTTTTTC-----CAAAAAATGATTATCCTCCTT    |       |
|-------------------|----------------------------------------------------------------------------------|-------|
|                   | 72490 72500 72510 72520 72530 72540 72550 72560                                  |       |
| Human             | TACTGTGCTTTCCGCTTCAGGCATAGGTTAATAATTAGAATCTTTTTTTTTTGT----CCAAAAATGATTATCCTCCTT  | 58149 |
| Coquerel'sSifaka  | -----TCTTCAAGCTG---TGACAGCTG-----TCC-----AGACAGCAAATACTC--CTC                    | 48409 |
| Ma'sNightMonkey   | TATTAGACTTTCTTTTCAGGCATAGGTTAACAATTAGAATCTTTTTTTTTC-----AAAAATAAGTAACC-CTTT      | 53635 |
| VervetAGM         | TATTATGCTTTCTCTTCAGGCATAGGTTGACAATTAGAATCTTTTTTTTTC-----CAAAAAATGATTATCCTCCTT    | 59924 |
| Gorilla           | TACTGAGCTTTCCGCTTCAGGCATAGGTTAACAATTAGAATCTTTTTTTTTTTTTTTT-CCAAAAAGTATTATCCTCCTT | 58682 |
| GrabEatingMacaque | TATTATGCTTTCTCTTCAGGCATAGGTTGACAATTAGAATCTTTTTTTTTC-----CAAAAAATGAGTATCCTCCTT    | 59124 |
| Macaque           | TATTATGCTTTCTCTTCAGGCATAGGTTGACAATTAGAATCTTTTTTTTTC-----CAAAAAATGAGTATCCTCCTT    | 59956 |
| PigTailedMacaque  | TATTATGCTTTCTCTTCAGGCATAGGTTGACAATTAGAATCTTTTTTTTTC-----CAAAAAATGAGTATCCTCCTT    | 58846 |
| Bonobo            | TACTGTGCTTTCCGCTTCAGGCATAGGTTAATAATTAGAATCTTTTTTTTTTTT----CCAAAAATGATTATCCTCCTT  | 57245 |
| OliveBaboon       | TATTATGCTTTCTCTTCAGGCATAGGTTGACAATTAGAATCTTTTTTTTTC-----CAAAAAATGATTATCCTCCTT    | 58703 |
| Orangutan         | TATTATGCTTTCTGCTTCAGGCATAGGTTAACAATTAGAATCTTTCTTTTTTTTTTTTCCAAAAATGATTATCCTCCTT  | 59119 |

| Majority          | TCACATGCCCTGGCTACCAAAATCAATGTGGTATGAGTTTTATGATTAGGAGACAATCTAGAAGTCATGGTTTCTGTGA |       |
|-------------------|---------------------------------------------------------------------------------|-------|
|                   | 72570 72580 72590 72600 72610 72620 72630 72640                                 |       |
| Human             | TCACATGCCCTGGCTACCAAAATCAATGTGGTATGAGTTTTATGAATAGGAGACAATCTAGAAGTCATGGTTTCTGTGA | 58229 |
| Coquerel'sSifaka  | TTA-----GTGGC-ACCACAGTGAGTG-----AGAGTGCAGTGACT-----CCAGCCAGA-----G-----         | 48455 |
| Ma'sNightMonkey   | TCACATGCCCTGGCTACCAAAATCAATGTGGTATGAGTTTTATCAGTAGGAGACAATCTAGAAGTCATGGTTTCTGTGG | 53715 |
| VervetAGM         | TCACATGCCCTGGCTACCAAAATCAATGTGGTATGAGTTTTATGATTAGGAGACAATCTAGAAATCATGGTTTCTGTGA | 60004 |
| Gorilla           | TCACATGCCCTGGCTACCAAAATCAATGTGGTATGAGTTTTATGAATAGGAGACAATCTAGAAGTCATGGTTTCTGTGA | 58762 |
| GrabEatingMacaque | TCACATGCTGTGGCTACCAAAATCAATGTGGTATGAGTTTTATGATTAGGAGACAATCTAGAAATCATGGTTTCTGTGA | 59204 |
| Macaque           | TCACATGCTGTGGCTACCAAAATCAATGTGGTATGAGTTTTATGATTAGGAGACAATCTAGAAATCATGGTTTCTGTGA | 60036 |
| PigTailedMacaque  | TCACATGCCGTGGCTACCAAAATCAATGTGGTATGAGTTTTATGATTAGGAGACAATCTAGAAATCATGGTTTCTGTGA | 58926 |
| Bonobo            | TCACATGCCCTGGCTACCAAAATCAATGTGGTATGAGTTTTATGAATAGGAGACAATCTAGAAGTCATGGTTTCTGTGA | 57325 |
| OliveBaboon       | TCACATGCCCTGGCTACCAAAATCAATGTGGTATGAGTTTTATGATTAGGAGACAATCTAGAAATCATGGTTTCTGTGA | 58783 |
| Orangutan         | TCACATGCCCTGGCTACCAAAATCAGTGTGGTATGAGTTTTATAAATAGGAGACAGTCTAGAAGTCGTGGTTTCTGTGA | 59199 |

| Majority          | CATTTTTCACAACTTCAAACATTTAAATATAGTCTACATTTTTCTTGGTGTGGAATATTTTCCTTGCTCTTCTGACCTCA  |       |
|-------------------|-----------------------------------------------------------------------------------|-------|
|                   | 72650 72660 72670 72680 72690 72700 72710 72720                                   |       |
| Human             | CATTTTTCACAACTTCAAACGTTTAAATATAGTCTACATTTTTCTTGGTGTGGAATATTTTCCTTGCTCTTCTGACCCCA  | 58309 |
| Coquerel'sSifaka  | -----TCCAGTACTTAGAATAATTATTGACAATATGTACTACCCT-----GTAACACTTG--ATGTTCTTC-----      | 48514 |
| Ma'sNightMonkey   | CATTTTTCACAACTTCAAGACATTGAAATATAGTGTACATTTTTCTTGATGTGGAATATTTTCCTTGCTCTTCTG-CCCTG | 53794 |
| VervetAGM         | CATTTTTCACAACTTCAAACATTTAAATATAGTCTACATTTTTCTTGGTGTGGAATATTTTCCTTGCTCTTCTGACCTCA  | 60084 |
| Gorilla           | CATTTTTCACAACTTCAAACATTTAAATATAGTCTACATTTTTCTTGATGTGGAATATTTTCCTTGCTCTTCTGACCCCA  | 58842 |
| GrabEatingMacaque | CATTTTTCACAACTTCAAACATTTAAATATAGTCTACATTTTTCTTGGTGTGGAATATTTTCCTTGCTCTTCTGACCTCA  | 59284 |
| Macaque           | CATTTTTCACAACTTCAAACATTTAAATATAGTCTACATTTTTCTTGGTGTGGAATATTTTCCTTGCTCTTCTGACCTCA  | 60116 |
| PigTailedMacaque  | CATTTTTCACAACTTCAAACATTTAAATATAGTCTACATTTTTCTTGGTGTGGAATATTTTCCTTGCTCTTCTGACCTCA  | 59006 |
| Bonobo            | CATTTTTCACAACTTCAAACATTTAAATATAGTCTACATTTTTCTTGGTGTGGAATATTTTCCTTGCTCTTCTGACCCCA  | 57405 |
| OliveBaboon       | CATTTTTCACAACTTCAAACATTTAAATATAGTCTACATTTTTCTTGGTGTGGAATATTTTCCTTGCTCTTCTGACCTCA  | 58863 |
| Orangutan         | CATTTTTCACAACTTCAAACATTTAAATATAGTTTACATTTTTCTTGGTGTGGAATATTTTCCTTGCTCTTCTGACCCCA  | 59279 |

Tuesday, May 03, 2022 06:16 PM

| Majority          | AAGAAAAGTATTTGTTAGAGGACCAATTAATGAAATTTG---GGGATTATACTGTATTTGAGCTATAAATCTTATGGG   |       |       |       |       |       |       |       |       |
|-------------------|----------------------------------------------------------------------------------|-------|-------|-------|-------|-------|-------|-------|-------|
|                   | 72730                                                                            | 72740 | 72750 | 72760 | 72770 | 72780 | 72790 | 72800 |       |
| Human             | AAGAAAAGTATTTGTTAGAGGACCAATTAATGAAATTTGAGTGGGATTATACTGTGTTTGGAGCTATAAATCTTAAGGG  |       |       |       |       |       |       |       | 58389 |
| Coquerel'sSifaka  | -----ACCAAGTAAGTTTAACTTA-----ATTTGCCTGC---TTACCTATAA-----ATTAG                   |       |       |       |       |       |       |       | 48558 |
| Ma'sNightMonkey   | AGGAAAAGTATTTGTTAAAGGACCAATTAATGAAATATGACTGGGAATTATACTGTATTTGGGCTATAAATCTTATGGG  |       |       |       |       |       |       |       | 53874 |
| VervetAGM         | AAGAAAAGTATTTGTTAGAGGACCAATTAATGAAATTTG---GGGATTATACTGTATTTGAGCTATAAATCTTATGGG   |       |       |       |       |       |       |       | 60160 |
| Gorilla           | AAGAAAAGTATTTGTTAGAGGACCAATTAATGAAATTTGAGTGGGAATTATACTGTGTTTGGAGCTATAAATCTGATGGG |       |       |       |       |       |       |       | 58922 |
| GrabEatingMacaque | AAGAAAAGTATTTGTTAGAGGACCAATTAATGAAATTTG---GGGATTGTACTGCATTTGAGCTATAAATCTTATGGG   |       |       |       |       |       |       |       | 59360 |
| Macaque           | AAGAAAAGTATTTGTTAGAGGACCAATTAATGAAATTTG---GGGATTGTACTGCATTTGAGCTATAAATCTTATGGG   |       |       |       |       |       |       |       | 60192 |
| PigTailedMacaque  | AAGAAAAGTATTTGTTAGAGGACCAATTAATGAAATTTG---GGGATTGTACTGCATTTGAGCTATAAATCTTATGGG   |       |       |       |       |       |       |       | 59082 |
| Bonobo            | AAGAAAAGTATTTGTTAGAGGACCAATTAATGAAATTTGAGTGGGATTATACTGTGTTTGGAGCTATAAATCTTATGGG  |       |       |       |       |       |       |       | 57485 |
| OliveBaboon       | AAGAAAAGTATTTGTTAGAGGACCAATTAATGAAATTTG---GGGATTATACTGTATTTAAGCTATAAATCTTACGGG   |       |       |       |       |       |       |       | 58939 |
| Orangutan         | AAGAAAAGTATTTGTTAGAGGACCAATTAATGAAATTTGAATGGGATTATACTGTGTTTGGAGCTATAAATCTTATGGG  |       |       |       |       |       |       |       | 59359 |

| Majority          | GAAAATAGTTTATATGTGTATCTTGTCTGAAGTAATACATAGTTA-CATTTAATCTCAT---AAAAG---TACCTCAAT |       |       |       |       |       |       |       |       |
|-------------------|---------------------------------------------------------------------------------|-------|-------|-------|-------|-------|-------|-------|-------|
|                   | 72810                                                                           | 72820 | 72830 | 72840 | 72850 | 72860 | 72870 | 72880 |       |
| Human             | GAAAATGTTTATATGTGTATCTTGTCTGAAGTAATACATAGTTA-CATTTAATCTCAT---AAAAG---TACCTCAAT  |       |       |       |       |       |       |       | 58461 |
| Coquerel'sSifaka  | AGAAATA----A-----TAATATAGTAGATAAATA-----AT-----GTTTGTAT                         |       |       |       |       |       |       |       | 48594 |
| Ma'sNightMonkey   | GAAAAT----AT--GTGTATCTTGTCTGAAGTAATACATAGTTA-CATTTAATCTCATATAAAAGATAGTACCTCAAT  |       |       |       |       |       |       |       | 53946 |
| VervetAGM         | GAAAATAGTTTATATGTGTATCTTGTCTGAAGTAATACATGGTTA-CATTTAATCTCAT---AAAAG---TACCTCAAT |       |       |       |       |       |       |       | 60232 |
| Gorilla           | GAAAATGTTTATATGTGTATCTTGTCTGAAGTAATACATAGTTAACGTTAAATCTCGT---AAAAG---TACCTCAGT  |       |       |       |       |       |       |       | 58995 |
| GrabEatingMacaque | GAAAATAGTTTATATGTGTATCTTGTCTGAAATAATACATGATTA-CATTTAATCTCAT---AAAAG---TACCTCAAT |       |       |       |       |       |       |       | 59432 |
| Macaque           | GAAAATAGTTTATATGTGTATCTTGTCTGAAATAATACATGATTA-CATTTAATCTCAT---AAAAG---TACCTCAAT |       |       |       |       |       |       |       | 60264 |
| PigTailedMacaque  | GAAAATAGTTTATATGTGTATCTTGTCTGAAATAATACATGATTA-CATTTAATCTCAT---AAAAG---TACCTCAAT |       |       |       |       |       |       |       | 59154 |
| Bonobo            | GAAAATGTTTATATGTGTATCTTGTCTGAAGTAATACATAGTTA-CATTTAATCTCAT---AAAAG---TACCTCAAT  |       |       |       |       |       |       |       | 57557 |
| OliveBaboon       | GAAAATAGTTTATATGTGTATCTTGTCTGAAGTAATACATGATTA-CATTTAATCTCAT---AAAAG---TACCTCAAT |       |       |       |       |       |       |       | 59011 |
| Orangutan         | GAAAATAGTTTATATGTGTATCTTGTCTGAAGTAATACATAGTTA-CATTTAATCTCATATAAAAG---TACCTCAAT  |       |       |       |       |       |       |       | 59434 |

| Majority          | TA-TGTCAACTG---TTTGCAATTTTCGTTTAACTCTTCTGTGAACAGATACTAAGCATCCAACATAAATATTGATGTTT  |       |       |       |       |       |       |       |       |
|-------------------|-----------------------------------------------------------------------------------|-------|-------|-------|-------|-------|-------|-------|-------|
|                   | 72890                                                                             | 72900 | 72910 | 72920 | 72930 | 72940 | 72950 | 72960 |       |
| Human             | TG-TGTCAACTG---TTTGACATTTTGTGTTAATCTTCTGTGAACAGATACTAAGCATCCAACATGATATTGATGTTT    |       |       |       |       |       |       |       | 58536 |
| Coquerel'sSifaka  | -----TTTAAATGTTTT---AACAGATAT---TTTCTAAGT-----TTGGTGCT-                           |       |       |       |       |       |       |       | 48631 |
| Ma'sNightMonkey   | TA-TGTCAACTGAAATTTTGAAGTTTTCATTTAATCTTCTGTGAACAGATAAATAAGCATCCAACATAAATATTGATGTTT |       |       |       |       |       |       |       | 54025 |
| VervetAGM         | TAAAGTCAACTG---TTTGCAATTTTCATTTAACTTCTGTGAACAGATAC-AAGCATCCAACATAAATATTGATGTTT    |       |       |       |       |       |       |       | 60307 |
| Gorilla           | TG-TGTCAACTG---TTTGAAATTTTGTGTTAATCTTCTGTGAACAGATACTAAGCATCCAACATGATATTGATGTTT    |       |       |       |       |       |       |       | 59070 |
| GrabEatingMacaque | TAATGTCAACTG---TTTGCAATTTTCGTTTAACTCTTCTGTGAACAGATACTAAGCATCCAACATAAATATTGATGTTT  |       |       |       |       |       |       |       | 59508 |
| Macaque           | TAATGTCAACTG---TTTGCAATTTTCGTTTAACTCTTCTGTGAACAGATACTAAGCATCCAACATAAATATTGATGTTT  |       |       |       |       |       |       |       | 60340 |
| PigTailedMacaque  | TAATGTCAACTG---TTTGCAATTTTCGTTTAACTCTTCTGTGAACAGATACTAAGCATCCAACATAAATATTGATGTTT  |       |       |       |       |       |       |       | 59230 |
| Bonobo            | TG-TGTCAACTG---TTTGAAATTTTGTGTTAATCTTCTGTGAACAGATACTAAGCATCCAACATGATATTGATGTTT    |       |       |       |       |       |       |       | 57632 |
| OliveBaboon       | ---GTCAACTG---TTTGCAATTTTCGTTTAACTCTTCTGTGAACAGATACTAAGCATCCAACATAAATATTGATGTTT   |       |       |       |       |       |       |       | 59083 |
| Orangutan         | TA-TGTCAACTG---TTTGAAATTTTGTGTTAATCTTCTGTGAACAGATACTAAGCATCCAACATAAATATTGATGTTT   |       |       |       |       |       |       |       | 59509 |



Tuesday, May 03, 2022 06:16 PM

| Majority          | GTGCACAGGTATGCACTCAGGCTTCTTGACAAAGATCTAAAGTTATAATTCCTAAGAGAGTAGATAAATGTTTTATTAAG  |       |       |       |       |       |       |       |       |
|-------------------|-----------------------------------------------------------------------------------|-------|-------|-------|-------|-------|-------|-------|-------|
|                   | 72970                                                                             | 72980 | 72990 | 73000 | 73010 | 73020 | 73030 | 73040 |       |
| Human             | GTGCACAGGTATGCACTCAGGCTTCTTGACAAAGATCTAAAGTTATAATTCCTAAGAGAGTAGATAAATGTTTTACTAAG  |       |       |       |       |       |       |       | 58616 |
| Coquerel'sSifaka  | -----GTAT-----TG---AAGAT---A-ATCACATTTACAAAA-----AATAACCAGTT--CAAG                |       |       |       |       |       |       |       | 48674 |
| Ma'sNightMonkey   | GTCCACAAGTATATACTCAGGCTTTTTGACAAACATCTTAAAGTTATAATTCCTAAGAGAGTAGATCATTGTTTTATTAAG |       |       |       |       |       |       |       | 54105 |
| VervetAGM         | GTGCACAGGTATGCACTCAGGCTTCTTGACAAAGATTTAAAGTTATAATTCCTAAGACAGTAGATAAATGTTTTATTAAG  |       |       |       |       |       |       |       | 60387 |
| Gorilla           | GTGCACAGGTATGCACTCAGGCTTCTTGACAAATATCTAAAGTTATAATTCCTAAGAGAGTAGATAAATGTTTTACTAAG  |       |       |       |       |       |       |       | 59150 |
| GrabEatingMacaque | GTGCACAGGTATGCACTCAGGCTTCTTGCCAAAGATCTAAAGTTATAATTCCTAAGATAGTAGATAAATGTTTTATTAAG  |       |       |       |       |       |       |       | 59588 |
| Macaque           | GTGCACAGGTATGCACTCAGGCTTCTTGCCAAAGATCTAAAGTTATAATTCCTAAGATAGTAGATAAATGTTTTATTAAG  |       |       |       |       |       |       |       | 60420 |
| PigTailedMacaque  | GTGCACAGGTATGCACTCAGGCTTCTTGCCAAAGATCTAAAGTTTTAATTCCTAAGACAGTAGATAAATGTTTTATTAAG  |       |       |       |       |       |       |       | 59310 |
| Bonobo            | GTGCACAGGTATGCACTCAGGCTTCTTGACAAAGATCTAAAGTTATAATTCCTAAGAGAGTAGATAAATGTTTTACTAAG  |       |       |       |       |       |       |       | 57712 |
| OliveBaboon       | GTGCACAGGTATGCACTCAGGCTTCTTGACAAAGATCTAAAGTTATAATTCGAAGACAGTAGATAAATGTTTTATTAAG   |       |       |       |       |       |       |       | 59163 |
| Orangutan         | GTGCACAGGTATGCACTCAGGCTTCTTGACAAAGATCTAAAGTTAAATTCCTAAGAGAGTAGATAAATGTTTTACTAAG   |       |       |       |       |       |       |       | 59589 |

| Majority          | TACTTATTCTGGTATCAGAACTCACACTTCACTTATTAGAGAAGGAAAAATAAATTTGTTTCCTAAACTTGCTTTGCCCC |       |       |       |       |       |       |       |       |
|-------------------|----------------------------------------------------------------------------------|-------|-------|-------|-------|-------|-------|-------|-------|
|                   | 73050                                                                            | 73060 | 73070 | 73080 | 73090 | 73100 | 73110 | 73120 |       |
| Human             | TACTTATTCTGGTATCAGAACTCACACTTCACTTATTACAGAAGGAAAAAGAAATTTGTTTCCTAAACTTGCTTTGCCCC |       |       |       |       |       |       |       | 58696 |
| Coquerel'sSifaka  | CTTTGCTTC-AGTATGG---TGATCCAGTAAATGCTCAACAAGCAAAATTAG---TAAGTCTAGAGCTTTTTTGCCAC   |       |       |       |       |       |       |       | 48746 |
| Ma'sNightMonkey   | TACTTATTCTGGTATCAGAACTCACACTTCACTTATTAG-GAAGGAAAAATAAATTTGTTTCCTAAACTTGCTTTGCCCC |       |       |       |       |       |       |       | 54182 |
| VervetAGM         | TACTTATTCTGGTATCAGAACTCACACTTCACTTATTAG-GAAGGAAAAATAAATTTGTTTCCTAAACTTGCTTTGCCCC |       |       |       |       |       |       |       | 60466 |
| Gorilla           | TACTTATTCTGGTATCAGAACTCACACTTCACTTATTACAGAAGCAAAAAGAAATTTGTTTCCTAAACTTGCTTTGCCCC |       |       |       |       |       |       |       | 59230 |
| GrabEatingMacaque | TACTTATTCTGGTATCAGAACTCACACTTCACTTATTAGAGAAGGAAAAATAAATTTGTTTCCTAAACTTGCTTTGCCCC |       |       |       |       |       |       |       | 59668 |
| Macaque           | TACTTATTCTGGTATCAGAACTCACACTTCACTTATTAGAGAAGGAAAAATAAATTTGTTTCCTAAACTTGCTTTGCCCC |       |       |       |       |       |       |       | 60500 |
| PigTailedMacaque  | TACTTATTCTGGTATCAGAACTCACACTTCACTTATTAGAGAAGGAAAAATAAATTTGTTTCCTAAACTTGCTTTGCCCC |       |       |       |       |       |       |       | 59390 |
| Bonobo            | TACTTATTCTGGTATCAGAACTCACACTTCACTTATTACAGAAGGAAAAAGAAATTTGTTTCCTAAACTTGCTTTGCCCC |       |       |       |       |       |       |       | 57792 |
| OliveBaboon       | TACTTATTCTGGTATCAGAACTCACACTTCACTTATTAGAGAAGGAAAAATAAATTTGTTTCCTAAACTTGCTTTGCCCC |       |       |       |       |       |       |       | 59243 |
| Orangutan         | TACTTATTCTGGTATCAGAACTCACACTTCACTTATTAGAGAAGGAAAAAGAAATTTGTTTCCTAAACTTGCTTTGCCCC |       |       |       |       |       |       |       | 59669 |

| Majority          | ATTACCTTGTAATCTAGACCCTTTGGTAAAATTTACATTTTTGATAACTACAGTAATGT-TCATTTTACATGCCTGCATC  |       |       |       |       |       |       |       |       |
|-------------------|-----------------------------------------------------------------------------------|-------|-------|-------|-------|-------|-------|-------|-------|
|                   | 73130                                                                             | 73140 | 73150 | 73160 | 73170 | 73180 | 73190 | 73200 |       |
| Human             | ATTACCTTGTAATCTAGACCCTTTGGTAAAATTTGCATTTTTGATAACTACAGTAATGT-TCATTTTACTTGCTGCATC   |       |       |       |       |       |       |       | 58775 |
| Coquerel'sSifaka  | GGTGGTTTTTTTTTTT-----CATTGATATA-TATATATTTTTG-----TATATTAATATGTCAATATAGCTAATTTTATT |       |       |       |       |       |       |       | 48815 |
| Ma'sNightMonkey   | TTTACCTTGTAATCTAGACCCTTTGTTAAAATTTACATTTTTGATAACTACAGTAATGT-TCATTTTACATGCCTGCATC  |       |       |       |       |       |       |       | 54261 |
| VervetAGM         | ATTACCTTGTAATCTAGACCCTTTGGTAAAATTTACATTTTTGATAACTAAGGTAATGT-TCATTTTACATGCCTGCATC  |       |       |       |       |       |       |       | 60545 |
| Gorilla           | ATTACCTTGTAATCTAGACCCTTTGGTAAAATTTGCATTTTTGATAACTACAGTAATGT-TCATTTTACATGCCTGCATC  |       |       |       |       |       |       |       | 59309 |
| GrabEatingMacaque | ATTACCTTGTAATCTAGACCCTTTGGTAAAATTTACATTTTTGATAACTGCAGTAATGT-TCATTTTACATGCCTGCATC  |       |       |       |       |       |       |       | 59747 |
| Macaque           | ATTACCTTGTAATCTAGACCCTTTGGTAAAATTTACATTTTTGATAACTGCAGTAATGT-TCATTTTACATGCCTGCATC  |       |       |       |       |       |       |       | 60579 |
| PigTailedMacaque  | ATTACCTTGTAATCTAGACCCTTTGGTAAAATTTACATTTTTGATAACTACAGTAATGT-TCATTTTACATGCCTGCATC  |       |       |       |       |       |       |       | 59469 |
| Bonobo            | AGTACCTTGTAATCTAGACCCTTTGGTAAAATTTGCATTTTTGATAACTACAGTAATGT-TCATTTTACTTGCTGCATC   |       |       |       |       |       |       |       | 57871 |
| OliveBaboon       | ATTACCTTGTAATCTAGACCCTTTGGTAAAATTTACATTTTTGATAACTACAGTAATGT-TCGTTTTACATGCCTGCATC  |       |       |       |       |       |       |       | 59322 |
| Orangutan         | ATTACCTTGTAATCTAGACCCTTTGGTAAAATTTACATTTTTGATAACTACAGTAATGT-TGATTTTACATGCCTGCATC  |       |       |       |       |       |       |       | 59748 |

Tuesday, May 03, 2022 06:16 PM

| Majority          | TGGGCTCTACCTAGAGAATATCACATAATA--ACATAATCTGACAATTGGTACCAGTTTAAATCCATCAGCATCAACTAC |       |
|-------------------|----------------------------------------------------------------------------------|-------|
|                   | 73210 73220 73230 73240 73250 73260 73270 73280                                  |       |
| Human             | TGGGCTCTACTTAGAGAATATCACATAATATTACATAATCTGACAATTGGTACCAGTTTAAATCCATCAACGTCAACTAC | 58855 |
| Coquerel'sSifaka  | --AATCCTGTG---ATAATTTAGCATACCA---TGTAGCATTATAGATGGTA-----GAAATTTGGTAGCATTAA--A-  | 48877 |
| Ma'sNightMonkey   | TGGGCTCTACCTAGAGAATATCACATAATATTATATAATCTGACAGTTGGTACCAGTTTAAATCCATCAGCATCAACTAC | 54341 |
| VervetAGM         | TGGGCTTTACCTAGAGAATATCACATAATA--ACATAATCTGACAATTGGTACCAGTTTAAATCCATCAGCATCAACTAC | 60623 |
| Gorilla           | TGGGCTCTACTTAGAGAATATCACATAATATTACATAATCTGACAATTGGTACCAGTTTAAATCCATCAACATCAACTAC | 59389 |
| GrabEatingMacaque | TGGGCTTTACCTAGAGAATATCACATAATA--ACATAATTTGACAATTGGTACCAGTTTAAATCCATCAGCATCAACTAC | 59825 |
| Macaque           | TGGGCTTTACCTAGAGAATATCACATAATA--ACATAATTTGACAATTGGTACCAGTTTAAATCCATCAGCATCAACTAC | 60657 |
| PigTailedMacaque  | TGGGCTTTACCTAGAGAATATCACATAATA--ACATAATTTGACAATTGGTACCAGTTTAAATCCACCAGCATCAACTAC | 59547 |
| Bonobo            | TGGGCTCTACTTAGAGAATATCACACAATATTACATAATCTGACAATTGGTACCAGTTTAAATCCATCAACATCAACTAC | 57951 |
| OliveBaboon       | TGGGTTTTACCTAGAGAATATCACATAATA--ACATAATCTGACAATTAGTACCAGTTTAAATCCATCAGCATCAACTAC | 59400 |
| Orangutan         | TGGGTTCTACTTAGAGAATATCACATAATATTACGTAATCTGACAATTGGTACCAGTTTAAATCCATCAGCATCAACTAC | 59828 |

| Majority          | AAATAAGCCCTCTACTCTAGTTTAAAAATCTCTTCCATTTCTTCAGTCAACAGTTTTTCTGTTTTTCACAATGCCTCTA  |       |
|-------------------|----------------------------------------------------------------------------------|-------|
|                   | 73290 73300 73310 73320 73330 73340 73350 73360                                  |       |
| Human             | AAGTAAGCCCTCTACTCTACTTTAAAAATCTCTTCCCATTCTTCAGTCAACAGTTTTTCTGTTTTTCACAATGCCTATG  | 58935 |
| Coquerel'sSifaka  | --ATAA-----TATTAGGAAA-----CCTTAGT-----ATTTGTCATA-----                            | 48908 |
| Ma'sNightMonkey   | AAATAAGCCCTC-----TACTTTAAAAATCTCTTCCATTTCTTCAGTCAACA-TGTTTTGTTTTTCATAATGCCTATA   | 54415 |
| VervetAGM         | AAAGAAGCCCC-ACTCTAGTTTAAAAATCTCCTCACATTTCTTCAGTCAACAGTTTTTCTGTTTTTCACAATGCCTCTA  | 60702 |
| Gorilla           | AAATAAGCCCTCTACTCTACTTTAAAAATCTCTTCCCATTCTTCAGTCAACAGTTTTTCTGTTTTTCACAATGCCTACG  | 59469 |
| GrabEatingMacaque | AAAGAAGCCCCCTACTCTAGTTTAAAAATCTCCTCACATTTCTTCAGTCAACAGTTTCTCTGTTTTTCACAGTGCCTCTA | 59905 |
| Macaque           | AAAGAAGCCCCCTACTCTAGTTTAAAAATCTCCTCACATTTCTTCAGTCAACAGTTTCTCTGTTTTTCACAGTGCCTCTA | 60737 |
| PigTailedMacaque  | AAAGAAGCCCCCTACTCTAGTTTAAAAATCTCCTCACATTTCTTCAGTCAACAGTTTCTCTGTTTTTCACAGTGCCTCTA | 59627 |
| Bonobo            | AAATAAGCCCTCTACTCTACTTTAAAAATCTCTTCCCATTATTTCAGTCAACAGTTTTTCTGTTTTTCACAATGCCTATG | 58031 |
| OliveBaboon       | AAAGAAGCCCCCTACTCTAGTTTAAAAATCTCCTCACATTTCTTCAGTCAACAGTTTTTCTGTTTTTCACAATGCCTCTA | 59480 |
| Orangutan         | AAATAAGCCCTCTACTCTACTTTAAAAATCTCTTCCATTTCTTCAGTCAACAGTTTTTCTGTTTTTCACAATGCCTATA  | 59908 |

| Majority          | TCAGATAGAAATTTCCCTTCTACCATAATCTCTCGTCACTCTCACTTGCTTGAAGAAGAAAATCACATGGAAGCTTCATC |       |
|-------------------|----------------------------------------------------------------------------------|-------|
|                   | 73370 73380 73390 73400 73410 73420 73430 73440                                  |       |
| Human             | TCAGATAGAAATTTCCCTTCTACCATAATCTCTCCTCACTCTCACTTGCTTGAAGAAGAAAATCACATGGAAGCTTCATC | 59015 |
| Coquerel'sSifaka  | --AAAAGAAATGTTTATTTTAGACT-----A-----ATGATAGCTGTG--                               | 48946 |
| Ma'sNightMonkey   | TCAGATAGAAATTTCCCTTCTACCATAATCTCTTCTCAATC--ACTTGCTTGAAGAAGAAAATCACATGAAAGCTTCATC | 54493 |
| VervetAGM         | TCAGATAGAAATTTCCCTTCTACCATAATCTCTCGTCACTCTCACTTGCTTGAAGAAGAAAATCACATGGAAGCTTCATC | 60782 |
| Gorilla           | TCAGATAGAAATTTCCCTTCTACCATAATGTCCTCACTCTCACTTGCTTGAAGAAGAAAATCACATGGAAGCTTCATC   | 59549 |
| GrabEatingMacaque | TCAGATAGAAATTTCCCTTCTACCATAATCTCTCGTCACTCTCACTTGCTTGAAGAAGAAAATCACATGGAAGCTTCATC | 59985 |
| Macaque           | TCAGATAGAAATTTCCCTTCTACCATAATCTCTCGTCACTCTCACTTGCTTGAAGAAGAAAATCACATGGAAGCTTCATC | 60817 |
| PigTailedMacaque  | TCAGATAGAAATTTCCCTTCTACCATAATCTCTCGTCACTCTCACTTGCTTGAAGAAGAAAATCACATGGAAGCTTCATC | 59707 |
| Bonobo            | TCAGATAGAAATTTCCCTTCTACCATGTCCTTCTCACTCTCACTTGCTTGAAGAAGAAAATCACATGGAAGCTTCATC   | 58111 |
| OliveBaboon       | TCAGATAGAAATTTCCCTTCTACCATAATCTCTCGTCACTCTCACTTGCTTGAAGAAGAAAATCACATGGAAGCTTCATC | 59560 |
| Orangutan         | TCAGATAGAAATTTCCCTTCTACCATAATCTCTCCTCACTCTCACTTGCTTGAAGAAGAAAATCACATGGAAGCTTCATC | 59988 |

Tuesday, May 03, 2022 06:16 PM

| Majority          | AGTTTTCTTGCAAAATCTGCTAATACTCACACTTGTCTTCTCTTCTAATAAAAAGGCATAGATGTTTAGTTGTCTAAGA |       |       |       |       |       |       |       |       |
|-------------------|---------------------------------------------------------------------------------|-------|-------|-------|-------|-------|-------|-------|-------|
|                   | 73450                                                                           | 73460 | 73470 | 73480 | 73490 | 73500 | 73510 | 73520 |       |
| Human             | AGTTTTCTTGCAAAATCTGCTAATACTCACACTTGTCTTCTCTTTAATAAAAAGGCATAGATGTTTAGTTATCTAAGA  |       |       |       |       |       |       |       | 59095 |
| Coquerel'sSifaka  | -----A---TTATCCATAACATAGACTTGCATTATTTT-----ACATTTCTGTTTGATT---TAGGT             |       |       |       |       |       |       |       | 48997 |
| Ma'sNightMonkey   | AGTTTTCTTGCAAAATCTGCTAATACTCA-CTTGTCTTCTCTTCTAATAAAAAGCATGCATGTTTAGTTGTCTAAGA   |       |       |       |       |       |       |       | 54572 |
| VervetAGM         | AGTTTTCTTGCAAAATCTGCTAATACTCACACTTGTCTTCTCTTCTAATAAAAAGGCATAGATGTTTAGTTATCTAAGA |       |       |       |       |       |       |       | 60862 |
| Gorilla           | AGTTTTCTTGAAAAATCTGCTAATACTCACACTTGTCTTCTCTTTAATAAAAAGGCATAGATGTTTAGTTATCTAAGA  |       |       |       |       |       |       |       | 59629 |
| GrabEatingMacaque | AGTTTTCTTGCAAAATCTGCTAATACTCACACTTGTCTTCTCTTCTAATAAAAAGGCATAGATGTTTAGTTGTGTAAGA |       |       |       |       |       |       |       | 60065 |
| Macaque           | AGTTTTCTTGCAAAATCTGCTAATACTCACACTTGTCTTCTCTTCTAATAAAAAGGCATAGATGTTTAGTTGTGTAAGA |       |       |       |       |       |       |       | 60897 |
| PigTailedMacaque  | AGTTTTCTTGCAAAATCTGCTAATACTCACACTTGTCTTCTCTTCTAATAAAAAGGCATAGATGTTTAGTTGTGTAAGA |       |       |       |       |       |       |       | 59787 |
| Bonobo            | AGTTTTCTTGCAAAATCTGCTAATACTCACACTTGTCTTCTCTTTAATAAAAAGGCATAGATGTTTAGTTATCTAAGA  |       |       |       |       |       |       |       | 58191 |
| OliveBaboon       | AGTTTTCTTGCAAAATCTGCTAATACTCACACTTGTCTTCTCTTCTAATAAAAAGGCATAGATGTTTAGTTGTCTAAGA |       |       |       |       |       |       |       | 59640 |
| Orangutan         | AGTTTTCTTGCAAAATCTGCTAATACTCACACTTGTCTTCTCTTTAATAAAAAGGCATAGATGTTTAGTTATCTAAGA  |       |       |       |       |       |       |       | 60068 |

| Majority          | CCAATAAACACCAAAGCCTATCGTCTTCTGCCTCTCAAGAGACTGCCTATCTGTCATCCCCTCTTCTCATTGTTTCT     |       |       |       |       |       |       |       |       |
|-------------------|-----------------------------------------------------------------------------------|-------|-------|-------|-------|-------|-------|-------|-------|
|                   | 73530                                                                             | 73540 | 73550 | 73560 | 73570 | 73580 | 73590 | 73600 |       |
| Human             | CCAATAAACACCAAAGCCTATCGTCTTCTGCCTGTCAAGAGACTGCCTATCTGTCATCCCCT--TTCTCATTATTTCT    |       |       |       |       |       |       |       | 59173 |
| Coquerel'sSifaka  | ACAACAAAA-----GTTTTGTGCTCTTGAGAAGATAGCAGGA-----T-----                             |       |       |       |       |       |       |       | 49035 |
| Ma'sNightMonkey   | CCAATAAACACCAAAGCCTATCATCTTCTGCCTTTCAGGAGACTGCCTATCAGTCATCCCCTCTTCTCGTTTATTTAT    |       |       |       |       |       |       |       | 54652 |
| VervetAGM         | CCAATAAACACCAAAGCCTATCGTCTTCTGCCTCTCAAGAGACTGCCTATCTGTCATCCCCTCTTCTCATTGTTTCT     |       |       |       |       |       |       |       | 60942 |
| Gorilla           | CCAATAAACACCAAAGCCTATCGTCTTCTGCCTCTCAAGAGACTGCCTATCTGTCCTCCCCT--TTCTCATTATTTCT    |       |       |       |       |       |       |       | 59707 |
| GrabEatingMacaque | CCAATAAACACCAAAGCCTATCGTCTTCTGCCTCTCAAGAGACTGCCTATCTGTCATCCCCTCTTCTCATTGTTTCT     |       |       |       |       |       |       |       | 60145 |
| Macaque           | CCAATAAACACCAAAGCCTATTGTCTTCTGCCTCTCAAGAGACTGCCTATCTGTCATCCCCTCTTCTCATTGTTTCT     |       |       |       |       |       |       |       | 60977 |
| PigTailedMacaque  | CCAATAAACACCAAAGCCTATCGTCTTCTGCCTCTCGAGAGACTGCCTATTTGTCATCCCCTCTTCTCATTGTTTCT     |       |       |       |       |       |       |       | 59867 |
| Bonobo            | CCAATAAACACCAAAGCCTATCGTCTTCTGCCTCTCAAGAGACTGCCTATCTGTCGTCCTCCCCT--TTCTCATTATTTCT |       |       |       |       |       |       |       | 58269 |
| OliveBaboon       | CCAATAAACACCAAAGCCTATCGTCTTCTGCCTCTCAAGAGACTGCCTATCTGTCATCCCCTCTTCTCATTGTTTCT     |       |       |       |       |       |       |       | 59720 |
| Orangutan         | CCAGTAAACACCAAAGCCTATCGTCTTCTGCCTCTCAAGAGACTGCCTATCTGTCATCCCCTCTTCTCATTATTTTT     |       |       |       |       |       |       |       | 60148 |

| Majority          | CTCTATATTGGCCACTTTTACCAGTTTCAAGCATTCTCAGCCTCTTTCATTTTAAATGAATTTACCTTCAACTTTCAAT  |       |       |       |       |       |       |       |       |
|-------------------|----------------------------------------------------------------------------------|-------|-------|-------|-------|-------|-------|-------|-------|
|                   | 73610                                                                            | 73620 | 73630 | 73640 | 73650 | 73660 | 73670 | 73680 |       |
| Human             | CTCTATATTGGCCACTTTTACCAGTTTCAAGCATTCTCAGCCTCTTTCATTTTAAATGAATTTACCTTCAACTTTCAAT  |       |       |       |       |       |       |       | 59253 |
| Coquerel'sSifaka  | ---TGTATTG-----TGATGCTACTTG---TAAAGGATTTAAGTGG-----TTT--C                        |       |       |       |       |       |       |       | 49077 |
| Ma'sNightMonkey   | CTTTATACTGGCCACTTTTGGCAGTTTCAAGCATTCTCAGCCTCTTTGATTTTAAATGAATTTACCTTCAACTTGGAAAT |       |       |       |       |       |       |       | 54732 |
| VervetAGM         | CTCTATGTTGGCCACATTTACCAGTTTCAAGTATTCTCAGCCTCTTTCATTTTAAATGAATTTACCTTCAACTTTCAAT  |       |       |       |       |       |       |       | 61022 |
| Gorilla           | CTCTATATTGGCCACTTTTACCAGTTTCAAGCATTCTCAGCCTCTTTCATTTTAAATGAATTTACCTTCAACTTTCAAT  |       |       |       |       |       |       |       | 59787 |
| GrabEatingMacaque | CTCTATGTTGGCCACTTTTACCAGTTTCAAGTATTCTCAGCCTCTTACATTTTAAATGAATTTACCTTCAACTTTCAAT  |       |       |       |       |       |       |       | 60225 |
| Macaque           | CTCTATGTTGGCCACTTTTACCAGTTTCAAGTATTCTCAGCCTCTTACATTTTAAATGAATTTACCTTCAACTTTCAAT  |       |       |       |       |       |       |       | 61057 |
| PigTailedMacaque  | CTCTATGTTGGCCACTTTTACCAGTTTCAAGTATTCTCAGCCTCTTACATTTTAAATGAATTTACCTTCAACTTTCAAT  |       |       |       |       |       |       |       | 59947 |
| Bonobo            | CTCTATATTGGCCACTTTTACCAGTTTCAAGCATTCTCAGCCTCTTTCATTTTAAATGAATTTACCTTCAACTTTCAAT  |       |       |       |       |       |       |       | 58349 |
| OliveBaboon       | CTCTATGTTGGCCACTTTTACCAGTTTCAAGTATTCTCAGCCTCTTTCATTTTAAATGAATTTACCTTCAACTTTCAAT  |       |       |       |       |       |       |       | 59800 |
| Orangutan         | CACTATATTGGCCACTTTTACCAGTTTCAAGCATTCTCAGCCTCTTTCATTTTAAATGAATTTATCTTCAACTTTCAAT  |       |       |       |       |       |       |       | 60228 |

Tuesday, May 03, 2022 06:16 PM

|                   |                                                                                   |       |
|-------------------|-----------------------------------------------------------------------------------|-------|
| Majority          | CCATCCATCTATAACTCTACATACTTTCTATCACCTGCCTCCCCTCTCCCTTTTCACTCAT-----GACTTCTTAAAGTA  |       |
|                   | 73690 73700 73710 73720 73730 73740 73750 73760                                   |       |
| Human             | CCATCCATCTATAACTCTACGTACTTTCTATCACCTGCCTCCCCTCTCCCTTTTCACTCATAACCAGACTTCTTAAATA   | 59333 |
| Coquerel'sSifaka  | CAGAG----GGAGTTT-----                                                             | 49091 |
| Ma'sNightMonkey   | CCATCCATCTGTAACCTCTACATACTTTCTATCACCTGCCTCTCTTCTCCCTTTTCATTCATAACCAGACTTCTTAAATA  | 54812 |
| VervetAGM         | CCATCCATCAATAACTCTACATACTTTCTGTACACCTGCCTCCCCTCTCCCTTTTCACTCAT-----GACTT---AAGTA  | 61094 |
| Gorilla           | CCATCCATCTATAACTCTACATACTTTCTATCACCTGCCTCCCCTCTCCCTTTTCACTCATAACCAGACTTCTTAAACA   | 59867 |
| GrabEatingMacaque | CCATCCATCTATAACTCTAC----TTTCTATCACCTTCCTCCCCTCTCCCTTTTCACTCAT-----GACTTCTTAAAGTA  | 60296 |
| Macaque           | CCATCCATCTATAACTCTAC----TTTCTATCACCTTCCTCCCCTCTCCCTTTTCACTCAT-----GACTTCTTAAAGTA  | 61128 |
| PigTailedMacaque  | CCATCCGCTATAACTCTAC----TTTCTATCACCTTCCTCCCCTCTCCCTTTTCACTCAT-----GACTTCTTAAAGTA   | 60018 |
| Bonobo            | CCATCCATCTATAACTCTACATACTTTCTATCACCTGCCTCCCCTCTCCCTTTTCACTCATAACCAGACTTCTTAAATA   | 58429 |
| OliveBaboon       | CCATCCATCTATAACTCTAC----TTTCTATCACCTGCCTCCCCTCTCCCTTTTCACTCAT-----GACTTCATAAGTA   | 59871 |
| Orangutan         | CCATC-ATCTGTAACCTCTACATACTTTCTATCACCTGCCTCCCCTCTCCCTTTTCACTCATAACCAGACTTCTTAAATA  | 60307 |
| Majority          | GGCTATCTTTGTTGTTTATT--CTC---ATTT-CTCTACTTACTATAATTTGGTTTTAGCACTGTTGACCCAAATTGCTC  |       |
|                   | 73770 73780 73790 73800 73810 73820 73830 73840                                   |       |
| Human             | GTCTATCTTTGTTGTTTATTATCTC---ATTT-CTCTACTTACTATAATTTGGTTTTAGCACTGTTGACCCAAATTGCTC  | 59409 |
| Coquerel'sSifaka  | -----                                                                             | 49091 |
| Ma'sNightMonkey   | GGCTATCTTTGTTGTTTATTATCTCCTCATTTCTCTACTTATTATAATTTGGTTTTAGCACTGTTTACCCAAATTGCTC   | 54892 |
| VervetAGM         | GGCTATCCTTGTTGTTTATT--CTC---ATTT-CTCTACTTACTATAATTTGGTTTTAGCACTGTTGACCCAAAGTTACTC | 61168 |
| Gorilla           | GGCTATCTTTGTTGTTTATTATCTCCTCATTT-CTCTACTTACTATAATTTGGTTTTAGCACTGTTGACCCAAATTGCTC  | 59946 |
| GrabEatingMacaque | GGCTATCCTTGTTGTTTATT--CTC---ATTT-CTCTACTTACTATAATTTGGTTTTAGCACTGTTGACCCAAATTACTC  | 60370 |
| Macaque           | GGCTATCCTTGTTGTTTATT--CTC---ATTT-CTCTACTTACTATAATTTGGTTTTAGCACTGTTGACCCAAATTACTC  | 61202 |
| PigTailedMacaque  | GGCTATCCTTGTTGTTTATT--CTC---ATTT-CTCTACTTACTATAATTTGGTTTTAGCACTGTTGACCCAAATTACTC  | 60092 |
| Bonobo            | GGCTATCTTTGTTGTTTATTATCTCCTCATTT-CTCTACTTACTATAATTTGGTTTTAGCACTGTTGACCCAAATTGCTC  | 58508 |
| OliveBaboon       | GGCTATCCTTGTTGTTTATT--CTC---ATTT-CTCTACTTACTATAATTTGGTTTTAGCACTGTTGACCCAAATTACTC  | 59945 |
| Orangutan         | GGCTATCTTTGTTGTTTATTATCTCCTCATTT-CTCTACTTACTATAATTTGGTTTCAGCACTGTTGACCCAAATTGCTC  | 60386 |
| Majority          | TTCCCCAGTGCACCAGTGATT-ATTAGAGTAGCTAAATGCTAGTGGTATGATTAGTCCTTGCTTACTTAATATCTAG     |       |
|                   | 73850 73860 73870 73880 73890 73900 73910 73920                                   |       |
| Human             | TTCTCAGCGTCACCAGCGATT-AGTAGAGTAGCTAAATGCTAGTGGTATGATTAGTCCTTGCTTACTTAATACCTAG     | 59488 |
| Coquerel'sSifaka  | -----                                                                             | 49091 |
| Ma'sNightMonkey   | TTCC-CAGTGTACCAGTGATT-ATTAGAGTAGCTAAATGCCAGTGATACGATTAGTCCTTACTTAATATTTAG         | 54970 |
| VervetAGM         | TTCCCCAGTGCCACCAGTGATT-ATTAGAGTAGCTAAATGCTAGTGGTATGATTAGTCCTTGCTTACTTAATATCTAG    | 61247 |
| Gorilla           | TTCTCAGCGTCACCAGTGATT-AGTAGAGTAGCTAAATGCTAGTGGTATGATTAGTCCTTGCTTACTTAATACCTAG     | 60025 |
| GrabEatingMacaque | TTCCCCAGTGCCACCAGTGATT-ATTAGAGTAGCTAAATGCTAGTGGTATGATTAGTCCTTGCTTACTTAATATCTAG    | 60449 |
| Macaque           | TTCCCCAGTGCCACCAGTGATT-ATTAGAGTAGCTAAATGCTAGTGGTATGATTAGTCCTTGCTTACTTAATATCTAG    | 61281 |
| PigTailedMacaque  | TTCCCCAGTGCCACCAGTGATT-ATTAGAGTAGCTAAATGCTAGTGGTATGATTAGTCCTTGCTTACTTAATATCTAG    | 60171 |
| Bonobo            | TTCTCAGCATCACCAGTGATT-AGTAGAGTAGCTAAATGCTAGTGGTATGATTAGTCCTTGCTTACTTAATACCTAG     | 58587 |
| OliveBaboon       | TTCCCCAGTGCCACCAGTGATT-ATTAGAGTAGCTAAATGCTAGTGGTATGATTAGTCCTTGCTTACTTAATATCTAG    | 60024 |
| Orangutan         | TTCCCCAGTGCACCAGTGATTATTAGAGTAGCTAAATGCTAGTGGTATGATTAGTCCTTGCTTACTTAATATCTAG      | 60466 |

Tuesday, May 03, 2022 06:16 PM

|                   |                                                                                    |       |
|-------------------|------------------------------------------------------------------------------------|-------|
| Majority          | ATAATATTTGGCACTGTGCACCATTGTCTTAAAATTCTCTTTCTTCTCCTGGTCTCTGATACTTCTCACCTAGATTTATCCT |       |
|                   | 73930 73940 73950 73960 73970 73980 73990 74000                                    |       |
| Human             | ATAATATTTGGCACTGTGCACCATTGTCTTAAAATTCTCTTTCTTCTCCTGGTCTCTGATACTTCTCACCTGGATTTATCCT | 59568 |
| Coquerel'sSifaka  | -----                                                                              | 49091 |
| Ma'sNightMonkey   | ATAATAATTTGGTGCTGTATACCATTGTCTTAAAATTCTTTCTTCTCCTGGTCTCTGATACTTCTCACCTAGATTTACCT   | 55050 |
| VervetAGM         | ATAATATTTGACACTGTGCACCATTATCTTAAAATTCTCTTTCTTCTCCTGGTCTCTGATACTTCTCACGTAGATTTATCCT | 61327 |
| Gorilla           | ATAATATTTGGCACTGTGCACCATTGTCTTAAAATTCTCTTTCTTCTCCTGGTCTCTGATACTTCTCACCTGGATTTATCCT | 60105 |
| GrabEatingMacaque | ATAATATTTGACACTGTGCACCATTATCTTAAAATTCTCTTTCTTCTCCTGGTCTCTGATACTTCTCACCTAGATTTATCCT | 60529 |
| Macaque           | ATAATATTTGACACTGTGCACCATTATCTTAAAATTCTCTTTCTTCTCCTGGTCTCTGATACTTCTCACCTAGATTTATCCT | 61361 |
| PigTailedMacaque  | ATAATATTTGACACTGTGCACCCTTATCTTAAAATTCTCTTTCTTCTCCTGGTCTCTGATACTTCTCACCTAGATTTATCCT | 60251 |
| Bonobo            | ATAATATTTGGCACTGTGCACCATTGTCTTAAAATTCTCTTTCTTCTCCTGGTCTCTGATACTTCTCACCTGGATTTATCCT | 58667 |
| OliveBaboon       | ATAATATTTGACACTGTGCACCATTATCTTAAAATTCTCTTTCTTCTCCTGGTCTCTGATACTTCTCACCTAGATTTATCCT | 60104 |
| Orangutan         | ATAATATTTAGCACTGTGCACCATTGTCTTAAAATTCTCTTTCTTCTCCTGGTCTCTGATACTTCTCACGTAGGTTTATCCT | 60546 |

|                   |                                                                                   |       |
|-------------------|-----------------------------------------------------------------------------------|-------|
| Majority          | ACCTCTCTGAC--TTTCTTCTTGTGCATGTCACCTCCCCTTCTACCTGGGAGGCCTCACCTGCTCTCACAGCTCCGTAAA  |       |
|                   | 74010 74020 74030 74040 74050 74060 74070 74080                                   |       |
| Human             | ACCTCTCTA----TTTCTTCTTGTCTTGTAACCTCCCCTTCTACCTGGGAGGCCTCACCTGCTGTCACAGCTCCATTAAA  | 59644 |
| Coquerel'sSifaka  | -----                                                                             | 49091 |
| Ma'sNightMonkey   | ACCTCTCTGGC--TATCTTCTTGTGAGGTT-CTCCCCTTCTGCCTGGGAGGCCTCACCTGCTCTCACAGGTCAGTTAAA   | 55127 |
| VervetAGM         | ACCCCTCTGACTGTTTCTTCTTGTGCATGTCACCTCCCCTTCTACCTGGGAGGCCTCACCTGCTCTCACACCTCTGTTAGA | 61407 |
| Gorilla           | ACCTCTCTA----TTTCTTCTTGTCTTGTAACCTCCCCTTCTACCTGGGAGGCCTCACCTGCTGTCACAGCTCCATTAAA  | 60181 |
| GrabEatingMacaque | ACCCCTCTGACTGTTTCTTCTTGTGCATGTCACCTCCCCTTCTACCTGGGAGGCCTCACCTGCTCTCACAGCTCCGTAAA  | 60609 |
| Macaque           | ACCCCTCTGACTGTTTCTTCTTGTGCATGTCACCTCCCCTTCTACCTGGGAGGCCTCACCTGCTCTCACAGCTCCGTAAA  | 61441 |
| PigTailedMacaque  | ACCCCTCTGACTGTTTCTTCTTGTGCATGTCACCTCCCCTTCTACCTGGGAGGCCTCACCTGCTCTCACAGCTCCGTAAA  | 60331 |
| Bonobo            | ACCTCTCTA----TTTCTTCTTGTCTTGTAACCTCCCCTTCTACCTGGGAGGCCTCACCTGCTGTCACAGCTCCATTAAA  | 58743 |
| OliveBaboon       | ACCCCTCTGACTGTTTCTTCTTGTGCATGTCACCTCCCCTTCTACCTGGGAGGCCTCACCTGCTCTCACAGCTCCGTAAA  | 60184 |
| Orangutan         | ACCTCTCTA----TTTCTTCTTGTCTTGTAACCTCCCCTTCTACCTGGGAGGCCTCACCTGCTCTCACAGCTCCATTAAA  | 60622 |

|                   |                                                                                    |       |
|-------------------|------------------------------------------------------------------------------------|-------|
| Majority          | CCTCT-GTGATTTCAGACAGTGTTCACATCACATTTTCTAGCTCAGACCTTTCCTAAGAGACCCACACTAAGAACCTGGCA  |       |
|                   | 74090 74100 74110 74120 74130 74140 74150 74160                                    |       |
| Human             | CCTCTTATGATTTCAGACAGAGTTCACATCACATTTTCTAGCTCAGACCTTCTCCTAAGAGACCCACACTAAGAACCTGGCG | 59724 |
| Coquerel'sSifaka  | -----                                                                              | 49091 |
| Ma'sNightMonkey   | CCTCT-GTGATTCA----GTGTTTCACATCACATTTTCTAGCTCAGACCTTCTTAAAGAGACCCACGCTAGGAACCTGGCA  | 55202 |
| VervetAGM         | CCTCT-ATGATTTCAGACAGTGTTCACATCACATTTTGTAGCTCAGACCTTTCCTAAGAGACCCACACTAAGAACCTGGCA  | 61486 |
| Gorilla           | CCTCT-GTGATTTCAGACAGAGTTCACATCACATTTTCTAGCTCAGACCTTCTCCTAAGAGACCCACACTAAGAACCTGGTG | 60260 |
| GrabEatingMacaque | CCTCT-GTGATTTCAGACAGTGTTCACATCACATTTTCTAGCTCAGACCTTTCCTAAGAGACCCACACTAAGAACCTGGCA  | 60688 |
| Macaque           | CCTCT-GTGATTTCAGACAGTGTTCACATCACATTTTCTAGCTCAGACCTTTCCTAAGAGACCCACACTAAGAACCTGGCA  | 61520 |
| PigTailedMacaque  | CCTCT-GTGATTTCAGACAGTGTTCACATCACATTTTCTAGCTCAGACCTTTCCTAAGAGACCCACACTAAGAACCTGGCA  | 60410 |
| Bonobo            | CCTCT-GTGATTTCAGACAGAGTTCACATCACATTTTCTAGCTCAGACCTTCTCCTAAGAGACCCACACTAAGAACCTGGTG | 58822 |
| OliveBaboon       | CCTCT-GTGATTTCAGACAGTGTTCACATCACATTTTCTAGCTCAGACCTTTCCTAAGAGACCCACACTAAGAACCTGGCA  | 60263 |
| Orangutan         | CCTCT-GTGATTCAAACAGAGTTCACATCACATTTTCTAGCTCAGACCTTCTCCTAAGAGACTCACACTAAGAACCTGGCG  | 60701 |

Tuesday, May 03, 2022 06:16 PM

| Majority          | GTCTAATGATTATCTTCAAACCTAGTGTGTTCAATCCAGCTCCTGTTTTGGTGTCTACTGT--TAGTAAAGTGCAAGAT |       |       |       |       |       |       |       |       |
|-------------------|---------------------------------------------------------------------------------|-------|-------|-------|-------|-------|-------|-------|-------|
|                   | 74170                                                                           | 74180 | 74190 | 74200 | 74210 | 74220 | 74230 | 74240 |       |
| Human             | GACTAATGAATATCTTCAAAC--AGTGTGTTCAATCTAGCTCCTGTTTTGGTGTCCGCTGTGTAGGAAAGTGCAAGAT  |       |       |       |       |       |       |       | 59802 |
| Coquerel'sSifaka  | -----                                                                           |       |       |       |       |       |       |       | 49091 |
| Ma'sNightMonkey   | GACTAATGAATATCTTCAAACCTAGTGTGTTCAATCCAACCTCCTGTTTTGGTGTCCCTGTGTAGTAAAGTGCAAGAT  |       |       |       |       |       |       |       | 55282 |
| VervetAGM         | GTCTAATGATTATCTTCAAACCTAGTGTGTTCAATCCAGCTCCTGTTTTGGTGTCTACTGT--TAGTAAAGTGCAAGAT |       |       |       |       |       |       |       | 61564 |
| Gorilla           | GACTAATGAATATCTTCAAACCTAGTGTGTTCAATCTAGCTCCTGTTTTGGTGTCCGCTGTGTAGTAAAGTGCAAGAT  |       |       |       |       |       |       |       | 60340 |
| GrabEatingMacaque | GTCTAATGATTATCTTCAAACCTAGTGTGTTCAATCCAGCTCCTGTTTTGGTGTCTACTGT--TAGTAAAGTGCAAGAT |       |       |       |       |       |       |       | 60766 |
| Macaque           | GTCTAATGATTATCTTCAAACCTAGTGTGTTCAATCCAGCTCCTGTTTTGGTGTCTACTGT--TAGTAAAGTGCAAGAT |       |       |       |       |       |       |       | 61598 |
| PigTailedMacaque  | GTCTAATGATTATCTTCAAACCTAGTGTGTTCAATCCAGCTCCTGTTTTGGTGTCTACTGT--TAGTAAAGTGCAAGAT |       |       |       |       |       |       |       | 60488 |
| Bonobo            | GACTAATGAATATCTTCAAAC--AGTGTGTTCAATCTAGCTCCTGTTTTGGTGTCCGCTGTGTAGTAAAGTGCAAGAT  |       |       |       |       |       |       |       | 58900 |
| OliveBaboon       | GTCTAATGATTATCTTCAAACCTAGTGTGTTCAATCCAGCTCCTGTTTTGGTGTCTACTGT--TAGTAAAGTGCAAGAT |       |       |       |       |       |       |       | 60341 |
| Orangutan         | GACTAATGAATATCTTCAAACCTAGTGTGTTCAATCCAGCTCCTGTTTTGGTGTCCACTGTGTAGTAAAGTGCAAGAT  |       |       |       |       |       |       |       | 60781 |

| Majority          | ACCAACTTCAGTCTCATTAAACAAGCCAGAAAACATGGTATTTTTCCCTTCCTTCCAGCCTATCATTAGATATTATTGAT    |       |       |       |       |       |       |       |       |
|-------------------|-------------------------------------------------------------------------------------|-------|-------|-------|-------|-------|-------|-------|-------|
|                   | 74250                                                                               | 74260 | 74270 | 74280 | 74290 | 74300 | 74310 | 74320 |       |
| Human             | ACCAACTTCAGTCTCATTAAACAAGCCAGTAAACATGGTATTTTTCCCTTCCTTCCAACCTGTCATCAGATATTATTGAT    |       |       |       |       |       |       |       | 59882 |
| Coquerel'sSifaka  | -----                                                                               |       |       |       |       |       |       |       | 49091 |
| Ma'sNightMonkey   | ACCAACTTCAGACTCATTAAACAAGCCAGAAAAGCAT--ATTTTTCCCTTCCTTCCAGTCTATCTTCAGATACTATTGAT    |       |       |       |       |       |       |       | 55359 |
| VervetAGM         | ACCAACTTCAGTCTCATTAAACAAGCCAGAAAACATGGTATTTTTCCCTTCCTTCCAGCCTATCATTAGATATTATTGAT    |       |       |       |       |       |       |       | 61644 |
| Gorilla           | ACCAACTTCAGTCTCATTAAACAAGCCAGTAAACATGGTATTTTTCCCTTCCTTCCAACCTGTCATCAGATATTATTGAT    |       |       |       |       |       |       |       | 60420 |
| GrabEatingMacaque | ACCAACGTCAGTCTCATTAAACAAGCCAGAAAACATGGTATTTTTCCCTTCCTTCCAGCCTATCATTAGATATTATTGAT    |       |       |       |       |       |       |       | 60846 |
| Macaque           | ACCAACGTCAGTCTCATTAAACAAGCCAGAAAACATGGTATTTTTCCCTTCCTTCCAGCCTATCATTAGATATTATTGAT    |       |       |       |       |       |       |       | 61678 |
| PigTailedMacaque  | ACCAACGTCAGTCTCATTAAACAAGCCAGAAAACATGGTATTTTTCCCTTCCTTCCAGCCTATCATTAGATATTATTGAT    |       |       |       |       |       |       |       | 60568 |
| Bonobo            | ACCAACTTCAGTCTCATTAAACAAGCCAGTAAACATGGTATTTTTCCCTTCCTTCCAACCTGTCATCAGATATTATTGAT    |       |       |       |       |       |       |       | 58980 |
| OliveBaboon       | ACCAACTTCAGTCTCATTAAACAAGCCAGAAAACATGGTATTTTTCCCTTCCTTCCAGCCTATCATTAGATATTATTGAT    |       |       |       |       |       |       |       | 60421 |
| Orangutan         | ACCAACTTCAGTCTCATTAAACAAGCCAGTAAAGCATGGTATTTTTCCCAATTCTTGCCAGCCTTTCGTCAGATATTATTGAT |       |       |       |       |       |       |       | 60861 |

| Majority          | TATACCTCC--TAAATTTTTGTTGAATCTGGCCTTTTTTCTCC--AACTCTTTTGCTGCCACTGCAGTCTAAGCC--AGTGT |       |       |       |       |       |       |       |       |
|-------------------|------------------------------------------------------------------------------------|-------|-------|-------|-------|-------|-------|-------|-------|
|                   | 74330                                                                              | 74340 | 74350 | 74360 | 74370 | 74380 | 74390 | 74400 |       |
| Human             | TATACCTCC--TAAATTTTTGTTGAATCTGGCCTTTTTTCTCC--AACTCTT--GCTACCATTGCAGTCTAAGCC--AGTGT |       |       |       |       |       |       |       | 59956 |
| Coquerel'sSifaka  | -----                                                                              |       |       |       |       |       |       |       | 49091 |
| Ma'sNightMonkey   | TATACCTCCCTAAATTTTTGTTGAATCTGGCCTTTTTTCTCTAACTCTTTGGTTACCATTCCAGTATAAGCC--AGTGT    |       |       |       |       |       |       |       | 55437 |
| VervetAGM         | TATACCTCC--TAAATTTTTGTTGAATCTGGCCTTTTTTCTCC--AACTCTTTTGCTGCCACTACAGTCTAAGCC--AGTGT |       |       |       |       |       |       |       | 61720 |
| Gorilla           | TATACCTCC--TAAATTTTTGTTGAATCTGGCCTTTTTTCTCC--AACTCTT--GCTACCACTGCAGTCTAAGCG--AGTGT |       |       |       |       |       |       |       | 60494 |
| GrabEatingMacaque | TATACCTCC--TAAATTTTTGTTGAATCTGGCCTTTTTTCTCC--AACTCTTTTGCTGTCAGTCTAAGCC--AGTGT      |       |       |       |       |       |       |       | 60922 |
| Macaque           | TATACCTCC--TAAATTTTTGTTGAATCTGGCCTTTTTTCTCC--AACTCTTTTGCTGTCAGTCTAAGCC--AGTGT      |       |       |       |       |       |       |       | 61754 |
| PigTailedMacaque  | TATACCTCC--TAAATTTTTGTTGAATCTGGCCTTTTTTCTCC--AACTCTTTTGCTGCCACTGCAGTCTAAGCC--AGTGT |       |       |       |       |       |       |       | 60644 |
| Bonobo            | TATACCTCC--TAAATTTTTGTTGAATCTGGCCTTTTTTCTCC--AACTCTT--GCTACCACTGCAGTCTAAGCC--AGTGT |       |       |       |       |       |       |       | 59054 |
| OliveBaboon       | TATACCTCC--TAAATTTTTGTTGAATCTGGCCTTTTTTCTCC--AACTCTTTTGCTGCCACTGCAGTCTAAGCCCCAGTGT |       |       |       |       |       |       |       | 60499 |
| Orangutan         | TATACCTCC--TAAATTTTTGTTGAATCTGGCCTTTTTTCTCC--AACTCTT--GCTACTACTGCAGTCTAAGCT--AGTGT |       |       |       |       |       |       |       | 60935 |

Tuesday, May 03, 2022 06:16 PM

|                   |                                                                                   |       |
|-------------------|-----------------------------------------------------------------------------------|-------|
| Majority          | TATTCAAGATGCTGGTCTCTCAAGGTAGT-AGTGTGTGTGCACACTGAAATCAGCATACTTCTAGCAA-CAGTATGCTTAA |       |
|                   | 74410 74420 74430 74440 74450 74460 74470 74480                                   |       |
| Human             | TATTCAAGATGCTGGTCTCTCAAGGTAGT-AGTGTGTGTCAAACCTGAAATCAGCATACTTCTAGCAA-CAGTATGCTTAA | 60034 |
| Coquerel'sSifaka  | -----                                                                             | 49091 |
| Ma'sNightMonkey   | TACTCAAGATGCTGGTTTCTCAAGGTAGG-AGTGTGTGTCAAACCTGAAATCAGCATACTTCTAGCAA-CAGTATGCTTAA | 55515 |
| VervetAGM         | TATTCAAGATGCTGGTCTCTCAAGGTAGTTAGTGTATGTCACACTGAAATCAGCATACTTCTAGCAAACAGTATACTTAA  | 61800 |
| Gorilla           | TATTCAAGATGCTGGTCTCTCAAGGTAGT-AGTGTGTGTCCAACCTGAAATCAGCATACTTCTAGCAA-CAGTATGCTTAA | 60572 |
| GrabEatingMacaque | TATTCAAGATGCTGGTCTCTCAAGGTAGTTAGTGTATGTCACACTGAAATCAGCATACTTCTAGCAAACAGTATACTTAA  | 61002 |
| Macaque           | TATTCAAGATGCTGGTCTCTCAAGGTAGTTAGTGTATGTCACACTGAAATCAGCATACTTCTAGCAAACAGTATACTTAA  | 61834 |
| PigTailedMacaque  | TATTCAAGATGCTGGTCTCTCAAGGTAGTTAGTGTATGTCACACTGAAATCAGCATACTTCTAGCAAACAGTATACTTAA  | 60724 |
| Bonobo            | TATTCAAGATGCTGATCTCTCAAGGTAGT-AGTGTGTGTCAAACCTGAAATCAGCATACTTCTAGCAA-CAGTATGCTTAA | 59132 |
| OliveBaboon       | TATTCAAGATGCTGGTCTCTCAAGGTAGTTAGTGTATGTCACACTGAAATCAGCATACTTCTAGCAAACAGTATACTTAA  | 60579 |
| Orangutan         | TATTCAAGATGCTGGTCTCTCAAGGTAGT-AGTGTGTGTCAAAGCTGAAATCAGCATACTTCTAGCAA-CAGTATGCTTAA | 61013 |

|                   |                                                                                    |       |
|-------------------|------------------------------------------------------------------------------------|-------|
| Majority          | TGTCGATATTGACGTAATAATTTTGACACAGACTT---ATATTCATGCAGAGTGGCCTGGGCTGCTGGACCGTGAATCATGA |       |
|                   | 74490 74500 74510 74520 74530 74540 74550 74560                                    |       |
| Human             | TGTCATATTGGCATAAAATTTTGACACAGACTTCTTATATTCATGCAGAGTAGCCTGGGCTTCTGGACCGTCAATCATAA   | 60114 |
| Coquerel'sSifaka  | -----                                                                              | 49091 |
| Ma'sNightMonkey   | TGTCATATTGACATAAAATTTTGACACAAACTTCTTATATTCGTGCAGAGTAACTGGATTGCTGAACCATGCATCATAA    | 55595 |
| VervetAGM         | TGTTGATATTGACGTAATAATTTTGACACAGACTT---ATATTCATGCAGAGTGGCCTGGGCTGCTGGACCGTGAATCATGA | 61877 |
| Gorilla           | TGTCATATTGGCATAAAATTTTGACACAGACTTCTTACATTCATGCAGAGTAGCCTGGGCTTCTGGACCGTCAATCATAA   | 60652 |
| GrabEatingMacaque | TGTCGATATTGACGTAATAATTTTGACACAGACTT---ATATTCATGCAGAGTGGCCTGGGCTGCTGGACCGTGAATCATGA | 61079 |
| Macaque           | TGTCGATATTGACGTAATAATTTTGACACAGACTT---ATATTCATGCAGAGTGGCCTGGGCTGCTGGACCGTGAATCATGA | 61911 |
| PigTailedMacaque  | TGTCGATATTGACGTAATAATTTTGACACAGACTT---ATATTCATGCAGAGTGGCCTGGGCTGCTGGACCGTGAATCATGA | 60801 |
| Bonobo            | TGTCATATTGGCATAAAATTTTGACACAGACTTCTTATATTCATGCAGAGTAGCCTGGGCTTCTGGACCGTCAATCATAA   | 59212 |
| OliveBaboon       | TGTCGATATTGACGTAATAATTTTGACACAGACTT---ATATTCATGCAGAGTGGCCTGGGCTGCTGGACCGTGAATCATGA | 60656 |
| Orangutan         | TGTTGATATTGGCATAAAATTTTGACACAGACTTCTTATATTCATGCAGAGTAGCTTGGGCTTCTGGACCGTCAATCATAA  | 61093 |

|                   |                                                                                    |       |
|-------------------|------------------------------------------------------------------------------------|-------|
| Majority          | TTTGAGTAGCATTGATGTAGTAATAAGTTCTCTTTTCATGCTCTACTTCTTGGCCTTCTGACTGAACTCACCATTTTGAC   |       |
|                   | 74570 74580 74590 74600 74610 74620 74630 74640                                    |       |
| Human             | TTTAAGTAGCATTGATGTAGTAATAAATTTCTCTTTTCATATCTCCACTTCTTGGCCTTCTGACTGAACTCACCATTTTGAC | 60194 |
| Coquerel'sSifaka  | -----                                                                              | 49091 |
| Ma'sNightMonkey   | TTTTAGTAGCACTGATGTAGTCATATTTCTCTTTTCATAGCTCTACTTCACTGGCCTTCTGACTGAACTCACCATTTTGAC  | 55675 |
| VervetAGM         | TTTGAGTAGCATTGATGTAGTAATAAGTTCTCTTTTCATGCTCTACTTCTTGGCCTTCTGACTGAACTCACCATTTTGAC   | 61957 |
| Gorilla           | TTTAAGTAGCATTGATGTAGTAATAAATTTCTCTTTTCATATCTCCACTTCTTGGCCTTCTGACTGAACTCACCATTTTGAC | 60732 |
| GrabEatingMacaque | TTTGAGTAGCATTGATGTAGTAATAAGTTCTCTTTTCATGCTCTCTTCTTGGCCTTCTGACTGAACTCACCATTTTGAC    | 61159 |
| Macaque           | TTTGAGTACCATTGATGTAGTAATAAGTTCTCTTTTCATGCTCTCTTCTTGGCCTTCTGACTGAACTCACCATTTTGAC    | 61991 |
| PigTailedMacaque  | TTTGAGTAGCATTGATGTAGTAATAAGTTCTCTTTTCATGCTCTCTTCTTGGCCTTCTGACTGAACTCACCATTTTGAC    | 60881 |
| Bonobo            | TTTAAGTAGCATTGATGTAGTAATAAATTTCTCTTTTCATATCTCCACTTCTTGGCCTTCTGACTGAACTCACCATTTTGAC | 59292 |
| OliveBaboon       | TTTGAGTAAACATTGATGTAGTAATAAGTTCTCTTTTCATGCTCTACTTCTTGGCCTTCTGACTGAACTCACCATTTTGAC  | 60736 |
| Orangutan         | TTTAAGTAGCATTGATGTAGTAATAAATTTCTCTTTTCATATCTCTACTTCTTGGCCTTCTGACTGAACTCACCATTTTGAC | 61173 |

Tuesday, May 03, 2022 06:16 PM

| Majority          | ATCTTCCTCTGCCTCCATTATTTTTCCACAGAGTACTAAGAATGATCTCATCCTC-AAGTCATATTGCTTCTAATCACAA |       |       |       |       |       |       |       |       |
|-------------------|----------------------------------------------------------------------------------|-------|-------|-------|-------|-------|-------|-------|-------|
|                   | 74650                                                                            | 74660 | 74670 | 74680 | 74690 | 74700 | 74710 | 74720 |       |
| Human             | ATCTTCCCCTACCTCCATTATTTTTCCACAGAGTACTAGGAATCATCTCAACGTC-AAGTCATATTGCTTCTAATCACAA |       |       |       |       |       |       |       | 60273 |
| Coquerel'sSifaka  | -----                                                                            |       |       |       |       |       |       |       | 49091 |
| Ma'sNightMonkey   | ATCTTCCTCTACCTCCATTGTTTTCCACAGAGGACCAAAAATGATCTCAACTTCCAAGTCATATTGCTTTCAATCACAA  |       |       |       |       |       |       |       | 55755 |
| VervetAGM         | ATCTTCCTCTGCCTCCATTATTTTTCCACAGAGTACTAAGAATTATATCATCCTC-AAGTCATATTGCTTCTAATCACAA |       |       |       |       |       |       |       | 62036 |
| Gorilla           | ATCTTCCCCTACCTCCATTATTTTTCCACAGAGTACTAAGAATCATCTCAACGTC-AAGTCATATTTCTTCTAATCACAA |       |       |       |       |       |       |       | 60811 |
| GrabEatingMacaque | ATCTTCCTCTGCCTCCATTATTTTTCCACAGAGTACTAAGAATGATATCATCCTC-AAGTCATATTGCTTCTAATCACAA |       |       |       |       |       |       |       | 61238 |
| Macaque           | ATCTTCCTCTGCCTCCATTATTTTTCCACAGAGTACTAAGAATGATATCATCCTC-AAGTCATATTGCTTCTAATCACAA |       |       |       |       |       |       |       | 62070 |
| PigTailedMacaque  | ATCTTCCTCTGCCTCCATTATTTTTCCACAGAGTACTAAGAATGATATCATCCTC-AAGTCATATTGCTTCTAATCACAA |       |       |       |       |       |       |       | 60960 |
| Bonobo            | ATCTTCCCCTACCTCCATTATTTTTCCACAGAGTACTAAGAATCATCTCAACGTC-AAGTCATATTGCTTCTAATCACAA |       |       |       |       |       |       |       | 59371 |
| OliveBaboon       | ATCTTCCTCTGCCTCCATTATTTTTCCACAGAGTACTAAGAATGATATCATCCTC-AAGTCATATTGCTTCTAATCACAA |       |       |       |       |       |       |       | 60815 |
| Orangutan         | ATCTTCCCCTACCTCCATTATTTTTCCA--GAGTACTAAGAATCATCTCAACCTC-AAGTCATATTGCTTCTAATCACAA |       |       |       |       |       |       |       | 61250 |

| Majority          | TACCCTTTAGTGACTTTTTTGTCCTTGTGATGAAGTCCACAGTTCCTTATCATGG-----CTTATAAAACTCTAAATCA   |       |       |       |       |       |       |       |       |
|-------------------|-----------------------------------------------------------------------------------|-------|-------|-------|-------|-------|-------|-------|-------|
|                   | 74730                                                                             | 74740 | 74750 | 74760 | 74770 | 74780 | 74790 | 74800 |       |
| Human             | TACCCTTTAGTGACTTTTTTGTCCTTGAATAAAGTCCACAGTTCCTTATCATGG-----CTTATAAGACTCTAAATCA    |       |       |       |       |       |       |       | 60346 |
| Coquerel'sSifaka  | -----                                                                             |       |       |       |       |       |       |       | 49091 |
| Ma'sNightMonkey   | TGCCCTTTAGTGACTTTGT-GTCCTTGTGATGAAGTCCACAGTTCCTTATCATGG-----CTTACAAAACCTCTAAATCA  |       |       |       |       |       |       |       | 55827 |
| VervetAGM         | TACCCTTTAGTGACTTTTTTGTCCTTGTGATGAAGTCCACAGTTCCTTATCATGGATCGTGGCTTATAAAACTCTAAATCA |       |       |       |       |       |       |       | 62116 |
| Gorilla           | TACCCTTTAGTGACTTTTTTGTCCTTGAATAAAGTCCACAGTTCCTTATCATGG-----CTTATAAGACTCTAAGTCA    |       |       |       |       |       |       |       | 60884 |
| GrabEatingMacaque | TACCCTTTAGTGACTTTTTTGTCCTTGTGATGAAGTCCACAGTTCCTTATCATGGATCATGGCTTATAAAACTCTAAATCA |       |       |       |       |       |       |       | 61318 |
| Macaque           | TACCCTTTAGTGACTTTTTTGTCCTTGTGATGAAGTCCACAGTTCCTTATCATGGATCATGGCTTATAAAACTCTAAATCA |       |       |       |       |       |       |       | 62150 |
| PigTailedMacaque  | TACCCTTTAGTGACTTTTTTGTCCTTGTGATGAAGTCCACAGTTCCTTATCATGGATCATGGCTTATAAAACTCTAAATCA |       |       |       |       |       |       |       | 61040 |
| Bonobo            | TACCCTTTAGTGACTTTTTTGTCCTTGAATAAAGTCCACAGTTCCTTATCATGG-----CTTATAAGACTCTAAATCA    |       |       |       |       |       |       |       | 59444 |
| OliveBaboon       | TACCCTTTAGTGACTTTTTTGTCCTTGTGATGAAGTCCACAGTTCCTTATCATGGATCATGGCTTATAAAACTCTAAATCA |       |       |       |       |       |       |       | 60895 |
| Orangutan         | TACCCTTTAGTGACTTTTTTGTCCTTGAATAAAGTCCACAGTTCCTTATCATGG-----CTTATAAGACTCTAAATCA    |       |       |       |       |       |       |       | 61323 |

| Majority          | GTCCTCAGCTTGCCCTCCATTCTCCTCTCATGCCTTTTT-AGCTATATTGGAGTTCCTTTAAATAGCTTGCATATACTGT |       |       |       |       |       |       |       |       |
|-------------------|----------------------------------------------------------------------------------|-------|-------|-------|-------|-------|-------|-------|-------|
|                   | 74810                                                                            | 74820 | 74830 | 74840 | 74850 | 74860 | 74870 | 74880 |       |
| Human             | GTCCTCAGCTTGCCCTCCATTCTCCTCTCATGCCTTTTT-AGCTATATTGGACTTCTTTAAATAGCTTGCATATACTGT  |       |       |       |       |       |       |       | 60425 |
| Coquerel'sSifaka  | -----                                                                            |       |       |       |       |       |       |       | 49091 |
| Ma'sNightMonkey   | GTCCTCAGCTTGCCCTCCAGTCTCTTCTCATGACTTTTT-AGCTATTTTGGACTTCTTTAAATAGCTTCCATATACTGT  |       |       |       |       |       |       |       | 55906 |
| VervetAGM         | GTCCTCAGCTTGCCCTCCATTCTCCTCTCATGCCTTTTT-AGCTATATTGGAGTTCCTTTAAATAGCTTGCATACACTGT |       |       |       |       |       |       |       | 62195 |
| Gorilla           | GTCCTCAGCTTGCCCTCCATTCTCCTCTCATGCCTTTTTAGCTATATTGGACTTCTTTAAATAGCTTGCATATACTGT   |       |       |       |       |       |       |       | 60964 |
| GrabEatingMacaque | GTCCTCAGCTTGCCCTCCATTCTCCTCTCATGCCTTTTT-AGCTATATTGGAGTTCCTTTAAATAGCTTGCATACACTGT |       |       |       |       |       |       |       | 61397 |
| Macaque           | GTCCTCAGCTTGCCCTCCATTCTCCTCTCATGCCTTTTT-AGCTATATTGGAGTTCCTTTAAATAGCTTGCATACACTGT |       |       |       |       |       |       |       | 62229 |
| PigTailedMacaque  | GTCCTCAGCTTGCCCTCCATTCTCCTCTCATGCCTTTTT-AGCTATATTGGAGTTCCTTTAAATAGCTTGCATACACTGT |       |       |       |       |       |       |       | 61119 |
| Bonobo            | GTCCTCAGCTTGCCCTCCATTCTCCTCTCATGCCTTTTT-AGCTATATTGGACTTCTTTAAATAGCTTGCATATACTGT  |       |       |       |       |       |       |       | 59523 |
| OliveBaboon       | GTCCTCAGCTTGCCCTCCATTCTCCTCTCATGCCTTTTT-AGCTATATTGGAGTTCCTTTAAATAGCTTGCATACACTGT |       |       |       |       |       |       |       | 60974 |
| Orangutan         | GTCCTCAGCTTGCCCTCCATTCTCCTCTCATGCCTTTTT-AGCTATATTGGACTTCTTTAAATAGCTTGCATATACTGT  |       |       |       |       |       |       |       | 61402 |



Tuesday, May 03, 2022 06:16 PM

| Majority          | ATTTTCTCTGATGTCT-----TGATCTTACAGATTGCTGTTCCATTTGCTAATACTATTTTTT-CT              |       |       |       |       |       |       |       |       |
|-------------------|---------------------------------------------------------------------------------|-------|-------|-------|-------|-------|-------|-------|-------|
|                   | 74890                                                                           | 74900 | 74910 | 74920 | 74930 | 74940 | 74950 | 74960 |       |
| Human             | ATTTTCTCTGATGTCT-----CGATCTTACAGATTGCTGTTCCATTTGCTAATACTATTTTTT-CT              |       |       |       |       |       |       |       | 60485 |
| Coquerel'sSifaka  | -----AAATAATAAATT--TGGTTTTTGAGATAAT-----TTGG---                                 |       |       |       |       |       |       |       | 49123 |
| Ma'sNightMonkey   | ATTTTCTCTGATGTCTGGTAAATCTCTGATGTCTCAGTCTTACAGATTGCTGTTCCATTTGCTAATACTATTTTTT-CT |       |       |       |       |       |       |       | 55985 |
| VervetAGM         | ATTTTCTCTGATGTCT-----TGATCTTACAGATTGCTGTTCCATTTGCTAATACTATTTTTTCT               |       |       |       |       |       |       |       | 62256 |
| Gorilla           | ATTTTCTCTGATGTCT-----CGATCTTACAGATTGCTGTTCCATTTGCTAATACTATTTTTT-CT              |       |       |       |       |       |       |       | 61024 |
| GrabEatingMacaque | ATTTTCTCTGATGTCT-----TGATCTTACAGATTGCTGTTCCATTTGCTAATACTATTTTTT-CT              |       |       |       |       |       |       |       | 61457 |
| Macaque           | ATTTTCTCTGATGTCT-----TGATCTTACAGATTGCTGTTCCATTTGCTAATACTATTTTTT-CT              |       |       |       |       |       |       |       | 62289 |
| PigTailedMacaque  | ATTTTCTCTGATGTCT-----TGATCTTACAGATTGCTGTTCCATTTGCTAATACTATTTTTT-CT              |       |       |       |       |       |       |       | 61179 |
| Bonobo            | ATTTTCTCTGATGTCT-----CGATCTTACAGATTGCTGTTCCATTTGCTAATACTATTTTTT-CT              |       |       |       |       |       |       |       | 59583 |
| OliveBaboon       | ATTTTCTCTGATGTCT-----TGATCTTACAGATTGCTGTTCCATTTGCTAATACTATTTTTTCT               |       |       |       |       |       |       |       | 61035 |
| Orangutan         | ATTTTCTCTGATGTCT-----CGATCTTACAGATTGCTGTTCCATTTGCTAATACTATTTTTT-CT              |       |       |       |       |       |       |       | 61462 |

| Majority          | CTTCATCTCTTTATGCCCAACTTCTGCTTCTCTTTGTCTTTCAAGTATCAGTTTAGAAGTCTCTTTCTGAGAGAAGTCTT |       |       |       |       |       |       |       |       |
|-------------------|----------------------------------------------------------------------------------|-------|-------|-------|-------|-------|-------|-------|-------|
|                   | 74970                                                                            | 74980 | 74990 | 75000 | 75010 | 75020 | 75030 | 75040 |       |
| Human             | CTTCATCTCTTTATGCCCAACTTCTGCTTCTCTTTGTCTTTCAAGTATCAGTTTAGAAGCCTCTTCTGAGATAAGTCTT  |       |       |       |       |       |       |       | 60565 |
| Coquerel'sSifaka  | CTGAA-----ATATATCAA-----TACAGATGT--GGTTCAGATG-----CTATGATAGGCTCT                 |       |       |       |       |       |       |       | 49170 |
| Ma'sNightMonkey   | CTTCATCTCTTTATGCCCAACTTCTGCTTATCTTCGTCTTTCAAGTATCAGTTTAGAAGTCTCTTTCTGAGAGAAGTCTT |       |       |       |       |       |       |       | 56065 |
| VervetAGM         | CTTCATCTCTTTATGCCCAACTTCTGCTCCTCTTTGTCTTTCAAGCATTAGTTTAGAAGTCTCTTTCTGAGAGAAGTCTG |       |       |       |       |       |       |       | 62336 |
| Gorilla           | ATTCATCTCTTTATGCCCAACTTCTGCTTCTCTTTGTCTTTCAAGTATCAGTTTAGAAGCCTCTTCTGAGATAAGTCTT  |       |       |       |       |       |       |       | 61104 |
| GrabEatingMacaque | CTTCATCTCTTTATGCCCAACTTCTGCTTCTCTTTGTCTTTCAAGTATCGGTTTAGAAGTCTCTTTCTGAGAGAAGTCTT |       |       |       |       |       |       |       | 61537 |
| Macaque           | CTTCATCTCTTTATGCCCAACTTCTGCTTCTCTTTGTCTTTCAAGTATCGGTTTAGAAGTCTCTTTCTGAGAGAAGTCTT |       |       |       |       |       |       |       | 62369 |
| PigTailedMacaque  | CTTCATCTCTTTATGCCCAACTTCTGCTTCTCTTTGTCTTTCAAGTATCGGTTTAGAAGTCTCTTTCTGAGAGAAGTCTT |       |       |       |       |       |       |       | 61259 |
| Bonobo            | CTTCATCTCTTTATGCCCAACTTCTGCTTCTCTTTGTCTTTCAAGTATCAGTTTAGAAGCCTCTTCTGAGATAAGTCTT  |       |       |       |       |       |       |       | 59663 |
| OliveBaboon       | CTTCATCTCTTTATGCCCAACTTCTGCTTCTCTTTGTCTTTCAAGTATCAGTTTAGAAGTCTCTTTCTGAGAGAAGTCTT |       |       |       |       |       |       |       | 61115 |
| Orangutan         | CTTCATCTCTTTATGCCCAACTTCTGCTTCTCTTTGTCTTTCAAGTATCAGTTTAGAAGCCTCTTCTGAGATAAGTCTT  |       |       |       |       |       |       |       | 61542 |

| Majority          | CTGTAACATTTCAACTAGATTAGATCCCTTCTTTCTTAGTTCTCAGTGCCACACATAAAAATTTTAAATTTGTTAAATGT  |       |       |       |       |       |       |       |       |
|-------------------|-----------------------------------------------------------------------------------|-------|-------|-------|-------|-------|-------|-------|-------|
|                   | 75050                                                                             | 75060 | 75070 | 75080 | 75090 | 75100 | 75110 | 75120 |       |
| Human             | CTGTAACATTTCAACTAGATTAGATCCCTTCTTTCTTAGTTCTCAGTATCACACATAAAAATTTATAAATTTGTTAAATGT |       |       |       |       |       |       |       | 60645 |
| Coquerel'sSifaka  | CAGTTT-----ATTTAGGTCTATATCCTCTATTTCTTTTAAAGATAATTTAGAAAACA---GATTTTCTGAGTAG       |       |       |       |       |       |       |       | 49236 |
| Ma'sNightMonkey   | CCGTAA-----GACTAGATTAGATCCCTTCTTTCTTAGTTCTCAGTAAACACACATAAAAATTTATAAATTTGTTAAATGT |       |       |       |       |       |       |       | 56139 |
| VervetAGM         | CTGTAACATTTCAACTAGATTAGATCCCTTCTTTCTTAGTTATCAGTGCCACACATAACAATTTTAAATTTGTTAAATGT  |       |       |       |       |       |       |       | 62416 |
| Gorilla           | CTGTAACATTTCAACTAGATTAGATCCCTTCTTTCTTAGTTCTCAGTATCACACATAAAAATTTATAAATTTGTTAAATGT |       |       |       |       |       |       |       | 61184 |
| GrabEatingMacaque | CTGTAACATTTCAACTAGATTAGATCCCTTCTTTCTTAGTTATCAGTGCCACACATAACAATTTTAAATTTGTTAAATGT  |       |       |       |       |       |       |       | 61617 |
| Macaque           | CTGTAACATTTCAACTAGATTAGATCCCTTCTTTCTTAGTTATCAGTGCCACACATAACAATTTTAAATTTGTTAAATGT  |       |       |       |       |       |       |       | 62449 |
| PigTailedMacaque  | CTGTAACATTTCAACTAGATTAGATCCCTTCTTTCCAGTTATCAGTGCCACACATAACAATTTTAAATTTGTTAAATGT   |       |       |       |       |       |       |       | 61339 |
| Bonobo            | CTGTAACATTTCAACTAGATTAGATCCCTTCTTTCTTAGTTCTCAGTATCACACATAAAAATTTATAAATTTGTTAAATGT |       |       |       |       |       |       |       | 59743 |
| OliveBaboon       | CTGTAACATTTCAACTAGATTAGATCCCTTCTTTCTTAGTTATCAGTGCCACACATAACAATTTTAAATTTGTTAAATGT  |       |       |       |       |       |       |       | 61195 |
| Orangutan         | CTGTAACATTTCAACTGGATTAGATCCCTTCTTTCTTAGTTCTCAGTATCACACATAAAAATTTATAAATTTGTTAAATGT |       |       |       |       |       |       |       | 61622 |

Tuesday, May 03, 2022 06:16 PM

| Majority          | GTATATTTTCTGTTGGACTGTAAGTTCTGAGTACCATGTCGCTTTGTTCTCTGCTGTATTT---AAGCATTGACATTTA  |       |       |       |       |       |       |       |       |
|-------------------|----------------------------------------------------------------------------------|-------|-------|-------|-------|-------|-------|-------|-------|
|                   | 75130                                                                            | 75140 | 75150 | 75160 | 75170 | 75180 | 75190 | 75200 |       |
| Human             | GTATATTTTCTGTCGGACTGTAAGTTCTGAGTACCATGTCGCTTTGCTTTCTGCTGTATTTATTAACATTGACATTCA   |       |       |       |       |       |       |       | 60725 |
| Coquerel'sSifaka  | --AT---TCCTAGTCTACTTTTTATTCCCATCATT-TGCTTTTTTTGTTGT-TGTTATGTAT---GGAGGGTGAGAGACA |       |       |       |       |       |       |       | 49306 |
| Ma'sNightMonkey   | GTGTATTTTCTGTTGGACTGTAAGTTCTGAGTACCATGTCGCTTTGTAAGTCTGCTATATTTCTTAAGCATTGACATTTA |       |       |       |       |       |       |       | 56219 |
| VervetAGM         | GTATATTTTCTGTTGGACTGTAAGTTCTGAGTACCATGTCGCTTTATTCTCTGCTGTATT----AAGCATTGACATTTA  |       |       |       |       |       |       |       | 62492 |
| Gorilla           | GTATATTTTCTGTCGCACTGTAAGTTCTGAGTACCATGTCGCTTTGCTTTCTGCTGTATTTATTAACATTGACATTCA   |       |       |       |       |       |       |       | 61264 |
| GrabEatingMacaque | GTATATTTTCTGTTGGACTGTAAGTTCTGAGTACCATGTCGCTTTATTCTCTGCTGTATT----AAGCATTGACATTTA  |       |       |       |       |       |       |       | 61693 |
| Macaque           | GTATATTTTCTGTTGGACTGTAAGTTCTGAGTACCATGTCGCTTTATTCTCTGCTGTATT----AAGCATTGACATTTA  |       |       |       |       |       |       |       | 62525 |
| PigTailedMacaque  | GTATATATTCTGTTGGACTGTAAGTTCTGAGTACCATGTCGCTTTATTCTCTGCTGTATT----AAGCGTTGACATTTA  |       |       |       |       |       |       |       | 61415 |
| Bonobo            | GTATATTTTCTGTCGGACTGTAAGTTCTGAGTACCATGTCGCTTTGCTTTCTGCTGTATTTATTAACATTGACATTCA   |       |       |       |       |       |       |       | 59823 |
| OliveBaboon       | GTATATTTTCTATTGGACTGTAAGTTCTGAGTACCATGTCGCTTTATTCTCTGCTGTATT----AAGCATTGACATTTA  |       |       |       |       |       |       |       | 61271 |
| Orangutan         | GTATATTTTCTGTTGGACTGTAAGTTCTGAGTACCATGTCGCTTTGTTCTCTGCTGTATTTATTAAGCATTGACATTTA  |       |       |       |       |       |       |       | 61702 |

| Majority          | GGGTGAAAATCAGAAGTCATAGTAACAATCCTAATTATCAATAAAAAAGTATTTTATTCGATCCTCATATTTATTAAGGA |       |       |       |       |       |       |       |       |
|-------------------|----------------------------------------------------------------------------------|-------|-------|-------|-------|-------|-------|-------|-------|
|                   | 75210                                                                            | 75220 | 75230 | 75240 | 75250 | 75260 | 75270 | 75280 |       |
| Human             | GGGTGAAAATCAGAAGTCATAGTAACAATCCTAATTATCAATAAAAAAGTATTTTATTCGATCCTCATATTTATTAAGGA |       |       |       |       |       |       |       | 60805 |
| Coquerel'sSifaka  | --ATTAAGAAGTAAAAGTGGCCATGTCATGACTACCATGAAAAGTGGCGTAGCA-AATCTTACTTCC-----A        |       |       |       |       |       |       |       | 49375 |
| Ma'sNightMonkey   | GGGTGATAATCAGAATCATAAGTGAAGACCCTAATTATCAATAAAAAAGTATTTTATATGATCCTCATATTTATTAAGGA |       |       |       |       |       |       |       | 56299 |
| VervetAGM         | GGGTGAAAATCAGAAGTCATAGTAACAATCCTAATTATCTATAAAAAAGTATTTTATTCGATCCTCATATTTATTAAGGA |       |       |       |       |       |       |       | 62572 |
| Gorilla           | GGGTGAAAATCAGAAGTCATAGTAACAATCCTAATTATCAATAAAAAAGTATTTTATTCGATCCTCATATTTATTAAGGA |       |       |       |       |       |       |       | 61344 |
| GrabEatingMacaque | GGGTGAAAATCAGAAGTCATAGTAACAATCCTAATTATCTATAAAAAAGTATTTTATTCGATCCTCATATTTATTAAGGA |       |       |       |       |       |       |       | 61773 |
| Macaque           | GGGTGAAAATCAGAAGTCATAGTAACAATCCTAATTATCTATAAAAAAGTATTTTATTCGATCCTCATATTTATTAAGGA |       |       |       |       |       |       |       | 62605 |
| PigTailedMacaque  | GGGTGAAAATCAGAAGTCATAGTAACAATCCTAATTATCTATAAAAAAGTATTTTATTCGATCCTCATATTTATTAAGGA |       |       |       |       |       |       |       | 61495 |
| Bonobo            | GGGTGAAAATCAGAAGTCATAGTAACAATCCTAATGATCAATAAAAAAGTATTTTATTCGATCCTCATATTTATTAAGGA |       |       |       |       |       |       |       | 59903 |
| OliveBaboon       | GGGTGAAAATCAGAAGTCATAGTAACAATCGTAATTATCTATAAAAAAGTATTTTATTCGATCCTCATATTTATTAAGGA |       |       |       |       |       |       |       | 61351 |
| Orangutan         | GGGTGAAAATCAGAAGTCATAGTAACAATCCTAATTATCAATAAAAAAGTATTTTATGTGATCCTCATATTTATTAAGGA |       |       |       |       |       |       |       | 61782 |

| Majority          | AACACCTTAATACCTT-TTAGAAAATCTTGTTTATTTATTGGAAAGTAGTGTATTAGGCAAAGATGTGCTTCT--TGCC  |       |       |       |       |       |       |       |       |
|-------------------|----------------------------------------------------------------------------------|-------|-------|-------|-------|-------|-------|-------|-------|
|                   | 75290                                                                            | 75300 | 75310 | 75320 | 75330 | 75340 | 75350 | 75360 |       |
| Human             | AACACCTTAATACCTT-TTAGAAAATCTTGTTTATTTATTGGAAAGTAGTGTATTAGGCAAAGATGTGCTTCTCTTGCC  |       |       |       |       |       |       |       | 60884 |
| Coquerel'sSifaka  | AATGCCTTAATCTTCTGTTTGTATATCTT-----ACTTAAATCTACTTT---G-C-----TCTATCTTTT--TAAC     |       |       |       |       |       |       |       | 49435 |
| Ma'sNightMonkey   | CACATCTTAATACCTT-TTAGAAAATCTTGTTTATTTTGGAAACAAT----AGGCAAACATGTGGCTTCTCGTGCC     |       |       |       |       |       |       |       | 56373 |
| VervetAGM         | AACACCTTAATACCTT-TTAGAAAGTCTTGTTTATTTATTGGAAAGTAGTGTATTAGGCAAAGATGTGCCTTCT--TGCC |       |       |       |       |       |       |       | 62649 |
| Gorilla           | AACACCTTAATACCTT-TTAGAAAATCTTGTTTATTTATTGGAAAGTAGTGTATTAGGCAAAGATGTGCTTCTCTTGCC  |       |       |       |       |       |       |       | 61423 |
| GrabEatingMacaque | AACACCTTAATACCTT-TTAGAAAATCTT-----ATTGGAAAGTAGTGTATTAGGCAAAGATGTGCCTTCT--TGCC    |       |       |       |       |       |       |       | 61842 |
| Macaque           | AACACCTTAATACCTT-TTAGAAAATCTTGTTTATTTATTGGAAAGTAGTGTATTAGGCAAAGATGTGCCTTCT--TGCC |       |       |       |       |       |       |       | 62682 |
| PigTailedMacaque  | AACACCTTAATACCTT-CTAGAAAATCTTGTTTATTTATTGGAAAGTAGTGTATTAGGCAAAGATGTGCCTTCT--TGCC |       |       |       |       |       |       |       | 61572 |
| Bonobo            | AACACCTTAATACCTT-TTAGAAAATCTTGTTTATGTATTGGAAAGTAGTGTATTAGGCAAAGATGTGCTTCTCTTGCC  |       |       |       |       |       |       |       | 59982 |
| OliveBaboon       | AACACCTTAATACCTT-TTAGAAAATCTTGTTTATTTATTGGAAAGTAGTGTATTAGGCAAAGATGTGCCTTCT--TGCC |       |       |       |       |       |       |       | 61428 |
| Orangutan         | AACACCTTAATACCTT-TTAGAAAATCTTGTTTATTTATTGGAAAGTAGTGTATTAGGCAAAGATGTGCTTCTCTTAGC  |       |       |       |       |       |       |       | 61861 |

Tuesday, May 03, 2022 06:16 PM

| Majority          | ATTCTAATTCAGCTTTTGTAAATGTTGAGGAATATAAATTACTTGATGCATAAAAAATATCAGTCTTTTAA-CAGTATAATA |       |       |       |       |       |       |       |       |
|-------------------|------------------------------------------------------------------------------------|-------|-------|-------|-------|-------|-------|-------|-------|
|                   | 75370                                                                              | 75380 | 75390 | 75400 | 75410 | 75420 | 75430 | 75440 |       |
| Human             | TTTCTAATTCAGCTTTTATAATGTTGAGGAATATAAATTACTTGATGCATAAAAAATATCAATCTTTTAA-TAGTATAATA  |       |       |       |       |       |       |       | 60963 |
| Coquerel'sSifaka  | TTTTTGTGCCATATATCTCGTTATTCCG--TT-----CTTAAGCCATTA AAAAATTC A--TTATTAACCATTATTAGG   |       |       |       |       |       |       |       | 49504 |
| Ma'sNightMonkey   | TTTCTAATTCAGCTTTTACAGTGTTGAGGAATGTAATTAGTTGATACATAAAAAA-CAGTCTTTTAA-TAGTATAATA     |       |       |       |       |       |       |       | 56451 |
| VervetAGM         | ATTCTAATTCAGCTTTTGTAAATGTTGAGGACTATAAATTACTTGATGCATAAAAAATACCAGTCTTTTAA-CAGTATAATA |       |       |       |       |       |       |       | 62728 |
| Gorilla           | TTTCTAATTCAGCTTTTATAATGTTGAGGAATATAAATTACTTGATGCATAAAAAATATCAATCTTTTAA-TAGTATAATA  |       |       |       |       |       |       |       | 61502 |
| GrabEatingMacaque | ATTCTAATTCAGCTTTTGTAAATGTTGAGGAATATAAATTACTTGATGCATAAAAAATACCAGTCTTTTAA-CAGTATAATA |       |       |       |       |       |       |       | 61921 |
| Macaque           | ATTCTAATTCAGCTTTTGTAAATGTTGAGGAATATAAATTACTTGATGCATAAAAAATACCAGTCTTTTAAACAGTATAATA |       |       |       |       |       |       |       | 62762 |
| PigTailedMacaque  | ATTCTAATTCAGCTTTTGTAAATGTTGAGGAATATAAATTACTTGATGCATAAAAAATACCAGTCTTTTAA-CAGTATAATA |       |       |       |       |       |       |       | 61651 |
| Bonobo            | TTTCTAATTCAGCTTTTATAATGTTGAGGAATATAAATTACTTGATGCATAAAAAATATCAATCTTTTAA-TAGTATAATA  |       |       |       |       |       |       |       | 60061 |
| OliveBaboon       | ATTCTAATTCAGCTTTTGTAAATGTTGAGGAATATAAATTACTTGACGCATAAAAAATACCAGTCTTTTAA-CAGTATAATA |       |       |       |       |       |       |       | 61507 |
| Orangutan         | ATTCTAATTCAGCTTTTAAAATGTTGAGGAATATAAATTACTTGATGCATAAAAAATATCAATCTTTTAA-TAGTATAATA  |       |       |       |       |       |       |       | 61940 |

| Majority          | AGACAGCTAATGTAATCTCCTTTTCACCTGGGATT-TAAAAATTGTTTT-ACGTAGTCCTTACATTATAACACACATGAG |       |       |       |       |       |       |       |       |
|-------------------|----------------------------------------------------------------------------------|-------|-------|-------|-------|-------|-------|-------|-------|
|                   | 75450                                                                            | 75460 | 75470 | 75480 | 75490 | 75500 | 75510 | 75520 |       |
| Human             | AGACATATAATGTAATCTCCTTTTCACCTGGGATT-TAAAAATTGTTTTTACATAGTCCTTACATTATAACACACATAAG |       |       |       |       |       |       |       | 61042 |
| Coquerel'sSifaka  | AAACCATTAAATCAACTGTCTTT--ACTTACATTTGTCTTACTTGTTTT---TCTCCCTTTCCTCTTTCTTTACTTT    |       |       |       |       |       |       |       | 49578 |
| Ma'sNightMonkey   | AGACA--CAGTGAATCTCCTTTTCACCTGGGAATT-TAAAAATTATTTT-ATGTAGTCCTTAAATTACAACACACGTGAG |       |       |       |       |       |       |       | 56527 |
| VervetAGM         | AGACAGCTAATGTAATCTCCTTTTCACCTGGGATT-TAAAAATTGTTTT-ACGTAGTCCTTACATTATAACACACATGAG |       |       |       |       |       |       |       | 62806 |
| Gorilla           | AGACATATAATGTAATCTCCTTTTCACCTGGGATT-TAAAAATTGTTTTTACATAGTCCTTACGTTATAACACACATAAG |       |       |       |       |       |       |       | 61581 |
| GrabEatingMacaque | AGACAGCTAATGTAATCTCCTTTTCACCTGGGATT-TAAAAATTGTTTT-ATGTAGTCCTTACATTATAACACACATGAG |       |       |       |       |       |       |       | 61999 |
| Macaque           | AGACAGCTAATGTAATCTCCTTTTCACCTGGGATT-TAAAAATTGTTTT-ACGTAGTCCTTACATTATAACACACATGAG |       |       |       |       |       |       |       | 62840 |
| PigTailedMacaque  | AGACAGCTAATGTAATCTCCTTTTCACCTGGGATT-TAAAAATTGTTTT-ACGTAGTCCTTACATTATAACACACATGAG |       |       |       |       |       |       |       | 61729 |
| Bonobo            | AGACATATAATGTAATCTCCTTTTCACCTGGGATT-TAAAAATTGTTTTTACATAGTCCTTACATTATAACACACATAAG |       |       |       |       |       |       |       | 60140 |
| OliveBaboon       | AGACAGCTAATGTAATCTCCTTTTCACCTGGGATT-TAAAAATTGTTTT-ACGTAGTCCTTACATTATAACACACATGAG |       |       |       |       |       |       |       | 61585 |
| Orangutan         | AGACAGATAATGTAATCTCCTTTTCACCTGGGATT-TAAAAATTGTTTT-ACATAGTCCTTACATTATAACACACATAAG |       |       |       |       |       |       |       | 62018 |

| Majority          | TAGGAAATGGTTCTTTTT-GGTTTTTGTATTAGAAACAGCTTTTCAGAAACAT---GTGTTTATTAGGAATATCTTTAG  |       |       |       |       |       |       |       |       |
|-------------------|----------------------------------------------------------------------------------|-------|-------|-------|-------|-------|-------|-------|-------|
|                   | 75530                                                                            | 75540 | 75550 | 75560 | 75570 | 75580 | 75590 | 75600 |       |
| Human             | TAGGAAATGGTTCTTTTT-GGTTTTTGTATTAGAAACAGCTTTTCAGAAACAT---GTCTTTATTAGGAATATCTTTAG  |       |       |       |       |       |       |       | 61118 |
| Coquerel'sSifaka  | CAG--ACTAATTAT--GA---TCTCTAATACTTCAGT--GCTTCCTTCAGA--T-----CAAGATTACTTCCAT       |       |       |       |       |       |       |       | 49636 |
| Ma'sNightMonkey   | TAGGAAATGGTTGTTTTTGTTTTTTGTAAATAGAAACAGCTTTTCAGAAACAT---GTCTTTATTAGGAATATCTTTAG  |       |       |       |       |       |       |       | 56604 |
| VervetAGM         | TAGGAAATGGTTCTTTTT-AGTTTTTGTATTAGAAACAGCTTTTCAGAAACATATGTGTTTATTAGGAATATCT--AG   |       |       |       |       |       |       |       | 62883 |
| Gorilla           | TAGGAAATGGTTCTTTTT-GGTTTTTGTATTAGAAACATCTTTTCAGAAACAT---GTCTTTATTAGGAATATCTTTAG  |       |       |       |       |       |       |       | 61657 |
| GrabEatingMacaque | TAGGAAATGGTTCTTTTT-GGTTTTTGTATTAGAAACAGCTTTTCAGAAACATATGTGTTTTTATTAGGAATATCT--AG |       |       |       |       |       |       |       | 62076 |
| Macaque           | TAGGAAATGGTTCTTTTT-GGTTTTTGTATTAGAAACAGCTTTTCAGAAACATATGTGTTTTTATTAGGAATATCT--AG |       |       |       |       |       |       |       | 62917 |
| PigTailedMacaque  | TAGGAAATGGTTCTTTTTGGTTTTTGTATTAGAAACAGCTTTTCAGAAACATATGTGTTCTTAGGAATATCT--AG     |       |       |       |       |       |       |       | 61807 |
| Bonobo            | TAGGAAATGGTTCTTTTT-GGTTTTTGTATTAGAAACAGCTTTTCAGAAACAT---GTCTTTATTAGGAATATCTTTAG  |       |       |       |       |       |       |       | 60216 |
| OliveBaboon       | TAGGAAATGGTTCTTCTT-GGTTTTTGTATTAGAAACAGCTTTTCAGAAACATATGTGTTTATTAGGAATATCT--AG   |       |       |       |       |       |       |       | 61662 |
| Orangutan         | TAGGAAATGGTTCTTTTC-AGTTTTTGTATTAGAAACAGCTTTTCAGAAACAT---GTCTTTATTAGGAATATCTTTAG  |       |       |       |       |       |       |       | 62094 |

Tuesday, May 03, 2022 06:16 PM

|                   |                                                         |                                          |                    |               |             |       |       |       |
|-------------------|---------------------------------------------------------|------------------------------------------|--------------------|---------------|-------------|-------|-------|-------|
| Majority          | TTGACACTGGACAGT                                         | GATATTGTGTCTTCTGGAAGTCCTGTTTATATGATCATT  | TTTATTTTAACATAT    | -AAGTGGGTTGT  |             |       |       |       |
|                   | 75610                                                   | 75620                                    | 75630              | 75640         | 75650       | 75660 | 75670 | 75680 |
| Human             | TTGACACTGGACAGT                                         | -ATATTGTGTCTTCTGGAAGTCCTGTTTATATGATCATT  | TTTATTTTAACATAT    | -AAGTGGGTTGT  | 61196       |       |       |       |
| Coquerel'sSifaka  | GGAACCCAGAACATT                                         | --TTTTGTTTCTGTTTCA--                     | TTGCATTTCTATGCTCAG | ---AATCTCATTG | ---GGAGGCAA | 49705 |       |       |
| Ma'sNightMonkey   | TTGACACTGGACATTGATACTGTGTCTTTTGGAAAGTCCTGTTTATATGATCATT | TTTATTTTAACATAT                          | -AAGTGGGTTGT       | 56683         |             |       |       |       |
| VervetAGM         | TTGACACTGGACAGT                                         | GATATTGTGTCTTCTGGAAGTCCTGTTTATATGATCATT  | TTTATTTTAACATAT    | -AAGTGGGTTGT  | 62962       |       |       |       |
| Gorilla           | TTGACACTGGACAGT                                         | -ATATTGTGTCTTCTGGAAGTCCTGTTTATATGATCATT  | TTTATTTTAACATAT    | TAAGT         | GAGTTGT     | 61736 |       |       |
| GrabEatingMacaque | TTGACACTGGACAGT                                         | GATATTGTGTCTTCTGGAAGTCCTGTTTATATGATCATT  | TTTATTTTAACGTAT    | -AAGTGGGTTGT  | 62155       |       |       |       |
| Macaque           | TTGACACTGGACAGT                                         | GATATTGTGTCTTCTGGAAGTCCTGTTTATATGATCATT  | TTTATTTTAACGTAT    | -AAGTGGGTTGT  | 62996       |       |       |       |
| PigTailedMacaque  | TTGACACTGGACAGT                                         | GATATTGTGTCTTCTGGAAGTCCTGTTTATATGATCATT  | TTTATTTTAACGTAT    | -AAGTGGGTTGT  | 61886       |       |       |       |
| Bonobo            | TTGACACTGGACAGT                                         | -ATATTGTGTCTTCTGGAAGTCCTGTTTATATGATCATT  | TTTATTTTAACATAT    | -AAGTGGGTTGT  | 60294       |       |       |       |
| OliveBaboon       | TTGACACTGGACAGT                                         | GATATTGTGTCTTCTGGAAGTCCTGTTTATATGATCATT  | TTTATTTTAACGTAT    | -AAGTGGGTTGT  | 61741       |       |       |       |
| Orangutan         | TTGACACTGGACAGT                                         | -ATATTGTGTCTTTTGGAAAGTCCTGTTTATATGATCATT | TTTATTTTAACATAT    | -AAGTGGGTTGA  | 62172       |       |       |       |

|                   |                                                                                     |                                      |       |       |       |       |       |       |
|-------------------|-------------------------------------------------------------------------------------|--------------------------------------|-------|-------|-------|-------|-------|-------|
| Majority          | TTCTTATTATTTATTTCTTCCAGGAGATTCCATTTTCATCACTAA                                       | ---TAATAAAAAATAAATATGAGGTAAAACATTTGT |       |       |       |       |       |       |
|                   | 75690                                                                               | 75700                                | 75710 | 75720 | 75730 | 75740 | 75750 | 75760 |
| Human             | TTCTTATTCTTTATTTCTTCCAGGAGATTCCATTTTCATCACTAACTGATAATAAAAAATAAATATGAGATAAAAACATTTGC | 61276                                |       |       |       |       |       |       |
| Coquerel'sSifaka  | -----AATAGCTTTAGGTAGCAGAA-AG---GCTGTATAAGTAA                                        | ---TAATAACAATTGTA-ATAGTTTACCAA       | ---GT | 49767 |       |       |       |       |
| Ma'sNightMonkey   | TTCTTATTATTTATTTCTTCTAGGAGATTGTATTTTCATCACTAAAC                                     | --ATAATAAAAAATAAATATGAGGTAAAA        | ----- | 56755 |       |       |       |       |
| VervetAGM         | TTCTTATTATTTATTTCTTCCAGGAGATTCCATTTTCATCACTAA                                       | ---TAATAAAAAATAAATATGAGGTAAAACATTTGT |       | 63038 |       |       |       |       |
| Gorilla           | TTCTTATTCTTTATTTCTTCCAGGAGATTCCATTTTCATCACTAACTGATAATAAAAAATAAATATGAGATAAAAACATTTGC | 61816                                |       |       |       |       |       |       |
| GrabEatingMacaque | TTCTTATTATTTATTTCTTCCAGGAGATTCCATTTTCATCACTAA                                       | ---TAATAAAAAATAAATATGAGGTAAAACATTTGT |       | 62231 |       |       |       |       |
| Macaque           | TTCTTATTATTTATTTCTTCCAGGAGATTCCATTTTCATCACTAA                                       | ---TAATAAAAAATAAATATGAGGTAAAACATTTGT |       | 63072 |       |       |       |       |
| PigTailedMacaque  | TTCTTATTATTTATTTCTTCCAGGAGATTCCATTTTCATCACTAA                                       | ---TAATAAAAAATAAATATGAGGTAAAACATTTGT |       | 61962 |       |       |       |       |
| Bonobo            | TTCTTATTCTTTATTTCTTCCAGGAGATTCCATTTTCATCACTAACTGATAATAAAAAATAAATATGAGATAAAAACATTTGC | 60374                                |       |       |       |       |       |       |
| OliveBaboon       | TTCTTATTATTTATTTCTTCCAGGAGATTCCATTTTCATCACTAA                                       | ---TAATAAAAAATAAATATGAGGTAAAACATTTGT |       | 61817 |       |       |       |       |
| Orangutan         | TTCTTATTATTTATTTCTTCCAGGAGATTCCATTTTCATCACTAACTGATAATAAAAAATAAATATGAGATAAAAACATTTGC | 62252                                |       |       |       |       |       |       |

|                   |                                                                                   |                        |                            |       |       |       |       |       |
|-------------------|-----------------------------------------------------------------------------------|------------------------|----------------------------|-------|-------|-------|-------|-------|
| Majority          | GAAAGTAAGATTATGTCATTCATTTCCCTTCTCGCAGAGTACACATTGCTTTATGCAGATTCTTTGAGAGACCTAATGGAA |                        |                            |       |       |       |       |       |
|                   | 75770                                                                             | 75780                  | 75790                      | 75800 | 75810 | 75820 | 75830 | 75840 |
| Human             | AGCAGTAAGATTATGTCATTCATTTCCCTTCTCACAGAGTACACATTGCTTTATGCAGATTCTTTGAGAGACCTAATGGAA | 61356                  |                            |       |       |       |       |       |
| Coquerel'sSifaka  | -----GCTATAATCTCATTTTTTTCT                                                        | ---GA-C---CATTACTTTATA | -----TTCTAAACAGAACAGGTTTT- | 49824 |       |       |       |       |
| Ma'sNightMonkey   | -----TATATCATTCAATTTCTTCTCACAGAGTAAGCATTTGTTTATGCAGAGTCTTTGAGACAACCTAATGGAA       | 56824                  |                            |       |       |       |       |       |
| VervetAGM         | GAAAGTAAGATTATGTCATTCATTTCCCTTCTCGCAGAGTACACATTGCTTTATGCAGATTCTTTGAGAGACCTAATGGAA | 63118                  |                            |       |       |       |       |       |
| Gorilla           | AGCAGTAAGATTATGTCATTCATTTCCCTTCTCACAGAGTACACATTGCTTTATGCAGATTCTTTGAGAGACCTAATGGAA | 61896                  |                            |       |       |       |       |       |
| GrabEatingMacaque | GAAAGTAAGATTGTGTCATTCATTTCCCTTCTCGCAGAGTACACATTGCTTTATGCAGATTCTTTGAGAGACCTAATGGA- | 62310                  |                            |       |       |       |       |       |
| Macaque           | GAAAGTAAGATTGTGTCATTCATTTCCCTTCTCGCAGAGTACACATTGCTTTATGCAGATTCTTTGAGAGACCTAATGGA- | 63151                  |                            |       |       |       |       |       |
| PigTailedMacaque  | GAAAGTAAGATTGTGTCATTCATTTCCCTTCTCGCAGAGTACACATTGCTTTATGCAGATTCTTTGAGAGACCTAATGGA- | 62041                  |                            |       |       |       |       |       |
| Bonobo            | AGCAGTAAGATTATGTCATTCATTTCCCTTCTCACAGAGTACACATTGCTTTATGCAGATTCTTTGAGAGACCTAATGGAA | 60454                  |                            |       |       |       |       |       |
| OliveBaboon       | GAAAGTAAGATTGTGTCATTCATTTCCCTTCTCGCAGAGTACACATTGCTTTATGCAGATTCTTTGAGAGACCTAATGGA- | 61896                  |                            |       |       |       |       |       |
| Orangutan         | GGCAGTAAGATTATGTCATTCATTTCTTCTCACAGAGTACACATTGCTTTATGCAGATTCTTTGAGAGACCTAGTGGAA   | 62332                  |                            |       |       |       |       |       |

Tuesday, May 03, 2022 06:16 PM

| Majority          | TTGTCCTTTCCTAATAATCTTGGGCAAAGATTCTGCTTGACATCTGCTTAATTTACAATCTGTATATTTTACATTTCATATT |       |
|-------------------|------------------------------------------------------------------------------------|-------|
|                   | 75850 75860 75870 75880 75890 75900 75910 75920                                    |       |
| Human             | TTATCCTTTGCTAATTTCTTGGGCAAAGATTCTCCTTGACATCTGCTTAATTTACAATCTGTATATTTTACATTTCATATT  | 61436 |
| Coquerel'sSifaka  | TCTTCTCTGTTACAACAGAATGCTAAGATTTTTC---AGAGGTGAATAATTTA---T---CATAATGCACACT-----     | 49889 |
| Ma'sNightMonkey   | TTATCCTTTCCTAATTTCTTGGGCAAAGATTTTCCTTGAC-TGTGTTAATTTACAGTGTATATATTTTACATTTCATATT   | 56903 |
| VervetAGM         | TTGTCCTTTCCTAATAATCTTGGGCAAAGATTCTGCTTGACATCTGCTTAATTTACAATCTGTATATTTTACATTTCATATT | 63198 |
| Gorilla           | TTATCCTTTCCTAATTTCTTGGGCAAAGATTCTCCTTGACATCTGCTTAATTTACAGTCTGTATATTTTACATTTCATATT  | 61976 |
| GrabEatingMacaque | TTGTCCTTTCCTAATAATCTTGGGCAAAGATTCTGCTTGACATCTGCTTAATTTACAATCTGTATATTTTACATTTCATATT | 62390 |
| Macaque           | TTGTCCTTTCCTAATAATCTTGGGCAAAGATTCTGCTTGACATCTGCTTAATTTACAATCTGTATATTTTACATTTCATATT | 63231 |
| PigTailedMacaque  | TTGTCCTTTCCTAATAATCTTGGGCAAAGATTCTGCTTGACATCTGCTTAATTTACAATCTGTATATTTTACATTTCATATT | 62121 |
| Bonobo            | TTATCCTTTCCTAATTTCTTGGGCAAAGATTCTCCTTGACATCTGCTTAATTTACAATCTGTATATTTTACATTTCATATT  | 60534 |
| OliveBaboon       | TTGTCCTTTCCTAATAATCTTGGGCAAAGATTCTGCTTGACATCTGCTTAATTTACAATCTGTATATTTTACATTTCATGTT | 61976 |
| Orangutan         | TTATCCTTTCCTAATTTCTTGGGCAAAGATTCTCCTTGACATCTGCTTAATTTACAATCTGTATATTTTACATTTCATATT  | 62412 |

| Majority          | AATGGAGAATTTATGATGAAATCAGTGGTTTTAGGATGCTTTAGGAAAATCCTGCATAATCTACCAGGGTGGGGTT----  |       |
|-------------------|-----------------------------------------------------------------------------------|-------|
|                   | 75930 75940 75950 75960 75970 75980 75990 76000                                   |       |
| Human             | AATGGAGAATTTATGATGAAATCAGTGGTTTTAGGATGCTTTAGGAAAATCCTGCATAATCTACCAGGGTGGGGTTATTT  | 61516 |
| Coquerel'sSifaka  | -----ATCTGTAAGGTAGAGATTTTTTTCAGTCTACCTTTCAGATAGCCTTTCT---TTCCA-----TT----         | 49945 |
| Ma'sNightMonkey   | AATGGAGGATTTATGATGAAATCAATTAATTTAAGATGCTTTAGGAAAATCCTGCATAATCTACCAGG-TCAGGTTATTT  | 56982 |
| VervetAGM         | AATGGTGAATTTATGATGAAATCAGTGGTTTTAGGATGCTTTAGGAAAATCCTGCATAATCTACCAGGGTGGAGTT----  | 63274 |
| Gorilla           | AATGGAGAATTTATGATTAATCAGTGGTTTTAGGATGCTTTAGGAAAATCCTGCATAATCTACCAGGGTGGGGTTATTT   | 62056 |
| GrabEatingMacaque | AATGGAGAATTTATGATGAAATCAGTGGTTTTAGGATGCTTTAGGAAAATCCTGCATAATCTACCAGGGTGGAGTT----  | 62466 |
| Macaque           | AATGGAGAATTTATGATGAAATCAGTGGTTTTAGGATGCTTTAGGAAAATCCTGCATAATCTACCAGGGTGGAGTT----  | 63307 |
| PigTailedMacaque  | AATGGAGAATTTATGATGAAATCAGTGGTTTTAGGATGCTTTAGGAAAATCCTGCATAATCTACCAGGGTAGAGTT----  | 62197 |
| Bonobo            | AATGGAGAATTTATGATGAAATCAGTGGTTTTAGGATGCTTTAGGAAAATCCTGCATAATCTACCAGGGTGGGGTTATTT  | 60614 |
| OliveBaboon       | AATGGAGAATTTATGATGAAATCAGTGGTTTTAGGATGCTTTAGGAAAATCCTGCATAATCTACCAGGGTGGAGTT----  | 62052 |
| Orangutan         | AATGGAGAATTTATGATGAAATCAGTGGTTTTAGGATGCTTTAGGAAAATCCTGCATAATATAACCAGG--GGGGTTATTT | 62490 |

| Majority          | GATATTGGTAAATAATTAGTCTGAAGTATTACATTAGTATTATAAGCTTAATTTTGTGTTGTTGATTTTGATAATTTTTTC |       |
|-------------------|-----------------------------------------------------------------------------------|-------|
|                   | 76010 76020 76030 76040 76050 76060 76070 76080                                   |       |
| Human             | GATATTGGTAAATAATTAGTCTGAAGTATTACATTAGTATTATAAGCTTAATTTTGTGTTGTTGATTTTGATAATTTTTTC | 61596 |
| Coquerel'sSifaka  | -GTGTTGCTACTCACTGGTTCTCAGGT--TA-----T---ATAATCT-AATC-----AT--ACTATGATTGCTTTT      | 50003 |
| Ma'sNightMonkey   | GATATTCGTAAATAATTAGTCTAAAGTATTA-----GTAGTATAAGCTTAATTTTGTGTTGTTGATTTTGATAATTTTTTC | 57057 |
| VervetAGM         | GATAGTGGTAAATAATTAGTCTGAAATATTACATTAGTATTATAAGCTTAATTTTGTGTTGTTGATTTTGATAATTTTTTC | 63354 |
| Gorilla           | GATATTGGTAAATAATTAGTCTGAAGTATTACATTAGTATTATAAGCTTAATTTTGTGTTGTTGATTTTGATAATTTTTTC | 62136 |
| GrabEatingMacaque | GATAGTGGTAAATAATTAGTCTGAAATATTACATTAGTATTATAAGCTTAATTTTGTGTTGTTGATTTTGATAATTTTTTC | 62546 |
| Macaque           | GATAGTGGTAAATAATTAGTCTGAAATATTACATTAGTATTATAAGCTTAATTTTGTGTTGTTGATTTTGATAATTTTTTC | 63387 |
| PigTailedMacaque  | GATAGTGGTAAATAATTAGTCTGAAATATTACATTAGTATTACAAGCTTAATTTTGTGTTGTTGATTTTGATAATTTTTTC | 62277 |
| Bonobo            | GATATTGGTAAATAATTAGTCTGAAGTATTACATTAGTATTATAAGCTTAATTTTGTGTTGTTGATTTTGATAATTTTTTC | 60694 |
| OliveBaboon       | GATAGTGGTAAATAATTAGTCTGAAATATTACATTAGTAGTATAAGCTTAATTTTGTGTTGTTGATTTTGATAATTTTTTC | 62132 |
| Orangutan         | GATATTGGTAAATAATTAGTCTGAAGTATTACATTAGTATTATAAGCTTAATTTTGTGTTGTTGATTTTGATAATTTTTTC | 62570 |

Tuesday, May 03, 2022 06:16 PM

| Majority          | ATGACTTGCCAAAAATTA AAAAGTAGATATTTAAAGAATTTGGAAGTTATGGTTTCTCTCATCGTGTGTTAAATCTGATC |       |       |       |       |       |       |       |       |
|-------------------|-----------------------------------------------------------------------------------|-------|-------|-------|-------|-------|-------|-------|-------|
|                   | 76090                                                                             | 76100 | 76110 | 76120 | 76130 | 76140 | 76150 | 76160 |       |
| Human             | ATGACTTGCCAAATATTA AAAAGTAGATATTTAAAGAATTTGGAAGTTAAGGTTTCTCTCAGTGTGTGTTAAATCTGATC |       |       |       |       |       |       |       | 61676 |
| Coquerel'sSifaka  | CA-----GGCAT-----AG---G-TTCTCTGAACATCTGTTAAATCTGATC                               |       |       |       |       |       |       |       | 50041 |
| Ma'sNightMonkey   | ATGACTTGCCAAAAATTA AAAAGTAGATATTTAAAGAATTTTCATGTTACGGTTTCTCTCAGCATGTGTTAAATCTGATC |       |       |       |       |       |       |       | 57137 |
| VervetAGM         | ATGACTTGCCAAAAATTA AAAAGTAGATATTTAAAGAATTTGGAAGTTATGGTTTCTGTCATCGTGTGCTAAATCTGATC |       |       |       |       |       |       |       | 63434 |
| Gorilla           | ATGACTTGCCAAATATTA AAAAGTAGATATTTAAAGAATTTGGAAGTTAAGGTTTCTCTCAGTGTGTGTTAAATCTGATC |       |       |       |       |       |       |       | 62216 |
| GrabEatingMacaque | ATGACTTGCCAAAAATTA AAAAGTAGATATTTAAAGAATTTGGAAGTTATGGTTTCTCTCATCGTGTGCTAAATCTGATC |       |       |       |       |       |       |       | 62626 |
| Macaque           | ATGACTTGCCAAAAATTA AAAAGTAGATATTTAAAGAATTTGGAAGTTATGGTTTCTCTCATCGTGTGCTAAATCTGATC |       |       |       |       |       |       |       | 63467 |
| PigTailedMacaque  | ATGACTTGCCAAAAATTA AAAAGTAGATATTTAAAGAATTTGGAAGTTATGGTTTCTCTCATCGTGTGCTAAATCTGATC |       |       |       |       |       |       |       | 62357 |
| Bonobo            | ATGACTTGCCAAATATTA AAAAGTAGATATTTAAAGAATTTGGAAGTTAAGGTTTCTCTCAGTGTGTGTTAAATCTGATC |       |       |       |       |       |       |       | 60774 |
| OliveBaboon       | ATGACTTGCCAAAAATTA AAAAGTAGATATTTAAAGAATTTGGAAGTTATGGTTTCTCTCATCGTGTGCTAAATCTGATC |       |       |       |       |       |       |       | 62212 |
| Orangutan         | ATGACTTGCCAAAAATTA AAAAGTAGATATTTAAAGAATTTGGAAGTTAAGATTTCTCTCAGCGTGTGTTAAATCTGATC |       |       |       |       |       |       |       | 62650 |

| Majority          | CCCAACAATCTCTTCAAAAAAGTAAGTTAT--AAATAGTAA--ACATTGTGA-AAAATGGAAATAGTTTTATTGTGGCTT |       |       |       |       |       |       |       |       |
|-------------------|----------------------------------------------------------------------------------|-------|-------|-------|-------|-------|-------|-------|-------|
|                   | 76170                                                                            | 76180 | 76190 | 76200 | 76210 | 76220 | 76230 | 76240 |       |
| Human             | CCCAACAATCTCTTCAAAAAAGTAAGTTAT--CAATAGTAA--ACGATGAGA-AAAATGGAAATAGTTTTATTTGGCTT  |       |       |       |       |       |       |       | 61751 |
| Coquerel'sSifaka  | CCCAACAATCTTTTCAAAAAATTAAGTTATCTAAATAAAAAAATGCGATAAAAATGGAAATAGTTTTATTGTGGCTT    |       |       |       |       |       |       |       | 50121 |
| Ma'sNightMonkey   | CCCAACAATCTCTTCAAAAAAGCAA-----ACATTGAGA-AAAATGGAAATCGTTTTGTTGTGGCTT              |       |       |       |       |       |       |       | 57198 |
| VervetAGM         | CCCAACAATCTCTTCAAAAAAGTAAGTTAT--AAATAGTAA--ACATTCTGA-AAAATGGAAATGGTTTTATTGTGGCTT |       |       |       |       |       |       |       | 63509 |
| Gorilla           | CCCAACAATCTCTTCAAAAAAGTAAGTTAT--AAATAGTAA--ACAATGAGA-AAAATGGAAATAGTTTTATTTGGCTT  |       |       |       |       |       |       |       | 62291 |
| GrabEatingMacaque | CCCAACAATCTCTTCAAAAAAGTAAGTTAT--AAATAGTAA--ACATTCTGA-AAAATGGAAATAGTTTTATTGTGGCTT |       |       |       |       |       |       |       | 62701 |
| Macaque           | CCCAACAATCTCTTCAAAAAAGTAAGTTAT--AAATAGTAA--ACATTCTGA-AAAATGGAAATAGTTTTATTGTGGCTT |       |       |       |       |       |       |       | 63542 |
| PigTailedMacaque  | CCCAACAATCTCTTCAAAAAAGTAAGTTAT--AAATAGTAA--ACATTCTGA-AAAATGGAAATAGTTTTATTGTGGCTT |       |       |       |       |       |       |       | 62432 |
| Bonobo            | CCCAACAATCTCTTCAAAAAAGTAAGTTAT--AAATAGTAA--ACAATGAGA-AAAATGGAAATAGTTTTATTTGGCTT  |       |       |       |       |       |       |       | 60849 |
| OliveBaboon       | CCCAACAATCTCTTCAAAAAAGTAAGTTAT--AAATAGTAA--ACATTCTGA-AAAATGGAAATAGTTTTATTGTGGCTT |       |       |       |       |       |       |       | 62287 |
| Orangutan         | CCCAACAATCTCTTCAAAAAAGTAAGTTAT--AAATAGTAA--ACAATGAGA-AAAATGGAAATAGTTTTATTTGGCTT  |       |       |       |       |       |       |       | 62725 |

| Majority          | TTCAATGTTTTTA--GTCATATGCAATGTTTCATTGTGCTGCTTTAATTATGCTTTCTTTGCCTAATATCTTTCCCTGTG  |       |       |       |       |       |       |       |       |
|-------------------|-----------------------------------------------------------------------------------|-------|-------|-------|-------|-------|-------|-------|-------|
|                   | 76250                                                                             | 76260 | 76270 | 76280 | 76290 | 76300 | 76310 | 76320 |       |
| Human             | TTCAATGTTTTCA--GTCATATGCAGTGTTCATTGTGCTGCTTTAATTATGCTTTCTGTGCCTAATATCTTTCCCTGTG   |       |       |       |       |       |       |       | 61828 |
| Coquerel'sSifaka  | TTTGTATTTTTTC--AGTCATATGCAGTGTTCATTGTGCTGTTTTAACTATCCACTTGTGTCTAATATCTTTCTGTG     |       |       |       |       |       |       |       | 50199 |
| Ma'sNightMonkey   | TTCAATGTTTTCAAAGTCCATATGCGGTGTTTCATTGTGTTGGTTAATTATGATTTCTATGCCTAATATCTTTCCCTGTG  |       |       |       |       |       |       |       | 57278 |
| VervetAGM         | TTCAATGTTTTTA--GTCATATGCAATGTTTCATTGTGCTGCTATAAATTATGCTTTCTTTGCCTAATATCTTTCCCTGTG |       |       |       |       |       |       |       | 63586 |
| Gorilla           | TTCAATGTTTTCA--GTCATATGCAGTGTTCATTGTGCTGCTTTAATTATGCTTTCTGTACCTAATATCTTTCCCTGTG   |       |       |       |       |       |       |       | 62368 |
| GrabEatingMacaque | TTCAATGTTTTTA--GTCATATGCAATGTTTCATTGTGCTGCTATAAATTATGCTTTCTTTGCCTAATATCTTTCCCTGTG |       |       |       |       |       |       |       | 62778 |
| Macaque           | TTCAATGTTTTTA--GTCATATGCAATGTTTCATTGTGCTGCTATAAATTATGCTTTCTTTGCCTAATATCTTTCCCTGTG |       |       |       |       |       |       |       | 63619 |
| PigTailedMacaque  | TTCAATGTTTTTA--GTCATATGCAATGTTTCATTGTGCTGCTATAAATTATGCTTTCTTTGCCTAATATCTTTCCCTGTG |       |       |       |       |       |       |       | 62509 |
| Bonobo            | TTCAATGTTTTCA--GTCATATGCAGTGTTCATTGTGCTGCTTTAATTATGCTTTCTGTGCCTAATATCTTTCCCTGTG   |       |       |       |       |       |       |       | 60926 |
| OliveBaboon       | TTCAATGTTTTTA--GTCATATGCAATGTTTCATTGTGCTGCTATAAATTATGCTTTATTTGCCTAATATCTTTCCCTGTG |       |       |       |       |       |       |       | 62364 |
| Orangutan         | TTCAATGTTTTCG--GTCATATGCAATGTTTCATTGTGCTGCTTTAATTATGCTTTCTGCGCTAATATCTTTCCCTGTG   |       |       |       |       |       |       |       | 62802 |

Tuesday, May 03, 2022 06:16 PM

| Majority          | TTTTGATTTC | CCATGTTTT | TAGCCATA  | AAACTTTAA | ATTTACAT | GAAAA-T  | TTTTTTT | CTGATTG | TTTTT | TGCTT | TACTGT | CTAA       |            |
|-------------------|------------|-----------|-----------|-----------|----------|----------|---------|---------|-------|-------|--------|------------|------------|
|                   | 76330      | 76340     | 76350     | 76360     | 76370    | 76380    | 76390   | 76400   |       |       |        |            |            |
| Human             | TTTTGATTTC | CCATGTTTT | TAGCCATA  | AAACTTTAA | ATTTACAT | GAAAACT  | TTTTTTT | CTGATTG | TTTTT | TGCTT | TACTGT | CTAA 61908 |            |
| Coquerel'sSifaka  | TTTTGATTAT | CATGTTTT  | TAGCCATAG | ATTTAAAT  | TTATATG  | AAAA-TAT | TTTTT   | CTGATTG | TTTTT | TGCTT | TACTGT | CTAA 50278 |            |
| Ma'sNightMonkey   | TTTTGATTTT | CGTGT     | TTAGCCATA | AAATTTAA  | ATTTACAT | GAAAT-T  | TTTTT   | CTGAAGG | TTTTT | TGCTT | TACTGT | TAA 57357  |            |
| VervetAGM         | TTTTGATTTC | CCATGTTTT | TAGCCATA  | AAACTTCAA | ATTTACAT | GAAAA-T  | TTTTT   | CTGATTG | TTTTT | TGCTT | TACTGT | CTAA 63665 |            |
| Gorilla           | TTTTGATTTC | CCATGTTTT | TAGCCATA  | AAACTTTAA | ATTTACAT | GAAAACT  | TTTTTTT | CTGATTG | TTTTT | TGCTT | TACTGT | CTAA 62448 |            |
| GrabEatingMacaque | TTTTGATTTC | CCATGTTTT | TAGCCATA  | AAACTTCAA | ATTTACAT | GAAAA-T  | TTTTT   | CTGATTG | TTTTT | TGCTT | TACTGT | CTAA 62857 |            |
| Macaque           | TTTTGATTTC | CCATGTTTT | TAGCCATA  | AAACTTCAA | ATTTACAT | GAAAA-T  | TTTTT   | CTGATTG | TTTTT | TGCTT | TACTGT | CTAA 63698 |            |
| PigTailedMacaque  | TTTTGATTTC | CCATGTTTT | TAGCCATA  | AAACTTCAA | ATTTACAT | GAAAA-T  | TTTTT   | CTGATTG | TTTTT | TGCTT | TACTGT | CTAA 62588 |            |
| Bonobo            | TTTTGATTTC | CCATGTTTT | TAGCCATA  | AAACTTTAA | ATTTACAT | GAAAACT  | TTTTTTT | CTGATTG | TTTTT | TGCTT | TACTGT | CTAA 61006 |            |
| OliveBaboon       | TTTTGATTTC | CCATGTTTT | TAGCCATA  | AAACTTCAA | ATTTACAT | GAAAT-T  | TTTTT   | CTGATTG | TTTTT | TGCTT | TACTGT | CTAA 62443 |            |
| Orangutan         | TTTTGATTTC | CCATGTTTT | TAGCCATA  | AAACTTTAA | ATTTACTT | GAAAA-T  | TTCTT   | TTTCTG  | ATTG  | TTTTT | TGCTT  | TACTGT     | CTAA 62881 |

| Majority          | ACTTTC  | ACTGTG | AGTAGG  | CACATTT | GGAAGG | CTTTCT | TGCAAAT | TGCTT  | GAGCTT | TTTACT | GTGC | CAGAAAT | CTTTG | CTCA       |
|-------------------|---------|--------|---------|---------|--------|--------|---------|--------|--------|--------|------|---------|-------|------------|
|                   | 76410   | 76420  | 76430   | 76440   | 76450  | 76460  | 76470   | 76480  |        |        |      |         |       |            |
| Human             | ACCTT   | CACTGT | GAGTAGG | CACATTT | GGAAGG | CTTTCT | TGCAAAT | TATCTT | GAGCTT | TTAAT  | GTGC | CAGAAAT | CTTTG | CTCA 61988 |
| Coquerel'sSifaka  | ACTTTC  | ACTGTG | AGTAGG  | CACATTT | GAAAGG | CTTTCT | TGCAAAT | TATCTT | GAGCTT | TTTACT | GTGC | CAGAAAT | CTTTG | CTCA 50358 |
| Ma'sNightMonkey   | ACTTTAA | CTGTG  | AGTAGG  | CATATTT | AGAAGG | CGTTCT | TGCAAAT | CGTTT  | GAGTTT | TTTACT | GTGC | CAGAAAT | CTTTG | CTCA 57437 |
| VervetAGM         | ACTTTC  | ACTGTG | AGTAGG  | CACATTT | GGAAGG | CTTTCT | TGCAAAT | TGCTT  | GAGCTT | TTTACT | GTGC | CAGAAAT | CTTAA | CTCA 63745 |
| Gorilla           | ACCTT   | CACTGT | GAGTAGG | CACATTT | GGAAGG | CTTTCT | TGCAAAT | TATCTT | GAGCTT | TTAAT  | GTGC | CAGAAAT | CTTTG | CTCA 62528 |
| GrabEatingMacaque | ACTTTC  | ACTGTG | AGTAGG  | CACATTT | GGAAGG | CTTTCT | TGCAAAT | TGCTT  | GAGCTT | TTTACT | GTGC | CAGAAAT | CTTAA | CTCA 62937 |
| Macaque           | ACTTTC  | ACTGTG | AGTAGG  | CACATTT | GGAAGG | CTTTCT | TGCAAAT | TGCTT  | GAGCTT | TTTACT | GTGC | CAGAAAT | CTTAA | CTCA 63778 |
| PigTailedMacaque  | ACTTTC  | ACTGTG | AGTAGG  | CACATTT | GGAAGG | CTTTCT | TGCAAAT | TGCTT  | GAGCTT | TTTACT | GTGC | CAGAAAT | CTTAA | CTCA 62668 |
| Bonobo            | ACCTT   | CACTGT | GAGTAGG | CACATTT | GGAAGG | CTTTCT | TGCAAAT | TATCTT | GAGCTT | TTAAT  | GTGC | CAGAAAT | CTTTG | CTCA 61086 |
| OliveBaboon       | ACTTTC  | ACTGTG | AGTAGG  | CACATTT | GGAAGG | CTTTCT | TGCAAAT | TGCTT  | GAGCTT | TTTACT | GTGC | CAGAAAT | CTTAA | CTCA 62523 |
| Orangutan         | ACCTT   | CACTGT | GAGTAGG | CACATTT | GGAAGG | CTTTCT | TGCAAAT | TGCTT  | GAGCTT | TTTACT | GTGC | CAGAAAT | CTTTG | CTCA 62961 |

| Majority          | ACAAGAT | CACCGAT | TCTGAT | TGCTGA | AACACAG | GACTGG | TTTGTG | TGCTACT | GCTATT | TCTTGG | GATTTT | TGCAAAT | AC          |          |
|-------------------|---------|---------|--------|--------|---------|--------|--------|---------|--------|--------|--------|---------|-------------|----------|
|                   | 76490   | 76500   | 76510  | 76520  | 76530   | 76540  | 76550  | 76560   |        |        |        |         |             |          |
| Human             | ACAAGAT | CACCGAT | TCTGAT | TGCTGA | AACACAG | GACTGG | TTTGTG | TGCTACT | GCTATT | TCTTGG | GATTTT | TGCAAAT | AC 62068    |          |
| Coquerel'sSifaka  | GCAAGAT | TACTGT  | TCTGAT | TGCTGA | AACACAG | GACTGG | TTTGTG | TGCTCT  | TGTTAT | TTTCT  | TGGAAT | TTTACA  | AATAT 50438 |          |
| Ma'sNightMonkey   | ACAAGCT | CACTGC  | ATTCCT | GATGCT | GAATCAT | AGGACT | GGTTT  | GTGTG   | CTACT  | GCTGTT | TCTTGG | -ATTTT  | TGCAAAT     | AC 57516 |
| VervetAGM         | ACAAGAT | CACCGAT | TCTGAT | TGCTGA | AACACAG | GACTGG | TTTGTG | TGCTACT | GCT-T  | TTTCT  | TGGAT  | TTT     | TGCAAAT     | AC 63824 |
| Gorilla           | ACAAGAT | CACCGAT | TCTGAT | TGCTGA | AACACAG | GACTGG | TTTGTG | TGCTACT | GGTATT | TCTTGG | GATTTT | TGCAAAT | AT 62608    |          |
| GrabEatingMacaque | ACAAGAT | CACCGAT | TCTGAT | TGCTGA | AACACAG | GACTGG | TTTGTG | TGCTACT | GCT-T  | TTTCT  | TGGAT  | TTT     | TGCAAAT     | AC 63016 |
| Macaque           | ACAAGAT | CACCGAT | TCTGAT | TGCTGA | AACACAG | GACTGG | TTTGTG | TGCTACT | GCT-T  | TTTCT  | TGGAT  | TTT     | TGCAAAT     | AC 63857 |
| PigTailedMacaque  | ACAAGAT | CACCGAT | TCTGAT | TGCTGA | AACACAG | GACTGG | TTTGTG | TGCTACT | GCT-T  | TTTCT  | TGGAT  | TTT     | TGCAAAT     | AC 62747 |
| Bonobo            | ACAAGAT | CACCGAT | TCTGAT | TGCTGA | AACACAG | GACTGG | TTTGTG | TGCTACT | ACTATT | TCTTGG | GATTTT | TGCAAAT | AC 61166    |          |
| OliveBaboon       | ACAAGAT | CACCGAT | TCTGAT | TGCTGA | AACACAG | GACTGG | TTTGTG | TGCTACT | GCT-T  | TTTCT  | TGGAT  | TTT     | TGCAAAT     | AC 62602 |
| Orangutan         | ACAAGAT | CACCGAT | TCTGAT | TGCTGA | AACACAG | GACTGG | TTTGTG | TGCTACT | GCCATT | TCTTGG | GATTTT | TGCAAAT | AT 63041    |          |

Tuesday, May 03, 2022 06:16 PM

| Majority          | ATGAGCTTGAAGTGAGCTTGCATATATTTTTTAAATTTGATTTTACTCCCTTCTTATTTGTGGTCACCT-<br>ACTTTAGCC |       |
|-------------------|-------------------------------------------------------------------------------------|-------|
|                   | 76570 76580 76590 76600 76610 76620 76630 76640                                     |       |
| Human             | ATGAGCTTGAAGTGAGCTTGCATATATTTTTTAAATTTGATTTTACTCCCTTCTTATTTGTGGTCACCT-CCTTTAACC     | 62147 |
| Coquerel'sSifaka  | ATGAGCATGAATTGAGCTTGTATATATATTTTT-AATTTGATTT----TACTCCCTTATT-GTGGTCACCTGACTTTAGCC   | 50512 |
| Ma'sNightMonkey   | ATGAGCTTGACGTGAACCTGCATATATTTTTTGAATTTGATTT-<br>ACTCCCTTCTTATTTATGGTCACCT-GCTTTAGCC | 57594 |
| VervetAGM         | ATGAGCTTGAAGTGAGCTTGCATATGTTTTTAAATTTGGTTTTACTCCCTTCTTATTTGTGGTCACCT-<br>ACTTTAGTC  | 63903 |
| Gorilla           | ATGAGCTTGAAGTGAGCTTGCATATATTTTTTAAATTTGATTTTACTCCCTTCTTATTTGTGGTCACCT-<br>CCTTTAACC | 62687 |
| GrabEatingMacaque | ATGAGCTTGAAGTGAGCTTGCATATGTTTTTAAATTTGATTTTACTCCCTTCTTGTTTGTGGTCACCT-<br>ACTTTAGTC  | 63095 |
| Macaque           | ATGAGCTTGAAGTGAGCTTGCATATGTTTTTAAATTTGATTTTACTCCCTTCTTGTTTGTGGTCACCT-<br>ACTTTAGTC  | 63936 |
| PigTailedMacaque  | ATGAGCTTGAAGTGAGCTTGCATATGTTTTTAAATTTGATTTTACTCCCTTCTTGTTTGTGGTCACCT-<br>ACTTTAGTC  | 62826 |
| Bonobo            | ATGAGCTTGAAGTGAGCTTGCATATATTTTTTAAATTTGATTTTACTCCCTTCTTATTTGTGGTCACCT-<br>CCTTTAACC | 61245 |
| OliveBaboon       | ATGAGCTTGAAGTGAGCTTGCATATGTTTTTAAATTTGATTTTACTCCCTTCTTGTTTGTGGTCACCT-<br>ACTTTAGTC  | 62681 |
| Orangutan         | ATGAGCTTGAAGTGAGCTTGCATATATTTTTTAAATTTGATTTTACTCCCTTCTTATTTGTGGTCACCT-<br>ACTTTAACC | 63120 |

| Majority          | AACTATTTAAAATACCTGGATTTTTGTCTCATGCATCCTCAGCTCCTATTTCTTTCCCTCTTTTGCTAACAGATGATT--    |       |
|-------------------|-------------------------------------------------------------------------------------|-------|
|                   | 76650 76660 76670 76680 76690 76700 76710 76720                                     |       |
| Human             | AACTATTTAAAATACCTGGATTTTTGTCTCATGCATCCTCAGCTCCTATTTCTTTCCCTCTTTTGCCAACAGATGATT--    | 62225 |
| Coquerel'sSifaka  | GGCTATTGAAAATGCCTGGATTCCTGTTTTCATGCATCCTCAGCTTTGGTTTCTCTCCCTCTTTTGCTAACAGGTGGTTTT   | 50592 |
| Ma'sNightMonkey   | AACTATT----ATACCTGGATTTCTGTCTCATGCACCTCT--<br>CAGTATTTCTTTCCCTCTTTTGCTAAACAATGATT-- | 57666 |
| VervetAGM         | AACTATTTAAAATACCTGGATTTTTGTCTCATGCATCCTCAACTCCTATTTCTTTCCCTCTTTTGCTAACAGATGATT--    | 63981 |
| Gorilla           | AACTATTTAAAATACCTGGATTTTTGTCTCATGCATCCTCAGCTCCTATTTCTTTCCCTCTTTTGCTAACAGATGATT--    | 62765 |
| GrabEatingMacaque | AACTATTTAAAATACCTGGATTTTTGTCTCATGCATCCTCAACTCCTATTTCTTTCCCTCTTTTGCTAACAGATGATT--    | 63173 |
| Macaque           | AACTATTTAAAATACCTGGATTTTTGTCTCATGCATCCTCAACTCCTATTTCTTTCCCTCTTTTGCTAACAGATGATT--    | 64014 |
| PigTailedMacaque  | AACTATTTAAAATACCTGGATTTTTGTCTCATGCATCCTCAACTCCTATTTCTTTCCCTCTTTTGCTAACAGATGATT--    | 62904 |
| Bonobo            | AACTATTTAAAATACCTGGATTTTTGTCTCATGCATCCTCAGCTCCTATTTCTTTCCCTCTTTTGCCAACAGATCATT--    | 61323 |
| OliveBaboon       | AACTATTTAAAATACCTGGATTTTTGTCTCATGCATCCTCAACTCCTATTTCTTTCCCTCTTTTGCTAACAGATGATT--    | 62759 |
| Orangutan         | AACTATTTAAAATACCTGAATTTTTGTCTCATGCATCCTCAGCTCCTATTTCTTTCCCTCTTTTGCTAACAGATGATT--    | 63198 |

| Majority          | AATTTACATCTGTTTGCTTATTTCTCTAGCTCTGTACCTTAGGTATACTTGTGTATCTTCCACCTACATAAA-----   |       |
|-------------------|---------------------------------------------------------------------------------|-------|
|                   | 76730 76740 76750 76760 76770 76780 76790 76800                                 |       |
| Human             | AATTTACATCTGTTTGCTTATTTCTCTAGCTCTGTACCTTAGGTATACTTCTGCATCTTCCACCTACATAAA-----   | 62299 |
| Coquerel'sSifaka  | AATGTACATGTTACTTGCTTATTTCTCTAGCTCTTACCGCTTAGGCATACTTGTGTATCTCCCATCTTCATAAA----- | 50666 |
| Ma'sNightMonkey   | AATTTACATCTTACTTGCTTATTTCTGTAGCTTTTATACCTTACGTGACTTGTGTATCTTCCACCTACATAAA-----  | 57740 |
| VervetAGM         | AATTTACATCTGTTTGCTTATTTCTCTAGCTCTGTACCTTAGGTATACTTGTGTATTTCCACCTACATAAAATTTAT   | 64061 |
| Gorilla           | AATTTACATCTGTTTGCTTATTTCTCTAGCTCTGTACCTTAGGTATACTTGTGCATCTTCCACCTACATAAA-----   | 62839 |
| GrabEatingMacaque | AATTTACATCTGTTTGCTTATTTCTCTAGCTCTGTACCTTAGGTATACTTGTGTATTTTCCACCTACATAAAAGTTTAT | 63253 |
| Macaque           | AATTTACATCTGTTTGCTTATTTCTCTAGCTCTGTACCTTAGGTATACTTGTGTATTTTCCACCTACATAAAAGTTTAT | 64094 |
| PigTailedMacaque  | AATTTACATCTGTTTGCTTATTTCTCTAGCTCTGTACCTTAGGTATACTTGTGTATTTTCCACCTACATAAAAGTTTAT | 62984 |
| Bonobo            | AATTTACATCTGTTTGCTTATTTCTCTAGCTCTGTACCTTAGGTATACTTCTGCATCTTCCACCTACATGAA-----   | 61397 |
| OliveBaboon       | AATTTACATCTGTTTGCTTATTTCTCTAGCTCTGTACCTTAGGTATACTTGTGTATTTTCCACCTACATAAAAGTTTAT | 62839 |
| Orangutan         | AATTTACATCTGTTTGCTTATTTCTGTAGCTCTCGTACCTTAGGTATACTTGTGCATCTTCCACCTACATAAA-----  | 63272 |



Tuesday, May 03, 2022 06:16 PM

|                   |                                                                                      |       |       |       |       |       |       |       |
|-------------------|--------------------------------------------------------------------------------------|-------|-------|-------|-------|-------|-------|-------|
| Majority          | GTTTTGTTTTGTTTTT-----TAATGTTCAAAGGGA--AAATTTCAAAGGTTCTGGAGGGCTTCTAACAATTGGCA         |       |       |       |       |       |       |       |
|                   | 76810                                                                                | 76820 | 76830 | 76840 | 76850 | 76860 | 76870 | 76880 |
| Human             | GTTTTGTTTTGTTTTT-----AATGTTCAAGGGA--AAATTTCAAAGGTTCTGGAGGGCTTCTAACAATTGGCA 62371     |       |       |       |       |       |       |       |
| Coquerel'sSifaka  | A---ATGTTT----TTTA-----AAATGTTAAAAGAGG--AAATGTCCA---TTTTGGAGTGCTTCTCACGATTGGCA 50729 |       |       |       |       |       |       |       |
| Ma'sNightMonkey   | GTTTTTTTTT----TTTT-----AATATTTCAAAGGGA--AAATTTCAAAGCTTCTGGAGGACTTCTAACAATTGGCA 57808 |       |       |       |       |       |       |       |
| VervetAGM         | GTTTTGTTTTGTTTTTGTGTTTGTATGTTCAAAGGGAGAAAATTTCAAAGGTTCTGGAGGGCTTCTAACAATGGGCA 64141  |       |       |       |       |       |       |       |
| Gorilla           | GTTTTGTTTTGTTTTT-----AATGTTCAAGGGA--AAATTTCAAAGGTTCTGGAGGGCTTCTAATAATTGGCA 62911     |       |       |       |       |       |       |       |
| GrabEatingMacaque | GTTTTGTTTTGTTTTT-GTTTTAATGTTCAAAGGGAGAAAATTTCAAAGGTTCTGGAGGGGTTCTAACAATGGGCA 63332   |       |       |       |       |       |       |       |
| Macaque           | GTTTTGTTTTGTTTTT-GTTTTAATGTTCAAAGGGAGAAAATTTCAAAGGTTCTGGAGGGGTTCTAACAATGGGCA 64173   |       |       |       |       |       |       |       |
| PigTailedMacaque  | GTTTTGTTTTGTTTTT-GTTTTAATGTTCAAAGGGAGAAAATTTCAAAGGTTCTGGAGGGCTTCTAACAATGGGCA 63063   |       |       |       |       |       |       |       |
| Bonobo            | GTTTTGTTTTGTTTTT-----AATGTTCAAGGGA--AAATTTCAAAGGTTCTGGAGGGCTTCTAACAATTGGCA 61469     |       |       |       |       |       |       |       |
| OliveBaboon       | GTTTTGTTTTGTTTTT-GTTTTAATGTTCAAAGGGAGAAAATTTCAAAGGTTCTGGAGGGCTTCTAACAATGGGCA 62918   |       |       |       |       |       |       |       |
| Orangutan         | GTTTTGTTTTGTTTTT-----AATGTTCAAAGGGA--AAATTTCAAAGGTTCTGGAGGGCTTCTAACAATTGGCA 63344    |       |       |       |       |       |       |       |

|                   |                                                                                          |       |       |       |       |       |       |       |
|-------------------|------------------------------------------------------------------------------------------|-------|-------|-------|-------|-------|-------|-------|
| Majority          | TATTCATTGTTAGATAAATTTGGCAGTCG-ACCTCAGTATTGCTGGGAAAGAATTCAGCTCCTAAAAA-----CTTAGTG         |       |       |       |       |       |       |       |
|                   | 76890                                                                                    | 76900 | 76910 | 76920 | 76930 | 76940 | 76950 | 76960 |
| Human             | TATTCATTGTTAGATAAATTTGGCAGTCGGACCTCAGTATTGCTGGGAAAGAATTCAGCTCCTAAAAA-----CTTAGTG 62446   |       |       |       |       |       |       |       |
| Coquerel'sSifaka  | TATTCATTGT-AGATGATTTGGTAGTCT-ATTTCAAGTATTGCTGGGAAAGAACTCAGCCCTAAAAAGTTTACTTAGTG 50807    |       |       |       |       |       |       |       |
| Ma'sNightMonkey   | TATTCATT---AGATAAATTTGGCAGTCG-ACCTCAGTATTGCTGGGAAATAAATTCAGCTCCTAAGAAA-----CTTAGTG 57879 |       |       |       |       |       |       |       |
| VervetAGM         | TATTAATTGTTAGATAAATTTGGCAGTCG-CCCTCAGTATTGCTGGGAAAGAATTCAGCTCCTAAAAA-----TATAGTG 64215   |       |       |       |       |       |       |       |
| Gorilla           | TATTCATTGTTAGATAAATTTGGCAGTCGGACCTCAGTATTGCTGGGAAAGAATTCAGCTCCTAAAAA-----CTTAGTG 62986   |       |       |       |       |       |       |       |
| GrabEatingMacaque | TATTAATTGTTAGATAAATTTGGCAGTCG-CCATCAGTATTGCTGGGAAAGAATTCAGCTCCTAAAAA-----CATAGTG 63406   |       |       |       |       |       |       |       |
| Macaque           | TATTAATTGTTAGATAAATTTGGCAGTCG-CCATCAGTATTGCTGGGAAAGAATTCAGCTCCTAAAAA-----CATAGTG 64247   |       |       |       |       |       |       |       |
| PigTailedMacaque  | TATTAATTGTTAGATAAATTTGGCAGTCG-CCATCAGTATTGCTGGGAAAGAATTCAGCTCCTAAAAA-----CATAGTG 63137   |       |       |       |       |       |       |       |
| Bonobo            | TATTCATTGTTAGATAAATTTGGCAGTCGGACCTCAGTATTGCTGGGAAAGAATTCAGCTCCTAAAAA-----CTTAGTG 61544   |       |       |       |       |       |       |       |
| OliveBaboon       | TATTAATTGTTAGATAAATTTGGCAGTCG-CCCTCAGTATTGCTGGGAAAGAATTCAGCTCCTAAAAA-----CATAGTG 62992   |       |       |       |       |       |       |       |
| Orangutan         | TATTCATTGTTAGATAAATTTGGCAGTCG-ACCTCAGTATTGCTGGGAAAGAATTCAGCTCCTAAAAA-----CTTAGTG 63418   |       |       |       |       |       |       |       |

|                   |                                                                                        |       |       |       |       |       |       |       |
|-------------------|----------------------------------------------------------------------------------------|-------|-------|-------|-------|-------|-------|-------|
| Majority          | TGGGTTTAGTAATTTTGTATCAGCACT-----TTTAGCATTAACCTAGATACTGTGACTCAAAGCCAGATCTTTTCTCAT       |       |       |       |       |       |       |       |
|                   | 76970                                                                                  | 76980 | 76990 | 77000 | 77010 | 77020 | 77030 | 77040 |
| Human             | TGTGTTTAGTAATTTTGTATCAGCACT-----TTTAGCATTAACCTAGATACTGTGACTCAAAGCCAGATCTTTTCTCAT 62521 |       |       |       |       |       |       |       |
| Coquerel'sSifaka  | AAGATTTGGTAATTTTGTATCGTACTGTAATTTTAGCATTAACCTAGATAGTATGATTCAAAGCCATATTTTCTCAT 50887    |       |       |       |       |       |       |       |
| Ma'sNightMonkey   | TGGGTTTAGTAATTTTGTATTAATACT-----TTTAGCATTAACCTAGATACTGTGACTCTAAGCCAGGCTTTTCTCAT 57954  |       |       |       |       |       |       |       |
| VervetAGM         | TGGGTTTAGTAATTTTGTATCAGCACT-----TTTAGCATTAACCTAGATACTGTGACTCAAAGCCAGATCTTTTCTCAT 64290 |       |       |       |       |       |       |       |
| Gorilla           | TATGTTTAGTAATTTTGTATCAGCACT-----TTTAGCATTAACCTAGATACTGTGACTCAAAGCCAGCTTTTCTCAT 63061   |       |       |       |       |       |       |       |
| GrabEatingMacaque | TGGGTTTAGTAATTTTGTATCAGCACT-----TTTAGCATTAACCTAGATACTGTGACTCAAAGCCAGATCTTTTCTCAT 63481 |       |       |       |       |       |       |       |
| Macaque           | TGGGTTTAGTAATTTTGTATCAGCACT-----TTTAGCATTAACCTAGATACTGTGACTCAAAGCCAGATCTTTTCTCAT 64322 |       |       |       |       |       |       |       |
| PigTailedMacaque  | TGGGTTTAGTAATTTTGTATCAGCACT-----TTTAGCATTAACCTAGATACTGTGACTCAAAGCCAGATCTTTTCTCAT 63212 |       |       |       |       |       |       |       |
| Bonobo            | TATGTTTAGTAATTTTGTATCAGCACT-----TTTAGCATTAACCTAGATACTGTGACTCAAAGCCAGCTTTT-CTCAT 61618  |       |       |       |       |       |       |       |
| OliveBaboon       | TGGGTTTAGTAATTTTGTATCAGCACT-----TTTAGCATTAACCTAGATACTGTGACTCAAAGCCAGATCTTTTCTCAT 63067 |       |       |       |       |       |       |       |
| Orangutan         | TATGTTTAGTAATTTTGTATCAGCGCT-----TTTAGCATTAACCTAGATGCTGTGACTCAAAGCCAGCTTTTCTCAT 63493   |       |       |       |       |       |       |       |

Tuesday, May 03, 2022 06:16 PM

|                   |                                                                                  |       |
|-------------------|----------------------------------------------------------------------------------|-------|
| Majority          | AAGGTATCATTCTCTTTGATAACATTGAAGTAGTCACCTAAGAGTGAATTTTGCTACTCATCTTTTGATATTTATCTG   |       |
|                   | 77050 77060 77070 77080 77090 77100 77110 77120                                  |       |
| Human             | AAGGTATCATTCTCTTTGATAACATTGAAGTAGTCACCTAAGAGTGAATTTTGCTACTTATCTTTTGATATTTATCTA   | 62601 |
| Coquerel'sSifaka  | A-----TCGTTCTTTGTTTGACAATATTGAAGTAGTCACCTAAGAGTCAATCATGCTACTCATCTTTTGATAATCGTATG | 50962 |
| Ma'sNightMonkey   | AAGGTATCATTCTCTTTGATAAATAATGAAGTAGTCACCTAAGAGTGAATTTTGCTACTCATCTTTTGATATTCATCTA  | 58034 |
| VervetAGM         | AAGGTATCATTCTCTTTGATAACATTGAAGTAGTCACCTAAGAGTGAATTTTGCTATTCTTTTGATACTTACCTG      | 64368 |
| Gorilla           | AAGGTATCATTCTCTTTGATAACATTGAAGTAGTCACCTAAGAGTGAATTTTGCTACTTATCTTTTGATATTTATCTA   | 63141 |
| GrabEatingMacaque | AAGGTATCATTCTCTTTGATAACATTGAAGTAGTCACCTAAGAGTGAATTTTGCTACTCTTTTGATACTTACCTG      | 63559 |
| Macaque           | AAGGTATCATTCTCTTTGATAACATTGAAGTAGTCACCTAAGAGTGAATTTTGCTACTCTTTTGATACTTACCTG      | 64400 |
| PigTailedMacaque  | AAGGTATCATTCTCTTTGATAACATTGAAGTAGTCACCTAAGAGTGAATTTTGCTACTCTTTTGATACTTACCTG      | 63290 |
| Bonobo            | AAGGTATCATTCTCTTTGATAACATTGAAGTAGTCACCTAAGAGTGAATTTTGCTACTTATCTTTTGATATTTATCTA   | 61698 |
| OliveBaboon       | AAGGTATCATTCTCTTTGATAACATTGAAGTAGTCACCTAAGAGTGAATTTTGCTACTCTTTTGATACTTACCTG      | 63145 |
| Orangutan         | AAGGTATCATTCTCTTTGATACATTGAAGTAGTCACCTAAGAGTGAATTTTGCTTCTTATCTTTTGATATTTATCTA    | 63573 |

|                   |                                                                                   |       |
|-------------------|-----------------------------------------------------------------------------------|-------|
| Majority          | TTGTGTAGAAACATCAGTTCTATTACTTATCTCACATTTTCCCTATAGGAATGCTACATTAGTAAATGAATACCTATCTT  |       |
|                   | 77130 77140 77150 77160 77170 77180 77190 77200                                   |       |
| Human             | TTGTGTAGAAACATCAGTTCTATTACTTATCTCACATTTTCCCTATAGGAATGCTACATTAGTAAATGAATACCTATCTT  | 62681 |
| Coquerel'sSifaka  | CTGTATAGAAACATAGATTCTATTACTTTTCTCACATTTTCCCTATAGGAATGCTACATGAGTAAAGTAAATACCTATTTT | 51042 |
| Ma'sNightMonkey   | TTGTGTAAAAACATCAGTTCTACTACTTACCTCACATTTTCCCTATAGGAATGCTATATTAGTAAATGAATACCCATCTT  | 58114 |
| VervetAGM         | TTGTGTAGAAACGTC AATTCTAT----TCTGTTACATTTTCCCTATAGGAATGCTACATTAGTAAATTAATACCTATCTT | 64444 |
| Gorilla           | TTGTGTAGAAACATCAATTCTATTACTTATCTCACATTTTCCCTATAGGAATGCTACGTTAGTAAATGAATACCTATCTT  | 63221 |
| GrabEatingMacaque | TTGTGTAGAAATGTCAGTTCTATTACTTATCTTACATTTTCCCTATAGGAATGCTACATTAGTAAATAAATACCTATCTT  | 63639 |
| Macaque           | TTGTGTAGAAATGTCAGTTCTATTACTTATCTTACATTTTCCCTATAGGAATGCTACATTAGTAAATAAATACCTATCTT  | 64480 |
| PigTailedMacaque  | TTGTGTAGAAATGTCAGTTCTATTACTTATCTTACATTTTCCCTATAGGAATGCTACATTAGTAAATAAATACATACTT   | 63370 |
| Bonobo            | TTGTGTAGAAACATCAGTTCTATTACTTATCTCACATTTTCCCTATAGGAATGCTACATTAGTAAATGAATACCTATCTT  | 61778 |
| OliveBaboon       | TTATGTAGAAATGTC AATTCTATTACTTATCTTACATTTTCCCTATAGGAATGCTACATTAGTAAATTAATACCTATCTT | 63225 |
| Orangutan         | TTGTGTAGAAACATCAATTCTATTACTTATCTCACATTTTACCTATAGGAATACTACATTAGTAAATGAATACCTATCTT  | 63653 |

|                   |                                                                                  |       |
|-------------------|----------------------------------------------------------------------------------|-------|
| Majority          | CAGTGCTTTGTTTGCCTTTACAC--CAGGGTATTGAATTAATAGTTATGTTATTCTGGCTGATAAAGTTGAT----ACAT |       |
|                   | 77210 77220 77230 77240 77250 77260 77270 77280                                  |       |
| Human             | CAGTGCTTTCTTCACCTTTACAC--CAGGGTATTCAATTAATAGTTATGTTATTCTGGCTGATAAAGTTGATTGATACAT | 62759 |
| Coquerel'sSifaka  | CAATGCTTTGTTTGCCTTTACACAACAGAGTATTGAATTTATAGTTATTTTATTCTGGCTGATAAATTTGAT----ACTT | 51118 |
| Ma'sNightMonkey   | CTGTGCTTTGTTTGCCTTTACAG--CAGCGTATTGAATTAATAGTTATGTTATTCTGGCTGATAAAGTTGAT----ACAT | 58188 |
| VervetAGM         | CAGTGCTTTGTTTGCCTTTACAC--CAGGGTGTGAATTAATAGTTATGTTATTCTGGCTGATAAAGTTGAT----ACAT  | 64518 |
| Gorilla           | CAGTGCTTTGTTTGCCTTTACAC--CAGGGTATTCAATTAATAGTTATGTTATTCTGGCTGATAAAGTTGATTGATACAT | 63299 |
| GrabEatingMacaque | CAGTGCTTTGTTTGCCTTTACAC--CAGGGTGTGAATTAATAGTTATGTTATTCTGGCTGATAAAGTTGAT----ACAT  | 63713 |
| Macaque           | CAGTGCTTTGTTTGCCTTTACAC--CAGGGTGTGAATTAATAGTTATGTTATTCTGGCTGATAAAGTTGAT----ACAT  | 64554 |
| PigTailedMacaque  | CAGTGCTTTGTTTGCCTTTACAC--CAGGGTGTGAATTAATAGTTATGTTATTCTGGCTGATAAAGTTGAT----ACAT  | 63444 |
| Bonobo            | CAGTGCTTTCTTCACCTTTACAC--CAGGGTATTCAATTAATAGTTATGTTATTCTGGCTGATAAAGTTGATTGATACAT | 61856 |
| OliveBaboon       | CAGTGCTTTGTTTGCCTTTACAC--CAGGGTGTGAATTAATAGTTATGTTATTCTGGCTGATAAAGTTGAT----ACAT  | 63299 |
| Orangutan         | CAGTGGTTTGTTCGCCTTTACAC--CAGGGTATTGAATTAATAGTTATGTTATTCTGGCTGATAAAGTTGATTAATACAT | 63731 |

Tuesday, May 03, 2022 06:16 PM

|                   |                                                                                  |       |
|-------------------|----------------------------------------------------------------------------------|-------|
| Majority          | GGCTTCCACTTTTATGTGATGATAGGTACCTTGCCTAACCCAAATGTAATTCAAATCCTGATGTGTATGAAGTCCCTTTG |       |
|                   | 77290 77300 77310 77320 77330 77340 77350 77360                                  |       |
| Human             | GGCTTCCACTTTTATGTGATGATAGGTACCTTGCCTAACCCAAATGTAATTCAAATCCTGATGTGTATGAAGTCCCTTTG | 62839 |
| Coquerel'sSifaka  | GGCTTCCACTTTTATGTGATGATAAGTGCCTTGCCTAACCTAAATGTAATTCATACCCTGATGTGTATGAAAT-----G  | 51192 |
| Ma'sNightMonkey   | GGCTTCCACTGTTATGTGATGATGGGTACTTTGCCTAACCCAAATATAATTCAAATCCTGATGTGTATGAGGTCCCTTTG | 58268 |
| VervetAGM         | GGCTTCCACTTTTATGTGATGATAGGTACCTTGCCTAACCCAAATGTAATTCATATCCTGATATGTATGAAGTCCCTTTG | 64598 |
| Gorilla           | GGCTTCCACTTTTATGTGATGATAGGTACCTTGCCTAACCCAAATGTAATTCAAATCCTGATGTGTATGAAGTCCCTTTG | 63379 |
| GrabEatingMacaque | GGCTTCCACTTTTATGTGATGATAGGTACCTTGCCTAACCCAAATGTAATTCAAATCCTGATATGTATGAAGTCCCTTTG | 63793 |
| Macaque           | GGCTTCCACTTTTACGTGATGATAGGTACCTTGCCTAACCCAAATGTAATTCAAATCCTGATATGTATGAAGTCCCTTTG | 64634 |
| PigTailedMacaque  | GGCTTCCACTTTTATGTGATGATAGGTACCTTGCCTAACCCAAATGTAATTCAAATCCTGATATGTATGAAGTCCCTTTG | 63524 |
| Bonobo            | GGCTTCCACTTCTATGTGATGATAGGTACCTTGCCTAACCCAAATGTAATTCAAATCCTGATGTGTATGAAGTCCCTTTG | 61936 |
| OliveBaboon       | GGCTTCCACTTTTATGTGATGATAGGTACCTTGCCTAACCCAAATGTAATTCAAATCCTGATATGTATGAAGTCCCTTTG | 63379 |
| Orangutan         | GGCTTCCACTTTTATGTGATGATAGGTACCTTGCCTAACCCAAATGTAATTCAGATCCTGATGTGTATGAAGTCCCTTTG | 63811 |

|                   |                                                                                  |       |
|-------------------|----------------------------------------------------------------------------------|-------|
| Majority          | AGTTTTTACCAGTGCTGTATTGAA-GTGGATGAACCTGTGTTGAATTATTTTCTAGGTTAGTTTTTAGCTAGGTAAAT-T |       |
|                   | 77370 77380 77390 77400 77410 77420 77430 77440                                  |       |
| Human             | AGTTTTTACCAGTGCTGTATTGAA-GTGGATGAATCTGTGTTGAATTATTTTCTAGGTTAGTTTTTAGGTAGGTAGAT-T | 62917 |
| Coquerel'sSifaka  | AGTTTTTACCAGTACTGTATTGAAAGTGGGTGAACCTCTGTTGAATTATTTTCTAGGTTAGTTTTTAGCTGGTAAATAC  | 51272 |
| Ma'sNightMonkey   | AGTTTTTACCAGTGCTGTATTTAA-GTGGATGAACCTGTGCTGAATCATGTTCTAGGTTAGTTTTTAGGTAGGTAAAT-T | 58346 |
| VervetAGM         | AGGTTTTACCAGTGCTGTATTGAA-GTGGATGAACCTGTGTTGAATTATTTTCTAGGTTAGTTTTTAGCTAGGTAAAT-T | 64676 |
| Gorilla           | AGTTTTTACCAGTGCTGTATTGAA-GTGGATGAATCTGTGTTGAATTATTTTCTGTTAGTTTTTAGCTAGGTAGAT-T   | 63457 |
| GrabEatingMacaque | AGTTTTTACCAGTGCTGTATTGAA-GTGGATGAACCTGTGTTGAATTATTTTCTAGGTTAGTTTTTAGCTAGGTAAAT-T | 63871 |
| Macaque           | AGTTTTTACCAGTGCTGTATTGAA-GTGGATGAACCTGTGTTGAATTATTTTCTAGGTTAGTTTTTAGCTAGGTAAAT-T | 64712 |
| PigTailedMacaque  | AGTTTTTACCAGTGCTGTATTGAA-GTGGATGAACCTGTGTTGAATTATTTTCTAGGTTAGTTTTTAGCTAGGTAAAT-T | 63602 |
| Bonobo            | AGTTTTTACCAGTGCTGTATTGAA-GTGGATGAATCTGTGTTGAATTATTTTCTAGGTTAGTTTTTAGCTAGGTAGAT-T | 62014 |
| OliveBaboon       | AGTTTTTACCAGTGCTGTATTGAA-GTGGATGAACCTGTGTTGAATTATTTTCTAGGTTAGTTTTTAGCTAGGTAAAT-T | 63457 |
| Orangutan         | AGTTTTTACCAGTGCTGTATTGAA-GTGGATGAACCTGTGTTGAATTATTTTCTAGGTTAGTTTTTAGCTAGGTAAAT-T | 63889 |

|                   |                                                                                      |       |
|-------------------|--------------------------------------------------------------------------------------|-------|
| Majority          | AGTCACGTAAAA----AATTCGTGTATTAAAGAGAAAAGGTTTTTATATTCCCAGAG-GTGAGAATATTTGAAT---TAAAA   |       |
|                   | 77450 77460 77470 77480 77490 77500 77510 77520                                      |       |
| Human             | AGTCACATAAAAA----AATTCGTATATTAAAGAGAAAAGGTTTTTATATTCCCAGAG-GTGAGAATATTTGAAT---TAAAA  | 62989 |
| Coquerel'sSifaka  | AGTCACATAAAAACCTTAATTTTGTATATTAAAGAGAAAAGGTTTTTGTATTTCCAGAGAGTAGGAATAGTTGAATATTTGAAA | 51352 |
| Ma'sNightMonkey   | AGTCACATAAAAA----ATTTTGTGTATTAAAGAGAAAAGGTTTTTATATTCCCAGAG-GTGAGAATATTTGAAT---TAAAA  | 58418 |
| VervetAGM         | AGTCACGTAAAA----AATTTGTGTATTAAAGAGAAAAGGTTTTTATATTCCCAGAG-GTGAGAATATTTGAAT---TAAAA   | 64748 |
| Gorilla           | AGTCACATAAAAA----AATTCGTGTATTAAAGAGAAAAGGTTTTTATATTCCCAGAG-GTGAGAATATTTGAAT---TAAAA  | 63529 |
| GrabEatingMacaque | AGTCACGTAAAA----AATTCATGTATTAAAGAGAAAAGGTTTTTATATTCCCAGAG-GTGAGAATATTTGAAT---TAAAA   | 63943 |
| Macaque           | AGTCACGTAAAA----AATTCATGTATTAAAGAGAAAAGGTTTTTATATTCCCAGAG-GTGAGAATATTTGAAT---TAAAA   | 64784 |
| PigTailedMacaque  | AGTCACGTAAAA----AATTCATGTATTAAAGAGAAAAGGTTTTTATATTCCCAGAG-GTGAGAATATTTGAAT---TAAAA   | 63674 |
| Bonobo            | AGTCACATAAAAA----A-TTCGTATATTAAAGAGAAAAGGTTTTTATATTCCCAGAG-GTGAGAATATTTGAAT---TAAAA  | 62085 |
| OliveBaboon       | AGTCACGTAAAA----AATTCGTGTATTAAAGAGAAAAGGTTTTTATATTCCCAGAG-GTGAGAATATTTGAAT---TAAAA   | 63529 |
| Orangutan         | AGTCACATAAAAA----AATTCATGTATTAAAGAGAAAAGGTTTTTATATTCCCAGAG-GTGAGAATATTTGAAT---TAAAA  | 63961 |

Tuesday, May 03, 2022 06:16 PM

| Majority          | GCTTTATATACTTAAGC-AACTGTAGAGGTTTACTTTTTCCATAACACGACATGTTTATTCTTTAATGAAAAGTTAACA   |       |       |       |       |       |       |       |       |
|-------------------|-----------------------------------------------------------------------------------|-------|-------|-------|-------|-------|-------|-------|-------|
|                   | 77530                                                                             | 77540 | 77550 | 77560 | 77570 | 77580 | 77590 | 77600 |       |
| Human             | GCTTTATATACTTAAGC-AACTGTAGAGGTTTACTTTTTCCATAACACGACATGTTTATTCTTCTAATGAAAAGTTAACA  |       |       |       |       |       |       |       | 63068 |
| Coquerel'sSifaka  | GCTTTATATACTTAAGT-AGCTATAGAGGTTTACTTTCTCCATAGCAGGACGTGTTTATTCTAATACTGAAAAATCAACA  |       |       |       |       |       |       |       | 51431 |
| Ma'sNightMonkey   | -CTTTATATACTTAAGC----TGTAGAGGTTTACTGTCTCCATAACAGGACATGTTTCATTCTTCTAACGAAAAGTTAACA |       |       |       |       |       |       |       | 58493 |
| VervetAGM         | GCTTTATATACTTAAGCTAACTGTAGAGGTTTACTTTTTCCATAACACGACATGTTTATTCTTTAATGAGAAGTTAACA   |       |       |       |       |       |       |       | 64828 |
| Gorilla           | GCTTTATATACTTAAGC-AACTGTAGAGGTTTACTTTTTCCATAACACGACATGTTTATTCTTCTAATGAAAAGTTAACA  |       |       |       |       |       |       |       | 63608 |
| GrabEatingMacaque | GCTTTATATACTTAAGCTAACTGTAGAGGTTTACTTTTTCCATAACACGACATGTTTATTCTTTAATGAGAAGTTAACA   |       |       |       |       |       |       |       | 64023 |
| Macaque           | GCTTTATATACTTAAGCTAACTGTAGAGGTTTACTTTTTCCATAACACGACATGTTTATTCTTTAATGAGAAGTTAACA   |       |       |       |       |       |       |       | 64864 |
| PigTailedMacaque  | GCTTTATATACTTAAGCTAACTGTAGAGGTTTACTTTTTCCATAACACGACATGTTTATTCTTTAATGAGAAGTTAACA   |       |       |       |       |       |       |       | 63754 |
| Bonobo            | GCTTTATATACTTAAGC-AACTGTAGAGTTTACTTTTTCCATAACACGACATGTTTATTCTTCTAATGAAAAGTTAACA   |       |       |       |       |       |       |       | 62164 |
| OliveBaboon       | GCTTTATATACTTAAGCTAACTGTAGAGGTTTACTTTTTCCATAACACGACATGTTTATTCTTTAATGAGAAGTTAACA   |       |       |       |       |       |       |       | 63609 |
| Orangutan         | GCTTTATATACTTAAGC-AACTGTAGAGGTTTACTTTTTCCATAACACGACATGTTTATTCTTCTAATGAAAAGTTAACA  |       |       |       |       |       |       |       | 64040 |

| Majority          | GTATGTTACCTGTTCTCTAGTTTGTTCAGCTTATATCCAGCTGAACTA--GAAATGGTGATTATATAGGAGCAGAAA  |       |       |       |       |       |       |       |       |
|-------------------|--------------------------------------------------------------------------------|-------|-------|-------|-------|-------|-------|-------|-------|
|                   | 77610                                                                          | 77620 | 77630 | 77640 | 77650 | 77660 | 77670 | 77680 |       |
| Human             | GTATGTTACCTGTTCTCTAGTTTGTTCAGCTTATATCCAGCTGAACTA--GAAATGGTGATTATATAGGAGCAGAAA  |       |       |       |       |       |       |       | 63146 |
| Coquerel'sSifaka  | CTATATTTCCCATCTCTAGTTTGTTCCTAGTT--ACCTAGATGTACTA--GAAATGGTAATTATACAGGAGCAGGAA  |       |       |       |       |       |       |       | 51507 |
| Ma'sNightMonkey   | ATATGTTCCCTGTCTCTAGTTTGTAAACAGCTTATAGCCAGCTGAACTA--GAAATGATGATTATATAGGAGCAGAAA |       |       |       |       |       |       |       | 58571 |
| VervetAGM         | GTATGTTACCTGTTCTCTAGTTTGTTCAGCTTATATCCAGCTGAACTA--CAAATGGTGATTATATAGGAGCAGAAA  |       |       |       |       |       |       |       | 64906 |
| Gorilla           | GTATGTTACCTGTTCTCTAGTTTGTTCAGCTTATATCCAGCTGAACTA--GGAATGGTGATTATATAGGAGCAGAAA  |       |       |       |       |       |       |       | 63686 |
| GrabEatingMacaque | GTATGTTACCTGTTCTCTAGTTTGTTCAGCTTCTATCCAGCTGAACTATACAAATGGTGATTATATAGGAGCAGAAA  |       |       |       |       |       |       |       | 64103 |
| Macaque           | GTATGTTACCTGTTCTCTAGTTTGTTCAGCTTCTATCCAGCTGAACTA--CAAATGGTGATTATATAGGAGCAGAAA  |       |       |       |       |       |       |       | 64942 |
| PigTailedMacaque  | GTATGTTACCTGTTCTCTAGTTTGTTCAGCTTCTATCCAGCTGAACTA--CAAATGGTGATTATATAGGAGCAGAAA  |       |       |       |       |       |       |       | 63832 |
| Bonobo            | GTATGTTACCTGTTCTCTAGTTTGTTCAGCTTATATCCAGCTGAACTA--GAAATGGTGGTTATATAGGAGCAGAAA  |       |       |       |       |       |       |       | 62242 |
| OliveBaboon       | GTATGTTACCTGTTTCTAGTTTGTTCAGCTTCTATCCAGCTGAACTA--CAAATGGTGATTATATAGGAGCAGAAA   |       |       |       |       |       |       |       | 63687 |
| Orangutan         | GTATGTTACCTGTTCTCTAGTTTGTTCAGCTTATATCCAGCTGAACTA--GAAATGGTGATTATGTAGGAGCAGAAA  |       |       |       |       |       |       |       | 64118 |

| Majority          | AAA-TACAAGATAATCATAGCAGTAACATAGTCCTTTATAAATTCATGTTGTATTTTCACATATGTGATCTTTAATTTACT |       |       |       |       |       |       |       |       |
|-------------------|-----------------------------------------------------------------------------------|-------|-------|-------|-------|-------|-------|-------|-------|
|                   | 77690                                                                             | 77700 | 77710 | 77720 | 77730 | 77740 | 77750 | 77760 |       |
| Human             | AAG-TACAAGATAATCATAGCGTAACATAGTCCTTTATAAATTCATGATGTATTTTCACATATGTTGTCTTTAATTTACT  |       |       |       |       |       |       |       | 63225 |
| Coquerel'sSifaka  | AAAAACCAAGATAATCATAACAGCAGCAAAGTCTCATACAATTCACAGCATACTTTACATATACGATCTTTTATTTAGT   |       |       |       |       |       |       |       | 51587 |
| Ma'sNightMonkey   | AA--TACAAGATAATCATAGCAGTAACATAGTCCTTTAAAATTCATGATGTATTTAACATATGTGATCTTTAATTTACT   |       |       |       |       |       |       |       | 58649 |
| VervetAGM         | AAA-TACAAGATAATCATAGCAGTAACATAGTCCTTTAT-----GTTGTATTTTCACATTTGTGATCTTTAGTTTACT    |       |       |       |       |       |       |       | 64978 |
| Gorilla           | AAG-TACAAGATAATCATAGCGTAACATAGTCCTTTATAAATTCATGATGTATTTTCACATATGTTGTCTTTAATTTACG  |       |       |       |       |       |       |       | 63765 |
| GrabEatingMacaque | AAA-TACAAGATAATCATAGCAGTAACATAGTCCTTTAT-----GTTGTATTTTCACATATGTGATCTTTAGTTTACT    |       |       |       |       |       |       |       | 64175 |
| Macaque           | AAA-TACAAGATAATCATAGCAGTAACATAGTCCTTTAT-----GTTGTATTTTCACATATGTGATCTTTAGTTTACT    |       |       |       |       |       |       |       | 65014 |
| PigTailedMacaque  | AAA-TACAAGATAATCATAGCAGTAACATAGTCCTTTAT-----GTTGTATTTTCACATATGTGATCTTTAGTTTACT    |       |       |       |       |       |       |       | 63904 |
| Bonobo            | AAG-TACAAGATAATCATAGCGTAACATAGTCCTTTATAAATTCATGATGTATTTTCACATATGTTGTCTTTAATTTACT  |       |       |       |       |       |       |       | 62321 |
| OliveBaboon       | AAAATACAAGATAATCGTAGCAGTAACATAGTCCTTTAT-----GTTGTATTTTCACATATGGTCTTTAGTTTACT      |       |       |       |       |       |       |       | 63760 |
| Orangutan         | AAA-TACAAGATAATCATAGCGTAACATAGTCCTTTATAAATTCATGATGTATTTTCATATATGTTGTCTTTAATTTACT  |       |       |       |       |       |       |       | 64197 |

Tuesday, May 03, 2022 06:16 PM

| Majority          | CCTCATAATAACCCTGTGAAGAAGCATGACAGCCATTGTCATCATTCTGTTTTCCCAATTAAGAAATTGAGATTCAGAG |       |
|-------------------|---------------------------------------------------------------------------------|-------|
|                   | 77770 77780 77790 77800 77810 77820 77830 77840                                 |       |
| Human             | CCTCTTAATAACCCT-TGAAGAAGCATGACAGCCATTGTCATCATTCTGTTTTCCCGATTAAGAAATTGAGATTCAGAG | 63304 |
| Coquerel'sSifaka  | CTT-----AACTCTATGAGGAAGCATAGCAGCCATT---ATCATCTCTGTTTTCCAGCTTAAGAAATTGAGATTGAGGG | 51658 |
| Ma'sNightMonkey   | CTTCATAATAACCCTATGAAGAAGCATGACAGCTATTGTCATATTCTATTTCCAGAGTAAGAAATTGAGATTCAGAG   | 58729 |
| VervetAGM         | CCTCATAATAACCCTGTGAAGAACCATGACAGCCATTGTCATCATTCTGTTTTCCCAATTAAGAAATTGAGATTCAGAG | 65058 |
| Gorilla           | CCTCTTAATAACCCTGTGAAGAAGCATGACAGCCATTGTCATCATTCTGTTTTCCCGATTAAGAAATTGAGATTCAGAG | 63845 |
| GrabEatingMacaque | CCTCATAATAACCCTGTGAAGAACCATGACAGCCATTGTCATCATTCTGTTTTCCCAATTAAGAAATTGAGATTCAGAG | 64255 |
| Macaque           | CCTCATAATAACCCTGTGAAGAACCATGACAGCCATTGTCATCATTCTGTTTTCCCAATTAAGAAATTGAGATTCAGAG | 65094 |
| PigTailedMacaque  | CCTCATAATAACCCTGTGAAGAACCATGACAGCCATTGTCATCATTCTGTTTTCCCAATTAAGAAATTGAGATTCAGAG | 63984 |
| Bonobo            | CCTCTTAATAACCCTGTGAAGAAGCATGACAGCCATTGTCATCATTCTGTTTTCCCGATTAAGAAATTGAGATTCAGAG | 62401 |
| OliveBaboon       | CCTCATAATAACCCTGTGAAGAACCATGACAGCCATTGTCATCATTCTGTTTTCCCAATTAAGAACTGAGATTCAGAG  | 63840 |
| Orangutan         | CCTCTTAATAACCCTGTGAAGAAGCATGACAGCCATTGTCATCATTCTGTTTTCCCAATTAAGAAATTGAGATTCAGAG | 64277 |

| Majority          | AGGTAAACAACCTTGCTTAAGATGACCTAAAAGAGTCTAGGCTTTTAATTAATCCTAGACCTGGCACTCGTCAGTTTCAG  |       |
|-------------------|-----------------------------------------------------------------------------------|-------|
|                   | 77850 77860 77870 77880 77890 77900 77910 77920                                   |       |
| Human             | AGGTCAAATAACTTGCTTAAGATGACCGAAAAGAGTCTAGGCTTTTAATTAATCCTAGACCTGGCACTCGTCAGTTTCAG  | 63384 |
| Coquerel'sSifaka  | AGGTAAAG--T--TGCTCAAGATGACGTAATTGAGTCTAGGCTTTT---AAGCTAGACCTGACACTCTTCTGTTATAG    | 51730 |
| Ma'sNightMonkey   | AGGTAAAAAACTTGCTTAAGATAACCTAATAGAGTCTAGGCTTTTAATTAATCTAGACCTGGCACTCATCAATTTTCAG   | 58809 |
| VervetAGM         | AGGTAAACAACCTTGCTTAAGATGACCTAAAAGACTCTAGGCTTTTAATTAATCCTAGACCTGGCACTTGTGAGTTTCAG  | 65138 |
| Gorilla           | AGGTCAGATAACTTGCTTAAGATGACCTAAAAGAGTCTAGGCTTTTAATTAATCCTAGACTGTCAGTTTCAG          | 63925 |
| GrabEatingMacaque | AGGTAAACAACCTTGCTTAAGGTGACCTAAAAGACTCTAGGCTTTTAATTAATCCTAGACCTGGCACTTGTGAGTTTCAG  | 64335 |
| Macaque           | AGGTAAACAACCTTGCTTAAGGTGACCTAAAAGACTCTAGGCTTTTAATTAATCCTAGACCTGGCACTTGTGAGTTTCAG  | 65174 |
| PigTailedMacaque  | AGGTAAACAACCTTGCTTAAGGTGACCTAAAAGACTCTAGGCTTTTAATTAATCCTAGACCTGGCACTTGTGAGTTTCAG  | 64064 |
| Bonobo            | AGGTCAAATAACTTGCTTAAGATGACCTAAAAGAGTCTAGGCTTTTAATTAATCCTAGACCTGGCACTCGTCAGTTTCAG  | 62481 |
| OliveBaboon       | AGGTTCAACAACCTTGCTTAAGGTGACCTAAAAGACTCTAGGCTTTTAATTAATCCTAGACCTGGCACTTGTGAGTTTCAG | 63920 |
| Orangutan         | AGGTTAAATAA---CTTAAGATGACCTAAAAGAGTCTAGGCTTTTAATTAATCCTAGACCTGGCACTCGTCAGTTTCAG   | 64353 |

| Majority          | AACTTTTCTGGAATGACATTGGATTGCTAATTTTCATCAAGATAATCTGATTGGGGGTGAACATTTTCAGGTTAAGGAAA- |       |
|-------------------|-----------------------------------------------------------------------------------|-------|
|                   | 77930 77940 77950 77960 77970 77980 77990 78000                                   |       |
| Human             | AACTTTTCTGGAATGACATTGGATTGCTAATTTTCATCAAGATAATCTGATTGGGGGTGAACATTTTCAGGTTAAGGAAA- | 63463 |
| Coquerel'sSifaka  | AACTTTCCTGTAATGACATTGGATTTCCTAATTTTATCAAGATAATCTGACTCAGGTTGAACACTTCAAGTTAAGAGTG-  | 51809 |
| Ma'sNightMonkey   | AACTTTTCTGGAATAACATTAGATTGCTAATTTTCATCAAGATAATCTGATTGGGGTTGAACATTTTCAGGTTAAGGAAA- | 58888 |
| VervetAGM         | AACTTTTCTGGAATGACATTGGATTACTAATTTTCATCAAGACACTCTGATTGGGGGTGAACATTTTCAGGTTAAGGAAA- | 65217 |
| Gorilla           | AACTTTTCTGGAATGACATTGGATTGCTAATTTTCATCAAGATAATCTGATTGGGGGTGAACATTTTCAGGTTAAGGAAA- | 64004 |
| GrabEatingMacaque | AACTTTTCTGGAATGACATTGGATTACTAATTTTCATCAAGACAGCTGATTGGGGGTGAACATTTTCAGGTTAAGGAAA-  | 64414 |
| Macaque           | AACTTTTCTGGAATGACATTGGATTACTAATTTTCATCAAGACAGCTGATTGGGGGTGAACATTTTCAGGTTAAGGAAA-  | 65253 |
| PigTailedMacaque  | AACTTTTCTGGAATGACATTGGATTACTAATTTTCATCAAGACAGCTGATTGGGGGTGAACATTTTCAGGTTAAGAAAA-  | 64143 |
| Bonobo            | AACTTTTCTGGAATGACATTGGATTGCTAATTTTCATCAAGATAATCTGATTGGGGGTGAACATTTTCAGGTTAAGGAAAT | 62561 |
| OliveBaboon       | AACTTTTCTGGAATGACATTGGATTACTAATTTTCATCAAGACAGCTGATTGGGGGTGAACATTTTCAGGTTAAGGAAA-  | 63999 |
| Orangutan         | AACTTTTCTGGAATGACATTGGATTGCTAATTTTCATCAAGATAATCTGATTGGGGGTGAACATTTTC-----AGGAAA-  | 64426 |

Tuesday, May 03, 2022 06:16 PM

| Majority          | -----ATAC-----TTTTTCTTTTTTGCCCTATTTTATGGGAATTGCTATTATGTGTTAGGATAAATTTG            |       |       |       |       |       |       |       |       |
|-------------------|-----------------------------------------------------------------------------------|-------|-------|-------|-------|-------|-------|-------|-------|
|                   | 78010                                                                             | 78020 | 78030 | 78040 | 78050 | 78060 | 78070 | 78080 |       |
| Human             | -----ATACTAGTTTTTTTTCTTTTTTGCCCTATTTTATGGGAATTGCTATTATGTGTTAGGATAAATTTG           |       |       |       |       |       |       |       | 63527 |
| Coquerel'sSifaka  | -----ATAC-----TAGTTTTTTTGCCCTATTTTCATGGGAATTGCTATTGTACGCTGTAGT-----               |       |       |       |       |       |       |       | 51860 |
| Ma'sNightMonkey   | -----ATACTAGCTTTTTTCTTTTTTACCTCATTTTATGGGAATTGCTATTATGTGTTAGGATAAATTTG            |       |       |       |       |       |       |       | 58952 |
| VervetAGM         | -----ATAG-----TTTTTCTTTTTTGCCCTATTTTATGGGAATTGCTATTATGTGTTAGGATAAATTTG            |       |       |       |       |       |       |       | 65277 |
| Gorrilla          | -----ATACTAGTTTTTTTTCTTTTTTGCCCTATTTTATGGGAATTGCTATTATGTGTTAGGATAAATTTG           |       |       |       |       |       |       |       | 64068 |
| GrabEatingMacaque | -----ATAG-----TTTTTCTTTTTTGCCCTATTTTATGGGAATTGCTATTATGTGTTAGGATAAATTTG            |       |       |       |       |       |       |       | 64474 |
| Macaque           | -----ATAG-----TTTTTCTTTTTTGCCCTATTTTATGGGAATTGCTATTATGTGTTAGGATAAATTTG            |       |       |       |       |       |       |       | 65313 |
| PigTailedMacaque  | -----ATAG-----TTTTTCTTTTTTGCCCTATTTTATGGGAATTGCTATTATGTGTTAGGATAAATTTG            |       |       |       |       |       |       |       | 64203 |
| Bonobo            | GTTTTTTTAAAGAAAAAAGTAGTTTTTTT-CTTTTTTGCCCTATTTTATGGGAATTGCTATTATGTGTTAGGATAAATTTG |       |       |       |       |       |       |       | 62640 |
| OliveBaboon       | -----ATAG-----TTTTTCTTTTTTGCCCTATTTTATGGGAATTGCTATTATGTGTTAGGATAAATTTG            |       |       |       |       |       |       |       | 64059 |
| Orangutan         | -----ATAC--ATTTTTTCTTTTTTGCCCTATTTTATGGGAATTGCTATTATGTGTTAGGATAAATTTG             |       |       |       |       |       |       |       | 64488 |

| Majority          | GTTTGAAGCAACTTTGTACAATGTGGCATCAAATAGCAGTTACCTTATAAACTGTACTGAATCATATAAGTACTGCCAT |       |       |       |       |       |       |       |       |
|-------------------|---------------------------------------------------------------------------------|-------|-------|-------|-------|-------|-------|-------|-------|
|                   | 78090                                                                           | 78100 | 78110 | 78120 | 78130 | 78140 | 78150 | 78160 |       |
| Human             | GTTTGAAGCAACTTTGTACAATGTGGCATCAAATAGCAGTTACCTTATAAACTGTACTGAATCATATAAGTACTGCCAT |       |       |       |       |       |       |       | 63607 |
| Coquerel'sSifaka  | ----GAAGCAACGTCATGTAATGTGGCATCAAATGCAGTTACCTTTGAAAATATAACCAATTCATATAAGTACTGCCAT |       |       |       |       |       |       |       | 51936 |
| Ma'sNightMonkey   | GTTTGAAGCAACTTTGTACAGGTAGCATCAAATAGCAGTTACTTCATAAACTGTACTGATTCATATAAGTACTGCCAT  |       |       |       |       |       |       |       | 59032 |
| VervetAGM         | GTTTGAAGCAACTTTGTACAATGTGGCATCAAATAGCAGTTACCTTATAAACTGTACTGAATCATCTAAGTACTGCTAT |       |       |       |       |       |       |       | 65357 |
| Gorrilla          | GTTTGAAGCAACTTTGTACAATGTGGCATCAAATAGCAGTTACCTTATAAACTGTACTGAATCATATAAGTACTGCCAT |       |       |       |       |       |       |       | 64148 |
| GrabEatingMacaque | GTTTGAAGCAGCTTTGTACAATGTGGCATCAAATAGCAGTTACCTTATAAACTGTACTGAATCATCAAAGTACTGCCAT |       |       |       |       |       |       |       | 64554 |
| Macaque           | GTTTGAAGCAGCTTTGTACAATGTGGCATCAAATAGCAGTTACCTTATAAACTGTACTGAATCATCAAAGTACTGCCAT |       |       |       |       |       |       |       | 65393 |
| PigTailedMacaque  | GTTTGAAGCAGCTTTGTACAATGTGGCATCAAATAGCAGTTACCTTATAAACTGTACTGAATCATCAAAGTACTGCCAT |       |       |       |       |       |       |       | 64283 |
| Bonobo            | GTTTGAAGCAACTTTGTACAATGTGGCATCAAATAGCAGTTACCTTATAAACTGTACTGAATCATATAAGTACTGCCAT |       |       |       |       |       |       |       | 62720 |
| OliveBaboon       | GTTTGAAGCAGTTTGTACAATGTGGCATCAAATAGCAGTTACCTTATAAACTGTACTGAATCATCAAAGTACTGCCAT  |       |       |       |       |       |       |       | 64139 |
| Orangutan         | GTTTGAAGCAACTTTGTACAATGTGGCATCAAATAGCAGTTACCTTATAAACTGTACTTAATCATATAAGTACTGCCAT |       |       |       |       |       |       |       | 64568 |

| Majority          | CCAGCAATAAATATATGTATAATAAAATTAACCTTATTGAGCAGAGTAGTGTGGTACTACTTTGGTAGGACTTCCTGTTT |       |       |       |       |       |       |       |       |
|-------------------|----------------------------------------------------------------------------------|-------|-------|-------|-------|-------|-------|-------|-------|
|                   | 78170                                                                            | 78180 | 78190 | 78200 | 78210 | 78220 | 78230 | 78240 |       |
| Human             | CCAGCAATAAATATATGTATAATAAAATTAACCTTATTGAGCAGAGTAGTGTGGTACTACTTTGGTAGGACTTCCTGTTT |       |       |       |       |       |       |       | 63687 |
| Coquerel'sSifaka  | ATAGCGATAAATACATGTAGAGCAAATTAATTTTATTATGCATACTAGTATGGTACTACTTTGGTAGGACTGACTATAT  |       |       |       |       |       |       |       | 52016 |
| Ma'sNightMonkey   | CCAGCAATAAATATATGTATAATAAAATTAACCTTACTGAGCAGGTAATATGGTACTACTTCAGTAGGACTTCCTGTTT  |       |       |       |       |       |       |       | 59112 |
| VervetAGM         | CCAGCAATAAATATATGTATAATAAAATTAACCTTATTGAGCAGAGTAGTGTGGTACTACTTTG-CAGGACTTCCTGTTT |       |       |       |       |       |       |       | 65436 |
| Gorrilla          | CCAGCAATAAATATATGTATAATAAAATTAACCTTACTGAGCAGAGTAGTGTGGTACTACTTTGGTAGGACTTCCTGTTT |       |       |       |       |       |       |       | 64228 |
| GrabEatingMacaque | CCAGCAATAAATATATGTATAATAAAATTAACCTTATTGAGCAGAGTAGTGTGGCACTACTTTG-CAGGACTTCCTGTTT |       |       |       |       |       |       |       | 64633 |
| Macaque           | CCAGCAATAAATATATGTATAATAAAATTAACCTTATTGAGCAGAGTAGTGTGGCACTACTTTG-CAGGACTTCCTGTTT |       |       |       |       |       |       |       | 65472 |
| PigTailedMacaque  | CCAGCAATAAATATCTGTATAATAAAATTAACCTTATTGAGCAGAGTAGTGTGGCACTACTTTG-CAGGACTTCCTGTTT |       |       |       |       |       |       |       | 64362 |
| Bonobo            | CCAGCAATAAATGTATGTATAATAAAATTAACCTTATTGAGCAGAGTAGTGTGGTACTACTTTGGTAGGACTTCCTGTTT |       |       |       |       |       |       |       | 62800 |
| OliveBaboon       | CCAGCAATAAATATATGTATAATAAAATTAACCTTATTGAGCAGAGTAGTGTGGCACTACTTTG-CAGGACTTCCTGTTT |       |       |       |       |       |       |       | 64218 |
| Orangutan         | TCAGCAATAAATATATGTATAATAAAATTAACCTTATTGAGCAGAGTAGTGTGGTACTACTTTGGTAGGACTTCCTGTTT |       |       |       |       |       |       |       | 64648 |

Tuesday, May 03, 2022 06:16 PM

| Majority          | GTGATCCTTATTAGTTTTTTTAT-TAAATTAACCTATTTGCAATTTTTTACAATTAAAAGTATTAGCATGGATGCTTAGC  |       |
|-------------------|-----------------------------------------------------------------------------------|-------|
|                   | 78250 78260 78270 78280 78290 78300 78310 78320                                   |       |
| Human             | GTGATCCTTATTAGTTTTTTT---AAACTAACCTATTTGCAATTTTTTAAAAATAAAAGTATTAGCATGGATGCTTAGC   | 63764 |
| Coquerel'sSifaka  | TTGACCCCTACTAATTTTTTT---TAAATTA-----TT-----TTTATAATAAAAGTATTAGCATGGTT-TTTAAT      | 52080 |
| Ma'sNightMonkey   | GTGACCCCTTATTAGTTTTTTAA---AAATTAACCTATTTGCAATTTATAAAAAATAAAAGTATTAGCATGGATGCTTAGC | 59188 |
| VervetAGM         | GTGATCCTTATTAGTTTTTTAAT-TAAATTAACATATTTGCAATTTTTTACAATTAAAAGTATTAGCATGGATGCTTAGC  | 65515 |
| Gorilla           | GTGACCCCTTATTAGTTTTTTT---AAACTAACCTATTTGCAATTTTTTAAAAATAAAAGTATTAGCATGGATGCTTAGC  | 64305 |
| GrabEatingMacaque | GTGATCCTTATTAATTTTTTTTAT-TAAATTAACCTATTTGCAATTTTTTACAATTAAAAGTATTAGCATGGATGCTTAGC | 64712 |
| Macaque           | GTGATCCTTATTAATTTTTTTTAT-TAAATTAACCTATTTGCAATTTTTTACAATTAAAAGTATTAGCATGGATGCTTAGC | 65551 |
| PigTailedMacaque  | GTGATCCTTATTAATTTTTTTTAT-TAAATTAACCTATTTGCAATTTTTTACAATTAAAAGTATTAGCATGGATGCTTAGC | 64441 |
| Bonobo            | GTGATCCTTATTAGTTTTTTT---TAACTAACCTATTTGCAATTTTTTAAAAATGAAAGTATTAGCATGGATGCTTAGC   | 62877 |
| OliveBaboon       | GTGATCCTTATTAGTTTTTTTAT-TAAATTAACCTATTTGCAATTTTTTACAATTAAAAGTATTAGCATGGATGCTTAGC  | 64297 |
| Orangutan         | GTGACCCCTTATTAGTTTTTTTTTAAAATTAACCTATTTGCAATTTTTTAAAAATAAAAGTATTAGCATGGATGCTTAGC  | 64728 |

| Majority          | TGGTTG----TATTTTAGGTTGAAGTAGCATTCTATTTAAAGAAGATAATATTTGGGGGAAACTAATACATGGACAGC |       |
|-------------------|--------------------------------------------------------------------------------|-------|
|                   | 78330 78340 78350 78360 78370 78380 78390 78400                                |       |
| Human             | TGGTTG----TATTTTAGGTTGAAGTAGCATTCTATTTAAAGAAGATAATATTTGGGGGAAAGTAATACATGGACAGC | 63840 |
| Coquerel'sSifaka  | TGGTTG----TATTTTAGATTAAAGTAGCATTCTATTTAAAGAAGATAGTTTCAGGTGGAAACTAATACAAATACAGC | 52156 |
| Ma'sNightMonkey   | TGGTTG----TATTTTAGATTGAAGTAGCATTCTATTTAAAGAAGATAATATTTGGTGGAAACTAATACATGCACAGC | 59264 |
| VervetAGM         | TGATTG----TATTTTAGGTTGAAGTAGCATTCTATTTAAAGAAGATAATATTTGGAGGAAACTAATACATGGACAGC | 65591 |
| Gorilla           | TGGTTG----TATTTTAGGTTGAAGTAGCATTCTATTTAAAGAAGATAATATTTGGGGGAAAGTAATACATGGACAGC | 64381 |
| GrabEatingMacaque | TGATTG----TATTTTAGGTTGAAGTAGCATTCTATTTAAAGAAGATAATATTTGGGGGAAACTAATACATGGACAGC | 64788 |
| Macaque           | TGATTG----TATTTTAGGTTGAAGTAGCATTCTATTTAAAGAAGATAATATTTGGGGGAAACTAATACATGGACAGC | 65627 |
| PigTailedMacaque  | TGATTG----TATTTTAGGTTGAAGTAGCATTCTATTTAAAGAAGATAATATTTGGGGGAAACTAATACATGGACAGC | 64517 |
| Bonobo            | TGGTTG----TATTTTAGGTTGAAGTAGCATTCTATTTAAAGAAGATAATATTTGGGGGAAACTAACACATGGACAGC | 62953 |
| OliveBaboon       | TGATTG----TATTTTAGGTTGAAGTAGCATTCTATTTAAAGAAGATAATATTTGGGGGAAACTAATACATGGACAGC | 64373 |
| Orangutan         | TGGTTGGTTGATTTTAGGTTGAAGTAGCATTCTATTTAAAGAAGATAATATTTGGGGGAAACTAATACATGGACAGC  | 64808 |

| Majority          | TGGAACAGCAAATTTGATGTATGAAATTTGAATCCTTTTCTGGTAGCTTTT-AAGTTCGAGTTTTTGTGTTGAGTTT    |       |
|-------------------|----------------------------------------------------------------------------------|-------|
|                   | 78410 78420 78430 78440 78450 78460 78470 78480                                  |       |
| Human             | TGGAACAGCAAATTTGATATATGAAATTTGAATCCTTTTCTGGTAGCTTTT-AAGTTCGAGTTTTTGTGTTGAGTTT    | 63919 |
| Coquerel'sSifaka  | TGGAACAGCAAAGTATGATGTATGAAATTTGAATCCTTTTCTGGTAGCTTTT-ATGTGCAGGTTTTTCATTGTTGAGTTT | 52235 |
| Ma'sNightMonkey   | TA-AACAACAAAATAAGATGTATGAAATTTAATCCTTTTCTGGTGGCTTTT-AAGTTCGAGTTTTTCGTTCTTTATTTT  | 59342 |
| VervetAGM         | TGGAATAGCAAATTTGATGTATGAAATTTGAATCCTTTTCTGCTAGCTTTT-AAGTTCGAGTTTTTGTGTTGAATTT    | 65670 |
| Gorilla           | TGGAACAGCAAATTTGATATATGAAATTTGAATCCTTTTCTGGTAGCTTTT-AAGTTGAGTTTTTGTGTTGAGTTT     | 64460 |
| GrabEatingMacaque | TGGAATAGCAAATTTGATGTATGAAATTTGAATCCTTTTCTGGTAGCTTTTAAAGTTCGAGTTTTTGTGTTGAATTT    | 64868 |
| Macaque           | TGGAATAGCAAATTTGATGTATGAAATTTGAATCCTTTTCTGGTAGCTTTTAAAGTTCGAGTTTTTGTGTTGAATTT    | 65707 |
| PigTailedMacaque  | TGGAATAGCAAATTTGATGTATGAAATTTGAATCCTTTTCTGGTAGCTTTT-AAGTTCGAGTTTTTGTGTTGAATTT    | 64596 |
| Bonobo            | TGGAACAGCAAATTTGATATATGAAATTTGAATCCTTTTCTGGTAGCTTTT-AAGTTCGAGTTTTTGTGTTGAGTTT    | 63032 |
| OliveBaboon       | TGGAATAGCAAATTTGATGTATGAAATTTGAATCCTTTTCTGGTAGCTTTT-AAGTTCGAGTTTTTGTGTTGAATTT    | 64452 |
| Orangutan         | TGGAACAGCAAATTTGATATATGAAATTTGAATCCTTTTCTGGTAGCTTTT-AAGTTCGAGTTTTTGTGTTGAGTTT    | 64887 |

Tuesday, May 03, 2022 06:16 PM

| Majority          | TATTA-TA-AAATTATACTTTCACTAATTTTTATTTTTGTTTAAGATTGCTGATATACTTTATTCACCTTTTACAGGCC   |       |       |       |       |       |       |       |       |
|-------------------|-----------------------------------------------------------------------------------|-------|-------|-------|-------|-------|-------|-------|-------|
|                   | 78490                                                                             | 78500 | 78510 | 78520 | 78530 | 78540 | 78550 | 78560 |       |
| Human             | TATTACTA-AAATTATACTTTCACTAATTTTTATTTTTGTTTAAGATTGCTGATATGCTTTATTCACCTTTTACAGGCC   |       |       |       |       |       |       |       | 63998 |
| Coquerel'sSifaka  | TATTGTCAGAAATCATACTTT-GCTAATTTTTATTCCTTATTTTAGATTGCTAATATACTTCATTCACCTTTTACAGGCC  |       |       |       |       |       |       |       | 52314 |
| Ma'sNightMonkey   | TATTATTA-AAATTATACTTTCACTAATTTTTATTTCT----TTAAGATTGCTGATATACTTTATTCACCTTTTACAGGCC |       |       |       |       |       |       |       | 59417 |
| VervetAGM         | TATTA----AAATTATACTTTCACTAATTTTTATGTTTTGTTTAAGATTGCTGATGTACTTTATTCACCTTTTACAGGCC  |       |       |       |       |       |       |       | 65746 |
| Gorilla           | TATTACTA-AAATTATACTTTCACTAATTTTTATTTTTGTTTAAGATTGCTGATATGCTTTATTCACCTTTTACAGGCC   |       |       |       |       |       |       |       | 64539 |
| GrabEatingMacaque | TATTA----AAATTATACTTTCACTAATTTTTATTTTTGTTTAAGATAGCTGATGTACTTTATTCACCTTTTACAGGCC   |       |       |       |       |       |       |       | 64944 |
| Macaque           | TATTA----AAATTATACTTTCACTAATTTTTATTTTTGTTTAAGATAGCTGATGTACTTTATTCACCTTTTACAGGCC   |       |       |       |       |       |       |       | 65783 |
| PigTailedMacaque  | TATTA----AAATTATACTTTCACTAATTTTTATTTTTGTTTAAGATTGCTGATATACTTTATTCACCTTTTACAGGCC   |       |       |       |       |       |       |       | 64672 |
| Bonobo            | TATTACTA-AAATTATACTTTCACTAATTTTTATTTTTGTTTAAGATTGCTGATATGCTTTATTCACCTTTTACAGGCC   |       |       |       |       |       |       |       | 63111 |
| OliveBaboon       | TATTA----AAATTATACTTTCACTAATTTTTATTTTTGTTTAAGATTGCTGATGTACTTTATTCACCTTTTACAGGCC   |       |       |       |       |       |       |       | 64528 |
| Orangutan         | TATTACTA-AAATTATACTTTCACTAATTTTTATTTTTGTTTAAGATTGCTGATATGCTTTATTCACCTTTTACAGGCC   |       |       |       |       |       |       |       | 64966 |

| Majority          | TAGATGGTCAGAATATTTATAATGCCTGCTGTACCCTAAGGATTGATTTTTCCAAACTTGTGAATTTGAATGTAATAAC |       |       |       |       |       |       |       |       |
|-------------------|---------------------------------------------------------------------------------|-------|-------|-------|-------|-------|-------|-------|-------|
|                   | 78570                                                                           | 78580 | 78590 | 78600 | 78610 | 78620 | 78630 | 78640 |       |
| Human             | TAGATGGTCAGAATATTTATAATGCCTGCTGTACCCTAAGGATTGATTTTTCCAAACTTGTGAATTTGAATGTAATAAC |       |       |       |       |       |       |       | 64078 |
| Coquerel'sSifaka  | TAGATGGTCAGAATATTTATAATGCTTGCTGTACCCTAAGGATTGATTTTTCCAAACTTGTGAATTTGAATGTAATAAC |       |       |       |       |       |       |       | 52394 |
| Ma'sNightMonkey   | TAGATGGTCAGAATATTTATAATGCCTGCTGTACCCTAAGGATTGATTTTTCCAAACTTGTGAATTTGAATGTAATAAC |       |       |       |       |       |       |       | 59497 |
| VervetAGM         | TAGATGGTCAGAATATTTATAATGCCTGCTGTACCCTAAGGATTGATTTTTCCAAACTTGTGAATTTGAATGTAATAAC |       |       |       |       |       |       |       | 65826 |
| Gorilla           | TAGATGGTCAGAATATTTATAATGCCTGCTGTACCCTAAGGATTGATTTTTCCAAACTTGTGAATTTGAATGTAATAAC |       |       |       |       |       |       |       | 64619 |
| GrabEatingMacaque | TAGATGGTCAGAATATTTATAATGCCTGCTGTACCCTAAGGATTGATTTTTCCAAACTTGTGAATTTGAATGTAATAAC |       |       |       |       |       |       |       | 65024 |
| Macaque           | TAGATGGTCAGAATATTTATAATGCCTGCTGTACCCTAAGGATTGATTTTTCCAAACTTGTGAATTTGAATGTAATAAC |       |       |       |       |       |       |       | 65863 |
| PigTailedMacaque  | TAGATGGTCAGAATATTTATAATGCCTGCTGTACCCTAAGGATTGATTTTTCCAAACTTGTGAATTTGAATGTAATAAC |       |       |       |       |       |       |       | 64752 |
| Bonobo            | TAGATGGTCAGAATATTTATAATGCCTGCTGTACCCTAAGGATTGATTTTTCCAAACTTGTGAATTTGAATGTAATAAC |       |       |       |       |       |       |       | 63191 |
| OliveBaboon       | TAGATGGTCAGAATATTTATAATGCCTGCTGTACCCTAAGGATTGATTTTTCCAAACTTGTGAATTTGAATGTAATAAC |       |       |       |       |       |       |       | 64608 |
| Orangutan         | TAGATGGTCAGAATATTTATAATGCCTGCTGTACCCTAAGGATTGATTTTTCCAAACTTGTGAATTTGAATGTAATAAC |       |       |       |       |       |       |       | 65046 |

| Majority          | AACAAATGATAAAAAGTAGGGATTATACTCGACCTGATCTTCCATCTGGGGATGGACAACCTGCATTGGACCCAGCTATTGC  |       |       |       |       |       |       |       |       |
|-------------------|-------------------------------------------------------------------------------------|-------|-------|-------|-------|-------|-------|-------|-------|
|                   | 78650                                                                               | 78660 | 78670 | 78680 | 78690 | 78700 | 78710 | 78720 |       |
| Human             | AACAAATGATAAAAAGTAGGGATTATACTCGACCTGATCTTCCATCTGGGGATGGACAACCTGCATTGGACCCAGCTATTGC  |       |       |       |       |       |       |       | 64158 |
| Coquerel'sSifaka  | AACAAATGATAAAAAGTAGGGATTATACTCGACCTGATCTTCCATCTGGGGATGGACAACCTGCATTGGACCCAGCTATTGC  |       |       |       |       |       |       |       | 52474 |
| Ma'sNightMonkey   | AACAAATGATAAAAAGTAGGGATTATACTCGACCCGATCTTCCCTCTGGGGATGGACAACCTGCATTGGACCCAGCTATTGC  |       |       |       |       |       |       |       | 59577 |
| VervetAGM         | AACAAATGATAAAAAGTAGGGATTATACTCGACCTGATCTTCCGCTCTGGGGATGGACAACCTGCATTGGACCCAGCTATTGC |       |       |       |       |       |       |       | 65906 |
| Gorilla           | AACAAATGATAAAAAGTAGGGATTATACTCGACCTGATCTTCCATCTGGGGATGGACAACCTGCATTGGACCCAGCTATTGC  |       |       |       |       |       |       |       | 64699 |
| GrabEatingMacaque | AACAAATGATAAAAAGTAGGGATTATACTCGACCTGATCTTCCGCTCTGGGGATGGACAGCCTGCATTGGACCCAGCTATTGC |       |       |       |       |       |       |       | 65104 |
| Macaque           | AACAAATGATAAAAAGTAGGGATTATACTCGACCTGATCTTCCGCTCTGGGGATGGACAGCCTGCATTGGACCCAGCTATTGC |       |       |       |       |       |       |       | 65943 |
| PigTailedMacaque  | AACAAATGATAAAAAGTAGGGATTATACTCGACCTGATCTTCCATCTGGGGATGGACAGCCTGCATTGGACCCAGCTATTGC  |       |       |       |       |       |       |       | 64832 |
| Bonobo            | AACAAATGATAAAAAGTAGGGATTATACTCGACCTGATCTTCCATCTGGGGATGGACAACCTGCATTGGACCCAGCTATTGC  |       |       |       |       |       |       |       | 63271 |
| OliveBaboon       | AACAAATGATAAAAAGTAGGGATTATACTCGACCTGATCTTCCGCTCTGGGGATGGACAACCTGCATTGGACCCAGCTATTGC |       |       |       |       |       |       |       | 64688 |
| Orangutan         | AACAAATGATAAAAAGTAGGGATTATACTCGACCTGATCTTCCATCTGGGGATGGACAACCTGCATTGGACCCAGCTATTGC  |       |       |       |       |       |       |       | 65126 |



Tuesday, May 03, 2022 06:16 PM

|                   |                                                                                |       |
|-------------------|--------------------------------------------------------------------------------|-------|
| Majority          | TGCAGCATTGCCAAGGAGACATCCCTCTTAGGTATGATTTTTATTGTCTTAACCACTTTCTCCCATTTTGCCAAATGG |       |
|                   | 78730 78740 78750 78760 78770 78780 78790 78800                                |       |
| Human             | TGCAGCATTGCCAAGGAGACATCCCTCTTAGGTATGATTTTTATTGTCTTAACCACTTTCTCCCATTTTGCCAAATGG | 64238 |
| Coquerel'sSifaka  | TGCAGCATTGCCAAGGAGACATCCCTCTTAGGTATGATTTTTATTGCGTGTACCACCTTTTCCCATTTTGCCAAATGG | 52554 |
| Ma'sNightMonkey   | TGCAGCATTGCCAAGGAAACATCCCTCTTAGGTATGATTTCTATTGTCTTAACCACTTTCTCTCATTTTGCCAAATGG | 59657 |
| VervetAGM         | TGCAGCATTGCCAAGGAGACATCTCTCTTAGGTATGATTTTTATTGTCTTAACCACTTTCTCCCATTTTGCCGAATGG | 65986 |
| Gorilla           | TGCAGCATTGCCAAGGAGACATCCCTCTTAGGTATGATTTTTATTGTCTTAACCACTTTCTCCCATTTTGCCAAATGG | 64779 |
| GrabEatingMacaque | TGCAGCATTGCCAAGGAGACATCTCTCTTAGGTATGATTTTTATTGGCTTAACCACTTTCTCCCATTTTGCCAAATGG | 65184 |
| Macaque           | TGCAGCATTGCCAAGGAGACATCTCTCTTAGGTATGATTTTTATTGGCTTAACCACTTTCTCCCATTTTGCCAAATGG | 66023 |
| PigTailedMacaque  | TGCAGCATTGCCAAGGAGACATCTCTCTTAGGTATGATTTTTATTGGCTTAACCACTTTCTCCCATTTTGCCAAATGG | 64912 |
| Bonobo            | TGCAGCATTGCCAAGGAGACATCCCTCTTAGGTATGATTTTTATTGTCTTAACCACTTTCTCCCATTTTGCCAAATGG | 63351 |
| OliveBaboon       | TGCAGCATTGCCAAGGAGACATCTCTCTTAGGTATGATTTTTATTGTCTTAACCACTTTCTCCCATTTTGCCAAATGG | 64768 |
| Orangutan         | TGCAGCATTGCCAAGGAGACATCCCTCTTAGGTATGATTTTTATTGTCTTAACCACTTTCTCCCATTTTGCCAAATGG | 65206 |

|                   |                                                                             |       |
|-------------------|-----------------------------------------------------------------------------|-------|
| Majority          | AAAAGTA-----CCAGTAAGTATAATGAATCCTCCCATTTTGGACCTTACCAAATTGTGTTAGGTTTCATGAGT  |       |
|                   | 78810 78820 78830 78840 78850 78860 78870 78880                             |       |
| Human             | AAAAGTA-----CCAGTAAGTATAATGAATCCCCCATTTTGGACCTTACCAAATTGTGTTAGGTTTCGTGAGT   | 64307 |
| Coquerel'sSifaka  | GAAATGACTGTAAATTCCAGTAAGTATAATGAATC-TCCTTTTGGACCTTACCAAATTG--TTAGGTTTATGAGT | 52631 |
| Ma'sNightMonkey   | AAAAATA-----CCAGTAAGTATAATGAATCACCCTTTTGGACCTTACCAAATTGTGTTGGTTTCATGAGT     | 59726 |
| VervetAGM         | AAAAGTA-----CCAGTAAGTATAATGAATCCTTCCATTTTGGACCTTACCAAATTGTGTTAGGTTTCATGAGT  | 66055 |
| Gorilla           | AAAAGTA-----CCAGTAAGTATAATGAGTCCCTCCCATTTTGAACCTTACCAAATTGTGTTAGGTTTCGTGAGT | 64848 |
| GrabEatingMacaque | AAAAGTA-----CCAGTAAGTATAATGAATCCTTCCATTTTGGACCTTACCAAATTGTGTTAGGTTTCATGACT  | 65253 |
| Macaque           | AAAAGTA-----CCAGTAAGTATAATGAATCCTTCCATTTTGGACCTTACCAAATTGTGTTAGGTTTCATGAGT  | 66092 |
| PigTailedMacaque  | AAAAGTA-----CCAGTAAGTATAATGAATCCTTCCATTTTGGACCTTACCAAATTGTGTTAGGTTTCATGAGT  | 64981 |
| Bonobo            | AAAAGTA-----CCAGTAAGTATAATGAATCCCCCATTTTGGACCTTACCAAATTGTGTTAGGTTTCGTGAGT   | 63420 |
| OliveBaboon       | AAAAGTA-----CCAGTAAGTATAATGAATCCTTCCATTTTGGACCTTACCAAATTGTGTTAGATTTCATGAGT  | 64837 |
| Orangutan         | AAAAGTA-----CCAGTAAGTATAATGAATCCCCCATTTTGGACCTTACCAAATTGTGTTAGGTTTCATGAGT   | 65275 |

|                   |                                                                                   |       |
|-------------------|-----------------------------------------------------------------------------------|-------|
| Majority          | TTTCTTTTT-CTCAAGTGAGA-AGGCATATGAATACTGTTAAGAAAAACCCAAAGTGTCTTCATAAGTCTAATTAAAAAT  |       |
|                   | 78890 78900 78910 78920 78930 78940 78950 78960                                   |       |
| Human             | TTTCTTTTT-CTCAAGTGAGA-AGGCATATGAATACTGTTAAGAAAAACCCAAAGTATTCTTTATAAGTCTAATTAAAAAT | 64385 |
| Coquerel'sSifaka  | TTTGTTTTT-CTCAGGTGAGA-AGGCATATGTGTGCTTTTAGAAAAACCTAAAGTGTCTTCATAAGCATAAATTAAAAAT  | 52709 |
| Ma'sNightMonkey   | TTTATTTTT-CTCAAGTGAGACAGGCATATGAATACTGTTAAGAAAAACCCAAAGTGTCTTCCTAAGTGTGATTAAAAAT  | 59805 |
| VervetAGM         | TTTCTTTTT-CTCAAGTGAGA-AGGCATATTAATACTATTAAGAACAACCCAAAGTGTCTCCGTAACTCTAAGTAAAAAT  | 66133 |
| Gorilla           | TTTCTTTTT-CTCAAGTGAGA-AGGCATATGAATACTGTTAAGAAAAACCCAAAGTGTCTTCATAAGTCTAATTAAAAAT  | 64926 |
| GrabEatingMacaque | TTTCTTTTT-CTCAAGTGAGA-AGGCATATTAATACTGTTAAGAACAACCCAAAGTATTCTCCATAACTCTACGTAAAAAT | 65331 |
| Macaque           | TTTCTTTTT-CTTAAGTGAGA-AGGCATATTAATACTGTTAAGAACAACCCAAAGTGTCTCCATAACTCTACGTAAAAAT  | 66170 |
| PigTailedMacaque  | TTTCTTTTT-CTCAAGTGAGA-AGGCATATTAATACTGTTAAGAACAACCCAAAGTGTCTCCGTAACTCTACGTAAAAAT  | 65059 |
| Bonobo            | TTTCTTTTTTCTCAAGTGAGA-AGGCATATGAATACTGTTAAGAAAAACCCAAAGTATTCTTTATAAGTCTAATTAAAAAT | 63499 |
| OliveBaboon       | TTTCTTTTT-CTCAAGTGAGA-AGGCGTATTAACACTGTTAAGAACAACCCAAAGTGTCTCCGTAACTCTACGTAAAAAT  | 64915 |
| Orangutan         | TTTTTTTTT-CTCAAGTGAGA-AGGCATATGAATACTGTTAAGAAAAACCCAAAGTGTCTTCATAAGTCTAATTAAAAAT  | 65353 |

Tuesday, May 03, 2022 06:16 PM

|                   |                                                                               |       |
|-------------------|-------------------------------------------------------------------------------|-------|
| Majority          | TAT--GTTAGTTTTGTTCTTTTAATACCTTCAGCTTCTCTTCCATG--CCACTCTCCCAGAACAAAAGAAG-----  |       |
|                   | 78970 78980 78990 79000 79010 79020 79030 79040                               |       |
| Human             | TATATGTTAGTTTTGTTCTTTTAATACCTTCAGCTTCTCTTCCATG--CCACTCTCCCAGAACAAAAGAAG-----  | 64455 |
| Coquerel'sSifaka  | TAT--ATTAGTTTTATTCCTTTTACCACCCTTTCCTTGCTTTCTTTTACACCCTCCCAAACAAAAGAAGTTCATTAG | 52787 |
| Ma'sNightMonkey   | TAT--GTTAGTTTTGTTCTTTTAATACCTTCACCTTTTCTTCCATGTGCTGTTTTCCAGAACAAAAGAAG-----   | 59875 |
| VervetAGM         | TAT--GTTAGTTTTGTTCTTTTAATACCTTCAGCTTCTCTTCCATG--CCACTCGCCAGAACAAAAGAAG-----   | 66201 |
| Gorilla           | TATATGTTAGTTTTGTTCTTTTAATACCTTCAGCTTCTCTTCCATG--CCACTCTCCCAGAACAAAAGAAG-----  | 64996 |
| GrabEatingMacaque | TAT--GTTAGTTTTGTTCTTTTAATACCTTCAGCTTCTCTTCCATG--CCACTCGCCAGAACAAAAGAAG-----   | 65399 |
| Macaque           | TAT--GTTAGTTTTGTTCTTTTAATACCTTCAGCTTCTCTTCCATG--CCACTCGCCAGAACAAAAGAAG-----   | 66238 |
| PigTailedMacaque  | TAT--GTTAGTTTTGTTCTTTTAATACCTTTAGCTTCTCTTCCATG--CCACTCGCCAGAACAAAAGAAG-----   | 65127 |
| Bonobo            | TATATGTTAGTTTTGTTCTTTTAATACCTTCAGCTTCTCTTCCATG--CCACTCTCCCAGAACAAAAGAAG-----  | 63569 |
| OliveBaboon       | TAT--GTTAGTTTTGTTCTTTTAATACCTTCAGCTTCTCTTCCATG--CCACTCGCCAGAACAAAAGAAG-----   | 64983 |
| Orangutan         | TATTTGTTAGTTTTGTTCTTTTAATACCTTCAGCTTCTCTTCCATG--CCACTCTCCCAGAACAAAAGAAG-----  | 65423 |

|                   |                                                                                  |       |
|-------------------|----------------------------------------------------------------------------------|-------|
| Majority          | ---AAAAGCTCTAATGAAGAAATACTGTTGAATTCTTAATGCCATA---TTTACACTTTAAACTTGATGTCACTATGCC  |       |
|                   | 79050 79060 79070 79080 79090 79100 79110 79120                                  |       |
| Human             | ---AAAAGCTCTAATGAAGAAATACTGTTGAATTCTTAATGCCATA---TTTACACTTTAAACTTGATGTCACTATGCC  | 64528 |
| Coquerel'sSifaka  | AACAGAAGTTCTAATGGAGAAATACTGTTGAATTCTTAATGAAATAAATATTTACACTTTAAACT---TGTCATACTCTC | 52864 |
| Ma'sNightMonkey   | ---GAAAGCTTTAATGAAGAATACTGTTGAATTCTTAATGACATG---TTTACACTTTAAACTTTATGTCACTATGTC   | 59948 |
| VervetAGM         | ---AAAAGCTCTAATGAAGAAATACTGTTGAATTATTAATGCCATA---GTTACACTTTAAACTTGATGTTACTATGCC  | 66274 |
| Gorilla           | ---AAAAGCTCTAATGAAGAAATACTGTTGAATTCTTAATGCCATA---TTTACACTTTAAACTTGATGTCACTATGCC  | 65069 |
| GrabEatingMacaque | ---AAAAGCTCTAATGAAGAAATACTGTTGAATTCTTAATGCCATA---GTTACACTTTAAACTTGATGTCACTATGCC  | 65472 |
| Macaque           | ---AAAAGCTCTAATGAAGAAATACTGTTGAATTCTTAATGCCATA---GTTACACTTTAAACTTGATGTCACTATGCC  | 66311 |
| PigTailedMacaque  | ---AAAAGCTCTAATGAAGAAATACTGTTGAATTCTTAATGCCATA---GTTACACTTTAAACTTGATGTCACTATGCC  | 65200 |
| Bonobo            | ---AAAAGCTCTAATGAAGAAATACTGTTGAATTCTTAATGCCATA---TTTACACTTTAAACTTGATGTCACTATGCC  | 63642 |
| OliveBaboon       | ---AAAAGCTCTAATGAAGAAATACTGTTGAATTCTTAATGCCATA---GTTACACTTTAAACTTGATGTCACTATGCC  | 65056 |
| Orangutan         | ---AAAAGCTCTAATGAAGAAATACTGTTGAATTTTAATGCCATA---TTTACACTTTAAACTTGATGTCACTATGCC   | 65496 |

|                   |                                                                                 |       |
|-------------------|---------------------------------------------------------------------------------|-------|
| Majority          | TA---AGTCTAGGCCTGAAGTTCTTGTGTGTGTTTTTCAGTGCTGATCTGATTGTTTTAATTTAGCATTG---CATGG  |       |
|                   | 79130 79140 79150 79160 79170 79180 79190 79200                                 |       |
| Human             | TG---AGTCTAGGCCTAAAGTTCTTGTGTGTGTTTTTCAGTGCTGATCTGATTGTTTTAATTTAGCATTG---CATGG  | 64600 |
| Coquerel'sSifaka  | TA-----AGGCT--AAGGCCCTGTGCCTGTTCTTTAGGGCTGATCTGATTGTTTTAAGTTCAGTGCTG---CGTGG    | 52929 |
| Ma'sNightMonkey   | TA---AGTCTAGACCTGAAGTTCTTGTGTGTGTTTTTCAGTGCTGATTTGATTGTTTTAATTCATTATTG---CATGG  | 60020 |
| VervetAGM         | TA---AGTCTAGGCCTGAAGTTCTTGTGTGTGTTTTTCAGTGCTGATCTGATTGTTTGGATTTAGCATTG---CATGG  | 66346 |
| Gorilla           | TG---AGTCTAGGCCTAAAGTTCTTGTGTGTGTTTTTCAGTGCTGATCTGATTGTTTTAATTTAGCATTG---CATGG  | 65141 |
| GrabEatingMacaque | AA---AGTCTAGGCCCGAAGTTCTTGTGTGTGTTTTTCAGTGCTGATCTGATTGTTTTAATTTAGCATTGATTGCATGG | 65548 |
| Macaque           | AA---AGTCTAGGCCCGAAGTTCTTGTGTGTGTTTTTCAGTGCTGATCTGATTGTTTTAATTTAGCATTG---CATGG  | 66383 |
| PigTailedMacaque  | TA---AGTCTAGGCCCGAAGTTCTTGTGTGTGTTTTTCAGTGCTGATCTGATTGTTTTAATTTAGCATTG---CATGG  | 65272 |
| Bonobo            | TG---AGTCTAGGCCTAAAGTTCTTGTGTGTGTTTTTCAGTGCTGATCTGATTGTTTTAATTTAGCATTG---CATGG  | 63714 |
| OliveBaboon       | TA---AGTCTAGGCCTGAAGTTCTTGTGTGTGTTTTTCAGTGGTATCTGATTGTTTTAATTTAGCATTG---CATGG   | 65128 |
| Orangutan         | TGCTGAGTCTAGGCCTGAAGTTCTTGTGTGTGTTTTTCAGTGCTGATCTGATTGTTTTAATTTAGCATTG---CATGG  | 65572 |

Tuesday, May 03, 2022 06:16 PM

| Majority          | AAACAGTGA AATGTTAAGAGACAAAACATACATAAATGGGTGGAGGCATATGGGATTTTTTTTTT--GAAGCATATTGTAGT  |       |       |       |       |       |       |       |       |
|-------------------|--------------------------------------------------------------------------------------|-------|-------|-------|-------|-------|-------|-------|-------|
|                   | 79210                                                                                | 79220 | 79230 | 79240 | 79250 | 79260 | 79270 | 79280 |       |
| Human             | AAACAGTGA AATGTTAAGAGACAAAACATACATAAATGGGTGGAGGCATATGGGATTTTTTTTTT---GAAGCATATTGTAGT |       |       |       |       |       |       |       | 64677 |
| Coquerel'sSifaka  | AAACAGTGA AATGTTAATAGACAAAACATATGTAATGAGAGTAGGCATACAGG--TGTTTTT---AAAGCATATTTTAGC    |       |       |       |       |       |       |       | 53004 |
| Ma'sNightMonkey   | AAACAGTGA AATGTTAAAATATAAAAACATACATAAATGGGTGGAGGCATATGGAATTTTTTTTTT--GAAGCATATTATAGT |       |       |       |       |       |       |       | 60098 |
| VervetAGM         | AAACAGTGA AATATTAAGAGACAAAACATACATAAATGGGTGGAGGCATGTGGGATTTTTTTTTT--GAAGCTTATTGTAGT  |       |       |       |       |       |       |       | 66424 |
| Gorilla           | AAACAGTGA AATGTTAAGAGACAAAACATACATAAATGGATGGAGGCATATGGGATTTTTTTTTT---GAAGCATATCGTAGT |       |       |       |       |       |       |       | 65218 |
| GrabEatingMacaque | AAACAGTGA AATATTAAGAGACAAAACATACATAAATGGGTGGAGGCATGTAGGATTTTTTTTTT--GAAGCATATTGTAGT  |       |       |       |       |       |       |       | 65627 |
| Macaque           | AAACAGTGA AATATTAAGAGACAAAACATACATAAATGGGTGGAGGCATGTAGGATTTTTTTTTT--GAAGCATATTGTAGT  |       |       |       |       |       |       |       | 66462 |
| PigTailedMacaque  | AAACAGTGA AATATTAAGAGACAAAACATACATAAATGGGTGGAGGCATGTAGGATTTTTTTTTTTGAAGCATATTGTAGT   |       |       |       |       |       |       |       | 65352 |
| Bonobo            | AAACAGTGA AATGTTAAGAGACAAAACATACATAAATGGGTGGAGACATATGGGATTTTTTTTTT---GAAGCATATTGTAGT |       |       |       |       |       |       |       | 63791 |
| OliveBaboon       | AAACAGTGA AATATTAAGAGACAAAACATACATAAATGGGTGGAGGCATGTAGGATTTTTTTTTT--GAAGCATATTGTAGT  |       |       |       |       |       |       |       | 65206 |
| Orangutan         | AAACAGTGA AATGTTAAGAGACAAAACATACATAAATGGGTGGAGGCATATGGGATTTTTTTTTT---GAAGCATATTGTAGT |       |       |       |       |       |       |       | 65649 |

| Majority          | GGCCTTT----AAAAACAATTTAAACTAGAAAGAAATTTCTGTAAAAATTAATTTTGCTATTTCTTTGCATTTTGCCTTAA |       |       |       |       |       |       |       |       |
|-------------------|-----------------------------------------------------------------------------------|-------|-------|-------|-------|-------|-------|-------|-------|
|                   | 79290                                                                             | 79300 | 79310 | 79320 | 79330 | 79340 | 79350 | 79360 |       |
| Human             | GGCCTTTTA-AAAAACAATTTAAACTAGAAAGAAATTTCTGTAAAAATTAATTTTGCTATTTCTTTGCATTTTGCCTTAA  |       |       |       |       |       |       |       | 64756 |
| Coquerel'sSifaka  | CCCTTTC----AAAAATAATTTAAACTAGAAAGAAATTTCTATAAAGTTTATTTTGCTGTTTATTTCTATTTTGCCTTAA  |       |       |       |       |       |       |       | 53080 |
| Ma'sNightMonkey   | GCCCTTTTTTAAAAACATTTTAAACTAGAA-AAATTTCTGTAAAAATAGTTTGTCTATTTCTTTGCATTTTATCTTAA    |       |       |       |       |       |       |       | 60177 |
| VervetAGM         | GGCCTTT-----AAACAATTCAAACTGGAAGAAATTTCTGTAAAAATTAATTTTGCTATTTCTTTGCATTTTGCCTTAA   |       |       |       |       |       |       |       | 66498 |
| Gorilla           | GGCCTTTTA-AAAAACTATTTAAACTAGAAATAAATTTCTGTAAAAATTAATTTTGCTATTTCTTTGCATTTTGCCTTAA  |       |       |       |       |       |       |       | 65297 |
| GrabEatingMacaque | GGCCTTT-----AAACAATTCAAACTAGAAAGAAATTTCTGTAAAAATTAATTTTGCTATTTCTTTGCATTTTGCCTTAA  |       |       |       |       |       |       |       | 65701 |
| Macaque           | GGCCTTT-----AAACAATTCAAACTAGAAAGAAATTTCTGTAAAAATTAATTTTGCTATTTCTTTGCATTTTGCCTTAA  |       |       |       |       |       |       |       | 66536 |
| PigTailedMacaque  | GGCCTTT-----AAACAATTCAAACTAGAAAGAAATTTCTGTAAAAATTAATTTTGCTATTTCTTTGCATTTTGCCTTAA  |       |       |       |       |       |       |       | 65426 |
| Bonobo            | GGCCTTTTA-AAAAACAATTTAAACTAGAAAGAAATTTCTGTAAAAATTAATTTTGCTATTTCTTTGCATTTTGCCTTAA  |       |       |       |       |       |       |       | 63870 |
| OliveBaboon       | GGCCTTT-----AAACAATTCAAACTAGAAAGAAATTTCTGTAAAAATTAATTTTGCTATTTCTTTGCATTTTGCCTTAA  |       |       |       |       |       |       |       | 65280 |
| Orangutan         | GGCCTTTTA-AAAAACAATTTTACACTAGAAAGAAATTTCTGTAAAAATTAATTTTGCTATTTCTTTGTGTTTTGCCTTAA |       |       |       |       |       |       |       | 65728 |

| Majority          | TCATTTATATTTTACTTTGTACCACAATGGACTTGAGCCACCTAATAAAAA--TACAGTGCAAACATATGCAACTTATAGT |       |       |       |       |       |       |       |       |
|-------------------|-----------------------------------------------------------------------------------|-------|-------|-------|-------|-------|-------|-------|-------|
|                   | 79370                                                                             | 79380 | 79390 | 79400 | 79410 | 79420 | 79430 | 79440 |       |
| Human             | TCATTTATATTTTACTTTGTACCACAATGGACTTGAGCCACCTAATAAAAA--TACAGTGCAAACATATGCAACTTATAGT |       |       |       |       |       |       |       | 64835 |
| Coquerel'sSifaka  | TC-----ATTTCACTTTGTCCCACAATGGGTTTGAGCCACTTAATAAAAA--TACATT-CAAAAATATGCAGCTAATAGT  |       |       |       |       |       |       |       | 53152 |
| Ma'sNightMonkey   | TCATTTATATTTTACTTTGTACCACAATGGATTGAGCCACCTAATAAAAA--TGCAGTGCAAACATATGCAACTTATAGT  |       |       |       |       |       |       |       | 60256 |
| VervetAGM         | TCATTTATATTTTACTTTGTACCACAATGGACTTGAGCCACCTAAAAAAA--TAAAGTGCAAGCATATGCAACTTATAGT  |       |       |       |       |       |       |       | 66576 |
| Gorilla           | TCATTTATATTTTACTTTGTACCACAATGGACTTGAGCCACCTAATAAAAA--TACAGTGCAAACATATGCAACTTATAGT |       |       |       |       |       |       |       | 65376 |
| GrabEatingMacaque | TCATTTATATTTTACTTTGTACCACAATGGACTTGAGCCACCTAAAAAAAATACCGTGCAAGCATATGCAGCTTATAGT   |       |       |       |       |       |       |       | 65781 |
| Macaque           | TCATTTATATTTTACTTTGTACCACAATGGACTTGAGCCACCTAAAAAAAATACAGTGCAAGCATATGCAGCTTATAGT   |       |       |       |       |       |       |       | 66616 |
| PigTailedMacaque  | TCATTTATATTTTACTTTGTACCACAATGGACTTGAGCCACTTAAAAAAAATACAGTGCAAGCATATGCAGCTTATAGT   |       |       |       |       |       |       |       | 65506 |
| Bonobo            | TCATTTATATTTTACTTTGTACCACAATGGACTTGAGCCACCTAATAAAAA--TACAGTGCAAACATATGCAACTTATAGT |       |       |       |       |       |       |       | 63949 |
| OliveBaboon       | TCATTTATATTTTACTTTGTACCACAATGGACTTGAGCCACCTAAAAAAA--TACAGTGCAAGCATATGCAGCTTATAGT  |       |       |       |       |       |       |       | 65358 |
| Orangutan         | TCATTTATATTTTACTTTGTACCACAATGGACTTGAGCCACCTAATAAAAA--TGCATTGCAAACATATGCAACTTATAGT |       |       |       |       |       |       |       | 65807 |

Tuesday, May 03, 2022 06:16 PM

| Majority          | TGATAGAGTGAATCAAGATGAAGAAAAAATAAAGGAAATCTTATTTTGTAAAGTAAAATGTGCAAAGTGATTTATA--    |       |
|-------------------|-----------------------------------------------------------------------------------|-------|
|                   | 79450 79460 79470 79480 79490 79500 79510 79520                                   |       |
| Human             | TGATAGCGTGGAAATCAAGATGAAGAAAAAATAA--GGAAATCTTACTTTGTAAAGTAAAATGTGCAAAGTGATTTATAAG | 64914 |
| Coquerel'sSifaka  | TGATGGAGTCGAA-----GGGAGAAAAACAAGGGAAATGTTAATTTGTAAAGTAAAATGAACGAAGTGATTTATG--     | 53223 |
| Ma'sNightMonkey   | TGATAGAGTGGAAATCACGATGAAGAAAAAATAAAGGAAATCTT--TT-GTAAAGTAAAATGAGCA--GTGATTTATAAG  | 60331 |
| VervetAGM         | TAATAGAGTGAATCAAGATGAAGAAAAAATAAAGGAAATCTTATTTTGTAAAGTAAAATATGCAAAGTGATTT-TA--    | 66653 |
| Gorilla           | TGATAGAGTGGAAATCAAGATGAAGAAAAAATAAAGGAAATCTTACTTTGTAAAGTAAAATGTGCAAAGTGATTTATAAG  | 65456 |
| GrabEatingMacaque | TGATAGAGTGAATCAAGATGAAGAAAAAATAAAGGAAATCTTATTTTGTAAAGTAAAATATGCAAAGTGATTT-TA--    | 65858 |
| Macaque           | TGATAGAGTGAATCAAGATGAAGAAAAAATAAAGGAAATCTTATTTTGTAAAGTAAAATATGCAAAGTGATTT-TA--    | 66693 |
| PigTailedMacaque  | TGATAGAGTGAATCAAGATGAAGAAAAAATAA---AATCTTATTTTGTAAAGTAAAATATGCAAAGTGATTT-TA--     | 65579 |
| Bonobo            | TGATAGAGTGAATCAAGATGAAGAAAAAATAAAGGAAATCTTACTTTGTAAAGTAAAATGTGCAAAGTGATTTATAAG    | 64029 |
| OliveBaboon       | TGATAGAGTGAATCAAGATGAAGAAAAAATAAAGGAAATATTATTTTGTAAAGTAAAATATGCAAAGTGATTT-TA--    | 65435 |
| Orangutan         | TGATAGAGTGGAAATCAAGATGAAGAAAAAATAAAGGAAATCTTACTTTGTAAAGTAAAATGTGCAAAGTGATTTATAAG  | 65887 |

| Majority          | TTAAGATGGAATTTTAGAGTTTCCTTTTATTTGATG-----TATTTCTTGATTTCTAGTATTTGTAAGATTATCTTTA |       |
|-------------------|--------------------------------------------------------------------------------|-------|
|                   | 79530 79540 79550 79560 79570 79580 79590 79600                                |       |
| Human             | TTAAGATGGAATTTTAGAGTTTCCTTTTATTTGATG-----TATTTCTTGATTTCTAGTATTTGTAAGATTATCTTTA | 64987 |
| Coquerel'sSifaka  | TTAAGGTGGAATTTTACAGTTTATTTGATGTGTTTAGGAAATATTTCTTGATTTCTGGTGTGTTGATGATTATCTTTA | 53303 |
| Ma'sNightMonkey   | TTAAGATGGAATTTTATAGTTTCCTTTTATTTGATG-----TATT-----CTGGTATTATAAGATTATCTTTA      | 60395 |
| VervetAGM         | -TAAGATGGAATTTAGAGTCTCCTTTTATTTGATG-----TATTTCTTGATTTCTAGTATTTGTAAGATTATCTTTA  | 66725 |
| Gorilla           | TTAAGATGGAATTTTAGAGTTTCCTTTTATTTGATG-----TATTTCTTGATTTCTAGTATTTGTAAGATTATCTTTA | 65529 |
| GrabEatingMacaque | -TAAGATGGAATTTTAGAGTCTCCTTTTATTTGATG-----TATTTCTTGATTTCTAGTATTTGTAAGATTATCTTTA | 65930 |
| Macaque           | -TAAGATGGAATTTTAGAGTCTCCTTTTATTTGATG-----TATTTCTTGATTTCTAGTATTTGTAAGATTATCTTTA | 66765 |
| PigTailedMacaque  | -TAAGATGGAATTTTAGAGTCTCCTTTTATTTGATG-----TATTTCTTGATTTCTAGTATTTGTAAGATTATCTTTA | 65651 |
| Bonobo            | TTAAGATGGAATTTTAGAGTTTCCTTTTATTTGATG-----TATTTCTTGATTTCTAGTATTTGTAAGATTATCTTTA | 64102 |
| OliveBaboon       | -TAAGATGGAATTTTAGAGTCTCCTTTTATTTGATG-----TATTTCTTGATTTCTAGTATTTGTAAGATTATCTTTA | 65507 |
| Orangutan         | TTAAGATGGAATTTTAGAGTTTCCTTTTATTTGATG-----TATTTCTTGATTTCTAGTATTTGTAAGATTATCTTTA | 65960 |

| Majority          | AGTCATGATTTTATACATATGGAACCTCAAATTGATAGTTGACAACTAGCTTTTACAGTTTATGTTTATGTTCCATCATT |       |
|-------------------|----------------------------------------------------------------------------------|-------|
|                   | 79610 79620 79630 79640 79650 79660 79670 79680                                  |       |
| Human             | AGTCATGATTTTATATATATGGAACCTCAAATTGATAGTTGACAACTAGCTTTTACAATTTAGTTTATGTTCTGTCATT  | 65067 |
| Coquerel'sSifaka  | AGTCAGGGTTTAAATCCCGTGGAAACCATAATGGTAGTTGATACACTAACTCTTACAGTTTATGTTTACATCCATCATT  | 53383 |
| Ma'sNightMonkey   | AGTCTTGATTTTATACATATGCAACTCATAATTGATAGTTGACA---AGCTCTTAAAGTTTATGTTTATGTTCCATCATT | 60471 |
| VervetAGM         | AGTCATGATTTTATACTTATGGAACCTCAAATTGATAGTTGACAACTACCTTTTACAGTTTATGTTTATGTTCCATCATT | 66805 |
| Gorilla           | AGTCATGATTTTATATATATGGAACCTCAAATTGATAGTTGACAACTAGCTTTTACAATTTAGTTTATGTTCTGTCATT  | 65609 |
| GrabEatingMacaque | AGTCATGATTTTATACATATGGAACCTCAAATTGATAGTTGACAACTAGCTTTTACAGTTTATGTTTATGTTCCATCATT | 66010 |
| Macaque           | AGTCATGATTTTATACATATGGAACCTCAAATTGATAGTTGACAACTAGCTTTTACAGTTTATGTTTATGTTCCATCATT | 66845 |
| PigTailedMacaque  | AGTCATGATTTTATACATATGGAACCTCAAATTGATAGTTGACAACTAGCTTTTACAGTTTATGTTTATGTTCCATCATT | 65731 |
| Bonobo            | AGTCATGATTTTATATATATGGAACCTCAAATTGATAGTTGACAACTAGCTTTTACAATTTAGTTTATGTTCTGTCATT  | 64182 |
| OliveBaboon       | AGTCATGATTTTATACATATGGAACCTCAAATTGATAGTTGACAACTAGCTTTTACAGTTTATGTTTATGTTCCATCATT | 65587 |
| Orangutan         | AGTCATGATTTTATATATATGGAACCTCAAATTGATAGTTGACAACTAGCTTTTACAATTTAGTTTATGTTCCATCATT  | 66040 |

Tuesday, May 03, 2022 06:16 PM

| Majority          | TCAAAAAGAAAA-ATCGTACAATTAAGTAGTTATTGGAAATATTTACTT---CCCAATATATAACAATCATGCCATCAG  |       |
|-------------------|----------------------------------------------------------------------------------|-------|
|                   | 79690 79700 79710 79720 79730 79740 79750 79760                                  |       |
| Human             | TCAAAA-GAAAAA-ATAGTATAATTAAGTAGTTATTGGAAATATTTACTT---CCCAATATATAACAGTCATGCCATCAG | 65142 |
| Coquerel'sSifaka  | TAAAAA-AGTAT-----TATAATGAAGTAATCTTAGAAATATTTATTTAATGTGGATATATAACAATCATCCTATTCA   | 53456 |
| Ma'sNightMonkey   | TCAAAAAGAAAA---GTACTATAATGTAGTCTTGGAAATATTTACTTCTTCCCAATATATAACAATCATGCCATCAG    | 60547 |
| VervetAGM         | TAAAAAAGAAAAACATCGTACAATGAAGTAGTTATTGGAAATACTT-----CCGAGTGTATAACAATCATGCCATCAG   | 66878 |
| Gorilla           | TCAAAAAGAAAA-ACAGTATAATTAAGTAGTTATTGGAAATATTTACTT---CCCAATATATAACAGTCATGCCATCAG  | 65685 |
| GrabEatingMacaque | TCAAAAAGAAAAAATCATAACAATTAAGTAGTTATTGGAAATACTTACTT---CCCAGTATATAACAATCATGCCATCAG | 66087 |
| Macaque           | TCAAAAAGAAAAAATCGTACAATTAAGTAGTTATTGGAAATACTTACTT---CCCAGTATATAACAATCATGCCATCAG  | 66922 |
| PigTailedMacaque  | TCAAAAAGAAAAAATCGTACAATTAAGTAGTTATTGGAAATACTTACTT---CCCAGTATATAACAATCATGCCATCAG  | 65808 |
| Bonobo            | TCAAAAAGAAAA-ATAGTATAATTAAGTAGTTATTGGAAATATTTACTT---CCCAATATATAACAGTCATGCCATCAG  | 64258 |
| OliveBaboon       | TCAAAAAGAAAAAATCGTACAATGAAGTAGTTATTGGAAATACTTACTT---CCCAGTATATAACAATCATGCCATCAG  | 65664 |
| Orangutan         | TCAAAAAGAAAA-ATAGTATAATGAAGTAGTTATTGGAAATATTTACTT---CCCAATATATAACAGTCATGCCATCAG  | 66116 |

| Majority          | TTTGTGAATCTGAAATCTGTAAGTGGTATATATGTAGAGAGAGATACTCT-AAGGCAGTTGATATTTGATTCTAGTAACT |       |
|-------------------|----------------------------------------------------------------------------------|-------|
|                   | 79770 79780 79790 79800 79810 79820 79830 79840                                  |       |
| Human             | TTTGTGAATATGAAATCTGTAAGTGGTATATATGTAGAGAGAGATACTCT-AAGGCAGTTGGTATTTGATTCTGGTAACT | 65221 |
| Coquerel'sSifaka  | CTTCTAAATATGAAATC--TAAGTGACACAATGTGGAGAGAGACAATCT-AATGCACAAGAGA-----AACAGCT      | 53524 |
| Ma'sNightMonkey   | TTTGTGAACCTGAGATTGGTAAGTGGTATATGTGTAGAGAGAGATACTCT-AAGGCAGTTGATACTTAATTCTGGTAACT | 60626 |
| VervetAGM         | TTTGTGAATCTGAAATCTGTAAGTGTATATATGTAGAGAAAGATACTCT-AAGGCAGTTGATATTTGATTCTAGTAACT  | 66957 |
| Gorilla           | TTTGTGAATATGAAATCTGTAAGTGGTATATATGTAGAGAGAGATACTCT-AAGGCAGTTGGTATTTGATTCTGGTAACT | 65764 |
| GrabEatingMacaque | TTTGTGAATCTGAAATCTGTAAGTGGTATATATGTAGAGAAATATACTCTTAAGGCAGTTGATATTTGATTCTAGTAACT | 66167 |
| Macaque           | TTTGTGAATCTGAAATCTGTAAGTGGTATATATGTAGAGAAATATACTCTTAAGGCAGTTGATATTTGATTCTAGTAACT | 67002 |
| PigTailedMacaque  | TTTGTGAATCTGAAATCTGTAAGTGGTATATATGTAGAGAAATATACTCTTAAGGCAGTTGATATTTGATTCTAGTAACT | 65888 |
| Bonobo            | TTTGTGAATATGAAATCTGTAAGTGGTATATATGTAGAGAGAGATACTCT-AAGGCAGTTGGTATTTGATTCTGGTAACT | 64337 |
| OliveBaboon       | TTTGTGAATCTGAAATCTGTAAGTGGTATATATGTAGAGAAAGATACTCT-AAGGCAGTTGATATTTGATTCTAGTAACT | 65743 |
| Orangutan         | TTTGTGAATATGAAATCTGTAAGTGGTATATATATAGAGAGAGATACTCT-AAGGCAGTTGGTATTTGATTCTGGTAACT | 66195 |

| Majority          | AATCAGAATTAACCTGTTAATTCTGGCAACTT----CAAACAAATCTGACCCTTTATTTCGAATTTTC-TGGTATATC     |       |
|-------------------|------------------------------------------------------------------------------------|-------|
|                   | 79850 79860 79870 79880 79890 79900 79910 79920                                    |       |
| Human             | AATAAGAATTAACCTGTTAATTCTGGCAGCTG----CAAACAAATCTGACCCTTTATTTCGAATTTTC-TGGTGTATC     | 65296 |
| Coquerel'sSifaka  | GAT---ATTTGA-----AATTAATTCTGGTGACTT----CAAACAAACTGACCCTTTATTTCGAATTTTCCTGATACATC   | 53592 |
| Ma'sNightMonkey   | AATCAGAATTAACCTGTGTGTTAATTCCGGTAACTT----CAAATAAATCTGACCCTTTATTTCGAATTTTC-TGGTATGTC | 60701 |
| VervetAGM         | AATCAGAATTAACCTGTTAATTCTGGCAACTT--A---AACAAATCTGACCCTTTATTTCGAATTTTC-TGGTATATC     | 67031 |
| Gorilla           | AATCAGAATTAACCTGTTAATTCTGGCAACTG----CAAACAAATCTGACTCTTTATTTCGAATTTTC-TGGTATATC     | 65839 |
| GrabEatingMacaque | AATCAGAATTAACCTGTTAATTCTGGCAACTTTAAACAAACAAATCTGACCCTTTATTTCGAATTTTC-TGGTATATC     | 66246 |
| Macaque           | AATCAGAATTAACCTGTTAATTCTGGCAACTTTAAACAAACAAATCTGACCCTTTATTTCGAATTTTC-TGGTATATC     | 67081 |
| PigTailedMacaque  | AATCAGAATTAACCTGTTAATTCTGGCAACTTTAAACAAACAAATCTGACCCTTTATTTCGAATTTTC-TGGTATATC     | 65967 |
| Bonobo            | AATCAGAATTAACCTGTTAATTCTGGCAGCTG----CAAACAAATCTGACCCTTTATTTCGAATTTTC-TGGTATATC     | 64412 |
| OliveBaboon       | AATCAGAATTAACCTGTTAATTCTGGCAACTTTAAACAAATAAATCTGACCCTTTATTTCGAATTTTC-TGTTATATC     | 65822 |
| Orangutan         | AATCAGAATTTACTACCTGTTAATTCTGGCAACTG----CAAACAAATCTGACCCTTTATTTCGAATTTTC-TGGTGTATC  | 66270 |

Tuesday, May 03, 2022 06:16 PM

| Majority          | -TAGCACAAGTCATAG-TGTTTTATTATG-----ACTGTAGTAGATGCTTTAGGTCACCTTACACTCTTTCTGACAGA    |       |
|-------------------|-----------------------------------------------------------------------------------|-------|
|                   | 79930 79940 79950 79960 79970 79980 79990 80000                                   |       |
| Human             | CTAGCAGAAGTCATAG-TGTTTTATTATG-----ACTGTAGTAGATGCTTTAGGTCACCTTACACTCTTTCTGACAGA    | 65367 |
| Coquerel'sSifaka  | -TGGCACGAGCCTTAGCTGTTTTATCATG-----ACTCTAGTAGATACTTTGGGTTGCTTTCCCTTTTTCTGACAAA     | 53663 |
| Ma'sNightMonkey   | -TAGCACAAGTCATAG-TGTTTTATTATGTTATTATGACTGTAGTAGATGCTTTCAGTCACCTTACACTCTTTCTGACAGA | 60779 |
| VervetAGM         | -TAGCACAAGTCATAG-TGTTTTTTTATG-----ACTGCAGTAGATGCTTTAGGTCCTTACACTCTTTCTGAC--A      | 67099 |
| Gorilla           | -TAGCAGAAGTCATAG-TGTTTTATTATG-----ACTGTAGTAGATGCTTTAGGTCACCTTACACTCTTTCTGACAGA    | 65909 |
| GrabEatingMacaque | -TAGCACAAGTCATAG-TGTTTTTTTATG-----ACTGCAGTAGATGCTTTAGGTCACCTTACACTCTTTCCGGACAGA   | 66316 |
| Macaque           | -TAGCACAAGTCATAG-TGTTTTTTTATG-----ACTGCAGTAGATGCTTTAGGTCACCTTACACTCTTTCCGGACAGA   | 67151 |
| PigTailedMacaque  | -TAGCACAAGTCATAG-TGTTTTTTTATG-----ACTGCAGTAGATGCTTTAGGTCACCTTACACTCTTTCTGACAGA    | 66037 |
| Bonobo            | CTAGCAGAAGTCATAG-TGTTTTATTATG-----ACTGTAGTAGATGCTTTAGGTCACCTTACACTCTTTCTGACAGA    | 64483 |
| OliveBaboon       | -TAGCACAAGTCATAG-TGTTTTTTTATG-----ACTGCAGTAGATGCTTTAGGTCACCTTACACTCTTTCTGACAGA    | 65892 |
| Orangutan         | -TAGCACAAGTCATAG-TGTTTTATTATG-----ACTGTAGTAGATACTTTAGGTCACCTTACACTCTTTC-TGACAGA   | 66339 |

| Majority          | ATCTCTAC-----C-CCTCTGTGTGTGTCTAGCTTAATTCGTAATTCAGTTAATAAGATTGAATATT         |       |
|-------------------|-----------------------------------------------------------------------------|-------|
|                   | 80010 80020 80030 80040 80050 80060 80070 80080                             |       |
| Human             | ATCTCTAC-----TACCTCTGTGTGTGTCTAGCTTAATTCGTAATTCAGTTAATAAGATTGAATATT         | 65430 |
| Coquerel'sSifaka  | ATCTCTATCAATCAATGTGTGGGCTAGTTAAGTCTTAATTCCTCAATTCCTTGCAAATTAATAAGATTGACTGTT | 53743 |
| Ma'sNightMonkey   | ATCTCTGTGTGTTG-----CTAGCTTAATTCCTTAATTCCTTAATTTTCTTTCAAGTTAATAAATTGAATATT   | 60849 |
| VervetAGM         | ATCTCTAC-----C-CCTCTGTGTGTGTCTAGCTGAATTCGTAATTCAGTTAATAAGATTGAATATT         | 67161 |
| Gorilla           | ATCTCTA-----CCTCTGTGTGTGTCTAGCTTAATTCGTAATTCAGTTAATAAGATTGAATATT            | 65969 |
| GrabEatingMacaque | ATCTCTAC-----C-CCTCTGTGTGTGTCTAGCTGAATTTGTAATTCAGTTAATAAGATTGAATATT         | 66378 |
| Macaque           | ATCTCTAC-----C-CCTCTGTGTGTGTCTAGCTGAATTTGTAATTCAGTTAATAAGATTGAATATT         | 67213 |
| PigTailedMacaque  | ATCTCTAC-----C-CCTCTGTGTGTGTCTAGCTGAATTCGTAATTCAGTTAATAAGATTGAATATT         | 66099 |
| Bonobo            | ATCTCTA-----CCTCTGTGTGTGTCTAGCTTAATTCGTAATTCAGTTAATAAGATTGAGTATT            | 64543 |
| OliveBaboon       | ATCTCTAC-----C-CCTCTGTGTGTGTCTAGCTGAATTCGTAATTCAGTTAATAAGATTGAATATT         | 65954 |
| Orangutan         | ATCTCTA-----CCTCTGTGTGTGTCTAGCTTAATTCGTAATTCAGTTAATAAGATTGAATATT            | 66397 |

| Majority          | TCACAGTGTGCAGTTTTTAAAGGCAAAGTCAAGAGTGAAACA-----GTGAAACATGGTTTTTGCTTATAAATTATTAC   |       |
|-------------------|-----------------------------------------------------------------------------------|-------|
|                   | 80090 80100 80110 80120 80130 80140 80150 80160                                   |       |
| Human             | TCACAGTGTGCAGTTTTTAAAGGCAAAGTCAAGAGTGAAACA-----GTGAAACATGGTTTTTGCTTATAAATTATTAC   | 65503 |
| Coquerel'sSifaka  | TCATAGTGTGCAGTTTTTAAAGGCAAAGTCAAGAGCGAGACAATGATGAGTAAAACATAGCCCTTGCTTATAAATTATTAC | 53823 |
| Ma'sNightMonkey   | TCACAGTGTGCAGTTTTTAAAGGCAAAGTCAAGA-----GTGAAACATGGTCCCTTGCTTATAAATTATTAC          | 60914 |
| VervetAGM         | TCACAGTGTACAGTTTTTAAAGGCAAAGTCAAGAGTGAAACA-----GTGAAACATGGTTTTTGCTTATAAATTACTAC   | 67234 |
| Gorilla           | TCACAGTGTGCAGTTTTTAAAGGCAAAGTCAAGAAATGAAAGA-----GTGAAACATGGTTTTTGCTTATAAATTATTAC  | 66042 |
| GrabEatingMacaque | TCACAGTATAACAGTTTTTAAAGGCAAAGTCAAGAGTGAAACA-----GTGAAACATGGTTTTTGCTTATAAATTACTAC  | 66451 |
| Macaque           | TCACAGTATAACAGTTTTTAAAGGCAAAGTCAAGAGTGAAACA-----GTGAAACATGGTTTTTGCTTATAAATTACTAC  | 67286 |
| PigTailedMacaque  | TCACAGTATAACAGTTTTTAAAGGCAAAGTCAAGAGTGAAACA-----GTGAAACATGGTTTTTGCTTATAAATTACTAC  | 66172 |
| Bonobo            | TCACAGTGTGCAGTTTTTAAAGGCAAAGTCAAGAAATGAAAGA-----GTGAAACATGGTTTTTGCTTATAAATTATTAC  | 64616 |
| OliveBaboon       | TCACAGTGTACAGTTTTTAAAGGCAAAGTCAAGAGTGAAACA-----GTGAAACATGGTTTTTGCTTATAAATTACTAC   | 66027 |
| Orangutan         | TCACAATGTGCAGTTTTTAAAGGCAAAGTCAAGAGTGAAAGA-----GTGAAACATGGTTTTTGCTTATAAATTATTAC   | 66470 |

Tuesday, May 03, 2022 06:16 PM

| Majority          | TATAGATTATTA | AACTCTTTACTGATAGACATTGT                                               | --TATAGAAA-GAATCAGAATTTATTGAGTAGCTTCTAGGTCATA |                                  |
|-------------------|--------------|-----------------------------------------------------------------------|-----------------------------------------------|----------------------------------|
|                   | 80170        | 80180                                                                 | 80190                                         | 80200                            |
|                   | 80210        | 80220                                                                 | 80230                                         | 80240                            |
| Human             | TATAGATTATTA | AACTCTTTACTGATAGACATTGT                                               | --TTTAGAAA-GAATCAA                            | ATTTATTGAGTAGCTTCTAGGTCATA 65580 |
| Coquerel'sSifaka  | TACAGATTATTA | AATTTCTT-ACTGATGGAGATTATATTATAGAAAAGAGTCAACATATATCAAGTAGCTTCTAGGTCCTA |                                               | 53902                            |
| Ma'sNightMonkey   | TATAGATTATTA | AACTCTTTACTGATAGAAAGTGT                                               | --TATAGAAAAGAATCAGAATTTATTGAGTAGCTTCTAGGTCATA | 60992                            |
| VervetAGM         | TATAGATTATTA | AACTCTTTACTGATAGACATTGT                                               | --TATAGAAA-GAATCAGAATTTATTGAGTGGCTTCTAGGTCATA | 67311                            |
| Gorilla           | TATAGATTATTA | AACTCTTTACTGATAGACATTGT                                               | --TTTAGAAA-GAATCAA                            | ATTTATTGAGTAGCTTCTAGGTCATA 66119 |
| GrabEatingMacaque | TATAGATTATTA | AACTCTTTACTGATAGACATTGT                                               | --TATAGAAA-GAATCAGAATTTATTGAGTGGCTTCTAGGTCATA | 66528                            |
| Macaque           | TATAGATTATTA | AATTTCTTTACTGATAGACATTGT                                              | --TATAGAAA-GAATCAGAATTTATTGAGTGGCTTCTAGGTCATA | 67363                            |
| PigTailedMacaque  | TATAGATTATTA | AACTCTTTACTGATAGACATTGT                                               | --TATAGAAA-GAATCAGAATTTATTGAGTGGCTTCTAGGTCATA | 66249                            |
| Bonobo            | TATAGATTATTA | AACTCTTTACTGATAGACATTGT                                               | --TTTAGAAA-GAATCAA                            | ATTTATTGAGTAGCTTCTAGGTCATA 64693 |
| OliveBaboon       | TATAGATTATTA | AACTCTTTACTGATAGACATTGT                                               | --TATAGAAA-GAATCAGAATTTATTGAGTGGCTTCTAGGTCATA | 66104                            |
| Orangutan         | TAAAGATTATTA | AAGTCTTCACTGATAGACATTGT                                               | --TTTAGAAA-GAATCAGAATTTATTGAGTAGCTTCTAGGTCATA | 66547                            |

| Majority          | AGCATTTCAGCTAGGC | ACTTGGCAGATA-CATTACTTTAT                                           | -----TAAAATAGATGGTGTTCATCAAGATTTTACATA |       |
|-------------------|------------------|--------------------------------------------------------------------|----------------------------------------|-------|
|                   | 80250            | 80260                                                              | 80270                                  | 80280 |
|                   | 80290            | 80300                                                              | 80310                                  | 80320 |
| Human             | TTCATTTCAGCTAGGC | ACTTGGCAGATA-CATTACTTTGT                                           | -----TAAAATAGATGGTCTCATCAAGATTTTACATA  | 65650 |
| Coquerel'sSifaka  | GACATTCTACTAAGC  | ACTTGTTCAGATAACGTTACTCAGAATACTCAGATAAAGTAGATGATGGCATCAAGATTTTACATG |                                        | 53982 |
| Ma'sNightMonkey   | GGCATTTCAGCTAGGT | ACTTGGTAGATA-CATTACTTTGT                                           | -----TAAAATAGGTGATGTTCATCAAGATTTTACACA | 61062 |
| VervetAGM         | AGCATTTCAGCTAGGC | ACTTGACAGATA-CATTACTTTAT                                           | -----TAAAACAGATGGTGTTCATCAAGATTTTACATA | 67381 |
| Gorilla           | TTCATTTCAGCTAGGC | ACTTGGCAGATA-CATTACTTTAT                                           | -----TAAAATAAATGGTCTCATCAAGATTTTACATA  | 66189 |
| GrabEatingMacaque | AGCATTTCAGCTAGGC | ACTTGGCAGATA-CATTACTTTAT                                           | -----TAAAACAGATGGTGTTCATCAAGATTTTACATA | 66598 |
| Macaque           | AGCATTTCAGCTAGGC | ACTTGGCAGATA-CATTACTTTAT                                           | -----TAAAACAGATGGTGTTCATCAAGATTTTACATA | 67433 |
| PigTailedMacaque  | AGCATTTCAGCTAGGC | ACTTGGCAGATA-CATTACTTTAT                                           | -----TAAAACAGATGGTGTTCATCAAGATTTTACATA | 66319 |
| Bonobo            | TTCATTTCAGCTAGGC | ACTTGGCAGATA-CATTACTTTGT                                           | -----TAAAATAGATGATCTCATCAAGATTTTACATA  | 64763 |
| OliveBaboon       | AGCATTTCAGCTAGGC | ACTTGGCAGATA-CATTACTTTAT                                           | -----TAAAACAGATGGTGTTCATCAAGATTTTACATA | 66174 |
| Orangutan         | GGCATTTCAGCTAGGT | ACTTGGCAGATA-CGTTACTTTAT                                           | -----TAAAATAGATGGTGTTCATCAAGATTTTACATA | 66617 |

| Majority          | TAGTTTCTAAGAAGTTGAAAAATTCATAT                                                     | -----GAAACAATTTAAAGATAAAAATACCAAGAAACTCCAG-- |                 |
|-------------------|-----------------------------------------------------------------------------------|----------------------------------------------|-----------------|
|                   | 80330                                                                             | 80340                                        | 80350           |
|                   | 80360                                                                             | 80370                                        | 80380           |
|                   | 80390                                                                             | 80400                                        |                 |
| Human             | TAGTTTCTAAGAAGTTGAAAAATTCACATGCAACTCATCAAAGAAACAATTTAAAGATAAAAATACCAAGAAACTCCAGCT |                                              | 65730           |
| Coquerel'sSifaka  | CAGTTTCTGAGAAGTTAAAAAATTCATGT                                                     | -----GCAGGCTGGGCACGGTGG-CTC----              | ACGCCTG-- 54039 |
| Ma'sNightMonkey   | TAGTTTCTAAGAAGTTGAAAAATTCACATGCAACTCATTAAGAAACAATTTAAAGGAAAATACCAAGAAACTCCGG--    |                                              | 61140           |
| VervetAGM         | TAGTTTCTAAGAAGTTGAGAAATTCCTTA                                                     | -----GAAACAATTTAAAGATAAAAATACCCAGAAACTCCAG-- | 67445           |
| Gorilla           | TAGTTTCTAAGAAGTTGAAAAATTCACATGCAACTCATCAAAGAAACAATTTAAAGATAAAAATACCAAGAAACTCCAGCT |                                              | 66269           |
| GrabEatingMacaque | TAGTTTCTAAGAAGTTGAAAAATTCCTTA                                                     | -----GAAACAATTTAAAGATAAGATAACCGAGCAACTCCAG-- | 66662           |
| Macaque           | TAGTTTCTAAGAAGTTGAAAAATTCCTTA                                                     | -----GAAACAATTTAAAGATAAAAATACCGAGCAACTCCAG-- | 67497           |
| PigTailedMacaque  | TAGTTTCTAAGAAGTTGAAAAATTCCTTA                                                     | -----GAAACAATTTAAAGATAAAAATACCGAGAAACTCCAG-- | 66383           |
| Bonobo            | TAGTTTCTAAGAAGTTGAAAAATTCACATGCAACTCATCAAAGAAACAATTTAAAGATAAAAATACCAAGAAACTCCAGCT |                                              | 64843           |
| OliveBaboon       | TAGTTTCTAAGAAGTTGAAAAATTCCTTA                                                     | -----GAAACAATTTAAAGATAAAAATACCGAGAAACTCCAG-- | 66238           |
| Orangutan         | TAGTTTCTAAGAAGTTGAAAAATTCACATGCAACTCATCAAAGAAACAATTTAAAGATAAAAATACCAAGAAACTCCAG-- |                                              | 66695           |

Tuesday, May 03, 2022 06:16 PM

|                   |                                                                                          |       |
|-------------------|------------------------------------------------------------------------------------------|-------|
| Majority          | -----CTAGCATTAACAATGGACTAC--TAATC- <u>ACTTCTTTGGACCATACTGAGCTAT</u>                      |       |
|                   | 80410 80420 80430 80440 80450 80460 80470 80480                                          |       |
| Human             | AAAGATAAAATACCAAGAAACTCCAGCTAGTATTAACAATGGACTACAATAATC- <u>ACTTCTTTGGACCCTACTGAGGTGT</u> | 65809 |
| Coquerel'sSifaka  | -----TAATCCTAGCA-----CTCTGGG--AGACAGAGGTGG                                               | 54069 |
| Ma'sNightMonkey   | -----CTAGCATAAACAATGGACTACAACAGTCCACTTCTTTGGACCCTACTGAGCTAT                              | 61194 |
| VervetAGM         | -----CTAGCATTAACAATGGACTAC--TAATC- <u>ACTTCTTTGGACCATACTGAGCTAT</u>                      | 67496 |
| Gorilla           | AAAGATAAAATAGCAAGAAACTCCAGCTAGTATTAACAATGGACTACAATAATC- <u>ACTTCTTTGAACCCTACTGAGCTGT</u> | 66348 |
| GrabEatingMacaque | -----CTAGCATTAACAATGGACTAC--TAATC- <u>ACTTCTTTGGACCATACTGAGCTAT</u>                      | 66713 |
| Macaque           | -----CTAGCGTTAACAATGGACTAC--TAATC- <u>ACTTCTTTGGACCATACTGAGCTAT</u>                      | 67548 |
| PigTailedMacaque  | -----CTAGCATTAACAATGGACTAC--TAATC- <u>ACTTCTTTGGACCATACTGAGCTAT</u>                      | 66434 |
| Bonobo            | AAAGATAAAATACCAAGAAACTCCAGCTAGTATTAACAATGGACTACAATAATC- <u>ACTTCTTTGGACCCTACTGAGGTGT</u> | 64922 |
| OliveBaboon       | -----CTAGCATTAACAATGGACTAC--TAATC- <u>ACTTCTTTGGACCATACTGAGCTAT</u>                      | 66289 |
| Orangutan         | -----CTAGTATTAACAATGGACTACAATAATC- <u>ACTTCTTTGGACCCTACTGAGCTAT</u>                      | 66748 |

|                   |                                                                                                  |       |
|-------------------|--------------------------------------------------------------------------------------------------|-------|
| Majority          | <u>GTGTATTTGCCCATCTGAATATACTTAGATGTGCTTGGATCCTGGGTGGGAGGCTTGTTT</u> <u>TAGAAGTCACCTGGATTCTTC</u> |       |
|                   | 80490 80500 80510 80520 80530 80540 80550 80560                                                  |       |
| Human             | <u>GTGTATTTGCCCATCTGGATATACTTAGATGTGCTTGGATCCTGGGTGGGAGGCTTGTTT</u> <u>TAGAAGTCACGTGGATTCTTC</u> | 65889 |
| Coquerel'sSifaka  | <u>GTGGATCGCTCAAGGTCAGGAGTTCGAGACCAGCCTC-AGCAAGAGCGAGA-----</u> <u>CCCCGTCTCTAC</u>              | 54131 |
| Ma'sNightMonkey   | <u>GTATATTTGCCCATCTGAGTATATTTAGATGTGTTTGGATCGTGGGTGGGAGGCATGGTT</u> <u>TAGAAATCACCTGGATTCTTC</u> | 61274 |
| VervetAGM         | <u>GTGTATTTGTCCATCTGAATATACTTAGATGCGCTTGGATCCTGGGTGGGAGGCTTGTTT</u> <u>TAGAAGTCACCTGGATTCTTC</u> | 67576 |
| Gorilla           | <u>GTGTATTTGCCCATCTGGATATACTTAGATGTGCTTGGATCCTGGGTGGGAGGCTTGATT</u> <u>TAGAAGTCACCTGGATTCTTC</u> | 66428 |
| GrabEatingMacaque | <u>GTGTATTTGCCCATCTGAATATACTTAGATGCGCTTGGATCCTGGGTGGGAGGCTTGTTT</u> <u>TAGAAGTCACCTGGATTCTTC</u> | 66793 |
| Macaque           | <u>GTGTATTTGCCCATCTGAATATACTTAGATGCGCTTGGATCCTGGGTGGGAGGCTTGTTT</u> <u>TAGAAGTCACCTGGATTCTTC</u> | 67628 |
| PigTailedMacaque  | <u>GTGTATTTGCCCATCTGAATATACTTAGATGCGCTTGGATCCTGGGTGGGAGGCTTGTTT</u> <u>TAGAAGTCACCTGGATTCTTC</u> | 66514 |
| Bonobo            | <u>GTGTATTTGCCTATCTGGATATACTTAGATGTGCTTGGATCCTGGGTGGGAGGCTTGTTT</u> <u>TAGAAGTCACCTGGATTCTTC</u> | 65002 |
| OliveBaboon       | <u>GTGTATTTGCCCATCTGAATATACTTAGATGCGCTTGGATCCTGGGTGGGAGGCTTGTTT</u> <u>TAGAAGTCACCTGGATTCTTC</u> | 66369 |
| Orangutan         | <u>GTGTATTTGCCCATCTGAATATACTTAGATGTGCTTGGATCCTGGGTGGGAGGCTTGTTT</u> <u>TAGAAGTCACCTGGATTCTTC</u> | 66828 |

|                   |                                                                                                 |       |
|-------------------|-------------------------------------------------------------------------------------------------|-------|
| Majority          | <u>TAGGGAATTTTTCAGCATTTTCCTTGTGATCTTATGACCTTGGTGAAACTTTTAAAACAATAATAAAGTCATTTT</u> <u>-----</u> |       |
|                   | 80570 80580 80590 80600 80610 80620 80630 80640                                                 |       |
| Human             | <u>TAGGGAATTTTATCACCATTTTCTTGTGATCTTATGACCTTGGTGAAACTTTTAAAACAATAATAAAGTCATTTT</u> <u>-----</u> | 65964 |
| Coquerel'sSifaka  | <u>TAA--AAATAGAAAGAAATTATTTGGACAACATAAAATCTATATAGAA-----</u> <u>AAAAAATTAGCCGGG-CATGGT-----</u> | 54198 |
| Ma'sNightMonkey   | <u>TAGGGAATTCATCACCATTT-CCTTGCATCTTAGACCTTGGTGAAACTTCTAAAACAATATTAAGTCATTTTAAATA</u>            | 61353 |
| VervetAGM         | <u>TCGGGAATTTTTCAGCATTTTCCTTGTGATCTCATGACCTTGGTGAAACTTTTAAAACAACAATAAAGTCATTTT</u> <u>-----</u> | 67651 |
| Gorilla           | <u>TAGGGAATTTATCACCATTTTCTTGTGATCTTATGACCTTGGTGAAACTTTTAAAACAATAATAAAGTCATTTT</u> <u>-----</u>  | 66503 |
| GrabEatingMacaque | <u>TCAGGAATTTTTCAGCATTTTCCTTGTGATCTTATGACCTTGGTGAAACTTTTAAAACAATAATAAAGTCATTTT</u> <u>-----</u> | 66868 |
| Macaque           | <u>TCAGGAATTTTTCAGCATTTTCCTTGTGATCTTATGACCTTGGTGAAACTTTTAAAACAATAATAAAGTCATTTT</u> <u>-----</u> | 67703 |
| PigTailedMacaque  | <u>TCAGGAATTTTTCAGCATTTTCCTTGTGATCTTATGACCTTGGTGAAACTTTTAAAACAATAATAAAGTCATTTT</u> <u>-----</u> | 66589 |
| Bonobo            | <u>TAGGGAATTTATCACCATTTTCTTGTGATCTTATGACCTTGGTGAAACTTTTAAAACAATAATAAAGTCATTTT</u> <u>-----</u>  | 65077 |
| OliveBaboon       | <u>TCGGGAATTTTTCAGCATTTTCCTTGTGATCTTATGACCTTGGTGAAACTTTTAAAACAATAATAAAGTCATTTT</u> <u>-----</u> | 66443 |
| Orangutan         | <u>TAGGTAATTTATCACCATTTTCTTGTGATCTTATGACTTGGTGAAACTTTTAAAACAATAATAAAGTCATTTT</u> <u>-----</u>   | 66903 |



Tuesday, May 03, 2022 06:16 PM

| Majority          | -----TTTTTT-CTTTCTTTGAGACGGAGTCTCACTCTGT                                          |       |       |       |       |       |       |       |       |
|-------------------|-----------------------------------------------------------------------------------|-------|-------|-------|-------|-------|-------|-------|-------|
|                   | 80650                                                                             | 80660 | 80670 | 80680 | 80690 | 80700 | 80710 | 80720 |       |
| Human             | -----TTTTCT-----CTTTGAGATGGAATCTCACTCTGT                                          |       |       |       |       |       |       |       | 65994 |
| Coquerel'sSifaka  | -----G---GCGCACGTCTGTAGTCCCA---GC                                                 |       |       |       |       |       |       |       | 54220 |
| Ma'sNightMonkey   | AAGATTATGAAGCCCTAGCACAGCTAGCTTCTGTCTTACTCTATGCTTTTCTTATTTTTTGGAGACGGAGTCTTGCTCTGT |       |       |       |       |       |       |       | 61433 |
| VervetAGM         | -----TTTTTTTCTTCTTTGAGACAGAGTCTCACTCTGT                                           |       |       |       |       |       |       |       | 67686 |
| Gorilla           | -----TTTTCT-----CTTTGAGATGGAGTCTCACTCTGT                                          |       |       |       |       |       |       |       | 66533 |
| GrabEatingMacaque | -----TTTTTT-CTTTCTTTGAGACGGAGTCTCACTCTGT                                          |       |       |       |       |       |       |       | 66902 |
| Macaque           | -----TTTTTTTCTTCTTTGAGACGGAGTCTCACTCTGT                                           |       |       |       |       |       |       |       | 67738 |
| PigTailedMacaque  | -----TTTTTT-CTTTCTTTGAGACGGAGTCTCACTCTGT                                          |       |       |       |       |       |       |       | 66623 |
| Bonobo            | -----TTTTCT-----CTTTGAGATGGAATCTCACTCTGT                                          |       |       |       |       |       |       |       | 65107 |
| OliveBaboon       | -----TTTTTT-CTTTCTTTGAGACGGAGTCTCACTCTGT                                          |       |       |       |       |       |       |       | 66477 |
| Orangutan         | -----TTTCTT-----CTTTGAGACGGAATCTCACCTGT                                           |       |       |       |       |       |       |       | 66933 |

| Majority          | GGCCCAGGCTGGAGTGCAGTGGCGCAGTCTCGGCTCACTGCAACTTCCGCCTCCCGGGTTCAAGCGATTCTCCCGCCTCA    |       |       |       |       |       |       |       |       |
|-------------------|-------------------------------------------------------------------------------------|-------|-------|-------|-------|-------|-------|-------|-------|
|                   | 80730                                                                               | 80740 | 80750 | 80760 | 80770 | 80780 | 80790 | 80800 |       |
| Human             | CGCCCGTGTGAGAGTGTGGTGGCGCAGTCTCGGCTCACTGCAACTTCCGCCTCCCGGGTTCAAGCGATTCTCCCGCCTCA    |       |       |       |       |       |       |       | 66074 |
| Coquerel'sSifaka  | TACTCGGG--AGGCTGAGGCAGTA-----GGATTGCTGGAGCCAGGAGTTTGGAGTTGCTGTGAG---CTAGGCTG        |       |       |       |       |       |       |       | 54287 |
| Ma'sNightMonkey   | CACCCAGGCTGGAGTGCATGCAATGGCATAATCTTGGCTCACTGCAACTCCCGCCTCCCGGGTTCAAGTGATTCTCCACATCA |       |       |       |       |       |       |       | 61513 |
| VervetAGM         | GGCCCAGGCTGGAGTGCAGTGGCACAATCTCGGCTCACTGCAACTTCCACCTCCCGGGTTCAAGCGATTCTCCTGCCTCA    |       |       |       |       |       |       |       | 67766 |
| Gorilla           | TGCCCGTGTGAGAGTGTGGTGGCGCAGTCTCGGCTCACTGCAACTTCCGCCTCCCGGGTTGAGCGATTCTCCTGCCTCA     |       |       |       |       |       |       |       | 66613 |
| GrabEatingMacaque | GGCCCAGGCTGGAATGCAGTGGCGCAGTCTTGGCTCACTGCAACTTCCACCTCCCGGGTTCAAGCGATTCTCCCGCCTCA    |       |       |       |       |       |       |       | 66982 |
| Macaque           | GGCCCAGGCTGGAATGCAGTGGCGCAGTCTTGGCTCACTGCAACTTCCACCTCCCGGGTTCAAGCGATTCTCCCGCCTCA    |       |       |       |       |       |       |       | 67818 |
| PigTailedMacaque  | GGCCCAGGCTGGAGTGCAGTGGCGCAGTCTTGGCTCACTGCAACTTCTACCTCCCGGGTTCAAGCGATTCTCCCGCCTCA    |       |       |       |       |       |       |       | 66703 |
| Bonobo            | CGCCCGTGTGAGAGTGTGGTGGCACAGTCTCGGCTCACTGCAACTTCCGCCTCCCGGGTTCAAGCGATTCTCCCGCCTCA    |       |       |       |       |       |       |       | 65187 |
| OliveBaboon       | GGCCCAGGCTGGAGTGCAGTGGCGCAGTCTCGGCTCACTGCAACTTCCACCTCCCGGGTTCAAGCGATTCTCCCGCCTCA    |       |       |       |       |       |       |       | 66557 |
| Orangutan         | CGCCCATATCGGAGTGTGGTGGCGCAGTCTCGGCTCACTGCAACTTCCGCCTCCCGGGTTCAAGTGATTCTCCCGCCTCA    |       |       |       |       |       |       |       | 67013 |

| Majority          | GCCTCCCGAGCATCTGGGACTACAGGCATGTACCACCACCCTGGCTAATTTTTGT-GTTTTTTCGTAGAAATGAGATTT   |       |       |       |       |       |       |       |       |
|-------------------|-----------------------------------------------------------------------------------|-------|-------|-------|-------|-------|-------|-------|-------|
|                   | 80810                                                                             | 80820 | 80830 | 80840 | 80850 | 80860 | 80870 | 80880 |       |
| Human             | GCCTCCTGAGCATCTGGGACTACAGGCATGTACCACCACCCTGGCTAATTTTTGT-CTTTTTTTCGTAGAGATGAGATTT  |       |       |       |       |       |       |       | 66153 |
| Coquerel'sSifaka  | ACGCCACGGCACTCT---ACTCCAGGCA-----ACAGAGTTAGACTCTGT---CTCAAAAAAAAAAAAAAAAAAATT     |       |       |       |       |       |       |       | 54350 |
| Ma'sNightMonkey   | GCCTCCCAAGTAGCTGGGATTACAGGTGTATGCCACCACACCTGGCTAATTTTTGT-ATTTTTTAGTAGAGATGAAGTTT  |       |       |       |       |       |       |       | 61592 |
| VervetAGM         | GCCTCCCGAGCATCTGGGACTACAGGCATGTAAACCACCACCCTGGCTAATTTTTGT-GTTTTTTCGTAGAAATGAGATTT |       |       |       |       |       |       |       | 67845 |
| Gorilla           | GCCTCCTGAGCATCTGGGACTACAGGCATGTACCACCACCCTGGCTAATTTTTGT-CTTTTTTCATAGAGATGACATTT   |       |       |       |       |       |       |       | 66692 |
| GrabEatingMacaque | TCCTCCCGAGCATCTGGGACTACAGGCATGTACCACCACCCC-GGCTAATTTTTGT-GTTTTTTCGTAGAAATGAGATTT  |       |       |       |       |       |       |       | 67060 |
| Macaque           | TCCTCCCGAGCATCTGGGACTACAGGCATGTACCACCACCCC-GGCTAATTTTTGT-GTTTTTTCGTAGAAATGAGATTT  |       |       |       |       |       |       |       | 67896 |
| PigTailedMacaque  | TCCTCCCGAGCATCTGGGACTACAGGCATGTACCACCACCCC-GGCTAATTTTTGT-GTTTTTTCGTAGAAATGAGATTT  |       |       |       |       |       |       |       | 66781 |
| Bonobo            | GCCTCCTGAGCATCTGGGACTACAGGCATGTACCACCACCTCTGGCTAATTTTTGT-CTTTTTTTCGTAGAGATGAGATTT |       |       |       |       |       |       |       | 65266 |
| OliveBaboon       | TCCTCCCGAGCATCTGGGACTACAGGCATGTACCACCACCCTGGCTAATTTTTGT-GTTTTTTCGTAGAAATGAGATTT   |       |       |       |       |       |       |       | 66636 |
| Orangutan         | GCCTCCCGAGCATCTGGGACTACAGGCATGTACCACCACCCTGGCTAATTTTTGTGTTTTTTCGTAGAGGTGAGATTT    |       |       |       |       |       |       |       | 67093 |

Tuesday, May 03, 2022 06:16 PM

| Majority          | CACGATGTTGGCCAGGCTGGTCTGGAACCTCTGATCTCAGGTGATCCGCCCGCCTCAGCCTCCCAAAGTGCTGGGATTA- |       |
|-------------------|----------------------------------------------------------------------------------|-------|
|                   | 80890 80900 80910 80920 80930 80940 80950 80960                                  |       |
| Human             | CACCATGTTGGCCAGGCTGGTCTGGAACCTCTGATCTCAGGTGATCTGCCCGCCTCAGCCTCCCAAAGTGCTGAGATTA- | 66232 |
| Coquerel'sSifaka  | CAC-----GTGCAGCTCATTCAAGAAACCAT--TTAAAGATAAAAATACC-AA--GAA-ACTC--GAG--CTAGCATCAA | 54414 |
| Ma'sNightMonkey   | CACCATCTTGGCCAGGCTCGTCTTGAACCTCTGGCCTTAGGTGATCTGCCTGCCTCAGCCTCCCAAGTGCTGGGATTA-  | 61671 |
| VervetAGM         | CACGATGTTGGCCAGGCTGGTCTGGAACCTCTGATCTCAGGGGATCCGCCCGCCTCAGCCTCCCAAAGACCTGGGATTA- | 67924 |
| Gorilla           | CACCATGTTGGCCAGGCTGGTCTGGAACCTCTGATCTCAGGTGATCTGCCCGCCTCAGCCTCCCAAAGTGCTGAGATTA- | 66771 |
| GrabEatingMacaque | CACGATGTTGGCCAGGCTGGTCTGGAACCTCTGATCTCAGGGGATCCGCCCGCCTCAGCCTTCCAAAGAGCTGGGATTA- | 67139 |
| Macaque           | CACGATGTTGGCCAGGCTGGTCTGGAACCTCTGATCTCAGGGGATCCGCCCGCCTCAGCCTTCCAAAGAGCTGGGATTA- | 67975 |
| PigTailedMacaque  | CACGATGTTGGCCAGGCTGGTCTGGAACCTCTGATCTCAGGGGATCCGCCCGCCTCAGCCTTCCAAAGAGCTGGGATTA- | 66860 |
| Bonobo            | CACCATGTTGGCCAGGATGGTCTGGAACCTCTGATCTCAGGTGATCTGCCCGCCTCAGCCTCCCAAAGTGCTGAGATTA- | 65345 |
| OliveBaboon       | CACGATGTTGGCCAGGCTGGTCTGGAACCTCTGATCTCAGGGGATCCGCCCGCCTCAGCCTCCCAAAGAGCTGGGATTA- | 66715 |
| Orangutan         | CACCATGTTGGCCAGGCTGGTCTGGAACCTCTGATCTCAGGTGATCCGCCACCTCAGCCTCCCAAAGTGCTGAGATTA-  | 67172 |

| Majority          | CAGGTGTGAGCCACCATGCCTGACAGCTTTTGTTCATTTTTTAAGTGTTTTTACATTTTTTACAT-TAAAAGCATGTAAATT  |       |
|-------------------|-------------------------------------------------------------------------------------|-------|
|                   | 80970 80980 80990 81000 81010 81020 81030 81040                                     |       |
| Human             | CAGGTGTGAGCCACCATGCCTGGCCGCTTTTGTTCATTTTTTGTGAGCGTTGTACATTTTTTACAT-TAAAGGCGTGTAATTT | 66311 |
| Coquerel'sSifaka  | CAAAGGATAGCAGTCACTCCTTACACCCT-----AAG----GAGCTATGTGCATTTGCCCATGTGGGTATATTTAGATG     | 54484 |
| Ma'sNightMonkey   | CAGGCATGAGCCACCATGCCTGGCTGCTTTTGTTCATTTTTTAAGTATTCTACATTTTTTACAC-FAAGAGTATGTAAATTT  | 61750 |
| VervetAGM         | CAGGTGTGAGCCACCATACTTGACAGCTTTTGTTCATTTTTTAAGTGTTTTTACCTTTTTTACAT-TAAAAGCATGTAAATTT | 68003 |
| Gorilla           | CAGTTGTGAGCCACCATGCCTGGCCGCTTTTGTGTTGTTTTTGTGAGCCTTGTACATTTTTTACAT-TAAAGGCGTGTAATTT | 66850 |
| GrabEatingMacaque | CAGGTGTGAGCCACCATGCCTTGACAGCTTTTGTTCATTTTTTAAGTGTTTTTATGTTTTTACAT-TAAAAGCATGTAAATTT | 67218 |
| Macaque           | CAGGTGTGAGCCACCATGCTTGACAGCTTTTGTTCATTTTTTAAAGTGTTTTTATGTTTTTACAT-TAAAAGCATGTAAATTT | 68054 |
| PigTailedMacaque  | CAGGTGTGAGCCACCATGCTTGACAGCTTTTGTTCATTTTTTAAAGTGTTTTTATGTTTTTACAT-TAAAAGCATGTAAATTT | 66939 |
| Bonobo            | CAGGTGTGAGCCACCATGCCTGGCCGCTTTTTTTCATTTTTTGTGAGCGT--ACATTTTTTACAT-TAAAGGCGTGTAATTT  | 65421 |
| OliveBaboon       | CAGGTGTGAGCCACCATGCTTGACAGCTTTTGTTCATTTTTTAAAGTGTTTTTACGTTTTTACAT-TAAAAGCATGTAAATTT | 66794 |
| Orangutan         | CAGGTGTGAGCCACCATGCCTGGCCGCTTTTGTTCATTTTTTAAAGTGTTCTACATTTTTTACAT-TAAAGGCGTGTAATTT  | 67251 |

| Majority          | AAGTTGCTCCCTTCGCCAAAAAA-----                                                     |       |
|-------------------|----------------------------------------------------------------------------------|-------|
|                   | 81050 81060 81070 81080 81090 81100 81110 81120                                  |       |
| Human             | AAGTTGCTCGCTTTGCCAAAAAA-----                                                     | 66334 |
| Coquerel'sSifaka  | GAGAGGGATCCCGGTGGAGACA-----                                                      | 54507 |
| Ma'sNightMonkey   | AAGTTGCTCACTTGGTAACAAAA-----                                                     | 61773 |
| VervetAGM         | AACTTCCTCCCTTCACCAAAAA-----TTGTCTAGTGTCTTTTTCCCTTCA                              | 68050 |
| Gorilla           | AAGTTGCTCCCTTCGCCAACAAA-----                                                     | 66873 |
| GrabEatingMacaque | AAGTTTCCTCCCTTCACCAAAAA-----TTGTCTAGTGTCTTTTTCCCTTCA                             | 67265 |
| Macaque           | AAGTTTCCTCCCTTCACCAAAAAATTGTCTAGTGTCTTTTTCCCTTCACCAAAAAATTGTCTAGTGTCTTTTTCCCTTCA | 68134 |
| PigTailedMacaque  | AAGTTTCCTCCCTTCACCAAAAA-----TTGTC--GTGTCTTTTTCCCTTCA                             | 66984 |
| Bonobo            | AAGTTGCTCCCTTCGCCAAAAAA-----                                                     | 65444 |
| OliveBaboon       | AAGTTTCCTCCCTTCACCAAAAA-----TTGTCTAGTGTCTTTTTCCCTTCA                             | 66841 |
| Orangutan         | AAGTTGCTCCCTTCGCCAAAAAC-----                                                     | 67274 |

Tuesday, May 03, 2022 06:16 PM

| Majority          | ---AAAATGTCTAGTGTCTTTTCCACTTCTGTGTTGAATTTTTTAGTATAATGCATTTTGTTCCTTCATCTCTGCC   |       |       |       |       |       |       |       |       |
|-------------------|--------------------------------------------------------------------------------|-------|-------|-------|-------|-------|-------|-------|-------|
|                   | 81130                                                                          | 81140 | 81150 | 81160 | 81170 | 81180 | 81190 | 81200 |       |
| Human             | -----TTGTCTAGTGTCTTTTCCACTTCTGTGTTGAATTTTTTAGTATAACGCATTTTGTTCCTTCATCTCTGCC    |       |       |       |       |       |       |       | 66406 |
| Coquerel'sSifaka  | -----TGGTTAGAAGATACCTGGATTCTCTGATGGAGAATTCATCACCG-----T---TTTCCTTATG---ATC     |       |       |       |       |       |       |       | 54566 |
| Ma'sNightMonkey   | ---AAAATATCTGGTGTCTTTTCCACTTCTGTGTTGAATTTTTTAGTATAATGCATTTTGTTCCTTCATCTCTGCC   |       |       |       |       |       |       |       | 61850 |
| VervetAGM         | CCAAAAAGTTGTCTAGTGTCTTTTCCACTTCTGTGTTGAATTTTTTAGTATAATGCATTTTGTTCCTTCATCTCTGCC |       |       |       |       |       |       |       | 68130 |
| Gorilla           | -----TTGTCTAGTGTCTTTTCCACTTCTGTGTTGAATTTTTTAGTATAACGCATTTTGTTCCTTCATCTCTGCC    |       |       |       |       |       |       |       | 66945 |
| GrabEatingMacaque | CCAAAAATGTCTAGTGTCTTTTCCACTTCTGTGTTGAATTTTTTAGTATAATGCATTTTGTTCCTTCATCTCTGCC   |       |       |       |       |       |       |       | 67345 |
| Macaque           | CCAAAAATGTCTAGTGTCTTTTCCACTTCTGTGTTGAATTTTTTAGTATAATGCATTTTGTTCCTTCATCTCTGCC   |       |       |       |       |       |       |       | 68214 |
| PigTailedMacaque  | CCAAAAATGTCTAGTGTCTTTTCCACTTCTGTGTTGAATTTTTTAGTATAATGCATTTTGTTCCTTCATCTCTGCC   |       |       |       |       |       |       |       | 67064 |
| Bonobo            | -----TTGTCTAGTGTCTTTTCCACTTCTGTGTTGAATTTTTTAGTATAACGCATTTTGTTCCTTCATCTCTGCC    |       |       |       |       |       |       |       | 65516 |
| OliveBaboon       | CCAAAAATGTCTAGTGTCTTTTCCACTTCTGTGTTGAATTTTTTAGTATAATGCATTTTGTTCCTTCATCTCTGCC   |       |       |       |       |       |       |       | 66921 |
| Orangutan         | -----TTGTCTAGTGTCTTTTCCACTTCTGTGTTGAATGTTTTTAGTATAACGCATTTTGTTCCTTATCTCTGCC    |       |       |       |       |       |       |       | 67346 |

| Majority          | TCATAAGAAAAAGGAAAAAA-TGTTTAGCCTTTCCTAAGTGACTTCATTTTTT-----                     |       |       |       |       |       |       |       |       |
|-------------------|--------------------------------------------------------------------------------|-------|-------|-------|-------|-------|-------|-------|-------|
|                   | 81210                                                                          | 81220 | 81230 | 81240 | 81250 | 81260 | 81270 | 81280 |       |
| Human             | TCATAAGAAAAAGGAAAAAG-TGTTTAGCCTTTCCTAAGTGACTTCTTTTTTTT-----                    |       |       |       |       |       |       |       | 66459 |
| Coquerel'sSifaka  | TCATGACCTGAGTGAAAT---TTTTTAAAAAGTAATAATAAATTTTGCTTTT-----                      |       |       |       |       |       |       |       | 54615 |
| Ma'sNightMonkey   | TCATAGAATAGAGGAAAAAATATTTAGCCTTTCCTAAATGACTTCATGTTTT-----                      |       |       |       |       |       |       |       | 61903 |
| VervetAGM         | TCATAAGAAAAAGGAAAAAA-TGTTTAGCCTTTCCTAAGTGACTTCATTTTTT-----                     |       |       |       |       |       |       |       | 68182 |
| Gorilla           | TCATAAGAAAAAGGAAAAAG-TGTTTAGCCTTTCCTAAGTGACTTCTTTTTTTT-----                    |       |       |       |       |       |       |       | 66998 |
| GrabEatingMacaque | TCATAAGAAAAAGGAAAAAA-TGTTTAGCCTTTCCTAAGTGACTTCATTTTTTTTTTTTTTTTTTTTGAGAC       |       |       |       |       |       |       |       | 67424 |
| Macaque           | TCATAAGAAAAAGGAAAAAA-TGTTTAGCCTTTCCTAAGTGACTTCATTTTTTTTTTTTTTTTTTT-----TTGAGAC |       |       |       |       |       |       |       | 68286 |
| PigTailedMacaque  | TCATAAGAAAAAGGAAAAAA--TGTTTAGCCTTTCCTAAGTGACTTCATTTTTT-----                    |       |       |       |       |       |       |       | 67115 |
| Bonobo            | TCATAAGAAAAAGGAAAAAG-TGTTTAGCCTTTCCTAAGTGACTTCTTTTTTTT-----                    |       |       |       |       |       |       |       | 65568 |
| OliveBaboon       | TCATAAGAAAAAGGAAAAAA-TGTTTAGCCTTTCCTAAGTGACTTCATTT-----                        |       |       |       |       |       |       |       | 66970 |
| Orangutan         | TCATAAGAAAAAGGAAAAAA-TGTTTAGCCTTTCCTAAGTGACTCCATTTTTTT-----                    |       |       |       |       |       |       |       | 67399 |

| Majority          | -----                                                                             |       |       |       |       |       |       |       |       |
|-------------------|-----------------------------------------------------------------------------------|-------|-------|-------|-------|-------|-------|-------|-------|
|                   | 81290                                                                             | 81300 | 81310 | 81320 | 81330 | 81340 | 81350 | 81360 |       |
| Human             | -----                                                                             |       |       |       |       |       |       |       | 66459 |
| Coquerel'sSifaka  | -----                                                                             |       |       |       |       |       |       |       | 54615 |
| Ma'sNightMonkey   | -----                                                                             |       |       |       |       |       |       |       | 61903 |
| VervetAGM         | -----                                                                             |       |       |       |       |       |       |       | 68182 |
| Gorilla           | -----                                                                             |       |       |       |       |       |       |       | 66998 |
| GrabEatingMacaque | GGAGTCTCGCTCTGTCCACCCAGGCTGGAGTGCAGTGGCCGGATCTCAGCTCACTGCAAGCTCTGCCTCCCGGGTTTACGC |       |       |       |       |       |       |       | 67504 |
| Macaque           | GGAGTCTCGCTCTGTCCACCCAGGCTGGAGTGCAGTGGCCGGATCTCAGCTCACTGCAAGCTCTGCCTCCCGGGTTTACGC |       |       |       |       |       |       |       | 68366 |
| PigTailedMacaque  | -----                                                                             |       |       |       |       |       |       |       | 67115 |
| Bonobo            | -----                                                                             |       |       |       |       |       |       |       | 65568 |
| OliveBaboon       | -----                                                                             |       |       |       |       |       |       |       | 66970 |
| Orangutan         | -----                                                                             |       |       |       |       |       |       |       | 67399 |

Tuesday, May 03, 2022 06:16 PM

| Majority          | -----                                                                          |       |       |       |       |       |       |       |       |
|-------------------|--------------------------------------------------------------------------------|-------|-------|-------|-------|-------|-------|-------|-------|
|                   | 81370                                                                          | 81380 | 81390 | 81400 | 81410 | 81420 | 81430 | 81440 |       |
| Human             | -----                                                                          |       |       |       |       |       |       |       | 66459 |
| Coquerel'sSifaka  | -----                                                                          |       |       |       |       |       |       |       | 54615 |
| Ma'sNightMonkey   | -----                                                                          |       |       |       |       |       |       |       | 61903 |
| VervetAGM         | -----                                                                          |       |       |       |       |       |       |       | 68182 |
| Gorilla           | -----                                                                          |       |       |       |       |       |       |       | 66998 |
| GrabEatingMacaque | CATTCTCCTGCCTCAGCCTCCCGAGTAGCTGGGACTACAGGCACCCGCCATCTCCCCGGCTAATTTTTGTATTTTTTA |       |       |       |       |       |       |       | 67584 |
| Macaque           | CATTCTCCTGCCTCAGCCTCCCGAGTAGCTGGGACTACAGGCACCCGCCATCTCCCCGGCTAATTTTTGTATTTTTTA |       |       |       |       |       |       |       | 68446 |
| PigTailedMacaque  | -----                                                                          |       |       |       |       |       |       |       | 67115 |
| Bonobo            | -----                                                                          |       |       |       |       |       |       |       | 65568 |
| OliveBaboon       | -----                                                                          |       |       |       |       |       |       |       | 66970 |
| Orangutan         | -----                                                                          |       |       |       |       |       |       |       | 67399 |

| Majority          | -----                                                                          |       |       |       |       |       |       |       |       |
|-------------------|--------------------------------------------------------------------------------|-------|-------|-------|-------|-------|-------|-------|-------|
|                   | 81450                                                                          | 81460 | 81470 | 81480 | 81490 | 81500 | 81510 | 81520 |       |
| Human             | -----                                                                          |       |       |       |       |       |       |       | 66459 |
| Coquerel'sSifaka  | -----                                                                          |       |       |       |       |       |       |       | 54615 |
| Ma'sNightMonkey   | -----                                                                          |       |       |       |       |       |       |       | 61903 |
| VervetAGM         | -----                                                                          |       |       |       |       |       |       |       | 68182 |
| Gorilla           | -----                                                                          |       |       |       |       |       |       |       | 66998 |
| GrabEatingMacaque | GTAGAGACGGGGTTTCACCGTGTAGCCAGGATGGTCTCGATCTCCTGACCTCGTGATCCGCCCGTCTCGGCCTCCCAA |       |       |       |       |       |       |       | 67664 |
| Macaque           | GTAGAGACGGGGTTTCACCGTGTAGCCAGGATGGTCTCGATCTCCTGACCTCGTGATCCGCCCGTCTCGGCCTCCCAA |       |       |       |       |       |       |       | 68526 |
| PigTailedMacaque  | -----                                                                          |       |       |       |       |       |       |       | 67115 |
| Bonobo            | -----                                                                          |       |       |       |       |       |       |       | 65568 |
| OliveBaboon       | -----                                                                          |       |       |       |       |       |       |       | 66970 |
| Orangutan         | -----                                                                          |       |       |       |       |       |       |       | 67399 |

| Majority          | -----ATCTGTTTTAATGTTTTTGCATCTTGTT                                                |       |       |       |       |       |       |       |       |
|-------------------|----------------------------------------------------------------------------------|-------|-------|-------|-------|-------|-------|-------|-------|
|                   | 81530                                                                            | 81540 | 81550 | 81560 | 81570 | 81580 | 81590 | 81600 |       |
| Human             | -----ATCTGTTTTAATGTTTTTGCATCTTGTT                                                |       |       |       |       |       |       |       | 66487 |
| Coquerel'sSifaka  | -----TT                                                                          |       |       |       |       |       |       |       | 54617 |
| Ma'sNightMonkey   | -----ACCTGTTTGAATGTTTTTACATCTTGTT                                                |       |       |       |       |       |       |       | 61931 |
| VervetAGM         | -----ATCTGTTTTAATGTTTTTGCATCTTGTT                                                |       |       |       |       |       |       |       | 68210 |
| Gorilla           | -----ATCTGTTTTAATGTTTTTGCATCTTGTT                                                |       |       |       |       |       |       |       | 67026 |
| GrabEatingMacaque | GTGCTGGGATTACAGGCTTGAGCCACCGCGCCTGGCTGTGACTTCATTTTTTATCTGTTTTAATGTTTTTGCATCTTGTT |       |       |       |       |       |       |       | 67744 |
| Macaque           | GTGCTGGGATTACAGGCTTGAGCCACCGCGCCCGGCTGTGACTTCATTTTTTATCTGTTTTAATGTTTTTGCATCTTGTT |       |       |       |       |       |       |       | 68606 |
| PigTailedMacaque  | -----ATCTGTTTTAATGTTTTTGCATCTTGTT                                                |       |       |       |       |       |       |       | 67143 |
| Bonobo            | -----ATCTGTTTTAATGTTTTTGCATCTTGTT                                                |       |       |       |       |       |       |       | 65596 |
| OliveBaboon       | -----ATCTGTTTTAATGTTTCTGCATCTTGTT                                                |       |       |       |       |       |       |       | 66998 |
| Orangutan         | -----ATCTGTTTTAATGTTTTTGCATCTTGTT                                                |       |       |       |       |       |       |       | 67427 |

Tuesday, May 03, 2022 06:16 PM

| Majority          | ATAACTGGGCTTTTAAAGTATACTCAAAAATAGGTTGAAAGTAGGTGAGTTAAAGGTTTTAAAAATCAGATAATGGACCC  |       |       |       |       |       |       |       |       |
|-------------------|-----------------------------------------------------------------------------------|-------|-------|-------|-------|-------|-------|-------|-------|
|                   | 81610                                                                             | 81620 | 81630 | 81640 | 81650 | 81660 | 81670 | 81680 |       |
| Human             | ATAACTGGGCTTTTAACTATACTCAAAAATAGGTTAAAAGTAGGTGAGTTAAAGGTTTTAAAAATCAGATAATGGACCC   |       |       |       |       |       |       |       | 66567 |
| Coquerel'sSifaka  | TGAGACAGGGTCTCCTCTGTCACTGGGCTAGAG-CGCGGTGGCGAGATCATAGCTCACAGCAACCTCAAACCTC---CT   |       |       |       |       |       |       |       | 54693 |
| Ma'sNightMonkey   | ACAACCTGGACTTTTAAAGTATACTCAAAAATAGGTTAAAAGTAGGTGAGTTACGGTTTTTAAACATTGTTTACAG----T |       |       |       |       |       |       |       | 62007 |
| VervetAGM         | ATAACTGGGCTTTTAAAGTATACTCAAAAATAGGTTGAAAGTAGGTGAGTGAAAGGTTTTAAAAATCAGATAATGGACCC  |       |       |       |       |       |       |       | 68290 |
| Gorilla           | ATAACTGGGCTTTTAACTATACTCAAAAATAGGTTAAAAGTAGGTGAGTTAAAGGTTTTAAAAATCAGATAATGGACCC   |       |       |       |       |       |       |       | 67106 |
| GrabEatingMacaque | ATAACTGAGCTTTTAAAGTATACTCAAAAATAGGTTGAAAGTAGGTGAGTTAAAGGTTTTAAAAATCAGATAATGGACCC  |       |       |       |       |       |       |       | 67824 |
| Macaque           | ATAACTGAGCTTTTAAAGTATACTCAAAAATAGGTTGAAAGTAGGTGAGTTAAAGGTTTTAAAAATCAGATAATGGACCC  |       |       |       |       |       |       |       | 68686 |
| PigTailedMacaque  | ATAACTGAGCTTTTAAAGTATACTCAAAAATAGGTTGAAAGTAGGTGAGTTAAAGGTTTTAAAAATCAGATAATGGACCC  |       |       |       |       |       |       |       | 67223 |
| Bonobo            | ATAACTGGGCTTTTAACTATACTCAAAAATAGGTTAAAAGTAGGTGAGTTAAAGGTTTTAAAAATCAGATAATGGACCC   |       |       |       |       |       |       |       | 65676 |
| OliveBaboon       | ATAACTGAGCTTTTAAAGTATACTCAAAAACAGGTTGAAAATAGGTGAGTTAAAGGTTTTAAAAATCAGATAATGGACCC  |       |       |       |       |       |       |       | 67078 |
| Orangutan         | ATAACTGGGCTTTTAACTATACTAAAAATAGGT-AAAAGTAGGTAGTTAAAGGTTTTAAAAATCAGATAATGGACCC     |       |       |       |       |       |       |       | 67506 |

| Majority          | AAGTTTTGATAAATCACAAGAGATAACCATTTATTTTCATATTTTTTATGTAATAACATGTTTCTGTACAAAATTTAAAT  |       |       |       |       |       |       |       |       |
|-------------------|-----------------------------------------------------------------------------------|-------|-------|-------|-------|-------|-------|-------|-------|
|                   | 81690                                                                             | 81700 | 81710 | 81720 | 81730 | 81740 | 81750 | 81760 |       |
| Human             | TGGTTTTGATAAATCACAAGAGATAACCATTTATTTTCATATTTTTTATGTAATAACATGTTTCTGTACAAAATTTAAAT  |       |       |       |       |       |       |       | 66647 |
| Coquerel'sSifaka  | GGGCTCAAGCAATCCTACTGCCTCA-----GCCTCCCAAGTAGCTG-----GGAC                           |       |       |       |       |       |       |       | 54738 |
| Ma'sNightMonkey   | GACATCCAGTATGGCATGAGTGAGG-----T---CATGCCTTTTAGATGAATA-----A---CTAAATC             |       |       |       |       |       |       |       | 62060 |
| VervetAGM         | AAGTTTTGATAAATCACAAGAGATAACCATTTATTTTATATTTTTAATGTAATAACATGTTTCTGTACAAAATTTAAAT   |       |       |       |       |       |       |       | 68370 |
| Gorilla           | TGGTTTTGATAAATCACAAGAGATAACCATTTATTTTCATATTTTTTATGTAATAACATGTTTCTGTACAAAATTTAAAT  |       |       |       |       |       |       |       | 67186 |
| GrabEatingMacaque | AAGTTTTGATAAATCACAAGAGATAACCATTTATTTTAAATATTTTTAATGTAATAACATGTTTTTGTACAAAATTTAAAT |       |       |       |       |       |       |       | 67904 |
| Macaque           | AAGTTTTGATAAATCACAAGAGATAACCATTTATTTTAAATATTTTTAATGTAATAACATGTTTTTGTACAAAATTTAAAT |       |       |       |       |       |       |       | 68766 |
| PigTailedMacaque  | AAGTTTTGATAAATCACAAGAGATAACCATTTATTTTAAATATTTTTAATGTAATAACATGTTTTTGTACAAAATTTAAAT |       |       |       |       |       |       |       | 67303 |
| Bonobo            | TGGTTTTGATAAATCACAAGAGATAACCATTTATTTTCATATTTTTTATGTAATAACATGTTTCTTTACAAAATTTAAAT  |       |       |       |       |       |       |       | 65756 |
| OliveBaboon       | AAGTTTTGATAAATCACAAGAGATAACCATTTATTTTATATTTTTAATGTAATAACATGTTTCTGTACAAAATTTAAAT   |       |       |       |       |       |       |       | 67158 |
| Orangutan         | TGGGTTTTGATAAATCAAAGAGATAACCGTTTATTTTATATTTTTTATGTAATAACATGTTTCTGTACAAAATTTAAAT   |       |       |       |       |       |       |       | 67586 |

| Majority          | TGCTCTGTATTTGCAGATTTGCATTATCTTTTATGTAATTGACATTTTACTTAGAATTTGTTTTAAAAATATAGTTTTAA |       |       |       |       |       |       |       |       |
|-------------------|----------------------------------------------------------------------------------|-------|-------|-------|-------|-------|-------|-------|-------|
|                   | 81770                                                                            | 81780 | 81790 | 81800 | 81810 | 81820 | 81830 | 81840 |       |
| Human             | TGCTCTGTATTTGCAGATTTGCATTATCTTTTATGTAATTGACATTTTACTTAGAATTTGTTTTAAAAGATAGCTTTAA  |       |       |       |       |       |       |       | 66727 |
| Coquerel'sSifaka  | TA-TGGGCATGCGC-----CAC--CATGCCAGC-TAATTTTTCTATGTGTGTTAG                          |       |       |       |       |       |       |       | 54787 |
| Ma'sNightMonkey   | TTTTCTGTGTTT-----CTATTCCTCTAATTA----TTTAATCAGA-TGACTTCAACAAAATAGTAGTGA           |       |       |       |       |       |       |       | 62120 |
| VervetAGM         | TGCTCTGTATTTGCAGATTTGCATTATCTTTTATGTAATTGACATTTTACTTAGAATTTGTTTTAAAAGATAGCTTTAA  |       |       |       |       |       |       |       | 68450 |
| Gorilla           | TGCTCTGTATTTGCAGATTTGCATTATCTTTTATGTAATTGACATTTTACTTAGAATTTGTTTTAAAAGATAGCTTTAA  |       |       |       |       |       |       |       | 67266 |
| GrabEatingMacaque | TGCTCTGTATTTGCAGATTTGCATTATCTTTTATGTAATTGATATTTTACTTAGAATTTGTTTTAAAATATAGTTTTAA  |       |       |       |       |       |       |       | 67984 |
| Macaque           | TGCTCTGTATTTGCAGATTTGCATTATCTTTTATAGTAATTGATATTTTACTTAGAATTTGTTTTAAAATATAGTTTTAA |       |       |       |       |       |       |       | 68846 |
| PigTailedMacaque  | TGCTCTGTATTTGCAGATTTGCATTATCTTTTATGTAATTGATATTTTACTTAGAATTTGTTTTAAAATACAGTTTTAA  |       |       |       |       |       |       |       | 67383 |
| Bonobo            | TGCTCTGTATTTGCATATTTGCATTATGTTTATGTAATTGACATTTTACTTAGAATTTGTTTTAAAAGATAGCTTTAA   |       |       |       |       |       |       |       | 65836 |
| OliveBaboon       | TGCTCTGTATTTGCAGATTTGCATTATCTTTTATGTAATTGATATTTTACTTAGAATTTGTTTTAAAATATAGTTTTAA  |       |       |       |       |       |       |       | 67238 |
| Orangutan         | TGCTCTGTATTTGCAGATTTGCATTATCTTTTAGTGAATTGACATTTTACTTAGAATTTGTTTTAAAAGATAGTTTTAA  |       |       |       |       |       |       |       | 67666 |

Tuesday, May 03, 2022 06:16 PM

| Majority          | TACCTGCGTAGCATGTTAGTGGATATGTTGTACCTTTGAAAGTGGACATGTAGGCTGTTCCATACTTTTTATTAAACAC   |       |
|-------------------|-----------------------------------------------------------------------------------|-------|
|                   | 81850 81860 81870 81880 81890 81900 81910 81920                                   |       |
| Human             | TACCTGCGTAGCATGTTATGGGTATGCCATACCTTTGAAAGTGGACATGTAGGCTATTCCATACTTTTTATTAAACAC    | 66807 |
| Coquerel'sSifaka  | TT---GTCCAGCTC-----ATTTCTTTCTATTTTTAGTAAAGACAG                                    | 54825 |
| Ma'sNightMonkey   | TA-----GGAT-----TAATTTCTGCTGAGTCTTCCTCAA-----                                     | 62152 |
| VervetAGM         | TACCTGCGTAGCATGTTAGTGGATATGTTGTACCTTTGAAAGTGAACATGTAGGCTGTTCCATACTTTTTATTAAACAC   | 68530 |
| Gorilla           | TACCTGCGTAGCATGTTATGGGTATGCCGTACCTTTGAAAGTGGACAAGTAGGCTATTCCATACTTTTTATTAAACAC    | 67346 |
| GrabEatingMacaque | TACCTGCATAGCATGTTAGTGGATATGTTGTACCTTTGAAAGTGGACATGTAGGCTGTTCCATACTTTTTATTAAACAC   | 68064 |
| Macaque           | TACCTGCATAGCATGTTAGTGGATATGTTGTACCTTTGAAAGTGGACATGTAGGCTGTTCCATACTTTTTATTAAACAC   | 68926 |
| PigTailedMacaque  | TACCTGCATAGCATGTTAGTGGATATGTTGTACCTTTGAAAGTGGACATGTAGGCTGTTCCATACTTTTTATTAAACAC   | 67463 |
| Bonobo            | TACCTGCGTAGCATGTTATGGGTATGCCATACCTTTGAAAGTGGACATGTAGGCTATTCCATACTTTTTATTAAACAC    | 65916 |
| OliveBaboon       | TACCTGCATAGCATGTTAGTGGATATGTTGTACCTTTGAAAGTGGACATGTAGGCTGTTCCATACTTTTTATTAAACATAC | 67318 |
| Orangutan         | TACCTGTGTAGCATGTTATGAGTATGTCGTACCTTTGACAGTGGACATGTAGGCTATTCCATACTTTTTATTAAACAC    | 67746 |

| Majority          | CCTTGTA CTTTTTGCCTCTCAAATTATTTCTTAGACTAGATTCCTAGAATTAGAATTATTGGGTCAAAGAAAATGTTA |       |
|-------------------|---------------------------------------------------------------------------------|-------|
|                   | 81930 81940 81950 81960 81970 81980 81990 82000                                 |       |
| Human             | CCTTGTA CTTTTTGCCTCTCAAATTATTTCTTAGACTAGATTCCTAGAATTAGAATTATTGGGTCAAAGAAAATGTTA | 66887 |
| Coquerel'sSifaka  | TCTCACTCTTGCT-----CAGTCTGGTCT-----TGAACCTCTGAGCT-----                           | 54863 |
| Ma'sNightMonkey   | --TGGTACTTGTT-----CAAATGCAAT-----AATTGATAGAAT---ATTATT---TCAAAGATTTTGTA         | 62208 |
| VervetAGM         | CCTTGTA CTTTTTGCCTCTCAAATTATTTCTTAGATTAGATTCCTAGAATTAGAATTATTGGCTCAAAGAAAATGTTA | 68610 |
| Gorilla           | CCTTGTA CTTTTTGCCTGTCAAATTATTTCTTAGACTAGATTCCTAGAATTAGAATTATTGGGTCAAAGAAAATGTTA | 67426 |
| GrabEatingMacaque | CCTTGTA CTTTTTGCCTCTCAAATTATTTCTTAGACTAGATTCCTAGAATTAGAATTATTGGGTCAAAGAAAATGTTA | 68144 |
| Macaque           | CCTTGTA CTTTTTGCCTCTCAAATTATTTCTTAGACTAGATTCCTAGAATTAGAATTATTGGGTCAAAGAAAATGTTA | 69006 |
| PigTailedMacaque  | CCTTGTA CTTTTTGCCTCTCAAATTATTTCTTAGACTAGATTCCTAGAATTAGAATTATTGGGTCAAAGAAAATGTTA | 67543 |
| Bonobo            | CCTTGTA CTTTTTGCCTCTCAAATTATTTCTTAGACTAGATTCCTAGAATTAGAATTATTGGGTCAAAGAAAATGTTA | 65996 |
| OliveBaboon       | CCTTGTA CTTTTTGCCTCTCAAATTATTTCTTAGACTAGATTCCTAGAATTAGAATTATTGGGTCAAAGAAAATGTTA | 67398 |
| Orangutan         | CCTTGTA CTTTTTGCCTCTCAAATTATTTCTTAGACTAGATTCCTAGGATTAGAATTATTGGGTCAAAGAAAATGTTA | 67826 |

| Majority          | AAGCCTATTTACATTATTTGCAAATTTCTTCATCTAAAGGTGATATTAACCTTAACTAACATTAATTATATATGAGGCTG   |       |
|-------------------|------------------------------------------------------------------------------------|-------|
|                   | 82010 82020 82030 82040 82050 82060 82070 82080                                    |       |
| Human             | AAGCCTGTTTACTTTATTTGCAAATTTCTTCATCTAAAGGTGATATTAACCTTAACTAACATTAATTATATATGAGGCTG   | 66967 |
| Coquerel'sSifaka  | --C-----AAA--C-----GAT-----CCA-----                                                | 54874 |
| Ma'sNightMonkey   | GAA-----C-----ACAAAT-----AT--AA--GGTGATACT--CTTCTGCTAA-----ATATTTGTAGTTA           | 62254 |
| VervetAGM         | AAG-----ACATTATTTGCAAATTTCTTCATCTAAAGGTGATATTAACCTTAACTAACATTAATTATATATGAGGCTG     | 68683 |
| Gorilla           | AAGCCTTTTTACTTTATTTGCAAATTTCTTCATCTAAAGGTGATATTAACCTTGAACCTAACAGTAATTATATATGAGGCTG | 67506 |
| GrabEatingMacaque | AAGCCTATTTACATTATTTGCAAATTTCTTCATCTAAAGGTGATATTAACCTTAACTAACATTAATTATATATGAGGCTG   | 68224 |
| Macaque           | AAGCCTATTTACATTATTTGCAAATTTCTTCATCTAAAGGTGATATTAACCTTAACTAACATTAATTATATATGAGGCTG   | 69086 |
| PigTailedMacaque  | AAGCCTATTTACATTATTTGCAAATTTCTTCATCTAAAGGTGATATTAACCTTAACTAACATTAATTATATATGAGGCTG   | 67623 |
| Bonobo            | AAGCGTATTTACTTTATTTGCAAATTTCTTCATCTAAAGGTGATATTAACCTTAACTAACATTAATTATATATGAGGCTG   | 66076 |
| OliveBaboon       | AAGCCTATTTACATTATTTGCAAATTTCTTCATCTAAAGGTGATATTAACCTTAACTAACATTAATTATATATGAGGCTG   | 67478 |
| Orangutan         | AAGCCTATTTACATTATTTGCAAATTTCTTCATCTAAAGGTGATATTAACCTTAACTAACATTAATTATATATGAGGCTG   | 67906 |

Tuesday, May 03, 2022 06:16 PM

| Majority          | GGTGTCTACTTTTTCCCTACCAGCATATTTTAAATTCACAAGATTAATTTGATAGGAAAATGTCTATTATTTT      |       |       |       |       |       |       |       |       |
|-------------------|--------------------------------------------------------------------------------|-------|-------|-------|-------|-------|-------|-------|-------|
|                   | 82090                                                                          | 82100 | 82110 | 82120 | 82130 | 82140 | 82150 | 82160 |       |
| Human             | GGTGTCTACTTTTTCCCTGCCAGCATACTATTTTAAATTCACAAGATTAATTTGATAGGCAAATGCCT---ATTTT   |       |       |       |       |       |       |       | 67044 |
| Coquerel'sSifaka  | -----CCTGCCTTGGCTCC--CAGAGTGTAGGATTATAGGCTAAGATATTAATTTGATAAGAAAATGTCTA-----TT |       |       |       |       |       |       |       | 54942 |
| Ma'sNightMonkey   | GGG---CTTCCCTTTACCTT---G--TATGATTTTATAGAAATAGCT-----ACTTGACTG--AA-----TTT      |       |       |       |       |       |       |       | 62306 |
| VervetAGM         | GGTGTCTACTTTTTCCCTACCAGCATATTTTAAATTCACAAGATTAATTTGATAGGAAAATGTCTATTATTTT      |       |       |       |       |       |       |       | 68763 |
| Gorilla           | GGTGTCTACTTTTTCCCTGCCAGCATACTACTTTTTAAATTCACAAGATTAATTTGATAGGCAAATGTCTATTATTTT |       |       |       |       |       |       |       | 67586 |
| GrabEatingMacaque | GGTGTCTACTTTTTCCCTACCAGCATATTTTAAATTCACAAGATTAATTTGATAGGAAAATGTCTATTATTTT      |       |       |       |       |       |       |       | 68304 |
| Macaque           | GGTGTCTACTTTTTCCCTACCAGCATATTTTAAATTCACAAGATTAATTTGATAGGAAAATGTCTATTATTTT      |       |       |       |       |       |       |       | 69166 |
| PigTailedMacaque  | GGTGTCTACTTTTTCCCTACCAGCATATTTTAAATTCACAAGATTAATTTGATAGGAAAATTTCTATTATTTT      |       |       |       |       |       |       |       | 67703 |
| Bonobo            | GGTGTCTACTTTTTCCCTGCCAGCATACTATTTTAAATTCACAAGATTAATTTGATAGGCAAATGTCTGTTATTTT   |       |       |       |       |       |       |       | 66156 |
| OliveBaboon       | GGTGTCTACTTTTTCCCTACCAGCATATTTTAAATTCACAAGATTAATTTGATAGGAAAATGTCTATTATTTT      |       |       |       |       |       |       |       | 67558 |
| Orangutan         | GGTGTCTACTTTTTCCCTACCAGCATACTATTTTAAATTCACAAGATTAATTTGATAGGAAAATGTCTA-----TT   |       |       |       |       |       |       |       | 67981 |

| Majority          | AATTTCTGTTAAGATTTAGTTTGCAGTCTTTAAATG-TTTATTTGACAGTCACAATTCCTAAATGCTTACCTGCATTC  |       |       |       |       |       |       |       |       |
|-------------------|---------------------------------------------------------------------------------|-------|-------|-------|-------|-------|-------|-------|-------|
|                   | 82170                                                                           | 82180 | 82190 | 82200 | 82210 | 82220 | 82230 | 82240 |       |
| Human             | AATTTCTGTTAAGATTTAGTTTACAATCTTTAAATG-TTTATTTGATAGTCACAATTTGCTAAATGCTTGCTGCATTC  |       |       |       |       |       |       |       | 67123 |
| Coquerel'sSifaka  | ATTTTCTTTTATAATCTAGTTTGCAGTTGTTAAGTG-CTTATTCAGTATTTACAATTCCTAAATGGTTATCTGCATTC  |       |       |       |       |       |       |       | 55021 |
| Ma'sNightMonkey   | AATTACC-TTAGAATCAGTACTATAAATTTAATTTGACTTATTTTACA-CAGTAATCTTTAAG--ACTAACATTTATCT |       |       |       |       |       |       |       | 62382 |
| VervetAGM         | AATTTCTGTTAAGATTTAGTTTGCAGTCTTTAAATG-TTTATTTGACAGTCACAATTCCTAAATGCTTACCTGCATTC  |       |       |       |       |       |       |       | 68842 |
| Gorilla           | AATTTCTGTTAAGATTTAGTTTACAATCTTTAAATG-TTTATTTGATAGTCACAATTCGCTAAATGCTTGCTGCATTC  |       |       |       |       |       |       |       | 67665 |
| GrabEatingMacaque | AATTTCTGTTAAGATTTAGTTTGCAGTCTTTAAATG-TTTATTTGACAGTCACAATTCCTAAATGCTTACCTGCATTC  |       |       |       |       |       |       |       | 68383 |
| Macaque           | AATTTCTGTTAAGATTTAGTTTGCAGTCTTTAAATG-TTTATTTGACAGTCACAATTCCTAAATGCTTACCTGCATTC  |       |       |       |       |       |       |       | 69245 |
| PigTailedMacaque  | AATTTCTGTTAAGATTTAGTTTGCAGTCTTTAAATG-TTTATTTGACAGTCACAATTCCTAAATGCTTACCTGCATTC  |       |       |       |       |       |       |       | 67782 |
| Bonobo            | AATTTCTGTTAAGATTTAGTTTACAGTCTTTAAATG-TTTATTTGATAGTCACAATTCGCTAAATGCTTGCTGCATTC  |       |       |       |       |       |       |       | 66235 |
| OliveBaboon       | AATTTCTGTTAAGATTTAGTTTGCAGTCTTTAAATG-TTTATTTGACAGTCACAATTCCTAAATGCTTACCTGCATTC  |       |       |       |       |       |       |       | 67637 |
| Orangutan         | AATTTCTGTTAAGATTTAGTTTACAATCTTTAAATG-TTTATTTGATAGTCACAATTCCTAAATTTCTTGCTGCATTC  |       |       |       |       |       |       |       | 68060 |

| Majority          | TTTCTGTTAGGATGTACAGTAATTCCTATAAAAATGCGTAGTAAGGATATTAATATGCATATTTTGGATGAGCCAAGCCTT   |       |       |       |       |       |       |       |       |
|-------------------|-------------------------------------------------------------------------------------|-------|-------|-------|-------|-------|-------|-------|-------|
|                   | 82250                                                                               | 82260 | 82270 | 82280 | 82290 | 82300 | 82310 | 82320 |       |
| Human             | TTTCTGTTAGGATGTACGGTAATTCCTATAAAAATGCATAGTAAGGATATTAATATGCATATTTTGGATGAGCCAAGCCTT   |       |       |       |       |       |       |       | 67203 |
| Coquerel'sSifaka  | CTTCTATTGGGATGTACAGTAATTCCTGATAAAAATGCTTATAAATGATATCA-TGTTTCATATTTGGTATGAGTTGAGCCTT |       |       |       |       |       |       |       | 55100 |
| Ma'sNightMonkey   | CT-----GGTTTTCTGT--TTCTTTTAA-----TGCTAGGTGTCACA---G--TGTCTCAGA--AA-----TT           |       |       |       |       |       |       |       | 62432 |
| VervetAGM         | TTTCTGTTAGGATGTACAATAATTTTTATAAAAATGGGTAGTAAGGATATTAATATGCATATTTTGGATGAGCCAAGCCTT   |       |       |       |       |       |       |       | 68922 |
| Gorilla           | TTTCTGTTAGGATGTACGGTAATTCCTATAAAAATGCATAGGAAGGATATTAATATGCATATTTTGGATGAGCCAAGCCTT   |       |       |       |       |       |       |       | 67745 |
| GrabEatingMacaque | TTTCTGTTAGGATGTACAATAATTTTTATAAAAATGGGTAGTAAGGATATTAATATGCGTATTTTGGATAGGCCAAGCCTT   |       |       |       |       |       |       |       | 68463 |
| Macaque           | TTTCTGTTAGGATGTACAATAATTTTTATAAAAATGGGTAGTAAGGATATTAATATGCGTATTTTGGATAGGCCAAGCCTT   |       |       |       |       |       |       |       | 69325 |
| PigTailedMacaque  | TTTCTGTTAGGATGTACAATAATTTTTATAAAAATGCGTAGTAAGGATATTAATATGCGTATTTTGGATAGGCCAAGCCTT   |       |       |       |       |       |       |       | 67862 |
| Bonobo            | TTTCTGTTAGGATGTATGGTAATTCCTATAAAAATGCATAGTAAGGATATTAATATGCATATTTTGGATGAGCCAAGCCTT   |       |       |       |       |       |       |       | 66315 |
| OliveBaboon       | TTTCTGTTAGGATGTACAATAATTTTTATAAAAATGGGTAGTAAGGATATTAATATGCGTATTTTGGATGAGCCAAGCCTT   |       |       |       |       |       |       |       | 67717 |
| Orangutan         | TTTCTGTTAGGATGTACAGTAATTCCTATAAAAATGCATAGTAAGGATATTAATATGCATATTTTGGATGAGCCAAGCCTT   |       |       |       |       |       |       |       | 68140 |

Tuesday, May 03, 2022 06:16 PM

| Majority          | CAGCTTTATTACATATGTTAGAG---GTCAGTTTTTGGAAAAGTATGTTTAAATAATCTTACCTTTTTAAATAAATTGATC |       |       |       |       |       |       |       |       |
|-------------------|-----------------------------------------------------------------------------------|-------|-------|-------|-------|-------|-------|-------|-------|
|                   | 82330                                                                             | 82340 | 82350 | 82360 | 82370 | 82380 | 82390 | 82400 |       |
| Human             | CAGCTTTATTCACTTATGTTAG---GTCAGTTTTTGGAAAAGTATTTTTCAATAATCT-CTCTTTTTAAATAAATTGATC  |       |       |       |       |       |       |       | 67278 |
| Coquerel'sSifaka  | CAGCTTTATTACCTATTTTACTGGTCACTGTTTTGGAAAAGTATTTTTAAATAATTT-ATCTCTTAAATGAATTGATC    |       |       |       |       |       |       |       | 55179 |
| Ma'sNightMonkey   | GTAATTTGTTCAAAGAAAGGAGA---CTGAGTATTTGTAA--TGAGTTAAA--ATCTGACATCT--AAATACATAATC    |       |       |       |       |       |       |       | 62503 |
| VervetAGM         | CAGCTTTATTACATATGTTAG---GTCAGTTTTTGGAAAAGTATGTTTAAATAATCTTACCTTTTTAAATAAATTGATC   |       |       |       |       |       |       |       | 68998 |
| Gorilla           | CAGCTTTATTGATGTTAG---GTCAGTTTTTGGAAAAGTATTTTTCAATAATCT-ATCTTTTTAAATAAATTGATC      |       |       |       |       |       |       |       | 67820 |
| GrabEatingMacaque | CAGCTTTATTACATATGTTAGACAGGTCAGTTTTTGGAAAAGTATGTTTAAATAATCTTACCTTTTTAAATAAATTGATC  |       |       |       |       |       |       |       | 68543 |
| Macaque           | CAGCTTTATTACATATGTTAGACAGGTCAGTTTTTGGAAAAGTATGTTTAAATAATCTTACCTTTTTAAATAAATTGATC  |       |       |       |       |       |       |       | 69405 |
| PigTailedMacaque  | CAGCTTTATTACATATGTTAGACAGGTCAGTTTTTGGAAAAGTATGTTTAAATAATCTTACCTTTTTAAATAAATTGATC  |       |       |       |       |       |       |       | 67942 |
| Bonobo            | CAGCTTTATTCACTTATGTTAG---GTCAGTTTTTGGAAAAGTATTTTTCAATAATCT-ATCTTTTTAAATAAATTGATC  |       |       |       |       |       |       |       | 66390 |
| OliveBaboon       | CAGCTTTATTACATATGTTAGACAGGTCAGTTTTTGGAAAAGTATGTTTAAATAATCTTACCTTTTTAAATAAATTGATC  |       |       |       |       |       |       |       | 67797 |
| Orangutan         | CAGCTTTGTTGATGTTAG---GTCAGTTTTTGGAAAAGTATTTTTAAATAATCT-ATCTTTTTAAATAAATTGATT      |       |       |       |       |       |       |       | 68215 |

| Majority          | TCAATCCCAAAGTATTCATTTGTAGGACATGAAGACACTATTTCTTCTTCATACATTTGGTGAATATTTT--GATCTC- |       |       |       |       |       |       |       |       |
|-------------------|---------------------------------------------------------------------------------|-------|-------|-------|-------|-------|-------|-------|-------|
|                   | 82410                                                                           | 82420 | 82430 | 82440 | 82450 | 82460 | 82470 | 82480 |       |
| Human             | TCAATCCCAAAGTATTCATTTGTAGGACATGAAGACACTATTTCTTCTTCATACATTTGGTGAATATTTT--GATCTC- |       |       |       |       |       |       |       | 67355 |
| Coquerel'sSifaka  | TCAATCCCAAAGGATCCATTTGCAGGACATGAAGATA---ATTTTTTTTCCACCGTTTGGTGGATATTATATGATCTTT |       |       |       |       |       |       |       | 55255 |
| Ma'sNightMonkey   | ACAAACCTGGCAGACT-ATTAGT----CATTCACATA-----TTCTGTTTCAA-----GAACACGGT--GATCAA-    |       |       |       |       |       |       |       | 62562 |
| VervetAGM         | TCAATCCCAAAGTATTCATTTGTACCACATGAAGACACTATTTCTTCTTCACACATTTGGTGAATATTT--GATCTC-  |       |       |       |       |       |       |       | 69074 |
| Gorilla           | TCAATCCCAAAGTATTCATTTGTAGGACATGAAGACACTATTTCTTCTTCATACATTTGGTGAATATTTT--GATCTC- |       |       |       |       |       |       |       | 67897 |
| GrabEatingMacaque | TCAATCCCAAAGTATTCATTTGTACGACATGAAGACACTATTTCTTCTTCATACATTTGGTGAATATTT--GATCTC-  |       |       |       |       |       |       |       | 68619 |
| Macaque           | TCAATCCCAAAGTATTCATTTGTACGACATGAAGACACTATTTCTTCTTCATACATTTGGTGAATATTT--GATCTC-  |       |       |       |       |       |       |       | 69481 |
| PigTailedMacaque  | TCAATCCCAAAGTATTCATTTGTACGACATGAAGACACTATTTCTTCTTCATACATTTGGTGAATATTT--GATCTC-  |       |       |       |       |       |       |       | 68018 |
| Bonobo            | TCAATCCCAAAGTATTCATTTGTAGGACATGAAGACACTATTTCTTCTTCATACATTTGGTGAATATTTT--GATCTC- |       |       |       |       |       |       |       | 66467 |
| OliveBaboon       | TCAATCCCAAAGTATTCATTTGTACGACATGAAGACACTATTTCTTCTTCATACATTTGGTGAATATTT--GATCTC-  |       |       |       |       |       |       |       | 67873 |
| Orangutan         | TCAATCCCAAAGTATTCATTTGTAGGACATGAAGACACTATTTCTTCTTCAGACATTTGGTGAATATTTT--GATCTC- |       |       |       |       |       |       |       | 68292 |

| Majority          | -----AGTTTCC-----ACCTTTATTTTT---GCTTTTTAAACATTTGTTTACAGTGATAT--CCAATATCGCATAAGT   |       |       |       |       |       |       |       |       |
|-------------------|-----------------------------------------------------------------------------------|-------|-------|-------|-------|-------|-------|-------|-------|
|                   | 82490                                                                             | 82500 | 82510 | 82520 | 82530 | 82540 | 82550 | 82560 |       |
| Human             | -----AGTTTCC-----ACTTCTCTTTTT---GCTTTTTAAACATTTGTTTATGGTGAATATTT--CCAATATTCATGAGT |       |       |       |       |       |       |       | 67418 |
| Coquerel'sSifaka  | AGTAGGAATTCCTTAACTGTTTTGCTCTTTATGTGGTTTTTACACACCCCTTTTACAGTGATAT--CCAATATTCATGAGT |       |       |       |       |       |       |       | 55333 |
| Ma'sNightMonkey   | -----AAAT-----CCTTGAGATTA---TATATTGAGACATCGTT-ATAATGAT-----CATTTTAT----           |       |       |       |       |       |       |       | 62610 |
| VervetAGM         | -----AGTTTCC-----ACCTTTATTTTT---GCTTTTTAAACATTTGTTTACAGTGATAT--CCAATATCCGATAAGT   |       |       |       |       |       |       |       | 69137 |
| Gorilla           | -----AGTTTCC-----ACTTTCTTTTT---GCTTTTTAAACATTTGTTTACGGTGAATATTT--CCAATATTCATGAGT  |       |       |       |       |       |       |       | 67960 |
| GrabEatingMacaque | -----AGTTTCC-----ACCTTTATTTTT---GCTTTTTAAACATTTGTTTACAGTGATAT--CCAATATCGCATAAGT   |       |       |       |       |       |       |       | 68682 |
| Macaque           | -----AGTTTCC-----ACCTTTATTTTT---GCTTTTTAAACATTTGTTTACAGTGATAT--CCAATATCGCATAAGT   |       |       |       |       |       |       |       | 69544 |
| PigTailedMacaque  | -----AGTTTCC-----ACCTTTATTTTT---GCTTTTTAAACATTTGTTTACAGTGATAT--CCAATATCGCATAAGT   |       |       |       |       |       |       |       | 68081 |
| Bonobo            | -----AGTTTCC-----ACTTTCTTTTT---GCTTTTTAAACATTTGTTTACGGTGAATATTT--CCAATATTCATGAGT  |       |       |       |       |       |       |       | 66530 |
| OliveBaboon       | -----AGTTTCC-----ACCTTTATTTTT---GCTTTTTAAACATTTGTTTACAGTGATAT--CCAATATCGCGTAAGT   |       |       |       |       |       |       |       | 67936 |
| Orangutan         | -----AGTTTCC-----ACTTTCTTTTT---GCTTTTTAAACATTTGTTTACAGTGATATATCCAATATCGCATGGGT    |       |       |       |       |       |       |       | 68357 |



Tuesday, May 03, 2022 06:16 PM

| Majority          | GAGG-TCATGCCTTTT TAGAATAGTAA-----CTAAATCTTTTCTCTA---ATTATTTAATCAGATGACTTCAA--    |       |       |       |       |       |       |       |       |
|-------------------|----------------------------------------------------------------------------------|-------|-------|-------|-------|-------|-------|-------|-------|
|                   | 82570                                                                            | 82580 | 82590 | 82600 | 82610 | 82620 | 82630 | 82640 |       |
| Human             | GAGG-TCATGCCTTTT TAGAATAATAA-----CTGAATCTTTTCTCTA---ATTATTTAATCAGATGACTTCCAG--   |       |       |       |       |       |       |       | 67483 |
| Coquerel'sSifaka  | AAAG-TCATGCCTTTTGGGAATAACTAAATCTTTTCCATCTTTCTTTCCCTACAATAACTTGTATCAGATGACTTCGAAG |       |       |       |       |       |       |       | 55412 |
| Ma'sNightMonkey   | -----CATGC---TAGGAAGTGTAG-----TTAATTT-----ATTAAGGGGT-AGATCACTTTTA--              |       |       |       |       |       |       |       | 62656 |
| VervetAGM         | GAGG-ACATGCCTTTT TAGAATAGTAA-----CTAAATCTTTTCTCTA---ATTATTTAATCAGATGACTTCAA--    |       |       |       |       |       |       |       | 69202 |
| Gorilla           | GAGG-TCATGCCTTTT TAGAATAATAA-----CTGAATCTTTTCTCTA---ATTATTTAATCAGATGACTTCCAG--   |       |       |       |       |       |       |       | 68025 |
| GrabEatingMacaque | GAGG-ACATGCCTTTT TAGAATAGTAA-----CTAAATCTTTTCTCTA---ATTATTTAATCAGATGACTTCAA--    |       |       |       |       |       |       |       | 68747 |
| Macaque           | GAGG-ACATGCCTTTT TAGAATAGTAA-----CTAAATCTTTTCTCTA---ATTATTTAATCAGATGACTTCAA--    |       |       |       |       |       |       |       | 69609 |
| PigTailedMacaque  | GAGGACATGCCTTTT TAGAATAGTAA-----CTAAATCTTTTCTCTA---ATTATTTAATCAGATGACTTCAA--     |       |       |       |       |       |       |       | 68147 |
| Bonobo            | GAGG-TCATGCCTTTT TAGAATAATAA-----CTGAATCTTTTCTCTA---ATTATTTAATCAGATGACTTCCAG--   |       |       |       |       |       |       |       | 66594 |
| OliveBaboon       | GAGG-ACATGCCTTTT TAGAATAGTAA-----CTAAATCTTTTCTCTA---ATTATTTAATCAGATGACTTCAA--    |       |       |       |       |       |       |       | 68001 |
| Orangutan         | GAGG-TCATGCCTTTT TAGAATAATAA-----CTGAATCTTTTCCGCTA---ATTATTTAATCAGATGACTTCAA--   |       |       |       |       |       |       |       | 68422 |

| Majority          | -----CAAAC TAGTATTGATGGGATTAACCTTCTGCTCAGTCTTCTCGAACAGTACTTGTTC AAAATGAAATAATTGA  |       |       |       |       |       |       |       |       |
|-------------------|-----------------------------------------------------------------------------------|-------|-------|-------|-------|-------|-------|-------|-------|
|                   | 82650                                                                             | 82660 | 82670 | 82680 | 82690 | 82700 | 82710 | 82720 |       |
| Human             | -----CAAAC TAATATTGGTGGGATTAACCTTCTGCTCAGTCTTCCAGTAACAGTACTTGTTC AAAATGAAATAATTGA |       |       |       |       |       |       |       | 67557 |
| Coquerel'sSifaka  | TAAACCAAAC TACTATTGATGGGACTCATTGCCTGCTCAGTAGTCTTCAAACAGTCTTGTTC AAAATGAAATAACTGA  |       |       |       |       |       |       |       | 55492 |
| Ma'sNightMonkey   | -----GAAA-----ATTGCTAGAAATAATTT-----TTCATGATCATGTTGTCTA                           |       |       |       |       |       |       |       | 62697 |
| VervetAGM         | -----CAAAC TAGTATTGATGGGATTAACCTTCTGCTCAGTCTTCTCGAACAGTACTTGTTC AAAATGAAATAATTGA  |       |       |       |       |       |       |       | 69276 |
| Gorilla           | -----CAAAC TAATATTGGTGGGATTAACCTTCTGCTCAGTCTTCCAGTAACAGTACTTGTTC AAAATGAAATAATTGA |       |       |       |       |       |       |       | 68099 |
| GrabEatingMacaque | -----CAAAC TAGTATTGATGGGATTAACCTTCTGCTCAGTCTTCTCGAACAGTACTTGTTC AAAATGAAGTCATTGA  |       |       |       |       |       |       |       | 68821 |
| Macaque           | -----CAAAC TAGTATTGATGGGATTAACCTTCTGCTCAGTCTTCTCGAACAGTACTTGTTC AAAATGAAGTCATTGA  |       |       |       |       |       |       |       | 69683 |
| PigTailedMacaque  | -----CAAAC TAGTATTGATGGGATTAACCTTCTGCTCAGTCTTCTCGAACAGTACTTGTTC AAAATGAAGTCATTGA  |       |       |       |       |       |       |       | 68221 |
| Bonobo            | -----CAAAC TAATATTGGTGGGATTAACCTTCTGCTCAGTCTTCCAGTAACAGTACTTGTTC AAAATGAAATAATTGA |       |       |       |       |       |       |       | 66668 |
| OliveBaboon       | -----CAAAC TAGTATTGCTGGAATTAACCTTCTGCTCAGTCTTCTCGAACAGTACTTGTTC AAAATGAAGTAATTGA  |       |       |       |       |       |       |       | 68075 |
| Orangutan         | -----CAAAC TAGTATTGGTGGGATTAACCTTCTGCCAGTCTTCTGT AACAGTACTTGTTC AAAATGAAATAATTAA  |       |       |       |       |       |       |       | 68496 |

| Majority          | -----TA-----TTTGTTTCAAAAATTTTGTAAGAACACAAATATAAGGTGATACTCTTTTGCTAAAATTTGTGTGGG   |       |       |       |       |       |       |       |       |
|-------------------|----------------------------------------------------------------------------------|-------|-------|-------|-------|-------|-------|-------|-------|
|                   | 82730                                                                            | 82740 | 82750 | 82760 | 82770 | 82780 | 82790 | 82800 |       |
| Human             | TAGAGTA-----TTTATTTCAAAAATTTT-TAAGAACACAAATATAAGGTGATACTCTTTTGCTAAA-ATTTGTGGGGGG |       |       |       |       |       |       |       | 67630 |
| Coquerel'sSifaka  | TAGAGTACCCCTTTATTTCAAAGATTTTGTAAGAACACAAATATAAGGTGATAGTCTTCCACTAAATACTTGAG--GGG  |       |       |       |       |       |       |       | 55570 |
| Ma'sNightMonkey   | -----CA-----TTC---TAAAAATTAG---AGATATTGTATACAAAG-AATATTTATTT--TAGA-----G         |       |       |       |       |       |       |       | 62745 |
| VervetAGM         | -----A-----TTTGTTTCAAAAATTTTGTAAGAACACAAATATAAGGTGATACTCTTTTGCTAAAATTTGTGTGGG    |       |       |       |       |       |       |       | 69345 |
| Gorilla           | TAGAGTA-----TTTATTTCAAAAATTTTGTAAGAACACAAATATAAGGTGATACTCTTTTGCTAAA-ATTTGTGGGGGG |       |       |       |       |       |       |       | 68173 |
| GrabEatingMacaque | -----A-----TTTGTTTCAAAAATTTTGTAAGAACACAAATATAAGGTGATACTCTTTTGCTAAAATTTGTGTGGG    |       |       |       |       |       |       |       | 68890 |
| Macaque           | -----A-----TTTGTTTCAAAAATTTTGTAAGAACACAAATATAAGGTGATACTCTTTTGCTAAAATTTGTGTGGG    |       |       |       |       |       |       |       | 69752 |
| PigTailedMacaque  | -----A-----TTTGTTTCAAAAATTTTGTAAGAACACAAATATAAGGTGATACTCTTTTGCTAAAATTTGTGTGGG    |       |       |       |       |       |       |       | 68290 |
| Bonobo            | TAGAGTA-----TTT---CAAAAATTTTGTAAGAACACAAATATAAGGTGATACTCTTTTGCTAAA-ATTTGTGGGGGG  |       |       |       |       |       |       |       | 66738 |
| OliveBaboon       | -----A-----TTTGTTTCAAAAATTTTGTAAGAACACAAATATAAGGTGATACTCTTTTGCTAAAATTTGTGTGGG    |       |       |       |       |       |       |       | 68144 |
| Orangutan         | TATAGTA-----TTTATTTCAAAAATTTTGTAAGAACACAAATATAAGGTGATACTCTTTTGCTAAA-ATCTGTGGGAGG |       |       |       |       |       |       |       | 68570 |

Tuesday, May 03, 2022 06:16 PM

| Majority          | CTTC-CTTTACCTTGTATGATTTTTATATTAGATCTAGCTACTTGACTGAATTTAATTACTTTTAGAATCAGTACTATAAA |       |       |       |           |        |       |       |       |        |        |        |       |       |       |          |       |       |
|-------------------|-----------------------------------------------------------------------------------|-------|-------|-------|-----------|--------|-------|-------|-------|--------|--------|--------|-------|-------|-------|----------|-------|-------|
|                   | 82810                                                                             | 82820 | 82830 | 82840 | 82850     | 82860  | 82870 | 82880 |       |        |        |        |       |       |       |          |       |       |
| Human             | CTTC                                                                              | CTTT  | ACCT  | TGTAT | GATTTTT   | ATATT  | AGAT  | CTAG  | CTACT | TGACT  | GAATTT | AATT   | ACTTT | TAGA  | ATCAG | TACT     | ATAAA | 67710 |
| Coquerel'sSifaka  | TTTC                                                                              | ----- | ATT   | CACT  | TTACA     | ATATAT | CTAG  | CCACT | TGATT | GAATTT | AATT   | ACT    | TATAG | AATCA | ATATT | ATAAA    | 55638 |       |
| Ma'sNightMonkey   | CTTT                                                                              | ----- | TCT   | TTT   | ATTAC     | ----   | AGAT  | TGAAT | --    | AACAG  | CGTTC  | TATCAT | GAAGT | TTTT  | AAAAG | AAAGACAA | ----  | 62809 |
| VervetAGM         | CTTT                                                                              | CTTT  | ACCT  | TGTAT | GATTTTT   | ATATT  | AGAT  | CTAG  | CTACT | TGACT  | GAATTT | AATT   | ACTTT | TAGA  | ATCAG | TACT     | ATAAA | 69424 |
| Gorilla           | CTTC                                                                              | CTTT  | ACCT  | TGTAT | GATTTTT   | ATATT  | AGAT  | CTAG  | CTACT | TGACT  | GAATTT | AATT   | ACTTT | TAGA  | ATCAG | TACT     | ATAAA | 68253 |
| GrabEatingMacaque | CTTC                                                                              | CTTT  | ACCT  | TGTAT | GATTTTT   | ATATT  | AGAT  | CTAG  | CTACT | TGACT  | GAATTT | AATT   | ACTTT | TAGA  | ATCAG | TACT     | ATAAA | 68969 |
| Macaque           | CTTC                                                                              | CTTT  | ACCT  | TGTAT | GATTTTT   | ATATT  | AGAT  | CTAG  | CTACT | TGACT  | GAATTT | AATT   | ACTTT | TAGA  | ATCAG | TACT     | ATAAA | 69831 |
| PigTailedMacaque  | CTTC                                                                              | CTTT  | ACCT  | TGTAT | GATTTTT   | ATATT  | AGAT  | CTAG  | CTACT | TGACT  | GAATTT | AATT   | ACTTT | TAGA  | ATCAG | TACT     | ATAAA | 68369 |
| Bonobo            | CTTC                                                                              | CTTT  | ACCT  | TGTAT | GATTTTT   | ATATT  | AGAT  | CTAG  | CTACT | TGACT  | GAATTT | AATT   | ACTTT | TAGA  | ATCAG | TACT     | ATAAA | 66818 |
| OliveBaboon       | CTTC                                                                              | CTTT  | ACCT  | TGTAT | GATTTTT   | ATATT  | AGAT  | CTAG  | CTACT | TGACT  | GAATTT | AATT   | ACTTT | TAGA  | ATCAG | TACT     | ATAAA | 68223 |
| Orangutan         | ATT                                                                               | CACT  | TTAC  | CTTGT | ATGATTTTT | ATATT  | AGAT  | CTAG  | CTACT | TGACT  | GAATTT | AATT   | ACTTT | TAGA  | ATCAG | TACT     | ATAAA | 68650 |

| Majority          | TTTTAATTGATTTATTTTACACAGTAATT--TTTTAAGACTAACATTTATGTCTGGCTTTTCTGTTTCCTTTAATGCTAG |        |       |       |       |        |        |        |        |         |       |      |       |        |       |       |       |       |
|-------------------|----------------------------------------------------------------------------------|--------|-------|-------|-------|--------|--------|--------|--------|---------|-------|------|-------|--------|-------|-------|-------|-------|
|                   | 82890                                                                            | 82900  | 82910 | 82920 | 82930 | 82940  | 82950  | 82960  |        |         |       |      |       |        |       |       |       |       |
| Human             | TTTT                                                                             | AATT   | GATTT | ATTTT | ACAC  | AGTA   | AATT-- | TTTT   | AAGACT | AACATTT | ATGT  | CTGG | CTTTT | CTGTT  | TTCCT | TTAAT | GCTAG | 67788 |
| Coquerel'sSifaka  | TT---                                                                            | TAACT  | TATTT | GCAT  | AGTA  | AATT-- | TTTT   | AAGACT | AGCAT  | TTATG   | TCTGG | CTCT | CTGTT | TTCCT  | TTAAT | GCTAG | 55712 |       |
| Ma'sNightMonkey   | ----                                                                             | AACAG  | ACTTT | TTGT  | AGAAA | ATAATT | GATG   | TAAA   | ATAG   | TATCAT  | TGGCT | AGGT | GAGG  | TGGCTC | ----  | A-CAC | CTG   | 62880 |
| VervetAGM         | TTTT                                                                             | AATT   | GATTT | ATTTT | ACAC  | AGTACT | --     | TTTT   | AAGACT | AACATTT | ATAT  | CTGG | CTTTT | CTGTT  | TTCCT | TCAAT | GCTAG | 69502 |
| Gorilla           | TTTT                                                                             | AATT   | GATTT | ATTTT | ACAC  | AGTA   | AATT-- | TTTT   | AAGACT | AACATTT | ATGT  | CTGG | CTTTT | CTGTT  | TTCCT | TTAAT | GCTAG | 68331 |
| GrabEatingMacaque | TTT                                                                              | GAATT  | GATTT | ATTTT | CCAC  | AGTACT | --     | TTTT   | AAGACT | AACATTT | ATAT  | CTGG | CTTTT | CTGTT  | TTCCT | TCAAT | GCTAG | 69047 |
| Macaque           | TTT                                                                              | GAATT  | GATTT | ATTTT | CCAC  | AGTACT | --     | TTTT   | AAGACT | AACATTT | ATAT  | CTGG | CTTTT | CTGTT  | TTCCT | TCAAT | GCTAG | 69909 |
| PigTailedMacaque  | TTT                                                                              | GAATT  | GATTT | ATTTT | CCAC  | AGTACT | --     | TTTT   | AAGACT | AACATTT | ATAT  | CTGG | CTTTT | CTGTT  | TTCCT | TCAAT | GCTAG | 68447 |
| Bonobo            | TTTT                                                                             | AATT   | GATTT | ATTTT | ACAC  | AGTA   | AATT-- | TTTT   | AAGACT | AACATTT | ATGT  | CTGG | CTTTT | CTGTT  | TTCCT | TTAAT | GCTAG | 66896 |
| OliveBaboon       | TTT                                                                              | GAATTT | ATTT  | ATTTT | ACAC  | AGTACT | --     | TTTT   | AAGACT | AACATTT | ATAT  | CTGG | CTTTT | CTGTT  | TTCCT | TCAAT | GCTAG | 68301 |
| Orangutan         | TTTT                                                                             | AATCG  | ATTT  | ATTTT | ACG   | AGTA   | AATT-- | TTTT   | AAGACT | AACATTT | ATGT  | CTGG | CTTTT | CTGTT  | TTCCT | TTAAT | GCTAG | 68728 |

| Majority          | GTATCACAGTGCTCAGAAAATGTAATTTGTTCAAAGAAAGGAGACTGA--GTACTTTGTAATGAGTTTAAAA-TCTGAC |       |        |        |       |       |        |       |       |         |        |       |       |        |         |      |       |       |
|-------------------|---------------------------------------------------------------------------------|-------|--------|--------|-------|-------|--------|-------|-------|---------|--------|-------|-------|--------|---------|------|-------|-------|
|                   | 82970                                                                           | 82980 | 82990  | 83000  | 83010 | 83020 | 83030  | 83040 |       |         |        |       |       |        |         |      |       |       |
| Human             | GTAT                                                                            | CACAG | TGCTC  | AGAAA  | ATGTA | ATTTG | TTCAA  | AGAA  | AGGAG | ACTGA-- | GTACT  | TTGTA | ATGAG | TTAAAA | -TCT    | GAC  | 67865 |       |
| Coquerel'sSifaka  | GGAT                                                                            | TACAG | TACCT  | CAGAAA | ATGTA | ATTTA | TTCAG  | AGA   | AGGG  | AGAC    | TACAG  | TGCTT | TGTA  | ATTAG  | TTAAAA  | -TCT | GAC   | 55791 |
| Ma'sNightMonkey   | TAAT                                                                            | CCCAG | TACTTT | GGG    | AGCGG | AG--- | GC---- | GGC   | CGATT | TATGA-- | G----- | GTAG  | -AAG  | TCA    | AGA---- | AC   | 62938 |       |
| VervetAGM         | GTAT                                                                            | CATAG | TGCTC  | AGAAA  | ATGTA | ATTTG | TTCAA  | AGAA  | AGGAG | ACTGA-- | GTACT  | TTGTA | ATGAG | TTAAAA | ATCT    | GAC  | 69580 |       |
| Gorilla           | GTAT                                                                            | CACAG | TGCTC  | AGAAA  | ATGTA | ATTTG | TTCAA  | AGAA  | AGGAG | ACTGA-- | GTACT  | TTGTA | ATGAG | TTAAAA | -TCT    | GAC  | 68408 |       |
| GrabEatingMacaque | GTAT                                                                            | CATAG | TGCTC  | AGAAA  | ATGTA | ATTTG | TTCAA  | AGAA  | AGGAG | ACTGA-- | GTACT  | TTGTA | ATGAG | TTAAAA | ATCT    | GAC  | 69125 |       |
| Macaque           | GTAT                                                                            | CATAG | TGCTC  | AGAAA  | ATGTA | ATTTG | TTCAA  | AGAA  | AGGAG | ACTGA-- | GTACT  | TTGTA | ATGAG | TTAAAA | ATCT    | GAC  | 69987 |       |
| PigTailedMacaque  | GTAT                                                                            | CATAG | TGCTC  | AGAAA  | ATGTA | ATTTG | TTCAA  | AGAA  | AGGAG | ACTGA-- | GTACT  | TTGTA | ATGAG | TTAAAA | ATCT    | GAC  | 68525 |       |
| Bonobo            | GTAT                                                                            | CACAG | TGCTC  | AGAAA  | ATGTA | ATTTG | TTCAA  | AGAA  | AGGAG | ACTGA-- | GTACT  | TTGTA | ATGAG | TTAAAA | -TCT    | GAC  | 66973 |       |
| OliveBaboon       | GTAT                                                                            | CATAG | TGCTC  | AGAAA  | ATGTA | ATTTG | TTCAA  | AGAA  | AGGAG | ACTGA-- | GTACT  | TTGTA | ATGAG | TTAAAA | ATCT    | GAC  | 68379 |       |
| Orangutan         | GTAT                                                                            | CACAG | TGCTC  | AGAAA  | ATGTA | ATTTG | TTCAA  | AGAA  | AGGAG | ACTGA-- | G----  | TGTA  | ATGAG | TTAAAA | -TCT    | GAC  | 68800 |       |

Tuesday, May 03, 2022 06:16 PM

| Majority          | ATCTAAA-TACATAATCACAAACGTGGCAGACTATTAGTCATTACACATATTCGTGTTTCAAAGAACACGGTGATCAAAAAT   |       |
|-------------------|--------------------------------------------------------------------------------------|-------|
|                   | 83050 83060 83070 83080 83090 83100 83110 83120                                      |       |
| Human             | ATCTAAAATACATAATCACAAATGTGGCCGACTATTAGTCATTACACATATTCGTGTTTCAAAGAACACAGTGATCAAAAAT   | 67945 |
| Coquerel'sSifaka  | CTCTAAA-TACTTAATCACAAACCTGGCAGACTATTAGTCATTTACATATTCGTGTTTAAAGAACAAGGTGATCAAAAAT     | 55870 |
| Ma'sNightMonkey   | AGCCTGG-----CTAACATGGTGAAAC-----CCCAT-TTCTATT--AAAGAAAATTA----CAAAAAT                | 62990 |
| VervetAGM         | ATCTAAA-TACGTAATCACAAACGTGGCAGACTATTAGTCATTACACATATTCGTGTTTCAAGAGAACACGGTGATCAAAAAT  | 69659 |
| Gorilla           | ATCTAAAATACATAATCACAAATGTGGCCGACTATTAGTCATTACATATATTCGTGTTTCAAAGAACACGGTGATCAAAAAT   | 68488 |
| GrabEatingMacaque | ATCTAAA-TACATAATCACAAACATGGCAGACTATTAGTCATTACACATATTCGTGTTTCAAAGAAAACGGTGATCAAAAAT   | 69204 |
| Macaque           | ATCTAAA-TACATAATCACAAACATGGCAGACTATTAGTCATTACACATATTCGTGTTTCAAAGAAAACGGTGATCAAAAAT   | 70066 |
| PigTailedMacaque  | ATCTAAA-TACATAATCACAAACATGGCAGACTATTAGTCATTACACATATTCGTGTTTCAAAGAAAACGGTGATCAAAAAT   | 68604 |
| Bonobo            | ATCTAAAATACATAATCACAAATGTGGCCAACACTATTAGTCATTACACATATTCGTGTTTCAAAGAACACAGTGATCAAAAAT | 67053 |
| OliveBaboon       | ATCTAAA-TACATAATCACAAACGTGGCAGACTATTAGTCATTACACATATTCGTGTTTCAAAGAACACGGTGATCAAAAAT   | 68458 |
| Orangutan         | ATCTAAAATACATAATCACAAACATGGCTGACTATTAGTCATTCCGATATTCGTGTTTCAAAGAACACGGTGATCAAAAAT    | 68880 |

| Majority          | CCTTCAGATTATAAATTGAGATATCATTATAAT----CGTTTTCTCATGTTAAGAGGTGTAGTTAATTTATTAAGGGGTA |       |
|-------------------|----------------------------------------------------------------------------------|-------|
|                   | 83130 83140 83150 83160 83170 83180 83190 83200                                  |       |
| Human             | CCTTCAGATTATAAATTGAGACATCATTATAATGGATCATTTTATCATGTTAAGAGGTGTAGTTAATTTATTAAGGGGTA | 68025 |
| Coquerel'sSifaka  | CCTCGAGATTATAAATTGAGACATCATTATAAT-GATTATTTTATCATGTTAAGAAATGTAGTTAATTTATTAAGGGATA | 55949 |
| Ma'sNightMonkey   | TAGCCAGAT-----GTGGTGGCGTGCATCTGT--A-----                                         | 63018 |
| VervetAGM         | CCTTCAGATTATAAATTGAGATAAC---ATAAT----TGCTTTCTCATGTTAAGAGGTGTAGTTAATTTATTAAGGGGTA | 69732 |
| Gorilla           | CCTTCAGATTATAAATTGAGACATCATTATAATGGATCATTTTATCATGTTAAGAGGTGTAGTTAATTTATTAAGGGGTA | 68568 |
| GrabEatingMacaque | CCTTCAGATTATAAATTGAGATATCATTATCAT----CGTTTTCTCATGTTAAGAGGTGTAGTTAATTTATTAAGGGGTA | 69280 |
| Macaque           | CCTTCAGATTATAAATTGAGATATCATTATCAT----CGTTTTCTCATGTTAAGAGGTGTAGTTAATTTATTAAGGGGTA | 70142 |
| PigTailedMacaque  | CCTTCAGATTATAAATTGAGATATCATTATAAT----CGTTTTCTCATGTTAAGAGGTGTAGTTAATTTATTAAGGGGTA | 68680 |
| Bonobo            | CCTTCAGATTATAAATTGAGACATCATTATAATAGATCATTTTATCATGTTAAGAGGTGTAGTTAATTTATTAAGGGGTA | 67133 |
| OliveBaboon       | CCTTCAGATTATAAATTGAGATATCATTATAAT----CGTTTTCTCATGTTAAGAGGTGTAGTTAATTTATTAAGGGGTA | 68534 |
| Orangutan         | CCTTCAGATTATAAATTGAGAC---ATTATAATGGATCATTTTATCATGTTAAGAGGTGTAGTTAATTTATTAAGGGGTA | 68957 |

| Majority          | GATCACTT--AGAAAAGTTGCTGGAAGTAATTTTTTCATGATCATGTTGTCTGCATTCTAAAAATTAGGAGAGAGAGTGTG |       |
|-------------------|-----------------------------------------------------------------------------------|-------|
|                   | 83210 83220 83230 83240 83250 83260 83270 83280                                   |       |
| Human             | GATCACTTTTAGAAAAATTGCTGGAAGTAATTTTTTCATGATCATGTTATCTACATTCTAAAAATTAGGAGAGAGACTGTG | 68105 |
| Coquerel'sSifaka  | GTTCACTTTTAGAAAAATTGCTAGAAAGTCATTATTCATGATCATGTTGTCTACGTTTAAAAATTAGGGCAGATAATGCA  | 56029 |
| Ma'sNightMonkey   | -ATCCC-----AGCTACTTGGGATATTGAGGCAGGAGCA--TTGCCTGAAACCGGAGCGGAGG----TTGCTGTG       | 63082 |
| VervetAGM         | GATCACTT--AGAAAAGTTGCTGGAAGTAATTTTTTCATGATCATGTTGTCTGCATTCTAAAAATTAGGAGAGAGAGTGTG | 69810 |
| Gorilla           | GATCACTTTTAGAAAAATTGCTGGAAGTAATTTTTTCATGATCATGTTATCTACATTCTAAAAATTAG-----AGTGTG   | 68641 |
| GrabEatingMacaque | GATCACTT--AGAAAAGTTGCTGGAAGTAATTTTTTCATGATCCTGTTGTCTGCATTCTAAAAATTAGGAGAGAGAGTGTG | 69358 |
| Macaque           | GATCACTT--AGAAAAGTTGCTGGAAGTAATTTTTTCATGATCCTGTTGTCTGCATTCTAAAAATTAGGAGAGAGAGTGTG | 70220 |
| PigTailedMacaque  | GATCACTT--AGAAAAGTTGCTGGAAGTAATTTTTTCATGATCCTGTTGTCTGCATTCTAAAAATTAGGAGAGAGAGTGTG | 68758 |
| Bonobo            | GATCACTTTTAGAAAAATTGCTGGAAGTAATTTTTTCATGATCATGTTATCTACATTCTAAAAATTAGGAGAGAGAGTGTG | 67213 |
| OliveBaboon       | GATCACTT--AGAAAAGTTGCTGGAAGTAATTTTTTCATGATCATGTTGTCTGCATTCTAAAAATTAGGAGAAAGAGTGTG | 68612 |
| Orangutan         | GATCACTTTTAGAAAAATTGCTGGAAGTAATTTTTTCATGATGATGTTATCTACATTCTAAAAATTAG-----AGAGTGTG | 69032 |

Tuesday, May 03, 2022 06:16 PM

| Majority          | TACAAAGAATATTTATTTTAGAGCTTTCCTTGTATTTCAAATTGA----                               | GTAACAGGCATTCTCATCATAAAAGTTTTTA       |                                 |       |       |       |       |       |
|-------------------|---------------------------------------------------------------------------------|---------------------------------------|---------------------------------|-------|-------|-------|-------|-------|
|                   | 83290                                                                           | 83300                                 | 83310                           | 83320 | 83330 | 83340 | 83350 | 83360 |
| Human             | TACAAAGAGTGT                                                                    | TTATTTTAGAGCTTTCCTTGTATTTCAAATTGA---- | ATAACAGGCATTCTCATCATAAAAGTTTTTA | 68180 |       |       |       |       |
| Coquerel'sSifaka  | TACAAAGAATAGTTACTTTAGAGCTTTGCATGTATTTGAGTTGAATGAAGTAATAGGCATTCTCATCATAAAGTCTT-- | 56107                                 |                                 |       |       |       |       |       |
| Ma'sNightMonkey   | AACTGAGA-----TTG--TGC---CATTGCACTCCAGCCTGG-----GCGACA-----ACAAGACTC---          | 63129                                 |                                 |       |       |       |       |       |
| VervetAGM         | TACAAAGAATATTTATTTTAGAGCTTTCCTTGTATTTCAAATTGA----                               | GGAACAGGCATTCTCATCATAAAAGTTTTTA       | 69885                           |       |       |       |       |       |
| Gorilla           | TACAAAGAGTATTTATTTTAGAGCTTTCCTTGTATTTCAAATTGA----                               | ATAACAGGCATTCTCATCATAAAAGTTTTTA       | 68716                           |       |       |       |       |       |
| GrabEatingMacaque | TACAAAGAATATTTATTTTAGAGCTTTCCTTGTATTTCAAATTGA----                               | GGAACAGGCATTCTCATCATAAAAGTTTTTA       | 69433                           |       |       |       |       |       |
| Macaque           | TACAAAGAATATTTATTTTAGAGCTTTCCTTGTATTTCAAATTGA----                               | GGAACAGGCATTCTCATCATAAAAGTTTTTA       | 70295                           |       |       |       |       |       |
| PigTailedMacaque  | TACAAAGAATATTTATTTTAGAGCTTTCCTTGTATTTCAAATTGA----                               | GGAACAGGCATTCTCATCATAAAAGTTTTTA       | 68833                           |       |       |       |       |       |
| Bonobo            | TACAAAGAGTATTTATTTTAGAGCTTTCCTTGTATTTCAAATTGA----                               | ATAACAGGCATTCTCATCATAAAAGTTTTTA       | 67288                           |       |       |       |       |       |
| OliveBaboon       | TACAAAGAATATTTATTTTAGAGCTTTCCTTGTATTTCAAATTGA----                               | GGAACAGGCATTCTCATCATAAAAGTTTTTA       | 68687                           |       |       |       |       |       |
| Orangutan         | TACAAAGAGT---ATTTTAGAACTTTCCTTGTATTTCAAATTGA----                                | ATAACAGGCATTCTCATCATAAAAGTTTTTA       | 69103                           |       |       |       |       |       |

| Majority          | AAA-GAAAGGCAAAGCAGATCTTTTGTAGGAAATC-ATTGACGTTAAAAATAGTTATCATTGTGAACAGATAC---AACAT |       |       |       |       |       |       |       |
|-------------------|-----------------------------------------------------------------------------------|-------|-------|-------|-------|-------|-------|-------|
|                   | 83370                                                                             | 83380 | 83390 | 83400 | 83410 | 83420 | 83430 | 83440 |
| Human             | AAA-GAAAGGCAAAGCAGACTTTCTGTAGGAAATC-ATTGACGTTAAAAATAGTTATAATTGTGAACAGATAC---AACAT | 68255 |       |       |       |       |       |       |
| Coquerel'sSifaka  | AAAAGAAAAGCAAACAAACTTTAATAAGAAATCTGTTGACATTAATAATTTAAAAATTGTGAACAGATTAGCAAACAT    | 56187 |       |       |       |       |       |       |
| Ma'sNightMonkey   | -----C--ATCTC---AAAAA-----AAAAAAGTTATCATTGTGAACAGATAC---AACAT                     | 63172 |       |       |       |       |       |       |
| VervetAGM         | AAAAGAAAGGCAAAGCAGATCTTTTGTAGGAAATC-ATTGACGTTAAAAATAGTTATCATTATGAACAGATAC---AACAT | 69961 |       |       |       |       |       |       |
| Gorilla           | AAA-GAAAGGCAAAGCAGACTTTCTGTAGGA-----ATTGACGTTAAAAATAGTTATAACTGTGAACAGATAG---AATAT | 68787 |       |       |       |       |       |       |
| GrabEatingMacaque | AAA-GAAAGGCAAAGCAGATCTTTTGTAGGAAATC-ATTGATGTTAAAAATAGTTATCATTGTGAACAGATAC---AACAT | 69508 |       |       |       |       |       |       |
| Macaque           | AAA-GAAAGGCAAAGCAGATCTTTTGTAGGAAATC-ATTGATGTTAAAAATAGTTATCATTGTGAACAGATAC---AACAT | 70370 |       |       |       |       |       |       |
| PigTailedMacaque  | AAA-GAAAGGCAAAGCAGATCTTTTGTAGGAAATC-ATTGATGTTAAAAATAGTTATCATTGTGAACAGATAC---AACAT | 68908 |       |       |       |       |       |       |
| Bonobo            | AAA-GAAAGGCAAAGCAGACTTT---AGGAAATC-ACTGACGTTAAAAATAGTTATAATTGTGAACAGATAC---AACAT  | 67359 |       |       |       |       |       |       |
| OliveBaboon       | AAA-GAAAGGCAAAGCAGATCTTTTGTAGGAAATC-ATTGACGTTAAAAATAGTTATCATTGTGAACAGATAC---AACAT | 68762 |       |       |       |       |       |       |
| Orangutan         | AAA-GAAAGGCAAAGCAGACTTTTGTAGGAAATC-ATTGACATTAATAATAGTTATAATTGTGAACAGATAC---AACAT  | 69178 |       |       |       |       |       |       |

| Majority          | TTATTCATGAAGGTAAACATGTAGGTCTTATAGAACATTGTTTCTCAAATTTTGGCTGCACATTGAAGTCACCAGATTCT  |       |       |       |       |       |       |       |
|-------------------|-----------------------------------------------------------------------------------|-------|-------|-------|-------|-------|-------|-------|
|                   | 83450                                                                             | 83460 | 83470 | 83480 | 83490 | 83500 | 83510 | 83520 |
| Human             | TTATTCATGAAGGTAAACATGTAGGTCTTATAGAAATATTGTTTCTCAAATTTTGGCTGCACGTTGAAGTCACCAGATTCT | 68335 |       |       |       |       |       |       |
| Coquerel'sSifaka  | TTATTTATGAAGGTAAATATTTAGCCTTTACAGAACAGTGTTTTCAAATTTTGGCTGCACGTTGAAGTTACTGGGCCCT   | 56267 |       |       |       |       |       |       |
| Ma'sNightMonkey   | TTATTCATGAAAGTAAACATGTAGGTCTTATAGAACAGTGTTTCTCAA-----CTGT                         | 63225 |       |       |       |       |       |       |
| VervetAGM         | TTATTCATAAAGATAAAACATGTCGGTCTTATAGAACATTGTTTCTCAAATTTTGGCTGCACATTGAAGTCACCAAATTCT | 70041 |       |       |       |       |       |       |
| Gorilla           | TTATTCATGAAGGTAAACATGTGGGTCTTATAGAACATTGTTTCTCAAATTTTGGCTGCACGTTGAAGTCACCAGATTCT  | 68867 |       |       |       |       |       |       |
| GrabEatingMacaque | TTATTCATAAAGATAAAACATGTAGGTCTTATAGAACATTGTTTCTCAAATTTTGGCTGCACATTGAAGTCACCAAATTCT | 69588 |       |       |       |       |       |       |
| Macaque           | TTATTCATAAAGATAAAACATGTAGGTCTTATAGAACATTGTTTCTCAAATTTTGGCTGCACATTGAAGTCACCAAATTCT | 70450 |       |       |       |       |       |       |
| PigTailedMacaque  | TTATTCATAAAGATAAAACATGTAGGTCTTATAGAACATTGTTTCTCAAATTTTGGCTGCACATTGAAGTCACCAAATTCT | 68988 |       |       |       |       |       |       |
| Bonobo            | TTATTCATGAAGGTAAACATGTAGGTCTTATAGAACATTGTTTCTCAAATTTTGGCTGCACGTTGAAGTCACCAGATTCT  | 67439 |       |       |       |       |       |       |
| OliveBaboon       | TTATTCATAAAGATAAAACATGTAGGTCTTATAGAACATTGTTTCTCAAATTTTGGCTGCACATTGAAGTCACCAAATTCT | 68842 |       |       |       |       |       |       |
| Orangutan         | TTATTCATGAAGGTAAACATGTAGGTCTTATAGAACCTTGTCTCAAATTTTGGCTGCACATTGAAGTCACCAGATTCT    | 69258 |       |       |       |       |       |       |



Tuesday, May 03, 2022 06:16 PM

| Majority          | TTATTT-----TGATTTT-----CTTTC---TTTGTTACATTTGTATGGGTATTTCATTTGGTAATATTTATTAAT--- |       |
|-------------------|---------------------------------------------------------------------------------|-------|
|                   | 83770 83780 83790 83800 83810 83820 83830 83840                                 |       |
| Human             | TT-----TGATTTT-----CTTTC---TTTGTTACATTTGTATGGGTATTTCATTTGGTAATATTTATTAAT---     | 68628 |
| Coquerel'sSifaka  | TTATTTTAAATGATTTCTGACAGCTTTGATTTTCTTTACTTTTGAATGGGTCATTCACATAGGAATATTTATTAGTATT | 56582 |
| Ma'sNightMonkey   | TTATTT-----TCACTTT-----CTTT-----GTTACATTTGAATGGGTATTTCATATGGTAATATTTATTAAT---   | 63517 |
| VervetAGM         | TTATTT-----TGATTTT-----CTTTC---TTTGTTACATTTGTATGGGTATTTCATTTGGTAATATTTATTAAT--- | 70340 |
| Gorilla           | TTACTT-----TGATTTT-----CTTTC---TTTGTTACATTTGTATGGGTATTTCATTTGGTAATATTTATTAAT--- | 69162 |
| GrabEatingMacaque | TTATTT-----TGATTTT-----CTTTC---TTTGTTACATTTGTATGGGTATTTCATTTGGTAATATTTATTAAT--- | 69887 |
| Macaque           | TTATTT-----TGATTTT-----CTTTC---TTTGTTACATTTGTATGGGTATTTCATTTGGTAATATTTATTAAT--- | 70746 |
| PigTailedMacaque  | TTATTT-----TGATTTT-----CTTTC---TTTGTTACATTTGTATGGGTATTTCATTTGGTAATATTTATTAAT--- | 69279 |
| Bonobo            | TTACTT-----TGATTTT-----CTTTC---TTTGTTACATTTGTATGGGTATTTCATTTGGTAATATTTATTAAT--- | 67736 |
| OliveBaboon       | TTATTT-----TGATTTT-----CTTT-----GTTACATTTGTATGGGTATTTCATTTGGTAATATTTATTAAT---   | 69137 |
| Orangutan         | TTATTT-----TGATTTT-----CTTT-----GTTACATTTTATGGGTATTTCATTTGGTAATATTTATTAAT---    | 69547 |

| Majority          | -----TTATTATTAGAGATTTAAGCTATATGCTAATAATAATGAATCCCATACACCTGTCATCTTGGTTCAATAGC       |       |
|-------------------|------------------------------------------------------------------------------------|-------|
|                   | 83850 83860 83870 83880 83890 83900 83910 83920                                    |       |
| Human             | -----TTATTATTAGAGATTTAAGCTATATGCTAATAATAATGAATCCCATACACCTGTCATCTTGGTTCAATAGC       | 68698 |
| Coquerel'sSifaka  | TATTAACCTTTTATTATCAAGGATTTACAGTTATATACTAATAATAATGAATCCCATACACCTGTCATCTTGGTTCAATAGC | 56662 |
| Ma'sNightMonkey   | -----TTATTATCAGAGATTTAAGCTATACACTAATAATAATGAATCCCATACACCTGTCATCTTGGTTCAATAGC       | 63587 |
| VervetAGM         | -----TTATTATTAGAGATTTAAGCTGTATGCTAATAATAACGAATCCCATACACCTGTCATCTTGGTTCAATAGC       | 70410 |
| Gorilla           | -----TTATTATTAGAGATTTAAGCTGTATGCTAATAATAATGAATCCCATACACCTGTCATCTTGGTTCAATAGC       | 69232 |
| GrabEatingMacaque | -----TTATTATTAGAGATTTAAGCTGTATGCTAATAATAACGAATCCCATACACCTGTCATCTTGGTTCAATAGC       | 69957 |
| Macaque           | -----TTATTATTAGAGATTTAAGCTGTATGCTAATAATAACGAATCCCATACACCTGTCATCTTGGTTCAATAGC       | 70816 |
| PigTailedMacaque  | -----TTATTATTAGAGATTTAAGCTGTATGCTAATAATAACGAATCCCATACACCTGTCATCTTGGTTCAATAGC       | 69349 |
| Bonobo            | -----TTATTATTAGAGATTTAAGCTGTATGCTAATAATAATGAATCCCATACACCTGTCATCTTGGTTCAATAGC       | 67806 |
| OliveBaboon       | -----TTATTATTAGAGATTTAAGCTGTATGCTAATAATAACGAATCCCATACACCTGTCATCTTGGTTCAATAGC       | 69207 |
| Orangutan         | -----TTATTATTAGAAATTTAAGCTGTATGCTAATAATAATGAATCCCATACACCTGTCATCTTGGTTCAATAGT       | 69617 |

| Majority          | GCTGACACTTAGTTTTATCTATTTCAGTTTTT--CTTTTGTATTCTAAAGCAAATCCTTGACATTATGACATGTCTTCTCA |       |
|-------------------|-----------------------------------------------------------------------------------|-------|
|                   | 83930 83940 83950 83960 83970 83980 83990 84000                                   |       |
| Human             | GCTGACACTTAGTTTTATCTATTTCAGTTTTT--CTTTTGTGTTCTAAAGCAAATCCTTGACATTATGACATGTCTTCTCA | 68776 |
| Coquerel'sSifaka  | GCCTACATTTGTTTTATCTATTTCATTTTTTTCTGTTGTGTTTTAGAACAAATCCTTGACATCATGACATGTCTTCTCA   | 56742 |
| Ma'sNightMonkey   | GCTGACA---GTTTTATCTATTTCAGTTTTT--CTATTGTATTCTAAAGCAAATCCTTGA--TCATGACATGTCTTCTCA  | 63659 |
| VervetAGM         | GCTGACACTTAGTTTTATCTATTTCAGTTTTT--CTTTTGTATTCAAAGCAAATCCTTGACATTATGACATGTCTTCTCA  | 70488 |
| Gorilla           | ACTGACACTTAGTTTTATCTATTTCAGTTTTT--CTTTTGTGTTCTAAAGCAAATCCTTGACATTATGACATGTCTTCTCA | 69310 |
| GrabEatingMacaque | GGTGACACTTAGTTTTATCTATTTCAGTTTTT--CTTTTGTATTCTAAAGCAAATCCTTGACATTATGACATGTCTTCTCA | 70035 |
| Macaque           | GGTGACACTTAGTTTTATCTATTTCAGTTTTT--CTTTTGTATTCTAAAGCAAATCCTTGACATTATGACATGTCTTCTCA | 70894 |
| PigTailedMacaque  | GCTGACACTTAGTTTTATCTATTTCAGTTTTT--CTTTTGTATTCTAAAGCAAATCCTTGACATTATGACATGTCTTCTCA | 69427 |
| Bonobo            | GCTGACACTTAGTTTTATCTATTTCAGTTTTT--CTTTTGTGTTCTAAAGCAAATCCTTGACATTATGACATGTCTTCTCA | 67884 |
| OliveBaboon       | GCTGACACTTAGTTTTATCTATTTCAGTTGTT--CTTTTGTATTCTAAAGCAGATCCTTGACATTATGACATGTCTTCTCA | 69285 |
| Orangutan         | GCTGACACTTAGTTTTATCTATTTCAGTTTTT--CTTTTGTATTCTAAAGCAAATCCTTGACATTATGACATGTCTTCTCA | 69695 |



Tuesday, May 03, 2022 06:16 PM

| Majority          | AATAGTCCTCTCCCTCTCTCTACTCCCAATCTCACATCCATTTACTTA-TGAAGTGACGTGGTTATCCTTTTAGAAAGTT  |       |       |       |       |       |       |       |  |       |
|-------------------|-----------------------------------------------------------------------------------|-------|-------|-------|-------|-------|-------|-------|--|-------|
|                   | 84250                                                                             | 84260 | 84270 | 84280 | 84290 | 84300 | 84310 | 84320 |  |       |
| Human             | AATAGTCCTCTCCCTCTCTCTACTCCCAATCTCTCATTTCATTTACTTA-TGAAGTGATGTT----TCCTTTTAGAAAGTT |       |       |       |       |       |       |       |  | 69086 |
| Coquerel'sSifaka  | TGTTACGGTC-CTTTCCCTTTACCCCCAACCCCATTTCCATTTACTTAATGAAGAGACCTAGTAATTCTTTTACAAAGTT  |       |       |       |       |       |       |       |  | 57050 |
| Ma'sNightMonkey   | AATGGTCCTGTCCCTCTCTCTACTCCCAGTCTCATTCCATTTACTTA-TGAAGTGATGTGGTTATCCTTTTAGAAAGTT   |       |       |       |       |       |       |       |  | 63970 |
| VervetAGM         | AATAGTCCTCTCCTTTCTCTACTCCCAATCTCACATCCGTTTACTTA-TGAAGTGACATGGTTATCCTTTTAGAAAGTT   |       |       |       |       |       |       |       |  | 70803 |
| Gorilla           | AATAGTCCTCTCCCTCTCTCTACTCCCAATCTCACGTTTCATTTACTTA-TGAAGTGATGTT----TCCTTTTAGAAAGTT |       |       |       |       |       |       |       |  | 69620 |
| GrabEatingMacaque | AATAGTCATCTCCCTTTCTCTACTCCCAATCTCACATCCGTTTACTTA-TGAAGTGACATGGTTATCCTTTTAGAAAGTT  |       |       |       |       |       |       |       |  | 70350 |
| Macaque           | AATAGTCATCTCCCTTTCTCTACTCCCAGTCTCACATCCGTTTACTTA-TGAAGTGACATGGTTATCCTTTTAGAAAGTT  |       |       |       |       |       |       |       |  | 71209 |
| PigTailedMacaque  | AATAGTCATCTCCCTTTCTCTACTCCCAATCTCACATCCGTTTACTTA-TGAAGTGACATGGTTATCCTTTTAGAAAGTT  |       |       |       |       |       |       |       |  | 69742 |
| Bonobo            | AATAGTCCTCTCCCTCTCTCTACTCCCAGTCTC--GTTTCATTTACTTA-TGAAGTGATGTT----TCCTTTTAGAAAGTT |       |       |       |       |       |       |       |  | 68192 |
| OliveBaboon       | AATAGTCCTCTCCCTTTCTCTACTCCCAATCTCACATCCGTTTACTTA-TGAAGTGACATGGTTATCCTTTTAGAAAGTT  |       |       |       |       |       |       |       |  | 69600 |
| Orangutan         | AATAGTCCTCTCCCTCTCTCTACTCCCAATCTCACGTTTCATTTACTTA-TGAAGTGATGTGGTTATCCTTTTAGAAAGTT |       |       |       |       |       |       |       |  | 70010 |

| Majority          | TCACAGATTAGACTAGTCTGGCTGTTTC-CTTAGAGTGCATGTTAACTTGTT-CCTCTATCTGCTGCGTTTCTTATATA   |       |       |       |       |       |       |       |  |       |
|-------------------|-----------------------------------------------------------------------------------|-------|-------|-------|-------|-------|-------|-------|--|-------|
|                   | 84330                                                                             | 84340 | 84350 | 84360 | 84370 | 84380 | 84390 | 84400 |  |       |
| Human             | TCACAGATTAGACTAGTCTGGCTGTTTC-TTAGAGTGCATGTTAACTTGTT-CCTCTATCTGCTGTGTTTCTTATATA    |       |       |       |       |       |       |       |  | 69164 |
| Coquerel'sSifaka  | TCACAGATTAGATTGGTCTGGCTGTTTC-CTTGAGTGCATCTTGATAAAAT---T-TACAGTCCGGGTTTTTTTGATT    |       |       |       |       |       |       |       |  | 57125 |
| Ma'sNightMonkey   | TCACAGTTAGACTAGTCTGACTGTTTC-CTTATAGTGCATGTTAACTTCTT-CCTCTATCTGCTGCATTTTTTATGTA    |       |       |       |       |       |       |       |  | 64048 |
| VervetAGM         | TCACAGATTAGACTAGCCTTGCTGTTTC-CTTAGAGTGCATGTTAACTTGTT-CCTCTATCTGCTGCGTTTCTTATATA   |       |       |       |       |       |       |       |  | 70881 |
| Gorilla           | TCACAGATTAGACTAGTCTGGCTGTTTC-TTAGAGTGCATGTTAACTTGTT-CCTCTATCTGCTGCGTTTCTTATATA    |       |       |       |       |       |       |       |  | 69698 |
| GrabEatingMacaque | TCACAGATTAGACTAGCCTTGCTGTTTC-CTTAGAGCGTCATGTTAACTTGTT-CCTCTATCTGCTGCGTTTCTTATATA  |       |       |       |       |       |       |       |  | 70428 |
| Macaque           | TCACAGATTAGACTAGCCTTGCTGTTTC-CTTAGAGCGTCATGTTAACTTGTT-CCTCTATCTGCTGCGTTTCTTATATA  |       |       |       |       |       |       |       |  | 71287 |
| PigTailedMacaque  | TCACAGATTAGACTAGCCTTGCTGTTTC-CTTAGAGCGTCATGTTAAATTTGTT-CCTCTATCTGCTGCGTTTCTTATATA |       |       |       |       |       |       |       |  | 69820 |
| Bonobo            | TCACAGATTAGACTAGTCTGGCTGTTTC-TTAGAGTGCATGTTAACTTGTT-CCTCTATCTGCTGCGTTTCTTATATA    |       |       |       |       |       |       |       |  | 68270 |
| OliveBaboon       | TCACAGATTAGACTAGCCTTGCTGTTTC-CTTAGAGTGCATGTTAACTTGTTTCTCTATCTGCTGCGTTTCTTATATA    |       |       |       |       |       |       |       |  | 69679 |
| Orangutan         | TCACAGATTAGACTAGTCTGGCTGTTTCCTTTAGAGTGCATGTTAACTTGTT-CCTCTATCTGCTGCGTTTCTTATATA   |       |       |       |       |       |       |       |  | 70089 |

| Majority          | AACTTAAAGTTAGTTCCAAAGGCTTGATAAGATTTAGAGCCTGTTTTTTTTTTTTTTT-----TTTTCTTTTT----    |       |       |       |       |       |       |       |  |       |
|-------------------|----------------------------------------------------------------------------------|-------|-------|-------|-------|-------|-------|-------|--|-------|
|                   | 84410                                                                            | 84420 | 84430 | 84440 | 84450 | 84460 | 84470 | 84480 |  |       |
| Human             | AACTTAAAGTTAGTTCCAAAGGCTTGATAAGATTTAGAGCC--TTTTTTTTTTTTTT-----TTTTCTTTTT----     |       |       |       |       |       |       |       |  | 69217 |
| Coquerel'sSifaka  | TTTTTTGATTTTTTTTTTAAAGCAAGAATACTATATAGA-----T-----TTTTCTTTTT----                 |       |       |       |       |       |       |       |  | 57164 |
| Ma'sNightMonkey   | AACTTA----CAGTTCCAAAGGCTTGATAAGACTTAGAGCC-GTTTTTTTTTTTTTGGTATTATGTTTTTTAAGCTGAAC |       |       |       |       |       |       |       |  | 64123 |
| VervetAGM         | AACTTAAAGTTAGTTCCAAAGGCTTGATAAGATTTAGAGCCTGTTTTTTTTTTCTTCTCTCTTTTTTTCTTTTT----   |       |       |       |       |       |       |       |  | 70957 |
| Gorilla           | AACTTAAAGTTAGTTCCAAAGGCTTGATAAGATTTAGAGCCTTTTTTTTTTTTTTTT-----TT----             |       |       |       |       |       |       |       |  | 69756 |
| GrabEatingMacaque | AACTTAAAGTTAGTTCCAAAGGCTTGATAAGATTTAGAGCCTGTTTTTCTTCTTT-----TTTTCTTTTT----       |       |       |       |       |       |       |       |  | 70495 |
| Macaque           | AACTTAAAGTTAGTTCCAAAGGCTTGATAAGATTTAGAGCCTGTTTTTCTTCTTT-----TTTTCTTTTT----       |       |       |       |       |       |       |       |  | 71354 |
| PigTailedMacaque  | AACTTAAAGTTAGTTCCAAAGGCTTGATAAGATTTAGAGCCTGTTTTTCTTCTTT-----TTTTCTTTTT----       |       |       |       |       |       |       |       |  | 69887 |
| Bonobo            | AACTTAAAGTTAGTTCCAAAGGCTTGATAAGATTTAGAGTCTTTTTTTTTTTTTTT-----TTTTCTTTTT----      |       |       |       |       |       |       |       |  | 68325 |
| OliveBaboon       | AACTTAAAGTTAGTTCCAAAGGCTTGATAAGATTTAGAGCCTGTTTTTTTTTTCTTT-----TTTTCTTTTT----     |       |       |       |       |       |       |       |  | 69746 |
| Orangutan         | AACTTAAAGTTAGTTCCAAAGGCTTGATAAGATTTAGAGAC---T--TTTTTTTT-----TTTTCTTTTT----       |       |       |       |       |       |       |       |  | 70139 |



Tuesday, May 03, 2022 06:16 PM

|                   |                                                                                   |       |
|-------------------|-----------------------------------------------------------------------------------|-------|
| Majority          | --TTAAGTGTTCCTTGCTTCCTATTGTGTCTCAGTAGGAGACATCTAATAATCTGGTTGCCCCACTTTTAGTGATTTTA   |       |
|                   | 84490 84500 84510 84520 84530 84540 84550 84560                                   |       |
| Human             | ---GAAGTGTTCCTTGCTTCCTATTGTGTCTCAGTAGGAGACATCTAATAATCTGGTTGCCCCACTTTTAGTGATTTTA   | 69294 |
| Coquerel'sSifaka  | -----GTTCTTTTGCTTCATATTAATGTGTCTCAGTAAGAGGCCAAATTATAATCTGGTTATCCCACTTTTGGTGATTTTA | 57236 |
| Ma'sNightMonkey   | TACTAAGTGTTCCTTGCTTCCTATTGTGTCTCAGTAGGAGGCAGCTAGTAATTGGTTGCCCCACTTTTAGTGATTTTA    | 64203 |
| VervetAGM         | --TTAAGTGTTCCTTGCTTCCTATTGTGTCTCAGTAGGAGACATCTAGTAATCTGGTTGCCCCACTTTTAGTGATTTTA   | 71035 |
| Gorilla           | --GGAAGTGTTCCTTGCTTCCTATTGTGTCTCAGTAGGAGACATCTAATAATCTGGTTGCCCCACTTTTAGTGATTTTA   | 69834 |
| GrabEatingMacaque | --TTAAGTGTTCCTTGCTTCCTATTGTGTCTCAGTAGGAGACATCTAATAATCTGGTTGCCCCACTTTTAGTGATTTTA   | 70573 |
| Macaque           | --TTAAGTGTTCCTTGCTTCCTATTGTGTCTCAGTAGGAGACATCTAATAATCTGGTTGCCCCACTTTTAGTGATTTTA   | 71432 |
| PigTailedMacaque  | --TCAAGTGTTCCTTGCTTCCTATTGTGTCTCAGTAGGAGACATCTAATAATCTGGTTGCCCCACTTTTAGTGATTTTA   | 69965 |
| Bonobo            | ---GAAGTGTTCCTTGCTTCCTATTGTGTCTCAGTAGGAGACATCTAATAATCTGGTTGCCCCACTTTTAGTGATTTTA   | 68402 |
| OliveBaboon       | --TTAAGTGTTCCTTGCTTCCTATTGTGTCTCAGTAGGAGACATCTAATAATCTGGTTGCCCCACTTTTAGTGATTTTA   | 69824 |
| Orangutan         | ---AAAGTGTTCCTTGCTTCCTATTGTGTCTCAGTAGGAGACATCTAATAATCTGGTTGCTCCACTTTTAGTGATTTTA   | 70216 |

|                   |                                                                                 |       |
|-------------------|---------------------------------------------------------------------------------|-------|
| Majority          | ATGATGCTTTAAGACTGATTGTGGATTGGGTGTTGACCTTCTGATCCTTTCGTTACATTTTTTCTGCTAATGATTTTA  |       |
|                   | 84570 84580 84590 84600 84610 84620 84630 84640                                 |       |
| Human             | ATGATGCTTTAAGACTGATTGTGGATTGGGTGTTGACATCTGATCCTTTCGTTACTTTTTTCTACTAATGATTTTA    | 69374 |
| Coquerel'sSifaka  | GTGATGCTTTAAGACTGGTTGTGG-----TTTT-----AATGATTTTA                                | 57274 |
| Ma'sNightMonkey   | ATGATGCTTTAAGACTGATTGTGATTTGAGTGTGACATCTGATCCTTTCATTACAGTTTTTCTACTAATGATTTTA    | 64283 |
| VervetAGM         | ATGATGCTTTAAGACTT-TTGTGGATTGGGTGTTGACCTTCTGATCCTTTCATTACATTTTTTCTGCTAATGATTTTA  | 71114 |
| Gorilla           | ATGATGCTTTAAGACTGATTGTGGATTGGGTGTTGACATCTGATCCTTTCATTACTTTTTTCTACTAATGATTTTA    | 69914 |
| GrabEatingMacaque | ATGATGCTTTAAGACTT-TTGTGGATTGGGTGTTGACCTTCTGATCCTTTCGTTACATTTTTTCTGCTAATGATTTTA  | 70652 |
| Macaque           | ATGATGCTTTAAGACTT-TTGTGGATTGGGTGTTGACCTTCTGATCCTTTCATTACATTTTTT-CTGCTAATGATTTTA | 71510 |
| PigTailedMacaque  | ATGATGCTTTAAGACTT-TTGTGGATTGGGTGTTGACCTTCTGATGCTTTCGTTACATTTTTTCTGCTAATGATTTTA  | 70044 |
| Bonobo            | ATGATGCTTTAAGACTGATTGTGGATTGGGTGTTGACATCTGATCCTTTCGTTACTTTTTTTC---TAATGATTTTA   | 68479 |
| OliveBaboon       | ATGATGCTTTAAGACTT-TTGTGGATTGGGTGTTGACCTTCTGATCCTTCCGTTACATTTTTTCTGCTAATGATTTTA  | 69903 |
| Orangutan         | ATGATGCTTTAAGACTGATTGTGGATTGGGTGTTGACATCTGATCCTTTCGTTACATTTTTTCTACTAATGATTTTA   | 70296 |

|                   |                                                                                  |       |
|-------------------|----------------------------------------------------------------------------------|-------|
| Majority          | GTATCCACTAATGGTTGCTGCCTTAATTAATTTCACTAGTGGGTGCAAATA-TTGCTTTTTCTCCCCTAATTCACATAT  |       |
|                   | 84650 84660 84670 84680 84690 84700 84710 84720                                  |       |
| Human             | GTATCCAATAATGGTTGCTGCCTTAATTAATTTCACTAGTGGGTGCAAATA-TTGCTTTTTCTCCCCTAATTCACATAT  | 69453 |
| Coquerel'sSifaka  | ATATCCACTAATGATTGCTGCCTTAATTTAATTTCAATGAGGAGGGTGGTTACAGATACTGCAGCCCCCAATTCACATAC | 57354 |
| Ma'sNightMonkey   | GTATTCACTAATGGTTGCTGCCTTAATTAATTTCACTAGTAGGTTGCAAATA-ATGCTTTTTCTCCCCTAATTCACGAT  | 64362 |
| VervetAGM         | GTATACACTAATGGTTGCTGCCTTAATTAATTTCACTAGTGGGTGCAAATA-TTGCTTTTTCTCCCCTAATTCACATAT  | 71193 |
| Gorilla           | GTATCCAGTAATGGTTGCTGCCTTAATTAATTTCACTAGTGGGTGCAAATA-TTGCTTTTTCTCCCCTAATTCACATAT  | 69993 |
| GrabEatingMacaque | GTATACACTAATGGTTGCTACCTTAATTAATTTCACTAGTGGGTGCAAATA-TTGCTTTTTCTCCCCTAATTCACATAT  | 70731 |
| Macaque           | GTATACACTAATGGTTGCTACCTTAATTAATTTCACTAGTGGGTGCAAATA-TTGCTTTTTCTCCCCTAATTCACATAT  | 71589 |
| PigTailedMacaque  | GTATACACTAATGGTTGCTACCTTAATTAATTTCACTAGTGGGTGCAAATA-TTGCTTTTTCTCCCCTAATTCACATAT  | 70123 |
| Bonobo            | GTATCCAATAATGGTTGCTGCCTTAATTAATTTCACTAGTGGGTGCAAATA-TTGCTTTTTCTCCCCTAATTCACATAT  | 68558 |
| OliveBaboon       | GTATACACTAATGGTTGCTACCTTAATTAATTTCACTAGTGGGTGCAAATA-TTGCTTTTTCTCCCCTAATTCACATAT  | 69982 |
| Orangutan         | GTATCCAATAATGGTTGCTGCCTTAATTAATTTCACTAGTGGGTGCAAATA-TTGCTTTTTCTCCCCTAATTCACATAT  | 70375 |



Tuesday, May 03, 2022 06:17 PM

| Majority          | GTCAGTTGTTTGCAGGTTCTAGTAGCCC-AGAGTGGTTTGAAATGGTGACCTTAGCCCAGATGT-----AT          |       |       |       |       |       |       |       |       |
|-------------------|----------------------------------------------------------------------------------|-------|-------|-------|-------|-------|-------|-------|-------|
|                   | 84970                                                                            | 84980 | 84990 | 85000 | 85010 | 85020 | 85030 | 85040 |       |
| Human             | GTCAGTTGTTTGCAGGTTCTGGTAGCCC-AGAGTGGTTTGAAATGGTGACCTTAGCCCAGAAGT-----AT          |       |       |       |       |       |       |       | 69749 |
| Coquerel'sSifaka  | ATTGGTTGCTTGCAGGTTCTAGTAGCCACAGAGTGGTTTGAAATGGTGACCTTAGCTTAGAGGTAAGCATTTTTATTTAT |       |       |       |       |       |       |       | 57665 |
| Ma'sNightMonkey   | GTCAGTTGCTTGCAGGTTTTAGTAGCCCCAGAGTGGTTTGAAATGGTGACCTTAGCCCAGAAGTGTGCAATTTTATTCAT |       |       |       |       |       |       |       | 64673 |
| VervetAGM         | GTCAGTTGTTTGCAGGTGCTAGTAGCCC-AGAGTGGTTTGAAACGGTGACCTTAGCCCAGATGT-----AT          |       |       |       |       |       |       |       | 71489 |
| Gorilla           | GTCAGTTGTTTGCAGGTTCTGGTAGCCC-AGAGTGGTTTGAAATGGTGACCTTAGCCCAGATGT-----AT          |       |       |       |       |       |       |       | 70289 |
| GrabEatingMacaque | GTCAGTTGTTTGCAGGTTCTAGTAGCCC-AGAGTGGTTTGAAATGGTGACCTTAGCCCCGATGT-----AT          |       |       |       |       |       |       |       | 71027 |
| Macaque           | GTCAGTTGTTTGCAGGTTCTAGTAGCCC-AGAGTGGTTTGAAATGGTGACCTTAGCCCCGATGT-----AT          |       |       |       |       |       |       |       | 71885 |
| PigTailedMacaque  | GTCAGTTGTTTGCAGGTTCTAGTAGCCC-AGAGTGGTTTGAAATGGTGACCTTAGCCCCGATGT-----AT          |       |       |       |       |       |       |       | 70419 |
| Bonobo            | GTCAGTTGTTTGCAGGTTCTGGTAGCCC-AGAGTGGTTTGAAATGGTGACCTTAGCCCAGATGT-----AT          |       |       |       |       |       |       |       | 68854 |
| OliveBaboon       | GTCAGTTGTTTGCAGGTTCTGGTAGCCC-AGAGTGGTTTGAAATGGTGACCTTAGCCCCGATGT-----AT          |       |       |       |       |       |       |       | 70278 |
| Orangutan         | GTCAGTTGTTTGCAGGTTCTAGTAGCCC-CGAGTGGTTTGAAATGGTGACCTTAGCCCAGATGT-----AT          |       |       |       |       |       |       |       | 70666 |

| Majority          | GTAATTATTTAATTTGGCCTTGACCAATGGCCCAAAAAAGGAAGGGGGT----GGGGTGGATAAAGGACTAAACAAAATT  |       |       |       |       |       |       |       |       |
|-------------------|-----------------------------------------------------------------------------------|-------|-------|-------|-------|-------|-------|-------|-------|
|                   | 85050                                                                             | 85060 | 85070 | 85080 | 85090 | 85100 | 85110 | 85120 |       |
| Human             | GTAATTATTTAATTTGGCCTTGACCAATGGCCCAAAAAAGGAAGGGGGT----GGGGTGGATAAAGGACTAAACAAAATT  |       |       |       |       |       |       |       | 69825 |
| Coquerel'sSifaka  | GTAATTATTTAATTTGTCCTTGTCAGTGACCCAAAAAAGGAAGGG-----GGTACTTAA-GGACTAAACAAAGTT       |       |       |       |       |       |       |       | 57736 |
| Ma'sNightMonkey   | ATAATTATTTAATTTGGCCTTGACCAATGGCCCAAAAAAGGAAGGGG-T----GGGTTGGATAAAGGACTAAACAAAATT  |       |       |       |       |       |       |       | 64748 |
| VervetAGM         | GTAATTATTTAATTTGGCCTTGAACAATGGCCCAAAAAAGGAAGGGGGT----CGGGTGGATAAAGGACTAAGCAAAAATT |       |       |       |       |       |       |       | 71565 |
| Gorilla           | GTAATTATTTAATTTGGCCTTGACCAATGGCCCAAAAAAGGAAGGGGGT----GGGGTGGATAAAGGACTAAACAAAATT  |       |       |       |       |       |       |       | 70365 |
| GrabEatingMacaque | GTAATTATTTAATTTGGCCTTGAACAATGGCCCAAAAAAGGAAGGGGGT----GGTGTGGATAAAGGACTAAGCAAAAATT |       |       |       |       |       |       |       | 71103 |
| Macaque           | GTAATTATTTAATTTGGCCTTGAACAATGGCCCAAAAAAGGAAGGGGGT----GGTGTGGATAAAGGACTAAGCAAAAATT |       |       |       |       |       |       |       | 71961 |
| PigTailedMacaque  | GTAATTATTTAATTTGGCCTTGAACAATGGCCCAAAAAAGGAAGGGGGT----GGGGTGGATAAAGGACTAAGCAAAAATT |       |       |       |       |       |       |       | 70495 |
| Bonobo            | GTAATTATTTAATTTGGCCTTGACCAATGGCCCAAAAAAGGAAGGGGGT----GGGGTGGATAAAGGACTAAACAAAATT  |       |       |       |       |       |       |       | 68930 |
| OliveBaboon       | GTAATTATTTAATTTGGCCTTGAACAATGGCCCAAAAAAGGAAGGGGGT----GGGGTGGATAAAGGACTAAGCAAAAATT |       |       |       |       |       |       |       | 70354 |
| Orangutan         | TTAATTATTTAATTTGGCCTTGACCAATGGCCCAAAAAAGGAAGGGGGTGGTGGGATGGATAAATGACTAAACAAAATT   |       |       |       |       |       |       |       | 70746 |

| Majority          | AATTTAAATTTAGAAATCTTTCTCTCAGAAGGAATTCATGCCATAAAAGAAAGA--CCAGGATACATTAATATTTT-CT   |       |       |       |       |       |       |       |       |
|-------------------|-----------------------------------------------------------------------------------|-------|-------|-------|-------|-------|-------|-------|-------|
|                   | 85130                                                                             | 85140 | 85150 | 85160 | 85170 | 85180 | 85190 | 85200 |       |
| Human             | AATTTAAATTTAGAAATTTTCTCTCAGAAGGAATTCATGCCATAAAACAAAGA--CCAGGATACATTCGTATTTT-AT    |       |       |       |       |       |       |       | 69902 |
| Coquerel'sSifaka  | AGTTAAATATAGGTATCTTTCTCTCAAAGGAATTTGTCGCCATAAAAAAAGAGCCAGGAAGAATGAATATTTTCT       |       |       |       |       |       |       |       | 57816 |
| Ma'sNightMonkey   | AATTTAAATTTAGAAATTTTGTGTC--AGAAGGAATTTACCCCATATAAATAAAGA--GCAAGAAGTCTTAATATTTT-CT |       |       |       |       |       |       |       | 64823 |
| VervetAGM         | AATTTAAATTTAGAAATCTTTCTCTCAGAAGGAATTCATGCCATAAATGGAAGA--CCAGGATACATTAATATTTT-CT   |       |       |       |       |       |       |       | 71642 |
| Gorilla           | AATTTAAATTTAGAAATTTTCTCTCAGAAGGAATTCATGCCATAAAACAAAGA--CCAGGATACATTCATATTTT-CT    |       |       |       |       |       |       |       | 70442 |
| GrabEatingMacaque | AATTTAAATTTAGAAATCTTTCTCTCAGAAGGAATTCATGCCATAAATGGAAGA--CCAGGATACATTAATATTTT-CT   |       |       |       |       |       |       |       | 71180 |
| Macaque           | AATTTAAATTTAGAAATCTTTCTCTCAGAAGGAATTCATGCCATAAATGGAAGA--CCAGGATACATTAATATTTT-CT   |       |       |       |       |       |       |       | 72038 |
| PigTailedMacaque  | AATTTAAATTTAGAAATCTTTCTCTCAAAGGAATTCATGCCATAAATGGAAGA--CCAGGATACATTAATATTTT-CT    |       |       |       |       |       |       |       | 70572 |
| Bonobo            | AATTTAAATTTAGAAATTTTCTCTCAGAAGGAATTCATGCCATAAAACAAAGA--CCAGGATACATTCATATTTT-CT    |       |       |       |       |       |       |       | 69007 |
| OliveBaboon       | AATTTAAATTTAGAAATCTTTCTCTCAGAAGGAATTCATGCCATAAATGGAAGA--CCAGGATACATTAATATTTT-CT   |       |       |       |       |       |       |       | 70431 |
| Orangutan         | AATTTAAATTTAGAAATTTTCTCTCAGAAGGAATTCATGCCATAAAACAAAGA--CCAGGATACATTCATATTTT-CT    |       |       |       |       |       |       |       | 70823 |

Tuesday, May 03, 2022 06:17 PM

```

Majority      CAGTAAATACCAATAGATTATAAATCACTTTTCTGTGATACATAATTGTG-----AAAAAACCCATCCAGGTGTGCAT
              85210      85220      85230      85240      85250      85260      85270      85280
Human         CGGTAAATACCAATAGATTATAAATCACTTTTCTCGTATACATAATTGTG-----AAAAAAAAAACCCATCCAGGTAT 69975
Coquerel'sSifaka CAGTAAATACCAATAGATT-TAAATCACTTCTCCCTTCTAGCTTATTGTGAGGT---AAAAATAATATCCAGCTGAG--T 57890
Ma'sNightMonkey CAGTAAATAAAAAATAGGTTAAAAAGTCACTTTTCTCGTATACATAATTGTGGAGGGGAAAAAACCCATCCAGGTGTGCAT 64903
VervetAGM     CAGTAAATACCAATAGATTAAAAATCACTTTTCTGTGATACATAATTGTG-----AAAAAACCCATCCAGGTGTGCAT 71715
Gorilla       CGGTAAATACCAATAGATTATAAATCATTTTCTCGTATACATAATTGTG-----AAAAAAAA--CCATCCAGGTAT 70513
GrabEatingMacaque CAGTAAATACCAATAGATTATAAATCACTTTTCTGTGATACATAATTGTG-----AAAAAACCCATCCAGGTGTGCAT 71253
Macaque       CAGTAAATACCAATAGATTATAAATCACTTTTCTGTGATACATAATTGTG-----AAAAAACCCATCCAGGTGTGCAT 72111
PigTailedMacaque CAGTAAATACCAATAGATTATAAATCACTTTTCTGTGATACATAATTGTG-----AAAAAGCCCATCCAGGTGTGCAT 70645
Bonobo        CGGTAAATACCAATAGATTATAAGTCACTTTTCTCGTATACATAATTGTG-----AAAAAAAA--CCATCCAGGTAT 69078
OliveBaboon   CAGTAAATACCAATAGATTATAAATCACTTTTCTGTGATACATAATTGTG-----AAAAAACCCATCCAGGTGTGCAT 70504
Orangutan     CAGTAAATACCAATAGATTATAAAT-ACTTTCTGTATATATAATTGTG-----AAAAAAAAAAAAACATCCGGGTAT 70895
    
```

```

Majority      GTGAGCTATTTATTCATTGAGAGGATTTACATCTCTTAGGTGTTTTTTGTTGTTGTATGTGACTTTTGTGTAGTC----
              85290      85300      85310      85320      85330      85340      85350      85360
Human         GCATGTTATTTATTCATTGAGAGGATATACATCTCTCAGGTGTTTTTTGTGCTG---ATGTGACTTTTGTGTAGTC---- 70048
Coquerel'sSifaka GTGAGTTACCTATTTCAATTAAGGATTAACATCCCTTACGTGTTTTTTGTTGTTGTGTATATCTGTATGTGTAGTCAGTG 57970
Ma'sNightMonkey ATTTATCTATTTATCCACTGAGAGAATTAACATCCCTCAGGTGTTTGTGTTGT---ATGTGACTTT----- 64967
VervetAGM     GTGAGCTGTTTATTCATTGAGAGGATTTAGGTCTCTTAGGTGCTTGTGTTGTTGTATGTGACTTTTGTGTAGTC---- 71791
Gorilla       GCGTGTATTTATTCATTGAGAGGATATACATCTCTCAGGTGTTTTTTGTGCTG---ATGTGACTTTTGTGTAGTC---- 70586
GrabEatingMacaque GTGAGCTGTTTATTCATTGAGAGGATTTAGATCTTTTAGGTGTTTTTTGTTGTTGTATGTGACTTTTGTGTAGTC---- 71329
Macaque       GTGAGCTGTTTATTCATTGAGAGGATTTAGATCTTTTAGGTGTTTTTTTGTGTTGTATGTGACTTTTGTGTAGTC---- 72187
PigTailedMacaque GTGAGCTGTTTATTCATTGAGAGGATTTAGATCTTTTAGGTGTTTTTTGTTGTTGTATGTGACTTTTGTGTAGTC---- 70721
Bonobo        GCGTGTATTTATTCATTGAGAGGATATACATCTCTCAGGTGTTTTTTGTGCTG---ATGTGACTTTTGTGTAGTC---- 69151
OliveBaboon   GTGAGCTGTTTATTCATTGAGAGGATTTAGATCTCTTAGGTGTTTTTTGTTGTTGTATGTATACTTTTCGTGTAGTC---- 70580
Orangutan     GCATGTTATTTATTCATTGAGAGGATATACATCTCTCAGGTGTTTTTTGTTGTTGTATGTATACTTTTGTGTAGTC---- 70971
    
```

```

Majority      ---TGCTGTT-TATTCTTTTTGAATAGGAT-----GATATGTACAATTAATAAAAA--ATCTTTTGTGAAATGTGGTTTT
              85370      85380      85390      85400      85410      85420      85430      85440
Human         ---TGCTGTT-TATTCTTTTTGAATAGGAT-----GATATGTACAATTAATAAAAA--ATCTTTTGTGAAATGTGGTTTT 70117
Coquerel'sSifaka CTGTGCTGTT-TATTCTTTTTGAATAGGAGTCCAGAAGATGTGCAGTAAAAACAGACATTTTTTGTGGAACATTATGTT 58049
Ma'sNightMonkey -----TTTCAATAGGAT-----GATATGTACAATTAAC-----ATCTTTTGTGAAATGTGGTTTT 65019
VervetAGM     ---TGCTGTT-TGTTCTTTTTGAATAGGAT-----GATATGTACAATTAATAAAAA--GTATTTTATGAAATTTGGCTTT 71860
Gorilla       ---TGCTGTT-TACTCTTTTTGAATAGGAT-----GATACGTACAATTAATAAAAA--ATCTTTTGTGAAATGTGGTTTT 70655
GrabEatingMacaque ---TGCTGTTCTATTCTTTTTGAATAGGAT-----GATATGTACAATTTTAAAAA--GTCTTTTGTGAAATGTGGCTTT 71399
Macaque       ---TGCTGTTCTATTCTTTTTGGATAGGAT-----GATATGTACAATTTTAAAAA--GTCTTTTGTGAAATGTGGCTTT 72257
PigTailedMacaque ---TGCTGTTCTATTCTTTTTGAATAGGAT-----GATATGTACAATTTTAAAAA--GTCTTTTGTGAAATGTGGCTTT 70791
Bonobo        ---TGCTGTT-TATTCTTTTTGAATAGGAT-----GATATGTACAATTAATAAAAA--ATCTTTTGTGAAATGTGGTTTT 69220
OliveBaboon   ---TGCTGTTCTATTCTTTTTGAATAGGAT-----GATATGTACAATTTTAAAAA--GTCTTTTGTGAAATGTGGCTTT 70650
Orangutan     ---TGCTGTT-TATTCTTTTTGAATAGGAT-----GATATGTACAATTAAC-----ATCTTTTGTGAAATGTGGTTTT 71037
    
```

Tuesday, May 03, 2022 06:17 PM

|                   |                                                                                   |       |
|-------------------|-----------------------------------------------------------------------------------|-------|
| Majority          | CTTAAATACATTATTGCATTTTCATCTACAGTGATGAAGGGAAAACTACAAAAGCTAGACAGATTGCAAATT----AGTAT |       |
|                   | 85450 85460 85470 85480 85490 85500 85510 85520                                   |       |
| Human             | CTTAAATACATTATTGCATTTTCATCTACAGTGATGAAGGGAAAACTACAAAAGCTAGACAGATTGCAAATT----AGTAT | 70193 |
| Coquerel'sSifaka  | ATATATGTTATTAATATATTTTCATC-ACAGCAATGAGGGGAAAACTACAAAAGCTAGATAAATTGGAAAT-----AGTGT | 58123 |
| Ma'sNightMonkey   | GTAAATACATTATTATATTTTCACCTACAGTGATGAAGGGAAAACTACAAAAGCTAGACAGATTGTAAATTAATTAGTAT  | 65099 |
| VervetAGM         | CTTAAATACATTATTGCATTTTCATCTACAGTGATGAAGGGAAAACTACAAAAGCTAGACAGATTACATATT----AGTAT | 71936 |
| Gorilla           | CTTAAATACATTATTGCATTTTCATCTACAGTGATGAAGGGAAAACTACAAAAGCTAGACAGATTGCAAATT----AGTAT | 70731 |
| GrabEatingMacaque | CTTAAATACATTATTGCATTTTCATCTACAGTGATGAAGGGAAAACTACAAAAGCTAGACAGATTACATATTAATTAGTAT | 71479 |
| Macaque           | CTTAAATACATTATTGCATTTTCATCTACAGTGATGAAGGGAAAACTACAAAAGCTAGACAGATTACATATTAATTAGTAT | 72337 |
| PigTailedMacaque  | CTTAAATACATTATTGCATTTTCATCTACAGTGATGAAGGGAAAACTACAAAAGCTAGACAGATTACGTATTAATTAGTAT | 70871 |
| Bonobo            | CTTAAATACATTATTGCATTTTCATCTACAGTGATGAAGGGAAAACTACAAAAGCTAGACAGATTGTAAATT----AGTAT | 69296 |
| OliveBaboon       | CTTAAATACATTATTGCATTTTCATCTACAGTGATGAAGGGAAAACTACAAAAGCTAGACAGATTACATATTAATTAGTAT | 70730 |
| Orangutan         | -TAAATACATTATTGCATTTTCATCTACAGTGATGAAGGGAAAACTACAAAAGCTAGACAGATTGCAAATT----AGT-T  | 71111 |

|                   |                                                                                  |       |
|-------------------|----------------------------------------------------------------------------------|-------|
| Majority          | TGCAGTAGTGAGGTAATAGAGTAATACCCATATATTTTCTTACAATATATGTAGGT-GATGCTTGTGTTCTTTACTTTTG |       |
|                   | 85530 85540 85550 85560 85570 85580 85590 85600                                  |       |
| Human             | TGCAGTAGTGAGGTAATAGAGCAATACCCAAATGTTTTCTTAAAATATATGTAGGT-GATGCCTGTGTTCTTTACTTTTG | 70272 |
| Coquerel'sSifaka  | TGTAGCAGTGAGGTAACAGCA-GTCACCTATATATTTTGTACAGTATATATAGAT-AATGCTGTGTTTTTTTTTCCTTG  | 58201 |
| Ma'sNightMonkey   | TACAGTAGTGAGGTAATAGAGCAATCCCATGTATTTTCTTACAATGTATGTAGGTAGATACCTGTATT-TTTACTTTTG  | 65178 |
| VervetAGM         | TGCAGTAGTGAGGTAATAGAGTAATACTCATATATTTTCTTACAATATATGTAGGT-GATGCTTGTATTCTTTACTTTTG | 72015 |
| Gorilla           | TGCAGTAGTGAGGTAATAGAGCAATACCCAAATGTTTTCTTAAAATATATGTAGGT-GATGCCTGTGTTCTTTACATTTG | 70810 |
| GrabEatingMacaque | TGCAGTAGTGAGGTAATAGAGTAATACTGATACATTTTCTTACAATATATGTAGGT-GATGCTTGTGTTCTTTACTTTTG | 71558 |
| Macaque           | TGCAGTAGTGAGGTAATAGAGTAATACTGATATATTTTCTTACAATATATGTAGGT-GATGCTTGTGTTCTTTACTTTTG | 72416 |
| PigTailedMacaque  | TGCAGTAGTGAGGTAATAGAGTAATACTGATATATTTTCTTACAATATATGTAGGT-GATGCTTGTGTTCTTTACTTTTG | 70950 |
| Bonobo            | TGCAGTAGTGAGGTAATAGAGCAATACCCAAATGTTTTCTTAAAATATATGTAGGT-GATGCCTGTGTTCTTTACTTTTG | 69375 |
| OliveBaboon       | TGCAGTAGTGAGGTAATAGAGTAATACTCATATATTTTCTTACAATATATGTAGGT-GATGCTTGTGTTCTTTACTTTTG | 70809 |
| Orangutan         | TGCAGTAGTGAGGTAATAGAGCAATACCCATATATTTTCTTACAATATATGTAGAT-GATGTCTGTGTTCTTTACTTCTG | 71190 |

|                   |                                                                                    |       |
|-------------------|------------------------------------------------------------------------------------|-------|
| Majority          | TGTGTGTGTGTGTGT-T-----TTTTAAACAAGATTCATTGTAGTCTTTTGTAGATATGATTTAATAAATTTAGGCTGTTC  |       |
|                   | 85610 85620 85630 85640 85650 85660 85670 85680                                    |       |
| Human             | TGTGTGTGTGTGTGT-----TTTTAAACAAGATTCATTGTAGTCTTTTGTAGATATAAATTTAATAAATTTAGGCTGTTC   | 70344 |
| Coquerel'sSifaka  | TATGAGTGTATGTGTTA----TAAAGGAAACAAGATTCACCTGT--CTTTT--GATATTATTTAATACGTTAAGGATGTTC  | 58273 |
| Ma'sNightMonkey   | TGTATGTGTACATGTCT--TTTTAAGAGAACAAGATTCATTGTAGTCAATTTAGATATAAATTTAATAAATTTAGGCTGTTC | 65256 |
| VervetAGM         | TGTGTGTGTGTGTGTGTGT----TTTTAAACAAGATTCATTATAGTCTTTTCAGATATGATTTAATAAATTTAGGCTGTTC  | 72091 |
| Gorilla           | TGTGTGT----GTGT-----TTTTAAACAAGATTCATTGTAGTCTTTTGTAGATATAAATTTAATAAATTTAGGCTGTTC   | 70878 |
| GrabEatingMacaque | TGTGTGTGTGTGTGTGT-----TTTTAAACAAGATTCATTATAGTCTTTTCAGATATGATTTAATAAATTTAGGCTGTTC   | 71630 |
| Macaque           | TGTGTGTGTGTGTGTGTGT----TTTTAAACAAGATTCATTATAGTCTTTTCAGATATGATTTAATAAATTTAGGCTGTTC  | 72492 |
| PigTailedMacaque  | TGTGTGTGTGTGTGTGTGT----TTTTAAACAAGATTCATTATAGTCTTTTCAGATATGATTTAATAAATTTAGGCTGTTC  | 71024 |
| Bonobo            | TGTGTGTGTATGTGT-----TTTTAAACAAGATTCATTGTAGTCTTTTGTAGATATAAATTTAATAAATTTAGGCTGTTC   | 69447 |
| OliveBaboon       | TGTGTGTGTGTGTGTGTGTGTTTTTAAACAAGATTCATTATAGTCTTTTCAGATATGATTTAATAAATTTAGGCTGTTC    | 70889 |
| Orangutan         | TGTGTGTGTATGTGT-----TTTTAAACAAGATTCATTGTAGTCTTTTGTAGATATAAATTTAATAAATTTAGGCTGTTC   | 71262 |

Tuesday, May 03, 2022 06:17 PM

|                   |                                                                                 |       |
|-------------------|---------------------------------------------------------------------------------|-------|
| Majority          | AGGGTTTCAGTATCCTACAAAGATGAATGCTGCTTCTAAGTTTTGGGTTTCTTGAA----CCAGAGCTTAGAAAGAACA |       |
|                   | 85690 85700 85710 85720 85730 85740 85750 85760                                 |       |
| Human             | AGGGTTTCAGTATCCTACAAAGAAGAACGCTGCTTCTAAGTTTTGGGTTTCTTGAA----CCAGAGCTTAGAAAGAACA | 70420 |
| Coquerel'sSifaka  | AGGGTTTCAGTGTCCAGAGATGAATGCCGTTTCAGAGTTTTGGGTTTTTCAGTAGCCCCAGAACTTAAAAGCACA     | 58353 |
| Ma'sNightMonkey   | AGGGTTTTAGCATCCTGCAAAGATGAGTATTGCTTCTAAGTTTTGGTTTTCTTGAA----CCAGAGCTTAGAATGAACA | 65332 |
| VervetAGM         | AGGGTTTC-----CTACAAAGATGAATGCTGCTTCTAAGTTTTGGGTTTCTTGAA----CCAGAGCTTAGAAAGAACA  | 72161 |
| Gorilla           | AGGGTTTCAGTATCCTACAAAGAAGAATGCTGCTTCTAAGTTTTGGGTTTCTTGAA----CCAGAGCTTAGAAAGAACA | 70954 |
| GrabEatingMacaque | AGGGTTTC-----CTACAGAGATGAATGCTGCTTCTAAGTTTTGGGTTTCTTGAA----CCAGAGCTTAGAAAGAACA  | 71700 |
| Macaque           | AGGGTTTC-----CTACAGAGATGAATGCTGCTTCTAAGTTTTGGGTTTCTTGAA----CCAGAGCTTAGAAAGAACA  | 72562 |
| PigTailedMacaque  | AGGGTTTC-----CTACAGAGATGAATGCTGCTTCTAAGTTTTGGGTTTCTTGAA----CCAGAGCTTAGAAAGAACA  | 71094 |
| Bonobo            | AGGGTTTCAGTATCCTACAAAGAAGAATGCTGCTTCTAAGTTTTGGGTTTCTTGAA----CCAGAACTTAGAAAGAACA | 69523 |
| OliveBaboon       | AGGGTTTC-----CTACAGAGATGAATGCTGCTTCTAAGTTTTGGGTTTCTTGAA----CCAGAGCTTAGAAAGAATA  | 70959 |
| Orangutan         | AGGGTTTCAGTATCCTACAAAGATGAATGCTGCTTCTAAGTTTTGGGTTTCTTGAA----CCAGAGCTTAGAA----CA | 71334 |

|                   |                                                                                   |       |
|-------------------|-----------------------------------------------------------------------------------|-------|
| Majority          | AAAATATGGCATGGTATTTTCATGGTTTAGTAAGGCTACTTTTAGTTAATTATTGTGATGTAGGCCGTTAA-GTAGACTT  |       |
|                   | 85770 85780 85790 85800 85810 85820 85830 85840                                   |       |
| Human             | AAAATATGGCATGGTATTTTCATGGTTTAGTAAGGCTACTTTTAGTTAATTATTGTGATGTAGGCCATTAA-GTAGACTT  | 70499 |
| Coquerel'sSifaka  | AAAGTATTGCTTGATATATTCATGAGTTAGTATGGCTACCTTTAGTTAATTATTGTGATGTAGGCCATTAAAGTAGACTT  | 58433 |
| Ma'sNightMonkey   | AAAATATGGCTTGGTATTTTCATGGTTTAGTAAGGATACTTTTAGTTAATTATTCTGATGTAGTCTGTTAA-GTAGACTT  | 65411 |
| VervetAGM         | AGAATATGGCATGGTATTTTCGTTGGTTTAGTAAGGCTACTTTTAGTTAATTATTGTGATGTAGGCCGTTAA-GTAGACTT | 72240 |
| Gorilla           | AAAATATGGCATGGTATTTTCATGGTTTAGTAAGGCTACTTTTAGTTAATTATTGTGATGTAGGCCATTAA-GTAGACTT  | 71033 |
| GrabEatingMacaque | AGAATATGGCATGGTATTTTCGTTGGTTTAGTAAGGCTACTTTTAGTTAATTATTGTGATGTAGGCCGTTAA-GTAGACTT | 71779 |
| Macaque           | AGAATATGGCATGGTATTTTCGTTGGTTTAGTAAGGCTACTTTTAGTTAATTATTGTGATGTAGGCCGTTAA-GTAGGCTT | 72641 |
| PigTailedMacaque  | AGAATATGGCATGGTATTTTCGTTGGTTTAGTAAGGCTACTTTTAGTTAATTATTGTGATGTAGGCCGTTAA-GTAGACTT | 71173 |
| Bonobo            | AAAATATGGCATGGTATTTTCATGGTTTAGTAAGGCTACTTTTAGTTAATTATTGTGATGTAGGCCATTAA-GTAGACTT  | 69602 |
| OliveBaboon       | AGAATATGGCATGGTATTTTCGTTGGTTTAGTAAGGCTACTTTTAGTTAATTATTGTGATGTAGGCTGTTAA-GTAGACTT | 71038 |
| Orangutan         | AAAATATGGCATGGTATTTTCATGGTTTAGTAAGGCTACTTTTAGTTAATTATTGTGATGTAGGCCATTAA-GTAGACTT  | 71413 |

|                   |                                                                                 |       |
|-------------------|---------------------------------------------------------------------------------|-------|
| Majority          | TT-CTAAAACGAAACCCAGTGAAAAGGGGTTTTGAAGATACATATATACTGGTTTCTAAGAACTAGTCTTTTTGGATCA |       |
|                   | 85850 85860 85870 85880 85890 85900 85910 85920                                 |       |
| Human             | TT-CTAAAACGAAACCCAGAGGAGAGGGGTTTTGAAGATACATATATACTGGTTTCTAAGAACTAATCTTTTTGGATCA | 70578 |
| Coquerel'sSifaka  | TTTTTAAAAGAAACCCAGTAGGGGGCAAGGGCAACATAAGTA-ACATAAATATCTG----TACCCCATATAT-G      | 58506 |
| Ma'sNightMonkey   | TT-CTTAAA-GAAACCCAGTGAAAAGGGGTTTTAAGATACATATATATTAGTTTCTAAGAACTAGTCTTTTTGAATCA  | 65489 |
| VervetAGM         | ---CTAAAACGAAACCCAGTGAAAAGGGGTTTTGAAGATGCATATATACTGGTTTCTAAGAACTAGGCTTTTTGGATCA | 72317 |
| Gorilla           | TT-CTAAAACGAAACCCAGAGAAGAGGGGTTTTGAAGATACGTATATACTGGTTTCTAAGAACTAATCTTTTTGGATCA | 71112 |
| GrabEatingMacaque | CT-CTAAAACGAAACCCAGTGAAAAGGGGTTTTGAAGATGCATATATACTGGTTTCTAAGAACTAGGCTTTTTGGATCA | 71858 |
| Macaque           | CT-CTAAAACGAAACCCAGTGAAAAGGGGTTTTGAAGATGCATATATACTGGTTTCTAAGAACTAGGCTTTTTGGATCA | 72720 |
| PigTailedMacaque  | CT-CTAAAACGAAACCCAGTGAAAAGGGGTTTTGAAGATGCATATATACTGGTTTCTAAGAACTAGGCTTTTTGGATCA | 71252 |
| Bonobo            | TT-CTAAAACGAAACCCAGAGGAGAGGGGTTTTGAAGATACATATATACTGGTTTCTAAGAACTAATCTTTTTGGATCA | 69681 |
| OliveBaboon       | TT-CTAAAACGAAACCCAGTGAAAAGGGGTTTTGAAGATGCATATATACTGGTTTCTAAGAACTAGGCTTTTTGGATCA | 71117 |
| Orangutan         | TT-CTAAAACGAAACCCAGAGAAGAGGGGTTTTGAAGATACATGTATACTGGTTTCTAAGAACTAATCTTTTTGGATCA | 71492 |

Tuesday, May 03, 2022 06:17 PM

| Majority          | TTGGTATTGGTAGAAGGGATTGCTGTGTTTTCTGCCACCATTGAATCTCTGTATAAA-GTTTGGCT-CCACTATCAAAA  |       |
|-------------------|----------------------------------------------------------------------------------|-------|
|                   | 85930 85940 85950 85960 85970 85980 85990 86000                                  |       |
| Human             | TTGGTATTGGTAGAAGGGATTGCTGTGTTTTCTGCCACCATTGGATCTCTGTATAAA-GTTTGGCT-CCACTATCAAAA  | 70656 |
| Coquerel'sSifaka  | CTGAAATAAAAAAAAAAAAAA-A----G----AAACCCAGTGAAAAGGGTTATAAAGGTCCCTATGCCAGTTTCTAAG   | 58577 |
| Ma'sNightMonkey   | CTGGTATTGGTAGAACGGATT-----CTGCCACCATTGGATCGCTGTATAAAAGTTTGTCT-CCACTATCAAAA       | 65557 |
| VervetAGM         | TTGGTATTGGTAGAAGGGATTGCTGTGTTTTCTGCCACCATTGAATCTCTGTAAAAA-GTTTGGCT-CCACTATCAAAA  | 72395 |
| Gorilla           | TTGGTATTGGTAGAAGGGATTGCTGTGTTTTCTGCCACCATTGGATCCAC-TATAAA-GTTTGGCT-CCACTATCAAAA  | 71189 |
| GrabEatingMacaque | TTGGTATTGGTAGAAGGGATTGCTGTGTTTTCTGCCACCATTGAATCTCTGTATAAA-GTTTGGCT-CCGCTATCAAAA  | 71936 |
| Macaque           | TTGGTATTGGTAGAAGGGATTGCTGTGTTTTCTGCCACCATTGAATCTCTGTATAAA-GTTTGGCT-CCGCTATCAAAA  | 72798 |
| PigTailedMacaque  | TTGGTATTGGTAGAAGGGATTGCTGTGTTTTCTGCCACCATTGAATCTCTGTATAAA-GTTTGGCT-CCGCTATCAAAA  | 71330 |
| Bonobo            | TTGGTATTGGTAGAAGGGATTGCTGTGTTTTCTGCCACCATTGGATCTCTGTATAAA-GTTTGGCT-CCACTATCAAAA  | 69759 |
| OliveBaboon       | TTGGTATTGGTAGAAGGGATTGCTGTGTTTTCTGCCACCATTGAATCTCTGTATAAA-GTTTGGCT-CCGCTATCAAAA  | 71195 |
| Orangutan         | TTGGTATTGGTAGAAGGGATTCACTGTGTTTTCTGCCACCATTGGATCTCT--GTATA-GTTTGGCT-CCACTATCAAAA | 71568 |

| Majority          | TGCTTAGATAGATCCCTTTGCAATAGTTGCCACCCTAGGAATAGCTCGAAAAATTATTAAGTTAATACTAGTTCCTTAGAT |       |
|-------------------|-----------------------------------------------------------------------------------|-------|
|                   | 86010 86020 86030 86040 86050 86060 86070 86080                                   |       |
| Human             | TGCTTAGATAGATGCCTTTGCAATAGTTGCCACCCTAGGAATAGCTCAAAAAATTATTAAGTTAATACTAGTTCCTTAGAT | 70736 |
| Coquerel'sSifaka  | AAGTGAGG--GGTTTTTTTG-GATCATTAGTATTAATAGAAGGGATTAGCTGTTTTTCTACCATTATTGGATCTCCATAT  | 58654 |
| Ma'sNightMonkey   | TGCTTAGATAGATCCCTTTGCAACAGTTGCCACCCTAGGAATAACTTGAAAACTACTAAGTTAATACTAGTTCCTTAGAT  | 65637 |
| VervetAGM         | TGCTTAGATAGATCCCTTTGCAATAGTTGCCACCCTAGGAATAGCTCGAAAAATTATTAAGTTAATACTAGTTCCTTAGAT | 72475 |
| Gorilla           | TGCTTAGATAGATCCCTTTGCAATAGTTACCACCCTAGGAATAGCTCAAAAAATTATTAAGTTAATACTAGTTCCTTAGAT | 71269 |
| GrabEatingMacaque | TGCTTAGATAGATCCCTTTGCAATAGTTGCCACCCTAGGAATAGCTCGAAAAATTATTAAGTTAATACTAGTTCCTTAGAT | 72016 |
| Macaque           | TGCTTAGATAGATCCCTTTGCAATAGTTGCCACCCTAGGAATAGCTCGAAAAATTATTAAGTTAATACTAGTTCCTTAGAT | 72878 |
| PigTailedMacaque  | TGCTTAGATAGATCCCTTTGCAATAGTTGCCACCCTAGGAATAGCTCGAAAAATTATTAAGTTAATACTAGTTCCTTAGAT | 71410 |
| Bonobo            | TGCTTAGATAGATCCCTTTGCAATAGTTGCCACCCTAGGAATAGCTCAAAAAATTATTAAGTTAATACTAGTTCCTTAGAT | 69839 |
| OliveBaboon       | TGCTTAGATAGATCCCTTTGCAATAGTTGCCACCCTAGGAATAGCTCGAAAAATTATTAAGTTAATACTAGTTCCTTAGAT | 71275 |
| Orangutan         | TGCTTAGATAGATCCCTTTGCAATAGTTGCCACCCTAGGAATAGCTCGAAAAATTATTAAGTTAATACTAGTTCCTTAGAT | 71648 |

| Majority          | TCCACCTCTATTTCCTTGGAGTT-T--GTTTTTTGTTTTTTGTTTTTTT-TTT--TTTT-GAGACGG-----      |       |
|-------------------|-------------------------------------------------------------------------------|-------|
|                   | 86090 86100 86110 86120 86130 86140 86150 86160                               |       |
| Human             | TCCACCTCTATTTCCTTGGAGTTGT--GTTTTTTTTTTTTTTTTTTTTTTTGG-----AGAT-----           | 70790 |
| Coquerel'sSifaka  | AAAAATTTGA---C-----                                                           | 58665 |
| Ma'sNightMonkey   | TCCACCTCT-----                                                                | 65646 |
| VervetAGM         | TCCACCTCTATTTCCTTGGAGTT-T--GTTTTTTGTTTTTTGTTTTTTGTTTTTTGTTTTTTGAGACGG-----    | 72536 |
| Gorilla           | TCCACCTCTATTTCCTTGGAGTTGT--GTTTTTTGTTTTTTGTTTTTTGTTTTTTGTTTTTTGTTTTTTGTTTTTTT | 71347 |
| GrabEatingMacaque | TCCACCTCTATTTCCTTGGAGTT-T--GTTTTTTGTTTTTTGTTTTTTT-----TTTTTGGAGACGG-----      | 72072 |
| Macaque           | TCCACCTCTATTTCCTTGGAGTT-T--GTTTTTTGTTTTTTGTTTTTTT-----TTTTTGGAGACAG-----      | 72934 |
| PigTailedMacaque  | TCCACCTCTATTTCCTTGGAGTT-T--GTTTTTTGTTTTTTGTTTTTTT-----TTTT-GAGACGG-----       | 71465 |
| Bonobo            | TCCACCTCTATTTCCTTGGAGTTGTTGTTTTTTTTTTTTTTTTTTTTTTTTTTTTTTTGTAGAT-----         | 69902 |
| OliveBaboon       | TCCACCTCTATTTCCTTGGAGTT-T--GTTTTTTGTTTTTTGTTTTTTGTTTTTTTGGAGACGG-----         | 71337 |
| Orangutan         | TCCACCTCTATTTCCTTGGAGTTGT--TTTTTTTTTTTTTTTTTTTTTTTTTTTGG-----AGAC-----        | 71702 |

Tuesday, May 03, 2022 06:17 PM

Majority AGTAGTCTCGCTCTGTTCGCCAGGCTGGAGTGCAGTGG--CGCGATCTCGGCTCACTGCAAGCTCCGCCTCCTGAGTTCA  
 86170 86180 86190 86200 86210 86220 86230 86240  
 Human -AGAGTCTGGCTCTGTACCCAGGCTGGAGTGCAGTGGCATGCAATCTCGGCTCACTGCAAGCTCCGCCTCCTGGGTTCA 70869  
 Coquerel'sSifaka -----CT--CACTAT--C-----AGAATGC-----CTACA-----TAGATCCC---TTCG 58698  
 Ma'sNightMonkey ----- 65646  
 VervetAGM AGTCGTCTCGCTCTGTTCGCCAGGCTGGAGTGCAGTGG--CGCGATCTCAGCTCACTGCAACCTCCGTCTCCTGAGTTCA 72614  
 Gorrilla GAGAGTCTGTCTCTGTTCGCCAGGCTGGAGTGCAGTGGGGTGCAATCTCGGCTCACTGCAAGCTCCGCCTCCTGGGTTCA 71427  
 GrabEatingMacaque AGTTGTCTCGCTCTGTTCGCCAGGCTGGAGTGCAGTGG--CGCGATCTCGGCTCACTGCAATCTCCGCCTCCTGAGTTCA 72150  
 Macaque AGTTGTCTCGCTCTGTTCGCCAGGCTGGAGTGCAGTGG--CGCGATCTCGGCTCACTGCAATCTCCGCCTCCTGAGTTCA 73012  
 PigTailedMacaque AGTTGTCTCGCTCTGTTCGCCAGGCTGGAGTGCATTGG--CGCGATCTCGGCTCACTGCAACCTCCGCCTCCTGAGTTCA 71543  
 Bonobo -AGAGTCTGGCTCTGTTCGCCAGGCTGGAGTGCAGTGGCATGCAATCTCGGCTCACTGCAAGCTCTGCCTCCTGGGTTCA 69981  
 OliveBaboon AGTCGTCTCGCTCTGTTCGCCAGGCTGGAGTGCAGTGG--CGCGATCTCGGCTCACTGCAACCTCTGCCTCCTGAGTTCA 71415  
 Orangutan -AGAGTCTGGCTCTGTTCGCCAGGCTGGAGTGCAGTGGTGCGCAATCTTGGCTCACTGCAAGCTCCGCCTCCTGGGTTCA 71781

Majority CGCCATTCTCCTGCCTCAGCCTCCCGAGTAGCTGGGACTACAGGTGCCTGCCACCATGCCCGGCTAATTTCTTTGTATTT  
 86250 86260 86270 86280 86290 86300 86310 86320  
 Human CGCCATTCTCCTGCCTCAGCCTCCCAAGTAGCTGGGACTACAGGCGCACGCCACCACGCCAGCTAATTTCTTCATATTT 70949  
 Coquerel'sSifaka TAATAGT-TCCTACCCTAG-----GAATAACTAGAA---AAATA-----TTAATTT----- 58740  
 Ma'sNightMonkey ----- 65646  
 VervetAGM TGCCATTCTCCTGCCTCAGCCTCCCGAGTAGCTGGGACTGCAGGTGCCTGCCACCATGCCCGGCTAATTTCTTTGTATTT 72694  
 Gorrilla CGCCATTCTCCTGCCTCAGCCTCCCAAGTAGCTGGGACTACAGGTGCCCGCCACCAGGCCAGCTAATTTCTTCGTATTT 71507  
 GrabEatingMacaque CGCCATTCTCCTGCCTCAGCCTCC-GAGTAGCTGGGACTACAGGTGCCTGCCACCATGCCCGGCTAATTTCTTTGTATTT 72229  
 Macaque CGCCATTCTCCTGCCTCAGCCTCC-GAGTAGCTGGGACTACAGGTGCCTGCCACCATGCCCGGCTAATTTCTTTGTATTT 73091  
 PigTailedMacaque CGCCATTCTCCTGCCTCAGCCTCC-GAGTAGCTGGGACTACAGGTGCCTGCCACCATGCCCGGCTAATTTCTTTGTATTT 71622  
 Bonobo CGCCATTCTCCTGCCTCAGCCTCCCAAGTAGCTGGGACTATAGGCGCCGCCACCACGCCAGCTAATTTCTTCGTATTT 70061  
 OliveBaboon CGCCATTCTCCTGCCTCAGCCTCCCGAGTAGCTGGGACTACAGGTGCCTGCCACCATGCCCGGCTCATTCTTTGTATTT 71495  
 Orangutan CGCCATTCTCCTGCCTCAGCCTCCCAAGTAGCTGGGACTACAGGCACCCGCCACCACACCAGCTAATTTCTTTGTATTT 71861

Majority TTTT-AGTAGAGACGGGGTTTCACCGTGTAGCCAGGATGGTCTTGAT----CCCTGACCTCGTGATCCTCCTGCCTTGG  
 86330 86340 86350 86360 86370 86380 86390 86400  
 Human TTTT-TAGTAGAGACGGGGTTTACTGTGTAGCCAGGATGGTCTTGAT---CTCCTGACCTCCTGATCCTCCTGCCTCGG 71026  
 Coquerel'sSifaka -A-----AGAACAG---T----- 58749  
 Ma'sNightMonkey -----G---T----- 65648  
 VervetAGM TTTT-AGTAGAGACGGGGTTTCACCGTGTAGCCAGGATGGTCTTGAT----CCCTGACCTCGTGATCCTCCACCTTGG 72769  
 Gorrilla TTTT-AGTAGAGACGGGGTTTACTGTGTAGCCAGGATGGTCTTGAT---CTCCTGACCTCCTGATCCTCCTGCCTCGG 71583  
 GrabEatingMacaque TTTT-TAGTAGAGACGGGGTTTCACCATGTTAGCCAGGATAGTCTTGAT----CCCTGACCTCGTGATCCTCCTGCCTTGG 72305  
 Macaque TTTT-TAGTAGAGACGGGGTTTCACCATGTTAGCCAGGATAGTCTTGAT----CCCTGACCTCGTGATCCTCCTGCCTTGG 73167  
 PigTailedMacaque TTTT-TAGTAGAGACGGGGTTTCACCATGTTAGCCAGGATAGTCTTGAT----CCCTGACCTCGTGATCCTCCTGCCTTGG 71698  
 Bonobo TTTT-AGTAGAGATGGGGTTTACTGTGTAGCCAGGATGGTCTTGAT---CTCCTGACCTCCTGATCCTCCTGCCTCGG 70137  
 OliveBaboon TTTT-TAGTAGAGACGGGGTTTCACCGTGTAGCCAGGATGGTCTTGAT----CCCTGACCTCGTGATCCTCCGCCTTGG 71571  
 Orangutan TTTT-AGTAGAGACGGGGTTTACCATGTTAGCCAGGATGGTCTTGATGATCCTGACCTCCTGATCCTCCTGCCTCGG 71940



Tuesday, May 03, 2022 06:17 PM

```
Majority      CCTCCCAAAGTACTGGGATTACAGGCGTGAGCAACCGCGCCTGGCCTGCTTAGAGTTTTTTATGTCATTATTTTGTGACA
              86410      86420      86430      86440      86450      86460      86470      86480
Human         CCTCCCAAAGTACTGGGATTACAGGCGTGAGCCACCGCGCCTAGCCTGCTTAGAGTTTTTTATGTAATTATTTTGTGACA 71106
Coquerel'sSifaka -----TACTTAGATT-----CCATCTCTG--TTGCTTAGAGTT---CATGTCATTATTTTGTGGCA 58800
Ma'sNightMonkey -----T-----G-----CTTAGAGTTTTTCATGTCATTATTTTGTGGCA 65682
VervetAGM     CCTCCCAAAGTACTGGGATTACAGGCGTGAGCACCAGCGCCTGGCCTGCTTAGAGTTTTTTATGTCATCATTTTGTGACA 72849
Gorilla       CCTCCCAAAGTACTGGGATTACAGGCGTGAGCCACCGCGCCTAGCCTGCTTAGAGTTTTTTATGTAATTATTTTGTGACA 71663
GrabEatingMacaque CCTCCCAAAGTACTGGGATTACAGGCGTGAGCAACCGCGCCTGGCCTGCTTAGAGTTTTTTATGTCATCATTTTGTGACA 72385
Macaque       CCTCCCAAAGTACTGGGATTACAGGCGTGAGCAACCGCGCCTGGCCTGCTTAGAGTTTTTTATGTCATCATTTTGTGACA 73247
PigTailedMacaque CCTCCCAAAGTACTGGGATTACAGGCGTGAGCAACCGCGCCTGGCCTGCTTAGAGTTTTTTATGTCATCATTTTGTGACA 71778
Bonobo        CCTCCCAAAGTACTGGGATTATGGGCGTGAGCCACCGTGCCTAGCCTGCTTAGAGTTTTTTATGTAATTATTTTGTGATG 70217
OliveBaboon   CCTCCCAAAGTACTGGGATTACAGGCGTGAGCAACCGCACCTGGCCTGCTTAGAGTTTTTTATGTCATCATTTTGTGACA 71651
Orangutan     CCTCCCAAAGTACTGGGATTACAGGCGTGAGCCACCGCGCCTGGCCTGCTTAGAGTTTTTTATGTAATTATTTTGTGGCA 72020
```

```
Majority      CAAACATTTAAAATACTGTAGCTTAGAATG-AAATTGTCTCAATCCTAGGAGCCAAAAGTT----TGATGAATATGAATA
              86490      86500      86510      86520      86530      86540      86550      86560
Human         CAAACATTTAAAATACTGTAGCTTAGAATG-AAATTGTCTCAATCCTAGGAGCCAAAAGTT----TGATGAATATGAATA 71181
Coquerel'sSifaka AAAACATTTCAAGATACAATACTATAGAATGGAAATTCATTTAATCCTAGGAACGAAAAGTTGGTTTGATGCATAGGAATC 58880
Ma'sNightMonkey CAAACATTTAAAATACTATAGTTTAGAATG-AAATTGTCTCAATCCCAGGAGCCAAAAGTT----GGAGGTGTATGAATA 65757
VervetAGM     CAAACATTTAAAATACTGTAGCTTAGAATG-AATT-GTCTCAATCCTAGGAGCCAAAAGTT----TGCTGAATATGAATA 72923
Gorilla       CAAACATTTAAAATACTGTAGCTTAGAATG-AAATTGTCTCAATCCTAGGAGCCAAAAGTT----TGATGAATATGAATA 71738
GrabEatingMacaque CAAACATTTAAAATACTGTAGCTTAGAATG-AAAT-GTCTCAATCCTAGGAGCCAAAAGTT----TGCTGAATATGAATA 72459
Macaque       CAAACATTTAAAATACTGTAGCTTAGAATG-AAAT-GTCTCAATCCTAGGAGCCAAAAGTT----TGCTGAATATGAATA 73321
PigTailedMacaque CAAACATTTAAAATACTGTAGCTTAGAATG-AAAT-GTCTCAATCCTAGGAGCCAAAAGTT----TGCTGAATATGAATA 71852
Bonobo        CAAACATTTAAAATACTGTAGCTTAGAATG-AAATTGTCTCAATCCTAGGAGCCAAAAGTT----TGATGAATATGAATA 70292
OliveBaboon   CAAACATTTAAAATACTGTAGCTTAGAATG-AAAT-GTCTCAATCCTAGGAGCCAAAAGTT----TGCTGAATATGAATA 71725
Orangutan     CAAACATTTAAAATACTGTAGCTTAGAATG-AAATTGTCTCAATCCTAGGAGCCAAAAGTT----TGATGAATGTGAATA 72095
```

```
Majority      CTAATATTAGCTAACCATTTTGTGTT--CTGTGTCAGGCA-----CTGTTCTTAGCCCTTTACAAGTAAGTTAATAC-A
              86570      86580      86590      86600      86610      86620      86630      86640
Human         CTAATATTA----ACCATTTTGTGTT--CTGTGTCAGGCA-----CTGTTCTTAGCCCTTTACAAGTAAGTTAATAC-A 71249
Coquerel'sSifaka TTAATAATA----GCTGTACTATGTATTGTGTGCCAGGCA-----CTATTCTTAGCCCTTTACATTTGAGTTAATCCTG 58951
Ma'sNightMonkey TTAATACTAGCTAGCCATTTTGTGTTTCTATGTCAGGCA-----CTGTTCTTAGCCCTTTACAGATAAGTTAATAC-A 65831
VervetAGM     CTAATATTAGCTAACCATTTTGTGTC--CTGTTTCAGGCACTCAACTGTTCTCAGCCCTTCACAAGTAA-----TAC-A 72995
Gorilla       CTAATATTA----ACCATTTTGTGTT--CTGTGTCAGGCA-----CTGTTCTTAGCCCTTTACAAGTAAGTTAATAC-A 71806
GrabEatingMacaque CTAATATTAGCTAACCATTTTCTGTC--CTGTTTCAGGCACTCAACTGTTCTTAGCCCTTCACAAGTAA-----TAC-A 72531
Macaque       CTAATATTAGCTAACCATTTTCTGTC--CTGTTTCAGGCACTCAACTGTTCTTAGCCCTTCACAAGTAA-----TAC-A 73393
PigTailedMacaque CTAATATTAGCTAACCATTTTCTGTC--CTGTTTCAGGCACTCAACTGTTCTTAGCCCTTCACAAGTAA-----TAC-A 71924
Bonobo        CTAATATTA----ACCATTTTGTGTT--CTGTGTCAGGCA-----CTGTTCTTAGCCCTTTACAAGTAAGTTAATAC-A 70360
OliveBaboon   CTAATATTAGCTAACCATTTTCTGTC--CTGTTTCAGGCACTCAACTGTTCTTAGCCCTTCACAAGTAA-----TAC-A 71797
Orangutan     CTAATATTAGCTAACCATTTTGTGTT--CTGTGTCAGGCA-----CTGTTCTTAGCCCTTTACAAGTAAGTTAATAC-A 72167
```

Tuesday, May 03, 2022 06:17 PM

| Majority          | TCATCTCTAAATGTAGTTACCATTATCGATCCCATTTTACAGATTTGGAAAGTAGGGCACAAGAACAGTTTGCTCAGAT  |       |
|-------------------|----------------------------------------------------------------------------------|-------|
|                   | 86650 86660 86670 86680 86690 86700 86710 86720                                  |       |
| Human             | TCATCTCTAAATGTAGTTACCATTATCGATCCCATTTTATAGATTTGGAAAGTAGGGTACAAAGAACAGTTTGCCAGAT  | 71329 |
| Coquerel'sSifaka  | GCATCTCTAAACACAGTTACCATTGTTGCCCTCTATTTTGCAGATCTGAAACTAGGGCACAAGAGCAGTTG-TCAGAT   | 59030 |
| Ma'sNightMonkey   | TCATCTCTAAATGTAGTTAACATTATCAACCCGTGTGTACAGATTTGGAAAGTAGGGCACAAGAGCAGTTTGCTCAGAT  | 65911 |
| VervetAGM         | TCATCTCTAAATGTAGTTACCATTATGGATCCCATTTTACAGATTTGGAAAGTAGGGCAGAAAGAACAGTTTGCTCAGAT | 73075 |
| Gorilla           | TCATATCTAAATGTAGTTACCATTATCGATCCCATTTTATAGATTTGGAAAGTAGGGTACAAAGAACAGTTTGCTCAGAT | 71886 |
| GrabEatingMacaque | TCATCTCTAAATGTAGTTACCATTATAGATCCCATTTTACAGATTTGGAAAGTAGGGCAGAAAGAACAGTTTGCTCAGAT | 72611 |
| Macaque           | TCATCTCTAAATGTAGTTACCATTATAGATCCCATTTTACAGATTTGGAAAGTAGGGCAGAAAGAACAGTTTGCTCAGAT | 73473 |
| PigTailedMacaque  | TCATCTCTAAATGTAGTTACCATTATAGATCCCATTTTACAGATTTGGAAAGTAGGGCAGAAAGAACAGTTTGCTCAGAT | 72004 |
| Bonobo            | TCATCTCTAAATGTAGTTACCATTATCGATCCCATTTTATAGATTTGGAAAGTAGGGTACAAAGAACAGTTTGCTCAGAT | 70440 |
| OliveBaboon       | TCATCTCTAAATGTAGTTACCATTATGGATCCCATTTTACAGATTTGGAAAGTAGGACAGAAAGAACAGTTTGCTCAGAT | 71877 |
| Orangutan         | TCATCTCTAAATGTAGTTACCATTATCGATCCCATTTTATAGATTTGGAAGGTAGGGCACAAGAACAGTTTGCTCAGAT  | 72247 |

| Majority          | TCCCTTAACTTTTGAGTGGCCGAGCCCTAGCACTCAATGCCAGGTAGTCTAGTTCCAAAGTCCGTACTCCTAACTAATAA  |       |
|-------------------|-----------------------------------------------------------------------------------|-------|
|                   | 86730 86740 86750 86760 86770 86780 86790 86800                                   |       |
| Human             | TCCCTTAACTTTTGAGTGGCCGAGCCCTAGCACTGAAAGCCAGGTAGTCTGGTTCCAAAGTCCGTACTCCTGACTAATAA  | 71409 |
| Coquerel'sSifaka  | TCTCATAACTGGTGGAGTGGCTGAGT--TAGTACTCAAAGCCAGATAGTCTGGCTGCAAAGTCCATGCTCCTTAGTAATCA | 59108 |
| Ma'sNightMonkey   | TCCCTCAACTTTTGAATGGCCGAGCCCAAGCACTCA--GTCAGGTAGTCTAGTTCCAAAGCCCATACTCCTAACTA----  | 65985 |
| VervetAGM         | TCCCTTAACTTTTGAGTGACCAAGCCCTGGCACTCAATGCCAGGAAATCTACTTCCAAAGGTCCGTACTCCTAACTAATAA | 73155 |
| Gorilla           | TCCCTTAACTTTTGAGTGGCCGAGCCCTAGCACTCAAAGCCAGGTAGTCTGGTTCCAAAGTCTGTACTCCTAACTAATAT  | 71966 |
| GrabEatingMacaque | TCCCTTAACTTTTGAGTGACCAAGCCCTGGCACTCAATGCCAGGAAATCTAGTTCCAAAGGTCCGTACTCCTAACTAATAA | 72691 |
| Macaque           | TCCCTTAACTTTTGAGTGACCAAGCCCTGGCACTCAATGCCAGGAAATCTAGTTCCAAAGGTCCGTACTCCTAACTAATAA | 73553 |
| PigTailedMacaque  | TCCCTTAACTTTTGAGTGACCAAGCCCTGGCACTCAATGCCAGGAAATCTAGTTCCAAAGGTCCGTACTCCTAACTAATAA | 72084 |
| Bonobo            | TCCCTTAACTTTTGAGTGGCCGAGCCCTAGCACTGAAAGCCAGGTAGTCTGGTTCCAAAGTCCATACTCCTAACTAATAA  | 70520 |
| OliveBaboon       | TCCCTTAACTTTTGAGTGACCAAGCCCTGGCACTCAATGCCAGGAAATCTAGTTCCAAAGGTCCGTACTCCTAACTAATAA | 71957 |
| Orangutan         | TCCCTTAACTTTTGAGTGGCCGAGCCCTAGCACTCAAAGCCAGGTAGTCTAGTTTCCAAAGTCCGTACTCCTAACTAATAA | 72327 |

| Majority          | ATAGTGAATAAAAAT-----TAGATTAGCTTGACATTTTAGCCTGTCGTCTTCTCCCCTGTAGAATAGTTATCAAGAAT  |       |
|-------------------|----------------------------------------------------------------------------------|-------|
|                   | 86810 86820 86830 86840 86850 86860 86870 86880                                  |       |
| Human             | ATAGTGAATAAAAAT-----TAGATTAGCTTGACATTTTAGCCTGTCGTCTTCTCACCTGTAGAATAGTTATCAAGAAT  | 71483 |
| Coquerel'sSifaka  | ACAATAGAATAAAAAGTACTATAGGTTACCTTGGCCTTTTAGCTTGCTTCCCTTCCCCTGTGAAATAGTTATCTAGAAT  | 59188 |
| Ma'sNightMonkey   | ---GTGGAGTAAAAT-----TAGATTAGCTTGACATTTTAGCCTGTCGTCTTCTTCCCCTGTAGAATAGTTATCAATA-- | 66054 |
| VervetAGM         | ATAGTGAATAAAAAT-----TAGATTAGCTTGACATTTTAGCCTGTCATCTTCTCCCCTGTAGAATAGTTATCAAGAAT  | 73229 |
| Gorilla           | ATAGTGAATAAAAAT-----TAGATTAGCTTGACATTTTAGCCTGTCGTCTTCTCCCCTGTAGAATAGTTATCAAGAAT  | 72040 |
| GrabEatingMacaque | ATAGTGAATAAAAAT-----TAGATTAGCTTGACATTTTAGCCTGTCATCTTCTCCCCTGTAAAATAGTTATCAAGAAT  | 72765 |
| Macaque           | ATAGTGAATAAAAAT-----TAGATTAGCTTGACATTTTAGCCTGTCATCTTCTCCCCTGTAGAATAGTTATCAAGAAT  | 73627 |
| PigTailedMacaque  | ATAGTGAATAAAAAT-----TAGATTAGCTTGACATTTTAGCCTGTCATCTTCTCCCCTGTAGAATAGTTATCAAGAAT  | 72158 |
| Bonobo            | ATAGTGAATAAAAAT-----TAGATTAGCTTGACATTTTAGCCTGTCGTCTTCTCACCTGTAGAATAGTTATCAAGAAT  | 70594 |
| OliveBaboon       | ATAGTGAATAAAAAT-----TAGATTAGCTTGACATTTTAGCCTGTCATCTTCTCCCCTGTAGAATAGTTATCAAGAAT  | 72031 |
| Orangutan         | ATAGTGAATAAAAAT-----TAGATTAGCTTGACATTTTAGCCGGTTCGTCTTCTCCCCTGTAGAATAGTTATCAAGAAT | 72401 |

Tuesday, May 03, 2022 06:17 PM

|                   |                                                                                   |       |
|-------------------|-----------------------------------------------------------------------------------|-------|
| Majority          | AATAATATACATGTAGTAAAAATGTAAGTCCCATCATTTTAGCTTCTTTTTTTTTTTTTTTT---ACATACTAAGAT     |       |
|                   | 86890 86900 86910 86920 86930 86940 86950 86960                                   |       |
| Human             | AGTAATATACATATAGTAAAAATTTAAGTCCCATCATTTTAGCTTGCTTTTTTTTTT-----ACATACTAAGAT        | 71551 |
| Coquerel'sSifaka  | AATGTCATACATGTAGCAAATATGTAAGTCCCATAGTTTTAATTTCTTTTTTC-----ACATACTAAGAT            | 59254 |
| Ma'sNightMonkey   | --CATTATACATGTAGTAAAAATGTAAGTCCCATCATTTTGCTTCTTCTTATTTTTTTTTTG---GCATACTAAGAT     | 66128 |
| VervetAGM         | AATAATATACATGTAGTAAAAATGTAAGTCCCATCATTTTAGCTTCTTTTTTTTTTCTTTTTT---ACATAGTAAGAT    | 73305 |
| Gorilla           | AGTAATATACATATAGTCAAAATTTAAGTCCCATCATTTTAGCTTACTTTTTTTTTTTTT-----ACATACTAAGAT     | 72112 |
| GrabEatingMacaque | AATAATATACATGTAGTAAAAATGTAAGTCCCATCATTTTAGCTTCTTTTTTTTTTTTTTTTTTTTACATAGTAAGAT    | 72845 |
| Macaque           | AATAATATACATGTAGTAAAAATGTAAGTCCCATCATTTTAGCTTCTTCTTTTTTTTTTTTTTTTTT-ACATAGTAAGAT  | 73706 |
| PigTailedMacaque  | AATAATATACATATAGTAAAAATGTAAGTCCCATCATTTTAGCTTCTTTTTTTTTTTTTTTTTT-----ACATAGTAAGAT | 72232 |
| Bonobo            | AGTAATATACATATAGTAAAAATTTAAGTCCCATCATTTTAGCTTGCTTTTTTTTTTTTT-----ACATACTAAGAT     | 70664 |
| OliveBaboon       | AATAATATACATGTAGTAAAAATGTAAGTCCCATCATTTTAGCTTCTTTTTTTTTTTTTTTTTTTT-ACATAGTAAGAT   | 72110 |
| Orangutan         | AGTAATATACATATAGTAAAAATGTAAGTCCCATCATTTTAGCTTCTTCTTTTTTTTTTTTTTCC-ACATACTAAGAT    | 72480 |

|                   |                                                                                   |       |
|-------------------|-----------------------------------------------------------------------------------|-------|
| Majority          | ATTTTTGTTACCAAGTCCATTTCAGTATTTAGCCTGATTATCTTATTGATTAAAAAACCAAAGTGAGTATTGTTTCATAC  |       |
|                   | 86970 86980 86990 87000 87010 87020 87030 87040                                   |       |
| Human             | ATTTTTGTTACCAAGTCCATTAAAGTATTTAGCCTGATTATCTTATTGATTAAAAATACCAAAATGTGTATTGTTTCATGC | 71631 |
| Coquerel'sSifaka  | ATTTTTGTTGCCAAGTCCATTCCGTGTTAACTGGTTATCTTAT-GATTACAAAACCAA-GTGAGTATTGTTCTTAT      | 59332 |
| Ma'sNightMonkey   | ATTTTTGTTACCAAGTCCATTTCAGTATTTAGTCTGATCATCTTATTGGTTAATAAACCAAAGTGAGTATTGTTGATAT   | 66208 |
| VervetAGM         | ATTTTTGTTACCAAGTCCATTTCAGTATTTAGCCTGATTATCTTATTGATTAAAAAATGAAAAGTGAGTATTGTTTCATAC | 73385 |
| Gorilla           | ATTTTTGTTACCAAGTCCATTAAAGTATTTAGCCTGATTATCTTATTGATTAAAAATACCAAAATGAGTATTGTTTCATGC | 72192 |
| GrabEatingMacaque | ATTTTTGTTACCAAGTCCATTTCAGTATTTAGCCTGATTATCTTATTGATTAAAAAATGAAAAGTGAGTATTGTTTCATAC | 72925 |
| Macaque           | ATTTTTGTTACCAAGTCCATTTCAGTATTTAGCCTGATTATCTTATTGATTAAAAAATGAAAAGTGAGTATTGTTTCATAC | 73786 |
| PigTailedMacaque  | ATTTTTGTTACCAAGTCCATTTCAGTATTTAGCCTGATTATCTTATTGATTAAAAAATGAAAAGTGAGTATTGTTTCATAC | 72312 |
| Bonobo            | -TTTTTGTACCAAGTCCATTAAAGTATTTAGCCTGATTATCTTATTGATTAAAAATACCAAAATGTGTATTGTTTCATGC  | 70743 |
| OliveBaboon       | ATTTTTGTTACCAAGTCCATTTCAGTATTTAGCCTGATTATCTTATTGATTAAAAAATGAAAAGTGAGTATTGTTTCATAC | 72190 |
| Orangutan         | ATTTTTGTTACCAAGTCCATTTCAGTATTTAGCCTGATTATCTTATTGATTAAAAAACCAAAGTGAGTATTGTTTCATGC  | 72560 |

|                   |                                                                                 |       |
|-------------------|---------------------------------------------------------------------------------|-------|
| Majority          | AT--TCATTCAAATTTGGGTACAAAACAGGGGTAGATATGTAACATGCAAATAAT-----AAACTGAACCTTATATTT  |       |
|                   | 87050 87060 87070 87080 87090 87100 87110 87120                                 |       |
| Human             | AT--TGATTCAAATTTGGGTACAAAACAGGG--TAGATATGTAACATGCAAATAAT-----AAATTGAACCTTATATTT | 71699 |
| Coquerel'sSifaka  | ATAGCCATTCAAATTTGTGTACAAAATAGGGATAGATACATAACATGCAAATCAAATACAGTAAACTGAATTTATATTT | 59412 |
| Ma'sNightMonkey   | AT--TCATTCAAATTTGGGTATAAAATAGGGGTGGATATGTAATATGCAAATCA-----AAACATAATAACAATT     | 66277 |
| VervetAGM         | AT--TCATTCAAATTTGGGTACAAAACAAGGGTAGATATGTAACATGCAAATAAT-----AAACTGAACCTTATATTT  | 73455 |
| Gorilla           | AT--TGATTAAAATTTGGGTACAAAACAGGGGTAGATATGTAACATGCAAATAAT-----AAATTGAACCTTATATTT  | 72262 |
| GrabEatingMacaque | AT--TCATTCAAATTTGGGTACAAAACAAGGGTAGATATGTAACATGCAAATAAT-----AAACTGAACCTTATATTT  | 72995 |
| Macaque           | AT--TCATTCAAATTTGGGTACAAAACAAGGGTAGATATGTAACATGCAAATAAT-----AAAC--AACTTATATTT   | 73854 |
| PigTailedMacaque  | AT--TCATTCAAATTTGGGTACAAAACAAGGGTAGATATGTAACATGCAAATAAT-----AAACTGAACCTTATATTT  | 72382 |
| Bonobo            | AT--TGATTCAAATTTGGGTACAAAACAGGAGTAGATATGTAACATGCAAATAAT-----AAATTGAACCTTATATTT  | 70813 |
| OliveBaboon       | AT--TCATTCAAATTTGGGTACAAAACAAGGGTAGATATGTAACATGCAAATAAT-----AAACTGAACCTTACATTT  | 72260 |
| Orangutan         | AT--TGATTCAAATTTGGGTACAAAACAGGGTAAATATGTAACATGCAAATAAT-----AAACT-----           | 72618 |



Tuesday, May 03, 2022 06:17 PM

| Majority          | TAGATTTTAAAGCACATTGCTGAATGC---CATA---ACACCAAAATAAAAAATACATATTAATTAATAATTAATATTT  |       |
|-------------------|----------------------------------------------------------------------------------|-------|
|                   | 87370 87380 87390 87400 87410 87420 87430 87440                                  |       |
| Human             | TAGATTTTGAAGCACATTGCTGAATGC---CATAGTAACACCAAATAAAAAATACATGTAATTAATAATTAATATTT    | 71996 |
| Coquerel'sSifaka  | TAGATTTTAAACACATCAATCAATGCATGCCATAGTAACACCAAATAAAA-----TATATAAATTAATAACTAGTATTT  | 59720 |
| Ma'sNightMonkey   | TAGATTTTAAAGCACATTGCTGACTGC---CACACTAACACCAAATAAAAAATACATGTAATTAATAATCAGTATTT    | 66572 |
| VervetAGM         | TAGATTTTAAAGCACATTGCTGAATGC---CATA---ACACCAAAATAAAAAATATGTATTAATTAATAA---AATATTT | 73743 |
| Gorilla           | -----                                                                            | 72428 |
| GrabEatingMacaque | TAGATTTTAAAGCACATTGCTGAATGC---CATA---ACACCAAAATAAAAAATACATATTAATTAATAATTAATATTT  | 73289 |
| Macaque           | TAGATTTTAAAGCACATTGCTGAATGC---CATA---ACACCAAAATAAAAAATACATATTAATTAATAATTAATATTT  | 74148 |
| PigTailedMacaque  | TAGATTTTAAAGCACATTGCTGAATGC---CATA---ACACCAAAATAAAAAATATATATTAATTAATAATTAATATTT  | 72676 |
| Bonobo            | TAGATTTTGAAGCACATTGCTGAATGC---CATAGTAACACCAAATAAAAAATACATGTAATTAATAATTAATATTT    | 71101 |
| OliveBaboon       | TAGATTTTAAAGCACATTGCTGAATGC---CATA---ACACCAAAATAAAAAATATATATTAATTAATAATTAATATTT  | 72554 |
| Orangutan         | TAGATTTTGAAGCACATTGCTGAATGC---CATAGTAACACCAAATAAAAAATACATGTAATTAATAATTAATATTT    | 72912 |

| Majority          | TATT---TTCAACATAAAA---TCAGAAATACTTGGTCAGAGGTCAC-----TACCTGTCCTAACT---GTCCATA    |       |
|-------------------|---------------------------------------------------------------------------------|-------|
|                   | 87450 87460 87470 87480 87490 87500 87510 87520                                 |       |
| Human             | TATT---TTCAACATAAAA---TCAGAAATACTTGGTTAGAGGTCACATGATAATACCTGTCCTAACT---GTCCATA  | 72065 |
| Coquerel'sSifaka  | TCTCATGTCCAGCATAAAA---TCAGAAATATTTGCTCAGAAATCATATGAAAATAGCTATCCTAACTCACTGTCTATA | 59796 |
| Ma'sNightMonkey   | TATTAGTTTCAACATAAAACAATCAGAAATATTTGGGCAGAGTTCACACGAAAATACCTATCCTAACT---GTCTGTA  | 66648 |
| VervetAGM         | TATT---TTCAACATAAAA---TCAGAAATACTTGATCAGAGGTCAC-----TACCTGTCCTAACT---GTCCATA    | 73805 |
| Gorilla           | -----                                                                           | 72428 |
| GrabEatingMacaque | TATT---TTCAACGTAAA---TCAGAAATACTTGGTCAGAGGTCAC-----TACCTGTCCTAACT---GTCCATA     | 73351 |
| Macaque           | TATT---TTCAACGTAAA---TCAGAAATACTTGGTCAGAGGTCAC-----TACCTGTCCTAACT---GTCCATA     | 74210 |
| PigTailedMacaque  | TATT---TTCAACGTAAA---TCAGAAATACTTGGTCAGAGGTCAC-----TACCTGTCCTAACT---GTCCATA     | 72738 |
| Bonobo            | TATT---TTCAACATAAAA---TCAGAAATACTTGGTTAGAGGTCACATGATAATACCTGTCCTAACT---GTCCATA  | 71170 |
| OliveBaboon       | TATT---TTCAACATAAAA---TCAGAAATACTTGGTCAGAGGTCAC-----TACCTGTCCTAACT---GTCCATA    | 72616 |
| Orangutan         | TGTT---TTCAACATAAAA---TCAGAAATACTTGGTCAGAGGTCACACAATAATGCCTGTCCTAACT---GTCTCATA | 72981 |

| Majority          | ACTTTGACT-----TTCTCATTTTCATGT--GTTTTAATATCTA                                    |       |
|-------------------|---------------------------------------------------------------------------------|-------|
|                   | 87530 87540 87550 87560 87570 87580 87590 87600                                 |       |
| Human             | ACTTCGGCT-----TTCTCATTTTCATGT--GTTTTAATATCTA                                    | 72101 |
| Coquerel'sSifaka  | ACTTTGATTCTCTGAAAATGCCTATCCTAACTCACTGTCTATAACTTTGATTTCTTATTTTGTGCTGTCTTAATACCTA | 59876 |
| Ma'sNightMonkey   | ACTTTGACT-----TTCTCGTTTCATGT--GTTTTAATATCTA                                     | 66684 |
| VervetAGM         | ACTTTGACT-----TTCTGATTTTCATGT--GTTTTAATATCTA                                    | 73841 |
| Gorilla           | -----                                                                           | 72428 |
| GrabEatingMacaque | ACTTTTACT-----TTCTCATTTTCATGT--GTTTTAATATCTA                                    | 73387 |
| Macaque           | ACTTTTACT-----TTCTCATTTTCATGT--GTTTTAATATCTA                                    | 74246 |
| PigTailedMacaque  | ACTTTTACT-----TTCTCATTTTCATGT--GTTTTAATATCTA                                    | 72774 |
| Bonobo            | ACTTCGGCT-----TTCTCATTTTCATGT--GTTTTAATATCTA                                    | 71206 |
| OliveBaboon       | ACTTTGACT-----TGCTCATTTTCATGT--GTTTTAGTATCTA                                    | 72652 |
| Orangutan         | ACTTTGGCT-----TTCTCATTTTCATGT--GTTTTAATATCTA                                    | 73017 |



Tuesday, May 03, 2022 06:17 PM

| Majority          | -----                                                                            |       |       |       |       |       |       |       |       |
|-------------------|----------------------------------------------------------------------------------|-------|-------|-------|-------|-------|-------|-------|-------|
|                   | 87850                                                                            | 87860 | 87870 | 87880 | 87890 | 87900 | 87910 | 87920 |       |
| Human             | CTCTGTTGCCTGGGCTGGAGTGCAGTGGCGGGATCTCTGCTCACTGCAAGCTCCGCCTCCTGGGTTACGCCATTCTGCC  |       |       |       |       |       |       |       | 72417 |
| Coquerel'sSifaka  | -----                                                                            |       |       |       |       |       |       |       | 60059 |
| Ma'sNightMonkey   | TTTTTTTTTTTTTTTGACAGTCTCGCTCTGTAGCCTAGGCTGGAGTGCAGTGGCACGATCTTGCTTCACTGCAACCTCCG |       |       |       |       |       |       |       | 66981 |
| VervetAGM         | -----                                                                            |       |       |       |       |       |       |       | 74018 |
| Gorilla           | -----                                                                            |       |       |       |       |       |       |       | 72428 |
| GrabEatingMacaque | -----                                                                            |       |       |       |       |       |       |       | 73564 |
| Macaque           | -----                                                                            |       |       |       |       |       |       |       | 74423 |
| PigTailedMacaque  | -----                                                                            |       |       |       |       |       |       |       | 72951 |
| Bonobo            | CTCTGTTGCCTGGGCTGGAGTGCAGTGGCGCGATCTCTGCTCACTGCAAGCTCTGCCTCCCGGGTTACGCCATTCTGCC  |       |       |       |       |       |       |       | 71521 |
| OliveBaboon       | -----                                                                            |       |       |       |       |       |       |       | 72829 |
| Orangutan         | CTCTGTTGCCCGGGCTGGAGTGCAGTGGCGCAGTCTCCGCTCACTACAAGCTCCGCCTCCCGGGTTACGCCATTCTGCC  |       |       |       |       |       |       |       | 73327 |

| Majority          | -----                                                                            |       |       |       |       |       |       |       |       |
|-------------------|----------------------------------------------------------------------------------|-------|-------|-------|-------|-------|-------|-------|-------|
|                   | 87930                                                                            | 87940 | 87950 | 87960 | 87970 | 87980 | 87990 | 88000 |       |
| Human             | GCCTCAGCCTCCTGAGTAGCTGGGGCTACAGGTGCCCTCCACCACACCTGGCTAATTTTTTTTGTAGTTTTAGTAGAGAC |       |       |       |       |       |       |       | 72497 |
| Coquerel'sSifaka  | -----                                                                            |       |       |       |       |       |       |       | 60059 |
| Ma'sNightMonkey   | CCTCCCGGGTCCAGGTTCAAGCAATTCTCTGCCTCAGCCTCCAGGGAGCTGGAATTACAGGCACACATCACCATGCCC   |       |       |       |       |       |       |       | 67061 |
| VervetAGM         | -----                                                                            |       |       |       |       |       |       |       | 74018 |
| Gorilla           | -----                                                                            |       |       |       |       |       |       |       | 72428 |
| GrabEatingMacaque | -----                                                                            |       |       |       |       |       |       |       | 73564 |
| Macaque           | -----                                                                            |       |       |       |       |       |       |       | 74423 |
| PigTailedMacaque  | -----                                                                            |       |       |       |       |       |       |       | 72951 |
| Bonobo            | GCCTCAGCCTCCTGAGTAGCTGGGGCTACAGGCGCCCTCCACCACACCCGGCTAATTTTTTTTGTAGTTTTAGTAGAGAC |       |       |       |       |       |       |       | 71601 |
| OliveBaboon       | -----                                                                            |       |       |       |       |       |       |       | 72829 |
| Orangutan         | GCCTCAGGCTCCTGAGTAGCTGGGGCTGCAGGCGCCCTCCACCACGCCCGGCTAATTTTTTTTGTAGTTTTAGTAGAGAC |       |       |       |       |       |       |       | 73407 |

| Majority          | -----                                                                           |       |       |       |       |       |       |       |       |
|-------------------|---------------------------------------------------------------------------------|-------|-------|-------|-------|-------|-------|-------|-------|
|                   | 88010                                                                           | 88020 | 88030 | 88040 | 88050 | 88060 | 88070 | 88080 |       |
| Human             | AGGCTTTCACCGTGTTAGCCAGGATGGTCTCAATCTCCTGACCTCGTGATCCGCCACCTTGGTCTCCCAAAGTGCTGGG |       |       |       |       |       |       |       | 72577 |
| Coquerel'sSifaka  | -----                                                                           |       |       |       |       |       |       |       | 60059 |
| Ma'sNightMonkey   | AG---CTAATTTTTGTACTTTTAGTAGAGATGGGGTTTACCCTTTTGGCCAAGCTAGTCTTGAACCTCCTGACCTTGTA |       |       |       |       |       |       |       | 67138 |
| VervetAGM         | -----                                                                           |       |       |       |       |       |       |       | 74018 |
| Gorilla           | -----                                                                           |       |       |       |       |       |       |       | 72428 |
| GrabEatingMacaque | -----                                                                           |       |       |       |       |       |       |       | 73564 |
| Macaque           | -----                                                                           |       |       |       |       |       |       |       | 74423 |
| PigTailedMacaque  | -----                                                                           |       |       |       |       |       |       |       | 72951 |
| Bonobo            | GGGCTTTCACCGTGTTAGCCAGGATGGTCTCAATCTCCTGACCTCGTGATCTGCCACCTTGGTCTCCCAAAGTGCTGGG |       |       |       |       |       |       |       | 71681 |
| OliveBaboon       | -----                                                                           |       |       |       |       |       |       |       | 72829 |
| Orangutan         | GGACTTTCACCGTGTTAGCCAGGATGGTCTCGATCTCCTGACCTCATGATCTGCCACCTTGGTCTCCCAAAGTGCTGG- |       |       |       |       |       |       |       | 73486 |

Tuesday, May 03, 2022 06:17 PM

| Majority          | -----TATTTAAAATTT----TTTAACACTGGATAAAAATTTTACTTTTGAGTCA                          |       |       |       |       |       |       |       |       |
|-------------------|----------------------------------------------------------------------------------|-------|-------|-------|-------|-------|-------|-------|-------|
|                   | 88090                                                                            | 88100 | 88110 | 88120 | 88130 | 88140 | 88150 | 88160 |       |
| Human             | ATTACAGTCATGAGCCACCGTGCCTGGCTCATTTAAAATTT----TTTAACACTGGGTA AAAATTTTATTTTTGAGTCA |       |       |       |       |       |       |       | 72653 |
| Coquerel'sSifaka  | -----TTCA-TTT-----A                                                              |       |       |       |       |       |       |       | 60067 |
| Ma'sNightMonkey   | TCCATCCTCCACGGCTCCCAAAGTGCCTGGCATTATAGGTGTGAGCCACCATGCCTGGCA-AATTTTTACTTTTGAGTCA |       |       |       |       |       |       |       | 67217 |
| VervetAGM         | -----TATTTAAAATTT----TTTAACACTGGATAAAAATTTTACTTTTGAGTCA                          |       |       |       |       |       |       |       | 74064 |
| Gorilla           | -----                                                                            |       |       |       |       |       |       |       | 72428 |
| GrabEatingMacaque | -----TATTTAAAATTT----TTTAACACTGGATAAAAATTTTACTTTTGAGTCA                          |       |       |       |       |       |       |       | 73610 |
| Macaque           | -----TATTTAAAATTT----TTTAACACTGGATAAAAATTTTACTTTTCGAGTCA                         |       |       |       |       |       |       |       | 74469 |
| PigTailedMacaque  | -----TATTTAAAATTT----TTTAACACTGGATAAAAATTTTACTTTTCGAGTCA                         |       |       |       |       |       |       |       | 72997 |
| Bonobo            | ATTACAGTCATGAGCCACCGTGCCTGGCTCATTTAAAATTT----TTTAACACTGGGTA AAAATTTTATTTTTGAGTCA |       |       |       |       |       |       |       | 71757 |
| OliveBaboon       | -----TATTTAAAATTT----TTTAACACTGGATAAAAATTTTACTTTTGGGTCA                          |       |       |       |       |       |       |       | 72875 |
| Orangutan         | -----CGTGAGCCACCGTGCCTGGCTCATTTAAAATTT----TTTAACACTGGATAACAATTTTATTTTTGAGTCA     |       |       |       |       |       |       |       | 73554 |

| Majority          | CAAATTAATTTGAAGCTGTGTCTTTTAGAGAGCTTATTCAGCTCTTAATTCATTATAAGTAATATTTGAATGAATGTGT   |       |       |       |       |       |       |       |       |
|-------------------|-----------------------------------------------------------------------------------|-------|-------|-------|-------|-------|-------|-------|-------|
|                   | 88170                                                                             | 88180 | 88190 | 88200 | 88210 | 88220 | 88230 | 88240 |       |
| Human             | CAAATTAATTTGAAGCTGTGTCTTTTAGAGAGCTTATTC AACTCTTAATTCATTATAAATAATATTTGAATGAATGTGT  |       |       |       |       |       |       |       | 72733 |
| Coquerel'sSifaka  | CAAATTAATTTGAAAGTATATCCTTTAGAGAGCTTATTC AACT-TTGATTCCATTTTATATAATATTTGAATGAATGTGT |       |       |       |       |       |       |       | 60146 |
| Ma'sNightMonkey   | CAAATTAATTTGAAGCTGTGTCTTTTGGAGAGCT-ATT CAACTCTTAATTCATTATAAGTATTTAAATGAATGTGT     |       |       |       |       |       |       |       | 67296 |
| VervetAGM         | CAAATTAATTTGAAGCTGTGTCTTTTAGAGAGCTTATTC AAGCTCTTAATTCATTATAAGTAATATTTGAATGAATGTGT |       |       |       |       |       |       |       | 74144 |
| Gorilla           | -----                                                                             |       |       |       |       |       |       |       | 72428 |
| GrabEatingMacaque | CAAATTAATTTGAAGCTGTGTCTTTTAGAGAGCTTATTC AAGCTCTTAATTCATTATAAGTAATATTTGAATGAATGTGT |       |       |       |       |       |       |       | 73690 |
| Macaque           | CAAATTAATTTGAAGCTGTGTCTTTTAGAGAGCTTATTC AAGCTCTTAATTCATTATAAGTAATATTTGAATGAATGTGT |       |       |       |       |       |       |       | 74549 |
| PigTailedMacaque  | CAAATTAATTTGAAGCTGTGTCTTTTAGAGAGCTTATTC AAGCTCTTAATTCATTATAAGTAATATTTGAATGAATGTGT |       |       |       |       |       |       |       | 73077 |
| Bonobo            | CAAATTAATTTGAAGCTGTGTCTTTTAGAGAGCTTATTC AACTCGTAATTCATTATAAATAATATTTGAATGAATGTGT  |       |       |       |       |       |       |       | 71837 |
| OliveBaboon       | CAAATTAATTTGAAGCTGTGTCTTTTAGAGAGCTTATTC AAGCTCTTAATTCATTATAAGTAATATTTGAATGAATGTGT |       |       |       |       |       |       |       | 72955 |
| Orangutan         | CAAATTAATTTGAAGCTGTGTCTTTTAGAGAGCTTATTC AACTCTTAATTCATTATAAGTAATATTTGAATGAATGTGT  |       |       |       |       |       |       |       | 73634 |

| Majority          | TTTATATCTGGAATGATTTTTATCATCTGAGTAA-AGGAAATATGTTTGATGGTAGTTGG-GTACTTTGAAGGTATTACG  |       |       |       |       |       |       |       |       |
|-------------------|-----------------------------------------------------------------------------------|-------|-------|-------|-------|-------|-------|-------|-------|
|                   | 88250                                                                             | 88260 | 88270 | 88280 | 88290 | 88300 | 88310 | 88320 |       |
| Human             | TTTACATCTGGAATGATTTTTATCATCTGAGTAA-AGGAA ATATGTTTGATGGTAGTTGG-GAACTTTGAAGGTATTACG |       |       |       |       |       |       |       | 72811 |
| Coquerel'sSifaka  | TTTAAATCTGGAATGATTTTTATCTTCTGAGCAATGGGAA ATATTTTTGGTGGTAATTGA-GTACTTTCAAG-TATTATG |       |       |       |       |       |       |       | 60224 |
| Ma'sNightMonkey   | TTTACATCTGGAATAATTTTTATCATCTCAGTAA-AGGAA ATACGTTTGATGGTAGTTGA-GTACTTTGAAGGTATTATG |       |       |       |       |       |       |       | 67374 |
| VervetAGM         | TTTATATCTGGAATGATTTTTATCATCTGAGTAA-AGGAA ATATGTTTGATGATAGTTGG-GTACTTGAAGGTATTACG  |       |       |       |       |       |       |       | 74222 |
| Gorilla           | -----                                                                             |       |       |       |       |       |       |       | 72428 |
| GrabEatingMacaque | TTTATATCTGGAGTGATTTTTATCATCTGAGTAA-GGGAA ATATGTTTGATGGTAGTTGG-GTACTTGAAGGTATTACG  |       |       |       |       |       |       |       | 73768 |
| Macaque           | TTTATATCTGGAGTGATTTTTATCATCTGAGTAA-AGGAA ATATGTTTGATGGTAGTTGG-GTACTTGAAGGTATTACG  |       |       |       |       |       |       |       | 74627 |
| PigTailedMacaque  | TTTATATCTGGAGTGATTTTTATCATCTGAGTAA-AGGAA ATATGTTTGATGGTAGTTGG-GTACTTGAAGGTATTACG  |       |       |       |       |       |       |       | 73155 |
| Bonobo            | TTTACATCTGGAATGATTTTTATCATCTGAGTAA-AGGAA ATATGTTTGATGGTAGTTGG-GAACTTTGAAGGTATTACG |       |       |       |       |       |       |       | 71915 |
| OliveBaboon       | TTTATATCTGGAATGATTTTTATCATCTGAGTAA-AGGAA ATATGTTTGATGGTAGTTGCGTACTTGAAGGTATTACG   |       |       |       |       |       |       |       | 73034 |
| Orangutan         | TTTACATCTGGAATGATTTTTATCATCTGAGTAA-AGGAA ATATGTTTGATGGTAGTTGG-GTACTTTGAAGGTATTACG |       |       |       |       |       |       |       | 73712 |



Tuesday, May 03, 2022 06:17 PM

|                   |                                                                                 |       |
|-------------------|---------------------------------------------------------------------------------|-------|
| Majority          | GGTTACAGATG-----AGAAAAAATGTTACTACATCATTTTCATGTTTACATACTGACCAGCATTTCAGT          |       |
|                   | 88330 88340 88350 88360 88370 88380 88390 88400                                 |       |
| Human             | GGCTACAGATG-----AGAAAAAATGTTACTACGTCATTTTCATGTTTACATACTGACCAGCATTTCAGT          | 72877 |
| Coquerel'sSifaka  | GGTTACTGATGTGATGTAACATTAGGAAAAACATGTTATTACATCAGTTCATAGTTACTTATTGATTGACATTCTCAGT | 60304 |
| Ma'sNightMonkey   | GGCTACAGATG-----AGAAAGAAATGTTACTACATCAGTTCCTATTTACATACTGACCAGCATTTCGAT          | 67440 |
| VervetAGM         | GGTTACAGATG-----AGAAAAAATGTTACTACATCATTTTCATGTTTACATACTGACCAGCATTTCAGT          | 74288 |
| Gorilla           | -----                                                                           | 72428 |
| GrabEatingMacaque | GGTTACAGATG-----AGAAAAAATGTTACTACATCATTTTCATGTTTACATACTGACCAGCATTTCAGT          | 73834 |
| Macaque           | GGTTACAGATG-----AGAAAAAATGTTACTACATCATTTTCATGTTTACATACTGACCAGCATTTCAGT          | 74693 |
| PigTailedMacaque  | GGTTACAGATG-----AGAAAAAATGTTACTACATCATTTTCATGTTTACATACTGACCAGCATTTCAGT          | 73221 |
| Bonobo            | GGCTACAGATG-----AGAAAAAATGTTACTACGTCATTTTCGTTTACATACTGACCAGCATTTCAGT            | 71981 |
| OliveBaboon       | GGTTACAGATG-----AGAAAAAATGTTACTACATCATTTTCATGTTTACATACTGACTAGCATTTCAGT          | 73100 |
| Orangutan         | GGCTACAGATG-----AGAAAAAATGTTACTACGTCATTTTCATGTTTACATACTGACCAGCATTTCAGT          | 73778 |

|                   |                                                                                  |       |
|-------------------|----------------------------------------------------------------------------------|-------|
| Majority          | GAAATACGCTTATTACTATAGGACTATAAAATGTTTTTCAAAGG-----TTTAATTATCCAGGGCAGATAGTTAAGACT  |       |
|                   | 88410 88420 88430 88440 88450 88460 88470 88480                                  |       |
| Human             | GAAATAAGCTTATTACTATAGGACTATAAAATGTTTTTCAAAGG-----TTTAAGTGTCCAGGGCAGATACTTAAAGACT | 72951 |
| Coquerel'sSifaka  | GGAATA-GCTTATT-TTATAGGACTA--AAGTGTACGCACAAGCCTTCTTTTAACTCTCCAAGGCAGAAATTTTATTTA  | 60380 |
| Ma'sNightMonkey   | GAAATACGCTTATTACTATAGGACTATAAAATGTTTTTCAAAGG-----TTTAATTATCCAGGGCAGATAGTTAAGACT  | 67514 |
| VervetAGM         | GAAATACGCTTATTACAATAGGACTATAAAATGTTTTTCAAAGG-----TTTAATTATCCAGGGCAGATAGTTAAGACT  | 74362 |
| Gorilla           | -----                                                                            | 72428 |
| GrabEatingMacaque | GAAATACGCTTATTACAATAGGACTATAAAATGTTTTTCAAAGG-----TTTAATTATCCAGGGCAGATAGTTAAGACT  | 73908 |
| Macaque           | GAAATACGCTTATTACGATAGGACTATAAAATGTTTTTCAAAGG-----TTTAATTATCCAGGGCAGATAGTTAAGACT  | 74767 |
| PigTailedMacaque  | GAAATACGCTTATTACGATAGGACTATAAAATGTTTTTCAAAGG-----TTTAATTATCCAGGGCAGATAGTTAAGACT  | 73295 |
| Bonobo            | GAAATAAGCTTATTACTATAGGACTATAAAATGTTTTTCAAAGG-----TTTAAGTGTCCAGGGCAGATACTTAAAGACT | 72055 |
| OliveBaboon       | GAAATACGCTTATTACAATAGGACTATAAAATGTTTTTCAAAGG-----TTTAATTATCCAGGGCAGATAGTTAAGACT  | 73174 |
| Orangutan         | GAAATAACCTTATTACTATAGGACTATAAAATGTTTTTCAAAGG-----TTTAAGTGTCCAGGGCAGATAGTTAAGACT  | 73852 |

|                   |                                                                                    |       |
|-------------------|------------------------------------------------------------------------------------|-------|
| Majority          | ATGTGATCATCCATTA AAAACTTTTCACATAGTCTTGCTTAAATGGATCCATTATGTTTACCCTTTATATTGTTCTCATC  |       |
|                   | 88490 88500 88510 88520 88530 88540 88550 88560                                    |       |
| Human             | ATCTGATCATCCATTA AAAACTTTTCACATAGTCTTGCTTAAATGGATCCATTATGTTTACCCTTTATATTGTTCTCAGC  | 73031 |
| Coquerel'sSifaka  | ATATATAAAGTTCTGAATGGATGGTCACATAGTCTTGCTTAAACTGATCTATATGATTATCCATCATACTGTTCTCAGC    | 60460 |
| Ma'sNightMonkey   | ATGTAATTATCTATTAAGA AACTTTTCATATACTCTTGCTTAAATGGATCCATTATATTTACCTGTTGTATTGTTCTCAGC | 67594 |
| VervetAGM         | ATGTGATCATCCATTA AAAACTTTTCACATAGTCTTGCTTAAATGGATCCATTATGTTTACTCTTTATATTGTTCTCATC  | 74442 |
| Gorilla           | -----                                                                              | 72428 |
| GrabEatingMacaque | ATGTGATCATCCATTA AAAACTTTTCACATAGTCTTGCTTAAATGGATCCATTATGTTTACCCTTTATATTGTTCTCATC  | 73988 |
| Macaque           | ATGTGATCATCCATTA AAAACTTTTCACATAGTCTTGCTTAAATGGATCCATTATGTTTACCCTTTATATTGTTCTCATC  | 74847 |
| PigTailedMacaque  | ATGTGATCATCCATTA AAAACTTTTCACATAGTCTTGCTTAAATGGATCCATTATGTTTACTCTTTATATTGTTCTCATC  | 73375 |
| Bonobo            | ATCTGATCATCCATTA AAAACTTTTCACATAGTCTTGCTTAAATGGATCCATTATGTTTACCCTTTATATTGTTCTCAGC  | 72135 |
| OliveBaboon       | ATGTGATCATCCATTA AAAACTTTTCACATAGTCTTGCTTAAATGGATCCATTATGTTTACCCTTTATATTGTTCTCATC  | 73254 |
| Orangutan         | ATGTGATCATCCATTA AAAACTTTTCACATAGTCTTGCTTAAATGGATCCATTATGTTTACCCTTTATATTGTTCTCAGC  | 73932 |

Tuesday, May 03, 2022 06:17 PM

| Majority          | TGTAGTTTTAAGAAATTTATTTTCATTTGTTAATACTTACTTTCCATTACCTTCCCCTTTTCTATGACAATCTGTT-GATA |       |
|-------------------|-----------------------------------------------------------------------------------|-------|
|                   | 88570 88580 88590 88600 88610 88620 88630 88640                                   |       |
| Human             | TGTAGTTTTAAGAAATTTATTTTCATTTGTTAATACTTACTTTCCATTACCTTCCCCTTTTCTGTGACAATCCGTT-GATA | 73110 |
| Coquerel'sSifaka  | TGTAGTTTTAAGAAATTTCTTTTCGTT-ATTAATCCTTTATTTACCTTCCGTTACCTTCCTCT-----T-----        | 60522 |
| Ma'sNightMonkey   | TGTAGTTTTAAGAAATGTATTTAATTTATTAATACTTACTTCCATTGCCTTCTCCATTTCTATGACAACCTGTCAGATA   | 67674 |
| VervetAGM         | TGTAGTTTTAAGAAATTTACTTCATTTGTTAATACTTACTTTCCATTACCTTCCCCTTTTCTATGACAATCTGTT-GATA  | 74521 |
| Gorilla           | -----                                                                             | 72428 |
| GrabEatingMacaque | TGTAGTTTTAAGAAATTTACTTCGTTTGTAAATACTTACTTTCCGTTACCTTCCCCTTTTCTATGACAATCTGTT-GATA  | 74067 |
| Macaque           | TGTAGTTTTAAGAAATTTACTTCGTTTGTAAATACTTACTTTCCGTTACCTTCCCCTTTTCTATGACAATCTGTT-GATA  | 74926 |
| PigTailedMacaque  | TGTAGTTTTAAGAAATTTACTTCATTTGTTAATACTTACTTTCCGTTACCTTCCCCTTTTCTATGACAATCTGTT-GATA  | 73454 |
| Bonobo            | TGTAGTTTTAAGAAATTTATTTTCATTTGTTAATACTTACTTTCCATTACCTTCCCCTTTTCTGTGACAATCTGTT-GATA | 72214 |
| OliveBaboon       | TGTAGTTTTAAGAAATTTACTTCATTTGTTAATACTTACTTTCCGTTACCTTCCCCTTTTCTATGACAATCTGTT-GATA  | 73333 |
| Orangutan         | TGTAGTTTTAAGAAATTTATTTTCATTTATTAATACTTACTTTCCATTACCTTCCCCTTTTCTATGACAGTCTGTT-GATG | 74011 |

| Majority          | CTTGAAGACCTCTCTTGATTTCATCTTAGAGTTAATATTTTTAAGGCCAAACAGCCTAAGTTCTATGGTAATCAACTCCA |       |
|-------------------|----------------------------------------------------------------------------------|-------|
|                   | 88650 88660 88670 88680 88690 88700 88710 88720                                  |       |
| Human             | CTTGAAGACCTCTCTTGATTTCATCTTAGGGTTAATATTTTTAAGGCCAAACAGCCTAAATTCTATGGTAATCAACTCCA | 73190 |
| Coquerel'sSifaka  | -TTAAAGGC--C-----ATACAGCTGGGA-----T---TCTA-----TCTGTGGTGATCAACTCCA               | 60567 |
| Ma'sNightMonkey   | CTTAAAGACCTCTCTCATATTCATCTTAGAGTTAGTATTTTTAAGGCCAAACAGCCTGAATTCTATGGTAATCAACCCCA | 67754 |
| VervetAGM         | CTTGAAGACCTCTCTTGATTTCATCTTAGAGTTAATATTTTTAAGGCCAAACAGCCTAAGTTCTATGGTAATCAACTCCA | 74601 |
| Gorilla           | -----                                                                            | 72428 |
| GrabEatingMacaque | CTTGAAGACCTCTCTTGATTTCATCTTAGAGTTAATATTTTTAAGGCCAAACAGCCTAAGTTCTATGGTAATCAACTCCA | 74147 |
| Macaque           | CTTGAAGACCTCTCTTGATTTCATCTTAGAGTTAATATTTTTAAGGCCAAACAGCCTAAGTTCTATGGTAATCAACTCCA | 75006 |
| PigTailedMacaque  | CTTGAAGACCTCTCTTGATTTCATCTTAGAGTTAATATTTTTAAGGCCAAACAGCCTAAGTTCTATGGTAATCAACTCCA | 73534 |
| Bonobo            | CTTGAAGACCTCTCTTGATTTCATCTTAGGGTTAATATTTTTAAGGCCAAACAGCCTAAATTCTATGGTAATCAACTCCA | 72294 |
| OliveBaboon       | CTTGAAGACTTCTCTTGATTTCATCTTAGAGTTAATATTTTTAAGGCCAAACAGCCTAAGTTCTGTGGTAATCAACTCCA | 73413 |
| Orangutan         | CTTGAAGACCTCTCTTGATTTCATCTTAGAGTTAATATTTTTAAGGCCAAACAGCCTAAATTCTATGGTAATCAACTCCA | 74091 |

| Majority          | GCCTT-GCATAATTAATAATCTTCTGCATAAAGATAGGTTTAAATCAAATCAGATTGCAGATTTTATT--GAAGAAATT-- |       |
|-------------------|-----------------------------------------------------------------------------------|-------|
|                   | 88730 88740 88750 88760 88770 88780 88790 88800                                   |       |
| Human             | GCCTT-GTGTAAATGAAA-TCTTCTGCATAAAGATAGGTTTAAATCAAATCAGATTGCAGATTTTATT--GAAGAAATT-- | 73264 |
| Coquerel'sSifaka  | GCCTTTGGATAATGAAGATTTTCTGTATAAAGATAGATTTAAATCAAATCAAGCCATAGGATTTATTTGAAAAAATTTT   | 60647 |
| Ma'sNightMonkey   | GCCTTTGCATAATGAAAATCTTTCGCATAAAGATAGGTTTAAATCAAATCAGACTGTAGATTTTATT--GAAGAAATT--  | 67830 |
| VervetAGM         | GCCTT-GCATAATTAATAATTTTCTGCATAAAGATAAGTTTAAATCAAATCAGATTGCAGATTTTATT--AAAGAAAT--  | 74676 |
| Gorilla           | -----                                                                             | 72428 |
| GrabEatingMacaque | ACTTT-GCATAATTAATAATCTTCTGCATAAAGATAAGTTTAAAGTCAAATCAGATTGCAGATTTTATT--AAAGAAAT-- | 74222 |
| Macaque           | ACTTT-GCATAATTAATAATCTTCTGCATAAAGATAAGTTTAAAGTCAAATCAGATTGCAGATTTTATT--AAAGAAAT-- | 75081 |
| PigTailedMacaque  | ACTTT-GCATAATTAATAATCTTCTGCATAAAGATAAGTTTAAAGTCAAATCAGATTGCAGATTTTATT--AAAGAAAT-- | 73609 |
| Bonobo            | GCCTT-GCGTAATGAAA-TCTTCTGCATAAAGATAGGTTTAAATCAAATCAGATTGCAGATTTTATT--GAAGAAAT--   | 72368 |
| OliveBaboon       | ACTTT-GCATAATTAATAATCTTCTGCATAAAGATAAGTTTAAATCAAATCAGATTGCAGATTTTATT--AAAGAAAT--  | 73488 |
| Orangutan         | GCCTT-GCATAATGAAAATCTTCTGCATAAAGATAGGTTTCAGTCAAATCAGATTGCAGATTTTATT--GAAGAAAT--   | 74166 |

Tuesday, May 03, 2022 06:17 PM

|                   |                                                                                 |       |
|-------------------|---------------------------------------------------------------------------------|-------|
| Majority          | GTGTTTTTAAGAGTTGACAA--ATATATATTGTATGGCTAAAACAAAGAAAA-----TACTTCTTTTGC           |       |
|                   | 88810 88820 88830 88840 88850 88860 88870 88880                                 |       |
| Human             | GTGTTTTTAAGAGTTGACAA--ATATATATTGTATGGCTAAAACAAAGAAAA-----TACTTCTGTTGC           | 73326 |
| Coquerel'sSifaka  | GTGTTTTTAAGAGTTGATGGTTATATATATGGTATGGCCAAAACAAAGAAAGCCTTCTAAAGAAGTGTATTACTGCTGC | 60727 |
| Ma'sNightMonkey   | GTGTTTTTAAGAGTCGACAA--T-----AGCAAAGAAAA-----TACTTCTGCTGC                        | 67874 |
| VervetAGM         | GTGTTTTTAAGAGTTGACAA--ATATATATCGTATGGCTAAAACAAAGAAAA-----TACTTCTTTTGC           | 74738 |
| Gorilla           | -----                                                                           | 72428 |
| GrabEatingMacaque | GTGTTTTTAAGAGTTGACAA--ATATATATTGTATGGCTAAAACAAAGAAAA-----TACTTCTTTTGC           | 74284 |
| Macaque           | GTGTTTTTAAGAGTTGACAA--ATATATATTGTATGGCTAAAACAAAGAAAA-----TACTTCTTTTGC           | 75143 |
| PigTailedMacaque  | GTGTTTTTAAGAGTTGACAA--ATATATATTGTATGGCTAAAACAAAGAAAA-----TACTTCTTTTGC           | 73671 |
| Bonobo            | GTGTTTTTAAGAGTTGACAA--ATATATATTGTATGGCTAAAACAAAGAAAA-----TACTTCTGTTGC           | 72430 |
| OliveBaboon       | GTGTTTTTAAGAGTTGACAA--ATATATATTGTATGGCTAAAACA---AAA-----TACTTCTTTTGC            | 73546 |
| Orangutan         | GTGTTTTTAAGAGTTGACAA--ATATGTATTGTATGGCTAAAACAAAGAAAA-----TACTTCTGTTGC           | 74228 |

|                   |                                                                                    |       |
|-------------------|------------------------------------------------------------------------------------|-------|
| Majority          | TTCTGCATTT-AGTAGAAGAAAACTATATATGTTTTTGACCAAAGTATAAAAATATGATTCTTTCCAGGGAGGTAAA--T   |       |
|                   | 88890 88900 88910 88920 88930 88940 88950 88960                                    |       |
| Human             | TTCTGCATTT-AGTAGAAGAAAACTATATATGTTTTGTGACCAAAGTATAAAAATATGATTCTTTCCAGGGAGGTAAAAGGT | 73405 |
| Coquerel'sSifaka  | TCCTGCAATT-AGTGAAGAA--AACCGTATATGTTTGTGACCATAGTATAAAAATGTGCCTCTTTCCAAGGAGGTAAAAAT  | 60805 |
| Ma'sNightMonkey   | TTCTGCATTT-AGTAGAGAAACAACCTATATATGTTTGCACACAGTATAAAAATGTGCCTCTTTCCAGGGAGGTAAAAGGT  | 67953 |
| VervetAGM         | TTCTGCATTTTAGTAGAAGAAAACTATATATGTTTTTGACCAAAGTATAAAAAGATGATTCTTTCCAGGGAGGTAAA--T   | 74816 |
| Gorilla           | -----                                                                              | 72428 |
| GrabEatingMacaque | TTCTGCATTT-AGTAGAAGAAAACTATATATGTTTTTGACCAAAGTATAAAAAGATGATTCTTTCCAGGGAGGTAAA--T   | 74361 |
| Macaque           | TTCTGCATTT-AGTAGAAGAAAACTATATATGTTTTTGACCAAAGTATAAAAAGATGATTCTTTCCAGGGAGGTAAA--T   | 75220 |
| PigTailedMacaque  | TTCTGCATTT-AGTAGAAGAAAACTATATATGTTTTTGACCAAAGTATAAAAAGATGATTCTTTCCAGGGAGGTAAA--T   | 73748 |
| Bonobo            | TTCTGCATTT-AGTAGAAGAAAACTATATATGTTTGTGACCAAAGTATAAAAATATGATTCTTTCCAGGGAGGTAAAAGGT  | 72509 |
| OliveBaboon       | TTCTGCATTT-AGTAGAAGAAAACTATATATGTTTTTGACCAAAGTATAAAAAGATGATTCTTTCCAGGGAGGTAAA--T   | 73623 |
| Orangutan         | TTCTGCATTT-AGTAGAAGAAAACTATATATGTTTGTAAACCAAAGTATAAAAATATGATTCTTTCCAGGGGGTAAAAGGT  | 74307 |

|                   |                                                                                   |       |
|-------------------|-----------------------------------------------------------------------------------|-------|
| Majority          | TATGCAGAAGATTTTCACTAGCAGCTCTAAACGGC-----TATC-----                                 |       |
|                   | 88970 88980 88990 89000 89010 89020 89030 89040                                   |       |
| Human             | TATGCAGAAGATTTTCACTAGCAGCTCTAAAAGGC-----TACC-----                                 | 73444 |
| Coquerel'sSifaka  | CATGCAAA---TTTTGTCAGCAACTCTAAAAGCATTAGATACATATAGAGCATTTCATTTAGATTCTTTCTTGATCTG    | 60881 |
| Ma'sNightMonkey   | TATGCAGAAGATTTTCACTAGCAACTCTAAAAGACATTAGTTACATATATGAAATTTTCATTTAGATTATCTCTTGACCTT | 68033 |
| VervetAGM         | TATGCAGAAGATTTTCACTAGCAGCTCTAAACGGC-----TATC-----                                 | 74855 |
| Gorilla           | -----                                                                             | 72428 |
| GrabEatingMacaque | TATGCAGAAGATTTTCACTAGCAGCTCTAAACGGC-----TATC-----                                 | 74400 |
| Macaque           | TATGCAGAAGATTTTCACTAGCAGCTCTAAACGGC-----TATC-----                                 | 75259 |
| PigTailedMacaque  | TATGTAGAAGATTTTCACTAGCAGCTCTAAACGGC-----TATC-----                                 | 73787 |
| Bonobo            | TATGCAGAAGATTTTCACTAGCAGCTCTAAAAGGC-----TACC-----                                 | 72548 |
| OliveBaboon       | TATGCAGAAGATTTTCACTAGCAGCTCTAAACGGC-----TATC-----                                 | 73662 |
| Orangutan         | TATGCAGAAGATTTTCACTAGCAGCTCTAAAAGGC-----TACC-----                                 | 74346 |

Tuesday, May 03, 2022 06:17 PM

| Majority          | -----                                                                            |       |       |       |       |       |       |       |       |
|-------------------|----------------------------------------------------------------------------------|-------|-------|-------|-------|-------|-------|-------|-------|
|                   | 89050                                                                            | 89060 | 89070 | 89080 | 89090 | 89100 | 89110 | 89120 |       |
| Human             | -----                                                                            |       |       |       |       |       |       |       | 73444 |
| Coquerel'sSifaka  | TATTTTTCCTGAGTTATTTCTAACTTTATATTATTTTCCTGTTGATTTAACAGTGAAATCCTGTCTCTGAATCTA----- |       |       |       |       |       |       |       | 60956 |
| Ma'sNightMonkey   | TTTTCCCCGAGTTTTTTTCTCATCATAATTCTGTCCCTTTCAGGTTTTTTCTGTTGATCTTGATTTTAATTTAAAATTG  |       |       |       |       |       |       |       | 68113 |
| VervetAGM         | -----                                                                            |       |       |       |       |       |       |       | 74855 |
| Gorilla           | -----                                                                            |       |       |       |       |       |       |       | 72428 |
| GrabEatingMacaque | -----                                                                            |       |       |       |       |       |       |       | 74400 |
| Macaque           | -----                                                                            |       |       |       |       |       |       |       | 75259 |
| PigTailedMacaque  | -----                                                                            |       |       |       |       |       |       |       | 73787 |
| Bonobo            | -----                                                                            |       |       |       |       |       |       |       | 72548 |
| OliveBaboon       | -----                                                                            |       |       |       |       |       |       |       | 73662 |
| Orangutan         | -----                                                                            |       |       |       |       |       |       |       | 74346 |

| Majority          | -----CTCAATTAATTGCCA                                                             |       |       |       |       |       |       |       |       |
|-------------------|----------------------------------------------------------------------------------|-------|-------|-------|-------|-------|-------|-------|-------|
|                   | 89130                                                                            | 89140 | 89150 | 89160 | 89170 | 89180 | 89190 | 89200 |       |
| Human             | -----CTCAATTAATTGCCA                                                             |       |       |       |       |       |       |       | 73459 |
| Coquerel'sSifaka  | -----CC-----CTTATTTGCCTCCGTTTTCTAGATTTTTCTGCTATCCTTAAGTAATTGCCA                  |       |       |       |       |       |       |       | 61009 |
| Ma'sNightMonkey   | GTACCCTTTTTCTCTGTCAGAATCCACCTTTCTATTGGCTCCAATTTCTAGGTTTTCTTCTTAGTCTCAATTAATTACCA |       |       |       |       |       |       |       | 68193 |
| VervetAGM         | -----CTCAATTAATTGCCA                                                             |       |       |       |       |       |       |       | 74870 |
| Gorilla           | -----                                                                            |       |       |       |       |       |       |       | 72428 |
| GrabEatingMacaque | -----CTCAATTAATTGCCA                                                             |       |       |       |       |       |       |       | 74415 |
| Macaque           | -----CTCAATTAATTGCCA                                                             |       |       |       |       |       |       |       | 75274 |
| PigTailedMacaque  | -----CTCAATTAATTGCCA                                                             |       |       |       |       |       |       |       | 73802 |
| Bonobo            | -----GTCAAATAATTGCCA                                                             |       |       |       |       |       |       |       | 72563 |
| OliveBaboon       | -----CTCAATTAATTGCCA                                                             |       |       |       |       |       |       |       | 73677 |
| Orangutan         | -----CTCAATTAATTGCCG                                                             |       |       |       |       |       |       |       | 74361 |

| Majority          | TGAACATTTTCATAGCCCTAGAAGGATGTTGGCTCACTTCAGTGTGCATCCTGGTTTATTCATTTATTGTATTATTCCAGCAG  |       |       |       |       |       |       |       |       |
|-------------------|--------------------------------------------------------------------------------------|-------|-------|-------|-------|-------|-------|-------|-------|
|                   | 89210                                                                                | 89220 | 89230 | 89240 | 89250 | 89260 | 89270 | 89280 |       |
| Human             | TGAACATTTTCATAGCCCTAGAAGGATGTTGGCTCACTTCAGTGTGCATCCTGGTTTATTCATTTATTGTATTATTCCAGCAG  |       |       |       |       |       |       |       | 73538 |
| Coquerel'sSifaka  | TGGGCATTTTCATATTCCTAGAAGGATACTGCCTCACTTCAGCGTTATCCTGGTTTATTAATTTATTGCATTATTCCAGCAG   |       |       |       |       |       |       |       | 61089 |
| Ma'sNightMonkey   | TGAACATTTTCATATCCCTAGAAGGATGTTGGCTCACTTCAGTGTGCATC-TGGTTTATTCATTTGTTGTATTATTCCAGGAG  |       |       |       |       |       |       |       | 68272 |
| VervetAGM         | TGAACATTTTCATAGCCCTAGAAGGATGTTGGCTCACTTCAGTGTGCATCCTGGTTTATTCGTTTCATTGTATTATTCCAGCAG |       |       |       |       |       |       |       | 74950 |
| Gorilla           | -----                                                                                |       |       |       |       |       |       |       | 72428 |
| GrabEatingMacaque | TGAACATTTTCATAGCCCTAGAAGGATGTTGGCTCACTTCAGTGTGCATCCTGGTTTATTCATTTATTGTATTATTCCAGCAG  |       |       |       |       |       |       |       | 74495 |
| Macaque           | TGAACATTTTCATAGCCCTAGAAGGATGTTGGCTCACTTCAGTGTGCATCCTGGTTTATTCATTTATTGTATTATTCCAGCAG  |       |       |       |       |       |       |       | 75354 |
| PigTailedMacaque  | TGAACATTTTCATAGCCCTAGAAGGATGTTAGCTCACTTCAGTGTGCATCCTGGTTTATTCATTTATTGTATTATTCCAGCAG  |       |       |       |       |       |       |       | 73882 |
| Bonobo            | TGAACATTTTCATAGCCCTAGAAGGATGTTGGCTCACTTCAGTGTGCATCCTGGTTTATTCATTTATTGTATTATTCCAGCAG  |       |       |       |       |       |       |       | 72642 |
| OliveBaboon       | TGAACATTTTCATAGCCCTAGAAGGATGTTGGCTCACTTCAGTGTGCATCCTGGTTTATTCATTTATTGTATTATTCCAGCAG  |       |       |       |       |       |       |       | 73757 |
| Orangutan         | TGAACATTTTCATAGCCCTAGAAGGATGTTGGCTCACTTCAGTGTGCATCCTGGTTTATTCATTTATTGTATTATTCCAGCAG  |       |       |       |       |       |       |       | 74441 |

Tuesday, May 03, 2022 06:17 PM

|                   |                                                                                    |       |
|-------------------|------------------------------------------------------------------------------------|-------|
| Majority          | TCATTTTAACACTGTGCTACACACTTCAGGGACTCAGAAGAATAACAGAGTTTCTGTTTTCATGAAGCTTCTCATC----   |       |
|                   | 89290      89300      89310      89320      89330      89340      89350      89360 |       |
| Human             | TCATTTTAACACTATGCTAGACACTTTAGAGATTGAGAAGAGTAACAGGGTTTCTGTTTCTCATGAAGCTT---ATC----  | 73611 |
| Coquerel'sSifaka  | T-----CACTGCAGGGACCCGGAAGAATAACAAAGTTTCTGCTTCATAAAGCTTACAATCTTGT                   | 61149 |
| Ma'sNightMonkey   | TTGTTTAAACATTATGCTAGACACTGCAGGGACTCAGAAGAATAACAGAGTTTCTTTTCTATAAAGCTTATAATC----    | 68348 |
| VervetAGM         | TCATTTTAACACTGTGCTACACACTTCAGGGACTCAGAAGAATAACAGAGTTTCTGTTTTCATGAAGCTTCTCATC----   | 75026 |
| Gorilla           | -----                                                                              | 72428 |
| GrabEatingMacaque | TCATTTTAACACTGTGCTACACACTTCAGGGACTCAGGAGAATAACAGAGTTTCTGTTTTCGTGAAGCTTCTCATC----   | 74571 |
| Macaque           | TCATTTTAACACTGTGCTACACACTTCAGGGACTCAGGAGAATAACAGAGTTTCTGTTTTCGTGAAGCTTCTCATC----   | 75430 |
| PigTailedMacaque  | TCATTTTAACACTGTGCTACACACTTCAGGGACTCAGGAGAATAACAGAGTTTCTGTTTTCGTGAAGCTTCTCATC----   | 73958 |
| Bonobo            | TCATTTTAACACTATGCTAGACACTTTAGGGATTGAGAAGAGTAACAGGGTTTCTGTTTCTCATGAAGCTT---ATC----  | 72715 |
| OliveBaboon       | TCATTTTAACACTGTGCTACACACTTCAGGGACTCAGAAGAATAACAGAGTTTCTGTTTTCGTGAAGCTTCTCATC----   | 73833 |
| Orangutan         | TCATTTTAACACTATGCTAGACACTGCAGGGATTGAGAAGAGTAACAGGGTTTCTGTTTCTCATGAAGCTT---ATC----  | 74514 |

|                   |                                                                                    |       |
|-------------------|------------------------------------------------------------------------------------|-------|
| Majority          | AGAGACAGCAAACATATGAGTTAGATCTAATTGGAGGCCAAACTGAAATATATAGTGGAGTTAGTGTGGTTATCAGCACAT  |       |
|                   | 89370      89380      89390      89400      89410      89420      89430      89440 |       |
| Human             | AGAGACAGAAAACATATGAGTTAGATCTAATTGGAGGCCAAACTGAAATATATAGTGGAGTTAGTGTGGTTATCAGCACAT  | 73691 |
| Coquerel'sSifaka  | GGAGGCAGCAAACACAAG---TAGCTCTGATTGGATGCAAATTGAAATATTTAATAGAGTCAGTGTGGT-ATTAGTACAT   | 61225 |
| Ma'sNightMonkey   | GGAGACAGCAAACAT--GAGTTAGATATAATTGGAGACAAAGTGAATATATAGTGGAGTTAGTGTGGTTATTAGCACAT    | 68426 |
| VervetAGM         | AGAGACAGTAAACATATGAGTTAGATCTAATTGGAGGCCAAACTGAAATATATAGTGGAGTTAGTGTGGTTATCAGCACAT  | 75106 |
| Gorilla           | -----                                                                              | 72428 |
| GrabEatingMacaque | AGAGACAGCAAACATATGAGTTAGATCTAATTGGAGGCCAAACTGAAATATATAGTGGAGTTAGTGTGGTTATCAGCACAT  | 74651 |
| Macaque           | AGAGACAGCAAACATATGAGTTAGATCTAATTGGAGGCCAAACTGAAATATATAGTGGAGTTAGTGTGGTTATCAGCACAT  | 75510 |
| PigTailedMacaque  | AGAGACAGCAAACATATGAGTTAGATCTAATTGGAGGCCAAACTGAAATATATAGTGGAGTTAGTGTGGTTATCAGCACAT  | 74038 |
| Bonobo            | AGAGACAGAAAACATACGAGTTAGATCTAATTGGAGGCCAAACTGAAATATATAGTGGAGTTAGTGTGGTTATCAGCACAC  | 72795 |
| OliveBaboon       | AGAGACAGCAAACATATGAGTTAGATCTAATTGGAGGCCAAACTGAAATACATAGTGGAGTTAGTGTGGTTATCAGCACAT  | 73913 |
| Orangutan         | AGAGACAGCAAACATATGAGTTAGATCTAATTGGAGGCCAAACTGAAATATATAGTGGAGTTAGTGTGGTTATCAGCACAT  | 74594 |

|                   |                                                                                    |       |
|-------------------|------------------------------------------------------------------------------------|-------|
| Majority          | AA----ATGAGTGATCCATCAACAAAAGGAGAAATTGGGAGGGTTTTATGGGCCAAAAAGATAGCATGATTAATGTGAT    |       |
|                   | 89450      89460      89470      89480      89490      89500      89510      89520 |       |
| Human             | AA----ATGAGTGATCCATCAACAAAAGGAGAAATTGGGAGGGTTTTATGGGCCAAAA--ACAGCATGATTAATGTGAT    | 73765 |
| Coquerel'sSifaka  | AATAGAATGAGTAATTCATCAAGAAAAGGAGAAATTGGGAGGGTTTTATGGACCAAAAATATAGCATGAGCAAATGTAAT   | 61305 |
| Ma'sNightMonkey   | AATGAAATGAGTGATCCATTAACAAAAGGAGAAATTGGGAGTGCTTTATGGGCCAAAAACATAGCATGATTAATGTGAT    | 68506 |
| VervetAGM         | AA----ATGAGTGATCCATCAACAAAAGGAGAAATTGGGAGGGTTTTATGGGCCAAAAAGATAGCATGATTAATGTGAT    | 75182 |
| Gorilla           | -----                                                                              | 72428 |
| GrabEatingMacaque | AA----ATGAGTGATCCATCAACAAAAGGAGAAATTGGGAGGGTTTTATGGGCCAAAAAGATAGCGTGATTAATGTGAT    | 74727 |
| Macaque           | AA----ATGAGTGATCCATCAACAAAAGGAGAAATTGGGAGGGTTTTATGGGCCAAAAAGATAGCATGATTAATGTGAT    | 75586 |
| PigTailedMacaque  | AA----ATGAGTGATCCATCAACAAAAGGAGAAATTGGGAGGGTTTTATGGGCCAAAAAGATAGCATGATTAATGTGAT    | 74114 |
| Bonobo            | AA----ATGAGTGATCCATCAACAAAAGGAGAAATTGGGAGGGTTTTATGGGCCAAAA--ACAGCATGATTAATGTGAT    | 72869 |
| OliveBaboon       | AA----ATGAGTGATCCATCAACAAAAGGAGAAATTGGGAGGGTTTTATGGGCCAAAAAGATAGCATGATTAATGTGAT    | 73989 |
| Orangutan         | AA----ATGAGTGATCCATCAACAAAAGGAGAAATTGGGAGGGTTTTATGGGCCAAAA--ACAGC-----             | 74653 |

Tuesday, May 03, 2022 06:17 PM

| Majority          | AGAGTATATGTCATGTTTTAGGAGTGATAAACATTCAGTTATGTGTGACGAATAGGATAATTGAAAAAATATGAAAGGTA  |       |
|-------------------|-----------------------------------------------------------------------------------|-------|
|                   | 89530 89540 89550 89560 89570 89580 89590 89600                                   |       |
| Human             | AGAGTATATGTCATGTTTTAGGAGTGATGAACATTCAGTTATGTGTGACGAATAGGATAATTGAAAAAATATGAAAGGCT  | 73845 |
| Coquerel'sSifaka  | AAAGTATATAACCATGTTTTAGAAGTGACAGATTTTCACTTACAAGTGACATACAGGGTAATTGGGAAAATACGAAATGTA | 61385 |
| Ma'sNightMonkey   | AGAGTATATGTCATATTTTAGGAGTGACAAACATTCAGTTATGTGTGACGAACAGGATAATGGAAAAA-ATGAAAGGTA   | 68585 |
| VervetAGM         | AGAGTATATGTCATGTTTTAGGAGTGATAAACATTCAGTTATGTGTGACGAATAGGATAATTGTAAAAATATGAAAGGTA  | 75262 |
| Gorilla           | -----                                                                             | 72428 |
| GrabEatingMacaque | AGAGTATATGTCATGTTTTAGGAGTGATAAACATTCAGTTATGTGTGACGAATAGGATAATTGAAAAAATATGAAAGGTA  | 74807 |
| Macaque           | AGAGTATATGTCATGTTTTAGGAGTGATAAACATTCAGTTATGTGTGACGAATAGGATAATTGAAAAAATATGAAAGGTA  | 75666 |
| PigTailedMacaque  | AGAGTATATGTCATGTTTTAGGAGTGATAAACATTCAGTTATGTGTGACGAATAGGATAATTGAAAAAATATGAAAGGTA  | 74194 |
| Bonobo            | AGAGTATATGTCATGTTTTAGGAGTGATGAACATTCAGTTATGTGTGACGAATAGGATAATTGAAAAAATATGAAAGGCT  | 72949 |
| OliveBaboon       | AGAGTATATGTCATGTTTTAGGAGTGATAAACATTCAGTTATGTGTGACGAATAGGATAATTGAAAAAATATGAAAGGTA  | 74069 |
| Orangutan         | ---GTATACGTC-TGTTTTAGGAGTGATGAACATTCAGTTATGTGTGACGAATAGGATAATTGAAAAAATATGAAAGGTA  | 74729 |

| Majority          | ATGATGCCAGAAAG---TATTATGGGACAAGATCTTAAAACCGATGTT-ATCCAGGGAGTATGAATTTTATATGGGAATT  |       |
|-------------------|-----------------------------------------------------------------------------------|-------|
|                   | 89610 89620 89630 89640 89650 89660 89670 89680                                   |       |
| Human             | ATGATGCCAGAAAG---TATTATGGGACAAGATCTTAAAACCGATGTT-ATCCAGGGAGTATGAATTTTATATGGGAATT  | 73921 |
| Coquerel'sSifaka  | ATGATGCTAGAAAGAGCTATTTAAAAGACAAGATCTTAGAACTGCTATT-CTCCAAGGAGTGTGAATTTTATGCAGGCATT | 61464 |
| Ma'sNightMonkey   | ATGATGCCAGAAAG---TATTATGGGACAAGATCTTAAAACCGATGTTTATCCAAGGAGTATGAATTTTACATGGGAATT  | 68662 |
| VervetAGM         | ATGATGCCAGAAAG---TATTATGGGACAAGATCTTAAAACCGATGTT-ATCCAGGGAGTATGAATTTTATATGGGAATT  | 75338 |
| Gorilla           | -----GTGTT-ATCCAGGGAAATATGAATTTTATATGGGAATT                                       | 72464 |
| GrabEatingMacaque | ATGATGCCAGAAAG---TATTATGGGACAAGATCTTAAAACCGATGTT-ATCCAGGGAGTATGAATTTTATATGGGAATT  | 74883 |
| Macaque           | ATGATGCCAGAAAG---TATTATGGGACAAGATCTTAAAACCGATGTT-ATCCAGGGAGTATGAATTTTATATGGGAATT  | 75742 |
| PigTailedMacaque  | ATGATGTCAGAAAG---TATTATGGGACAAGATCTTAAAACCGATGTT-ATCCAGGGAGTATGAATTTTATATGGGAATT  | 74270 |
| Bonobo            | ATGATGCCAGAAAG---TATTATGGGACAAGATCTTAAAACCGATGTT-ATCCAGGGAGTATGAATTTTATATGGGAATT  | 73025 |
| OliveBaboon       | ATGATGCCAGAAAG---TATTATGGGACAAGATCTTAAAACCGATGTT-ATCCAGGGAGTATGAATTTTATATGGGAATT  | 74145 |
| Orangutan         | ATGATGCCAGAAAG---TATTATGGGACAAGATCTTAAAACCGATGTT-ATCCAGGGAGTATGAATTTTATATGGGAATT  | 74805 |

| Majority          | CTTAAACTCCTTTATGACTGGAAGATGAGCGTCAG-AGTATCTGCGACCATTTGATGATATTATGTACCAAGTTTTAGAT  |       |
|-------------------|-----------------------------------------------------------------------------------|-------|
|                   | 89690 89700 89710 89720 89730 89740 89750 89760                                   |       |
| Human             | CTTAAACTCCTTTATGACTGGAAGATGAGCATCAG-AGTGTCTGCGACCATTTGATGATATTATGTACCAAGTTTTAGAT  | 74000 |
| Coquerel'sSifaka  | CTTAGACTCCTTTAGGATCA-AACATGAACTTAAA-AGTATCGGTAACCATCTCAT---ATTGTGGACCACATTTTAGTT  | 61539 |
| Ma'sNightMonkey   | ATTGGACTCCTTTATGGCTAGAAGATGAGTGTGAGGATATCTGTGACCATTTGATGATGTTATGAACCAAGTTTTAGAT   | 68742 |
| VervetAGM         | CTTAAACTCCTTTTATGACTGGAAGATGAGCGTCTG-AGTATCTGCGACTATTTGATGATATTATGTACCAAGTTTTAGAT | 75417 |
| Gorilla           | CTTAAACTCCTTTATGACTGGAAGATGAGCATCAG-AGTGTCTGCGACCATTTGATGATATTTGTACCAAGTTTTAGAT   | 72543 |
| GrabEatingMacaque | CTTAAACTCCTTTTATGACTGGAAGATGAGCGTCTG-AGTATCTGTGACTATTTGATGATATTATGTACCAAGTTTTAGAT | 74962 |
| Macaque           | CTTAAACTCCTTTTATGACTGGAAGATGAGCGTCTG-AGTATCTGTGACTATTTGATGATATTATGTACCAAGTTTTAGAT | 75821 |
| PigTailedMacaque  | CTTAAACTCCTTTTCACTGGAAGATGAGCGTCTG-AGTATCTGCGACTATTTGATGATATTATGTACCAAGTTTTAGAT   | 74349 |
| Bonobo            | CTTAAACTCCTTTATGACTGGAAGATGAGCATCAG-AGTGTCTGTGACCATTTGATGATATTATATACCAAGTTTTAGAT  | 73104 |
| OliveBaboon       | CTTAAACTCCTTTTATGACTGGAAGATGAGTGTCTG-AGTATCTGCGACTATTTGATGATATTATGTACCAAGTTTTAGAT | 74224 |
| Orangutan         | CTTAAACTCCATTACAACCTGGAAGATGAGTGTCTG-AGTATCTGCGACCATTTGATGATACTATGTACCAAGTTTTAGAT | 74884 |

Tuesday, May 03, 2022 06:17 PM

|                   |                                                                                    |       |
|-------------------|------------------------------------------------------------------------------------|-------|
| Majority          | GTTTGGCTTTTTTCAGGTTATCAAAGTGGGGG--ATGAGTTAAGAACCATTGCTGTGAAGGATTCATCAACTATTTTTAG   |       |
|                   | 89770 89780 89790 89800 89810 89820 89830 89840                                    |       |
| Human             | GTTTGGCTTTTTTCAGGTTATGAAAGCGGGGG--ATGAGTTAAGAACCCTGCTGTGAAGGATTCATCAACTATTTTTAG    | 74078 |
| Coquerel'sSifaka  | GTTTGGCTTTTCATCAGATCATCCAAGGAG-----TGAGTTAAGAACCCTTGTGTGAAGGATTCATGAGCTGTTTTTAA    | 61613 |
| Ma'sNightMonkey   | GTTTGACTIONTTTCAGATTATCAAAGAGGG----ATGAGTTAAGAACCATTGCTGTGAAGGATTCATCA--CCATTTTTAA | 68817 |
| VervetAGM         | GTTTGGCTTTTTTCAGGTTATCAAAGTGGGGG--ATGAGTTAAGAACCATTGTTGTGAAGGATTCATCAACTATTTTTAG   | 75495 |
| Gorilla           | GTTTGGCTTTTTTCAGGTTATCAAAGTGGGGG--ATGAGTTAAGAACCAGTGTGTGAAGGATTCATCAACTATTTTTAG    | 72621 |
| GrabEatingMacaque | GTTTGGCTTTTTTCAGGTTATCAAAGTGGGGG--ATGAGTTAAGAACCATTGCTGTGAAGGATTCATCAACTATTTTTAG   | 75040 |
| Macaque           | GTTTGGCTTTTTTCAGGTTATCAAAGTGGGGG--ATGAGTTAAGAACCATTGCTGTGAAGGATTCATCAACTATTTTTAG   | 75899 |
| PigTailedMacaque  | GTTTGGCTTTTTTCAGGTTATCAAAGTGGGGG--ATGAGTTAAGAACCATTGCTGTGAAGGATTCATCAACTATTTTTAG   | 74427 |
| Bonobo            | GTTTGGCTTTTTTCAGGTTATCAAAGCGGGGG--ATGAGTTAAGAACCATTGCTGTGAAGGATTCATCAACTATTTTTAG   | 73182 |
| OliveBaboon       | GTTTGGCTTTTTTCAGGTTATCAAAGTGGGGG--ATGAGTTAAGAACCATTGCTATGAAGGATTCATCAACTATTTTTAG   | 74302 |
| Orangutan         | GTTTGGCTTTTTTCAGGTTATCAAAGTGGGGGGATGAGTTAAGAACCATTGCTGTGAAGGATTCATCAACTATTTTTAG    | 74964 |

|                   |                                                                                   |       |
|-------------------|-----------------------------------------------------------------------------------|-------|
| Majority          | GCAGTTGGGTAAAAATGACCAATTTAGTTTTAAGAAA--CCAAGTGTGGCTCCAGAGTATGTTGGAGAAGTAAAAATGGA  |       |
|                   | 89850 89860 89870 89880 89890 89900 89910 89920                                   |       |
| Human             | GCAGTTGGGTAAAAATGACCAATTTAGTTTTAAGAAA--CTGACTGTGGCTCCAGAGTATGTTGGAGAAGTAAAAATGGA  | 74156 |
| Coquerel'sSifaka  | GCAGTTACATAAAAAACGACCAGATTAGTTTTAAGAAAAATTAAGTGTGGCTCCAGAGTATGCTGGAGAGGTAAAAATGGA | 61693 |
| Ma'sNightMonkey   | GCAGTTGGGTAAAAATGACCAATTTAGTTTTAAGAAA--CCAAGTGTG-----TATGTTGGAGAAGTAAAAATGGA      | 68886 |
| VervetAGM         | GCAGTTGGGTAAAAATGAGCAATTTAGTTTTAAGAAA--CCAAGTGTGGCTCCAGAGTATGTTGGAAAAGTAAAAATAGA  | 75573 |
| Gorilla           | GCAGTTGGGTAAAAATGACCAATTTAGTTTTAAGAAA--CCGACTGTGGCTCCAGAGTATGTTGGAGAAGTAAAAATGGA  | 72699 |
| GrabEatingMacaque | GCAGTTGGGTAAAAATGAGCAATTTAGTTTTAAGAAA--CCAAGTGTGGCTCCAGAGTATGTTGGAAAAGTAAAAATAGA  | 75118 |
| Macaque           | GCAGTTGGGTAAAAATGAGCAATTTAGTTTTAAGAAA--CCAAGTGTGGCTCCAGAGTATGTTGGAAAAGTAAAAATAGA  | 75977 |
| PigTailedMacaque  | GCAGTTGGGTAAAAATGAGCAATTTAGTTTTAAGAAA--CCAAGTGTGGCTCCAGAGTATGTTGGAAAAGTAAAAATAGA  | 74505 |
| Bonobo            | GCAGTTGGGTAAAAATGACCAATTTAGTTTTAAGAAA--CTGACTGTGGCTCCAGAGTATGTTGGAGAAGTAAAAATGGA  | 73260 |
| OliveBaboon       | GCAGTTGGGTAAAAATGAGCAATTTAGTTTTAAGAAA--CCAAGTGTGGCTCCAGAGTATGTTGGAAAAGTAAAAATAGA  | 74380 |
| Orangutan         | GCAGTTGGGTAAAAATGACCAATTTAGTTTTAAGAAA--CCGACTGTGGTCCAGAGTATGTTGGAGAAGTAAAAATGGA   | 75042 |

|                   |                                                                                   |       |
|-------------------|-----------------------------------------------------------------------------------|-------|
| Majority          | GACTAGGAATAACAGGTAGGAGACTCTTAGTCTAATTAAGATGTAATTATAAATCTAAGCTAGGAACGTAAAAATGAGAAT |       |
|                   | 89930 89940 89950 89960 89970 89980 89990 90000                                   |       |
| Human             | GACTAGGAATAACAGGTAGGAGACTCTTAGTCTAATTAAGATGTAATTATAAATCTAAGCTAGGAACGTAAAAATGAGAAT | 74236 |
| Coquerel'sSifaka  | GACTAGGAATAACAGGTAGGAGACT----GTCTAAGATAGATATAAATGTAATCTAAGCTAGGAACGTAAAAATGAGAAT  | 61769 |
| Ma'sNightMonkey   | GACTAAGCATTCAGGTAGGATACTGTTAGTCTAAGTAAGATGTAAGTATAAATCTAGGTTAGGAGCATGAAATGAGAAT   | 68966 |
| VervetAGM         | GATTAGGAAAAACAGGTAGGAGACTCTTAGTCTAATTAAGATGTAATTATAAATCTAAGCTAGGAACGTAAAAATGAGAAT | 75653 |
| Gorilla           | GACTAGGAATAACAGGTAGGAGACTCTTAGTCTAATTAAGATGTAATTATAAATCTAAGCTAGGAACGTAAAAATGAGAAT | 72779 |
| GrabEatingMacaque | GATTAGGAAAAACAGGTAGGAGACTCTTAGTCTAATTAAGATGTAATTATAAATCTAAGCTAGGAACGTAAAAATGAGAAT | 75198 |
| Macaque           | GATTAGGAAAAACAGGTAGGAGACTCTTAGTCTAATTAAGATGTAATTATAAATCTAAGCTAGGAACGTAAAAATGAGAAT | 76057 |
| PigTailedMacaque  | GATTAGGAAAAACAGGTAGGAGACTCTTAGTCTAATTAAGATGTAATTATAAATCTAAGCTAGGAACGTAAAAATGAGAAT | 74585 |
| Bonobo            | GACTAGGAATAACAGGTAGGAGACTCTTAGTCTAATTAAGATGTAATTATAAATCTAAGCTAGGAACGTAAAAATGAGAAT | 73340 |
| OliveBaboon       | GATTAGGAAAAACAGGTAGGAGACTCTTAGTCTAATTAAGATGTAATTATAAATCTAAGCTAGGAACGTAAAAATGAGAAT | 74460 |
| Orangutan         | GACTAGGAATAACAGGTAGGAGATTATAGTCTAATTAAGATGTAATTATAAATCTAAGCTAGGAACGTAAAAATGAGAAT  | 75122 |

Tuesday, May 03, 2022 06:17 PM

| Majority          | GCAAAGTAAGAA----ATCTGGGGAAAATTATATGTAAAAGTAATAGGACTTGGCATCTTATTGATATGATTGCTTATGA  |       |
|-------------------|-----------------------------------------------------------------------------------|-------|
|                   | 90010 90020 90030 90040 90050 90060 90070 90080                                   |       |
| Human             | GCAAAGTAAGAAACAAATATGGGGAAAATTATATGTAAAAGTAATAGGACTTGGCATCTTACTGATGTGATTGATTATGA  | 74316 |
| Coquerel'sSifaka  | GCAAAGTAAGAA----ATATGGGGAAAATTATACATAAA-GTAATAGGACTTGGCATCTTAGTGATAGGATTGCTTATGA  | 61844 |
| Ma'sNightMonkey   | ACAAAGTAAGAA----ATGTGGGGAAAATTTTCATGTAAAAGTAATAGGACTTGGCATCTTACTGATATGATTGCTTATGA | 69042 |
| VervetAGM         | GCAAAGTAAGAA----ATCTGGGGAAAATTATATGTAAAAGTAATAGGACTTGGC-TCTTATTGATATGATAGCTTATGA  | 75728 |
| Gorilla           | GCAAAGTAAGAAACAAATATGGGGAAAATTATATGTAAAAGTAATAGGACTTGGCATCTTACTGATGTGATTGATTATGA  | 72859 |
| GrabEatingMacaque | GCAAAGTAAGAA----ATCTGGGGAAAATTATATGTAAAAGTAATAGGACTTGGC-TCTTATTGATATGATAGCTTATGA  | 75273 |
| Macaque           | GCAAAGTAAGAA----ATCTGGGGAAAATTATATGTAAAAGTAATAGGACTTGGC-TCTTATTGATATGATAGCTTATGA  | 76132 |
| PigTailedMacaque  | GCAAAGTAAGAA----ATCTGGGGAAAATTATATGTAAAAGTAATAGGACTTGGC-TCTTATTGATATGATAGCTTATGA  | 74660 |
| Bonobo            | GCAAAGTAAGAA----ATATGGGGAAAATTATATGTAAAAGTAATAGGACTTGGCATCTTATTGATGTGATTGATTATGA  | 73416 |
| OliveBaboon       | GCAAAGTAAGAA----ATCTGGGGAAAATTATATGTAAAAGTAATAGGACTTGGC-TCTTATTGATATGATAGCTTATGA  | 74535 |
| Orangutan         | GCAAAGTAAGAAACAAATATGGGGAAAATTATATGTAAAAGTAATAGGACTTGGCATCTTACTGATGTGATTGATGATGA  | 75202 |

| Majority          | GAAAAATGA-GCATGTGGAGGAGTCCACCGACAGTAGGAAATTCAGCCTAAGACTTGGGCAAGAGTTCTGTGGAGTTGT  |       |
|-------------------|----------------------------------------------------------------------------------|-------|
|                   | 90090 90100 90110 90120 90130 90140 90150 90160                                  |       |
| Human             | GAAAAATGAAGCATGTGGAGGAGTCCACTGGACAGTAGGAAATTCAGCCTAAGACTTGGGTAAGAGTTCTGTGGAGTTGT | 74396 |
| Coquerel'sSifaka  | AGAGGGAA--GCATGTGGAGGAGTCCACTAGAGAGTAGGAAATTCAGCCTACT-CTTGGGCAGGAGTTCTGTGGGGTTGT | 61921 |
| Ma'sNightMonkey   | GAAAAATGAAGCATGTGGAGGAGTCCACTGAGCAGTAGGAAATTCAGCTGAAGACTTGGGCAAGAGTTCTGTGGAAATGT | 69122 |
| VervetAGM         | GAAAAATGT-----GGAGGAGTCCACCGACAGTAGGAAATTCAGCCTAAGACTTGGGCAAGAGTTCTGTGGAAATGT    | 75801 |
| Gorilla           | GAAAAATGAAGCATGTGGAGGAGTCCACCGACAGTAGGAAATTCAGCCTAAGACTTGGGTAAGAGTTCTGTGGAGTTGT  | 72939 |
| GrabEatingMacaque | GAAAAATG-----AGGAGTCCACCAGACAGTAGGAAATTCAGCCTAAGACTTGGGCAAGAGTTCTGTGGAGTTGT      | 75343 |
| Macaque           | GAAAAATG-----AGGAGTCCACCAGACAGTAGGAAATTCAGCCTAAGACTTGGGCAAGAGTTCTGTGGAGTTGT      | 76202 |
| PigTailedMacaque  | GAAAAATGT-----GGAGGAGTCTACCAGACAGTAGGAAATTCAGCCTAAGACTTGGGCAAGAGTTCTGTGGAGTTGT   | 74733 |
| Bonobo            | GAAAAATGAAGCATGTGGAGGAGTCCACTGGACAGTAGGAAATTCAGCCTAAGACTTGGGTAAGAGTTCTGTGGAGTTGT | 73496 |
| OliveBaboon       | GAAAAATGT-----GGAGGAGTCCACCAGACAGTAGGAAATTCAGCCTAAGACTTGGGCAAGAGTTCTGTGGAGTTGT   | 74608 |
| Orangutan         | GAAAAATGAAGCATGTGGAGGAGTCCACTGGACAGTAGGAAATTTGGCCTAAGACTTGGGCAAGAGTTCTGTGGAGTTGT | 75282 |

| Majority          | GAATTCAGAGGCCAGAGATGTGATATTTAAAATTTTGGTTTAAAGATTTCCAGGTATAAGAAAGCAAGAGGATTAAGCA  |       |
|-------------------|----------------------------------------------------------------------------------|-------|
|                   | 90170 90180 90190 90200 90210 90220 90230 90240                                  |       |
| Human             | GAATTCAGAGGCCAGAGATGTGATATTTAAAATTTTGGTTTAAAGATTTCCAGGTATAAGAAAGCAAGAGGATTAAGCA  | 74476 |
| Coquerel'sSifaka  | GAATTCACAGACCAGAGGTGTGATATTTGAAACACTGGCTTAAAGCTTTTCCAGTTATAAGAGAGCAAGAGGATTAAGCA | 62001 |
| Ma'sNightMonkey   | GAATTCAGAGGCCAGAGATGTGGTACTTTAAAATTTTGGTATAAGATTTCCAGGTATAAAAAAGCAAGAAGATTAAGCA  | 69202 |
| VervetAGM         | GTATTCAGAGGCCAGAGATGTGATGTTTAAAATTTTGAATTAAGATTTCCAGGTATAAGAAAGCAAGAGGATTAAGCA   | 75881 |
| Gorilla           | GAATTCAGAGGCCAGACATGTGATATTTAAAATTTTGGTTTAAAGATTTCCAGGTATAAGAAAGCAAGAGGATTAAGCA  | 73019 |
| GrabEatingMacaque | GTATTCAGAGGCCAGAGATGTGATGTTTAAAATTTTGAATTAAGATTTCCAGGTATAAGAAAGCAAGAGGATTAAGCA   | 75423 |
| Macaque           | GTATTCAGAGGCCAGAGATGTGATGTTTAAAATTTTGAATTAAGATTTCCAGGTATAAGAAAGCAAGAGGATTAAGCA   | 76282 |
| PigTailedMacaque  | GTATTCAGAGGCCAGAGATGTGATGTTTAAAATTTTGAATTAAGATTTCCAGGTATAAGAAAGCAAGAGGATTAAGCA   | 74813 |
| Bonobo            | GAATTCAGAGGCCAGAGATGTGATATTTAAAATTTTGGTTTAAAGATTTCCAGGTATAAGAAAGCAAGAGGATTAAGCA  | 73576 |
| OliveBaboon       | GTATTCAGAGGCCAGAGATGTGATGTTTAAAATTTTGAATTAAGATTTCCAGGTATAAGAAAGCAAGAGGATTAAGCA   | 74688 |
| Orangutan         | GAATTCAGAGGCCAGAGATGTGATATTTAAAATTTTGGTTTAAAGATTTCCAGGATAAGAAAGCAAGAGGATTAAGCA   | 75362 |



Tuesday, May 03, 2022 06:17 PM

|                   |                                                                                    |       |
|-------------------|------------------------------------------------------------------------------------|-------|
| Majority          | TT-GTAATTAAGCTTTAAGCAGTGCATATTTATGTTATAGATAAGATAAAACAAGAAATCTAGGGATCAAATAAATAGGAT  |       |
|                   | 90250 90260 90270 90280 90290 90300 90310 90320                                    |       |
| Human             | TT-GTAATTAAGCTTTAAGCAGTGCATATTTATGTTATAGATAAGATAAAACAAGAAATCTAGGGATCAAATA---GGAT   | 74551 |
| Coquerel'sSifaka  | TT-GACATAAAAATATAAGCAGTGCACATTCATATTTGTGGATAAAAATAAA-TAGAAAT-TGAGGATTGAATAAA-----T | 62073 |
| Ma'sNightMonkey   | TTTGTAAATTAAGCTTTAAGCAGTGCATATTTATGTTATAGATAAAAATAAA-AAGGAATCTAGGGATCAGATAAATAGGAT | 69281 |
| VervetAGM         | TT-GTAATTAAGCTTTAAGCAGTGCATATTTATGTTATAGATAAGATAAAACAAGAAATCTAGCAATCAAATACATAGGAT  | 75960 |
| Gorilla           | TT-GTAATTAAGCTTTAAGCAGTGCCTATTTATGTTATAGATAAGATAAAACAAGAAATCTAGGGATCAGATAAATAGGAT  | 73098 |
| GrabEatingMacaque | TT-GTAATTAAGCTTTAAGCAGTGCATATTTATGTTATAGATAAGATAAAACAAGAAGTCTAGCAATCAAATAAATAGGAT  | 75502 |
| Macaque           | TT-GTAATTAAGCTTTAAGCAGTGCATATTTATGTTATAGATAAGATAAAACAAGAAGTCTAGCAATCAAATAAATAGGAT  | 76361 |
| PigTailedMacaque  | TT-GTAATTAAGCTTTAAGCAGTGCATATTTATGTTATAGATAAGATAAAACAAGAAGTCTAGCAATCAAATAAATAGGAT  | 74892 |
| Bonobo            | TT-GTAATTAAGCTTTAAGCAGTGCATATTTATGTTATAGATAAGATAAAACAAGAAATTTAGGGATCAAATAAATAGGAT  | 73655 |
| OliveBaboon       | TT-GTAATTAAGCTTTAAGCAGTGCATATTTATGTTATAGATAAGATAAAACAAGAAGTCTAGCAATCAAATAAATAGGAT  | 74767 |
| Orangutan         | TT-GTAATTAAGCTTTAAGCAGTGCATATTTATGTTATAGATAAGATAAAACAAGAAATCTAGGGATCAAATAAATAGGAT  | 75441 |

|                   |                                                                                     |       |
|-------------------|-------------------------------------------------------------------------------------|-------|
| Majority          | TAAATTTAGT-AGTGATTATTCAGTACAGT--AGTTA-CATAAGATTATTCACAAGAGT--GTATAAATCAAATTACAAG    |       |
|                   | 90330 90340 90350 90360 90370 90380 90390 90400                                     |       |
| Human             | TAAATTTAGT-AGTGATCATTTCAGTACAGT--AGTTA-CGTAAGTGTATTTCACAAGAGT--ATATAAATCAAATTACAAG  | 74625 |
| Coquerel'sSifaka  | -AAAATTTAGA-AATGGCTGTTTCAGTCCAGT--AGTTAACATAATATTATTTCACGAGAATAGGTATAAATCAAATTACAAG | 62149 |
| Ma'sNightMonkey   | TAAATTTAGT-AGTAATTGTTGAGTACAGT--AGTTA-CATAAGATTATTCACAAGCAT--GTATAAATCAGATTACAAG    | 69355 |
| VervetAGM         | TAAATTTAGT-AGTGATTGTTTCAGTACAGTGTAGTTA-CATAAGATTATTCACAAGAGT--GTATAAATCAAATTACAAT   | 76036 |
| Gorilla           | TAAATTTAGT-AGTGATCATTTCAGTACAGT--AGTTA-CGTAAGTGTATTTCACAAGAGT--ATATCAATCAAATTACAAG  | 73172 |
| GrabEatingMacaque | TAAATTTAGT-AGTGATTATTCAGTACAGTGTAGTTA-CATAAGATTATTCACAAGAGT--GTATAAATCAAATTACAAT    | 75578 |
| Macaque           | TAAATTTAGT-AGCGATTATTCAGTACAGTGTAGTTA-CATAAGATTATTCACAAGAGT--GTATAAATCAAATTACAAT    | 76437 |
| PigTailedMacaque  | TAAATTTAGT-AGTGATTATTCAGTACAGTGTAGTTA-CATAAGATTATTCACAAGAGT--GTATAAATCAAATTACAAT    | 74968 |
| Bonobo            | TAAATTTAGT-AGTGATCATTTCAGTACAGT--AGTTA-CGTAAGTGTATTTCACAAGAGT--ATATAAATCAAATTACAAG  | 73729 |
| OliveBaboon       | TAAATTTAGT-AGTGATT-TTCAGTACAGTGTAGTTA-CATAAGATTATTCACAAGAGT--GTATAAATCAAATTACAAT    | 74842 |
| Orangutan         | TAAATTTAGTTAGTGATTATTCAGTACAGT--AGTTA-CGTATGATTATTCACAAGAGT--GTATAAATCAAATTACAAG    | 75516 |

|                   |                                                                                    |       |
|-------------------|------------------------------------------------------------------------------------|-------|
| Majority          | GGATTAAGGATATAAATGTGATGAGAAAGTA--ACTGTACTCTTTGAAGAAGTGTGCCATAGAAAAGGAAGAAGAAATGG   |       |
|                   | 90410 90420 90430 90440 90450 90460 90470 90480                                    |       |
| Human             | GAATTAAGGATATAAACGTGATAAAGAAAGTATGCACTGTACTCTTTGAGGAAGTTTGCCATAGAAAAGGAAGAAGAAATAG | 74705 |
| Coquerel'sSifaka  | GAATCGGGGTATAAATGTGATAAAGAGCACA---CTTCTGCTGTTTAAAGAAGTGTGCCATGGAAGGAAGAAGAAATGG    | 62226 |
| Ma'sNightMonkey   | GCATTAAGGATATAAATGTGATGAACAAGTAT--CTAATACTCTTTGAAGAAGTGTGCCATAGAAAAGGAAGAAGAAATAG  | 69433 |
| VervetAGM         | GGATTAAGGATATAAATGTGATGAGAAAGTA--ACTGTACTCTTTGAAGAAGTGTGCCATAGAAAAGGAAGAAGAAATGG   | 76113 |
| Gorilla           | GAATTAAGGATATAAACGTGATAAAGAAAGTATACACTGTACTCTTTGAGGAAGTGTGCCATAGAAAAGGAAGAAGAAATAG | 73252 |
| GrabEatingMacaque | GGATTAAGGATATAAATATGATGAGAAAGTA--ACTGTACTCTTTGAAGAAGTGTGCCATAGAAAAGGAAGAAGAAATGG   | 75655 |
| Macaque           | GGATTAAGGATATAAATATGATGAGAAAGTA--ACTGTACTCTTTGAAGAAGTGTGCCATAGAAAAGGAAGAAGAAATGG   | 76514 |
| PigTailedMacaque  | GGATTAAGGATATAAATATGATGAGAAAGTA--ACTGTACTCTTTGAAGAAGTGTGCCATAGAAAAGGAAGAAGAAATGG   | 75045 |
| Bonobo            | GAATTAAGGATATAAACGTGATAAAGAAAGTATGCACTGTACTCTTTGCGGAAGTTTGCCATAGAAAAGGAAGAAGAAATAG | 73809 |
| OliveBaboon       | GGATTAAGGATATAAATGTGATGAGAAAGTA--ACTGTACTCTTTGAAGAAGTGTGCCATAGAAAAGGAAGAAGAAATGG   | 74919 |
| Orangutan         | GAATTAAGGATATAAATGTGATAAAGAAAGTATGCACTGTACTCTTTGAGGAAGTGTGCCATAGAAAAGGAAGAAGAAATAG | 75596 |

Tuesday, May 03, 2022 06:17 PM

|                   |                                                                                   |       |
|-------------------|-----------------------------------------------------------------------------------|-------|
| Majority          | GATGGTAGTTCAGGAGTAAAGCAGGACCCAATGGGGGGAATGTTTGCAGTGAGGCAGTATGTATAATCATTTAAAACATG  |       |
|                   | 90490 90500 90510 90520 90530 90540 90550 90560                                   |       |
| Human             | GATGGTAGATCAGAAGTAAAGCAGGACCCAGTGGGGGAGTGTTCAGTGAGGCAGTATGTATAATCATTTAAAACATG     | 74785 |
| Coquerel'sSifaka  | GATGGTAGTTTAGGAGTAAAGCAGGACCGAA--GACGGAATATTTTCAGTGAAGCAGTATGCATAATCATTAAAGAGCAG  | 62304 |
| Ma'sNightMonkey   | GATGGTAGTTCAGGAGTAAAGCAGGACCTGCTGGGGGGAATGTTTGCAGTGAGGTAGTATGTATAATCATTTAAAACATG  | 69513 |
| VervetAGM         | GATGGTAGTTCAGGAGTAAAGCAGGAACCAATGGAGGGAAATGTTTGCAGTGAGGCAGTATGTATAATCATTTAAAACATG | 76193 |
| Gorilla           | GATGGTAGATCAGAAGTAAAGCAGGACCCAGTGGGGGGAATGTTTGCAGTGAGGCAGTATGTATAATGATTTAAAACATG  | 73332 |
| GrabEatingMacaque | GGTGGTAGTTCAGGAGTAAAGTAGGAACCAATGGGGGGAATGTTTGCAGTGAGGCAGTATGTATAATCATTTAAAACATG  | 75735 |
| Macaque           | GGTGGTAGTTCAGGAGTAAAGTAGGAACCAATGGGGGGAATGTTTGCAGTGAGGCAGTATGTATAATCATTTAAAACATG  | 76594 |
| PigTailedMacaque  | GGTGGTAGTTCAGGAGTAAAGTAGGAACCAATGGGGGGAATGTTTGCAGTGAGGCAGTATGTATAATCATTTAAAACATG  | 75125 |
| Bonobo            | GATGGTAGATCAGAAGTAAAGCAGGACCCAGTGGGGGAGTGTTCAGTGAGGCAGTATGTATAATCATTTAAAACATG     | 73889 |
| OliveBaboon       | GGTGGTAGTTCAGGAGTAAAGCAGGAACCAATGGGGGGAATGTTTGCAGTGAGGCAGTATGTATAATCATTTAAAACATG  | 74999 |
| Orangutan         | GATGGTAGATCAGAAGTAAAGCAGGACCCAATGGGGGGAATGTTTGCAGTGAGGCAGTATGTATAATCATTTAAAACATG  | 75676 |

|                   |                                                                                   |       |
|-------------------|-----------------------------------------------------------------------------------|-------|
| Majority          | GGCTTGGAGTCCTCTCAT-TTCCACGTTTGTAAATGGACATAATGATAATAATACCTTTCATTTAAGGCTGTTGTGAGGAT |       |
|                   | 90570 90580 90590 90600 90610 90620 90630 90640                                   |       |
| Human             | GGTTTGGAGTCCTCTCAGGTTCCATGTTTGTAAATGGACATAATGATAATAATCCCTTTCATTTAAGGCTGTTGTGAGGAT | 74865 |
| Coquerel'sSifaka  | GGCTTCAAATCCTCTCAGCTTCCACATTTGTAATGGACATAATGATAATAATACCT--ATCTAAGGCTTTTGTGAAGAT   | 62381 |
| Ma'sNightMonkey   | GCCTTGAAATCCTCTCAATTTCCATGCTTGTAAATGGGCATATTGATAATAATCCCTATCATTTAAGGCTGTTGTGAGGAT | 69593 |
| VervetAGM         | GGCTTGGAGTCCTCTCAT-TTCCACGTTTGT--GACATAATGATAATAATACCTTCCATTTAAGGCTGTTGTGAGGAT    | 76267 |
| Gorilla           | GGTTTGGAGTCCTCTCAGGTTCCATGTTTGTAAATGGACATAATGATAATAATCCCTTTCATTTAAGGCTGTTGTGAGGAT | 73412 |
| GrabEatingMacaque | GGCTTGGAGTCCTCTCAT-TTCCACATTTG--GACATAATGATAATAATACCTTCCATTTAAGGCTGTTGTGAGGAT     | 75809 |
| Macaque           | GGCTTGGAGTCCTCTCAT-TTCCACATTTG--GACATAATGATAATAATACCTTCCATTTAAGGCTGTTGTGAGGAT     | 76668 |
| PigTailedMacaque  | GGCTTGGAGTCCTCTCAT-TTCCACGTTTGT--GACATAATGATAATAATACCTTCCATTTAAGGCTGTTGTGAGGAT    | 75199 |
| Bonobo            | GGTTTGGAGTCCTCTCAGGTTCCATGTTTGTAAATGGACATAATGATAATAATCCCTTTCATTTAAGGCTGTTGTGAGGAT | 73969 |
| OliveBaboon       | GGCTTGGAGTCCTCTCAT-TTCCACGTTTGT--AACATAATGATAATAATACCTTCCATTTAAGGCTGTTGTGAGGAT    | 75073 |
| Orangutan         | GGCTTGGAGTCCTCTCAGGTTCCATGTTTGTAAATGGACATAATGATAATAATCCCTTTCATTTAAGGCTGTTGTGAGGAT | 75756 |

|                   |                                                                                    |       |
|-------------------|------------------------------------------------------------------------------------|-------|
| Majority          | TAAATGTGTTAAT--GTGCAAAGAACTTTGTACAGTGCCTGGCATATAATAAATGCTTGCTACCTATTAAC-TAGTATTT   |       |
|                   | 90650 90660 90670 90680 90690 90700 90710 90720                                    |       |
| Human             | TAAATGTGTTAAT--GTGCAAATAAATTTACACAGTGCCTGGTATATAATAAATGCTTGCTACCTATTAAC-TAGTATTT   | 74942 |
| Coquerel'sSifaka  | TAAATGTGTTTCAAT--ACATGGAGAACTTTGTACAGTGCCTGGCATATAATGAATGCTTGCTACATGTTAAC-TTGTATTT | 62458 |
| Ma'sNightMonkey   | TAAATGTGTTAATATGTGCAAAGAACTTTGCACAGTGCCTGGCATATAGTAAATGCTTGCTACCTGTTAACCTAGTATTT   | 69673 |
| VervetAGM         | TAAATGTGTTAAT--GTGCAAAGAACTTTGTACAGTGCCTGTCATATAATAAATGCTCCCTACCTATTAAC-TAGTATTT   | 76344 |
| Gorilla           | TAAATGTGTTAAT--GTGCAAATAAATTTACACAGTGCCTGGTATGTAATAAATGCTTGCTACCTATTAAC-TAGTACTT   | 73489 |
| GrabEatingMacaque | TAAATGTGTTAAT--GTGCAAAGAACTTTGTACAGTGCCTGGCATATAATAAATGCTTGCTACCTATTAAC-TAGTATTT   | 75886 |
| Macaque           | TAAATGTGTTAAT--GTGCAAAGAACTTTGTACAGTGCCTGGCATATAATAAATGCTTGCTACCTATTAAC-TAGTATTT   | 76745 |
| PigTailedMacaque  | TAAATGTGTTAAT--GTGCAAAGAACTTTGTACAGTGCCTGGCATATAATAAATGCTTACTACCTGTTAAC-TAGTA---   | 75273 |
| Bonobo            | TAAATGTGTTAAT--GTGCAAATAAATTTACACAGTGCCTGGTATATAATAAATGCTTGCTACCTATTAAC-TAGTATTT   | 74046 |
| OliveBaboon       | TAAATGTGTTAAT--GTGCAAAGAACTTTTGTACAGTGCCTGGCATATAATAAATGCTCGCTACCTATTAAC-TAGTATTT  | 75150 |
| Orangutan         | TAAATGTGTTAAT--GTGCAAAGAACTTTGCACAGAGCCTGGCATATAATAAATGCTTGCTACCTATTAAC-TAGTATTT   | 75833 |

Tuesday, May 03, 2022 06:17 PM

| Majority          | GTTTCTAAGGCTAGTTTAAGTCCTAGAATTGATTGTAA-GGATTAGATCAGGAGTATAGTGGACATGTTGGGATTTAAAT |       |       |       |       |       |       |       |       |
|-------------------|----------------------------------------------------------------------------------|-------|-------|-------|-------|-------|-------|-------|-------|
|                   | 90730                                                                            | 90740 | 90750 | 90760 | 90770 | 90780 | 90790 | 90800 |       |
| Human             | GTTTCTAAGGCTAATTTAAGTCCTAGAATTGATTGTAA-GGATTAGATCAGGAGTATAGTGGACATGTTGGGATTTAAAT |       |       |       |       |       |       |       | 75021 |
| Coquerel'sSifaka  | ATTTCTGAG-----TCCTAGAATTGATTATGATGGATTAGATTAAGAGTATGGTGGAAATGTTGGAGCGTGGAA       |       |       |       |       |       |       |       | 62527 |
| Ma'sNightMonkey   | GTTTCTAAGGCTAATTTAAGTCCTAGAATTGATTGTAA-GGATTAGATCAGTAGTATAATGGACATGTTAGGATTTAAAT |       |       |       |       |       |       |       | 69752 |
| VervetAGM         | GTTTCTAAGGCTAGTTTAAGTCCTAGAATTGATTGTAA-GGATTAGATCAGGAGTATAGTGTACATGTTGGGATTTAAAT |       |       |       |       |       |       |       | 76423 |
| Gorilla           | GTTTCTAAGGCTAGTTTAAGTCCAGAATTGATTGTAA-GGATTAGATCAGGAGTATGGTGGACATGTTGGGATTTAAAT  |       |       |       |       |       |       |       | 73568 |
| GrabEatingMacaque | GTTTCTAAGGCTAGTTTAAGTCCTAGAATTGATTGTAA-GGATTAGATCAGGAGTATAGTGTACATGTTGGGATTTAAAT |       |       |       |       |       |       |       | 75965 |
| Macaque           | GTTTCTAAGGCTAGTTTAAGTCCTAGAATTGATTGTAA-GGATTAGATCAGGAGTATAGTGTACATGTTGGGATTTAAAT |       |       |       |       |       |       |       | 76824 |
| PigTailedMacaque  | --T-----CCTAGAATTGATTGTAA-GGATTAGATCAGGAGTATAGTGTACATGTTGGGATTTAAAT              |       |       |       |       |       |       |       | 75332 |
| Bonobo            | GTTTCTAAGGCTAGTTTAAGTCCTAGAATTGATTGTAA-GGATTAGATCAGGAGTATAGTGGACATGTTGGGATTTAAAT |       |       |       |       |       |       |       | 74125 |
| OliveBaboon       | GTTTCTAAGGCTAGTTTAAGTCCTAGAATTGATTGTAA-GGATTAGATCAGGAGTATAGTGTACATGTTGGGATTTAAAT |       |       |       |       |       |       |       | 75229 |
| Orangutan         | GTTTCTAAGGCTAGTTTAAGTCCTAGAATTGATTGTAA-GGATTAGATCAGGAGTATAGTGGACATGTTGGGATTTAAAT |       |       |       |       |       |       |       | 75912 |

| Majority          | AT-----AGAGAGATATTTTTTAGGACCATTGTTAGAACCAGAAGAGATTTTTTATCAAGTTCACACAGAAATGTAGGT   |       |       |       |       |       |       |       |       |
|-------------------|-----------------------------------------------------------------------------------|-------|-------|-------|-------|-------|-------|-------|-------|
|                   | 90810                                                                             | 90820 | 90830 | 90840 | 90850 | 90860 | 90870 | 90880 |       |
| Human             | ATTTAAATATAGAGATGCTTTTTTAGGACCATTGTTAGAACCAGAAGAGATTTTTTACCAAGTTCACACAGAAATGTAGGT |       |       |       |       |       |       |       | 75101 |
| Coquerel'sSifaka  | AAT-----ATAGAGATAGTTTT-AGGTCATTGTGAGGACTAGAAGGATTTTT-ATCAAGTTCACATGGAAAT-----     |       |       |       |       |       |       |       | 62594 |
| Ma'sNightMonkey   | AT-----AGAGATACTTTTTTAGGACCATTGTTAGAACCAGAAGGAATTTTTTATCAAGTTCACCTAGAAATGTAGGT    |       |       |       |       |       |       |       | 69824 |
| VervetAGM         | AT-----AGAGATATATTTTTAAAGACCATTGTTAGAACCAGAAGAGATTTTTTATCAAGTTCACACAGAAATGTAGGT   |       |       |       |       |       |       |       | 76497 |
| Gorilla           | ATTTAAATATAGAGATGCTTTTTTAGGACCATTGTTAGAACCAGAAGAGATTTTTTATCAAGTTCACACAGAAATGTAGGT |       |       |       |       |       |       |       | 73648 |
| GrabEatingMacaque | AT-----AGAGATATATTTTTTAAGACCATTGTTAGAACCAGAAGAGATTTTTTATCAAGTTCACACAGAAATGTAGGT   |       |       |       |       |       |       |       | 76039 |
| Macaque           | AT-----AGAGATATATTTTTTAAGACCATTGTTAGAACCAGAAGAGATTTTTTATCAAGTTCACACAGAAATGTAGGT   |       |       |       |       |       |       |       | 76898 |
| PigTailedMacaque  | AT-----AGAGATATATTTTTTAAGACCATTGTTAGAACCAGAAGAGATTTTTTATCAAGTTCACACAGAAATGTAGGT   |       |       |       |       |       |       |       | 75406 |
| Bonobo            | ATTTAAATATAGAGATGCTTTTTTAGGACCATTGTTAGAACCAGAAGAGATTTTTTATCAAGTTCACACAGAAATGTAGGT |       |       |       |       |       |       |       | 74205 |
| OliveBaboon       | AT-----AGAGATATATTTTTAAAGACCATTGTTAGAACCAGAAGAGATTTTTTATCAAGTTCACACAGAAATGTAGGT   |       |       |       |       |       |       |       | 75303 |
| Orangutan         | AC-----AGAGATGCTTTTTTAGGACCATTGTTAGAACCAGAATAGATTTTTTATCAAGTTCACACAGAAATGTGGGT    |       |       |       |       |       |       |       | 75984 |

| Majority          | GCATTGGCTGGGCGTGGTGGCTCACACCTGCAATCCCAGCACTTTGGAAGGCTGAGGCAGGAGAATTGCTTGAGGCCAAG  |       |       |       |       |       |       |       |       |
|-------------------|-----------------------------------------------------------------------------------|-------|-------|-------|-------|-------|-------|-------|-------|
|                   | 90890                                                                             | 90900 | 90910 | 90920 | 90930 | 90940 | 90950 | 90960 |       |
| Human             | GCATTGGCTGGGCATGGTGGCTCACACCTGCAATCCCAGCACTTTGGAAGGCTGAGGCAGGAGAATTGCTTGAGGCCAAG  |       |       |       |       |       |       |       | 75181 |
| Coquerel'sSifaka  | -----TGAGG-----                                                                   |       |       |       |       |       |       |       | 62599 |
| Ma'sNightMonkey   | GTATTGGCTGGGCATGGTGGCTCACACCTCCAGTCCCAGCTCTTTGGAAGGCTGAGGCAGCAGAAATTGCTTGAGGCCAAG |       |       |       |       |       |       |       | 69904 |
| VervetAGM         | GCATTGGCTGGGCGTAGTAACCTCACACCTGCAATCCCAGCACTTTGGAAGGCTGAGGCAGGAGAATTGCTTGAGGCCAAG |       |       |       |       |       |       |       | 76577 |
| Gorilla           | GCATTGGCTGGGCATGGTGGCTCACACCTGCAATCCCAGCACTTTGGAAGGCTGAGGCAGGAGAATTGCTTGAGGCCAAG  |       |       |       |       |       |       |       | 73728 |
| GrabEatingMacaque | GCATTGGCTGGGCGTAGTAACCTCGCACCTGCAATCCCAGCACTTTGGAAGGCTGAGGCAGGAGAATTGCTTGAGGCCAAG |       |       |       |       |       |       |       | 76119 |
| Macaque           | GCATTGGCTGGGCGTAGTAACCTCGCACCTGCAATCCCAGCACTTTGGAAGGCTGAGGCAGGAGAATTGCTTGAGGCCAAG |       |       |       |       |       |       |       | 76978 |
| PigTailedMacaque  | GCATTGGCTGGGCGTAGTAACCTCGCACCTGCAATCCCAGCACTTTGGAAGGCTGAGGCAGGATAATTGCTTGAGGCCAAG |       |       |       |       |       |       |       | 75486 |
| Bonobo            | GCATTGGCTGGGCATGGTGGCTCACACCTGCAATCCCAGCACTTTGGAAGGCTGAGGCAGGAGAATTGCTTGAGGCCAAG  |       |       |       |       |       |       |       | 74285 |
| OliveBaboon       | GCATTGGCTGGGCGTAGTAACCTCGCACCTGCAATCCCAGCACTTTGGAAGGCTGAGGCAGGAGAATTGCTTGAGGCCAAG |       |       |       |       |       |       |       | 75383 |
| Orangutan         | GCATTGGCTGGGCATGGTGGCTCACACCTGCAATCCCAGCACTTTGGAAGGCTGGGGCAGGAGAATTGCTTGAGGCCAAG  |       |       |       |       |       |       |       | 76064 |

Tuesday, May 03, 2022 06:17 PM

|                   |                                                                                |       |
|-------------------|--------------------------------------------------------------------------------|-------|
| Majority          | ATTTTGAGACCATTCTGGGCAACCTCGCAAGACCTATCTCCACCAAAAAAAAAAAAAAAAAA-----G-----      |       |
|                   | 90970 90980 90990 91000 91010 91020 91030 91040                                |       |
| Human             | ATTTTGAGACCAGCCTGGGCAACATATTAAGACCCCGTCTCCACCAAAAAAAAAAAAAAAAAA-----GAAG-----  | 75246 |
| Coquerel'sSifaka  | -----T-----                                                                    | 62600 |
| Ma'sNightMonkey   | ATTTTTAGACCAGCCTGGACAACATGGCAAGGCCCATCTCCACCAAAAAAAAAAAAAAAAAAAAAAAAAAAAAAAAAA | 69984 |
| VervetAGM         | ATTTTGAGACCATTCTGGGCAACCTCGCAAGACCTATCTCCACCAAAAAAAAAAAAAAAG-----              | 76636 |
| Gorilla           | ATTTTGAGACCAGCCTGGGCAACATATTAAGACCCCGTCTCCACCAAAAAAAAAAAAAAAAAAGAA---GAAG----- | 73795 |
| GrabEatingMacaque | ATTTTGAGACCATTCTGGGCAACCTCGCAAGACCTATCTCCACCAAAAAAAAAAAAAAAAAA-----G-----      | 76179 |
| Macaque           | ATTTTGAGACCATTCTGGGCAACCTCGCAAGACCTATCTCCACCAAAAAAAAAAAAAAAAAAAAAAAG-----      | 77048 |
| PigTailedMacaque  | ATTTTGAGACCATTCTGGGCAACCTCGCAAGACCTATCTCCACCAAAAAAAAAAAAAAAAAA-----G-----      | 75549 |
| Bonobo            | ATTTTGAGACCAGCCTGGGCAACATATTAAGACCCCGTCTCCACCAAAAAAAAAAAAAAGAGA-----G-----     | 74346 |
| OliveBaboon       | ATTTTGAGACCATTCTGGGCAACCTCGCAAGACCTATCTCCACCAAAAAAAAAAAAAAAAAA-----G-----      | 75445 |
| Orangutan         | ATTTTGAGACTAGCCTGGGCAACATAGTAAGACCCCATCTCCACCAAAAAAAAAAAAAAAAAAAAAA-AAAG-----  | 76133 |

|                   |                                                                                   |       |
|-------------------|-----------------------------------------------------------------------------------|-------|
| Majority          | --TAGGTGCAGAGCTGGAAGCAGAACCAGAAATCATCAGTGTTACAGTCATTATTCTTTCTGTCCACATTATATGTCTTT  |       |
|                   | 91050 91060 91070 91080 91090 91100 91110 91120                                   |       |
| Human             | --TAGGTGCAGAGCTGGAAGCAGAACCAGAAATCATCAGTGTTACAGTCATTATTCTTTCTGTCCACATTATATGTCTTT  | 75324 |
| Coquerel'sSifaka  | -----GCAGAGTTGGAGCCAAAACCTGAAATCATCAGCTTTACAGTCTTTATTCTTTCTTTCCACATTCTGTGTGTT     | 62673 |
| Ma'sNightMonkey   | ATTAGGTGCAGAGCTGGAAGCAGAACCTGAAATAATCAGTCTATAGTCTTT-TTCTTTCTCTCACCATTATGTGTCTTT   | 70063 |
| VervetAGM         | --TAGATGCAGAGCTGGAAGCAGAACCAGAAATCATCAGTGTTACAGTCATTATTCTTTCTGTCCACATTATATGTCTTT  | 76714 |
| Gorilla           | --TAGGTGCAGAGCTGGAAGCAGAACCAGAAATCATCAGTGTTACAGTCATTATTCTTTCTGTCCACATTATATGTCTTT  | 73873 |
| GrabEatingMacaque | --TAGATGCAGAGCTGGAAGCAGAACCAGAAATCATCAGTGTTACAGTCATTATTCTTTCTGTCCACATTATATGTCTTT  | 76257 |
| Macaque           | --TAGATGCAGAGCTGGAAGCAGAACCAGAAATCATCAGTGTTACAGTCATTATTCTTTCTGTCCACATTATATGTCTTT  | 77126 |
| PigTailedMacaque  | --TAGATGCAGAGCTGGAAGCAGAACCAGAAATCATCAGTGTTACAGTCATTATTCTTTCTGTCCACATTATATGTCTTT  | 75627 |
| Bonobo            | --TAGGTGCAGAGCTGGAAGCAGAACCAGAAATCATCAGTGTTACAGTCATTATTCTTTCTGTCCACATTATATGTCTTT  | 74424 |
| OliveBaboon       | --TAGATGCAGAGCTGGAAGCAGAACCTGAAATCATCAGTTTTACAGTCATTATTCTTTCTGTCCACATTATATGTCTTT  | 75523 |
| Orangutan         | --TAGGTGCAGAGCTGGAAGCAGAACCAGAAATCATCGGTGTTACAGTGATTATTCTTTCTGTCCACTATTACATGTCTTT | 76211 |

|                   |                                                                                  |       |
|-------------------|----------------------------------------------------------------------------------|-------|
| Majority          | ATGAAGCAAGGGAGAAAGAAGAACAGATGAAAGAAGTGAGGATTTTGAAGTTGGTTGAAAAA--TTTGATTGAATTCTGA |       |
|                   | 91130 91140 91150 91160 91170 91180 91190 91200                                  |       |
| Human             | ATGAAGCAAGGGAGAAAGAAGAACAGATGAAAGAAGTGAGGATTTTGAAGTTGGTTGAAAGA--TTTGATTGAATTCTGA | 75402 |
| Coquerel'sSifaka  | ACGAAGAAAGGGAAAAAG---AACA-----TGAGGACTTTGAAGTTGGTTGAAAAAATCTGAGAGATTCCAG         | 62739 |
| Ma'sNightMonkey   | ATAAAGAAAGGGAGAAGGAAGAACAGCTGAAAGCAGTGAGGATTTTGAAGGTAGCTGAAAAA--TTTGAGAGAATTCTGT | 70141 |
| VervetAGM         | ATGAAGCAAGGGAGAAAGAAGAACAGATGAAAGAAGTGAGGATTTTGAAGTTGGTTGAAAAA--TTTGATTGAATTCTGA | 76792 |
| Gorilla           | ATGAAGCAAGGGAGAAAGAAGAACAGATGAAAGAAGTGAGGATTTTGAAGTTGGTTGAAAGA--TTTGATTGAATTCTGA | 73951 |
| GrabEatingMacaque | ATGAAGCAAGGGAGAAAGAAGAACAGATGAAAGAAGTGAGGATTTTGAAGTTGGTTGAAAAA--TTTGATTGAATTCTGA | 76335 |
| Macaque           | ATGAAGCAAGGGAGAAAGAAGAACAGATGAAAGAAGTGAGGATTTTGAAGTTGGTTGAAAAA--TTTGATTGAATTCTGA | 77204 |
| PigTailedMacaque  | ATGAAGCAAGGGAGAAAGAAGAACAGATGAAAGAAGTGAGGATTTTGAAGTTGGTTGAAAAA--TTTGATTGAATTCTGA | 75705 |
| Bonobo            | ATGAAGCAAGGGAGAAAGAAGAACAGATGAAAGAAGTGAGGATTTTGAAGTTGGTTGAAAGA--TTTGATTGAATTCTGA | 74502 |
| OliveBaboon       | ATGAAGCAAGGGAGAAAGAAGAACAGATGAAAGAAGTGAGGATTTTGAAGTTGGTTGAAAAA--TTTGATTGAATTCTGA | 75601 |
| Orangutan         | ATGAAGCAAGGGAGAAAGAAGAACAGATGAAAGAAGTGAGGATTTTGAAGTTGGTTGAAAAA--TTTGATTGAATTCTGA | 76289 |

Tuesday, May 03, 2022 06:17 PM

|                   |                                                                                  |       |
|-------------------|----------------------------------------------------------------------------------|-------|
| Majority          | TCTGAATATTATAAGACACTTGCTTAACA-----AGTTGAAAGTAGGAAAGTAGACTT-AAGACTCTACTGGATTTGG-  |       |
|                   | 91210 91220 91230 91240 91250 91260 91270 91280                                  |       |
| Human             | TCTAAAAATTATAAGGCACTTGTTTAACA-----AGTTGAAAGTAGGAAAGTAGACAT-AAGACTCTACTAGATTTGG-  | 75474 |
| Coquerel'sSifaka  | TCTGAATATTATAAG--ATTTGCTGAACATATGGAGGTTGAAAGTAGGATAAAGGACTT---AAGTCTACTGAATTTGTT | 62814 |
| Ma'sNightMonkey   | TCTGAATATTGTAAGACACTTGCTGAACA-----AGTTGAAAGTAGGAAAGTAGACTT---AATACTACTGGATTTGG-  | 70211 |
| VervetAGM         | TCTGAATATTATAAGACACTTGCTTAACA-----AGTTGAAAGTAGGAAAGTAGACTT-AAGACTCTATTGGATTTGG-  | 76864 |
| Gorilla           | TGTGAAAATTATAAGGCACTTGTTTAACA-----AGTTGAAAGTAGGAAAGTAGACTT-AAGACTCTACTAGATTTGG-  | 74023 |
| GrabEatingMacaque | TCTGAATATTATAAGACACTTGCTTAACA-----AGTTGAAAGTAGGAAAGTAGACTT-AAGACTCTGTTGGATTTGG-  | 76407 |
| Macaque           | TCTGAATATTATAAGACACTTGCTAAACA-----AGTTGAAAGTAGGAAAGTAGACTTTAAGACTCTGTTGGATTTGG-  | 77277 |
| PigTailedMacaque  | TCTGAATATTATAAGACACTTGCTTAACA-----AGTTGAAAGTAGGAAAGTAGACTT-AAGACTCTATTGGATTTGG-  | 75777 |
| Bonobo            | TCTAAAAATTATAAGGCACTTGTTTAACA-----AGTTGAAAGTAGGAAAGTAGACTT-AAGACTCTACTAGATTTGG-  | 74574 |
| OliveBaboon       | TCTGAATATTATAAGACACTTGCTTAACA-----AGTCGAAAGTAGGAAAGTAGACTT-AAGACTCTGTTGGATTTGG-  | 75673 |
| Orangutan         | TCTGAAAATTATAAGGCACTTGTTTAACA-----AGTTGAAAGTAGGAAAGTAGACTT-AAGACTCTACTAGATTTGG-  | 76361 |

|                   |                                                                                    |       |
|-------------------|------------------------------------------------------------------------------------|-------|
| Majority          | GGAAACTCTC--AAAAATGGACTGGAAATTCAGCTAAAAGTGGATAACAAAAATATTTCTAGAAATTAGCATTGTGGGGTT  |       |
|                   | 91290 91300 91310 91320 91330 91340 91350 91360                                    |       |
| Human             | GGAAACTCTC--AAAAATGGACTGGAAATTCAGCTAAAAGTGGATAACAAAAATATTTCTAGAAATTAGCATTGTGGGGTG  | 75552 |
| Coquerel'sSifaka  | GGGAACTCTTTGGAAAATGGAGTAGGAAATCAGGTAAGTAGATAACAAAAATATCTGTAGAAATT-----             | 62879 |
| Ma'sNightMonkey   | GGGAACTCTC--AAAAATGGACTGAAAATTCAGCTAAAAGTGGATAACAAAAATATTTCTAGAAATTAGCCTTTGTGGGGCA | 70289 |
| VervetAGM         | GGAAACTCTC--AAGAATGGACTGGAAATTCAGCTAAAAGTGGATTACAAAAATATTTCTAGAAATTAGCATTGTGGGGTT  | 76942 |
| Gorilla           | GGAAACTCTC--AAAAATGGACTGGTAATTCAGCTAAAAGTGGATAACAAAAATATTTCTAGAAATTAGCATTGTGGGGTG  | 74101 |
| GrabEatingMacaque | GGAAACTCTC--AAGAATGGACTGGAAATTCAGCTAAAAGTGGATTACAAAAATATTTCTAGAAATTAGCATTGTGGGGTT  | 76485 |
| Macaque           | GGAAACTCTC--AAGAATGGACTGGAAATTCAGCTAAAAGTGGATTACAAAAATATTTCTAGAAATTAGCATTGTGGGGTT  | 77355 |
| PigTailedMacaque  | GGAAACTCTC--AAGAATGGACTGGAAATTCAGCTAAAAGTGGATTACAAAAATATTTCTAGAAATTAGCATTGTGGGGTT  | 75855 |
| Bonobo            | GGAAACTCTC--AAAAATGGACTGGAAATTCAGCTAAAAGTGGATAACAAAAATATTTCTAGAGTTAGCATTGTGGGGTG   | 74652 |
| OliveBaboon       | GGAAACTCTC--AAGAATGGACTAGAAATTCAGCTAAAAGTGGATTACAAAAATATTTCTAGAAATTAGCATTGTGGGGTT  | 75751 |
| Orangutan         | GGAAACTCTC--AAAAATGGACTGGAAATTCAGCTAAAAGTGGATAACAAAAATATTTCTAGAAATTAGCATTGTGGGGTG  | 76439 |

|                   |                                                                                 |       |
|-------------------|---------------------------------------------------------------------------------|-------|
| Majority          | TGTGTGTTTTACTCTAGTA-TTTGTCAAGCCCAGATGAAAGCATAGACAGAATATAAGACTGGATTTATCTAAGTCTGG |       |
|                   | 91370 91380 91390 91400 91410 91420 91430 91440                                 |       |
| Human             | TGTGTGTTTTACTCTAGTA-TTTGTCAAGCCCAGATGAAAGCATAGACAGAATGTAAGACTGGATTTATCTAAGTCTGG | 75631 |
| Coquerel'sSifaka  | -----TT---ACTCTAATA-CTTATCCAACCCATATGAAAGCATAGACACA-CATAAGGTTGAATTTGTCTAAGTCTGG | 62948 |
| Ma'sNightMonkey   | TATGTGTTTTACTCTCATAATTCATTAAGCCCACATGAAAGCATGGACAGAATGTAAGACTGGATTTATCTAAGTCTGA | 70369 |
| VervetAGM         | TGTGTGTTTTACTCTAATA-TTTGTCAAGCCCAGATGAAAGCGTAGACAGAATATAAGACTGGATTTATCTAAGTCTGG | 77021 |
| Gorilla           | TGTGTGTTTTACTCTAATA-TTTGTCAAGCCCAGATGAAAGCATGGACAGAATGTAAGACTGGATTTATTTAAGTCTGG | 74180 |
| GrabEatingMacaque | TGTGTGTTTTACTCAAGTA-TTTGTCAAGCCCAGATGAAAGTGTAGACAGAATATAAGACTGGATTTATCTAAGTCTGG | 76564 |
| Macaque           | TGTGTGTTTTACTCAAGTA-TTTGTCAAGCCCAGATGAAAGTGTAGACAGAATATAAGACTGGATTTATCTAAGTCTGG | 77434 |
| PigTailedMacaque  | TGTGTGTTTTACTCAAGTA-TTTGTCAAGCCCAGATGAAAGTGTAGACAGAATATAAGACTGGATTTATCTAAGTCTGG | 75934 |
| Bonobo            | TGTGTGTTTTACTCTAGTA-TTTGTCAAGCTCAGATGAAAGCATAGACAGAATGTAAGACTGGATTTATCTAAGTCTGG | 74731 |
| OliveBaboon       | TGTGTGTTTTACTCTAGTA-TTTGTCAAGCCCAGATGAAAGCATAGACAGACTATAAGACTGGATTTATCTAAGTCTGG | 75830 |
| Orangutan         | TGTGTGTTTTACTCTAATA-TTTGTCAAGCCCAGATGAAAGCATAGACAGAATGTAAGACTGGATTTATCTAAGTCTGG | 76518 |

Tuesday, May 03, 2022 06:17 PM

|                   |                                                                                       |
|-------------------|---------------------------------------------------------------------------------------|
| Majority          | AATTGT-GTAAACATTAAGAAATAGTAGCAAATGAGCAGAGTGTGGTCCAA---GCTTA-----GGC                   |
|                   | 91450 91460 91470 91480 91490 91500 91510 91520                                       |
| Human             | AATTGT-GTAAACATTAAGGAATAGTAGCAAATGAGCAGAGTGTGGCTCAA---GCCTAAGCTTGAGCCTAAGCTTGAC 75707 |
| Coquerel'sSifaka  | AATTACAGTGTAAAGGAATAGTAATAGCACATGAACAGAGTATTGGGCCAAAAGGCTTA-----GGC 63011             |
| Ma'sNightMonkey   | AATTGC-ATGACATCAAAGTAATAGTAGCAGATGAGCAGCATGTTGGCTCAA---GCTTA-----GGC 70428            |
| VervetAGM         | AATTGT-GTAAACATTAAGAAACAGTAGCAGATGAGCAGAGTGTGGTCCAA---GCTTA-----GGC 77080             |
| Gorilla           | AATTGT-GTAAACATTAAGGAATAGTAGCAAATGAGCAGAGTGTGGCTCAA---GCCTAAGCTTGAGCCTAAGCTTGAC 74256 |
| GrabEatingMacaque | AATTGT-GTAAACATTAAGAAATAGTAGCAAATGAGCAGAGTGTGGTCCAA---GCTTA-----GGC 76623             |
| Macaque           | AATTGT-GTAAACATTAAGAAATAGTAGCAAATGAGCAGAGTGTGGTCCAA---GCTTA-----GGC 77493             |
| PigTailedMacaque  | AATTGT-GTAAACATTAAGAAATAGTAGCAAATGAGCAGAGTGTGGTCCAA---GCTTA-----GGC 75993             |
| Bonobo            | AATTGT-GTAAACATTAAGGAATAGTAGCAAATGAGCAGAGTGTGGCTCAA---GCCTAAGCTTGAGCCTAAGCTTGAC 74807 |
| OliveBaboon       | AATTGT-GTAAACATTAAGAAATAGTAGCAAATGAGCAGAGTGTGGTCCAA---GCTTA-----GGC 75889             |
| Orangutan         | AATTGT-GTAAACATTAAGGAATAGTAGCAAATGAGCAGAGTTTTGGCTGAA---GCTTA-----GAC 76577            |

|                   |                                                                                          |
|-------------------|------------------------------------------------------------------------------------------|
| Majority          | TCTATGGTAAAGTCAAGTCAAGGGAGAATAGAAAGGG----GGTCACCATAAAGGTCAAAGTGGGTTTGTAGTGGTTGTGT        |
|                   | 91530 91540 91550 91560 91570 91580 91590 91600                                          |
| Human             | TCTATGGTAAAGTCAAGTCAAGGGAGAATAGAAAGGG----GGTCACCATAAAGGTCAAAGTGGGTTTGTAGTGGTTGTGT 75783  |
| Coquerel'sSifaka  | TATATGGTAAAGTCAAGCCAAAGGAGAATAGAAAGGGAACCTGGTCACTATAAAGGCCAAAAGTGGGTTTCAGTG-TTGCCT 63090 |
| Ma'sNightMonkey   | TATATGGTAAAGTCAAGCCCAGGGAGCATATAAAGGAA-CTGGTCACCATAAAGGCCAAAAGTGTGTTTGTAGTGGTTATGT 70507 |
| VervetAGM         | TCTATGGTAAAGTCAAGTCAAGGGAGAATAGAAAGGG----GGTCACCATAAAGGTCAAAGTGGGTTTGTAGTGGTTGTAT 77156  |
| Gorilla           | CCTATGGTAAAGTCAAGTCAAGGGAGAATAGAAAGGG----GGTCACCATAAAGGTCAAAGTGGGTTTGTAGTGGTTGTGT 74332  |
| GrabEatingMacaque | TCTATGGTAAAGTCAAGTCAAGGGAGAATAGAAAGGG----GGTCACCATAAAGGTCAAAGTGGGTTTGTAGTGGTTGTGT 76699  |
| Macaque           | TCTATGGTAAAGTCAAGTCAAGGGAGAATAGAAAGGG----GGTCACCATAAAGGTCAAAGTGGGTTTGTAGTGGTTGTGT 77569  |
| PigTailedMacaque  | TCTATGGTAAAGTCAAGTCAAGGGAGAATAGAAAGGG----GGTCACCATAAAGGTCAAAGTGGGTTTGTAGTGGTTGTGT 76069  |
| Bonobo            | TCTATGGTAAAGTCAAGTCAAGGGAGAATAGAAAGGG----GGTCACCATAAAGGTCAAAGTGGGTTTGTAGTGGTTGTGT 74883  |
| OliveBaboon       | TCTATGGTAAAGTCAAGTCAAGGGAGAATAGAAAGGG----GGTCACCATAAAGGTCAAAGTGGGTTTGTAGTGGTTGTGT 75965  |
| Orangutan         | TGTATGGTAAAGTCAAGTCAAGGGAGAATAGAAAGGG----GGTCACCATAAAGGTCAAAGTGGGTTTGTAGTGGTTGTGT 76653  |

|                   |                                                                                       |
|-------------------|---------------------------------------------------------------------------------------|
| Majority          | GGGAATAGGAGGATCAAGAAAAGAATGAAGTTAGGAAAGGAGATATAAGTGT---GAATGACCATTACAAAAGAGAC         |
|                   | 91610 91620 91630 91640 91650 91660 91670 91680                                       |
| Human             | GGGAATAGGCAGATCAAGAAAAGAATGAAGTTAGGAAAGGAGATATAAGTGT---GAATGACCATTACAAAAGAGAC 75859   |
| Coquerel'sSifaka  | GGTAATAG---GATCAAGAA--GAGTGAAGTCAGGAAAGGGGATTCAAAGGTTAAATGAATGGCCATT-TAAAAAAG-- 63162 |
| Ma'sNightMonkey   | GGGAATAGGAGGATCAAGAA--GAATGAAGTTAGGAAAGGAGATGTAAGTGTACATGAATGACCATTACAAAAGTGAC 70585  |
| VervetAGM         | GGGAATAGGAGGATGAAGAAAAGAAAGAAGTTAGGAAAGGAGATATAAGTGT---GAATGACCATTACAAAAGAGAC 77232   |
| Gorilla           | GGGAATAGGCGGATCAAGAAAAGAATGAAGTTAGGAAAGGAGATATAAGTGT---GAATGACCATTACAAAAGGAGAC 74408  |
| GrabEatingMacaque | AGGAATAGGAGGATCAAGAAAAGAAAGAAGTTAGGAAAGGAGATATAAGTGT---GAATGACCATTACAAAAGAGAC 76775   |
| Macaque           | AGGAATAGGAGGATCAAGAAAAGAAAGAAGTTAGGAAAGGAGATATAAGTGT---GAATGACCATTACAAAAGAGAC 77645   |
| PigTailedMacaque  | GGGAATAGGAGGATCAAGAAAAGAAAGAAGTTAGGAAAGGAGATATAAGTGT---GAATGACCATTACAAAAGAGAC 76145   |
| Bonobo            | GGGAATAGGCGGATCAAGAAAAGAATGAAGTTAGGAAAGGAGATATAAGTGT---GAATGACCATTACAAAAGAGAC 74959   |
| OliveBaboon       | GGGAATAGGAGGATCAAGAAAAGAAAGAAGTTAGGAAAGGAGATATAAGTGT---GAATGACCATTACAAAAGAGAC 76041   |
| Orangutan         | GGGAATAGGGGATCAAGAAAAGAATGAAGTTAGGAAAGGAGACATAAGTGT---GAATGACCATTACAAAAGAG-- 76727    |



Tuesday, May 03, 2022 06:17 PM

| Majority          | ATGATTAGGTGGCATTGACATCGGAAGCCATCCTCATTGATGGTGGTAGAACA---GCAGTTTGAAAAGTAACATTGGGCG |       |       |       |       |       |       |       |  |       |
|-------------------|-----------------------------------------------------------------------------------|-------|-------|-------|-------|-------|-------|-------|--|-------|
|                   | 91930                                                                             | 91940 | 91950 | 91960 | 91970 | 91980 | 91990 | 92000 |  |       |
| Human             | ATGATTGGGTGGCATTGACATCGGAAGCCATCCTCATTGATGGTGGTGAACA---GCAGTTTGAAAAGTAACATTGTGCG  |       |       |       |       |       |       |       |  | 76151 |
| Coquerel'sSifaka  | ATGATTAGATGGCATTGACTTCAAAGCTGCCCCATCAATGGTGGTAGAGCA---ATAGTGTGAAAAGTAACATTGGGTG   |       |       |       |       |       |       |       |  | 63469 |
| Ma'sNightMonkey   | ATGATTAGGTGGTATTGACATCAGAAGTCATCCTCATTGATGGTGGTAGAACAACAGCAGTTTGAAAAGTAACATTGGGTG |       |       |       |       |       |       |       |  | 70892 |
| VervetAGM         | ATGATTAGGTGGCATTGGCATTGAAAACCAAACCTATTGATGGTGGTAGAACA---GCAGTTTGAAAAGTAACATTGGGCG |       |       |       |       |       |       |       |  | 77540 |
| Gorilla           | ATGATTGGGTGGCATTGACATCGGAAGCCATCCTCATTGATGGTGGTGAACC---GCAGTTTGAAAAGTAACATTGTGCG  |       |       |       |       |       |       |       |  | 74700 |
| GrabEatingMacaque | ATGATTAGGTGGCATTGACATTGAAAACCAAACCTACTGATGGTGGTAGAACA---GCAGTTTGAAAAGTAACATTGGGCG |       |       |       |       |       |       |       |  | 77083 |
| Macaque           | ATGATTAGGTGGCATTGACATTGAAAACCAAACCTACTGATGGTGGTAGAACA---GCAGTTTGAAAAGTAACATTGGGCG |       |       |       |       |       |       |       |  | 77953 |
| PigTailedMacaque  | ATGATTAGGTGGCATTGACATTGAAAACCAAACCTATTGATGGTGGTAGAACA---GCAGTTTGAAAAGTAACATTGGGCG |       |       |       |       |       |       |       |  | 76453 |
| Bonobo            | ATGATTGGGTGGCGTTGACATCGGAAGCCATCCTCGTTGATGGTGGTGAACA---GCAGTTTGAAAAGTAACATTGTGCG  |       |       |       |       |       |       |       |  | 75251 |
| OliveBaboon       | ATGATTAGGTGGCATTGACATTGAAAACCAAACCTATTGATGGTGGTAGAACA---GCAGTTTGAAAAGTAACATTGGGCG |       |       |       |       |       |       |       |  | 76349 |
| Orangutan         | ATGATTGGGTGGCATTGACATCGGAAGCCATCCTCATCGATGGT---GGAACA---GCAGTTTGAAAAGTAACATTGTGCG |       |       |       |       |       |       |       |  | 77012 |

| Majority          | GTGAGGTAGAGTGATGCATGATGCATCCTTATTCTTTCCCTTTGGAGAAAAGTTGAGGGAGACCAAAAATGACTTTTTT-GA |       |       |       |       |       |       |       |  |       |
|-------------------|------------------------------------------------------------------------------------|-------|-------|-------|-------|-------|-------|-------|--|-------|
|                   | 92010                                                                              | 92020 | 92030 | 92040 | 92050 | 92060 | 92070 | 92080 |  |       |
| Human             | GTGAGGTAGAGTGGCACATGATGCATCCTTATTCTTACCTTTGGAGAAAAGTTGAGGGAGACCAAAAATGACTTTTTT-GA  |       |       |       |       |       |       |       |  | 76230 |
| Coquerel'sSifaka  | GTGAGGTAGAATGATGAATAATGCATCTTTTTTCTTCCCTTTGG-GAAAGATTTAGGGAGATAAAAA-TGACTTTTTT-GA  |       |       |       |       |       |       |       |  | 63546 |
| Ma'sNightMonkey   | GTGAGGTAAAGTGATGCGTGATGCATCCTTATTCTTTTCTTTGGAGAAAAGTTAAGGGAGACTAA---TGAATTTTTT-GA  |       |       |       |       |       |       |       |  | 70968 |
| VervetAGM         | GTGAGGTGGAGTGATGCATGATGCATCCTTACTCTTTCCCTTTGGAGAAAAGTTGAGGGAGACCAAAAATGACTTTTTT-GA |       |       |       |       |       |       |       |  | 77619 |
| Gorilla           | GTGAGGTAGAGTGGCGCATGATGCATCCTTATTCTTTCCCTTTGGAGAAAAGTTGAGGGAGACCAAAAATGACTTTTTTGA  |       |       |       |       |       |       |       |  | 74780 |
| GrabEatingMacaque | GTGAGGTGGAGTGATGCATGATGCATCCTTATTCTTTCCCTTTGGAGAAAAGTTGAGGGAGACCAAAAATGACTTTTTT-GA |       |       |       |       |       |       |       |  | 77162 |
| Macaque           | GTGAGGTGGAGTGATGCATGATGCATCCTTATTCTTTCCCTTTGGAGAAAAGTTGAGGGAGACCAAAAATGACTTTTTT-GA |       |       |       |       |       |       |       |  | 78032 |
| PigTailedMacaque  | GTGAGGTGGAGTGATGCATGATGCATCCTTGTCTTTCCCTTTGGAGAAAAGTTGAGGGAGACCAAAAATGACTTTTTT-GA  |       |       |       |       |       |       |       |  | 76532 |
| Bonobo            | GTGAGGTAGAGTGGCGCATGATGCATCCTTATTCTT-CCTTTGGAGAAAAGTTGAGGGAGACCAAAAATGACTTTTTT-GA  |       |       |       |       |       |       |       |  | 75329 |
| OliveBaboon       | GTGAGCTGGAGTGATGCATGATGCATCCTTATTCTTTCCCTTTGGAGAAAAGTTGAGGGAGACCAAAAATGACTTTTTT-GA |       |       |       |       |       |       |       |  | 76428 |
| Orangutan         | GTGAGGTAGAGTGGTGCATGATGCATCCTTTTTCTTTCCCTTCGGAGAAAAGTTGATGGAGACCAAAAATGACTTTTTT-GA |       |       |       |       |       |       |       |  | 77091 |

| Majority          | GGGGATTGTAGAAG---TTTCATTAGAAGAA--AAGTAAGTTTTTAATTA AAAAGTTAATCTGAGGAACAGGTAGAATAA   |       |       |       |       |       |       |       |  |       |
|-------------------|-------------------------------------------------------------------------------------|-------|-------|-------|-------|-------|-------|-------|--|-------|
|                   | 92090                                                                               | 92100 | 92110 | 92120 | 92130 | 92140 | 92150 | 92160 |  |       |
| Human             | GGGAATTGTAGAAG---TTTCATTAGAAGAA--AAGTAAGTTTTTAATTA AAAAGTTAATCTGAGGAACAGGTAGAATAA   |       |       |       |       |       |       |       |  | 76305 |
| Coquerel'sSifaka  | GAGGGATGTAGAAGAAGTTTCATTAGAACAG--AGGTAAGCTTTTTAATTA AAAAATTTCTCTAAGGAACACAGCTGAACAA |       |       |       |       |       |       |       |  | 63624 |
| Ma'sNightMonkey   | GGGGTTTGTAGAAG---TTTCATTGGTGAAGAAAGTAAGTTTTTAATTA AAAAGTTTCTCTGAGGAACAGGTAGAGTAA    |       |       |       |       |       |       |       |  | 71045 |
| VervetAGM         | GGGGATTGTGAAG---TTTCATTAGAAGAA--AAGTAAGTTTTTAATTA AAAAGTTAATCTGAGGAACAGGTAGAATAA    |       |       |       |       |       |       |       |  | 77694 |
| Gorilla           | GGGGATTGTAGAAG---TTTCATTAGAAGAA--AAGTAAGTTTTTAATTA AAAAGTTAATCTGAGGAACAGGTAGAATAA   |       |       |       |       |       |       |       |  | 74855 |
| GrabEatingMacaque | GGGGATTGTGAAG---TTTCATTAGAAGAA--AAGTAAGTTTTTAATTA AAAAGTTAATCTGAGGAACAGGTAGAATAA    |       |       |       |       |       |       |       |  | 77237 |
| Macaque           | GGGGATTGTGAAG---TTTCATTAGAAGAA--AAGTAAGTTTTTAATTA AAAAGTTAATCTGAGGAACAGGTAGAATAA    |       |       |       |       |       |       |       |  | 78107 |
| PigTailedMacaque  | GGGGATTGTGAAG---TTTCATTAGAAGAA--AAGTAAGTTTTTAATTA AAAAGTTAATCTGAGGAACAGGTAGAATAA    |       |       |       |       |       |       |       |  | 76607 |
| Bonobo            | GGGGATTGTAGAGG---TTTCATTAGAAGAA--AAGTAAGTTTTTAATTA AAAAGTTAATCTGAGGAACAGGTAGAATAA   |       |       |       |       |       |       |       |  | 75404 |
| OliveBaboon       | GGGGATTGTGAAG---TTTCATTAGAAGAA--AAATAAGTTTTTAATTA AAAAGTTAATCTGAGGAACACGTAGAATAA    |       |       |       |       |       |       |       |  | 76503 |
| Orangutan         | GGGGATTGTAGAAG---TTTCATTAGAAGAA--AAGTAAGTTTTTAATTA AAAAGTTAATCTGAGGAACAGGTAGAATAA   |       |       |       |       |       |       |       |  | 77166 |



Tuesday, May 03, 2022 06:17 PM

| Majority          | AAGTGTAGTTGTTAATGGTAGAA--GAGAATGGATTCCATAGGGCAAATAAGAACT-AAGGGAAGGTTGGTGGGAAGAGG  |       |
|-------------------|-----------------------------------------------------------------------------------|-------|
|                   | 92170 92180 92190 92200 92210 92220 92230 92240                                   |       |
| Human             | AAGTGTAGTTGTTAGTGGTAGAA--GAGAATGGATTCCATAGGGCAAATAAGAACTCAAGGGAAGGTTGGTGGGAAGAGG  | 76383 |
| Coquerel'sSifaka  | AAATGCAGTTGTTAATGGTAGAAAAGAGAATGGATTCTATACAGAAAATTTGGAATTAAGGAAAGGTTGGCGGAAGAGG   | 63704 |
| Ma'sNightMonkey   | AAGT-T-----ATGGTAGAA--GAGAATGGATTCCATAGGGCAAATAAGAACTGAAGGGAAGGTTGGTGGGAAGAGG     | 71114 |
| VervetAGM         | AAGTGTAGCTGTTAATGGTAGAA--GAGAATGGATTCCATAAGGCAAATAAGAACG-AAAGGGAAGGTTGGTGGGAAGAGA | 77771 |
| Gorilla           | AAATGTAGTTGTTAGTGGTAGAA--GAGAATGGATTCCATAGGGCAAATAAGAACTCAAGGGAAGGTTGGTGGGAAGAGG  | 74933 |
| GrabEatingMacaque | AAGTGTAGCTGTTAATGATAGAA--GAGAATGGATTCCATAAGGCAAATAAGAACG-AAAGGGAAGATTGGTGGGAAGAGA | 77314 |
| Macaque           | AAGTGTAGCTGTTAATGATAGAA--GAGAATGGATTCCATAAGGCAAATAAGAACG-AAAGGGAAGATTGGTGGGAAGAGA | 78184 |
| PigTailedMacaque  | AAGTGTAGCTGTTAATGGTAGAA--GAGAATGGATTCCATAAGGCAAATAAGAACG-AAAGGGAAGGTTGGTGGGAAGAGA | 76684 |
| Bonobo            | AAGTGTAGTTGTTAGTGGTAGAA--GAGAATGGATTCCATAGGGCAAATAAGAACTCAAGGGAAGGTTGGTGGGAAGAGG  | 75482 |
| OliveBaboon       | AAGTGTAGCTGTTAATGGTAGAA--GAGAATGGATTCCATAAGGCAAATAAGAACG-AAAGGGAAGGTTGGTGGGAAGAGA | 76580 |
| Orangutan         | AAGTGTAGTTGTTAGTGGTAGAA--GAGAATGGATTCCATAGGGCAAATAAGAACTCAAGGGAAGGTTGGTGGGAAGAGG  | 77244 |

| Majority          | AAGAGGATTGAATTGTTTCAAGAAAGAATAGCAGTTGTCATGCTTATGAAAAGTAAAATTTTTATTTTCAAATCAGGAAA |       |
|-------------------|----------------------------------------------------------------------------------|-------|
|                   | 92250 92260 92270 92280 92290 92300 92310 92320                                  |       |
| Human             | AAGAGGATTGAATTGTTTCAAGAAAGAATAGCAGTTGTCATCCTTATGAAAAGTAAAATTTTTATTTTCAAATCAGGAAA | 76463 |
| Coquerel'sSifaka  | A-----TTGGATTGTTG-AGGAAAGAATAGCAGTTGTCATCTTATCTAAAGTAAAATTTTTATTTTCAATCAGGAAA    | 63777 |
| Ma'sNightMonkey   | AAGAGAATTGAATTGTTTCAAGAAAGAATAGCATTATCATGCTTATGAAAAGTAAAATTTTTATTTTCAAATCAGGAAA  | 71194 |
| VervetAGM         | AAGAGGATTGAATTGTTTCAAGAAAGAATAGCAGGTGTCATGCTTATGAAAAGTAAAATTTTTATTTTCAAATCAGGAAA | 77851 |
| Gorilla           | AAGAGGATTGAATTGTTTCAAGAAAGAATAGCAGTTGTCATCCTTATGAAAAGTAAAATTTTTATTTTCAAATCAGGAAA | 75013 |
| GrabEatingMacaque | AAGAGGATTGAATTGTTTCAAGAAAGAATAGCAGGTGTCATGCTTATGAAAAGTAAAATTTTTATTTTCAAATCAGGAAA | 77394 |
| Macaque           | AAGAGGATTGAATTGTTTCAAGAAAGAATAGCAGGTGTCATGCTTATGAAAAGTAAAATTTTTATTTTCAAATCAGGAAA | 78264 |
| PigTailedMacaque  | AAGAGGATTGAATTGTTTCAAGAAAGAATAGCAGGTGTCATGCTTATGAAAAGTAAAATTTTTATTTTCAAATCAGGAAA | 76764 |
| Bonobo            | AAGAGGATTGAATTGTTTCAAGAAAGAATAGCAGTTGTCATCCTTATGAAAAGTAAAATTTTTATTTTCAAATCAGGAAA | 75562 |
| OliveBaboon       | AAGAGGATTGAATTGTTTCAAGAAAGAATAGCAGGTGTCATGCTTATGAAAAGTAAAATTTTTATTTTCAAATCAGGAAA | 76660 |
| Orangutan         | A-GAGGATTGAATTGTTTCAAGAAAGAATATCAGTTGTCATCCTTATGAAAAGTAAAATTTTTATTTTCAAATCAGGAAA | 77323 |

| Majority          | TAAAATGTAAAATGTGCCTTCCAGACCCCTTGGTGTA---TACATGGAAGATTGGTCTAGGACACACACAGTCCCCTCCC   |       |
|-------------------|------------------------------------------------------------------------------------|-------|
|                   | 92330 92340 92350 92360 92370 92380 92390 92400                                    |       |
| Human             | T----GTAAAATGTGCCTTCCAGACCCCTTGGTGGTATACATGGGAGATTGGTCTAGGACACACACAGTCCCCTCCC      | 76538 |
| Coquerel'sSifaka  | TAAAATATAAAAAATGCTGTCTCAGCC--AGGA--CCCCATACAAGTATCCCCTCAATATCCATGGGGAATTGGTTCT     | 63852 |
| Ma'sNightMonkey   | TAAAATATAAAAAGTGCCTTCAAGACCCCTTGGTGTA---TGCATGGGAGATTGGTCTAGGACACACACAGCCCCACGCCA  | 71271 |
| VervetAGM         | TAAAATGTAAAATGTGCCTTCCAGACCCCTTGGTGTA---TACATGGAAGATTGGTCTAGGACACACACAGTCCCCTCCC   | 77928 |
| Gorilla           | TAAAACGTAAAATGTGCCTTCCAGACCCCTTGGTGGTATACATGGGAGATTGGTCTAGGACACACACAGTCCCCTCCC     | 75093 |
| GrabEatingMacaque | TAAAATGTAAAATGTGCCTTCCAAACCCCTTGGTGTA---TACATGGAAGATTGGTCTAGGACACACACAGTCCCCTCCC   | 77471 |
| Macaque           | TAAAATGTAAAATGTGCCTTCCAAACCCCTTGGTGTA---TACATGGAAGATTGGTCTAGGACACACACAGTCCCCTCCC   | 78341 |
| PigTailedMacaque  | TAAAATGTAAAATGTGCCTTCCAAACCCCTTGGTGTA---TACATGGAAGATTGGTCTAGGACACACACAGTCCCTACTCCC | 76841 |
| Bonobo            | TAAAACGTAAAATGTGCCTTCCAGACCCCTTGGTGGTATACATGGGAGATTGGTCTAGGACACACACAGTCCCCTCCC     | 75642 |
| OliveBaboon       | TAAAATGTAAAATGTGCCTTCCAGACCCCTTGGTGTA---TACATGGAAGATTGGTCTAGGACACACACAGTCCCCTCCC   | 76737 |
| Orangutan         | TAAAATGTAAAATGTGCCTTCCAGACCCCTTGGTGTA---TACATGGGAGATTGGTCTAGGACACACACAGTCCCCTCCC   | 77400 |

Tuesday, May 03, 2022 06:17 PM

| Majority          | CACC---TACCCCGCCCCACACCCCCCTGGATACTAAAATCCACTGATGCTCAAGTTCCTTGTATAAAAATGGTATAG   |       |
|-------------------|----------------------------------------------------------------------------------|-------|
|                   | 92410 92420 92430 92440 92450 92460 92470 92480                                  |       |
| Human             | CACC----CTCT-GACCCCATACACCCCTGGATACTCAAATCCACTGATGCTCAAGTTCCTTGCATAAAAATGGTATAG  | 76612 |
| Coquerel'sSifaka  | AGGA-----ACTCCCC--TGCCTCTGTATACCAGAATCCATGGATGCTCAAGTTCCTTATATAAAAATGGTATAG      | 63920 |
| Ma'sNightMonkey   | CCCC---TACTCCACTCCCAACACACCCCTGGATACTAAAATCCACTGATGCTCAAGTACCTTGTATAAAAATGGTATAG | 71348 |
| VervetAGM         | CACCGCTACCCCGCCCCACACACCCCTGGATACTAAAATCCACTGGTCTCAAGTTCCTTGTATAAAAACGGTATAG     | 78008 |
| Gorilla           | CACC----CTCT-GCCCCATACAGCCCTGGATACTCAAATCCACTGATGCTCAAGTTCCTTGTATAAAAATGGTATAG   | 75167 |
| GrabEatingMacaque | CACCGCTACCCCGCCCCACATACCCCGGATACTAAAATCCACTGATGCTCAAGTTCCTTGTATAAAAATGGTATAG     | 77550 |
| Macaque           | TACCGCTACCCCGCCCCACATACCCCGGATACTAAAATCCACTGATGCTCAAGTTCCTTGTATAAAAATGGTATAG     | 78420 |
| PigTailedMacaque  | TACCGCTACCCCTCCCCACACACCCCGGATACTAAAATCCACTGATGCTCAAGTTCCTTGTATAAAAATGGTATAG     | 76920 |
| Bonobo            | CACC----CTCT-GACCCCATACACCCCTGGATACTCAAATCCACTGGTCTCAAGTTCCTTGTATAAAAATGGTATAG   | 75716 |
| OliveBaboon       | CACCGCTACCCCGCCCCACACACCCCGAGATACTAAAATCCACTGATGCTCAAGTTCCTTGTATAAAAATGGTATAG    | 76816 |
| Orangutan         | CACC----CCCT-GCCCCATACACCCCTGGATACTCAAATCCGCTGATGCTCAAGTTCCTTGTATAAAAATGGTATAG   | 77474 |

| Majority          | TGTTTGCATATGACCTATACACAACCTCTTATATGTACTTTAAATCATCTCTAGATTACTTGTATTACCCAGTACAATAT  |       |
|-------------------|-----------------------------------------------------------------------------------|-------|
|                   | 92490 92500 92510 92520 92530 92540 92550 92560                                   |       |
| Human             | TGTTTGCATATGACCTATACACAACCTCTTATGTGTACTTTAAATCATCTCTAGATTACTTATATTACCCAGTACAATAT  | 76692 |
| Coquerel'sSifaka  | TATTTGCATATCACTTATGCACCACCTCTGTATATACTTTAAATCATCT----CTACATGTAATACCTAGTACAACAT    | 63995 |
| Ma'sNightMonkey   | TGTTTGTATATGACCTATGCACAACCTCTTATATGTACTTTAAATCATCTCTAGATTACTTATATTACCCAAAACAATAT  | 71428 |
| VervetAGM         | TGTTTGCATATGACCTATACACAACCTCTTATATGTACTTTAAATCATCTTTAGATTACTTGTATTACCCAGTACAATAT  | 78088 |
| Gorilla           | TGTTTGCATATGACCTATACACAACCTCTCATGTGTACTTTAAATCATCTCTAGATTACTTATATTACCCAGTACAATAT  | 75247 |
| GrabEatingMacaque | TGTTTGCATATGACCTATACACAACCTCTTATATGTACTTTAAATCATCT--AGATTACTTGTATTACCCAGTACCATAT  | 77628 |
| Macaque           | TGTTTGCATATGACCTATACACAACCTCTTATATGTACTTTAAATCATCTTTAGATTACTTGTATTACCCAGTACCATAT  | 78500 |
| PigTailedMacaque  | TGTTTGCATATGACCTATACACAACCTCTTATATGTACTTTAAATCATCTTTAGATTACTTGTATTACCCAGTACCATAT  | 77000 |
| Bonobo            | TGTTTGCATATGACCTATACACAACCTCTTATGTATACTTTAAATCATCTCTAGATTACTTATATTACCCAGTACAATAT  | 75796 |
| OliveBaboon       | TGTTTGCATATGACCTATACACAACCTCTTATATGTACTTTAAATCATCTTTAGATTACTTGTATTACCCAGTACAATAT  | 76896 |
| Orangutan         | TGTTTGTCTTCTGACCTATACACAACCTCTTATATGTACTTTAAATCATCTCTAGATTACTTATATTACCCAGTACAATAT | 77554 |

| Majority          | AAATGCTATGTAAATGGTTGTTTATACTGTATTGTTTAGGGAATAA-TGACAAGAACAACCTTCTATACATTTGCAGTACA |       |
|-------------------|-----------------------------------------------------------------------------------|-------|
|                   | 92570 92580 92590 92600 92610 92620 92630 92640                                   |       |
| Human             | AAATGTTATGTAAATGGTTGTTTATAGTGTATTGTTTAGGGAATAA-TGACAAGAACAACCTTCTATACATTTGCAGTACA | 76771 |
| Coquerel'sSifaka  | AAATGCTTTGTAAATAGTTGTTTACACTGTATTGTTTAGGGAATAA-TGACAAGAAAAA---GTGTATATGTTTCAGTACA | 64070 |
| Ma'sNightMonkey   | AAATGCTATGTAAATGGTTGTTTACACTGTATTGTTTAGATAATAAATGACAAGAGCAACTTCTATATGTGTGCAGTACA  | 71508 |
| VervetAGM         | AAATGCTATGTAAATGGTTGTTTATACTATATTGTTTAGGGAATAA-GGACAAGAACAACCTTCTATACATGTGCAGTACA | 78167 |
| Gorilla           | AAATGTTATGTAAATGGTTGTTTATACTGTATTGTTTAGGGAATAA-TGACAAGAACAACCTTCTATACATTTGCAGTACA | 75326 |
| GrabEatingMacaque | AAATGCTATGTAAATGGTTGTTTATACTATATTGTTTAGGGAGTAA-GGACAAGAACAACCTTCTATACATATGCAGTACA | 77707 |
| Macaque           | AAATGCTATGTAAATGGTTGTTTATACTATATTGTTTAGGGAATAA-GGACAAGAACAACCTTCTATACATATGCAGTACA | 78579 |
| PigTailedMacaque  | AAATGCTATGTAAATGGTTGTTTATACTATATTGTTTAGGGAATAA-GGACAAGAACAACCTTCTATACATATGCAGTACA | 77079 |
| Bonobo            | AAATGTTATGTAAATGGTTGTTTATACTGTATTGTTTAGGGAATAA-TGACAAGAACAACCTTCTATACATTTGCAGTACA | 75875 |
| OliveBaboon       | AAATGCTATGTAAATGGTTGTTTATACTATATTGTTTAGGGAATAA-GGACAAGAACAACCTTCTATACATGTGCAGTACA | 76975 |
| Orangutan         | AAACGTTATATAAATGGTTGTTTATACTGTATTGTTTAGGGAATAA-TCACAAGAACAACCTTGTATACATTTGCAGTACA | 77633 |

Tuesday, May 03, 2022 06:17 PM

```

Majority      -----CCATCGTTTTTC---CCCCAAATATTTTTGATCCAAGGTTGGTTGAATCGGAACCCAGAGATACAGAGGGCTG
              92650    92660    92670    92680    92690    92700    92710    92720
Human         -----CCATTGTTTTTA---CCCCAAATATTTTTGATCCAAGGTTGGTTGAATCGGAACCCAGAGATACAGAGGGCTG 76841
Coquerel'sSifaka GATACAAGCATCATTTTTTTACCCTGAATGTTTTTGTCTGAGGT-GGTTGAATT-----CACAGATACAG----- 64136
Ma'sNightMonkey GATGCAGCCATCGTTTTTTT---CCCCAAATATTTTTGATCCAAGGTTGGTTGAATCGGAACCCAGACCTATAGAGGGCTG 71586
VervetAGM      -----CCATCGTTTTTC---CCCCAAATATTTTT-ATCCAAGGTTGGTTGAATCGGAACCCAGAGATACAGAGGGCTG 78236
Gorilla        -----CCATTGTTTTTC---CCCCAAATATTTTTGATCCAAGGTTGGTTGAATTGGAACCCAGAGATACAGAGGGCTG 75396
GrabEatingMacaque -----CCATCGTTTTTC---CCCCAAATATTTTT-ATCCAAGGTTGGTTGAATCGGAACCCAGAGATACAGAGGGCTG 77776
Macaque        -----CCATCGTTTTTC---CCCCAAATATTTTT-ATCCAAGGTTGGTTGAATCGGAACCCAGAGATACAGAGGGCTG 78648
PigTailedMacaque -----CCATCGTTTTTC---CCCCAAATATTTTT-ATCCAAGGTTGGTTGAATCGGAACCCAGAGATACAGAGGGCTG 77148
Bonobo         -----CCATTGTTTTTC---CCCCAAATATTTTTGATCCAAGGTTGGTTGAATCGGAACCCAGAGATACAGAGGGCTG 75945
OliveBaboon    -----CCATCGTTTTTC---CCCCAAATATTTTT-ATCCAAGGTTGGTTGAATCGGAACCCAGAGATACAGAGGGCTG 77044
Orangutan      -----CCATTGTTTTTC---CCCCAAATATTTTTGATCCAAGGTTGGTTGAATCGGAACCCAGAGATACAGAGGGCTG 77703
    
```

```

Majority      ACTATACTTT-AAGAATTAGA---ATTAGCCAGTCGTGGTTGCAGGTGCCTGTAGTCCCAGCTACTCGGGAGGCTGAGTC
              92730    92740    92750    92760    92770    92780    92790    92800
Human         ACTATACTTT-AAGAATTAGA---ATTAGTCGGGTGTGGTGGTGGGTGCCTGTAGTCCCAGCTACTCGGGAGGCTGACGC 76917
Coquerel'sSifaka -----G----- 64137
Ma'sNightMonkey ACTATACTTT-AAGAATTAGATGGGGTGGCCAGGAGCGGTGGCTTACACCTGTAACCCAGCACTTTGGGAGGCCAAGTA 71665
VervetAGM      ACTATACTTT-AAGAATTAGA---ATTAGCCAGTCATGGTTGCAGGTGCCTGTAGTCCCAGCTACTTGGGAGGCTGAGTC 78312
Gorilla        ACTATACTTT-AAGAATTAGA---ATTAGTCGGGTGTGGTGGTGGTGCCTGTAGTCCCAGCTACTCGGGAGGCTGACGC 75472
GrabEatingMacaque ACTATACTTT-AAGAATTAGA---ATTAGCCAGTCATGGTTGCAGGCGCCTGTAGTCCCAGCTGCTCCGGAGGCTGAGTC 77852
Macaque        ACTATACTTT-AAGAATTAGA---ATTAGCCAGTCATGGTTGCAGGCGCCTGTAGTCCCAGCTACTCCGGAGGCTGAGTC 78724
PigTailedMacaque ACTATACTTT-AAGAATTAGA---ATTAGCCAGTCATGGTTGCAGGCGCCTGTAGTCCCAGCTACTCCGGAGGCTGAGTC 77224
Bonobo         ACTATACTTT-AAGAATTAGA---ATTAGTCGGGTGTGGTGGTGGTGCCTGTAGTCCCAGCTACTCGGGAGGCTGACGC 76021
OliveBaboon    ACTATACTTT-AAGAATTAGA---ATTAGCCAGTCATGGTTGCAGGTGCCTGTAGTCCCAGCTACTCGGGAGGCTGAGTC 77120
Orangutan      ACCATACTTTAAGAATTAGA---ATTAGTCGGGTGTGGTGGTGGTGCCTGTAGT-----GGAGGCTGACGC 77767
    
```

```

Majority      AGGAGAATGGCATGAACCTGGGAGGTGGAGCTTGTAGT---GAGCCGAGATCGTGCCACTGCGCTCCAGCCTGGGCGACA
              92810    92820    92830    92840    92850    92860    92870    92880
Human         AGGAGAAAGGCGTGAACCCGGGAGGTGGAGCTTGCAGT---GAGCCGAGATCGTGCCACTGCACTCCAGCCTGGGCGACA 76994
Coquerel'sSifaka -----ATCCA-----GGGATATGGAG-----G-----GCCGTGTACTTTA-----A 64169
Ma'sNightMonkey GTTCAAAAACCAGCATGATGAGACTTGAGGTCAGTAGTTAAAAACCAGCATGATGAAACCCCTGTCTCTACTAAGAATACA 71745
VervetAGM      AGGAGAATGGCATGAACCTGGGAGGTGGAGCTTATAGT---GAGCCGAGATCGTGCCACAGCGCTCCAGCCTGGGCGACA 78389
Gorilla        AGGAGAAAGGCGTGAACCCGGGAGGTGGAGCTTGCAGT---GAGCCGAGATCGTGCCACTGCACTCCAGCCTGGGCGACA 75549
GrabEatingMacaque AGGAGAATGGCATGAACCTGGGAGGTGAAGCTTATAGT---GAGCCGAGATCGTGCCACAGCGCTCCAGCCTGGGCGACA 77929
Macaque        AGGAGAATGGCATGAACCTGGGAGGTGAAGCTTATAGT---GAGCCGAGATCGTGCCACAGCGCTCCAGCCTGGGCGACA 78801
PigTailedMacaque AGGAGAATGGCATGAACCTGGGAGGTGAAGCTTATAGT---GAGCCGAGATCGTGCCACAGCGCTCCAGCCTGGGCGACA 77301
Bonobo         AGGAGAAAGGCGTGAACCCGGGAGGTGGAGCTTGCAGT---GAGCCGAGATCGTGCCACTGCACTCCAGCCTGGGCGACA 76098
OliveBaboon    CAGAGAATGGCATGAACCTGGGAGGTGAAGCTTATAGT---GAGCCGAGATGTGCCACAGCGCTCCAGCCTGGGCGATA 77197
Orangutan      AGGAGAATGGCGTGAACCCGGGAGGTGGAGCTTGCAGT---GAGCCGAGATCGTGCCACTGCACTCCAGCCTGGGCGACA 77844
    
```

Tuesday, May 03, 2022 06:17 PM

| Majority          | GAGCGAGACTCTGTCTCAAAAAAAAAAAAAAAAAAAATTAGA-AGGTGCT-----                          |       |       |       |       |       |       |       |       |
|-------------------|----------------------------------------------------------------------------------|-------|-------|-------|-------|-------|-------|-------|-------|
|                   | 92890                                                                            | 92900 | 92910 | 92920 | 92930 | 92940 | 92950 | 92960 |       |
| Human             | GAGCGAGACTCTGTCT---CTAAAAAAAAAAAAAAAAAAATTAGA-AGGGGCT-----                       |       |       |       |       |       |       |       | 77042 |
| Coquerel'sSifaka  | GAATTAG-----A---AAAA-----                                                        |       |       |       |       |       |       |       | 64181 |
| Ma'sNightMonkey   | AAATTAG-CCCAGTGTGATAGCAGGCGCTGTAATCTCAGCTACTCAGGAGACTGAGGCAGGAGAATCACTTGAACCTGG  |       |       |       |       |       |       |       | 71824 |
| VervetAGM         | GAGCGAGACTCTGTCTCAAAAAAAAAAAAAAAAAAGGTA-----GCT-----                             |       |       |       |       |       |       |       | 78429 |
| Gorilla           | AAGTGAGACTCTGTCTCAAAAAAAAAAAAAAAAAAGAATTAGA-AGGGGCT-----                         |       |       |       |       |       |       |       | 75601 |
| GrabEatingMacaque | GAGCGAGACTCCGACTCAAAAAAAAAAAAAAAAA---TTAGA-AGGTGCT-----                          |       |       |       |       |       |       |       | 77977 |
| Macaque           | GAGCGAGACTCCGACTCAAAAAAAAAAAAAAAAAAAATTAGA-AGGTGCT-----                          |       |       |       |       |       |       |       | 78853 |
| PigTailedMacaque  | GACCGGACTCCGACTCAAAAAAAAAAAAAAAAAAAATTAGA-AGGTGCT-----                           |       |       |       |       |       |       |       | 77353 |
| Bonobo            | GAGCGAGACTCTGTCTA-AACTAAAAAAAAANNNNNNNNNNNNNNNNNNNNNTACGTCGTAATAAAAACTAAAAAAAAAN |       |       |       |       |       |       |       | 76176 |
| OliveBaboon       | GAGCGAGACTCCGTCTCAAAAAAAAAAAAAAAAAAGAAAAATTAGA-AGGTGCT-----                      |       |       |       |       |       |       |       | 77249 |
| Orangutan         | GAGCGAGACTCTGTCTC-AAAAAAAAAAAAATACAACAATTAGA-AGGGGCT-----                        |       |       |       |       |       |       |       | 77895 |

| Majority          | -----GTCAGGCGCGATGGTTCTTGCCT-----GTAATCCCAGCA                                    |       |       |       |       |       |       |       |       |
|-------------------|----------------------------------------------------------------------------------|-------|-------|-------|-------|-------|-------|-------|-------|
|                   | 92970                                                                            | 92980 | 92990 | 93000 | 93010 | 93020 | 93030 | 93040 |       |
| Human             | -----GTCAGGCGTGGTGTCTCATGCCTA--TAATCCCAGTCATGCCTGTAATCCCAGCA                     |       |       |       |       |       |       |       | 77095 |
| Coquerel'sSifaka  | -----GCCT-----                                                                   |       |       |       |       |       |       |       | 64185 |
| Ma'sNightMonkey   | GAGGTGGAGGTTGAGTGAGCTGAGATCACGCCATTGCCTCCAGCTGGGCGACAGTGAAACTCCATCTCAAAAAAAAA    |       |       |       |       |       |       |       | 71904 |
| VervetAGM         | -----GCCAGGCGCGATGGTTCTTGCCT-----GTAATGCCAGCA                                    |       |       |       |       |       |       |       | 78464 |
| Gorilla           | -----GTCAGGCGTGGTGGCTCATGCCTA--TAATCCCAGTCATGCCTATAATCCCAGCA                     |       |       |       |       |       |       |       | 75654 |
| GrabEatingMacaque | -----GCCAGGCGCGATGGTTCTTGCCT-----GTAATCCCAGCA                                    |       |       |       |       |       |       |       | 78012 |
| Macaque           | -----GCCAGGCGCGATGGTTCTTGCCT-----GTAATCCCAGCA                                    |       |       |       |       |       |       |       | 78888 |
| PigTailedMacaque  | -----GCCAGGCGCGATGGTTCTTGCCT-----GTAATCCCAGCA                                    |       |       |       |       |       |       |       | 77388 |
| Bonobo            | AAAAAAAAAGAATTAGAAAGGGGCTGTCAGGCGTGGTGGCTCATGCCTA--TAATCCCAGTCATGCCTGTAATCCCAGCA |       |       |       |       |       |       |       | 76254 |
| OliveBaboon       | -----GCCAGGCGCGATGGTTCTTGCCT-----GTAATCCCAGCA                                    |       |       |       |       |       |       |       | 77284 |
| Orangutan         | -----GTCAGGCATGGTGGCTCATGCCT-----GTAATCCCAGCA                                    |       |       |       |       |       |       |       | 77930 |

| Majority          | CTTTGGGAGGCTGAGGCGGGCATATCA----CTTGAGGTGAGGAGTTTAAAACCAGCCTGGCCAACATGGTGAAACAAC |       |       |       |       |       |       |       |       |
|-------------------|---------------------------------------------------------------------------------|-------|-------|-------|-------|-------|-------|-------|-------|
|                   | 93050                                                                           | 93060 | 93070 | 93080 | 93090 | 93100 | 93110 | 93120 |       |
| Human             | CTTTGGGAGGCTAAGGTGGGCATATCA----CTTGAGATCATGAGTTCAAACCAGCCTGGCCAACATGGTGAAACA-C  |       |       |       |       |       |       |       | 77169 |
| Coquerel'sSifaka  | -----                                                                           |       |       |       |       |       |       |       | 64185 |
| Ma'sNightMonkey   | AAAAGGAAAAAAAAAGAATTAGAAGGGACTTTGGAGTCCCACCACTAATCCTCTTCTGTTTCAGTAGTACACAAGACT  |       |       |       |       |       |       |       | 71984 |
| VervetAGM         | CTTTGGGAGGCTGAGGCGGGCATGTCA----CTTGAGGTGAGGAGTTTAAAACCAGCCTGGCCAACATGGTGAAACAAC |       |       |       |       |       |       |       | 78539 |
| Gorilla           | TTTTGGGAGGCTAAGGTGGGCATATCA----CTTGAGGTCTTGAAGTTCAAACCAGCCTGGCCAACATGGTGAAACA-C |       |       |       |       |       |       |       | 75728 |
| GrabEatingMacaque | CTTTGGGAGGCTGAGGCGGGCATATCA----CTTGAGGTGAGGAGTTTAAAACCAGCCTGGCCAACATGGTGAAACAAC |       |       |       |       |       |       |       | 78087 |
| Macaque           | CTTTGGGAGGCTGAGGCGGGCATATCA----CTTGAGGTGAGGAGTTTAAAACCAGCCTGGCCAACATGGTGAAACAAC |       |       |       |       |       |       |       | 78963 |
| PigTailedMacaque  | CTTTGGGAGGCTGAGGCGGGCATATCA----CTTGAGGTGAGGAGTTTAAAACCAGCCTGGCCAACATGGTGAAACAAC |       |       |       |       |       |       |       | 77463 |
| Bonobo            | CTTTGGGAGGCTAAGGTGGGCATATCA----CTTGAGGTGAGGAGTTTAAAACCAGCCTGGCCAACATGGTGAAACA-C |       |       |       |       |       |       |       | 76328 |
| OliveBaboon       | CTTTGGGAGGCTGAGGCGGGCATATCA----CTTGAGGTGAGGAGTTTAAAACCAGCCTGGCCAACATGGTGAAACAAC |       |       |       |       |       |       |       | 77359 |
| Orangutan         | CTTTGGGAGGCTGAGGCGGGCATATCA----CTTGAGGTGAGGAGTTTAAAACCAGCCTGGCCAACATGGTGAAACA-C |       |       |       |       |       |       |       | 78004 |

Tuesday, May 03, 2022 06:17 PM

|                   |                                                                                   |       |
|-------------------|-----------------------------------------------------------------------------------|-------|
| Majority          | CGTCTCTACTAAAAAT-ACAAAAATTAGCCAGGTGTGTTGGTGGGCGCCTGTAATCTTAGCTCCTCAGGAAGCTGAGTCA  |       |
|                   | 93130 93140 93150 93160 93170 93180 93190 93200                                   |       |
| Human             | TGTCCTCTACTAAAAAT-ACAAATATTAGCCAGGTGTGTTGGTGGGCGCCTGTAATCTTAGCTACTCAGGAGGCTGAGTCA | 77248 |
| Coquerel'sSifaka  | -----T-----                                                                       | 64186 |
| Ma'sNightMonkey   | ACTAACTACCAGATGTCATGAACAGGTAAGAAGTAAGGCCAAAAGAA-ATCATGTAAATTACTTTGGATGGAAGTTTT    | 72063 |
| VervetAGM         | CATCTCTACTAAAAAT-ACAAAAATTAGCCAGGTGTGTTGGTGGGCGCCTGTAATCTTAGCTCCTCAGGAAGCTGAGTCA  | 78618 |
| Gorilla           | TGTCCTCTACTAAAAAT-ACAAATACTAGCCAGGTGTGTTGGTGGGCGCCTGTAATCTTAGCTACTCAGGAGGCTGAGTCA | 75807 |
| GrabEatingMacaque | CGTCTCTACTAAAAAT-ACAAAAATTAGCCAGGTGTGTTGGT-----AATCTTAGCTCCTCAGGAAGCTGAGTCA       | 78156 |
| Macaque           | CGTCTCTACTAAAAAT-ACAAAAATTAGCCAGGTGTGTTGGT-----AATCTTAGCTCCTCAGGAAGCTGAGTCA       | 79032 |
| PigTailedMacaque  | CGTCTCTACTAAAAAT-ACAAAAATTAGCCAGGTGTGTTGGTGGGTCCTGTAATCTTAGCTCCTCAGGAAGCTGAGTCA   | 77542 |
| Bonobo            | TGTCCTCTACTAAAAAT-ACAAATATTAGCCAGGTGTGTTGGTGGGCGCCTGTAATCTTAGCTACTCAGGAGGCTGAGTCA | 76407 |
| OliveBaboon       | CGTCTCTACTAAAAAT-ACAAAAATTAGCCAGGTGTGTTGGTGGGCGCCTGTAATCTTAGCTCCTCGGAAGCTGAGTCA   | 77438 |
| Orangutan         | TGTCCTCTACTAAAAAT-ACAAATATTAGCCACGTGTGTTGGTGGGCGCCTGTAATCTTAGCTACTCAGGAGGCTGAGTCA | 78083 |

|                   |                                                                                   |       |
|-------------------|-----------------------------------------------------------------------------------|-------|
| Majority          | GGAGAATCGCTTGAACCCAGGAGGTGGAGGTTGCAGTGAGCTG-AGATCATGCCATTGCACTCCAG-----CCTGGGCG   |       |
|                   | 93210 93220 93230 93240 93250 93260 93270 93280                                   |       |
| Human             | GGAGAATTGCTTGAACCCAGGAGGTGGAGGTTGCAGTGAGCTG-AGATCATGCCATTGCACTCCAG-----CCTGTGTG   | 77321 |
| Coquerel'sSifaka  | -----A-----G-----                                                                 | 64188 |
| Ma'sNightMonkey   | AGAGTGGGAAGTGGAAGGATAAATTTGACGTTCTTCAAACCTCGTAGATTAAACTCTTACAAGTAAGGGGAACCTAAGGAG | 72143 |
| VervetAGM         | GGAGAATCGCTCGAACCCAGGAGGTGGAGGTTGCAGTGAGCTG-AGATCATGCCATTGCACTCCAG-----CCTGGGCG   | 78691 |
| Gorilla           | GGAGAATTGCTTGAACCCAGGAGGTGGAGGTTGCAGTGAGCTG-AGATCATGCCATTGCACTCCAG-----CCTGTGTG   | 75880 |
| GrabEatingMacaque | GGAGAATCGCTTGAACCCAGGAGGTGGAGGTTGCAGTGAGCTG-AGATCATGCCATTGCACTCCAG-----CCTGGGCA   | 78229 |
| Macaque           | GGAGAATCGCTTGAACCCAGGAGGTGGAGGTTGCAGTGAGCTG-AGATCATGCCATTGCACTCCAG-----CCTGGGCG   | 79105 |
| PigTailedMacaque  | GGAGAATCGCTTGAACCCAGGAGGTGGAGGTTGCAGTGAGCTG-AGATCATGCCATTGCACTCCAG-----CCTGGGCG   | 77615 |
| Bonobo            | GGAGAATTGCTTGAACCGAGGAGGTGGAGGTTGCAGTGAGCTG-AGATCATGCCAT-GCACTCCAG-----CCTGTGTG   | 76479 |
| OliveBaboon       | GGAGAATCGCTTGAACCCAGGAGGTGGAGGTTGCAGTAAGCTG-AGATCATGCCATTGCACTCCAG-----CCTGGGCG   | 77511 |
| Orangutan         | GAAGAATTGCTTGAACCCAGGAGGTGGAGGTTGCAGTGAGCTG-AGATCATGCCATTGCACTCCAG-----CCTGCGTG   | 78156 |

|                   |                                                                                 |       |
|-------------------|---------------------------------------------------------------------------------|-------|
| Majority          | ACAGAGTGA---AACTCCAT-----CTCAAAAAAAAAAAAAAAAAATAGAA---GGGGCTTTAG--AGTCTACCACG   |       |
|                   | 93290 93300 93310 93320 93330 93340 93350 93360                                 |       |
| Human             | ACAGAGTGA---AACTCCAT-----CTCAAAAATACAAAAGAATTAGAA---AGGGCTTTAG--AGTCCCACCCT     | 77385 |
| Coquerel'sSifaka  | --A-----GTCCCACCACC                                                             | 64200 |
| Ma'sNightMonkey   | ACATGATGATTAATGTAATAGGAGATACTGGAACAACAAAAAGGGACATTAGATGCAAAATTGAGGAAATCTGATAAAG | 72223 |
| VervetAGM         | ACAGAGTGA---AACTCCAT-----CTCAAAAAAAAAAAAAAAAAAGAAGAAG---GGGCTTTAG--AGTCTACCACC  | 78753 |
| Gorilla           | ACAGAGTGA---AACTCCAT-----CTCAAAAATACAAAAGAATTAGAA---GGGGCTTTAG--AGTCCCACCCT     | 75944 |
| GrabEatingMacaque | ACAGAGTGA---AACTCCAT-----CTCAAAAAAAAAAAAAAAAAAAAAA-----GGCTTTAG--AGTCTACCACG    | 78290 |
| Macaque           | ACAGAGTGA---AACTCCAT-----CTCAAAAAAAAAAAAAAAAAAAAAAAGGGGGCTTTAG--AGTCTACCACG     | 79172 |
| PigTailedMacaque  | ACAGAGCGA---AACTCTGT-----CTCAAAAAAAAAAAAAAAAAAAGAA---GGGGCTTTAG--AGTCTACCACG    | 77678 |
| Bonobo            | ACAGAGTGA---AACTCCAT-----CTCAAAAATACAAAATAATTAGAA---AGGGCTTTAG--AGTCCCACCCT     | 76543 |
| OliveBaboon       | ACAGAGTGA---AACTCCAT-----CTCAAAAAAAAAAAAAAAAAACAGAA---GGGGCTTTAG--AGTCTACCACG   | 77575 |
| Orangutan         | ACAGAGTGA---AACTCCAT-----CTCAA-----AAAAGAATT-----TGG--AGTCCCACCCT               | 78203 |

Tuesday, May 03, 2022 06:17 PM

| Majority          | AATGCTCTTCTGTTTCAGTAGTACACAAGACTAAT-TACTACCAGATGTTATGAACAGGGAAAAGAAGTAAGACCAAAAAA |       |       |       |       |       |       |       |       |
|-------------------|-----------------------------------------------------------------------------------|-------|-------|-------|-------|-------|-------|-------|-------|
|                   | 93370                                                                             | 93380 | 93390 | 93400 | 93410 | 93420 | 93430 | 93440 |       |
| Human             | AATGCTCTTCTGTTTCAGTAGTACACAAGACTAAT-AACTACGAGATGTTATGAACAGGGAAAAGAAGTAAGACCAAAAAA |       |       |       |       |       |       |       | 77464 |
| Coquerel'sSifaka  | AGTCCTCTTCTGTTTCATTAGTACACAAGATTGAT-AACTACCAGATGTTTGAAGATGGAAAAGAAGACCAAAAAGAGAAA |       |       |       |       |       |       |       | 64279 |
| Ma'sNightMonkey   | AATTTTTTTTTTTTTTTTGGAGACAGAGTCTTGCTCTGTTGCCAGCTGCCA-GGCTGGAGTGCAGTGGCACTACCTTGGCT |       |       |       |       |       |       |       | 72302 |
| VervetAGM         | AATGCTCTTCTGTTTCAGTAGTACACAAGACTAAT-TACTACCAGATGTTGTGAACAGGGAAAAGAAGTAAGACCAAAAAA |       |       |       |       |       |       |       | 78832 |
| Gorilla           | AATGCTCTTCTGTTTCAGTAGTACACAAGACTAAT-AACTACCAGATGTTATGAACAGGGAAAAGAAGTAAGACCAAAAAA |       |       |       |       |       |       |       | 76023 |
| GrabEatingMacaque | AATGCTCTTCTGTTTCAGTAGTACACAAGACTAAT-TACTACCAGATGT---GAACAGGGAAAAGAAGTAAGACCAAAAAA |       |       |       |       |       |       |       | 78366 |
| Macaque           | AATGCTCTTCTGTTTCAGTAGTACACAAGACTAAT-TACTACCAGATGT---GAACAGGGAAAAGAAGTAAGACCAAAAAA |       |       |       |       |       |       |       | 79248 |
| PigTailedMacaque  | AATGCTCTTCTGTTTCAGTAGTACACAAGACTAAT-TACTACCAGATGT---GAACAGGGAAAAGAAGTAAGACCAAAAAA |       |       |       |       |       |       |       | 77754 |
| Bonobo            | AATGCTCTTCTGTTTGTAGTACACAAGACGAAT-AACTACGAGATGTTATGAACAGGGAAAAGAAGTAAGACCAAAAAA   |       |       |       |       |       |       |       | 76622 |
| OliveBaboon       | AATGCTCTTCTGTTTCAGTAGTACACAAGACTAAT-TACTACCAGATGTTGTGAACAAGGAAAAGAAGTAAGACCAAAAAA |       |       |       |       |       |       |       | 77654 |
| Orangutan         | AATGCTCTTCTGTTTCTGTAGTACACAAGGCTAAT-AACTACCAGGTGTTGTGAACAGGGAAAAGAAGTAAGACCAAAAAA |       |       |       |       |       |       |       | 78282 |

| Majority          | AATCATAAATTACTT-----TGGATGGA--ACTT-----TTAGAAT----GGAAGATGGAGGGATAAATTTGA----      |       |       |       |       |       |       |       |       |
|-------------------|------------------------------------------------------------------------------------|-------|-------|-------|-------|-------|-------|-------|-------|
|                   | 93450                                                                              | 93460 | 93470 | 93480 | 93490 | 93500 | 93510 | 93520 |       |
| Human             | AATCATAAATTACTT-----TGGATGGA--ACTT-----TTAGAAT----GGCAGATGGAGGGATAAATTTGA----      |       |       |       |       |       |       |       | 77521 |
| Coquerel'sSifaka  | TAATATAAATGTCTT-----TGGCTGGA--AGTT-----TTAGAAT----GGGAAATGGAAGGATAAAAACAAGTCCT     |       |       |       |       |       |       |       | 64340 |
| Ma'sNightMonkey   | CACTGCAACCTCTTCCCTCCCTGGTTCAAGTACTTCTCCTGCCTTAACCTTTTGTAGTAGCTGGAATTACAGGTGTGCGC-- |       |       |       |       |       |       |       | 72380 |
| VervetAGM         | AATCATAAATTACTT-----TGGATGGA--ACTT-----TTAGAAT----GGAAGATGGAGGGATAAATTTGA----      |       |       |       |       |       |       |       | 78889 |
| Gorilla           | AATCATAAATTACTT-----TGGATGGA--ACTT-----TTAGAAT----GGCAGATGGAGGGATAAATTTGA----      |       |       |       |       |       |       |       | 76080 |
| GrabEatingMacaque | AATCATAAATTACTT-----TGGATGGA--ACTT-----TTAGAAT----GGAAGATGGAGGGATAAATTTGA----      |       |       |       |       |       |       |       | 78423 |
| Macaque           | AATCATAAATTACTT-----TGGATGGA--ACTT-----TTAGAAT----GGAAGATGGAGGGATAAATTTGA----      |       |       |       |       |       |       |       | 79305 |
| PigTailedMacaque  | AATCATAAATTACTT-----TGGATGGA--ACTT-----TTAGAAT----GGAAGATGGAGGGATAAATTTGA----      |       |       |       |       |       |       |       | 77811 |
| Bonobo            | AATCATAAATTACTT-----TGGATGGA--ACTT-----TTAGAAT----GGCAGATGGAGGGATAAATTTGA----      |       |       |       |       |       |       |       | 76679 |
| OliveBaboon       | AATCATAAATTACTT-----TGGATGGA--ACTT-----TTAGAAT----GGAAGATGGAGGGATAAATTTGA----      |       |       |       |       |       |       |       | 77711 |
| Orangutan         | AATCATAAATTACTT-----TGGATGGA--ACTT-----TTAGAAT----GGAAGATGGAGGGATAAATTTGA----      |       |       |       |       |       |       |       | 78339 |

| Majority          | -CATTTTTTCAGAATCATA-----AACTCTCACAAAGTAAGGGGA----ACCTAAGGAGACAAGATGAT-TAGAT----- |       |       |       |       |       |       |       |       |
|-------------------|----------------------------------------------------------------------------------|-------|-------|-------|-------|-------|-------|-------|-------|
|                   | 93530                                                                            | 93540 | 93550 | 93560 | 93570 | 93580 | 93590 | 93600 |       |
| Human             | -CATTGTTCAAATCATAGAGTAAACTCTCAAAGTAAGGGGA----ACCTAAGGAGACAAGATGAT-TAAAT-----     |       |       |       |       |       |       |       | 77588 |
| Coquerel'sSifaka  | ACGTTCTTAAAAATCATAGATTAAACTGTCACAGTTTTAAGGT---CACCTAAGGATAAATGATGAC-TAAAT-----   |       |       |       |       |       |       |       | 64409 |
| Ma'sNightMonkey   | -CACCATGCCAGCTAATTTTTGTATTTTTAATAGAGACGGGGTTTACCATGTTGGCCACGATGGTCTCGATCTCTTGA   |       |       |       |       |       |       |       | 72459 |
| VervetAGM         | -CATTTTTTCAGAATCATA-----AACTCTCACAAAGTAAGGGGA----ACCTAAGGAAACAAGATGAT-TAGAT----- |       |       |       |       |       |       |       | 78951 |
| Gorilla           | -CATTGTTCAAATCATAGAGTAAAC-----CTAAGGAGACAAGATGAT-TAAAT-----                      |       |       |       |       |       |       |       | 76128 |
| GrabEatingMacaque | -TATTTTTTCAGAATCATA-----AACTCTCACAAAGTAAGGGGA----ACCTAAGGAAACAAGATGAT-TAGAT----- |       |       |       |       |       |       |       | 78485 |
| Macaque           | -TATTTTTTCAGAATCATA-----AACTCTCACAAAGTAAGGGGA----ACCTAAGGAAACAAGATGAT-TAGAT----- |       |       |       |       |       |       |       | 79367 |
| PigTailedMacaque  | -TATTTTTTCAGAATCATA-----AACTCTCACAAAGTAAGGGAA----ACCTAAGGAAACAAGATGAT-TAGAT----- |       |       |       |       |       |       |       | 77873 |
| Bonobo            | -CATTGTTCAAATCATAGAGTAAACTCTTAAAGTAAGGGGA----ACCTAAGGAGACAAGATGAT-TAAAT-----     |       |       |       |       |       |       |       | 76746 |
| OliveBaboon       | -CATTTTTTCAGAATCATA-----AACTCTCACAAAGTAAGGGGA----ACCTAAGGAAACAAGATGAT-TAGAT----- |       |       |       |       |       |       |       | 77773 |
| Orangutan         | -CATTCTTCAAATCATA-----AACTCTCACAAAGTAAGGGGA----ACCTAAGGAGACAAGATGAT-TAAAT-----   |       |       |       |       |       |       |       | 78401 |

Tuesday, May 03, 2022 06:17 PM

|                   |      |                                                                 |       |                  |       |                               |       |               |                     |                     |
|-------------------|------|-----------------------------------------------------------------|-------|------------------|-------|-------------------------------|-------|---------------|---------------------|---------------------|
| Majority          | ---- | GTAATAGGAGATACTGGAACAAAAAAA                                     | ----  | GGGGACATTAGATGCA | ----  | AATTGAGGAAATCTGA              | ----  | CAAAGAATGGACT |                     |                     |
|                   |      | 93610                                                           | 93620 | 93630            | 93640 | 93650                         | 93660 | 93670         | 93680               |                     |
| Human             | ---- | GTAATAGGAGATACTGGAACAACAAAA                                     | ----  | AGGGACATTAGATGCA | ----  | ATTTGAGGAAATCTGA              | ----  | TAATG----     | GACT 77657          |                     |
| Coquerel'sSifaka  | ---- | GACTATGAGATCCTGGAATAAACAAAG                                     | ----  | GATATTAGGTACA    | ----  | ACTAAGGAAAGCTGAATAAAGAATGAACT |       |               | 64480               |                     |
| Ma'sNightMonkey   |      | CCTCGTAATCTGCCACCTTGGCCTCCCAAAGTGTGGGATTACAGGCGTGAGCCACCTTGCCAG |       | ----             |       | ----                          |       | ----          | CCAAGAATGGACT 72538 |                     |
| VervetAGM         | ---- | GTAATAGGAGATACTGGAACAAAAATAA                                    | ----  | GGGTACATTAGATGCA | ----  | AATTGAAGAAATCTGA              | ----  | CAAAGAATGGACT | 79024               |                     |
| Gorilla           | ---- | GTAATAGGAGATACTGGAACAACAAAA                                     | ----  | AGGGACATTAGATGCA | ----  | ATTTGAGGAAATCTGA              | ----  | TAAAGAATGGACT | 76201               |                     |
| GrabEatingMacaque | ---- | GTAATAGGAGATACTGGACCAAAAAAAGGGGGACATTAGATGCA                    |       | ----             |       | ----                          |       | ----          | AATTGAAGAAATCTGA    | CAAAGAATGGACT 78559 |
| Macaque           | ---- | GTAATAGGAGATACTGGACCAAAAAAAGGGGGACATTAGATGCA                    |       | ----             |       | ----                          |       | ----          | AATTGAAGAAATCTGA    | CAAAGAATGGACT 79441 |
| PigTailedMacaque  | ---- | GTAATAGGAGATACTGGACCAAAAAAAGGGGGACATTAGATGCA                    |       | ----             |       | ----                          |       | ----          | AATTGAAGAAATCTGA    | CAAAGAATGGACT 77947 |
| Bonobo            | ---- | GTAATAGGAGATACTGGAACAACAAAA                                     | ----  | AGGGACATTAGATGCA | ----  | ATTTGAGGAAATCTGA              | ----  | TAAAGAATCGACT | 76819               |                     |
| OliveBaboon       | ---- | GTAATAGGAGATACTGGAACAAAAAAA                                     | ----  | GGGGACATTAGATGCA | ----  | AATTGAAGAAATCTGA              | ----  | CAAAGAATGGACT | 77846               |                     |
| Orangutan         | ---- | GTAATAGGAGATACTGGAACAACAAAA                                     | ----  | AGGGACATTAGATGCA | ----  | ATTTGAGGAAATCTGA              | ----  | TAAAGAATGGACT | 78474               |                     |

|                   |                                          |                                           |                        |                                       |       |       |       |                          |
|-------------------|------------------------------------------|-------------------------------------------|------------------------|---------------------------------------|-------|-------|-------|--------------------------|
| Majority          | TTTGTTAATTTATCAATATTGGTTGATTAATTGCAACAAC | TAATAAAATTGCAATACCATACTAATGTATGGTGCTAATAA |                        |                                       |       |       |       |                          |
|                   | 93690                                    | 93700                                     | 93710                  | 93720                                 | 93730 | 93740 | 93750 | 93760                    |
| Human             | TTTGTTGATTTATCGATATTGGTTGATTAATTGCAAGAAC | TAATAAAATTGTAATACCATACTAATGTATGATGCTAATAA |                        |                                       |       |       |       | 77737                    |
| Coquerel'sSifaka  | TGAG-----                                | TTAATATTAT---                             | ATCAAT---              | ACTGGTTAATTAATTGCAACACCATACTAATGTAT-- |       |       |       | TAATAATGG 64544          |
| Ma'sNightMonkey   | TTTG---                                  | ATTTATCAATATTGGTTGATTAATTGTAACAAC         | TAATAAAATTTCAACACCTTAC | ----                                  |       |       |       | AGTGTATGGTGCTAATAA 72614 |
| VervetAGM         | TTTGTTAATTTAGCAATATTGGTTGATTAATTGCAACAAC | TAATAAAATTGCAATACCATACTAATGTATGGTGCTAATAA |                        |                                       |       |       |       | 79104                    |
| Gorilla           | TTTGTTAATTTATCAATATTGGTTGATTAATTGCAAGAAC | TAATAAAATTGTAATACCATACTAATGTATGATGCTAATAA |                        |                                       |       |       |       | 76281                    |
| GrabEatingMacaque | TTTGTTAATTTATCAATATTGGTTGATTAATTGCAACAAC | TAATAAAATTGCAATACCATACTAATGTATGGTGCTAATAA |                        |                                       |       |       |       | 78639                    |
| Macaque           | TTTGTTAATTTATCAATATTGGTTGATTAATTGCAACAAC | TAATAAAATTGCAATACCATACTAATGTATGGTGCTAATAA |                        |                                       |       |       |       | 79521                    |
| PigTailedMacaque  | TTTGTTAATTTATCAATATTGGTTGATTAATTGCAACAAC | TAATAAAATTGCAATACCATACTAATGTATGGTGCTAATAA |                        |                                       |       |       |       | 78027                    |
| Bonobo            | TTTGTTAATTTATCGATATTGGTTGATTAATTGCAAGAAC | TAATAAAATTGTAATACCATACTAATGTATGATGCTAATAA |                        |                                       |       |       |       | 76899                    |
| OliveBaboon       | TTTGTTAATTTATCAATATTGGTTGATTAATTGCAACAAC | TAATAAAATTGCAATACCATACTAATGTATGGTGCTAATAA |                        |                                       |       |       |       | 77926                    |
| Orangutan         | TTTGTTAATTTATCGATATTGGCTGATTAATTGCAACAAC | TAATAAAATTGCAATACCATACTAATGTATGATGCTAATAA |                        |                                       |       |       |       | 78554                    |

|                   |                                  |                                                     |                                        |                                        |       |       |       |       |
|-------------------|----------------------------------|-----------------------------------------------------|----------------------------------------|----------------------------------------|-------|-------|-------|-------|
| Majority          | TGGGGGAAC                        | TGGGGTTCCAGGTTATATAAGA                              | ACTTTGTAAT                             | GTCTTAAATTTGTTTGTAAATCTAAACCT--TTTAAAA |       |       |       |       |
|                   | 93770                            | 93780                                               | 93790                                  | 93800                                  | 93810 | 93820 | 93830 | 93840 |
| Human             | TGGGGGAAC                        | TGCGGTTTCCAGGTTATATAAGA                             | ACTCTGTAAT                             | GTCTTAAATTTGTTTGTAAATCTAAACCT--TTTAAAA |       |       |       | 77815 |
| Coquerel'sSifaka  | GGGAGGAAGTGGGGTGCTCAGGTCATAAAGA  | AAGCCTGTAAAGTTTTCTCAGGTTTCTGTAAATCTAAAACCTGTTCTAAAA |                                        |                                        |       |       |       | 64624 |
| Ma'sNightMonkey   | TGGGGGAAT                        | TGGGGTTTCCAGGTTATGTAAGA                             | ACTGTGTAAT                             | GTCTTAAATTTGTTTGTAAATCTAAACCT--TTTAAAA |       |       |       | 72690 |
| VervetAGM         | TGGGGGATCTGGGGTTTCCAGGTTATCTAAGA | ATGTTGTAAT                                          | GTCTTAAATTTGTTTGTAAATCTAAACCT--TTTAAAA |                                        |       |       |       | 79182 |
| Gorilla           | TGGGGGAAC                        | TGCGGTTTCCAGGTTATATAAGA                             | ACTCTGTAAT                             | GTCTTAAATTTGTTTGTAAATCTAAACCT--TTTAAAA |       |       |       | 76359 |
| GrabEatingMacaque | TGGGGGATCTGGGGTTTCCAGGTTGATAAGA  | AACATTGTAAT                                         | GTCTTAAAGTTTGTAAATCTAAACCT--TTTAAAA    |                                        |       |       |       | 78717 |
| Macaque           | TGGGGGATCTGGGGTTTCCAGGTTGATAAGA  | AACATTGTAAT                                         | GTCTTAAAGTTTGTAAATCTAAACCT--TTTAAAA    |                                        |       |       |       | 79599 |
| PigTailedMacaque  | TGGGGGATCTGGGGTTTCCAGGTTATATAAGA | ACGTTGTAAT                                          | GTCTTAAAGTTTGTAAATCTAAACCT--TTTAAAA    |                                        |       |       |       | 78105 |
| Bonobo            | TGGGGGAAC                        | TGCGGTTTCCAGGTTATATAAGA                             | ACTCTGTAAT                             | GTCTTAAATTTGTTTGTAAATCTAAACCT--TTTAAAA |       |       |       | 76977 |
| OliveBaboon       | TGGGGGATCTGGGGTTTCCAGGTTATATAAGA | ACGTTGTAAT                                          | GTCTTAAATTTGTTTGTAAATCTAAACCT--TTTAAAA |                                        |       |       |       | 78004 |
| Orangutan         | TGGGGGAAC                        | TGGGGTTTCCAGGTTATATAAGA                             | ACTTTGTAAT                             | GTCTTAAATTTGTTTGTAAATCTAAACCT--TTTAAAA |       |       |       | 78632 |

Tuesday, May 03, 2022 06:17 PM

|                   |                                                                                   |       |
|-------------------|-----------------------------------------------------------------------------------|-------|
| Majority          | TAGCTAAA-AATTATAGAT---ACAATTTCTAAATGATTTAAT-TAACAAAACCAGTTTAATTCCTTCAGTTGAAATGAGC |       |
|                   | 93850 93860 93870 93880 93890 93900 93910 93920                                   |       |
| Human             | TAGCTAAA-AATTATAGAT---ACAATTTCTAAATGATTTAAT-TAACAAAACCAGTTTAATTCCTTCAGTTGAAATGAGC | 77890 |
| Coquerel'sSifaka  | TAGAAAAGTTAATTAAAAATTATAGAATTTGTAATGATTTAAAATAAATTAATAAGTATAATTCGTAGTTGAATCAGGC   | 64704 |
| Ma'sNightMonkey   | TACATAAA-AATTATATAT---ACAATTTCTAAATGATTTAAT-TAACAAAAACAG--TAATTCCTTCAGTTGAAATGAAC | 72763 |
| VervetAGM         | TAGCTAAA-AATTACAGAT---ACAATTTCTAAATGATTTAAT-TAACAAAACCAGTTTAATTCCTTCAGTTGAAATGAGC | 79257 |
| Gorilla           | TAGCTAAA-AATTATAGAT---AGAATTTCTAAATGATTTAAT-TAACAAAACCAGTTTAATTCCTTAAGTTGAAATGAGC | 76434 |
| GrabEatingMacaque | TAGCTAAA-AATTATAGAT---ACAATCTCTAAATGATTTAAT-TAACAAAACCAGTTTAATTCCTTCAGTTGAAATGAGC | 78792 |
| Macaque           | TAGCTAAA-AATTATAGAT---ACAATCTCTAAATGATTTAAT-TAACAAAACCAGTTTAATTCCTTCAGTTGAAATGAGC | 79674 |
| PigTailedMacaque  | TAGCTAAA-AATTATAGAT---ACAATTTCTAAATGATTTAAT-TAACAAAACCAGTTTAATTCCTTCAGTTGAAATGAGC | 78180 |
| Bonobo            | TAGCTAAA-AATTATAGAT---ACAATTTCTAAATGATTTAAT-TAACAAAACCAGTTTAATTCCTTCAGTTGAAATGAGC | 77052 |
| OliveBaboon       | TAGCTAAA-AATTATAGAT---ACAATTTCTAAATGATTTAAT-TAACAAAACCAGTTTAATTCCTTCAGTTGAAATGAGC | 78079 |
| Orangutan         | TAGCTAAA-AATTATAGAT---ACAATTTCTAAATGATTTAAT-TAACAAAACCAGTTTAATTCCTTCAGTTGAAATGAGC | 78707 |

|                   |                                                                                   |       |
|-------------------|-----------------------------------------------------------------------------------|-------|
| Majority          | AAGGTTAGGG-ATACCTGTGTGTTTCAGTGTAATAT---CTGAAAGGAAGAGAAT-AGATACATAATTTATATCACTTCT  |       |
|                   | 93930 93940 93950 93960 93970 93980 93990 94000                                   |       |
| Human             | AAGGTTAGGG-ATACCTGTGTGTTTCAGTGTAATAT---CTGAAAGGAAAAGAAT-AGATACATAATTTATATCACTTCT  | 77965 |
| Coquerel'sSifaka  | AAAGTTAGGG-ATGCCTATATGTTTCAGTGAAATATGAAATGAAGGGAAGAGGGTTGGGTACATAATTTATATCACTTCT  | 64783 |
| Ma'sNightMonkey   | AAGGTTAGGGGATACCTATGTGTTTCAGTGTAATAT---ATGAAAG---AGAAT-AGATACATAATTTATATCACTTCT   | 72835 |
| VervetAGM         | AAGGTTAGGG-ATACCTGTGTGTTTCAGTGTAATAT---CGGAAAGGAAGAGAAC-AGATACATAATTTGTATCACTTCT  | 79332 |
| Gorilla           | AAGGTTAGGG-ATACCTGTGTGTTTCAGTGTAATAT---CTGAAAGGAAAAGAAT-AGATACATAATTTATATCACTTCT  | 76509 |
| GrabEatingMacaque | AAGGTTAGGG-ATACCTGTGTGTTTCAGTGTAATAT---CTGAAAGGAAGAGAAC-AGATACATAATTTGTATCACTTCT  | 78867 |
| Macaque           | AAGGTTAGGG-ATACCTGTGTGTTTGTAGTGTAATAT---CTGAAAGGAAGAGAAC-AGATACATAATTTGTATCACTTCT | 79749 |
| PigTailedMacaque  | AAGGTTAGGG-ATACCTGTGTGTTTCAGTGTAATAT---CTGAAAGGAAGAGAAC-AGATACATAATTTGTATCACTTCT  | 78255 |
| Bonobo            | AAGGTTAGGG-ATACCTGTGTGTTTCAGTGTAATAT---CTGAAAGGAAAAGAAT-AGATACATAATTTATATCACTTCT  | 77127 |
| OliveBaboon       | AAGGTTAGGG-ATACCTGTGTGTTTCAGTGTAATAT---CTGAAAGGAAGAGAAC-AGATACATAATTTGTATCACTTCT  | 78154 |
| Orangutan         | AAGGTTAGGG-ATACCTGTGTGTTTCAGTGTAATAT---CTGAAAGGAAAAGAAT-AGATACATAATTTATATCACTTCT  | 78782 |

|                   |                                                                                   |       |
|-------------------|-----------------------------------------------------------------------------------|-------|
| Majority          | ---CTCTGGACTTAGGGTCTCTTGTCATATACATGGCTGGGCATCCATCAGCTTCTGTGGAGGAAAGGTTAGTAATAATA  |       |
|                   | 94010 94020 94030 94040 94050 94060 94070 94080                                   |       |
| Human             | ---CTCTGGACTTAGGGTCTCTTGTCATATACATGACTGGGCATCCATCAGCTTCTGTGGAGGAAAGGTTAGGAATAATA  | 78042 |
| Coquerel'sSifaka  | TCCCTCTGGACTTTGGGTCTCT-ATCATATACATGGCTGGGTGTCCGTTCAGTTTCAGTTGATGAAGGGTTAGTAATAATA | 64862 |
| Ma'sNightMonkey   | ---CTGTGGACTTAGGTTCTCTTGTCATATACATGGCTGGGCATCCATCAGTTTCCGTGGAGGAAAGGTTAGTAATAATA  | 72912 |
| VervetAGM         | ---GTCTGGACTTAGGGTCTCTTGTCATATACATGGCTGGGCATCCATCAGCTTCTGTGGAGGAAAGGTTAGTAGTAATA  | 79409 |
| Gorilla           | ---CTCTGGACTTAGGGTCTCTTGTCATATACATGACTGGGCATCCATCAGCTTCTGTGGAGGAAAGGTTAGGAATAATA  | 76586 |
| GrabEatingMacaque | ---GTCTGGACTTAGGGTCTCTTGTCATATACATGGCTGGGCATCCATCAGCTTCTGTGGAGGAAAGGTTAGTAATTATA  | 78944 |
| Macaque           | ---GTCTGGACTTAGGGTCTCTTGTCATATACATGGCTGGGCATCCATCAGCTTCTGTGGAGGAAAGGTTAGTAATTATA  | 79826 |
| PigTailedMacaque  | ---GTCTGGACTTAGGGTCTCTTGTCATATACATGGCTGGGCATCCATCAGCTTCTGTGGAGGAAAGGTTAGTAATTATA  | 78332 |
| Bonobo            | ---CTCTGGACTTAGGGTCTCTTGTCATATACATGACTGGGCATCCATCAGCTTCTGTGGAGGAAAGGTTAGGAATAATA  | 77204 |
| OliveBaboon       | ---GTCTGGACTTAGGGTCTCTTGTCATATACATGGCTGGGCATCCATCAGCTTCTGTGGAGGAAAGGTTAGTAATTATA  | 78231 |
| Orangutan         | ---CTCTGGACTTAGGGTCTCTTGTCATATACATGACTGGGCATCCATCAGCTTCTGTGGAGGAAACGTTAGGAATAATA  | 78859 |



Tuesday, May 03, 2022 06:17 PM

```

Majority      --GTGTCAGAACTAACATGAGAATTTTAGGAGATTGCTGAGTCACTCAAATGTCTGGGTGACCCATCTGATGAGGGCCA
              94090      94100      94110      94120      94130      94140      94150      94160
Human         --GTGTCAGAACTAACATGAGAATTTTAGGAGATTACTGAGTCACTCAAATGTCTGGGTGACCCAGCTGATGAGGGCCA 78120
Coquerel'sSifaka CAGTGTGAGAACTAACACAAGAATTTTGAAAATTACTGA--TACTCAAGATGTCTGGTTGGCCACCTGATGGGGATCG 64940
Ma'sNightMonkey --GTGTCAGAACTAACATGAGAATTTTAGGAGATTGCTGAGTAAATCAAATGTCTGGGTGACCCAGCTGATGTGGGCCA 72990
VervetAGM     --GTGTCAGAACTAACCTGAGAATTTTAGGAGATTGCTGAGTCACTCACAGTGTCTGGGTGACCCATCTGATGAGGGCCA 79487
Gorilla       --GTGTCAGAACTAACCTGAGAATTTTAGGAGATTACTGAGTCACTCAAATGTCTGGGTGACCCAGCTGATGAGGGCCA 76664
GrabEatingMacaque --GTGTCAGAACTAACATGAGAATTTTAGGAGATTGCTGAGTCACTCACAGTGTCTGGGTGACCCATCTGATGAGGGCCA 79022
Macaque       --GTGTCAGAACTAACATGAGAATTTTAGGAGATTGCTGAGTCACTCACAGTGTCTGGGTGACCCATCTGATGAGGGCCA 79904
PigTailedMacaque --GTGTCAGAACTAACATGAGAATTTTAGGAGATTGCTGAGTCACTCACAGTGTCTGGGTGACCCATCTGATGAGGGCCA 78410
Bonobo        --GTGTCAGAACTAACATGAGAATTTTAGGAGATTACTGAGTCACTCAAATGTCTGGGTGACCCAGCTGATGAGGGCCA 77282
OliveBaboon   --GTGTCAGAACTAACATGAGAATTTTAAGAGATTGCTGAGTCACTCACAGTGTCTGGGTGACCCATCTGATGAGGGCCA 78309
Orangutan     --GTGTCAGAACTAACATGAGAATTTTAGGAGATTACTGAGTCACTCAAATGTCTGGGTGACCCAGCTGATGAGGGCCA 78937
    
```

```

Majority      TTTTCACATGAAGAAGATTCTGCAACACCTTCTTTTCTTCAGCACATGATCGTTTATGAAGCTCTTTTACATTATTTTAT
              94170      94180      94190      94200      94210      94220      94230      94240
Human         TTTTCACATGAAAAAGATTCTGCAACACCTTCTTTTCTTTAGCACATGATCGTTTATGAAGCTCTTTTACATTGTTTTAT 78200
Coquerel'sSifaka TTTTCATATGAATAGGATCCCTGCAACACCTT----CTTCAACATAGGACAGTTTACAAAGCTCTTTTACATTATTTTAT 65015
Ma'sNightMonkey TTTTCACATGAAAAAGATTCTGCAACACCTTATTTTCTTCAGCACATGTAGTTTATGAAGCTCTTTTACATTATTTTAT 73070
VervetAGM     TTTTCACATGAAGAAGATTCTGCAACACCTTCTTTTCTTCAGCACATGATCGTTTAGGAAGCTCTTTTACATTATTTTAT 79567
Gorilla       TTTTCACATGAAAAAGATTCTGCAACACCTTCTTTTCTTTAGCACATGATCATGTATGAAGCTCTTTTACATTGTTTTAT 76744
GrabEatingMacaque TTTTCACATGAAGAAGATTCTGCAACACCTTCTTTTCTTCAGCACATGATCGTTTAGGAAGCTCTTTTACATTATTTTAT 79102
Macaque       TTTTCACATGAAGAAGATTCTGCAACACCTTCTTTTCTTCAGCACATGATCGTTTAGGAAGCTCTTTTACATTATTTTAT 79984
PigTailedMacaque TTTTCACATGAAGAAGATTCTGCAACACCTTCTTTTCTTCAGCACATGATCGTTTAGGAAGCTCTTTTACATTATTTTAT 78490
Bonobo        TTTTCACATGAAAAAGATTCTGCAACACCTTCTTTTCTTTAGCACATGATCGTTTATGAAGCTCTTTTACATTGTTTTAT 77362
OliveBaboon   TTTTCACATGAAGAAGATTCTGCAACACCTTCTTTTCTTCAGCACATGATGTTTAGGAAGCTCTTTTACATTATTTTAT 78389
Orangutan     TTTTCACATGAAAAAGATTCTGCAACACCTTCTTTTCTTCAGCACATGATCGTTTATGAAGCTCTTTTACATTGTTTTAT 79017
    
```

```

Majority      CTTTATAACAATCCTCAGAGTAGATCAAGC-----
              94250      94260      94270      94280      94290      94300      94310      94320
Human         CTTTATAGCAATCCTCAGAATAGATCAAGCTTTTTTTT-----TTTTTTTTTTTGGAGATGGAGTCTGCTCTGTCGCCAG 78276
Coquerel'sSifaka TCTTATAACAATCTGGGAGTAAAACAGGC----- 65045
Ma'sNightMonkey CCTTCTAACAATCCCTAGAATAGATCAAGC----- 73100
VervetAGM     CTTTATAACAATCCTCAGAGTAGATCGAG----- 79596
Gorilla       CTTTATAGCAATCCTCAGAATAGATCAAGCTTTTTTTT-----TTTTT-TTTTGGAAATGGAGTCTCGCTCTGTCGCCAG 76818
GrabEatingMacaque CTTTATAACAATCCTCAGAGTAGATCGAG----- 79131
Macaque       CTTTATAACAATCCTCAGAGTAGATCGAG----- 80013
PigTailedMacaque CTTTATAACAATCCTCAGAGTAGATCGAG----- 78519
Bonobo        CTTTATAGCAATCCTCAGAATAGATCAAGCTTTTTTTTGTTTTTTTTTTTTTTTTGGAGATGGAGTCTCACTCTGTCGCCAG 77442
OliveBaboon   CTTTATAACAATCCTCAGAGTAGATCGAG----- 78418
Orangutan     CTTTATAGCAACCCTCAGAGTAGATCAAGCTTTTTTTT-----TTTTTTTTTTTGGAGACGGAGTCTCACTCTGTCGCCAG 79092
    
```

Tuesday, May 03, 2022 06:17 PM

| Majority          | -----T-----                                                                        |       |       |       |       |       |       |       |       |
|-------------------|------------------------------------------------------------------------------------|-------|-------|-------|-------|-------|-------|-------|-------|
|                   | 94330                                                                              | 94340 | 94350 | 94360 | 94370 | 94380 | 94390 | 94400 |       |
| Human             | GCTGGAGTGC AATGG---TGCGATCTCGGCTCACTGC AA ACTCGGCCTCCCGGGTTCGTGCCATTCTTCTGCCTCAGCC |       |       |       |       |       |       |       | 78352 |
| Coquerel'sSifaka  | -----                                                                              |       |       |       |       |       |       |       | 65045 |
| Ma'sNightMonkey   | -----                                                                              |       |       |       |       |       |       |       | 73100 |
| VervetAGM         | -----                                                                              |       |       |       |       |       |       |       | 79596 |
| Gorilla           | GCTGGAGTGC AATGG---TGCGATCTCGGCTCACTGC AA ACTCGGCCTCCCGGGTTCGTGCCATTCTTCTGCCTCAGCC |       |       |       |       |       |       |       | 76898 |
| GrabEatingMacaque | -----                                                                              |       |       |       |       |       |       |       | 79131 |
| Macaque           | -----                                                                              |       |       |       |       |       |       |       | 80013 |
| PigTailedMacaque  | -----                                                                              |       |       |       |       |       |       |       | 78519 |
| Bonobo            | GCTGGAGTGC AATGG---CGCGATCTCGGCTCACTGC AA ACTCGGCCTCCCGGGTTCGTGCCATTCTTCTGCCTCAGCC |       |       |       |       |       |       |       | 77518 |
| OliveBaboon       | -----                                                                              |       |       |       |       |       |       |       | 78418 |
| Orangutan         | GCTGGAGTGC AATGG---TGCGATCTCGGC-----AAACTCAGCCTCCTGGGTTCGTGCCATTCTTCTGCCTCAGCC     |       |       |       |       |       |       |       | 79161 |

| Majority          | -----T-----                                                                      |       |       |       |       |       |       |       |       |
|-------------------|----------------------------------------------------------------------------------|-------|-------|-------|-------|-------|-------|-------|-------|
|                   | 94410                                                                            | 94420 | 94430 | 94440 | 94450 | 94460 | 94470 | 94480 |       |
| Human             | TCCCGAGTAGCTGCTACTACAGGTGCCTGCCACCACGCCAGCTAATTTTTTTGTATGTTTAGTAGAGATGGGGTTTCAT  |       |       |       |       |       |       |       | 78432 |
| Coquerel'sSifaka  | -----                                                                            |       |       |       |       |       |       |       | 65045 |
| Ma'sNightMonkey   | -----                                                                            |       |       |       |       |       |       |       | 73100 |
| VervetAGM         | -----T-----                                                                      |       |       |       |       |       |       |       | 79597 |
| Gorilla           | TCCCGAGTAGCTGGGACTACAGGCGCCGCCACCACGCC-AGCTAATTTTTTTGTATGTTTAGTAGAGACGGGGTTTCAT  |       |       |       |       |       |       |       | 76977 |
| GrabEatingMacaque | -----T-----                                                                      |       |       |       |       |       |       |       | 79132 |
| Macaque           | -----T-----                                                                      |       |       |       |       |       |       |       | 80014 |
| PigTailedMacaque  | -----T-----                                                                      |       |       |       |       |       |       |       | 78520 |
| Bonobo            | TCCTGAGTAGCTGGGACTACAGGCGCCTGCCACCACGCCAGCTAATTTTTTT-GTATGTTTAGTAGAGACGGGGTTTCAT |       |       |       |       |       |       |       | 77597 |
| OliveBaboon       | -----T-----                                                                      |       |       |       |       |       |       |       | 78419 |
| Orangutan         | TCCCGAGTAGCTGGGACTACTGGCGCCTGCCACCACGCCAGCTAATTTTTTTGTATATTTAGTAGAGATGGGGTTTCAT  |       |       |       |       |       |       |       | 79241 |

| Majority          | -----ATTTTTATCCCTCCTTATCAATATGTGTAAA                                             |       |       |       |       |       |       |       |       |
|-------------------|----------------------------------------------------------------------------------|-------|-------|-------|-------|-------|-------|-------|-------|
|                   | 94490                                                                            | 94500 | 94510 | 94520 | 94530 | 94540 | 94550 | 94560 |       |
| Human             | CGTGTTAGCCAGGATGGTCTCGATCTCCTGACCTTGTGATAGATCAAGTATTTTTATCCCTC-TCATCAACATGTGTAAA |       |       |       |       |       |       |       | 78511 |
| Coquerel'sSifaka  | -----ATTTTTATCCCTCCTTATCAATGTGCTTAAA                                             |       |       |       |       |       |       |       | 65076 |
| Ma'sNightMonkey   | -----ATTTTTATCCTCCTCATCAATATGTGTAAA                                              |       |       |       |       |       |       |       | 73131 |
| VervetAGM         | -----ATTTTTATCCCTCCTTATCAGTATGTGAAAA                                             |       |       |       |       |       |       |       | 79628 |
| Gorilla           | CGTGTTAGCCAGGATGGTCTCGATCTCCTGACCTTGTGATAGATCAAGTATTTTTATCCCTCCTCATCAACATGTGTAAA |       |       |       |       |       |       |       | 77057 |
| GrabEatingMacaque | -----ATTTTTATCCCTCCTTATCAATATGTGAAAA                                             |       |       |       |       |       |       |       | 79163 |
| Macaque           | -----ATTTTTATCCCTCCTTATCAATATGTGAAAA                                             |       |       |       |       |       |       |       | 80045 |
| PigTailedMacaque  | -----ATTTTTATCCCTCCTTATCAATATGTGAAAA                                             |       |       |       |       |       |       |       | 78551 |
| Bonobo            | AGTGTTAGCCAGGATGGTCTCGATCTCCTGACCTTGTGATAGATCAAGTATTTTTATCCCTCCTCATCAACATGTGTAAA |       |       |       |       |       |       |       | 77677 |
| OliveBaboon       | -----ATTTTTATCCCTCCTTATCAATATGTGAAAA                                             |       |       |       |       |       |       |       | 78450 |
| Orangutan         | TATGTTAGCCAGGATGGTCTCGATCTCCTGACTTCGTGATAGATGAAGTATTTTTATCTCTCCTCATCAACATGTGTAAA |       |       |       |       |       |       |       | 79321 |

Tuesday, May 03, 2022 06:17 PM

| Majority          | CAGTTTTTTCCT-GCATATCTGCTGCCTTAGCTAAAGATGCAAATCATTTAAAGTTAAAATTATAA--TTTCTGTAGCTAA  |       |
|-------------------|------------------------------------------------------------------------------------|-------|
|                   | 94570 94580 94590 94600 94610 94620 94630 94640                                    |       |
| Human             | CAGTTTTTTCCTCACATATCTGCTGCCTTAGCTAAAGATGCAAATCATTTAAAGTTAAAATTATAA--TTTATGTAGCTAA  | 78589 |
| Coquerel'sSifaka  | AGTGTTTTTTCCAGTATACTTGTGCCTTAGCTAAAGATTTTAATAATAAAAAATTTAAAATTACAACCTTTTTTATAGCTAA | 65156 |
| Ma'sNightMonkey   | CAGTTTTTTCCTCCAGCATATCTACTGCCTTA---AAGACGAAAATCATTTGAAGTTAAAATTAAAA--TTTCTGTAACTAA | 73205 |
| VervetAGM         | CAGTTTTTTCCT-GCATATCTGCTGCCTTAGCTAAAGATGCAAATTTAAAGTTAAAATTTTAA--TTTCTGTAGCTAA     | 79705 |
| Gorilla           | CAGTTTTTTCCTCCACATATCTGCTGCCTTAGCTAAAGATGCAAATCATTTAAAGTTAAAATTATAA--TTTATGTAGCTAA | 77135 |
| GrabEatingMacaque | CAGTTTTTTCCT-GCATATCTGCTGCCTTAGCTAAAGATGCAAATCATTTAAAGTTAAAATTATAA--TTTCTGTAGCTAA  | 79240 |
| Macaque           | CAGTTTTTTCCT-GCATATCTGCTGCCTTAGCTAAAGATGCAAATCATTTAAAGTTAAAATTATAA--TTTCTGTAGCTAA  | 80122 |
| PigTailedMacaque  | CAGTTTTTTCCT-GCATATCTGCTGCCTTAGCTAAAGATGCAAATCATTTAAAGTTAAAATTATAA--TTTCTGTAGCTAA  | 78628 |
| Bonobo            | CAGTTTTTTCCTCCACATATCTGCTGCCTTAGCTAAAGATGCAAATCATTTAAAGTTGAAATTATAA--TTTATGTAGCTAA | 77755 |
| OliveBaboon       | CAGTTTTTTCCT-GCATATCTGCTGCCTTAGCTAAAGATGCAAATCATTTAAAGTTAAAATTATAA--TTTCTGTAGCTAA  | 78527 |
| Orangutan         | CAGTTTTTTCCTCACGTATCTGCTGCCTTAGCTAAAGATGCAAATCATTTAAAGTTAAAATTATAA--TTTCTGTAGCTAA  | 79399 |

| Majority          | AAGTAATCTG----TTAGAGCCAGTGTATACAATATGTGTAATATGCTTTCTATAACTTTCTCAAAGGGCCCATGGTGAG  |       |
|-------------------|-----------------------------------------------------------------------------------|-------|
|                   | 94650 94660 94670 94680 94690 94700 94710 94720                                   |       |
| Human             | AAGTAATCTG----TTAGAGCCAGTGTATACAATATGTGTAATATGCTTTCTATAACTTTCTCAAAGGGCCCTTGGTAAG  | 78665 |
| Coquerel'sSifaka  | AAGTAATCTAAATATTAGAGTCAAGTGTATGTAATGTATGTAACACATTTTATATAACTCTTACAAAGGGACCATGGTAAA | 65236 |
| Ma'sNightMonkey   | AAAAAATCTG----TTAGAGCCAGGGTATATAATATGTGGAATATACTTCATATAACTTTTACAAAGGGCT-ATGGTGAG  | 73280 |
| VervetAGM         | AAGTAATCTG----TTAGAGCTGGTGTATACAATATGTTTAAATATGCTTTCTATAACTTTCTCAAAGGGCCACGGTGAG  | 79781 |
| Gorilla           | AAGTAATCTG----TTAGAGCCAGTGTATACAATATGTGTAATATGCTTTCTATAACTTTCTCAAAGGGCCCGTGGTAAG  | 77211 |
| GrabEatingMacaque | AAGTAATCTG----TTAGAGCCAGTGTATACAATATGTTTAAATATGCTTTCTATAACTTTCTCAAAGGGCCCATGGTGAG | 79316 |
| Macaque           | AAGTAATCTG----TTAGAGCCAGTGTATACAATATGTTTAAATATGCTTTCTATAACTTTCTCAAAGGGCCCATGGTGAG | 80198 |
| PigTailedMacaque  | AAGTAATCTG----TTAGAGCCAGTGTATACAATATGTTTAAATATGCTTTCTATAACTTTCTCAAAGGGCCCATGGTGAG | 78704 |
| Bonobo            | AAGTAATCTG----TTAGAGCCAGTGTATACAATATGTGTAATATGCTTTCTATAACTTTCTCAAAGGGCCCGTGGTAAG  | 77831 |
| OliveBaboon       | AAGTAATCTG----TTAGAGCCAGTGTATACAATATGTTTAAATATGCTTTCTATAACTTTCTCAAAGGGCCCATGGTGAG | 78603 |
| Orangutan         | AAGTAATCTG----TTAGAGCCAGTGTATACAATACGTGTAATATGCTTTCTGCAACTTTCTCAAAGGGCCCATGGTGAG  | 79475 |

| Majority          | TTTATTGCTCTCT-----CATTAGCTGGGAGTTAAGAACAGAATTATTTTCTAGAATGTATTA-TTAT-          |       |
|-------------------|--------------------------------------------------------------------------------|-------|
|                   | 94730 94740 94750 94760 94770 94780 94790 94800                                |       |
| Human             | TTTATTGTTTTCT-----CATTAGCTGGGAGTTAAGAACAGAACTATTTTCTAGAATGTATTAATTAT-          | 78729 |
| Coquerel'sSifaka  | TTTATTGCTTTAATAGCTGAGAGTTAATATTTATATGAAAAATACAGCGCAGATTTTTTCCAGAATTTATCA-TTATT | 65315 |
| Ma'sNightMonkey   | TTTATTGCTCTCT-----TATTAGCTGGGAGTTAAGAACAGAATTATTTTATAGAATGTATTA-TTATG          | 73344 |
| VervetAGM         | TTTATTGCTCTCT-----CATTAGCTGGGAGTTCAGAACAGAATTATTTTCTAGAATGTATTA-AGAT-          | 79844 |
| Gorilla           | TTTATTGTTCTCT-----CATTAGCTGGGAGTTAAGAACAGAACTATTTTCTAGAATGTATTAATTAT-          | 77275 |
| GrabEatingMacaque | TTTATTGCTCTCT-----CATTAGCTGGGAGTTCAGAACAGAATTATTTTCTAGAATGTATTA-TGAT-          | 79379 |
| Macaque           | TTTATTGCTCTCT-----CATTAGCTGGGAGTTCAGAACAGAATTATTTTCTAGAATGTATTA-TGAT-          | 80261 |
| PigTailedMacaque  | TTTATTGCTCTCT-----CATTAGCTGGGAGTTCAGAACAGAATTATTTTCTAGAATGTATTA-TGAT-          | 78767 |
| Bonobo            | TTTATTGTTTTCT-----CATTAGCTGGGAGTTAAGAACAGAACTGTTTTCTAGAATGTATTAATTAT-          | 77895 |
| OliveBaboon       | TTTATTGCTCTCT-----CATTAGCTGGGAGTTCAGAACAGAATTATTTTCTAGAATGTATTA-TGAT-          | 78666 |
| Orangutan         | TTTATTGTTCTCT-----CATTAGCTGGGAGTTAAGAACAGAATTATTTTCTAGAATGTATTAATTATG          | 79540 |

Tuesday, May 03, 2022 06:17 PM

|                   |                                                                                  |       |
|-------------------|----------------------------------------------------------------------------------|-------|
| Majority          | --ATAAATAGTGCATCATGAAATATTTTGTAGGTTTTATATTTTTATTGCAGCAGACAGCATTTAGATTAAACCTAAAA  |       |
|                   | 94810 94820 94830 94840 94850 94860 94870 94880                                  |       |
| Human             | --ATAAATAGTGCATCATGAAATATTTTGTAGGTTTTATATTTTTATTGCAGCAGACAGCATTTAGATTAAACCTAAAA  | 78807 |
| Coquerel'sSifaka  | GTATAAATAGTGCATCATGAAATATTTTGTAGGTTTTATATTTTTATTGCAGCCGACAACATTTAGATTAAACCTAAGA  | 65395 |
| Ma'sNightMonkey   | ATACAAATAGGGCATCATGAAATATTTTGTAGATTTTTATGTTTTTATTGCAGCAGACAGCATTTAGATTAAACGTTAAA | 73424 |
| VervetAGM         | --ATAAATATTCATCATGAAATATTTTGTAGGTTTTATATTTTTATTGCAGCAGACAGCATTGAGATTAAACCTAAAA   | 79922 |
| Gorilla           | --ATAAATAGTGCATCATGAAATATTTTGTAGGTTTTATATTTTTATTGCAGCAGACAGCATTTAGATTAAACCTAAAA  | 77353 |
| GrabEatingMacaque | --ATAAATAGTGCATCATGAAATATTTTGTAGGTTTGTATATTTTTATTGCAGCAGACAGTATTGAGATTAAACCTAAAA | 79457 |
| Macaque           | --ATAAATAGTGCATCATGAAATATTTTGTAGGTTTGTATATTTTTATTGCAGCAGACAGTATTGAGATTAAACCTAAAA | 80339 |
| PigTailedMacaque  | --ATAAATAGTGCATCATGATATATTTTGTAGGTTTGTATATTTTTATTGCAGCAGACAGTATTGAGATTAAACCTAAAA | 78845 |
| Bonobo            | --ATAAATAGTGCATCATGAAATATTTTGTAAAGTTTTATATTTTTATTGCAGCAGACAGCATTTAGATTAAACCTAAAA | 77973 |
| OliveBaboon       | --ATAAATAGTGCATCATGAAATATTTTGTAGGTTTGTATATTTTTATTACAGCAGACAGCATTGAGATTAAACCTAAAA | 78744 |
| Orangutan         | ATATAAATAATGCATCATGAAATATTTTGTAGGTTTTATATTTTTATTGCAGCAGACAGCATTTAGATTAAACCTAAAA  | 79620 |

|                   |                                                                                   |       |
|-------------------|-----------------------------------------------------------------------------------|-------|
| Majority          | A-----TACCTGATTGACAAAGTAATTTTTTCAGACAAAAGTATATTGAGGGAAATTGGAGAATCT----TCAGAGGCT   |       |
|                   | 94890 94900 94910 94920 94930 94940 94950 94960                                   |       |
| Human             | A-----TACCTGATTGACAAAGTAGTTTTTCAGACAAAAGTATATTGAGGGAAATTGGAGAATCT----TCAGAGGCT    | 78876 |
| Coquerel'sSifaka  | AAACATTATACCTGATTGACCAAGTAATTTTTTCAGAGAAGAGTATGCTGAGGAAAATTGTGGAATTTATGCTCAGAGGCA | 65475 |
| Ma'sNightMonkey   | A-----TACCTGATTGACAAAGTAATTTTTTCAGAGAAAAGAATATTGAGGGAAATTGGAGA--CT----TCAGAGGCT   | 73491 |
| VervetAGM         | A-----TACCTGATTGACAAAGTAATTTTTTCAGACAAAAGTATATTGAGGGAAATTGGAGAATCT----TCAGAGGCT   | 79991 |
| Gorilla           | A-----TACCTGATTGACAAAGTAGTTTTTCAGACAAAAGTATATTGAGGGAAATTGGAGAATCT----TCAGAGGCT    | 77422 |
| GrabEatingMacaque | A-----TACCTGATTGACAAAGTAATTTTTTCAGACAAAAGTATATCGAGGGAAATTGGAGAATCT----TCAGAGGCT   | 79526 |
| Macaque           | A-----TACCTGATTGACAAAGTAATTTTTTCAGACAAAAGTATATCGAGGGAAATTGGAGAATCT----TCAGAGGCT   | 80408 |
| PigTailedMacaque  | A-----TACCTGATTGACAAAGTAATTTTTTCAGACAAAAGTATATCGAGGGAAATTGGAGAATCT----TCAGAGGCT   | 78914 |
| Bonobo            | A-----TACCTGATTGACAAAGTAGTTTTTCAGACAAAAGTATATTGAGGGAAATTGGAGAATCT----TCAGAGGCT    | 78042 |
| OliveBaboon       | -----TACCTGATTGACAAAGTAATTTTTTCAGACAAAAGTATATTGAGGGAAATTGGAGAATCT----TCAGAGGCT    | 78812 |
| Orangutan         | A-----TACCTGATTGACAAAGTAATTTTTTCAGACAAAAGTATATTGAGGGAAATTGGAGAATCT----TCAGAGGCT   | 79689 |

|                   |                                                                                  |       |
|-------------------|----------------------------------------------------------------------------------|-------|
| Majority          | TTAAAA--GTCCAGGAAAATCTTA-GACTACTCCAGTGATTTAGAACTGTGTAAAGGTAGCCTAAGTCGTTTTTCTAAGT |       |
|                   | 94970 94980 94990 95000 95010 95020 95030 95040                                  |       |
| Human             | TTAAAA--GTCCAGGAAAATCTTA-GACTACTCCAGTGATTTAGAACTGTGTAAAGGTAGCCTAAGTAGTTTTTCTAAGT | 78953 |
| Coquerel'sSifaka  | TTAAAA--GTCCAATAAAAACCTAAGACTACTCCAGTGATTCAGAACTGTGTAAAGGTAGCTTAAGTAGTTTTTTAGGA  | 65553 |
| Ma'sNightMonkey   | TTAAAA--GTCCAACAAAATCTTA-GACTACTCCAGTGATTTAGAACT--GTAAAGATAGCCTAAGTCGTTTTTCTAAGT | 73566 |
| VervetAGM         | TTAAAA--GTCCAGGAAAATCTTA-GACTACTCCAGTGATTTAGAACTGAGTAAAGGTAGCCTAAGTCGT-----AAGT  | 80062 |
| Gorilla           | TTAAAA--GTCCAGGAAAATCTTA-GACTACTCCAGTGATTTAGAACTGTGTAAAGGTAGCCTAAGTAGTTTTTCTAAGT | 77499 |
| GrabEatingMacaque | TTAAAA--GTCCAGGAAAATCTTA-GACTACTCCAGTGATTTAGAACTGTGTAAAGGTAGCCTAAGTCGTTTTTCTAAGT | 79603 |
| Macaque           | TTAAAA--GTCCAGGAAAATCTTA-GACTACTCCAGTGATTTAGAACTGTGTAAAGGTAGCCTAAGTCGTTTTTCTAAGT | 80485 |
| PigTailedMacaque  | TTAAAAAGTCCAGGAAAATCTTAAGACTACTCCAGTGATTTAGAACTGTGTAAAGGTAGCCTAAGTCGTTTTTCTAAGT  | 78994 |
| Bonobo            | TTAAAA--GTCCAGGAAAATCTTA-GACTACTCCAGTGATTTAGAACTGTGTAAAGGTAGCCTAAGTAGTTTTTCTAAGT | 78119 |
| OliveBaboon       | TTAAAA--GTCCAGGAAAATCTTA-GACTACTCCAGTGATTTAGAACTGTGTAAAGGTAGCCTAAGTCGTTTTTCTAAGT | 78889 |
| Orangutan         | TTAAAA--GTCCAGGAAAATCTTA-GACTACTCCAGTGATTTAGAACTGTGTAAAGGTAGCCTAAGTAGTTTTTCTAAGT | 79766 |

Tuesday, May 03, 2022 06:17 PM

| Majority          | TATCAGCCGAGGGGAGGAAATAATGAAAGAGAAATACATACTAGTGGCATTAAAGGACAGGTGGTGGCT-CCTCTTACCTA |       |
|-------------------|-----------------------------------------------------------------------------------|-------|
|                   | 95050 95060 95070 95080 95090 95100 95110 95120                                   |       |
| Human             | TATCAGCCGCGGGGAGGAAATAATGAAAGAGAAATACATACTAGTGGCATTAAAGGACAGGTGGTGGCT-TCTTTTACCTA | 79032 |
| Coquerel'sSifaka  | TATCAGCCGAGGGGAGGAAATA-TGGTAGAGAAATAGATACTAGTGGCATTAAAGGATAGATGGCGACTGCCCTTATCTC  | 65632 |
| Ma'sNightMonkey   | TATCAGCTGAGGGGAGGAAATAATGAAAGAGAACTACATACTAG--GCATTAAGGACAGGTGGTGGCT-CCTCTTACCTG  | 73643 |
| VervetAGM         | TATCAGCCTAGGGGAGGAAATAATGAAAGAGAAATACATACTAGTGGGATTAAGGACAGGTGGTGGCT-CCTCTTCCCTA  | 80141 |
| Gorilla           | TATCAGCCGCGGGGAGGAAATAAT-AAAGAGAAATACATACTAGTGGCATTAAAGGACAGGTGGTGGCT-TCTTTTACCTA | 77577 |
| GrabEatingMacaque | TATCAGCTGAGGGGAGGAAATAATGAAAGAGAAATACATACTAGTGGGATTAAGGACAGGTGGTGGCT-CCTCTTACCTA  | 79682 |
| Macaque           | TATCAGCTGAGGGGAGGAAATAATGAAAGAGAAATACATACTAGTGGGATTAAGGACAGGTGGTGGCT-CCTCTTACCTA  | 80564 |
| PigTailedMacaque  | TATCAGCTGAGGGGAGGAAATAATGAAAGAGAAATACATACTAGTGGGATTAAGGACAGGTGGTGGCT-CCTCTTACCTA  | 79073 |
| Bonobo            | TATCAGCCGCGGGAAGGAAATAATGAAAGAGAAATACATACTAGTGGCATTAAAGGACACGTGGTGGCT-TCTTTTACCTA | 78198 |
| OliveBaboon       | TATCAGCCGAGGGGAGGAAATAATGAAAGAGAAATACATACTAGTGGGATTAAGGACAGGTGGTGGCT-CCTCTTACCTA  | 78968 |
| Orangutan         | TATGAGCCGAGGGGAGGAAATAATGAAAGAGAAATACATACTAGTGGCATTAAAGGACAGGTGGTGGCT-CTTCTTACCTA | 79845 |

| Majority          | TTAAAGCATTCTTACACCATACTATGAACTGTGTAAAAGGAAGGATCATTGGACATAATAGATCACCTGACAAGGTGGCC |       |
|-------------------|----------------------------------------------------------------------------------|-------|
|                   | 95130 95140 95150 95160 95170 95180 95190 95200                                  |       |
| Human             | TTAAAGCATTCTTACACCATACTGTGAACTGTGTAAAAGGAAGGATCATTGGACATAATAGATTATCTGACAGGGTGGTC | 79112 |
| Coquerel'sSifaka  | TTAAAGCATTCTTGCATCATACTATAGGCT-----GACCTACTACCTGACTTAGTAG-----TACAGTGGCC         | 65694 |
| Ma'sNightMonkey   | TTAAACATTCTTACACCATACTATGAACTTTGTAAAAGGAAGGATCATTGGACATAATAGATCACCTGACAAGGTGGCA  | 73723 |
| VervetAGM         | TTAAAGCATTCTTACACCATACTATGAACTGTGTAAAAGGAAGGATCATTGGACATAATAGATCACCTGACAAGGTGGCC | 80221 |
| Gorilla           | TTAAAGCATTCTTACACCATACTGTGAACTGTGTAAAAGGAAGGATCATTGGACATAATAGATTATCTGACAAGGTGGCC | 77657 |
| GrabEatingMacaque | TTAAAGCATTCTTACACCATACTATGAACTGTGTAAAAGGAAGGATCATTGGACATAATAGATCACCTGACAAGGTGGCC | 79762 |
| Macaque           | TTAAAGCATTCTTACACCATACTATGAACTGTGTAAAAGGAAGGATCATTGGACATAATAGATCACCTGACAAGGTGGCC | 80644 |
| PigTailedMacaque  | TTAAAGCATTCTTACACCATACTATGAACTGTGTAAAAGGAAGGATCATTGGACATAATAGATCACCTGACAAGGTGGCC | 79153 |
| Bonobo            | TTAAAGCATTCTTACACCATACTGTGAACTGTGTAAAAGGAAGGATCATTGGACATAATAGATTATCTGACAAGGTGGCC | 78278 |
| OliveBaboon       | TTAAAGCATTCTTACACCATACTATGAACTGTGTAAAAGGAAGGATCATTGGACATAATAGATCACCTGACAAGGTGGCC | 79048 |
| Orangutan         | TTAAAGCATTCTTACACCATACTGTGAACTGTGTAAAAGGAAGGATCATTGGACATAATAGATTATCTGACAAGGTGGCC | 79925 |

| Majority          | CAGAATGGTGGAAAGTAAATCGACAAGTGAGGAGACTG--AATTAGCATTTCAGACAG-----TGGGGACCTCACACCTTGC |       |
|-------------------|------------------------------------------------------------------------------------|-------|
|                   | 95210 95220 95230 95240 95250 95260 95270 95280                                    |       |
| Human             | CGGAATGGTGGAAAGTAAATCGACAAGTGAGGAGACTG--AATTAGCATTTCAGACAG-----TGGGGACCTCACACCTTGT | 79185 |
| Coquerel'sSifaka  | CAGAATGGTGGAAAGTAAAGTGGACAAGTTAGGAGACTATCAATTAGCGTTAGTAAGGACATTTGGGGTCTAACAGCTTAC  | 65774 |
| Ma'sNightMonkey   | AAGAATGGTGGAAAGTAAATGGACAAGTGAGGAGACTA--AATTAGCATTTCAGACAG-----TGGGGACCTCACAGCTTGC | 73796 |
| VervetAGM         | CAGAATGGTGGAAAGTAAATCGACAAGTGAGGAGACTG--AATTAGCATTTCAGACAG-----TAGGGACCTCACACCTTGC | 80294 |
| Gorilla           | CTGAATGGTGGAAAGTAAATCAACAAGTGAGGAGACTG--AATTAGCATTTCAGACAG-----TGGGAACCTAACACCTTGC | 77730 |
| GrabEatingMacaque | CAGAATGGTGGAAAGTAAATCGACAAGTGAGGAGACTG--AATTAGCATTTCAGACAG-----TGGGGACCTCACACCTTGC | 79835 |
| Macaque           | CAAAATGGTGGAAAGTAAATCGACAAGTGAGGAGACTG--AATTAGCATTTCAGACAG-----TGGGGACCTCACACCTTGC | 80717 |
| PigTailedMacaque  | CAGAATGGTGGAAAGTAAATCGACAAGTGAGGAGACTG--AATTAGCATTTCAGACAG-----TGGGGACCTCACACCTTGC | 79226 |
| Bonobo            | CGGAATGGTGGAAAGTAAATCGACAAGTGAGGAGACTG--AATTAGCATTTCAGACAG-----TGGGGACCTCACACCTTGT | 78351 |
| OliveBaboon       | CAGAATGGTGGAAAGTAAATCGACAAGTGAGGAGACTG--AATTAGCATTTCAGACAG-----TGGGGACCTCACACCTTGC | 79121 |
| Orangutan         | CAGAATGGTGGAAAGTAAATCGACAAGTGAGGAGACTG--AATTAGCATTTCAGACAG-----TGGGGACCTCACACCTTGC | 79998 |

Tuesday, May 03, 2022 06:17 PM

| Majority          | ATTCCCCTTTTTGGTAAGATTTTATTACCTCCTTAGTTGGAAAGAGGTAAATT-CATCTATTTTGAGCCCAAATTTTTC  |       |       |       |       |       |       |       |       |
|-------------------|----------------------------------------------------------------------------------|-------|-------|-------|-------|-------|-------|-------|-------|
|                   | 95290                                                                            | 95300 | 95310 | 95320 | 95330 | 95340 | 95350 | 95360 |       |
| Human             | ATTCCCCTTTTTGGTAAGATTTTATTACCTCCTTAG----AAAGAGGTAAATT-CATCTATTTGAGCCCAAATTTTTC   |       |       |       |       |       |       |       | 79260 |
| Coquerel'sSifaka  | ATTCTACTTTTGGGTAAGATTTCCATTACCTCCTTATT-AGAAAGAGGTAAATTGTATCTATTTTGAACCCAAATTTTTC |       |       |       |       |       |       |       | 65853 |
| Ma'sNightMonkey   | ATGAC--TTTTGGTAAGATTTTGTACCTCCTTAGTTAGAAAGAGGTAAATT-CTTCTATTTTGAACCCAAATTTTTC    |       |       |       |       |       |       |       | 73873 |
| VervetAGM         | ATTCCCCTTTTTGGTAAGATTTTATTACCTCCTTAGTTGGAAAGAGGTAAATT-CATCTATTTTGAGCCCAAATTTTTC  |       |       |       |       |       |       |       | 80373 |
| Gorilla           | ATTCCCCTTTTTGGTAAGATTTTATTAGCTCCTTAG----AAAGAGGTAAATT-CATCTATTTTGAACCCAAATTTTTC  |       |       |       |       |       |       |       | 77805 |
| GrabEatingMacaque | ATTCCCCTTTTTGGTAAGATTTTATTACCTCCTTAGTTGGAAAGAGGTAAATT-CATCTATTTTGAGCCCAAATTTTTC  |       |       |       |       |       |       |       | 79914 |
| Macaque           | ATTCCCCTTTTTGGTAAGATTTTATTACCTCCTTAGTTGGAAAGAGGTAAATT-CATCTATTTTGAGCCCAAATTTTTC  |       |       |       |       |       |       |       | 80796 |
| PigTailedMacaque  | ATTCCCCTTTTTGGTAAGATTTTATTACCTCCTTAGTTGGAAAGAGGTAAATT-CATCTATTTTGAGCCCAAATTTTTC  |       |       |       |       |       |       |       | 79305 |
| Bonobo            | ATTCTCTTTTTGGTAAGATTTTATTACCTCCTTAG----AAAGAGGTAAATT-CATCTATTTTGAGCCCAAATTTTTC   |       |       |       |       |       |       |       | 78426 |
| OliveBaboon       | ATTCCCCTTTTTGGTAAGATTTTATTACCTCCTTAGTTAGAAAGAGGTAAATT-CATCTATTTTGAGCCCAAATTTTTC  |       |       |       |       |       |       |       | 79200 |
| Orangutan         | ATTCCCCTTTTTGGTAAGATTTTATTACCTCCTTAG----AAAGAGGTAAATT-CATCTATTTTGAGCCCAAATTTTTC  |       |       |       |       |       |       |       | 80073 |

| Majority          | TGACTAGAAGATTGGTAGTCTTATTTTTACTAAAGTACAAGATTATTTAGTAAAATATAGCATTCTCTGGCTT-----  |       |       |       |       |       |       |       |       |
|-------------------|---------------------------------------------------------------------------------|-------|-------|-------|-------|-------|-------|-------|-------|
|                   | 95370                                                                           | 95380 | 95390 | 95400 | 95410 | 95420 | 95430 | 95440 |       |
| Human             | TGCTAGAAGATTGGTAGTCTTATTTTTACTAAAGTACAAGATTATTTAGTAAAAGGTAGCATTCTCTGGCTT-----   |       |       |       |       |       |       |       | 79333 |
| Coquerel'sSifaka  | TCACTGAAAATTAGTAGTCTTAATTTCACTTAAGCACCATATTGTTTATTTAAAATATAGCATTCTCTGGCCT-----  |       |       |       |       |       |       |       | 65926 |
| Ma'sNightMonkey   | TCACTAGAAGATTGGTAGTCTTACTAA---AAAATACAAGATTGTTTAGTAAAATGTGGCATTCTCTGGCTTGCTTATT |       |       |       |       |       |       |       | 73949 |
| VervetAGM         | TGACTAGAAGATTGGTAGTCTTATTTTTACTAAAGTGCAAGATTATTTAGTAAAATATAGCATTCTCAGCCCT-----  |       |       |       |       |       |       |       | 80446 |
| Gorilla           | TGCTAGAAGATTGGTAGTCTTATTTTTACTAAAGTACAAGATTATTTAGTAAAAGGTAGCGTTCTCTGGCTT-----   |       |       |       |       |       |       |       | 77878 |
| GrabEatingMacaque | TGACTAGAAGATTGGTAGTCTTATTTTTACTAAAGTGCAAGATTATTTAGTAAAATATAGCATTCTCTGGCTT-----  |       |       |       |       |       |       |       | 79987 |
| Macaque           | TGACTAGAAGATTGGTAGTCTTATTTTTACTAAAGTGCAAGATTATTTAGTAAAATATAGCATTCTCTGGCTT-----  |       |       |       |       |       |       |       | 80869 |
| PigTailedMacaque  | TGACTAGAAGATTGGTAGTCTTATTTTTACTAAAGTGCAAGATTATTTAGTAAAATATAGCATTCTCTGGCTT-----  |       |       |       |       |       |       |       | 79378 |
| Bonobo            | TGCTAGAAGATTGGTAGTCTTATTTTTACTAAAGTACAAGATTATTTAGTAAAAGGTAGCATTCTCTGGCTT-----   |       |       |       |       |       |       |       | 78499 |
| OliveBaboon       | TGACTAGAAGATTGGTAGTCTTATTTTTACTAAAGTGCAAGATTAGTTAGTAAAATATAGCATTCTCTGGCTT-----  |       |       |       |       |       |       |       | 79273 |
| Orangutan         | TCTCTAGAAGATTGGTAGTCTTATTTTTACTAAAGTACAAGATTGTTTAGTAAAAGGTAGCATTCTCTGGCTT-----  |       |       |       |       |       |       |       | 80146 |

| Majority          | -----                                                                         |       |       |       |       |       |       |       |       |
|-------------------|-------------------------------------------------------------------------------|-------|-------|-------|-------|-------|-------|-------|-------|
|                   | 95450                                                                         | 95460 | 95470 | 95480 | 95490 | 95500 | 95510 | 95520 |       |
| Human             | -----                                                                         |       |       |       |       |       |       |       | 79333 |
| Coquerel'sSifaka  | -----                                                                         |       |       |       |       |       |       |       | 65926 |
| Ma'sNightMonkey   | TACTTACTTACTTACTTACTTACTTACTTACTTACTTATTTATTTATTTTTCAGACGGAGTCTTGCTTTGTCACCAG |       |       |       |       |       |       |       | 74029 |
| VervetAGM         | -----                                                                         |       |       |       |       |       |       |       | 80446 |
| Gorilla           | -----                                                                         |       |       |       |       |       |       |       | 77878 |
| GrabEatingMacaque | -----                                                                         |       |       |       |       |       |       |       | 79987 |
| Macaque           | -----                                                                         |       |       |       |       |       |       |       | 80869 |
| PigTailedMacaque  | -----                                                                         |       |       |       |       |       |       |       | 79378 |
| Bonobo            | -----                                                                         |       |       |       |       |       |       |       | 78499 |
| OliveBaboon       | -----                                                                         |       |       |       |       |       |       |       | 79273 |
| Orangutan         | -----                                                                         |       |       |       |       |       |       |       | 80146 |

Tuesday, May 03, 2022 06:17 PM

| Majority          | -----                                                                            |       |       |       |       |       |       |       |       |
|-------------------|----------------------------------------------------------------------------------|-------|-------|-------|-------|-------|-------|-------|-------|
|                   | 95530                                                                            | 95540 | 95550 | 95560 | 95570 | 95580 | 95590 | 95600 |       |
| Human             | -----                                                                            |       |       |       |       |       |       |       | 79333 |
| Coquerel'sSifaka  | -----                                                                            |       |       |       |       |       |       |       | 65926 |
| Ma'sNightMonkey   | GCTGGAGTGCAGTGGCTGGATCTCAGCTCAGTGC AACCTCTGCCTTCTGGGTTCAGTGATTCTCCTGCCTCAGTTTCCT |       |       |       |       |       |       |       | 74109 |
| VervetAGM         | -----                                                                            |       |       |       |       |       |       |       | 80446 |
| Gorilla           | -----                                                                            |       |       |       |       |       |       |       | 77878 |
| GrabEatingMacaque | -----                                                                            |       |       |       |       |       |       |       | 79987 |
| Macaque           | -----                                                                            |       |       |       |       |       |       |       | 80869 |
| PigTailedMacaque  | -----                                                                            |       |       |       |       |       |       |       | 79378 |
| Bonobo            | -----                                                                            |       |       |       |       |       |       |       | 78499 |
| OliveBaboon       | -----                                                                            |       |       |       |       |       |       |       | 79273 |
| Orangutan         | -----                                                                            |       |       |       |       |       |       |       | 80146 |

| Majority          | -----TTTTTTTTTTTTTT-----                                                       |       |       |       |       |       |       |       |       |
|-------------------|--------------------------------------------------------------------------------|-------|-------|-------|-------|-------|-------|-------|-------|
|                   | 95610                                                                          | 95620 | 95630 | 95640 | 95650 | 95660 | 95670 | 95680 |       |
| Human             | -----TTTTTTTTTTTTTT-----                                                       |       |       |       |       |       |       |       | 79346 |
| Coquerel'sSifaka  | -----TTTTTTTTTTTAAAT-----                                                      |       |       |       |       |       |       |       | 65939 |
| Ma'sNightMonkey   | GAGCTGCTGGGACTACAAGTCTGTGGCACCACGCCAGCTAATTTTTGTATTTTAGTAGAGATGGGGTTTCACCATGTT |       |       |       |       |       |       |       | 74189 |
| VervetAGM         | -----TTTTTTTTTTTTTT-----                                                       |       |       |       |       |       |       |       | 80459 |
| Gorilla           | -----TTTTTTTTTTTTTT-----                                                       |       |       |       |       |       |       |       | 77891 |
| GrabEatingMacaque | -----TTTTTTTTTTTTTT-----                                                       |       |       |       |       |       |       |       | 80000 |
| Macaque           | -----TTTTTTTTTTTTTT-----                                                       |       |       |       |       |       |       |       | 80881 |
| PigTailedMacaque  | -----TTTTTTTTTTTTTT-----                                                       |       |       |       |       |       |       |       | 79391 |
| Bonobo            | -----TTTTTTTTTTTTTT-----                                                       |       |       |       |       |       |       |       | 78512 |
| OliveBaboon       | -----TTTTTTTTTTTTTT-----                                                       |       |       |       |       |       |       |       | 79286 |
| Orangutan         | -----TTTTTTGTGTGTG-----                                                        |       |       |       |       |       |       |       | 80159 |

| Majority          | -----                                                                            |       |       |       |       |       |       |       |       |
|-------------------|----------------------------------------------------------------------------------|-------|-------|-------|-------|-------|-------|-------|-------|
|                   | 95690                                                                            | 95700 | 95710 | 95720 | 95730 | 95740 | 95750 | 95760 |       |
| Human             | -----                                                                            |       |       |       |       |       |       |       | 79346 |
| Coquerel'sSifaka  | -----                                                                            |       |       |       |       |       |       |       | 65939 |
| Ma'sNightMonkey   | GGCCAGGATGATCTCCATCTCTTGACCTCGTGATCCACCTGCCTCGGCCCTCCCAAAGTGTGGGATTATAGGCATGAGCC |       |       |       |       |       |       |       | 74269 |
| VervetAGM         | -----                                                                            |       |       |       |       |       |       |       | 80459 |
| Gorilla           | -----                                                                            |       |       |       |       |       |       |       | 77891 |
| GrabEatingMacaque | -----                                                                            |       |       |       |       |       |       |       | 80000 |
| Macaque           | -----                                                                            |       |       |       |       |       |       |       | 80881 |
| PigTailedMacaque  | -----                                                                            |       |       |       |       |       |       |       | 79391 |
| Bonobo            | -----                                                                            |       |       |       |       |       |       |       | 78512 |
| OliveBaboon       | -----                                                                            |       |       |       |       |       |       |       | 79286 |
| Orangutan         | -----                                                                            |       |       |       |       |       |       |       | 80159 |

Tuesday, May 03, 2022 06:17 PM

|                   |                                                                                |       |
|-------------------|--------------------------------------------------------------------------------|-------|
| Majority          | -----TTTT-----AATGTTTCAGATCTGTCCACTAAAAA-GGGCTTTAGGCCAGGTGT                    |       |
|                   | 95770 95780 95790 95800 95810 95820 95830 95840                                |       |
| Human             | -----T-TTT-----AATGTTTCAGATCTGTCCACTAAAAA-GGGCTTTAGACCAGGTGT                   | 79395 |
| Coquerel'sSifaka  | -----GTCTCTTGGGGCTACCACACTAAAAAAGGGCTTTACCCCTAGATAT                            | 65984 |
| Ma'sNightMonkey   | ACCACACCCAGCCTTTTTATTACTATTATTTTTAATGTCTCAGGTCTGTCCACTAAAA--GGGCTTTAGGCCAGGCAT | 74347 |
| VervetAGM         | -----TTTT-----TAAATGTTTCAGATCTGTCCACTAAAAA-GGGCTTTAGGCCGGGTGT                  | 80511 |
| Gorilla           | -----TCTTT-----TATGTTTCAGATCTGTCCACTAAAAA-GGGCTTTAGGCCAGGTGT                   | 77941 |
| GrabEatingMacaque | -----TTA-----AATGTTTCAGATCTGTCCACTAAAAA-GGGCTTTAGGCTGGGTGT                     | 80048 |
| Macaque           | -----AATGTTTCAGATCTGTCCACTAAAAA-GGGCTTTAGGCTGGGTGT                             | 80926 |
| PigTailedMacaque  | -----TTTTTTTT-----TTTTAATGTTTCAGATCTGTCCACTAAAAA-GGGCTTTAGGCTGGGTGT            | 79448 |
| Bonobo            | -----T-TTT-----AATGTTTCAGATCTGTCCACTAAAAA-GGGCTTTAGGCCAGGTGT                   | 78561 |
| OliveBaboon       | -----TTTT-----GTAATGTTTCAGATCTGTCCACTAAAAA-GGGCTTTAGGCCGGGTGT                  | 79337 |
| Orangutan         | -----T-----GTGTTTCAGATCTATCACACTAAAAA-GGGCTTTAGGCCAGGTGT                       | 80204 |

|                   |                                                                                   |       |
|-------------------|-----------------------------------------------------------------------------------|-------|
| Majority          | TGTGGCTCACACCTGTAATCCCAGCACTTTGAGAGGTCAAGGTGGGAGGATTGCTTGAGGCCAGCAGTTTGTAGACCAGCC |       |
|                   | 95850 95860 95870 95880 95890 95900 95910 95920                                   |       |
| Human             | TGTGGCTCACACCTGTAATCCCAGCACTTTGACAGGTCAAGGTGGGAGGATTGCTTGAGGCCAGGAGTTTGTAGACCAGCC | 79475 |
| Coquerel'sSifaka  | TTTAATTCTAAATTATCATTTTA-----AATTCATTTTA-----ATTATTT----TTAAAATTCTC--ACCATTT       | 66043 |
| Ma'sNightMonkey   | T-TTGCTCACATCTGTAATCCCAGCACTTTGAGAGGTCAAGGTGGGAGGATTGCTTGAGGCCAGCAGTTTGTAGACCAGCC | 74426 |
| VervetAGM         | TGTGGCTCACACCTGTAATCCCAGCACTTTGAGAGATCAAGGTGGGAGGATTGCTTGAGGCCAGCAGTTTGTAGACCAGCC | 80591 |
| Gorilla           | TGTGGCTCACACCTGTAATCCCAGCACTTTGAGAGGTCAAGGTGGGAGGATTGCTTGAGGCCAGGAGTTTGTAGACCAGCC | 78021 |
| GrabEatingMacaque | TGTGGCTCACACCTGTAATCCCAGCACTTTGAGAGGTCAAGGTGGGAGGATTGCTTGAGGCCAGCAGTTTGTAGACCAGCC | 80128 |
| Macaque           | TGTGGCTCACACCTGTAATCCCAGCACTTTGAGAGGTCAAGGTGGGAGGATTGCTTGAGGCCAGCAGTTTGTAGACCAGCC | 81006 |
| PigTailedMacaque  | TGTGGCTCACACCTGTAATCCCAGCACTTTGAGAGGTCAAGGTGGGAGGATTGCTTGAGGCCAGCAGTTTGTAGACCAGCC | 79528 |
| Bonobo            | TGTGGCTCACACCTGTAATCCCAGCACTTTGAGAGGTCAAGGTGGGAGGATTGCTTGAGGCCAGGAGTTTGTAGACCAGCC | 78641 |
| OliveBaboon       | TGTGGCTCACACCTGTAATCCCAGCACTTTGAGAGGTCAAGGTGGGAGGATTGCTTGAGGCCAGCAGTTTGTAGACCAGCC | 79417 |
| Orangutan         | TGTGGCTCACACCTGTAATCCCAGCACTTTGAGAAGTCAAGGTGGGAGGATTGCTTGAGGCCAGCAGTTTGTAGACCAGCC | 80284 |

|                   |                                                                                  |       |
|-------------------|----------------------------------------------------------------------------------|-------|
| Majority          | TGAGCAACATAGTGAGATCTCAGTCTCTACTAAAAATAAAAA-----AAATTAGCCAGGCTGGTGGCATGTGCCTGTAG  |       |
|                   | 95930 95940 95950 95960 95970 95980 95990 96000                                  |       |
| Human             | TGAGCAACATAGTGAGATCTCAGTCTCTACTAAAAATAAAAA-----AAATTAGCCATGCTGGTGGCATGTGCCTGTAG  | 79550 |
| Coquerel'sSifaka  | T----TCCATGATAAGGCTTGATGTTATGTTCTAAACAAT-----A-TTA-TGACACCAA--GTCAT---CTCCAG     | 66103 |
| Ma'sNightMonkey   | TGAGCAATGTAGTGAGATCTTGGTCTCTACTAAAACTAAAAAATAAAAAATTAGCCAGACCTG-TGGCATGTGCCTGTAG | 74505 |
| VervetAGM         | TGAGCAACATAGTGAGATCTCAGTCTCTACTAAAAAGAAAA-----AAATTAGCCAGGCTGGTGGCATGTGCCTGTAG   | 80666 |
| Gorilla           | TGAGCAACATAGTGAGATCTCAGTCTCTACTAAAAATAAAAA-----AAATTAGCCATGCTGGTGGCATGTGCCTGTAG  | 78096 |
| GrabEatingMacaque | TGAGCAACATAGTGAGATCTCAGTCTCTACTAAAAATAAAAA-----AAATTAGCCAGGCTGGTGGCATGTGCCTGTAG  | 80203 |
| Macaque           | TGAGCAACATAGTGAGATCTCAGTCTCTACTAAAAATAAAAA-----AAATTAGCCAGGCTGGTGGCATGTGCCTGTAG  | 81081 |
| PigTailedMacaque  | TGAGCAACATAGTGAGATCTCAGTCTCTACTAAAAATAAAAA-----AAATTAGCCAGGCTGGTGGCATGTGCCTGTAG  | 79603 |
| Bonobo            | TGAGCAACATAGTGAGATCTCAGTCTCTACTAAAAATAAAAT-----AAATTAGCCATGCTGGTGGCATGTGCCTGTAG  | 78716 |
| OliveBaboon       | TGAGCAACATAGTGAGATCTCAGTCTCTACTAAAAATAAAAA-----AAATTAGCCAGGCTGGTGGCATGTGCCTGTAG  | 79492 |
| Orangutan         | TGAGCAACATAGTGAGATCTCAGTCTCTACTAAAAATAAA-----AAATTAGCCATGCGTGGTGGCATATGCCTGTAG   | 80357 |



Tuesday, May 03, 2022 06:17 PM

| Majority          | TCCCAGCTACTTAGGAGGCTGAGGTGGGAGGATTGCCTGAGCCCAGAAGATAGAGACTGCAGTGAGCCATGATCATGCCA  |       |
|-------------------|-----------------------------------------------------------------------------------|-------|
|                   | 96010 96020 96030 96040 96050 96060 96070 96080                                   |       |
| Human             | TCCCAGCTACTTAGTAGGCTGAGGTGGGAGGATTGCCTGAGCCCAGAAGATAGAAAACAGCAGTGAGCCATGATCATGCCA | 79630 |
| Coquerel'sSifaka  | -----TGTA AAA ACCAGATTTCAAGA----AAAAAATGTATTTTAAAAACAATTATT-TCTTAATA              | 66159 |
| Ma'sNightMonkey   | -----GCTGAGGTGGGAGGATTGCTTGATCCCAGAAAATCAAGACTGTAGTGAGCCAAGATCACGCCA              | 74568 |
| VervetAGM         | TCCCAGCTACTTAGGAGGCTGAGGTGGGAGGATTGCCTGAGCCCAGAAGATAGAGACTACAGTGAGCCATGATCATGCCA  | 80746 |
| Gorilla           | TCCCAGCTACTTAGTAGGCTGAGGTGGGAGGATTGCCTGAGCCCAGAAGATAGAAAACAGCAGTGAGCCATGATCATGCTA | 78176 |
| GrabEatingMacaque | TCCCAGCTACTTAGGAGGCTGAGGTGGGAGGATTGCCTGAGCCCAGAAGATAGAGACTGCAGTGAGCCATGATCATGCCA  | 80283 |
| Macaque           | TCCCAGCTACTTAGGAGGCTGAGGTGGGAGGATTGCCTGAGCCCAGAAGATAGAGACTGCAGTGAGCCATGATCATGCCA  | 81161 |
| PigTailedMacaque  | TCCCAGCTACTTAGGAGGCTGAGGTGGGAGGATTGCCTGAGCCCAGAAGATAGAGACTGCAGTGAGCCATGATCATGCCA  | 79683 |
| Bonobo            | TCCCAGCTACTTAGTAGGCTGAGGTGGGAGGATTGCCTGAGCCCAGAAGATAGAAAACAGCAGTGAGCCATGATCATGCCA | 78796 |
| OliveBaboon       | TCCCAGCTACTTAGGAGGCTGAGGTGGGAGGATTGCCTGAGCCCAGAAGATAGAGACTGCAGTGAGCCATGATCATGCCA  | 79572 |
| Orangutan         | TCCCAGCTACTTAGTAGGCTGAGGTGGGAGGATTGCCTGAGCCCAGAAGATAGAAAACAGCAGTGAGCCATGATCATGCCA | 80437 |

| Majority          | CTGTACTCTAGCTTGGGTGACAGAGTGAACCTTGCTCTCAAAAAATAAAGGGTGGGGAAGCTTTAGCCTAGACTTTTAAATT |       |
|-------------------|------------------------------------------------------------------------------------|-------|
|                   | 96090 96100 96110 96120 96130 96140 96150 96160                                    |       |
| Human             | CTGCACTCTAGCCTGGGTGACAGAGCAAACCTTGCTCTCAAAAAATAAAGGGTGGGGAAGCTTTAGCCTAGGCTTTTAAATT | 79710 |
| Coquerel'sSifaka  | TTTAAGGCTTTTTTAGGT----AAGTTTTTCTCACCTTTAAACTTTTTG-GTGAGTAATTTTTA-----TTGGATT       | 66225 |
| Ma'sNightMonkey   | CCACATTCTTGCTGGGTGACAGAGCAAACCTTTTCTCAAAAAATGAAGAGTTGGGGAGCTTTAGCCTAGACTTATAAATT   | 74648 |
| VervetAGM         | CTGTACTCTAGCTTGGGTGACAGAGTGAACCTTATCTCAAAAAATAAAGGGTGGGGAAGCTTTAGCCTAGACTTTTAAATT  | 80826 |
| Gorilla           | CTGCACTCTAGCCTGGGTGACAGAGCAAACCTTGCTCTCAAAAAATAAAGGGTGGGGAAGCTTTAGCCTAGACTTTTAAATT | 78256 |
| GrabEatingMacaque | CTGTACTCTAGCTTGGGTGACAGACTGAACCTTGCTCTCAAAAAATAAAGGGTGCGGAAGCTTTAGCCTAGACTTTTAAATT | 80363 |
| Macaque           | CTGTACTCTAGCTTGGGTGACAGACTGAACCTTGCTCTCAAAAAATAAAGGGTGGGGAAGCTTTAGCCTAGACTTTTAAATT | 81241 |
| PigTailedMacaque  | CTGTACTCTAGCTTGGGTGACAGACTGAACCTTGCTCTCAAAAAATAAAGGGTGGGGAAGCTTTAGCCTAGACTTTTAAATT | 79763 |
| Bonobo            | CTGCACTCTAGCCTGGGTGACAGAGCAAACCTTGCTCTCAAAAAATAAAGGGTGGGGAAGCTTTAGCCTAGACTTTTAAATT | 78876 |
| OliveBaboon       | CTGTACTCTAGCTTGGGTGACAGAGTGAACCTTGCTCTCAAAAAATAAAGGGTGGGGAAGCTTTAGCCTAGACTTTTAAATT | 79652 |
| Orangutan         | CTGCACTCTAGCCTGGGTGACAGAGCGAACCTTGCTCTCAAAAAATAAAGGGTGGGGAAGCTTTAGCCTAGACTTTTAAATT | 80517 |

| Majority          | CTCAA-TTACCATTATAAATTTATTTTAAATTATTAACCTAATTTATTTTAAATTCCTCAATTAGTGTTTTTCCATGATAAGGCT  |       |
|-------------------|----------------------------------------------------------------------------------------|-------|
|                   | 96170 96180 96190 96200 96210 96220 96230 96240                                        |       |
| Human             | CTCAA-TTACCATTATAAATTTATTTTAAATTATTAACCTAATTTACTTTAATTCCTCAATTACTATTTTTCCATGAAAAGGCT   | 79789 |
| Coquerel'sSifaka  | GTTTA-----ATTGTATGTTGGT----GGCACGGTAAAAGTATCTCAG-----AAGAAATAATCTTCATAAAAA---T         | 66287 |
| Ma'sNightMonkey   | CTCAA-TTACCATTATAAGTTTA-----ATTATTAACCTAATTTATTTTAAATTCCTCAATTACTGTTTTTCCATGATAAGGCT   | 74722 |
| VervetAGM         | CTCAA-TTACCATTATAAATTTATTTTAAATTATTAACCTAATTTATTTTAAATTCCTCAATTAGTGTTTTTCCATGATAAGGCT  | 80905 |
| Gorilla           | CTCAA-TTACCATTATAAATTTATTTTAAATTATTAACCTAATTTACTTTAATTCCTCAATTACTATTTTTCCATGAGAAGGCT   | 78335 |
| GrabEatingMacaque | CTCAAATTACCATTATAAATTTATTTTAAATTATTAACCTAATTTATTTTAAATTCCTCAATTAGTGCTTTTTCCATGATAAGGCT | 80443 |
| Macaque           | CTCAAATTACCATTATAAATTTATTTTAAATTATTAACCTAATTTATTTTAAATTCCTCAATTAGTGTTTTTCCATGATAAGGCT  | 81321 |
| PigTailedMacaque  | CTCAAATTACCATTATAAATTTATTTTAAATTATTAACCTAATTTATTTTAAATTCCTCAATTAGTGTTTTTCCATGATAAGGCT  | 79843 |
| Bonobo            | CTCAA-TTACCATTATAAATTTATTTTAAATTATTAACCTAATTTACTTTAATTCCTCAATTACTATTTTTCCATGAAAAGGCT   | 78955 |
| OliveBaboon       | CTCAA-TTACCATTATAAATTTATTTTAAATTATTAACCTAATTTATTTTAAATTCCTCAATTAGTGTTTTTCCATGATAAGGCT  | 79731 |
| Orangutan         | CTCAA-TTACCATTATAAATTTATTTTAAATTATTAACCTAATTTACTTTAATTCCTCAATTACTGTTTTTCCATGATAAGGCT   | 80596 |

Tuesday, May 03, 2022 06:17 PM

| Majority          | TGATGTTCTAAACAATATTATACCACCAAGTTATCTCTACTGGAAAACCCAGATTTCAAGAAA--AAAAAA-TGTATTTT  |       |       |       |       |       |       |       |       |
|-------------------|-----------------------------------------------------------------------------------|-------|-------|-------|-------|-------|-------|-------|-------|
|                   | 96250                                                                             | 96260 | 96270 | 96280 | 96290 | 96300 | 96310 | 96320 |       |
| Human             | TGATGTTCTAAACAGTATTATACCACCAAGTTATCTCTACTGGAAAACCCAGATTTCAAGAAA--AAAAAATGTATTTT   |       |       |       |       |       |       |       | 79867 |
| Coquerel'sSifaka  | -GAAGTATTAACC----TTAGGCTTGTATGTT-----TAGATAGATATTGAATTTAAGTAG---ATTGA-TAAATTT-    |       |       |       |       |       |       |       | 66350 |
| Ma'sNightMonkey   | TGATGTTCTAAACGATATTATACCAGCA---T-----GGAAAACCTGATTTCAAGAAATGAAATAAGTGTATTTT       |       |       |       |       |       |       |       | 74790 |
| VervetAGM         | TGATGTTCTAAACAATATCATAACCACCAAGTTATCTCTACTGGAAAACCCAGATTTCAAGAAA--AAAAAA-TGTATTTT |       |       |       |       |       |       |       | 80982 |
| Gorilla           | TGATGTTCTAAACAGTATTATACCACCAAGTTATCCCTACTGGAAAACCCAGATTTCAAGAAA--AAAAAATGTATTTT   |       |       |       |       |       |       |       | 78413 |
| GrabEatingMacaque | TGATGTTCTAAACAATATCATAACCACCAAGTTACCTCTGCTGGAAAACCCAGATTTCAAGAAA--AAAAAA-TGTATTTT |       |       |       |       |       |       |       | 80520 |
| Macaque           | TGATGTTCTAAACAATATCATAACCACCAAGTTACCTCTGCTGGAAAACCCAGATTTCAAGAAA--AAAAAA-TGTATTTT |       |       |       |       |       |       |       | 81398 |
| PigTailedMacaque  | TGATGTTCTAAACAATATCATAACCACCAAGTTACCTCTGCTGGAAAACCCAGATTTCAAGAAA--AAAAAATGTATTTT  |       |       |       |       |       |       |       | 79921 |
| Bonobo            | TGATGTTCTAAACAGTATTATACCACCAAGTTATCTCTACTGGAAAACCCAGATTTCAAGAAA--AAAAAA-TGTATTTT  |       |       |       |       |       |       |       | 79032 |
| OliveBaboon       | TGATGTTCTAAACAATATCATAACCACCAAGTTACCTCTGCTGGAAAACCCAGATTTCAAGGAA--AAAA--TGTATTTT  |       |       |       |       |       |       |       | 79807 |
| Orangutan         | TGATGTTCTAAACAGTATTATACCACCAAGTTATCTCTACTGGAAAACCCAGATTTCAAGAAA--AAAAAA-TGTATTTT  |       |       |       |       |       |       |       | 80673 |

| Majority          | GAAAACAATTATGTCTTAAATATTTAAATTTCTTTTTGACTTGTTTTT--ACCATCTTTAAATGTTTTTGGTAAGTAATT |       |       |       |       |       |       |       |       |
|-------------------|----------------------------------------------------------------------------------|-------|-------|-------|-------|-------|-------|-------|-------|
|                   | 96330                                                                            | 96340 | 96350 | 96360 | 96370 | 96380 | 96390 | 96400 |       |
| Human             | GAAAACAATTATGTCTTAAATATTTAAATTTCTTTTTAAACATGTTTT--ACCATCTTTAAATTTTTTGGTAAGTAATT  |       |       |       |       |       |       |       | 79946 |
| Coquerel'sSifaka  | -G-TA--TGTATTTTATGAA--TTAGTAATTTTCTTGTGATGT-----CAACAGGGAAAAATGAATAATAGGTGACT    |       |       |       |       |       |       |       | 66417 |
| Ma'sNightMonkey   | GAAAACAGTTGTCTTTT-----TTTTGGTGGGGTGGGGGAGTTACT-GATCACCTT--ATTATTTTGTCTGGGGCAGG   |       |       |       |       |       |       |       | 74861 |
| VervetAGM         | GAAAACAATTATGTCTTAAATATTTAAATTTCTTTTTGACTGGTTTTT--ACCATCTTTAAATGTTTTTGGTAAGTAATT |       |       |       |       |       |       |       | 81060 |
| Gorilla           | GAAAACAATTATGTCTTAAATATTTAAATTTCTTTTTAAACATGTTTTTAAACCATCTTTAAATTTTTTGGTAAGTAATT |       |       |       |       |       |       |       | 78493 |
| GrabEatingMacaque | GAAAACAATTATGTCTTAAATATTTAAATTTCTTTTTGACTGGTTTTT--ACCATCTTTAAATGTTTTTGGTAAGTAATT |       |       |       |       |       |       |       | 80598 |
| Macaque           | GAAAACAATTATGTCTTAAATATTTAAATTTCTTTTTGACTGGTTTTT--ACCATCTTTAAATGTTTTTGGTAAGTAATT |       |       |       |       |       |       |       | 81476 |
| PigTailedMacaque  | GAAAACAATTATGTCTTAAATATTTAAATTTCTTTTTGACTGGTTTTT--ACCATCTTTAAATGTTTTTGGTAAGTAATT |       |       |       |       |       |       |       | 79999 |
| Bonobo            | GAAAACAATTATGTCTTAAATATTTAAATTTCTTTTTAAACATGTTTT--ACCATCTTTAAATTTTTTGGTAAGTGATT  |       |       |       |       |       |       |       | 79111 |
| OliveBaboon       | GAAAACAATTATGTCTTAAATATTTAAATTTCTTTTTGACTGGTTTTT--ACCATCTTTAAATGTTTTTGGTAAGTAATT |       |       |       |       |       |       |       | 79885 |
| Orangutan         | GAAAACAATTATGTCTTAAATATTTAAATTTCTTTTTAAACATGTTTT--ACCATCTTTAAATTTTTTGGTAAGTAATT  |       |       |       |       |       |       |       | 80752 |

| Majority          | TTCA-TTAGATTATTTAAATGTATAGTGGCACGGTAGGGTGTATCTCA-GATATGAAGCGATTTTTCATAAAAATA-AA |       |       |       |       |       |       |       |       |
|-------------------|---------------------------------------------------------------------------------|-------|-------|-------|-------|-------|-------|-------|-------|
|                   | 96410                                                                           | 96420 | 96430 | 96440 | 96450 | 96460 | 96470 | 96480 |       |
| Human             | TTCA-TTAGATTGTTAAATGTATAGTGGCACGGTAGGGTGTATCTCAAGATATGAAGCAGTTTTTCATAAAAATA-AA  |       |       |       |       |       |       |       | 80024 |
| Coquerel'sSifaka  | TGGAACTATAAATTTTGAAAGC-----GTCAGTGTATAATTTA---ACTTAGCATCTTTTTAAAAAATACAA        |       |       |       |       |       |       |       | 66482 |
| Ma'sNightMonkey   | CAGA-TCACAAGATCAAGAGGT-----CGAGACCATCTGGCCAACATGGTGAAACCCCATCTCTACTAAAAATACAA   |       |       |       |       |       |       |       | 74933 |
| VervetAGM         | TTCA-TTAGATTATTTAAATGTATAGTGGCACGGTAGGGTGTATCTCA-GATATGAAGTGATTTTTCATGAAAATA-AA |       |       |       |       |       |       |       | 81137 |
| Gorilla           | TTCA-TTAGATTGTTAAATGTATAGTGGCATGGTAGGGTGTATCTCAAGATATGAAGCAGTTTTTCATAAAAATA-AA  |       |       |       |       |       |       |       | 78571 |
| GrabEatingMacaque | TTCA-TTAGATTATTTAAATGTATAGTGGCACAGTAGGGTGTATCTCA-GATATGAAGTGATTTTTCATAAAAATA-AA |       |       |       |       |       |       |       | 80675 |
| Macaque           | TTCA-TTAGATTATTTAAATGTATAGTGGCACAGTAGGGTGTATCTCA-GATATGAAGTGATTTTTCATAAAAATA-AA |       |       |       |       |       |       |       | 81553 |
| PigTailedMacaque  | TTCA-TTAGATTATTTAAATGTATAGTGGCACAGTAGGGTGTATCTCA-GATATGAAGTGATTTTTCATAAAAATA-AA |       |       |       |       |       |       |       | 80076 |
| Bonobo            | TTCA-TTAGATTGTTAAATGTATAGTGGCACGGTAGGGTGTATCTCAAGATATGAAGCAGTTTTTCATAAAAATA-AA  |       |       |       |       |       |       |       | 79189 |
| OliveBaboon       | TTCA-TTAGATTATTTAAATGTATAGTGGCACGGTAGGGTGTATCTCA-GATATGAAGCGATTTTTCATAAAAATA-AA |       |       |       |       |       |       |       | 79962 |
| Orangutan         | TTCA-TTAGATTGTTAAATGTATAGTGGCACGGTAGGGTGTATCTCAAGATATGAAGCAGTTTTTCATAAAAATA-AA  |       |       |       |       |       |       |       | 80830 |



Tuesday, May 03, 2022 06:17 PM

| Majority          | CTTTTAAATTCCTTAGTAATTTTT-GAGCACTCCATATATACAAAGCATGTGAATATTTGGTAGCGTTTTACA-AATGT  |       |       |       |       |       |       |       |       |
|-------------------|----------------------------------------------------------------------------------|-------|-------|-------|-------|-------|-------|-------|-------|
|                   | 96730                                                                            | 96740 | 96750 | 96760 | 96770 | 96780 | 96790 | 96800 |       |
| Human             | CTTTTAAATTCCTTAGTAATTTTT-GAGCACTCCATATGTATAAAGCATGTGAATATTTGGTAGCATTTTACA-AATGT  |       |       |       |       |       |       |       | 80330 |
| Coquerel'sSifaka  | CTTTT-AAATTCCTATGTACTTTTTGAGCACTCCATATGTACAAAGCATAT--GTATATGATAGAGGTTTACATAATGT  |       |       |       |       |       |       |       | 66746 |
| Ma'sNightMonkey   | CTTTT-AAATTCCTTAATAATTTCT-GAGCACTCCATATATATAAAGCAT---ATATTTGGTAGCATTTTGCA-AATGT  |       |       |       |       |       |       |       | 75239 |
| VervetAGM         | TCTTTAAGTTCCTTAGTAATTTTT-GAGCACTCCATATATACAAAGCATGTGAATATTTGGTAACGTTTTACA-AATGT  |       |       |       |       |       |       |       | 81446 |
| Gorilla           | CTTTTAAATTCCTTAGTAATTTTT-GAGCACTCCTTATGTATAAAGCATGTGAATATTTGGTAGCATTTTACA-AATGT  |       |       |       |       |       |       |       | 78878 |
| GrabEatingMacaque | TCTTTAAGTTCCTTAGTAGTTTT-GAGCACTCCATATATACAAAGCATGTGAATATTTGGTAGCGTTTTACA-AATGT   |       |       |       |       |       |       |       | 80984 |
| Macaque           | TCTTTAAGTTCCTTAGTAGTTTT-GAGCACTCCATATATACAAAGCATGTGAATATTTGGTAGCGTTTTACA-AATGT   |       |       |       |       |       |       |       | 81862 |
| PigTailedMacaque  | TCTTTAAGTTCCTTAGTAGTTTT-GAGCACTCCATATATACAAAGCATGTGAATATTTGGTAGCGTTTTACA-AATGT   |       |       |       |       |       |       |       | 80385 |
| Bonobo            | CTTTTAAATTCCTTAGTAATTTTT-GAGCACTCCATATGTATAAAGCATGTGAATATTTGGTAGCATTTTACA-AATGT  |       |       |       |       |       |       |       | 79495 |
| OliveBaboon       | TCTTTAAGTTCCTTAGTAATTTTT-GAGCACTCCATATATACAAAGCATGTGAATATTTGGTAGCGTTTTACA-AATGT  |       |       |       |       |       |       |       | 80271 |
| Orangutan         | CTTTT-AAATTCCTTAGTAATTTTT-GAGCACTCCATATGTACAAAGCATGTGAATATTTGGTAGCATTTTACA-AATGT |       |       |       |       |       |       |       | 81133 |

| Majority          | -----CCAGAGATTTGTGAGAGTTCCCTGAGATCCTCATAGGGGGCCTACAAAGTTTGTAGTATTACTTTTTCATGGTAATA |       |       |       |       |       |       |       |       |
|-------------------|------------------------------------------------------------------------------------|-------|-------|-------|-------|-------|-------|-------|-------|
|                   | 96810                                                                              | 96820 | 96830 | 96840 | 96850 | 96860 | 96870 | 96880 |       |
| Human             | -----CCAGAGATTTGTGAGAGTTCCCTGAGATCCTCATAGGGGGCCACAAAGTTTGTAGTATTACTTTTTCACGGTAATA  |       |       |       |       |       |       |       | 80403 |
| Coquerel'sSifaka  | T----TTCCAGAGATCCTTGGGCGTTCCCTGAGA-CCTCA-AGGAGGTCTACAAAGTG---AGAACTTTT-AGGATAATA   |       |       |       |       |       |       |       | 66815 |
| Ma'sNightMonkey   | TGGTGTCCAGAGATCTGTGAGAGTTCCCTGAGATCCTCATAGAGGGCCACACAGTTTGTAGTATTACTTTTTCACGGTAGTA |       |       |       |       |       |       |       | 75319 |
| VervetAGM         | -----CCAGAGATTTGTGAGAGTTCCCTGAGATCCTTATAGGGGGCCTACAAAGTTTGTAGTATTACTTTTTCATGGTAATA |       |       |       |       |       |       |       | 81519 |
| Gorilla           | -----CCAGAGATTTGTGAGAGTTCCCTGAGATCCTCATAGGGGGCCACAAAGTTTGTAGTATTACTTTTTCACGGTAATA  |       |       |       |       |       |       |       | 78951 |
| GrabEatingMacaque | -----CCAGAGATTTGTGAGAGTTCCCAAGATCCTTATAGGGGGCCTACAAAGTTTGTAGTATTACTTTTTCATGGTAATA  |       |       |       |       |       |       |       | 81057 |
| Macaque           | -----CCAGAGATTTGTGAGAGTTCCCAAGATCCTTATAGGGGGCCTACAAAGTTTGTAGTATTACTTTTTCATGGTAATA  |       |       |       |       |       |       |       | 81935 |
| PigTailedMacaque  | -----CCAGAGATTTGTAAGAGTTCCCGAGATCCTTATAGGGGGCCTACAAAGTTTGTAGTATTACTTTTTCATGCTAATA  |       |       |       |       |       |       |       | 80458 |
| Bonobo            | -----CCAGAGATTTGCGAGAGTTCCCTGAGATCCTCATAGGGGGCCACAAAGTTTGTAGTATTACTTTTTCACGGTAATA  |       |       |       |       |       |       |       | 79568 |
| OliveBaboon       | -----CCAGAGATTTGTGAGAGTTCCCTGAGATCCTTATAGGGGGCCTACAAAGTTTGTAGTATTACTTTTTCATGGTAATA |       |       |       |       |       |       |       | 80344 |
| Orangutan         | -----CCAGAGATTTGTGAGAGTTCCCTGAGATCCTCATAGGGGGCCACAAAGTT-AATATTACTTTTTCATGGTAATA    |       |       |       |       |       |       |       | 81205 |

| Majority          | CTAAATGTATTTTGCCTTTTTTACTTT--TTCTCTTAATAGCGTACAGTG---GCATCACTCTGAAGGCTAATAGTA    |       |       |       |       |       |       |       |       |
|-------------------|----------------------------------------------------------------------------------|-------|-------|-------|-------|-------|-------|-------|-------|
|                   | 96890                                                                            | 96900 | 96910 | 96920 | 96930 | 96940 | 96950 | 96960 |       |
| Human             | CTAAAGTGTATTTTGCCCTTTTTACTTT--TTCTCTTAATAGCATAACAGTG---GTAA---CTGAAGGCTAATAGTA   |       |       |       |       |       |       |       | 80473 |
| Coquerel'sSifaka  | CTAAATGTTTTTTGCCCT-TTTTGATTCCTATTCCTTAGTACAGTGGTGTCCCTACATCATTCTGAAGACTAATAGAA   |       |       |       |       |       |       |       | 66894 |
| Ma'sNightMonkey   | CTAAATGTATTTTGCCCT-TTTTGACTTT--TTGTCTTAATAGCATAACAGTG---GTATCACTCTGAAGGCTAATAGTA |       |       |       |       |       |       |       | 75392 |
| VervetAGM         | CTAAATATAGTTTGCCTTTTTTACTTT--TTCTCTTAATAGCGTACAGTG---GCATCTCTCTGAAGGCTAATAGTA    |       |       |       |       |       |       |       | 81593 |
| Gorilla           | CTAAAGTGTATTTTGCCCTTTTTACTTT--TTCTCTTAATAGCATAACAGTG---GTATGACTCTGAAGGCTAATAGTA  |       |       |       |       |       |       |       | 79025 |
| GrabEatingMacaque | CTAAATATAGTTTGCCATTTTTACTTT--TTCTCTTAATAGCGTACAGTG---GCATCACTCTGAAGGCTAATAGTA    |       |       |       |       |       |       |       | 81131 |
| Macaque           | CTAAATATAGTTTGCCATTTTTACTTT--TTCTCTTAATAGCGTACAGTG---GCATCACTCTGAAGGCTAATAGTA    |       |       |       |       |       |       |       | 82009 |
| PigTailedMacaque  | CTAAATATAGTTTGCCTTTTTTACTTT--TTCTCTTAATAGCGTACAGTG---GCATCACTCTGAAGGCTAATAGTA    |       |       |       |       |       |       |       | 80532 |
| Bonobo            | CTAAAGTGTATTTTGCCCTTTTTACTTT--TTCTCTTAATAGCATAACAGCG---GTAA---CTGAAGGCTAATAGTA   |       |       |       |       |       |       |       | 79638 |
| OliveBaboon       | CTAAATATAGTTTGCCTTTTTTACTTT--TTCTCTTAATAGCGTACAGTG---GCATCACTCTGAAGGCTAATAGTA    |       |       |       |       |       |       |       | 80418 |
| Orangutan         | CTAAAGTGTATTTTGCCTTTTTTACTTT--TTGTCTTAATAGCATAACAGTG---GTATTACTCTGAAGGCTAATAGTA  |       |       |       |       |       |       |       | 81279 |

Tuesday, May 03, 2022 06:17 PM

| Majority          | TGTGTGTTTGTGTGCTTTA----AA--AAGTTCGTGGTTTTGTCCGGGCACAGTGGCTCAGTCCTGTAATCCCAGCACT  |       |
|-------------------|----------------------------------------------------------------------------------|-------|
|                   | 96970 96980 96990 97000 97010 97020 97030 97040                                  |       |
| Human             | TGTGTGTTTATGTGCTTTA----AA--AAGTTCGTGGTTTTGGCCAGGCGCAGTGGCTCAGACCTGTAATCCCAGCACT  | 80546 |
| Coquerel'sSifaka  | TGTGTGAAAGTGTGACCTGTGCCTTAAGAAGTCTCTGGTTTTAATTTTCTGAAAGTATAAATATCAATAGATACAGC-CC | 66972 |
| Ma'sNightMonkey   | TGTGTGAAAGTGTG-----A-----GGCCGGGCATGGTGGCTCAGCCTGTAATCCCAGCACT                   | 75445 |
| VervetAGM         | TGTGTGTTTGTGTGCTTTA----AA--AAGTTAGTGGTTTTGTCCGGGCACATTGGCTCAGTCCTGTAATCCCAGTACT  | 81666 |
| Gorilla           | TGTGTGTTTATGTGCTTTA----AA--AAGTTCGTGATTTTGGCCAGGCGCAGTGGCTCAGACCTGTAATCCCAGCACT  | 79098 |
| GrabEatingMacaque | TGTGTGTTTGTGTGCTTTA----AA--AAGTTAGTGGTTTTGTCCGGGCACATTGGCTCAGTCCTGTAATCCCAGTACT  | 81204 |
| Macaque           | TGTGTGTTTGTGTGCTTTA----AATAAAGTTAGTGGTTTTGTCCGGGCACATTGGCTCAGTCCTGTAATCCCAGTACT  | 82084 |
| PigTailedMacaque  | TGTGTGTTTGTGTGCTTTA----AA--AAGTTAGTGGTTTTGTCCGGGCACATTGGCTCAGTCCTGTAATCCCAGTACT  | 80605 |
| Bonobo            | TGTGTGTTTATGTGCTTTA----AA--AAGTTCGTGGTTTTGGCCAAGCGCAGTGGCTCAGACCTGTAATCCCAGCACT  | 79711 |
| OliveBaboon       | TGTGTATTTGTGTGCTTTA----AA--AAGTTAGTGGTTTTGTCCGGGCACATTGGCTCAGTCTGTAATCCCAGTACT   | 80491 |
| Orangutan         | TGTGTGTTTGTGTGCTTTA----AA--AAGTTCATGGTTTTGGCCAGGTGCAGTGGCTCAGACCTGTAATCCCAGCACT  | 81352 |

| Majority          | TTGGGAGGCTGAGGCGGGCGGATCACC--TGAGGTCAGGAGTTTCGAGACCA-----GCCTG-GCCAACATGGTGAAACCC |       |
|-------------------|-----------------------------------------------------------------------------------|-------|
|                   | 97050 97060 97070 97080 97090 97100 97110 97120                                   |       |
| Human             | TTGGGAGGCTGAGGCGAGTGGATCACC--TGAGGTCAGGAGTTCAAGACCAAAACCAGCCTG-GCCAACATGGTGAAACCC | 80624 |
| Coquerel'sSifaka  | ACGTAAGCGAGAACTTTGTGGTCTCAGTAATTTTAAGAGTGTAAAAGG-----TCCTGAGACCAAAAAGTCTGACAG     | 67046 |
| Ma'sNightMonkey   | TTGGGAGGCCGAGGCGAGTGGATCACC---GAGGTCAGAGATTGAGACCA-----TCCTG-GCCAACATGGTGAAACCC   | 75515 |
| VervetAGM         | TTGGGAGGCTGAGGCGGGCAGATCACC--TGAGGTCAGGAGTTTCGAGACCA-----GCCTG-GCCAACATGGTGAAACCC | 81738 |
| Gorilla           | TTGGGAGGCTGAGGCGAGTGGATCACC--TGAGGTCAGGAGTTCAAGACCAAAACCAGCCTG-GCCAACATGGTGAAAGCC | 79176 |
| GrabEatingMacaque | TTGGGAGGCTGAGGCGGGCAGATCACC--TGAGGTCAGGAGTTTCGAGACCA-----GCCTG-GCCAACATGGTGAAACCT | 81276 |
| Macaque           | TTGGGAGGCTGAGGCGGGCAGATCACC--TGAGGTCAGGAGTTTCGAGACCA-----GCCTG-GCCAACATGGTGAAACCC | 82156 |
| PigTailedMacaque  | TTGGGAGGCTGAGGCGGGCAGATCACC--TGAGGTCAGGAGTTTCGAGACCA-----GCCTG-GCCAACATGGTGAAACCC | 80677 |
| Bonobo            | TTGGGAGGCTGAGGCGAGTGGATCACC--TGAGGTCAGGAGTTCAAGACCAAAACCAGCCTG-GCCAACATGGTGAAACCC | 79789 |
| OliveBaboon       | TTGGGAGGCTGAGGCGGGCAGATCACC--TGAGGTCAGGAGTTTCGAGACCA-----GCCTG-GCCAAAATGGTGAAACCC | 80563 |
| Orangutan         | TTGGGAGGCTGAGGCGGGCGGATCACC--TGAGGTCAGGAGTTCAAGACCA-----GCCTG-GCCAACATGGTGAAACCC  | 81424 |

| Majority          | CATCTCTTCTAAAA---ATACAAAAATT-AGCCGGGCATGGTGGCGGGTGCCTGTAGTCTCAGCTACTCGAGAGGCTGA  |       |
|-------------------|----------------------------------------------------------------------------------|-------|
|                   | 97130 97140 97150 97160 97170 97180 97190 97200                                  |       |
| Human             | CATCTCTACTAAAA---ATACAAAAATT-AGCCAGGCATGGTGGTGGTGCCTGTAGTCTCAGCTACTCGAGATGCTGA   | 80699 |
| Coquerel'sSifaka  | CTTTTCTACTGTAG---GATACAAAGTTCAGACAATTCTAGTAG-ATAAATGGGAGATACAGAGTATTTTAAT----AA  | 67118 |
| Ma'sNightMonkey   | CGTCTCTGCTAAAATATAAAACAAAAATT-AGTTGCGCCTGGTGGCTTACACCTGTAGTCTCAGCTACCCAGGAGACTGA | 75594 |
| VervetAGM         | CATCTCTTCTAAAA---ATACAAAAATT-AGCCGGACATGGTGGCGGGTGCCTGTACTCTCAGCTACTCGAGAGGCTGA  | 81813 |
| Gorilla           | CATCTCTACTAAAA---ATACAAAAATT-AGCCAGGCATGGTAGCGGGTGCCTGTAGTCTCAGCTACTCGAGATGCTGA  | 79251 |
| GrabEatingMacaque | CATCTCTTCTAAAA---ATACAAAAATT-AGCCGGGCGTGGTGGCGGGTGCCTGTAGTCTCAGCTCCTCGAGAGGCTGA  | 81351 |
| Macaque           | CATCTCTTCTAAAA---ATACAAAAATT-AGCCGGGCGTGGTGGCGGGTGCCTGTAGTCTCAGCTCCTCGAGAGGCTGA  | 82231 |
| PigTailedMacaque  | CATCTCTTCTAAAA---ATACAAAAATT-AGCCGGGCGTGGTGGCGGGTGCCTGTAGTCTCAGCTCCTCGAGAGGCTGA  | 80752 |
| Bonobo            | CATCTCTACTAAAA---ATACAAAAATT-AGCCAGGCATGGTGGTGGTGCCTGTAGTCTCAGCTACTCGAGATGCTGA   | 79864 |
| OliveBaboon       | CATCTCTTCTAAAA---ATACAAAAATT-AGCCGGGCGTGGTGGTGGTGCCTGTAGTCTCAGCTCCTCGAGAGGCTGA   | 80638 |
| Orangutan         | CATCTCTACTAAAA---ATACAAAAATC-AGCCAGGCATGGTGGCGGGTGCCTGTAGTCTCAGCTACTCGAGATGCTGA  | 81499 |

Tuesday, May 03, 2022 06:17 PM

| Majority          | GGCAGGAGAAT-CGCTTGAAGCCAGGAGGTGGAGATTGCAGTGAGCCAAAATCTTGCCATTACACTCCA----GCCTGG- |       |
|-------------------|----------------------------------------------------------------------------------|-------|
|                   | 97210 97220 97230 97240 97250 97260 97270 97280                                  |       |
| Human             | GGCAGGAGAAT-CACTTGAAGCTGGGAGGTGGAGGTTGCAGTGAGCCAAAATCTCGCCATTACACTCCA----GCCTGG- | 80773 |
| Coquerel'sSifaka  | A-CAGTAGACTGTGTTTGGAGTCAAGAGATGTACAGAGAAAATGCTTGTGATCTGATTTCTGAGATTATTTTGATTTTG- | 67196 |
| Ma'sNightMonkey   | GGCAGGAGAAT-TGCTTGAACCTGGGAGGCGGAGGTTGCAGTGAGCTGAGATCGTGCCACTGTACTCCATCCAGCCTGGC | 75673 |
| VervetAGM         | GGCAGGAGAAT-CGCTTGAAGCCAGAAGGTGGAGATTGCAGTAAGCCAAAATCTTGCCATTACACTCCA----GCCTGG- | 81887 |
| Gorilla           | GGCAGGAGAAT-CACTTGAAGCTGGGAGGTGGAGGTTGCAGTGAGCCAAAATCTCGCCATTACACTCCA----GCCTGG- | 79325 |
| GrabEatingMacaque | GGCAGGAGAAT-CGCTTGAAGCCAGAAGGTGGAGATTGCAGTGAGCCAAAATCTTGCCATTACACTCCA----GCCTGG- | 81425 |
| Macaque           | GGCAGGAGAAT-CGCTTGAAGCCAGAAGGTGGAGATTGCAGTGAGCCAAAATCTTGCCATTACACTCCA----GCCTGG- | 82305 |
| PigTailedMacaque  | GGCAGGAGAAT-CGCTTGAAGCCAGAAGGTGGAGATTGCAGTGAGCCAAAATCTTGCCATTACACTCCA----GCCTGG- | 80826 |
| Bonobo            | GGCAGGAGAAT-CACTTGAAGCTGGGAGGTGGAGGTTGCAGTGAGCCAAAATCTCGCCATTACACTCCA----GCCTGG- | 79938 |
| OliveBaboon       | GGCAGGAGAAT-TGCTTGAAGCCAGAAGGTGGAGATTGCAGTGAGCCAAAATCTTGCCATTACACTCCA----GCCTGG- | 80712 |
| Orangutan         | GGCAGGAGAAT-CACTTGAAGCCAGGAGGTGGAGGTTGCAGTGAGCCAAAATCTTGCCATTACACTCCA----GCCTGG- | 81573 |

| Majority          | ----GGGACAAGAGCGAGACTCCGTCTCAAA-----AAAAAAAAAAAAAAAA-----G TTC              |       |
|-------------------|-----------------------------------------------------------------------------|-------|
|                   | 97290 97300 97310 97320 97330 97340 97350 97360                             |       |
| Human             | ----GGGACAAGAGCAAGACTCCATCTCA-----AAAAAAAAAAAAAAAA-----GTTA                 | 80819 |
| Coquerel'sSifaka  | GCAGCTAATTACAATTAGTTTCTCAATTAAGTCTTTCTGGCTTAGTGAGCACTGAG-----AATCACTTC      | 67261 |
| Ma'sNightMonkey   | GCCTGGTGACAGAGCAAGTCT-TGTCTCAAAAAAGAAAAGAAAAGAAAGTGTGTTTGTGTGCTTTTAAAAAGTTC | 75752 |
| VervetAGM         | ----GGGACAAGAGCGAGACTCCGTCTCAAAA-----AAAAAAAAAAAAAAAA-----G TTC             | 81936 |
| Gorilla           | ----GGGACAAGAGCAAGACTCCATCTCAAAAAAAAAAAAAAAAAAAAAAAAA-----GTTA              | 79379 |
| GrabEatingMacaque | ----GGGACAAGAGCGAGACTCTGTCTCA-----AAAAAAAAAAAA-----G TTC                    | 81466 |
| Macaque           | ----GGGACAAGAGCGAGACTCTGTCTCA-----AAAAAAAAAAAAAAAA-----AAAAAGTTC            | 82357 |
| PigTailedMacaque  | ----GGGACAAGAGCGAGACTCCGTCTCA-----AAAAAAAAAAAAAAAA-----G TTC                | 80870 |
| Bonobo            | ----GGGACAAGAGCAAGACTCCATCT-----ACAAAAAAAAAAAAAAAA-----GTTA                 | 79982 |
| OliveBaboon       | ----GGGACAAGAGCAAGACTCCGTCTCAAAA-----AAAGAAAAAAAAAAAAAAAA-----AAAAAATTC     | 80767 |
| Orangutan         | ----GGGACAATAGCGAGACTCCATGTCAAA-----AAAAAAAAAAAAAAAA-----G TTC              | 81621 |

| Majority          | TTGGTTTTAATTTCTGAAATGATAACCATTAATAGAACCCAAATT-----A-----                        |       |
|-------------------|---------------------------------------------------------------------------------|-------|
|                   | 97370 97380 97390 97400 97410 97420 97430 97440                                 |       |
| Human             | TTGGTTTTAATTTTGGAAATGACAACCATTAATAGAACCCACATTAGGCCGGCGCGGTGGCTCATGCCTGTAATCCTAG | 80899 |
| Coquerel'sSifaka  | TTGACTGTTAGAAGTGAAAAGA-AACCAGAAATTAAGT--GGTTT-----AATTTTTTAT-----               | 67314 |
| Ma'sNightMonkey   | TTGGTTTTAATTTCTGAAATGATAACCATTAATAGAACCCAAATT-----A-----                        | 75798 |
| VervetAGM         | TTGGTTTTAATTTCTGAAATGATAACCATTAATAGAACCCAAATT-----A-----                        | 81982 |
| Gorilla           | TTGGTTTTAATTTCTGGAAATGACAACCATTAATAGAACCCACATT-----A-----                       | 79425 |
| GrabEatingMacaque | TTGGTTTTAATTTCTGAAATGATAACCATTAATAGAACCCAAATT-----A-----                        | 81512 |
| Macaque           | TTGGTTTTAATTTCTGAAATGATAACCATTAATAGAACCCAAATT-----A-----                        | 82403 |
| PigTailedMacaque  | TTGGTTTTAATTTCTGAAATGATAACCATTAATAGAACCCAAATT-----A-----                        | 80916 |
| Bonobo            | TTGGTTTTAATTTCTGGAAATGACAACCATTAATAGAACCCACATT-----A-----                       | 80028 |
| OliveBaboon       | TTGGTTTTAATTTCTGAAATGATAACCATTAATAGAACCTAAATT-----A-----                        | 80813 |
| Orangutan         | TTGGTTTTAATTTCTGGAAATGACAACCATTAATAGAACCCACATT-----A-----                       | 81667 |

Tuesday, May 03, 2022 06:17 PM

| Majority          | -----                                                                            |       |       |       |       |       |       |       |       |
|-------------------|----------------------------------------------------------------------------------|-------|-------|-------|-------|-------|-------|-------|-------|
|                   | 97450                                                                            | 97460 | 97470 | 97480 | 97490 | 97500 | 97510 | 97520 |       |
| Human             | CACTTTGGGAGGCCGAGACGGGTGGATCACGAGGTCAGGAGATCAAGACCATCTTGGCTAACACGGTGAAACCCCGTTTC |       |       |       |       |       |       |       | 80979 |
| Coquerel'sSifaka  | -----                                                                            |       |       |       |       |       |       |       | 67314 |
| Ma'sNightMonkey   | -----                                                                            |       |       |       |       |       |       |       | 75798 |
| VervetAGM         | -----                                                                            |       |       |       |       |       |       |       | 81982 |
| Gorrilla          | -----                                                                            |       |       |       |       |       |       |       | 79425 |
| GrabEatingMacaque | -----                                                                            |       |       |       |       |       |       |       | 81512 |
| Macaque           | -----                                                                            |       |       |       |       |       |       |       | 82403 |
| PigTailedMacaque  | -----                                                                            |       |       |       |       |       |       |       | 80916 |
| Bonobo            | -----                                                                            |       |       |       |       |       |       |       | 80028 |
| OliveBaboon       | -----                                                                            |       |       |       |       |       |       |       | 80813 |
| Orangutan         | -----                                                                            |       |       |       |       |       |       |       | 81667 |

| Majority          | -----                                                                           |       |       |       |       |       |       |       |       |
|-------------------|---------------------------------------------------------------------------------|-------|-------|-------|-------|-------|-------|-------|-------|
|                   | 97530                                                                           | 97540 | 97550 | 97560 | 97570 | 97580 | 97590 | 97600 |       |
| Human             | TACTAAAAATACAAAAAATTAGCCGGGCGTGTGGCGGGCGCCTGTAGTCCCAGCTACTTGGGAGGCTGAGGCAGGAGAA |       |       |       |       |       |       |       | 81059 |
| Coquerel'sSifaka  | -----                                                                           |       |       |       |       |       |       |       | 67314 |
| Ma'sNightMonkey   | -----                                                                           |       |       |       |       |       |       |       | 75798 |
| VervetAGM         | -----                                                                           |       |       |       |       |       |       |       | 81982 |
| Gorrilla          | -----                                                                           |       |       |       |       |       |       |       | 79425 |
| GrabEatingMacaque | -----                                                                           |       |       |       |       |       |       |       | 81512 |
| Macaque           | -----                                                                           |       |       |       |       |       |       |       | 82403 |
| PigTailedMacaque  | -----                                                                           |       |       |       |       |       |       |       | 80916 |
| Bonobo            | -----                                                                           |       |       |       |       |       |       |       | 80028 |
| OliveBaboon       | -----                                                                           |       |       |       |       |       |       |       | 80813 |
| Orangutan         | -----                                                                           |       |       |       |       |       |       |       | 81667 |

| Majority          | -----                                                                             |       |       |       |       |       |       |       |       |
|-------------------|-----------------------------------------------------------------------------------|-------|-------|-------|-------|-------|-------|-------|-------|
|                   | 97610                                                                             | 97620 | 97630 | 97640 | 97650 | 97660 | 97670 | 97680 |       |
| Human             | TGGCATGAACCTGGGAGGCGGAGCTTGCACTGAGCCGAGATCACGCCACTGCACTCCAACCTGAGAGACACAGCGGAGACT |       |       |       |       |       |       |       | 81139 |
| Coquerel'sSifaka  | -----T-----G-----                                                                 |       |       |       |       |       |       |       | 67316 |
| Ma'sNightMonkey   | -----                                                                             |       |       |       |       |       |       |       | 75798 |
| VervetAGM         | -----                                                                             |       |       |       |       |       |       |       | 81982 |
| Gorrilla          | -----                                                                             |       |       |       |       |       |       |       | 79425 |
| GrabEatingMacaque | -----                                                                             |       |       |       |       |       |       |       | 81512 |
| Macaque           | -----                                                                             |       |       |       |       |       |       |       | 82403 |
| PigTailedMacaque  | -----                                                                             |       |       |       |       |       |       |       | 80916 |
| Bonobo            | -----                                                                             |       |       |       |       |       |       |       | 80028 |
| OliveBaboon       | -----                                                                             |       |       |       |       |       |       |       | 80813 |
| Orangutan         | -----                                                                             |       |       |       |       |       |       |       | 81667 |





Tuesday, May 03, 2022 06:17 PM

| Majority          | TTAG-----TTTAGATTATTTTAA---TGGTAACTAATTATAAATCCACAGTTAAGATTTTTTGG-CTTAGTGG---G   |       |
|-------------------|----------------------------------------------------------------------------------|-------|
|                   | 97930 97940 97950 97960 97970 97980 97990 98000                                  |       |
| Human             | TTAGAG---TTTTTAGATTATTTAATTTTGGTAACTAATTATAAATCCCTCAGTTAAGATTTTTTGG-CTTAGTGG---G | 81447 |
| Coquerel'sSifaka  | AAAATAGA---AAGAAATTATCTGGA--CAACTAAAAATATATATATATATAGAAAAAATTAGCTGGGCATGGTGGCGCG | 67589 |
| Ma'sNightMonkey   | TTAGGAGGTTTTTTTAGATTATTTAATTTCTGGTAACTAATTATAAATTAAGATTTTTTGT-CTCAGTGG---G       | 76066 |
| VervetAGM         | TGAG-----CAGATTTTTTT-----GGTAACTAATTTAATTTCCACAGTGAAGATTTTTTGG-CTTAGTGG---G      | 82234 |
| Gorilla           | TTAGAG---TTTTTAGATTATTTAATTTTGGTAACTAATTATAAATCCCTCAGTTAAGATTTTTTGG-CTTAGTGG---G | 79691 |
| GrabEatingMacaque | TGAG-----CAGATTTTTTT-----GGTAACTAATTTAATTTCCACAGTGAAGATTTTTTGG-TTTAGTGG---G      | 81766 |
| Macaque           | TGAG-----CAGATTTTTTT-----GGTAACTAATTTAATTTCCACAGTGAAGATTTTTTGG-TTTAGTGG---G      | 82657 |
| PigTailedMacaque  | TGAG-----CAGATTTTTTT-----GGTAACTAATTTAATTTCCACAGTGAAGATTTTTTGG-TTTAGTGG---G      | 81170 |
| Bonobo            | TTAGAG---TTTTTAGATTATTTAATTTTGGTAACTAATTATAAATCCCTCAGTTAAGATTTTTTGG-CTTAGTGG---G | 80294 |
| OliveBaboon       | TGAG-----CAGATTTTTTT-----GGTAACTAATTTAATTTCCACAGTGAAGATTTTTTGG-TTTAGTGG---G      | 81067 |
| Orangutan         | TTAGAT---TTTTTAGATTATTTAATTTTGGTAACTAATTATAAATCCCTCAGTTAAGATTTTTTGG-CTTAGTGG---A | 81921 |

| Majority          | CCCTTAGAATTGCTTCTTCTGTTAGGATTAATA-AGTGAAACCAGA-AATTAAGTGATTTAATTTTTTTTATTGTGGTAA |       |
|-------------------|----------------------------------------------------------------------------------|-------|
|                   | 98010 98020 98030 98040 98050 98060 98070 98080                                  |       |
| Human             | CCCTTAGAATTACTTCTTCTGTTAGAATTAAA-AGTGAAACCAGA-AATTAAGTGATTTAATTTTTTTTATTGTGGCAA  | 81525 |
| Coquerel'sSifaka  | TACCTGTAGTCCCAGCTACTTGGGAGGCTGAGGCAGTAGGATCGCTTGAGCCCAGGAGTTTGGGTTGC---TGTGAGCT  | 67666 |
| Ma'sNightMonkey   | CCCTTATAAATTGCTTCTTCTGTTAGAATTAAA-AATGAAACTAGA-AATTAAGTGATTTAATTTTTTT-ATTGTGGGAA | 76143 |
| VervetAGM         | CCCTTAGAATTGCTTCTTCTGTTAGGATTAATA-AGGGAAACCAGA-AATTAAGTGATTTAATTTTTTTTATTGTGGTAA | 82312 |
| Gorilla           | CCCTTAGAATTACTTCTTCTGTTAGAATTAAA-AGTGAAACCAGA-AATTAAGTGATTTAATTTTTTTTATTGTGGCAA  | 79769 |
| GrabEatingMacaque | CCCTTAGAATTGCTTCTTCTGTTAGGATTAATA-AGTGAAACCAGA-AATTAAGTGATTTAATTTTTTTTATTGTGGTAA | 81844 |
| Macaque           | CCCTTAGAATTGCTTCTTCTGTTAGGATTAATA-AGTGAAACCAGA-AATTAAGTGATTTAATTTTTTTTATTGTGGTAA | 82735 |
| PigTailedMacaque  | CCCTTAGAATTGCTTCTTCTGTTAGGATTAATA-AGTGAAACCAGA-AATTAAGTGATTTAATTTTTTTTATTGTGGTAA | 81248 |
| Bonobo            | CCCTTAGAATTACTTCTTCTGTTAGAATTAAA-AGTGAAACCAGA-AATTAAGTGATTTAATTTTTTT-ATTGTGGCAA  | 80371 |
| OliveBaboon       | CCCTTAGAATTGCTTCTTCTGTTAGGATTAATA-AGTGAAACCAGA-AATTAAGTGATTTAATTTTTTTTATTGTGGTAA | 81145 |
| Orangutan         | CCCTTAGAATTACTTCTTCTGTTAGAATTAAA-AGTGAAACCAGA-AATTAAGTGATTTAATTTTTTTTATTGTGGCAA  | 81999 |

| Majority          | AGATCTAGTCCA-AATATCCTTGATGGACTTTTTAAAAAAA--CAGGCTTTGT-----ATTGTTAAAAAGGGAATTTGAG |       |
|-------------------|----------------------------------------------------------------------------------|-------|
|                   | 98090 98100 98110 98120 98130 98140 98150 98160                                  |       |
| Human             | AGATCTAGTCCA-AATATCCTTGATGGACTTTTTGAAAA---CAGACTTT-----ATTGTTAAAAAGGGAATTTGAG    | 81593 |
| Coquerel'sSifaka  | AGGCTGACGCCACGGCACTACTCTAGCCCAGGCAAAAACCT--CTGTCTCAAAAAAAAAAAAAAAAAAAGGAACATGAG  | 67744 |
| Ma'sNightMonkey   | AGATCTAGTCCA-AATATCCTTGATGGACTTTTTAAAAAAA--CAGGCTTTGT-----ATTGTTAAAAAGGGAATTTGAG | 76213 |
| VervetAGM         | AGATCTAGTCCA-AATATCCTTGATGGACTTTTTAAAAAAAACAGGCTTTGT-----ATTGTTAAAAAGGGAATTTGAG  | 82386 |
| Gorilla           | AGATCTAGTCCA-AATATCCTTGATGGACTTTTTGAAAA---CAGACTTTTT-----ATTGTTAAAAAGGGAATTTGAG  | 79839 |
| GrabEatingMacaque | AGATCTAGTCCA-AATATCCTTGATGGACTTTTAAAGAAAA--CAGGCTTTGT-----ATTGTTAAAAAGAGAATTTGAG | 81916 |
| Macaque           | AGATCTAGTCCA-AATATCCTTGATGGACTTTTTAAAAAAA--CAGGCTTTGT-----ATTGTTAAAAAGAGAATTTGAG | 82807 |
| PigTailedMacaque  | AGATCTAGTCCA-AATATCCTTGATGGACTTTTTAAAAAAA--CAGGCTTTGT-----ATTGTTAAAAAGAGAATTTGAG | 81320 |
| Bonobo            | AGATCTAGTCCA-AGTATCCTTGATGGACTTTTTGAAAA---CAGACTTTTT-----ATTGTTAAAAAGGGAATTTGAG  | 80441 |
| OliveBaboon       | AGATCTAGTCCA-AATATCCTTGATGGACTTTTTAAAAAAA--CAGGCTTTGT-----ATTGTTAAAAAGGGAATTTGAG | 81217 |
| Orangutan         | AGATCTAGTCCA-AATATCCTTGATGGACTTTTTAAAAAAA--CAGACTTTTT-----ATTGTTAAAAAGGGAATTTGAG | 82069 |

Tuesday, May 03, 2022 06:17 PM

|                   |                                                                                |       |
|-------------------|--------------------------------------------------------------------------------|-------|
| Majority          | GCTTGGTACTGAAC-----TACTTCTGCATGCCAT--ATTGAAGTTGGTGGTTTTGTGTTTGTTT-----GCCAT    |       |
|                   | 98170 98180 98190 98200 98210 98220 98230 98240                                |       |
| Human             | GCTTGGTACTGAAC-----TTCTTCTGCATGCCAT--ATTGAAGTTGGTGGTTTTGTGTTTGTTT-----GCCAT    | 81656 |
| Coquerel'sSifaka  | GCTCAGTACTGAACATTTTTCTTCTGTATGCCACGTATTGCAGTTGGTAGTTTTGCCTTTTTTTGGGGGGGGGGGCAT | 67824 |
| Ma'sNightMonkey   | GCTTGGTACTGAAC-----TACTTCTGCATGCCATGTATCGAAGTTGATGGTTTTGTATTTGTTT-----GCCAT    | 76278 |
| VervetAGM         | GCTTGGTACTGAAC-----AACTTCTGCATGCCAT--ATTGAAGTTGGTGGTTTTGTGTTTGTTT-----GCCAT    | 82449 |
| Gorilla           | GCTTGGTACTGAAC-----TTCTTCTGCATGCCAT--ATTGAAGTTGGTGGTTTTGTGTTTGTTT-----GCCAT    | 79902 |
| GrabEatingMacaque | GCTTGGTACTGAAC-----AACTTCTGCATGCCAT--ATTGAAGTTGGTGGTTTTGTGTTTGTTT-----GCCAT    | 81979 |
| Macaque           | GCTTGGTACTGAAC-----AACTTCTGCATGCCAT--ATTGAAGTTGGTGGTTTTGTGTTTGTTT-----GCCAT    | 82870 |
| PigTailedMacaque  | GCTTGGTACTGAAC-----AACTTCTGCATGCCAT--ATTGAAGTTGGTGGTTTTGTGTTTGTTT-----GCCAT    | 81383 |
| Bonobo            | GCTTGGTACTGAAC-----TTCTTCTGCATGCCAT--ATTGAAGTTGGTGGTTTTGTGTTTGTTT-----GCCAT    | 80504 |
| OliveBaboon       | GCTTGGTACTGAAC-----AACTTCTGCATGCCAC--ATTGAAGTTGGTGGTTTTGTGTTTGTTT-----GCTAT    | 81280 |
| Orangutan         | GCTTGGTACTGAAC-----TTCTTCTGCATGCCAT--ATTGAAGTTGGTCGTTTTTTGTGTTTGTTT-----GCCAT  | 82132 |

|                   |                                                                                  |       |
|-------------------|----------------------------------------------------------------------------------|-------|
| Majority          | CAGTTGGATCTCATAAAGACTATGGAATTTAATAGAATTTTTAAGTTACCGTTTTT-CCTAAAAGGTAGCTAACTAAAGG |       |
|                   | 98250 98260 98270 98280 98290 98300 98310 98320                                  |       |
| Human             | CAGTGGGATCTCATAAAGACTATGGAATTTAATAGAATTTTTAAGTACTGTTTTT-CCTAAAAGGTAGCTAACTAAAGG  | 81735 |
| Coquerel'sSifaka  | CAGCTGGATCTCATAAAGACTATGGAATTTAACAGAATTTTTAAGTTACTTTTTCT-ACTTAAAGGTAGCTAATTAAGG  | 67903 |
| Ma'sNightMonkey   | CAGTTGGATCTCATAAAGACTATGGAATTTAATAGAATTTT-AGGTTACTGTTTTT-CCTAAAAGGTAGCTAATTAAGG  | 76356 |
| VervetAGM         | CAGTTGGATCTCATAAAGACTATGGAATTTAATAGAATTTTTAAGTTACCATTTTTTCTAAAAGGTAGCTAACTAAAGG  | 82529 |
| Gorilla           | CAGTGGGATCTCATAAAGACTATGGAATTTAATAGAATTTTTAAGTACTGTTTTT-CCTAAAAGGTAGCTAGCTAAAGG  | 79981 |
| GrabEatingMacaque | CAGTCGGATCTCATAAAGACTATGGAATTTAATAGAATTTTAAAGTTACCATTTTT-CCTAAAAGGTAGCTAACTGAAGG | 82058 |
| Macaque           | CAGTCGGATCTCATAAAGACTATGGAATTTAATAGAATTTTAAAGTTACCATTTTT-CCTAAAAGGTAGCTAACTAAAGG | 82949 |
| PigTailedMacaque  | CAGTCGGATCTCATAAAGACTACGGAATTTAATAGAATTTTAAAGTTACCATTTTT-CCTAAAAGGTAGCTAACTAAAGG | 81462 |
| Bonobo            | CAGTGGGATCTCATAAAGACTATGGAATTTAATAGAATTTTTAAGTACTGTTTTT-CCTAAAAGGTAGCTAACTAAAGG  | 80583 |
| OliveBaboon       | CGGTCGGATCTCATAAAGACTATGGAATTTAATAGAATTTTAAAGTTACCATTTTT-CCTAAAAGGTAGCTAACTAAAGG | 81359 |
| Orangutan         | CAGTTGGATCTCATAAAGACTATGGAATTTAATAGAATTTGTAAGTACCGTTTTT-TCTAAAAGGTAGCTAACTAAAGG  | 82211 |

|                   |                                                                                     |       |
|-------------------|-------------------------------------------------------------------------------------|-------|
| Majority          | CAGGAAAATAGGAGAAATGATGCAACAATATAATGACTACATCTGGAGTTTCTGCTACTAATAAAATAATTGTATTGTCAAC  |       |
|                   | 98330 98340 98350 98360 98370 98380 98390 98400                                     |       |
| Human             | CAGGAAAATAG---AATGATGTAACAATATAATGACTACATCTGGAGTTTCTGCTACTAATAAAATAATTGTATTGTCAAC   | 81812 |
| Coquerel'sSifaka  | CAGGAAAACAAGGGGATGATTTGACAATATAATGACTACATCTGGCGTTTCCACTATTATTAATAAATAATTGTGTTGTTGTT | 67983 |
| Ma'sNightMonkey   | CAGGAAAATAAGGGAATGATTTGACAATATAATGACTACATCTGGAGTTGCTGCTACTAA-----TTGTATTGTCAAC      | 76429 |
| VervetAGM         | CAGGAAAATAGGAGAAATGATGCAACAATATAATGACTACATCTGGAGTTTCTGCTACTAATAAAATAATTGTATTGTCAAC  | 82609 |
| Gorilla           | CAGGAAAATAGGAGAAATGATGTAACAATATAATGACTACATCTGGAGTTTCTGTTACTAATAAAATAATTGTATTGTCAAC  | 80061 |
| GrabEatingMacaque | CAGGAAAATAGGAGAAATGATGCAACAATATAAATACTACATCTGGAGTTTCTGCTACTAATAAAATAATTGTATTGTCAAC  | 82138 |
| Macaque           | CAGGAAAATAGGAGAAATGATGCAACAATATAAATACTACATCTGGAGTTTCTGCTACTAATAAAATAATTGTATTGTCAAC  | 83029 |
| PigTailedMacaque  | CAGGAAAATAGGAGAAATGATGCAACAATATAAATACTACATCTGGAGTTTCTGCTACTAATAAAATAATTGTATTGTCAAC  | 81542 |
| Bonobo            | CAGGAAAATAG---AATGATGTAACAATATAATGACTACATCTGGAGTTTCTGCTACTAATAAAATAATTGTATTGTCAAC   | 80660 |
| OliveBaboon       | CAGGAAAATAGGAGAAATGATGCAACAATATAATGACTACATCTGGAGTTTCTGCTACTAATAAAATAATTGTATTGTCAAC  | 81439 |
| Orangutan         | CAGGAAAATAGGAGAAATGATGCAACAATATAAGGACTATATCTGGAGTTTCTGCTACTAATAAAATAATTGTATTGTCAAC  | 82291 |

Tuesday, May 03, 2022 06:17 PM

```
Majority      --TTT-AGTCAAATATTTCTGTGCATTTCAGTCAGAGCTATCTGAAAATACTGATGAATAGTATTACA-----GTGTGGGG
              98410      98420      98430      98440      98450      98460      98470      98480
Human         --TTT-AGTCAAATATTTCTGTGCATTTCAGTCAGAGCTATCTGAAAATACTGACGAATAGTATTACA-----ATATGGGG 81883
Coquerel'sSifaka GACTTAGGTTAAATGTTCTGTGCATTCAAGCAAAGCTATCTGAAAATACTGAAGAACAATGTTAAAAATTAAGTGTGGAG 68063
Ma'sNightMonkey --TTTTAGTTGAATATTTTATGCATTTCAGTCAGAGTTATCTGAAAATACTGAAGAATAGTGTCCACA-----GTGTGGGG 76501
VervetAGM      --TTT-AGTCTAATATTTCTGTACATTTCAGTCAGAGCTATCTGAAAATACTGATGATTAGTATTACA-----GTGTGGGG 82680
Gorilla        --TTT-AGTCGAATATTTCTGTGCATTTCAGTCAGAGCTATCTGAAAATACTGACAAATAGTATTACA-----ATGTGGGG 80132
GrabEatingMacaque --TTT-AGTCAAATATTTCTGTGCATTTCAGTCAGAGCTATCTGAAAATACTGATGAATAGTATTACA-----GTGTGGGG 82209
Macaque        --TTT-AGTCAAATATTTCTGTGCATTTCAGTCAGAGCTATCTGAAAATACTGATGAATAGTATTACA-----GTGTGGGG 83100
PigTailedMacaque --TTT-AGTCAAATATTTCTGTGCATTTCAGTCAGAGCTATCTGAAAATACTGATGAATAGTATTACA-----GTGTGGGG 81613
Bonobo         --TTT-AGTCGAATATTTCTGTGCATTTCAGTCAGAGCTATCTGAAAATACTGACAAATACTATTACA-----ATATGGGG 80731
OliveBaboon    --TTT-AGTCAAATATTTCTGTGCATTTCAGTCAGAGCTATCTGAAAATACTGATGAATAGTATTACA-----GTGTGGGG 81510
Orangutan      --TTT-AGTTGAATATTTCTGTGCATTCAATCAGAGCTATCTGAAAATACTGACGAATAGTATTACA-----GTGTAGGG 82362
```

```
Majority      AGGTCACTTCTCAAGACTGCAAGAAAAAAA--TTGTTGTGTGTAGGAATGCATGCCTAGGAATTAGGAATGTAT-----
              98490      98500      98510      98520      98530      98540      98550      98560
Human         AGGTCACTTCTCAAGACTGCAAGAAAAAAA--TTGTTGTGTGTAGGAATGTTTGCCCTAGGAATTAGGAATGTAT----- 81956
Coquerel'sSifaka AAGTCACTTTCCTAGAGTATGCAAGTTACA-----GTGTATGTGTGTGCGTGCCTAGGAATTAGGAGTGTATCTTTAT 68136
Ma'sNightMonkey AGGTCACTTTTCAAGACTGTGCAAGAAAAAAGT-GTTGTGTGTAGGAATGCATGCAAAGGAATTAGGAATGTAT----- 76574
VervetAGM      AGGTCACTTCTCAAGACTGCAAGAAAAAAAATTTGTTGTGTGTAGGAATGCATGCCTGGGAATTAGGAATGTAT----- 82754
Gorilla        AGGTCACTTCTCAAGACTGCAAGAAAAAAA--TTGTTGTGTGTAGGAATGCTTGCCCTAGGAATTAGGAATGTAT----- 80205
GrabEatingMacaque AGGTCACTTCTCAAGACTGCAAGAAAGAAAAGTTGTTGTGTGTAGGAATGCACGCCTGGGAATTAGGAATGTAT----- 82283
Macaque        AGGTCACTTCTCAAGACTGCAAGAAAAAAAATT---GTGTGTAGGAATGCATGCCTGGGAATTAGGAATGTAT----- 83171
PigTailedMacaque AGGTCACTTCTCAAGACTGCAAGAAAAAAAATTTGTTGTGTGTAGGAATGCATGCCTGGGAATTAGGAATGTAT----- 81687
Bonobo         AGGTCACTTCTCAAGACTGCAAGAAAAAAA--TTGTTGTGTGTAGGAATGCTTGCCCTAGGAATTAGGAATGTAT----- 80804
OliveBaboon    AGGTCACTTCTCAAGACTGCAAGAAAAAAAATTTGTTGTGTAGGAATGCATGCCTGGGAATTAGGAATGTAT----- 81584
Orangutan      AGGTCACTTCTCAAGACTGCAAGAAAAAAA----TTGTGTGTAGGAATGCATGCCTAGGAATTAGGAATGTAT----- 82431
```

```
Majority      -----ACTTGACAACAAATGAACATATCCATTGAATGTTAAATGAGAACAACCTTATGGGGTGGATAGTGAGAGGTATAG
              98570      98580      98590      98600      98610      98620      98630      98640
Human         -----ACTTGACAACAAGTGAACGTATCCATTGAATGTTAAATGAGAACAACCTTATGGGGAGGATAGTGAGAGGTATAG 82030
Coquerel'sSifaka ACTAGCACTTGGAACGAATGAACCTTATCCATTAATGTTAAATGGAATGACCTGTGAAGTGTAAAGCTG-----TAG 68210
Ma'sNightMonkey -----ACT-GATAACAAATGAACATATCCATTGAATGTTAGATGAGAACAGCTTACGGGGAGGATAGTGC---G----- 76639
VervetAGM      -----GCTTGACAACAAATGAACATATCTATTGAATGTTAAATGAGAACAACCTTACGGGGTGGATAGTGAGAGGTATAG 82828
Gorilla        -----ACTTGACAACAAGTGAACGTATCCATTGAATGTTAAATGAGAACAACCTTATGGGGAGGATAGTGAGAGGTATAG 80279
GrabEatingMacaque -----GCTTGACAACAAATGAACATATCTGTTGAATGTTAAATGAGAACAACCTTACGGGGTGGATAGTGAGAGGTATAG 82357
Macaque        -----GCTTGACAACAAATGAACATATCTGTTGAATGTTAAATGAGAACAACCTTACGGGGTGGATAGTGAGAGGTATAG 83245
PigTailedMacaque -----GCTTGACAGCAAATGAACATATCTGTTGAATGTTAAATGAGAACAACCTTATGGGGTGGATAGTGAGAGGTATAG 81761
Bonobo         -----ACTTGACAACAAGTGAACGTATCCATTGAATGTTAAATGAGAACAACCTTATGGGGAGGATAGTGAGGGGTATAG 80878
OliveBaboon    -----GCTTGACAACAAATGAACATATCTGTTGAATGTTAAATGAGAACAACCTTACGGGGTGGATAGTGAGAGGTATAG 81658
Orangutan      -----ACTTGACAACAAGTGAACATATCCATTTAATGTTAAATGAGAACAACCTTATGGGGAGGATAGTGAGAGGTATAG 82505
```

Tuesday, May 03, 2022 06:17 PM

| Majority          | TATTTAACATGGAGAAGTTAGTAATATAGTAGAATATTTGGATTGAAAAGATCCACATTGGTGTATTCAAAGACACACTGA |       |
|-------------------|-----------------------------------------------------------------------------------|-------|
|                   | 98650 98660 98670 98680 98690 98700 98710 98720                                   |       |
| Human             | TATTTAACATGGAAAAGTTAGTAATATAGTAGAATATTTGGTTGAAAAGATCCACATTGGTGTATTCAAAGACACACTGA  | 82110 |
| Coquerel'sSifaka  | TATTTAACATGGAGAAGTTAGTAATGCAGTAGAATAGTTGATTGAAAAGATCCACACTGGTGTATCCAAGGAGTCATCAA  | 68290 |
| Ma'sNightMonkey   | -----GTAGATTATTTGGTTGAAAAGATCCATACTGGTGTATTCAAAGACACACTGA                         | 76691 |
| VervetAGM         | TATTTAATATGGAGAAGTTAGTAATATAGTAGAATATTTGATTGAAAAGATCCACATTGGTGTATTCAAAGACACACTGA  | 82908 |
| Gorilla           | TATTTAACATGGAAAAGTTAGTAATATAGTAGAATATTTGGTTGAAAAGATCCACACTGGTATATTCAAAGACACACTGA  | 80359 |
| GrabEatingMacaque | TATTTAACATGGAGAAGTTAGTAATATAGTAGAATATTTGATTGAAAAGATCCACATTGGTGTATTCAAAGACACACTGA  | 82437 |
| Macaque           | TATTTAACATGGAGAAGTTAGTAATATAGTAGAATATTTGATTGAAAAGATCCACATTGGTGTATTCAAAGACACACTGA  | 83325 |
| PigTailedMacaque  | TATTTAACATGGAGAAGTTAGTAATATAGTAGAATATTTGATTGAAAAGATCCACATTGGTGTATTCAAAGACACACTGA  | 81841 |
| Bonobo            | TATTTAACATGGAAAAGTTAGTAATATAGTAGAATATTTGGTTGAAAAGATCCACATTGGTGTATTCAAAGACACACTGA  | 80958 |
| OliveBaboon       | TATTTAACATGGAGAAGTTAGTAATATAGTAGAATATTTGATTGAAAAGATCCACATTGGTGTATTCAAAGACACACTGA  | 81738 |
| Orangutan         | TATTTAACATGGAAAAGTTAGTAATATAGTAGAATATTTGGTTGAAAAGATTACATTGGTGTATTCAAAGACACACTGA   | 82585 |

| Majority          | AGACTATTGTGCATTAGTAAGTATTAACAT-GAGAATTTTTTATTTTAAAATTAGATCCTAATTTCTGAGATTTACTTT  |       |
|-------------------|----------------------------------------------------------------------------------|-------|
|                   | 98730 98740 98750 98760 98770 98780 98790 98800                                  |       |
| Human             | AGACTATTGTGCATTAGTAAGTATTAACAT-GAGAATTTCTTAATTTTAAAATTGGACCCTAATTTCTGAGATTTACTTT | 82189 |
| Coquerel'sSifaka  | AGACTACTGTACATTAGTAAATATTAGACTTCGAGACTTTTCTATTTTAAAGTTAGATCCTTATTTCTGAGATTTACTTT | 68370 |
| Ma'sNightMonkey   | AGATTGTTGTGCATTAGTAAGTATTAACAC-AAGAATTTTCTACTTTAAAATTAGATCCTAATTTCTGGAATGTACTTT  | 76770 |
| VervetAGM         | AGACTATTATGCATTAGTAAGTATTAACAT-GAGAATTTTTTATTTTAAAGTTAGATTCTAATTTCTGAGATTTACTTT  | 82987 |
| Gorilla           | AGACTATTGTGCATTAGTAAGTATTAACAT-GAGAATTTCTTAATTTTAAAATTGGACCCTAATTTCTGAGACTTACTTT | 80438 |
| GrabEatingMacaque | AGACTATTATGCATTAGTAAGTATTAACAT-GAGAATTTTTTA-----                                 | 82480 |
| Macaque           | AGACTATTATGCATTAGTAAGTATTAACAT-GAGAATTTTTTA-----                                 | 83368 |
| PigTailedMacaque  | AGACTATTATGCATTAGTAAGTATTAACAT-GAGAATTTTTTATTTTAAAATTAGATTCTAATTTCTGAGATTTACTTT  | 81920 |
| Bonobo            | AGACTATTGTGCATTAGTAAGTATTAACAT-GAGAATTTCTTAATTTTAAAATTGGACCCTAATTTCTGAGATTTACTTT | 81037 |
| OliveBaboon       | AGACTATTATGCATTAGTAAGTATTAACAT-GAGAATTTTTTATTTTAAAATTAGATTCTAATTTCTGAGATTTACTTT  | 81817 |
| Orangutan         | AGACTACTGTGCATTAGTAAGTATTAACAT-GAGAATTTCTTAATTTTAAAATTGGATCCTAATTTCTGAGATTTACTTT | 82664 |

| Majority          | AAGAATAAAA-----GGGGATGAAACAAGATTGGCCATGAGTTGATCATTGTTAAAGCTGGGTGATGGCTACATAGAG    |       |
|-------------------|-----------------------------------------------------------------------------------|-------|
|                   | 98810 98820 98830 98840 98850 98860 98870 98880                                   |       |
| Human             | AAGAATAAAA-----GGGGATGAAACGAGATTGGCCATGAGTTGATCATTGTTAAAGTTGGGTGATGGCTACTTAGAG    | 82262 |
| Coquerel'sSifaka  | AAAAATAAAATGAGTGAGTGGATGAAACAAGATTGCCATGAGTTG---TTGTTAAACCTGTGTAATGGGTATATGGGG    | 68446 |
| Ma'sNightMonkey   | AAGAACAAAATGGATAAGGAGATGAAACAAGACTGGCCATGAGTTGCTTATTTGTTAAACCTGGGTGATGGCTACGTAGAG | 76850 |
| VervetAGM         | AAGAATAAAA-----GGGGATGAAACAAGATTGGCCATGAGTTGATCATTGTTAAAGCTGGGTGATGGCTACATAGAG    | 83060 |
| Gorilla           | AAGAATAAAA-----GGGGATGAAACGAGATTGGCCATGAGTTGATCATTGTTAAAGTTGGGTGATGGCTACATAGAG    | 80511 |
| GrabEatingMacaque | -AGAATAAAA-----GGGGATGAAACAAGATTGGCCATGAGTTTATCATTGTTAAAGCTGGGTGATGGCTACATAGAG    | 82552 |
| Macaque           | -AGAATAAAA-----GGGGATGAAACAAGATTGGCCATGAGTTTATCATTGTTAAAGCTGGGTGATGGCTACATAGAG    | 83440 |
| PigTailedMacaque  | AAGAATAAAA-----GGGGATGAAACAAGATTGGCCATGAGTTTATCATTGTTAAAGCTGGGTGATGGCTACATAGAG    | 81993 |
| Bonobo            | AAGAATAAAA-----GGGGATGAAACGAGTTGGCCATGAGTTGATCATTGTTAAAGTTGGGTGATGGCTACATAGAG     | 81110 |
| OliveBaboon       | AAGAATAAAA-----GCGTATGAAACAAGATTGGCCATGAGTTGATCATTGTTAAAGCTGAGTGATGGCTACATAGAA    | 81890 |
| Orangutan         | AAGAATAAAA-----GGGGATGAAATGAGATTGGCCATGAGTTGATCATTGTTAAAGTTGGGTGATGGCTACGTAGAG    | 82737 |

Tuesday, May 03, 2022 06:17 PM

|                   |                                                                                    |       |
|-------------------|------------------------------------------------------------------------------------|-------|
| Majority          | GTGCATTATTATAGTCTCTTT-AC TTTTGTATATGTTGGAAAT-CTTCCAAAACAAAATGTAAAGCCATAAAAAAG-GGT  |       |
|                   | 98890 98900 98910 98920 98930 98940 98950 98960                                    |       |
| Human             | TTGCATTATTTTGTAGTCACTTTTACTTTTGTATATGTTGGAAAT-CTTCCAAAACAAAATGTATAGCCATAAAAAAAGGG  | 82341 |
| Coquerel'sSifaka  | GTTCATTAGTCTAATCTTTT-AC TTTTATATATGTTGGAAAC-TTTCCAAAGCAAAAAGTTGTATCAAAAAAAG-AAA    | 68523 |
| Ma'sNightMonkey   | ATAGGTTATTCTAGTCTCTTT-AC TTTTGTATATGTTGGAAAT--TTTC----CAAAGTGTAAGTCGTGAAAAA-GAT    | 76922 |
| VervetAGM         | GTGCATTATTATAGTCTCTTT-AC TTTTGTATATGTTGGAAATCTTCCAAAACAAAATGTAAAGCCATAAAAAAG--GT   | 83137 |
| Gorilla           | GTGCATTATTTTGTAGTCACTTTTACTTTTGTGTATGTTGGAAAT-CTTCCAAAACAAAATGTATAGCCATAAAAAAAGGG  | 80590 |
| GrabEatingMacaque | GTGCATTATTATAGTCTCTTT-AC TTTTGTATATGTTGGAAATCTTCCAAAACAAAATGTAAAGCCATAAAAAAG--GT   | 82629 |
| Macaque           | GTGCATTATTATAGTCTCTTT-AC TTTTGTATATGTTGGAAATCTTCCAAAACAAAATGTAAAGCCATAAAAAAG--GT   | 83517 |
| PigTailedMacaque  | GTGCATTATTATAGTCTCTTT-AC TTTTGTATATGTTGGAAATCTTCCAAAACAAAATGTAAAGCCATAAAAAAG--GT   | 82070 |
| Bonobo            | ATGCATTATTTTGTAGTCACTTTTACTTTTGTATATGTTGGAAAT-CTTCCAAAACAAAATGTATAGCCATAAAAAA-GGG  | 81188 |
| OliveBaboon       | GTGCATTATTATAGTCTCTTT-AC TTTTGTATATGTTGGAAATCTTCCAAAACAAAATGTAAAGCCATAAAAAAG--GT   | 81967 |
| Orangutan         | GTGCATTATTTTGTAGTCTCTTT-AC TTTTGTATATGTTGGAAAT-CTTCCAAAACAAAATGTATAGCCATAAAAAA-GGG | 82814 |

|                   |                                                                                |       |
|-------------------|--------------------------------------------------------------------------------|-------|
| Majority          | AGCAAAGTAAGAAAAAAGA--GAGCCAAAAAAGGGTATAGGCCAAAAGCTGTGAAAAGAAACTCATCAAGAGCAAG   |       |
|                   | 98970 98980 98990 99000 99010 99020 99030 99040                                |       |
| Human             | AGCAAAGTAAGAAAAAAGG-AGAGCCTAAAAAAGGTTACAGGCCAAAAGGTTGTGAAAAGAAACTCATCAAGAGCAAG | 82420 |
| Coquerel'sSifaka  | AGGGGAGAAATAGGAAAAGAAGAAGCTCCTAAAAAATGGCATGGGAAAAAAGCTGTAATATAAACTCATCCAAGCAAG | 68603 |
| Ma'sNightMonkey   | GGCAAAGAAAGAAAAAGAGATCCTAAAAAAGGTTATAGGCCAAAAGCTGTGAAAAGAACTCATCAAGAGCAGA      | 77002 |
| VervetAGM         | AGCAAAGTAAGAAAAAAGGA--GAGCCAA-AAAAAGGGTATAGACAAAAGCTGTGAAAAGAAACTCATCAAGAGCAAG | 83214 |
| Gorilla           | AGCAAAGTAAGAAAAAAGG-AGAGCCTAAAAAAGGTTACAGGCCAAAAGCTGTGAAAAGAAACTCATCAAGAGCAAG  | 80669 |
| GrabEatingMacaque | AGCAAAGTAAGAAAAAAGGA--GAGCCAA-AAAAAGGGTATAGACAAAAGCTGTGAAAAGAAACTCATCAAGAGCAAG | 82707 |
| Macaque           | AGCAAAGTAAGAAAAAAGGA--GAGCCAA-AAAAAGGGTATAGACAAAAGCTGTGAAAAGAAACTCATCAAGAGCAAG | 83595 |
| PigTailedMacaque  | AGCAAAGTAAGAAAAAAGGA--GAGCCAA-AAAAAGGGTATAGACAAAAGCTGTGAAAAGAAACTCATCAAGAGCAAG | 82148 |
| Bonobo            | AGCAAAGTAAGAAAAAAGG-AGAGCCTAAAAAAGGTTACAGGCCAAAAGCTGTGAAAAGAAACTCATCAAGAGCAAG  | 81266 |
| OliveBaboon       | AGCAAAGTAAGAAAAAAGGA--GAGCCAGCAAAAAGGGTATAGACAAAAGCTGTGAAAAGAAACTCATCAAGAGCAAG | 82045 |
| Orangutan         | TGCAAAGTAAGAAAAAAGGGAGAGCCTTAAAAAAGGTTACAGGCCAAAAGCTGTGAAAAGAAACTGATCAAGAGCAAG | 82893 |

|                   |                                                                                   |       |
|-------------------|-----------------------------------------------------------------------------------|-------|
| Majority          | AGTATTAATGAGAAACATATG---CCACTGACAGAGTTCTC---AGAAGAGATAAAGGCTGAATTA AAAAGAGAT--G   |       |
|                   | 99050 99060 99070 99080 99090 99100 99110 99120                                   |       |
| Human             | AGTATTAATGAGAAACATATG---CCACTGACAGAGTTCTC---AGAAGAGATAAAGGCTGAATTA AAAAGAGAT--G   | 82491 |
| Coquerel'sSifaka  | AATATTAATGAGAAACATATGATTCCACTGATACAGTGCCTGGAGAGAAGGCATAAAGGCTGAATTA TAGAACAAAT--- | 68680 |
| Ma'sNightMonkey   | AGTGTTAAATGAGAAACATATG---CAACTGACAGAGTTCTC---AGAAGAGATAAAGGCTGAATTA AAAAGGTGATTGG | 77075 |
| VervetAGM         | AGTATTAATGAGAAACATATG---CCACTGACAGAGTTCTC---AGAAGAGATAAAGGCTGAATTA AAAAGAGAT--G   | 83285 |
| Gorilla           | AGTATTAATGAGAAACATATG---CCACTGACAGAGTTCTC---AGAAGAGATAAAGGCTGAATTA AAAAGAGAT--G   | 80740 |
| GrabEatingMacaque | AGTATTAATGAGAAACATATG---CCACTGACAGAGTTCTC---AGAAGAGATAAAGGCTGAATTA AAAAGAGAT--G   | 82778 |
| Macaque           | AGTATTAATGAGAAACATATG---CCACTGACAGAGTTCTC---AGAAGAGATAAAGGCTGAATTA AAAAGAGAT--G   | 83666 |
| PigTailedMacaque  | AGTATTAATGAGAAACATATG---CCACTGACAGAGTTCTC---AGAAGAGATAAAGGCTGAATTA AAAAGAGAT--G   | 82219 |
| Bonobo            | AGTATTAATGAGAAACATATG---CCACTGACAGAGTTCTC---AGAAGAGATAAAGGCTGAATTA AAAAGAGAT--G   | 81337 |
| OliveBaboon       | AGTATTAATGAGAAACATATG---CCACTGACAGAGTTCTC---AGAAGAGATAAAGGCTGAATTA AAAAGAGAT--G   | 82116 |
| Orangutan         | AGTATTAATGAGAAACAT--G---CCACTGACAGAGTTCTC---AGAAGAGATAAAGGCTGAATTA AAAAGAGAT--G   | 82962 |

Tuesday, May 03, 2022 06:17 PM

|                   |                                                                                  |       |
|-------------------|----------------------------------------------------------------------------------|-------|
| Majority          | GAGGGGAAAGTTTGTAAAGTCAAAAACCTTAGGTTAAGGATTGTGAATATTAAGAGCAC-----TTCAGACTGCCAATGA |       |
|                   | 99130 99140 99150 99160 99170 99180 99190 99200                                  |       |
| Human             | GAGGGGAAAGTTTATAAGTCAAAAACCTTAGGTTAAGGTTTGTGAATATTAAGAGCGC-----TTCAGATTGCCAATGA  | 82566 |
| Coquerel'sSifaka  | --TTG-GAGG-----AAAACTTAGGTTAAGGTTTGTGAATATTAAGACTGCCAGTATTTCAGACTGCCAGTGA        | 68746 |
| Ma'sNightMonkey   | AGGAAAAAAGTTTATAAGTCAAAAACCTTAGGTTAAGGATTGTGAATATTAAGAGCAC-----TTCTGACTGCCAGTGA  | 77150 |
| VervetAGM         | GAGGGGAAAGTTTCGTAATCAAAAATTTAGGTTAAGGATTGTGAATATTAAGAGCAC-----TTCAGACTGCCAATGA   | 83360 |
| Gorilla           | GAGGGGAAAGTTTATAAGTCAAAAACCTTAGGTTAAGGATTGTGAATATTAAGAGCAC-----TTCAGATTGCCGATGA  | 80815 |
| GrabEatingMacaque | GAGGGGAAAGTTTCGTAATCAAAAATTTAGGTTAAGGATTGTGAATATTAAGAGCAC-----TTCAGACTGCCAATGA   | 82853 |
| Macaque           | GAGGGGAAAGTTTCGTAATCAAAAATTTAGGTTAAGGATTGTGAATATTAAGAGCAC-----TTCAGACTGCCAATGA   | 83741 |
| PigTailedMacaque  | AAGGGGAAAGTTTCGTAATCAAAAATTTAGGTTAAGGATTGTGAATATTAAGAGCAC-----TTCAGACTGCCAATGA   | 82294 |
| Bonobo            | GAGGGGAAAGTTTATAAGTCAAAAACCTTAGGTTAAGGATTGTGAATATTAAGAGCAC-----TTCAGACTGCCAATGA  | 81412 |
| OliveBaboon       | GAGGGGAAAGTTTCGTAATCAAAAATTTAGGTTAAGGATTGTGAATATTAAGAGCAC-----TTCAGACTGCCAATGA   | 82191 |
| Orangutan         | GAGGGGAAAGTTTATAAGTCAAAAACCTTAGGTTAAGGATTGTGAATATTAAGAGCAC-----TTCAGACTGCCAATGA  | 83037 |

|                   |                                                                                   |       |
|-------------------|-----------------------------------------------------------------------------------|-------|
| Majority          | AAGGTCATA----GTAGTTTCTATAAAGTAAAAAGATCAAAAACCTTGACTT--AAAAGAGTAAGATCTCTAAAACCAAAG |       |
|                   | 99210 99220 99230 99240 99250 99260 99270 99280                                   |       |
| Human             | AAGGTCATA----GTAGTTTCTATAAAGTCAAAGATCAAAAACCTTGACTT--AAAAGAGTAAGATCTCTAAAACCAAAG  | 82640 |
| Coquerel'sSifaka  | AAGGTCATA----GTAATTTCTGTAAGTAAAAAGGTCAAAAACCTTAACT---AAAAGATTAAGATCTCTGAAACCAAAG  | 68819 |
| Ma'sNightMonkey   | AAGGTCATA----GTAGTTTCTATAAAGTAAAAAGATCAAAAACCTTGACTT--AAAAGAATAAGATTTCTAAAACCGAAG | 77224 |
| VervetAGM         | AAGGTCACA----GTAGTGTCTATAAAGTAAAAAGATCAAAAACCTTGACTTTTAAAAGAGTAAGATCTCTAAAACCAAAG | 83436 |
| Gorilla           | AAGGTCATA----GTAGTTTCTATAAAGTAAAAAGATCAAAAACCTTGACTT--AAAAGAGTAAGATCTCTAAAACCAAAG | 80889 |
| GrabEatingMacaque | AAGGTCACA----GTAGTGTCTATAAAGTAAAAAGATCAAAA-CTTGACTTTCAAAGAGTAAGATCTCTAAAACCAAAG   | 82928 |
| Macaque           | AAGGTCACA----GTAGTGTCTATAAAGTAAAAAGATCAAAAACCTTGACTTTCAAAGAGTAAGATCTCTAAAACCAAAG  | 83817 |
| PigTailedMacaque  | AAGGTCACACAGTGTAGTGTCTATAAAGTAAAAAGATCAAAAACCTTGACTTTCAAAGAGTAAGATCTCTAAAACCAAAG  | 82374 |
| Bonobo            | AAGGTCATA----GTAGTTTCTATAAAGTAAAAAGATCAAAAACCTTGACTT--AAAAGAGTAAGATCTCTAAAACCAAAG | 81486 |
| OliveBaboon       | AAGGTCACA----GTAGTGTCTATAAAGTAAAAAGATCAAAAACCTTGACTTTTAAAAGAGTAAGATCTCTAAAACCAAAG | 82267 |
| Orangutan         | AAGGTCATA----GTAGTTTCTATAAAGTAAAAAGATCAAAAACCTTGACTT--AAAAGAGTAAGAGCTCTAAAACCAAAG | 83111 |

|                   |                                                                                  |       |
|-------------------|----------------------------------------------------------------------------------|-------|
| Majority          | GTAACAGCAGATTCTTATGAAATGCACCAGAAAGCTGGAAAGAAAGAAGAAATAAAATGTGAACTTATGGAACAAGAGTG |       |
|                   | 99290 99300 99310 99320 99330 99340 99350 99360                                  |       |
| Human             | GTAACAGCAGATTCTTATGAAATGCACCAGAAAGCTGGAAAGAAAGAAGAAATAAAATGTGAACTTATGGAACAAGAGTG | 82720 |
| Coquerel'sSifaka  | GTAACAACAGATGCTTATGAAATGCTCAAGAAGGCTGGAAAGAGAGAAGAAATAAAATGTGAACTTACCGAACGACAGTG | 68899 |
| Ma'sNightMonkey   | ATAACAGCAGATTCTTATGAAATGCAACCGAAAGCTGGAAAGAAAGAAGAAATAAAATGTGAACTTATGGAACAAGAGTG | 77304 |
| VervetAGM         | GTAACAGCAGATTCTTATGAAATGCACCAGAAAGCTGGAAAGAAAGAAGAAATAAAATGTGAACTTATGGAACAAGAGTG | 83516 |
| Gorilla           | GTAACAGCAGATTCTTATGAAATGCACCAGAAAGCTGGAAAGAAAGAAGAAATAAAATGTGAACTTATGGAACAAGAGTG | 80969 |
| GrabEatingMacaque | GTAACAGCAGATTCTTATGAAATGCACCAGAAAGCTGGAAAGAAAGAAGAAATAAAATGTGAACTTATGGAACAAGAGTG | 83008 |
| Macaque           | GTAACAGCAGATTCTTATGAAATGCACCAGAAAGCTGGAAAGAAAGAAGAAATAAAATGTGAACTTATGGAACAAGAGTG | 83897 |
| PigTailedMacaque  | GTAACAGCAGATTCTTATGAAATGCACCAGAAAGCTGGAAAGAAAGAAGAAATAAAATGTGAACTTATGGAACAAGAGTG | 82454 |
| Bonobo            | GTAACAGCAGATTCTTACGAAATGCACCAGAAAGCTGGAAAGAAAGAAGAAATAAAATGTGAACTTATAGAACAAGAGTG | 81566 |
| OliveBaboon       | GTAACAGCAGATTCTTATGAAATGCACCAGAAAGCTGGAAAGAAAGAAGAAATAAAATGTGAACTTATGGAACAAGAGTG | 82347 |
| Orangutan         | GTAACAGCAGATTCTTATGAAATGCACCAGAAAGCTGGAAAGAAAGAAGAAATAAAATGTGAACTTATGGAACAAGAGTG | 83191 |

Tuesday, May 03, 2022 06:17 PM

| Majority          | GTAAGGCCCGTTCTACCCAGGTATGTTATGAAATCAAATTCATTTAGTTTGGGTGTTTGTTCCTTTATGTTGGGAAGGT   |       |       |       |       |       |       |       |       |
|-------------------|-----------------------------------------------------------------------------------|-------|-------|-------|-------|-------|-------|-------|-------|
|                   | 99370                                                                             | 99380 | 99390 | 99400 | 99410 | 99420 | 99430 | 99440 |       |
| Human             | CTAAGGCCCTGTTCTACCCAGGTATGTTATGAAATCAAATTCATTTAGTTTGGGTGTTTGTTCCTTTATGTTGGGAAGAT  |       |       |       |       |       |       |       | 82800 |
| Coquerel'sSifaka  | GTAAGGCC-----AGGTATGTCATGAAATCAGCTTCATTTAGTTTGGGTGT-TGTTCCCTTTATCATGGGAAGGT       |       |       |       |       |       |       |       | 68968 |
| Ma'sNightMonkey   | GTAAGGCCCGTTCTATCCAGGTATGTCATGAAATCAAATTCATTTAGTTTGGGTGTTTGTTCCTTTATGCTGGGAAGGT   |       |       |       |       |       |       |       | 77384 |
| VervetAGM         | GTAAAGGCCCGTTCTACCCAGGTATGTTATGAAATCAAATTCATTTAGTTTGGGTGTGTGTTCCCTCTATGTTGGGAAGGT |       |       |       |       |       |       |       | 83596 |
| Gorilla           | GTAAGGCCCTGTTCTACCCAGGTATGTTATGAAATCAAATTCATTTAGTTTGGGTGTTTGTTCCTTTATGTTGGGAAGAT  |       |       |       |       |       |       |       | 81049 |
| GrabEatingMacaque | GTAAAGGCCCATTCACCCAGGTATGTTATGAAATCAAATTCATTTAGTTTGGGTGTTTGTTCCTCTATGTTGGGAAGGT   |       |       |       |       |       |       |       | 83088 |
| Macaque           | GTAAAGGCCCGTTCTACCCAGGTATGTTATGAAATCAAATTCATTTAGTTTGGGTGTTTGTTCCTCTATGTTGGGAAGGT  |       |       |       |       |       |       |       | 83977 |
| PigTailedMacaque  | GTAAAGGCCCGTTCTACCCAGGTATGTTATGAAATCAAATTCATTTAGTTTGGGTGTTTGTTCCTCTATGTTGGGAAGGT  |       |       |       |       |       |       |       | 82534 |
| Bonobo            | GTAAGGCCCTGTTCTACCCAGGTATGTTATGAAATCAAATTCATTTACTTTGGGTGTTTGTTCCTTTATGTTGGGAAGAT  |       |       |       |       |       |       |       | 81646 |
| OliveBaboon       | GTAAAGGCCCGTTCTACCCAGGTATGTTATGAAATCAGATTCATTTAGTTTGGGTGTTTGTTCCTCTATGTTGGGAAGGT  |       |       |       |       |       |       |       | 82427 |
| Orangutan         | GTAAGGCCCTGTTCTACCCAGGTATGTTATGAAATCAAATTCATTTAGTTTGGGTGTTTGTTCCTTTATGTTGGGAAGGT  |       |       |       |       |       |       |       | 83271 |

| Majority          | AAAAAGAA-----CATATAATTCGTTTCTTTAGTGAACCAATATTTAT-GAGAAATAAGCTAG-TGTGTAAGAATTTA     |       |       |       |       |       |       |       |       |
|-------------------|------------------------------------------------------------------------------------|-------|-------|-------|-------|-------|-------|-------|-------|
|                   | 99450                                                                              | 99460 | 99470 | 99480 | 99490 | 99500 | 99510 | 99520 |       |
| Human             | AAAAAGAA-----CATATAATTCGTTTCTTGTAGTGAACCAAGTATTTAT-GAGAAATAAGCTGGGTGTGTAAGAATTTA   |       |       |       |       |       |       |       | 82873 |
| Coquerel'sSifaka  | AAAAAGAAAAAACAATGTAATTAATTTCTTTAGTGAACCAATTTATTTGAAAAATAAACTGG-TATGTAAGAATTTT      |       |       |       |       |       |       |       | 69047 |
| Ma'sNightMonkey   | AAAAAGAA-----CATATAACTTGTTCCTTTAATAAACCAATATTTAT-GAGTAATAAGCTAG-TGTGTAAGAATTTA     |       |       |       |       |       |       |       | 77456 |
| VervetAGM         | AAAAAGAA-----CAAACAATTCGTTTGTTCCTTTAGTGAACCAATATTTAT-GAGAAATAAGCTAG-TGTGTAAGAATTTA |       |       |       |       |       |       |       | 83668 |
| Gorilla           | AAAAAGAA-----CATATAATTCGTTTCTTGTAGTGAACCAAGTATTTAT-GAGAAATAAGCTGGGTGTGTAAGAATTTA   |       |       |       |       |       |       |       | 81122 |
| GrabEatingMacaque | AAAAGAGAA-----CATACAATTCATTTGTTTGTAGTGAACCAATATTTAT-GAGAAATAAGCTAG-TGTGTAAGAATTTA  |       |       |       |       |       |       |       | 83160 |
| Macaque           | AAAAAGAA-----CATACAATTCATTTGTTTGTAGTGAACCAATATTTAT-GAGAAATAAGCTAG-TGTGTAAGAATTTA   |       |       |       |       |       |       |       | 84049 |
| PigTailedMacaque  | AAAAAGAA-----CATACAATTCATTTGTTTGTAGTGAACCAATATTTAT-GAGAAATAAGCTAG-TGTGTAAGAATTTA   |       |       |       |       |       |       |       | 82606 |
| Bonobo            | AAAAAGAA-----CATATAATTCGTTTCTTGTAGTGAACCAAGTATTTAT-GAGAAATAAGCTGGGTGTGTAAGAATTTA   |       |       |       |       |       |       |       | 81719 |
| OliveBaboon       | AAAAAGAA-----CATACAATTCGTTTGTTCCTTTAGTGAACCAATATTTAT-GAGAAATAAGCTAG-TGTGTAAGAATTTA |       |       |       |       |       |       |       | 82499 |
| Orangutan         | AAAAAGAA-----CATATAATTCATTTCTTGTAGGGAACCAAGTATTTAT-GATAAATAAGCTGGGTGTGTAAGAATTTA   |       |       |       |       |       |       |       | 83344 |

| Majority          | AGGGATGAAAGTATTCGAAGTTGATTGGTAATGAAAAGTAGATGAAGGGTGCTAACACAAAAGGGAATTCGTCTAGAA  |       |       |       |       |       |       |       |       |
|-------------------|---------------------------------------------------------------------------------|-------|-------|-------|-------|-------|-------|-------|-------|
|                   | 99530                                                                           | 99540 | 99550 | 99560 | 99570 | 99580 | 99590 | 99600 |       |
| Human             | AGGGATGAAAATATTCGAAGTTGATTGGTAATGAAAAGTAGATGAACGGTGCTAACACAAAAGGGAATTCGTCTAGAA  |       |       |       |       |       |       |       | 82953 |
| Coquerel'sSifaka  | AGGGATGAAAGTATTCGAGTTCATTTGTAATGAAAAGTGATAAAGGGTGCTAAGACAGAAGAGAATTCATCTAGAA    |       |       |       |       |       |       |       | 69127 |
| Ma'sNightMonkey   | AGAGATTAAGTATTCGAAGTTGATTGGTAATGAAAAGTAGATGAAGGGTACTAACACAAAAGGGTTTCTCTCTAGAA   |       |       |       |       |       |       |       | 77536 |
| VervetAGM         | AGGGATGAACGTATTCGAAGCTGATTGGTAATGAAAAGTAGATGAAGGGTGCTAACACAAAAGGGAATTCGTCTAGAA  |       |       |       |       |       |       |       | 83748 |
| Gorilla           | AGGGATGAAAGTATTCGAAGTTGATTGGTAATGAAAAGTAGATGAACGGTGCTAACACAAAAGGGAATTCGTCTAGAA  |       |       |       |       |       |       |       | 81202 |
| GrabEatingMacaque | AGGGATGAACGTATTCGAAGCTGATTGGTAATGAAAAGTAGATGAAGGGTGCTAACACAAAAGGGAATTCGTCTAGAA  |       |       |       |       |       |       |       | 83240 |
| Macaque           | AGGGATGAACGTATTCGAAGCTGATTGGTAATGAAAAGTAGATGAAGGGTGCTAACACAAAAGGGAATTCGTCTAGAA  |       |       |       |       |       |       |       | 84129 |
| PigTailedMacaque  | AGGGATGAACGTATTCGAAGCTGATTGGTAATGAAAAGTAGATGAAGGGTGCTAACACAAAAGGGAATTCGTCTAGAA  |       |       |       |       |       |       |       | 82686 |
| Bonobo            | AGGGATGAAAGTATTCGAAGTTGATTGGTAATGAAAAGTAGATGAACGGTGCTAACACAAAAGGGAATTCGTCTAGAA  |       |       |       |       |       |       |       | 81799 |
| OliveBaboon       | AGGGATGAACGTATTCGAAGCTGATTGGTAATGAAAAGTAGATGAAGGGTGCTAACACAAAAGGGAATTCGTCTAGAA  |       |       |       |       |       |       |       | 82579 |
| Orangutan         | AAGGACGAAAGTATTCGAAGTTGATTGGTAATGAAAAGTAGATGAAGGGTGCTAACAA--AAAGGAAATTCGTCTAGAA |       |       |       |       |       |       |       | 83422 |

Tuesday, May 03, 2022 06:17 PM

| Majority          | TAAATGACTGAAGATATGGT-GACTTAAAGATAGTAGGACAGCAATAAGACTGGAAACTAGAACAAATA-----A---A  |       |
|-------------------|----------------------------------------------------------------------------------|-------|
|                   | 99610 99620 99630 99640 99650 99660 99670 99680                                  |       |
| Human             | TAAATGA----AAATATGGT-GACTTAAAGATAGTAGGACAGCAATAAGACTGGAAATTAGAACAAATA-----AAATA  | 83021 |
| Coquerel'sSifaka  | TAAATGACCGAAGGTATGGAAGACCTAAAGATAATAGGACAACAATAAGACTGGAAACTAGAAAAATATTAATAGAAATA | 69207 |
| Ma'sNightMonkey   | TAAGTGACTGAAGATATGGT-GACTTAAAGATAG---GACAATAATAAGACTGGAAACTACAACAATA-----A---A   | 77602 |
| VervetAGM         | TAGATGACTGAAGAGATGGT-GACTTAAAGGTAGTAGGACAGCAATAAGACTGGAAACTAGAACAAATA-----A---A  | 83817 |
| Gorilla           | TAAATGA----AAATATGGT-GACTTAAAGATAGTAGGACAGCAATAAGACTGGAAATTAGAACAAATA-----AAATA  | 81270 |
| GrabEatingMacaque | TAAATGACTGAAGAGATGGT-GACTTAAAGGTAGTAGGACAGCAGTAAGACTGGAAACTAGAACAAATA-----A---A  | 83309 |
| Macaque           | TAAATGACTGAAGAGATGGT-GACTTAAAGGTAGTAGGACAGCAGTAAGACTGGAAACTAGAACAAATA-----A---A  | 84198 |
| PigTailedMacaque  | TAAATGACTGAAGAGATGGT-GACTTAAAGGTAGTAGGACAGCAGTAAGACTGGAAACTAGAACAAATA-----A---A  | 82755 |
| Bonobo            | TAAATGA----AAATATGGT-GACTTAAAGATAGTAGGACAGCAATAAGACTGGAAATTAGAACAAATA-----AAATA  | 81867 |
| OliveBaboon       | TAAATGACTGAAGAGATGGT-GACTTAAAGGTAGTAGGACAGCAGTAAGACTGGAAACTAGAACAAATA-----A---A  | 82648 |
| Orangutan         | TAAATGACTGAAAATATGGT-GACTTAAAGATAGTAGGACAGCAATAAGACTGGAAACTAGAACAA-----TA        | 83489 |

| Majority          | ATAAGGAAATGATAACATAGATTGGGAAAGGATAGGAAAATACTGAAACAAAATCTGTGTTGTATAGTGATGGTTTCTTG  |       |
|-------------------|-----------------------------------------------------------------------------------|-------|
|                   | 99690 99700 99710 99720 99730 99740 99750 99760                                   |       |
| Human             | AGAAGGAAATGATAACATAGATTGGGAAAGGATAGGAAAATACTGAAACAAAATCTGTGTTGTATAGTGATGGTTTCTTG  | 83101 |
| Coquerel'sSifaka  | AGAAGGAAATGGTAAACACATTGGCAAAGGATAGGAACATACTGAAATAGAAAGTCTGTTACATAGTGACGGTTTCTCT   | 69287 |
| Ma'sNightMonkey   | ATAAGGAAATGGTAAACATAGATTGGGAAAGGATAGGAAAATACTGAAACAAAATCTGTGTTGTATAGTGATGGTTTCTTG | 77682 |
| VervetAGM         | ATAAGGAAATGATAACATAGATTGGGAAAGGATAGGAAAATACTGAAACAAAATCTGTGTT--ATAGTGATGGTTTCTTG  | 83895 |
| Gorilla           | AGAAGGAAATGATAACATAGATTGGGAAAGGATAGGAAAATACTGAAACAAAATCTGTGTTGTATAGTGATGGTTTCTTG  | 81350 |
| GrabEatingMacaque | ATAAGGAAATGATAACATAGATTGGGAAAGGATAGGAAAATACTGAAACAAAATCTGTGTT--ATAGTGATGGTTTCTTG  | 83387 |
| Macaque           | ATAAGGAAATGATAACATAGATTGGGAAAGGATAGGAAAATACTGAAACAAAATCTGTGTT--ATAGTGATGGTTTCTTG  | 84276 |
| PigTailedMacaque  | ATAAGGAAATGATAACATAGATTGGGAAAGGATAGGAAAATACTGAAACAAAATCTGTGTT--ATAGTGATGGTTTCTTG  | 82833 |
| Bonobo            | AGAAGGAAATGATAACATAGATTGGGAAAGGATAGGAAAATACTGAAACAAAATCTGTGTTGTATAGTGATGGTTTCTTG  | 81947 |
| OliveBaboon       | ATAAGGAAATGATAACATAGATTGGGAAAGGATAGGAAAATACTGAAACAAAATCTGTGTT--ATAGTGATGGTTTCTTG  | 82726 |
| Orangutan         | AGAAGGAAATGATAACATAGATTGGGAAAGGATAGGAAAATACTGAAACAAAATCTGTGTTGTATTTTGATGGTTTCTTG  | 83569 |

| Majority          | TTCTTTCAACTGGGAGAGTGTGTTTGAAGAACTTGTATT----ATAATTACTTGAGTGTATAATTAAGAAGGCAAGC    |       |
|-------------------|----------------------------------------------------------------------------------|-------|
|                   | 99770 99780 99790 99800 99810 99820 99830 99840                                  |       |
| Human             | TTCTTTCAACC GGAGAGTGTGTTGTTGAAGAACTTGTATTTCATTTAATTACTTGAGTGTATAATTAAGAAGGCAAGC  | 83181 |
| Coquerel'sSifaka  | TGCTTTCTACTGGGAGGGTATTGACTGGAGAACTT--ATT----ATAACTACTCAAGTGTAGAATTAAG---GCAAAC   | 69358 |
| Ma'sNightMonkey   | TTCAATCAACTGGTAGAGTATTGTGTTGAAGAACTTGTATTTCATTATAATTACTTGAGTGTGTAATTAAGAAGGCAAGC | 77762 |
| VervetAGM         | TTCTTTGAACTGGGAGAGTGTGTTTGAAGAACTTGTATT----ATAATTACTTGAGTGTATAATTAAGAAGGCAAGC    | 83971 |
| Gorilla           | TTCTTTCAACC GGAGAGTGTGTTGTTGAAGAACTTGTATTTCATTTAATTACTTGAGTGTATAATTAAGAAGGCAAGC  | 81430 |
| GrabEatingMacaque | TTCTTTGAACTGGAAGAGTGTGTTTGAAGAACTTGTATT----ATAATTACTTGAGCGTATAATTAAGAAGGCAAGC    | 83463 |
| Macaque           | TTCTTTGAACTGGAAGAGTGTGTTTGAAGAACTTGTATT----ATAATTACTTGAGCGTATAATTAAGAAGGCAAGC    | 84352 |
| PigTailedMacaque  | TTCTTTGAACTGGAAGAGTGTGTTTGAAGAACTTGTATT----ATAATTACTTGAGTGTATAATTAAGAAGGCAAGC    | 82909 |
| Bonobo            | TTCTTTCAACCAGGAGAGTGTGTTGTTGAAGAACTTGTATTTCATTTAATTACTTGAGTGTATAATTAAGAAGGCAAGC  | 82027 |
| OliveBaboon       | TTCTTTGAACTGGAAGAGTGTGTTTGAAGAACTTGTATT----ATAATTACTTGAGTGTATAATTAAGAAGGCAAGC    | 82802 |
| Orangutan         | TTCTTTCAACTGGGAGAGTGTGTTGTTGAAGAACTTGTATTTCATTATAATTACTTGAGTGTATAATTAAG---GCAAGC | 83646 |



Tuesday, May 03, 2022 06:17 PM

| Majority          | ACATTTTGCTAAGATTTTCTTTA-----TTTGCATGAATTAATAATGATGTTTCAGAGTGATTTGTCTCTAGGAGCTGAA   |       |
|-------------------|------------------------------------------------------------------------------------|-------|
|                   | 99850 99860 99870 99880 99890 99900 99910 99920                                    |       |
| Human             | ACATTTTGCTAAGATTTTCTTTA-----TTTGCATGAATTAATAATGATGTTTCAGAGTGATTTGTCTCTAGGAGCTGAA   | 83256 |
| Coquerel'sSifaka  | ACATTTTGCTAAGCTTTTCTTTAGGTTATTTGCATGAATTAATAATGTT---CAGAGTGACTTGTCTCGAGGAACCTGAA   | 69435 |
| Ma'sNightMonkey   | ACATTTTGCTAAGATTTTCTTTA-----TTTGCATGAATTAATAATGATGAT---CAGAGTGATATGTC--TAGGAGTTGAA | 77832 |
| VervetAGM         | ACATTTTGCTAAGATTTTCTTTA-----TTTGCATGAATTAATAATGATGTTTCAGAGTGATTTGTCTCTAGGAGCTGAA   | 84046 |
| Gorilla           | ACATTTTGCTAAGATTTTCTTTA-----TTTGCATGAATTAATAATGATGTTTCAGAGTGATTTGTCTCTAGGAGCTGAA   | 81505 |
| GrabEatingMacaque | ACATTTTGCTAAGATTTTCTTTA-----TTTGCATGAATTAATAATGATGTTTCAGAGTGATTTGTCTCTAGGAGCTGAA   | 83538 |
| Macaque           | ACATTTTGCTAAGATTTTCTTTA-----TTTGCATGAATTAATAATGATGTTTCAGAGTGATTTGTCTCTAGGAGCTGAA   | 84427 |
| PigTailedMacaque  | ACATTTTGCTAAGATTTTCTTTA-----TTTGCATGAATTAATAATGATGTTTCAGAGTGATTTGTCTCTAGGAGCTGAA   | 82984 |
| Bonobo            | ACATTTTGCTAAGATTTTCTTTA-----TTTGCATGAATTAATAATGATGTTTCAGAGTGATTTGTCTCTAGGAGCTGAA   | 82102 |
| OliveBaboon       | ACATTTTGCTAAGATTTTCTTTA-----TTTGCATGAATTAATAATGATGTTTCAGAGTGATTTGTCTCTAGGAGCTGAA   | 82877 |
| Orangutan         | ACATTTTGCTAAGATTTTCTTTA-----TTTCCATGAATTAATAATGCTGTTTCAGAGTGACTTGTCTCTAGGAGCTGAA   | 83721 |

| Majority          | AGACT--ACTATCTTTGTTTCATAAGCTGTAATTATTTGTCTGATTTCAAGTGTGAGTTTATGAAGAAGATAGCACTTGC |       |
|-------------------|----------------------------------------------------------------------------------|-------|
|                   | 99930 99940 99950 99960 99970 99980 99990 100000                                 |       |
| Human             | AGACT--ACTACCTTTGTTTCATAAGCTGTAATTATTTG---ATTTCAAGTGTGAGTTTATGAAGAAGATAGCACTTGC  | 83330 |
| Coquerel'sSifaka  | GGATTTTACTGTATTTGTTTCATAGG-TGTGATTATTTG---ATTTCAAGTGTGAGTTTATAAAGAAGATAGCACTTGT  | 69510 |
| Ma'sNightMonkey   | AGACT--ACTATCGTTGTTTCATAAGCTGTAATTATTTGTCTGATTTCAAGTGTGAGTTTATGAAGAAGATAGCACTTGC | 77910 |
| VervetAGM         | ACACT--ACTATCTTTGTTTCTTAAGCTGTAATTATTTGTCTGATTTCAAGTGTGAGTTTATGAAGAAGATAGCACTTGC | 84124 |
| Gorilla           | AGACT--ACTACCTTTGTTTCATAAGCTGTAATTATTTG---ATTTCAAGTGTGAGTTTATGAAGAAGATAGCACTTGT  | 81579 |
| GrabEatingMacaque | AGACT--ACTATCTTTGTTTCTTAAGCTGTAATTATTTGTCTGATTTCAAGTGTGGGTTTATGAAGAAGATAGCACTTGC | 83616 |
| Macaque           | AGACT--ACTATCTTTGTTTCTTAAGCTGTAATTATTTGTCTGATTTCAAGTGTGGGTTTATGAAGAAGATAGCACTTGC | 84505 |
| PigTailedMacaque  | AGACT--ACTATCTTTGTTTCTTAAGCTGTAATTATTTGTCTGATTTCAAGTGTGAGTTTATGAAGAAGATAGCACTTGC | 83062 |
| Bonobo            | AGACT--ACTACCTTTGTTTCATAAGCTGTAATTATTTG---ATTTCAAGTGTGAGTTTATGAAGAAGATAGCACTTGC  | 82176 |
| OliveBaboon       | AGACT--ACTATCTTTGTTTCTTAAGCTGTAATTATTTGTCTGATTTCAAGTGTGAGTTTATGAAGAAGATAGCACTTGC | 82955 |
| Orangutan         | AGACT--ACTACCTTTGTTTCATAAGCTGTAATTATTTG---ATTTCAAGTGTGAGTTTATGAAGAAGATAGCACTTGC  | 83795 |

| Majority          | AGAAAAAGTG-AATTACCATTAT---GTCGAAAGTGATACTTTTTTACATTTGGCTTATTACTGTAATCATGGAAGT  |       |
|-------------------|--------------------------------------------------------------------------------|-------|
|                   | 100010 100020 100030 100040 100050 100060 100070 100080                        |       |
| Human             | GGAAAAAGTG-AATTACCATTAT---GTCGAAAGTGATACTTTTTTACATTTGGCTTTTACTGTAATCATGGAAGT   | 83405 |
| Coquerel'sSifaka  | AGAAAAAGTATGAATGCTATTAT---GTCGAAGGTGAT--TTTTTACATTTGGCTTCTCAGTATAAACCATGGGAGT  | 69584 |
| Ma'sNightMonkey   | AGAAAAAGTG-AATTACCATTAT---GTC-AAAGTGATACTTTTCTACATTTGGCTTATTACTGTAATCATGGAAGT  | 77984 |
| VervetAGM         | AGAAAATAGTG-AATTACCATTATGATGTCGAAAGTGATACTTTTTTACATTTGGCTTATTACTGTAATCATGGAAGT | 84203 |
| Gorilla           | GGAAAAAGTG-AATTACCATTAT---GTCGAAAGTGATACTTTTTTACATTTGGCTTTTACTGTAATCATGGAAGT   | 81654 |
| GrabEatingMacaque | AGAAAATAGTG-AATTACCATTATGATGTCGAAAGTGATACTTTTTTACATTTGGCTTATTACTGTAATCATGGAAGT | 83695 |
| Macaque           | AGAAAATAGTG-AATTACCATTATGATGTCGAAAGTGATACTTTTTTACATTTGGCTTATTACTGTAATCATGGAAGT | 84584 |
| PigTailedMacaque  | AGAAAATAGTG-AATTACCATTATGATGTCGAAAGTGATACTTTTTTACATTTGGCTTATTACTGTAATCATGGAAGT | 83141 |
| Bonobo            | GGAAAAAATG-AATTACCATTAT---GTCGAAAGTGATACTTTTTTACATTTGGCTTTTACTGTAATCATGGAAGT   | 82251 |
| OliveBaboon       | AGAAAATAGTG-AATTACCATTATGATGTCGAAAGTGATACTTTTTTACATTTGGCTTATTACTGTAATCATGGAAGT | 83034 |
| Orangutan         | GGAAAAAGTG-AATTACCATTAT---GTCGAAAGTGATACTTCTTTACATTTGGCTTTTACTGTAATCATGGAAGT   | 83870 |

Tuesday, May 03, 2022 06:17 PM

|                   |                                                                                   |       |
|-------------------|-----------------------------------------------------------------------------------|-------|
| Majority          | GAATTTTCCAAGCCTGTGACTTGGAAATATATTTCTTCATGCTTTGTTTGCTTTTCCAGAGGAAATAGAGTATTATATATT |       |
|                   | 100090 100100 100110 100120 100130 100140 100150 100160                           |       |
| Human             | GAATTTTCCAAGCCTGTGACTTGGAAATATATTTTTCATGCTTTGTTTGCTTTTCCAGAGGAAATAGAGTATTATATATT  | 83485 |
| Coquerel'sSifaka  | GAATTTTCTGAGTCTCTGACTTGGAAATATATCTTTATGCTTTGTTTGCTTTTCCCTTAGGAAATGGAGAAATGCATATT  | 69664 |
| Ma'sNightMonkey   | GAATTTTCCAAGCCTGTGACTTGGAAATAAATCTTCACGCTTTGTTTGCTTTTCCAGAGAAAAATAGAGTATTATGTATT  | 78064 |
| VervetAGM         | GAATTTTCCAAGCCTGTGACTTGGAAATATATCTTCATGCTTTGTTTGCTTTTCCAGAGGAAATAGAGTATTATATATT   | 84283 |
| Gorilla           | GAATTTTCCAAGCCTGTGACTTGGAAATATATCTTCATGCTTTGTTTGCTTTTCCAGAGGAAATAGAGTATTATATATT   | 81734 |
| GrabEatingMacaque | GAATTTTCCAAGCCTGTGACTTGGAAATATATCTTCATGCTTTGTTTGCTTTTCCAGAGGAAATAGAGTATTATATATT   | 83775 |
| Macaque           | GAATTTTCCAAGCCTGTGACTTGGAAATATATCTTCATGCTTTGTTTGCTTTTCCAGAGGAAATAGAGTATTATATATT   | 84664 |
| PigTailedMacaque  | GAATTTTCCAAGCCTGTGACTTGGAAATATATCTTCATGCTTTGTTTGCTTTTCCAGAGGAAATAGAGTATTATATATT   | 83221 |
| Bonobo            | GAATTTTCCAAGCCTGTGACTTGGAAATATATCTTCATGCTTTGTTTGCTTTTCCAGAGGAAATAGAGTATTATATATT   | 82331 |
| OliveBaboon       | GAATTTTCCAAGCCTGTGACTTGGAAATATATCTTCATGCTTTGTTTGCTTTTCCAGAGGAAATAGAGTATTATATATT   | 83114 |
| Orangutan         | GAATTTTCCAAGCCTGTGACTTGGAAATATATCTTCATGCTTTGTTTGCTTTTCCAGAGGAAATAGAGTATTATATATT   | 83950 |

|                   |                                                                     |       |
|-------------------|---------------------------------------------------------------------|-------|
| Majority          | TGATATTTTAAACATAATACAGGTATGTACTT-----TAGTTCAAATAA                   |       |
|                   | 100170 100180 100190 100200 100210 100220 100230 100240             |       |
| Human             | TGATATTTTAAACATAATACAGGTATGTACTT-----TAGTTCAAATAA                   | 83528 |
| Coquerel'sSifaka  | TAAT-TTTTAAACAT---ACAGGTATGTATCT-----TAGCTGAAATAA                   | 69703 |
| Ma'sNightMonkey   | TGATATTTTAAACATAATACAGGTATGTACTT-----TAGTTCAAATAA                   | 78107 |
| VervetAGM         | TGATATTTTAAACATAATACAGGTATGTACTTCAATTAATGTAGTTCAATTAATGTAGTTCAATTAA | 84363 |
| Gorilla           | TGATATTTTAAACATAATACAGGTATGTACTT-----TAGTTCAAATAA                   | 81777 |
| GrabEatingMacaque | TGATATTTTAAACATAATACAGGTATGTACTT-----TAGTTCAATTAA                   | 83818 |
| Macaque           | TGATATTTTAAACATAATACAGGTATGTACTT-----TAGTTCAATTAA                   | 84707 |
| PigTailedMacaque  | TGATATTTTAAACATAATACAGGTATGTACTT-----TAGTTCAATTAA                   | 83264 |
| Bonobo            | TGATATTTTAAACATAATACAGGTATGTACTT-----TAGTTCAAATAA                   | 82374 |
| OliveBaboon       | TCATATTTTAAACATAATACAGGTATGTACTT-----TAGTTCAATTAA                   | 83157 |
| Orangutan         | TGATATTTTAAACATAATACAGGTATGTACTT-----TAGTTCAAATAA                   | 83993 |

|                   |                                                                                   |       |
|-------------------|-----------------------------------------------------------------------------------|-------|
| Majority          | TT---GTTTTGTTGAAATCAATTATTTTTCTCTACTACACATCAGCAAACAATTTTTCTAAACACTATAAAAAATTAACT  |       |
|                   | 100250 100260 100270 100280 100290 100300 100310 100320                           |       |
| Human             | TTAATGGTTTTGTTGAAATCAATTATTTTTCTTTACTACACATCAGCAAACAATTTTTCTAAACACTATAAAAAATTAACT | 83608 |
| Coquerel'sSifaka  | TTAATGGTTTTGTTGAAATAAATATCTTTCTCTACTACACATCAGCAAATAAATTTTTATAAACA---TAAAAATTAACT  | 69780 |
| Ma'sNightMonkey   | TTAATGGTTTTGTTGAAATCAGTTATTTTTCTCTACTACACATCAGCAAACAATTTTTCTAAACACTATAAAAAATTAACT | 78187 |
| VervetAGM         | TG---GTTTTGTTGAAATCGATTATTTTTCTCTACTACACATCAGCAAACAATTTTTCTAAACACTATAAAAAATTAACT  | 84439 |
| Gorilla           | TTAATGGTTTTGTTGAAATCAATTATTTTTCTCTACTACACATCAGCAAACAATTTTTCTAAACACTATAAAAAATTAACT | 81857 |
| GrabEatingMacaque | TG---GTTTTGTTGAAATCGATTATTTTTCTCTACTACACATCAGCAAACAATTTTTCTAAACACTATAAAAAATTAACT  | 83894 |
| Macaque           | TG---GTTTTGTTGAAATCGATTATTTTTCTCTACTACACATCAGCAAACAATTTTTCTAAACACTATAAAAAATTAACT  | 84783 |
| PigTailedMacaque  | TG---GTTTTGTTGAAATCGATTATTTTTCTCTACTACACATCAGCAAACAATTTTTCTAAACACTATAAAAAATTAACT  | 83340 |
| Bonobo            | TT---GTTTTGTTGAAATCAATTATTTTTCTTTAC--ACATCAGCAAACAATTTTTCTAAACACTATAAAAAATTAACT   | 82447 |
| OliveBaboon       | TG---GTTTTGTTGAAATCGATTATTTTTCTCTACTACACATCAGCAAACAATTTTTCTAAACACTATAAAAAATTAACT  | 83233 |
| Orangutan         | TTAATGGTTTTGTTGAAATCAATTATTTTTCTCTACTACACATCAGCAAACAATTTTTCTAAACACTATAAAAAATTAACT | 84073 |

Tuesday, May 03, 2022 06:17 PM

|                   |                                                                                  |       |
|-------------------|----------------------------------------------------------------------------------|-------|
| Majority          | TTCAGGAACCATTTGGAATGGTCAGCCGTAAGCCATGCAGCCATCGTGCTTAAATTGGTTTTGTAAACGACTTGTGTGT  |       |
|                   | 100330 100340 100350 100360 100370 100380 100390 100400                          |       |
| Human             | TTCAGGAACCATTTGGAATGGTCAGCCGTAAGCCATGCAGCCATCGTGCTTAAATTGGTTTTGTAAACGACTTGTGTGT  | 83688 |
| Coquerel'sSifaka  | TTCAGGAGCCATTTGGAATGGTCAGCCGTAAGCCATGCAGCCATCATGCTTAAATTGGTTTTTATAAATGACTTGTGTGT | 69860 |
| Ma'sNightMonkey   | TTCAGGAACCATTTGGAATGGTCAGCCGTAAGCCATGTAGCCCTCGTGCTTAAATTGGTTTTGTAAACGACTTGTGTGT  | 78267 |
| VervetAGM         | TTCAGGAACCATTTGGAATGGTCAGCCGTAAGCCATGCAGCCATCGTGCTTAAATTGGTTTTGTAAACGACTTGTGTGT  | 84519 |
| Gorilla           | TTCAGGAACCATTTGGAATGGTCAGCCGTAAGCCATGCAGCCATCATGCTTAAATTGGTTTTGTAAACGACTTGTGTGT  | 81937 |
| GrabEatingMacaque | TTCAGGAACCATTTGGAATGGTCAGCCGTAAGCCATGCAGCCATCGTGCTTAAATTGGTTTTGTAAACGACTTGTGTGT  | 83974 |
| Macaque           | TTCAGGAACCATTTGGAATGGTCAGCCGTAAGCCATGCAGCCATCGTGCTTAAATTGGTTTTGTAAACGACTTGTGTGT  | 84863 |
| PigTailedMacaque  | TTCAGGAACCATTTGGAATGGTCAGCCGTAAGCCATGCAGCCATCGTGCTTAAATTGGTTTTGTAAACGACTTGTGTGT  | 83420 |
| Bonobo            | TTCAGGAACCATTTGGAATGGTCAGCCGTAAGCCATGCAGCCATCGTGCTTAAATTGGTTTTGTAAACGACTTGTGTGT  | 82527 |
| OliveBaboon       | TTCAGGAACCATTTGGAATGGTCAGCCGTAAGCCATGCAGCCATCGTGCTTAAATTGGTTTTGTAAACGACTTGTGTGT  | 83313 |
| Orangutan         | TTCAGGAACCATTTGGAATGGTCAGCCGTAAGCCATGCAGCCATCGTGCTTAAATTGGTTTTGTAAACGACTTGTGTGT  | 84153 |

|                   |                                                                                    |       |
|-------------------|------------------------------------------------------------------------------------|-------|
| Majority          | GTTTCGTA AAAATATGCTTTATTTTAAAATTAGGGCTTCCTGTTGCAGCTGTTCCAGGAGCTCTGAGTCCTTTGGCTATTC |       |
|                   | 100410 100420 100430 100440 100450 100460 100470 100480                            |       |
| Human             | GTTTCGTA AAAATATGCTTTATTTTAAAATTAGGGCTTCCTGTTGCAGCTGTTCCAGGAGCTCTGAGTCCTTTGGCCATTC | 83768 |
| Coquerel'sSifaka  | GTTTCGTA AAAATATACTTTATTTTAAAATTAGGGCTTCCTGTTGCAGCTGTTCCAGGAGCTCTGAGTCCTTTGGCTATTC | 69940 |
| Ma'sNightMonkey   | GTTTCGTA AAAATATGCTTTATTTTAAAATTAGGGCTTCCTGTTGCAGCTGTTCCAGGAGCGCTGAGTCCTTTGGCTATTC | 78347 |
| VervetAGM         | GTTTCGTA AAAATATGCTTTATTTTAAAATTAGGGCTTCCTGTTGCAGCTGTTCCAGGAGCTCTGAGTCCTTTGGCTATTC | 84599 |
| Gorilla           | GTTTCGTA AAAATATGCTTTATTTTAAAATTAGGGCTTCCTGTTGCAGCTGTTCCAGGAGCTCTGAGTCCTTTGGCCATTC | 82017 |
| GrabEatingMacaque | GTTTCGTA AAAATATGCTTTATTTTAAAATTAGGGCTTCCTGTTGCAGCTGTTCCAGGAGCTCTGAGTCCTTTGGCTATTC | 84054 |
| Macaque           | GTTTCGTA AAAATATGCTTTATTTTAAAATTAGGGCTTCCTGTTGCAGCTGTTCCAGGAGCTCTGAGTCCTTTGGCTATTC | 84943 |
| PigTailedMacaque  | GTTTCGTA AAAATATGCTTTATTTTAAAATTAGGGCTTCCTGTTGCAGCTGTTCCAGGAGCTCTGAGTCCTTTGGCTATTC | 83500 |
| Bonobo            | GTTTCGTA AAAATATGCTTTATTTTAAAATTAGGGCTTCCTGTTGCAGCTGTTCCAGGAGCTCTGAGTCCTTTGGCCATTC | 82607 |
| OliveBaboon       | GTTTCGTA AAAATATGCTTTATTTTAAAATTAGGGCTTCCTGTTGCAGCTGTTCCAGGAGCTCTGAGTCCTTTGGCTATTC | 83393 |
| Orangutan         | GTTTCGTA AAAATATGCTTTATTTTAAAATTAGGGCTTCCTGTTGCAGCTGTTCCAGGAGCTCTGAGTCCTTTGGCTATTC | 84233 |

|                   |                                                                                  |       |
|-------------------|----------------------------------------------------------------------------------|-------|
| Majority          | CAAATGCTGCTGCAGCAGCTGCTGCAGCTGCTGCTGGCCGAGTGGGTATGCCTGGAGTCTCAGCTGGTGGCAATACAGTC |       |
|                   | 100490 100500 100510 100520 100530 100540 100550 100560                          |       |
| Human             | CAAATGCTGCTGCAGCAGCTGCTGCAGCTGCTGCTGGCCGAGTGGGTATGCCTGGAGTCTCAGCTGGTGGCAATACAGTC | 83848 |
| Coquerel'sSifaka  | CAAATGCTGCTGCAGCAGCTGCTGCAGCTGCTGCTGGCCGAGTGGGTATGCCTGGAGTCTCAGCTGGTGGCAATACAGTC | 70020 |
| Ma'sNightMonkey   | CAAATGCTGCTGCAGCAGCTGCTGCAGCTGCTGCTGGCCGAGTGGGTATGCCTGGAGTCTCAGCTGGTGGCAATACAGTC | 78427 |
| VervetAGM         | CAAATGCTGCTGCAGCAGCTGCTGCAGCTGCTGCTGGCCGAGTGGGTATGCCTGGAGTCTCAGCTGGTGGCAATACAGTC | 84679 |
| Gorilla           | CAAATGCTGCTGCAGCAGCTGCTGCAGCTGCTGCTGGCCGAGTGGGTATGCCTGGAGTCTCAGCTGGTGGCAATACAGTC | 82097 |
| GrabEatingMacaque | CAAATGCTGCTGCAGCAGCTGCTGCAGCTGCTGCTGGCCGAGTGGGTATGCCTGGAGTCTCAGCTGGTGGCAATACAGTC | 84134 |
| Macaque           | CAAATGCTGCTGCAGCAGCTGCTGCAGCTGCTGCTGGCCGAGTGGGTATGCCTGGAGTCTCAGCTGGTGGCAATACAGTC | 85023 |
| PigTailedMacaque  | CAAATGCTGCTGCAGCAGCTGCTGCAGCTGCTGCTGGCCGAGTGGGTATGCCTGGAGTCTCAGCTGGTGGCAATACAGTC | 83580 |
| Bonobo            | CAAATGCTGCTGCAGCAGCTGCTGCAGCTGCTGCTGGCCGAGTGGGTATGCCTGGAGTCTCAGCTGGTGGCAATACAGTC | 82687 |
| OliveBaboon       | CAAATGCTGCTGCAGCAGCTGCTGCAGCTGCTGCTGGCCGAGTGGGTATGCCTGGAGTCTCAGCTGGTGGCAATACAGTC | 83473 |
| Orangutan         | CAAATGCTGCTGCAGCAGCTGCTGCAGCTGCTGCTGGCCGAGTGGGTATGCCTGGAGTCTCAGCTGGTGGCAATACAGTC | 84313 |



Tuesday, May 03, 2022 06:17 PM

| Majority          | TATATGTATATTTTTT-AACCTAAC---CTATTTTTCCTAAGAAAAATATGGTGAAGTACTGTAGTTTGGCTT---ATCT |       |
|-------------------|----------------------------------------------------------------------------------|-------|
|                   | 100810 100820 100830 100840 100850 100860 100870 100880                          |       |
| Human             | TATATGTATATTTTTT-AACCTAAC---CTATTTTTCCTAAGAAAAATATGGTGAAGTACTGTAGTTTGGCTT---ATCT | 84160 |
| Coquerel'sSifaka  | ---ATGTATATTTTTTTAACCTAACTACCTATTTTTCCTAAGAAAAATATGGTGAAGTACTGTAGTTTGGCTTTTTATCT | 70334 |
| Ma'sNightMonkey   | TATATGTATATTTTTT-AACCTAAC---CTATTTTTCCTAAGAAAAATATGGTGAAGTACTGTAGTTTGGCTT---ATCT | 78739 |
| VervetAGM         | TATTGTATATTTTTT-AACCTAAC---CTATTTTTCCTAAGAAAAATATGGTGAAGTACTGTAGTTTGGCTT---ATCA  | 84991 |
| Gorilla           | TATATGTATATTTTTT-AACCTAAC---CTATTTTTCCTAAGAAAAATATGGTGAAGTACTGTAGTTTGGCTT---ATCT | 82409 |
| GrabEatingMacaque | ---TTGTATATTTTTT-AACCTAAC---CTATTTTTCCTAAGAAAAATATGGTGAAGTACTGTAGTTTGGCTT---ATCA | 84437 |
| Macaque           | ---TTGTATATTTTTT-AACCTAAC---CTATTTTTCCTAAGAAAAATATGGTGAAGTACTGTAGTTTGGCTT---ATCA | 85326 |
| PigTailedMacaque  | ---TTGTATATTTTTT-AACCTAAC---CTATTTTTCCTAAGAAAAATATGGTGAAGTACTGTAGTTTGGCTT---ATCA | 83883 |
| Bonobo            | TATATGTATATTTTTT-AACCTAAC---CTATTTTTCCTAAGAAAAATATGGTGAAGTACTGTAGTTTGGCTT---ATCT | 82999 |
| OliveBaboon       | ---TTGTATATTTTTT-AACCTAAC---CTATTTTTCCTAAGAAAAATATGGTGAAGTACTGTAGTTTGGCTT---ATCA | 83779 |
| Orangutan         | TATATGTATATTTTTT-AACCTAAC---CTATTTTTCCTAAGAAAAATATGGTGAAGTACTGTAGTTTGGCTT---ATCT | 84625 |

| Majority          | TTTTGTTGTTCTCAAAGGCAAAATGTGATCTAATTTGCAAATTTAACTGTAAAACAATTTTGCTCTTTGCCTTTTCTAATT |       |
|-------------------|-----------------------------------------------------------------------------------|-------|
|                   | 100890 100900 100910 100920 100930 100940 100950 100960                           |       |
| Human             | TTTTGTTGTTCTCAAAGGCAAAATGTGATCTAATTTGCAAATTTAACTGTAAAACAATTTTGCTCTTTGCCTTTTCTAATT | 84240 |
| Coquerel'sSifaka  | TTTTGTTGATTTCAAAGGCAAAATGTGATCTAATTTGCAAATTTAACTGTAAAACAATTTTGCTCTTTGCCTTTTCTAATT | 70414 |
| Ma'sNightMonkey   | TTTTGTTGTTCTCAAAGGCAAAATGTGATCTAATTTGCAAATTTAACTGTAAAACAATTTTGCTCTTTGCCTTTTCTAATT | 78819 |
| VervetAGM         | TTTTGTTGTTCTCAAAGGCAAAATGTGATCTAATTTGCAAATTTAACTGTAAAACAATTTTGCTCTTTGCCTTTTCTAATT | 85071 |
| Gorilla           | TTTTGTTGTTCTTAAAGGCAAAATGTGATCTAATTTGCAAATTTAACTGTAAAACAATTTTGCTCTTTGCCTTTTCTAATT | 82489 |
| GrabEatingMacaque | TTTTGTTGTTCTCAAAGGCAAAATGTGATCTAATTTGCAAATTTAACTGTAAAACAATTTTGCTCTTTGCCTTTTCTAATT | 84517 |
| Macaque           | TTTTGTTGTTCTCAAAGGCAAAATGTGATCTAATTTGCAAATTTAACTGTAAAACAATTTTGCTCTTTGCCTTTTCTAATT | 85406 |
| PigTailedMacaque  | TTTTGTTGTTCTCAAAGGCAAAATGTGATCTAATTTGCAAATTTAACTGTAAAACAATTTTGCTCTTTGCCTTTTCTAATT | 83963 |
| Bonobo            | TTTTGTTGTTCTCAAAGGCAAAATGTGATCTAATTTGCAAATTTAACTGTAAAACAATTTTGCTCTTTGCCTTTTCTAATT | 83079 |
| OliveBaboon       | TTTTGTTGTTCTCAAAGGCAAAATGTGATCTAATTTGCAAATTTAACTGTAAAACAATTTTGCTCTTTGCCTTTTCTAATT | 83859 |
| Orangutan         | TTTTGTTGTTCTCAAAGTCAAATGTGATCTAATTTGCAAATTTAACTGTAAAACAATTTTGCTCTTTGCCTTTTCTAATT  | 84705 |

| Majority          | ATTTGCTTGTTTCATTTTCATGCTTATATGTCATTGCATTTTTTTTTAAATCTTATTTT-ATGTGAAGTACTCTAATACATTT |       |
|-------------------|-------------------------------------------------------------------------------------|-------|
|                   | 100970 100980 100990 101000 101010 101020 101030 101040                             |       |
| Human             | ATTTGCTTGTTTCATTTTCATGCTTATATGTCATTGCATTTTTTTTTAAATCTTATTTT-ATGTGAAGTACTCTAATACATTT | 84319 |
| Coquerel'sSifaka  | ATTTGCTTGTTTCATTTTCATGCTTATGTCATTGT-TTTTTTTTAAATCTTATTTT-ATGTGAAGTACTCTAATACATTT    | 70492 |
| Ma'sNightMonkey   | ATTTGCTTGTTTCATTTTCATGCTTATATGTCATTGCATTTTTTTTTAAATCTTATTTTATGTGAAGTACTCTAATACATTT  | 78899 |
| VervetAGM         | ATTTGCTTGTTTCATTTTCATGCTTATATGTCATTGCATTTTTTTTTAAATCTTATTTT-ATGTGAAGTACTCTAATACATTT | 85150 |
| Gorilla           | ATTTGCTTGTTTCATTTTCATGCTTATATGTCATTGCATTTTTTTTTAAATCTTATTTT-ATGTGAAGTACTCTAATACATTT | 82568 |
| GrabEatingMacaque | ATTTGCTTGTTTCATTTTCATGCTTATATGTCATTGCATTTTTTTTTAAATCTTATTTT-ATGTGAAGTACTCTAATACATTT | 84596 |
| Macaque           | ATTTGCTTGTTTCATTTTCATGCTTATATGTCATTGCATTTTTTTTTAAATCTTATTTT-ATGTGAAGTACTCTAATACATTT | 85485 |
| PigTailedMacaque  | ATTTGCTTGTTTCATTTTCATGCTTATATGTCATTGCATTTTTTTTTAAATCTTATTTT-ATGTGAAGTACTCTAATACATTT | 84042 |
| Bonobo            | ATTTGCTTGTTTCATTTTCATGCTTATATGTCATTGCATTTTTTTTTAAATCTTATTTT-ATGTGAAGTACTCTAATACATTT | 83158 |
| OliveBaboon       | ATTTGCTTGTTTCATTTTCATGCTTATATGTCATTGCATTTTTTTTTAAATCTTATTTT-ATGTGAAGTACTCTAATACATTT | 83938 |
| Orangutan         | ATTTGCTTGTTTCATTTTCATGCTTATATGTCATTGCATTTTTTTTTAAATCTTATTTT-ATGTGAAGTACTCTAATACATTT | 84784 |

Tuesday, May 03, 2022 06:17 PM

| Majority          | TTCTTTGAAGGTTCTTCCAAAGATCTTGACGAGGCACTCTTCCAGTCTTTCTTAGTAATTTTTT-CTTTGCAGTTATTAG |        |        |        |        |        |        |        |  |  |       |
|-------------------|----------------------------------------------------------------------------------|--------|--------|--------|--------|--------|--------|--------|--|--|-------|
|                   | 101050                                                                           | 101060 | 101070 | 101080 | 101090 | 101100 | 101110 | 101120 |  |  |       |
| Human             | TTCTTTGAAGGTTCTTCCAAAGATCTTGACGAGGCACTCTTCCCCTCTTTCTTAGTAATTTTTT-CTTTGCAGTTATTAG |        |        |        |        |        |        |        |  |  | 84398 |
| Coquerel'sSifaka  | TTCTTTGAAGGTTCTTCCAAAGATCTTGACGAGGCACTCTTCCAGTCTTTCTTAGTAATTTTTT-CTTTGCAGTTATTAG |        |        |        |        |        |        |        |  |  | 70571 |
| Ma'sNightMonkey   | TTCTTTGAAGGTTCTTCCAAAGATCTTGACGAGGCACTCTTCCAGTCTTTCTTAGTAATTTTTT-CTTTGCAGTTATTAG |        |        |        |        |        |        |        |  |  | 78978 |
| VervetAGM         | TTCTTTAAAGGTTCTTCCAAAGATCTTGACGAGGCACTCTTCCAGTCTTTCTTAGTAATTTTTT-CTTTGCAGTTATTAG |        |        |        |        |        |        |        |  |  | 85229 |
| Gorilla           | TTCTTTGAAGGTTCTTCCAAAGATCTTGACGAGGCACTCTTCCAGTCTTTCTTAGTAATTTTTTCTTTGCAGTTATTAG  |        |        |        |        |        |        |        |  |  | 82648 |
| GrabEatingMacaque | TTCTTTGAAGGTTCTTCCAAAGATCTTGACGAGGCACTCTTCCAGTCTTTCTTAGTAATTTTTT-CTTTGCAGTTATTAG |        |        |        |        |        |        |        |  |  | 84675 |
| Macaque           | TTCTTTGAAGGTTCTTCCAAAGATCTTGACGAGGCACTCTTCCAGTCTTTCTTAGTAATTTTTT-CTTTGCAGTTATTAG |        |        |        |        |        |        |        |  |  | 85664 |
| PigTailedMacaque  | TTCTTTGAAGGTTCTTCCAAAGATCTTGACGAGGCACTCTTCCAGTCTTTCTTAGTAATTTTTT-CTTTGCAGTTATTAG |        |        |        |        |        |        |        |  |  | 84121 |
| Bonobo            | TTCTTTGAAGGTTCTTCCAAAGATCTTGACGAGGCACTCTTCCCCTCTTTCTTAGTAATTTTTT-CTTTGCAGTTATTAG |        |        |        |        |        |        |        |  |  | 83237 |
| OliveBaboon       | TTCTTTGAAGGTTCTTCCAAAGATCTTGACGAGGCACTCTTCCAGTCTTTCTTAGTAATTTTTT-CTTTGCAGTTATTAG |        |        |        |        |        |        |        |  |  | 84017 |
| Orangutan         | TTCTTTGAAGGTTCTTCCAAAGATCTTGACGAGGCACTCTTCCAGTCTTTCTTAGTAATTTTTT-CTTTGCAGTTATTAG |        |        |        |        |        |        |        |  |  | 84863 |

| Majority          | TCATTGTCTTCTAAAAATATTTTTTAACTTTATTCCCCACCCCTTCCTTCCTGACCCCGACCCACCCACCCACCTCA  |        |        |        |        |        |        |        |  |  |       |
|-------------------|--------------------------------------------------------------------------------|--------|--------|--------|--------|--------|--------|--------|--|--|-------|
|                   | 101130                                                                         | 101140 | 101150 | 101160 | 101170 | 101180 | 101190 | 101200 |  |  |       |
| Human             | TCATTGTCTTCTAAAAATATTTTTTAACTTTATTCCCCACCCCTTCCTTCCTTACC-----ACCCCT-----CCA    |        |        |        |        |        |        |        |  |  | 84465 |
| Coquerel'sSifaka  | TTATTGTCTTCTAAAAATATTTTTCAACTTTATTCCCCTTTCCTTCCCCC---CC-----                   |        |        |        |        |        |        |        |  |  | 70625 |
| Ma'sNightMonkey   | TCATTGTCTTCTAAAAATATTTTTTAACTTTAA-CCCCACCCCTTCCTCCCTGACCCCTCCCACCCCGCC-ACCCTG  |        |        |        |        |        |        |        |  |  | 79056 |
| VervetAGM         | TCATTGTCTTCTAAAAATATTTTTTAACTTTATTCCCCACCCCTTCCTTCCTGACCCCGACCCACCCACCCACCTCA  |        |        |        |        |        |        |        |  |  | 85309 |
| Gorilla           | TCATTGTCTTCTAAAAATATTTTTTAACTTTATTCCCCACCCCTTCCTTCCTTACC-----ACCTCC-----CCA    |        |        |        |        |        |        |        |  |  | 82715 |
| GrabEatingMacaque | TCATTGTCTTCTAAAAATATTTTTTAACTTTATTCCCCTACCCCTTCCTTCCTGACCCCGACCCACCCACCCACCTCG |        |        |        |        |        |        |        |  |  | 84755 |
| Macaque           | TCATTGTCTTCTAAAAATATTTTTTAACTTTATTCCCCTACCCCTTCCTTCCTGACCCCGACCCACCCACCCACCTCG |        |        |        |        |        |        |        |  |  | 85644 |
| PigTailedMacaque  | TCATTGTCTTCTAAAAATATTTTTTAACTTTATTCCCCACCCCTTCCTTCCTGACCCCGACCCACCCACCCACCTCA  |        |        |        |        |        |        |        |  |  | 84201 |
| Bonobo            | TCATTGTCTTCTAAAAATATTTTTTGACTTTTATTCCCCACCCCTTCCTTCCTTACC-----ACCCCT-----CCA   |        |        |        |        |        |        |        |  |  | 83303 |
| OliveBaboon       | TCATTGTCTTCTAAAAATATTTTTTAACTTTATTCCCCACCCCTTCCTTCCTGACCCCGACCCACCCACCCACCTCG  |        |        |        |        |        |        |        |  |  | 84097 |
| Orangutan         | TCATTGTCTTCTAAAAATATTTTTTAACTTTATTCCCCAACCCCTTCCTTCCTTACC-----ACCTCCCCCACCA    |        |        |        |        |        |        |        |  |  | 84935 |

| Majority          | CCCAGTTAAATAAAATTTATTGCTAAGTTATTTTCTTT-AGTTGTACATTTTATGTCTGGTATATTTTATTTTGAATGCT |        |        |        |        |        |        |        |  |  |       |
|-------------------|----------------------------------------------------------------------------------|--------|--------|--------|--------|--------|--------|--------|--|--|-------|
|                   | 101210                                                                           | 101220 | 101230 | 101240 | 101250 | 101260 | 101270 | 101280 |  |  |       |
| Human             | CCCAGTTAAATAAAATTTATTGCTAAGTTATTTTCTTT-AGTTGTACATTTTATGTCTGGTATATTTTATTTTGAATGCT |        |        |        |        |        |        |        |  |  | 84544 |
| Coquerel'sSifaka  | ----GTTGAATAAAATTTATTGCTAAGTTATTTTATTT-AGTTGTACATTTTATGTCTGGTATATTTTATTTTGAATGCT |        |        |        |        |        |        |        |  |  | 70700 |
| Ma'sNightMonkey   | CCCGTTAAATAAAATTTATTGCTAAGTTGTTTTTTTTTAGTTGTACATTTTATGTCTGGTATATTTTATTTTGAATGCT  |        |        |        |        |        |        |        |  |  | 79136 |
| VervetAGM         | CCCAGTTAAATAAAATTTATTGCTAAGTTATTTTCTTT-AGTTGTACATTTTATGTCTGGTATATTTTATTTTGAATGCT |        |        |        |        |        |        |        |  |  | 85388 |
| Gorilla           | CCCAGTTAAATAAAATTTATTGCCAAGTTATTTTCTTT-AGTTGTACATTTTATGTCTGGTATATTTTATTTTGAATGCT |        |        |        |        |        |        |        |  |  | 82794 |
| GrabEatingMacaque | CCCAGTTAAATAAAATTTATTGCTAAGTTATTTTCTTT-AGTTGTACATTTTATGTCTGGTATATTTTATTTTGAATGCT |        |        |        |        |        |        |        |  |  | 84834 |
| Macaque           | CCCAGTTAAATAAAATTTATTGCTAAGTTATTTTCTTT-AGTTGTACATTTTATGTCTGGTATATTTTATTTTGAATGCT |        |        |        |        |        |        |        |  |  | 85723 |
| PigTailedMacaque  | CCCAGTTAAATAAAATTTATTGCTAAGTTATTTTCTTT-AGTTGTACATTTTATGTCTGGTATATTTTATTTTGAATGCT |        |        |        |        |        |        |        |  |  | 84280 |
| Bonobo            | CCCAGTTAAATAAAATTTATTGCTAAGTTATTTTCTTT-AGTTGTACATTTTATGTCTGGTATATTTTATTTTGAATGCT |        |        |        |        |        |        |        |  |  | 83382 |
| OliveBaboon       | CCCAGTTAAATAAAATTTATTGCTAAGTTATTTTCTTT-AGTTGTACATTTTATGTCTGGTATATTTTATTTTGAATGCT |        |        |        |        |        |        |        |  |  | 84176 |
| Orangutan         | TCCAGTTAAATAAAATTTATTGCTAAGTTATTTTCTTT-AGTTGTACATTTTATGTCTGGTATATTTTATTTTGAATGCT |        |        |        |        |        |        |        |  |  | 85014 |

Tuesday, May 03, 2022 06:17 PM

| Majority          | ATGAAAGCTGGTATGAAATGTGGGAAGCTCAGTGTATCAGTTTATGATGTCTAATTTGAATATTTGTTTCATTTTAAATT |        |        |        |        |        |        |        |  |       |
|-------------------|----------------------------------------------------------------------------------|--------|--------|--------|--------|--------|--------|--------|--|-------|
|                   | 101290                                                                           | 101300 | 101310 | 101320 | 101330 | 101340 | 101350 | 101360 |  |       |
| Human             | ATGAAAGCTGGTATGAAATGTGGGAAGCTCAGTGTATCAGTTTATGATGTCTAATTTGAATATTTGTTTCATTTTAAATT |        |        |        |        |        |        |        |  | 84624 |
| Coquerel'sSifaka  | ATGAAAGCTGGTATGAAATGTGGGAAGCTCAATGTATCAGTTTATGATGTCTAATTTGAATATTTGTTTCATTTTAAATT |        |        |        |        |        |        |        |  | 70780 |
| Ma'sNightMonkey   | ATGAACGCTGGTATGAAATGTGGGAAGCTCAGTGTATCAGTTTATGATGTCTAATTTGAATATTTGTTTCATTTTAAATT |        |        |        |        |        |        |        |  | 79216 |
| VervetAGM         | ATGAAAGCTGGTATGAAATGTGGGAAGCTCAGTGTATCAGTTTATGATGTCTAATTTGAAT--TTGTTTCATTTTAAATT |        |        |        |        |        |        |        |  | 85466 |
| Gorilla           | ATGAAAGCTGGTATGAAATGTGGGAAGCTCAGTGTATCAGTTTATGATGTCTAATTTGAATATTTGTTTCATTTTAAATT |        |        |        |        |        |        |        |  | 82874 |
| GrabEatingMacaque | ATGAAAGCTGGTATGAAATGTGGGAAGCTCAGTGTATCAGTTTATGATGTCTAATTTGAAT--TTGTTTCATTTTAAATT |        |        |        |        |        |        |        |  | 84912 |
| Macaque           | ATGAAAGCTGGTATGAAATGTGGGAAGCTCAGTGTATCAGTTTATGATGTCTAATTTGAAT--TTGTTTCATTTTAAATT |        |        |        |        |        |        |        |  | 85801 |
| PigTailedMacaque  | ATGAAAGCTGGTATGAAATGTGGGAAGCTCAGTGTATCAGTTTATGATGTCTAATTTGAAT--TTGTTTCATTTTAAATT |        |        |        |        |        |        |        |  | 84358 |
| Bonobo            | ATGAAAGCTGGTATGAAATGTGGGAAGCTCAGTGTATCAGTTTATGATGTCTAATTTGAATATTTGTTTCATTTTAAATT |        |        |        |        |        |        |        |  | 83462 |
| OliveBaboon       | ATGAAAGCTGGTATGAAATGTGGGAAGCTCAGTGTATCAGTTTATGATGTCTAATTTGAAT--TTGTTTCATTTTAAATT |        |        |        |        |        |        |        |  | 84254 |
| Orangutan         | ATGAAAGCTGGTATGAAATGTGGGAAGCTCAGTGTATCAGTTTATGATGTCTAATTTGAATATTTGTTTCATTTTAAATT |        |        |        |        |        |        |        |  | 85094 |

| Majority          | GGCCTCTGTTAATATGAACATTA-GCTTATTTTATCCATTTAATACTATTATCATTACAGTTCCTGCATGCTAAAAATGTT |        |        |        |        |        |        |        |  |       |
|-------------------|-----------------------------------------------------------------------------------|--------|--------|--------|--------|--------|--------|--------|--|-------|
|                   | 101370                                                                            | 101380 | 101390 | 101400 | 101410 | 101420 | 101430 | 101440 |  |       |
| Human             | GGCCTCTGTTAATATGAACATTA-GCTTATTTTATCCATTTAATACTATTATCATTACAGTTCCTGCATGCTAAAAATGTT |        |        |        |        |        |        |        |  | 84703 |
| Coquerel'sSifaka  | GGCCT--GTTAATATGAACATTAAGCTTATTTTATC-ATTTAATACTATTATCATTACAGTTCCTGCATGCTAAAAATGTT |        |        |        |        |        |        |        |  | 70857 |
| Ma'sNightMonkey   | GGCCTCTGTTAATATGAACATTA-GCTTATTTTATC-ATTTAATACTATTATCATTACAGTTCCTGCATGCTAAAAATGTT |        |        |        |        |        |        |        |  | 79294 |
| VervetAGM         | GGCCTCTGTTAATATGAACATTA-GCTTATTTTATCCATTTAATACTATTATCATTACAGTTCCTGCATGCTAAAAATGTT |        |        |        |        |        |        |        |  | 85545 |
| Gorilla           | GGCCTCTGTTAATATGAACATTA-GCTTATTTTATCCATTTAATACTATTATCATTACAGTTCCTGCATGCTAAAAATGTT |        |        |        |        |        |        |        |  | 82953 |
| GrabEatingMacaque | GGCCTCTGTTAATATGAACATTA-GCTTATTTTATCCATTTAATACTATTATCATTACAGTTCCTGCATGCTAAAAATGTT |        |        |        |        |        |        |        |  | 84991 |
| Macaque           | GGCCTCTGTTAATATGAACATTA-GCTTATTTTATCCATTTAATACTATTATCATTACAGTTCCTGCATGCTAAAAATGTT |        |        |        |        |        |        |        |  | 85880 |
| PigTailedMacaque  | GGCCTCTGTTAATATGAACATTA-GCTTATTTTATCCATTTAATACTATTATCATTACAGTTCCTGCATGCTAAAAATGTT |        |        |        |        |        |        |        |  | 84437 |
| Bonobo            | GGCCTCTGTTAATATGAACATTA-GCTTATTTTATCCATTTAATACTATTATCATTACAGTTCCTGCATGCTAAAAATGTT |        |        |        |        |        |        |        |  | 83541 |
| OliveBaboon       | GGCCTCTGTTAATATGAACATTA-GCTTATTTTATCCATTTAATACTATTATCATTACAGTTCCTGCATGCTAAAAATGTT |        |        |        |        |        |        |        |  | 84333 |
| Orangutan         | GGCCTCTGTTAATATGAACATTA-GCTTATTTTATCCATTTAATACTATTATCATTACAGTTCCTGCATGCTAAAAATGTT |        |        |        |        |        |        |        |  | 85173 |

| Majority          | TGAATCAGAGTGCCTTTGTTTTATTTTAAAGACTTTTGCCTGCATTTTCATAACCAGCCATGCTTATGCAGTT-AAAGTTC |        |        |        |        |        |        |        |  |       |
|-------------------|-----------------------------------------------------------------------------------|--------|--------|--------|--------|--------|--------|--------|--|-------|
|                   | 101450                                                                            | 101460 | 101470 | 101480 | 101490 | 101500 | 101510 | 101520 |  |       |
| Human             | TGAATCAGAGTGCCTTTGTTTTATTTTAAAGACTTTTGCCTGCATTTTCATAACCAGCCATGCTTATGCAGTT-AAAGTTC |        |        |        |        |        |        |        |  | 84782 |
| Coquerel'sSifaka  | TGAATCAGAGTGCCTTTGTTTTATTTTAAAGACTTTTGCCTGCATTTTCATAACCAGCCATGCTTATGCAGTT-AAAGTTC |        |        |        |        |        |        |        |  | 70936 |
| Ma'sNightMonkey   | TGAATCAGAGTGCCTTTGTTTTATTTTAAAGACTTTTGCCTGCATTTTCATAACCAGCCATGCTTATGCAGTTGAAAGTTC |        |        |        |        |        |        |        |  | 79374 |
| VervetAGM         | TGAATCAGAGTGCCTTTGTTTTGTTTTAAAGACTTTTGCCTGCATTTTCATAACCAGCCATGCTTATGCAGTT-AAAGTTC |        |        |        |        |        |        |        |  | 85624 |
| Gorilla           | TGAATCAGAGTGCCTTTGTTTTATTTTAAAGACTTTTGCCTGCATTTTCATAACCAGCCATGCTTATGCAGTT-AAAGTTC |        |        |        |        |        |        |        |  | 83032 |
| GrabEatingMacaque | TGAATCAGAGTGCCTTTGTTTTGTTTTAAAGACTTTTGCCTGCATTTTCATAACCAGCCATGCTTATGCAGTT-AAAGTTC |        |        |        |        |        |        |        |  | 85070 |
| Macaque           | TGAATCAGAGTGCCTTTGTTTTGTTTTAAAGACTTTTGCCTGCATTTTCATAACCAGCCATGCTTATGCAGTT-AAAGTTC |        |        |        |        |        |        |        |  | 85959 |
| PigTailedMacaque  | TGAATCAGAGTGCCTTTGTTTTGTTTTAAAGACTTTTGCCTGCATTTTCATAACCAGCCATGCTTATGCAGTT-AAAGTTC |        |        |        |        |        |        |        |  | 84516 |
| Bonobo            | TGAATCAGAGTGCCTTTGTTTTATTTTAAAGACTTTTGCCTGCATTTTCATAACCAGCCATGCTTATGCAGTT-AAAGTTC |        |        |        |        |        |        |        |  | 83620 |
| OliveBaboon       | TGAATCAGAGTGCCTTTGTTTTGTTTTAAAGACTTTTGCCTGCATTTTCATAACCAGCCATGCTTATGCAGTT-AAAGTTC |        |        |        |        |        |        |        |  | 84412 |
| Orangutan         | TGAATCAGAGTGCCTTTGTTTTATTTTAAAGACTTTTGCCTGCATTTTCATAACCAGCCATGCTTATGCAGTT-AAAGTTC |        |        |        |        |        |        |        |  | 85252 |





Tuesday, May 03, 2022 06:17 PM

|                   |                                                                                |       |
|-------------------|--------------------------------------------------------------------------------|-------|
| Majority          | TGCTGTTTCCCTTCCCATTTCATCCTTTTCCCTGTGTGTTACCTTCCCTTTCCTTGCTCTTTTCCAAATGCCCATTC  |       |
|                   | 101770 101780 101790 101800 101810 101820 101830 101840                        |       |
| Human             | TGCTGTTTCCCTTCCCATTTCATCCTTTTCCCTGTGTGTTACCTTCCCTTTCCTTGCTCTTTTCCAAATGCCCATTC  | 85099 |
| Coquerel'sSifaka  | TGCTGTTTCCCTTCCCATTTCATCCTTTTCCCTGTGTGTTACCTTCCCTTTCCTTGCTCTTTTCCAAATACCCATTTC | 71256 |
| Ma'sNightMonkey   | TGCTGTTTCCCTTCCCATTTCATCCTTTTCCCTGTGTGTTACCTTCCCTTTCCTTGCTCTTTTCCAAATGCCCATTC  | 79690 |
| VervetAGM         | TGCTGTTTCCCTTCCCATTTCATCCTTTTCCCTGTGTGTTACCTTCCCTTTCCTTGCTCTTTTCCAAATGCCCATTC  | 85941 |
| Gorilla           | TGCTGTTTCCCTTCCCATTTCATCCTTTTCCCTGTGTGTTACCTTCCCTTTCCTTGCTCTTTTCCAAATGTCCATTTC | 83349 |
| GrabEatingMacaque | TGCTGTTTCCCTTCCCATTTCATCCTTTTCCCTGTGTGTTACCTTCCCTTTCCTTGCTCTTTTCCAAATGCCCATTC  | 85387 |
| Macaque           | TGCTGTTTCCCTTCCCATTTCATCCTTTTCCCTGTGTGTTACCTTCCCTTTCCTTGCTCTTTTCCAAATGCCCATTC  | 86276 |
| PigTailedMacaque  | TGCTGTTTCCCTTCCCATTTCATCCTTTTCCCTGTGTGTTACCTTCCCTTTCCTTGCTCTTTTCCAAATGCCCATTC  | 84833 |
| Bonobo            | TGCTGTTTCCCTTCCCATTTCATCCTTTTCCCTGTGTGTTACCTTCCCTTTCCTTGCTCTTTTCCAAATGCCCATTC  | 83937 |
| OliveBaboon       | TGCTGTTTCCCTTCCCATTTCATCCTTTTCCCTGTGTGTTACCTTCCCTTTCCTTGCTCTTTTCCAAATGCCCATTC  | 84729 |
| Orangutan         | TGCTGTTTCCCTTCCCATTTCATCCTTTTCCCTGTGTGTTACCTTCCCTTTCCTTGCTCTTTTCCAAATGCCCATTC  | 85569 |

|                   |                                                                                  |       |
|-------------------|----------------------------------------------------------------------------------|-------|
| Majority          | CTTCCCTGCTTATCCTTTATTTTCCTTGCTCTTGCTTTCATTCCCTGTCTCCATTCCCTATGTTTCATGCTTCTGTGCTT |       |
|                   | 101850 101860 101870 101880 101890 101900 101910 101920                          |       |
| Human             | CTTCCCTGCTTATCCTTTATTTTCCTTGCTCTTGCTTTCATTCCCTGTCTCCATTCCCTATGTTTCATGCTTCTGTGCTT | 85179 |
| Coquerel'sSifaka  | CTTCCCTGCTTATCCTTTATTTTCCTTGCTCTTGCTTTCATTCCCTGTCTCCATTCCCTATGTTTCATGCTTCTGTGCTT | 71336 |
| Ma'sNightMonkey   | CTTCCCTGCTTATCCTTTATTTTCCTTGCTCTTGCTTTCATTCCCTGTCTCCATTCCCTATGTTTCATGCTTCTGTGCTT | 79770 |
| VervetAGM         | CTTCCCTGCTTATCCTTTATTTTCCTTGCTCTTGCTTTCATTCCCTGTCTCCATTCCCTATGTTTCATGCTTCTGTGCTT | 86021 |
| Gorilla           | CTTCCCTGCTTATCCTTTATTTTCCTTGCTCTTGCTTTCATTCCCTGTCTCCATTCCCTATGTTTCATGCTTCTGTGCTT | 83429 |
| GrabEatingMacaque | CTTCCCTGCTTATCCTTTATTTTCCTTGCTCTTGCTTTCATTCCCTGTCTCCATTCCCTATGTTTCATGCTTCTGTGCTT | 85467 |
| Macaque           | CTTCCCTGCTTATCCTTTATTTTCCTTGCTCTTGCTTTCATTCCCTGTCTCCATTCCCTATGTTTCATGCTTCTGTGCTT | 86356 |
| PigTailedMacaque  | CTTCCCTGCTTATCCTTTATTTTCCTTGCTCTTGCTTTCATTCCCTGTCTCCATTCCCTATGTTTCATGCTTCTGTGCTT | 84913 |
| Bonobo            | CTTCCCTGCTTATCCTTTATTTTCCTTGCTCTTGCTTTCATTCCCTGTCTCCATTCCCTATGTTTCATGCTTCTGTGCTT | 84017 |
| OliveBaboon       | CTTCCCTGCTTATCCTTTATTTTCCTTGCTCTTGCTTTCATTCCCTGTCTCCATTCCCTATGTTTCATGCTTCTGTGCTT | 84809 |
| Orangutan         | CTTCCCTGCTTATCCTTTATTTTCCTTGCTCTTGCTTTCATTCCCTGTCTCCATTCCCTATGTTTCATGCTTCTGTGCTT | 85649 |

|                   |                                                                                  |       |
|-------------------|----------------------------------------------------------------------------------|-------|
| Majority          | GAACAAATGTTTCTCGGACCAACTTGCCCCAATTAACCGCCTTGAACCATGATCCATGACCACCTCACCATTCTGCGGGA |       |
|                   | 101930 101940 101950 101960 101970 101980 101990 102000                          |       |
| Human             | GAACAAATGTTTCTCGGACCAACTTGCCCCAATTAACCGCCTTGAACCATGATCCATGACCACCTCACCATTCTGCGGGA | 85259 |
| Coquerel'sSifaka  | GAACAAATGTTTCTCGGACCAACTTGCCCCAATTAACCGCCTTGAACCATGATCCATGACCACCTCACCATTCTGCGGGA | 71416 |
| Ma'sNightMonkey   | GAACAAATGTTTCTCGGACCAACTTGCCCCAATTAACCGCCTTGAACCATGATCCATGACCACCTCACCATTCTGCGGGA | 79850 |
| VervetAGM         | GAACAAATGTTTCTCGGACCAACTTGCCCCAATTAACCGCCTTGAACCATGATCCATGACCACCTCACCATTCTGCGGGA | 86101 |
| Gorilla           | GAACAAATGTTTCTCGGACCAACTTGCCCCAATTAACCGCCTTGAACCATGATCCATGACCACCTCACCATTCTGCGGGA | 83509 |
| GrabEatingMacaque | GAACAAATGTTTCTCGGACCAACTTGCCCCAATTAACCGCCTTGAACCATGATCCATGACCACCTCACCATTCTGCGGGA | 85547 |
| Macaque           | GAACAAATGTTTCTCGGACCAACTTGCCCCAATTAACCGCCTTGAACCATGATCCATGACCACCTCACCATTCTGCGGGA | 86436 |
| PigTailedMacaque  | GAACAAATGTTTCTCGGACCAACTTGCCCCAATTAACCGCCTTGAACCATGATCCATGACCACCTCACCATTCTGCGGGA | 84993 |
| Bonobo            | GAACAAATGTTTCTCGGACCAACTTGCCCCAATTAACCGCCTTGAACCATGATCCATGACCACCTCACCATTCTGCGGGA | 84097 |
| OliveBaboon       | GAACAAATGTTTCTCGGACCAACTTGCCCCAATTAACCGCCTTGAACCATGATCCATGACCACCTCACCATTCTGCGGGA | 84889 |
| Orangutan         | GAACAAATGTTTCTCGGACCAACTTGCCCCAATTAACCGCCTTGAACCATGATCCATGACCACCTCACCATTCTGCGGGA | 85729 |

Tuesday, May 03, 2022 06:17 PM

|                   |                                                                                    |       |
|-------------------|------------------------------------------------------------------------------------|-------|
| Majority          | ACCACCCCTTCGTTATGGATGATCTGTTCATCTCCGCTCTTCCCTCGACTCTTCTCTCTTCTTGCTTTACGCTGCTTGCTCT |       |
|                   | 102010 102020 102030 102040 102050 102060 102070 102080                            |       |
| Human             | ACCACCCCTTCGTTATGGATGATCTGTTCATCTCCGCTCTTCCCTCGACTCTTCTCTCTTCTTGCTTTACGCTGCTTGCTCT | 85339 |
| Coquerel'sSifaka  | ACCACCCCTTCGTTATGGATGATCTGTTCATCTCCGCTCTTCCCTCGACTCTTCTCTCTTCTTGCTTTACGCTGCTTGCTCT | 71496 |
| Ma'sNightMonkey   | ACCACCCCTTCGTTATGGATGATCTGTTCATCTCCGCTCTTCCCTCGACTCTTCTCTCTTCTTGCTTTACGCTGCTTGCTCT | 79930 |
| VervetAGM         | ACCACCCCTTCGTTATGGATGATCTGTTCATCTCCGCTCTTCCCTCGACTCTTCTCTCTTCTTGCTTTACGCTGCTTGCTCT | 86181 |
| Gorilla           | ACCACCCCTTCGTTATGGATGATCTGTTCATCTCCGCTCTTCCCTCGACTCTTCTCTCTTCTTGCTTTACGCTGCTTGCTCT | 83589 |
| GrabEatingMacaque | ACCACCCCTTCGTTATGGATGATCTGTTCATCTCCGCTCTTCCCTCGACTCTTCTCTCTTCTTGCTTTACGCTGCTTGCTCT | 85627 |
| Macaque           | ACCACCCCTTCGTTATGGATGATCTGTTCATCTCCGCTCTTCCCTCGACTCTTCTCTCTTCTTGCTTTACGCTGCTTGCTCT | 86516 |
| PigTailedMacaque  | ACCACCCCTTCGTTATGGATGATCTGTTCATCTCCGCTCTTCCCTCGACTCTTCTCTCTTCTTGCTTTACGCTGCTTGCTCT | 85073 |
| Bonobo            | ACCACCCCTTCGTTATGGATGATCTGTTCATCTCCGCTCTTCCCTCGACTCTTCTCTCTTCTTGCTTTACGCTGCTTGCTCT | 84177 |
| OliveBaboon       | ACCACCCCTTCGTTATGGATGATCTGTTCATCTCCGCTCTTCCCTCGACTCTTCTCTCTTCTTGCTTTACGCTGCTTGCTCT | 84969 |
| Orangutan         | ACCACCCCTTCGTTATGGATGATCTGTTCATCTCCGCTCTTCCCTCGACTCTTCTCTCTTCTTGCTTTACGCTGCTTGCTCT | 85809 |
| Majority          | TCTCTCCTTCTAAAGATGGTTACGCCCCAAAGTCTGTTTACCCTCTTCGGTATGTTATTGTTAGCACTATACTTTTATTA   |       |
|                   | 102090 102100 102110 102120 102130 102140 102150 102160                            |       |
| Human             | TCTCTCCTTCTAAAGATGGTTACGCCCCAAAGTCTGTTTACCCTCTTCGGTATGTTATTGTTAGCACTATACTTTTATTA   | 85419 |
| Coquerel'sSifaka  | TCTCTCCTTCTAAAGATGGTTACGCCCCAAAGTCTGTTTACCCTCTTCGGTATGTTATTGTTAGCACTATACTTTTATTA   | 71576 |
| Ma'sNightMonkey   | TCTCTCCTTCTAAAGATGGTTACGCCCCAAAGTCTGTTTACCCTCTTCGGTATGTTATTGTTAGCACTATACTTTTATTA   | 80010 |
| VervetAGM         | TCTCTCCTTCTAAAGATGGTTACGCCCCAAAGTCTGTTTACCCTCTTCGGTATGTTATTGTTAGCACTATACTTTTATTA   | 86261 |
| Gorilla           | TCTCTCCTTCTAAAGATGGTTACGCCCCAAAGTCTGTTTACCCTCTTCGGTATGTTATTGTTAGCACTATACTTTTATTA   | 83669 |
| GrabEatingMacaque | TCTCTCCTTCTAAAGATGGTTACGCCCCAAAGTCTGTTTACCCTCTTCGGTATGTTATTGTTAGCACTATACTTTTATTA   | 85707 |
| Macaque           | TCTCTCCTTCTAAAGATGGTTACGCCCCAAAGTCTGTTTACCCTCTTCGGTATGTTATTGTTAGCACTATACTTTTATTA   | 86596 |
| PigTailedMacaque  | TCTCTCCTTCTAAAGATGGTTACGCCCCAAAGTCTGTTTACCCTCTTCGGTATGTTATTGTTAGCACTATACTTTTATTA   | 85153 |
| Bonobo            | TCTCTCCTTCTAAAGATGGTTACGCCCCAAAGTCTGTTTACCCTCTTCGGTATGTTATTGTTAGCACTATACTTTTATTA   | 84257 |
| OliveBaboon       | TCTCTCCTTCTAAAGATGGTTACGCCCCAAAGTCTGTTTACCCTCTTCGGTATGTTATTGTTAGCACTATACTTTTATTA   | 85049 |
| Orangutan         | TCTCTCCTTCTAAAGATGGTTACGCCCCAAAGTCTGTTTACCCTCTTCGGTATGTTATTGTTAGCACTATACTTTTATTA   | 85889 |
| Majority          | TTGATTTGATTTTTGTTTCACCTTAATCTTATTTGTAGCTAGCACTTTGGCTTAAAGTTGAATAGTAAATCTTTTGCTA    |       |
|                   | 102170 102180 102190 102200 102210 102220 102230 102240                            |       |
| Human             | TTGATTTGATTTTTGTTTCACCTTAATCTTATTTGTAGCTAGCACTTTGGCTTAAAGTTGAATAGTAAATCTTTTGCTA    | 85499 |
| Coquerel'sSifaka  | TTGATTTGATTTTTGTTTCACCTTAATCTTATTTGTAGCTAGCACTTTGGCTTAAAGTTGAATAGTAAATCTTTTGCTA    | 71656 |
| Ma'sNightMonkey   | TTGATTTGATTTTTGTTTCACCTTAATCTTATTTGTAGCTAGCACTTTGGCTTAAAGTTGAATAGTAAATCTTTTGCTA    | 80090 |
| VervetAGM         | TTGATTTGATTTTTGTTTCACCTTAATCTTATTTGTAGCTAGCACTTTGGCTTAAAGTTGAATAGTAAATCTTTTGCTA    | 86341 |
| Gorilla           | TTGATTTGATTTTTGTTTCACCTTAATCTTATTTGTAGCTAGCACTTTGGCTTAAAGTTGAATAGTAAATCTTTTGCTA    | 83749 |
| GrabEatingMacaque | TTGATTTGATTTTTGTTTCACCTTAATCTTATTTGTAGCTAGCACTTTGGCTTAAAGTTGAATAGTAAATCTTTTGCTA    | 85787 |
| Macaque           | TTGATTTGATTTTTGTTTCACCTTAATCTTATTTGTAGCTAGCACTTTGGCTTAAAGTTGAATAGTAAATCTTTTGCTA    | 86676 |
| PigTailedMacaque  | TTGATTTGATTTTTGTTTCACCTTAATCTTATTTGTAGCTAGCACTTTGGCTTAAAGTTGAATAGTAAATCTTTTGCTA    | 85233 |
| Bonobo            | TTGATTTGATTTTTGTTTCACCTTAATCTTATTTGTAGCTAGCACTTTGGCTTAAAGTTGAATAGTAAATCTTTTGCTA    | 84337 |
| OliveBaboon       | TTGATTTGATTTTTGTTTCACCTTAATCTTATTTGTAGCTAGCACTTTGGCTTAAAGTTGAATAGTAAATCTTTTGCTA    | 85129 |
| Orangutan         | TTGATTTGATTTTTGTTTCACCTTAATCTTATTTGTAGCTAGCACTTTGGCTTAAAGTTGAATAGTAAATCTTTTGCTA    | 85969 |

Tuesday, May 03, 2022 06:17 PM

| Majority          | TTTTCTTTGCTATTTAAACTCTCCATAGACACAAAATTTGTTTTAATGCATGCTAATTTATTTTGCATGGTCTTTAAT |        |        |        |        |        |        |        |  |       |
|-------------------|--------------------------------------------------------------------------------|--------|--------|--------|--------|--------|--------|--------|--|-------|
|                   | 102250                                                                         | 102260 | 102270 | 102280 | 102290 | 102300 | 102310 | 102320 |  |       |
| Human             | TTTTCTTTGCTATTTAAACTCTCCATAGACACAAAATTTGTTTTAATGCATGCTAATTTATTTTGCATGGTCTTTAAT |        |        |        |        |        |        |        |  | 85579 |
| Coquerel'sSifaka  | TTTTCTTTGCTATTTAAACTCTCCATAGACACAAAATTTGTTTTAATGCATGCTGATTTATTTTGCATGGTCTTTAAT |        |        |        |        |        |        |        |  | 71736 |
| Ma'sNightMonkey   | TTTTCTTTGCTATTTAAACTCTCCATAGACACAAAATTTGTTTTAATGCATGCTAATTTATTTTGCATGGTCTTTAAT |        |        |        |        |        |        |        |  | 80170 |
| VervetAGM         | TTTTCTTTGCTATTTAAACTCTCCATAGACACAAAATTTGTTTTAATGCATGCTAATTTATTTTGCATGGTCTTTAAT |        |        |        |        |        |        |        |  | 86421 |
| Gorilla           | TTTTCTTTGCTATTTAAACTCTCCATAGACACAAAATTTGTTTTAATGCATGCTAATTTATTTTGCATGGTCTTTAAT |        |        |        |        |        |        |        |  | 83829 |
| GrabEatingMacaque | TTTTCTTTGCTATTTAAACTCTCCATAGACACAAAATTTGTTTTAATGCATGCTAATTTATTTTGCATGGTCTTTAAT |        |        |        |        |        |        |        |  | 85867 |
| Macaque           | TTTTCTTTGCTATTTAAACTCTCCATAGACACAAAATTTGTTTTAATGCATGCTAATTTATTTTGCATGGTCTTTAAT |        |        |        |        |        |        |        |  | 86756 |
| PigTailedMacaque  | TTTTCTTTGCTATTTAAACTCTCCATAGACACAAAATTTGTTTTAATGCATGCTAATTTATTTTGCATGGTCTTTAAT |        |        |        |        |        |        |        |  | 85313 |
| Bonobo            | TTTTCTTTGCTATTTAAACTCTCCATAGACACAAAATTTGTTTTAATGCATGCTAATTTATTTTGCATGGTCTTTAAT |        |        |        |        |        |        |        |  | 84417 |
| OliveBaboon       | TTTTCTTTGCTATTTAAACTCTCCATAGACACAAAATTTGTTTTAATGCATGCTAATTTATTTTGCATGGTCTTTAAT |        |        |        |        |        |        |        |  | 85209 |
| Orangutan         | TTTTCTTTGCTATTTAAACTCTCCATAGACACAAAATTTGTTTTAATGCATGCTAATTTATTTTGCATGGTCTTTAAT |        |        |        |        |        |        |        |  | 86049 |

| Majority          | TTAATATCATTACATAGCTTTGAGGGTTTATCAAAAATTATTCTTTTCAAATTCAGTGTCAAATCTTGATCTTCTT |        |        |        |        |        |        |        |  |       |
|-------------------|------------------------------------------------------------------------------|--------|--------|--------|--------|--------|--------|--------|--|-------|
|                   | 102330                                                                       | 102340 | 102350 | 102360 | 102370 | 102380 | 102390 | 102400 |  |       |
| Human             | TTAATATCATTACATAGCTTTGAGGGTTTATCAAAAATTATTCTTTTCAAATTCAGTGTCAAATCTTGATCTTCTT |        |        |        |        |        |        |        |  | 85659 |
| Coquerel'sSifaka  | TTAATATCATTACATAGCTTTGAGGGTTTATCAAAAATTATTCTTTTCAAATTCAGTGTCAAATCTTGATCTTCTG |        |        |        |        |        |        |        |  | 71816 |
| Ma'sNightMonkey   | TTAATATCATTACATAGCTTTGAGGGTTTATCAAAAATTATTCTTTTCAAATTCAGTGTCAAATCTTGATCTTCTT |        |        |        |        |        |        |        |  | 80250 |
| VervetAGM         | TTAATATCATTACATAGCTTTGAGGGTTTATCAAAAATTATTCTTTTCAAATTCAGTGTCAAATCTTGATCTTCTT |        |        |        |        |        |        |        |  | 86501 |
| Gorilla           | TTAATATCATTACATAGCTTTGAGGGTTTATCAAAAATTATTCTTTTCAAATTCAGTGTCAAATCTTGATCTTCTT |        |        |        |        |        |        |        |  | 83909 |
| GrabEatingMacaque | TTAATATCATTACATAGCTTTGAGGGTTTATCAAAAATTATTCTTTTCAAATTCAGTGTCAAATCTTGATCTTCTT |        |        |        |        |        |        |        |  | 85947 |
| Macaque           | TTAATATCATTACATAGCTTTGAGGGTTTATCAAAAATTATTCTTTTCAAATTCAGTGTCAAATCTTGATCTTCTT |        |        |        |        |        |        |        |  | 86836 |
| PigTailedMacaque  | TTAATATCATTACATAGCTTTGAGGGTTTATCAAAAATTATTCTTTTCAAATTCAGTGTCAAATCTTGATCTTCTT |        |        |        |        |        |        |        |  | 85393 |
| Bonobo            | TTAATATCATTACATAGCTTTGAGGGTTTATCAAAAATTATTCTTTTCAAATTCAGTGTCAAATCTTGATCTTCTT |        |        |        |        |        |        |        |  | 84497 |
| OliveBaboon       | TTAATATCATTACATAGCTTTGAGGGTTTATCAAAAATTATTCTTTTCAAATTCAGTGTCAAATCTTGATCTTCTT |        |        |        |        |        |        |        |  | 85289 |
| Orangutan         | TTAATATCATTACATAGCTTTGAGGGTTTATCAAAAATTATTCTTTTCAAATTCAGTGTCAAATCTTGATCTTCTT |        |        |        |        |        |        |        |  | 86129 |

| Majority          | TATTCATTTGTGAGAATGATGAGATTGAATGAGTGATCATGTTGATGCTGAATGTTTCATTGATATGTCAGAAAGATAA |        |        |        |        |        |        |        |  |       |
|-------------------|---------------------------------------------------------------------------------|--------|--------|--------|--------|--------|--------|--------|--|-------|
|                   | 102410                                                                          | 102420 | 102430 | 102440 | 102450 | 102460 | 102470 | 102480 |  |       |
| Human             | TATTCATTTGTGAGAATGATGAGATTGAATGAGTGATCATGTTGATGCTGAATGTTTCATTGATATGTCAGAAAGATAA |        |        |        |        |        |        |        |  | 85735 |
| Coquerel'sSifaka  | TATTCATTTGTGAGAATGATGAGATTGAATGAGTGATCATGTTGATGCTGAATGTTTCATTGATATGTCAGAAAGATAA |        |        |        |        |        |        |        |  | 71896 |
| Ma'sNightMonkey   | TATTCATTTGTGAGAATGATGAGATTGAATGAGTGATCATGTTGATGCTGAATGTTTCATTGATATGTCAGAAAATAA  |        |        |        |        |        |        |        |  | 80330 |
| VervetAGM         | TATTCATTTGTGAGAATGATGAGATTGAATGAGTGATCATGTTGATGCTGAATGTTTCATTGATATGTCAGAAAGATAA |        |        |        |        |        |        |        |  | 86581 |
| Gorilla           | TATTCATTTGTGAGAATGATGAGATTGAATGAGTGATCATGTTGATGCTGAATGTTTCATTGATATGTCAGAAAGATAA |        |        |        |        |        |        |        |  | 83985 |
| GrabEatingMacaque | TATTCATTTGTGAGAATGATGAGATTGAATGAGTGATCATGTTGATGCTGAATGTTTCATTGATATGTCAGAAAGATAA |        |        |        |        |        |        |        |  | 86027 |
| Macaque           | TATTCATTTGTGAGAATGATGAGATTGAATGAGTGATCATGTTGATGCTGAATGTTTCATTGATATGTCAGAAAGATAA |        |        |        |        |        |        |        |  | 86916 |
| PigTailedMacaque  | TATTCATTTGTGAGAATGATGAGATTGAATGAGTGATCATGTTGATGCTGAATGTTTCATTGATATGTCAGAAAGATAA |        |        |        |        |        |        |        |  | 85473 |
| Bonobo            | TATTCATTTGTGAGAATGATGAGATTGAATGAGTGATCATGTTGATGCTGAATGTTTCATTGATATGTCAGAAAGATAA |        |        |        |        |        |        |        |  | 84573 |
| OliveBaboon       | TATTCATTTGTGAGAATGATGAGATTGAATGAGTGATCATGTTGATGCTGAATGTTTCATTGATATGTCAGAAAGATAA |        |        |        |        |        |        |        |  | 85369 |
| Orangutan         | TATTCATTTGTGAGAATGATGAGATTGAATGAGTGATCATGTTGATGCTGAATGTTTCATTGATATGTCAGAAAGATAA |        |        |        |        |        |        |        |  | 86205 |

Tuesday, May 03, 2022 06:17 PM

| Majority          | TCTTTAGGTGACTTTCACATAAAAATTAATTCATTTTGGATTACCTCTCTGTGGCTCCAAAAAAGGTGTTTATGGAGAT  |       |
|-------------------|----------------------------------------------------------------------------------|-------|
|                   | 102490 102500 102510 102520 102530 102540 102550 102560                          |       |
| Human             | TCTTTAGGTGACTTTCACATAAAAATTAATTCATTTTGGATTACCTCTCTGTGGCTCCAAAAAAGGTGTTTATGGAGAT  | 85815 |
| Coquerel'sSifaka  | TCTTTAGGTGACTTTCACATAAAAATTAATTCATTTTGGATTACCTCTCTGTGGCTCCAAAAAAGGTGTTTATGGAGAT  | 71976 |
| Ma'sNightMonkey   | TCTTTAGGTGACTTTCACATAAAAATTAATTCATTTTGGATTACCTCTCTGTGGCTCCAAAAAAGGTGTTTATGGAGAT  | 80410 |
| VervetAGM         | TCTTTAGGTGACTTTCACATAAAAATTAATTCATTTTGGATTACCTCTCTGTGGCTCCAAAAAAGGTGTTTATGGAGAT  | 86661 |
| Gorilla           | TCTTTAGGTGACTTTCACATAAAAATTAATTCATTTTGGATTACCTCTCTGTGGCTCCAAAAAAGGTGTTTATGGAGAT  | 84065 |
| GrabEatingMacaque | TCTTTAGGTGACTTTCACATAAAAATTAATTCATTTTGGATTACCTCTCTGTGGCTCCAAAAAAGGTGTTTATGGAGAT  | 86107 |
| Macaque           | TCTTTAGGTGACTTTCACATAAAAATTAATTCATTTTGGATTACCTCTCTGTGGCTCCAAAAAAGGTGTTTATGGAGAT  | 86996 |
| PigTailedMacaque  | TCTTTAGGTGACTTTCACATAAAAATTAATTCATTTTGGATTACCTCTCTGTGGCTCCAAAAAAGGTGTTTATGGAGAT  | 85553 |
| Bonobo            | TCTTTAGGTGACTTTCACATAAAAATTAATTCATTTTGGATTACCTCTCTGTGGCTCCAAAAAAGGTGTTTATGGAGAT  | 84653 |
| OliveBaboon       | TCTTTAGGTGACTTTCACATAAAAATTAATTCATTTTGGATTACCTCTCTGTGGCTCCAAAAAAGGTGTTTATGGAGAT  | 85449 |
| Orangutan         | TCTTTAGGTGACTTTCACGTAATAAATTAATTCATTTTGGATTACCTCTCTGTGGCTCCAAAAAAGGTGTTTATGGAGAT | 86285 |

| Majority          | GTGCAGCGTGTGAAGATTTTGTACAATAAGAAAGACAGCGCTCTAATACAGATGGCTGATGGAAACCAAGTCACAACCTGG |       |
|-------------------|-----------------------------------------------------------------------------------|-------|
|                   | 102570 102580 102590 102600 102610 102620 102630 102640                           |       |
| Human             | GTGCAGCGTGTGAAGATTTTGTACAATAAGAAAGACAGCGCTCTAATACAGATGGCTGATGGAAACCAATCACAACCTGG  | 85895 |
| Coquerel'sSifaka  | GTGCAGCGTGTGAAGATTTTGTACAATAAGAAAGACAGCGCTCTAATACAGATGGCTGATGGAAACCAATCACAACCTGG  | 72056 |
| Ma'sNightMonkey   | GTGCAGCGTGTGAAGATTTTGTACAATAAGAAAGACAGCGCTCTAATACAGATGGCTGATGGAAACCAAGTCGCAACCTGG | 80490 |
| VervetAGM         | GTGCAGCGTGTGAAGATTTTGTACAATAAGAAAGACAGCGCTCTAATACAGATGGCTGATGGAAACCAAGTCACAACCTGG | 86741 |
| Gorilla           | GTGCAGCGTGTGAAGATTTTGTACAATAAGAAAGACAGCGCTCTAATACAGATGGCTGATGGAAACCAATCACAACCTGG  | 84145 |
| GrabEatingMacaque | GTGCAGCGTGTGAAGATTTTGTACAATAAGAAAGACAGCGCTCTAATACAGATGGCTGATGGAAACCAAGTCACAACCTGG | 86187 |
| Macaque           | GTGCAGCGTGTGAAGATTTTGTACAATAAGAAAGACAGCGCTCTAATACAGATGGCTGATGGAAACCAAGTCACAACCTGG | 87076 |
| PigTailedMacaque  | GTGCAGCGTGTGAAGATTTTGTACAATAAGAAAGACAGCGCTCTAATACAGATGGCTGATGGAAACCAAGTCACAACCTGG | 85633 |
| Bonobo            | GTGCAGCGTGTGAAGATTTTGTACAATAAGAAAGACAGCGCTCTAATACAGATGGCTGATGGAAACCAATCACAACCTGG  | 84733 |
| OliveBaboon       | GTGCAGCGTGTGAAGATTTTGTACAATAAGAAAGACAGCGCTCTAATACAGATGGCTGATGGAAACCAAGTCACAACCTGG | 85529 |
| Orangutan         | GTGCAGCGTGTGAAGATTTTGTACAATAAGAAAGACAGCGCTCTAATACAGATGGCTGATGGAAACCAATCACAACCTGG  | 86365 |

| Majority          | TAAGATTAACATATGTTTTATCTATACATCTTCACTTCTGCTTTCAAATGCATA--ATGTGAATCTGTGAATAAAAATAA    |       |
|-------------------|-------------------------------------------------------------------------------------|-------|
|                   | 102650 102660 102670 102680 102690 102700 102710 102720                             |       |
| Human             | TAAGATTAACATATGTTTTATCTATACATCTTCACTTCTGCTTTCAAATGCATA--ATGTGAATCTGTGAATAAAAATAA    | 85973 |
| Coquerel'sSifaka  | TAAGACTAAACATATGTTTATCTATACATCTTCACTTCTGCTTTCAAATGCATA--ATGTGAATCTGTGAATAAAAATAA    | 72118 |
| Ma'sNightMonkey   | TAAGATTAACAT--TGTGTTTTATCTATACATCTTCACTTCTGCTTTCAAATGCATA--ATGTGAATCTGTGAATAAAAATAA | 80568 |
| VervetAGM         | TAAGATTAACATATGTTTATCTATACATCTTCACTTCTGCTTTCAAATGCATA--ATGTGAATCTGTGAATAAAAATAA     | 86819 |
| Gorilla           | TAAGATTAACATATGTTTTATCTATACATCTTCACTTCTGCTTTCAAATGCATA--ATGTGAATCTGTGAATAAAAATAA    | 84223 |
| GrabEatingMacaque | TAAGATTAACATATGTTTATCTATACATCTTCACTTCTGCTTTCAAATGCATA--ATGTGAATCTGTGAATAAAAATAA     | 86264 |
| Macaque           | TAAGATTAACATATGTTTATCTATACATCTTCACTTCTGCTTTCAAATGCATA--ATGTGAATCTGTGAATAAAAATAA     | 87153 |
| PigTailedMacaque  | TAAGATTAACATATGTTTATCTATACATCTTCACTTCTGCTTTCAAATGCATA--ATGTGAATCTGTGAATAAAAATAA     | 85710 |
| Bonobo            | TAAGATTAACATATGTTTTATCTATACATCTTCACTTCTGCTTTCAAATGCATA--ATGTGAATCTGTGAATAAAAATAA    | 84811 |
| OliveBaboon       | TAAGATTAACATATGTTTATCTATACATCTTCACTTCTGCTTTCAAATGCATA--ATGTGAATCTGTGAATAAAAATAA     | 85605 |
| Orangutan         | TAAGATTAACATATTTTTATCTATACATCTTCACTTCTGCTTTCAAATGCATA--ATGTGAATCTGTGAATAAAAATAA     | 86443 |

Tuesday, May 03, 2022 06:17 PM

| Majority          | ACTCCTTTACATCAGTAAGAAATTTATTTATTTTAAATGGCCAGGGCTCAAATGTCATTTTAAATGTGAATAGTTGTATGTG |                    |                                                  |           |                  |        |            |        |  |
|-------------------|------------------------------------------------------------------------------------|--------------------|--------------------------------------------------|-----------|------------------|--------|------------|--------|--|
|                   | 102730                                                                             | 102740             | 102750                                           | 102760    | 102770           | 102780 | 102790     | 102800 |  |
| Human             | ACTCCTTTACATCAGTAAGAAATTTATTT                                                      | ----               | TAATGGCCAGGGCTCAAATGTCATTTTAAATGTGAATAGTTGTATGTG | 86049     |                  |        |            |        |  |
| Coquerel'sSifaka  | AATCCTG---                                                                         | ATTAATAC-ACATTATTT | ----                                             | TAAT----- | TCTCCTAAAGTCATTT | -----  | ATTGTA---- | 72168  |  |
| Ma'sNightMonkey   | ACCCCTTTACATCAGTAAGAAATTTATTTATTTTAAATGGCCAGGGCTCAAATGTCATTTTAAATGTGAATAGTTGTATGTG | 80648              |                                                  |           |                  |        |            |        |  |
| VervetAGM         | ACTCCTTTACATCAGTAAGAAATTTATTTATTTTAAATGGCCAGGGCTCAAATGTCATTTTAAATGTGAATAGTTGTATGTG | 86899              |                                                  |           |                  |        |            |        |  |
| Gorilla           | ACTCCTTTACATCAGTAAGAAATTTATTT                                                      | ----               | TAATGGCCAGGGCTCAAATGTCATTTTAAATGTGAATAGTTGTATGTG | 84299     |                  |        |            |        |  |
| GrabEatingMacaque | ACTCCTTTACATCAGTAAGAAATTTATTTATTTTAAATGGCCAGGGCTCAAATGTCATTTTAAATGTGAATAGTTGTATGTG | 86344              |                                                  |           |                  |        |            |        |  |
| Macaque           | ACTCCTTTACATCAGTAAGAAATTTATTTATTTTAAATGGCCAGGGCTCAAATGTCATTTTAAATGTGAATAGTTGTATGTG | 87233              |                                                  |           |                  |        |            |        |  |
| PigTailedMacaque  | ACTCCTTTACATCAGTAAGAAATTTATTTATTTTAAATGGCCAGGGCTCAAATGTCATTTTAAATGTGAATAGTTGTATGTG | 85790              |                                                  |           |                  |        |            |        |  |
| Bonobo            | ACTCCTTTACATCAGTAAGAAATTTATTT                                                      | ----               | TAATGGCCAGGGCTCAAATGTCATTTTAAATGTGAATAGTTGTATGTG | 84887     |                  |        |            |        |  |
| OliveBaboon       | ACTCCTTTACATCAGTAAGAAATTTATTTATTTTAAATGGCCAGGGCTCAAATGTCATTTTAAATGTGAATAGTTGTATGTG | 85685              |                                                  |           |                  |        |            |        |  |
| Orangutan         | ACTCCTTTACATCAGTAAAAATTTATTTATTTTAAATGGCCAGGGCTCAAATGTCATTTTAAATGTGAATAGTTGTATGTG  | 86523              |                                                  |           |                  |        |            |        |  |

| Majority          | GTGAACATATTTGTATTTTTCTGCTATCCTCCTACTGTTTTTCAAATGCACTCA-----TAATAGGAAAAGATTTTGTAG   |               |          |         |             |                    |        |        |  |
|-------------------|------------------------------------------------------------------------------------|---------------|----------|---------|-------------|--------------------|--------|--------|--|
|                   | 102810                                                                             | 102820        | 102830   | 102840  | 102850      | 102860             | 102870 | 102880 |  |
| Human             | ACGAACATATTTGTATTTTTCTGCTATCCTCCTACTGTTTTTCAAATGCACTCA-----TAATAGGAAAAGATTTTGTAG   | 86122         |          |         |             |                    |        |        |  |
| Coquerel'sSifaka  | -----                                                                              | CGTATTTG----- | GCT----- | AA----- | ACTTAG----- | TAATGGAAAAGAG----- | 72199  |        |  |
| Ma'sNightMonkey   | ATGAACGTATTTGTGTTTTCTGCTATCCTCCTACTGTTTTTCAAATGCACTCTAATGCTCTAATAGGAAAAGATTTTGTAG  | 80728         |          |         |             |                    |        |        |  |
| VervetAGM         | GTGAACATATTTGTATTTTTCTGCTTTCTCCTCCTACTGTTTTTCAAATGCACTCA-----TAATAGGAAAAGATTTTGTAG | 86972         |          |         |             |                    |        |        |  |
| Gorilla           | ACGAACATATTTGTATTTTTCTGCTATCCTCCTACTGTTTTTCAAATGCACTCA-----TAATAGGAAAAGATTTTGTAG   | 84372         |          |         |             |                    |        |        |  |
| GrabEatingMacaque | GTGAACATATTTGTATTTTTCTGCTATCCTCCTACTGTTTTTCAAATGCACTCA-----TAATAGGAAAAGATTTTGTAG   | 86417         |          |         |             |                    |        |        |  |
| Macaque           | GTGAACATATTTGTATTTTTCTGCTATCCTCCTACTGTTTTTCAAATGCACTCA-----TAATAGGAAAAGATTTTGTAG   | 87306         |          |         |             |                    |        |        |  |
| PigTailedMacaque  | GTGAACATATTTGTATTTTTCTGCTATCCTCCTACTGTTTTTCAAATGCACTCA-----TAATAGGAAAAGATTTTGTAG   | 85863         |          |         |             |                    |        |        |  |
| Bonobo            | ACGAACATATTTGTATTTTTCTGCTATCCTCCTACTGTTTTTCAAATGCACTCA-----TAATAGGAAAAGATTTTGTAG   | 84960         |          |         |             |                    |        |        |  |
| OliveBaboon       | GTGAACATATTTGTATTTTTCTGCTATTTCTCCTACTGTTTTTCAAATGCACTCA-----TAATAGGAAAAGATTTTGTAG  | 85758         |          |         |             |                    |        |        |  |
| Orangutan         | ATGAACATATTTGTATTTTTCTGCTATCCTCCTACTGTTTTTCAAATCCACTCG-----TAATAGGAAAAGATTTTGTAG   | 86596         |          |         |             |                    |        |        |  |

| Majority          | CTTCAAATGTGAATAATAGTTTACATGAGAAT-----TATTTATATTGAAGATTCATAGTGATTTTTATTCTAGCTAC |                                                             |        |             |        |        |        |        |  |
|-------------------|--------------------------------------------------------------------------------|-------------------------------------------------------------|--------|-------------|--------|--------|--------|--------|--|
|                   | 102890                                                                         | 102900                                                      | 102910 | 102920      | 102930 | 102940 | 102950 | 102960 |  |
| Human             | CTTCAAATGTGAATAATAGTTTACATGAGAAT                                               | TATATCATTTATATTGAAGATTCATAGTGATTTTTATTCTAGGTAC              | 86202  |             |        |        |        |        |  |
| Coquerel'sSifaka  | -----                                                                          | T-CACATG-----                                               | G----- | A---AG----- | 72210  |        |        |        |  |
| Ma'sNightMonkey   | CTTCAAATGTGAATG---                                                             | GTTTACATGAGAATGTATCATTTATATTGAAAATCAGTAGTGATTTTTATTCCAGCTAC | 80805  |             |        |        |        |        |  |
| VervetAGM         | CTTCAAATGTGAATAATAGTTTACATGAGAAT-----TATTTATTTTGAAGATTCATAGTGATTTTTATTCTAGCTAC | 87047                                                       |        |             |        |        |        |        |  |
| Gorilla           | CTTCAAATGTGAATAATAGTTTACATGAGAAT                                               | TATATCATTTATATTGAAGATTCATAGTGATTTTTATTCTAGCTAC              | 84452  |             |        |        |        |        |  |
| GrabEatingMacaque | CTTCAAATGTGAATAATAGTTTACATGAGAAT-----TATTTATTTTGAAGATTCATAGTGATTTTTTGTCTAGCTAC | 86492                                                       |        |             |        |        |        |        |  |
| Macaque           | CTTCAAATGTGAATAATAGTTTACATGAGAAT-----TATTTATTTTGAAGATTCATAGTGATTTTTTGTCTAGCTAC | 87381                                                       |        |             |        |        |        |        |  |
| PigTailedMacaque  | CTTCAAATGTGAATAATAGTTTACATGAGAAT-----TATTTATTTTGAAGATTCATAGTGATTTTTTGTCTAGCTAC | 85938                                                       |        |             |        |        |        |        |  |
| Bonobo            | CTTCAAATGTGAATAATAGTTTACATGAGAAT                                               | TATATCATTTATATTGAAGATTCATAGTGATTTTTATTCTAGCTAC              | 85040  |             |        |        |        |        |  |
| OliveBaboon       | CTTCAAATGTGAATAATAGTTTACATGAGAAT-----TATTT---TGAAGATTCATAGTGATTTTTTGTCTAGCTAC  | 85829                                                       |        |             |        |        |        |        |  |
| Orangutan         | CTTCAAATGTGAATAATAGTTTACATGAGAAT-ATATCATTTATATTGAAGATTCATAGTGATTTTTATTCTAGCTAC | 86675                                                       |        |             |        |        |        |        |  |

Tuesday, May 03, 2022 06:17 PM

| Majority          | TCCTTGTTAATAGAGCTAACT---GTTTCATATA-TCCATAGAATCCTTCTTAATGCCGTGTTATTTTAATTCTTGTA   |       |
|-------------------|----------------------------------------------------------------------------------|-------|
|                   | 102970 102980 102990 103000 103010 103020 103030 103040                          |       |
| Human             | TCCTTGTTAATAGAGGCTAACT---GTTTCATACAGTCCATAGAATCCTTCTTAATGCCATGTTATTTTAATTCTTCTAA | 86278 |
| Coquerel'sSifaka  | -----ATGCC-----TTTTA-----                                                        | 72220 |
| Ma'sNightMonkey   | TCCTTGT-AATAGAGCTAATTAATTGTTTCATATAGTCCATAGAATCCTACCTAATGCCATGTTATTTTAATTCTTCTTA | 80884 |
| VervetAGM         | TCCTTGTTAATAGAGCTAACT---GTTTCATATAGCCCATAGAATCCTCCTTAATGCCGTGTTATTTTAATTCTTGTA   | 87123 |
| Gorilla           | TCCTTGTTAATAGAGGCTAACT---GTTTCATACAATCCATAGAATGCTTCTTAATGCCATGTTATTTTAATTCTTCTAA | 84528 |
| GrabEatingMacaque | TCCTTGTTAATAGAGCTAACT---GTTTCATATA-CCCATAGAATCCTTCTTAATGCCGTGTTATTTTAATTCTTGTA   | 86567 |
| Macaque           | TCCTTGTTAATAGAGCTAACT---GTTTCATATA-CCCATAGAATCTTCTTAATGCCGTGTTATTTTAATTCTTGTA    | 87456 |
| PigTailedMacaque  | TCCTTGTTAATAGAGCTAACT---GTTTCATATA-CCCATAGAATCCTTCTTAATGCCGTGTTATTTTAATTCTTGTA   | 86013 |
| Bonobo            | TCCTTGTTAATAGAGGCTAACT---GTTTCATACAGTCCATAGAATCCTTCTTAATGCCATGTTATTTTAATTCTTCTAA | 85116 |
| OliveBaboon       | TCCTTGTTAATAGAGCTAACT---GTTTCATATA-CCCATAGAATCCTTCTTAATGCCGTGTTATTTTAATTCTTGTA   | 85904 |
| Orangutan         | TCCTTGTTAATAGAGGCTAACT---GTTTCATATATCCATAGAATCCTTCTTAATGCCATGTTATTTTAATTCTTCTAA  | 86751 |

| Majority          | AGTCTTGCGATACCAGGTTCTTACAAAATGAAAAGCTTGTGCTAAAAA-CACTGTTGTTAATCCCTTTGGGAATCTTAAA  |       |
|-------------------|-----------------------------------------------------------------------------------|-------|
|                   | 103050 103060 103070 103080 103090 103100 103110 103120                           |       |
| Human             | AGTCTTGCGATACCAGGTTCTTACAAAATGAAAAGCTTGTGCTAAAAA-CACTGTTGTTAATCCCTTTGGGAATCTTAAA  | 86357 |
| Coquerel'sSifaka  | -----GAGATACCAAGTTCTTACAAAATGAAAACCTGTGCCAAAAG-CACTGTTGTTAATCCCTTTGGGAATCTTAAG    | 72293 |
| Ma'sNightMonkey   | AGTCTTGAGATACCAGGTTTTTACAAAATGAAAATCTGTGCTAAAAAACACTGTTGTTAATCCCTTTGGGAATCTTAAA   | 80964 |
| VervetAGM         | AGTCTTGCGATACCAGGTT--TACAAAATGAAAAGCT-GTGCTAAAAA-CACTGTTGTTAATCCTTTGGGAATCTTAAA   | 87199 |
| Gorilla           | AGTCTTGCGATACCAGGTTCTTACAAAATGAAAAGTTTGTGCTAAAAAG-CACTGTTGTTAATCCCTTTGGGAATCTTAAA | 84607 |
| GrabEatingMacaque | AGTCTTGCGATACCAGGTT--TACAAAATGAAAAGCTTGTGCTAAAAA-CACTGTTGTTAATCCTTTGGGAATCTTAAA   | 86644 |
| Macaque           | AGTCTTGCGATACCAGGTT--TACAAAATGAAAAGCTTGTGCTAAAAA-CACTGTTGTTAATCCTTTGGGAATCTTAAA   | 87533 |
| PigTailedMacaque  | AGTCTTGCGATACCAGGTT--TACAAAATGAAAAGCTTGTGCTAAAAA-CACTGTTGTTAATCCTTTGGGAATCTTAAA   | 86090 |
| Bonobo            | AGGCTTGCGATACCAGGTTCTTAGAAGATGAAAAGCTTGTGCTAAAAA-CACTGTTGTTAATCCCTTTGGGAATCTTAAA  | 85195 |
| OliveBaboon       | AGTCTTGCGATACCAGGTT--TACAAAATGAAAAGCTTGTGCTAAAAA-CACTGTTGTTAATCCTTTGGGAATCTTAAA   | 85981 |
| Orangutan         | AGTCTTGCGATACCAGGTTCTTACAAAATGAAAAGCTTGTGCTAAAAA-CACTGTTGTTAATCCCTTTGGGAATCTTAAA  | 86830 |

| Majority          | AGGTACTTTAGTCAAGTTACACTTTATATCATTACTTAAATAAGTAATTGATTATTTTAATTAAGTCTTAA--TGTCATTTG  |       |
|-------------------|-------------------------------------------------------------------------------------|-------|
|                   | 103130 103140 103150 103160 103170 103180 103190 103200                             |       |
| Human             | AGGCACCTTTAGTCAAGTTACACTTTATATCATTACTTAAATAAGTAATTGATTATTTTAATTAAGTCTTAA--TGTCGTTTG | 86435 |
| Coquerel'sSifaka  | ATGTACTTGAGTCAAGTTACACTTAA-ATCATTAGTTAGATAAATAATTGGTGATTTTAATTAAGTCTTACATCTCATTG    | 72372 |
| Ma'sNightMonkey   | AGGTACTGTATTTAAGTTACGCTTTATTTTACTTACTTAGATAAATAATTGGTATTTTAATTAAGTCTTATATGTCATTTG   | 81044 |
| VervetAGM         | AGGTAGTTTACTCAAGTTACCTTTATATCATTACTTAAATAAGTAATTGATTATTTTAATTAAGTCTTAA--TGTCATTTG   | 87277 |
| Gorilla           | AGGTACTTTAGTCAAGTTACACTTTATATCATTACTTAAATAAGTAATTGATTATTTTAATTAAGTCTTAA--TGTCATTTG  | 84685 |
| GrabEatingMacaque | AGGTAGTTTACTCAAGTTACACTTTATATCATTACTTAAATAAGTAATTGATTATTTTAATTAAGTCTTAA--TGTCATTTG  | 86722 |
| Macaque           | AGGTAGTTTACTCAAGTTACACTTTATATCATTACTTAAATAAGTAATTGATTATTTTAATTAAGTCTTAA--TGTCATTTG  | 87611 |
| PigTailedMacaque  | AGGTAGTTTACTCAAGTTACACTTTATATCATTACTTAAATAAGTAATTGATTATTTTAATTAAGTCTTAA--TGTCATTTG  | 86168 |
| Bonobo            | AGGCACCTTTAGTCAAGTTACACTTTATATCATTACTTAAATAAGTAATTGATTATTTTAATTAAGTCTTAA--TGTCGTTTG | 85273 |
| OliveBaboon       | AGGTAGTTTACTCAAGTTACACTTTATATCATTACTTAAATAAGTAATTGATTATTTTAATTAAGTCTTAA--TGTCATTTG  | 86059 |
| Orangutan         | AGGTACTTTAGTCAAGTTACACTTTGTATCATTACTTAAATAAGTAATTGATTATTTTAATTAAGTCTTAA--TGTCATTTG  | 86909 |

Tuesday, May 03, 2022 06:17 PM

| Majority          | ACTTCATACATAGTCGAAT-ACATAAATCTAGAACACACCTGCACATTCACACCAGTGATTGACTGTAAATGCCAGGATG |       |
|-------------------|----------------------------------------------------------------------------------|-------|
|                   | 103210 103220 103230 103240 103250 103260 103270 103280                          |       |
| Human             | ACTTCATACATCCTCGAAT-ACATAAATCTAGAACACACCTGCACATTCACACCAGTGATTGACTGTAAATGCCAGGATG | 86514 |
| Coquerel'sSifaka  | ACTTCATACACAGTCATGTACATAAATCTGGAATATAACTGCATA----CAGTAGTGATTGACTATAAATATTAGTATG  | 72448 |
| Ma'sNightMonkey   | GCTTCGTACATAGTCAAAT-ACGTAAATCTAAAACACACCTGCACATTCACACTAGTGATTGACCGTAAGTGCCAGGATG | 81123 |
| VervetAGM         | ACTTCATACATAGTCGAAT-ACATAAATCTAGAACACACCTGCACATTCACACCAGTGATTGACTGTAAATGCCAGGATG | 87356 |
| Gorilla           | ACTTCATACATACTCGAAT-ACATAAATCTAGAACACACCTGCACATTCACACCAGTGATTGACTGTAAATGCCAGGATG | 84764 |
| GrabEatingMacaque | ACTTCATACATAGTTGAAT-ACATAAATCTAGAACACACCTGCACATTCACACCAGTGATTGACTGTAAATGCCAGGATG | 86801 |
| Macaque           | ACTTCATACATAGTTGAAT-ACATAAATCTAGAACACACCTGCACATTCACACCAGTGATTGACTGTAAATGCCAGGATG | 87690 |
| PigTailedMacaque  | ACTTCATACATAGTTGAAT-ACATAAATCTAGAACACACCTGCACATTCACACCAGTGATTGACTGTAAATGCCAGGATG | 86247 |
| Bonobo            | ACTTCATACATACTTGAAT-ACATAAATCTAGAACACACCTGCACATTCACACCAGTGATTGACTGTAAATGCCAGGATG | 85352 |
| OliveBaboon       | ACTTCATACATAGTCGAAT-ACATAAATCTAGAACACACCTGCACATTCACACCAGTGATTGACTGTAAATGCCAGGATG | 86138 |
| Orangutan         | ACTTCATACATAGTCGAAT-ACATAAATCTAGAACACACCTGCACATTCACACCAGTGATTGACTGTAAATGCCAGGATG | 86988 |

| Majority          | TTC-----TTACAGTTCTGTTTCATTGAGATTCAGGGATAATGGTGCCTCAGACTGATTGTATTCACATTGTTAATTTGTA  |       |
|-------------------|------------------------------------------------------------------------------------|-------|
|                   | 103290 103300 103310 103320 103330 103340 103350 103360                            |       |
| Human             | TTC-----TTACATTTCTGTTTCATTGAGATTCAGGGATAATGGTGCCTCAGACTGATTGTATTCACATTGTTAATTTGTA  | 86589 |
| Coquerel'sSifaka  | TTCATCACTTACAATTTCTGTTTCATTGAGATT-AGGGATGACGGTGCCTTAGAC----TGTATTTACATTGTTAATTTTGA | 72523 |
| Ma'sNightMonkey   | TTC-----TTA-GGTTTTGTTTCATTGAGATTC AAGGATAGTGGTACCTCAGACTGATTGTATTCACATTGTTAATTTGTA | 81197 |
| VervetAGM         | TTC-----TTACAGCTCTGTTTCATTGAGATTCAGGGATAATGGTGCCTCAGACTAATTGTATTCACATTGTTAATTTGTA  | 87431 |
| Gorilla           | TTC-----TTACATTTCTGTTTCATTGAGATTCAGGGATAATGGTGCCTCAGACTGATTGTATTCACATTGTTAATTTGTA  | 84839 |
| GrabEatingMacaque | TTC-----TTACAGCTCTGTTTCATTGAGATTCAGGGATAATGGTGCCTCAGACTGATTGTATTCACATTGTTAATTTGTA  | 86876 |
| Macaque           | TTC-----TTACAGCTCTGTTTCATTGAGATTCAGGGATAATGGTGCCTCAGACTGATTGTATTCACATTGTTAATTTGTA  | 87765 |
| PigTailedMacaque  | TTC-----TTACAGCTCTGTTTCATTGAGATTCAGGGATAATGGTGCCTCAGACTGATTGTATTCACATTGTTAATTTATA  | 86322 |
| Bonobo            | TTC-----TTACATTTCTGTTTCATTGAGATTCAGGGATAATGGTGCCTCAGACTGATTGTATTCACATTGTTAATTTGTA  | 85427 |
| OliveBaboon       | TTC-----TTACAGCTCTGTTCTGTTGAGATTCAGGGATAATGGTGCCTCAGACTGATTGTATTCACATTGTTAATTTGTA  | 86213 |
| Orangutan         | TTC-----TTACAGTTCTGTTTCATTGAGATTCAGGGATAATGGTGCCTCAGACTGATTGTATTCACATTGTTAATTTGTA  | 87063 |

| Majority          | AATTTGCCATTTTTGATGTAAGGACGAGTGTATTTTTGCTTTTATATCCC--T---GAGACAGAGATGAACAACCTTGTTA |       |
|-------------------|-----------------------------------------------------------------------------------|-------|
|                   | 103370 103380 103390 103400 103410 103420 103430 103440                           |       |
| Human             | AATTTGCCATTTTTGATGTAAGGACGAGTGTATTTTTGCTTTTATATCCC--T-----GAGAGATGAACAACCTTGCTA   | 86649 |
| Coquerel'sSifaka  | AATTTGCCATTTTTGATGTAAGAAGTATATTTTTGCTGTTATAT-----GAAACTCAGAGATGAACAACGTGATA       | 72596 |
| Ma'sNightMonkey   | AATTTGCCATTTTTGATGTAAGGACGAGTGTATTTCTGCTTTTATATCCCTATTGAGACTCAGAGATGAACAACCTTATTA | 81277 |
| VervetAGM         | AATTTGCCATTTTTGATGTTAGGACGAGTGTATTTTTGCTTTTATATCCCTCT---GAGACTCAGATGAACAACCTTGTTA | 87508 |
| Gorilla           | AATTTGCCATTTTTGATGTAAGGACGAGCGTATTTTTGCTTTTATATCCCCTCT---GAGAGATGAACAACCTTGCTA    | 84899 |
| GrabEatingMacaque | AATTTGCCATTTTTGATGTTAGGACGAGTGTATCTTTGCTTTTATATCCCCGT---GAGACTCAGATGAACAACCTTGTTA | 86953 |
| Macaque           | AATTTGCCATTTTTGATGTTAGGACGAGTGTATCTTTGCTTTTATATCCCCGT---GAGACTCAGATGAACAACCTTGTTA | 87842 |
| PigTailedMacaque  | AATTTGCCATTTTTGATGTTAGGACGAGTGTATTTTTGCTTTTATATCCCTGT---GAGACTCAGATGAACAACCTTGTTA | 86399 |
| Bonobo            | AATTTGCCATTTTTGATGTAAGGACGAGTGTATTTTTGCTTTTATATCCCCTCT---GAGAGATGAACAACCTTGCTA    | 85487 |
| OliveBaboon       | AATTTGCCATTTTTGATGTTAGGACGAGTGTATTTTTGCTTTTATATCCCTGT---GAGACTCAGATGAACAACCTTGTTA | 86290 |
| Orangutan         | AATTTGCCATTTTTGATGTAAGGACGAGTGTATTTTTGCTTTTATATCCCCTCT---GAGAGATGAACAACCTTGCTA    | 87123 |

Tuesday, May 03, 2022 06:17 PM

| Majority          | TACTAGACCAATTTTGGCCTTTGGCATCACATAGAAAATTTTGAATTTCAAACACATAATAGGTTTGAATTTTAGTGTTT  |       |
|-------------------|-----------------------------------------------------------------------------------|-------|
|                   | 103450 103460 103470 103480 103490 103500 103510 103520                           |       |
| Human             | TATTAGACCAATTTTGGCCTTTGACATCACATAGAAAATTTTGAATTTCAAACACATAATAGGTTTGAATTTTAGTGTTT  | 86729 |
| Coquerel'sSifaka  | TACTAGACCACCTTTGGCCTTTGGAATCAT----AAAAGTTGGAATTTCAAAC----AGTAAGTTTAAACTTTTAGTGTT- | 72667 |
| Ma'sNightMonkey   | TACTAGACCAATTTTGGTCTTTGGCATCACATAGAAAATTTTGAATTTCAAACAGAAAGTAAGTTTGAAGTTTAGTGTTT  | 81357 |
| VervetAGM         | -GCTAGACCAATTTTGGCCTTTGGCATCACATAGAAAATTTTGAATTTCAAACACATAATAGGTTTGAATTTTAGTGTTT  | 87587 |
| Gorilla           | TACTAGACCAATTTTGGCCTTTGACATCACATAGAAAATTTTGAATTTCAAACACATAATAGGTTTGAATTTTAGTGTTT  | 84979 |
| GrabEatingMacaque | CACTAGACTAATTTTGGCCTTTGGCATCACGTAGAAAATTTTGAATTTCAAACACATAATAGGTTTGAATTTTAGTGTTT  | 87033 |
| Macaque           | CACTAGACCAATTTTGGCCTTTGGCATCACGTAGAAAATTTTGAATTTCAAACACATAATAGGTTTGAATTTTAGTGTTT  | 87922 |
| PigTailedMacaque  | CACTAGACCAATTTTGGCCTTTGGCATCACGTAGAAAATTTTGAATTTCAAACACATAATAGGTTTGAATTTTAGTGTTT  | 86479 |
| Bonobo            | TACTAGACCAATTTTGGCCTTTGACATCACATAGAAAATTTTGAATTTCAAACACATAATAGGTTTGAATTTTAGTGTTT  | 85567 |
| OliveBaboon       | CGCTAGACCAATTTTGGCCTTTGGCATCACGTAGAAAATTTTGAATTTCAAACACATAATAGGTTTGAATTTTAGTGTTT  | 86370 |
| Orangutan         | TACTAGACCAATTTTGGCCTTTGACATCACATAGAAAATTTTGAATTTCAAACACATAATAGGTTTGAATTTTAGTGTTT  | 87203 |

| Majority          | CTTGGCAATAGTCTTAGCAACTCAGATGAGGTATAAAACTATCCATCTGGCTCTCCATTTTAAAAATGGTGGTATGTGTC |       |
|-------------------|----------------------------------------------------------------------------------|-------|
|                   | 103530 103540 103550 103560 103570 103580 103590 103600                          |       |
| Human             | CTTGGCAATAGTCTTAGCAACTCAGATGAGGTATAAAACTATCCATCTGGCTGTCCATTTTAAAAATGGTGGTATGTGTT | 86809 |
| Coquerel'sSifaka  | CTTGGCAATGATCTTAGCAACTCAGACAAGGCATGAAACTATTTCATCTGGTCTCCATTTTATAATGGTGATACCTATT  | 72747 |
| Ma'sNightMonkey   | CTTTCCAATAGTCTTAGAAGCTCAGATGAGGTATAAAGCTATCCATCTGGCTCTTCATTTTAAAAATGGTGGTACGTGTC | 81437 |
| VervetAGM         | CTTGGCAATACTCTTAGCAACTCAGATGAGGCATAAAACTATCCATCTGGCTCTCCATTTTAAAAATGGTGGTATGTGTC | 87667 |
| Gorilla           | CTTGGCAATAGTCTTAGCAACTCAGATGAGGT--A-----TCTGGCTGTCCATTTTAAAAATGGTGGTATGTGTT      | 85047 |
| GrabEatingMacaque | CTTGGCAATACTCTTAGCAACTCAGATGAGGTATAAAACTATCCATCTGGCTCTCCATTTTAAAAATGGTGGTATGTGTC | 87113 |
| Macaque           | CTTGGCAATACTCTTAGCAACTCAGATGAGGTATAAAACTATCCATCTGGCTCTCCATTTTAAAAATGGTGGTATGTGTC | 88002 |
| PigTailedMacaque  | CTTGGCAATACTCTTAGCAACTCAGATGAGGTATAAAACTATCCATCTGGCTCTCCATTTTAAAAATGGTGGTATGTGTC | 86559 |
| Bonobo            | CTTGGCAATAGTCTTAGCAACTCAGATCAGGTATAAAACTATCCATCTGGCTGTCCATTTTAAAAATGGTGGTATGTGTT | 85647 |
| OliveBaboon       | CTTGGCAATACTCTTAGCAACTCAGATGAGGTATAAAACTATCCATCTGGCTCTCCATTTTAAAAATGGTGGTATGTGTC | 86450 |
| Orangutan         | CTTGGCAATAGTCTTAGCAACTCAGATGAGGTATAAAACTATCCATCTGGCTGTCCATTTTAAAAATGGTGGTATGTGTC | 87283 |

| Majority          | TTAAAGAGGTATGAAAGTGCTGATTATGTCATGATCCCTAGTATATATTTTCCTCT-----GTGTGCACCTTCTGTACTC |       |
|-------------------|----------------------------------------------------------------------------------|-------|
|                   | 103610 103620 103630 103640 103650 103660 103670 103680                          |       |
| Human             | TTAAAGAGATACGAAAGTGCTGATTATGTCAGATACTTAGTACATATTTTCCTCTTTCTCTGTGTGCACCTTCTGTACTC | 86889 |
| Coquerel'sSifaka  | TTAAA-----TGAAAG-----ACAT--GTA-----A-----                                        | 72766 |
| Ma'sNightMonkey   | TTAAAGAGATCTGAAAGTTCTGATCATTTCAAGATACTTAGTATATATTTTCCTCTTTCTCTGTGCACACTTCTGTACTC | 81517 |
| VervetAGM         | TTACAGAGGTATGAAAGTGCTGATTATGTCATGATCCCTAGTATATATTTTCCTCT-----GTGTGCACCTTCTGTACTC | 87741 |
| Gorilla           | TTAAAGAGATATGAAAGTGCTGATTATGTCAGATACTTAGTACATATTTTCCTCTTTCTCTGTGTGCACCTTCTGTACTC | 85127 |
| GrabEatingMacaque | TTACAGAGGTATGAAAGTGCTGATTATGTCATGATCCCTAGTATATATTTTCCTCT-----GTGTGCACCTTCTGTACTC | 87187 |
| Macaque           | TTACAGAGGTATGAAAGTGCTGATTATGTCATGATCCCTAGTATATATTTTCCTCT-----GTGTGCACCTTCTGTACTC | 88076 |
| PigTailedMacaque  | TTACAGAGGTATGAAAGTGCTGATTATGTCATGATCCCTAGTATATATTTTCCTCT-----GTGTGCACCTTCTGTACTC | 86633 |
| Bonobo            | TTAAAGAGATATGAAAGTGCTGATTATGTCAGATACTTAGTACATATTTTCCTCTTTCTCTGTGTGCACCTTCTGTACTC | 85727 |
| OliveBaboon       | TTATAGAGGTATGAAAGTGCTGATTATGTCATGATCCCTAGTATATATTTTCCTCT-----GTGTGCACCTTCTGTACTC | 86524 |
| Orangutan         | TTAAAGAGATATGAAAGTGCTGATTATGTCAGATACTTAGTACATATTTTCCTCTTTCTCTGTGTGCACCTTCTGTACTC | 87363 |



Tuesday, May 03, 2022 06:17 PM

| Majority          | TGGTTGGAATAGTCATTGCTGTTGCTTTTCATATATGTTGTAAGTAGC-<br>ACTTGACAGTACTTCATAATCA---GAGTGTT  |       |
|-------------------|----------------------------------------------------------------------------------------|-------|
|                   | 103690 103700 103710 103720 103730 103740 103750 103760                                |       |
| Human             | TGGTTGGAATAGTCATTGCTGTTGTTTTTCATATATGTTGTAAGTAGC-<br>ACTTAAACAGTACTTCATAATAG---GAGTATT | 86965 |
| Coquerel'sSifaka  | -----GACTGATGATA-----TGTCATATACATTGTAAGTAACCATT<br>TTCAGTACTTCATAGTCAACAGAACATT        | 72832 |
| Ma'sNightMonkey   | TGGTTGGAATAGTCATTACTCTGTTTTTATATATATTGTAAGTAGC-<br>ATTTGACAATACTTCATAGTGA---GAGTATT    | 81593 |
| VervetAGM         | TGGTTGGAATAGTAATTGCTGTTGCTTTTCATACATGTTGTAAGTAGC-<br>ACTTGGCAGTACTTCATAATCA---GAGTGTT  | 87817 |
| Gorilla           | TGGTTGGAATAGTCATTGCTGTTGTTTTTCATATATGTTGTAAGTAGC-<br>ACTTAAACAGTACTTCATAATAG---GAGTATT | 85203 |
| GrabEatingMacaque | TGGTTGGAATAGTAATTGCTGTTGCTTTTCATACATGTTGTAAGTAGC-<br>ACTTGGCAGTACTTCATAATCA---GAGTGTT  | 87263 |
| Macaque           | TGGTTGGAATAGTAATTGCTGTTGCTTTTCATACATGTTGTAAGTAGC-<br>ACTTGGCAGTACTTCATAATCA---GAGTGTT  | 88152 |
| PigTailedMacaque  | TGGTTGGAATAGTAATTGCTGTTGCTTTTCATACATGTTGTAAGTAGC-<br>ACTTGGCAGTACTTCATAATCA---GAGTGTT  | 86709 |
| Bonobo            | TGGTTGGAATAGTCATTGCTGTTGTTTTTCATATATGTTGTAAGTAGC-<br>ACTTAAACAGTACTTCATAATAG---GAGTATT | 85803 |
| OliveBaboon       | TGGTTGGAATAGTAATTGCTGTTGCTTTTCATACATGTTGTAAGTAGC-<br>ACTTGGCAGTACTTCATAATCA---GAGTGTT  | 86600 |
| Orangutan         | TGGTTGGAATAGTCATTGCTGTTGCTTTTCATATATGTTGTAAGTAGC-<br>ACTTAAACAGTACTTCATAATAG---GAGTGTT | 87439 |

| Majority          | CTCAAATATGTCATTTTTTTCCCTA--ATTGTTTGAGGTATGGGTGGCATT<br>TATGTGTCATTTAAATAAGGGATGCAGAGT |       |
|-------------------|---------------------------------------------------------------------------------------|-------|
|                   | 103770 103780 103790 103800 103810 103820 103830 103840                               |       |
| Human             | CTCAAATATGTCATTTTTTTCCCTA--ATTGTTTGAGGTATGGGTGGCATT<br>--GTGTCATTTAAATAAGGGATGCATAGT  | 87041 |
| Coquerel'sSifaka  | CTTAAATATGTCATTTTTTTCTTGTACCATTGAGATCTGGGTGTCATTA-<br>CCATCATATAAATAATGGATACAAAAT     | 72911 |
| Ma'sNightMonkey   | CTCAAATGTGTCATTTTTT-CCCTA--ATTGTTTGAGTATGGGTGGCATT<br>TATGTGTCATTTAAATAAGGGATACAGAGT  | 81670 |
| VervetAGM         | CTCAAATATGTCATTTTTTTCCCTA--ATTGTTTGAGGTATGGGTGGCATT<br>TGTGTCATTTAAATAAAGGATGCAGAGT   | 87895 |
| Gorilla           | CTCAAATATGTCATTTTTTTCCCTA--ATTGTTTGAGGTATGGGTGGCATT<br>--GTGTCATTTAAATAAGGGATGCATAGT  | 85279 |
| GrabEatingMacaque | CTCAAATATGTCATTTTTTTCCCTA--ATTGTTTGAGGTATGGGTGGCATT<br>TATGTGTCATTTAAATAAAGGATGCAGAGT | 87341 |
| Macaque           | CTCAAATATGTCATTTTTTTCCCTA--ATTGTTTGAGGTATGGGTGGCATT<br>TATGTGTCATTTAAATAAAGGATGCAGAGT | 88230 |
| PigTailedMacaque  | CTCAAATATGTCATTTTTTTCCCTA--ATTGTTTGAGGTATGGGTGGCATT<br>TATGTGTCATTTAAATAAAGGATGCAGAGT | 86787 |
| Bonobo            | CTCAAATATGTCATTTTTTTCCCTA--ATTGTTTGAGGTATGGGTGGCATT<br>--GTGTCATTTAAATAAGGGATGCATAGT  | 85879 |
| OliveBaboon       | CTCAAATATGTCATTTTTTTCCCTA--ATTGTTTGAGGTATGGGTGGCATT<br>TGTGTCATTTAAATAAAGGATGCAGAGT   | 86678 |
| Orangutan         | CTCAAATATGTCATTTTTTTCCCTA--ATTGTTTGAGGTATGGGTGGCATT<br>--GTGTCATTTAAATAAGGAGTGCATAGT  | 87515 |

| Majority          | CTTTATGGTTGATAATTACCTGTGGTAGAATTACCTCAGAT-CTTCTAGATA<br>GTTTTTT---GTTTTATGTAAAGACTGTT  |       |
|-------------------|----------------------------------------------------------------------------------------|-------|
|                   | 103850 103860 103870 103880 103890 103900 103910 103920                                |       |
| Human             | CTTTATGGTTGATAATTACCTGTGGTAGAATTACCTCAGAT-CTTCCAGATA<br>GTTTTTT---GTTTTATGTAAAGACTGTT  | 87117 |
| Coquerel'sSifaka  | CATTACGGTTGAGAATTTCCCTAAGATAAAAAGAAACCAAAATTCCTCTGG<br>GTAGTTTTTTTGGTTTTATGTAAAGACTATT | 72991 |
| Ma'sNightMonkey   | CTTTATGGTTGATAATTACTTGTGGTAGAATTACCTCAGAT-CTTCTGGATA<br>GTTTTTT---GTTTTATGTAAAGACTGTT  | 81746 |
| VervetAGM         | CTTTATGGTTGATAATTACCTGTGGTAGAGTTACCTCAGAT-CTTCTAGATA<br>GTTTTTT---GTTTTATGTAAAGACTGTT  | 87971 |
| Gorilla           | CTTTATGGTTGATAATTACCTGCAGTAGAATTACCTCAGAT-CTTCCAGATA<br>GTTTTTT---GTTTTATGTAAAGACTGTT  | 85355 |
| GrabEatingMacaque | CTTTATGGTTGATAATTACCTGTGGTAGAGTTACCTCAGAT-CTTCTAGATA<br>GTTTTTT---GTTTTATGTAAAGACTGTT  | 87417 |
| Macaque           | CTTTATGGTTGATAATTACCTGTGGTAGAGTTACCTCAGAT-CTTCTAGATA<br>GTTTTTT---GTTTTATGTAAAGACTGTT  | 88306 |
| PigTailedMacaque  | CTTTATGGTTGATAATTACCTGTGGTAGAGTTACCTCAGAT-CTTCTAGATA<br>GTTTTTT---GTTTTATGTAAAGACTGTT  | 86863 |
| Bonobo            | CTTTATGGTTGATAATTACCTGTGGTAGAATTACCTCAGAT-CTTCCAGATA<br>GTTTTTT---GTTTTATGTAAAGACTGTT  | 85955 |
| OliveBaboon       | CTTTATGGTTGATAATTACCTGTGGTAGAGTTACCTCAGAT-CTTCTAGATA<br>GTTTTTT---GTTTTATGTAAAGACTGTT  | 86754 |
| Orangutan         | CTTTATGGTTGATAATTACCTGTGGTAGAATTACCTCAGAT-CTTCCAGATA<br>GTTTTTT---GTTTTATGTA--GACTGTT  | 87589 |

Tuesday, May 03, 2022 06:17 PM

| Majority          | TTAAGTAA---TATTTTAATTTTT-----TGCCATACTTGTAGTCTGCTTGGGCTGCCATAACCAAATAAC          |       |
|-------------------|----------------------------------------------------------------------------------|-------|
|                   | 103930 103940 103950 103960 103970 103980 103990 104000                          |       |
| Human             | TTATGTAA---TATTTTAATTTTT-----TGCCATGCTCGTAGTCTGCTTGGGCTGCTGTAACCAAATAAC          | 87180 |
| Coquerel'sSifaka  | TTAAATAAGTGGTATTTTAATTTTTACCATACTTGTATTAGTGTACTTGGAGTCTGCTTGGGCTGCCATAA---AAATAC | 73068 |
| Ma'sNightMonkey   | TTAAGTAA---TATTTTAATTTTT-----TGCCATACTCGTAGTCTGCTTGGGCTACCGTAACCAAATAAC          | 81809 |
| VervetAGM         | TTAAGTAA---TACTTTAATTTTT-----TGCCATACTTGTAGTCTACTTGGGCTGCCATGACCAAATAAC          | 88034 |
| Gorilla           | TTATGTAA---TATTTTAATTTTT-----TGCCATACTCGTAGTCTGCTTGGGCTGCTGTAACCAAATAAC          | 85418 |
| GrabEatingMacaque | CTAAGTAA---TACTTTAATTTTT-----TGCCATACTTGTAGTCTGCTTGGGCTGCCATAACCAAATAAC          | 87480 |
| Macaque           | CTAAGTAA---TACTTTAATTTTT-----TGCCATACTTGTAGTCTGCTTGGGCTGCCATAACCAAATAAC          | 88369 |
| PigTailedMacaque  | CTAAGTAA---TACTTTAATTTTT-----TGCCATACTTGTAGTCTGCTTGGGCTGCCAAAATCAAATAAC          | 86926 |
| Bonobo            | TTATGTAA---TATTTTAATTTTT-----TGCCATACTCGTAGTCTGCTTGGGCTGCTGTAACCAAATAAC          | 86018 |
| OliveBaboon       | CTAAGTAA---TACTTTAATTTTT-----TGCCATACTTGTAGTCTGCTTGGGCTGCCATAACCAAATAAC          | 86817 |
| Orangutan         | TTAAGTAA---TATTTTAATTTTT-----TGCCATACTTGTAGTCTGCTTGGGCTGCTGTAACCAAATAAC          | 87652 |

| Majority          | CATAGACT-GAGTAGATGAAACAACAAAATTTATTTCTCAAAGTTTTGAGAAATAAAACTTTGGGGTCTAGAAGTCCC  |       |
|-------------------|---------------------------------------------------------------------------------|-------|
|                   | 104010 104020 104030 104040 104050 104060 104070 104080                         |       |
| Human             | CATAGACT-GAGTAGATGAAACAACAAAATGTATTTCTCAAAGTTTTGAGAAATAAAACTTTGGGGTCTAGAAGTCCC  | 87259 |
| Coquerel'sSifaka  | CACAGACT-GGGTGACTTAAACACCAGAAATTTATTTTATCA--GTTT-----T-----GGAGTCTC             | 73122 |
| Ma'sNightMonkey   | CAAAGACTTGAGCAGATGAAACAACAAAATTTATTTTCACAAAATTCGAGAAATAAAACT--GGGATCTAGAAGTCCC  | 81887 |
| VervetAGM         | CATGGACT-GAGTAGATGAAACAACGAAAATTTATTTCTCAAAGTTTTGAGAAATAAAACTTTGGGGTCTAGAAGTCCC | 88113 |
| Gorilla           | CATAGACT-GAGTAGATGAAACAACAAAATGTATTTCTCAAAGTTTTGAGAAATAAAACTTTGGGGTCTTGAAGTCCC  | 85497 |
| GrabEatingMacaque | CACGGACT-GAGTAGATGAAACAACGAAAATTTATTTCTCAAAGTTTTGAGAAATAAAACTTTGGGGTCTAGAAGTCCC | 87559 |
| Macaque           | CACGGACT-GAGTAGATGAAACAACGAAAATTTATTTCTCAAAGTTTTGAGAAATAAAACTTTGGGGTCTAGAAGTCCC | 88448 |
| PigTailedMacaque  | CACGGACT-GAGTAGATGAAACAACGAAAATTTATTTCTCAAAGTTTTGAGAAATAAAACTTTGGGGTCTAGAAGTCCC | 87005 |
| Bonobo            | CATAGACT-GAGTAGATGAAACAACAAAATGTATTTCTCAAAGTTTTGAGAAATAAAACTTTGGGGTCAAGAAGTCCC  | 86097 |
| OliveBaboon       | CACGGACT-GAGTAGATGAAACAATGAAAATTTATTTCTCAAAGTTTTGAGAAATAAAACTTTGGGGTCTAGAAGTCCC | 86896 |
| Orangutan         | CATAGACT-GAGTAGATGAAACAACAAAATGTATTTCTCAAAGTTTTGAGAAATAAAACTTTGGGGTCTAGAAGTCCC  | 87731 |

| Majority          | AGATGAAACTGCTAGCAGATT--GTTTCTGGTGAGGTCTCTCTT---GGCTTGCA-GCCAACCATCTTCCCC-ATGTGTC |       |
|-------------------|----------------------------------------------------------------------------------|-------|
|                   | 104090 104100 104110 104120 104130 104140 104150 104160                          |       |
| Human             | AGATGAAACTGCTAGCAGATT--GTTTCTGGTGAGGTCTCTCTT---GGCTTGCA-GCCAACCATCTTCCCC-CTGTGTC | 87332 |
| Coquerel'sSifaka  | AGATCAAGGTGCCAACAGATTGGTTTCTGATGAGGGCTCTCTTCTTGGCTTGCTACAAGCCATCTTCTCTGTTGTGTC   | 73202 |
| Ma'sNightMonkey   | AGATGAAACTGCCAGCAGATT--GTTTCTGGTGAGGTCTCTCTT---GGTTTGCA-ACCAGCCATCTTCCCT-TTGTCTC | 81960 |
| VervetAGM         | AGATGAAACTGCTAGCAGATT--GTTTCTGGTGAGGTCTCTCTT---GACTTGCA-GCCAACCATCTTCCCC-ATGTGTC | 88186 |
| Gorilla           | AGATGAAACTGCTAGCAGATT--GTTTCTGGTGAGGTCTCTCTT---GGCTTGCA-GCCGGCCATCTTCCCC-ATGTGTC | 85570 |
| GrabEatingMacaque | AGATGAGACTGCTAGCAGATT--GTTTCTGGTGAGGTCTCTCTT---GACTTGCA-GCCAACCATCTTCCCC-AAGTGTC | 87632 |
| Macaque           | AGATGAGACTGCTAGCAGATT--GTTTCTGGTGAGGTCTCTCTT---GACTTGCA-GCCAACCATCTTCCCC-AAGTGTC | 88521 |
| PigTailedMacaque  | AGATGAAACTGCTAGCAGATT--GTTTCTGGTGAGGTCTCTCTT---GACTTGCA-GCCAACCATCTTCCCC-AAGTGTC | 87078 |
| Bonobo            | AGATGAAACTGCTAGCAGATT--GTTTCTGGTGAGGTCTCTCTT---GGCTTGCA-GCCAACCATCTTCCCC-ATGTGTC | 86170 |
| OliveBaboon       | AGATGAAACTGCTAGCGGATT--GTTTCTGGTGAGGTCTCTCTT---GACTTGCA-GCCAACCATCTTCCCC-ATGTGTC | 86969 |
| Orangutan         | AGATGAAACTGCTAGCAGATT--GTTTCTGGTGAGGTCTTCTT---GGCTTGCA-GCCAACCTGCTTCCCC-ATGTGTC  | 87804 |

Tuesday, May 03, 2022 06:17 PM

| Majority          | CTCATGTGGCCTTTCCACTGTGCAGGCACGTTAAGAGTCTCTTCCCCTTATAAGGATACTAGTCCTGTTGAATCAGGGCT |        |        |        |        |        |        |        |  |       |
|-------------------|----------------------------------------------------------------------------------|--------|--------|--------|--------|--------|--------|--------|--|-------|
|                   | 104170                                                                           | 104180 | 104190 | 104200 | 104210 | 104220 | 104230 | 104240 |  |       |
| Human             | CTCATGTGGCCTTTCCACTGTGCAAGCACGTTAAGAGTCTCTTCCCCTTGTAAGGATCCTAGTCCTGTTGAATCAGGGCT |        |        |        |        |        |        |        |  | 87412 |
| Coquerel'sSifaka  | CTCACGTGGCCTTTTTGGTG-ACAGAGATCT-----CTGCCTCTTCTTACAAGGACACCAGTTCTGTTGAATTAGGACT  |        |        |        |        |        |        |        |  | 73275 |
| Ma'sNightMonkey   | TTCATGTGGCCTTTCCACTGTGCAAGCACATTAAGAGTCTCTTCTTCTTATAAGGACACTAGTCCTGTTGAGTCAGGGCT |        |        |        |        |        |        |        |  | 82040 |
| VervetAGM         | CTCATGTGGCCTTTCCACTGTGCAGGCGTGTAAAGAGTCTCTTCCCCTTATAAGGATACTAGTCCTGTTGAATCAGGGCT |        |        |        |        |        |        |        |  | 88266 |
| Gorilla           | CTCATGTGGCCTTTCCACTGTGCAAGCACGTTAAGAGTCTCTTCCCCTTGTAAGGATCCTAGTCCTGTTGAATCAGGGCT |        |        |        |        |        |        |        |  | 85650 |
| GrabEatingMacaque | CTCATGTGGCCTTTCCACTGTGCAGGCACGTTAAGAGTCTCTTCCCCTTATAAGGATACTAGTCCTGTTGAATCAGGGCT |        |        |        |        |        |        |        |  | 87712 |
| Macaque           | CTCATGTGGCCTTTCCACTGTGCAGGCACGTTAAGAGTCTCTTCCCCTTATAAGGATACTAGTCCTGTTGAATCAGGGCT |        |        |        |        |        |        |        |  | 88601 |
| PigTailedMacaque  | CTCATGTGGCCTTTCCACTGTGCAGGCTCGTTAAGAGTCTCTTCCCCTTATAAGGATACTAGTCCTGTTGAATCAGGGCT |        |        |        |        |        |        |        |  | 87158 |
| Bonobo            | CTCATGTGGCCTTTCCACTGTGCAAGCACGTTAAGAGTCTCTTCCCCTTGTAAGGATCCTAGTCCTGTTGAATCAGGGCT |        |        |        |        |        |        |        |  | 86250 |
| OliveBaboon       | CTCATGTGGCCTTTCCACTGTGCAGGCGGTAAAGAGTCTCTTCCCCTTATAAGGATACTAGTCCTGTTGAATCAGGGCT  |        |        |        |        |        |        |        |  | 87049 |
| Orangutan         | CTCATGTGGCCTTTCCACTGTGCAAGTGCATGAAGAGTCTCTTCCCCTTATAAGGATACTAGTCCTGTTGAATCAGGGCT |        |        |        |        |        |        |        |  | 87884 |

| Majority          | CTACCCTTAATGACCACATTTAACCTT--AATTACCTCCTTAAAGGTCCTGTTTTTAAGTACAGTTACATT-GGGGGTTA |        |        |        |        |        |        |        |  |       |
|-------------------|----------------------------------------------------------------------------------|--------|--------|--------|--------|--------|--------|--------|--|-------|
|                   | 104250                                                                           | 104260 | 104270 | 104280 | 104290 | 104300 | 104310 | 104320 |  |       |
| Human             | TTACCCTTAATGACCACATTTAACCTT--AATTACCTCCTTAAAGGTCCTGTTTTTAAGTACAGTTACATT-GGGGGTTA |        |        |        |        |        |        |        |  | 87489 |
| Coquerel'sSifaka  | CTCCCCTAA--GACTTCATTTAACCTTGAAATTACCTTCTTAAAGGTCCCATCTTTAAATACAGTTACATTTGGGAGTTA |        |        |        |        |        |        |        |  | 73353 |
| Ma'sNightMonkey   | CCACCCTTAATGAGCACATTTAACCTT--AATTACCTCCTTAAAGATCTTATTTTTAAACAT---TG-----GGGGGTTA |        |        |        |        |        |        |        |  | 82110 |
| VervetAGM         | CTACTCTTAATGACCACATTTA-CCTG--AATTACCTCCTTAAAGGCCCTGTTTTTAAGTACCATTACATT-GGGGGTTA |        |        |        |        |        |        |        |  | 88342 |
| Gorilla           | TTACCCTTAATGACCACATTTAACCTT--AATTACCTCCTTAAAGGTCCTGTTTTTAAGTACAGTTACATT-GGGGGTTA |        |        |        |        |        |        |        |  | 85727 |
| GrabEatingMacaque | CTACTCTTAATGACCACATTTA-CCTG--AATTACCTCCTTAAAGGCCCTGTTTTTAAGTACAGTTACATT-GGGGGTTA |        |        |        |        |        |        |        |  | 87788 |
| Macaque           | CTACTCTTAATGACCACATTTA-CCTG--AATTACCTCCTTAAAGGCCCTGTTTTTAAGTACAGTTACATT-GGGGGTTA |        |        |        |        |        |        |        |  | 88677 |
| PigTailedMacaque  | CTACTCTTAATGACCACATTTA-CCTG--AATTACCTCCTTAAAGGCCCTGTTTTTAAGTACAGTTACATT-GGGGGTTA |        |        |        |        |        |        |        |  | 87234 |
| Bonobo            | TTACCCTTAATGACCACATTTAACCTT--AATTACCTCCTTAAAGGTCCTGTTTTTAAGTACAGTTACATT-GGGGGTTA |        |        |        |        |        |        |        |  | 86327 |
| OliveBaboon       | CTACTCTTAATGACCACATTTA-CCTG--AATTACTCCTTAAAGGCCCTGTTTTTAAGTACAGTTACATT-GGGGGTTA  |        |        |        |        |        |        |        |  | 87125 |
| Orangutan         | CTACCCTTAATGACCACATTTAACCTT--AATTACCTCCTTAAAGGTCCTGTTTTTAAGTACAGTTACATT-GGGGGTTA |        |        |        |        |        |        |        |  | 87961 |

| Majority          | GGACTTCAACATACAAAATTTGGGAGGACACAATTCAGT---TAATAGTACTTAAATTTGTAAAATCATTATATCCC-AATT |        |        |        |        |        |        |        |  |       |
|-------------------|------------------------------------------------------------------------------------|--------|--------|--------|--------|--------|--------|--------|--|-------|
|                   | 104330                                                                             | 104340 | 104350 | 104360 | 104370 | 104380 | 104390 | 104400 |  |       |
| Human             | GGACTTCAACATATAAAATTTGGGAGGACACAATTCAGT---TAATAGTACTTAAATTTGTAAAATCATTATATCCCAAATT |        |        |        |        |        |        |        |  | 87566 |
| Coquerel'sSifaka  | GGGCTTCAACATACGAATCTGGGGA-AACACAATTCAGTCTGTTACATTACTTATATTTGGAAATCATTATATCCCAATT   |        |        |        |        |        |        |        |  | 73432 |
| Ma'sNightMonkey   | GGAGTT---CATATGAATTTTGAGAGAACAAAATTCAGT---TTATAGTCTTATATTTGTAAAATCATTATATGCCCAATT  |        |        |        |        |        |        |        |  | 82184 |
| VervetAGM         | GGACTTCAACATACAAAATTTGGGAGGACACAATTCAGT---TAATAGAACTTAAATTTGTAAAATCATTAT-----      |        |        |        |        |        |        |        |  | 88411 |
| Gorilla           | GGACTTCAACATATAAAATTTGGGAGGACACAATTCAGT---TAATAGTACTTAAATTTGTAAAATCATTATATCCCAATT  |        |        |        |        |        |        |        |  | 85804 |
| GrabEatingMacaque | GGACTTCAACATACAAAATTTGGGAGGACACAGTTGAGT---TAATAGTACTTAAATTTGTAAAATCATTAT-----      |        |        |        |        |        |        |        |  | 87857 |
| Macaque           | GGACTTCAACATACAAAATTTGGGAGGACACAGTTGAGT---TAATAGTACTTAAATTTGTAAAATCATTAT-----      |        |        |        |        |        |        |        |  | 88746 |
| PigTailedMacaque  | GGACTTCAACATACAAAATTTGGGAGGACACAGTTGAGT---TAATAGTACTTAAATTTGTAAAATCATTAT-----      |        |        |        |        |        |        |        |  | 87303 |
| Bonobo            | GGACTTCAACATATAAAATTTGGGAGGACACAATTCAGT---TAATAGTACTTAAATTTGTAAAATCATTATATCCCAAATT |        |        |        |        |        |        |        |  | 86404 |
| OliveBaboon       | GGACTTCAACATACAAAATTTGGGAGGACACAGTTGAGT---TAATAGTACTTAAATTTGTAAAATCATTAT-----      |        |        |        |        |        |        |        |  | 87194 |
| Orangutan         | GTACTTAAACATATAAAATTTGGGAGGACACAATTCAGT---TAATAGTACTTAAATTTGTAAAATCATTATATCCCAATT  |        |        |        |        |        |        |        |  | 88038 |

Tuesday, May 03, 2022 06:17 PM

|                   |                                                                                  |       |
|-------------------|----------------------------------------------------------------------------------|-------|
| Majority          | TTATAAGATATTGTCACTAAAGTTTTGACTTGCTAGTAA-----GGCTTATAATTTTTGGACTATATGTAGTGGTA     |       |
|                   | 104410 104420 104430 104440 104450 104460 104470 104480                          |       |
| Human             | TTATAAGATATTGTCACTAAAGTTTTGACTTGCTAGTAG-----GGCTTATAATTTTTGGACTATCTGTAGTGGTA     | 87637 |
| Coquerel'sSifaka  | TCTTAAGATACTATCACTAAAGTTTTGACTTGCTATTAATAGTAGCCTGGTTTATAATTTTTGGACTTTATGTAGTGGTT | 73512 |
| Ma'sNightMonkey   | TTATAAGATATTGTCACTAAAGTTTTGACTTGCTAGTAG-----ACCTTATAATTTTTGGACTATATCTAGTGGTA     | 82255 |
| VervetAGM         | -----TGTCATTAAAGTTTTGACTTGCTAGGAA-----GGCTTATAATTTTTGGACTATATATAGTGGTA           | 88471 |
| Gorilla           | TTATAAGATATTGTCACTAAAGTTTTGACTTGCTAGTAG-----GGCTTATAATTTTTGGACTATCTGTAGTGGTA     | 85875 |
| GrabEatingMacaque | -----TGTCATTAAAGTTTTGACTTGCTAGGAA-----GGCTTATAAGTTTTGGACTATATGTAGTGGTA           | 87917 |
| Macaque           | -----TGTCATTAAAGTTTTGACTTGCTAGGAA-----GGCTTATAAGTTTTGGACTATATGTAGTGGTA           | 88806 |
| PigTailedMacaque  | -----TGTCATTAAAGTTTTGACTTGCTAGGAA-----GGCTTATAAGTTTTGGACTATATGTAGTGGTA           | 87363 |
| Bonobo            | TTATAAGATATTGTCACTAAAGTTTTGACTTGCTAGTAG-----GGCTTATAATTTTTGGACTATCTGTAGTGGTA     | 86475 |
| OliveBaboon       | -----TGTCATTAAAGTTTTGACTTGCTAGGAA-----GGCTTATAATTTTTGGACTATATGTAGTGATA           | 87254 |
| Orangutan         | TTATAAGATATTGTCACTAAAGTTTTGACTTGCTAGTAG-----GGCTTATAATTTTTGGACTATCTGTAGTGGTA     | 88109 |

|                   |                                                                                   |       |
|-------------------|-----------------------------------------------------------------------------------|-------|
| Majority          | AATAATTCATCATTTCCTATTGCTGCTAGGTAGATTTT-GCTTTCCTGAACTGTGTGACCATAAAAAATATGTACTGACAC |       |
|                   | 104490 104500 104510 104520 104530 104540 104550 104560                           |       |
| Human             | AATAATTCATCATTTCCTATTGCTGCTAGGTAGATTTT-GCTTTCCTGAACTGTGTGACCATAAAAAGTATGTACTGACAC | 87716 |
| Coquerel'sSifaka  | AATAATTTATTTCTCATTG--CTAGGTAGATACT-GCTTTCCTGAACTGTATGACCATAAAAAATA-GTATTCACAC     | 73587 |
| Ma'sNightMonkey   | AATAATTCATCATTTCCTATTGCTGCTAGGTAAATTTT-GCTTTCCTAAACTGTGTGACCATAAAAAATATGTACTGACAC | 82334 |
| VervetAGM         | AATAATTCAT---TTCTCATTGCTGCTAGGTAGATTTT-GCTTTCCTGAACTATGTGACCATAAAAAATATGTACTGACAC | 88548 |
| Gorilla           | AATAATTCATCATTTCCTATTGCTGCTAGGTAGATTTT-GCTTTCCTGAACTGTGTGACCATAAAAAGTATGTACTGACAC | 85954 |
| GrabEatingMacaque | AATAATTCAT---TTCTCATTGCTGCTAGGTAGATTTT-GCTTTCCTGAACTATGTGACCATAAAAAATATGTACTGACAC | 87994 |
| Macaque           | AATAATTCAT---TTCTCATTGCTGCTAGGTAGATTTT-GCTTTCCTGAACTATGTGACCATAAAAAATATGTACTGACAC | 88883 |
| PigTailedMacaque  | AATAATTCAT---TTCTCATTGCTGCTAGGTAGATTTT-GCTTTCCTGAGCTATGTGACCATAAAAAATATGTACTGACAC | 87440 |
| Bonobo            | AATAATTCATCATTTCCTATTGCTGCTAGGTAGATTTT-GCTTTCCTGAACTGTGTGACCATAAAAAGTATGTACTGACAC | 86554 |
| OliveBaboon       | AATAATTCAT---TTCTCATTGCTGCTAGGTAGATTTT-GCTTTCCTGAACTATGTGACCATAAAAAATACGTACTGACAC | 87331 |
| Orangutan         | AATAATTCATCGTTTCTCATTGCTGCTAGGTAGATTCT-GCTTTCCTGAACTGTGTGACCATAAAAAATACGTACTGACAC | 88188 |

|                   |                                                                                    |       |
|-------------------|------------------------------------------------------------------------------------|-------|
| Majority          | CATC--ACTTCCTTTAAAACACACACACACACACACACCCCCACA--CCCACACA--AAACTCTGTGGTGTACTATTGAG   |       |
|                   | 104570 104580 104590 104600 104610 104620 104630 104640                            |       |
| Human             | CATC--ATTTCTTTAAAACACACACACACAAACACACACACACA--CACGCA-----                          | 87765 |
| Coquerel'sSifaka  | CATCTCAGTGCCTGTAAAACACGCACATACACTCACAGTCAAAT---CCTACAGG--AAACTCTAGGATGTGGTATTGAG   | 73662 |
| Ma'sNightMonkey   | TATT--ACTTCCTTTAAAACACACACTCGCTCTCGCTTTCCTCTGCCCCACACACCAAACCTCTATGGTGTACCATTGAG   | 82412 |
| VervetAGM         | CATC--ACTTCCTTTAAAACACACCCACATACACACACCCCCACA--CCCACACA--AAACTCTGTGGTGTACTATTGAG   | 88622 |
| Gorilla           | CATC--ATTTCTTTAAAACACACACACACACACACATACATACA--CTCACACA-----                        | 86005 |
| GrabEatingMacaque | CATC--ACTTCCTTTAAAGCACACCCACACACACACACACCCCCACA--CCCACACA--AAACTCTGTGGTGTACTATTGAG | 88068 |
| Macaque           | CATC--ACTTCCTTTAAAGCACACCCACACACACACACACCCCCACA--CCCACACA--AAACTCTGTGGTGTACTATTGAG | 88957 |
| PigTailedMacaque  | CATC--ACTTCCTTTAAAGCACACCCACACACACACACACCCCCACA--CCCACACA--AACATCTGTGGTGTACTATTGAG | 87514 |
| Bonobo            | CATC--ATTTCTTTAAAACACACACACACAAACACACACACACA--C-----                               | 86598 |
| OliveBaboon       | CATC--ACTTCCTTTAAAACACACCCACACACACACACACCCCCACA--CCCACACA--AAACTCTGTGGTGTACTATTGAG | 87405 |
| Orangutan         | CATC--ACTTCCTTTAAAACACACACACACACACACACACT--CCCACACA--AAACTCTATGGTGTACTATTGAG       | 88262 |

Tuesday, May 03, 2022 06:17 PM

| Majority          | AACAAATAAA-TGAGGCCAAAACATTTTT---TT-GTTTCTGAACTCTATTCTT-ATTCTTTTGGTTTTCAAGGGGAC  |        |        |        |        |        |        |        |       |
|-------------------|---------------------------------------------------------------------------------|--------|--------|--------|--------|--------|--------|--------|-------|
|                   | 104650                                                                          | 104660 | 104670 | 104680 | 104690 | 104700 | 104710 | 104720 |       |
| Human             | -----                                                                           |        |        |        |        |        |        |        | 87765 |
| Coquerel'sSifaka  | AAAAATGAGACTTAAAAAAAAAATTTTAATTTTGGTTTTTGGACTCTGTCCTC-ATTCTTTCTGGTTTTTCAT-GGGAC |        |        |        |        |        |        |        | 73740 |
| Ma'sNightMonkey   | AACAAATAAA-GGAGGCCAAAACATTTTT---TTGTTTCTGGACTCTGTTCTT-ATTATTTTGGTTTTCAAGGGGAC   |        |        |        |        |        |        |        | 82486 |
| VervetAGM         | AACAAATAAA-TGAGGCCAAAACATTTTT---TT-GTTTCTGAACTCTATTCTT-ATTCTTTTGGTTTTCAAGGGGAC  |        |        |        |        |        |        |        | 88695 |
| Gorilla           | -----                                                                           |        |        |        |        |        |        |        | 86005 |
| GrabEatingMacaque | AACAAATAAA-TGAGGCCAAAACATTTTT---TT-GTTTCTGAACTCTATTCTT-ATTCTTTTGGTTTTCAAGGGGAC  |        |        |        |        |        |        |        | 88141 |
| Macaque           | AACAAATAAA-TGAGGCCAAAACATTTTT---TT-GTTTCTGAACTCTATTCTT-ATTCTTTTGGTTTTCAAGGGGAC  |        |        |        |        |        |        |        | 89030 |
| PigTailedMacaque  | AACAAATAAA-TGAGGCCAAAACATTTTT---TT-GTTTCTGAACTCTATTCTTTATTCTTTTTGTTTTACAAGGGGAC |        |        |        |        |        |        |        | 87588 |
| Bonobo            | -----                                                                           |        |        |        |        |        |        |        | 86598 |
| OliveBaboon       | AACAAATCAG-TGAGGCCAAAACATTTTT---TT-GTTTCTGAACTCTATTCTT-ATTCTTTTGGTTTTCAAGGGGAC  |        |        |        |        |        |        |        | 87478 |
| Orangutan         | AACAAATAAA-TGAGGCCAAAACATTTTT---TTGTTTCTGTACTCTATTCTT-ATTCTTTTGGTTTTCAAGGGGAC   |        |        |        |        |        |        |        | 88336 |

| Majority          | TCTATTTGTGAGTATTCATTGCTTTGTATTATAGGCAGATGTCTTTATGCTTAAGAGGTAACATGGGAAAAATAAGTGCC  |        |        |        |        |        |        |        |       |
|-------------------|-----------------------------------------------------------------------------------|--------|--------|--------|--------|--------|--------|--------|-------|
|                   | 104730                                                                            | 104740 | 104750 | 104760 | 104770 | 104780 | 104790 | 104800 |       |
| Human             | -----                                                                             |        |        |        |        |        |        |        | 87765 |
| Coquerel'sSifaka  | TCTAGTTGGAAATATTCATTGCTTTATGTTACAGGCAGATGTCTTTATGTTTAAAGAGGTAGCATGGGAGAAATAAATGAC |        |        |        |        |        |        |        | 73820 |
| Ma'sNightMonkey   | TCT--TTGTGAGTATTCATTGCTTTATATTATAGGCAGA--T-----                                   |        |        |        |        |        |        |        | 82524 |
| VervetAGM         | TCTATTTGTGAGTATTCATTGCTTTGTATTATAGGCAGATGTCTTTATGCTTAAGAGGTAACATGGGAAAAATAAGTGCC  |        |        |        |        |        |        |        | 88775 |
| Gorilla           | -----                                                                             |        |        |        |        |        |        |        | 86005 |
| GrabEatingMacaque | TCTATTTGTGAGTATTCATTGCTTTGTATTATAGGCAGATGTCTTTATGCTTAAGAGGTAACATGGGAAAAATAAGTGCC  |        |        |        |        |        |        |        | 88221 |
| Macaque           | TCTATTTGTGAGTATTCATTGCTTTGTATTATAGGCAGATGTCTTTATGCTTAAGAGGTAACATGGGAAAAATAAGTGCC  |        |        |        |        |        |        |        | 89110 |
| PigTailedMacaque  | TCTATTTGTGAGTATTCATTGCTTTGTATTATAGGCAGATGTCTTTATGCTTAAGAGGTAACATGGGAAAAATAAGTGCC  |        |        |        |        |        |        |        | 87668 |
| Bonobo            | -----                                                                             |        |        |        |        |        |        |        | 86598 |
| OliveBaboon       | TCTATTTGTGAGTATTCATTGCTTTGTATTATAGGCAGATGTCTTTATGCTTAAGAGGTAACATGGGAAAATAAGTGCC   |        |        |        |        |        |        |        | 87558 |
| Orangutan         | TC---TGTGAGTATTCATTGCTTTGTATTATAGGCAGTGTCTTTATGCTTAAGAGGTAACATGGGAAAAATAAATGAC    |        |        |        |        |        |        |        | 88412 |

| Majority          | AAGGAAAATTAAGAGAG---ATACTCAGAAATGTTTAAATGTGAATGGAAGTGT---AAATCTTACAGGCCATGTTAAAT |        |        |        |        |        |        |        |       |
|-------------------|----------------------------------------------------------------------------------|--------|--------|--------|--------|--------|--------|--------|-------|
|                   | 104810                                                                           | 104820 | 104830 | 104840 | 104850 | 104860 | 104870 | 104880 |       |
| Human             | -----                                                                            |        |        |        |        |        |        |        | 87765 |
| Coquerel'sSifaka  | AAGGAAAATTAAGAGAGATATAGTCAGCAGTGTTTAAATGTGAATGAGATTGTTGCAGATCTTACAGGCGATGTTAAAT  |        |        |        |        |        |        |        | 73900 |
| Ma'sNightMonkey   | ---AA--TTAAGAGA----TACTCAGTAATGTTTAAATGTGAATGGAATGTTACAAATCTTACAGGCCATGTTAAAT    |        |        |        |        |        |        |        | 82593 |
| VervetAGM         | AAGGAAAATTAAGAGAG---ATACTCAGAAATGTTTAAATGTGAATGGAAGTGT---AAATCTTACAGGCCATGTTAAAT |        |        |        |        |        |        |        | 88849 |
| Gorilla           | -----                                                                            |        |        |        |        |        |        |        | 86005 |
| GrabEatingMacaque | AAGGAAAATTAAGAGAG---ATACTCAGAAATGTTTAAATGTGAATGGAAGTGT---AAATCTTACAGGCCATGTTAAAT |        |        |        |        |        |        |        | 88295 |
| Macaque           | AAGGAAAATTAAGAGAG---ATACTCAGAAATGTTTAAATGTGAATGGAAGTGT---AAATCTTACAGGCCATGTTAAAT |        |        |        |        |        |        |        | 89184 |
| PigTailedMacaque  | AAGGAAAATTAAGAGAG---ATACTCAGAAATGTTTAAATGTGAATGGAAGTGT---AAATCTTACAGGCCATGTTAAAT |        |        |        |        |        |        |        | 87742 |
| Bonobo            | -----                                                                            |        |        |        |        |        |        |        | 86598 |
| OliveBaboon       | AAGGAAAATTAAGAGAG---ATACTCAGAAATGTTTAAATGTGAATGGAAGTGT---AAATCTTACAGGCCATGTTAAAT |        |        |        |        |        |        |        | 87632 |
| Orangutan         | AAGGAAAATCAAGAGA----TACTCAGTAATGTTTAAATGTGAATGGAATGTT---AAATCTTACAGGCCATGTTAAAT  |        |        |        |        |        |        |        | 88484 |

Tuesday, May 03, 2022 06:17 PM

|                   |                                                                                  |       |
|-------------------|----------------------------------------------------------------------------------|-------|
| Majority          | TGTTTCAGACCAGAGTTTTAAAATTTGTAACATTAAGGTGTTTTCA----AATATTAATACTCTTAGAATTTTTCTTAG  |       |
|                   | 104890 104900 104910 104920 104930 104940 104950 104960                          |       |
| Human             | -----                                                                            | 87765 |
| Coquerel'sSifaka  | CATTTACACCAGAATTTTATAATTTTCAAACCTTAAGATGTTTCTTTGATAAACTTTGTCCCATTAGCCTATTTAATTG  | 73980 |
| Ma'sNightMonkey   | TGTTTCAGACCAGAGTTCTAAAAGTTGTAACATTAAGATGTTTTTA----AAGATTAATATTATGTAATCATTCTTAG   | 82669 |
| VervetAGM         | TGTTTCAGACCAGAGTTTTAAAATTTGTAACATTAAGGTGTTTTCA----AATATTAATACTCTTAGAATTTTTCTTAG  | 88925 |
| Gorilla           | -----                                                                            | 86005 |
| GrabEatingMacaque | TGTTTCAGACCAGAGTTTTAAAATTTGTAACATTAAGGTGTTTTCA----AATATTAATACTCTTAGAATTTTTCTTAG  | 88371 |
| Macaque           | TGTTTCAGACCAGAGTTTTAAAATTTGTAACATTAAGGTGTTTTCA----AATATTAATACTCTTAGAATTTTTCTTAG  | 89260 |
| PigTailedMacaque  | TGTTTCAGACCAGAGTTTTAAAATTTGTAACATTAAGGTGTTTTCA----AATATTAATACTCTTAGAATTTTTCTTAG  | 87818 |
| Bonobo            | -----                                                                            | 86598 |
| OliveBaboon       | TGTTTCAGACCAGAGTTTTAAAGTTTGTAAACATTAAGGTGTTTTCA----AATATTAATACTCTTAGAATTTTTCTTAG | 87708 |
| Orangutan         | TGTTTCAGACCAGAGTTTTAAAATTTGCAAACATGAAGATGTTTTCA----AAGATTAATACTCTTAGAATTATCTTAG  | 88560 |

|                   |                                                                                |       |
|-------------------|--------------------------------------------------------------------------------|-------|
| Majority          | A-GTATTATTGGGTAATATTTCTTAGAGTATTACTGTATAAATTTGTAATTCATCTTTAAAAGTAGTATATTGATCTC |       |
|                   | 104970 104980 104990 105000 105010 105020 105030 105040                        |       |
| Human             | -----TACTCTCCAC-----                                                           | 87776 |
| Coquerel'sSifaka  | ATACAGTATTTTTCAATGAATATTTTAAAGAATAATAAAATTTGTAATTCATCTT-AAAAGCAGTATACTTATCTG   | 74059 |
| Ma'sNightMonkey   | A-GTATTATTGGGTAATAAT-----ACTGTATAAATTTGTAATTCACATCTTTAAAGATAGTATATTGATCTC      | 82736 |
| VervetAGM         | A-GTATTATTGGGTAATATTTCTTAGAGTATTACTGAATAAATTTGTAATTCATCTTTAAAAGTAGTATATTGATCTC | 89004 |
| Gorilla           | -----TACTCTCCAC-----                                                           | 86016 |
| GrabEatingMacaque | A-GTATTATTGGGTAATATTTCTTAGAGTATTACTGTATAAATTTGTAATTCATCTTTAAAAGTAGTATATTGATCTC | 88450 |
| Macaque           | A-GTATTATTGGGTAATATTTCTTAGAGTATTACTGTATAAATTTGTAATTCATCTTTAAAAGTAGTATATTGATCTC | 89339 |
| PigTailedMacaque  | A-GTATTATTGGGTAATATTTCTTAGAGTATTACTGTATAAATTTGTAATTCATCTTTAAAAGTAGTATATTGATCTC | 87897 |
| Bonobo            | -----ACTCTCCAC-----                                                            | 86608 |
| OliveBaboon       | A-GTATTATTGGGTAATATTTCTTAGAGTATTACTGTATAAATTTGTAATTCATCTTTGAAAGTAGTATATTGATCTC | 87787 |
| Orangutan         | A-GTATTATTGGGTAATAAT-----ACTGTATAAATTTGTAATTCATCTTTAAAAGTAGTATATTGATCTC        | 88627 |

|                   |                                                                                 |       |
|-------------------|---------------------------------------------------------------------------------|-------|
| Majority          | CAA-GATTAATAAATTTCTAACAAAATGCCAA--AGTAGTTTATTCATAGTAA----AATAATTTAGTTTCTCTAGTTC |       |
|                   | 105050 105060 105070 105080 105090 105100 105110 105120                         |       |
| Human             | -----ACAAAAC-----TCTATGGT-----                                                  | 87791 |
| Coquerel'sSifaka  | CACAGATT-----TTCTGAAAAAA-----TAGTTCCTTTAGGGTAAGAATAATTGTCTAGATTCTTCAATTT        | 74122 |
| Ma'sNightMonkey   | CAAAAATTAATAAATTTTAAACAAAATGCTGG--AGTAGTTTGTTCATAGTAA----TACA----GTTTCTCTAGTTC  | 82805 |
| VervetAGM         | CAA-GATTAATAAATTTCTAACAAAATGCCAACTAGTAGTTTATTCATAGTAA----AATAATTTAGTTTCTCTAGTTC | 89079 |
| Gorilla           | -----ACAAAAC-----TCTATGGT-----                                                  | 86031 |
| GrabEatingMacaque | CAA-GATTAATAAATTTCTAACGAAATGCCAACTAGTAGTTTATTCATAGTAA----AATAATTTAGTTTCTCTGGTTC | 88525 |
| Macaque           | CAA-GATTAATAAATTTCTAACGAAATGCCAACTAGTAGTTTATTCATAGTAA----AATAATTTAGTTTCTCTGGTTC | 89414 |
| PigTailedMacaque  | CAA-GATTAATAAATTTCTAACGAAATGCCAACTAGTAGTTTATTCATAGTAA----AATAATTTAGTTTCTCTAGTTC | 87972 |
| Bonobo            | -----ACAAAAC-----TCTATGGT-----                                                  | 86623 |
| OliveBaboon       | CAA-GATTAATAAATTTCTAACAAAATGCCAACTAGTAGTTTATTCATAGTAA----AATAATTTAGTTTCTCTAGTTC | 87862 |
| Orangutan         | CAAGATTAATAAATTTCTAACAAAATGCCAA--AATAGTTTATTCATAGTAA----AATAATTTAGTTTCTCCAGTTC  | 88700 |

Tuesday, May 03, 2022 06:17 PM

| Majority          | ATGTTTTCAAGAACTATTT--T---TTTAAATGCCTGCTTTTAA-TATATAGCTACCATCTCAAAAAGTAAA-----CTTA |        |        |        |        |        |        |        |       |
|-------------------|-----------------------------------------------------------------------------------|--------|--------|--------|--------|--------|--------|--------|-------|
|                   | 105130                                                                            | 105140 | 105150 | 105160 | 105170 | 105180 | 105190 | 105200 |       |
| Human             | -----G TACTATTT-----AGTA-----                                                     |        |        |        |        |        |        |        | 87804 |
| Coquerel'sSifaka  | ATGTTTTTACCAACTGCTTATAAAATGCCTCTGTTTTTAAATTAATATACTGTCACTCAGAAAGTTAAACTGATTTA     |        |        |        |        |        |        |        | 74202 |
| Ma'sNightMonkey   | ATGTTTTCAAGAATTATTTTTTAAATGCCTTAGTTTTTATTTAA-TATATAGCTGACATCTCAAAAATAAAA-----CTTA |        |        |        |        |        |        |        | 82879 |
| VervetAGM         | ATGTTTTCAAGAACTATTGAAC---TATAAATGCCTGCTTTTAA-TATATAGCTACCATCTCAAAAAGTAAA-----CTTA |        |        |        |        |        |        |        | 89150 |
| Gorilla           | -----G TACTATTT-----AGTA-----                                                     |        |        |        |        |        |        |        | 86044 |
| GrabEatingMacaque | ATGTTTTCAAGAACTATTT--T---TTTAAATGCCTGCTTTTAA-TATATAGCTACCATCTCAAAAAGTAAA-----CTTA |        |        |        |        |        |        |        | 88594 |
| Macaque           | ATGTTTTCAAGAACTATTT--T---TTTAAATGCCTACTTTTAA-TATATAGCTACCATCTCAAAAAGTAAA-----CTTA |        |        |        |        |        |        |        | 89483 |
| PigTailedMacaque  | ATGTTTTCAAGAACTATTT--T---TTTAAATGCCTGCTTTTAA-TATATAGCTACCATCTCAAAAAGTAAA-----CTTA |        |        |        |        |        |        |        | 88041 |
| Bonobo            | -----G TACTATTT-----AGTA-----                                                     |        |        |        |        |        |        |        | 86636 |
| OliveBaboon       | ATGTTTTCAAGAACTATTT--T---TTTAAATGCCTGCTTTTAA-TATATAGCTACCATCTCAAAAAGTAAA-----CTTA |        |        |        |        |        |        |        | 87931 |
| Orangutan         | ATGTTT-CAAGAACTATTTT-----TTTAAATGCCTGCTTTTAA-TATATAGCCGCGTCTCAAAAAGTAAA-----CTTA  |        |        |        |        |        |        |        | 88768 |

| Majority          | GTTCTTATTTATAATAAGCCTTTAC-----AAAATTATATCAAAATGTTCTGTAAAGTGAGTGGAAATCAT-----TCTG |        |        |        |        |        |        |        |       |
|-------------------|----------------------------------------------------------------------------------|--------|--------|--------|--------|--------|--------|--------|-------|
|                   | 105210                                                                           | 105220 | 105230 | 105240 | 105250 | 105260 | 105270 | 105280 |       |
| Human             | -----TG                                                                          |        |        |        |        |        |        |        | 87806 |
| Coquerel'sSifaka  | GTTCTTGTTTCGTAACCTTTACCTACTAAATTATATC-TATAAAAGTGTCTA-AGAATGAGTGGAAATCATATTACCCTA |        |        |        |        |        |        |        | 74280 |
| Ma'sNightMonkey   | GTTCTTGTTTCATAATAAGCCTTTACTT-ACTAAATTATATCAAAATGTTCTGTAAAGTGAGTAGAAATCATATTATCTG |        |        |        |        |        |        |        | 82958 |
| VervetAGM         | GTTCTTATTTATAATAAGCCTTTACTTTACAAAATTATATCAGAATGTTCTGTAAAGTGAGTGGAAATCAT-----TCTG |        |        |        |        |        |        |        | 89225 |
| Gorilla           | -----TG                                                                          |        |        |        |        |        |        |        | 86046 |
| GrabEatingMacaque | GTTCTTATTTATAATAAGCCTTTAC-----AAAATTATATCAAGATGTTCTGTAAAGTGAGTGGAAATCAT-----TCTG |        |        |        |        |        |        |        | 88664 |
| Macaque           | GTTCTTATTTATAATAAGCCTTTAC-----AAAATTATATCAAGATGTTCTGTAAAGTGAGTGGAAATCAT-----TCTG |        |        |        |        |        |        |        | 89553 |
| PigTailedMacaque  | GTTCTTATTTATAATAAGCCTTTAC-----AAAATTATATCAAAATGTTCTGTAAAGTGAGTGGAAATCAT-----TCTG |        |        |        |        |        |        |        | 88111 |
| Bonobo            | -----TG                                                                          |        |        |        |        |        |        |        | 86638 |
| OliveBaboon       | GTTCTTATTTATCATAAGCCTTTACTTTACAAAATTATATCAAAATATTCTATAAAGTGAGTGGAAATCAT-----TCTG |        |        |        |        |        |        |        | 88006 |
| Orangutan         | GTTCTTGTTTATAATAAGCCTGTGCTTTACAAAATTACATCAAAATGTTCTGTAAAGTGAGTGGAAATCAT-----TCTG |        |        |        |        |        |        |        | 88843 |

| Majority          | GTGTTATGATATTTGAACAGTTTTT--GTGTATATTGGTTTTTCACCTCCACTGTTATG-AGTAATGAGTAATTGCCACAC  |        |        |        |        |        |        |        |       |
|-------------------|------------------------------------------------------------------------------------|--------|--------|--------|--------|--------|--------|--------|-------|
|                   | 105290                                                                             | 105300 | 105310 | 105320 | 105330 | 105340 | 105350 | 105360 |       |
| Human             | GTGT-----                                                                          |        |        |        |        |        |        |        | 87810 |
| Coquerel'sSifaka  | GTGTTATGGCACTTGAGAAGTTTTTAAGCGTGTGTATGTATTTCACTTTTAAGTATGTG---TATACATTATTGTCATAA   |        |        |        |        |        |        |        | 74356 |
| Ma'sNightMonkey   | TGGTTATGATATCTGAACAATTTTT--GTATATACTGGTTTTTCACCTTACACTATCATG-AGTAATGAGTAATTGCTACAC |        |        |        |        |        |        |        | 83035 |
| VervetAGM         | CTGTTACGATATTTGAACAATTTTT--GTGTATATTGGTTTTTCACCTCCACTGTTATG-AGTAATGAGTAATTGCCACAC  |        |        |        |        |        |        |        | 89302 |
| Gorilla           | GTGT-----                                                                          |        |        |        |        |        |        |        | 86050 |
| GrabEatingMacaque | CTGTTATGATATTTGAACAGTTTTT--GTGTATATTGGTTTTTCACCTCCACTGTTATG-AGTAATGAGTAATTGCCACAC  |        |        |        |        |        |        |        | 88741 |
| Macaque           | CTGTTATGATATTTGAACAGTTTTT--GTGTATATTGGTTTTTCACCTCCACTGTTATG-AGTAATGAGTAATTGCCACAC  |        |        |        |        |        |        |        | 89630 |
| PigTailedMacaque  | CTGTTATGATATTTGAACAGTTTTT--GTGTATATTGGTTTTTCACCTCCACTGTTACG-AGTAATGAGTAATTGCCACAC  |        |        |        |        |        |        |        | 88188 |
| Bonobo            | GTGT-----                                                                          |        |        |        |        |        |        |        | 86642 |
| OliveBaboon       | CTGTTATGATATTTGAACAGTTTTT--GTGTGATTGGTTTTTCACCTCCACTGTTATG-AGTAATGAGTAATTGCCACAC   |        |        |        |        |        |        |        | 88083 |
| Orangutan         | GTGTTATGATATTTGAACAATTTTT--GTATATAATTGGTTTTTCACCTCCACTGTTATGGAGTAATGAGTAATTGCCACAC |        |        |        |        |        |        |        | 88921 |

Tuesday, May 03, 2022 06:17 PM

|                   |                                                                                    |                                                         |
|-------------------|------------------------------------------------------------------------------------|---------------------------------------------------------|
| Majority          | TTTGGGG-CATTGCTGTTTTTCATAAAAAGAGAGATCTTACCCTCCAAAACAAAACAAGGGAAGGAGAGGGAGACAGCAAAT |                                                         |
|                   |                                                                                    | 105370 105380 105390 105400 105410 105420 105430 105440 |
| Human             | -----                                                                              | 87810                                                   |
| Coquerel'sSifaka  | GT--AGTTAGTAATAAGTCACACTTTGAAGCATTTGTTGGCCTC-ACAAAAGAGAGATCTTAAGAGATCTTCCCTCCAAA   | 74433                                                   |
| Ma'sNightMonkey   | TTTGAAGCATTCCTGGTTTTTCATAAAACAGAGATCTTCTCCTCCAAAACAAA-CAAAGGCAAGAGAGGGAAACAGCAAAT  | 83114                                                   |
| VervetAGM         | TTTGGGGGCATTGCTGTTTTTCATAAAAAGAGAGATCTTACCCTCCAAAACAAAACAAGGGAAGGAGAGGGAGACAGCAAAT | 89382                                                   |
| Gorilla           | -----                                                                              | 86050                                                   |
| GrabEatingMacaque | TTTGGGGTCATTGCTGTTTTTCATAAAAAGAGAGATCTTACCCTCCAAAACAAAACAAGGGAAGGAGAGGGAGACAGCAAAT | 88821                                                   |
| Macaque           | TTTGGGGTCATTGCTGTTTTTCATAAAAAGAGAGATCTTACCCTCCAAAACAAAACAAGGGAAGGAGAGGGAGACAGCAAAT | 89710                                                   |
| PigTailedMacaque  | TTTGGGGGCATTGCTGTTTTTCATAAAAAGAGAGATCTTACCCTCCAAAACAAAACAAGGGAAGGAGAGGGAGACAGCAAAT | 88268                                                   |
| Bonobo            | -----                                                                              | 86642                                                   |
| OliveBaboon       | TTTGGGGGCATTGCTGTTTTTCATAAAAAGAGAGATCTTACCCTCCAAAACAAAACAAGGGAAGGAGAGGGAGACAGCAAAT | 88163                                                   |
| Orangutan         | TTTGGGG-TATTGCTGTTTTTCATAAAAAGAGACATTAATCCTCCAAAACAAAACAAGGGAAGGAGAGGGAGACAGCAAAT  | 89000                                                   |

|                   |                                                                                   |                                                         |
|-------------------|-----------------------------------------------------------------------------------|---------------------------------------------------------|
| Majority          | TTATATGGAGAAAAATAGGGAAAA---ATTAAAAATTATGGTAGAATCAAATTTCTGATGCATCAGTAATAGTGAAAAAT  |                                                         |
|                   |                                                                                   | 105450 105460 105470 105480 105490 105500 105510 105520 |
| Human             | -----                                                                             | 87810                                                   |
| Coquerel'sSifaka  | ACAAAGAAGGGAAGGAGGGGAAAAACAGCAAATGAAATTATGATAGAGTCAAGACCTGATGCATCAATAATAATGACAAAT | 74513                                                   |
| Ma'sNightMonkey   | T-ATACAGAGAAAAATAGGGAAAA---ATAAGAAATTATAATAGAATCAAATTTCTGATGCATCAGTAATGTTGAACAAT  | 83189                                                   |
| VervetAGM         | TTATATGG-----GGAAAA---ATTAAAAATTATGGTAGAATCAAATTTCTGATGCATCAGTAATAGTGAAAAAT       | 89448                                                   |
| Gorilla           | -----                                                                             | 86050                                                   |
| GrabEatingMacaque | TTATATGGAGAAAAATAGGGAAAA---ATTAAAAATTATGGTAGAATCAAATTTCTGATGCATCAGTAATAGTGAAAAAT  | 88897                                                   |
| Macaque           | TTATATGGAGAAAAATAGGGAAAA---ATTAAAAATTATGGTAGAATCAAATTTCTGATGCATCAGTAATAGTGAAAAAT  | 89786                                                   |
| PigTailedMacaque  | TTATATGGAGAAAAATAGGGAAAA---ATTAAAAATTATGGTAGAATCAAATTTCTGATGCATCAGTAATAGTGAAAAAT  | 88344                                                   |
| Bonobo            | -----                                                                             | 86642                                                   |
| OliveBaboon       | TTATATGGAGAAAAATAGGGAAAA---ATTAAAAATTATGGTAGAATCAAATTTCTGATGCATCAGTAATAGTGAAAAAT  | 88239                                                   |
| Orangutan         | T-ATATGGAGAAAAATAGGGAAAA---ATTAAAAATCATGGTAGAATCAAATTTCTGATGCATCAGTAATAGTGAAAAAT  | 89075                                                   |

|                   |                                                                                   |                                                         |
|-------------------|-----------------------------------------------------------------------------------|---------------------------------------------------------|
| Majority          | GTAAGGAATAAAATTTGTCAACTAAAAAGATTGTCAAACCTGGTATTTAAAAAGCTACCTGTATAC-TTTTTACAAGAGA  |                                                         |
|                   |                                                                                   | 105530 105540 105550 105560 105570 105580 105590 105600 |
| Human             | -----ACTAAAAAGATTATCAAACCTGGTATTTAAAAAGTTAGCTATATAC-TTTTTACAAGAGA                 | 87869                                                   |
| Coquerel'sSifaka  | GTGAAGGAATAAAATTCATCAATTAATA-TATTGTGAGATTGATTTTTGAAAAGTTCCTGTATGC-TCTTTGCAACAGA   | 74591                                                   |
| Ma'sNightMonkey   | GTGAAGGGATAAAATTTGTGAGCTAAAAAGATTGGCAGACTTGATATTTAAAAAGCCACCTAAATGCATTTTTACAAGAGA | 83269                                                   |
| VervetAGM         | GTAAGGAATAAAATTTGTCAACTAAAAAGATTGTCAAACCTTAGTATTTAAAAAGCTACCTGT-----TACAAGAGA     | 89519                                                   |
| Gorilla           | -----ACTAAAA-GATTGTCAAACCTGGTATTTAAAAAGTTAGCTATATAC-TTTTTACAAGAGA                 | 86108                                                   |
| GrabEatingMacaque | GTAAGGAATAAAATTTGTAACTAAAAAGATTGTCAAACCTTAGTATTTAAAAAGCTACCTGTATAC-TTTTTACAAGAGA  | 88976                                                   |
| Macaque           | GTAAGGAATAAAATTTGTAACTAAAAAGATTGTCAAACCTTAGTATTTAAAAAGCTACCTGTATAC-TTTTTACAAGAGA  | 89865                                                   |
| PigTailedMacaque  | GTAAGGAATAAAATTTGTAACTAAAAAGATTGTCAAACCTTAGTATTTAAAAAGCTACGTGTATAC-TTTTTACAAGAGA  | 88423                                                   |
| Bonobo            | -----ACTAAAAAGATTATCAAACCTGGTATTTAAAAAGTTAGCTATATAC-TTTTTACAAGAGA                 | 86701                                                   |
| OliveBaboon       | GTAAGGAATAAAATTTGTCAACTAAAAAGATTGTCAAACCTTAGTATTTAAAAAGCTACCTGTATAC-TTTTTACAAGAGA | 88318                                                   |
| Orangutan         | GTAAGGAATAAAATTTGTCAACTAAAAAGATTGTCAAACCTGGTATTTAAAAAGTTACCTATATAC-TTTTTACGAGGGA  | 89154                                                   |



Tuesday, May 03, 2022 06:17 PM

|                   |                                                                                  |       |
|-------------------|----------------------------------------------------------------------------------|-------|
| Majority          | CATGTAAAGCAGAAGGATGT-GAAAGATTGAAAGGAAAAGGATGTAAAGAGATACTAATATACTGGGCAGATAGTAAGCA |       |
|                   | 105610 105620 105630 105640 105650 105660 105670 105680                          |       |
| Human             | CATGTAAAGCAGAAGAATAT-GAAAGATTGAAAGGAAAAGGATGTAAAGAGATACTAATATACTGGACAGATAGTAAGCA | 87948 |
| Coquerel'sSifaka  | CGTATGAAGCACAAG-ATGTGGAAGGATTGAAAGCAAAGGGATGTAAAGAGAT-----GTATTGGGCAGATAGTAAGCC  | 74664 |
| Ma'sNightMonkey   | CATGTAAAGCAGAAGGATATGGAAGATTGAAAGGAAAAGGGATATAAAGAGATACTGATATTTTGGGCATATAGTAAGCA | 83349 |
| VervetAGM         | CATGTAAAGCAGAAGGATG--GAAAGATTGAAAAGAAAAGGATGTGAAGAGATACTAATATACTGGGCAGATAGTAAGCA | 89597 |
| Gorilla           | CATGTAAAGCAGAAGAATAT-GAAAGATTGAAAGGAAAAGGATGTAAAGAGATACTAATATACTGGACAGATAGTAAGCA | 86187 |
| GrabEatingMacaque | CATGTAAAGCAGAAGGATG--GAAAGATTGAAAGGAAAAGGATGTGAAGAGATACTAATATACTGGGCAGATAGTAAGCA | 89054 |
| Macaque           | CATGTAAAGCAGAAGGATG--GAAAGATTGAAAGGAAAAGGATGTGAAGAGATACTAATATACTGGGCAGATAGTAAGCA | 89943 |
| PigTailedMacaque  | CATGTAAAGCAGAAGGATG--GAAAGATTGAAAGGAAAAGGATGTGAAGAGATACTAATATACTGGGCAGATAGTAAGCA | 88501 |
| Bonobo            | CATGTAAAGCAGAAGAATAT-GAAAGATTGAAAGGAAAAGGATGTAAAGAGATACTAATATACTGTACAGATAGTAAGCA | 86780 |
| OliveBaboon       | CATGTAAAGCAGAAGGATG--GAAAGATTGAAAGGAAAAGGATGTGAAGAGATACTAATATACTGGGCAGATAGTAAGCA | 88396 |
| Orangutan         | CATGTAAAGCAGAAGGATAT-GAAAGATTGAAAGGAAAAGGATGTAAAGAGATACTAATATACTGGGCAGATAGTAAGCA | 89233 |

|                   |                                                                                    |       |
|-------------------|------------------------------------------------------------------------------------|-------|
| Majority          | AAACAAAACCTAAATACCTTTATTAACCTTAAGACAGAGA-ATTGATAAAA-GGATTTAGTTCCTAGGAAGATATAACAGT  |       |
|                   | 105690 105700 105710 105720 105730 105740 105750 105760                            |       |
| Human             | AGACAAAACCTAAATACCTTTATTAACCTTAAGACAGAGA--ATTGATAAAA-GGATTTAGTTCCTAGAAAGATATAACAGT | 88024 |
| Coquerel'sSifaka  | AAAGAAAACCTCACGTGACTTTGCTAATTTAAGCCAAATGTATTGATAAAA-AGATTTAGTTCACCAGGAAAATACAACAGT | 74743 |
| Ma'sNightMonkey   | AAAGGAAAACCTAAATACCTTTGTAA-----GACATAGA-ATTGAGAAA-GGATTTGGTTCCTAGGAAGATGCAACAAT    | 83422 |
| VervetAGM         | AAACAAAACCTAAATACCTTTATTAACCTTAAGACCGAGA-ATTGATAAAA-GGATTTAGTTCCTAGGAAGATATAACAGT  | 89675 |
| Gorilla           | AAACAAAACCTAAATACCTTTATTAACCTTAAGACAGAGA-ATTGATAAAA-GGATTTAGTTCCTAGAAAGATATAACAGT  | 86265 |
| GrabEatingMacaque | AAACAAAACCTAAATACCTTTATTAACCTTAAGACCGAGA-ATTGATAAAA-GGATTTAGTTCCTAGGAAGATATAACAGT  | 89132 |
| Macaque           | AAACAAAACCTAAATACCTTTATTAACCTTAAGACCGAGA-ATTGATAAAA-GGATTTAGTTCCTAGGAAGATATAACAGT  | 90021 |
| PigTailedMacaque  | AAACAAAACCTAAATACCTTTATTAACCTTAAGACCGAGA-ATTGATAAAA-GGATTTAGTTCCTAGGAAGATATAACAGT  | 88579 |
| Bonobo            | AGACAAAACCTAAATACCTTTATTA-----GACAGA---ATTGATAAAA-GGATTTAGTTCCTAGAAAGATATAACAGT    | 86851 |
| OliveBaboon       | AAACAAAACCTAAATACCTTTATT-----AAGACCGAGA-ATTGATAAAA-GGATTTAGTTCCTAGGAAGATATAACAGT   | 88469 |
| Orangutan         | AAACAAAATTTAAATACCTTTATTAACCTTAAGACAGAGA-ATTGATAAAAAGGATTTAGTTCCTAGAAAGATATAACAGT  | 89312 |

|                   |                                                                                  |       |
|-------------------|----------------------------------------------------------------------------------|-------|
| Majority          | TTGTGTATATGTGTGCCTAGTGA--AATAGCTTCAAATATATAAAATAATAAGTGGATAGAACTACAGGTAGACTTGAG  |       |
|                   | 105770 105780 105790 105800 105810 105820 105830 105840                          |       |
| Human             | TTATGTATATGTGTGCCTAGTGA--AATAGCCTCAAATATATAAAATAATAAGTAGATAGAACTACAGGTAGACTTGAG  | 88101 |
| Coquerel'sSifaka  | TT-TATGTATGTATGTCTAGTGA--AATAACTTCAAATGTATAAATCATAAATGGATAACGCTGCAGGTAGAATTGAG   | 74819 |
| Ma'sNightMonkey   | TTATATATATGTGGGCCTAGTGA--AATAGCCTCAAATATATAAAATAATAAATGGCTGGAACCTACAGGTAAACTTGAG | 83499 |
| VervetAGM         | TTGTGTATATGTGTGCCTAGTGA--AATAGCTTCAAATACATAG---TAAGTGGATAGAACTACAGGTGCGACTTGAG   | 89748 |
| Gorilla           | TTATGTATATGTGTGCCTAGTGA--AATAGCCTCAAATATATAAAATAATAAGTAGATAGAACTACAGGTAGACTTGAG  | 86342 |
| GrabEatingMacaque | TTGTGTATATGTGTGCCTAGTGA--AATAGCTTCAAATACATAG---TAAGTGGATAGAACTACAGGTGCGACTTGAG   | 89205 |
| Macaque           | TTGTGTATATGTGTGCCTAGTGA--AATAGCTTCAAATACATAG---TAAGTGGATAGAACTACAGGTGCGACTTGAG   | 90094 |
| PigTailedMacaque  | TTGTGTATATGTGTGCCTAGTGA--AATAGCTTCAAATACATAG---TAAGTGGATAGAACTACAGGTGCGACTTGAG   | 88652 |
| Bonobo            | TTATGTATATGTGTGCCTAGTGA--AATAGCCTCAAATATATAAAATAATAAGTAGATAAAACTACAGGTAGACTTGAG  | 86928 |
| OliveBaboon       | TTGTGTATATGTGTGCCTAGTGTGAAATAGCTTCAAATACATAG---TAAGTGGATAGAACTACAGGTGCGACTTGAG   | 88545 |
| Orangutan         | TTATGTATATGTGTGCCTAGTGA--AATAGCCTCAAATATATAAAATAATAAGTGGATAGAACTACAGGTAGACTTGAG  | 89389 |

Tuesday, May 03, 2022 06:17 PM

| Majority          | CAAATCTATTATAGTGGTGGATTTC | CAATTCACCTTTCTGAATTACATGTCAGACTGACCA | AAAAAAGACAAAATCAACAA |                            |
|-------------------|---------------------------|--------------------------------------|----------------------|----------------------------|
|                   | 105850                    | 105860                               | 105870               | 105880                     |
| Human             | CAAATCTATTATAGTGGTGGATTTC | CAATTCACCTTTCTGAATTACATGTC           | CAAACTGACCA          | AAAAAAGACAAAATCAACAA 88181 |
| Coquerel'sSifaka  | TAAATCTATCATAGTGGTGGATTTC | CAACCCACTTTTCTGAATTATATGTC           | CAAGCAGACCA          | AAAAAACAACAA---AACAA 74896 |
| Ma'sNightMonkey   | CAAATCTGTTATAGTGGTGGATTTC | CAATTCACCTTTCTGAATTACATGTC           | CACACTGACCAG         | AAAAAAGAAAATCAACAA 83579   |
| VervetAGM         | CAAATCTATTATAGTGGTAGATTTC | CAGTTCACCTTTCTGAATTACATGTC           | CAGACTGACCC          | AAAAAAGACAAAATCAACAA 89828 |
| Gorilla           | CAAATCTATTATAGTGGTGGATTTC | CAATTCACCTTTCTGAATTACATGTC           | CAAACTGACCA          | AAAAAAGACAAAATCAACAA 86422 |
| GrabEatingMacaque | CAAATCTATTATAGTGGTGGATTTC | CAGTTCACCTTTCTGAATTACATGTC           | CAGACTGACCC          | GAAAAAGACAAAATCAACAA 89285 |
| Macaque           | CAAATCTATTATAGTGGTGGATTTC | CAGTTCACCTTTCTGAATTACATGTC           | CAGACTGACCC          | GAAAAAGACAAAATCAACAA 90174 |
| PigTailedMacaque  | CAAATCTATTATAGTGGTGGATTTC | CAGTTCACCTTTCTGAATTACATGTC           | CAGACTGACCC          | GAAAAAGACAAAATCAACAA 88732 |
| Bonobo            | CAAATCTATTATAGTGGTGGATTTC | CAATTCACCTTTCTGAATTACATGTC           | CAAACTGACCA          | AAAAAAGACAAAATCAACAA 87008 |
| OliveBaboon       | CAAATCTATTATAGTGGTGGATTTC | CAGTTCACCTTTCTGAATTACATGTC           | CAGACTGACCC          | AAAAAAGACAAAATCAACAA 88625 |
| Orangutan         | CAAATCTATTATAGTGGTGGATTTC | CAATTCACCTTTCTGAATTACATGTC           | CAAACTGACCA          | AAAAAAGACAAAATCAACAA 89469 |

| Majority          | AGATACAAA-TGATACAAT----   | TACCTTAACAGAATTATGTGTCTAA-- | GTTACGCATCCAACACAGTTTTT--  | AAAC       |
|-------------------|---------------------------|-----------------------------|----------------------------|------------|
|                   | 105930                    | 105940                      | 105950                     | 105960     |
| Human             | AGATACAAA-TGATACAATACAATT | TACCTTAACAGAATTATGTGTCTAA-- | GTTATGCATCCAACACAGTTTTT--  | AAAC 88256 |
| Coquerel'sSifaka  | AGATACAAAATGATACAAC-----  | ACAATTCCTGT-TAA-----        | TGCATCCAGCACATTTTTTAAAGC   | 74955      |
| Ma'sNightMonkey   | AGATACAAA-TTATACAACACAGTT | TACCTGCACAGAATTGTGTGTCTAAC- | GGTATGCATCCAACACAGTTTTT--  | AAGC 83655 |
| VervetAGM         | AGATACAAA-TGATACAAT----   | TACCTTAACAGAATTATGTGTCTAAC  | AGTTACACATCCAATACAGTTTTT-- | AAAC 89900 |
| Gorilla           | AGATACAAA-TGATACAATGCGATT | TACCTTAACAGAATTATGTGTCTAA-  | GTTATGCATCCAACACAGTTTTT--  | AAAC 86497 |
| GrabEatingMacaque | AGATACAAA-TGATACAAT----   | TACCTTAACAGAATTATGTGTCTAAA  | AGTTACACATCCAGTACAGTTTTT-- | AAAC 89357 |
| Macaque           | AGATACAAA-TGATACAAT----   | TACCTTAACAGAATTATGTGTCTAAA  | AGTTACACATCCAGTACAGTTTTT-- | AAAC 90246 |
| PigTailedMacaque  | AGATACAAA-TGATACAAT----   | TACCTTAACAGAATTATGTGTCTAAA  | AGTTACACATCCAGTACAGTTTTT-- | AAAC 88804 |
| Bonobo            | AGATACAAA-TGATACAATACAATT | TACCTTAACAGAATTATGTGTCTAA-  | GTTATGCATCCAACACAGTTTTT--  | AAAC 87083 |
| OliveBaboon       | AGATACAAA-TGATACAAT----   | TACCTTAACAGAATTATGTGTCTAAA  | AGTTACACATCCAGTACAGTTTTT-- | AAAC 88697 |
| Orangutan         | AGATACAAA-TGATACAATACAATT | TACCTTAACAGAATTATGTGTCTAA-  | GTTACGCATCCAACGCAATTTTT--  | AAAC 89544 |

| Majority          | ACATATGGAACATTTTTGAAAAAT | CAGTCACATACTAAACCATAAAGCA | AGCTTCATCTAATTTCAAAGAGTATCA----   |               |
|-------------------|--------------------------|---------------------------|-----------------------------------|---------------|
|                   | 106010                   | 106020                    | 106030                            | 106040        |
| Human             | GCATATGGAACATTTTTGAAAAAT | CAGTCACATACTAAACCATAAAGCA | AGCTTCAGCTAATTTCAAAGAGTATCA----   | 88332         |
| Coquerel'sSifaka  | ACATATGGAACATTTA-AAAAAAT | TGATCATATACTAAACCATAAAA   | CAAGCTTCAATTAATTTCAAAGAGTAA       | AGTATCA 75034 |
| Ma'sNightMonkey   | ACATATGGAACATTTTTGAAAAAT | CAGTGACATACTAAACCGTAAAG   | CAAGCTTCAACTAATTTCAAAGAGTATCA---- | 83731         |
| VervetAGM         | ACATATGGAACATTTTTGAAAAAT | CAGCCACATACTAAACCATAAAG   | CAAGCTTCATCTAATTTCAAGAGTATCA----  | 89976         |
| Gorilla           | GCATATGGAACATTTTTGAAAAAT | CAGTCACATACTAAACCATAAAG   | CAAGCTTCAGCTAATTTCAAAGAGTATCA---- | 86573         |
| GrabEatingMacaque | ACATACGGAACATTTTTGAAAAAT | CAGCCACATACTAAACCATAAAG   | CAAGCTTCATCTAATTTCAAAGAGTATCA---- | 89433         |
| Macaque           | ACATACGGAACATTTTTGAAAAAT | CAGCCACATACTAAACCATAAAG   | CAAGCTTCATCTAATTTCAAAGAGTATCAATCA | 90326         |
| PigTailedMacaque  | ACATATGGAACATTTTTGAAAAAT | CAGCCACATACTAAACCATAAAG   | CAAGCTTCATCTAATTTCAAAGGGTATCA---- | 88880         |
| Bonobo            | GCATATGGAACATTTTTGAAAAAT | CAGTCACATACTAAACCATAAAG   | CAAGCTTCAGCTAATTTCAAGAGTATCA----  | 87157         |
| OliveBaboon       | ACATATGGAACATTTTTGAAAAAT | CAGCCACATACTAAACCATAAAG   | CAAGCTTCATCTAATTTCAAAGAGTATCA---- | 88773         |
| Orangutan         | GCATATGGAACATTTTTGAAATAT | CAGTCACATACTAAACCATAAAG   | CAAGCTTCAGCTAATTTCAAAGAGTAGCA---- | 89620         |

Tuesday, May 03, 2022 06:17 PM

|                   |                                                                                   |       |
|-------------------|-----------------------------------------------------------------------------------|-------|
| Majority          | TACAGACCTCATTCTCTGACTATTGCACAATTAAGTTAGAATTAATAA----CAAAAAGA-TGCATTTAAAATCT----G  |       |
|                   | 106090 106100 106110 106120 106130 106140 106150 106160                           |       |
| Human             | TACAGACCTCATTCT----CTATTGCACAAGTAAGTTAGAATTAATAA----CAAAAAGA-TGCATATAAAAATCT----G | 88399 |
| Coquerel'sSifaka  | TACAGACCTCATTCT----CTGTTGCA--A---AGTTAGAATAATAA----CAGAAAAA-TACATTTAAAGTCTCCATG   | 75100 |
| Ma'sNightMonkey   | TACAGACCTTATTCTCTGACTATTGCACAATAGAGTTAGAATTAATAAATAACAAAAGGA-TACATTTAAAATCT----G  | 83806 |
| VervetAGM         | TACAGACCTCATTCTCTGACTATTGCACAATTAAGTTAGAATTAATAA----CAAAAAGA-TGCATTTAAAATCT----G  | 90047 |
| Gorilla           | TACAGACCTCATTCT----CTATTGCACAAGTAAGTTAGAATTAATAA----CAAAAAGA-TGCATATAAAAATCT----G | 86640 |
| GrabEatingMacaque | TACAGACCTCATTCTCTGACTATTGCACAATTAAGTTAGAATTAATAA----CAAAAAAATGCATTTAAAATCT----G   | 89505 |
| Macaque           | TACAGACCTCATTCTCTGACTATTGCACAATTAAGTTAGAATTAATAA----CAAAAAA-TGCATTTAAAATCT----G   | 90397 |
| PigTailedMacaque  | TACAGACCTCATTCTCTGACTATTGCACAATTAAGTTAGAATTAATAA----CAAAAAA-TGCATTTAAAATCT----G   | 88951 |
| Bonobo            | TACAGACCTCATTCT----CCATTGCACAAGTAAGTTAGAATTAATAA----CAAAAAGA-TGCATATAAAAATCT----G | 87224 |
| OliveBaboon       | TACAGACCTCATTCTCTGACTATTGCACAATTAAGTTAGAATTAATAA----CAAAAAA-TGCATTTAAAATCT----G   | 88844 |
| Orangutan         | TACAGACCTCATTCT----CTATTGCACAAGTAAGTTAGAATTAATAA----CAAAAAGA-TGCATATAAAAATCT----G | 89687 |

|                   |                                                                                 |       |
|-------------------|---------------------------------------------------------------------------------|-------|
| Majority          | TATCCAGAGATTTAAAAATAAGTCTCAGTATTGCATGAGTCAAAGTTTGTTTT--TTTGTTTT-----T-GTTTTT    |       |
|                   | 106170 106180 106190 106200 106210 106220 106230 106240                         |       |
| Human             | TATCCTGAGATTTAAAAATAAGTCTCAGTATTGCATGAGTCAAGTTTGTTTG--TTTGTTTG-----TTTT         | 88465 |
| Coquerel'sSifaka  | TACCTGGAAATTTAAAAGCAACTCCCAGTGTTCATGGGTCGAAGAGGTG---G-----TT                    | 75153 |
| Ma'sNightMonkey   | TATCCAGAGACTTTAAAAATAAGTCTCAGTATTGTATGAGTCAAAGGTTTTTTTGGTTTGTTTT-----T-GTTTTT   | 83877 |
| VervetAGM         | TGTCCAGAGATGTA AAAATAAGTCTCAGTATTGCATGAGTCAAAGTTTGTTTT--TTTGTTTTGTATTGTTTTGTTTT | 90125 |
| Gorilla           | TATCCGGAGATTTAAAAATAAGTCTCAGTATTGCATGAGTCAAAGTTTGTTTG--TTTGTTTG-----TTTT        | 86706 |
| GrabEatingMacaque | TGTCCAGAGATGTA AAAATAAGTCTCAGTATTGCATGAGTCAAAGTTTGTTTT--TTTGTTTTGTATTGTTTTGTTTT | 89583 |
| Macaque           | TGTCCAGAGATGTA AAAATAAGTCTCAGTATTGCATGAGTCAAAGTTTGTTTT--TTTGTTTTGTATTGTTTTGTTTT | 90475 |
| PigTailedMacaque  | TGTCCAGAGATATA AAAATAAGTCTCAGTATTGCATGAGTCAAAGTTTGTTTT--TTTGTTTTGTATTGTTTTGTTTT | 89029 |
| Bonobo            | TATCCTGAGATTTAAAAATAAGTCTCAGTATTGCATGAGTCAAGTTTGTTTG--TTTGTTTG-----TTTT         | 87290 |
| OliveBaboon       | TGTCCAGAGATGTA AAAATAAGTCTCAGTATTGCATGAGTCAAAGTTTGTTTT--TTTGTTTTGTATTGTTTTGTTTT | 88922 |
| Orangutan         | TATCCTGAGATTTAAAAATAAGTCTCAGTATTGCATGAGTCAAAGTTTGT---TTTT                       | 89741 |

|                   |                                                                                  |       |
|-------------------|----------------------------------------------------------------------------------|-------|
| Majority          | TGAGACAG-GTCTTGCTCTGTCCCCAGGCTGGAGTGCAGTGGT---ATTGTGGCTCACTGCAGCCTCGACCTCCCAGGC  |       |
|                   | 106250 106260 106270 106280 106290 106300 106310 106320                          |       |
| Human             | TGAGCCAGTGTCTTGCTCTGTCCCCAGGGTGGAGTGCAGTGGTGTCTATTGTGGCTCACTGCAGCCTCGACCTCCCAGGC | 88545 |
| Coquerel'sSifaka  | TTAATGGGAGTTTAAA---ATACTTAAACTAGATATTGGAAGT-----ACTATATGTAAATTAGATATCTGTGGT      | 75221 |
| Ma'sNightMonkey   | TGAGACAGGGTCTTGCCCTGTTGCCAGGCTGGAGTGCAGTGGTGTCTCATGGCTCGTGCAGCCTTGACCTTCCAGGC    | 83957 |
| VervetAGM         | TGAGACAG-GTCTTGCTCTGTCCCCAGGCTGGAGTGCAGTGGT---ATTGTGGCTCACTGCAGCCTCGACCTCCCAGGC  | 90201 |
| Gorilla           | TGAGACAGTGTCTTGCTCTGTCCCCAGGGTGGAGTGCAGTGGTGTCTATTGTGGCTCACTGCAGCCTCGACCTCCCAGGC | 86786 |
| GrabEatingMacaque | TGAGACAG-GTCTTGCTCTGTCCCCAGGCTGGAGTGCAGTGGT---ATTGTGGCTCACTGCAGCCTCGACCTCCCAGGC  | 89659 |
| Macaque           | TGAGACAG-GTCTTGCTCTGTCCCCAGGCTGGAGTGCAGTGGT---ATTGTGGCTCACTGCAGCCTCGACCTCCCAGGC  | 90551 |
| PigTailedMacaque  | TGAGACAG-GTCTTGCTCTGTCCCCAGGCTGGAGTGCAGTGGT---ATTGTGGCTCACTGCAGCCTCGACCTCCCAGGC  | 89105 |
| Bonobo            | TGAGCCAGTGTCTTGCTCTGTCCCCAGGGTGGAGTGCAGTGGTGTCTATTGTGGCTCACTGCAGCCTCGACCTCCCAGGC | 87370 |
| OliveBaboon       | TGAGACAG-GTCTTGCTCTGTCCCCAGGCTGGAGTGCAGTGGT---ATTGTGGCTCACTGCAGCCTCGACCTCCCAGGC  | 88998 |
| Orangutan         | TGAGACAGTGTCTTGCTCTGTCCCCAGGGTGGAGTGCAGTGGTGTCTATTGTGGCTCACTGCAGCCTCGACCTCCCAGGC | 89821 |

Tuesday, May 03, 2022 06:17 PM

|                   |                                                                                    |       |
|-------------------|------------------------------------------------------------------------------------|-------|
| Majority          | TCAAGCAATCCTTGCACCTTAAGCCTCCCAAGTAGCTAGGACTACAAGCATGCATCACTTGCCCCGCTAATTTATTATTAT  |       |
|                   | 106330 106340 106350 106360 106370 106380 106390 106400                            |       |
| Human             | TTAAGCAGTCTTGCACCTTAAGCCTCCAAAGTAGCTAGGACTAAAAGCATGCACCACCTTGCCCCGCTAATTTATTATTAT  | 88625 |
| Coquerel'sSifaka  | ACAGTAAAAGAGGTCTTTTGAA-----AGAAAGTTTAACTTTAAGGAAACAGCA-----TAA-----                | 75274 |
| Ma'sNightMonkey   | TCAAGCAGTCTCCCACCTTCAGCCTCCCAAGTAGCTAGGACTACAAGCAC-CACCA--TGCC-----                | 84016 |
| VervetAGM         | TCAAGCAACCCTTGAACCTTAAGCCTCCCAAGTAGCTAGGACTACAAGCATGCATCACTTGCCCCGCTAATTTTTTTTTTAT | 90281 |
| Gorilla           | TTAAGCAGTCTTGCACCTTAAGCCTCCGAAGTAGCTAGGACTAAAAGCATGCACCACCTTGCCCCGCTAATTTATTATTAT  | 86866 |
| GrabEatingMacaque | TCAAGCAATCCTTGTACTTAAGCCTCCCAAGTAGCTGGGACTACAAGCATGCATCACTTGCCCCGCTAATTTATTATTAT   | 89739 |
| Macaque           | TCAAGCAATCCTTGTACTTAAGCCTCCCAAGTAGCTGGGACTACAAGCATGCATCACTTGCCCCGCTAATTTATTATTAT   | 90631 |
| PigTailedMacaque  | TCAAGCAATCCTTGTACTTAAGCCTCCCAAGTAGCTGGGACTACAAGCATGCATCACTTGCCCCGCTAATTTATTTTTTAT  | 89185 |
| Bonobo            | TTAAGCAGTCTTGCACCTTAAGCCTCCGAAGTAGCTAGGACTAAAAGCATGCACCACCTTGCCCCGCTAATTTATTATTAT  | 87450 |
| OliveBaboon       | TCAAGCAATCCTTGCACCTTAAGCCTCCCAAGTAGCTAGGACTACAAGCATGCATCACTTGCCCCGCTAATTTTTTTATTAT | 89078 |
| Orangutan         | TTAAGCAATCCTTGCACCTTAAGCCTCCCAAGTAGCTAGGACTAAAAGCATGCACCACCTTGCCCCGCTAATTTATTATTAT | 89901 |

|                   |                                                                                   |       |
|-------------------|-----------------------------------------------------------------------------------|-------|
| Majority          | TATTATTTTTT-GTAGAGATGAATTCTCACTGTGTTGCCAGACGGAAGTTATTTTAAATGGGAATATAAAAA-ACTTAAA  |       |
|                   | 106410 106420 106430 106440 106450 106460 106470 106480                           |       |
| Human             | TATTATTTTTT-GTAGAGATGAGTTCTCACTGTGTTGCCAGACAGAAGTTATTTTAAATGGGAATATAAAAAT-ACTTAAA | 88703 |
| Coquerel'sSifaka  | -----ACCCAAGG-----G-----                                                          | 75283 |
| Ma'sNightMonkey   | -----T-----GTCTAGAC-----                                                          | 84025 |
| VervetAGM         | TATTATTTTTT-GTAGAGATGAATTCTCACTATGTTGCCAGACGGAAGTTATTTTAAATGGGAATATAAAAAACTTAAA   | 90360 |
| Gorilla           | TATTTTTTTTT-GTAGAGATGAGTTCTCACTGTGTTGCCAGACAGAAGTTATTTTAAATGGGAATATAAAAAT-ACTTAAA | 86944 |
| GrabEatingMacaque | TATTATTTTTT-GTAGAGATGAATTCTCACTCTGTTGCCAGACGGAAGTTATTTTAAATGGGAATATAAAAAACTTAAA   | 89818 |
| Macaque           | TATTATTTTTT-GTAGAGATGAATTCTCACTCTGTTGCCAGACGGAAGTTATTTTAAATGGGAATATAAAAAACTTAAA   | 90710 |
| PigTailedMacaque  | TATTATTTTTT-GTAGAGATGAATTCTCACTATGTTGCCAGACGGAAGTTATTTTAAATGGGAATATAAAAAACTTAAA   | 89264 |
| Bonobo            | TATTATTTTTT-GTAGAGATGAGTTCTCACTGTGTTGCCAGACAGAAGTTATTTTAAATGGGAATATAAAAAT-ACTTAAA | 87528 |
| OliveBaboon       | TATTATTTTTT-GTAGAGATGAATTCTCACTATGTTGCCAGATGGAAGTTATTTTAAATGGGAATATAAAAAACTTAAA   | 89157 |
| Orangutan         | TATTTTTTTTTGTAGAGATGAGTTCT---GTGTTGCCAGACAGAAGTTATTTTAAATGGGAATATAAAA-----AAA     | 89971 |

|                   |                                                                                  |       |
|-------------------|----------------------------------------------------------------------------------|-------|
| Majority          | ATTAAGCGATAAAGTACTATATACATAT---TTAGATATATGTGGTACAGTGAAAGAGATGTCTTGACGGGAAGTTTTAA |       |
|                   | 106490 106500 106510 106520 106530 106540 106550 106560                          |       |
| Human             | ATTAAGCGATAAAGTACTATATACAAAT---T-AGATATATGTGGTACAGTGAAAGAGAAGTCTTGACGGGAAGTTTTAA | 88779 |
| Coquerel'sSifaka  | -----AAGG-----A-----GATA-----TTAAGGA-----                                        | 75299 |
| Ma'sNightMonkey   | -----TTAAG-----                                                                  | 84030 |
| VervetAGM         | ATTAAGCGATAAAGTACTATATACATATAAATTAGATATATGTGGTACAGTGAAAGAGATGTCTTGACGGGAAGTTTTAA | 90440 |
| Gorilla           | ATTAAGCGATAAAGTACTATATACAAAT---T-AGATATATGTGGTACAGTGAAAGAGAAGTCTTGACGGGAAGTTTTAA | 87020 |
| GrabEatingMacaque | ATTAAGCGATAAAGTACTATATACATATAAATTAGATATATGTGGTACAGTGAAAGAGATG----ACGGGAAGTTTTAA  | 89893 |
| Macaque           | ATTAAGCGATAAAGTACTATATACATATAAATTAGATATATGTGGTACAGTGAAAGAGATG----ACGGGAAGTTTTAA  | 90785 |
| PigTailedMacaque  | ATTAAGCGATAAAGTACTATATACATATAAATTAGATATATGTGGTACAGTGAAAGAGATGTCTTGACGGGAAGTTTTAA | 89344 |
| Bonobo            | ATTAAGCGATAAAGTACTACATACAAAT---T-AGATATATGTGGTACAGTGAAAGAGAAGTCTTGACGGGAAGTTTTAA | 87604 |
| OliveBaboon       | ATTAAGCGATAAAGTACTATATACATATAAATTAGATATATGTGGTACAGTGAAAGAGATGTCTTGAAGGGAAGTTTTAA | 89237 |
| Orangutan         | ATTAAGCGATAAAGTACTATATACAAAT---TTAGATATATGTGGTACAGTGAAAGAGATGTCTTGATGGGAAGTTTTAA | 90048 |

Tuesday, May 03, 2022 06:17 PM

| Majority          | CTTT--AAGAATAACAGTGTTACCCCCAGGAAAGGAGATATTAAGATAAGACTAGAAATCAGTGGTAT---AAAAGACA |        |        |        |        |        |        |        |  |       |
|-------------------|---------------------------------------------------------------------------------|--------|--------|--------|--------|--------|--------|--------|--|-------|
|                   | 106570                                                                          | 106580 | 106590 | 106600 | 106610 | 106620 | 106630 | 106640 |  |       |
| Human             | CTTT--AAGAATAACAGTGTTACCCCCAGGAAAGGAGATATTAAGACAAGACTGGAAATCAATGGTAT---AAAAGACA |        |        |        |        |        |        |        |  | 88854 |
| Coquerel'sSifaka  | CT-----AGAAT--CAGTGGTAT-----AGAAGA-----C-----AAACA                              |        |        |        |        |        |        |        |  | 75327 |
| Ma'sNightMonkey   | -----GTTGTC-----AGGAGA-----A-----AAAATT                                         |        |        |        |        |        |        |        |  | 84049 |
| VervetAGM         | CTTTTAAAGAATAACAGTGTTACCCCCAGGAAAGGAGATATTAAGATAAGACTAGAAATCAGTGGTAT---AAAAGACA |        |        |        |        |        |        |        |  | 90517 |
| Gorilla           | CTTT--AAGAATAACAGTGTTACCCCCAGGAAAGGAGATATTAAGACAAGACTGGAAATCAATGGTATTTTAAAAGACA |        |        |        |        |        |        |        |  | 87098 |
| GrabEatingMacaque | CTTT--AAGAATAACAGTGTTACCCCCAGGAAAGGAGATATTAAGATAAGACTAGAAATCAGTGGTAT---AAAAGACA |        |        |        |        |        |        |        |  | 89968 |
| Macaque           | CTTT--AAGAATAACAGTGTTACCCCCAGGAAAGGAGATATTAAGATAAGACTAGAAATCAGTGGTAT---AAAAGACA |        |        |        |        |        |        |        |  | 90860 |
| PigTailedMacaque  | CTTT--AAGAATAACAGTGTTACCCCCAGGAAAGGAGATATTAAGATAAGACTAGAAATCAGTGGTAT---AAAAGACA |        |        |        |        |        |        |        |  | 89419 |
| Bonobo            | CTTT--AAGAATAACAGTGTTACCCCCAGGAAAGGAGATATTAAGACAAGACTGGAAATCAATGGTAT---AAAAGACA |        |        |        |        |        |        |        |  | 87679 |
| OliveBaboon       | CTTT--AAGAATAACAGTGTTACCCCCAGGAAAGGAGATATTAAGATAAGACTAGAAATCAGTGGTAT---AAAAGACA |        |        |        |        |        |        |        |  | 89312 |
| Orangutan         | CTTT--AAGAATAACAGTGTTACCCCCAGGAAAGGAGATATTAAGACAAGACTAGAAATCAGTGGTAT---AAAAGACA |        |        |        |        |        |        |        |  | 90123 |

| Majority          | GTTGAGAGAAAAAAC-ATGCCACAAGTTGGGTTCTTTGAAAAG---ACTAAAGAAATGGACAAACATCTAAAGATTGA  |        |        |        |        |        |        |        |  |       |
|-------------------|---------------------------------------------------------------------------------|--------|--------|--------|--------|--------|--------|--------|--|-------|
|                   | 106650                                                                          | 106660 | 106670 | 106680 | 106690 | 106700 | 106710 | 106720 |  |       |
| Human             | GTTGAGAGAAAAAAC-ATGCCACAAGTTGGATTCTTTGAAAAG---ACTAAAAAATAGACAAACATCTAAAGATTGA   |        |        |        |        |        |        |        |  | 88929 |
| Coquerel'sSifaka  | GTTGAGAGAAAAAACGAAGCCAAAAGTTGAGTTCTTTGAAAAGGCTAGTAATAAAATGGACAGGTGTCTGTTAA--GA  |        |        |        |        |        |        |        |  | 75405 |
| Ma'sNightMonkey   | GTCTAAATAAAAAGAC-ACACAAACAGCTGAG--CTTTGAGATA---ACGGAAGGA-----                   |        |        |        |        |        |        |        |  | 84099 |
| VervetAGM         | GTTGAGAGAAAAAAC-ATGCCACAAGTTGGGTTCTTTGAAAAG---ACTAAAGAAATGGACAAACATCTAAAGATTGA  |        |        |        |        |        |        |        |  | 90592 |
| Gorilla           | GTTGAGAGAAAAAAC-ATGCCACAAGTTGGATTCTTTGAAAAG---ACTAAAAAATAGACAAACACCTAAAGATTGA   |        |        |        |        |        |        |        |  | 87173 |
| GrabEatingMacaque | GTTGAGAGAAAAAAC-ATGCCACAAGTTGGGTTCTTTGAAAAG---ACTAAAGAAATGGACAAACATCTAAAGATTGA  |        |        |        |        |        |        |        |  | 90043 |
| Macaque           | GTTGAGAGAAAAAAC-ATGCCACAAGTTGGGTTCTTTGAAAAG---ACTAAAGAAATGGACAAACATCTAAAGATTGT  |        |        |        |        |        |        |        |  | 90935 |
| PigTailedMacaque  | GTTGAGTGA AAAAAC-ATGCCACAAGTTGGGTTCTTTGAAAAG---ACTAAAGAAATGGACAAACATCTAAAGATTGA |        |        |        |        |        |        |        |  | 89494 |
| Bonobo            | GTTGAGAGAAAAAAC-ATGCCACAAGTTGGATTCTTTGAAAAG---ACTAAAAAATAGACAAACATCTAAAGATTGA   |        |        |        |        |        |        |        |  | 87754 |
| OliveBaboon       | GTTGAGAGAAAAAAC-ATGCCACAAGTTGGGTTCTTTGAAAAG---ACTAAAGAAATGGACAAACATCTAAAGATTGA  |        |        |        |        |        |        |        |  | 89387 |
| Orangutan         | GTTGAGAGAAAAAAC-ATGCCACAAGTTGGGTTCTTTGAAAAG---ACTAAAAA-TAGACAAACATCTAAAGTTGA    |        |        |        |        |        |        |        |  | 90197 |

| Majority          | TTAAAAATGAGAGTGGTAACACAAAAA---TTTTTTGAATTATAAAGGGGAGAACCATTGATAAAGTCCAGTTTC     |        |        |        |        |        |        |        |  |       |
|-------------------|---------------------------------------------------------------------------------|--------|--------|--------|--------|--------|--------|--------|--|-------|
|                   | 106730                                                                          | 106740 | 106750 | 106760 | 106770 | 106780 | 106790 | 106800 |  |       |
| Human             | TTAAAAATGAGAGTGGTAACACAAAAAAT---TTTTTTGAATTATAAAGGGGAGAAGCATTGATAAAGTCCAGTTTC   |        |        |        |        |        |        |        |  | 89006 |
| Coquerel'sSifaka  | TTAAGAAATGAGAGTG-TGGCACAAGTAA-----TATTTTGAATTATAAAGGGGAGAACTATTGATATAGTCCAG-TTC |        |        |        |        |        |        |        |  | 75478 |
| Ma'sNightMonkey   | ---AGGAATAAGA-----A-----A-----ATAAA-----AAGTCCAG----                            |        |        |        |        |        |        |        |  | 84125 |
| VervetAGM         | TTAAACATGAGAGTGGTAACACA-AA-----TTTTTTT-AATTATAAAGGGGAGAACCATTGCAAAAGTCCAGTTTC   |        |        |        |        |        |        |        |  | 90664 |
| Gorilla           | TTAAAAACGAGAGTGGTAACACAAAAA---TTTTTTGAATTATAAAGGGGAGAAGCATTGATAAAGTCCAGTTTC     |        |        |        |        |        |        |        |  | 87250 |
| GrabEatingMacaque | TTAAACATGAGAGTGGTAACACAAAAA-TATTTTTT-AATTATAAAGGGGAGAACCATTGAAAAAGTCCAGTTTC     |        |        |        |        |        |        |        |  | 90121 |
| Macaque           | TTAAACATGAGAGTGGTAACACAAAAA-TATTTTTT-AATTATAAAGGGGAGAACCATTGAAAAAGTCCAGTTTC     |        |        |        |        |        |        |        |  | 91013 |
| PigTailedMacaque  | CTAAACATGAGAGTGGTAACACAAAAA-TATTTTTT-AATTATAAAGGGGAGAACCATTGAAAAAGTCCAGTTTC     |        |        |        |        |        |        |        |  | 89572 |
| Bonobo            | TTAAAAATGAGAGTGGTAACACAAAAAAT---TTTTTTGAATTATAAAGGGAAGAAGCATTGATAAAGTCCAGTTTC   |        |        |        |        |        |        |        |  | 87831 |
| OliveBaboon       | TTAAACATGAGAGTGGTAACACAAAAAATATTTTTTTAATTATAAAGGGGAGAACCATTGAAAAAGTCCAGCTTC     |        |        |        |        |        |        |        |  | 89467 |
| Orangutan         | TTAAAAATGAGAGTGGTAACACAAAAAAGTA--TTTTTTGAATTATAAAGGGGAGAACCATTGATAAAGTCCAGTTTC  |        |        |        |        |        |        |        |  | 90275 |

Tuesday, May 03, 2022 06:17 PM

| Majority          | CACATCATATAAATGCCACCTATATCTGTAAATTTCTTGAGGTCTTTTAAATTTTTATTATTCATTAATA-TCTTCTTC   |        |        |        |        |        |        |        |  |       |
|-------------------|-----------------------------------------------------------------------------------|--------|--------|--------|--------|--------|--------|--------|--|-------|
|                   | 106810                                                                            | 106820 | 106830 | 106840 | 106850 | 106860 | 106870 | 106880 |  |       |
| Human             | CACATCATATAAACACCAC-TATGTCTGTAAATTTCTTGAGGTCTTTTAAATTTTTATTATTCGTTAATAATCTCTTTC   |        |        |        |        |        |        |        |  | 89085 |
| Coquerel'sSifaka  | CACATTATATATA---CTTCTGTATCTGTAAACTTCTTGCTGTCTTTTGAA-TTTTCATAATTCATTAATA-TCTTCTTC  |        |        |        |        |        |        |        |  | 75553 |
| Ma'sNightMonkey   | -GCATAGTA-----AC---TGTATGCAGA-----                                                |        |        |        |        |        |        |        |  | 84145 |
| VervetAGM         | CACATCATATAAATGCCACCTATATCCGTAAATTTCTTGAGGTCTTTTAAAGTTTTAAATTATTCGTTAATA-TCTTCTTC |        |        |        |        |        |        |        |  | 90743 |
| Gorilla           | CACATCATATAAACACCAC-TATGTCTGTAAATTTCTTGAGGTCTTTTAAATTTTTATTATTCGTTAATAATCTCTTTC   |        |        |        |        |        |        |        |  | 87329 |
| GrabEatingMacaque | CACATCATATAAATGCCACCTATATCTGTAAATTTCTTGAGGTCTTTTAAATTTTTATTATTCATTAATA-TCTTCTTC   |        |        |        |        |        |        |        |  | 90200 |
| Macaque           | CACATCATATAAATGCCACCTATATCTGTAAATTTCTTGAGGTCTTTTAAATTTTTATTATTCATTAATA-TCTTCTTC   |        |        |        |        |        |        |        |  | 91092 |
| PigTailedMacaque  | CACATCATATAAATGCCACCTATATCTGTAAATTTCTTGAGGTCTTTTAAATTTTTATTATTCATTAATA-TCTTCTTC   |        |        |        |        |        |        |        |  | 89651 |
| Bonobo            | CACATCATATAAACACCAC-TATGTCTGTAAATTTCTTGAGGTCTTTTAAATTTT-ATTATTCGTTAATAATCTCTTTC   |        |        |        |        |        |        |        |  | 87909 |
| OliveBaboon       | CACATCATATAAATGCCACCTATATCTGTAAATTTCTTGAGGTCTTTTAAATTTTTATTATTCATTAATA-TCTTCTTC   |        |        |        |        |        |        |        |  | 89546 |
| Orangutan         | CACATCATATAAACACCACCTATGTCTGTAAATTTCTTGAGGTATTTTAAATTTCTATTATTCATTAATA-TCTCCTTC   |        |        |        |        |        |        |        |  | 90354 |

| Majority          | ATAGATGGATTAAGGGAAAGGTAAAAAA-TTACATTCAACCAAAAATGCCATTTCAATTGTGAAACATTGACTTTTTCTCCT   |        |        |        |        |        |        |        |  |       |
|-------------------|--------------------------------------------------------------------------------------|--------|--------|--------|--------|--------|--------|--------|--|-------|
|                   | 106890                                                                               | 106900 | 106910 | 106920 | 106930 | 106940 | 106950 | 106960 |  |       |
| Human             | ATAGATGGATTAAGGGAAATGTAAAAAA-TTACATTAAATCAAAAATGTCATTTCAATTGTGAAACATTGACTTTTTCTCCT   |        |        |        |        |        |        |        |  | 89164 |
| Coquerel'sSifaka  | AGAGATGGAAATATGGTAAAGCTAAAAAA-TTATGTTTCAGCCAAAAATGCTATTTCTACAGTGCAACATTGACTTTTTCTCCT |        |        |        |        |        |        |        |  | 75632 |
| Ma'sNightMonkey   | ACAGATGAATGAC-----TGAAGAA-----                                                       |        |        |        |        |        |        |        |  | 84165 |
| VervetAGM         | ATAGATCGATTAAGGGAAAGGTAAAAAAATTACATTCAACCAAAAATGCCATTTCAATTGTGAAACACTGACTTTTTCTCCT   |        |        |        |        |        |        |        |  | 90823 |
| Gorilla           | ATAGATGGATTAAGGGAAAGGTAAAAAA-TTATATTAAATCAAAAATGCCATTTCAATTGTGAAACATTGACTTTTTCTCCT   |        |        |        |        |        |        |        |  | 87408 |
| GrabEatingMacaque | ATAGATGGATTAAGGGAAAGGTAAAAAAATTACATTCAACCAAAAATGCCATTTCAATTGTGAAACACTGACTTTTTCTCCT   |        |        |        |        |        |        |        |  | 90280 |
| Macaque           | ATAGATGGATTAAGGGAAAGGTAAAAAAATTACATTCAACCAAAAATGCCATTTCAATTGTGAAACACTGACTTTTTCTCCT   |        |        |        |        |        |        |        |  | 91172 |
| PigTailedMacaque  | ATAGATGGATTAAGGGAAAGGTAAAAAAATTACATTCAACCAAAAATGCCATTTCAAGTTGTGAAACACTGACTTTTTCTCCT  |        |        |        |        |        |        |        |  | 89731 |
| Bonobo            | ATAGATGGATTAAGGGAAAGGTAAAAAA-TTATATTAAATCAAAAATGTCATTTCAATTGTGAAACATTGACTTTTTCTCCT   |        |        |        |        |        |        |        |  | 87988 |
| OliveBaboon       | ATAGATGGATTAAGGGAAAGGTAAAAAAATTACATTCAACCAAAAATGCCATTTCAATTGTGAAACACTGACTTTTTCTCCT   |        |        |        |        |        |        |        |  | 89626 |
| Orangutan         | ATAGATGGATTAAGGGAAAGGTAAAAAA-TTATATTCAATCAGAAATGCCATTTCAATTGTGAAACATTGACTTTTTCTCCT   |        |        |        |        |        |        |        |  | 90433 |

| Majority          | TCTTTATTATGCCTTGTCATTATATGCCATATTTCTTGGAATAGGAGACTTCAAAGTGAAGATTTACATTGTTT-AAA |        |        |        |        |        |        |        |  |       |
|-------------------|--------------------------------------------------------------------------------|--------|--------|--------|--------|--------|--------|--------|--|-------|
|                   | 106970                                                                         | 106980 | 106990 | 107000 | 107010 | 107020 | 107030 | 107040 |  |       |
| Human             | T---TATTATGCCTTGTCATTATATGCCATATTTCTTGGAATAGGAGAGTTCAA-GTGTAAGATTACATTGTTT-AAA |        |        |        |        |        |        |        |  | 89239 |
| Coquerel'sSifaka  | CCTTTATTATGCCTTGTCATTATATGCCATATTTATTGGAATAGTAGATTCCTA-GTATAAGATTCTCATTGTTTAAA |        |        |        |        |        |        |        |  | 75711 |
| Ma'sNightMonkey   | -----TGGAA-----                                                                |        |        |        |        |        |        |        |  | 84170 |
| VervetAGM         | TCTTTATTATGCCTTGTCATTATATGCCATATTTCTTGGAATAGGAGACTTCAAAGTGAAGATTTACATTGTTT-AAA |        |        |        |        |        |        |        |  | 90902 |
| Gorilla           | TCTTTATTATGCCTTGTCATTATATGCCATATTTCTTGGAATAGGAGACTTCAA-GTGTAAGATTACATTGTTT-AAA |        |        |        |        |        |        |        |  | 87486 |
| GrabEatingMacaque | TCTTTATTATGCCTTGTCATTATATGCCATATTTCTTAGAATAGGAGACTTGAAAGTGAAGATTTACATTGTTT-AAA |        |        |        |        |        |        |        |  | 90359 |
| Macaque           | TCTTTATTATGCCTTGTCATTATATGCCATATTTCTTAGAATAGGAGACTTCAAAGTGAAGATTTACATTGTTT-AAA |        |        |        |        |        |        |        |  | 91251 |
| PigTailedMacaque  | TCTTTATTATGCCTTGTCATTATATGCCATATTTCTTGGAATAGGAGACTTCAAAGTGAAGATTTACATTGTTT-AAA |        |        |        |        |        |        |        |  | 89810 |
| Bonobo            | TCTTTATTATGCCTTGTCATTATATGCCATATTTCTTGGAATAGGAGACTTCAA-GTGTAAGATTACATTGTTT-AAA |        |        |        |        |        |        |        |  | 88066 |
| OliveBaboon       | TCTTTATTATGCCTTGTCATTATATGCCATATTTCTTGGAACAGGAGACTTCAAAGTGAAGATTTACATTGTTT-AAA |        |        |        |        |        |        |        |  | 89705 |
| Orangutan         | TCTTTATTATGCCTTGTCATTATATGCCATATTTCTTGGAATAGGAGACTTCAAAGTGAAGATTTACATTGTTT-AAA |        |        |        |        |        |        |        |  | 90512 |

Tuesday, May 03, 2022 06:17 PM

| Majority          | ATTTTATTTATTTAAAATTAGTAATTCAGATAGTTTCCTTCTGCTCT-----GTTTACTCATTGTGTACTTTCAGTTTTT  |        |        |        |        |        |        |        |       |
|-------------------|-----------------------------------------------------------------------------------|--------|--------|--------|--------|--------|--------|--------|-------|
|                   | 107050                                                                            | 107060 | 107070 | 107080 | 107090 | 107100 | 107110 | 107120 |       |
| Human             | ATTTTATTTATTTAAAATTAGTAATTCAGTAATTTTCCTTCTGCTCT-----GTTTACTCCTTGTGTACTTTCAGTTTTT  |        |        |        |        |        |        |        | 89314 |
| Coquerel'sSifaka  | AAGTGATTCATTTAAAATTAGTGATTAAGATACTTTCCTTCTGCTTTATTTTGTAAATCCTTATATACCT-CAATTTTT   |        |        |        |        |        |        |        | 75790 |
| Ma'sNightMonkey   | -----TTAAAAT-----AA--A-----                                                       |        |        |        |        |        |        |        | 84180 |
| VervetAGM         | ATTTTATTTATTTAAAATTAGTAATTCAGATAGTTTCCTTCTGCTCT-----GTTTACTCATTGTGTACTTTCAGTTTTT  |        |        |        |        |        |        |        | 90977 |
| Gorilla           | ATTTTATTTATTTAAAATTAGTAATTCAGGTAATTTTCCTTCTGCTCT-----GTTTACTCATTGTGTACTTTCAGTTTTT |        |        |        |        |        |        |        | 87561 |
| GrabEatingMacaque | ATTTTATTTATTTAAAATTAGTAATTCAGATAGTTTTCCTTCTGCTCT-----GTTTACTCATTGTGTACTTTCAGTTTTT |        |        |        |        |        |        |        | 90434 |
| Macaque           | ATTTTATTTATTTAAAATTAGTAATTCAGATAGTTTTCCTTCTGCTCT-----GTTTACTCATTGTGTACTTTCAGTTTTT |        |        |        |        |        |        |        | 91326 |
| PigTailedMacaque  | ATTTTATTTATTTAAAATTAGTAATTCAGATAGTTTATTCCTGCTCT-----GTTTACTCATTGTGTACTTTCAGTTTTT  |        |        |        |        |        |        |        | 89885 |
| Bonobo            | ATTTTATTTATTTAAAATTAGTAATTCAGGTAATTTTCCTTCTGCTCT-----GTTTACTCCTTGTGTACTTTCAGTTTTT |        |        |        |        |        |        |        | 88141 |
| OliveBaboon       | ATTTTATTTATTTAAAATTAGTAATTCAGATAGTTTCCTTCTGCTCT-----GTTTACTCATTGTGTACTTTCAGTTTTT  |        |        |        |        |        |        |        | 89780 |
| Orangutan         | ATTTTATTTATTTAAAATTAGTAATTCAGGTAATTTTCCTTCTGCTCT-----GTTTACTCATTGTGTACTTTCAGTTTTT |        |        |        |        |        |        |        | 90587 |

| Majority          | GACAAAGC-TTTTGTTTTCTT---TTTT-----ACTTAAAACTTTGGTATT-----CTAATTATCCTCCCCCTTC   |        |        |        |        |        |        |        |       |
|-------------------|-------------------------------------------------------------------------------|--------|--------|--------|--------|--------|--------|--------|-------|
|                   | 107130                                                                        | 107140 | 107150 | 107160 | 107170 | 107180 | 107190 | 107200 |       |
| Human             | GACAAAGC-TTTTGTTTTCTT---TTTT-----ACTTAAAACTTTGGTATT-----CTAATTATCCTCCCCCTTC   |        |        |        |        |        |        |        | 89376 |
| Coquerel'sSifaka  | GGCAAAGTGTTTTGTTTTGGGTTTTTTTAAACTTAAAACTTTGATATTTAACTGCCACTCTATCCTCCCCCTT--   |        |        |        |        |        |        |        | 75868 |
| Ma'sNightMonkey   | -ACAAA-----AT-----                                                            |        |        |        |        |        |        |        | 84187 |
| VervetAGM         | GACAAAGC-TTTTGTTTTCTT---TTTT-----ACTTAAAACTTTGGTCTATAATTATCTAATTATCCTCCCCCTTC |        |        |        |        |        |        |        | 91047 |
| Gorilla           | GACAAAGC-TTTTGTTTTCTT---TTTT-----ACTTAAAACTTCTGGTATT-----CTAATTATCCTCCCCCTTC  |        |        |        |        |        |        |        | 87623 |
| GrabEatingMacaque | GACAAA-C-CTTTGTTTTCTT---TTTT-----ACTTAAAACTTTGGTACT-----CTAATTATCCTCCCCCTTC   |        |        |        |        |        |        |        | 90495 |
| Macaque           | GACAAAGC-TTTTGTTTTCTT---TTTT-----ACTTAAAACTTTGGTACT-----CTAATTATCCTCCCCCTTC   |        |        |        |        |        |        |        | 91388 |
| PigTailedMacaque  | GACAAAGC-TTTTGTTTTCTT---TTTT-----ACTTAAAACTTTGGTACT-----CTAATTATCCTCCCCCTTC   |        |        |        |        |        |        |        | 89947 |
| Bonobo            | GACAAAGC-TTTTGTTTTCTT---TTTT-----ACTTAAAACTTTGGTATT-----CTAATTATCCTCCCCCTTC   |        |        |        |        |        |        |        | 88203 |
| OliveBaboon       | GACAAAGC-TTTTGTTTTCTT---TTTT-----ACTTAAAACTTTGGTACT-----CTAATTATCCTCCCCCTTC   |        |        |        |        |        |        |        | 89842 |
| Orangutan         | GACAAAGC-TTCTGTTTTCTT---TTTT-----AGTTAAATATTTTGGTATT-----CTAATTATCCTCCCCCTTC  |        |        |        |        |        |        |        | 90649 |

| Majority          | CCCTTTAGATCACTTCAGATCCTATTGT--CAGCAATCAGCTGGCTAGAA-CTCTC--ATTACCTGGCTACCTTCTGAGG |        |        |        |        |        |        |        |       |
|-------------------|----------------------------------------------------------------------------------|--------|--------|--------|--------|--------|--------|--------|-------|
|                   | 107210                                                                           | 107220 | 107230 | 107240 | 107250 | 107260 | 107270 | 107280 |       |
| Human             | CCCTTTAGATCACTTCAGATCCTATTGT--CAGCAATCAGCTGGCTAGAA-CTCTCCTTGTACCTGGCTACTTCTGAGG  |        |        |        |        |        |        |        | 89453 |
| Coquerel'sSifaka  | --CTTTAAGTCACTTCAGATCCTTTTGTGTTAACAATCAGCTGACTTGAATCTCTTATTACCTGGCTACTGCCTGAGG   |        |        |        |        |        |        |        | 75946 |
| Ma'sNightMonkey   | -----A-----GCCAAA-----C-----AGCTACCTCAGGAAG                                      |        |        |        |        |        |        |        | 84210 |
| VervetAGM         | CCCTTTAGATCACTTCAGATCCTATTGT--CAGCAATCAGCTGGCTAGAA-CTCTC--ATTACCTGGCTACCTTCTGAGG |        |        |        |        |        |        |        | 91122 |
| Gorilla           | CCCTTTAGATCACTTCAGATCCTATTGT--CAGCAATCAGCTGGCTAGAA-CTCTCCTTGTACCTGGCTACTTCTGAGG  |        |        |        |        |        |        |        | 87700 |
| GrabEatingMacaque | CCCTTTAGATCACTTCAGATCCTATTGT--CAGCAATCAGCTGGCTAGAA-CTCTC--ATTACCTGGCTACCTTCTGAGG |        |        |        |        |        |        |        | 90570 |
| Macaque           | CCCTTTAGATCACTTCAGATCCTATTGT--CAGCAATCAGCTGGCTAGAA-CTCTC--ATTACCTGGCTACCTTCTGAGG |        |        |        |        |        |        |        | 91463 |
| PigTailedMacaque  | CCCTTTAGATCACTTCAGATCCTATTGT--CAGCAATCAGCTGGCTAGAA-CTCTC--ATTACCTGGCTACCTTCTGAGG |        |        |        |        |        |        |        | 90022 |
| Bonobo            | CCCTTTAGATCACTTCAGATCCTATTGT--CGGCAATCAGCTGGCTAGAA-CTCTCCTTGTACCTGGCTACTTCTGAGG  |        |        |        |        |        |        |        | 88280 |
| OliveBaboon       | CCCTTTAGATCACTTCAGATCCTATTGT--CAGCAATCAGCTGGCTAGAA-CTCTC--ATTACCTGGCTACCTTCTGAGG |        |        |        |        |        |        |        | 89917 |
| Orangutan         | CCCTTTAGATCACTTCAGATCCTATTGT--CAGCAATCAGCTGGCTAGAA-TTCTCTCGTTACCTGGCTACTTGTGAGG  |        |        |        |        |        |        |        | 90726 |

Tuesday, May 03, 2022 06:17 PM

| Majority          | TAGCTGTTTGGTTATTTTGCTTTATTTTAATCCCATTCCCTCTAT--CACTCATCTGTTCTGTATACAGTTACTATGCCTG  |       |
|-------------------|------------------------------------------------------------------------------------|-------|
|                   | 107290 107300 107310 107320 107330 107340 107350 107360                            |       |
| Human             | TAGCTGTTTGGTTATTTAGCTTTATTTTAATCCCATTCCCTCTAT--CACTCATCTGTTCTGTATGCAGTTACTATGCCTG  | 89531 |
| Coquerel'sSifaka  | TAGCTGTTTGGTTATTTTGCTTTATTTTAATCCATTCCCTTTAT--CATCAGTCTCTTCTTTGTACAGTTACTGTGCATA   | 76024 |
| Ma'sNightMonkey   | TAG-----                                                                           | 84213 |
| VervetAGM         | TAGCTGTTTGGTTATTTTGCTTTATTTCTAATCTCATTCCCTCTAT--CACTCATCTGTTCTGTATACAGTTACTATGCCTG | 91200 |
| Gorilla           | TAGCTGTTTGGTTATTTTGCTTTATTTTAATCCCATTCCCTCTAT--CACTCATCTGTTCTGTATGCAATTACTATGCCTG  | 87778 |
| GrabEatingMacaque | TAGCTGTTTGGTTATTTTGCTTTATTTCTAATCCCATTCCCTCTAT--CACTCATCTGTTCTGTATACAGTTACTATGCCTG | 90648 |
| Macaque           | TAGCTGTTTGGTTATTTTGCTTTATTTCTAATCCCATTCCCTCTAT--CACTCATCTGTTCTGTATACAGTTACTATGCCTG | 91541 |
| PigTailedMacaque  | TAGCTGTTTGGTTATATTGCTTTATTTCTAATCCCATTCCCTCTAT--CACTCATCTGTTCTGTATACAGTTACTATGCCTG | 90100 |
| Bonobo            | TAGCTGTTTGGTTATTTAGCTTTATTTTAATCCCATTCCCTCTAT--CACTCATCTGTTCTGTATGCAATTACTATGCCTG  | 88358 |
| OliveBaboon       | TAGCTGTTTGGTTATTTTGCTTTATTTCTAATCCCATTCCCTCTAT--CACTCATCTGTTCTGTATACAGTTACTATGCCTG | 89995 |
| Orangutan         | TAGCTGTTTGGTTATTTTGCTTTATTTTAATCCCATTCCCTCTATATCACTCATCTGTTCTGTATGCAATTACTATGCCTG  | 90806 |

| Majority          | GGACTTTTTATTTTCTTATTCCCTCCCTCCATTATCTCAAAGCTCAGCTGTTTGTGCTGCTTTTTATTTAGACAGCTTT   |       |
|-------------------|-----------------------------------------------------------------------------------|-------|
|                   | 107370 107380 107390 107400 107410 107420 107430 107440                           |       |
| Human             | GGACTT--ATTTTCTTATTCTTTCCCTCCATTATCTCAAAGCTCTGCTGTTTGTGCTGCTTTTTATTTAGACAGCTTT    | 89608 |
| Coquerel'sSifaka  | AGACTTTCTATTTTCTTATTCCCTACCCTTCATTATCTCAAAGCTCAGCTGTTTGTGCTGCTTTTTCATTGAGATGGCTTT | 76104 |
| Ma'sNightMonkey   | -----TCAGG-----TAATGAGAGAGATTC                                                    | 84233 |
| VervetAGM         | GGACTTTTTATTTTCTTATTCCCTCCCTCCATTATCTCAAAGCTCAGCTGTTTGTGCTGCTTTTTATTTAGACAGCTTT   | 91280 |
| Gorilla           | GGACTT--ATTTTCTTATTCTTTCCCTCCATTATCTCAAAGCTCTGCTGTTTGTGCTGCTTTTTATTTAGACAGCTTT    | 87855 |
| GrabEatingMacaque | GGACTTTTTATTTTCTTATTCCCTCCCTCCATTATCTCAAAGCTCAGCTGTTTGTGCT---TTTTATTTAGACAGCTTT   | 90724 |
| Macaque           | GGACTTTTTATTTTCTTATTCCCTCCCTCCATTATCTCAAAGCTCAGCTGTTTGTGCT---TTTTATTTAGACAGCTTT   | 91617 |
| PigTailedMacaque  | GGACTTTTTATTTTCTTATTCCCTCCCTCCATTATCTCAAAGCTCAGCTGTTTGTGCTGCTTTTTATTTAGACAGCTTT   | 90180 |
| Bonobo            | GGACTT--ATTTTCTTATTCTTTCCCTCCATTATCTCAAAGCTCTGCTGTTTGTGCTGCTTTTTATTTAGACAGCTTT    | 88435 |
| OliveBaboon       | GGACTTTTTATTTTCTTATTCCGTCCTCCATTATCTCAAAGCTCAGCTGTTTGTGCTGCTTTTTATTTAGACAGCTTT    | 90075 |
| Orangutan         | GGACTTTTTATTTTCTTATTCCCTCCCTCCATTATCTCAAAGCTCTGCTGTTTGTGCTGCTTTTTATTTAGACAGCTTT   | 90886 |

| Majority          | TTTTCTGACAACCTTAAGTCTACTTATTTATATCACTTTATTTCTCAAACCTCATACTTAATAACACATTTTGTCTGAGGT  |       |
|-------------------|------------------------------------------------------------------------------------|-------|
|                   | 107450 107460 107470 107480 107490 107500 107510 107520                            |       |
| Human             | TTTTCTGACAACCTTAAGTCTACTTATTTATATCACTTTATTTCTCAAACCTCATACTTAATAACACATTTTATCTGAGGT  | 89688 |
| Coquerel'sSifaka  | CTTATGG-CAACCTTA-GTCTCCT-----TTATTCCCCAAACTCATATATATAATATGTTATGTCTGAAGT            | 76169 |
| Ma'sNightMonkey   | TCGCCAG--A-----TGATTGCTGA-----TAATAGGA---T---CGGAAGT                               | 84267 |
| VervetAGM         | TTTTCTGACAACCTTAAGTCTACTTATTTATATCACTTTATTTCTCAAACCCATACTTAATAACACATTTTGTCTGAGGT   | 91360 |
| Gorilla           | TTTTCTGACAACCTTAAGTCTACTTATTTATATCACTTTATTTCTCAAACCTCATACTTAATAACACATTTTGTCTGAGGT  | 87935 |
| GrabEatingMacaque | TTTTCTGACAACCTTAAGTCTACTTATTTATATCACTTTATTTCTCAAACCCATACTTAATAACACATTTTGTCTGAGGT   | 90804 |
| Macaque           | TTTTCTGACAACCTTAAGTCTACTTATTTATATCACTTTATTTCTCAAACCCATACTTAATAACACATTTTGTCTGAGGT   | 91697 |
| PigTailedMacaque  | TTTTCTGACAACCTTAAGTCTACTTATTTATATCACTTTATTTCTCAAACCCATACTTAATAACACATTTTGTCTGAGGT   | 90260 |
| Bonobo            | TTTTCTGACAACCTGAAGTCTACTTATTTATATCACTTAAATTTCTCAAACCTCATACTTAATAACACATTTTGTCTGAGGT | 88515 |
| OliveBaboon       | TTTTCTGACAACCTTAAGTCTACTTATTTATATCACTTTATTTCTCAAACCCATACTTAATAACACATTTTGTCTGAGGT   | 90155 |
| Orangutan         | TTTTCTGACAACCTTAAGTCTACTTATTTATATCACTTTATTTCTCAAACCTCATACTTAATAACACATTTTGTCTGAGGT  | 90966 |



Tuesday, May 03, 2022 06:17 PM

| Majority          | AGTAGCACTTTATCTAAACAAAAGTTTGTTCACCTAAAACAGTTATAGA-----                            |        |        |        |        |        |        |        |  |       |
|-------------------|-----------------------------------------------------------------------------------|--------|--------|--------|--------|--------|--------|--------|--|-------|
|                   | 107530                                                                            | 107540 | 107550 | 107560 | 107570 | 107580 | 107590 | 107600 |  |       |
| Human             | AGT-----TTATCTAAACAAAAGTTTGTTCACCTAAAATAGTTATAGA-----                             |        |        |        |        |        |        |        |  | 89731 |
| Coquerel'sSifaka  | A-TAGCACTTTATC---ATCGAAGCTTGTTCACCTAATAGAATTATAGG-----                            |        |        |        |        |        |        |        |  | 76214 |
| Ma'sNightMonkey   | GAT-----CTAAAGGGGA-----AGG-----                                                   |        |        |        |        |        |        |        |  | 84283 |
| VervetAGM         | AGTAGCACTTTATCTAAACAAAAGTTTATTTCACCTAAAACAGTTACAGA-----                           |        |        |        |        |        |        |        |  | 91409 |
| Gorilla           | AGT-----TTATCTAAACAAAAGTTTGTTCACCTAAAATAGTTATAGA-----                             |        |        |        |        |        |        |        |  | 87978 |
| GrabEatingMacaque | AGTAGCACTTTATCTAAACAAAAGTTTATTTCACCTAAAACAGTTACAGA-----                           |        |        |        |        |        |        |        |  | 90853 |
| Macaque           | AGTAGCACTTTATCTAAACAAAAGTTTATTTCACCTAAAACAGTTACAGA-----                           |        |        |        |        |        |        |        |  | 91746 |
| PigTailedMacaque  | AGTAGCACTTTATCTAAACAAAAGTTTATTTCACCTAAAACAGTTACAGAGGCCGGGCGCGGTGGCTCAAGCCTGTAATCC |        |        |        |        |        |        |        |  | 90340 |
| Bonobo            | AGT-----TTATCTAAACGAAAGTTTGTTCACCTAAAATAGTTATAGA-----                             |        |        |        |        |        |        |        |  | 88558 |
| OliveBaboon       | AGTAGCACTTTATCTAAACAAAAGTTTATTTCACCTAAAACAGTTACAGA-----                           |        |        |        |        |        |        |        |  | 90204 |
| Orangutan         | AGT-----TTATCTAAACAAAAGTTTGTTCACCTAAAACAGTTATAGA-----                             |        |        |        |        |        |        |        |  | 91009 |

| Majority          | -----                                                                            |        |        |        |        |        |        |        |  |       |
|-------------------|----------------------------------------------------------------------------------|--------|--------|--------|--------|--------|--------|--------|--|-------|
|                   | 107610                                                                           | 107620 | 107630 | 107640 | 107650 | 107660 | 107670 | 107680 |  |       |
| Human             | -----                                                                            |        |        |        |        |        |        |        |  | 89731 |
| Coquerel'sSifaka  | -----                                                                            |        |        |        |        |        |        |        |  | 76214 |
| Ma'sNightMonkey   | -----                                                                            |        |        |        |        |        |        |        |  | 84283 |
| VervetAGM         | -----                                                                            |        |        |        |        |        |        |        |  | 91409 |
| Gorilla           | -----                                                                            |        |        |        |        |        |        |        |  | 87978 |
| GrabEatingMacaque | -----                                                                            |        |        |        |        |        |        |        |  | 90853 |
| Macaque           | -----                                                                            |        |        |        |        |        |        |        |  | 91746 |
| PigTailedMacaque  | CATCACTTTGGGAGGCCGAGATGGGCGGATCACGAGGTCAGGAGATCGAGACCATCCTGGCTAACACGGTGAAACCCCGT |        |        |        |        |        |        |        |  | 90420 |
| Bonobo            | -----                                                                            |        |        |        |        |        |        |        |  | 88558 |
| OliveBaboon       | -----                                                                            |        |        |        |        |        |        |        |  | 90204 |
| Orangutan         | -----                                                                            |        |        |        |        |        |        |        |  | 91009 |

| Majority          | -----                                                                           |        |        |        |        |        |        |        |  |       |
|-------------------|---------------------------------------------------------------------------------|--------|--------|--------|--------|--------|--------|--------|--|-------|
|                   | 107690                                                                          | 107700 | 107710 | 107720 | 107730 | 107740 | 107750 | 107760 |  |       |
| Human             | -----                                                                           |        |        |        |        |        |        |        |  | 89731 |
| Coquerel'sSifaka  | -----                                                                           |        |        |        |        |        |        |        |  | 76214 |
| Ma'sNightMonkey   | -----                                                                           |        |        |        |        |        |        |        |  | 84283 |
| VervetAGM         | -----                                                                           |        |        |        |        |        |        |        |  | 91409 |
| Gorilla           | -----                                                                           |        |        |        |        |        |        |        |  | 87978 |
| GrabEatingMacaque | -----                                                                           |        |        |        |        |        |        |        |  | 90853 |
| Macaque           | -----                                                                           |        |        |        |        |        |        |        |  | 91746 |
| PigTailedMacaque  | CTCTACTAAGAAATACAAAAATAGCCGGGCGAGGTGGCAGCGCCTGTAGTCCCAGCTACTCGGGAGGCTGAGGCCGGAG |        |        |        |        |        |        |        |  | 90500 |
| Bonobo            | -----                                                                           |        |        |        |        |        |        |        |  | 88558 |
| OliveBaboon       | -----                                                                           |        |        |        |        |        |        |        |  | 90204 |
| Orangutan         | -----                                                                           |        |        |        |        |        |        |        |  | 91009 |

Tuesday, May 03, 2022 06:17 PM

| Majority          | -----                                                                           |        |        |        |        |        |        |        |       |
|-------------------|---------------------------------------------------------------------------------|--------|--------|--------|--------|--------|--------|--------|-------|
|                   | 107770                                                                          | 107780 | 107790 | 107800 | 107810 | 107820 | 107830 | 107840 |       |
| Human             | -----                                                                           |        |        |        |        |        |        |        | 89731 |
| Coquerel'sSifaka  | -----                                                                           |        |        |        |        |        |        |        | 76214 |
| Ma'sNightMonkey   | -----                                                                           |        |        |        |        |        |        |        | 84283 |
| VervetAGM         | -----                                                                           |        |        |        |        |        |        |        | 91409 |
| Gorrilla          | -----                                                                           |        |        |        |        |        |        |        | 87978 |
| GrabEatingMacaque | -----                                                                           |        |        |        |        |        |        |        | 90853 |
| Macaque           | -----                                                                           |        |        |        |        |        |        |        | 91746 |
| PigTailedMacaque  | AATGGCGTGAACCCGGAGGTGGAGGTTGAGCTGAGATCCGGCCACTGCCTCCAGCCTGGGCTACAGAGCGAGACTCCGT |        |        |        |        |        |        |        | 90580 |
| Bonobo            | -----                                                                           |        |        |        |        |        |        |        | 88558 |
| OliveBaboon       | -----                                                                           |        |        |        |        |        |        |        | 90204 |
| Orangutan         | -----                                                                           |        |        |        |        |        |        |        | 91009 |

| Majority          | -----                                                                       |        |        |        |        |        |        |        |       |
|-------------------|-----------------------------------------------------------------------------|--------|--------|--------|--------|--------|--------|--------|-------|
|                   | 107850                                                                      | 107860 | 107870 | 107880 | 107890 | 107900 | 107910 | 107920 |       |
| Human             | -----                                                                       |        |        |        |        |        |        |        | 89768 |
| Coquerel'sSifaka  | -----                                                                       |        |        |        |        |        |        |        | 76250 |
| Ma'sNightMonkey   | -----                                                                       |        |        |        |        |        |        |        | 84283 |
| VervetAGM         | -----                                                                       |        |        |        |        |        |        |        | 91446 |
| Gorrilla          | -----                                                                       |        |        |        |        |        |        |        | 88015 |
| GrabEatingMacaque | -----                                                                       |        |        |        |        |        |        |        | 90890 |
| Macaque           | -----                                                                       |        |        |        |        |        |        |        | 91783 |
| PigTailedMacaque  | CTCAAAACAAACAAACAAACAAACAAACAGTTACAGAACTTTAAAAT--TTTATAATTCAGTGGGTTTATTGTAA |        |        |        |        |        |        |        | 90658 |
| Bonobo            | -----                                                                       |        |        |        |        |        |        |        | 88595 |
| OliveBaboon       | -----                                                                       |        |        |        |        |        |        |        | 90241 |
| Orangutan         | -----                                                                       |        |        |        |        |        |        |        | 91046 |

| Majority          | -----                                                                            |        |        |        |        |        |        |        |       |
|-------------------|----------------------------------------------------------------------------------|--------|--------|--------|--------|--------|--------|--------|-------|
|                   | 107930                                                                           | 107940 | 107950 | 107960 | 107970 | 107980 | 107990 | 108000 |       |
| Human             | -----                                                                            |        |        |        |        |        |        |        | 89841 |
| Coquerel'sSifaka  | -----                                                                            |        |        |        |        |        |        |        | 76321 |
| Ma'sNightMonkey   | -----                                                                            |        |        |        |        |        |        |        | 84283 |
| VervetAGM         | -----                                                                            |        |        |        |        |        |        |        | 91519 |
| Gorrilla          | -----                                                                            |        |        |        |        |        |        |        | 88088 |
| GrabEatingMacaque | -----                                                                            |        |        |        |        |        |        |        | 90963 |
| Macaque           | -----                                                                            |        |        |        |        |        |        |        | 91856 |
| PigTailedMacaque  | AAGGATTTTATGTACTGTCACCTGTAGATAAATT-----GGTTTTACAGGTATAAGTGTAAATTTGCAAGTATATGAAAT |        |        |        |        |        |        |        | 90731 |
| Bonobo            | -----                                                                            |        |        |        |        |        |        |        | 88668 |
| OliveBaboon       | -----                                                                            |        |        |        |        |        |        |        | 90314 |
| Orangutan         | -----                                                                            |        |        |        |        |        |        |        | 91119 |

Tuesday, May 03, 2022 06:17 PM

| Majority          | TAAGTATGTGAAATGCAGTGTGAGAAACAAATGAGA--ACATTCAGGCTTGTGAGAAGATTGTTTTTTTTTT--TTTTCTT   |        |        |        |        |        |        |        |  |       |
|-------------------|-------------------------------------------------------------------------------------|--------|--------|--------|--------|--------|--------|--------|--|-------|
|                   | 108010                                                                              | 108020 | 108030 | 108040 | 108050 | 108060 | 108070 | 108080 |  |       |
| Human             | TAAGTATGTGAAATGCAGTGTGAGAAACAAATGAGA--AAATTCAGACTTGTGAGAAGATTGTTTTGTTTT--TTTTCTG    |        |        |        |        |        |        |        |  | 89917 |
| Coquerel'sSifaka  | ---GTATGTGAAATGTACTGTAAGAACTAGTGAGAGAAGATTTCAGGCTGAGAGATGAT-ATTTTTTTTT---TTTTCC     |        |        |        |        |        |        |        |  | 76394 |
| Ma'sNightMonkey   | -----GAAATGATAATTAGA--ATACCAGAGTTTTTAAGTAAA-----                                    |        |        |        |        |        |        |        |  | 84319 |
| VervetAGM         | TAAGTATGTGAAATGCAGTGCAGGAGAAACAAATGAGA--ACATTCAGGCTTGTGAGAAGATTGTTTTTTTTTTTTTTTT    |        |        |        |        |        |        |        |  | 91597 |
| Gorilla           | TAAGTATGTGAAATGCAGTGTGAGAAACAAATGAGA--AAATTCAGACTTGTGAGAAGATTGTTTTGTTTT--TTTTCTG    |        |        |        |        |        |        |        |  | 88164 |
| GrabEatingMacaque | TAAGTATGTGAAATGCAGTGCAGGAGAAACAAATAAGA--ACATTCAGGCTTGTGAGAAGATTGTTGTTTTTT--TTTTCTT  |        |        |        |        |        |        |        |  | 91040 |
| Macaque           | TAAGTATGTGAAATGCAGTGCAGGAGAAACAAATAAGA--ACATTCAGGCTTGTGAGAAGATTGTTGTTTTTT--TTTTTT   |        |        |        |        |        |        |        |  | 91932 |
| PigTailedMacaque  | TAAGTATGTGAAATGCAGTGCAGGAGAAACAAATAAGA--ACATTCAGGCTTGTGAGAAGATTGTTTTTTTTTT--TTTTTTT |        |        |        |        |        |        |        |  | 90808 |
| Bonobo            | TAAGTATGTGAAATGCAGTGTGAGAAACAAATGAGA--AAATTCAGACTTGTGAGAAGATTGTTTTGTTTT--TTTTCTG    |        |        |        |        |        |        |        |  | 88744 |
| OliveBaboon       | TAAGTATGTGAAATGCAGTGCAGGAGAAACAAAGTGA--ACATTCAGGCTTGTGAGAAGATTGTTTTGTTTTGTTTTTTTT   |        |        |        |        |        |        |        |  | 90392 |
| Orangutan         | TAAGTATGTGAAATGCAGTGTGAGAAACAAATGAGA--AAATTCAGGCTTGTGAGAAGATTGTTTTGTTTT--TTTTCTG    |        |        |        |        |        |        |        |  | 91195 |

| Majority          | CTGTTAGCCTTGCCGAAAATCTGAGAAAACCTAAAATATATAAACAACCTGGAGTGACAATCAGGAAGAGTGG--CCCCCCC  |        |        |        |        |        |        |        |  |       |
|-------------------|-------------------------------------------------------------------------------------|--------|--------|--------|--------|--------|--------|--------|--|-------|
|                   | 108090                                                                              | 108100 | 108110 | 108120 | 108130 | 108140 | 108150 | 108160 |  |       |
| Human             | TGCTTAGCCTTGCCGAAAATCTGAGAAAACCTAAAATATATAAACAACCTGGAGTGACAATCAGGAAGAGTGGACTCTTTTT  |        |        |        |        |        |        |        |  | 89997 |
| Coquerel'sSifaka  | CTGTTAGCCTCAGTTGAAAATAGAAAACCTGTTACAAATATATA--A-----CAGT----GTAGTG-----             |        |        |        |        |        |        |        |  | 76448 |
| Ma'sNightMonkey   | -----A-----AAGAAAACAAAAGCTTTGT-----CA-----AAAACG-----A-                             |        |        |        |        |        |        |        |  | 84349 |
| VervetAGM         | CTGTTAGCCTTGCCGAAAATCTGAGAAAACCTAAAATATATAAACAACCTGGAGTGACAATCAGGAATAGTG--CCCCCCC   |        |        |        |        |        |        |        |  | 91674 |
| Gorilla           | TGCTTAGCCTTGCCGAAAATCTGAGAAAACCTAAAATATATAAACAACCTGGAGTGACAATCAGGAAGAGTGGACTCTTTTT  |        |        |        |        |        |        |        |  | 88244 |
| GrabEatingMacaque | CTGTTAGCCTTGCCGAAAATCTGAGAAAACCTAAAATATATAAACAACCTGGAGTGACAATCAGGAAGAGTG--CCCCCCC   |        |        |        |        |        |        |        |  | 91117 |
| Macaque           | CTGTTAGCCTTGCCGAAAATCTGAGAAAACCTAAAATATATAAACAACCTGGAGTGACAATCAGGAAGAGTGGC-CCCCCCC  |        |        |        |        |        |        |        |  | 92011 |
| PigTailedMacaque  | CTGTTAGCCTTGCCGAAAATCTGAGAAAACCTAAAATATATAAACAACCTGGAGTGACAATCAGGAAGAGTG--CCCCCCC   |        |        |        |        |        |        |        |  | 90885 |
| Bonobo            | TGCTTAGCCTTCGCGAAAATCTGAGAAAACCTAAAATATATAAACAACCTGGAGTGACAATCAGGAAGAGTGGACTCTTTTT  |        |        |        |        |        |        |        |  | 88824 |
| OliveBaboon       | CTGTTAGCCTTGCCGAAAATCTGAGAAAACCTAAAATATATAAACAACCTGGAGTGACAATCAGGAAGAGTGGCCCCCCCC   |        |        |        |        |        |        |        |  | 90472 |
| Orangutan         | TGCTTAGCCTTGCCGAAAATCTGCGAAAACCTAAAAGTGTATAAACAACCTGGAGTGACAATCAGGAAGACTAGACTCTTTTT |        |        |        |        |        |        |        |  | 91275 |

| Majority          | CCCTT---TTTTTTTAAACAAATTAGAGAAGTAAGTTCAATGGCTAGTGGTTATCACAATAAGAAAAATTTAAGGAAGTT |        |        |        |        |        |        |        |  |       |
|-------------------|----------------------------------------------------------------------------------|--------|--------|--------|--------|--------|--------|--------|--|-------|
|                   | 108170                                                                           | 108180 | 108190 | 108200 | 108210 | 108220 | 108230 | 108240 |  |       |
| Human             | TTTTTTAATTTTTTAAACAAATTAGGGAAGTAAGTTCAATGGCTAGTGGTTATCATAATAAGAAAAATTTAAGGAAGTT  |        |        |        |        |        |        |        |  | 90077 |
| Coquerel'sSifaka  | -----ACATTCAGGAAGAGTAAACT----T-----GTTTTTACA-----AATCAGGGAAGTT                   |        |        |        |        |        |        |        |  | 76491 |
| Ma'sNightMonkey   | -----AATTAGGAAAGTAAGTTCAATGTCTTGTAGTTATAATAAGAAAAATAAATTAAGGAAGTT                |        |        |        |        |        |        |        |  | 84409 |
| VervetAGM         | CCCCC---CTTTTTTAAACAAATTAGAGAAGTAAGTTCAATGGCTAGTGGTTATCACAATAAGAAAAATTTAAGCAAGTT |        |        |        |        |        |        |        |  | 91751 |
| Gorilla           | TTTA--AATTTTTTAAACAAATTAGGGAAGTAAATTCATGGCTAGTGGTTATCATAATAATAAAAAATTTAAGGAAGTT  |        |        |        |        |        |        |        |  | 88322 |
| GrabEatingMacaque | CCCTT---TGTTTTTAAACAAATTAGAGAAGTAAGTTCAATGGCTAGTGGTTATCACAATAAGAAAAATTTAAGCAAGTT |        |        |        |        |        |        |        |  | 91194 |
| Macaque           | CCCTT---TGTTGTTAAACAAATTAGAGAAGTAAGTTCAATGGCTAGTGGTTATCACAATAAGAAAAATTTAAGCAAGTT |        |        |        |        |        |        |        |  | 92088 |
| PigTailedMacaque  | CCCTT---TTTTTTTAAACAAATTAGAGAAGTAAGTTCAATGGCTAGTGGTTATCACAATAAGAAAAATTTAAGCAAGTT |        |        |        |        |        |        |        |  | 90962 |
| Bonobo            | TTTA--AATTTTTTAAACAAATTAGGGAAGTAAGTTCAATGGCTAGTGGTTATCATAATAAGAAAAATTTAAGGAAGTT  |        |        |        |        |        |        |        |  | 88902 |
| OliveBaboon       | CCCTT---TTTTTTTAAACAAATTAGAGAAGTAAGTTCAATGGCTAGTGGTTATCACAATAAGAAAAATTTAAGCAAGTT |        |        |        |        |        |        |        |  | 90549 |
| Orangutan         | TTTT-----TTA-AAAACAAATTAGGGAAGTAAGTTCAATGGCTAGTGGTTATCATA---AGAAAAATTTAAGGAAGTT  |        |        |        |        |        |        |        |  | 91345 |

Tuesday, May 03, 2022 06:17 PM

| Majority          | ATAGGTA | AAAATA  | ----   | TTTACTT  | -----   | TTCTGA  | AATGGT  | ACCTCA  | TATTTT | TGACAG | CATTAT  | CCTTTT   | CAGATC |        |       |
|-------------------|---------|---------|--------|----------|---------|---------|---------|---------|--------|--------|---------|----------|--------|--------|-------|
|                   | 108250  | 108260  | 108270 | 108280   | 108290  | 108300  | 108310  | 108320  |        |        |         |          |        |        |       |
| Human             | ATAGGTA | AAAATA  | AAGAAT | TTTACT   | TTTGTTC | TTTCTGA | AATGGT  | ACCTCA  | TATTTT | TGACAG | CATTAT  | CCTTTT   | CAGATC | 90156  |       |
| Coquerel'sSifaka  | GTAAGTA | AAACAA  | AAGAAT | TTTAATTT | ----    | TTTTTT  | CTCTGA  | ATGGTAT | CTCATA | CTTTCA | CAGCATT | ATCCTTTT | CAGATC | 76567  |       |
| Ma'sNightMonkey   | ATAGGTA | AAAAGAA | ----   | TTTATA   | AAGAAT  | TTTGTTC | TTTCTGA | AATGGT  | ACCTCA | TATTTT | TGACAG  | CATTAT   | CCTTTT | CAGATC | 84485 |
| VervetAGM         | ATAGGTA | AAAATA  | ----   | TTTACTT  | -----   | TTCTGA  | AATGGT  | ACCTCA  | TATTTT | TGACAG | CATTAT  | CCTTTT   | CAGGTC | 91817  |       |
| Gorilla           | ATAGGTA | AAAATA  | AAGAAT | TTTACT   | TTTGTTC | TTTCTGA | AATGGT  | ACCTCA  | TATTTT | TGACAG | CATTAT  | CCTTTT   | CAGATC | 88401  |       |
| GrabEatingMacaque | ATAGGTA | AAAATA  | ----   | TTTACTT  | -----   | TTCTGA  | AATGGT  | ACCTCA  | TATTTT | TGACAG | CATTAT  | CCTTTT   | CAGGTC | 91260  |       |
| Macaque           | ATAGGTA | AAAATA  | ----   | TTTACTT  | -----   | TTCTGA  | AATGGT  | ACCTCA  | TATTTT | TGACAG | CATTAT  | CCTTTT   | CAGGTC | 92154  |       |
| PigTailedMacaque  | ATAGGTA | AAAATA  | ----   | TTTACTT  | -----   | TTCTGA  | AATGGT  | ACCTCA  | TATTTT | TGACAG | CATTAT  | CCTTTT   | CAGGTC | 91028  |       |
| Bonobo            | ATAGGTA | AAAATA  | AAGAAT | TTTACT   | TTTGTTC | TTTCTGA | AATGGT  | ACCTCA  | TATTTT | TGACAG | CATTAT  | CCTTTT   | CAGATC | 88981  |       |
| OliveBaboon       | ATAGGTA | AAAATA  | ----   | TTTACTT  | -----   | TTCTGA  | AATGGT  | ACCTCA  | TATTTT | TGACAG | CATTAT  | CCTTTT   | CAGGTC | 90615  |       |
| Orangutan         | ACAGGTA | AAAATA  | AAGAAT | TTTAA    | -----   | TTCTGA  | AATGGT  | ACCTCA  | TATTTT | TGACAG | CATTAT  | CCTTTT   | CAGATC | 91412  |       |

| Majority          | TGTTTT | TATTTA  | ATTTA  | TGGTTT | TATTT  | -ATACAT | GTAAGT | ATGAT  | GAT-   | AGATT | CGTGG | ATTTA  | ACCAGT | TCTTT  | TGTAT  | CTTCTG |       |
|-------------------|--------|---------|--------|--------|--------|---------|--------|--------|--------|-------|-------|--------|--------|--------|--------|--------|-------|
|                   | 108330 | 108340  | 108350 | 108360 | 108370 | 108380  | 108390 | 108400 |        |       |       |        |        |        |        |        |       |
| Human             | TGTTTT | TATTTA  | ATTTA  | TGGTTT | TATTT  | -ATACAT | GTAAGT | ATGAT  | GAT-   | AGATT | CGTGG | ATTTA  | ACCAGT | TCTTT  | TGTAT  | CTTCTG | 90234 |
| Coquerel'sSifaka  | TAT--  | TGTATTT | AATTTG | GGTTT  | TATTTT | TATACAT | GTAAGT | ATGACA | AAGATT | CATGG | CTTTA | ACAAAT | TCTTGG | TATCTT | CTG    |        | 76645 |
| Ma'sNightMonkey   | TGTTTT | TGTATTT | AATTTG | GGTTT  | TATTT  | -ATACAT | ATAAGT | ATGA   | ---    | GATTC | ATGG  | ATTTA  | ACAAAT | TCTTT  | TGTAT  | CTTCTG | 84561 |
| VervetAGM         | TGTTTT | TATGTT  | AATTTG | GGTTT  | TATTT  | -ATACAT | GTGAGT | ATGAT  | GATA   | TTCGT | GGATT | TTA    | ACCAGT | TCTTT  | TGTGT  | CTTCTG | 91896 |
| Gorilla           | TGTTTT | TATTTA  | ATTTA  | TGGTTT | TATTT  | -ATACAT | GTAAGT | ATGAT  | GATT   | AGATT | CGTGG | ATTTA  | ACCAGT | TCTTT  | TGTAT  | CTTCTG | 88479 |
| GrabEatingMacaque | TGTTTT | TATGTT  | AATTTG | GGTTT  | TATTT  | -ATACAT | GTGAGT | ATGA   | ---    | GATTC | CGTGG | ATTTA  | ACCAGT | TCTTT  | TGTAT  | CTTCTG | 91336 |
| Macaque           | TGTTTT | TATGTT  | AATTTG | GGTTT  | TATTT  | -ATACAT | GTGAGT | ATGA   | ---    | GATTC | CGTGG | ATTTA  | ACCAGT | TCTTT  | TGTAT  | CTTCTG | 92230 |
| PigTailedMacaque  | TGTTTT | TATGTT  | AATTTG | GGTTT  | TATTT  | -ATACAT | GTGAGT | ATGA   | ---    | GATTC | CGTGG | ATTTA  | ACCAGT | TCTTT  | TGTAT  | CTTCTG | 91104 |
| Bonobo            | TGTTTT | TATTTA  | ATTTA  | TGGTTT | TATTT  | -ATACAT | GTAAGT | ATGAT  | GATT   | AGATT | CGTGG | ATTTA  | ACCAGT | TCTTT  | TGTAT  | CTTCTG | 89059 |
| OliveBaboon       | TGTTTT | TATGTT  | AATTTG | GGTTT  | TATTT  | -ATACAT | GTGAGT | ATGAT  | GAGATT | CGTGG | ATTTA | ACCAGT | TCTTT  | TGTAT  | CTTCTG |        | 90694 |
| Orangutan         | TGTTTT | TATTTA  | ATTTA  | TGGTTT | TATTT  | -ATACAT | GTAAGT | ATGAT  | GAGATT | CGTGG | ATTTA | ACCAGT | TCTTT  | TGT    | ----   | CTG    | 91485 |

| Majority          | TGTCAAA | ATGTATA | CTGTAGT  | TATACT | TGTTT   | TATATT | TAGAA  | ACTCTTT | TGAAAGT | GGATGTT | CTCTT   | CTCT  | -----  | CAGTTT |       |
|-------------------|---------|---------|----------|--------|---------|--------|--------|---------|---------|---------|---------|-------|--------|--------|-------|
|                   | 108410  | 108420  | 108430   | 108440 | 108450  | 108460 | 108470 | 108480  |         |         |         |       |        |        |       |
| Human             | TGTCAAA | ATGTATA | CTGTAGT  | TATACT | TGTTT   | TATATT | TAGAA  | ACTCTTT | TGAAAGT | GGATGTT | CTCTT   | CTCT  | -----  | TAATTT | 90306 |
| Coquerel'sSifaka  | TGTCAGA | ATGTGT  | ACCATAGT | GTACTA | AATTTG  | TATTAG | AAACTC | TTGGAG  | AGTAG   | ATTCT   | ATTGTC  | AGTTT | GAAGC  | ATTGT  | 76725 |
| Ma'sNightMonkey   | TGTCAGA | AT--    | TACTGT   | AGTATA | ACCATTT | AAACT  | TAGAA  | ACTCTTT | TGAAAGT | GGATGTT | CTATTTT | ----- | CAATTT | 84632  |       |
| VervetAGM         | TGTCAAA | ATGTATA | CTGTAG   | CATACT | TGTTT   | TATATT | TAGAA  | ACTCTTT | TGAAAGT | GGATGTT | CTCTT   | CTCT  | -----  | CAGTTT | 91968 |
| Gorilla           | TGTCAAA | ATGTATA | CTGTAGT  | TATACT | TGTTT   | TATATT | TAGAA  | ACTCTTT | TGAAAGT | GGATGTT | CTATTT  | CT    | -----  | TAATTT | 88551 |
| GrabEatingMacaque | TGTCAAA | ATGTATA | CTGTAGT  | ATGCTG | TTTT    | TATATT | TAGAA  | ACTCTTT | TGAAAGT | GGATGTT | CTC     | ----- | AGTTT  | 91403  |       |
| Macaque           | TGTCAAA | ATGTATA | CTGTAGT  | ATGCTG | TTTT    | TATATT | TAGAA  | ACTCTTT | TGAAAGT | GGATGTT | CTC     | ----- | AGTTT  | 92297  |       |
| PigTailedMacaque  | TGTCAAA | ATGTATA | CTGTAGT  | TATACT | TGTTT   | TATATT | TAGAA  | ACTCTTT | TGAAAGT | GGATGTT | CTC     | ----- | AGTTT  | 91171  |       |
| Bonobo            | TGTCAAA | ATGTATA | CTGTAGT  | TATACT | TGTTT   | TATATT | TAGAA  | ACTCTTT | TGAAAGT | GGATGTT | CTATTT  | CT    | -----  | TAATTT | 89131 |
| OliveBaboon       | TGTCAAA | ATGTATA | CTGTAGT  | TATACT | TGTTT   | TATATT | TAGAA  | ACTCTTT | TGAAAGT | GGATGTT | CTC     | ----- | AGTTT  | 90761  |       |
| Orangutan         | TGTCAAA | ATGTACC | GTAGT    | TATACT | TTTT    | TATATT | TAGAA  | ACTCTTT | TGAAAGT | GGATGTT | CTATTT  | CT    | -----  | CAATTT | 91557 |

Tuesday, May 03, 2022 06:17 PM

|                   |                                                                                  |       |
|-------------------|----------------------------------------------------------------------------------|-------|
| Majority          | CCTGATCTTCC-----ACATTGT----CTTTATCT----CTCTGCTGTTTTTTA----TTTGTTTTT-----G        |       |
|                   | 108490 108500 108510 108520 108530 108540 108550 108560                          |       |
| Human             | CCTGATCTTCC-----ACATTGT----CTTTATCTG-TAACTCTACTGTTTTTTG----TTGGTTTTT-----G       | 90361 |
| Coquerel'sSifaka  | CTTTACCTCTCTGCTGCTAATACTTTAATGCCTTTATCCAGTTTCATTACAATCATTTAGACCTTCAATTTAGTCAAAAG | 76805 |
| Ma'sNightMonkey   | CCTGATCGTCC-----ACATT-----T-ATCT-----                                            | 84653 |
| VervetAGM         | CCTGATCTTCC-----ACATTGT----CTTTATCT----CTCTGCTGTTTTTTA----TTTGTTTTTGTTTTTG       | 92026 |
| Gorilla           | CCTGATCTTCC-----ACATTGT----CTTTATCTG-TAACTCTACTGTTTTTTG----TTTGTTTTT-----G       | 88606 |
| GrabEatingMacaque | CCTGATCTTCC-----ACATTGT----CTTTATCT----CTCTGCTGTTTTTTA----TTTGTTTTTG--TTTG       | 91459 |
| Macaque           | CCTGATCTTCC-----ACATTGT----CTTTATCT----CTCTGCTGTTTTTTA----TTTGTTTTTG--TTTG       | 92353 |
| PigTailedMacaque  | CCTGATCTTCC-----ACATTGT----CTTTATCT----CTCTGCTGTTTTTTA----TTTGTTTTTG--TTTTG      | 91227 |
| Bonobo            | CCTGATCTTCC-----ACATTGT----CTTTATCTG-TAACTCTACTGTTTTTTG----TTTGTTTTT-----G       | 89186 |
| OliveBaboon       | CCTGATCTTCC-----ACATTGT----CTTTATCT----CTCTGCTGTTTTTTA----TTTGTTTT-----          | 90810 |
| Orangutan         | CCTGATCTTCT-----GCATTGT----CTTTATCTG-TAACTCTACTGTTTTTTG----TTTGTTT-----          | 91609 |

|                   |                                                                                   |       |
|-------------------|-----------------------------------------------------------------------------------|-------|
| Majority          | TTTTTGTTTTG--AGACGGAGTCTTGCTCTGTCAACCAGGCTGG--AGTGCA--GTGGCACCATCTC-----A         |       |
|                   | 108570 108580 108590 108600 108610 108620 108630 108640                           |       |
| Human             | TTTTTGTTTTG--AGACAGAGTCTCGCTCTGTCAACCAGGCTGG--AGTGCACTGTGGCACCATCTC-----A         | 90425 |
| Coquerel'sSifaka  | TGTATGACTTATTAATAAATGGTCTTTTTTAGTTGTTGGGACTGGTAAATAAAACATAAAACTGTTTCTAATATCAGATCA | 76885 |
| Ma'sNightMonkey   | -----                                                                             | 84653 |
| VervetAGM         | TTTTTGTTTTG--AGACGGAGTCTTGCTCTGTCAACCAGGCTGG--AGTGCA--GTGGCACCATCTC-----A         | 92088 |
| Gorilla           | TTTTTGTTTTG--AGACAGAGTCTCGCTCTGTCAACCAGGCTGG--AGTGCACTGTGGCACCATCTC-----A         | 88670 |
| GrabEatingMacaque | TTTTTGTTTTG--AGACGGAGTCTTGCTCTGTCAACCAGGCTGG--AGTGCA--GTGGCACCATCTC-----A         | 91521 |
| Macaque           | TTTTTGTTTTG--AGACGGAGTCTTGCTCTGTCAACCAGGCTGG--AGTGCA--GTGGCACCATCTC-----A         | 92415 |
| PigTailedMacaque  | TTTTTGTTTTG--AGACGGAGTCTTGCTCTGTCAACCAGGCTGG--AGTGCA--GTGGCACCATCTC-----A         | 91289 |
| Bonobo            | TTTTTGTTTTG--AGACAGAGTCTCGCTCTGTCAACCAGGCTGG--AGTGCACTGTGGCACCATCTC-----A         | 89250 |
| OliveBaboon       | ----TGTTTTTG--AGACGGAGTCTTGCTCTGTCAACCAGGCTGG--AGTGCA--GTGGCACCATCTC-----A        | 90868 |
| Orangutan         | ----GTTTTG--AGACAGAGTCTCGCTCTGTCAACCAGGCTGG--AGTGCACTGTGGCACCATCTC-----A          | 91668 |

|                   |                                                                                   |       |
|-------------------|-----------------------------------------------------------------------------------|-------|
| Majority          | GCTCACT-----GTAACCT-----CCACCTCCTGAATTCAA-GTGATTCTTCTGCCTCAGCCTCCTGAGTAGCTG       |       |
|                   | 108650 108660 108670 108680 108690 108700 108710 108720                           |       |
| Human             | GCTCACT-----GTAACCT-----CCGCTCCTGGGTACAA-GCAATTCT---GCCTCAGCCTCCTGAGTAACTG        | 90486 |
| Coquerel'sSifaka  | GTTCAATTTAGTTTAAAAATAACCCAACAGCTACCTTAAGAAATAACTGTAATGTTCTGTGTTACGCACCTGCACTATGCG | 76965 |
| Ma'sNightMonkey   | -----                                                                             | 84653 |
| VervetAGM         | GCTCACT-----GTAACCT-----CCACCTCCTGAATTCAA-GTGATTCTTCTGCCTCAGCCTCCTGAGTAGCTG       | 92152 |
| Gorilla           | GCTCACT-----GTAACCT-----CCGCTCCTGGGTACAA-GCAATTCT---GCCTCAGCCTCCTGAGTAACTG        | 88731 |
| GrabEatingMacaque | GCTCACT-----GTAACCT-----CCACCTCCTGAATTCAA-GTGATTCTTCTGCCTCAGCCTCCTGAGTAGCTG       | 91585 |
| Macaque           | GCTCACT-----GTAACCT-----CCACCTCCTGAATTCAA-GTGATTCTTCTGCCTCAGCCTCCTGAGTAGCTG       | 92479 |
| PigTailedMacaque  | GCTCACT-----GTAACCT-----CCACCTCCTGAATTCAA-GTGATTCTTCTGCCTCAGCCTCCTGAGTAGCTG       | 91353 |
| Bonobo            | GCTCACT-----GTAACCT-----CTGCCTCCTGGATACAA-GCAATTCT---GCCTCAGCCTCCTGAGTAACTG       | 89311 |
| OliveBaboon       | GCTCACT-----GTAACCT-----CCACCTCCTGAATTCAA-GTGATTCTTCTGCCTTAGCCTCCTGAGTAGCTG       | 90932 |
| Orangutan         | GCTCACT-----GTAACCT-----CCACCTCCTGGGTCAA-GCAATTCTTCTGCCTCAGCCTCCTGAGTAGCTG        | 91732 |

Tuesday, May 03, 2022 06:17 PM

```
Majority      --GGACTACAGGCACGAGCCACCATGCCTAGCTAATTT-----TTG-----TATTTT---TAGTAGAGACGGGGTGT
              108730   108740   108750   108760   108770   108780   108790   108800
Human         --GGACCACAGGCACGAGCCACCACGCCAGCTAATTT-----TTG-----TATTTT---TAGTAGAGATGGGGTGT 90548
Coquerel'sSifaka CCGGGGTAGAGAAAGTAATTCATGTCTCCATGTACTTTACAGTCTGAAGGAGAATATGTAGATAATGACAATAAATTGT 77045
Ma'sNightMonkey -----
VervetAGM     --GGACTACAGGCACGAGCCACCACGCCTGGCTAATTT-----TTG-----TATTTT---TAGTAGAGACGGGGTGT 92214
Gorrilla      --GGACCACAGGCACGAGTCACCACGCCAGCTAATTT-----TTG-----TATTTT---TAGTAGAGATGGGGTGT 88793
GrabEatingMacaque --GGACTACAGGCACGAGCCACCATGCCTGGCTAATTT-----TTG-----TATTTT---TAGTAGAGACGGGGTGT 91647
Macaque       --GGACTACAGGCACGAGCCACCATGCCTGGCTAATTT-----TTG-----TATTTT---TAGTAGAGACGGGGTGT 92541
PigTailedMacaque --GGACTACAGGCACGAGCCACCATGCCTAGCTAATTT-----TTG-----TATTTT---TAGTAGAGACGGGGTGT 91415
Bonobo        --GGACCACAGGCACGAGCCACCACGCCAGCTAATTT-----TTG-----TATTTT---TAGTAGAGATGGGGTGT 89373
OliveBaboon   --GGACTACAGGCACGAGCCACCATGCCTGGCTAATTT-----TTG-----TATTTT---TAGTAGAGACGGGGTGT 90994
Orangutan     --GGACCACAGGCACAAGCCACCACGCCAGCTAATTT-----TTG-----TATTTT---TAGTAGAGACGGCGTGT 91794
```

```
Majority      CACCATAT-----TGGC-CAGGCTG-GTCT--TGAGCTCCTAGACCTTGT-----GATCCGCCACCTG
              108810   108820   108830   108840   108850   108860   108870   108880
Human         TACCATAT-----TGGC-CAGGCTG-GTCT--CGAACTCCTAGACCTTGT-----GATCCGCCACCTC 90603
Coquerel'sSifaka GATGATAAACTTAAAAAATGGTACAGAGTACGTCTAGTGAGGTTCTGAACCTTCCAGAGGATAAAGAAAGGCCTTCCTG 77125
Ma'sNightMonkey -----
VervetAGM     CACCATAT-----TGGC-CAGGCTG-GTCT--TGAGCTCCTAGACCTCGT-----GATCCGCCACCTG 92269
Gorrilla      CACCATAT-----TGGC-CAGTCTG-GTCT--CGAACTCCTAGACCTTGT-----GATCCGCCACCTC 88848
GrabEatingMacaque CACCATAT-----TGGC-CAGGCTG-GTCT--TGAGCTCCTAGACCTCGT-----GATCCGCCACCTG 91702
Macaque       CACCATAT-----TGGC-CAGGCTG-GTCT--TGAGCTCCTAGACCTCGT-----GATCCGCCACCTG 92596
PigTailedMacaque CACCATAT-----TGGC-CAGGCTG-GTCT--TGAGCTCCTAGACCTCGT-----GATCCGCCACCTG 91470
Bonobo        CACCATAT-----TGGC-CAGGCTG-GTCT--CAAACCTCCTAGACCTTGT-----GATCCGCCACCTC 89428
OliveBaboon   CACCATAT-----TGGC-CAGGCTG-GTCT--TGAGCTCCTAGACCTCGT-----GATCCGCCACCTG 91049
Orangutan     CACCATAT-----TGGC-CAGGCTG-GTCT--CGAACTCCTAGACCTTGT-----GATCCACCCACCTC 91849
```

```
Majority      GG-----CCTCCCAAAGTGCTGGGATTACAGGCGTGAGCCAACCGCCTGGCATCTACTGTTAATACTTTAATGTTTT
              108890   108900   108910   108920   108930   108940   108950   108960
Human         AG-----CCTCCCAAAGTGTTGGGATTACAGGCGTGAGCCAACCGCCTGGCATCTACTGTTAATACTTTA-----T 90670
Coquerel'sSifaka GAGAAGTGACTTTGAAGAATAAGTAGACTAAAAGGGAAAGGAAAGGACATAGGAAATGTTATAGATAGAAGATCATGTA 77205
Ma'sNightMonkey -----CTACTGTTAATACTTTTCATGTTTT 84677
VervetAGM     GG-----CCTCCCAAAGTGCTGGGATTACAGGCGTGAGACAACACGCCTGGCATCTACTGTTA-TACTTTAATGTTTT 92341
Gorrilla      AG-----CCTCCCAAAGTGTTGGGATTACAGGCGTGAGCCAACCGCCTGGCATCTACTGTTAATAGTTAATGTTTT 88921
GrabEatingMacaque GG-----CCTCCCAAAGTGCTGGGATTACAGGCGTGAGCCAACACGCCTGGCATCTACTGTTA-TACTTTAATGTTTT 91774
Macaque       GG-----CCTCCCAAAGTGCTGGGATTACAGGCGTGAGCCAACACGCCTGGCATCTACTGTTA-TACTTTAATGTTTT 92668
PigTailedMacaque GG-----CCTCCCAAAGTGCTGGGATTACAGGCGTGAGCCAACACGCCTGGCATCTACTGTTA-TACTTTAATGTTTT 91542
Bonobo        AG-----CCTCCCAAAGTGTTGGGATTACAGGCGTGAGCCAACCGCCTGGCATCTACTGTTAATACTTTAATGTTTT 89501
OliveBaboon   AG-----CCTCCCAAAGTGCTGGGATTACAGGCGTGAGCCAACACGCCTGGCATCTACTGTTA-TATTTTAATGTTTT 91121
Orangutan     AG-----CCTCCCAAAGTGCTGGAAATCCAGGCGTGAGCCAACCGCCTGGCATCTACTATTAATACTTTAATGTTTT 91922
```

Tuesday, May 03, 2022 06:17 PM

| Majority          | TATCTAGTTGATTATA---GTCATTTAGACCT-----TCAGTTTAGCCAAAGTGCATGACATATTAGAAATGG             |
|-------------------|---------------------------------------------------------------------------------------|
|                   | 108970 108980 108990 109000 109010 109020 109030 109040                               |
| Human             | TATCTAGTTGATTATA---GTCATTTAGACCT-----TCAGTTTAGCCAAAGTGCATGACATATTAGAAATGG 90735       |
| Coquerel'sSifaka  | CACAAGAATAAAAATAAGAGACACTTGCACCTAGTGTAGGATATCTGTTTTGTATAGCTGGAGCATAAAGTGCAAGCAG 77285 |
| Ma'sNightMonkey   | TACCTAGTTGATTATA---GTCATTTAGACTT-----TCGGTTTAGCCAAAGTGCATGACATATTAGAAATGG 84742       |
| VervetAGM         | TTTCTAGTTGATTATA---GTCATTTAGACCT-----TCAGTTTAACCAAAGGGCATGACATACTAGAAATGG 92406       |
| Gorilla           | TATCTAGTTGATTATA---GTCATTTAGACCT-----TCAGTTTAGCCAAAGTGCATGACATATTAGAAATGG 88986       |
| GrabEatingMacaque | CATCTAGTTGATTATA---GTCATTTAGACCT-----TCAGTTTAACCAAAGGGCATGACATACTAGAAATGG 91839       |
| Macaque           | CATCTAGTTGATTATA---GTCATTTAGACCT-----TCAGTTTAACCAAAGGGCATGACATACTAGAAATGG 92733       |
| PigTailedMacaque  | CATCTAGTTGATTATA---GTCATTTAGACCT-----TCAGTTTAACGAAAGGGCATGACATACTAGAAATGG 91607       |
| Bonobo            | TATCTAGTTGATTGTA---GTCATTTAGACCT-----TCAGTTTAGCCAAAGTGCATGACATATTAGAAATGG 89566       |
| OliveBaboon       | CATCTAGTTGATTATA---GTCATTTAGACCT-----TCAGTTTAACCAAAGGGCATGACATACTAGAAATGG 91186       |
| Orangutan         | TATCTAGTTGATTATA---GTCATTTAGACCT-----TCAGTTTAGCCAAAGTGCATGGCATATTAGAAATGG 91987       |

| Majority          | TCT--TTTTTAGTTATTTTGACT----GGTGAATAAAA-----CATGTAAGTGT--TTCTAGCATCAGACCAG           |
|-------------------|-------------------------------------------------------------------------------------|
|                   | 109050 109060 109070 109080 109090 109100 109110 109120                             |
| Human             | TCT--TTTTTAGTTATTTTGACT----GGTGAATAAAA-----CATATAACT----TTCTAGCATCAGACCAG 90793     |
| Coquerel'sSifaka  | TATAGTACTAAGATACCATAAATCCACGAGGGCTGGGATGTGTCTTATCTTACCACTTTATCCCAGCACTAGCACAG 77365 |
| Ma'sNightMonkey   | TCT--TTTT-AGTTATTTTGACT----GGTGAATAAAA-----CATATAATTGT--TTCTAGTATCAGACCAG 84801     |
| VervetAGM         | TCT--TTTTTAGTTATTTTGACT----GGTGAATAAAA-----CATGTAAGTGT--TTCTAGCATCAGACCAG 92466     |
| Gorilla           | TCT--TTTTTAGTTATTTTGACT----GGTGAATAAAA-----CATGTAAGTGT--TTCTAGCATCAGACCAG 89044     |
| GrabEatingMacaque | TCT--TTTTTAGTTATTTTGACT----GGTGAATAAAA-----CATGTAAGTGT--TTCTAGCATCAGACCAG 91899     |
| Macaque           | TCT--TTTTTAGTTATTTTGACT----GGTGAATAAAA-----CATGTAAGTGT--TTCTAGCATCAGACCAG 92793     |
| PigTailedMacaque  | TCT--TTTTTAGTTATTTTGACT----GGTGAATAAAA-----CATGTAAGTGT--TTCTAGCATCAGACCAG 91667     |
| Bonobo            | TCT--TTTTTAGTTATTTTGACT----GGTGAATAAAA-----CATATAACT----TTCTAGCATCAGACCAG 89624     |
| OliveBaboon       | TCT--TTTTTAGTTATTTTGACT----GGTGAATAAAA-----CATGTAAGTGT--TTCTAGCATCAGACCAG 91246     |
| Orangutan         | TCT--TTTTTAGTTATTTTGACT----GGTGAATAAAA-----CATATAACTGT--TTGTAGCATCACACCAG 92047     |

| Majority          | TTCATTTAGTTTAAAAATGATCCAGCAG---CTATGTCAAGAAAT---AGTCATGTA-ATGTT---CTTGTTTCACACA         |
|-------------------|-----------------------------------------------------------------------------------------|
|                   | 109130 109140 109150 109160 109170 109180 109190 109200                                 |
| Human             | TTCATTTAGTTTAAAAATGATCCAGCAG---CTATGTCAAGAAAT---AGTCATGTA-ATGTT---CTTGTTTCACACA 90862   |
| Coquerel'sSifaka  | TG-ATTGATATTGCACATCATTTGATAAAAATCTGCTCAAAGAAGCTGAAAGTTATATGCAGGTTGAGTATTGCTTATCCA 77444 |
| Ma'sNightMonkey   | TTCATTTAGTTTAAAAATGATCCAGCAG---CTATGTCAAGAAAT---AGTCATGTA-ATGTT---CTTGTTTCACACA 84870   |
| VervetAGM         | TTCATTTAGTTTAAAAATGATCCAGCAG---CTATGTCAAGAAAT---AGTAATGTA-ATGTT---CTTGTTTCACACA 92535   |
| Gorilla           | TTCATTTAGTTTAAAAATGATCTAGCAG---CTATGTCAAGAAAT---AGTCATGTA-ATGTT---CTTGTTTCACACA 89113   |
| GrabEatingMacaque | TTCATTTAGTTTAAAAATGATCCAGCAG---CTATGTCAAGAAAT---AGTCATGTA-ATGTT---CTTGTTTCACACA 91968   |
| Macaque           | TTCATTTAGTTTAAAAATGATCCAGCAG---CTATGTCAAGAAAT---AGTCATGTA-ATGTT---CTTGTTTCACACA 92862   |
| PigTailedMacaque  | TTCATTTAGTTTAAAAATGATCCAGCAG---CTATGTCAAGAAAT---AGTCATGTA-ATGTT---CTTGTTTCACACA 91736   |
| Bonobo            | TTCATTTAGTTTAAAAATGATCCAGCAG---CTATGTCAAGAAAT---AGTCATGTA-ATGTT---CTTGTTTCACACA 89693   |
| OliveBaboon       | TTCATTTAGTTTAAAAATGATCCAGCAG---CTATGTCAAGAAAT---AGTCATGTA-ATGTT---CTTGTTTCACACA 91315   |
| Orangutan         | TTGATTAGTTTAAAAATGATCCAGCAG---CTATGTCAAGAAAT---AGTCATGTA-ATGTT---CTTGTTTCACACA 92116    |





Tuesday, May 03, 2022 06:17 PM

|                   |                                                                                  |       |
|-------------------|----------------------------------------------------------------------------------|-------|
| Majority          | TCAACTTTGTCCTTAAGGGTTTTAAGCAGGTATTGACATGATCAGATTTGTAATTTACGAAGGCATCAAGCTGCTGTAT  |       |
|                   | 109450 109460 109470 109480 109490 109500 109510 109520                          |       |
| Human             | TCAACTTTGTCCTTAAGGGTTTTAAGCAGGTATTGACGTGATCAGATTTGTAATTTATGAAGGCATCAAGCTGCTGTAT  | 91165 |
| Coquerel'sSifaka  | -AGACTTTGTCCTTAAGGGTTTTAAGCAGGTAATGGCATGATTAATTTATAATTTGCAAAGGCATCAAGCTGATATGT   | 77754 |
| Ma'sNightMonkey   | TAGACTTTGTCCTTAAGGGTTTTAAGTAGGTATTGACATGATCAGATTTGTAATTTACAAACGTCATCATGCTGCTGTAT | 85172 |
| VervetAGM         | TCAACTTTGTCCTGAAGAGTTTTAAGCATGTGTTGACATGATCAGATTTGTAATTTACGAAGGCATCAAGCTGCTATAT  | 92839 |
| Gorilla           | TCAACTTTGTCCTTAAGGGTTTTAAGCAGGTATTGACGTGATCAGATTTGTAATTTATGAAGGCATCAAGCTGCTGTAT  | 89416 |
| GrabEatingMacaque | TCAACTTTGTCCTT--GAGTTTTAAGCATGTGTTGACATGATCAGATTTGTAATTTACGAAGGCATCAAGCTGCTGTAT  | 92269 |
| Macaque           | TCAACTTTGTCCTT--GAGTTTTAAGCATGTGTTGACATGATCAGATTTGTAATTTACGAAGGCATCAAGCTGCTGTAT  | 93163 |
| PigTailedMacaque  | TCAACTTTGTCCTT--GAGTTTTCAGCATGTGTTGACATGATCAGATTTGTAATTTACGAAGGCATCAAGCTGCTGTAT  | 92037 |
| Bonobo            | TCAACTTTGTCCTTAAGGGTTTTAAGCAGGTATTGACGTGATCAGATTTGTAATTTATGAAGGCATCAAGCTGCTGTAT  | 89996 |
| OliveBaboon       | TCAACTTTGTCCTTAAGAGTTTTAAGCATGTGTTGACATGATCAGATTTGTAATTTACGAAGGCATCAAGCTGCTGTAT  | 91618 |
| Orangutan         | TCGACTTTGTCCTTAAGGGTTTTAAGCAGGTATTGACATGATCAGATTTGTAATTTATGAAGGCATCAAGCTGCTGTAT  | 92419 |

|                   |                                                                                  |       |
|-------------------|----------------------------------------------------------------------------------|-------|
| Majority          | AGAAAAATGGATTGGAAAAA---AAAA--TCCAACAGGAAGACAAATGATGA---GACTGAGTTATCCAGATAAAA     |       |
|                   | 109530 109540 109550 109560 109570 109580 109590 109600                          |       |
| Human             | AGAAAAATGGATTGGAAAAAT-----TA-----TCCAACAGGAAGACAAAT-ATGA---GACTGAGTTATCCAGATAAAA | 91230 |
| Coquerel'sSifaka  | ATAGAATGGATTGAAAAAATACAGAGAAATATCCAGTAGGAAGACAAATGGGGACTGATTGAGTTATCCAGATAAAA    | 77834 |
| Ma'sNightMonkey   | AGAAAAATGGATTGGAAAAAAG---AATTA--TCCAACAGGAAGACAAATGAGGA---GACTGAGTTATCCAGATAAAA  | 85242 |
| VervetAGM         | AGAAAAATGGATTGGAAAAA---AAAA--TCCAACAGGAAGACAAACGATGA---GACTGAGGTATCCAGATAAAA     | 92909 |
| Gorilla           | AGAAAAATGGATTGGAAAAA---TA-----TCCAACAGGAAGACAAAT-AAGA---GACTGAGTTATCCAGATAAAA    | 89481 |
| GrabEatingMacaque | AGAAAAATGGATTGGAAAAA---AAAAA-TCCAGCAGGAAGACAAACGATGA---GACTGAGGTATCCAGATAAAA     | 92340 |
| Macaque           | AGAAAAATGGATTGGAAAAA---AAAAAATCCAGCAGGAAGACAAACGATGA---GACTGAGGTATCCAGATAAAA     | 93235 |
| PigTailedMacaque  | AGAAAAATGGATTGGAAAAA---AAA---TCCAGCAGGAAGACAAACGATGA---GACTGAGGTATCCAGATAAAA     | 92106 |
| Bonobo            | AGAAAAATGGATTGGAAAAA---TA-----TCCAACAGGAAGACAAAT-ATGA---GACTGAGTTATCCAGATAAAA    | 90062 |
| OliveBaboon       | AGAAAAATGGATTGGAAAAA---AAAA--TCCAACAGGAAGACAAACGATGA---GACTGAGGTATCCAGATAAAA     | 91688 |
| Orangutan         | AGAAAAATGGATTGGAAAAA---TA-----TCCAACAGGAAGACAAAT-ATGA---GACTGAGTTATCTAGATAAAA    | 92484 |

|                   |                                                                                  |       |
|-------------------|----------------------------------------------------------------------------------|-------|
| Majority          | AATAATGGCAGTGAAAAGTAGAGAAAT---AGAACATGAATTTGAGAGATAATTAGGAGGAAGGCTATCACAGTATTTA  |       |
|                   | 109610 109620 109630 109640 109650 109660 109670 109680                          |       |
| Human             | AATAATGTCAGCGAGAAGTAGAGAAAC---AGATCATGAATTTGAGGGACAATTAGGAGGAAGGCTATCACAAATATTTA | 91306 |
| Coquerel'sSifaka  | TATA-----GTA AAAAGTGGAGAAATGGAGAGAACATGAATTTGAGAGACAGTTAGGAGAAGGAATATTACA--A--TA | 77904 |
| Ma'sNightMonkey   | AATAATGGCAGTGAAAAGTAGAGAAAT---AGAGCATGAATTTGAGAGATAATTAGGAGGAAGACTATCACAGGATTTA  | 85318 |
| VervetAGM         | AATAATGGCAGTGAAAAGTAGAGAAAT---AGAACATGAATTTGAGAGATAATTAGCAGGAAGGCTATCACAGTATTTA  | 92985 |
| Gorilla           | AATAATGGCAGCGAGAAGTAGAGAAAC---AGATCATGAATTTGAGGGATAATTAGGAGGAAGGCTATCACAAATATTTA | 89557 |
| GrabEatingMacaque | AATAATGGCAGTGAAAAGTAGAGAAAT---AGAACATGAATTTGAGAGATAATTAGGAGGAAGGCTATCACAGTATTTA  | 92416 |
| Macaque           | AATAATGGCAGTGAAAAGTAGAGAAAT---AGAACATGAATTTGAGAGATAATTAGGAGGAAGGCTATCACAGTATTTA  | 93311 |
| PigTailedMacaque  | AATAATGGCAGTGAAAAGTAGAGAAAT---AGAACATGAATTTGAGAGATAATTAGGAGGAAGGCTATCACAGTATTTA  | 92182 |
| Bonobo            | AATAATGTCAGCGAGAAGTAGAGAAAC---AGATCATGAATTTGAGGGACAATTAGGAGGAAGGCTATCACAAATATTTA | 90138 |
| OliveBaboon       | AATAATGGCAGTGAAAAGTAGAGAAAT---AGAACATGAATTTGAGAGATAATTAGGAGGAAGGCTATCACAGTATTTA  | 91764 |
| Orangutan         | AATAATGGCAGTGAAAAGTAGAGAAAT---AGATCATGAATTTGAGGGACAATTAGGAGGAAGGCTATCGCAATATTTA  | 92560 |

Tuesday, May 03, 2022 06:17 PM

| Majority          | GCAATTAGGATGTGTAACAGAAGGGAGAAAAAGAGCTAGGGATGATTATTAAGTTTCTTTCTTGTGTAGCTCACTATATG |        |        |        |        |        |        |        |       |
|-------------------|----------------------------------------------------------------------------------|--------|--------|--------|--------|--------|--------|--------|-------|
|                   | 109690                                                                           | 109700 | 109710 | 109720 | 109730 | 109740 | 109750 | 109760 |       |
| Human             | GCAATTAGGATGTGTAACAGAAGGGAGAAAAAGAGCTAGGGATGCTTATTAAGTTTCTTTCTTGTGTAGCTCACTATACG |        |        |        |        |        |        |        | 91386 |
| Coquerel'sSifaka  | GCAATTAGGATGTGTAGCAGAAGGGAGAAAAAGAGAGATGACTA--TACTAAGTATCTTTCTTGGGTAGCTAAGTATATG |        |        |        |        |        |        |        | 77982 |
| Ma'sNightMonkey   | GCAATTAGGATGTGGAGCAGGAGGGAGAAAAAGAGCTAGGGATTATTATTAAGTTTCTTCTTGTGTAGCTAACTATACG  |        |        |        |        |        |        |        | 85398 |
| VervetAGM         | GCAATTAGGATATGTAACAGAAGGGAGAAAAAGAGCTAGGGATGATTATTAAGTTTCTT----GTGTAGCTCACTATATG |        |        |        |        |        |        |        | 93061 |
| Gorilla           | GCAATTAGGATGTGTAACAGAAGGGAGAAAAAGAGCTAGGGATGCTTATTAAGTTTCTTTCTTGTGTAGCTCACTATACG |        |        |        |        |        |        |        | 89637 |
| GrabEatingMacaque | GCAATTAGGATGTGTAACAGAAGGGAGAAAAAGAGCTAGGGATGATTATTAAGTTTCTT----GTGTAGCTCACTATATG |        |        |        |        |        |        |        | 92492 |
| Macaque           | GCAATTAGGATGTGTAACAGAAGGGAGAAAAAGAGCTAGGGATGATTATTAAGTTTCTT----GTGTAGCTCACTATATG |        |        |        |        |        |        |        | 93387 |
| PigTailedMacaque  | GCAATTAGGATGTGTAACAGAAGGGAGAAAAAGAGCTAGGGATGATTATTAAGTTTCTT----GTGTAGCTCACTATATG |        |        |        |        |        |        |        | 92258 |
| Bonobo            | GCAATTAGGATGTGTAACAGAAGGGAGAAAAAGAGCTAGGGATGCTTATTAAGTTTCTTTCTTGTGTAGCTCACTATACG |        |        |        |        |        |        |        | 90218 |
| OliveBaboon       | GCAATTAGGATGTGTAACAGAAGGGAGAAAAAGAGCTAGGGATGATTATTAAGTTTCTT----GTGTAGCTCACTATATG |        |        |        |        |        |        |        | 91840 |
| Orangutan         | GCAATTAGGATGTGTAACAGAAGGGAGAAAAAGAGCTAGGGATGCTTATCAAGTTTCTTTCTAGTGTAGCTCACTATATA |        |        |        |        |        |        |        | 92640 |

| Majority          | ATTTGTCAGCAGGATTGTTGAGGAAGATAGATATTCATAAATCTGGATTTTCATTCTATGAAAGTAGCTGGCTTTTTTGCC |        |        |        |        |        |        |        |       |
|-------------------|-----------------------------------------------------------------------------------|--------|--------|--------|--------|--------|--------|--------|-------|
|                   | 109770                                                                            | 109780 | 109790 | 109800 | 109810 | 109820 | 109830 | 109840 |       |
| Human             | ATTTGTTAGCAGGATTGTTGAGGAAGATAGATATTCATAAATCTGGATTTTCATTCTATGAAAGTAGCTGGCTTTTTTGCC |        |        |        |        |        |        |        | 91466 |
| Coquerel'sSifaka  | ATTTATCAGCAGGATTATTGAGGAAGGTGGATAGTCATAAATCTGGATTTTGTCTGTGAAAGAAGCCAGCTTTTTTACC   |        |        |        |        |        |        |        | 78062 |
| Ma'sNightMonkey   | ATTTATCAGCAGGATTGTTGAGGAAGATAGATATTCATAAATCTGAATTTTCATTCTTTGAAAGTAGCTGGCTTTT--GCT |        |        |        |        |        |        |        | 85476 |
| VervetAGM         | ATTTGTCAGCAGGATTGTTGAGGAAGATAGATAGTCATAAATCCGGATTTTCATTCTATGAAAGTAGCTGGCTTTTTTGCC |        |        |        |        |        |        |        | 93141 |
| Gorilla           | ATTTGTTAGCAGGATTGTTGAGGAAGATAGATATTCATAAATCTGGATTTTCATTCTATGAAAGTAGCTGGCTTTTTTGCC |        |        |        |        |        |        |        | 89717 |
| GrabEatingMacaque | ATTTGTCAGCAGGATTGTTGAGGAAGATAGATATTCATAAATCTGGATTTTCATTCTATGAAAGTAGCTGGCTTTTTTGCC |        |        |        |        |        |        |        | 92572 |
| Macaque           | ATTTGTCAGCAGGATTGTTGAGGAAGATAGATATTCATAAATCTGGATTTTCATTCTATGAAAGTAGCTGGCTTTTTTGCC |        |        |        |        |        |        |        | 93467 |
| PigTailedMacaque  | ATTTGTCAGCAGGATTGTTGAGGAAGATAGATATTCATAAATCTGGATTTTCATTCTATGAAAGTAGCTGGCTTTTTTGCC |        |        |        |        |        |        |        | 92338 |
| Bonobo            | ATTTGTTAGCAGGATTGTTGAGGAAGATAGATATTCATAAATCTGGATTTTCATTCTATGAAAGTAGCTGGCTTTTTTGCC |        |        |        |        |        |        |        | 90298 |
| OliveBaboon       | ATTTCTCAGCAGGATTGTTGAGGAAGATAGATATTCATAAATCTGGATTTTCATTCTATGAAAGTAGCTGGCTTTTTTGCC |        |        |        |        |        |        |        | 91920 |
| Orangutan         | ATTTGTTAGCAGGATTGTTGAGGAAGATAGATATTCATAAATCTGGATTTTCATTCTATGAAAGTAGCTGGCTTTTTTGCC |        |        |        |        |        |        |        | 92720 |

| Majority          | AGAATGCCTTGCTAGTACAAATGAAAATGTACTT--AAGTCTTGTCACCAATGGCTATGGTAAATGGTGATTTATTTTA |        |        |        |        |        |        |        |       |
|-------------------|---------------------------------------------------------------------------------|--------|--------|--------|--------|--------|--------|--------|-------|
|                   | 109850                                                                          | 109860 | 109870 | 109880 | 109890 | 109900 | 109910 | 109920 |       |
| Human             | AGAATGCCTTGCTAGTACAAATGAAAATGTACTT--AAGTCTTATCACCAGTGGCTATGGTAAATGGTGATTTATTTTA |        |        |        |        |        |        |        | 91545 |
| Coquerel'sSifaka  | AGAATATCTTATCTACTACAAGTAAAATGGGATTGAAGTCTTGTCACCAATGGCTATGCTAAATTCATGGTTTATTTTA |        |        |        |        |        |        |        | 78142 |
| Ma'sNightMonkey   | AGACTGCCTTATCTAGTACAAATGAAAATGCACCT--AGGCCTTGTCACCAATGGCTATGGTAAATGGTGATTTATTTT |        |        |        |        |        |        |        | 85555 |
| VervetAGM         | AGAATGCCATGCTAGTACAAATGAAAATGTACTT--AAGTCTTGTCACCAATGGCTATGGTAAATGGTGATTTATTTTA |        |        |        |        |        |        |        | 93220 |
| Gorilla           | AGAATGCCTTGCTAGTACAAATGAAAATGTACTT--AAGTCTTATCACCAGTGGCTATGGTAAATGGTGATTTATTTTA |        |        |        |        |        |        |        | 89796 |
| GrabEatingMacaque | AGAATGCCATGCTAGTACAAATGAAAATGTACTT--AAGTCTTGTCACCAATGGCTATGGTAAATGGTGATTTATTTTA |        |        |        |        |        |        |        | 92651 |
| Macaque           | AGAATGCCATGCTAGTACAAATGAAAATGTACTT--AAGTCTTGTCACCAATGGCTATGGTAAATGGTGATTTATTTTA |        |        |        |        |        |        |        | 93546 |
| PigTailedMacaque  | AGAATGCCATGCTAGTACAAATGAAAATGTACTT--AAGTCTTGTCACCAATGGCTATGGTAAATGGTGATTTATTTTA |        |        |        |        |        |        |        | 92417 |
| Bonobo            | AGAATGCCTTGCTAGTACAAATGAAAATGTACTT--AAGTCTTATCACCAGTGGCCAGGTAATGGTGATTTATTTTA   |        |        |        |        |        |        |        | 90377 |
| OliveBaboon       | AGAATGCCATGCTAGTACAAATGAAAATGTACTT--AACTCTTGTCACCAATGGCTATGGTAAATGGTGATTTATTTTA |        |        |        |        |        |        |        | 91999 |
| Orangutan         | AGAATGCCTTGCTAGTACAAATGAAAATGTACTT--AAGTCTTGTCACCAATGGCTATGGTAAATGGTGATTTATTTTA |        |        |        |        |        |        |        | 92799 |

Tuesday, May 03, 2022 06:17 PM

| Majority          | AAATCATAAGAAAATTCAAATTTTAAACTGTTACTTTAAAA---GAATTATTTTGTGTTTGAGCTTTGATATTGTTG  |        |        |        |        |        |        |        |       |
|-------------------|--------------------------------------------------------------------------------|--------|--------|--------|--------|--------|--------|--------|-------|
|                   | 109930                                                                         | 109940 | 109950 | 109960 | 109970 | 109980 | 109990 | 110000 |       |
| Human             | AAATCATAAGAAAATTCAAATTTTAAACTGTTACTTTAAAA---GAATTATGTTTGTGTTTGAGCTTTGATATTGTTG |        |        |        |        |        |        |        | 91621 |
| Coquerel'sSifaka  | AAGTCATAAGAAAAT-CAGATTTT-AACTATTATTTTAAAAATAAGAATTATTTTGTGTTGAACTTTGATATTGTTA  |        |        |        |        |        |        |        | 78220 |
| Ma'sNightMonkey   | AAATCATTAGAAAATTCAAATTTTAAACTGTTA-----AAGTATTTTGTGTTTGAGCTTTGATATTGT---        |        |        |        |        |        |        |        | 85619 |
| VervetAGM         | AAATCATAAGAAAATTCAAATTTTAAAGCTGTTACTTTAAAA---GAATTATTTTGTGTTTGAGCTTTGATATTGTTG |        |        |        |        |        |        |        | 93296 |
| Gorilla           | AAATCATAAGAAAATTCAGATTTTAAACTGTTACTTTAAAA---GAATTATGTTTGTGTTTGAGCTTTGATATTGTTG |        |        |        |        |        |        |        | 89872 |
| GrabEatingMacaque | AAATCATAAGAAAATTCAAATTTTAAAGCTGTTACTTTAAAA---GAATTATTTTGTGTTTGAGCTTTGATATTGTTG |        |        |        |        |        |        |        | 92727 |
| Macaque           | AAATCATAAGAAAATTCAAATTTTAAAGCTGTTACTTTAAAA---GAATTATTTTGTGTTTGAGCTTTGATATTGTTG |        |        |        |        |        |        |        | 93622 |
| PigTailedMacaque  | AAATCATAAGAAAATTCAAATTTTAAAGCTGTTACTTTAAAA---GAATTATTTTGTGTTTGAGCTTTGATATTGTTG |        |        |        |        |        |        |        | 92493 |
| Bonobo            | AAATCATAAGAAAATTCAGATTTTAAACTGTTACTTTAAAA---GAATTATGTTTGTGTTTGAGCTTTGATATTGTTG |        |        |        |        |        |        |        | 90453 |
| OliveBaboon       | AAATCATAAAAAAATTCAAATTTTAAAGCTGTTACTTTAAAA---GAATTATTTTGTGTTTGAGCTTTGATATTGTTG |        |        |        |        |        |        |        | 92075 |
| Orangutan         | AAATCATAAGAAAATTCAAATTTTAAACTGTTACTTTAAAA---GAATTATGTTTGTGTTTGAGCTTTGATATTGTTG |        |        |        |        |        |        |        | 92875 |

| Majority          | TTAATAGACATGCTTTCTTTTT-ATAGCCATGAATCATCTTAATGGACAGAAAATGTATGGAAAAATTATTCGTGTTACT |        |        |        |        |        |        |        |       |
|-------------------|----------------------------------------------------------------------------------|--------|--------|--------|--------|--------|--------|--------|-------|
|                   | 110010                                                                           | 110020 | 110030 | 110040 | 110050 | 110060 | 110070 | 110080 |       |
| Human             | TTAATAGACATGCTTTCTTTTT-ATAGCCATGAATCATCTTAATGGACAGAAAATGTATGGAAAAATTATTCGTGTTACT |        |        |        |        |        |        |        | 91700 |
| Coquerel'sSifaka  | TTAATAAGCATTCTTTCTTTTT-ATAGCCATGAACCATCTTAATGGACAGAAAATGTATGGAAAAATTATTCGTGTTACT |        |        |        |        |        |        |        | 78299 |
| Ma'sNightMonkey   | -TAATAGACATCTTTTTTTTTTATAGCCATGAATCATCTTAATGGACAGAAAATGTATGGAAAAATTATTCGTGTTACT  |        |        |        |        |        |        |        | 85698 |
| VervetAGM         | TTAATAGACATACTTTCTTTTT-ATAGCCATGAATCATCTTAATGGACAGAAAATGTATGGAAAAATTATTCGTGTTACT |        |        |        |        |        |        |        | 93375 |
| Gorilla           | TTAATAGACATGCTTTCTTTTT-ATAGCCATGAATCATCTTAATGGACAGAAAATGTATGGAAAAATTATTCGTGTTACT |        |        |        |        |        |        |        | 89951 |
| GrabEatingMacaque | TTAATAGACATGCTTTCTTTTT-ATAGCCATGAATCATCTTAATGGACAGAAAATGTATGGAAAAATTATTCGTGTTACT |        |        |        |        |        |        |        | 92806 |
| Macaque           | TTAATAGACATGCTTTCTTTTT-ATAGCCATGAATCATCTTAATGGACAGAAAATGTATGGAAAAATTATTCGTGTTACT |        |        |        |        |        |        |        | 93701 |
| PigTailedMacaque  | TTAATAGACATGCTTTCTTTTT-ATAGCCATGAATCATCTTAATGGACAGAAAATGTATGGAAAAATTATTCGTGTTACT |        |        |        |        |        |        |        | 92572 |
| Bonobo            | TTAATAGACATGCTTTCTTTTT-ATAGCCATGAATCATCTTAATGGACAGAAAATGTATGGAAAAATTATTCGTGTTACT |        |        |        |        |        |        |        | 90532 |
| OliveBaboon       | TTAATAGACATGCTTTCTTTTT-ATAGCCATGAATCATCTTAATGGACAGAAAATGTATGGAAAAATTATTCGTGTTACT |        |        |        |        |        |        |        | 92154 |
| Orangutan         | TTAATAGACATGCTTTCTTTTT-ATAGCCATGAATCATCTTAATGGACAGAAAATGTATGGAAAAATTATTCGTGTTACT |        |        |        |        |        |        |        | 92954 |

| Majority          | CTGTCTAAACATCAGACTGTACAACTACCTCGAGAGGGACTTGATGATCAAGGGCTAACAAAAGATTTTGGTAATTCCCC |        |        |        |        |        |        |        |       |
|-------------------|----------------------------------------------------------------------------------|--------|--------|--------|--------|--------|--------|--------|-------|
|                   | 110090                                                                           | 110100 | 110110 | 110120 | 110130 | 110140 | 110150 | 110160 |       |
| Human             | CTGTCTAAACATCAGACTGTACAACTACCTCGAGAGGGACTTGATGATCAAGGGCTAACAAAAGATTTTGGTAATTCCCC |        |        |        |        |        |        |        | 91780 |
| Coquerel'sSifaka  | CTTTCTAAACATCAGACTGTACAACTACCTCGAGAGGGACTTGATGATCAAGGGCTAACAAAAGATTTTGGTAATTCCCC |        |        |        |        |        |        |        | 78379 |
| Ma'sNightMonkey   | CTGTCCAAACATCAGACTGTACAACTACCTCGAGAGGGACTTGATGATCAAGGGCTAACAAAAGATTTTGGTAATTCCCC |        |        |        |        |        |        |        | 85778 |
| VervetAGM         | CTGTCTAAACATCAGACTGTACAACTACCTCGAGAGGGACTTGATGATCAAGGGCTAACAAAAGATTTTGGAAATTCCCC |        |        |        |        |        |        |        | 93455 |
| Gorilla           | CTGTCTAAACATCAGACTGTACAACTACCTCGAGAGGGACTTGATGATCAAGGGCTAACAAAAGATTTTGGTAATTCCCC |        |        |        |        |        |        |        | 90031 |
| GrabEatingMacaque | CTGTCTAAACATCAGACTGTGCAACTACCTCGAGAGGGACTTGATGATCAAGGGCTAACAAAAGATTTTGGGAATTCCCC |        |        |        |        |        |        |        | 92886 |
| Macaque           | CTGTCTAAACATCAGACTGTACAACTACCTCGAGAGGGACTTGATGATCAAGGGCTAACAAAAGATTTTGGGAATTCCCC |        |        |        |        |        |        |        | 93781 |
| PigTailedMacaque  | CTGTCTAAACATCAGACTGTACAACTACCTCGAGAGGGACTTGATGATCAAGGGCTAACAAAAGATTTTGGGAATTCCCC |        |        |        |        |        |        |        | 92652 |
| Bonobo            | CTGTCTAAACATCAGACTGTACAACTACCTCGAGAGGGACTTGATGATCAAGGGCTAACAAAAGATTTTGGTAATTCCCC |        |        |        |        |        |        |        | 90612 |
| OliveBaboon       | CTGTCTAAACATCAGACTGTACAACTACCTCGAGAGGGACTTGATGATCAAGGGCTAACAAAAGATTTTGGGAATTCCCC |        |        |        |        |        |        |        | 92234 |
| Orangutan         | CTGTCTAAACATCAGACTGTACAACTACCTCGAGAGGGACTTGATGATCAAGGGCTAACAAAAGATTTTGGTAATTCCCC |        |        |        |        |        |        |        | 93034 |

Tuesday, May 03, 2022 06:17 PM

|                   |                                                                                 |       |
|-------------------|---------------------------------------------------------------------------------|-------|
| Majority          | ATTGCATCGTTTTAAGAAACCTGGATCCAAAAATTTTCAAACATTTTTCCTCCTTCTGCCACTCTCACCTATCTAATA  |       |
|                   | 110170 110180 110190 110200 110210 110220 110230 110240                         |       |
| Human             | ATTGCATCGTTTTAAGAAACCTGGATCCAAAAATTTTCAAACATTTTTCCTCCTTCTGCCACCCTTCACCTATCTAATA | 91860 |
| Coquerel'sSifaka  | ATTGCATCGTTTTAAGAAACCTGGATCCAAAAATTTTCAAACATTTTTCCTCCTTCTGCAACCCTTCACCTGTCTAATA | 78459 |
| Ma'sNightMonkey   | ATTGCATCGTTTTAAGAAACCTGGATCCAAAAATTTTCAAACATTTTTCCTCCTTCTGCAACCCTTCACCTATCTAATA | 85858 |
| VervetAGM         | ATTGCATCGTTTTAAGAAACCTGGATCCAAAAATTTTCAAACATTTTTCCTCCTTCTGCCACTCTTCACCTATCTAATA | 93535 |
| Gorilla           | ATTGCATCGTTTTAAGAAACCTGGATCCAAAAATTTTCAAACATTTTTCCTCCTTCTGCCACCCTTCACCTATCTAATA | 90111 |
| GrabEatingMacaque | ATTGCATCGTTTTAAGAAACCTGGATCCAAAAATTTTCAAACATTTTTCCTCCTTCTGCCACTCTTCACCTATCTAATA | 92966 |
| Macaque           | ATTGCATCGTTTTAAGAAACCTGGATCCAAAAATTTTCAAACATTTTTCCTCCTTCTGCCACTCTTCACCTATCTAATA | 93861 |
| PigTailedMacaque  | ATTGCATCGTTTTAAGAAACCTGGATCCAAAAATTTTCAAACATTTTTCCTCCTTCTGCCACTCTTCACCTATCTAATA | 92732 |
| Bonobo            | ATTGCATCGTTTTAAGAAACCTGGATCCAAAAATTTTCAAACATTTTTCCTCCTTCTGCCACCCTTCACCTATCTAATA | 90692 |
| OliveBaboon       | ATTGCATCGTTTTAAGAAACCTGGATCCAAAAATTTTCAAACATTTTTCCTCCTTCTGCCACTCTTCACCTATCTAATA | 92314 |
| Orangutan         | ATTGCATCGTTTTAAGAAACCTGGATCCAAAAATTTTCAAACATTTTTCCTCCTTCTGCCACTCTTCACCTATCTAATA | 93114 |

|                   |                                                                                   |       |
|-------------------|-----------------------------------------------------------------------------------|-------|
| Majority          | TCCCGTAAGTATATAAGCTAGAGTGATTAAGGAGATACATTCTATTTTGATAAAAATATGAAATTTATTATTAATCTTCA  |       |
|                   | 110250 110260 110270 110280 110290 110300 110310 110320                           |       |
| Human             | TCCCGTAAGTATATAAGCTAGAGTGATTT---GAGATACATTCTATTTTGATAAAAATATGAAATTTATTCTTAATCTTCA | 91937 |
| Coquerel'sSifaka  | TCCCGTAAGTATTTAGGCTGGAGTTTATTAAGGATATATTTTATTTTAATAAAAATATAAAAATTTATTATTAATCTTTG  | 78539 |
| Ma'sNightMonkey   | TCCCGTAAGTATATAAGCTAGAGTGATTAAGGAGATGCATTCTGTTTTGATAAAAATATGAAATTTATTATTAATCTTTA  | 85938 |
| VervetAGM         | TCCCGTAAGTTTATAAGCTAGAGTGATTAAGGAGATACATTCTATTTTGATAAAAATGTGAAATTTATTATTAATCTTCA  | 93615 |
| Gorilla           | TCCCGTAAGTATATAAGCTAGAGTGATTT---GAGATACATTCTATTTTGATAAAAATATGAAGTTTATTACTAATCTTCA | 90188 |
| GrabEatingMacaque | TCCCGTAAGTATATAAGCTAGAGTATATTAAGGAGATACATTCTATTTTGATAAAAATGTGAAATTTATTATTAATCTTCA | 93046 |
| Macaque           | TCCCGTAAGTATATAAGCTAGAGTATATTAAGGAGATACATTCTATTTTGATAAAAATGTGAAATTTATTATTAATCTTCA | 93941 |
| PigTailedMacaque  | TCCCGTAAGTATATAAGCTAGAGTATATTAAGGAGATACATTCTATTTTGATAAAAATGTGAAATTTATTATTAATCTTCA | 92812 |
| Bonobo            | TCCCGTAAGTATATAAGCTAGAGTGATTT---GAGATACATTCTATTTTGATAAAAATATGAAATTTATTATTAATCTTCA | 90769 |
| OliveBaboon       | TCCCGTAAGTATATAAGCTAGAGTGATTAAGGAGATACATTCTATTTTGATAAAAATGTGAAATTTATTATTAATCTTCA  | 92394 |
| Orangutan         | TCCCGTAAGTATATAAGCTACAGTGATTAAGGAGATACATTCTATTTTGATAAAAATACGAAATTTATTATTAATCTTCA  | 93194 |

|                   |                                                                                   |       |
|-------------------|-----------------------------------------------------------------------------------|-------|
| Majority          | CTTTTTCTTCCCATTCAAATTTTCTAGTCCATCAGTAGCAGAAGAGGATCTACGAACACTGTTTCGCTAACACTGGGGGCA |       |
|                   | 110330 110340 110350 110360 110370 110380 110390 110400                           |       |
| Human             | CTTTTTCTTCCCATTCAAATTTTCTAGTCCATCAGTAGCAGAAGAGGATCTACGAACACTGTTTCGCTAACACTGGGGGCA | 92017 |
| Coquerel'sSifaka  | CTTCTTTCCCCATCCAATTTTCTAGTCCCTCAGTAGCAGAAGAGGATCTACGAACACTGTTTGCTAACACTGGGGGCA    | 78619 |
| Ma'sNightMonkey   | CTTTTTCTTCCCATTCAAATTTTCTAGTCCATCAGTAGCAGAAGAGGATCTACGAACACTGTTTGCTAACACTGGGGGCA  | 86018 |
| VervetAGM         | CTTTTTCTTCCCATTCAAATTTTCTAGTCCATCAGTAGCAGAAGAGGATCTACGAACACTGTTTCGCTAACACTGGGGGCA | 93695 |
| Gorilla           | CTTTTTCTTCCCATTCAAATTTTCTAGTCCATCAGTAGCAGAAGAGGATCTACGAACACTGTTTCGCTAACACTGGGGGCA | 90268 |
| GrabEatingMacaque | CTTTTTCTTCCCATTCAAATTTTCTAGTCCATCAGTAGCAGAAGAGGATCTACGAACACTGTTTCGCTAACACTGGGGGCA | 93126 |
| Macaque           | CTTTTTCTTCCCATTCAAATTTTCTAGTCCATCAGTAGCAGAAGAGGATCTACGAACACTGTTTCGCTAACACTGGGGGCA | 94021 |
| PigTailedMacaque  | CTTTTTCTTCCCATTCAAATTTTCTAGTCCATCAGTAGCAGAAGAGGATCTACGAACACTGTTTCGCTAACACTGGGGGCA | 92892 |
| Bonobo            | CTTTTTCTTCCCATTCAAATTTTCTAGTCCATCAGTAGCAGAAGAGGATCTACGAACACTGTTTCGCTAACACTGGGGGCA | 90849 |
| OliveBaboon       | CTTTTTCTTCCCATTCAAATTTTCTAGTCCATCAGTAGCAGAAGAGGATCTACGAACACTGTTTCGCTAACACTGGGGGCA | 92474 |
| Orangutan         | CTTTTTCTTCCCATTCAAATTTTCTAGTCCATCAGTAGCAGAAGAGGATCTACGAACACTGTTTCGCTAACACTGGGGGCA | 93274 |



Tuesday, May 03, 2022 06:17 PM

|                   |                                                                                    |       |
|-------------------|------------------------------------------------------------------------------------|-------|
| Majority          | GGAAGAAGCTATTCAGGCCTTGATTGATCTTCATAATTATAACCTTGGAGAAAACCATCATCTGAGAGTGTCTTTCTCCA   |       |
|                   | 110650 110660 110670 110680 110690 110700 110710 110720                            |       |
| Human             | GGAAGAAGCTATTCAGGCCTTGATTGATCTTCATAATTATAACCTTGGAGAAAACCATCATCTGAGAGTGTCTTTCTCCA   | 92327 |
| Coquerel'sSifaka  | GGAAGAAGCTATCCAGGCCTTGATTGATCTTCATAATTATAACCTTGGTGA AAAACCATCATCTGAGAGTGTCTTTCTCCA | 78939 |
| Ma'sNightMonkey   | GGAAGAAGCTATTCAGGCCTTGATTGATCTTCATAATTATAACCTTGGAGAAAACCATCATCTGAGAGTGTCTTTCTCTA   | 86326 |
| VervetAGM         | GGAAGAAGCTATTCAGGCCTTGATTGATCTTCATAATTATAACCTTGGAGAAAATCATCATCTGAGAGTGTCTTTTCCA    | 94009 |
| Gorilla           | GGAAGAAGCTATTCAGGCCTTGATTGATCTTCATAATTATAACCTTGGAGAAAACCATCATCTGAGAGTGTCTTTCTCCA   | 90582 |
| GrabEatingMacaque | GGAAGAAGCTATTCAGGCCTTGATTGATCTTCATAATTATAACCTTGGAGAAAATCATCATCTGAGAGTGTCTTTTCCA    | 93440 |
| Macaque           | GGAAGAAGCTATTCAGGCCTTGATTGATCTTCATAATTATAACCTTGGAGAAAATCATCATCTGAGAGTGTCTTTTCCA    | 94335 |
| PigTailedMacaque  | GGAAGAAGCTATTCAGGCCTTGATTGATCTTCATAATTATAACCTTGGAGAAAATCATCATCTGAGAGTGTCTTTTCCA    | 93206 |
| Bonobo            | GGAAGAAGCTATTCAGGCCTTGATTGATCTTCATAATTATAACCTTGGAGAAAACCATCATCTGAGAGTGTCTTTCTCCA   | 91163 |
| OliveBaboon       | GGAAGAAGCTATTCAGGCCTTGATTGATCTTCATAATTATAACCTTGGAGAAAATCATCATCTGAGAGTGTCTTTTCCA    | 92788 |
| Orangutan         | AGAAGAAGCTATTCAGGCCTTGATTGATCTTCATAATTATAACCTTGGAGAAAACCATCATCTGAGAGTGTCTTTCTCCA   | 93588 |

|                   |                                                                                    |       |
|-------------------|------------------------------------------------------------------------------------|-------|
| Majority          | AGTCAACAATTTAAAAAGGGGAAGATGAAGATTGGGGGTGAATCACATTGTTTCAGTGTGCATCACCTATT-GACTGTTCAG |       |
|                   | 110730 110740 110750 110760 110770 110780 110790 110800                            |       |
| Human             | AGTCAACAATTTAAAAATGGGAAGATGAAGATTGGGGGTGAATCACATTGTTCAATGTCATCACCTATTTGACTGTTCAG   | 92407 |
| Coquerel'sSifaka  | AGTCAACAATTTAAAAAGTGGGAGATGAAGATTGGGG-TGAATCACATTGTTTCAGTGTGCATCACCTATT-GACTGTTCAG | 79017 |
| Ma'sNightMonkey   | AGTCAACAATTTAAAAAGGGGAAGATGAAGATTGGGGGTGAATCACATTGTTTCAGTGTGCATCACCTATT-GACTGTTCAG | 86405 |
| VervetAGM         | AGTCAACAATTTAAAAAGGGGAAGATGAAGATTGGGGGTGAATCACATTGTTTCAGTGTGCATCACCTATT-GACTGTTCAG | 94088 |
| Gorilla           | AGTCAACAATTTAAAAATGGGAAGATGAAGATTGGGGGTGAATCACATTGTTTCAGTGTGCATCACCTATTTGACTGTTCAG | 90662 |
| GrabEatingMacaque | AGTCAACAATTTAAAAAGGGGAAGATGAAGATTGGGGGTGAATCACATTGTTTCAGTGTGCATCACCTATT-GACTGTTCAG | 93519 |
| Macaque           | AGTCAACAATTTAAAAAGGGGAAGATGAAGATTGGGGGTGAATCACATTGTTTCAGTGTGCATCACCTATT-GACTGTTCAG | 94414 |
| PigTailedMacaque  | AGTCAACAATTTAAAAAGGGGAAGATGAAGATTGGGGGTGAATCACATTGTTTCAGTGTGCATCACCTATT-GACTGTTCAG | 93285 |
| Bonobo            | AGTCAACAATTTAAAAATGGGAAGATGAAGATTGGGGGTGAATCACATTGTTCAATGTCATCACCTATTTGACTGTTCAG   | 91243 |
| OliveBaboon       | AGTCAACAATTTAAAAAGGGGAAGATGAAGATTGGGGGTGAATCACATTGTTTCAGTGTGCATCACCTATT-GACTGTTCAG | 92867 |
| Orangutan         | AGTCAACAATTTAAAAATGGGAAGATGAAGATTGGGGGTGAATCACATTGTTCAATGTCATCACCTATTTGACTGTTCAG   | 93668 |

|                   |                                                                                  |       |
|-------------------|----------------------------------------------------------------------------------|-------|
| Majority          | AAAAGTGGGGACCAGAGTTTGATTTTTTTTGTTTTTTGTTTTTTGGGGTTT-CTTTTTTTTTTT-----CCATGCTGT   |       |
|                   | 110810 110820 110830 110840 110850 110860 110870 110880                          |       |
| Human             | AAAAGTGGGGACCAGAGTTTGATTTTTTTTGTTTTTTGTTTTTTGGGGTTT-CTTTTTTTTTTT-----CCATGCTGT   | 92478 |
| Coquerel'sSifaka  | AAAAGTGGGGACCAGAGTTTGATTTTTTTGTAAATT--TTTTTT-----CTTTTTTTTC-----CCATGCTGT        | 79078 |
| Ma'sNightMonkey   | AAAAGTGGGGACCAGAGTTTGATTTTTTTTCTGT---TTTTTTGGGGTTTCTTTTTTTTTTTTTTCTCCCATGCTGT    | 86481 |
| VervetAGM         | AAAAGTGGGGACCAGAGTTTGATTTTTTTTGTCTTTTGTTTTTTGGGGTTTTTTTTTTTTTTTTTT-----CCATGCTGT | 94161 |
| Gorilla           | AAAAGTGGGGACCAGAGTTTGATTTTTTTTGTTTTTTGTTTTTTGGGGTTT-CTTTTTTTTTTT-----CCATGCTGT   | 90732 |
| GrabEatingMacaque | AAAAGTGGGGACCAGAGTTTGATTTTTTTTGTCTTTTGTTTTTTGGG-----TTTTTTTTTTTTTT-----CCATGCTGT | 93587 |
| Macaque           | AAAAGTGGGGACCAGAGTTTGATTTTTTTTGTCTTTTGTTTTTTGGG-----TTTTTTTTTTTTTT-----CCATGCTGT | 94482 |
| PigTailedMacaque  | AAAAGTGGGGACCAGAGTTTGATTTTTTTTGTCTTTTGTTTTTTGGGGT---TTTTTTTTTTTTTT-----CCATGCTGT | 93355 |
| Bonobo            | AAAAGTGGGGACCAGAGTTTGATTTTTTTTGTTTTTTGTTTTTTGGGGTTT-CTTTTTTTTTTT-----CCATGCTGT   | 91313 |
| OliveBaboon       | AAAAGTGGGGACCAGAGTTTGATTTTTTTTGTCTTTTGTTTTTTGGGGT---TTTTTTTTTTTTTT-----CCATGCTGT | 92937 |
| Orangutan         | AAAAGTGGGGACCAGAGTTTGATTTTTTTTGT---TCTTTTGGGGTTT-CTTTTTTTTTTTTT-----CCATGCTGT    | 93736 |

Tuesday, May 03, 2022 06:17 PM

|                   |                                                                                     |       |
|-------------------|-------------------------------------------------------------------------------------|-------|
| Majority          | TATCATTCCCTTGGTTATAAAAATGAAATGGCATATGTAAAGGCAGAGTTGTTAACTGCTATATTTTCATCTGTTCTATAGGG |       |
|                   | 110890 110900 110910 110920 110930 110940 110950 110960                             |       |
| Human             | TATCATTCCCTTGGTTATAAAAATGAAATGGCATATGTAAAGGCAGAGTTGTTAACTGCTATATTTTCATCTGTTCTATAGGG | 92558 |
| Coquerel'sSifaka  | TATCATTCCCTTGGTTATGAAATGAAATGGCATATGTAAAGGCAGAGTTATTAAGTCTGTTATTTTCATCTGTTCTATAGGG  | 79158 |
| Ma'sNightMonkey   | TATCATTCCCTTGGTTATAAAAATGAAATGGCATATGTAAAGGCAGAGTTATCAACTGCTATATTTTCATCTGTTCTATAGGG | 86561 |
| VervetAGM         | TATCATTCCCTTGGTTATAAAAATGAAATGGCATATGTAAAGGCAGAGTTGTTAACTGCTATATTTTCATCTGTTCTATAGGG | 94241 |
| Gorilla           | TATCATTCCCTTGGTTATAAAAATGAAATGGCATATGTAAAGGCAGAGTTGTTAACTGCTATATTTTCATCTGTTCTATAGGG | 90812 |
| GrabEatingMacaque | TATCATTCCCTTGGTTATAAAAATGAAATGGCATATGTAAAGGCAGAGTTGTTAACTGCTATATTTTCATCTGTTCTATAGGG | 93667 |
| Macaque           | TATCATTCCCTTGGTTATAAAAATGAAATGGCATATGTAAAGGCAGAGTTGTTAACTGCTATATTTTCATCTGTTCTATAGGG | 94562 |
| PigTailedMacaque  | TATCATTCCCTTGGTTATAAAAATGAAATGGCATATGTAAAGGCAGAGTTGTTAACTGCTATATTTTCATCTGTTCTATAGGG | 93435 |
| Bonobo            | TATCATTCCCTTGGTTATAAAAATGAAATGGCATATGTAAAGGCAGAGTTGTTAACTGCTATATTTTCATCTGTTCTATAGGG | 91393 |
| OliveBaboon       | TATCATTCCCTTGGTTATAAAAATGAAATGGCATATGTAAAGGCAGAAATGTTAACTGCTATATTTTCATCTGTTCTATAGGG | 93017 |
| Orangutan         | TATCATTCCCTTGGTTATAAAAATGAAATGGCATACGTAAAGGCAGAGTTGTTAACTGCTATATTTTCATCTGTTCTATAGGG | 93816 |

|                   |                                                                                     |       |
|-------------------|-------------------------------------------------------------------------------------|-------|
| Majority          | AAGCCATTTTTGTCTGTTTAAAAATTTTCAGTTTAAATTTTGCTTTTTTTTTTTTTCTT-----CCTTTCAACTTAGTTGACA |       |
|                   | 110970 110980 110990 111000 111010 111020 111030 111040                             |       |
| Human             | AAGCCATTTT-GTCTGTTTAAAAATTTTCAGTTTAAATTTTGCTTTTTTTTTTTTTTTTTTTTTCCTTTCAACTTAGTTGACA | 92637 |
| Coquerel'sSifaka  | AAGCCATTTT-GTCTGTTTAAAAATTTTCAGTTTAAATTTTGCTTTCTTTTTTTT-----AACTTAGTTGACA           | 79221 |
| Ma'sNightMonkey   | AAGCCATTTTGTCTGTTTAAAAATTTTCAGTTTAAATTTTGCTTTTTTTTTTTT-----TCAACTTAGTTGACA          | 86627 |
| VervetAGM         | AAGCCATTTTGTCTGTTTAAAAATTTTCAGTTTAAATTTTGCTTTTTTTTTTTTTCTT-----CCTTTCAACTTAGTTGACA  | 94315 |
| Gorilla           | AAGCCATTTT-GTCTGTTTAAAAATTTTCAGTTTAAATTTTGCTTTTTTTTTTTTTTT-----CCTTTCAACTTAGTTGACA  | 90884 |
| GrabEatingMacaque | AAGCCATTTTGTCTGTTTAAAAATTTTCAGTTTAAATTTTGCTTTTTTTTTTTT-CCTT-----CCTTTCAACTTAGTTGACA | 93740 |
| Macaque           | AAGCCATTTTGTCTGTTTAAAAATTTTCAGTTTAAATTTTGCTTTTTTTTTTTTTCTT-----CCTTTCAACTTAGTTGACA  | 94636 |
| PigTailedMacaque  | AAGCCATTTTGTCTGTTTAAAAATTTTCAGTTTAAATTTTGCTTTTTTTTTTTT-CCTT-----CCTTTCAACTTAGTTGACA | 93508 |
| Bonobo            | AAGCCATTTT-GTCTGTTTAAAAATTTTCAGTTTAAATTTTGCTTTTTTTTTTTTTTT---TTCCTTTCAACTTAGTTGACA  | 91469 |
| OliveBaboon       | AAGCCATTTTGTCTGTTTAAAAATTTTCAGTTTAAATTTTGCTTTTTTTTTTTTTCTT-----CCTTTCAACTTAGTTGACA  | 93091 |
| Orangutan         | AAGCCATTTT-GTC--TTTAAAAATTTCTGTTTAAATTTTGCTTTTTTTTTTTTTCTT-----CAACTTAGTTGACA       | 93881 |

|                   |                                                                                 |       |
|-------------------|---------------------------------------------------------------------------------|-------|
| Majority          | TACGTGCCTTAAAAAGGAAAACCTAGTGTGCTATTGTGCATTTACTAGAAAAAGGAAATGGTTGTTTAGGGCACACTGT |       |
|                   | 111050 111060 111070 111080 111090 111100 111110 111120                         |       |
| Human             | TACGTGCCTTAAAAAGGAAAACCTAGTGTGCTATTGTGCATTTACTAGAAAAAGGAAATGGTTGTTTAGGGCACACTGT | 92717 |
| Coquerel'sSifaka  | TACGTGCCTTAAAAAGGAAAACCTAGTGTGCTATTGTGCATTTACTAGAAAAAGGAAATGGTTGTTTAGGGCACACTGT | 79301 |
| Ma'sNightMonkey   | TACGTGCCTTAAAAAGGAAAACCTAGTGTGCTATTGTGCATTTACTAGAAAAAGGAAATGGTTGTTTAGGGCACACTGT | 86707 |
| VervetAGM         | TACGTGCCTTAAAAAGGAAAACCTAGTGTGCTATTGTGCATTTACTAGAAAAAGGAAATGGTTGTTTAGGGCACACTGT | 94395 |
| Gorilla           | TACGTGCCTTAAAAAGGAAAACCTAGTGTGCTATTGTGCATTTACTAGAAAAAGGAAATGGTTGTTTAGGGCACACTGT | 90964 |
| GrabEatingMacaque | TACGTGCCTTAAAAAGGAAAACCTAGTGTGCTATTGTGCATTTACTAGAAAAAGGAAATGGTTGTTTAGGGCACACTGT | 93820 |
| Macaque           | TACGTGCCTTAAAAAGGAAAACCTAGTGTGCTATTGTGCATTTACTAGAAAAAGGAAATGGTTGTTTAGGGCACACTGT | 94716 |
| PigTailedMacaque  | TACGTGCCTTAAAAAGGAAAACCTAGTGTGCTATTGTGCATTTACTAGAAAAAGGAAATGGTTGTTTAGGGCACACTGT | 93588 |
| Bonobo            | TATGTGCCTTAAAAAGGAAAACCTAGTGTGCTATTGTGCATTTACTAGAAAAAGGAAATGGTTGTTTAGGGCACACTGT | 91549 |
| OliveBaboon       | TACGTGCCTTAAAAAGGAAAACCTAGTGTGCTATTGTGCATTTACTAGAAAAAGGAAATGGTTGTTTAGGGCACACTGT | 93171 |
| Orangutan         | TACGTGCCTTAAAAAGGAAAACCTAGTGTGCTATTGTGCATTTACTAGAAAAAGGAAATGGTTGTTTAGGGCACACTGT | 93961 |

Tuesday, May 03, 2022 06:17 PM

|                   |                                                                                  |       |
|-------------------|----------------------------------------------------------------------------------|-------|
| Majority          | TATATGGGAATTAATAATATGTTTAGGCAGGGGTGTGTAATAAGGTTAAGTTTTGTTTCTCCTGCTTGGAACTTATTTTG |       |
|                   | 111130 111140 111150 111160 111170 111180 111190 111200                          |       |
| Human             | TATATGGGAATTAATAATATGTTTAGGCAGGGGTGTGTAATAAGGTTAAGTTTTGTTTCTCCTGCTTGGAACTTATTTTG | 92797 |
| Coquerel'sSifaka  | TATATGGGAATTAATAATATGTTTAGGCAGGGGTGTGTAATAAGGTTAAGTTTTGTTTCTCCTGCTTGGAACTTATTTTG | 79381 |
| Ma'sNightMonkey   | TACATGGGAATTAATAATATGTTTAGGCAGGGGTGTGTAATAAGGTTAAGTTTTGTTTCTCCTGCTTGGAACTTATTTTG | 86787 |
| VervetAGM         | TATATGGGAATTAATAATATGTTTAGGCAGGGGTGTGTAATAAGGTTAAGTTTTGTTTCTCCTGCTTGGAACTTATTTTG | 94475 |
| Gorilla           | TATATGGGAATTAATAATATGTTTAGGCAGGGGTGTGTAATAAGGTTAAGTTTTGTTTCTCCTGCTTGGAACTTATTTTG | 91044 |
| GrabEatingMacaque | TATATGGGAATTAATAATATGTTTAGGCAGGGGTGTGTAATAAGGTTAAGTTTTGTTTCTCCTGCTTGGAACTTATTTTG | 93900 |
| Macaque           | TATATGGGAATTAATAATATGTTTAGGCAGGGGTGTGTAATAAGGTTAAGTTTTGTTTCTCCTGCTTGGAACTTATTTTG | 94796 |
| PigTailedMacaque  | TATATGGGAATTAATAATATGTTTAGGCAGGGGTGTGTAATAAGGTTAAGTTTTGTTTCTCCTGCTTGGAACTTATTTTG | 93668 |
| Bonobo            | TATATGGGAATTAATAATATGTTTAGGCAGGGGTGTGTAATAAGGTTAAGTTTTGTTTCTCCTGCTTGGAACTTATTTTG | 91629 |
| OliveBaboon       | TATATGGGAATTAATAATATGTTTAGGCAGGGGTGTGTAATAAGGTTAAGTTTTGTTTCTCCTGCTTGGAACTTATTTTG | 93251 |
| Orangutan         | TATATGGGAATTAATAATATGTTTAGGCAGGGGTGTGTAATAAGGTTAAGTTTTGTTTCTCCTGCTTGGAACTTATTTTG | 94041 |

|                   |                                                                                  |       |
|-------------------|----------------------------------------------------------------------------------|-------|
| Majority          | AATTACTGGCTTGTACACCTTTTTTCTATTTAATCAAATAAGATACATGATATTGAAAGAATAAAGCAGCATTTTTAGTT |       |
|                   | 111210 111220 111230 111240 111250 111260 111270 111280                          |       |
| Human             | AATTACTGGCTTGTACACCTTTTTTCTATTTAATCAAATAAGATACATGATATTGAAAGAATAAAGCAGCATTTTTAGTT | 92877 |
| Coquerel'sSifaka  | AATTATTGACTTGTACACATTTTTTCTATTTAATCAAATAAGATACATGCTACTGAAAGAATAAAGCAGCATTTTTAGGT | 79461 |
| Ma'sNightMonkey   | AATTACTGGCTTGTACACCTTTTTTCTATTTACTCAAATAAGATACATGATATTGAAAGAATAAAGCAGCATTTTTAGTT | 86867 |
| VervetAGM         | AATTACTGGCTT-TCACCTTTTTTGTATTTAATCAAATAAGATACATGATATTGAAAGAATAAAGCAGCATTTTTAGTT  | 94554 |
| Gorilla           | AATTACTGGCTTGTACACCTTTTTTCTATTTAATCAAATAAGATACATGATATTGAAAGAATAAAGCAGCATTTTTAGTT | 91124 |
| GrabEatingMacaque | AATTACTGGCTT-TCACCTTTTTTGTATTTAATCAAATAAGATACATGATATTGAAAGAATAAAGCAGCATTTTTAGTT  | 93979 |
| Macaque           | AATTACTGGCTT-TCACCTTTTTTGTATTTAATCAAATAAGATACATGATATTGAAAGAATAAAGCAGCATTTTTAGTT  | 94875 |
| PigTailedMacaque  | AATTACTGGCTT-TCACCTTTTTTGTATTTAATCAAATAAGATACATGATATTGAAAGAATAAAGCAGCATTTTTAGTT  | 93747 |
| Bonobo            | AATTACTGGCTTGTACACCTTTTTTCTATTTAATCAAATAAGATACATGATATTGAAAGAATAAAGCAGCATTTTTAGTT | 91709 |
| OliveBaboon       | AATTACTGGCTT-TCACCTTTTTTGTATTTAATCAAATAAGATACATGATATTGAAAGAATAAAGCAGCATTTTTAGTT  | 93330 |
| Orangutan         | AATTACTGGCTTGTACACCTTTTTTCTATTTAATCAAATAAGATACATGATATTGAAAGAATAAAGCAGCATTTTTAGTT | 94121 |

|                   |                                                                                   |       |
|-------------------|-----------------------------------------------------------------------------------|-------|
| Majority          | TTTACTACCTTAGGCTTTATTGCTTTAAAAACAACATTGGCCCTTTTGTATCTCACAAATCTGGTCTAGATTCAGTTATGA |       |
|                   | 111290 111300 111310 111320 111330 111340 111350 111360                           |       |
| Human             | TTTACTACCTTAGGCTTTATTGCTTTGAAAACAACATTGGCCCTTTTGTATCTCACAAATCTGGTCTAGATTCAGTTATGA | 92957 |
| Coquerel'sSifaka  | TTCACTACCTTAGGCTTTATTGCTTTAAAAA-AACATTGGCCCTTTTGTATCTCACAAATCTGGTCTAGATTCAGTTATGA | 79540 |
| Ma'sNightMonkey   | TTTACTACCTTAGGCTTTATTGCTTTAAAAA-AACATTGGCCCTTTTGTATCTCACAAATCTGGTCTAGATTCAGTTATGA | 86946 |
| VervetAGM         | TTTACTACCTTAGGCTTTATTGCTTTAAAAACAACATTGGCCCTTTTGTATCTCACAAATCTGGTCTAGATTCAGTTATGA | 94634 |
| Gorilla           | TTTACTACCTTAGGCTTTATTGCTTTGAAAACAACATTGGCCCTTTTGTATCTCACAAATCTGGTCTAGATTCAGTTATGA | 91204 |
| GrabEatingMacaque | TTTACTACCTTAGGCTTTATTGCTTTAAAAACAACATTGGCCCTTTTGTATCTCACAAATCTGGTCTAGATTCAGTTATGA | 94059 |
| Macaque           | TTTACTACCTTAGGCTTTATTGCTTTAAAAACAACATTGGCCCTTTTGTATCTCACAAATCTGGTCTAGATTCAGTTATGA | 94955 |
| PigTailedMacaque  | TTTACTACCTTAGGCTTTATTGCTTTAAAAACAACATTGGCCCTTTTGTATCTCACAAATCTGGTCTAGATTCAGTTATGA | 93827 |
| Bonobo            | TTTACTACCTTAGGCTTTATTGCTTTGAAAACAACATTGGCCCTTTTGTATCTCACAAATCTGGTCTAGATTCAGTTATGA | 91789 |
| OliveBaboon       | TTTACTACCTTAGGCTTTATTGCTTTAAAAACAACATTGGCCCTTTTGTATCTCACAAATCTGGTCTAGATTCAGTTATGA | 93410 |
| Orangutan         | TTTACTACCTTAGGCTTTATTGCTTTGAAAACAACATTGGCCCTTTTGTATCTCACAAATCTGGTCTAGATTCAGTTATGA | 94201 |



Tuesday, May 03, 2022 06:17 PM

| Majority          | ATGTAGGCATTAGTTAAAATTAACAAGATGCAGAGTATTAATTTCTTAAGACAACAAAGTGATTTCTGTAAGTTTGAGCC |        |        |        |        |        |        |        |  |       |
|-------------------|----------------------------------------------------------------------------------|--------|--------|--------|--------|--------|--------|--------|--|-------|
|                   | 111370                                                                           | 111380 | 111390 | 111400 | 111410 | 111420 | 111430 | 111440 |  |       |
| Human             | ATGTAGGCATTAGTTAAAATTAACAAGATGCAGAGTATTAATTTCTTAAGACAACAAAGTGATTTCTGTAAGTTTGAGCC |        |        |        |        |        |        |        |  | 93037 |
| Coquerel'sSifaka  | ATGTAGGCATTAGTTAAAATTAACAAGATGCAGAGTATTAATTTCTTAAGACAACAAAGTGATTTCTGTAAGTTTGAGCC |        |        |        |        |        |        |        |  | 79620 |
| Ma'sNightMonkey   | ATGTAGGCATTAGTTAAAATTAACAAGATGCAGAGTATTAATTTCTTAAGACAACAAAGTGATTTCTGTAAGTTTGAGCC |        |        |        |        |        |        |        |  | 87026 |
| VervetAGM         | ATGTAGGCATTAGTTAAAATTAACAAGATGCAGAGTATTAATTTCTTAAGACAACAAAGTGATTTCTGTAAGTTTGAGCC |        |        |        |        |        |        |        |  | 94714 |
| Gorilla           | ATGTAGGCATTAGTTAAAATTAACAAGATGCAGAGTATTAATTTCTTAAGACAACAAAGAGATTTCTGTAAGTTTGAGCC |        |        |        |        |        |        |        |  | 91284 |
| GrabEatingMacaque | ATGTAGGCATTAGTTAAAATTAACAAGATGCAGAGTATTAATTTCTTAAGACAACAAAGTGATTTCTGTAAGTTTGAGCC |        |        |        |        |        |        |        |  | 94139 |
| Macaque           | ATGTAGGCATTAGTTAAAATTAACAAGATGCAGAGTATTAATTTCTTAAGACAACAAAGTGAT                  |        |        |        |        |        |        |        |  | 95018 |
| PigTailedMacaque  | ATGTAGGCATTAGTTAAAATTAACAAGATGCAGAGTATTAATTTCTTAAGACAACAAAGTGATTTCTGTAAGTTTGAGCC |        |        |        |        |        |        |        |  | 93907 |
| Bonobo            | ATGTAGGCATTAGTTAAAATTAACAAGATGCAGAGTATTAATTTCTTAAGACAACAAAGTGATTTCTGTAAGTTTGAGCC |        |        |        |        |        |        |        |  | 91869 |
| OliveBaboon       | ATGTAGGCATTAGTTAAAATTAACAAGATGCAGAGTATTAATTTCTTAAGACAACAAAGTGATTTCTGTAAGTTTGAGCC |        |        |        |        |        |        |        |  | 93490 |
| Orangutan         | ATGTAGGCATTAGTTAAAATTAACAAGATGCAGAGTATTAATTTCTTAAGACAACAAAGTGATTTCTGTAAGTTTGAGCC |        |        |        |        |        |        |        |  | 94281 |

| Majority          | CTATGTGGAAAGCATTGTGGAATCTTAACCTTTTTGTACACACTCTTGTGGGACGTATCATATAAATGTCAGCACTAAGT |        |        |        |        |        |        |        |  |       |
|-------------------|----------------------------------------------------------------------------------|--------|--------|--------|--------|--------|--------|--------|--|-------|
|                   | 111450                                                                           | 111460 | 111470 | 111480 | 111490 | 111500 | 111510 | 111520 |  |       |
| Human             | CTATGTGGAAAGCATTGTGGAATCTTAACCTTTTTGTACACACTCTTGTGGGACGTATCATATAAATGTCAGCACTAAGT |        |        |        |        |        |        |        |  | 93117 |
| Coquerel'sSifaka  | CTATGTGGAAAGCATTGTGGAATCTTAACCTTTTTGTACACACTCTTGTGGGACGTATCATATAAATGTCAGCACTAAGT |        |        |        |        |        |        |        |  | 79700 |
| Ma'sNightMonkey   | CTATGTGGAAAGCATTGTGGAATCTTAACCTTTTTGTACACACTCTTGTGGGACGTATCATATAAATGTCAGCACTAAGT |        |        |        |        |        |        |        |  | 87106 |
| VervetAGM         | CTATGTGGAAAGCATTGTGGAATCTTAACCTTTTTGTACACACTCTTGTGGGACGTATCATATAAATGTCAGCACTAAGT |        |        |        |        |        |        |        |  | 94794 |
| Gorilla           | CTATGTGGAAAGCATTGTGGAATCTTAACCTTTTTGTACACACTCTTGTGGGACGTATCATATAAATGTCAGCACTAAGT |        |        |        |        |        |        |        |  | 91364 |
| GrabEatingMacaque | CTATGTGGAAAGCATTGTGGAATCTTAACCTTTTTGTACACACTCTTGTGGGACGTATCATATAAATGTCAGCACTAAGT |        |        |        |        |        |        |        |  | 94219 |
| Macaque           |                                                                                  |        |        |        |        |        |        |        |  | 95018 |
| PigTailedMacaque  | CTATGTGGAAAGCATTGTGGAATCTTAACCTTTTTGTACACACTCTTGTGGGACGTATCATATAAATGTCAGCACTAAGT |        |        |        |        |        |        |        |  | 93987 |
| Bonobo            | CTATGTGGAAAGCATTGTGGAATCTTAACCTTTTTGTACACACTCTTGTGGGACGTATCATATAAATGTCAGCACTAAGT |        |        |        |        |        |        |        |  | 91949 |
| OliveBaboon       | CTATGTGGAAAGCATTGTGGAATCTTAACCTTTTTGTACACACTCTTGTGGGACGTATCATATAAATGTCAGCACTAAGT |        |        |        |        |        |        |        |  | 93570 |
| Orangutan         | CTATGTGGAAAGCATTGTGGAATCTTAACCTTTTTGTACACACTCTTGTGGGACGTATCATATAAATGTCAGCACTAAGT |        |        |        |        |        |        |        |  | 94361 |

| Majority          | AATGCTTGTTTGTGGCTGAATATTTTTCGTAGATGTTTTGAAGTTGACATGACTTACGTGCATTTAAATATATATTGC |        |        |        |        |        |        |        |  |       |
|-------------------|--------------------------------------------------------------------------------|--------|--------|--------|--------|--------|--------|--------|--|-------|
|                   | 111530                                                                         | 111540 | 111550 | 111560 | 111570 | 111580 | 111590 | 111600 |  |       |
| Human             | AATGCTTGTTTGTGGCTGAATATTTTTCGTAGATGTTTTGAAGTTGACATGACTTACGTGCATTTAAATATATATTGC |        |        |        |        |        |        |        |  | 93197 |
| Coquerel'sSifaka  | AATGCTTGTTTGTGGCTGAATATTTTTCGTAGATGTTTTGAAGTTGACATGACTTATGTGCATTTAAATATATATTGC |        |        |        |        |        |        |        |  | 79780 |
| Ma'sNightMonkey   | AATGCTTGTTTGTGGCTGAATATTTTTCGTAGATGTTTTGAAGTTGACATGACTTACGTGCATTTAAATATATATTGC |        |        |        |        |        |        |        |  | 87186 |
| VervetAGM         | AATGCTTGTTTGTGGCTGAATATTTTTCGTAGATGTTTTGAAGTTGACATGACTTACGTGCATTTAAATATATATTGC |        |        |        |        |        |        |        |  | 94874 |
| Gorilla           | AATGCTTGTTTGTGGCTGAATATTTTTCGTAGATGTTTTGAAGTTGACATGACTTACGTGCATTTAAATATATATTGC |        |        |        |        |        |        |        |  | 91444 |
| GrabEatingMacaque | AATGCTTGTTTGTGGCTGAATATTTTTCGTAGATGTTTTGAAGTTGACATGACTTACGTGCATTTAAATATATATTGC |        |        |        |        |        |        |        |  | 94299 |
| Macaque           |                                                                                |        |        |        |        |        |        |        |  | 95018 |
| PigTailedMacaque  | AATGCTTGTTTGTGGCTGAATATTTTTCGTAGATGTTTTGAAGTTGACATGACTTACGTGCATTTAAATATATATTGC |        |        |        |        |        |        |        |  | 94067 |
| Bonobo            | AATGCTTGTTTGTGGCTGAATATTTTTCGTAGATGTTTTGAAGTTGACATGACTTACGTGCATTTAAATATATATTGC |        |        |        |        |        |        |        |  | 92029 |
| OliveBaboon       | AATGCTTGTTTGTGGCTGAATATTTTTCGTAGATGTTTTGAAGTTGACATGACTTACGTGCATTTAAATATATATTGC |        |        |        |        |        |        |        |  | 93650 |
| Orangutan         | AATGCTTGTTTGTGGCTGAATATTTTTCGTAGATGTTTTGAAGTTGACATGACTTACGTGCATTTAAATATATATTGC |        |        |        |        |        |        |        |  | 94441 |

Tuesday, May 03, 2022 06:17 PM

|                   |                                                                                   |       |
|-------------------|-----------------------------------------------------------------------------------|-------|
| Majority          | CATCCTTAGTTTGTAAATTAAGATTTGGAATATGGTTGTGGATTTCTGAGCATGTGCAGACTGGTCTAGCTAGTTCAGGAA |       |
|                   | 111610 111620 111630 111640 111650 111660 111670 111680                           |       |
| Human             | CATCCTTAGTTTGTAAATTAAGATTTGGAATATGGTTGTGGATTTCTGAGCATGTGCAGACTGGTCTAGCTAGTTCAGGAA | 93277 |
| Coquerel'sSifaka  | CATCCTTAGTTTGTAAATTAAGATTTGGAATATGGTTGTGGATTTCTGAGCATGTGCAGACTGGTCTAGCTAGTTCAGAAA | 79860 |
| Ma'sNightMonkey   | CATCCTTAGTTTGTAAATTAAGATTTGGAATATGGTTGTGGATTTCTGAGCATGTGCAGACTGGTCTAGCTAGTTCAGGAA | 87266 |
| VervetAGM         | CATCCTTAGTTTGTAAATTAAGATTTGGAATATGGTTGTGGATTTCTGAGCATGTGCAGACTGGTCTAGCTAGTTCAGGAA | 94954 |
| Gorilla           | CATCCTTAGTTTGTAAATTAAGATTTGGAATATGGTTGTGGATTTCTGAGCATGTGCAGACTGGTCTAGCTAGTTCAGGAA | 91524 |
| GrabEatingMacaque | CATCCTTAGTTTGTAAATTAAGATTTGGAATATGGTTGTGGATTTCTGAGCATGTGCAGACTGGTCTAGCTAGTTCAGGAA | 94379 |
| Macaque           |                                                                                   | 95018 |
| PigTailedMacaque  | CATCCTTAGTTTGTAAATTAAGATTTGGAATATGGTTGTGGATTTCTGAGCATGTGCAGACTGGTCTAGCTAGTTCAGGAA | 94147 |
| Bonobo            | CATCCTTAGTTTGTAAATTAAGATTTGGAATATGGTTGTGGATTTCTGAGCATGTGCAGACTGGTCTAGCTAGTTCAGGAA | 92109 |
| OliveBaboon       | CATCCTTAGTTTGTAAATTAAGATTTGGAATATGGTTGTGGATTTCTGAGCATGTGCAGACTGGTCTAGCTAGTTCAGGAA | 93730 |
| Orangutan         | CATCCTTAGTTTGTAAATTAAGATTTGGAATATGGTTGTGGATTTCTGAGCATGTGCAGACTGGTCTAGCTAGTTCAGGAA | 94521 |

|                   |                                                                                  |       |
|-------------------|----------------------------------------------------------------------------------|-------|
| Majority          | CTGGTGCATGTATTTTTCAAAGATAAAGAAAGTGTACTGCGAAAATATGCAGGAAGATTAATTTTGTGGCAGTTTTCTAA |       |
|                   | 111690 111700 111710 111720 111730 111740 111750 111760                          |       |
| Human             | CTGGTGCATGTATTTTTCAAAGATAAAGAAAGTGTACTGCGAAAATATGCAGGAAGATTAATTTTGTGGCAGTTTTCTAA | 93357 |
| Coquerel'sSifaka  | CTGGTGCATGTATTTTTCAAAGATAAAGAAAGTGTACTGCGAAAATTTGCAGGAAGATTAATTTTGTGGCAGTTTTCTAA | 79940 |
| Ma'sNightMonkey   | CTGGTGCATGTATTTTTCAAAGATAAAGAAAGTGTACTGCGAAAATATGCAGGAAGATTAATTTTGTGGCAGTTTTCTAA | 87346 |
| VervetAGM         | CTGGTGCATGTATTTTTCAAAGATAAAGAAAGTGTACTGCGAAAATATGCAGGAAGATTAATTTTGTGGCAGTTTTCTAA | 95034 |
| Gorilla           | CTGGTGCATGTATTTTTCAAAGATAAAGAAAGTGTACTGCGAAAATATGCAGGAAGATTAATTTTGTGGCAGTTTTCTAA | 91604 |
| GrabEatingMacaque | CTGGTGCATGTATTTTTCAAAGATAAAGAAAGTGTACTGCGAAAATATGCAGGAAGATTAATTTTGTGGCAGTTTTCTAA | 94459 |
| Macaque           |                                                                                  | 95018 |
| PigTailedMacaque  | CTGGTGCATGTATTTTTCAAAGATAAAGAAAGTGTACTGCGAAAATATGCAGGAAGATTAATTTTGTGGCAGTTTTCTAA | 94227 |
| Bonobo            | CTGGTGCATGTATTTTTCAAAGATAAAGAAAGTGTACTGCGAAAATATGCAGGAAGATTAATTTTGTGGCAGTTTTCTAA | 92189 |
| OliveBaboon       | CTGGTGCATGTATTTTTCAAAGATAAAGAAAGTGTACTGCGAAAATATGCAGGAAGATTAATTTTGTGGCAGTTTTCTAA | 93810 |
| Orangutan         | CTGGTGCATGTATTTTTCAAAGATAAAGAAAGTGTACTGCGAAAATATGCAGGAAGATTAATTTTGTGGCAGTTTTCTAA | 94601 |

|                   |                                                                                  |       |
|-------------------|----------------------------------------------------------------------------------|-------|
| Majority          | AACTGACAACCAGGTGGGACCAAAGTTTATGTGCCTTTAGTCTTAATTTACCTTGCATTGTAATATTCAGTTTTAATAAA |       |
|                   | 111770 111780 111790 111800 111810 111820 111830 111840                          |       |
| Human             | AACTGACAACCAGGTGGGACCAAAGTTTATGTGCCTTTAGTCTTAATTTACCTTGCATTGTAATATTCAGTTTTAATAAA | 93437 |
| Coquerel'sSifaka  | AACTGACAACCAGGTGGGACCAAAGTTTATGTGCCTTTAGTCTTAATTTACCTTGCATTGTAATATTCAGTTTTAATAAA | 80020 |
| Ma'sNightMonkey   | AACTGACAACCAGGTGGGACCAAAGTTTATGTGCCTTTAGTCTTAATTTACCTTGCATTGTAATATTCAGTTTTAATAAA | 87426 |
| VervetAGM         | AACTGACAACCAGGTGGGACCAAAGTTTATGTGCCTTTAGTCTTAATTTACCTTGCATTGTAATATTCAGTTTTAATAAA | 95114 |
| Gorilla           | AGCTGACAACCAGGTGGGACCAAAGTTTATGTGCCTTTAGTCTTAATTTACCTTGCATTGTAATATTCAGTTTTAATAAA | 91684 |
| GrabEatingMacaque | AACTGACAACCAGGTGGGACCAAAGTTTATGTGCCTTTAGTCTTAATTTACCTTGCATTGTAATATTCAGTTTTAATAAA | 94539 |
| Macaque           |                                                                                  | 95018 |
| PigTailedMacaque  | AACTGACAACCAGGTGGGACCAAAGTTTATGTGCCTTTAGTCTTAATTTACCTTGCATTGTAATATTCAGTTTTAATAAA | 94307 |
| Bonobo            | AACTGACAACCAGGTGGGACCAAAGTTTATGTGCCTTTAGTCTTAATTTACCTTGCATTGTAATATTCAGTTTTAATAAA | 92269 |
| OliveBaboon       | AACTGACAACCAGGTGGGACCAAAGTTTATGTGCCTTTAGTCTTAATTTACCTTGCATTGTAATATTCAGTTTTAATAAA | 93890 |
| Orangutan         | AACTGACAACCAGGTGGGACCAAAGTTTATGTGCCTTTAGTCTTAATTTACCTTGCATTGTAATATTCAGTTTTAATAAA | 94681 |

Tuesday, May 03, 2022 06:17 PM

| Majority          | TCTTCAA | AATAT  | TTTTG  | TATTT  | TAGGA  | ATAGAT | CTGACT | TTAATA | AAAAA | CATGG | CTCAGA | ATCTAC | AGGTCA | AATTA | ATTTG |       |
|-------------------|---------|--------|--------|--------|--------|--------|--------|--------|-------|-------|--------|--------|--------|-------|-------|-------|
|                   | 111850  | 111860 | 111870 | 111880 | 111890 | 111900 | 111910 | 111920 |       |       |        |        |        |       |       |       |
| Human             | TCTTCAA | AATAT  | TTTTG  | TATTT  | TAGGA  | ATAGAT | CTGACT | TTAATA | AAAAA | CATGG | CTCAGA | ATCTAC | AGGTCA | AATTA | ATTTG | 93517 |
| Coquerel'sSifaka  | TCTTCAA | AATAT  | TTTTG  | TATTT  | TAGGA  | ATAGAT | CTGACT | TTAATA | AAAAA | CATGG | CTCAGA | ATCTAC | AGGTCA | AATTA | ATTTG | 80100 |
| Ma'sNightMonkey   | TCTTCAA | AATAT  | TTTTG  | TATTT  | TAGGA  | ATAGAT | CTGACT | TTAATA | AAAAA | CATGG | CTCAGA | ATCTAC | AGGTCA | AATTA | ATTTG | 87506 |
| VervetAGM         | TCTTCAA | AATAT  | TTTTG  | TATTT  | TAGGA  | ATAGAT | CTGACT | TTAATA | AAAAA | CATGG | CTCAGA | ATCTAC | AGGTCA | AATTA | ATTTG | 95194 |
| Gorilla           | TCTTCAA | AATAT  | TTTTG  | TATTT  | TAGGA  | ATAGAT | CTGACT | TTAATA | AAAAA | CATGG | CTCAGA | ATCTAC | AGGTCA | AATTA | ATTTG | 91764 |
| GrabEatingMacaque | TCTTCAA | AATAT  | TTTTG  | TATTT  | TAGGA  | ATAGAT | CTGACT | TTAATA | AAAAA | CATGG | CTCAGA | ATCTAC | AGGTCA | AATTA | ATTTG | 94619 |
| Macaque           |         |        |        |        |        |        |        |        |       |       |        |        |        |       |       | 95018 |
| PigTailedMacaque  | TCTTCAA | AATAT  | TTTTG  | TATTT  | TAGGA  | ATAGAT | CTGACT | TTAATA | AAAAA | CATGG | CTCAGA | ATCTAC | AGGTCA | AATTA | ATTTG | 94387 |
| Bonobo            | TCTTCAA | AATAT  | TTTTG  | TATTT  | TAGGA  | ATAGAT | CTGACT | TTAATA | AAAAA | CATGG | CTCAGA | ATCTAC | AGGTCA | AATTA | ATTTG | 92349 |
| OliveBaboon       | TCTTCAA | AATAT  | TTTTG  | TATTT  | TAGGA  | ATAGAT | CTGACT | TTAATA | AAAAA | CATGG | CTCAGA | ATCTAC | AGGTCA | AATTA | ATTTG | 93970 |
| Orangutan         | TCTTCAA | AATAT  | TTTTG  | TATTT  | TAGGA  | ATAGAT | CTGACT | TTAATA | AAAAA | CATGG | CTCAGA | ATCTAC | AGGTCA | AATTA | ATTTG | 94761 |

| Majority          | AACAGT | TCTTG  | TCAAT  | CTGA   | ATTG   | TGATT  | CTGTT  | TAAAT  | GACCA | AACT | TTTTG | GAAAT | TGAT | GTACT | TAGTT | CAAGAT |       |
|-------------------|--------|--------|--------|--------|--------|--------|--------|--------|-------|------|-------|-------|------|-------|-------|--------|-------|
|                   | 111930 | 111940 | 111950 | 111960 | 111970 | 111980 | 111990 | 112000 |       |      |       |       |      |       |       |        |       |
| Human             | AACAGT | TCTTG  | TCAAT  | CTGA   | ATTG   | TGATT  | CTGTT  | TAAAT  | GACCA | AACT | TTTTG | GAAAT | TGAT | GTACT | TAGTT | CAAGAT | 93597 |
| Coquerel'sSifaka  | AACAGT | TCTTG  | TCAAT  | CTGA   | ATTG   | TGATT  | CTGTT  | TAAAT  | GACCA | AACT | TTTTG | GAAAT | TGAT | GTACT | TAGTT | CAAGAT | 80180 |
| Ma'sNightMonkey   | AACAGT | TCTTG  | TCAAT  | CTGA   | ATTG   | TGATT  | CTGTT  | TAAAT  | GACCA | AACT | TTTTG | GAAAT | TGAT | GTACT | TAGTT | CAAGAT | 87586 |
| VervetAGM         | AACAGT | TCTTG  | TCAAT  | CTGA   | ATTG   | TGATT  | CTGTT  | TAAAT  | GACCA | AACT | TTTTG | GAAAT | TGAT | GTACT | TAGTT | CAAGAT | 95274 |
| Gorilla           | AACAGT | TCTTG  | TCAAT  | CTGA   | ATTG   | TGATT  | CTGTT  | TAAAT  | GACCA | AACT | TTTTG | GAAAT | TGAT | GTACT | TAGTT | CAAGAT | 91844 |
| GrabEatingMacaque | AACAGT | TCTTG  | TCAAT  | CTGA   | ATTG   | TGATT  | CTGTT  | TAAAT  | GACCA | AACT | TTTTG | GAAAT | TGAT | GTACT | TAGTT | CAAGAT | 94699 |
| Macaque           |        |        |        |        |        |        |        |        |       |      |       |       |      |       |       |        | 95018 |
| PigTailedMacaque  | AACAGT | TCTTG  | TCAAT  | CTGA   | ATTG   | TGATT  | CTGTT  | TAAAT  | GACCA | AACT | TTTTG | GAAAT | TGAT | GTACT | TAGTT | CAAGAT | 94467 |
| Bonobo            | AACAGT | TCTTG  | TCAAT  | CTGA   | ATTG   | TGATT  | CTGTT  | TAAAT  | GACCA | AACT | TTTTG | GAAAT | TGAT | GTACT | TAGTT | CAAGAT | 92429 |
| OliveBaboon       | AACAGT | TCTTG  | TCAAT  | CTGA   | ATTG   | TGATT  | CTGTT  | TAAAT  | GACCA | AACT | TTTTG | GAAAT | TGAT | GTACT | TAGTT | CAAGAT | 94050 |
| Orangutan         | AACAGT | TCTTG  | TCAAT  | CTGA   | ATTG   | TGATT  | CTGTT  | TAAAT  | GACCA | AACT | TTTTG | GAAAT | TGAT | GTACT | TAGTT | CAAGAT | 94841 |

| Majority          | TCATAG | ATCTG  | TATCT  | ATGTAG | ACAGA  | ATGGT  | CATGT  | ATATAT | TTTCT | ATTAG | TGAGT | TTTTT | TACAT | CTTTA | GAAAT | TGTA |       |
|-------------------|--------|--------|--------|--------|--------|--------|--------|--------|-------|-------|-------|-------|-------|-------|-------|------|-------|
|                   | 112010 | 112020 | 112030 | 112040 | 112050 | 112060 | 112070 | 112080 |       |       |       |       |       |       |       |      |       |
| Human             | TCATAG | ATCTG  | TATCT  | ATGTAG | ACAGA  | ATGGT  | CATGT  | ATATAT | TTTCT | ATTAG | TGAGT | TTTTT | TACAT | CTTTA | GAAAT | TGTA | 93677 |
| Coquerel'sSifaka  | TCATAG | ATCTG  | TATCT  | ATGTAG | ACAGA  | ATGGT  | CATGT  | ATATAT | TTTCT | ATTAG | TGAGT | TTTTT | TACAT | CTTTA | GAAAT | TGTA | 80260 |
| Ma'sNightMonkey   | TCATAG | ATCTG  | TATCT  | ATGTAG | ACAGA  | ATGGT  | CATGT  | ATATAT | TTTCT | ATTAG | TGAGT | TTTTT | TACAT | CTTTA | GAAAT | TGTA | 87666 |
| VervetAGM         | TCATAG | ATCTG  | TATCT  | ATGTAG | ACAGA  | ATGGT  | CATGT  | ATATAT | TTTCT | ATTAG | TGAGT | TTTTT | TACAT | CTTTA | GAAAT | TGTA | 95354 |
| Gorilla           | TCATAG | ATCTG  | TATCT  | ATGTAG | ACAGA  | ATGGT  | CATGT  | ATATAT | TTTCT | ATTAG | TGAGT | TTTTT | TACAT | CTTTA | GAAAT | TGTA | 91924 |
| GrabEatingMacaque | TCATAG | ATCTG  | TATCT  | ATGTAG | ACAGA  | ATGGT  | CATGT  | ATATAT | TTTCT | ATTAG | TGAGT | TTTTT | TACAT | CTTTA | GAAAT | TGTA | 94779 |
| Macaque           |        |        |        |        |        |        |        |        |       |       |       |       |       |       |       |      | 95018 |
| PigTailedMacaque  | TCATAG | ATCTG  | TATCT  | ATGTAG | ACAGA  | ATGGT  | CATGT  | ATATAT | TTTCT | ATTAG | TGAGT | TTTTT | TACAT | CTTTA | GAAAT | TGTA | 94547 |
| Bonobo            | TCATAG | ATCTG  | TATCT  | ATGTAG | ACAGA  | ATGGT  | CATGT  | ATATAT | TTTCT | ATTAG | TGAGT | TTTTT | TACAT | CTTTA | GAAAT | TGTA | 92509 |
| OliveBaboon       | TCATAG | ATCTG  | TATCT  | ATGTAG | ACAGA  | ATGGT  | CATGT  | ATATAT | TTTCT | ATTAG | TGAGT | TTTTT | TACAT | CTTTA | GAAAT | TGTA | 94130 |
| Orangutan         | TCATAG | ATCTG  | TATCT  | ATGTAG | ACAGA  | ATGGT  | CATGT  | ATATAT | TTTCT | ATTAG | TGAGT | TTTTT | TACAT | CTTTA | GAAAT | TGTA | 94921 |

Tuesday, May 03, 2022 06:17 PM

| Majority          | AAATTCAGTATAGTTTGAAAGCGGCACAATTA AAAAATTAATTTTCTAACAAAGTTGGGAGGTTTGATGGTTGTTTAATTT |        |        |        |        |        |        |        |  |       |
|-------------------|------------------------------------------------------------------------------------|--------|--------|--------|--------|--------|--------|--------|--|-------|
|                   | 112090                                                                             | 112100 | 112110 | 112120 | 112130 | 112140 | 112150 | 112160 |  |       |
| Human             | AAATTCAGTATAGTTTGAAAGCGGCACAATTA AAAAATTAATTTTCTAACAAAGTTGGGAGGTTTGATGGTTGTTTAATTT |        |        |        |        |        |        |        |  | 93757 |
| Coquerel'sSifaka  | AAATTCAGTATAGTTTGAAAGCGGCACAATTA AAAAATTAATTTTCTAACAAAGTTGGGAGGTTTGATGGTTGTTTAATTT |        |        |        |        |        |        |        |  | 80340 |
| Ma'sNightMonkey   | AAATTCAGTATAGTTTGAAAGCGGCACAATTA AAAAATTAATTTTCTAACAAAGTTGGGAGGTTTGATGGTTGTTTAATTT |        |        |        |        |        |        |        |  | 87746 |
| VervetAGM         | AAATTCAGTATAGTTTGAAAGCGGCACAATTA AAAAATTAATTTTCTAACAAAGTTGGGAGGTTTGATGGTTGTTTAATTT |        |        |        |        |        |        |        |  | 95434 |
| Gorilla           | AAATTCAGTATAGTTTGAAAGCGGCACAATTA AAAAATTAATTTTCTAACAAAGTTGGGAGGTTTGATGGTTGTTTAATTT |        |        |        |        |        |        |        |  | 92004 |
| GrabEatingMacaque | AAATTCAGTATAGTTTGAAAGCGGCACAATTA AAAAATTAATTTTCTAACAAAGTTGGGAGGTTTGATGGTTGTTTAATTT |        |        |        |        |        |        |        |  | 94859 |
| Macaque           |                                                                                    |        |        |        |        |        |        |        |  | 95018 |
| PigTailedMacaque  | AAATTCAGTATAGTTTGAAAGCGGCACAATTA AAAAATTAATTTTCTAACAAAGTTGGGAGGTTTGATGGTTGTTTAATTT |        |        |        |        |        |        |        |  | 94627 |
| Bonobo            | AAATTCAGTATAGTTTGAAAGCGGCACAATTA AAAAATTAATTTTCTAACAAAGTTGGGAGGTTTGATGGTTGTTTAATTT |        |        |        |        |        |        |        |  | 92589 |
| OliveBaboon       | AAATTCAGTATAGTTTGAAAGCGGCACAATTA AAAAATTAATTTTCTAACAAAGTTGGGAGGTTTGATGGTTGTTTAATTT |        |        |        |        |        |        |        |  | 94210 |
| Orangutan         | AAATTCAGTATAGTTTGAAAGCGGCACAATTA AAAAATTAATTTTCTAACAAAGTTGGGAGGTTTGATGGTTGTTTAATTT |        |        |        |        |        |        |        |  | 95001 |

| Majority          | CATTTTGTGTGTA CTCTGCTTACCTCTGTAGCATGCTCAATAAACACTTCTGTAGCTCTATATTCACCTTTTCTGTCTTT |        |        |        |        |        |        |        |  |       |
|-------------------|-----------------------------------------------------------------------------------|--------|--------|--------|--------|--------|--------|--------|--|-------|
|                   | 112170                                                                            | 112180 | 112190 | 112200 | 112210 | 112220 | 112230 | 112240 |  |       |
| Human             | CATTTTGTGTGTA CTCTGCTTACCCCTGTAGCATGCTCAATAAACACTTCTGTAGCTCTATATTCACCTTTTCTGTCTTT |        |        |        |        |        |        |        |  | 93837 |
| Coquerel'sSifaka  | CATTTTGTGTGTA CTCTGCTTACCTCTGTAGCATGCTCAATAAACACTTCTGTAGCTCTGTATTCACCTTTTCTGTCTTT |        |        |        |        |        |        |        |  | 80420 |
| Ma'sNightMonkey   | CATTTTGTGTGTA CTCTGCTTACCTCTGTAGCATGCTCAATAAACACTTCTGTAGCTCTATATTCACCTTTTCTGTCTTT |        |        |        |        |        |        |        |  | 87826 |
| VervetAGM         | CATTTTGTGTGTA CTCTGCTTACCTCTGTAGCATGCTCAATAAACACTTCTGTAGCTCTATATTCACCTTTTCTGTCTTT |        |        |        |        |        |        |        |  | 95514 |
| Gorilla           | CATTTTGTGTGTA CTCTGCTTACCTCTGTAGCATGCTCAATAAACACTTCTGTAGCTCTATATTCACCTTTTCTGTCTTT |        |        |        |        |        |        |        |  | 92084 |
| GrabEatingMacaque | CATTTTGTGTGTA CTCTGCTTACCTCTGTAGCATGCTCAATAAACACTTCTGTAGCTCTATATTCACCTTTTCTGTCTTT |        |        |        |        |        |        |        |  | 94939 |
| Macaque           |                                                                                   |        |        |        |        |        |        |        |  | 95018 |
| PigTailedMacaque  | CATTTTGTGTGTA CTCTGCTTACCTCTGTAGCATGCTCAATAAACACTTCTGTAGCTCTATATTCACCTTTTCTGTCTTT |        |        |        |        |        |        |        |  | 94707 |
| Bonobo            | CATTTTGTGTGTA CTCTGCTTACCCCTGTAGCATGCTCAATAAACACTTCTGTAGCTCTATATTCACCTTTTCTGTCTTT |        |        |        |        |        |        |        |  | 92669 |
| OliveBaboon       | CATTTTGTGTGTA CTCTGCTTACCTCTGTAGCATGCTCAATAAACACTTCTGTAGCTCTATATTCACCTTTTCTGTCTTT |        |        |        |        |        |        |        |  | 94290 |
| Orangutan         | CATTTTGTGTGTA CTCTGCTTACCTCTGTAGCATGCTCAATAAACACTTCTGTAGCTCTATATTCACCTTTTCTGTCTTT |        |        |        |        |        |        |        |  | 95081 |

| Majority          | CTCTGCTGCCTTTT-CTCTCTCCTCTTCTTTGTTTTCACTCCACTGTGCTTCTGAATTCATGTTTATTCTCTGCCAGGGT |        |        |        |        |        |        |        |  |       |
|-------------------|----------------------------------------------------------------------------------|--------|--------|--------|--------|--------|--------|--------|--|-------|
|                   | 112250                                                                           | 112260 | 112270 | 112280 | 112290 | 112300 | 112310 | 112320 |  |       |
| Human             | CTCTGCTGCCTTTT-CTCTCTCCTCTTCTTTGTTTTCACTCCACTGTGCTTCTGAATTCATGTTTATTCTCTGCCAGGGT |        |        |        |        |        |        |        |  | 93916 |
| Coquerel'sSifaka  | CTCTGCTGCCTTTT-CTCTCTCCTCTTCTTTGTTTTCACTCCACTGTGCTTCTGAATTCATGTTTATTCTCTGCCAGGGT |        |        |        |        |        |        |        |  | 80500 |
| Ma'sNightMonkey   | CTCTGCTGCCTTTT-CTCTCTCCTCTTCTTTGTTTTCACTCCACTGTGCTTCTGAATTCATGTTTATTCTCTGCCAGGGT |        |        |        |        |        |        |        |  | 87905 |
| VervetAGM         | CTCTGCTGCCTTTT-CTCTCTCCTCTTCTTTGTTTTCACTCCACTGTGCTTCTGAATTCATGTTTATTCTCTGCCAGGGT |        |        |        |        |        |        |        |  | 95593 |
| Gorilla           | CTCTGCTGCCTTTT-CTCTCTCCTCTTCTTTGTTTTCACTCCACTGTGCTTCTGAATTCATGTTTATTCTCTGCCAGGGT |        |        |        |        |        |        |        |  | 92163 |
| GrabEatingMacaque | CTCTGCTGCCTTTT-CTCTCTCCTCTTCTTTGTTTTCACTCCACTGTGCTTCTGAATTCATGTTTATTCTCTGCCAGGGT |        |        |        |        |        |        |        |  | 95018 |
| Macaque           |                                                                                  |        |        |        |        |        |        |        |  | 95018 |
| PigTailedMacaque  | CTCTGCTGCCTTTT-CTCTCTCCTCTTCTTTGTTTTCACTCCACTGTGCTTCTGAATTCATGTTTATTCTCTGCCAGGGT |        |        |        |        |        |        |        |  | 94786 |
| Bonobo            | CTCTGCTGCCTTTT-CTCTCTCCTCTTCTTTGTTTTCACTCCACTGTGCTTCTGAATTCATGTTTATTCTCTGCCAGGGT |        |        |        |        |        |        |        |  | 92748 |
| OliveBaboon       | CTCTGCTGCCTTTT-CTCTCTCCTCTTCTTTGTTTTCACTCCACTGTGCTTCTGAATTCATGTTTATTCTCTGCCAGGGT |        |        |        |        |        |        |        |  | 94369 |
| Orangutan         | CTCTGCTGCCTTTT-CTCTCTCCTCTTCTTTGTTTTCACTCCACTGTGCTTCTGAATTCATGTTTATTCTCTGCCAGGGT |        |        |        |        |        |        |        |  | 95160 |

Tuesday, May 03, 2022 06:17 PM

|                   |                                                                                   |       |
|-------------------|-----------------------------------------------------------------------------------|-------|
| Majority          | GGGAAAGGAGTAATAATATTACAATTC-TATGGCTTTATACCATAAAATAAATCTAGATGCTGTGAAAATATACCAGCTGG |       |
|                   | 112330 112340 112350 112360 112370 112380 112390 112400                           |       |
| Human             | GGGAAAGGAGTAATAATATTACAATTC-TATGGCTTTATACCATAAAATAAATCTAGATGCTGTGAAAATATACCAGCTGG | 93995 |
| Coquerel'sSifaka  | GGGAAAGGAGTAATAATATTACAATTCCTATGGCTTTATACCATAAAATAAATCTAGATGCTGTGAAAATATACCAGCTGG | 80580 |
| Ma'sNightMonkey   | GGGAAAGGAGTAATAATATTACAATTC-TATGGCTTTATACCATAAAATAAATCTAGATGCTGTGAAAATATACCAGCTGG | 87984 |
| VervetAGM         | GGGAAAGGAGTAATAATATTACAATTC-TATGGCTTTATACCATAAAATAAATCTAGATGCTGTGAAAATATACCAGCTGT | 95672 |
| Gorilla           | GGGAAAGGAGTAATAATATTACAATTC-TATGGCTTTATACCATAAAATAAATCTAGATGCTGTGAAAATATACCAGCTGG | 92242 |
| GrabEatingMacaque | GGGAAAGGAGTAATAATATTACAATTC-TATGGCTTTATACCATAAAATAAATCTAGATGCTGTGAAAATATACCAGCTGT | 95097 |
| Macaque           |                                                                                   | 95018 |
| PigTailedMacaque  | GGGAAAGGAGTAATAATATTACAATTC-TATGGCTTTATACCATAAAATAAATCTAGATGCTGTGAAAATATACCAGCTGT | 94865 |
| Bonobo            | GGGAAAGGAGTAATAATATTACAATTC-TATGGCTTTATACCATAAAATAAATCTAGATGCTGTGAAAATATACCAGCTGG | 92827 |
| OliveBaboon       | GGGAAAGGAGTAATAATAATACAATTC-TATGGCTTTATACCATAAAATAAATCTAGATGCTGTGAAAATATACCAGCTGT | 94448 |
| Orangutan         | GGGAAAGGAGTAATAATATTACAATTC-TATGGCTTTATACCATAAAATAAATCTAGATGCTGTGAAAATATACCAGCTGG | 95239 |

|                   |                                                                                  |       |
|-------------------|----------------------------------------------------------------------------------|-------|
| Majority          | TTTTTTTT-AATTTAAAAGATGGTAAGTCTTTTTCAGGAGGACACATATTAACATTTCCACCCTGTTATAATCTACTG   |       |
|                   | 112410 112420 112430 112440 112450 112460 112470 112480                          |       |
| Human             | TTTTTTTT-AATTTAAAAGATGGTAAGTCTTTTTCAGGAGGACACATATTAACATTTCCACCCTGTTATAATCTACTG   | 94074 |
| Coquerel'sSifaka  | TTTTTTTT-AATTTAAAAGATGATAAGTCTTTTTCAAGAGGACACATATTAACATTTCCACCCTGTTATAATCTACTG   | 80659 |
| Ma'sNightMonkey   | TTTTTTTT--AATTTAAAAGATGGTGACTGCTTTTTCAGGAGGACACATATTAACATTTCCACCCTGTTATAATCTACTG | 88062 |
| VervetAGM         | TTTTTTTTTAACTTAAAAGATGGTAAGTCTTTTTCAGGAGGACACATATTAACATTTCCACCCTGTTATAATCTACTG   | 95752 |
| Gorilla           | TTTTTTTT-AATTTAAAAGATGGTAAGTCTTTTTCAGGAGGACACATATTAACATTTCCACCCTGTTATAATCTACTG   | 92321 |
| GrabEatingMacaque | TTTTTTTT-AATTTAAAAGATAGTAAGTCTTTTTCAGGAGGACACATATTAACATTTCCACCCTGTTATAATCTACTG   | 95176 |
| Macaque           |                                                                                  | 95018 |
| PigTailedMacaque  | TTTTTTTT-AATTTAAAAGATAGTAAGTCTTTTTCAGGAGGACACATATTAACATTTCCACCCTGTTATAATCTACTG   | 94944 |
| Bonobo            | TTTTTTTT--AATTTAAAAGATGGTAAGTCTTTTTCAGGAGGACACATATTAACATTTCCACCCTGTTATAATCTACTG  | 92905 |
| OliveBaboon       | TTTTTTTT-AATTTAAAAGATAGTAAGTCTTTTTCAGGAGGACACATATTAACATTTCCACCCTGTTATAATCTACTG   | 94527 |
| Orangutan         | TTTTTTTT-AATTTAAAAGATGGTAAGTCTTTTTCAGGAGGACACATATTAACATTTCCACCCTGTTATAATCTACTG   | 95318 |

|                   |                                                                                |       |
|-------------------|--------------------------------------------------------------------------------|-------|
| Majority          | CTTTAAAGACATAACTTTTATGTAGCTTGTTAATCTATCTCTTTTGTGTTGTTGTTTTTTTTTTT---CCAGTAGAT  |       |
|                   | 112490 112500 112510 112520 112530 112540 112550 112560                        |       |
| Human             | CTTTAAAGACATAACTTTTATGTAGCTTGTTAATCTATCTCTTTTGTGTTGTTGTTTTTTTTTTTCCAGTAGAT     | 94154 |
| Coquerel'sSifaka  | CTTTAAAGACATAACTTTTATGTAGCTTGTTAATCTCTCTCT--CTTTGTTGTTTTTCTTTTTTTTCCAGTAGAT    | 80737 |
| Ma'sNightMonkey   | CTTTAAAGACATAACTTTTATGTAGCTTGTTAATCTATCTCTTTTGTGTTGTTGTTTTTCTTTT---CCAGTAGAT   | 88138 |
| VervetAGM         | CTTTAAAGACATAACTTTTACTGTAGCTTGTTAATCTATCTCTTTTGTGTTGTTGTTGTTTTTTT---CCAGTAGAT  | 95829 |
| Gorilla           | CTTTAAAGACATAACTTTTATGTAGCTTGTTAATCTATCTCTTTTGTGTTGTTGTTTTTTTTT---CCAGTAGAT    | 92397 |
| GrabEatingMacaque | CTTTAAAGACATAACTTTTACTGTAGCTTGTTAATCTATCTCTTTTGTGTTGTTGTTTTTTTTTTT---CCAGTAGAT | 95253 |
| Macaque           |                                                                                | 95018 |
| PigTailedMacaque  | CTTTAAAGACATAACTTTTACTGTAGCTTGTTAATCTATCTCTTTTGTGTTGTTGTTGTTTTTTT---CCAGTAGAT  | 95020 |
| Bonobo            | CTTTAAAGACATAACTTTTATGTAGCTTGTTAATCTATCTCTTTTGTGTTGTTGTTTTTTTTT---CCAGTAGAT    | 92981 |
| OliveBaboon       | CTTTAAAGACATAACTTTTACTGTAGCTTGTTAATCTATCTCTTTTGTGTTGTTGTTGTTTTTTT---CCAGTAGAT  | 94604 |
| Orangutan         | CTTTAAAGACATAACTTTTATGTAGCTTGTTAATCTATCTCTTTTGTGTTGTTGTTTTTTTTTTT---CCAGTAGAT  | 95397 |

Tuesday, May 03, 2022 06:17 PM

|                   |                                                                                    |       |
|-------------------|------------------------------------------------------------------------------------|-------|
| Majority          | TTATGCACTAATAGATCTTTTGGATTGGCCATGCTCTCTTGTGCTGCAGTTTCATCTTTCATCTTTTGTGTCTGCTAAAGAT |       |
|                   | 112570 112580 112590 112600 112610 112620 112630 112640                            |       |
| Human             | TTATGCACTAATAGATCTTTTGGATTGGCCATGCTCTCTTGTGCTGCAGTTTCATCTTTCATCTTTTGTGTCTGCTAAAGAT | 94234 |
| Coquerel'sSifaka  | TTATGCACTAATAGATCTTTTGGATTGGCCATGCTCTCTTGTGCTGCAGTTTCATCTTTCATCTTTTGTGTCTGCTAAAGAT | 80817 |
| Ma'sNightMonkey   | TTCTGCACTAATAGATCTTTTGGATTGGCCATGCTCTCTTGTGCTGCAGTTTCATCTTTCATCTTTTGTGTCTGCTAAAGAT | 88217 |
| VervetAGM         | TTATGCACTAATAGATCTTTTGGATTGGCCATGCTCTCTTGTGCTGCAGTTTCATCTTTCATCTTTTGTGTCTGCTAAAGAT | 95909 |
| Gorilla           | TTATGCACTAATAGATCTTTTGGATTGGCCATGCTCTCTTGTGCTGCAGTTTCATCTTTCATCTTTTGTGTCTGCTAAAGAT | 92477 |
| GrabEatingMacaque | TTATGCACTAATAGATCTTTTGGATTGGCCATGCTCTCTTGTGCTGCAGTTTCATCTTTCATCTTTTGTGTCTGCTAAAGAT | 95333 |
| Macaque           |                                                                                    | 95018 |
| PigTailedMacaque  | TTATGCACTAATAGATCTTTTGGATTGGCCATGCTCTCTTGTGCTGCAGTTTCATCTTTCATCTTTTGTGTCTGCTAAAGAT | 95100 |
| Bonobo            | TTATGCACTAATAGATCTTTTGGATTGGCCATGCTCTCTTGTGCTGCAGTTTCATCTTTCATCTTTTGTGTCTGCTAAAGAT | 93061 |
| OliveBaboon       | TTATGCACTAATAGATCTTTTGGATTGGCCATGCTCTCTTGTGCTGCAGTTTCATCTTTCATCTTTTGTGTCTGCTAAAGAT | 94684 |
| Orangutan         | TTATGCACTAATAGATCTTTTGGATTGGCCATGCTCTCTTGTGCTGCAGTTTCATCTTTCATCTTTTGTGTCTGCTAAAGAT | 95477 |

|                   |                                                                                     |       |
|-------------------|-------------------------------------------------------------------------------------|-------|
| Majority          | TTCTTACTAA---TCTTA-GACTACCTT-GTGAGTTAACAAAAGAAGAACTTGATGTTACTGGGAAGAAAGAGCAGCATATC  |       |
|                   | 112650 112660 112670 112680 112690 112700 112710 112720                             |       |
| Human             | TTCTTACTAA---TCTTA-GACTACCTT-GTGAGTTAACAAAAGAAGAACTTGATGTTACTGGGAAGAAAGAGCAGCATATC  | 94309 |
| Coquerel'sSifaka  | TTCTTACTAA---TCTTA-GACTACTTAAGTTAGTTAACAAAAGAGTACTTGATGTT---GGGAAGAAAGAGTATCATATC   | 80890 |
| Ma'sNightMonkey   | TTCTTACTAA---TCTTA-GACTACCTT-GTGAGTTAACAAAAGAAGAACTCGATGTTACTGGGAAGAAAGAGCAACATATC  | 88292 |
| VervetAGM         | TTCTTACTAATAATCTTA-GACTATCTT-GTGAGTTAACTAAAAGAAGAACTTGATGTTACTGGGAAGAAAGAGCAGCATATC | 95987 |
| Gorilla           | TTCTTACTAA---TCTTAAGACTACCTT-GTGAGTTAACAAAAGAAGAACTTGATGTTACTGGGAAGAAAGAGCAGCATATC  | 92553 |
| GrabEatingMacaque | TTCTTACTAATAATCTTA-GACTATCTT-GTGAGTTAACTAAAAGAAGAACTTGATGTTACTGGGAAGAAAGAGCAGCATATC | 95411 |
| Macaque           |                                                                                     | 95018 |
| PigTailedMacaque  | TTCTTACTAATAATCTTA-GACTATCTT-GTGAGTTAACTAAAAGAAGAACTTGATGTTACTGGGAAGAAAGAGCAGCATATC | 95178 |
| Bonobo            | TTCTTACTAA---TCTTA-GACTACCTT-GTGAGTTAACAAAAGAAGAACTTGATGTTACTGGGAAGAAAGAGCAGCATATC  | 93136 |
| OliveBaboon       | TTCTTACTAATAATCTTA-GACTATCTT-GTGAGTTAACTAAAAGAAGAACTTGATGTTACTGGGAAGAAAGAGCAGCATATC | 94762 |
| Orangutan         | TTCTTACTAA---TCTTA-GACTACCTT-GTGAGTTAACAAAAGAAGAACTTGATGTTACTGGGAAGAAAGAGCAGCATATC  | 95552 |

|                   |                                                                                   |       |
|-------------------|-----------------------------------------------------------------------------------|-------|
| Majority          | -----GCTGCTTTTGCCTTGGGTGGGAAGGATGATATACATTCAAGTATTTAAAAACTTA--GAGTAATTT           |       |
|                   | 112730 112740 112750 112760 112770 112780 112790 112800                           |       |
| Human             | TGCATATCAGCATATCTGCTTTTGCCTTGGGTGGGAAGAAATGATATACATTCAAGTATTTAAAAACTTA--GAGTAATTT | 94387 |
| Coquerel'sSifaka  | -----ATCTGCTTTTGCCTTGGGTGGGAAGAAATGGTATATATTCAGCATTTAAAAACAAG---GGTAATTG          | 80954 |
| Ma'sNightMonkey   | -----ATCTGCTTTTGTGTTTGGGTGGGAAGGATGATATACATTCAAGTATTTAAAGACTTAAAGGTAATTT          | 88359 |
| VervetAGM         | -----GCCTGCTTTTGCCTTGGGTGGGAAGGATGATATACATTCAAGTATTTAAAAACTTA--GAGTAATTT          | 96052 |
| Gorilla           | TGCATATCAGCATATCTGCTTTTGCCTTGGGTGGGAAGAAATGATATACATTCAAGTATTTAAAAACTTA--GAGCAATTT | 92631 |
| GrabEatingMacaque | -----GCCTGCTTTTGCCTTGGGTGGGAAGGATGATACACATTCAAGTATTTAAAAACTTA--GAGTAATTT          | 95476 |
| Macaque           |                                                                                   | 95018 |
| PigTailedMacaque  | -----GCCTGCTTTTGCCTTGGGTGGGAAGGATGATACACATTCAAGTATTTAAAAACTTA--GAGTAATTT          | 95243 |
| Bonobo            | TGCATATCAGCATATCTGCTTTTGCCTTGGGTGGGAAGAAATGATATACATTCAAGTATTTAAAAACTTA--GAGTAATTT | 93214 |
| OliveBaboon       | -----GCCTGCTTTTGCCTTGGGTGGGAAGGATGATATACATTCAAGTATTTAAAAACTTA--GAGTAATTT          | 94827 |
| Orangutan         | -----GCTGCTTTTGCCTT                                                               | 95567 |

Tuesday, May 03, 2022 06:17 PM

| Majority          | GCATTTAACAACTGAAGATGTTACTACTTTAACTTTTT-AAACAGTTACAATTAGGGTGCTATTTATATTCAAAATATTT  |       |
|-------------------|-----------------------------------------------------------------------------------|-------|
|                   | 112810 112820 112830 112840 112850 112860 112870 112880                           |       |
| Human             | GCATTTAACAACTGAGGATGTTACTACTGTAAC TTGTT-AAGCAGTTACAATTAGGGTGCTATTTATATTCAAAATATTT | 94466 |
| Coquerel'sSifaka  | GCATTTAACAACTGGAAATGTTACTACTTTTCACTTTTTAAACAGGTATGATTAGGGTGC-----TATTCAAAATATTT   | 81028 |
| Ma'sNightMonkey   | GCATTTAACAACTGAAGA-GTTACTACTTTTCACTTCTT-AAACAGTTACAATTAGGGTGCTATTTATATTCAAAATACTT | 88437 |
| VervetAGM         | GCATTTAACAACTAAAATATGTTACTACTTTAACTTTTT-AAACAGTTACAATTAGGGTGCTATTTATATTCAAAATATTT | 96131 |
| Gorilla           | GCATTTAACAACTGAGGATGTTACTACTGTAAC TTGTT-AAACAGTTACAATTAGGGTGCTATTTATATTCAAAATATTT | 92710 |
| GrabEatingMacaque | GCATTTAACAACTAAACATGTTACTA-----AACAGTTACAATTAGGGTGCTATTTATATTCAAAATATTT           | 95542 |
| Macaque           |                                                                                   | 95018 |
| PigTailedMacaque  | GCATTTAACAACTAAACATGTTACTACTTTAACTT---AAACAGTTACAATTAGGGTGCTATTTATATTCAAAATATTT   | 95319 |
| Bonobo            | GCATTTAACAACTGAGGATGTTACTACTGTAAC TTGT--AAGCAGTTACAATTAGGGTGCTATTTATATTCAAAATATTT | 93292 |
| OliveBaboon       | GCATTTAACAACTAAACATGTTACTACTTTAACTTTTT-AAACAGTTACAATTAGGGTGCTATTTATATTCAAAATATTT  | 94906 |
| Orangutan         |                                                                                   | 95567 |

| Majority          | TGG-TCAGTTTTTCTAAACAGATATATTTGGTGTCAAATAACTTTGGAGTTATGCATG---TTTCTTAGGTTTGTCTCGTT |       |
|-------------------|-----------------------------------------------------------------------------------|-------|
|                   | 112890 112900 112910 112920 112930 112940 112950 112960                           |       |
| Human             | CGG-TCAGTTTTTCTAAACAGATATATTTGGTATCAAATAACTTTGGAGTTACACATG---TTTCTTAGGTTTGTCTCGTT | 94542 |
| Coquerel'sSifaka  | TGGGCCACTTTTTCTAAATAGGTATACTGGTGTCAAATAACTTTGAAGTTATATATG---TTCCTTAAGTTTGTCTCGTT  | 81105 |
| Ma'sNightMonkey   | TGG-TCAGTTTTTCTAAACAGATATATTTGGTATCAAATAACTTTGAAGTTATGCATG---TTCCTTAGGTTTGTCTCGTT | 88513 |
| VervetAGM         | TGG-TCAGTTTTTCTAAACAGGTATGTTGGTGT CAGATAACTTTGGAGTTATGCATGATGTTTCTTAGGTTTGTCTCGTT | 96210 |
| Gorilla           | TGG-TCAGTTTTTCTAAACAGATGATTTGATATCAAATAACTTTGGAGTTACACATG---TTTCTTAGGTTTGTCTCGTT  | 92786 |
| GrabEatingMacaque | TGG-TCAGTTTTTCTAAACAGATATGTTGGTGT CAGATAACTTTGGAGTTATGCATGATGTTTCTTAGGTTTGTCTCGTT | 95621 |
| Macaque           |                                                                                   | 95018 |
| PigTailedMacaque  | TGG-TCAGTTTTTCTAAACAGATATGTTGGTGT CAGATAACTTTGGAGTTATGCATGATGTTTCTTAGGTTTGTCTCGTT | 95398 |
| Bonobo            | TGG-TCAGTTTTTCTAAACAGATATATTTGGTATCAAATAACTTTGGAGTTACACATG---TTTCTTAGGTTTGTCTCGTT | 93368 |
| OliveBaboon       | TGG-TCAGTTTTTCTAAACAGATATGTTGGTGT CAGATAACTTTGGAGTTATGCATGATGTTTCTTAGGTTTGTCTCGTT | 94985 |
| Orangutan         |                                                                                   | 95567 |

| Majority          | ACAAAATATCCACACTTATGCAAAAC TTATACAT-AGGATAATAAAAAGTAAATGAAGGAXCATAXXXXXXXXXXXXXX |       |
|-------------------|----------------------------------------------------------------------------------|-------|
|                   | 112970 112980 112990 113000 113010 113020 113030 113040                          |       |
| Human             | ATAAAATATCCACACTTATGCAAAAC TTACACAT-AGGATAATAAAAAGTAAATGAAGGAACATAAAAT-ATGTTTTAC | 94620 |
| Coquerel'sSifaka  | AC-----ATCTCACAATTACACAAAAC TTACACATTAGGATAAT--AA--AAAATGAAGGAGCATAGG            | 81164 |
| Ma'sNightMonkey   | ATAAAATATCCACAGTTATGCAAAAG TTATACAG-AAGATAA---AAAGTAAATGAAGGAACATAAAATATGTTTTAAA | 88589 |
| VervetAGM         | ACAAAATATCCACACTTATACAAAAC TTATACGT-AGGATAATAAAAAGTAAATGAAGGAACATAAAAT-ACGTTTTAC | 96288 |
| Gorilla           | ATAAAATATCCACACTTATGCAAAAC TTATACAT-AGGAT                                        | 92826 |
| GrabEatingMacaque | ACAAAATATCCACACTTATGCAAAAC TTACACGT-AGGATAATAAAAAGTAAATGAAGGAACATA               | 95686 |
| Macaque           |                                                                                  | 95018 |
| PigTailedMacaque  | ACAAAATATCCACACTTATGCAAAAC TTATACGT-AGGATAATAAAAAGTA                             | 95449 |
| Bonobo            | ATAAAATATCCACACTTATGCAAAAC TTATACAT-AGGATAAT                                     | 93411 |
| OliveBaboon       | ACAAAATATCCACACTTATGCAAAAC TTATAGGT-AGGATAATAAAAAGTAAATGAAGGAACATAAAAT-ATGTTTTAC | 95063 |
| Orangutan         |                                                                                  | 95567 |

Tuesday, May 03, 2022 06:17 PM

| Majority          | XXXXXXXXXXXXXXXXXXXXXXXXXXXXXXXXXXXXXXXXXXXXXXXXXXXXXXXXXXXXXXXXXXXXXXXXXXXX    |       |
|-------------------|---------------------------------------------------------------------------------|-------|
|                   |                                                                                 |       |
|                   | 113050 113060 113070 113080 113090 113100 113110 113120                         |       |
| Human             | TATACTTAATGTAGTAATTCAGTTACCTCCAAGAAAGAAGAATATAATAAGTAAATAATTTTGTTTACACTAGTGTCAC | 94700 |
| Coquerel'sSifaka  |                                                                                 | 81164 |
| Ma'sNightMonkey   | TATACTATACTTAGTACAGTAATT                                                        | 88613 |
| VervetAGM         | TATACCTAATATAGTAATTCAGTTACCTCCAAGAAAGAAGAACATAGTAAGTAAATAATTTTGTTTACACTAGTGTCAC | 96368 |
| Gorrilla          |                                                                                 | 92826 |
| GrabEatingMacaque |                                                                                 | 95686 |
| Macaque           |                                                                                 | 95018 |
| PigTailedMacaque  |                                                                                 | 95449 |
| Bonobo            |                                                                                 | 93411 |
| OliveBaboon       | TATACCTAATGTAGTAATTCAGTTACCTCCAAGAAAGAAGAACATAGTAAGTAAATAATTTTGTTTACACTAGTGTCAC | 95143 |
| Orangutan         |                                                                                 | 95567 |

| Majority          | XXXXXXXXXXXXXXXXXXXXXXXXXXXXXXXXXXXXXXXXXXXXXXXXXXXXXXXXXXXXXXXXXXXXXXXXXXXX     |       |
|-------------------|----------------------------------------------------------------------------------|-------|
|                   |                                                                                  |       |
|                   | 113130 113140 113150 113160 113170 113180 113190 113200                          |       |
| Human             | TGTTGTCATCTGAAGAAGAACCATTAGAGTCAACAGTCTGGGATGATTTGGAAGCTAGGTGATCTGTGTTTTTTTCTTAA | 94780 |
| Coquerel'sSifaka  |                                                                                  | 81164 |
| Ma'sNightMonkey   |                                                                                  | 88613 |
| VervetAGM         | TGTTGTCATCTGAAGAAGAACCATTAGAGTCAACAGTTTGGGATGATTTGGAAGCTAGGTGATCTGTGTTTTTTTCTTAA | 96448 |
| Gorrilla          |                                                                                  | 92826 |
| GrabEatingMacaque |                                                                                  | 95686 |
| Macaque           |                                                                                  | 95018 |
| PigTailedMacaque  |                                                                                  | 95449 |
| Bonobo            |                                                                                  | 93411 |
| OliveBaboon       | TGTTGTCATCTGAAGAACCACCATTAGAGTCTACAGTTTGGGATGATTTGGAATTTAGGTGATATGTTTTTTTTTTT--  | 95221 |
| Orangutan         |                                                                                  | 95567 |

| Majority          | XXXXXXXXXXXXXXXXXXXXXXXXXXXXXXXXXXXXXXXXXXXXXXXXXXXXXXXXXXXXXXXXXXXXXXXXXXXX      |       |
|-------------------|-----------------------------------------------------------------------------------|-------|
|                   |                                                                                   |       |
|                   | 113210 113220 113230 113240 113250 113260 113270 113280                           |       |
| Human             | AATAACATCGTAGCACAGAGGA ACTCTACCAGCATCAGATAAGTCTAAAGTCTAAAAACCAATACCAGGGTTAGTGAAT  | 94860 |
| Coquerel'sSifaka  |                                                                                   | 81164 |
| Ma'sNightMonkey   |                                                                                   | 88613 |
| VervetAGM         | AATAACATTGTAGCACAGAGGA ACTCTAGCAACATCAGATATGTCTAAAGTCTAAGAAACCAGTCCCAGGGTTAGTGAAC | 96528 |
| Gorrilla          |                                                                                   | 92826 |
| GrabEatingMacaque |                                                                                   | 95686 |
| Macaque           |                                                                                   | 95018 |
| PigTailedMacaque  |                                                                                   | 95449 |
| Bonobo            |                                                                                   | 93411 |
| OliveBaboon       | -----TTGTAGCACAGAGGA ACTCTAGCAACATCAGATATGTCTAAAGTCTAA---ACGTAATCCCAGGTAGTGTTG    | 95291 |
| Orangutan         |                                                                                   | 95567 |





Tuesday, May 03, 2022 06:17 PM

| Majority          | XXXXXXXXXXXXXXXXXXXXXXXXXXXXXXXXXXXXXXXXXXXXXXXXXXXXXXXXXXXXXXXXXXXXXXXXXXXX     |        |        |        |        |        |        |        |       |
|-------------------|----------------------------------------------------------------------------------|--------|--------|--------|--------|--------|--------|--------|-------|
|                   | 113530                                                                           | 113540 | 113550 | 113560 | 113570 | 113580 | 113590 | 113600 |       |
| Human             | GACTACAGCAGATTCTATACTGTCTTACAGTATGCCTAATACGGCCTTCCTTCCAAAGCACCAAGTCACTAAAGGGGGA  |        |        |        |        |        |        |        | 95178 |
| Coquerel'sSifaka  |                                                                                  |        |        |        |        |        |        |        | 81164 |
| Ma'sNightMonkey   |                                                                                  |        |        |        |        |        |        |        | 88613 |
| VervetAGM         | ACTTACAGCAGATTCTATACTCTTTACTACTATACCCCAATACAGCCTTCCTTCCAAAGCACCAAGTCAGTAAAGGGGGA |        |        |        |        |        |        |        | 96847 |
| Gorilla           |                                                                                  |        |        |        |        |        |        |        | 92826 |
| GrabEatingMacaque |                                                                                  |        |        |        |        |        |        |        | 95686 |
| Macaque           |                                                                                  |        |        |        |        |        |        |        | 95018 |
| PigTailedMacaque  |                                                                                  |        |        |        |        |        |        |        | 95449 |
| Bonobo            |                                                                                  |        |        |        |        |        |        |        | 93411 |
| OliveBaboon       | TCATGCAGCAGATTCTATACTCTTTACTACTATACCCCAATACAGCCTTCCTTCCAAAGCACCAAGTCAGTAAAGGGGGA |        |        |        |        |        |        |        | 95603 |
| Orangutan         |                                                                                  |        |        |        |        |        |        |        | 95567 |

| Majority          | XXXXXXXXXXXXXXXXXXXXXXXXXXXXXXXXXXXXXXXXXXXXXXXXXXXXXXXXXXXXXXXXXXXXXXXXXXXX      |        |        |        |        |        |        |        |       |
|-------------------|-----------------------------------------------------------------------------------|--------|--------|--------|--------|--------|--------|--------|-------|
|                   | 113610                                                                            | 113620 | 113630 | 113640 | 113650 | 113660 | 113670 | 113680 |       |
| Human             | TTTTGACATTCTAGAATATTTTTAATTCAGTACATCAAATTAACCCAGGCCTTGGCATATAGTGAATTGCTTATTAAGAAG |        |        |        |        |        |        |        | 95258 |
| Coquerel'sSifaka  |                                                                                   |        |        |        |        |        |        |        | 81164 |
| Ma'sNightMonkey   |                                                                                   |        |        |        |        |        |        |        | 88613 |
| VervetAGM         | TTTTGACATTCTGGAATATTTTTAATTCAGTACATGAAATTAACCCAGACCTTGGCATATAGCGAATTACTTATTAAGAAG |        |        |        |        |        |        |        | 96927 |
| Gorilla           |                                                                                   |        |        |        |        |        |        |        | 92826 |
| GrabEatingMacaque |                                                                                   |        |        |        |        |        |        |        | 95686 |
| Macaque           |                                                                                   |        |        |        |        |        |        |        | 95018 |
| PigTailedMacaque  |                                                                                   |        |        |        |        |        |        |        | 95449 |
| Bonobo            |                                                                                   |        |        |        |        |        |        |        | 93411 |
| OliveBaboon       | ATTTGACATTCTGGAATACGGACCAGT-----ATGAAATTAACTCAGACCCATATAGCTAATTGTTT--CTATTAAGAAG  |        |        |        |        |        |        |        | 95675 |
| Orangutan         |                                                                                   |        |        |        |        |        |        |        | 95567 |

| Majority          | XXXXXXXXXXXXXXXXXXXXXXXXXXXXXXXXXXXXXXXXXXXXXXXXXXXXXXXXXXXXXXXXXXXXXXXXXXXX    |        |        |        |        |        |        |        |       |
|-------------------|---------------------------------------------------------------------------------|--------|--------|--------|--------|--------|--------|--------|-------|
|                   | 113690                                                                          | 113700 | 113710 | 113720 | 113730 | 113740 | 113750 | 113760 |       |
| Human             | TTAGGTAAAAATAAACAGCTTTGTGCTATATTAGTACTCTATGACTCTTAGAGTGAACAAGCTAACAAGTATTCTTAG  |        |        |        |        |        |        |        | 95338 |
| Coquerel'sSifaka  |                                                                                 |        |        |        |        |        |        |        | 81164 |
| Ma'sNightMonkey   |                                                                                 |        |        |        |        |        |        |        | 88613 |
| VervetAGM         | TTAGGTAAAAATAATAACAGCTTTGTTGTATATTAGTACTCTATGCCTCTTAGAGTGAAGTACTAACAATGAAGTATTC |        |        |        |        |        |        |        | 97007 |
| Gorilla           |                                                                                 |        |        |        |        |        |        |        | 92826 |
| GrabEatingMacaque |                                                                                 |        |        |        |        |        |        |        | 95686 |
| Macaque           |                                                                                 |        |        |        |        |        |        |        | 95018 |
| PigTailedMacaque  |                                                                                 |        |        |        |        |        |        |        | 95449 |
| Bonobo            |                                                                                 |        |        |        |        |        |        |        | 93411 |
| OliveBaboon       | TTAGGTAAAAATAATAACAGCTTTGTTGTATATTAGTACTCTATGCCTCTTAGAGTGAAGTACTAACAATGAAGTATTC |        |        |        |        |        |        |        | 95755 |
| Orangutan         |                                                                                 |        |        |        |        |        |        |        | 95567 |

Tuesday, May 03, 2022 06:17 PM

| Majority          | XXXXXXXXXXXXXXXXXXXXXXXXXXXXXXXXXXXXXXXXXXXXXXXXXXXXXXXXXXXXXXXXXXXXXXXXXXXX      |        |        |        |        |        |        |        |       |
|-------------------|-----------------------------------------------------------------------------------|--------|--------|--------|--------|--------|--------|--------|-------|
|                   | 113770                                                                            | 113780 | 113790 | 113800 | 113810 | 113820 | 113830 | 113840 |       |
| Human             | GACTTAGCTGCTTTGTAAATAGAGGTCTTAACTTGAATATTTAGAAATAATCAGAAAAATTATTTTGGTATTGAAGAT    |        |        |        |        |        |        |        | 95418 |
| Coquerel'sSifaka  |                                                                                   |        |        |        |        |        |        |        | 81164 |
| Ma'sNightMonkey   |                                                                                   |        |        |        |        |        |        |        | 88613 |
| VervetAGM         | TTAGGACTCAGCTGCTTTGTAAATAGAGGTATTAAGTGAATATTTAAAAATAACTTTAATCAGAAAAATTATTTTGGGACT |        |        |        |        |        |        |        | 97087 |
| Gorilla           |                                                                                   |        |        |        |        |        |        |        | 92826 |
| GrabEatingMacaque |                                                                                   |        |        |        |        |        |        |        | 95686 |
| Macaque           |                                                                                   |        |        |        |        |        |        |        | 95018 |
| PigTailedMacaque  |                                                                                   |        |        |        |        |        |        |        | 95449 |
| Bonobo            |                                                                                   |        |        |        |        |        |        |        | 93411 |
| OliveBaboon       | TTAGGACTCAGCTGCTTTGTAAATAGAGGTATTAAGTGAATATTTAAAAATAACTTTAATCAGAAAAATTATTTTGGGACT |        |        |        |        |        |        |        | 95835 |
| Orangutan         |                                                                                   |        |        |        |        |        |        |        | 95567 |

| Majority          | XXXXXXXXXXXXXXXXXXXXXXXXXXXXXXXXXXXXXXXXXXXXXXXXXXXXXXXXXXXXXXXXXXXXXXXXXXXX       |        |        |        |        |        |        |        |       |
|-------------------|------------------------------------------------------------------------------------|--------|--------|--------|--------|--------|--------|--------|-------|
|                   | 113850                                                                             | 113860 | 113870 | 113880 | 113890 | 113900 | 113910 | 113920 |       |
| Human             | GTATTTGGAAATGGGTTTTAAAGTACCTACTTAAGGAAGAGATATCTACAGTTTATATTTAACGTTAGCATTTGAAAGC    |        |        |        |        |        |        |        | 95498 |
| Coquerel'sSifaka  |                                                                                    |        |        |        |        |        |        |        | 81164 |
| Ma'sNightMonkey   |                                                                                    |        |        |        |        |        |        |        | 88613 |
| VervetAGM         | ATTTAATAAGATGTATTTTGGAAATGGGTTTTAAAGCACCTACTTAAGGAAGAGATATCTACAGTTTAAATGTTAGCATTT  |        |        |        |        |        |        |        | 97167 |
| Gorilla           |                                                                                    |        |        |        |        |        |        |        | 92826 |
| GrabEatingMacaque |                                                                                    |        |        |        |        |        |        |        | 95686 |
| Macaque           |                                                                                    |        |        |        |        |        |        |        | 95018 |
| PigTailedMacaque  |                                                                                    |        |        |        |        |        |        |        | 95449 |
| Bonobo            |                                                                                    |        |        |        |        |        |        |        | 93411 |
| OliveBaboon       | ATTTAATAAGATGTATTTTGGAAATTTTTTTTTTTTTTTTGGAGATTTGGAGTCTCGGCCTGT-CACTCAGGGCTGAGTGAC |        |        |        |        |        |        |        | 95914 |
| Orangutan         |                                                                                    |        |        |        |        |        |        |        | 95567 |

| Majority          | XXXXXXXXXXXXXXXXXXXXXXXXXXXXXXXXXXXXXXXXXXXXXXXXXXXXXXXXXXXXXXXXXXXXXXXXXXXX    |        |        |        |        |        |        |        |       |
|-------------------|---------------------------------------------------------------------------------|--------|--------|--------|--------|--------|--------|--------|-------|
|                   | 113930                                                                          | 113940 | 113950 | 113960 | 113970 | 113980 | 113990 | 114000 |       |
| Human             | AATGAAGAAAATTTTTCCTTAACCAGGAAGTGTAATGAATCATTATATTAGAGATTAATTAACACTTTGGAAGCATTTT |        |        |        |        |        |        |        | 95578 |
| Coquerel'sSifaka  |                                                                                 |        |        |        |        |        |        |        | 81164 |
| Ma'sNightMonkey   |                                                                                 |        |        |        |        |        |        |        | 88613 |
| VervetAGM         | GAAAGCAACGAAGAAAATTTTGGCTTAACTAGGAAGTGTAATGAATCATTAT                            |        |        |        |        |        |        |        | 97219 |
| Gorilla           |                                                                                 |        |        |        |        |        |        |        | 92826 |
| GrabEatingMacaque |                                                                                 |        |        |        |        |        |        |        | 95686 |
| Macaque           |                                                                                 |        |        |        |        |        |        |        | 95018 |
| PigTailedMacaque  |                                                                                 |        |        |        |        |        |        |        | 95449 |
| Bonobo            |                                                                                 |        |        |        |        |        |        |        | 93411 |
| OliveBaboon       | GCCAGATTTTCAGCTCCAGCCCGGCTCCAGGTTGCCTATCTTCTGCCTCAGCCTCCCCGAGAAGCTGGGACTACAGGCC |        |        |        |        |        |        |        | 95994 |
| Orangutan         |                                                                                 |        |        |        |        |        |        |        | 95567 |

Tuesday, May 03, 2022 06:17 PM

|                   |                                                                                                                              |        |        |        |        |        |        |        |       |
|-------------------|------------------------------------------------------------------------------------------------------------------------------|--------|--------|--------|--------|--------|--------|--------|-------|
| Majority          | XXXXXXXXXXXXXXXXXXXXXXXXXXXXXXXXXXXXXXXXXXXXXXXXXXXXXXXXXXXXXXXXXXXXXXXXXXXXXXXXXXXXXXXXXXXXXXXXXXXXXXXXXXXXXXXXXXXXXXXXXXXX |        |        |        |        |        |        |        |       |
|                   | 114010                                                                                                                       | 114020 | 114030 | 114040 | 114050 | 114060 | 114070 | 114080 |       |
| Human             | AGCTCCTAGAGTTAAGGTTAGTATAGTGAAATTATGGTGATTAGCTTAATTCATTCATGTACATCTATTTGTATCACCAT                                             |        |        |        |        |        |        |        | 95658 |
| Coquerel'sSifaka  |                                                                                                                              |        |        |        |        |        |        |        | 81164 |
| Ma'sNightMonkey   |                                                                                                                              |        |        |        |        |        |        |        | 88613 |
| VervetAGM         |                                                                                                                              |        |        |        |        |        |        |        | 97219 |
| Gorrilla          |                                                                                                                              |        |        |        |        |        |        |        | 92826 |
| GrabEatingMacaque |                                                                                                                              |        |        |        |        |        |        |        | 95686 |
| Macaque           |                                                                                                                              |        |        |        |        |        |        |        | 95018 |
| PigTailedMacaque  |                                                                                                                              |        |        |        |        |        |        |        | 95449 |
| Bonobo            |                                                                                                                              |        |        |        |        |        |        |        | 93411 |
| OliveBaboon       | CACCACCTCAGCTCGCCAGTTTTTGTATTTTAGTAGAGATGGGGTTTCACCCCAGAGCTAGCCAGGATGGTCTCGACTT                                              |        |        |        |        |        |        |        | 96074 |
| Orangutan         |                                                                                                                              |        |        |        |        |        |        |        | 95567 |

|                   |                                                                                                                              |        |        |        |        |        |        |        |       |
|-------------------|------------------------------------------------------------------------------------------------------------------------------|--------|--------|--------|--------|--------|--------|--------|-------|
| Majority          | XXXXXXXXXXXXXXXXXXXXXXXXXXXXXXXXXXXXXXXXXXXXXXXXXXXXXXXXXXXXXXXXXXXXXXXXXXXXXXXXXXXXXXXXXXXXXXXXXXXXXXXXXXXXXXXXXXXXXXXXXXXX |        |        |        |        |        |        |        |       |
|                   | 114090                                                                                                                       | 114100 | 114110 | 114120 | 114130 | 114140 | 114150 | 114160 |       |
| Human             | ATAATTACTAGGGAAAGGACAAATCACTTTTCAAAGCCTCAATGTATTTTGTAAATGGAGGCAATAAGTTCTGCTCTGC                                              |        |        |        |        |        |        |        | 95738 |
| Coquerel'sSifaka  |                                                                                                                              |        |        |        |        |        |        |        | 81164 |
| Ma'sNightMonkey   |                                                                                                                              |        |        |        |        |        |        |        | 88613 |
| VervetAGM         |                                                                                                                              |        |        |        |        |        |        |        | 97219 |
| Gorrilla          |                                                                                                                              |        |        |        |        |        |        |        | 92826 |
| GrabEatingMacaque |                                                                                                                              |        |        |        |        |        |        |        | 95686 |
| Macaque           |                                                                                                                              |        |        |        |        |        |        |        | 95018 |
| PigTailedMacaque  |                                                                                                                              |        |        |        |        |        |        |        | 95449 |
| Bonobo            |                                                                                                                              |        |        |        |        |        |        |        | 93411 |
| OliveBaboon       | CCCGACTCATGATCCCGCCTGGCCTCAGCCTCCCAAAGTGTGGGATTACAGGCTTGAGCCACC GCGCC CAGCCGAAAT                                             |        |        |        |        |        |        |        | 96154 |
| Orangutan         |                                                                                                                              |        |        |        |        |        |        |        | 95567 |

|                   |                                                                                                                              |        |        |        |        |        |        |        |       |
|-------------------|------------------------------------------------------------------------------------------------------------------------------|--------|--------|--------|--------|--------|--------|--------|-------|
| Majority          | XXXXXXXXXXXXXXXXXXXXXXXXXXXXXXXXXXXXXXXXXXXXXXXXXXXXXXXXXXXXXXXXXXXXXXXXXXXXXXXXXXXXXXXXXXXXXXXXXXXXXXXXXXXXXXXXXXXXXXXXXXXX |        |        |        |        |        |        |        |       |
|                   | 114170                                                                                                                       | 114180 | 114190 | 114200 | 114210 | 114220 | 114230 | 114240 |       |
| Human             | TCCCTCACAGGATTATTACAGAGGCTCAAATAGGATAAGTGAAGGAATGCTATGCAATTAGTTAACTAATGCCAGTTCC                                              |        |        |        |        |        |        |        | 95818 |
| Coquerel'sSifaka  |                                                                                                                              |        |        |        |        |        |        |        | 81164 |
| Ma'sNightMonkey   |                                                                                                                              |        |        |        |        |        |        |        | 88613 |
| VervetAGM         |                                                                                                                              |        |        |        |        |        |        |        | 97219 |
| Gorrilla          |                                                                                                                              |        |        |        |        |        |        |        | 92826 |
| GrabEatingMacaque |                                                                                                                              |        |        |        |        |        |        |        | 95686 |
| Macaque           |                                                                                                                              |        |        |        |        |        |        |        | 95018 |
| PigTailedMacaque  |                                                                                                                              |        |        |        |        |        |        |        | 95449 |
| Bonobo            |                                                                                                                              |        |        |        |        |        |        |        | 93411 |
| OliveBaboon       | GGTTCATAAGCACCTACTTAAGGAAGAGATATCTACAGTTAATGTTAGCATTGAAAGCAACGAAGAAAATTTTGCT                                                 |        |        |        |        |        |        |        | 96234 |
| Orangutan         |                                                                                                                              |        |        |        |        |        |        |        | 95567 |

Tuesday, May 03, 2022 06:17 PM

| Majority          | XXXXXXXXXXXXXXXXXXXXXXXXXXXXXXXXXXXXXXXXXXXXXXXXXXXXXXXXXXXXXXXXXXXXXXXXXXXX     |        |        |        |        |        |        |        |       |
|-------------------|----------------------------------------------------------------------------------|--------|--------|--------|--------|--------|--------|--------|-------|
|                   | 114250                                                                           | 114260 | 114270 | 114280 | 114290 | 114300 | 114310 | 114320 |       |
| Human             | CAGACTGCCAGATTGCCACAGTAACTTCATTATCCACAATACATGTTATCCTAATATGTCTTTTGGCTACAAAGAAA    |        |        |        |        |        |        |        | 95898 |
| Coquerel'sSifaka  |                                                                                  |        |        |        |        |        |        |        | 81164 |
| Ma'sNightMonkey   |                                                                                  |        |        |        |        |        |        |        | 88613 |
| VervetAGM         |                                                                                  |        |        |        |        |        |        |        | 97219 |
| Gorrilla          |                                                                                  |        |        |        |        |        |        |        | 92826 |
| GrabEatingMacaque |                                                                                  |        |        |        |        |        |        |        | 95686 |
| Macaque           |                                                                                  |        |        |        |        |        |        |        | 95018 |
| PigTailedMacaque  |                                                                                  |        |        |        |        |        |        |        | 95449 |
| Bonobo            |                                                                                  |        |        |        |        |        |        |        | 93411 |
| OliveBaboon       | TAACTAGGAAGTGTAATGAATCATTATATTAGAGATTAAATTAAGACTTTGGAAGCATTTTAGCCCGTAGAGTTAAGGTT |        |        |        |        |        |        |        | 96314 |
| Orangutan         |                                                                                  |        |        |        |        |        |        |        | 95567 |

| Majority          | XXXXXXXXXXXXXXXXXXXXXXXXXXXXXXXXXXXXXXXXXXXXXXXXXXXXXXXXXXXXXXXXXXXXXXXXXXXX     |        |        |        |        |        |        |        |       |
|-------------------|----------------------------------------------------------------------------------|--------|--------|--------|--------|--------|--------|--------|-------|
|                   | 114330                                                                           | 114340 | 114350 | 114360 | 114370 | 114380 | 114390 | 114400 |       |
| Human             | TACTAATGTTTTAAAAATTATTTACTAGTTTCATAAAGCAGAAAGATGTAATGCAGTTATAGAGAGCATCCCAAGCCAG  |        |        |        |        |        |        |        | 95978 |
| Coquerel'sSifaka  |                                                                                  |        |        |        |        |        |        |        | 81164 |
| Ma'sNightMonkey   |                                                                                  |        |        |        |        |        |        |        | 88613 |
| VervetAGM         |                                                                                  |        |        |        |        |        |        |        | 97219 |
| Gorrilla          |                                                                                  |        |        |        |        |        |        |        | 92826 |
| GrabEatingMacaque |                                                                                  |        |        |        |        |        |        |        | 95686 |
| Macaque           |                                                                                  |        |        |        |        |        |        |        | 95018 |
| PigTailedMacaque  |                                                                                  |        |        |        |        |        |        |        | 95449 |
| Bonobo            |                                                                                  |        |        |        |        |        |        |        | 93411 |
| OliveBaboon       | AGTGTAGTGAAATTATGGTGATTAGCTTAATTCATTCATGTACATTTATTTGTATCTGTACCAGATAATTACTAGGTAAA |        |        |        |        |        |        |        | 96394 |
| Orangutan         |                                                                                  |        |        |        |        |        |        |        | 95567 |

| Majority          | XXXXXXXXXXXXXXXXXXXXXXXXXXXXXXXXXXXXXXXXXXXXXXXXXXXXXXXXXXXXXXXXXXXXXXXXXXXX      |        |        |        |        |        |        |        |       |
|-------------------|-----------------------------------------------------------------------------------|--------|--------|--------|--------|--------|--------|--------|-------|
|                   | 114410                                                                            | 114420 | 114430 | 114440 | 114450 | 114460 | 114470 | 114480 |       |
| Human             | ATGAAAAGAAACCATGGATTTAGCTTTATATTTTCTGTTTGAACCTTGATAGCCCAATCATAAAATGCACATATTTAATTA |        |        |        |        |        |        |        | 96058 |
| Coquerel'sSifaka  |                                                                                   |        |        |        |        |        |        |        | 81164 |
| Ma'sNightMonkey   |                                                                                   |        |        |        |        |        |        |        | 88613 |
| VervetAGM         |                                                                                   |        |        |        |        |        |        |        | 97219 |
| Gorrilla          |                                                                                   |        |        |        |        |        |        |        | 92826 |
| GrabEatingMacaque |                                                                                   |        |        |        |        |        |        |        | 95686 |
| Macaque           |                                                                                   |        |        |        |        |        |        |        | 95018 |
| PigTailedMacaque  |                                                                                   |        |        |        |        |        |        |        | 95449 |
| Bonobo            |                                                                                   |        |        |        |        |        |        |        | 93411 |
| OliveBaboon       | GGACAAATCACTTCAAAGCCTCAGTATTATTTGTAAAATGGAGGCAATAAGTTCTGCTCTGCTCACCTCACAGGATTATT  |        |        |        |        |        |        |        | 96474 |
| Orangutan         |                                                                                   |        |        |        |        |        |        |        | 95567 |

Tuesday, May 03, 2022 06:17 PM

| Majority          | XXXXXXXXXXXXXXXXXXXXXXXXXXXXXXXXXXXXXXXXXXXXXXXXXXXXXXXXXXXXXXXXXXXXXXXXXXXX      |        |        |        |        |        |        |        |       |
|-------------------|-----------------------------------------------------------------------------------|--------|--------|--------|--------|--------|--------|--------|-------|
|                   | 114490                                                                            | 114500 | 114510 | 114520 | 114530 | 114540 | 114550 | 114560 |       |
| Human             | TAGACTGCACTTAAGATTTTCATATGTATAAAAAAGTTGCTGTGAAACAGGTAATTTTAACACTCAGGAATTTCAAGGCTA |        |        |        |        |        |        |        | 96138 |
| Coquerel'sSifaka  |                                                                                   |        |        |        |        |        |        |        | 81164 |
| Ma'sNightMonkey   |                                                                                   |        |        |        |        |        |        |        | 88613 |
| VervetAGM         |                                                                                   |        |        |        |        |        |        |        | 97219 |
| Gorrilla          |                                                                                   |        |        |        |        |        |        |        | 92826 |
| GrabEatingMacaque |                                                                                   |        |        |        |        |        |        |        | 95686 |
| Macaque           |                                                                                   |        |        |        |        |        |        |        | 95018 |
| PigTailedMacaque  |                                                                                   |        |        |        |        |        |        |        | 95449 |
| Bonobo            |                                                                                   |        |        |        |        |        |        |        | 93411 |
| OliveBaboon       | ATAGAGGCTCAAATAGGATAAGTGAAGAAATGCTATGCAATTAGTAAACTGTTAGGCCAGAGAGTCCCAGACTGCCAGA   |        |        |        |        |        |        |        | 96554 |
| Orangutan         |                                                                                   |        |        |        |        |        |        |        | 95567 |

| Majority          | XXXXXXXXXXXXXXXXXXXXXXXXXXXXXXXXXXXXXXXXXXXXXXXXXXXXXXXXXXXXXXXXXXXXXXXXXXXX     |        |        |        |        |        |        |        |       |
|-------------------|----------------------------------------------------------------------------------|--------|--------|--------|--------|--------|--------|--------|-------|
|                   | 114570                                                                           | 114580 | 114590 | 114600 | 114610 | 114620 | 114630 | 114640 |       |
| Human             | AGGAAGAAAGACATACTCTCATGAGCAGCTCTGAACTTCAAACAGGATTTTCTGGCTGCCTTAATATATTTAAATGGAGC |        |        |        |        |        |        |        | 96218 |
| Coquerel'sSifaka  |                                                                                  |        |        |        |        |        |        |        | 81164 |
| Ma'sNightMonkey   |                                                                                  |        |        |        |        |        |        |        | 88613 |
| VervetAGM         |                                                                                  |        |        |        |        |        |        |        | 97219 |
| Gorrilla          |                                                                                  |        |        |        |        |        |        |        | 92826 |
| GrabEatingMacaque |                                                                                  |        |        |        |        |        |        |        | 95686 |
| Macaque           |                                                                                  |        |        |        |        |        |        |        | 95018 |
| PigTailedMacaque  |                                                                                  |        |        |        |        |        |        |        | 95449 |
| Bonobo            |                                                                                  |        |        |        |        |        |        |        | 93411 |
| OliveBaboon       | TTTGCCACAGTAAACTTCATTATCCGCAATACATGTTATCCTAATATGTCTTTTTGCTACGAAGAAATACTAATGTTTT  |        |        |        |        |        |        |        | 96634 |
| Orangutan         |                                                                                  |        |        |        |        |        |        |        | 95567 |

| Majority          | XXXXXXXXXXXXXXXXXXXXXXXXXXXXXXXXXXXXXXXXXXXXXXXXXXXXXXXXXXXXXXXXXXXXXXXXXXXX      |        |        |        |        |        |        |        |       |
|-------------------|-----------------------------------------------------------------------------------|--------|--------|--------|--------|--------|--------|--------|-------|
|                   | 114650                                                                            | 114660 | 114670 | 114680 | 114690 | 114700 | 114710 | 114720 |       |
| Human             | CTAAATCTGAAAACGTTTTTTTCATTGAGAAAGTACAGAATTCAGTGAAATTGAGTATACTAGGAAATCTGATGGCA     |        |        |        |        |        |        |        | 96298 |
| Coquerel'sSifaka  |                                                                                   |        |        |        |        |        |        |        | 81164 |
| Ma'sNightMonkey   |                                                                                   |        |        |        |        |        |        |        | 88613 |
| VervetAGM         |                                                                                   |        |        |        |        |        |        |        | 97219 |
| Gorrilla          |                                                                                   |        |        |        |        |        |        |        | 92826 |
| GrabEatingMacaque |                                                                                   |        |        |        |        |        |        |        | 95686 |
| Macaque           |                                                                                   |        |        |        |        |        |        |        | 95018 |
| PigTailedMacaque  |                                                                                   |        |        |        |        |        |        |        | 95449 |
| Bonobo            |                                                                                   |        |        |        |        |        |        |        | 93411 |
| OliveBaboon       | AAAATTATTTACTAGTTTCATAAAGCAGAAAGATGTAATAATGCAGTTATAGAGAGCATCCCAAGCCAAACGAAAAGAAAC |        |        |        |        |        |        |        | 96714 |
| Orangutan         |                                                                                   |        |        |        |        |        |        |        | 95567 |

Tuesday, May 03, 2022 06:18 PM

| Majority          | XXXXXXXXXXXXXXXXXXXXXXXXXXXXXXXXXXXXXXXXXXXXXXXXXXXXXXXXXXXXXXXXXXXXXXXXXXXX     |        |        |        |        |        |        |        |       |
|-------------------|----------------------------------------------------------------------------------|--------|--------|--------|--------|--------|--------|--------|-------|
|                   | 114730                                                                           | 114740 | 114750 | 114760 | 114770 | 114780 | 114790 | 114800 |       |
| Human             | AGAATTCAGCAGAAAGTCTTAATTTTAAACCGTAATATTCATTGATTATGCAAACCTTAGTTTATAGTTATTCTTTGT   |        |        |        |        |        |        |        | 96378 |
| Coquerel'sSifaka  |                                                                                  |        |        |        |        |        |        |        | 81164 |
| Ma'sNightMonkey   |                                                                                  |        |        |        |        |        |        |        | 88613 |
| VervetAGM         |                                                                                  |        |        |        |        |        |        |        | 97219 |
| Gorrilla          |                                                                                  |        |        |        |        |        |        |        | 92826 |
| GrabEatingMacaque |                                                                                  |        |        |        |        |        |        |        | 95686 |
| Macaque           |                                                                                  |        |        |        |        |        |        |        | 95018 |
| PigTailedMacaque  |                                                                                  |        |        |        |        |        |        |        | 95449 |
| Bonobo            |                                                                                  |        |        |        |        |        |        |        | 93411 |
| OliveBaboon       | CATGGATTTAGTTTGTATTTTGTGTTGAACTTGATAGCCCAATCATAAAATGCATATTTAATTATATTTAATTATAGACT |        |        |        |        |        |        |        | 96794 |
| Orangutan         |                                                                                  |        |        |        |        |        |        |        | 95567 |

| Majority          | XXXXXXXXXXXXXXXXXXXXXXXXXXXXXXXXXXXXXXXXXXXXXXXXXXXXXXXXXXXXXXXXXXXXXXXXXXXX     |        |        |        |        |        |        |        |       |
|-------------------|----------------------------------------------------------------------------------|--------|--------|--------|--------|--------|--------|--------|-------|
|                   | 114810                                                                           | 114820 | 114830 | 114840 | 114850 | 114860 | 114870 | 114880 |       |
| Human             | TATTTTGAATAGCTTCCCTTTAAATTTTCTAGTTTCAGATTTTGCAAATAAAAGTGTACATGTTAAAGTTATAGAGTATT |        |        |        |        |        |        |        | 96458 |
| Coquerel'sSifaka  |                                                                                  |        |        |        |        |        |        |        | 81164 |
| Ma'sNightMonkey   |                                                                                  |        |        |        |        |        |        |        | 88613 |
| VervetAGM         |                                                                                  |        |        |        |        |        |        |        | 97219 |
| Gorrilla          |                                                                                  |        |        |        |        |        |        |        | 92826 |
| GrabEatingMacaque |                                                                                  |        |        |        |        |        |        |        | 95686 |
| Macaque           |                                                                                  |        |        |        |        |        |        |        | 95018 |
| PigTailedMacaque  |                                                                                  |        |        |        |        |        |        |        | 95449 |
| Bonobo            |                                                                                  |        |        |        |        |        |        |        | 93411 |
| OliveBaboon       | GCACTTAAGATTTTCATATGTATAAAAAAGTTGCTGTGACACTTAGAGGTAATCTAACACTCAGGAATTTCAAGGCTAAG |        |        |        |        |        |        |        | 96874 |
| Orangutan         |                                                                                  |        |        |        |        |        |        |        | 95567 |

| Majority          | XXXXXXXXXXXXXXXXXXXXXXXXXXXXXXXXXXXXXXXXXXXXXXXXXXXXXXXXXXXXXXXXXXXXXXXXXXXX      |        |        |        |        |        |        |        |       |
|-------------------|-----------------------------------------------------------------------------------|--------|--------|--------|--------|--------|--------|--------|-------|
|                   | 114890                                                                            | 114900 | 114910 | 114920 | 114930 | 114940 | 114950 | 114960 |       |
| Human             | AGATTATTCACATTAAGAAGTCTTCAAATACGCGGAAAAATAAAACCGTAATGAACACCTATGCACTTCACTCAACTATA  |        |        |        |        |        |        |        | 96538 |
| Coquerel'sSifaka  |                                                                                   |        |        |        |        |        |        |        | 81164 |
| Ma'sNightMonkey   |                                                                                   |        |        |        |        |        |        |        | 88613 |
| VervetAGM         |                                                                                   |        |        |        |        |        |        |        | 97219 |
| Gorrilla          |                                                                                   |        |        |        |        |        |        |        | 92826 |
| GrabEatingMacaque |                                                                                   |        |        |        |        |        |        |        | 95686 |
| Macaque           |                                                                                   |        |        |        |        |        |        |        | 95018 |
| PigTailedMacaque  |                                                                                   |        |        |        |        |        |        |        | 95449 |
| Bonobo            |                                                                                   |        |        |        |        |        |        |        | 93411 |
| OliveBaboon       | GAAGAAAGACATATTTCTCAGCAGCAGCTCTGAACTTCAAACAGGATTTTCTGGCTGCCTTAATATATTTAAATGGAGCCT |        |        |        |        |        |        |        | 96954 |
| Orangutan         |                                                                                   |        |        |        |        |        |        |        | 95567 |





Tuesday, May 03, 2022 06:18 PM

| Majority          | XXXXXXXXXXXXXXXXXXXXXXXXXXXXXXXXXXXXXXXXXXXXXXXXXXXXXXXXXXXXXXXXXXXXXXXXXXXX     |        |        |        |        |        |        |        |       |
|-------------------|----------------------------------------------------------------------------------|--------|--------|--------|--------|--------|--------|--------|-------|
|                   | 115210                                                                           | 115220 | 115230 | 115240 | 115250 | 115260 | 115270 | 115280 |       |
| Human             | CAAATAATATGATATGGGTGTTAAATAGTACAATATTGTTCAAAACACACTTTATAATTTTAAACAGACTGTTTGGAC   |        |        |        |        |        |        |        | 96858 |
| Coquerel'sSifaka  |                                                                                  |        |        |        |        |        |        |        | 81164 |
| Ma'sNightMonkey   |                                                                                  |        |        |        |        |        |        |        | 88613 |
| VervetAGM         |                                                                                  |        |        |        |        |        |        |        | 97219 |
| Gorrilla          |                                                                                  |        |        |        |        |        |        |        | 92826 |
| GrabEatingMacaque |                                                                                  |        |        |        |        |        |        |        | 95686 |
| Macaque           |                                                                                  |        |        |        |        |        |        |        | 95018 |
| PigTailedMacaque  |                                                                                  |        |        |        |        |        |        |        | 95449 |
| Bonobo            |                                                                                  |        |        |        |        |        |        |        | 93411 |
| OliveBaboon       | ACATTAAGAACTGTTCAAATACGCGGAAACATAAAACCATAATGAACACCTGTGCACTTCACTCAACTATATCACTACCT |        |        |        |        |        |        |        | 97274 |
| Orangutan         |                                                                                  |        |        |        |        |        |        |        | 95567 |

| Majority          | XXXXXXXXXXXXXXXXXXXXXXXXXXXXXXXXXXXXXXXXXXXXXXXXXXXXXXXXXXXXXXXXXXXXXXXXXXXX    |        |        |        |        |        |        |        |       |
|-------------------|---------------------------------------------------------------------------------|--------|--------|--------|--------|--------|--------|--------|-------|
|                   | 115290                                                                          | 115300 | 115310 | 115320 | 115330 | 115340 | 115350 | 115360 |       |
| Human             | ATTGATAATCCCCTATCAAATCTCATGACATTTAACCAATTTTAAACAAGGATTTTAAATTGTGTTAAGAAATAAGTC  |        |        |        |        |        |        |        | 96938 |
| Coquerel'sSifaka  |                                                                                 |        |        |        |        |        |        |        | 81164 |
| Ma'sNightMonkey   |                                                                                 |        |        |        |        |        |        |        | 88613 |
| VervetAGM         |                                                                                 |        |        |        |        |        |        |        | 97219 |
| Gorrilla          |                                                                                 |        |        |        |        |        |        |        | 92826 |
| GrabEatingMacaque |                                                                                 |        |        |        |        |        |        |        | 95686 |
| Macaque           |                                                                                 |        |        |        |        |        |        |        | 95018 |
| PigTailedMacaque  |                                                                                 |        |        |        |        |        |        |        | 95449 |
| Bonobo            |                                                                                 |        |        |        |        |        |        |        | 93411 |
| OliveBaboon       | TTTTCATATTTTAAATGTAATTATATATTAGTTGAAAGGAAATGTTACAGAATGAACTGAAATCCCATATGAACCTCTT |        |        |        |        |        |        |        | 97354 |
| Orangutan         |                                                                                 |        |        |        |        |        |        |        | 95567 |

| Majority          | XXXXXXXXXXXXXXXXXXXXXXXXXXXXXXXXXXXXXXXXXXXXXXXXXXXXXXXXXXXXXXXXXXXXXXXXXXXX    |        |        |        |        |        |        |        |       |
|-------------------|---------------------------------------------------------------------------------|--------|--------|--------|--------|--------|--------|--------|-------|
|                   | 115370                                                                          | 115380 | 115390 | 115400 | 115410 | 115420 | 115430 | 115440 |       |
| Human             | ATTTGGGCCTCAGGTTTCTCTTAAGGATGTAACAAGGAGCTATATCATTGGTATTTTAGACGCTGAATTATGTGTAAGG |        |        |        |        |        |        |        | 97018 |
| Coquerel'sSifaka  |                                                                                 |        |        |        |        |        |        |        | 81164 |
| Ma'sNightMonkey   |                                                                                 |        |        |        |        |        |        |        | 88613 |
| VervetAGM         |                                                                                 |        |        |        |        |        |        |        | 97219 |
| Gorrilla          |                                                                                 |        |        |        |        |        |        |        | 92826 |
| GrabEatingMacaque |                                                                                 |        |        |        |        |        |        |        | 95686 |
| Macaque           |                                                                                 |        |        |        |        |        |        |        | 95018 |
| PigTailedMacaque  |                                                                                 |        |        |        |        |        |        |        | 95449 |
| Bonobo            |                                                                                 |        |        |        |        |        |        |        | 93411 |
| OliveBaboon       | TCTGATCTTAGTTCAAACCTGTTCTTTCCAAGAGGTAATTGTTCCTTCAATTTAGTATTTTATTATTCAGTGGTTGC   |        |        |        |        |        |        |        | 97434 |
| Orangutan         |                                                                                 |        |        |        |        |        |        |        | 95567 |

Tuesday, May 03, 2022 06:18 PM

| Majority          | XXXXXXXXXXXXXXXXXXXXXXXXXXXXXXXXXXXXXXXXXXXXXXXXXXXXXXXXXXXXXXXXXXXXXXXXXXXX    |       |
|-------------------|---------------------------------------------------------------------------------|-------|
|                   | 115450 115460 115470 115480 115490 115500 115510 115520                         |       |
| Human             | TCCTTAAATACAAACATACCCTTTGTAGCTTCACAGAGCCACCCGTTTGCACCTTCTCTCGCTTTTCTTCCTCCCTCTT | 97098 |
| Coquerel'sSifaka  |                                                                                 | 81164 |
| Ma'sNightMonkey   |                                                                                 | 88613 |
| VervetAGM         |                                                                                 | 97219 |
| Gorrilla          |                                                                                 | 92826 |
| GrabEatingMacaque |                                                                                 | 95686 |
| Macaque           |                                                                                 | 95018 |
| PigTailedMacaque  |                                                                                 | 95449 |
| Bonobo            |                                                                                 | 93411 |
| OliveBaboon       | TTTTCAAGAGGAATTTGTCCTAAATTTCTTGTCTGCCTAGTTATAAAAATGGCAAATAATATAATACTGGGTGTTTAAA | 97514 |
| Orangutan         |                                                                                 | 95567 |

| Majority          | XXXXXXXXXXXXXXXXXXXXXXXXXXXXXXXXXXXXXXXXXXXXXXXXXXXXXXXXXXXXXXXXXXXXXXXXXXXX      |       |
|-------------------|-----------------------------------------------------------------------------------|-------|
|                   | 115530 115540 115550 115560 115570 115580 115590 115600                           |       |
| Human             | GGCTCCCATTTCAATGGACAGAAAGACTATGTGGCATCTCTATTTTTCATTCACTTGGTTTATTGTCTTGGTATGTTGTAT | 97178 |
| Coquerel'sSifaka  |                                                                                   | 81164 |
| Ma'sNightMonkey   |                                                                                   | 88613 |
| VervetAGM         |                                                                                   | 97219 |
| Gorrilla          |                                                                                   | 92826 |
| GrabEatingMacaque |                                                                                   | 95686 |
| Macaque           |                                                                                   | 95018 |
| PigTailedMacaque  |                                                                                   | 95449 |
| Bonobo            |                                                                                   | 93411 |
| OliveBaboon       | TAGTACAATATTTTATTGTTCAAACACATTTTATAATTTTAAACAGATTGGACATTGATAATCCCTTATCAAATCTCA    | 97594 |
| Orangutan         |                                                                                   | 95567 |

| Majority          | XXXXXXXXXXXXXXXXXXXXXXXXXXXXXXXXXXXXXXXXXXXXXXXXXXXXXXXXXXXXXXXXXXXXXXXXXXXX     |       |
|-------------------|----------------------------------------------------------------------------------|-------|
|                   | 115610 115620 115630 115640 115650 115660 115670 115680                          |       |
| Human             | AGGTTTTTGAATCAGAAAATTTTAACATTTTGTAGATATTTCAAACATACAAAAATAGAAGAATATTTAACAACCCTTG  | 97258 |
| Coquerel'sSifaka  |                                                                                  | 81164 |
| Ma'sNightMonkey   |                                                                                  | 88613 |
| VervetAGM         |                                                                                  | 97219 |
| Gorrilla          |                                                                                  | 92826 |
| GrabEatingMacaque |                                                                                  | 95686 |
| Macaque           |                                                                                  | 95018 |
| PigTailedMacaque  |                                                                                  | 95449 |
| Bonobo            |                                                                                  | 93411 |
| OliveBaboon       | TGACATGTAACCAATTTTAAATAAGGATTTTAAATCGTGTTTAAGAAATAAGTCATTTGGGCCCCAGGTTTCTCTTAAAT | 97674 |
| Orangutan         |                                                                                  | 95567 |





Tuesday, May 03, 2022 06:18 PM

```

Majority      XXXXXXXXXXXXXXXXXXXXXXXXXXXXXXXXXXXXXXXXXXXXXXXXXXXXXXXXXXXXXXXXXXXXXXX
                |      |      |      |      |      |      |      |      |
                116170  116180  116190  116200  116210  116220  116230  116240
Human         ATCTAGTTTTAACCAGCTGTTTTAAAGATAAACAGTTCTAGAGATCAAATGAATAGTTTAGCAACATATTTATTGTA 97818
Coquerel'sSifaka         81164
Ma'sNightMonkey         88613
VervetAGM         97219
Gorrilla         92826
GrabEatingMacaque         95686
Macaque         95018
PigTailedMacaque         95449
Bonobo         93411
OliveBaboon       AACCTCGCTATTAAAAATGCAGTCACCAAACCAGTGGCAAATTAATATCACCTAGGAGTTTATTAGAAACTCAATCTATG 98234
Orangutan         95567
    
```

```

Majority      XXXXXXXXXXXXXXXXXXXXXXXXXXXXXXXXXXXXXXXXXXXXXXXXXXXXXXXXXXXXXXXXXXXXXXX
                |      |      |      |      |      |      |      |      |
                116250  116260  116270  116280  116290  116300  116310  116320
Human         TACCTGTAGTTAGAATCCAAGTCCCTGGCTTTCCAATCCAGTCTTCAATGTATAATACTGATCAAAAGAAATACAGGCCT 97898
Coquerel'sSifaka         81164
Ma'sNightMonkey         88613
VervetAGM         97219
Gorrilla         92826
GrabEatingMacaque         95686
Macaque         95018
PigTailedMacaque         95449
Bonobo         93411
OliveBaboon       ATCCTACTGAATCTACACTTTGGCAAGATTTGGCAGGTGATGCATTTGGACATAAGTTGAAGAAGCACTCTTAATAGAAT 98314
Orangutan         95567
    
```

```

Majority      XXXXXXXXXXXXXXXXXXXXXXXXXXXXXXXXXXXXXXXXXXXXXXXXXXXXXXXXXXXXXXXXXXXXXXX
                |      |      |      |      |      |      |      |      |
                116330  116340  116350  116360  116370  116380  116390  116400
Human         GCTATTATTCATAAATTTAAACTATTATGTACAAGTTGATAGCTTATAATAGAAATCAGTATGATTAGTGTTAAAAGTCA 97978
Coquerel'sSifaka         81164
Ma'sNightMonkey         88613
VervetAGM         97219
Gorrilla         92826
GrabEatingMacaque         95686
Macaque         95018
PigTailedMacaque         95449
Bonobo         93411
OliveBaboon       GCGTTTTTTTCAGTTCGTAAAAATCAGCTTCCAAGTTTTTTCCTGAGTGTGGAAATTTATTTCTTAGTAATTTTAAGTTT 98394
Orangutan         95567
    
```

Tuesday, May 03, 2022 06:18 PM

```

Majority      XXXXXXXXXXXXXXXXXXXXXXXXXXXXXXXXXXXXXXXXXXXXXXXXXXXXXXXXXXXXXXXXXXXXXXXX
              |-----|
              116410 116420 116430 116440 116450 116460 116470 116480
Human      AATTTAGTCTGACAGGAAGGAATGTCCATGTGAAGTATTTTAAATAGAATGCAATTAATACTCAATTCCTGATT 98058
Coquerel'sSifaka
Ma'sNightMonkey
VervetAGM
Gorrilla
GrabEatingMacaque
Macaque
PigTailedMacaque
Bonobo
OliveBaboon  TGCAGATATGTAGTTAATAATACCAAGAAATAATTGAAAAGGAACCCGGATATCCAGTTTTAACCTCCTGTTTTAAAGAT 98474
Orangutan

```

```

Majority      XXXXXXXXXXXXXXXXXXXXXXXXXXXXXXXXXXXXXXXXXXXXXXXXXXXXXXXXXXXXXXXXXXXXXXXX
              |-----|
              116490 116500 116510 116520 116530 116540 116550 116560
Human      TGTTTATTACATTTTGTGGTTTAAATGAAATGATACTCAGGTCATTTTCATAAATAGCTTTTCTATTAATGCTTCCTCAGT 98138
Coquerel'sSifaka
Ma'sNightMonkey
VervetAGM
Gorrilla
GrabEatingMacaque
Macaque
PigTailedMacaque
Bonobo
OliveBaboon  AAACAGTTCTAGAGCTCAAATAAATAGTTTAGCAACATTTATTGTAACATACCTGTAGTTAGAATCCAAGTCCCTGGCTT 98554
Orangutan

```

```

Majority      XXXXXXXXXXXXXXXXXXXXXXXXXXXXXXXXXXXXXXXXXXXXXXXXXXXXXXXXXXXXXXXXXXXXXXXX
              |-----|
              116570 116580 116590 116600 116610 116620 116630 116640
Human      CACATTCTCTATTCTTATTGCATAGCACAGTCTAACAGTTGAAATGCCTAAGCCTTACTGAATGATGACTGATATTCTCT 98218
Coquerel'sSifaka
Ma'sNightMonkey
VervetAGM
Gorrilla
GrabEatingMacaque
Macaque
PigTailedMacaque
Bonobo
OliveBaboon  TCCAATCCAGTCTTCAGTGTTTTACTGATCAAAGAAATACAGGCCTGCTATTATTCATAAATTTAACTATTACGTA 98634
Orangutan

```

Tuesday, May 03, 2022 06:18 PM

| Majority          | XXXXXXXXXXXXXXXXXXXXXXXXXXXXXXXXXXXXXXXXXXXXXXXXXXXXXXXXXXXXXXXXXXXX              |        |        |        |        |        |        |        |       |
|-------------------|-----------------------------------------------------------------------------------|--------|--------|--------|--------|--------|--------|--------|-------|
|                   | 116650                                                                            | 116660 | 116670 | 116680 | 116690 | 116700 | 116710 | 116720 |       |
| Human             | GTGAGAGTTAGAGCTGTACTATAAATATACATTACCTGTGCAAAGTATGCCTTCAGGGGCTATTCCCATAACCTTAGCA   |        |        |        |        |        |        |        | 98298 |
| Coquerel'sSifaka  |                                                                                   |        |        |        |        |        |        |        | 81164 |
| Ma'sNightMonkey   |                                                                                   |        |        |        |        |        |        |        | 88613 |
| VervetAGM         |                                                                                   |        |        |        |        |        |        |        | 97219 |
| Gorrilla          |                                                                                   |        |        |        |        |        |        |        | 92826 |
| GrabEatingMacaque |                                                                                   |        |        |        |        |        |        |        | 95686 |
| Macaque           |                                                                                   |        |        |        |        |        |        |        | 95018 |
| PigTailedMacaque  |                                                                                   |        |        |        |        |        |        |        | 95449 |
| Bonobo            |                                                                                   |        |        |        |        |        |        |        | 93411 |
| OliveBaboon       | CAAGTTGGTAGCTTATCATAGAAATCAGTATGATCAGTATTTAAAAGTCAAATTTAACAGGGAAGGAATGTCCATGTGAAT |        |        |        |        |        |        |        | 98714 |
| Orangutan         |                                                                                   |        |        |        |        |        |        |        | 95567 |

| Majority          | XXXXXXXXXXXXXXXXXXXXXXXXXXXXXXXXXXXXXXXXXXXXXXXXXXXXXXXXXXXXXXXXXXXX            |        |        |        |        |        |        |        |       |
|-------------------|---------------------------------------------------------------------------------|--------|--------|--------|--------|--------|--------|--------|-------|
|                   | 116730                                                                          | 116740 | 116750 | 116760 | 116770 | 116780 | 116790 | 116800 |       |
| Human             | AAATTTTAAATATTCTTATGGCTAGCAATCTTATCTATTGTCATGTCTTACTATTTCTCTGCTTACCACCCCATTTCTC |        |        |        |        |        |        |        | 98378 |
| Coquerel'sSifaka  |                                                                                 |        |        |        |        |        |        |        | 81164 |
| Ma'sNightMonkey   |                                                                                 |        |        |        |        |        |        |        | 88613 |
| VervetAGM         |                                                                                 |        |        |        |        |        |        |        | 97219 |
| Gorrilla          |                                                                                 |        |        |        |        |        |        |        | 92826 |
| GrabEatingMacaque |                                                                                 |        |        |        |        |        |        |        | 95686 |
| Macaque           |                                                                                 |        |        |        |        |        |        |        | 95018 |
| PigTailedMacaque  |                                                                                 |        |        |        |        |        |        |        | 95449 |
| Bonobo            |                                                                                 |        |        |        |        |        |        |        | 93411 |
| OliveBaboon       | TGATTTTTTAAATAGACTGCAAATTAGTACTCTTAATCCTGATTTGTTTTATTACATTTTGTTGTTTATAAAATGATA  |        |        |        |        |        |        |        | 98794 |
| Orangutan         |                                                                                 |        |        |        |        |        |        |        | 95567 |

| Majority          | XXXXXXXXXXXXXXXXXXXXXXXXXXXXXXXXXXXXXXXXXXXXXXXXXXXXXXXXXXXXXXXXXXXX             |        |        |        |        |        |        |        |       |
|-------------------|----------------------------------------------------------------------------------|--------|--------|--------|--------|--------|--------|--------|-------|
|                   | 116810                                                                           | 116820 | 116830 | 116840 | 116850 | 116860 | 116870 | 116880 |       |
| Human             | TCTCAACCTTGTTGCTGCATTAGCTGTCCATCACTTAACACTGTTTATTTCTCTGTTTCTTCCATCATCTCTTCTTT    |        |        |        |        |        |        |        | 98458 |
| Coquerel'sSifaka  |                                                                                  |        |        |        |        |        |        |        | 81164 |
| Ma'sNightMonkey   |                                                                                  |        |        |        |        |        |        |        | 88613 |
| VervetAGM         |                                                                                  |        |        |        |        |        |        |        | 97219 |
| Gorrilla          |                                                                                  |        |        |        |        |        |        |        | 92826 |
| GrabEatingMacaque |                                                                                  |        |        |        |        |        |        |        | 95686 |
| Macaque           |                                                                                  |        |        |        |        |        |        |        | 95018 |
| PigTailedMacaque  |                                                                                  |        |        |        |        |        |        |        | 95449 |
| Bonobo            |                                                                                  |        |        |        |        |        |        |        | 93411 |
| OliveBaboon       | CTCGGGTCATTTTCGTAAATAGCTTTTCTACTCATTTAATGCTTCCTCAGTCACCTTTTCTACTATTGCATAGCACAGTC |        |        |        |        |        |        |        | 98874 |
| Orangutan         |                                                                                  |        |        |        |        |        |        |        | 95567 |

Tuesday, May 03, 2022 06:18 PM

| Majority          | XXXXXXXXXXXXXXXXXXXXXXXXXXXXXXXXXXXXXXXXXXXXXXXXXXXXXXXXXXXXXXXXXXXXXXXXXXXX     |        |        |        |        |        |        |        |       |
|-------------------|----------------------------------------------------------------------------------|--------|--------|--------|--------|--------|--------|--------|-------|
|                   | 116890                                                                           | 116900 | 116910 | 116920 | 116930 | 116940 | 116950 | 116960 |       |
| Human             | GCAACTAAATGATTTAGACTTTTTATAACCATAATCAACCAGTTAGATTCTTTTATTTGTGGTTATTGAGTTGATAAAT  |        |        |        |        |        |        |        | 98538 |
| Coquerel'sSifaka  |                                                                                  |        |        |        |        |        |        |        | 81164 |
| Ma'sNightMonkey   |                                                                                  |        |        |        |        |        |        |        | 88613 |
| VervetAGM         |                                                                                  |        |        |        |        |        |        |        | 97219 |
| Gorrilla          |                                                                                  |        |        |        |        |        |        |        | 92826 |
| GrabEatingMacaque |                                                                                  |        |        |        |        |        |        |        | 95686 |
| Macaque           |                                                                                  |        |        |        |        |        |        |        | 95018 |
| PigTailedMacaque  |                                                                                  |        |        |        |        |        |        |        | 95449 |
| Bonobo            |                                                                                  |        |        |        |        |        |        |        | 93411 |
| OliveBaboon       | TAACAGTTGAAATGCCTAAGCGTTACTGAATAATGACTCTGATATTCTCTCTGAGAGTTAAAGCTGTGCTATAAATATAC |        |        |        |        |        |        |        | 98954 |
| Orangutan         |                                                                                  |        |        |        |        |        |        |        | 95567 |

| Majority          | XXXXXXXXXXXXXXXXXXXXXXXXXXXXXXXXXXXXXXXXXXXXXXXXXXXXXXXXXXXXXXXXXXXXXXXXXXXX     |        |        |        |        |        |        |        |       |
|-------------------|----------------------------------------------------------------------------------|--------|--------|--------|--------|--------|--------|--------|-------|
|                   | 116970                                                                           | 116980 | 116990 | 117000 | 117010 | 117020 | 117030 | 117040 |       |
| Human             | GATAGTGCATTTTATGTAATATTCAGGTGTTATGCTATTTTATCTGGTTCACTTTAAACCTCCCTCCCCCACTCCCT    |        |        |        |        |        |        |        | 98618 |
| Coquerel'sSifaka  |                                                                                  |        |        |        |        |        |        |        | 81164 |
| Ma'sNightMonkey   |                                                                                  |        |        |        |        |        |        |        | 88613 |
| VervetAGM         |                                                                                  |        |        |        |        |        |        |        | 97219 |
| Gorrilla          |                                                                                  |        |        |        |        |        |        |        | 92826 |
| GrabEatingMacaque |                                                                                  |        |        |        |        |        |        |        | 95686 |
| Macaque           |                                                                                  |        |        |        |        |        |        |        | 95018 |
| PigTailedMacaque  |                                                                                  |        |        |        |        |        |        |        | 95449 |
| Bonobo            |                                                                                  |        |        |        |        |        |        |        | 93411 |
| OliveBaboon       | ATTTACCTGTGCGAAGTATGCCTTCAGGGGCTATGCCCCATAACCTTAGCAAATTTTAAAATATTTCTTATGGCTAGCAA |        |        |        |        |        |        |        | 99034 |
| Orangutan         |                                                                                  |        |        |        |        |        |        |        | 95567 |

| Majority          | XXXXXXXXXXXXXXXXXXXXXXXXXXXXXXXXXXXXXXXXXXXXXXXXXXXXXXXXXXXXXXXXXXXXXXXXXXXX      |        |        |        |        |        |        |        |       |
|-------------------|-----------------------------------------------------------------------------------|--------|--------|--------|--------|--------|--------|--------|-------|
|                   | 117050                                                                            | 117060 | 117070 | 117080 | 117090 | 117100 | 117110 | 117120 |       |
| Human             | TTTTTGTGGGTTTTTTTTTATTATTATTTTCCAGTTTGTGTGTTTGTGCTTTTAACTTCTGAGATTGCAGTGG         |        |        |        |        |        |        |        | 98698 |
| Coquerel'sSifaka  |                                                                                   |        |        |        |        |        |        |        | 81164 |
| Ma'sNightMonkey   |                                                                                   |        |        |        |        |        |        |        | 88613 |
| VervetAGM         |                                                                                   |        |        |        |        |        |        |        | 97219 |
| Gorrilla          |                                                                                   |        |        |        |        |        |        |        | 92826 |
| GrabEatingMacaque |                                                                                   |        |        |        |        |        |        |        | 95686 |
| Macaque           |                                                                                   |        |        |        |        |        |        |        | 95018 |
| PigTailedMacaque  |                                                                                   |        |        |        |        |        |        |        | 95449 |
| Bonobo            |                                                                                   |        |        |        |        |        |        |        | 93411 |
| OliveBaboon       | TTTTATCTATTGTCATGTCCTTACAATTTCTGCTTACCACCCCAATTTGTCTCTCAACCTTGTGTGCTGCATTAGCTGTCC |        |        |        |        |        |        |        | 99114 |
| Orangutan         |                                                                                   |        |        |        |        |        |        |        | 95567 |



Tuesday, May 03, 2022 06:18 PM

| Majority          | XXXXXXXXXXXXXXXXXXXXXXXXXXXXXXXXXXXXXXXXXXXXXXXXXXXXXXXXXXXXXXXXXXXXXXXXXXXX    |        |        |        |        |        |        |        |       |
|-------------------|---------------------------------------------------------------------------------|--------|--------|--------|--------|--------|--------|--------|-------|
|                   | 117130                                                                          | 117140 | 117150 | 117160 | 117170 | 117180 | 117190 | 117200 |       |
| Human             | TTCCAGATGGTTGAAATCACTAGTAGTATTACATGAAGCATTTCATGTATTTATTACTGGTATATTCAACTATGGTGGA |        |        |        |        |        |        |        | 98778 |
| Coquerel'sSifaka  |                                                                                 |        |        |        |        |        |        |        | 81164 |
| Ma'sNightMonkey   |                                                                                 |        |        |        |        |        |        |        | 88613 |
| VervetAGM         |                                                                                 |        |        |        |        |        |        |        | 97219 |
| Gorrilla          |                                                                                 |        |        |        |        |        |        |        | 92826 |
| GrabEatingMacaque |                                                                                 |        |        |        |        |        |        |        | 95686 |
| Macaque           |                                                                                 |        |        |        |        |        |        |        | 95018 |
| PigTailedMacaque  |                                                                                 |        |        |        |        |        |        |        | 95449 |
| Bonobo            |                                                                                 |        |        |        |        |        |        |        | 93411 |
| OliveBaboon       | ATCACTTAAAACTGTTTATTTCTGTTTTCTTCCATCATTCTCTTTGCAACTACATGTCTTAGACTTTTTATAATCATAA |        |        |        |        |        |        |        | 99194 |
| Orangutan         |                                                                                 |        |        |        |        |        |        |        | 95567 |

| Majority          | XXXXXXXXXXXXXXXXXXXXXXXXXXXXXXXXXXXXXXXXXXXXXXXXXXXXXXXXXXXXXXXXXXXXXXXXXXXX       |        |        |        |        |        |        |        |       |
|-------------------|------------------------------------------------------------------------------------|--------|--------|--------|--------|--------|--------|--------|-------|
|                   | 117210                                                                             | 117220 | 117230 | 117240 | 117250 | 117260 | 117270 | 117280 |       |
| Human             | GGGAAATTGGTTCGAAGAATTACGGTTAAAGAGCTCCTTTAAAAAGGAGATTTGTAGAATTCTAAAATGTGATTCTGATTCT |        |        |        |        |        |        |        | 98858 |
| Coquerel'sSifaka  |                                                                                    |        |        |        |        |        |        |        | 81164 |
| Ma'sNightMonkey   |                                                                                    |        |        |        |        |        |        |        | 88613 |
| VervetAGM         |                                                                                    |        |        |        |        |        |        |        | 97219 |
| Gorrilla          |                                                                                    |        |        |        |        |        |        |        | 92826 |
| GrabEatingMacaque |                                                                                    |        |        |        |        |        |        |        | 95686 |
| Macaque           |                                                                                    |        |        |        |        |        |        |        | 95018 |
| PigTailedMacaque  |                                                                                    |        |        |        |        |        |        |        | 95449 |
| Bonobo            |                                                                                    |        |        |        |        |        |        |        | 93411 |
| OliveBaboon       | TCAACCATAACCAGATTCTTTTTATTTGTGGTTAATGAGTTGACAAACAATAGTGCATTTTATGTAATAATCAGGTGTTT   |        |        |        |        |        |        |        | 99274 |
| Orangutan         |                                                                                    |        |        |        |        |        |        |        | 95567 |

| Majority          | XXXXXXXXXXXXXXXXXXXXXXXXXXXXXXXXXXXXXXXXXXXXXXXXXXXXXXXXXXXXXXXXXXXXXXXXXXXX      |        |        |        |        |        |        |        |       |
|-------------------|-----------------------------------------------------------------------------------|--------|--------|--------|--------|--------|--------|--------|-------|
|                   | 117290                                                                            | 117300 | 117310 | 117320 | 117330 | 117340 | 117350 | 117360 |       |
| Human             | ATATAGTCATGATTCTTAGAAATTAGCTACAGGAAGAGATAGAAACATTGCATATAGTTGTCTTTGCCCTAAGTTTGAGAT |        |        |        |        |        |        |        | 98938 |
| Coquerel'sSifaka  |                                                                                   |        |        |        |        |        |        |        | 81164 |
| Ma'sNightMonkey   |                                                                                   |        |        |        |        |        |        |        | 88613 |
| VervetAGM         |                                                                                   |        |        |        |        |        |        |        | 97219 |
| Gorrilla          |                                                                                   |        |        |        |        |        |        |        | 92826 |
| GrabEatingMacaque |                                                                                   |        |        |        |        |        |        |        | 95686 |
| Macaque           |                                                                                   |        |        |        |        |        |        |        | 95018 |
| PigTailedMacaque  |                                                                                   |        |        |        |        |        |        |        | 95449 |
| Bonobo            |                                                                                   |        |        |        |        |        |        |        | 93411 |
| OliveBaboon       | TGCTATTTTGTCTGGTTCAGCTTAAAATCTCCCTGCCCCCACTCCCTTTTTTGTGGGTTTTTAAAATATTATTACTA     |        |        |        |        |        |        |        | 99354 |
| Orangutan         |                                                                                   |        |        |        |        |        |        |        | 95567 |



Tuesday, May 03, 2022 06:18 PM

| Majority          | XXXXXXXXXXXXXXXXXXXXXXXXXXXXXXXXXXXXXXXXXXXXXXXXXXXXXXXXXXXXXXXXXXXXXXXXXXXX     |       |
|-------------------|----------------------------------------------------------------------------------|-------|
|                   | 117610 117620 117630 117640 117650 117660 117670 117680                          |       |
| Human             | TGTTTTTTCCCTAAGATCATTTTGATGTCTCAGAAGACATTTGCTATGTACGTTGGACATTTGCCATGTACATTGTAGA  | 99258 |
| Coquerel'sSifaka  |                                                                                  | 81164 |
| Ma'sNightMonkey   |                                                                                  | 88613 |
| VervetAGM         |                                                                                  | 97219 |
| Gorrilla          |                                                                                  | 92826 |
| GrabEatingMacaque |                                                                                  | 95686 |
| Macaque           |                                                                                  | 95018 |
| PigTailedMacaque  |                                                                                  | 95449 |
| Bonobo            |                                                                                  | 93411 |
| OliveBaboon       | GAGAGATAGTAACATTGCTATAGTTGTCTTTGCCCTAAATGTGGAGTTTTATAGTGTAATAATATATAAATAGCTCTAAT | 99674 |
| Orangutan         |                                                                                  | 95567 |

| Majority          | XXXXXXXXXXXXXXXXXXXXXXXXXXXXXXXXXXXXXXXXXXXXXXXXXXXXXXXXXXXXXXXXXXXXXXXXXXXX    |       |
|-------------------|---------------------------------------------------------------------------------|-------|
|                   | 117690 117700 117710 117720 117730 117740 117750 117760                         |       |
| Human             | GAATACAAAGATAAACAGAACACAGTACAGCTGGTTCTATTAGACATTGAAAATGCATATTCTAGCATATTTAATATAT | 99338 |
| Coquerel'sSifaka  |                                                                                 | 81164 |
| Ma'sNightMonkey   |                                                                                 | 88613 |
| VervetAGM         |                                                                                 | 97219 |
| Gorrilla          |                                                                                 | 92826 |
| GrabEatingMacaque |                                                                                 | 95686 |
| Macaque           |                                                                                 | 95018 |
| PigTailedMacaque  |                                                                                 | 95449 |
| Bonobo            |                                                                                 | 93411 |
| OliveBaboon       | TATAAATACACTTTTACTCTGGAAAAACATAAGACATTGACATGAGACATTTAAAAACCATTATTTTCTCATCTGTAAA | 99754 |
| Orangutan         |                                                                                 | 95567 |

| Majority          | XXXXXXXXXXXXXXXXXXXXXXXXXXXXXXXXXXXXXXXXXXXXXXXXXXXXXXXXXXXXXXXXXXXXXXXXXXXX       |       |
|-------------------|------------------------------------------------------------------------------------|-------|
|                   | 117770 117780 117790 117800 117810 117820 117830 117840                            |       |
| Human             | TAGGGAACAATTTAAGCATAATGTGAATTTTCATGTTTACTGAAGATTTTCATCCTGAGAAACAAATGAAAGCAGAAAATTA | 99418 |
| Coquerel'sSifaka  |                                                                                    | 81164 |
| Ma'sNightMonkey   |                                                                                    | 88613 |
| VervetAGM         |                                                                                    | 97219 |
| Gorrilla          |                                                                                    | 92826 |
| GrabEatingMacaque |                                                                                    | 95686 |
| Macaque           |                                                                                    | 95018 |
| PigTailedMacaque  |                                                                                    | 95449 |
| Bonobo            |                                                                                    | 93411 |
| OliveBaboon       | GTGGAGAGAATCACTTCATATGTTCACTTATAAGGATTATATACTGTTCCATTAGTAGTGTTCCTTTTCTCTAATTAGG    | 99834 |
| Orangutan         |                                                                                    | 95567 |

Tuesday, May 03, 2022 06:18 PM

| Majority          | XXXXXXXXXXXXXXXXXXXXXXXXXXXXXXXXXXXXXXXXXXXXXXXXXXXXXXXXXXXXXXXXXXXXXXXXXXXX    |       |
|-------------------|---------------------------------------------------------------------------------|-------|
|                   | 117850 117860 117870 117880 117890 117900 117910 117920                         |       |
| Human             | CAACCAACTGAACCAGCTGTGTAAGAAATATATATATGGTGTGCACACATGTACATACTCAGACATCTATTAGCATTCT | 99498 |
| Coquerel'sSifaka  |                                                                                 | 81164 |
| Ma'sNightMonkey   |                                                                                 | 88613 |
| VervetAGM         |                                                                                 | 97219 |
| Gorrilla          |                                                                                 | 92826 |
| GrabEatingMacaque |                                                                                 | 95686 |
| Macaque           |                                                                                 | 95018 |
| PigTailedMacaque  |                                                                                 | 95449 |
| Bonobo            |                                                                                 | 93411 |
| OliveBaboon       | GGTGGGGGCAGTTTTTGGCATTTTATTTATGGAAGTTTTTTTTTTTCCCTAAAATCATTTTGACCTCTCAAAGACATT  | 99914 |
| Orangutan         |                                                                                 | 95567 |

| Majority          | XXXXXXXXXXXXXXXXXXXXXXXXXXXXXXXXXXXXXXXXXXXXXXXXXXXXXXXXXXXXXXXXXXXXXXXXXXXX      |       |
|-------------------|-----------------------------------------------------------------------------------|-------|
|                   | 117930 117940 117950 117960 117970 117980 117990 118000                           |       |
| Human             | CAGTTTTCCACAAGTTAAAGCCACGCTCATCCATATCTGGTGCTAATAACTTCCTATCCAATTTTCAGATAGCTGTTTTTC | 99578 |
| Coquerel'sSifaka  |                                                                                   | 81164 |
| Ma'sNightMonkey   |                                                                                   | 88613 |
| VervetAGM         |                                                                                   | 97219 |
| Gorrilla          |                                                                                   | 92826 |
| GrabEatingMacaque |                                                                                   | 95686 |
| Macaque           |                                                                                   | 95018 |
| PigTailedMacaque  |                                                                                   | 95449 |
| Bonobo            |                                                                                   | 93411 |
| OliveBaboon       | TGCTATGTACGTTGGACATTTGCTATGTACATTGTAGAGAATACAAAGATAAACAGACACTGAAAATACAAATTTGTTCT  | 99994 |
| Orangutan         |                                                                                   | 95567 |

| Majority          | XXXXXXXXXXXXXXXXXXXXXXXXXXXXXXXXXXXXXXXXXXXXXXXXXXXXXXXXXXXXXXXXXXXXXXXXXXXX     |        |
|-------------------|----------------------------------------------------------------------------------|--------|
|                   | 118010 118020 118030 118040 118050 118060 118070 118080                          |        |
| Human             | AACACATCTGACACCTTCTTTTTTCAAGCAAACCTTCAGGCTCTTTTCAAGATAAAGTCATTTATAGTAGTGTCTATATA | 99658  |
| Coquerel'sSifaka  |                                                                                  | 81164  |
| Ma'sNightMonkey   |                                                                                  | 88613  |
| VervetAGM         |                                                                                  | 97219  |
| Gorrilla          |                                                                                  | 92826  |
| GrabEatingMacaque |                                                                                  | 95686  |
| Macaque           |                                                                                  | 95018  |
| PigTailedMacaque  |                                                                                  | 95449  |
| Bonobo            |                                                                                  | 93411  |
| OliveBaboon       | AGCATATTTAATATATTAGGGAACAATTTAAGCATAATGTGAATTTTACTTAAAGATTTTTCCTCTGAGAAACAAA     | 100074 |
| Orangutan         |                                                                                  | 95567  |

Tuesday, May 03, 2022 06:18 PM

```
Majority      XXXXXXXXXXXXXXXXXXXXXXXXXXXXXXXXXXXXXXXXXXXXXXXXXXXXXXXXXXXXXXXXXXXXXXXX
                |-----|
                118090   118100   118110   118120   118130   118140   118150   118160
Human          TTTCTTAACCATTTAACATGTAAACTGTGCTGCCTTTTAAAGAAATTAATTCTATCCTTTTTAGTGTCAGAGTTGAAGATT 99738
Coquerel'sSifaka                                     81164
Ma'sNightMonkey                                    88613
VervetAGM                                           97219
Gorrilla                                             92826
GrabEatingMacaque                                   95686
Macaque                                              95018
PigTailedMacaque                                   95449
Bonobo                                               93411
OliveBaboon    TGAAAGCAGGAAATTACAACCATTTTGAACCAGCTGTGGAAGAAAATATATATTTATCAGGTGTGCACACATGTACGTTC 100154
Orangutan                                           95567
```

```
Majority      XXXXXXXXXXXXXXXXXXXXXXXXXXXXXXXXXXXXXXXXXXXXXXXXXXXXXXXXXXXXXXXXXXXXXXXX
                |-----|
                118170   118180   118190   118200   118210   118220   118230   118240
Human          TTGAGTGTTGTGCCCTAACCTTATCATTTTCCTCATAAGTCCTGTGGTTTTTTATTGTATGATTTTGCATAGTGTGGCAAT 99818
Coquerel'sSifaka                                     81164
Ma'sNightMonkey                                    88613
VervetAGM                                           97219
Gorrilla                                             92826
GrabEatingMacaque                                   95686
Macaque                                              95018
PigTailedMacaque                                   95449
Bonobo                                               93411
OliveBaboon    CTCAGACATCTATTAGTCTCAGTTTTCCACAAGTTAAGAACTACGCTCATCCATATCTGGTGCTAATAACTTCCCATCCA 100234
Orangutan                                           95567
```

```
Majority      XXXXXXXXXXXXXXXXXXXXXXXXXXXXXXXXXXXXXXXXXXXXXXXXXXXXXXXXXXXXXXXXXXXXXXXX
                |-----|
                118250   118260   118270   118280   118290   118300   118310   118320
Human          TCTTGAAATGCTTATGTTGTGTATAGTATAACTGACTTACTACTTTCAAATAGCTTCTAGTCTGATTCATGTTATGAC 99898
Coquerel'sSifaka                                     81164
Ma'sNightMonkey                                    88613
VervetAGM                                           97219
Gorrilla                                             92826
GrabEatingMacaque                                   95686
Macaque                                              95018
PigTailedMacaque                                   95449
Bonobo                                               93411
OliveBaboon    ATTTCAGATAGCTGTTTTCAACACATCTGACACCCTCATTTTTTCAAGCAAACCTTCAGGTCTTTTTCAAGATAAAGTCAT 100314
Orangutan                                           95567
```

Tuesday, May 03, 2022 06:18 PM

```
Majority      XXXXXXXXXXXXXXXXXXXXXXXXXXXXXXXXXXXXXXXXXXXXXXXXXXXXXXXXXXXXXXXXXXXXXXX
                |-----|-----|-----|-----|-----|-----|-----|-----|
                118330   118340   118350   118360   118370   118380   118390   118400
Human         AGTATACAGTATAGCAAATAAGGACATCAGGGAACAGGAGGCTGAGCATATCACCATTTACCAATGGTAGCTTGAGCAA 99978
Coquerel'sSifaka      81164
Ma'sNightMonkey      88613
VervetAGM            97219
Gorrilla             92826
GrabEatingMacaque    95686
Macaque              95018
PigTailedMacaque     95449
Bonobo               93411
OliveBaboon         TTATAGTAGTATTTATATATTTCTTAACCATTTAACATGTAAACTGTGCTGCCTTTTAAGAAATTACTTCTGTCCTTTT 100394
Orangutan           95567
```

```
Majority      XXXXXXXXXXXXXXXXXXXXXXXXXXXXXXXXXXXXXXXXXXXXXXXXXXXXXXXXXXXXXXXXXXXXXXX
                |-----|-----|-----|-----|-----|-----|-----|-----|
                118410   118420   118430   118440   118450   118460   118470   118480
Human         GGCAC TTCATTTATCGAAGTCCATTTTCTCATCTGTACAATGGAGGTGATGATAGTACATGTCTTTTCTGTCTTGTGTTA 100058
Coquerel'sSifaka      81164
Ma'sNightMonkey      88613
VervetAGM            97219
Gorrilla             92826
GrabEatingMacaque    95686
Macaque              95018
PigTailedMacaque     95449
Bonobo               93411
OliveBaboon         TAGTGTCACGGATGAAGATTTTGAGTGTGTACCCTAACCTTATCATTTTCCTCATAAGTCCTGTGGGTTTTTTTGTATG 100474
Orangutan           95567
```

```
Majority      XXXXXXXXXXXXXXXXXXXXXXXXXXXXXXXXXXXXXXXXXXXXXXXXXXXXXXXXXXXXXXXXXXXXXXX
                |-----|-----|-----|-----|-----|-----|-----|-----|
                118490   118500   118510   118520   118530   118540   118550   118560
Human         TTTGTAGTTTCAAGTAAGATATGAAATATGCTGTAGAAATACAGGGTTGGGAATATCTAGTGGTACAAAAATCAACTTTT 100138
Coquerel'sSifaka      81164
Ma'sNightMonkey      88613
VervetAGM            97219
Gorrilla             92826
GrabEatingMacaque    95686
Macaque              95018
PigTailedMacaque     95449
Bonobo               93411
OliveBaboon         ATTTGCATAGTGTGGTAATTTCTTGAAATGCTTACGTTGTGTTATAGTGTAAGTACTTACTGCTTTCAAATAGCTTCT 100554
Orangutan           95567
```

Tuesday, May 03, 2022 06:18 PM

---

|                   |                                                                                  |                                                         |
|-------------------|----------------------------------------------------------------------------------|---------------------------------------------------------|
| Majority          | XXXXXXXXXXXXXXXXXXXXXXXXXXXXXXXXXXXXXXXXXXXXXXXXXXXXXXXXXXXXXXXXXXXXXXXXXXXX     |                                                         |
|                   |                                                                                  | 118570 118580 118590 118600 118610 118620 118630 118640 |
| Human             | GGCCCAATTTTAAGGTGAGATAATTATGAGACATTTTCGACCTCAAAGTCTTGTTCCTTTCTCTCTACACCATTGTGA   | 100218                                                  |
| Coquerel'sSifaka  |                                                                                  | 81164                                                   |
| Ma'sNightMonkey   |                                                                                  | 88613                                                   |
| VervetAGM         |                                                                                  | 97219                                                   |
| Gorilla           |                                                                                  | 92826                                                   |
| GrabEatingMacaque |                                                                                  | 95686                                                   |
| Macaque           |                                                                                  | 95018                                                   |
| PigTailedMacaque  |                                                                                  | 95449                                                   |
| Bonobo            |                                                                                  | 93411                                                   |
| OliveBaboon       | AGTCTGATTTCACGCTATGACAGTATACAGTATAGCAAATAAGGACGTCAGGGAACAGGAGGCTGAGCATATCACCGTTT | 100634                                                  |
| Orangutan         |                                                                                  | 95567                                                   |

---

|                   |                                                                                  |                                                         |
|-------------------|----------------------------------------------------------------------------------|---------------------------------------------------------|
| Majority          | XXXXXXXXXXXXXXXXXXXXXXXXXXXXXXXXXXXXXXXXXXXXXXXXXXXXXXXXXXXXXXXXXXXXXXXXXXXX     |                                                         |
|                   |                                                                                  | 118650 118660 118670 118680 118690 118700 118710 118720 |
| Human             | ATAACACAGTGTATATATGAGATTAATTTATTACCTCGACTTTCATTTTGTGTTTGTAAAGTAGTTTAAATTTTTTATAT | 100298                                                  |
| Coquerel'sSifaka  |                                                                                  | 81164                                                   |
| Ma'sNightMonkey   |                                                                                  | 88613                                                   |
| VervetAGM         |                                                                                  | 97219                                                   |
| Gorilla           |                                                                                  | 92826                                                   |
| GrabEatingMacaque |                                                                                  | 95686                                                   |
| Macaque           |                                                                                  | 95018                                                   |
| PigTailedMacaque  |                                                                                  | 95449                                                   |
| Bonobo            |                                                                                  | 93411                                                   |
| OliveBaboon       | ACCAATGGTAGCTTCAGCAAGCCCTTCATTTTATCTAAATCTTTTCTCATCTGTAAAATGGAGGTGATGATAGTACAT   | 100714                                                  |
| Orangutan         |                                                                                  | 95567                                                   |

---

|                   |                                                                                   |                                                         |
|-------------------|-----------------------------------------------------------------------------------|---------------------------------------------------------|
| Majority          | XXXXXXXXXXXXXXXXXXXXXXXXXXXXXXXXXXXXXXXXXXXXXXXXXXXXXXXXXXXXXXXXXXXXXXXXXXXX      |                                                         |
|                   |                                                                                   | 118730 118740 118750 118760 118770 118780 118790 118800 |
| Human             | CTATTTATAAAGTTAACTGCAGGAGTGTACCTGCAGTTAACTTTTATACAGTTAAGAAGAGGTTGGTTTCAGTTTTAAAGA | 100378                                                  |
| Coquerel'sSifaka  |                                                                                   | 81164                                                   |
| Ma'sNightMonkey   |                                                                                   | 88613                                                   |
| VervetAGM         |                                                                                   | 97219                                                   |
| Gorilla           |                                                                                   | 92826                                                   |
| GrabEatingMacaque |                                                                                   | 95686                                                   |
| Macaque           |                                                                                   | 95018                                                   |
| PigTailedMacaque  |                                                                                   | 95449                                                   |
| Bonobo            |                                                                                   | 93411                                                   |
| OliveBaboon       | CTCTTTCTGTCTTGTGTTATTTGTAGTTTCAATTTTATACAGCATGAAATATGGGGTTGGGAGTATCTAGTGGTACAAA   | 100794                                                  |
| Orangutan         |                                                                                   | 95567                                                   |

Tuesday, May 03, 2022 06:18 PM

|                   |                                                                                  |                                                         |
|-------------------|----------------------------------------------------------------------------------|---------------------------------------------------------|
| Majority          | XXXXXXXXXXXXXXXXXXXXXXXXXXXXXXXXXXXXXXXXXXXXXXXXXXXXXXXXXXXXXXXXXXXXXXXXXXXX     |                                                         |
|                   |                                                                                  | 118810 118820 118830 118840 118850 118860 118870 118880 |
| Human             | TTGTATGTCAGTGTAAACATCCATTATTATGCTTTCAGTAAAATAGCTCCTAAAAATATGGATTACTATCAACTTTC    | 100458                                                  |
| Coquerel'sSifaka  |                                                                                  | 81164                                                   |
| Ma'sNightMonkey   |                                                                                  | 88613                                                   |
| VervetAGM         |                                                                                  | 97219                                                   |
| Gorrilla          |                                                                                  | 92826                                                   |
| GrabEatingMacaque |                                                                                  | 95686                                                   |
| Macaque           |                                                                                  | 95018                                                   |
| PigTailedMacaque  |                                                                                  | 95449                                                   |
| Bonobo            |                                                                                  | 93411                                                   |
| OliveBaboon       | ATCACCTTGTGGCCCAATTTTAAAGGTGAGATAATTATGAGAGATTTTCAACCTCAAAGTCTTTGTTCTTTTCTCTCTAC | 100874                                                  |
| Orangutan         |                                                                                  | 95567                                                   |

|                   |                                                                                  |                                                         |
|-------------------|----------------------------------------------------------------------------------|---------------------------------------------------------|
| Majority          | XXXXXXXXXXXXXXXXXXXXXXXXXXXXXXXXXXXXXXXXXXXXXXXXXXXXXXXXXXXXXXXXXXXXXXXXXXXX     |                                                         |
|                   |                                                                                  | 118890 118900 118910 118920 118930 118940 118950 118960 |
| Human             | AGGAAAATAGCTCCTAAAAATATGGATTACTACCAACTTTCAAGGAAAATAGCTCCTAGAAATATGGATTACTAGCCACA | 100538                                                  |
| Coquerel'sSifaka  |                                                                                  | 81164                                                   |
| Ma'sNightMonkey   |                                                                                  | 88613                                                   |
| VervetAGM         |                                                                                  | 97219                                                   |
| Gorrilla          |                                                                                  | 92826                                                   |
| GrabEatingMacaque |                                                                                  | 95686                                                   |
| Macaque           |                                                                                  | 95018                                                   |
| PigTailedMacaque  |                                                                                  | 95449                                                   |
| Bonobo            |                                                                                  | 93411                                                   |
| OliveBaboon       | ACCATTGTGAATAACACAGTGTACATATGAGATTAATTTATTACCTCAACTTCTATTTTTGTTTTGTAAAGTAGTAGTT  | 100954                                                  |
| Orangutan         |                                                                                  | 95567                                                   |

|                   |                                                                                      |                                                         |
|-------------------|--------------------------------------------------------------------------------------|---------------------------------------------------------|
| Majority          | XXXXXXXXXXXXXXXXXXXXXXXXXXXXXXXXXXXXXXXXXXXXXXXXXXXXXXXXXXXXXXXXXXXXXXXXXXXX         |                                                         |
|                   |                                                                                      | 118970 118980 118990 119000 119010 119020 119030 119040 |
| Human             | TAAATTGCTAACATTTGCTTTTATTATTATTATTATTATTATTATTATTAGACACAGTCTTGCTCTGTCACCCAGGCTGGAGTG | 100618                                                  |
| Coquerel'sSifaka  |                                                                                      | 81164                                                   |
| Ma'sNightMonkey   |                                                                                      | 88613                                                   |
| VervetAGM         |                                                                                      | 97219                                                   |
| Gorrilla          |                                                                                      | 92826                                                   |
| GrabEatingMacaque |                                                                                      | 95686                                                   |
| Macaque           |                                                                                      | 95018                                                   |
| PigTailedMacaque  |                                                                                      | 95449                                                   |
| Bonobo            |                                                                                      | 93411                                                   |
| OliveBaboon       | TAATTTTTGGTATCTATAAAGTTAACTGCAGGAGTCTACCTACATTTAACTTTATACAGTTAAGAGGTTGGTTTCAGTTT     | 101034                                                  |
| Orangutan         |                                                                                      | 95567                                                   |





















Tuesday, May 03, 2022 06:18 PM

```

Majority      XXXXXXXXXXXXXXXXXXXXXXXXXXXXXXXXXXXXXXXXXXXXXXXXXXXXXXXXXXXXXXXXXXXXXXXX
                |-----|
                120970  120980  120990  121000  121010  121020  121030  121040
Human         ATTCCTGAGTTGTGACCAACAAAGAAACAGATTAATGATTGAAAATTCACCATACATTACTACCTATGTCTCTCCACCT 102618
Coquerel'sSifaka
Ma'sNightMonkey
VervetAGM
Gorrilla
GrabEatingMacaque
Macaque
PigTailedMacaque
Bonobo
OliveBaboon   GAAAGAATTAATGTAGATAAGGAAAAACCCCTTTATAAAAAATGCTTACCCTTTAAAAAATGTTGAATCCTCACAGTACT 103034
Orangutan
  
```

```

Majority      XXXXXXXXXXXXXXXXXXXXXXXXXXXXXXXXXXXXXXXXXXXXXXXXXXXXXXXXXXXXXXXXXXXXXXXX
                |-----|
                121050  121060  121070  121080  121090  121100  121110  121120
Human         GCTATCTACTTCCAATTTTTATATATATAAAAGTCATTAAAGTCATTTGTAATTGAGTTTGTTTTTTTCTTGAGACA 102698
Coquerel'sSifaka
Ma'sNightMonkey
VervetAGM
Gorrilla
GrabEatingMacaque
Macaque
PigTailedMacaque
Bonobo
OliveBaboon   ATTAAATACTACTTGGAAAAGTGTTTGTTAACCATGATATCTTTTTTGTAGATAATTTGAGTAGAATTATACATGCAATAT 103114
Orangutan
  
```

```

Majority      XXXXXXXXXXXXXXXXXXXXXXXXXXXXXXXXXXXXXXXXXXXXXXXXXXXXXXXXXXXXXXXXXXXXXXXX
                |-----|
                121130  121140  121150  121160  121170  121180  121190  121200
Human         GGGTCTCACTCTGTCCAGGCTGGAGTGCAATGGCATGATCACAGCTCACTGCAGCCTCAACCTCCCAGGTTTCGATA 102778
Coquerel'sSifaka
Ma'sNightMonkey
VervetAGM
Gorrilla
GrabEatingMacaque
Macaque
PigTailedMacaque
Bonobo
OliveBaboon   ATTCCTGAGTTGTGACCAACAAAGAAACAGATTAATGATTGAAAATTCACCATACATTACTACCTATGTCTCTCCACCT 103194
Orangutan
  
```

Tuesday, May 03, 2022 06:18 PM

| Majority          | XXXXXXXXXXXXXXXXXXXXXXXXXXXXXXXXXXXXXXXXXXXXXXXXXXXXXXXXXXXXXXXXXXXXXXXXXXXX            |
|-------------------|-----------------------------------------------------------------------------------------|
|                   | 121210 121220 121230 121240 121250 121260 121270 121280                                 |
| Human             | GATCCTCCCACCTCAGTCCCCACAGGCATGCATCACCATGCCTGACTAGTTTTTGTGTTTTTTGTAGAGACAAGGTTT 102858   |
| Coquerel'sSifaka  | 81164                                                                                   |
| Ma'sNightMonkey   | 88613                                                                                   |
| VervetAGM         | 97219                                                                                   |
| Gorilla           | 92826                                                                                   |
| GrabEatingMacaque | 95686                                                                                   |
| Macaque           | 95018                                                                                   |
| PigTailedMacaque  | 95449                                                                                   |
| Bonobo            | 93411                                                                                   |
| OliveBaboon       | GCTATCTACTTCAATTTTTTAAATATATAAAAGTCATTTGTAATTGAGTATTTTTTTTTTCTTGAGACAGGGTCTCACTC 103274 |
| Orangutan         | 95567                                                                                   |

| Majority          | XXXXXXXXXXXXXXXXXXXXXXXXXXXXXXXXXXXXXXXXXXXXXXXXXXXXXXXXXXXXXXXXXXXXXXXXXXXX            |
|-------------------|-----------------------------------------------------------------------------------------|
|                   | 121290 121300 121310 121320 121330 121340 121350 121360                                 |
| Human             | TGCCATGTTGCCCAGACTGGTCTCAAACCTGGGCCAAAGCCATCCACCTGCCTCGGCTTCCCAATGTGCTGGGATTACAT 102938 |
| Coquerel'sSifaka  | 81164                                                                                   |
| Ma'sNightMonkey   | 88613                                                                                   |
| VervetAGM         | 97219                                                                                   |
| Gorilla           | 92826                                                                                   |
| GrabEatingMacaque | 95686                                                                                   |
| Macaque           | 95018                                                                                   |
| PigTailedMacaque  | 95449                                                                                   |
| Bonobo            | 93411                                                                                   |
| OliveBaboon       | TGTCACCCAGGCTGGTGTGCAAATGGCATGATCACAGCTCACTGCAGCCTCAACCTCCCAGGTTCAATAGATCCTTCCAC 103354 |
| Orangutan         | 95567                                                                                   |

| Majority          | XXXXXXXXXXXXXXXXXXXXXXXXXXXXXXXXXXXXXXXXXXXXXXXXXXXXXXXXXXXXXXXXXXXXXXXXXXXX           |
|-------------------|----------------------------------------------------------------------------------------|
|                   | 121370 121380 121390 121400 121410 121420 121430 121440                                |
| Human             | GTGTGAGCCACCACCCAGTCATGAGAATTATTTTAAATCAGGTAAACAAAATGTCTGTGGGAATATTGAGCTTTATGA 103018  |
| Coquerel'sSifaka  | 81164                                                                                  |
| Ma'sNightMonkey   | 88613                                                                                  |
| VervetAGM         | 97219                                                                                  |
| Gorilla           | 92826                                                                                  |
| GrabEatingMacaque | 95686                                                                                  |
| Macaque           | 95018                                                                                  |
| PigTailedMacaque  | 95449                                                                                  |
| Bonobo            | 93411                                                                                  |
| OliveBaboon       | CTCAGTCTCCCACAGGCATGCATCACTATGCCTGACTAGTTTTTGTATTTTTTTGTAGAGACAAGGTTTTGCCATGTTG 103434 |
| Orangutan         | 95567                                                                                  |

Tuesday, May 03, 2022 06:18 PM

| Majority          | XXXXXXXXXXXXXXXXXXXXXXXXXXXXXXXXXXXXXXXXXXXXXXXXXXXXXXXXXXXXXXXXXXXXXXXXXX      |        |
|-------------------|---------------------------------------------------------------------------------|--------|
|                   | 121450 121460 121470 121480 121490 121500 121510 121520                         |        |
| Human             | TAGATACCTAAGTTTTCCCAAAAATAATTGTGTAGCATTTCAGTGAATCACTATACTTAACTAGAAATCTAGGTTACC  | 103098 |
| Coquerel'sSifaka  |                                                                                 | 81164  |
| Ma'sNightMonkey   |                                                                                 | 88613  |
| VervetAGM         |                                                                                 | 97219  |
| Gorilla           |                                                                                 | 92826  |
| GrabEatingMacaque |                                                                                 | 95686  |
| Macaque           |                                                                                 | 95018  |
| PigTailedMacaque  |                                                                                 | 95449  |
| Bonobo            |                                                                                 | 93411  |
| OliveBaboon       | CCCAGGCTGGTCTCAAACCTGCGCCCAAGCCATCCGCCTGCCTCGGCTTCCCAAAGTGTGGGATTACATGTGTGAGCCA | 103514 |
| Orangutan         |                                                                                 | 95567  |

| Majority          | XXXXXXXXXXXXXXXXXXXXXXXXXXXXXXXXXXXXXXXXXXXXXXXXXXXXXXXXXXXXXXXXXXXXXXXXXX           |        |
|-------------------|--------------------------------------------------------------------------------------|--------|
|                   | 121530 121540 121550 121560 121570 121580 121590 121600                              |        |
| Human             | AATAACAGTCTCTTTTCAGTTTTTTTCTTTCTTTTCCTGTGTCTTTCTTTTACTAAAATCATTTCATAACTGGGATGACTTATG | 103178 |
| Coquerel'sSifaka  |                                                                                      | 81164  |
| Ma'sNightMonkey   |                                                                                      | 88613  |
| VervetAGM         |                                                                                      | 97219  |
| Gorilla           |                                                                                      | 92826  |
| GrabEatingMacaque |                                                                                      | 95686  |
| Macaque           |                                                                                      | 95018  |
| PigTailedMacaque  |                                                                                      | 95449  |
| Bonobo            |                                                                                      | 93411  |
| OliveBaboon       | CCACACCCAGTCATGAGAATTATTTTAAATCAAGTAAACAAAATGTCGTTGGGAATATTGAGCTTTATGATAGATACCTA     | 103594 |
| Orangutan         |                                                                                      | 95567  |

| Majority          | XXXXXXXXXXXXXXXXXXXXXXXXXXXXXXXXXXXXXXXXXXXXXXXXXXXXXXXXXXXXXXXXXXXXXXXXXX      |        |
|-------------------|---------------------------------------------------------------------------------|--------|
|                   | 121610 121620 121630 121640 121650 121660 121670 121680                         |        |
| Human             | GAGTTGATACCTTAGGTCAAATCCCAATTTAGAACTCCCAAAAGCCTGTCAAATTTTGACACATACTTTAAATGAACTG | 103258 |
| Coquerel'sSifaka  |                                                                                 | 81164  |
| Ma'sNightMonkey   |                                                                                 | 88613  |
| VervetAGM         |                                                                                 | 97219  |
| Gorilla           |                                                                                 | 92826  |
| GrabEatingMacaque |                                                                                 | 95686  |
| Macaque           |                                                                                 | 95018  |
| PigTailedMacaque  |                                                                                 | 95449  |
| Bonobo            |                                                                                 | 93411  |
| OliveBaboon       | AGTTTCCCGAAAATAATTGTGTAGCATTTCAGTGAATCACTATACTTAACTAGAAATCTAGGTTACCAATAACTTAG   | 103674 |
| Orangutan         |                                                                                 | 95567  |







Tuesday, May 03, 2022 06:18 PM

|                   |                                                                                                                      |        |
|-------------------|----------------------------------------------------------------------------------------------------------------------|--------|
| Majority          | XXXXXXXXXXXXXXXXXXXXXXXXXXXXXXXXXXXXXXXXXXXXXXXXXXXXXXXXXXXXXXXXXXXXXXXXXXXXXXXXXXXXXXXXXXXXXXXXXXXXXXXXXXXXXXXXXXXX |        |
|                   | 122410 122420 122430 122440 122450 122460 122470 122480                                                              |        |
| Human             |                                                                                                                      | 103274 |
| Coquerel'sSifaka  |                                                                                                                      | 81164  |
| Ma'sNightMonkey   |                                                                                                                      | 88613  |
| VervetAGM         |                                                                                                                      | 97219  |
| Gorrilla          |                                                                                                                      | 92826  |
| GrabEatingMacaque |                                                                                                                      | 95686  |
| Macaque           |                                                                                                                      | 95018  |
| PigTailedMacaque  |                                                                                                                      | 95449  |
| Bonobo            |                                                                                                                      | 93411  |
| OliveBaboon       | TAAGGAGCCAATAACAGCTATTTGACAATTTGCTGAAATTCGAGGTTTCAGTTTAAAAAATGAATTTATACTGTTTGAT                                      | 104474 |
| Orangutan         |                                                                                                                      | 95567  |

|                   |                                                                                                                      |        |
|-------------------|----------------------------------------------------------------------------------------------------------------------|--------|
| Majority          | XXXXXXXXXXXXXXXXXXXXXXXXXXXXXXXXXXXXXXXXXXXXXXXXXXXXXXXXXXXXXXXXXXXXXXXXXXXXXXXXXXXXXXXXXXXXXXXXXXXXXXXXXXXXXXXXXXXX |        |
|                   | 122490 122500 122510 122520 122530 122540 122550 122560                                                              |        |
| Human             |                                                                                                                      | 103274 |
| Coquerel'sSifaka  |                                                                                                                      | 81164  |
| Ma'sNightMonkey   |                                                                                                                      | 88613  |
| VervetAGM         |                                                                                                                      | 97219  |
| Gorrilla          |                                                                                                                      | 92826  |
| GrabEatingMacaque |                                                                                                                      | 95686  |
| Macaque           |                                                                                                                      | 95018  |
| PigTailedMacaque  |                                                                                                                      | 95449  |
| Bonobo            |                                                                                                                      | 93411  |
| OliveBaboon       | ACACTGTGATGAAGACATGACAAAATCAAAATGGTATTCCTGCCCATGGACTTAATCTAGCTTTGTTAGATTTCGCAGTGC                                    | 104554 |
| Orangutan         |                                                                                                                      | 95567  |

|                   |                                                                                                                      |        |
|-------------------|----------------------------------------------------------------------------------------------------------------------|--------|
| Majority          | XXXXXXXXXXXXXXXXXXXXXXXXXXXXXXXXXXXXXXXXXXXXXXXXXXXXXXXXXXXXXXXXXXXXXXXXXXXXXXXXXXXXXXXXXXXXXXXXXXXXXXXXXXXXXXXXXXXX |        |
|                   | 122570 122580 122590 122600 122610 122620 122630 122640                                                              |        |
| Human             |                                                                                                                      | 103274 |
| Coquerel'sSifaka  |                                                                                                                      | 81164  |
| Ma'sNightMonkey   |                                                                                                                      | 88613  |
| VervetAGM         |                                                                                                                      | 97219  |
| Gorrilla          |                                                                                                                      | 92826  |
| GrabEatingMacaque |                                                                                                                      | 95686  |
| Macaque           |                                                                                                                      | 95018  |
| PigTailedMacaque  |                                                                                                                      | 95449  |
| Bonobo            |                                                                                                                      | 93411  |
| OliveBaboon       | AAGAAGAGGACATACGCCTTTAACTTGTATATACAACCAACACTAAAAGTAAACCGTCCATCTGGTAGTCCTTCAGTGAA                                     | 104634 |
| Orangutan         |                                                                                                                      | 95567  |











```

Majority      XXXXXXXXXXXXXXXXXXXXXXXXXXXXXXXXXXXXXXXXXXXXXXXXXXXXXXXXXXXXXXXXXXXX
               |-----|
               123610   123620   123630   123640   123650   123660   123670   123680

```

|                   |                                                                                  |        |
|-------------------|----------------------------------------------------------------------------------|--------|
| Human             |                                                                                  | 103274 |
| Coquerel'sSifaka  |                                                                                  | 81164  |
| Ma'sNightMonkey   |                                                                                  | 88613  |
| VervetAGM         |                                                                                  | 97219  |
| Gorrilla          |                                                                                  | 92826  |
| GrabEatingMacaque |                                                                                  | 95686  |
| Macaque           |                                                                                  | 95018  |
| PigTailedMacaque  |                                                                                  | 95449  |
| Bonobo            |                                                                                  | 93411  |
| OliveBaboon       | GTATTTCGGTTTCTCCCCTCAGCTTGCTTTCTTCTAGCTCTCTGATCTCCACATATCTTTCCAGAGTCATTAAATATCCC | 105674 |
| Orangutan         |                                                                                  | 95567  |

```

Majority      XXXXXXXXXXXXXXXXXXXXXXXXXXXXXXXXXXXXXXXXXXXXXXXXXXXXXXXXXXXXXXXXXXXX
               |-----|
               123690   123700   123710   123720   123730   123740   123750   123760

```

|                   |                                                                                  |        |
|-------------------|----------------------------------------------------------------------------------|--------|
| Human             |                                                                                  | 103274 |
| Coquerel'sSifaka  |                                                                                  | 81164  |
| Ma'sNightMonkey   |                                                                                  | 88613  |
| VervetAGM         |                                                                                  | 97219  |
| Gorrilla          |                                                                                  | 92826  |
| GrabEatingMacaque |                                                                                  | 95686  |
| Macaque           |                                                                                  | 95018  |
| PigTailedMacaque  |                                                                                  | 95449  |
| Bonobo            |                                                                                  | 93411  |
| OliveBaboon       | CTCCTTTGTAGAGCACTCTCTGATGTCTAGAGACTGCATGGCTTTCTGTACTAAAGCTGATCACTATTCATTCAAAACGG | 105754 |
| Orangutan         |                                                                                  | 95567  |

```

Majority      XXXXXXXXXXXXXXXXXXXXXXXXXXXXXXXXXXXXXXXXXXXXXXXXXXXXXXXXXXXXXXXXXXXX
               |-----|
               123770   123780   123790   123800   123810   123820   123830   123840

```

|                   |                                                                                 |        |
|-------------------|---------------------------------------------------------------------------------|--------|
| Human             |                                                                                 | 103274 |
| Coquerel'sSifaka  |                                                                                 | 81164  |
| Ma'sNightMonkey   |                                                                                 | 88613  |
| VervetAGM         |                                                                                 | 97219  |
| Gorrilla          |                                                                                 | 92826  |
| GrabEatingMacaque |                                                                                 | 95686  |
| Macaque           |                                                                                 | 95018  |
| PigTailedMacaque  |                                                                                 | 95449  |
| Bonobo            |                                                                                 | 93411  |
| OliveBaboon       | ACTTTTATTAATGACCTCTGATAACCAGGAATACATTTGTAATTAGGGCCTGAATATATGATTCTCTTATTTGTGGCCC | 105834 |
| Orangutan         |                                                                                 | 95567  |





Tuesday, May 03, 2022 06:18 PM

| Majority          |                                                                                  |        |        |        |        |        |        |        |        |
|-------------------|----------------------------------------------------------------------------------|--------|--------|--------|--------|--------|--------|--------|--------|
|                   | 124330                                                                           | 124340 | 124350 | 124360 | 124370 | 124380 | 124390 | 124400 |        |
| Human             |                                                                                  |        |        |        |        |        |        |        | 103274 |
| Coquerel'sSifaka  |                                                                                  |        |        |        |        |        |        |        | 81164  |
| Ma'sNightMonkey   |                                                                                  |        |        |        |        |        |        |        | 88613  |
| VervetAGM         |                                                                                  |        |        |        |        |        |        |        | 97219  |
| Gorilla           |                                                                                  |        |        |        |        |        |        |        | 92826  |
| GrabEatingMacaque |                                                                                  |        |        |        |        |        |        |        | 95686  |
| Macaque           |                                                                                  |        |        |        |        |        |        |        | 95018  |
| PigTailedMacaque  |                                                                                  |        |        |        |        |        |        |        | 95449  |
| Bonobo            |                                                                                  |        |        |        |        |        |        |        | 93411  |
| OliveBaboon       | TGCGGCTGGGTGCGGTGGCTCACGCCTGTAATCTCAGCACTTTCGGAGGCTGAGGCGGGCGGATCACGAGGTCAGGAGAT |        |        |        |        |        |        |        | 106394 |
| Orangutan         |                                                                                  |        |        |        |        |        |        |        | 95567  |

| Majority          |                                                                          |        |        |        |        |        |        |        |        |
|-------------------|--------------------------------------------------------------------------|--------|--------|--------|--------|--------|--------|--------|--------|
|                   | 124410                                                                   | 124420 | 124430 | 124440 | 124450 | 124460 | 124470 | 124480 |        |
| Human             |                                                                          |        |        |        |        |        |        |        | 103274 |
| Coquerel'sSifaka  |                                                                          |        |        |        |        |        |        |        | 81164  |
| Ma'sNightMonkey   |                                                                          |        |        |        |        |        |        |        | 88613  |
| VervetAGM         |                                                                          |        |        |        |        |        |        |        | 97219  |
| Gorilla           |                                                                          |        |        |        |        |        |        |        | 92826  |
| GrabEatingMacaque |                                                                          |        |        |        |        |        |        |        | 95686  |
| Macaque           |                                                                          |        |        |        |        |        |        |        | 95018  |
| PigTailedMacaque  |                                                                          |        |        |        |        |        |        |        | 95449  |
| Bonobo            |                                                                          |        |        |        |        |        |        |        | 93411  |
| OliveBaboon       | CGAGACCGTCTGGCTAACACGGTAAATCCCGTCTCTACTTAAAAAAGAAAAAAGAGGCCGGCGCGGTGGCTC |        |        |        |        |        |        |        | 106474 |
| Orangutan         |                                                                          |        |        |        |        |        |        |        | 95567  |

| Majority          |                                                                                 |        |        |        |        |        |        |        |        |
|-------------------|---------------------------------------------------------------------------------|--------|--------|--------|--------|--------|--------|--------|--------|
|                   | 124490                                                                          | 124500 | 124510 | 124520 | 124530 | 124540 | 124550 | 124560 |        |
| Human             |                                                                                 |        |        |        |        |        |        |        | 103274 |
| Coquerel'sSifaka  |                                                                                 |        |        |        |        |        |        |        | 81164  |
| Ma'sNightMonkey   |                                                                                 |        |        |        |        |        |        |        | 88613  |
| VervetAGM         |                                                                                 |        |        |        |        |        |        |        | 97219  |
| Gorilla           |                                                                                 |        |        |        |        |        |        |        | 92826  |
| GrabEatingMacaque |                                                                                 |        |        |        |        |        |        |        | 95686  |
| Macaque           |                                                                                 |        |        |        |        |        |        |        | 95018  |
| PigTailedMacaque  |                                                                                 |        |        |        |        |        |        |        | 95449  |
| Bonobo            |                                                                                 |        |        |        |        |        |        |        | 93411  |
| OliveBaboon       | AAGCCTGTAATCCAGCACTTTGGGAGGCCGAGACGGGCGGATCACGAGGTCAGGAGATCGAGACCATCCTGGCTAACAC |        |        |        |        |        |        |        | 106554 |
| Orangutan         |                                                                                 |        |        |        |        |        |        |        | 95567  |





Tuesday, May 03, 2022 06:18 PM

| Majority          | XXXXXXXXXXXXXXXXXXXXXXXXXXXXXXXXXXXXXXXXXXXXXXXXXXXXXXXXXXXXXXXXXXXXXXXXXXXXXXXXXXXXXXXXXXXXXXXXXXXXXXXXXXXXXXXXXXXXXXXXXXXX |                  |                 |                    |                    |           |        |        |  |        |
|-------------------|------------------------------------------------------------------------------------------------------------------------------|------------------|-----------------|--------------------|--------------------|-----------|--------|--------|--|--------|
|                   | 124810                                                                                                                       | 124820           | 124830          | 124840             | 124850             | 124860    | 124870 | 124880 |  |        |
| Human             |                                                                                                                              |                  |                 |                    |                    |           |        |        |  | 103274 |
| Coquerel'sSifaka  |                                                                                                                              |                  |                 |                    |                    |           |        |        |  | 81164  |
| Ma'sNightMonkey   |                                                                                                                              |                  |                 |                    |                    |           |        |        |  | 88613  |
| VervetAGM         |                                                                                                                              |                  |                 |                    |                    |           |        |        |  | 97219  |
| Gorrilla          |                                                                                                                              |                  |                 |                    |                    |           |        |        |  | 92826  |
| GrabEatingMacaque |                                                                                                                              |                  |                 |                    |                    |           |        |        |  | 95686  |
| Macaque           |                                                                                                                              |                  |                 |                    |                    |           |        |        |  | 95018  |
| PigTailedMacaque  |                                                                                                                              |                  |                 |                    |                    |           |        |        |  | 95449  |
| Bonobo            |                                                                                                                              |                  |                 |                    |                    |           |        |        |  | 93411  |
| OliveBaboon       | ACTTTATACGGTTTC                                                                                                              | CAAAGTCACAGCGTCT | TATACGGGTAAAGCT | TATAATCTTTTTTTTTTT | TTTTTTTTTTTTTTTTTT | TGAGACGGA |        |        |  | 106874 |
| Orangutan         |                                                                                                                              |                  |                 |                    |                    |           |        |        |  | 95567  |

| Majority          | XXXXXXXXXXXXXXXXXXXXXXXXXXXXXXXXXXXXXXXXXXXXXXXXXXXXXXXXXXXXXXXXXXXXXXXXXXXXXXXXXXXXXXXXXXXXXXXXXXXXXXXXXXXXXXXXXXXXXXXXXXXX |                      |        |        |        |        |        |        |  |        |
|-------------------|------------------------------------------------------------------------------------------------------------------------------|----------------------|--------|--------|--------|--------|--------|--------|--|--------|
|                   | 124890                                                                                                                       | 124900               | 124910 | 124920 | 124930 | 124940 | 124950 | 124960 |  |        |
| Human             |                                                                                                                              |                      |        |        |        |        |        |        |  | 103274 |
| Coquerel'sSifaka  |                                                                                                                              |                      |        |        |        |        |        |        |  | 81164  |
| Ma'sNightMonkey   |                                                                                                                              |                      |        |        |        |        |        |        |  | 88613  |
| VervetAGM         |                                                                                                                              |                      |        |        |        |        |        |        |  | 97219  |
| Gorrilla          |                                                                                                                              |                      |        |        |        |        |        |        |  | 92826  |
| GrabEatingMacaque |                                                                                                                              |                      |        |        |        |        |        |        |  | 95686  |
| Macaque           |                                                                                                                              |                      |        |        |        |        |        |        |  | 95018  |
| PigTailedMacaque  |                                                                                                                              |                      |        |        |        |        |        |        |  | 95449  |
| Bonobo            |                                                                                                                              |                      |        |        |        |        |        |        |  | 93411  |
| OliveBaboon       | GTCTGGCTCTGTCACCCAGTGGCGGATCTCAGCTCACTGCAAGCTCCGCTCCCGGATT                                                                   | CACACCATTCCCCTGCCTCA |        |        |        |        |        |        |  | 106954 |
| Orangutan         |                                                                                                                              |                      |        |        |        |        |        |        |  | 95567  |

| Majority          | XXXXXXXXXXXXXXXXXXXXXXXXXXXXXXXXXXXXXXXXXXXXXXXXXXXXXXXXXXXXXXXXXXXXXXXXXXXXXXXXXXXXXXXXXXXXXXXXXXXXXXXXXXXXXXXXXXXXXXXXXXXX |        |        |        |        |        |        |        |  |        |
|-------------------|------------------------------------------------------------------------------------------------------------------------------|--------|--------|--------|--------|--------|--------|--------|--|--------|
|                   | 124970                                                                                                                       | 124980 | 124990 | 125000 | 125010 | 125020 | 125030 | 125040 |  |        |
| Human             |                                                                                                                              |        |        |        |        |        |        |        |  | 103274 |
| Coquerel'sSifaka  |                                                                                                                              |        |        |        |        |        |        |        |  | 81164  |
| Ma'sNightMonkey   |                                                                                                                              |        |        |        |        |        |        |        |  | 88613  |
| VervetAGM         |                                                                                                                              |        |        |        |        |        |        |        |  | 97219  |
| Gorrilla          |                                                                                                                              |        |        |        |        |        |        |        |  | 92826  |
| GrabEatingMacaque |                                                                                                                              |        |        |        |        |        |        |        |  | 95686  |
| Macaque           |                                                                                                                              |        |        |        |        |        |        |        |  | 95018  |
| PigTailedMacaque  |                                                                                                                              |        |        |        |        |        |        |        |  | 95449  |
| Bonobo            |                                                                                                                              |        |        |        |        |        |        |        |  | 93411  |
| OliveBaboon       | GCCTCCGAGTAGCTGGGACTACAGGCGCCCGCCACCTCGCCCGCTAGTTTTTTTGTACTTTTTTAGTGAGACGGGGTTT                                              |        |        |        |        |        |        |        |  | 107034 |
| Orangutan         |                                                                                                                              |        |        |        |        |        |        |        |  | 95567  |









Tuesday, May 03, 2022 06:18 PM

```
Majority          XXXXXXXXXXXXXXXXXXXXXXXXXXXXXXXXXXXXXXXXXXXXXXXXXXXXXXXXXXXXXXXXXXXXXXX
                  |-----|
                  126010  126020  126030  126040  126050  126060  126070  126080
Human              |-----|
Coquerel'sSifaka  |-----|
Ma'sNightMonkey   |-----|
VervetAGM         |-----|
Gorrilla          |-----|
GrabEatingMacaque |-----|
Macaque           |-----|
PigTailedMacaque  |-----|
Bonobo            |-----|
OliveBaboon       TTTTCAATTCAGCATATCTGATTTTTGAAAACAGTCTGTGTTTCCTTGATTCTTCCAGTTTTTCTACATACTCTGGACC 108074
Orangutan         |-----|
```

```
Majority          XXXXXXXXXXXXXXXXXXXXXXXXXXXXXXXXXXXXXXXXXXXXXXXXXXXXXXXXXXXXXXXXXXXXXXX
                  |-----|
                  126090  126100  126110  126120  126130  126140  126150  126160
Human              |-----|
Coquerel'sSifaka  |-----|
Ma'sNightMonkey   |-----|
VervetAGM         |-----|
Gorrilla          |-----|
GrabEatingMacaque |-----|
Macaque           |-----|
PigTailedMacaque  |-----|
Bonobo            |-----|
OliveBaboon       CAATGACAGGTTATCCGAACAATTCACTAAAATCTTCATTATCTTTGTACTTATCTGCTTATGCCACACCTGCCCCATAA 108154
Orangutan         |-----|
```

```
Majority          XXXXXXXXXXXXXXXXXXXXXXXXXXXXXXXXXXXXXXXXXXXXXXXXXXXXXXXXXXXXXXXXXXXXXXX
                  |-----|
                  126170  126180  126190  126200  126210  126220  126230  126240
Human              |-----|
Coquerel'sSifaka  |-----|
Ma'sNightMonkey   |-----|
VervetAGM         |-----|
Gorrilla          |-----|
GrabEatingMacaque |-----|
Macaque           |-----|
PigTailedMacaque  |-----|
Bonobo            |-----|
OliveBaboon       ATCCAACCCAGATCAGTATCAAACCTCTATATCTTTGAATTGCTAGGTACAGTTGAACAAAATCTTACATCCTTGCAGA 108234
Orangutan         |-----|
```







Tuesday, May 03, 2022 06:18 PM

```
Majority      XXXXXXXXXXXXXXXXXXXXXXXXXXXXXXXXXXXXXXXXXXXXXXXXXXXXXXXXXXXXXXXXXXXXXXXX
              |-----|
              |126730| |126740| |126750| |126760| |126770| |126780| |126790| |126800|
              |-----|
Human          |                                           | 103274
Coquerel'sSifaka |                                           | 81164
Ma'sNightMonkey |                                           | 88613
VervetAGM       |                                           | 97219
Gorrilla        |                                           | 92826
GrabEatingMacaque |                                           | 95686
Macaque         |                                           | 95018
PigTailedMacaque |                                           | 95449
Bonobo          |                                           | 93411
OliveBaboon     | AGCACATGGGAAGGATAATGCTACAGAGGAAGTGACATTCAATTAGGGTACTGAAGGTTAGGGAAGCATTGCCAGAGGA | 108794
Orangutan      |                                           | 95567
```

```
Majority      XXXXXXXXXXXXXXXXXXXXXXXXXXXXXXXXXXXXXXXXXXXXXXXXXXXXXXXXXXXXXXXXXXXXXXXX
              |-----|
              |126810| |126820| |126830| |126840| |126850| |126860| |126870| |126880|
              |-----|
Human          |                                           | 103274
Coquerel'sSifaka |                                           | 81164
Ma'sNightMonkey |                                           | 88613
VervetAGM       |                                           | 97219
Gorrilla        |                                           | 92826
GrabEatingMacaque |                                           | 95686
Macaque         |                                           | 95018
PigTailedMacaque |                                           | 95449
Bonobo          |                                           | 93411
OliveBaboon     | GAAAAGGATAACGTGCACATCTTGGTTAGATACAATAAAAAATATGTGCAGTGTAGTAGAAAAACATATGTTTAGTTCAT | 108874
Orangutan      |                                           | 95567
```

```
Majority      XXXXXXXXXXXXXXXXXXXXXXXXXXXXXXXXXXXXXXXXXXXXXXXXXXXXXXXXXXXXXXXXXXXXXXXX
              |-----|
              |126890| |126900| |126910| |126920| |126930| |126940| |126950| |126960|
              |-----|
Human          |                                           | 103274
Coquerel'sSifaka |                                           | 81164
Ma'sNightMonkey |                                           | 88613
VervetAGM       |                                           | 97219
Gorrilla        |                                           | 92826
GrabEatingMacaque |                                           | 95686
Macaque         |                                           | 95018
PigTailedMacaque |                                           | 95449
Bonobo          |                                           | 93411
OliveBaboon     | ATGAATAGTTCAATATTGATGGCAGGTGGGAAGTGGCAAGAGATAAAAGTGGGAAAGCTGATAGGTCTTGTTTCTATAGA | 108954
Orangutan      |                                           | 95567
```



Tuesday, May 03, 2022 06:18 PM

```
Majority      XXXXXXXXXXXXXXXXXXXXXXXXXXXXXXXXXXXXXXXXXXXXXXXXXXXXXXXXXXXXXXXXXXXXXXXXXXXX  
              |-----|-----|-----|-----|-----|-----|-----|-----|  
              127210   127220   127230   127240   127250   127260   127270   127280  
Human                      103274  
Coquerel'sSifaka          81164  
Ma'sNightMonkey          88613  
VervetAGM                 97219  
Gorrilla                  92826  
GrabEatingMacaque        95686  
Macaque                   95018  
PigTailedMacaque        95449  
Bonobo                    93411  
OliveBaboon    GAAGGAGAAAGAAGAGCTGGTGACCAGAAGGTTAAACTATTATTTTTTAAGGAAAAAATTAGAAAAAGTAGTCTTGTCT 109274  
Orangutan                95567
```

```
Majority      XXXXXXXXXXXXXXXXXXXXXXXXXXXXXXXXXXXXXXXXXXXXXXXXXXXXXXXXXXXXXXXXXXXXXXXXXXXX  
              |-----|-----|-----|-----|-----|-----|-----|-----|  
              127290   127300   127310   127320   127330   127340   127350   127360  
Human                      103274  
Coquerel'sSifaka          81164  
Ma'sNightMonkey          88613  
VervetAGM                 97219  
Gorrilla                  92826  
GrabEatingMacaque        95686  
Macaque                   95018  
PigTailedMacaque        95449  
Bonobo                    93411  
OliveBaboon    AAGAGTGTGAAAGCTAGTGAATTGCACATTAGTTTAAAGAACTGTTGAAACATTATTGAATTATAAAAGCATAATATGAA 109354  
Orangutan                95567
```

```
Majority      XXXXXXXXXXXXXXXXXXXXXXXXXXXXXXXXXXXXXXXXXXXXXXXXXXXXXXXXXXXXXXXXXXXXXXXXXXXX  
              |-----|-----|-----|-----|-----|-----|-----|-----|  
              127370   127380   127390   127400   127410   127420   127430   127440  
Human                      103274  
Coquerel'sSifaka          81164  
Ma'sNightMonkey          88613  
VervetAGM                 97219  
Gorrilla                  92826  
GrabEatingMacaque        95686  
Macaque                   95018  
PigTailedMacaque        95449  
Bonobo                    93411  
OliveBaboon    TCACAGAGAATAGGTGAGAGTGAAGATAATATTTAGAGAGGCTTTGGCATACCATGTAGATAATAGTTTAAAGCAGTGGGA 109434  
Orangutan                95567
```

Tuesday, May 03, 2022 06:18 PM

|                   |                                                                                   |        |        |        |        |        |        |        |
|-------------------|-----------------------------------------------------------------------------------|--------|--------|--------|--------|--------|--------|--------|
| Majority          | XXXXXXXXXXXXXXXXXXXXXXXXXXXXXXXXXXXXXXXXXXXXXXXXXXXXXXXXXXXXXXXXXXXXXXXXXXXX      |        |        |        |        |        |        |        |
|                   | 127450                                                                            | 127460 | 127470 | 127480 | 127490 | 127500 | 127510 | 127520 |
| Human             |                                                                                   |        |        |        |        |        |        | 103274 |
| Coquerel'sSifaka  |                                                                                   |        |        |        |        |        |        | 81164  |
| Ma'sNightMonkey   |                                                                                   |        |        |        |        |        |        | 88613  |
| VervetAGM         |                                                                                   |        |        |        |        |        |        | 97219  |
| Gorrilla          |                                                                                   |        |        |        |        |        |        | 92826  |
| GrabEatingMacaque |                                                                                   |        |        |        |        |        |        | 95686  |
| Macaque           |                                                                                   |        |        |        |        |        |        | 95018  |
| PigTailedMacaque  |                                                                                   |        |        |        |        |        |        | 95449  |
| Bonobo            |                                                                                   |        |        |        |        |        |        | 93411  |
| OliveBaboon       | GTGGATAAGACAAGACTATCTCAAGAGAGTGGGTAGATATTTATATTTTTATCTATTTTCATGTTCTATCAGTTATCTCTG |        |        |        |        |        |        | 109514 |
| Orangutan         |                                                                                   |        |        |        |        |        |        | 95567  |

|                   |                                                                                |        |        |        |        |        |        |        |
|-------------------|--------------------------------------------------------------------------------|--------|--------|--------|--------|--------|--------|--------|
| Majority          | XXXXXXXXXXXXXXXXXXXXXXXXXXXXXXXXXXXXXXXXXXXXXXXXXXXXXXXXXXXXXXXXXXXXXXXXXXXX   |        |        |        |        |        |        |        |
|                   | 127530                                                                         | 127540 | 127550 | 127560 | 127570 | 127580 | 127590 | 127600 |
| Human             |                                                                                |        |        |        |        |        |        | 103274 |
| Coquerel'sSifaka  |                                                                                |        |        |        |        |        |        | 81164  |
| Ma'sNightMonkey   |                                                                                |        |        |        |        |        |        | 88613  |
| VervetAGM         |                                                                                |        |        |        |        |        |        | 97219  |
| Gorrilla          |                                                                                |        |        |        |        |        |        | 92826  |
| GrabEatingMacaque |                                                                                |        |        |        |        |        |        | 95686  |
| Macaque           |                                                                                |        |        |        |        |        |        | 95018  |
| PigTailedMacaque  |                                                                                |        |        |        |        |        |        | 95449  |
| Bonobo            |                                                                                |        |        |        |        |        |        | 93411  |
| OliveBaboon       | TCCAAGTAGACTGTGTGCACCTTGAGGGCTGAGATTGAGTCAAATTTTGTTCCTCTAAAAGTACAGCAGCAGAAAATG |        |        |        |        |        |        | 109594 |
| Orangutan         |                                                                                |        |        |        |        |        |        | 95567  |

|                   |                                                                                  |        |        |        |        |        |        |        |
|-------------------|----------------------------------------------------------------------------------|--------|--------|--------|--------|--------|--------|--------|
| Majority          | XXXXXXXXXXXXXXXXXXXXXXXXXXXXXXXXXXXXXXXXXXXXXXXXXXXXXXXXXXXXXXXXXXXXXXXXXXXX     |        |        |        |        |        |        |        |
|                   | 127610                                                                           | 127620 | 127630 | 127640 | 127650 | 127660 | 127670 | 127680 |
| Human             |                                                                                  |        |        |        |        |        |        | 103274 |
| Coquerel'sSifaka  |                                                                                  |        |        |        |        |        |        | 81164  |
| Ma'sNightMonkey   |                                                                                  |        |        |        |        |        |        | 88613  |
| VervetAGM         |                                                                                  |        |        |        |        |        |        | 97219  |
| Gorrilla          |                                                                                  |        |        |        |        |        |        | 92826  |
| GrabEatingMacaque |                                                                                  |        |        |        |        |        |        | 95686  |
| Macaque           |                                                                                  |        |        |        |        |        |        | 95018  |
| PigTailedMacaque  |                                                                                  |        |        |        |        |        |        | 95449  |
| Bonobo            |                                                                                  |        |        |        |        |        |        | 93411  |
| OliveBaboon       | ATACTTTCAACATGAATGAATATTTGCTTATGAAGTTTTTTTCCCTCTTTGCTCCTTTATGTTTAAAGCACTTTTCTTTC |        |        |        |        |        |        | 109674 |
| Orangutan         |                                                                                  |        |        |        |        |        |        | 95567  |











Tuesday, May 03, 2022 06:18 PM

Majority XXXXXXXXXXXXXXXXXXXXXXXXXXXXXXXXXXXXXXXXXXXXXXXXXXXXXXXXXXXXXXXXXXXXXXXXXXXXXXXXXXXXXXXXXXXXXXXXXXXXXXXXXXXXXXX

128650 128660 128670 128680 128690 128700 128710 128720

Human 103274
Coquerel'sSifaka 81164
Ma'sNightMonkey 88613
VervetAGM 97219
Gorilla 92826
GrabEatingMacaque 95686
Macaque 95018
PigTailedMacaque 95449
Bonobo 93411
OliveBaboon ATCTGATTCATAAATATTTGAAAGCTTTCGATTGGTCCTACTCAGCACTGTTTTACTTGTGGTATTCTATTTTAAAATAT 110714
Orangutan 95567

Majority XXXXXXXXXXXXXXXXXXXXXXXXXXXXXXXXXXXXXXXXXXXXXXXXXXXXXXXXXXXXXXXXXXXXXXXXXXXXXXXXXXXXXXXXXXXXXXXXXXXXXXXXXXXXXXX

128730 128740 128750 128760 128770 128780 128790 128800

Human 103274
Coquerel'sSifaka 81164
Ma'sNightMonkey 88613
VervetAGM 97219
Gorilla 92826
GrabEatingMacaque 95686
Macaque 95018
PigTailedMacaque 95449
Bonobo 93411
OliveBaboon ATAGTATAGCAACAAAACAACATTCAGGTCACAGACTTTCAGGCTTACAATCATTTCTTAATATTACTTTAAAAGGTATA 110794
Orangutan 95567

Majority XXXXXXXXXXXXXXXXXXXXXXXXXXXXXXXXXXXXXXXXXXXXXXXXXXXXXXXXXXXXXXXXXXXXXXXXXXXXXXXXXXXXXXXXXXXXXXXXXXXXXXXXXXXXXXX

128810 128820 128830 128840 128850 128860 128870 128880

Human 103274
Coquerel'sSifaka 81164
Ma'sNightMonkey 88613
VervetAGM 97219
Gorilla 92826
GrabEatingMacaque 95686
Macaque 95018
PigTailedMacaque 95449
Bonobo 93411
OliveBaboon ATCATGACCTTGAAGCATATTGAACTTGAGCTTTGCCTGAAATTCACAAACATGATGATAATTTCAAGAAGCACTGTCTT 110874
Orangutan 95567

Tuesday, May 03, 2022 06:18 PM

| Majority          | XXXXXXXXXXXXXXXXXXXXXXXXXXXXXXXXXXXXXXXXXXXXXXXXXXXXXXXXXXXXXXXXXXXXXXXXXXXX           |
|-------------------|----------------------------------------------------------------------------------------|
|                   | 128890 128900 128910 128920 128930 128940 128950 128960                                |
| Human             | 103274                                                                                 |
| Coquerel'sSifaka  | 81164                                                                                  |
| Ma'sNightMonkey   | 88613                                                                                  |
| VervetAGM         | 97219                                                                                  |
| Gorrilla          | 92826                                                                                  |
| GrabEatingMacaque | 95686                                                                                  |
| Macaque           | 95018                                                                                  |
| PigTailedMacaque  | 95449                                                                                  |
| Bonobo            | 93411                                                                                  |
| OliveBaboon       | AAAGTTGCCTTATTCCTGTAATTAAGCTACTGAAAATTCATTTATTCTCAAGTTAAATCTCAGGAAACCTATTTTATCA 110954 |
| Orangutan         | 95567                                                                                  |

| Majority          | XXXXXXXXXXXXXXXXXXXXXXXXXXXXXXXXXXXXXXXXXXXXXXXXXXXXXXXXXXXXXXXXXXXXXXXXXXXX            |
|-------------------|-----------------------------------------------------------------------------------------|
|                   | 128970 128980 128990 129000 129010 129020 129030 129040                                 |
| Human             | 103274                                                                                  |
| Coquerel'sSifaka  | 81164                                                                                   |
| Ma'sNightMonkey   | 88613                                                                                   |
| VervetAGM         | 97219                                                                                   |
| Gorrilla          | 92826                                                                                   |
| GrabEatingMacaque | 95686                                                                                   |
| Macaque           | 95018                                                                                   |
| PigTailedMacaque  | 95449                                                                                   |
| Bonobo            | 93411                                                                                   |
| OliveBaboon       | TAGGAAATCAGTCAGTGCTAAAATACTGCTTTGATTCTATAGTTCAAACCTATTCATGTACCTCCTGAGAAAAGCCTTTC 111034 |
| Orangutan         | 95567                                                                                   |

| Majority          | XXXXXXXXXXXXXXXXXXXXXXXXXXXXXXXXXXXXXXXXXXXXXXXXXXXXXXXXXXXXXXXXXXXXXXXXXXXX           |
|-------------------|----------------------------------------------------------------------------------------|
|                   | 129050 129060 129070 129080 129090 129100 129110 129120                                |
| Human             | 103274                                                                                 |
| Coquerel'sSifaka  | 81164                                                                                  |
| Ma'sNightMonkey   | 88613                                                                                  |
| VervetAGM         | 97219                                                                                  |
| Gorrilla          | 92826                                                                                  |
| GrabEatingMacaque | 95686                                                                                  |
| Macaque           | 95018                                                                                  |
| PigTailedMacaque  | 95449                                                                                  |
| Bonobo            | 93411                                                                                  |
| OliveBaboon       | AGTCAATCACAGAAATGTATTGCCATATATATTTATTTTAAATATACATTTAAATTTAGCAATCTCTGAGGGTAAGTAC 111114 |
| Orangutan         | 95567                                                                                  |

```

Majority      XXXXXXXXXXXXXXXXXXXXXXXXXXXXXXXXXXXXXXXXXXXXXXXXXXXXXXXXXXXXXXXXXXXXXXXXXXXX
              |-----|-----|-----|-----|-----|-----|-----|-----|
              129130   129140   129150   129160   129170   129180   129190   129200
Human        103274
Coquerel'sSifaka 81164
Ma'sNightMonkey 88613
VervetAGM       97219
Gorrilla        92826
GrabEatingMacaque 95686
Macaque         95018
PigTailedMacaque 95449
Bonobo          93411
OliveBaboon     CCTGTGTGTGCTACTTTTATCATGTGTGTGTCTTCTTTTCATTTAACTATAGATACATCACGAAGTTTGCCATATTCTAC 111194
Orangutan      95567

```

```

Majority      XXXXXXXXXXXXXXXXXXXXXXXXXXXXXXXXXXXXXXXXXXXXXXXXXXXXXXXXXXXXXXXXXXXXXXXXXXXX
              |-----|-----|-----|-----|-----|-----|-----|-----|
              129210   129220   129230   129240   129250   129260   129270   129280
Human        103274
Coquerel'sSifaka 81164
Ma'sNightMonkey 88613
VervetAGM       97219
Gorrilla        92826
GrabEatingMacaque 95686
Macaque         95018
PigTailedMacaque 95449
Bonobo          93411
OliveBaboon     ATGTCACAGACTTTGGCTGTATAGTGATAGTAGGATTTAAGGACAATACATGTTAACTCAAAAATCTGTGGTTATGGCTG 111274
Orangutan      95567

```

```

Majority      XXXXXXXXXXXXXXXXXXXXXXXXXXXXXXXXXXXXXXXXXXXXXXXXXXXXXXXXXXXXXXXXXXXXXXXXXXXX
              |-----|-----|-----|-----|-----|-----|-----|-----|
              129290   129300   129310   129320   129330   129340   129350   129360
Human        103274
Coquerel'sSifaka 81164
Ma'sNightMonkey 88613
VervetAGM       97219
Gorrilla        92826
GrabEatingMacaque 95686
Macaque         95018
PigTailedMacaque 95449
Bonobo          93411
OliveBaboon     CTCGGTAGTCATCTATTTAATGGTTAAGAGATATACTGTGGCTCTACAAGAATGTTTTGCACTTTGGAATTAACATGACT 111354
Orangutan      95567

```

















| Majority          |                                                                                 |        |        |        |        |        |        |        |        |  |
|-------------------|---------------------------------------------------------------------------------|--------|--------|--------|--------|--------|--------|--------|--------|--|
|                   | 131050                                                                          | 131060 | 131070 | 131080 | 131090 | 131100 | 131110 | 131120 |        |  |
| Human             |                                                                                 |        |        |        |        |        |        |        | 103274 |  |
| Coquerel'sSifaka  |                                                                                 |        |        |        |        |        |        |        | 81164  |  |
| Ma'sNightMonkey   |                                                                                 |        |        |        |        |        |        |        | 88613  |  |
| VervetAGM         |                                                                                 |        |        |        |        |        |        |        | 97219  |  |
| Gorrilla          |                                                                                 |        |        |        |        |        |        |        | 92826  |  |
| GrabEatingMacaque |                                                                                 |        |        |        |        |        |        |        | 95686  |  |
| Macaque           |                                                                                 |        |        |        |        |        |        |        | 95018  |  |
| PigTailedMacaque  |                                                                                 |        |        |        |        |        |        |        | 95449  |  |
| Bonobo            |                                                                                 |        |        |        |        |        |        |        | 93411  |  |
| OliveBaboon       | TTAGATTGAGGCCATCACTTACTTGGTCCTTAATGCCCATATCAGTCATTTTACTTGACCTTGATAAACACCTACTCTC |        |        |        |        |        |        |        | 113114 |  |
| Orangutan         |                                                                                 |        |        |        |        |        |        |        | 95567  |  |

| Majority          |                                                                                |        |        |        |        |        |        |        |        |  |
|-------------------|--------------------------------------------------------------------------------|--------|--------|--------|--------|--------|--------|--------|--------|--|
|                   | 131130                                                                         | 131140 | 131150 | 131160 | 131170 | 131180 | 131190 | 131200 |        |  |
| Human             |                                                                                |        |        |        |        |        |        |        | 103274 |  |
| Coquerel'sSifaka  |                                                                                |        |        |        |        |        |        |        | 81164  |  |
| Ma'sNightMonkey   |                                                                                |        |        |        |        |        |        |        | 88613  |  |
| VervetAGM         |                                                                                |        |        |        |        |        |        |        | 97219  |  |
| Gorrilla          |                                                                                |        |        |        |        |        |        |        | 92826  |  |
| GrabEatingMacaque |                                                                                |        |        |        |        |        |        |        | 95686  |  |
| Macaque           |                                                                                |        |        |        |        |        |        |        | 95018  |  |
| PigTailedMacaque  |                                                                                |        |        |        |        |        |        |        | 95449  |  |
| Bonobo            |                                                                                |        |        |        |        |        |        |        | 93411  |  |
| OliveBaboon       | CTCCTCATCACATTTACTCAAGCCTACTGTCTAATAAACATGCACACACACGAAATACGTATGTACACATGTGGTTCC |        |        |        |        |        |        |        | 113194 |  |
| Orangutan         |                                                                                |        |        |        |        |        |        |        | 95567  |  |

| Majority          |                                                                                 |        |        |        |        |        |        |        |        |  |
|-------------------|---------------------------------------------------------------------------------|--------|--------|--------|--------|--------|--------|--------|--------|--|
|                   | 131210                                                                          | 131220 | 131230 | 131240 | 131250 | 131260 | 131270 | 131280 |        |  |
| Human             |                                                                                 |        |        |        |        |        |        |        | 103274 |  |
| Coquerel'sSifaka  |                                                                                 |        |        |        |        |        |        |        | 81164  |  |
| Ma'sNightMonkey   |                                                                                 |        |        |        |        |        |        |        | 88613  |  |
| VervetAGM         |                                                                                 |        |        |        |        |        |        |        | 97219  |  |
| Gorrilla          |                                                                                 |        |        |        |        |        |        |        | 92826  |  |
| GrabEatingMacaque |                                                                                 |        |        |        |        |        |        |        | 95686  |  |
| Macaque           |                                                                                 |        |        |        |        |        |        |        | 95018  |  |
| PigTailedMacaque  |                                                                                 |        |        |        |        |        |        |        | 95449  |  |
| Bonobo            |                                                                                 |        |        |        |        |        |        |        | 93411  |  |
| OliveBaboon       | TCTTGTTAAAGGATCCAGACAATCTCCTCCCAACCTGAACCTCTAATCTAAATAGGAAACATCAAGTGAGACTCCCAAC |        |        |        |        |        |        |        | 113274 |  |
| Orangutan         |                                                                                 |        |        |        |        |        |        |        | 95567  |  |



```

Majority      XXXXXXXXXXXXXXXXXXXXXXXXXXXXXXXXXXXXXXXXXXXXXXXXXXXXXXXXXXXXXXXXXXXXXXXX
              |-----|
              |131530| |131540| |131550| |131560| |131570| |131580| |131590| |131600|
Human                 |-----|
Human                103274
Coquerel'sSifaka    81164
Ma'sNightMonkey     88613
VervetAGM           97219
Gorrilla            92826
GrabEatingMacaque   95686
Macaque             95018
PigTailedMacaque    95449
Bonobo              93411
OliveBaboon         TTTCCCATTTCTTGTTTTTCTTCTGTAGGTTTGTCAAAGATCAGATGGCTGTAGATGTGTGGTATATTCTGAGGACTCTG 113594
Orangutan           95567
  
```

```

Majority      XXXXXXXXXXXXXXXXXXXXXXXXXXXXXXXXXXXXXXXXXXXXXXXXXXXXXXXXXXXXXXXXXXXXXXXX
              |-----|
              |131610| |131620| |131630| |131640| |131650| |131660| |131670| |131680|
Human                 |-----|
Human                103274
Coquerel'sSifaka    81164
Ma'sNightMonkey     88613
VervetAGM           97219
Gorrilla            92826
GrabEatingMacaque   95686
Macaque             95018
PigTailedMacaque    95449
Bonobo              93411
OliveBaboon         TTCTGTTCCATTGGTCTATATCTCTGTTTTGGTACCAGTACCATGCTGTTTTGGTTACTGTAGCCTTGTAGTATAGTTTG 113674
Orangutan           95567
  
```

```

Majority      XXXXXXXXXXXXXXXXXXXXXXXXXXXXXXXXXXXXXXXXXXXXXXXXXXXXXXXXXXXXXXXXXXXXXXXX
              |-----|
              |131690| |131700| |131710| |131720| |131730| |131740| |131750| |131760|
Human                 |-----|
Human                103274
Coquerel'sSifaka    81164
Ma'sNightMonkey     88613
VervetAGM           97219
Gorrilla            92826
GrabEatingMacaque   95686
Macaque             95018
PigTailedMacaque    95449
Bonobo              93411
OliveBaboon         AAGTCAGGTAGCGGATGCCTCCAGCTTTGTTCTTTGACTTAGGATTGTTCGAGATGCGGGCTCTTTTGGTTCCATATGA 113754
Orangutan           95567
  
```



Tuesday, May 03, 2022 06:18 PM

|                   |                                                                                        |
|-------------------|----------------------------------------------------------------------------------------|
| Majority          | XXXXXXXXXXXXXXXXXXXXXXXXXXXXXXXXXXXXXXXXXXXXXXXXXXXXXXXXXXXXXXXXXXXXXXXXXXXX           |
|                   | 132010 132020 132030 132040 132050 132060 132070 132080                                |
| Human             | 103274                                                                                 |
| Coquerel'sSifaka  | 81164                                                                                  |
| Ma'sNightMonkey   | 88613                                                                                  |
| VervetAGM         | 97219                                                                                  |
| Gorilla           | 92826                                                                                  |
| GrabEatingMacaque | 95686                                                                                  |
| Macaque           | 95018                                                                                  |
| PigTailedMacaque  | 95449                                                                                  |
| Bonobo            | 93411                                                                                  |
| OliveBaboon       | CTTTGAAGCAATTGTGAATGGAAGTTCATTCATGATTTGCTCTGTGTTTGTCTGTTATTGGTGTATAAGAATGCTTGTA 114074 |
| Orangutan         | 95567                                                                                  |

|                   |                                                                                       |
|-------------------|---------------------------------------------------------------------------------------|
| Majority          | XXXXXXXXXXXXXXXXXXXXXXXXXXXXXXXXXXXXXXXXXXXXXXXXXXXXXXXXXXXXXXXXXXXXXXXXXXXX          |
|                   | 132090 132100 132110 132120 132130 132140 132150 132160                               |
| Human             | 103274                                                                                |
| Coquerel'sSifaka  | 81164                                                                                 |
| Ma'sNightMonkey   | 88613                                                                                 |
| VervetAGM         | 97219                                                                                 |
| Gorilla           | 92826                                                                                 |
| GrabEatingMacaque | 95686                                                                                 |
| Macaque           | 95018                                                                                 |
| PigTailedMacaque  | 95449                                                                                 |
| Bonobo            | 93411                                                                                 |
| OliveBaboon       | TTTTGCACATTAATTTGTATCCTGAGATTCCTTTGTTTAGTTGCTTATCAGCTTAAGGGATTTGGGCTGAGACAATGG 114154 |
| Orangutan         | 95567                                                                                 |

|                   |                                                                                     |
|-------------------|-------------------------------------------------------------------------------------|
| Majority          | XXXXXXXXXXXXXXXXXXXXXXXXXXXXXXXXXXXXXXXXXXXXXXXXXXXXXXXXXXXXXXXXXXXXXXXXXXXX        |
|                   | 132170 132180 132190 132200 132210 132220 132230 132240                             |
| Human             | 103274                                                                              |
| Coquerel'sSifaka  | 81164                                                                               |
| Ma'sNightMonkey   | 88613                                                                               |
| VervetAGM         | 97219                                                                               |
| Gorilla           | 92826                                                                               |
| GrabEatingMacaque | 95686                                                                               |
| Macaque           | 95018                                                                               |
| PigTailedMacaque  | 95449                                                                               |
| Bonobo            | 93411                                                                               |
| OliveBaboon       | GGTTTCTAAATATACAATCATGTCATCTGCAACAGGGACAATTTGACTTCTTCTTTTCTACTGAATACCCCTGATT 114234 |
| Orangutan         | 95567                                                                               |

Tuesday, May 03, 2022 06:18 PM

```
Majority      XXXXXXXXXXXXXXXXXXXXXXXXXXXXXXXXXXXXXXXXXXXXXXXXXXXXXXXXXXXXXXXXXXXXXXXX
              |-----|
              | 132250 | 132260 | 132270 | 132280 | 132290 | 132300 | 132310 | 132320 |
              |-----|
Human          |                                           | 103274
Coquerel'sSifaka |                                           | 81164
Ma'sNightMonkey |                                           | 88613
VervetAGM       |                                           | 97219
Gorrilla        |                                           | 92826
GrabEatingMacaque |                                           | 95686
Macaque         |                                           | 95018
PigTailedMacaque |                                           | 95449
Bonobo          |                                           | 93411
OliveBaboon     | TCTTCTCTTGCCTAATTGCCCTGTAGCCAGAACTTTCCAACACTATGTTGAATAGGAGTGGTGAGAGGGCATCCCTGTC | 114314
Orangutan       |                                           | 95567
```

```
Majority      XXXXXXXXXXXXXXXXXXXXXXXXXXXXXXXXXXXXXXXXXXXXXXXXXXXXXXXXXXXXXXXXXXXXXXXX
              |-----|
              | 132330 | 132340 | 132350 | 132360 | 132370 | 132380 | 132390 | 132400 |
              |-----|
Human          |                                           | 103274
Coquerel'sSifaka |                                           | 81164
Ma'sNightMonkey |                                           | 88613
VervetAGM       |                                           | 97219
Gorrilla        |                                           | 92826
GrabEatingMacaque |                                           | 95686
Macaque         |                                           | 95018
PigTailedMacaque |                                           | 95449
Bonobo          |                                           | 93411
OliveBaboon     | TTGAAGTCAGGACATAGGCATGGGCAAAGACTTCATGTCTAAAACACCAAAGCAACGGCAGCAAAGCTGTACCACCGGG | 114394
Orangutan       |                                           | 95567
```

```
Majority      XXXXXXXXXXXXXXXXXXXXXXXXXXXXXXXXXXXXXXXXXXXXXXXXXXXXXXXXXXXXXXXXXXXXXXXX
              |-----|
              | 132410 | 132420 | 132430 | 132440 | 132450 | 132460 | 132470 | 132480 |
              |-----|
Human          |                                           | 103274
Coquerel'sSifaka |                                           | 81164
Ma'sNightMonkey |                                           | 88613
VervetAGM       |                                           | 97219
Gorrilla        |                                           | 92826
GrabEatingMacaque |                                           | 95686
Macaque         |                                           | 95018
PigTailedMacaque |                                           | 95449
Bonobo          |                                           | 93411
OliveBaboon     | ATCTAATTAACTAAAGAGCTTCTGCACAGCAAAACAAACTACCATCAGAGTGAACAGGCAACCTACAGAATGGGAGAGA | 114474
Orangutan       |                                           | 95567
```



|                   |                                                                                  |        |        |        |        |        |        |        |
|-------------------|----------------------------------------------------------------------------------|--------|--------|--------|--------|--------|--------|--------|
| Majority          | XXXXXXXXXXXXXXXXXXXXXXXXXXXXXXXXXXXXXXXXXXXXXXXXXXXXXXXXXXXXXXXXXXXXXXXXXXXX     |        |        |        |        |        |        |        |
|                   | 132490                                                                           | 132500 | 132510 | 132520 | 132530 | 132540 | 132550 | 132560 |
| Human             |                                                                                  |        |        |        |        |        |        | 103274 |
| Coquerel'sSifaka  |                                                                                  |        |        |        |        |        |        | 81164  |
| Ma'sNightMonkey   |                                                                                  |        |        |        |        |        |        | 88613  |
| VervetAGM         |                                                                                  |        |        |        |        |        |        | 97219  |
| Gorrilla          |                                                                                  |        |        |        |        |        |        | 92826  |
| GrabEatingMacaque |                                                                                  |        |        |        |        |        |        | 95686  |
| Macaque           |                                                                                  |        |        |        |        |        |        | 95018  |
| PigTailedMacaque  |                                                                                  |        |        |        |        |        |        | 95449  |
| Bonobo            |                                                                                  |        |        |        |        |        |        | 93411  |
| OliveBaboon       | AAAATTTTGCAATCTACTCATCTGGACAAAGGGCTAATATCCAGAACCTACAAAGAACTCCCAAACAAATTTACAAGAAA |        |        |        |        |        |        | 114554 |
| Orangutan         |                                                                                  |        |        |        |        |        |        | 95567  |

|                   |                                                                                  |        |        |        |        |        |        |        |
|-------------------|----------------------------------------------------------------------------------|--------|--------|--------|--------|--------|--------|--------|
| Majority          | XXXXXXXXXXXXXXXXXXXXXXXXXXXXXXXXXXXXXXXXXXXXXXXXXXXXXXXXXXXXXXXXXXXXXXXXXXXX     |        |        |        |        |        |        |        |
|                   | 132570                                                                           | 132580 | 132590 | 132600 | 132610 | 132620 | 132630 | 132640 |
| Human             |                                                                                  |        |        |        |        |        |        | 103274 |
| Coquerel'sSifaka  |                                                                                  |        |        |        |        |        |        | 81164  |
| Ma'sNightMonkey   |                                                                                  |        |        |        |        |        |        | 88613  |
| VervetAGM         |                                                                                  |        |        |        |        |        |        | 97219  |
| Gorrilla          |                                                                                  |        |        |        |        |        |        | 92826  |
| GrabEatingMacaque |                                                                                  |        |        |        |        |        |        | 95686  |
| Macaque           |                                                                                  |        |        |        |        |        |        | 95018  |
| PigTailedMacaque  |                                                                                  |        |        |        |        |        |        | 95449  |
| Bonobo            |                                                                                  |        |        |        |        |        |        | 93411  |
| OliveBaboon       | AACAAACAAACCCCATCAAAAAGTGGGCAAAGGATGAACAGACATTTCTCAAAGAAGATGTTTCATACAGCCAACAGACA |        |        |        |        |        |        | 114634 |
| Orangutan         |                                                                                  |        |        |        |        |        |        | 95567  |

|                   |                                                                                |        |        |        |        |        |        |        |
|-------------------|--------------------------------------------------------------------------------|--------|--------|--------|--------|--------|--------|--------|
| Majority          | XXXXXXXXXXXXXXXXXXXXXXXXXXXXXXXXXXXXXXXXXXXXXXXXXXXXXXXXXXXXXXXXXXXXXXXXXXXX   |        |        |        |        |        |        |        |
|                   | 132650                                                                         | 132660 | 132670 | 132680 | 132690 | 132700 | 132710 | 132720 |
| Human             |                                                                                |        |        |        |        |        |        | 103274 |
| Coquerel'sSifaka  |                                                                                |        |        |        |        |        |        | 81164  |
| Ma'sNightMonkey   |                                                                                |        |        |        |        |        |        | 88613  |
| VervetAGM         |                                                                                |        |        |        |        |        |        | 97219  |
| Gorrilla          |                                                                                |        |        |        |        |        |        | 92826  |
| GrabEatingMacaque |                                                                                |        |        |        |        |        |        | 95686  |
| Macaque           |                                                                                |        |        |        |        |        |        | 95018  |
| PigTailedMacaque  |                                                                                |        |        |        |        |        |        | 95449  |
| Bonobo            |                                                                                |        |        |        |        |        |        | 93411  |
| OliveBaboon       | TATGAAAATGCTCATCATCACTGGCCATCAGAGAAATGCAAATCAAACCACAATGAGATACCATCTCTTACCAGTTAG |        |        |        |        |        |        | 114714 |
| Orangutan         |                                                                                |        |        |        |        |        |        | 95567  |





Tuesday, May 03, 2022 06:18 PM

|                   |                                                                                      |
|-------------------|--------------------------------------------------------------------------------------|
| Majority          | XXXXXXXXXXXXXXXXXXXXXXXXXXXXXXXXXXXXXXXXXXXXXXXXXXXXXXXXXXXXXXXXXXXXXXXXXXXXXXXXXXXX |
|                   | 133210 133220 133230 133240 133250 133260 133270 133280                              |
| Human             | 103274                                                                               |
| Coquerel'sSifaka  | 81164                                                                                |
| Ma'sNightMonkey   | 88613                                                                                |
| VervetAGM         | 97219                                                                                |
| Gorrilla          | 92826                                                                                |
| GrabEatingMacaque | 95686                                                                                |
| Macaque           | 95018                                                                                |
| PigTailedMacaque  | 95449                                                                                |
| Bonobo            | 93411                                                                                |
| OliveBaboon       | GATCACTTGACTCCAGGAAGGAAACATCACCGGGCCTATCATGGGGAGGGGGAGGGGAGGGATTGTACTAGAGTTAT 115274 |
| Orangutan         | 95567                                                                                |

|                   |                                                                                         |
|-------------------|-----------------------------------------------------------------------------------------|
| Majority          | XXXXXXXXXXXXXXXXXXXXXXXXXXXXXXXXXXXXXXXXXXXXXXXXXXXXXXXXXXXXXXXXXXXXXXXXXXXXXXXXXXXX    |
|                   | 133290 133300 133310 133320 133330 133340 133350 133360                                 |
| Human             | 103274                                                                                  |
| Coquerel'sSifaka  | 81164                                                                                   |
| Ma'sNightMonkey   | 88613                                                                                   |
| VervetAGM         | 97219                                                                                   |
| Gorrilla          | 92826                                                                                   |
| GrabEatingMacaque | 95686                                                                                   |
| Macaque           | 95018                                                                                   |
| PigTailedMacaque  | 95449                                                                                   |
| Bonobo            | 93411                                                                                   |
| OliveBaboon       | ACTGATGTAAAATGACGAGTTGATGGGTGCAGCAGACCAACATGCACAAGTATACATATGTAATAAACCTGCATGTTATG 115354 |
| Orangutan         | 95567                                                                                   |

|                   |                                                                                      |
|-------------------|--------------------------------------------------------------------------------------|
| Majority          | XXXXXXXXXXXXXXXXXXXXXXXXXXXXXXXXXXXXXXXXXXXXXXXXXXXXXXXXXXXXXXXXXXXXXXXXXXXXXXXXXXXX |
|                   | 133370 133380 133390 133400 133410 133420 133430 133440                              |
| Human             | 103274                                                                               |
| Coquerel'sSifaka  | 81164                                                                                |
| Ma'sNightMonkey   | 88613                                                                                |
| VervetAGM         | 97219                                                                                |
| Gorrilla          | 92826                                                                                |
| GrabEatingMacaque | 95686                                                                                |
| Macaque           | 95018                                                                                |
| PigTailedMacaque  | 95449                                                                                |
| Bonobo            | 93411                                                                                |
| OliveBaboon       | CACATGTACCCTACAACCTAAAGTATAATAATAAAATAAAATTTAAAAAAGTTGAAAAAATAAAATTAATA 115434       |
| Orangutan         | 95567                                                                                |



Tuesday, May 03, 2022 06:18 PM

| Majority          | XXXXXXXXXXXXXXXXXXXXXXXXXXXXXXXXXXXXXXXXXXXXXXXXXXXXXXXXXXXXXXXXXXXXXXXXXXXXXXXXXXXXXXXXXXXXXXXXXXXXXXXXXXXXXXXXXXXX |        |        |        |        |        |        |        |        |
|-------------------|----------------------------------------------------------------------------------------------------------------------|--------|--------|--------|--------|--------|--------|--------|--------|
|                   | 133690                                                                                                               | 133700 | 133710 | 133720 | 133730 | 133740 | 133750 | 133760 |        |
| Human             |                                                                                                                      |        |        |        |        |        |        |        | 103274 |
| Coquerel'sSifaka  |                                                                                                                      |        |        |        |        |        |        |        | 81164  |
| Ma'sNightMonkey   |                                                                                                                      |        |        |        |        |        |        |        | 88613  |
| VervetAGM         |                                                                                                                      |        |        |        |        |        |        |        | 97219  |
| Gorrilla          |                                                                                                                      |        |        |        |        |        |        |        | 92826  |
| GrabEatingMacaque |                                                                                                                      |        |        |        |        |        |        |        | 95686  |
| Macaque           |                                                                                                                      |        |        |        |        |        |        |        | 95018  |
| PigTailedMacaque  |                                                                                                                      |        |        |        |        |        |        |        | 95449  |
| Bonobo            |                                                                                                                      |        |        |        |        |        |        |        | 93411  |
| OliveBaboon       | GGGCTCTGTCTCCTGGTGGAGTGCAGTGATCCTGCTCACTGCAAGCTCCGCCCTGTTCCACATTCTCTGCCTCAGCCTC                                      |        |        |        |        |        |        |        | 115754 |
| Orangutan         |                                                                                                                      |        |        |        |        |        |        |        | 95567  |

| Majority          | XXXXXXXXXXXXXXXXXXXXXXXXXXXXXXXXXXXXXXXXXXXXXXXXXXXXXXXXXXXXXXXXXXXXXXXXXXXXXXXXXXXXXXXXXXXXXXXXXXXXXXXXXXXXXXXXXXXX |        |        |        |        |        |        |        |        |
|-------------------|----------------------------------------------------------------------------------------------------------------------|--------|--------|--------|--------|--------|--------|--------|--------|
|                   | 133770                                                                                                               | 133780 | 133790 | 133800 | 133810 | 133820 | 133830 | 133840 |        |
| Human             |                                                                                                                      |        |        |        |        |        |        |        | 103274 |
| Coquerel'sSifaka  |                                                                                                                      |        |        |        |        |        |        |        | 81164  |
| Ma'sNightMonkey   |                                                                                                                      |        |        |        |        |        |        |        | 88613  |
| VervetAGM         |                                                                                                                      |        |        |        |        |        |        |        | 97219  |
| Gorrilla          |                                                                                                                      |        |        |        |        |        |        |        | 92826  |
| GrabEatingMacaque |                                                                                                                      |        |        |        |        |        |        |        | 95686  |
| Macaque           |                                                                                                                      |        |        |        |        |        |        |        | 95018  |
| PigTailedMacaque  |                                                                                                                      |        |        |        |        |        |        |        | 95449  |
| Bonobo            |                                                                                                                      |        |        |        |        |        |        |        | 93411  |
| OliveBaboon       | CCCCAGTAGCTGAGACTAGGTGCCTGCTACCACGCTCGCTAATTTTTTGTATTTTAGTAGAGACGGGGTTTCACCGTGTT                                     |        |        |        |        |        |        |        | 115834 |
| Orangutan         |                                                                                                                      |        |        |        |        |        |        |        | 95567  |

| Majority          | XXXXXXXXXXXXXXXXXXXXXXXXXXXXXXXXXXXXXXXXXXXXXXXXXXXXXXXXXXXXXXXXXXXXXXXXXXXXXXXXXXXXXXXXXXXXXXXXXXXXXXXXXXXXXXXXXXXX |        |        |        |        |        |        |        |        |
|-------------------|----------------------------------------------------------------------------------------------------------------------|--------|--------|--------|--------|--------|--------|--------|--------|
|                   | 133850                                                                                                               | 133860 | 133870 | 133880 | 133890 | 133900 | 133910 | 133920 |        |
| Human             |                                                                                                                      |        |        |        |        |        |        |        | 103274 |
| Coquerel'sSifaka  |                                                                                                                      |        |        |        |        |        |        |        | 81164  |
| Ma'sNightMonkey   |                                                                                                                      |        |        |        |        |        |        |        | 88613  |
| VervetAGM         |                                                                                                                      |        |        |        |        |        |        |        | 97219  |
| Gorrilla          |                                                                                                                      |        |        |        |        |        |        |        | 92826  |
| GrabEatingMacaque |                                                                                                                      |        |        |        |        |        |        |        | 95686  |
| Macaque           |                                                                                                                      |        |        |        |        |        |        |        | 95018  |
| PigTailedMacaque  |                                                                                                                      |        |        |        |        |        |        |        | 95449  |
| Bonobo            |                                                                                                                      |        |        |        |        |        |        |        | 93411  |
| OliveBaboon       | AGCCAGGATGGTCTCGATCTCCTGACCTCTTGATCCGCCCGCCTCGGCTCCCAAAGTGCTGGGATTACAGGCGTGAGCC                                      |        |        |        |        |        |        |        | 115914 |
| Orangutan         |                                                                                                                      |        |        |        |        |        |        |        | 95567  |

Tuesday, May 03, 2022 06:18 PM

| Majority          | XXXXXXXXXXXXXXXXXXXXXXXXXXXXXXXXXXXXXXXXXXXXXXXXXXXXXXXXXXXXXXXXXXXXXXXXXXXX    |        |        |        |        |        |        |        |        |
|-------------------|---------------------------------------------------------------------------------|--------|--------|--------|--------|--------|--------|--------|--------|
|                   | 133930                                                                          | 133940 | 133950 | 133960 | 133970 | 133980 | 133990 | 134000 |        |
| Human             |                                                                                 |        |        |        |        |        |        |        | 103274 |
| Coquerel'sSifaka  |                                                                                 |        |        |        |        |        |        |        | 81164  |
| Ma'sNightMonkey   |                                                                                 |        |        |        |        |        |        |        | 88613  |
| VervetAGM         |                                                                                 |        |        |        |        |        |        |        | 97219  |
| Gorrilla          |                                                                                 |        |        |        |        |        |        |        | 92826  |
| GrabEatingMacaque |                                                                                 |        |        |        |        |        |        |        | 95686  |
| Macaque           |                                                                                 |        |        |        |        |        |        |        | 95018  |
| PigTailedMacaque  |                                                                                 |        |        |        |        |        |        |        | 95449  |
| Bonobo            |                                                                                 |        |        |        |        |        |        |        | 93411  |
| OliveBaboon       | ACCGCCCCGGCCTCTACTCAATATTTCAATGCCTTATTCCTTTTTTAGTCAACTGCAGTCTGACTTCTGCCACCAGCAT |        |        |        |        |        |        |        | 115994 |
| Orangutan         |                                                                                 |        |        |        |        |        |        |        | 95567  |

| Majority          | XXXXXXXXXXXXXXXXXXXXXXXXXXXXXXXXXXXXXXXXXXXXXXXXXXXXXXXXXXXXXXXXXXXXXXXXXXXX       |        |        |        |        |        |        |        |        |
|-------------------|------------------------------------------------------------------------------------|--------|--------|--------|--------|--------|--------|--------|--------|
|                   | 134010                                                                             | 134020 | 134030 | 134040 | 134050 | 134060 | 134070 | 134080 |        |
| Human             |                                                                                    |        |        |        |        |        |        |        | 103274 |
| Coquerel'sSifaka  |                                                                                    |        |        |        |        |        |        |        | 81164  |
| Ma'sNightMonkey   |                                                                                    |        |        |        |        |        |        |        | 88613  |
| VervetAGM         |                                                                                    |        |        |        |        |        |        |        | 97219  |
| Gorrilla          |                                                                                    |        |        |        |        |        |        |        | 92826  |
| GrabEatingMacaque |                                                                                    |        |        |        |        |        |        |        | 95686  |
| Macaque           |                                                                                    |        |        |        |        |        |        |        | 95018  |
| PigTailedMacaque  |                                                                                    |        |        |        |        |        |        |        | 95449  |
| Bonobo            |                                                                                    |        |        |        |        |        |        |        | 93411  |
| OliveBaboon       | TCCACAGAACTGCTCTCCCTAAATTATTAATGATCTTCTAATTGCCAAATGTACTIONTATGCAAGTGTTTACATGTATCAA |        |        |        |        |        |        |        | 116074 |
| Orangutan         |                                                                                    |        |        |        |        |        |        |        | 95567  |

| Majority          | XXXXXXXXXXXXXXXXXXXXXXXXXXXXXXXXXXXXXXXXXXXXXXXXXXXXXXXXXXXXXXXXXXXXXXXXXXXX    |        |        |        |        |        |        |        |        |
|-------------------|---------------------------------------------------------------------------------|--------|--------|--------|--------|--------|--------|--------|--------|
|                   | 134090                                                                          | 134100 | 134110 | 134120 | 134130 | 134140 | 134150 | 134160 |        |
| Human             |                                                                                 |        |        |        |        |        |        |        | 103274 |
| Coquerel'sSifaka  |                                                                                 |        |        |        |        |        |        |        | 81164  |
| Ma'sNightMonkey   |                                                                                 |        |        |        |        |        |        |        | 88613  |
| VervetAGM         |                                                                                 |        |        |        |        |        |        |        | 97219  |
| Gorrilla          |                                                                                 |        |        |        |        |        |        |        | 92826  |
| GrabEatingMacaque |                                                                                 |        |        |        |        |        |        |        | 95686  |
| Macaque           |                                                                                 |        |        |        |        |        |        |        | 95018  |
| PigTailedMacaque  |                                                                                 |        |        |        |        |        |        |        | 95449  |
| Bonobo            |                                                                                 |        |        |        |        |        |        |        | 93411  |
| OliveBaboon       | TGCATGTAATCCTCTACCATCTATTACGTGTATATTCTTATCCTAGTATTGCCTAGGACAGGAGTCATCAAATACTGGC |        |        |        |        |        |        |        | 116154 |
| Orangutan         |                                                                                 |        |        |        |        |        |        |        | 95567  |









Tuesday, May 03, 2022 06:18 PM

| Majority          | XXXXXXXXXXXXXXXXXXXXXXXXXXXXXXXXXXXXXXXXXXXXXXXXXXXXXXXXXXXXXXXXXXXXXXXXXXXX    |        |        |        |        |        |        |        |        |
|-------------------|---------------------------------------------------------------------------------|--------|--------|--------|--------|--------|--------|--------|--------|
|                   | 134890                                                                          | 134900 | 134910 | 134920 | 134930 | 134940 | 134950 | 134960 |        |
| Human             |                                                                                 |        |        |        |        |        |        |        | 103274 |
| Coquerel'sSifaka  |                                                                                 |        |        |        |        |        |        |        | 81164  |
| Ma'sNightMonkey   |                                                                                 |        |        |        |        |        |        |        | 88613  |
| VervetAGM         |                                                                                 |        |        |        |        |        |        |        | 97219  |
| Gorilla           |                                                                                 |        |        |        |        |        |        |        | 92826  |
| GrabEatingMacaque |                                                                                 |        |        |        |        |        |        |        | 95686  |
| Macaque           |                                                                                 |        |        |        |        |        |        |        | 95018  |
| PigTailedMacaque  |                                                                                 |        |        |        |        |        |        |        | 95449  |
| Bonobo            |                                                                                 |        |        |        |        |        |        |        | 93411  |
| OliveBaboon       | AATGGATCTAAGAACGGGAAGCACAACTATAAAAAAAAAAAAAATGGCCGGGCGGGTGGCTCAAGCCTGTAATCCCAGC |        |        |        |        |        |        |        | 116954 |
| Orangutan         |                                                                                 |        |        |        |        |        |        |        | 95567  |

| Majority          | XXXXXXXXXXXXXXXXXXXXXXXXXXXXXXXXXXXXXXXXXXXXXXXXXXXXXXXXXXXXXXXXXXXXXXXXXXXX    |        |        |        |        |        |        |        |        |
|-------------------|---------------------------------------------------------------------------------|--------|--------|--------|--------|--------|--------|--------|--------|
|                   | 134970                                                                          | 134980 | 134990 | 135000 | 135010 | 135020 | 135030 | 135040 |        |
| Human             |                                                                                 |        |        |        |        |        |        |        | 103274 |
| Coquerel'sSifaka  |                                                                                 |        |        |        |        |        |        |        | 81164  |
| Ma'sNightMonkey   |                                                                                 |        |        |        |        |        |        |        | 88613  |
| VervetAGM         |                                                                                 |        |        |        |        |        |        |        | 97219  |
| Gorilla           |                                                                                 |        |        |        |        |        |        |        | 92826  |
| GrabEatingMacaque |                                                                                 |        |        |        |        |        |        |        | 95686  |
| Macaque           |                                                                                 |        |        |        |        |        |        |        | 95018  |
| PigTailedMacaque  |                                                                                 |        |        |        |        |        |        |        | 95449  |
| Bonobo            |                                                                                 |        |        |        |        |        |        |        | 93411  |
| OliveBaboon       | ACTTTGGGAGGCCGAGACGGGTGGATCACGAGGTGAGGAGATCGAGACCATCTGGCTAACACAGTGAAACCCCGTCTCT |        |        |        |        |        |        |        | 117034 |
| Orangutan         |                                                                                 |        |        |        |        |        |        |        | 95567  |

| Majority          | XXXXXXXXXXXXXXXXXXXXXXXXXXXXXXXXXXXXXXXXXXXXXXXXXXXXXXXXXXXXXXXXXXXXXXXXXXXX      |        |        |        |        |        |        |        |        |
|-------------------|-----------------------------------------------------------------------------------|--------|--------|--------|--------|--------|--------|--------|--------|
|                   | 135050                                                                            | 135060 | 135070 | 135080 | 135090 | 135100 | 135110 | 135120 |        |
| Human             |                                                                                   |        |        |        |        |        |        |        | 103274 |
| Coquerel'sSifaka  |                                                                                   |        |        |        |        |        |        |        | 81164  |
| Ma'sNightMonkey   |                                                                                   |        |        |        |        |        |        |        | 88613  |
| VervetAGM         |                                                                                   |        |        |        |        |        |        |        | 97219  |
| Gorilla           |                                                                                   |        |        |        |        |        |        |        | 92826  |
| GrabEatingMacaque |                                                                                   |        |        |        |        |        |        |        | 95686  |
| Macaque           |                                                                                   |        |        |        |        |        |        |        | 95018  |
| PigTailedMacaque  |                                                                                   |        |        |        |        |        |        |        | 95449  |
| Bonobo            |                                                                                   |        |        |        |        |        |        |        | 93411  |
| OliveBaboon       | ACTAAAAAAAAATACAAAAAACTAGCCGGGCGAGGTGGCGGGCACCTGTAGTCCCAGCTACTCGGGAGGCTGAGGCAGGAG |        |        |        |        |        |        |        | 117114 |
| Orangutan         |                                                                                   |        |        |        |        |        |        |        | 95567  |







Tuesday, May 03, 2022 06:18 PM

| Majority          | XXXXXXXXXXXXXXXXXXXXXXXXXXXXXXXXXXXXXXXXXXXXXXXXXXXXXXXXXXXXXXXXXXXXXXXXXXXX          |
|-------------------|---------------------------------------------------------------------------------------|
|                   | 135850 135860 135870 135880 135890 135900 135910 135920                               |
| Human             | 103274                                                                                |
| Coquerel'sSifaka  | 81164                                                                                 |
| Ma'sNightMonkey   | 88613                                                                                 |
| VervetAGM         | 97219                                                                                 |
| Gorrilla          | 92826                                                                                 |
| GrabEatingMacaque | 95686                                                                                 |
| Macaque           | 95018                                                                                 |
| PigTailedMacaque  | 95449                                                                                 |
| Bonobo            | 93411                                                                                 |
| OliveBaboon       | CTAAATCTGTCTATCATCTATCTGCTATATCATCTCAAATAGTGGCAAATGCAATGGACGTGAAAACACACAAACAAA 117914 |
| Orangutan         | 95567                                                                                 |

| Majority          | XXXXXXXXXXXXXXXXXXXXXXXXXXXXXXXXXXXXXXXXXXXXXXXXXXXXXXXXXXXXXXXXXXXXXXXXXXXX            |
|-------------------|-----------------------------------------------------------------------------------------|
|                   | 135930 135940 135950 135960 135970 135980 135990 136000                                 |
| Human             | 103274                                                                                  |
| Coquerel'sSifaka  | 81164                                                                                   |
| Ma'sNightMonkey   | 88613                                                                                   |
| VervetAGM         | 97219                                                                                   |
| Gorrilla          | 92826                                                                                   |
| GrabEatingMacaque | 95686                                                                                   |
| Macaque           | 95018                                                                                   |
| PigTailedMacaque  | 95449                                                                                   |
| Bonobo            | 93411                                                                                   |
| OliveBaboon       | AAGTGGAAAGAGATTGGAATAGAGTTAGGGAGTGCTATTCTGTATCATGTGATTAAGAGAGGCTTCATTGACAGAGGAAC 117994 |
| Orangutan         | 95567                                                                                   |

| Majority          | XXXXXXXXXXXXXXXXXXXXXXXXXXXXXXXXXXXXXXXXXXXXXXXXXXXXXXXXXXXXXXXXXXXXXXXXXXXX            |
|-------------------|-----------------------------------------------------------------------------------------|
|                   | 136010 136020 136030 136040 136050 136060 136070 136080                                 |
| Human             | 103274                                                                                  |
| Coquerel'sSifaka  | 81164                                                                                   |
| Ma'sNightMonkey   | 88613                                                                                   |
| VervetAGM         | 97219                                                                                   |
| Gorrilla          | 92826                                                                                   |
| GrabEatingMacaque | 95686                                                                                   |
| Macaque           | 95018                                                                                   |
| PigTailedMacaque  | 95449                                                                                   |
| Bonobo            | 93411                                                                                   |
| OliveBaboon       | ATTTGAACAGCATCTCTGAAGGGTGTGTGAGAGAGCCACAAAACTGGGCTAGGAATTGCCTGAGGGTATCTTCACCACTT 118074 |
| Orangutan         | 95567                                                                                   |

Tuesday, May 03, 2022 06:18 PM

|                   |                                                                                                                              |        |        |        |        |        |        |        |  |        |
|-------------------|------------------------------------------------------------------------------------------------------------------------------|--------|--------|--------|--------|--------|--------|--------|--|--------|
| Majority          | XXXXXXXXXXXXXXXXXXXXXXXXXXXXXXXXXXXXXXXXXXXXXXXXXXXXXXXXXXXXXXXXXXXXXXXXXXXXXXXXXXXXXXXXXXXXXXXXXXXXXXXXXXXXXXXXXXXXXXXXXXXX |        |        |        |        |        |        |        |  |        |
|                   | 136090                                                                                                                       | 136100 | 136110 | 136120 | 136130 | 136140 | 136150 | 136160 |  |        |
| Human             |                                                                                                                              |        |        |        |        |        |        |        |  | 103274 |
| Coquerel'sSifaka  |                                                                                                                              |        |        |        |        |        |        |        |  | 81164  |
| Ma'sNightMonkey   |                                                                                                                              |        |        |        |        |        |        |        |  | 88613  |
| VervetAGM         |                                                                                                                              |        |        |        |        |        |        |        |  | 97219  |
| Gorrilla          |                                                                                                                              |        |        |        |        |        |        |        |  | 92826  |
| GrabEatingMacaque |                                                                                                                              |        |        |        |        |        |        |        |  | 95686  |
| Macaque           |                                                                                                                              |        |        |        |        |        |        |        |  | 95018  |
| PigTailedMacaque  |                                                                                                                              |        |        |        |        |        |        |        |  | 95449  |
| Bonobo            |                                                                                                                              |        |        |        |        |        |        |        |  | 93411  |
| OliveBaboon       | TAGAAGCAAAGGCTCCACAATTAGTTCAATCAGAGAAAAATACAGTTACATTCTTTTGTCTCTGAGACTGAAATTTGTA                                              |        |        |        |        |        |        |        |  | 118154 |
| Orangutan         |                                                                                                                              |        |        |        |        |        |        |        |  | 95567  |

|                   |                                                                                                                              |        |        |        |        |        |        |        |  |        |
|-------------------|------------------------------------------------------------------------------------------------------------------------------|--------|--------|--------|--------|--------|--------|--------|--|--------|
| Majority          | XXXXXXXXXXXXXXXXXXXXXXXXXXXXXXXXXXXXXXXXXXXXXXXXXXXXXXXXXXXXXXXXXXXXXXXXXXXXXXXXXXXXXXXXXXXXXXXXXXXXXXXXXXXXXXXXXXXXXXXXXXXX |        |        |        |        |        |        |        |  |        |
|                   | 136170                                                                                                                       | 136180 | 136190 | 136200 | 136210 | 136220 | 136230 | 136240 |  |        |
| Human             |                                                                                                                              |        |        |        |        |        |        |        |  | 103274 |
| Coquerel'sSifaka  |                                                                                                                              |        |        |        |        |        |        |        |  | 81164  |
| Ma'sNightMonkey   |                                                                                                                              |        |        |        |        |        |        |        |  | 88613  |
| VervetAGM         |                                                                                                                              |        |        |        |        |        |        |        |  | 97219  |
| Gorrilla          |                                                                                                                              |        |        |        |        |        |        |        |  | 92826  |
| GrabEatingMacaque |                                                                                                                              |        |        |        |        |        |        |        |  | 95686  |
| Macaque           |                                                                                                                              |        |        |        |        |        |        |        |  | 95018  |
| PigTailedMacaque  |                                                                                                                              |        |        |        |        |        |        |        |  | 95449  |
| Bonobo            |                                                                                                                              |        |        |        |        |        |        |        |  | 93411  |
| OliveBaboon       | CCTGCTCTTCCAATAAACGGCCAGTCCGCATTTTTCCTCTTCTTCTGGCCTTCTGCTTTAGCGGGCCACCATCCTGTT                                               |        |        |        |        |        |        |        |  | 118234 |
| Orangutan         |                                                                                                                              |        |        |        |        |        |        |        |  | 95567  |

|                   |                                                                                                                              |        |        |        |        |        |        |        |  |        |
|-------------------|------------------------------------------------------------------------------------------------------------------------------|--------|--------|--------|--------|--------|--------|--------|--|--------|
| Majority          | XXXXXXXXXXXXXXXXXXXXXXXXXXXXXXXXXXXXXXXXXXXXXXXXXXXXXXXXXXXXXXXXXXXXXXXXXXXXXXXXXXXXXXXXXXXXXXXXXXXXXXXXXXXXXXXXXXXXXXXXXXXX |        |        |        |        |        |        |        |  |        |
|                   | 136250                                                                                                                       | 136260 | 136270 | 136280 | 136290 | 136300 | 136310 | 136320 |  |        |
| Human             |                                                                                                                              |        |        |        |        |        |        |        |  | 103274 |
| Coquerel'sSifaka  |                                                                                                                              |        |        |        |        |        |        |        |  | 81164  |
| Ma'sNightMonkey   |                                                                                                                              |        |        |        |        |        |        |        |  | 88613  |
| VervetAGM         |                                                                                                                              |        |        |        |        |        |        |        |  | 97219  |
| Gorrilla          |                                                                                                                              |        |        |        |        |        |        |        |  | 92826  |
| GrabEatingMacaque |                                                                                                                              |        |        |        |        |        |        |        |  | 95686  |
| Macaque           |                                                                                                                              |        |        |        |        |        |        |        |  | 95018  |
| PigTailedMacaque  |                                                                                                                              |        |        |        |        |        |        |        |  | 95449  |
| Bonobo            |                                                                                                                              |        |        |        |        |        |        |        |  | 93411  |
| OliveBaboon       | TCAACTGTCGATCTATTTTTCTGAGTATATCTCACCTCCCCAGGTCTGCGGCAGGCAAAGCAGCTTTGGCCTTTCAGA                                               |        |        |        |        |        |        |        |  | 118314 |
| Orangutan         |                                                                                                                              |        |        |        |        |        |        |        |  | 95567  |





Tuesday, May 03, 2022 06:18 PM

```

Majority      XXXXXXXXXXXXXXXXXXXXXXXXXXXXXXXXXXXXXXXXXXXXXXXXXXXXXXXXXXXXXXXXXXXXXXXX
              |-----|
             136570   136580   136590   136600   136610   136620   136630   136640
Human          |-----|
Coquerel'sSifaka
Ma'sNightMonkey
VervetAGM
Gorrilla
GrabEatingMacaque
Macaque
PigTailedMacaque
Bonobo
OliveBaboon  CTTTCCTGACACCTAGTTCTGACCTGTTGAGCCAAGAAGACTGTCTCAAGCCATGTGTGAAATGTAAGGCTTTAATCTCA 118634
Orangutan
    
```

```

Majority      XXXXXXXXXXXXXXXXXXXXXXXXXXXXXXXXXXXXXXXXXXXXXXXXXXXXXXXXXXXXXXXXXXXXXXXX
              |-----|
             136650   136660   136670   136680   136690   136700   136710   136720
Human          |-----|
Coquerel'sSifaka
Ma'sNightMonkey
VervetAGM
Gorrilla
GrabEatingMacaque
Macaque
PigTailedMacaque
Bonobo
OliveBaboon  GACTCTTAGGTCTAAATTTTAAATTTAATGTAATTATAACTTACACTCCTGTAGCAGTTTGCAATACATTCCTATATTTCA 118714
Orangutan
    
```

```

Majority      XXXXXXXXXXXXXXXXXXXXXXXXXXXXXXXXXXXXXXXXXXXXXXXXXXXXXXXXXXXXXXXXXXXXXXXX
              |-----|
             136730   136740   136750   136760   136770   136780   136790   136800
Human          |-----|
Coquerel'sSifaka
Ma'sNightMonkey
VervetAGM
Gorrilla
GrabEatingMacaque
Macaque
PigTailedMacaque
Bonobo
OliveBaboon  TTTAGGCTTGATACAAAACCTTCAGAGGTAGCCCAGCCAATGCGGAGGAGGATAATGATGATGATGACAACGCCTTCAAC 118794
Orangutan
    
```





Tuesday, May 03, 2022 06:18 PM

```

Majority      XXXXXXXXXXXXXXXXXXXXXXXXXXXXXXXXXXXXXXXXXXXXXXXXXXXXXXXXXXXXXXXXXXXX
                137290  137300  137310  137320  137330  137340  137350  137360
Human              103274
Coquerel'sSifaka  81164
Ma'sNightMonkey  88613
VervetAGM        97219
Gorrilla         92826
GrabEatingMacaque 95686
Macaque          95018
PigTailedMacaque 95449
Bonobo           93411
OliveBaboon      AAGTTCAGACTTCACAATCTACCCCCTTTCATCTCCCATAGCCTGTGGTAATATAAACTACTGCATTATATGAGCTCA 119354
Orangutan        95567
    
```

```

Majority      XXXXXXXXXXXXXXXXXXXXXXXXXXXXXXXXXXXXXXXXXXXXXXXXXXXXXXXXXXXXXXXXXXXX
                137370  137380  137390  137400  137410  137420  137430  137440
Human              103274
Coquerel'sSifaka  81164
Ma'sNightMonkey  88613
VervetAGM        97219
Gorrilla         92826
GrabEatingMacaque 95686
Macaque          95018
PigTailedMacaque 95449
Bonobo           93411
OliveBaboon      ATGTAAGGGTCAGAAGTTCCTTAAAGAAAGACCAATCTCCATGCAATCTCGTCAAATATTTAAAACTCTATTCTCATA 119434
Orangutan        95567
    
```

```

Majority      XXXXXXXXXXXXXXXXXXXXXXXXXXXXXXXXXXXXXXXXXXXXXXXXXXXXXXXXXXXXXXXXXXXX
                137450  137460  137470  137480  137490  137500  137510  137520
Human              103274
Coquerel'sSifaka  81164
Ma'sNightMonkey  88613
VervetAGM        97219
Gorrilla         92826
GrabEatingMacaque 95686
Macaque          95018
PigTailedMacaque 95449
Bonobo           93411
OliveBaboon      GACGGAACATGAACAATAATGTTTTCCCTTGAGGACTGTTTGCTCTCTGACACTGAAGATTCTTATTTTCTGCAGTTTCT 119514
Orangutan        95567
    
```











Tuesday, May 03, 2022 06:18 PM

|                   |                                                                                                                                      |        |
|-------------------|--------------------------------------------------------------------------------------------------------------------------------------|--------|
| Majority          | XXXXXXXXXXXXXXXXXXXXXXXXXXXXXXXXXXXXXXXXXXXXXXXXXXXXXXXXXXXXXXXXXXXXXXXXXXXXXXXXXXXXXXXXXXXXXXXXXXXXXXXXXXXXXXXXXXXXXXXXXXXXXXXXXXXX |        |
|                   | 138490 138500 138510 138520 138530 138540 138550 138560                                                                              |        |
| Human             |                                                                                                                                      | 103274 |
| Coquerel'sSifaka  |                                                                                                                                      | 81164  |
| Ma'sNightMonkey   |                                                                                                                                      | 88613  |
| VervetAGM         |                                                                                                                                      | 97219  |
| Gorrilla          |                                                                                                                                      | 92826  |
| GrabEatingMacaque |                                                                                                                                      | 95686  |
| Macaque           |                                                                                                                                      | 95018  |
| PigTailedMacaque  |                                                                                                                                      | 95449  |
| Bonobo            |                                                                                                                                      | 93411  |
| OliveBaboon       | TCTTGAACAAAGGGCTATCTCTGCTTCCTGCTTCAATAAATGAGGTC CCTATCGCTACAAGCAGTGATGTGTTCCTCACC                                                    | 120554 |
| Orangutan         |                                                                                                                                      | 95567  |

|                   |                                                                                                                                      |        |
|-------------------|--------------------------------------------------------------------------------------------------------------------------------------|--------|
| Majority          | XXXXXXXXXXXXXXXXXXXXXXXXXXXXXXXXXXXXXXXXXXXXXXXXXXXXXXXXXXXXXXXXXXXXXXXXXXXXXXXXXXXXXXXXXXXXXXXXXXXXXXXXXXXXXXXXXXXXXXXXXXXXXXXXXXXX |        |
|                   | 138570 138580 138590 138600 138610 138620 138630 138640                                                                              |        |
| Human             |                                                                                                                                      | 103274 |
| Coquerel'sSifaka  |                                                                                                                                      | 81164  |
| Ma'sNightMonkey   |                                                                                                                                      | 88613  |
| VervetAGM         |                                                                                                                                      | 97219  |
| Gorrilla          |                                                                                                                                      | 92826  |
| GrabEatingMacaque |                                                                                                                                      | 95686  |
| Macaque           |                                                                                                                                      | 95018  |
| PigTailedMacaque  |                                                                                                                                      | 95449  |
| Bonobo            |                                                                                                                                      | 93411  |
| OliveBaboon       | CTGCCAAGAGCCTGCAGACACAAGATGCCAGGTGAGCATGAGGTTGTGTGTCAGGGTGGGGTGGGTCAGCTTTACCTT                                                       | 120634 |
| Orangutan         |                                                                                                                                      | 95567  |

|                   |                                                                                                                                      |        |
|-------------------|--------------------------------------------------------------------------------------------------------------------------------------|--------|
| Majority          | XXXXXXXXXXXXXXXXXXXXXXXXXXXXXXXXXXXXXXXXXXXXXXXXXXXXXXXXXXXXXXXXXXXXXXXXXXXXXXXXXXXXXXXXXXXXXXXXXXXXXXXXXXXXXXXXXXXXXXXXXXXXXXXXXXXX |        |
|                   | 138650 138660 138670 138680 138690 138700 138710 138720                                                                              |        |
| Human             |                                                                                                                                      | 103274 |
| Coquerel'sSifaka  |                                                                                                                                      | 81164  |
| Ma'sNightMonkey   |                                                                                                                                      | 88613  |
| VervetAGM         |                                                                                                                                      | 97219  |
| Gorrilla          |                                                                                                                                      | 92826  |
| GrabEatingMacaque |                                                                                                                                      | 95686  |
| Macaque           |                                                                                                                                      | 95018  |
| PigTailedMacaque  |                                                                                                                                      | 95449  |
| Bonobo            |                                                                                                                                      | 93411  |
| OliveBaboon       | TTTCTCTCATCTAGCAAGTTCTTTCTCCAAGCTGGGCACTGTCTTCATCACCTTCACTAAGCACAGAGGCAGGCTGGG                                                       | 120714 |
| Orangutan         |                                                                                                                                      | 95567  |



Tuesday, May 03, 2022 06:18 PM

```
Majority      XXXXXXXXXXXXXXXXXXXXXXXXXXXXXXXXXXXXXXXXXXXXXXXXXXXXXXXXXXXXXXXXXXXXXXXXXXXXX
              138970  138980  138990  139000  139010  139020  139030  139040
Human          103274
Coquerel'sSifaka 81164
Ma'sNightMonkey 88613
VervetAGM       97219
Gorrilla        92826
GrabEatingMacaque 95686
Macaque         95018
PigTailedMacaque 95449
Bonobo          93411
OliveBaboon    TTCCTTCTTTGTGGACCTGACTGCCACTGAGAATTGAGGGCTGTGTTGGTACTGGCGACCCCAGTGTGCATGCT 121034
Orangutan      95567
```

```
Majority      XXXXXXXXXXXXXXXXXXXXXXXXXXXXXXXXXXXXXXXXXXXXXXXXXXXXXXXXXXXXXXXXXXXXXXXXXXXXX
              139050  139060  139070  139080  139090  139100  139110  139120
Human          103274
Coquerel'sSifaka 81164
Ma'sNightMonkey 88613
VervetAGM       97219
Gorrilla        92826
GrabEatingMacaque 95686
Macaque         95018
PigTailedMacaque 95449
Bonobo          93411
OliveBaboon    CAGAGCTGACTTCAGCCTGGCTTTGTAGTATCCCCTGAAGCCATAGACACCTGTCCTTGAAGGAAGGGGAGTTTTTCTGA 121114
Orangutan      95567
```

```
Majority      XXXXXXXXXXXXXXXXXXXXXXXXXXXXXXXXXXXXXXXXXXXXXXXXXXXXXXXXXXXXXXXXXXXXXXXXXXXXX
              139130  139140  139150  139160  139170  139180  139190  139200
Human          103274
Coquerel'sSifaka 81164
Ma'sNightMonkey 88613
VervetAGM       97219
Gorrilla        92826
GrabEatingMacaque 95686
Macaque         95018
PigTailedMacaque 95449
Bonobo          93411
OliveBaboon    CAGAAATAGATGTCAGTTACAAACAAGAATTTATAGAAGAAGAATTTAAAAACAAGAAACACCTCATTCATTCAGTCTGAA 121194
Orangutan      95567
```

Tuesday, May 03, 2022 06:18 PM

```

Majority          XXXXXXXXXXXXXXXXXXXXXXXXXXXXXXXXXXXXXXXXXXXXXXXXXXXXXXXXXXXXXXXXXXXXXXXXXXXXXXX
                  139210  139220  139230  139240  139250  139260  139270  139280
Human            103274
Coquerel'sSifaka 81164
Ma'sNightMonkey 88613
VervetAGM        97219
Gorrilla         92826
GrabEatingMacaque 95686
Macaque          95018
PigTailedMacaque 95449
Bonobo           93411
OliveBaboon     AATATTCCTTAAGGGTTTCCCCTAAAGGAACCTCATGAAATAACAGGGGACATAAGGTAATTAGTGTTCAAAAGTGAGAG 121274
Orangutan       95567

```

```

Majority          XXXXXXXXXXXXXXXXXXXXXXXXXXXXXXXXXXXXXXXXXXXXXXXXXXXXXXXXXXXXXXXXXXXXXXXXXXXXXXX
                  139290  139300  139310  139320  139330  139340  139350  139360
Human            103274
Coquerel'sSifaka 81164
Ma'sNightMonkey 88613
VervetAGM        97219
Gorrilla         92826
GrabEatingMacaque 95686
Macaque          95018
PigTailedMacaque 95449
Bonobo           93411
OliveBaboon     AAGTACTCTGATAAACCTATTCATATGGAGCTTATATAAGGGGCACCAAATTAGACTGTTGGGTAAAGGATGCCAGCAT 121354
Orangutan       95567

```

```

Majority          XXXXXXXXXXXXXXXXXXXXXXXXXXXXXXXXXXXXXXXXXXXXXXXXXXXXXXXXXXXXXXXXXXXXXXXXXXXXXXX
                  139370  139380  139390  139400  139410  139420  139430  139440
Human            103274
Coquerel'sSifaka 81164
Ma'sNightMonkey 88613
VervetAGM        97219
Gorrilla         92826
GrabEatingMacaque 95686
Macaque          95018
PigTailedMacaque 95449
Bonobo           93411
OliveBaboon     GGAGGAAGTAATTCTAAAGTTCATAGTTATGGAGGATCAAGGGTGAGTGGAGATAAGACTGTACCTAGGAGGTTGTGACAG 121434
Orangutan       95567

```



















Tuesday, May 03, 2022 06:18 PM

```
Majority      XXXXXXXXXXXXXXXXXXXXXXXXXXXXXXXXXXXXXXXXXXXXXXXXXXXXXXXXXXXXXXXXXXXXXXXX
               |-----|-----|-----|-----|-----|-----|-----|-----|
               |141370|  |141380|  |141390|  |141400|  |141410|  |141420|  |141430|  |141440|
               |-----|-----|-----|-----|-----|-----|-----|-----|
Human          |                                         |103274
Coquerel'sSifaka |                                         |81164
Ma'sNightMonkey  |                                         |88613
VervetAGM        |                                         |97219
Gorrilla         |                                         |92826
GrabEatingMacaque |                                         |95686
Macaque          |                                         |95018
PigTailedMacaque |                                         |95449
Bonobo           |                                         |93411
OliveBaboon      TCACCCTATTTGCCTTTCAATTCGGCCACCATCCTGGCACATCATGAAACTCAGTCAACATTGTGTATCCAATTTATTT |123434
Orangutan        |                                         |95567
```

```
Majority      XXXXXXXXXXXXXXXXXXXXXXXXXXXXXXXXXXXXXXXXXXXXXXXXXXXXXXXXXXXXXXXXXXXXXXXX
               |-----|-----|-----|-----|-----|-----|-----|-----|
               |141450|  |141460|  |141470|  |141480|  |141490|  |141500|  |141510|  |141520|
               |-----|-----|-----|-----|-----|-----|-----|-----|
Human          |                                         |103274
Coquerel'sSifaka |                                         |81164
Ma'sNightMonkey  |                                         |88613
VervetAGM        |                                         |97219
Gorrilla         |                                         |92826
GrabEatingMacaque |                                         |95686
Macaque          |                                         |95018
PigTailedMacaque |                                         |95449
Bonobo           |                                         |93411
OliveBaboon      GGGGACACCACATGTGGTTTTAGAGTCACAATTCCAAAGATACTGCAAGAACATTAATAAATTCTCAGAACATAGCATTTT |123514
Orangutan        |                                         |95567
```

```
Majority      XXXXXXXXXXXXXXXXXXXXXXXXXXXXXXXXXXXXXXXXXXXXXXXXXXXXXXXXXXXXXXXXXXXXXXXX
               |-----|-----|-----|-----|-----|-----|-----|-----|
               |141530|  |141540|  |141550|  |141560|  |141570|  |141580|  |141590|  |141600|
               |-----|-----|-----|-----|-----|-----|-----|-----|
Human          |                                         |103274
Coquerel'sSifaka |                                         |81164
Ma'sNightMonkey  |                                         |88613
VervetAGM        |                                         |97219
Gorrilla         |                                         |92826
GrabEatingMacaque |                                         |95686
Macaque          |                                         |95018
PigTailedMacaque |                                         |95449
Bonobo           |                                         |93411
OliveBaboon      AGCTCTTACTTTAGGTGTAATTAAATTCCCCTGTATTTGCAGTGTCTCATGACCAATCAGCTGAAAGCCATCGAACAGC |123594
Orangutan        |                                         |95567
```



















Tuesday, May 03, 2022 06:18 PM

|                   |                                                                                |        |        |        |        |        |        |        |  |        |
|-------------------|--------------------------------------------------------------------------------|--------|--------|--------|--------|--------|--------|--------|--|--------|
| Majority          | XXXXXXXXXXXXXXXXXXXXXXXXXXXXXXXXXXXXXXXXXXXXXXXXXXXXXXXXXXXXXXXXXXXXXXXXXXXX   |        |        |        |        |        |        |        |  |        |
|                   | 143530                                                                         | 143540 | 143550 | 143560 | 143570 | 143580 | 143590 | 143600 |  |        |
| Human             |                                                                                |        |        |        |        |        |        |        |  | 103274 |
| Coquerel'sSifaka  |                                                                                |        |        |        |        |        |        |        |  | 81164  |
| Ma'sNightMonkey   |                                                                                |        |        |        |        |        |        |        |  | 88613  |
| VervetAGM         |                                                                                |        |        |        |        |        |        |        |  | 97219  |
| Gorrilla          |                                                                                |        |        |        |        |        |        |        |  | 92826  |
| GrabEatingMacaque |                                                                                |        |        |        |        |        |        |        |  | 95686  |
| Macaque           |                                                                                |        |        |        |        |        |        |        |  | 95018  |
| PigTailedMacaque  |                                                                                |        |        |        |        |        |        |        |  | 95449  |
| Bonobo            |                                                                                |        |        |        |        |        |        |        |  | 93411  |
| OliveBaboon       | TAATCAGGATTTTGTTTTTTTAAATTAATAAATTAGGGCTCGATACTGGGGCAGGGGAAATCTCCATTGACTAATTAA |        |        |        |        |        |        |        |  | 125594 |
| Orangutan         |                                                                                |        |        |        |        |        |        |        |  | 95567  |

|                   |                                                                                |        |        |        |        |        |        |        |  |        |
|-------------------|--------------------------------------------------------------------------------|--------|--------|--------|--------|--------|--------|--------|--|--------|
| Majority          | XXXXXXXXXXXXXXXXXXXXXXXXXXXXXXXXXXXXXXXXXXXXXXXXXXXXXXXXXXXXXXXXXXXXXXXXXXXX   |        |        |        |        |        |        |        |  |        |
|                   | 143610                                                                         | 143620 | 143630 | 143640 | 143650 | 143660 | 143670 | 143680 |  |        |
| Human             |                                                                                |        |        |        |        |        |        |        |  | 103274 |
| Coquerel'sSifaka  |                                                                                |        |        |        |        |        |        |        |  | 81164  |
| Ma'sNightMonkey   |                                                                                |        |        |        |        |        |        |        |  | 88613  |
| VervetAGM         |                                                                                |        |        |        |        |        |        |        |  | 97219  |
| Gorrilla          |                                                                                |        |        |        |        |        |        |        |  | 92826  |
| GrabEatingMacaque |                                                                                |        |        |        |        |        |        |        |  | 95686  |
| Macaque           |                                                                                |        |        |        |        |        |        |        |  | 95018  |
| PigTailedMacaque  |                                                                                |        |        |        |        |        |        |        |  | 95449  |
| Bonobo            |                                                                                |        |        |        |        |        |        |        |  | 93411  |
| OliveBaboon       | GTACTCAAGCATTTAAATTCCTTTGAAACAAATCTCATCCAGATTAGGTATTTGCTACATTTTAATTTCTCTAATTTG |        |        |        |        |        |        |        |  | 125674 |
| Orangutan         |                                                                                |        |        |        |        |        |        |        |  | 95567  |

|                   |                                                                                  |        |        |        |        |        |        |        |  |        |
|-------------------|----------------------------------------------------------------------------------|--------|--------|--------|--------|--------|--------|--------|--|--------|
| Majority          | XXXXXXXXXXXXXXXXXXXXXXXXXXXXXXXXXXXXXXXXXXXXXXXXXXXXXXXXXXXXXXXXXXXXXXXXXXXX     |        |        |        |        |        |        |        |  |        |
|                   | 143690                                                                           | 143700 | 143710 | 143720 | 143730 | 143740 | 143750 | 143760 |  |        |
| Human             |                                                                                  |        |        |        |        |        |        |        |  | 103274 |
| Coquerel'sSifaka  |                                                                                  |        |        |        |        |        |        |        |  | 81164  |
| Ma'sNightMonkey   |                                                                                  |        |        |        |        |        |        |        |  | 88613  |
| VervetAGM         |                                                                                  |        |        |        |        |        |        |        |  | 97219  |
| Gorrilla          |                                                                                  |        |        |        |        |        |        |        |  | 92826  |
| GrabEatingMacaque |                                                                                  |        |        |        |        |        |        |        |  | 95686  |
| Macaque           |                                                                                  |        |        |        |        |        |        |        |  | 95018  |
| PigTailedMacaque  |                                                                                  |        |        |        |        |        |        |        |  | 95449  |
| Bonobo            |                                                                                  |        |        |        |        |        |        |        |  | 93411  |
| OliveBaboon       | AAAAGTCAAAATTGGGGTAATAACAGCCATTTGAAATAAAAGGTCTAAAAGACACCACAGACATTTGTGAAGAAGACAGA |        |        |        |        |        |        |        |  | 125754 |
| Orangutan         |                                                                                  |        |        |        |        |        |        |        |  | 95567  |





Tuesday, May 03, 2022 06:18 PM

|                   |                                                                                                                              |
|-------------------|------------------------------------------------------------------------------------------------------------------------------|
| Majority          | XXXXXXXXXXXXXXXXXXXXXXXXXXXXXXXXXXXXXXXXXXXXXXXXXXXXXXXXXXXXXXXXXXXXXXXXXXXXXXXXXXXXXXXXXXXXXXXXXXXXXXXXXXXXXXXXXXXXXXXXXXXX |
|                   | 144010 144020 144030 144040 144050 144060 144070 144080                                                                      |
| Human             | 103274                                                                                                                       |
| Coquerel'sSifaka  | 81164                                                                                                                        |
| Ma'sNightMonkey   | 88613                                                                                                                        |
| VervetAGM         | 97219                                                                                                                        |
| Gorrilla          | 92826                                                                                                                        |
| GrabEatingMacaque | 95686                                                                                                                        |
| Macaque           | 95018                                                                                                                        |
| PigTailedMacaque  | 95449                                                                                                                        |
| Bonobo            | 93411                                                                                                                        |
| OliveBaboon       | CATATGGTGCCAGTACGAGCTTCCCCAAAATACAAATTCATTCACTGCTTCTGTAAACCCCTCTAGCAAACCTGAGCTGC 126074                                      |
| Orangutan         | 95567                                                                                                                        |

|                   |                                                                                                                              |
|-------------------|------------------------------------------------------------------------------------------------------------------------------|
| Majority          | XXXXXXXXXXXXXXXXXXXXXXXXXXXXXXXXXXXXXXXXXXXXXXXXXXXXXXXXXXXXXXXXXXXXXXXXXXXXXXXXXXXXXXXXXXXXXXXXXXXXXXXXXXXXXXXXXXXXXXXXXXXX |
|                   | 144090 144100 144110 144120 144130 144140 144150 144160                                                                      |
| Human             | 103274                                                                                                                       |
| Coquerel'sSifaka  | 81164                                                                                                                        |
| Ma'sNightMonkey   | 88613                                                                                                                        |
| VervetAGM         | 97219                                                                                                                        |
| Gorrilla          | 92826                                                                                                                        |
| GrabEatingMacaque | 95686                                                                                                                        |
| Macaque           | 95018                                                                                                                        |
| PigTailedMacaque  | 95449                                                                                                                        |
| Bonobo            | 93411                                                                                                                        |
| OliveBaboon       | TCAAAAACAAAACAGCCATAGACTGGGTGGCTTATGCAACAGGCATTCTTCTCACAGTTCTGGAGGCTGCAAGTCTG 126154                                         |
| Orangutan         | 95567                                                                                                                        |

|                   |                                                                                                                              |
|-------------------|------------------------------------------------------------------------------------------------------------------------------|
| Majority          | XXXXXXXXXXXXXXXXXXXXXXXXXXXXXXXXXXXXXXXXXXXXXXXXXXXXXXXXXXXXXXXXXXXXXXXXXXXXXXXXXXXXXXXXXXXXXXXXXXXXXXXXXXXXXXXXXXXXXXXXXXXX |
|                   | 144170 144180 144190 144200 144210 144220 144230 144240                                                                      |
| Human             | 103274                                                                                                                       |
| Coquerel'sSifaka  | 81164                                                                                                                        |
| Ma'sNightMonkey   | 88613                                                                                                                        |
| VervetAGM         | 97219                                                                                                                        |
| Gorrilla          | 92826                                                                                                                        |
| GrabEatingMacaque | 95686                                                                                                                        |
| Macaque           | 95018                                                                                                                        |
| PigTailedMacaque  | 95449                                                                                                                        |
| Bonobo            | 93411                                                                                                                        |
| OliveBaboon       | AGATCAGGGTGTCAGCATGGTCAGGCTCTGATAAGTCCCCTTCTGGCTTGACAGACAGCTGCTTCTTCATTGTATCCTC 126234                                       |
| Orangutan         | 95567                                                                                                                        |













Tuesday, May 03, 2022 06:19 PM

|                   |                                                                                       |
|-------------------|---------------------------------------------------------------------------------------|
| Majority          | XXXXXXXXXXXXXXXXXXXXXXXXXXXXXXXXXXXXXXXXXXXXXXXXXXXXXXXXXXXXXXXXXXXXXXXXXXXX          |
|                   | 145690 145700 145710 145720 145730 145740 145750 145760                               |
| Human             | 103274                                                                                |
| Coquerel'sSifaka  | 81164                                                                                 |
| Ma'sNightMonkey   | 88613                                                                                 |
| VervetAGM         | 97219                                                                                 |
| Gorrilla          | 92826                                                                                 |
| GrabEatingMacaque | 95686                                                                                 |
| Macaque           | 95018                                                                                 |
| PigTailedMacaque  | 95449                                                                                 |
| Bonobo            | 93411                                                                                 |
| OliveBaboon       | ATGTTTGATAAAAGACTCAGCATAGTGCATCATTGTAGAAAACCTCAATAATTTGTGGATTGGTTCCAGTTCATATTG 127754 |
| Orangutan         | 95567                                                                                 |

|                   |                                                                                         |
|-------------------|-----------------------------------------------------------------------------------------|
| Majority          | XXXXXXXXXXXXXXXXXXXXXXXXXXXXXXXXXXXXXXXXXXXXXXXXXXXXXXXXXXXXXXXXXXXXXXXXXXXX            |
|                   | 145770 145780 145790 145800 145810 145820 145830 145840                                 |
| Human             | 103274                                                                                  |
| Coquerel'sSifaka  | 81164                                                                                   |
| Ma'sNightMonkey   | 88613                                                                                   |
| VervetAGM         | 97219                                                                                   |
| Gorrilla          | 92826                                                                                   |
| GrabEatingMacaque | 95686                                                                                   |
| Macaque           | 95018                                                                                   |
| PigTailedMacaque  | 95449                                                                                   |
| Bonobo            | 93411                                                                                   |
| OliveBaboon       | CTCACCTTTGTTTGCCATGGTGCCTGACCAAAGCAGACACTCGTATATGCTCACTGAATTGAACCATGATCTATGATCTA 127834 |
| Orangutan         | 95567                                                                                   |

|                   |                                                                                         |
|-------------------|-----------------------------------------------------------------------------------------|
| Majority          | XXXXXXXXXXXXXXXXXXXXXXXXXXXXXXXXXXXXXXXXXXXXXXXXXXXXXXXXXXXXXXXXXXXXXXXXXXXX            |
|                   | 145850 145860 145870 145880 145890 145900 145910 145920                                 |
| Human             | 103274                                                                                  |
| Coquerel'sSifaka  | 81164                                                                                   |
| Ma'sNightMonkey   | 88613                                                                                   |
| VervetAGM         | 97219                                                                                   |
| Gorrilla          | 92826                                                                                   |
| GrabEatingMacaque | 95686                                                                                   |
| Macaque           | 95018                                                                                   |
| PigTailedMacaque  | 95449                                                                                   |
| Bonobo            | 93411                                                                                   |
| OliveBaboon       | GTTAATAGAAAAGAGTGGCACATGTAAAATATGAAAGTTTATAAATTATGTACCTACCACTCTATATTTGTAGAGTAGTA 127914 |
| Orangutan         | 95567                                                                                   |















Tuesday, May 03, 2022 06:19 PM

```

Majority      XXXXXXXXXXXXXXXXXXXXXXXXXXXXXXXXXXXXXXXXXXXXXXXXXXXXXXXXXXXXXXXXXXXXXXXXXXXX
              147370   147380   147390   147400   147410   147420   147430   147440
Human             |                                           |
Coquerel'sSifaka |                                           |
Ma'sNightMonkey  |                                           |
VervetAGM        |                                           |
Gorrilla         |                                           |
GrabEatingMacaque|                                           |
Macaque          |                                           |
PigTailedMacaque |                                           |
Bonobo           |                                           |
OliveBaboon      GGGATGGCGAGGGAAGTATTGAGGGAAGAGGCTTAAGTTTATTGTGAGGCACTGAAACCTATGGAGCCAAAGTGCAGACT 129434
Orangutan        |                                           |

```

```

Majority      XXXXXXXXXXXXXXXXXXXXXXXXXXXXXXXXXXXXXXXXXXXXXXXXXXXXXXXXXXXXXXXXXXXXXXXXXXXX
              147450   147460   147470   147480   147490   147500   147510   147520
Human             |                                           |
Coquerel'sSifaka |                                           |
Ma'sNightMonkey  |                                           |
VervetAGM        |                                           |
Gorrilla         |                                           |
GrabEatingMacaque|                                           |
Macaque          |                                           |
PigTailedMacaque |                                           |
Bonobo           |                                           |
OliveBaboon      CACTTCAATTGGTTTTAATGGGGCATTTCGTTTTGTTTTCTTTTCTCTCTCTCTCTTTCTTTCTTTCTTTCTTT 129514
Orangutan        |                                           |

```

```

Majority      XXXXXXXXXXXXXXXXXXXXXXXXXXXXXXXXXXXXXXXXXXXXXXXXXXXXXXXXXXXXXXXXXXXXXXXXXXXX
              147530   147540   147550   147560   147570   147580   147590   147600
Human             |                                           |
Coquerel'sSifaka |                                           |
Ma'sNightMonkey  |                                           |
VervetAGM        |                                           |
Gorrilla         |                                           |
GrabEatingMacaque|                                           |
Macaque          |                                           |
PigTailedMacaque |                                           |
Bonobo           |                                           |
OliveBaboon      CTTTCTTTCTTTCTTTCTTTCTTTCTTTCTTTCTTTCTTTCTTTCTTTCTTTGTTTTGACTACTGTAATGTTGAAAAGATA 129594
Orangutan        |                                           |

```











Tuesday, May 03, 2022 06:19 PM

|                   |                                                                                 |        |        |        |        |        |        |        |  |        |
|-------------------|---------------------------------------------------------------------------------|--------|--------|--------|--------|--------|--------|--------|--|--------|
| Majority          | XXXXXXXXXXXXXXXXXXXXXXXXXXXXXXXXXXXXXXXXXXXXXXXXXXXXXXXXXXXXXXXXXXXXXXXXXXXX    |        |        |        |        |        |        |        |  |        |
|                   | 148570                                                                          | 148580 | 148590 | 148600 | 148610 | 148620 | 148630 | 148640 |  |        |
| Human             |                                                                                 |        |        |        |        |        |        |        |  | 103274 |
| Coquerel'sSifaka  |                                                                                 |        |        |        |        |        |        |        |  | 81164  |
| Ma'sNightMonkey   |                                                                                 |        |        |        |        |        |        |        |  | 88613  |
| VervetAGM         |                                                                                 |        |        |        |        |        |        |        |  | 97219  |
| Gorrilla          |                                                                                 |        |        |        |        |        |        |        |  | 92826  |
| GrabEatingMacaque |                                                                                 |        |        |        |        |        |        |        |  | 95686  |
| Macaque           |                                                                                 |        |        |        |        |        |        |        |  | 95018  |
| PigTailedMacaque  |                                                                                 |        |        |        |        |        |        |        |  | 95449  |
| Bonobo            |                                                                                 |        |        |        |        |        |        |        |  | 93411  |
| OliveBaboon       | GGTTAAAAAAGCAGAAGAGTAGGGTTAAACACCCAACCCTGAAGTGGTAGATAAAGAAATCTTCAGATCACAAC TAAA |        |        |        |        |        |        |        |  | 130634 |
| Orangutan         |                                                                                 |        |        |        |        |        |        |        |  | 95567  |

|                   |                                                                                 |        |        |        |        |        |        |        |  |        |
|-------------------|---------------------------------------------------------------------------------|--------|--------|--------|--------|--------|--------|--------|--|--------|
| Majority          | XXXXXXXXXXXXXXXXXXXXXXXXXXXXXXXXXXXXXXXXXXXXXXXXXXXXXXXXXXXXXXXXXXXXXXXXXXXX    |        |        |        |        |        |        |        |  |        |
|                   | 148650                                                                          | 148660 | 148670 | 148680 | 148690 | 148700 | 148710 | 148720 |  |        |
| Human             |                                                                                 |        |        |        |        |        |        |        |  | 103274 |
| Coquerel'sSifaka  |                                                                                 |        |        |        |        |        |        |        |  | 81164  |
| Ma'sNightMonkey   |                                                                                 |        |        |        |        |        |        |        |  | 88613  |
| VervetAGM         |                                                                                 |        |        |        |        |        |        |        |  | 97219  |
| Gorrilla          |                                                                                 |        |        |        |        |        |        |        |  | 92826  |
| GrabEatingMacaque |                                                                                 |        |        |        |        |        |        |        |  | 95686  |
| Macaque           |                                                                                 |        |        |        |        |        |        |        |  | 95018  |
| PigTailedMacaque  |                                                                                 |        |        |        |        |        |        |        |  | 95449  |
| Bonobo            |                                                                                 |        |        |        |        |        |        |        |  | 93411  |
| OliveBaboon       | TGATGTGTATTCTTTAATACCTGCATTTGAGAGGCTAACAAATATTTGGACACTATGTAACACTTTGCACCTTTCCACT |        |        |        |        |        |        |        |  | 130714 |
| Orangutan         |                                                                                 |        |        |        |        |        |        |        |  | 95567  |

|                   |                                                                                 |        |        |        |        |        |        |        |  |        |
|-------------------|---------------------------------------------------------------------------------|--------|--------|--------|--------|--------|--------|--------|--|--------|
| Majority          | XXXXXXXXXXXXXXXXXXXXXXXXXXXXXXXXXXXXXXXXXXXXXXXXXXXXXXXXXXXXXXXXXXXXXXXXXXXX    |        |        |        |        |        |        |        |  |        |
|                   | 148730                                                                          | 148740 | 148750 | 148760 | 148770 | 148780 | 148790 | 148800 |  |        |
| Human             |                                                                                 |        |        |        |        |        |        |        |  | 103274 |
| Coquerel'sSifaka  |                                                                                 |        |        |        |        |        |        |        |  | 81164  |
| Ma'sNightMonkey   |                                                                                 |        |        |        |        |        |        |        |  | 88613  |
| VervetAGM         |                                                                                 |        |        |        |        |        |        |        |  | 97219  |
| Gorrilla          |                                                                                 |        |        |        |        |        |        |        |  | 92826  |
| GrabEatingMacaque |                                                                                 |        |        |        |        |        |        |        |  | 95686  |
| Macaque           |                                                                                 |        |        |        |        |        |        |        |  | 95018  |
| PigTailedMacaque  |                                                                                 |        |        |        |        |        |        |        |  | 95449  |
| Bonobo            |                                                                                 |        |        |        |        |        |        |        |  | 93411  |
| OliveBaboon       | TGGTGCTTATGGTAATCCTGATGCGTTTCTAGTTTTCTAGGACACTGAACTCCAATCACACATGATATGATTTGACTCT |        |        |        |        |        |        |        |  | 130794 |
| Orangutan         |                                                                                 |        |        |        |        |        |        |        |  | 95567  |















Tuesday, May 03, 2022 06:19 PM

| Majority          | XXXXXXXXXXXXXXXXXXXXXXXXXXXXXXXXXXXXXXXXXXXXXXXXXXXXXXXXXXXXXXXXXXXXXXXXXXXXXXXXXXXX |
|-------------------|--------------------------------------------------------------------------------------|
|                   | 150250 150260 150270 150280 150290 150300 150310 150320                              |
| Human             | 103274                                                                               |
| Coquerel'sSifaka  | 81164                                                                                |
| Ma'sNightMonkey   | 88613                                                                                |
| VervetAGM         | 97219                                                                                |
| Gorilla           | 92826                                                                                |
| GrabEatingMacaque | 95686                                                                                |
| Macaque           | 95018                                                                                |
| PigTailedMacaque  | 95449                                                                                |
| Bonobo            | 93411                                                                                |
| OliveBaboon       | AAGCCACAGACTCAACACCAGCCTGTAAAAGCAGTCAGGAGTGGGGCTATACTCTGCAAAGCCACAGGTTGGAGCTG 132314 |
| Orangutan         | 95567                                                                                |

| Majority          | XXXXXXXXXXXXXXXXXXXXXXXXXXXXXXXXXXXXXXXXXXXXXXXXXXXXXXXXXXXXXXXXXXXXXXXXXXXXXXXXXXXX   |
|-------------------|----------------------------------------------------------------------------------------|
|                   | 150330 150340 150350 150360 150370 150380 150390 150400                                |
| Human             | 103274                                                                                 |
| Coquerel'sSifaka  | 81164                                                                                  |
| Ma'sNightMonkey   | 88613                                                                                  |
| VervetAGM         | 97219                                                                                  |
| Gorilla           | 92826                                                                                  |
| GrabEatingMacaque | 95686                                                                                  |
| Macaque           | 95018                                                                                  |
| PigTailedMacaque  | 95449                                                                                  |
| Bonobo            | 93411                                                                                  |
| OliveBaboon       | TCCAAGGCTATGGGAACCTACCCCTTGATCAGCATGACCTGGATGTGAGACATGGAGTCAAAGGAGGTCATTTGGAGCT 132394 |
| Orangutan         | 95567                                                                                  |

| Majority          | XXXXXXXXXXXXXXXXXXXXXXXXXXXXXXXXXXXXXXXXXXXXXXXXXXXXXXXXXXXXXXXXXXXXXXXXXXXXXXXXXXXX   |
|-------------------|----------------------------------------------------------------------------------------|
|                   | 150410 150420 150430 150440 150450 150460 150470 150480                                |
| Human             | 103274                                                                                 |
| Coquerel'sSifaka  | 81164                                                                                  |
| Ma'sNightMonkey   | 88613                                                                                  |
| VervetAGM         | 97219                                                                                  |
| Gorilla           | 92826                                                                                  |
| GrabEatingMacaque | 95686                                                                                  |
| Macaque           | 95018                                                                                  |
| PigTailedMacaque  | 95449                                                                                  |
| Bonobo            | 93411                                                                                  |
| OliveBaboon       | TTAGAATTTGACTGCCATGCTAGATTCGGATTTGCATGGGCCCTGTAACCCCTTAGTTTTGGTCAATTTCTCCCATTTG 132474 |
| Orangutan         | 95567                                                                                  |



Tuesday, May 03, 2022 06:19 PM

| Majority                                                                     |                                                                               |        |        |        |        |        |        |        |        |
|------------------------------------------------------------------------------|-------------------------------------------------------------------------------|--------|--------|--------|--------|--------|--------|--------|--------|
| XXXXXXXXXXXXXXXXXXXXXXXXXXXXXXXXXXXXXXXXXXXXXXXXXXXXXXXXXXXXXXXXXXXXXXXXXXXX |                                                                               |        |        |        |        |        |        |        |        |
|                                                                              | 150730                                                                        | 150740 | 150750 | 150760 | 150770 | 150780 | 150790 | 150800 |        |
| Human                                                                        |                                                                               |        |        |        |        |        |        |        | 103274 |
| Coquerel'sSifaka                                                             |                                                                               |        |        |        |        |        |        |        | 81164  |
| Ma'sNightMonkey                                                              |                                                                               |        |        |        |        |        |        |        | 88613  |
| VervetAGM                                                                    |                                                                               |        |        |        |        |        |        |        | 97219  |
| Gorrilla                                                                     |                                                                               |        |        |        |        |        |        |        | 92826  |
| GrabEatingMacaque                                                            |                                                                               |        |        |        |        |        |        |        | 95686  |
| Macaque                                                                      |                                                                               |        |        |        |        |        |        |        | 95018  |
| PigTailedMacaque                                                             |                                                                               |        |        |        |        |        |        |        | 95449  |
| Bonobo                                                                       |                                                                               |        |        |        |        |        |        |        | 93411  |
| OliveBaboon                                                                  | GTTTGGCTCTGTGTCCCCACCCAATCTCATCTTGAATTATACTCCATAATTCCCAAGTGTGTGGGAGGGACCCAGTG |        |        |        |        |        |        |        | 132794 |
| Orangutan                                                                    |                                                                               |        |        |        |        |        |        |        | 95567  |

| Majority                                                                     |                                                                                  |        |        |        |        |        |        |        |        |
|------------------------------------------------------------------------------|----------------------------------------------------------------------------------|--------|--------|--------|--------|--------|--------|--------|--------|
| XXXXXXXXXXXXXXXXXXXXXXXXXXXXXXXXXXXXXXXXXXXXXXXXXXXXXXXXXXXXXXXXXXXXXXXXXXXX |                                                                                  |        |        |        |        |        |        |        |        |
|                                                                              | 150810                                                                           | 150820 | 150830 | 150840 | 150850 | 150860 | 150870 | 150880 |        |
| Human                                                                        |                                                                                  |        |        |        |        |        |        |        | 103274 |
| Coquerel'sSifaka                                                             |                                                                                  |        |        |        |        |        |        |        | 81164  |
| Ma'sNightMonkey                                                              |                                                                                  |        |        |        |        |        |        |        | 88613  |
| VervetAGM                                                                    |                                                                                  |        |        |        |        |        |        |        | 97219  |
| Gorrilla                                                                     |                                                                                  |        |        |        |        |        |        |        | 92826  |
| GrabEatingMacaque                                                            |                                                                                  |        |        |        |        |        |        |        | 95686  |
| Macaque                                                                      |                                                                                  |        |        |        |        |        |        |        | 95018  |
| PigTailedMacaque                                                             |                                                                                  |        |        |        |        |        |        |        | 95449  |
| Bonobo                                                                       |                                                                                  |        |        |        |        |        |        |        | 93411  |
| OliveBaboon                                                                  | GGAGATAATTTGAATCATGGGAGTGGTTTCCTCCATACTGTTCTCATGGTAGTGAATAAAAATCATGAGATCTGATGGTT |        |        |        |        |        |        |        | 132874 |
| Orangutan                                                                    |                                                                                  |        |        |        |        |        |        |        | 95567  |

| Majority                                                                     |                                                                           |        |        |        |        |        |        |        |        |
|------------------------------------------------------------------------------|---------------------------------------------------------------------------|--------|--------|--------|--------|--------|--------|--------|--------|
| XXXXXXXXXXXXXXXXXXXXXXXXXXXXXXXXXXXXXXXXXXXXXXXXXXXXXXXXXXXXXXXXXXXXXXXXXXXX |                                                                           |        |        |        |        |        |        |        |        |
|                                                                              | 150890                                                                    | 150900 | 150910 | 150920 | 150930 | 150940 | 150950 | 150960 |        |
| Human                                                                        |                                                                           |        |        |        |        |        |        |        | 103274 |
| Coquerel'sSifaka                                                             |                                                                           |        |        |        |        |        |        |        | 81164  |
| Ma'sNightMonkey                                                              |                                                                           |        |        |        |        |        |        |        | 88613  |
| VervetAGM                                                                    |                                                                           |        |        |        |        |        |        |        | 97219  |
| Gorrilla                                                                     |                                                                           |        |        |        |        |        |        |        | 92826  |
| GrabEatingMacaque                                                            |                                                                           |        |        |        |        |        |        |        | 95686  |
| Macaque                                                                      |                                                                           |        |        |        |        |        |        |        | 95018  |
| PigTailedMacaque                                                             |                                                                           |        |        |        |        |        |        |        | 95449  |
| Bonobo                                                                       |                                                                           |        |        |        |        |        |        |        | 93411  |
| OliveBaboon                                                                  | TTATCAGATCTTCTTCATCTTCAGATCTTTTTCATCTTTCTCATTCTTGTGCAACCATGGAGGAAGTGCCTTT |        |        |        |        |        |        |        | 132954 |
| Orangutan                                                                    |                                                                           |        |        |        |        |        |        |        | 95567  |





Tuesday, May 03, 2022 06:19 PM

| Majority          | XXXXXXXXXXXXXXXXXXXXXXXXXXXXXXXXXXXXXXXXXXXXXXXXXXXXXXXXXXXXXXXXXXXX |        |        |        |        |
|-------------------|----------------------------------------------------------------------|--------|--------|--------|--------|
|                   |                                                                      | 151450 | 151460 | 151470 | 151480 |
| Human             |                                                                      |        |        |        | 103274 |
| Coquerel'sSifaka  |                                                                      |        |        |        | 81164  |
| Ma'sNightMonkey   |                                                                      |        |        |        | 88613  |
| VervetAGM         |                                                                      |        |        |        | 97219  |
| Gorrilla          |                                                                      |        |        |        | 92826  |
| GrabEatingMacaque |                                                                      |        |        |        | 95686  |
| Macaque           |                                                                      |        |        |        | 95018  |
| PigTailedMacaque  |                                                                      |        |        |        | 95449  |
| Bonobo            |                                                                      |        |        |        | 93411  |
| OliveBaboon       | GAGAAAATAATGCTCAGCACAGATTCAAATTATGGGGGTATTACTC                       |        |        |        | 133480 |
| Orangutan         |                                                                      |        |        |        | 95567  |
