# Supplementary material for: PTBP2 – a gene with relevance for both Anorexia nervosa and body weight regulation
Source: PubMed Central journal article supplement (PMC9184595; doi:10.1038/s41398-022-02018-5), 2022-06-09
Supplement: 41398_2022_2018_MOESM2_ESM.pdf [file 41398_2022_2018_MOESM2_ESM.pdf]

Monday, May 02, 2022 06:49 PM

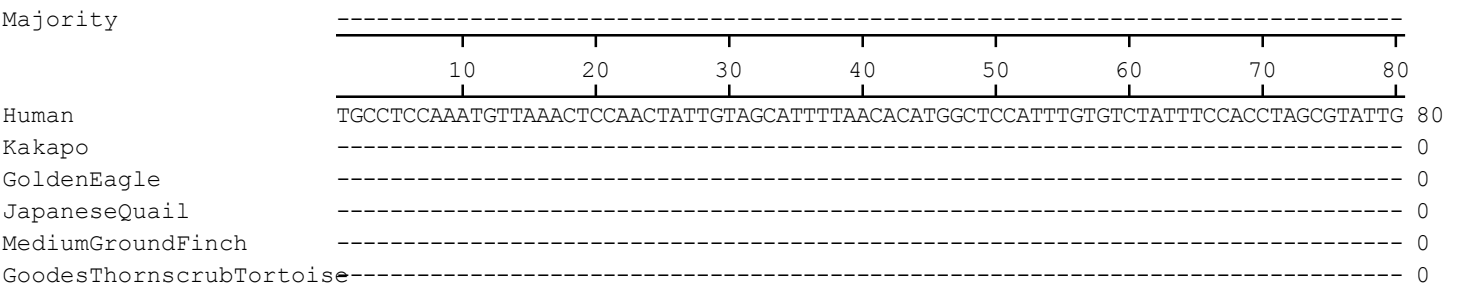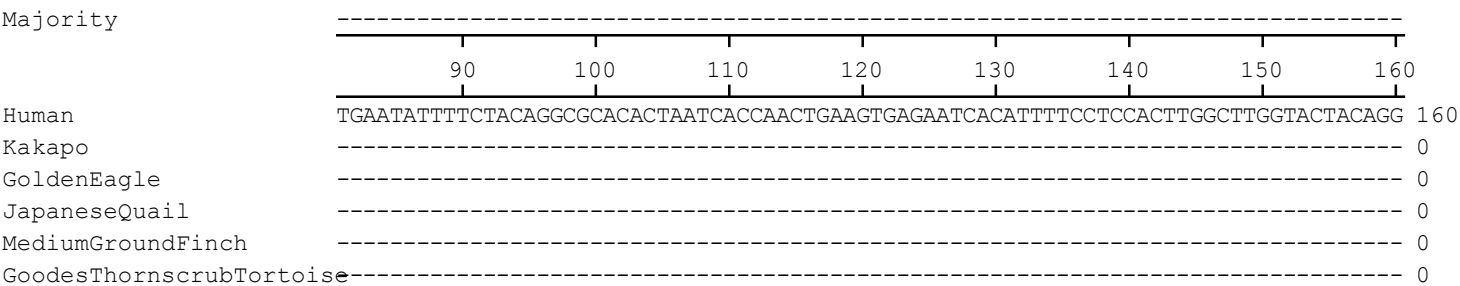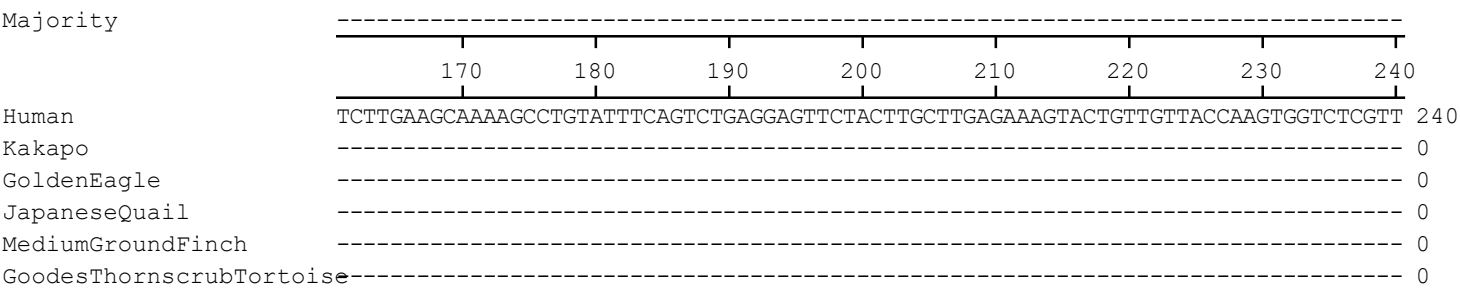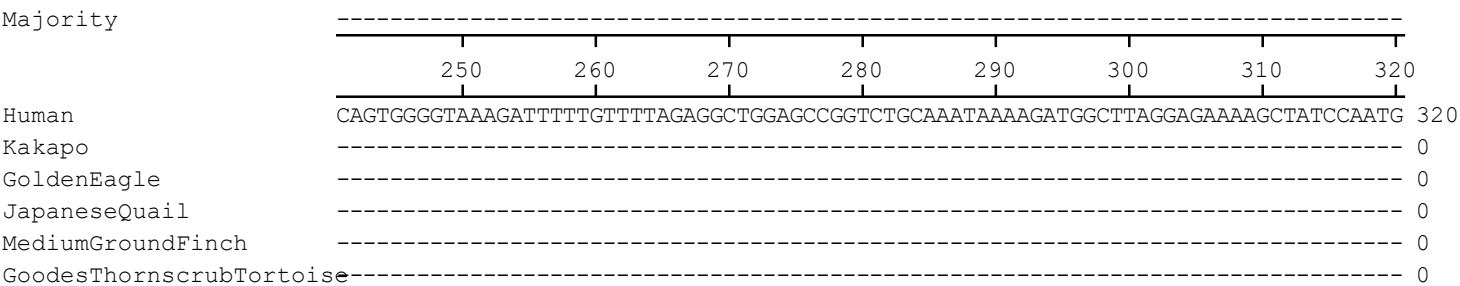

Monday, May 02, 2022 06:49 PM

```
Majority -----
      330      340      350      360      370      380      390      400
Human  TTTTTCCTTGGCCCGCATAGGTTGACGGTAGCCAAGCTGGTACTTGGCTTGGAGTGAAAAGTGGAGGCTGCCTGGGGGC 400
Kakapo ----- 0
GoldenEagle ----- 0
JapaneseQuail ----- 0
MediumGroundFinch ----- 0
GoodesThornscrubTortoise ----- 0
```

```
Majority -----
      410      420      430      440      450      460      470      480
Human  GTCCTGCAGTCAGGGCAGAGAGAGTGTGGAGAGCTGTTGGGAGGTGTCCCACCCACGCCCCACAAGGAGGGGAAACCAG 480
Kakapo ----- 0
GoldenEagle ----- 0
JapaneseQuail ----- 0
MediumGroundFinch ----- 0
GoodesThornscrubTortoise ----- 0
```

```
Majority -----
      490      500      510      520      530      540      550      560
Human  GTCGCCGCGGTCTGCAGCAGAACGCCAGGTTCCAGAGGACGGCAGGCGGAGGGCGGAGGGAGAAAGGCGCGGAAGGCGC 560
Kakapo ----- 0
GoldenEagle ----- 0
JapaneseQuail ----- 0
MediumGroundFinch ----- 0
GoodesThornscrubTortoise ----- 0
```

```
Majority -----
      570      580      590      600      610      620      630      640
Human  GGAGGAGGCGTCGGCTGCGGCGCCCACTCCCCCTAGTCCCAGCGCCCTGCCGCTCGCCTCCCCTGCCGGGCGCCGGCGC 640
Kakapo ----- 0
GoldenEagle ----- 0
JapaneseQuail ----- 0
MediumGroundFinch ----- 0
GoodesThornscrubTortoise ----- 0
```

Monday, May 02, 2022 06:49 PM

```

Majority -----
      650      660      670      680      690      700      710      720
Human  GCTCGGCTCTTTCCGCGCCCGCCGCTGCCGCGCGGTGGCCCGTGCGCCTCGGCACCTTCGGCAATTTCCGTCGGGCCCCA 720
Kakapo ----- 0
GoldenEagle ----- 0
JapaneseQuail ----- 0
MediumGroundFinch ----- 0
GoodesThornscrubTortoise ----- 0
    
```

```

Majority -----
      730      740      750      760      770      780      790      800
Human  GCCGCCATTTTCTCGCCGCTTGTTGTGGCTCGCTGGCTGCGTGGCTCGGTTCTTGTGAGCGAAGCTTTGTCCGGTTCGGCA 800
Kakapo ----- 0
GoldenEagle ----- 0
JapaneseQuail ----- 0
MediumGroundFinch ----- 0
GoodesThornscrubTortoise ----- 0
    
```

```

Majority -----
      810      820      830      840      850      860      870      880
Human  ATGGACGGGTATGTAATCGGGCCGGCGAGAAGGTGTGTGTGAGAGAGGAGTTGGACCGTCCTTCGGCCCGGTCCCAGGGCC 880
Kakapo ----- 0
GoldenEagle ----- 0
JapaneseQuail ----- 0
MediumGroundFinch ----- 0
GoodesThornscrubTortoise ----- 0
    
```

```

Majority -----
      890      900      910      920      930      940      950      960
Human  GGGGAGAAACCCTCCCGCGGCCCTCCAGGGCTGGGCTGCCGTTACCCAACCCCGCCCCATCGCACACACCCTCCCT 960
Kakapo ----- 0
GoldenEagle ----- 0
JapaneseQuail ----- 0
MediumGroundFinch ----- 0
GoodesThornscrubTortoise ----- 0
    
```

Monday, May 02, 2022 06:49 PM

```

Majority -----
          970      980      990      1000      1010      1020      1030      1040
Human      TTGCTTCCCCCGGGCGGGCTTTGGTTCGAGAAAATGAGAAGAAAGCGGGGCTTGGAGGCTGGGGAGGCATAGGGGCGATGGCG 1040
Kakapo     ----- 0
GoldenEagle ----- 0
JapaneseQuail ----- 0
MediumGroundFinch ----- 0
GoodesThornscrubTortoise ----- 0
    
```

```

Majority -----
          1050      1060      1070      1080      1090      1100      1110      1120
Human      GGGGTGAGGATCCCCGAGTGGGAGCGGGCACCGGCTTGGCGGGGGGGATGGGGTGGGAACCCCATACGTCTCCCCGGT 1120
Kakapo     ----- 0
GoldenEagle ----- 0
JapaneseQuail ----- 0
MediumGroundFinch ----- 0
GoodesThornscrubTortoise ----- 0
    
```

```

Majority -----
          1130      1140      1150      1160      1170      1180      1190      1200
Human      CTGTCCCTGCCCCCTTAGGAGCCATTTTCGATCCGTACCTTGGGACCCGACCCTTGGGTTAGCGGTGCCTGTGAGAGCGA 1200
Kakapo     ----- 0
GoldenEagle ----- 0
JapaneseQuail ----- 0
MediumGroundFinch ----- 0
GoodesThornscrubTortoise ----- 0
    
```

```

Majority -----
          1210      1220      1230      1240      1250      1260      1270      1280
Human      GTGGGATGGGCAGAGACAGGCCTTTGGATTGGGGGAGCCTCTAGGGGAAGAGGAGAGAGGCACCCCATGTGGACCCAGC 1280
Kakapo     ----- 0
GoldenEagle ----- 0
JapaneseQuail ----- 0
MediumGroundFinch ----- 0
GoodesThornscrubTortoise ----- 0
    
```

Monday, May 02, 2022 06:49 PM

```

Majority      -----
              |-----|
              |1290  1300  1310  1320  1330  1340  1350  1360|
              |-----|
Human          CATGAGCAACCTCTCCGGCCTCGCCCGGCCCTCCGTGGTCGGGAGAGATGCCGGTGGCGGGAGCTCCGGGGAAAGCCTAG 1360
Kakapo        ----- 0
GoldenEagle   ----- 0
JapaneseQuail ----- 0
MediumGroundFinch ----- 0
GoodesThornscrubTortoise ----- 0
    
```

```

Majority      -----
              |-----|
              |1370  1380  1390  1400  1410  1420  1430  1440|
              |-----|
Human          TGGGAGCCGCTGGGGAAGGGGGAGGGCGTGCGGCGGGCGGAGGAAGGGGGAGGGCAGATGTCATACTCCTTTGTTTTCA 1440
Kakapo        ----- 0
GoldenEagle   ----- 0
JapaneseQuail ----- 0
MediumGroundFinch ----- 0
GoodesThornscrubTortoise ----- 0
    
```

```

Majority      -----
              |-----|
              |1450  1460  1470  1480  1490  1500  1510  1520|
              |-----|
Human          TTTGAGTCTGGTAGTGGGGCGGGAGGGAGGAAAAATGCCTTTTTGTGGGGACTGAAAACATTCAAGGCTTGGCAAAAG 1520
Kakapo        ----- 0
GoldenEagle   ----- 0
JapaneseQuail ----- 0
MediumGroundFinch ----- 0
GoodesThornscrubTortoise ----- 0
    
```

```

Majority      -----
              |-----|
              |1530  1540  1550  1560  1570  1580  1590  1600|
              |-----|
Human          GGCCAGAAATTAATCATCTAAAAACGAAGTGTTTGAAGCCGACATCAGTCACATGGGCAAAGGCCAACAGCAATGGC 1600
Kakapo        ----- 0
GoldenEagle   ----- 0
JapaneseQuail ----- 0
MediumGroundFinch ----- 0
GoodesThornscrubTortoise ----- 0
    
```

Monday, May 02, 2022 06:49 PM

```

Majority -----
                1610      1620      1630      1640      1650      1660      1670      1680
Human          AGAAACAAGAGCAGATAGTCAACAAAGGGCTATCTCTTTAGCTACTTTGGTCAGTTTCTGGAAAAACGACTATAAAAACC 1680
Kakapo         ----- 0
GoldenEagle    ----- 0
JapaneseQuail  ----- 0
MediumGroundFinch ----- 0
GoodesThornscrubTortoise ----- 0
    
```

```

Majority -----
                1690      1700      1710      1720      1730      1740      1750      1760
Human          CAGAACCATGCTGCATCTTTGCGAACCTGAGTCAAGACGGAATGCTGAGTGAGGTGAGAGGCAAGACTGTGAAATGGTAG 1760
Kakapo         ----- 0
GoldenEagle    ----- 0
JapaneseQuail  ----- 0
MediumGroundFinch ----- 0
GoodesThornscrubTortoise ----- 0
    
```

```

Majority -----
                1770      1780      1790      1800      1810      1820      1830      1840
Human          GGACCGATGTCTCGCTCATATGCTTCACACCTGAAAAGACTCAGTAATTTAACTCAATGTTAGAAAGGGGGCACGCTTAA 1840
Kakapo         ----- 0
GoldenEagle    ----- 0
JapaneseQuail  ----- 0
MediumGroundFinch ----- 0
GoodesThornscrubTortoise ----- 0
    
```

```

Majority -----
                1850      1860      1870      1880      1890      1900      1910      1920
Human          GGTCAAAAATACAGCAGTATGCAGCTCTTTGGGAGTGTAACATAGTATCATTTAACAAGTACATTTATTAATAATCAGT 1920
Kakapo         ----- 0
GoldenEagle    ----- 0
JapaneseQuail  ----- 0
MediumGroundFinch ----- 0
GoodesThornscrubTortoise ----- 0
    
```

Monday, May 02, 2022 06:49 PM

Majority -----  
 1930 1940 1950 1960 1970 1980 1990 2000  
 Human GAGTATTTGAAGAATCAACAATTTGGTTAAGCGCCTAGAGTTTGGTGTGTTTTAAAAGGTACTAAAAACAAGATTTTATA 2000  
 Kakapo ----- 0  
 GoldenEagle ----- 0  
 JapaneseQuail ----- 0  
 MediumGroundFinch ----- 0  
 GoodesThornscrubTortoise----- 0

Majority -----  
 2010 2020 2030 2040 2050 2060 2070 2080  
 Human AAAGTTAACACAGTCTCACAGAATTCAAATCATCCTAGATGTTACCTAAAGATTATTTTCCAGATGAAACAAATCCAGAG 2080  
 Kakapo ----- 0  
 GoldenEagle ----- 0  
 JapaneseQuail ----- 0  
 MediumGroundFinch ----- 0  
 GoodesThornscrubTortoise----- 0

Majority -----  
 2090 2100 2110 2120 2130 2140 2150 2160  
 Human AAGTTCAGTATTCCCCCAGATCAACACGGAAATTGATGTCAAAACTTGCACTAGAATTCATGTTTCCTGATTCCCTGGTT 2160  
 Kakapo ----- 0  
 GoldenEagle ----- 0  
 JapaneseQuail ----- 0  
 MediumGroundFinch ----- 0  
 GoodesThornscrubTortoise----- 0

Majority -----  
 2170 2180 2190 2200 2210 2220 2230 2240  
 Human CCTGTGGAGACTACTAAAGAGTTTAAGCGTTAAATTATTAATCTCAGTATACTGGCATTGTAGAAATGGCATAGTGTTTT 2240  
 Kakapo ----- 0  
 GoldenEagle ----- 0  
 JapaneseQuail ----- 0  
 MediumGroundFinch ----- 0  
 GoodesThornscrubTortoise----- 0

Monday, May 02, 2022 06:49 PM

```

Majority -----
      2250      2260      2270      2280      2290      2300      2310      2320
Human  GGGTTTTGTTCTTTTTGGCTATTGAATGTGTTGTTAAAAAATACCACAAGTTGTCTCACATTTGAAAGTTACTTTTAGAA 2320
Kakapo ----- 0
GoldenEagle ----- 0
JapaneseQuail ----- 0
MediumGroundFinch ----- 0
GoodesThornscrubTortoise----- 0
    
```

```

Majority -----
      2330      2340      2350      2360      2370      2380      2390      2400
Human  AACCAGGTTGGTAACAGTACAGGTAAGTCACGGATCATCTGTGGTATTTTTTATCCCATCTGTGTGTGAGTGGCTGGAA 2400
Kakapo ----- 0
GoldenEagle ----- 0
JapaneseQuail ----- 0
MediumGroundFinch ----- 0
GoodesThornscrubTortoise----- 0
    
```

```

Majority -----
      2410      2420      2430      2440      2450      2460      2470      2480
Human  GATTTATGAATGATGGACTATCCTAAAAAGTTTTAGAGCCAAAGAGTGAGTGATTAGAAGAATAACAGGAGGTTGAAACT 2480
Kakapo ----- 0
GoldenEagle ----- 0
JapaneseQuail ----- 0
MediumGroundFinch ----- 0
GoodesThornscrubTortoise----- 0
    
```

```

Majority -----
      2490      2500      2510      2520      2530      2540      2550      2560
Human  ACTTATTTTTTCTTTGCAGAATCGTCACTGAGGTTGCAGTTGGCGTGAAGGTAGGAAAATACTATGTTTGAAACTGGGAT 2560
Kakapo ----- 0
GoldenEagle ----- 0
JapaneseQuail ----- 0
MediumGroundFinch ----- 0
GoodesThornscrubTortoise----- 0
    
```



Monday, May 02, 2022 06:49 PM

```

Majority      -----
              |-----|
              |2570  2580  2590  2600  2610  2620  2630  2640|
              |-----|
Human          TGTTGGATCTATTATCATAATTACTGGAAAATTTTAGCTTTTGCTTTTGAAAACATAACGTAGCTAACAAAACCCAAGT 2640
Kakapo        ----- 0
GoldenEagle   ----- 0
JapaneseQuail ----- 0
MediumGroundFinch ----- 0
GoodesThornscrubTortoise ----- 0
    
```

```

Majority      -----
              |-----|
              |2650  2660  2670  2680  2690  2700  2710  2720|
              |-----|
Human          GTAAAATGTTTCCTTTTCATTTGTAAGTTGGACCATATAAACAGTTTGTAAATCACCATAAGTTTTTCTAGAACTGTCAGT 2720
Kakapo        ----- 0
GoldenEagle   ----- 0
JapaneseQuail ----- 0
MediumGroundFinch ----- 0
GoodesThornscrubTortoise ----- 0
    
```

```

Majority      -----
              |-----|
              |2730  2740  2750  2760  2770  2780  2790  2800|
              |-----|
Human          CTGTAAGAATAACCTTTTAAAGTAAGTATGAATGATCAAGAAATGAAAATGCTTTCACACATGGCTTCTTGTAAATATAA 2800
Kakapo        ----- 0
GoldenEagle   ----- 0
JapaneseQuail ----- 0
MediumGroundFinch ----- 0
GoodesThornscrubTortoise ----- 0
    
```

```

Majority      -----
              |-----|
              |2810  2820  2830  2840  2850  2860  2870  2880|
              |-----|
Human          AACGATACCCCAATTTTCTGAGGGGAAATAATGATTTTAAATGGATGGTAAGTGGTTTGACCTATATCTTATAATTTTGT 2880
Kakapo        ----- 0
GoldenEagle   ----- 0
JapaneseQuail ----- 0
MediumGroundFinch ----- 0
GoodesThornscrubTortoise ----- 0
    
```

Monday, May 02, 2022 06:49 PM

```

Majority -----
                2890      2900      2910      2920      2930      2940      2950      2960
Human           TAATCTAAGTTTTTTGTTTTTTATTACTTTTTGTCATGAAAATGAATATATTTTGGTTAATAATAAAGCACATTAGAAAT 2960
Kakapo          ----- 0
GoldenEagle     ----- 0
JapaneseQuail   ----- 0
MediumGroundFinch ----- 0
GoodesThornscrubTortoise ----- 0
    
```

```

Majority -----
                2970      2980      2990      3000      3010      3020      3030      3040
Human           GAATTACACTGATCCTTAAAAAGGAAGTTGTTGAGGCAGTTAGCTTCAAATTTGAATTAGAAGTTAAGAGCTGGTTTGTC 3040
Kakapo          ----- 0
GoldenEagle     ----- 0
JapaneseQuail   ----- 0
MediumGroundFinch ----- 0
GoodesThornscrubTortoise ----- 0
    
```

```

Majority -----
                3050      3060      3070      3080      3090      3100      3110      3120
Human           TATTAAAGAAAGTCCTTATGGTAGAGATCCTTTGGAATCCTTCCTTTTTGGCTAAGAAAAC TACTCATCGTTTAAACTTT 3120
Kakapo          ----- 0
GoldenEagle     ----- 0
JapaneseQuail   ----- 0
MediumGroundFinch ----- 0
GoodesThornscrubTortoise ----- 0
    
```

```

Majority -----
                3130      3140      3150      3160      3170      3180      3190      3200
Human           AGTTCTAATGCTTAACATTTTCTTGAGTACTTGCAACTTTTAATGTCATGATGTATTGTAATTTTTTTTGGTTTTTTGTT 3200
Kakapo          ----- 0
GoldenEagle     ----- 0
JapaneseQuail   ----- 0
MediumGroundFinch ----- 0
GoodesThornscrubTortoise ----- 0
    
```

Monday, May 02, 2022 06:49 PM

```

Majority -----
      3210      3220      3230      3240      3250      3260      3270      3280
Human  TTTTGGAGACGGAGCCTCACTCTGTTGCCAGGCTGGATGCAGTGGCACGATCTTGGCCACTGCAACCTCTGCCTCTCTG 3280
Kakapo ----- 0
GoldenEagle ----- 0
JapaneseQuail ----- 0
MediumGroundFinch ----- 0
GoodesThornscrubTortoise ----- 0
    
```

```

Majority -----
      3290      3300      3310      3320      3330      3340      3350      3360
Human  GGTTC AAGCAGTTCTCCTGCCTCAGCCTCCTGAGTAGCTGGGATTACAGGTGCGCACCACCACGCCAGCTAATTTGTAT 3360
Kakapo ----- 0
GoldenEagle ----- 0
JapaneseQuail ----- 0
MediumGroundFinch ----- 0
GoodesThornscrubTortoise ----- 0
    
```

```

Majority -----
      3370      3380      3390      3400      3410      3420      3430      3440
Human  TTTTAGTAGAAATGGCATTTCACCCTGTGGTCAGGCTGGTCTCAAACCTCCTGACCTCATGATCTGCCTGCCTCTTATGA 3440
Kakapo ----- 0
GoldenEagle ----- 0
JapaneseQuail ----- 0
MediumGroundFinch ----- 0
GoodesThornscrubTortoise ----- 0
    
```

```

Majority -----
      3450      3460      3470      3480      3490      3500      3510      3520
Human  TCTGCCTGCCTTGACCTCCCAAAGTGCTGGGATTACAAGTGTGAGCCACCGTGCCCGGCTGTATTGTCATTTTTCATTT 3520
Kakapo ----- 0
GoldenEagle ----- 0
JapaneseQuail ----- 0
MediumGroundFinch ----- 0
GoodesThornscrubTortoise -----GACAAATTTGAATGTAGACACATGCATCAGTAGGTTGATGCA 42
    
```

Monday, May 02, 2022 06:49 PM

```

Majority -----
                3530   3540   3550   3560   3570   3580   3590   3600
Human          GCAAGCCTCTCTGTCTGAGAGGCTTTCTGCTTAGTCCAGTGATGCTGACTGTTCAAACATTTTTTCGAATTCTTAAAAT 3600
Kakapo          ----- 0
GoldenEagle    ----- 0
JapaneseQuail  ----- 0
MediumGroundFinch ----- 0
GoodesThornscrubTortoiseAGGCAATTTTTGTGAACGTAACTTTGTAGTGTAGACCAAGGGTGGGCAACTTGTGGGCCGCGAGACTGTTTATTTACATT 122
    
```

```

Majority -----
                3610   3620   3630   3640   3650   3660   3670   3680
Human          TGTATCCATAATGGGGGGAGGGGAAGGGATAGCATTGGGAGATATAGGGGGGAGGGGGAGGGATAGCTTTAGGAGATA 3680
Kakapo          ----- 0
GoldenEagle    ----- 0
JapaneseQuail  ----- 0
MediumGroundFinch ----- 0
GoodesThornscrubTortoiseGACTGGCTGCAGCTCCCAGTGTCCGTGGTTTGCCATTCCCGGACAATGGGAGCTGAAGGAAGTGGTGACCAGCATGTCTC 202
    
```

```

Majority -----
                3690   3700   3710   3720   3730   3740   3750   3760
Human          TACCTAATGCTAAATGACAAGTTAATGGGTGCAGCACACCAACATGGCACATGTATACATATGTAACAAACCTGCACGTT 3760
Kakapo          ----- 0
GoldenEagle    ----- 0
JapaneseQuail  ----- 0
MediumGroundFinch ----- 0
GoodesThornscrubTortoiseAGCCAAAACCATGAGGTGGGACTCAGGAAATCATGGGATTGGTTTAAAAATCATGAGACTATTTTTTTTAAACAAAATGT 282
    
```

```

Majority -----
                3770   3780   3790   3800   3810   3820   3830   3840
Human          GTACTCATGTACCCTAAAACCTTAAAGTATAATAATGATAATAATAATTGTATCCATAATGATGTGGTGTCTTTCAAATA 3840
Kakapo          ----- 0
GoldenEagle    ----- 0
JapaneseQuail  ----- 0
MediumGroundFinch ----- 0
GoodesThornscrubTortoiseATGTTGAGATCTCTTTATTTTCTGTGGTTTTTGAGCCCTTATATTACCTTTGGTTTACATTTTTTAAAGCTTTTCTCCA 362
    
```

Monday, May 02, 2022 06:49 PM

```

Majority -----
                3850      3860      3870      3880      3890      3900      3910      3920
Human          CTTTGGGGATGGTACTGTGTTTTCTTGCTTATTTTCTGTCTCTTTCCTATAGTGAATAGATATTTGCCCATTCCTTA 3920
Kakapo          ----- 0
GoldenEagle    ----- 0
JapaneseQuail  ----- 0
MediumGroundFinch ----- 0
GoodesThornscrubTortoise @AAACACAAAGGTTAGAAACTTTTTTTTTTCAAAAAAATGAAAGCTGAGATTTTCCATAATCAGCCATCTCCAGGAGA 442
    
```

```

Majority -----
                3930      3940      3950      3960      3970      3980      3990      4000
Human          GGCTTGTTTCTTGAGTTCATTTGTACAGACTAAAGGAGGAATAATACGCTCTTTTTGGTGATAGTATTTCCAAGTTGA 4000
Kakapo          ----- 0
GoldenEagle    ----- 0
JapaneseQuail  ----- 0
MediumGroundFinch ----- 0
GoodesThornscrubTortoise @TTGGATATAAGTAAATATCAAATATTGCAAGATTCACCTAAACAGAGAGAGTTTGCAATACTGTGAAACCAAACAT 522
    
```

```

Majority -----
                4010      4020      4030      4040      4050      4060      4070      4080
Human          GTTAGTCATGGGATTTAAATCAGGAATAGCTAAAGATTGCAAAATGGTAGATGTTGTAGGTTCCATCCAAACAGATTTTC 4080
Kakapo          ----- 0
GoldenEagle    ----- 0
JapaneseQuail  ----- 0
MediumGroundFinch ----- 0
GoodesThornscrubTortoise @CTATTAAATGGCCTTGTAGTGTTAATATACCTAGGTTAGATTTAGGCCAAATCCTGCAATCTACAACATTTCCGGGACT 602
    
```

```

Majority -----
                4090      4100      4110      4120      4130      4140      4150      4160
Human          TGTAATTTTGTAAAAGAATAAATGATACAAGTGTGAGTTGTTCGACTGTTAGTGAAAAGGAGAGGAGTTGTAGACAAG 4160
Kakapo          ----- 0
GoldenEagle    ----- 0
JapaneseQuail  ----- 0
MediumGroundFinch ----- 0
GoodesThornscrubTortoise @TTGTAGCCATGAGGAGTCCCAATGACTTCAAAAGGATCATTGACCAATAAGGCTAATGACTCTTACATATTGCGCAACA 682
    
```

Monday, May 02, 2022 06:49 PM

```

Majority -----
                4170      4180      4190      4200      4210      4220      4230      4240
Human          GCTCAGAATGAGTAGACAGGAAAAAACTGAGGAGACTTGGAAATAGGATGTCCAGGTGTAATGTATTGGTTACACCAGTTT 4240
Kakapo        ----- 0
GoldenEagle   ----- 0
JapaneseQuail ----- 0
MediumGroundFinch ----- 0
GoodesThornscrubTortoise @GGACTAATCCACCTGCATATTGTACAATACAGGATTTAGGTCTTAATTTATATGTTTCATCTTAATACCAACTAAAATAT 762
    
```

```

Majority -----
                4250      4260      4270      4280      4290      4300      4310      4320
Human          TTTTTTTTTTTTTTTTGAGACAGAGTCTCACTCTTCGCCCAGGTGGAGTGCAGTGGCAGATCCTGGCTCACTACAAGCTC 4320
Kakapo        ----- 0
GoldenEagle   ----- 0
JapaneseQuail ----- 0
MediumGroundFinch ----- 0
GoodesThornscrubTortoise @TTTGTATCAGCTTTGAAGGGGAA---ACCCTAACCCCAACAGGAGTGTGAGCCATTGTGTGCAATCTTTAATTGCTTG 839
    
```

```

Majority -----
                4330      4340      4350      4360      4370      4380      4390      4400
Human          CGCCTTCCGGGTTCACTCCATTCTTCTGCCTCAGCCTCCCAGTAGCTGGGACTACAGGCGCCACCACCACGCCCGGCT 4400
Kakapo        ----- 0
GoldenEagle   ----- 0
JapaneseQuail ----- 0
MediumGroundFinch ----- 0
GoodesThornscrubTortoise @AGAGAGGGGGAGAACATACTATAGCAGGGGTAGGCAACCTATGGCACACGTGCAGAAGGTGGCACACAAGCTGATTTTC 919
    
```

```

Majority -----
                4410      4420      4430      4440      4450      4460      4470      4480
Human          AATTTTTTGTATTTTTTAGTAGAGACGGGGTTTCACCGTGTAGCCAGGATGGTCTTGATCTCCTGACCTTGTTGGTTACAC 4480
Kakapo        ----- 0
GoldenEagle   ----- 0
JapaneseQuail ----- 0
MediumGroundFinch ----- 0
GoodesThornscrubTortoise @GTGGCACTCAGCTGCCAGATCCTGGCCACCGGTCTGAGGGGCTCTGCATTTTAATTTAATTTTAAATGAAGCTTCTT 999
    
```

Monday, May 02, 2022 06:49 PM

```

Majority -----
                4490      4500      4510      4520      4530      4540      4550      4560
Human          CAGTTTTTTGTTAGTTGTTTGAGGAGAACACTTTAGAAGATGATAAAAAAAAAATTGCAAATCGTTTTTAAAAATCCATTG 4560
Kakapo         ----- 0
GoldenEagle    ----- 0
JapaneseQuail  ----- 0
MediumGroundFinch ----- 0
GoodesThornscrubTortoiseA AACATTTTAAAAACCTTATTTACTTTTACATACAACAATGGTTTAGTTATATATCATAGACTTATAGAAAGAGACCTTCT 1079
    
```

```

Majority -----
                4570      4580      4590      4600      4610      4620      4630      4640
Human          TTTAATATAAAAAGTCTGAATAATTAAGTTAATTTAATTTTCTGGAATAATGGTTAAGAATTTTGTCTTTGGTGTCCAGGC 4640
Kakapo         ----- 0
GoldenEagle    ----- 0
JapaneseQuail  ----- 0
MediumGroundFinch ----- 0
GoodesThornscrubTortoiseA AAAATGTTGAAATGTATTACCGGCACGCAAAACCTTAAATTAAGTGAATAAATGAAGACTCGGCACACCATTTCTGAA 1159
    
```

```

Majority -----
                4650      4660      4670      4680      4690      4700      4710      4720
Human          CTGTGTACAAGTAATTAAGTGTCTTTTAAACTTAAAAC--ATTTGTGAATTTGCTTTAAAGACACTGATGCATGTGCAT 4718
Kakapo         ----- 0
GoldenEagle    ----- 0
JapaneseQuail  ----- 0
MediumGroundFinch ----- 0
GoodesThornscrubTortoiseA AGTTGCTGACCCCTGACTATAGGATGCTTGATGGTTTTGGTTTTTTTTTGTTCATCAGCAGTCTTAAGAGTGGTTGAT 1239
    
```

```

Majority -----
                4730      4740      4750      4760      4770      4780      4790      4800
Human          ATTTAAAAAATTTCAGGCCGGCGCGGTGGGTCACACCTGTAATCCAGCACTTTGGGAGGCCGAGCGGGCGGATCAGC 4798
Kakapo         ----- 0
GoldenEagle    ----- 0
JapaneseQuail  ----- 0
MediumGroundFinch ----- 0
GoodesThornscrubTortoiseA ATCTAGTACTAACTGCACTAGCTGTGATTATTATATCGTGTGCAATAACATGTCTACCTTTTCATTGCTCATGTTTCAGG 1319
    
```

Monday, May 02, 2022 06:49 PM

```

Majority -----
                4810   4820   4830   4840   4850   4860   4870   4880
Human            AGTTCAGGAGAGACCATCCTGGCTAACACGGTGAAACCCTGTCTTTACTAAAAATACAAAAAATTAGCCGGGTGTGGTGA 4878
Kakapo          ----- 0
GoldenEagle     ----- 0
JapaneseQuail   ----- 0
MediumGroundFinch ----- 0
GoodesThornscrubTortoise GCATAAGCTAATACTTCTCAATTTAAAAACAGGAAGAATTTCTTTCTCTCCTTTGGAATACTGTTGCACAATTAGGTGCA 1399
    
```

```

Majority -----
                4890   4900   4910   4920   4930   4940   4950   4960
Human            CGGGTGCCTGTAGTCCAGCTACTCGGGAGGCTGAGGCAGGAGAAATGGCATGAACCTGCGAGGCAGAGGTTGCAGTAAGC 4958
Kakapo          ----- 0
GoldenEagle     ----- 0
JapaneseQuail   ----- 0
MediumGroundFinch ----- 0
GoodesThornscrubTortoise GTATGAGAGGTAATAATTTTCCTTTGAAGGACCCTGCACCTGGCCAATTGGAGAGGCAGGATACTACAGAAGATGGACTATT 1479
    
```

```

Majority -----
                4970   4980   4990   5000   5010   5020   5030   5040
Human            GGAGATTGCACCACTGCACCTCCAGCCTGGGCGACAGAGACAGACTCTATCTCAAAAAAAAAAAAAAAAAAAAAAAAAAAAA 5038
Kakapo          ----- 0
GoldenEagle     ----- 0
JapaneseQuail   ----- 0
MediumGroundFinch ----- 0
GoodesThornscrubTortoise CATGGCAATTCCTCTCCATAATTTCCATTACAAGAGGAGAAAGGCTTTAACTACTCCCTCTCTGTCCCAGAAATGTGG 1559
    
```

```

Majority -----
                5050   5060   5070   5080   5090   5100   5110   5120
Human            AAAAAAAAAATTCAAACCTGCTTTCACAGCTTTTTTTTGCTATTTCTTAGGTGTAGGTAATTGTGTTAAAATTTTGTGCCTTTT 5118
Kakapo          ----- 0
GoldenEagle     ----- 0
JapaneseQuail   ----- 0
MediumGroundFinch ----- 0
GoodesThornscrubTortoise AGATGTGGACCAAGTT--TGGACAGTTTCTTCTGCAACAAGCGAAGCCTTGCACCAGGGCTGGAGCCTGGGGAATCCA 1637
    
```



Monday, May 02, 2022 06:49 PM

```

Majority -----
                    5130      5140      5150      5160      5170      5180      5190      5200
Human              TTCTTGAAATTATTAATTTATATATATTAGCACACATATAAACATCTTTATTTACGTGATTGAATTCAAACTATTGTTTTGG 5198
Kakapo             ----- 0
GoldenEagle       ----- 0
JapaneseQuail     ----- 0
MediumGroundFinch ----- 0
GoodesThornscrubTortoise ATCCAAGTCTCCCTGCATCATATCTGGCAAGTTTCTCTTCTCAAGCTCAGCTGGCAGTAGGGCTGAGGAGTCTTTCTCC 1717
    
```

```

Majority -----
                    5210      5220      5230      5240      5250      5260      5270      5280
Human              CCCACATCTTGCCTTTTTTTTTTTTTTTTTTGGAGTCGGAGTCTCCCTCTGTTCATCAGGCTGGAGTGCAGTGGCATGATCTCG 5278
Kakapo             ----- 0
GoldenEagle       ----- 0
JapaneseQuail     ----- 0
MediumGroundFinch ----- 0
GoodesThornscrubTortoise AGCTAAAGGAGCCAGACTTTGAGGGAAACAGTCAAAGAATTTCCCTCCAGAAAGTGGGCCCTCCAGTCAGCAGGGCTGGG 1797
    
```

```

Majority -----
                    5290      5300      5310      5320      5330      5340      5350      5360
Human              GCTTACTGCAACCTCTGCCTCCTGGGTTCAAGCAATTCTCCTGCCTCAGCTCCCTAGTAGCTGGGACTACAGGCACACG 5358
Kakapo             ----- 0
GoldenEagle       ----- 0
JapaneseQuail     ----- 0
MediumGroundFinch ----- 0
GoodesThornscrubTortoise AGATGAATGTGACGTCGGAGATGGGCCCTAGGAGTGGGCCCTCGTGGGCAGCAAGGCTCGGAAACCGCCCTGCTTGTCTTGC 1877
    
```

```

Majority -----
                    5370      5380      5390      5400      5410      5420      5430      5440
Human              CCGCATGCCA--GACTAATTTTTTTTTTTTTTTTCGAGACGGAGTCTCGCCCGGTCTCCAGGCTGGAGTGCAGTGTTCGC 5436
Kakapo             ----- 0
GoldenEagle       ----- 0
JapaneseQuail     ----- 0
MediumGroundFinch ----- 0
GoodesThornscrubTortoise eTGCTTTGCCCGCGGGGGAATAGTTTGCCTCAGACAGGCAGGTGACGAGGAGCATCGCAGAAGCGCCAGTAGCTGC 1957
    
```

Monday, May 02, 2022 06:49 PM

```

Majority -----
                    5450   5460   5470   5480   5490   5500   5510   5520
Human      GATCTCTGCTCACTGCAACCTCTGCCTCCTGGGTTACAGCCATTCTCTGTCTCAGCCTCCCAAGTAGCTGGGACTACAG 5516
Kakapo     ----- 0
GoldenEagle ----- 0
JapaneseQuail ----- 0
MediumGroundFinch ----- 0
GoodesThornscrubTortoise @GCTACTGAGCATGCGCACAGCGCACGGGCATGCCAGTGACAGCTGAGGGAGCCCAATCTGATGGGGAGCAGAGCCTGG 2037
    
```

```

Majority -----
                    5530   5540   5550   5560   5570   5580   5590   5600
Human      GCGCCTGCCACCACGCCTGGCTTCTTTTTTGTATATTTCAGTAGAGACAGAGTTTCACCATGTTAGCCAGGATAGTCTCTA 5596
Kakapo     ----- 0
GoldenEagle ----- 0
JapaneseQuail ----- 0
MediumGroundFinch ----- 0
GoodesThornscrubTortoise @ACTCGGCAACCTTCGGCGGTTTCCGGGGGGGCTGGCCGCCATTTTCTCGTTGCCCTCTCTCCGTTTCGCTGCCTGCGCGG 2117
    
```

```

Majority -----
                    5610   5620   5630   5640   5650   5660   5670   5680
Human      TCTCCTGACCTCGTGATCTGCCTGCCTCGGCCTCCCAAAGTGCTGGGATTACAAGCGTGAGCCACCGCGCCTAGCCAAAA 5676
Kakapo     ----- 0
GoldenEagle ----- 0
JapaneseQuail ----- 0
MediumGroundFinch ----- 0
GoodesThornscrubTortoise @TCCCTGCCCTGCTCGCCAGCGCTTTGTCTTGTTCGGCGATGGACGGGTGAGTACAGGGCGGTGGGGAGCGGGGGCG 2197
    
```

```

Majority -----
                    5690   5700   5710   5720   5730   5740   5750   5760
Human      TGCCAGACTAATTTTTGTATTTTGTAGTAGAGACAGGGTTTCACCATTTTGGCCAGGATGGTCTTGATCTCTTGACTCCAT 5756
Kakapo     ----- 0
GoldenEagle ----- 0
JapaneseQuail ----- 0
MediumGroundFinch ----- 0
GoodesThornscrubTortoise @TGC CGCGCCCGCGGGTTATTGTTGCTTTCCTGTCGGGGCTGGGCAGAGCGGGCTCGCTCTCCCCCGTGGGTGTCT 2277
    
```

Monday, May 02, 2022 06:49 PM

```

Majority      -----
              |-----|
              |5770   5780   5790   5800   5810   5820   5830   5840|
              |-----|
Human          CATCCGCCCGCTTGACTTCCCAAAGTGTGGGATTACAGGCTTGAGCCACCGCTCCGCCCATATCTTGCCTTTAAAA 5836
Kakapo        ----- 0
GoldenEagle   ----- 0
JapaneseQuail ----- 0
MediumGroundFinch ----- 0
GoodesThornscrubTortoiseGGGAGGAGCAGGGTGCCAGCACACCCCACTGAATAGCGGGGATTAGCTCCTGCAGACTCCTTGTGGGGCAGCTGGAGAC 2357
    
```

```

Majority      -----
              |-----|
              |5850   5860   5870   5880   5890   5900   5910   5920|
              |-----|
Human          AAAATAGCTTTATTGAGATATAAATTTGACATAAAATAAACTACCCATATTAATATAACAATGTTTTATCTCATATATACC 5916
Kakapo        ----- 0
GoldenEagle   ----- 0
JapaneseQuail ----- 0
MediumGroundFinch ----- 0
GoodesThornscrubTortoiseGACTGGGGCCAGTGAGGATGAGGGCGGTGGGGGAGCTTCTGCATAACCGGACTCAGATGCGGGGCTGGGGCGGGTCC 2437
    
```

```

Majority      -----
              |-----|
              |5930   5940   5950   5960   5970   5980   5990   6000|
              |-----|
Human          CTTGTGAAACCACT----GCAATCAAGATAATGAACATCTATCACTCCCTACAGTATCATCTTGCGCCTTTATAGTCCCT 5992
Kakapo        ----- 0
GoldenEagle   ----- 0
JapaneseQuail ----- 0
MediumGroundFinch ----- 0
GoodesThornscrubTortoiseETTACTGACTCACCTAGGGCTGCGTGAGTCCTTAGCGCCCTGTTTCATTCTGTGGCCTTCTCAGTGGTGGGTGTCTGTGTG 2517
    
```

```

Majority      -----
              |-----|
              |6010   6020   6030   6040   6050   6060   6070   6080|
              |-----|
Human          CCTTCTGCTTTTCTTTCCCAAGGAACCACTGATCTGCTTTCTGTCACTATAGATTAGTTCACACTTTTATAGAATTTTA 6072
Kakapo        ----- 0
GoldenEagle   ----- 0
JapaneseQuail ----- 0
MediumGroundFinch ----- 0
GoodesThornscrubTortoiseGTGTGTGGGGGTGCCCAATCCCGCCTTTTATCCCTCCCCCTCATTCGTGGTGTAGGGGAAACGCTGTGAGCAA 2597
    
```

Monday, May 02, 2022 06:49 PM

```

Majority -----
                6090      6100      6110      6120      6130      6140      6150      6160
Human          GATAAATGTAATCATATGGTATGTACATTTTGGTCTGGGTTAGTCCACTCAGAATAATTATTTTGAAATTCACCCATGT 6152
Kakapo          ----- 0
GoldenEagle    ----- 0
JapaneseQuail  ----- 0
MediumGroundFinch ----- 0
GoodesThornscrubTortoiseCACCCCTGCTTGTTTTGGTGTGCCAGAGGAGGAGGAGCTGGCAGATGGCAAGCTCTTTTGTTCATAGCTGTT 2677
    
```

```

Majority -----
                6170      6180      6190      6200      6210      6220      6230      6240
Human          TGTCCTTCAATAGTCCATTCTGTTTTATTGCTTAGTAATAGTACACTTTATGGCTATACAGCAATTTGTTAATCCATTCA 6232
Kakapo          ----- 0
GoldenEagle    ----- 0
JapaneseQuail  ----- 0
MediumGroundFinch ----- 0
GoodesThornscrubTortoiseCAATAGCCCCCTGGCTTTTTTTTTTTTTTATTTAAGGTAGAAAGATGCCTTTGTGTATACTGGAGACAGGCAGTTAAAGCC 2757
    
```

```

Majority -----
                6250      6260      6270      6280      6290      6300      6310      6320
Human          AGTCTTGAGGGACATTGTATTGTTTTCCGTTTTGAGCTAATAAAAAATATAGTTGTGAACATTACTGTACAAGTCTTTGT 6312
Kakapo          ----- 0
GoldenEagle    ----- 0
JapaneseQuail  ----- 0
MediumGroundFinch ----- 0
GoodesThornscrubTortoiseCAAGTAGGGAAGGGTTGCAGGCATCAACCATATGGGACAGCAAGGGCCTTGATTCTGGCAGGAGCTTGGGTGGGTAG 2837
    
```

```

Majority -----
                6330      6340      6350      6360      6370      6380      6390      6400
Human          ATGGACATATGCTTTTCATTTCTCTTGGTGGGGCAGGCTATGATTGGAAAGTCTGGATCATGTGATAGGCATATGTTTAAC 6392
Kakapo          ----- 0
GoldenEagle    ----- 0
JapaneseQuail  ----- 0
MediumGroundFinch ----- 0
GoodesThornscrubTortoiseATATACACAAGGCCCTCTTTTCATTGGGGCTGGGAGCTGCTGCTGGTGTATATAGCTACTGTCAGCATAAACACTTGTGT 2917
    
```

Monday, May 02, 2022 06:49 PM

```

Majority -----
                6410      6420      6430      6440      6450      6460      6470      6480
Human          TTTTAAAGGAAGTGCAAACTTTTAAAAGTAGTTGTACCATCTTACATTGCCATCAGCATGGTATGAAATTTCCAGTCCT 6472
Kakapo         ----- 0
GoldenEagle    ----- 0
JapaneseQuail  ----- 0
MediumGroundFinch ----- 0
GoodesThornscrubTortoise 6TGTGCAGCATCTTACTGCCCCATTACTTGCCCTCATCCTTTTGAGACAGATTAACAACCTCTTGTGTTTGTGTGATA 2997
    
```

```

Majority -----
                6490      6500      6510      6520      6530      6540      6550      6560
Human          TCCACATCCTCTTTAATGCCTGTTATCTTCTGTTTTTGATTATAGATATTGTAGTGTATATGAAGTGATATTTCACTGTG 6552
Kakapo         ----- 0
GoldenEagle    ----- 0
JapaneseQuail  ----- 0
MediumGroundFinch ----- 0
GoodesThornscrubTortoise 6AATGTATAATCTATTGGTAATGTGATTTTAAAGTCTTTT-TTATGGTTGCTTGTGCAGCCTAATGTTGGTGTACAAACCT 3076
    
```

```

Majority -----
                6570      6580      6590      6600      6610      6620      6630      6640
Human          GATTTAATTTGCATTCCTCTAATATCTATGATGTTGGACATCTTTTCGTGTGCTTTTTGTGCAGCTGTTATCTTTGGTGAA 6632
Kakapo         ----- 0
GoldenEagle    ----- 0
JapaneseQuail  ----- 0
MediumGroundFinch ----- 0
GoodesThornscrubTortoise 6ACTAAAAAGTCAATCCTTTGTGCTGCTCACAAATTGATACCCATGGAAGTGGCATGCTTTACTTATCACATTTTGTTTG 3156
    
```

```

Majority -----
                6650      6660      6670      6680      6690      6700      6710      6720
Human          GTGCTGTTTATATCTTTAGCCCAATTTTTTATTTGGTTATTTATTTTAAATTGAGTTTTGAGAGGTCTTCATTGTGGTT 6712
Kakapo         ----- 0
GoldenEagle    ----- 0
JapaneseQuail  ----- 0
MediumGroundFinch ----- 0
GoodesThornscrubTortoise 6AATATTTTATGATATTTGTGTTAATTAGGGTAGCCTGGCTATATTTCTGTTTTGGGTGTTATATTCTGCCTACCCAGTG 3236
    
```

Monday, May 02, 2022 06:49 PM

```
Majority -----
      6730      6740      6750      6760      6770      6780      6790      6800
Human   ACAAGTCCTTTATCAGCCATAAGGCCTGCAAATATTTTCTGCCACTCATCTTCTTATTCTCGCATTGTCTTTTGAAGAGC 6792
Kakapo  ----- 0
GoldenEagle ----- 0
JapaneseQuail ----- 0
MediumGroundFinch ----- 0
GoodesThornscrubTortoise @TAGATCCTGCAAATAGATCTACATAAGAGCATGTCTGTGCTGTTGTTCCACATGGGTGTAGAGTGCCATTTGTAGGATC 3316
```

```
Majority -----
      6810      6820      6830      6840      6850      6860      6870      6880
Human   AACAGTTATTAAATCTGATGGACTCCAGTTTACCAATTTTTTCTTTTATGGATTGTAGTTTTGGGGTCTTGTCTGAGCCA 6872
Kakapo  ----- 0
GoldenEagle ----- 0
JapaneseQuail ----- 0
MediumGroundFinch ----- 0
GoodesThornscrubTortoise @AGCATTCAATTTGGTCATCTTTTTCAATTCAGAAATAGTATTAATCACTTTCTGCCCTGAACGTCTCTGTAAGGATCAC 3396
```

```
Majority -----
      6890      6900      6910      6920      6930      6940      6950      6960
Human   TTTTTCCTGACTGTAAGCCATGAAGATTTTTTCTTTGTTGTTAATAATAATAATAATTTTTTTTATAGAGACAGGA 6952
Kakapo  ----- 0
GoldenEagle ----- 0
JapaneseQuail ----- 0
MediumGroundFinch ----- 0
GoodesThornscrubTortoise @GTTAAAGAATGAACAGAAAGATTATCTTATGTACTACATCTGTCCTTAAATTTCTCCTATTCTCACCTATCCATTATCC 3476
```

```
Majority -----
      6970      6980      6990      7000      7010      7020      7030      7040
Human   CCTGACTCTGTACCCAGCTGGAGTGCAGTGGTGCAATCGTAGCTCATGATAACCTTGAACCTCTGGACACAAGGGCTC 7032
Kakapo  ----- 0
GoldenEagle ----- 0
JapaneseQuail ----- 0
MediumGroundFinch ----- 0
GoodesThornscrubTortoise @ACAAGTCCAGAGACTTCTCTCAGACTTACTGGCATTGGCCAAAATGGATATCTATCAGACTCTGGAAGGAGGAGGC 3556
```

Monday, May 02, 2022 06:49 PM

```

Majority -----
                7050      7060      7070      7080      7090      7100      7110      7120
Human          CTGCTTCAGCCTCCCAAGTAGCTAGGACTATAGGCACACAGCACCATGCCAGCTAACTTTTAAATTTTATAGACCCG 7112
Kakapo          ----- 0
GoldenEagle    ----- 0
JapaneseQuail  ----- 0
MediumGroundFinch ----- 0
GoodesThornscrubTortoise @GGATGGGGTGGGTTCTCTGACTGTGGGACCTAATTCCTCTCACTTCTTAAGTCCCATGTCCAGGCAGAGCTTCTTTGGA 3636
    
```

```

Majority -----
                7130      7140      7150      7160      7170      7180      7190      7200
Human          GGGTCTCTCTGTTTTGCCAGGCTGGTGTGTAAGTCTCTGGCCTCAAGCGATCTTTCTGCCTCAGCCTTCCAAAGTGTGG 7192
Kakapo          ----- 0
GoldenEagle    ----- 0
JapaneseQuail  ----- 0
MediumGroundFinch ----- 0
GoodesThornscrubTortoise @AGTGTTCACTGACATCATGGACACCTTTGTAGCTGTGTGACTCTCAGGGATTCTTTGTTTCAGTGTGCTGCCTGGATG 3716
    
```

```

Majority -----
                7210      7220      7230      7240      7250      7260      7270      7280
Human          GATTAAAGGCATGAGCCACTACACTTGGCCACCTTTGTTTTCTAATAGAAGTTTTATACTTTGGTTTAACATTTGGGTCT 7272
Kakapo          ----- 0
GoldenEagle    ----- 0
JapaneseQuail  ----- 0
MediumGroundFinch ----- 0
GoodesThornscrubTortoise @CTTCTATTGAACCTTTGAGCCCGTTCCCATTCCTGTTTTGTTTTCTTTTGGACTCCTCTCCTCTTTGAGGGGGTGGTCT 3796
    
```

```

Majority -----
                7290      7300      7310      7320      7330      7340      7350      7360
Human          CTTTCATTTTGACTTAAATATTTGAATATGGTACAAAGTGTGGGTCAGAAGTATTTGGTTTTGCATGGGGATATCCAGTG 7352
Kakapo          ----- 0
GoldenEagle    ----- 0
JapaneseQuail  ----- 0
MediumGroundFinch ----- 0
GoodesThornscrubTortoise @TGCTATTTTAATTTCTAAATACTAAAGTTAATAAAATCTAT-TAAGAGTTCAGTTTTATGGGGAAATCATATTTATTT 3875
    
```

Monday, May 02, 2022 06:49 PM

```

Majority -----
                7370      7380      7390      7400      7410      7420      7430      7440
Human          TTTACAGCATCATTGTGTTGAAAAGACTATCCTTTCTCCATTCACTTGGCTTTGCAGCTTCATGAAAAATCACTTATGTCT 7432
Kakapo          ----- 0
GoldenEagle    ----- 0
JapaneseQuail  ----- 0
MediumGroundFinch ----- 0
GoodesThornscrubTortoise @GAGTCAATTTGTGGATTGAAAAGACTCAGACATGTTTCTTACTATTAAGTCAGGTTTCTGTTTTCTTTACAGCATCGTCA 3955
    
```

```

Majority -----
                7450      7460      7470      7480      7490      7500      7510      7520
Human          GTATGTGTGATTTTATGTCTGTACTCTTTTTTGTATTGACCCATTTTCTTTATCTAGATGCTGGAAACATACTGTCTTA 7512
Kakapo          ----- 0
GoldenEagle    ----- 0
JapaneseQuail  ----- 0
MediumGroundFinch ----- 0
GoodesThornscrubTortoise @TGATGTTGCAGTTGGCGTGAAGGTATGATGTGAAGCTAGCTGATGATAAACTGGCAACCTGTAAAATGATATATGTTA 4035
    
```

```

Majority -----
                7530      7540      7550      7560      7570      7580      7590      7600
Human          ATCATTGTAGCTTTTATATTGAGTCTTGAAACCACTTACTTAGTCTTGGCCCTCCAACCTCTGTTCTTTTTCAAAGTTGTTT 7592
Kakapo          ----- 0
GoldenEagle    ----- 0
JapaneseQuail  ----- 0
MediumGroundFinch ----- 0
GoodesThornscrubTortoise @TTTGTGGAGTTGAAGTGAGCTGTAAGATTTTATTAAGTGATTGTCAGCTGAC-----ATTTTGTTCATCGAGATATGC 4108
    
```

```

Majority -----
                7610      7620      7630      7640      7650      7660      7670      7680
Human          TTAACCTCTTCTGAGTCCTTTGTATTTTCATATGAGTCAGTTCTTAGAAAACTGCTTGGATTTTACTGGATTTGACTTGA 7672
Kakapo          ----- 0
GoldenEagle    ----- 0
JapaneseQuail  ----- 0
MediumGroundFinch ----- 0
GoodesThornscrubTortoise @TTAATAAACAGAAAGCTTTAAGTTGAAAAGCTGACCAGAAATGGGAGAATCTGTTATCAAACCACTGACTTGGATTGCA 4188
    
```



Monday, May 02, 2022 06:49 PM

```

Majority -----
                7690   7700   7710   7720   7730   7740   7750   7760
Human           ATCTGTAGAGCAAATTTGGGGAAAATTGGCATCATGACTACAATTGATGTCTCTATTAGGTCTTTAATTTCTTTAAGCAT 7752
Kakapo          ----- 0
GoldenEagle     ----- 0
JapaneseQuail   ----- 0
MediumGroundFinch ----- 0
GoodesThornscrubTortoise CATGATATAAACTTATTCTAAAGATTAGTCTCTCAGAAATAACGTTTGGGCAACATGCTGTTCTCACTGCTGCATGATGG 4268
    
```

```

Majority -----
                7770   7780   7790   7800   7810   7820   7830   7840
Human           TTTTTTTTTTTTTTTCAGTGCACACGTTTTGTGCATTGTTTGATTAGATTTACCCATAAGTATTTTATGTATTTTGAAGT 7832
Kakapo          ----- 0
GoldenEagle     ----- 0
JapaneseQuail   ----- 0
MediumGroundFinch ----- 0
GoodesThornscrubTortoise CTTAAAAGCTGATTTTTTCCCCCTCT--CCCTACCTGCAAAAACTCCAATAGGTATTCAGTTCTTGTTGACCT 4345
    
```

```

Majority -----
                7850   7860   7870   7880   7890   7900   7910   7920
Human           ACTGTAAATGATATTTTAAAACTTAATTTCCAATTGTTTGCTAGTGTATAGAAATGATTATGGCATATGCTCATATGT 7912
Kakapo          ----- 0
GoldenEagle     ----- 0
JapaneseQuail   ----- 0
MediumGroundFinch ----- 0
GoodesThornscrubTortoise CATAATTGGAGCAGAAATATGAGAATGAAGTTTTGACCTGCAGATCTGAGAGCAGAGGTTTGCTGTTTTTTTGTTTTTTGT 4425
    
```

```

Majority -----
                7930   7940   7950   7960   7970   7980   7990   8000
Human           TCTGAACCTTTGCTAAACTCATTTTAGTAGATCTAATAGTTTTTTTTATATATTTTCATCAGATTTGCTTGAGAGGGAGTCT 7992
Kakapo          ----- 0
GoldenEagle     ----- 0
JapaneseQuail   ----- 0
MediumGroundFinch ----- 0
GoodesThornscrubTortoise CCCTCCCCCTCAACTCACATTTCTTCAATGAAAGTTCTCCAGTTATAAGAATTGTACCATATAGTTAATTTAGTTAGCC 4505
    
```

Monday, May 02, 2022 06:49 PM

```

Majority -----
      8010      8020      8030      8040      8050      8060      8070      8080
Human    CAGTCACCCAGGCTGGAGTGCAGTGCAGTGACGTGATCTTGGCTCACTGCAACCTGCACCTCCTGGGTCAAGCAATTCTCCTGCC 8072
Kakapo   ----- 0
GoldenEagle ----- 0
JapaneseQuail ----- 0
MediumGroundFinch ----- 0
GoodesThornscrubTortoiseCTCTGATTCTTTCACTCTTGAATGAATGTTGCATTTGAGAATCAGATCAATACTTCATAGGAGCTGAATGCGACAAAAA 4585
    
```

```

Majority -----
      8090      8100      8110      8120      8130      8140      8150      8160
Human    TCAGCCTCATAAGTAGCTGGGACTGCAGGTGCACACCACCAGCCAGCTAATTTTTGCATTTTCAGTTGAGGCAGGGTT 8152
Kakapo   ----- 0
GoldenEagle ----- 0
JapaneseQuail ----- 0
MediumGroundFinch ----- 0
GoodesThornscrubTortoiseCATAGTTAGCATGAAGGGAACAATGGCACAGGGCTGGCCTTGAACATACAGACAAATATGTTGCCACAGGTGCACAAGT 4665
    
```

```

Majority -----
      8170      8180      8190      8200      8210      8220      8230      8240
Human    TCACCATGTTGGCCAGGCTGGTCTGGAACCTCTGACCTCAAGTGATACACTTACCTAGGCCTCCCAAAGTGTTAAGATTA 8232
Kakapo   ----- 0
GoldenEagle ----- 0
JapaneseQuail ----- 0
MediumGroundFinch ----- 0
GoodesThornscrubTortoiseCATGAACAAATGAGAGTTTTCTAATATTTGTATATTACTTGTGAAAGAGCATATTTGGGATTATGGAAGTGAACACAGCA 4745
    
```

```

Majority -----
      8250      8260      8270      8280      8290      8300      8310      8320
Human    CAGGCGTGAGCCACCACCCAGCCTATGCCATTAAATTTTCTACATAGATAATTTATACCCAATTGTTTTTAAATAGTT 8312
Kakapo   ----- 0
GoldenEagle ----- 0
JapaneseQuail ----- 0
MediumGroundFinch ----- 0
GoodesThornscrubTortoiseAATCTTTTTATTATGAAATAGACTCTTGAAAGTAGCACCCATAAAATAAAGTTCCAGCTGTACTAGAAACAACACTAGAT 4825
    
```

Monday, May 02, 2022 06:49 PM

```

Majority -----
      8330      8340      8350      8360      8370      8380      8390      8400
Human      TTCTTTCTTTTCTATCTGGATGCCATTTTTGTCTCCTTTTTTGTCTGTGGTATCCAGTACAATGTTTAATAGAAGTGT 8392
Kakapo     ----- 0
GoldenEagle ----- 0
JapaneseQuail ----- 0
MediumGroundFinch ----- 0
GoodesThornscrubTortoise@GCACAATTTTCAGCACTTTAACCCCTGTCAGTATCAGTCTCTTAGGGAATGCCCTGAATTGTGTGGACAAGGGTGAACCA 4905
    
```

```

Majority -----
      8410      8420      8430      8440      8450      8460      8470      8480
Human      TGAGAGAATATCTTTTCTTGCTCCTGATATTAGGGTGAGAACTCTAAAATTTCTTCCTTAACTGACACAGTTCACTAGT 8472
Kakapo     ----- 0
GoldenEagle ----- 0
JapaneseQuail ----- 0
MediumGroundFinch ----- 0
GoodesThornscrubTortoise@TGGGATAGTGTGCTTGGACTTTTCAGAAAGTCTTTATCAAGGTCTCTCACTAAAGGCTCTTAAACAAGCTAAGTAGTCAT 4985
    
```

```

Majority -----
      8490      8500      8510      8520      8530      8540      8550      8560
Human      GAAGCCATGTGGGGCCAGATGTTTGTGTTTGTTCGGGAGGTTTTTAAACTACATATTCAACTTATTTAATAGATATAGGGCTA 8552
Kakapo     ----- 0
GoldenEagle ----- 0
JapaneseQuail ----- 0
MediumGroundFinch ----- 0
GoodesThornscrubTortoise@GGATAAGAGGGAAGGTCCTCTCATGGATAAGTAACTGGCTGAAAGATGGGAAACAAGGGAGGAATAAATGGTCAGTTTT 5065
    
```

```

Majority -----
      8570      8580      8590      8600      8610      8620      8630      8640
Human      TTCAGTTTGTTTAGTTCTTCTTGAGTGAACCTTTGGTAATTTGTATCTTCTGTAGAACTAGTCCATTTCCCTTTAAGTTGCT 8632
Kakapo     ----- 0
GoldenEagle ----- 0
JapaneseQuail ----- 0
MediumGroundFinch ----- 0
GoodesThornscrubTortoise@AGAATGGAGAGAGGTGAATATTGGTGTCCCTGAGAGATCTGTACTGGGACCAGTACTGGTCAAGGTATTTGTAAATGAT 5145
    
```

Monday, May 02, 2022 06:49 PM

```

Majority -----
      8650      8660      8670      8680      8690      8700      8710      8720
Human      GAATGTATTTGTGTAGAGTTGTTTCATGATACTACTATTTTTTTTTTTTTTTTTTTTTTTTGGAGACGGAGCCTTGCTCTGTGCG 8712
Kakapo     ----- 0
GoldenEagle ----- 0
JapaneseQuail ----- 0
MediumGroundFinch ----- 0
GoodesThornscrubTortoise @TGGAAAAAGGGGTAAACAGGGAGGTGGAAAAGTTGCAGATGATATAAAATTACTTTAAAATAGTTAAATCCAAAACAG 5225
    
```

```

Majority -----
      8730      8740      8750      8760      8770      8780      8790      8800
Human      CCCGGGCTGGAGTGCAGTGGCACCATCTCGGCTCAATGCAACCTCCACGTCCTCCGGGTTACGCGGTTCTCCTGCCTCAGC 8792
Kakapo     ----- 0
GoldenEagle ----- 0
JapaneseQuail ----- 0
MediumGroundFinch ----- 0
GoodesThornscrubTortoise @ATTGCGAAGAGTTACAAAGGGATCTCACAAAACGGGAGATTGGGCAACAAAATGGCCAATGAAATTCAGTGTGATAAA 5305
    
```

```

Majority -----
      8810      8820      8830      8840      8850      8860      8870      8880
Human      ATCCAAGTAGCTGGGATCACAGGCACACACCACCACACCTGGCTAATTTTTTGTATTTTGTAGTAGAGACGGGGTTTCAC 8872
Kakapo     ----- 0
GoldenEagle ----- 0
JapaneseQuail ----- 0
MediumGroundFinch ----- 0
GoodesThornscrubTortoise @GCAAAGTAATACATATTGGAAAATATAATCCCAACTATACATACAAAATGATGGGGTCTATAATTAGCTGTCACCATTC 5385
    
```

```

Majority -----
      8890      8900      8910      8920      8930      8940      8950      8960
Human      TATGTTGGCCAGGTTGGTCTCGAACTTGTGATCTGCCCGCCTGCCTCACAAAGTGTCTGGGATTACAGGCGTGAGCCACT 8952
Kakapo     ----- 0
GoldenEagle ----- 0
JapaneseQuail ----- 0
MediumGroundFinch ----- 0
GoodesThornscrubTortoise @A----GAAAGAGCTCTTGGAGTCATTTGTGATTTTTTTTTTCCCCTGAAAACATCAGCTGAATGTCCAATGGCAGTCAAAA 5461
    
```

Monday, May 02, 2022 06:49 PM

```

Majority -----
          8970      8980      8990      9000      9010      9020      9030      9040
Human      GCGCCCAGCCATGATACTACATTTTACTACTTTTGGTATCTGTTGAATCCTTAGTGATGTCAGCTTTCTCATTCCCAGTA 9032
Kakapo     ----- 0
GoldenEagle ----- 0
JapaneseQuail ----- 0
MediumGroundFinch ----- 0
GoodesThornscrubTortoiseAGTTAAAACTTTAGAAAACAGTATGAAAGGGATAGATAAATAAGACAGTAAATATAATGCCA-TTGTATAAATCCATGGA 5540
    
```

```

Majority -----
          9050      9060      9070      9080      9090      9100      9110      9120
Human      GGGATAATTTGTGTCATCTTTTTTCTGTCTGCTGGATTGAAGTTTATTGATTTTATTAATCTCCAAAATACCAGCTT 9112
Kakapo     ----- 0
GoldenEagle ----- 0
JapaneseQuail ----- 0
MediumGroundFinch ----- 0
GoodesThornscrubTortoiseGTGCCCATAGCTATTGTGTACAGTTCTGGTTGCCCATCTTGAAAA-----AGGTATCTTAGAAATGGAAAAGACGGAGA 5615
    
```

```

Majority -----
          9130      9140      9150      9160      9170      9180      9190      9200
Human      TTGGTTTGAGTTTTCTCTGCTGTTTTTCTGTTTTCTATTTTATTGATTTCTGCTATTTTTATTTGTTTTGCTTTGTGGT 9192
Kakapo     ----- 0
GoldenEagle ----- 0
JapaneseQuail ----- 0
MediumGroundFinch ----- 0
GoodesThornscrubTortoiseAGGGCAATAAAAAATGATTGGGGTATGGAACAACCTCCTTATGAGAAGAGATTAAGATTGCACGGTTAGTCTGAAAAAAGA 5695
    
```

```

Majority -----
          9210      9220      9230      9240      9250      9260      9270      9280
Human      TAGTTTGATCTTCATTTTCTACTTAGTTAACATTGAAGTTAATGTCATTAACCTTAGTACTTTTACTTATATAGGGATTTA 9272
Kakapo     ----- 0
GoldenEagle ----- 0
JapaneseQuail ----- 0
MediumGroundFinch ----- 0
GoodesThornscrubTortoiseGCAACGAAGGTCTATAAAATCATGAATGGGGTAGAGGAAGTGAATAAGGAAGTGTGTTTATCCCTTCACATAACACAA 5775
    
```

Monday, May 02, 2022 06:49 PM

```

Majority -----
          9290   9300   9310   9320   9330   9340   9350   9360
Human      TTGCTGTATGTTTCCCTTTTAAAGTACCGCTTTCACGGCATTCTCAAATTTTGACACGTATATTTTATTCACTTCAAAA 9352
Kakapo     ----- 0
GoldenEagle ----- 0
JapaneseQuail ----- 0
MediumGroundFinch ----- 0
GoodesThornscrubTortoise GAACCAGGGGTCACCCAATTAATAATAGGCAGCAGGTTTAAACAAACAACACACAGTCAGCCTTTGGAATTTGTTGC 5855
    
```

```

Majority -----
          9370   9380   9390   9400   9410   9420   9430   9440
Human      TACTTTTTTAAATATTTCTTTGACCCATGGGTTATTGGAAAGTATGTTATTTATGTTATTTAATTTCCAAATATTTGGAG 9432
Kakapo     ----- 0
GoldenEagle ----- 0
JapaneseQuail ----- 0
MediumGroundFinch ----- 0
GoodesThornscrubTortoise GAGGGGATGTTGTGAAGGCCAGAGTATAACTGGCTTAAAAAAGAATTAGTTAAGTTCATGGAGGATGGGGCCAAAATGA 5935
    
```

```

Majority -----
          9450   9460   9470   9480   9490   9500   9510   9520
Human      TTTTCCATATATCTTTCTGTTATGTATTCATAATTTTAGTTTTATTTCTGGCCAGAGAACATATTTTCTAAGACTTGGATC 9512
Kakapo     ----- 0
GoldenEagle ----- 0
JapaneseQuail ----- 0
MediumGroundFinch ----- 0
GoodesThornscrubTortoise GTCGCTTGGGATGACTTGGAGCATGGATTAACGTCCAGTTGCAACTGTCTCCATCCATAATTTGATTTGTATCCCAT 6015
    
```

```

Majority -----
          9530   9540   9550   9560   9570   9580   9590   9600
Human      TTTGTAAACATGGAGACTTGTTTTGTGGTCCAAATATATATGTTGTTAAGTATTTCACTGAATACTCTGATGATTCTCTGC 9592
Kakapo     ----- 0
GoldenEagle ----- 0
JapaneseQuail ----- 0
MediumGroundFinch ----- 0
GoodesThornscrubTortoise AACTTTTGTGTCCTTTTTTTTCAAATCCACAAACCCACATGTCCCTCCTTGCTCTCCACTATCTCAGACAGAAGCATGA 6095
    
```

Monday, May 02, 2022 06:49 PM

```

Majority      -----
              |-----|
              |9610  9620  9630  9640  9650  9660  9670  9680|
              |-----|
Human          AGATTTGGAGAAATCTCTGTGCAGTTCTTTTCTCTGGTACTTTGACCTGTATGTAAACTCTAGTTACTTTGGTCTTCTCA 9672
Kakapo        ----- 0
GoldenEagle   ----- 0
JapaneseQuail ----- 0
MediumGroundFinch ----- 0
GoodesThornscrubTortoiseAGCCTGCACAGTTCTGCACTATTGTCTCAGGAGCATTGCAAGCACAGGGTTCACGATCCTGTAGTAGTTGCAGAGCTGCAAG 6175

```

```

Majority      -----
              |-----|
              |9690  9700  9710  9720  9730  9740  9750  9760|
              |-----|
Human          GGCTCTTGGCTCTTTTACAATTAAGTAGTCTTTGAGGCTCAGCCTGCTTTTCTCATAGCTATGCTATGGCCTGGACT 9752
Kakapo        ----- 0
GoldenEagle   ----- 0
JapaneseQuail ----- 0
MediumGroundFinch ----- 0
GoodesThornscrubTortoiseAGACCTGAATGGGTGGGTAGTGGGGGCATAAATGATTCCTTGAGGACAGATTGTCAAGGGACATAGCAAGAATCAATTG 6255

```

```

Majority      -----
              |-----|
              |9770  9780  9790  9800  9810  9820  9830  9840|
              |-----|
Human          CAAGGGAGTATAAGCTGAGGCAAACATGGACTCATTGTGTTTTCTAACTTTCAGGGATTATTGTCCATCATTGCCTGATGT 9832
Kakapo        ----- 0
GoldenEagle   ----- 0
JapaneseQuail ----- 0
MediumGroundFinch ----- 0
GoodesThornscrubTortoiseAATGTTGTTGGTGTGCATGGAACAGATGGAGATGGTGGAGCACCA-CTTCTGGACCTGAGAAACAAGCAATGACTGACTG 6334

```

```

Majority      -----
              |-----|
              |9850  9860  9870  9880  9890  9900  9910  9920|
              |-----|
Human          CCAGTGTCTTGAAAAGCAATTTATCTGTATAGTTGCTTGATTGTTTGGTGTGTTTCGGCGAGGCAAATCTGGGTCATGT 9912
Kakapo        ----- 0
GoldenEagle   ----- 0
JapaneseQuail ----- 0
MediumGroundFinch ----- 0
GoodesThornscrubTortoiseCTGAAATCGCATCGTAATGTAAGTTTGGGAAGATGACCAGTGGCTGAGGAACTTTCAGATGTATAAGGCCATGTGCCTGG 6414

```

Monday, May 02, 2022 06:49 PM

```

Majority -----
          9930      9940      9950      9960      9970      9980      9990      10000
Human      TATTCTGTCTTGACTGGAAGTAGAAGTCCACTGTTTTTTTTTAATTACATAATATGGTCTCAGCAGTTGTAGATCTACCT 9992
Kakapo     ----- 0
GoldenEagle ----- 0
JapaneseQuail ----- 0
MediumGroundFinch ----- 0
GoodesThornscrubTortoise ATCTGTGTAGGGAGCTTTCTCCAGCCCTCCGCCCAAGATACCAAATGAGAGCTGCGCTGACAGTGGAGAAGTGAGTGG 6494
    
```

```

Majority -----
          10010     10020     10030     10040     10050     10060     10070     10080
Human      CATTCTTTGTTAATGACAATGGAGGATACTCGTGTGGCTGCACCACAGTGTAGTTACTGGACATACCACAATTTAGTTTC 10072
Kakapo     ----- 0
GoldenEagle ----- 0
JapaneseQuail ----- 0
MediumGroundFinch ----- 0
GoodesThornscrubTortoise GCTCACAAGTGGAACACCTGATTGTTACCTGTCTGAAACCAATTTGGGGTCAGGAAATCCATGGCTGTTTTTCATGTGAG 6574
    
```

```

Majority -----
          10090     10100     10110     10120     10130     10140     10150     10160
Human      CTACATCGATGGACATTTAGGTTTGATTCCAGTTTGTGTTATAACATGTGGACATATTTAGAATAGAAGTAAAAATGCT 10152
Kakapo     ----- 0
GoldenEagle ----- 0
JapaneseQuail ----- 0
MediumGroundFinch ----- 0
GoodesThornscrubTortoise GTACAGAGCCTTTAAATGCCTCATGCTATGCAGGATTGTGACTGCAATGTGCAGGACATACTGGATGGCTTTGGAGCTG 6654
    
```

```

Majority -----
          10170     10180     10190     10200     10210     10220     10230     10240
Human      GTGTCAAATGAAATTTATACTTAAAGAGTTACTGAAAACCACAATGCCAGAACACTCATTTGTTTTTCACAAGTGTGTAT 10232
Kakapo     ----- 0
GoldenEagle ----- 0
JapaneseQuail ----- 0
MediumGroundFinch ----- 0
GoodesThornscrubTortoise GGGGTTTCCTGAACGTGGTGGAGCAACAGATGGCATGCATATCCCTATTTTGGCACCAGAACATGTTGCCACTGTATAC 6734
    
```



Monday, May 02, 2022 06:49 PM

```

Majority      -----
              |-----|
              |10250|10260|10270|10280|10290|10300|10310|10320|
              |-----|
Human          GGGAGTGCCTATTTTTCCATACCCCTGGCAATCTAGGTTTTATCAAATTTAAGAATACTAGCTTATTTTACACTAAAA 10312
Kakapo        ----- 0
GoldenEagle   ----- 0
JapaneseQuail ----- 0
MediumGroundFinch ----- 0
GoodesThornscrubTortoise GTTGGTAGAAAGGGCTCTTTTCTATGATTATGCAAGCATAGATGGATCACTGGGGATGCTTCATCGACATCAATGTCGG 6814

```

```

Majority      -----
              |-----|
              |10330|10340|10350|10360|10370|10380|10390|10400|
              |-----|
Human          ATTATTTTGTAAATTTATATTTTGAAATGGGTGAGGTTTTTCAGATTTGGTTATTTATATTTTCATTTTCTGTGAAGTGCCT 10392
Kakapo        ----- 0
GoldenEagle   ----- 0
JapaneseQuail ----- 0
MediumGroundFinch ----- 0
GoodesThornscrubTortoise GTCCAGGAAGGTACATGTCACTCACATCTTTAAGAACA--CAGGACTGTTTCAGAAAGCTACAAGCATGGACTCTTTGCCT 6892

```

```

Majority      -----
              |-----|
              |10410|10420|10430|10440|10450|10460|10470|10480|
              |-----|
Human          GTTTGTGTACTGGACCTAGTTAATTCAAATATATATATTTGAATTAAGTGATTTTATTGTTTAAAGTCCATTTGATGTGT 10472
Kakapo        ----- 0
GoldenEagle   ----- 0
JapaneseQuail ----- 0
MediumGroundFinch ----- 0
GoodesThornscrubTortoise ACTGGTGGATTGCCGCTGTCAATATTGAAATGCCAATCCTTTGCTCCCCTTTCTCATGAAGCCATAGATTGGTCACCTTG 6972

```

```

Majority      -----
              |-----|
              |10490|10500|10510|10520|10530|10540|10550|10560|
              |-----|
Human          AAACATTTTTCAGCTCAGCTTCTTCACCTTTTAAATTAGGATTTTAAATAGTTCACAAACTAGGTCTAATGTTAATGTAT 10552
Kakapo        ----- 0
GoldenEagle   ----- 0
JapaneseQuail ----- 0
MediumGroundFinch ----- 0
GoodesThornscrubTortoise ACAGACCAAGGAATGATTCACTACTGGATCAGCAGGTATTGAGTGACAGTTGAATGTGCATTTGGTCATTTGAAGGGTC 7052

```

Monday, May 02, 2022 06:49 PM

```

Majority -----
      |-----|
      |10570  10580  10590  10600  10610  10620  10630  10640|
      |-----|
Human  TTACATTTAGAAATATCCAAGTTTTTATGGCTTTAGGATACAAATGAAATCTCATTTCATTATTTTATAAATTTGCTGT 10632
Kakapo ----- 0
GoldenEagle ----- 0
JapaneseQuail ----- 0
MediumGroundFinch ----- 0
GoodesThornscrubTortoiseCTGGCGTTGCCTACTCACAAGATTGGACCTCAGGGAGAAAAATATCCCACAGCTGACTGCTGTGTCTGCCTAATATCT 7132
    
```

```

Majority -----
      |-----|
      |10650  10660  10670  10680  10690  10700  10710  10720|
      |-----|
Human  ATTACAGCTTTTCTTGATTTTAGACTTTTTTTTGTAGCTCAGTGAGACTATTAAGAAAGAATATTTGTGAGTTTGTAAATA 10712
Kakapo ----- 0
GoldenEagle ----- 0
JapaneseQuail ----- 0
MediumGroundFinch ----- 0
GoodesThornscrubTortoiseATAAAGCAAAGGGGAAAAGTTTCTGCTGGGATGGAGGGCAGAGGTGGAGTGGCTGCCTGCTGAATTTGAATGGGGCTAT 7212
    
```

```

Majority -----
      |-----|
      |10730  10740  10750  10760  10770  10780  10790  10800|
      |-----|
Human  GGAGATTTGTTGCATTCTTTTAAATGGCTTTTTATATCTCTCGTAATTTGTAATATCAGGGGTGTCATTTCTGTACTCT 10792
Kakapo ----- 0
GoldenEagle ----- 0
JapaneseQuail ----- 0
MediumGroundFinch ----- 0
GoodesThornscrubTortoiseAGAGAGATGAACATGGAGCTGTACAGCTCAGGGAGGCTTTGAAAGGCAATTTTAAACAGTGAGTGGAGTAATGTGTGGT 7292
    
```

```

Majority -----
      |-----|
      |10810  10820  10830  10840  10850  10860  10870  10880|
      |-----|
Human  TAACCATTTTGCCAAATGTGAAATCCTTGCAAAGTAATCGGCCATTACTTGGGAAGACAGAATTGTATGAAATGACTGTA 10872
Kakapo ----- 0
GoldenEagle ----- 0
JapaneseQuail ----- 0
MediumGroundFinch ----- 0
GoodesThornscrubTortoiseCATGTAGTATGCTCTATCTGGCCCTGCTCTTTTGTGGCCTGGTAGGAATTGTGTGGTGATTACTGTAC-ATGTAGGAATA 7371
    
```

Monday, May 02, 2022 06:49 PM

```

Majority -----
      |-----|
      |10890  10900  10910  10920  10930  10940  10950  10960|
      |-----|
Human  GAATAATTCAGGATGGTCCCAATACGGTAAAAATGTTAACTTTTTAGATGTAGATTTTAAAGTATGGTCAAATTTGTAGCA 10952
Kakapo ----- 0
GoldenEagle ----- 0
JapaneseQuail ----- 0
MediumGroundFinch ----- 0
GoodesThornscrubTortoiseGAACATTGTCAACTCACCTTCGCCATTGGGAGGTGAACTATCTCAAATTCACAGGTTAATTATTAATACTTAGAGGATT 7451
    
```

```

Majority -----
      |-----|
      |10970  10980  10990  11000  11010  11020  11030  11040|
      |-----|
Human  GTGTTCTTTAGTAAGTTAACTATTAATATATCAAGACCTATAACTGGACAATAATAAATAACCTGTTTCTTAAAATGTT 11032
Kakapo ----- 0
GoldenEagle ----- 0
JapaneseQuail ----- 0
MediumGroundFinch ----- 0
GoodesThornscrubTortoiseGTCTTGCCATGCTCTATTATGAGGAGAACATCACCAGACATTTAAATTTGTTTATTTTAACTAAAACAACAAGCAGCATAA 7531
    
```

```

Majority -----
      |-----|
      |11050  11060  11070  11080  11090  11100  11110  11120|
      |-----|
Human  AGCTTTTTCTAAATATTCTGAAAGTACTGGTTGTAAATGCTGAACTCACAATTTAAATTATGATATGACTATTGAATTC 11112
Kakapo ----- 0
GoldenEagle ----- 0
JapaneseQuail ----- 0
MediumGroundFinch ----- 0
GoodesThornscrubTortoiseGATTTTAAACAAAATAATCATATGCATTTTTGAATTTAGTTAAACATTCACGTTTTTTTAAATCAGGTTTGTTTTGTAA 7611
    
```

```

Majority -----
      |-----|
      |11130  11140  11150  11160  11170  11180  11190  11200|
      |-----|
Human  ATCCTCATTTGGCTTGCATAGAAAATTACAATCAAATAATGCTAAATGTAACTTTTTTGGTAATAGTTGTGTGTAACGGT 11192
Kakapo ----- 0
GoldenEagle ----- 0
JapaneseQuail ----- 0
MediumGroundFinch ----- 0
GoodesThornscrubTortoiseAATTTTAACTAAAGTAGTTAAATGAATTTAAAAAATTAATAGACTATGTCAGCCAGGTC AATATGAGAACTTAA 7691
    
```

Monday, May 02, 2022 06:49 PM

```

Majority -----
      |-----|
      |11210  11220  11230  11240  11250  11260  11270  11280|
      |-----|
Human  TG TTCATTATAGATGTGTTATTCAAACCTTTGGGTTTTTAGGTTTTGACTTTTCTTAAAATACTTTTCTTAAATGCTACT 11272
Kakapo ----- 0
GoldenEagle ----- 0
JapaneseQuail ----- 0
MediumGroundFinch ----- 0
GoodesThornscrubTortoise ATATTGGCTTCTGCAGCTAACTCAGTCGTCTTCACCTTAATTTTCTGTGTTTCATAATCTGGAAAAGAAAAACAAGCT 7771
    
```

```

Majority -----
      |-----|
      |11290  11300  11310  11320  11330  11340  11350  11360|
      |-----|
Human  TAATGCTTTTCTCTAGGGTATTTTTATTAGAAATTTCAATTAACAGATATTTTGATGTCTGCGAAATGACAGTACTATGTTA 11352
Kakapo ----- 0
GoldenEagle ----- 0
JapaneseQuail ----- 0
MediumGroundFinch ----- 0
GoodesThornscrubTortoise ATCCTGCTTTTTCAAATCCAAAAACAATTTCTCAATTTGGAATGAATTAGTCCAAAGAGAAAAATTTCTTTCTACTG 7851
    
```

```

Majority -----
      |-----|
      |11370  11380  11390  11400  11410  11420  11430  11440|
      |-----|
Human  GAAATTGATGTATTGGCTCCTTGAGGGCAGTGACCCTATTTGTTATGTTTGTTCCTCAATCATTAAATAGTACACATATTA 11432
Kakapo ----- 0
GoldenEagle ----- 0
JapaneseQuail ----- 0
MediumGroundFinch ----- 0
GoodesThornscrubTortoise ACAGAAGAAGCTACTGCTGTTTAAAGTGAGATTATCACTTCAACAGTCTCTGAATCAAATGCTTAAGTGACTTCTGCTG 7931
    
```

```

Majority -----
      |-----|
      |11450  11460  11470  11480  11490  11500  11510  11520|
      |-----|
Human  AATAGTACATATACACTTAATATTTAATAACTCTTAGAAGTGTCATAGGCTTTAATATGCTCATACTCTAATGAGCCATT 11512
Kakapo ----- 0
GoldenEagle ----- 0
JapaneseQuail ----- 0
MediumGroundFinch ----- 0
GoodesThornscrubTortoise CTGAAAGTGACTTTCTTTAAACATCATCAGCAAATAAATATTTCTGAATGGTTCCACCTTAGCTCTGAAGTTTATTAG 8011
    
```

Monday, May 02, 2022 06:49 PM

```

Majority -----
      |-----|
      |11530  11540  11550  11560  11570  11580  11590  11600|
      |-----|
Human  TATCAATAAAAAGATAAATAACAAGACTATGTCCTTTAGGACTTTAGTTAGAGAAATAAGGACTCAAGGTTTAAATTAAG 11592
Kakapo ----- 0
GoldenEagle ----- 0
JapaneseQuail ----- 0
MediumGroundFinch ----- 0
GoodesThornscrubTortoise@TGGTATTATGGAGGGATGATTGCTGGATGTCCATGTGATAGCTAACTCCTCTTCTTCAGCAGTTAAGGGTTGACCCTGG 8091
    
```

```

Majority -----
      |-----|
      |11610  11620  11630  11640  11650  11660  11670  11680|
      |-----|
Human  TGCTATATGGCTACAGTAGGAAAAGATTGGTTTGGGTTGGTAGGCTCAGAATAGTGGTCTGTGACCTAGCTAGATTGGGAG 11672
Kakapo ----- 0
GoldenEagle ----- 0
JapaneseQuail ----- 0
MediumGroundFinch ----- 0
GoodesThornscrubTortoise@ACGGAGTATTGAGAAATTTGCAAGAAAATGAGCTGGAGATAGTCTTGTCCCATTTTGTTTTTTTTAAATGTTTGTGAT 8171
    
```

```

Majority -----
      |-----|
      |11690  11700  11710  11720  11730  11740  11750  11760|
      |-----|
Human  ATAGGAGAAAAGAGTGGAGAGCAACAGGCGTTGAGAGAAGGACGTAACCAAAGTTGTGTCTATAGGTT--GGCATAAATTT 11750
Kakapo ----- 0
GoldenEagle ----- 0
JapaneseQuail ----- 0
MediumGroundFinch ----- 0
GoodesThornscrubTortoise@TAACTCTGTCATTCCATATTTCTCTCTTAAAGATCTCACTCAGTTCCTTCCAAATTTCAACAGCATCAGCAATAAAACA 8251
    
```

```

Majority -----
      |-----|
      |11770  11780  11790  11800  11810  11820  11830  11840|
      |-----|
Human  ACAGCCATTGATCAGTGAGTTGAATAGTTTGGCCTTTATGGCTAACAGCTTGTATATGGATATGAGAGAAAAGATAGAAT 11830
Kakapo ----- 0
GoldenEagle ----- 0
JapaneseQuail ----- 0
MediumGroundFinch ----- 0
GoodesThornscrubTortoise@CTATTTCCATGCATTTTGTTCAGGCTACAGAAATAGGCTTCAGAGTACTCAGCATGTGTTCAACATTGGGCTTAAAGAG 8331
    
```

Monday, May 02, 2022 06:49 PM

```

Majority -----
      11850      11860      11870      11880      11890      11900      11910      11920
Human  GGCAGATAGGTTATATAGAAGACCTCAATTACAGGTAGTGAAATTTGTACTTCATCTGGTAGGCATTATTCTATATACCT 11910
Kakapo ----- 0
GoldenEagle ----- 0
JapaneseQuail ----- 0
MediumGroundFinch ----- 0
GoodesThornscrubTortoiseAATGTTGAGAACTGTGACTGTGATCAAAATCGTGAAAAAAGTAGATGGCACTAACTGTCATCAGATTAGGCCAGTTCTT 8411
    
```

```

Majority -----
      11930      11940      11950      11960      11970      11980      11990      12000
Human  GTAATTTTCCACATAAAAAGTAGCTCATTACTCTGCTTTCTTTCTTTCTTTTTTTTTTTTTTTGCTATAGCAAATTTATTG 11990
Kakapo ----- 0
GoldenEagle ----- 0
JapaneseQuail ----- 0
MediumGroundFinch ----- 0
GoodesThornscrubTortoiseCATATAGTGCTCAAAAAGTCCACTACTGAGTTCCATCACACATCTGTGGGAGAGTTAGTGTGGTTCCCTCCACTTTTT 8491
    
```

```

Majority -----
      12010      12020      12030      12040      12050      12060      12070      12080
Human  TAACAACACAAAGTATTATCTTATAGTTTTGTAGGTGAGAAATCTGACACAGGTGGGCTAAAATCAAGGTGTTAGCAGGG 12070
Kakapo ----- 0
GoldenEagle ----- 0
JapaneseQuail ----- 0
MediumGroundFinch ----- 0
GoodesThornscrubTortoiseACAGAGCGGCTGCTGCAAAGTGGTTGTTACGGAAGTATTTTGCAGTTTCAACAACATTAACCTTTATTTCTGCAACACTG 8571
    
```

```

Majority -----
      12090      12100      12110      12120      12130      12140      12150      12160
Human  CTGTGTTTCCTTTTTGCAGGATCTGGGGGAATTTGTTTTCCTTGACATAACTCGGCTGTTAGCTTCATCTTCAAAGAAGGA 12150
Kakapo ----- 0
GoldenEagle ----- 0
JapaneseQuail ----- 0
MediumGroundFinch ----- 0
GoodesThornscrubTortoiseAAGTCTTTGGCTAGGAGGTGCATCAAAATGAGCACTGCAACGGTATGTTATTAGCTTGGGACTCTCTTTTAAATAAATTTCT 8651
    
```

Monday, May 02, 2022 06:49 PM

```

Majority -----
      12170      12180      12190      12200      12210      12220      12230      12240
Human  ATGGCAAAGAAGACTCTGTCTCACATCACATCACTCCGACACATTCTTGTGCCTCCGTTTCCCACTTACAGGGACCTTGT 12230
Kakapo ----- 0
GoldenEagle ----- 0
JapaneseQuail ----- 0
MediumGroundFinch ----- 0
GoodesThornscrubTortoise@CTCATCTTGGCTGCATTTTCAGCATTGTCTGTGACCAAGCTGCATACTAGACATTTGAATTTTTTTTCCAAGTTCGTTAT 8731
    
```

```

Majority -----
      12250      12260      12270      12280      12290      12300      12310      12320
Human  GATTACAATGGGCCAACTACATAATAGAGGATAAATGT-TTAAATTACAAATTAATGAAGTGGCAACTGAAACAAGTTT 12309
Kakapo ----- 0
GoldenEagle ----- 0
JapaneseQuail ----- 0
MediumGroundFinch ----- 0
GoodesThornscrubTortoise@GCTTTTACTGCTACTTGTAAAGTATTCTGCTCTATGTGCATTTCCCTGATGTATCAATGTTTTCTACAAGGAAACATTCCC 8811
    
```

```

Majority -----
      12330      12340      12350      12360      12370      12380      12390      12400
Human  TAACCTATTCTCAAGAAAGGGCTTTGCTGGAATGGTGGCTCACACCTGTAATCCCAGAACTTAGGGAGGCTGAGGCAGGC 12389
Kakapo ----- 0
GoldenEagle ----- 0
JapaneseQuail ----- 0
MediumGroundFinch ----- 0
GoodesThornscrubTortoise@TCTTCCATTATCACACAAGCACATACAACAGGATCATTTGTGGACGTTGCTCCACCCATCAAGACTCGGGTTAACAGTTT 8891
    
```

```

Majority -----
      12410      12420      12430      12440      12450      12460      12470      12480
Human  AGATCACTTGAGCCCAGGAGTTTGAGACCAGCCTGGTCCCTCATAGCAAGACCCCATCTCTACAAAACTTTTAA---AAA 12466
Kakapo ----- 0
GoldenEagle ----- 0
JapaneseQuail ----- 0
MediumGroundFinch ----- 0
GoodesThornscrubTortoise@ACTCTCTCTGGCCGTGGTTCACTGCTCCAGGCCAATGGGAGCTGCTGGAAGCGGTGGCCAGTACGTCCCTCAGTCCGTG 8971
    
```

Monday, May 02, 2022 06:49 PM

```

Majority -----
      12490 12500 12510 12520 12530 12540 12550 12560
Human    TTAGATAGATCTGGTGGCATGGGCCTGTAGTCCCAGCTACTTGGGAGGCTGAGACAAGAGGATCACCTGAGCCCAGGCGG 12546
Kakapo   ----- 0
GoldenEagle ----- 0
JapaneseQuail ----- 0
MediumGroundFinch ----- 0
GoodesThornscrubTortoiseCGCAGCTAGTGGGAGCCGCGATAAGCTGAACCTACGGACGCGGCAGGTAAACAAACCGGCCCTAGCTACCAGGGGCTTT 9051
    
```

```

Majority -----
      12570 12580 12590 12600 12610 12620 12630 12640
Human    CAGTGAGCTATGATTGTATCACTACTCCAGCCTGGGCGAGAGGAGATCCAGTCTCAAAAAAAAAAGGAAAAGGGCTTTC 12626
Kakapo   ----- 0
GoldenEagle ----- 0
JapaneseQuail ----- 0
MediumGroundFinch ----- 0
GoodesThornscrubTortoiseCCCTACACGAGCGGCGTCCCAATTTTGGGAAACACTGCCATAGAATAACAACTATATATTTTTCTCAAACATGAGAATTC 9131
    
```

```

Majority -----
      12650 12660 12670 12680 12690 12700 12710 12720
Human    CTGAGGGTCAAATGAAGTACAGTTGACCCTTGAACAACATGATTTTGAATTACACAGGTCCACTTATGCATAGATCCACT 12706
Kakapo   ----- 0
GoldenEagle ----- 0
JapaneseQuail ----- 0
MediumGroundFinch ----- 0
GoodesThornscrubTortoiseAGAATAGTCCAGAAGGAAGACAAGCAGTCCTTAAGAAAGAACTATGAAATAAAAAAATTTACCAACCTGCAGATCCTGT 9211
    
```

```

Majority -----
      12730 12740 12750 12760 12770 12780 12790 12800
Human    TATACAGAAATTTTCTCTCCCTCTTCCACCCAAGACAGAAAGACCAACTCGTCTCTTCCCTCTTAGCCTACTCAGCGTG 12786
Kakapo   ----- 0
GoldenEagle ----- 0
JapaneseQuail ----- 0
MediumGroundFinch ----- 0
GoodesThornscrubTortoiseGTGTCAGACATGTTCCCTTTCATCATCTTTAACGCAACTTTCCTGAGAAGGATCATTTCTCATGATGTTGTTTCATTT 9291
    
```



Monday, May 02, 2022 06:49 PM

```

Majority -----
      12810  12820  12830  12840  12850  12860  12870  12880
Human      AAGACAGTCAGGATGAAGACCTTTATTATGACTGATCTCCAAAAAGATTGGCTTCAGTATTTTCATGGAGTGCTATGAATT 12866
Kakapo     ----- 0
GoldenEagle ----- 0
JapaneseQuail ----- 0
MediumGroundFinch ----- 0
GoodesThornscrubTortoise GAGTAATCAGGCCTTGCATTTCTTTGTGGCCCTGTTTGCATTTTGCACGCATGCGCGTCTTACTCACAGGAAGAGGAACT 9371
    
```

```

Majority -----
      12890  12900  12910  12920  12930  12940  12950  12960
Human      AGAATCCTGAGTCTCTATATTGTTAATTATTTTAGTCTCTTGGTC--TACGTGTGTTCCTAAACTGTAGTAGCTTTCTTA 12944
Kakapo     ----- 0
GoldenEagle ----- 0
JapaneseQuail ----- 0
MediumGroundFinch ----- 0
GoodesThornscrubTortoise GCATTAAAAATATTTCCAAACTGGGTTTCTTTTACGGCCTGCTGCCATTATAGGTTTTCTTTCTAGTGAGAGAATGGTAT 9451
    
```

```

Majority -----
      12970  12980  12990  13000  13010  13020  13030  13040
Human      ATTTAGTTCTAGGCATACTACATTAGGGGATAAGGTGGTTAAGTGATATTTTCACTTTAAAAGTAATAAGGTGTCACAGA 13024
Kakapo     ----- 0
GoldenEagle ----- 0
JapaneseQuail ----- 0
MediumGroundFinch ----- 0
GoodesThornscrubTortoise AGTAGATCACAGATCAATGAAGGCTACACTCAGAAAGACCTCAAAACTTCTGGAATATGCTGCTCAGACAGTTTCGCCTT 9531
    
```

```

Majority -----
      13050  13060  13070  13080  13090  13100  13110  13120
Human      AAGTTATCACGAGATTTTTTTGAGCAGTACTTCTTTTTTAAAACATATAATGAATTTTAGACACAATAGTATCATGAA 13104
Kakapo     ----- 0
GoldenEagle ----- 0
JapaneseQuail ----- 0
MediumGroundFinch ----- 0
GoodesThornscrubTortoise AGTTTCTACTGCCTGTCCCTCACTTCTCATATTTATCTCCAGGCTTCTTCCCCTTGTCAGATGAATGTTGGGGGCAGAA 9611
    
```

Monday, May 02, 2022 06:49 PM

```

Majority -----
      13130  13140  13150  13160  13170  13180  13190  13200
Human    CCATTGTGTATCTATCATTTCAGTCCCAAAACCATTAGTAACCCATAGCTAAAATGATGATATCCACACTCTGCTTTTCC 13184
Kakapo   ----- 0
GoldenEagle ----- 0
JapaneseQuail ----- 0
MediumGroundFinch ----- 0
GoodesThornscrubTortoise @AGAACTTTTTGAACTTTGCACATTTAGAGAGAGGTCAGAGATTGACTCTGTGTACACAAGTTTGCAGAGGGACAGTAG 9691
    
```

```

Majority -----
      13210  13220  13230  13240  13250  13260  13270  13280
Human    ACTTCTGTTATTTTGAGATAAAATTCAGATATTCATATTTGTTTTATCTGTAAAGGCTTCAGTGTATATCTTTAAAGAATA 13264
Kakapo   ----- 0
GoldenEagle ----- 0
JapaneseQuail ----- 0
MediumGroundFinch ----- 0
GoodesThornscrubTortoise @GTTGAGGCTGTTATTTCTCACCTCTATATATGATTTATTTATTAATAAATATTTGTTGTTAACAAGTGTGTTATCTC 9771
    
```

```

Majority -----
      13290  13300  13310  13320  13330  13340  13350  13360
Human    GGGACTCTCCTCTCCTTTTTAAATATAATCAAAGACTGTTAGGACACACACACAAAGTTACCTCATAATTATAAAATGT 13344
Kakapo   ----- 0
GoldenEagle ----- 0
JapaneseQuail ----- 0
MediumGroundFinch ----- 0
GoodesThornscrubTortoise @GGAAACACAAATCCAGTTTGAGAACTGCAAAGCTAAGCATCTTTGATGGTGTTCCTAGACCAGTGCTTCTCAAAGTGG 9851
    
```

```

Majority -----
      13370  13380  13390  13400  13410  13420  13430  13440
Human    CAAATTTGTATTAAAATTTCTAATTGCTCTATAAAAGTCATAGTATTTTTATAGGGTTTTTTTTTTAGTGGGGGAAGGA 13424
Kakapo   ----- 0
GoldenEagle ----- 0
JapaneseQuail ----- 0
MediumGroundFinch ----- 0
GoodesThornscrubTortoise @GGTCTG---CAGACTGGTGCCGGTCCACGAGCCATCAGCTGCCAGTCCGCAACGAGTTTCCTCATAAGAGCGTCAAAT 9927
    
```

Monday, May 02, 2022 06:49 PM

```

Majority      -----
              |-----|
              |13450  13460  13470  13480  13490  13500  13510  13520|
              |-----|
Human          GTCACGATAAAATAAGATCAGCAAATTTAACAGGTCGTTATTACCTCTTAAATATCTTTTAATGTACAAGCTCTCCGTTTC 13504
Kakapo        ----- 0
GoldenEagle   ----- 0
JapaneseQuail ----- 0
MediumGroundFinch ----- 0
GoodesThornscrubTortoiseAGGATAATAACATGGCACCTGTCCCTGACACATTGGGGAAAAAAAAAATTGCTGGTCCCCACATCAGATAGTGCTCAGTC 10007

```

```

Majority      -----
              |-----|
              |13530  13540  13550  13560  13570  13580  13590  13600|
              |-----|
Human          CTGTTTTTTGTTTTTTTTTAAAGTTGCATTTTCATTTGTTGAAGAAAACCTGGTTATTGGTCTTACACAGTTGCCTATAGAC 13584
Kakapo        ----- 0
GoldenEagle   ----- 0
JapaneseQuail ----- 0
MediumGroundFinch ----- 0
GoodesThornscrubTortoiseTAGAACAGTGCTTCTCAAGCTAAGTCCCATTGGGTAGATAGAAGATGAACCTAAATAATCTATACAGAAGCCCCTGGAA 10087

```

```

Majority      -----
              |-----|
              |13610  13620  13630  13640  13650  13660  13670  13680|
              |-----|
Human          TACATTTACTGATTGCGTTATGATTTTGTAATTTAGTATGTTTTCCATATTTCCAGTAAATTGGTAGTTAGATCTAGAGA 13664
Kakapo        ----- 0
GoldenEagle   ----- 0
JapaneseQuail ----- 0
MediumGroundFinch ----- 0
GoodesThornscrubTortoiseATCCATAAAATTGGGTCCCTAATCCATGCACTGTTGGAACCTCTTAACGAAACTTTTCTTAAACATTACATGAATATATT 10167

```

```

Majority      -----
              |-----|
              |13690  13700  13710  13720  13730  13740  13750  13760|
              |-----|
Human          CTTGCTCAGGGTCTCTATTTTTTTGGTAATATTTTTAAGTGGTGGGTTTTTTATTTCTGTTAGACATGGTTTCTGACTTTT 13744
Kakapo        ----- 0
GoldenEagle   ----- 0
JapaneseQuail ----- 0
MediumGroundFinch ----- 0
GoodesThornscrubTortoiseCTCTCATACTATAGAATTAGAATTTATAATCCCTATTCCATGAGGAGATACATTATAGTTCAAAGGTATCTTTATTAATA 10247

```

Monday, May 02, 2022 06:49 PM

```

Majority -----
                |-----|
                |13770  13780  13790  13800  13810  13820  13830  13840|
                |-----|
Human           |CGTGTATGTCATGTTTTTCCCAGGAACATTTCTTATACTTTACCTTGTTTGTGCTAGGCATAGTCTGTGCTCAATAATTG| 13824
Kakapo         |-----| 0
GoldenEagle    |-----| 0
JapaneseQuail  |-----| 0
MediumGroundFinch |-----| 0
GoodesThornscrubTortoise|eTGTCCTTTAGATAAGATGCTTTTTGAGGGGGAAAAGCATATCAAAAATCCAATTTTAAATTTAAAAAAATCCATTTTTTT| 10327
    
```

```

Majority -----
                |-----|
                |13850  13860  13870  13880  13890  13900  13910  13920|
                |-----|
Human           |TTCCTTTTTTTTTTCTTTTTTTTTTTTTTTTTTCTCCTGCTTTTTGAGAGACAAGAGTCTTGCCCTGTTGCCCAGGCTGGA| 13904
Kakapo         |-----| 0
GoldenEagle    |-----| 0
JapaneseQuail  |-----| 0
MediumGroundFinch |-----| 0
GoodesThornscrubTortoise|eTAAAAATAATTGATTTTTATCCACCCTGGTATTTACGGTTCCCAGAAGCCTGAAAGGCAAAACCTCTGTGGGCTCTCCCC| 10407
    
```

```

Majority -----
                |-----|
                |13930  13940  13950  13960  13970  13980  13990  14000|
                |-----|
Human           |GTGCAGTGGCCCAATCTCAGCTCAGTGCAACCTCTGCCTCCCGGATTCAAGCGATTCTCCTGCCTCAGCTTCCCAAGTAG| 13984
Kakapo         |-----| 0
GoldenEagle    |-----| 0
JapaneseQuail  |-----| 0
MediumGroundFinch |-----| 0
GoodesThornscrubTortoise|eTAGGTGAACTCCTAGGCAAACCTCCTCTGTTTGCTTCTCCTCTGTTCAGTCTCACTAGGTTGGCAGCTGGCTGCCTTTT| 10487
    
```

```

Majority -----
                |-----|
                |14010  14020  14030  14040  14050  14060  14070  14080|
                |-----|
Human           |CTGGAACTACAGGCGCCTGCCACTACACCTGGCTAATTTTTGTGTTTTTAGTAGGGATGGGGTTTCACCACGTTGGCCAG| 14064
Kakapo         |-----| 0
GoldenEagle    |-----| 0
JapaneseQuail  |-----| 0
MediumGroundFinch |-----| 0
GoodesThornscrubTortoise|aTAAGGCTGCTGGCTCAAACAAGTTACCCAGGTTTGAAGCCTCACCTGGTTCACACTTCAGTCAACCACTCAGGACTCA| 10567
    
```

Monday, May 02, 2022 06:49 PM

```

Majority -----
                |-----|
                |         |         |         |         |         |         |         |
                |14090  |14100  |14110  |14120  |14130  |14140  |14150  |14160  |
                |-----|-----|-----|-----|-----|-----|-----|-----|
Human           |GCTGACTTGGAACTCCTGACCTCAAGTGATCTGCCACCTTGGCTTCCCAAAGTGCTGGGATTATAGGCATGAGCCACTG| 14144
Kakapo         |-----|-----|-----|-----|-----|-----|-----|-----|
GoldenEagle    |-----|-----|-----|-----|-----|-----|-----|-----|
JapaneseQuail  |-----|-----|-----|-----|-----|-----|-----|-----|
MediumGroundFinch|-----|-----|-----|-----|-----|-----|-----|-----|
GoodesThornscrubTortoise|CAGGAACAAAGTTCTCCAAGTCACACTTTTCAAACAGGCATGCAGTCAAGCAGTCCCTGCAGTTAGCAGCAGTCAAACA| 10647
    
```

```

Majority -----
                |-----|
                |         |         |         |         |         |         |         |
                |14170  |14180  |14190  |14200  |14210  |14220  |14230  |14240  |
                |-----|-----|-----|-----|-----|-----|-----|-----|
Human           |TGCCTGGCCAATAAGTGTCTCTTAATGAGTATTCTTAAAGGATATCTAAAAAGAAATGTAACCTAAAATTCACATAATAG| 14224
Kakapo         |-----|-----|-----|-----|-----|-----|-----|-----|
GoldenEagle    |-----|-----|-----|-----|-----|-----|-----|-----|
JapaneseQuail  |-----|-----|-----|-----|-----|-----|-----|-----|
MediumGroundFinch|-----|-----|-----|-----|-----|-----|-----|-----|
GoodesThornscrubTortoise|TAGCCAAACAATGGTCACAGCAGACAGACGCTCAAATCTTACCCACCAGCTCACAACACAGCCCCTCTAATGCAGCA| 10727
    
```

```

Majority -----
                |-----|
                |         |         |         |         |         |         |         |
                |14250  |14260  |14270  |14280  |14290  |14300  |14310  |14320  |
                |-----|-----|-----|-----|-----|-----|-----|-----|
Human           |TAATACTATACAGTATTAACATTTAATGTAAGTTGGAAC TATTGATGGTGGACAAGAATGTTTTCTTGTC AAGAACATAC| 14304
Kakapo         |-----|-----|-----|-----|-----|-----|-----|-----|
GoldenEagle    |-----|-----|-----|-----|-----|-----|-----|-----|
JapaneseQuail  |-----|-----|-----|-----|-----|-----|-----|-----|
MediumGroundFinch|-----|-----|-----|-----|-----|-----|-----|-----|
GoodesThornscrubTortoise|CTACCTCAAAGCACTGACCATAGTTTCTCTTGGATGGTCCCAGACAATTTCCCTGTTTGCTGCTCATCCTGAGTCCT| 10807
    
```

```

Majority -----
                |-----|
                |         |         |         |         |         |         |         |
                |14330  |14340  |14350  |14360  |14370  |14380  |14390  |14400  |
                |-----|-----|-----|-----|-----|-----|-----|-----|
Human           |GATTTAGAATGAAAAGATGAGGGTTTGACTTTTATAGCATTGAACAGGTTAACCTCTGAGCTTCAGTTTTATACATTTTT| 14384
Kakapo         |-----|-----|-----|-----|-----|-----|-----|-----|
GoldenEagle    |-----|-----|-----|-----|-----|-----|-----|-----|
JapaneseQuail  |-----|-----|-----|-----|-----|-----|-----|-----|
MediumGroundFinch|-----|-----|-----|-----|-----|-----|-----|-----|
GoodesThornscrubTortoise|TTCTGTCTCTGCTTCTCTGGCTCAGATGCTCCATGGGTGTGGAGGAGGAGACCCTGAAGGCTGCAGTGGCAGCAGCTG| 10887
    
```

Monday, May 02, 2022 06:49 PM

```

Majority -----
      14410   14420   14430   14440   14450   14460   14470   14480
Human AAATGGTTTCAGTTGTACCTACTTCCAAAATTATTTTGAATGTTAGATGAGATGAGGAAAAGACTTATGCTGAAAGGATG 14464
Kakapo ----- 0
GoldenEagle ----- 0
JapaneseQuail ----- 0
MediumGroundFinch ----- 0
GoodesThornscrubTortoiseGAGATAAAACATATGGATGTACTATTGTCTGTGTAGTCACGATGGAAAGTGACATTTAATATGCAGAACTCACTCTCTTT 10967
    
```

```

Majority -----
      14490   14500   14510   14520   14530   14540   14550   14560
Human AGAATGGTTTGTGTTGTAGTTCTTTAATCTGTAAATCTACATTTGGAAGGAACACTTTTATGGAAATCAAATACAGTAAA 14544
Kakapo ----- 0
GoldenEagle ----- 0
JapaneseQuail ----- 0
MediumGroundFinch ----- 0
GoodesThornscrubTortoiseGCTCCCTAAAGTTTTAGGCACTATATTCTCAGTTCTGCTTGGGGTATTTTGTGCACCATGCCAGTCACAGGACCAGTCGT 11047
    
```

```

Majority -----
      14570   14580   14590   14600   14610   14620   14630   14640
Human TTAATTTCTAAGAGGTCTGGAGTTCAGGTTAAAAATAGCCTCAGACAGCACTAAATATCTTTATTAGTGAACAAAAAAA 14624
Kakapo ----- 0
GoldenEagle ----- 0
JapaneseQuail ----- 0
MediumGroundFinch ----- 0
GoodesThornscrubTortoiseGTTGAGTAGTGCCCCACCCACGCTAGAGTTTGGGGAAATGAGGAAAGAATTATTCGGTTGCATGAATCTAAAAGTATA 11127
    
```

```

Majority -----
      14650   14660   14670   14680   14690   14700   14710   14720
Human TAAAAATAACTTGAATTTAGCACAGAGAAGCAAAGAGATGAAAATAGGAGAAGCGTTAAAAATGTGTTGGAAAGGAAGA 14704
Kakapo ----- 0
GoldenEagle ----- 0
JapaneseQuail ----- 0
MediumGroundFinch ----- 0
GoodesThornscrubTortoiseGTTGTAATGACACTGAATTCTGGTTCTGTTTTCCACAGGCAGGAGTGGCTTTTAGATCAGGAGTGAGCAAACATTTTGGCCT 11207
    
```

Monday, May 02, 2022 06:49 PM

```

Majority -----
                |-----|
                |14730  14740  14750  14760  14770  14780  14790  14800|
                |-----|
Human           |GAAGTTCTAACAAACATCTAATTAGCGTTCCAGAAATTAAGATTGCAGAAAGGCCAAAATTTGAAATGCTAAAGGCTGAT| 14784
Kakapo          |-----| 0
GoldenEagle    |-----| 0
JapaneseQuail  |-----| 0
MediumGroundFinch |-----| 0
GoodesThornscrubTortoise |GAGGGCCACATCTGGGTATGGAAATTGTATGGTGGGCCATGAATGCTCACAAAACGGGGGTGGGGATGAGGACTCCAGCT| 11287
    
```

```

Majority -----
                |-----|
                |14810  14820  14830  14840  14850  14860  14870  14880|
                |-----|
Human           |AATTTTTCAGAATTGGTGAGCTATATGAGTTCTTAGATTTAGGAGGCACAAGAAAACCTGGACACATAACAGTAAAAGAG| 14864
Kakapo          |-----| 0
GoldenEagle    |-----| 0
JapaneseQuail  |-----| 0
MediumGroundFinch |-----| 0
GoodesThornscrubTortoise |GAGGGATGCAGACTCTGGGGATGAGGGGGTTGGGGTGCAGGAGGGGATCAGGGGTGCAGGCTCCGGGCGGCACTTACCTC| 11367
    
```

```

Majority -----
                |-----|
                |14890  14900  14910  14920  14930  14940  14950  14960|
                |-----|
Human           |CAGAGCACCAAAGACATAGAGATCTTTAAAGCAGCCAGAGAAAATCAGATTCCCTAAAGAATAAGAACTAGAAAAGT---C| 14941
Kakapo          |-----| 0
GoldenEagle    |-----| 0
JapaneseQuail  |-----| 0
MediumGroundFinch |-----| 0
GoodesThornscrubTortoise |AAGCTGCTCCCGTAAGTAGCGACATGTCTCTCCCTCCGGCTCTATGTGAAGGCATAGCCAGGCAGCTCTGCACACTGCC| 11447
    
```

```

Majority -----
                |-----|
                |14970  14980  14990  15000  15010  15020  15030  15040|
                |-----|
Human           |CTAATATGCTTCATCAGCATGGGCATCCAGAAGATAGTGGAAATAATATTTTCAATGTGTTGAGTGAAAATAGCTGCCCAC| 15021
Kakapo          |-----| 0
GoldenEagle    |-----| 0
JapaneseQuail  |-----| 0
MediumGroundFinch |-----| 0
GoodesThornscrubTortoise |CATCCACAGGTGCCCTCCCTGCAGTTCCTCCACTGGCCGTGGTTCCAGCCAATGGGAGCTGTGGGGCGGCATTTGGGGCGG| 11527
    
```

Monday, May 02, 2022 06:49 PM

```
Majority -----  
15050 15060 15070 15080 15090 15100 15110 15120  
Human CTGTTATTTTATAGCCAGCCAAATTATCATATAAGGAGAAGAACAAAATAAAGACACTTTTGGAAACACGTCATTCTGCC 15101  
Kakapo ----- 0  
GoldenEagle ----- 0  
JapaneseQuail ----- 0  
MediumGroundFinch ----- 0  
GoodesThornscrubTortoiseGGGCAGTGCAGAGCCCCCTGGCTGCCGTACATGTAGGAGCTGGAGGGAGGACATGCTGTTGCTTCCAGGAACGCGCAG 11607
```

```
Majority -----  
15130 15140 15150 15160 15170 15180 15190 15200  
Human TCCAAAAAAGCAATTTAGGAAATGTATCAACAGACCCACTGAAGGAATTTCTGGAGTTTGTACTTCAGGAAGAAAGCCAA 15181  
Kakapo ----- 0  
GoldenEagle ----- 0  
JapaneseQuail ----- 0  
MediumGroundFinch ----- 0  
GoodesThornscrubTortoiseAGCCACAACATGAGCGGAGCAGGGCAAGCCCCAGACCCCGCTTGCCGATGGGAGCTTGAGGGCCAGATTAAATAGTGGA 11687
```

```
Majority -----  
15210 15220 15230 15240 15250 15260 15270 15280  
Human TGACACCAGAAAGGAAGTCTGATATAGAAGTGAGGCTAATCAAGAAATTGGTAGGTCTGTGAGTAAATCTAATTACTGAC 15261  
Kakapo ----- 0  
GoldenEagle ----- 0  
JapaneseQuail ----- 0  
MediumGroundFinch ----- 0  
GoodesThornscrubTortoiseGAGGCTGTAGTTTGCACACCCCTGTTTTAGCTGATATCTTACTCCTGCAGGTAGATCAATCAAATATTTAATTTTAGCT 11767
```

```
Majority -----  
15290 15300 15310 15320 15330 15340 15350 15360  
Human CATATAAGAATGTAATAGCAGTGATTGATAAGGGGTTTTAAAAATAGAATTAATAATCATAACAATATGTGAGA 15341  
Kakapo ----- 0  
GoldenEagle ----- 0  
JapaneseQuail ----- 0  
MediumGroundFinch ----- 0  
GoodesThornscrubTortoiseCCTGAAGAAATTCCTTAAGTCTATATAAATTGTATATTTATGTATAACCTATGCATCTAATTCCTCAAGTATAAGTATTT 11847
```



Monday, May 02, 2022 06:50 PM

```

Majority -----
      15370  15380  15390  15400  15410  15420  15430  15440
Human   GAGTGGTAGAGACTGGAGTTTGAGTTCTGATGATCTAGTATTGATTGGAGCTGTGTTGTCTAGTTACAGTAGCTACTAG 15421
Kakapo  ----- 0
GoldenEagle ----- 0
JapaneseQuail ----- 0
MediumGroundFinch ----- 0
GoodesThornscrubTortoise @AAAAATGGATAAATCAGAAATTTGTATTTACCTGGCTTCTTTATAACCAAATTCAGATGGCTTAACTACTTTATATT 11927
    
```

```

Majority -----
      15450  15460  15470  15480  15490  15500  15510  15520
Human   TCATTTGTTACTGAGCACTTGACATGTATGTAGTTTAAGTTGATCTTCTACTTAATTGAAAAATACACATTTCTGAGCCT 15501
Kakapo  ----- 0
GoldenEagle ----- 0
JapaneseQuail ----- 0
MediumGroundFinch ----- 0
GoodesThornscrubTortoise @CATACCTGAGAAAATACTGCAATCTTCTCATTACAACTTTCCATTTCTCTCAACTGTA AAAATCTTGGCTAATCAAATA 12007
    
```

```

Majority -----
      15530  15540  15550  15560  15570  15580  15590  15600
Human   TAGTCTGAAAGAAGAATGTAAAATATCCCAAGTTTTCATATTGGTTACATGTACAGCGGATAATATTTTGGTATTTTGGG 15581
Kakapo  ----- 0
GoldenEagle ----- 0
JapaneseQuail ----- 0
MediumGroundFinch ----- 0
GoodesThornscrubTortoise @A-TAAAAATTCAGCCTGCCCAAACCATGGATTTAAGGTATTGTCTTCTGTACACAAATGATGATTTTACCTACCTGA 12086
    
```

```

Majority -----
      15610  15620  15630  15640  15650  15660  15670  15680
Human   TTAAATGAAATACATTATGTGTGTTGCCTTTTCCTCTTTTTTTCCTTTCTTTTAAAGATAGGGTCTTGCTCTGTCCAC 15661
Kakapo  ----- 0
GoldenEagle ----- 0
JapaneseQuail ----- 0
MediumGroundFinch ----- 0
GoodesThornscrubTortoise @CAGCAGTGAGTGCT----GGGTGAGAGAGTTAGGGCCCTAACTGAACTAATTAAGGATAGTCTGACAACCTCTGTGC 12161
    
```

Monday, May 02, 2022 06:50 PM

```

Majority -----
                |-----|
                |15690  15700  15710  15720  15730  15740  15750  15760|
Human           |CAGGCTGGAGTGCCGTGGCATGATCATGGCAGCCTCAACCTCCTGGGCTCCAGTGACCCTCCCACCTCAGCCTCCCAAGT| 15741
Kakapo          |-----| 0
GoldenEagle    |-----| 0
JapaneseQuail  |-----| 0
MediumGroundFinch |-----| 0
GoodesThornscrubTortoise|GTTAAGGACAATGGAAGTCTTGGGGAAAACATCAAGCTGGAGCGGAGGGAAATGAGCCCATCATTGGGACTCTACTTGT| 12241
    
```

```

Majority -----
                |-----|
                |15770  15780  15790  15800  15810  15820  15830  15840|
Human           |AGCTGGGACTACAGTTGTGTGCCACCACACCTGGCTAATTTTTGAGTTTTTTTTTTGTAGAGACAGCGTCTCGCTGTATCG| 15821
Kakapo          |-----| 0
GoldenEagle    |-----| 0
JapaneseQuail  |-----| 0
MediumGroundFinch |-----| 0
GoodesThornscrubTortoise|AGATGATGATGATGTATTTCGCTCACACTGAGGATTCCATTCTGGGGGAGGGAACCCAGTTATTAGGAAGAGACAGGTAA| 12321
    
```

```

Majority -----
                |-----|
                |15850  15860  15870  15880  15890  15900  15910  15920|
Human           |CTTAGGCTGGTCTCAAACCTCCTGGGCTCAAAGTGATCCTCCTGCTTTAGCCTTGCAAAGTGCTGGGATTACAGGACTGAGT| 15901
Kakapo          |-----| 0
GoldenEagle    |-----| 0
JapaneseQuail  |-----| 0
MediumGroundFinch |-----| 0
GoodesThornscrubTortoise|AGTAGTAGGAGATCTGATTATTAGAAATATAGATAGTTGGGTTTGTGATGATTGGGAATACAAATGGTGGATTGTCTGC| 12401
    
```

```

Majority -----
                |-----|
                |15930  15940  15950  15960  15970  15980  15990  16000|
Human           |CTGGCCACCTTTTTCTTTCTTTCTTTTTTTTTTAGACGGAGTCTCCCTTTGTTGCCAGGCTGGAGTACAGTGGCTCTAT| 15981
Kakapo          |-----| 0
GoldenEagle    |-----| 0
JapaneseQuail  |-----| 0
MediumGroundFinch |-----| 0
GoodesThornscrubTortoise|AGAGAGAAGGTTGTGGACGTCATGAGTCAATTTAGGTGAATTTTTGTGATGTGCTGGGAAGAACCAGTGATCATGGTAC| 12481
    
```

Monday, May 02, 2022 06:50 PM

```

Majority -----
                16010   16020   16030   16040   16050   16060   16070   16080
Human          CTCTGCTTCCTGCAAGCTCTGCCTCCTGGGTTTCAGCCATTCTCCTGCCTCAGCCTCCCGAGTAGCTGGGACTACAGGCG 16061
Kakapo         ----- 0
GoldenEagle    ----- 0
JapaneseQuail  ----- 0
MediumGroundFinch ----- 0
GoodesThornscrubTortoise ATGCAAGTACCAGTGACATAGGAAAAAGTAGGAAAGAGGTCTCGAAGCCAAATTTGGGCTACTTGGTAAGAGATTAAAG 12561
    
```

```

Majority -----
                16090   16100   16110   16120   16130   16140   16150   16160
Human          CCTGCCACCACACCCGGCTAATTTTTTGTATTTTTTAGTAGAGATGGGTTTTACCATGGTCTCGATCTCCTGACCTCCTGA 16141
Kakapo         ----- 0
GoldenEagle    ----- 0
JapaneseQuail  ----- 0
MediumGroundFinch ----- 0
GoodesThornscrubTortoise ATACAAGACCTCCTTGGTGGCATTTTCTGATATGCTTCCAGCTCCATGTGCAGGACTAGTTAGACAGGCAGAACTGCAGGA 12641
    
```

```

Majority -----
                16170   16180   16190   16200   16210   16220   16230   16240
Human          TCTGCCACCCTGGCTCCCAAAGTGTGGGATTACAGGCGTGAGCCACTGCGACCGGCCACTTTTTCTTTTTACTTTT 16221
Kakapo         ----- 0
GoldenEagle    ----- 0
JapaneseQuail  ----- 0
MediumGroundFinch ----- 0
GoodesThornscrubTortoise ATCTCAGTGTGTGGATGAAATGTTGGTGTGTTGAAGGAGGGATTTAGGTTTATTAGGAACTGGGGAACTTTTTGCGAGAGGA 12721
    
```

```

Majority -----
                16250   16260   16270   16280   16290   16300   16310   16320
Human          AAAAATGTGGCTAATAGAAATTTATGAGATTATATTTATGGTTCATACTACGTTTCTTTTGGACAGTGCCAGAGTGAATC 16301
Kakapo         ----- 0
GoldenEagle    ----- 0
JapaneseQuail  ----- 0
MediumGroundFinch ----- 0
GoodesThornscrubTortoise ATGAGCCTATCCTGGCAGAATGGGCTTCTCATAACCCAAAAGGGAACCAGATTGCTGGCATGTAAAATTA AAAAAGGTCGTA 12801
    
```

Monday, May 02, 2022 06:50 PM

```

Majority -----
                |-----|
                |16330  16340  16350  16360  16370  16380  16390  16400|
                |-----|
Human           |AGATAAGCTTGCATTTTAAAAATCCTAAGGGTAAATGCAATAGAGATAGAACGCAAATAATTGGGGAGGGGGGTGACTGA| 16381
Kakapo         |-----| 0
GoldenEagle    |-----| 0
JapaneseQuail  |-----| 0
MediumGroundFinch |-----| 0
GoodesThornscrubTortoise|GAGGAGGTTAGAAACTAAGAG--CTGAGGGAAAGCTGACGGGTGTATAGAAGCACACAGTTTAGAAAGAGACATTCCATA| 12879
    
```

```

Majority -----
                |-----|
                |16410  16420  16430  16440  16450  16460  16470  16480|
                |-----|
Human           |AATTAAAGATGTATAATCCAAAAGAAGGCAAAAAAAGGAAAGACACAAAGTGAGCTTATATGTTAATAGCGTGGAAAG| 16461
Kakapo         |-----| 0
GoldenEagle    |-----| 0
JapaneseQuail  |-----| 0
MediumGroundFinch |-----| 0
GoodesThornscrubTortoise|GAGGAGTATTTTATTAATGGGGTATTCTATATCCTAGTAAAGAGTAGGGGGTAGCAGCTGATGATAAAGTACAGGTAGG| 12959
    
```

```

Majority -----
                |-----|
                |16490  16500  16510  16520  16530  16540  16550  16560|
                |-----|
Human           |GTTCTATGAAGGGTGTGTTTAGAGCCTTTAAGGGCAAAATTTTCTTGTCTGGTTGCAGGAAAGAGTGGCATTGTTTTTGT| 16541
Kakapo         |-----| 0
GoldenEagle    |-----| 0
JapaneseQuail  |-----| 0
MediumGroundFinch |-----| 0
GoodesThornscrubTortoise|AAGTGAAGAGAAACAGTCAAATGAAAAAGATTCCCTTTAGTTACATCACATGAAAGCAGACATCTAAATATTAGCAAAT| 13039
    
```

```

Majority -----
                |-----|
                |16570  16580  16590  16600  16610  16620  16630  16640|
                |-----|
Human           |CACTTTTAAAGCTACAAAAACAAGTAATGATGAGGAAATTTGGGACATGTTGAGGAAGTAAGTAATTTTTTGGAAATGTAG| 16621
Kakapo         |-----| 0
GoldenEagle    |-----| 0
JapaneseQuail  |-----| 0
MediumGroundFinch |-----| 0
GoodesThornscrubTortoise|ATTATAAGTGCTTGTTTACAAATGCTAGAAATCTAAATACTTAAATGCGTGAAGTGGAGTGCCTGGTGTAAATGAAGAT| 13119
    
```

Monday, May 02, 2022 06:50 PM

```

Majority -----
                |-----|
                |16650  16660  16670  16680  16690  16700  16710  16720|
                |-----|
Human            |GTTGAGTTAGAGTAGTAGAAGACAAAATTTAAAAAGTAGTTTTTGACAGTAATATGGAGAGCTTTGAGTGCAAAGGATTT| 16701
Kakapo          |-----| 0
GoldenEagle     |-----| 0
JapaneseQuail   |-----| 0
MediumGroundFinch |-----| 0
GoodesThornscrubTortoise|ACTGGTATAACA-AGAATCACAGAAATTTTCGTGAGATGATGATAAAACAATGGCACAGAGTAATACCAGGGTACAAAATAT| 13198
    
```

```

Majority -----
                |-----|
                |16730  16740  16750  16760  16770  16780  16790  16800|
                |-----|
Human            |GCAGTGAGGACCTTTGAAAATTGAACCTGCTTTCTCCTATCAGTATTTATGTTTAAATAAACTTGATTCTTTGTGAGTAT| 16781
Kakapo          |-----| 0
GoldenEagle     |-----| 0
JapaneseQuail   |-----| 0
MediumGroundFinch |-----| 0
GoodesThornscrubTortoise|ATAGGAATAACAGAGTAGGTTGCACTGGGTGGGGGGGGGGGAGAGAGGAGAGAAAGTGGTACTGTATGTGAAAGA| 13278
    
```

```

Majority -----
                |-----|
                |16810  16820  16830  16840  16850  16860  16870  16880|
                |-----|
Human            |TGTTATATATGTTTTTCATAACTACTGTTGTAGTAACGTTTCTTTTTTTTTTACTAGCTTGCTTTCATGCCACGCTGTTGAT| 16861
Kakapo          |-----| 0
GoldenEagle     |-----| 0
JapaneseQuail   |-----| 0
MediumGroundFinch |-----| 0
GoodesThornscrubTortoise|CAGCATAGAATCGAATAAAGTAAAGTTTCATTCATTCAAGACAGTACCATAGAATATGTATGAGTAGAATTTCCATTCT| 13358
    
```

```

Majority -----
                |-----|
                |16890  16900  16910  16920  16930  16940  16950  16960|
                |-----|
Human            |TAAATATTTATGGGCCATTTTAAGGCTTCTAATCTTCATTTGTGATGAACTTTTGAGGAAGAGTTAGGTTTTGTAAGTGT| 16941
Kakapo          |-----| 0
GoldenEagle     |-----| 0
JapaneseQuail   |-----| 0
MediumGroundFinch |-----| 0
GoodesThornscrubTortoise|TAAATAACAGTATAGCAATAGTAATTGCTTGATCAGGATGGTGATGGTGATTGTGAAATGCTCAGGGAGATTAGCAGTTA| 13438
    
```

Monday, May 02, 2022 06:50 PM

```

Majority -----
                |-----|
                |16970  16980  16990  17000  17010  17020  17030  17040|
-----|-----|
Human      TGAACTCCAATAAAC-----ACAGTTCCTTCTCAGAAAGATACTTTGCTATTTGATACAGATAGTTGT 17016
Kakapo     ----- 0
GoldenEagle ----- 0
JapaneseQuail ----- 0
MediumGroundFinch ----- 0
GoodesThornscrubTortoiseCAAAAACAGAAAACCCAGTAATAATGGAGGATTTTCAGCTATGCTCATACTGACTGGGTAAATGTCACCTCAGGATGGAAT 13518
    
```

```

Majority -----
                |-----|
                |17050  17060  17070  17080  17090  17100  17110  17120|
-----|-----|
Human      CTAGGCAAGCTATTAGCAGGGTTTCAGGTAAGACATATGTGTTTGCTATTTGTTTTAAGCACTCTTCCCTCATTATTCA 17096
Kakapo     ----- 0
GoldenEagle ----- 0
JapaneseQuail ----- 0
MediumGroundFinch ----- 0
GoodesThornscrubTortoiseCAGAGAAATTTTTGGTCCCCATTTCATGACTGTTTCTTGAGGCAACTACTTCTGGGAACCCACAGGGGGAGAGGCAGTTT 13598
    
```

```

Majority -----
                |-----|
                |17130  17140  17150  17160  17170  17180  17190  17200|
-----|-----|
Human      AATTGTAGCAAACATCTACTACACCCATTTCCAGTTCTTTGTCTTAAATAGTTCAACTATTATAAAAAGGAGTGGTATATA 17176
Kakapo     ----- 0
GoldenEagle ----- 0
JapaneseQuail ----- 0
MediumGroundFinch ----- 0
GoodesThornscrubTortoiseCTGATTTAGTCCTAAATGGAACACAGGATCTGGTCCAACGAGTCAATATAGCCAAACTGCTCAGTAATAGCTACCATAAT 13678
    
```

```

Majority -----
                |-----|
                |17210  17220  17230  17240  17250  17260  17270  17280|
-----|-----|
Human      TATATATAAACTCTTGCTTGGCTTTGGTTTGATTGAATTAATAAGGTGAGTTTTTTTTGTTTGTGTTTGTGATGGAG 17256
Kakapo     ----- 0
GoldenEagle ----- 0
JapaneseQuail ----- 0
MediumGroundFinch ----- 0
GoodesThornscrubTortoiseATAATTAATTTTCACATCCTTGTAGGGGGGAAAATACCAAAGAAACCCACCACAGTAGCAGTTTAAGTTAAAAAAGGGGA 13758
    
```

Monday, May 02, 2022 06:50 PM

```

Majority -----
      17290  17300  17310  17320  17330  17340  17350  17360
Human      TCTCGCTCTGTTGCCAGGCTGGAGTGCAGTGGTGGGATCTCGGCTCACTGCAGGCCATTCTCCTGCCTC-AGCCTCCCG 17335
Kakapo      ----- 0
GoldenEagle ----- 0
JapaneseQuail ----- 0
MediumGroundFinch ----- 0
GoodesThornscrubTortoise ACTACACAAAAATGTGAGAGCTAGTTAAATTGAAATTTAAAGGAACAGTTATGAATGAAATGCTTGCATGGAAACTATTT 13838
    
```

```

Majority -----
      17370  17380  17390  17400  17410  17420  17430  17440
Human      AGTAGCTGGGACTGCAGGTGCCTGCCACCACACCTGGCTAATTTTTTGTATTTTTAGTAGAGATGGGGTTTCACCGTGTT 17415
Kakapo      ----- 0
GoldenEagle ----- 0
JapaneseQuail ----- 0
MediumGroundFinch ----- 0
GoodesThornscrubTortoise AAAACACCATAGCAGAAGCCAGACTAAATGTATATCCCAAATTTAAAAAAAATAAAAAAAAAATACAGTAAGAGGACCA 13918
    
```

```

Majority -----
      17450  17460  17470  17480  17490  17500  17510  17520
Human      AGCCAGGATGGTCTAGATCTCCTGACCTTGTGATCCGCCCGCTCGGAAATACTTTGCATTGTTGGATTGATTGGGTTTG 17495
Kakapo      ----- 0
GoldenEagle ----- 0
JapaneseQuail ----- 0
MediumGroundFinch ----- 0
GoodesThornscrubTortoise AGGCTAAACAATGAAGAGCCGGTTAGATGCAAAAAGACACACTTAAAAAAATTCATAATAAAATCCTACTGAGGATAACA 13998
    
```

```

Majority -----
      17530  17540  17550  17560  17570  17580  17590  17600
Human      AGCCCTGTTGTACTTAAGTGATTATGAACAAGTCTTTTATAATCTGAATTTCCCTTTCCTAGTTTGTAATATTGAGGAT 17575
Kakapo      ----- 0
GoldenEagle ----- 0
JapaneseQuail ----- 0
MediumGroundFinch ----- 0
GoodesThornscrubTortoise TAAACTAGCAAGTCAAGTGTAATGTAGAATGAGGCAGGACAAAAAGAATTTAAAGAGCAATTAGCAGAAAACACATCA 14078
    
```

Monday, May 02, 2022 06:50 PM

```

Majority -----
      |-----|
      |17610  17620  17630  17640  17650  17660  17670  17680|
      |-----|
Human  AATAATTTCTAACTTGCATGATTGTTGTGAAGATTAAATAAGACAATGATATTGGTAGGAGCTCTTTATAATCTTTCTCT 17655
Kakapo ----- 0
GoldenEagle ----- 0
JapaneseQuail ----- 0
MediumGroundFinch ----- 0
GoodesThornscrubTortoiseCCTTCGTATCAGTGCACATAACAAAATTCATGTGGGGTGGAGCCAAGGGGTTCGGAGTGTGGGAAGGGGCTCAGGCTGGG 14158
    
```

```

Majority -----
      |-----|
      |17690  17700  17710  17720  17730  17740  17750  17760|
      |-----|
Human  CTTATGTACAATTCAAATATATGTCCGTTTAAATACCAAATACCACCTTTAAAAAATCTGGGCTGAAATGGACACTTCTA 17735
Kakapo ----- 0
GoldenEagle ----- 0
JapaneseQuail ----- 0
MediumGroundFinch ----- 0
GoodesThornscrubTortoiseACAGGGTGCAGGGCTTGGGTGCAGGGCTCTGAGGGCTCCAGCTGTGGGTTTCAGGCTCTGGCGTGGGTCTGGAGATGGGCT 14238
    
```

```

Majority -----
      |-----|
      |17770  17780  17790  17800  17810  17820  17830  17840|
      |-----|
Human  ATGTAGGAGTAGTGCTTTAGAAAATAATGCTTTGTTTCGTATTCTTTTCCTAGTATTTTATGTCTAGTAACTCATAAGGA 17815
Kakapo ----- 0
GoldenEagle ----- 0
JapaneseQuail ----- 0
MediumGroundFinch ----- 0
GoodesThornscrubTortoiseCAGGGCTGGGGCAGAGGGTTGTGGTGCAGGGGTGTGAGGGCTCCGGCTGGAGGATGTGCTCTGGGATGAGGTCAGGGATG 14318
    
```

```

Majority -----
      |-----|
      |17850  17860  17870  17880  17890  17900  17910  17920|
      |-----|
Human  AAAAATGATCAGATAAGTATATTTTTAGATGCTGATTACAGCATTATTTAAATAGTAGAAATAACAACCTGTTTCAGTGAT 17895
Kakapo ----- 0
GoldenEagle ----- 0
JapaneseQuail ----- 0
MediumGroundFinch ----- 0
GoodesThornscrubTortoiseAGGGGCTCAGGGCTAGAGAAAGGATTGGGGTACAGGAGTTGAGGGCTCAGAGGTGGGACTGGAGATGAGGGGTTTGGAGGT 14398
    
```



Monday, May 02, 2022 06:50 PM

```

Majority -----
                |-----|
                |17930  17940  17950  17960  17970  17980  17990  18000|
                |-----|
Human           |AAGACAATGAATAAATTCTGTTCATAAACATTACAAATGTTTTTTTAAATATTTTTTCATATGTGTGAAAAGTAGGATTAAA| 17975
Kakapo         |-----| 0
GoldenEagle    |-----| 0
JapaneseQuail  |-----| 0
MediumGroundFinch |-----| 0
GoodesThornscrubTortoise|CAGGAGCGTGCTTAGGGGCTACAGCTGGGAGAGAGGACCCCACTCTCTCTCCCGCAGCAGCAGCAGCACCAGC| 14478
    
```

```

Majority -----
                |-----|
                |18010  18020  18030  18040  18050  18060  18070  18080|
                |-----|
Human           |AATAACTTTGACAAATGCATAACAATTTATATGTGTCCCCAAAAGCTGGAGGGCAGTGTACCAAATAGAGTAGTTTTTCTC| 18055
Kakapo         |-----| 0
GoldenEagle    |-----| 0
JapaneseQuail  |-----| 0
MediumGroundFinch |-----| 0
GoodesThornscrubTortoise|AGCACTGGGTGGCGGGGAGATGCCTCTCCCTGCTACAGCAGCTCTGGGGTTGGGGCTGCAGGATAGGCTCCCCTTCCC| 14558
    
```

```

Majority -----
                |-----|
                |18090  18100  18110  18120  18130  18140  18150  18160|
                |-----|
Human           |CAGGTTGA--TGGGATTAGTTTTTTGTAATTCTTTATATATTTTCTCTATATTCACATTTTAAGTATTTTATGATAAAG| 18133
Kakapo         |-----| 0
GoldenEagle    |-----| 0
JapaneseQuail  |-----| 0
MediumGroundFinch |-----| 0
GoodesThornscrubTortoise|GATTGGGCTTCCCAGCCATGGCTGGGTCTGGGCCACTCTGGTCATGCTTGAGGCTAGCCCGGGCTGTGCCACAGCAAGA| 14638
    
```

```

Majority -----
                |-----|
                |18170  18180  18190  18200  18210  18220  18230  18240|
                |-----|
Human           |TTATTAATATTGATAAAGTTATTAATGTTGCTTAATTGATTAAACCCTGATATTTTCTTGTTTCTTTAAAAAACGTTGCA| 18213
Kakapo         |-----| 0
GoldenEagle    |-----| 0
JapaneseQuail  |-----| 0
MediumGroundFinch |-----| 0
GoodesThornscrubTortoise|CTGGGGCCAGAGGAGGGGCGCCCTGCACCCTTGCTGCACCAGATTGTGGGCCAGGCTAGGTGGGGCCGGGAAGGGAT| 14718
    
```

Monday, May 02, 2022 06:50 PM

```

Majority -----
                |-----|
                |18250  18260  18270  18280  18290  18300  18310  18320|
                |-----|
Human           |TAAC TTGATATAAATCTTTTAAATTGTACAAAAAACACATAAAATTTACTATCTTAACCATTTTAAAGTGTACACTTAA| 18293
Kakapo         |-----| 0
GoldenEagle    |-----| 0
JapaneseQuail  |-----| 0
MediumGroundFinch |-----| 0
GoodesThornscrubTortoise|CCCCCTCCACCGGCCCGCCGGTCCCCAACAGGTTCCCTTAAGCACCTGCGCAGTACTAAACAGGCTGCTGCGTGGCCA| 14798
    
```

```

Majority -----
                |-----|
                |18330  18340  18350  18360  18370  18380  18390  18400|
                |-----|
Human           |ATTGTTTAAATTATTCTTATACGTACTTAATAATATTACATTGCAAAACCCATCTCCAGAACTTTTGGAGAACTGAAACT| 18373
Kakapo         |-----| 0
GoldenEagle    |-----| 0
JapaneseQuail  |-----| 0
MediumGroundFinch |-----| 0
GoodesThornscrubTortoise|GTCAGCTTCCAGGAACTTAGATGAGAAGTGAGGAAGAGGGAGAGGACTTATAGGAGAAATGAGGACACGTATGCATGTA| 14878
    
```

```

Majority -----
                |-----|
                |18410  18420  18430  18440  18450  18460  18470  18480|
                |-----|
Human           |CTATACTGATTTTAAACTCCCTCTTTTGTCTTCTGCTGGTAACCAGCATTCTATTTTCTGTGTCTATGAATTTGACTA| 18453
Kakapo         |-----| 0
GoldenEagle    |-----| 0
JapaneseQuail  |-----| 0
MediumGroundFinch |-----| 0
GoodesThornscrubTortoise|ATGTCTAATTAGTTAGAGAAAGACAAGTGAAC TAAAACAAATTACAGCAATGAGTTACCACCTGTTGGAATACAGAGTT| 14958
    
```

```

Majority -----
                |-----|
                |18490  18500  18510  18520  18530  18540  18550  18560|
                |-----|
Human           |CTTTAAATACCTCACATAAGTGGAAATTATACAGTATAGGTTAAGCATCCCTAATCTGAAAATCCAAAGTCTGAATGCTAC| 18533
Kakapo         |-----| 0
GoldenEagle    |-----| 0
JapaneseQuail  |-----| 0
MediumGroundFinch |-----| 0
GoodesThornscrubTortoise|CTTGGGCTGGTCTACGCACAGTTCTTGTCTGATTTAACTAAATTTGATTTTAAATCAGTAAAAAACTGTTTAGACAAGTC| 15038
    
```

Monday, May 02, 2022 06:50 PM

```

Majority -----
      |-----|
      |18570  18580  18590  18600  18610  18620  18630  18640|
      |-----|
Human  AAAATCTGAAACTGGTGTGTGTTTTTTTTTTTTTTTTTTTTTTTGGAGACGGAGTCTTACTCTGTCGCCAGGCTGGA 18613
Kakapo ----- 0
GoldenEagle ----- 0
JapaneseQuail ----- 0
MediumGroundFinch ----- 0
GoodesThornscrubTortoise@TTTTGTCTGTATGGTGATGTGGCAGGGATGAAACTGGGGAGTTTTGTAGCACGCCAGTGAACCTGCATGGAATTTCTTTT 15118
    
```

```

Majority -----
      |-----|
      |18650  18660  18670  18680  18690  18700  18710  18720|
      |-----|
Human  GTGCAGTGGCGGATCTCTGCTCACTGCAAGCTCCACCACCCGGGTTACGCCATCTTCCTGAGTAGCTGGGACTACAGG 18693
Kakapo ----- 0
GoldenEagle ----- 0
JapaneseQuail ----- 0
MediumGroundFinch ----- 0
GoodesThornscrubTortoise@GACTATAGGTAGGATGAGAATGTGTATGGATGTAACATCATATCTTGGGGCCCTGGCCTTGGGGAGTCTAGTGATACTA 15198
    
```

```

Majority -----
      |-----|
      |18730  18740  18750  18760  18770  18780  18790  18800|
      |-----|
Human  CGCCCGCCACCACGCCCGCTAATTTTTTGTATATATATATATATTTTTTTAGTAGAGACGGGGTTTCACTGTAGCCAGGA 18773
Kakapo ----- 0
GoldenEagle ----- 0
JapaneseQuail ----- 0
MediumGroundFinch ----- 0
GoodesThornscrubTortoise@GTTGCTATACAAAGTGAGTTGGTTTTCTGTTAGTTAT-----TTTTGGAGCAGATTGGGGATATTGCTGTTTGAGG 15269
    
```

```

Majority -----
      |-----|
      |18810  18820  18830  18840  18850  18860  18870  18880|
      |-----|
Human  TGGACTCTTATCTCCCACCTCGTGATCCGCCTGCCTCGGCTCCCAAAGTGCTGGGATTACAGGCCTGAGCCACCGCGC 18853
Kakapo ----- 0
GoldenEagle ----- 0
JapaneseQuail ----- 0
MediumGroundFinch ----- 0
GoodesThornscrubTortoise@CAGTGTGTAAGGTAAGATGTCTATACATAAATGCACGTCTCTTCACTAAATAAGCATAAACCAAATAATATGCATGCT 15349
    
```

Monday, May 02, 2022 06:50 PM

```

Majority -----
      |-----|
      |18890 18900 18910 18920 18930 18940 18950 18960|
      |-----|
Human  CTGGCCAATCTGAAACTTTTTGAGCACTTACTTGATGCTCAAAGGAAGTGCTTAGTGGAGCATTTTGGATTTTAGATTTT 18933
Kakapo ----- 0
GoldenEagle ----- 0
JapaneseQuail ----- 0
MediumGroundFinch ----- 0
GoodesThornscrubTortoiseCTATTTTCACTAAAAATTCATCATGTGACAACAGAATATT--AATTAATTCATATCTATCTATCATGCAAATTGAAATCT 15427
    
```

```

Majority -----
      |-----|
      |18970 18980 18990 19000 19010 19020 19030 19040|
      |-----|
Human  CAGATTAGGAATGCTCAGGTTGTGTTTGTCTCTTTTGTGACTGGCTTATATTCACTTAATATAAATGTCTCAGGGTCCATC 19013
Kakapo ----- 0
GoldenEagle ----- 0
JapaneseQuail ----- 0
MediumGroundFinch ----- 0
GoodesThornscrubTortoiseCTAAATGAGTGCTTATTGTTCTGTGCCCTCTCCTTCCCCCAATGTACTACCTCAAACCTCTTAGTATTTTCATCCCTGGA 15507
    
```

```

Majority -----
      |-----|
      |19050 19060 19070 19080 19090 19100 19110 19120|
      |-----|
Human  CATTTTGTAGCATGTGACAAGATTTCTCCCTTTTTAAGGCTACATAGCATTCCATTGTGGTACACAAAAGTTCATTTGA 19093
Kakapo ----- 0
GoldenEagle ----- 0
JapaneseQuail ----- 0
MediumGroundFinch ----- 0
GoodesThornscrubTortoiseGACAATGTGTTTTTTTTAAATCCTGAAGACACTTTATATTTTGGATTTGCAAGAAATTTACACTGAAGAAGAAATGACTCAA 15587
    
```

```

Majority -----
      |-----|
      |19130 19140 19150 19160 19170 19180 19190 19200|
      |-----|
Human  AGCCCCCTGTGTCATAAATCAGACTTCCATAACAAAATACCATAGACTGAGTGACTTAAAAACAGAGATTCGTTTTTCTC 19173
Kakapo ----- 0
GoldenEagle ----- 0
JapaneseQuail ----- 0
MediumGroundFinch ----- 0
GoodesThornscrubTortoiseGCTACTGGAATGGTAGTCACTGATTATTTTGAACACTTTTTTTTTGAATGCTGCTACTCCTCCATCATACTGCTAGTTTTTC 15667
    
```

Monday, May 02, 2022 06:50 PM

```

Majority -----
                |-----|
                |19210|19220|19230|19240|19250|19260|19270|19280|
                |-----|
Human           |ACAGTTCTGGAAACTGGGAAGTCCAAGATCAAGGTACCAGCAAGGCAACTTTCCTTCTGAGGCCACTTCTCTTGAAGTGA| 19253
Kakapo         |-----| 0
GoldenEagle    |-----| 0
JapaneseQuail  |-----| 0
MediumGroundFinch |-----| 0
GoodesThornscrubTortoise|AGTTGCCTGCAGATGCTGTTAGAAAGCTAAGGGTACATCTACACTTCAATAAAAAACCTGTGGCACCAAGTCTCAGAGCCT| 15747
    
```

```

Majority -----
                |-----|
                |19290|19300|19310|19320|19330|19340|19350|19360|
                |-----|
Human           |GGCCACCATTTTACTTTGTGTGCCTCACATGACCTTTTCTTTGTGAGCACACTTTGGGGGAGTGGGTGGCAGAAGCTCTC| 19333
Kakapo         |-----| 0
GoldenEagle    |-----| 0
JapaneseQuail  |-----| 0
MediumGroundFinch |-----| 0
GoodesThornscrubTortoise|GGTCAA---TTGATTTCAGGCCAGCTGTGGCTCTGCTGTTTGAATGTAAACATACCTTGAGTGTTCACAGTGATGTTA| 15824
    
```

```

Majority -----
                |-----|
                |19370|19380|19390|19400|19410|19420|19430|19440|
                |-----|
Human           |TGGTATTTCTTCTCATAAAGGCATTAATCCCATCATGAAGGCCTTACTCTCATGATCTCATGAAATCCTCCAGTTAACTC| 19413
Kakapo         |-----| 0
GoldenEagle    |-----| 0
JapaneseQuail  |-----| 0
MediumGroundFinch |-----| 0
GoodesThornscrubTortoise|GGCTCATGGTTTGACATGTGTCCCTAGGCTGAGACTAACTGTGGTAAATATACAATGTAACATAAAACCACCATTTAACAT| 15904
    
```

```

Majority -----
                |-----|
                |19450|19460|19470|19480|19490|19500|19510|19520|
                |-----|
Human           |CTAAAGGCCCTGTTTCAAATTCATCACATTTGGGGTTAGGACTTCAGCATGTGATTTTGGGGAAACATAAGCATTGA| 19493
Kakapo         |-----| 0
GoldenEagle    |-----| 0
JapaneseQuail  |-----| 0
MediumGroundFinch |-----| 0
GoodesThornscrubTortoise|TTTTCTGTTTCTTTTCATCACAGAAAAAGTGTCTTCTTCTACCCCGATATAACGCTGTCCTTGGGAGCCAAA| 15984
    
```

Monday, May 02, 2022 06:50 PM

```

Majority -----
                |-----|
                |19530  19540  19550  19560  19570  19580  19590  19600|
                |-----|
Human           |GTTGATAAATACCCTGCATATAGTTGACCCATACTTCTCCACTCCAGGTAATTACTATACTAAATTTGATGTTTACCATT| 19573
Kakapo         |-----| 0
GoldenEagle    |-----| 0
JapaneseQuail  |-----| 0
MediumGroundFinch |-----| 0
GoodesThornscrubTortoise|AATCTTAAACAAATTATA--AGTGAAACTGTGTGAAATCGAACTTGTTTTGATCCACCGGAGCGCTGCTTTACCGTGTTA| 16061
    
```

```

Majority -----
                |-----|
                |19610  19620  19630  19640  19650  19660  19670  19680|
                |-----|
Human           |CCATAAATTTCTCATTTACTACATGTTTATGTATTTTTTATCTTAAGCAATATATGGTTTTGTTTTGCATGTTTAAACTAT| 19653
Kakapo         |-----| 0
GoldenEagle    |-----| 0
JapaneseQuail  |-----| 0
MediumGroundFinch |-----| 0
GoodesThornscrubTortoise|AATCTGAATTCATGTTATATCGGGGAGAGGTATACGTATCATCGGTGAATCAGAATCTCTCCCAAGAGTTAACAGCATT| 16141
    
```

```

Majority -----
                |-----|
                |19690  19700  19710  19720  19730  19740  19750  19760|
                |-----|
Human           |AGATGTACTATCATGCTGTATGTATTCTGTAATTTGCTTTTCTTGTTCAGTGTTATTTTTGTTAAGTTTATATATATATA| 19733
Kakapo         |-----| 0
GoldenEagle    |-----| 0
JapaneseQuail  |-----| 0
MediumGroundFinch |-----| 0
GoodesThornscrubTortoise|AATCTTTTAAATTAT--TATATTCTCTCCACCAGTTGTAATTA AAAACTGTTTAGATATTGTATCACAGTAGAGTAGATGA| 16219
    
```

```

Majority -----
                |-----|
                |19770  19780  19790  19800  19810  19820  19830  19840|
                |-----|
Human           |TATTTTCATTGCCATATAGTATATGATATATGAATATATCATCTTGACAAATGAGTTAATATTTGACGAGATTGATTTGT| 19813
Kakapo         |-----| 0
GoldenEagle    |-----| 0
JapaneseQuail  |-----| 0
MediumGroundFinch |-----| 0
GoodesThornscrubTortoise|AATTGCTGGCTCTTACTACTATGTTTGAAGTAGAGGGATAGTTTTGTTTCATTGTTGACTATTTTTAGTAATATCATTCA| 16299
    
```

Monday, May 02, 2022 06:50 PM

Majority -----  
 19850 19860 19870 19880 19890 19900 19910 19920  
 Human CAAATATTTTAAATTTTTTCCATTACAAACTGCTACTGTAAGCATTAATATGCATATTCTAACGTGTTAATATTAGAGT 19893  
 Kakapo ----- 0  
 GoldenEagle ----- 0  
 JapaneseQuail ----- 0  
 MediumGroundFinch ----- 0  
 GoodesThornscrubTortoiseATTTCGTGTTTTGTTTTATTTCCATTGTCAGAGGAGACTACAAATTTGAGTGATGCTTTTAATAAGCCTTCTTTAACCCAAG 16379

Majority -----  
 19930 19940 19950 19960 19970 19980 19990 20000  
 Human TTCTCATAGATTGTGTCTTTTTCAAATCGATTGAATATTAACATATTGCTTTTCATAGGTAATTATATTAATTATACTGTTA 19973  
 Kakapo ----- 0  
 GoldenEagle ----- 0  
 JapaneseQuail ----- 0  
 MediumGroundFinch ----- 0  
 GoodesThornscrubTortoiseGAGATCTGTTACGTTAGGTACAAGAATCAACTTCCGAAAAGTTTTTCTCTACTTAGGAGTTAATAAAATATTGGGCAGAC 16459

Majority -----  
 20010 20020 20030 20040 20050 20060 20070 20080  
 Human GCGCTGCATGTAGATTCTTGTGTTCTATACATTCCTTTGAAAATCGGCATTGTTGGACTTTTTAATTTTGCTGATCAAATGT 20053  
 Kakapo ----- 0  
 GoldenEagle ----- 0  
 JapaneseQuail ----- 0  
 MediumGroundFinch ----- 0  
 GoodesThornscrubTortoiseAACTTTTGGATATATATATTTTTTAGACTTTTAGAAATTTTTTTGACAGGTCCTCACGAGGCAGTTAAACTTGGTAGCCGC 16539

Majority -----  
 20090 20100 20110 20120 20130 20140 20150 20160  
 Human ACATGGGAAGGATATCTTGTGGTTTTTAATTTGCATTCCCTATTAATGCAAAAAAAAAAAAAACATTGATTCCTGGGAGTTT 20133  
 Kakapo ----- 0  
 GoldenEagle ----- 0  
 JapaneseQuail ----- 0  
 MediumGroundFinch ----- 0  
 GoodesThornscrubTortoiseCAAGTTTTCAATCCAGTAATAGATTTTTAAAAATGTTTGCGAATTGGCTGCTTATTTCTACTCTTTGCTTCTTAAATGTGG 16619

Monday, May 02, 2022 06:50 PM

```

Majority -----
                |-----|
                |20170|20180|20190|20200|20210|20220|20230|20240|
                |-----|
Human           |TTATATACTGTGCAGACTAATTGTTTGTATTATTTTTTTGGTTTGTGTTTGTGTTTCATTTTGTGTTTGTGTTT| 20213
Kakapo         |-----| 0
GoldenEagle    |-----| 0
JapaneseQuail  |-----| 0
MediumGroundFinch |-----| 0
GoodesThornscrubTortoise|AAGAGATTTCTACTAGAGTTAAAATATATTATCTGGAGATGTGGGAAAAATAGTTGACAGTAGATTTTTTGCCATCCT| 16699
    
```

```

Majority -----
                |-----|
                |20250|20260|20270|20280|20290|20300|20310|20320|
                |-----|
Human           |GAGAGACAGAGTCTCACTGTGTCATCCAGGCTGGAGTGCAGTGGCTCGGTCACAGTCACTGCAGTCTTGACATCCCAGGC| 20293
Kakapo         |-----| 0
GoldenEagle    |-----| 0
JapaneseQuail  |-----| 0
MediumGroundFinch |-----| 0
GoodesThornscrubTortoise|CAATGGTTTCATGGTTAGACCTTAGGGGATTTTGATGACTTTAATGGCCTGATAAACTGGGAGAGTGTGTAACATAACC| 16779
    
```

```

Majority -----
                |-----|
                |20330|20340|20350|20360|20370|20380|20390|20400|
                |-----|
Human           |TCTAGCAATTCTCTCACCTTTGTTTCTGAGTAGCTGGGACTACAGGAATACACCACCTATGCCAGCTAATTTTTCAATT| 20373
Kakapo         |-----| 0
GoldenEagle    |-----| 0
JapaneseQuail  |-----| 0
MediumGroundFinch |-----| 0
GoodesThornscrubTortoise|GTGGCATTGAGATTAGACACATTTTCAAAGTAATGCGTGTGGGACAAACCATTTTGAACATAATTATAATATGGATAC| 16859
    
```

```

Majority -----
                |-----|
                |20410|20420|20430|20440|20450|20460|20470|20480|
                |-----|
Human           |TTTTTGTAGAGATGGAGTCTCACTGTATTACCCAGGTTTGTGCGAACTCCCAGGCTCAAGCAGTTCTCCCGCATTGGCC| 20453
Kakapo         |-----| 0
GoldenEagle    |-----| 0
JapaneseQuail  |-----| 0
MediumGroundFinch |-----| 0
GoodesThornscrubTortoise|AAAATTAGTTGCAACATTTAAAGCAAAGATCTAAACACTGTGGCTAGTCATTGCACTTCTTCTCCTTTTCTATAGGTT| 16939
    
```



Monday, May 02, 2022 06:50 PM

```

Majority -----
                |-----|
                |20490|20500|20510|20520|20530|20540|20550|20560|
                |-----|
Human           |TCCTAAAGTGCTGAGATTACAGGCGTGAGTCGCTGTGCCTGGCCTGTTTTGTTAGTTACATGTCCTACAGATAACTCTCT| 20533
Kakapo         |-----| 0
GoldenEagle    |-----| 0
JapaneseQuail  |-----| 0
MediumGroundFinch |-----| 0
GoodesThornscrubTortoise|-----ATCGTATAATTTTTGAAAATTAGAAGATTTGATTGTATTTGTTGTGCAATGGTATTATACACAGTTAAACATTC| 17014
    
```

```

Majority -----
                |-----|
                |20570|20580|20590|20600|20610|20620|20630|20640|
                |-----|
Human           |CCTCTCTCTGACCTGTTTTTTTTTACACTGATGAATAGTTGTAATTTTAATGGGACATTTATGTTTTCTTTTAAAAAAA| 20613
Kakapo         |-----| 0
GoldenEagle    |-----| 0
JapaneseQuail  |-----| 0
MediumGroundFinch |-----| 0
GoodesThornscrubTortoise|-----CCTACATCCACTTCTTTTAAATTTTTTATATTTTCAGATTTACAGTACATGAAGCAATTTATGCTTCTGAAGTTTGTAATT| 17094
    
```

```

Majority -----
                |-----|
                |20650|20660|20670|20680|20690|20700|20710|20720|
                |-----|
Human           |CATTTAACCTAAGGCCTTACGTATAGGCTTGTTGATTTTTATTTTGAAGTTTAAAAATTTTGATTTTCACATTTATGGCG| 20693
Kakapo         |-----| 0
GoldenEagle    |-----| 0
JapaneseQuail  |-----| 0
MediumGroundFinch |-----| 0
GoodesThornscrubTortoise|-----CCTTTTGGGAGTTGCATATTGAAGGCTTAACTTGGCAGTCAAATCTTTTTTGA AAAATTTGGTCCTGTGTGAGGAAACTC| 17174
    
```

```

Majority -----
                |-----|
                |20730|20740|20750|20760|20770|20780|20790|20800|
                |-----|
Human           |TTAATCTACCTGGAATTTATCTTTTGTGTAGCATATGTTACAGGTTAATTTATTTTTTCT---ATATGGATAGCAAGCTT| 20770
Kakapo         |-----| 0
GoldenEagle    |-----| 0
JapaneseQuail  |-----| 0
MediumGroundFinch |-----| 0
GoodesThornscrubTortoise|-----ACAGTGTCACTTTTACACATCTGCTTTTCTGGATAGAACCACACTTCAAATATTTTTCTTCACACTTGTGGTGAAAGGCT| 17254
    
```

Monday, May 02, 2022 06:50 PM

```

Majority -----
                |-----|
                |20810  20820  20830  20840  20850  20860  20870  20880|
                |-----|
Human           |AGTATGTACTTGATTGAATAGCTCAGCTTTTCTCCAATGATCTGCTTTCTCAGCTCTTCAGGTTTCCGTATATTCACAGA| 20850
Kakapo         |-----| 0
GoldenEagle    |-----| 0
JapaneseQuail  |-----| 0
MediumGroundFinch |-----| 0
GoodesThornscrubTortoise|6CATTGAGGGGGACAGGATGAGATAGGAAGGACAAAACAGAATTTGTGCGCATGAGCGAGGATTATTTAAAAGAGGCTGG| 17334
    
```

```

Majority -----
                |-----|
                |20890  20900  20910  20920  20930  20940  20950  20960|
                |-----|
Human           |ACCATTTCTGTGCTATGTCTTGTAGCAGTACAACAGTGTCTTAATTACTTATGGCATCAGCATTAAAGTTTGGAAATCTTG| 20930
Kakapo         |-----| 0
GoldenEagle    |-----| 0
JapaneseQuail  |-----| 0
MediumGroundFinch |-----| 0
GoodesThornscrubTortoise|6CTCTAATATCCTCCATGTTTTAAGTTGTAAATTAGGAGTTCATCAAGTAGTTTGTGTTTGTAGTACAGAGTCTTCCCTTCG| 17414
    
```

```

Majority -----
                |-----|
                |20970  20980  20990  21000  21010  21020  21030  21040|
                |-----|
Human           |TACAGTGAGTGTCAAAACTTTGTTTTTCAAATTTGTCTTGGTGTGTTTCTTCACTGCATTTATTTTAAGATCATTGGCTA| 21010
Kakapo         |-----| 0
GoldenEagle    |-----| 0
JapaneseQuail  |-----| 0
MediumGroundFinch |-----| 0
GoodesThornscrubTortoise|6AGGGTAAATACATAGGGTTAGTGGTCTGGCTGTTACTTAAGACAGATCAGGATTCCATGATTTTAAGAGTTGTTGCTTT| 17494
    
```

```

Majority -----
                |-----|
                |21050  21060  21070  21080  21090  21100  21110  21120|
                |-----|
Human           |AGTTCTGTGAAGGCTCTTTGGGTCTTATTTATACTTGCCTTAAATTTAGTAGTTAATTGGGAGAACATTATAGCTGCATT| 21090
Kakapo         |-----| 0
GoldenEagle    |-----| 0
JapaneseQuail  |-----| 0
MediumGroundFinch |-----| 0
GoodesThornscrubTortoise|6CCAAGACTGAAATAGCATCCATCTTTCCAAAACAAAAAGAAAAAATTATGAGACTCTTGGGACTTGAAAGCCTTCTAGA| 17574
    
```

Monday, May 02, 2022 06:50 PM

```

Majority -----
                |-----|
                |21130  21140  21150  21160  21170  21180  21190  21200|
Human           |ATCAAAATAAAATGGCAATTTTTTTTGAGCTGAAAGGCAGAGAACTATAACATTTCTTTGAAGAATTTTCCACTTTCTTC| 21170
Kakapo          |-----| 0
GoldenEagle    |-----| 0
JapaneseQuail  |-----| 0
MediumGroundFinch |-----| 0
GoodesThornscrubTortoise|TCAAAAATGCATGTGCCTAGATCCGGCACTGGTAGAGATGTGGCCTGTGTGTCATCTATGTTTCAGGCCTGAGACTAAGC| 17654
    
```

```

Majority -----
                |-----|
                |21210  21220  21230  21240  21250  21260  21270  21280|
Human           |TTCATGGTATTTTCCCTAAGAGACATGCTTAATGCAGAAAATATATATAAAGGATTTTAAACAGCTTATATGTAAGGGAT| 21250
Kakapo          |-----| 0
GoldenEagle    |-----| 0
JapaneseQuail  |-----| 0
MediumGroundFinch |-----| 0
GoodesThornscrubTortoise|AGGTAATTGCCCTCAAATGAAGCAATGAAAACAGAATCTGGATATATCCAGGTCAGTACATGGAGCAGCATGGGAATTCC| 17734
    
```

```

Majority -----
                |-----|
                |21290  21300  21310  21320  21330  21340  21350  21360|
Human           |GAGGGAACAGGGATACTTGGACTAATATTTCAATATTTCTAAAATATTGGTTTATTGAGTACGTTCCCTAGAAAACGTGT| 21330
Kakapo          |-----| 0
GoldenEagle    |-----| 0
JapaneseQuail  |-----| 0
MediumGroundFinch |-----| 0
GoodesThornscrubTortoise|TTTGGATGTAGGGGAAGGGCTGTGTCTGACAAGCAAACCTGAAGTCTTAAATATGCAGTAATATATATACACGGGTTT| 17814
    
```

```

Majority -----
                |-----|
                |21370  21380  21390  21400  21410  21420  21430  21440|
Human           |TTATTGAAAGCTTCAAATTTCTCAGAATTTGTATAGCATTTTTGAATTTCTCTCTTTTATTACTAATATCAAGCACCTATGT| 21410
Kakapo          |-----| 0
GoldenEagle    |-----| 0
JapaneseQuail  |-----| 0
MediumGroundFinch |-----| 0
GoodesThornscrubTortoise|TTTGGAGAACTACCATAATTTTTTTTTTAAACAACCATGTATAATCTGTTAATTGGTAGTAAAAATAACTGAGGTAT| 17894
    
```

Monday, May 02, 2022 06:50 PM

```

Majority -----
                21450      21460      21470      21480      21490      21500      21510      21520
Human          TTTCTCCTATTTCTTGATTGTTCTTGTGCACAGAATTTATTTTACTGGTCTTTTCAAAGAACCAACCTTTTACTTGTTTT 21490
Kakapo          ----- 0
GoldenEagle    ----- 0
JapaneseQuail  ----- 0
MediumGroundFinch ----- 0
GoodesThornscrubTortoise 6TTTTGTTTTTTTTTTTTTTTTTTTAAATGATAGCTGCCATCACTAGTTATTTTTGTCCATTGCAAACAGAGGTAAAATA 17974
    
```

```

Majority -----
                21530      21540      21550      21560      21570      21580      21590      21600
Human          CTTTTTTGTTGGGGCAGTGGAGGGATTCACTTTAATTTGATCCTGAACTCCTTTATTTTCTTTTAAAAATGCATTCAAGG 21570
Kakapo          ----- 0
GoldenEagle    ----- 0
JapaneseQuail  ----- 0
MediumGroundFinch ----- 0
GoodesThornscrubTortoise 6CCTTCTCTGGAAATGTATTGGTGGGCTGACTGCACAGAAGTGCAGGTATTTTTTGAATTCAACCATCTTGTCTTCCATG 18054
    
```

```

Majority -----
                21610      21620      21630      21640      21650      21660      21670      21680
Human          TTAAAGGTAATCAGCTGATAGCTTTGGCTTTTTTTTTTTTTTTTTTACTTTTATAGATTCTCTTTTATTGTAAACTTCATT 21650
Kakapo          ----- 0
GoldenEagle    ----- 0
JapaneseQuail  ----- 0
MediumGroundFinch ----- 0
GoodesThornscrubTortoise 6ATTTTACTTCCATAATTTTGATGTCAAACATAAATATCCTCTCCTTAGCAAATATTGGGGTAGTAATTTAGATTTTCAAA 18134
    
```

```

Majority -----
                21690      21700      21710      21720      21730      21740      21750      21760
Human          TAAAGGTTTTAAGTACACAAAAGTAGAGGGAATGGTATATAATACACTTTTTTCTGTTGGATAAATATTAATGCAAATCT 21730
Kakapo          ----- 0
GoldenEagle    ----- 0
JapaneseQuail  ----- 0
MediumGroundFinch ----- 0
GoodesThornscrubTortoise 6AGAAAGAGAGAAC-ATTTCAATGAGTCCATCTGCCACATTTTCAGTCATCTTGTACTTGAGAACAGTCATATAGAGT- 18212
    
```

Monday, May 02, 2022 06:50 PM

```

Majority -----
                |-----|
                |21770  21780  21790  21800  21810  21820  21830  21840|
                |-----|
Human           |CAGATCATTTTCATATAAATCTGCAGATATATCAGAATGTGTGTCTCTCTATTTAAATGTGACATTGGTACCATTATAAAGTT| 21810
Kakapo         |-----| 0
GoldenEagle    |-----| 0
JapaneseQuail  |-----| 0
MediumGroundFinch |-----| 0
GoodesThornscrubTortoise -GAATAATGGAAAGGTTCCATAGCTTCTCTGAATTGGCTTTCAGTTTTGCCTGTTTTAAGTTATTCTTTTGATCTAATT| 18290
    
```

```

Majority -----
                |-----|
                |21850  21860  21870  21880  21890  21900  21910  21920|
                |-----|
Human           |TAAATAAATTTCTTAATGTGCTCTAATCTCCAGTATTCAGAATACTTTCTTTTCATTATTTTATTTTCTTGCCTTTTCT| 21890
Kakapo         |-----| 0
GoldenEagle    |-----| 0
JapaneseQuail  |-----| 0
MediumGroundFinch |-----| 0
GoodesThornscrubTortoise -AAAAATGGTTTCCTCTGACAGTGACAAGACTTATTGCTGTTTCATTTTATTTAAATTTAAAGTCAAATCATCTTGCCAATT| 18370
    
```

```

Majority -----
                |-----|
                |21930  21940  21950  21960  21970  21980  21990  22000|
                |-----|
Human           |TTTTTGTGTGTGTAGATAAAGTGAGTCATCTGTACAATTTCCACTTTCTGGCTGGGCGTGGTGGCTCACGCCTGTAATC| 21970
Kakapo         |-----| 0
GoldenEagle    |-----| 0
JapaneseQuail  |-----| 0
MediumGroundFinch |-----| 0
GoodesThornscrubTortoise -GAACCCCAAATGTGTAGAGCAGAATCTAGAATCAACAAGAGTGTGAGGCAAACATAAAATTTATTTAGAAGTAGTCTGTT| 18450
    
```

```

Majority -----
                |-----|
                |22010  22020  22030  22040  22050  22060  22070  22080|
                |-----|
Human           |CCAGCACTTCGGGAGGCTGAGGCGGGCAGATCACGAGGTCAGGAGATCAAGACCATTTTGGCTAACACAGTGAAAACCTG| 22050
Kakapo         |-----| 0
GoldenEagle    |-----| 0
JapaneseQuail  |-----| 0
MediumGroundFinch |-----| 0
GoodesThornscrubTortoise -AAAATAACTTTGAAACTAGGCTCAAAACTGAATAAGCTTAGTGACTGTAATAGCTTGGTGTGTTGTCTAGTATGTTGT| 18530
    
```

Monday, May 02, 2022 06:50 PM

```

Majority -----
                22090      22100      22110      22120      22130      22140      22150      22160
Human          TCTCTACTAAAAATACGAAAAAATTAGCCAGGCGTGGTGGGGGGCACCTGTAGTCCCAGCTACTCGGGAGGCTGAGGCAG 22130
Kakapo          ----- 0
GoldenEagle    ----- 0
JapaneseQuail  ----- 0
MediumGroundFinch ----- 0
GoodesThornscrubTortoise GAATTTTAGATATGGGATACTTCAAATGTGTTATATATTTCTAATATTCCTCTTCATATTCCTATGTGTGTGATTATATG 18610
    
```

```

Majority -----
                22170      22180      22190      22200      22210      22220      22230      22240
Human          GAGAATGGTGTGAACCCGGGAGGCGGAGCTTGCCAGTGGCGCCACTGGACTCCAGCCTGGGTGACAGAGCAAGACTCCGTC 22210
Kakapo          ----- 0
GoldenEagle    ----- 0
JapaneseQuail  ----- 0
MediumGroundFinch ----- 0
GoodesThornscrubTortoise GTTATTATATGAATCCTGGTATAAGCATACTACTTAGTATTGTGATATCCTCAGATTAGTTTAGTATGATTTTGAATG 18690
    
```

```

Majority -----
                22250      22260      22270      22280      22290      22300      22310      22320
Human          TTAAAAAAAAAAAAAAAAATCCACTTTCTGGATTCTGCTGATTGTACCGCTGTGTTGTCATTTTCATATGTTCTTCATGTA 22290
Kakapo          ----- 0
GoldenEagle    ----- 0
JapaneseQuail  ----- 0
MediumGroundFinch ----- 0
GoodesThornscrubTortoise AAGAACTATCCAAATATACAGGATGCTTTTCAAACAGAGGTAGATGATATCTGCCTCAAGGACAGCACAGTCTGAAACA 18770
    
```

```

Majority -----
                22330      22340      22350      22360      22370      22380      22390      22400
Human          AACAAAGTTTACCTGAAATACAGGGGTTTGATCAGACTCTGGTGTAAATTTTACCAAGAATATTTTGCAGATGTACTCTAT 22370
Kakapo          ----- 0
GoldenEagle    ----- 0
JapaneseQuail  ----- 0
MediumGroundFinch ----- 0
GoodesThornscrubTortoise CTGATTATTATAAAGATTTTATAAGTAAAGCAGTTTGTGGTCAGTACTCAGAATGAAACAGACTCCATGCAAAGTAA 18850
    
```

Monday, May 02, 2022 06:50 PM

```

Majority -----
                22410      22420      22430      22440      22450      22460      22470      22480
Human          GTAATTCCTGTTGTATGTGTCAGCTTGCTCCATCTATTACAGAGCGCATCATCCTTTCACCTAATAGTTTTTAGTAGCTAAT 22450
Kakapo        ----- 0
GoldenEagle   ----- 0
JapaneseQuail ----- 0
MediumGroundFinch ----- 0
GoodesThornscrubTortoise @AATTGGTGATTTCAGTAACTGGCACTCACCTTTTTTAGTAATGACCCAATGGCTGGGTTAGTGCTGAGGGCATTTGGTGC 18930
    
```

```

Majority -----
                22490      22500      22510      22520      22530      22540      22550      22560
Human          GATTGCATACTTTTATTAGGTATTGCA-AAAGTGGCGCTATTCTTTTTTCTGTGTATATTAGAATTCTTAAGAATTATA 22529
Kakapo        ----- 0
GoldenEagle   ----- 0
JapaneseQuail ----- 0
MediumGroundFinch ----- 0
GoodesThornscrubTortoise @AATGGAGATACCTTTGAATTAAGACACAAAACGGAGGCTCTAACCTCTTTTGGATATAAAAAATCTAGTAGCCTATTAA 19010
    
```

```

Majority -----
                22570      22580      22590      22600      22610      22620      22630      22640
Human          TCCATCAACTGTTTGGTCATACGTAAGTACCTTTTTATAAGAAAAGCAGGAGAGAATTTGACTTCTTAAGTTTTCTGATG 22609
Kakapo        ----- 0
GoldenEagle   ----- 0
JapaneseQuail ----- 0
MediumGroundFinch ----- 0
GoodesThornscrubTortoise @GATGCCATGCAAAGGAAGGGAGGTTTATGCCCTTTTTAATTCATTTGACTTATGAGGAAGGCCTGAAAGATTTAAAAA 19090
    
```

```

Majority -----
                22650      22660      22670      22680      22690      22700      22710      22720
Human          AGTTGTTACCTTAAAACCTCCAGTATAATCAATATGAGTTCCTTTTTGTTGCTGTTAGTATCGTCGCAACAGCAAAGAGT 22689
Kakapo        ----- 0
GoldenEagle   ----- 0
JapaneseQuail ----- 0
MediumGroundFinch ----- 0
GoodesThornscrubTortoise @ACAAACAAACAAAAATCCTACTTGTTTTACATTAGGCCTCTGAGTGTTTTTCTATCCTGGAAGGAAATGAAACCTGA 19170
    
```

Monday, May 02, 2022 06:50 PM

```

Majority      -----
              |-----|
              |22730|22740|22750|22760|22770|22780|22790|22800|
              |-----|
Human         TTAATAACATTTATTTTCTAGTGTATTGCAGTAATCATTCTTCTTTTTTTTAAATTTCTAAGCTGTTTTATTAAATGAAA 22769
Kakapo       ----- 0
GoldenEagle  ----- 0
JapaneseQuail ----- 0
MediumGroundFinch ----- 0
GoodesThornscrubTortoise@CACTGAGAGGGGAAGTATATTTTTTTTAAAGTACACCTCTACCTCAATATAACAC-----GAATTTCGG 19233
    
```

```

Majority      -----
              |-----|
              |22810|22820|22830|22840|22850|22860|22870|22880|
              |-----|
Human         AGAGAACAATGCTAAGCAGCTTGTATGGTGTGTGTGTTGTTGTTGGGTTTTTATTTTGTATGAATGTTAAAAACACGGTGGC 22849
Kakapo       ----- 0
GoldenEagle  ----- 0
JapaneseQuail ----- 0
MediumGroundFinch ----- 0
GoodesThornscrubTortoise@ATACAACACGGTAAAGCACTGCTCCGGGGGGTGGGGCTGTGCACCTCTGTGGATCAAAGCAAGTAAGATGTAACGCAGT 19313
    
```

```

Majority      -----
              |-----|
              |22890|22900|22910|22920|22930|22940|22950|22960|
              |-----|
Human         TAAAGCCTGTAATCCCAGCATTTTGGGAGGCCAAGGTGGTTGGATCACAAAGTCCAGGAGCTTGAGACCAGCCTGGCTCTA 22929
Kakapo       ----- 0
GoldenEagle  ----- 0
JapaneseQuail ----- 0
MediumGroundFinch ----- 0
GoodesThornscrubTortoise@TCACCTATAATGCATTAAGATTTTTTGGCTCCTGAGGACTGTGTATATTTAGGTTAGAGTGTATTTAGACTGCTTCAG 19393
    
```

```

Majority      -----
              |-----|
              |22970|22980|22990|23000|23010|23020|23030|23040|
              |-----|
Human         CTAAAAATAAAATGTGGTGAAACCCCGTCTCTACTAAAAATACAAAAATTAGCCCTTTGTTGTTGCACGCGCCTATAGTC 23009
Kakapo       ----- 0
GoldenEagle  ----- 0
JapaneseQuail ----- 0
MediumGroundFinch ----- 0
GoodesThornscrubTortoise@ACTAATTTTTAACACCTATTTAACTCAAATGCTTGGGGGAAAGGATCCCTCTTTAAGGATTCAACACCAAATCTCCTCT 19473
    
```



Monday, May 02, 2022 06:50 PM

```

Majority -----
                23050   23060   23070   23080   23090   23100   23110   23120
Human          CCAGCTACTCGGGAGGCTGAGGCAGAAAAATTGCTTGAACCTGGGGAGGCTGAGGCAGAAAAATTACTTGAACCCGGGAG 23089
Kakapo          ----- 0
GoldenEagle    ----- 0
JapaneseQuail  ----- 0
MediumGroundFinch ----- 0
GoodesThornscrubTortoise 6GTATCTGCATTCCACATTGAAATCATCCAAAAAGAAGACTAAGAAAGAACAGACTTGATGTTCTTCATATTTTATGAA 19553
    
```

```

Majority -----
                23130   23140   23150   23160   23170   23180   23190   23200
Human          ACAGAGGTTGCAGCGAGCCGAGATTGCGCCACTGCACTCCAGCCTGGGCAACAGACTGAGATTCCATCTAAAAACAAAAC 23169
Kakapo          ----- 0
GoldenEagle    ----- 0
JapaneseQuail  ----- 0
MediumGroundFinch ----- 0
GoodesThornscrubTortoise 6CTTAAACCAAAAAGAAATCCATCCTCCAACAAAACAAATTTGTTTTTCAGCGTTCCTTTATATATTATAAAGAAGTGC 19633
    
```

```

Majority -----
                23210   23220   23230   23240   23250   23260   23270   23280
Human          CATGTATATATGTAAGTTTGAGGAAAAGAGTTGTATGAAAATTCAGGATAATTAATAAAAAGTAAACGAGAACTTCTTTAC 23249
Kakapo          ----- 0
GoldenEagle    ----- 0
JapaneseQuail  ----- 0
MediumGroundFinch ----- 0
GoodesThornscrubTortoise 6AAACACAACAGTCTGCTTTGAACTTTTCTAATAGGAGTGCTAGCCCTAGCACTTTGGTCAAATTCCTAATTTTCAGTATT 19713
    
```

```

Majority -----
                23290   23300   23310   23320   23330   23340   23350   23360
Human          ATATATATATATTTTTTAATTTTCTCAGTTAATGTTTGAATTTTTTTAACGTAGAAAATGTCAATGGGGTTATCTGGGGA 23329
Kakapo          ----- 0
GoldenEagle    ----- 0
JapaneseQuail  ----- 0
MediumGroundFinch ----- 0
GoodesThornscrubTortoise 6GCCTGAATTCCTTCTAGTTTTCAGTGGATATTAACCTCCTATTTTAAATATTTTGTAAAGTTGTGCACTGTTGGACA 19793
    
```

Monday, May 02, 2022 06:50 PM

```

Majority -----
                23370   23380   23390   23400   23410   23420   23430   23440
Human          GAAAGATTATAGTCCATGAGTCCCCCTGTTGTATATATACCTGTATTAAAAATATGCAATAAATGCTATTTTAAAAAATGT 23409
Kakapo         ----- 0
GoldenEagle    ----- 0
JapaneseQuail  ----- 0
MediumGroundFinch ----- 0
GoodesThornscrubTortoise GCTCTTGTGGTCCCTGGAGATTGCATTTTCAGATGTGGATGAAGTGATTTTGTGTATGGAATTATTTGACTTGAGGGATGC 19873
    
```

```

Majority -----
                23450   23460   23470   23480   23490   23500   23510   23520
Human          CTTATTACATAGAACAGAAGACCAGAATACTAGCTCTCCACGCTCTTATGTCTTGATCAGTGAAGATTAGCTAGCAAAACA 23489
Kakapo         ----- 0
GoldenEagle    ----- 0
JapaneseQuail  ----- 0
MediumGroundFinch ----- 0
GoodesThornscrubTortoise GATGTAATATACTGTATTGTTTAGATTTTAAATTTTTTAAATTTACTGTCACTTTCTGAAGAGGGAGAATCTGCCAAATCT 19953
    
```

```

Majority -----
                23530   23540   23550   23560   23570   23580   23590   23600
Human          ACCATAACTTAGGGATAGCTTTTATTTGTGGGAAGTGTCAATTTAGTATGTCAATGATTTAAAAATCATTGTAGTCTTTCAG 23569
Kakapo         ----- 0
GoldenEagle    ----- 0
JapaneseQuail  ----- 0
MediumGroundFinch ----- 0
GoodesThornscrubTortoise GATGTAATGTTTCATTTAAAGCTCTCTGAAGGGATTTGCCCTGTCAAAGTATAGTTTAAATATCAACATTAAGATGACA 20033
    
```

```

Majority -----
                23610   23620   23630   23640   23650   23660   23670   23680
Human          AGAGCATCTTATCTTTCTTGTAGGTGATAGTATTGGCTATCTATGTAGTGTCTTAAGTTCTTTAAATTATCCTTATTCTT 23649
Kakapo         ----- 0
GoldenEagle    ----- 0
JapaneseQuail  ----- 0
MediumGroundFinch ----- 0
GoodesThornscrubTortoise AAAATAGAAAGGGAAAAAAACTCTTACTGTCTTTTCTTTTTTAGAGAGGATCTGACGAACTTCTTTCAGGCAGTGTCTC 20113
    
```

Monday, May 02, 2022 06:50 PM

```

Majority -----
                |-----|
                |23690|23700|23710|23720|23730|23740|23750|23760|
                |-----|
Human            |ACTTTTGTGTACATTGTTTATAAAAATAATGTGATCATCTTAATCTACCATTTTGATTATGGTTTGATCATTCTTTTACT| 23729
Kakapo          |-----| 0
GoldenEagle     |-----| 0
JapaneseQuail   |-----| 0
MediumGroundFinch |-----| 0
GoodesThornscrubTortoise |AATAGTCCGA ACTCTAACATGAGCAGCATGGTAGTTACTGGTAAGTGTTCAGAGGAGAAATCTAACATTATATCTCAGA| 20193
    
```

```

Majority -----
                |-----|
                |23770|23780|23790|23800|23810|23820|23830|23840|
                |-----|
Human            |ATTTCCACTTGTTAGCAAAGCCTTTATACTTACTAAATTTATGATAAAAATGATTATTATAACATGCCCGGTTTACTTAA| 23809
Kakapo          |-----| 0
GoldenEagle     |-----| 0
JapaneseQuail   |-----| 0
MediumGroundFinch |-----| 0
GoodesThornscrubTortoise |ATCTTTTCCTGTTTACAAGGGGAAAATAGTAAAATTTAAAATAGTAAAAGTAGATTTTCAT-----CCTGTTGTACAAGA| 20266
    
```

```

Majority -----
                |-----|
                |23850|23860|23870|23880|23890|23900|23910|23920|
                |-----|
Human            |ATGTCTTATTTAAACGTTCTGATTGTTATTCTTTCTTATTCAGGTTTCTTATTGTTCATGTTTTATGTCTGTTTTCAGGTG| 23889
Kakapo          |-----| 0
GoldenEagle     |-----| 0
JapaneseQuail   |-----| 0
MediumGroundFinch |-----| 0
GoodesThornscrubTortoise |ATAAATTGTTGGCATGCACCAGACTTTAACAATCCTGTATCTATATTGAAACACTCAAAAAATATTTGAACGAGTAAACC| 20346
    
```

```

Majority -----
                |-----|
                |23930|23940|23950|23960|23970|23980|23990|24000|
                |-----|
Human            |TAATTGTCCTCTCACAAATGTATCCCATTTTGGGTGACAAAATACCTGATCACCTTATCCTTATAGTTTTCTCCCTAGAA| 23969
Kakapo          |-----| 0
GoldenEagle     |-----| 0
JapaneseQuail   |-----| 0
MediumGroundFinch |-----| 0
GoodesThornscrubTortoise |AATTAAATTAATGGAAATTTACAGATGATGAAACAATCTTAGGGCTGGGGA ACTGGATGGGACATGAAAGAAATTAAC| 20426
    
```

Monday, May 02, 2022 06:50 PM

```

Majority -----
                24010   24020   24030   24040   24050   24060   24070   24080
Human          TCTTTTTTGTATATTAATCAAAGTTTATTTGTGAGAATGTTATGAAATATAAGAAAATGAACATCATGAACCTGTCACT 24049
Kakapo          ----- 0
GoldenEagle    ----- 0
JapaneseQuail  ----- 0
MediumGroundFinch ----- 0
GoodesThornscrubTortoise @TTTTAATATGGAATGAGTTATACAATTCTCTTCAAACCTAAGGAGTGATACAGAGCAAACAAAGGCTAACAGGAACTGCT 20506
    
```

```

Majority -----
                24090   24100   24110   24120   24130   24140   24150   24160
Human          CAAATAAAAAAACTTGAATGT-TACCAATACTATTGTATATTCCATATGCAGCAATATTGCTTTTTTTTTTTAGAGTCT 24128
Kakapo          ----- 0
GoldenEagle    ----- 0
JapaneseQuail  ----- 0
MediumGroundFinch ----- 0
GoodesThornscrubTortoise @TAGAAATTTAACTTTGTGCATGTGTAGGCATCCACATGTCTGGGCATCCCTGCTGGATTAGCCTGTTTCATTTCCACTAG 20586
    
```

```

Majority -----
                24170   24180   24190   24200   24210   24220   24230   24240
Human          TGCTCTGATACCCACGCTGGAGTGCAGTGGTGTGCATCTCGGCTCACAGCAAGCTTCGCCTCCCTGGTTCACCCCATTTCTC 24208
Kakapo          ----- 0
GoldenEagle    ----- 0
JapaneseQuail  ----- 0
MediumGroundFinch ----- 0
GoodesThornscrubTortoise @GGAGTAACTTTATGAATAATTAAAATCTAATAACTCCTCCGCTAGACTGCCACAGCACTAGACTCTGATCCTAGTTTC 20666
    
```

```

Majority -----
                24250   24260   24270   24280   24290   24300   24310   24320
Human          CTGCCTCAGCCTCCCAGTAGCTGGGACTTCAGGC--ACCGCCACCACCCGGCTAATTTTTTGAATTTTGTAGTAGAG 24286
Kakapo          ----- 0
GoldenEagle    ----- 0
JapaneseQuail  ----- 0
MediumGroundFinch ----- 0
GoodesThornscrubTortoise @CTGCCTTAGGATGGAAGTAGCTTTAGGCTCAGAGCAGCACTTCAGTGCAGCACGTGTTACTGTTCTTTGTCAAACCTGC 20746
    
```

Monday, May 02, 2022 06:50 PM

```

Majority -----
                24330   24340   24350   24360   24370   24380   24390   24400
Human          ACGGGGTTTCACCCTGTTAGCCAGGATGGTTTTGATCTCATGACCTCGTGATCCGTCTGCCTCGGCCTCCCAAAGTGCTG 24366
Kakapo          ----- 0
GoldenEagle    ----- 0
JapaneseQuail  ----- 0
MediumGroundFinch ----- 0
GoodesThornscrubTortoise @GGGGACTCCAATAAATTGGCTTTTCAGTAATTGAAACCTGTTCTCTTTTCTTTTATAACTTCCTTACAGCTATTTTCAG 20826
    
```

```

Majority -----
                24410   24420   24430   24440   24450   24460   24470   24480
Human          GGATTATAGGTGTGAGCTACTGCGCCAGCCCAATATTGCTTTTTTAATCCCCCTTCTTACCCTGCCATGGGTAGGTGGCT 24446
Kakapo          ----- 0
GoldenEagle    ----- 0
JapaneseQuail  ----- 0
MediumGroundFinch ----- 0
GoodesThornscrubTortoise @AGTGTATCTGTCAAAGGAGCTTTGCTCAGCCTGCTGTTTTGGCACACCTACCACTTAGGTCTTTTCATTCTGGTGGCAGAG 20906
    
```

```

Majority -----
                24490   24500   24510   24520   24530   24540   24550   24560
Human          GCCACAACCTTTGCCTTATTTTTTCAATATGGATTTTTTCATGTAAATGACAAAAATATATTTAGTTTTTTTTTAGTTTAT 24526
Kakapo          ----- 0
GoldenEagle    ----- 0
JapaneseQuail  ----- 0
MediumGroundFinch ----- 0
GoodesThornscrubTortoise @GGTTTAGTTCATACCTCTAGTCTGTTAGTGGGTGATCTAAATAATTGTAATCAGAAGACTTAGTTCGCCACTTACTGTG 20986
    
```

```

Majority -----C-----T--A--A-AT---C-----T--T
                24570   24580   24590   24600   24610   24620   24630   24640
Human          GGAAACGGTATGCCTATATAATGTTTTCCATGTCTTGTGTTTTAATTC AATAATGATCTAATAAATAGCCGTATTTTTT 24606
Kakapo          ----- 0
GoldenEagle    ----- 0
JapaneseQuail  -----TTAACGGTATCTGTTAGAAAAATTTTCCTTCTTTTT 37
MediumGroundFinch ----- 0
GoodesThornscrubTortoise @TAGGTGAATTCTCCACAGCAGTGCAGCAAGGTGGTCTAGTA-ACTCCTGCTACCAGTGGACCATATCAACAGTAATCCT 21065
    
```

Monday, May 02, 2022 06:50 PM

```

Majority      G-A-----T--T-CT-TCTGAGTTCTTATAATAGTG--GCATAGGTTTCAGAGCCTGTATTGTGTTACTCTCAAGGGT
              24650      24660      24670      24680      24690      24700      24710      24720
Human         GGATAGTTTTATAATACTCATTGCTGTGATATACTCTTTT-GTGAATAATACCCATTTTATCTTTTATTGGACATTTGGGT 24685
Kakapo        -----AGGTCCTGCCCTGGGTCGGGGCAATCCCAGGCAC 35
GoldenEagle   -----AACAGGGATATTACAAAAGAGAAACACAGGTTTCAAGATGGCATTACTATAAAGGCAAAGGA 62
JapaneseQuail GAAAATTCATATGTTCTGTAGGAGTCCATAAAATAATCTCAAATAAGCCCAGGAACCTAATACTGTTTCTATGTAAGGT 117
MediumGroundFinch ----- 0
GoodesThornscrubTortoise@CAGTAAAAGGTGGTGTCTTCTGAGTGCTAATGACTGTG--GCATAGCTTTAAAGCCACTACAGAGATCCTATAAAATTAT 21143
    
```

```

Majority      TGTTAGAGGTTTGGGAGA--T-TAGATA--TTTACTTTAGCCTGGGGTGATGGCTTTGGTATTGTTTGTAAACAATAATC
              24730      24740      24750      24760      24770      24780      24790      24800
Human         TGATGGACATTTGAATAT--T-TAAAGATTTTGACTTAGGCCGGGCGTGGTGGCTCAAGCTTGTAAATCCCAGCACTTTGG 24762
Kakapo        AGCTACAGGCTGGGCAGA--GAAGAGA--TTCAGAGCAGCCTGAGGAGAAGGACTTGGGAGTGTGGTTGACAAGAAAC 110
GoldenEagle   GGTAAGCAAGACAGGCAG--TGAGATA--GATACATCAGA-TGGAAAGACAGATTTTCTACTAAGTACTGTAAGAAGTAGA 136
JapaneseQuail GCAAAATGGTTTGGGAGAACCTGTGATA--GATGGGATGTTATGAGAGCACAGCTCTGAAAAAGTTCTGCAAAACTAATT 195
MediumGroundFinch ----- 0
GoodesThornscrubTortoise@TTTATATTTAAAGGAAGATTTCTGGATACCAGTGCTTTACCCAGCTCTCCTGGTTTCCTTTTGGCTTCTGGACAATATTC 21223
    
```

```

Majority      AGATTTTGTGCTCTACATTTTAAGGTCGAGTGATGAT--ATGCTTGGCTTACTTAGTGTCATCAACATCACCGT----
              24810      24820      24830      24840      24850      24860      24870      24880
Human         GAGGCCAGGGCGGGCAGATCACAAAGTCAGGAGTTTGAGACCAGCCTGGCCAACATAGTGAAACCCCATCTCTACTA-- 24840
Kakapo        TGAACATGAACCGCTTCAGTGTGTGCTTGAGCCAGAA--ACCCCGTGTGCTGGGCTGCATCAACAGGGGCGT---- 183
GoldenEagle   AGGATTAGTACTTCTACCAATCCAAAACAGACAAGAT--GTGTTTAGATTTATAAGGGGGAAAAACGACAAAAA---- 209
JapaneseQuail ACATTTTCTGACATCAAAGTGTAAAGTGAATGGTACTTTCATATATCACTTACGTGACCTTCTAAAAATGACCGT---- 271
MediumGroundFinch ----- 0
GoodesThornscrubTortoise@TATTTTCAATTTCTAGGTATCTTTGGACACAATAATAGT--ATGCTTGAAGTGTGCTCCTTCCATCTTTTCT 21300
    
```

```

Majority      --AAGCTCCATTTTCAGGGCAGGGGATCTGATTGTTTCCTTTGCTCCGGATGGCTCCCTATTTAAGCACCGTGTGAACTT
              24890      24900      24910      24920      24930      24940      24950      24960
Human         --AAAATACCATAATTAGCGGGGTATGGTGGTGGGTGCCTGTAGTCCCAGCTACTCAGGAGGCTGAGACAGGAGAATCGC 24918
Kakapo        --GAGCAGCAGGTCGAGGGAGGGGATCTGCCCTCCGCTCTGCTCTGGTGAGGCCCACTTGCAGCACTGTGTGCAGTT 261
GoldenEagle   --AATCCCCAATACAGTACAAGAGAAACCAACTGTAACCTAACCTCCAATGGTGCAAAGTCTACTAACCATGCTAGAAT 287
JapaneseQuail --GAGACACATTTTAGGCCTAATTGTCAAATCTGATCTTTTGATCTGTATGGCTGCTTAGTAAAGAGCAGTATGAACTG 349
MediumGroundFinch ----- 0
GoodesThornscrubTortoise@TATAGTCTTTTCCAGCTTCTGGGAAAAACTATGATTCCTTCTCCCTGCTCCCAAGCTTTCTGTGCATCAGGACTAAAT 21380
    
```

Monday, May 02, 2022 06:50 PM

|                          |                                                                                   |       |
|--------------------------|-----------------------------------------------------------------------------------|-------|
| Majority                 | CTATGTTATTGAGTCGTAGATT--GAGTAAAGAAGTAACACTGCTTTCCATTCTACAGATGCTTTAGACTGAGTCTCAT   |       |
|                          | 24970 24980 24990 25000 25010 25020 25030 25040                                   |       |
| Human                    | TTGAACCCAGGAGGCGGAGGTTG-CAGTGAGCTGAGACCGGCCATTACACTCCAGCCTGTGTGACAGACTGAGACTCCA   | 24997 |
| Kakapo                   | CAACGTAAGAAGGACATGGAAC--TGTTGGAGAAGTCCAGAGG-----AGGCCACGAGGATGATCGGGGCTGGAGCACCC  | 334   |
| GoldenEagle              | CTACAGGAATGATATCTATATG--GAGTAAATATATAAAAATGCACCTGGATTTATAGAGATGGTTATAAGCAATTCTAAA | 365   |
| JapaneseQuail            | TTGTGTTTTGGTATTTAAGACT--GTAGAGAGCAGTAACACTCCCTTGCCCTTCCAAAATATGCTGTCTTCGAGGAGAAAT | 427   |
| MediumGroundFinch        | -----                                                                             | 0     |
| GoodesThornscrubTortoise | CATGTTATTTAATCGAAGATTCTAAACAAAAAAGCTATATTACTGTCAAGTTTTACTGCTACATTACAGTTAATGTGAT   | 21460 |

|                          |                                                                                     |       |
|--------------------------|-------------------------------------------------------------------------------------|-------|
| Majority                 | TCTCTAAATAAGCCAAATGTAATAATACCAGGTTTGAACGCTTTAACA-ATACAAGCTGTGTTGAGGACTACAACCATATA   |       |
|                          | 25050 25060 25070 25080 25090 25100 25110 25120                                     |       |
| Human                    | TCTCAAAAACAACAACAAAAACAACAACAAAAAAGATTTTGACT-TTAAGAACAATACTGCTGTGAACTTCTTTGTA       | 25076 |
| Kakapo                   | CCCATACGGACACAGGTTGAGAACATTTGGGGCTGTTTCAGCCTGGAGA-AGAGAAGCTGCGTGGAGGCCCTTAGAGCAGCTT | 413   |
| GoldenEagle              | TCTCTAAAGTCCTCAATGTTACTTTCAAGGATAGTACTTCTTTAACACATGCAATCCGTAAAGAATACTACAACCAGATA    | 445   |
| JapaneseQuail            | ACTACAAATAAGATACTGGAAAATACCCTGTGGGACTTGGACCAACA-AGACAAGTTCTGATCTGAACTCGAAAAAATA     | 506   |
| MediumGroundFinch        | -----                                                                               | 0     |
| GoodesThornscrubTortoise | TTTTCAAGTGAGCCAATATTTAAACACAATTTGAGAGAAATAAATTAGTTTAAATTGACTGCAAAATGGAAATGTTTCT     | 21540 |

|                          |                                                                                  |       |
|--------------------------|----------------------------------------------------------------------------------|-------|
| Majority                 | CTTTTTCTGATTGGAGCTATGTCAGTGTCTTCTTG-AGAGGATATTAGCATGTG--GGAATATATTCATTGTACACAGAC |       |
|                          | 25130 25140 25150 25160 25170 25180 25190 25200                                  |       |
| Human                    | CTTGTTTCTGTTGTCATTTATGCAAGCGTTTTTGGAGAGGTTATATTTAAAGGTATAGGTATATATTTACTAGTGTGTA  | 25156 |
| Kakapo                   | CCAGTGTCTGAAGGGGGCTACAAGGATGCTGGAG---AGGGACTCTGCATCAG--GGACTGTAGTGACAGGACAAGGGG  | 487   |
| GoldenEagle              | CTTTTTTAAAAAACAATAACAATGTTGAAAGCAAAAAGAATAGCATTTG--GCATGATGAACTTTGTATACAATC      | 523   |
| JapaneseQuail            | CTTTTACTTGGTACAAGGCTTGTAAGAATTACTTGAGTAACTTCAAACTTCAAT-AAAAGAAAGTAAATCAACACAGAC  | 585   |
| MediumGroundFinch        | -----                                                                            | 0     |
| GoodesThornscrubTortoise | TCTTCTCAAATTGGTCTTCTTCCAGGCTCTTATAGGGGCCACCAGCTGGTTG-TGAAAGACTTCATTGTACTCAGAT    | 21619 |

|                          |                                                                                   |       |
|--------------------------|-----------------------------------------------------------------------------------|-------|
| Majority                 | TGAA-TGAATGAAATGTTAATGAAGGATTTTGTAAAGATAGAGTTCATCCATATGTTCTGCCCTGTAGTGATTTTTGGTC- |       |
|                          | 25210 25220 25230 25240 25250 25260 25270 25280                                   |       |
| Human                    | TAACTTTATGAGACAGTACTAGATTATTTCCAGTGTATTGTTCTTATTTATGTTCTCACCAGTAGTGCCTAGGAGTTC    | 25236 |
| Kakapo                   | TGA--TGGGTTCAAACGAACAGGGGAAGTCCAAGTTAGATCTCAGGCAGAAGTCTTCCCTGTGAGGGTGTGAGGC-      | 564   |
| GoldenEagle              | TAAG-TAAATGAAATGTTAAGAGGATTTTATAAGAATGAGAATAACAAATCATTTCAGTCTAGTGGTCAGCAATGGGT-   | 601   |
| JapaneseQuail            | TGTT-GGAAAGAAATGTTGATTAAGGACATTGTTTGCAGGAGTACAAAAGATGAATAGCTACTAATAAATTTTAGGAC-   | 663   |
| MediumGroundFinch        | -----                                                                             | 0     |
| GoodesThornscrubTortoise | CGAA-CAAATGCA---CTAAAGAATTTTGTGAAAAATATTGATTTTCCATACTATTGGGCCTTAAAACAACACTATGGTC- | 21694 |

Monday, May 02, 2022 06:50 PM

```

Majority      --GCTGTTTCAAGTCGCCAAGAGAATTTGT---GGTTTCTGATTTC-TAATAGTGTTCAATTTTAGGTGGAATA----TT
              25290      25300      25310      25320      25330      25340      25350      25360
Human         TTGTGTTTTCAGATCCCCACCAGCACCTGGCTAGGTATTTAATTTCTTAATTTTAAACAATTTGGTGTGTAGTATATTCT 25316
Kakapo        --GCTGGCACAGGGCGCCAGAGAAGCTGT---GGCTGCCCCATCCCTGGCAGTGTTCAGGCCAGGTGGACA----CA 635
GoldenEagle   --GCTGAAGGCAGTTGCTGAAAGAGAAGGT---AGTTGCAGATATCCAAATGATATTGACATCTAGGAGAAGCAA---TA 673
JapaneseQuail --TTTGGTCAAATGCATCTAGGCGATTTAT---GAATTATGAAGT--TGATAAGAAGTATTAAAGATAGAATA----AT 732
MediumGroundFinch ----- 0
GoodesThornscrubTortoise-AAGATTTTAAAATGTGATTAGAGTATCC---AACTTAAACACC-TAATAGGGCTCAGTTTTTCAGAGAAATGGGGTTT 21768
    
```

```

Majority      TTGGT-----TTTGTGCAACCTAGACTATTGAATGGTGTCTACAA-----G-CTTTACCATTATAGGCATATGAAAAAT
              25370      25380      25390      25400      25410      25420      25430      25440
Human         CTGGTCTTCCTTTGTCTTACCCTGATTATTAATGAGGTCTTACATCTTTTTTCCCCCACATTTATGGCCATGGATGTTT 25396
Kakapo        GGGGC-----TTGAGCAACCTGCTCTAGTGGAAGGTGTCC-----CTGCCTGTGGCAGGGGGCTGGAACT 696
GoldenEagle   TCAGT-----TATTGTCCACCTAGTAAATTGATTGCTGCACAGAATCAGAGTGACTTTTCCAGAACAGGACAACAAAAAG 748
JapaneseQuail TTGGT-----TGAATGCAACAAAGACTGGAAAAATGAAATCATCAA-----G-CTTTACAATTATATCCAGAGGAACAA 799
MediumGroundFinch ----- 0
GoodesThornscrubTortoiseGTAC-----TTTGAGAAAATCAGAGCCTTTCAAGGTGTCTCAAGGTAGGTCTTCAGAATCATTAGTCACTTTTGAAAAA 21843
    
```

```

Majority      TCATATTGTGTAATTTTATTTCTAGTTAAACCTGTTTGTGTTTAAATAAACTGGATGCTTTTAATTTTCAG---TTATG
              25450      25460      25470      25480      25490      25500      25510      25520
Human         CTCTTTTGTGAAATCTGTAAATGCCTATTTGTGTTTTTTGC--TTGATAAAATGTGAGCTTATTATTTAACTGATTTTG 25475
Kakapo        GGATGAGCTTTAAGGTTCTTTCCAACCTGGGACCAGTCTGGTCTTACACTAACCTGAAGAAATTAATTACAA---TCAAG 773
GoldenEagle   TCACAGGGTAGAATGAGAATTTGCAGGTACTCCTAATTGTTAAGTTAGTTACTGGGCTGCTCATGGGGTCAG---TTAGA 825
JapaneseQuail ACGTATTAAGCAACACCATTCACTGTAAAATATAAGGAAAGCAAAGAGATAATGGAGGCATCTAGTTTTGG---TCATC 876
MediumGroundFinch ----- 0
GoodesThornscrubTortoise@CTTAGCCTATACTTTTATTTTACAGTCAAACCTAGCCACAAGTTTCAATGAACTGAATAATCTTAACCGAACTCTTCTA 21923
    
```

```

Majority      TAATGTGCAGATAG-GCTGGGGTTGTTAAATTTAGTCTTTAATCTCGGATTATGGAGATGTTGATAGACTAGAATTTGTT
              25530      25540      25550      25560      25570      25580      25590      25600
Human         TAGTTTTAAAAAATTTGCTGGGGGCGGTGGCTTGCCTCTGTAATCTCAGCTTTTTGGGAGGCTGAAGGAGGAGGATTGCTT 25555
Kakapo        TATTGTGGTAATGG-GCTACCTCCCCGAAATGTAGTTTTTAAACCCGTATT-TCCAGATCAAACATACTAAAAACAGAA 851
GoldenEagle   GGAGAGGCAGGCAG-ACAGGGGTAGTAAAGCCTAGTGAATAATTTCTGATTATGGAGATATGCATAGCCTTTTGGCTCTT 904
JapaneseQuail CAAACAAATGAAAA-GCTGTTACTGTACAAGTATATCCAGCAGCAAAGAAATAAAATTTCTTGACAGGAGTCAGTATGTT 955
MediumGroundFinch ----- 0
GoodesThornscrubTortoise@AATGCCAGATCC-GTTGCCCTTCTAATGGTAATAATAAATATTGGAAAAAGAGGAGGGAACCTTAAAAGAAATATAA 22002
    
```



Monday, May 02, 2022 06:50 PM

```

Majority      GATGTTTTAAGAAGGTT-----TGA CTGCAGTATTTTGT TTGAGATTTTTTA-AGGGTGT TTTTGTAACCTGCTCAGATT
                25610      25620      25630      25640      25650      25660      25670      25680
Human         GTGGGGCCCAAGGAGTTT-----AGGCTGCAGTGAGCTATGATCGTTCCATTGCACTCTAGCTTGGTGACAGAGCAAGACT 25631
Kakapo        GATGTTTTGAATAATTT-----TTAATATCTTTCTAAGTTTGGGATTTTTTA-GGAACGCTTGGATCACCTTTTCAAATT 925
GoldenEagle   AAATTTCTTTATCAGGCT-----CTATTGCAATATTTTCAGTGACAACTCCA-AGGGTCTTGCAGTAACCTGAAAAAATT 978
JapaneseQuail TGTTGTTTTAGGATTGAT-----TGACAACACGATATCGTCTCAAAAAAAAAA-AAAAAGTTGAAGTTCTCTGCCAGATC 1029
MediumGroundFinch ----- 0
GoodesThornscrubTortoiseGAATCCCTAACAAAGATGTTCTCTGAATGCAGTAATATAATTGTCATTTTTCAACGGGGAGTCTTGAAAATATCCTTGATA 22082
    
```

```

Majority      TAATTTGAATGAATTCAT-AAAACATTAGCTG-TTATACATTCTATGATTGTTCTTTGACATA--TCTTTTGCAGAAAT
                25690      25700      25710      25720      25730      25740      25750      25760
Human         TTGTCTGAAAAAAAAAAAAAAAAAAGTGTGTG-TTTTACAGTTACTGATTGTCTTTTGGTTAT--TTGTGTTGCTGGTGT 25708
Kakapo        -----TTACTTCAT-ATGACTTCAGGTTTGAATGCATTCCAGGATCGTTCCCGTACACA--GCTCTTTGCAGAAAC 993
GoldenEagle   AAAGTGCAATCAAGTAAT-GGGCTTCCTCCTCAAAATCTATTTTAAAGAACAGCATTGCCAGA--TCAAAATACAGAAAA 1055
JapaneseQuail TCTTGAGACTGAGGTGAT-ACAAGATTAGC---AGGTACATTCTTTGATATATGAATAACTTA--TTATTTATCAATTAT 1103
MediumGroundFinch ----- 0
GoodesThornscrubTortoiseAACTTTTCAGGAATTCATCAAAAATAAACCCTGTTTCTCAGTCCAGCTCTCTTATGAGACATAAGCCTCTGAACAGAAAA 22162
    
```

```

Majority      TATTTCTGAATTACTGTATGTTTTTTTTATGAAATTTTGAGGCTGGGTTGTCTATGTGTCTATTGAAGCGGGA----ATTT
                25770      25780      25790      25800      25810      25820      25830      25840
Human         CTTTTCCCAGTT--TGTAGCTTGCCTTGTCACTTCTTTATGCTGTCTTGTCTGTCTGTCTGTCTCCCTCCCTCCCT 25786
Kakapo        TGCTCTCACACAGTGTAAGATTTGTGATGAAATACTGAGACCTGGAT-----GTGAATAATGAAGGGGAA----AAGT 1063
GoldenEagle   TACAGAAGATGTTTTGAATATTTTTTAATACACTTCCGGGTTTGGGATCTTCTAGGAACATTTGGATCACAT----TTTC 1131
JapaneseQuail TAATAGTGGATTACTACAAGATTTTATATAAAGGTACAAGAAAAAATAGTCTATATTTTTACTGAAGAGGGAGGTCACCT 1183
MediumGroundFinch ----- 0
GoodesThornscrubTortoiseATTGACTAACTCCCACATCTGTCTGGTGAGATCTAATGGACAATCCTTCCAGCTGTATCCAGAGCCAGGAAAT-ATTT 22241
    
```

```

Majority      GTATTTCCCTGCATGCGTGTGTACTGTTCAAGTTTGTCTTTTACGAC--GTCGTATATAGGGTGCTTCTTGGAATGGTTC
                25850      25860      25870      25880      25890      25900      25910      25920
Human         CCCCCTCCCTCCGTCGGTCTGTCCCTCCCTCCCTCCCTCCCTCCCTCCCTCCCTCCCTCCCTCCCTCCCTCCCTCCCTCCCT 25866
Kakapo        GTATTTCCAAGCAGCCACGTGGAGCGAATGGTTTGTACCTGACGTG--GTAGTTTACAGAGAGCTTCTGTGACCGGTTT 1141
GoldenEagle   AAATTTTCCCTTCATAGGTATAAAATCCTTAGTTTACTTTTTGTAA--ATCCAATCTAGGATTGTCCAGGAACAGCTC 1209
JapaneseQuail GTAGCATACCACAGGGACCTGTGCTGTTTCAGCATATTCTTAAATGAT--GTGGAAAAAGGAGTGATTATTGAGGTGACCA 1261
MediumGroundFinch ----- 0
GoodesThornscrubTortoiseATCCAGCTTTGCAAGCGAGAGGTGAGTACAGATTCTTCTTCAACCACTCATAATGTAAATGATCAACTAAGGTATAATTA 22321
    
```

Monday, May 02, 2022 06:50 PM

Majority AGTCCTG----GAAGCTAAATTATAGATTATTG--TAGTCTGTGATGGTTTACTACGGAGACTTATGGTATAAAGTCTCGA  
 25930 25940 25950 25960 25970 25980 25990 26000  
 Human CTTCCTTCCTTCTACTTTACTTTAGATTTCAGGGTTACATGTGCAGGTTTGTTCATGGGTATATGGCATGAAGCTGAGG 25946  
 Kakapo GGGTTG----GAAGGGACATTAAGATCATC---CAGTTCCAAGCCCCTGCCACAGTATCTCAGTGTTTAACATCCCAA 1213  
 GoldenEagle TTTCTA----GAAACTCGGTATCAAAATTG--TAGGATTTGTGATGAAATACTGAGACCCGGCATAAAAAATACTGGG 1282  
 JapaneseQuail AGTTTGCTGATGATGCTGAATTATTCATGGTAA--TAAAAACAAAAGCTGACTGTGAAGAATTGTGGAAAGCTCTCATGA 1339  
 MediumGroundFinch ----- 0  
 GoodesThornscrubTortoiseAGCCTA----AAAGGAAAACCAAGCATTTTTTC--TTATTTCAGATTCTTGACCAAGACTACTTAAGGCTTATAGGTTCTGA 22394

Majority TAT---TACAAG---CCTGTCTGCTAA--TGTCAGCTTAATACGTACCGTTTGGATTTATATTCGTGTCTCTCTGCGA  
 26010 26020 26030 26040 26050 26060 26070 26080  
 Human TTTGCAATACAAGTGATCCTGTGTCAGCCAGAGAGTGAGCTCAGTACCCAACAGTTAGATTTACAATCCTTTCTCCCTCCCC 26026  
 Kakapo CAT---TAGAAG---CTTCAGGCTTAA--TGTCCTCCCTTAGACAAACTGTAGGGGCTCATTCGCGTGCTTATCAGTGT 1283  
 GoldenEagle GGG---AAAAAG---CCTATTTCTCTAA--TGGCCATGTAGAGCGAACAGTTTGTACCCTGATACG--GTAGTTTAGAGA 1351  
 JapaneseQuail TAC---TCCATG---ACTGACTGATAAAATGGCAAGTTAAATCTGTCTCTGAAAAATGGAAGTAATATGTAAAGGAGA 1411  
 MediumGroundFinch ----- 0  
 GoodesThornscrubTortoiseAATGTCATTTAAA---AATGTATTATAGGTCAACAGACTAATAGGTTTCATCTCTAATCTATCTCTCTGGCTCTCTGCCA 22470

Majority GCACCATTAGTTTACCAGTTTATA-TGTCGAGGAGTTCGACTTATTCTGATTTATTAGTTTTTAAGGTGACTTTAAATGTT  
 26090 26100 26110 26120 26130 26140 26150 26160  
 Human CCACCCTAGTTTCCAGTGCATATTGTTGCGGATTAATACAGATTCTTAATGTATAGTTTTAATGTGGCCACAAATTCC 26105  
 Kakapo GCTTGATAAGTTGATCTCTTTATA-ACTCAGGAGGTCGTATTTATTCTGATTTATGTGGAAAAACAGACTTTCAAAGAG 1362  
 GoldenEagle GAACCATGGCTACACCAGTTTCTG-TGAAGAACAGCCTAACACACTGCAATAGTTAATTTTTATGTTTCATCTGAATTATT 1430  
 JapaneseQuail AAAAAAAAACAAAGCCAAGCTATACACAAAAATGCTGGAATCTAAATGAATTACTACCATGCAGGAAAGAGCTTAAGTT 1491  
 MediumGroundFinch ----- 0  
 GoodesThornscrubTortoiseATGAATTTATATATATGTGATAGTATTGACATGAGTCAGAGTTCTGCTATCACACTCAAAGCATCATGACTATGAAGCCT 22550

Majority CTTTGAAGCTAAGATATTATTCTTTTTCA----GCTTCCAAGGTTGTATACT-AAGAA-----TGGCTCTTCTATAAA  
 26170 26180 26190 26200 26210 26220 26230 26240  
 Human CTTTGCATCTTAGATAAAAAATAATTTATA---TGATCCCATTCTTTACACATTCCAATTTTCTTTGCTCTTCTGGACA 26182  
 Kakapo CCGTAAAGCCCCACGGATACTTTCCCTCA---GCATCCAAAACGGGTGCAC--AAGA-----TCCCTCTGCTATGTA 1429  
 GoldenEagle TTTTGAATAGTATTAGTGGTCAGCTATA----TAGTCAACAGGTTGTTTCTTAAGAA-----TGACTGTGTAGCCGA 1500  
 JapaneseQuail CTGTGAAACTAACAGCTCATTTGTTTAGCA---GCACTCAAATGTGGAAATC---AGAC-----TGGCTTTATCAGAAA 1558  
 MediumGroundFinch ----- 0  
 GoodesThornscrubTortoiseATATAAAGAGAAGATATAATCCTTGATCACTCTGTTTGTAAAGGAAGCATGATTTAGAACAG---TAGCTACTCCATAAC 22627

Monday, May 02, 2022 06:50 PM

|                          |                                                                                  |       |
|--------------------------|----------------------------------------------------------------------------------|-------|
| Majority                 | ACTCA---TTGAGTGATGGATCTAGTGCACGCTTTTACAATTTGTAGTTTTAAAGCATTTGGCTTTTT--GCTTTGTGC  |       |
|                          | 26250 26260 26270 26280 26290 26300 26310 26320                                  |       |
| Human                    | TCTTCCATGTTGATTGCTGGAAGTCTTGAAGGCAATCCCAATAACAGTTTTTAGCTTTTCAACTGTTGCTGTGATACGG  | 26262 |
| Kakapo                   | CTTCA---CTGGATGTTTCATCAAGTAAATGCTTGTTTTAAATGAAAGCTTAAACATCGTAATTCTT--CCT--GTGC   | 1501  |
| GoldenEagle              | AGGCA---CTGAGTGATGAGGACAGGGCTCCCTGTGAGGGTTGGGTCTCTGAGGGGACGGGGTGCCCGAGCCTGGCGC   | 1576  |
| JapaneseQuail            | AATAA---TAGAAAAACAGAAATAAAACAAGAAGAAAAATAAATGATATAAAAGCATTTGGTTTGTAAACGAATAATGA  | 1634  |
| MediumGroundFinch        | -----                                                                            | 0     |
| GoodesThornscrubTortoise | ACTC-----TCGAGAAATGGCTCTGCTTCCCTCTTTTGCACCGTGTAGTTCTCAAGAACTTCTCTTTCT--GATTTGTCC | 22700 |

|                          |                                                                                   |       |
|--------------------------|-----------------------------------------------------------------------------------|-------|
| Majority                 | TGCCTTTCA-AGTCTTTTATAGTGACGTTAAGAGGGGTTTTTATGAAGCCTGGCTGTTTTGGCGTCAAATTCGAAAAGTC  |       |
|                          | 26330 26340 26350 26360 26370 26380 26390 26400                                   |       |
| Human                    | TTTCTTATAGAGATTTTTGTAGTAGAATTTATCAGTATTTTCTTTTATGTTTCTAGTTTCTTGTGTCTTAATTTAAAAATC | 26342 |
| Kakapo                   | TGCCATGA-AGGATATAACAGTGACTTAAAGTTGGTATCTTATGAAGCCTGGCGGTGTGCCGACCCTTCCAAAACAGC    | 1580  |
| GoldenEagle              | GGCTCTCT-GAACGTTTTCCATGACGAGAAGGGGCAGGCTCCCGCGCCGGGAAGTTTTGGCACCGAGCACGCAAAGTC    | 1655  |
| JapaneseQuail            | GGATCGTCACAGTCTTCTAGAAATAAAATTAGGAAAGGTGTGGAGTAAGGCTAATTGAATTACTGG-AAATATGGAACGAC | 1713  |
| MediumGroundFinch        | -----                                                                             | 0     |
| GoodesThornscrubTortoise | GGTCTTTCATTTTCTACTATTTCTGGAACAAGAGCTATTTATGAC-CTTGTCACTTCTGTATCAGATTCCATAATAC     | 22779 |

|                          |                                                                                   |       |
|--------------------------|-----------------------------------------------------------------------------------|-------|
| Majority                 | TTCCATACTGCAATCGCTAAATTGTA-TATAGATTCTGATTGAAGTTTAAAGGAGCTGT-CTGCATGCATTTACCCCATTT |       |
|                          | 26410 26420 26430 26440 26450 26460 26470 26480                                   |       |
| Human                    | CTTACATACTCAGAGTTCATAAAGATACTATATTTTCTTCTGAAATTTTAAAAAATTTGCTTTTTATATTTATCAGAAA   | 26422 |
| Kakapo                   | CTAACCCACTGCAATAGCTAATTTGTA-CGTTCATCTTAATTACTGTTTGGAGTACTAT-TAAGAGGCCAGAAGGTGTT   | 1658  |
| GoldenEagle              | TCTCCGCGCAACAAGCGGGTCCGGCGGTCCAGACACCGCCCGAGGACTGAGGAGCCCC-CGGAGCGGGCCTGCCCCAC    | 1734  |
| JapaneseQuail            | TTCCAATAGAGGAGAAGTTAAATTTACAAAGAGTCTCTAAATTAATTTGAAGGAGGTGT-ATGCATTCATGGACGGCATG  | 1792  |
| MediumGroundFinch        | -----                                                                             | 0     |
| GoodesThornscrubTortoise | GTCTAAGCTGTTGTCTTCATAGAATA-AAAGAAGGAAGAGGGCAATTCATATTTCTGT-AACCAGGATATGACCTATTT   | 22857 |

|                          |                                                                                   |       |
|--------------------------|-----------------------------------------------------------------------------------|-------|
| Majority                 | GTTATACGTAGGTCTCGAGTTCCTAACCATCTGGTTGCGTGAATTTGGCGGTTTCCGAGG-GGTGTTTCTCCTTCGCACA  |       |
|                          | 26490 26500 26510 26520 26530 26540 26550 26560                                   |       |
| Human                    | ATTATTTTTGTGATTTGATTTAGTAGGGATCTGGTTTTCATTTTTTTGCCCTTATTAAGATAGTCAATTAATTTGAAATC  | 26502 |
| Kakapo                   | TCCTTACAAACGGGCCGCTACCCGAAGCACCGGGGGGCTTGCCCTGGGGGTGCCCGGCTGGCGCGGCCCTCTGCACA     | 1738  |
| GoldenEagle              | CGCCCCGGCGGCCTCGGGCCTCTCCCGGGCAGGACCGTGAGTTCGCGCTCCTCCGAGGCGACCTCTCTCCCTCGCGCA    | 1814  |
| JapaneseQuail            | GTTAGGAGAAGACAGAAAGTTACCTATCTATTTTGTAAAGACAACCTAACGGATTATAAAG-GATATTATTAGGCAGCAAG | 1871  |
| MediumGroundFinch        | -----                                                                             | 0     |
| GoodesThornscrubTortoise | SGTGAAATACATCTGAAACAACCTTACCTTCACACAGCCCAAAGAGTCTACCTACTACT-AGTGCTACCCCAACAGTGA   | 22936 |

Monday, May 02, 2022 06:50 PM

```

Majority      TTTGTAATAAGTACTTAGACGTTTCGTTTGTCTCTGTGTTAAGGGTCT--CTCCCGACTCGTTGTTCTGTGATGCTGTGG
              26570      26580      26590      26600      26610      26620      26630      26640
Human         TCTGTAATGACTTTTTTCATATTACAGGTATATATATATCGTAAGGCCAAAGGCTGAAAAAATCATAACAAAATGCAGAAT 26582
Kakapo        ATTCATGAGGAGACGGGACATGCTCCCAGCGCCGGGAATTGTGTCCCGCTCCTGAGGCGGGAAGCGGTTACGCCGGGG 1818
GoldenEagle   CGCACAACCGCTCCCAGCGGTGCGCTGGGGCGGGAGGAGCGGGAAC--CCCCCGCTCGCTGCGCGGGTCCCGGG 1892
JapaneseQuail CTTGAAACAAGCAGTAAGAAATACGTTTAAACACAGTGTTTAACTATGT--TGTGCAACTGCTGTTTGAATGCTGTGA 1949
MediumGroundFinch ----- 0
GoodesThornscrubTortoise@TCATAATAAAGACTTT--TGTTTGTGTTTTTTTTTAAAGCCTTCT--CTCTCCTTCTCCCTCTCTGGTCTTATA 23012
    
```

```

Majority      CTGGTAAGGGAGATAAAAATCGTTTTTGTGCGC--CTTCCCTCTTCCCGCCCAGGCGGGGCAGGATCGGGGCATCTT--CG
              26650      26660      26670      26680      26690      26700      26710      26720
Human         ATGGTGGCATAAATAAAGAGTTTTTTTGTGTTT--CTTTTCTGTGCATAGCAGAAGTCTGTTGGTATAAGAAAGTGGTATC 26661
Kakapo        CAGGAATGGGTGTCTGTTGTCCCCCTCCCCGCCGCCAGCTTCCCGCCTCGGCGGGCCTCGATCGCGCCACCTCCGG 1898
GoldenEagle   CGCGGGCCGCGGAGGAACCCGCTGCCGCGCCCGCTTCCCGCTTCCCGCCCAGGCGGGGCAGGCTGGCGGCGCCTCGCG 1972
JapaneseQuail ATGCCAAGAGGGAGAGGATAAACCTGGTCCG---TTTAATACCCCCGCCAGGCGGGCAGTGTCCGGGCAGCT--- 2022
MediumGroundFinch ----- 0
GoodesThornscrubTortoise@TTGTAAGCACTTAAAAACATTTTTGTAAAAATAAAAAATAATTTACGACAAGAAGCAAAAGATCAGATTATTTTTTCA 23092
    
```

```

Majority      C-TCTGCT--ATGGCGGCAGCTTCAGGGTCGGGTA--TTTACATGCTCGGACGGCTGGTGCCTGCTCGGTTGGCGTTTG
              26730      26740      26750      26760      26770      26780      26790      26800
Human         AGTCTGCTCCATAAGGTTATTCACTGGGCCAAGTTTCTTTTCATATTGTTGCTTCACTGATCCCTAGGCTTTTGTCTTGG 26741
Kakapo        CACCCGCTCATGGCAACGGCTTCAGCGCCGCCCG--GGGCGCATGCTCGGGCGGGCGGCATGCTCGGTTAGCGGCGG 1976
GoldenEagle   ACTCTGCTCGGCCCCGGCAGCT--GATGGCAGAAA--CTTCAGCGGCGCCGACGGCGCATGCCCGCGGACTGGCGCATG 2048
JapaneseQuail ----G----ATGGCAGAAGCTTCATGGTCTCGTA--CTGCGCCCGCTCGGAACTCTGGCGCATGCTCCG-T----- 2082
MediumGroundFinch ----- 0
GoodesThornscrubTortoise@TTTACT--TGCTAAGATTTTAAAGTGGGAT--TTTCAAAGGAACCCAAGGAATTAGGCATCCAGCTCCCATTTA 23166
    
```

```

Majority      CTCGGGAGGGGGTTGAC--GGGAGCGGACTCCCGCCCTCGGTAACGTTTCGGCGTTTTTCCGTGCAGGCCAGGCCCCATT
              26810      26820      26830      26840      26850      26860      26870      26880
Human         CTATGTGGTCTGTTGATGTGTGATTGTGCTCTTCTCCTTGTTTAAAAAAAAGTTTTCCCTGTATTTGTGTATTTTCATTG 26821
Kakapo        AGCGGGAGGGGGGCC--GGGAGCGGAGCGCGCGCTCGGTAACGCTCGGCGGTTTTCCGTGCAGGCCAGGCCCCATT 2055
GoldenEagle   CTCCTAGCGGCGAGG--GACGAGCGGAATCCGGCACTCGGCAACGTTTCGGCGGTTTTCGTGCAGGCCGGGCGCCATT 2126
JapaneseQuail ---GTGAGCGAAGGAC--GAGGAGCGGAATCCGGCCCTCGGCAACGTTTCGGCAATTTCCGTGCAGGCCCGGCCATT 2158
MediumGroundFinch ----- 0
GoodesThornscrubTortoise@TTCAGTGAGACTTGAGTACCAAATTTCCCTAGTCTCTCTGAAATTC--CATTACAATTTCTTCAAATAGACGGTG 23244
    
```

Monday, May 02, 2022 06:50 PM

```

Majority      TCTGACAGCGTTCCCGTCCGCGTTTGTCTGCGCGGCTGTCTGTCCCCTTGTTCAGCGCTTTGTCC-TGCTCGGCGAT---G
                26890      26900      26910      26920      26930      26940      26950      26960
Human         TCTTTTTTTTTTAAAGTCAGCTTTTGATTTTACTGATCCTCTTCATTGTACCATTGTTTCTCTATTTTTATTGGT--TG 26899
Kakapo        TCTGACCGCGTTCCCGTCCGCGTTGCCCGCGCGGCTGCCCGTCCCCTTGCCCGCGCTCTGTCC-TGCTCGGCGAT---G 2131
GoldenEagle   TCTCACAGCCTCCTCGTACGCGTGCCTGCGCGGCTGTCTGTCCCCTTGTCCGCGCTTTGTCC-TGCTCGGCGAT---G 2202
JapaneseQuail TCTCGCAGACTCTCCGTGCTCGCGTGTGCGCGGCTCTCCGTCCCCTGGTCAGCGCTTTGTCC-TGCTCGGCGAT---G 2234
MediumGroundFinch ----- 0
GoodesThornscrubTortoiseAATGATACGGCAGATAGACACCTTCTCTTCCCTCAAGGATTTCTGTACGTTAACCTTTTCTCC-TATTTTTTCATATTG 23323
    
```

```

Majority      GACGGGTGAGT-GTGAT-CGAGGCGGTG-----A---G--A-T-----G-CTTCGTCGCCGG-TCGGTGGGGGCGACCT
                26970      26980      26990      27000      27010      27020      27030      27040
Human         CGTGAGTCAGGGCTTTTGCAAGTCTTTAATAGGTAGGTGGTATTTCAGTCCACTTCTTCATCATCTTGGTGGCACCTCTGT 26979
Kakapo        GACGGGTGAGTCGCGAT-CGCGGCGGTG-----G-CACCGCCGCCGG-TCGGTGGCGTCGACCT 2187
GoldenEagle   GACGGGTGAGTAGTGAG-CGGGGCGGTGTGGGCGAA--GGTACTGCCCGGTTGTGCCGCCGG-TCGGCGGTGG-GACCC 2277
JapaneseQuail GACGGGTGAG-----AGCGACG-----GCCGACGCTGG-TTGGGGGGGTGGGAT 2278
MediumGroundFinch ----- 0
GoodesThornscrubTortoise@CTGGGTGACTTGCAAATAAAACGAGGTAAAGAATCTGTAATCTTATTGCATCATATTGG-CCTCACAGGCCATCAT 23402
    
```

```

Majority      GTCCCGCGCCAGGG---CGC-----CGTCTCGGTGGGTGCGGGGAGC-GGCCG
                27050      27060      27070      27080      27090      27100      27110      27120
Human         TTAAGGAGACCAGGAATACTCACCTGGGTACGTACCTTTCTTCTCTCTGATAATCTATTTTCTCAGGAACTTAATAT 27059
Kakapo        GTCCCGTGCCAGGG---GC-----GTCCCCGAGGCTGCGGGGAGC-GGCCG 2230
GoldenEagle   GTCCAGCGCCGGGGGCTCGCTCCCCGCGCGGCTGGCTGTGCGCGGGCGGGCGTCTCCGCGGTGTGGGGAGC-GGCCG 2356
JapaneseQuail GAGGCCCGCCGTGC---CGC-----CCGCTCGCTCGGTGGTGGCACC-GCTCC 2323
MediumGroundFinch ----- 0
GoodesThornscrubTortoise@ATCCACGATCATGAAGACATATT---T---GTAGGAAAACCTTCAACATTTTCACTTCTGACCTTGGCAGGTGA-AACTA 23474
    
```

```

Majority      CTGCGCCGGAGGCGGTGGGGACGGTGCGGTGTTCCTCCG---CG---GCCGCTGCGGGGAGTACGTTGGTCGGAAGGGTCTCA
                27130      27140      27150      27160      27170      27180      27190      27200
Human         TTGTGTCTTGTCCCGTGTCTTTCTGTTCATGGTTCCTAGGCTGCCATCTCCACAGGAGAAAATGTTTGGTTAGTTCTCA 27139
Kakapo        CTGCCCCGAGGCGGTGGGGACGAGGCGGGCTTCTC-----GCCCGGGACGGCGGTGGGCAGAAGGGGCTCA 2299
GoldenEagle   CTGCCCCGAGTGGTGGGGACGGGCCGCTTCCCGC-CGCCGCGCAGCTGAGGCCAGTACGAGGGGGGAAGGGGCTCA 2435
JapaneseQuail GCACGCCGGTCCCCTGGCGGCTTTGGGGTGTGGGAG-CG---GCCGCTGCCCGCGGCACGGGGACGGCGGGTACTG 2398
MediumGroundFinch ----- 0
GoodesThornscrubTortoise@TAGTTTAGAGTCTAAGAGAACGGATCTGGAACAACCTCTGTTAAGCATTGATAAACATTCTGCAGTCAGAACATACATA 23554
    
```

Monday, May 02, 2022 06:50 PM

```

Majority      GCCGCTTGGTA-ACTCGGGCCCTCG--GTGGG-GCCCTCCGCTTAAAGTGCTGGGGGCTCTGGGCCGCC-CCCTACTT
                27210      27220      27230      27240      27250      27260      27270      27280
Human         GTCCCAAACCATAGCAGAGCCCAGAGACTCTTGTACCCTCAGCCTTCAAGTCTGGTTGCCTTCTTCGCAGACCTGGCA 27219
Kakapo        GCCGCTCCGTA-ACGCGGGCCCTCG--GCGGG-GGCTGCCGTTTAAAGTGCCGAGGGCTCTGGGCCGCC-TTGTACTT 2373
GoldenEagle   GCCTCTTCGTA-GCGCGGGCCCTTCG--GTAGG-GTCTTCCGTTTAAATTTGCTGGGGGCTTTGGGCCGCC-CCCTACTT 2509
JapaneseQuail GCTGCGGGAGG-ACTGGAGT-----GCGGG-GCCCTGCGCGGGATGGGAAGGGGGAACCTGGCCTCC-CCGCAACG 2466
MediumGroundFinch ----- 0
GoodesThornscrubTortoiseAGGATTTGGAGTACTTGGCTTCCAAA--GTACACAACCTTTACCAAAACAGACTTCAAATCAAACACTCT-AACTTATG 23630
    
```

```

Majority      CTGTGTGCACCTGGGATTTTTGCTTTGGATGTCCAGAGGGCCCA--CTGTT-TGCTCCCCGCCGTCTCTTGTATCGATGC
                27290      27300      27310      27320      27330      27340      27350      27360
Human         GCTCTTCCACCTGAAAGTGATACATGGTATTAATAGTTGGACTAGACTATTATGATAAACAGAGTATCTAATAACCATGA 27299
Kakapo        CGCGTAGAGGCGCCCGCTCTAACGAGGGAGCGCATCTGCCCA--TCTGT-CCCCTCCAGCCCCGAGTGTCTCGTTCT 2450
GoldenEagle   AGTATAGTACCCGAGATGCTGGATCTGGCTGTAAAGAGGGAGCG--CTGTC-TACCCCTCCGTCCTCCAGAACCTC 2586
JapaneseQuail CTGGCCCTCTTGGGGTCTTGGCTTTACACAGCCGAGGGCTTCGGGCCGTG-GGATCCCGCCCCCTGTGAGGCGGCGG 2545
MediumGroundFinch ----- 0
GoodesThornscrubTortoise@TCCTTTCAGAAAGGAATTCTTCCCAGTTGTCCAGAGGTCCCAATCTCTC-TATTCATGTTATTTCTGGTATCAATAC 23709
    
```

```

Majority      GTATAGTTTCTGCTACCCCTCGCGCTTGCCCTCGACTGTGGGTGGCGTGTGAGCCCCGTAGGGTTTGGGTTTGTFTTTG
                27370      27380      27390      27400      27410      27420      27430      27440
Human         GAATAAAAAACAAGAAATTTGTAACATTGAAATGAGTGCTAAATGGCCTTTAATCTGTACTTGTCTTTGCACATTTTTTT 27379
Kakapo        GTCCCGCTTTGCCTACCCCGAGCGCCGGTTCCCCCTCCTCAGCCGTGGGGAGCCTCTTCGGGCTCGGGTTTGTFTTTG 2530
GoldenEagle   TTGTTCTTTCTTCTCCCCCCCCCGCCCGACCGTGGGGTGAGGAGGAGCGCTCTGTAGGGTTCGGGTTTGTFTTTG 2666
JapaneseQuail GTACAGTGTGCTGCTACCCCT-GCGCTGCCCTCGGCTGCCCTCGGCCCGTCCGTTCCCCCAGGCGCTGGGGTGTFTTTG 2624
MediumGroundFinch ----- 0
GoodesThornscrubTortoise@TTTACATCCTTGCAATTTCTCAAAGCTATGTGGTGTAGGGTGCAGTCGTCACCCAGAGTGTFTTTGTATTTCACTT 23789
    
```

```

Majority      GAGCTGGCTGGAGTGGAGGAGCGA-TA-CCTGCAGGAGCC--ATTCGAGCTCTTTTGTFTTTCAGAAGCTGCTTAATAAG
                27450      27460      27470      27480      27490      27500      27510      27520
Human         TTAAGTGGTTTCTTTCTCTGACGTGTAGAGTGTATCTTCTATTTCTGAATTTCTTGTCTTCTGTGGGATGTTAGTTTCT 27459
Kakapo        GAGCCGGCTGGAGGGGAGGAGCGA-TA-CCAGCAGGAGCCAGATGTCGAGCTCTTTTGTFTTTCAGAACTGCTTAATAAG 2608
GoldenEagle   GAGCTGGCTGGAGGGGAGGAGCAAATA-CCAGCAGGAGCCAGATGTCGAGCTCTTTTGTFTTTCAGGAGCTGCCTAATAAG 2745
JapaneseQuail GAGCAGGATGGGGAGGAGGAGCGA-TA-CCGGCGGGAG---A--T-----CTTTTGTFTTTCAGAACTACCCGCTT-G 2689
MediumGroundFinch ----- 0
GoodesThornscrubTortoise@AGCTATATATATTTATATCAAATTAGTTTTTACGAGTC--ATTTGTGACTCCTTTGCGTG-AAAAGTCCATAAATAAC 23866
    
```

Monday, May 02, 2022 06:50 PM

|                          |                                                                                  |       |
|--------------------------|----------------------------------------------------------------------------------|-------|
| Majority                 | CCCTCTGACTTCTCCCCATC-C-CAGGTAGAAAGATGCCTTTGTGCGTGTGGAGACTGGTTGTAGATGCCATA-----   |       |
|                          | 27530 27540 27550 27560 27570 27580 27590 27600                                  |       |
| Human                    | CTTGAAATGGTCATTGATATTACTCAGGAAGAAAAGTTTCTGTGGTCAGATTTAATAAGAGATATCTATGCTAGTC--T- | 27536 |
| Kakapo                   | CCCTCTGGCTTCTCCCCCTC-CTCAGGTAGGAAGATGCCTTTGTGCGTGCCGGAGACTCGCTGTGAAGGCCATA-----  | 2682  |
| GoldenEagle              | CCCTCTGCCTTCTCCCGGC-C--AGGTAGAAAGATGCCTTTGTGCGTGTGGCGACTGGCTGTAGAAGCCAAA-----    | 2817  |
| JapaneseQuail            | CCCTCTGACTTACTCCCTCC-C-CAGGTAGAAAGGTGCCTTTGTGTGTGTAGGAGACGGGTGTAGGAGCCAGA-----   | 2762  |
| MediumGroundFinch        | -----                                                                            | 0     |
| GoodesThornscrubTortoise | ATTTGAGAAGAAAATCCTAGA-T--GCTTGAATAGATTATTTTAAAGGTGAAGACAAGACTAACAACTGCTATGTATTC  | 23943 |

|                          |                                                                                   |       |
|--------------------------|-----------------------------------------------------------------------------------|-------|
| Majority                 | -GAAGGGAAGTTT-----TTGGAGGAGTCTACCATT--TAGGACAGCGAGGTCCTTCGGTCTCGTTGGTAGCGGGGGTG   |       |
|                          | 27610 27620 27630 27640 27650 27660 27670 27680                                   |       |
| Human                    | TAACATTTAATTT--CTTTTAGTTGAATCTAAAATTGATATCATTCTTAGATTAATTAATAAATTTTTTAAAGAGCATGTA | 27614 |
| Kakapo                   | -GAAGGGAAGGTT-----TAGAAGGAGTCAGCCATT--CAGGACAGAGAGGGCCCTCGGTCTGGC-----CAGGGCTG    | 2748  |
| GoldenEagle              | -GAAGGGAAGGTT-----TTGAAGGAGTCGGCCATA--TGGGACAGCGAGGGCCCTCGGTCTGGCTGGGAGCTGGGGTG   | 2889  |
| JapaneseQuail            | -GAAGGGAAG-----TCGGAGGAGTCGA-----GAGGCAACGAGGCCCTCCG--TCTGGAGGGTAGCGCGGGTG        | 2823  |
| MediumGroundFinch        | -----                                                                             | 0     |
| GoodesThornscrubTortoise | GGAAAGCAGTTTTGTCTTTGCTTAAGATTAGGGTT--CAGGGCTCAGAGTTTTTCTAGCAATAGTTGATGACATCATT    | 24021 |

|                          |                                                                                  |       |
|--------------------------|----------------------------------------------------------------------------------|-------|
| Majority                 | GG--CAGTCACTGTGCGCT-GGCCTTCTTTATTTTGGACCTGGACAATGAG-GTTGATGTTG---GTCGTCT-TCATTA  |       |
|                          | 27690 27700 27710 27720 27730 27740 27750 27760                                  |       |
| Human                    | TTCTTTAGTATTTTGATTCTAAGTACCACTAATTTGATTTGTTTCAACAGTCATTAATGTGGGGCAGTCATCAATCACTA | 27694 |
| Kakapo                   | GG--CAGTCACTATGCACA-GGCCTTCTTTTGTTCGACCTGG-----TGATC---GTAGCCT-TCCTCA            | 2806  |
| GoldenEagle              | GG--CAGTCACTGTACACAAGGCCTTCTTTCTGTTGGACCTGGAAAATGAG-GCTGGTGGCT---GTAGCCT-TCGTCA  | 2961  |
| JapaneseQuail            | GG--CAGGCAAGA-GCGCTCAGGGCCCGAAGTTTGGACCCGAAGAGGGAG-GGAGCTGCTCTGT-GCTGTCT-TCATGA  | 2897  |
| MediumGroundFinch        | -----                                                                            | 0     |
| GoodesThornscrubTortoise | ACACCTACAGCTGAGAGCTGCACCCTCAAAGCACAGATTAATACTATTAGAGTAAATGTTGTCC-TTCATCA-TTTCTG  | 24099 |

|                          |                                                                                     |       |
|--------------------------|-------------------------------------------------------------------------------------|-------|
| Majority                 | GTGTAATAACAACATCTCCAGCTGCTATATGTCCTAT--GAGTTGTTTGTCTCTGGTTCAAACAGAGAAGCAATCTCT-T    |       |
|                          | 27770 27780 27790 27800 27810 27820 27830 27840                                     |       |
| Human                    | CCATTGATCATTTATTTTCATATACATTGTAAGTTAAAT--GACCAGGCTGAAATAATTCAGATGAAATTTATCTGTGTCAGT | 27772 |
| Kakapo                   | GTGTAATAACAACGCTCTCCAGCTCCTAAATGCCCTATT-GAGTTGTTTACTCTGCTTCAAACACAGAAGCAATCTCT-T    | 2884  |
| GoldenEagle              | GTGTAATAACAACATCTCCAGCTTCCAAATTTCTTATT-AAGTTGTTTACTCTGCTTCAAACAGAGAAGCAATCTCT-T     | 3039  |
| JapaneseQuail            | GTATAAACACAGAACCTGCCTGCTGCCAGATGCCAAC--AAGTTGTCTGTCTTGTCTCAAACAGAGAAACGATCCCT-T     | 2974  |
| MediumGroundFinch        | -----                                                                               | 0     |
| GoodesThornscrubTortoise | AAGCTGATGTAATAATCCATCTTGTTTTCTATTTTAAACTAGTTAGGGTCAGAAGTCTTTGGAGAGCCTGAGCCTCC-T     | 24178 |

Monday, May 02, 2022 06:50 PM

```

Majority      TGGTATGTTT---AAGCATTATCCTTTCAACTG--TGAGAGTTTTAAAGGCTTTTTATGGTTAGTTGTGATTATAATG
                27850      27860      27870      27880      27890      27900      27910      27920
Human         TAATGTGGTAATGTTAACATTTATCAGTAGTGCCTGAATCACTTCTTTTGGGCATAATAGTGGTAAGCTTTTGTCTCAATG 27852
Kakapo        TGGTATGTTT---CAAGCACGCAGCCTTTCAGCT---GAGAGTTCTAAAGGCTTTTTATGGTTAGTTGTGATTATAATG 2957
GoldenEagle   TGGTATGCTT---TAAGCATATAACCTTTCAACTG--TGAAAGTTTTAAAGGCTTTTTATGGTTAGTTGTGATTATAATG 3114
JapaneseQuail TGGCATGT-----AACCTTTCAACTG--TGAGAGTTTGAAGGCTTATATGGTTACTTCTGACTGTAATG 3038
MediumGroundFinch ----- 0
GoodesThornscrubTortoise@CCAGTGT---ATGAAATCATCCTTTTATAT--TGATGAATGGCAGATATTGACTCACTGAAAAGTATTCCAAGCA 24252
    
```

```

Majority      TTGGG--AGTTACAATTCCTTTCT--GAGGAG-CTTGTCATTAATGAGT-----ATTACACTGTGGAATGCTTTTACA
                27930      27940      27950      27960      27970      27980      27990      28000
Human         CAAAGACAGGCATAATTGCTTTTTTCAAATAAAAAATGTAATTTGTAAAAATACTCCAGTAATTTTTGTAAAATCTCAAAA 27932
Kakapo        GTAGG--AGTTGCAAAGCCCTGCT--GAGGAGGCTTGTCATTAATGAGT-----ATTACACTGTGGAATGCTTTCCCG 3026
GoldenEagle   TTCG---AGTTACAAATCCTGTCT--GAGAAG-----TCATTAATGAGT-----ATTACATTGTGAAAAGCTTTCACG 3177
JapaneseQuail TTGGG--AGTACCAAGTCCAGACG--AAGGAGTCTTGGCACTCACGAGTGT---TATTATGCTGTAGAATGTTTTTACA 3110
MediumGroundFinch ----- 0
GoodesThornscrubTortoise@AGAG--AGATTAATGGGACTCT--GATACTCTATGAAATGGATCAGAA-----TGAAACAGGGAAATACACCTCTA 24322
    
```

```

Majority      T-GTTCATATTTTGCCTGTTAT-TTTTTTTTTGGTGGGGTTTTAGGTCTTTTGGAAATTGT-GTT---ATATACT-TGAG
                28010      28020      28030      28040      28050      28060      28070      28080
Human         TTGCAAATAATTTGACGTTATTCTCAGTAATGAAGGCTGTTAAATCTCCTCTCTTAACGGCAGGTATGAAATCATTGAG 28012
Kakapo        T-ATCCTTGTTTTGCC-----TTTTCTGTTGGGGTGGGCTTAGGTTCTTTTGGGATTGT-GTT---ATACACT--GAG 3093
GoldenEagle   T-ATTCATGTTTTGCCTTCAT-TTTTTTTTTGGTGGGGACTTAGATTTCTTTTGGGATTGC-GTT---ACATGCTGTGAG 3251
JapaneseQuail C-GTTCATATTTGCAAGTTTTCTTTTTTCTGTTGGTGTCTTCTGCTACCTTTGGAGTTTT-ATT---GCATAGT----- 3180
MediumGroundFinch ----- 0
GoodesThornscrubTortoise@-CTCAATATAATGCTGTCTTGGGAGCCAAAAAATCTTAACGCATTATAGGTGAAACTGT-GTTTATATTGAAGTTGCT 24400
    
```

```

Majority      TT-----GTTCTGTACACTGTCTAAGAAAAAGATGGACCTTGGTGTACCTGTTGGAGAGTTTCTTGTAGGTGT--G
                28090      28100      28110      28120      28130      28140      28150      28160
Human         GAAGAAAAAGTTTCATAAATACAACTTAAAAAAAATGGAAAGACTTTTCCATGCAAAAAGATGCATTGCAGGAAGGAG 28092
Kakapo        TT-----ACCATGTCACAACCTCCAAGAAAAAGATGGGCCTTGATGTACCTGTTGCAGAGTTTCATATAGGTGT--A 3163
GoldenEagle   TT-----GTGTTGTCACAACCTCTCAGAAAAAGATTTACCTTGACATACCTGTTGGAGAGTTTCGTATAGGTGT--A 3321
JapaneseQuail -----GTTAAGTTACACTGTCTATGAGGATGGCGTACCTTGGTGTACCTGTTGCGGAGTTCCATGTAGATA---G 3247
MediumGroundFinch ----- 0
GoodesThornscrubTortoise@T-----GATCCACCAGAGTGCGCAGTGCAAAAGAGGGAGGTGGAGCCATTTCTTGAGTGTGTTTTGGAGTAGC--T 24470
    
```



Monday, May 02, 2022 06:50 PM

```

Majority      GATGATTAAATTTTATATTAGTGTACCTGGCAATATATTTCTTTTGG-TTGTGTCTTATTTTAAACCTGTATTTCGTCAC
              28170      28180      28190      28200      28210      28220      28230      28240
Human         GAAGAGTGTCTTTCATAGCACACCACAAGTCAGTATTAGAGGCTTGCTTTTCTACTTGAGTAGACCCAAGATTCCCCACC 28172
Kakapo        CATGGTTAAACTTTCATATAGGTGTACCTGGTTAAAT-TTCATATAG-GTGTACCTGGTTAAACTTCATATAGATGT-ACC 3240
GoldenEagle   CCTGATTAAATTTTATACAGGTGTACCTGCCAATGCATTTCTTTTTT-TTCAAGCTAATTTCAAAAAATGTGTTTCGTTGCT 3400
JapaneseQuail GATACCTATCTACTATTTTAGT--ACCAGCCAATACATTTCTTTTT--CCAGGCTCATTTCAAAACCTGTGTTTATCACT 3322
MediumGroundFinch ----- 0
GoodesThornscrubTortoise@CTGTTCCAAATTTGTGTTATATCAGGTGGCGTTATATCAAGGTAG-TGGTGTATTAGAATTTGACCTCAACTCTGGGTA 24549
    
```

```

Majority      TTCTGTTGTGCGCAGTTCTCTGGGCTAGGCTATAA-TACTG-ATTAAGTGTTTTTTACTATGGGTTTGTGGGATAAGTT
              28250      28260      28270      28280      28290      28300      28310      28320
Human         TATCGTCTTCCAAAGTTACTTGTGATCCACTGCAATCACAAGTTTTACAGTGTGTATACTCTAGGTGTATGGAAGGATTT 28252
Kakapo        TGCCAATGTGTTCTTTTTTACAGGCTAATTTAAAA-CAATGTGTTTCAATGCTTTCTACTGTTAGATCTGTAGGGTAGGCT 3319
GoldenEagle   TTCTGTTGTAAGAAGATCTATAGGGTAGGCTATGT-TGCTGAAGTACTGTCTAGTTAATAGGGGTGCGTGAGAAAAGTT 3479
JapaneseQuail TTCTTCTGTAAGGAGATCTCTGGGTGAACTGGA-----TGCTGTTTAAACA-GGGTTTGTGAGAAAAGTT 3387
MediumGroundFinch ----- 0
GoodesThornscrubTortoise@TCTGCAGGCACCAAGTGTCT--GTCTAGGTCATAAGTCTGCACTAACTGATCTTAAACTGGTGTCTTTTAAACAATATGCT 24627
    
```

```

Majority      ---CTGTACTTATTTTTAGATATCTATTTAATCA---GTGTGTGTTCTCATGTTATGTAGTTACCTATGTTTTCTAAAT
              28330      28340      28350      28360      28370      28380      28390      28400
Human         GA-ATTCACAAATAGTCAAACATCAGAAGAATAAGCTGATAATAATACATTTGAAAAGAGGTCAAGTATATTTTTGAAA 28331
Kakapo        ---GTGTAGCTGAAGT-AGCTGCCTAGTTAATAG---GAGTGTGTGGAAAAGTTCTGTACTTACGAATTTCTCACTCT 3391
GoldenEagle   ---ATGTACTTACTTTTAAATTTCTTTTATTTTCA---GCCTATGATCTCATGTAGTCCAGAAACCTGAGTTTCTTAAAT 3552
JapaneseQuail ---CTGTGTTTACTTTAAGTTCTTCTTTTTCACCCTGTTTGTGATCTCACGTCATCCAGAAACCCATGTTTCTTAAAT 3464
MediumGroundFinch ----- 0
GoodesThornscrubTortoise@CCCTATGCTTTTCACTAGGCAACTAGGAAAGCAGATGTTGCATGCCCATAAATACTTTCTTAACTATGTACTTTGCAT 24707
    
```

```

Majority      GTAGTGACAGATAGTGT--TTTTTTGAAGTAATATTTATATGAGACATTGA---ATTTTTCTGGA----GAAGCTTAT
              28410      28420      28430      28440      28450      28460      28470      28480
Human         CTAG-GAGAGTTAAAGTGTTTTTGTGAACTAAGGAACAAATAAGGCATTGACAATATTTTACTTGATTAGGAATTTTGTT 28410
Kakapo        GTGATCACAGAAACCCG--AATTTCCGCTGAATAAAT-TTCTGGCAGTGC---AGCTTTGGAGT-----CATGTTTAC 3459
GoldenEagle   AAATTTCTGACAGTAC--TGCTTTAAAGTAATATTTACTTGAAACTTTGG---GCTCTTTTGGG----GAAGCCTAT 3621
JapaneseQuail GTACTGCCTGGTAGTGTGTTGCATTGGAGTAATGTTTACATGAAACTTTGA---ACTCCGCTGTA----GAAGCCAAT 3535
MediumGroundFinch ----- 0
GoodesThornscrubTortoise@TGGTGAAAAAAGTGTCTTATTCTAAGGTTTAGCTATAAAACACATTTA---TTTTCTATAGAACAAGGAAACATGC 24783
    
```

Monday, May 02, 2022 06:50 PM

|                          |                                                                                   |       |
|--------------------------|-----------------------------------------------------------------------------------|-------|
| Majority                 | ATGGTGGGTGAGAC-T---GTGGCTTTTGTATGTTTCTTTTGTGTTT-TTACTCTTAGTCTTCTGTTTTCTTTGGCTGTAC |       |
|                          | 28490 28500 28510 28520 28530 28540 28550 28560                                   |       |
| Human                    | CAGGTGAGTAAACCTTAAGCATCAGTTAAGTTTTGTTTTGTTTCTTACTTTTAGAATATCTGATCTGGACTTCTGTGG    | 28490 |
| Kakapo                   | TTGAAACTTTGGAC-T---CTGGCTTTTGAAGTTGCTTTTGTAC-TTACCCTCAGCCCTGCTGTGTTCTTTGAACCTAT   | 3534  |
| GoldenEagle              | AAGCTGGGGAAGTC-A---GTGGCTTTTCTAAGTTTCTTTTGTAC-TTCCTCCAACCTCTGCTATGTTCTTTGAATATAC  | 3696  |
| JapaneseQuail            | GGAGCAGGTG-G-----AGCTTTTGTATGTTTCTGTATTCTGTACATTTTTTTTTTTTTTTTCTTTGGCCACAC        | 3605  |
| MediumGroundFinch        | -----                                                                             | 0     |
| GoodesThornscrubTortoise | AATCTCTCTGTGGTGT---GCTATTTCTGTGCCAAATTTAGTCTTCTGAAACTTTATTCCTTTCAACTGTAGGGCTGCTC  | 24860 |

|                          |                                                                                    |       |
|--------------------------|------------------------------------------------------------------------------------|-------|
| Majority                 | TTTCTTGATTGGGGAAGT--TGTTG-TCTATTGTGATTCCCTAATGTTTTGTCATTGCA-GTA-----AACTTGAACAG    |       |
|                          | 28570 28580 28590 28600 28610 28620 28630 28640                                    |       |
| Human                    | ATTTATGGAAGAGCTGGCTTTATTTCTCTATCCCTGTGGGAGGGGCAAACCTTTGATTTTGTATGTGGAGTAACTTGACCTT | 28570 |
| Kakapo                   | TTTCTTGATTGGGTAAT--CGTTG-GCTATTGCAATT-----GCACTGC-----TTTGAAG                      | 3585  |
| GoldenEagle              | TTTCTTGATTGGGGAAGT--TGTTG-GCTGTTTGTATTCCCTATTATCTTGGCATTGCA-ATA-----CTTGAACAG      | 3764  |
| JapaneseQuail            | TTTCTGGTTGGGAAAGT--TGTTA-ACTAATGTGATCCCTAATCGCTCTGATGTTGCA-GAACAAACCAACAAAAGCCC    | 3681  |
| MediumGroundFinch        | -----                                                                              | 0     |
| GoodesThornscrubTortoise | AATAAAAATGCGAGAAATATTTTA-TGTATGGAAAAGTATATCTGTTTTCTAGTTCCTTGTACATGGAACAGACAAAC     | 24939 |

|                          |                                                                                |       |
|--------------------------|--------------------------------------------------------------------------------|-------|
| Majority                 | TTGGTTTTATG-----AGGACAAATTGAT-TG---ACTTCTTGTGTTGTTTCTTTTTTTTTTTTACAGCATTG      |       |
|                          | 28650 28660 28670 28680 28690 28700 28710 28720                                |       |
| Human                    | CAGTTTTTTTGGTCTGAGAACAAGGCCAAAAAATATGTAACAGTTAATAACGTAATCACTTACTTAGTCAATAAATAT | 28650 |
| Kakapo                   | TTGGCTTTATA-----AGGATAAATTGGT-TG---ACCTCTTGTGTTTCTCTTTTTTCTTTTACAGCATTG        | 3649  |
| GoldenEagle              | TTGGTTTTATG-----AGGATAAATTGGT-TG---ACTTGT-GTCTTGTTTTTTCTTTTTTACAGCATTG         | 3827  |
| JapaneseQuail            | TTGGTTTTATG-----AGAACAATTGAT-TG---ACTTAT-----GTTTCTTTTTTCTTTACAGCATTG          | 3738  |
| MediumGroundFinch        | -----                                                                          | 0     |
| GoodesThornscrubTortoise | GTGTTTTCTG-----AAATCTGCCAAATCTT---ACCTCTTTTCTCACTCTCTCTCTCCCCACGCAAAA          | 25004 |

|                          |                                                                                   |       |
|--------------------------|-----------------------------------------------------------------------------------|-------|
| Majority                 | TCACTGATGTTGCAGTTGGTG-TGAAGGTAGGATGTGTACTTAGCAAATAAGGGGGCAAACCTGTTGATACAAAATGAACT |       |
|                          | 28730 28740 28750 28760 28770 28780 28790 28800                                   |       |
| Human                    | GTGGGGACATTGTACTTGGTTGACACTTGGGAATATTGTAGTGAGCACTACTGATGTGAGCCAGGCACTTTGCCTGGTAA  | 28730 |
| Kakapo                   | TCACTGATGTTGCAGTTGGTG-TGAAGGTAGGATGGGCACCTTGGCAAATAAGGGGGCAAATGTTGATACAAAGTGAACC  | 3728  |
| GoldenEagle              | TCACTGATGTTGCAGTTGGTG-TGAAGGTAGGATGTATACTCAGCAAATAAGGGGGCAAATGTTGATACAAAATGAACT   | 3906  |
| JapaneseQuail            | TCACTGATGTTGCAGTTGGTG-TGAAGGTAGGATGTGCACCTTAACAAATAAGCGGGTTCACTGCTGATACAAAACGAGCT | 3817  |
| MediumGroundFinch        | -----                                                                             | 0     |
| GoodesThornscrubTortoise | AAAAAGAAAATAAAAATAAAAAATCATCAGTGGGCAGATACACAGAAATGGAAAATTCAGCCTGAGGGGATTAAATTTCT  | 25084 |

Monday, May 02, 2022 06:50 PM

|                         |                                                                                   |       |
|-------------------------|-----------------------------------------------------------------------------------|-------|
| Majority                | GCTTTGTGCGTGTGTAATTTCAAGTTGTAAGATTTTAAGCAGT---CATTGTCAGCTGATATTTAGTCAGCTGTATG--   |       |
|                         | 28810 28820 28830 28840 28850 28860 28870 28880                                   |       |
| Human                   | TCACTGTTTCGTGTATAATTTAATCCTAAGGGCTGTGATGTAGATGT-TATCCCTGTTTTACAAATAAAGAAGTTCAGGCT | 28809 |
| Kakapo                  | ACTTTCCGCGTCGGTAATCTCAAGTTGTAAGGTTTAAACCAGT---CATTGTCAGCTGATATTTAGTCAGCAGTATA--   | 3802  |
| GoldenEagle             | ACTTTGAGCATCAGTAATTGCAAGTTGTAAGATTTTAACTAGT---CATTGTCAGCTGGTATTTAGTCAGCTGTATA--   | 3980  |
| JapaneseQuail           | GCTTTGAGCATGTGTCATTGCAAATTTTAAAGACTTTAAGCAGT---CATTGTCAGCTGATATTTAGTCAGCAGTACG--  | 3891  |
| MediumGroundFinch       | -----                                                                             | 0     |
| GoodesThornscrubTortois | 6AAAGTTGAGTGACTGGAAACAAGGGATTGGAATGGAAACAGTTACCCAACGTTAACTGTAGCAGTGGCTGCTGCTGC--  | 25162 |

|                         |                                                                                    |       |
|-------------------------|------------------------------------------------------------------------------------|-------|
| Majority                | TGCTTTA-TTAACTAAAAATCCCTAGAGGTAATTTGGAGGCTCTACACAAAA--GGCTTTTCTAGGCACTGAACTGTAGA   |       |
|                         | 28890 28900 28910 28920 28930 28940 28950 28960                                    |       |
| Human                   | TAGAATGATTAAGTACTGTTACCTAAGTATAAGTGGAAAGCTGAGCTCCAGAGCACCCCTTCTTAATACAGTATTTTCTA   | 28889 |
| Kakapo                  | TGCTTTA-TTAAACCAAAAAATCCCTAGAGATAAATTACAGCCTCTACACAAAA--GGCTTTGCTAAGCACTGAACTGTAAA | 3879  |
| GoldenEagle             | TGCTTTA-TTAAACCAAAAAATCCCTAGAGGTAATTTGGAGGCTCTACACAAAA--GACTTTTCTAGGCACTGAACTGCAGA | 4057  |
| JapaneseQuail           | TGCTTTA-TTAAACCAAAAAATCCCTAGAGGTAATTTGGAGGCCCTACACA-----GACTTTTCTAGGCAGTAGACTGTAAA | 3965  |
| MediumGroundFinch       | -----                                                                              | 0     |
| GoodesThornscrubTortois | @CCTATAATCCAGTAGAAAATCCATCAGTGCAGAACATCTGAAAAAATGTAT-TGATATTAACCCTAATAATTTGGG      | 25241 |

|                         |                                                                                   |       |
|-------------------------|-----------------------------------------------------------------------------------|-------|
| Majority                | CAGT--AGTACTAGATTAATGTAG-TAGTGTACAGCTTCTTATTTT-AAAGC---TTGATTTTGCAGATTA-T--TTTTTT |       |
|                         | 28970 28980 28990 29000 29010 29020 29030 29040                                   |       |
| Human                   | CTTGTGCATGAAAACATGAAGAAAGCTAGGAAACATTTTCTGTGTTGATAATGAGCCAATAATGTGTATCAGTGGTTCTTA | 28969 |
| Kakapo                  | CAGT--GGCACTAGATTAACGTAG-TAGTGTACAGCGTCTTATTTTGAAGC---TTGATTTTACATATTAGTC-TTTTTT  | 3952  |
| GoldenEagle             | CAGT--GGTCTAGATTAATGTAG-TGGTGTACAGCTTCTTATTTT-AAAGC---TTAATTTTGCAGATT-----TTTTT   | 4124  |
| JapaneseQuail           | CAGG--AGTTCTAAATTAATGTAG-TGCCATCAGATTCCTATTTT-AAAGC---TTTATTT-GCAGATTA-----TTTTT  | 4032  |
| MediumGroundFinch       | -----                                                                             | 0     |
| GoodesThornscrubTortois | 6AATTAACAATCCAGTGTCTGTGG-TAACTTTTAACTGTCTCATTAGAAAT---ATGCTTTGATAGATATTTAATTGCAT  | 25317 |

|                         |                                                                                   |       |
|-------------------------|-----------------------------------------------------------------------------------|-------|
| Majority                | CAAAACAACACTTTTCTCGT-G---TTGCATAGTAATTGTAATAGACATGTTTTCTTCTTCTTCTCCCTCATCTTTT     |       |
|                         | 29050 29060 29070 29080 29090 29100 29110 29120                                   |       |
| Human                   | AACTTTAGCATGCATCAGAAACACTTGGGGATTTTTTTTTTTTAAACCTGGGGTTTTTAGATCCCACCCTCAGAGTTTCTT | 29049 |
| Kakapo                  | CAAAACAGCACTTTTCTCATTTG---TTGCATAGTAACTGTAAGACATGTTTTCTTCTCCCTCCCTCCCTCCCTCCCTTT  | 4029  |
| GoldenEagle             | CAAAACAACACTTTTCTCGTTG---TTGCATGGTGAATGTAAGACATGTTTTCTTCTTCCCTCCCTCCCTCCCTTTT     | 4201  |
| JapaneseQuail           | CTAAGCAATGCTTTCTTGT-----G-----TGCTTTGTGTTT-TCTTCTCCCTCATCTCT                      | 4084  |
| MediumGroundFinch       | -----                                                                             | 0     |
| GoodesThornscrubTortois | @CACAAAACACTTAACAAT-G---TGGCATACAAGTGATCATGTATATCTTAAAATATGGTTTAAACAATGCTAATTTGAC | 25393 |

Monday, May 02, 2022 06:50 PM

```

Majority      TTTC--T---AAAACAGTT--ACCACTGAAGTTAGA-----AAAA--T-----CTGTTTTTA---TTAGG----ACA
                29130      29140      29150      29160      29170      29180      29190      29200
Human         ATTCAGTAGGTCTGGGATTGGACCTGAGAACATATACTGTCAGTAAGCTTCCAGGCTAATCTTAGGATTAGGGACCACA 29129
Kakapo        TTCC-----AAAACAGTT--ACTACTGAAGTTAAA-----AAAGA-----CA 4064
GoldenEagle   TTTTTTTTTTGAAACAGTT--ACCACTGAAGTTAAA-----AAAGAAGTGA-----CTGTCTGTA---ATAGG----ACA 4262
JapaneseQuail TT-----CAGTT--AACACTGAAATTAGA-----AAAAG-----TTGTTTTA---TCAGT----ACA 4127
MediumGroundFinch -----0
GoodesThornscrubTortoise@TCCTTACAAGAAGAGGTCATTGTTATACATTGA----ATGAATTTATATGTCCTGTTTTTA---TAAAG----CCA 25461
    
```

```

Majority      CAACAATATGGGTGGTAG-----AATTT-----ATGTAGACAGAGAAGTGAGTGTTTTCTTTGCT--TTACT
                29210      29220      29230      29240      29250      29260      29270      29280
Human         CTTTGAGAATGATTAGAGTATTCAATTAGATCTTAGGGACTACACTGTGAGAATCAGTAATGTATACAATTCTGCTCATC 29209
Kakapo        CACAATATGGGAGGTAG-----AATTT-----ATGTAGACAGAGAAGGGGGCGTTCGCTCTGCT--TTACT 4124
GoldenEagle   CAAAAATATGGGAGGTAG-----AATTTGTT-----ATGTAGACAGAGAAGTGGGTGTTTGCTTTGCT--TTACT 4325
JapaneseQuail AAACAAAATGAGTGCTAG-----AATTT-----ATGTAGACAG--AAGTAAACATTTTCTTTGCT--TGACT 4185
MediumGroundFinch -----0
GoodesThornscrubTortoise@AGCTAAACTGGCAGTGGTTAACAATAAAATGTTATAA---ATACAAATACTTGAGTAACTAAGTTCACAACACTAGTAATT 25538
    
```

```

Majority      TTTTATTTTCAAGTTC--AGTTATGAATTTT-ATCATAATTTATATAATAAGGTGATTGCTTTCGACTTGTGTGTTAAT
                29290      29300      29310      29320      29330      29340      29350      29360
Human         ATGTTCTTATAAAACTATGCCATGCCAGATCTTCCATATCTTGATTAGAAAATTGGTTAAGAAAATTAGGCTTGGTGTAAT 29289
Kakapo        TCTTGTTCCTCAAGTT----GTTATGAATTT--ATCATAATTTATTAACAAGGGAAGAGCTTCCAAATGTGCGTTAAT 4197
GoldenEagle   TTTTATTTTCAAGTTC--AGTTATGAATTT--ATCGTATTTGTTATAACAAGGGAAGAGCTTCCAAATGGTTGTTAAT 4400
JapaneseQuail TTTTCTCTC-CAAGTTC--AGTTATGAATTTTATCATAATTTATTTAATAAGGAGTTTCCTGTAGGTTATTAATTATT 4261
MediumGroundFinch -----0
GoodesThornscrubTortoise@TTAATAGTATCTGCTGGA-AGTTTTAAAAAATTACTACCCATCCTAAGTTTGGTGATTTATATTGACCAGTTTATCAT 25617
    
```

```

Majority      TCAGTATT-TTTTTCATTGTTGTT--TTTGATTTTTTT--GTTGGAATTGGATCTGTACTTGATAGAGAAGCAGGCTGAGA
                29370      29380      29390      29400      29410      29420      29430      29440
Human         ACAGTATCAATGTGGCTTGAAACTGGTTGTATTTTCTGTTTTTTTTTTTCTTTGTGCATTTGATGCTAATAAGTAGAAA 29369
Kakapo        TTACTGTT-TACTTCACTTCTGTG--TCCAAATCTGTT--GTGGGAATCAGATCAGTACTTTGTAGAGAAGCAGACTGAGA 4271
GoldenEagle   TT-----TGTTTCACTTTTGTA--TTCAAATCTGTT--GCAGGAATTAGATCGGTACTTTCATAGAGGCAGACTGAGA 4468
JapaneseQuail TCACTTCTGTATCCAGTTGTTGTT--TTGTTTTTTTTTTTACAAGAACTGGATCAGTACTTGATAAAAACAGTTTCGAGA 4339
MediumGroundFinch -----0
GoodesThornscrubTortoise@CTGTAGTAATGTAAATTGACATT--TATGATTATCATACCAGTGGGCTTGTGCATATATGTGCATACATTAAGCTCACA 25695
    
```

Monday, May 02, 2022 06:50 PM

|                          |                                                                                   |       |
|--------------------------|-----------------------------------------------------------------------------------|-------|
| Majority                 | AATAATGAGA-ATGTAAAGATAA-GTTGTATGCGTGAACCTTTAGGTT-TGTTAATGTATGTATGAAAGCAGTTCTATT-T |       |
|                          | 29450 29460 29470 29480 29490 29500 29510 29520                                   |       |
| Human                    | GCTCTTAAATATTTTAAAGGGAGACAACCTATGGATATCTGTTTACTC-TTCTCATATTTGTTGTAATACAGTTTATTCAT | 29448 |
| Kakapo                   | AATAATGAGA-ATGCAAAAATAATGTAGGGCAAGGGAACCTTGAGGTTATATTAATGAATGCACGCAAGCAATTCTGTT-T | 4349  |
| GoldenEagle              | AATAATGAGA-ATGCAAAGATA-TATGGGACAAGGGAACCTTCAGGTTATGTTAATGGATGCATGCAAGCAGTTCTATT-T | 4545  |
| JapaneseQuail            | AATAACGAGA-ATGAAAAGACC----T--GTGCGAGAACCTTTAAATT--GTTAATGCATGTAAGAAAAAAATCCTATT-T | 4409  |
| MediumGroundFinch        | -----                                                                             | 0     |
| GoodesThornscrubTortoise | AGCAAGAACA-GTTTTAAAATAA-GCTTTATGCTTGAAAGTGTGTTTTTCAGTGGAATCTAGCTTAAACATCAAGAATT-G | 25772 |

|                          |                                                                                  |       |
|--------------------------|----------------------------------------------------------------------------------|-------|
| Majority                 | CAGTGGTGTAAATGTAA-TTTGTATA--AGC-AATGGTTCATATTTGTCCAGGGACTTTTTAGCTATACTATGTAAGTGC |       |
|                          | 29530 29540 29550 29560 29570 29580 29590 29600                                  |       |
| Human                    | TATGAGTTTAAATACAAATTAGCGTAA-AGCTTATGGTTAATTTGGATTTTTTGGACTTTCTGAAATGCTTTGATAATTC | 29527 |
| Kakapo                   | CAGTAGAAACAGAATTCTAGTATATA-CAGTTAAGTCTTCACATTTGTCCAGGGGCTTTTTAGCTATACTGCATCACTGC | 4428  |
| GoldenEagle              | CAGTGGTAGAAATGT-----AGACTCCACATTTGTCCAGGGACTTTGTAGCTATACTATGTAGCTGC              | 4607  |
| JapaneseQuail            | CAGGGGTGTGCATGGAAGTTTTCTTA-TGAA-AATGGTCTCTGCTTGTCTGGGGAGTTT-----GTACTACGTAGCTGC  | 4481  |
| MediumGroundFinch        | -----                                                                            | 0     |
| GoodesThornscrubTortoise | TAACCTTTGTTTATGAAACCTTGATAACTGCAGAAGACAAAACCTAAACAGTAAATCTGGAAATGAA-TAGTTAAGAGA  | 25851 |

|                          |                                                                                  |       |
|--------------------------|----------------------------------------------------------------------------------|-------|
| Majority                 | CTTACCACCTTATGCTGCTTTTTGTAACTGCTTGGTGAACC-AGGTTTTGTGTAGTAAAGCTCTTTGGCTCAGATTCAG  |       |
|                          | 29610 29620 29630 29640 29650 29660 29670 29680                                  |       |
| Human                    | ATTGCTCCTTTGCACATTTTTTTCATTTTGATGGTTGCATTTAACTTCTTTGTACTGA--TTTTTTAAATCAG--CCAG  | 29603 |
| Kakapo                   | CTTACCACCTAACACTGCTCTGTGTTAACTGCTTGGTTAGCC-AGGTTTTGTCTAGTAAAGCTCTTTGGCTCAGATTCAG | 4507  |
| GoldenEagle              | CTTTTCACCTGAAGCTGATCTATGTTAACTGCTTGGTAAGCC-AGGTTTTGTCTAGTAAACTCTTTGGCTGAGATTCAG  | 4686  |
| JapaneseQuail            | CTTA-----AATGCTAGTTTATGTGAAGTCTTGGTGAACC-AGGTTTTGTGTAGTAAAGCTGCGTGGCTCAGGTTTCAG  | 4554  |
| MediumGroundFinch        | -----                                                                            | 0     |
| GoodesThornscrubTortoise | TTACTGCTTTATAATGCTACTTAACTCCTCTTTATCCCCTTAACTTATATGCACTCAACCTTAATTTTTGATCCAT     | 25931 |

|                          |                                                                                   |       |
|--------------------------|-----------------------------------------------------------------------------------|-------|
| Majority                 | TAT-TGGTTCTACTGGATTTGGACT---AGTTCTTATAT-AATACAACCTAGCTTTTAGATAGCAGAGGCTATTTTGTCA  |       |
|                          | 29690 29700 29710 29720 29730 29740 29750 29760                                   |       |
| Human                    | TAT-TAATTTAACCTATTTTCAATACTAATATCCATGTATGTAATATCCATAACTAAGGCAAAACAGTTGATTTTAGCT   | 29682 |
| Kakapo                   | CAT-TGGTCCTGCTGGATTTGGACT---AGTTCTTATGT-AATACAACCTAGCTTGTAGATAACAGCAGCTATTTCTGTCA | 4581  |
| GoldenEagle              | TAT-TGGTCCTA---GATTTGGACT---AGTTCTTATAC-AATACAGCTAGCCAGTAGATA-CAGCAGCTGTTTGTCA    | 4756  |
| JapaneseQuail            | TAG-TGGTTCTGCTGGATTTGGGCT---AGATCTTAGAT-AATACAATTAGTCTTTAGATAGCAGAGGCTACTGTGTCA   | 4628  |
| MediumGroundFinch        | -----                                                                             | 0     |
| GoodesThornscrubTortoise | AACATTGTAAAAATATATTTAAAGTTCAAATTCCTATATTAATAGTACTAAATCATATTTAGAGGATCCATTTCCGATT   | 26011 |

Monday, May 02, 2022 06:50 PM

```

Majority      GATTT-AAC-----CCTGTATTATGTTTCTAAGTAAGCTTGCTTCTAGGAGGAGCTGTAATAA-ACTGGT-----TA
                29770      29780      29790      29800      29810      29820      29830      29840
Human         AGTTTAAATATTAGTCCATTCATATTTTTGTAAGTACATAACATTTTCAAATAGCTAAAATGTCACCTGGCTGGTTTGAA 29762
Kakapo        GAATGTAGA-----CCTGTAGTATGTTTCTGAGCAAGCTTGCTTCTAGGAGAAGCTGTAAGAA-GTCAGT-----TA 4647
GoldenEagle   GATGT--AC-----CTCGTATTACGTTTCTAAGCAAGCTTGCTTCTAGGAGGAGCTGTAAGAA-GCGAGT-----TA 4820
JapaneseQuail AATGA--A-----CCTGCGTTATGTTT--GAGTAAGCTCTCTTCTAGGAGGAGTTGTAATAA-ACTGTG-----TG 4689
MediumGroundFinch ----- 0
GoodesThornscrubTortoise@ACTATAACATA---CCCACTGTTACTCACTACCAAATCCCTACCCACTTGGTACTACACAAA-ATAGAGATAAAAAATA 26087
    
```

```

Majority      CA--GATTCTGGTCCCATCTGGCTTCATGTGTTTCGCTCAGT-ATTGAAG-CT-AGCTTAAAATCACTCTCTGAATCAAGA
                29850      29860      29870      29880      29890      29900      29910      29920
Human         CAACTGTGCAGTTACCGAAGAGATGAATGTATAACCTTTTCTGTAAAGAATTTTAAGACATGACCTTATTTTTTGCAGA 29842
Kakapo        CA--GATTCTGGACCCATCTGGCCCCACAGGTTTCAGGCAGT-ACTGAAGACA-AGCTTAAAATCACTCTCTGAATCAAGA 4723
GoldenEagle   CATAGATTCTGGACCCATCTGGCTTCACATGTTTCGCGCAGT-ATCGGAG-CA-AGCTTAAAATCACTCTCTGAATCAAGA 4897
JapaneseQuail -----TTCTGGGCCCTACCTTGGTCCATGTGCGTGTTTCAG--ATAACAG-----ATAAATCACTCTTGAGTCAAAA 4753
MediumGroundFinch ----- 0
GoodesThornscrubTortoise@ACACTTGCAGCTTTTATGTCACTTTGTGTGTAAATCTGT-GTTCTTGGCTTAACTGGTAGACATTTACCTTCTTGAGC 26166
    
```

```

Majority      GAAAAGTGTAGTTATTCAGTAATTCTGTGGGAGCT----AATCCCAATCA--GAAATATAAACTGGTATAAATT-TTTC
                29930      29940      29950      29960      29970      29980      29990      30000
Human         AAGAAATCTCTTCATTCCAAGATTTTGCCTTTGCTTTTCGGTGTCTAGCCACTGAAGTATATACCTGTTTAATTTAAT 29922
Kakapo        GGAAAGTGTAGCTCCAGTA---CTGGGTGGGAGCT----AATCCCAATCA--GAAACACAACTGGCATGATTATTTTC 4792
GoldenEagle   GGAAAGTGTAAATTATAAAGTACTTCTGTCAGAGCT----AATCCCAATCA--GAAATATGAACT----- 4956
JapaneseQuail GAAAAGTACAGTTATTAAGTAGTTCTGTGGGAGCTC---AATGCCATTCA--GAAATATAGACCAGTAAAATGT TTC 4827
MediumGroundFinch ----- 0
GoodesThornscrubTortoise@AGGAATTCTGATACACCCACATTCCACTCCTGCCT----AAT--AAACA--ATTGTATAAATTGCTGGCCATCTATG 26237
    
```

```

Majority      TCTGTTGAAGGGAGGGATA-C-----CA-----TTTAAATTGTATTTAATAGTTGGGAGGAATTTTC-CGGGTAAATTCAA
                30010      30020      30030      30040      30050      30060      30070      30080
Human         AATGATGAAGATATTGATATCTAACTCACCAGAATGAAGTTCTAATTTTCTAAAGACCTGAATTATCTGGATGAATAAAG 30002
Kakapo        TCTGTTGATGGGAGGAAAA-AAGCGTCAACTGCCTTAAACTGTATTTAATAGTTTGGAGGAATACC-TGAGGAAGTTCAA 4870
GoldenEagle   -----TTAGGAATGTATTTAATAGTTTGGAGAAATACC-CAGGGAAGTTCAA 5002
JapaneseQuail CCCATTACCTGGGAGGACA-G-----TGCTCAACTGCCTACAAGTGTAGGAGTGTATTTGACAGTTAAATTCAA 4894
MediumGroundFinch ----- 0
GoodesThornscrubTortoise@CTTCTAGAAGCTGGTCTA-CAAACCCACTGCCAGTTATTTCTTTAGAGCAATTGGTAGAAACCTATCCTATGAATCTGA 26316
    
```

Monday, May 02, 2022 06:50 PM

```

Majority      GTCTTTCAGAAATTAACCTGCCTCA--TGAACGGTTTTG-GGCAAAACAATTTCTAA--A-TTGCTCTCATTCTTTTCTAA
              30090      30100      30110      30120      30130      30140      30150      30160
Human         GACCATTGGGATGGAGGATTTATA---GAACGTTTCTGAGAAAGTCTAGCTGTTGTGGCTTTGGTTTGTTTGTAAACAAT 30079
Kakapo        GTCTTTCAGAAGTAAACTGCCTCC----ATGGTTTTGCGGCAAAACGATTTATAA--A-TTGCCCTCCATCACGTCTAA 4942
GoldenEagle   GTCTTTCAGAAGTAAACTGCCTCATGTGAACAGTTTTGGGGCAAAACAATTTCTAA--A-TTGCCCTCAATCCTGTCTAA 5079
JapaneseQuail GTCTTTCAGAAATAAACTGCACCACATGAAGAAGTTTGTGGCAAAGCAATTCATAA--AATCACTCTCAGTCATTTCTAA 4972
MediumGroundFinch ----- 0
GoodesThornscrubTortoiseAGGTGT-GGCGTCAAACCCCGTTT-ATGAGACATGCTG-GAAAAAATAGTCTCTAATTATTTGATTGCATACTATCATAA 26393
    
```

```

Majority      TGAAGAAGCAATTTTCAGGCA---GACTATGTATTGTTT--GAACCTTAAATTTCTGACATTCTCAGTTTTGGAGAAGTTAA
              30170      30180      30190      30200      30210      30220      30230      30240
Human         TGAGATAGCTTTCCAAAGCTTTTGCTTATAGAATCTAATCACTTTTTCTATTTATTGTCTTTTGGGCTTAGAGTAAAGAA 30159
Kakapo        TGAAGAAACAATTTTCAGGTA---GACCATGTATTGCTT--AAGCCTTAAATTTCTGACATTCTCACTTCAGGAGAAGTAAA 5017
GoldenEagle   TGAAGAAGCAATTTTCAGGTA---GACTGTGTATTGCTT--GAACCTTAAATTTCTGACATTCTCACTTTGGGAGAAGTAAA 5154
JapaneseQuail TGAAGAAGCAGTTTCAGACA---GTCCATGTATTATTT--GAACGTAAAATTTCTGACACTCTTAGTTCAGGAGAAGTT-- 5045
MediumGroundFinch ----- 0
GoodesThornscrubTortoiseAGCATATTTCTCAAGAGAGCA---AAATTGAGATTATATCGGTAACTTTAAATTTGGGCATTTCCCATCTTTGAGTGCCT-- 26468
    
```

```

Majority      -GGATTTAGTATC--TT-CATTTTTTAGTATGAGTGACTTAGA-T-TTAGGAGAATTTGAGGGTTCATGAAATATTTTGT
              30250      30260      30270      30280      30290      30300      30310      30320
Human         GGGAAAGGAAACACTGTTGCCTTTGTGAGAATGGGAGAGGGATAGA--TGGGAGAGTAGAGGGATGAAGTTAATTTTTTAT 30237
Kakapo        TGGATATAGTATCCCTTTTCATTCGTTGCTGTGAGTGACTTAG-----GAGAATTTGAGTGTTCATGAAGTATGTTGT 5089
GoldenEagle   TGGATTCAGTATCCCTTTTCATTTCTTAACATATGAGTGACTTAGAATCTTAGGGGAATTTGAACGTTTCATGAAATACGTTGT 5234
JapaneseQuail --GGTTCAGCATC-----AATTCCTTAGTATGAGTGACTTAGACTCTTAGAAAAATTTGAGCATTCCTGAAATACTTTGT 5117
MediumGroundFinch ----- 0
GoodesThornscrubTortoiseGACTTTGTAAAG-----AATATTAAGATTGCATATTTTGTGTTTTGAAATATATCCAGGGGATCCTCTC-TGATTAGC 26540
    
```

```

Majority      G---ATGTAGTACGATTTTGGAAACCATAATTTTCAGTTACTAGCCAGACGATGAAGTGAAGGTACTTCAGATGACATAATT
              30330      30340      30350      30360      30370      30380      30390      30400
Human         TA-TAGGGATTAACATTTTTAACTATTTCCCAATAGTGTAACATTTGACATTTAAGTGAAGGCTTTTAGATTA-ATATTT 30315
Kakapo        G---TGTAGGACGATATTGGAACCATAATTTTCAGATACTAGACA--CGATGAAATGAAGATACTTCAGATGACATAAGT 5163
GoldenEagle   AAGCATGTAGTGTGATTTTGGAAACCATAATTTTCAGGTTACTAGCCAGACAATGAAGTAAAGACACTTCAGATGACATAACT 5314
JapaneseQuail G---TGTAGAGCAACTCTGGATCCATAATTTTCAGGTTACTAGCCAGCGATGAA-TGAAGGTACATCAAATGACAT---T 5189
MediumGroundFinch ----- 0
GoodesThornscrubTortoiseATTTATTTGGAAACA-GTAGAAGGGATAGGTTCTGTGCATCACAAGTGGATTATCTGTGCCTTAGATTTCTCTGTT 26619
    
```

Monday, May 02, 2022 06:50 PM

```

Majority      GCTTCT-TTTTGTGTCTGTAGAAAGTTGTGTTTTTAATGTAATA----AAGAAAGTGAGACAAGTGTATCTGAGGTAGT
                30410      30420      30430      30440      30450      30460      30470      30480
Human         TTA A A T T T A A A G A T G T C T T A T G C T A A T T G T T T T G T T T T C A T A ---- G A G A G G A T C T G A C G A A C T A C T C T C A G G C A G T 30390
Kakapo        GCTTCT-TTTTGTGATTGTAGAAAGTTGATTTATGAATGTAATATAAAAAAGAAAGCGAGCCAGGTGTATCTGAGGTACT 5242
GoldenEagle   GCTTCT-TTCTGTTGATTGTAGAAAGTTATATTATGAATATAAATA----AAGAAGGTAAGACAGGTGTATCAGAGGTAGT 5388
JapaneseQuail ACTGCT-TTCTGCTGCCTGTAGAAACTGAGGTTGTAATGCAAGA----AAGAAAGCGAGGGAAGTGTATCAGAA--AAT 5261
MediumGroundFinch ----- 0
GoodesThornscrubTortoise eTTGTTATTTTGACATCTGGTAAATTGCTCAATCAGACACAATTTTCTATCATACATAGTTTATTAAATTGTGAGTATTC 26699
    
```

```

Majority      GTTTAAATTC AATACAAAG---AAATGAACAGAAAGTGT CAGGAAGATGTGATCTTTGCCTTGTAAGAAAGGTCTTGTTT
                30490      30500      30510      30520      30530      30540      30550      30560
Human         GTTCTCAGT-AGTCCGAAC TCTAATATGAGCAGCATGGT-AGTTACAGGTAAGTGT TACTCTCTTAGCAGTCTGTCATTT 30468
Kakapo        GCTTAAAATCCATACAAAG---AAAGGCACAGAAGTCTCAA AAAAGGTGTGCTCTTTGCCTTGTA AAAAAGGGCTTCCTC 5318
GoldenEagle   GATTAAAATCAATACAAGG---AGAGGAACAGAAAGCGTCAA AAAAGGTGTGGTCTTTGCCTTGTAAGAAATGGCCTTATTC 5464
JapaneseQuail GATTAAAGTTAAATACAGGG---AAATGCAAGCAAGTAT-ATGAAGACATGATCTTTGTCATGTGAAAACGGTATTGTT- 5335
MediumGroundFinch ----- 0
GoodesThornscrubTortoise aTTTTAATTCATTATGTAATATTAATAAATCTAATTATCAGGTTAAT-TAAACAATACCAAATAGGATAACAATTGCTT 26778
    
```

```

Majority      TC-GGATTTTAAA---AGGAAACAATCAATTTGTGTATTGAAGTATTTGGGTATAAATAAAAAGGATGATTGT---TTTCT
                30570      30580      30590      30600      30610      30620      30630      30640
Human         GC--CATTTTAGGG--GGCAGAATGTTAAA ACTCAAATTTAACCC TGTATACCAGGAAAGCCTTTCTTTT TAAATGCGT 30544
Kakapo        TCTGGACTTTAAA---AGGAAACAATCCATTTGTGCATGGAAGTAGTGGGAATAAATAGAAAGGGT GATTGT---TTTCT 5392
GoldenEagle   TCTGGATTTAAA---AGGAAACAATCAATTTGTGCATGGAAGTAGTGGGAATACATAAAAAGGATGATGGT---TTTCT 5538
JapaneseQuail -----GATGTAGA---AGAAAACAATC---TGTATGCAGGAGCATAGGGTATAA--AATAAAGACAATGGT---TTTCT 5398
MediumGroundFinch ----- 0
GoodesThornscrubTortoise eTAGCTCTTTTAACTGGTAAATGGCAGTCTTTGTGTTTAGCTGTCAGTCACAAAATAGGAGGACATTTCC---ACTGT 26855
    
```

```

Majority      GAAGAAAGCTGTTAGATTTGAGTGTAGTAAAGTGGATTGTATCC---TGGAGCTTCTGTAAC--TCTCAAGATACTAATA
                30650      30660      30670      30680      30690      30700      30710      30720
Human         GTTGAAACATTTTAGAGTAAATTTTACTAAAGTATATATGAGCCGAGTGGAAAAAAAAAAAAAAAAA CCTGAAGCTGGTAACT 30624
Kakapo        GAAGAAAGCTGTTAACTGTGGGAGAAGTAAACTGGATTGTATTC---CTGAGCTTCTGTAATTATCTCTAGATACTAATA 5469
GoldenEagle   GAAGAAAAGTGTTAGATACGGGAGCAGTAAACTGGAATGTATTC---TGGAGCTTTTGTG----TCTCAAGATACTAATA 5611
JapaneseQuail GAAGGAAGCTGTTAAATATGAGTGGGATAAAGTGCAC TGTCTCC---TTGAGCTTCTGTAAC TGCTCAGGACACCAAGA 5475
MediumGroundFinch ----- 0
GoodesThornscrubTortoise eTCCCAATTTATATGATTTTATGTTTGTGTTGTCAAAAGACTCACACCG---TGAAGATCAGCTCAC--TTCCATGTTAAATATA 26930
    
```



Monday, May 02, 2022 06:50 PM

```

Majority      AGAATGTA AAAATGGAATTTCTCAGTAATTTATGTTTGCAGTTTGTGTA-GCAGTTTGATGCTAGCTTCAGTTATGTTTTG
              30730      30740      30750      30760      30770      30780      30790      30800
Human         TTGGTGAACAAGTTACTCTTAAATTTGATTGCTTTTCATTTTTGAACCACAAATGTAATCTGTCTCACATTATAGTCCC 30704
Kakapo        GGAATGGAAAATGGAATT-CTGGCTAATTGATGTATGCAGTTTGGGTA-GCAGCCTGATGCGAGCTTCAGCAGTGTTC 5547
GoldenEagle   AGAATGGAAAATGGAATTTCTCGCTAATTGATACATGCAGTTTGGGTA-GCAGTCTTATGCTAGCTTCAGTCATGTTT 5690
JapaneseQuail AGAATGTGACATGGAATTTCTTAGCAATTTATATTATAGTTTGTGTAAGCAGTTTGTGTTGGCTCTAGTCATATTTTC 5555
MediumGroundFinch ----- 0
GoodesThornscrubTortoiseAACAGTTAAAGTAAAGAGAACAGTTTCATCAGGATTTAAGCACATAAT-GTTAATCCATAAAAATTTACATGTGAGATTAG 27009
    
```

```

Majority      TTGGAGGCCTTGTGAAGCA--TTTGTTTTTTTTTT-TTCTGGTGGCTGTTTCGT--TGCTGTTGATGAA-CTTATGTTTT
              30810      30820      30830      30840      30850      30860      30870      30880
Human         TTCATCTGCCCTCTGGTATTTTTATTTGTTTTATTTTTTGTGTTTGTGTTGTCATATAATATTTTTACTTTAAGTATT 30784
Kakapo        TGAAGGCCATGTGAAGCA--TTTGCCTTTTATGT-TCTCTGGTACTGTTTCAT--AGCTCTTGATGAA-CTGATGTTTT 5621
GoldenEagle   TGGTAGGCCATGTGAAACA--TTTGTCTTTTATGT-TCTCTGGTACTGTTTCGC--TGCTCTTGATGAA-CTGATGTTTT 5764
JapaneseQuail TAGGAAGCATTGTGAAACACCTCTGTGTTTCTTTT-TTCTGGTGGATGTTTCAT--TGCTGTTAATAAAGCTAACGCTCT 5632
MediumGroundFinch ----- 0
GoodesThornscrubTortoiseTTGGGTTTTTTTTTAAAGTACTTAATTTAATTTTTT-GTTTCTGTGGCTGACTTT--AGGAGTTGCCCTATGTGGGTTT 27086
    
```

```

Majority      AAAGTTGAGGAATGCTTTACCTATAGGTTGTGTATAAACCACAGGGAACATTCACTTGGCCTTTTCTTAGCTTTTTTCTT
              30890      30900      30910      30920      30930      30940      30950      30960
Human         TATGCCACAAACCCTAAAACCCAAATTTAAGTAAAACCGAAGAATTCAGTACATAGTTGTTTAAAACCATTGCAACC 30864
Kakapo        ACAGTTGAGGAATGCTTTATCTATAGGTGGTTTATAAACCACCAGGAACATTCATTCGGCCTTTTCTTGGCTGTTATCTT 5701
GoldenEagle   AAAGTTGAGGAATGCTTTACCTATAGGTGGTATATAAACAACCTGGGAACATTCATCTGGCCTTTCTTGGCCATTTTCTT 5844
JapaneseQuail AAAGCTGAGGGATGCTTTACCTAATAGTTG-GTATTTATGACAGGAAAATTCACGTGGCTTTAACTTAGCTGTCATCTG 5711
MediumGroundFinch ----- 0
GoodesThornscrubTortoiseAAATAATCACACACTTACTCTTAATTAACGTGCCTAATAAGGAGAGAACACTAGACCTTCTAGGAGTGTGTCTCTG 27166
    
```

```

Majority      TTCTTTGGGGTGCTTTGGG--AATGTGTA--GGGAGCAGGTTTGTGAGT-CCAAGGTGTTGCATCA--GCAGTTTTAATGC
              30970      30980      30990      31000      31010      31020      31030      31040
Human         ATAGTTGCTATGGTTTTAACTAATTTTTGCTGAAACAGTATTTAATTCTGAGTTGATCCTTTTATGTTGTCTACCTGC 30944
Kakapo        TTCTTTGGGGTGCTTTGGG--AACGTGCA--GGGAGCAAGTTTGTGAGT-CCAAGGTGTTGCATCA--GCAGTGTTAATGC 5774
GoldenEagle   TTCTTTGGGGTGCTTTGGG--AATGGG---AGGAGCAAGTTTGTGAGT-CCAAGGAGTTGCATCA--GCAGTTTTAATGC 5915
JapaneseQuail TTCTTAGGGGTATATTGGG--AGTGGGTA--GAGAGCAGCTTTGTGAGTGCCAAGGTTTGCATCA--GCAGATTTAATGC 5785
MediumGroundFinch ----- 0
GoodesThornscrubTortoiseTTGGAAAAATAAAATCGA--AACACATGATACTTATAGAAGATGATTTACATTGTTATGGTTTCATGCATCTTCAGGAA 27244
    
```

Monday, May 02, 2022 06:50 PM

```

Majority      TCTTTTAA--TACT--GCTTTTATCGTGATTGG-ATAGCTATTGGAAGTTGGCAGGGATTTACCTGTGT-----TAGAT
              31050   31060   31070   31080   31090   31100   31110   31120
Human         ATATTTAAGATGATTTGTTTTAATCTTCAAAGTTAGAGTTAAAAAAATTTGATATGTCTGAAATAATGTTG--TTTGTA 31022
Kakapo        TCTTTTGG--CACT--GCTTTTACTGTGACTGG-ATAGCTCTTGGAAAGTGGATTGGGATTTACCTGTGT-----GAAAT 5843
GoldenEagle   TCTTTTGA--CACT--GCTTTTATTGTGACTGG-ATAGCTGTTGGAAAGTGGGCAGGGATTTACCTGTGT-----GAAAT 5984
JapaneseQuail TCTTTTAG--TACT--GCTTTTATCATGATTGG-ACAGCCATTAGAAGCAGACAAGGATTTACCTGTACTTGCACATGAT 5860
MediumGroundFinch ----- 0
GoodesThornscrubTortoise@CTAATAA--TGATTAGCCTGTAACATTTTCAACACAGCTTGTTAATATTAGAAGCTGATTCCTTGTGG-----CTATCA 27317
    
```

```

Majority      CAACTTATCCAGGATATTTGTTTGACCTGATGCCTTCTTGAGGTTTTCTGCCTACTGTATG-TATGTTTATTAGTC--TT
              31130   31140   31150   31160   31170   31180   31190   31200
Human         GCATCTGTCAGTAAAAACAATATAGACCAAATTTTAGACCTTAGTTTTATGGCTGATGGGCCAAATTTTTTTTTGTATTTT 31102
Kakapo        CAACTTACCCAGGACATTTGTTTGACCTGATGCCTCCCTGAGGTTTTCTACCTACTGTAT--TATGCTGATCAGTTAGTT 5921
GoldenEagle   CGACTTATCCAGAATATTTGTTTGACCTGATGCCTTCTTGAGATTTTGCGCCTACTGTATG-TATATATGCTGATCAGTT 6063
JapaneseQuail CAACTTACCCAGGGTATTTGTGTGACCTTACACTTTCTTGAGGTTTTTGCCTGCTGTATG-TATGCTGAGCAGC---T 5935
MediumGroundFinch ----- 0
GoodesThornscrubTortoise@ATCTTAGATTTTACAAGTTATTGGACTCCTGCCCTTGTTGGTTGCCAGGCAGGGAATG-GAGAAAACCTTAGGC--CT 27394
    
```

```

Majority      ATTTGGTATGTTTGTGATGTATTCAATTTATATTTGAA-GAAAGAGATTGTGAT-TT---TGACCCTTCTGTTTGAAAAAT
              31210   31220   31230   31240   31250   31260   31270   31280
Human         GTTTAGTTTTGCTTGAATTGACGTGTTCTCATCTGAATGGGCCAAATTTTGAATTTGATTATTATTATTATCAAATGAAT 31182
Kakapo        AGACGGCATGTTTGTGATATATTCAGTTGTATTTGGA-GAAAGGGATTGTGACACA---GGACACTTCTGTTTGGAAAAT 5997
GoldenEagle   ATACAGTATGTTTGTGATGTACTCAATTATATTTGCA-GAAAGGGATTGTGATATA---TGACCCTTCTGTTTGGAAAAT 6139
JapaneseQuail -----CTATGGCATACTGGTTATACTTGAA-GAAAAAGACTGTGA-----CCCTTCTCTTAGAAAATA 5993
MediumGroundFinch ----- 0
GoodesThornscrubTortoise@CTTGCCAGCATGGACTGGCATCATATA-GCCAGAA-GCAATATAGTCTCCT-TT---TCCTCCAGGTCTTGAAGATAA 27468
    
```

```

Majority      TTGCTTTGCTT-TTCATCATCAGTCATGTCGATACAAATTTGAAAGTTCTATTA-ACTATTGCTGGCTG--GTTTCTCT
              31290   31300   31310   31320   31330   31340   31350   31360
Human         TTACCTCACAACCTCCACATTTTACATTTATTTACCTGAAACCAAAGTTCTTTTTCTGTATTTTAACTTTGA-ATTATTTG 31261
Kakapo        TGGCTTTATTT---CATCATCAATCATGTCGACACAAATTTTCATAGTTCCATTA-ACTATTGGCTGGTT-----TCT 6065
GoldenEagle   TTGCTTTGCTTTATCATCATCAGTCATGTCGATACAAATTTGAAATTCATTA-ACTATTGCTGGCTG--GTTTCTCT 6216
JapaneseQuail CAGTTTATCAAATCATCATTAGTGTGTTGATACAACTATGGAAATGTATTA-ACTATTGCTGGCAG--GCTTCTCT 6070
MediumGroundFinch ----- 0
GoodesThornscrubTortoise@AGCCTGGCTGGTTCTCTCTCACA AAAAACCATCTTCTTTGGCAAGTCAGAAATGTGGCACTGTCCTCTGAAGTCACTGA 27548
    
```

Monday, May 02, 2022 06:50 PM

|                          |                                                                                   |       |
|--------------------------|-----------------------------------------------------------------------------------|-------|
| Majority                 | CTTAAACAGCAAAG--TGAAT--GTTAGTTATATTTTTTATACCCATTTGTAAGAGAGTAATAGTAGAAGTTAACTACTGT |       |
|                          | 31370 31380 31390 31400 31410 31420 31430 31440                                   |       |
| Human                    | CTTGAAGAACAAT--TATATTTGGCAATAAAAGGATCATGAAAGACTAGAAGACATTTTGATTCCCTTAGGTAGCTGT    | 31339 |
| Kakapo                   | CTTAAACAGCAAAG--TGAAC--GT--GTTACGTTTTTACACCCATTTGTAAGAGAGTAATAGTAGAAGTTAACTACTGT  | 6139  |
| GoldenEagle              | CTTAAACAGAAAAG--TGAAT--GTTAGTTATATTTTTAAACCCATTCGTAAGAGAGTAATAGCAGAAGTTAACTACTGT  | 6292  |
| JapaneseQuail            | CGTAAGCATAAAAG--TGAGCTTGTTAGCTATGTTTT-AAACCTGTTTGCTA-AGGCTAGCAGTGGAAGTTAACAAGTAT  | 6146  |
| MediumGroundFinch        | -----                                                                             | 0     |
| GoodesThornscrubTortoise | ATCACCAGTGGGGATTGATTGGGTCAATTTTATGCAAAATGAAGAACTTTTGAAAGTCCCACAATTAGTTT-TTATTTT   | 27627 |

|                          |                                                                                  |       |
|--------------------------|----------------------------------------------------------------------------------|-------|
| Majority                 | AGTCTGGGAATT-TTT--GAATTAGAAA-----AAGGCTTTTCAGCTTTTGGGACTGCATGTAGGCAAGGTAAGTATGA  |       |
|                          | 31450 31460 31470 31480 31490 31500 31510 31520                                  |       |
| Human                    | GCTTAATGTATACATACATCTTGACACACACAAACACAAACACACATCTCTGACAATTCAGTTAACTAAAAATTATAAGG | 31419 |
| Kakapo                   | AGTCTGGGAATTTTCT--GAATTAATAA-----AAGGCTTTTGAGCTTTGGGGACTGCATGTGGGCAAGGCAAGTATAA  | 6211  |
| GoldenEagle              | AGTCTGGGAATTGCTTTGAATTAATAA-----AGGGCTTTTCAGCTTTAGGGACTGCATGTGGGCAAGGCAAGCGTGA   | 6366  |
| JapaneseQuail            | AGACAGGA-----TTT--GGATTGAAA-----AAGGGGTTTCAGCTTTAGGAACTGCATGTAGGCAAGGTGAGTATAA   | 6213  |
| MediumGroundFinch        | -----                                                                            | 0     |
| GoodesThornscrubTortoise | ATTTTGAAATAAATGGGCAGTCAGTCATTCTACAGAACAGAAAACATTTTGTGATGCATGCAGGTAGAGT--CCATCA   | 27705 |

|                          |                                                                                  |       |
|--------------------------|----------------------------------------------------------------------------------|-------|
| Majority                 | A-TAAAGGGAAAACCTGCTTATAATGTTTTGTTAACAGTTTTACAGT--CTTAGTGTATTTAT----TAATGAGGCTGC  |       |
|                          | 31530 31540 31550 31560 31570 31580 31590 31600                                  |       |
| Human                    | ACTTAACAGATAA--TAGTCATGATGTGAAGATA--AATTTGTCAACAGGTCATTATCATTGATTTTGCTATGTAATGAT | 31495 |
| Kakapo                   | AGTAAAAGGAATACTTGCTTATAATGTTTTAGTAACAGTTTTACAGT--CTTGGGCTTAC-----AATGAGGCTGC     | 6280  |
| GoldenEagle              | AGTAAAATGAATACTTGCTTATAATGTTTTATTAACAGTTTTATAGT--CTCAGAGTTACCTGC----TAATGAGGCTGC | 6440  |
| JapaneseQuail            | A-TAAAGGGAAAGCCTGCTTGAATATTTCT----CAGTTAGATAGT--CTAACTGCAAATTTCT----TAATGAGGTTGT | 6281  |
| MediumGroundFinch        | -----                                                                            | 0     |
| GoodesThornscrubTortoise | A-CTTGGGGAAAGTTGACTTTAGATTCTCTGTCAACAAGATCACCATAATTTAAATTTATTCATAC-ATACTGGACCTTC | 27783 |

|                          |                                                                                 |       |
|--------------------------|---------------------------------------------------------------------------------|-------|
| Majority                 | T-AAATTTAAAGCTATTACCATTGTTTGTGCTGTTC-A-GTGCTTTGATTTAAACATTTTT-GTTCATCAAATTTTG   |       |
|                          | 31610 31620 31630 31640 31650 31660 31670 31680                                 |       |
| Human                    | TACAAGCAAAATCACTGGGCCTTGATTTTGATAGTCAAAGTACCATGTACACATAATTGAACAATAGGCAGAAGTGTG  | 31575 |
| Kakapo                   | T-AAATTTGAAGCTATTACCATTATTTGTGCTGTTC---GTGATGTGATTTAAACATTTTT-GTTCATCGGAGTGTG   | 6355  |
| GoldenEagle              | T-AAATTTGAAGCTATTA-----TTTTTGTGCTGT----ATGCTTTGATTTGAAACATTTTT-GTTCATCAAATTTGTG | 6508  |
| JapaneseQuail            | TTAAATTTAAAGCTATTACCATTATTTGTGCTAAGCAAGTTGGCTTGATTTAAAGCATTTTTTGTTCACAAACTCATG  | 6361  |
| MediumGroundFinch        | -----                                                                           | 0     |
| GoodesThornscrubTortoise | ATTATTTACAGTTGCTGCTGTGCTTTAACTTTAGACAGCATTTTTTATTCAAATCTGACTGAAAGGTTAAACTATC    | 27863 |

Monday, May 02, 2022 06:50 PM

|                          |                                                                                   |       |
|--------------------------|-----------------------------------------------------------------------------------|-------|
| Majority                 | AAT-----GTTCAAT--TTTGTTTTTATTTTTGTGCTGAGTCACCAGAAATTAATACCAAAGCTGAGTAAAGAATTTAT   |       |
|                          | ----- ----- ----- ----- ----- ----- ----- -----                                   |       |
|                          | 31690 31700 31710 31720 31730 31740 31750 31760                                   |       |
| Human                    | TAACTCTGGTTTGTGCGTTTCTCTTTTTTGTTTTTACAATGCATACTGTGATCGATAATGGGAAATTAATTTGGAATTAAT | 31655 |
| Kakapo                   | AAT-----GTTCAAT--CTTGGGTTTATTTATGTGTTGAGTCACCAGAAATTAATGCCAAAAGGCGAGGAAAATATA-AA  | 6427  |
| GoldenEagle              | AAT-----GTTCAAT--CTTGATTTTATTTTCATGTTGAGTCACCAGAAATTAACACCAAAGCTGAGTAAAAAAAATAA   | 6581  |
| JapaneseQuail            | AGT-----GTT-----T---T-ATTTGTGTGCTGAGTCAGAAGAAATTAATACCAAAGCTGAGGAAAGCATTTCAG      | 6423  |
| MediumGroundFinch        | -----                                                                             | 0     |
| GoodesThornscrubTortoise | ACT-----GTAAAAAGTCTTTTTTTTTTTTAAACGAAATTCCCAGTTGTTGGTACAGTAATTATATAGGCTGTGTTGT    | 27938 |

|                          |                                                                                    |       |
|--------------------------|------------------------------------------------------------------------------------|-------|
| Majority                 | AACTAAAAAT--GGAGGTGGAGAAAA--TGAATAACTATTTGAAAAC-----TTGGTTTACATCGAGTAAATGTGGG      |       |
|                          | ----- ----- ----- ----- ----- ----- -----                                          |       |
|                          | 31770 31780 31790 31800 31810 31820 31830 31840                                    |       |
| Human                    | TTCCAAATATTTAGGGCTAGTGACAGAGTAACTAGTAGCAGCCTTTGGCCCTTTTTTCAGTCTCCCCCAAACCAAAAAG    | 31735 |
| Kakapo                   | ACTCAAAAAT--GGAGGTGGAAAAAA--TGACACATACTCTTTGAAAAC-----TTGGTTCACACAGAGTAAATGTGGG    | 6497  |
| GoldenEagle              | AACTTAAAAAT--GGAGGTGGAAAAAA--TGACATATACTATTTGAAAAC-----TTGGTTTACATAGAGTAAATGTGGG   | 6651  |
| JapaneseQuail            | CGCAGAATGA--AGGAGTGGAGAAA---TGATGAATGCTATTTGAAAGC-----TTGGTTTACGTGGTGTAAATGTGGT    | 6492  |
| MediumGroundFinch        | -----                                                                              | 0     |
| GoodesThornscrubTortoise | GATTACAAGT--GGATGCCTTGACATA--TTGCTAATGGTCTGTGAAGATCACCAGTTTGAAGTCCAGCTTGGCTCTGTAGG | 28015 |

|                          |                                                                                     |       |
|--------------------------|-------------------------------------------------------------------------------------|-------|
| Majority                 | GATTTG----TACAACATAAAAATATGTGGTGGGAGCATGC--TTCCAAGTTAAAATCTGTCAGAGGAGCAGTGTGCTT-AA  |       |
|                          | ----- ----- ----- ----- ----- ----- -----                                           |       |
|                          | 31850 31860 31870 31880 31890 31900 31910 31920                                     |       |
| Human                    | TATGTA----ACTGAATAAAAATACGTGGAACAACCTGTTGTTTGGAAAGTGATGAGCAGACGGTATAAGATCATCCTT-GA  | 31809 |
| Kakapo                   | GATTTG----CACAACTCAAAAATATGTGGTGGGAGCATGC--TTCCAGGCTAAAACCTGTCAGAGGAGCAGTGTGCTTTAA  | 6572  |
| GoldenEagle              | GATTTG----CACAACTCAAAAATATGCAGTGGGAGCACGC--TTCCAGTTAAA-TCTGTCAGAGGAGCAGAGTGTGCTTTAA | 6725  |
| JapaneseQuail            | GTTCTG----TCTAAAATCAAAATGCGTAATGAGAACATAC--TTCCAGCTAACATCTGTCAGAGGAGCAGTGTGCTT-AT   | 6566  |
| MediumGroundFinch        | -----                                                                               | 0     |
| GoodesThornscrubTortoise | AACTTAAAATTACCGTATAATGAATGTTGTGTGACTCTGTGTTCCAAGTTGTAATCATAAACTTATCATTGTGCTT--T     | 28093 |

|                          |                                                                                  |       |
|--------------------------|----------------------------------------------------------------------------------|-------|
| Majority                 | TTTCTGAAAGAGTTAGAACATGTCAAAGCTGAATACTCTGTGTGTACATGTGAAGTAATTCATA--TTTGATTTGGTCT  |       |
|                          | ----- ----- ----- ----- ----- ----- -----                                        |       |
|                          | 31930 31940 31950 31960 31970 31980 31990 32000                                  |       |
| Human                    | GAGAAGGGGTACACGTGAGGTAAGTATCATGAACACTCTGGCTTTCTGTCTTGGACTATTTTACTGCTCTAAACCACAGA | 31889 |
| Kakapo                   | TTTCTGAAGCGTTAGAACATGTCAAAACCCAGTAATCTTCTGAGCACGTGTGAAATAGTTCATA--TTTGATTTGGTCT  | 6650  |
| GoldenEagle              | TTTCTCAAAGCGTTAGAACATGTCAAAACCCATCATCTTGTGAGTACATATGAAATAATTCATA--TTTGATTTGGTCT  | 6803  |
| JapaneseQuail            | TTTCTGGAAGAATTAGAATATATCAATGCAGATGACTTGTGGCCGTA-ATATAAAGTAATTCATA--CTTGAGTTGATAT | 6643  |
| MediumGroundFinch        | -----                                                                            | 0     |
| GoodesThornscrubTortoise | ATACTGACAGATTCAGATAAGCCAGGAGCTGTATGGGCAGCTATTTACCTGTAAAGAAAGTAGCT--TCAGATCAGAT-T | 28170 |

Monday, May 02, 2022 06:50 PM

|                          |                                                                                  |       |
|--------------------------|----------------------------------------------------------------------------------|-------|
| Majority                 | GTAGTGTGTGTTTTGCTTACCTAGAAATTCATGGAGGC-A-GA-A-CGTGACTCTGCACAAAGTTTACCCCTTCCGTTTC |       |
|                          | 32010 32020 32030 32040 32050 32060 32070 32080                                  |       |
| Human                    | GAAGTGGAGAGCCCAGAGTATACAGGTCTCACTGAGCTGAAGAGACCAAGAGTGGGTGTCAGGGCTGCCAATCATTTGG  | 31969 |
| Kakapo                   | TTAGTGTCTGTTTTGCTTACCTAGAAATTCATGGAGGCAAGGAAA-CAGCACTCTGCAC--AGTTTACCCCTTCCGTTTC | 6727  |
| GoldenEagle              | GTAATGTGTGGTTTTGCTTACCTGGAATTCATGGAGGCAAGGAAA-TGTCACTCTGCACACAGTTTACCCCTTATGTTAC | 6882  |
| JapaneseQuail            | GTAGCGTCTGTTTTGGCTGTCTTAGAATTCATGG-----CGTGCCTTTGCACAAAGTACACCCCTTACAGTTC        | 6711  |
| MediumGroundFinch        | -----                                                                            | 0     |
| GoodesThornscrubTortoise | GAGGCATGTTAGCAGGCAATGTATATGAGAAGCTTAC-----CCTGCCACTGTGCTATAGATAAGCAGAGGACTTC     | 28242 |

|                          |                                                                                    |       |
|--------------------------|------------------------------------------------------------------------------------|-------|
| Majority                 | AATTTACAGAGTAGTACGAGAATAATGAGCTTTAGCTTTGTGTCTGATGTTACTTTGTGAATTCCTGTTGTATATAAGCA   |       |
|                          | 32090 32100 32110 32120 32130 32140 32150 32160                                    |       |
| Human                    | AATTTATGGAGAAGTCTGGAGAAAAGAGAGCTGTCTAGGGGTTTAGGAATAGAGCAGGGGGCAGAATTTAGTATGGTCA    | 32049 |
| Kakapo                   | AATTTCCAAAGTAACAGGAAAAGAATGAGCTTTAGCTCTGGGTCTGATGTTACTTTGGGAATTCCTTGTATAGAAGCA     | 6807  |
| GoldenEagle              | AGTTTACAAAATAATAACAAGAAGAATGAGCTTTGCTCTGTGTCTGATGTTACTTTGTGAACCTCTGTTGTATATAAGCA   | 6962  |
| JapaneseQuail            | AATTTAGATAGCAGTATGAAAATACTGAGATTTAACTTCGTGTCAAATGTTCTGTGTAACCTCCACTATATATAAACA     | 6791  |
| MediumGroundFinch        | -----                                                                              | 0     |
| GoodesThornscrubTortoise | AATTTACCAGGGCTGGAAACTTGTAGTAGTGCTAAATCTATATACATTTTTTAAAGATGAAGTTTATAGTTATATGCACAAT | 28322 |

|                          |                                                                                   |       |
|--------------------------|-----------------------------------------------------------------------------------|-------|
| Majority                 | GTTTGTGTAAA--GTGTTTTG--AAAAGAACAGAGTTAAAGGTTCCAGTTATGATACTAT-ATTACGTGTTTCAGACAT   |       |
|                          | 32170 32180 32190 32200 32210 32220 32230 32240                                   |       |
| Human                    | TTTCACTTCATTCACAGTTTTGG-ATAATGACTTGGTTACATGTGTGCAGGTTGAGGCTTT-GCCAGGTCTGTCAGAAAT  | 32127 |
| Kakapo                   | GGTTGTACAAA--GTGGTTTTG--AATAGAACAGAGCTAAAGATTCCAGTTACGATAATAT-ATTACATAGTTCAGTCTG  | 6882  |
| GoldenEagle              | GTTTGTGTGA---GTATTTTTG--AATAGAACAGAGCTAAGGATTCCAGTAATGATAATAT-ATTACATAGTTCATAGAT  | 7036  |
| JapaneseQuail            | GTTTGTGTAAA--GTGTTTTGAGTAAAACAACAGATTTAAAGGCTTCCAGTAATGACAGTA--ATACCGTG--TCGATTGG | 6865  |
| MediumGroundFinch        | -----                                                                             | 0     |
| GoodesThornscrubTortoise | ATTGGTAAATA--TACACATTTAATTAATGGACTGATTTACATGAAGTGGTTGTGTGACCATGACTAAGTGTCCCTAACAT | 28400 |

|                          |                                                                                 |       |
|--------------------------|---------------------------------------------------------------------------------|-------|
| Majority                 | TTTCTCTTCAGTTTTTAATT-----TCTTGATGTAAT-C-GTACATCTAAAATTTGTAG-TTTGTACATTCATAATTTT |       |
|                          | 32250 32260 32270 32280 32290 32300 32310 32320                                 |       |
| Human                    | TGCTGCTCTGGGGCTAAATGGTGATTCATAGGTTGCACGGTACTCTGAAACATTGGAGTTCTGAGAAGTCAGAATGCA  | 32207 |
| Kakapo                   | TTTGAAATGACCTGCTAGTT-----ACCTACTAA-----TCTCAAACCTTCT-----CAT-----               | 6926  |
| GoldenEagle              | TTTTTTTTTAATTTTCAGTT-----TCTTGAAGAAATGCTATACATTTTAAATTTATAGATTTCTTCATGCATAGTTTT | 7110  |
| JapaneseQuail            | TACCTCTTCAGTTTTTCATT-----TCTTGAAGGAAT-CTGTACATCTGAAGTTTATAGATTTCTATGTGTACGCTTTT | 6938  |
| MediumGroundFinch        | -----                                                                           | 0     |
| GoodesThornscrubTortoise | ATTTCCCCAAATCTGGCAAC-----CCGAAATGTCAA---GTGACTCTAAAAGTGT---TTGTACATTTAAAAGGT    | 28467 |

Monday, May 02, 2022 06:50 PM

```

Majority      GACAATTGTCATGTTGTATAAAATGTTT----T----TTT--AAAGTGTGCGTCTTGGTTGCTTTGTTTTATTATATGT
              32330      32340      32350      32360      32370      32380      32390      32400
Human         GACATATTGCAGGGTACTTCAAACACTCCATTTAGACTACAGAAAGCCTGGACCTGAATAGAAAGGATCACACCCTATAG 32287
Kakapo        -----
GoldenEagle   AAAAATTGCCATATTGTATAAAATGTTTGTCTTTATGTTTTAAAAAGGTGCATCTTTGTTGCTCTGTTTTATTACATGA 7190
JapaneseQuail GACAATTGTCATGTTGTATAAAATGTTT-----TTCCAAGTGTATGTTTTAGTTGCTCTGTTTTATTACGTGT 7008
MediumGroundFinch ----- 0
GoodesThornscrubTortoise GACTGTAGTGACTCCATA-ATGAAGTCTGCAATGAGATTT--GAAATGGTAGGGGAGATTAATCAATTTTCTTATATGT 28544
    
```

```

Majority      G--CCTTAGTCACTAAATCTTGAATTGCGTGCTAGTATCCCTTCTGTG----AGTTAAGGTTGCAT--GTTAA--TTG-C
              32410      32420      32430      32440      32450      32460      32470      32480
Human         GAAGTGCCATCTATAAGACTGAGATAAAAACCAGAAACCTAGCCCGATAGGAAGTGAAGGATTCACCAGTTAATCTAACC 32367
Kakapo        A--TCT-AATAACTGTAGCTTGAATTGCTGGCTTGTGTTCCCTTTTG-----C----- 7002
GoldenEagle   GGTCCTTAGTCACTAAATATGAAATAGCCTGCTAGTTAGCTTCTAGTCTCAAACCTCTCATTGCTC--ATTGGCTATGTA 7268
JapaneseQuail GGTCATAGTTA-TATAGTTTCAGGGACGAGTTAGCATCTCATCTCTGT---AGTCAGTGAGGAAT--GTCAATTTTGGC 7082
MediumGroundFinch ----- 0
GoodesThornscrubTortoise G-----CGGCATTTCACTACTGAGCTTGGTGTCAACACCCTTCCTAG---ACTTAAGATTGAAT--TTCA--GGAAA 28611
    
```

```

Majority      GTTTGAGTATCTGGGTTTAATAGC--TGTAGTT----TGAATTGCTGTCTTATGTTCTCTTTACAGTTATGATGCTTTA
              32490      32500      32510      32520      32530      32540      32550      32560
Human         AGTAACTGATGAAGGATTAATCAGTAATTTAGTTGCCTTCCAAAACAAAACAACACCCCAAGAAAGACATGATATAGTT 32447
Kakapo        -----AGCTA-----TGATGTTCTCTTTACAGTTATGATACTTTA 7037
GoldenEagle   GTTTGAGTATCAGAATCTAATAAC--TGTAGTT----TGAATTGCTGTCTTGTGTTCTCTTTACAGTTATGATGCTTTA 7342
JapaneseQuail GCTTTGA-CATCTGGGTCTGACAGC--TGTAGTT----AGAGTTGCTGTCTTGTGTTCTCCTTATAGTTAGGAGGCTTTA 7155
MediumGroundFinch ----- 0
GoodesThornscrubTortoise GTTGAAAGTAAATCTGTTCACTAGC--TCAAGTT----ACAATCAAAGTTATTTTCTTTTTGAAATT-TAAACTTAAA 28684
    
```

```

Majority      ATCTGGC-----TAAGTAAACTGATTTGGCACTTGAGGTGATAGAGGCTTTTTCGACTGTTGAAGTGAACGTATG
              32570      32580      32590      32600      32610      32620      32630      32640
Human         TTCTGCAACTATCTTCCATAATATCTAGTATAACCATCAAAAATTACAAGTGTGTCAGAAGCAGGAAAGTAACCCATG 32527
Kakapo        ATCTCGA-----TAAGTAAACTGATTTGGCACTTGAAGTGATAGAGCCTTTTCAACTGTTAAAGTGAACGTATG 7107
GoldenEagle   ATCTGGA-----TAAGTAAACTGATTTGACACTTGAGGTGATAAAGCCTTTTTCGATTGTTGAAGTGAATGTATG 7412
JapaneseQuail ATCTGGC-----TAAGTAAAC----TTGGTACTTGAGTGGTGGAGGCTTTTGA-----AATGTAGG 7209
MediumGroundFinch ----- 0
GoodesThornscrubTortoise CTCTCAG-----CTCCTTTTCCCTTTCCCTAAGTCAGTGGTCCCAGTCTTTTCTCTGCCATGCCACACCTTGA 28754
    
```

Monday, May 02, 2022 06:50 PM

|                          |                                                                                   |       |
|--------------------------|-----------------------------------------------------------------------------------|-------|
| Majority                 | AAGTATATAATGTATCTTTTCTCTGG--AGTAGTAAAAGAATCTTTAG--AGAGGTAT-AAAATGTGATGTAAAGAATG   |       |
|                          | 32650 32660 32670 32680 32690 32700 32710 32720                                   |       |
| Human                    | AAATATAAAGAACACATTTAATAGGAACAGATTCCAAAATGACCTAGAGTTAGAATTAGCAGACAAGGACGATAAGTATT  | 32607 |
| Kakapo                   | AAGTATATAATGTAGCTTTTCTCTGG--AGTAATAAAAGAATCTTTGG--AGGGGTAT-AAAATGTGATGTAAAGAAGG   | 7182  |
| GoldenEagle              | AAGTATATAATGTATCTTTTCTCTGG--AGTAGTAAAAGAATCCGTAG--AGGGATAT-AAAATGTGATGTAAAGAATA   | 7487  |
| JapaneseQuail            | AAGTATATAATCTGTCTTTTCTCAGG--AGTAATGACAAAATCTTTAG--AGACACAG-AAGCTGTGATGGAAAGAATG   | 7284  |
| MediumGroundFinch        | -----                                                                             | 0     |
| GoodesThornscrubTortoise | CTCCACGGGCTCATCCTCATTCTGGCTGTGAGTGGATAGGGGACGGGC--AGAGGTG--ACGACCTGTGCTCACACAG    | 28830 |
| Majority                 | TAGATCACAGAGGTGCAAGGAATAACTTTGGTGTGATTTTGGTGCCTGTTGAAGGTGATAGTTCTCTTTTACTGTATT-C  |       |
|                          | 32730 32740 32750 32760 32770 32780 32790 32800                                   |       |
| Human                    | TAAAGCTGTAAAGGAAAAGATTGAAATAATGAGTGATGGAGGAGTGTGTTGAAGA-GATAAAAACTATAAAGAAAGCA-   | 32685 |
| Kakapo                   | TAGATCACACAGATGCA-GGAATAACTTTGGTGAATTTTGGTGCCTATTGAAGGTGATATTTCTCTTCTACTGTATTGC   | 7261  |
| GoldenEagle              | TACACTACACAGGTGCATGGAATAACTTAGGTGAACTTTTGGTGCCTATTGAAGATTATAGTTCTCCTTTACTGTATTTT  | 7567  |
| JapaneseQuail            | TACCTCACAGAGATGCAGGGAATAACTATATGGTGA----GCTGCTAGTTGGTATTGATAGTTCTCTT----TGTA----  | 7352  |
| MediumGroundFinch        | -----                                                                             | 0     |
| GoodesThornscrubTortoise | CAGGGGAGGGGGGAAAAGAGGGAAGTTGAGCTCTAATTGCTCTCCTCCTGGAGGAGGTGGTGCAGTGAGGCAGCTTCCC   | 28910 |
| Majority                 | --AGTGTGTGCCACTTCAGTCTAATATATCGTCTTTCTCCTGGTTGGCATGGATAGCTGTGCTGGAAATGGGGGCTGA--  |       |
|                          | 32810 32820 32830 32840 32850 32860 32870 32880                                   |       |
| Human                    | --TGTAGAAATATTCTAATTGAAAAATACAGTTTTTGAATAGTTGGGACTGATTCACTGGTTGGAAGTACTAGCAGATT   | 32763 |
| Kakapo                   | --AGTGGGTGCCACTTCAGTCGGATGTATCATCTTTCTCCTGCATGGCCTGCATAGTTGTGCTGGAAACGGGGACTGA--  | 7337  |
| GoldenEagle              | --AGTGTGTGCCACTTCAGTCTAATCTATTATCTTTCTCCTGGATGGCAGATGTAGCTGTGAGTAAATGGGGCCCGA--   | 7643  |
| JapaneseQuail            | --AGCGTGCACCCTTCAGCTAACATATCCTCTTTCTCCTCATTTGGCATGGGTAGCTGTGAGTGAATGTGGCCTGA--    | 7428  |
| MediumGroundFinch        | -----                                                                             | 0     |
| GoodesThornscrubTortoise | TTTTCCCTCCCCCTTATTCTCACTTCAGTTTTTCAAAAAGTTCCACAGCACAGCTGT-TTGGACATGATGGCACA--     | 28987 |
| Majority                 | ----ACAATTGAGTGACTCATTTTG-ATATGTGCATTGCGCATTTTCATG-----TGCAATGGGTCAGG----TGTACTTC |       |
|                          | 32890 32900 32910 32920 32930 32940 32950 32960                                   |       |
| Human                    | GGAGACAATAGAAGAAATGTTAGTGAACCTGAATACTGTTGAATACAGTG---ATTAAATCTGTGAGAGAGGAGAAAGTA  | 32840 |
| Kakapo                   | ----ACAATTGAGTGACTCATTTAGTGTATGTGCATTGCGCATTTTCATG-----TGCAATGGGTCAGG----TGTACTTT | 7404  |
| GoldenEagle              | ----ACAATTGACTGACTCATTTTGTATACATGCATTGCACATCT-----TGGAATGGGTCAGG----TGTACTTC      | 7706  |
| JapaneseQuail            | ----GCAATTGAGTGACTCATTTGG-GGATGAGCATTGCACGTTTCAGGCTGTCTGCAGTCACTCTGGCT-ATGACACTC  | 7502  |
| MediumGroundFinch        | -----                                                                             | 0     |
| GoodesThornscrubTortoise | ---CCAGTTGGGAAACATTGCTCT-AAATATGATAAGTGTCTTGGATGTGACACTTAAACTTCAGGTCCATATATCTC    | 29062 |

Monday, May 02, 2022 06:50 PM

```

Majority      TATCTGATG-----A-----TGGAGCGAAGAAGCAGTCGTTCCCTTCATGGGTGTTTT-----
                32970      32980      32990      33000      33010      33020      33030      33040
Human         TATCTAATGGACAATGAAGCAGTCTGACA-----TGTAAGTTGAATTTTCAGAGTGAGAATGTGGGGGAATAAAACATCTA 32915
Kakapo        TGCCTGCTG-----GGAGAAAAGAAGCAGTCATTCCCTTCATGAATGTGTG----- 7449
GoldenEagle   TACCTGACG-----GGAGAAAAGCAGCAGTCATTCCCTTCATGGGTGCATT----- 7751
JapaneseQuail TAACTGATGAGCAGAAAAAGGTGGGGGGGGCGGGTGGAGCGGAGGGGAAGTTTTTCTTTCTTTGTTCTTTTTTCTAATAC 7582
MediumGroundFinch ----- 0
GoodesThornscrubTortoise@TTTAGATAT---AAACTAAT-----TATGACGAGATCCCCGAGGTGCACCCAGGGACCGTGGGACTGCTGT 29126
    
```

```

Majority      --T-ATTTGGTACATAGCATTGGGAATTTGTAACTT-GTCTACACTGCTTTGGGCTACA-----GCTGGCCAAGATC
                33050      33060      33070      33080      33090      33100      33110      33120
Human         TCTGTTTGAGATAGTAATGACTGAGAACTTCTAAAATTTGAATAAAATATATCAACTTACATTCCTAAGAAGCTCAGGTA 32995
Kakapo        ----ATTTGGTATATAGCAGTCGGGAATTCGCAACGTT-GTCAACACTGCTTTGGGCTGT-----GCTGGCCAAAAAC 7517
GoldenEagle   ----ATTTGGTACATAGCATTGGGAATTTGTGACGTT-GTTGACAGTGCTTTGGGCTAC-----ACTGGCCAAAACC 7819
JapaneseQuail ATTTACTTTGGTACATAGCATTGGGAATTTGTAACTT-GTAGA-ACTGCTTTGGGCTACA-----CGCTGGCCAAGAGT 7655
MediumGroundFinch ----- 0
GoodesThornscrubTortoise@CTGCCATAACTCTTTCCAGTCTGGGCTGTCTCTCAAT-GCCTTGCTAGTGACAAGCAGCA----AGCACCTCCAGGTG 29200
    
```

```

Majority      TGATCTTCAGCT-GC-CAAGTGTGGACAGCCCTAGTTA--TACCTAGGAGGGAAAAC-TCATATACTC---CTGTAAAC
                33130      33140      33150      33160      33170      33180      33190      33200
Human         AACTCCTCATGTAGGCTAAATAAAAAGAACCATACTTAGACACATAGTAGTCAAATATTGAAAAGTAAAGTGAAGAGC 33075
Kakapo        TGAACGTCAGCTTGC-CAAGTGTGGACAGCCCCAGCTG--TACCTAGGAGGGAAAACCTCATATATTC---CTGTAAAC 7590
GoldenEagle   TGAGCTTCAGCT-GC-CAAGTGTGGACAGCCCCAGTTA--TACCTAGGAGGGAAAAC-TCATGTACTC---CTGTAAAC 7890
JapaneseQuail GGAGCTTCAGCT-GC-CAAATGTGAACAGCCCCAGTTA--TGTATAGGGGAAGAACTTCATATGCTA---TTGTAAAT 7727
MediumGroundFinch ----- 0
GoodesThornscrubTortoise@TGTGATCACTCAGCACAACTGCATGTAGAGCTCCCG--AGCCAGCTAGGTTGCA--TGAATGTTTC---CCTGAGCC 29272
    
```

```

Majority      ATAGTTTTGTAATTTTGAAAGA---GGG-AATAGCCTTTTTCCCCCAAGAGTCAGGGCATCAGTCATTGCAGTATGCTTA
                33210      33220      33230      33240      33250      33260      33270      33280
Human         AAATCTAAACAGCTGCGAAAAAACGCTAACAGGAGACCAACACCTCGTATTAAAGGGGAAAAAAGCGAATTTCTTT 33155
Kakapo        ATAGTTTTGTAATGTCTAAAGATGTGGG-AATGGCCTTTTTCCCCCAAAGGCAGGGCATCAGCCTTTGCATGCT--TAA 7667
GoldenEagle   ATAGTTTTGTAATGTTTAAAGATGTGGG-AATGGCCTTTT-CCCCAAAAGTCAGGGCATCAGCCATTGCAGTATGCTTA 7968
JapaneseQuail GCAGGTTTTGTGATCTGGGAGA-----AGGATCTTTTTTCCCCAAGAATCAGAGCATC--TCTTTTTAGTATGCCTA 7798
MediumGroundFinch ----- 0
GoodesThornscrubTortoise@ACTCATGAATCACACAGAGAAA---GGC-ACCAGCCGAATCCCCCAGCTCCAGCAC-TGACTCAGGGATATATCATCT 29347
    
```



Monday, May 02, 2022 06:50 PM

```

Majority      AGGAAGGATGGAATTGTTAGTGTGTA-TTAGTTGGTTATGTTAGGATTGGGTAG----AAGATGTTAAGAAGTATT----
                33290      33300      33310      33320      33330      33340      33350      33360
Human         AGACTGAATGGCATAACTTGGCTCTA--CAGGGGATAAGAGGAGTACTGGGAATGGTTAATATGTGTATAAATTTTAAAA 33233
Kakapo        AGAGAAGACGCAATTCTTGGTGTGTGTAGTTGGTTACGTTATGGTTGGGTAG----AAGATGCCAAGAAGTGCT---- 7739
GoldenEagle   AGGAAAGAGGGAATTTCTAGTGTGTATTTAGTTGGTTATGTTAGGATTGGGTAG----AAGATGCTAAGAAGCACT---- 8040
JapaneseQuail GGGAAAGGAGGAAATTTGTTAGTGGTT--TTAGTTGGTAATGTTAGGTTGGGCAG----GCGGTGTTAGAACATAGC---- 7868
MediumGroundFinch ----- 0
GoodesThornscrubTortoise@GCATTGCTCAAGTTGAGCGGTACAAATTTATTAATTGGTTTACCAGTGGAAAG----TGGATATACACCAGCCTTTGCA 29423
    
```

```

Majority      -GTCCTAGTAC-TTTCTGTTAGTTTTCCAAAAAGTTATGTGTACAAAAGTCCCTCTTTTTTCATGGTTGCTGAAAT-TTAA
                33370      33380      33390      33400      33410      33420      33430      33440
Human         GGGCTCTCTCTTTTCCTATCAGTTTCTTTGAAAGCCTTTATGTAAACAACAACCTTTGTATTATGGGGTTTATTATGTAAA 33313
Kakapo        -CTCCTGGTAC-TTTCTGGTAGGTTTCCAAACAGTAATGTGTCCCAAAGTCCCCCTTTTTCAAGGTTGCTGAAAT-TTAA 7816
GoldenEagle   -GTCCTAGTAC-TTTCTAATAGTTTTCCAAACAGTAATGTGTACAAAAGTCCCCCTTTTTCTCGTTGCTGAAAT-TTAA 8117
JapaneseQuail -ATATGAGTAC-TTTCTGTTGGCTTTCCAAACAAGTT---CATCACAAAGGCCCTCTTTTTCTCGTTACTGAAAT-TTAA 7942
MediumGroundFinch ----- 0
GoodesThornscrubTortoise@ACCTGAGCACATTTGCCACACACTTCAGGCAGATTCACTGGTAAAGATAAACAGTAAAATAAGTTTGACTACAA-AAGA 29502
    
```

```

Majority      CAGATGTTAATATAATAGTATTGAGGAAGGGCT-----GAAACTAAAAGAAATATGAGGTGATAGAGTACA-TAAGAGT
                33450      33460      33470      33480      33490      33500      33510      33520
Human         TGGATGTTTATATGACAACAGTTAGTACAAAGTG-----AAGATAAATGGAATCTTCAGTGGTAAGGTTCTTATATTTT 33388
Kakapo        CACAGGGGAATATAATAGTATTGGGGAAGGG-----GAACCCATGAGAGACACGAGGTGATAGAG-----AAGAGG 7882
GoldenEagle   CATGGGGGAATATAGTAGTATGGGGGAAGGGCAGTAGCTAAAAGCAAAGAGATAGGAGCTGATGGAGAACAGGAAGAGA 8197
JapaneseQuail CAC-----TGTA--GAGGAAGGGCA-----GTCGCTAAAACCAGCACAAAGTTGAAGGAGAGAAATAAGAGA 8001
MediumGroundFinch ----- 0
GoodesThornscrubTortoise@AGATTTTTAAGTGATAGGCCAAAAGTCAGAGTTAGTTACCAAATAAAATAAATATAAGCAAGCAGGTTAAACTCTCAAT 29582
    
```

```

Majority      GCCTGAAGTAG--CAGTGTT--TGTA-AATAC-A-----A-A-----A-T-TC--TGTAAGCACTT
                33530      33540      33550      33560      33570      33580      33590      33600
Human         ACCTGAAGTGATACAGTGTAACTCTAACATAAAAAGATTCTGTTAAGGTTGCATATCAAAATCTAAGTGTAATCTCAT 33468
Kakapo        GCATGAAGTAG--AGGGT-----TGC----- 7902
GoldenEagle   GCACAAAGTAG--CAGTGTC--TGGAGAAAAGGAAGAG-----AGCACAAAATAGCAGTGTC--TGTAAGTACTC 8261
JapaneseQuail GCCCTGAGTAG--CAGTGTT--TGTA-AGTAC-----TC--CCTGAGCAATA 8041
MediumGroundFinch ----- 0
GoodesThornscrubTortoise@CTTAGATTGGG-CAACATC---TAGATTAAGCAATTTTCTCACCCCTACTGGATATTGCAATTCGT--TGACACAGAT 29656
    
```

Monday, May 02, 2022 06:50 PM

```

Majority      TTCA-GTT-TATCCAGTTCCTTTT-TTCTTTTTTTTTTAGACTCAAGTCTGAGGGTTAATCTCTTTTCTTCCAAAATTATT
              33610   33620   33630   33640   33650   33660   33670   33680
Human         TTAAAAAGATAAAAAGAAGTATAACGAAAAGCCAATAGAGGAAAAATTGGAGCATTGACTACCAGTTTTCAAGAATTACT 33548
Kakapo        -TA-----CT-TCATTTAACTCGAGTCTGAGGAGTAATCTCTTTTCTTACAAAATTATA 7955
GoldenEagle   TTGAAGCGTTGTCCACTTCTTTT-TTTTTTTTTTTTGCCTGAAGTCTGAGGGTTAATCTCTCTCTTACAAAGTTACA 8340
JapaneseQuail CTCA-GTTCCTTTTTTTTCTTTT-TTCTTTTTTTTTTAAACTCAAATCTGAGATCT--TCTTTTCTCTTCGGAGATTATT 8117
MediumGroundFinch ----- 0
GoodesThornscrubTortoise@TCACGTTGAAACCGGGGTCAGT-CTCCTCTGTGGAGTCTTAAGTCTTCTCAGTGT-CCTTGTGTGCTTGCAGCATAGGT 29734
    
```

```

Majority      G-AACGCTGGCCCTTTTTTGCTTCTAATAACTGAGAGTTTC-GTTATGGTGGTAATACATATTGTGGATATATTGCGACT
              33690   33700   33710   33720   33730   33740   33750   33760
Human         GCAAAGCTACGGTAATTAATAATAGCATCATAATAACATAAAGATAAATAGGTCAGTGAGACAGAGCAGAGAGTTTCAGAA 33628
Kakapo        G-AGCCCTGGCCCTTTTTTGCTTCTAATAACTGAGAGTTTC-CTCATGGTGGGCATA-----GATACATTGCGACT 8024
GoldenEagle   G-AACACTGACCCTTTTTTGCTACTAATAACTGAGAGTTTC-CTTGTGGTGGAAACACATATTGTGGATATATTGTGACT 8418
JapaneseQuail A-AAGACTGACCAGTTTTTACTCTCAATAATGGAGAGCTTC-GTTATGGTGGAAACAAATATTTTGGTCATATTGGGTCT 8195
MediumGroundFinch ----- 0
GoodesThornscrubTortoise@GGAGCAGGGGAAGCCAAGCATGTGGCCACTGTCTTCTGT-TTTATACCCTTAATCCATGTGCT-TGTAAACACAAGT 29811
    
```

```

Majority      TTTTATTTGAGCTGTACAGTGTA-----GG---A---CA---CTCCTGGGAAG-TGTCAAC---AGA
              33770   33780   33790   33800   33810   33820   33830   33840
Human         GTTAACTCACACAATTATGGATAACTGATTTTTGACAAAGGTGCAAAGTCAATTCAGTGGAGAAAAGTAGACTTCCAAC 33708
Kakapo        TCTTATTTGAACTGTACAGTGTA-----ATTCTAGCAAGCTGTCAGC---AGA 8069
GoldenEagle   TTTTATTTGAGCTGTACACTGTATAATGAAAATATGTGTGAAAAAAGTCAGAAATCCTAGGAAGTTGTCAAA---AGA 8494
JapaneseQuail TTTTATTTAAGCTGT-----T-----T----- 8212
MediumGroundFinch ----- 0
GoodesThornscrubTortoise@CAGGCATGTCTCATGGACATTGCTGAGTCTCCAGGCAAGGCTGAG---CAATTCCCCTGGTGTGGCCTCATG---CAG 29884
    
```

```

Majority      GAAGTTTACTCTAAACTTTAGAAATGGGAGAATAGATGTAATAAGTTTTTTCTTTTCAGTTTCTTCTTCTT-TTTCTGTT
              33850   33860   33870   33880   33890   33900   33910   33920
Human         AAAGGGTGTCTACAGCAGTTGGAGCTATCCGTATGCAAAAAAATGATCTTGGATCTGTATCTCACACTGCATATGAAAATT 33788
Kakapo        GAAGTTGAGACTAAACTTTAGAAATGAGAAAATACATGTAATAAGCTTCTTCTTTCAGTTTCTTCTTCTT-TTTCTGAA 8148
GoldenEagle   TAAGTTTACTACTAAACTTAAGAAATGAGAAAATGATTTTAAATAGCTTTTTCTTTCAGTTTCTTCTTCTT-TTTCTGAA 8573
JapaneseQuail --A--TAA---TACTTTAAAAAAGGAAGCATAGGAATA--A-----T----- 8247
MediumGroundFinch ----- 0
GoodesThornscrubTortoise@TGAGTCATTGCATTCCCTTGCTGGACAGTGGCCGGTATGTCTGTTCACAGCACCCACCTTGC-TGTTAGTT 29963
    
```

Monday, May 02, 2022 06:50 PM

|                          |                                                                                    |       |
|--------------------------|------------------------------------------------------------------------------------|-------|
| Majority                 | ACCTCTTT-GCCTTCA----CTGTTGTAATTCCAAATACTTAAAAAAA---A--GA-TGGTAGGATAAAACTCCTT----   |       |
|                          | 33930      33940      33950      33960      33970      33980      33990      34000 |       |
| Human                    | AACTCCAAATGGATCATGGCCTAATGTAAAACCAAAATATATAAAATCTCTAGAAAAAATACAGAAAATCTTCGTGACT    | 33868 |
| Kakapo                   | ACCTGTTT-ACCTTCA----CTGTTGTAATTCTAGATACTTAAAAAACTCATGGAGTGGTAGGATAAAAAACCTG---G    | 8220  |
| GoldenEagle              | ATCTCTTTTGCCTTCA----CTGTCATCATTCTAGATACTTAAATAAA---AGGGAGTGGTAGGATAAAAAAGT-----    | 8641  |
| JapaneseQuail            | --CTGTTA-----GAAATTCCAATAAATTACCAAAA-----GGTAAGTTTAGCCTCCCT----                    | 8294  |
| MediumGroundFinch        | -----                                                                              | 0     |
| GoodesThornscrubTortoise | ACCTCCCTTGTC AAT----CTGGGTGCCTCCCAAACCCTCAGCATATTTTAA--G--TGAAAACCATGCACCATTT---T  | 30031 |

|                          |                                                                                    |       |
|--------------------------|------------------------------------------------------------------------------------|-------|
| Majority                 | TTGAATTATTCATACAGACAAATGCCATG----TGAAGGCTGTGTTTATTGTATTTAAACTATTAGAATGATACTTTTGA   |       |
|                          | 34010      34020      34030      34040      34050      34060      34070      34080 |       |
| Human                    | TTGGATTAAGCAGGAATGTATTTGATATGACCCTAAAAGCACAATCTATTAATAAAATGGAATTTGACATCAGAATTAATA  | 33948 |
| Kakapo                   | TTGACTCATTCATACAGACAAATGCCATT---TGAAAGCCTGTGTTTATTGTGTTCAAACCTATTAGAATGATACATTTGA  | 8296  |
| GoldenEagle              | TTGAATCATTCATACAGACAAATGGTATG---TGATGGTCTGTGTTTACTGTATTTAAATATTTAGAATGATAGTTTGA    | 8717  |
| JapaneseQuail            | TTAGGCTAAACTTACAGACAAATGCCATC---TGATGATTTGTGTTTATTTTGGTAAACTA-----                 | 8352  |
| MediumGroundFinch        | -----                                                                              | 0     |
| GoodesThornscrubTortoise | ATAATTTCAAATGCATTGACGATACACA---TACACCTCTACCCCGATATAAGGCGGGTTTGCATACAAGGCAGTAAA     | 30107 |

|                          |                                                                                    |       |
|--------------------------|------------------------------------------------------------------------------------|-------|
| Majority                 | GCTATCTT-----TGCTTGCTGATATA--ATTACTAGTAGATTGCTAGTAG---ATTA-GACAAAGCCTC-AG          |       |
|                          | 34090      34100      34110      34120      34130      34140      34150      34160 |       |
| Human                    | TCTTCTGCCATTCAAAGAAACTGCTAGGGAATGAAAAGACAAGCCATAAACTGGAAGAACATCATAACAAAGCATATAG    | 34028 |
| Kakapo                   | GCTATCTT-----TGCATGTCTGATATA--ATTACTAGTAAATTCCTAGTAG---ATTA-GACAAAAGTC-AG          | 8358  |
| GoldenEagle              | GCTATCTT-----TGCATGTCTAATATA--ATTACTAGTAGATTGCTCATAG---ATTA-GACAAAGACT---G         | 8777  |
| JapaneseQuail            | -----GTGTTTCTCATACT--AGT--TGG--GCTGCTAGTAG---ATTA-GACAAAGTTTC-TG                   | 8400  |
| MediumGroundFinch        | -----                                                                              | 0     |
| GoodesThornscrubTortoise | CTCTGAC-----ACACTGCTCTGACACACTGCTCTGAGCAGCGTGTAAAGGGT--GCTG-GACCAGGCCCG-GG         | 30173 |

|                          |                                                                                    |       |
|--------------------------|------------------------------------------------------------------------------------|-------|
| Majority                 | CT----AAGGGCATCGATATGAG--AAAAATGTTTGGATTGTGAATTGGATGAAGTGTG-TAGTTTTG-----TGTTA     |       |
|                          | 34170      34180      34190      34200      34210      34220      34230      34240 |       |
| Human                    | CTGATAAAGGACTTCTATCCAGAATATTTAAAGATTTCAGTATATGTAAAATCAGCAGTC-AAGCAACAACTACTCAATG   | 34107 |
| Kakapo                   | CT----AAGGGCAGTATGATGAG--AAAAATGGGTTGATTGTGAATTAGATGAAGTGTGTTTGTGTTT-----TGTTA     | 8425  |
| GoldenEagle              | CT----AAGGGCAGCAATATGAG--AAAAATGACTTGATGGTGAATTGGAAGAACTATTTTAAATTTTA-----TGTTA    | 8844  |
| JapaneseQuail            | CT----AAGCCATTGGTACGA-----AAGCTGTTTGCCTGTGAATTGGAGGAAGTGT-----GTTA                 | 8453  |
| MediumGroundFinch        | -----                                                                              | 0     |
| GoodesThornscrubTortoise | ET----GAGGGTTCGATAAGGGGCAGAAGGTCCTGGGGGGTGGTCAGGGGCTACCCCGGGTCTGGGGCGGGCAGGA       | 30249 |

Monday, May 02, 2022 06:50 PM

```

Majority      GCTGGGATAATGTT-TTAAATCGACTTTTGTGTTCATAATAATTTAGTTGTAGCAACTGTAGACAGTAAAAAATTGCAG
              34250   34260   34270   34280   34290   34300   34310   34320
Human         AATTGGCCAAAATATTTGAACAGGTAGTACAGCACAA-AAGATACACAGATGGTAAGTA-AGCACGTGAAAAGCTGGTC 34185
Kakapo        GCCAGGATAACGTTCTTAAATCAAATTTGGTGTTCGGTAATACTTAGTTGTAGCAAGAATAGACAGCAAAAAATGTGCAG 8505
GoldenEagle   GCTAGGAGAATGTT-TTATATCAACTTTTGTGTTCATAATACTTAGTTGTAGCAACAGTAGACAGCAAAAAATGCGCAG 8923
JapaneseQuail GCTGGGATGATGTT-TACAGTTGAACTTTATATCAACAATAATTTTGTTCAGCAGCTCTTGTAAAGTAGAAA-TTTCAG 8531
MediumGroundFinch ----- 0
GoodesThornscrubTortoise GCTGTGGGAGGGCAGCTTTTGGGGGCCCGCAGTGCCAGAGTGGCCTGGGGGATTAGCGGGGGCTGGGAGCAGCTCGCTC 30329
    
```

```

Majority      AACATTC-TAGCAGTGA----AGTGGGAAT--GAATTGTGATTAT---GTTTAGAAGTTTAGAACTGGCGTCTGGATTT
              34330   34340   34350   34360   34370   34380   34390   34400
Human         AGCATCATTAGTTATTAGGGAAATGAAAATTTAAACTACAGTGAGATAATATTACAAACCTATTAATAGTACTAAAATT 34265
Kakapo        GACATTC-TAGCAGTGA----AGTGGGAAT--GAAGCGTGACCAC---GTTCAGAAGTTCAGAACTGGCATCTGGATTT 8574
GoldenEagle   AACATTC-TAACAGTGA----AGTAAGAAT--GAATTGTGACTAT---CTTCAGAAGTTTAGAACCACCGCTGGATTT 8992
JapaneseQuail AACGTTT-TAACAGTGA----AGTGGGAGT--GATTTGTGATTGTA---GTTTGTAAAGTCTGGAAGTGGCATCTGGATTT 8601
MediumGroundFinch ----- 0
GoodesThornscrubTortoise GCTTCCCTCGCCCCAGCCCCAGCTGTGTT--GCTTGAGGGAGGGG---ACTTGGGGAAAGGATCCCCCCCCACTC 30404
    
```

```

Majority      -----GTCTCTTCAGCGGTAGTGTG-----GT-----G-----CA-----C--C-----
              34410   34420   34430   34440   34450   34460   34470   34480
Human         AAAAAGAGTGCCATCTTGGAAGCATGAGTTGGGAAGAATGTGGAAGAATGTTAATATTACAATACTGCTGATGGGAAT 34345
Kakapo        -----GTCTTTTCAGCAGTGG----- 8590
GoldenEagle   -----CTCTCTCCAGTGGTGGTGTGTGTGGTTTAACCCAGCCAGCAACTAAGCACCACACAGCTGCTCACTTACTC 9065
JapaneseQuail -----GTTTCTTCAGCAGGAGTGTG-----T----- 8622
MediumGroundFinch ----- 0
GoodesThornscrubTortoise -----AGCGCAGCTGCGGAAGCGGA--GCAGCCCTGCCGAGCCCGCTCCACTCTGCCAGCTCTCCACCGCAGCACTC 30475
    
```

```

Majority      -----G-A-----C-----C--TT--C-----
              34490   34500   34510   34520   34530   34540   34550   34560
Human         GTAAATCGTAGTACTTTGGAAAACAATCTGGTAGTTTCTCCATGATCCAGGTTATTTGTCTCCTAAGCATTTACCCAAG 34425
Kakapo        ----- 8590
GoldenEagle   CCCTCACCAGTGGGATGGGAGCAAGAATCAGAAGGAAAAAGGTAACCTGTGGGTTGAGATAAGAACAGTTTAATAGA 9145
JapaneseQuail -----A----- 8623
MediumGroundFinch ----- 0
GoodesThornscrubTortoise GCTTCCGTCGCTGGTGAGTATAGAGGGGCGTCTTTCTCCAACCTCTCCACTCACCAGCCCGCTCCGCTTTCTCTTGC 30555
    
```

Monday, May 02, 2022 06:50 PM

```

Majority      --A-----AATATGTAAGTGGCAAAAGTTA-----TC-----A--TGAAATACCTAAAGTG-GA-
              34570   34580   34590   34600   34610   34620   34630   34640
Human         AGAAAAGAAGGCATCTATTTCATTAATAAACTCTCATGTTAATGTTTCATAGCCATTTTATTTGTAATCACCAAATGTGAA 34505
Kakapo        -----AACATGTCCTTGGTGACAAAATC-----CC-----CCAACTTCTTACAGTGAAAC 8636
GoldenEagle   ACAGAAAGGAAGAACTAATAATAATAACATGACAACAATAATTAAGGATTGGAATATACAAAACAAGTGACGCACAAT 9225
JapaneseQuail --A-----AGCATGTCCTCAATGGCAAAAGCAA----- 8649
MediumGroundFinch ----- 0
GoodesThornscrubTortoiseCTGGTCCCAGCCGTGTG--GCTGGGGAGCGGCTGGGGAAAGTCTGCCTGGTGGGAAGTGGATCACCACAGCTGGGGAG 30633
    
```

```

Majority      ATAATTGCTCACCCT-GCTG---T-----AATTTCTGTGC-GCCATCCTGTGCAGG-CGATTC-G--C---ATAT
              34650   34660   34670   34680   34690   34700   34710   34720
Human         ACAAACATTTCATCAACAGATGAACATA-ATAAGTAGATTCTGTTTGGCATCATATGCTTTCCATACAGTGGAAATACAA 34584
Kakapo        ATATCTGCTCTCTTTTAACA---G-----AATTTCTGTAAATTTACCCTGTTGAAAATTACTCTC--C---TAT 8698
GoldenEagle   GCAATTGCTCACCCTCACCACCGGATGTCAGTAGTTCGAGCGGCGATCCCCTCCAGGCCGACTCCCCCAGTATAT 9305
JapaneseQuail ----- 8649
MediumGroundFinch ----- 0
GoodesThornscrubTortoiseTGGTGGAGTGGAACTGGCTGGGGTGGGCTGTTCGCTTCCCGCCACCGGTGAGTGCGGGGAGGTTGGGAGTGTGAGTT 30713
    
```

```

Majority      -TG-----A-----A-----TA-CCCCT-GAACGGTTTG--AT-CAGTTCT--TCT-----TG-----
              34730   34740   34750   34760   34770   34780   34790   34800
Human         CAGCCATGTAGAATGAGCTATTGATAGACACAACAGCAAGAATGAATCTCCAACAATTATGTTATGTAAGATGGGAG 34664
Kakapo        TTA-----T--TCCCT-GAACAGTTTA--CTCCAATTCT--TTT-----T----- 8731
GoldenEagle   ATGCTGGGCATGACGTCGCATGGTATGGAATACCCCTTTGGCCAGTTTG--GGTCAGTTGT--CCTGGCTGTGTCCCTGC 9381
JapaneseQuail ----- 8649
MediumGroundFinch ----- 0
GoodesThornscrubTortoiseGGGAGGATACCCCCACACACTCACCTATGGCAGGAAGCGGAGCG--ATGCAGCCCCAGCCACTGCAGTCTGCCG 30791
    
```

```

Majority      C---TAGTTGTGACCCTCTAGTTTCTTTTAA-TGAGA-TCTGGGGCTGGGCAATCTTTGTC-AG-CTATAAGCAGTC
              34810   34820   34830   34840   34850   34860   34870   34880
Human         AAAAAAGACTACATCCTGTATGATTCCATTTATATAAACTCTGGGAAATGCAAATAATCTAAAGCAAATTCATGGTT 34744
Kakapo        T---TCTTTGTCACCTTTTTTGTCTTCTTAAATGCTTATTCTGCCACTGTGTAATGTATGTGGAA-AAATAAGGAGAG 8806
GoldenEagle   CCAGCTTCTGTGCCCTCCAGCCTTCTGTGCTGGCTGGGCATGAGAAGCTGAAACAATCCTTGACTTG-GTATAAACTA 9460
JapaneseQuail -----CTGAAACAATAC 8661
MediumGroundFinch ----- 0
GoodesThornscrubTortoiseATCCCAGCTGTGGCGCTCCACTTCCCGATGCCAGTGTGAGTGCAGGGGGAGGCATTTCTTTCCCAACCTCCCCGACTC 30871
    
```

Monday, May 02, 2022 06:50 PM

|                          |                                                                                    |       |
|--------------------------|------------------------------------------------------------------------------------|-------|
| Majority                 | CTTAGCAGT-ATTAAAGACATATGTGGGCTGTCAGGATGCTTTGTATA--G--GCAAGGATGGACCGGTGTAG-----     |       |
|                          | 34890 34900 34910 34920 34930 34940 34950 34960                                    |       |
| Human                    | CTTAGGAGT--TTAAGAGTGGGAAAGGACAGGCAGGAGGGGTGGCAAAGGGACACAGGAAAACCTCGGGAGTGATGGACAT  | 34822 |
| Kakapo                   | CAAAATGGAGAGGAAAGAAAATGTTGAGAATTAGTGTGCTCTGTA-----GCAAGCATGCATCAGTGTAG-----        | 8872  |
| GoldenEagle              | CTTAGCAGCAACTGAAAACATCAGTGTGTTATCAACATTTCTTCTCATACTGAATCCAGGACATAACACTATAACCAGCTAC | 9540  |
| JapaneseQuail            | C-----ATGAAAGACACTTGC-----TGCTTTGAT-----GATAAAATGGACCCTGTTAG-----                  | 8707  |
| MediumGroundFinch        | -----                                                                              | 0     |
| GoodesThornscrubTortoise | CCAGCAGTGGGAAGTGGAGTACCAAGGCTGGGAGGTGGCGGAGTGGAGCGGGCTGGGGCTGGGCTGCTCTGCT---TCC    | 30948 |

|                          |                                                                                   |       |
|--------------------------|-----------------------------------------------------------------------------------|-------|
| Majority                 | -GGAAGGCTTGTTAAGTTTGTTCAG--G----G-----TTGTGTGTATGTCATGTTTTTTGTTGTCAGAA---A----    |       |
|                          | 34970 34980 34990 35000 35010 35020 35030 35040                                   |       |
| Human                    | ATAAATTATTGTGATGGTGGTTTTATGGATGTATGCATATGTCAAAACCTGTCAAATTTTATAATTTAAATACATATACA  | 34902 |
| Kakapo                   | -GGAAGGCTTAGTGTACCTGTTTGAT-----TTGTTTTGATGCTTTGCTACTAGTTG---GAA-----              | 8926  |
| GoldenEagle              | TAGAAAGAAAATTAACCTCTATCCCAGCCGAAACCAGGACATGGTATGGGGAACATGTCTTTCATTGTAAGAAGTTATTTT | 9620  |
| JapaneseQuail            | -AGGTGGCTTTCAAATTTGTCTCAG--A----A-----AAGTGTATAATTCCTTCTTTTTGTTTTCGGAA-----       | 8766  |
| MediumGroundFinch        | -----                                                                             | 0     |
| GoodesThornscrubTortoise | CGCCCTGCTGGTAAGTGCCTGTCAGGGGGCGGGGCGGGGTGGGGGTAGATAGGGATTGGAGCAGTCAGGGGCCAGAGG    | 31028 |

|                          |                                                                                   |       |
|--------------------------|-----------------------------------------------------------------------------------|-------|
| Majority                 | -----TCGGAGGACA---CTGTGTTTTCTTTTTGATAGCAGGGTGTTTGGATGGA-----GA-A-GA-GTTCCACTTA    |       |
|                          | 35050 35060 35070 35080 35090 35100 35110 35120                                   |       |
| Human                    | CATCCTAGAATGGCCGAACCTCAGAACATTGATAACACCAAATGCTGGCAAGGATGTGGAGCAACAGGAACCTCTCACTTA | 34982 |
| Kakapo                   | -----ACAGAGCACT---TATGTTTGCTCTTAATTGAAGGGGTGTAGAAAGA-----GA-AATGTGATCACCTTC       | 8989  |
| GoldenEagle              | TTGTCACCAAGGACA---TCTGCTCTCTTTTTAACAGTAACTTCGGTAAATGACCCTGTTTGAATGACACTCATATTT    | 9697  |
| JapaneseQuail            | -----CTTATTTTTCTTACGGTGACAGGATGGTTGGGTACT-----ATGTC-----                          | 8807  |
| MediumGroundFinch        | -----                                                                             | 0     |
| GoodesThornscrubTortoise | GTGGGTAGGAGTTACGTCCTGGGGGTGATTGGGGATGGGGTCTCTGGAGGGGCGGTCAGGGAACAAGGAACCAAAAA     | 31108 |

|                          |                                                                                    |       |
|--------------------------|------------------------------------------------------------------------------------|-------|
| Majority                 | ATGCTCAGAAAAGT-TGAT-TAATAC-----C----G-----AACTTTGAGATTTTTTTGCCTACTGCACAGCCTTTCAC   |       |
|                          | 35130 35140 35150 35160 35170 35180 35190 35200                                    |       |
| Human                    | CTGCTCAGTGGAAATGCAGAGTGGTACAGCCACTTTGGAAGACAATTTGGCAATTTCTTAGAAAACCTATACGGCCGGGCAC | 35062 |
| Kakapo                   | ACCATCTGAAAAATAGGAGCCAATACC-----AGCATGAAAATACCTTTCCCATTTACAGACTCACAC               | 9053  |
| GoldenEagle              | ATCCCAGAACAGCCTACTTCAATTTCTTTTCTTTG----TAACCTTTGGGGTTTTCTTCTTAATGCTCATTCTTCCAC     | 9773  |
| JapaneseQuail            | -----A--A-----TT---                                                                | 8811  |
| MediumGroundFinch        | -----                                                                              | 0     |
| GoodesThornscrubTortoise | GGCCAAAGCAAGTTTGATATAATGCGGTCTCACCTG---TAACACTGAGATTTTTTTGTCTCCCGAGAACCAGGTTAT     | 31184 |

Monday, May 02, 2022 06:50 PM

|                          |                                                                                    |       |
|--------------------------|------------------------------------------------------------------------------------|-------|
| Majority                 | AGTGGTTTAGGTGTGAAATCAGATAGGGCTGAAA--TGGAGACAAAGTAATAACCTTGGAACTGA-ATTCACACTGTAG    |       |
|                          | 35210 35220 35230 35240 35250 35260 35270 35280                                    |       |
| Human                    | AGTGGCTTACGCCTGTAATCCCAGCGCTTTGGGAAGCCAAGGCAGGCGGATCACCTGAGGTGAGAAAGTTCAAACCAGCC   | 35142 |
| Kakapo                   | ACTGGTTTGGGTTGGAAAGGACCTTAAGCTCATC--CAGCTCCAACCCCTGCCACGGGCAGGGACATCTCACACTAGAG    | 9131  |
| GoldenEagle              | TGTAATATATGTGGAAAAACAAGGAGAGCTGAAAA-TGGAGAGAAAAGGAAAAATGTTGAAAATTAGTTTGTACTCTGTAG  | 9852  |
| JapaneseQuail            | -----TAAAAAAAAAAAAAGAAAGGCTGAAAG-TGGAGAGAAAATAAAAGTATTGAAGATTA-----ATGCTGTGA       | 8877  |
| MediumGroundFinch        | -----                                                                              | 0     |
| GoodesThornscrubTortoise | ATCAGGGTAGAGGTGTATTTAGATGTGATCTGCT--GAAAGACACTGTTCTAACCTTTCTCCTGATATCTCACATGGCAT   | 31262 |
| Majority                 | CAGGTA-----A---TACAGAAGTCTTCTGATTCCTACTTG---GTTTTGAAGTCTGTGCGCAAATTGGAAATCCC--G    |       |
|                          | 35290 35300 35310 35320 35330 35340 35350 35360                                    |       |
| Human                    | TGGCCAACATGGAGAAACCCGATCTCTACTAAAAATACAAAATTAGCTAGGCGTGGTGGTGCATGCCTGTAATCCC-AG    | 35221 |
| Kakapo                   | CAGGT-----TGCTCCAGGCCCTGTGTCCAACCTTG---GCCTTAAACACTGCCAGGGATGGGGCAGCCACAG          | 9196  |
| GoldenEagle              | CAAGTATGCATCAATGTAAGGAAGGCTTAGTATTCCTATTTGATATGTTTTGATGCTGTCTACTAATTGGAAATCACGTA   | 9932  |
| JapaneseQuail            | ATGCT-----TACAGGAAATTTCTG-----TTG-----TCTGTTGCAAATTGGAAAGTC---A                    | 8921  |
| MediumGroundFinch        | -----                                                                              | 0     |
| GoodesThornscrubTortoise | CTTTATATGCAATATCACAGTTATATACAGATGAGGAATATGGGAGTTAACAGATGCACCCCAAAGTATAGCAA--G      | 31340 |
| Majority                 | CTTCTCTTTTGTACAGAACCCTTAGATTTGTGTATTTCATTTGGGTGGAGTTTGTGATGAGC-AATGTGATCTTTATCTCC  |       |
|                          | 35370 35380 35390 35400 35410 35420 35430 35440                                    |       |
| Human                    | CCACTCAGGAGGCTGAAGCAGGAGAATTACTTGAACCCAGGAGGTGGAGGTTGCAGTGAGCCAGGATCACGCCCATTTCA   | 35301 |
| Kakapo                   | CTCCTCTGGGCACCCTGTGCCAGCGCCTCAGCACCCCTCACAGGGAAGAGCTTCTGCCTTA--GATCTAACCTGAACTTCC  | 9274  |
| GoldenEagle              | TTTTTCATTTGTAACAGAACACCTATATTTGCATCTTAATTGAGGGGTTGTAGGAGGAGC-AATGAGATCACTTGCACC    | 10011 |
| JapaneseQuail            | CTTTTCCTTTGTAAGAACCCTTAGACTCGTGTATTAATTGAGAGGACTTTGGGAAGAGA-AATGTGATCATTGCCCCA     | 9000  |
| MediumGroundFinch        | -----                                                                              | 0     |
| GoodesThornscrubTortoise | CTCAGCTATTTTATCTAACTTTTAGATATTTGCATTGTTTGTAACTTGAATAAAT-GTTATGGTATTAATCATG         | 31419 |
| Majority                 | GTCTGATCAGTT----TGAACATA-ATATCAACTTTAATAT-C-TTCCTTGTTTCTTAGAGCTT-TGGGCT----GTGT    |       |
|                          | 35450 35460 35470 35480 35490 35500 35510 35520                                    |       |
| Human                    | CTCCAACCTGGGCAACAAGAGCGGAGACTCCATCTCAAATATACTTTTCATTGTATGATCCAGCAGTTGTGCTCCCTGGTAT | 35381 |
| Kakapo                   | CCTGGTTCAGTC----TGAACCC-ATCACCCCTTGAGTAT---TT-CTCATTTCTGAGAGCTT-TAGGCC----ATGT     | 9338  |
| GoldenEagle              | ATCTGAAAAATA----TGTACTG-ATACCAACATGAAAATACCTTTCTGTTTCTTAAAGCTT-TGGGCC----ATGT      | 10079 |
| JapaneseQuail            | GTCTGAAGAGCT----TG-ATGA-ATATCAACATTCATATGCCTTCCTAGTTTCTTTGAGCTC-TGAGAT----CTGT     | 9067  |
| MediumGroundFinch        | -----                                                                              | 0     |
| GoodesThornscrubTortoise | CTCAGTTATTTTAGCAATGAACTA-ATATCAGCTGTTATAT---TTGCAAGAGAATTATAGTTGGTAAATT----GTAA    | 31490 |

Monday, May 02, 2022 06:50 PM

|                          |                                                                                   |       |
|--------------------------|-----------------------------------------------------------------------------------|-------|
| Majority                 | TTTCACAAGCAAATCAA--GCTGCATTCCAGTTTTCTCTGTCTCTGTGATACTTATGGCACAAATGCTTGGA--TAGCC-  |       |
|                          | 35530 35540 35550 35560 35570 35580 35590 35600                                   |       |
| Human                    | TTGCCTAAAGGAGTTGAAAACCTAGTCTGCGCAGAAAGTAGCACATGGATGTTTATAGCACCTTTCTTTATAG--TTGCCA | 35460 |
| Kakapo                   | TTTCACAAGCAGATCAA--ACTGTGTTCCAGTTTTCTCTGTTCCTGTAATGCTTGAGCACCAAAATGTTTGGG--TAGCC- | 9413  |
| GoldenEagle              | TTTCACAAGCAGATCAA--GCTGCATTCCAGTTTTCTCTGTCACTGTAATACTTGTGTAACAAATGCTTGGG--TAGCC-  | 10154 |
| JapaneseQuail            | TTTCACAGGCAAACGAA--GCTGCATTCCACTTTTCCCTGCCTCTGTGACACCTAAGGCACAAATGCTTGAA--TAACC-  | 9142  |
| MediumGroundFinch        | -----                                                                             | 0     |
| GoodesThornscrubTortoise | TCCTCAAGAGAAACAATAGGTGAAATTAAGTTTTTTTTTTTAAATAGATAGGTATTCTTCCAGGGCATAAACCTTGCCC   | 31570 |
| Majority                 | --ACTTCACAG-----ACGTCTCTTGGGAACT---TAACCAGGTTAAAGCTGA-----GTTGACACAACAGTGAGTT     |       |
|                          | 35610 35620 35630 35640 35650 35660 35670 35680                                   |       |
| Human                    | GAACCTCATAGCAACCAAGAAGTCCTTTAGGAGGTGAATGGCCAAATAAACTGTGGTGTATATTCAGACAGTATAATGTT  | 35540 |
| Kakapo                   | --ACTTCACAA-----GCTTCTCTTGAGAACT---TAACCAGGATAAAGCTGA-----GCTGACACAACAGTGAGTT     | 9475  |
| GoldenEagle              | --ACTTCACAA-----ACCTCTCTTGGGAACT---TAACCAGGTTAAAGCTAA-----GTTGACACAACAGTGCATT     | 10216 |
| JapaneseQuail            | --ACTTCAAAC-----ACCTTCTCTTGAGAACT---TAACCAGGTTGAAGCTGA-----GCTGACACAGTAATGAGTT    | 9204  |
| MediumGroundFinch        | -----                                                                             | 0     |
| GoodesThornscrubTortoise | AACTACACAG-----AAGTTGCTGTGGACCTAGGTAATGGAGGCTGAGCAAATATG-GGTAAGGGAACTGTAGGAC      | 31641 |
| Majority                 | ATTTCTTTTAGTGGGATATG--TACCAAAGTGTGTGGTTGCATAAGT-GCTTGTAGCAATATAGACTTGG-----T-     |       |
|                          | 35690 35700 35710 35720 35730 35740 35750 35760                                   |       |
| Human                    | AATCAGCACTAAATGGAAATGAGCTATCAAGCCATGGAGAACCTTCAGT-GAACATTACTAAATAAAAGAAGCCACTCTG  | 35619 |
| Kakapo                   | ACATCCTTTTAGTCGGATTTG---TGCCAAAGTTGTGGTTGCATAAAT-GCTTGTAGCG-CATAGAATTGG-----      | 9542  |
| GoldenEagle              | ACATCCTTTTAGTCAGATTTG---TACCAAAGCGTGTGGTTACATAAAT-GCTTGTAGCAATATAGACTTGG-----     | 10284 |
| JapaneseQuail            | ATGTCATCTTTGGGGCAAATC---TGACA-----T--GGTTGCATAAGC-TCTTGTAAACAATATAGACTTTATATTGGTT | 9273  |
| MediumGroundFinch        | -----                                                                             | 0     |
| GoodesThornscrubTortoise | ATTCACTGTAGGAGGAAGAAA---GAGGAAAATGTTTGTACAGTGGGTCATTTGTATCACAGCATAGCAAGGAGATGTC   | 31718 |
| Majority                 | GGAGTTCTGAATAGGAACAAGTTGCT-AGGGCTCGGGAGACGGTAGGACTGTTGCTTTTGGTGGTAGTTGG--CAA-TGA  |       |
|                          | 35770 35780 35790 35800 35810 35820 35830 35840                                   |       |
| Human                    | AAAATTCTGCATACCATATGATTCCA-ACTATATGACATCTGGAAAAAGCAAAATTATGGAGACAGTAAAAATCAGTGG   | 35698 |
| Kakapo                   | GGAGGACAGAACAAGAGCAAGTTGCT-GGGGCCAGGGAGAAGGTAGGGCAGTTGCTTTTGGTGGTAGCTGGTTCAA-TGA  | 9620  |
| GoldenEagle              | GGAGGACAGAATAGGAACAAGTTGTT-AGGGCCCGGGAGACAGCAGGACTGTTGCTTTTGGTGGTAGTTGGTTCAAATGA  | 10363 |
| JapaneseQuail            | GGGAAGGGCAATAGAAACAACTGCTTAGGACTAAGGAGAAGGTAGGACTGATGCTTTTGGTGTGG-----            | 9340  |
| MediumGroundFinch        | -----                                                                             | 0     |
| GoodesThornscrubTortoise | AATTTTTTAAATTTAAATTTTCAATTACATCTCAGTTTTTCACAGTAACGTTAAATTAAGTTGCCATAAG--AAAGTTT   | 31796 |



Monday, May 02, 2022 06:50 PM

```

Majority      TGTTGTTGTTTTACAAGTTGTTAATGGGACTGTGGTGTCTGATTTAGGGGATTGGG---G--TTT--ATAGCTGCAAGT
              35850   35860   35870   35880   35890   35900   35910   35920
Human         TTGCTAGGGTTTAGGGGTGGAGGGAGGGATGAACTGGTGGAGTACAGAGGATTTTAGGGTACTGAAAATATTCTGCATGA 35778
Kakapo        GGTCTAGTTTTGCAAGCTATTAATGGGACTGTGATGTCTGATTTAGGGGTTTGGG---G--TTT--ATAGCTGCAAGT 9692
GoldenEagle   GGTGTTGTTTTACAAGCTGTTAATGGGACTGTGATGTTTGTATTTAGGGGGTTGGGTGGGTTTTTTTATAGCTGGAAGT 10443
JapaneseQuail ---TGTTGTGTTTTAATTTAAT----TTCTGTGGC----ATGT---G--CTGGG-----CTT--ATAGTTGAAAGA 9393
MediumGroundFinch ----- 0
GoodesThornscrubTortoise@ACTGATGGATTACATTTTTGTCTAACATAGATTGC-TCTGACCTCAAACACTTAAAAAATTCATTTTTTAATGCTGCC 31875
    
```

```

Majority      ACATACA---ATTGTTA-CTTTTCATAAAAATTTAGTTTTTTTCATA-AATGTGTAACATCAGGA-TGAATTTTGG---AC
              35930   35940   35950   35960   35970   35980   35990   36000
Human         TACTATAATGATAGATA-CATGTCATACATTTTCCAAACCCATAGAATGTAAGACACTTGGAGTGAACCTGGAGGTAAC 35857
Kakapo        ACATACG---TTCTTAGCTTTTCATAAAA-TCAGGTTTTTTATG-AATGTGTAACATCAGTATTGAATTATAG---AC 9762
GoldenEagle   ACATACAGCCATTTTLAGCTTTTCATAAAAATCAGTTTTTCTATG-AATGTGTAACATGAGGATTGAGTTATAG---AC 10518
JapaneseQuail AAAAAA-----CC---AAACTTAGTTTTTCTCCTA-GATGTG-----T----- 9427
MediumGroundFinch ----- 0
GoodesThornscrubTortoise@CAAAAAAGAAGTGACAATTCATGCTAGTATTTTTTTTTTTCAAA-TTTAATTTTCCAACA-TGAAGTTGGC---CC 31949
    
```

```

Majority      ATAATAGCTTTAGTG-TTTTAATTTATTATTGGAGAATAGCAGAGTT-TAAGTAGAAAATATCTTCTTT-----T-G-T
              36010   36020   36030   36040   36050   36060   36070   36080
Human         TACAGACTTTGAGTGAATTATAATGTGTCAAGTGTAGGTTTCATC-AGTTGTAACAATGTGCCATCTGGTGGGAGATGTTGAT 35936
Kakapo        AAAATAGCCCTAAATCTTCTAATTTATTATTGCAAAATAGCAGAGAAACAAGTAGAAAATACCTTCTTTTCATATTGGAT 9842
GoldenEagle   ATAATAGCACTAGCGTTTTTAATTCATTATTGCAAAATAGCAGAGAATCAAGCAGAAAATACCTTCCTT----- 10587
JapaneseQuail -----CCTTACTTTAATATTGTTAATA----- 9450
MediumGroundFinch ----- 0
GoodesThornscrubTortoise@ATTGTTTCATTGGTTGGTATTATTCTGGGCTTTGGGATTAGCTGTTTTCTTTCTAAAGCAGCTCTGACTTCTGAGTTGGCT 32029
    
```

```

Majority      -----GTGGATCTTGTTTTGAGAAATTAGGAATTGC-----T-CTGGAGGATCAGATGTGTACTTGTGG-TTCC
              36090   36100   36110   36120   36130   36140   36150   36160
Human         AAAGGGGAGGCTATTTGGGGCAGGAGGCAGGGAAATCTCTCTGCTTTCTCTCCATTTTGTGTGTACCTAAACTTACTC 36016
Kakapo        CTTTTCATAGTGGATCTTATTTTGTAGAGGTAGGAATTGC-----TACTGGAGGACCAAATGGGTACATCTCAG-CTCC 9914
GoldenEagle   -----ATGGATCTTATTTTGTAGATGTAGAACTGC-----TGCTGAAGGACCAAATATGTACATCTAGG-TGCC 10650
JapaneseQuail -----T--TTTAACAATTAATAATTGT-----T-----A-----A-----TACTCGTTAC-TTCA 9487
MediumGroundFinch ----- 0
GoodesThornscrubTortoise@CAGG-ATGGTCTCTGCAGCCTGTATGATTGAGAGTCACA---TGTTCCAGATGATCTGTCGTCTATTGGTTGCATTTA 32104
    
```

Monday, May 02, 2022 06:50 PM

|                          |                                                                                   |       |
|--------------------------|-----------------------------------------------------------------------------------|-------|
| Majority                 | ATGAATCTTTATTTCAGAAAGTTAATAATACATCTGGGTGGTATCTCTAGCGAATATTTCT--CAT--CTGTTCTAACTTA |       |
|                          | 36170 36180 36190 36200 36210 36220 36230 36240                                   |       |
| Human                    | TGAAAAATGCTTTTGGAAAATTTACTCATGCGCTTGCATTGCATTTCTTTGGATATTACTGGTCTAAGTAGTCCAGTTAA  | 36096 |
| Kakapo                   | ATGACTCTCTAACCAGAAAGCAAAGAATACATCCAGGTGGTAGCTCTAGCGAGTAGTTCT--CAC--CTGTTGTAAGTTAA | 9990  |
| GoldenEagle              | ATGATTCTCTATCCAGAAAGCTAAGAACACATCCAGGTGGTACCTCTAGCAAGTTGTTCT--CAC--CTATTCTAACTTA  | 10726 |
| JapaneseQuail            | GTTAATTGTTA-----GGAGATGTCCCCAGCCAACATTAC-----                                     | 9522  |
| MediumGroundFinch        | -----                                                                             | 0     |
| GoodesThornscrubTortoise | ACATGGCTTTATTTCAGGATATGTATGATTTTTCTGTTCTTTGGATCTGATCCATGACCCT--CTTGGTTGCTTAAAAGAA | 32182 |
| Majority                 | CTACCAGTTATTTTCAGCTGCTTTAGAGGAACA----CTTACTTTCTGGTAA----AGGTGGAATAGAAA-CTTGAAA    |       |
|                          | 36250 36260 36270 36280 36290 36300 36310 36320                                   |       |
| Human                    | AAGACAAAGATTGTCAGACTTGATTAAGCAAGGCCTAACTACACTGTCAATACGAGGGTCAGGTAGAAATATCAAGA     | 36176 |
| Kakapo                   | CTACCGTTTATGTGTAGCTGCTTCAGAGGAACA----CTTCTTTCTGGTAA----AAGTGGAGTAGAAAGCTTGAAA     | 10061 |
| GoldenEagle              | CTACCAGTTATGTACAGCTGCTTCAGAGTAACA----CTTACTTTCTGGTAA----AAGTGGAAATAGAAAGTCTGAAA   | 10797 |
| JapaneseQuail            | -----ATTGTTTACAGC-----ATGAAAAGGA---TTGAAG                                         | 9551  |
| MediumGroundFinch        | -----                                                                             | 0     |
| GoodesThornscrubTortoise | AGCTAAGTGGTTTTTTTGCCCTTTATAGGAATT---ATCAATACCTTGCTAA----AGGAGTGAAAGATC-CTGACTA    | 32252 |
| Majority                 | TGC---TGGAAATAAA--ATTTGTGTAATTCCTTTTGG---AAGTAGGAAGCATCAGTTAGT--ATTGGACTGGATTATT  |       |
|                          | 36330 36340 36350 36360 36370 36380 36390 36400                                   |       |
| Human                    | TGCAGGTTGAAAGTAAAAAGATGGAAAATGATAATCCGTGCAAACAGTAAGCACAAGAAAGTTGATATGATTATATTACT  | 36256 |
| Kakapo                   | TGC---TGGAAATAAA--ATCTGTGTGTTTCTCCTGG---AAGTTGGAAGCATCAGTTGGT--ATTAAACATGGCTCTT   | 10130 |
| GoldenEagle              | TGC---TGGAAATAAATTGTTTGTGTACTTCTCCTGG---ATGTTTGAAGCGTCAACTGGT--ATTGGACTAGAATCTT   | 10868 |
| JapaneseQuail            | CAG---GGGGAAAA-----AAGTACAGAGGATAAAGTATG--GAAAGGCAGACATATT                        | 9600  |
| MediumGroundFinch        | -----                                                                             | 0     |
| GoodesThornscrubTortoise | @TC---TTAAACAGGCAACTTCAAGAACTCAGTTAATGCTAAATAAATAGTCTTTCTAATC--TTTGGGAGGGTTTAAAG  | 32326 |
| Majority                 | GCCTACAGTCTTTTATGACA---ATAGGAAATTTAAAG-TTT---CCAAATAAGGTTGAGGGGTCAGTTT-----G      |       |
|                          | 36410 36420 36430 36440 36450 36460 36470 36480                                   |       |
| Human                    | AGACAGAAAAATTTAAGACAAATATTACCAGATATAAAAAAGCATATTTCAATGTTGAAGGGTCAGTTTATCAGAAAA    | 36336 |
| Kakapo                   | GCCTACAGTCTTTTATGACA---ATTGAAAGTTTGAAGCTTT---CCAAATGAGGTTTAAAGTGCAGATTT-----G     | 10195 |
| GoldenEagle              | GCCTGCAGTCTTTTATTACA---ATTGAAAGTTTGAAGCTTT---CCAAATAAGGCTGGTGGCATGGTTTAAAGTGGAG   | 10941 |
| JapaneseQuail            | CTAACCAGTTACTT-C-----ATAGGGAATTTAAGG-----CCAAGTGA-----T-----                      | 9639  |
| MediumGroundFinch        | -----                                                                             | 0     |
| GoodesThornscrubTortoise | @CCCAAGGAATCTTATGCAT---CTAATAGACTTAAATAGTAGCATATGTATAGCACAGCCATCAATCTTTTAAATTG    | 32402 |

Monday, May 02, 2022 06:50 PM

```

Majority      -----ATTTGTTTTTTTACTCTTCAGC-T-CTGGTTTAATAGT----CCATCTTGATCTTGAGATGCTTTG-AGAA
              36490      36500      36510      36520      36530      36540      36550      36560
Human         CATTCTTAATTTGTATGCCAATAATAACAAATCAAAGTATATTAAGAAAAACATCACAGAACTAAGTAGAGAAACAAA 36416
Kakapo        -----ATTCTTTTTTTTACTCTTCAGCCTGCTGGTTTAATAGT----CCATCTTGATCTTCAGATGCTTTGGAGAA 10262
GoldenEagle   -----ATTTGATTCTTTACTCTTCAGCTTCTGGTTTAATAGTAGT-CTGTCTTGATCTTGAGATGCTTTG-AGAA 11010
JapaneseQuail -----G-----T--AATAGG-----A----- 9648
MediumGroundFinch ----- 0
GoodesThornscrubTortoise@TGCTGTTTATTCACTATCTTGAGTCTGTGTATAGATTTGGAAAATA-TGACAGTACTTTTGAGAAATGGGTGTATGT 32481
    
```

```

Majority      ATTTG-CTCTTTTCTACATTGTATTT-----TGAGAACTTGGAAAGTTTTTAGGAGAGATTGATCCTTGCTCTCTTTTAGC
              36570      36580      36590      36600      36610      36620      36630      36640
Human         ATCCA-CAATCATAGCCTGGTTTTTTTAAAACATAAATTTATGGCAATTGATAGGATAGTACAGTCCTAGCCCCAAATAAA 36495
Kakapo        ATTTGGCTCTTTCCACATTTGTATTT-----TGAGAACTTGGAAACTTTTCCAAGAACTGAGCCTTGCTCTCTTTTCAGC 10337
GoldenEagle   ACTTGGCTCTTTCTACAATGTATTT-----TGAGAACTTGGAGGCTTTTAAAGGAATTGAGACTTGCTCTCTTTTCAGT 11085
JapaneseQuail -----T--T--CT----TAAGCACTG-----TGA-- 9665
MediumGroundFinch ----- 0
GoodesThornscrubTortoise@TGCTGTTTATTTCTTCAGTGAAATTCCAAGTGATAATTTTGTGTCTATTGTAGAGATTACTTTTAACTAACATTTTAC 32561
    
```

```

Majority      TTAAAGAATCTTTGCTA--TCCTTTCATGCTGCTTTTGTTT-T-----TTTTCA-GAATTGGGTACATGGCA
              36650      36660      36670      36680      36690      36700      36710      36720
Human         AAGATACATAAATTTGAAAAGTGCTATCATGTTGGCTTAACTCACATTTATAAAACTATACCCAGTAACTGTAATAAATAACT 36575
Kakapo        TTAAAGACTTCTCAGCTT--CCCTTGATTGCGCTCTCAATTTCTGCCAACTTTGTGTTTTACAAAGAAGGTACATGGCA 10415
GoldenEagle   CTTAAAGACTGCTTGCTC--TCAATTTCTACAGACTTTGTGTGT-----TTTTCATGAATTGGGTACATGGCA 11151
JapaneseQuail -----A--GA-----CA 9670
MediumGroundFinch ----- 0
GoodesThornscrubTortoise@CAGAGAGAGCTTTGGGA--TTTTTCCATCATGTAGATGTCTTTTGAAGGTGGGATTTGTTTGGAAATGGCAACAGGGAT 32639
    
```

```

Majority      TATACCATACATATAGTT-----AAAAAGGA-----TAATAGCTT-----ATTTTTCTCTAAGATTC---TTCTTTACT
              36730      36740      36750      36760      36770      36780      36790      36800
Human         TCAAGTGTACATAGAACATTCACAATGATAGACCTTATATTGGATTATAAAATAACTCAATAAATTTCAAATGATTGACA 36655
Kakapo        TATACCATGCATATAGTT-----AAAAAGGA-----TAAAGCTT-----ATTTTTCTCTGAGATTC---TTCCTTACT 10476
GoldenEagle   TATACCATGCATATAGTTGCAAGAAAAAAGAA-----TAAAGCTT-----AATTTTTCTCTACATCC---TTCCTTACT 11218
JapaneseQuail TACTCCATATATGTAGGG-----TTCT----- 9692
MediumGroundFinch ----- 0
GoodesThornscrubTortoise@AATACTAAACAAATAATTCAGTTTAGTAACAA-----TGATCATTGGATGATCCTTTTGGATGATGC---TTTTCCACA 32711
    
```

Monday, May 02, 2022 06:50 PM

```

Majority      GATAAAG-ATGAGTGTAAAAATGGTGAA-----ATTAGTTGTTAAGAT-TATA-A-A-----TG-TGGGCTGAGGATTGC
                36810      36820      36830      36840      36850      36860      36870      36880
Human         GCTAATGTATCTGACTGACTATAGTGAATTAATTAGAAATCAAAA--ATAGACATCTAGGAAAGTACTAAATATTAG 36732
Kakapo        GAAAAAA-ATGAGTGTAAAAATGGTCAA-----ATTAGTTGTTAAGATATATC-----TGCTGGGCTGAGGACAGC 10541
GoldenEagle   GAAAAAATATGAGTGTAAAAATGGTGAA-----GTTAGTTGTTAGGATATATAAACAATACATGGTTGGCTGAGGACAGC 11293
JapaneseQuail GATGAAG-----A-----GA----- 9702
MediumGroundFinch ----- 0
GoodesThornscrubTortoise@CGAGTGGCCGATATTTTTCCTTGTGAATGAACATTAATTTTATCTTCTCCAGAAAATAGCAGTGGGGGAGGAGCTTAA 32791
    
```

```

Majority      ATGAAAAAGAATTGTAGTG---GGGAAAAATGAGAATGCA-GATAATAAGGAT-TATAGGTGGTCGGAT---TA--TT-C
                36890      36900      36910      36920      36930      36940      36950      36960
Human         AAATTACACAATCGTGAACAATACATGGATTATAGAAGTGTACCACAAGGCATATTTTGGACTGAATGAAAATATATC 36812
Kakapo        ATGAAAAAGCACTGAAGTG---GGGAAAAAGAGAATACA-GATAATAAGCATTGAAAGGTGGTCATAT--TC--TACC 10612
GoldenEagle   ATGAAAAAGAATTGAAGTGAGGGGGAAAAAGAGAATGCA-GAGAATAAATATGGAAAGGTGGTCGGTCATATT--GTAC 11370
JapaneseQuail ----- 9702
MediumGroundFinch ----- 0
GoodesThornscrubTortoise@CTGAATAGATTTTTCAGATCTGGTAAAAGTTAAATTTTCATGATAATACAGGCCTGTAGGCAATCAGCTGTTTAAAGTGC 32871
    
```

```

Majority      CAGTTAATTTGATTCTGAATTAAG---GTGATGTTATAA-----C-A-----T--
                36970      36980      36990      37000      37010      37020      37030      37040
Human         AAAATTTGTTGGATACTACCCAAGGGTGTGTATGGTGAAGTATGTCTTCAAATACCTATATTACAAAAAAGGTTTAA 36892
Kakapo        CAGTTAATGGGATACTGCATTTAA---GTGATGTTATA----- 10647
GoldenEagle   CAGTTAACTTCATACTGAATTTAAAGCAGGTGATGTTGTAAGTGAGTTACTAAGCACCCACAGAGTTCATGGCCTTATCT 11450
JapaneseQuail -----TAA----- 9705
MediumGroundFinch ----- 0
GoodesThornscrubTortoise@AAATACTGTAATTGTAATTTTGGCAGAATTGAAACACTGACATTTGTCCTGGCTTTCCACTATTTACTACTTAGCCTGT 32951
    
```

```

Majority      -----A---A--C-----G-----CAG--TT--T---A-----T---G---A---C---T--A-
                37050      37060      37070      37080      37090      37100      37110      37120
Human         AACTCCCAATTTAAGACTGACCAAGGAAAAAGACATAAATACCAATACTGGAAATCAAGGTCGAGATAATCACTTTCAG 36972
Kakapo        -----CAT--GT----- 10652
GoldenEagle   GATAAG--ATTTTCATGCTAATATAGTTAAATAG--TATAGTCTTAAAAAATAAAAATCAAGTAGACATACTC-CTTTTAT 11525
JapaneseQuail -----T----- 9706
MediumGroundFinch ----- 0
GoodesThornscrubTortoise@GCATC--AGGGAAGACCTTTTAGGCTTGTCTG--TTGTTTCCTTAACTCTATCTGTGATTGAGATGAACCAC-AGTACAT 33026
    
```

Monday, May 02, 2022 06:50 PM

```

Majority      -----T-----TAGTGAGAATAAGCTTATAGTTTAAATTATAT-GATTTGTAAAATACTTTTAAACCAGCATTGA-A
              37130      37140      37150      37160      37170      37180      37190      37200
Human         AGAAAGTGGATATATGCAGAGTATAATAGTATAACATAAATAATATAAAGTGGAGATAGCACTTTC AATAAAAGCAGAGA 37052
Kakapo        -----AAGTGGGAACAAGCTTATAGGTTAACTATAT-GATTTGTAAAATACTTTA AACTGCATGGA-A 10716
GoldenEagle   GTAAGGTTCTGGTGAAGTGATAACAAGGTTATAGTTTAAATTGTAT-GCTTTGTAAAATACTT AATTAACCTGCATGGA-A 11603
JapaneseQuail -----AAGCTTATAGTTGAAATTATGT-GCTTTATAAAGTAC-TGTGAAGCAGCAGTGA-A 9759
MediumGroundFinch ----- 0
GoodesThornscrubTortoise AATTGCTACAGCCATTTCAGTGGTTGATTACGCAGGTATACCATTGTTAAATGACTGAACATTTTCTAACAATAATTGA-G 33105
    
```

```

Majority      TTTCCTTTGGATTGTATGTTTGGACTTGGTTTTGTCCTGTCTCTGAATGA-G-----ATCTTCTGTGATTTTGTT-----
              37210      37220      37230      37240      37250      37260      37270      37280
Human         TATATAGAATATAATAGGAAAATAAGTCAATATTAGTAATGTTGTTAAGGCTAACAAATTCAGCAACTTAGATGAAAAGT 37132
Kakapo        TTTCCTTTGGATTGTCTGTTTGGACTTGGCTTGCCCTGTCCTGAATGA-----GTCTTCTGTGAT----- 10776
GoldenEagle   TTTCCTTCTGGATTGTATGTTTGGACCTGGCTTGTCCTGTCTCTGAATGA-----GTCTTCTGTGATCCAGTA----- 11669
JapaneseQuail TTTCCTTTGGGTTTTATGTATCGACTTGGTTTTGGCCTGTCCTCATTGATGAGGACATTGTCTGTGATCCTATA----- 9832
MediumGroundFinch ----- 0
GoodesThornscrubTortoise @TCACCTTCCAGTGGCTTTGAGCTTCTGTTTTTTCATGTATTA AACTGGG-----ATCATCAGTCCCTTTTCT----- 33173
    
```

```

Majority      TGTGTGAGAGGTTGTAACAGTCTATT-A--ATGTAGTTTAG--ATTATGTGTTTTGATAGTAGTGCCTGTA-GTCAGAGAG
              37290      37300      37310      37320      37330      37340      37350      37360
Human         TTCTTGACAAATGCAAACTGACTTAAGTATATAGCTTAACAGCTATATACTACTGTATTATACAAATTTGGAATTTATAA 37212
Kakapo        -GTGCGAGAGGTGTCAGGGCCTATTCACCATCTAATTTGG--ATTAGGTGTTTTGACAGTAGTGCCTGCAAGTCAGAGCG 10853
GoldenEagle   TGTATGAGAGGTTGTAACAGTCTATTAATTAGGTAATTTAG--ATTATGTGTTTTGACAGTAGTCCGTATA-GTCAGAGCA 11746
JapaneseQuail TGTGTA A AATGTGTAGCAGTCTGTT---AGGTAGTTCGG--TGTATGTGCTTTGATAGCAGTGTGTGAA-GTCAGGGAG 9905
MediumGroundFinch ----- 0
GoodesThornscrubTortoise @CCACATATATCATTA AACTTTATC---TCCTGTTGAAA--AGTATCATTTAA AATGGTAAGTGAGAGACCACACAGAG 33247
    
```

```

Majority      TAAGGCAGAT-----AGAGTATTTCTCTTCAC--A-GTGTGTTGTGATAGTGTATTT-ATGCAGTGTTCATTA A A A A A T
              37370      37380      37390      37400      37410      37420      37430      37440
Human         TTAAAAAATCTTTCCACAAAGATTACTCTAGTCATAGATGGTTTTCACTATTGAATTTTATGAAATTTTAAAGGAATACT 37292
Kakapo        TAAGGCAGAT-----CCAGTATTTCTTCTTCACTAAAGAGTATGTGAGGGTGTATTT-ATACAGTAGTTCATCA A A A A A T 10926
GoldenEagle   TAAGGCAGAT-----AAAGTATTTCTTCTTCACTA--GAGTATGTGAGAGTGTATTT-ATGCAGTGTTCATTA A A A A A T 11817
JapaneseQuail TAAGGCAGGT-----CGGCTATTTCTCTT----- 9930
MediumGroundFinch ----- 0
GoodesThornscrubTortoise @AAGGTGGAG-----AGCTTTCTTTCAGTTCC--AAATGCTTCTAATAA TAGTTTT-GAAA A CTGAATG A A TTTCA TA 33317
    
```

Monday, May 02, 2022 06:50 PM

```

Majority      GTTTCATGTTAAAAATGAAGCATTTCATTAAATCTCT--CCATTGTATGTAACCTGTATAAAATTT-AGAAATGCT-TGTTT
              37450      37460      37470      37480      37490      37500      37510      37520
Human         AGCTGTCTTTGAAATGGAGGAGGGAATACTACCCTGTTCACTTTATGAAACCACTATAACTGACAGCAAAACC-TGACA 37371
Kakapo        GTATCCTGTCAAGAATGAAGCGTTCATCAAATCTGAGCCATTGCGTGTAACTGAATGAAGTTGAGAAATGCTACATTT 11006
GoldenEagle   GTTTCATGTTAAAAATGAAGCATTTCATTAAATCTGATCCATTGCATGTAAATTGAACAAAGTTTATAAATGCTGTGGTT 11897
JapaneseQuail ----- 9930
MediumGroundFinch ----- 0
GoodesThornscrubTortoise@TTTCAAATCAATATTTT-TATTTTGAAGTTC--CTTTAATATGTACCTTGTAATAAATGTACAAAGGGCAGTGTTA 33393
    
```

```

Majority      AGGGGTTTATAGTGTGTTTCC-----T-----C-----CCAAGGATAAATCAGACACTGAATATTGATGCAT--
              37530      37540      37550      37560      37570      37580      37590      37600
Human         AGGGTAATATATCAAGATTTCCAGACTAGTATTTCTCATTAACCTAAATGCATATATTTCTTAAGAAAATGTTGGTAAATCA 37451
Kakapo        AGAGGTTTGAAGTGTCTGTCC-----C-----CCAAGTTAAAATCAGACATTGAACATTGAAGCAG-- 11063
GoldenEagle   GGGGGTTTAAAGTGTGTTGTCTGTTTCCAACATCCATTCCCAAAGCTAATTCACACACTGAATATTGAAGCAG-- 11975
JapaneseQuail -----TGGAGTG-----GGATGTTG----- 9945
MediumGroundFinch ----- 0
GoodesThornscrubTortoise@TCAATCCATGACTCATATAAAACACATTGATTTCCGCTGGCTGGCAAAGAGAGGGAAGAATCAAGACATCACTGCTT-- 33471
    
```

```

Majority      --TGTGTTTCAAGTGTG--TATCTTTTAGGGGGGAATGT--ATGTCTGGGTTTGAATTCTCATTTGATTTTATTCCTG
              37610      37620      37630      37640      37650      37660      37670      37680
Human         CCTCCGGTAGAATATGAGAGACAATTTCTGAGACTTATCGCAGGATTGTAAGGTTTGTTTAACATTTGAAAATGAACTCAG 37531
Kakapo        --TGTGTTTACAAGTGTGAGTATCTATTAGAGGGGAATGTTTAAATGTCTGCGTTGGAATTCTCATATGCTTTTATTCCTC 11141
GoldenEagle   --TGTGTTTACAAGTGTG--TATCTGTTAGAGGGGAATGTTTAAATGTCTGGGTTGGAATTCTCATATGCCTTTATTCCTC 12051
JapaneseQuail -----CTGTCTAGGTTAGAATTCTCATTGCAGTCTCCCATTG 9982
MediumGroundFinch ----- 0
GoodesThornscrubTortoise-TCTGTTAGCAGGTGACTCTAGAATTTTGGAGAACTGC--ATGTTTTATTATCTGTTGGCACTCCATCCTTTTCCAT 33546
    
```

```

Majority      TGC-----ATTAAATTTCTGGCTTTTGCTTTT-TAAATGTTCTCAGATGTTGTTAGAGATGAAGTG-TTTTACAATGCT
              37690      37700      37710      37720      37730      37740      37750      37760
Human         TGTAATTTGTCACAATGATAGAATGAAGAAAGAAGAATTTCTCTCAGAAAACAGGAAGAGAAGGAGCTTTTACAATGTA 37611
Kakapo        TCCCATACCATCAAGTTTCTGGCTTTTCTCTTT-TAAACTGTTCCAGATGTTGTAAGAGATGAAGTG-TTTTACAATGCT 11219
GoldenEagle   TCC-----GTTAGTTTCTGGCTTTTCTTTT-TAAATGTTCCAGATGTTGTTAGAAATGAAGTG-TTTTACAATGCT 12123
JapaneseQuail TGC-----CAGATTTCTGGTCTTGCTTTT-TAAATGTTCTCAGATGTTGTTAGAAATGAAATA-TTTTACAGCACT 10052
MediumGroundFinch ----- 0
GoodesThornscrubTortoise@GAGATGTAGAGTAACTGCTTTCTGTTGTTACATGCAACACTCTCATCCATTTGATGAGCTGAGATG-GAGACAGCCATT 33625
    
```

Monday, May 02, 2022 06:50 PM

```

Majority      GTTAGATTTCTTTGAATCATGAGAT-----CTATCTCCTTGCTTGTC-ATAGCCCTTGGGAAATTCGTGCTTGTAGGC-G
                37770      37780      37790      37800      37810      37820      37830      37840
Human         AATAAGGGGTATCTACTAAGAACCTACAACAAATTTTACTACTTAATGGAGAAATATTGAATGTTTTCTTCTTAAAAACAG 37691
Kakapo        GTTAGATTTCTTTGAAATCATGAGAT-----CTGTCTCCTGGCTTGTC-ATAGCCCTTGGGAAATTCGTGCTTGTAGGCTG 11293
GoldenEagle   GTTAGATTTCTTTAAATCACGAGAT-----CCATCTCCTGGCTTGTC-ATACCCCTTGGGAAATTCATGCCTGTAGGCTG 12197
JapaneseQuail GTTAGAATTCCTTG--TCATGTG-----CTATCTCCCTACTTGCC-ATGGCTGTTGGGAAGTTCCTGC----- 10112
MediumGroundFinch ----- 0
GoodesThornscrubTortoiseATTCTCTACTCTGAGCCATAAGTTAAAGGGAATCTCTGTTTTTCATT-TTAAACAATCAGCAACTTGGAAATTTCTCAC-A 33703
    
```

```

Majority      AGAATGACTGTGGTAAA--ATAGTGCAGCTGATGTTCTC--CTTTTTTCTTTTCATTTAGGGGAGTA---GGGGAGAGAG
                37850      37860      37870      37880      37890      37900      37910      37920
Human         AAATGAAGCAAGGATGTCTGTTTTCTCAATTTTCCCCTTAGCTTTCTGCTTACATTAAGGCAGGTGAAATAAAAGACAT 37771
Kakapo        AGAATGACTGTGGTAAATGTGCAGTGCAGCTGAAGTTCTC--CTTCTTCTTTTCATCTAGGGGAGGAGTGGGGAGAGAG 11371
GoldenEagle   AGAATGACTGTGGTAAATGCACAGTGCAGCTGAAGTTCTC--CTTTTTTCTTTTCATCTGGGGGAGGAAGCAGGGAGAGAG 12275
JapaneseQuail -----ACAGCTCAGGTTCTC--CTTTGCTCCCTCACACAGAGG-----GGAGGGAT 10156
MediumGroundFinch ----- 0
GoodesThornscrubTortoiseAGAGTATCTATGCAAAG--ATAAAATGACCATTACAACA--GTTTCATTTTATACTTAAGACTCTA---GATATAACTG 33775
    
```

```

Majority      GGAGGTG--GGGG-----GGAAAAGCATCCTGTTCTTGAT--AGAGGTTTGTAATAGCAGCAAATTTGAA--TACTA
                37930      37940      37950      37960      37970      37980      37990      38000
Human         AAAGATTGTAAAGGAAGAAAGAAAACGTCTTATTCCACATTCAACATGCTTTTTTAAAGTAGAAGACCTGAAGGACTCTA 37851
Kakapo        GGAAGTG--GGGTG-----GGAAAAGCATCCTGTTCTTGAG--AGAGGTTTGTAATAGAAGCAAATTTGGG--TGCCA 11438
GoldenEagle   AGAAGTGGTGGGG-----GCAAAGCATCCTGTTCTTGAA--AGAGGCTTGTAATATCAGCAAATTTGAA--TACCA 12344
JapaneseQuail GGGGGTC-----GGGAAATCATTCTTTTCATTGTT--AGAGGTTTGGAACGTCCGCATATTTGA---TACTA 10217
MediumGroundFinch ----- 0
GoodesThornscrubTortoiseAATATCAAGCAAC-----TTCAAAGTGGGGAGAGCAAT--CAATCATTGAAAGGCTAAAAGTTTGA---TATTG 33844
    
```

```

Majority      CGAATGAGATG-T-TTATCAGAAAATGAATTTTTCATTATTTTGGGTGTATTCT--ATGTTTTCTAATGGGATTTTAAG
                38010      38020      38030      38040      38050      38060      38070      38080
Human         CAACAGATTTGGTAGAACTAATAAGTGAATTTAGAATAATTATAGGATACAAGTTCATGTACAGAAATAGTCTCCTTAT 37931
Kakapo        TGAATGAAAGAAT-TTATCAGAAAATGTATTTTGGATATCTTTGAGTATATTCT--GTCTTTTCTAGTGGGAATTAAG 11515
GoldenEagle   CAAATGAGAGGAT-TTATCAGAAAATGTATTTTCAATATCTTTGAGTGTATTCTTTATCTTTTCTAGTGGGAGTTAAG 12423
JapaneseQuail CGAATCAGAAG--TTATTGGAGAATATTTTTCAGTATTTT--TGTAT-----ATGTTTTCTAATGGGATGTCAAG 10286
MediumGroundFinch ----- 0
GoodesThornscrubTortoiseGTTTGAATC--TAATCTTAAATTTACCCTTCCATTTCTACAAGATCAATAAAAAATAATTAAATATGCACAAAAT 33921
    
```

Monday, May 02, 2022 06:50 PM

|                          |                                                                                   |       |
|--------------------------|-----------------------------------------------------------------------------------|-------|
| Majority                 | AAATTACTTTAGATGATTCTGATTGATTTTTTAATAAAGTGCAGTTATGTCATTTGTTTACTGTTTTTTGTATTATTGGT  |       |
|                          | 38090 38100 38110 38120 38130 38140 38150 38160                                   |       |
| Human                    | ACTTGCCAGCAAATTCCTAGAAAATGAAATTTTAAAAATCTGTTTATAAAAAGTATCAGACAAAATATCAGGAAAAAAT   | 38011 |
| Kakapo                   | AAATTACTTCAGCTGATGCTG-TTGACTTTTTAAGAAAGTGCAGTTTTGTCACTTGTACTGGTTTCAGTAGTGTGGT     | 11594 |
| GoldenEagle              | AATTTATTTAGATGATGCTG-TTGACTTTTTAACAAAGTGCAGTTTTGTCATTTGTTTACTGTTTCTTGTAGTATTGGT   | 12502 |
| JapaneseQuail            | AAATTACTGTAGCTGATTCTGATTGATGACATTTTAAAAATGCAGTTAGTTTTGTTGGTTATTCTTGCTAGTGTATCAGT  | 10366 |
| MediumGroundFinch        | -----                                                                             | 0     |
| GoodesThornscrubTortoise | AATGTTAAAAATAAAATTATAATATTTCTTTAATACAGTGTTCCAAAGTGTTCATGTAGCCTTGTAGATTGTGAA       | 34001 |
| Majority                 | TTAGTGTTT--ATGTAGTACA-----CGGATCTAACCTTGGTCTAATAAGCCTTTTATGAAACA-T                |       |
|                          | 38170 38180 38190 38200 38210 38220 38230 38240                                   |       |
| Human                    | TTGACAAAAGATATGTAAGACATCTACACCAATATGAAACACTGCTAAGAGAAGTTTTAAAAAGACTTACATGAAGACGT  | 38091 |
| Kakapo                   | TTAGTGTTT--ATATA--A-----CGTATCTAACATGCTTCTAGTAAGCCTTTAGTAAAAAA--                  | 11648 |
| GoldenEagle              | TTAGTGTTT--TTGTAGTATAGTT-----GTAGTGCATCTACACGTGCTTCTAATAAGCCTTCTGTGATACACT        | 12569 |
| JapaneseQuail            | TCAGTGTTT--CTGTAGTGC-----TAGAAGGGCCTGCATGTTACACGCTTCTGATAAGTCA--                  | 10423 |
| MediumGroundFinch        | -----                                                                             | 0     |
| GoodesThornscrubTortoise | CTACTAGTTGG-AGATAAGGGAGTA-----TGGACTGACCTCTCATTGTGACTCCTGAGTCCCATATTTTCATTTT      | 34070 |
| Majority                 | -GAT----TTCTTATGTTATGTTTCAGCCATAACTTCTGATGAGAGTCT--TC-----ATAGCCTTGAATTATTGGG     |       |
|                          | 38250 38260 38270 38280 38290 38300 38310 38320                                   |       |
| Human                    | AGACCATGTTTCATGAATTAGAAGGCTCAATATGTTAACATGCCAGTTCCTCCATAAATGGGATGGCATTGAATCTATAAA | 38171 |
| Kakapo                   | -GAC----TCAGTTTGTATGTTTAGCCAGAACTTCTGCTAAGAGTCTCTT-----ATAGGCTGGAATTATTGGG        | 11714 |
| GoldenEagle              | CAAT----TTGTTATGTTGGGTTTCAGCCATAACTTCTGATCAAAGCCT--TC-----ATAGCCCTGAATTATTGGG     | 12634 |
| JapaneseQuail            | -----CGTTATGTGCAGCTGTAACCTTCTCCTGGAGCCT--TC-----GTAGCCTCAGATTATTGGA               | 10478 |
| MediumGroundFinch        | -----                                                                             | 0     |
| GoodesThornscrubTortoise | AGT----CCCTGATTTCTGATTTCTTAAAGAACAAATAAAGTTAGTTT--CT-----GGCTGTTCTGGTTGTTGAG      | 34135 |
| Majority                 | AAAAGAGCTGATAATATTTCTCTTTAA-AAACAGTTGT-GAAATATGACTGAGCTTGGAAAA--AACCTCTTTGGTAAC   |       |
|                          | 38330 38340 38350 38360 38370 38380 38390 38400                                   |       |
| Human                    | GACTTATAAATTGAGAGTACATTCTA--AAATTTATGTGGAAATAAAAAGGAGCTAGGACAATTAACCATTGTTGAAAA   | 38249 |
| Kakapo                   | AAAAGAGCTGATAATGCTTCCCTTCCATAAACAGTTGTCAAAAAGGACTTTGCTTAAAAGACTAAACCTCTTTGATAAC   | 11794 |
| GoldenEagle              | AAAAGAGCTGATAATGTTTCTCT-----CTCATTGGTAAC                                          | 12669 |
| JapaneseQuail            | AAAAGAGCTGATAATATTTCTCTTCTATAAACAGTTGTTAAAAATTTCTCTGATGCTTGAACAACTAACTTCTCGG-GGT  | 10557 |
| MediumGroundFinch        | -----                                                                             | 0     |
| GoodesThornscrubTortoise | AGCCTTCAAAATGAGACGTTTTTGTAAACAAAAGAAGG--GATCTCTGCCTGAGTTTGCAAAG--AGCCTGAAATGAAAC  | 34210 |



Monday, May 02, 2022 06:50 PM

```

Majority      TCTGAA---GCCAGAGTTGT-----TATTCTTTTGTGTTTTTTTTTACCTCA--T-----G-----TAGTG
              38410      38420      38430      38440      38450      38460      38470      38480
Human         AGTAAATTTTGCACAGTTCTCAAGACTCACTACAACCTGTAGTTAATCCAAAACAGTTTACTACTAGCATAGTTAGTG 38329
Kakapo        TCTGAA---GCCAGAGTTGT-----TATTCTTGAGGGTTTTTTTTTGCC-----TG 11837
GoldenEagle   TCTCAA---GCCAAAGTTGT-----TACTGTTT-GTGTTTTTTTTACTT-----TG 12711
JapaneseQuail TCTCAG---GCCAAAATTGAGAAGTTG-GTGTTTTTTTGTGGTTTGTAGCCTCATTTTA--AACGGAGCTAGTAGTG 10630
MediumGroundFinch ----- 0
GoodesThornscrubTortoise@TTGAG---GTGTGAACTGA-----C-CTGTTCTTTTTTATCAGTGCTAACTCAGGT---GCCAGTAATAGTAGTT 34274
    
```

```

Majority      G-ATGTAATAACATTTGGGGAATGTTTGAATAATTTAAA--GCCCTATCTGCACTGTGAGGAAAA--TA----GTTGGCA
              38490      38500      38510      38520      38530      38540      38550      38560
Human         ACACAGAATAGCGTTCAGGGAATAACTCATGCATTAAAGTTGCCTTGATCACTCAGTGAAGAAAGAGAAGGCCTTTCAAC 38409
Kakapo        G-ATGTAATGAAATCTGGGGAATGACTGAAATAATTTCAA--GCCCTATCTGAAGCGTGAGGAGAAGATA----GCTGGCA 11910
GoldenEagle   G-ATGTAATAAAATCTGGGGAATGTTTGAATTTTAAA--GCCCTATCTGGAATGTGAGGAAAA--TA----GTTGGCA 12782
JapaneseQuail G-CTGTAGTAAGTTTGGGGAT-TTTGAAATACT-GAA--GTCCCATCAGCCCTGTGAGGAAAA--TC----ATTGGTA 10699
MediumGroundFinch ----- 0
GoodesThornscrubTortoise@-AAATGTTAGCATTGTTAATAATGTTACTGCTTATTAA--AACATGTAAGAAAGGAGAAAACATATGTATGAAAATCTGA 34351
    
```

```

Majority      AGGACTTCTA-AATAGTATACTTTTTATT--AGCCTGGAAGATAATTTGACTGTAACTTCCCTG-ATATTACATCGC
              38570      38580      38590      38600      38610      38620      38630      38640
Human         AGATGTGCTAGAACAGCTGAATATACATACAAAAAGCAAAGAACTTAAACCTACATCATTCTGTATAAAACAATGA 38489
Kakapo        AGGACTTCTA-AATAGTATAGTTTTGTTT--AGCCTGGAAGGATAGCGTGACTGTAATGACTTCCTG-ACATTCCATAGC 11986
GoldenEagle   AAGACTTCTA-AATAGTATATTTTGTATA--AGCCTGGAGGGATAATATGACTGTAATGACTTCCTG-AAATTACATAGC 12858
JapaneseQuail AGGACTTGTA-AATAGTG-GCTTTTTATT--AGCCTGGAAGATAGTATGACTGTGACAACTTCCCTG-GAATGGCATCGG 10774
MediumGroundFinch ----- 0
GoodesThornscrubTortoise@TGCTTGCTA-AACAACAAGCTTTTCAT--CCTACTGCTAAATAATTTAAAGGT-ACACCTCTACC-CTGATATAACGC 34426
    
```

```

Majority      TACTTAATATA-----ACCTGTGA-----TAGCATGAAGCTTCATAGTTGTCTGC---TTTGGGGGAAAGGGGG
              38650      38660      38670      38680      38690      38700      38710      38720
Human         GATTAATTATATAAAAATAATATATAGAGTTTTTAGGAAAAGCATAGGATATACTTGCAACTTTGGGATAAATGAAGA 38569
Kakapo        TGCTTAATATA-----ACCTGCGA-----TAGCATGAGGCTTCATAGTTGTCTGT---TTTGGGGGAAAGGGGGG 12048
GoldenEagle   TACTTAATATA-----ACCTGTGA-----TAGCATGAAGCTTTATAGTAGTCTGT---TATGGGGGAAAA---- 12916
JapaneseQuail TACTTAATATA-----ACTTGTGA-----TAGCATGAAGTCTCA-AGTAATCTGC---TGTGGGGGAGTGGAGGG 10835
MediumGroundFinch ----- 0
GoodesThornscrubTortoise@ACCCGATATA-----ACACGAAT-----TCAGATATAACCCGTAAAGCAGTGC---TCCAGGGGGCCGGGGCA 34488
    
```

Monday, May 02, 2022 06:50 PM

```

Majority      -----GGAATCTGAAATCCT-----GCTACATAAAATTTAGCTC-GTGTAGTGAGGG-----ATTCTGAGTTAACAG
              38730   38740   38750   38760   38770   38780   38790   38800
Human         TTTCTTAAAATAGAAAATCTTAAAGGAATATATAAACTTGACTCCATCAAATGGGA--AATTCTGCCTCATCAAAG 38647
Kakapo        -----GGAATCCAAAATCCT-----GCTACCTAAATCCAGCTT-GTGTAGTGAAGA-----ATTCTGAGTTAGCTA 12108
GoldenEagle   -----AATCTGAAATCCT-----CCTACATAAAATCCAGCTT-GTGTAGTGAGGG-----ATTCTGAGTTAGCTA 12974
JapaneseQuail ATT---GGAATCTGGAGTCCA-----GCTACATAAAATTTAATTC-CAGTAGTGAGGG-----ATTCTGAGTTAACAG 10898
MediumGroundFinch -----
GoodesThornscrubTortoise-----GGGCTGTGCACTCCG-----GCGAATCAAAGTAAGTTCAGTATAATGTGGTTTCACCTATAATGCGGTAAGAT 34556
    
```

```

Majority      TTACTGTTA--AAGCAAGGAGCTAGAAGATTGATTTGGTGAGCTTGGTATTTTT-----TGCTTTTCTTTGTA
              38810   38820   38830   38840   38850   38860   38870   38880
Human         ACATTGTAAAGACATTGAAAAGACAAGGCACAGACTTGGAGAATATAATATTTGTGTATCAATACATGCATATGACTGTA 38727
Kakapo        TTACTGTTA--AAGCAAGGAGCTAGAAGAT-----C-----T--CCTTTATG 12146
GoldenEagle   TGACTGTTA--AAGCAAGGAGCTAGGAGATTAATTTGATGAGCTAGGGGCTTTT-----TCTTTTCTTTGTA 13040
JapaneseQuail TGACTGCTA--AAGCAGGGAGCTTGAAGGTTCAATTTGCTAAGCTAGTTACTTTT-----TACTTCTCTTAGTA 10964
MediumGroundFinch -----
GoodesThornscrubTortoise@TTTTGGCACCCGAGGACAGTGTATATAGGGGTAGAGGTGTACATTGGATTGTT-----TGATGTAAAGAAAA 34625
    
```

```

Majority      TAATTCCTCTTTTAGATTGCAGAAAATAAAAGTATCAACAGT-----ATTTATGAAAA-----TTTCATGAATT
              38890   38900   38910   38920   38930   38940   38950   38960
Human         TTAGTCCATTTTCATGCTGCTGATAAAGACGTACCCGAGACTGGGCGGGCAATTTATGAAAGAAACCAGTTTAATGAATT 38807
Kakapo        TAATTCCTCTGGTTGATTCC--A-----TACATGAATG 12177
GoldenEagle   TAACTGATTTTGTAATTTGTAGAAGAGAGATATATACAAT-----AACTGTGTTCA-----CTTACAGAAATT 13104
JapaneseQuail TAATTGTTCAATTTGAAGAGCCAGAATATTTGCAACAACACTGT-----ATTTAATAAAA--GATTTCTTTACGAATT 11032
MediumGroundFinch -----
GoodesThornscrubTortoise@AATTCACCTAGAGGTAACAAATATAAAACAATCACTAGT-----AAGTAAACTATTGGAACTTGAAAATCT 34695
    
```

```

Majority      TACTAAACTATAGAAATGGTATATTCTATTAAAAGTATTTAAAGGCATCTTTATATGTATA---TTTAAGCTTCTTTGAA
              38970   38980   38990   39000   39010   39020   39030   39040
Human         TACAATTCTATGTGACTGGGGAAGCCTCATAATCATGGTGAAGGCAAGGAGGAGCAAGTCACATCTTACGTAGATGGCA 38887
Kakapo        TGCT-----12181
GoldenEagle   AACTAAAATATCGAAGTGGTATCTTCAATTAACAGCATATAAAATAATTTTATACGTATAATTTCAAGTTTCTCTGAA 13184
JapaneseQuail AAGTGAAATATAGAAATGCTATTTTCAATTTAAGGTACTGAAAGATTTCTTTATATGTATA---TTTAAGCTCCTTTGAA 11109
MediumGroundFinch -----
GoodesThornscrubTortoise@CTTCCACTTTAAAAAATAAATAATTTTATGCAACATTTCTTAGCATCCCATATTGAATATACTCTATTCTTTAATTAA 34775
    
```

Monday, May 02, 2022 06:50 PM

|                          |                                                                                    |       |
|--------------------------|------------------------------------------------------------------------------------|-------|
| Majority                 | ATACGTA---AAAAT---CTAGT---GGATATCTTTTATCTTTTTCTGAAAATGA-CCT-TAGGTCATTTTTA-----     |       |
|                          | 39050      39060      39070      39080      39090      39100      39110      39120 |       |
| Human                    | ACAGGCAAAGAAAAGAGAGCTTGTGCGGGGAAACTCTCCCCTTTTTAAAACCATGAGACT-TACTTCACTGTCACGAGAA   | 38966 |
| Kakapo                   | -----                                                                              | 12181 |
| GoldenEagle              | ATACATATTTAAAGT---CTCATTGGTATATTTTTCATCTTTTTCTGAAAGTGATCCACATGCCAGTTTTATGTAGT      | 13260 |
| JapaneseQuail            | ATACATATTCAGTCT---TGAGT---GGACAACCTTTTTCTTTTTCTGAAAATGTCCAATTTGCACATTTTTA-----     | 11176 |
| MediumGroundFinch        | -----                                                                              | 0     |
| GoodesThornscrubTortoise | AAATGTA---AAGAT---GTATTATAAGATGTAGCTTAATTTAATAAAAAAATTAATTTATGGGTATTTTTTAAACACAT   | 34848 |

|                          |                                                                                    |       |
|--------------------------|------------------------------------------------------------------------------------|-------|
| Majority                 | -----A---CATAcATTAACATGCTGTT--TTCACA-----CCGTA--GTTAGAAATGCTC--TCATGAGGGC          |       |
|                          | 39130      39140      39150      39160      39170      39180      39190      39200 |       |
| Human                    | CAGCATTGGAAAGACCTGCCCCCATGATTTCAGTTAACTCCCACCAGGTCCCTCCCACAACACATGGGAATTCAGAGGAG   | 39046 |
| Kakapo                   | -----G-CATGCTGGT--CTTACA-----CCACA--GATGGAAATGCTC--TCATGAGGGC                      | 12225 |
| GoldenEagle              | TCCATTGGTTGAAGCCATAAAATTAACATGCTGTT--TTCACA-----CTGCA--GATGGAAATGGTC--TCGTGGGGGC   | 13328 |
| JapaneseQuail            | -----CATAGATTAACATGCTATT--GCCACA-----CCGTGCTGTCAGAAGTACTCAGTGACAGGGGC              | 11233 |
| MediumGroundFinch        | -----                                                                              | 0     |
| GoodesThornscrubTortoise | SGTAGGACTGAAAGGAGCACATTAGTTTTTATTT--TCCTGAAGTTTTCAGAAGTTTGACAAATGCTGTGTATTAATATA   | 34926 |

|                          |                                                                                    |       |
|--------------------------|------------------------------------------------------------------------------------|-------|
| Majority                 | AAGGGTGTGATAACATGGGCTTCCTTGA--AAGGACAAT--CTTGAT-CTGCAACAAATTTGAAGTTCACCTCA---CTGC  |       |
|                          | 39210      39220      39230      39240      39250      39260      39270      39280 |       |
| Human                    | ATGTGGGTGGGGACACAGCCAAACCATATCAATGACAAAGGACTTGTATCCCAAAGGACTTGTAACAAAAAACTCCTCC    | 39126 |
| Kakapo                   | AAGGATGTGATAACGTGGGCTTCCTTGG--AGAGACA-T--CCTGA--CTGCAACAAATCAAGGTTCCCTCA---CTGC    | 12295 |
| GoldenEagle              | AAGG--GTGATAACATGGGCTTCATTGA--AAGGACAAT--ATTGACTCTGCAACAAATTTAAAGTTCACCCA---GTGC   | 13399 |
| JapaneseQuail            | TGGGGTATGAGAGCATTGCATTCCTTGA--GAGGGCT----TTGATTCTGCAAGAAATCTGAAGTTCCTCTGA---CTGT   | 11303 |
| MediumGroundFinch        | -----                                                                              | 0     |
| GoodesThornscrubTortoise | 6ATCAACAGTTATCATATTTATGCAGAA--ATATGCAA--CTTGGC-ACATAACACATATGAAGTCAAATAATG-CTCC    | 35000 |

|                          |                                                                                    |       |
|--------------------------|------------------------------------------------------------------------------------|-------|
| Majority                 | AAGAAGTTAGTTTG---GCAATTCCTTGTTTT--T-TGTGTAAGTCTTTTTGGC---AGATACTGGTTTCATGAAGAT     |       |
|                          | 39290      39300      39310      39320      39330      39340      39350      39360 |       |
| Human                    | AATCAATAAATATG--AGCAGCCCAATTTTTTTTTAAGTGGCAAAAGAAGTGACATTATAAGGATGGGTAACAAGCACAT   | 39204 |
| Kakapo                   | AGGAAGTTAGTTTG---GCAATTCCTTGTTTTATTCTGTGTAACAGTGTTTTTGGC---AGATGCTGGTTTCATGAAGAA   | 12368 |
| GoldenEagle              | AAGAAGTTAGTTTG---GTGATTCCTTGTTTT--TGTGTAATAGCATTTTTTGGC---AGATGCTGGTTTGTGAAGAA     | 13468 |
| JapaneseQuail            | AAGAAGTTGGTTTG---GCCATTCCTGGTTTT-----ACCTTTTTGGC---AGACATTGAATCCAGAGCATT           | 11364 |
| MediumGroundFinch        | -----                                                                              | 0     |
| GoodesThornscrubTortoise | eTGGAATTACTGTGCGTGAAGTGATACTGAATGCTTTCCTTAAAAGATTTTTGGGCCCTTAGAAACCCACATTACAACAAG  | 35080 |

Monday, May 02, 2022 06:50 PM

```

Majority      TTTTGTGGATGTCTCTGATCTGGATAGT---GTTTTAGC--TTTtagggaggattaatgtatatattcatggt-cttga-
              39370      39380      39390      39400      39410      39420      39430      39440
Human         GAAAAGATAATGTTAGTCATCAGGTGATCACAAGTCAAAACCATTAGAGATAGAATTTACACCAACTAGAATGGCTAAAA 39284
Kakapo        GTGTTCTAGATAGCTCTGATCTGAATAGG---AGTTTATC--TTTtagggagattaatatatattcatggt-cttga- 12440
GoldenEagle   ATGTTTTGGATATCTCTGATCAGAATAGTTACTGGTTTAGC--ATTTATGGAAGATTAAATGTAGATTAATGTT-CTTGA- 13544
JapaneseQuail TGCTGTGAATGTCTATGGTATAGTTAAT---GTTTTAGG--TTGTATACAGTACTGCTTGATGTTTGT---CTTGA- 11433
MediumGroundFinch ----- 0
GoodesThornscrubTortoise@GTAGCAGCAACTCCCTGCTGTTGACTGAGAGAGCCTCT--TTATGGGCTGGCATAGAGTCCACCCATGATGCATAAA 35158
    
```

```

Majority      ---CATTGGTAGGAATAAAAAATATGGCGTTGAAAACCTTG-TGCTGTTGAGGACTAGTTGTCAGTAGATGACC-----TAT
              39450      39460      39470      39480      39490      39500      39510      39520
Human         TTAAATAGATTGGCAATACCGAATGTTGATGAAGATGTGGAAGTCTCTTTAAATTACTGCTGAGTATATAACA---TAGT 39360
Kakapo        ---CATTGGTAGGAATGAAAATATGGCGTAGAAAAC---GCTGTTGAGGAGTAGCTGTCAGGCGATGACC-----TAT 12508
GoldenEagle   ---CATTGGTAGGAATAGAAAATATGGCATTGAAAACCTTG-TGCTGTTGAGGACTAGGTGTCAGAAGATGACC-----TAT 13615
JapaneseQuail ---TGTTGGTAGGAATACAGATGTGGCATTGAAAACCTCC-TGCTCTTGAGGGCAAGCTCTCAGAAGATGACC-----TTC 11504
MediumGroundFinch ----- 0
GoodesThornscrubTortoise@CCCATCTGTCAATGTATCAGAAATAGCTTTTGTAAACAC-AGTCAGGAACTAGACTCAATAGTACATAGTCATAATCAG 35237
    
```

```

Majority      TAATAGTAT--AATAGTAGTTTGTACTTTTTATTTTGCCTTTATAATCTCTTTCCCTCTTACTAAAAT-GAATATTCAG
              39530      39540      39550      39560      39570      39580      39590      39600
Human         TGGGAAAATAGTTTGCCTTTTTTTTTTTTTTTTTTTTTTTTTTTTGGACAGAGTCTTGCTCTGTCACCAGGCTGGAATGCAGTG 39440
Kakapo        TAATAGTAT--AATAGCACTTTGTACTTCTTATTTTGCCTTTATAATCTGCTTGCCCTCATGCTAAAAT-GGATATTCAG 12585
GoldenEagle   TAATAGTAT--AATAGTAGTTTGTACTTTTTATTTTGCCTTTATAATCTCCTTCCCTCATCGTAAAAT-GAATATTCAG 13692
JapaneseQuail TAATAGTCTGCAATAGCAGTTTGTACTTCT---TTGTCCTTTGCAACCTCTTTCCCGTGTCTAAAAT-GAATACTTAA 11580
MediumGroundFinch ----- 0
GoodesThornscrubTortoise@CATAATGAAACAATGTAACCTGATTTTTTTGCATTTTATTAGAAAATGTCTTTTACGCTAATTGTCATAGAGTAATCAT 35317
    
```

```

Majority      GTAGTTTCTTACA-TGTTGCTA-TTGTAGGAACTTT-CCTTTGCAGTTTTTGTGTT-----GGAAATAAAAATT
              39610      39620      39630      39640      39650      39660      39670      39680
Human         GCATGATCTCAGCTTACTGCAACCTCCGCTCCTGGGTTCAAGCGATTCTCCTGCTCAGCCTCCTGAGTAGCTGGAACCT 39520
Kakapo        TTAGTCTCTATCA-----TGTAGGAACTAT-CCTTTCCAGTCTATGCC-----AAAATAAAAATC 12638
GoldenEagle   TTAGTCTCTTACCATGTTGCTA-TTATAGGAACTTT-CCTTTGCAGTCTATGGT-----GAAATAAAAATC 13755
JapaneseQuail GTAGCTTCTATCA-TGTTGCTA-TTGTAGGAAATTT-TCCTTTGCAGCTTGCAGTT-----GGAAGGGAAGTT 11644
MediumGroundFinch ----- 0
GoodesThornscrubTortoise@CATTTTTTAAAACCTGCTTAAATTTTAGGAGTTTGGCAGTTTAAATTTTTATTCATTGGA-----GGGAAAAAAAACCT 35392
    
```

Monday, May 02, 2022 06:50 PM

|                          |                                                                                  |       |
|--------------------------|----------------------------------------------------------------------------------|-------|
| Majority                 | ACAGTGGTTGTTTTTG----TTTTTTTGTTTTTTTTACTTTTATTTTAGAATTCTT-----TTTGCTTGTGATCTTC    |       |
|                          | 39690 39700 39710 39720 39730 39740 39750 39760                                  |       |
| Human                    | ACAGGTGCACGCCACCACACCCGGCTAATTTTTTGTATTTTATAGTAGAGACTGGGT-----TTCGCCATGTTGGCC    | 39591 |
| Kakapo                   | ACAGTGGTTGGTTTT----TGTTTGTGTTATTTTACCTTAGATTTTATAGATTCTT-----TGTGTTTGTGATCTTC    | 12705 |
| GoldenEagle              | ATTGTGGTGGTTTTTG----TTCATTTGTACTTTAACTTATATTTGGACATTCTGTACCTACGTGCTTGTGATCTTC    | 13831 |
| JapaneseQuail            | GATGTGGCAGCTTCAG----TTTGTTTGGCTTATTTATTTTTGTTTTTAAACTTAAATTTGGACTTTTCTGTGATCTGT  | 11720 |
| MediumGroundFinch        | -----                                                                            | 0     |
| GoodesThornscrubTortoise | ACAAATATTTTTCTTAGCTCTGGTATTACTGCTGTGCCTATTAATGAATAATTCTCTGTATAGACACCAGAATAGCTCCT | 35472 |

|                          |                                                                                   |       |
|--------------------------|-----------------------------------------------------------------------------------|-------|
| Majority                 | AGTCTTGTTTTACGGTCTCAAACCTTGCTT-GA---T-CGGCACACAGCAGTTTGCAAAGATGGGGAAAAGAGTTAAGTGA |       |
|                          | 39770 39780 39790 39800 39810 39820 39830 39840                                   |       |
| Human                    | AGGATGGTCTTGCTCTCTTGACGTTGTGA-----T-CTGCCACGTCGGCCTCCCAGAGTGTGGATTACAGGCCTGA      | 39664 |
| Kakapo                   | AGTCTTGTAAACAAACTCAGACTTGCTTTGATCTTTCAGAACACAGCAGTTGCACAGATGGGGAAAAGAGTTAAGTGA    | 12785 |
| GoldenEagle              | AGTCTTGTATACAATCTCAAACCTTGCTTTGATCTTTAGAACACAGCAATTTGCATGGATGGGGAAAAGAGTTAAGTGA   | 13911 |
| JapaneseQuail            | GTTTGTGATCTTTGGTCTCGAACTTGCTT-----GACACACAGCAGCTTGCAAAGATGGGGAAAAGAGCTAAGTGA      | 11791 |
| MediumGroundFinch        | -----                                                                             | 0     |
| GoodesThornscrubTortoise | CGCCCCAGTTGAAGGGTGGAAAGATTCCA-GAGCTCGGGCGACAACCCAAGCT-CAGAAGTCTCCACAGCAGTGAACAG   | 35550 |

|                          |                                                                                  |       |
|--------------------------|----------------------------------------------------------------------------------|-------|
| Majority                 | ACATTGCTCTTGGATCTTGCATTCTTTATTGAATCTGATGGACTATGTTCTTCAGAGATCTGAGTTTAGTTTCCTTATCT |       |
|                          | 39850 39860 39870 39880 39890 39900 39910 39920                                  |       |
| Human                    | GCCACTGCGCTTGACCTAGTTTACTATTTT----CTTACGGAGTTAAACATTAACCTATTTTATGGTCCATAACTTCTAC | 39740 |
| Kakapo                   | ACATTGCTCTTGGATCTTGCATTCTCCCTGAATCTGATGTGCTATGTTCTTCAGAGATCCGAGTTTAGTTTCCTTACCT  | 12865 |
| GoldenEagle              | ACATTGCTCTTGGATCTTCCATTCTTCATTGAATCTGATTCACTGTGCTCTTCAGAGATCTGAGTTTAGTTTCCTTATCT | 13991 |
| JapaneseQuail            | AAATTGCTCTTGAATCTTCCATTCTTTATTGAATTTGATTCACCACGTTCTTCAAAGATGTGAGCTTGTTCCTTGT     | 11871 |
| MediumGroundFinch        | -----                                                                            | 0     |
| GoodesThornscrubTortoise | CCCCACAGCCCAAGCCCTGTGAGCCCGAGTCGACTGCTAGGGGCCAGGCATGAGATTTCTTTTGCTGTGTAGACATAACC | 35630 |

|                          |                                                                                    |       |
|--------------------------|------------------------------------------------------------------------------------|-------|
| Majority                 | CTGAAGCTCTCGATAGAATTTACCTGAATTGGTTGAAAGGTTTCTTTGCGTTGCAT-AATTTGACTAGCAGAACTGGTAT   |       |
|                          | 39930 39940 39950 39960 39970 39980 39990 40000                                    |       |
| Human                    | TTTTAGTTTTTTACCAGTAAGAACATGTTTGTGCTGTAACACTTGTATGTGTATCAAAAACCTTTACTGATAATGGTCCCAA | 39820 |
| Kakapo                   | CTGAAACACTCGAAAGAATTTACCCGAATAGGTGGAAAGGTTTCTTTGCTTTGCAC-GATTTGGCTAGCAGAACTGGTGG   | 12944 |
| GoldenEagle              | CTGAAACACTCAATAGAATTTACCTAAATAGTTTAAAGGTTTCTTTGCATTGCAT-AATTTGACTAGCAGAACTGGCAT    | 14070 |
| JapaneseQuail            | CTGAACCGCTCGATAGAATTGACCTGAACT---TAACGGTTTCTTCGTGTTGGAT-GATTTGACTATTGGAAGTGGTGT    | 11946 |
| MediumGroundFinch        | -----                                                                              | 0     |
| GoodesThornscrubTortoise | ATAAGGTCAGGGGCAAAGCATCTGCTACTGTGTGGATTCTTCTTCCCCTCCGTCAGTGGGGGTGCCACTACTGGAAT      | 35710 |

Monday, May 02, 2022 06:50 PM

```

Majority      GCTTGA---GAATAAGACTAGTGTATGTT--CAAGATGCT-TGGGAAATGGGTTATAAATCTGAAATTTATGTGTGAGAG
              40010   40020   40030   40040   40050   40060   40070   40080
Human         ACTTGA---AATAACCCAAATGTTTATCAACAGGAAATGGATAAATGTGGTATAATCATATAGTATATTACTION-- 39894
Kakapo        GCTTGA---GAATAAGACTAGTGAATGTT--CAAGGTGCT-TGGGAAATGGTTTATCATTCTGAAATTCATGTGTGAGAG 13018
GoldenEagle   GCTTGA---GAATAAGACAAGCAAATGTT--CAAGATGCT-TGGGAAATGGGTTATAAATGTGAAATTTGTGTGTGAGAG 14144
JapaneseQuail GCTTGA---GAATAAGACTACTGTGTGCC--CAAGATACT-TGGGAAGTGAGCTGTAATTCTGAAAT-CATGTA----- 12013
MediumGroundFinch ----- 0
GoodesThornscrubTortoiseACTGCATCCAGTTCTGCTGTTTACATTTT--TAAAAGGATGTTGAAAATTGAAGAGGGCGCAGAGAGGAGAGAAACAG 35788
    
```

```

Majority      TGCTGGG--TGATGAAGAGCTTTGCCCTTGAG-CAAATGCCAG-GCCTTTTTGGCTTAGCACCCCTCTAAAAGAAAATG
              40090   40100   40110   40120   40130   40140   40150   40160
Human         TACTAATAACAAAAGAATGGTTAGTAGTACATGCGAAAACATGGGTGAATAGTAAGCATTGTATGAAGCAAAGAAACCA 39974
Kakapo        AGCTGGG--TGATGAAGAGCTTTGCCCTTGAAACAAGATGCCAC-TCCTTTTTGGCTTAGCACCCCTCTAAAAGAAGATG 13095
GoldenEagle   AGTGGAG--TGATGAAGAGCTTTGCCCTCGGAG-CAAGATGCCAG-GCCTTTTTGTCTTAGCACCCCTCTAAAAGAAGATG 14220
JapaneseQuail --C-----AAGAACGTTGCCCTTGAAG-TAGAGTGCAAG-GCCTTTTTGGCCTATCTCCCTCTAAAAGAAAATA 12078
MediumGroundFinch ----- 0
GoodesThornscrubTortoiseATTGAGGCCTGGAAAAATGCCTTACTGTGAGAGACTTAA-GCTCA-ATCTGGTTAATTTATCATAAAGAAAATGAGAGTG 35866
    
```

```

Majority      CACATAAAACCAAAGC---CAAGCGCC---CCAAACCTCAAATGT---ATAA-----AGTCTTTTCTTTG----C
              40170   40180   40190   40200   40210   40220   40230   40240
Human         GACAGACCTGAAAGAGTACATAGTGTGATTCCATTTCTTGAAAGTTAAGAGCAGATCATTAAATTTTTGTTTAGAAACC 40054
Kakapo        CACATAAACCCAAAGC---CAAGCACC---CCAAACCGCTAATTGC---ATAA-----AGTCTTCTCTCTG----C 13153
GoldenEagle   CACATAAAACCAAGC---CAAGCACC---CCAAACCAAATGA---ATAA-----AGTCTTATCTCTG----C 14278
JapaneseQuail CACATAAAACTGGTC---CAAACGC-----ACAAGTTG---ATAA-----AGTCTTCTCTTTG----C 12127
MediumGroundFinch ----- 0
GoodesThornscrubTortoiseATATGAGCGTAAGTGGATAAGTGTGTTGTGCCGGAAGTCAGATTTCTGATCATGATCATGATGGTCCGTCTGAC----C 35941
    
```

```

Majority      TGAATGTATGTGATTAAG---AAGTATTTATG--TCTGTGCTGTAATTCAGTAGGTGCTTCTGTGCAT-GTAGTAGTGTC
              40250   40260   40270   40280   40290   40300   40310   40320
Human         AGAATGTTGGAGATTAACA-GAAAGGGAATATGGTGGCATTCTTCTGGTGTGATGGAAACGTCCTATGT--TAATAAACTA 40131
Kakapo        TGAATAAATCTAAGTAAAG---AAGTATTTATG--TCTGTGCTGTATTTCCAGGAGGTGCTTGTGCCAC-GTAGTAGTGCC 13227
GoldenEagle   TGAATAAATGTAAGTAA-----GTATTTATG--TCTGTGCTGTAATTCAGGAGGTGCTTCTGTGCAC-ATAGTAGTGCC 14348
JapaneseQuail TGAATGGATGTTTTAAAAA---AAATAAAGTTGG-CCTCTGTTGTAATTTCTGAGGTGCTTATGTCATTATAGCAGTGTC 12203
MediumGroundFinch ----- 0
GoodesThornscrubTortoiseATAAAGTCTATGATTAGTGTAGAAGTATTTTACAGGGAGACTATAAAGCACTACAGGGTCTTTAAT-GTAGCAGAGAA 36020
    
```

Monday, May 02, 2022 06:50 PM

```

Majority      AGTTT-AAAGAGAA-CGCAT--TTGCTTACTTGAAATGCTTATATTAATGCTTT-ATTAGACAGCTGTCATCTTAAGA
              40330   40340   40350   40360   40370   40380   40390   40400
Human         AGTTGCAAAACAAATCCAAAAGTTGTTTGAAGCAGTAGATTATCTCTGAGAACTCTGAATTTCCAGTAGTTGTGTCTTGC 40211
Kakapo        AGTCTGAAAGAGAA-CGCAT--TTGCTTACTTGAAATGCTTATATTAACAGCTTT-ACCAGATAACTGTCATCTTAAGA 13303
GoldenEagle   AGTCT--AAGACTA-CGCAT--TGGCTTACTTGAAATGCTTATATTAATGCTTT-CTAGACAACACTGTCATCCTGAGA 14422
JapaneseQuail AGTTG-----ACTTACTTGAAATGCTTATATTAATGCTTT-GTAAACAGCTGTCATCTTATGA 12263
MediumGroundFinch ----- 0
GoodesThornscrubTortoiseAGGTATAACAAGAA-CGAATGGCTGGAAGTTAAAGCTAAACAAATACAAATAGAA-ATAAGATACAGATTTTTAACAGT 36098
    
```

```

Majority      TAA-CCTTTTTGAAGTAAA-TGGCAATTACCAGGCAG-----TTA-CTGCTTTTGATTT-TGTAATTTAACTGGTCTGT
              40410   40420   40430   40440   40450   40460   40470   40480
Human         TGTAATGAGAAATATGAGATTGGGAATGACTAGGTGAGTCCATGTAGCAGGGGCCTAGATGTGGGATTTGATGTGTGTGT 40291
Kakapo        TAGCCCTTTTTGAAGTAAA-AGACAATTACCAGGCAG-----TTA-CTGCTTTTGATTT-TGTAATTTAACTGCTCTGT 13374
GoldenEagle   TAATCCTTTT-GAAGTAAA-TGACAATTACCAGGCAG-----TTA-CTGCTTTTGATTT-TTTAATTTAACTGCTCTGT 14492
JapaneseQuail GA--CCTTTTTGAAGTAAA-TAGCAATTAACAGCCAG-----CTAACTGCTTTTGATTTCTGTAATTACTCTGTTTTCA 12334
MediumGroundFinch ----- 0
GoodesThornscrubTortoiseGAGGTTCAATGAGACAAACTACCAATAAAGAGTAGG---ATTCTCCGGCTTTTGATGTTTTTAAAT---CGAGACTGG 36172
    
```

```

Majority      GTGCGAGTGTGTTTTGTTTCTTTGCGTG--TTTTAGGTTACATATTTGAATGAAGTGCA-----GAGGTTTCTATGCTG
              40490   40500   40510   40520   40530   40540   40550   40560
Human         GTGTGTGTGTG-TGTGTGTGTGTGTGTGTGTGTAGCTTGGACTTTAACAGATTTACATTTTAGAAAGAATTTTGTTC 40370
Kakapo        GCCGAAGTACGTCATGTGTCTTAA-----AGTTTTACATACTGAATGAAGTGCA-----GAGCTATCTAGGCTG 13438
GoldenEagle   GTCCAAGTGTCTTTTGCAGCATAGCTGG--TTTAAAGGTTACATACTGAATGAAGTGCA-----GAGGTGTCTAGGCTG 14564
JapaneseQuail AGTAGACTGTGACTTCTTTTGCTGCATGGCTGTTAAGTTACATATTTAATGAGGTACA-----GGGGTTTCTATGCTG 12408
MediumGroundFinch ----- 0
GoodesThornscrubTortoiseATGCCTTTATGCTTTAATCAAAATACAG--TTATTGGGCTCAGTATGGGGATAAATGAG-----TGAAATTCTATGGCC 36244
    
```

```

Majority      CTTATGAACTT-ATAGGGAAAATAATCATGTATATTTGGTAG-GT-ATTTTTCATACA-GTATATGATACCTTTGTTTT
              40570   40580   40590   40600   40610   40620   40630   40640
Human         CATTGTATTTTACAGGTAGGATCAGTATTGTATAGAGGGGAGAAT-AGTTTTAAAACATTACGGTAGTTTATTCCAAAG 40449
Kakapo        CTTAAGAACTG-ATAAGGAAAAGAACCAGGTATATTT--A-----ATTGCTCACATG-GTAAGAGATATCTTTGTCTT 13508
GoldenEagle   CTTAAGAACTG-ATAAGGAAGAATAGCCATGTATATCTAGTAAGGTCATTGGTCGCACA-GTACATGATACCTTTGTCTT 14642
JapaneseQuail CTTACAAACCT-ATGGGGAAATGTGATGATGTATATAAGACAGTGT-GCTCTGCTTACA-TTATAAGGTATGTTTGTTTT 12485
MediumGroundFinch ----- 0
GoodesThornscrubTortoiseATTTTATAC--ATGGGGCAGACTAGAAAGCCTAATGATTCCTCTGACTTTAATATATGAATATAATGCTGTAGTTAT 36321
    
```

Monday, May 02, 2022 06:50 PM

```

Majority      TTCC--AAAAGCTTGGCAAGTATGTCTCTGGGAGGGAGTTTGCAGAAGTTTGCCTATACGCTTGTGATTTTCATGGTGAAC---
              40650      40660      40670      40680      40690      40700      40710      40720
Human         ATACCAAGGTCCTGAATTTTAGGGTCTTGAAGGAGAATGCAGGAAATGATAAAAACG--AGTTATCTGGAAGAAGACAAG 40527
Kakapo        TTCC-CAAAAGCTTGGCAAATACATGTGGGAGCGAGTTAGCAGAGGTTTGCCTACGTTGTGATTTTCATGGTGAACCTCG 13587
GoldenEagle   TTTAGTAAAAGCTTGGCAAGTATATATGGGAGTGAGCTAGCAGAGGTTTGCCTATACGTTTGTGATTTTCATGGTGAAC--- 14719
JapaneseQuail ACCA---AAAGCTTAGCAAGCATGAATGGGA----GTTTGCAGAAATCTGTCACATGCTGTTGGTTCATGGTGAAC--- 12555
MediumGroundFinch ----- 0
GoodesThornscrubTortoise GACTG-AGAGGCTACCCTCACTGCTCTGAAGAGTTGAAGATGGTAGACTTCTCCATTCTCTCCCTTCATGGAATTCTCC 36400
    
```

```

Majority      -----AT-CCAT-ACAGAGATCTGTACA---TTTGTACTTAGGTTTCGTGAACATTGATTTATGACAGTAAAATAAATG
              40730      40740      40750      40760      40770      40780      40790      40800
Human         TTTGGAATAATATTAAGAGTTTGTCTTAGAATCACTGGGTTGGTAGAAGATGATGCCATTAACAAAGGGGGAAAAGTA 40607
Kakapo        AAGAACATGCCAT-ACACAAACCTGGACA---TCTGTGAATCAGGCTCGTGAACACTGATTTGTGACAATAAACGAATG 13663
GoldenEagle   -----ATTCCAC-ATACAAACCTGTACA---TCTGTGACTCAGACTTGTGAACACTGATTTATGAGAACAAAACAATG 14789
JapaneseQuail -----C--CA--GGTTTACAACAGTAAAATAAATG 12581
MediumGroundFinch ----- 0
GoodesThornscrubTortoise GATAACAACCTCAG-GCTGGGCTCTGAGAGGATTTTTTACATAAGTGCCTGCCTATTGATTTATCTATGGACTTGTTTA 36479
    
```

```

Majority      TAGAATTTATGATAGATGCTGGTGTAAGGAATTCACATT-TGCT--TGTTCTTCTGAAGCAAACTGTTATAACTTTTTTC
              40810      40820      40830      40840      40850      40860      40870      40880
Human         GGAAAAGGAGACTCGTTTTTGGTGGGAAAAAGAATAATCCGCTACTGTTCTGTTTTTTTTTGTGTTGTTTTTGTGTTTTT 40687
Kakapo        TAGGATTTATGATAGATGCCACTATAAGGAATTCACATT-TGCT--TGTTCTTCTGAACAAAACCTGTTAAAACCTTTCC 13740
GoldenEagle   TAGAATTTATGATACATGCCAATATAAGGAATTCACGTT-TGCT--TGTTCTTCTGAAGCAAACTGTTAAAACCTTTTC 14866
JapaneseQuail CTG--TTTATAATATGTGCTGGTGTAAGAACTCCCGT-----GTTCTTCTGAAGAAAAAC--TTGTAATTTTTTC 12648
MediumGroundFinch ----- 0
GoodesThornscrubTortoise @CAA--TTAC-ATAGATTTGTCTCTGGTCTCTGGCACCATATT--TGTTCTCCCAAACCTTTGTC-ATATGACCTCTGA 36553
    
```

```

Majority      AAGTTTAATGACTAAATCTTGTGATTGTCTCTG---AATGTATTCGTGAGATGTTAAATG---TGTTTCAAATGAAGAG
              40890      40900      40910      40920      40930      40940      40950      40960
Human         ATTTTTTATTGATCATTCTTGGGTGTTTCTCGCAGAGGGGGATTGGCAGG-GTCATAGGA--CA---ATAGTGGAGGG 40760
Kakapo        AAGTGTAATGACTAAATCTTGTGATTGACTCTG---AATGTATTCATGACATTCAAATG--ATGTTTCAAATGAAGAG 13815
GoldenEagle   AAGTGGAATGACAAAATCTGGTGATCGACTCTG---AATGTATTCATGAAATGCAAAATGGTATGTTTCAAATGAAGAG 14943
JapaneseQuail AAGTATAATGACAAAATTTTATAACTATCTACATC-AGCGTTATCGTGAGATGTTAAAT--CATTTCAAAATGGAAAG 12724
MediumGroundFinch ----- 0
GoodesThornscrubTortoise @AGTTTCACAGTTTCATCTGCTTGTAGTTCCTTTAGAAATTGTAGGTAAATGTTAAATGGC-TTTGCTGACATGAATGA 36632
    
```



Monday, May 02, 2022 06:50 PM

```

Majority      AAAACTCTTTA-----ATTGTTTCATTAAACACAAA--TACAG-TAACTGAGT--ATCCACTCTGTTGAGTA-ATTTGTG
              40970      40980      40990      41000      41010      41020      41030      41040
Human         AAGGTCAGCAG-----ATAAACAAGTGAACAAAGGTCTCTGGTTTTCTTAGGCAGAGGACCCTGCGGACTTCCGCAGTG 40834
Kakapo        AAAACTCTTC-----GCTGTTTCATGAAACACAAAATAACAG-TAACTTAAT--ATCCACTCTGTTGAGTA-ATTTGTG 13884
GoldenEagle   AAAACTCTTTTA----ACTGTTTCACAAAACACAAA--TACAG-TAACTGAAT--ATCCACTCTATTGAGTA-ATTTGTG 15012
JapaneseQuail AGAACTTTTAAA-----ATTGCTCTTAAAAACA-----TAACTGAGT--AGCCACTCTATTTGGC---TTGGTG 12782
MediumGroundFinch -----ACTGTTTCATGAAACACAAA--TACAA-GAACTGAAT--ATCTACTCTGTTTAGTA-ATTTGTG 57
GoodesThornscrubTortoise AAGGTCATAGCTCAGTTCATGTTGACTTGAATATTTAGCATCAA-GTACAAAGTGCATCTTATTTGAAAAGTTTGCTTATG 36711
    
```

```

Majority      T---TCCTTTTGGATTTTT---CTGCTGTG-GATTAAGAAATTAA-C---AGGTTTTCTTAAAGC--CTGTTTTACTA
              41050      41060      41070      41080      41090      41100      41110      41120
Human         TTTGTGTCCTGGGTCCTTGAGATTAGGGAGTGGTGATGACTCTTAAACGAGCATGCTGCCTTCAAGCATCTGTTTAAACA 40914
Kakapo        C---TCCTTTTGGATTTTT---CTGCTGTG-GTTAAGAAAT-----GGCTTTT-GAAGGC--CTCGTTTACTG 13944
GoldenEagle   C---TCCTTTTGGATTTTT---CTGCTGTG-GATTAAGAAATTAA-C---AGCTTTT-AAAAGC--CTGATTTACTA 15076
JapaneseQuail T---TGATTTTGGATTTTTT---CTGCTGTG-GTTAAGAGACGTATC---AGGCTTTC---ATCG--TGGGTTTCTTA 12847
MediumGroundFinch C---TCCTTTTGGATTTTT---CTGCTGTG-GATTAAGAAATTAA-C---AGTTTTTTTGAAGC--CGGATTTACTA 122
GoodesThornscrubTortoise TAGATATTTTCTAAAATATTA--CTGACCTGTAAATATGAAATGAAGTTTA-AAAATGTCTTTCAGC--CAATGGTAATG 36786
    
```

```

Majority      GGAACAA---GAAGTTCAT-----GTAA-----TCATTCTTGTGTTCTGCTAGTCAG-CAGTTGCTGGTT
              41130      41140      41150      41160      41170      41180      41190      41200
Human         AGCACATCTTGACCCGCCCTTAATCCATTTAACCTGAGTGGACACAGCACATGTTTCAGAGAGCACAGGGTTGGGGGT- 40993
Kakapo        GGAGCAA---GAAGTTCAT-----GTAA-----TCACTCTAGTGTCTGTTAGTTAG-CAGCTGCTG--- 13997
GoldenEagle   GGAGCCA---GAAGTTTAT-----GTAA-----TCACTCTTGTGTTCTGCTAGTCAG-CAGGTGCTGATG 15132
JapaneseQuail GGA-----G-----GCA-----TTTTACATTCTGCCAGTTAG-AAATTGCTCATT 12886
MediumGroundFinch GGAACCA---GAAGTTTAT-----ATAA-----TCATTCTTGCACTCTTTCATTTCAG-CAGTTGCTGTTG 178
GoodesThornscrubTortoise ACAACAA---GAAATTCAAAGCAGAGGATAAAATGGATGGGGCTCCTTCTCGTGTCTTCATATCAGGAAATTGCCTGGT 36863
    
```

```

Majority      TAAGTAACTTGTTGAAGCTGATGGCAATTTAA-TTTGAGATATTTTCAGATTTGTAAAGTTCCTGCAGGTTTTGGGAAGA-
              41210      41220      41230      41240      41250      41260      41270      41280
Human         AAGGTCACA-GATCAACAGGATAAGAATTTTT-CTTAGTACAGAACAAAATGAAAAGTCTCCCATGTCTACCTCTTTCTA 41071
Kakapo        -AAGTAACTTGTTGAAGCTGAAGGCACTAAAATTTGAGATATTTTCAGAGTTGTAAAGTTCCTGCAGGTTTGGGAAGA- 14075
GoldenEagle   GAAGTAACTTTTTGAAGCTGAAGACAGCTCAA-TTTGAGATATTTTCAGAATTGTAAAGTTCCTGCAGGTTTTGGAAAGA- 15210
JapaneseQuail TAGGCAACTTCTTGAAGACAGTTGGAATCAGT-TGT-AGG--TTTTAGATTTGTGGAGTTCCTGTAGGGTTTGGGAAGG- 12961
MediumGroundFinch TAAGTAACTTCTGAAGCTGGTGGCAATTGAAATCTGAGATATTTTCAGATTTGTGAAGTTCCTACAGGTTTGGGAAGA- 257
GoodesThornscrubTortoise GAAGTGACA-GAAACAGAAGTTATTGCTTTAGGCTTACCTTTTGGTAAGGTAACCAACATCCTGATGCTAAAAGGAAAAA 36942
    
```

Monday, May 02, 2022 06:50 PM

```

Majority      -TCATTCATTT-G---GTACTGGGGTTGCTTCTGTGTTTACATAGTAATTGCTGTACTGTTGCAAATTAATGCCTG---
              41290      41300      41310      41320      41330      41340      41350      41360
Human         CACAGACACG--GCAACCATCCGATTTCTCAATCTTTTCCCCACCTTTCCCCCTTTCTATTCCACAAAACCGCCAT--- 41146
Kakapo        -GCATTCATT-----GTACTGGGGATAACAAT-----ACATAGTAATTGCTGTACTGTTGGAAATGAATGCCTG--- 14137
GoldenEagle   -CCATTCATTT-G---GTACTGGGGATGCTTCGGGTGTTTACATAGTAAATGCTGTACTGTTCCAAATTAATGCCTG--- 15282
JapaneseQuail -TCATTCATTC-ATCAGTACTGGGGTTGTTTCAGCTCTTTGTGTAGCATTGCTGTACTGTTGCAAACCTGATGACTG--- 13036
MediumGroundFinch -GCATTCATTT-G---GTACTGGGGTACTTCAGCTGTTAATGTAGTAATTGCTGTACTGTTGCAAATTTATACCTG--- 329
GoodesThornscrubTortoise@TCAGGTATTCTGCTGTTTCAGAGTTCATTATAGTACAATGATTAAGTATTTTCTAATTCCAAATATACTGGTAAAA 37022
    
```

```

Majority      GCTTATTAAGGGA-A--CCAAATATGCTGCTGAATTATCTTAATATGCTTGACTATGAACTGATTCAGTGTCTGCTGCTA
              41370      41380      41390      41400      41410      41420      41430      41440
Human         TGTCATCATGGCCCGTTCTCAATGAGCTGTTGGGTACACCTCCCAGACGGGGTGGTGGCCGGGCAGAGGGGCTCCTCACT 41226
Kakapo        GCATGTTAAGGGA-A--GAAAAAATGCTGCTGAGTTATCTTAATATGCCTGACTATGAACTGATTTAGTCTCTGCTGCTG 14214
GoldenEagle   GCGTATAAAGGA----AAAAAATGCTGCTGAATTATCTTAATATGCCTGACTATGAACTGATTCAGAGTCTGCTGCTA 15357
JapaneseQuail GCCTATTAGGGAA-AA-CCAAATTTACCACTGAATTTATTTAATTTGCTTACCTCCGAATGGATTCTGTCTCTGCTG--- 13111
MediumGroundFinch TCGTATTAAGGG----GGAAAAATGCTGGTGAATGATCTTGATCAGCTGGACTATGAGCAGATTCAGTGTCTGCTGCTA 404
GoodesThornscrubTortoise@CTTACTAAGATT-AATCCAGATGTAATGGTAAATAA--TAAAAATGAAAAGTCTTGCAATCTTTCAGTTTGCATTCTCT- 37098
    
```

```

Majority      CTCTGCCTGTTTCAGTTGAGCT-----GTCCAGTCTACAGACGAGGGCTTCCAAGCAAGGCTA-----GG
              41450      41460      41470      41480      41490      41500      41510      41520
Human         TCCAGTAGGGGCGGCCGGGCAGAGGCGCCCTCACTCCCAGTAGGGGCAGCCGGGCAGAGGCGCCCTCACCTCCCGG 41306
Kakapo        CTCTGCCTATCCAGTTGAGCT-----GTCCAGGCTACAGACAAGGGCTTCCAACAAGG----- 14269
GoldenEagle   CTCTGCATATTCAGTTGAGCT-----GTCCAGTCTACAGACCAGGCCTTCCAAGCAAGGCTA-----GG 15417
JapaneseQuail CCTCTGACTATTGAGTTGAGAT-----TTCCAGACTAGAGATGAGGACTTTCGAGCAAGGCTG-----GA 13171
MediumGroundFinch CTTCGGCCTGTTTCAGCTGGGCT-----GGCCTGGCTGCAGACCAGGGGCTCCAAGCAAAGCTA-----GA 464
GoodesThornscrubTortoise@TTTTCATGTGCTCCATACTATTT--CTAGTCTATTTTATATTAGAAAGCAGTGAAGGGCTAATA-----GT 37162
    
```

```

Majority      T--GGGTAGCTG--CAAGCAGAAGGA--ACTGCTGTT---ATCA-CTGAGTGAGCTAATA--CTGTTAGTAGTCTTGAAC
              41530      41540      41550      41560      41570      41580      41590      41600
Human         ATGGGGCGGCTGGCCGGGCGGGGGCTGACCCCCCACCTCCCTCCCGGATGGGGCAGCTGGCCGGGCGGGGGGCTGACC 41386
Kakapo        -----AAGGA--ACTGCTATT---ATCA-CCGAGTGAGCTAATA--CTGGTAGTAATCTTGAAC 14320
GoldenEagle   T--GGATAGCTG--CAAGCAGAAAGA--ACTGCAGTT---CTCAACTGAATGAGCTAATA--CTGCTAGTAATCATGAAC 15486
JapaneseQuail T--GAGTAGCTG--TGAGCAGAAATA--ACAGTTGT---ATTA-CTGAGTGAGC-AGCA--GTGTTGACAGTCTTGACC 13237
MediumGroundFinch T--GGGTA-TTG--CAATCAGAAGGA--ACTGCACTT---ACCA-CTGAGTAACCTAATG--CTGCTAGTAAACTTCAAC 531
GoodesThornscrubTortoise@CAGAGCAGATGA-CACTCAAAAAAAT-ATGGCTTTCAG-GCTAACCATTTAGGCTAAC---CTCTTCAAAGGTATCATT 37236
    
```

Monday, May 02, 2022 06:50 PM

```

Majority      TTTGCAGTATTCTACCCA----TGTAATATTAT-GTTAGA---AAAA-TAGGACATTGAAG----AGAAAGAGTGAATG
              41610      41620      41630      41640      41650      41660      41670      41680
Human         CCCCCACCTCCCTCCCGGACGGGGCGGCTGGCCGGGCTGGGGGCTGACCCCCGCCACCTCCCTCCCGGACGGGGCGGCTG 41466
Kakapo        TTTGCAGTATTCTACCCA----TGTAATATTAT-ATTAGA---AAAC-TAGAACCT-----AGTG---- 14372
GoldenEagle   TTTGCAATATTCTACCCA----TGTAATATTAT-GTTAGA---AAAA-TACAACATTGAAG----AGAAAGAAGGAATA 15553
JapaneseQuail TTTAGGGTACTCTGCCTG----TGT-----GTTAGA---GGAA-TGGGCCATTAGAG----AGGAAGAAGAAATG 13295
MediumGroundFinch TTTGCAGCATTCTACCCT---TGTCAATATTAT-GTTAGA---AAAAGTAGAACGTGAAAG----GGAAGAATG---- 595
GoodesThornscrubTortoise@TATGTGCACAAACCCA---GTTTGCTAAACTGGGCAGACTTAAAATGGTGTCTTTGAAT----ATATGAGGTTTATT 37308
    
```

```

Majority      -TTTATGTTTCGACTTATAACCGAGT---T---T-TAGTGTATTATA-TTTGCAGTACAAAGCAG-TGTAGTTTGAATAATA
              41690      41700      41710      41720      41730      41740      41750      41760
Human         GCCGGGCTGGGGGCTGACCCCCGACCTCCTCCCGGACGGGGCGGCTGGCCGGGCAGAGGGGCTCCTCACTTCCCAGTA 41546
Kakapo        -----CCTGGGTGG-----GTGTATTATA-TTTGAAGTAGAAAACAG-GGTAGTCTAAATAATG 14424
GoldenEagle   TTTTATGTTTCAACTTATACTGAGTGCCTGGGTTAGTGTATTGTA-TTTACAGTACAAAGCAA-TGTAGTTTGAATAATG 15631
JapaneseQuail -TTTGTGTAGCCATTTGTACTGATT---T---T-TAGTGTATGATA-CTAACAGTACAGAGCAA-TCTAGGCTGACTAATA 13366
MediumGroundFinch -TTTATGTTTCAACTTACACCT-----GCATGTTATG-TCAGTAGTAGAAAAGCAA-TGTAGTTAGAAAAACA 659
GoodesThornscrubTortoise@GCCAACTACGGACCCATTTCAGAGAGCTTGGTTTTGGTTTTTTT-GTTTTTGTGTTTGGG-GTTTTTTGGGGTAAAA 37386
    
```

```

Majority      GA-GAGTTTCCATA-ACTT-CCTCTAACTTGTTTCTCAGTTTTAT---CCAGCTAAATTTTTCCTTAGTTATATCTGAT
              41770      41780      41790      41800      41810      41820      41830      41840
Human         GGGGCGGCCGGGCAGAGGCGCCCTCACCTCCCGGAAGGGGCGGCTGGCCGGGCGGGGCTGACCCCCCACCTCCCTC 41626
Kakapo        TA-GAGTTTCCATA-ACTT--CTCTAATTTGTTTCTCAGTTTCAC---CCAGCTAAATTTTTCCTTAGTTACATCTGAT 14496
GoldenEagle   GAAGAGTTTCCATA-ACTT--CTCTAACTTGTTTCTCAGTTTTGT---CCAGCTAAGTTTTTTCCTTAGTTATATCTGAT 15704
JapaneseQuail AA-GAGTTCCATA-ACTT--TTCTGACATATGTCTTAGTTCCAT---CCAGTTACATATTTTCCTTAGTTCTATCTGAT 13438
MediumGroundFinch GA-GAATTTCTATA-ACTTGCCTATAAATTGCTTCTCAGTTCTAT---CTAGCTAAATTTTTC-TTAGTTATATCTGAT 732
GoodesThornscrubTortoise@ATGAAATCTTATC-AAATCCCTTTATATGTGAATGTGTTTTATT---CTAGCAATACAAAGTGTAATAGTGTGTA 37462
    
```

```

Majority      TAGAAATGTGTCCTTACA-TTGAGAAGGATAACACATGGTCC----TTCTCATGGTCTGGCTAATCTTGGTATTAGGT
              41850      41860      41870      41880      41890      41900      41910      41920
Human         CTGGATGGGGCGGCTGGCCTGGCGGGGCTGACCCCCACCT-----CCCTCCAGACGGGGTGACTGCCGGGCGGAGAC 41700
Kakapo        TAGAGATCTGTACTTACA-CGGAGAAGGACAACACATGGTCC----TTCTCATGGTCTACTTAGTCTTGGTATCAGGC 14570
GoldenEagle   TAGAGATCTGTCATTATA-TTGAGAAGGACAAGACATGGTCC----TTCTCATGGTCTACTTAATCTTGGTATTAGGT 15778
JapaneseQuail TGGATATATA-CTTTGCA-CTGAGAACAAGAAGAC-----TTCTCA-----GTATTAGCT 13486
MediumGroundFinch TAGAAATGCATCCTTACA-TGAAAAGAAAAACACATAGTCC----CTCTCATGGTCTGTCTGATCTTGGTATTAGGA 806
GoodesThornscrubTortoise@ACTATATTATTATAATTATTATTTTAATCTTGCTTTATAGGCTTTTTTGGAGCTGGC-AACAGAAGAAGCAGCT 37541
    
```

Monday, May 02, 2022 06:50 PM

|                          |                                                                                  |       |
|--------------------------|----------------------------------------------------------------------------------|-------|
| Majority                 | GTTACTCAGTTTTAAAGGAAATCTGTTGT-----TGATTTGATAGGCA--CA-GCTTTGTTGGTTGCTATGTACCCTT   |       |
|                          | 41930 41940 41950 41960 41970 41980 41990 42000                                  |       |
| Human                    | GCTCCTCACTTCCCAGACGGCGTGGCTGCCGGGCGGAGGGGCTCCTCACTTCTCAGATGGGGCGGCTGCT--GGG--CGG | 41776 |
| Kakapo                   | ATTACTCAGTTGTAAAGGAAATGTGCTGT-----TGATTTGATAGGC---A-GCTTTGTTGGCTGCTGTGTACCCTT    | 14638 |
| GoldenEagle              | GTTACTCAATTTTTAAAGGAAATCTGTTGT-----TGATTTGGTAGGCA--CA-GCTTTGTTGATTGCTATGTAGCCTT  | 15848 |
| JapaneseQuail            | GTCATTTATTTTCAGAGGAAGTCAGTTGG-----CAATGTGATGGGCA--CATGTTTTGTTGGTTG-----TT        | 13547 |
| MediumGroundFinch        | ATGATGCAATCTTAAGGGAG--CTCTTGC-----TCATTTGATAGGCG--CA-GCTTTGTTGCTTGCTATGTACCCTT   | 874   |
| GoodesThornscrubTortoise | ATCACTATGGTTAATTACTATTCGCTGTGACACCTCATCTTCGTAACCAACCCATCTATATTCAGTATTCTA-ATCATA  | 37620 |

|                          |                                                                                    |       |
|--------------------------|------------------------------------------------------------------------------------|-------|
| Majority                 | AAGAGCTTAGAGTATTCAATAAACTGTA-TCAAGATTCTTCAGAGCTGATGTTGAAAACCTGAGTAAA---CTTTAATGG   |       |
|                          | 42010 42020 42030 42040 42050 42060 42070 42080                                    |       |
| Human                    | AGGGACTCCTCGTCTCTCAGATGGGGCGGCCGGGCGGAGACGCTCCTCACCTCCCAGACGGGGTCGCGGCCGGGTAGAGG   | 41856 |
| Kakapo                   | AAGAGCTTAGAGTACTCAGTAA-----GGTCTTCAGAGGTGATGTTAAAAACTGAGTAAA---CTTTAATGG           | 14703 |
| GoldenEagle              | AACAGCTCAGAGTATTCAATAAAGTGTGTA-TCAAGATTCTTCAGAGCTAATGTTGAAAACCTAAGTAAA---CTTGAATGG | 15923 |
| JapaneseQuail            | AAGAGTGAAGAATCTTCCATAAGCTGCA-TGAAGATACTACAGAGCTGATGCTAGAAATTGCAT-----CTTTAATG-     | 13618 |
| MediumGroundFinch        | ACAAGCTTAGAGCATTTCAGTAACTGTA-TAGAGATTCTTCAGAGCTGATGTTGAAAACCAAGTAAA---CTTTAATGG    | 949   |
| GoodesThornscrubTortoise | AAGAGCTAAAGACTGATAATACACTAAA-CCAGGTATATTTACTGTT-ATGGAGTATAACAAATGC-----ATACAATAG   | 37693 |

|                          |                                                                                   |       |
|--------------------------|-----------------------------------------------------------------------------------|-------|
| Majority                 | CTCTGTGTGTGTA-TACACA-TACGTACTACTCTTAAGAGCT----AT-TCAG-TG----T-ATTTAAACTGTAACATA   |       |
|                          | 42090 42100 42110 42120 42130 42140 42150 42160                                   |       |
| Human                    | CGCTCCTCACATCCCAGACGGGGCGGGCGGGCAGCGCGCTCCCCACATCTCAGACGATGGGCGGCCGGGCAGAGACGCT   | 41936 |
| Kakapo                   | CTCTGTGTGTGCAACACACA-TACGTACTACTCTTAAGAGCTTCTGTATTTTCAGGTG----TGAATTAACCTGT--CATA | 14776 |
| GoldenEagle              | CTCTATGCGTACA-TACACAGTATATACTATTTTTAAGAGCTTGTGGATTTTCAGGTGTGGATTAACAAACTTTAAGATA  | 16002 |
| JapaneseQuail            | -TCTGTGTATGCA-TACGTA-----CTGCTCTTAAGAAC-----CTTTGGATGTCAGGTG                      | 13666 |
| MediumGroundFinch        | CTCTATATGTGTG-TACACA-----T-ATATAAACTTTAACATA                                      | 986   |
| GoodesThornscrubTortoise | AAATTAAGCTTAGCATACTTCAACTATACACTATGTAGCC-----A-TGAATATATTTTTATATAAACCAA           | 37761 |

|                          |                                                                                  |       |
|--------------------------|----------------------------------------------------------------------------------|-------|
| Majority                 | CTGTTCTT--TTTATGGACACACATACAGTGCCTATGTTAAAATGGTAAAGGTTTGATTTT-ATGCGTCTTGCAACTGT  |       |
|                          | 42170 42180 42190 42200 42210 42220 42230 42240                                  |       |
| Human                    | CCTCACTTCTAGATGGGATGGCGGCCGGGAAGAGGCGCTCCTCACTTCTAGATGGGATGGCGGCCGGGCAGAGACCTC   | 42016 |
| Kakapo                   | ACGTTCTA--TGTATGAACAC--ATACAGTGCCTAGGATTAATGGGAAAGGTTTGATTTT-ATGCATCTTGCAACCGT   | 14851 |
| GoldenEagle              | CTGTTCTG--ATTATGAGCACACATACAGTACACTATGGTAAAATGGTAAAGGTTTGATTTT-ATGGATCTTGCAACTGT | 16079 |
| JapaneseQuail            | CCATTTT---TGTGTATATATACACACAGAACATTGTGTTCCAATGCTAAAGGTTTGATTTT-----A----TGC      | 13729 |
| MediumGroundFinch        | CTGTTCTC--TTTGTGGACACAAATCTAGTGCAGTATGAGAAAAAGGTAAGGTTTGATTTTGTAAAGTCTTTCAACTGT  | 1064  |
| GoodesThornscrubTortoise | ETTTATTT--CTGATAGCTGCA-GTTTATTGTAATATATAAAAGACATAGAGTCTGGAATTGTACATGTTGCAATTACAT | 37838 |

Monday, May 02, 2022 06:50 PM

|                          |                                                                                   |       |
|--------------------------|-----------------------------------------------------------------------------------|-------|
| Majority                 | GCT-GTCTCTAAAGGTGGTATTCT--CAGGTTAATT---TAGTATGCAG-TATTGAGGTGCCTTGTA AAA-CATAT-TTA |       |
|                          | 42250 42260 42270 42280 42290 42300 42310 42320                                   |       |
| Human                    | CTTTCTTTCCAGACTGGGCAGCCAGGCAGAGGGGCTCCTCACGTTCCAGACGATGGGCGCCAGGCAGAGACGCTCCTCA   | 42096 |
| Kakapo                   | GCT-GACTAGAAAGGTGAGATCCT--CCTGTTATTT---TAGTATGCAG-TATTGAGGTGCCGTGTA AAC-CACAT-TTG | 14922 |
| GoldenEagle              | GCT-GCCTAGAAAGGTGATATCCT--CAGGTTAATT---TAGTATGCAG-TATTGAGGTGCCCTGTA AAA-CATAT-TCA | 16150 |
| JapaneseQuail            | GC-----AGACAGTATTCT--TAGGTTAATT---TAGAATGTGG-TTTTGAGGTACTTTGCAGGA-CAT---TTT       | 13789 |
| MediumGroundFinch        | GCT-GTCTCTGAAGGTAATAGTCT--CAGATGAATT---TATTATGAAG-TATTGAAGTGCCTTGTA AAA-CATAG-TCA | 1135  |
| GoodesThornscrubTortoise | ATTAGAATTTTATTAATGTATTTT--ATGGTTAATTGTTTCTAATTAAA-TTTTGAATATTTTCATAAAATCAGTC-TTA  | 37914 |

|                          |                                                                                  |       |
|--------------------------|----------------------------------------------------------------------------------|-------|
| Majority                 | CTAACTATTCTTGAGG-TTCTATTGTAGTGTCCACAACAGAATGAAATTCGTTTATTTTGTAAAGGAG-TGGGTAGTA-- |       |
|                          | 42330 42340 42350 42360 42370 42380 42390 42400                                  |       |
| Human                    | CTTCCCAAACGGGGTGGCGGTGGGCAGAGGCTGCAATCTCGGCACCTTTGGGAGGCCAAGGCAGGCGGCTGGGAGGTG-- | 42174 |
| Kakapo                   | CTGACTGTTCTTGAGG-TTCTCCTGTAATGTTCCACAACAGGATGAAGACCATT-----                      | 14974 |
| GoldenEagle              | CTAACTATTCTTGAGA-TTCTATTGTAGTGTCCACAACAGAATGAAAAATGTTTATTTTGTAAAGA--TAGGTAGTA--  | 16225 |
| JapaneseQuail            | CTGCCTAGCATGGAGA-TTTTATTATAGTGCCCATAACTAAATGAGATGCTTTCACTTCTAAAAGGAGGTGAGCTGCA-- | 13866 |
| MediumGroundFinch        | TTAACTATTCTTGA---TTCTCTGTAGTGTCCACAACAGAATTAACCCATTTATTTTAATAAGGA--TGATAGAA--    | 1208  |
| GoodesThornscrubTortoise | ATTATTGACTCTTGTT-TAGAAGTTACATGACTAAAACCTCAAGCTTCTTGTTCTGGCATTGAGAGTTCAGTACCATA   | 37993 |

|                          |                                                                                  |       |
|--------------------------|----------------------------------------------------------------------------------|-------|
| Majority                 | ---ACTTGTCTTCTTCTCATT---CCATTTTAGCAGTGACCTGGAT--TAGTGTAAAGGGTGTGTGGAACACTTTT     |       |
|                          | 42410 42420 42430 42440 42450 42460 42470 42480                                  |       |
| Human                    | -GAGGTTGTAACGAGCCGAGATCAC-GCCACTGCA-CTCCAGCCTGGGC---ACCATTGAGCACTGAGTGAACCAGACTC | 42248 |
| Kakapo                   | -----                                                                            | 14974 |
| GoldenEagle              | ---ACTCTTTCTTCTCATT---CCGTTTTAGCAGTGACCTGGAT--TAGTGTAAAGGGTGTGGGAAACTTTT         | 16296 |
| JapaneseQuail            | ---ATTGGTTCTTTACTCTTT---CCATTGTAGTGGTGACCTGGAT--TGGTGTAAAGGCTGTGGAGGAAGTACTTTT   | 13937 |
| MediumGroundFinch        | ---ACT-TTTTTTCCCTCATG---CCATTTTAGCAGTGACCTGGAT--TAGTCTTAAGGGTGTGTAGAAACTTTC      | 1278  |
| GoodesThornscrubTortoise | GGGAATTGTGCCATCACTAATGCAGAGTCTACTCTCAGTGTGTTGAATCGTAAATTCGATAGTATTGATAACCTCAGTT  | 38073 |

|                          |                                                                                 |       |
|--------------------------|---------------------------------------------------------------------------------|-------|
| Majority                 | TGAAGG---T-C-----GGGAAATAACTGATAAGAAATTC--ATAATGTTCAACGGATGTCAAGTTTATTC--C      |       |
|                          | 42490 42500 42510 42520 42530 42540 42550 42560                                 |       |
| Human                    | CGTCTGCAATTC-CGGCACCTCGGGAGGCCGAGGCTGGCGGATCACTCGCGTGTAGGAGCTGCAGACCAGCCCGCCAAC | 42327 |
| Kakapo                   | -GGG---T-----T--T-----                                                          | 14981 |
| GoldenEagle              | TGAAGGAAATACTTTTGAAGTGGGAAAGAACCAATAAGAAATTAAGATAATCTGCAAAGGATGTCAAGTTTATTC--C  | 16374 |
| JapaneseQuail            | TGAAG---T-----GGGAAATATGTAATAAAAA-----ATGTTTAAAGGTTGTCAAGTTTATTC--C             | 13990 |
| MediumGroundFinch        | TGAAG---T-----GGGAAAGAACCTGTAAGAAATTCAGATAATATTCAGGGATG---G-TTTA-----           | 1332  |
| GoodesThornscrubTortoise | GTTTGGTCTGCTCTCTCCTACTGGACAGTTCCTGAAGAAAAATTC--TTAATGATCACCTTGGGAAAAATGTATTC--A | 38149 |

Monday, May 02, 2022 06:50 PM

```

Majority      ATTTTAAAATTTTGTTTTTTTTAAAGATCACATGAATATTTTGTGGGCTTTTCGA-GCGAGGAAGTTTGGGAG-TTGACG
              42570      42580      42590      42600      42610      42620      42630      42640
Human         ACAGCGAAACCCCGTCTCCACCAAAAAAATACGAAAACCAAGTCAGGCGTGGCGGCGCGTGCCTGCAATAGCAGGCACTCG 42407
Kakapo        -----TTTGTTT-----GGGTTTTTC-----AGTTTTGG----- 15005
GoldenEagle   CCTTTAAAATTTTAAATGAAGGATCACCTAAATATTTTGGGGCTTTTGA-GAGAGGAAGTCTTGAGGGATTGAGA 16453
JapaneseQuail ATTTTAATAATTTCTTTTTTTTAAAGTGG---AAGATAATGTGTGTGTGTGAA-ATAAAGACCTACTGGGGT-TGGACA 14064
MediumGroundFinch -----AATATTTTGTATTGAAAGATCACATAAAGATTTTGTAGGCTTTTGA-GGGAGGAAGTCTTGAGAA--TGAAG 1404
GoodesThornscrubTortoise@TAACTGAGAATTTTGTGTTTGATCTTGGATGTGTATAGAACCAGGCTGTTCTT-TCAAAACAGTTGTAATACATTTTT- 38227
    
```

```

Majority      AGGGGTTGAGGGATAAAAAGAAAAAGGGAAGGATAAAA--AGCAGGGAA---AGAAGCAAAGGCCTCTTTAGCTTTGTCA
              42650      42660      42670      42680      42690      42700      42710      42720
Human         GCAGGCTGAGGCAGGAGAATCAGGCAGGGAGGTTGCAGTGAAGTCAGATGGCAGCAGTACAGTCCAGCTTCGGCTCGTCA 42487
Kakapo        -----T-----T-- 15007
GoldenEagle   AGGGGTTGGGGTTAAAAGAAAAAGGGAAGGAAAAAAGGCATGAAA---AGAAGCAAAGGCCTCTTCAGCTATGTCA 16530
JapaneseQuail AGAAGTAAAAAAGAAAAAGGGGAGGGGGAGAGCAGCGAGGGGAGACAGAAGCAAATGACTCTTTAGCTTTTTCA 14144
MediumGroundFinch AGGG-TTGGGGCATAAAAAGAAAAAGAAACAACAA---GGTGTGAAA---AGAAGCA---CCTCTTCAGCTGTGTCA 1472
GoodesThornscrubTortoise---TTAATAGAACACGGAAGTGTTCACGATAACA-TAGCAGGG-----GCAGTAAAGGTCTTCGTAGTATTTGAG 38295
    
```

```

Majority      --AGTGCC-TATCTTACAATAGTTTG--AGGGAAGGATTGTCTTGT-ACGTTTTTAATATGGATCTTTTTATGATTATT
              42730      42740      42750      42760      42770      42780      42790      42800
Human         TCAGAGGGAGACTGTGGAAAGAGAGGGGAGAGGGAGACCGTGGGGAGAGGAGGGAGGGGGAGGGGGAGGGGGAGGGGGAGG 42567
Kakapo        -----T-----GGGTGGGCTTGTTTTGT----- 15025
GoldenEagle   --AATGCC-CATCTCACAAAGTAATTTGATAGGAAAATATATCTTGT-ACATTTTCAATATAAACCCCTCCTCTGATTTTT 16606
JapaneseQuail --ACTATC-TGTCTTGTAAGTATTT---GAGGAAAAGTTTCCATAGAAATCCTGCTCTGGTTGTTTGTGGCCTACT 14217
MediumGroundFinch --AGTGCC-CATCTTACCATT--TGT---GGAAAGGTTATCTTGTATGTTTTTAATATATAACCCTCCT--GATCTTT 1541
GoodesThornscrubTortoise-GTTGCTGTATCCTACAAAGAATAGGGGAAAGAAGCATTGACTCCTCAGTGTGAAATGCTAATATCTTCATGTTTCATT 38373
    
```

```

Majority      GCT---GTTCAATTTTAAAGT-CATTTTAGTGATGATT---GT--AATT-ATATTTAAGGTGT---TTTAAT--TATTGT
              42810      42820      42830      42840      42850      42860      42870      42880
Human         GCTGTTCTGTTTTTTTAACTATGCTTTAGGGATGATATATAATGTACTTCATGACCAAGGAATCAATCTAATCTTTTTGT 42647
Kakapo        ----- 15025
GoldenEagle   GCA---GCCAATTTTCGAGT-CATTTTTGAAAAGACT---GTTTAATTGATATTTACCATGT---TTTAAG--AATTAT 16673
JapaneseQuail ACT---ATTCAAAGC--GAT-CATTTACGTGATAATT---GT---C--ATATTTTAGGAGT---TATAGT--TGTTGC 14276
MediumGroundFinch GCA---GCTCAGTTTTAAGT-CATTC-----AT-----T--AATTTATATTTGTCATGT---TTTAAG--AACTGC 1596
GoodesThornscrubTortoise@CTTGTTCCCTTTTCTAT-CAGACTAATGCTGTCT---GTTGTGACAACTACAGTTTCT---ATTAGTC-TCTTGT 38444
    
```

Monday, May 02, 2022 06:50 PM

|                          |                                                                                  |       |
|--------------------------|----------------------------------------------------------------------------------|-------|
| Majority                 | CATGAAGATGTAATTTTCTGCCCTAAGTTGTGTTTTTC---CAGGAAA--AATGA----ATGTCGCCAAAATGAGAATTG |       |
|                          | 42890 42900 42910 42920 42930 42940 42950 42960                                  |       |
| Human                    | AATGATGGCATAAAATTC--CTTTAAGCCTTGTTTTAATACAAGAAGTCAGTTTATTTAACCTCCATGTACAGAGGAAAT | 42725 |
| Kakapo                   | -----TTGGTTTTTT-----AT----A---                                                   | 15038 |
| GoldenEagle              | GATGAAGAAGCAGTTCCCTGCCATAAATGTGTTTTTC---CAGGACA--AATGA----ATGCCCCAAAATGAAAATTG   | 16743 |
| JapaneseQuail            | C-TGTAGATGCTACCTTCTACCCTAAGTTCTGTTTTTC---CAGGACA--AATGA----CTGTCCCCAGATTGAGCAACG | 14345 |
| MediumGroundFinch        | AATGAAGATGTAATTCCTGCCCTAAGTTGTGTTTTG---CAGAAAA--AATGA----ATGTCGCCAAAATGAAAATG    | 1666  |
| GoodesThornscrubTortoise | ATACTTAAGTCATTT-CTAGTATA-ATAGTGTGTTA---ATGGCAA--ATTTTTTTTTATGTCTTTAAGAGAAGTTTTTC | 38517 |

|                          |                                                                                 |       |
|--------------------------|---------------------------------------------------------------------------------|-------|
| Majority                 | AC-GTTTCCT--G-----T-TTTCTGATAATCATTTATTTATTTGTTTTTTTTTTTTTTT-TTC-AATAGGGGT      |       |
|                          | 42970 42980 42990 43000 43010 43020 43030 43040                                 |       |
| Human                    | ACTGAGTTTTAAGATTTTTCTATTTTTTTCTGACAAAAATGAAA-GTCTGCATATATTCTAAGAGACACCAATTTGAAT | 42804 |
| Kakapo                   | -----AATAGGGGT                                                                  | 15047 |
| GoldenEagle              | ACCATTTCCCTATGAAGGAAGATGAGTCTTCTTTTAATCTTTTTGTTTTGTTTTTTTTTTTTTTTAAATAGGGGT     | 16823 |
| JapaneseQuail            | ATAGCATTC-----CTGAAGACGAGTTTTTATTTTCTTTTTTTTTTTTCCCCAAAATAGGAAT                 | 14405 |
| MediumGroundFinch        | A---TTTCAT-----TTCCTGTGATCATTAATAATTTGTTTTTA-----AATAGGGGT                      | 1711  |
| GoodesThornscrubTortoise | GGAAACCCTTGGTTGTTGTTTTTTCTTTCTGCTAAAATTAAGTTCAGTATTAATTTCCCTACCTGTTAGTACAAACAT  | 38597 |

|                          |                                                                                   |       |
|--------------------------|-----------------------------------------------------------------------------------|-------|
| Majority                 | GTTAGAA-TTGAGCTGAACCTCCGTATTTCTATTTGTAT---AGATTTCCCTTTTAGT-TTCAGCTAGATATAATAATTTA |       |
|                          | 43050 43060 43070 43080 43090 43100 43110 43120                                   |       |
| Human                    | ACTGTTG-CTTATAAGAGCAAAATAGCATAAAAGACCTTT--AAAAATGGTGATTATATTTGCCTGGAAA-AATACTCCA  | 42880 |
| Kakapo                   | GTTAGAA-CTGAGTTAAACACCATATTTCTATTTGTAT---AAATTTCCCTCTTAGT-TTCAGCTAGA---ATCATGTA   | 15118 |
| GoldenEagle              | GTTAGAA-TTGAGCTAAACTCCGTATTTCTATTTGTAT---AGATTTCCCTTTTAGT-TTCAGCTAGATATAGTAATTTA  | 16898 |
| JapaneseQuail            | GCTAGAA-TTGAGCTGAACCTCACCCTTTATATTTGTGT---AGATTTCCCTTGATGT-TTCATCTGGATGTAATAATTTA | 14480 |
| MediumGroundFinch        | GTTAAAA-TTGAGCTAAACTCCATATTTCTCTTTGCAT---AGATTTCCCTTGATGT-TTCAGCTAGATATAATAATTTA  | 1786  |
| GoodesThornscrubTortoise | ACTAGATCTTTTGGAGCGCTGAGTATTTCTCCTATCCATTAAGAAATACTTTAGATTGTCCATTTTTAAAGTGCCAGCTG  | 38677 |

|                          |                                                                                    |       |
|--------------------------|------------------------------------------------------------------------------------|-------|
| Majority                 | TTATATATGTATATTTAAATATTTAAACAAT-AAGTTAATTTAAATGTTATTGAAATAGACTA--AATATATTTAATTAT   |       |
|                          | 43130 43140 43150 43160 43170 43180 43190 43200                                    |       |
| Human                    | TGTAATTCAGATGACTCAAAGGACGTTGGTAGACAATGTTACAAGGACACTTTTATGGTTATCAGATATAGTACAGGAT    | 42960 |
| Kakapo                   | GTATGTACATATATCCACTATTTAAACAAT-AAGTGAATTTAAATGTAAGTAAAGTAAAGTAAAGTAAAGTAAAGTAAAG   | 15195 |
| GoldenEagle              | ATATAT--GTATATTTAAATATTTAAACAAT-AAGTGAATTTAGATGTCATTGAAATAGACTA--AATATATTTAATTAT   | 16973 |
| JapaneseQuail            | --ACAT-----AA-ACA-----TTTAATTA-                                                    | 14497 |
| MediumGroundFinch        | ATATATATGTGTATTTAAATATTTAAACT-T-AAATTAATTTAAATGTTATTGAAAGTAAAGTAAAGTAAAGTAAAGTAAAG | 1861  |
| GoodesThornscrubTortoise | AAGAAATGGATACTTAAAGGTAAATAGAATGAAATTTGTAAGGGAATGATAAAACATGATGCCAGCATGGGCAATAAG     | 38757 |

Monday, May 02, 2022 06:50 PM

|                         |                                                                                  |       |
|-------------------------|----------------------------------------------------------------------------------|-------|
| Majority                | TATAATATTT-----TAATTTGAAATGCTGGACAAAATTATTGTT-CAGCAGTTCTCATTGT-----GTTTTGAGGTGG  |       |
|                         | 43210 43220 43230 43240 43250 43260 43270 43280                                  |       |
| Human                   | TTCATTTTTATGTTCCAGCTTCCAGCTTATCTAAAATATTTCTTGTAATAGATTTTACTGTAGAATTGTTTCCTAAGGC  | 43040 |
| Kakapo                  | AATAAATACTT-----TAACTGGAAATGCTGGACACAATTATTGTT-CA---GTTCTCATTGT-----GTTTGGAGGTGG | 15260 |
| GoldenEagle             | CATAATATTT-----TAATTTGAAATGCTGGACAAAATTACTGTT-CAGCAGTTCTCATTGT-----GTCTGGAGGTGG  | 17041 |
| JapaneseQuail           | -----TGTTA-----CAATTTGAAGTGTGATGAAAATTATTGTT-CAGCACTTCTTGTTGT-----GTCTTAAGGTGG   | 14560 |
| MediumGroundFinch       | -----TATTT-----TAATTTGAAATGCTGGACAAAATTACTGTT-CAGCAGTTCTCATTGT-----GTCCAGAGATGG  | 1924  |
| GoodesThornscrubTortois | @GGTGGATTTCATGTACAACCTTAAACAATAGGAACACTATCAGTC-ACGTATTTGCCTTTCA-----TTTTTTTTGGGG | 38830 |

|                         |                                                                                 |       |
|-------------------------|---------------------------------------------------------------------------------|-------|
| Majority                | CTTTGTTTCAGTGG-----TGGGTGAAACAACACTGTGCTTAAGCTGCTCTCATTTCAAAG-T--TTGCCATGTA--A  |       |
|                         | 43290 43300 43310 43320 43330 43340 43350 43360                                 |       |
| Human                   | ATCTGTCTCAACAGCCTTTCCCTTATCTGTGCAGACTTTTCTTCTCTGTACTTGTGAATAGGTGCTTTTTGTCAAAGA  | 43120 |
| Kakapo                  | CTTCATTTTCAGTGG-----TGGGTGAAACAACACTGTGCTTAAGCTGCTCTCATTTCAAAG-C--TTGCCATGTA--A | 15326 |
| GoldenEagle             | CTTTGTTTCAGTGG-----TGGGTGAAACAACACTGTGCTTAAGCTGCTCTCATTTCAAAG-C--TTGCCATGTA--A  | 17107 |
| JapaneseQuail           | CTGCATTTTGGTGG-----TGGGTAAAACAACACTGTGCTTGAGCTGCTCTCGTTGCAAAG-T--TTGCCTTGTA--A  | 14626 |
| MediumGroundFinch       | CTATATTTTCAGTGG-----TGGGTAAAACAACACTATGCTTAAGCTGCTCTCATTTCAGA-----TTGCCATGTA--A | 1988  |
| GoodesThornscrubTortois | @CCTGTGGCAGTGTCC-----TGCCTGCTTCAGTTAACCATCTTCTGCTCTGATGTGATGC-TGTCAGCCTTTTGGCA  | 38902 |

|                         |                                                                                  |       |
|-------------------------|----------------------------------------------------------------------------------|-------|
| Majority                | ATATACT-GCTTTACT-----TAGA-TTTCAGTTGTTGCA--CTTATCTGA---AAAGAGGAAGTCTGCCAAATCTGAA  |       |
|                         | 43370 43380 43390 43400 43410 43420 43430 43440                                  |       |
| Human                   | AAAAAATAATTTTACAGGTGAAAAATTTTCATGTTATTAGAACTTAATCTCAGGTAATAAATGTTTAATAAATTGATA   | 43200 |
| Kakapo                  | ATAGACC-GCTTTACT-----TGGA-TTTCAGTTGTTGCA--CTTAACTGA---AAAGAGGAAATCTGCCAAATCGGAA  | 15394 |
| GoldenEagle             | ATATACT-GCTTTACT-----TAGA-TTTCAGTTATTGCA--CTTATCTGA---AAAGAGGAAGTCTGCCAAATCTGAA  | 17175 |
| JapaneseQuail           | ATATACT-GCTTTATG-----TAGA-CTTCAAGTTGTTGCA--CATATCTGA---AATGAGAAAGTCTGCCAAATCTGAA | 14694 |
| MediumGroundFinch       | ATATTCC-GCTTTACT-----TAGA-TTTCAAATTGTTGCA--CTTATCTGA---AAAGAGGAAGT-----          | 2042  |
| GoodesThornscrubTortois | @ATATCTTGCTTTTCAT-----AACACTTTTTGTTTTAGCA--CTAAGTTGGCTCAGTCTTGCAAGCACCTTATTTTAT  | 38975 |

|                         |                                                                                     |       |
|-------------------------|-------------------------------------------------------------------------------------|-------|
| Majority                | TAGGTTTGGTTATGCTTGCTTAA---GTTCTTTTAAAGGTTTTCCCTGTCAAACACTGACAT--TTTTAATATCATCTTTAA  |       |
|                         | 43450 43460 43470 43480 43490 43500 43510 43520                                     |       |
| Human                   | CAGTAAGGACATTTTCTAATGAATTGGTTCCTTCAAGAGATATAAAAGTGAAA-TATTTCAAAAATACAACACTGTTCCCTAA | 43279 |
| Kakapo                  | GAGGTTTGGTTGTGCTTGCTTAA---GTTCTTCTGAAAGTTTTCCCTGTCAAACACTGACAT--TTTTAATATCATCATTAA  | 15469 |
| GoldenEagle             | TAGGTTTGGTTATGCTTGCTTAC---GTTCTTCTAAAGGTTTTCCCTGTCAAACACTGACAT--TTTTAATATCATCTTTAA  | 17250 |
| JapaneseQuail           | TAGGTTTGGTTATGCTTGCTTAA---GTTCT---AAAGGTTTTCCCTGTCAAACACTGACAT--TTTTAATATCATCTTTAA  | 14766 |
| MediumGroundFinch       | -----A-----T-----CATCTTTAA                                                          | 2053  |
| GoodesThornscrubTortois | @C--TTTTTTTATGTATAAT-AA---ATTAATTGACAGTACAGTCTATAAATATCTGTGACTTCACCAGCATGATGGA      | 39049 |



Monday, May 02, 2022 06:50 PM

|                          |                                                                                  |       |
|--------------------------|----------------------------------------------------------------------------------|-------|
| Majority                 | AAA-T-CACAAAATAGAGGAAAAAAAAA-TCTCTT-----ACTGTCTCTTTCTTTTATAGAGAGGATCTGA--CGAACT  |       |
|                          | 43530 43540 43550 43560 43570 43580 43590 43600                                  |       |
| Human                    | GTAGCATTAGAATTTGATTTTGTAAA-TTTGTAATAATTTAGCAGTGACTATGAGGCTTGACAATTCTAAGGTACAGTC  | 43358 |
| Kakapo                   | AACT-CACAAAATAGAGGAAAAAAAAA-TCTCTT-----ACTGTCTCTTTCTTTTATAGAGAGGATCTGA--CGAACT   | 15537 |
| GoldenEagle              | AAA-T-CACAAAATAGAGGAAAAAAAAAC-TCTCTT-----ACTGTCTCTTTCTTTTATAGAGAGGATCTGA--CGAACT | 17317 |
| JapaneseQuail            | AAA-T-CACAAAATAGAGGAAAAAAAAATCTCTT-----ACTGTCTCTTTCTTTTATAGAGAGGATCTGA--CGAACT   | 14834 |
| MediumGroundFinch        | AAA-T-CACAAAATAGAGGAAAAAAAAA-TCTCTT-----ACTGTCTCTTTCTTTTATAGAGAGGATCTGA--CGAACT  | 2120  |
| GoodesThornscrubTortoise | AAATGTACAGAGCAGGAGCCAGTTGGCTGTGATGGGTGTGGACAGTGTAGTAACTGCTGGGAAGACTAAAAATGAGTT   | 39129 |

|                          |                                                                                 |       |
|--------------------------|---------------------------------------------------------------------------------|-------|
| Majority                 | TCTTTCAGGC---AGTG--TACTCAATAGC--CCGAACTCTAACAT-----GAGCA-----GCATGGTA--GTTACTG  |       |
|                          | 43610 43620 43630 43640 43650 43660 43670 43680                                 |       |
| Human                    | TCTTTAATTTTCTAGTGATTTCTTTGTAGCTACGGAAGTGAATATCCCTTTAGGTAT-----ACATATTTCTGCCAGTG | 43433 |
| Kakapo                   | TCTTTCAGGC---AGTG--TACTCAATAGC--CCGAACTCTAACAT-----GAGCA-----GCATGGTA--GTTACTG  | 15596 |
| GoldenEagle              | TCTTTCAGGC---AGTG--TACTCAATAGC--CCGAACTCTAACAT-----GAGCA-----GCATGGTA--GTTACTG  | 17376 |
| JapaneseQuail            | TCTTTCAGGC---AGTG--TACTCAATAGC--CCGAACTCTAACAT-----GAGCA-----GCATGGTA--GTTACTG  | 14893 |
| MediumGroundFinch        | TCTTTCAGGC---AGTG--TACTCAGTAGC--CCGAACTCTAACAT-----GAGCA-----GCATGGTA--GTTACTG  | 2179  |
| GoodesThornscrubTortoise | ETTGGTAGGT---CATG--TACAGAATATC--CCATTGTCTGGTCTAG--TGGGGCATTTCATACATAATTTTGTACCA | 39200 |

|                          |                                                                                  |       |
|--------------------------|----------------------------------------------------------------------------------|-------|
| Majority                 | GTAAGTGA---TGCCCTTTCAAAG--GAGAAATCTATCATTATATACTTGGAC-TCATTTCTGTTTACAAGGGGAGAACA |       |
|                          | 43690 43700 43710 43720 43730 43740 43750 43760                                  |       |
| Human                    | GTGATTGT---TACTCTGTAATAGCAGGATTTCTGAAAATATTTGCTAAACATGACATTTTGCT--CTACCTGAAAGCA  | 43508 |
| Kakapo                   | GTAAGTGA---CGCCCTTTCAAAG--GAGAAATCTATCCTTTATACTTGGAC-TCATTTCTATTTACAAGGGGAAAACA  | 15670 |
| GoldenEagle              | GTAAGTGA---TGCCCTTTCAAAG--GAGAAATCTATCATTATATACTTGGAC-TAATTTCTGTTTACAAGGGGAGAACA | 17450 |
| JapaneseQuail            | GTAAGTGA---TGCCCTTTCAAAG--GAGAAATCTATCATTATTTCTTGGAC-TCATTTCTGTTTGCAAGGGGAGAACA  | 14967 |
| MediumGroundFinch        | GTAAGTGA---TGCCCTTTCAAAG--GAGAAATCTATAATTTATACTTGGAC-TCATTTCTGTTTACAAGGGGAGAACA  | 2253  |
| GoodesThornscrubTortoise | AAATTTGAAAGTTACATTTGAAAGCTAGGCAGTTTCATTTTTAAATGGTCC-TTTCCTTACATTTGAGACAGAGAAATG  | 39279 |

|                          |                                                                                   |       |
|--------------------------|-----------------------------------------------------------------------------------|-------|
| Majority                 | CTGAAA---CGAGAATCCGTTGTGCTATAG-AGGGATAAACTGTTGGCATGCATTAGAATGTAGTGACTTTTAA-TTTAC  |       |
|                          | 43770 43780 43790 43800 43810 43820 43830 43840                                   |       |
| Human                    | GTAAA-----CCATTCATAGAGTCT-----GGAACATTTTACTTAGAAGTCTTTTAAAGATTTTCATTTTAACTTTTAC   | 43578 |
| Kakapo                   | CTGAAA---CCAGAATCCGTTGTGCTATAG-AGGGATAAACTGTTGTCATGC-----TGAGTGATCTTGTG-TTTAC     | 15738 |
| GoldenEagle              | CTGAAA---CAAGAATCCGTTGTGCTATAG-AGAGATAAACTGTTGGCATGCATTAGACTGTAGTGACCTCTA--TATAC  | 17524 |
| JapaneseQuail            | CTGAAA---TGAGAACCCATTTGTGCTATAG-AGGGATAAACTGTTGGCATGCATTAGACTGTAGTGACTTTACA-TATAG | 15042 |
| MediumGroundFinch        | CCAAAA---CAAGAATCCGTTGTGCTATAG-AGGGATAAACTGTTGGCTTGTATTAGAATATAGTGACTTTGT--ATTTT  | 2327  |
| GoodesThornscrubTortoise | AAAGAAAGTGAGGGTCAGTAGATTCATTGCAAAGATGAAATATGAAAAGG--TGAAAAGTACAAACGGTTAA-GCTAA    | 39356 |

Monday, May 02, 2022 06:50 PM

|                          |                                                                                      |       |
|--------------------------|--------------------------------------------------------------------------------------|-------|
| Majority                 | TGACAAACCTTGGGTATC-TGAGAAGAGTAATCCCATATAATACAATAGGCCAAGTTTCAGATGTCTGTACATTAAATTTGTTG |       |
|                          | ----- ----- ----- ----- ----- ----- ----- -----                                      |       |
|                          | 43850      43860      43870      43880      43890      43900      43910      43920   |       |
| Human                    | AGACATATTTTGGAGTGATGTCATTCTTTTGGCTATAATGTTTTGAAAGTATTCCAGTAGATTATTTTCATAGTTTACT      | 43658 |
| Kakapo                   | TCACAAACCTTGGGTATC-TGAGAAGGCGAATCCCATAAAACAAGAGGCAGCTTTCAGATGTCTGTACGCTAAATTTGTTG    | 15817 |
| GoldenEagle              | TCACAAACCTTGGGTATC-TGAGAAGAATAATCCCATAAAACAAGAGGCCAAGTTTCAGATGTCTGTACACTAAATTTGTTG   | 17603 |
| JapaneseQuail            | GGTAAATCCTCAGGAATC-TGAGAAGAGTGATCCCATGAAACAAAGAGCAAGTTTCAGTTGTCTGTACAGAACACTGATG     | 15121 |
| MediumGroundFinch        | CTACAAACCTTGGGTGTC-TGAGAAGAATAATCCCACAAAT-CAACAGGCCAAGTTTCAGATGTCTGCACATGAAATTTGTTG  | 2405  |
| GoodesThornscrubTortoise | AGGGATGAGAGAGGGATC-TGTAATTAGAAAAGATGGGGTACATTAAACAGC---CAAGTTTTTGAAC-TCAAAGTAAAA     | 39431 |

|                          |                                                                                    |       |
|--------------------------|------------------------------------------------------------------------------------|-------|
| Majority                 | GTGGGTGATGGGATGAAAAATTACACTTCTCTTGTACAGCTGCCTTCAAAGTAAGGAATCACA-----ACTAC-----     |       |
|                          | ----- ----- ----- ----- ----- ----- ----- -----                                    |       |
|                          | 43930      43940      43950      43960      43970      43980      43990      44000 |       |
| Human                    | ATTTATAAAGGTTTTTAAACACTCATCTTCTTGCATATAAAGGTAGTGAGAGCCTTATTTTCATAGTGTTACTATTTATGAG | 43738 |
| Kakapo                   | GTGGGTGATGGGATGAAAAATTACACTTATCTTGCACAGCTGCCTTCAAAGTAAGGAATGCA-----ACTGC-----      | 15885 |
| GoldenEagle              | GTGGGTGATGGGATGAAAAATTACACTTGCCTTGTACAGCTGCCTTCAAAGTAAGGAATCACA-----ACTAC-----     | 17671 |
| JapaneseQuail            | GTGGATGACAGGATGAAAAATTACACTTGTCTTATTCTGCTGCTTCAAAGTAAGGAATCAGA-----ACTAC-----      | 15189 |
| MediumGroundFinch        | GTGGGTGATGGGATGAAAAATCACAGTTCTCTTGTACAGCTGCCTTAAAGTAAGGACTCTCA-----GCTGCAAAGGTA    | 2480  |
| GoodesThornscrubTortoise | CAAGTTGC---ATTTATGACTGAATTTCCCATGATTGGTTGTGTCAGCAACATGGTTATTTATG-----AAAAAGTCTAAT  | 39503 |

|                          |                                                                                     |       |
|--------------------------|-------------------------------------------------------------------------------------|-------|
| Majority                 | -----A-----CAAGCAAAGGTAACAGCTT-AACAATTCCTGTATGACTTCAGCTTTTTTACACATGGTCA             |       |
|                          | ----- ----- ----- ----- ----- ----- ----- -----                                     |       |
|                          | 44010      44020      44030      44040      44050      44060      44070      44080  |       |
| Human                    | GGTTTTAACAACTTATCTTCTTGTATATAAAGGTAGTGAGAGCCTTCTCTAGGTGCCTTCTGTGTTTTTCCAGCTCATGC    | 43818 |
| Kakapo                   | -----CAAGCAAAGGTAAGAGCTT-AACAACCTCTGGGATGACATC--CTTTTTCACACATGGACA                  | 15943 |
| GoldenEagle              | -----CAAGCAAAGGTAACAGCTT-AACAACCTCTGTATGACATCAGCTTTTTTTCACACATAGACA                 | 17731 |
| JapaneseQuail            | -----CAGTTAAAGGTAACAGCA--AACAACCTCAC-TATGACTTCTGTTTTTTCACATGTAG-CT                  | 15246 |
| MediumGroundFinch        | AACAGCCC-AGTAAATCTCAGGCAAAGGTAACAGCT---CAGTTCTGTGTGACATCAACTTCTTTACTCATGGTCA        | 2555  |
| GoodesThornscrubTortoise | ACATA-TTA-GGTTTTATACCTGACCAAAAAAAAAAAGATGT-AAAAGCTTTTTGAATGTTTCATGTCATTTTAATAATTTTG | 39580 |

|                          |                                                                                    |       |
|--------------------------|------------------------------------------------------------------------------------|-------|
| Majority                 | TCTGTGAGTCTGGGCGTTACAGGGAAGAACACTGTGC--CAGTTTTATAGT--ATAGTTTGGATTTCAGGAAAA-----    |       |
|                          | ----- ----- ----- ----- ----- ----- ----- -----                                    |       |
|                          | 44090      44100      44110      44120      44130      44140      44150      44160 |       |
| Human                    | CTAATATGCTTTTGCACACTACACCACACAACACTACTTGGAAATACAAGAGTTAATAGTTACCTTTTACGGAAACCTGGTG | 43898 |
| Kakapo                   | TCTGTGAGTCTGGGCATTGCAGGGAAGAACACTG--C--CAGTTTTATAGC--ATAGTATGGATTTCAGAAGAG-----    | 16010 |
| GoldenEagle              | TCTGTGAATCTGGGCATTGCAGGGAAGAACCCTGTGC--GAGTGTACATAAT--ATAATATGGATTTCAGGAAAA-----   | 17800 |
| JapaneseQuail            | TCTGTGAGCCTGGGTGTTAT-GGGAAGAACGCTG-----CCCTATAG-----TGGACTCAAAAAA-----             | 15301 |
| MediumGroundFinch        | TCCACAAGTCTGGGTGTTACAGGGAAGACCCTGTGC--CAGTTTGATAAT--ACAGTGTGGATTTCAGGAAGA-----     | 2624  |
| GoodesThornscrubTortoise | CAAGATATTTTGTCTAAAAGACATGTAAACAGAACAAACAAAATAACATT--AAAGTTCGGATTCAAACAA-----       | 39651 |

Monday, May 02, 2022 06:50 PM

|                          |                                                                                  |       |
|--------------------------|----------------------------------------------------------------------------------|-------|
| Majority                 | AAGATTTTTGCTTTGT-TCT-GTTTAGACT--GCTAA-----AGCAGGAA----ACTT-----CACTT---TG-CTTCT  |       |
|                          | 44170 44180 44190 44200 44210 44220 44230 44240                                  |       |
| Human                    | AGGCTTTTTGCGTGGTGGCTGTTGCAGAAACAGCCAACAGAATAGCAGAAGTACCACCTATCTGCACCTACCTGCTTTTT | 43978 |
| Kakapo                   | CAGAGTTTTTT---TGC-T---GTTTG--CT--GCTAA-----AGCAGGAA----ACTTTT---CACTT---TG-CTCCT | 16062 |
| GoldenEagle              | CAGAGTTTTGCTCTGT-TCTAGTTTAGACT--GCTAA-----AGCAGGAA----ACTT-----CACTT---TG-CTGCT  | 17858 |
| JapaneseQuail            | AGAGAATTTGGTCTGT-TCTCATTTAGACT--GCCAA-----AGCAGTAA----ACTA-----CACTT---TG-CTTGT  | 15359 |
| MediumGroundFinch        | GAGACTTCTG----G-----GTTT---CT--GCTCA-----AGCAGGAA----GCTT-----CACTT---TG-CTCCT   | 2670  |
| GoodesThornscrubTortoise | ACATTTTTTACCTTGTGTGCTGCAGTACCTAGGCACA-----AGTAGGTG---AGTTAAGAACAGAA---TGACTGCT   | 39718 |

|                          |                                                                                    |       |
|--------------------------|------------------------------------------------------------------------------------|-------|
| Majority                 | TCAGTTTGAGATCGC---AGTGGTAGAATCTCAGAATGTCAA--TGCAAAGTGGGTATGGTTGTTCTTTAAGCTTA---    |       |
|                          | 44250 44260 44270 44280 44290 44300 44310 44320                                    |       |
| Human                    | TTCTCTTTAACTCTTCTTTGGAATTTGTTTCTCATAACAGGAAAGAGTAGCAGCATTTCATTTTTTTTTTCTTAGCTTAGAG | 44058 |
| Kakapo                   | TCAGCCTGAGATTGC---AGCGGTAGAATCTCAGAATGTCA--TGCAAAGTGGCATGGTTGTTCTTTAGGCACA---      | 16133 |
| GoldenEagle              | TCAGTCTGAGACTGC---AGTGGTAGAATCTCAGAATGTCAA--TGCAAAGTGGTGTG-TTGTCTTGAGTCAAA---      | 17928 |
| JapaneseQuail            | TCAGTCCGAGGTGGC---A---CTAAAATCTCAAT-----GG-TAGG-TTGTCTTTAACCA-----                 | 15408 |
| MediumGroundFinch        | TCAGTTTGAGATCAC---AGTGGTAGAATATCAGA-----GCAAAGAGACTGTGGCTGTTCTTGAATCTGT---         | 2733  |
| GoodesThornscrubTortoise | CTAACTGTGCATCTCCTTGATGTGTCAGTTTGTGAGAATGTTTAAATATAGACTTTATATTTTTATAAGCTTA---       | 39795 |

|                          |                                                                                 |       |
|--------------------------|---------------------------------------------------------------------------------|-------|
| Majority                 | -----T---TTTTGGTGTGCTAGGTAGAAAGGCTTTTT-----CATTAA-ATTGGCACACACTAAAA             |       |
|                          | 44330 44340 44350 44360 44370 44380 44390 44400                                 |       |
| Human                    | TCTTTTTATTTGTTTTTTGTTTTTCTAAAGCTAGAAAACACTGCCTTTGCCTTGAAGTCTAAAAGTCTTAGAATTAAAA | 44138 |
| Kakapo                   | -----T---TGCTGGTGATGCTGGGTAGAAAGACTTCATGAATGGCACACACTAAAATTGGCACACACTAAAA       | 16199 |
| GoldenEagle              | -----T---TTTGGTGGTGTAGATGAAAGGCTTTT-----CATGAA--TTGGCACATACTGAAA                | 17980 |
| JapaneseQuail            | -----CTATGGTGTACTGGATAGAAAGGCTTTT-----AAGGAA--TTAGCGGTAATAAAA                   | 15459 |
| MediumGroundFinch        | -----T---TTCTGGTGATGCTAGATAGAAAGGTTTTTT-----CATTAA--TTGTCACACACTAAAA            | 2786  |
| GoodesThornscrubTortoise | -----TGTATTATGATGTTCTTAGGATCAAAGGTGAAATAGTCAAATGTGGTAGAATATTATGAAACATTAAAA      | 39864 |

|                          |                                                                                |       |
|--------------------------|--------------------------------------------------------------------------------|-------|
| Majority                 | TGCCTT--CTATTGCAGTTAATGCTTCT-----GTAAGTTGAACGTGCA-----TTGAGTTCC-----CTTGGAG    |       |
|                          | 44410 44420 44430 44440 44450 44460 44470 44480                                |       |
| Human                    | CTTCTTTGCCTCTCAGTTTCATATTTGATAAAGAGAGTTAGGAAAACTTTATAAATGTGTGCTCTGAAAGACTTGGAG | 44218 |
| Kakapo                   | TGCTT--CTATTGCAGTTAATACTTCT-----GTACGGTGAACGTGCA-----TTGAGTTCC-----CTTGGAA     | 16257 |
| GoldenEagle              | TGCCTT--CTATTGCAGTTAATGCTTCT-----GTATGTTGAACGTGCA-----TTGAGTTCC-----CTTGGAG    | 18038 |
| JapaneseQuail            | AGCCTT--TCATTGCAGTGTATGGTCT-----GACATTTGAACTTGCT-----TTGATTTCC-----TTGTGAG     | 15517 |
| MediumGroundFinch        | TGCCTT--CTTTTGCACCTTGAATGCTTCT-----GTATGTTGAATGTACA-----TTAAGTTCC-----CTTGGAA  | 2844  |
| GoodesThornscrubTortoise | GAAAT--CAATTTTATGTAATACTTCT-----ATAAGTTAAATATGCAG---CTGATTTTACCTA--TTCCAAC     | 39926 |

Monday, May 02, 2022 06:50 PM

|                          |                                                                                  |       |
|--------------------------|----------------------------------------------------------------------------------|-------|
| Majority                 | AGCTCACTT---CAGAGGTCTTGCTT-----TTTCTCTTTTATTATT-TACAGTACTCTTAATT-T-----TTTT-     |       |
|                          | 44490 44500 44510 44520 44530 44540 44550 44560                                  |       |
| Human                    | AATGAAGATGTACCTAAGTTTTGTCACT---GATTTTCATTGGACAGAAGTATAAGGTTTTGCCGTGTCGTATTTTATAT | 44295 |
| Kakapo                   | GGCTCACTT---CAGAGGTCTT-----TTTCTCTT---C-----CC-----                              | 16287 |
| GoldenEagle              | AGCTCACTT---CAGAGGTCTTGCTT-----TTTCTCTTTTTTCATTTCCCCCCCCCCCC-----CTTT-           | 18095 |
| JapaneseQuail            | AGCTCACCT---CACAG-TCTTGCTT-----TTTCTCTCTG-----AGAACGTCTAAC-----TTCT-             | 15565 |
| MediumGroundFinch        | AGCTCATTT---CTGAGGTCTTGCTT-----TTTCTTTTTTCTTTTTCTACTGTACTATTAATTTTGTGTGGGTTTT-   | 2913  |
| GoodesThornscrubTortoise | ATTACATTTTCTCAGACACCTTCAAAGGTAGGGTTTCTGTACAACATTAATAAAATTAAACTGAATTTTTTCTCTCTCCA | 40006 |

|                          |                                                                                  |       |
|--------------------------|----------------------------------------------------------------------------------|-------|
| Majority                 | ---TTCTCTTTTTTTCCTTT---TTTTAG-AGATGTGGAGGAATTAGTTCA--TGGTA--TCAGAGAGT--TGCTGGGCT |       |
|                          | 44570 44580 44590 44600 44610 44620 44630 44640                                  |       |
| Human                    | TTGTACACAGTTGAAAGTATAACGGTGAATGAGTAGGACTAAAATAATTTACAAATTATATGAGAAAGT-AGGCCAGGTG | 44374 |
| Kakapo                   | ----CCCCTTTCTCCCT-----AGATGTGGAGGAATTGGTTCA--TGGCA--TCAGAGAGTGGTCTGGGCT          | 16346 |
| GoldenEagle              | ---TTTTTTTTTTTTCTAC---CCTCAG-AGATGTGAAGGAATTGGTTCA--TGGCA--GCAGAGTGT--TGCTGAGCT  | 18162 |
| JapaneseQuail            | ---TTTTCTTTTTTCTTTT---TTTTAG-AAATAGAGAGGAATTAGTTCA--TGGTA--TCAGTGTG---CTTGGGCT   | 15631 |
| MediumGroundFinch        | ---TTCTCTTTTTTCCCTCTTGCCCTAG-AGATGTGGAGGAGTTAATTC--TGACA--TCAGAGGT--TGCTGCACT    | 2983  |
| GoodesThornscrubTortoise | AAACAATCCATTGTTCTTGTA-ATTTCTA-AGCTGTAGACCCTACACTGCAAATGCTTATTCCAACAATCATGCTTGCTT | 40084 |

|                          |                                                                                   |       |
|--------------------------|-----------------------------------------------------------------------------------|-------|
| Majority                 | TTCCAAGTAGTTGCCTGGTCTCTGT---TTTAGTGTGCTTGATCAG---ATTTTTTGTATTATGTGCTCAGC-AGT      |       |
|                          | 44650 44660 44670 44680 44690 44700 44710 44720                                   |       |
| Human                    | CTGTGGCTCAT-GCCTGTATTTTCAGC--ACTTTGGGAGGCTGAGGCAGGTGGATCACTTGAGGCCAGGAGTTCGAG-ACC | 44450 |
| Kakapo                   | TTCCAAGGAATTGCCTGCTTTGCTGC---TTTAATCTGCCTGATCA---A--TTTTTCTGTCTTTGTGCTGAGC-AGT    | 16415 |
| GoldenEagle              | TTCCAAATAGTTGCCTGGTTCAGTGC---TTTAATGTGCTTGATCA---ATTTTACCGTATTTCTCTGCTGAGC-ATT    | 18233 |
| JapaneseQuail            | TCCCAAATAGTTGCTTGGTTCACAGT---TTTAGTGTGCAATATATGT--ATATTCACCTGTATATACTAGTTGAGC     | 15705 |
| MediumGroundFinch        | TTCCAGTCACTTGCTGGTTCGCTGT---TCTACTGTGCTGAT-----TTTTCTGTATTCATGGGGTCAGC-AGT        | 3049  |
| GoodesThornscrubTortoise | EGCTATGCAGTCCCTTTGACCTTAGTGAATTAAGTGTAAGGAATAAGCACACACTGAAGAAAGTGTGTTTTCAGGCTTT   | 40164 |

|                          |                                                                                  |       |
|--------------------------|----------------------------------------------------------------------------------|-------|
| Majority                 | AGAGTGGCTGATATTA-GTAGCAGACTCTTTCCTT--TT-AAATTA--TTAGTAAGAGGTTGGGATTCAGGGTGAATTT  |       |
|                          | 44730 44740 44750 44760 44770 44780 44790 44800                                  |       |
| Human                    | AGCCTGGCCAAACATGGTGAACCCCATCTCTACTGAAAATAGAAAAA-TTAGCTGGGTGTGGTGGTGACACCTGAATTC  | 44529 |
| Kakapo                   | AGAGTAGCTGATATTA-GTAGCAGACTCTTTCCTT--TT-AATCTA--GTAGTAAAAGACTGGGATCTAGGGTGAATTT  | 16489 |
| GoldenEagle              | ATAGTTGCTGATACTA-GTAGCAGACTCTTTCCTT--TT--AATC---TAGTAA-AGATTGGAATTCAGGGTGAATTT   | 18303 |
| JapaneseQuail            | AGTATGTACAGTGTTA-GTACCAGATTTACTACTAGATTTAAAGCAAAGTAAACAAAGGTTAAGATTCTGGATACAGCTT | 15784 |
| MediumGroundFinch        | ATAATCACTGATATTA-ATAGCAGACTATTTCCAT--TTTAAATG--TTAGTAAGAGGTTGGGATTCAGGGTGAATTT   | 3124  |
| GoodesThornscrubTortoise | EATGTAGAAAGCCAGA-TCAGACAAATCCTTACTTACTT-GAATAGTCTGATTG-AGCTTACTAGTATGAGTAAGAGTT  | 40241 |

Monday, May 02, 2022 06:50 PM

```

Majority      CATGTTACA--TTTAGGGTGC--TGTGGTGGCAGCTGTTGCCAGGATGGGTGGTCTGT--GCT-TTCTCATCCTACATC
              44810      44820      44830      44840      44850      44860      44870      44880
Human         CCAGCTACA-TGGGAGGCTGTGGCACGAGAATCACTTAAACCTGGGAAGTGGAGGTGTAGTCAACCAAGATCATGCCAC 44608
Kakapo        CATGTTACA--TTTAGGGT----TGTGATGGCAGCTGTTGCCAGGATGGGTAGTTCTGT--GCT-TTCTCGTCCTACATC 16560
GoldenEagle   CATGTTATG--TTTGGGGTGC--TGTGGTGGCAGCTGTTGCCAGAATGGGTACTTCTAT--GCT-TTCTCATCCTACCTC 18376
JapaneseQuail CTCTATGTA--TTTAAACATGCTGTGTAATGGCAGCTGTTGCCAGAGCGGGTG-----TTCTCTTCCTGCATT 15849
MediumGroundFinch CATGTTACT--ATTAGGGTGC--TGTGGTGACAGCTCTTGCTAGAATGGGTGGCTCTGT--GCT-TTCTCATCCTACATC 3197
GoodesThornscrubTortoise GCTGTACAACCTAAGGACCAGAACTTGCAAAAGCTTCTTCTCAGACATACATTTTAATTGACA-CATTACTACTATTTG 40320
    
```

```

Majority      CTTAGCACAGGCAGGAAAACC-----TCCAACCTCCATAT--GTTTCTGCTCCAT---TCTTTATGTTGGAGTGCTCATA
              44890      44900      44910      44920      44930      44940      44950      44960
Human         TGCCTCCAGCCTGGCAATAC-----AGCAAGACTCTGTCTTAGATAGATAGATAGATAGATAGATAGATAGATA 44682
Kakapo        CTTAGCTCAGGCAGAAACCCTCC---CCCAACTCCACAT--GTTTCTGCTCCAT---TCTCTATGTTGGAGTGCTCATA 16631
GoldenEagle   CTTAGCACAGGCAGAAACCCCCCA---CCCAACGCCACAT--GTTTCTGCTCCAC---TCTCTGTGTTGGAGTGCTCATA 18448
JapaneseQuail CTTAGTACAAACAAGAAAAA-----AGCAACTGTTTGT--GTTTCTGCCCCGC---TCAAT--GCTGGAGTGTTTATA 15916
MediumGroundFinch TTTAGCACAAAGCAGAAAAACC-----TCCAACCTCCAC---GTTTCTACTACAC---TCTTC-TGTTGGAGTGCTCATA 3263
GoodesThornscrubTortoise TTTAAAAATTAGAAGAAGACCAAATGTTTGAGTTGCTTAAAAATGTGTGTTTATGTGTTTTTAAAAATAAATTAACATA 40400
    
```

```

Majority      GACTTGCAGAA---T-CGTTAATGCAGCATTAAACTGTACT-GCCAAAAAGA-GTAGTTTTTCCTTG---GAGCAGC---
              44970      44980      44990      45000      45010      45020      45030      45040
Human         GATACTGTGAAA--CCAGTGCTAGAGTGTTTTATATTTAATAAGTAAAGATAGGTAGAGTATCGGAACAAAAACAGCATG 44760
Kakapo        CACTTGC-----TAATCCAGCAGTAAACTGTACT-GCCAAAAAGT--TAGTTTTCCCTTG---GAGCAAC--- 16690
GoldenEagle   GACTTGCAGAA---TGAGCTAATCCAGCATTAAACTGTACT-GCCAAAAAGT-GTAGTTTTTCCTTG---GAGCAAC--- 18517
JapaneseQuail CTCTTCGCAA-----GATACAGCACTAAAGTGTACT-GCTAAGAAGA-GCTGCTTTCTGTTG---GAGCAGC--- 15978
MediumGroundFinch CACTTGCAGAG---TACGTTAATGCAGCATTAAACTAGGCT-AACAAAAATGAAGTCGTTTTCCCTTG---TAGCAGC--- 3333
GoodesThornscrubTortoise CTCTTCAAAATACTTTTGTGAGTAGCATTAACTAATGCTTGACATGATACGGTAAACTTTCTGTCCC-AAGTAGTGT- 40478
    
```

```

Majority      -TTA-CTGATCAGTCATG----TGACTGCACAGTTGCTAGATTCACTGTC-AGTGTGGGGTGGA-----GGAGTGTGGCA
              45050      45060      45070      45080      45090      45100      45110      45120
Human         GGAAACTAACAAATTTTGGGGAATGAATGAGTAATCA--GGATTCAAAGCAAGTATCAAATGAGTC---GGGAAATTAGA 44834
Kakapo        -TTA-GTCATCAGTCCCG----TGGCTGCACAGTTGCTAGATT-----ACTGTGGGGTGGA-----GGAGTGTGGTG 16752
GoldenEagle   -TTAACTGATAAGTCATG----TGGCTGCACAGTTGCTAGATTCACTGTC-ATTGTGGAGTGGA-----GGAGCATGGCA 18585
JapaneseQuail -TTA-CAGGTTGGTCATA----TGACCATGCAATTTGTAGATCATGAAC-ATTGTAGGGAAAA-----TGAGTCAGGTG 16045
MediumGroundFinch -TTT-CTGATCAGTCATG----TGATTGCACAGTTG-TAGACACAGTGT-AGTGTGAGTGGA-----GGAGTGTGGCA 3399
GoodesThornscrubTortoise TCACCAGGTCTTTTTTCT--TACTTTCCTTATTCCTTAATTCGTTTC-AGTGTGAGGAATATCATGTAAGTTGTGGCA 40554
    
```

Monday, May 02, 2022 06:50 PM

```

Majority      TCAGAAGAGA-----GGAGAACCACCTCCATTGGCAGTCTGTAAACCAA---GGTGAAGAGTT--TTTTTC
              45130      45140      45150      45160      45170      45180      45190      45200
Human         AAAGTAGAAATTGAAGTTTTTAGGGGTGCTATT---AGAGAAATTCAGTGAGGAAGAGAGGGTTCACAGTTCCTTGTTG 44910
Kakapo        CAAGAAGAGA-----GGAGAACCACCTCTGTTGGCAGTCTATAACCAA---GGTGAAGAGAT---GATAC 16813
GoldenEagle   GCAGAAGAGA-----GGAGAACCACCTCCATTGGCAGTCTGTAAACCAA---GGTGAAGAGATGATACTTC 18649
JapaneseQuail TCAGGAGA-----GAAAGC----- 16059
MediumGroundFinch GCAGAAGA-----AAACCACCTCCACTGGCAGTCTGTAAACCAA---GGTGACGAGGT--TATTCC 3456
GoodesThornscrubTortoise@ CTGCAGTTGTGTATTGTCTCTGGTATACTTTTAGAATATTCAGTATGCATTTCATATGTTGGTGATTGATTTGATTTTT 40634
    
```

```

Majority      TTTGGAATAGG-----TCAGAAATGTGGTGTAGT-----GC-ATTCATAGCCATTTTAG---AACTCCTGAACATAT
              45210      45220      45230      45240      45250      45260      45270      45280
Human         ACTGATGGATGTGGTGATTTAACAAATTACCCATGATCCTTGCCGACACCCATTTATGTA AAAAATTGCAGGTAAAAGCTA 44990
Kakapo        TTTGGAATAGC-----TCTGAAGTGGGATGTAGT-----GC-ATTCATAGCCATTTTAG---AACTC----- 16866
GoldenEagle   TTTGGAATAGA-----TCAAAAATGTGGTGCAGT-----AC-ATTCATAGCCAGTTTAG---AACTCCAGAACATCT 18712
JapaneseQuail -----CAAT-----GT-ATTTGTGGTCATTTTAG---AGCCCCTGGA---AC 16094
MediumGroundFinch TTTGGAATAAG-----TCAGAAATGCAGTGCAGTTTAGTGC-ATTCATAGCCATTTTGG---AACCTCAGAACATAT 3524
GoodesThornscrubTortoise@ CTGGCATGCACACTTTTGTCTTTTCTATTGTGTATTGTTTTACTACTTAAAGGTACTGTAATAAAAACATATGAAATGAA 40714
    
```

```

Majority      GTTTATCTCTTCTGCTTTTCT-----TACTTCCTTCTGGTCTGA-----AAG-----
              45290      45300      45310      45320      45330      45340      45350      45360
Human         GTGGAGAACAAAGGTCAGTCAGCAGGAGAAAAGTGATGTACTGATCAGAGGTGAAGATGCTGGCTTTAGAATTGAGGTGA 45070
Kakapo        GTTTATCTCCCCTGCTTTTCT-----TACTTCCTTCTGCTTCTGA-----AAG----- 16909
GoldenEagle   GTTTATCTCCTCTGCTTTTCT-----TTCTTCCTTCTGGTCTGA-----AAG----- 18755
JapaneseQuail ACTTATCTCTTCTGCTTTTGT-----TGCTTCTTCTATGTCTGA-----AAC----- 16137
MediumGroundFinch GTCTCTCTTTTCTGTTTTTCT-----TACTTCCTTCTGGTCTGA-----AAG----- 3567
GoodesThornscrubTortoise@ AACCTCTTTTCTGCATTTTTCGTCAGAAAATCACCTAGCCCTTTTAAAATTTGATCAATTGGCAATAGAAGTAGTTATG 40794
    
```

```

Majority      -AGGTCCCT--T---CTTGTTTTCATTTTCTTGATGTCCCTCTGCATTCTCGGA---TATTT--AGTGCTTCAGCAATTT-
              45370      45380      45390      45400      45410      45420      45430      45440
Human         AAAACTGGTTTTGAGTTTGGAAGAGAAGTATTC AAGTAGAAACCATTTTAAAATTTTATTTGCTTTGAATCCGTGATTAC 45150
Kakapo        -AGGTCCCT-----T-GTTTTTCATTTTCTTGATGTCCCTCTGCATTCTCGGA---CATT---AGTGCTTCAGCACTTT- 16973
GoldenEagle   -AGGTCCCTGTT---CTTATTTTCATTTTCTTGATGTCCCTCTGCAGTGTCTGGA---TATT---AGTGCTTCAGCAATTT- 18824
JapaneseQuail -AGGTACAT-----CT--TTTCCATTTTCTTGACATCCTCAGCAGTCCAAGA---TGATAATACTGCTTCAGCAATTT- 16204
MediumGroundFinch -AGGTCCCT-----CTTTGTTCATTTTCTTGATGTCCCTTTCAGTCTCGGA---TATTT--AGTGCTTCATCAGTTT- 3634
GoodesThornscrubTortoise@ AGATGTGTGCT---CTTATGTTACTATGTGATTATCCTAAGAATTTTAAAAC-TGTA CTTATTGCTTTAAGAAACTC 40870
    
```

Monday, May 02, 2022 06:50 PM

```

Majority      -----GCTTTACTTAAATGAGAAACTTGAATGAAAAGGAGT----TTGG----GTTGTGTGTGT-TGAGGGTTTGGATT
              45450    45460    45470    45480    45490    45500    45510    45520
Human         ATGAACATCTTCCCTAAGCAAGAGGCTTTGAAAGAGTTGAATAATGTATGGAAAATGGTGTGCTTAAAGATTTTTTACAT 45230
Kakapo        -----GCTTTACCTAAATGAGAAACTAGAATGAAAAGGAGT----TTGG----GTTGTGTGTGTGTGAAGGGTTTGGATT 17039
GoldenEagle   -----GCTTCACTTAAATGAGAAACTAGAGTAAAAGGAGC----TTGG----GTTGTGTGTG--TGAGGGTTTGGATT 18888
JapaneseQuail -----GCTTTTCTTAAATGAGAAAACGCAATTAAGGGAGT----TAAGA---GTTGTGTGGG---GGGCATTTGGATT 16268
MediumGroundFinch -----GCTTTACTTAAACAAGAAACAGCTATGCAAAGGAG-----TTGTGTGC---CAAGGGTTTGGGTT 3691
GoodesThornscrubTortoise@TGG-TATTTTTGTTTTTAAAGAGGTTGGATAATACAGACT---GCAAGTAGTTTGTCTATCTGTGACCACTTCATTC 40945
    
```

```

Majority      TGAGCAGTGGGT--GGGAGTGTGAGTTCATTGTTAACAGGACAAAGT-----TCCTGAACGTTACCAA-TTTTCCATG
              45530    45540    45550    45560    45570    45580    45590    45600
Human         TCATATACAATGAATAAAATTTATATGCATAAAATAAAGCATTACCTCATGCCTTCTTAACTGAACATAAACATTTGAAT 45310
Kakapo        TGGGCAGTGGGA--GGG-----AGAACACTGTAAACAGGACTAAAT-----CCTGAATGTTACCAA-TTTTCCATG 17103
GoldenEagle   TGGGCAGTGGGA--GGGGGAGGGAGAGCACTGTATCAGGACAAAGT-----CCTGAATGTTACCAA-TTTTCCATG 18958
JapaneseQuail TGAGCATCGAGTATGGGAGTGGAAATGTCATTGTTTACAGGACAACTAGTTTTTCTGAACATTCTGAAAATCTTCCATG 16348
MediumGroundFinch TCAGCAGTGGG-----CATTAAAG-CAGGACCAAGT-----CCTAAACATTACCAA-TTTTCTATA 3746
GoodesThornscrubTortoise@GACTTTTTGTTTCAGTACTGTGTATTGTTTCATTAACACAAATGGAATATTTTTAAAGTACCATACTGCATTATC 41025
    
```

```

Majority      TATTTTTAGAGAACTTTTAGTTCAGGAA-----AGCTAAATGTAA-GTTAATTTATGAAAGG--AAAAA
              45610    45620    45630    45640    45650    45660    45670    45680
Human         TATTACTGGTTTTACACGCCCAAACAAAAGTTCGGGTTTACTGGAGGAATGGAAGGGAAAGATCTCTTTCATTCCCCCA 45390
Kakapo        GATTTTCAGAGAACTTTTAGTTCAGGAA-----AACAAAATGCAA-GTGAATTTATCAAAGG--GAAA- 17165
GoldenEagle   TATTTTGAAGAACTTTTAGTTCAGGAA-----AACTAAATGTAA-GTTATCAAAGGAAAAA--AAAAA 19021
JapaneseQuail TGTTTGTAGAGGAACTTGAAAATGGGAA-----AGCTAAATGGGT-GTTTATTTATCCAAAG--GAAA- 16410
MediumGroundFinch TATTTTGAATAAACTTTTAGTTCAGGAA-----AATTAATGCAA-ATTAATTTATGAAAGG--AAAAAG 3809
GoodesThornscrubTortoise@TTTCTATCAGAACTTTTGCTTAATTTTTACTATTGTTTTGGTTAACTTAATATGAATATGGAATATTAATAA 41105
    
```

```

Majority      GAAAGC--AAGGGATTC--AAAATTGAAATATGAATTAGTAGAATTTTAGGTTTTTATGACAAGAAAT-ACTGAAGCTTG
              45690    45700    45710    45720    45730    45740    45750    45760
Human         GTAAACCTTTCCCATTC--AGGATCATGGGAAGATGCTGAAGAATGTGAGAACTGTAACACAGGCAGA-CCTAATGCTTC 45467
Kakapo        -----AACCTGAAATATAAATGAATGTCACATATGCGTTTTTCAGGCCAAAAAAT-ACAGAAGCTTG 17224
GoldenEagle   AAAAGCTAAAGGGAAAAACAAAATTGATATATGAATTATTAATTTTGGTTTTTCAGCAGAAAAAAT-ACAGAAGCTTG 19100
JapaneseQuail -----A-----GAGTTAAAAGCTAAAGGAGT--AAGAAAAGAACTATATGTTTGGGTTT-TCTGAAGCTTT 16468
MediumGroundFinch GAGGG--AAAGGAAA--AAAATTGAAATAAGAATTAT---AATTTAAGGTTTCGTAACAAGAAAT-ACGAAAGCTTG 3880
GoodesThornscrubTortoise@AAAACTTCAGTTATTCAGTAAATCACATTATGATTCTGTAGATTTGTTTTTGTGTTTTTACTCCTCATTGTAACCTG 41185
    
```

Monday, May 02, 2022 06:50 PM

```

Majority      TCTAAGAAGCCTTAA-ACTT-TAAATACAAATCTTTTTTGCTCAAAAAGTCTTTA-----AATGG--AAAAGAGTGC
              45770    45780    45790    45800    45810    45820    45830    45840
Human         ATAAGCTAATGTTTCCATTTTTGGACCCTTTTTCGGTGTGTCTGGAGTGTGTTTATATTTGAAAATAGGCTTTGTTATAT 45547
Kakapo        TCTAAGAAGCCTCAA-ACTT-TAAATAGAAATCCTTTTCTCCTTAAAAAGCTCTTAA-----AATG---AAAAGAGTGC 17293
GoldenEagle   TCTAAGAAGCCTCAA-ACTT-TAAATAAAAATCTTTTCTCCTCAAAAAGTCTTGA-----AATGG--AAAAGAGTGC 19170
JapaneseQuail TCTAAGAAGCCTTAATGCTT-GTAATGTGAGTTTTTCTCATTT--GGGAGTTATT-----TGG--AATAAATGGC 16533
MediumGroundFinch TCTAAGCAGCCCC-----TACATACAAATCTTCCTT-----AAAATCTGAG-----AATGG--AAAAGCATGT 3939
GoodesThornscrubTortoise @GGAAGTAGTCTTCTGAAAT-CTCCCAAAAGCTCACTTTTGTCTACTAGCACTATACTTGCTGCTAG--AAAGGCCAGA 41262
    
```

```

Majority      T-TT----GATTCCATT-ATGTGGATTAC-----GGAGTTTGATGTATTTT-AACATATACATTCTT-CTGCTTTCCA
              45850    45860    45870    45880    45890    45900    45910    45920
Human         TATTAAAGGAGCCCCCATTCCCAGTTTCACATTCTCATAGTATCATTTATTTAAAATGAAGACTTTTATAATATTTGGCA 45627
Kakapo        T-TT----GATTCTCTG-GGCACCCTGTGCC-----AGCGCCTCA-GCACCT-CACAGGGAAGAACTT-CTGCCTTAGA 17359
GoldenEagle   T-TT----GATTCCATT-ATGTGGACTTG-----GGAGTTTGATGTATTTT-AACAAATACGGA-TT-CTCCTCCCA 19234
JapaneseQuail T-TT----GATTCCATA-ATGTGGATGGAT-----GAGTTT---GTGTTTA-ATGATGCAAATTCTC-CTACCTTCCA 16595
MediumGroundFinch T-TT----GATCCTGTT-AGGTTGATGTATGGGATAGAAGTTTGATGTATTT--AACAGATACA-----TTGCTTCCA 4005
GoodesThornscrubTortoise @ATT----GACTTCATTTGAAGCCACTTCTGTGTTCAGTAAGAAACAAATC-ATTATTTTTCAGCATTACTGCCTTCTC 41337
    
```

```

Majority      TCTTGTTTTTATTTCCT-----T-----CA--CTGGTTCAGGATTTTGGTTTTGTCAATGTTTTTGGAATTTTTTTGTTT
              45930    45940    45950    45960    45970    45980    45990    46000
Human         CTAAGATATGAATACTTAGTAGTCACCTCATGGAAGCTATTAAGTGGAGTGTGTCAGGTAGTAAATGTTGATAGTTT 45707
Kakapo        TCTAACCTGAACTTCCC-----CTGGTTCAG---TTTGAACCCATCACCCCTTGTCTATCGCTCCAGTC 17421
GoldenEagle   CCTTGTTTTTGTTCCTCCCTTTT--TAAG--CTGATTTAGGGTTTGGGGTTTGTGTTGGTTTGTGGGATTTTTTCTTG 19310
JapaneseQuail TCTTGTTTTTAGGAGAC-----A--GTTTCCAAACAACTGATCTGT----TTTATACAAGCCAAACCTCT 16656
MediumGroundFinch TTTTGTTTTTATTTCCT-----AG--CTGACTGAGGGTTTGGGTTTTAT----TTTGGGAGTTTCTTTGTTG 4067
GoodesThornscrubTortoise @CCTGGTGGTAGATTATGGTGGTT--TCCATTATACTTCCCTAATTTGGCATTGCACCTTATTTGCTAGATCTAGTAGAT 41415
    
```

```

Majority      -----A-----TCTGTTGGAGAGTT---A---ATTT-----T---T-T-TGTGT-GGT---TAGGTTTC
              46010    46020    46030    46040    46050    46060    46070    46080
Human         ACTACAGTAACTGGCTTGGTCTTTGGGAGAAGAGGACAGATCTTTTTTAGGCAACCTGTATGTAATGTAATGTTTGT 45787
Kakapo        -----CCTGATGCAGAGTC-----CCTC-----T---CCAGCATC 17448
GoldenEagle   GTACCAAAGAAAAGCA--TTTGTAAAGAGATTTTCAAATGAATTTATCTTTACATTT-TATACAGGT---CAGACCTC 19384
JapaneseQuail -----TGGT---AGGT-----TTC-----TAGGCATC 16675
MediumGroundFinch -----CGTGT--GGGAGT-----ATTC-----T---T---GGTGTGGGT---GGGGTTTC 4101
GoodesThornscrubTortoise @GTTTAGTTTTGCTGCCATGCCACTGAAGGAATATCTAAGATGTTTAGCATCTATTGT-TACGTCAGTAGGTATATTTT 41494
    
```



Monday, May 02, 2022 06:50 PM

Majority TTAGTATGTGCTTTTTAGTCGTTTTTAAGGATAACTGA-T----AGTAATGATCTCATTATGAA-GCAGCTGTGGTCTGA  
 46090 46100 46110 46120 46130 46140 46150 46160  
 Human TGAGATCCTACTATAGTGTAGTTGTTGAAGAGCACAGACTATGGAATCATGCTCCCTGAGTTTAAATCCTTCTCTGCTAC 45867  
 Kakapo CTTGTA-GCCCCCTCAGACA-CTGGAAGCTGCTCTGA-----GGTCTCCACG-----CAGCTTCTCTTC-- 17506  
 GoldenEagle TTGATATG---TCTCTAGGCATACAGAAGCATAAATGATTTCTCAGAAATGATCTCATTAAACAA-GCAGCAGTGCCTCTGA 19460  
 JapaneseQuail CAAAAGT-----TAAGTGGTTTCCAAGGAAAAA-----AATAATCTCATTATGAG-CCGCAATGGTCTGA 16739  
 MediumGroundFinch TCTGTTTGGGTTTTTTTGGCATCCATAACCATAACTCA-----AGAAACAATCTCATT-----GCAGCAGTGGTTAGA 4170  
 GoodesThornscrubTortoise@GAAGAGGTGAATTTTCATTG-GGTCAAAGGTAAGTGAATATGTATTGGTAGTAACAATATGAATATATCTATAAGCT-- 41571

Majority GTCGTG-TCTAGTTCCTGTAGTATCTGTTTCCCTGTTATTAAATTTTTTATTTTTATTGTGTAATTTGTAAAGGATATTCA  
 46170 46180 46190 46200 46210 46220 46230 46240  
 Human TTCCTG-TCTATACCACTTAGTAACTATCTAATCTTGGGCATTTAACTAATGTTACCTGTAATGGGGTTGATAGGTCA 45946  
 Kakapo -----TCCAGGCTGAACAGCCCCAATGTTCTGGTTTTGACCTTGCTGTTTTCAACATCTGATCCCC---TGATACTTT 17576  
 GoldenEagle GTAGTGGTCTGGTTTCTGTAGTATCAGTTGCCTGTTATAAAAGTTTTTCATATTAGTTGTGCAGTATATAAAGGAGGTTGG 19540  
 JapaneseQuail G-----ATAAGTTCCTGTAGTATCTGTAACAAATTTTGATATTAAGTATAAAGGAGTATCTGGAAAAGTACCCA 16813  
 MediumGroundFinch GTTGTGATCTGGCTCCTGTAGTATCAGATGCCTGTCATTTAAAGTTTCATATGAGTTTCAAGTATGTAAGAAGATTGG 4250  
 GoodesThornscrubTortoiseTCTGAACCTTTTTCTTTAAATGCTTTGTTTATAATACATATTTTTTTCTTTTTATTAGCGGGCTCAAGCTGTTCTTCA 41650

Majority TGG-AAAAACAAT--CCCAGACAAACAAAACCTCC-----CCATTGTTAGTG-CAGT---GTTTTAATTCAAGTC  
 46250 46260 46270 46280 46290 46300 46310 46320  
 Human TAATGATAGCAAT--CTGAGAGTTGTAAATGCCCCGCATGTAGTTAATTAGCAGTGAATATTAATATTTGATGCAAAAT 46024  
 Kakapo TCC-AAACACATA--CCTAGATGAACAGAAGAA-----AGAGTGTGTTGT--CTTT---GTAATTCTCTGAGCC 17636  
 GoldenEagle TGG-AAAAATAGT--CCCAAACAAACAAAAACC-----CCAATCTGAATG-CAGT---ATTATAATTCAAGTC 19602  
 JapaneseQuail GGA-GAAAACAAC--AACAAACAAAAAAACTCC-----CCATCACAATG-CAAT---ATTTAATTCAAGTC 16875  
 MediumGroundFinch TGG-AAAAATAAT--TCCAAACAAACAAAAACC-----ACAATCTGAATG-CAGT---GCTGTAATTCAAGTC 4312  
 GoodesThornscrubTortoise@GC-AGTAACAGCAGTACAGACAACAAATACTCCATTAGTGGAACTACTGTTAGTGAAAGT---GCCGTGACTCCAGCT 41726

Majority A-----TTCTTTATAGAGGTTTGTGGAAAGGGG-ACTAG-TTGT--TTTTGGCTGTTCTGTTGATTTTAAGCAGTT  
 46330 46340 46350 46360 46370 46380 46390 46400  
 Human AAAATTACATCTTTTCTATATTTTTTCCAAGAAG-----TCAAGATCTTTGCTTATCCTTTGATCTCAGAAGTT 46095  
 Kakapo -----TTATTGGTAAAGGC--ACAGACAAAAA-CCCAG-TTGT--CACTAGCAGTGCCCTGAATTTAGGGCAAAA 17701  
 GoldenEagle A-----TTCTCTATAGAGGTCAGTGGAAAGGGG-GACATTTTGG--TTTGGGCTTTTTTGTGTTTAAAGCACTT 19671  
 JapaneseQuail C-----TTCCCTATAGAGGTATGTGGGAAGG-----T---T-----TGT---TTCATGCAGTT 16918  
 MediumGroundFinch A-----TTCTCTACAGCAGTCTGTGAAAAGGGG-ATTAGCTTG---TTTGGG-TGTTCTATT---TTTTAAACATTT 4376  
 GoodesThornscrubTortoise@AGAGTCCAGTACTTAGAATAATTATTGATAATATGTACTACCCTGTAACCTGGATGTTCTTACCAAGTAAGCCAGTT 41806

Monday, May 02, 2022 06:50 PM

|                          |                                                                                    |       |
|--------------------------|------------------------------------------------------------------------------------|-------|
| Majority                 | TCTTGG----TAT---TGTTTTCAAGCTTCTTTT-T-----TCTGTCTACATTTTTTAAATAGCATT-AA-AAATATCCT   |       |
|                          | 46410      46420      46430      46440      46450      46460      46470      46480 |       |
| Human                    | TCCTACGTTCTTTCTGTGTTATTTCAGCTATTTTACTTCTGCTTAATATCCACTATCCAGAAAACATCCAACACAAATCCA  | 46175 |
| Kakapo                   | TCTTG-----TGTTTCACAGCCTCATTT-----CTTACTAAATACCTACTGTAGAACT-----ATTACCCT            | 17757 |
| GoldenEagle              | TCTTGG----GAT---TGCCTTCAAATTTCTCTTCTGCCTGTCTGCCTGCCTTTGTAAAATAGCATTTAA-AAAAACCC    | 19743 |
| JapaneseQuail            | TTTTGG----CAT---TATGTTCAAGCTTCTATT-----CTGCCTACTTTGGTTAAATAGCAT-----GCAGATTCT      | 16978 |
| MediumGroundFinch        | TCTTGG----TAT---TGTATTCAAATTTCA-TT-----CTGTTTGTCTTTTGAAGTAGCAC--AA-AAACCCCT        | 4437  |
| GoodesThornscrubTortoise | CTCTATGTAACCT---TAGTTTATATGTTTTGTAATAAATTTCTATACATAACAATCTTGTTATTTTTGAC-AGATATTCT  | 41882 |

|                          |                                                                                    |       |
|--------------------------|------------------------------------------------------------------------------------|-------|
| Majority                 | GTAGAGAAGGTTAAGTCTTCATTTTCAGTGTATTT--CTGAATATATCCTCTCATATCTTTTTTTTT---TTTATTGTGA   |       |
|                          | 46490      46500      46510      46520      46530      46540      46550      46560 |       |
| Human                    | AAATAAATTATTTAATTTCCTTAATAATAGGTTTAGGCAGGCTTTTGCCTTTTGGGAATTATTTTTGGAAAATCATTGA    | 46255 |
| Kakapo                   | AAACCAAGTTTTAGGGGTGAAACTGGGAGATGTTT--TTCATTGTG----CTCATCTGTGTC-TTTT----ATCACAGTGA  | 17826 |
| GoldenEagle              | GTAGAGTAGGCTAAGTCCGCAGTTCAGTGTATTT--CTTAATATATCCTCCCATCTCTCTCTTTT---TTTAGTGTGA     | 19817 |
| JapaneseQuail            | GTAGAGCAGGTTAAATCAACATTTCCGTTGTTATTC--CAGTATGTGTATGTTCTTATATCTGTCTTG---TTTATTAGGA  | 17053 |
| MediumGroundFinch        | GTAGAGAAGGATAAATCTTCTGTTTCAGC-----TT--CTGAATATATCCTCTCATAGCTCT-TTTT----TTTACTGTGA  | 4505  |
| GoodesThornscrubTortoise | CTAAATTTGGTGTGTGTTGAAGATAATCACATTC-CAAAGAATAACCAATTTCAAGCTTTACTGC---AATATGGTGA     | 41958 |

|                          |                                                                                    |       |
|--------------------------|------------------------------------------------------------------------------------|-------|
| Majority                 | ACCTGGAAG--TACTTTTTCCAGACTTGCTCAG-----TTTTACAA-----TTTCAGATTGT-ATACTC-             |       |
|                          | 46570      46580      46590      46600      46610      46620      46630      46640 |       |
| Human                    | AAGGGGAAGCCTTTTTTCTCCTTATGGGTACAGTGATAGGTAGTATCTTTATTGGTCTTTTTTTTCCCTGTCTTTCTCC    | 46335 |
| Kakapo                   | CAGTTCCAG--TAGGGTTTTTTG--TTCCTCAG-----CTGCCA-----TGCAGTTAGA-ATACT--                | 17876 |
| GoldenEagle              | ATCTGGAAG--TACTTTTTCCAGACTTGACACAG-----TTTTATAA-----GTTTCAGATTGT-AGACTC-           | 19872 |
| JapaneseQuail            | ACCTGGAAGG-TACGTTTTCTAGACTTGCTGGGT-----TTCTTTTACAA-----TTTCAGATTAC-AGATGC-         | 17115 |
| MediumGroundFinch        | ACCAGGAAG--TACTTTTTCCAGACTTACACAG-----TTTTACAA-----GTTTCAGATTGT-AAACTC-            | 4560  |
| GoodesThornscrubTortoise | CCAGTAAATGCACAGCAAGCAAATTTGGTAAGTA-----CAAATTAAT-----TTTGGGCTAGTGATATCC-           | 42021 |

|                          |                                                                                    |       |
|--------------------------|------------------------------------------------------------------------------------|-------|
| Majority                 | -AGAAGTAATTGGATG-----TGAAATGGAACTTG-TGTGTTAATTTTTTTG-TACCCATT-----                 |       |
|                          | 46650      46660      46670      46680      46690      46700      46710      46720 |       |
| Human                    | CAGAAGGAAAAGGACAGACCAAATTAGGAGAACTGAAATTTGCTTTTTTGAGTATCCTGATAC-CATAACTAT---AAC    | 46411 |
| Kakapo                   | --GTAATACTTTAATGC-----TTTTATGAATACTCT-TGCTCTAATTCTCTT-----CCTT-----                | 17925 |
| GoldenEagle              | -AGAAGTAATTAGATC-----TGAAATGGAAACCCA-TGTGTTAATTTTTCTG-TACCCATT-----                | 19926 |
| JapaneseQuail            | -AGAAATGATTGGGTC-----TGAAATGGAAACCTG-TACATTAATTTTTTTGTACCTGTC-----                 | 17170 |
| MediumGroundFinch        | -AGAAGTAGTTAGATG-----TGAAATGAAACC---TCTGTTAATTTTTTTG-TAGCCATT-----                 | 4612  |
| GoodesThornscrubTortoise | TGTGGTGTGGAATTGTT---ATTATTTGTGCAGGGTATTAC-TATGACACTGATTTAACCACACATCTTTTATTAAA      | 42096 |

Monday, May 02, 2022 06:50 PM

Majority TCATGAAGCC--AAATGGGTTT-----AAGTATCTTTTC--TGTCCAAA-----TTAATGTC-----TTCCTTATGC  
 46730 46740 46750 46760 46770 46780 46790 46800  
 Human ACATGGGGCTTTAGGTGGATTGTGAAGTATTTGTTCTCGTTATTCAAACAACTAATGAACAAGAACAATTATCAAGT 46491  
 Kakapo AGAGAAAGGC--ATGAAAGGT-----GCCTGCTTTTGC--TGCCCTGT-----AGGGCGTC-----TTACATATG- 17981  
 GoldenEagle TCATGAAGCC--AAATGAGTTC-----AAGTATCTTTTA--TGTCCAAA-----TTCATGTC-----CTCCTTTTGC 19984  
 JapaneseQuail TCCTGAAGCC--AGATGGGTG-----AAACATCTTTTA--TGTCCAAA-----CTAATGCC-----TTCCTTTTAC 17228  
 MediumGroundFinch TCCTGAAGCC--AAATGAGTTC-----AAGTATCTTTTC--TATCTGAA-----TTGATGTC-----TTCCTTATGC 4670  
 GoodesThornscrubTortoise@CTGAAGGCC--AAATGGTATTTATACAATTGCCTCAAACCTTGCCATAAAAAGCATAAATAAAG--CAGTTTACTACAT 42172

Majority TTCAGTTCTCTTATTACTTTTT-----TCTTGAAAAGAATTTAAAACCTTTAGTGAAC---AATTTTTTTTTTTTATC  
 46810 46820 46830 46840 46850 46860 46870 46880  
 Human TTCTGTACTIONAGACTGCTTTG-----TCAAAAAAGGTCTTAGTCTGTATCAGAATAATATGTGTTCCTTGTGAC 46563  
 Kakapo ----AATCCCTCCCTATTTTT-----GGTGAAAGAACTTGCAGAATTGTTGGAC---AACATTAAGTTTGCATT 18044  
 GoldenEagle TTCAGTTCTGTGTTACTTTTT-----CTCTTTAGAAGAATTTAAAACCTTTGTGAAC---AGTTTTTTTGATGTAGC 20053  
 JapaneseQuail TTCAGTTCTCTTATATTTTT-----TCAGCAAATGAATTTAAAACATCAGTGAATA---GGATTTTTTTCAGCTATAGC 17298  
 MediumGroundFinch TTCAGTTCTGTATTACTTTTT-----CTCTTCACAAGAATTTAAAACCTTTAGTCAATT---AACTTTTTTTTTTTTT 4741  
 GoodesThornscrubTortoise@CAAACAGTAACAAAACATTTATAAGCATTTGAGGAAGAAATTTACAAATGGGCTAAACCCAGGATACTTACTTCCATA 42252

Majority TGAGTTGTAGT-----AGTATTGAATCTTTTCCGATT-----T-TTTATGGC-TTCAGGGAATCTGTAA--TCA  
 46890 46900 46910 46920 46930 46940 46950 46960  
 Human TGATGCCGATTGTTGTGTGTGCCATTATGTGTTTTAAAGTATATGTGTATTTTTTGGATTCTGTGCTTTAGCTT--ACA 46641  
 Kakapo CGTATTG-----ATTATTGAACTACTGGCAATTTGA---T-CATATGGA-ATTAAGGAAGATGCTA--GCA 18103  
 GoldenEagle CAAGGCATGGT-----AGTGATAAATCTTCTCCGATT-----T-TGTAGGGC-TTAAGAGAATCTGTAA--TCA 20114  
 JapaneseQuail TGAGCCA-----TCGTAGCTTTCCAGGGCC-----TA-----TTGAGAGACTCTGTAG--TCA 17344  
 MediumGroundFinch TTTGCTGTAGCCAA-----GGTGATGAATCTTTCCAGATT-----T-TCTAGGGT-TTCAGGGACCCTGTGA--TCA 4805  
 GoodesThornscrubTortoise@GAGTTCCAACATGGTTATTTAGCAATGAACCCTTAAAGAATTTATTTT-TTTATACCGTTCAACAAACGTGTAACATCA 42331

Majority TTTC---TTAAGTCTTTGTAAATGAGACATGTTGTAGAACTTGCCATA-T-C-A---T-AATCC-----TTATA  
 46970 46980 46990 47000 47010 47020 47030 47040  
 Human TTTTCAATTAACGGGCCTAGAGATGATTT-TGTTAGATAAGATACTACAAAATGCAAAGTTTCAGTCTCTTCCTTTTGACA 46720  
 Kakapo CGT---TTGACTGCTGTCCAAAAGACAT-TGCTCAAAGTACAAGGCAATA---C-----TTGAG 18155  
 GoldenEagle TTGA---TTAAGTCTTTGTAAAGGAGACATGTTGTAGAAATCTGCCTAAATTTGTAATTCTTAAAAC-----TAATG 20183  
 JapaneseQuail TTGC---TTAAGTCTTTGTAAAGGAGGCATTTTCATAGAACTGACCTACT-----CTGTA 17397  
 MediumGroundFinch TTTA---TTAAGTCCCTTGTAAATGAGACATGTTGTAGATACTTGCCATG---T-----AAAAC-----TAATA 4864  
 GoodesThornscrubTortoise@TGCCAATTACTAACTTCAGATAAAAAACAGTTTGTAGACAATTCATCCTTAGTTCTAGTCTTAATCC-----ACATA 42403

Monday, May 02, 2022 06:50 PM

|                          |                                                                                   |       |
|--------------------------|-----------------------------------------------------------------------------------|-------|
| Majority                 | CTTTTCTTGCCCT-TTTCGTTCTTAGAGTTTG-ATGTGTCTTGATGTTATTG---AGAGATTTGTTTCATTGTTTTCTGGA |       |
|                          | 47050 47060 47070 47080 47090 47100 47110 47120                                   |       |
| Human                    | AATTGAGGTGCCCTGTGCGCACACAAATCTTT-GTCAGTAGTGAAAGGACATGTGATAGCTTCCTGTAGTTTTTTCATAT  | 46799 |
| Kakapo                   | CATTTTCTAACCAGCTTTGTCATCAGTATCC--AT-CCTACAGACTATATAG---ATGAAATTGG-CAGTGTGTTT---   | 18224 |
| GoldenEagle              | CTTGTTTTGGCT-TTTCATTCTTAGAGTTTGGAGGTGTCATGATGTTAT-----GAGACCTGGTCATTGTTTTCTGGA    | 20256 |
| JapaneseQuail            | ACTCTT-TAATCTAATGCCTGCTTGGAGTTTG-GTGTCAATTTATGAGACC----TGTCCATTGTTGGTTTTCTTTTGA   | 17471 |
| MediumGroundFinch        | CTTGTTCTTGCCC-TTTCATTCTTAGAGTTGGGAAGTGTGATGGTGTATTA---TGAGACTTGGCCATTGTTTCCAGA    | 4940  |
| GoodesThornscrubTortoise | AGATTTACAACCTCCTTTCTTCCAAATCCTTTCTCCCTCCTCCTTGCTGACAAGCAATTTTCCATTGCATCTTGGT      | 42483 |

|                          |                                                                                  |       |
|--------------------------|----------------------------------------------------------------------------------|-------|
| Majority                 | TTATGTAGAAACCTATTCTGGTTTT-----TATGTTGATATTTTCAATATCTGATTCC-TTATATTTTTCTAAA       |       |
|                          | 47130 47140 47150 47160 47170 47180 47190 47200                                  |       |
| Human                    | TTCTGGAGTGGTGAAGAGCTACCCAGCCAAGATTTTCAGGGCAATATATTCAGAAGCCAGAGCT--TACTCTTCTGTACA | 46877 |
| Kakapo                   | ---TGCTGACACTCACTACAAGTC-----AAGTGAGTGTCTTAAGTTCCCTCGTGTG---TCTTTTGCTAAA         | 18284 |
| GoldenEagle              | GTATGTAGAAACCTATTCTGGTTTT-----TACCTTGATATTTTCAACATCTGATCAC---ATATTTTTCCAAA       | 20322 |
| JapaneseQuail            | ATACATAGAAACC---TCTGGTTTA-----GTTATTGATGTTTTCAACATAAGATTCCATTATACTTT-CTGAA       | 17536 |
| MediumGroundFinch        | GAATATAGAAACCTATTCTGGTTTT-----GACTGTGATATTTCAATATCTGACTCTGTGATATTTTCTAAG         | 5009  |
| GoodesThornscrubTortoise | GCATGTAGGCTTTAACCCAGTATGCAGGGAAGGCTTATGCTGGCTTCTTTAAGACAGATTCC-TTTTGTCTTATTTAA   | 42562 |

|                          |                                                                                  |       |
|--------------------------|----------------------------------------------------------------------------------|-------|
| Majority                 | CAGATACCTTGGTGAGCAGATGAA-AGTAAAGGTTTGCC-TT-----TATAATCCTCTGTGCCTTTTATTGGTTAAAGT  |       |
|                          | 47210 47220 47230 47240 47250 47260 47270 47280                                  |       |
| Human                    | AAGACAACCTAAGGGGATTTTAAATGCATTGGCTTGCCGTTCAAGTATATAAACCTAAGTGAACCTCCTAGAGTAAAAT  | 46957 |
| Kakapo                   | GA-ATAGCCT-----TAGAAGAA-AGTTCAAGTTGGA-----TAATTGAGGATGACTTCCAT--GTGGGTTC         | 18342 |
| GoldenEagle              | CAGATACCTAGATGAACAGAAGAA-AGACACAGTTTGT--TT-----TGTAATCCTCTGAGCCTT--ATTGGTAAAAGC  | 20391 |
| JapaneseQuail            | CAGATGCTGTGCTGTGAACCTTCACTGGTAAAAGTATGCAATC-----CAGAAAACAGCATTGCTCTAACAGGCCTAAAT | 17610 |
| MediumGroundFinch        | TAGATAGCTAGGAGAACAGAAGAA-AGAGATGGTTTGTG-TT-----TGTAATCCTCTGGGCCTTTTATTGGTGAAAGT  | 5081  |
| GoodesThornscrubTortoise | AACCATCTGCAGTCCCCCTAAACATCAGAGGCCTTCTTTT-----TAGAAACTTCACTTATCTTATTAGCTATTCT     | 42636 |

|                          |                                                                                  |       |
|--------------------------|----------------------------------------------------------------------------------|-------|
| Majority                 | TTACACCATCAATAG-----TCCAGTTGTTATTACTT-----CTGCTTTAGTAATCCTATACTTTGAATA-----      |       |
|                          | 47290 47300 47310 47320 47330 47340 47350 47360                                  |       |
| Human                    | ATGACTTAAGTATAGCTTGAGTCCATATATTATCACTTAGAGATACCTTCTCTGATCATCCAATAAAGTCATTACTACTA | 47037 |
| Kakapo                   | TTTTACCAC--ATAG-----TTCTGGTCTTATATCTC-----CTGCTTTA-----CACATAGTTTGATTA-----      | 18395 |
| GoldenEagle              | ATACACAATCAAAAA-----ACCAGTTGTCACTAGCA-----GTGCCCTAGCAGGCCTAAACTTAGAGCA-----      | 20451 |
| JapaneseQuail            | TTAGAAGAAAAACTT-----GTGAATTGTTCCCTCCT-----TTCTTTTG--AAATCCACACTGCAAAGAT-----     | 17669 |
| MediumGroundFinch        | GTACACAGTCAAAAA-----AGCAGTTATCAATAGCA-----GTGCCCTAGCAGGCCTAAACTTTGAACA-----      | 5141  |
| GoodesThornscrubTortoise | GTGAACCAGACATCC-----TCTCTACTTCATTCCTT-----CTGGCCTTATAATTTAGTATTTTCAAGGCCTGCC     | 42702 |

Monday, May 02, 2022 06:50 PM

```

Majority      -AAATCTTGCTTGTC---ACAGCCTTTTTTCTGTGAATCTCTGCTTTAG---AAACATTTACCT--AAACCAATCTT
              47370      47380      47390      47400      47410      47420      47430      47440
Human         TCAATCTTCCAGTCCTAGACAAAGTAACTTTTAAAGCACATCACTGTTTTACCTCACAGCATATACCGTAGAAAGTATCTG 47117
Kakapo        -CTGTCCTTAGTGTT---GTCGCATTTTCGTTTCAGTTAAGCATTTCTATTT---AGACATTCA-----AGATTATTCTT 18462
GoldenEagle   -AAAACCTTGTAATC---ACAGCCTCTTTTCTTCTGAATCTCTGCTATAG---AAATATTAACCT--AAACCAAATTG 20521
JapaneseQuail -ATATCAAACCTTCTT---ATAAAACAATTTGCCTCAGACCTGTTGCTGCT----AAGCAGTGGTTT--TAAAACTCTT 17738
MediumGroundFinch -AAATCTTGTCATC---ACAACCTCATTTCTTTC-----TCTGCTGTAG---AAATATTAACCT--AAACCAAATG 5205
GoodesThornscrubTortoise@TCAACTTGCTTGTC---AGGCCTTTCTTTACAGCACGTGTATTCTCTTAA---CCAAACTTAAGC--TAACCCTGATT 42773
    
```

```

Majority      CTTTAGTTTCTAAATAATCTAGCTTTTCA-TGGAAGTTATTGGTTTTGGTTGAATTGAGT-----T-GTTGTGTCT
              47450      47460      47470      47480      47490      47500      47510      47520
Human         GTTCAGGTACTAGTTAGTCCAGCTCCCTACTATAAGGTATCAGGAATCATATAATC--ATCTTGTTCACTCTCTGTACCC 47195
Kakapo        CTTT--TTCCTGAATGGGTTTGAGCAGTA-TGGCAGAACATCAGTCTGAGGGAAC--AA-----TCACATCT 18524
GoldenEagle   CTTAAGTTGTCAAAAAAATGGCCTTATCA-TGGAAGTGGGTGGTTTTGGTAGAACTGGAG-----GCTGTGTCT 20589
JapaneseQuail TTTTTTTTTCTCCAAACAAGACCTGTTCA-CAGAAGTTGTCACTTTCTGTTGAATTGAGCTGTCTTTGATGGTTCTGTGG 17817
MediumGroundFinch CCTAAGTTGTCAAAAAACCTACCTTTTCG-TGGAAGGAAGGGTTTTGGTGGAACTGGGG-----GCGGTGTCG 5273
GoodesThornscrubTortoise@TTTAATTTTCATATTTATCTGTGTGGCT-TACAAGAGATATTTGAAAAATGTGTT-AGTGTAAAGACATTGCTAATTTTA 42851
    
```

```

Majority      TTAGGG-GTAAACCTGGATGTGAGGTTTTTTAAATGATCATCTTATCTTTTATCGTAGTAATAGTCCATTAG-----
              47530      47540      47550      47560      47570      47580      47590      47600
Human         TCAGAACGTAAACATTGCTAGACACATCCCTGAATACCCAGTAAATG--TTTAAGGAATTAATGAGTGAATTAATTTTG 47273
Kakapo        ACTAGC-TCACAGTTGGTTGCAAG-----GGAGGCCAGCTTCTCATG-TTCCAGGTCAGCATTAGATGTTTTAA----- 18591
GoldenEagle   TTAGGG-GTGAACTGGAGGTGAGGTTTTTAAATGATCATCTACCCTTTTATCGTGGTAACAGTCCATTAG----- 20663
JapaneseQuail TTAGAG-GTAAAGTTCGACATGAGGTTTCTAAATGATTATCTTATCTTTTATCATAGTAATAGTCCCATGAG----- 17891
MediumGroundFinch TTATGG-GTGAG-CTGGAGATGAT-TTTTTTAAATGAACATCTACCCTTTTATCATAGGAAGAGTTCCTTTAGTGAGT 5350
GoodesThornscrubTortoise@TAATG-TCCTAAACTCTCCACTGCTTTTTAAAGAGAGTAATCTTTT-TTATACAGAGATAATGTGTACCCTAA----- 42924
    
```

```

Majority      -----AATGTTTTTTTGAT---T-----T---GATTCAGCTGACATT-CAGTTAGAATACTG
              47610      47620      47630      47640      47650      47660      47670      47680
Human         AAGATACGTTGGAGACCAAGATAATCTGACAGTCTTATAGATGTTGTTGAACATACAAACACATTATATAGTTTATAG 47353
Kakapo        -----GTTTCTGACAT-----GGATAAGTTGAAGTTGCATTGTCAAACCA 18632
GoldenEagle   -----GTTTTTTTGGT-----ATTCAGCTGCTGTT-CAGTTAGAATACTG 20702
JapaneseQuail -----AATTTTTTTTAAAT-----ATTCAACTCTCTTT-CAGATAAAGTACTG 17933
MediumGroundFinch TGIGTTGGGGTTTTTTGGGGTTTTTTGTTGGTTGTTTTTTTTTTTTTAAATTCAGCTGCCATT-CAGTGAGAATACTG 5429
GoodesThornscrubTortoise@-----TAATTGTTGTTTTATGTGTTGTGGTAGCACTTATAGGCCCAATAAGATATCAG-GACCTCACTG 42988
    
```

Monday, May 02, 2022 06:50 PM

```

Majority      TAGTACTTTAATGCTTTTATAAATACTCTTGCT---CTAATTTTTTATCTTAGT---AG-----AAAG
              |         |         |         |         |         |         |         |
              47690   47700   47710   47720   47730   47740   47750   47760
Human         GTTGTGTTGAATGTTTTAGGAAATACCATAAATTACCTAAAGTTTTATACAAAATGGAGTATACATGTATATTTCTGAAT 47433
Kakapo       CAGACCTGC--TGCTTCCTGAACTACTCCTGGT---GTTTCCTTCACCTTTTC----T-----GAAA 18686
GoldenEagle  TAGTACTTTAATGCTTTTATGAATACTCTTGCT---CTAATCTTTTTCTTAGTCTGAG-----AAAG 20762
JapaneseQuail TAG---TTTAATGCTCCTAAAAGGATTTCTCATG---CTTATTTTTCTT-----AAAG 17979
MediumGroundFinch TAGTACTTCAATGCTTTTATGAATACTCTTGCT---CTAATCTTCTCCTAGT---G-----AAAG 5485
GoodesThornscrubTortoise@GTAAGTAAAATGAATGAGTAGAGTTTTTAGCG---TTAAAGTGTAGATTAATAAAAAA-----AAAA 43048
    
```

```

Majority      GCATGAAAGATGT--ATTTTTCTATGTCCTATAGGGATTCTTG----CAGATGAATTGTTTCCTATTTTTTTGGGAAA
              |         |         |         |         |         |         |         |
              47770   47780   47790   47800   47810   47820   47830   47840
Human         GTGTCAAGATCCTTCATTTTAGCTAAGTCTCAGAAATATCCTTGAGATCCTAAAAGACTAAGAACCATTGATCTGGCATA 47513
Kakapo       ACATTGTCAAAGT--ATA--TGCTATTTTCTATCAGAATC-----ATGCTTGGTTTGACCTCTTTGGAGAGCA 18750
GoldenEagle  GCATGAAAGATGC--ATGCTTTCTATGCCCTATAGGGAGTCTTA----CATATGAATCCCTCCCTATTTTTTTGTGAAA 20835
JapaneseQuail GCATGAAAGATGT--GTTCCCTCTTTCTCCTTTGCAGGAT-----CATTTAAAAAGAAAA 18032
MediumGroundFinch GCATGAAAGAGGA--ATGGTTTCTCTGCCCTATAGGGAGTCTTG----CAGATGAATCCTTTCTATTTTTTTGTGAAA 5558
GoodesThornscrubTortoise@CCTTTGAAAAGCCAAAATCTGTCTTGAGCAACACAGACTGTGC----CAGCTAAATTGAAAATTGACTGGAAAGGAGA 43123
    
```

```

Majority      GAAAATT-----CTTGCAAA-ATTT---TTGAATAA-AC--ATTTGATTTGCATTCTTAGTAA-TAATTTGAAC
              |         |         |         |         |         |         |         |
              47850   47860   47870   47880   47890   47900   47910   47920
Human         GTAGATATACTGCAAGTCCTTCAAACAACCTGTAATTTAAATATTACCTATTTTATAGGCATTTTGAATAA-TATTTTTATT 47592
Kakapo       CAACGCT-----CATGCAAAGATCT---GTGAATGA-ACTGGTTTTGTTTTGATGCCTAGCAA-TGACTGGAAA 18814
GoldenEagle  GAGAATT-----TTTGCAAA-ATTG---TTGGACAA-AC--ATTTGGTTTGCTTTCTTATTGA-TTGTTTGAAC 20896
JapaneseQuail AAGC-----CTTGCAAA-ATTG---TTGGATAC-GC--ATTTGTTTTGCATTGGTG-----TAATTTGGTGC 18086
MediumGroundFinch GAAA-----CTTGCAAA-ATTG---GTGAACAA-AC--GTTTGATTTGCATTCTTACTGA-TAATTTGAAC 5616
GoodesThornscrubTortoise@AAAAGAGAA-----CAAGAAATGACTTGCCCTTATTTAA-ATACATTTGAAGTACATTAGAAGTAAGAAGACTGTGT 43195
    
```

```

Majority      CACTGGTAATTTTTTAAA---A-----T--A---AATTC-----AAGCATGTTGGACTA-TGT-----A-ATTAC
              |         |         |         |         |         |         |         |
              47930   47940   47950   47960   47970   47980   47990   48000
Human         TTTTGGTGAAGTTTTTGAATGAAGACAGTTAACTAATTTGTTGATTGAATTTATGTTACTTTACTTTAAATCTCACGGTAA 47672
Kakapo       ----GGCAGTTTAGGCA-----AATA-----AAACATGATCTAGTAACGG-----GATTC 18856
GoldenEagle  CACTGGTAATTTGATAAACAATATGGAATTAAGGAAAATTC-----TAGCATGTTGGACTGTTGTCCAGAGGACATTGC 20970
JapaneseQuail -ATTAACATTTATTTGA-----TAATATGAGCCACTG-----ATAAT 18122
MediumGroundFinch CACTAGTAATTTCTCTAA-----A-----A---AAGGC-----CAGCATGTTTGAC-----ATGGC 5658
GoodesThornscrubTortoise@ACTAGGCCTTCTAAAAAAGTACTAGTGGGCTGCCTGGGGTTCAGTTGAAAAGCATGATGAGATAGTGAAGTTGTTAAATGAT 43275
    
```

Monday, May 02, 2022 06:50 PM

Majority TGAAAAAATAATGCTTAATCCTTGAGCATTTTTGAA-ACATATTTGTCACCTGTATCCATCTTCAAGG-TGTATAGGTGA  
 48010 48020 48030 48040 48050 48060 48070 48080  
 Human CAGAATAAGGTAATTAAGTTCATGAGTGATTTAGAGTATATTGATGTTAATAGTCACAAAATATTAGGTAGTTTAGACGG 47752  
 Kakapo TGAGAAAGCAGAGCTGAAGCC---AGCATATTTCAA-ACATATTT-TTGCCCTCTGCATGTTTTTAAAG--ACATTAGTTA 18929  
 GoldenEagle TCAAAATACAAGGGCTGGTCCTTGAGCATTTTCTAA-ACAGCTTTGTCATCAGTATCCATCTTCAAGGGTGTACAGATGA 21049  
 JapaneseQuail TGGATAAATGGTATGAAATTA---AGGAAAGCTGAT-GCATATTA---GACTGT-----TGTTCAAAG--AAATTGCTGA 18188  
 MediumGroundFinch TCAAAATGTAAGGCCTGATCCTTGGGCCCTTTTCTAA-ACAGTTTTGTCACCTGTATCCATCTCCAGACTGTGTCGGTGA 5737  
 GoodesThornscrubTortoise@TTTTTTCATCATTCTTACTATAGAAGATAATGGGAA-ATTAATTTTCCAGTGGCACACTTCAAAGGAAATGAGAATGTGA 43354

Majority ----A-----ATAGCAGGTT-----ATGTTAATATTCACTACAAGTGAATTTACTGTTTTAGGTACTTTGTAAGTCT  
 48090 48100 48110 48120 48130 48140 48150 48160  
 Human CAATAGTAATATATCAGGAGAGGCT-CATTGTAGATAAGCCAT-AATATGGATTGACTGCATTATCATTTTTATAAACTT 47830  
 Kakapo -----CATACT-----A-ATTAAT-GTT--TATAAG--GACCTGCAGTGACAGG----ACAAGAGGGT 18977  
 GoldenEagle AAGGAAATTGACAGTATGTT-----GTATTAATATTCACTACAAGTCAAGTTACTGTCTTAAGTACTTTGTGTGTCT 21121  
 JapaneseQuail -----GAGTTT-----AAGTTATGATTC--T-CAAAC--AATTTCTG-AACAGC----TTGGTCATCG 18236  
 MediumGroundFinch -----CAGCAGGTT-----ACATTAGCAGTCACTACAGGTGAAGTTACTGTTTTAGGTACTTTCTATGTCT 5798  
 GoodesThornscrubTortoise@CTTACAGAAATTGAAGACTTAGTAATAAAGTTAAAGAGCAATTTGAAAACTCAAGTGATGTAAGTAC-TTGAAGAGA 43433

Majority TT-GTA---TGAGCTCAGCCTTAAGAA-A-TTTAGAGAAGTATAAAAT--TATATTTGCTTTGAAATTTCTTTTCTTTCT  
 48170 48180 48190 48200 48210 48220 48230 48240  
 Human TACATTCTTTGATCCCACCTTCAAGTACATTTTCAAATCAAACAATTTATA-ATTTCTCAGGTAAAATTATAATCTTCC 47909  
 Kakapo TCAGGA---TGGGTCAAACCTGAACCA-----GGGGAAGTTCAGGTT---AGATCTAAGGCAGAAGTTCTCCCTGTGA 19045  
 GoldenEagle T--GTA---AAAGAACAGCCTTAAAAGAAATTTAGACTTGAATAATTGAGGATGACTTCTTTGTGAGTTCTTTTACCACT 21196  
 JapaneseQuail TT-----A-CCCATCTTCAAGAC-----TGTGTAGGTAATATA----ACATACTTCCAACCTCCCTTTATGGTT 18295  
 MediumGroundFinch TTTGTA---AAGGAGCAGTCTTAAGAC---TGTAAGGAGCAGAATTC--TACACTTGGATTGAGATGACTTTTGTCTCT 5870  
 GoodesThornscrubTortoise@GGTAT---TAGCTGAGTGTGTGAAGAAAATAGTGAGATATTGACAAGGGTGTGTGCTAAGAAGTCTCTGGCCCTATG 43510

Majority TAATTCTGATCCCTT--GT---T-TTTTGTGCAAAATTTGAT---TATTGTT--TATTGTTGTTGAATTTTCAT--TTC  
 48250 48260 48270 48280 48290 48300 48310 48320  
 Human TAATTTTGGTCAAACCAGTTTTTTCACTTTTTAAAAATGTTCATATTAGTTCATTATAAGATGATTAATTTACAAGATAC 47989  
 Kakapo GGGTGTCTGAGGCGCT--G-----GCACAGGGTGCC---CAGAGGA---GCTGTGGCTG--CCCCAT--CCC 19099  
 GoldenEagle TAATTCTGAACCCTTATATCTCCTCTTTTGGACATAATTTGAT---TATTGTCCTTATTGTTGTGGAATATCAT--TTC 21270  
 JapaneseQuail TACTGCAAGTTACT-----AACCTAAG---TACT-----TGGTG-----TAT--CTT 18332  
 MediumGroundFinch TAATACTGAACCCT--G-----TTTTGGACA-AATTTGAT---TATTGTC---ATTGTTGAGGAATTTTCAT--TTC 5930  
 GoodesThornscrubTortoise@AACTTCACTCATTGAGATAGCATAAATAGTGA AAAATGCATTCCCTTACCCTTGTTTTCCAGGAAAATGTCAT--TTC 43588

Monday, May 02, 2022 06:50 PM

```

Majority      AGTTAAGAAT--TTATATCTAGATATGCAG-----ATTCTTGTTT-----CTGGATCAGTTTGTGA-----CAATATA
              48330      48340      48350      48360      48370      48380      48390      48400
Human         AGTCATAAATCTTGGGGATAGTGATGAGGATACTCTCGGAGAAATGCATTGTTAGGTAATTTTGTCACTGCATAAATGTC 48069
Kakapo        TGGCA-GTGT-TCAAGGCCAGGTTGGACA-----CAGGGGC-----TTGGAGCAACCTGC-----TCTA 19151
GoldenEagle   AGTTAAGCAT--TTATATTTAAATATACAA-----ATTATTTTTC-----CTGAATTAGTTTATAA-----GCCATATG 21332
JapaneseQuail CAGTA-AA-----AGAGCTACCTCAAAAAG-----GAAGGCAGCCTTTG-----ATA 18372
MediumGroundFinch AGTTAAGTGT--TTATATTTAAATATACAAAGATTTATTCTTGTTT-----CTGAACCAGGTTGGA-----CAGTATG 5995
GoodesThornscrubTortoise @TCTTGGAAT-A-GATTCTGGACATGCTGATCCATGTTTTTATCACCACCTCTGGATTGGATCATGA-----TATCTGCA 43661
    
```

```

Majority      GCAGAAATATGATTCTGTAAACATTGAGGGA--AGAATCCTATCTGCTATA-----TTATGATTCTTTGCAAGGGAGGC
              48410      48420      48430      48440      48450      48460      48470      48480
Human         ATAGAGTACATTTGCACAAAC-CTGCTACACATGTAGGCTATATGGTATATGTAGCCTTTTGCTCCTAGGCAACAAATTT 48148
Kakapo        GTGGAAGGTGTCCCTGCCCATGGCAGGGGGTTGGAACGGATGAGCT-----TTAAGGTCCCTTCCAACACAAAC 19221
GoldenEagle   GCAGAAAATCATTCTGTAAACATTGAGGGA--AGAATCCCATCTACTAGA-----TCAGAAATTTGTTGCAAGGGAGGA 21403
JapaneseQuail AATGAGCATGACTTTGT-----GAGA----TTTTCTTACTGCTTAC-----TCTTGACTCCTTGCATCTG---- 18428
MediumGroundFinch GCAAAATATTTATTCTGTAAATATTAAGGGA--AGGATCCCATCCACTAGA-----TTAGAATTTGTAGCAAGGGAGAA 6066
GoodesThornscrubTortoise @CTGAAGTGAAGTGAAAAACACT--GAGACAAGACTCTGGTGTACTCTAAGCTA--TCATGTCTCTTTTAGAGGAAGGC 43737
    
```

```

Majority      --CAGCATGTTACTGTTCTTGAT-CTGCAAATATTTATACTT----AATA-AAATCT-TTTTTTATGTTAGATGTGTAAG
              48490      48500      48510      48520      48530      48540      48550      48560
Human         GACAGCATGTTACTGTTCTGAATACTGGAGGCAGTTGCAACACAGTAATAAGTATTGATGTATCTAAACAGAAAAGGTAC 48228
Kakapo        --CAGTCTGTGACTGTCTGTACA-TTGTAATGATTGTACAT-----AAACCT-----TTCAGTGAAAC---TATG 19281
GoldenEagle   --CAGCTTGTAAG-GTTCCAGGT-CAGCAAATATCTAACTTTTCTAATA-AGTTCTCTTTTTTACGTTAGATGTTAAT 21478
JapaneseQuail --CGGTTATTTACTGTTCTTAC--CTGTGAGGAAATTCATTT-----AAACAT-----GTCTATTATAA----- 18483
MediumGroundFinch --CAGCATGTAAA-GTACAAGAT-CAGCAAATATCTAAGCTT----AAGA-AGTTCT-TTTTTTATGTTACATGTGTAAG 6136
GoodesThornscrubTortoise @TCTGGACCTTGACAGATGCTGAC-ATGCACAAAGTGATACTTTTCAGTCACAACAT-TGTCTTAGGGGACATCTACGTG 43815
    
```

```

Majority      TTTCTGAATTTTTTAAACATCACTGATATTAG-TATGTTGAAGTTGTGTTGTCAGAACTACAGGCCT--TTTATTACTAG
              48570      48580      48590      48600      48610      48620      48630      48640
Human         AATAAAAATATGGTATTATAATCTTATGGGACCACCATTGTATATGTGGCCTGTCAATGACCAAAT--GTAGTTATGTG 48306
Kakapo        TTCAGGAAATACATAAC-TTATTTCTTATAAG-CAACTT--AGTTGC-TTGTC---CTGCAG--CT--TTTAAATCTAA 19348
GoldenEagle   TTTCTGAGCTTTTTTAGCACCAGCTGACATTGA-TATGTTGAAGTTGTATTGTGCAAGCCACAGGCCT--TCTACTACTGC 21555
JapaneseQuail ----AGCATATTTTATCGTCAGCTGGCATTGA-TATGTTGAATTTGC-----AGAATCACAGGCCT--TGCATGTGTAG 18550
MediumGroundFinch TTTCTGATGTTTTTAAACACCAGCTGACATGAG-TATATTTAAAGTTGTGTTCTCAGAACTACAGGCCT--TTTACTACTGC 6213
GoodesThornscrubTortoise @A-GTTTGACACCCAAGGCTGTCCCATGCTAGCTGACTCAGGCTCATGGACTTGGGCTAAGGGGCTGCTTAATTGCAAT 43894
    
```



Monday, May 02, 2022 06:50 PM

```

Majority      GTAAATGACTG---TCAGT--TTTCTTTTAGCTTTTGA-GAATGTTTGTCTGTTTTGATTTTCATTTTATTATCTTGCT
              48650    48660    48670    48680    48690    48700    48710    48720
Human         GCACATGACTG---TGATTGTATTCTTTAGTCATTGGACAGTTTCTTTATGAGATTACATTTTAATGTTGTTG-CTTATT 48382
Kakapo        GAAAGTCCCT----TC--T---TTTTAAGAACTTAAGA-AAAAGTGTGGTGGTGGCTTTTAGGCTCAACTTCTTGTG 19418
GoldenEagle   TTGAACCTA---CCAGTGTTCCTTCAGCTTTTCT-GAAGATATTGTCTGTTCTCATTTTC-TATTATAATCTTGCT 21630
JapaneseQuail -----TG---TT-----TTCTTTTAGCTTTTCA---GTGCTGAGTCCATTTTGACTTTC-TATCATAATCATGCT 18608
MediumGroundFinch TTAAACTACTG---CTAGT--TTTCCTTTAGCTTTTTTTGAAAATATTGTCGAAGTCTATTCTTATTCCATTATCTTGCT 6288
GoodesThornscrubTortoise GTAGATGTTTGGGCTCAGGCAGTAGCCTTGCTCTGGGACCTTG TG-AGAGGGTGGGACCCAGAGTTTGGGCTCCAGCC 43973
    
```

```

Majority      AGGCTCTGATCTCTTTGGA-GAGCATAA---ACCTTGTTATGAACATCTTTGAATTGTTTATTTCTGTGTTGATGCAC--
              48730    48740    48750    48760    48770    48780    48790    48800
Human         AATAATTACTCTTTATAA--TACTGTTAAGAAAC--ATTAACAGCAATCTTAAATAGTTGATAATTTCAATTAATAAT-- 48456
Kakapo        AGGCCTTTTTCTTTTCAG--GTGAAGGA---CTGCCATATGGAAGTTTTAGAAGCAGTTATATATATGAAGATGCTC-- 19490
GoldenEagle   TGGTTCCGATCTCTTTGGA-GAGCATAA---CCTGTGCATAAACATCTGTGAATTCATTTTTT-TGTCTTGGTGCAC-- 21702
JapaneseQuail CATCTCTCATATCCTAGAA-GAGCGTAAGTAACCTTCTGTGAGAACCTTGAATTTGTTTCTTCATGAACACAGCAGC-- 18685
MediumGroundFinch CGACTCGGATTTCTTTAGA-GAGCATAA---TC---TCATGAAGATCCATGAGTTAATTTTTTCTGTGTTGGTGCAC-- 6358
GoodesThornscrubTortoise GAGCCCAAATGTCTTAGCCTGAGCAGAGTCACTGGCACAGGCCAGCTGTGGGTATCTGATTGCAGTGTAGATATACCC 44053
    
```

```

Majority      -AA-A---TGACTTGAATG-GCAGTTTAGGTAAACTGACATTTGGTTTGGTAAACAGGATTTTGAGAATCCAGAGCTGAAG
              48810    48820    48830    48840    48850    48860    48870    48880
Human         -AATAGGTGGATATGATTTTATTCCTTTGAAAGCCTGGCATTTGAATTTTCAAGAATTTTAAAGTATTCTCAGCTATGT 48535
Kakapo        -AT-----GCCATGAATT-GCA--TTGACGAAACCC-----CCGCACACTCACAAAATTAAGGGATGTAGATACGAAG 19555
GoldenEagle   -AGCAGACTGACTAGAAAG-GCAGTTTAGGTAAACTG-----TGGTTTGGTAAACAGGATTTCTGAGAAACCAGAGCTGAAG 21775
JapaneseQuail -AA-----TGACTTGAAGG-ACAGTTTAGGTAAACTGAAGTACAGTTTGATAGCAGGATTTCTGAGAAACAAGAGCTGAAG 18758
MediumGroundFinch -AA-----TGACTAGAAAG-ACTCCTTAAGTAAACTAAAATATGATTTGGTAAACAAGATTTCTGAGAAACCAGAGCTGAAA 6431
GoodesThornscrubTortoise GAGAATTATAGAGGAAGA-GCCAGTTCTCTGTAGTGACATTTGGGACTTGTATGAGTATTGAGTATTTTAAATGATAGTA 44132
    
```

```

Majority      CTTGGATCTTTTAAATGA-----TGTTTTGATACTGC-AATGTTTTAGAAGACA--TTAGTT-ATGGATATTGTAAA-
              48890    48900    48910    48920    48930    48940    48950    48960
Human         TTTTAAAGTCTTTTGGAAATTTGTAGTTTTTTTAC-ACAAATAGGAAAATTCATACATTTCTTTATTGTTGATATATAA 48614
Kakapo        -----TGAAAGA-----CGTTGATGCAA----GTTTTACAAAACGG-CTTGTC-AAAGACATGG----- 19603
GoldenEagle   CCAGGATATTTAGAAAA-----TATTTTTGACTCTG--GGTGTTTTTCAAGACA--TTAGTT-ATGCACATTGTAAA- 21842
JapaneseQuail -----CC----- 18760
MediumGroundFinch CCAGGATCTTTAAATAAATATTGCTGTTTCTGACCTTGCTAATGGTTTTGAAGACA--TTAGTA-AGGCAGATTGCAAA- 6507
GoodesThornscrubTortoise GTTGGGGCTATCTGGAGCCAGGGTGGAGTACATATGCTCCCTTTCCAGATGATGGCTAATTCAGGATACTGCCATT 44212
    
```

Monday, May 02, 2022 06:50 PM

|                          |                                                                                   |       |
|--------------------------|-----------------------------------------------------------------------------------|-------|
| Majority                 | TGGTTGTATATAAATAA-TTTTTTCACGTTTTAATGCTGT----AAGTTCAATGAGTA-----TGTAGTTGCT--T-AT   |       |
|                          | 48970 48980 48990 49000 49010 49020 49030 49040                                   |       |
| Human                    | GGACTGTTTTTTAATGTCTTTTCAGCCAATGGTAATGATAGTAAAAAATTTAAAGGAGAAGATAAAATGGATGGTGTCTCT | 48694 |
| Kakapo                   | -GGTTGAAGCAGAAGAA---TTGGCAGGGTTTTTACTAT---AGGTGTCACCAATT-----TCATTGCT--C-AC       | 19664 |
| GoldenEagle              | TGATTGTATATAAACAACTGTTTTACCTTTTCAGTGTCTGT---GTGTTTCAGTAAATACATAACTGCAGTTGCT--T-AT | 21915 |
| JapaneseQuail            | TGG--ATATATAAGGAA-TATCTTATTGACACTATTCTTC---AACTTCTAAGAGAA-----TCAAGTC-----        | 18818 |
| MediumGroundFinch        | TGATTGTACATAAATAA-TGTTTTTACCTTTTCAGTGTCTGT---ATGTTTCAGTAAGTA-----TGTAGCTGTT--T-AT | 6573  |
| GoodesThornscrubTortoise | AGGAGCCCCCAAATAGTTTGTCAACACCATGATTCTGG---CATCCCAATCTGAATT---CTTAAGTTCCA--GGAT     | 44283 |

|                          |                                                                                 |       |
|--------------------------|---------------------------------------------------------------------------------|-------|
| Majority                 | -TCTGTGTGTTTTAAGTTCAAGAAAT--TCCCTTATTTATAAAAACTGGAAAAGTT-----GTTTACTTTGTGATGG   |       |
|                          | 49050 49060 49070 49080 49090 49100 49110 49120                                 |       |
| Human                    | TCTCGTGTACTTCATATTCGAAAATTACCTGGGGAAGTAACAGAACTGAAGTTATTGCTTTAGGCTTACCTTTTGGTAA | 48774 |
| Kakapo                   | ATTTGTGTGTTTTAAGTTCAAGCAG-----TA-AAAAACATGTCAA-----ACTTACTTTGCAACTG             | 19721 |
| GoldenEagle              | -TCTGCAGCTTTTAAGTCTAAGAAAG---TCCCTTCTCTTAAAGAACTAGAAAAGGC-----ATTCCTCTGTGGTGG   | 21984 |
| JapaneseQuail            | --CCT--TTTT-----CAG--AA-----G---AACTACAAAGGTT-----ATTCCTCTATGAGGG               | 18860 |
| MediumGroundFinch        | -TCTGCAGATTTTAAATGTAAGAAAAAATCCCTTATCTTTAAAAACTGGAAAAGTT-----GTTTTCTCTGTAAAGG   | 6645  |
| GoodesThornscrubTortoise | STCCCTCAGAGACCATTTGAGGACATCATACTTCTAATAAGAAGATTTGTCACAACT-----GGTCATTTTGAACAAT  | 44356 |

|                          |                                                                                  |       |
|--------------------------|----------------------------------------------------------------------------------|-------|
| Majority                 | AGT-A-----T-A-G-----GTTACTTTTTTGCTGAACCTTCTTGTGAGGCTTTTG-CTTTTCAGGTGGAGGACTT     |       |
|                          | 49130 49140 49150 49160 49170 49180 49190 49200                                  |       |
| Human                    | GGTGACCAACATCCTTATGCTGAAAGGAAAAAATCAGGTACACTTCTTTTCAGGGTTTATGAAATGTTAAACCCCAACTA | 48854 |
| Kakapo                   | AGC-----TCCCAAATTCCTGGAGCTTTAAATGATACTATTG-ATCTT-----GACTTGT                     | 19772 |
| GoldenEagle              | -----GTTACTTTTATGCTGAACCTTCTTGTGAGGCTTTTTTCTTTTCAGGTGGAGGACTG                    | 22039 |
| JapaneseQuail            | -----GTTACTTTTATGCCAAACTTCTTGTGTGACTTCTT-TCTTTTCAGGTGGAGGGCTA                    | 18914 |
| MediumGroundFinch        | AGTAACCTCCTCTGTAAAGGG---GTTACTTTTTTCACTGAACCTTGGTGTGAGGCTTTGG-CTGTTCA--GGAGGATTG | 6717  |
| GoodesThornscrubTortoise | ACTTA--TGAGTGTTAAGGTT---GTCGCTAACTAGATACATAGTACATGTGACATATCTGTATTTGGAT-AACCTCAT  | 44429 |

|                          |                                                                                  |       |
|--------------------------|----------------------------------------------------------------------------------|-------|
| Majority                 | TTTAATGG----AATTTGTAGG--AAGAGTTAT--GTATGAAGTTGCTCATGCCAT--GAAGTGTATTGCTG----AAA  |       |
|                          | 49210 49220 49230 49240 49250 49260 49270 49280                                  |       |
| Human                    | TCCAGCAGGTGTGAATTAATGTAAAAGGGAGAA-AATAGTAGGTTATTTTTCTTAAA-GAACAGAAGTCTTATTCTCAC  | 48932 |
| Kakapo                   | TTTTACGT----CATTAGCAGG--CAGTGACTTTGGTAGGTAATTCATTGTAACAG--AATAC-----             | 19827 |
| GoldenEagle              | CTTAATGG----AAGTTTGTAGG--AACAGTTAT--ATATGAAGATGCTCATGCCAT--GAAGTGTATTGCTG----AAA | 22104 |
| JapaneseQuail            | CTCAATGG----AAGTTCTAG-----TGT--GTGTGAAGGTGCTGGTGCCAT--GAAGTGTATTGCTG----AAA      | 18972 |
| MediumGroundFinch        | CTTAATGG----AATTTGTAGG--AAGAGTTATCTGTGTGGAGATGCTCATGCCAT--GAAGT-CATTGCTG----AAA  | 6783  |
| GoodesThornscrubTortoise | AAAAACCT----AAATCATAGTGAAGCACGTTCCAGAGGGACTTTCCCATCCCATCTGAATGATAACTTTGGGGCAAC   | 44504 |

Monday, May 02, 2022 06:50 PM

```

Majority      ---TCCACAC-GATA---AAGGATAATATTTTAAAGTGGTTTAGATAAA--AATTGAAA--GATGTTAATGAAAGTTT
              49290   49300   49310   49320   49330   49340   49350   49360
Human         TTTTTCGAGTAGATGTCTGTGGGAAACTAATGCCTAGGTAGCCAAAGTGAGTGAATCACTATAGTTTTTAAACTTTGTCTT 49012
Kakapo        ---TTGGCAC---CG---AGGCATGTAATCATAGAATGGTTTGGGTTGG--AA---AG--GACCTTAGAGCTCATCCA 19889
GoldenEagle   ---TCCACAC-CAAA---AAAAAAAAAATTTTAAAGGGATGTAGATAAA--AAGTGAAA--GATGTTGATCAAAGTTT 22172
JapaneseQuail ---TCTACAA-----AAGAAAAATGTTCTAAAGGGGTATAGATAAA--AA---GT--GAATTTTAGGAGAGTTT 19032
MediumGroundFinch ---TCCACATACAAA---AAAGGTAATAATTTTAAAGTATATAGATAAA--AAGTGAAA--GATGTTGATGAAAGTTT 6852
GoodesThornscrubTortoise--TCTACCCTGATAGGCTATGGATGATCTTCTGGTAGGACTAGATTTCC--AGTTTAACTAATGTAATTTTATAATGT 44579
    
```

```

Majority      ATGAAAGTTGT-CTTGCCAAAGACAGGAG--AG-TTTGAAGATTTGCAGATTTTTTAAAG-GTGGCTGTTTTCAATTTGG
              49370   49380   49390   49400   49410   49420   49430   49440
Human         TTGAATTGACTTTAGGGCTCTAATTGAATAATTGTTATGAAATTGTGGAAAAACAAATGAAGTATTTCTTTTACTGTGG 49092
Kakapo        GCTCCAACCC--CCTGCCACGGGCAGGGA--CACCTCCACTAGAGCAGGTTGCTCCAA-GCCCCTGTGTCCAACATGG 19963
GoldenEagle   ATGGAACTTGG-CTTGTCAAAGACAAGGGATGAAGCAGAAAGATTGGCAGATTTTTTAACTATGGCTGTCACCAATTTCA 22251
JapaneseQuail ATGAAAGTTA-----CCAAAGACAAAAG--A---TGAACAAAAGTGTATTTTCTTA--TATCTACTATCACTTTTA 19097
MediumGroundFinch ATGAAAATTTGG-CTTGTCAAAGACAAG-----AAGAATTTGGCAGGTTTCTTGTGTCAGCTGCCATCAATTTCA 6920
GoodesThornscrubTortoiseATAAGAGATGTAGTCACCCTGGAATGGACTAAGGATTTTCAGACATTCAGAATCCTAAAG-GTGATCTTTTTTAAATAGG 44658
    
```

```

Majority      TTGTTTACATTTGTGT-----GTTTGAGTTGGATCAG-TTGCAACATTTCTAAATCATTTTGAGGCTGAGCA--TCACC
              49450   49460   49470   49480   49490   49500   49510   49520
Human         CTCTGTTCTTTGGTATCAGAAATCAGCAGGGGTACTAGTCGCATCTTTCCTTAAGCTTTATGAGAATATGAAATTTTATT 49172
Kakapo        CCTTGAACACT-----GCCAGGGATGGGGCAG-CCACAGCTTCTCTGGG-CACCCTGTGCCAGCGCC--TCAGC 20028
GoldenEagle   TTGTTACATTTGTGT-----GTTGAAGTTGAATCAG-TGAAAACATCTCAAATTTGTTTGTAGCTGAGC----TCACC 22321
JapaneseQuail TTATTTATGTTT-----GCGTGTTTTAACTCTA-CTGCACCATTACCAACATAGCAAAGAGGAGGCA--TTA-- 19162
MediumGroundFinch TTGTTACATTTGTGT-----GTTTAAAGTAGACCAG-TAGAAAACATTCAAAATCATTTTGCAGCTGAGC----TCACC 6990
GoodesThornscrubTortoiseTATTTAAAAAATATAT--AATTGGAGATATACCAATCTCTAGAACTGGAAGGGACCTCGAAGGTCATCG--AGTCC 44733
    
```

```

Majority      ---AAACTCCTGG---AGCATT-AGATGCTGCTTTTGATCTTGATCC-TGTTTTTACTTAATTAGGATGGAAC-GTTAA
              49530   49540   49550   49560   49570   49580   49590   49600
Human         TAAAAATGTAAATGATACCATTTAGAAGAATTTATGAAATTTAACTCCCTTTTATATACTTGAGGTTAATC---TGA 49249
Kakapo        ---ACCCTCACAG---GGAAG--AGCTTCTGCCTTAGATCTAACCTG-ACTTCCCTCTGGTTCAGTTTGAACCCATCAC 20098
GoldenEagle   ---AAACTCCTGG---AGCTTT-AAACGATACTATTAATCTTGATCT-TGTTTTTACTATATTAGCAGGGAAT-GTTAA 22391
JapaneseQuail -----CTTTTGG---AGT---AGACTCAGGTGGACATTTG-----TGTGTGGACAACCGGAATGATAA-TGCAC 19219
MediumGroundFinch ---AAACTCCTGG---AGCTTT-GAATGGTACTGTTTATCTT-----GTTTTTACTTAATTAGCAGGGAAT-GTTAG 7054
GoodesThornscrubTortoise--AGCCCCCTGGCTTCACTAGC-AGAACCAGTTTTTGCCCCAGATCCCTAAGTGGCCCCCTCAAGGACTGAACTCACAA 44809
    
```

Monday, May 02, 2022 06:50 PM

|                          |                                                                                   |       |
|--------------------------|-----------------------------------------------------------------------------------|-------|
| Majority                 | CAGTTGTTTTGGCAGTGTATTTCTTTG-----TATAATCAGACTCTTTAGCAT---G-----CAATGTAACAATGT--TT  |       |
|                          | 49610 49620 49630 49640 49650 49660 49670 49680                                   |       |
| Human                    | CATTTAATTTGTAATTTTGTCTCTTGTCTCTATATAAATTATACTGCTTTTAAATGACTTGGAATCTTACATTCT-CTA   | 49328 |
| Kakapo                   | CCCTTGCTCTGTCACACTACAGTCCCTGA-----TGAAGAGTCCCTCTCCAGCAT-----CCTTGTAGCCCCGT--TC    | 20162 |
| GoldenEagle              | CAGTGACTTTGGTAG-GTAATTCATTG-----TATTAACAGAATAATTTAGCAC-----AAGCTAATAATAT--TT      | 22453 |
| JapaneseQuail            | AGAATGTTTGAACACTATATCTTTCTG-----TAAATTAAGAACTTTAGGAG---G-----TAGATAGCAAAG-----    | 19280 |
| MediumGroundFinch        | GAGTGACTTTGGTAG-GTAGTTCATTG-----TATTAACAGAATAATTTAGCACTGAGGCATACAAAGTAATAATAT--TT | 7126  |
| GoodesThornscrubTortoise | CCCTGGGTTTAGCAGGCCAATGCTCAAACCACTGAGCTATCCCTCCCCTTATTATTTCTGTAGAAGCAAGCAGGGACCT   | 44889 |

|                          |                                                                                  |       |
|--------------------------|----------------------------------------------------------------------------------|-------|
| Majority                 | CGAGTGCAGTATTTAACTTGGGGAGTAAACGTAGAT-----TCTGTTTCTTTTGAT--AGCACATT-----GAG       |       |
|                          | 49690 49700 49710 49720 49730 49740 49750 49760                                  |       |
| Human                    | GGGTAGAAGTGGTAAAATTCTGATGCTAG--AAAATGTTTACATTTTCTCTAGCATTGTTGCAAGAATAGATTTGTGGG  | 49406 |
| Kakapo                   | AGACACTGGAAGCTGCTCTGAGGTCTCCACGCAGCT-----TCTCTCTCCAGGCTG-AACACATCG-----AAG       | 20226 |
| GoldenEagle              | CAAGTGCTGTATTTAACTTGGGGAATAAACATAGAT-----GTGCTGGTTTTGAT--GGCACATT-----AAG        | 22514 |
| JapaneseQuail            | -AAAATAATAAACACCACCACCGCAATCAGCTAAAAC-----CACATCTCTGGAT--GGGAGA-----GAG          | 19337 |
| MediumGroundFinch        | CAAGTGCTGTATTTAACTTGGGCAGTAAACATAGATATGTCATAGATGTGCCATTTTGTGCT--AGCACATT-----AAG | 7198  |
| GoodesThornscrubTortoise | CGAGTGCAGCTCTTGTGGCAGGAAGCATA-GTAGATGCAAAAACAGGCTTTGTCTTTGGATTTCCCATTTTCTGCAGAA  | 44968 |

|                          |                                                                                  |       |
|--------------------------|----------------------------------------------------------------------------------|-------|
| Majority                 | TAAAATTAGTTATTAGTTAAC-----ATTAATGATGTCTAAACTT-----AGGTAATT-TACTTCTGAAGTT---T     |       |
|                          | 49770 49780 49790 49800 49810 49820 49830 49840                                  |       |
| Human                    | TGTGAAAAATCATAGGTGGAAGGCAGAGCAGCGTGTACTCGGTTTTCTTCTGAGGTTAGCTTTAACTGTATACCTAAAC  | 49486 |
| Kakapo                   | TAAAATTGGTTATTAGTTAAC-----ATTAATGATGCCTAAACAT-----AGGTAATT-TACTTCTGAAGCT---T     | 20288 |
| GoldenEagle              | TAAAATTGGTTATTAGTTAAC-----ATTAATGATGTCTAAACAT-----AGGTAATC-TACTTCTGAAGTT---T     | 22576 |
| JapaneseQuail            | AGAATACAGCTATTAG-----AATGAATTCCTTTTTT-----TTTCTATC-TGCATCACTATGC---T             | 19391 |
| MediumGroundFinch        | TAAAATTACTTATTAGTTAAA-----ATTAATGATGCCTAAACTT-----AGGTAATT-TACTTCTGAAGTT---T     | 7260  |
| GoodesThornscrubTortoise | CAACATATGCTACAAGTGGTCTCTGGATCAAGAATTTCTCCATATGATACCAGTAGATGACCATATTTGTTAGGAT---C | 45045 |

|                          |                                                                                    |       |
|--------------------------|------------------------------------------------------------------------------------|-------|
| Majority                 | TCAAAT---TGATTACAATTAATAGTAATTGGAAGAGATT---TGAAGCAGTACGGTTCATGTGATTGGTAAGTGAATAA   |       |
|                          | 49850 49860 49870 49880 49890 49900 49910 49920                                    |       |
| Human                    | TTCAACAAGAGATTTCTAATCTGCTTATCAGAACATTTAAAAGTAACTGAAGGATTATATTTCTAGATAAATTGATTAAA   | 49566 |
| Kakapo                   | GCAAAT---TGATTACAATTAATAGTAATTGGAAGAGATC---TGAATTAAGACAGTACATGTGATTGGAAGAATAAGAA   | 20362 |
| GoldenEagle              | GCAAAT---TGATTACAATTAATAGTAATTGGAAGAGATC---TGAAGAAGTACAGTACATGCGATTGGAAGTATAATAA   | 22650 |
| JapaneseQuail            | GTAATT---TGCTTTTATTTCAATTTTCAGTTGCACTGCAC---TCTAGCCATAGTATTTTATTTTCTTAAGGGCAGGGG   | 19465 |
| MediumGroundFinch        | TCAAAT---TGATTACAATTAATAATAATTTGAAAGAGATT---TTAAGAAGTAGGTTACATGTGACTGGAAGGATTTGTAA | 7334  |
| GoodesThornscrubTortoise | CATGTCCATACTGCCAATGTGGAGTGTCTGAATGCTTA--TCCTCAGTACCTCTGCTCCCACCAGTACTTGCAAAGA      | 45123 |

Monday, May 02, 2022 06:50 PM

|                         |                                                                                    |       |
|-------------------------|------------------------------------------------------------------------------------|-------|
| Majority                | TTT-----AAT-----AATAGGGTATATTTTAAATTTTCTGAAGATA--T---G-CATGTGCATGTGAGTGAATTAAATT   |       |
|                         | 49930      49940      49950      49960      49970      49980      49990      50000 |       |
| Human                   | ATCATCTGAAT---AGATTGCTTAGATATTAATTTTATTTGAATTTA--TA--G-TATTA AAAAATTGTGCTACTTAAATT | 49638 |
| Kakapo                  | TTT-----AAT-----AGTAGGCTATAATTTAAATTTTCTAAAGATATATGTAGACATGTGCATGTGAATGAACTAAATT   | 20433 |
| GoldenEagle             | TTT-----AAT-----AATAGACTGTAATTTACATTTTTCGGCAGATAACTT--GGCATGTGCATGTGGATGAACTAAATT  | 22719 |
| JapaneseQuail           | TG-----ATTGACGTTTGTTTTGGATGGTCC--TG-----                                           | 19493 |
| MediumGroundFinch       | TTT-----AAT-----AATACTGCATACTTTACTTATTTCTACAGATA-----CA-----TG-----                | 7376  |
| GoodesThornscrubTortois | @TCTGGCCAATCTCAGAAGAGATAAGGTTTCAGTATTCTTGAAGGTGCC-----CACACTGTCCCAAGCAGTTACAGTT    | 45198 |

|                         |                                                                                    |       |
|-------------------------|------------------------------------------------------------------------------------|-------|
| Majority                | -----TTGATGCTCTTAACGG-T-----T---T--GG-TAAT-ATT-TTTCCTGAGATTTAGAAATTT               |       |
|                         | 50010      50020      50030      50040      50050      50060      50070      50080 |       |
| Human                   | TTCAGGCATTTTGGAACTAGCAACCGAGGAAGCAGCTATTACTATGGTTAATTACTATTCTGCTGTGACACCTCATCTT    | 49718 |
| Kakapo                  | AATGGTTGGACTCGATGATCTTAAAGGTCTTTTCCAACCTAGTTGAGTCTATG-ATTCTCTTCGATGAGTCTATAAATGT   | 20512 |
| GoldenEagle             | -----TTAATACTCTGAATGCCT-----GAACAAT-ATATCTTTTGC AAATTAAGAACTT                      | 22770 |
| JapaneseQuail           | -----TGCAACTTC                                                                     | 19502 |
| MediumGroundFinch       | -----GATTTAGAACTT                                                                  | 7389  |
| GoodesThornscrubTortois | @TCATGTCTGCTGCAAGAGTTATCTTGTCTCTTTGCCTTACTCCTGGCAAG-AAGGAACTCCTGAGGTTTCAAGTGTCT    | 45277 |

|                         |                                                                                    |       |
|-------------------------|------------------------------------------------------------------------------------|-------|
| Majority                | T-----T-AGAAA-----AAAC-CAAATAATCA--CAAACCCCAAACAT-TA                               |       |
|                         | 50090      50100      50110      50120      50130      50140      50150      50160 |       |
| Human                   | CGTAACCAACCAATATATATCCAGTACTCGAATCACAAAGAACTAAAGACAGATAATACATTAACCAAGTAAGTATGTG    | 49798 |
| Kakapo                  | TAATGCTTTGAATGCCTGAACAATGTATCTTCTTAGAAATTCAGAACTTTAAAAGTCAGGCAAACCCCAAACCTTCA      | 20592 |
| GoldenEagle             | T-----AAAA-----AAACCCAAACAAACACACAAAACCCCAAACCTCCTC                                | 22812 |
| JapaneseQuail           | C-----AACAG-----C-----CAATA-----                                                   | 19514 |
| MediumGroundFinch       | -----AGAAA-----AAA--T-----AAAA-----                                                | 7402  |
| GoodesThornscrubTortois | @GAGTTAGGTGCTTCAAATGTTCTTACGCTTTTAGGCGGTTACAGAAGGAATTACAGTTCTAAATTGAAAATACAACA     | 45357 |

|                         |                                                                                    |       |
|-------------------------|------------------------------------------------------------------------------------|-------|
| Majority                | ---AACCTTAGGATGTGAGAAATAAAATGTGGCTATT---A-----TTATCAATTTGGAT--AATTTCTGTCTGCATC     |       |
|                         | 50170      50180      50190      50200      50210      50220      50230      50240 |       |
| Human                   | TAGGTACATAAAATAAAATGGCCTAGAACATA-TTATGAAT-CTCATAAACATTAATAGGAAGGAAATGTTTACCTGTTCA  | 49876 |
| Kakapo                  | GAAAGCTTCAGGATCAGAGAAATAAATAGTGGCTATT---ACTGTTATTATCAATTTAGGT--AACTTCTGTCTGCAGC    | 20666 |
| GoldenEagle             | ---AACCTCAGGATGGGAGAAATAAAATGTGGCTATT---A-----TTATTAATTTAGTT--CATTCTGTCTGTATC      | 22877 |
| JapaneseQuail           | -----TACCACATTAGAAGTGCATTATAGTTAGA---A-----AACAAATCAGTAG--ATTTTGAACAGCAGC          | 19572 |
| MediumGroundFinch       | ---AATCTCCGGATGGGAGAAATAAAATGTGGCCATT---A-----TTATCAGTTTGGGT--AATTTCTGTCTGCATT     | 7467  |
| GoodesThornscrubTortois | @GCACATATGGATGCTTTTAAATGCCCTCCATACATGCCTGACTACCTTCGCTTTTCTGCATT-AAAGTCCAATTCATT    | 45436 |

Monday, May 02, 2022 06:50 PM

```

Majority      GCTATGCT--ATGGTAATTCATT----TTTGTCTACTTCAGTTGCATTTC-----CTCTAGC-----TGTAGTAT---
                50250      50260      50270      50280      50290      50300      50310      50320
Human         GATGTTCCCTTATAGGCATTTTCTT--GTTATTTTAAAGGTATTTTCATGCAGAATGTTTCTAAGTATTAATACTATGTC 49954
Kakapo        ACTATGCT--ATGGTGATTAATA----TTTTTACCACCTTCAGTTGCATTTC-----CTCTATC-----TATAGTAT--- 20727
GoldenEagle   GCTATGCC--ATGGTAATTCATT----TTTGTCCACTTCAGTTGCATTTC-----CTCTAGC-----TGTAGTGT--- 22938
JapaneseQuail AGACTGA---ATGTGGATGCA-----CTTGTCTA---GGTCTTAATTAA-----CATCGAT-----ATAG--- 19622
MediumGroundFinch GCTATGCT--GTGGTAACTC-----CTTGTCTACTTCAGTTGGATTTC-----CTCTAGCC----TGTGGTAT--- 7526
GoodesThornscrubTortoise@CTCTGAAT-TTGACAACCTTTCTGGCCCATGTAAAGCAGTTGAAGGTAA-----ATCTACCTGCAGCCCATTTGT--- 45507
    
```

```

Majority      -TTTTACATTTTTTTTAGGGCCTAAGTGAAGTG-CATTTGTTTTAT-CTG-----CAACATTGAGTAGCCACTATAC
                50330      50340      50350      50360      50370      50380      50390      50400
Human         ATTTTGAATTCCTTTAATCCCTGGTCAAATGTTCTTTTTCTTGTGCAAGTTAAA--ATTTTGTGTAGAACT-TAT 50030
Kakapo        -TTG-GCAT-TTTGAAGGGCCAAAGGGAAGTG-CATTAGTGT-----AACATTGAACAGCCACTATAC 20786
GoldenEagle   -TTTTACATATTTTAAGGGCCAAAGGAAAGTG-CATTAGTTTTAGACTGTG-----CAACATTGAACAGCCACTATAC 23009
JapaneseQuail -ATA---ATCTTTTATCTGCCTGACTGTGGGT-TATTTATTT-----GAACTCACGTTGCTGATGGGC 19680
MediumGroundFinch -TTTTACATATTTTAGGGACTAAATAGGTG-CATTCAATGTTAGGCTG-----CAGCATTGAACAGCCACTATAC 7595
GoodesThornscrubTortoise@CGTCAGATTAATATGAGGCTTCACACATTTGACACTCCTTCCCTCCCCCGGCCCAATTTTGTGTCAATGTTACTG 45586
    
```

```

Majority      CATATTGTAATGTTGT-GTTAGGATAGTTG--TTTATAACAACCT----TAGTTAG-GCTCA-----GT---GGATTTTT
                50410      50420      50430      50440      50450      50460      50470      50480
Human         CAGGTAGGATTTATTATTAGCATAACTG-TTTATAACAACCTCTCCTGCTTAGAATTTAAGGTAAGAAGTTCAGTGCCTTT 50109
Kakapo        CATAGTCCATGTGT-GTTAGAGTAGTTG--CGTAGAAAACCT----TACTCAGTGCTCT-----GT---GGGTTTTG 20847
GoldenEagle   CATATAGTAAGTGT-GCTATGGTAGATG--CTTAGAAAACCT----TAGTGCT-GCTCA-----GT---GCATTTTG 23069
JapaneseQuail AAAATTCTTTGTAG-TTTAGGATTAGTT--TCAGTACTATT---TGGTCA-----GGATTTTC 19732
MediumGroundFinch CATACTGTAAATGT-ATTAGCATAGTTG--CTTCAAAAACCT----CAGTGC----TCA-----GT---GTATTTTA 7652
GoodesThornscrubTortoise@GTTTTGGACATAG-CTAATGATAGCTGATTTTGAGCTATT---TCTCTGCCTGTGA-----GTTCAGATTTTT 45652
    
```

```

Majority      AATT--AGATGTGCAGCCTATGTGCAGATGTCCAGTTAAAAGCTGTTTATGTTGATGTTTGTGTTTACTATGTT
                50490      50500      50510      50520      50530      50540      50550      50560
Human         GGTATTGATTTTTTTTATAGGTCTTAATTTCTTACGGAAAATTTTTTTTTGAAGATGTGTTAATGGTTTTCTGGAAA 50189
Kakapo        AAA---AGAGGTGCAGCCTCTGTGCAGATGTCCAGTTAAAAGCTGTATAAGTTAATTTTTGCTTGCTTGACCATGTT 20923
GoldenEagle   AAAC---AGAGGGCAGCCTATGTGCAGTTTGCCAGTTAGAAGCTGTGTA-GTTAATTTTTAATTGCTTGACCATGTT 23145
JapaneseQuail CTT---TGTCTTGTGGCTGTATCTGGAC---TAAGGCTCCAGCTGTTATTACTGATGGGATGCTTCATAACAAGGAATA 19805
MediumGroundFinch AAAC---AG--GCACAGCCTATGTGCAGATGTGCCAATTTAAAAGCTGTAT---TAAAGTTTTCTTTGTTTCGCTATGTT 7723
GoodesThornscrubTortoise@ATTTTTTATGTGGAAAGTATCTTTCTGGTGGCAGTGGCATTAGCTTGCTAAGTGGGTAAGCTTTCAGCTGTAATAACTG 45732
    
```

Monday, May 02, 2022 06:50 PM

```

Majority      TGTTTATTTAAG-ATGAAATTCCTGTGAAGTGGTTGGTTTG---TATGGTAAGATA-ATCTTATTA-----TTA
              50570      50580      50590      50600      50610      50620      50630      50640
Human         AGAAATCTTAAGGATGAAGAATATGTGAATGTATTGATGTTTTAAAAATGTAATATAGAAGATATTGT--TTAAAATTAA 50267
Kakapo        TGTTTATTTCA---TAGAATCCCAGCC---TGGTTTGGGTTG---GAAGGGACATCA-AGCTCAT-----CCA 20981
GoldenEagle   TACTTATTTAAG-TTCAAATTCCTGAGAGGTGGTATTCTTTG---TACGATAAGATA-GTTTTATTA-----CTG 23210
JapaneseQuail TGATTAGTGCAG--TGCAGTACTGGCC---TGACAGGGTAAG---GATAATAAGGTATAGCATACTT-----TTA 19867
MediumGroundFinch TACTTATTTAAG-CTCAAATTCCTCTTAAGCAATAGTCTTTG---TAGCGTAAGATA-GTTTTAATA-----TTG 7788
GoodesThornscrubTortoise CATCTATCTTAT-ACAAATATCAAGAGATACGGTTGGTATTGCTATTTTCATCAAATATTTCTTCCAAGATGGTAACTGA 45811
    
```

```

Majority      ATTGGTCAATATT---TTACCATGCTCGTGGCCCTTTTCCATTATACAAAT-----T---T-----TA
              50650      50660      50670      50680      50690      50700      50710      50720
Human         TGTATTCAAAAATAGCATTAGAATGTTTTCCGACCTACATTATAAGACTGCTGTAATGATCTAAAACCTTTAGCTGTTTTA 50347
Kakapo        GCT--CCAACCCC---CTGCCACAGGCAGGGACCCCTTCCACTAGAGCAG-----G-----TT 21029
GoldenEagle   ATTGGTCAAGATT---TTCCTTTGCACGTGGCCCATGTCCATGGTAAAAATCCACCTATTGCTACTGGTTAATGCTTTA 23286
JapaneseQuail AGT---CAATACT---CAACCATACTCCTGTCTCCCCAGAGATCTCAAA-----19911
MediumGroundFinch ATTGGTCAAGATT---TTTGTATGCACATGGCTCATGTCTGTGATAAACA-----7835
GoodesThornscrubTortoise ATTCTCCCTGTTGAGCCAATCATTCTCGTGGCACTTTTTCTGTATTTGCAATGTTTCTTTTAGTGAAGTCTTTCTCCACA 45891
    
```

```

Majority      ----A-GTTATAAACTT---TATGT-----CTAACAAAGTATGGATCA-----ATGCA
              50730      50740      50750      50760      50770      50780      50790      50800
Human         ATATA-GTTTTAAAATAATGATATCTTTCTCTG--TCAGTAAAATACAACTTT-----TT-----CTTAAT 50407
Kakapo        -----GCTCCAAGCCCC---TGTGT-----CCAACCTGGCCTTGAACA-----CTGCC 21069
GoldenEagle   GTTCAGGTGGTAAAATACTCCA-CATGTAGTCGTGGCCTAGCAAGGCAAGGATAATGGG-----GTATATA 23350
JapaneseQuail -----ACAACAGAAGC-----C-----TGACAGAGT-----AAGCA 19937
MediumGroundFinch -----GCAAAAAAACCC---CAT-----TAACAAA-----ATGTA 7862
GoodesThornscrubTortoise AGCCACATTAGAAGGCTTTTGGGATTCTACGTGTAGCAGACAGAAATTTGTATCACAGGTACCATATCTAAATGGCTGGCA 45971
    
```

```

Majority      AAGAATGTTGAAGC-TACAGTTTCCCAGAGCAC-TTCTGCCCCCCCT---C-----C-----
              50810      50820      50830      50840      50850      50860      50870      50880
Human         AAAAATGTAATGGAATAACTGTTCTCATAGAT--TTTTGTCACTTTACAAAG---TG--ACAAAATCATTTTGTAGTTT 50480
Kakapo        AGGGATGGGGCAGC-CACAGCTTCCCTGGGCACCCTGTGCCAGCGCCT---C-----21117
GoldenEagle   AAGTATGTTGAAGTACAAAGTCTTGCAAGACACACTCCGCCCCCCCC---CCCCCCCCCCCCCCCCGCAAGCCCCCA 23427
JapaneseQuail TAGAATGTGTATCC-TGCAATTTT--AGAATA-----19966
MediumGroundFinch ATTAACATTGA-----CC--AATGTA-----ATCT-----7885
GoodesThornscrubTortoise CACTGTATTTCTATTGCTATTACCTGTACACCTGCAGCCACCCTTGACAGTTTGTACAGTGTGAGGCAAGGCAGTT 46051
    
```

Monday, May 02, 2022 06:50 PM

```

Majority      ----AAAGCA--AT-----CTTTAAGGTTAACAGATGCTGA----CTTCATACTATTTTCATATTTTTTCATGT--TTTT
              50890   50900   50910   50920   50930   50940   50950   50960
Human         ATGGAAAATAAGCTTGTAAAACTTTTTACCTAAAAGATAGGACTGAAATTTTCAGCTTTTTTAATTTGATGATGAGTTTTT 50560
Kakapo        -----AGC---AC-----CCTCACAGGGAAGAGCTTCTGC---CTTAGATCTAACTTGAATCTC-----CCCT 21169
GoldenEagle   AACAACAGCAAAACCCCTTAAATTTTAAAGGTTAACAAATGCAGA----CTTCAGAGTACTTCACATTCTTCATGT--TTTC 23501
JapaneseQuail -----AAA-----AT-----ATGCAAGCTTTACAGAACTTAA---TCTCATAATTTTTCTTTTTTTC--TTT--TTTT 20022
MediumGroundFinch -----A-----AC-----CTTCAAGGTTAACAAATGTGGA---CTTCAGACAACCTTCATATTCTATGTGT--TTTT 7941
GoodesThornscrubTortoise@CTGATACCAGCCTGAATCTTTTTTTAATTTGACATATGCAAAGCAGCCACATGGCAGCAACCATCATACAAAGCGTTGT 46131
    
```

```

Majority      ATTTTATTTTTAAATATAATATCTTCTTTTTCTGTCTTTTCAAGCGTTTG--TG-----AATTCC---ACATTTTA
              50970   50980   50990   51000   51010   51020   51030   51040
Human         AATTTCTTTTGAAAAAGAATGTATGCTTCTAATAATTTATCAAGAGGAAGAATACCAAAGAAAATATCTGCTCTTCTTT 50640
Kakapo        CTGGCAGGTT--AAGCCATTCCCCCTTGACTGTCCTTACAGGCCCTTG--TC-----AAAAGT---CCTTCTCT 21233
GoldenEagle   ATCTTATTTTTGAATGTAATATCTTCTTTT-TTGCTCTTTCAAACATTT---TA-----AATTCC---AGATTTTA 23565
JapaneseQuail TTTTTTTTCATATGCATTATAGACTCCATTTCCCTTCATTTCAAGCGTTC---TG-----AATTCC---AGATTTTA 20087
MediumGroundFinch ATAATATTTT-GAGTATAGTATCTCCTTTTCTGTCTTTCAAACATTT---TG-----AATTCC---AAATTTTA 8005
GoodesThornscrubTortoise@GCCTAAATTCAACTACAGTGGATGACGTTTCCGTCCTCAGTGTGTTGAGCC-----AATGCCACACACTCTC 46202
    
```

```

Majority      TCTTTAGCTTGGATTTTTG---ATGTTTCACGTATTAATAAAGAATCTG---TTTTTTTTTTTTTAGGATCTTGTTTA
              51050   51060   51070   51080   51090   51100   51110   51120
Human         CTTTTTACTTTAGATTTTTTGCATTTTTAACTTATTTTTAACAAATAATGTTTATACTTATGGTGTACAATGTGATGTT 50720
Kakapo        AATGAAGCTTAAATTCCTG---ATAGGTG--ATATTCTTTGACTATTCTA---TTATTGATTGGTCAAGATCTTCTTT- 21304
GoldenEagle   TCTTTAGCTTGAACTTTTG---ATGCTC---GTACTAAAACAAAGGTCCTG---TTTTTCTGTGTTTGGGAACCTATTGA 23636
JapaneseQuail TCTTTAGCTTGGG-TTCTG---AGGTATC-TGTATGAAAAACAAGAATCTGA--TTTTCCGTTTTTTAGGAATCTGTTGA 20160
MediumGroundFinch TCTATAGGTTGAACTTTTG---AAGATTTACATGCTAAAGTAAAGGGCCTG---TGTATTTGCTTTTGGGAGCCTG--- 8075
GoodesThornscrubTortoise@ACTCTCTGTTAGTTTTGTT---TCTCTTCAGGCATCTCACATTTGAATTGGCCGTTTTTTGAAAGTTAGAATATTTGGTCA 46279
    
```

```

Majority      TTCTTGTTGATATGTTT---GTCACCTTGATCAGACTA---AAAATCTTCTCTTCCCTACGTTCTATCACTTTCATCAGGG
              51130   51140   51150   51160   51170   51180   51190   51200
Human         TTAATACATATATATATGGAATGATCAAATCTGGCTGGTTAACATATTCATCTCTTTCAGTACTTACAATTTCTTTATGG 50800
Kakapo        TGACATGGCCATGT-----ACATGGTAAAA-----ATCCACCTATTACTACTGGTTAACGCTTTAGTTCAAG 21367
GoldenEagle   CACTTGTGGAGAAGTTT---GTCACCTGGATCAGACCA---AAAGTCTCCTCTTCCCTACGTTTTATCTGTGACATCAGGC 23709
JapaneseQuail CTCTTGACAGC-AAGTCT---CTCATTTGATCCTTCCA---AAGATCCTCTCTTCTATCTTCTGTGATCCGTTATCAGGC 20232
MediumGroundFinch -----GGAGAGGT-----CACTGG-TCAG-----CTCCCTTCCCTACATTCTATCACTTACATCAGGG 8126
GoodesThornscrubTortoise@TTGTCTGTTTTGTGT---GGTGCCTA-TTATAGTA---TTAA--TTCTTTTATTTTGGACATCCATTGAGTCAGAG 46349
    
```



Monday, May 02, 2022 06:50 PM

```

Majority      T-AGGTACATATAGGA-TA-T--TTTTTAAAGGAAAGAACATAGCAGAAATAA--AA--CTGTATTGTTTTCTGTATAC
              51210   51220   51230   51240   51250   51260   51270   51280
Human         T-AAGAACATTTAAAATTCCTTTAGCTATTTTGGAAAGTATACAGTGGAAATGTGGAAAACTGTTTTCCCTCTGCTCACAC 50879
Kakapo        T--GGTAAGACTTCCACGA----TGTAAGTAAATGGTGTAGCAAGGCAAGGATAATGGG--GTATAAAGTACTTGGAAGTAC 21439
GoldenEagle   T-GGGTATATATA-----TTTAAGGAAAGAACCT--CAGAAACAA--AA--CCACAATGTTCTCTGTATAC 23769
JapaneseQuail C-AGGTGCATACA-----CTTAGGAA---AACCT--CAGAAATAG-----CTGTGGTGGTTTCT-TTGTGT 20286
MediumGroundFinch TAGGGTACGTATAGGAAAAC--TTCTTTAAGAAAAGAACTTTCCAGAAATGA--AA--CCACAGTGATCTCTATTATAC 8200
GoodesThornscrubTortoise @GAGAATCCTATAGGGGTAATGCCTTTCTAAAGAAGAGACAGAGTGAGAGGGAGAATGTGTGTCTAATTGGGTTTTTT 46429
    
```

```

Majority      T-----CAAAGTATTTTTGTTT-GCGGTTTTCT--GCTGGTTGTTTTTATACAGATGATTGTTTTTCAGTAGCCAGTGT
              51290   51300   51310   51320   51330   51340   51350   51360
Human         CACAACAATCAACACAGAAGGCTTCTGTGGCCTCAAATGTGGGGGAATTTTTTCCACGCCAAG--CAAGCAGTCAGGTC 50957
Kakapo        -----CAAGTATTGCAGAAC-ACACTTTTCT--GCTCCCCAAAACAAGAAGAAAAAAT-CCCACCAACCAAGA 21505
GoldenEagle   T----CTCCAATTTGTGGTGTCT-GCGGTTTCTTAGCTGGTGTGTTTTATGCAAATGATTGTGTTTAGTAGCCACTGC 23844
JapaneseQuail T-----CCAGCCTTTCTTTG-GTGGTTTTCT---TTCATTGCTTTATACAGGTGGTGTGTTTTTCAGTAACCACTGT 20353
MediumGroundFinch -----AATTTGCGATTGTCT-GCAGTTTTGT--GCTGGTTGGTTGAGACAGATGATTGTGTTTCAGTAGCCAGTGT 8267
GoodesThornscrubTortoise @----TTCCCAAAGAATTTTTTTTTTAGCATTTTTTTTGTGGTTAATTTTTTACACCTGTGATTAGTTTGGAGGTCTTGAT 46505
    
```

```

Majority      A---ATATTTGATCTTTCTGTTTGGT-ATAA--CATTATTTTAACTAGATATCTTCA--ATTCCATTGCCTTT-CTCTT
              51370   51380   51390   51400   51410   51420   51430   51440
Human         TGCAGTGTCTCCAACCTAGCTCAGTTTCAA--CACTGTCTGCCGGGAGATAGCATCA-GATCCACAGGTTGAGGGGTC 51034
Kakapo        A---GCCTAAG-----T-----A-----AACTGAACATGT-----AACCTTTAATTTT-AACAT 21547
GoldenEagle   A---ATATTTAATCTTTCTCTCTGGTCATAATCCACAACCTGTAACTAGATATCTTCATAATTCATTACCTTT-CTCTT 23920
JapaneseQuail G---ATACTTGATCTTTCTGTCTGGGAGAATCCATGATTTTAACTAAATATTTTCATAATTCATTGCCTT--CTTTT 20428
MediumGroundFinch A---ACATTTG-----TCTAAT-----AACTAGATATCTTCA--GTTGCATTGCCTTT-CTGTT 8316
GoodesThornscrubTortoise @T--ATCCTCCACAATTAGAGAGATGACTAAAAGATTCTAGGAAATGAGGTAATGGC---AGTTTGTGGACC--ATGAT 46578
    
```

```

Majority      AGTCAAATATGTCCTGTGTGGATA--TGTGCCTTATGT-TCTACATGTTGTTAACA-TTAAATTTCTTATATTTAGGTAA
              51450   51460   51470   51480   51490   51500   51510   51520
Human         AGTCCACAAGATCTCCTGAGACACCAGCAAGTCAGGCCCTCTGGAACCTCTGA----TTGACCAGCTTCAAGTTGGGGTT 51110
Kakapo        TAACAAATGCAGCCCTCGGAGA-----ACTTTGTGT-TCTTCAATGTT-----TT---TCTCTTATTTTTGAGTGT 21608
GoldenEagle   GGTCAGATATTTCTGTGTGGATA--TGTGTCTATGT-TCTACTTGTGTAACG-TTAAATTTTCATATATTTAGCTAA 23996
JapaneseQuail AGTCAAGTATGTTCTATATGGATA--TATACCTGATG---CTACTTCTT---AACA-TTGAATTTGTGTATTCAACATA 20499
MediumGroundFinch AGTCACTTATTTCTGTCTGGATA--TGTGTCTGATGT-TCTACA-GCTGATAACA-TTAAATCACATATATTTAGCCAA 8391
GoodesThornscrubTortoise @AGTGAGAATGGCTTAGGTGGATAATCTGCTGTTAGT-ACTGCAGTCTTTGAGCACTCAAATGCTTTGAACTTTGGGAA 46657
    
```

Monday, May 02, 2022 06:50 PM

```

Majority      G-----GTGATACAAGTAGTATTTTCTATATTAGCA-ACAGCACTGAATAATACTGTTAGTAAGTATCTTG
              51530   51540   51550   51560   51570   51580   51590   51600
Human         CCCACAACCC-CCTTTTTGGATTTCATTAATTTGCTAGAGCAGCACACAGAACTCAAGGAAACATTTACTGAGATTTACT 51189
Kakapo        A-----GTTTCTCCTTTTTTATGTCTTTCTCCCAA-ACACTTCAAAAGTTCAAGCTAAAGAGAAAAGCTG 21673
GoldenEagle   T-----GTGACACAAGAAGTACTTTCTACATTAGCA-ACAACAATGAATAATACTGTTAGTAAGCTTCTTG 24061
JapaneseQuail G-----GTGATACA---AATATTTTTGACATTAGCA-GCAACTATGAATATATCTGTTAGGAAGTATCCTG 20561
MediumGroundFinch G-----GTAACAACAAGTAGTGCTTTCTATGT--AGA-ACAGCACTGAATACTACTGCTATTAGGTGTCTTG 8454
GoodesThornscrubTortoiseATTCTGCCTTGTCTTGTGCTGGGAGCAGAAGACCCAAGGTAAGA-ATTCTGTGAAATAATAGTTTCAAAAAGAATTCC 46736
    
```

```

Majority      TCTTTAGTATATAG--A-TGATTGTACTGAAAGATATAATAAGT-TTCTAAGAATGC--AA--A-TTA-CTTTTTCTTGT
              51610   51620   51630   51640   51650   51660   51670   51680
Human         AGTTTATTATATAG-----GATATTA AAAAGGATAATAAGC-CTCTAATCATGC-----CTTGATCTTTCAGGT 51252
Kakapo        GAATTTAAAGACAG-----CCATACTAAAACAA-----AG-----TTCCTGTTCT 21713
GoldenEagle   TCTTAAATGTATAA--ACTGATTGTATTGGAGGATGAAATAAGTGTTCAGGAAAGCCTAAGTATTTACCTTTTTTTTGT 24139
JapaneseQuail GCTTTT-TATATGA--AGTGATTGTACTGGAAGATAAAAATAACTGTTCCAAGAAAGCACAAATACTTAAATTTCTCTTGT 20638
MediumGroundFinch TCTTTAGTATTTA-----CAAAGT-----TA-----CTTTTTTTTT 8493
GoodesThornscrubTortoiseAGGTGAGTAATTTTTTTCATTGATAGCACAAATGGATATTAGCAATCTAAATGAGAATTTGAAATGATCTCTCTTTGCTTTT 46816
    
```

```

Majority      AGTTGGTTGTTGGTGTGTAGTGGTATTTGT--GAAACAGA-AG-TGACTCGTGCAGAAAGTATGTTTATTTATAAATT-A
              51690   51700   51710   51720   51730   51740   51750   51760
Human         GACCAGTCCCATCTTAAAGTGGGGCTGCCAGCCATCAGTCAACTCATTAGCATACAAAATATATCATTTTGGAGATTTA 51332
Kakapo        GGGAACCTGTTGGTACTTGTGGAAATGTTT--GTCAC-----TGGCTCAGACCAAAGGTCTCT-TCTTCCTATATT-C 21782
GoldenEagle   AGTTGGTTGGTGGTGTGTACTGACAGTTGT--GAAACAGATAT-TGACTCCTGCAGAAAGGATATTTATTTATCAATT-A 24215
JapaneseQuail AGTTGGTTATTGGGGTGTAGTGATGATTGT--GATCCAGA--G-TAAGTGTGCAGAAATCAGGT----TTATCAATT-A 20708
MediumGroundFinch AATTGGTTGTTGATGTGTACTGGCAGTTGT--GAACCAGA--G-TGATTTCTGCAGGAAGTATGTGATTTGTACATT-A 8567
GoodesThornscrubTortoiseAGGAAAATGTCAATGCATAATTGTTTTAACTAGTTATAAAAAA-TGAAACTTGCCAAGAATTTCTTAAAAAAAATA-A 46894
    
```

```

Majority      TTTC-ACTAG---TACAGATATGAGGAAATT----TATCG--TCAGTGTCTTGTGATCAATTTTCAATATTTTTTCC-
              51770   51780   51790   51800   51810   51820   51830   51840
Human         TTAGGAATTTAGAGTTGTATGCCAGGAAATGGGGTTGAGGACCAAATGTCTATTTTACAATGTCACAATACAGTATTATG 51412
Kakapo        TGTC-TGTGA---CATCAAGCCGGGTATATA----TATT---TAAGAACCTCAGAAGCAAACCACAGTAGTTCTTCCA 21851
GoldenEagle   TTTC-GCTA---CACTGATATGCAGGGATT----TATCA--TCAGCATCTTGTGATGAATTTTAAAAATTTTTTCC- 24283
JapaneseQuail TCCTGTCTCG---TGCAGGTATAAGAAGATC----TACAG--TTAACCTTTC-----CCCC----CACCCCTCC- 20766
MediumGroundFinch TTTC-ACTAG---TGCAGATATGCAGGAATT----TATAG--CCAGTGTCTTGTGGTCATTTT---ACTTTTTTTCC- 8633
GoodesThornscrubTortoiseAGGTAATTAAGGAAACAGGCATCAGTCAACTGGACTATCA--TGTGACATTTAGCACAGTATTTGAATGTGGCCTTCTG 46972
    
```

Monday, May 02, 2022 06:50 PM

```

Majority      --CT----TATTTTCTGTTATTAATGGGTG-----AGATCAAATTTTATTGTATGCAACTTT---TTTT-----GCCT
              51850   51860   51870   51880   51890   51900   51910   51920
Human         CATTACAGTAGTTGCCATGCTGTGCGGTAGATCACCAGAACCTATTTCTTCTGTCTGAAACTTTGTACTTTGACCATCAT 51492
Kakapo        AGCT----GGTTGTTTTATGCAGATGATTG-----TGTGAAGCCACTGCAATATTTAATCTT---TCT-----GTCT 21912
GoldenEagle   --CT----TCTTTCCAGGAAATAATAGGTG-----AAAGCAACTTTTCATTGTATGCAAAATC---TTT-----GCCC 24342
JapaneseQuail -----ACTCCCTCATGTCAAAGAAAG-----AAGTAAACCT-TATTGTATGCCAGATC---TTTG-----CCCT 20822
MediumGroundFinch --CT----AATTTTCAGGAACTAATGGGTG-----AAAGCAACTTTATATTGTATCCAACCTTT---TTTT-----GCCT 8693
GoodesThornscrubTortoise @ATT----TGTATTTGGTGAGTAGTGAGGACCTCATAGAAGAAATGATTGTAGGGGGCAACCTTA-GTTTGAGTGATCAT 47047
    
```

```

Majority      GTACCCATATAGTTCATTTCATATATTAGGAGA---TTTTGTGAATATGAGAGAAGGATATTTTATAGTAAAATTATACA
              51930   51940   51950   51960   51970   51980   51990   52000
Human         CACCCCTTCCCTGTTCACTCCTCCCTCCCCAGC-CTCTGGTGACTATTTTTTCTACTCTCTACTAATGTGAGTTCAGCTT 51571
Kakapo        G--GTCATA-ATCTCCATTTATAAACTAGAAGGGGGCTACAAGGATGCTGGAGAGGGACTCTTCATCA-GGGACTGTAGC 21988
GoldenEagle   ATAGCCACATAGTTACATTTCTATATTAGGAGA---TTGCGTGAATATGAAAGAAGATTATTGTAAAGGAAAATTACACA 24419
JapaneseQuail G----AGCA-----ATTTCTGTACAGGGAGA---AATTGTGAATGTGAGAGGAGGA-ACCCTAGAGGAGAAT----- 20881
MediumGroundFinch GTACCCACATAGTTACATTTCTGTATTAGGAGA---TTGTGTGCTTAT-AAAAAAGTTTATGATACAG-AAAATTATGCA 8768
GoodesThornscrubTortoise @CGCTAATTCAGTTCAAACCTAAATGGAAGGATAAACAAAAATAGATCTGTGACTAGGATTTTTTATTTTAAAAGGGCTAA 47127
    
```

```

Majority      TTT---AGAATAAGGGT-T-A--A-----T-----C-----T-----T-----CAGAACA-TTTTAG-
              52010   52020   52030   52040   52050   52060   52070   52080
Human         TTTT---AGATTACATATGTAAGTGAGATAATGTGTTATTTGTCTTTCTTTGTTGACTTATTCACTTAGCACACACAGT 51648
Kakapo        GAT---AGGACAAGGGG-----T-GATGG-GTTCAA- 22014
GoldenEagle   TCT---AATTTAAAGGCTTCATATAT-----TTTCAAGGTCAATTATGTATTTTGGCCTCAGAACA-CTTTAG- 24484
JapaneseQuail -----GAATGAGGAA-----GAATA-TTTTGCT 20903
MediumGroundFinch TCT---AAAATAAAGGT-----C-----T-----CAGAAC--TCTTAG- 8796
GoodesThornscrubTortoise @TTTAAAAAAGTAAGGAAATTAGTTAGGGAAGTGGATTGGACTGAAGAACTTGTGGATCTAAAGGCAGAGGAGGCTTGA 47207
    
```

```

Majority      GTCATATTTA--TGAATTTCTAGA---A--TTAAAT-----A--GTGTAGGGAAAAGCTCTTCTAGGATGAA
              52090   52100   52110   52120   52130   52140   52150   52160
Human         GTCTCTTAAAATGACATTTAATATCCCATTTCTAGTTCGTTATTTAAGTAATTTGCAAGTACATTCTCATTTTAAA 51728
Kakapo        ACTGAAACAG--GGGAAGTTCAGG-----TTAGAT-----CTAAGGCAGAAGCTCTTCCCTGTGAGG 22069
GoldenEagle   GTCATATTTA--TGTATTTCTCGAAA-A--TTAAAAA-----AAGTGTGCAGAGAAAACTCCTCTAGGATGAA 24557
JapaneseQuail GCAGTAGCTC--TTAATTTCTAGA-----GTAAAT-----ATTCAATTACAGTTCTTGTCATAGAAA 20957
MediumGroundFinch GTCATATTTA--CATATTTCTTTT-----TTAAAA-----GTGCAGAGAAAAGCTCCTCTAGGATGAA 8852
GoodesThornscrubTortoise @TTACTTCAAGTTAAAGTTGCAGAAACTA--TCAGAAGCTGCATCCAAGAAAGGGGGGAAAAAATCATAGGCAGGA 47285
    
```

Monday, May 02, 2022 06:50 PM

|                          |                                                                                  |       |
|--------------------------|----------------------------------------------------------------------------------|-------|
| Majority                 | ATTTTA-----A-----T-GAAATGGTTTTTAAGATCAT--G---ATACTATTAA---G-----T-               |       |
|                          | 52170 52180 52190 52200 52210 52220 52230 52240                                  |       |
| Human                    | AGATTAAACGAA--AGGAACATGTAAAGAATAAAGCTGGGGGCTGGGCTTGGTGGCTTATACTGGTAATCCAGCACTTT  | 51806 |
| Kakapo                   | GTGCTG-----AGGCGCTGGCA---CA---G-----ACTTTTC-----                                 | 22096 |
| GoldenEagle              | ATCTCATTAAGATCATAGAATCATTTAGGTTGGAAAAGACCTTCAAGATCATCGAGTCCAACCATCAACCATGCCACTA  | 24637 |
| JapaneseQuail            | ATTACAC-----ACACAAAACATAGGACTGT-----GTATCTCAA---G-----                           | 20994 |
| MediumGroundFinch        | ATTTTA-----T-----GAAATGTTTTCAAATCA-----GCTATTA-----                              | 8885  |
| GoodesThornscrubTortoise | ATTGTAGACCAAGCTGGATGAGCAAGCATCTCAGAAAGGTGATTAAGAAAAAGCAGAAAGCTTACAAAGAGTAGGAAGTG | 47365 |

|                          |                                                                                 |       |
|--------------------------|---------------------------------------------------------------------------------|-------|
| Majority                 | -----GTCAG-AGAGTATGTTATTT---TCTCGATTTTAGGACTCTTC-----AAGGTGA---A-----           |       |
|                          | 52250 52260 52270 52280 52290 52300 52310 52320                                 |       |
| Human                    | GGGAGGCTGAGGCGGTGGATTACCTGAGGTCAGGAGTTCAAGACCCGCCTGACCAACATGGTGAAACCCTGAGTCTACT | 51886 |
| Kakapo                   | -----CCAG-AGAAGCTGTGGCTG---CCCCATCCCTGGCAGTGTTTC---AAGGCCA-----                 | 22141 |
| GoldenEagle              | AACCATGTCCT-GAAGTACCCCGTCC---ACTCGCTTTTGAATACCTCCAGGGATGGTGACTCAACCACTTCCCTGGG  | 24712 |
| JapaneseQuail            | -----GCAA-ACAGTGTGTATATT---TTCCAACCTTGTA--TTT-----TGG-----                      | 21033 |
| MediumGroundFinch        | -----TCAG-ATAGTAAGCTATTC---ATTCTTTGCTAGGA--CTT-----AGGGTGA-----                 | 8927  |
| GoodesThornscrubTortoise | GGAGGGATCAGCAAGGAAAACATATCT---TATTGATGTCAGAACTTTCC---AAGACCAATGCAGGTTGAGTAAGG   | 47436 |

|                          |                                                                                    |       |
|--------------------------|------------------------------------------------------------------------------------|-------|
| Majority                 | -----ACTTGAAAAC---A--AGTATCTCAGTAAAAA--CT--TTTCTA-GTTCCTAGCT---TGAATGTTCA--TAGC    |       |
|                          | 52330 52340 52350 52360 52370 52380 52390 52400                                    |       |
| Human                    | AAAAATACAAAAAAAAAAAAAAAAATTAGCCAGGCATGGTGCCAGGTGCCTGTAATCCCAGCTACTTGGAGGCTGAGGCAAG | 51966 |
| Kakapo                   | -----GGTTGGACAC-----AGGGGCTTGGAGCAAC--CT--GCTCTA-GTGGAAGGTG---TCCCTGCCCA--TGGC     | 22199 |
| GoldenEagle              | CAGCCCATTCCAATGTTGACAACCCTCTCAGTAAAAAATT--TTCCTA-ATATCTAACT---TAAATCTCCC--TTGC     | 24784 |
| JapaneseQuail            | -----CTTCAGAAC-----ATTTCAGGTGGTA-----TTTCT--G-----TGCCTTTTGT--TAGG                 | 21075 |
| MediumGroundFinch        | -----ACTTAAAAAC-----AGTTTTTCTGCAAAAA--C--TGCTTG-GT---TGCAT---TGAATATTCA--TAGC      | 8981  |
| GoodesThornscrubTortoise | -----ATTGATTGAGAGAGGAAAATCAAATGAAAAC-CA--ATTGTA-ATTCAAACCAAGTGATTGTTTA--TTAA       | 47504 |

|                          |                                                                                  |       |
|--------------------------|----------------------------------------------------------------------------------|-------|
| Majority                 | TTGGGATTGAG-----G-----TTGAGTGATCTGA-----A---CA--ACT--C-----TAC-AATT              |       |
|                          | 52410 52420 52430 52440 52450 52460 52470 52480                                  |       |
| Human                    | AGAGAATTGCTTGAACCCGGGGGGTGGAGCTTGCGGTGATCCAGATGCGTCACTGCACTCCAGCCTGGGTGACAGAGC   | 52046 |
| Kakapo                   | AGGGGGTTGGAA-----CTGGATGATCTTG-----AGGT                                          | 22228 |
| GoldenEagle              | CTCAACTTGAGGCCATTTCTCTCGTCTATCTCCAGCCACCTGACAGAAG--AGACCAGCACCCACCTCACTAC-AACC   | 24861 |
| JapaneseQuail            | GGAGG-----AAGTGTGCAAAGA-----A--AAAT                                              | 21098 |
| MediumGroundFinch        | TTGAA--TGA-----TTGAATGACTTGG-----ACT-----TAA-AATA                                | 9012  |
| GoodesThornscrubTortoise | ATCGGAATGAG-T--TGCAACTTGGACTGGGGAGGAGCACTTTTACCAACT--AA--CAATACTATCAGGACAAG-AATA | 47576 |

Monday, May 02, 2022 06:50 PM

|                          |                                                                                 |       |
|--------------------------|---------------------------------------------------------------------------------|-------|
| Majority                 | TCCTTTCTGTTTGAAACA--G-----A---TT--CTTTTAGTTTAGTCTTCTATA-----T-A-----AGTTCC      |       |
|                          | 52490 52500 52510 52520 52530 52540 52550 52560                                 |       |
| Human                    | GAGACTCTATCTCAAAAAAAAAAAAAAAAAAAGAGTAAAGCTGAGGCCTACACATGGATGGATGTGGAGGAGGGGC    | 52126 |
| Kakapo                   | CCTTTCCAACCCAAACCA-----TT--CTATGAGTCTATGATTCTATA-----ATTCC                      | 22274 |
| GoldenEagle              | CCCTTCAGGTAGTTGTAGAGAGCGATAAGGTCTC--CCCTCAGCCTCCTCTTTCTAG--ACTGAACAGCCCCAGTTCC  | 24937 |
| JapaneseQuail            | TCCTTAGTGTTTCCAATA-----TTAGTTCT----CAGCA-----GGAAAC                             | 21135 |
| MediumGroundFinch        | TGCTTGTGTTTGCTGCA--G-----TT--CTTTTGTTC-TTTTTATA-----T-A-----GGTTCC              | 9061  |
| GoodesThornscrubTortoise | ACACACAACCTTGAAACAATCTATTTACATCCAACGACAAGAACTAAGCAGTCTATAA--TCAACTGCTCACTAAAAAC | 47654 |

|                          |                                                                                 |       |
|--------------------------|---------------------------------------------------------------------------------|-------|
| Majority                 | -----TATTACTC-----A-TTGT--T-----C-TTAGTTAATTG---GTTCTTCTATGAAAATGCCCTAGGACCTC   |       |
|                          | 52570 52580 52590 52600 52610 52620 52630 52640                                 |       |
| Human                    | ACTTAGGATGACTAGTGAAGCCCCATTGAGAGGGGATATTTGAATAATGAACTTCAAAGTGGTTAGGGAATAAGCCACT | 52206 |
| Kakapo                   | -----ATTGCTT-----TTCT-----C-TTGGTCAGATA---TTTCCTGTATGGATATGTCTTACGTTCCC         | 22326 |
| GoldenEagle              | CTCAGCTGCTCCTCATGAGACTTGTGCTCCAGGCCCTCACCAACTTGGTTGCCCTCCTCTGAACACGCTCCAGCACCTC | 25017 |
| JapaneseQuail            | -----GTTACTTG---TTCTTGATAAGAGTTGCGTTGAACTTT                                     | 21171 |
| MediumGroundFinch        | -----TATTTCT-----TTGT-----TTAATAAAATAGGAGTTTCTCACTGAAAATGC--CAGGACCTG           | 9113  |
| GoodesThornscrubTortoise | CAGAGCAGATACACAAACCAATAAACTCTA---CACGCATTAATTG---AATACTATAAAAATACACCAGCTAGCC    | 47725 |

|                          |                                                                                  |       |
|--------------------------|----------------------------------------------------------------------------------|-------|
| Majority                 | AG--TC----T-----A-----TGTTGAGAATTTGGC--C-----A-----                              |       |
|                          | 52650 52660 52670 52680 52690 52700 52710 52720                                  |       |
| Human                    | TAT-TCCAGACAGAAGGAATAATCAATGCAAAGTTCCTTCTGTTGAAAAAATGCTTTTATAAT-TTTATTTTTCATCTT  | 52284 |
| Kakapo                   | -----C-----T-----TGTTGGTAACATCAC-----                                            | 22343 |
| GoldenEagle              | AGCGTCTTTCTGTAGTGAGGGGCCAAAACCTGAACACAGTACTTGAGGTGCGGCCTCACCAGTGCCGAGTACAGGGGGA  | 25097 |
| JapaneseQuail            | -----AGAATTTGTT-----                                                             | 21181 |
| MediumGroundFinch        | AG-----T-----TGCTCAGATTGTGGC--C-----                                             | 9132  |
| GoodesThornscrubTortoise | ACAATAGCAATTAATACAACAATTTGACTCTCATATACTATATACACAACCTGGTACCAAGTAAGGGAAGGGAAGAAGTT | 47805 |

|                          |                                                                                   |       |
|--------------------------|-----------------------------------------------------------------------------------|-------|
| Majority                 | -----C-----A---TATTTCT---ATAGGC-A-G-----TTAGCTACCTGTGAA                           |       |
|                          | 52730 52740 52750 52760 52770 52780 52790 52800                                   |       |
| Human                    | CTAAAGCCCTTCAGTCTCCTTTGGTCACTCTTTTTTTTGTAGTTGGTTATGCCTTA---A---CAACAGTACTTTGAGGA  | 52357 |
| Kakapo                   | -----ATTTC---ATATAT-----TTAGCTAATGTGAAA                                           | 22369 |
| GoldenEagle              | CAGTCACCTCCCTGCTCCTGCTGGCCACACTATTTCTGATAGAGGCCAGGATGCGATTGGCCTTCTTGCCACCTGGGCA   | 25177 |
| JapaneseQuail            | -----TTTCT---GTAGAA-----ACTACCTGTGAA                                              | 21204 |
| MediumGroundFinch        | -----ATTT-----AAAGGC-----T-----TTGTCAACCTGTAAA                                    | 9158  |
| GoodesThornscrubTortoise | AAGCAAGCAGAGTATCTACAGAAATTAATAATGCACATACCACACTCCAGGCGCAGCTGACCAGCAGTACAGACACGAGGA | 47885 |

Monday, May 02, 2022 06:50 PM

Majority CATT-----C-----CA---AACCTCACCAGTTTTTCTATGCTAGC-T--T---A-----  
 52810 52820 52830 52840 52850 52860 52870 52880  
 Human TACTAGTTACAGTATTTAAAAATACGTCACATATATGCTGAGTTATTTTTCTAGTGTAGCATTATGTTTATCTTGTTTC 52437  
 Kakapo CAAG-----A-----AGTACTTTCTACATTAGC-C----- 22393  
 GoldenEagle CACTGCTGGCTCATATCCAGCCGGCTGTCAA-CCAGCACCCCGAGGTCTTTCTCTGCCGGG-CAGCTTCCAGCCACTCT 25255  
 JapaneseQuail CATT-----GAATCTTTAAAGCTTG----- 21224  
 MediumGroundFinch CATT-----C-----AATTTACCAGGTTGGTCTATGCTGA----- 9189  
 GoodesThornscrubTortoise CATGGCGAATTGGGGAGGGGAAGTGATCCAA-AGAACCAAACGACACGACATGAGCCAGC-TAAATCCGGAGGAGACCT 47963

Majority -----ACTGAAG---G-----T-----GACTTTATTTCG  
 52890 52900 52910 52920 52930 52940 52950 52960  
 Human TCATTCTCTTCATCCCCCTTTGTTGTCTTTTCGTGTTTCAGAATGGACAATTAGATTTTGTAAAGTTGTATGCTTTCC 52517  
 Kakapo -----ACAACAA-----T-----GACTA-ATACT 22411  
 GoldenEagle GCCCAAGCCTGCAGCGCTGCATGGGGTTGCCGTGACCGAAGTGCCGGACCCGGCCTTGGCCTTGTGAACTTCATACG 25335  
 JapaneseQuail -----AAT-----GATTGAATGCC 21238  
 MediumGroundFinch -----ATTGAAG---G-----AACTCTATTCA 9208  
 GoodesThornscrubTortoise TAGTGGGAAGGGTGATCAGGCCTTCCAGCTAACACACGGATACTCTCG-CAGGTTTTGGCATGAGATACAGTTTTATTG 48042

Majority ACTGG--T-A-----GATTTAGCTTAT---G-----CTGTCTTTCCTGCTTAATTTCAAGCAG-----T-----  
 52970 52980 52990 53000 53010 53020 53030 53040  
 Human TCTAGGATAAAGTAATGAAGAGCGTTTACTAAGCTGTTACCCCCATTCCCCCAAATACCAAAGAGGCTCTTATTCTGGG 52597  
 Kakapo ACTAG-----TAAGCTTCT-----TGCTTTAATGTATAAACTGAAATG----- 22450  
 GoldenEagle ATTGGCCTCAGCCCATCGATCCAGCCTGTCCAGATCCCTCTGTAGAGCCTTCTTACCCTCAAGCAGATCGACCCTGCCTC 25415  
 JapaneseQuail ATGGA-----CTTAACTTGT-----GTACCTTATGCTTCATTTT--GCA----- 21275  
 MediumGroundFinch GCAGG-----GATGTGGCTTAT---G-----TGTC AATTATTTAAATTGAAGTA-----T-- 9252  
 GoodesThornscrubTortoise CAACTCTTACTCGTGTC-A-GCGTCTGATTGGTCCCTAGCTCCTTCACCAACCAGGTTCCGAGCTGGTACCCTCTACATC 48121

Majority CCAACTTGG---ATGTGCAAAT-----C--AATGTTTTGACTCACAGCTTTAATAAAAT---T-----  
 53050 53060 53070 53080 53090 53100 53110 53120  
 Human TCAACAAAACCTCCCTTTAGAATTT---CTGGTACCAGGCTGTGCGTGGTGGCTCACACTTGTAATCCCAGCACTTTGGGA 52674  
 Kakapo --AA-----AGGATGAAATA-----AATGTTTTGGAA--A-GCTTTAAGTATTT----- 22489  
 GoldenEagle CCAACTTGGTGTCACTGCAAACTTGCTGACGGTGCA-CTCAATCCCCTCATCCAAATCATTGATAAAGTTATTAACAG 25494  
 JapaneseQuail -----GTCATAT-----AGTTTTTCAGTC-CTGTTTTAATAAAA----- 21309  
 MediumGroundFinch CCTATTTGG---ATGTGAGAAT-----AATGCTTTGAAT--A-TCATTAGTAAAG----- 9296  
 GoodesThornscrubTortoise AATAGGAGCTGCACCCGGCAGACTACTTTTGCACACAGCCCTATGCTTTTACACACAGCACCAACTTGACCTTTTGACCG 48201

Monday, May 02, 2022 06:50 PM

```

Majority      -A---G-T-----G-----GACATC--TGGTTTT-A--C-A-----A--
                53130   53140   53150   53160   53170   53180   53190   53200
Human         GGCTGAGGTGGGCGGATCACGAGGTGAGGATCGAGACCATGGTCAAACCCCGTCTGTACTAAAAATACGAAAATTAGC 52754
Kakapo        -----ACATT--TGAGTTT---C----- 22502
GoldenEagle   AACGGGGCCCAACACCGAGCCCTGGGGAACACCACTTGTGACCCGCCCAAC--TGGTTTTCACCCCATTACCACAAC 25572
JapaneseQuail ----- 21309
MediumGroundFinch -A-----T-----GACATC--TTGTTT----- 9310
GoodesThornscrubTortoiseACAGAAGGTTTCGAGAACAGGCACGCTGGTATTTTGCACATGGCACTGGC--C--TGACCCTTAGGTGACCAGGGAAAAG 48277
    
```

```

Majority      ----G---G-----A-----G-A-----TAAGATGTTGTTGGCTCA-
                53210   53220   53230   53240   53250   53260   53270   53280
Human         TGGGCGTGGTGGCGGGCGCCTGTAGTCCAGCTACTCGGGAGGCTGAGGCAGGAGAAATGGTGCAGACCCAGGAGGCGGAG 52834
Kakapo        -----TAGTTGGTTGTTGGTCTG- 22520
GoldenEagle   CCTCTGGGCTCGGCCATCCAGCCAGTTTTCACCGAGTGAAGAGTGCCTTATCCGGGACACAAGATGCCAGTTTCTCAA 25652
JapaneseQuail -----GAGAAGTTTCTAACT--- 21324
MediumGroundFinch -----AAGATATGGTTGTCTCA- 9327
GoodesThornscrubTortoiseAATGGGAATAGGCACACGGCACTATGGTGTAGCACACAGTACCAGTGTGACCTTT-----TGACCACAATTGGCCAAA 48351
    
```

```

Majority      -GAGTATCACATG-----T-----A---T--A-A---G-----GAAAGTGAGTT
                53290   53300   53310   53320   53330   53340   53350   53360
Human         CTTGCAGTGAGCCGAGATCGCGCCACTGCACCTCAGCCTGGGCGACAGAGCGAGACTCTGTCTCAAAAAAAAAAAAAAAAA 52914
Kakapo        -GACTGACACTTG-----T-----GAAACAGAG-- 22542
GoldenEagle   GGAGTATGCCATGACAGTGGCAAAGGCCTTGCTGAAGTCAAGATATGTTTTCAAAAATAGTTATCAGCAGGAAGTTAGTT 25732
JapaneseQuail -----ACAAATG----- 21331
MediumGroundFinch -----TATCACATG-----GAAACTGAATT 9347
GoodesThornscrubTortoiseAGACGCCATGTTTGGAGCATAGGCTTTAGGGCTGCGACAAGAACATGTAGGGATAAAGTGAGAAAGGTCAAAGCCATGT 48431
    
```

```

Majority      ATTGATTG-TCTTGCAA--AGGGCATGCTGAGTACTTAGATCAGTT-----A--A-----A---A---
                53370   53380   53390   53400   53410   53420   53430   53440
Human         AAGAATTCCTGGTACCAGCAGGGCACTTTGGCTCATGCCTGTAATCCAGCACTTTGAGAAGCTGAGGTAAATTCAGGGC 52994
Kakapo        ATTGACT---CCTGCAA--AATGCATGTTTAGTAGTCA-ATGATT----- 22581
GoldenEagle   ATTCACTG-TTTGTTAG--GAGTTATGCTGAACTTAAGATCAGTTTTTCTGCAAAAACACTTGGGAGCATTGAATCTT 25809
JapaneseQuail -----TC-----AGGGAATGCAGATTGCTTAGATAATGC----- 21360
MediumGroundFinch CTTTCTCT-CCTTGGTG--GAGAGATGCAGAGCACTTAGATCAGT----- 9389
GoodesThornscrubTortoiseAGAGTTGGACCTTGCAA--AGGGAATTAAAACCAATAGTAAAAGTTCTATAGTCATATAAATAAGAAGAAAACAAAGAA 48509
    
```

Monday, May 02, 2022 06:50 PM

```

Majority      ---AG-----GCCATGGA-----A-----ACA-----TT-----
                53450      53460      53470      53480      53490      53500      53510      53520
Human         AGCAGTGAAGTGGTTCACACCCTGCACTCCAGCCTCAGCAACAAAGCAAGACACAGTCTCTTAAAAAAAAAAAAAGGAAG 53074
Kakapo        -----TCACTAA----- 22588
GoldenEagle   CATAGCTTTAACAATTGAATGCCATGGACTTACAGTATTCCTTGTGTACATTACACTTCATTCTGTTGTGTATAGGTTTC 25889
JapaneseQuail -----CCATTC----- 21366
MediumGroundFinch -----GCTATGG----- 9396
GoodesThornscrubTortoise AGAAGAAGTGGGACTGCTAAACACTGAGGTTAAGGTATGGCCCAATATCTAAACAAATACTTTGCTCAGTCTTTAATGA 48589
    
```

```

Majority      -----TTG--T--TTAATGGAACAGGGGTTTTTAAT-----CA--G-----GGTATTATGTGTTC-----A-
                53530      53540      53550      53560      53570      53580      53590      53600
Human         AAATTCTGGTTCCTTTAAGGGAGATTTGTTGTTGTTTTCTCTTTTAATGGTGAGGGTACAAGTTGGTTCACAGGAGGGAG 53154
Kakapo        -----TG-----CAGAGAAACAGGGGCTTAGAAT-----C-----AGCACCTGTGATG----- 22627
GoldenEagle   TATTCTG--TCTTTAATAAAATAGAAGTTTCTAACTAAAAATGCCAGGGACCCAAGTTGTTTAGATAATGGCCATTTAT 25967
JapaneseQuail -----A--TAGGCTTTGTCA-----GATCTTATGCCTTC----- 21393
MediumGroundFinch -----TTG-----TTAACAGAACGTGGGTTTTTA-----C-----AATAGTCTGAATTG----- 9435
GoodesThornscrubTortoise GAGCTTA--TGGATAATGGTACGATGACAAATGGG--AATGAGGATATGGAGGTAGATATTACCACATCTGAGGTAGAAA 48666
    
```

```

Majority      -----AATTTT-----TATCACTTTTTCCATTTGTGCTTAATTGA---A---T-T-----G-ATAT
                53610      53620      53630      53640      53650      53660      53670      53680
Human         AAGAGAAATTTAGCTCTTTTGTTAATGAAGTACTTTCTGTTCCGCTGTTTTTTACCCACTCCCTCCTCTGTGAACCT 53234
Kakapo        -----AATTTT-----TAACATATTTCCCTTTATTTCCAGGAAA-----T 22663
GoldenEagle   AGGCTTTGTCAACTGTTAAGCATTCAATTTCAACAACCTCATTATGCTAAATTGAAGGAACTCTGTGCAACAGGGATGT 26047
JapaneseQuail -----AATTC-----CATGACTTGGTTT-TCTGTGAGTATGGA-----TAT 21430
MediumGroundFinch -----AATATT-----CCTGAACCATTCC--TGTGCTCAGTGGA-----TCT-----T 9471
GoodesThornscrubTortoise AAAACTTGAACAGCTTAATGGGACTAAATCGTGGGCCAGATAATCTTCATCCAAGAATCCTAAAGGAACTGGCACAT 48746
    
```

```

Majority      GGCT-----C--G---GG---TGT-AGTATC-----AATTTTGTCTGGATGC-----G---G-
                53690      53700      53710      53720      53730      53740      53750      53760
Human         GCCAATTTCTGATTTGGTTCCTGTGGCTGCTACCAGTAT----A---ACACCTGTTTGTGTGTGTTCACTGTGTCTC 53305
Kakapo        AGT-----A---GG---TG--AAAAC-----AACTTTTACTGGATGC----- 22693
GoldenEagle   GGCTTACATATCAACTATGTTTAGGG---TGT-AGTATCCTATTTAGGAGAATAATGCTTTGGATGCCATTTGTAGAGA 26122
JapaneseQuail GGCT-----TA--TGTGTC-----AATTATGTTTAGACTGC----- 21459
MediumGroundFinch GGC-----C-----G---TGT-AGGAT-----TAATGGT---TGGGCTC-----G- 9499
GoodesThornscrubTortoise GAAATTGCAAGCTCATTAGCAAGAAATTTTAA-AGAATCCTGTAAACTCAGGGTTGTACTGTATGACTGGAGAATTGA 48825
    
```



Monday, May 02, 2022 06:50 PM

```

Majority      -A--AGATTTT-T-----A--AAG-----GTCCTATGTAATCTGGATTTTCTA-TC--TGATGGTGAGCCA-----
              53770      53780      53790      53800      53810      53820      53830      53840
Human         CAGTCCATTTGGTTCATTTCATTTTCTGTGTTCCAGGAATTTGATAAAATTTATTCTCAGC--TAATGATAACCTTCCCTC 53383
Kakapo        -A--AAATCTT-----TGCA--CGTATCTGCATCGTTATATTA--CTATATTAAGACG----- 22739
GoldenEagle   TG--AGATTTTGTTTAGAAATAGACAGCTGATGTCATACGGAACTGGATTTTCTTCTCCTTGGTGGAGAGCCAAAGAG 26200
JapaneseQuail ----AGGATTC-----AGTTAGATTGGTGAA-----TAATGC----- 21488
MediumGroundFinch -----ATCTT-----A--AAG-----GTCCTCTCCAACCCAAATGTTTCTA-----TGATTCCAGGGCTA----- 9546
GoodesThornscrubTortoise@AGCATAGTTCCTATTTTAAAGAAAGGGAAAAAAATGTGATCCGGGTAATCACAGGCC--TGTCAGTTTGACATCTGT 48904
    
```

```

Majority      -----T-----GG---TTTTTG---G-----AATA---TGAAT---A--
              53850      53860      53870      53880      53890      53900      53910      53920
Human         CCTTCAGTGTTTGTTTATTTTATATTCATTCTACTTCTAGGCATTTTAATAGAGTTTCAT--AATAGAAGACATGCAAATG 53461
Kakapo        -----TTTTTG-----ACA---TGAA----- 22753
GoldenEagle   GGCTTA-CATCAGTGAATGGCTGTTACAGGAGAGGGGGTTTTTGGTAGTCTTGAGTTGAATATAATGAATATTCACG 26279
JapaneseQuail -----TTTTG-----AAT----- 21496
MediumGroundFinch -----GG---TTCCT-----AAT---TT----- 9558
GoodesThornscrubTortoise@GTATG-C---AAGTCTTGGGAAAAATTTGAAGGAGAAAGTAGTGAAGGAC-----ATTGAGGTCAATGGTAATT 48972
    
```

```

Majority      ----TTTATGGTTTATGTTTTTTTAAATTTCTGCT--TTTTAAAGCTATAACTTGAT--TTCTAAATGAACATAATATT
              53930      53940      53950      53960      53970      53980      53990      54000
Human         -AGTATGCATTAACCATGAATCTTTTCACATCCGTTTCATGAAATCACCAGGTCCTATTAGTTCACACTTTTAAATTATCT 53540
Kakapo        ----AGA--AGGTTATTGTAAAGAAAAATCCACACA--TCTAAAAGGCATTATATAGT--TTCAAGGTTAA-TGATGTAT 22821
GoldenEagle   TTAGATTTCTGATTTATTTTTTTTAAATTTTTTAAACTATAAGGCTATAACTTGAT--TAGTAAATGAACATAACTA 26357
JapaneseQuail -----GCCTTATGTAGAGGCAAGATTCTGCT-----TAG---AATTTG-----CCAAGTATGTTG 21544
MediumGroundFinch -----TTTTTGGTTTACATTTTTTTTAAACTATGCA--TTTGCAGCTATAACTTGAT--TTGTAAATGAGCTAACACTG 9628
GoodesThornscrubTortoise@AAACAAAATACAACATGGTTTTACAAAAGGTGGATCGTGCTAAACC--AACCTGAT--CTCCTT-TGAGAAAGTAACA 49046
    
```

```

Majority      ----TGTTTTAGTCATAGTACTCTCTTTGTGATTTTTTTAACTTTTTTTC---CGTAATGCATATATTGTAGC-CTGCTC
              54010      54020      54030      54040      54050      54060      54070      54080
Human         GCCTGGTTTTCTCCATCTTTCTGCTACTTGTATTGCTCAAACACTCACCTGTTGGCTATATTACTACGACAGTTCTC 53620
Kakapo        -----TTTTGGCCACAGAACTTTTCGAGGATTTTTTATACTATTTTTTC--AAGAAATACATAAATTGTG----TG--- 22886
GoldenEagle   AACTGTTTTAGTCATGCTATTCTCGTGGTGATTTTTTATTTTTTTTTTCCCAATGTAGATATTGTATCATTATGC 26437
JapaneseQuail -----CATGGAAC-----TG-GATTTTTCTTCTCTTTTT-----GTTGACAAACT----- 21585
MediumGroundFinch ----TGTTTTAGTCAT----TCTCCAGTCTCTTAAACTTTTTCT---CCCAATGCAAATATTGTAGC-CTGCTC 9694
GoodesThornscrubTortoise@A--TTTTTAGACAAAGGAAACACGTTGGATCTAATTTACCTCAATTC--AGTAAGGCATTTGATACAGTTCCACAT 49121
    
```

Monday, May 02, 2022 06:50 PM

```

Majority      TTTTCAAAGCGTATTTATTTTTATTACAGTTCTTGCATTAAGATTTTGTATTGGATGAAGCTTT--TCAAT-TCTAGTG
              54090      54100      54110      54120      54130      54140      54150      54160
Human         TTTATAAACTACTTTCTTTTTCTTTTCCCTTCTGGAATTTTTTCTCGCTAGTACAGCCAGTACGTATCTTTCTCAAATG 53700
Kakapo        ----CAAAGAGAAACTCTTTTTGGGTGAAATCTTGCTTCAGCGTGT---TTGAAAGTAGTTA-----CCAGCA 22949
GoldenEagle   TCTTCAGTGCATGTTTATTTTTATTA--GTTACAGCAGCAAGAGTTTTGAATTGGATTAGGCTTT--TCAAG-TCTGGTG 26512
JapaneseQuail -----AAAGAGGACTTTGCATCAGTGCAGTGGCTATTACAGAATT-----GCT----- 21628
MediumGroundFinch TTTTCAGTGCATATTTATGTTTGTAAAGTTTTAGCAGTAAAATGTTTGAATTGGATCAAGATTT--TCAAG-TCCAGTG 9771
GoodesThornscrubTortoise GAAAAAATGGGGATCAATATGAAAATTGAAAGGTGGATAAGGAACTGGTTAAAGAGGAGGCTACAGTGGGT-TGTA CTG 49200
    
```

```

Majority      AA---AGCTAAATTACTTGGT---GAAGTAGCTACTTGCCAA-----TAAGCTTCCATTTTAAGATCAGTATTTTTG
              54170      54180      54190      54200      54210      54220      54230      54240
Human         CACATATCTAAGTTACTC--CCATGCAGTAGGTCCTGTTTCATGCTCAGGCTAAAGGCCCTTTCTGAGCTTACTACTTTTT 53778
Kakapo        GG---AAGTAAGTTACTC-----ACTGTTTGCCAGGAGT-----TAGGCTGAACCTTTAAGATCAGAGTTTCTG 23010
GoldenEagle   AA---AGCCAAACTACTTGGT---GAAATACCTACTTGCCAA-----TAAGCTTCCAATTTAATAACAG--TTCCT- 26575
JapaneseQuail -----CTTATTCATTTGGT---GAATTAGCTTCTTGCCAA-----TAAGCTTCCACTTCAATAGCACTATCTTGG 21690
MediumGroundFinch AA---AGCCAAACTACCTCAT---GAAATAGCTACTTGCCAG-----TAAGTCTCCAGTTTAACAGCAG--TTTCAG 9835
GoodesThornscrubTortoise AA---GGGTGAAGTGTGAGGCTGGAAGGAGGTTACTAGTGGAGTTCT--TCAGGGATCGGTTTTGGGACCAATCTTATTT 49275
    
```

```

Majority      CAGTAGTTTTTAGTTGGCTTGTGAGAT--TGCTTGCCAGCATGCTTTGCTTCTTCTCGTTTTTCTGCAATTTTGTCTTA
              54250      54260      54270      54280      54290      54300      54310      54320
Human         GTCTTGCTTATGACTACTCCCACCCTATTTGCTTATGCTTCTGTCCAAAAGTAATGGTGCATCCTGTAACCTGGCATG 53858
Kakapo        CATTGAATCTTCAT-AGCTTGAACAAT---TGAGTGCCGAGACTTAGAGTATGCCTTGTGTACATTCCACTTCAGTTTA 23086
GoldenEagle   CAGCAGTATTTAGTTGGCTTGTGAGGTGTCCCCCTCCAACATGCCCTTGCCCCCTCCAGTTTTCTGCAGTTTTGTCTTT 26655
JapaneseQuail TAGTAGTTATTAGCTGGCTTTTGTGAGAT-----TGTCCTTCCAGTTTTCTGCAGTTTTGTCTTT 21750
MediumGroundFinch CAGTAGTTATTAGTCAGCTTGTGAGGT---CTCCTCCAACATCCCTTGCCCTCTCCCAAGTTTCAGCAATTTTGTTTTA 9912
GoodesThornscrubTortoise AATCTTTTTATTACTGACCT-TGGCACAAAAGTGGGAGCGTGCTAATAAATTTTGTGGATGACACAAAAGTGAAGGTA 49354
    
```

```

Majority      TT---GCTGTATAGGGAAGGATCTTTGAGGTTA-----T-----TTAT---GATAGATTTTGTCTTACCAGAAGACAA
              54330      54340      54350      54360      54370      54380      54390      54400
Human         TTTTCTCTTGATGTCAGTCGTTTGTCTGCCATTAATGTCAGTCTCTCATGCAATGGAATATTGTGGGTTGGCTGCCTTTTG 53938
Kakapo        TT---GCT-TATTTGGATAGGTTTCTGTGTTTA-----ATAA---AATAGGAGTTTCTAACAAAAAAGCCAA 23147
GoldenEagle   CTCCTGCTGTATAGGAGGGATCTTTTGGGTTACTTGTATTATCTTATCTCCACAGACTCCATTTCTACTGCAAGACAA 26735
JapaneseQuail TT---CCT-----GAAGCATCTTTCACATTG-----T-CCTGTGTGTCAGAAAAC-A 21790
MediumGroundFinch TG--TGCTGTATAGGGAAGGATCTTTCAGGTTG----TTGCTGCTTAG--GCATAGACTCTATTTCTACCAAAAAGACCA 9983
GoodesThornscrubTortoise ATA--CCAATGCAGAGAAGGACC---AGGATA-----TCATACAGGAAGATCTGGATGACCTTGTAAGTGG 49416
    
```

Monday, May 02, 2022 06:50 PM

```

Majority      GGTATACTTTTAGTACCTTACTCTTCTTGATTGAGTTGTTAACTTTTATGGATCCTGATTTTGCTCATAAATTT-TGT
              54410      54420      54430      54440      54450      54460      54470      54480
Human         CACCACCCTTCTCCACCTCACACTTCACATGGCCAGTGTAAATATCTTGAGGTCTCCCTTTAGCTATTT--CTTCTCC 54016
Kakapo        GGACCAAAGCTGTGTAGATAATGGCCATTTATAGGCTTTGTCAACTCCTAAGCATTTCTACTTTCAAACCTTGATTTCTGC 23227
GoldenEagle   TATTATTCTTTTAGTACCTTGTCTTCTTGACTTAACTTATTAACCTTTATGGACACTGATTATGCTGGTACAATT-TGT 26814
JapaneseQuail GACTATATAAATAATG--TTCTTCTCAGTGCTTGGGGTT--TGTTTTTTTTTGTCTTTTTTTT-----TA--TTT--GC 21856
MediumGroundFinch GGTATTCCCTCTAGTACCTTGTCTCCCTTGACTTGGCTT--TTAACCTTTATGGACCTGATTCTGCTAATAAAAATT-TGT 10061
GoodesThornscrubTortoise @GTAAGTAAATAGGA--TGAATTTAATAGTGAAAAATGCAAGGTCATGCATTTAGGGATTAATAACAAGAATTTTTTGT 49494
    
```

```

Majority      TAAAAGATTGGAGCTGTTGTTTTAACAGTA---AGTTTACCTTTTCAGTGGCTCTGA--ACAAGTTGTGCTTCT-ATGTT
              54490      54500      54510      54520      54530      54540      54550      54560
Human         TAAAAGCTATCCCCTGATAAGCAAAGAGTAGATTAGGTTTGGATTGAGAGTGTAAAC--TCCGAATGAGATACTGCTATG 54094
Kakapo        TAAATTGAAGGAACT-CTGTGC-AGCAGGG-----AT--GTGGCTTAGAT-ATCAGTTATGCTTA---GAG 23285
GoldenEagle   TAAGAGAATGAAGCTGTTGTTTTAACAGTAGTTGAATTCACCTTTTCAGTGTCTCTGA--ACAAGTTGTGTTCCC-ATGTT 26891
JapaneseQuail TAAA-GAATGAAGTTGGTGCCTTAACATCA----GTTTACCTTTTCAGTGGCTCTGA--ACAAATTGTGTTTCC-ATGTT 21927
MediumGroundFinch TAGAGGATGAGATTTGTTGTTTTAACAGTA---AATTCACCTTTCAATGGCTCTGA--ACAAGTTGTGCTTCT-GTGTG 10134
GoodesThornscrubTortoise @ATAAGCTGGGGACACATCAGTTGGAAGTAACAGAGGAGG--AGAAAGACCTCAGAGTATTGGTTGATCACAGGATGAC 49571
    
```

```

Majority      TTAAATGTT--GGTT-TTCTATTCCCAAGTGTAGTTAA-ATGATGCTTCTTTAGCTCAGAAGTGCCATTTAAAGTTAGAA
              54570      54580      54590      54600      54610      54620      54630      54640
Human         CACATAACCAGAGTGGCTAAAATTTAAAGGATAGGTAATAAAAATACTGGTGACAACCATTTTGGAAAACTCGAAATATCT 54174
Kakapo        TGGAATAT---CCT-ATTTAGGTAGGAGAATAATGCT-TTGA-ACATCATTAGTACAGAGGAG--ATTTT--GTTAGAA 23354
GoldenEagle   TTAAATGTTGCAGTT-TTCTATTCCCAAGTGCATTTA-ATGATGTCTCTCCAGCTGAGAAGTACCATTTAAAATGGCAA 26969
JapaneseQuail TTAAAACT--GGTT-TTCTGTACC-AAGTGTAGTTAA-ATAA-----GAGAGTG---TATAAAGTTAGGG 21985
MediumGroundFinch ATAAATGT---GGTT-TTCTATTCCCAAGTGCATTTA-ATGATGCGTCTTCAGCTGAGAAGTACCATTTATAATGACAA 10209
GoodesThornscrubTortoise @GAGTCGCAATGTG-ATATGCCATGAAAAAGCCAATGTGGTCTTGGGATGCATCAGGCCAGGTATTTCCAGTAGAGA 49650
    
```

```

Majority      ATAGGAGATTA-AGTT--G-TGTA-GGTGTCATGTAGTGCCAGGATCTCTCGATAACTGTCCTGAGAGCTAATTTTAATT
              54650      54660      54670      54680      54690      54700      54710      54720
Human         ACTAAAGTTGAGCATATAGCTATT--CTTTGATGTAGTAAACTCGCTCCTAGTTAACATACCTGAGAACATGTACATAGG 54252
Kakapo        ATAGACAAC-----GATGTCCTGTGGAACCTGGATTTTTTTC----TTCTCTTTGGTGCAGAGCCAAAGA 23414
GoldenEagle   ATAAGAGACTAAAGTTGGGGAGAAAGTTTCATACAGTGCCAAAAACTCTTAATAACTGTTCTGAAAGCTAAATTTCACT 27049
JapaneseQuail AGAGGTGCTT-----CATGTGGTGAAGGAACTTTAC-TATTTGTCCTAAAAGATAATTTCCA--T 22042
MediumGroundFinch ATAAGAGACTACAGTT---AGAGAGGTGTCATACAGTGCCAGAATCTCTCAATAACTCTCCTAAAAGCTAAATTTAATT 10285
GoodesThornscrubTortoise @CAGGAGTTTTAGTACTGTTATAGAAAGGCACG-AGTGAGACCTCATCTGGAATACTATGTGCAGTTCTGGTCTCC-TA 49728
    
```

Monday, May 02, 2022 06:50 PM

```

Majority      TGT-TTAACAA--ATGTTTTAGAAAATTCAGTGTGTATGTACATGTTTGTTTAGTATATGATACACTTTT-----T
              54730    54740    54750    54760    54770    54780    54790    54800
Human         TATGTTAAAAGATATGTACAAGAAAGTTCATGGAACACTGTATGTAATAGCCCAAAAACTATAAATCATC----- 54323
Kakapo        GGG-TT-----TACCTCAGTGCAGTGGCTGTTACA-GAACAGGTTTGGTTTCGTTTTGGGGTTCTTTG----- 23475
GoldenEagle   TGT-TC-ACAA--ATGTTTTGAAAAATTCAGTGTGTATGTGCATGCATATTTAGTATATGACACACACACACGCTTTAT 27125
JapaneseQuail TGT-TTGACAG--ATGTTTT-GAAAATTCAGTCTGTG--TACACAAGTGTTTAGTATATGACAGAGTTTG-----T 22108
MediumGroundFinch TGT-TCCACGA--ATGTCTT-AAAAGTTCAGTGTGTATGTTTCATGCATATTTAGTGTATGATACACACTT----- 10352
GoodesThornscrubTortoise @GT-TTAAGAAGGATGAATTCAAACTGGAACAGGTACAGAGAAGGTTGATCCGAGGAATGGAAAACCTGT-----CAT 49801
    
```

```

Majority      TACTGCCATTACTGAAATAG-GAAGTTTGTGTTAGGCTATACTGGATGGATAATTAAGGTAGTAA--AAGAACATGTTT
              54810    54820    54830    54840    54850    54860    54870    54880
Human         CAAATGTTCAACAGCAGCAGAATATGTTGTGTTGTATTTCATTTAGTGGAAATATTGTATAGTAATAAAAAATGAACAAGCTA 54403
Kakapo        -----CCAGT-CTGAAGTGGCTATAATCATCCCTGGAGGTGTTTAAAAGATGTGTAAGTGTGGTGTCTGGGGACATGGTT 23549
GoldenEagle   TACTGCCATTATTGAAATAG-TAAGTTAGTGTAGGCTATGCTGGCTGGATAATCAAAGGTAGAAA--CAGTACATGTTT    27202
JapaneseQuail TACTGCCCTTATTGAAGTAG-GAAGTTTGAAGTAAAGCTATACTGGCTGGATAATTGAAGATTACAA--AAAAGCTTCTTT 22185
MediumGroundFinch -----CATTACTGGAACAG-GAAATTAAGTGTAGGTGATACTGAATGGATAACCAAAAAGTAGTAA--AAGTACATATTC 10423
GoodesThornscrubTortoise @TGAAAGGAGACTCAAAGAGCGTGGCT--TGTTTAGCCTAACCAAAAGAAGGCTGAGGGGGAGATA---TGATTGCTCTC 49876
    
```

```

Majority      TCTTGTGTTCAGAAA--AGCAGTAATCACCG--GTTAGGTTAATTTTTTCTGTCTATCTAGAATCTGGTCTTAA--AT
              54890    54900    54910    54920    54930    54940    54950    54960
Human         CTGCTGCCTGCAAAACATGGGTAGTGTACATCATAATTATTGGAAGAAGCCAAACCAAAGTAGAA--TACATCTGAT-AT 54480
Kakapo        TAGTGGTGGACTTG-----GCAGT-----GTTAGGTTTATGGTTGGACTCGATCTTAAA---GGTCTT----- 23604
GoldenEagle   TCTTGGCTTTCAGAAA--AGCAGTAATAACCGATGTTGTGTTAATTTCTTCTCTTTCTGAGAATCCAGTCTTAA--AT 27278
JapaneseQuail TCT--ATGTTCAAAAA--AGCAATAGTACTA--ATTTGTTGTTTTTTTTTTTCCATCTTCTATCTGATATTAA--AC 22257
MediumGroundFinch TCTTTCATTCA-----GCAGC-----TGACACGTTTCAATTTCTTCTGTCTTCCAAAAG-CCATTGTTAA--AT 10483
GoodesThornscrubTortoise @ATAAATATGTCAGAGG--ATAAATACCAGGGA-GGAAGAGGAATATTTAAGCTAAGTACCAGTGTGGACACAAGAAC 49953
    
```

```

Majority      GTTTTGGTGTAAATTT-ACTTTATGAAGGT-GGGCTTCATTTTT--ATGAATTTTATTAGTTCAGCTTTTA-TTCTCTGA
              54970    54980    54990    55000    55010    55020    55030    55040
Human         GATTCCATTTATGTAA-CTTGGAGGAAGCGTGAGTATGGCTTCT--AGAGTGTGATAATATACTGTTTT-TTATCTGG 54555
Kakapo        -TTCTGACCTAAATG--ATTCTGTGATTCA-GGGTTAGATTTCT----GATTTTATTATTTTAAATTTTAACTCTATAT 23675
GoldenEagle   GTTTTGGGTAAATTTTACTTTAAGAAGGT-GGGCTTCATTTTT--ATGAATGTTACTAGTTCAGCTTTCA-CTCTGCAA 27354
JapaneseQuail ATTTTGGGTAAATTT--CTTGTG-----GCTTCATTTTG--TGAATTCATCAGTTCAGCTTTCA-GTATCTGA 22321
MediumGroundFinch CTTTTGGCATAAATTTTACTTTAAGAAGGT-GGGCTTCATTTTTTAAATGAATGGTACCAGTTCAGCTTTCA-TTGTACAA 10561
GoodesThornscrubTortoise @AATGGATATAAACTGGCCATCAGGAAGTTTAGACTAAATTAGAGGAAGTATTCTAACCATCAGTGGAGTGTGTTCTGG 50033
    
```

Monday, May 02, 2022 06:50 PM

```

Majority      GTCATGCTTTTGCGGATA-G-GTAATAAG---CTTTT-TATTGGTTTTTTGCCCCTACGACTGATAACTTTTTTTGGGCAA
              55050   55060   55070   55080   55090   55100   55110   55120
Human         GTAATTATTTACAGAGATGTCCAATTTGTGGTATTT-TATGGAGCTTTATACTTAGGTTTTGTGTCTTTTTGTGTGTGT 54634
Kakapo        TTAAGGCTGTAAC-----TAATAA-----A-----TGAAC TAAGACTAACACTGTGTTCCGGTCA- 23726
GoldenEagle   GGCATGCTTCTGCCAATA-A-GTAATAA----CTTTTGTGCATGGTTGCTTGCCCTACCACTGAAAAC TTCTTTGGGCA- 27427
JapaneseQuail AGTATGCTCCTGCGAATA-G-GAAATCAG-----TGGCTCTGTCAGACTTACTTGCATTTATGTAG 22380
MediumGroundFinch GAGAGGCTTTTGCCATA-A-GTAATAAACAGCTTTTGTGCATGTTTACCTGCCCTACTGCTAAAAACATTTTTTTGGGCAA 10639
GoodesThornscrubTortoise ACAGCCTTCCAAGGGGA-GCGGTGGAGGAAAAAGACATATCTGGCTTTTAAACTAAGCTTGATAAGTTTGTGGAGGGTA 50112
    
```

```

Majority      ---TTC TATTGTGATGAGAATCTTGTGTG-CAGTCTCCCT-----TCCTGTTCCCCCAA-----CC-C
              55130   55140   55150   55160   55170   55180   55190   55200
Human         GTGTAATATTTTGATAAGAAGTTTTATTA-AAATCTAGGTTTGCAAGCCAACACTGCTCCATGAATTATAAGAAAAATA 54713
Kakapo        ---TGCTGTTCTCACAGGGATTTTTATT-----TATTCCCCTAA----- 23762
GoldenEagle   ---TTACATAGCATTGAGAATGCTTGTGCCAGTCCCCCCCCATCCTGTCTGTCCCCCCCATCCTGTCTGCCCCCCC 27504
JapaneseQuail ---CACTATTGC--CAAAGGTCCTTGAG-----TGGCTGCCA----- 22413
MediumGroundFinch ---TTCCATAGCACTGAGAATGCTTGTGCCAGTCCCCC-----ATCCTGTCCCTCCCA-----CC-C 10694
GoodesThornscrubTortoise --TGGTATGATG--GGGTAGCCTAATTTTGGCAATTAATTGATCTTTGACTATTAGCGGTAAGTATGCCCAATGGCCTG 50187
    
```

```

Majority      T--CTGGTTTTTGATTGCCATAT-GTTCCTTAGTGCTTAAATCTGTATTTTT-TTTGTGT-TATTG-TATTAATATTTATC
              55210   55220   55230   55240   55250   55260   55270   55280
Human         TATGAAGTCATTA AAAATGAAATCATAAAGAAATGTATGAAGTAATTTGTTACTGATGTGAGAGAACATGATTGTTAAGC 54793
Kakapo        T--ATGGATATTGTAAGCATTAT-GTTCCTCAGTCCTT--CTTTGTATTTG-TTAAAA-----G-TGTTAACAGCAAGA 23829
GoldenEagle   C--CTTTTTCTGATTGCCATAC-ATTCCTTAGTGCATTTCTGTATCTT-TTTGTGTATATTG-TTTTAATATATATA 27579
JapaneseQuail -----TGTT--TTGTCTTGT-GTTCCTTAGTGTGTTACCCTGTATATT-TTCGTGT-----G-TATTAATTTCCATA 22475
MediumGroundFinch C--CTGTTTTCTGATTGCCATAT-GTTCCTTTGTGCCTAATCTGTATTTTT-TTTGTAT-TACTG-TAATA-TATTTATC 10767
GoodesThornscrubTortoise @GATGGGATGTTAAATGGGGTGG-GATCTGAGTTACTACAGAAATCTTTT-CCTATGTGTCTGGCTGATGAGTCTTACC 50265
    
```

```

Majority      TATTTTTTCACGGAAATG--TT-TTAGCCTTTTCAGTCTCAATATGGCTATTTTTTCCAGTAAGTATAAAAAGTTTCAA
              55290   55300   55310   55320   55330   55340   55350   55360
Human         CATAAAAGGAAGATAGAGAACAATGAATAGTATTAATAAAAAGTATGAATAGTATTGAATAAAAATATGAATAGTATTGA 54873
Kakapo        GGTTT-----GAATTG--GA-TCAGGCTTTTCAGGCTCGGTGGAAGCCAGATTTACCTGATGGAATAGCTCCTTGCCA 23899
GoldenEagle   TACTTTTTCACTTAAACA--TT-TTAGCATAGGCAGTCTCTATATAGCTCTTTTTCCACAGTAAG--AAAAAGTTTAAA 27654
JapaneseQuail TATTT-----A-----TCTACTTTTTATCTTCTGAAACTGGATGTTTATCCCCGAATCTCCACATGTGTGAA 22538
MediumGroundFinch TGCTTTTTTACAAAAATG--TT-TTTGCCAGGCACTGTCTACATAGCT-TTTTTTACAGTAAGTAAAAAAGTTACAA 10843
GoodesThornscrubTortoise @CATGCTCAGGGTTTAG--CTGATAGCCATATTTGGGGTCAGGAAGGAATTTTCTCCAGGGCAGATTGGCAGAGGCC 50343
    
```

Monday, May 02, 2022 06:50 PM

|                          |                                                                                |       |
|--------------------------|--------------------------------------------------------------------------------|-------|
| Majority                 | ATAAAGT-GTAGTTTAGGT---TAGCATTTTTTAAAAAGTAAAATTGTGTTAGAGGCTTGTCTATGTGAA-----CTA |       |
|                          | 55370 55380 55390 55400 55410 55420 55430 55440                                |       |
| Human                    | AAAAAT-ACAGACTAAGT---ATAATATTTATATATATATGCTTGTAGATGTAGCTAGTATCTCTGGAAGGATATCGA | 54948 |
| Kakapo                   | ATAATCTTACAGTTTAGG----AGCAATTCCTCAGTAGTAGTAGT-TCTTACAGAATCAGCTACGT-----TG      | 23962 |
| GoldenEagle              | TAATAGCAGAAGCTTAGTT---TAAGATAGTTTAAAAAATAAAATGTGTGAGAGACTTGTATACGTGAG-----TTA  | 27724 |
| JapaneseQuail            | ACCAAGCCATAGTCTTGATATGTGGCAGCAGAGAAAAGAAAATGTGTCTTACTGCATTTCATCTCT-----CCT     | 22608 |
| MediumGroundFinch        | GTACAGT-GTAGTTGAGGT---TAAGACTGTGTAAAAAATAAAATGTGTGAGAGGCTTGTGTATGTGAA-----CTA  | 10912 |
| GoodesThornscrubTortoise | GGGGGGCGGGGGTTGCCCTCCTCGCAGCATGGGGCATGGGTCACT-TGCTGGAGGATTCTCTGCCCTTGAAGTCTTTA | 50422 |

|                          |                                                                                 |       |
|--------------------------|---------------------------------------------------------------------------------|-------|
| Majority                 | AGCTAAAGCTGTTAGATGCTGGTTAGGCA--AAGACTTATATATTTA----A--GTGGATTAAAGTTTTTCTTTTCAC  |       |
|                          | 55450 55460 55470 55480 55490 55500 55510 55520                                 |       |
| Human                    | AGATAATACTGTGAGGGGTGGTAGGGGAAAATAGACTGGGTGACAGAGTTGCAGGGGAATTTTAAATCTTAAATACCAC | 55028 |
| Kakapo                   | GGAAAGACCTTTAAGATCAT--CAAGTCC--AACCTTTAC--CC-CA-----GGACTGAGGTTTCCCCCTTCAT      | 24024 |
| GoldenEagle              | AGGTAAAGCTGTTAACTGCT--CTAGGAA--AAGACATATATATATATAAAAATAGTACAACAAAATATTTCTCATAAA | 27799 |
| JapaneseQuail            | AGCAGTATCTGTTGGATACTTACTACCCCTCAATTCTGATCAATTTA----A--AAGGTGTAAGGTTTTTGTGTGT--- | 22678 |
| MediumGroundFinch        | AGTTAAAGCTCTTAGTTGCTGTTTAGGAA--AAGATACACATATTTA-----GTACATCAAATGCTTCTTTTAAG     | 10981 |
| GoodesThornscrubTortoise | AATATGATTTGAGGACTTCAGTGGCTCAGACATGGGTTAGGGGTTGTTATGGGAGTGGGTGGATGAGATTATTTG-GC  | 50501 |

|                          |                                                                                |       |
|--------------------------|--------------------------------------------------------------------------------|-------|
| Majority                 | CT--TTCCTTAAACTTATTGCAGCAAAAGTTGAAAA-----ACTGTGT--GAAGTGTA-GATATTA-TTGCAATGT   |       |
|                          | 55530 55540 55550 55560 55570 55580 55590 55600                                |       |
| Human                    | TTTATATACC-ATGATCATGGATTCTATTTTAGAAAACAT-TTTATATTT--GAAGCAGATGTAGTGTTTTCTAAGT  | 55104 |
| Kakapo                   | C---ATCCC---CTCGAGGCAATGAAAGTTCAAGA-----ACTGTGT--GAAATGCA-AATGATA-----         | 24075 |
| GoldenEagle              | TTTGTCTTTAAACTTACTGCAGCAAAAGTTGAAAA-----ACTGT---AAATGTA-GATATTACATAGCAATGT     | 27866 |
| JapaneseQuail            | ----TTTCTAGAACAATAGAAAAAGTCTTAGAAA-----ATCTTCC--GTGGTATA-AGAACCT-----G-        | 22733 |
| MediumGroundFinch        | C---TTCTTTAAACTTACTGCAGCAAAAGTTGAAAA-----ACTGTG---AAATGCC-AGTATTA-GTAGCAATGC   | 11045 |
| GoodesThornscrubTortoise | GTGATTGTGCAGGAGGTTGGACTAGACGTTTATAATGGTCTCTGCTGTCTTAAAGTCTATGATTCTATTATATGTATT | 50581 |

|                          |                                                                                  |       |
|--------------------------|----------------------------------------------------------------------------------|-------|
| Majority                 | TA--ATAGATTCA-AAATCAATT--ATATTGATGTAATACAATAATTATTGTTT-T-AAAGAAACATTA----A-CTTTG |       |
|                          | 55610 55620 55630 55640 55650 55660 55670 55680                                  |       |
| Human                    | TGTGGTAGTCTATGCTTGTATTATAGATAAATACAGTAAGAACATGTTCACTAATGAAGAAGATAAATATTGCAATGAGC | 55184 |
| Kakapo                   | -----AAACCAGTT---ATTTCAGGTAATACAATAATTATT-----AAAGGAACATTT-----CTTTG             | 24124 |
| GoldenEagle              | TA--ATAGATGGA-AAACCAATT---TATTTCAGGTAATACAATAATTATT-----AAAGGAACATTT-----CTTTG   | 27927 |
| JapaneseQuail            | -----G-AAAGCAGAA--ACACTGAACTAGAACAGGAAGTTTAGCTG-T-TAGGAAAAGATG-----              | 22785 |
| MediumGroundFinch        | TA--ATAGATGCA-AAATCAATTGGGTAATACAGTAATTCATAAATATTGTGT-T-AAATAATTATTAGAGAAACATTT  | 11120 |
| GoodesThornscrubTortoise | A--ATAGAATCACTTATTAATCATATATTGGTTTAAATATGAGCACAATTTTTT-CCAAACAAACAATAAA--ACTTAAC | 50656 |

Monday, May 02, 2022 06:50 PM

|                          |                                                                                  |       |
|--------------------------|----------------------------------------------------------------------------------|-------|
| Majority                 | CAAATACA-TATATATGAGTAATTATATA-CTGGCTAGAGATTCTTTTATTAG-----TAACA--CTGGGATTACCT    |       |
|                          | 55690 55700 55710 55720 55730 55740 55750 55760                                  |       |
| Human                    | TACTTAAAAATATTTAAATACATTTAAACATTTGAATAGATACTGCCTATAAAACTAATTTTACCAATTTACAATTATTT | 55264 |
| Kakapo                   | CAAATACA-TATATTGGAGTGATTCTAT--CTGGCTAGGGATGCTTTTATTAG-----TAACA--CTGGGATTACCT    | 24191 |
| GoldenEagle              | CAAATACA-TATATGTGAGTGATTGTATA-CTGGCCAGTGATACTTTTACTAG-----TAACA--TAGGGATTACCT    | 27995 |
| JapaneseQuail            | TAAAAGAG-TG-GTAGTAGTAATT-TGCG-ATGGACAGATCTTTTCTTTTCC-----TTTC---CTATCACTTCCA     | 22850 |
| MediumGroundFinch        | AATATACA-TATATGTGAGTAATTATATA-CTGGCCAGTGATACCTTTACTAG-----AAATG--CTGGGATTACCT    | 11188 |
| GoodesThornscrubTortoise | AGTTGTG-AAAACATCCACTATTACTCT-CCTGTTTTAAGCTCTTTAATTAGAGCTTATTTAGTC--ATGAGATTGT    | 50732 |

|                          |                                                                                  |       |
|--------------------------|----------------------------------------------------------------------------------|-------|
| Majority                 | GAAGCCTAATCCAAATAAAATCTTTAGTTTAATAAAAACCT----CAAATCTTGGACATTATGCTGTGGAA---AAGTTA |       |
|                          | 55770 55780 55790 55800 55810 55820 55830 55840                                  |       |
| Human                    | TTTCAATAATAGTATCAAGATGTCTACTAAAATAATCTAT----CACATTTCAAATGTTGAGTTTTAATTAGTAAGTCA  | 55340 |
| Kakapo                   | AAAGCCTAATCCAAATACAAGCTGTAGTTGAACAAAACCCCTCAAATCTCTGGACCTTATGCTGTGGAA---AAGTTA   | 24268 |
| GoldenEagle              | AAGCCTAATCCAAATACAAGCTTTAGTTTAAAAAAA-----TTCTTGGACATTATGCTGTGGAA---AAATTA        | 28062 |
| JapaneseQuail            | GTAGTGAAAACACAGGAAATTACTGTGTTTACTAAAAATGGG---AACTATTTGTAGCTTTGGCCAGAGAACTGGAGTTT | 22927 |
| MediumGroundFinch        | GAAGCCTAATTTAAATAAGAAGCTTTAGTGTAACAAAAGT----AAATCTCTGGACATTGTACTGTGGAA---ACGTTA  | 11260 |
| GoodesThornscrubTortoise | CTGGGAAGTACAGAAAAATAGTTCTTTAATAAGAACCCTGA--CATTCAATGAAAAATAACACTGATGTG---GCTTTC  | 50807 |

|                          |                                                                                    |       |
|--------------------------|------------------------------------------------------------------------------------|-------|
| Majority                 | ATTTGTCAAA---AT-TATATGTTGAAAAGCATAACGAAAGATTAACCT-GTTCTGTAAATATAGATCTGAGC-ATCATGG  |       |
|                          | 55850 55860 55870 55880 55890 55900 55910 55920                                    |       |
| Human                    | TTTTGACTAATACATAAAATTTATAGATAAAATTAAGTAGCATTAAATGATTGTTTATAGATATATATCTGGACTCTCAAGC | 55420 |
| Kakapo                   | ATCTGTCAAA---AT-GATATGTTGAAAACCACACAAAAGATAATACA-GCTCCGTAA-----GAACTGATC--TCATGG   | 24336 |
| GoldenEagle              | ATAGGTCAAA---AT-TGTATGTTGAAAACCACACAAAAGTCAAAACA-GCTCTGTAA-----GATCTGAGCATTCGTGG   | 28132 |
| JapaneseQuail            | GCCTGTTTGG---ATAGAAATGTTGGGATGTTTGTGAAATATGTTACTTGGTCTGGCTGTTTGGATCCAGAA--TTGAAA   | 23002 |
| MediumGroundFinch        | ATATGTTAAA---AT-TGTTTGTGAAAAGCACACAAAAGACGAAACA-GTTCTGTCCATACTGATCTGAGCCATCATGG    | 11335 |
| GoodesThornscrubTortoise | TTAAACACA---AATAAAATGTGAAAATTCATATGTAGATGTACAGT-GTTTTAGAAACCTAAAAGGGCCTGATACATG    | 50883 |

|                          |                                                                                   |       |
|--------------------------|-----------------------------------------------------------------------------------|-------|
| Majority                 | TATATACTTTTCTGGTGATGTAATA-----AAAACAGAAATTTCTTATCTGTTTCAGAGAATTTTTTAGTTTAAATGCT   |       |
|                          | 55930 55940 55950 55960 55970 55980 55990 56000                                   |       |
| Human                    | CGTGTGATCTG-TGGTTATATAATATTTTAGTAAAATGACTTTTCTTGTATTATCTCCTGAGTGTCTTAATCTTTTGTGTA | 55499 |
| Kakapo                   | TACATACTTTTCTGGTGACGTAGTA-----AAAACAGAGGTTTCTTACCAGTTTCAGAGAATCTTTTAGTTTAAAGCCT   | 24410 |
| GoldenEagle              | TATATACTTTTCTGGTGATGTAATA-----AAAACAGAAATTTCTTACCAGTTTCAGAAAATCTTTTAGTTTAAAGCT    | 28206 |
| JapaneseQuail            | CATGGATATCTTGGCT-TCTAAA-----ATGAATTGATTCCATCTCTGTTTTTAAACATGACTGAGTTGTCATGGT      | 23075 |
| MediumGroundFinch        | TGAATATTTTCTGGTGATGTA-----AAAAAGAGGCTTCTT---AATTCAGAAAATCTTTTAGTTTAAAAACT         | 11404 |
| GoodesThornscrubTortoise | ATCAACTCCATTTGGAATTAGAAA-----AATACGTAATCTTTGAGTTGATACAGCCATGTATTCCACTTAAATGTG     | 50957 |

Monday, May 02, 2022 06:50 PM

|                          |                                                                                   |       |
|--------------------------|-----------------------------------------------------------------------------------|-------|
| Majority                 | T----TTTCTCTTTCTCATTCTGATTGTTAATTTTTCATATTTAAA-T--TTGAAGTTTGTC----ATGAATTTAAATT   |       |
|                          | 56010 56020 56030 56040 56050 56060 56070 56080                                   |       |
| Human                    | T----TCTCTTTTCATTAACCTGTTGATATAGATTTTTCAAACTGTAA--A-CCTATGTATAGGTATTTGTGGTATTTGTC | 55572 |
| Kakapo                   | TGATTTTTCACCTTTCTCATTCTCATTTGTTAACGTTTCATATTTAGCTT--TTGAAACCTGT-----ATGAATTCAGGTT | 24483 |
| GoldenEagle              | TTAT-TTTTGCTTTCTCATTCTCATTTGTTAATGTTTCATATTTAATTT--TTGAAATTTGTA----ATGAATTCAAATT  | 28279 |
| JapaneseQuail            | G----TA-GGCAAACCTGAGTTAAGAGCTTAAATCTTAAATTTTAA-----CTTAGGTATAACC----TTAGTATAACTT  | 23140 |
| MediumGroundFinch        | T----TTTCTCGTTTTTCATTCTGATTGGTAATGTTTCATATTT----T--TTGAAACTTT-----ATGAATTTGAAATT  | 11468 |
| GoodesThornscrubTortoise | @G---CACCTTAGCACATCTGAGCTGGAGAATTTGCCTAGCCGTAAGTTAGAGGAGCGGCGCTCGTGTCTTGTGTATC    | 51034 |

|                          |                                                                                    |       |
|--------------------------|------------------------------------------------------------------------------------|-------|
| Majority                 | ATTGATAAAGCT----TAAGTATGATA-GGCATTGGAT--ATCTGTGTTTCAGTATCACTATAAATTTCTTTTATTCT---T |       |
|                          | 56090 56100 56110 56120 56130 56140 56150 56160                                    |       |
| Human                    | ATTGTTATATTT----T-AGAACTATTTGCCTTTGTATGTTTTTTGACCACAGATAAGGTAGAAAGAAATTATTTCCCTTA  | 55647 |
| Kakapo                   | ATTTAGAAAGCT----GAAGTATGACA-GGCATTGGAA--ATCTAGTTCAGTATCACTGTAACCTCTTTTGTCT---T     | 24552 |
| GoldenEagle              | ATTTAGAAAGCT----TAAGTATGAAA-GGCATTGGAA--ATCTGGTTTCAGGATCACTGTAATACTTCCATTCT---T    | 28348 |
| JapaneseQuail            | ACTGTTCTCAAT----TTAGTCACATA-TGAGTGAAAT--ATTTTTATGCAA-GTGATCAGATTAGGTCTAAATA---A    | 23208 |
| MediumGroundFinch        | ATTCAGAAAACCT----GAAGTATGAAG-GGCATTGGAC--ATGTAGTCTCAGTATCGCCATAAATTTCTTTTATCCT---T | 11537 |
| GoodesThornscrubTortoise | @TAGCTGTCTGCTCCTGGCTGTATGAGCGGCATCACCCC--ATCCTCCCTCAGTTCCTTCTTACTGCTCATGGCCTGAGT   | 51112 |

|                          |                                                                                   |       |
|--------------------------|-----------------------------------------------------------------------------------|-------|
| Majority                 | TGCAAGTTTGTTTG-----TAATGTGATATCTGTAATAC--ATTGTTGAAGCCTGTT---GTACTTTACAATGTAT---T  |       |
|                          | 56170 56180 56190 56200 56210 56220 56230 56240                                   |       |
| Human                    | TCATAGACTGTCATCATAATAACAGGAAAGGGATAATAGTAATAAAGGCAGTCTTTTGGAGCATTTAACATAATATTTGA  | 55727 |
| Kakapo                   | TGCAAGTTTGTTTG-----TAATGTGTTGCCTCTAATAC--ATTGTTAA-GCCTGAC---AACTTTGCAATGTAT----   | 24617 |
| GoldenEagle              | TGCAAGTTTGTTTG-----AAATGTGCTATTTGTAATAC--ATTTTTGAAGCCTGTC---ATACTTTACAATGTTT----  | 28414 |
| JapaneseQuail            | TTTACCTGGACATA-----AAATCTG--AGCTGTATTCT--GCAGTTACAGCTGAGTG--ATAATTGAAAATTTCT---T  | 23274 |
| MediumGroundFinch        | TGCAAGTTTGTTTT-----TAACATG---TTTGTAATGC--ATTGTCCA-GCCTATT---GTACTTTGCCTTGTTTCTTC  | 11603 |
| GoodesThornscrubTortoise | @GTCGCTGTGTGTGGTTCCCTAACTTCACAACCTCTCTCT--TTCTTAGTGACCTCTCTA-GGAGTATATAGTTAATTAGT | 51189 |

|                          |                                                                                     |       |
|--------------------------|-------------------------------------------------------------------------------------|-------|
| Majority                 | TCTTCTGGTTTTTTT-TTAATTTTGTAGAGATTTAATTTGAGAAGCTAGGTAA----GGCTGTT-GTGTGATGAGCTTCA--  |       |
|                          | 56250 56260 56270 56280 56290 56300 56310 56320                                     |       |
| Human                    | TTGACAGATTTCTACAAATACTGTGTTTATTCAATTTTATGGGTATATTTTTCGCATTTTAAAATCTCAGAAATTTGA      | 55807 |
| Kakapo                   | TCTTCTAGTTTTTTT---G-----GCAGAGATTTAAATTTGAGAAGCTAGGGAA----GACTGTT-GTGTGATGAGCCTCA-- | 24682 |
| GoldenEagle              | TCTTCTAGTGTTTTT-----GTAGAGATTTGAATTTGAGATCTAGGGAA----GACTATT-GTGTAAATGAGCTTCA--     | 28478 |
| JapaneseQuail            | TATTCCC-TTCTCTCTGGAATCACAGCCATTGGCTTTCCCTATGAAGGTGA----GGCTTTT-GGAGGATTTAATACA--    | 23346 |
| MediumGroundFinch        | TCTTCGGTTTTTTTTTTTATTTTGTAGAGATTTAATTTGAGAAGCTAGAGAA----GGCTGTT-GTGTGATGAGCTTCA--   | 11676 |
| GoodesThornscrubTortoise | @CCCTTGGTATAGTGTAGTTTTAGTTAGCTTTAGTTTAAAGTACTGTATAT---ACTTGTTCATAAGCTGGATTTTTTTT    | 51265 |



Monday, May 02, 2022 06:50 PM

```

Majority      GGTGAAAAATAAAAGTATTTTTTTC-TATATCGTTTGGCTATCTGTCACTTTGAGGATAAAAGTGGTAT-----TA
              56330      56340      56350      56360      56370      56380      56390      56400
Human         TGTGTCCTGCAATAGTCTATCTTCCATAGTTCAATTGGCAACATCTTATTAGTCATACATAAAACAATAG-----TGCA 55881
Kakapo        GGTGAAAAAGAAAAGGATGTTTT-----CTGT--CTTTGAGGATTAAGTGCTC-----TA 24730
GoldenEagle   GGTGAAAAATAAAAGTACTTTTT---CATAAACTTTGGCTGTCTGTCACTTTGAGGATAAAAGTGGTA-----TA 28544
JapaneseQuail AATTCTCACTATTGATTTTTTATTTTTT---TTTATTTTTTTTCCCTCTTCTCTTATTTCTTCT-----GA 23412
MediumGroundFinch GGTGAAAAGTGAAAGTACTTTTTTCCCACAAAGTTGGCTCTCTGTCTCTTTGAG-ATAGTGTATAA-----TA 11745
GoodesThornscrubTortoise AGTAAAAAAGGAAAGCATCAGAGAAGGGGGTTCGGCTTGTGAACGGCTATAGAGAGGGAGAAGTGGGACACAGCCCTCTG 51345
    
```

```

Majority      TTTTGTAAATTT----TGAATAGGTGAAGTCTGGCTGCTTGAAGCTCA--GTCTCACCATGTTTTCCAAACTGG-TACGG
              56410      56420      56430      56440      56450      56460      56470      56480
Human         TTTTATAATTAATGGTGTATTTGATACCATAAAATGTATGGGAAATATTCTTCATATATATCTTGAAGTTTACCTGAGA 55961
Kakapo        TTGTGTAATTT----TG-----CTACTTGAAGCCCACAGTCTCACCATGTTTACCAAAGGGA-TAGAG 24789
GoldenEagle   TTATGCAACTT----TGAACAGGTGAAATCTGGTTACCTGGAAGCCCA--GTCTCGCCACGTTTTCCAAAATGA-TACAG 28617
JapaneseQuail TTTTTTAGTTAG---TAAATAAAGTTAGTC---CTGTTAATAAATTTA---T-TTTTAATCCTCATCAACC----CATGA 23478
MediumGroundFinch ATGTATAATTT----TGAGCAAGTGAAACCTGGCTGCCTGGAAGCTCA--ATCTCACCATGTTTGCCAAAATGG-TACGG 11818
GoodesThornscrubTortoise TCCCCAATAGGAG-CAAGGAGAGGCAGCACAGCCAGAAGGGAAGCAGCGAGGCCAGAATCTCTCCCCTTCTGGCCACGC 51424
    
```

```

Majority      -GTTAGAGCCCTGTGTATACGTTACAG-TGGACTTCAGATCCTAG--TTCAGTGTGTGGTTTTGAATTTTTAGTCTTCT
              56490      56500      56510      56520      56530      56540      56550      56560
Human         ATTTTGTGGTTTTGGACTAGACTACACGTTGGTTTTCTATTCTAAAAATTTTGGTGTGAGAAGTTAAGTGTAGTATGAAA 56041
Kakapo        -GTTAGAGCCCTGGGTAGAC-TGACAG-TGGACTTCAGATCCTAC--TTCACACTGTGGTTTTGACATTT--TCTTCT 24861
GoldenEagle   -GTTAGAGCCCTGTGTAGACGTAAGGA-TGGACTTCAGATACTAG--TTCAGTGTGTATTTTTGAAGTTTTAGTCATCT 28692
JapaneseQuail -ATTTGAACCCTAATAATAAGATATAT-ATTTCTTCTAGTCACAG--GACTGTTTTAGTTTT---TTTTAGAAGAGT 23549
MediumGroundFinch -GTTAGAGTCTGTGTAGAC-----TTCAGATCCTAG--GTCAGTGTGTATTTT--AAATTTTACTCTTCT 11879
GoodesThornscrubTortoise @GCTCTTCCCCTGAGTGTCTGAAGCAGCTGCAGCTCCGGGGCTGG--CTTAGGCTGTGGCCACGTCTCCTGGCCTGGCC 51501
    
```

```

Majority      GTGTTCCACCAGAATTTGTCTTTCTGTGCAGCAGACCAAAATAAAATACGTACTATTGCATGGATTT--CCACTTCTAGC
              56570      56580      56590      56600      56610      56620      56630      56640
Human         ATGTATTTTCTGAATGTTCCATTTTTAAGATTGTATTAGAA-ATAATAAGCTTTATGGGAGTTCTTTTGGATAAATCAGT 56120
Kakapo        GTGTTCCATCACAATTTGTCTTCTGTGCAGCAGACCAACATAAAATACATACTCTTGCATGGATTTGACCCCTTCTAGC 24941
GoldenEagle   GTGTTCCACCAAAATTTGTCTTCTGTGCAGCAGACCAAAATAAAATACATACTATTGCATAGATTCAACCACTTCTAGC 28772
JapaneseQuail AAGTAGTTGTTGAGTGTATTTTCCAAAGATGAAATGAAAGATTGAATA--TATCACTGCATATTTT-----ATGGCCAGA 23622
MediumGroundFinch GTGTTCCACCAAAATTTGTCTTTCTGTGCAGCAGACCAAAATAAAACACCTACTATTGCATGGAT-----TCTAGC 11950
GoodesThornscrubTortoise @GGCTCAGCCCGGCTGTGCTGCCAGCCTGCCAGAGCAGTCCAAGCA-GGCCAGAGACATCCTTCCC-TGGCCCATCCC 51579
    
```

Monday, May 02, 2022 06:50 PM

```

Majority      AATTGTC A--GTTGGGAGTTACTGCTAGCTGGATTTTGACCGGTCCTGATGTGTTTAGGTTTTTGTTCGTT--TTGCTGCT
              56650   56660   56670   56680   56690   56700   56710   56720
Human         AACCCCTTGTGAGATTTACAACGTACCTGTTTTATGGAGTGATTA--TGTTAAAGTTGTATTCTCTAAATTTCTGTT 56198
Kakapo        AATTGGCA--GTTGGAGGTAACGCTAGCTGGATTTTGACCCTTTCCCATGTAGTTAGGTTTGGGTTGTT--TTGGCTGCC 25017
GoldenEagle   AATTGTC A--GTTGG-AGATGCTGCTAGCTGAATTTTGACCAGTCTCTGATGTCATTAGGTTTTTGTGTTGTT--TTGCTGCT 28847
JapaneseQuail AATACAA--AAAAGGAAGTCTTAAT-GCTTGTTTTCGTCATATCCAAATGTGTTCTGATTTTCAACATTAATTCATTAGT 23699
MediumGroundFinch AATTGTC A--GTTGGGAGATACTGCTAGCTGAATTTTAACCAGTCTTGA-ATGTTGAGGTTTTTATAGTT--TTGCCTGCT 12025
GoodesThornscrubTortoise AGCTAAG--GTGGGAAGGAATGGGATGGGGAGAATGTGGGGTCTCTGG---GCTAGGGGTGGGGTCATT--TTGGGGGGT 51652
    
```

```

Majority      GTAGTAAGTTGGTAAAAGACTTTAGAATGTGTTCTTTCAGTGTAAGGACTTTTTTAAAAAG----T---T-TCTCAGTCC--T
              56730   56740   56750   56760   56770   56780   56790   56800
Human         TAAACATTTTCTGATGGTACATGTATTTATAAAACTACATCTTGTTCCTTTTGAGAATAAATTACATATCATACTTTGC 56278
Kakapo        AATTGGAAGTTGG-AAAAGACTTAGAAAGTGTCTGCAGTGCAAGGACTTTTTTAAAAAG-----CTCAGTTC--T 25083
GoldenEagle   GTAGTAAGTTGG-AAAAGACTTACAAAGTGTCTGCAGTGTAAGAACTCTTTAAAAAG---CTCAGTCTTTCAGTCC--T 28921
JapaneseQuail GTCCTTGTCTCTTAAGACAGT-----TCTGTGCTTTAGCTTTTCAGTCCTTTATGTTA-----CTTCAGT----- 23758
MediumGroundFinch GTAGTAAGTTGG-AAAACACT---GTGTGTTCTTTCAGTGCAAGAACTTTTTTAAAAAG-----CTTAGTCA--T 12086
GoodesThornscrubTortoise GGTACAGGGCTTACTCCCCTGACCCCCAGCTCCCCCCCCCAAACCTTTCCACCAG---TT-GCTGTCCCAGCCCATC 51728
    
```

```

Majority      GGATTTATTTTTT--TTGGGGGGGTGG-TAGTTTTTTTGCATGACCTGCCTTTAAGGCATACTGTT-TTT-AGCTAAGAG
              56810   56820   56830   56840   56850   56860   56870   56880
Human         ATGTTCAACATTGATCCCAAAGCCTGGATAATTTTTTTGAATGAAATACTAGTAGAATATTTGATTTATTAACAGGTAG 56358
Kakapo        GGAATCAATTTTT--TTGAGGGGGGAG-AGGAGTGAAGGGATGACCTGCCTCTAAGGCATACTGGT-TTT-AACTAAGAG 25158
GoldenEagle   GGATTTTTTTTATTACTTGGGGGGCAGG-TAGAGTTAAGGCATGACCTGCCTTTAAGGCATACTTTT-TTTTAGCGAAGAG 28999
JapaneseQuail -GACATATTTA-----TGGGCA-----A----- 23775
MediumGroundFinch GGAAATTTTTT-----TTGGAGG----- 12103
GoodesThornscrubTortoise AGGGTAAGCTGCTGGTGGGCTGGGTGA-CACTTTGTTTACTTAGGTTTACCTCCATGCTGCGGACACTTGAGGTAAACA 51807
    
```

```

Majority      AA--TAGCTTGAGTTT-ACGTTTAGCTATATCTATTGCTGGATAGCTGAAGTAGA-GGTAGAACCATTCAAATTAGA---
              56890   56900   56910   56920   56930   56940   56950   56960
Human         TACCTGGCTCATGGCAGGTGCTTAAAAATATCTGTTGAGGGGCCATTTAATTTT--GTTTAATCTGTGTAAGTTCTAGGA 56436
Kakapo        AA--TAGCTGAATTT-ACATTTAGCTAAATCTAA---AGATAGCTGAAGCAGAAGGTAGAAACATTCAAATTAGA--- 25228
GoldenEagle   AA--TATCTGAATTTTAGGTTTAGCTAAATCTAAAGATGGATAGCTGAAGTGAAGGTAGAAACATTCAAATTAGAATG 29077
JapaneseQuail -----T-----AGTTTTATTACCATATAGCTGAAGTA--AGT-----A----- 23806
MediumGroundFinch -----AG-GTTGATGGTAGTGGTACAGGGT----- 12128
GoodesThornscrubTortoise AA--CTGGCTCGGCCTGCCAGAGGCTTATCCTGATGGCCAGGAGCCAAAGTT--TGCCAACCCTGAATTATAGGGTC 51882
    
```

Monday, May 02, 2022 06:50 PM

```

Majority      ----GGTTTAGCTGTTATAAAAAGAT-TACGTGATTTATGGAAATATTT--TATGATGTTTAGCT--ATCTTTTTTCCAT
              56970      56980      56990      57000      57010      57020      57030      57040
Human         ACAAAGTGAAC TAGTAGTGTAA CAGGTTGCAAAGTATGTGACAATAATGGGTATGTTTCTAAACTACATAATCTTAATTT 56516
Kakapo        ----GGTTTAGCTGTTAGAAAAAGCTAGAAGGGAGTGGTGGAAACAGTT--CCTAATGTATAGATGTATCCTTCTCCCAT 25302
GoldenEagle   AAGAGGTTTAGCTGTTAGAAAAAGATATACGTGAGTGTAGGAAACAGTT--CCTGATGTGTAGATTTATCCTTTTTTCCAT 29155
JapaneseQuail -----AGTATTTCTTAAACATATTT--TTCAAAGCAGA ACT---TCTTCCATCCAG 23851
MediumGroundFinch -----GTGGGT-ATGGAGTTACTA--CATGATGT--A----- 12155
GoodesThornscrubTortoise @GCTTATGAATAGGTCATAAAAAAAT-TTCAATTTTACTTATCCATCT--TAGGGGTTTCAGCT-----TATAAACAAA 51954
    
```

```

Majority      CCGTCCCTTTAATGGATATATTCAGGATGTCTTTGTTTTTGAAAAAGT-AAA ACTT-----GTGTTTCC-CA-----G--
              57050      57060      57070      57080      57090      57100      57110      57120
Human         CCAGCGTGCTCAGGCAGTTCTTCAAGCTGTGACAGCTGTCCAGACAGCAAATACTCCTCTTAGTGGCACCACAGTTAGCG 56596
Kakapo        TAATTCCTTTAATGGAAGTATGGAGAATGACTTTATTCTTGAAAAAGT-AAGACAT-----ATGTTTACAGGTTTAGTC 25375
GoldenEagle   CACTTCCTTTAATGGAATATGGAGAATGACCTTATTCTTGAAAAAGT-AAAAAGT-----GGGTTT----- 29216
JapaneseQuail CTGTCTCTTTATTTCATATGTTCTGGCCTGAGTTCTTTTTTT---TGT-GAATTTT-----A----- 23903
MediumGroundFinch -----CCTCTAA--GACATAC-----TGTTTTT-----AA----- 12178
GoodesThornscrubTortoise @CGGCTTATGATTGAGTACATACGGCATTCTTTGGTGATGCCTTCGCCAAAACAC-----TGTCATCATGTGAGGGG 52028
    
```

```

Majority      A-A---C-----TTGCTAATTGCTTTGAATAGTTAGTTAAATGTCATACCT-GGTTTGGCTTTTGTGATGTT
              57130      57140      57150      57160      57170      57180      57190      57200
Human         AGAGTGCAGTGACTCCAGCCCAGAGTCCAGTACTTAGAATAATTATTGACAACATGTACTACCCTGTAACACTTGATGTT 56676
Kakapo        AGAGACCCCGAGCTTGCCAATCTTCCTAATTGCCTTGAAAAGGTACTTAAATGTCATACCT-GGTTTGGCTTTTCATATC 25454
GoldenEagle   -----TTCCTAATAGCATTGAAAAGGTAGTTAAATGTCATACCT-GGTTTGGCTTTTCAAGTC 29273
JapaneseQuail -----TTGGAATTCTGTGCAAGGAATCTGGAA-----A-----ACATT 23937
MediumGroundFinch -----CTAAT-----AG----- 12185
GoodesThornscrubTortoise @CAAATCCCAACAACAGTCCCATGTACAGTACTTGCTGTGCTTAGTGGAAGCCACGTC AAGGATCGGTGTTTGTATTTT 52108
    
```

```

Majority      CAAATC---TGTAGTGTGGATGTTCTTGA---CATGTAAAATTG--AGTCTATTTTCATTGTGTGTTTTTAAT--TTTGAT
              57210      57220      57230      57240      57250      57260      57270      57280
Human         CTTCAC-CAAGTAAGTTTAATCTGCATAATTACCTATAAATTAGAGAAATAATAATATAGTAAATAAGTAATGTTTTGAT 56755
Kakapo        CACATC---TGGAGTGTGGATGTTCTTGA---CTTGTA AAAATG--AGTCCATTTCTGTTGTGTGTTTTTAAT--CTAGAG 25524
GoldenEagle   CAAATC---TGGAGTGTGGATGTTCTTGA---CATGTAAAAAACAGTCCATTTTCATTCTGTGTTTTTAAT--CTTGAG 29345
JapaneseQuail CAAAAC---TGTCTCGTGGAGCTTTGTAC---GATATGA-----TTTTTT-----TATATTATTATT--TTTA-- 23992
MediumGroundFinch -----GA-----T-----ATT----- 12191
GoodesThornscrubTortoise @CAAATCATTACAAGGTGGACTCAGGTGA---CATGGGAGCTTT--GTCTAAAGCAGCACCTGCTCAAACA--GGCAGT 52180
    
```

Monday, May 02, 2022 06:50 PM

```

Majority      TAAGTTGGCTTGGCTTATACTAACTGAGTTA--AACTTGAATTC---T-A-----T-----T-----A-----TT
                57290      57300      57310      57320      57330      57340      57350      57360
Human         TTTAATGTTTTAACAGATATTTTCTAAGTTTGGTGCT-GTATTGAAGATAATCACATT----TACAAAAATAACCAGTT 56830
Kakapo        TAAGTTGGGTGGCTTAGACAAACGGAGTTAAGAACTTGAATTC---T-----T-----T-----T-----TT 25571
GoldenEagle   TAAGTTGGCTTGGTTTAGGCAAACACTGAGTTAAAAACTTGAATTCTGGATTATGACTTAGGCATACCCTTAGCAAACTTT 29425
JapaneseQuail -----TTTCCTTGTCTAGTAGAAATA---CTTG-----T-----T-----T-----T-----TT 24020
MediumGroundFinch -----TTGAAT-----T-----T-----T-----T-----T-----T-----T-----T 12198
GoodesThornscrubTortoise 6CAGCTTGCTTCGGAACCAATGACTGTGTTA--GATCAGAGGTTGCTCTCAGGTTCTGAGAGTTTTATCACTTCCTGGTC 52258
    
```

```

Majority      TTGTGCTTAAGTCCGTC--ATAAATGAATGCATTCTTTTAA--TGCATGTAGCGAGA--TTAGGTTGAGATGGT-TTTT
                57370      57380      57390      57400      57410      57420      57430      57440
Human         TCAAGCTTTGCTCCAGTATGGTGATCCAGTAAATGCTCAACAAGCAAACACTAGTAAGTCTTTCTTTTGAGATGGTGATTT 56910
Kakapo        CTATACTCAAGTCAGTC--AGAAATGAATGCAGTATTTTAA--CACAGGGAACGAGA--TTAGGTAGAAATGAC-TTTT 25643
GoldenEagle   CTGTGCTCAAGTCCGTC--ATAAATGAATGCAATGTTTTAA--TGCAGGGAATCAGA--TTAGGTGTAATGG--TTTT 29496
JapaneseQuail TTGCTCTCCCTCCCTG--TTAACTGCATG-GTCTTTCTTA--TGGATAAGCCCA-----TGGTTCATCATGGT-TCTT 24088
MediumGroundFinch TTATATT-----T-----T-----T-----T-----T-----T-----T-----T 12210
GoodesThornscrubTortoise 6GGAGCTGGTACCTTTCCAAAGAGATGGAGGAGTCCCTCCCCATTGAGTGTGGCGAGG--AAAAGGTCACATGAG-ACTG 52335
    
```

```

Majority      CTTGGCATTAAATTCAG---AGTGGAAATCTGTATTTACATCTGAGT-ATAATTGAGGACTTCTTGATTCTCTTCACTCT
                57450      57460      57470      57480      57490      57500      57510      57520
Human         TTTTTTATTGAAAT-GTATATGTAGAAAAATATATATATATATGTATGT-ATACTTAATGATATCTGTAGCATTACAGATA 56988
Kakapo        CCTGGCACCAATTCAG---AACGACATCTGTAGTTATAGCTGAGTGAGAACTGAAGACTTCTTCATTCACTTCTCTCT 25719
GoldenEagle   CCTGGCACAAATTCAG---AATTATATTCTGTGGTTACAGCTGAGTGATAATTGAGGACTTATTTATTCTCTTCCCTGT 29572
JapaneseQuail CTTAGCATTAGT-----GACTTCTGTATTTGCATC-----AATAAA-----TTTTCTT----- 24131
MediumGroundFinch -----A-----AAT-----T-----T-----T-----T-----T-----T-----T 12214
GoodesThornscrubTortoise 6ATTAAGGTTGCTCCAGGTTGAGTGGGGTCTTGTCTTTCCAAA-GAGACGCAGCCTGGTACAGTGTGAATCCTGGCATGCA 52414
    
```

```

Majority      GGAAA--CAGCCATTAGCTTTCTTAT-A---A-C--T---G--GACTTAAACACCTGTACTT-CTTCCTATTGATTCC
                57530      57540      57550      57560      57570      57580      57590      57600
Human         GTAGA---AATTGATGGCATTAAATATTAAGA-AACCTTAATATTTGTCATAAAAAGAAATATTTATTTTATAGGAAAATCA 57063
Kakapo        GCAAATTCAGCCATCAACTTCTTACAA-----G--GATTTAACACCCGTAATGCTTCCTATTGATTTC 25783
GoldenEagle   GGAAATCACAGCCATCAGCTTTCTTATGAAGACAACGCTTTTGGAGGACTAAACATACAGAAATGCTTCCTATTGATTCC 29652
JapaneseQuail -----TTAACTTTTAA-----CTTTGTGCCTG-GCG--CT---AGTAGTAT- 24167
MediumGroundFinch -----CTAA-----T-----T-----T-----T-----T-----T-----T-----T 12218
GoodesThornscrubTortoise 6GAAAGTGCAGGATCTGTCAACCACACCCTAGTACCATTAGGGAGGATGGAGATCCTGTACTG--TTGACCCTGGTTCC 52492
    
```

Monday, May 02, 2022 06:50 PM

```

Majority      TCCCCTCCTC---C-----TTT-T-TGTTTCTACTTTTTTATTTAGTATATAAATAGTAGTCCTG--TTC-GTAG
              57610   57620   57630   57640   57650   57660   57670   57680
Human         TAGTTGTAGTTAACCATGATGTGGGTTTCTATTATTTTACTTTTTTTTTTTTTTTAATTTAAGGACAAAAGTTTGTAC 57143
Kakapo        TCCCCTTCCCC---C-----TTTGT-TGTTTCTGCTTTTTTAGTGAGTAAATCAAAGTAGTCCTG--TACTATTT 25848
GoldenEagle   TCCCCCCCCCCCCCCCCCCCCCTTTAT-TGTTTCTACTTTTTTAGTGAGTAAACAAAAGTAGTCTTG--TTC-ATAA 29728
JapaneseQuail -----T-TGTAGTTACTTTATT-----CC-GTTG 24189
MediumGroundFinch -----ACTTTTT----- 12226
GoodesThornscrubTortoise@ACCCTGCTTCTTGATCGCAGACGT--T-CCACTCTACATCTTGCTCTAAGATGAAATCACTGGCCA--GGCACCAG 52566
    
```

```

Majority      TTTTCTTTTTTATTAATCCTCTTTGGTATAAGCCCTCAAGCCAGGATTTGAACCTCTGATAAT-----TTTTCTT
              57690   57700   57710   57720   57730   57740   57750   57760
Human         TCTTAAGAAAAAGCAGGACTATATTGTGAATGTGCACCAGCATAAGATTTGAAGT--GGCTTTTGCTGGGAATTTCAA 57221
Kakapo        CTTTCTTTCTTTATTAATCCTCTTTGGTAGAAGCTCTCAACCCAGAATTTGAACCTAATAATGACAAATCTTTTCTC 25928
GoldenEagle   TTTTTTTTTTTTTAAATCCTCTTTGGTATAAGCCTTCAACCCATGGATTTGCACCTAATAAT-----TTTCTA 29799
JapaneseQuail CTGTCTGTTTCCATT-----CAAGATAAAAAC---AAAGCAAAAACAGAACTA-G-----TTTACCT 24243
MediumGroundFinch -----TTTGGTAGAAGA----- 12238
GoodesThornscrubTortoise@GAACCTTTCCTTGAAGAGCATCCAAAGTTGCCATCAGTCTGGAGTAGCA-TCTGTACAGTTAACCATTTTATCT 52645
    
```

```

Majority      CTAGTCACAGTTGGTGTG--TTTTTTTGAA-T--TATACAGTTGTTGTTCTATTGTTCTAAGATGTAATCAGATGTTTT
              57770   57780   57790   57800   57810   57820   57830   57840
Human         GTAATTAGTTTTCAAAGAGTTGGCTGAAA----TATACAGATGGCTCAAATGCTATGATAGGCTCTCAGTTTATTT 57297
Kakapo        CTAGTCACAGTTGGTGTGGTGTGTTTGGAAATA-TATGGAGCTATTTGAGTGCTCTTCTAACCTGTAATCAGAGGTTGA 26007
GoldenEagle   CTAGTCACAATTTGTGTG--TTTTTTTGAAATA-CAGATAGCTGTTGAACGTCTTCTAACATGAAATCAGAAGTTGA 29876
JapaneseQuail CTAACCTAC-----TTTACAGTTCTTATGCAATCGTCTGAGTCTTAATTAG----TA- 24291
MediumGroundFinch ----- 12238
GoodesThornscrubTortoise@CATCCCCAGATGATCCATGTGCCTGGCTCTTCCACTCCTTTGGTATTTGAGTATTTCAAGGCATACCAGGATCTTTT 52725
    
```

```

Majority      GTAGCTCATACTGCCTTTCATGTTTTTTAGCCAGAAGTGGTATAAAA-GGAAGTCTTATCACTTGTTTCAC---TTATA
              57850   57860   57870   57880   57890   57900   57910   57920
Human         AAAACT-ATATATCTCTTTAATGTCTTTTTTTAAAGGTTTTATGAATAGGTTTCTAGTCACTTTTTATTCA--TATCA 57374
Kakapo        GTAGCTCATGCACTGGCTTACATGTTTTATAGCCAGAAGTGGAAGGAG-GGAAGTCTTAACACTTGCTTCTC---TCATA 26083
GoldenEagle   ATAGCTCACACTGACTTGCATGTTTTATAGCCAGAAGTAGAACAAA-GGAAGTCTTAACACTTGCTTCGC---TTGTA 29952
JapaneseQuail ----TTCTTACACAGCTTTACATGATACGTCACAGAAATTGAGGTGGA-AAAAAATTGACTGTGCTTTTCATCT-TGATG 24365
MediumGroundFinch -----A-----AG-----GGAAGTCTTATCACTTGTTTCAC---TAATG 12269
GoodesThornscrubTortoise@CAGTTCATG-GCTGCTTCTCTGGGTATTCAGCAGAGTCTGCAGG-AGAATACCATAAATTTGTTGGATATGCTGCA 52803
    
```

Monday, May 02, 2022 06:50 PM

|                         |                                                                                    |       |
|-------------------------|------------------------------------------------------------------------------------|-------|
| Majority                | TCTAATTGCGTTCTGATTTCCAGC----ATTGATTAA---TTCATGAATATT---ATATCTTTCAACAGTGTGTGTTCTTT  |       |
|                         | 57930 57940 57950 57960 57970 57980 57990 58000                                    |       |
| Human                   | TTTATCTTTTTTGTTCATTGTTACATATGGAGGATGTAAGGTCATTGAGAGATGTAATAATTTCCCATCAAGGCTGCCACTG | 57454 |
| Kakapo                  | TGTAATTGTGTTCTGATTTCCAGC----ATTGATTAAA--TTCATTAATATCCATCTATCTTGGGACAGTGTGTGTTCTTT  | 26157 |
| GoldenEagle             | TCTAAATGCATTCTGATTCCAGC----ATTGATTCA---TTAATATCCAT---AGAACTTATAACAGTGTGTGTTCTTT    | 30021 |
| JapaneseQuail           | AGGAAATGAGTTATCATAAACAGCT---GCTGGGGTA---TCCTTGAACAGT---CCATCTTCAA--GTATTGTAG---    | 24431 |
| MediumGroundFinch       | TCTAAGTGCATACTGATTTCCAGC----ACTGATTAA---TTCATTAATATT---ATATCTTATGACAGTGTGTGTTCTTT  | 12339 |
| GoodesThornscrubTortois | 6CTGTTTGCCCCGTTAGTCCCCCTCCCTATTAGCAATGA-CCTCTGAGTGCCTGCTAAGTTCTCTGAAGCAATCCAGGTC   | 52882 |

|                         |                                                                                  |       |
|-------------------------|----------------------------------------------------------------------------------|-------|
| Majority                | AGCTCTTGACTCTG-ATGTTTAC-TCCACTGATATATTTTTATTTCAG-TGT--TA-----TGTACTTTTT          |       |
|                         | 58010 58020 58030 58040 58050 58060 58070 58080                                  |       |
| Human                   | AAACTGCGCACCACATCTTTGCTTCCA--AGTACCTTAATCTTCTGTTTGTATATCTTAAATCTACTTTTGTCTGTCT   | 57532 |
| Kakapo                  | AGCTCTTGACTCTA-ATGTTTAT-TCCACTGACATATTTTTAGGCAG-----TGGTTGTA                     | 26210 |
| GoldenEagle             | AGCTCTTGACTCTG-ATGTTTAC-TCTACTGACATATTTGTGGGCAGCAGTTGTATTACCTTTTAACCAAAGTAATTTTT | 30099 |
| JapaneseQuail           | AATCATTAAGATTG-GAAAAGA--TCTA--GATGTAGTC-CAACCAT-----CACCACCA                     | 24480 |
| MediumGroundFinch       | AGCTCTTGACTCTG-ATGTTTAC-TCCACTGACATGTTTTTAACCAA-AGT--T-----AATAGTTTTT            | 12398 |
| GoodesThornscrubTortois | 6GTACTGCTTATTG-CGAAGCACATGGAGAAATGCTACTTCAATCCAGTGCAGCAATTTGAGGGTTTTTATTTACATCCA | 52961 |

|                         |                                                                                  |       |
|-------------------------|----------------------------------------------------------------------------------|-------|
| Majority                | TTTCTGGCCTTCTTTCCAAAGCAAGACTTCTTCCATCCAAGTGGCTAGTTC-----T-GCTTATTC---A-AAAAAGGAA |       |
|                         | 58090 58100 58110 58120 58130 58140 58150 58160                                  |       |
| Human                   | CTTTAACTTTTTGTGCCATAGTATCTCATTATTTACTATTCCATTATTAAGCCATTAATAATTC-----ATTATTAAG   | 57607 |
| Kakapo                  | TTACTGGCCTTCTTTCCAAAGCAAGACTTCTTCCATCCAAGTGGCTAG-----GAA                         | 26261 |
| GoldenEagle             | TTTCTGGCCTTCATTTCCAAAGCAAGACTTCTTCCATCCAGCTGGCTAGCTCTTTTATTGCATATTTCAAGAAAAAGGAA | 30179 |
| JapaneseQuail           | TGCCCGTAAGCCATCTGTGCCG---CTTCTGTGCCACATCTGCCTTTTTT-----AT-GAA                    | 24533 |
| MediumGroundFinch       | TT-CTGGCCTTCTTTCAAAGCAAGATTCTTCCATCCAAGTGGTTAGCT-----GCTTATTC---AGCAAAGGAA       | 12466 |
| GoodesThornscrubTortois | 6CCCCAGATTTCTGGTTGTAACCGCTGTGAACGACAGAGCCCGACAGAGCAGATGTAAGTCAACTCCCAAGGATAAGGA  | 53041 |

|                         |                                                                                  |       |
|-------------------------|----------------------------------------------------------------------------------|-------|
| Majority                | CTCCAGTTGGAATTTTGTGTATTTCTTTACAAGAATCTGGACAGTATTCTTAA---TA---ATACCTTTCTGGTGTTT   |       |
|                         | 58170 58180 58190 58200 58210 58220 58230 58240                                  |       |
| Human                   | CCATTATTATGAAACCATTTAATAAGCTTACATTTATCTTAACTGGTTTTCTTCTTTCATTTCATTCTTTACTTTTCAGA | 57687 |
| Kakapo                  | CTCCAGCTGGAATTTTG-TC-----CAAGAATCTGGACAGCATTCTTAA---TA---ATACCTCTAAGGTGCTT       | 26324 |
| GoldenEagle             | CTCAAGCTGGAATTTTGTGGAATTTCTGCACAGGAATCTGGACAGTATTCTGAA---TA---GTACCTTTCTGGTGGTT  | 30253 |
| JapaneseQuail           | CGCTCTAGGGCTGCTGACT-----ACCTTCTCCCTGGGCACCCTTTTC-----CA---ATACCTCACCCTCTTT       | 24596 |
| MediumGroundFinch       | TTCCAGTTGGAATTTTGTGTAAATTTCTTTGCAAGAATCTGGAGAGTATTCTGAA---TA---GT--CTTTCTGGTGTTT | 12538 |
| GoodesThornscrubTortois | 6TCTAAATGTATGGACCCGGTGTATCCCCTGAAGCCCCAACGGAGGAATTTCAAG---CATTTATCACCAAAGACTGGTT | 53118 |

Monday, May 02, 2022 06:50 PM

|                          |                                                                                  |       |
|--------------------------|----------------------------------------------------------------------------------|-------|
| Majority                 | TGTAC-AATGATGTTAATGCTTTCCTGCTTCTTCTAGGAAAATCTTGTCTGG-T----CTCTTA-----TT----TTG   |       |
|                          | 58250 58260 58270 58280 58290 58300 58310 58320                                  |       |
| Human                    | TTAATTATGTCTCTAATACTTAAATGCTTCCCTCCAGATCAAGATTACTTCTGTGGAGCCCAGACCATTTTTTACAATTG | 57767 |
| Kakapo                   | TGTAC-AATGATGTTAATGCTTCCCTGCTTCTGCTAGGAAAATCTGGTCTGG-----CTCTTC-----CC----ACA    | 26386 |
| GoldenEagle              | TGTAA-AATGATGTTAGTGTCTCCCTGCTTCTGCTAGGAAAATCTTGTCTGGTCTTGTGTTTG-----TT----TTG    | 30321 |
| JapaneseQuail            | TGGA--ACAGAAATT-----TTCCTGATATCCAACCTAAACCCTCACCT-----CTCA-----TC----GTG         | 24648 |
| MediumGroundFinch        | TGTAC-ATTGATGCTAATGCTTGCCCTGATTCTTTTAGGAAAATGT-ATCTGG-----ATCTTA-----CC----CCA   | 12599 |
| GoodesThornscrubTortoise | GGTGGCTAAGACTTTGTTGCAGTCCATGTTGCATCGCAGAGTGATGGCCTCAGTGGCGACCATGAGAAGGGCT---TCC  | 53194 |

|                          |                                                                                  |       |
|--------------------------|----------------------------------------------------------------------------------|-------|
| Majority                 | TTCCCTTGTCATGTTGGCTGCATCATATTT-----ATTAGTTG----GTTTTTCCTTTTCTATGGGTGAGCT         |       |
|                          | 58330 58340 58350 58360 58370 58380 58390 58400                                  |       |
| Human                    | TTTCATTGCATTTCCATCCACACAACCTCATTTTGGGAGCAAAATTAGTTGTAG-GTAGCAGAAAGGCTATACAAGTAAT | 57846 |
| Kakapo                   | CCCCCTTCCCC-TGTGTTGGCTGCCTCATGTTT-----ATTAGTTG----GGTTTT----TTCTGTCAGAGAGCT      | 26447 |
| GoldenEagle              | TTCCCTATC--CATATTGGCTGCATCATATTT-----ATTAGTTG----GTTTTTCATTTTCTATTGGTGAGCT       | 30385 |
| JapaneseQuail            | TT-GCTTGTTA-TTTGGGAAAAGAGGCCACTT-----ACACCTTG----CTACCACC--TCTTTTCTGGCAGCT       | 24710 |
| MediumGroundFinch        | T--CCCTGTC--TGTGTTGGCTGCATCATGTT-----ATTAGTTG----GTTTTTCCTTTTTTATGAGTGAGCT       | 12660 |
| GoodesThornscrubTortoise | GGCTGTGGAA-TCTGTGATTGCTCCCATGTGC-----AACAGGCCATAGAGGATTTGCCCTCAATGGCTGAGTC       | 53266 |

|                          |                                                                                  |       |
|--------------------------|----------------------------------------------------------------------------------|-------|
| Majority                 | CGTAGT----TCATAATGGACTTTTTTGTCG-GGGTCCTTAA--ATTCTGAG-GCT---CTAGATT-TCATCAGATTTT- |       |
|                          | 58410 58420 58430 58440 58450 58460 58470 58480                                  |       |
| Human                    | AATAGCATAATTGTAATAGTTTACCAAGTGCCGTAGTCTCATTTTTTCTGACCCTACTCTATATTGTCAACAAAACAGG  | 57926 |
| Kakapo                   | TGTAGT----TCATAATGGATAGTTTGGCTCTTGGTCCTTAA--ATTCCGAG-GCT---CAGGATT-TCATCAGATGTT- | 26515 |
| GoldenEagle              | TGTAGT----TCATAATGGACATTTTGTACTGGGTCCTTAA--ATTCTGAG-GTG---GTGGATT-TCATCAGACTTC-  | 30453 |
| JapaneseQuail            | CTTAGT----GAGCAGTGAGGTCTCCTCTGG---CCCTCAT--GTT-----TT---CTAGACA-AAACAAACCCGT-    | 24768 |
| MediumGroundFinch        | CGTGGT----TCAGAAGGGACGTTTTCTTAC-----C-TTAA--ATT-----GTTGGTT-TCATCAGCTTTT-        | 12714 |
| GoodesThornscrubTortoise | TTTTTT----TCCAAACAGACGAAACTCTGC-ACTCCTTCAAGGACTCTATG-GCTACCCTACAGT-CCTTGGGGGTGTA | 53339 |

|                          |                                                                                 |       |
|--------------------------|---------------------------------------------------------------------------------|-------|
| Majority                 | TGTGATGTCAGTCCCTTTG-GGTCATCCCTTTCTC--CGTGTG-GATCCTTCTCAG-----CATTAATAAT---GCTT  |       |
|                          | 58490 58500 58510 58520 58530 58540 58550 58560                                 |       |
| Human                    | GTTTTCCCTGCGTTACAAGAGGATGCTAAGATTTAAAGAGGTGAATTACTTACAGTGAACACCACCTATAAGGTAGACA | 58006 |
| Kakapo                   | TGCAATATCAGTCCCTCTG-GGTCATCCCTTTCTC--CGTGTG-GATCCTTCTCAG-----CATGAATAAC---GCTT  | 26581 |
| GoldenEagle              | TGTGATGTCAGTCCCTTTG-GGTCATCCCTTTCTC--CAGTGT-GATCCTTCTCAG-----CATTAATAAT---GCTT  | 30519 |
| JapaneseQuail            | TCCCTCAGCTGTTCCCT---AGTAAGACTTGTGTTC--CAG---ACCCCTCACCAG-----CTTTGTTGA---ACAT   | 24828 |
| MediumGroundFinch        | TGTGATGTCAGTCCCTTTG-GGTCATCCCTTTCTC--CGTCTG-GATCCTTCCAG-----CATTAATGAT---GCTT   | 12780 |
| GoodesThornscrubTortoise | TTGCTGGCAGTGCAGAGATGTCAGTGTGGTAGTCAGCAGCGG-CATCATCTGTAG-----CCCACATCTGG--GCAG   | 53409 |

Monday, May 02, 2022 06:50 PM

|                          |                                                                                  |       |
|--------------------------|----------------------------------------------------------------------------------|-------|
| Majority                 | CCTTTCTTGCTTTGATACTTTTCTACT--TTTTGTGTCTGGT-----TCCTTAGTGCAAACAGTTCTTAAAATTTTCC   |       |
|                          | 58570 58580 58590 58600 58610 58620 58630 58640                                  |       |
| Human                    | TTTTTTCAGTCTTAGCCTTTCTCTCCA--GTATGCTGCTTCTCACTGGTTCCTCGGTATAATCTAATCTTACTGTGCTTT | 58084 |
| Kakapo                   | CCTGTCTTGCTTTGATACTTCTCTACT--TTCTGTGTCTGGT-----TCCTTAGTGCAAACAATCCTTAAAACCTTCC   | 26652 |
| GoldenEagle              | CCTTTCTTGCTTTGATAATTTTCTACT--TTTCGTGTCTGGT-----TCCTTAGTGCAAACAATCCTTAAAACCTTCC   | 30590 |
| JapaneseQuail            | GCTCCAGGGCTTCAGTGATTTTCT----TTTAGTGAGGAGT-----CTGAAACTGAACACAGTACTTAATAGTG---    | 24893 |
| MediumGroundFinch        | CCTGTCTTGCTTTGTACTTTTCTACT--TTTCGTGTCCAGT-----TCCTTAGTGCAAGCAGTTCTTAAAAAAA--C    | 12849 |
| GoodesThornscrubTortoise | CCTTCCCTCCCTGAGACAGCAGGACTACTTCAGAAAGGGGTATAGGTCCCAGGAGGAGGCGGCATTCTGGTTTTGCC    | 53489 |

|                          |                                                                                  |       |
|--------------------------|----------------------------------------------------------------------------------|-------|
| Majority                 | TTTCGGAGCTC-TTTATTAATTATTCACCAC-----TATTTTTTCTCTTTGAAACAAAATTCTGGTTA-GCC---TCTAA |       |
|                          | 58650 58660 58670 58680 58690 58700 58710 58720                                  |       |
| Human                    | CCGCTTCAGGCATAGGTTAAT-AATTAGAAT-TCTTTTTTTTTGTCCAAAAAATGATTATCCTCCTTTCACATGCCCTGG | 58162 |
| Kakapo                   | TTTAGAAGCTCTTCTAGTAATATTCACCAC-----CATTTTTGTCCAGAAAAACAAAATTCTGGGTA-ATC---TCTAA  | 26723 |
| GoldenEagle              | TTTAGGAGCTC-TTTAGTAACATTCACCAC-----CATTTTTCTCCTTTCAAA-AAAATTCTGGGTA-ACC---TTTAA  | 30659 |
| JapaneseQuail            | -----T-----AAT--CTCACCAG-----TGCTGCATACAGAGGGACAGTTACCCCCCTTGTGCT---GCTGA        | 24946 |
| MediumGroundFinch        | TCTGGGA-----TCTATTAATGGTTCACCAC-----TATTTTATTTCTTTCAAA-AAATCTCTGGGTA-GCC---ACTAA | 12914 |
| GoodesThornscrubTortoise | AGTCGACATACTTTTCCCAAGAGCCTTCCATGTACTCATTTTCACTCCTTGGACCAGAGCTGTGTTCTGGTCATGGCTAC | 53569 |

|                          |                                                                                  |       |
|--------------------------|----------------------------------------------------------------------------------|-------|
| Majority                 | CTGTTT---T--GTTTTTTTTATGT-----AATTTGGAGTTCTTATGCAAGCCCT---TCTGGGTCATCATTAATAT-   |       |
|                          | 58730 58740 58750 58760 58770 58780 58790 58800                                  |       |
| Human                    | CTACCAAAATCAATGTGGTATGAGGTTTTATGAATAGGAGACAATCTAGAAGTCATGGTTTCTGTGACATTTTTCACAA- | 58241 |
| Kakapo                   | TTGTTT---TGGGTTTCTTTAATAG-----AATTTAGAGTTCTTATGCAAGCCCT---TCTGAGTCATCATTAATAC-   | 26789 |
| GoldenEagle              | TTGTTT---T---TTTTTTTTATGT-----ACTTTAGAGTTCTTATGCGAGCCCG---TCTGAGTCATAATTAATAT-   | 30722 |
| JapaneseQuail            | CTGCAC---T--GCTTCTGGTACTG-----AAGCCAGGATGCCATTGG---CCT---GCTTGGCCAC--TTGGCGC-    | 25004 |
| MediumGroundFinch        | CTGTTT---T---TACTTTA-ATGT-----GTGTTGGAGTTCTTATGTGAGCCCT---TGTTGGACATGATTAATATC   | 12977 |
| GoodesThornscrubTortoise | eTTCTC---CCTGCCTGCTCCATTTGGGAACAGACTGGCTTGCTTTACAGTGCTTGGGA-TCTCGATCACCATTGACATT | 53645 |

|                          |                                                                                  |       |
|--------------------------|----------------------------------------------------------------------------------|-------|
| Majority                 | ----TTTTACATGTTATTATATGAGA-TACTTCACTGAGAGT----TGTAAGGATTTGCTGTGGTCTTTTTCT--T---  |       |
|                          | 58810 58820 58830 58840 58850 58860 58870 58880                                  |       |
| Human                    | ----CTTCAAACGTTTAAATATA-GTCTACATTTTTCTTGGT-----GTGGAATATTTTCTTGCTCTTCTGAC--CCCA  | 58309 |
| Kakapo                   | ----TCTTGCATGGTATTACATGAGA-TACTTCACTGAGAGC----TGAAAAGGATTTG----AGT---T-----      | 26843 |
| GoldenEagle              | ----TCTTACATGGTATTATATGAGA-TGCTTCACTGAAAGTGAGATGAAGAGGATTTGCTGTGGTTTTTGTCTTGTTA  | 30797 |
| JapaneseQuail            | ----T--CAGCTGGC-TCATGCT----CATCTCACTGTCAGC-----CAATGCTGTC---AGATCCTTTTCT-----    | 25057 |
| MediumGroundFinch        | ATGTTATTCATGTTATTATATGAGA-TGCTTCACTGAAAGTGAGGTGTAAGGGTTTTGCTGAGGTCTCTGT----T---  | 13049 |
| GoodesThornscrubTortoise | @GGATTGCAAGCATTTGTCAAGTGGGGCTATGCCATCCAGTTCC---TTTGCATCCTCCTCCCTCTCCTTCCCC-ATCCC | 53721 |



Monday, May 02, 2022 06:50 PM

```

Majority      -----AGATGAG-----G--G--TTA---AGTCTTTGACA---CATCTTTTATG-
              58890   58900   58910   58920   58930   58940   58950   58960
Human         AAGAAAAGTATTTGTTAGAGGACCAATTAATGAAATTTGAGTGGGGATTATACTGTGTTTGAGCTATAAATCTTAAGGG 58389
Kakapo       -----AGTCTTGAACA---CACCTTTTCTG- 26865
GoldenEagle  GAAAATGAGTTATCACAGAGGGCTGTTGAGTTAGTGTAAGAGACTGGGTCAGTTAGTCATTAACAGTCCAACCTTTCATG- 30876
JapaneseQuail -----TGTG-----GATGTGTGACA----ATTTCTTCAT- 25082
MediumGroundFinch -----AGATGA-----CGA---AGTCTTGAACAATCTACCTTCTATG- 13083
GoodesThornscrubTortoise@CTTCAGGGACACCTCTCATGAGATGCTGCTCCTCGAGCAGGATTGCTCTCTGCTGGCTTTGGGA---GTAGTGGAA- 53796
    
```

```

Majority      --AAACTAT--A-ACATCTGTCTCTTCAGAATTTGTTCTGAA--GCCTTGAATTTTATTTAGATCCAACCTAAGAGGTGAC
              58970   58980   58990   59000   59010   59020   59030   59040
Human         GAAAATTGTTTATATGTGTATCTTGTCTGAAGTAATACATAGTTACATTAATCTCATAAAAAGTACCTCAATTGTGTCAA 58469
Kakapo       --AAGCTAT--A-ACATCTGTCTCTTCAGAATTTATTCTGAA--GCCTTGCCTTTTATTTAGACCCAACCTAAAAGGTGGC 26938
GoldenEagle  --AAACTATGTA-ACATTTGTCTCTTCAGAAGTTGTTCTGAA--ACCTCAAATTTTATTTAGATCAAACCTAAGAGATGGC 30951
JapaneseQuail --GTTCTT----CTAGCTGCCCTTCAGAATCTGTTCTAAAC-ACTCCATTTTCTTTAGACAGGACCAGAAGGCGAT 25154
MediumGroundFinch --AAACT---A-GCATTGTCTCTGCAGAATTTGTTCTGAA--GCCTTGAATTTGACCTAAACCAAAT---GAGATTAC 13151
GoodesThornscrubTortoise@GGATTCCGCT-GGAACACCAGGGTCAGAACTTCTATTTCTG-GTACTTTCTGGTGCCCAAATCCAAGGGAGGGCTAAG 53872
    
```

```

Majority      TTACTTAAAATTTATG-C-T-----GTTTATAA-----TAAAAGCATTTTTAAATATAGTATTAATAGTATCAGTAAA
              59050   59060   59070   59080   59090   59100   59110   59120
Human         CTGTTTGACATTTTGG---TTAATCTTCTGTGAACAGATACTAAGCATCCA--ACTATGATATTTGATGTTTGTGCACAG 58544
Kakapo       TTACTTCAAAGTGA-----T-----ATTTATAA-----TGCAAACCATTTT-----ATCAGTCAA 26983
GoldenEagle  TTACTTAAAATTTATCTCAT-----GTTTATAA-----TAAAACCATTTTAAATAAAGCACTAATAATATCAGTAAA 31020
JapaneseQuail TCTTCTAAAACCTTA-----T-----GTTTATAA-----TAAAAGCATTTTTAAATGGAATGCTAACAGTGTGAGTAAA 25218
MediumGroundFinch TCACTTAAAATTAATTTTCAT-----GTTTATAA-----TAAAAGCATTTTTAAATAAAGCATTAAAAGTATCAGTAAA 13220
GoodesThornscrubTortoise@ATTCTTGACCTTCATGGCCTCAACAGATTTATCAG-ATATGTGACATAGCCTCCCCGTTGTCTTGGAAACGACTGGTTGG 53951
    
```

```

Majority      CTTTTCAAATAGAGTCTGAATATGTCTTTCAGCAAATGGTAATGACAACAAGAAATTCAAAGGTGACGATAA--AATGGA
              59130   59140   59150   59160   59170   59180   59190   59200
Human         GTATGCACTCAGGTCTTCTTGACAAAGATCTA-AAGTTATAATTTCTAAGAGAGTAGATAATGTTTTACTAAGTACTTAT 58623
Kakapo       CTTTTCAAATCTAGTCTGACTCTGTCTTTCAGCAAATGGTAATGACACCAAGAAATTCAAAGGGGACGATAA--AATGGA 27061
GoldenEagle  CTTTTCAAATAGAGTCTGAATATGTCTTTCAGCAAATGGTAATGACAACAAGAAATTCAAAGGTGACGATAA--AATGGA 31098
JapaneseQuail GTCTTCAAAT--AGTCTTAATGTGTCTTTCAGCTAATGGTAATGACAACAAGAAATTCAAAAGTGAAGATAA--AATGGA 25294
MediumGroundFinch CTTTTCAAATAGAGTCTGAATATGTCTTTCAGCAAATGGTAATGACAACAAGAAATTCAAAGGTGATGATAA--AATGGA 13298
GoodesThornscrubTortoise@TACTC---TGGACCTCAGGATGCCTATTTTCATGTGGCAATTTTGCCAAGCCA--CAGAACATTCCTTTG--ATTTGT 54024
    
```

Monday, May 02, 2022 06:50 PM

```

Majority      TGGGGCTCCTT--CTCGTGTTCATATCAGGAAACTGCCTGGGGAAGTGACAG--AAACAGAAGTT-----ATTGCTT
              59210   59220   59230   59240   59250   59260   59270   59280
Human         TCTGGTATCAGAACTCACACTTCACTTATTACAGAAGGAAAAAGAAATTTGTTTCCTAAACTTGCTTTGCCCCATTACCT 58703
Kakapo        TGGGGCTCCTT--CTCGTGTTCATATCAGGAAACTGCCTGGGGAAGTGACAG--AAACAGAAGTT-----ATTGCTT 27132
GoldenEagle   TGGGGTTCCTT--CTCGTGTTCATATCAGGAAATGCCTGGGGAAGTGACAG--AAACAGAAGTT-----ATTGCTT 31169
JapaneseQuail TGGGGCTCCTT--CTCGTGTTCATATCAGAAAACGCCTGGGGAAGTGACGG--AAACAGAAGTT-----ATTGCTT 25365
MediumGroundFinch TGGGGCTCCTT--CTCGTGTTCATATCAGGAAATGCCTGGGGAAGTGACAG--AAACAGAAGTT-----ATTGCTT 13369
GoodesThornscrubTortoise ATAGCACCAT--TTCCAGTATGTGGTGCTTCCCTTCAGCCTGTTGGGTTTTTACC-AAATGCATGGT-----CATGGTG 54096
    
```

```

Majority      TAGGTTT---ACCTTTTGGTA-AGGTAACCAACATCCTGATGCTGAAAGGGAAAAATCAGGTAATTTGTTGCTTTCC---
              59290   59300   59310   59320   59330   59340   59350   59360
Human         TGTAATCTAGACCCTTTGGTA---A-AATTTGCATTTTTGATAACTACAGTAATGTTTACTTTGCTGCATCTGGG 58779
Kakapo        TAGGTTT---ACCTTTTGGTA-AGGTGACCAACATCCTGATGCTGAAAGGGAAAAATCAGGTAACTTGTGCTTTCC--- 27205
GoldenEagle   TAGGTTT---ACCTTTTGGTA-AGGTAACCAACATCCTCATGCTGAAAGGGAAAAATCAGGTAATTTGTTGCTTTCC--- 31242
JapaneseQuail TAGGCTT---ACCTTTTGGTA-AGGTAACCAACATCCTGATGCTGAAAGGGAAAAATCAGGTAATTTGTTG----- 25432
MediumGroundFinch TAGGTTT---ACCTTTTGGTA-AAGTAACCAACATCCTGATGCTGAAAGGGAAAAACCAGGTAATTTGATGCTTTTGTG-- 13443
GoodesThornscrubTortoise ATGGCAT---ACCTCAGGAAGGAAGGAATCCATAACTTCCCATACATAGATGACTGTTTACTGAGGGGCAG-TATCCA-- 54170
    
```

```

Majority      -TTTTTTTAGTATGCTTTCTGTCTCATTTCAAAATATGCT-GTTAAAATGCTTTTGAATAAGTCATA-CAACAGTAAGT
              59370   59380   59390   59400   59410   59420   59430   59440
Human         CTCTACTTAGAGAATATCACATAATATTACATAATCTGACAATGGTACCAGTTTAAATCCATCAACGTCAACTACAAGT 58859
Kakapo        -TTTTTTTAGTATGCTTTCTGTGTAATGTCAAAATAGGCT-GTTAAAATGCTCTTGAGATAAGTCATA-GAACAGTAAGT 27282
GoldenEagle   -TTTTTTTAGTATGCTTACTGTCTAATTTCAAAATATGCT-GTTAAAATGCTATTGAAATAAGTCATG-TAACAGTAAGT 31319
JapaneseQuail --TTGCTT--T-----TCTTCTCATTTCAAAATATGCT-GTTAAAATATATTGAAATAAGTCACA-CAACAGTAAGT 25500
MediumGroundFinch -TTTTTTTCATATGCTTGCTGTCTGATTTCAAAATGTATT-GTTAAAATGCTGTTGAAGTAAGTCATA-AAGCAGTAAGT 13520
GoodesThornscrubTortoise GAGAGGAAGTCC-TTTTCCATGTCAACACTACATGCCTTGCTCAAACATCTGGGACTCATCTAAA-CATCGGAAAGT 54247
    
```

```

Majority      ATTCAATAGA---A--AAAAAGCCTTTGTTCCCTTCTTTT-TT-AATGAATTTATAGTGTCTTTTA--GTAAATTTT-
              59450   59460   59470   59480   59490   59500   59510   59520
Human         AAGCCCTCTACTCTACTTTAAAAATCTCTTCCCATTTCTTCA-GTCAACAGTTTTTCTGTTTTTCACAATGCCTATGTCA 58938
Kakapo        ATTAAAACCA-----AAAAGCCTTAGTTTTTCTTTT-----ATGAATTTAGAGTGTCTTTTA--GTAAATTTA- 27345
GoldenEagle   ATTAAAAAAAAAAAAAAAAAAGAGCCTTTGTTCCCTTAAATTTTTTAAATGAACTTATAGTGTCTTTTA--GTAGATTTGA 31397
JapaneseQuail CGTAATGAGG-----AAAGAACAGTTGTTTCTTCTTTA----AATCAGTTTGTGCTGTCTT-----GTAAATTTCT- 25563
MediumGroundFinch ATTCTAGAAA-----AAAAGACTTTTGTTCCTTCTTTTTTAAATGAATTTATGCCATCTTTTA--CTAAATTTT- 13590
GoodesThornscrubTortoise AACTTTGGTTCCCAT-TCAGAAAATGAGTTAATTATCGCCCGT--ATAGACTCTGAGAGCATTTTT--GTCAACT--- 54319
    
```

Monday, May 02, 2022 06:50 PM

|                         |                                                                                   |       |
|-------------------------|-----------------------------------------------------------------------------------|-------|
| Majority                | GGGGGGGAACAGGGATTGTTTGGCAGCTACCTAAAGCAAAAAG--TTAG-----ACTGTAAGATAAAATATTT----AGT  |       |
|                         | 59530 59540 59550 59560 59570 59580 59590 59600                                   |       |
| Human                   | GATAGAAATTTTCCCTTCTACCATATCTCTCCTCACTCTCACTTGGCTTGAAGAGGAAAATCACATGGAAGCTTCATCAGC | 59018 |
| Kakapo                  | GGGGGGGAACAGGG--TATGGTGAAGCTGCATACAGCAAAAAG--TTAA-----CTGTAAGAGAAATA-----GTC      | 27407 |
| GoldenEagle             | GGGGGGGAACAGAGGATGGTTGGCAGCTACGTAAGCAAAAAG--TTAG-----CTCTAAGATAAAATATTT----AGT    | 31464 |
| JapaneseQuail           | GTTTGGGAATGTGGATTGGTTAACGGCTAACTAAATTAGGAAG--TAGGATAAAATACTGTAAGTTAAATACGC----AGT | 25637 |
| MediumGroundFinch       | GGGGGGAACAAA---ATTTGGCAGCTACATAAAGCAAAAAG--TTAG-----TTGGAAGATAAAATATTT----ATT     | 13653 |
| GoodesThornscrubTortois | 6ACAGTTTTTCAGGCAATTCACCACCTTTGTCTCAGTCCGAGTC-TCAGCCTTTCACAAGAATCCAGATGTGCCTGAAGC  | 54398 |
| Majority                | TCTGCATCTTCACAGGTG---AATTTTTGGAGATGCATTAGTTTTATCAAATAAAGTTGGTATGTGTAGAATGACATTT-- |       |
|                         | 59610 59620 59630 59640 59650 59660 59670 59680                                   |       |
| Human                   | TTTTCTTGCA-AAATCTG-CTAATACTCACACTTGTCTTTCTCTTTTAA-TAAAAGGCATAGATGTTTAGTTATCTAAGA  | 59095 |
| Kakapo                  | CCTTCATCTTCAGAGGTG---AATTTTTGGAGATG----A-----A--TAACTTGGTATGTAACAAATGACAT----     | 27467 |
| GoldenEagle             | CCTGCATCTCCACAGATG---AATTTTTGGAGATGCATTAGCTTAGCAAATGAAGTTGGTATGTAGAGAATGACATCT--  | 31539 |
| JapaneseQuail           | TCTGCATTCCTTCAGATG---ATGTTTTGAAGATGAAGTGGTTTAGCAAATAAAGTTGGTAATTGGAGGATGACATCT--  | 25712 |
| MediumGroundFinch       | CTTGCATCTTCAGGTG---AATTTTTGGAGATGAAGTAGCTTATCAAATAACATTTGGTATGTGTAGAATGACATTT--   | 13728 |
| GoodesThornscrubTortois | @CTGTTTGACACAGTGGTCCAGTTTGCAAGGTTGCATCTTTGTCTCCTTCAGATGTGTCTCAGGACAGTTTACTGTC--   | 54476 |
| Majority                | T--CTGAAGACTGATAT--ATTTGTTAAAATGTGTTATCAGACC-CTTTAAGTGTTTTTT----GTATGCTTCTAA----  |       |
|                         | 59690 59700 59710 59720 59730 59740 59750 59760                                   |       |
| Human                   | CCAATAAACACCAAAGCCTATCGTCTTCTGCCTGTCAAGAGACTGCATATCTGTCCATCC-----CCTTTCTCATTTA    | 59168 |
| Kakapo                  | ---CTGAAGACTGGTAT----TTGTTACAATGTGTTGTCAAATG-CTTTAAGTGTTTTAT----GTATGCTGCTAA----  | 27531 |
| GoldenEagle             | T--CTGAAGACTGATAT----TTGTTAAAATGTGTTATCAAACC-CTTTAAGTGTTTTTT----ATATGCTACTAA----  | 31604 |
| JapaneseQuail           | T--CTAAGGATTTATGT----TTGGGAAAATGTGTTCTTAGACC-TCTTA--TGTCTC-----TGCTTCTAA----      | 25771 |
| MediumGroundFinch       | T--CTGAAGGCTGATATCAATTTGTTAAAATATGTTATCAAACC-CTTT---TTTTTTTA----ATGTACGTCTAA----  | 13794 |
| GoodesThornscrubTortois | @AECTTTCACTTGGACAGATTGGTCCACTTTCCTCCACTGGTC-TTGGTCATATCGTAGTGATGGACACTTCCGGAGGA   | 54555 |
| Majority                | ----TATCAATATTATCTGCTTTGTA--AATACTGAAAATT--AGTTGTTTT-ATTACAGGCATTTTTGGAACCTTGCTA  |       |
|                         | 59770 59780 59790 59800 59810 59820 59830 59840                                   |       |
| Human                   | TTTCTCTCTATATTGGCCACTTTTCACCAGTTTCAAGCATTCTCAGCTTCTTTTAAATGAATTTACCTTCAACTT       | 59248 |
| Kakapo                  | ----TATGACTGTTATCTGCCTTGTA--AATACTGAAAATT--AACTGTTG-ATCACAGGCATTTTTGGAACCTTGCCA   | 27601 |
| GoldenEagle             | ----TATCAAGATTATCTGCTTTGTA--AATACTGAAAATT--AACTGTTA-ATTACAGGCATTTTTAGAACTTGCTA    | 31674 |
| JapaneseQuail           | ----TACAAATTTTATCTACTTGAAA---TTTACCTGT--TT--AACTTGATT---TTACAGGCTTTTTTGGAACTTGCAA | 25838 |
| MediumGroundFinch       | ----TATGAAGATTTCTGCTTTGTA--AATACTGAAAATTTAATTCTTTTA-ATTACAGGCATTTTTGGAACCTTGCCA   | 13867 |
| GoodesThornscrubTortois | @GTTTGTGAGGTTGTTCCCTTTGTCC--GGCCCTTACCAACC--AGTTCTCTT-GTCACCGATGCCTCCCTGATGGGCTG  | 54630 |

Monday, May 02, 2022 06:50 PM

|                          |                                                                                    |       |
|--------------------------|------------------------------------------------------------------------------------|-------|
| Majority                 | CAGAAG-AAGCAGCTATCACTATGGTTAATTACTACTCTGCTGTG-ACGCCTCATCTT-----CGTAACCAACCTATTT    |       |
|                          | 59850      59860      59870      59880      59890      59900      59910      59920 |       |
| Human                    | TCAATCCATCCATCTATAACTCTACGTACTTTCTATCACCCCTGCCTCCCCTCTCCCTTTTCACTCATAACCAGACTTCTT  | 59328 |
| Kakapo                   | CAGAAG-AAGCAGCTATCACTATGGTGAATTACTACTCTGCTGTG-ACGCCTCATCTT-----CGGAACCAACTTATCT    | 27673 |
| GoldenEagle              | CAGAAG-AAGCAGCTATCACTATGGTTAACTACTACTCTGCTGTG-ACGCCTCATCTT-----CGTAACCAACCTATCT    | 31746 |
| JapaneseQuail            | CAGAAG-AAGCAGCTATCACAATGGTTAATTACTATAACAGCTGTG-ACGCCTCATCTT-----CGTAACCAACCTATCT   | 25910 |
| MediumGroundFinch        | CAGAAG-AAGCAGCTATCACTATGGTTAATTACTACTCTGCTGTG-ACACCTCATCTT-----CGTAACCAACCCATTT    | 13939 |
| GoodesThornscrubTortoise | GGGAG---CGCACATGGCGCTGCTGAAAAGTCAAGGTCAGAGATGCAGGCCTCA-CTG-----CATAAC-AGTGTGCTG    | 54699 |

|                          |                                                                                    |       |
|--------------------------|------------------------------------------------------------------------------------|-------|
| Majority                 | A--TA-TCCAG-----TATTC-CAATCATAAAGAAGCTAAAGACTGATAATACGCTTAAC-----CAGGTATATTTACT    |       |
|                          | 59930      59940      59950      59960      59970      59980      59990      60000 |       |
| Human                    | AAATAGTCTATCTTTGTTGTTTATTATCTCATTCTCTACTTACTATTATTTGGTTTTAGCACTGTTGACCCAAATTGCT    | 59408 |
| Kakapo                   | A--TA-TCCAG-----TATTC-CAATCATAAAGAAGCTGAAGACTGATAACACACTTAAC-----CAGGTATATTTACT    | 27737 |
| GoldenEagle              | A--TA-TTCAG-----TATTC-CAATCATAAAGAAGCTAAAGACTGATAACACGCTTAAC-----CAGGTATATTTACT    | 31810 |
| JapaneseQuail            | A--TA-TCCAG-----TATTC-CAATCATAAAGAAGCTGAAGACTGATAATACACTGAAC-----CAGGTATATTTGCT    | 25974 |
| MediumGroundFinch        | A--TA-TCCAA-----TATTC-CAATCATAAAGAAGCTAAAGACTGATAACACACTTAAC-----CAGGTATATTTACT    | 14003 |
| GoodesThornscrubTortoise | GA--CACTTCAGGC---CATCT-ACAAGGTCATGCTTTTTCTGGACCATATTGGGCTCAGTGGTTCACATACCTACAGACA  | 54772 |

|                          |                                                                                    |       |
|--------------------------|------------------------------------------------------------------------------------|-------|
| Majority                 | GTTCGGTAGTATTACAAATG-TAGACAGTGGGAAGATGAGGCATGGCATGTGTTCTTGGCTCATGTGGC--ACATGTTTTG  |       |
|                          | 60010      60020      60030      60040      60050      60060      60070      60080 |       |
| Human                    | CTTCCTCAGCGTCACCAGCGATTAGTAGAGTAGCTAAATGCTAGTGATATGATTTAGTCCTTGTCTTACTTAATACCTAG   | 59488 |
| Kakapo                   | GTTCTGTACCATTGCAAATG-CAGGCAG---AAGATGAGGCTTAGCATGTATTCTTGGCTTATGTGGC--ATATGTTCTG   | 27811 |
| GoldenEagle              | GTTATGTAGTATTACAGATG-CAGACAGTAGAAAATGAGGCATGGCATGTATTCTTGGCTCATGTGGG--ATATGTTTAA   | 31887 |
| JapaneseQuail            | ATTACATGGTATTAGAAATG-TAGACAGTGGGGTGTGTGACA-AATATAC-CGCATCAGTCAAGAA-T--ACCTGTTATT   | 26048 |
| MediumGroundFinch        | GTTCAGTAGTATCACAATG-CAGACAGTAGAAGATGAGGCATGGCATG--TTCTTGGCTCATGTG----CCATGTTTGA    | 14076 |
| GoodesThornscrubTortoise | GTACCACCACAATGTATATG-TGAACAA-GCAAGGGGGAGCACACTCCAGGATGCTGTGCCAGGAGGCAATCAGATTGTG   | 54850 |

|                          |                                                                                      |       |
|--------------------------|--------------------------------------------------------------------------------------|-------|
| Majority                 | ATAAT-T-TGGTTTTGT---CCACATTCCTAATACTACTGTGTA---GTCTTCTCTGTGATCATTCTATCTTGTGTCAATTGAA |       |
|                          | 60090      60100      60110      60120      60130      60140      60150      60160   |       |
| Human                    | ATAATATTTGGCACTGTGCACCATTGTCTTAAAATTCTCTTTCTTCTCTGGTCTCTGATACTTCTCACCTGGATTTATCCT    | 59568 |
| Kakapo                   | GTCAG-T-TAGTTTTGT---CCACATTCCTAATGCTACTGTGTA---GTCTTCTCTATGATCATTCTGTCTTGTGACATTGAA  | 27883 |
| GoldenEagle              | ATAAT-T-TGGTTTTGT---CCACATTCCTGATACTACTGTGTA---GTCTCACCTGTGATCATTCCATTTTGTGACATTAGA  | 31959 |
| JapaneseQuail            | TAAGT-C-TACTTTTGC---CCACATTCAGATACTACTGTGTA---GTTTTTCCAGTGGT-----TTTGGTAATGAA        | 26110 |
| MediumGroundFinch        | ATCGT-T-TGGTTTTGT---CCACATTCCTAACTCCTGTG---GTCTTATCTATGATTGTTCCATTTTGTGGCACTGAA      | 14148 |
| GoodesThornscrubTortoise | ATAAT-TCTGCACTTAC---CTAGGATCCAGAATCATCTTACGGACCATCTCAGCAGGAATTTTTTCTGAGTCA-TGAA      | 54925 |

Monday, May 02, 2022 06:50 PM

```

Majority      GGGTCTTTGCT-----TTCTGTG-TGATCTTCCATTAGGATGAA-TC-----T-----TT-----
              60170      60180      60190      60200      60210      60220      60230      60240
Human         ACCTCTCTATTTCTTCCTTGTCCTTGTAACCTCCCTTCTACCTGGGAGGCCTCACCTGCTGTACAGCTCCATTAAACCTC 59648
Kakapo        GGGGATTGGCT-----TTCTGTG-TGATCTTCCATTAGGATGAAATC-----TGGAGAGGGACTTTTCGACAA 27945
GoldenEagle   GGGA-TTTGCT-----TTCTGTG-TGATCTTCCATTACAATGAG-----T----- 31997
JapaneseQuail -GA--TTTGCT-----TTCAATG-TGATCCTTCAATTAGGATGAA-----T----- 26146
MediumGroundFinch AGGCCTTTGCT-----TTCTGTG-CCGTCCTTCCGTTACAATAAA-----T----- 14187
GoodesThornscrubTortoise @GGTCTTTGTAGACAAGT-GTCCTCTG-TTATCTTCTCAGCTTTGAGCATTC-----TGGCAATTGACTTATTCTAA 54995
    
```

```

Majority      -----G-----T-----A-----G-----C-
              60250      60260      60270      60280      60290      60300      60310      60320
Human         TTATGATTTCAGACAGAGTTTCACATCACATTTTCTAGCTCAGACCTCTCCTAAGAGACCCACACTAAGAACCTGGCGGACT 59728
Kakapo        GGGCCTGTAGGGACAGGCCAAAGGGAATGGCTTTAACCTGCCAGAGGGGAGATTGAGATGAGCTCTGAGGCAGAAGCTCT 28025
GoldenEagle   -----T----- 31997
JapaneseQuail -----T----- 26146
MediumGroundFinch -----T----- 14187
GoodesThornscrubTortoise @CTTGAGGGTACCTTAGTCTGGAATCCTTATCCTGTGCTTTCCATCTCAGGTGGCAGTTGGATCTCCTGTAAGCTTTTCC 55075
    
```

```

Majority      -----T-----T-----A-----C-----
              60330      60340      60350      60360      60370      60380      60390      60400
Human         AATGAATATCTTCAAACAGTGTGTTCAATCTAGCTCCTGTTTTTGGTGTCCGCTGTGTTAGGAAAGTGAAGATACCAAC 59808
Kakapo        TCCCTGTGAGGGTGTGAGGCGCTGGCACAGACTTTTCCAGAGAAGCTGTGGCTGCCCCATCCCTGGCAGTGTTC AAG 28105
GoldenEagle   -----T----- 31997
JapaneseQuail -----T----- 26146
MediumGroundFinch -----T----- 14187
GoodesThornscrubTortoise @CCAGTTCTGATCATCCACAAGTCATGCTCAAGCTGAGGTTGGATCGGGCCACACTCATACTTATTACCTCGGTATGGC 55155
    
```

```

Majority      ----G-----C-----T-T-----T-C-----C-----T---A-----
              60410      60420      60430      60440      60450      60460      60470      60480
Human         TTCAGTCTCATTAACAAGCCAGTAAACATGGTATTTTTCCCTTTCCTTCCAACCTGTCATCAGATATTATTGATTATAACC 59888
Kakapo        CCAGGTTGGACACAGGGGCTTGGAGCAACCTGCTCTAGTGAAGGTGTCCCTGCCCCGTTGGCAGGGGGTTGGAAC TGGATG 28185
GoldenEagle   -----T----- 31997
JapaneseQuail -----T----- 26146
MediumGroundFinch -----T----- 14187
GoodesThornscrubTortoise @GAGGCAGTTCTGGTTCTCTGACCTTGTGCTCTGTCAGTTCAGCCTTTCATATCCCTTTCTTTCCATCCTGACCTACTC 55235
    
```

Monday, May 02, 2022 06:50 PM

Majority -----A---T--T-----A---T---ATTTTCTTAATGTG--TCCTTGATGTCAAAGGAA  
 60490 60500 60510 60520 60530 60540 60550 60560

Human TCCTAAATTTTGTGAATCTGGCCTTTTTCTCCAACCTTGCTACCATTGCAGTCTAAGCCAGTGTTATTCAAGATGC 59968  
 Kakapo ATCTTAAGGTCTTTTCCAACCCAACCAGCCTGGG-ATCGTGTGAATTTGCTTAATGGC--TCATGAATGTAAAAAGAAA 28262  
 GoldenEagle -----TTTTCTTAATGT---TCCTTAATGTAAAAAGGAA 32028  
 JapaneseQuail -----TTTACTTAGCGT-----AAAAGAA 26165  
 MediumGroundFinch -----TTTTCTTAATGTG--TCCTTGATGTCAGAAGGCA 14219  
 GoodesThornscrubTortoiseACACAGAAACATGGTTGCCTCTTATTTCCCATGCTCAGCTTCCCGAATCTCATGATGTGGTTCCGTCATGACTAAATGAG 55315

Majority AAGATTCT-----GTAGTGTGTTTTAA-----TTTTAATATTTTTCATAACA-T--A---AGTTTTCATCTTAGTT  
 60570 60580 60590 60600 60610 60620 60630 60640

Human TGGTCTCTCAAGGTAGTAGTGTGTGTCAAACTGAAATCAGCATACTTCTAGCAACAGTATGCTTAATGTCAATATTGGCA 60048  
 Kakapo AAGATTCC-----AAAGTGTCTTTTCA-----CTTTAAAATTTTTCCTAAGA-C--A---AGTTTTCATCCTGATT 28322  
 GoldenEagle AAGATTCT-----GTAGTGTCTTTTTAA-----CTTTAATTTTTCATAAAA-T--A---AGTTTTCATCTTAGTT 32088  
 JapaneseQuail AAGATTGT-----GAAG-ATGTTTTTAA-----CTTGAATATTTTTCACAG-----ATTTACATCTCAGTT 26219  
 MediumGroundFinch AAGTTTCT-----GAAGTGTGTTTTAATAGTTATTTAAAAGTTCTAAATAACT-TCAA---AGTTTTTGTCTTAGTT 14288  
 GoodesThornscrubTortoiseGAGGAAGT-----GTGATGTTTGGTGGCTGT---TTAACAAGTCTACTCAGCAATAGA---AAACCCTCTACCAGAA 55382

Majority TAGA-ACTGTAGGATGAAA---AAATTAACCTTTCTAATT---CTG-ACACCTGAGATTTTAATGCCAATTTGAATTTCC--  
 60650 60660 60670 60680 60690 60700 60710 60720

Human TAA--ATTTTGACACAGACTTCTTATATTCATGCAGAGTAGCCTGGGCTTCTGGACCCTCAATCATAATTTAAGTAGCA- 60125  
 Kakapo TAG--GCTATAGGATGAAA---AAATGAACCTTTCTAATT---CTG-ACACCTGAGATTTCTAATTTCCAAGTTGAATTTCC- 28392  
 GoldenEagle TAGAGACTGTAGGATAAAA---AAATTAACCTTTCTAATT---CTG-ACACCTGAGATTTCTAATGCCAGTTTGAATTTCC- 32160  
 JapaneseQuail TAGAAAGTGTAGAATGAGA---AAATTAACCTTTTAAATT---CTG-ACACCTGAGATGTTAATCTC--TTTAAATTTCC- 26289  
 MediumGroundFinch TAGAGACTGTAGGATGGTA---CAATTAACCTTCTTGTTA-ATTGTACACCTGAGATTTCCAATGCCAATTTGAATTTCC- 14363  
 GoodesThornscrubTortoiseGG--CCTGTCAGGCAAATTT-GAAGCAGTTTTTCAATTGTG-TTCGCTGGCCTGTGGAGTTCAAGATAACCTGAATAGAAG 55458

Majority CTAGTGGTAGTGACTAATGCCAATGCCTATATTTTTCAGTGTCTTGGATGATCACTCTGGTAGCAC-----TGGTAACCTC  
 60730 60740 60750 60760 60770 60780 60790 60800

Human -TTGATGTAGTAATAATTCT---CTTTCATATCTCCACTTCTTGCCCTTCTGACTGAACTCACCATTT-TGACATCTTC 60200  
 Kakapo CT---GGTGTGCTAATGCCAATGCCTATGTTTTGGTGTCTTGAACGATTGCTCTGGTAGCAC-----TGGTAACCTC 28463  
 GoldenEagle CTAGGGATAATGACTAATGCCAATGCCTACATTTTTCAGTGTCTTGAATGATCACT--GGTAGCAC-----TGGTAACCTC 32232  
 JapaneseQuail CTGGTGATAATGAGTAATGTGAATGCCTACATTTTTCAGTGTCTTGAATGATTAATCTCTGGTAGCAC-----TGGTGGGCTC 26363  
 MediumGroundFinch CTAGTGGTAGTGGCTAATGCCAATGCCTAAATTTTTCAGTGTCTTGGATGATCACTCCAGTAGCAC-----TGGTAACCTC 14437  
 GoodesThornscrubTortoiseCAGCTGAAGTACTTGTCTGC--ACCTTCAGCTGTTGGCCTTGTGCTTAGCTCATTGAGAGTATATCTGGCAGTGATATC 55536

Monday, May 02, 2022 06:50 PM

```

Majority      AGCTTCTGTGATCTGCTGTTCTCGGAGAACAATACCTTAATGATCACTGTAGAGACAAAT-GTTCTTAATAACAAAAAA
              60810   60820   60830   60840   60850   60860   60870   60880
Human         CCCTACCTCCATTATTTTTCCACAGAGTACTAGGAATCATCTC--AACGTCAAGTCATATTGCTTCTAATCACAATACCC 60278
Kakapo        AGCTTATGTCATCTGCTGTTCTCGGAGAACAATAACTTGATGA---CTGGAGAGACAAAT-ATGCATAATAAAAGCAAAA 28539
GoldenEagle   AGCTTCTGTGATCTGCTGTTCTCGGAGAAGAATAACCTTAATGATCACTGTAGAGACAAAT-ATACTTAATAACAAAAAA 32311
JapaneseQuail TTCTTCTGTGATCTGCTGTTCCCAAAGAACA---CATTAATGCTCAGTGCAGAGATAAAT-GTGCATGTTAGCAGAAAGA 26439
MediumGroundFinch AGCTT--GTGATCTGCTTTTTCTGGAGAATAATACCCTAATGATCACTTTAGAGACAAAT-GTACTTAATAACAAAACAT 14514
GoodesThornscrubTortoise AGCAT-TTCATCCTCTATTTCATTGAAGATCAGTCTTTTCCAAT-GCCAGGGTAGCAAG--GTTCTTAAAAGGACTTTGT 55612
    
```

```

Majority      TTTTTTG-----TTTGTCTCTTGCCCTC----TGCAGAACCTATTTTACAATAAATATAGCTATATATGTG-----
              60890   60900   60910   60920   60930   60940   60950   60960
Human         TTTAGTGACT---TTTTTGTCTCTGCAATAAAGTCCACAGTCCCTTATCATGGCTTATAAGACTCTAAATCAGTCCCTCAGC 60355
Kakapo        TGTTTTT-----CTCTTGCTTC---TGCAGAACCTATTTTACAATAAAGATCATTACATATGGGGGGTTAG 28603
GoldenEagle   TGTTTTG-----CTCTTGCCCTC---TGCAGAACCTATTTTACAATAAATATAGATGCATATGTA----- 32367
JapaneseQuail AAAAATA-----TTTAGATTTTGCCCTC---TGCAGAACCTATTTTCAAAGAAAGGTATGTATGTATAC----- 26499
MediumGroundFinch CATTTTGATCCCCATTTTGTCTCTTGCCCTC---TCGAGGACCTATTTTACAACAAATACAGATACATATGT----- 14581
GoodesThornscrubTortoise ATTTCATCCTCCAGTCTAAGAGTTTCTTCC---TGTGGAATCT-TAGCACAGTCTTAGCAGCTTTTAATGAGGCTTCCAT 55687
    
```

```

Majority      -----TC-----T-----T-----T-----T-----CTGTTTTTAGTAGA
              60970   60980   60990   61000   61010   61020   61030   61040
Human         TTGCCTCTCCATTCTCCTCTCATGCCTTTTTAGCTATATTGGACTTCTTTAAATAGCTTGCATATACTGTATTTTCTCTG 60435
Kakapo        ACTAAGTGATCTCCGGAGTCCCTTCCAACCGTGATGATTCTGGGAGTCTGTGATAAGT-----CTGTTTTTAATAGA 28676
GoldenEagle   -----T-----CTGTTTTCAGTAGA 32382
JapaneseQuail -----CTGTTTCTAGT--- 26510
MediumGroundFinch -----CTATTTTLAGTAGA 14595
GoodesThornscrubTortoise ATGACCCTTGGCATCTTGCTGTTTCTGCT-----TTTGTG--TCA--GAAGACT-----TTGTTCTGATAGT 55748
    
```

```

Majority      ATAGGACAATTAGCAAAAGT---AAC-----GTGGTGACCTTTTTTATACAAATTATTGGGAGAAAAAAG-GACT-
              61050   61060   61070   61080   61090   61100   61110   61120
Human         ATGCTCTCGATCTTACAGATTGCTGTTCCATTGCTAATACTATTTTTTCTCTTCATCTCTTTATGCCCAACTTCTGCTTC 60515
Kakapo        ACAGGAAGATTAGCAAAAACCTAAACCA-----CGGCAGTGACCATTTTCATACAAATTATTGGGGGAGAAAAGAGACA- 28749
GoldenEagle   ACAGGAAAATTAGCAAAAGT---AAC-----GTGGTGACCATTTTGTACAAATTATAGGGGGAGAAAAA-GGCA- 32447
JapaneseQuail A-----CAGAAAT---G-----TTTTGTTTTTTTCCAAT---AGGAAAA----- 26544
MediumGroundFinch ATTGAAGAATTGGCACAAGT---AAC-----ATGGTGACCAATTAATGCAAACAATAGAGAGATAAGA--GACT- 14659
GoodesThornscrubTortoise G-ATAACATCCATAAGGAGGGTTGCGGG-----CACTGATGACCTCTTATACACAATTCTCTAAGGACAAAGTGATT- 55820
    
```

Monday, May 02, 2022 06:50 PM

|                          |                                                                                 |       |
|--------------------------|---------------------------------------------------------------------------------|-------|
| Majority                 | --TCAACTTACCACAAGTCAGATGA-----TTGTTTTAAGGTTAATTTTTT---ATGTTTCCTTTTTGTTG-----    |       |
|                          | 61130 61140 61150 61160 61170 61180 61190 61200                                 |       |
| Human                    | TCTTTGTCTTTCAAGTATCAGTTTAGAAGCCTCTTCTGAGATAAGTCTTCTGTAACATTTCAACTAGATTAGATCCCTT | 60595 |
| Kakapo                   | --TCATCTTACCACAAGTCAGATGA-----TTAATTTAAGGTTAAT-----ATGTTTCTTTAAGATG-----        | 28805 |
| GoldenEagle              | --TCAATTTACTACAAGTCAGATGA-----TTGTTTTAAGGTTAATTTCTT---ACGTTTCTTTTTGGTG-----     | 32508 |
| JapaneseQuail            | -----TTAGCAAAAT--AGTGA-----T-GTTGCAAAATAAAT-----TTTCCT-----                     | 26581 |
| MediumGroundFinch        | --CAAACCTACCAGAAGTCTGATGG-----TTATTTTAAGATTAATTTCTT---ATGTTGCATTTTTGATG-----    | 14720 |
| GoodesThornscrubTortoise | -T---CCTACCACACCTGAAATTT-----TTG-TGTAAAGTGGTTTCTC----AGTTTCATTTGAATCG-----      | 55875 |

|                          |                                                                                 |       |
|--------------------------|---------------------------------------------------------------------------------|-------|
| Majority                 | ----TTACAAAAGACAGTGT-AAGTACCAATTT--A-TTTCTAATACTTGTATTTTTTTTTATG-A--GTAGGTGCCTA |       |
|                          | 61210 61220 61230 61240 61250 61260 61270 61280                                 |       |
| Human                    | CCTTTCTTAGTCTCAGTATCACACATAAAATTTATAATTTGTTAAATGTGTATATTTCTGTGCGACTGTAAGTTCTGA  | 60675 |
| Kakapo                   | ----TTAAAAAAGACAGTGT-AAGTGTCTGTCT---T-TGGGTAAGGCACGTAGATAGTAAATGAAGAGAAGCTGCGTG | 28876 |
| GoldenEagle              | ----TTACAAAAGACAGCGT-AAGTACCAAGTTA-CAGTTCCTGTGCTTGTGTCTGTCTTAGGTAAGGTACATAACTA  | 32582 |
| JapaneseQuail            | -----AATGT-GATGACCTTTTT-----TATTTTATTTCAAG-----A                                | 26613 |
| MediumGroundFinch        | ----ATACAAAAACAGTGT-AAGTGCCAAAT--AATTTCTATTAATGTGTCTCTATTAGG---ACATGTAAATA      | 14788 |
| GoodesThornscrubTortoise | ---GT-----CAGTAT-ATTTACCTATGTT---CTTCTCAAAGCTGCATTCACTCAATACAT--TAGATGTCAG      | 55936 |

|                          |                                                                                    |       |
|--------------------------|------------------------------------------------------------------------------------|-------|
| Majority                 | GTG--ATGTCATAGCTGTTATC-G--G-TTTGA--AAGCAATTTCCAGGGTATTCTGTTGAGAGAC-----ATTTCCGGTTC |       |
|                          | 61290 61300 61310 61320 61330 61340 61350 61360                                    |       |
| Human                    | GTACCATGTCTGCTTTGCTTTCTGCTGTATTTATTAACATTGACATTCAGGGTGAAAATCAGAAGTCATAGTAACAATC    | 60755 |
| Kakapo                   | GAG--ACCTCAGAGCAGCTTCCAG--GGTCTGA--AGGGGCTACAAGG-ATGCTGGAGAGGGACTCTGCATCAGGGACT    | 28949 |
| GoldenEagle              | GTA--AAATCATAGCCGTTACC-----TTTAA--AAACAATTTCCAGGGTAATCTGTTGAAAGGC-----ATCTCCGGTTC  | 32647 |
| JapaneseQuail            | TTG--TTTTCAAT-CAATCATC-----TTTGA--AAG---TG-----TCT-----GTTT                        | 26649 |
| MediumGroundFinch        | GTA--AAGTTATAGCTGTTGCC-----TTTGA--AAGCAATTTCCAGGGTAATCTATTGAAAGAC-----ATTTTGGTTC   | 14853 |
| GoodesThornscrubTortoise | GTG--ATGCTAGCCTTCTATCTG--GACAGGACTAAACCATTTCT--TCTCTCACCTGTTTCTGTCATGTGCAGATC      | 56009 |

|                          |                                                                                 |       |
|--------------------------|---------------------------------------------------------------------------------|-------|
| Majority                 | ATATCAA---GTAAAGTGT---TGATT--TTCCTATTGATCTTTCTAAA---CATTTTAG---TTCTTA--TAGAATCT |       |
|                          | 61370 61380 61390 61400 61410 61420 61430 61440                                 |       |
| Human                    | TTAATTATCAATAAAAAGTAT-TTTATGCGATCCTCATATTTATTAAGAAAACACCTTAATACCTTTCA--GAAAATCT | 60832 |
| Kakapo                   | GGAGCGACAGGACAAGGGG---TGATGGGTTCAAACGAACCAGGGGAAGTTCAGGTTAG---ATCTAAGGCAGAAGCT  | 29022 |
| GoldenEagle              | AGATCAA---GTGTAGTGT---TGATT--TTCCTATTGATCTTTCTAAA---CATTCAG---TTCCT---TAGAATCT  | 32709 |
| JapaneseQuail            | ATGTAAA-----TCC--T-----AAA-----TG-TAG---TTTTT---TAGAA-C-                        | 26679 |
| MediumGroundFinch        | AGATCAA---GTATAGTGT---TGATT--TTTCTGTTGGTCTTTCTAAA---TAGTCTCG---TTCCT---TAGAATAC | 14915 |
| GoodesThornscrubTortoise | ATATGAAGGACAAATGGTCTCTTACAGACAATCTCTAAATGGATAACATCCCATATCAAGACTGCTTATGAAAAAAT   | 56089 |



Monday, May 02, 2022 06:50 PM

```

Majority      TTTGCTTTT-TTGGTGCTAAGGGT--TTGTCAAAGGTTGAGCGTCGATTCTCTTTCTATCCCATCCCT-ATAGTGTTCA-
              61450      61460      61470      61480      61490      61500      61510      61520
Human         TGTTATTTTATTGGAAGTAGTGTATTAGGCAAAGATGCGTCTTCTCTTGGCTTTCTAATTCAGCTTTTATAATGTTGAG 60912
Kakapo        CTTCCTGTGAGGGTGTGAGGC--GCTGGCACAGGGTGCCAGAGAAGCTGTGGCTGCCCCATCCCTGGCAGTGTTCAA 29100
GoldenEagle   TTTGATAGTTGTCTGCTAAAGGTACTTTTTAAAAATTGAGGGTTGGTTTTCTTTTTTCCCCCACAAAATGTCAGTTAT 32789
JapaneseQuail ----- 26679
MediumGroundFinch TTTGAT----- 14921
GoodesThornscrubTortoise@TTGGCTATGCCTCCTCAGAGGGTTCAAGCTCATTTGATGAGAGCCCAAGCAAAGTCAATAGCGTTCCTCAGTGCTGTCTC 56169
    
```

```

Majority      GAA-ATGAT-AATTGAAGGGCTT---TATCTACTT-TTCAAATGTAGAGTAA-GCTT-ACATGTGTCAGC-TTT-CACT-
              61530      61540      61550      61560      61570      61580      61590      61600
Human         GAATATAAATACTTGTATGCATAAAAAATATCAATCTTTTTAATAGTATAATAAGACATATAATGTAATCTCCTTTTCACCT 60992
Kakapo        GGCCAGGTTGGACACAGGGGCTTG--GAGCAACCTGCTCTAGTGGAAAGGTGTCCCTGCCATGGCAGGGGGTTGGAACT- 29177
GoldenEagle   AAAGAAAAGAAAAATAAATACCTT--CATTTACTTCTGAAAAAATAGAGTAGAGGTTGAATTCTGTGACACATACAGT- 32866
JapaneseQuail ----- 26679
MediumGroundFinch ----- 14921
GoodesThornscrubTortoise@AATATTGGACATTTGCAGGGCTGC--TATATGGTCATTATATACCGATTTTATGAACTACACCTGTACATTGTCTGAA- 56246
    
```

```

Majority      -GGATGTACATACTGTTTTTCTCTATCTCTTACATTGT-GTACTCT-ACGTTGGCTG-CGTCTTTAGTGG-ATTGTTTTT
              61610      61620      61630      61640      61650      61660      61670      61680
Human         GGGATTTAAAAATTGTTTTTACATAGTCCTTACATTATAACACACATAAGTAGGAAATGGTTCCTTTTGGTTTTTGTAT 61072
Kakapo        -GGATGATCTTAAGGTTCTGTCCAACCCAAACCAGTCTGGAATTCT-ATGATAGCTGCTGCCTTTAGAAACAATAGTAAT 29255
GoldenEagle   -GGATGGACATACTCCCTTAAGCTTTCTCTTACATTGTCTTTCTCTTACATTCTCTGGCTTCTGTGGTGGTACTGTTTTT 32945
JapaneseQuail ----- 26679
MediumGroundFinch ----- 14921
GoodesThornscrubTortoise@GTGGCTCACCCTGCAAATTACTATCTCAGGGCTGGCTGTCAGAAAACGAGGGCAGACACCCCAAACGG-GTTGTACTA 56324
    
```

```

Majority      TTG-TTCA-GT-TTCA----TTTAACTT-ATGTGAAGTATTGATTTTTCAG-----TTTATGCATCGAGTCGTAT-AATG
              61690      61700      61710      61720      61730      61740      61750      61760
Human         TAGAAACAGCTTTTCAGAAACATGTCTTTATTAGGAATATCTTTAGTTGACACTGGACAGTATATTGTGTCTTCTGGAAG 61152
Kakapo        GTG-TTCAAGGACGCTTGGTTTCAGATT-AAGTATAGTATTGATTTTCTG-----TTGATGCTTCTAAACGTTTCAGTT 29328
GoldenEagle   GTACTTCACGTGTTACCTTTTCAACAT-ATAGAATGTACTGACTTTTCAGCAGTTTTTATGCCACCATAACGATTAATA 33024
JapaneseQuail ----- 26679
MediumGroundFinch ----- 14921
GoodesThornscrubTortoise@AATTAGATTACCCAAGCCAGTAACAA-ATGTGAGCTTCTAGCTCACTATTCCAGTGTTACCATGGAGTCACAGACAAG 56403
    
```

Monday, May 02, 2022 06:50 PM

```

Majority      TCCTGTTTTTCATGT-CT-CTTATCTTGCCAAACA-ACTTTTTGTTAATTGTGATTTATTTTTTTTAAACCTTACATGTC
                61770      61780      61790      61800      61810      61820      61830      61840
Human         TCCTGTTTTATATGATCATTTTTATTTTAAACATATAAGTGGGTGTTTCTTATCTTTTATTTCTTCCAGGAGATTCCATTTTC 61232
Kakapo        CCTCAGAATCTTGTGATAGTTTGGCTGCTAAAGGTACTTTTTTAAAACTGAGATTTTTTTTTTTTGTCCCAAATGTC 29408
GoldenEagle   CCCAATTTTAAACATAATTCCCAGTCTTTTCAGTCTCTATTTTCTTTAATTTAGAACGAAATAATATAAATAGGTACTTGGC 33104
JapaneseQuail ----- 26679
MediumGroundFinch ----- 14921
GoodesThornscrubTortoise@CCTGTTACCCTCTCCAGCCTATCTTGCCAACCAGACAAATTGAACTTTGTGATTAAGTTTATTTAAACCTAAAATCAC 56483
    
```

```

Majority      AGTAC-ACAGGATAATAAATATCT-TATGAGACCTA-TATTAACCGCAGAACGGTTGGATCTTCT-TTTTTTCTCAGGA
                61850      61860      61870      61880      61890      61900      61910      61920
Human         ATCACTAACTGATAATAAAAAATAAATATGAGATAAAACATTTGCAGCAGTAAGATTATGTCATTCATTTCTTCTCACAG 61312
Kakapo        AGTGATAAAGAAAAACAAATACCT-TCATTTACCTAGAAAAAAGAGAATAGAGGATGAATTCTGTCTGCACATCTATGGA 29487
GoldenEagle   AGTAA-GCACTCTAACTAGTATCT-TATGAGGCATTCTGTAAAACACAAGACAGTTGGATATCTTTTTTCTGTAAGGA 33182
JapaneseQuail ----- 26679
MediumGroundFinch -----T----- 14922
GoodesThornscrubTortoise@CCACATCAGGTTTCTCCAGTCC-CAAGAGACCAGTTACTCACCTAGATCAACTGGTACTCCAGACCTTTCACCAAAC 56562
    
```

```

Majority      AGAATA-AGTCCTTTAAGAAG-TTCTT-TAGACTTCTA-TTTTATTTTTTTATGCTAAATACTTAGGTATTGATTGTCTT
                61930      61940      61950      61960      61970      61980      61990      62000
Human         AGTACACATTGCTTTTATGCAGATTCTTTGAGAGACCTAATGGAATTATCCTTTGCTAATTTCTTGGGCAAAGATTCTCCT 61392
Kakapo        TGGACATAGTCCTTTAAGAAGCTTTCCCTTGCAATGTCTCTGGCTTCTGGGCTAAAACCTTTTTTGTACTCCATGTGTC 29567
GoldenEagle   AAAATAAAGGTGGTGCAGATATTGCTTGTAGACTGCCTTTTTTATTTTTTTATGCTCAAACCTAGGTTTTTTTTTTTT 33262
JapaneseQuail ----- 26679
MediumGroundFinch -----TATTTTTATA----- 14932
GoodesThornscrubTortoise@CAATGGTCACAGTCAATTCTGTAGTAAACTGCCTATAGATTTATTTGCTAAGAAAAAGAATGAGTTATTGAGAGGCTA 56642
    
```

```

Majority      TGACATGTAATTG-TAAGCATTGTCTTTCTTTTCAATTCCTTTTGATAGTGACTTTTT--CGAAATCAGTA--TATAAAG
                62010      62020      62030      62040      62050      62060      62070      62080
Human         TGACATCTGCTTAATTTACAATCTGTATATTTTACATTCATATTAATGGAGAATTTATGATGAAATCAGTGGTTTTAGGA 61472
Kakapo        CACCTTCTCAATGTAGAGGATGGGCTCACTTTTCAACAGCTTTTAATACACATTAATA--CCCAATTTGAACATAATCCC 29645
GoldenEagle   TAATCTGTATTTG-AAAGCTTCTCATCCAGCCAAATTCCTTTTGAAATTGTCTTTTT--CTGGATGATCAAGCAGGAAG 33339
JapaneseQuail ----- 26679
MediumGroundFinch -----GC--- 14934
GoodesThornscrubTortoise@GACAGGTAAAAAATAACAAGTGCAGTTGTAACTCCAATGGTGGCAGTGACGTAAT--AGACACCAGTTCCCAAAG 56720
    
```

Monday, May 02, 2022 06:50 PM

```

Majority      TGCTTTAGGGGTCTCCAT-TTAATACTTG-GAGTTGAGTTATATGAT-----TAAGTA-TTGG-C-AAGGTATTAT-TTA
              62090      62100      62110      62120      62130      62140      62150      62160
Human         TGCTTTAGGAAAATCTGCATAATCTACCAGGGTGGGGTTATTTGATATTGGTAAATAATTAGTCTGAAGTATTACATTA 61552
Kakapo        AGCATTCCAGGTCTCTATTTCTTTAATTTCAAGCTAAATAATAGAAA-----TAGGTACTTGGCAGTAAGTATTCTGTTA 29720
GoldenEagle   ATGTGAAGAAGTCAGGATGTTAGTACATGTAAC TGAAAGGTAGGAT-----AAACAAGTTGGAGAAAGGTGCAAATATC 33414
JapaneseQuail ----- 26679
MediumGroundFinch -----GAT-----TA----- 14939
GoodesThornscrubTortoise@CTTTCAGGGCTACCCAGAATAACTCTGGGGAGCTCCGTTTTCTCAT-----TCAGTTTTTCTGCCATGTTAGAATCCAA 56795
    
```

```

Majority      -TAGTATAAACATAG-----ATTGAT-A-AATG-TGTTT-TCTATG-TTT-CTATATAC-GACAAGTC-ATATAAATAG
              62170      62180      62190      62200      62210      62220      62230      62240
Human         GTATTATAAGCTTAATTTTGTGTTGTTGATTTTGATAATTTTTCATGACTTGCCAAATATTA AAAAGTAGATATTTAAAG 61632
Kakapo        CTAGTATCTCCAAGGCATTCTATACACACAAGG-TGGTTGGCTATTTCTTTTTCTGTAAGGAAAAATAAAGGTGATGCA 29799
GoldenEagle   TTAGCTGTAAAGAAG-----ATAGAAAAAAATG-TGTTTAAACCAAGGGTACTTTAAACAGCCAGGCCTTTAGAAATAA 33487
JapaneseQuail ----- 26679
MediumGroundFinch ----- 14939
GoodesThornscrubTortoise@CAGTCTAGAGATACAGGAGCCTTTCTTTGAATT-CATATCTATATCTTCTCACAGAAGCCACCCCTCCACAGAGCTGG 56874
    
```

```

Majority      GATCTGGAAGGTAAGCTTCATTTAGATATGCCATTGTG-TTATCTCCGGCAGTGTAGCTAGGAAGAT-AATT-TAGTTGG
              62250      62260      62270      62280      62290      62300      62310      62320
Human         AATTTGGAAGTTAAGGTTTCTCTCAGTGTGTGTTAAATCTGATCCCCAACAAATCTCTTCAAAAAAGTAAGTTATCAATAG 61712
Kakapo        GATGTTGCTTGTAGTCTTCTTTTGGATTGAAATTGTCTTTGTTTCTGGATGTTCAAGCAGGAAGATCTAAAGAAGTTGG 29879
GoldenEagle   TGACAGTAGGGAAAGTTCATTAAGCTATGCTATTCTGAATTTCTCAGAAATAGTAGCTTCCAAGATTATTTTGTAGTTAT 33567
JapaneseQuail ----- 26679
MediumGroundFinch -----CCA----- 14943
GoodesThornscrubTortoise@AGCGCAGACGGTAGCGGGGCCACACAAACGCTGGCGGCCAAGACCTGCAGCGGAGCTGGGGGCTGGGACCCCTGGCGC 56954
    
```

```

Majority      GTT-TCAT--GTGGAGTTGAAA-AGTTTTGTTTAGGCTTATGATGTGCCCTTTC--TTTTCA--T-TTATT-TGCTGCT
              62330      62340      62350      62360      62370      62380      62390      62400
Human         TAAACGATGAGAAAAATGGAAATAGTTTTATTTTGGCTTTTCATGTTTTCAGTCCATATGCAGTGTTCATTGTGCTGCT 61792
Kakapo        GATTTAGTCCATGGAAGTGGAA-AGATAAGATAAAAAATATGAAGAGGAGTGCAAGTGTCTT--AGTTATAAAGAAGAT 29955
GoldenEagle   GTACTCAG--AATGAGTTGACT-CTGAATAAATAGATTCAAAGGGACCATTTAAATTTTCA--TCTCAGCTTTATAAT 33641
JapaneseQuail ----- 26679
MediumGroundFinch ----- 14943
GoodesThornscrubTortoise@ATTGCCAGGAGTGGAGCTGTGG-GGTCTGGTCCGGGCCAGCTCTGCCCTTC--CTCTAA--CATTACTCCGCACCC 57028
    
```

Monday, May 02, 2022 06:50 PM

```

Majority      TCTATGAAGCTTTTTATCCTGATTGACGTT-GCA-ATTTTGATTA-GGTGTTTTA-TT-TAAATTTAAAATTTATATCAA
              62410      62420      62430      62440      62450      62460      62470      62480
Human         TTAATTATGCTTTCTGTGCCTAATATCTTTCCTGTGTTTTGATTTCCATGTTTTAGCCATAAACTTTAAATTTACATGAA 61872
Kakapo        TAAAAAAAACCTTTTAAACATAATGAAAGTAGGCAAAGTCCATTAAAGCTGTTTTATTC-TGAATTCCTCAATAATAGCAG 30034
GoldenEagle   TCTATGAAAATCCTTTTCCTGTGAGACATCAGAACACTGTGAGAGGAGCATTTAAACT-CAGATTTAAAACAAACATCTC 33720
JapaneseQuail ----- 26679
MediumGroundFinch ----- 14943
GoodesThornscrubTortoiseCTGGGGGGCACACCACAGATTGAAGATTTCTGATATACATAATGGCCACTTGCTT-GAAATTAACTTTTTCTGTAA 57107
    
```

```

Majority      ATCCCTTGTTTCTTTTTGTTTCTGTTCCTCAGGATGA-TTTGCTCTGTGAGTAAGT-TGTATGGGTAATTTTCA-TTAATT
              62490      62500      62510      62520      62530      62540      62550      62560
Human         AACTTTTTTTTCTGATTGTTTTTGCTTACTGTCTAAACCTTCACTGTGAGTAGGCACATTTGGAAGGTCTTCTGCAAAT 61952
Kakapo        CTTCAGGACTGTTTTAGTCTGTGCTCGGGATGAGTTGGCTCTGAAGAAAAC-TAAATGGTCCATTTTGAATCTGTT 30113
GoldenEagle   GTACCTTGTTTCATACAGTATCTAGACTCAGAAGGATTGAGAACAGAGTGACCTC-TGTAAGTGAATTTCTCT-TTAATC 33798
JapaneseQuail ----- 26679
MediumGroundFinch -----C-----CCT----- 14947
GoodesThornscrubTortoiseAGCCCTTAAGTCCTTCATTAGCATTTCACAAGATTTCTTTGATGTGTAATTTAGT-TGCAAGAGTATTTGCCATCTAAAT 57186
    
```

```

Majority      TTTT-CCAGTTCTTAATGCCAGGTATAT-T-TTCAACACAGTCATCGCAACATTGAG-AATATTTAAA-G--TT--AAT
              62570      62580      62590      62600      62610      62620      62630      62640
Human         TATCTTGAGCTTTTAAATGTCAGAAATCTTTGCTCCAACAAGATCACCACATTCCTGATTGCTGAACCACAGGACT--GGT 62030
Kakapo        TTCTCTCAGCTCTTAATTCCATGTAAATCCTTTTCCTGTGAGACATCAAACACAGAGGAGCATTTAAACTCCTTTAAAC 30193
GoldenEagle   ATCAGCCTGTCATAAATGCATGGTTTTAGTCTTTCTGCACAGACATGGCAACATTTAGAAATAAATGTATGTTATACTTT 33878
JapaneseQuail ----- 26679
MediumGroundFinch -----C----- 14948
GoodesThornscrubTortoiseCTTTACTATTACGTTGTGACAGGTATAGATAAGTGAAAACAGTACAAGTAACTTTCCACTAGTTTCAATGAAGTTTAAAC 57266
    
```

```

Majority      CTGTGTGTTCTCTGCTATTTTTTGTGAATTTACTT--AT-TGGCCTAGAAGTGAGAATG-CTTTTATTTACTTTAATT
              62650      62660      62670      62680      62690      62700      62710      62720
Human         TTGTGTGCTACTGCTATTTCTTGGGATTTTGCAAATACATGAGCTTGAAGTGAGCTTGCATATATTTTTTAAATTTGATT 62110
Kakapo        CAACCATTTCTTACCTTGTGTTTGTCTGGTATCTGGACTGAGGAATCGAGATGACAGTGACCTCTGTAATTTCTTTAATC 30273
GoldenEagle   CTGAATGTTGCAGCTGATCTTTTAAATTAATTTCCATTTTGCAAAAATAAGAAAAAAGCTTTACATACTGCTCAAATGT 33958
JapaneseQuail ----- 26679
MediumGroundFinch ----- 14948
GoodesThornscrubTortoiseATCTGAATACATTCTATACATTACGCAATTACTTTGATCTATCTTAATAGAAAGTAAATGGCCTGAATACACTCTTACA 57346
    
```

Monday, May 02, 2022 06:50 PM

|                          |                                                                                  |       |
|--------------------------|----------------------------------------------------------------------------------|-------|
| Majority                 | TTTAAACAATGCTTATTTGTGTATG---ATGCTAACTAT-TATTTTGAATTTATGGATTAATATACTCATA-GCCATAAG |       |
|                          | 62730 62740 62750 62760 62770 62780 62790 62800                                  |       |
| Human                    | TTACTCCCTTTCTTATTTGTGGTCACCTCCTTTAACCAACTATTTTAAAATACCTGGATTTTGTCTCTACACACCCTCAG | 62190 |
| Kakapo                   | ATTACGGGTTTAGTCTTTCTGCAC---AGACACTGCAA-CATTTGGAAAGGAAGAAATACTACATTTAGA-AAGAAAGA  | 30347 |
| GoldenEagle              | CTTAAAAAATGGCTATTTATATATG---ATACGAAATGT-TATTTTGAACTTGTGACAAAATACTCACT-GCCATAAT   | 34033 |
| JapaneseQuail            | -----TTTCTTGA AAAA---ATGCTCACTGT-TGTATTCGTTCTATAGATTACCCTTTTT-----TGAG           | 26734 |
| MediumGroundFinch        | CC--AAA--TGACTACTTAGGTATG---ATGCTAGATAT-TATTTTGAAGTGTGTTGACAAAATACTC-T-----TAAG  | 15013 |
| GoodesThornscrubTortoise | @CTAACAATCGCTTTTGGGTACTGC---TTGTGAGTCACCTAAATGGAATACATGGCTGCATGTACTCAAG-GAAGAAGA | 57422 |

|                          |                                                                                   |       |
|--------------------------|-----------------------------------------------------------------------------------|-------|
| Majority                 | AATTT--TATAGAT----TATATCCTTATATGCT-----TCCTGTATTCCTTC-----GTGTATTCACAT            |       |
|                          | 62810 62820 62830 62840 62850 62860 62870 62880                                   |       |
| Human                    | CTCCTATTTCTTTCCCTTTTTGCCAACAGATGATTAATTTACATCTTGTGTTGCTTATTTCTCTAGCTCTTGTACCTTAGG | 62270 |
| Kakapo                   | AATATCATATAGAT----TTTATCCTTACATGGTGA---TGTT-GTCATGTATTCCCTTC-----GTGTATTCACAT     | 30410 |
| GoldenEagle              | AATTT--TACAGAT----TATATCCTTATTTGCC-----AATGTATTCCTTC-----AAGTATTCACAT             | 34086 |
| JapaneseQuail            | AATGT----TAAGT----CATGTACAT-T--CCT-----TCACTCCATC-----GTGTGTTTACAC                | 26779 |
| MediumGroundFinch        | AATTT--TAATATT----TACCATTTTTTTTAGT-----CCTGTATTCCTTC-----ATGTA CTACAT             | 15066 |
| GoodesThornscrubTortoise | @AATTTT-TAAAGATGTGATGCAGACGTGATTCAC--GACCCATCCTACGTCCCTCTGCATTGGAGTTTAGTCTCTG     | 57498 |

|                          |                                                                                    |       |
|--------------------------|------------------------------------------------------------------------------------|-------|
| Majority                 | TA-ACTTTTGTGGAATGAAAT--ATGATGTATAAGCATATATGGATAGTGTGACAAGGGTTCATATGTTAAAATTG-AC    |       |
|                          | 62890 62900 62910 62920 62930 62940 62950 62960                                    |       |
| Human                    | TATACTTCTGCATCTTCCACCTACATAAAGTTTTTGTGTTTTGTTTTAATGTTTCAGAGGGA--AAATTTCAAAGGGT-CC  | 62347 |
| Kakapo                   | TA-ACTTTAGTGGAATGAAAT--ATGATGTATAAGCATAAATGGGTAGTGTCTAACAAGGGTTCAGATGTTAAAAC TG-AC | 30485 |
| GoldenEagle              | TA-ACTTTTGTGGAATGAAAT--ATGATCTATAAGCATAGACGGATAGTGTCTAACAAGGGTTCATATGTTAAAATTG-AC  | 34161 |
| JapaneseQuail            | TA-ACTTCAGTGCAGTGAAGT--ATGATGTGTAATCATATGTGAATAGTGTCTTCAAGGGTGTATGTTAAAAGTA-AC     | 26854 |
| MediumGroundFinch        | TA-ATTTTAAATGGAATGAAAT--ATGATGTATAAGTATGTATAGACAGTGTGACAAGGGTTCATACGTTAAAATTG-AC   | 15141 |
| GoodesThornscrubTortoise | @A-TGTTCTTTGCAAAGGAACTGAGGGAAGTTGAAGCAACACCATCTCATATAGCCAGGAG--AGGCATTATAGCCACAG   | 57575 |

|                          |                                                                                    |       |
|--------------------------|------------------------------------------------------------------------------------|-------|
| Majority                 | TTCACAAGTTTTGGTTCTTTGGGTTA--TACAGTTTAA-ACTTTTCCAGTC--ACTTTAAGGAGTG-----AGTTTTA     |       |
|                          | 62970 62980 62990 63000 63010 63020 63030 63040                                    |       |
| Human                    | TGGAGGGCTTTCTAACAATTTGGCATATTCATTGTTAGATAAATTTGGCAGTCGGACCTCAGTATTGCTGGGAAAGAATTCA | 62427 |
| Kakapo                   | TTCACAGATGTTGGTTCTTTTGATTA--TACAGTCTAG-CCCTTTCCAGTC--ACTTGAAGGAGTG-----AGTTTTA     | 30553 |
| GoldenEagle              | TTCACAAGTTTTGGTTCTTTGGGTTA--TACAGTCTAA-ACTTTTCCAGTC--ACTTTAAGGAGTG-----AGTTTTA     | 34229 |
| JapaneseQuail            | GCCACAAGTTTCGGTTCTGTAGGTTG--CACGATTCAG-CATTCTCCAATC--ACTTAATGACATG-----AATGTTA     | 26922 |
| MediumGroundFinch        | TTCACAAGTTGTAGTTCATTGTGTTA--TACAGTTTGA-ACTTTTCCAGTC--ACTGTAAGTATTG-----ATATTTA     | 15209 |
| GoodesThornscrubTortoise | @GCGCGAGCACCATCCCTTTTGGAGTAC-TGCTAGGCAA-AATTCTCCAGCT--CCGGTGTGGTGGGCATGCACACACCTA  | 57651 |

Monday, May 02, 2022 06:50 PM

```

Majority      AATTGCTATG-TGCTTCTTC-----TGTGCTTACAGAAAGAGTAGGAAATAATT-----ATGCA
                63050      63060      63070      63080      63090      63100      63110      63120
Human         ACTCCTAAAAAAGTCTAGTG-----TGTGTTTAGTAATTTTGTATCAGCACCTTTAGCATTAACTAGATACTGTGACTCA 62502
Kakapo        ATTCCCATG-TGCTTCTCC-----TGTGCTTACAGAAGGAGTAGGAAATAATT-----ATGCA 30605
GoldenEagle   AATTGATATG-TGCTTCTTC-----TGTGCTTACAGAAAGAGTAGGAAAGTAGTT-----ATGCA 34281
JapaneseQuail AATTG--GTG-TGCTGCTTC-----TGTGCTTGCAGATAGAGTAGGAAATAATT-----ATACA 26972
MediumGroundFinch AATTGATATG-AACTTG-----T-----ATAAAGAGTAGGAAATAATT-----ATGCA 15250
GoodesThornscrubTortoise AGTGGAATACTGCTGCATCACATCTCGAACCACAGTAACAGTAAGAAATTGTTTGTTTTAAAAAATTGTCTTAAATAGA 57731
    
```

```

Majority      ACTCGGCCAAATATCTGACCAGCTTGAAAGTTGTGTTTTTCATACATTAGGGAAAAAA---AGAACCTGATTGTTATCAA
                63130      63140      63150      63160      63170      63180      63190      63200
Human         AACCAGCTCTTTTCTCATAAGGTATCATTTTCTCT-TTGATAACATTGAAGTAGTCACCTAAGAGTGAATTTTGCTACT 62581
Kakapo        ACTTGCCCCAATATCCGGCCAGCTTGAAAGTTACATATTTTCATACATTAGGGAGAAAA---AGAACATGGTTGTTACCAA 30682
GoldenEagle   ACTCGGCCAAATATCTGACCAGCTTGAAAGTTGTGATTTTTCATACATTAGGGAAAAAA---AGAACCTG-TTGGTATCAA 34357
JapaneseQuail ACTCAGCCAAAGGCTGAACAGCCTGAAATTTCTGTTTTTTCGTACGCTGGGGAGGAA---AAAAAC--ATCTTTATCAA 27047
MediumGroundFinch ACTCAACCAAGTATCTGGCTATCTTGAAAGTTGTG--TTTCATGCATTAGGGAAAAGA---AG-----TGTAATTGA 15317
GoodesThornscrubTortoise @CTTTTTTCATCTGTCTTTTAAATGTTGATGCTGCTTTTGTTTAACAGTAGAACAAAA---ACATTCTACTAGAACACTG 57808
    
```

```

Majority      AAGATATTTTTATAG--TTACAGTAATT-AATGTTAAATGTAGAGGTAAA---TTTTGTTTTCCCAACTGGTGTTCACCA
                63210      63220      63230      63240      63250      63260      63270      63280
Human         TATCTTTTGATATTTATCTATTGTGTAGAAACATCAGTTCTATTACTTAT--CTCACATTTTCCCTATAGGAATGCTACA 62659
Kakapo        AAGCTGTTTTTACAG--TT---GCAGT--ACTGTTAAATGTGGAGGTAAA---TCTTGTTTTCCCAACTAGTGTTCACCA 30752
GoldenEagle   AAGATGTTTTTACAG--TTACAGTAATT-AATGTTAAACATAGAGGTAAA---TTTTGTTTTCCCAACTAGTGTTCACGA 34431
JapaneseQuail AAGGCATTTTTATGGAATTACAGTAATT-ATTGTTAAGTGCAGAGTTAAA---TTTTGTTTTCTCAGCTAGAGTTCATCA 27123
MediumGroundFinch AAGAGATTTCAAT-----GTAATT-AATGTTAAATGTAGAGGTAAA---TTTTGTTTTCCCAACTGGTGTTCACCA 15384
GoodesThornscrubTortoise @AAATACTGTGATCC--TTGACATAACCTCTTTTTACATATATTTTAAATGCCTTCTGTTTATCTTCTGTCTCTCTCTA 57886
    
```

```

Majority      --GGTCTTT-----T---TTCTTTCCCCCCTTT-ACTTTCCTTATTCA-TTGAT--TTGTTTCAGTATGAGG
                63290      63300      63310      63320      63330      63340      63350      63360
Human         TTAGTAAATGAATACCTATCTTCAGTGCTTTCTTCACCTTTACACCAGGGTATTCAATTAATAGTTATGTTATTCTGGCT 62739
Kakapo        --GGTCTTTGTGTTTTTTGTTTTGTTCACCTTTACACCAGGGTATTCAATTAATAGTTATGTTATTCTGGCT 30827
GoldenEagle   --GGTCTTT-----TTCCCCCCCCCTTCGACTTTTCTTACTCA-TTGAT--TCGTTTCAGTATGAGG 34490
JapaneseQuail --AGTCTTT-----AATC-----GTTCCTTATCAAATTGAT--TCATTTTCAGTTTGAGG 27168
MediumGroundFinch --GGTCTTT-----TTTTTTTCCCCTC----CTTTCCTTATTCA-TTGAT--TTGATTTCAGTATGAGG 15438
GoodesThornscrubTortoise -ATGCCTCTTTACAAAGAATGCTTTATGTGGTTTTAACTTTTGCCAACCTTACAGTATAT--CTGCATTAACCTGAG 57962
    
```

Monday, May 02, 2022 06:50 PM

|                          |                                                                                   |       |
|--------------------------|-----------------------------------------------------------------------------------|-------|
| Majority                 | AATATCAT-GTAAGTTGTGAGATATGAAATTTTGTAGTAGCTCTGATACCTT---TAAAATAA-TGCAGT--ATGTATTA  |       |
|                          | 63370 63380 63390 63400 63410 63420 63430 63440                                   |       |
| Human                    | GATAAAGTTGATTGATACATGGCTTCCACTTTTATGTGATGATAGGTACCTTGCCTAACCCAAATGTAATTCAAATCCTG  | 62819 |
| Kakapo                   | ATTATCAT-GTAAGTTGTAAGCTATGAAATCGTGTCGTAGCTCTAATACCTT---TAAAATA--CGCGGT--ATGTGTTC  | 30899 |
| GoldenEagle              | AAGATCAT-GTAAGTTGTGAGATATAAAATTTTGTAGTAGCTCTAATACCTT---TAAAATA--TGCAGT--ATGCGTTA  | 34562 |
| JapaneseQuail            | AGCATTGTTGTAGGTTGTGGGATGTGAAAC--TGAGGTAACCTCTGATACCTC---TGAAATAA-TGCATTG-ACTTACTC | 27241 |
| MediumGroundFinch        | AATATCAT-GTAAGTTGTGAGACATGGAATGGTATAGTATCTCTAATACCTT---TAAAATA--TGCAGT--ATGCATTA  | 15510 |
| GoodesThornscrubTortoise | ATAAATACCAAGCAGCATGGAACAGGTTGATTCAGTAGATCTGACAAACT---GGGTCCCA-AGTTTTA-CTGCACTA    | 58037 |

|                          |                                                                                   |       |
|--------------------------|-----------------------------------------------------------------------------------|-------|
| Majority                 | ATATGGTGGTTATTATTTTTA-----CCTGGCA-TGCTCACTTGTCTCTGTT-GTTTTGTATTGTTTTGCTTCCTAAGGC  |       |
|                          | 63450 63460 63470 63480 63490 63500 63510 63520                                   |       |
| Human                    | ATGTGTATGAACTCTCTTTCAGTT--TTTACCAGTGCTGTATTGAAGTGGATGAATCTGTGTTGAATTATTTTCTAGGTT  | 62897 |
| Kakapo                   | ATATGGCGGTTATTACTTTTTA-----CCTGGCA-TGCTCACCTGTCTCTCT--GTTCTGTATCATTTTGCTTCGTAAGGC | 30971 |
| GoldenEagle              | ACATGGTGGTTATTATTTTTA-----CCTTGCA-TGCTCACTTGTCTCT---GTTTCGTATTGGTTTGCTTCCTAAGGC   | 34632 |
| JapaneseQuail            | GAATGGTCGTTACTCGTTTTG-----CCTGGTG-TGCTCACTT-T-----GTTTTGTATTGTTTTGTTTCATGCGGC     | 27306 |
| MediumGroundFinch        | ATATGATGGTTATTATTTTTA-----CCTGGCA-TGCTCACTTGTCTCTCTT-GTTTTGTATTGTTTTGCTTCATAAGGG  | 15583 |
| GoodesThornscrubTortoise | AATGCTACTATAAATCTCCAGGTATTTTGATA-TGCAAAATTTTCTAGGT-AAGGGAATTTCAAAGCTTCAGGAAT      | 58115 |

|                          |                                                                                  |       |
|--------------------------|----------------------------------------------------------------------------------|-------|
| Majority                 | TACTGTAA--TGA---AAGTATTAATGGAACCCCT--TT--TTTTA--CTGCAC-TTTTTTTTCTCAGGAA--AAGAC   |       |
|                          | 63530 63540 63550 63560 63570 63580 63590 63600                                  |       |
| Human                    | AGTTTTTAGGTAGGTAGATTAGTCCATAAAAAAATTCGTA-TATTAAGAGAAAAGGTTTTATATCCCAGAGGTGAGAAT  | 62976 |
| Kakapo                   | TCCTGCAA--TGA---AAGTATTAATGGAACCCC--TT--TTTC---CTGCAC-TTTTTCTTCTCAGGAA--AAGAC    | 31035 |
| GoldenEagle              | TACTGTAA--TGA---AAGTATTAATGGAACCCC--TT--TTTT---CTGCAC-TTTTTCTTCTCAGAAA--AAGAC    | 34696 |
| JapaneseQuail            | TGTTCTAA--TGG---AAGTAGTAACGGAACCCCT--TT--TTTTCACTCAGTACGTTTCTTTTTCTCAGGAA--GAAAG | 27375 |
| MediumGroundFinch        | GACTGTAA--TGA---AAGTATTAATGGAACCTC--TT--TTTT--CTGCC-TTTT---TCTCAGAAA--AAGAC      | 15644 |
| GoodesThornscrubTortoise | GACCTTTA--TGAGCTACATAATATGTTAATCTTAATGGTTTTTAAACTAAATACTTTAGTTTAAATGGA--CAAAA    | 58191 |

|                          |                                                                                |       |
|--------------------------|--------------------------------------------------------------------------------|-------|
| Majority                 | ATCTGATC-----TTTCTGATACTTT--CAGTTTGGC-----AGTGGACGTAGTTACATAGATTTGTGTTTTT--    |       |
|                          | 63610 63620 63630 63640 63650 63660 63670 63680                                |       |
| Human                    | ATTTGAATTAAGCTTTATATACTTAAGCAACTGTAGA-GGTTTACTTTTTCCATAACACGACATGTTTATTCTTCT-- | 63053 |
| Kakapo                   | ATCT-----TTCTGATCCTGT--CAGTTTGGC-----AGTGGAAAGTAGTGACATAGCTGTGTGGTTTT--        | 31092 |
| GoldenEagle              | ATCTAATC-----TTTCTGATACTGT--CAGTTTGGC-----AGTGGACGTAGTTACATAGATGTGTGTTCTT--    | 34758 |
| JapaneseQuail            | TTAT--C-----TTTCTGATACTTC--CAGTTTGGC-----AGC-----AGCTATGTAGACACATATTTTT--      | 27428 |
| MediumGroundFinch        | ATCTAATC-----TTTCTGATACTGT--CAGTTTGGC-----AGTGGAAAGTAGTTACATACATTTGTGTTTTT--   | 15706 |
| GoodesThornscrubTortoise | GTGTGCTCACT--TTTATCAGACTTCAGCAGTTATGACCAAGCTATATTGTATATTATTAATACATTTTTCTCTTTTC | 58268 |

Monday, May 02, 2022 06:50 PM

```

Majority      ----GTGATGTCATCATGTGGTT-----ACCTTTTGAATT-----TCTAAACT-----CCTGCTTG
              63690      63700      63710      63720      63730      63740      63750      63760
Human         -AATGAAAAGTTAACAGTATGTTACCTGTTCTCTAGTTTGTTCAGCTTATATCCAGCTGAACTAGAAATGGTGATTA 63132
Kakapo        ----GTGCTGTCATCATGTGGTT-----ACCTTTTGGATT-----TCTAAACC-----CCTGCTTG 31139
GoldenEagle   ----GTGATGTCATCATGTGGTT-----ACCTTTTGAATT-----TCTAAAAC-----CCTGCTTG 34804
JapaneseQuail ----GTGATGTCATC-----ATA-----AACCTTTGAATT-----TCTAAAA-----CCTGTTTC 27469
MediumGroundFinch ----GTGGTATCAT-----GATT-----ACCTTTTGAATT-----TCTAAAAT-----CCTACTTC 15747
GoodesThornscrubTortoiseAGGCATTAGATGGTCAAAATATTTATAATGCTTGCTGTACCCTACGGATTGATTTT--TCCAAACTGGTGAATTTAAATG 58346
    
```

```

Majority      TGT--A-TAAAAACAATAAAATCC---ACCATACATGGA-----T--T--T---GAGGATTTT--GTTT
              63770      63780      63790      63800      63810      63820      63830      63840
Human         TATAGGAGCAGAAAAAGTACAAGATA--ATCATAGCGGTAACATAGTCC---TTTATAATTCATGATGATTTTTCACAT 63206
Kakapo        TGT----TAAAGACCCCAAAATCC----CCACACATGAA-----GAGGATTTT--GTTT 31184
GoldenEagle   TGT----TAAAAACCAAAATCC----CCACACATGGA-----GAGGATTTT--GTTT 34849
JapaneseQuail TGTTACA-TAAAAATAATAAAACCAATAACAACAGAAGGAAACAGAAGTG--CTTGTGTGGAAGAGGATTTTCTATTT 27546
MediumGroundFinch TGT----TAAAAACAAAAAAAC----CCATACATGGA-----GAGGATTTT--GTTT 15792
GoodesThornscrubTortoise@GAAGTA-CAACAATGATAAAAGTAGG-GACTATACTCGACCTGATCTTCCATCTGGTGATGGGCAACCAGCATTTGGACC 58424
    
```

```

Majority      TTCTTTTTATTAAAGAGGGTGGATAACAGACACCAGTTT---GTTT-ACCTC---TCTGTGGATACTAC--TTTCTGAT-
              63850      63860      63870      63880      63890      63900      63910      63920
Human         ATGTTGTCTTTAATTTACTCCTCTTAATAAACCTTGAAG-AAGCATGACAGCCATTGTCATCATTCCTGTTTCCCGATT 63285
Kakapo        TTTCT----GAAAGAGGGTGGATAACAAACACCAGTTT---GTTTACCTC---TCTGGGATACTAC--TTCTGAC- 31250
GoldenEagle   TTCTTTTCATGAAAGAGGGTGGATAACAGACACCAGTTT---GTTT-ACTTC---TCTGTGGATACTAC--TTTCTGAC- 34919
JapaneseQuail CTCTTTTGTAGTAAGAAGGGTAAAAAGCAGGCACCGGGTT---GTTT-ACCTT---TCTGTGAATACTAC--TTTCTGAT- 27616
MediumGroundFinch TTCTTTTACAAAAGAGGGTGGATAACAGACACTAGTTT---GTTT-ACCTC---TCTG--GATACTAC--TTTCTGAC- 15860
GoodesThornscrubTortoise@AGCTATTGCTGCAGCATTGCAAAAGGAGACGCTACTTCTAGGTATGATTTTAAATTTTCAAACACTTCCCTCCCATT- 58503
    
```

```

Majority      ----ACTTGTGAGTCTTGTGTATTATTTTCAATTGTGTTAAA---ACTGAGAAGTTTGGATGTGT-TAGTTTAGCATTTTCC
              63930      63940      63950      63960      63970      63980      63990      64000
Human         AAGAAATTGAGATTTCAGAGAGGTCAAATAACTTGCTTAAGATGACCGAAAAGAGTCTAGGCTTTTAAATTAATCCTAGACC 63365
Kakapo        ----ATTTGTGAGCCTTGTGTATGATTCACCTGTGTTAAA---GCTGAGAAGTTTGGAAAGCGT-TAGCTTAGCGTTAGCC 31322
GoldenEagle   ----ACTTGTGAGTCTTGTGTATTATTTTCAATTGTGTTAAA---ACTGAGAAGTGTGGAAGTGT-TAGTTTAACATTATCT 34991
JapaneseQuail ----GCT-GTCAATCTTCTTCAATTTCTTTGTGTTACA---TCAGAGAAATTTGGCTGTAT-T--C--AGCATTTTCC 27683
MediumGroundFinch ----ATTTGTTAGTCTTTTGTATTATTTTCAATTGTGTTAAA---ACTGAGAAGTTTGGACATGT-TAGTTTAGAATTTTCC 15932
GoodesThornscrubTortoise---CCCAATTAATCAATGCAGTCTTTTTTCTTATTAATC--ACTGTAATTAATTAATGTTTATATTATGGTAGAGCCC 58577
    
```



Monday, May 02, 2022 06:50 PM

|                          |                                                                                   |       |
|--------------------------|-----------------------------------------------------------------------------------|-------|
| Majority                 | C---TTCCTGTTAGAGTTTTCTACA---TAAT-TAAAATGGCAGTGGAA-----TGTTAACT-GTT                |       |
|                          | 64010 64020 64030 64040 64050 64060 64070 64080                                   |       |
| Human                    | T--GGCACTCGTCAG--T-TTCAGAAC---TTTTCGGGAATGACATTGGATTGCTAATTTTCAATCAAGATAATCTGATT  | 63436 |
| Kakapo                   | C---TTCCTATCAG--CGTTCTA-----AAATGGCAGGGAAA-----TGTTGAAGT-GTC                      | 31365 |
| GoldenEagle              | C---TTCCTATTAGACCTTCTACA---TAAT-TAAAGTGGCAGTGGAAA-----TGTTAACT-GTA                | 35044 |
| JapaneseQuail            | C---TTTGTACACAGAGTTTTCCACA---TAAT-TAAAGTGGCAATGGAA-----TATTAACCT-GTA              | 27736 |
| MediumGroundFinch        | C---TTCCCGTTAGAACCTTCTACA---TAAT-TAAAATGACAGTGGAA-----TGTTAGCT-GAG                | 15985 |
| GoodesThornscrubTortoise | AAGATATATGTTAGGGTTGTTTTTCAGTTGCAGTGTACAATTGTAGTAGAACAGACAGTTTCTGCCACTGCAAACCTTACT | 58657 |

|                          |                                                                                  |       |
|--------------------------|----------------------------------------------------------------------------------|-------|
| Majority                 | ATACAATCTCTTGAAA-AATAAGATAAGTACTT-CTGGTTTCTGTGA--GTCTC---GGTTTTTGTGGTTGGT----TT  |       |
|                          | 64090 64100 64110 64120 64130 64140 64150 64160                                  |       |
| Human                    | GGGGTGAACATTTTCAGGTTAAGGAAAATACTAGTTTTTTTTCTTTTTTGCCTC---ATTTTATGGGAATTGCTATTATG | 63512 |
| Kakapo                   | ATAGAATCTCCTGGAA-AACAGGTTCAATACTT-TTGGTTTCTATA-----GGTTTTTGGTGGGTT-----          | 31425 |
| GoldenEagle              | ATACAATCTCTTGAAA-AATAGGATAAGTACTT-CTGGTTTCTGTATAGTCTTGG-GTTTTTTGTGGTTGATTGGTTT   | 35121 |
| JapaneseQuail            | ATACAGACCGTTGAAATAACAAGATTAATAATTACTGGCTTCTGCA-----CTTTTTTCCCCTTAG-----          | 27798 |
| MediumGroundFinch        | ATACAACCTTTTGAAC-A-TAAGACAAGTACCT-CTGCTTCTGTGA--GCATCAG-CGTTTTTTCCTTGGTTGGT----T | 16054 |
| GoodesThornscrubTortoise | ATATAAATAGATGAGAGAGAGAACTAGAAATAGGACAGAAATATACACATTATCAAAAGTTTTTGCTAGTTACTTACATT | 58737 |

|                          |                                                                                    |       |
|--------------------------|------------------------------------------------------------------------------------|-------|
| Majority                 | TGTTGGTTTTGTTGGTTTTATTTCTTTTATATAAAGAGTCTTGAAACCTACAAAATCCTCACTTACTTTA-----T       |       |
|                          | 64170 64180 64190 64200 64210 64220 64230 64240                                    |       |
| Human                    | TGTTAGGATAAATTTGGTTTTGAAGCAACTTTGTACAATGTGGCATCAAATAGCAGTTACCTTCTAAAACCTGACTGA---A | 63589 |
| Kakapo                   | -----TTGGTTTGCTCGAAAGGAAAGAACAATAAAGAATCTTGAAACCTACAAAATCCTCACTTACTTCA-----T       | 31491 |
| GoldenEagle              | TGTGGGTTTTGTTGGTTTTTTCTCTCTAT--AAAGAGTCTTGAAACCTACAAAATCCTCACTTCTTTA-----T         | 35192 |
| JapaneseQuail            | -----AAGTTTG-T-----AAGGAGTTTGTGACATCCACAAAATCCTA--TTTTTTTA-----T                   | 27843 |
| MediumGroundFinch        | TGTGGGTTA-GTTTAGCTTTATTTCTGTTAAAGGAAAGAATCTTGAAACCTACAAAATCCTC-----TTTA-----T      | 16120 |
| GoodesThornscrubTortoise | TTTTAAGTTTCCCTAATCCATCCTTCTTTTGTCTGGTGTGAGTCAACTTCCACCCTGGTGACCTAAAGTATCTT         | 58817 |

|                          |                                                                                  |       |
|--------------------------|----------------------------------------------------------------------------------|-------|
| Majority                 | CCTTACTAGTAGA-ACAATAAGCTTTCTAC-TAGGAAGATTGATATTGGTGCTATTT---GAAGCCCCCTTTTACTGTG  |       |
|                          | 64250 64260 64270 64280 64290 64300 64310 64320                                  |       |
| Human                    | TCATATAAGTACTGCCATCCAGCAATAAATATATGTATAATAAAATTAACCTTATTGAG-CAGAGTAGTGTGGTACTACT | 63668 |
| Kakapo                   | CCTTACTAGTAGA-A--GTAGGATT-----GATTGACACTGGTGCCATTT---GAAGCCCCCTTTTACTGTG         | 31552 |
| GoldenEagle              | CCTTACTAGTAGA-ACAATAAGCTTGTCTAC-TAGAAAGATGGATATTGGTGCCGTTT---GAAGCCCCCTTGTCTGTG  | 35266 |
| JapaneseQuail            | TGTTAATAGTAGA-ACAATAAGCTTGTCTAC-TGGGAAGATTGATATTGTGCTATTT---GAAGGCT-----TA       | 27907 |
| MediumGroundFinch        | CCTTACTAGTAGA-ACAACAAGCTTTCTAC-TAGAAAGATTGATGTTGGTGCCTTTTTT-TGAAGCCCCCTTAAATGTG  | 16197 |
| GoodesThornscrubTortoise | CCTTCTTCTGCCCACCTCATGGCGAAATC-TTTGGGACTTGATATTGGTCTGTTAAAATCAAGTAAGCTTCTCTATTG   | 58896 |

Monday, May 02, 2022 06:50 PM

```

Majority      ACATAAGGATTAATTGA--T--TTGTTTTTATT-GT-TTCTT----CTCACAGAGTTGGACTGCATTGCACTTA-CGTTG
              64330      64340      64350      64360      64370      64380      64390      64400
Human         TTGGTAGGACTTCCTGT--TTGTGATCCTTATTAGTTTTTTTAAACTAACCTATTTGCAATTTTAAAAATTTAAAAGTA 63746
Kakapo        ACACAAGGGTTAATTGA-----TGTTCATTTGT-CTCTT----CTCACAGAGTCGGACTGCATTGCACTTA-CATTG 31620
GoldenEagle   ACATAAGGATTAATTGACATTTTCATTTTATT-GT-TTATT----CTCACAGAGTGGGACTGCATTGCACTTA-CGTTG 35339
JapaneseQuail ATTTATGAATT--T-----ATTTTTATT-----TT----CTCATAGA-TTGGAGTGCATTACATTTA----- 27957
MediumGroundFinch ACATAAGGATTAATTG-----CTGTTTTTGTG-GG-CTCTT----CTCACAGAGTCAGACTGCATTGCACTTAACGTTG 16265
GoodesThornscrubTortoise ACTTCAGCAGGAACAGG-ATCTGTGTCCTTATTGGCATTTGTA----TGCAGGTGATGACATTTTGGCTTGCTTTCCTATA 58971
    
```

```

Majority      -TGTTATGTCTG--TAGCT--CTGAGTTTTAAATAAGTGGACTATTTTCTGTTTCTGGAGTTAACTATATGAATATTACT
              64410      64420      64430      64440      64450      64460      64470      64480
Human         TTAGCATGGATGCTTAGCTGGTTGTATTTTAGGTTGAAGTAGCATTTTCTATTTAAGGAAGATAATATTTGGGGGAAAGT 63826
Kakapo        -TGTTCTGTCTG--TAGCT--CTGAGGTTTAAATCAGTGGCCAGTTTCTGTTTCCGGAGTTAACGATACGAATATCGCT 31695
GoldenEagle   -TGTTATGTCAG--TAGCT--CTGAGTTTTAAATAAGTGGACTATTTATGTTTCTGAAGTTAACTATATTAGTATTGCT 35414
JapaneseQuail -TATTCTGCC-----T-----CATTGT---TTTCTGAA--TAATCATGTGAC--TFACT 27998
MediumGroundFinch -TGTTATGTCTG--TAGCT--CTGAGTTTTAAATAAGTGGACTATTTGTGTTTCTGGAGTTAACTATATTAATATTTCT 16340
GoodesThornscrubTortoise TGCAAGTGTCCA--TT-TT--CTTCAACTAAGAAAGATGCTTTGCTTTTTCTATTAATAAAA--AAAAATACCAAAGAAATA 59043
    
```

```

Majority      AATTAATTTCTAGCTATTATCTTGAATAT---TAA-GAAATTTG---TCTTTTGTCTTTTTTTTTTT-ATT-----T--T
              64490      64500      64510      64520      64530      64540      64550      64560
Human         AATACATGGACAGCTGGAACAGCAAATTTGATATATGAAATTTGAATCCTTTTCTGGTAGCTTTAAGTTCGAGTTTT 63906
Kakapo        AATTAATTTCTAGCTCTCATCTTGAATAT---TAACCAAGCTGT---CTTGTGCTTGTCTCTTTTGTT-----T 31761
GoldenEagle   AATTAATTTCCAGCTACCATCTTGAATAT---TAA-AAAGTCTG---TCTTCTGTCATCTTTTTTTGTTGTTTGTGTT-T 35486
JapaneseQuail AATTAATTTCTAGCTATTGTCTTGAATAT---TAA---AATCT-----TTGTTATTTCTTTT----- 28051
MediumGroundFinch AACTAATTTCAAGCTGTTATCTTGAATAT---TAAGAAAATCTC---TCTTCTGCTTATTTTTTT---T----- 16401
GoodesThornscrubTortoise AAAGAACAGATGACAAAATGAGACCATGTATACAAAGAAATTCC---ATCTTAGCATTTTATTTTTTCATAATTACTGAT 59120
    
```

```

Majority      T--T-T----TAAGCGGGCCCAAGCTGTTCT-TCAGGCAGTGA---CAGCTGTGCAGG--CAACAA-ATGCTCCCATTAG
              64570      64580      64590      64600      64610      64620      64630      64640
Human         TGTTGTTGAGTTTTTACTAAAATTATACTTTCACTAATTTTTATTTTTTTGTTAAGATTGCTGATATGCTTTATTCAC 63986
Kakapo        ---T-----GAAGCGGGCCCAAGCTGTTCT-TCAGGCAGTGA---CAGCTGTGCAGG--CAACAA-ATGCTCCCATTAG 31825
GoldenEagle   TTGTTTTTGTAAAGCGGGCCCAAGCTGTTCT-TCAGGCAGTGA---CGGCTGTGCAGG--CAACAA-ATGCTCCCATTAG 35559
JapaneseQuail ---C-----AAGCGGGCCCAAGCTGTTCT-TCAGGCAGTGA---CAGCTGTGCAGG--CAACAA-ATGCTCCCATAAG 28114
MediumGroundFinch ---T-----AAAGCGGGCCCAAGCTGTTCT-TCAGGCAGTGA---CAGCTGTGCAGG--CATCAA-ACGCTCCCATTAG 16465
GoodesThornscrubTortoise @TTTTTCTTTATATAGATCATCACTCTTATCTCTAGCGCC----CTGTTATGCAAGTTCAAGAA-CTGATAAGAT-AT 59193
    
```

Monday, May 02, 2022 06:50 PM

|                         |                                                                                  |         |        |       |          |         |        |       |         |         |         |         |       |
|-------------------------|----------------------------------------------------------------------------------|---------|--------|-------|----------|---------|--------|-------|---------|---------|---------|---------|-------|
| Majority                | TGGGACCAC                                                                        | TGTTAGT | GAGAGT | GCAGT | GACTCCAG | CTCAGAG | TCCAGT | ACTT  | TAGAATA | AATTATT | TGACAAC | ATGTA-- | CTA   |
|                         | 64650                                                                            | 64660   | 64670  | 64680 | 64690    | 64700   | 64710  | 64720 |         |         |         |         |       |
| Human                   | TTTTACAGGCCCTAG-ATGGTCAGAATATTTATAATGCCTGCTGTACCCTAAGGATTGATTTTTCCAAACTTGTGAATTT |         |        |       |          |         |        |       |         |         |         |         | 64065 |
| Kakapo                  | TGGGACCAC                                                                        |         |        |       |          |         |        |       |         |         |         |         | 31903 |
| GoldenEagle             | CGGGACCAC                                                                        |         |        |       |          |         |        |       |         |         |         |         | 35637 |
| JapaneseQuail           | TGGGACCAC                                                                        |         |        |       |          |         |        |       |         |         |         |         | 28192 |
| MediumGroundFinch       | TGGGACCAC                                                                        |         |        |       |          |         |        |       |         |         |         |         | 16543 |
| GoodesThornscrubTortois | @AGAACC--CATCAG-AAGAATCAACTGAGATTCCTGAG---CAGTGCATAGA-TAAACATTCATAGCATCTAA-CCA   |         |        |       |          |         |        |       |         |         |         |         | 59264 |

|                         |                                                                                   |        |        |       |       |        |       |       |      |       |       |       |      |     |      |     |     |       |
|-------------------------|-----------------------------------------------------------------------------------|--------|--------|-------|-------|--------|-------|-------|------|-------|-------|-------|------|-----|------|-----|-----|-------|
| Majority                | TCCTGTA                                                                           | AACCC- | TGGATG | TCTT  | CAT-  | CAGG-- | TAA-- | GTCAA | ATTT | CATTT | TAACT | TG--- | AGCT | ATG | ATTT | GGG | GAG |       |
|                         | 64730                                                                             | 64740  | 64750  | 64760 | 64770 | 64780  | 64790 | 64800 |      |       |       |       |      |     |      |     |     |       |
| Human                   | GAATGTAAAATACAACATGATAAAAGTAGGGATTATACTCGACCTGATCTTCCATCTG-----GGGATGGACAACCTGC   |        |        |       |       |        |       |       |      |       |       |       |      |     |      |     |     | 64140 |
| Kakapo                  | TCCAGTAACCC-TGGATGTCTTCAT-CAGG--TAA--GCCCAATTTCTTTTGAACCTG---AGCTCTCATTGGGAGG     |        |        |       |       |        |       |       |      |       |       |       |      |     |      |     |     | 31973 |
| GoldenEagle             | TCCGGTAACCT-TGGATGTCTTCAT-CAGG--TAA--GCCAATTTTCATTTTAACTTG---AGCTATGATT-GGGAGG    |        |        |       |       |        |       |       |      |       |       |       |      |     |      |     |     | 35706 |
| JapaneseQuail           | TCCTGTAACCC-TGGATGTCTTCAT-CAGG--TAA--GAAAAATTTTCATTTTAAATTTG---ACCTTGTAAATTAGCAGG |        |        |       |       |        |       |       |      |       |       |       |      |     |      |     |     | 28262 |
| MediumGroundFinch       | TCCAGTAACCC-TGGATGTCTTCAT-CAGG--TAA--GTCAGATTTTCATTTAGCTTG---AGCTATGATT-GGGAGA    |        |        |       |       |        |       |       |      |       |       |       |      |     |      |     |     | 16612 |
| GoodesThornscrubTortois | @CTTGTGTGGTAGAGGCAGTGCATTCAGGACTTA--CTGTACTTATGCTTTGAGAGAGAGAAAATTTTAAATACACTAT   |        |        |       |       |        |       |       |      |       |       |       |      |     |      |     |     | 59342 |

|                         |                                                                                    |       |       |        |       |        |        |       |       |       |      |      |      |     |     |       |    |        |       |
|-------------------------|------------------------------------------------------------------------------------|-------|-------|--------|-------|--------|--------|-------|-------|-------|------|------|------|-----|-----|-------|----|--------|-------|
| Majority                | AACTTGT                                                                            | GTGTA | AAAAT | TTTTAC | AGTGT | TTTTTT | -GGCAG | ATATT | TCTC- | --TAA | ATTT | GGTG | CTGT | ATT | TGA | AGATA | AT | CACATT |       |
|                         | 64810                                                                              | 64820 | 64830 | 64840  | 64850 | 64860  | 64870  | 64880 |       |       |      |      |      |     |     |       |    |        |       |
| Human                   | ATTGGACCCAGCTATTGCTGCAGCATTTGCCAAGGAGACATCCCTCTTAGGTATGATTTT-TATTGTC-TTAACCACTTT   |       |       |        |       |        |        |       |       |       |      |      |      |     |     |       |    |        | 64218 |
| Kakapo                  | AATTTGTGTGTAAAAATTTTACCGTGTTTTTTT-GGCAGATATTCTC--TAAATTTGGTGCTGTATTGAAGATAATCACATT |       |       |        |       |        |        |       |       |       |      |      |      |     |     |       |    |        | 32050 |
| GoldenEagle             | AACTTCTGTGTAAAAATTTTACAATGTTTTTT--GGCAGATATTCTC--TAAATTTGGTGCTGTATTGAAGATAATCACATT |       |       |        |       |        |        |       |       |       |      |      |      |     |     |       |    |        | 35782 |
| JapaneseQuail           | AACATGTGTATAAAAATTTT-----GTTTTT--GACAGATATTCTC--TAAATTTGGTGCTGTATTGAAGATAATCACATT  |       |       |        |       |        |        |       |       |       |      |      |      |     |     |       |    |        | 28333 |
| MediumGroundFinch       | AACAGATGTGTAAAAATGTACAATGTTTTTT-GGCAGATATTCTC--TAAATTTGGTGCTGTATTGAAGATAATCACATT   |       |       |        |       |        |        |       |       |       |      |      |      |     |     |       |    |        | 16689 |
| GoodesThornscrubTortois | @TCTTTTTTTTTTGTTTTATCATTTTAAATTT-GGTATCGACCCTG--TAAATTTTCATGAT-TATATAAACTAGTAAGCTT |       |       |        |       |        |        |       |       |       |      |      |      |     |     |       |    |        | 59418 |

|                         |                                                                                    |        |       |       |       |       |       |       |      |       |       |      |      |      |        |      |     |       |
|-------------------------|------------------------------------------------------------------------------------|--------|-------|-------|-------|-------|-------|-------|------|-------|-------|------|------|------|--------|------|-----|-------|
| Majority                | CACAA                                                                              | AGAATA | AACCA | GT    | TTT   | ACTG  | CAGT  | ATGG  | TGA- | TCCAG | TAAAT | GCAC | AGCA | AGCA | AGCT-- | AGTA | AG- |       |
|                         | 64890                                                                              | 64900  | 64910 | 64920 | 64930 | 64940 | 64950 | 64960 |      |       |       |      |      |      |        |      |     |       |
| Human                   | TCTCCCATTTTGCCAAATGGAAAAGTACCAGTAAGTATAATGAATCCCCCATTTTGGACCTTACCAAATTTGTGTTAGGT   |        |       |       |       |       |       |       |      |       |       |      |      |      |        |      |     | 64298 |
| Kakapo                  | CACAAAGAATAAACCA GTTTCAA-GCTTTACTGCAGTATGGTGA-TCCAGTAAATGCACAGCAAGCAAAACT--AGTAAG- |        |       |       |       |       |       |       |      |       |       |      |      |      |        |      |     | 32125 |
| GoldenEagle             | CACAAAGAATAAACCA GTTTCAA-GCTTTACTGCAGTATGGTGA-TCCGGTAAACGCACAGCAAGCAAGCT--AGTAAG-  |        |       |       |       |       |       |       |      |       |       |      |      |      |        |      |     | 35857 |
| JapaneseQuail           | CACAAAGAATAAACCA GTTTCAA-GCTTTACTCCAGTACGGTGA-TCCAGTGAATGCACAGCAAGCAAAACT--AGTAAG- |        |       |       |       |       |       |       |      |       |       |      |      |      |        |      |     | 28408 |
| MediumGroundFinch       | CACAAAGAATAAACCA GTTTCAA-GCTTTACTGCAGTTTGGTGA-TCCAGTAAATGCACAGCAAGCAAGCA--AGTAAG-  |        |       |       |       |       |       |       |      |       |       |      |      |      |        |      |     | 16764 |
| GoodesThornscrubTortois | @ACCCAG--TTCCTGTCTGGATGTCCTTTTATATTTTGAAGT-TTAGGGTTCATTTTGTGTCAGCAAAGTTCAGGTTGGA   |        |       |       |       |       |       |       |      |       |       |      |      |      |        |      |     | 59495 |

Monday, May 02, 2022 06:50 PM

```

Majority      --TAT-AGTTTTCTTTTAAG-----GCTGGATATCTTCTGTGA---CTCTAAATATTTGT-----
                64970      64980      64990      65000      65010      65020      65030      65040
Human         TTCGTGAGTTTTCTTTTCTCAAGTGAGAAGGCATATGAATACTGTTAAGAAAACCCAAAGTATTCTTT----- 64368
Kakapo        --TAG-AGTTTTCTTTTAAG-----GCTGGAGACCTTCTGTGA---CTCTAAATGTTCTGT----- 32174
GoldenEagle   --TAT-AGTTCTCTTGTAAG-----GCTGGAGACCTTCTGTGA---CTCTAAACATTTGT----- 35906
JapaneseQuail --TAT-AGTTTTCTTTTAAG-----GGTAGGTATGTTTCTGTG---CTCTAGACATTTGT----- 28457
MediumGroundFinch --TAT-AGTTCTCTTCTAAA-----GCTAGAGATCTTCTGTGA---CTCTCAGTATTTGT----- 16813
GoodesThornscrubTortoise@TTAG-AGATTTTTTACAAGACCCAATGAACGGTGTGTTTATTTTCTTACC---CACTTATTTGTTTGTTCCTTAGGAG 59571
    
```

```

Majority      --AAAATGTTAATATAACGGATTACTGACTCTTATAATGTGTCATACTC--CTCTACTATTTG-TGTGAA-TTTTTTGAG
                65050      65060      65070      65080      65090      65100      65110      65120
Human         --ATAAGTCTAATTAAAATTATATGTTAGTTTTGTTCCTTTTAATACCTTCAGCTTCTCTTCCATGCCACTCTCCCAGAA 64446
Kakapo        --AAAATGCTAATGTAAC-----CTT-CCCTGATGA-----CTTTAGTACTT--TGTGAA-TTCTTTGAG 32228
GoldenEagle   --AAAATGTTAATATAACAGAGTACTGACTGTAATAATGTGTCATACTC--CTCTACCACTTG-TGTGAA-TTTTTTGAG 35980
JapaneseQuail --ACAATGTTAACAGAATG-----CTGACTACTATAG-----TTGTAATATTC----C----TCCTCCAG 28507
MediumGroundFinch --AAAATGTTGATGTAACAGAGTACTG-CCATAACAATGTGTCATACTC--CTCCACCATGTG-TGTGAACTTTTTTGAG 16887
GoodesThornscrubTortoise@TAGGAAGCTAGAAGGAAGGATCAGCCATTCATGTAAAGTGCTGCATTCTGTTTTGACAGTCAGTAAATAGCTTTTTTGAA 59651
    
```

```

Majority      --ATTAGAA-A-A---ATAATGGGAGTTACTA---AA-TGTTAATAT--TGTGTA AAAATCTGTGTTTGAAGATACTATG
                65130      65140      65150      65160      65170      65180      65190      65200
Human         CAAAAGAAGAAAAGCTCTAATGAAGAAATACTGTTGAATCTTAATGCCATATTTACACTTTAAACTTGATGTCACTATG 64526
Kakapo        --ATGAAA---A---ATAGTTGGCAGGTATGA-----TATTAATAT--TGCATAAAATCAGTGTGTTGAAGATACTATG 32292
GoldenEagle   --ATCAGAA---A---ATAACTGGGAGTTAATATATAA-TGTTT-TAT--TGCCTGAAATCGGTGTTTAAAGATGCTATG 36048
JapaneseQuail --TTTTGAG-----AAATC--T--TTG---A----- 28524
MediumGroundFinch --ATTAAAACAAA---ATAAGTAGAAGTTAGT-----TGTTA-TAC--TATGTGAAATCAGTGTTAATGATAGTATG 16952
GoodesThornscrubTortoise@TATTTGATTATAGGCAGAGCTGACAG-CACCACCTAA-TACTGAGGT--TGTCACAACTTCTGATTTTCAGTTGCTCTG 59727
    
```

```

Majority      TTTAAGGATTCTATGTCTAAAGAATTT---TATACATCTATGATTATGACCAAATATTTTAATA----AGACTGCACAGA
                65210      65220      65230      65240      65250      65260      65270      65280
Human         CCTGAG---TCTAGGCCTAAAGTTCTTGTGTGTGTTTTTCAGTGTCTGATCTGATTGTTTTAATTT--AGCATTGCATGGA 64601
Kakapo        TTTAAGGATTCTATGTCTAAAGATTTG---TATACATCTATAATATGACCAAATATTTTAATA----AGACTTCACATA 32365
GoldenEagle   TTTAAGGATACTATGTCTAAACAATTG---TATACATCTATAATATGAACAAATATTTTAGTA----AGACTGCACAGA 36121
JapaneseQuail -----AAATTTTTTA----- 28534
MediumGroundFinch TTTATGGATACTGTGTCTAAATATTT---TAGATATTTG---TATGAACAAATATTTGATGTA----AGACTGCACAGA 17021
GoodesThornscrubTortoise@C-ACTGTTGTCAATTGTACATAACTTAGCCAACTTCAATGATTTGGGCTGATAATTTCCATGCCAGATATCTGCCTAA 59806
    
```

Monday, May 02, 2022 06:50 PM

```

Majority      GATGGAATAATATGCAAGACTGCAATAGTGAAAATG--TCAACCAGAAGTAAGAAT-----GTAGGA--A-TGTAATGG-
                65290      65300      65310      65320      65330      65340      65350      65360
Human         AACAGTGAATGTTAAGAGACAAAACATACATAATGGGTGGA-GGCATATGGGATTTTTTTTGAAGCATATTGTAGTGGC 64680
Kakapo        -----TATGCCAGAGTGCCTTGGTGCAGATG--TCAACAAGCAGTAGAAATCTG-TGTAGAAGTACTGTGATGT- 32431
GoldenEagle   GGTGAAATAATATGCAAGACTGCAATAGTGAAAATG--TCAACCAGAAGTAAAAAT-----GTAGGA----TGTAATGT- 36189
JapaneseQuail -----A-----AAA----- 28538
MediumGroundFinch GATGAAATAATATGCAAGACTGCAATAGTAAAAATG--TCTACCAGAAGTAAGAAT-----GTAGGA----TGTCAGGG- 17089
GoodesThornscrubTortoise GACTGAATGTTTTTTTAAATAT-TCAGCCAAAATGGCTCAGCCATTTCTGAGAACAAGGCATGGGGAAAATACATTTG- 59884
    
```

```

Majority      -TGTTCATAATTAATTCACCTGTAAGCGGCATTTTCTGTAA-A-----T-----T-----
                65370      65380      65390      65400      65410      65420      65430      65440
Human         CTTTTAAAAAACAATTTAAACTAGAGAAATTTTCTGTAAAATTAATTTTGTCTATTCTTTGCATTTTGTCTTAATCAT 64760
Kakapo        -TGGTGCAGAAATTAATTCACCTCTAAGCAGGAAATTTCTGTAAAGATAGAATCACAGAATGGTTTGG--GTTGGAAAGGACCT 32508
GoldenEagle   -TGATGCATAATTAATTCACCTGTAACAGCAGATTTAGTAA----- 36229
JapaneseQuail -----AAGGGGAGTTTATATAA----- 28556
MediumGroundFinch -TGATGCATAATTAATTCACCTGTAAGCAGCAAATTTAGTAA----- 17129
GoodesThornscrubTortoise TTTTCCCCTTGTTAAAAAATTCAGTGACCTTTCCTTTGAGAAAGTTTTTTAGTGCTCCACACC--CCCACTTCAGAGCA 59961
    
```

```

Majority      -----T-----T-----T-----A-----G-----AA-----
                65450      65460      65470      65480      65490      65500      65510      65520
Human         TTATATTTTACTTTGTACCACAATGGACTTGAGCCACCTAATAAAAAATACAGTGCAAACATATGCAACTTATAGTTGATA 64840
Kakapo        TAAGATCATCCAGTTCCAACCCCTGCCATGGGCAGGGACACCTCACACTAGAGCAGGTTGCTCCAAGCCCCTGTGTCCA 32588
GoldenEagle   ----- 36229
JapaneseQuail ----- 28556
MediumGroundFinch ----- 17129
GoodesThornscrubTortoise GGGACTTGAAATTTGACAGGGGATGATTTTTGTGTGAGGATGTGCCTTTTGCCATCAGGTTGAAATCCTCCCAATTT 60041
    
```

```

Majority      -----A-----G-----C-----T-----G-----G-----C-----
                65530      65540      65550      65560      65570      65580      65590      65600
Human         GCGTGGAATCAAGATGAAGAAAAAATAAGGAAAATCTTACTTTGTAAAGTAAAATGTGCAAAGTGATTTATAAGTTAAGA 64920
Kakapo        ACCTGGCCTTGAACACTGCCAGGGATGGGGCAGCCACAGCTTCTCTGGGCACCTGTGCCAGCGCCTCAGCACCCTCACA 32668
GoldenEagle   ----- 36229
JapaneseQuail ----- 28556
MediumGroundFinch ----- 17129
GoodesThornscrubTortoise GCGCAAGTCGTGAGCCTTAAAAAATCACAGTTCACACATAGACTCATAGACTCTAGGACTGGAAGGGACCTCGAGAGGTC 60121
    
```

Monday, May 02, 2022 06:51 PM

```

Majority      ----A-----T-----G-A---CCCTTT--AG-----TT-----
                65610     65620     65630     65640     65650     65660     65670     65680
Human         TGG AATTTT TAGAGTTT CCTTTT ATTTGATGTATTTCTTGATTTCTAGTATTTGGTAAGATTATCTTTAAGTCATGATTTTT 65000
Kakapo        GGGGAGAGCTTCTGCCTTAGATCCAACCTGAACCTCCCTGTTTCAGTTTGAACCCATCACCCCTTGCCTGTGCGCTCCA 32748
GoldenEagle   -----GCCATT----- 36236
JapaneseQuail ----- 28556
MediumGroundFinch -----CCCTTT----- 17136
GoodesThornscrubTortoiseATCGAGTCCAGTCCCTGCCCCTCATGGCAGGACCAAATACTGTCTAGACCATCCCTAATAGATATTTATCTAAC---CTA 60198
    
```

```

Majority      -T---A-----GAATTGTT-GTTGGCAGATCCTTTCTAAGCA-TCAATACAAATGTGTGATTTGTGGATTGGATA
                65690     65700     65710     65720     65730     65740     65750     65760
Human         ATATATATGGAACCTCAA AATTTGATAGTTGACAACTAGCTTTTACAATTTAGTTTATGTCTGTCATTTCAAAGAAAAAA 65080
Kakapo        GTCCCTAATGTAGAGCGAATTATT-GTTGGTAGATCCTTTCTTACCA-TCAAACAAAGATGTGATTTGTGGATTGGATA 32826
GoldenEagle   -----GGATTACT-GTTGGCAGATACTTTCTAAGCA-TCAAACAAAGGTGTGATTTGTGGATTGGATA 36298
JapaneseQuail -----ATTGGACG 28564
MediumGroundFinch -----GAGTTGTT-GTTGGCAGGTA CTTT-TAAGCA-TCCATACCAA AATGTGATTTGTGGATTAGTTA 17197
GoodesThornscrubTortoiseTCTTAAATATCTCCAGAGATGGA-GATTCCACAACCTCCCTAGGCAATCTATTCCAGTGTTTAACTACCCTGACAGTTA 60277
    
```

```

Majority      TAGATTTGTTA-AAGTATTTAATTATAGTATCCT---A--AAATATAA-AATCTAGACTTC--TTTGTAACTATAAATG
                65770     65780     65790     65800     65810     65820     65830     65840
Human         TAGTATAAAT--AAGTAGTTATTTGGA AATTTTACTTCCCAATATATAACAGTCATGCCATCAGTTTGTGAATATGAAAT 65158
Kakapo        TAGATTTGTAA-AAGTATTTAATTATAGTATCCT---A--AAAGAAAT-TACCTAGACTTC--ATTATAACCATAAATG 32896
GoldenEagle   TAGGTCTGCAA-AAGTATTTAATTATAGTATCCT-----AAAAAAA-AATCTAGACTTC--ATTATAACTATAAATG 36367
JapaneseQuail AAGATC-----A-----ATAGCATGTC-----ATCA----- 28585
MediumGroundFinch CAGATTTGTGA-AAGTACTTAGTTATAGTATCCTTAAAAAGAAAAGAA-AATCTAAACTAA--TATGTAACCATAAATG 17273
GoodesThornscrubTortoiseGAACTTTTCTCTAATGTCCAACCTCAATCTCCCTTGCTGCAGTTTAA-GTCCATTGCTTCTTGTCTATCATTTGGAGG 60356
    
```

```

Majority      CCCAGAAGAGAGAGTGTA---GTCTTACTCATGTGACCAGACTGTGAAGAAGCTTTG-CAGTAGTGACAGGTGAGT---
                65850     65860     65870     65880     65890     65900     65910     65920
Human         CTGTAAGTGGTATATATGTAGAGAGAGATACTCTAAGGCAGTTGGTATTTGATTTCTGGTAACTAATAAGAATTA ACTACC 65238
Kakapo        CCCAGAACAGAGAGTGATGGGATCAGACTCATGGGATCAGACTATGAAGCAGCTTTG-GATGAGTGACAGGTGAGTGTT 32975
GoldenEagle   CCCAGAAGAGAGAGTGCA---GTCTTACTCATGGGACCAGACTATGAAGAAGCTTTG-CAGCAGTGACAGATGAGA--- 36439
JapaneseQuail -----A-----GACCAGAC-----A----- 28595
MediumGroundFinch CCCAGAAGAAAGAGTGCA---AT-TTACTCATGTGACCAGACTGTGAAGAAGCTTTG-CAGCAGTGATGGGTGA----- 17342
GoodesThornscrubTortoiseTAAGGTGAACAAGTTTCT---TCCTCTTCTGTTGACACCCTTTTAGATACCTGCA-AACTGCTATCATGTCCCCTCT 60432
    
```

Monday, May 02, 2022 06:51 PM

```

Majority      -----T---T-T--CA-----AA--GCATGATCTTA-----CTTTT-----GTTT---
              65930    65940    65950    65960    65970    65980    65990    66000
Human         -----TGTTAATTTCTGGCAGCTGCAAACAAATCTGACCCTTTATTTCGAATTTTC-----TGGTGTAT 65295
Kakapo        TTAATGGAGGCATCCCTCCCTGTGGCACGGGGTTGGAAGTCTTCCAAACCAACCAGTCTGTG 33055
GoldenEagle   -----GCAGGATCTTA-----CTTTT-----GTTT--- 36460
JapaneseQuail -----TTTT----- 28599
MediumGroundFinch -----GCAGGATCTTG-----CTTTT-----GTTT--- 17362
GoodesThornscrubTortoise -----CAGTCTTCTCTTTCCAAACTAAACAAACCAATTCCTTTAGCCTTCCTTC--A-----T-AGGTCATG 60493
    
```

```

Majority      --TATAGGAAATTCTCCTATCCTGGATAGGAGTGGCAAGAACATGTGGCTGGTTTTATTTCATTATAGCAGGAGAGAGCCT
              66010    66020    66030    66040    66050    66060    66070    66080
Human         CCTAGCAGAAGTCATAGTGTATTATTGACTGTAGTAGATGCTTTAGGTCACCTTACACTCTTTCCTGACAGAAT----- 65369
Kakapo        ATTCATGAAACTCTCCCATCCTGGGTAAGAAAGGCAAGAACAGGTAACGGTTTTATTTCATTATAACAGGAGAGAGCCT 33135
GoldenEagle   --TATTGAAACTCTCCTATCCTGGTTAGGAGAGGCAAAAACAGGTAACGGTTTTATTTCATTATAGCAGGAGAGAGCCT 36538
JapaneseQuail -----GAATT-----A---AATGATAATGATGTGTG-----TACATCCATGACAACAAGA----- 28641
MediumGroundFinch --TATAGGAAACTCTCCTATCCTGGATAGGAGAGGCAAGAACAGGTAAGTGGTTTTATTTCATTATAGCAGGAGAGAGCCA 17440
GoodesThornscrubTortoise TCTTAAGATCTTTAATCATCTTGTGTGCTTCTCTGGACCCTCTG-CAATTTTCCACATCTTCTTGAAATG---CG 60569
    
```

```

Majority      ATGGATAAATTATGACAAAGT-CAACAGTATGTCATCTAGACCAGATGTTTTGAATTAATTGGATGGAATA--TGTTCCG
              66090    66100    66110    66120    66130    66140    66150    66160
Human         ---C-TCTACTACCTCTGTGT-----GTGTCTAGCTTAATTCG--TAATTCAGTTAATAAGATTGAATATTTACAGT 65437
Kakapo        ATGGATAAATTATGACAGAG--CAACAGCACATAATCTACACCAGTTGTTTGAATTAGTTGGATGAAATAATTGAATGA 33213
GoldenEagle   ATGGATTAATTATGACAAAGATCAACAGTATGTCATCTAGACCAGATGTTTTGAATTAATTGAATGGGATA--TATTCAC 36616
JapaneseQuail -----AAAG-----TAAACCAAGGCGACGACTAGATTGTGTG-TGTG--TGTATAC 28685
MediumGroundFinch ATGGATAAATTATGGCAAAGATCAACAGCATGTCATCTAGACCAGATGTTTTGAATTAATTGAATGGCATA--TGTTTAC 17518
GoodesThornscrubTortoise GTGCCAGAACTGGACACAGTACTCCAGT-TGAGGCCA-ACCA--GCGCAGAGTAAAGCGGAAG-AATGACTTCTCGT 60643
    
```

```

Majority      ATCTG--TGGCAATAGAAAAGTTGAACCAAGGGGAAGGCTAG-T--GTTTTTTTTGTTATTATGATTATATTT-TTCAA
              66170    66180    66190    66200    66210    66220    66230    66240
Human         GTGCAGTTTTTAA-AGGCAAAGTCAGGAATGAAAGAGTGAACATGGTTTTTGCTTATAATTATTACTATAGATTATTAA 65516
Kakapo        ATCTG--TGGCAACAGAAAAGTTGAACCAAGGGGAGGCTGG---ATTTTTTTTGTATTATTGATT-----TTCAA 33280
GoldenEagle   ATCTG--TGGCAATAGGAAAGCTGAACCAAGGGGAGGCTAGTTTGGTTTTTTGGGTTTTTTGTTTGTTTTCTTCAA 36694
JapaneseQuail ACT---T-----AT-----CTAA-----TTTT---TTATTCTGATT-----TTTAA 28715
MediumGroundFinch ATTTG--TGGCAGTAGAAAAGTTGAACCAAGGGGAAGGTGAG---ATTTTTATTATTATTATTATAATT-TTCAA 17591
GoodesThornscrubTortoise CTCTGTTTACAACACACCTGTTAATGCATCCCAGAA--TCACGTTTGCTTTTTTTGCAACAATATCACACTGTTGACTC 60721
    
```

Monday, May 02, 2022 06:51 PM

|                          |                                                                                    |       |
|--------------------------|------------------------------------------------------------------------------------|-------|
| Majority                 | GGGTAAA--TGAATCAATTTTATTTTCAAACCTTCATGTGCAGTCTGGGTTTGTGGA-AGGCTGATTCAAATTGGTA      |       |
|                          | 66250 66260 66270 66280 66290 66300 66310 66320                                    |       |
| Human                    | ACTCTTTACTGATAGACATTGTTTTAGAAAGAATCAAAATTTATTGAGTAGCTTCTAGGTCATATTCATTCAGCTAGGCA   | 65596 |
| Kakapo                   | GAGCTAAAA-TGAATCAGTTTATGTTTTCCAGCCTTCCCGTAGAGGCCGATTTGTGGG-AGGCTGATTCAGTTGGTA      | 33358 |
| GoldenEagle              | GGGATAAA--TGAATGAATTTATATTTCAAACCTTCACATGCAGTCTGGGTTTGTGGA-AGGCTGATTAATAATTGATG    | 36771 |
| JapaneseQuail            | GGGTAAA---TGAATTACTTTGTATTTCTTAAACATTCATGTGCTGTCTGTTTTTTTGGGA-AGGTTGGTTAAAACCTGATG | 28791 |
| MediumGroundFinch        | GAGATAAA--TGAATTAATTTGTATTTCAAACCTTCACATGCAGTCTGAGTTTGAGGA-AGGCTGATTAATAATTGATA    | 17668 |
| GoodesThornscrubTortoise | AATTAAGCTTGTGGTCTACTATGACCCTAGATCTCTTTCTGCCATACTCCTTCTAGACAGTCTCTTCCCATTTCTGTA     | 60801 |

|                          |                                                                                 |       |
|--------------------------|---------------------------------------------------------------------------------|-------|
| Majority                 | TGCTGGTTAAGTGTGCTTGGCAGCATAGAAAGTTCTTATTG----CCTATAGATGACAGAATAG---CTGAGAACTTCA |       |
|                          | 66330 66340 66350 66360 66370 66380 66390 66400                                 |       |
| Human                    | CTTGGCAGATACATTACTTTGTTAAATAGATGGTCTCATCAAGATTTTACATATAGTTTCTAAGAAGTTGAAAAATTCA | 65676 |
| Kakapo                   | TGCTGGTTCGGTGTGCTTGGCAGCACAGAAAGTTCTTACTG---CCCATAGATGACAGAATAG---CTGAGAACTTGA  | 33431 |
| GoldenEagle              | TGCTGGTTAAGTGTGCTTGGCAGCATAGAAAGTACTTGTG---CCCATAGATAACAGAATAG---CTGAGAACTTCA   | 36844 |
| JapaneseQuail            | TACTGGTTAAATGTTGCTTGGCAGCATAGAAAGAGTGTATTA---CCCACAAGTACAGAATAG---CTGAGAACTTCA  | 28864 |
| MediumGroundFinch        | TGCTGGTTAAGTGTGCTTGGCAGCATAGAAAGTGTCTTATTG---CCTGTAGATGACAGACTAG---CTGAGAACTTC- | 17740 |
| GoodesThornscrubTortoise | GTGTGAAACTGATTTCTTCTTAAGTGAACACTTTGCA---TTTATGTTTATTGAACTTCATCTGTTTACCTCA       | 60877 |

|                          |                                                                                  |       |
|--------------------------|----------------------------------------------------------------------------------|-------|
| Majority                 | GG-GCAAATTTGAAAAGCTCGCACCTCAGACTAAGTTGGCAATGAGTATCTCTTAGTAGAGGAAAGA-AAAAATAGGCTT |       |
|                          | 66410 66420 66430 66440 66450 66460 66470 66480                                  |       |
| Human                    | CATGCAACTCATCAAAGAAACAATTTAAAGATAAAATACCAA---GAAACTCCAGCTAAAGATAAAATACCAAGAACTC  | 65753 |
| Kakapo                   | A--GCAAAAGTGAAAAGCTTGCACCTCAGACTAAGTTGGCAATGAGTTTTTCTTAGTAGAGGAAAGA-AAAAACAGGCTT | 33508 |
| GoldenEagle              | GG-AAAAAGTGAAAAGCTCGCACCTCAGACTAAGTTGGCAATGAGTATCTCTTAGTAGAGGAAAGA-AAAAATAGGCTT  | 36922 |
| JapaneseQuail            | TG-TGAAAGTGAAAATTCACGCTCTGATGAAGTTGGTGAAGAGTATCTGGTAGTAGAGGAGAGAAAAAGCAGGCTTT    | 28943 |
| MediumGroundFinch        | ---ACAAAATTTGAAAAGCTCACACCTCAGGCTAAGTTGGCAA-ATTTTCTCTTGGTAGAGGAAAGACAAAAATGGTCTT | 17816 |
| GoodesThornscrubTortoise | GA-CCATTTTCCAATTTGTCCAGATCATTTTGAATTTTGACCCTGTCTCCAAGCAGTTGCAATC--CCTCCACTTT     | 60954 |

|                          |                                                                                  |       |
|--------------------------|----------------------------------------------------------------------------------|-------|
| Majority                 | AGTTTTCTGTTGT---T---AAAGAATAATGACTATATTGAA----ATAAAGACCTTT--ATTAAATA-GTGGAGGATGG |       |
|                          | 66490 66500 66510 66520 66530 66540 66550 66560                                  |       |
| Human                    | CAGCTAGTATTAACAATGGACTACAATAATCACTTCTTTGGACCTACTGAGGTGTGTGATTTGCCCATCTGGATATAC   | 65833 |
| Kakapo                   | AGTTTTCTGTTCT-----TGTAAGTA--GATTATATCGAA----ATCAAGACCTT-----C--ACA-GTGGAGGATGG   | 33567 |
| GoldenEagle              | AGTTTTCTGTTGT-----AAAGAATGATGACTATATTGAA----ATAAAGACCTTC--ATTAAATG-GTGGAGGATGG   | 36988 |
| JapaneseQuail            | GGGTTTCTACTGTGCTTCTTAAAGAATTATGACACTATTGAG---ATAAAGACCGTC--ATTAAAAA-GTGGAGGATTG  | 29016 |
| MediumGroundFinch        | AACTTCTGTTGT-----AAAGAATGAGGACTATATTGTA---ATAAAGACTTT---GTT--ATG-GTGGAGGGTGG     | 17879 |
| GoodesThornscrubTortoise | SGTATCGTCCAAACTTAATAAGCATACTTTCTATGCCAAC---ATCTAAATCGTT--GATGAAGATATTGAACAGAG    | 61028 |



Monday, May 02, 2022 06:51 PM

```

Majority      TCATTTTATCCTTATCACCAAATGAAATC-ACTGGTTATTGATTAAAAGAA---CTGTGA---GGTGGTCAAGACAG--
              66570      66580      66590      66600      66610      66620      66630      66640
Human         TTAGATGTGCTTGGATCCTGGGTGGGAGGC--TTGGTTAGAAATCAGCTGGATTCTTCTAGGGAATTTATCACCATTTTT 65911
Kakapo        TCATTTTATCCTCATCACCAAATGAAATC-ACTGGTTATTGATTAAAAAATACTTTAAAAAGGTGGTCAAGACA--- 33643
GoldenEagle   TCATTTTATCCTCGTCACCAAATGAAAT--GCTGGGTATTGATTAATAA---CTGTTA---GGTGGTCGAGAC---- 37055
JapaneseQuail TTATTTTCATTCTTATCACCCATAAAAGT--AATGAACATTGATTAATAAGT-----TGA---GGCAGCCAAGACAG-- 29082
MediumGroundFinch TCATTTTGTCCCTATCACCAAATGAAAT--ACTCAGCATTGAGTCAAGAA---CTGTGA---CATGGTCAAGACAGG- 17949
GoodesThornscrubTortoise@CGGTCCCAAACAGACCCCTGCGGAACCCACTTGTATCCCTTCCAGCAGGATTGGGAGCCATTAATAACTACTCT- 61107
    
```

```

Majority      ---GGGATCACAAAAATAAG--AGATGTTTTCAAAAAGCAGAGTGTAAGTTTTTCATG-CTGT-TGATAAAAAGTAAAGTT
              66650      66660      66670      66680      66690      66700      66710      66720
Human         CTTGTGATCTTATGACCTTGCTGAAACTTTTAAAAACAATAATAAAGTCATTTTTTTTTCTCTTTGAGATGGAATCTCACTC 65991
Kakapo        ---GGAATCACAAAAGATAAA---GAGGTTTTCAAAAACCAGAGAGGAAGTTTTCTGTG-CTGT-TGAGAAGAGTAAAGTC 33715
GoldenEagle   ---GGAATCACAAAAGTAAGAGACATGTTTTCAAAAAGCAGAGTGTAAGTGTTCATG-CTAT-TGACAAAAATAAAGTT 37130
JapaneseQuail ---GGAATGGCAAAAATAAG--AGATCTTTTCAAAAAGCAGAATGTAAGTGTGA-----G-----AAAAAGTAAAGCT 29147
MediumGroundFinch ---GGGATCACAAAGAATTGA--ACATGTTTTCAAAAAGCAGAGTGTAAGTTTTTCATG-CTGT-TGAGGGAAACAAG--- 18019
GoodesThornscrubTortoise--CTGAGTACGGTTATCCAGCCAGTTATGCACCCACCGTATAGTAGCCCATCTAAA-TTGTACTTTCCTAGTTTATCT 61183
    
```

```

Majority      AGCCA-----AGAGTAAAGAAGATTTG--TAACT-TGATTTATGATGATCTACTTTAAGATAATCTACTCCA
              66730      66740      66750      66760      66770      66780      66790      66800
Human         TGTCGCCCCTGTGAGAGTGTGGTGGCGCAGTCTCGGCTCACTGCAACTTCCGCCTCCCGGGTTCAAGCGATTCTCCCGCC 66071
Kakapo        AGCCAGAATAAAGTTACAGGAATAAAGATGATTTA--CAACT-TGATTTACAATGATCTAATTTAAGATAATCTACTCCT 33792
GoldenEagle   AGCC-----AGAGACAAGAAGATTTG--TAACT-TGATTTATGATGATCTATTTAAGATAATCTAGTCCT 37193
JapaneseQuail AGCTT-----AGGACAAGCAGAATTTT--CAACT-TGGTTTCTGATTATGTGCTTTAAAGTAGTCAGCCTCA 29211
MediumGroundFinch -----AGAGAAGAGATGATTTG--CAGCT-TGATTTATGGTGGCCCACTTTAAGATAATCTACTCCA 18078
GoodesThornscrubTortoise@--TAAGAATATCATGAGAGACCGTATCAAATGCC--TTACT-AAAGTCTAGGTATATCACATCCACTGCTTCTCCCTTA 61258
    
```

```

Majority      GCAAAGC---AGTCTGGAAA--TACTTGTGGAT-TTGGAAATACAATTTAAATTAGGGATATTCTTTTTCAGAGATGAA-T
              66810      66820      66830      66840      66850      66860      66870      66880
Human         TCAGCCTCCTGAGCATCTGGGACTACAGGCGTGTACCACCACCCCTGGCTAACTTTTGTCTTTTTTCGTAGAGATGAGAT 66151
Kakapo        GCAAAGC---AGTCTGGAAA--TACTTGTGTAT-TTGGAGTATAATTTAAATTGGGGATATTCTTTTTCAGAGATGAA-T 33864
GoldenEagle   GAAAAGC---AGTCTGGAAA--TAGTTGTAGAT-TTGGAGTACGATTTAAATTAGGGATATCCTTTTTTCAGAGATGAA-T 37265
JapaneseQuail GGAAGGT---AGTCTGGAAA--TATTTGTAGACCTTGGAAATCCACTTTAAATTAGTGATATGTTTACTGACATGTA-T 29284
MediumGroundFinch GAAAAGC---AGTCTGGAAA--TACTTGTAGAT-CTGGAACACAATTTAAATTAGGAATGTCATTTTCAGAGTTGAAAT 18151
GoodesThornscrubTortoise@CCACAA---GGCTCGTTATCCTATCAAAGAATGTTATCAGATTAGTTTGACACGATTTGTTCTTTACAAACCCATGCT 61334
    
```

Monday, May 02, 2022 06:51 PM

|                         |                                                                                  |       |
|-------------------------|----------------------------------------------------------------------------------|-------|
| Majority                | AG-TATCAAAT--ATTAGATTGTGT--TTCCGAGTGGAGGCAGATG-----TAAGTATTTTCATTGTGAT-----      |       |
|                         | 66890 66900 66910 66920 66930 66940 66950 66960                                  |       |
| Human                   | TT-CACCATGTTGGCCAGGCTGGTCTGGAACCTCTGATCTCAGGTGATCTGCCCGCCTCAGCCTCCCAAAGTGCTGAG-A | 66229 |
| Kakapo                  | AG-TGTCAAAT--ATTAGATGGTGT--TT--GAGTAGAGGAAGATG-----CAAGGATGTCGCTGTGAG-----       | 33921 |
| GoldenEagle             | AG-TATTATGT--ACTAGATCATAT--GTCAGAGTAGAGGAAATG-----CAAGTATTTTCATTGTAAT-----       | 37324 |
| JapaneseQuail           | AA-TATAAAAT--ATTAGGTGGGA-----GGCGTGTGCAAATG-----TATTACTGAAACTAGTAA-----          | 29337 |
| MediumGroundFinch       | AA-TATCAAAT--ATTAGATTGTGC--CTCAGAGTGGAGAGAAATG-----CAGATACATCAATGTACT-----       | 18210 |
| GoodesThornscrubTortois | GGCTATTCCCT--GTCACCTTACCACCTTCCAAGTGTTCGAGATGATTTCTTTAATTACTTGCTCCATTATCTTCCCTG  | 61412 |

|                         |                                                                                  |       |
|-------------------------|----------------------------------------------------------------------------------|-------|
| Majority                | ATACAAGAATTTGTCTGGATGGGATGCAGCTTTCAGG--TTT-TAAATAGGTTTAAAATAGTAG-ATAGAACTAGATCT  |       |
|                         | 66970 66980 66990 67000 67010 67020 67030 67040                                  |       |
| Human                   | TTACAGGTGTGAGCCACCATGCCTGGCCGCTTTTGTTCATTTTTTTGAGCGTTGTACATTTTTTACATTAAAGGCGTGTA | 66309 |
| Kakapo                  | ATACAAGG-----TGGGATACGCCTTTCAGG--TTT-GAAGTAGGTTTAAAATAGTG---CAGAAA--AGATCT       | 33982 |
| GoldenEagle             | ATGTAAAAATTTGCTTGGATGGGATACACCTTTCAGG--TTT-TAAGTAAGTTTAAAATAGTAACACAGAACTAGATCT  | 37401 |
| JapaneseQuail           | AAAGAAAAATTTGTGTGGATGGAATGCAGCTGTCAAG--TTTATAAATAGACTTAGAATGACA---TAAAAGGTTGATCA | 29412 |
| MediumGroundFinch       | ACATAAGAATTTGGTATGGTTGGAATGGACCTTGCAG-----GTTTAAAATAGTGGTACAGAACTACATCA          | 18276 |
| GoodesThornscrubTortois | GCACAGAAGTTAAACTAAGTGGTCTGTAGTTTCCCTGG--GTTGTTTTTATTTCCCTTTTATAG-ATGGGCACTATATTT | 61489 |

|                         |                                                                                   |       |
|-------------------------|-----------------------------------------------------------------------------------|-------|
| Majority                | TTAACCTACAATTGCTGC--AGAAATGACTG-TAGTCATTTAGATTTTATAT-TTGAAATACTTGATA-AACGGT-GTAT  |       |
|                         | 67050 67060 67070 67080 67090 67100 67110 67120                                   |       |
| Human                   | TTAAGTTGCTCGCTTTGCCAAAAATGTCTAGTGTCTTTTTCCACTTCTGTGTTGAATTTTTTAGTATAACGCATTTTT    | 66389 |
| Kakapo                  | TTAACCTACAATTGCTGC--AGAAAGCAACTG-AAGTCATTGAGGTTCCCTAT-TTGAAATACTTTATA-AACGGT----T | 34053 |
| GoldenEagle             | TTAAACTACAATTGCTGC--AGAAATCGACTG-TAGTCATTTAGATTCATAT-TTGAAATACTTGATA-AACAG----AT  | 37472 |
| JapaneseQuail           | TTAACCTGAAATTGCTGT--GGGAAGTACTGCAAAACATTTGAATTCACCT-CTGAGATACATTTTG-ATCCCA-GTGT   | 29487 |
| MediumGroundFinch       | T-AACCTACAAGTTCTGC--AGAAATCAATTG-TAGACATTTAGATTTTATAT-TTGAAATATTTGATA-AATAGTTGGAT | 18350 |
| GoodesThornscrubTortois | CCGTTTTCCAGTCTTCT--GGAATCTCCCC--GTCTCCCATGATT-TCC-CAAAGATAATAGCTA-GAGGCTCAGAT     | 61561 |

|                         |                                                                                    |       |
|-------------------------|------------------------------------------------------------------------------------|-------|
| Majority                | GCTTCA-TGTATTTGTTGCA-GAA-TGTTGTAATTCAGGTTTGATTTGTGTTTGGGAAGTTATTTTT-TAGTAA---TAG   |       |
|                         | 67130 67140 67150 67160 67170 67180 67190 67200                                    |       |
| Human                   | GTTTCTTCACTCTGCCTCATAAGAAAAAGGAAAAAGTGTTTAGCCTTTCCCTAAGTGACTTCTTTTTTTTATCTGTTT     | 66469 |
| Kakapo                  | GCTCA--TGTGTTTGTGCA-GAA-TGTTGTAATTCAGGCTTGATTTGTGCTTGGGAAGTTATTTTGTGCTGAGTAA---TA- | 34125 |
| GoldenEagle             | GCTA---TGTGTTTGTGCA-GAA-TGTTGTAATTTAGTCTTGATTCGTGTTTGGGAAGTTATTTTT-CAATAA---TAG    | 37543 |
| JapaneseQuail           | TCTTCA-GGTATTTGTTGCG-GA--TGTTGTAATTCAGTTTTGATCAACGCTGCGGAAGTTGTTTT--T--T-----      | 29551 |
| MediumGroundFinch       | GCTAAA-TGTATTTGTTACA-GAA-GGTTGTAATTCAGGCTTCACTTGTGTTTCGAAAGCCATTTT--CAGTAG---TAG   | 18422 |
| GoodesThornscrubTortois | ACCTCC-TCTATTAACCTCTGAG-TATTCTAGGATGCATTTTCATCAGGCCCTGGTGACTTGCAGGCATC-TAA---CTT   | 61635 |

Monday, May 02, 2022 06:51 PM

```

Majority      ATGTTAATGC-TGTTTTTATAGTCTCTTTTTTATGCAAAATATGA-A---CGTGATAAATCTTTTACTTCA-GTTTTTT
              67210      67220      67230      67240      67250      67260      67270      67280
Human         ATGTTTTTGCATCTTGTATAACTGGGCTTTTTAACTATACTCAAAAATAGGTTAAAAGTAGGTGAGTTAAAGGTTTTAA 66549
Kakapo        -TGTTAATGC-TGCTTTTAAAGTGCCTTTCTAAAGCAAAATAGGACATTAAGTGATACATTTCTTTACCTT---TTTTGA 34200
GoldenEagle   ATGTTAATGC-TGCTTTTAAAGTGCCTTTTTGAAGCAAAATATGCAT--CGTGATAAATCTTTTACTTCA-GTTTTTT 37619
JapaneseQuail -----TTTTTAAATAGTTATGTTTTACTTCACA-----TTTTTACTTCA-TTTTTGA 29598
MediumGroundFinch ATGTTGCTGC-TGCTTTTAAAGTGCCTTTCTGTATGCAAGTATGA-----CGTGTTAAAACCTCTGACCTC--GTTTTTT 18494
GoodesThornscrubTortoise @TCTAAGTGA-TTTTTACTTGCTCTTTTTTTATTTTATCTTCTA-----ATCCTACCCTCTTCCATAAGC-ATTCACT 61708
    
```

```

Majority      GTGTTATATATATTATCAGAAGTTT--TAATGGA-AAGATGGCGTCTGTGAAATGGACTTTAGTGATTTGAAAATTA---
              67290      67300      67310      67320      67330      67340      67350      67360
Human         AAATCAGATAATGGACCCTGGTTTTGATAATTCACAAGAGATAACCATTTATTTTCATATTTTTTATGTAAATACATGTT 66629
Kakapo        GTCTTAAATGTATTATCAGAAGATT--TAATGGA-AAGATGACGCTCTGTACAATGGCCTGTAGTGATCTGAGAATGAA-- 34275
GoldenEagle   GAGTTAT--ATATTATCAGAAGATT--TAATGGA-AAGAC---GTCTGTGAAATCGACTGTAGTGATTTGAAAATTA--- 37688
JapaneseQuail ATCTTAAATATGTTGTCAGAAGATT--TAATGGA-AAGATGGCATCTGTGAAATAAACTTTAGCAATCTGAAAATTA--- 29672
MediumGroundFinch GAGTCATGTATATTATCAGAAATTT--TAATGGA-AAAATTATGTCTGTGAAATGGACTGTAGTGATATGAAAATTA--- 18568
GoodesThornscrubTortoise @TACTAGACATTCCCTTCAGACTTCT--CAGTG---AAGACGGAACAAAGAAGTCA--TTAAGCATCTCTGCCATTTTC-- 61779
    
```

```

Majority      TCAGTGTAATTCTAGGAATATATTAT-AAAGAAGTTACAAAATAAC-AAAGGATGAGGTATGTAATGTATGAAAGGAAT
              67370      67380      67390      67400      67410      67420      67430      67440
Human         TCTGTACAAAATTAATAATGCTCTGTATTTGCAGATTTGCATTATCTTTTATTGTAATTGACATTTTACTTAGAATTTGT 66709
Kakapo        TCAGTGTAATTCTAGGAATATATTAT-AAGGAAGTAACAGAATAAC-AAAGGATGAGGTATGAGAAAGTATGGAAGGAAC 34353
GoldenEagle   TCAGTGTAATTCTAAGAATATATTAT-AAAGAAGTGACAAAATAACAAAAGGATGAGGTATGTAATGTATGAAAGGAAC 37767
JapaneseQuail CCAGTATAATTTTAGAACTGTATTATTGAAGAAGCGACAAAAAAC-ACAGGATGAGGTATGTAAAAGTATGAAAGGAAA 29751
MediumGroundFinch TCAGTGTAATTCTAGGAATATATTAT-AAAGAAGTTACAA---ATGAAAGGATGAGGTATGTAAAAGTGTGAAAGGAAT 18643
GoodesThornscrubTortoise @AAGTCTCGTTACTGTTTCCCTCTCCTCACTGAGCAGTGGGCTACCCTGTCCTTGGTCTTCCCTCTGCTTCTAATGTAT 61859
    
```

```

Majority      T--TAAGAATCTC--TTGCTGTTGTTGACTTCT---GATAGATTGATACTAGCTTGTGGGAT-GCT-TATTGGTCTTACT
              67450      67460      67470      67480      67490      67500      67510      67520
Human         TT-TAAAAGATAGCTTTAATACCTGCGTAGCATGTTTCATGGGTATGCCATACCTTTGAAAGTGGACATGTAGGCTATTCC 66788
Kakapo        C--TAAGGATCTCCCTTGCTGTTGTTGACTTCT---GACAAACTGATACTAGGTCATGGGT-----TACTG----T--- 34415
GoldenEagle   A--TAGGAATCTC--TTGATGTTGTTGACTTCT---GACAGACTGATACTAGCTTGTGGGAT-ACTGTATTGGTCGTAAT 37839
JapaneseQuail T--AAAGAACCT-----GCTGCTCTGACTTCT---GATAAGTTGCTACCAGCTTGTGGGAT-GC--TATTGGCCATAGT 29818
MediumGroundFinch C--TAAGAATCTC--TTGCTGTTGTTGACTTCA---GACAAACTGATACTAGCTTGTGGGA---CTCTATTGGTCTTAA- 18712
GoodesThornscrubTortoise @GATAAAAAGTCTTCTTGTTCCTTTATTTCCCATAGCTAGTTTAAAGCTCATTTTGTGCCTTTGCCTTTCTAATCTTGCC 61939
    
```

Monday, May 02, 2022 06:51 PM

|                         |                                                                                 |       |
|-------------------------|---------------------------------------------------------------------------------|-------|
| Majority                | TTT---T--TAAAAAACAGCATGTATTTGTTTCT-----CCAGTTTGCATGTTTTGATTAGGGTAGCTGTTT        |       |
|                         | 67530 67540 67550 67560 67570 67580 67590 67600                                 |       |
| Human                   | ATACTTTTTATTAAAAACACC-CTTGTACTTTTTTGCCCT-----CTCAAATTATTTTCTTAGACTAGATTCCTAGAAT | 66859 |
| Kakapo                  | -----A-----TGTATTTGTTGCT-----CCAGTCTTCATGTTTTGATTAGGGTAGCTGTTT                  | 34463 |
| GoldenEagle             | TTT---TTTTAAAAAAAAGCATGTATTTGTTTCC-----CCAGTTTGCATGTTTTGATTAGGGTAGCTGTTC        | 37905 |
| JapaneseQuail           | ATT---T---GAAACAACAACATCTTTTTTGCT-----CTGGTTTTGCATGT---GACTAGGGTAGCTGT--        | 29876 |
| MediumGroundFinch       | -----AAAAACCAGTATGTATTTGTTTCT-----CCAGTTTGCATGTTTTTATTAGGGTACCTGTTC             | 18771 |
| GoodesThornscrubTortois | @CTGCATTCTGTGTATTGCTTATATTCGTCCTTTGTGATCTGACCAAGTTTCCATTTTTTATATGACGCCTTTTTTAT  | 62019 |

|                         |                                                                                   |       |
|-------------------------|-----------------------------------------------------------------------------------|-------|
| Majority                | ACTAGTGGTAGCGCATGTGTGAATGACTAAACTTCATTGATTAAT-AGTGAC-TCCTGTATGTACAGTCATTGTCAGAGT  |       |
|                         | 67610 67620 67630 67640 67650 67660 67670 67680                                   |       |
| Human                   | TAGAATTATTGGGTCAAAGAAAATGTTAAAGCCTGTTTACTTTATTTGCAAATTTCTTCATCTAAAGGTGATATTTAACTT | 66939 |
| Kakapo                  | ACTACTGGTAGCTCATGGGTGAATGACTAAACT-CATTGAGTA---AGTGAC-TCCTGCAGGTACAGTCATTGTCAGAGT  | 34538 |
| GoldenEagle             | ACTAGTGGTACCTCATGTGTGAATGACTAAACTTCATTGAGTAAC-AGTGAC-TGCTGCATGTACAGTCATTGTCAGAGT  | 37983 |
| JapaneseQuail           | GTCACTAATGGCACTCGTGTGAATGACTAAACTTAATGAATAGC-AGAAAT-ACCTGTGTGTGCTGTTATTGTCTGAGT   | 29954 |
| MediumGroundFinch       | ACTTGTAGTAACGTGTGTGTGAATGACAAAACTTCATTGAATA---AGTGAC-TCATGTATGTGCAGTCATTGTCAGAGT  | 18847 |
| GoodesThornscrubTortois | @TTGTAGGTCACGCAAGATCTCGTGGTTAAGCCAAGGTGGTCTTT-TGCCACATTTTCTATCTTTCCTAACCATCGGAAT  | 62098 |

|                         |                                                                               |       |
|-------------------------|-------------------------------------------------------------------------------|-------|
| Majority                | AATCT---TGGAGCCTAT-----CTTAGTGACAAATGAAATAGTCTTAGGTTTATAGTTTCATATTTTAACCAATTT |       |
|                         | 67690 67700 67710 67720 67730 67740 67750 67760                               |       |
| Human                   | AACTAACATTAATTATATATGAGGCTGGGTGTCCTACTTTTTCCCTGCCAGCATACTATTTTTAATTTACAAGATT  | 67019 |
| Kakapo                  | GATCT---TGGAGCCAT-----CTTGGTGACAAATGAAATGGTCTTCAGTTTATAGTTTCATATTTTAACCAATCT  | 34608 |
| GoldenEagle             | GATCT---TGGAGCC-----TTAGTGACAAATGAAATAGTCTTAGGTTTATAGTTTCATATTTTAACCAATCT     | 38049 |
| JapaneseQuail           | TATCT---CGAAGCCTAT-----CTTAGTGACAAATGAAACGGGAATAGGCTTATAGCGTCTTATTTTAACCAATTT | 30024 |
| MediumGroundFinch       | AATGT---TGGGGCC-----TTATTGA--AATTGAAATAACCTTAGATTTATGGTTTCACGTTTAAACCAATCT    | 18911 |
| GoodesThornscrubTortois | @GCTTGCTTTTGGGCCCTT-----AATAGCGTCCCTTTGAAAACCTGCCAACTCTCCTCAGTTGTTTTCCCTCAGTC | 62172 |

|                         |                                                                                   |       |
|-------------------------|-----------------------------------------------------------------------------------|-------|
| Majority                | ATGCATAAACAGGCCAAAATGCTAAGTGAATACCTATTGCAATT--ATTAAAGAGTGCTAAATTTGAATGAA--GGTTTT  |       |
|                         | 67770 67780 67790 67800 67810 67820 67830 67840                                   |       |
| Human                   | AAT--TTGATAGG-CAAATGCCTATTTTAATTTCTGTTAAGATTTAGTTTACAATCTTTAAATGTTTATTTGATAGTCAC  | 67096 |
| Kakapo                  | ATACATAAATAGGCCAAAATGCTAAGGGTAATACCCATTGCAAGT--ATTGAAGAATGCCAAACTAGAGGGAA--GGTTTA | 34684 |
| GoldenEagle             | GTGCATAAACAGACAAAGTGCCTAAGAGTAATACCAACTGCAAGT--ATTGAAGAGTGCTGTATTTGAAGGAA--GGTTTG | 38125 |
| JapaneseQuail           | CTG-----AG--AAAATGCTT-----TAATG-----AAGAAGGCTTGATTTTATTT---TTTCT                  | 30070 |
| MediumGroundFinch       | ATGCATAAACATACAAAATGTTAAGAGTAGTACCAAGTGCAGTT--ACTAAAGGGTGCTAAATTTGAAGGAA--GGTTTG  | 18987 |
| GoodesThornscrubTortois | @TG-ATTCCCAT--GAGACCTTACCTATCA-GCTCTCTGAGCTT--ACCAAATCCGCCTTCTGAAATCCATTGTCTCT    | 62246 |

Monday, May 02, 2022 06:51 PM

| Majority                 | ATTTTCCTACTATCCTCCAAGC--TAAATAGAGTAAAATAAGTA-CAGTTCCTATGGTTAAGTTACTGTGGTAAAACAT   |       |
|--------------------------|-----------------------------------------------------------------------------------|-------|
|                          | 67850 67860 67870 67880 67890 67900 67910 67920                                   |       |
| Human                    | AATTGCTAAATTGCTTGCCTGCATTCTTTCTGTTAGGATGTACGGTAATTCCTATAAAATGCATAGTAAGGATATTAAT   | 67176 |
| Kakapo                   | ATTTTCCTCCTATCCTCCAAGC--TAA-TAGAATAAAAATAAGTA-CAGTTCCTTAGGGTTGAGCTACTATGGTCGAACAC | 34760 |
| GoldenEagle              | ATTTCTGCACTACCTCCAAGC--TAAATAGAGTAAAATAAGTA-CAGCTCTGATGGTTGCGCTACAGTGGTAAAACAT    | 38202 |
| JapaneseQuail            | CCTTCTCTTTTCTCTCCAG----AGATAGAGTAAAATTAATA-CTGTTGTTACAATTAAGGTAATGTGATAAAAACAT    | 30144 |
| MediumGroundFinch        | ATTTCCCCACTACTCTCACAAAC--TAAATAGAGTAAAATA----CAGTTCCTACAGTTAAGTCACTGTGATAAAAACAT  | 19060 |
| GoodesThornscrubTortoise | AATTGCTGTACTCCCTTCTACCCTTCCTTAGAACTGCAAACTCT-ATGATTTTCATGATCACTTTCACCCAAGCTTCCTT  | 62325 |

| Majority                 | GAAGTGCCACCAGATCAA-AAATACCTAAAGGCATGAAACAGTCA-GT-T-----GATT--ATGGGAAAAACCTTTTCA    |       |
|--------------------------|------------------------------------------------------------------------------------|-------|
|                          | 67930 67940 67950 67960 67970 67980 67990 68000                                    |       |
| Human                    | ATGCATATTTGGATGAGCCAAGCCTTCAG--CTTTATTCACTTATGT-TAGGTCAGTTT--TTGGAAAAGTATTTTCA     | 67251 |
| Kakapo                   | AAAGTGCCACCAGAAGAA-AAGTACTTAAA-----AAAGAGTCA-----GATG--ATAGGAAAAACCTTCTG           | 34820 |
| GoldenEagle              | GAAGTGCCACCAAAACAA-AAATACCTAAAGGCAAGAAACAGTCA-----GATG--ATGGGAAGAACTCTCCA          | 38268 |
| JapaneseQuail            | GAAATGTTACCAGATCAA-AGCTGACAAAAGGAA--AGAAAGTCA-----C---ATAAGGAAAAAGCCTACA           | 30205 |
| MediumGroundFinch        | GAAGTGCCGCCAGAACAA-AAATACCTGAAGGAAAGAAGCAGTCAAGTATTTCAAGTGATA--AGGAAGAAAAACCTTCTCA | 19137 |
| GoodesThornscrubTortoise | ETACTTTCAAATTTCTCAACAAGTTCTCCCTATTTGTTAAAATCAAGTCTAGAACAGCTTCCCCCAGTAGCTTTTCA      | 62405 |

| Majority                 | GTTTAAATACATCTGGAAATA-GTGTA--GAAGCCAGAGGATGTGGTGGCTACACTTT-AGTTGCATGGAGTTCAAAATC  |       |
|--------------------------|-----------------------------------------------------------------------------------|-------|
|                          | 68010 68020 68030 68040 68050 68060 68070 68080                                   |       |
| Human                    | ATAATCTCTCTTTTTAAATAATTGATCTCAATCCCAAAGTATTCATTTGTAGGACATGAAGACACA--ATTTTCTTCTTC  | 67329 |
| Kakapo                   | GTTTAAATATATCTGGAAATA-GAGTA--GAAACAAGAGGATGTGGTGGCCACAATTTTCAGTTGCA-GGAGTTCAAAATG | 34896 |
| GoldenEagle              | GTTTAAATACAGCTGGAAATA-CAGTA--GAAGCAAGAGGATGTGGTGGCTACACTTA-AGTTGCATGGAGTTCAAAAT   | 38344 |
| JapaneseQuail            | GTTTAAATTCATCTGGAAATA-GTGTT--AGAAGCAAAGGGGATGGTGGCAACGTTTG-AGTTACGTGGCATTCAAAT    | 30281 |
| MediumGroundFinch        | CCTTAAATACATCTGG--GT----GTA--GAAGCAAGATGATGTGGTGGCTGCAATTA-AGTTGCATGGAGTTCAAAGATC | 19208 |
| GoodesThornscrubTortoise | ACTTCTGAAATAAAAAGTTGTCTGTAATGCAGTCCAGGAAGTTATGAATACTCTGT--GCCCGCGGTGTTATTTTCC     | 62483 |

| Majority                 | AAACCGTGGTAGAAGAGTAAAGAAGTTTTCAATTTGTTTTCCATCAGTTGTTACTATAGAA--GATAATGGGGAAATTT  |       |
|--------------------------|----------------------------------------------------------------------------------|-------|
|                          | 68090 68100 68110 68120 68130 68140 68150 68160                                  |       |
| Human                    | ATACGTTTGGT-GAATATTTTGA----TCTCAGTTTCCACTTCTCTTTTTGCTTTTTAAACATTGTTTATGGTGATATCC | 67404 |
| Kakapo                   | AAAAGCATACTAAAAGAGGAAAGAAGTTTTCAATTTCTTTTCCATCAGTTGTTACTATAGAA--GATAATGGGGAAAT-- | 34972 |
| GoldenEagle              | AAAAGCGTGGTAGAAGAGTAAAGAAGTTTTCAATTTGTTTTCCGTCAGTTGTTACTATAGAA--GATAATGGGGAAATTT | 38422 |
| JapaneseQuail            | AAAAGCGTGGTAAAAGAGTAAAGAAGTTTTCAATTTGTTTTCCGTCAGTTGTTACTATAGAA--GATAATGGGGAAATTT | 30359 |
| MediumGroundFinch        | AAACACGTGGTAAAAGAGTAAAG--TTTTCAATCTGTTTTCCAT-ACAAGTTACTGTAGAA--GATAATAGGGAAATTT  | 19282 |
| GoodesThornscrubTortoise | EACATATATCTGGATAGTTGAA--GTCCCCATCACCACCAATCTGGGCT-TTGGAGGA--TTTTGTTAGTTGTTTCG    | 62558 |

Monday, May 02, 2022 06:51 PM

|                          |                                                                                    |       |
|--------------------------|------------------------------------------------------------------------------------|-------|
| Majority                 | AATTTTCCATTGGCCCTCTTCACAGGAAATCAGAATGTGGCCT---TAATAGAAATTGAAGACTT-ATTAAGGAAGTTAA   |       |
|                          | 68170 68180 68190 68200 68210 68220 68230 68240                                    |       |
| Human                    | AATATTGCATGAGTGAGGTCAT--GCCTTTTAGAATAATAACTGAATCTTTTCTTCTAATTATTTAATCAGATGACTTCA   | 67482 |
| Kakapo                   | -----CAGAATGTGGCCT---TAATGGAAATTGAAGACTT-ATTAGGGAAGTTGA                            | 35018 |
| GoldenEagle              | AATTTTCCACTGGCACTCTTCACAGGAAATCAGAATGTGGCCT---TAATAGAAATTGAAGACTT-ATTAAGGAAGTTAA   | 38498 |
| JapaneseQuail            | AATTTTCCACTGGCACTCTTCACAGGAAATCAGAATGTGGTCT---TAATAGAAATTGAAGACTTTATTAAGGAAGTTAA   | 30436 |
| MediumGroundFinch        | AATTTTCCGGTGGCCCTCTTCACAGGAAATCAGAATATGGCCT---TAATAGAAATTGAAGACTT-ATTAAGGAAGTTAA   | 19358 |
| GoodesThornscrubTortoise | AAAAAGCCTCATCCACCTCTTCC--ACCTGATTAGGTGGCCTG--TAGTAGACTCCCAGCACGACATCACCCGTGTTTT    | 62634 |
| Majority                 | --AGAGCAATTTGGAA-AACTCAAGTGCTGTAAGTACCAAGGAGAGATGCTATTCATTTGAAG--GTTCTGAGAACTAG    |       |
|                          | 68250 68260 68270 68280 68290 68300 68310 68320                                    |       |
| Human                    | GCAAACTAATATTGGTGGGATTAACCTCCTGCTCAGTCTTCCAGTAACAGTACTTGTTCAAAATGAAATAATTGATAGAG   | 67562 |
| Kakapo                   | --AGAGCAATTTGGA-----AGGGCTGGAAGTACCAAGGAGAGATGCTATTCATTTGAAG--GTTCTCAGAAGCCAG      | 35086 |
| GoldenEagle              | --AGAGCAATTTGAAA-AACTCAAGTGATGTAAGTACCAAGGAGAGATGCTATTCATTTGAAG--GTTCTGAGAAAATAG   | 38573 |
| JapaneseQuail            | --AGAGCAATTTGAAA-AACTCAAGTGATGTAAGTACCAAGGAGAGATGTTATTCATTTGAAG--GTTCTGAGAACTAG    | 30511 |
| MediumGroundFinch        | --AGAGCAATTTGAAA-AACTCAAGTGATGTAAGTACCAAGGAGAGATGCGATGCATTTGAAG--GTTCTGAGAAAACAG   | 19433 |
| GoodesThornscrubTortoise | -TACCCCTTTTAGCCTAACCCAGAGACTCTCAACACTTCCATCTCCTA-TGTCCATCTCCA-----CCGCAGTCCAAG     | 62705 |
| Majority                 | TGACACTGACAAGAATGTACAATATGAAGCCTCTAGCCCTGTGGGACTACTTTTGCTATTTGAATGAGCAA--GTAGTGA   |       |
|                          | 68330 68340 68350 68360 68370 68380 68390 68400                                    |       |
| Human                    | TATTTATTTCAAAAATTTTAAAGAACACAAATATAAGG-TGATACTCTTTTGCTAAAATTTGTGGGGGGCTTCACTTTAC   | 67641 |
| Kakapo                   | TGACACTGACAGGAATGTACAATACCAAGCCTC-----TGTGGGACCACCTTTGCTATCTGAATGAGCAA--ACAGTGG    | 35158 |
| GoldenEagle              | TGACACTGACAAGAATGTACAATATGAAGCCTCTAGCCCTATGGGACCACCTTTGCTGTTTGAATGAGCAA--GTAGTGA   | 38651 |
| JapaneseQuail            | TGACACTGACAAGAATGTACAATATGAAGCTTCTAGCCCTGTGGGACTACTTCTGCTATCTGAATGAGCAA--GTAGTGA   | 30589 |
| MediumGroundFinch        | TGACACTGACAAGAATGTGCAATATGAAACCTCTAGCCCTGTGGGATCTCTTTTGCAATTTGAATGAGCAG--CTAGTGA   | 19511 |
| GoodesThornscrubTortoise | @GTGTACATTTTAAATATAAAAGGCAACACCTCCTCCCTTTTCCCTGTCTATCCTTCCCTGAGCAAATATACCCATCC     | 62785 |
| Majority                 | AAAATTGCATTCCTGCCCA---CTTGTTTTGT-GAGAAACTCATTTCTGTAAAAGTAG-ATTATGGCTGC--ACTGAT     |       |
|                          | 68410 68420 68430 68440 68450 68460 68470 68480                                    |       |
| Human                    | CTTGTATGATTTTTATATTAGATCTAGCTACTTGACTGAATTTAATTTACTTTAGAATCAGTACTATAAATTTTAAATTGAT | 67721 |
| Kakapo                   | AGAATTGCACTGCTGCCTCA---CTTGTGTATTGAGAAGCTCATTTCTGTGAGGTAG-ATGATGGCTGC--ACTAAT      | 35232 |
| GoldenEagle              | AAAATTGCATTCCTGCTCCA---CTTGTTTTGT-GAGAAACTCATTTCTGTAAAAGTAG-ATTATGGCTAC--ACTGAT    | 38724 |
| JapaneseQuail            | AAAATTGCGTTCTGCTCCA---CTTGTGTGT-GAGAAACTCATTTCTGTAAAAGTAG-ACTATGGCTAC--ACTGAT      | 30662 |
| MediumGroundFinch        | AAAACCTCATTCCTGACCCG---CTTGTTTTGT-AAGAAACTCATTTCTGTAAAAGTAG-ATAGTGGCTCC--ACCGAT    | 19584 |
| GoodesThornscrubTortoise | @CACCAACATTCCAGTCGTG--TGTATTATCCACCAAGTTTCAGTAGTCCAACA-AT-GTCATAGTTGT--ATTTAT      | 62858 |

Monday, May 02, 2022 06:51 PM

|                         |                                                                                   |       |
|-------------------------|-----------------------------------------------------------------------------------|-------|
| Majority                | TTAT-GTTTCATCACCACCTTCAGATTGGATCATTATAGTTC-TTATATTTGTAT-TAA-GGTGAAGGTGACAGGCTTCA  |       |
|                         | 68490 68500 68510 68520 68530 68540 68550 68560                                   |       |
| Human                   | TTAT-TTTACACAGTAATTTTTTAAGACTAACATTTATGTCTGGCTTTTCTGTTT-----CCTTTAA-TGCTAGGTATCA  | 67794 |
| Kakapo                  | TTGT-GTTTCATCAGCACCCTCAGATTGGATTAGTACAGTA-----AA-GGTGAAGGTGACAAAGCTCA             | 35294 |
| GoldenEagle             | TCAT-GTTTCATCACCACCGTCAGATTGGATCATTATAGTTCGTTATACTTGCAAGTAAAGGTGAAGATGACAAACTTCG  | 38803 |
| JapaneseQuail           | TCAT-GTTTCATCACCACCTTCAGATTGGATCATTATAGTTCATTATATCTGTAAC TAAAGGTGAAG---ACAGACTTGG | 30738 |
| MediumGroundFinch       | ACTT-GTTTCATCACGGCCCTCAGGCTGGATCGTTATAGGT-----TCCTTG-----GGTGAAGACTGGCAGCTTCA     | 19650 |
| GoodesThornscrubTortois | @TATTAGCACTTCCAGTTCTTCTCTGCTTATTACCCATAATTC-TTGCATTTGTATATAGGCATCTAAGATACTGGTTTGA | 62937 |

|                         |                                                                                  |       |
|-------------------------|----------------------------------------------------------------------------------|-------|
| Majority                | GGTTCTGTGCAATGCAGCAGTCTAGCCATGGGTGGAGA--AAGTA-CTGAGAATGTGCAGCA-----GTAGAGCAC     |       |
|                         | 68570 68580 68590 68600 68610 68620 68630 68640                                  |       |
| Human                   | CAGTGTCTCAGAAAATGTAATTTGTTCAAAGAAAGGAGACTGAGTGCTTTGTAATGAGTTTAAAATCTGACATCTAAAAT | 67874 |
| Kakapo                  | GGTTCTGTGCAATGCAGCAGCTAGCCATGGGTGGAGA--AGGTA-CTGAGTATGTGCAGTA-----GTAGAGCAC      | 35363 |
| GoldenEagle             | GGTTCTGTGCAATGCAGCAGTCTAGCCATGGGTGGAGA--AAGTA-CTGAGGCTGTGCAGCA-----GTAGAGCAC     | 38872 |
| JapaneseQuail           | GGTACTTTTCAGTGCAGCGGTCTAGCCATGGTTGGAGA--AAGTA-CTGAGAATGTGCAGCA-----CTAAAGCAT     | 30807 |
| MediumGroundFinch       | GGATCTGTATAAAGCAGCAGTCTAGCCA--GGGTGGAGA--ATGTAAGTGAAGTGGGCAAGA-----GTAGAGCAC     | 19718 |
| GoodesThornscrubTortois | @CTTGCCTCCA-GCTTTGCCTGACCTCCTTTCTCTC--TGCCATTATAGCCCGTCTCCCT-----CCTATTTCCA      | 63008 |

|                         |                                                                                  |       |
|-------------------------|----------------------------------------------------------------------------------|-------|
| Majority                | ATTGAACTACT--GTGCTTCTGCTAATG--C-GAAGGTGATGTTT--TG TAGATGTCTGTATTCATATGGAGATATTC  |       |
|                         | 68650 68660 68670 68680 68690 68700 68710 68720                                  |       |
| Human                   | ACATAATCACAA-ATGTGGCCGACTATTAGTC--ATTCACATATTC-TGTTTCAAAGAACACAGTGATCAAAAATCCTTC | 67950 |
| Kakapo                  | TTTGAACTACT--GTACTTCTAATGAAG---CAAAGGTGATGTCC---TG TAGATGTCTGTATGCATGAGGAGATACTC | 35435 |
| GoldenEagle             | ATTGAACTACT--GTGCTGCTCCTAATGAAGCAGAAGGTGATGTCC---TGGAGATGTCTGTATGCATAAGGAGATATT- | 38946 |
| JapaneseQuail           | GCTGAACTATT--GTACTTCTGGTAAAA-----CAAAGGATATTC---TGGAGGTGTCCGTATTCATATGGAAATTTT-  | 30876 |
| MediumGroundFinch       | ATTGAAGTACT--GTGCTTCTGCTAATG-----AAGGTTTTGTC---TGGAGATGTCTGTATGCATATGGAGATAC--   | 19784 |
| GoodesThornscrubTortois | @CCCATCTCCAGGCTTGTGCCCACTTACCTGTGGCTTTGCTCACCTGTCCCCGTCGAACCTAGTTTAAAGCCCTCC     | 63088 |

|                         |                                                                                   |       |
|-------------------------|-----------------------------------------------------------------------------------|-------|
| Majority                | TTA-----AGCAT-----CAAAAATAGCTCATTTT--CATAGTAAATGGTG-AGTACCCTCAGCATA-AGCAG-        |       |
|                         | 68730 68740 68750 68760 68770 68780 68790 68800                                   |       |
| Human                   | AGATTATAAATTGAGACAT---CATTATAATGGATCATTTTATCATGTTAAGAGGTGTAGTTAATTTATTAAGGGGTAGA  | 68027 |
| Kakapo                  | TTA-----AGCAT-----CAAAAATAGCTCATTTT--CGTAGTAAATGGTG-AATACCTTCAGCATA-ACCAG-        | 35494 |
| GoldenEagle             | CTA-----AGCAT-----CAAAAATAGCTCATTTT--CATAGTAAATGATC-AGTACCCTCAGCATA-AGCAG-        | 39005 |
| JapaneseQuail           | TTG-----TGCAT-----CAGAGCCAGCACATTTT--CACAGTAAATGAT--AGTGCCTCAACAGA-AGCAG-         | 30934 |
| MediumGroundFinch       | CTA-----AGCAT-----TAAAAATAGCCATTTT--CATTGTAATGATG-AGTACTCTTAGCATA-AGCAG-          | 19843 |
| GoodesThornscrubTortois | @TACTAGGTTAGCCAGTCTGTGCGCAAATAAGGCCCTTTCCC--CTTCTCGAAAGGTG-AACGCCATCTGTGCCTAGCAGT | 63165 |

Monday, May 02, 2022 06:51 PM

```

Majority      -CAAAC TTAATA--TTTCTATGC-----CAGT--AATCTGGTCTACCATATTCAGATTAGAGTGCAAGTGTTCCTGTC
              68810   68820   68830   68840   68850   68860   68870   68880
Human         TCAC TTTTAGAAAAATTGCTGGAAGTAATTTTTCATGATCATGTTATCTACATTCATAAAATTAGGAGAGAGACTGTGTA 68107
Kakapo        -CAAAC TGAATA--TTT-----TAAAGTT 35516
GoldenEagle   -CAAAC TTAATA--TTTGAATGC-----CAGT--AATCTGGTATACCATAGAAAGATTAGAGTGCCAGTGTTCCTGTC 39074
JapaneseQuail -AAAGCGTACTTAGGTTGCTATGA-----AAGT--AATGCCTCTATGTATTTCCATGGAAACAACAATAACAAAG 31005
MediumGroundFinch -CAGACTTAAATG--TTTGAACAC-----CAGT--ACTTTGGTATACCATG---AGATGAGAGTGCTGGTGTTCCTGTC 19909
GoodesThornscrubTortoise CTTCTCGAATAGCATCCCCTGGTTCGAGGAAGCCAAAGCCCTCCTGGCGACACCATCTTCGCAGCCAGGCATTACACCTC 63245
    
```

```

Majority      TGAACAGCAGGTTTATTTGG--AGCCTTGATCTTCAAGTAGAAGAACC GGAAATATTTATTGCCAAATCTTGAATATTGA
              68890   68900   68910   68920   68930   68940   68950   68960
Human         CAAAGAGTGT TTTATTTAGAGCTTTCCTTG TATTTCAAATTTGAATAACAGGCATTCTCATCATAAAGTTTTTAAAAGAAA 68187
Kakapo        TGAATAGCAGG--AATCTGG--AATCTG-----TAGAAAA-----T----ATTGA 35555
GoldenEagle   TGAACAGCTGGCTAGTCCAG--AGTGTGATCTTTGTGTAAATGCACCAAAGTACTCTTGCCAAATCTTGATATTGA 39151
JapaneseQuail AGCACAGTAAACAGTATTTGGT--AGAGCAAATCCTCAACTACAAACTCAGCTACAAAAGTGT-GACTTTTCAACAGTCA 31082
MediumGroundFinch TGAGAAGCTGGCTAATTCAG--AGCATTG-CCTTCATGCAGATGTACTGGAAGTATCTTGCCAAATCGTGGCTATTAA 19985
GoodesThornscrubTortoise CACGATGCATCTGTCTCTGCCTGGGCCCTACCTTCGACAGGAAGAATCGAAGAGAATACCACCTGTGCTCCAAACTCCT 63325
    
```

```

Majority      -----CAGTCATTAA-TGCCTCATCTTTGGAGTATTA ACTGAGACGCTTA-TGTAGTGCATGACAGTCAT-CTTGACC
              68970   68980   68990   69000   69010   69020   69030   69040
Human         GGCAAAGCAGACTTTCTGTAGGAAATCATTGACGTTAAAATAGTTATAATTTGTGAACAGATACAACATTTATTCATGAAG 68267
Kakapo        -----CAGTTACTAA-TGCCTCATCTCTGGAGGATTA ACTGAGACGTGTA-TGTAGTGCATGGCAGTCAT-CTTGACC 35625
GoldenEagle   -----CAGTTATTAA-TGCCTCGTCTATGGAGGATTA ACTGAGACTCATA-TGTAGCACGTGACAGTCAT-CTTGACC 39221
JapaneseQuail -----CCACCATTAGCTGTGTTTTTTTGGCCAGCAGTGAACAAGA-GCCTG-TGTGTTGCACTCAAACAAA-TCTGTGC 31152
MediumGroundFinch -----CAGTCATTAA-TGACTCATCTACAGACCATCA ACTGAGGCTCATA-TGTAGTGCATGCAGGTCAT-CTTGACC 20055
GoodesThornscrubTortoise -----TAACCATAC-TCCAGAGCCCTGTAGTCACTCTTGATCTGCTCAGTGTACACCTCACAGTATCATTTGTGC 63397
    
```

```

Majority      CAACATGGGTTAAAAATATGACTAGT-----AGGTTCTGTTATA-GTTG--GCCAGTTGGTCCTTACTCGGCCTGT
              69050   69060   69070   69080   69090   69100   69110   69120
Human         GTAAACATGTAGGTCTTATAGAATATGTTTCTCAAATTTTGTGTCACGTTGAAGTACCAGATTCTACCCAGGCTGA 68347
Kakapo        CAACAGAGTTCGAAA---TG--GAG-----AGTTTCTGTTCTA-GTTG--GCCTATAGGTGAT---TCAGAGTAC 35684
GoldenEagle   CAACATGGCTTAAAAATATCACAAGTCTAATTGAGAGTTTCTGTTATA-GTTG--GCCAGTTGGTCCTCACTTGGCCCAT 39298
JapaneseQuail CAGCAGATGTGACCCAC-TGTTTCA-----TGG--CTGTTGTG-ATGG--CATTGTTGCTAGGAACATGTTGCCT 31216
MediumGroundFinch CAGCATGGGTTAAAAATATCACTAG-----GGGTTCTGTTACA-GTTG--GCCAGTTGATCCTTCTCGGCCTGC 20122
GoodesThornscrubTortoise CACATGGATGAGTAGCATG--GGGTAGTAGTCAGAAGCCGGATAAT-CCTC--GACAATGCCTCTGTA-ACATCTCGG 63471
    
```



Monday, May 02, 2022 06:51 PM

|                          |                                                                                 |       |
|--------------------------|---------------------------------------------------------------------------------|-------|
| Majority                 | ATGTAGTTCAA-----GTTACAGAGATTCTGGTGAGGTTTGACTCTACA---GAGGTGTCTTCTTTCCAGT---TGTTG |       |
|                          | 69130 69140 69150 69160 69170 69180 69190 69200                                 |       |
| Human                    | GAATAGTTAAAGAGTGGGTACAGGCATTCTATGTTTTTAGGATCTCAA---GATGGTTTTACTATGTAGCAAGAGTTG  | 68424 |
| Kakapo                   | CTCTA---CA-----GAGATTCTGCTGAGGTTTGACTCTACATTCAGGTTGTCTTCTTTCCCTGT---TGATG       | 35745 |
| GoldenEagle              | AGGTAAATCAGAGTACCTTTACAGAGATTCTGTTGAGGTTTGACTCTACAGTCAAGATGTCTTGTTCAGT---TGTTG  | 39375 |
| JapaneseQuail            | GTGAAGTCAA-----CTTTCATTGGTCTCTGATAAGAAGGAATTCAGAA-----GGTGCCAAATCTGAAGTGTATGGTG | 31285 |
| MediumGroundFinch        | ACGTGATTCA-----AAGATTCCAGTGAAGTTTGACTGCACA-----TGTCATCTTTCCAGT---TGTTT          | 20179 |
| GoodesThornscrubTortoise | ATACGGGCCCTGGCAGGCAGCATACCTCCCGGATGAACGGTACAGGCAACAGATGGGTGTCTCCGTCGCTCAGCAG    | 63551 |

|                          |                                                                                  |       |
|--------------------------|----------------------------------------------------------------------------------|-------|
| Majority                 | AGAGTGACAGCTTCAGGGTAGCTCTGCGCTGGTAGCAGTCTGCAA---AAGATCTCTGCTAG-CTACATTGCCCTAAGC  |       |
|                          | 69210 69220 69230 69240 69250 69260 69270 69280                                  |       |
| Human                    | AGAATTACTGCTACAGAAA-----AGAGCTTGTAACTTAATGTTCAT--TTAAATCTATTTTGG--TACAGTTCTCTGGC | 68495 |
| Kakapo                   | TGAGTGACAGCTTCAGGGT-GCTCTGCACCCGGTAGCAGTCTACAA---AAGATCTCTGCTAGACTACATTGCCCTAACA | 35820 |
| GoldenEagle              | AGAGTGACAGCTTCAGAGTGGCTCTGCCCTGGTAGCAGTCTGCAA---AAGACCTCTGCTAGGCTACATTGCCCTAAAG  | 39451 |
| JapaneseQuail            | GGTGTGGTAAGA-CAGGCCAGC-CAAAATTGGCAGTGGGCTACGT---GGTCTTCAGACTGG--TATGGGGCCTGAATC  | 31357 |
| MediumGroundFinch        | TGCCCTACAACCTTCAGGGTAGCTCTGTGCTGGTAGCAGTCTGCAA---AAGATCTCTGCCAATCTGCATTGCCCTAAAA | 20255 |
| GoodesThornscrubTortoise | AGAGTCTCCAAC-CACCCTACCCTACGTTTCTTATTATCAATGGTGGCAGCAGACCTCCAGCCTTAGGGGTACGAGGC   | 63630 |

|                          |                                                                                   |       |
|--------------------------|-----------------------------------------------------------------------------------|-------|
| Majority                 | TCTGTATTAGG-AAC-GTTCAGG-TAGTTTTGCTGTAGTGGAAAGTAAGGACATCTCCAGTTAAGTTATTTCAGCTTCAG  |       |
|                          | 69290 69300 69310 69320 69330 69340 69350 69360                                   |       |
| Human                    | ACAATTTTAATTAGCTGTTAAACTGAATTTATAATTTTCTATATGTTTGTGATACATAAAATTAAGTGGAAACTTTGAT   | 68575 |
| Kakapo                   | TCTGTAGTAGG-AAC--TTCAGG-TAGTCGTTGCTGGAGTGGAAAGCAAGGACACCTCCAGGTAAGATATTTCAGCTTCAG | 35896 |
| GoldenEagle              | TCTGTAATAGG-AAC--TTCAGG-TAGTCATTGCCAGAATGGAAAGCAAGGACATCTCCAGATAAGATATTTAGCTTCAG  | 39527 |
| JapaneseQuail            | TGTGCATTAC-AAGAGTGCAGT-TATCTTCTCTCTAGCTGGCTCTAAAAGTTTGAGCCTTTAGCTTAGTCAGTGTCTGT   | 31435 |
| MediumGroundFinch        | TATGTAGTAGG-AAC--TTCAGG-TAGTTATTGT-GGAATGGAA-GAAAGAACATCTTCAGATAGGATACTGAGCTGCAG  | 20329 |
| GoodesThornscrubTortoise | TCGCCTCCTT-ACTGTTGGGGATGATTCTTCTCTCTCTGTATCAAGAAGAGCATAACGGTTATCTATTACCACAGCAG    | 63709 |

|                          |                                                                                   |       |
|--------------------------|-----------------------------------------------------------------------------------|-------|
| Majority                 | GGCGATTATCCGTGA---TTGTATTGGGGATT--TTCAGGCATCTTGAATCTAAAGAGC-ACAATTTTGGCTCAGAAGT   |       |
|                          | 69370 69380 69390 69400 69410 69420 69430 69440                                   |       |
| Human                    | TTTCTTTCTTTGTTACATTTGTATGGGTTATTCATTTGGTAATATTTATTAATTTATTATTAGAGATTTTCAGCTATTTGC | 68655 |
| Kakapo                   | GGCAGTTATCCGTGATTATTGCATTCAGGCTT--TTCAGGCATCTTGAATCTTAAGAGC-CCAATTTGTGCTAGGAAAT   | 35973 |
| GoldenEagle              | GGCAATTATCCATGATTATTGCATTAAGGATT--TTCAGGCATCTTGAATCTTAAGAGC-ACAATTTGTGCTCAGAAGT   | 39604 |
| JapaneseQuail            | GTGGTTAAA-----GTTGGTGGTTTG--TCCAGGCTCCAGGAAATCCAGAAAG--ATAACCCTTTTC-----          | 31495 |
| MediumGroundFinch        | GGCTATTATC-----GTATTAGGGTTT--TTTTGACATCTTTAGTTCTAAGGAGC-ACAATTCATGCTC-----        | 20390 |
| GoodesThornscrubTortoise | GAGGATTTGCAGCAG-----GGGTGGAGCACT--GCCTGCTGCCAGAAGTAACCAGCTGCCAGTGTCCACCCTGAGCCAT  | 63782 |

Monday, May 02, 2022 06:51 PM

```

Majority      CATAA----TGTTTCATATACACAGCAGG-TT--G-----C-----G
                69450      69460      69470      69480      69490      69500      69510      69520
Human         TAATATAATGAATCCCATACACCTGTGCATCTTGGTTCAATAGCGCTGACACTTAGTTTTATCTATTCAGTTTTTCTTTTG 68735
Kakapo        GGTA-----GTTTATATCC-CAGCATGATG----- 35998
GoldenEagle   CATAAGCAGTGTTTCAGGTAACAGAAAGAGTGTCTGGATTGTATCCATTGTATCAGGAAGCGCAGGAAGTGCAGCAACAGTG 39684
JapaneseQuail -----TGTCTCAAAACACAGCAGC----- 31514
MediumGroundFinch -----CGTTCACATGCACAGA----- 20406
GoodesThornscrubTortoise eTCCTCCTCCACTGGTGTGT-CAGTAGTCTGTGAACTGGGACAGCTACGTCAGCTGTCTCCACATGGATACTGTCCAGG 63861
    
```

```

Majority      --T-----A-----TTTTGTAGCATGGCCTC-----T--T-----T---
                69530      69540      69550      69560      69570      69580      69590      69600
Human         TGTTCTAAAGCAAATCCTTGACATTGTGACATGTCTTCTCAAATATTACCATAGTATCTCTAAAATAATTACATTTTCTT 68815
Kakapo        -----TGCTGTAGTATGGAATA----- 36015
GoldenEagle   TTTGTCTCCTGGATATTCCAATTTTGTAGAAAAGAATAAGATATGCAACTGGTCCTTCAGTCAAGGAACTGCACATAAAA 39764
JapaneseQuail -----CATCGGTTTACCTG----- 31528
MediumGroundFinch ----- 20406
GoodesThornscrubTortoise eATTGCTCATGGATACGGATGTTCTCAGCCTAGCCACCTCCTCCTGTAGCTCTCCTACTTGCTGCCTGAGAGATTCCAC 63941
    
```

```

Majority      -----A-----T--A-----A--T--AT-A---T-----AA---C---T-----
                69610      69620      69630      69640      69650      69660      69670      69680
Human         ACCAAACCATAATATGATTATTACACTTACCAGA-ATTGACAATGATTTCTTAATGTCCTCAAATACCCAGCTTACATTA 68894
Kakapo        ----- 36015
GoldenEagle   AAAAGAAAAAAATTTATCTTATTTTTGGAGAATGTTTTACATAAACATTTTAGCCACAGAACTTCTCATATCCAAGA 39844
JapaneseQuail ----- 31528
MediumGroundFinch ----- 20406
GoodesThornscrubTortoise eAGTAGGCACCTTTCACATTGGATGCCACCCAGCCTGGATATCAGTAAGTGAAATTGCAAGTTACAGTCTTTTCAAG 64021
    
```

```

Majority      -----TC--AA-----T-AA-----T--A-----CTGTGGGATGCATTTGGGACATATTTCTCCGAAGAGGTGC
                69690      69700      69710      69720      69730      69740      69750      69760
Human         AAATTTCCCAATTATTTTGAATGCTTTTA-----AAGTTTGATTTGTTTCAGAACAAAGGTCCTATGGAGGGCCGC 68966
Kakapo        -----TC-----CCTTTAGCTGC-TTTGGGTCGGGTGTCTC---GGCTGTGC 36053
GoldenEagle   CACTTGTCTCAAAGAAATCAATTTTATCAAATGCATATCTGTAGGATGCACCTGGGACACATCTCTCCCAAGAGATAT 39924
JapaneseQuail -----CAGAGGGCTGCATCTTGATCTTTTCTTC--AATGAGGAA 31566
MediumGroundFinch -----T-----CTGTGGGATGCACCTGGGACATATCTCTCCCAAGAGATAC 20447
GoodesThornscrubTortoise eCCACACCAGAATCTGGGTAAA--AGCATCCA-T----GCTTTGGTGCTCTGTCTGGCTACAGGCGCAGGTGGAGGAGA 64093
    
```

Monday, May 02, 2022 06:51 PM

```

Majority      TTATCGTGTGCTTTTCAGATGTTTTGCTGTTCTTACTCGAGCTGGAGTGTGTTTTACTATCATTCTTTTCTT--T---T-
              |-----|-----|-----|-----|-----|-----|-----|-----|
              69770     69780     69790     69800     69810     69820     69830     69840
Human         ACATAGTATTTGGTTGTTACATCTCATTAGTCTGTTTCAGTCTGTAATAGTCTCTCCCTCTCTACTCCAATCTCTC 69046
Kakapo        TTCTTGTGCCCTTCTCACTGGTAGAGCATGAGAGACTGAAAACACGAGTGTGTTACCAACATTATTCTCAG----- 36125
GoldenEagle   TTACCATGTGGCCTTCAGTTACTTTGAGGTACTTATTCGAGCTGGAGTGTGTTTTGTAAGGATTACTTCTTTTTTTT 40004
JapaneseQuail TTCACATGTCAGTGTCCATGGACTGCTGTTTTGACTCCAGCTCATAGTGGTGATACTGTGTCTCATCTCTG----- 31638
MediumGroundFinch TTACCATATGACCTTCAGTTACCTTGAAGTACTTACTTGAGCTGGAGTATAATTTATAAGTGTGTTTCCTT----- 20519
GoodesThornscrubTortoise @AGAAGCAGTGTGCCACAGGTGTTGCGGGTCTCCTCACCATCGTAAGCCTCCCTCTGTCAAACCTCTCTCAAATCTCTG 64173
    
```

```

Majority      -T-----T---GTT-----TTTT-TT-----T-----T-G--T-----
              |-----|-----|-----|-----|-----|-----|-----|-----|
              69850     69860     69870     69880     69890     69900     69910     69920
Human         ATTCAATTTACTTATGAAGTGATGTT----TCCTTTTAGAAAGTTTCACAGATTAGACTAGTCTGGCTGTTTCTTTAGAG 69121
Kakapo        -----ACT-----ATT----- 36131
GoldenEagle   ATGCCTTAAACTGTTATGCCCTTCTGAAGATCTGTTTTCTGGTTTTCTCTGCTTTGTGTGCTTTGGGAAGAGACAGTG 40084
JapaneseQuail ----- 31638
MediumGroundFinch ----- 20519
GoodesThornscrubTortoise @TCAGAGACTTCTTAGATTTTAGCAGTTAAATTTTTTTTTGAGTGTTCCTACCCTGGGCTTGCTCCAGCCTGGGGCTGAGC 64253
    
```

```

Majority      -GGAATAA-----T-TGT-T-----AT-TAGGGTAGATGTCAG-----T--C-----CTAG
              |-----|-----|-----|-----|-----|-----|-----|-----|
              69930     69940     69950     69960     69970     69980     69990     70000
Human         TGTCATGTTAACTTGTTCCCTCTATCTGCTGTGTTTCTTATATAAACTTAAAGTTAGTCCAAAGGCTTGATAAGATTTAG 69201
Kakapo        -GGTATAA-----C-----AT-TAGGTTAG---CAG-----CTAA 36156
GoldenEagle   GGGATTAATTTCTCTCTCTCTTTTTTCTCCATGAGT-TTGAGAGAAGGCAGCAGTTTTGTGTTGCCCTCTCTGC 40163
JapaneseQuail -GTAACA-----CTGT-----GAT-CCAGGAACTATCA-----C-----CTGC 31670
MediumGroundFinch -GG-----GT-TTGGGGAG-----T-- 20532
GoodesThornscrubTortoise @AGGACTTCCACTGCAATTGCAGCTCTGGACTGCTGCGCAC-CATGCCAGTCCCTGTCTGGACCCTGAGCTGAAGGTAG 64332
    
```

```

Majority      AGCTTTT----TTTT-T-----T---T-T-----G-C---G---AATGCTTTTGTGCT----T-----
              |-----|-----|-----|-----|-----|-----|-----|-----|
              70010     70020     70030     70040     70050     70060     70070     70080
Human         AGCCTTT----TTTTTTTTGAAGTGTTCCTTGCTTCTCATTGTGTCTCAGTAGGAGACATCTAATATCTGGTTGCC 69277
Kakapo        AGTTGTT----TTTC-----T-----GTTAATTTTGTC----- 36181
GoldenEagle   CACTTTT----TTCTCTCCACTCTTAATTTGATTTTTCTTTATCAGACCTTGGTAAATGCTTTCAAGCTATCCTCATCC 40238
JapaneseQuail AG---CT----CTGT-----ATTGGTTCTG----- 31688
MediumGroundFinch ----TT----TTTT-----ATGCTTT----- 20545
GoodesThornscrubTortoise @AAGCCTGTCGCTTCTGTGCTGTCAATGTCTCCCTTCGTGGGTCCAGGCAGTGTGGAGTGAGATGCTGCTTGATTCAGAT 64412
    
```

Monday, May 02, 2022 06:51 PM

```

Majority      --C-----T-----TG-----G-----A-----
              70090   70100   70110   70120   70130   70140   70150   70160
Human         CACTTTTAGT--GATTTTAATGATGCTTAAAGACTGATTGTGGATTGGGTGTTGACATTCTGATCCTTTCGTTACTTTT 69355
Kakapo       -----
GoldenEagle  TGCAAGAGATCCATTTCTGTCTTGGATCATCATAGGTGTCTACAGTGCTTGACAAAGAGAGGGGCACATGCACTCTTTG 40318
JapaneseQuail -----
MediumGroundFinch -----
GoodesThornscrubTortoise @CCATGGAGAAAAGATCTGGACCTGTGCAGGGTGGGAGTAACATAGACTGGAACGAGGAACCTGCGGGCGAGAGTCAGA 64492
    
```

```

Majority      -----T--G-----G-----T-CTAGCT--A-----TG--AA---G-----
              70170   70180   70190   70200   70210   70220   70230   70240
Human         TTTTCTACTAATGATTTTAGTATCCAATAATGGTTGCTGCCTTAAT-TAATTTCACTAGTGGGTGCAAATATTGCTTTT 69434
Kakapo       -----CTAATT--A-----
GoldenEagle  TTGTGGCTTGAAGCCATGTGTCTCCAGAAATATCTGCTAGCTAAATCTCTGGGCTCTCTGAACTGGGAAATGAGAATAT 40398
JapaneseQuail -----TAGAT-----
MediumGroundFinch -----TAGCT-----
GoodesThornscrubTortoise @GACTGAATTTTGACAAGAGCCGTTGGAGGGAGATTGGGACTGGGAACCAGTAGGGGTGGAGAATGTGAATGGGGGAGCG 64572
    
```

```

Majority      -----A-----A-----T-----T-----G-----TA-----CTGAATG-
              70250   70260   70270   70280   70290   70300   70310   70320
Human         TCTCCCCTAATTCACATATTCCTTCTCTACATTAATTAGCTGAAAATCTTTATAAAGTAGAATTTTCCTTCATCAACTAG 69514
Kakapo       -----TA-----TTGAAGG-
GoldenEagle  GAGAATGTCAGATAATTTTCTGTCTCCATACTGTGTTCTGTCTGTTGTTAGGTACTGTATGTGAATTAGCTAAATA- 40477
JapaneseQuail -----C-----CTG-----
MediumGroundFinch -----CT-----
GoodesThornscrubTortoise @GAGGAGAGAGATTGGATGAGGAGAGGCAGGGAAC-TTGGAACTGAGGGAAGGAGACTGAGAACAAGAGCTGAGGGT 64651
    
```

```

Majority      -GTA-TTTAAGTAG-----TATCTTCTGGGT-----G---A-----G--A-----T-G-----
              70330   70340   70350   70360   70370   70380   70390   70400
Human         AATTATCAACCTTGTAATTCAATTTGTGCAGGACAATTAGTTAAATCTTTCGATTTGTTGCTAATTTTAAGTTGGTGCC 69594
Kakapo       -GGA---GAAGGAA-----AACATGCAGGA-----
GoldenEagle  -GTATTTTAAGTAGCATATCTATCTTCTGAGTTTtagagggctaccttgactatctctgagaggggtttcattgcaca 40556
JapaneseQuail -----TCAGGC-----TTGCGTACCGTGT-----
MediumGroundFinch -----TAAG-----ACCCTTCTGAA-----
GoodesThornscrubTortoise @GAAGTGGGAGAAGTGGGAGTGGCTGTGTGGGGACACTGGGACCAAGGCAGACTGGAATGGTGACACAAGGACTTGCTGG 64731
    
```

Monday, May 02, 2022 06:51 PM

```

Majority      -----T-C-----T---C-----CT---
              70410   70420   70430   70440   70450   70460   70470   70480
Human         CAGCTTTTGTTTTCAGGTAAGTACTTAAACCAGCTTATGAACAGGTACAGTATAGAT---TCTTCCCAGTGTCTGCTTTA 69671
Kakapo        -----
GoldenEagle   GATTCATGGTCTATACAGGCCTTAGAAGCTCATCAAAAACATAGTTCTTATGAATATAGCACTTTCAAGGGAGTCTTCC 40636
JapaneseQuail -----
MediumGroundFinch -----
GoodesThornscrubTortoise 6CAACAAGACTAGGGGTAGGAGAGTAGTTCTCAGCCTGCAGCCTGTGCACCAGTGTGTGCCAATCAGCACACAGCTGCA 64811
    
```

```

Majority      --C---G-----G---T--A---T-----G---T-----T
              70490   70500   70510   70520   70530   70540   70550   70560
Human         AACTTTTGAAACTGTCAGTTGTTTGCAGGTTCTGGTAGCCAGAGTGGTTTGAATGGTGACCTTAGCCAGAAGTATGT 69751
Kakapo        -----
GoldenEagle   TTCACAAGGATTTTCAGGCATCTTGAACATCTGAATCTTGCAAGTAATAAAAAGAGCAGTGAATTCTTCTATCCATTAT 40716
JapaneseQuail -----
MediumGroundFinch -----
GoodesThornscrubTortoise 6CCATATGACATCCACAGGACCATATAGTAGGTAGTATTGGATGTCACCAGGTGGTATTGGATGTGGTCATATAACACAT 64891
    
```

```

Majority      -----T-----G-----T-----
              70570   70580   70590   70600   70610   70620   70630   70640
Human         AATTATTTAATTTGGCCTTGACCAGTGGCCAAAAAAGGAAGGGGTGGGGTGGATAAAGGACTAAACAAAATTAATTAA 69831
Kakapo        -----
GoldenEagle   ATCAGAAAGTCCTTCATTCAGGTGAGGAAAGCCTTAGAGAAGAAATTATCTAGGAATGTTCTTCTCCGCTTCAGAGCC 40796
JapaneseQuail -----
MediumGroundFinch -----
GoodesThornscrubTortoise 6GTGGGCTGTGTAATGGTAAATAGGTTGAGAACCACAGGGCTAGAATGGGAAGCTTGATAAGTGAGACGGACTGGTTAC 64971
    
```

```

Majority      -----AT---CT---A---GA-----A-----A-----G-----
              70650   70660   70670   70680   70690   70700   70710   70720
Human         AATTTAGAAATTTTCTCTCAGAAGGAATTC-ATGCCCATAAAACAAAGACCAGGATACATTCTGATTTTATCGGTAAAT 69910
Kakapo        -----
GoldenEagle   TACCATAGATCGGACTCTTAATCAGAGAACTGCATCAGTCATTCAGGATGTTACAACATTTTGTAATTTGTAGAGTGC 40876
JapaneseQuail -----
MediumGroundFinch -----
GoodesThornscrubTortoise 6TGAGGAGAATGGGACTGGGAGTGGGAGCTAGGTTAAGGAAGAGACAGGACTCGGACAAGGCCAGATTAGGGAGGATTGA 65051
    
```

Monday, May 02, 2022 06:51 PM

```

Majority      -----T--A-----T-----A-T-----A-----A-----A-----T-----
              70730   70740   70750   70760   70770   70780   70790   70800
Human         ACCAATAGATTATAAATCACTTTTCTCGTATACATAAATGTGAAAAAAAAAACCATCCAGGTATGCATGTTATTTATTC 69990
Kakapo        -----
GoldenEagle   TTTTGCCATCTGAGATCACCTTTGCTGCTGTTACCACTTCTCTCAACCTCCACAATCACATTGGGAAATGAGAGATCCTA 40956
JapaneseQuail -----
MediumGroundFinch -----
GoodesThornscrubTortoise@CAGAAAGGATTCTCACTTCAGGGAATGGGCAGAAGACTCTACTCACTAGTGCACAGTCTATTCCAGAACCTCTAATGGAA 65131
    
```

```

Majority      -----A-----ATTT--T-T-----TGTTGTTAATCTTGCGTGT-----T-----
              70810   70820   70830   70840   70850   70860   70870   70880
Human         ATTGAGAGGATATACATCTCTCAGGTGTTTTTTGTCGTATGTGTACTTTTGTGTAGTCTGCCTGTTTATTTCTT-TTTGAA 70069
Kakapo        -----ACAA-----TGTAAGTATTTCTTGCCAT----- 36241
GoldenEagle   GTGTCATGAGTCCATGTTGACTAGATAGAAATCTTACTGTCTTTTGCAGAAAACCTTGAGTGTGGTTGATTGCATCAG 41036
JapaneseQuail -----TGTTTCTGTCTTGTGTGGG----- 31736
MediumGroundFinch -----A-----A--TCTTG----- 20574
GoodesThornscrubTortoise@CTCAGACTGCTGAATCTCACCGTTCGTTTGTGTTAGCAAATATCTGTGATTAACCACGAATAA--CCACTGTGCATC 65208
    
```

```

Majority      -----A--A--TTTT-----TT--GT-GGTGG-----C-----
              70890   70900   70910   70920   70930   70940   70950   70960
Human         TAGGATGATATGTACAATTAATAAATCTTTTGTGAAATGTGGTTTTCTTAAATACATTATTGCATTTTCATACACAGTG 70149
Kakapo        -----CA-----GGTGG----- 36248
GoldenEagle   CAGCAGGAGAAAATACTGTTTATTGAGCTTTTCTTTCTTTTGTGGTGGGTGACCCTGACTGGATGCCAGGTGCC 41116
JapaneseQuail -----C-----ATTTGTGG----- 31745
MediumGroundFinch -----GGT----- 20577
GoodesThornscrubTortoise@GAAGAAGTGAGTTGTAGCCACGGAAGCTTATGCTGAAATAAATTTGAGTCTCTAAGGTGCCACAAGTACTCCTGTCCT 65288
    
```

```

Majority      -----G-----A--C-----A--A-----T-----AA-GT-
              70970   70980   70990   71000   71010   71020   71030   71040
Human         ATGAAGGGAAAAACTACAAAGCTAGACAGATTGCAAATTAGTATTGCAGTAGTGAGGTAATAGAGCAATACCCAAATGTT 70229
Kakapo        -----
GoldenEagle   CACCAAAGCCGCTCTATCACTCCTCCTTTCAGCTGGACAGGGGAGAAAAATAAAACAAAAGGCTTATGGGTCAAGGTA 41196
JapaneseQuail -----
MediumGroundFinch -----
GoodesThornscrubTortoise@TTTGCAGATACAGACTAACACTGCTGCTACTCTGAAACCTGTCACTAGTAGCGTGTGTCTCGCTCTTCTCTAATGTT 65368
    
```

Monday, May 02, 2022 06:51 PM

```

Majority      -----A-A-----A---A-----T-----T---T-----A--A-----T-----
              71050   71060   71070   71080   71090   71100   71110   71120
Human         TTCTTAAAATATATGTAGGTGATGCCTGTGTTCTTTACTTTTGTGTGTGTATGTGTTTTTAAACAAGATTCATTGTAG 70309
Kakapo       -----
GoldenEagle  AGGACAGAGAGAGATCACTCAACCAATTACTGTCATCGGCAAAGCAGACTCAACTTAGGGAAAATTAAGTTATTTATTGC 41276
JapaneseQuail -----
MediumGroundFinch -----
GoodesThornscrubTortoiseAATCCACATATCATATAGAGGAGGACAGCCTACTACTGCTATAAAATTACTCTTTTTGCTCAAGAGGCAAAGGTCTGCCA 65448
    
```

```

Majority      ---T-----A-----T-----C---T-----T-----
              71130   71140   71150   71160   71170   71180   71190   71200
Human         TCTTTTAGATATAAATTTAATAAAATTTAGGCTGTTCAGGGTTTCAGTATCCTACAAAGAAGAACGCTGCTTCTAAGTTTTT 70389
Kakapo       -----
GoldenEagle  CAATCAAACCAGAGTAGGGTAAGGAGAAATGAAGCCAAATCTTAAACACCTTCCCCCATCCCTCCCTTTTCCCAGGC 41356
JapaneseQuail -----
MediumGroundFinch -----
GoodesThornscrubTortoiseCCTTTGCTGATAACCCGTTTGAGGTCATGTGATCAAATTTCTGTGCTTTCAGTTTGTACATTTTAAAAACTAGCAAATT 65528
    
```

```

Majority      -----A--A-C---T---G-----A-----G-----A-----
              71210   71220   71230   71240   71250   71260   71270   71280
Human         GGGTTTCTTGAACCAGAGCTTAGAAAGAACAAAAATATGGCATGGTATTTTCATGGTTTAGTAAGGCTACTTTTAGTTAA 70469
Kakapo       -----T-----
GoldenEagle  ACAGCTTCACTCCCGATTCTCTACCTACCCCGCTGCCAGCGCGCAGGGGGACAGGGAATGGGGTTACGATCAGTTCA 41436
JapaneseQuail -----
MediumGroundFinch -----
GoodesThornscrubTortoiseACACACACATGCAAACCTCTGCTAAAAAAACATTACTAGGGTTGCAAAGTCAAGTCAGAGGTTAGGAAATGCAGAATGAAG 65608
    
```

```

Majority      -----TGTCTCTCCTGATGTTTACTTCT-----C--G-----A-----T-C-
              71290   71300   71310   71320   71330   71340   71350   71360
Human         TTATTGTGATGTAGGCCATTAAGTAGACTTTTCTAAAACGAAACCCAGAGGAGAGGGGTTTTGAAGATACATATATACT 70549
Kakapo       -----TGTCTAACATGGTATTTAAGTCT-----
GoldenEagle  TCACA-CGTTGTCTCTGCTGCTCCTTCCTCCTCAGGGGCAGGACTCCTCACACTCTTCCCCTGCTCCAGTGTGGGGTCC 41515
JapaneseQuail -----GATTACCTGATG---AAAAC---G-----
MediumGroundFinch -----T-----
GoodesThornscrubTortoiseATTAT-CTGTG-CAATCTTAATTTGGCCTTCTGTGGAACATGCATATGATAGTCTTTACATGATCACATACCATTTTTC 65686
    
```

Monday, May 02, 2022 06:51 PM

```

Majority      -----A---T-----GGATTTTTTG---G-----GG-----TC-----T-----
              71370   71380   71390   71400   71410   71420   71430   71440
Human         GGTTCCTAAGAACTAATCTTTTTGGATCATTGGTAT-TGGTAGAAGGGATTCGCTATGTTTTCTGCCACCATTGGATCTC 70628
Kakapo        -----AGATTTTTTA-----GG----- 36284
GoldenEagle   TCCCACGGGAGACAGTTCTCCACGAACCTTTTTGAGCGTGGGTCCCTCCCACGGGCTGCAGTTCTTCATGAACTGCTCCAG 41595
JapaneseQuail -----TGATATTCC-----AG----- 31776
MediumGroundFinch -----GAATTTTTT---G-----GG----- 20590
GoodesThornscrubTortoise-----ATAGGGCTTCTGTCTTATTCTGTGTACAAGATGGACCTGCTCTGGGGAGGAATCAGGGTTGTGTAATAAAA 65757
    
```

```

Majority      ----T-----T-----C-----G-----G-----
              71450   71460   71470   71480   71490   71500   71510   71520
Human         TGTATAAAGTTTGGCTCCACTATCAAAATGCTTAGATAGATGCCTTTGCAATAGTTGCCACCCTAGGAATAGCTCAAAA 70708
Kakapo        ----- 36284
GoldenEagle   CGTGGGTCCCTTCCACGGGGTGCAGTCCCTCAGGAGCACACTGCTCCAGCGTGGGTCCCCAAGGGGTACAAGTCCTGC 41675
JapaneseQuail ----- 31776
MediumGroundFinch ----T----- 20591
GoodesThornscrubTortoiseGAGATGGAAGGTGTGTAATGAATAAGAGAGGGGATTGCAGGACCAAAGAGGATGAATGGATTTTGTGGTTAAAGCAGTTG 65837
    
```

```

Majority      -----C-T-----C-C-G---C---G-----T-----T---
              71530   71540   71550   71560   71570   71580   71590   71600
Human         TTATTAACCTAATACTGGTTACTTAAATTCACCTCTGTGTGCTTGGAGTTGTGCTTTTTTTTTTTTTTTTTTTTGGAG 70788
Kakapo        ----- 36284
GoldenEagle   CAGAAAACCTGCTCCAAAGTGGGCTTCTCTCTGCACAGGTCCACAGGTCCTGCCAGGAGCCTGCTCCAGTGC GGCTGGG 41755
JapaneseQuail ----- 31776
MediumGroundFinch ----- 20591
GoodesThornscrubTortoiseAATGCTGCCTTGAGAATTGGTTTATATCCCTTCCCTGCCACGGAGTTCCCTAGGTGGTGCTGGGCAAGTTGATTTGTATA 65917
    
```

```

Majority      -----T-----C---G-----C-----G-----C
              71610   71620   71630   71640   71650   71660   71670   71680
Human         ATAGAGTCTGGCTCTGTCCACCAGGCTGGAGTGCAGTGGCATGCAATCTCGGCTCACTGCAAGCTCCGCCTCCTGGGTTT 70868
Kakapo        ----- 36284
GoldenEagle   CTCCCATGGGATCACAGCCTCCTTCAGGCACATCCACCTGCTCCAGCGTGGGGTCCCTCCCAGGCTGCAGGGGGACAGC 41835
JapaneseQuail ----- 31776
MediumGroundFinch ----- 20591
GoodesThornscrubTortoiseGTTCTGAGCACTGACACCTGCAATTAGTCATTGGGAGCTGTACTTTGAAAAATATAAAGTGATATAGAATGCTAAATTC 65997
    
```



Monday, May 02, 2022 06:51 PM

```

Majority      -----G--T-----G-A-----T---T---
              |-----|-----|-----|-----|-----|-----|-----|
              71690   71700   71710   71720   71730   71740   71750   71760
Human         ACGCCATTCTCCTGCCTCAGCCTCCCAAGTAGCTGGGACTACAGGCGCACGCCACCACGCCCAGCTAATTTCTTCAT--A 70946
Kakapo       -----
GoldenEagle  CTGCCTCACCATGGTCTTCCCCACGGGCTGCAGGGGAATCTGTTCTGGTGCCTGAAGCACCTCTCCCCCTCCTTCTTCA 41915
JapaneseQuail -----
MediumGroundFinch -----
GoodesThornscrubTortoise@CTGAAAAAATCCGGTTCAAGGAGTCTCAAATTGAGCACCCAAAATTAGTGAACGCTTTTTTAATTTCTCTATGCTTCAG 66077
    
```

```

Majority      -T---T-G-----GGG-T-----T-----T-----C-G---C--
              |-----|-----|-----|-----|-----|-----|-----|
              71770   71780   71790   71800   71810   71820   71830   71840
Human         TTTTTTTTAGTAGAGACGGGGTTTTACTGTGTTAGCCAGGATGGTCTTGATCTCCTGACCTCCTGATCCTCCTGCCTCGG 71026
Kakapo       -----
GoldenEagle  CTGACCTTGGAGTCTGCAGGGTTGTTTTTCACATGTTCTCACTCCTCTCTCCAGCTGCAGTTTCTGTGCCACAGCAACTT 41995
JapaneseQuail -----
MediumGroundFinch -----
GoodesThornscrubTortoise@TCCCCCTAGGTAATATGGGGATAATAACCCCTCATTTCACAGTCTGTAATGAAAATGAATGTGAAGCGCTCAGATACTG 66157
    
```

```

Majority      -----T-----C-----G---G-TT-----A-----
              |-----|-----|-----|-----|-----|-----|-----|
              71850   71860   71870   71880   71890   71900   71910   71920
Human         CCTCCCAAAGTGCTGGGATTACGGGCGTGAGCCACCGCGCCTAGCCTGCTTAGAGTTTTTTATGTAATTATTTTGTGACA 71106
Kakapo       -----
GoldenEagle  TTTTTTCCCTTCTTAAATCTGTTATCACAGAG-GCGCTACCACCGTCGCTGATGGGCTTGGCCTCGGCCAGCGGCAGGTC 42074
JapaneseQuail -----
MediumGroundFinch -----
GoodesThornscrubTortoise@AGTAATGAGTGCCATAGAAAAGCCCATGAGG-AAATTGATAATTCTGTCTTTAGAGCAGGGTTAATTAGTGTACAGTA 66236
    
```

```

Majority      -----T-----T---GAA-----
              |-----|-----|-----|-----|-----|-----|-----|
              71930   71940   71950   71960   71970   71980   71990   72000
Human         CAAACATTTAAATACTGTAGCTTAGAATGAAATTGTCTCAATCCTAGGAGCCAAAAGTTTGATGAATATGAATACTAAT 71186
Kakapo       -----
GoldenEagle  CGTCTTGCAGCTGGCTGGCAGTTGCTCTGTTGGACATTGAGGAAACTTCTGGCATCTTCTCACAGAAGCCACCCCTGTAG 42154
JapaneseQuail -----
MediumGroundFinch -----
GoodesThornscrubTortoise@AGAAAACATGCGGGCACACACTGAACAATGAGGAGAAAAGAAAATATTGAAACTACTCTTTGTGAACACTGTCCATTCT 66316
    
```

Monday, May 02, 2022 06:51 PM

```

Majority      -----C--T-----T-----A--A-T-T-----A-
              72010   72020   72030   72040   72050   72060   72070   72080
Human         ATTAACCATTTTGTGTTCTGTGTCAGGCACGTCTTCTTAGCCCTTTACAAGTAAGTTAATACATCA-TCTCTAAATGTAG 71265
Kakapo        ----- 36284
GoldenEagle   CCCGCTGGCTACCAAAACCTTGCCACGCAGACCTAATACACTTTTTTTTTTTTCCCCATTGGAACAGTCTCTAGTCTCAT 42234
JapaneseQuail ----- 31778
MediumGroundFinch ----- 20591
GoodesThornscrubTortoise 6TGCACTGAATAAGTCATTGATGTAAAAAGCGGCAGAGTCTGTGGCACCTTATAGAGTAACAGAAAGTGTGGAGCATAA 66396
    
```

```

Majority      -----T-----T-T-----C---AA-----
              72090   72100   72110   72120   72130   72140   72150   72160
Human         TTACCATTATCGATCCCATTTTATAGATTTGGAAAGTAGGGTACAAAGAACAGTTTGCCAGATTCCTTTAACTTTTGAG 71345
Kakapo        ----- 36284
GoldenEagle   CTCTTAATCTGTGGGATCTTTTCTCAGTCAGCGGTTTTTCATCTCTCTTCCCTCGGCTGCTATGACCAAAAGAGAGGGT 42314
JapaneseQuail ----- 31778
MediumGroundFinch ----- 20591
GoodesThornscrubTortoise 6CGTTCATGAACAGCATTATCTCCTGTAAAGTGTAAACAAACTTGTGTCTTAGCGATTGGCTGAACAAGAAGTAGGACT 66476
    
```

```

Majority      -----GA-----AA-----A-T-T-T-----G-----T---T---A---A-----T-
              72170   72180   72190   72200   72210   72220   72230   72240
Human         TGGCCGAGCCCTAGCACTGAAAGCCAGGTAGTCTGGTTCCAAAGTCCGTACTCCTGACTAATAAATAGTGAATAAAATT 71425
Kakapo        ----- 36284
GoldenEagle   GGTTTGACATTATTTTAAAGAAATGAGAGAGTATTGTGTTTTGTGGTGCAGACCTCCGTTTCATCGATATTCCTGTATG 42394
JapaneseQuail ----- 31778
MediumGroundFinch ----- 20591
GoodesThornscrubTortoise 6AGTGGACATGTAGGCCTTAAAGTTTTATATTTTTTTTTTGTGTTTGTGAGTGCAGTTATGTAACAAAAAATACTACATTT 66556
    
```

```

Majority      -----T-----C-----T-----T-----
              72250   72260   72270   72280   72290   72300   72310   72320
Human         AGATTAGCTTGACATTTTAGCCTGTCGTCCTTCTCACCTGTAGAATAGTTATCAAGAATAGTAATATACATATAGTAAAAA 71505
Kakapo        ----- 36284
GoldenEagle   GTCATTTTTAATGTCTGTGACAGACAGTCATAGCTCTCTGTTCTGGATCCTTACGACTTCTGGGCTATTTCTGCTAGTT 42474
JapaneseQuail ----- 31778
MediumGroundFinch -----T----- 20592
GoodesThornscrubTortoise 6TAAGCTGCACTTTCACGATAAAAAGATTGCACTACAGTACTTTTATGAGATGAATTGAAAAATACTATTTCTTTTGTGTT 66636
    
```

Monday, May 02, 2022 06:51 PM

| Majority                 | -----T-----TTGCTTAT--T--T-----T-----T--T-----                                     |       |
|--------------------------|-----------------------------------------------------------------------------------|-------|
|                          | 72330 72340 72350 72360 72370 72380 72390 72400                                   |       |
| Human                    | TTTAAGTCCCATCATTTTAGCTTGCTTTTTTTTACATACTAAGATATTTTTTGTACCAAGTCCATTAAGTATTTAGCC    | 71585 |
| Kakapo                   | -----GTTTTT--T-----                                                               | 36291 |
| GoldenEagle              | CCTGTGTTGTTAG-GCCTTGCTTGCTTATTCTTGCTTCACTGAAAGGTGCTTCCATGAGACATGAGCAGATTTTGGATT   | 42553 |
| JapaneseQuail            | -----TTGCCACT-----                                                                | 31786 |
| MediumGroundFinch        | -----T-GCTGAT-----                                                                | 20599 |
| GoodesThornscrubTortoise | ATCATTTTTTACAGTGCAAATATTTGTAATATAAAATAATAAAAGTGAGCATTGTACACTTTGTAGTCTGTGTTGTAATTG | 66716 |

| Majority                 | ---T---T-TT---A--T---AA-A-----TT---A-----T-----A---                               |       |
|--------------------------|-----------------------------------------------------------------------------------|-------|
|                          | 72410 72420 72430 72440 72450 72460 72470 72480                                   |       |
| Human                    | TGATTATCTTATTGATTAAAATACCAAAAATGTGTATTGTTTCATGCATTGATTCAAATTTGGGTACAAAACGGGTAGATA | 71665 |
| Kakapo                   | -----                                                                             | 36291 |
| GoldenEagle              | CTTTGTGAATGTTGCCCCAGTTGTTAAGACCCTTCTAAATATCTGGAATTTTCTACTGTACTAGTTGTCTAGGAATAC    | 42633 |
| JapaneseQuail            | -----                                                                             | 31786 |
| MediumGroundFinch        | -----                                                                             | 20599 |
| GoodesThornscrubTortoise | AAATCAATATATTTAAAAAAGTAGAAAAACATCCAAAAATTTTAAATACTTTTCAATGGGTATCTACTGTTTAAACAGT   | 66796 |

| Majority                 | -----G---TT-----T-T---T---A-----T---                                               |       |
|--------------------------|------------------------------------------------------------------------------------|-------|
|                          | 72490 72500 72510 72520 72530 72540 72550 72560                                    |       |
| Human                    | TGTAACATGCAAATAATAAATGAACCTATATTTTTATCTTTTTGACAAACAACACGTTAAAATTTATGTCAATCTTATT    | 71745 |
| Kakapo                   | -----                                                                              | 36291 |
| GoldenEagle              | TAGCTTCTTTCCAACCAACTCCGCTATTTTGGAGCTTTCCTACTAGTATTGGGGATTGTGATTTTCTTTATTTCTGGTTTGC | 42713 |
| JapaneseQuail            | -----                                                                              | 31786 |
| MediumGroundFinch        | -----                                                                              | 20599 |
| GoodesThornscrubTortoise | GTGATTAATAACTGCGATTAATTTGTGATTAATTTTAAATATGATTTTTTTTTTTAGTTAATTGCATGAGTTAACTGAT    | 66876 |

| Majority                 | T-----T-----T---A-----A--A-----TCT-----CT-----                                   |       |
|--------------------------|----------------------------------------------------------------------------------|-------|
|                          | 72570 72580 72590 72600 72610 72620 72630 72640                                  |       |
| Human                    | TTTTCAAAATCCTTTTCTATATTTTATTAAGACTAATTATAGCAAATAATAGCCATAAAAATTAACCAAAAAACTCATCT | 71825 |
| Kakapo                   | -----TCC-----                                                                    | 36294 |
| GoldenEagle              | TCCCTTTCTTAGCTGCCATAGCTGATGTAGAACCAAGCAGCATATTTGTTATTAGGAGTAATCTTTTGTTCCTTCTGT   | 42793 |
| JapaneseQuail            | -----                                                                            | 31786 |
| MediumGroundFinch        | -----                                                                            | 20599 |
| GoodesThornscrubTortoise | AAATCAATAGCCCTATTACAAATAAGCAAGGTGCTTTATAGAATATACAAATACAGGATCCCCACCTGAGGAGCTTACAG | 66956 |

Monday, May 02, 2022 06:51 PM

```

Majority      -----T-----T--T-----CT-----
              |-----|-----|-----|-----|-----|-----|-----|
              | 72650 | 72660 | 72670 | 72680 | 72690 | 72700 | 72710 | 72720 |
Human         | ACTGCAGACATATTTGAAAGCTGTCCCCAAGAAAGACCAAAGTAATCACACATACCTAAACATGCTAGTATTTCCAGAG | 71905
Kakapo        | ----- | ----- | ----- | ----- | ----- | ----- | ----- | 36294
GoldenEagle   | GTGGTGTTTTGGTTTTTTGTTGTTGTTGTTTCTTTTTTTTTTTTCGGTGGTGGTGGTTTTCTCCCTCCCAAAAACAGTC | 42873
JapaneseQuail | ----- | ----- | ----- | ----- | ----- | ----- | ----- | 31786
MediumGroundFinch | ----- | ----- | ----- | ----- | ----- | ----- | ----- | 20599
GoodesThornscrubTortoise|ATAAGTATTGTGACAGGGTCAGGCCAGGTGGCCACAAGAGAGTGGTCGAAGGTAGATACATTAGCTCCAGGTTAAACAG | 67036
    
```

```

Majority      -----G---T-----A---A---G-A-----
              |-----|-----|-----|-----|-----|-----|-----|
              | 72730 | 72740 | 72750 | 72760 | 72770 | 72780 | 72790 | 72800 |
Human         | AATATTAATAAATACATAGATTTTGAAGCACATTGCTGAATGCCATAGTAACACCAAACCTAAAAAATACATGTAAATTA-A | 71984
Kakapo        | ----- | ----- | ----- | ----- | ----- | ----- | ----- | 36294
GoldenEagle   | TAAGTGGCCATAGAGAAACTTGTAGGGATGATGGTGTGTTTGCACCTGTGGAGTTGAGGTCATGCACAGGAGTATGCTGTG | 42953
JapaneseQuail | ----- | ----- | ----- | ----- | ----- | ----- | ----- | 31786
MediumGroundFinch | ----- | ----- | ----- | ----- | ----- | ----- | ----- | 20599
GoodesThornscrubTortoise|STCCCTTTTCGCTGGGTAAGATAACAGTGACTATTCCAGAACACTCAGGAACCTTCTAGAACTAATTAAGGCAGACAGGC | 67116
    
```

```

Majority      -A-T---A-----T--C--CTTAGGTA----T-C-----AA--G-----
              |-----|-----|-----|-----|-----|-----|-----|
              | 72810 | 72820 | 72830 | 72840 | 72850 | 72860 | 72870 | 72880 |
Human         | AAATTAATATTTTATTTTCAACATAAATCAGAAATACTTGGTTAGAGGTCACATGATAATACCTGTCTAACTGTCCCAT | 72064
Kakapo        | ----- | ----- | ----- | ----- | ----- | ----- | ----- | 36302
GoldenEagle   | GAGTGGAGATTGTTGTGTGTCAGCACAGGCACATGCTTCTCTCTTGGGTTATGTGTGTCAGTCTGAATTGAGAAAGGGATTTT | 43033
JapaneseQuail | ----- | ----- | ----- | ----- | ----- | ----- | ----- | 31794
MediumGroundFinch | ----- | ----- | ----- | ----- | ----- | ----- | ----- | 20606
GoodesThornscrubTortoise|AATTAGGACACCTGTAGCCAATTGGGAAGTTACTAGAAATTAATTAAGGCTAATCAGGACACCTGGTAAAAAAGGCTCTC | 67196
    
```

```

Majority      --CT-----T--C-----T-----G--A--A-----T-C-T-----A-
              |-----|-----|-----|-----|-----|-----|-----|
              | 72890 | 72900 | 72910 | 72920 | 72930 | 72940 | 72950 | 72960 |
Human         | AACTTCGGCTTTCTCATTTTCAATGTGTTTAAATATCTAAG-AAGTAAAAAATAGTTGGAGCATGCCTCTTTATATGTGCAA | 72143
Kakapo        | ----- | ----- | ----- | ----- | ----- | ----- | ----- | 36302
GoldenEagle   | TGTTTGTCTTTTACTACTGTTTTCTATGTCCTTAGTCTTACTAGCCATCTGTTTGTGTGCTTCTAAATACTACAAT | 43113
JapaneseQuail | --C----- | ----- | ----- | ----- | ----- | ----- | ----- | 31796
MediumGroundFinch | ----- | ----- | ----- | ----- | ----- | ----- | ----- | 20606
GoodesThornscrubTortoise|ACTGTGGAATAGACAGGAGCCACACATCTCGAAGAGTGAAGTTACGGAACAGGTAATTATCCTTTACTGATTTTACAA | 67276
    
```

Monday, May 02, 2022 06:51 PM

```

Majority      -----T-----G-----AGGTTTGCTACT-----
              72970   72980   72990   73000   73010   73020   73030   73040
Human         TTTTAAATTATGTTGACTTCTTTGGATTATTGAACTGTCCTCTGCTTTGCTATA-GCTGAATTTTAAAATGTTAATTTT 72222
Kakapo        -----AGCTTTCATCT----- 36314
GoldenEagle   GTGTTTTTTTAGGAATCTGTCTGCTGACAAGCTCTTGGCAGGAGGTGAGCCACTCATCAGAATCATTTTCCCCCTCGGGA 43193
JapaneseQuail -----ATGCAATT----- 31804
MediumGroundFinch -----AGGTGA----- 20612
GoodesThornscrubTortoise GAGAAGTTGTAATTCGTAACCACATGTTGAATATAAGGTTTGAGTCTTAATAGACACTTCTTCAACAATTAATATAGTT 67356
    
```

```

Majority      -----AGAAGAGTATT-----A-----G--A-----A---A-----TG---A-----AT---
              73050   73060   73070   73080   73090   73100   73110   73120
Human         GAAGTCTTAAAATGTGTCTTTTGGAAAAACATTGGAAGAGCTAAAGTAGATAGAGTTGTTTCATTTAAATGTTTATTTT 72302
Kakapo        -----AAAAGAGCACT----- 36325
GoldenEagle   AAGTCCAAGAGAAGGGTACTTTTGTAGTAACAAGAGGGAGGGAGGGGAGGCAGGGCCTGGAAACAATTCAGTATCATGAC 43273
JapaneseQuail -----AAGCCAGTGTT----- 31815
MediumGroundFinch -----AGAATGGTGCT----- 20623
GoodesThornscrubTortoise @TAGCAGTCTGACTAGCATTAAGTCTACGAGTAGAGAATCTAAAAATATATGTAAGTGAAAACCATTGTATCTATCAC 67436
    
```

```

Majority      -----T-TCGTATT-----T-----T-T-TTGTTTAGGCT-----C---CA--
              73130   73140   73150   73160   73170   73180   73190   73200
Human         TTATTTTATTTTATTTTTTTGTAGTTGGAGTACTGGCTCTGTTGCCTGGGCTGGAGTGCAGTGGCGGGATCTCTGCTCACT 72382
Kakapo        -----C--GTG-----T-----CATTTTGGCT----- 36340
GoldenEagle   ACTTGATATCACATGATGAC-ATAAGTTTGTACTTCTGTTGTTGAAGCTTAATAAT-GGGTTTGCTGGCCCATGCAAG 43351
JapaneseQuail -----CAACT-----CCATACACA----- 31829
MediumGroundFinch -----CGCAT-----T-----TGTAGAAG----- 20637
GoodesThornscrubTortoise @CTACATGTGGTTTTACTAG-GACATTGACAAGCTCTTTTTTATTTGGGAATGTGTTT-TTATATTGTTTGCAATTACACT 67514
    
```

```

Majority      -----GTTTCATT-----GGTACTTTATCTTCTTGGTTTGGCACATATGTG-TGTTTTACTGTATC
              73210   73220   73230   73240   73250   73260   73270   73280
Human         GCAAGCTCCGCCTCCTGGGTTACAGCCATTCTGCCGCCTCAGCCTCCTGAGTAGCTGGGGCTACA--GGTGCCCTCCACC 72460
Kakapo        -----TTTCCTTTT-----TCCTTTGAGCAATTTATTTGGCAT-TATGTC-TGTATTAAAGTTAC 36393
GoldenEagle   ATAACGAACAGTAGTCACATTTGTAGAGCTTGGTACTTGATCTCCTTGGTTTGGCACATGTGTGGTGTGGTACTGTGTC 43431
JapaneseQuail -----GTTCCT-----GATCATATTCTGCCAGTTTG-CCTGGATGAGCTGATTGAGACCCTC 31881
MediumGroundFinch -----GTTCAT-----GATTCTTGATCTCCTTGGTTTGGCCCATGTGTGATGTGGTGTGGTATC 20692
GoodesThornscrubTortoise @ATGCCTAGAGGACTGAGATT-----GAGTATCCACTGTGCTAGGTATAATACAAATACA---TATTAAGACATA 67581
    
```

Monday, May 02, 2022 06:51 PM

|                          |                                                                                   |       |
|--------------------------|-----------------------------------------------------------------------------------|-------|
| Majority                 | ACACGTGGA---GTGCATAGGTAAATGTAGTTGTATGGAAAAGTTTCTTCTTTTATAGCTAGACTGCTTT-GAGATGTTGA |       |
|                          | 73290 73300 73310 73320 73330 73340 73350 73360                                   |       |
| Human                    | ACACCTGGCTAATTTTTTTTGTAGTTTTAGT--AGAGACAGGCTTTCACCGTGTAGCCAGGATGGTCTCAATCTCCTGA   | 72538 |
| Kakapo                   | AC-CGTGGA---ATGCA--GGTGAATGAACCTTATATTGAACAGACTTAACTTTTCAGTTGGACTGCATT-GCCACTTTGG | 36466 |
| GoldenEagle              | ACATGTAATGTGTGCATAGGTAAATGCTCAAAGAAAGCAAAGTTTCTTAGCAGTAACTAGAGTTCTGT-GAGATGATGC   | 43510 |
| JapaneseQuail            | TCATTTGGTGATGTG-ATGGGGGTACGTGGCTGTCTGGAAATGTGACTTGTTTTTTCACTTCACTGTTGT-GTC-TGTTGA | 31958 |
| MediumGroundFinch        | ACACGTGAA---AT-----AAATACT---GGAAAGAAAAGTTTCTTTCACAGTAGCTAGAGTTCTTG-GAGATAATGT    | 20757 |
| GoodesThornscrubTortoise | ATCCTTGTC---CCAAACAGGTAAATCTATAAGTATGCAAGGCAGACCAAACCTCATGGGAAACTGAAACAGAGTTATTGA | 67658 |

|                          |                                                                                     |       |
|--------------------------|-------------------------------------------------------------------------------------|-------|
| Majority                 | TTGTGTGTACATTCACCTAACGGTGTATGGTTAAAGTCTTGAATTTTTTTTTCAGGATGTCTGT--TCTAGGCGAAT---A-  |       |
|                          | 73370 73380 73390 73400 73410 73420 73430 73440                                     |       |
| Human                    | CCTCGTGA---TCCGCCACCTTGGTCTCCCAAAGTGCTGGGATTACAGTCATGAGCCACCGTGCCTGGCCTCATTTAAA     | 72615 |
| Kakapo                   | T-GCATGAACAGCTTCTAGAGAAAAGAAGGAAACATC-----AGGCTTCTGGAAT-CATGT--TAAGAGAGGTT---A-     | 36533 |
| GoldenEagle              | CCGTATATACATTCACCTAACAGT--ATGGCTACTGTCTTCTCATTTTTTTTTCAGGATGTCTGT--TTGAGAGGAAC---A- | 43582 |
| JapaneseQuail            | A-GTGCAC-CATTCACCTGCCTCTCTATGCTAACACTCACTAACTGGTCTCCATAAA-TATTC-----AGCAAAC---A-    | 32025 |
| MediumGroundFinch        | TTGTATGTGCGTTCACTAGCAGTGAATGGTGGTGTC-----ATGTTTTTTCAGGATGTCTG-----AGAGGAAC---A-     | 20822 |
| GoodesThornscrubTortoise | STTTGCAGAAGGTCACTAAGGAAGTCCGTGGAAAGTCTGGGACCTGAACCCAGAACTTCTGAGTCTTAGTCTAGT---AT    | 67735 |

|                          |                                                                                   |       |
|--------------------------|-----------------------------------------------------------------------------------|-------|
| Majority                 | GTTTTTGAGTGTGGTTGAACTTTTTTTTTTT-ATT-GCCATATATGAAGGAGTTTCACTATTCTTGTGTTG-AGTTGTAAC |       |
|                          | 73450 73460 73470 73480 73490 73500 73510 73520                                   |       |
| Human                    | ATTTTTTAACACTGGGTAAAATTTTTATTTTTGAGTCACAAATTAATTTGAAGCTGTGTCTTTTAGAGAGCTTATTCAAC  | 72695 |
| Kakapo                   | ATGAATACGTTTTAAGCTGAACTGGTTTTTCAG-ATG-GATGTATAT----GTATACACTGACCTTGTTTA-AAACATAA- | 36605 |
| GoldenEagle              | GGTTTTGAGGGTTT-GTTGCACCTTTTTTTTT-ATT-GCCATATAAGAAGGAGCTCAGGATACACATTC--AGTTGTGAC  | 43657 |
| JapaneseQuail            | GTGTTGGTATGTTGGTGTGATTATTTTTTTTTT-TCT-GC-----ATGGAGGAATTCAGCAGCACTCTTT-----TGCTT- | 32092 |
| MediumGroundFinch        | GTGTTTGAGGATTT-GTTGCACATTCCTTT-----GC----TA--A--GAGCTCAGGACACATATTCGCAATTGTGAC    | 20886 |
| GoodesThornscrubTortoise | STTAACACAAGCCAAGCGCTACTTTTTATGTTT-TTTAGCCTAATGTAAACAGTTTCTTCTCTATTTTATAAGGTTTTAAT | 67814 |

|                          |                                                                                   |       |
|--------------------------|-----------------------------------------------------------------------------------|-------|
| Majority                 | TTTATATGTGATC--AATTAATCTTG-AA-AAATGTTTTAGTTGTCTTGAAT-CTTTATTGCAT-GGTATAGGTGTATTA  |       |
|                          | 73530 73540 73550 73560 73570 73580 73590 73600                                   |       |
| Human                    | TCTTAATTCATTATAAATAATATTTGAATGAATGTGTTTTACATCTGGAATGATTTTTATCATCTGAGTAAAGGAAATA   | 72775 |
| Kakapo                   | ---ATGTGCAACC--AACCTGTATTG-TG-TCTTATTTTTAAGTAACTTGACT-CCCTTTTCCA--GGCCTTAGATGGTCA | 36675 |
| GoldenEagle              | TTTACATATGAAC--AGTTAATCTTG-AA-AAAACC-CTAGTTGCTGGTAAT-CTTTAGTGCATTGGTATTGGAGCTGTC  | 43731 |
| JapaneseQuail            | ----CTTGTGCTC--T-TCCATGTTA-GA-CTGTCCTTCTGTTGTCATG----TCACACAGCA---ACTACACGTAATG   | 32155 |
| MediumGroundFinch        | TTTAGATGTGAAC--AATTAATCTTG-AA-AAAAATGCTGGTTGGCGAGAAT-CTTTCTTGCAATTATTAGAGGTGTATGA | 20961 |
| GoodesThornscrubTortoise | ATGTTTTAATGATTCTAAGCTCTCTGATAA-AAATGTTACAGTTTACAAATAT-GCTCAGATAT-AACATATATGTACAC  | 67891 |

Monday, May 02, 2022 06:51 PM

|                          |                                                                                   |       |
|--------------------------|-----------------------------------------------------------------------------------|-------|
| Majority                 | TGAT-GTTGGTAGTATGAT-TGCTGGGCCGA---TTTGTGTTTGTCTGGCACAAGAATCTTTTTCCAGAGTTTGAC-TACA |       |
|                          | 73610 73620 73630 73640 73650 73660 73670 73680                                   |       |
| Human                    | TGTTTGATGGTAGTTGGGAACTTGAAGGTATTACGGGCTACAGATGAGAAAAAATGTTACTACGTCAATTCATGTTTA    | 72855 |
| Kakapo                   | AAAT-ATTTATAATGCT-TGCTGTACCTACGGATTGATTTTTCCAAACTGGTGAATTTGAATGTCAAGTACAAC-AACG   | 36752 |
| GoldenEagle              | TGCT-GCTGGTAGAGGT-GGGTGGGGTGA---TTTGGTTTTGATCTGTTGCAAGAAGCCTTTCCAGAGTGTGAC-TACA   | 43805 |
| JapaneseQuail            | AAAT-ATTGGTGGGGA--AGTCAACCGA-----TACTGCCATACCCTGACATCCATCTCCAGTGTGGACC-AGCA       | 32223 |
| MediumGroundFinch        | TGTT-GCTGGTAAAGAT-GGTTGGGGTGAAGGTTTTTTTTTGTCTGGTGTGTTGAATCCTTTCCCTAGAGTTTGAC-TACA | 21038 |
| GoodesThornscrubTortoise | TAA-AAAAACATTGATGTGCTGGGCCAA-----GGTATACTTTAGCAAAAAGAGCTGATAAGATTGCATCTCTAACA     | 67963 |
| Majority                 | -GTACTAATTAGGAGTGTCC-TCTTCTTCCTTTTTTATTTAG-GATGTTCTATCAGCGT-TCAATGCTTCTATTGC--AA  |       |
|                          | 73690 73700 73710 73720 73730 73740 73750 73760                                   |       |
| Human                    | CATACTGACCAGCATTTTCAATGAAATAAGCTTATTACTATAGGACTATAAAATGTTTT-TCAAAGTTTAACTGTCCAG   | 72934 |
| Kakapo                   | -ATAAAAGCAGGGACTACAC-TCGTCTGATCTTCCATCTGGTATGGACAGCCAGCGC-TGGACCCAGCTATTGC--TG    | 36827 |
| GoldenEagle              | -GTGCTTATTAAGAGTGTG--TCTCCTTCCTTTCTGGTTCAG-GATGTTCTTTCAGCGTGTCTGTGTCCCAACTGC--AA  | 43879 |
| JapaneseQuail            | -TAATCAAATAGGAGGCATT-ACTTTTGGAGCATCTATTTACAAACATTGGAATGCCAC-TAATGTCTTCTGTTGG--TT  | 32298 |
| MediumGroundFinch        | -GTGCTTATTAAGAGTGC--TCTCCTTCCTTTCTCATTCAG-GATGTTCTTTCAGCCCATCTATCCCCAGCTAC--AA    | 21112 |
| GoodesThornscrubTortoise | GCAAAAAACAAAAACAGCCCTCATTTCCCAAAATGTGTTAGCTGTAATCTAGAAAAGAT-TAAATACAGCTATTG---A   | 68037 |
| Majority                 | GGGAATTCTCTAGTGCAGTGTG-TTTTCTAT-ATGTAATTTTGGCCTCGTTTTTATTTGATTGAATGAGTTATTTTTACTG |       |
|                          | 73770 73780 73790 73800 73810 73820 73830 73840                                   |       |
| Human                    | GGCAGATACTTAAGACTATCTGATCATCCATTA AAAACTTTTCACATAGTCTTGCTTAAATGGATCCATTATGTTTACCC | 73014 |
| Kakapo                   | CAGCATTGCAAAGGAGACCTC-TCTTCTAG-GTATGATCTTGCCCTTGTTCTTTTGGATTGCAA-AGTCACTTGATGGA   | 36904 |
| GoldenEagle              | GGGATTTCTCTTGTGCAGTATT-C TTT-TGT-ATGTGCTTTTGGTCACTTTGAATTTGTCAGAAGGAGGAATTTTGTCTG | 43956 |
| JapaneseQuail            | TGATACTGG---GAGTAAAGCT-GTGCATGA-AAGTCATTTTGACTCAGCATGAGTTA--CAAATGGCATATATCACTG   | 32371 |
| MediumGroundFinch        | GGGATTTCTCTTGTGCAGTACC-TTTTATAT-ATGTATTTTGGTCGCTTTGATTTTG---GAA---GGAGTTTTTGTCTG  | 21184 |
| GoodesThornscrubTortoise | CAAATTCATGAATGCAGGGTCACTGTGTTG-AAATAATTTAAGATTCGCTCCATATCATGTATACTATTCTGTTGATTA   | 68116 |
| Majority                 | ATT--CAGTGTGGTTTTTGTATTATTGAACAAGTTTTTTTAAACTTTGTTTATCTTGAA-ACTCTGAATA-----T      |       |
|                          | 73850 73860 73870 73880 73890 73900 73910 73920                                   |       |
| Human                    | ATTA-TATTGTTCTCAGCTGTAGTTTTTAAGAAATTTATTTC--TTTGTAAACTTACTTTCCATTACCTTCCCCTTTT    | 73091 |
| Kakapo                   | AAT--GGCTGTTGGTTCTTCTCTGACAATTAGAGATCTTAGGCTGTAGTAGTGTCCAAA-GGCCATTCA-----G       | 36973 |
| GoldenEagle              | TTT--CAGTGAAGTTTTAGTTACTTATGCAGCTCCCTTTAAACATCGACTACTCTGGAA-ACTATGAATG-----C      | 44025 |
| JapaneseQuail            | AGT--TTCTGTTGCGCTTGGTCATTTGAACCTAAGATGCA---TGTAGGTGTTCTAGAGTACTGAGAATT-----T      | 32438 |
| MediumGroundFinch        | TTT--CAGTAGAAGTTTTAGTTAATTACATAACTCCCTTCAAATACTGACTACTCTAGAA-ACTCCAAACA-----C     | 21253 |
| GoodesThornscrubTortoise | ATTACCAGTGCATCATCTACAAATTGATCATGGTTTTTATCAAAATATTTTACCTGATAATTGAGAATAGCCAGCTGT    | 68196 |

Monday, May 02, 2022 06:51 PM

| Majority                 | GGTTATCTATTGGTTTTCTGTTTCTTAATTCTAAAGTATTTATATATCTTT-CAGCTTTCTTGACAGACACAAGTCAGTG  |                                                 |
|--------------------------|-----------------------------------------------------------------------------------|-------------------------------------------------|
|                          |                                                                                   | 73930 73940 73950 73960 73970 73980 73990 74000 |
| Human                    | CTGTGACAAATCCGTTGATACTTGAAGACCTCTCTTGATTCATCTTAGGGTTAATATTTTAAAGGCCAAACAGCCTAAAT  | 73171                                           |
| Kakapo                   | TGTTCACTCTCTATTTTGAGCTGAATTGTAGTAACACAGTTACATTGTCTT--TAGACATCTTGAGAAATGAATGAGAG   | 37051                                           |
| GoldenEagle              | GGGTATATTTTGGTTTTGCTGCTTTTTAAGACTAAAAGATTTACATCAACTTCACAGCCTTCTGCCAGCCATAAATCAGTG | 44105                                           |
| JapaneseQuail            | GTTTCTCTACAGAATTCTTTTACTCCACACTGGAG-----ATGCCCTCTT--CCAGTTTCTTTGAGTGACTGCTTCATG   | 32511                                           |
| MediumGroundFinch        | AGATATGCTTGGTTTTGCTACTTCTTAAGTCTAAAATATTTCCATCAACTTAGCAGCTTTCTGCAAGCCACAAGTCAGTA  | 21333                                           |
| GoodesThornscrubTortoise | AAATAGCTACAGAATAAGGATCACTTTTTTCTGTGGATGTGTAATTTCTCT-GAACCTTCTAACAGATG-AAGTCTCTG   | 68274                                           |

| Majority                 | TTTGTACTGATCACCTAGAGATCT--ACAATGTGAATCTCTA-TTGTGG-TT-----T-----GGTTC              |                                                 |
|--------------------------|-----------------------------------------------------------------------------------|-------------------------------------------------|
|                          |                                                                                   | 74010 74020 74030 74040 74050 74060 74070 74080 |
| Human                    | TCTATGGTAATCAACTCCAGCCTTGTTGTAATGAAATCTTCTGCATAAAGATAGGTTTAAATCAAATCAGATTGCAGATTT | 73251                                           |
| Kakapo                   | AATGCAGGGGAAAAGGAGAAATCC--ACAAAGTGGATGGAAA-ACTCAAGTT-----AGTTC                    | 37105                                           |
| GoldenEagle              | TGCTACAGACTCCATACAGAGGT--ATAACATGAATCTTGA-TTGTGTTTTAAAGACTTAGAGCTCTGTGTCATGGTCC   | 44182                                           |
| JapaneseQuail            | GTTGCTCTGTTCTGCTAGCAGTCT--GCAGAGAAGACCTCTG-CCA-----GGCCT                          | 32559                                           |
| MediumGroundFinch        | TTTCTACAGACTCCACACAGAGGT--TAAGTATGAATCTTG--TTG-----GGTCC                          | 21380                                           |
| GoodesThornscrubTortoise | @GCTATATAATCACTTAGAAACCTG-ACATCCAAAAGACAA-TCCTGGCCCTGACAGATGATTATTCATTCATATACTG   | 68352                                           |

| Majority                 | TGTTATTTGGTCTAAGCTAATG-GTGCTTCCTTTTGT-TCTTATGTATTCAA--AGTTATCTTCATTATGTGC-TTGTG   |                                                 |
|--------------------------|-----------------------------------------------------------------------------------|-------------------------------------------------|
|                          |                                                                                   | 74090 74100 74110 74120 74130 74140 74150 74160 |
| Human                    | TATTGAAGAAATTGTGTTTTTAAAGATTGACAAATATATGTTGTATGGCTAAAACAAAGAAAATACTTCTGTTGCTTCTG  | 73331                                           |
| Kakapo                   | TACT-TTTGTTCCCAAATATG---TCCTCCCCTC----TCTCATATATTCTG----TCAGCCTC-TCCTGGCC-ACGTT   | 37171                                           |
| GoldenEagle              | TGTGATTTGGACAAAGCTAAAGGATACTGCCTTTTGG-TCTCATTGTGACATA---GTTTTCTTCATTATGTGA-ATGGG  | 44257                                           |
| JapaneseQuail            | TGTT--GCCGTAAAATCTAATGTGAGCTTCTGTGGT-CATTTTCTAAACAAA--AAGCAACAACATTTCCAGT-TAAGA   | 32633                                           |
| MediumGroundFinch        | TGTGATTCAGACTAAGCTAAA---TACATCCTTCTG-TCTCAAGAATTCACACCTGTTGCTTCATCATGGGA-TTGGG    | 21455                                           |
| GoodesThornscrubTortoise | @ATTCTCTGCTGTGAAAGAACA-AGGTGATCAGAAAGT-CCTTGAGATTGTAAAATGGATGTCTTTTTAATGAGCCTTTTA | 68430                                           |

| Majority                 | TATTTTCGTTGCAGGGCAATTACAT-TGTTTGTGAC-AAAAATAAATTTCTGGCTGTTTCATTGTTACCAATGTTTATTCC |                                                 |
|--------------------------|-----------------------------------------------------------------------------------|-------------------------------------------------|
|                          |                                                                                   | 74170 74180 74190 74200 74210 74220 74230 74240 |
| Human                    | CATTTAGTAGAAGAAAACCTATATATGTTTGTGACCAAAGTATAAAAATATGATTCTTTCCAGGGAGGTAAAGGTTATGC- | 73410                                           |
| Kakapo                   | GCCACCTTCCCACCCAA---GT-T---TGTAAG-AGACAACATGATTGTCATGTTTCATTTCATGCTAATGCTTATTTG   | 37242                                           |
| GoldenEagle              | TATTTTCCTTGATGG-CAATGGCAT-TGCTTTGAT-AAGAAGTAAGCTCTGGCTGTGTAACCTGGACCTACCTTTAATCC  | 44334                                           |
| JapaneseQuail            | TATTTAGCTTCAGGACAGTTACCT-TGATTATTC- GTTAAGGACATTCATGCCACCTGAATCCTAAAGAAGACTATC--  | 32709                                           |
| MediumGroundFinch        | TGTTCCCTTGCTGGGCAGTGACAT-TGATCTGAC-AGTAAAAAACTCTGGCTGGATAAATTTGCACCTTCTCTAGTCC    | 21533                                           |
| GoodesThornscrubTortoise | @ATTTTGAAGAAGGAAAACCTCAT-TAATGGACAG-AAAGGAGTATTTTCAGGTGAATTGTCAAAGCAATAGTTCCCTTT  | 68508                                           |



Monday, May 02, 2022 06:51 PM

```

Majority      --A-TATCATAGTATGATTAGAAAG---GTATGAAGTTTTCTTAAAGTGATGG-AGATTATCAGT-TATGCTTTTATA-A
              74250   74260   74270   74280   74290   74300   74310   74320
Human         ----AGAAGATTTTCACTAGCAGC--TCTAAAAGGCTACCCCTCAATTAATTG-CCATGAACATTCATAGCCCTAGAAG 73482
Kakapo        TAG-TATCATATTATGAAAAGAACA---TTTTGTTGGTTTTCTTCAATGAGGGAAGATTAT-GCTCTCTGCTTAAAA--A 37315
GoldenEagle   --A-TATTTTAGTCGATTTTAAAAG---GTGAGAAATCTTCTGAAAGTGATGACTCATTCTCGGTGTATGCTTTTTTTT-A 44407
JapaneseQuail ----GTGCTGGAATGATAGGCAGT---GCTTGGATCAACCATAGTGTGCTGG-ATTTTATCAGT-TATGTCAGAAAAG-C 32778
MediumGroundFinch --A-TATCTTAGTGGTTTTTAAAAG---GTAGGAAGTCTTCTAAAAGTGATGGTAGATTCTCAATATAAACTTTTTTC--A 21605
GoodesThornscrubTortoise GAGTGGCATAATATGAAAAAAAACACATAGGGAAAATCCTCTATATAGGGA-AGATCACTAGC-TGTGTTTTGATATG 68586
    
```

```

Majority      GATGCAAGTAT-TCTGAGTGTATT---TTTTTTCCTATATTTCTAATAT-----TTTGAGTTTTGGATTATGCTT--TGT
              74330   74340   74350   74360   74370   74380   74390   74400
Human         GATGTTGGCTCATTTCAGTGTATCCTGGTTTTATTCTTTATTGTATTATTCAGCAGTCATTTTAACTATGCTAGACAC 73562
Kakapo        AAGAAAAGGAA-TC----TGTAAGT---TCACTTCTGGTGTGTGGTAC-----ATGAGTACTAATGCTCTGTC--AGG 37379
GoldenEagle   GATGTAAGTGT-TCCGAGTGAGATT---TTTTTCCCAAATACCAACAT-----TAGGAGTCTTGGATTCTGCTT--TGC 44476
JapaneseQuail CCAGCAAGTAC-AGTAATAGTGTGTTG---CTGCTTCCTGGACGCTGCAGC-----TTTGTAGAGAAGAATATGATG--CGT 32848
MediumGroundFinch GGTGCAAGTGT-TC-AAGTGATATT---CTTTT-CCCAAATACCAACA-----GGAGTCTTGGATTGTGCTT--TGT 21669
GoodesThornscrubTortoise AAGCAGTTATATCTGATCAATATCA--GTATAATCTATATTTCCAAGATACAAACTGGAGTTAAGGCTTATTGTA--TAT 68662
    
```

```

Majority      TTCTGAGTTTTAAAAGAGCTAGCAGGTTTTGTGTCT-GTGATGGTGATTCTTGACAGTACTCTAATGATTTAGATTTAAT
              74410   74420   74430   74440   74450   74460   74470   74480
Human         TTTAGAGATTCAGAAGAGTAACAGGGTTTCTGTTCTCATGAAGCTTATCAGAGACAGAAAACATATGAGTTAGATCTAAT 73642
Kakapo        TTTCGAGTTCATCAGAAGTAGTAGGTGAAAGGCTCT-GAGAAAGAGAGAGATAAATGTATTTT--TGACTCTTAGCAAAC 37456
GoldenEagle   CACTGTGTGTAAGAGAGCTAGCAAACCTGTACTCT-GTAATGGTGACACCCGCCATCACCCCAGCAATACAGAATTAAT 44555
JapaneseQuail AACTGATCTTTAATG--AAG-GAAGTGGTGCAAA-AAAACCTTGGTTTTGGATAATGGTCT-GTGATTTACA-TACGT 32922
MediumGroundFinch CACCATGTATTAAAGAGCTAGCAAATGGTGTATGCT-GTAATGGTGGTGTGCTCGCCACCACCCCAACAATACAGAATTAAT 21748
GoodesThornscrubTortoise ATCAGGGGTGACGAAC-CTTTCAGGAGTGGTGTGCT-GAGTCTTCATTTATTCACTCTAATTTAAGGTTCTGTGTGCCAG 68740
    
```

```

Majority      TAAT--AGCTTGTAATCTTTGTATAAGGACTGTATTTTTTATTTTTGAATTATTGTATAATCCATTGTTT-----
              74490   74500   74510   74520   74530   74540   74550   74560
Human         TGGA-GGCAAACTGAAATATATAGTGGAGTTAGTGTGGTTATCAGCACATAAATGAGTGATCCATCAACAAAAGGAGAAA 73721
Kakapo        TAAT---GAATGCATGCTTTGGGAGAGAGTTGTAATTTGTGGTTTTAATTTAT--CACAAAGTTGTTGCCT----- 37521
GoldenEagle   CCTC--AGCTTGATTTCTATGAATCAGGACAGTAGATTTTATTTTGCAGTATTGTATAAAGCATTGTTT----- 44623
JapaneseQuail TGTTTAGCCACAGAACTTCTTGTATCCAAGGCATTTGTCTCAAAAGAAACAAACCTCATTCAAATGTAT----- 32992
MediumGroundFinch TAATGAAGCTTGTGCTCTATGAATAAGGACAGTAAATTTGTCTTTTGAATATTGTATAAGGCATCGTT----- 21817
GoodesThornscrubTortoise AAT--ACATTTTAACTTTTTAGAAAGTCTCTTTCTATAAGTCTGTAATAGATAACTAACTATTGTTGTATGTAAAGT 68818
    
```

Monday, May 02, 2022 06:51 PM

|                          |                                                                                    |       |
|--------------------------|------------------------------------------------------------------------------------|-------|
| Majority                 | AAGTTAGGTTTCAAAGG-TGCAAAGAAGCTTCTTTTAAATTGATA--TGTTTGGTGGTATAATCTCTAGACTGTTGGGTT   |       |
|                          | 74570 74580 74590 74600 74610 74620 74630 74640                                    |       |
| Human                    | TTGGGAGGGTTTTATGGGCCAAAACAGCATGATTAATGTGATA---GAGTATATGTCATGTTTTAGGTGTGATGAACA     | 73798 |
| Kakapo                   | AAGTTTCACTCCTACTTCTGTCAAGATGCTATTTCTTCAAATGGAATAGTACTCGGGCATAATCTGCTGACTTTTGTAG--- | 37598 |
| GoldenEagle              | AAGCTGAGTTTCAA-----GCACAGGAGTTTCTCTTAAATTGCTAAGTATTTGTTGAGACAATGCTAGACTGTCAGGTT    | 44698 |
| JapaneseQuail            | ACAAAAGGATCCAAAGGATACAATAAGGATACATCTCTTGAGAGA-----TTTACAGTATAACCTCTAAGCTACCTTAGC   | 33067 |
| MediumGroundFinch        | AAGCTGAATCTCAA-----GCATAGGAGTTTCTCTTAAATTGCTG--T--TTGTTGATATAATGCTTAGATTTTCCAGTT   | 21888 |
| GoodesThornscrubTortoise | AAATAAGGTTTTAAAAATGTTTAAAGAAGCTTCATTTAAAATTAATTAATAATGCAGAGCTCCCCCGGACCGGTGG-CC    | 68897 |

|                          |                                                                                   |       |
|--------------------------|-----------------------------------------------------------------------------------|-------|
| Majority                 | TGGAGACATGTTTTGTTATTTTGATATTTTTGAACTTCCCATT-ATAGTAATTTT-CATTATATTGCTTACT--TATT    |       |
|                          | 74650 74660 74670 74680 74690 74700 74710 74720                                   |       |
| Human                    | TTCAGTTATGTGTGACGAATAGGATAATTGAAAAATATGAAAG-GCTATGATGCCAGAAAGTATTATGGGACA--AGAT   | 73875 |
| Kakapo                   | --AAAACCTGATTTATTCTGTT-GTGATCATTTGTTCCCTCCACT--TAGTCTTTTC---TCATATTTTCTTCTTT-CATC | 37669 |
| GoldenEagle              | TCTATACTTTTTTTTTTTTTTTGGTATTATTTTATTTTCCATTACTTGGAAAGTTGGAACAATACTGACTGACT--TATT  | 44776 |
| JapaneseQuail            | TGGAG-TATGTTTTGTGAGGATCAATTTTTAAAAATTTTTATT--TATTTACTT-----TGTATTCTTTTATTT-TCCT   | 33138 |
| MediumGroundFinch        | --AAG--TTTTTTGTTCTAT--ATGTTTTTAGAACTTCCAAGCTATGGCAAAAT--AATTACATTGACTTACA--CATT   | 21957 |
| GoodesThornscrubTortoise | AGGACCCGGGCAGTGTGAGTGCCATAAGTTGCTACCTGTGATATATAGTAATGTAAGAGTAAAGTATTATAATGATGTT   | 68977 |

|                          |                                                                                   |       |
|--------------------------|-----------------------------------------------------------------------------------|-------|
| Majority                 | GTTATACGTTGATTTATACTGGTGGTA-----ATTTAA-GAGCGTTGGAGATGTTAGCTGTGTTAATA--TA          |       |
|                          | 74730 74740 74750 74760 74770 74780 74790 74800                                   |       |
| Human                    | CTTAAAACCAGTGTACCAGGGAGTATGA-----ATTTAA---TATGGGAATTCTTAAACTCCTTTATGACTG          | 73941 |
| Kakapo                   | AATTCCATT--TTTCTTCTAAAGAAA-----ACTTCA-GAGCAACATAGATTTCA--TGCCTTGGTT--TT           | 37729 |
| GoldenEagle              | CTTGTACACTGATTCATAATGGTGGTA-----ATTTACAGCCCTGGAGATGTGAGCTGTGGTAATA--CA            | 44841 |
| JapaneseQuail            | GGTACTTGTC-ATTTTTAATAGTACTA-----ACTTAT--GTGTTCTTAATATTAGCTGTGATAATA--CA           | 33199 |
| MediumGroundFinch        | GTTTTACGTTGACTGCCAGTGGTGGTAGTTCTTTAAGTGATTTTGTGAGCCCTGGAGATGTCAGGTGTGATAATG--T-   | 22034 |
| GoodesThornscrubTortoise | ATTATTATCC--TCCATATAGGTATTACAAACTCTGGAT-ATTCAGTTAAGGTTAAAATTTAAAAGAAATTCAGACA--CA | 69052 |

|                          |                                                                                   |       |
|--------------------------|-----------------------------------------------------------------------------------|-------|
| Majority                 | -TTTGTGGGAAT--GGACAGCCTTGCTGACCCAAGCCTGGCATAGTGGTGTCTGTTGGATGTTTCAGTTTT--CAGATGCA |       |
|                          | 74810 74820 74830 74840 74850 74860 74870 74880                                   |       |
| Human                    | GAAGATGAGCATCAGAGTGTCTGCGACCATTTGATGATATTAT-GTACCAAGTTTTAGATGTTTGGCTTTTTTCAGGTTA  | 74020 |
| Kakapo                   | -GGTACAGGATG--GGTCAGCTT---GAAGTAAGTCTGAGCTAATGCAGCTCTTTGTGTTAGAGAAGT--TAGAAG--    | 37798 |
| GoldenEagle              | -TTTGTGGGAAG--GGACAGCCTTGCTGGCCAGACCTAGCAGAAGGGTGTCTGCGATATGTTTCAGTTTTC--CAGATGCA | 44916 |
| JapaneseQuail            | GCTTGTAGGAAA--GGACGGACTTGCTAACCCAGACATAGC---GAGGTGTCTGTTGGTCACTCAGTTCC--CGGATTCA  | 33272 |
| MediumGroundFinch        | -TTTGTGGG-----GACAGCCTTTCTGGCCCAAGCCTGGCAGAGGGGTGTCTGTAAGATGTTTCAGTTTTC--CAGATGCA | 22105 |
| GoodesThornscrubTortoise | GTGTAAGGCATCCAGGCAACCTT--AACTCCACCCTGTAATGATGTTGTGCAATAACCATACTGTTATAACTAATGCA    | 69129 |

Monday, May 02, 2022 06:51 PM

|                          |          |                        |                    |                    |                    |                   |             |
|--------------------------|----------|------------------------|--------------------|--------------------|--------------------|-------------------|-------------|
| Majority                 | TGAC---- | TGTGTGAAAACAGCT-TG---- | TTTCATG--          | TAGAGGGCTCATTAGT   | TTTGT----          | GCAGTGCT-TAGGTC   |             |
|                          | 74890    | 74900                  | 74910              | 74920              | 74930              | 74940             | 74950 74960 |
| Human                    | TGAA---- | AGCGGGGATGAGTTAAGA     | ACCAGTCTGCTG--     | TGAAGGATTCATCAACT  | ATTTT--            | TAG--GCAGT-TGGGTA | 74089       |
| Kakapo                   | GCAC---- | TTTGTGAATGCTGT-----    |                    | GAGCCCAGGAAAAGGGT  | -----              | G-AATATT-GTAGTT   | 37846       |
| GoldenEagle              | TGAC---- | TGTGTGAAAATAGCTATGTT   | GCTTCCATACCAGCAGG  | CACACTAGGTTTGT---- |                    | GCAGTGCT-TGGCTC   | 44986       |
| JapaneseQuail            | TTGC---- | TGTATGAAAACAGC--T----  | TTCCATGGCCAGAAGGC  | CTAATAGTCCAT----   |                    | GCAGCACT-TAATTC   | 33335       |
| MediumGroundFinch        | TCAC---- | TGTATGAAAATAGC-----    |                    | AGGCACACAAGGTTTGT  | -----              | GCAGTGCT-GAGCTC   | 22154       |
| GoodesThornscrubTortoise | GAATAGC  | ATTGTGGTCTCAGGTTAG     | TAAACTTATTTTTTAAAG | ACATTATATATTTTGT   | TACTAGTATCGCTACAGG | C                 | 69209       |

|                          |           |                    |                   |                    |                   |                         |             |
|--------------------------|-----------|--------------------|-------------------|--------------------|-------------------|-------------------------|-------------|
| Majority                 | AAAGTGG-- | TAAGTCCTTTTA-GAACT | TTAATGTG-TTGGGAT  | GTACATTGCAG---     | GTA               | AAATCAAGC-TAGCTGT--     | C           |
|                          | 74970     | 74980              | 74990             | 75000              | 75010             | 75020                   | 75030 75040 |
| Human                    | AAAA      | TGACCAATTTAGT      | TTTTAAGAACTGACTGT | GGCTCCAGAGTATGTT   | GGAGAAGTGAAAAT    | GGAGACTAGGAATAAC        | 74169       |
| Kakapo                   | AAGG----- | CTACT--GAAC--      | GCTGTG-CTA-TATCT  | GCCTTTT----        | CTAAAATCAGAT-CACT | TG--A                   | 37900       |
| GoldenEagle              | AAAA      | TGA--CAAGTCCTACCA- | GAACTT            | TAAATGTG-TTGGGAAGT | ACTGCAG---        | CTGTAACCAAGC-TAGCTGTG-C | 45057       |
| JapaneseQuail            | AAAA      | TGG--TACATCTTTTCA- | GAACTT            | TAAATGTG-TTGGAA    | TGTGCATTGCTG---   | GTAAGCTAAGC-TAGCTT----  | 33403       |
| MediumGroundFinch        | AAAG      | TAG--TAAGCCCTACCA- | GAACCT            | TGGATGTG-TTAGCAAGT | ACTGCAG---        | ATGTAACCCTGC-TAACTG--C  | 22223       |
| GoodesThornscrubTortoise | GAAGT     | TCCCTAACTGATTTTC-  | ATACTT            | TAACTTT-TTGGGATTT  | CTTTTAAAG---      | GTAACCTTAACTGTAAATATC-C | 69283       |

|                          |           |                    |                   |                 |                     |                      |
|--------------------------|-----------|--------------------|-------------------|-----------------|---------------------|----------------------|
| Majority                 | AGGAGCT-- | ATTTCTGGTCCAG--    | AAGTTGTACATTT     | CAGTCCAGTATTGC  | ACTCTAAACAAATG----- | T-GGAATAT            |
|                          | 75050     | 75060              | 75070             | 75080           | 75090               | 75100 75110 75120    |
| Human                    | AGGTGGG   | AGACTATTAGTCTAATTA | AGATGTAATTATAAAT  | CTAAGCTAGGAACG  | TAAAATGAGAA-----    | T-GCAAAGT 74243      |
| Kakapo                   | AGGATAC-- | ATTTCTAT--GG--     | A-GTTGTAAATCCA--- | CATACTCCCACCT   | CCCACAAATT-----     | TTGGAATGC 37964      |
| GoldenEagle              | AAGAGCT-- | AGCTCAGGTTCCAG--   | AAGTGGTACATTT     | CAGTCCAGCATT--  | AATCAAGAGAAACA----- | AAAGAT 45122         |
| JapaneseQuail            | -----     | TCTTTGGTCCAG--     | AGGTGATGCGTTT     | CTGTCCAGTATT--  | ACTCAAGAGAAACG----- | AAAGAT 33460         |
| MediumGroundFinch        | AAGAGCT-- | AGCTCAGGTTCCAG--   | AAGTGGTACATTT     | CAGTCTAACATTT   | CAGTCCAAACAGATGT    | GTGTATTTGAAAAT 22299 |
| GoodesThornscrubTortoise | GGGTTT    | TGTAATGCTTGT       | TTGG--GGGCTAATCT  | GAACATCCCAGTAAT | GTGTTTCAACCATTGAAT  | ---TACTGATAT 69358   |

|                          |            |                    |                  |                  |                    |                           |
|--------------------------|------------|--------------------|------------------|------------------|--------------------|---------------------------|
| Majority                 | TTGATTT--  | TTGTATTTTCCAGTGTA- | ATTTATGTATTACT   | GTATGATTTCTATTT  | TGATGTAG-TTTATATTT | TAGGATAA                  |
|                          | 75130      | 75140              | 75150            | 75160            | 75170              | 75180 75190 75200         |
| Human                    | AAGAA      | CAAAATATGGGGAAAAT  | TATATGTAAAAGTAAT | AGGACTTGGCATCTT  | ACTGATGTGA-TTGAT   | TATGAGAAAAA 74322         |
| Kakapo                   | TCGACTT--- | CACATCCTCCAGTCTG-  | ACTTGCAAAGCACT   | GTATCACTTCTAGCT  | TACAGCAG---        | GA-GTTTGGGGAAG 38036      |
| GoldenEagle              | CTGATTT--  | TTGTATTTGGAGGTGTG- | ATTTGTGTTTTT     | CACCAT-GTGTA     | TATATGAGGTAGTTTT   | TATTTAATATAA 45198        |
| JapaneseQuail            | CTCGCTT--  | TTGCATTTGAAAGT     | CCAAATGTTTCTA--- | CTGAATGATCTGTG   | TTCTTGAA-----      | ACATT-----AAA 33526       |
| MediumGroundFinch        | TTGCTTT    | TATTTGATTTTTT      | CAGTGCATATGTATAT | ATATATATATATATAT | ATATATATATATGGT    | AGCTTTATATTTAGCATAA 22378 |
| GoodesThornscrubTortoise | GTACTCT    | CAACTTTCAGTCCAGCT  | TAA-ACATAGTTCT   | GATTTGGGAATTT    | CTTTTTTATTTAATTT   | TAAATGTTCCAGGTAT 69437    |

Monday, May 02, 2022 06:51 PM

|                          |                                                                                    |       |
|--------------------------|------------------------------------------------------------------------------------|-------|
| Majority                 | TGACTTGATTGAATGAT---TCATTAATTTTTAGAAATGTGCTGTTAATCTTTATTTCCCTAGTATTTGTTATTAATC-TCA |       |
|                          | 75210 75220 75230 75240 75250 75260 75270 75280                                    |       |
| Human                    | TGAAGCATGTGGAGGAGTCCACTGGACAGTAGGAAATTCAGCCTAAGACTTGGGTAAGAGTTCCTGTGGAGTTGTGAATTC  | 74402 |
| Kakapo                   | TAAAAATACTGTAAGAA---TCCAAAGTCTGAAGAACCCTACTGCTGAAGTTTATTTCCCTGTTTTCTCTTTAACT-TCC   | 38112 |
| GoldenEagle              | TGACTTGATTGAATGG-----ATTAATTTTTAGGATGAGCTGT--ACCTTTACTTCCTAGCATTTCTGAAGAATA-TAA    | 45269 |
| JapaneseQuail            | TAACCTGCTTTAAAAAG---T--TCTATTTCTTCTGTGTAGCATTAAGAGCTA-TACATACTATATGAAAGCATGC-TCA   | 33599 |
| MediumGroundFinch        | TGAATTGATTGAATGCTAATTTGCTAATTTTTAAGATGAGCTGC--ATCATCACTTCCTAGCACTCCCTAAGAAT--TAA   | 22454 |
| GoodesThornscrubTortoise | GAACACTAAACAAGAAATGCCAAAGAGAATGTTACAATGTGATATTTCTAATGATTTGAAGATGTATATTATAAACCTTCA  | 69517 |

|                          |                                                                                   |       |
|--------------------------|-----------------------------------------------------------------------------------|-------|
| Majority                 | AGTTGCTT-AATTATTAATAATTT---CTGTGTTTTAAATC--TATGATATTTAAATG-TTAGTGATTAGAGTGTAAATGA |       |
|                          | 75290 75300 75310 75320 75330 75340 75350 75360                                   |       |
| Human                    | AGAGGCCAGAGATGTGATATTTAAAATTTGGTTCAAGATTTCCAGGTATAAGAAAGCAAGAGGATTAAGCATTGTAA     | 74482 |
| Kakapo                   | TATTGTTT-AAGTATTGAAATCT---CTCTTTTCACGGGTTGATAGGGCAGGTGGATGAGTATTTGTAAGTGTGACACCA  | 38188 |
| GoldenEagle              | ACCAACTT-AGTTACAAAAATGT---CCAT-TTTTTAAATC--TCTCATATTTAGCTG-TTAGTGCTTCAACTGAAAGAA  | 45341 |
| JapaneseQuail            | AAATGCTA-ATGGAATTAATA---GTCTGATATAGAATG---AGAATAGTCAAAAGTCAAATAATTAGGTCTTAATGG    | 33672 |
| MediumGroundFinch        | AGTGACTT-TATTACAACAGTTT---CTGTATTTTTAAGTC--TGCCATATTTAACTG-GTAGTGCTTAGAGTGAAAGGA  | 22527 |
| GoodesThornscrubTortoise | TTTTATTCCAACTTTTAGGACCA---TTGTCCCTAACACCTATATTTCCCTTCCTTAGTCACACACCCTTCCTCCTCA    | 69594 |

|                          |                                                                                   |       |
|--------------------------|-----------------------------------------------------------------------------------|-------|
| Majority                 | TAGGTGTGCCACAAATGTATATGGAC----TCAAGTTAAGTTATACTTATTTGCCTTGTGTTAA-TAGGTATAATGTAG   |       |
|                          | 75370 75380 75390 75400 75410 75420 75430 75440                                   |       |
| Human                    | TTAAACTTTAAGCAGTGCATATTTATG--TTATAGATAAGATAAA-CAAGAAATCTAGGGATCAAATAGGATTAATAATTA | 74559 |
| Kakapo                   | TAGGGATGAGTGCTATAGAATTGCCC----TGGAGGCAGTTAGTAATCTTTGGTCAGCACGTAA-TAAGTAGAATTCAG   | 38263 |
| GoldenEagle              | -AGGTGTGCCCAAAATGTAATGGAA----TAAAATCCAGGTATATCAATTTGCCTGGTATATAA-TGAAGATGGACAAA   | 45415 |
| JapaneseQuail            | AAAGCGTTTCCAC-ATAGATGTGGTA----CCATGGTAAG-AGTCCATGTGAATTCGTGTTAG-TAGGCATCCCCTAA    | 33745 |
| MediumGroundFinch        | -GGATATGCCCAAAATGTAATGGAC----TCAAATCCAGGTAT--TGACTTGCCTGGTGGATAA-GGGAGATAACGGAG   | 22599 |
| GoodesThornscrubTortoise | GTGTTGCTTTCACATATCTCTGTTCCATCCACCCTGAGTTCCCCTTCCTAACCTTCTGTCAAGTCAATATGGTGCAG     | 69674 |

|                          |                                                                                     |       |
|--------------------------|-------------------------------------------------------------------------------------|-------|
| Majority                 | ACAGTGATAATTAGGTATATTT-TTGTTTATTTTT-TATACTTTTTTATAGCATTATTTTAAACAGGGAATGTGAGTTTCA   |       |
|                          | 75450 75460 75470 75480 75490 75500 75510 75520                                     |       |
| Human                    | GTAGTGATCATTCAGTACAGTAGTTACGTACTGTTATTCACAAGAGTATATAAATCAAATTACAAGGAATTAAGGATATA    | 74639 |
| Kakapo                   | ACATGGGGCTACAGTCATATTA--GCTTAAATGC--AC-CTCTTTAAATGCACTGTTTTTCCAAGCAGCAGGAAAATCA     | 38337 |
| GoldenEagle              | ACATACATAATTAGGTCTTTTTAGAGAGTGTTTTCATAGAGTTCTAAGTAGTGTGTCATGGTAAGAGTTCCACGTGAATTTCA | 45495 |
| JapaneseQuail            | GAAGTAAGAATTGGGAAAATAG---GATTTTCTTT---TATTAAGGTGTAGCATTAGACTAGCAGGTAATGGGTCTTTTG    | 33819 |
| MediumGroundFinch        | ACACACATATATATATATATGT-GTGTGTATATGT-TGGATTTTTTACAAAAGTGTTTTCATAGAGTAC-TAGTTGTCA     | 22676 |
| GoodesThornscrubTortoise | AGAGTAGTTATTGAAAATAATTTTCATTTTTGTCTGTCATCTGCATAACTTGGGTACTTCAACAAGGACT-AAAGAATAA    | 69753 |

Monday, May 02, 2022 06:51 PM

```

Majority      T-T-TTTGTAGGCAATTTTTCATAAGTTTCACTTAATATG-TTGTTCATAGTATTTTTTAAAGGATAGT--GTTAGAAACA
              75530      75540      75550      75560      75570      75580      75590      75600
Human         AAC-GTGATAAGAAAGTATGCACTGTACTCTTTGAGGAAGTTTGCCATAGAAAGGAAGAAGAAATAGGATGGTA-GATCA 74717
Kakapo        ----AAGGTAGACGA-CATGAGTAAGTTGCAGTGGAG-T--CAGTCAT-GTTTATTTTGATGAGTAGT--GC-AGATACT 38405
GoldenEagle   C-TGTTAATAGGCAACCTTTCAGAAGTACTAATTAAT-TG-TGAAAATAGGATTTTTTTAAAAAAGT--GTTAGTAACA 45570
JapaneseQuail TGTTGTGTATGTGTGTTTTGTTTTGTTTTCTTAAAATT-TCGGCACAGATTACTTCTAAGGGGAGA--GT---AAA-A 33892
MediumGroundFinch --TATTAATACACATTCTTTTAGAAGTACCAATTAAT-TG-TGAAAAT-GGGTTTTCTAAAAGAGAGT--ATTAGGAACA 22749
GoodesThornscrubTortoise@GT-TCTGCGGATAATTCCACAAAGAAGGGGCTGGATAGG-GTGTTCATCGTATTCGCAAAGGCAGTTTGGCTTCATGTA 69831

```

```

Majority      TTAGGTTAGCA-GTTAGAGTTGGTTGTCTTTCT--ATTTAGGCACTATTTAT-----CTTAAA--AGGGAGAAGGGGAGC
              75610      75620      75630      75640      75650      75660      75670      75680
Human         GAAGTAAAGCAGGACCCAGTGGGGGAGTGTTCAGTGAGGCAGTATGTATAATCATTTAAAACATGGGTTTGGAGTCC 74797
Kakapo        ATAATATGGTT-GCTACATTACTTTCTCCCTCC--ATAAAAGCATTCATTGT-----TTGGAA--AGAGACTTAAGGGAG 38475
GoldenEagle   TTAGGTTAGCA-GGTAGAGTTGCTTTTCTTTCA--ATTTTGGCACTAATTAC-----CTTGAA--GGGGAGAAGGAAAAC 45640
JapaneseQuail GCAGGCAGG---AACAAATTTGGTGGTTAGC---TTGGAGCCATCTACTAT-----ATGATG--TGTAAGCCTTGGGGT 33959
MediumGroundFinch TCAGGTTAGCA-GTTAAAGTTGGTTTTCTCTCA--TTTTTGGCACTATCTAC-----CTTTAA--GAGGAGAAGGGAAGC 22819
GoodesThornscrubTortoise@ATTGTTCCCA-ATAGGAGTTGGTGGCCATTTTGAAAGAGGGAACGTTCGC-----CTCATTCATTGAGAAAAATAGT 69905

```

```

Majority      ATGCAGGAATTATGTTTATATGTGCTTTATCAGATGGTTGTCTGTTGTGTTTTTGAAG-GTTTAGATTTTTCTT-----C
              75690      75700      75710      75720      75730      75740      75750      75760
Human         TCTCAGGTTCCATGTTTGTAAATGGACATAAT--GATAATAATCCCTTTCATTTAAGGCTGTTGTGAGGATTAATGTGTT 74875
Kakapo        CTGGATCCATTTTCTA-ACGCTGCTCATGGCCAGTTGGGTGAGCTTTGAGTTGTCAA-ATGGGAATGGTGCTT----- 38547
GoldenEagle   ATGCAGGAACAATGTAATATTCAGCTTTAACAGATAGCTGTCTAACATGATATTTAA-GTCTAGATTTCTGCCCCGCC 45719
JapaneseQuail TTTTTTGGGTTTTTTT--GGTTTTTTTTTTT---TGTTTGTGTTGTT-TGTTTTTTGA-GATC-----TTCTT----- 34019
MediumGroundFinch ATGCAGGAATAATGTATATATATGCTTTAACAGATGGCTGTCTAACATGGTAGTGAA-GTCTAGATTTTTTTT-----C 22893
GoodesThornscrubTortoise@GATAGTAACCATTTTTAAAGAGAGCATTTTTGTGTAATTATCGGTCTGATAGTAGCA-GTACCCTCAACCCCC-----C 69979

```

```

Majority      TCAGTTC AATTTTCCATGTAAAA-----TCT-TGGTTTTTGGTTTGGT----TTTTCTTTTTTTTTTTTACTTTGAGA
              75770      75780      75790      75800      75810      75820      75830      75840
Human         AATGTGCAAATAACTTTACACAGTGCCTGGTATATAATAAAT-GCTTGCTACCTATTAAGTATTTGTTTCTAAGGCT 74954
Kakapo        ---GTTTGAAT----ATGAAAA-----CA-TGGTCTCAGTCTGG-----GCTCCTTACTGTGCAAAAAGGCACAA 38606
GoldenEagle   TCAGGTCAGCTTTCCATATAAAAAGACTACTTGTGTGGTTTTTGGTTTTTGGTGTGTTGTTTTTTTTTTTTTCTTTGAGA 45799
JapaneseQuail --AAGTCAGCTTTT--TGAGAC-----T--ATTTCTGGTCTGAT---TTTTATTTATTTATTTACTTTTTGA 34079
MediumGroundFinch TCAG-TTGATTTTCCATGTAAAA-----TTCT-TGGCTTTTTGTTTT-----TGTTCTTTTTTTTTTTTTTTTGGAGA 22959
GoodesThornscrubTortoise@CCCCTCAATTAATCCTAAAAAA-AA-----GTTTTATGATATAGC---CAATTTCAATGAGTTTACATTGAAG 70045

```

Monday, May 02, 2022 06:51 PM

|                         |                                                                                   |       |
|-------------------------|-----------------------------------------------------------------------------------|-------|
| Majority                | AATTTA---TTTGGCATT--ATGTCTGAATTAAGCTGTACTTTAGAATACAGGTT-----CATTATCTTTATTAGACA    |       |
|                         | ----- ----- ----- ----- ----- ----- -----                                         |       |
|                         | 75850 75860 75870 75880 75890 75900 75910 75920                                   |       |
| Human                   | AATTTAAGTCCTAGAATTGATTGCAAGGATTAGATCAGGAGTATAGTGGACATGTTGGGATTTAAATATTTAAATATAGA  | 75034 |
| Kakapo                  | AATAGA---AGTGACAT---AAATAAGAA---AGGGCAAAGGATAGAAGAAACCCT-----CAAAGCTTCAATGGACA    | 38671 |
| GoldenEagle             | AATTTA---TTTGGCATT--ATGTCTGAATTAAGCTGTACTGTCTGAATACAGGTT-----AGTTATCAATATTTCAACA  | 45868 |
| JapaneseQuail           | GAGATG---TTTGGCATT--TTGCCTGCATTAAGCTATACTGTGGAATACAGATT-----CATTATATTCAGCAGAAA    | 34148 |
| MediumGroundFinch       | AATCTC---TTTGGCATT--ATGTCTGATTTTAAAGCTGTGCCTTGGAAATGCAGGTT-----AATGAGCTGTATTCGACA | 23028 |
| GoodesThornscrubTortois | 6ATCTA---CCGTATTTT--GTTGTTGAGATCATTTGGGGACTTCAAGAAAAACCTATTAGAGCGCTAAATTTCTTAAAGA | 70120 |

|                         |                                                                                  |       |
|-------------------------|----------------------------------------------------------------------------------|-------|
| Majority                | GTTGATTTTTT-AACTTTTGAC-TGCGTTAAA-ATTTTTCTTGCCACTTTGGTGCAGAAA-----TGTAGGTACTAAG   |       |
|                         | ----- ----- ----- ----- ----- -----                                              |       |
|                         | 75930 75940 75950 75960 75970 75980 75990 76000                                  |       |
| Human                   | GATGCTTTTTTAGGACCATTGTTAGAACCAGAAGAGATTTTTTACCAAGTTCACACAGAAA-----TGTAGGTGCATTG  | 75107 |
| Kakapo                  | CTTGCGCCTGC-AATTTATAGC-TGCGTT----TTTATTCAGAGACTCAAAGGAGAAGG-----TTGAGAACACTCAG   | 38739 |
| GoldenEagle             | GCCTAACTTTT-AAGTT-TGAC-TGCATTTAAA-ATGTATCTTGCCACTTTGGTGCATA-----TCTAGGTAAGAGA    | 45935 |
| JapaneseQuail           | TTTGATTGCACCAACTTCTTTG-CACCTTGCT-GCATGAACCGTCTCTTGGTAAGAGAA-----ATAAATGTCAAG     | 34217 |
| MediumGroundFinch       | GACAAAATTT--AAATT-TGAC-AGTGTGAAA-ATGTCCCTTGCCACTTGGGTGCATAAAAACAGTTTCTAGGTAAGAAG | 23103 |
| GoodesThornscrubTortois | @TCCATTATTTTAAATTTTAAATGCAAATTAATTGATTTACTTGTAAATCTCTTAAGTCCTTCTGTATTTAAAGAGTGAG | 70200 |

|                         |                                                                                 |       |
|-------------------------|---------------------------------------------------------------------------------|-------|
| Majority                | TGTTAACATGGAGGTTCTCTG-----GCATCATGTTGAG--AGAGGTTAATGCATTTTAAATTCAGTTGGTTTTAAG   |       |
|                         | ----- ----- ----- ----- ----- -----                                             |       |
|                         | 76010 76020 76030 76040 76050 76060 76070 76080                                 |       |
| Human                   | GCTGGGCATGGTGGCTCACACCTGCAATCCCAGCACTTGGG---AAGGCTGAGGCAGAAGAACTGCTTGAGGCCAACAT | 75183 |
| Kakapo                  | TTATAATATGGAGGTTGGCA-----A-ACTGCGATGTG--TGAAT-ATGGCAGAATGATAGCAG-TGACCTTCCT     | 38805 |
| GoldenEagle             | AGTAAACATCAAGGTTCTCTG-----GAATCGTTTTTAAA--AGAGGTTAATGCATTTTAAATCTTAATTGGTTTTAAG | 46004 |
| JapaneseQuail           | TA--AACATCGAGCATCCGG-----GAGTCATGTTAAG--AGAGGTTAATACATTGTAATCTTAATTAGTTTTAAG    | 34284 |
| MediumGroundFinch       | GG--AGCATGGAGCTTCTCTG-----GCATCATGTTGA---GAGGTTAATGCATTTTAAAT-----TGGTTTTAAG    | 23162 |
| GoodesThornscrubTortois | @GCTGTGATGGCGGTGCTGCTGGTGGAGGCAGCACATGGAGCTAGGAGCTGAGGGAGAGGAGCTCCTGTCACCTATTCA | 70280 |

|                         |                                                                                    |       |
|-------------------------|------------------------------------------------------------------------------------|-------|
| Majority                | CTAGACAGTAAGATGGATAA-ATATCTATACGCTGACCTTCTTTAAAAATACAACCCTATAAT-CCAACAACGATGCTT    |       |
|                         | ----- ----- ----- ----- ----- -----                                                |       |
|                         | 76090 76100 76110 76120 76130 76140 76150 76160                                    |       |
| Human                   | TTTGAGACCAGCCTGGGCAACATATTAAGACCCCGTCTCCACCAAAAAAAAAAAAAAAAAAGAAGTAGGTGCAGAGCTGGAA | 75263 |
| Kakapo                  | CCTGCTTCTTGCTTTGAATA-TTTTATTTCTTTTATTGCTTTAGAATTGCGAGCTCTGTAATGTCACCTAACGATACCT    | 38884 |
| GoldenEagle             | CTAGACAGTAAGATGGATAA-ATATCTATACGCTGACCTTATTTAAATAAACAACAACCACCAC-CAAACAAAAATAATT   | 46082 |
| JapaneseQuail           | CTAGACAGTAAGAGGGATAA-ATAATTACATACTGATCCAGTGCAAC----CAACCTATAT-----T                | 34341 |
| MediumGroundFinch       | CTAGACTGTAAGACAGATAA-ATATCTATACACTGACCTTCTTTAAA-ATAAACAACCAA-----AAACCCAGCC-TT     | 23234 |
| GoodesThornscrubTortois | @GGAGCCCCCCCCAGTAA-GCACCTCTCGCACACCAGTCCCCAGCCCTGAGTCCCTCCAAACCAATCTTC-TGCTG       | 70358 |

Monday, May 02, 2022 06:51 PM

|                          |                                                                                   |       |
|--------------------------|-----------------------------------------------------------------------------------|-------|
| Majority                 | GTGGAACCAACTTGTCTGTGTTGTTTTAAATTAATTGT-GCTCCTTTTTCCAGGCCTTAGATGGTCAAATATTTATA     |       |
|                          | 76170 76180 76190 76200 76210 76220 76230 76240                                   |       |
| Human                    | GCAGAACCGAAATCATCAGTGTACAGTCATTATTCTTCTGTCCATTATATGTCTTTATGAAGCAAGGGAGAAAGA       | 75343 |
| Kakapo                   | TCAGAGGGTACTCAGTCAGTGTCTGCTCGCCATTCCACAGATGGCTCCCAAAGGCATGTTTCTCCATGAAAGAGTGG     | 38964 |
| GoldenEagle              | ATGTAACCAACCTGTATTGTGATTTTTTAAATAAATTG--ACTCCCTTTTTCCAGGCCTTAGATGGTCAAATATTTATA   | 46160 |
| JapaneseQuail            | GTGTA-----T-----TATTTATTTTAAATTAATTGT--TTCCTTTTTGCAGGCCCTTAGATGGTCAAGATATTTATA    | 34406 |
| MediumGroundFinch        | GTGCAACCAACTGTTATTGTG--TCTTTTAAATAAACTGT-GATCTTTTTTCCAGGCCTTAGACGGTCAAATATTTATA   | 23311 |
| GoodesThornscrubTortoise | GTGGGGCAAGGGGGCCTGAGACTGCCCCAG--CAGCTG--CTGCTGCGACTGGCCCATGGGCTGCCTGAGCTGCTCAG    | 70433 |
| Majority                 | ATGCTTGCTGTACCCTACGGATTGATTTTTCCAAGTTGGTGAATTTGAATGTCAAGTACAACAAAGATAAAAAGC--AGTG |       |
|                          | 76250 76260 76270 76280 76290 76300 76310 76320                                   |       |
| Human                    | AGAACAGATGAAAGAAGTGAAGTGGTTGAAAGATTTGATTGAATTTCTGATCTAAAAATTATAAGGCACTT           | 75423 |
| Kakapo                   | AGCTCCGTTTTGAGCTTCGTGTGATGCTCTTCAGGTTCTTTTGCATGCTCAAAAAGAATACCCTAAATGGAACC--TGTG  | 39042 |
| GoldenEagle              | ATGCTTGCTGTACCCTACGGATTGATTTTTCCAATTTGGTGAATTTGAATGTCAAGTACAACAACGATAAAAAGC--AGGG | 46238 |
| JapaneseQuail            | ATGCTTGCTGTACTCTACGGATTGATTTTTCCAATTTGGTGAATTTGAATGTCAAGTACAACAATGATAAAAAGC--AGGG | 34484 |
| MediumGroundFinch        | ATGCTTGCTGTACCCTACGAATTGATTTTTCCAATTTGGTGAATTTGAATGTCAAGTACAACAACGATAAGAGC--AGGG  | 23389 |
| GoodesThornscrubTortoise | GCAGCTCCCAGGCCAACACAGGGGCCCGAAAGTTGCGGCATCCG--TGACCTGCATGACAAACATGGAGCCTTACTG     | 70511 |
| Majority                 | ACTACACTCGTCTGATCTTCCATCTGG---TGATGGTCAGCTAGCTCTGGACCCAG--TCATTGCTGGAGCATTGCTA    |       |
|                          | 76330 76340 76350 76360 76370 76380 76390 76400                                   |       |
| Human                    | GTTTAAACAAGTTGAAAGTAGGAAAGTAGACATAAGACTCTACTAGATTTGGGGAAACTCTCAAAAATGGACTGGAAATTC | 75503 |
| Kakapo                   | GC-ATTCTTGTAAAAATCCTTGCTGTAC---CTGTGCTCTTATATGTATATAATGAGA-TCATTAACAGAAAATGTGGTG  | 39117 |
| GoldenEagle              | ACTACACTCGTCTGATCTGCCATCTGG---TGATGGACAGCCAGCGCTGGACCCAG--CCATTGCTGCGGCATTTGCAA   | 46313 |
| JapaneseQuail            | ACTACACTCGTCTGATCTTCCATCTGG---TGATGGACAGCCAGCGCTGGACCCAG--CTATTGCTGCAGCATTGCAA    | 34559 |
| MediumGroundFinch        | ACTACACTCGTCTGACCTTCCATCTGG---CGATGGACAACCAACTCTGGACCCAG--CTATTGCTGCAGCATTGCCA    | 23464 |
| GoodesThornscrubTortoise | ATGAGACTGCTAAAAATGATTTGATTGT---TGTGCTTAGTT--TATTTGAAAAGC-TGTCCAGTAGGGTTTTCACTG    | 70585 |
| Majority                 | AGGAG-ACTTCTCTTCTAGGTATGATTTGACTTTGTTGTTATGTGTTGCATAGTTATTTTCATGAAAATATTTATTAATC  |       |
|                          | 76410 76420 76430 76440 76450 76460 76470 76480                                   |       |
| Human                    | AGCTAAAAGTGGATAACAAAATATTTCTAGAATTAGCATTGTGGGGTGTGTGTGT-TTCACTCTAGTATTTGTCAAGC    | 75582 |
| Kakapo                   | AGGA---C-TCAGTTCTGGCTTTTGCTTATGTTATGCTATTATATGCTGGATAGTTGTACATTAGATGCTTTTTTTTGT   | 39193 |
| GoldenEagle              | AGGAG-ACATCTCTTCTAGGTATGATTTGACGTTGTTCTTTTGTATTGCAAAGTCACTTGATGAAAATGTTTATTAATC   | 46392 |
| JapaneseQuail            | AGGAG-ACTTCTCTTTTAGGTATGACTCTGACTTTATTTGTTATGTGTTTCAGAGTCACTTGATGAAAATACTTATTAGTC | 34638 |
| MediumGroundFinch        | AGGAA-ACCTCTCTTCTAGGTATGATATTTACATTTCTTCTCTGTATTGCAAAGCCACTTCATGAAAATATTCATTAATC  | 23543 |
| GoodesThornscrubTortoise | ACAACCTGCTTACCTACCTGGCCAGATTTGAACCAGGGGCAATAGGGTGCATTTGTATTCCATTATCAATCCCCACATC   | 70665 |

Monday, May 02, 2022 06:51 PM

|                          |                                                                                        |  |
|--------------------------|----------------------------------------------------------------------------------------|--|
| Majority                 | CTTC----TATCA-ATTCTAAATCTTAAATTGCAATAGT----GTCCTAAGTCTCTGTT---CAGGGTTCAGTCTATTTTG      |  |
|                          | ----- ----- ----- ----- ----- ----- -----                                              |  |
|                          | 76490      76500      76510      76520      76530      76540      76550      76560     |  |
| Human                    | CCAGATGAAAGCATAGACAGAATGTAAGACTGGATTTATCTAAGTCTGGAATTGTGTAACATTAAGGAATAGTAGCAA 75662   |  |
| Kakapo                   | GGCT----TTTTA-ACTCTCTGCTGTAATCTGTA----T----GTCAGAAGTGAGGTT---TAGGTTTAATACGATTTTG 39257 |  |
| GoldenEagle              | CTTC----TAACA-GTTAAAGATCTTAAATTACGATACT---GTCCAAAGGCCATT---CAGGGTTCAGTCTATATTG 46460   |  |
| JapaneseQuail            | -----T-----TAAATTGCAATAGT---GTCCTGAGGCTA-----TTCAGTTTATGTTG 34680                      |  |
| MediumGroundFinch        | CTTC----TAACA-A-----CTTAAATTACAATAGT---GTCCAAAGACCCAGG---CACGGTTCAGTCTAGATTG 23603     |  |
| GoodesThornscrubTortoise | ATCCAGATTCTAA-ATACTAAATATTTATTTCCCTTTCT---TCTCTAGACTGTGGC---CTGGAGAGGGATAGCTCAG 70737  |  |

|                          |                                                                                        |  |
|--------------------------|----------------------------------------------------------------------------------------|--|
| Majority                 | TGGTCTGAGTTTTAG--TAA--CATAAT-TGTGTTGTCTTTTGAAGCCCTGCATAAG-TGAGT---GAGAGAATGCATGA       |  |
|                          | ----- ----- ----- ----- ----- ----- -----                                              |  |
|                          | 76570      76580      76590      76600      76610      76620      76630      76640     |  |
| Human                    | TGAGCAGAGTGTGGCTCAAGCCTAAGCTTGAGCCTAAGCTTGACTCTATGGTAAAGTCAAGTCAAGGGAGAATAGAAAAG 75742 |  |
| Kakapo                   | CAAGCTGAGTTTTAG--TGA--CAGAAATGTGGGCTTGGTGTTTAAATCTGCATTAA--TACT---AAACCATTACATAT 39328 |  |
| GoldenEagle              | TGATCTGCATTGTAG--TAA--CACAAT-TATATTGTCTTTAGAAGTCTGCATAAA-TGAGT---GAGAGAATGCATGA 46531  |  |
| JapaneseQuail            | CAGTGTGAATTCTAG--CAA--TATAGT-TGCATTATCCTTAGGAGCCCTGGAGAAG-TGAAT---GAAAGAATGCATGA 34751 |  |
| MediumGroundFinch        | TGGTCTGAATTGTAG--TAA--CATAAT-TATATTGCCTTTAGAAGTACTGCAAAAAATGAGT---GAAACT-TGCATGA 23674 |  |
| GoodesThornscrubTortoise | GGTTTGAGCATTGGCCTGC--TAAACCCAGGGTGTGAGTTCAATCCTTGAGGGGGCCATTT---GGGGATTTAGTTGG 70812   |  |

|                          |                                                                                        |  |
|--------------------------|----------------------------------------------------------------------------------------|--|
| Majority                 | CAAT--ATGATAAA-TGCACAAAGTATAAGAAAAGGTCAAGTTAGTTCAGCTTG-TGTTCCAAAGTCTGA--TCCTTCCA       |  |
|                          | ----- ----- ----- ----- ----- ----- -----                                              |  |
|                          | 76650      76660      76670      76680      76690      76700      76710      76720     |  |
| Human                    | GGGGTCACCATAAA-GGTCAAAGTGGGTTTAGTGGTGTGTGGGAATAGGCAGATCAAGAAAAGAAATGAAGTTAGGAAA 75821  |  |
| Kakapo                   | CTCT--GTTTCCTTCTGGATGGAATTAACCCTTTGCTTCAGGAAATGGAACTTTATGATGCAGTGTAGGAA-CACTTACA 39405 |  |
| GoldenEagle              | CAAA--ATGAAAAA-TGCACAAAGTATAAGGAAAAGTCAAGTTAGTCTACTTT-TATTTCCAAATCTG---TCCTCCCG 46604  |  |
| JapaneseQuail            | CAA---ATGAGAAA-TGCACAAACTATAA-ATAAGCTCTCGCTCTGAATGCGTG-TCTTCGATTGTACCG--TTGTCCCA 34823 |  |
| MediumGroundFinch        | CAAA--ATGACAAA-TGCACAAAGTACTAGAAAAAGTCAAGTTAGTTCAGTTTG-TATCCCAAAATCTG---TCCTTCCC 23747 |  |
| GoodesThornscrubTortoise | GGATTGGCCCTGCTTTGAGCAGGGGGTGGACTAGATCAGTGTACTCAAAGTGGTGGTCCATGGACCCATGTCGGGCTG 70892   |  |

|                          |                                                                                       |  |
|--------------------------|---------------------------------------------------------------------------------------|--|
| Majority                 | TCTGTCAT-GAGTGTGCTAGTCCGGCTGCTAGTAAC---GACCTTGCTAACTTTACCAGCCATGTTTT-----AAAAAA       |  |
|                          | ----- ----- ----- ----- ----- ----- -----                                             |  |
|                          | 76730      76740      76750      76760      76770      76780      76790      76800    |  |
| Human                    | GGAGATAT-AAGTGTGAATGACCATTACAAAAAGAGACAGAGGAAAGAAAATGAAGATGTATCAAAGAAGTTGCTAA 75900   |  |
| Kakapo                   | GCTTCCAA-AACTGTTACGCAGGGACTTGA AAA---GAACTTACTATCTCCTCCAAACCCATTT-----A 39466         |  |
| GoldenEagle              | TCTTTCAT-GTGTTCCTGTGCTAGTCTACTACC---CACCTTGCTCACACTCCTACCCAAGTT-T-----GTAACA 46670    |  |
| JapaneseQuail            | AATGACAG-AAAAATAAAGGGATGT-----GACACAAGTAACTTAAACAGCATTCTTG-----AAAGTG 34883           |  |
| MediumGroundFinch        | TCTATCAT-GTGTTCCTGTCTGTGGC-----CACCTTGCTCACCTTCCCAGCTAATTTGT-----AAGAGA 23807         |  |
| GoodesThornscrubTortoise | GGAGTATCGGCAGCCAGTCCGAGCGAGTTTCTTAGAATGTAAGTACCAGAAGGGTTCATGCTTGGCAAAAAAAAAAAAA 70972 |  |



Monday, May 02, 2022 06:51 PM

|                          |                                                                                    |       |
|--------------------------|------------------------------------------------------------------------------------|-------|
| Majority                 | GACTGAGTGTGATGTGCATGTTTTTCATCATGTT-AATGCTTA----TTTG-TGATTTTCAGATTATGAAGCTACCATTTTG |       |
|                          | 76810 76820 76830 76840 76850 76860 76870 76880                                    |       |
| Human                    | TATGGATGGCAAAGTAGATGTTTTTAAGAAATCATGAGACCAGAGTCTTGGAAAAGTCATAGGATGATGCAGGGAATGGA   | 75980 |
| Kakapo                   | GGCTCAGCATAAGAAGCAGGCCATTAACAGGTACAAAA--G----CTGG-TGGTTCCTTGACATAAAGCCACAAAAAAG    | 39539 |
| GoldenEagle              | GACTTAATGTGATTTGCATGTTTCATTCATGCT-AATGCTTA----TTTG-TAATATCAGATTATGAAAATAACATTTTG   | 46744 |
| JapaneseQuail            | TCCTGAGTGTCA-GTGAATGCTTTCATAATCTT-----TA----TCT--TGATTATTA---ATGGAGTTTTTATATTT     | 34946 |
| MediumGroundFinch        | GACTTAACATGATGTGCATGATTTCTTCATGCTGAATGGTTA----TTTG-TAATATCAGATTATGAACTAACATTTTG    | 23882 |
| GoodesThornscrubTortoise | AAGGGAGGAAGGGGAGAAAAATAACAATTTAAATAATGCGGA----CTGAATGGGGCCAGTGGCTGGTATCCCAGACTGG   | 71048 |

|                          |                                                                                   |       |
|--------------------------|-----------------------------------------------------------------------------------|-------|
| Majority                 | CTGGATTCCTAGAATGGGGAAAGATTATGTTTTTGGTTATAGTAAGCTAATCTGGGTGTG-ATTTGTAATTTTGGTG     |       |
|                          | 76890 76900 76910 76920 76930 76940 76950 76960                                   |       |
| Human                    | GAAGAGGGAAATAAAGCCAGGTGCTGAAGTCTTTATGTAATGGGAGGAGATGTTCCAGTAATCCAATGGCTATTTTGATG  | 76060 |
| Kakapo                   | CTTCATACCAAGTCTAGGGATTAATCCAGTTCCTCAGTCACAGTTATGCACCTCCTGCATTAAG-ATGACTACTCCTGGTG | 39618 |
| GoldenEagle              | TTGGTTTCCTCAATGAGGAAAGATTATGCTCTTTGCTTAAAAAAAAGAAATAAAGTTCTA-GTCTGGGATTTCTGTA     | 46823 |
| JapaneseQuail            | GAAGAAAGAGAGAGGGAGGTAACTTTTCTGCTTTTGCTAATGACCAGTTGCATGAGCTTTGTG-TATCTTAACTTTGCTT  | 35025 |
| MediumGroundFinch        | CTGGTTTCCTTCAAAGGGGAAAGATTATGTTCTTTGGTTAAAATACCCAAATCCTTTGGTGCT-ACCTGTAGTTTCTGT-  | 23960 |
| GoodesThornscrubTortoise | CAGCAAGCTGAGCGGGCTGGCAGCTAGGACCCAGGCTGGCAGTAGGCTGAGCAGAGCTGGCA-ACTGGGACCCAGTTG    | 71127 |

|                          |                                                                                  |       |
|--------------------------|----------------------------------------------------------------------------------|-------|
| Majority                 | GCAATGGGTAACATAAAAAAGTTTATCGTT-----GC----ATTTCTAGTGTTGT-----GT                   |       |
|                          | 76970 76980 76990 77000 77010 77020 77030 77040                                  |       |
| Human                    | GGAAAGAGTGTGGTATGATGGGTGGCATTGAC-ATCGGAAGCCATCCTCATTGATGGTGGTGGAAACAGCAGTTTGAAAG | 76139 |
| Kakapo                   | CCTATGGTTTTACACAGAAGTTCATCATA-----G----ATTTTTAGTCTAGC-----TT                     | 39665 |
| GoldenEagle              | GAAAAAGGAAAAAAAAAAAAATCTGTAGTT-----GC----ACTTCTAGTGCTAT-----GG                   | 46871 |
| JapaneseQuail            | CATCTGGCAAATAGAAATACTCTGATCTTT-----GCATTAGTTTCTCTTTCAT-----TT                    | 35077 |
| MediumGroundFinch        | --G-----AATAAAAAATCTATAGCT-----GC----ACTTCTAGTGATAT-----GT                       | 23998 |
| GoodesThornscrubTortoise | CAGGAACCAACGGATGGAACCTCTTAGCCCGCTGCCAGCCGGGGTCCCAGCCACCAGCCCCGCCAGCCCTCTGCCAGC   | 71207 |

|                          |                                                                                   |       |
|--------------------------|-----------------------------------------------------------------------------------|-------|
| Majority                 | TAACTGAGTTCTGT---TTATCCTGTCA-----TAGCTTTTGTGTTTCATCAGAAGCTGTAGGTGGAGATGCTCTGAAAA  |       |
|                          | 77050 77060 77070 77080 77090 77100 77110 77120                                   |       |
| Human                    | TAACATTGTGCGGTGAGGTAGAGTGGCACATGATGCATCCTTATTTCTTACCTTTGGAGAAAAGTTGAGGGAGACCAAAAA | 76219 |
| Kakapo                   | TAATTTGCCTCTGA---TTAAACTGTCA-----TTACTAATGTGCATTTTCAGAAGTCATGCAAGAAGATGCACCAAAATG | 39736 |
| GoldenEagle              | TACATGAGTTCTA---ATATCCTGTC-----AGCTTTTGTAGTTCATCAGAAGAAGTAGGTGGA-ATGCTCTGAGAA     | 46938 |
| JapaneseQuail            | TGACTGCCTCCTGC---TTGCCTTATT-----TTCTTATCACAGACTTCAGGCTCTACTGCTGAACAACTTCAGAAAA    | 35147 |
| MediumGroundFinch        | TATAGGAGTTCTAT---ATATCCTGTCT-----CAGCCTTTGAGTTCATCAGAA---GTTGGTGAA-ATGCTCTGAAAA   | 24065 |
| GoodesThornscrubTortoise | GAGTGAATGCAGCC--CCAAGCCGGCAG----CAGGTTTCAGTGGCGGCCAGGACCTGCAGCTGCCATTAATAAAAAA    | 71280 |

Monday, May 02, 2022 06:51 PM

|                          |                       |                     |                               |                    |           |       |
|--------------------------|-----------------------|---------------------|-------------------------------|--------------------|-----------|-------|
| Majority                 | AGAC----              | TACAGATAATTTTATC-   | TTCTGACTATTAGCAAATTAATT-----  | AATAAATGCTT-----   | TAGGAGG-  |       |
|                          | 77130                 | 77140               | 77150                         | 77160              | 77170     | 77180 |
| Human                    | TGACT-TTTTGAGGGAATTGT | TAGAAAGTTTCATTAGAA  | AGAAAGTAAGTTTTTAATTA          | AAAAAGTTAATCTGAGGA | ACAGGT    | 76298 |
| Kakapo                   | GGA-----              | ATAAATAATGTGACA-    | TGCTGTGTTAAGCTTCCTTGAG----    | GAAAAAGACCT-----   | CAGAAAG-  | 39795 |
| GoldenEagle              | AGAA----              | TACAGATAAATATATC-   | CTCTGACTATTAGCAAAATAAATT----- | AATGCATGCTT-----   | TGGGAGAA  | 47000 |
| JapaneseQuail            | TGGG----              | TTCTGTTGGTATTAT--   | TGCTGCCT--TAGCCAATCAAGT-----  | AGTTGTCATAT-----   | TTGGA---  | 35203 |
| MediumGroundFinch        | AGG----               | TACAGATATGTCTGTC-   | TTCTGACTATTACCAAAATAATC-----  | AATGCATGCT-----    |           | 24117 |
| GoodesThornscrubTortoise | AATCAGCTCGCTGCCACCTT  | TATGGTACCAGTTCCTGGC | ACATTTGGAA-----               | AAAAATTGCCAGTCCGCC | ACATCAGAT | 71355 |

|                          |                      |                     |                       |                    |                |        |       |                     |           |
|--------------------------|----------------------|---------------------|-----------------------|--------------------|----------------|--------|-------|---------------------|-----------|
| Majority                 | A-----               | A-----              | TT-----               | T---AGTA-          | ATGAGAATTCAT-- | CA---- | G---- | ATTATTATTCTTGTTAAGT | TTTTTATTC |
|                          | 77210                | 77220               | 77230                 | 77240              | 77250          | 77260  | 77270 | 77280               |           |
| Human                    | AGAAATAAAAGTGTAGTTG  | TGTAGTGGTAGAAGAGAAT | GGATTCCATAGGGCAAATA   | AAGAACTCAAGGGAAGG- | TTGGTGG        | 76377  |       |                     |           |
| Kakapo                   | -----                | CT-----             | AGGAAAAAGATGTACA----- | ATAGTTGTATGTTTTCA- | TTAATACCC      | 39839  |       |                     |           |
| GoldenEagle              | ATTTGTAATTTGTTTTTTTT | TTAATTTATCACAATTCAT | TGCATAA-GTTTCACTCCT   | ACTTCTGTCAAGTTGCTG | TTC            | 47078  |       |                     |           |
| JapaneseQuail            | -----                | A-----              | -----                 | TTATACTTGTTTG---   | AATATGG        | 35224  |       |                     |           |
| MediumGroundFinch        | -----                | C-----              | -----                 | CTACTCCTGTCAAATTG  | TTTTTT         | 24141  |       |                     |           |
| GoodesThornscrubTortoise | AGTTTTAGAAAGCACTGA   | ACTA-GATGACCTGAGGT  | CTCTCCACCCTGTTATT     | TCTATGATTCTTGTGCC  | AGTTTTTACCC    | 71434  |       |                     |           |

|                          |                     |                          |                       |                   |               |       |       |       |
|--------------------------|---------------------|--------------------------|-----------------------|-------------------|---------------|-------|-------|-------|
| Majority                 | AGGAAGAGCACCTTTCA-- | TTTTTCTATATTTAATAGT      | ACTC--AGACATTAATAAT-- | AACTTTTATACAAGCTG | ATT           |       |       |       |
|                          | 77290               | 77300                    | 77310                 | 77320             | 77330         | 77340 | 77350 | 77360 |
| Human                    | AAGAGGAAGAGGATTGAAT | TGTTTCAAGAAAGAATAG       | CAGTTGTCATCCTTATG     | AAAAGTAAAATTTTTAT | TTTCAAATC     | 76457 |       |       |
| Kakapo                   | AGAAAAAGCACA----    | A--CCATGTTATCCGTA        | ATTGTT--TC--AAAGCC    | AAGATAA--AGCTACT  | GACCAAGCT-ATG | 39905 |       |       |
| GoldenEagle              | TTTGAGAACACCTTTCA-- | CTCTTCAAATTTAATAGT       | ACTC--AGGCATAATCT     | CAT--GACTTTCATAAA | ACCTGATT      | 47152 |       |       |
| JapaneseQuail            | AAGTACAAGGCTC-----  | TCGCTCTATGCAAAAAAGG----- | AGAGAAAAA-----        | AGGCACAAAATACAT   | TATAT         | 35290 |       |       |
| MediumGroundFinch        | GGGGAGAGCACCTTTCA-- | CTCTTAAAAATGTAATAG       | CACTC--AGATACTGAAT    | CAT--AACTTTTATACA | AGCTGATT      | 24215 |       |       |
| GoodesThornscrubTortoise | AGTAAAAGCAAAAATAAG  | GTTACTTTTATCGATTGG       | TCTA--AATCATTAATAG    | GTGCAAAATTTCAAG   | CATATC-ATT    | 71511 |       |       |

|                          |                       |                   |                   |                 |                 |          |       |       |
|--------------------------|-----------------------|-------------------|-------------------|-----------------|-----------------|----------|-------|-------|
| Majority                 | TATTATGTTATGATGATTG   | TT-CAACCCACTTAATG | TTTTATAT-A----    | TT--TTTTATTTGGT | GCTTT--         | CCCATTTT |       |       |
|                          | 77370                 | 77380             | 77390             | 77400           | 77410           | 77420    | 77430 | 77440 |
| Human                    | AGGAAATGTAAAATGTGC    | CTTCCAGACCCCTTGGT | GGTATACATGGGAGATT | GGTCTTAGGACACAC | ACAGTCCCATCCC   | 76537    |       |       |
| Kakapo                   | TGATACCATTTGATCACA    | TTCAAAAGAGCTAACG  | TGGTAAAGTA----    | GT--TTCAAATAAGT | CCTCAAATCTAGTTG | 39979    |       |       |
| GoldenEagle              | TATTATGCTGCAATCATT    | GTT-CTTCCCCTTAATG | TATTTCTCA----     | CTTTTTTCTTTT    | CATCATT--       | CCCATTTT | 47225 |       |
| JapaneseQuail            | GAATATGAAAGGAGGA----- | AACAAAAGGAACTTGA  | AAG-----          | TCTGATTGGGTGGT  | TAT-GCAGTTTA    | 35350    |       |       |
| MediumGroundFinch        | TATTATGTTGTGATCATT    | GTT-CTTCCCCTTAGT  | CTTTTTT-----      | T--CTTCTTGGATA  | ATTT--          | CCCATTTT | 24281 |       |
| GoodesThornscrubTortoise | TTTTGT-TTATAAAGAT     | CATTTAAAGAGAGTCA  | CCCTTTTTTAGAAAAA  | AACTGTTTTATTTGG | AGTGTCTCCTATAGA | 71590    |       |       |

Monday, May 02, 2022 06:51 PM

```

Majority      TGTTCTTATTAAT---ACTCACGAACAGAGTAGTTTTAGTATTTTATTTTTGAGTACTTTGGGCCTACTTGAATTAAGTT
              77450      77460      77470      77480      77490      77500      77510      77520
Human         CCACCTCTGACCCC-ATACACCCCCTGGATACTCAAATCCACTGATGCTCAAGTTCCTTGCATAAAATGGTATAGTGTT 76616
Kakapo        CGTGCTAACTAGT---AATCATAAACCAAGTTGTTCTTGTATTTATTTATTAACTATTTTTGACTTGCTTAAATCAGAAT 40056
GoldenEagle   TCTTCTAAAGAAA---ACTTAAGAACAACATAGATTTTCATGCCTTGTTTTTGTACAAGATGGGCCAACTTGAGTAAGTC 47302
JapaneseQuail TGGCTGTATTTGT---ATTAGATACAGAGAAAGGTTAGAACAGC---TTTAAGTTCAGAGAGCTG--TAAGATGAAGGT 35422
MediumGroundFinch TGTTCTGAAGAAA---ACATAAGAACAACATAGATTTAATGGTTT---TTTGTACAGTCTGGGCCGAACCTGAAGTAAGTT 24355
GoodesThornscrubTortoise @TTATTTCATTTATCCTACTCCCTGTTTGTAGTTGTAATTCATTTTTATTCCCGAGAAACCTAGATCTTTTTAAATTGAAAA 71670
    
```

```

Majority      TGAGTATCTCTGATAAAGAGG---GGCGTGTGCTCTCTGT---TTATGAAATGTATGAGTTACTTAGTGAATGATGT--
              77530      77540      77550      77560      77570      77580      77590      77600
Human         TGCATGTGACCTTATACACAACCTCTTATGTGTACTTTAAATCATCTCTAGATTACTTATATTACCCAGTACAATATAAAT 76696
Kakapo        GGC AAATCAGAGAACAAGAAC---GGAGTTTGCTGTAGGT---TTGTAATTTGTCTGACCTTTCCAAGAAATGAGGTCT 40129
GoldenEagle   AGAGTTAATCTAGTAAAGAGG---GGCCTCTGCTCTCTGTGTTTACAGAAATTTAGAAGGCACCTTAGTGAATGATGT-- 47376
JapaneseQuail TGGGAATCTATGA-----AGT---GAAGTATGGCAG--A-----ATGATAGCAGTGACCTTCC-----TCCTGT-- 35476
MediumGroundFinch TGAGTTACTCTACGAAAGAGG---GGCCTCTGCTCTCTGT---TATGAAAGGTAGAAGGCACCTTAGTGAATGATGT-- 24425
GoodesThornscrubTortoise @AAGAATTAATCATTTGAGAGGCT--ATGATGTGCTATGCATGTCCCCTGAGACACATGCTTTAATTGTTTCCATCTGAGG 71748
    
```

```

Majority      --GTTCTAAAGTATCGGTTAAATATTTTATTTAT---GGCTACTGAATG-ATGCAT-TGTCTC-AC-----A---
              77610      77620      77630      77640      77650      77660      77670      77680
Human         GTTATGTAAATGGTTGTTATAGTGTATTGTTTAGGGAATAATGACAAGA-ACAACCTTCTATACATTTGCAGTACACCAT 76775
Kakapo        CTGTGCTATAGGATCAGTTAGAAACGTTATCCAT-GGTCCTAGCCCACATGCAT-CGTTAC----- 40188
GoldenEagle   --GAATCCAGGAAAAGGGTGAATATTGTAGTTAA-GGCTACTGAATG-ATGCGC-TATATCTACGCTTTTCCAAAATCAG 47451
JapaneseQuail ---TGCTTATTTATCTT-CATATTTTATATTTT-ATTTGCTTTAGA-----AT-TGTC----- 35524
MediumGroundFinch --GAACCCAGGAAGAGG-TAAATATTGTAGCTAG-GGCTACCGAATG-TTGAC-TGTA----- 24478
GoodesThornscrubTortoise @GTTCTAAACTTTGTAATATAAGCTTTGCTTGTGAGCTCTTGAAGGTGCATATGTGAGGACACACGACTTAAGAATGTG 71827
    
```

```

Majority      -----TT-----A-A--TT-----A---T---T-----CA-----
              77690      77700      77710      77720      77730      77740      77750      77760
Human         TGTTTTACCCCAAATATTTTGTATCCAAGGTTGGTTGAATCGGAACCCAGAGATACAGAGGGCTGACTATACTTTAAGA 76855
Kakapo        ----- 40188
GoldenEagle   ATTACTTGAAGGATACATTTTCATATCTAGCTGTAAATTCACACATGCCACCTCCCACAAATTTGGAGTGCTTGACTG 47531
JapaneseQuail ----- 35524
MediumGroundFinch -----T----- 24479
GoodesThornscrubTortoise @ACCTTTAGAGCAGAGGTTCTCAGGACAAATTTTTTGGTGGCTTCAGAGTGCAGGCCACCAACTCTTGCTGATGGCCACT 71907
    
```

Monday, May 02, 2022 06:51 PM

```

Majority      ---A---T-----T-----G-----A---A---AC-----TT-----A-----
              77770   77780   77790   77800   77810   77820   77830   77840
Human         ATTAGAATTAGCTGGGTGTGGTGGTGGGTGCCTGTAGTCCCAGCTACTCGGGAGGCTGACGCAGGAGAAAGGCGTGAACC 76935
Kakapo        -----T-----
GoldenEagle   CACAACCTCGAGTATGACTTGCAAAATGGTGTATCACTTGTAGCTACTGCAGACGTTTTGGAAAGTAAAAAATACCGTAA 47611
JapaneseQuail -----
MediumGroundFinch -----T-----
GoodesThornscrubTortoiseAGACAATTTTTCCTAAAATGCTTTAGAAAAACAAATAAATATGCACATATACATGTCCAAATCAGTGTAAATTTATTCAT 71987
    
```

```

Majority      -----G-----G-----T-----C--T--T-----A--T-----
              77850   77860   77870   77880   77890   77900   77910   77920
Human         CGGGAGGTGGAGCTTGCAGTGAGCCGAGATCGTGCCACTGCACTCCAGCCTGGGCGACAGAGCGAGACTCTGTCTCTAAA 77015
Kakapo        -----
GoldenEagle   GAATCTAAAGTCTCTGAAGAACCTGTGGCTAATGTTGTTTTCTTTTTTCTTTTGAACCTCCCATCATTTAAAAAAT 47691
JapaneseQuail -----
MediumGroundFinch -----T-----
GoodesThornscrubTortoiseGCTAGCTAGTTAAGTCTGTTGTGAAAAGCCATATTAACAACATACAAGTATCACTTTTACAGCAGCCTTACTTAGCC 72067
    
```

```

Majority      -----A-----G-----A-----
              77930   77940   77950   77960   77970   77980   77990   78000
Human         AAAAAAAAAAAAAAATTAGAAGGGGCTGTCAGGCGTGGTGTCTCATGCCTATAATCCCAGTCATGCCTGTAATCCCAGCA 77095
Kakapo        -----
GoldenEagle   GAAACCTCTCATTTCATGGATTGATAGGGAAGGTGGATGAGTGTTTGTGAAGAAGTTTGACACCATAGAGATGAGTACTG 47771
JapaneseQuail -----
MediumGroundFinch -----
GoodesThornscrubTortoiseGTGCAAGCCTGGGGAGAAATTAACTCTGGACTGGGGGTGAGGGGAATGAGGGAGAATTGATGGGGGCAGGAGAAGTAG 72147
    
```

```

Majority      -----G---A-----G-----A-----A--C-----
              78010   78020   78030   78040   78050   78060   78070   78080
Human         CTTTGGGAGGCTAAGGTGGGCATATCACTTGAGATCATGAGTTCAAAACCAGCCTGGCCAACATGGTGAACACTGTCTC 77175
Kakapo        -----
GoldenEagle   TAGAAATGCCCTTGAGGCAGTTAGTAATTCTTTGTGCAGCACGTAATGACTAGAACATAGACATGGGGATGCCCTATGAG 47851
JapaneseQuail -----
MediumGroundFinch -----
GoodesThornscrubTortoiseAGGGGGCTGGAGCCTGTAGCCCCGACCCAGAGCTCAGTGGCTGGTGGATGGAGCCTAAAGCCCTGCAGCCAGAGCCTG 72227
    
```

Monday, May 02, 2022 06:51 PM

```

Majority      ---T-----C-----A-----C-----T-G-----G-----
                |       |       |       |       |       |       |
                78090   78100   78110   78120   78130   78140   78150   78160
Human          TACTAAAAATACAAATATTAGCCAGGTGTGGTGGTGGGCGCCTGTAATCTTAGCTACTCAGGAGGCTGAGTCAGGAGAAT 77255
Kakapo        -----
GoldenEagle   TAGTAAGGAGGCCAAAAACAAAGTAAAGAAGCTGCTTATTAATAAAAAGACCTATCATATTAGTTGTTGTAAGGCAGGGATT 47931
JapaneseQuail -----
MediumGroundFinch -----
GoodesThornscrubTortoise@TGTCGCCAGTACCCCAGGGCTGAAGCCAATGCCTGAGCCATGCAACCCCTGGGAAGGTGGGGAATTCACCTACTGCCTGC 72307
    
```

```

Majority      T-----A-----A-----GACA
                |       |       |       |       |       |       |
                78170   78180   78190   78200   78210   78220   78230   78240
Human          TGCTGAACCCAGGAGGTGGAGGTTGCAGTGAGCTGAGATCATGCCATTGCACTCCAGCCTGTGTGACAGAGTGAAACTC 77335
Kakapo        -----CA
GoldenEagle   TAGAAGAGAGTGAGTTGAAGATTTCATGATTTATAAAACGGTGCCAAATGCAGGATTACTTATGGAACTCTAATTCTGACA 48011
JapaneseQuail -----
MediumGroundFinch -----GACA
GoodesThornscrubTortoise@CCTCCAGTGTGTGCCCCAGCAGTCTTCAGAGGGTGGAGCAGGGCCCTGCTGGCAGCCCCAGCAACCAACACCAAGGCA 72387
    
```

```

Majority      TTTTCTGAAAC-----T--G--AC-A--C-----A-G--
                |       |       |       |       |       |       |
                78250   78260   78270   78280   78290   78300   78310   78320
Human          CATCTCAAAAATACAAAAAGAATTAGAAAGGGCTTTAGAGTCCCACCCTAATGCTCTTCTGTTCAGTAGTACACAAGAC 77415
Kakapo        TTCGTCTACTAC-----A-----
GoldenEagle   TTTTCCTGAATCTTGAGAAGTTGCTTTCCAGTCTCAGGCTTACTAATGCATTTCTTTGTATATAATGCTTATAGTATGCA 48091
JapaneseQuail -TTCTCTAAT-----
MediumGroundFinch ATTTTCTGAA-----A-----
GoodesThornscrubTortoise@TCTTGAGCAACAGGGAGGAGCAGAGGCTGCTATTTTGTCCCCCATCCATTACAGCCCAGGAGGCTGTGGCTGCAAGAA 72467
    
```

```

Majority      -----G-T---TTGTC-----AGG-----T-C-----T-----T
                |       |       |       |       |       |       |
                78330   78340   78350   78360   78370   78380   78390   78400
Human          TAATAACTACGAGATGTTATGAACAGGGAAAAGAAGTAAGACCAAAAAGAAATCATAA--ATTACTTTGGATGGAACCTTTT 77493
Kakapo        -----TCCTC-----AGC-----
GoldenEagle   TCAAATTAACAGTTTAATTTGTCTGGCATAGTGAATTACACTGAGGATGCTTGGATCATTGCATCACTTTTGATATGT 48171
JapaneseQuail -----GTC-----
MediumGroundFinch -----TTGTC-----AGG-----
GoodesThornscrubTortoise@AGCCCCTGGTGGCTGCATGTGGCCCCAGTGGACACATTTGAGAAAACGGTGTCTTTAGAGGATACAGCCTTTGGAGAACTT 72547
    
```

Monday, May 02, 2022 06:51 PM

```

Majority      --A-T---G-----A---T-----T-TTC---T-A-----T--A---A-----A-----
              78410   78420   78430   78440   78450   78460   78470   78480
Human         AGAATGGCAGATGGAGGGATAAATTTGACATTGTTCAAATCATAGAGTAAACTCTCAAAGTAAGGGGAACCTAAGGAG 77573
Kakapo        -----
GoldenEagle   TTAATAATGGGGTTACTATACTTGTATAGTTTTCCAAGTGACTTTAGCTTTAGTGGACTTTATGTTCTAGTATTTTAG 48251
JapaneseQuail -----
MediumGroundFinch -----
GoodesThornscrubTortoise@CACTTCAGGTCCTGGTAAGCTGTGCTTTTGTATTCTGCTTTACTATGCTAATTGTTAAGAACATTATAAAAATGCAGTC 72627
    
```

```

Majority      ----G---T-----TA-----A-----A-----G---T-A-----G-----
              78490   78500   78510   78520   78530   78540   78550   78560
Human         ACAAGATGATTAATGTAATAGGAGATACTGGAACAACAAAAAGGGACATTAGATGCAATTTGA----GGAAATCTGA 77648
Kakapo        -----
GoldenEagle   GCCTGAAAGTCACTTCGACGCTTTTGTAAATTTTGTCTACAA---AACTACGTAAGTTTCTAACCTTTTGATTTAAT 48327
JapaneseQuail -----
MediumGroundFinch -----
GoodesThornscrubTortoise@TCTGTTGTTTTCAATATAGTAGTGGTACATAGAAGCCCCAGTCAGGATTAACCTGTATATTTAAGGTTGGTTAAAGCT 72707
    
```

```

Majority      -----T-----A-T---T-----T-----G--A-A-----A---
              78570   78580   78590   78600   78610   78620   78630   78640
Human         TAATGGACTTTTGTGATTATCGATATTGGTTGATTAATTGCAAGAACTAATAAATTGTAATACCATACTAATGTATGA 77728
Kakapo        -----
GoldenEagle   CAGGCTCATTCTTTTGTGTATATTAATTTTTTTGCTAGTAAATATGAAGATGACAGTCATATTAGCTGATTAATAT 48407
JapaneseQuail -----
MediumGroundFinch -----
GoodesThornscrubTortoise@TGTGGAAATACAGAAACATTTCTAATTAGAATCATGGTTATATATCTGTTCAAAGAGGGAAAAAGGCTCTTAAGTAGTG 72787
    
```

```

Majority      -----T-----G-----ATATATTGA--TT--A-----T-AAAGGTACAT---GA
              78650   78660   78670   78680   78690   78700   78710   78720
Human         TGCTAATAATGGGGGAACCTGCGGTTTCCAGGTTATATAAGAACTCTGTAA-----TGTCTTAAATTTGTTT---GTA 77797
Kakapo        -----TGTGATAA-----AATAGTGCA---GA 40232
GoldenEagle   TTTAATTCCTACTCTCTGGGTGGACCTTTAAATGCAGTGTTTTCCAAGCAGCAGGAAAATAAAAGGTACAT---GA 48483
JapaneseQuail -----AATAGTGA--T-----AAAGGTAG----- 35553
MediumGroundFinch -----ATACATTG-----AAGGATAC----- 24521
GoodesThornscrubTortoise@TGAGGGATTTTACTTAGTAAGAATATATAGATGAATATTGGTAGTTTCAATTTGCTTCTGTTTATTCTTCCATTGAAGG 72867
    
```

Monday, May 02, 2022 06:51 PM

|                          |                                                                                   |       |
|--------------------------|-----------------------------------------------------------------------------------|-------|
| Majority                 | AAT---A--TT-----A-CT---A---A---A-A-C-----A-----T-----                             |       |
|                          | 78730 78740 78750 78760 78770 78780 78790 78800                                   |       |
| Human                    | AATCTAAACCTTTTAAAATAGCTAAAAATTATAGATACAATTTCTAAATGATTTAATTAACAAAACCAGTTTAATCTTC   | 77877 |
| Kakapo                   | AAT-----C-----                                                                    | 40236 |
| GoldenEagle              | CATGAGTAACCTTTCATTGCAGCTGTGGAACGTTTTCAGAGCATCAGTGAAGTCAGTCATGTTTATTTTGATGAGTAGTAG | 48563 |
| JapaneseQuail            | -----C-----                                                                       | 35554 |
| MediumGroundFinch        | -AT-----                                                                          | 24523 |
| GoodesThornscrubTortoise | ACTGATATTTTAAGTATTACCTCAGCAACAAATTGATAACACAACAGCATTTTGACATGAAGCGATTGATATGCAGT     | 72947 |

|                          |                                                                                  |       |
|--------------------------|----------------------------------------------------------------------------------|-------|
| Majority                 | A-----T-----TG-----T---T-----A-A-----T--AT-                                      |       |
|                          | 78810 78820 78830 78840 78850 78860 78870 78880                                  |       |
| Human                    | AGTTGAAATGAGCAAGGTTAGGGATACCTGTGTGTTTCAGTGTAAATCTGAAAGGAAAAGAATAGATACATAATTTATA  | 77957 |
| Kakapo                   | -----                                                                            | 40236 |
| GoldenEagle              | AGATTATGTATCATGGTTGTTTTTTCTGCTGTAAAAGCATTCAATGTTTTGAAAGAGATTTAAGGGAGCTGGGTTTCATC | 48643 |
| JapaneseQuail            | -----                                                                            | 35554 |
| MediumGroundFinch        | -----                                                                            | 24523 |
| GoodesThornscrubTortoise | AATAGGTGATACAAAAGATAAATGCAGCTACATATTATGTATATGTTATAAATGCATACATGGGTGTATA           | 73027 |

|                          |                                                                                  |       |
|--------------------------|----------------------------------------------------------------------------------|-------|
| Majority                 | -----TTCGGGGTTAGT-----T-----ATTGGG--T---TATCTTTTG---AATGA-----A                  |       |
|                          | 78890 78900 78910 78920 78930 78940 78950 78960                                  |       |
| Human                    | TCACTTCTCTCTGGACTTAGGGTCTCTGTGCATATACATGACTGGGCATCCATCAGCTTCAGTGGAGGAAAGGTTAGGAA | 78037 |
| Kakapo                   | -----TTCGAGACTGAG-----A-----ATTGGA-----CATCTTTC---AATG-----                      | 40268 |
| GoldenEagle              | TTCTAACTGCTCATGGCCAGTT--GGGTGAGCTTGGTATATTGTAAGTCTGCATCATCTGTCAAATGAGGATGATGACA  | 48720 |
| JapaneseQuail            | -----TTCAGAGTGTGC-----TTAG-----                                                  | 35570 |
| MediumGroundFinch        | -----TTCATGTCTAGT-----GTTGT-----AA-----                                          | 24542 |
| GoodesThornscrubTortoise | GGAATATGTTTTGGTATGTGTAAAGAGTTCCAGCATAAATTAGGAATGGCTGCCTTGTG-CAAATGACAAATCTATAA   | 73106 |

|                          |                                                                                  |       |
|--------------------------|----------------------------------------------------------------------------------|-------|
| Majority                 | -----T-----T-----T-----AGTC---T-----T-----                                       |       |
|                          | 78970 78980 78990 79000 79010 79020 79030 79040                                  |       |
| Human                    | TAATAGTGTGACAACCTAACATGAGAATTTTAGGAGATTACTGAGTCACTCAAATGTCTGGGTGACCCAGCTGATGAGGG | 78117 |
| Kakapo                   | -----AGTC-----                                                                   | 40272 |
| GoldenEagle              | CAGTGATTTTTTGTGTTGTTGTTGGGTTTTTACTAGTTGCCTTTTCTGTTTGTGTTTTTACAGAAATTTGA          | 48800 |
| JapaneseQuail            | -----GTA-----                                                                    | 35573 |
| MediumGroundFinch        | -----AGTG-----                                                                   | 24546 |
| GoodesThornscrubTortoise | GTGAGTTATGAAGTTCATCCAGAAGAACGTTGTGTCGTCTGCACAGGGGTACAAAATAATATTTTAAGACTGTT       | 73186 |

Monday, May 02, 2022 06:51 PM

```

Majority      -----A--T-A-----T-----C-----T-----T-----T---AG-T-T-----
              79050   79060   79070   79080   79090   79100   79110   79120
Human         CCATTTACATGAAAAAGATTCTCGCAACACCTT---CTTTTCTTTAGCACATGATCGTTTATGAAGCTCTTTTACATTG 78194
Kakapo        -----
GoldenEagle   GCTCTACAGCTGAAAAACTTTATAAAAAAGGCTCCATAGTACTGTTGGTGCCTTAGCCATTTGGATAGTTGTCAAATGGG 48880
JapaneseQuail -----
MediumGroundFinch -----
GoodesThornscrubTortoise@TAAAAAATATTATTGGGACTTTTTTTTATCCCTTTACCTGTAAAATATCAGTTACTACGTTTCTAGCTGTAGAGGGCTC 73266
    
```

```

Majority      -----T-T---AA-----A-----T-----T---T-CT---A-----ACTTAAAAATATC-GA-
              79130   79140   79150   79160   79170   79180   79190   79200
Human         TTTTATCTTTATAGCAATCCTCAGAATAGATCAAGCTTTTTTTTTTTTTTTTTTTTGGAGATGGAGTCTTGCTCTGTCGCCC 78274
Kakapo        -----TTTAAAAA----GA- 40282
GoldenEagle   AATGGTGCTTGTTTGAATATTCAGAACAGGGTCTCATTCTGAGCTGCTTACTGTGCAAAAACACACAAAATATGTGAC 48960
JapaneseQuail -----GATTATC---- 35580
MediumGroundFinch -----C-----ACACAAA----- 24554
GoodesThornscrubTortoise@GAGGGAGCTATTAAAAAACCTCTAAAAATGGCTTGAAATAGCTTTTCCATGCTTAAAAATGTACTTCTAGTCCTCAAA 73346
    
```

```

Majority      -----A-----A-----CT-----TG---A---T---G---C---T-
              79210   79220   79230   79240   79250   79260   79270   79280
Human         AGGCTGGAGTGCAATGGTGCGATCTCGGCTCACTGCAAACCTCGGCTCCCGGTTTCGTGCCATTCTTCTGCCTCAGCCTC 78354
Kakapo        -----
GoldenEagle   ATAAATAAGAAAGGACAAAGGATAGAAAACCTCAAAGCCTAAATGGATGCTTGTGCATGCAATTTATAGCTGCATTTTA 49040
JapaneseQuail -----
MediumGroundFinch -----G----- 24555
GoodesThornscrubTortoise@GTCCTGAAATAGTAAGTGTTAAGTCTGATTGGGAAGCTCT---GCTTCCAGTGGTACAAAGCTGCTGTTTCTCGCTC 73422
    
```

```

Majority      -----C-----T---CA---A-----G---G-----
              79290   79300   79310   79320   79330   79340   79350   79360
Human         CCGAGTAGCTGCTACTACAGGTGCCTGCCACCACGCCAGCTAATTTTTTTTGTATGTTTAGTAGAGATGGGGTTTCATCG 78434
Kakapo        -----G----- 40283
GoldenEagle   ATTCAATACTCAAAGGAGAAGGATGAGAACACTTAAAAGTTCTGAGAGTCATAAGGTCGAGTTTGGCAAATATGATG 49120
JapaneseQuail -----
MediumGroundFinch ----- 24555
GoodesThornscrubTortoise@TCCAGTGATTCTTTAGTGTCATGGTATTTTCATAGATAAAAAATGGCTACGTTTAAACTGTGCTAGGCTTACAGTGGA 73502
    
```



Monday, May 02, 2022 06:51 PM

```

Majority      -----G-----G--C-----T-----T-T-----T-----A-----
              79370   79380   79390   79400   79410   79420   79430   79440
Human         TGTTAGCCAGGATGGTCTCGATCTCCTGACCTTGTGATAGATCAAGTATTTTATCCCTCTCATCAACATGTGTAAACAG 78514
Kakapo        -----
GoldenEagle   TGTGAAATATGGCAGAATGATAGGAGCGACCTTCTTCTGTTTGTTCCTTCATCTTAATATTTTATTTCTTTTATTTG 49200
JapaneseQuail -----
MediumGroundFinch -----
GoodesThornscrubTortoiseAAGTTGTGCAGTGGGCACATGGTATTGTGCCCTTTGT-CTTGTGCATCTTTCCTGAATTTTACTATGCAGCTAATGT 73581
    
```

```

Majority      -T-T-----T-----T---T---GA-----A-----GCTATGCCCTGTTTCAGGT
              79450   79460   79470   79480   79490   79500   79510   79520
Human         TTTTTTCTCACATATCTGCTGCCTTAGCTAAAGATGCAAATCATTAAGTTAAAATATAATTTATGTAGCTAAAAGTA 78594
Kakapo        -----GGAGAACTAGAACGGGC 40301
GoldenEagle   CTTTAGAATCTTATTCTGTAAATGTCGATAAAGATGCTTCAGAGTATACTCAGAGTGTCTGCCATGCCCTGTTACAA 49280
JapaneseQuail ---T-----GCCATTCGCTGTTTCATGG 35599
MediumGroundFinch -----GCTGTGCCCTTATTCACGT 24573
GoodesThornscrubTortoiseATGCATATGTGACCTCTTTAACTATACTTTTTGAGCTTACCAGAAAACAGACACGAAAAATGGGTATGTACAATATAAAT 73661
    
```

```

Majority      ATGGTTTCCAGAAGGTTTGTCTCTCC--ATGAAATAGT---AAAACCTTATTTAGAG---CTTAA---TGTGTTGTT
              79530   79540   79550   79560   79570   79580   79590   79600
Human         ATCTGTTAGAGCCAGTGTATACAATATGTGTAATATGCTTCTATAACTTTCTCAAAGGGCCCTGGTAAGTTTATTGTT 78674
Kakapo        -TGGTTTCCAAAAGTTAGGAAATC-----TGACAGAAA---AAACCTGTGAATAAAC---AGCAAC---TGTATTATG 40365
GoldenEagle   ATGGTTCCCAAAGGGCATGATCCTCC--ATGAAAGAGT---CAAGCTCCATTTGAG---CTTAA---TGTGATGCT 49346
JapaneseQuail ATGGCTCCCAAAGGTGTGCTTCACC--ATGAAATAGT---GGAGCTTCATTTGAG---CTTGA---TGTGATGCT 35665
MediumGroundFinch GTGATTCTCAGAGGGCATATTTCCCC--ATGAAAGAGT---GGAACCTCCATTTGGAG---TTTAG---TGTGCTGTT 24639
GoodesThornscrubTortoiseATCTATTTCTGCATATTTTTTGTCTGG-ATTAATTTTTTTC-AAAATGTTTCTAGGG--AACAAGTTTATACATTG 73736
    
```

```

Majority      CTTCAAGTTCTGTGCGTGCA-AAAAAGAATACCA-----TAAGATGGACCTGTGGTATTCTTGTAAAACCTCTTGCTAT
              79610   79620   79630   79640   79650   79660   79670   79680
Human         TTCTCA-TTTAGCTGGGAGTT-AAGAACAGAACTATTTTCTAGAATGTATTAATTATATAAATAGTGCATCATGAAATAT 78752
Kakapo        CTGAA---CTGCAACAAACA-AAAAAGATTATCG-----TAAGAATGGCTCAAGGTTTAACTACTAATATGTAATAAT 40435
GoldenEagle   CTTCAAGTTCTTTTGCCTGCACAAAAGAATACCA-----TAAGTTGAACCTGTGGCATTCTTGTAAAATCTTGCTGT 49421
JapaneseQuail CTTCAAGTTCTGTTACGTTTG---CAGCGATGCTA-----T--GTTGCACCTCTGGCATTCTGTAAAACCTCCTGCTTT 35735
MediumGroundFinch CTTCAGGTTCTTTTGCATGCTCAGAAAGAATACCA-----TGAGATGGACATGTGACATTGCTGTAAAATCTTGCTGT 24714
GoodesThornscrubTortoiseCTCTATTTCTCTTATTTACATCACAAAATCTGAAATACTAATATAATTCAGAAGTATACTTAAATCAACTACTGCTAT 73816
    
```

Monday, May 02, 2022 06:51 PM

|                          |                                                                                  |       |
|--------------------------|----------------------------------------------------------------------------------|-------|
| Majority                 | A-----GCTATTTTTTTATATGTATATCATGAGATTGCTAACA-GAAAATGTGTTAAGG-ACTCAGTTCTGACATTGGC  |       |
|                          | 79690 79700 79710 79720 79730 79740 79750 79760                                  |       |
| Human                    | TT---TGTAGGTTTTTATATTTTTATTGCAGCAGACAGC-ATTTAGATTAAACCTAAAAATACCTGATTGACAAAGTAGT | 78828 |
| Kakapo                   | A-----CTTAGATATCTAAATTGGAGTTA-GATATTAC-AGCT-GGAAATAGGTTGCTGTGGTTAGCGCTCCCATTGGT  | 40506 |
| GoldenEagle              | A-----GCTGTTCTCTTATATGTATATAATGAGATCACCAACA-GAAAATGTGGTAAGG-ACTCGTTCTGACTTTCGC   | 49493 |
| JapaneseQuail            | A-----GCTATTTTAGTATAT-----GAGATCTCTAACA-GAAAATGTGGTAAGA-CTTCAGTTTTGATCTTGTC      | 35798 |
| MediumGroundFinch        | A-----GCAAT-CTTTTATACGTATATCATGAGATTGCCAACA-GAAAATGCACTAAGG-ACTCACTTCTTCCTTTTGC  | 24785 |
| GoodesThornscrubTortoise | AATAGTTAGCAAGGAAAGTAAATGTAT-CATTTTTATGGCTGTACAAAAATGTTCTGGCTCTCAGAATACAGGGAGTGGG | 73895 |

|                          |                                                                                  |       |
|--------------------------|----------------------------------------------------------------------------------|-------|
| Majority                 | TTATGTTTACTGTTATATGCTGGATAGTTGTATAA--TTTGGGTGC--CTTTTTGTAGTGGCTTTTTAGGAGTATACT   |       |
|                          | 79770 79780 79790 79800 79810 79820 79830 79840                                  |       |
| Human                    | TTTTCAGACAAAAGTATATTGAGGGAAATTGGAGAATCTTCAGAGGCTTTAAAAGTCCAGGAAAATCTTAGACTACTCCA | 78908 |
| Kakapo                   | TTATCCCTTGCTGTCAT-TGCTG---GCTTGCTT---TCTGGGTGC--TTCCACTAATGCCCTTCTTAAG---ATT     | 40572 |
| GoldenEagle              | TTCTGTTATGCTGTTATATGCTGGATAGTTGTACAA--CTTGGGTGC--CTTTTTGTGTTGGCTTTTTAACAGTATACT  | 49569 |
| JapaneseQuail            | TTCTGTTACATTGTGCT--GTTATATAGTGGGTTG---TTTTGTAGC---TT-TGGTACTTTTTCTAAAGTGTATGAA   | 35868 |
| MediumGroundFinch        | TTATGTTTACTTTTTATATGCTGCGAACTTGTACAAAACCTGGGTGCAACGTTTTGTGCTGGCTTTCTAGGAGTATACT  | 24865 |
| GoodesThornscrubTortoise | AAAAACATTTAGAAACAAATTACATATTTGAAGC---CCCTAGTTCTCCTCCCTATCAGCCCTCCACTCCTTGGAACT   | 73972 |

|                          |                                                                                   |       |
|--------------------------|-----------------------------------------------------------------------------------|-------|
| Majority                 | GTAATTCATATGTCAGAAGTGA-----TATTTAGGTTTATCATAATTTTGT-----GAGTTGAGTTTITAG-----      |       |
|                          | 79850 79860 79870 79880 79890 79900 79910 79920                                   |       |
| Human                    | GTGATTTAGAACGGTGTAAAGATAGCCTAAGTAGTTTTTCT--AAGTTATCAGCCGCGGGGAGGAAATAATGAAAGAGAA  | 78986 |
| Kakapo                   | CTTATTAATTTATC-----TATTTCAAAGAATAACAATTGTGT-----GAATGGTGTGAAT-----                | 40624 |
| GoldenEagle              | GTAATTTACATGTCAGAAGTGA-----CATTTAGGTTCAACATAATTTTGT-----GAGTTGAGTTTITAG-----      | 49629 |
| JapaneseQuail            | GTAATTCATATGTCAGAAGTGA-----GGCTTAGGTTGATT---AGTTTAT-----GAGTAGAGGTTTITAG-----     | 35925 |
| MediumGroundFinch        | GTAATCCATATGTCAAAAGTGA-----GATTTAGGTTCAACACAATTTTGT-----GGCTTGTGTTTITAG-----      | 24925 |
| GoodesThornscrubTortoise | AATATTACAAATATCAAATTTTATGACCAACTTACTTCAGTCTTGAATTAGTTGTACAATAGAATGCACATTTAAATTGCC | 74052 |

|                          |                                                                                   |       |
|--------------------------|-----------------------------------------------------------------------------------|-------|
| Majority                 | TGACAGGATGTGAGT-TTTGTTATTCTTGGTTTTTAAATGTGCCT-TAATTGCATACCAAT-----                |       |
|                          | 79930 79940 79950 79960 79970 79980 79990 80000                                   |       |
| Human                    | ATACATACGAGTGGCATTAAAGGACAGGTGGTGGCTTCTTTTACCTATTAAGCATTCCTTACACCATACTGTGAAGTGTGT | 79066 |
| Kakapo                   | TAATCTT-TGTCAGC-TTCTCTCTGCTCAGCTGTGGAAGAGCCA-TAAAGACTTCACTAG-----                 | 40682 |
| GoldenEagle              | TGACAAGATGTGAGT-CTTGTTAGTCTTGGTGTAAATCTGCCT-TAATACCAAACCATT-----                  | 49688 |
| JapaneseQuail            | TGACAGGGTGAAGT-CTTAGTCTTTCTATATCATATATATATATAAACAACACACACACACACACACACACATA        | 36004 |
| MediumGroundFinch        | TGACAGGATGTAAAT-CTTGTTAGTCTTGGTCTTAAATCTGCAC-TAATTCCAAACCAA-----                  | 24983 |
| GoodesThornscrubTortoise | CAATAGGATAAATGTATTTTGTCTCTAAATGTTGATGTGCATCTGTTGTTGTTGGCAATTATGAAGTAAGGGATTGGA    | 74132 |

Monday, May 02, 2022 06:51 PM

|                          |                                                     |                                           |                    |            |                                |                    |       |       |       |
|--------------------------|-----------------------------------------------------|-------------------------------------------|--------------------|------------|--------------------------------|--------------------|-------|-------|-------|
| Majority                 | ----                                                | ACATATCTCAGTTTACTTC                       | -TGGATATAGTTAA---- | TGTTCCATTT | -CAGTAAATGTA                   | AAATTTATGATTTAGTGT |       |       |       |
|                          |                                                     | 80010                                     | 80020              | 80030      | 80040                          | 80050              | 80060 | 80070 | 80080 |
| Human                    | AAAAGGAAGGATCATTGGACATAATAGATTATCTGACAGGGTGGTCCGGAA | -TGGTGGAAAGTAAATCGACAGGTGAGGAC            | 79145              |            |                                |                    |       |       |       |
| Kakapo                   | ----                                                | TCATCTTCAGATTCATTTA                       | -TTCCTATAAATGC---- | TGGACTGGCT | -GAAAGCTTCTAAAGTTAGGGAAAGGTGC  | 40752              |       |       |       |
| GoldenEagle              | ----                                                | ACATATCTCAGTTTCCCTTC                      | -TGGATGGAATTAA---- | CCCTTCTCTT | -CAGTAAATGTA                   | AACTTTATGATGTAGTGT | 49758 |       |       |
| JapaneseQuail            | T---                                                | ATATATATATATATATATA                       | -TATATATATAAAA---- | TGTTATATTT | -CAGTTTCCCTTCTGCTTGAAATTAACCCT | 36075              |       |       |       |
| MediumGroundFinch        | ----                                                | ACGTATCTCAGTTTCCCTTC                      | -TGGGTGAAGTGAA---- | TGCTCCACTT | -CAGTAAATGTA                   | AACTTGATGATGTA---- | 25049 |       |       |
| GoodesThornscrubTortoise | 6AGGGAATGTCTCAGAGGAGACC                             | -AGGATAGTGTAAAAACGTGTGTAATTTGCAGAAAAGACCA | AAATTAGTCATTTCT-T  | 74210      |                                |                    |       |       |       |

|                          |                                                                                   |                                   |                             |                                     |              |              |       |       |
|--------------------------|-----------------------------------------------------------------------------------|-----------------------------------|-----------------------------|-------------------------------------|--------------|--------------|-------|-------|
| Majority                 | ATTCACTCA--                                                                       | ATTGTA                            | ACTTTGTAAGC----             | TGTTGTGCAGTGCCTTTTAAATGT            | -AACTTATA--  | CCTCCCTCAAAG |       |       |
|                          | 80090                                                                             | 80100                             | 80110                       | 80120                               | 80130        | 80140        | 80150 | 80160 |
| Human                    | ACTGAATTAGCATTTCAGACAGTGGGGACCTCACACCTTGTATTCCCTTTTTTGGTAAGATTTTTATTACCTCCTTAGAAA | 79225                             |                             |                                     |              |              |       |       |
| Kakapo                   | ATACACACA---                                                                      | CTGGAAGATTGGAAG----               | TGCTCTGCTATTTTGTCAATTT----- | TCTAATA--                           | CCTAAATGATTG | 40816        |       |       |
| GoldenEagle              | AGTAACAC---                                                                       | TCCAGTTCATAAGC----                | TGTTATGCAGAGATTTTAAAG--     | AACCTGCTA--                         | TCTCCCCAAAC  | 49825        |       |       |
| JapaneseQuail            | CTTCATTAGTACTGTTACTTTATGATG----                                                   | TGGTGTAGTAAAACCTAAAATGTGAACTTATAG | -GCCCTCCTAAACG              | 36150                               |              |              |       |       |
| MediumGroundFinch        | ----                                                                              | ACTC---                           | CTGTAGCTTTGTAAGC----        | TGTTAAGCAGAGGTGTTAAG-----           | CTGCTG--     | TCTCCCTCAAAG | 25107 |       |
| GoodesThornscrubTortoise | 6CTTGTA                                                                           | AAAACATGTA                        | ATAATGAACAC----             | AGGTGAAAGCTGCTTTGAGAAATTTAACTCATG-- | CATCTATCACTG | 74283        |       |       |

|                          |                                                    |                                                                     |                       |                       |                       |       |       |       |
|--------------------------|----------------------------------------------------|---------------------------------------------------------------------|-----------------------|-----------------------|-----------------------|-------|-------|-------|
| Majority                 | CATTCAGACTAAGTATAAGAGGAGC                          | -CTAGTATTCAGTTCAAGTAGATAG                                           | -TGGTTAC-             | TTGACATAAAGTCACAAAAAT |                       |       |       |       |
|                          | 80170                                              | 80180                                                               | 80190                 | 80200                 | 80210                 | 80220 | 80230 | 80240 |
| Human                    | GAGGTAAATTCATC                                     | -TATTTTCGAGCCCAAATTTTTCTGTCTAGAAGATTGGTAGTCTTATTTTTACTAAAGTACAAGATT | 79304                 |                       |                       |       |       |       |
| Kakapo                   | C-TGTTGACCTGGTGTAAATAAGC--                         | TGTT--                                                              | TCCCTTCAGGTGGACAT     | -CTGTCAC-TC--         | CTTACTGTCA-----       | 40880 |       |       |
| GoldenEagle              | CATTCAGGCTAAGTATAAGAAGCATGCCAGTAACAAGTACAAAAAGATGG | -TGGTTAC-                                                           | TTGACATAAAGTTACAAAAAA | 49903                 |                       |       |       |       |
| JapaneseQuail            | CTTTCAGGCTAAGTATAAGAGAGCA--                        | AAGTAATGAGTGCCAGGAGGTAG                                             | -TGCTTAC-             | TTGACATAAAGTCACAAAGAA | 36226                 |       |       |       |
| MediumGroundFinch        | C---CATAGGAAGCATGGCAGGAAC--                        | TAG---                                                              | TCAGTACAAGTAGATGG     | -TGATTAC-             | TTGACATAGAGCCATGAAAAG | 25177 |       |       |
| GoodesThornscrubTortoise | 6CCCCAGATTATAC                                     | -TAGAGGAATTACCATACTTAGTTTTTGATTAACAGATGGTCTC                        | -TCCTAACACTTCATCCA    | ACTT                  | 74361                 |       |       |       |

|                          |                                                                                 |                                                |                            |                                      |                          |       |       |       |
|--------------------------|---------------------------------------------------------------------------------|------------------------------------------------|----------------------------|--------------------------------------|--------------------------|-------|-------|-------|
| Majority                 | GTTTCGTAACAGGT----                                                              | CTATGTACTTAATCCATTTCTCAGTTATAGTTTTACATAACCTG-- | -CATTAAGATGATTATT          |                                      |                          |       |       |       |
|                          | 80250                                                                           | 80260                                          | 80270                      | 80280                                | 80290                    | 80300 | 80310 | 80320 |
| Human                    | ATTTAGTAAAAGGTAGCATTCTCTGGCTTTTTTTTTTTTTTTTTTAAATGTTTCAGATCTGTCACACTAAAAGGGCTT- | 79383                                          |                            |                                      |                          |       |       |       |
| Kakapo                   | --TTCTTCACATTT----                                                              | CTGTCTGCGTGACC---                              | TCCACAGG---                | AGCTGAGTGTA                          | AACTGA-ACGTGACAGTCAGCATA | 40947 |       |       |
| GoldenEagle              | GGTTCGTAACAGGA----                                                              | CTATGGACTAAATCCAGTTCTCAGTTGCAGTTGTGCATAACCTG-- | -CATTAAGATGACCACT          | 49976                                |                          |       |       |       |
| JapaneseQuail            | G-TTTGTAGCCCGA----                                                              | CCAGGAAT-GAATCCAATTC--                         | AGTCATAGTCTTACATAACCTA--   | -CATTAAGATGATTATT                    | 36295                    |       |       |       |
| MediumGroundFinch        | GGTTCATAACAGGT----                                                              | CTAT-----                                      | AAACCCAGTCTCTGGT--         | -CAGTTTTACTTACCTG--                  | -CATTAAGATGATTAC-        | 25242 |       |       |
| GoodesThornscrubTortoise | 6ATACA                                                                          | CAACTGAT----                                   | CTTAACAATCAGTCTTTTCAACATTA | AAAAACATAACATTTTATT-GTATTTAACTTTTTTC | 74436                    |       |       |       |

Monday, May 02, 2022 06:51 PM

```

Majority      TATACTGCGTATTGTT-TTCACACATAAGTTCATAAT-ATTTTTTTAGTGTAGCTTTAA--TTTGCCTATTATTTAAATG
              80330      80340      80350      80360      80370      80380      80390      80400
Human         TAGACCAGGTGTTGTGGCTCACACCTGTAATCCCAGCACTTTGACAGGTCAAGGTGGGAGGATTGCTGGAGGCCAGGAGT 79463
Kakapo        TACAATACAAAGCACT-CAAAAGGACATTTCCAAAACGATTTTTTTTAGAGCAGAACTGG--ATTGTTATAAAATTTGTTG 41024
GoldenEagle   CTTACTGCCTATGGTT-TTCACACATAAGTTCATTAT-ATATTTTTAGTATAGCTTTAA--TTTGCCTTTTACTAAAATG 50052
JapaneseQuail TCTACTGTGTATTGCT-TCCACACACAATTTACACATT-TTATTTATAGCGTCACTTTAA--TTTGTCCATTAATAAAAATA 36371
MediumGroundFinch ---AGTGCCTGTGGTT-TTCATGGA--AGTTGATAAT-ATATTTTTAGTGTAGCTTCAA--TCTGCCTACTATGAAAATG 25313
GoodesThornscrubTortoise@GAAATAATATTTATT-TAAAAATT--GGCTGTGAGTACTTTTTAAAAAAAATAACAG--TTTTGATACTGTTTTTGAG 74511
    
```

```

Majority      GTGTTAGTAATTTGAATTTTCAGAGGT--CTCTCAAAAAGATATTTCTGAT--AGGGAATAAAA---TAATT-GTGACATG-
              80410      80420      80430      80440      80450      80460      80470      80480
Human         TTGAGACCAGCCTGAGCAACATAGTGAGATCTCAGTCTCTACTAAAAATAAAAAAATTAGC-CATGCCTGGTGGCATGT 79542
Kakapo        AGGGCTTTAATTTGACATTCACAGGTTCCCTGTGTATTACAATCTGATTTGGGGAATAAAA---CTTCCAGTTCAGTG- 41099
GoldenEagle   GTGTTACTAATTTGAATTTTCAGAAAGT--CGTGCAAAAAGATAAACTGAG--AGGGAATAAAA---TAAT--GTGACATG- 50121
JapaneseQuail TCATTAATAACTTTGAACTTAAAGAAGT--CACACAAAAA-ATATGCT-----GGGAGTAAG---CAATGCATAACATG- 36437
MediumGroundFinch GCGTTAGCAATTTGCATTTTCGGAAGT--CACAGAAAAGGATAAGCTGAG--AGGGAATTAA---TAAT--GTGATATG- 25382
GoodesThornscrubTortoise@GGACAGCATTATGGGATTCAGTGTGACTTCCAGAAGACATTTTCTCATCTTGAAGCAAAGATGTTTTTTCTGTCTA- 74590
    
```

```

Majority      --CTGTATTTCAACTT-----GGTTGAGG-GAAA-GATCTCCATGGTCTAGAA---GAAAGGTGTGTAATTTA--A
              80490      80500      80510      80520      80530      80540      80550      80560
Human         GCCTGTAGTCCCAGCTACTTAGTAGGCTGAGGTGGGAGGATTGCCTGAGCCCAGAAGATAGAAAACAGCAGTGGCCATGA 79622
Kakapo        --TTCAAGGCCAGATT-----GGATGGGG-CATT-GAGCAACCTGGTCTAGTA---CAGGGGTACTTTATTTA--A 41161
GoldenEagle   --CTGTGTTTAAACTT-----CATTGAGG-AAAAAGACCTCAAAGGCTAGGA---AAAAGGTGTATAATAT---- 50182
JapaneseQuail --CTGT-----GTTGAGG-GTAA-AGGCTCCATGGCTGGGAA---GAAAGATCTGTAATGT---- 36486
MediumGroundFinch --TTGTATTTTAACTT-----CATTGAGG-AAAA-GGCTCAAAGGCTAGAA---AGAAAGTATGTAATAT---- 25442
GoodesThornscrubTortoise-CTCTACAAACTTTT-----TTATGAAA-GTTATGTTCTTTCTGGTTTGTAGCTTTGAGGGATGAGGGGTTTCAT-A 74658
    
```

```

Majority      TTGTATGTTTTTCATTAATATTTTGAAGAAAACGAAATCCTG--TTATCTTTAATTTTTGGAAGCTAAAATAAAGCTTGTG
              80570      80580      80590      80600      80610      80620      80630      80640
Human         TCATGCCACTGCACCTAGCCTGGGTGACAGAGCAAACCTTG-TCTCAAAAATAAAGGGTGGGGAAGCTTTAGCCTAGG 79701
Kakapo        CTGCATCCTTTAGTAATTGTTTTTTTGTAAAAGTAACGCTA--TATCTTCAGCTTTAGCC--CAAGAGCAAACATGCA 41237
GoldenEagle   TTGTATGTTTTTCATTAATATCCAGAAAAAG-CAAAACCTG--TTACTTGTAAATTGTTGGAAGCTAAAATAAAGCTAGTG 50259
JapaneseQuail TTATGTGTTTTTCATTAATATCCGGAAGAAG-TAAAGTCTG--TTATCTATGATTGT-----T--A 36542
MediumGroundFinch TTGTATGTTTCCATTAATATTTTGAAAAAAACAAAAGCCTG--TTATCTGTAGTTATAGGAAGCTAAAATAAAGCTAGTG 25520
GoodesThornscrubTortoise@TATCTTCTCCATGGGATATGTGAAAAATCGGAAGTATTGAATAGTGTTCATATTTTGGATATATTTTCATTTTTTCG 74738
    
```

Monday, May 02, 2022 06:51 PM

|                          |                                                                                        |       |
|--------------------------|----------------------------------------------------------------------------------------|-------|
| Majority                 | CCAA-----AGCTTTCTAATACCA----G--TTTATCTTGTTTATAAAGTAGCTAAT--ATTTCTAA---ATAGTTTCA        |       |
|                          | 80650 80660 80670 80680 80690 80700 80710 80720                                        |       |
| Human                    | CTTTT----AATTCTCAATTACCATTATAAATTTATTTTAAATTATTAATAACTAATTACTTTAATTTCTCAATTACTATTTTTTC | 79777 |
| Kakapo                   | TCAT-----ATTTATGTTATATT-----TTTATGTTGCTATTAATATACGTTAA--GTATATAGTATTACACTTTGA          | 41302 |
| GoldenEagle              | ACAA-----AGCTTTCTAATACCA----G--TTGATCATGTTGTCAAAGTAGCTAAC--ATTTCTAA---GTAGTTTCA        | 50322 |
| JapaneseQuail            | -----AGCTTTCCAATACA-----G--GACATCTTCTTGATAAAGTAGCAACA--GTTTCTGA---ATAGCTGCA            | 36600 |
| MediumGroundFinch        | ACAA-----AGATTCTAATACTA----G--TTGATCATGTTTACAACATAGCTAA--ATTTCTAA---ATAGTTTCA          | 25582 |
| GoodesThornscrubTortoise | TTTATCTCAGCCTCTTTAATGGCT---GGTTCGTGTTGCTCTAATACAGTGCCTAAT--ATCTGTGCA--TTTCTTCTGT       | 74810 |

|                          |                                                                                 |       |
|--------------------------|---------------------------------------------------------------------------------|-------|
| Majority                 | GAT---AAGGCATCATATCTTAAACAGTAATGTGTAAGTTAGTTAATTATA----AAAACCCATGTTGT-----T     |       |
|                          | 80730 80740 80750 80760 80770 80780 80790 80800                                 |       |
| Human                    | CATGAAAAGGCTTGATGTTCTAAACAGTATTATACCACCAAGTTATCTCTACTGGAAAACCCAGATTTCAAGAAAAAAA | 79857 |
| Kakapo                   | CAC---CAAGTACATTTTGAGAAACAAAAGTGCCTAAGTGGTCCATCTA---ATTTCATATCCTGTC-----T       | 41366 |
| GoldenEagle              | GAT---GAGTCCTCAAATCTTAAACAGTGTGTTGCATGATAACTAATAAAC---ATAATACAAGTTGT-----T      | 50385 |
| JapaneseQuail            | GGT---AAGTCAT-----T-AAACAGTCAACAATGAGTTGAGTGATGATC---AATAGCCATGATATAA-----AT    | 36659 |
| MediumGroundFinch        | TAC---AAGGTCT-----AAACAGTAAACATGGTAACCTTTTTCATAATA---GAAACTCTTCTTAT-----T       | 25637 |
| GoodesThornscrubTortoise | GAT---ACAACAGCAGAACATAGCTAGTTAAGGGGAAATCAGTTAATTGCA---GAATGCCTCTCTGC-----C      | 74873 |

|                          |                                                                                   |       |
|--------------------------|-----------------------------------------------------------------------------------|-------|
| Majority                 | CTTATTTATTA AAAACATTTTGTCTCTCTATTAGAATGGCAAATCAAATGCTGTGGA-----GAATTACTTA-A       |       |
|                          | 80810 80820 80830 80840 80850 80860 80870 80880                                   |       |
| Human                    | AATGATTTTGA AAAACAATTATGTCTTAAATATTTAAATTTCTTTTAAACATGTTTTTAACCATCTTTAAATTTTTTTGG | 79937 |
| Kakapo                   | CTTGACTCTTAGCATTACTTCTGCCTTCTCTGCTGGAGGACCTAGCACAGCCCTCGTAGT-----GGA-TGCTCA-C     | 41436 |
| GoldenEagle              | CTTATTTATTA AAAAATTTTTTACTTGCTTAAATCAGAATGGCAAATCAGGGTGCAGTGA-----GACCTACAGA-A    | 50456 |
| JapaneseQuail            | TTTATTCATGAAACAAGATTTTG--ACTTCTGTT-GAGTGGCAAATGTTAAAGACCTACA-----AAATAAACCC-A     | 36727 |
| MediumGroundFinch        | TTTATTTATTA AAAAACCTTTTCATTGCTTTAATCAGAATGGCAAATCAAAGTACAGTGA-----GAC-TGCAGA-C    | 25707 |
| GoodesThornscrubTortoise | TTTACTATTTGAAACATTCAGGGCACAACTTTAATGATGACCTTTTGGAAAACCTTCGGC-----ACATCATTTTTTA    | 74945 |

|                          |                                                                                  |       |
|--------------------------|----------------------------------------------------------------------------------|-------|
| Majority                 | CAAGTAATGTACTTT--A----T-T-TTGTGCTTTTGTA-ATTTGTC-TGAGCATTTCAAGAAATGAGGTCTGTGTGTGC |       |
|                          | 80890 80900 80910 80920 80930 80940 80950 80960                                  |       |
| Human                    | TAAGTAATTTTCATTAGATTGTTAAATGTATAGTGGCACGGTAGGG--TTGTATCTCAAGATATGAAGCAGTTTTTCAT  | 80015 |
| Kakapo                   | ACAGTAGTATACCTGGGAGGAGTGC-TTTCCTCCCCAGA-GGGTGCT-CAGGCATTGGAACAGGCTGCCAGGGCAGTGC  | 41513 |
| GoldenEagle              | CAAGAACTGTGTTTT-----CTCTGGGTTTGTA-ATTTGTC-TGACCTTTCCAAGAAACAAGGTCTATGTGTGC       | 50523 |
| JapaneseQuail            | TAAAAAATGCAATTC-----CTGTT-ATATGTCCTGACCCCTCTAGGAAATGAGGGCTGT--GTGC               | 36785 |
| MediumGroundFinch        | CAAGAATTCGTGCCACAGCTGTTGCTGTGGCTTTTGTA-ATTTGTC-TGACCTTTTCAAAAAATGAGATCTATGTATGC  | 25785 |
| GoodesThornscrubTortoise | ATCTAACGTACTTT-----TCTCTATTTATTGGTACATTTGTATATAGCAGTATAAATTTGCATGGCCGTCAACTG     | 75018 |

Monday, May 02, 2022 06:51 PM

| Majority                 | TA-AGTAATCAGTTAAAAATGTATTG-GATGAATAGATGATCCTGGCCTGCAT--GCATTATTACTTATTCATCTA----  |                                                 |
|--------------------------|-----------------------------------------------------------------------------------|-------------------------------------------------|
|                          |                                                                                   | 80970 80980 80990 81000 81010 81020 81030 81040 |
| Human                    | AAAAATAAAGTATTAACCTTAGGCTGGTATGTTTAGATCAATACTGTATTTAAATAGATTGATAATTTTTTATATATTTT  | 80095                                           |
| Kakapo                   | TGGAGTCACCGCCCTGCAAGCATTACACACTGTGTAGCCGAGGCCCTCA---GTGCCATGGGTTAGTGGT-----       | 41582                                           |
| GoldenEagle              | TA-TGTAATCGGTTAGAAACGTATCA-ATCAAATAGATGATCCTAGCCTGCAT--GCATCATTACTIONTTCATCTA---- | 50595                                           |
| JapaneseQuail            | TA-TATAAGCAAGTAGAAAATGTTG-CATGTGTAGATTATCCTGTCTCACAT--GCGTTGTTACTTGTTCATATC----   | 36857                                           |
| MediumGroundFinch        | TA-AGTAATCAGTTAAAAACACATCA-GTCAAATAGATGGTC-TAGCCTGCAT--GCATCATCACTIONTTCATCTA---- | 25856                                           |
| GoodesThornscrubTortoise | @GGAAAAGAAAGTGAAAAGTGGATTTTGGAGGAATATAGGAAT-TGCCATGCA---GAACTACCAGTGGTCTATCTAATC- | 75093                                           |

| Majority                 | -----CTACATCCTTGGCTGTGATAAAAATAAGGTTT-CAGAAATCTTTG-AGACTGTAAGTTGGACATC-----TTTTC |                                                 |
|--------------------------|----------------------------------------------------------------------------------|-------------------------------------------------|
|                          |                                                                                  | 81050 81060 81070 81080 81090 81100 81110 81120 |
| Human                    | ATGAATTTATACTTTTTCTGAGATTTTCAAGGAGGAAAAATGAGTAGGAGATGACTGAGAGCTTAAAGTTTGGGAGTGTG | 80175                                           |
| Kakapo                   | -----G--GCCTTGGCAGTGGTGGCAATGGTT---GGACTGGATG-AGCTTTAAAGGTCTTTCA-----AACCG       | 41641                                           |
| GoldenEagle              | -----CTACATCCTCAGCTGTGATGAAATAAGGTGT-CAGAAATCTTTG-AGACTGTAAATGGACATC-----TTTTC   | 50662                                           |
| JapaneseQuail            | -----CTACATCCTCGGCTATGATAAAAAGTGTGTCAGAAATCTTAG-AGACTGTAAATGGACATA-----TTCTC     | 36925                                           |
| MediumGroundFinch        | -----CTACATCCTCACCTGTGATAAAAATAAGGTTT-CAGAAATCTTTG-AGTCTGTAAACTGGACAA-----TATTC  | 25922                                           |
| GoodesThornscrubTortoise | -----CTGTATACTT-TCTCTGACAGCAACCAGTAC-TATATTTCAATGCAAGATGATAGACAACCCTC-----ATTAT  | 75160                                           |

| Majority                 | AGTGAGTTTTGCTATTTTTTGAAGAAGTGGAT----AATTAC-----T-AATGGATAG-AGTGGGCTGGT-----  |                                                 |
|--------------------------|------------------------------------------------------------------------------|-------------------------------------------------|
|                          |                                                                              | 81130 81140 81150 81160 81170 81180 81190 81200 |
| Human                    | AATTAACCTCAGCATTTCTTTAAAAAATGTGTATATATTACAGCATTTTCTTTTATTTGAAGTGAATGTATCTT   | 80255                                           |
| Kakapo                   | AGTGGATTTGTGATGCAGATTATATGTTACTT----TATTGC-----CCATTTAATAT-AACTGGCTGTTG----- | 41703                                           |
| GoldenEagle              | AATGAGTCTTGTATCTTTTGAAGAAGTGGAT----AATCAC-----T-AATGGACAG-AATGGGCTAGT-----   | 50722                                           |
| JapaneseQuail            | AGTGAGTCTGCTATTTTTTAGAATAAAGGGGAA----AATTTT-----T-AATGAACCA-GGTGGATTGCT----- | 36985                                           |
| MediumGroundFinch        | AATGAGTGTAAATGTTTTTGAAGAAGGAGAA----AATTAC-----T-AGTGGACTA-AATGAGCTGGT-----   | 25982                                           |
| GoodesThornscrubTortoise | @GACAATTATACAATATTATGTTGGGGTGGGTCCT-AAACCC-----CAGATAGTTAGTGGTGGCTTATA-----  | 75226                                           |

| Majority                 | TTCAAA----TGAATG-ATCATGTGCATTT-ATTTG-TTATTTTGTTTTGTTTTTTTTTTCATATTATATATGAAGAGATA |                                                 |
|--------------------------|-----------------------------------------------------------------------------------|-------------------------------------------------|
|                          |                                                                                   | 81210 81220 81230 81240 81250 81260 81270 81280 |
| Human                    | TTTAAATTCCTTAGTAATTTTTGAGCACTCCATATGTATAAAGCATGTGAATATTTGGTAGCATTTTACA--AATGTCCA  | 80333                                           |
| Kakapo                   | TTTACA----TAGACC-ATCTAATACGGTC--T---CAAATCTGCTGAGTTTTTATAGGATGGAAGGGAGCAAGAGAAG   | 41772                                           |
| GoldenEagle              | TCCAAA----TGAAAT-ATCAGAAGCAGATGGTTTGTTTTTTTTCTTTTCTTTTTCACATCCTATATGAAGAGAGA      | 50797                                           |
| JapaneseQuail            | TTCAAG----TGAGT--ATCATGGCCATCATATCA--GAATTAGGCTTTTTTTTTTCCCTTTTATGTGTGAAGCAGAG    | 37057                                           |
| MediumGroundFinch        | TTCAAA----TGAATG-ATCAGAGGCAATT-----TTTTTTTCTTCTGTTTTTACCTCACATATGAAAC-AATAGATA    | 26049                                           |
| GoodesThornscrubTortoise | @CCTGAAGCTTGATTG-TCCAATGTACTGTACTTAGCCTCTTAATATAACTGGATGTTCTTGTATCCATAAAAATGTC    | 75305                                           |

Monday, May 02, 2022 06:51 PM

```

Majority      TAAACTTTTTTTTGTTC--CCTTCAAATATATAGCCTATGTTACAGAATAAAACC-TTTATATTAATAAT-AAGTGTT
              81290      81300      81310      81320      81330      81340      81350      81360
Human         GAGATTTGTGAGAGTTCCTGAGATCTTCATAGGGGGCCCAAAAGTTTAGTATTACTTTTCACGTAATACTAAAGTGTA 80413
Kakapo        ATAATGGACTTTTGTTC--CTTTTAGGTATCCAGTCAGTCCCACA-AATACCACA-TCTAATGCAATAAA-AGATGGT 41846
GoldenEagle   TACACATTCCTCCCCC--CCCCCAAAGTTACAGGAGATCTTACAGAAAAAAACC-TTTGAATAAACAGC-AACTGTG 50873
JapaneseQuail AAAAGTTATGGGAGATT---TTTCAGGATAAAAAGCCTTTTGTGTGA-AACAGCAGC-TATATGGTAATG---AACCGCT 37128
MediumGroundFinch TAGTCTCCCTCCTCTCAACCCCCCTAAAAAGTTACAGATGTCACAGAAAAAAGT--TTTGGATAAACAAAC-AGGTGTA 26126
GoodesThornscrubTortoise@AATCCCTTGTGTAATC--CCACTAAACTCTATGCATTTGTGCTAAAAAATAAGCA-TTCTTATTGCTCTT-AAATGTG 75380
    
```

```

Majority      TTATACTGAATTTTAATTAATAAAAATATT-C-----T--TTA-----ATAAGAACTACTTGGGATTGCAAGTACTGA
              81370      81380      81390      81400      81410      81420      81430      81440
Human         TTTTGCCTCTTTTACTTTTTCTCTTAATAGCATACAGTGGTAACTGAAGGCTAATAGTATGTGTGTTTATGTGCTTTAA 80493
Kakapo        GTTTGTTGCCTTTGATTTCAGGGAGATTTCCCTTTCTCTGTGCG----CGTGAGAGATGAGTGGGATTGTCATTACTGA 41921
GoldenEagle   TTATACTGAAGTCAACAAACAAAAGATT-----TTA-----ATAAGAACTACTTATAATTGCAAGTACTAA 50936
JapaneseQuail AAATAAAAATAAATGCTAATAAAAATGCT-----A-----ACAAAATTTACTTGGGATTGCAA-----GA 37184
MediumGroundFinch TTATACTGAACCACACATAACAAAATATT-----TTA-----TATAAGAACTACTCAAATAGCAAATACTGA 26189
GoodesThornscrubTortoise@TGCCCTTTAATTTTATTAGATACCTCCTCCCTTTTCTTGAGTTACAAGAGGGACTAAATAGGATTGCCTAGTTAAC 75460
    
```

```

Majority      TA-TTTGTTATTC-TTAGTTTAGCTCCCTGTTTGATATCACTATTGCAAGTCTTTTGCTATACTTGGAAATATGCTGT--
              81450      81460      81470      81480      81490      81500      81510      81520
Human         AAAGTTCGTGGTT-TTGGCCAGGCGCAGTGGCTCAGACCTGTAATCCAGCACTTTGGGAGGCTGAGGCAGGTGGATCAC 80572
Kakapo        TAACTTTCTATTCCCTCTGGTTCGACCCCTGCATACTAACAAATTTGAATCTTCTAACTTTATTAGAAGACATTCGTAT 42001
GoldenEagle   TA-TGTAATA---ATACTTTAACTCCAATTTAGATATTT-----GTTAATGCTATAGCTGGAAATATGTTGT-- 51000
JapaneseQuail TA-TATCTTA-----GTTTAACTTCAATTTAGCTG-----TTCATTACTACAGCTAGAAATATACTGT-- 37241
MediumGroundFinch TA-TTCGTTACTC-ACAATTTAGGTATTTGTGTAATATTACAGCTGCAAATATACTGTTGTGCTGGAAAATTCACTGT-- 26265
GoodesThornscrubTortoise@TCAGTGGCATTGTTATTTTATACCTGTGTATGACACTATAGAGCAGTGTTCCTCCAACTGGGATGCCGCT-TGT 75539
    
```

```

Majority      -TGTGGTTAGGCCTCCAGAGCTTTATC--CCTTGCTGTCTTTGCTGGCGTCTTTTGTTAG-AACTTTTCACTAATTCC-
              81530      81540      81550      81560      81570      81580      81590      81600
Human         CTGAGGTCAGGAGTTCAAGACAAAACCAGCCTGGCCAACATGGTGAACCCCATCTCTACTAAAAATACAAAAATTAGC 80652
Kakapo        CTTTAATTTCCCTTCTTAGAACACTTAG--TAGTGGGGTTTTTTTGTATGTGCCTTGACAG-GAAATAACCACAAAATA- 42077
GoldenEagle   -TGTGGTTAGGTCTCCACAGCTTTATC--CCTTGCCGTCGTTGCTGGCTTGCTTTATTAG-CACTTTCCACTAATGCG- 51075
JapaneseQuail ----TATTATGACTCCACAGTATTATT--TCTTGCTGTCTTCCTAGGCTTTTTTATTAT-AACTTTTCACTAATTCT 37314
MediumGroundFinch -TGTGCTTAGGGCTCACACAGCTTTATC--CATTGCTGCCATTGCTGGCGTCTTTTGTTAG-CACTTTCCACTAGTGCC- 26340
GoodesThornscrubTortoise@TAGGGAAAGGCCCTGGTGGGCTGGGCT--GATTTGTGTACTGCC-GCATCCACAGGTTC-AGCCAATCATGGCTCCCA 75615
    
```

Monday, May 02, 2022 06:51 PM

```

Majority      CTTTC-TTATGGTTGTTGCT--AAAT-TAATCTGTTTTAGAGGATAATAAATTGAAAA--TATTTCTGTGTGAATGGTG--
              81610      81620      81630      81640      81650      81660      81670      81680
Human         CAGGCATGGTAGTGGGTGCCTGTAGTCTCAGCTACTCGAGATGCTGAGGCAGGAGAAT-CACTTGAAGCTGGGAGGTGGA 80731
Kakapo        CTTTC-CAATGCTTGATCAG--TAAG-TAAGCACTATTACAGAGTAGTGATGGATGTCCTGTTCCTTTGAGGGGGCA-- 42151
GoldenEagle   TTGTC-TTATGGTGGTTCTT--AAAT-TAATCTATTTCAAAGGATAATAAATTGAAAA--TATTTTCATGTGAATGCTG-- 51147
JapaneseQuail CCTTT-TTAAAAGTCTTATT--AAAT-GAATCTGTTTCAGAGGATAACAATTGAAAA--CATTTCTGGATGAACGCTG-- 37386
MediumGroundFinch CCTTT-TTGAAGATTGTTGCT--GA-----CAGTTTTGAAGGATAATAAATTGAAAA--TGCTTTTGTAGGAATGGTG-- 26406
GoodesThornscrubTortoise eTGGC-CGTAGTTCGCTGCTCCAGGC-CAATGGGGGCTGCAGGA-AGCCACAGCCAGCACATCCCTCGGCCACCCTGC- 75691
    
```

```

Majority      --TTAATTAATCCTTTTT-----TTTAACTTCT-TCAGTGGGACCAAAGAAAGTCTTGACGAGAGTTTGATGC
              81690      81700      81710      81720      81730      81740      81750      81760
Human         GGTTCAGTGGAGCCAAAATCTCGC----CATTACACTCCAGCCTGGGGGACAAGAGCAAGACTCCATCTCAAAAAAAAAA 80807
Kakapo        --TTTGTGCAACCCTTTT-----ACGAACAGAT-TGGACTGA--CGATGGAAATCTTGCCATAAATTGTAACCT 42215
GoldenEagle   --TTGAATTAATCTTTGTT-----TTTAACTTCT-TTAGTGGGACCAAAGAATGTCTGTAGAGAGTCTGATGC 51213
JapaneseQuail --TTAATTAATCTTTTTCT-----TTTACTCCA-TCAGTAGGA-CCAAGTGAGTCCATATAGAAAGTTTAATGC 37451
MediumGroundFinch --TGATAAATAATCATGTT-----TATAACTTCT-GTGGTGGGGCCAAAGAATGTCTCTAGGAGAGTCTGATGC 26472
GoodesThornscrubTortoise eTTCCAGCAGTTCCCATGGCTGGAGCAATGAACCGCTGCCAGTGGGAGCTGCAATCGGCTTGACCTGTGGTCGCGGC 75769
    
```

```

Majority      TGTAAGAGTTTTTGCCTTTTAA---TGAGTTACTTGTGTTTGTGTGCCCCA-ATTATGGAAAGAGCGATAA-ACACTT
              81770      81780      81790      81800      81810      81820      81830      81840
Human         AAAAAAAGTTATGGTTTTAATTTTGGAAATGACAACCATTAATAGAACCACATTAGGCCGGGCGCGGTGGCTCATGC 80887
Kakapo        TGCTCACTGCTCC--CCTTCT-----GC-GCCCGTGGATGTTCTG--AG-AATATGATTGCACTAAAAG-ACAGTA 42279
GoldenEagle   TATGAAGAATTTT-GCCTTTTAAAGTATGAATTACTCGGCTATGCTCTGCCCA-ACTATGGAAAGAGCAATAA-AAACTT 51290
JapaneseQuail TATGAAGAGTTTTGGCTTTTAAA----GCATCTTTTGTGT-CATTACATTCA-ATTATGGAAAGAGCCTTAA-TAACTT 37523
MediumGroundFinch TGTAAGAATTTTTGCCTTTT-----TGAGTTACTTGGCTTTGCTGTGCCCCA-GCTATGGAAAGAACCATAA-ACACTG 26544
GoodesThornscrubTortoise eAGGTAAACAACCAGCCAGCAG---CCC GCCAGGAGCTTCTACTACACAAGCAGTGTCCGAAGTTTGGGAA-ACACTG 75844
    
```

```

Majority      CACTAGTCA-----TCT-----TTAGATTCTTTTATT-----TATTAATTT--GTTGGACTGGT
              81850      81860      81870      81880      81890      81900      81910      81920
Human         CTGTAATCCTAGCACTTTGGGAGGCCGAGACGGGTGGATCACGAGGTCAGGAGATCAAGACCATCTT-GGCTAACACGGT 80966
Kakapo        AAATACTCA-----ACT-----TAGATTCTTCTTTT-----ACATAATTTT--GTTAAGCCAGT 42326
GoldenEagle   CACTAGTCA-----TCT-----TTAGGTTCTTTTATT-----TGTAATAAT--GCTGGACCGGC 51337
JapaneseQuail TGTTAGGCA-----TCT-----TCAAATCCCTTCTGTATTTTGTATTGTATGTATTGATGT--ATTGGAATAGC 37588
MediumGroundFinch CACTGGTCT-----TCT-----TTAGATTCTTTTACT-----CCTGAAAAT--GCTGGACTGGC 26591
GoodesThornscrubTortoise eTATAGACTAATATCTTT-----TAAAACCTTCTATTTTGAATAATCCTTTCACATCATTAAATTTAATTGCCCTTCT 75917
    
```



Monday, May 02, 2022 06:51 PM

```

Majority      TTAAAGTTTCTTATATTAGGGAG-----AAATG-TCTAGACATATTTGAAGAT--TTGAAATGCTATAATATTTTGACGC
              81930      81940      81950      81960      81970      81980      81990      82000
Human         GAAACCCCGTTTCTACTAAAAATACAAAAAATTAGCCGGGCGTGTGGCGGGCGCCTGTAGTCCCAGCTACTTGGGAGGC 81046
Kakapo        GTCTTTTTTACTGAACTCTGTA-----AAATG-TGCAAATAAAAT-GTGGAT--C--AAATACTATAAAAGCT----- 42388
GoldenEagle   TTAAAGCTTCTAAGGTTAGGGAG-----AAGTG-CCTAGACACACTTGAAGAT--TTGAAATGCTTTAGTATCTTGGCAT 51409
JapaneseQuail TTAGAGTTTCTAAACTATGGAG-----AGGTGCTTTAGGCACATTTAAAAGAC--TTGAAGCACACTAATATTTTGACAC 37661
MediumGroundFinch TTAAAGTTTCTAAGGTTAGGGAG-----AAATG-TCTAGACATACTAGAAGAC--TGGCTATGCTCTAG----- 26652
GoodesThornscrubTortoise@TCAACTCTTCTGTATCTGTTTTT---GACATGGAATTACCAGAACTGAACATGTTTTTCGAAGGGAGAATATAACTTTGA 75994
    
```

```

Majority      TT---CATAAAACTAGCA-----TGGCCCCGTATAAAGTAAGTTGTT---C-----TG--C-----
              82010      82020      82030      82040      82050      82060      82070      82080
Human         TGAGGCAGGAGAATGGCATGAACCTGGGAGGCGGAGCTTGCAGTGAGCCGAGATCACGCCACTGCACTCCAACCTGAGAG 81126
Kakapo        -----GTTCTGTATAAACTA----- 42404
GoldenEagle   TT---CCTAATACCTAAATGATTGCTATTGACCTCGTATAAAATAAGTTGTTTCCCTCAGGTGGACATCTGTCACACC- 51485
JapaneseQuail TT---CTCATACTAAA-----TGATCAC-TGCTAAGTAGGTTTTT---C----- 37699
MediumGroundFinch -----TA----- 26654
GoodesThornscrubTortoise@T---TATAAAAGCAGCAAAGAATCCTGTGGCACCTTATAGACTAACAGACGTTTTTGGAGCATGAGCTTTCGTGGGTGA- 76070
    
```

```

Majority      --AC-----T-----T-----A-----T--A--A-----T-A--T---
              82090      82100      82110      82120      82130      82140      82150      82160
Human         ACACAGCGAGACTCCGTCTCGAAAAAAAAAAAAAAAAAAGAACCCACATTAACAAAACCTCCTTGTGATTCTCCAT 81206
Kakapo        -----T----- 42405
GoldenEagle   TTACTGTCATTCTTCACATTTCTGTCTCTATGACCTCTGCCGTACATGAGTGAAATAAACATGACAT-TCAGCATATGA 51564
JapaneseQuail ----- 37699
MediumGroundFinch ----- 26654
GoodesThornscrubTortoise@ATACCCACTTTGTCCGATGCATGTAGTGAAATTTCCAGGGGCAGGTGTATATATATGCAGGCAAGAA-TCAGTCTAGAG 76149
    
```

```

Majority      A-----A-G-----A-----A--A--A---TTTAGAA---TAGAACTGTAGGTTTCAAAGTTGA--GAGGAA
              82170      82180      82190      82200      82210      82220      82230      82240
Human         AGTTTTAAGACTATAAAGGGGAGCTGAGACCAAAAAGTTTGAGAAGTTTCTACTGTGGGATACAAAGTTGAA-GACAAT 81285
Kakapo        -----AGAT---GAGGCATATAGGTGACAA---G----- 42428
GoldenEagle   AATACAAAGCACTCAAAGTAAATTTCCAAAACAATTTTTTAGAA---CAGAACTGGATTTTTTAAAGTTGTTGAGAAA 51641
JapaneseQuail -----TTGAGAG---TAAAGCCATATCTTCAGTTTTACCCCAAGAA 37738
MediumGroundFinch -----AGACCTGG---T----- 26663
GoodesThornscrubTortoise@ATAATGAGGTTAGTTCAATCAGGG---AGGATGAAGCCCTGTTC---TAGCAGTTGAGGTGTGAAAACCAAGGGAGGAG 76222
    
```

Monday, May 02, 2022 06:51 PM

|                          |                                                                                    |       |
|--------------------------|------------------------------------------------------------------------------------|-------|
| Majority                 | ---AATTTGATATTCACG---TTCAGCGTGTAGTACAGTC--AT-----T-----                            |       |
|                          | 82250 82260 82270 82280 82290 82300 82310 82320                                    |       |
| Human                    | TATAGTTAAATAAGCAGGAGATACAGAGTATTTAATGAACAGTA-GATGGTTATAAGAGTCAAGAGATGTACAGAGAAA    | 81364 |
| Kakapo                   | ---AACCTTCCACTGA-----TCCTAGGAGTAGCACAGTC-----                                      | 42460 |
| GoldenEagle              | TTTAATTTGATATTCACAGGTTCCCTGTGTAGTACAGTCTGATTTGGGGAGTAAACTTCTTCTCCGTAGGGGTACTTT     | 51721 |
| JapaneseQuail            | CA-AAACCAATACTTGTG---TAGGCATATAGGACTGT---AT-----                                   | 37775 |
| MediumGroundFinch        | ---AGCTTGACATT-----                                                                | 26674 |
| GoodesThornscrubTortoise | --AAATTGGTTTTTACACA--CCTCAACTGCTAGAACAGGGCTTCATCCTCCCTGGTTGAACTAACCTTGTATCTCTAGC   | 76297 |
| Majority                 | -TGTTACTGCTTCG--TATATCAATTATTTTACTTGGAAAAA-CAGTTATATTCCT---T--A-----               |       |
|                          | 82330 82340 82350 82360 82370 82380 82390 82400                                    |       |
| Human                    | ATGCTAGTGATTAGAGTTTTTTAGATTATTTTAAATTTTGGTAACTAATTATAATTCCTCAGTTAAGATTTTTTGGCTTAGT | 81444 |
| Kakapo                   | -----GCCTAG--TACCCAGTGACTTGACCAGGCAGAAA-CCGTCAGCTCCCT-----                         | 42505 |
| GoldenEagle              | CTGTAACATGCATCC--TTTATTAATTTTTTCTTGGAAAGTA-AAGCTATATTTCTTCAGCTTTAACCAAAGAGCAAAAACA | 51798 |
| JapaneseQuail            | ---TTACACTTTCC--TATATCACGTGATTGGTTTTAAGAAA-CAGTAA--TC-----                         | 37820 |
| MediumGroundFinch        | -----T-----                                                                        | 26675 |
| GoodesThornscrubTortoise | @TGCTTCTTGCTTG--CATATATATACCTGCCCTGGAAATTTCCACTACATGCATCCGATGAAGTGGGTATTCACGCAT    | 76375 |
| Majority                 | -----C-----T--T-----T-----A-GATAT-----T-----A                                      |       |
|                          | 82410 82420 82430 82440 82450 82460 82470 82480                                    |       |
| Human                    | GGGCCCTTAGAATTACTTCTTCTCTGTTAGAATTTAAAGTGAAACCAGAAATTAAGTGATTTAATTTTTTTATTGTGGCA   | 81524 |
| Kakapo                   | -----ACACAAT-----                                                                  | 42512 |
| GoldenEagle              | TGCGTCATATTTATGTTACATTATTATCTTGCTATTAATATATGTTAGTATATAGTATTACACCTTCCTTTACACAAAA    | 51878 |
| JapaneseQuail            | -----                                                                              | 37820 |
| MediumGroundFinch        | -----                                                                              | 26675 |
| GoodesThornscrubTortoise | @AAAGCTCTTGCTCCAAAATGCTGTAGTCTGTAAGGTGCCACAGGATTCCTTGCTGCTTTTACAGATCCAGACTAACA     | 76455 |
| Majority                 | ----T-----AACTTGGTATGTTTATCTAGCAATAGACTTTCTAATTTTCAT----ATCCTTCTCTTGCTGCT          |       |
|                          | 82490 82500 82510 82520 82530 82540 82550 82560                                    |       |
| Human                    | AAGATCTAGTCCAAATATCTTTG-ATGGACTTTTTGAAAACAGACTTTATTTGTTAAAAAGGGAATTTGAGGCTTGGTACT  | 81603 |
| Kakapo                   | -----CCATGTTT--CCTTGGAAAGGGGAACTAAAAGCAC----A-----GC----                           | 42549 |
| GoldenEagle              | TGTATTTTGAGAAACGAAATTGCTATGCTTGGCCTAGCAGTGGTCCATCTAATTTTCAT----ATCCTTCTCTGACAGCT   | 51954 |
| JapaneseQuail            | -----ACTACGCTTTGTATGCCAGCAGTGG----TCTAATTTGGT----ATCCTTCTCTGACAGAT                 | 37875 |
| MediumGroundFinch        | -----T-----CTAA-----                                                               | 26680 |
| GoodesThornscrubTortoise | @GGTACCCTCTGATACTTTGATTTATGTAATGCCATAAAAATTTTCAGAATTAATGTCTATCCCTAACATTGTTTTT      | 76535 |

Monday, May 02, 2022 06:51 PM

```

Majority      G-TGT-ACTTCTTTGTTCT--CTTATAGAAGACATTGG-TAGCT-TC-TAATGGGTGACCATAGGTTAGCATGCCTGAGA
              82570      82580      82590      82600      82610      82620      82630      82640
Human         GA----ACTTCTTCTGCATGCCATATTGAAGTTGGTGGTTTTTTGTT-TGTTTGCCATCAGTGGGATCTCATACTAGACTA 81678
Kakapo        -----T--G-----AAGGTTTAGCCTAAGGGTAACGTGCTT---- 42578
GoldenEagle   AGTGTTACTTCTGCGTTCT--CTGATGGAAGACCTAGCGCAGCCCTCGTAATGGATGATCATACTAGCATACCTGGGG 52032
JapaneseQuail GCTGTTACTTCTATGTTCTTGCATATAGCAGACATAGGACAGCCTTAATAATGGGTGATCATTGTTAGCATGCCTGAGA 37955
MediumGroundFinch ----- 26680
GoodesThornscrubTortoise GTTGTGGTTTTTTTTTACCATTACTACATAACAGTTACTGGCTATCCCCTCAGTCACAATAAATTAATATTACATAAT 76615
    
```

```

Majority      TGGGTACTTTTCTAGTCTCTGAAGTAGCTAGTGT--TGACTTGTGATTA--ATATTACATATAATAACAATGGTCTATTT
              82650      82660      82670      82680      82690      82700      82710      82720
Human         TGGAATTTAATAGAAATTTTTAAGATACTGTTTTTCTAAAAGGTAGCTAACTAAAGGCAGGAAAATAGAATGATGTA-AC 81757
Kakapo        -----CT-TCAGGGAATTGG-----ATTACAGA-----AG---CCACAA 42608
GoldenEagle   GGAGTGCTTTCTAACCCCAAGGTAGCTAGTGTCT--TGACTTGTGATGAAGCATATTATATGTCACCTTTATTGCCTATTT 52110
JapaneseQuail GAAGTACTTTCTAGTCCCGAAGTTGCTAGTGTCT--TGGCTTATGTGC----TGAAGCACATTACACATTGCTTTATTT 38028
MediumGroundFinch ----- 26680
GoodesThornscrubTortoise TAGCTAGTCTTTTGTCCAGAACATAAAATCTC--AATGTGTTAATTATTTATCTCTCATGAATCCCCTGGTAAAAGA 76693
    
```

```

Majority      AATATAATGGT----TGGTGTTTCCACTGTTTACCTAGTATATATAAACTATTTTAGTTGCTTAT-TTGT-----
              82730      82740      82750      82760      82770      82780      82790      82800
Human         AATATAATGACTACATCTGGAGTTTCTGCTACTAATAAAATAATTGTATTGTCAACTTTAGTCAAATATTCTGTGCATTCA 81837
Kakapo        AGTATAATCAG-----TGGTGCT-----GCCTAGAATC----- 42636
GoldenEagle   AATGTAAGTGGC----TGTGTTTCCATAGACCATCTAATACAGTCTCAAATCTATTAAGTGTTTTTGCAGGA----- 52179
JapaneseQuail AATATAATGGC----TGCTGTTTCCACTGTTTCCATAGTCTATCAAATACTGTTTGAAGTGCTGATATAAGCATAGCT 38103
MediumGroundFinch AATGTAAGTGAT----TGCTATT----G----ACCTAGTATA----- 26710
GoodesThornscrubTortoise AACATAATTAATG-AGGTGGAGCACGGAAATTTTACTTACTTTATGTGAAAGAACTTTGTAACCACACTTATTTTACAC 76772
    
```

```

Majority      -TCGCCGCTAT--AAACAAGATAAGGTTTTTTTTTTTGTATGT--TG-AGATAATTTCTCAAAT-TGACAAGTAATGTA
              82810      82820      82830      82840      82850      82860      82870      82880
Human         GTCAGAGCTATCTGAAAATACTGACGAATAGTATTACAATATG---GGGAGGTCACCTTCTCAAGACTGCAAGAAAAAAA 81914
Kakapo        ----- 42636
GoldenEagle   -TGGAGGGGAGAAAGACAAGATAGGGTTTTTCTTTTTTTTATGTATTATAGTCAATCCACAAATATCACATATAATGCA 52258
JapaneseQuail TTTGCCCTCAATGGAAGAAAGACAAGATTTTTCTTTCTGTCTGTATTCCAGACAGTCCACAAATGTCACAAGTAATGTG 38183
MediumGroundFinch ----- 26710
GoodesThornscrubTortoise CTCTCCATTTTCTTCTGCTGCAATAACTATTTTTTAGTAGTGTGGGAATATTTTATTTTATTATTGACGAGTACGGTC 76852
    
```

Monday, May 02, 2022 06:51 PM

|                          |                                                                                   |       |
|--------------------------|-----------------------------------------------------------------------------------|-------|
| Majority                 | ATAAT-AG-TT-TGTATGTTT-CTTTTGATTTA----AGTAGGTTTTCTCTTCATCTCGTG-A-TTATATTT--AGACTT  |       |
|                          | 82890 82900 82910 82920 82930 82940 82950 82960                                   |       |
| Human                    | TTGTTGTTGTTAGGAATGTTTGCTTAGGAATTA----GGAATGTATACTTGACAACAAGTGAACGTATCCATTGAATGTT  | 81990 |
| Kakapo                   | -----T--TGAATTG---AGAACGTTGCCTCCTCACCTCA-----                                     | 42666 |
| GoldenEagle              | ATAAA-AGATCATATTTGTTGCCTTTTGATTCA----AATAGGTTTTCCCTTTATCTTGTGGCATGAGAGAT---GACTG  | 52330 |
| JapaneseQuail            | ATAAA-AAGAT-TGTATTTATGCTTTTATTTA----AGTAAATTTTCCCTTTATCTCATCCAGGGAGATTACTAGAATT   | 38257 |
| MediumGroundFinch        | -----A-----AATAAGTT-----                                                          | 26719 |
| GoodesThornscrubTortoise | ACAATTAGCTTCTCAGTATTTACTCACTATCTGAGACAGGAGAATTTCTTCTGCCTTTCCCTTATTTTTATTTTTAAACAA | 76932 |

|                          |                                                                                   |       |
|--------------------------|-----------------------------------------------------------------------------------|-------|
| Majority                 | AATTAA-TGTTACTTAGAAGTTTGTATATCTCTGGTTTGGCCTCTGAATACTAACA-TTTG-A---TTATAGATTAATCG  |       |
|                          | 82970 82980 82990 83000 83010 83020 83030 83040                                   |       |
| Human                    | AAATGAGAACAACCTTATGGGGAGGATAGTGAGAGGTATAGTATTTAACATGGAAAAGTTAGTAATATAGTAGAATATTTG | 82070 |
| Kakapo                   | -----GTTATGCAGAGGTT-----C-----                                                    | 42681 |
| GoldenEagle              | GAATTGTTGTTACTCAGAACCTTCTATTTCTCTGGTTTGAACCTGAATACGAACATTTTAAATCTTTTAAACTTTATCA   | 52410 |
| JapaneseQuail            | TTTTAAATATTACTTAGTACTTTATGTATCTCTGATTGGCCTGTGAATACTAACACTATG-----CTATTGATTCATCA   | 38332 |
| MediumGroundFinch        | -----                                                                             | 26719 |
| GoodesThornscrubTortoise | AATTAACCTCTCAGGAAAGAAGGGAGAAAACCTCAGTTCTCATCTGCAAACATAAGATTTCTATTTAGATGGGTAGTGG   | 77012 |

|                          |                                                                                |       |
|--------------------------|--------------------------------------------------------------------------------|-------|
| Majority                 | GAAGGCATCTCTATGTTGAAT---CTTTATTAGAATACTTATTT---GTATTTTCTTCTGGGTATTATTAGACAAGAG |       |
|                          | 83050 83060 83070 83080 83090 83100 83110 83120                                |       |
| Human                    | GTTGAAAAGATCCACATTGG-----TGTATTCAAAGACACACTGAAGACTATTGTGCATTAGTAAGTATTAACATGAG | 82144 |
| Kakapo                   | -----T---GA-GAGACATGTAG---GCCTTTTCATAGG-----                                   | 42708 |
| GoldenEagle              | GAAAGCATCCATGCTTTAATTTCCCTTTCTTAGAACACTTAACT---GTTTTTCTTCTGTATGTGCTTTGACACGAA  | 52486 |
| JapaneseQuail            | GAAGGCATCTGTATGTTGAATTTCCCTTTCTAGAATGTGTGTT---TTATTTTGTGTGGGTTTGGCAGGAAATGA    | 38408 |
| MediumGroundFinch        | -----GTTTTTCTTCTG-----                                                         | 26732 |
| GoodesThornscrubTortoise | CCCCAAGGTCAGGTTACATGGTCATGAGTTAAATATTCAATTTATCATCATCCTCCAGGCATCAGAAGACCACAG    | 77092 |

|                          |                                                                                   |       |
|--------------------------|-----------------------------------------------------------------------------------|-------|
| Majority                 | AATACT--ATTTTCCAGTTGGAGTGTGA---CAGAGATTTGCTTTAAGTCTAATTGAGTATTGAAGGAT-----CATTTG  |       |
|                          | 83130 83140 83150 83160 83170 83180 83190 83200                                   |       |
| Human                    | AATCTTAATTTTAAATTTGGACCCTAATTTCTGAGATTTACTTTAAGAATAAAAGGGGATGAAACGAGATTGGCCATGA   | 82224 |
| Kakapo                   | -----ACCAGCTCCAGTGTTA---CAGA-----TTGAGT-TTGAAGCAT-----CA----                      | 42745 |
| GoldenEagle              | ATGACC--AGAAAATATTTGCACTATGG---CAAAGTAGTGATGGATGTCTGTTCCT-TTGAGGGGT-----CATTTG    | 52555 |
| JapaneseQuail            | CAAAAT--ATTTTTCAGCGTGTTTGTGA-ATCATGACTGATCAGTAATACTCCTTAAGTACTTCAGAAA-----AATAGG  | 38480 |
| MediumGroundFinch        | -----                                                                             | 26732 |
| GoodesThornscrubTortoise | AGTGAA--ATCTGCAAGGCCTAGTGCAGTAGTAGAAAATAGCATAACAATAGAATAAAGTAATAAATAATTCAAACAATTA | 77170 |

Monday, May 02, 2022 06:51 PM

```

Majority      T-CTTTT-TTGTTAAACTT-TGTGTTTATTTCTTTGAG-CCCA-TATAAT-TCCACATTTATCT--TTTAATTTTATAA
              83210      83220      83230      83240      83250      83260      83270      83280
Human         GTTGATCATTGTTAAAGTTGGGTGATGGCTACTTAGAGTTGCATTATTTTAGTCACTTTTACTTTTGTATATGTTGAAA 82304
Kakapo        -----
GoldenEagle   TCCAGCCCCGCCAAATCTCTCTCTCTCTCTCTCTCCCCCCTCTCAGTGTGCCACCTCCCCGATTTGTTTTC 52635
JapaneseQuail GACTTATGCTCTGTTCCCTTTGAGGAAACATTTATCCAGCCTGGGAAAATCTCCTTATTTTTATGGTTTGGTTTTATCA 38560
MediumGroundFinch -----
GoodesThornscrubTortoise GATTTTTGTGCTAGTCTTATCATTTTTATTTGTTGGAGACTAAATAAAATGTACAAATATATCTAATTTAACTGTAAAAG 77250
    
```

```

Majority      ACTT-TTTGGCAAAA-GTA-ATACAGAATT-----GGA-----GTGAGGA-AGATGTCTTTCCTAGGCAATTAGTT----
              83290      83300      83310      83320      83330      83340      83350      83360
Human         TCTTCCAAAACAAATGTATAGCCATAAAAAAAAAAGGGAGCAAAGTAAGAAAAAAGGAGAGCCTAAAAAAAAAGGTACAG 82384
Kakapo        -----AGTT-----GAA-----GTGAGGT---GTCCCTGCCCATGGCAGGGGGTT---- 42782
GoldenEagle   ACAAATTTGTGTAACAAAACATAAAGAATT-----GGA-----ATGAAGATAGAAATCTCCCTAGGCAATTAGAA---- 52701
JapaneseQuail ACTTGTTTAGCAAAAGGTAACATAAGAGTG-----GAA-----ATAAATATAGATGTATTTTCTAGATAATTCAT----- 38625
MediumGroundFinch -----GTGGGA-----TCTGTC----- 26745
GoodesThornscrubTortoise TAGTGAGGCATAGCACAGGGGCACAATTTTCGAGGAT---GGTGAAGGA-AGAGGTGTATCCTAGGGGGCAGTATGCT 77326
    
```

```

Majority      ----AA--TACTAAAATAATCTCATTGCGTACACCCTTGTTAAATCTTACTGTCCGTTTCCGTTTCC-TTCTCATTCT
              83370      83380      83390      83400      83410      83420      83430      83440
Human         GCAAAAAGGTGTGAAAAGAAACTCATCAAGAGCAAGAGTATTAATGAGAAACATATGCCACTGACAGAGTTCTCAGAAG 82464
Kakapo        ----GG--AACTGGA-----TGA-----TCTTAAGGTCTTTC-C----- 42810
GoldenEagle   ----AA--AAAAAAATTGTAACCATGCTTACTCCCTGCCTTCTCTCTCCCTGTGTGTTTCCCTTTGATACTAAATCT 52773
JapaneseQuail ----AA--TTCTATAATAATCTCTTTCCATCCACAATGGTAAAGACCTTCTCTCCCTCCATGTTCCCTTCTGATACT 38698
MediumGroundFinch -----ATGC----- 26749
GoodesThornscrubTortoise ACTAAA--TACCCAAGGGATTCTACTGGGAAAACCCATCATAAATTAATATTGTCCCTGCACAATGCCTTAGCCTTTTT 77404
    
```

```

Majority      GGAT-AGGGGTGTTTTTAAATAAGTGG-TGA-TGTATTTACTTTT-TCTGCTTA-TATTTTGGGATTGACTGAAACTGAA
              83450      83460      83470      83480      83490      83500      83510      83520
Human         AGATAAAGGCTGAATTAAGAGATGGAGGGGAAAGTTTATAAGTCAAAAACCTTAGGTTAAGGTTTGTGAATATTTAA 82544
Kakapo        -----
GoldenEagle   GGGATTATCTTTTTTAAATTAATGGTTGAATGTATTTACTATTTACTGCTTAGTACTTGGGCATTGACTGAAACTGAA 52853
JapaneseQuail AAATCAGGGGTATTTTTCAATATGCAGATGACTATATTTACTGTTTCTGCTTAATATTCGGTCATTGACTGAAACTGAA 38778
MediumGroundFinch -----
GoodesThornscrubTortoise GAGGGGAGGAGCTGAAGTGTAGGTGGCCATTGGCAGCTGAGTTCCTGGATTAACCTTTGTTAGGAGGCAGAGACTAGG 77484
    
```

Monday, May 02, 2022 06:51 PM

```

Majority      GAGCTTTTCTTTTTCTG--ATGTCTTTTAATA-AATACTTTAAGGTCAAAGGGCGAAAACCTT---T--A-AGTGTA
              83530      83540      83550      83560      83570      83580      83590      83600
Human         GAGCGCTTCAGATTGCCAATGAAAGGTCATAGTA-GTTTCTATAAAGTCAAAGATCAAAAACCTTGACTTAAAAGAGTAA 82623
Kakapo        -----A-----ACCCTAA----- 42818
GoldenEagle   GAATTTATTTTTTTATG---ACTTCCTTTAAAATAAACTTAATGTGGGAAGGGAAGTAGTCTTAGGTGCATAGTGAAA 52930
JapaneseQuail GAACTTGCTTTTCTG---TTGTCTTCTTCTGAAATAAATCAGGGGAAAAAAGCGCTAGAT-----AGTGTAATA 38848
MediumGroundFinch ----- 26749
GoodesThornscrubTortoise GAGGATTACCACTATGGAGCCATGTCTCTGGACTGAATATTCCTATGTCTTTCATGGCTAGAACCTTTTTTCCCCACTGA 77564
    
```

```

Majority      GATTATTTTTA--CTGTCTACCTAGGATACTGGAA--GACTTGTCCAGAGATGTGGTA-C-TAGCATGATGATATAAGCT
              83610      83620      83630      83640      83650      83660      83670      83680
Human         GATCTCTAAAACCAAAGGTAAC-AGCAGATTCTTATGAAATGCACCAGAAAGCTGGAA---AGAAAGAAGAAATAAAAT 82698
Kakapo        -----CCAGTCTAGGATTCTATGA--GGAATGCC----- 42845
GoldenEagle   AGTTATATTTAGACTGTCTACCTGGCATACTGGAA--TATTAGTCAAAGTTGTATTAGCTTAGCGTGATCATATAAGCA 53008
JapaneseQuail AATTATATTTAATCTGTCTACCTGGTGTATTGGAA--GACTGGTCAAAGCTTTGCTAGCTTAACATCATCATACAAACA 38926
MediumGroundFinch -----C---ATACTG----- 26756
GoodesThornscrubTortoise GCCTATTACTATGGGTAATACGTAGGCTACTCGATTTGCCTTGCTCTGCAAGGTTGTAACCTAGCCTAAAGCATCAAGTT 77644
    
```

```

Majority      TTAGAAATTTTGCCAA--AGTGCTGAAAGCT-----A-----AAGTTAA---GCATTTAAGTTATGT-
              83690      83700      83710      83720      83730      83740      83750      83760
Human         GTGAACTTATGGAACAAGAGTGCTAAGGGCCTGTTCTACCCAGGTATGTTATGAAATCAA--TTCATTTAGTTTGGGTG 82776
Kakapo        -----TTTCAAAG--GGTGATGGAAAAT-----AA---GGATG---TAA--- 42876
GoldenEagle   TTAGAAGTTTTGCCAA--AATACTGAAAGCTGAGAAGCCAGTTGCAGTAAAAGAAAATAAA---ACGCTGAAGTTATAT- 53082
JapaneseQuail TCTGGAATTTTGCCAA--ACTGTAGAGAAA-----GTTAA---ACACTTAAGTTCTGT- 38974
MediumGroundFinch -----TCCTGGAA-----AA---GTA--- 26771
GoodesThornscrubTortoise GAAGTGAAGAAAGTAACTAATAACCAAAGCGTAATATAAAGGAAATATAATGGTGAAGATAACTTGCATTAATATTTAGT- 77723
    
```

```

Majority      TTCTTT---TTTTTGCACATTTT---GCTACATTGGTTTCCTTTT---ACTGAACT-----CTATAATAT
              83770      83780      83790      83800      83810      83820      83830      83840
Human         TTTGTTCCTTTATGTTGGGAAGATAAAAAGAACATATAAATTCGTTTCTTGAGTGAACCAGTATTTATGAGAAATAAGCT 82856
Kakapo        -----TGATGCAGAGAGC---ACAATTAGCGTTTACTCTT---ACTGATTTGT-----CAATATTTA 42927
GoldenEagle   TTCTTTATGTTTTTTACACATTTT---GCTATGTCGGTGTCCCTTTT---ACTGAACT-----CTGTGAAAT 53143
JapaneseQuail TTCTGTT---CTTTTACACGTTTT---GCTACATAAATGTCCCTTTT---AATGGACT-----CTGTAAAAT 39032
MediumGroundFinch -----T--T-----GATACAATGGTGCTCATT---ACTGAAC-----CTACATGAT 26808
GoodesThornscrubTortoise @TCACTGACTTGACTGGTATATTCAGCAACAAGATTAATTAAGGTCC---ATCTAGCCCA-----GTATCCTGT 77790
    
```

Monday, May 02, 2022 06:51 PM

Majority GTGCAAATAATAATTTTAAT---CAAATATTTTAAAGCTATT---CCTGTATAGGCTATGTACAGTGCATATGTATTA  
 83850 83860 83870 83880 83890 83900 83910 83920  
 Human GGGTGTGTAAGAATTTAAGGGATGAAAATATCCAAAGTTGATTGGTAATTGAAAAGTAGATGAACGGTGTAAACACAAA 82936  
 Kakapo CTTTAGACCATTGTGATAAC---TAGAACTTTAAGCATT---AGAGTACAGGCTGAATACATTTTAGA-GTATGA 42998  
 GoldenEagle GTACAAATAA-AATTTTGAT---CAAATATGATAAAGCTGTT---CCTGTATCAACTATGTATAGTGCATATGTATCA 53214  
 JapaneseQuail GTGCAAATAAAAATTTGATT---AAAATATGATATTGATATT---CCTGTATGAGCTGTCTGCAATGTATATATGTTG 39104  
 MediumGroundFinch GTGCAATGGCAATGTGGAT---CAAATACATTAAGCTGTT---CCTATATAAACCATGTATAGTGAAGTGTATCA 26880  
 GoodesThornscrubTortoiseTTCCAACAGTGGTCAATGC---CAGGTGCCTCAGAGGGAACG--AACAGAACAGGTAATCATCAAGTATCCATTCTC 77864

Majority CGAGAGTCTTTCCCGATCC-TGGGAGTAGCACGCTTGGCAGA-----TACCCAGTGACGTGACCAG--ATTAAACC  
 83930 83940 83950 83960 83970 83980 83990 84000  
 Human GGGAAATTCTGTCTAGAAATAAATGAAAATATGGTGACTTAAAGAT---AGTAGGACAGCAATAAGACTGGAAATTAGAAC 83012  
 Kakapo AGACAGGCT---GAGAACAT-TGGGGCTGTTACGCTTGGAGAA-----GAGA--AGCTGCGTGGAGAC--CTCAGAGC 43063  
 GoldenEagle CAAGAACCTTTCACAGATCC-TGGGAGTAGCACACTTGCCTAG-----TACCCAGTGACTTGACCAG--GCAAAACC 53284  
 JapaneseQuail CAGAGATCTTTCACAGCTCC-TGGAAGTAGCACAGTTGTCAGG-----TGCAGCAGTGACATCACCAC--ATGCAACA 39174  
 MediumGroundFinch CAAGAGCCTTTCACGATCC-TGGGAGTAGCACACTCAACTCA-----TACCCAGTGATGTGAGCAG--ACAAAACC 26950  
 GoodesThornscrubTortoiseGTGCGTTATTCCAAGCCTC-TGGCAAGCAGAGGCTAGGGACACCATCGCTGCCATCCTGCCTAATAACT-ATTGATGG 77942

Majority AGCATTTCTCTATAGG---ATCTGAGTTCTTTGGA---TGATGGAAAGTA--GAAGCTCAACTGATGCTGTAGC-TGAT  
 84010 84020 84030 84040 84050 84060 84070 84080  
 Human AATAAAATAAGAAGGAAATGATAACATAGATTGGGAAAGGATAGGAAAATACTGAAACAAAATCTGTGTGTATAGTGAT 83092  
 Kakapo AGC-TTCCAGTGTCTG---AAGGGGGCTACAA-GGA---TGCTGGAGAGGG--ACTCTTCATCAGAGACTGTAG--TGAT 43131  
 GoldenEagle AGCAGGGCTCTACAGG---ATGTGAATTTCTTTGGA---AGAAGGAAAAA--AAAGCACAGCTGAAGGTTTAGC-TAAT 53355  
 JapaneseQuail ACCAGATTTCTGTAGG---ATCTGAGTTACTTTGGA---AGAGTGG-----TCAAGTGTTTTCTAG----- 39230  
 MediumGroundFinch AGCATTTCTGTACAGG---GTCTGAGTTCTTTGAA---GAAGAAAACGTA--GAGGCACAACCTGAAGCTATAGC-TGAG 27021  
 GoodesThornscrubTortoiseACCTATCCTCCATGAATTTATCTAGGTTTTTTTGAACCTCTGTTATAGTCTT--GGCCTTCACAACATACTCTGGC-AAAG 78019

Majority GGTAACATGTTTTTTCAGGGCGTTGGATTTCAAAGCCACAGAGTATG-T---T-----TTGAGTCTTTAATTTAG  
 84090 84100 84110 84120 84130 84140 84150 84160  
 Human GGTTTCTGTTCTTTCAACCGGGAGAGTGTGTGTGTTGAAGGAACCTGTATTCATTTTAATTACTTGAGTGTATAATTAAG 83172  
 Kakapo AG-GACA-AG-----GGGTGATGG-TTCAACTGAACCAGGGGAAG-----TTCAGG-TTAGATCTAA 43185  
 GoldenEagle GGTAACATGTGTCTTCAGGGCATTGGATTACAAAAGCCACAGAGCATAATCAGTGGTGTACCTTCAGTCTTGAATTTAC 53435  
 JapaneseQuail GGAATCATAT-----TATAT--AAAACCATAGAATAAC-----CAGT--TTGATGCAG 39274  
 MediumGroundFinch GGTAACATGGTTCTTCAGAGAACTGGATTACTAAAGCCACAGAGCATG-----TTGAATCTTGAATTTAG 27086  
 GoodesThornscrubTortoiseAGTACCACAGGTTGGCTGTGCGTTTTGTGA--AGAAATACTTCCTTTGTTTGTGTTTAAACCTGCTGCCTTCTAATTTTCAT 78097

Monday, May 02, 2022 06:51 PM

```

Majority      ATGGTTGCCTC-TTCACCTTG--CATGCTAAGGTTCTGAGA---GATGCATAGTCCTTTTCACATGGCCAGCTCTCTAGT
              84170      84180      84190      84200      84210      84220      84230      84240
Human         AAGGCAAGCACATTTTCTAAGATTTTCTTTATTTGCATGA---ATTAATAATGATGTTTCAGAGTGATTTGTCTCTAGG 83249
Kakapo        GGCAGAAGCTC-TTCCCTGTGAGGGTCTGAGGCGCTGGCACAGGGTGCCAGAGAAGCTGTGGCTGCCCCATCCCTGGC 43264
GoldenEagle   AACGTTGCCTC-CTCACCTAGTTCATGCTAAGGCTCTGAGA---GATACATAGGCCTTTTCACATGACCAACTCGCATGT 53511
JapaneseQuail CTGTGTGCCTC-CTCACCT----CAT-TTATGGTG-TGAGA---GATGCATAGGCCTTTTCACTTGACCAGCTCTGCAGT 39344
MediumGroundFinch AGGGTTGCCTC-CCCACCT----CATGCTAAGGTTCTGAGA---GATGTGTAACCTCTTCACATGGACAAATGCACAGT 27158
GoodesThornscrubTortoise@TGATGACCTC-TTGTCTTG--TGTTATGAGGAGTAAATAACACTTCCTTATTTACTTTCTCCACACCAGTCATGATT 78174
    
```

```

Majority      TGTGGACATAGTCTGAAGTTTGAAGTTGAAGTGTGGAGTACCT---CTCAA-G-TGGTGTGAAATAAAGATGTCATGAT
              84250      84260      84270      84280      84290      84300      84310      84320
Human         AGCTGAAAGACTACTACCTTTGTTTCATAAGCTGTAATTATTTGATTTCAAGTGTGAGTTTATGAAGAAGATAGCAC-TT 83328
Kakapo        AGTGTTC AAGGCC--AGGTGGACACAGGGCTTGGAGCAAC---CTGCTC---TAGTGTGAGGTGTCCCTGCC-TGTG 43334
GoldenEagle   TGTATACTTAGTCTGAAGTATCAAGTTGAAGTGAGGAGTACCT---CTCAAAGGGTGATGGAAAATAAGGATGTAATGAT 53588
JapaneseQuail -----ATATAGTATGAAGCATGAAGTTGAAGTGAGCAGTACCT---TTCAA-----GGCAATACAGATA----- 39404
MediumGroundFinch TGGGGATTTAGTC--AAGCACC AAGTTGAAGTGTGGAAAGTCT---CTCAA---TGATGAGAAACAAGGATGTAATGAT 27230
GoodesThornscrubTortoise@ATAGACCTCAGTCATATCTCCCTTTAGTCTCTCTTTTCCAAG--CTGAAAAGTCCCAGTCTTATTAATCTCTCCTCAT 78252
    
```

```

Majority      GCGGAGAGCACAATTAGTGTTTATTTTACTGATTTTATCAACATTTACT-T---CC-----AACTAGACA-----
              84330      84340      84350      84360      84370      84380      84390      84400
Human         GCGGAAAAA--GTGAATTACCATTATGTCGAAAGTGATACTTTTTTACATTTGGCCTTTTACTGTAATCGTGGGAAGTG 83406
Kakapo        GCAGGGGGTTGGAAGCTG-GATGATCTTTAAGGTCCTTTCCAAC-----CCAAACC----- 43383
GoldenEagle   GCAGAGAGCACAATTAGTGTTTATTTTACTGATTTGATCAACATTTACT-----AACTGGACA----- 53647
JapaneseQuail GTGGGGAG-----GAGAGAGAGAGAGAGAGAGAGAGAGAGAGAGAGAGAGAGAGAGAGAGAGAGAGAGAGAGAGAGAG 39412
MediumGroundFinch GCAGAGAGCACAATTAGTGTTTATTTCTTACTGATTTAATCAACATTTACTTTAGACCATCTTGATAAACTAGACA----- 27305
GoodesThornscrubTortoise@TGAAAGTGATTATATACCCTAATCATTTTTGCCCTTTTCTGAACTTTTCTAAACCTGTAGATATTATTAGGGAGGATT 78332
    
```

```

Majority      -TTTCTGTCATTTTGGAGTACAGTAGAAACAGTTTGGTGCACAAGAAT---GTTTATTTGAAAAGAA-----AGTACTT
              84410      84420      84430      84440      84450      84460      84470      84480
Human         AATTTTCCAAGCCTGTGACTTGG-AATTATATTTTTCATGCTTTG-TTGTCTTTTCCAGAGGAAATAGAGTATTATATAT 83484
Kakapo        -ATTCTGTGATTCTA---TACAGGAGAAACAGTCTCTGGTACATAG-AAT---GTTTGTTTGAAAAGAA-----AGTACTT 43450
GoldenEagle   -TTTAAAGCATTTTGGAGTACACTGGAACACCTTTGGTGCACAAGAAT---GTTTATTTGAAAAGAA-----AGTACTT 53718
JapaneseQuail -----CG-----GTTCTGGTGCACAAGAAT---ACTTATTTGAAAAGAGGAGAGAGTAATT 39460
MediumGroundFinch -CTTCAAGCATTTTGGAGTGCAGTGC AAACAGTTTGTCTGCACAATAAT---GGTATTTGAATAGAA-----AGTACTT 27376
GoodesThornscrubTortoise@TTGCTGTAATCTAAGAAAAAAGAGCAATATGTGTGCTTCACAAGAACTACATTTGATTGAAAACAA-----AATGGTC 78407
    
```



Monday, May 02, 2022 06:51 PM

|                          |                                                                                  |       |
|--------------------------|----------------------------------------------------------------------------------|-------|
| Majority                 | TTTATACCT---CATCAGTTCCTTTGAAGACTTGATTTGAAT-AA--AA-----AATATTTTTCATTTTCTTCTTTCT   |       |
|                          | 84490 84500 84510 84520 84530 84540 84550 84560                                  |       |
| Human                    | TTGATATTTTAACATAATACAGGTATGTACTTTAGTTCAAATAATTAATGGTTTTGTGAAATCAATTATTTTCTTTAC   | 83564 |
| Kakapo                   | TTTATACCT---CCTCAATTCCTTTGAAGACTTGATCTGAAT-AA--GA-----AAGAATTTTCACTTTGCTTCTTGCT  | 43517 |
| GoldenEagle              | TTTACACCT---CATCACTTCCTTTGAAGACTTGATCTGAATCAA--AAAAA---ATAATTCGCCATTTCTCTTCTTCT  | 53789 |
| JapaneseQuail            | TTTACACCT---CGTCTCTT---TGAAGCCTTGATTTGAGT-----AATATTTAATATTTCTATCCCTCAT          | 39520 |
| MediumGroundFinch        | TTTATACCT---CATAAGTC---TGCAGACTTGATCTGAA--AA--A-----AAAATTCTACGTTTCTTCTGCCT--    | 27436 |
| GoodesThornscrubTortoise | TTTAGAGAA---GTGAAGTAGCGTATAAAGT-GCTTTGAAGCAA--GAAAATAGCGAGAAGTTTGGTTTTTCTCCTTA-T | 78480 |

|                          |                                                                                    |       |
|--------------------------|------------------------------------------------------------------------------------|-------|
| Majority                 | GTTAATTTAGCAACCCATTTTACAACCCCTTTGGATAACTTTAACAGTT-GAATGGTTTGCTTTGTAGAGTGTGTATGCA   |       |
|                          | 84570 84580 84590 84600 84610 84620 84630 84640                                    |       |
| Human                    | TACACATCAGCAAACAATTTTCTAAACACTATAAAAAATTAACCTTTCAGGAACCATTTGGAATGGTCAGCCGTAAGCCAT  | 83644 |
| Kakapo                   | GTGAATTTAGCAACCCCTTCTCAAGCCTTTGGAGGACGTTGACAGC--GAATGGTCTGCTGAGTAGAGTGTGTCTGCA     | 43595 |
| GoldenEagle              | GTTAATTTAACAACCCATTTTACAACCCCTTTGGATAACATTAACAGTG-GAATGGTCTGCTCTGTAGAGCATTGTATGCA  | 53868 |
| JapaneseQuail            | GTTCACTTA---ATTCAATTTTACAACCCCTCTGGACATCTACAGCAGTTAGAATGGTCAACTTTGTAGACT--CATATTCA | 39595 |
| MediumGroundFinch        | --TAATTTACCAGCCTATTTTACAACCTTTTGGATGACTTTA-CAGTT-GTATTGTTTGCTGTGTAGAGTGGTGTATACA   | 27512 |
| GoodesThornscrubTortoise | ATTTA-TTACTGATCCATTTCACTAAGCATTGGAAAATACGAATTGTG-GAAGGAATTTTTTTATAGTGT---AAATATA   | 78555 |

|                          |                                                                                   |       |
|--------------------------|-----------------------------------------------------------------------------------|-------|
| Majority                 | GCACCTGTACTGATAAAGGTGCTTTTTT-T--TAAATGACTTGTGTGTGTTTCGTAAAATATGCTTTATTTTAAAATTAG  |       |
|                          | 84650 84660 84670 84680 84690 84700 84710 84720                                   |       |
| Human                    | GCAGCCATCGTGCTTAAATTTGGTTTTTG----TAAACGACTTGTGTGTGTTTCGTAAAATATGCTTTATTTTAAAATTAG | 83720 |
| Kakapo                   | GCACGTGTGCTGATAGAGGGACTTTTCTATACAAAATGACTTGTGTGTGTTTCGTAAAATATGCTTTATTTTAAAATTAG  | 43675 |
| GoldenEagle              | ACACTTGTGCTGATAAAGGTACTTTTTT-TTTTAAATGACTTGTGTGTGTTTCGTAAAATATGCTTTATTTTAAAATTAG  | 53947 |
| JapaneseQuail            | ACACTTGTACTGATGTAGGTGCTGTCT---TAAGCGACTTGTGTGTGTTTCGTAAAATATGCTTTATTTTAAAATTAG    | 39671 |
| MediumGroundFinch        | GCCCTAGTACTGATATAGGAACTTTTT-TAGAAAATGACTTGTGTGTGTTTCGTAAAATATGCTTTATTTTAAAATTAG   | 27591 |
| GoodesThornscrubTortoise | GTATTTGAACCTCTAATTTAGATATTTT---TAAATGACTTGTTTGTATTTTCGTAAAATATGCTTTATTTTAAAATTAG  | 78631 |

|                          |                                                                                    |       |
|--------------------------|------------------------------------------------------------------------------------|-------|
| Majority                 | GGCTTCCTGTTGCAGCTGTTCCAGGAGCTCTGAGTCCCTTTGGCTATTTCCAAATGCTGCTGCTGCAGCTGCAGCTGCTGCT |       |
|                          | 84730 84740 84750 84760 84770 84780 84790 84800                                    |       |
| Human                    | GGCTTCCTGTTGCAGCTGTTCCAGGAGCTCTGAGTCCCTTTGGCCATTTCCAAATGCTGCTGCTGCAGCTGCAGCTGCTGCT | 83800 |
| Kakapo                   | GGCTTCCTGTTGCAGCTGTTCCAGGAGCTCTGAGTCCCTTTGGCTATTTCCAAATGCTGCTGCTGCAGCTGCAGCTGCTGCT | 43755 |
| GoldenEagle              | GGCTTCCTGTTGCAGCTGTTCCAGGAGCTCTGAGTCCCTTTGGCTATTTCCAAATGCTGCTGCTGCAGCTGCAGCTGCTGCT | 54027 |
| JapaneseQuail            | GGCTTCCTGTTGCAGCTGTTCCAGGAGCTCTGAGTCCCTCTGGCTATTTCCAAATGCTGCTGCTGCAGCTGCAGCTGCTGCT | 39751 |
| MediumGroundFinch        | GGCTTCCTGTTGCAGCTGTTCCAGGAGCTCTGAGTCCCTTTGGCTATTTCCAAATGCTGCTGCTGCAGCTGCAGCTGCTGCT | 27671 |
| GoodesThornscrubTortoise | GGCTTCCTGTTGCAGCTGTTCCAGGAGCTGAGTCCCTTTGGCTATTTCCAAATGCTGCTGCTGCTGCAGCTGCTGCTGCT   | 78711 |

Monday, May 02, 2022 06:51 PM

|                          |                                                                                |       |
|--------------------------|--------------------------------------------------------------------------------|-------|
| Majority                 | GCTGGCCGTGTGGGAATGCCTGGAGTTTCAGCTGGTGGCAATACAGTCCCTCGTTAGCAATTTAAATGAAGAGGTCAG |       |
|                          | 84810 84820 84830 84840 84850 84860 84870 84880                                |       |
| Human                    | GCTGGCCGAGTGGGTATGCCTGGAGTCTCAGCTGGTGGCAATACAGTCCCTCGTTAGCAATTTAAATGAAGAGGTTAG | 83880 |
| Kakapo                   | GCCGGCCGGTGGGAATGCCTGGAGTTTCAGCTGGTGGCAATACAGTCCCTCGTTAGCAATTTAAATGAAGAGGTCAG  | 43835 |
| GoldenEagle              | GCTGGCCGTGTGGGAATGCCTGGAGTTTCAGCTGGTGGCAATACAGTCCCTCGTTAGCAATTTAAATGAAGAGGTCAG | 54107 |
| JapaneseQuail            | GCTGGCCGTGTGGGAATGCCTGGAGTCTCAGCTGGTGGCAATACAGTCCCTCGTTAGCAATTTAAATGAAGAGGTCAG | 39831 |
| MediumGroundFinch        | GCTGGCCGTGTGGGAATGCCTGGAGTTTCAGCTGGTGGCAATACAGTCCCTCGTTAGCAATTTAAATGAAGAGGTAAG | 27751 |
| GoodesThornscrubTortoise | GCTGGCCGAGTGGGTATGCCTGGAGTTTCAGCTGGTGGCAATACAGTCCCTCGTTAGCAATTTAAATGAAGAGGTCAG | 78791 |

|                          |                                                                                    |       |
|--------------------------|------------------------------------------------------------------------------------|-------|
| Majority                 | TGAAACAATTTTA---TCTTTTTTTTTTTTCCCTCTTTAGTCACACTTCATTTGTCAGTGTTTTAT-ATTTTTTTCGATTT  |       |
|                          | 84890 84900 84910 84920 84930 84940 84950 84960                                    |       |
| Human                    | TAAAATAATCTCTAATGTTTATTTCTTTAACTCCATTTTCATT-TGTGAAAGTTTTTCATGTTTATT--TCATTTTGCACCT | 83957 |
| Kakapo                   | TGAAACCACTTTA---CTACTTCTTTTGCCTCTTTAGTCACCTTCATTTGTCCTCGTTTATGATTTCTTTGCATTT       | 43911 |
| GoldenEagle              | TGAAACAATTGTAATTTTTTTTTTTTTTCCCTCTTTAGTCACACTTCATTTGTCAGTATTTTATAATTTCTTTGCATTT    | 54187 |
| JapaneseQuail            | TGAAATAATTTGA--CTCTTTTATTTTTTCCCTTTTACCATATGTCATTTGGTCATCATTTTAT--TTCTTTGTTTTT     | 39907 |
| MediumGroundFinch        | TGAAACAATTTTA---CTTTGTTTTTCCCCCTCTTTAGTCACACTTCATTTGTCAGTATTTTATAATTTCTTTGCATTT    | 27827 |
| GoodesThornscrubTortoise | TGAAACTATTAAC---TCTTCTTTCCCTTTATTTTTTAAATCACACTTCATTTGTAATGTTTTTC-ATTTTTTTCGACCT   | 78867 |

|                          |                                                                                 |       |
|--------------------------|---------------------------------------------------------------------------------|-------|
| Majority                 | GGCCTC--TTATATTTGGAT--TTTAAGCTCAA-GTATTTTTGCTGTT---TTTTTTTA--ATAATCCCTACCCAAAGT |       |
|                          | 84970 84980 84990 85000 85010 85020 85030 85040                                 |       |
| Human                    | GCCTTTCTTTTATGTACAT--TCATTAGTCAA-GTATTTTCTGTATGTTTCTACTTCTGAATAAAATCTACATATTGT  | 84034 |
| Kakapo                   | GGCCTC--TTACATTTGGGT--TTTAAGCTCAAAGTATTTTTGCTGGT---TTTCTTTA--GTAATCCCTCCCAAGT   | 43982 |
| GoldenEagle              | GGCCTC--TTACATTTGGAT--TTTAAGCTCAA-GTATTTTTGCTG-----TTTTTTAA--TAATCCCCA---AAGT   | 54251 |
| JapaneseQuail            | GGCCTC--TTATATTTGGAT--TTTAAGCTCATA-GTATGTTGCTGTTACATTTTATTACCTTACTACTCCCCAAAGT  | 39982 |
| MediumGroundFinch        | GGCCTC--TTATATTTGGAT--TTTAAGCTCAA-GTATTTTTGCTG-----TTTTTTTA--ATAATCCCTA---AAGT  | 27891 |
| GoodesThornscrubTortoise | GCCTCTATTTTCACTTGCATACTTTATGATCAA-GTATTTTTTCTCGTTTTTTGATGTCTAAATTAATTTGGAAACTA  | 78946 |

|                          |                                                                                     |       |
|--------------------------|-------------------------------------------------------------------------------------|-------|
| Majority                 | TAATTTTAAAGTTATTTTTGTAAATACTTTTGTTTTCCCTAGGTAGCTAACAACCTTAAAATGTCCTTTGATAGTTGGCTA   |       |
|                          | 85050 85060 85070 85080 85090 85100 85110 85120                                     |       |
| Human                    | TTAGGTAATACTTTATTTCCTTAAACAGTCATGCTCTTTATATCTATATCTATATATG-TATATTTTTTAACTA---A      | 84110 |
| Kakapo                   | TAATTTGAAAGCCC-----TT----CTTTTGTTTTTCCAGGTAGCTAACAACCTTAAAATGTCCTTTGATAGTCGGCTA     | 44051 |
| GoldenEagle              | TAATTTTAAAGCCATTATTGTAAATACTTTTGTTTTCCAGGTAGCTAACAACCTTAAAATGTCCTTTGATAGTCAGCTA     | 54331 |
| JapaneseQuail            | TAATTTTGAAGTTATCCTTGTAAATACTTTTGTTTTCCAAGGTAGCTAATGACTTAAAATGTACTTTCATAGTTGGCTA     | 40062 |
| MediumGroundFinch        | TTATTTTAAAGCCA---TTGTTAAATACATTTTGTTCCTAGGTAGCTAACAACCTTAAAATATCCTTTGACAGTCAGCTA    | 27968 |
| GoodesThornscrubTortoise | TAAACTTTTATATTTTTTCTATTA--TAATTTTGTTTTCCCTAGGTAGCTAACAACCTTAAAATAGCCTTTGATATTTGGCTG | 79024 |

Monday, May 02, 2022 06:51 PM

```

Majority      CCTATTTTTTCT--AAGAAAAATATGGT-AACTACTGCATGTTTGACTTTTGAATTGAAAGTTCTA--TTT-----AAA
              85130      85140      85150      85160      85170      85180      85190      85200
Human         CCTATTTTTTCT--AAGAAAAATATGGTGAAGTACTGTA-GTTTGGCTTATCTTTTTGTGTTCTC-----AA 84175
Kakapo        CCTATTTTTTCT--AAGAACAATGTGGT-AACTACTGCATGTTTGACCTTGAATGAAAGCTCTTCTTTT----- 44119
GoldenEagle   CCTATTTTTTGT--AAGAAAAATGTGGT-AACTACTGCATGTTTGACATTTGAATTGAAAACTTATTTTTACA---AAA 54405
JapaneseQuail CCTGTATTTTCT-----TAAGTATGGT-AACTATTGCATGTTTGACATTTGAATTGAAA----- 40115
MediumGroundFinch CCTATTTTTTTTCTAAGAAAAATTTGGT-AACTTCTTCATGTTTGA-----A-- 28014
GoodesThornscrubTortoise CCTATTTTTTCT--AAGAAAAATATGGT-AAATACTGCATGTTTGGCTTTCGATTTGTAACTTAAATATTTTCACAAAAA 79101
    
```

```

Majority      TAGCAACTGTGCTTTCTTTTGCA-ATTATAATC-ATGTAAACTAGAAATTT-CTGTTTGTTCCTTCTAATTGTTTGCTGT
              85210      85220      85230      85240      85250      85260      85270      85280
Human         AGGCAAATGTGATCTAATTTGCAAATT-TAACT---GTAAAACAATTTTG--CTCTTTGCCTTTTCTAATTATTTGCTTG 84249
Kakapo        TTACACCTCTGCTTTCTTTTGCA-ATTATAATC-CCCTAAACTCGATTTTCTGTTTCGTTTCTCTTAATGGTTTGCTGT 44197
GoldenEagle   TAGCAACTATGCTTTCTTTTGCA-ATTATAATC-ATGTAAACTAGAAATTT-CTGTTTGTTCCTTCTAATTGTTTGCTGT 54482
JapaneseQuail -TTTTGTTTGTGTTTTATTTTACA-ATTATGATC-ATTTAAACTTAGAATTCCTGTTTGTTCCTTCTAATTGTTTGCTGC 40192
MediumGroundFinch TACCAACTATTCTTTCTTTTGTA-ACTGTAATC-ATGTAAACTAGAAATTT-CTGTTTGTTCCTT--ATTGTTTGCTGT 28088
GoodesThornscrubTortoise AGCAAATGTATTCTAATTTGTAGATTATATTTTATGTAAAGTAGAATTG--TGTTTTCTTTTC-TAATTATTTGTTGC 79178
    
```

```

Majority      TTCATTTTCATGCTTGTATCTCACA-----TTTAAAGGCTCTT-AATTTATGTGAACACTACTCTAACACGTTTTCTTTGAA
              85290      85300      85310      85320      85330      85340      85350      85360
Human         TTCATTTTCATGCTTATATGTCATTGCATTTTTTTTAAATCTT-ATTTTATGTGAACACTACTCTAATACATTTTCTTTGAA 84328
Kakapo        TCCATTCCATGCTTGGAGCTCACC-----TTTGAAGGCTTTAATTTATGTGAACACTACTCTAACACGTTTTCTTTGAA 44271
GoldenEagle   TTCATTTTCATGCTTGTATCTCACA-----TTTAAAGGCTCTT-AATTTATGTGAACACTACTCTAACACATTTTCTTTGAA 54555
JapaneseQuail TTCATTCCATGCTTGTATCTCACA-----TTGTAAGGCTCTT-AATTTACGTGAACACTACTCTAACACGTTTTCTTTAAA 40265
MediumGroundFinch TTCATTTTCATGCTTGTATCTCACA-----TTTTTGAGTCTT-AATTTATGTGAACACTACTCTAACACATTTTCTTTGAA 28161
GoodesThornscrubTortoise TTCATTTTCATGCTTACATGTCACCTGCAT--TTTTAAAATCTT-AATTTATATGAACGCTCTAACACGTTTTCTTTGAA 79255
    
```

```

Majority      GGTTCCTCCAAAGATCTTGACGAGGCACTCTTCCAGTCTCTCTTAGTAATTTTTTTTCTTTGCAGTTACTCATTGTGCT
              85370      85380      85390      85400      85410      85420      85430      85440
Human         GGTTCCTCCAAAGATCTTGACGAGGCACTCTTCCCGTCTTTCTTAGTAATTTTTTCTTTGCAGTTATTAGTCATTGTGCTT 84408
Kakapo        GGTTCCTCCAAAGATCTTGACGGGCCACTCTTCCAGTCTCTCTTAGTAATTTGTTTC--CTTTGCAGTAACTCGTTGTGCT 44349
GoldenEagle   GGTTCCTCCAAAGATCTTGACGAGGCACTCTTCCAGTCTCTCTTAGTAATTTTTTTT--CTTTGCAGTTACTCATTGTGCT 54633
JapaneseQuail GGTTCCTCCAAAGATCTTGACGAAGCACTCTTCCAGTCTCTCTTAGTAATTTTTTTT--CATTCAGTTTCTCATTGTGCT 40343
MediumGroundFinch GGTTCCTCCAAAGATCTTGACGAGGCACTCTTCCAGTCTCTCTTAGTAATTTTTTTTCTTTGCAGTTACTCATTGTGCT 28241
GoodesThornscrubTortoise GGTTCCTCCAAAGATCTTGACGAGGCACTCTTCCAGTCTCTCTTAGTAATTTTTTCTTTGCAGTTATTATTCATTGTGCT 79335
    
```

Monday, May 02, 2022 06:51 PM

Majority TTAAAAA-----A----TAAAAAATGGTGGCAAAGCATTTCACCTAA--CTGT-ATCTTTCTTGCTAACTCTG  
 85450 85460 85470 85480 85490 85500 85510 85520  
 Human CTAAAAAT-----A-TTTTTTAACCTTATTCACCCACCCCTTCCTTCCTTACCACCCCTCCACCCAGTTAAATAAA 84479  
 Kakapo TTAAAAAATAACAATAAGACGAAAAAAGTGGTGGCAAAGCATTTCACCTAA--CTGT-ATCTTTCTTGCTAACTCTG 44426  
 GoldenEagle TTAAAAA-----TAATAATAAAAAAATGGTGGCAAAGCATTTCACCTAA--CTGT-ATCTTTCTTGCTAACTCTG 54703  
 JapaneseQuail AAAAGTAA-----TAAGGAAAAATGACAAAGCATTTCACCTAA--CTGT-ATCTTTCTCGCTAACTTTG 40407  
 MediumGroundFinch TAAAAA-----TAAAAAAGTGGTGGCAA--CATTTTCACCTAA--CTGT-ATCTTTCTTGCTAACTCTG 28302  
 GoodesThornscrubTortoise@CAAAA-----ATA--TTTTTCACCTAATACTGTTATCTTTCTTGCTAACTCTA 79383

Majority A---AATCTAAAGGGT---ATTTAGTTTTGCATTTTTACTGTCCTTT-ACATTTATTTTGATGGCTGTGAAAGCTGGTA  
 85530 85540 85550 85560 85570 85580 85590 85600  
 Human ATTTATTGCTAAGTTATTTTCTTTAGTTGTACATTTTA--TGTCTGGTATATTTTATTTTGAATGCTATGAAAGCTGGTA 84557  
 Kakapo A---AATCTCCAGGGT---GATTTAGTTTTGCATTTTGACTGTCCTTTTACATTTCTTTTGATGGCTGTGAAAGCTGGTA 44503  
 GoldenEagle A---AATCTAAAGGGT---GTTTAGTTTTGCATTTTTACTGTCCTTT-ACATTTATTTTGATGGCTGTGAAAGCTGGTA 54778  
 JapaneseQuail A---AATCTAAAGGAGTTT-GTTTAGTTATGCATCTTTACCGTCTTT-ACATTTATTTTGATGGCTGTGAAAGCTGGTA 40482  
 MediumGroundFinch A---AATCTAAAGGGATTA-ATTTAGTTTTGCATTTTTACTGTCCTTT-ACATTTATTTTGATGGCTGTGAAAGCTGGTA 28377  
 GoodesThornscrubTortoise@A---AATCTAAGGGT---ATTTAGTT-TGCATTTTTACTGTTTGTACAATTTTTTTAATTGATGTGAAAGCTGGTA 79458

Majority TGAAATGTGGGAAGTTG---TATCAGTCTAG-----CT-----GTTCCATTTTTAACTGGCCTCTGTCACT  
 85610 85620 85630 85640 85650 85660 85670 85680  
 Human TGAAATGTGGGAAGCTCAGTGTATCAGTTTATGATGTCTAATTTGAATATTTGTTTCATTTTTAATTGGCCTCTGTAAAT 84637  
 Kakapo TGAAATGTGGGAAGTTG---TATCAGTCTAG-----CT-----GTTCCATTTTTAACTGGCCTCTGTCACT 44562  
 GoldenEagle TGAAATGTGGGAAGTTG---TATCAGTCTAG-----CT-----GTTCCATTTTTAACTGGCCTCTGTCACT 54837  
 JapaneseQuail TGAAATGTGGGAAGTTG---TTTCAGTCTAG-----CT-----GTTCCATTTTTAACTGGCCTCTGTCACT 40541  
 MediumGroundFinch TGAAATGTGGGAAGTTG---TATCAGTCTAG-----CT-----GTTCCATTTTTAACTGGCCTCTGTCACT 28436  
 GoodesThornscrubTortoise@TGAAATGTGGGAAGTTGATGTATCAGTTTGT----CTAGTTGGAATACTGTTTCATTTTTAACTGGCCTCTGTAAAT 79533

Majority GTAAATCATTAAGCTTTTTTATCATCTGGTACTATTTTGTCCATCCACAGTCTTGCAATGTTAAAATGTTTTAGATCAGAG  
 85690 85700 85710 85720 85730 85740 85750 85760  
 Human ATGAA-CATTAGCTTATTTTATCCATTTAATACTATT--ATCATTACAGTCTTGCAATGCTAAAATGTTT-GAATCAGAG 84713  
 Kakapo GTAAATCATGAAGTTTTTTTTATCATCTGGTGTACTATTTTGTCCATCC--GTCTTGCAATGTTAAAATGTTTTGGTCAGAG 44640  
 GoldenEagle GTAAATCATTAAGCTTTTTTGTCCATCCACAGTCTTGCAATGTTAAAATGTTTTAGATCAGAG 54917  
 JapaneseQuail ATAAATCATTAAGCTTATTTTATCATCTGGTACTATTTTGTCCATCCACAGTCTTGCAATGCTAAAATGTTTTAGATCAGAG 40621  
 MediumGroundFinch GTAAATCATTAAGCTTTTTTATCATCTAGTACTATTTTGTCCATCCACAGTCTTGCAATGTTAAAATGTTTCAGATCAGAG 28516  
 GoodesThornscrubTortoise@ATGATTCATTAAGCTTATTTATCATTTTGTACTATTTTCTCATTCACAGTCTTGCAATGTTAAAATGTTT-GGATCAGAG 79612

Monday, May 02, 2022 06:51 PM

|                          |                                                                                  |       |
|--------------------------|----------------------------------------------------------------------------------|-------|
| Majority                 | TGCCATT-----TTGAAAGATTTTTGCCTGCATTTTCATAACCAGCCATGCTTATGCAGTTAAAGTTCAAATTTTAAA   |       |
|                          | 85770 85780 85790 85800 85810 85820 85830 85840                                  |       |
| Human                    | TGCCTTTGTTTTATTTTAAGAC-TTTTGCCTGCATTTTCATAACCAGCCATGCTTATGCAGTTAAAGTTCAAAGTTTAAA | 84792 |
| Kakapo                   | TGCCGTT-----TGAAAGAGGTTTTGCCTGCATTTTCATAGCCAGCCATGCTTACGCAGTTCAAGTTCCAAGTTGAAA   | 44713 |
| GoldenEagle              | TGCCATT-----TTGAAAGATTTTTGCCTGCATTTTCATAACCAGCCATGCTTATGCAGTTAAAGTTCAAATTTTAAA   | 54990 |
| JapaneseQuail            | TGCCATT-----TGAAAGGTTTTGTGCCTGCATTTTCATAACCAGCCATGCTTACGCAGTTGAAGTTTAAATTTCAA    | 40694 |
| MediumGroundFinch        | TGCCATT-----TTGAAAGATTTTTGCCTGCATTTTCATAACCAGCCATGCTTACGCAGTTAAAGTTTAAATTTTAAA   | 28589 |
| GoodesThornscrubTortoise | TGCCATT-----TTGAAAGAT-TTTTGCCTGCATTTTCATAACCAGCCATGCTTATGCAGTTAAAGTTCAAAGTTTAAA  | 79684 |

|                          |                                                                                   |       |
|--------------------------|-----------------------------------------------------------------------------------|-------|
| Majority                 | ATTTCTATTGCATGCTTTTTTTA-TTTATTTTCATGTTGAGATGAAATGCTGTAGTTTACTCTT-GATATGAATGTACTT  |       |
|                          | 85850 85860 85870 85880 85890 85900 85910 85920                                   |       |
| Human                    | ATTCCTAT-GCATGCTT--T-----CCTTCCCTATGTTGAGATGAAATGCTGTAATTTACTCTTTGATATAGATGTACTT  | 84864 |
| Kakapo                   | AGTTCTATTGCATGCTCTTTTTTA-TTTATTTTCATGTTGAGATGAAATGCTGTAGTTGACTCTT-GATATGAATGTACTT | 44791 |
| GoldenEagle              | ATTTCTATTGCATGCTTTTTTTA-TTTATCTTCATGTTGAGATGAAATGCTGTAGTTTACTCTT-GATATGAATGTACTT  | 55068 |
| JapaneseQuail            | ATTTCTATTGCATGCT-TTTTTA-TTTATTTTCGTTGAGATGAAATGCTGTAGTTTACTCTC-GATATGAATGTACTT    | 40771 |
| MediumGroundFinch        | ATTTCTATTGCATGCTTTTTTTAATTTATTTTCATGTTGAGATGAAATGCTGTAGTTTACTCTT-GATATGAATGTACTT  | 28668 |
| GoodesThornscrubTortoise | ATTTCTATTGCATGCT-----TTTTTTTCATGTTGAGATGAAATGCTGTAATTTATTCTTTGATATGGATGTACTT      | 79755 |

|                          |                                                                                  |       |
|--------------------------|----------------------------------------------------------------------------------|-------|
| Majority                 | TACCCATATTTGTCTTGGGTGACTACATTTTACTCAGTTTTT--CTTGTACAGTACATAAACCAACCATTTTCTGACCAA |       |
|                          | 85930 85940 85950 85960 85970 85980 85990 86000                                  |       |
| Human                    | TACCCATATTTGTCTTGGATGACTACATTTTACTCAGTTTTT--CTTGTACAGTACATAAACCAACCATTTTCTGACCAA | 84942 |
| Kakapo                   | TACCCATATTTGTCTTGGGTGACTACATTTTACTCAGTTTTT--CTTGTACAGTACATAAACCAACCATTTTCTGACCAA | 44869 |
| GoldenEagle              | TACCCATATTTGTCTTGGGTGACTACATTTTACTCAGTTTTT--CTTGTACAGTACATAAACCAACCATTTTCTGACCAA | 55146 |
| JapaneseQuail            | TACCCATATTTGTCTTGGGTGACTACATTTTACTCAGTTTTT--CTTGTACAGTACATAAACCAACCATTTTCTGACCAA | 40849 |
| MediumGroundFinch        | TACCCATATTTGTCTTGGGTGACTACATTTTACTCAGTTTTT--CTCGTACAGTACATAAACCAACCATTTTCTGACCAA | 28746 |
| GoodesThornscrubTortoise | TACCCATATTTGTCTTGGGTGACTACATTTTACTCAGTTTTTTTCTTGTACAGTACATAAACCAACCATTTTCTGACCAA | 79835 |

|                          |                                                                      |       |
|--------------------------|----------------------------------------------------------------------|-------|
| Majority                 | ATTCCTGCATTTCCCTATGTACTGACCTATATTTATTTTTTTTTTGTTCCTTATTTTCTTCTGCAT   |       |
|                          | 86010 86020 86030 86040 86050 86060 86070 86080                      |       |
| Human                    | ATTCCTGCATTTCCCTATGTACTGACCTATATTTATTTTGTTTTTGTTCCTTATTTTCTTCTGCAT   | 85019 |
| Kakapo                   | ATTCCTGCATTTCCCTATGTACTGACCTATATTTATTTTGTTTTTGTTCCTTATTTTCTTCTGCAT   | 44947 |
| GoldenEagle              | ATTCCTGCATTTCCCTATGTACTGACCTATATTTATTTTTTTTT--GTTCCCTTATTTTCTTCTGCAT | 55224 |
| JapaneseQuail            | ATTCCTGCATTTCCCTATGTACTGACCTATATTTATTTTTTTTT--GTTCCCTTATTTTCTTCTGCAT | 40923 |
| MediumGroundFinch        | ATTCCTACATTTCCCTATGTACTGACCTATATTTATTTTTTTTTGTTCCTTATTTTCTTCTGCAT    | 28825 |
| GoodesThornscrubTortoise | ATTCCTGCATTTCCCTATGTACTGACCTATATTTATTTTTTTTT--GTTCCCTTATTTTCTTCTGCAT | 79905 |

Monday, May 02, 2022 06:51 PM

|                          |                                                                                    |       |
|--------------------------|------------------------------------------------------------------------------------|-------|
| Majority                 | TGCTGTATTCCTTCCCCATTTTCATCCTTTTCCCTTTGTGTTCAACTTCCCTTT-CCTTGTCTTTACCCAAATCCCATG    |       |
|                          | 86090 86100 86110 86120 86130 86140 86150 86160                                    |       |
| Human                    | TGCTGT-TTCCCTTCCCCATTTTCATCCTTTTCCCTGTGTTTCACTTCCCTTT-CCTTGTCTTTCCCAAATGCCATT      | 85097 |
| Kakapo                   | TGCTGTATCCCCTTCCCCATTTTCATCCTTTTCCCTTTGTGTTCAACTTCCCTTTTCCCTTGTCTTTCCCCAACTCCCATC  | 45027 |
| GoldenEagle              | TGCTGTATTCCTTCCCCATTTTCATCCTTTTCCCTTTGTGTTCAACTTCCCTCT-CCTTGTCTTTACCCAAATCCCATG    | 55303 |
| JapaneseQuail            | TGCTGTTTCCCCCTCCCCATTTTCATCTTTTCCCTTTGTGTTCAACTTCCCTTT-CCTTGTCTTGACCCAAATTCCCGTG   | 41002 |
| MediumGroundFinch        | TGCTGTATTCCTTCCCCATTTTCATCCTTTTCCCTGTGTTTCAACTTCCCTCT-CCTTGTCTTTACCCAAATTCCCGTG    | 28904 |
| GoodesThornscrubTortoise | TGCTGT-TTCCCTTCCCCATTTTCATCCTTCTCCTTTTGTGTTTCACTTCCCTTT-CCTTGTCTTTCCCTCAAATTCCCATG | 79983 |

|                          |                                                                                      |       |
|--------------------------|--------------------------------------------------------------------------------------|-------|
| Majority                 | CCCTTCCCTGTCTTACCCTTT--TCTCCTTGCTTT-GTCTGCGTTCCTGTCTTTCATTCCCTATGTTTCATGCTTCTGTG     |       |
|                          | 86170 86180 86190 86200 86210 86220 86230 86240                                      |       |
| Human                    | CCCTTCCCTGTCTTACCCTTTATTTTCCCTTGCTCTT-GTCTTTCATTCCCTGTCTTCCATTCCCTATGTTTCATGCTTCTGTG | 85176 |
| Kakapo                   | CCCTTCCCTGTCTTACCCTT---CTCCTCGCTTTTGTCTCCATTCCCTGTCTTTCATTCCCTATGTTTCATGCTTCTGTG     | 45103 |
| GoldenEagle              | CCCTTCCCTGTCTTACCCTT---CTCCTCGCTTTT-GTCTGTGTTCCCTGTCTTTCATTCCCTATGTTTCATGCTTCTGTG    | 55378 |
| JapaneseQuail            | CCCTTCCCGTTTTTACCCTTT--TCTCCTCGCTTTT-GTCTGTGTTCCCTGTCTTTCATTCCCTATGTTTCATGCTTCTGTG   | 41079 |
| MediumGroundFinch        | CCCTTCCCTGTCTTACCCTT---CTCCTTGCTTTT-GTCTACGTTCCTGTCTTCCATTCCCGATGTTTCATGCTTCTGTG     | 28979 |
| GoodesThornscrubTortoise | CCCTCCCTGTCTTACCCTTTATTTTCCCTTATCCTT-GTCTACGTTCCTGTCTTCCATTCCCTGTGTTTCATGCTTCTGTG    | 80062 |

|                          |                                                                                   |       |
|--------------------------|-----------------------------------------------------------------------------------|-------|
| Majority                 | CTTGAACAAAATGT--TCCTCGGACCAACTTGCCCCAATTAACCGCCTTGAAACCATGATCCATGACCACCTCACCATTC  |       |
|                          | 86250 86260 86270 86280 86290 86300 86310 86320                                   |       |
| Human                    | CTTGAACAAA-TGT--TCCTCGGACCAACTTGCCCCAATTAACCGCCTTGAA-CCATGATCCATGACCACCTCACCATTC  | 85252 |
| Kakapo                   | CTTGAACAAAATGT--TCCTCGGACCAACTTGCCCCAATTAACCGCCTTGAAACCATGATCCATGACCACCTCACCATTC  | 45181 |
| GoldenEagle              | CTTGAACAAAATGT--TCCTCGGACCAACTTGCCCCAATTAACCGCCTTGAAACCATGATCCATGACCACCTCACCATTC  | 55456 |
| JapaneseQuail            | CTTGAACAAAATGT--TCCTCGGACCAACTTGCCCCAATTAACCGCCTTGAAACCATGATCCATGACCACCTCACCATTC  | 41157 |
| MediumGroundFinch        | CTTGAACAAAATGT--TCCTCGGACCAACTTGCCCCAATTAACCGCCTTGAAACCATGATCCATGACCACCTCACCATTC  | 29057 |
| GoodesThornscrubTortoise | CTTGAACAAAATGTGTTCCCTCGGACCAACTTGCCCCAATTAACCGCCTTGAA-CCATGATCCATGACCACCTCACCATTC | 80141 |

|                          |                                                                                 |       |
|--------------------------|---------------------------------------------------------------------------------|-------|
| Majority                 | TGCGGGAACCACCCTTCGTTATGGATGATCTGTTCATCTCCGCTCTTCTCGACTCTTCTCTCTTCTTGTCTTACGCTGC |       |
|                          | 86330 86340 86350 86360 86370 86380 86390 86400                                 |       |
| Human                    | TGCGGGAACCACCCTTCGTTATGGATGATCTGTTCATCTCCGCTCTTCTCGACTCTTCTCTCTTCTTGTCTTACGCTGC | 85332 |
| Kakapo                   | TGCGGGAACCACCCTTCGTTATGGATGATCTGTTCATCTCCGCTCTTCTCGACTCTTCTCTCTTCTTGTCTTACGCTGC | 45261 |
| GoldenEagle              | TGCGGGAACCACCCTTCGTTATGGATGATCTGTTCATCTCCGCTCTTCTCGACTCTTCTCTCTTCTTGTCTTACGCTGC | 55536 |
| JapaneseQuail            | TGCGGGAACCACCCTTCGTTATGGATGATCTGTTCATCTCCGCTCTTCTCGACTCTTCTCTCTTCTTGTCTTACGCTGC | 41237 |
| MediumGroundFinch        | TGCGGGAACCACCCTTCGTTATGGATGATCTGTTCATCTCCGCTCTTCTCGACTCTTCTCTCTTCTTGTCTTACGCTGC | 29137 |
| GoodesThornscrubTortoise | TGCGGGAACCACCCTTCGTTATGGATGATCTGTTCATCTCCGCTCTTCTCGACTCTTCTCTCTTCTTGTCTTATGCTGC | 80221 |

Monday, May 02, 2022 06:51 PM

```

Majority      TTGCTCTTCTCCTTCTAAAGATGGTTACGCCCCAAAGTCTGTTTACCCTCTTCGGTATGTTATTGTTAGCACTATACT
              86410      86420      86430      86440      86450      86460      86470      86480
Human         TTGCTCTTCTCCTTCTAAAGATGGTTACGCCCCAAAGTCTGTTTACCCTCTTCGGTATGTTATTGTTAGCACTATACT 85412
Kakapo        TTGCTCTTCTCCTTCTAAAGATGGTTACGCCCCAAAGTCTGTTTACCCTCTTCGGTATGTTATTGTTAGCACTATACT 45341
GoldenEagle   TTGCTCTTCTCCTTCTAAAGATGGTTACGCCCCAAAGTCTGTTTACCCTCTTCGGTATGTTATTGTTAGCACTATACT 55616
JapaneseQuail TTGCTCTTCTCCTTCTAAAGATGGTTACGCCCCAAAGTCTGTTTACCCTCTTCGGTATGTTATTGTTAGCACTATACT 41317
MediumGroundFinch TTGCTCTTCTCCTTCTAAAGATGGTTACGCCCCAAAGTCTGTTTACCCTCTTCGGTATGTTATTGTTAGCACTATACT 29217
GoodesThornscrubTortoise TTGCTCTTCTCCTTCTAAAGATGGTTACGCCCCAAAGTCTGTTTACCCTCTTCGGTATGTTATTGTTAGCACTATACT 80301
    
```

```

Majority      TTTATTATTGATTGATTTTTTTTTTTT-T--TTTGTGTTGTTTTTTT-TTTTT--TTTGTTCACCTTAATTCTTATTTGTA
              86490      86500      86510      86520      86530      86540      86550      86560
Human         TTTATTATTGATTGATTTTT-----TGTTTCACCTTAATTCTTATTTGTA 85457
Kakapo        TTTATTATTGGTTGATTTTTGGTTTCTGTTGGTTGGTTTTCTATTTTTTTTTTTTTCACCTTAATTCTTATTTGTA 45421
GoldenEagle   TTTATTATTGATTGATTTGTTTTATTTTTTTTTTTTGTGTTTTT-TTTTTGTGTTGTTTCACATTAATTCTTATTTGTA 55695
JapaneseQuail TTTATTATTGATTGATTTTTGTCTGT--TTTGGTTTTTTGTTGGTTTTGTTTTGTTTCACCTTAATTTTTATTTGTA 41395
MediumGroundFinch TTTATTATTGATTGGTTTTGTTTTATGGTTTTGTTGGTTGGT-TTTTT--TTGTTTCACCTTAATTCTTATTTGTA 29293
GoodesThornscrubTortoise TTTATTATTGATTTAATTTTT-----TGTTTCACCTTAATTCTTATTTGTA 80346
    
```

```

Majority      GCTAGCACTTT-GGCTTAAAGTTGAATAGTAAATCTTTTG-CTATTTTCTTTTGCTGTTTAAAA-CTCTCCATAGA-CA
              86570      86580      86590      86600      86610      86620      86630      86640
Human         GCTAGCACTTT-GGCTTAAAGTTGAATAGTAAATCTTTTG-CTATTTTCTTTT-GCTATTTAAAA-CTCTCCATAGA-CA 85532
Kakapo        GCTAGCACTTT-GGCTTAAAGTTGAATAGTAAATCTTTTGCTATTTTCTTTTGCTGTTGAAAA-CTCTCCATAGAACA 45499
GoldenEagle   GCTAGCACTTC-AGCTTAAAGTTGAATAGTAAATCTTTTG-CTATTTTCTTTTGCTGTTTAAAA-CTCTCCATAGA-CA 55771
JapaneseQuail GCTAGCACTTT-GGCTTAAAATTGAGTAGTAAATCTTTTG-CTGTTTTCTTTTGCTGTTTAAAA-CTCTCCATAGA-CA 41471
MediumGroundFinch GCTAGCACTTT-GGCTTAAAGTTGAATAGTAAATCTTTTG-CTATTTTCTTTTGCTGTTTAAAT-CTCTCCATAGA-CA 29369
GoodesThornscrubTortoise GCTAGCACTTTTGGCTTAAAGTTGAATAGTAAATCTTTTG-CTATTTTCTTTTGCTGTTTAAAAACTCTCCATAGA-CA 80424
    
```

```

Majority      CAGATT-----TTCTTTTAATGCATGCTAATATATTTTGCATGGTCTTTAATTTAATAT-CATTCACAT
              86650      86660      86670      86680      86690      86700      86710      86720
Human         CAAAAT-----TTGTTTTAATGCATGCTAATTTATTTTGCATGGTCTTTAATTTAATAT-CATTCACAT 85595
Kakapo        CAGATTGATTGATTTATTTATTTTCTTTTAATGCATGCTAATATATTTTGCATGGTCTTTAATTTAATAT-CATTCGCAT 45578
GoldenEagle   CAGATT-----TTCTTTTAATGCATGCTAATATATTTTGCATGGTCTTTAATTTAATATTCATTCACAT 55835
JapaneseQuail CAGATT-----TTCTTTTAATGCATGCTAATATATTTTGCATGGTCTTTAATTTAATAT-CATTCGCAT 41534
MediumGroundFinch CAGATT-----TTCTTTTAATGCATGCTAATATATTTTGCATGGTCTTTAATTTTATAT-CATTCACAT 29432
GoodesThornscrubTortoise CAAGAT-----T-----TTCTTTTAATGCATGCTAATATATTTTGCATGGTCTTTAATTTAATAT-CATTCACAT 80488
    
```

Monday, May 02, 2022 06:51 PM

|                          |                                       |                                             |                                |                                |                                |       |       |       |
|--------------------------|---------------------------------------|---------------------------------------------|--------------------------------|--------------------------------|--------------------------------|-------|-------|-------|
| Majority                 | AGCTTT-GAGGGTTTATCAGAAATT-ATTCTTTTCAA | ATTCTTTTCAA                                 | AATTCAC                        | TATTCA                         | -AAATCTTTATCTCCTTTATTCATTTGTGA |       |       |       |
|                          | 86730                                 | 86740                                       | 86750                          | 86760                          | 86770                          | 86780 | 86790 | 86800 |
| Human                    | AGCTTT-GAGGGTTTATCAAAAATT-ATTCTTTTCAA | AAAATTCACTG                                 | TTCA                           | -AAATCTTGATCTTCTTTATTCATTTGTGA | 85672                          |       |       |       |
| Kakapo                   | AGCTTT-GAGGGTTTATCAGAAATG-ATTCTTTTCAA | AAGTCACTATTCAGAAATCTTTATCTCCTTTATTCATTTGTGA | 45656                          |                                |                                |       |       |       |
| GoldenEagle              | AGCTTT-GAGGGTTTATCAGAAATT-ATTCTTTTCAA | AATTCAC                                     | TATTCA                         | -AAATCTTTATCTCCTTTATTCATTTGTGA | 55912                          |       |       |       |
| JapaneseQuail            | AGCTTT-GAGGGATTATCAGAA----ATTCTTTTCAA | -CTCACTATTC                                 | -AAATCTTTATCTCCTTTATTCATTTGTGA | 41607                          |                                |       |       |       |
| MediumGroundFinch        | AGCTTT-GAGGGTTTATCAGAAATT-ATTCTTTTCAA | AATTCAC                                     | TATTCA                         | -AAATCTTTATCTCCTTTATTCATTTGTGA | 29509                          |       |       |       |
| GoodesThornscrubTortoise | AGCTTTGAGGGTTTATCAAAAATTTATTCTTTTCAA  | AATTCAC                                     | TATTCA                         | -AAATCTTGATCTTCTTTATTCATTTGTGT | 80567                          |       |       |       |

|                          |                                      |                                               |                        |       |       |       |       |       |
|--------------------------|--------------------------------------|-----------------------------------------------|------------------------|-------|-------|-------|-------|-------|
| Majority                 | GAGTGTGAGTTTGAGTGAGTGATCTTGTGCTGTCT  | GAATGTTCCATTGATATGTCA                         | -AAATGTATTACTTAGGTGACT |       |       |       |       |       |
|                          | 86810                                | 86820                                         | 86830                  | 86840 | 86850 | 86860 | 86870 | 86880 |
| Human                    | GAATGATGAGATTGAG---TGATCATGTTGATGTCT | GAATGTTTCATTGATATGTCAGAAAGATAATCTTTAGGTGACT   | 85748                  |       |       |       |       |       |
| Kakapo                   | GAGCGTTGAGTTTGAGCGAGTGATCTCGTTGCTGT  | CTGAATGTTCCATTGATATGTCA-AAATGTATTACTTAGGTGACT | 45735                  |       |       |       |       |       |
| GoldenEagle              | GAATGTTGAGTTTGAGTGCCTGATCTTGTGCTGT   | CTGAATGTTCCATTGATATGTCA-AAATGTATTACTTAGGTGACT | 55991                  |       |       |       |       |       |
| JapaneseQuail            | GAGTGTTAAGTTGGAGCGAGTGATCTTGTGCTGT   | CTGAGTGTCCATTGGTATGTGA-AAATATGTA              | CTTAGCTGACT            | 41686 |       |       |       |       |
| MediumGroundFinch        | GTGTGTTGAGTTTGAGTGAGTGATCTTGTGCTGT   | CTGAATGTTCCATTGATATGTCA-AAATGTATTACTTAGGTGGCT | 29588                  |       |       |       |       |       |
| GoodesThornscrubTortoise | GAATGTTGAGTTTGAGTGGGTGATCTTGTGATGT   | CTGAATGTTTCATTGATATGTCA-AGATGTGCTGTTTAGTTAATT | 80646                  |       |       |       |       |       |

|                          |                                      |                                                             |                              |                              |       |       |       |       |
|--------------------------|--------------------------------------|-------------------------------------------------------------|------------------------------|------------------------------|-------|-------|-------|-------|
| Majority                 | GGC-TTTAAATGAAC                      | TTTTCTTTGGGTTACCTTT                                         | ----GACTTTGAAAA              | -GGTGTTTATGGTGATGTGCAGCGTGTG |       |       |       |       |
|                          | 86890                                | 86900                                                       | 86910                        | 86920                        | 86930 | 86940 | 86950 | 86960 |
| Human                    | TCCACATAAAATTAATTCCA-TTTTGGATTACCTCT | CTGTGGCTCCAAAAAAGGTGTTTATGGAGATGTGCAGCGTGTG                 | 85827                        |                              |       |       |       |       |
| Kakapo                   | GGC-TTTAAATGAAC                      | TTTTCTTTGGGTTACCTTT----GACTTTGAAAA                          | -GGTGTTTATGGTGATGTGCAGCGTGTG | 45809                        |       |       |       |       |
| GoldenEagle              | GGC-TTTAAATGAAC                      | TTTTCTTTGGGTTACTTT----GAATTTGAAAA                           | -GGTGTTTATGGCGATGTGCAGCGTGTG | 56064                        |       |       |       |       |
| JapaneseQuail            | GGC-TTTAAATAAACT                     | TTTTCTTTGGGTTACCTTT----GACTTTGAAAA                          | -GGTGTTTATGGTGATGTGCAGAGTGTG | 41760                        |       |       |       |       |
| MediumGroundFinch        | GGC-TTTAAATGAAC                      | TTTTCTTTGGGTTACTTT----GACTTTGAAAA                           | -GGTGTTTATGGTGATGTGCAGCGTGTG | 29661                        |       |       |       |       |
| GoodesThornscrubTortoise | AGA-CTTAAATTAAT                      | TTTTCTTTGGGTTACTTT--GACTCCAAAAAAGGTGTTTATGGGGATGTGCAGCGTGTG | 80722                        |                              |       |       |       |       |

|                          |                                      |                  |                               |                   |       |       |       |       |
|--------------------------|--------------------------------------|------------------|-------------------------------|-------------------|-------|-------|-------|-------|
| Majority                 | AAGATTTTATACAATAAGAAAGACAGTGCTCTTATA | CAGATGGCTGATGGA  | AACCAGTCACAGCTGGGTAAGATTAGTTT |                   |       |       |       |       |
|                          | 86970                                | 86980            | 86990                         | 87000             | 87010 | 87020 | 87030 | 87040 |
| Human                    | AAGATTTTATACAATAAGAAAGACAGCGCTCTAATA | CAGATGGCTGATGGA  | AACCAATCACA                   | ACTTGGTAAGATTAACT | 85907 |       |       |       |
| Kakapo                   | AAGATTTTATACAATAAGAAAGATAGTGCTCTTATA | CAGATGGCTGATGGA  | AACCAGTCACAGCTGGGTAAGATTAGTTT | 45889             |       |       |       |       |
| GoldenEagle              | AAGATTTTATACAATAAGAAAGACAGTGCTCTTATA | CAGATGGCTGATGGA  | AACCAGTCACAGCTGGGTAAGATTACTTT | 56144             |       |       |       |       |
| JapaneseQuail            | AAGATTTTATACAATAAGAAAGACAGTGCTCTTATA | CAGATGGCTGATGGA  | AACCAGTCACAGCTGGGTAAGATCAGATT | 41840             |       |       |       |       |
| MediumGroundFinch        | AAGATTTTATACAATAAGAAAGATAGTGCTCTTATA | CAGATGGCTGATGGA  | AACCAGTCACAGCTGGGTAAGATGAGTTT | 29741             |       |       |       |       |
| GoodesThornscrubTortoise | AAGATTTTATACAATAAGAAAGACAGTGCTCTAATA | CAGATGGCAGATGGGA | AACCAGTCACAGCTGGGTAAGATTAGATT | 80802             |       |       |       |       |



Monday, May 02, 2022 06:51 PM

```

Majority      TCTTTTAT-----ATTCCATTAGT---CT-AAGTACTTGAAAATTATGC-TGTGTAAAA-----TCAGGTGA
              87050      87060      87070      87080      87090      87100      87110      87120
Human         ATGTTTATCTATACATCTTCACTTCTGCTTTCAAATGCATAATGTGAATGTGCGAATAAAAAATAAACTCCTTTACATCA 85987
Kakapo        TCCATTTCT-----ATTCCCGTTAGT---CTTAAGTGCCTTGAAATGAACAC-TGTGTAAAA-----TGAGGTGA 45949
GoldenEagle   TCTGTTTGT-----ATTCCATTAGT---CT-AAGTACTTG-AAATCATGC-TGTGTAAAA-----TCAGGTGA 56202
JapaneseQuail TCTATTTAT-----ATTTGCA-----AAAAATTAAGC-TGTGTAAAA-----TTAGGTGA 41884
MediumGroundFinch TCTGCTTAT-----ATTCCTATTAGT---CT-AAGTACTTGAAATTAGGC-TGTGTAAAG-----TCAGGTGA 29800
GoodesThornscrubTortoise CATTTATGCCT---CATTTAAATCTGTAAATTTAAGTATTTG-AAATCATGT-TGTGGAAAT-----TCAAATGA 80867
    
```

```

Majority      AC-TGAACATGTTT-----ACATTTGTT--AGTTTGTCTTGTATCCTGG-TTATCCACAAGATCCAAAATCTTATTG
              87130      87140      87150      87160      87170      87180      87190      87200
Human         GTAAGAAATTAATTTAATGGCCAGGGCTCAAAATGTCATTTTAATGTGAATAGTTGTATGTGACGAACATATTTGTATTT 86067
Kakapo        AC-TGAGCATGTTT-----ACATTTGTC--AGTTTGTCTTGTATCCTGG-TTATCCCCAAAATCCAGAGTCTTACTG 46017
GoldenEagle   AC-TAAGCATGTTT-----ACATTTGTC--AGTTTGTCTTGTATCCTGG-TTACCCTCAAGATCCAAAATCTTACTG 56270
JapaneseQuail AC-TAAAGATGTTT-----ACATTTGAA--AGT---TCTTGTGTGCTAG-TTACCAACAAGATCTGAAATCATATTT 41949
MediumGroundFinch AC-TAAATATGTTT-----ATATTTGTT--AGTCTGTCTCTTATCTTGG-TTATCCACCAGATCCAAAATTTT-TTG 29867
GoodesThornscrubTortoise ACATGTTTCATATTTGTCAGTCTACTGTTATTCTAGTTTTTCTCAGATCCCAGACTGTCCATGAGACATGAAAACCTATTA 80947
    
```

```

Majority      C-----ATGCACTT---GTATTCCAGAAGGTCTGCAC-----AGTAGTCTAAA-
              87210      87220      87230      87240      87250      87260      87270      87280
Human         TTCTGCTATCCTCCTACTGTTTTTCA-AATGCACTCATAATAGGAAGAGATTTTAGCTTCAAAATTGTAATAATAGTTTC 86146
Kakapo        C-----ATGCACTT---GTATTCCAGAAGGTCTGCAC-----AATAGCCTAAA- 46057
GoldenEagle   C-----ATGTACTT---GTATTCCAGAAGGTCTGCAC-----AGTATCCTAAA- 56310
JapaneseQuail C-----ATCCACAT---GTATTCCA-AAAGTCTG-----GCGGTGTAGG- 41984
MediumGroundFinch C-----ATGCACTT---GTGTTCCATAAGGTCTGCACCTAAATG-----AACACCCTAAA- 29914
GoodesThornscrubTortoise ATCA---ACCCATTTT--GTATTCTAAAAAGAAATGTGTGTATGTGCTGCTGTATGTGAACAGAATAATAGTGGTGTGGA 81022
    
```

```

Majority      -----TGAATTCA--ACAGTTG-----AAT-----GATGGTCTCTAATTG-
              87290      87300      87310      87320      87330      87340      87350      87360
Human         ACATGAGAATTATATCATTATATTGAAGATTCATAGTGATTTTTATTCTAGGTACTCCTTGTTAATAGAGGCTAACTGT 86226
Kakapo        -----TGAATTCA--ACAGCTT-----AATCGCATGTGATGGTCTTTAAGTA- 46097
GoldenEagle   -----TGAATTCA--ACAGCTG-----AAT-----CACA---TGTGATGG- 56340
JapaneseQuail -----ATAACTCA--GAAGTTG-----AAA-----CTAACT-- 42008
MediumGroundFinch -----TGAATTCA--ACAGCTG-----AAT-----GATGATCCCTGAATA- 29947
GoodesThornscrubTortoise GAGAAAGAGGTGTTAATTTATTTTTTGAACTAA--ACATTTGCTCCAAATCTAATTTAACCCATGGACATCAATTTG 81100
    
```

Monday, May 02, 2022 06:51 PM

```

Majority      -----ATATTA-----AATACTCATGAAG-----ATTCTGCA-----GA
              87370      87380      87390      87400      87410      87420      87430      87440
Human         TCATACAGTCCATAGAATCCTTCTTAATGCCATGTTATTTAATCTTCTAAAGTCTTGCGATACCAGGTTCTTAGAAAA 86306
Kakapo        -----AAATGA-----AATATTCATGCAG-----ATTCTGCA-----GA 46126
GoldenEagle   -----TCTTTA-----AATACTCATGCAG-----ATTCTGCA-----GA 56369
JapaneseQuail -----TTCTA-----AATACTCACGT-----ATTCTGCA-----GA 42034
MediumGroundFinch -----AAATTA-----AATATTGACAAAG-----AGTCTGCA-----GA 29976
GoodesThornscrubTortoiseATA-----CTACACTGGCCATATCAGCACAAT-----AGCACACACAAAA-----ATACCACAATTAATCAGA 81159
    
```

```

Majority      CCTAGTTCTTGATTC-----C-----AGTCTTTTAGCACGCT-----
              87450      87460      87470      87480      87490      87500      87510      87520
Human         TGAAAAGCTTGTGCTAAAAACACTGTTGTTAATCCCTTTGGGAATCTTAAAAGGCACCTTAGTCAGGTTACACTTTATAT 86386
Kakapo        GCTGGAA-TCGATTC-----C-----TGCCTTTTAGCTCATT----- 46157
GoldenEagle   CCTAGTTCTTGATTC-----C-----AGTCTTTTAGCACGTT----- 56401
JapaneseQuail CCTAGTTTTTGCTT-----AGTCTTCTAGCACACC----- 42064
MediumGroundFinch CCTAATCTTGATTC-----T-----AGTCCTTTAGCACACT----- 30008
GoodesThornscrubTortoiseAAAAAGTTTGATCA-----TAATACTATGTAGTGGTGTATATGTTGGTTAGTGCATGGTGTGCTTTTTTCACCTGGA 81232
    
```

```

Majority      -----GACCCTTTGATT-----TGTTTGGGTGTTTGTCTTGTTTG---CATGT-----
              87530      87540      87550      87560      87570      87580      87590      87600
Human         CATTACTTAAATAAGTAATTGATTATTTAATTAACCTT-ATGTCGTTTGACTTCATACATCCTCGAATACATAAAATCTA 86465
Kakapo        -----GACCCTTTGATT-----TGCTTGGGTGGTGGTCTCGGTTG---CTTGG----- 46197
GoldenEagle   -----GACCCTTTGATT-----TGCTTGGGTGTTTTTCTTGTTCG---CTTGT----- 56441
JapaneseQuail -----AACTATTCGATT-----TTTCT---TGTTTGAAGGGCT-----GTGT----- 42098
MediumGroundFinch -----GACCCATTGATT-----TGCTTGAGTGCTTTTCTTCTTTG---CATGT----- 30048
GoodesThornscrubTortoiseATAAAATTATTTGACCATTCAAATAACAGAATAAAATAGGATTGTGTTTGCATGTTTGTTTTACTGAATACATGACTAAA 81312
    
```

```

Majority      ----GCGA-TGTA-----TCACAAGCTG-----
              87610      87620      87630      87640      87650      87660      87670      87680
Human         GAACACACCTGCACATTACACCAGTGATTGACTGTAAATGCCAGGATGTTCTTACATTTCTGTTTCATTGAGATTTCAGGG 86545
Kakapo        ----GCGA-GGTA-----CCACAAGCTG----- 46215
GoldenEagle   ----GTGA-TGTA-----TCACAAGCTA----- 56459
JapaneseQuail ----ACAG-TGTA-----TCACATGCTG----- 42116
MediumGroundFinch ----GTGA-TGTA-----CCACAAGCTA----- 30066
GoodesThornscrubTortoiseATATAGCAG-TGCAGTTTTGAAAAATTTACAACAACTTTGAAATGGAATTATTTTTCGCAATGTTGGCTAAAATCAGTG 81391
    
```

Monday, May 02, 2022 06:51 PM

```

Majority      -----TTGAAAAGT----AATACTGAATTGAGTAAAC-T-TTGTCT
              |-----|-----|-----|-----|-----|-----|-----|
              87690      87700      87710      87720      87730      87740      87750      87760
Human          ATAATGGTGCCTCAGACTGATTGTATTACATTGTTAATTTGTAAATTTGCCATTTTGTATGTAAGGACGAGTGTATTTT 86625
Kakapo         -----TTGTAAAAGT----CACACTGAACTGAGTAAAC---CTGTCT 46249
GoldenEagle   -----TTGAAAATT----AACACTGAATTGAGTAAACTTCCTGTCT 56496
JapaneseQuail -----CTGAAAAGT----AATACTACATTGAG-AAACCTGTTGTCT 42152
MediumGroundFinch -----TTGAAAAGT----AGCACTCAATTGAGTAAAC---CTGTCT 30100
GoodesThornscrubTortoise ATTTAATGAGAAAGTATATGCCATCCTTGAATGTT--TTGAAATGT---AGTATTGAATTTAATAAAC---TTGTCT 81461

```

```

Majority      TTTTCAGCCATGAGCCATCT----TAATGGACAAAAAATGTATGGAAAGATTATTCCGGTTACCCT---TTCTAAACATC
              |-----|-----|-----|-----|-----|-----|-----|
              87770      87780      87790      87800      87810      87820      87830      87840
Human          TGCTCAGAGATGAACAACCTTGTATATTAGACCAATTTTGGCCTTTGACATCACATAGAAAATTTGAATTTCAAACACA 86705
Kakapo         TTTTCAGCCATGAGCCATCT----TAATGGACAAAAAATGTACGGCAAGATTATTCCGGTTACCCT---TTCTAAACATC 46322
GoldenEagle   TTTTCAGCCATGAGCCATCT----TAATGGACAAAAAATGTATGGAAAGATTATTCCGGTTACCCT---TTCTAAACATC 56569
JapaneseQuail CTTTTCAGCTATGAGCCATCT----TAATGGACAGAAAATGTATGGGAAGATAATCCGTGTTACCCT---TTCTAAACATC 42225
MediumGroundFinch TTTTCAGCCATGAGCCATCT----TAATGGACAAAAAATGTATGGAAAGATCATTCCGGTTACCCT---TTCTAAACATC 30173
GoodesThornscrubTortoise TTTTCAGCCATGAGTCATCT----TAATGGACAAAAAATGTATGGAAAGATTATTCCGAGTTACCCT---TTCCAAGCATC 81534

```

```

Majority      AGACAG-----TACAACCTACCTCGAGAGGGACTTGATGACCAAGGGCTGACTAAAGATT-----TTGGTAATTC
              |-----|-----|-----|-----|-----|-----|-----|
              87850      87860      87870      87880      87890      87900      87910      87920
Human          TAATAGGTTTGAATTTTAGTGTCTTGGCAATAGTCTTAGCAACTCAGATGAGGTATAAACTATCCATCTGGCTGTCC 86785
Kakapo         AGACAG-----TACAACCTACCTCGAGAGGGACTTGATGACCAAGGGCTGACAAAGGATT-----TTGGTAATTC 46386
GoldenEagle   AAACAG-----TACAACCTACCTCGAGAGGGACTTGATGACCAAGGGCTGACTAAGGATT-----TTGGCAATTC 56633
JapaneseQuail AGACAG-----TTCAACTACCTCGAGAGGGTCTCGATGATCAAGGGCTGACTAAAGATT-----TTGGTAATTC 42289
MediumGroundFinch AGACAG-----TACAACCTACCTCGAGAGGGACTGGATGACCAAGGGCTGACTAAAGATT-----TTGGTAATTC 30237
GoodesThornscrubTortoise AGACAG-----TACAGCTACCTCGAGAAGGACTTGATGACCAAGGGCTCACTAAAGATT-----TTGGTAATTC 81598

```

```

Majority      ACCTTTGCATCG-----CTTCAAGAAAC-----CTGGTT----CAAAAAACTTCCAAAATATATTCC---
              |-----|-----|-----|-----|-----|-----|-----|
              87930      87940      87950      87960      87970      87980      87990      88000
Human          ATTTTAAATGGTGGTATGTGTTTTAAAGAGATACGAAAGTGCTGATTATGTCAAGATACTTAGTACATATTTTCTCT 86865
Kakapo         ACCTCTGCATCG-----CTTCAAGAAAC-----CTGGTT----CAAAAAACTTCCAAAATATATTCC--- 46439
GoldenEagle   ACCTTTGCATCG-----CTTCAAGAAAC-----CTGGTT----CAAAAAACTTCCAAAATATATTCC--- 56686
JapaneseQuail ACCTCTGCATCG-----TTTCAAGAAAC-----CTGGCT----CCAAAAACTTCCAGAATATCTTCC--- 42342
MediumGroundFinch ACCTTTGCACCG-----CTTCAAGAAAC-----CTGGTT----CCAAAAACTTCCAAAATATATTTC--- 30290
GoodesThornscrubTortoise ACCTTTGCATCG-----CTTCAAGAAAC-----CTGGCT----CAAAAAATTTTCAGAATATATTCC--- 81651

```

Monday, May 02, 2022 06:51 PM

```

Majority      --CTCCTTCGCAACT-----TCATC-----TGCCAATATCCGTAAGTGTGTCTGTCAG
                88010      88020      88030      88040      88050      88060      88070      88080
Human         TTCTCTGTGTGCACCTCTGTACTCTGGTTGGAATAGTCATTGCTGTTGTTTTTCATATATGTTGTAAGTAGCACTTAACAG 86945
Kakapo        --CTCCTTCGCAACT-----TCATC-----TGCCAATATCCGTAAGTGTGGCTCTCAG 46491
GoldenEagle   --CTCCTTCGCAACT-----TCATC-----TATCCAATATCCGTAAGTGTGGCTGTCAG 56738
JapaneseQuail --CTCCATCTGCAACGCT-----TCATC-----TATCCAATATCCGTAAGTCTGGTCTATTAG 42394
MediumGroundFinch --CTCCTTCGCAACCCT-----TCATC-----TGCCAATATCCGTAAGTGTTCATTGTCAG 30342
GoodesThornscrubTortoise --CTCCATCTGCAACT-----TCATT-----TGCCAATATCCGTAAGTATTGTATGACAG 81703
    
```

```

Majority      TAAGCCA----GTAGTATTTAT--GTGAGTCATAACACACTG-AATTGACTAATAAATTTCTTG--CTTATGCTTTTTTT
                88090      88100      88110      88120      88130      88140      88150      88160
Human         TACTTCATAAATAGGAGTATTCTCAAATATGTCAATTTTTTCCCTAATGTTTGAGGTATGGGTGGCATTGTGTCATTTAA 87025
Kakapo        TCAGCCA----GTTGTGTTAAT--GTGAACCACAACACACCG-AACTGACTAAGAACTCTCTC--CTTATGCTCGTTTC 46561
GoldenEagle   TAAGCCA----GTAATGTTAAC--GTGAGTCACAACACACTG-AATTGACTAATAAATTTCTTG--CTTATGCTTATTTT 56808
JapaneseQuail GAAGCCT----GTAGTATTTTTT-GATACTCATAATACAGTG-AATTAGTTTG---TTTTCTA--ATTATGCTTGTC-- 42460
MediumGroundFinch CAATCTG----ATAATATTTAT--GTGAATCACAGCACACTG-AACTGACTAATGATTTCTTG--CTTATGCTGATTTT 30412
GoodesThornscrubTortoise GACGCCT----GCGGAATTCAC---AAGCCATAAAATACTA-GATCCACTAATAATTAATT---CTTATGTTTTTTTGT 81770
    
```

```

Majority      -----CTTTCGTCTGTAGACCATCAGTAGCAGAAG-----AGGATCTACGCACATTGTTTGCTAACA
                88170      88180      88190      88200      88210      88220      88230      88240
Human         ATAAGGGATGCATAGTCTTTATGGTTGGTAATTACCTGTGGTAGAATTACCTCAGATCTCCAGATAGTTTTTGTTTTAT 87105
Kakapo        -----CTTTCGTCTGTAGACCCTCGGTAGCAGAAG-----AGGATCTACGCACATTGTTTGCTAACA 46619
GoldenEagle   -----CTTTCGTCTGTAGACCATCAGTAGCAGAAG-----AGGATCTACGCACATTGTTTGCTAACA 56866
JapaneseQuail -----TTTTGTCTGTAGACCATCAGTAGCAGAAG-----AGGATTTACGCACACTGTTTGCTAACA 42516
MediumGroundFinch -----CTTTCGTCTGTAGACCATCAGTAGCAGAAG-----AGGATCTACGCACATTGTTTGCTAACA 30470
GoodesThornscrubTortoise -----TTTTGTTTTTCTAGACCATCAGTGGCAGAAG-----ATGATCTGCGCACACTGTTTGCTAACA 81829
    
```

```

Majority      CTGGAGGCACTGTGAA--AGCATTTAAATTTTTT-----CAGTAAGTAACTT---TTCTGTA-----CATAG
                88250      88260      88270      88280      88290      88300      88310      88320
Human         GTAAAGACTGTTTTATGTAATATTTTAAATTTTTTGCCATGCTCGTAGTCTGCTTGGGCTGCTGTAACCAAATACCATAG 87185
Kakapo        CTGGAGGCACTGTGAA--AGCGTTTTAAATCTTT-----CAGTAAGTAACTT---TCCTGTA-----CGTAG 46676
GoldenEagle   CTGGAGGCACTGTGAA--AGCATTTAAATTTTTT-----CAGTAAGTATCTT---TTCTGTA-----CATAG 56923
JapaneseQuail CTGGAGGCACTGTGAA--AGCATTTAAATTTTTT-----CAGTAAGTAAATTT---TTCTGTG-----CGTAG 42573
MediumGroundFinch CTGGAGGCACTGTGAA--AGCATTTAAATTTTTT-----CAGTAAGTACCTT---TTCTGCA-----CATAG 30527
GoodesThornscrubTortoise CTGGAGGCACTGTGAA--AGCATTTAAATTTTTT-----CAGTAAGCAAGTT---TTCCTTGA---ATCCTTATGT 81892
    
```

Monday, May 02, 2022 06:51 PM

|                          |                                                                                   |       |
|--------------------------|-----------------------------------------------------------------------------------|-------|
| Majority                 | CTTTAACAAA--AGACAGCCTAAGTGTGTTT-TTGCAGCGTGTCTTAAGAAAAAGTTCTT-----AGAA-----AATAG   |       |
|                          | 88330 88340 88350 88360 88370 88380 88390 88400                                   |       |
| Human                    | ACTGAGTAGATGAAACAACAAAAATGTATTT-CTTCAAAGTTTGTGAGAAATAAACTTTGGGGTCTAGAAGTCCCAGATG  | 87264 |
| Kakapo                   | CTCTACCAAA--AGACCATCTAAGCGTGTTT-TTGCAGCGTGCCTTAAGAAAAAG-----                      | 46728 |
| GoldenEagle              | CTCTAACAAA--AGACTGCCTAAGTGCCTTT-TTGCAGCATGTCTTAAGGAAAAGTGCCT-----AGAG-----GATAG   | 56989 |
| JapaneseQuail            | TTTTAACAAA--AGACAGGATAATTGCATTTTTTTTCAGTGTGTCTTAAGGAAAAGTGTCTT-----AGAG-----TATAG | 42640 |
| MediumGroundFinch        | CTCTAAAAAA--AAAGAG--T-----T---TTGCAGCTCATCTTAAGAAAAAGTATAT-----ATCA-----AATTG     | 30582 |
| GoodesThornscrubTortoise | TTTTAACAAA--AGATTGACTTCATATGTTT-TAACAGAATGTCTTGAAAAAATACTCTTCTGTAGAGAA-----AAGAG  | 81964 |

|                          |                                                                                  |       |
|--------------------------|----------------------------------------------------------------------------------|-------|
| Majority                 | CAATATTAGGAG-CAACTCCTGTAGTGTTCGAGTTCCCTAATGCCGTTATTTTGTTCAGAAGAGATCACAAGATGGCAC  |       |
|                          | 88410 88420 88430 88440 88450 88460 88470 88480                                  |       |
| Human                    | AAACTGCTAGCAGATTGTTTCTGGTGAGGTCTCTCTTTGGCTTGCAGCCAACCATCTTCCCCCTGTGTCTCATGTGGCCT | 87344 |
| Kakapo                   | CAACATTAGGAG-AAGCTCCTGTTGTGTTTCGAGTTCCCTAATGCCGTTATTTTGTTCAGAAGAGATCACAAGATGGCAC | 46807 |
| GoldenEagle              | AAAACATTAGGAG-CAACCCCTGTAGTGTTCGAGTTCCCTAATGCCATTATTTTGTTCAGAAGAGATCACAAGATGGCAC | 57068 |
| JapaneseQuail            | CAATATTAGGAG-CAACTCTGTAGTGTTCAGTTCCCTAATGCCATTATTTTGTTCAGAAGAGATCACAAGATGGCAC    | 42719 |
| MediumGroundFinch        | CAACATTAGGAG-CAACCC-TGTAGTGTTCAGTTCCCTAATCCATTATTTTGTTCAGAAGAGATCACAAGATGGCAC    | 30660 |
| GoodesThornscrubTortoise | AAGTTTTTAGGCC-CTTATTTAGTATTGGTTGAGTTCCCTAATGTTGTTGTTTGTTCAGAAGAGATCACAAGATGGCAC  | 82043 |

|                          |                                                                                  |       |
|--------------------------|----------------------------------------------------------------------------------|-------|
| Majority                 | TTCTTCAGATGTCAACAGTAGAAGAAGCTATTCCAGGCTTTGA-----TTGATCTTCACAATTACAATCTTGGAGAAAAT |       |
|                          | 88490 88500 88510 88520 88530 88540 88550 88560                                  |       |
| Human                    | TTCCACTG-TGCAAGCACGTTAAGAGTCTCTTCCCCTTGTAAGGATCCTAGTCTGTGTAATCAGGGCTTACCCTTAAT   | 87423 |
| Kakapo                   | TTCTTCAGATGTCAACAGTAGAAGAAGCTATTCAAGCTTTGA-----TTGATCTTCACAATTACAATCTGGGAGAAAAT  | 46881 |
| GoldenEagle              | TTCTTCAGATGTCAACAGTAGAAGAAGCTATTCCAGGCTTTGA-----TTGATCTTCACAATTACAATCTGGGAGAAAAT | 57142 |
| JapaneseQuail            | TTCTTCAGATGTCAACAGTAGAAGAAGCTATTCCAGGCTTTGA-----TTGATCTTCACAATTACAATCTTGGAGAAAAT | 42793 |
| MediumGroundFinch        | TTCTTCAGATGTCAACAGTAGAAGAAGCTATTCCAGGCTTTGA-----TTGATCTTCACAATTACAATCTGGGAGAAAAT | 30734 |
| GoodesThornscrubTortoise | TTCTTCAGATGTCAACAGTAGAAGAAGCTATTCCAGGCTTTGA-----TTGATCTGCATAATTACAATCTTGGAGAAAAT | 82117 |

|                          |                                                                                  |       |
|--------------------------|----------------------------------------------------------------------------------|-------|
| Majority                 | CACCA--TCTGAG---AGTTTCTTTCTCTAAG-TCAACTATTTAA--AAAGGCAGATTG-AAAATGAGGGTGTATTGCAT |       |
|                          | 88570 88580 88590 88600 88610 88620 88630 88640                                  |       |
| Human                    | GACCACATTTAACCTTAATTACCTCCTTAAAGGTCCTGTTTTTAAGTACAGTTACATTGGGGGTTAGGACTTCAACATAT | 87503 |
| Kakapo                   | CACCA--TCTGAG---AGTTTCTTTCTCGAAG-TCAACCATTTAA--AAAGGCAGATTGAAAAGGAGGGTGTCTTGCAT  | 46953 |
| GoldenEagle              | CACCA--TCTGAG---AGTTTCTTTCTCGAAG-TCAACTATTTAA--AAAGGCAGATTG-AAAATGAGGGTGTATTGCAT | 57213 |
| JapaneseQuail            | CACCA--TCTGAG---AGTTTCTTTCTCTAAG-TCAACTATTTAA--AAAGGCAGATTG-AAAATGAGGGTGTATTGCAT | 42864 |
| MediumGroundFinch        | CACCA--TCTGAG---AGTTTCTTTCTCTAAG-TCAACTATTTAA--AAAGGCAGATAG-AGAATGAAGGTGTATTGCAT | 30805 |
| GoodesThornscrubTortoise | CACCA--TCTGAG---AGTTTCTTTCTCCAAA-TCAACAATTTAA--AATGGGAGATAA-AAAATGAAGGTGTATCGCAT | 82188 |

Monday, May 02, 2022 06:51 PM

|                          |                                                                                    |       |
|--------------------------|------------------------------------------------------------------------------------|-------|
| Majority                 | TG-TTTGGTGTGTCAC----CTATTGACTGTTTCAGGAAAGTGGGGACCAGAGTTTGTCTTCTGTTTTTTTA----TTT    |       |
|                          | 88650      88660      88670      88680      88690      88700      88710      88720 |       |
| Human                    | AAATTTGGGGAGGACACAATTCAGTTAATAGTACTTAAATTTGTAAATCA---TTTATCCCAAATTTTATAAGATATTGT   | 87580 |
| Kakapo                   | TG-TTTGGTGTGTCAC----CTATTGACTGTTTCAGGAAAGTGGGGACCAGAGTTTGTCTTCTCTGTTTTTAGGGGTTT    | 47028 |
| GoldenEagle              | TG-TTTGGTGTGTCAC----CTATTGACTGTTTCAGGAAAGTGGGGACCAGAGTTTGTCTTCTGTTGTCTTT-----TTT   | 57283 |
| JapaneseQuail            | TG-TTTGGTGTGTCAC----CTATTGACTGTTCCGGAGAGTGGGGACCAGAGTTTGTCTTCTATTTTTTGA-----TTT    | 42934 |
| MediumGroundFinch        | TG-TTTGGTGTGTCAC----CTTTTACTGTTCAAGAAAGTGGGGACCAGAGTTTGTCTTCTGTTTTTTTA----TTT      | 30875 |
| GoodesThornscrubTortoise | CG-TTCAGTGTGTCAC----CTATTGACTGTTTCAGGAGAGTGGGGACCAGAGTTTGACTTCTGTCTTT-----C        | 82253 |

|                          |                                                                                    |       |
|--------------------------|------------------------------------------------------------------------------------|-------|
| Majority                 | TTTTT-----TTTCCTTCCATGCTG---TTATCATTCCCTTGGTGTGTTTTAAAAAATAAAAAA-----TTTAAAGAA     |       |
|                          | 88730      88740      88750      88760      88770      88780      88790      88800 |       |
| Human                    | CACTAAAGTTTTGACTTGCTAGTAGGGCTTATAATTTTTGGACTATCTGTAGTGGTAAATAATTCATCATTCTCATTGC    | 87660 |
| Kakapo                   | TTTTAATTATTTCTTCTCATGCTG---TTATCATTCCCTTGATTGTTTTAAAAACTTAAACC-----CTTCAAA---      | 47094 |
| GoldenEagle              | TTTTTTTT--TTTCCCCCATGCTG---TTATCATTCCCTTGGTGTGTTTTAAAAAATAAAAAA-----TAAAAA         | 57350 |
| JapaneseQuail            | TCTTT-----CTGTTTTCCATGCTG---TTATCATTCCCTTGGTGTGTTTTAAAAAATAAGAAAA-----AGTTTAAAG-   | 42997 |
| MediumGroundFinch        | TTTT-----C---ATGCTG---TTACCATTCCCTTGATTGTTTTAAAAA---ATAA-----TTTAAAAA              | 30927 |
| GoodesThornscrubTortoise | -----ATGCTG---TTATCATTCCCTTGGTGTGTTTTAAAAAATAAAAAAAGAACGTTCATAAGAA                 | 82311 |

|                          |                                                                                    |       |
|--------------------------|------------------------------------------------------------------------------------|-------|
| Majority                 | T-----GCAGTGATATT-ACTGCTGTT---TGTTCAACTGT-----TGTTTAGATAAACCATCATTTTGTTTAAAG       |       |
|                          | 88810      88820      88830      88840      88850      88860      88870      88880 |       |
| Human                    | T-----GCTAGGTAGATTTTGCT-TTCTTGAAGTGTGTGACCATAAAAGTATGTACTGACACCATCATTTCCTTTAAAC    | 87734 |
| Kakapo                   | -----GCAGTGATACT-ACTGCTGGT-----GTTCAACTGT-----TGTT--GATAAACCATCTTTTGTGAAAAG        | 47154 |
| GoldenEagle              | TTAAAAAGCAGTGATACT-ACTGCTGTT-----GTTCAACTGT-----TGTTTGGATAAACCATCATTTTGTTTAAAG     | 57419 |
| JapaneseQuail            | -----GCAGTGATACT-ACTGCTGTT-----GTCCAAGTGT-----TGTTTAGATAAACCATCACTTTGTTTAAAG       | 43059 |
| MediumGroundFinch        | T-----GCAGTGATGTT-ACTGCTTTTCAACTGTTCAACTGT-----TGTTTAGATAAACCATTGTTTGTTTAAAG       | 30995 |
| GoodesThornscrubTortoise | AATAAAAGCAGTGATATTTAACTGTTGGT---TTTTCATCTGT-----TGTTTAGGAAAC-ATCATTTTGTTTAAAG      | 82381 |

|                          |                                                                                    |       |
|--------------------------|------------------------------------------------------------------------------------|-------|
| Majority                 | A-TTTCAAGTTAATAC-CACAGTTTTTCAACTTAGTTGACGTACGTGCCTTAAAAA-GGAA-AACTAGTAC----TGCTG   |       |
|                          | 88890      88900      88910      88920      88930      88940      88950      88960 |       |
| Human                    | ACACACACACAAACACACACACACACACGCATACACTCCACACAAAACCTATGGTGTACTATTTAGTATGGTGTACTA     | 87814 |
| Kakapo                   | A-TTTCAAGTTAATAC-CACAGTTTTTCAACTTAGTTGACGTACGTGCCTTAAAAAAGGAG-AACTAGTAC----TGCTG   | 47227 |
| GoldenEagle              | A-CTTCAAGTTAATAC-CACAGTTTTTCAACTTAGTTGACGTACGTGCCTTAAAAA-GGAA-AACTAGTAC----TGCTG   | 57491 |
| JapaneseQuail            | A-TTTCAAGTTAATAC-CACAGTTTTTCAACTTAGTTGACATACGTGCCTTATAAA-GGAA-AGCTAGTAC----TGCTG   | 43131 |
| MediumGroundFinch        | A-TTTCAAGTTAATAC-AACATTTTTTCAACTTAGTTGACGTACGTGCCTTAAAAA-GGAA-AATTAGTAC----TGCTG   | 31067 |
| GoodesThornscrubTortoise | CGTTTCAAGTTAAGCC-CACAATTTTTCAAGTTAGTTGACATATGTGCCTTAAAAA-GGAA-AACTAGTGT----TGCT-   | 82453 |

Monday, May 02, 2022 06:51 PM

|                           |                                                                                   |       |
|---------------------------|-----------------------------------------------------------------------------------|-------|
| Majority                  | GAA---TTGCATAACTAG----T-AAAAAGCAAATTTGGT----TGCTCTGGGGCACAT-TGTTACATGATAATTTAAATA |       |
|                           | 88970 88980 88990 89000 89010 89020 89030 89040                                   |       |
| Human                     | AAAAGATTATCAAACCTGGTATTTAAAAAGTTAGCTATATACTTTTTACAAGAGACATGTAAAGCAGAAGAATATGAAAG  | 87894 |
| Kakapo                    | GAA---TTGCATAACTAG----TGAAAAAGCAAATTTGGT----TGCTCTGGGGCACAT-TGTTACATGACGATTTTAATA | 47295 |
| GoldenEagle               | GAA---TTGCATAACTAG----T-AAAAAGCAAATTTGGT----TGCTCTGGGGCACAT-TGTTACATGATAATTTAAATA | 57558 |
| JapaneseQuail             | GAA---TTGCGTAACTAG----T--GTAACGAATTTGGT----TGCTGTGGGGCACAT-TGTTACATGATAATTTGAATA  | 43197 |
| MediumGroundFinch         | GAA---TTGCATAACTAG----T-AAAAAGCAAATTTGGT----TGCTCTGGGGCACAT-TGTTACATGATAATTTAAATA | 31134 |
| GoodesThornscrubTortoiseA | -----GT-----AAAATGAATTTGGT----TGGCTGGGGCACAG-TGTTATATGAGAATTTAAATG                | 82505 |

|                           |                                                                                    |       |
|---------------------------|------------------------------------------------------------------------------------|-------|
| Majority                  | TGTTTAGGCAGGGGTGTGTA AAAAGGTTAAGCTTTTGT TTTCTCCTGCTTG--ATAGATTTCTTT-ATCTGCTGGCTTGT |       |
|                           | 89050 89060 89070 89080 89090 89100 89110 89120                                    |       |
| Human                     | ATTGAAAGGAAAAGGATGTAAAGAGAT---ACTAATATACTGGACAGATAG---TAAGCAAGACAAAACCTAAATACCTT   | 87968 |
| Kakapo                    | TGTTTTGGCAGGGGTGTGTA AAAAGGTTAAGCTTTTGT TTTCTCCTGCTTG--ATAGATTTCTTTTATCTGCTGGCTTGT | 47372 |
| GoldenEagle               | TGTTTAGGCAGGGGTGTGTA AAAAGGTTAAGCTTTTGT TTTCTCCTGCTTG--ATAGATTTCTTT-ATCTTCTGGCTTTT | 57634 |
| JapaneseQuail             | TGTTTAGGCAGGGGTGTGTA AAAAGGTTAAGCTTTTGT TTTCTCCTGCTTGAATTAATTTCTCT-ATCTGCTAGCTCGT  | 43275 |
| MediumGroundFinch         | TGTTTAGGCAGGGGTGTGTA AAAAGGTTAAGCTTTTGT TTTCTCCTGCTTG--ATAGATTTCTTTTATCTGCTGGCTTGT | 31212 |
| GoodesThornscrubTortoiseA | ATTTAGGCAGGGGTGTGTA AAAAGGTTAAGCTTTTGT TTTCTCCTGCTTGAATT-ATTTTATT-ACTTATTGGGTTGT   | 82583 |

|                           |                                                                                 |       |
|---------------------------|---------------------------------------------------------------------------------|-------|
| Majority                  | CACTTACTTTTCTTTTAAATGGATAAGATGCATTACGCTGAAAGAGTAAAACG-ATTTTATTTGATTTTGTCTACTTTT |       |
|                           | 89130 89140 89150 89160 89170 89180 89190 89200                                 |       |
| Human                     | TATTAACCTAAGACAGAATTGATAAAGGATTTAGTTCACTAGAAAGATATAACAGTTTATGTATATGTGTGCTAGTGAA | 88048 |
| Kakapo                    | CACTTAGTTTTCTTTTAAATCGGATAAGATGCATTAGGCTGAAAGAGTAAAAGGACGTTATTTGATT--TGCTACTTTT | 47450 |
| GoldenEagle               | CACTTACTTTTCTTTTAAATGGATAAGATGTATTATGCTGAAAGAGTAAAATG-ACATTATTTGATTTCTGTTACTTTT | 57713 |
| JapaneseQuail             | CACTTAATTTTCTTTTATTTGG-TAAGATACATTGTACTGAAAGGGTAAAACA-TTGCTATTTGATTT-TGCTACTTTT | 43352 |
| MediumGroundFinch         | CACTTA-TTTTCTTTTAAATGGATAAGATGCATTACGCTGAAAGAGTAAAATG-ATTTTATTTGATTTTGTCTACTTTT | 31290 |
| GoodesThornscrubTortoiseA | ACGTACCTTTCTTTTAAATCAGATAAGATACATTACTTTGAAAGATTAAAACACAACATATTTTATTTCTGCTACTTTA | 82663 |

|                           |                                                                                 |       |
|---------------------------|---------------------------------------------------------------------------------|-------|
| Majority                  | T--GCTTTGTGCTCTTTT--TT-----ACAAAAGGCCTTTTGTA----TTTCATGGTTCTGG-TCTAGA           |       |
|                           | 89210 89220 89230 89240 89250 89260 89270 89280                                 |       |
| Human                     | ATAGCCTCAAATATATAAATAAATAAGTAGATAGAACTACAGGTAGACTTGAGCAAATCTATTATAGTGGTGGATTCAA | 88128 |
| Kakapo                    | TT-GCTTTGTGCTCATTTGTTT-----GGAAAAGGCCTTTTAGTA----TTTCATCGTTCTGG-TCTAGA          | 47508 |
| GoldenEagle               | T--GCTTTGTGCTCTTTT--TT-----TCAAAGGCCTTTTGTA----TTTCATGGTTCTGG-TCTAGA            | 57768 |
| JapaneseQuail             | T--GCTTTATGCTTTTTTTTTTTTTT-TAAAGGAAAAAAAAGGCCTTTTGTA----TTTTATGATTTCTGG-TCTAGA  | 43424 |
| MediumGroundFinch         | T--GCTATGTGTTCTTTT--TT-----AAAGAAAGCCTTTTGTA----TTTCATTGTTCTGG-TCTAGA           | 31345 |
| GoodesThornscrubTortoiseA | -----CTTTTTT--T-----GTAAATGGCCTTCTATA----TTTCATGATTTCTGG-TCTAGA                 | 82709 |

Monday, May 02, 2022 06:51 PM

|                          |                                                                                  |       |
|--------------------------|----------------------------------------------------------------------------------|-------|
| Majority                 | TTCAGTTATGAATGTAGGCATTAGTTAAAATTAACAAGGTACAGAATATTAATTTCTTCAAAGGACAAAAAGTGACTTCT |       |
|                          | 89290 89300 89310 89320 89330 89340 89350 89360                                  |       |
| Human                    | TTCAGTTTCTGAATTACATGTCAAAGTACCAAAAAAGACAAAATCAACAAGATACAAATGATACAATACAATTACC     | 88208 |
| Kakapo                   | TTCAGTTCTGAATGTAGGCATTAGTTAAAATTAACAAGGTACGGAATATTAATTTCTTCAAAGGACAAAAAGTGACTTCT | 47588 |
| GoldenEagle              | TTCAGTTATGAATGTAGGCATTAGTTAAAATTAACAAGGTACAGAATATTAATTTCTT-AAAGGACAAAAAGTGACTTCT | 57847 |
| JapaneseQuail            | TTCAGTTA                                                                         | 43432 |
| MediumGroundFinch        | TTCAGTTATGAATGTAGGCATTAGTTAAAATTAACAAGGTACAGATTATTAATTTCTT-AAAGGACAAAAAGTGACTTCT | 31424 |
| GoodesThornscrubTortois@ | TTCAGTTATGAATGTAGGCATTAGAGAAAATTAACAAGGTACAGAATATTAATTTCTTAAAGGAGAAAAAGTGATTTCT  | 82789 |

|                          |                                                                                  |       |
|--------------------------|----------------------------------------------------------------------------------|-------|
| Majority                 | GTGACTTTGAGCCCTACGTGAAAAGCAT---TGTGG---AATCTTAACCTTTTTGTACACACTCTTGTGGGATGTATCA  |       |
|                          | 89370 89380 89390 89400 89410 89420 89430 89440                                  |       |
| Human                    | TTAAC--AGAATTATGTGTCTAAGTTATGCATCCAACACAGTTTTTAAACGCATATGGAACATTTTTGAAAAATCAGTCA | 88286 |
| Kakapo                   | GTGACTTTGAGCCCTGCGTAAAAGCAT---TGTGG---GATCTTAACCTTTTTGTACACACTCTTGTGGGATGTATCA   | 47661 |
| GoldenEagle              | GTGACTTTGAGCCCTACGTGAAAAGCAT---TGTGG---AATCTTAACCTTTTTGTACACACTCTTGTGGGATGTATCA  | 57920 |
| JapaneseQuail            |                                                                                  | 43432 |
| MediumGroundFinch        | GTGACTTTGAGCCCTACGTGAAAAGCAT---TGTGG---AATCTTAACCTTTTTGTACACACTCTTGTGGGATGTATCA  | 31497 |
| GoodesThornscrubTortois@ | GTGTTTTGAGCCCTCATGTGAAAAGCAT---TGTGGGTAGAATCTTAACCTTTTTGTACACACTCTTGTGGGACGTATCA | 82866 |

|                          |                                                                                   |       |
|--------------------------|-----------------------------------------------------------------------------------|-------|
| Majority                 | TATAAATGTCAGCACTAAGTAATGTCTTGTTTTGTGGCTGAATATTTTTXGTAGATGTTTTTXGAAGTTG-ACATGACTTA |       |
|                          | 89450 89460 89470 89480 89490 89500 89510 89520                                   |       |
| Human                    | CATACTAAAC--CATAAAGCAAGCTTCAGCTAATTTCAAAGAGTATCATAACAGACCTCATTCTCTATTGCACAAGTAAGT | 88364 |
| Kakapo                   | TATAAATGTCAGCACTAAGTAATGTCTTGTTTTGTGGCTGAATATTTTTCGTAGATGTTTTTGAAGTTG-ACATGACTTA  | 47740 |
| GoldenEagle              | TATAAATGTCAGCACTAAGTAATGTCTTGTTTTGTGGCTGA                                         | 57960 |
| JapaneseQuail            |                                                                                   | 43432 |
| MediumGroundFinch        | TATAAATGTCAGCACTAAGTAATGTCTTGTTTTGTGGCTGAATATTTTTCGTAGATGTTTTT-GAAGTTG-ACATGACTTA | 31575 |
| GoodesThornscrubTortois@ | TATAAATGTCAGCACTAAGTAATGTCTTGTTTTGTGGTGAATATTTTTGTAGATGTTTTT-GAAGTTG-ACATGACTTA   | 82944 |

|                           |                                                                                  |       |
|---------------------------|----------------------------------------------------------------------------------|-------|
| Majority                  | XGXXXXXXXXXXXXXXXXXXXXXXXXXXXXXXXXXXXXXXXXXXXXXXXXXXXXXXXXXXXXXXXXXXXXXXXXXXXX   |       |
|                           | 89530 89540 89550 89560 89570 89580 89590 89600                                  |       |
| Human                     | TAGAATTAATAACAAAAGATGCATATAAAATCTGTATCTGAGATTTAAAAATAAGTCTCAGTATTGCATGAGTCAGAA   | 88444 |
| Kakapo                    | CGTGCATTTCAATATATATTGCCATCTTTAGTTTGTAATTAAGATATGGAATATGGTTGTGGATTTCTGAGCATGTACAG | 47820 |
| GoldenEagle               |                                                                                  | 57960 |
| JapaneseQuail             |                                                                                  | 43432 |
| MediumGroundFinch         | CGTGCATTTCAATATATATTGCCATCTTTAGTTTGTAATTAAGATATGGAATATGGTTGTGGATTTCTGAGCATGTACAG | 31655 |
| GoodesThornscrubTortois@G |                                                                                  | 82946 |



Monday, May 02, 2022 06:51 PM

```

Majority      XXXXXXXXXXXXXXXXXXXXXXXXXXXXXXXXXXXXXXXXXXXXXXXXXXXXXXXXXXXXXXXXXXXXXXX
              |-----|
              89610   89620   89630   89640   89650   89660   89670   89680
Human         GTTTGTTTGTTTGTTTGTTTGTGAGCCAGTGTCTTGCTCTGTCCCCAGGGTGGAGTGCAGTGGTGCTATTGTGGCTCAC 88524
Kakapo       ACTGGTCAAGCTAGTTCAGGAAATGGTGCATGTATTTTTTCAATGAAGAAGAAAGTTTGCTGCAGAAGCTGGCAGGAAAT 47900
GoldenEagle  57960
JapaneseQuail 43432
MediumGroundFinch ACCGGTCAAGCTAGTTCAGGAAATGGTGCATGTATTTTT-CAATGATGAAGAAGTTTGCTGCAGATGCTTGCAGGAAAT 31734
GoodesThornscrubTortoise 82946
    
```

```

Majority      XXXXXXXXXXXXXXXXXXXXXXXXXXXXXXXXXXXXXXXXXXXXXXXXXXXXXXXXXXXXXXXXXXXXXXX
              |-----|
              89690   89700   89710   89720   89730   89740   89750   89760
Human         TGCAGCCTCGACCTCCAGGCTTAAGCAGTCCCTTGCACTTAAGCCTCCAAAGTAGCTAGGACTAAAAGCATGCACCACCT 88604
Kakapo       TTTGGGGCAGTTTCCCTCAAACGACAAACCAGGTGGGACCAAAGTTTATGTGCCTTTAGTCTTAATTTACCTTGCATTGT 47980
GoldenEagle  57960
JapaneseQuail 43432
MediumGroundFinch TTTGTGGCAGTTTCTAAACGACAA-CCAGGTGGGACCAAAGTTTATGTGCCTTTAGTCTTAATTTACCTTGCATTGT 31813
GoodesThornscrubTortoise 82946
    
```

```

Majority      XXXXXXXXXXXXXXXXXXXXXXXXXXXXXXXXXXXXXXXXXXXXXXXXXXXXXXXXXXXXXXXXXXXXXXX
              |-----|
              89770   89780   89790   89800   89810   89820   89830   89840
Human         GCCCGGCTAATTTATTA---TTATTATTATTTTTTGTAGAGATGAGTTCTCACTGTGTTGCCAGACAGAAGTTATTTTA 88681
Kakapo       AATATTCAGTTTTAATAAATCTCTTCAAACATTTTGTATTTAGAAATTGATCTGACTTTACTATAAACATGGCTCAGAA 48060
GoldenEagle  57960
JapaneseQuail 43432
MediumGroundFinch AATATTCAGTTTTAATAAATCTCTTCAAACATTTTGTATTTAGAAATTGATCTGACTTTACTATAAACATGGCTCAGAA 31893
GoodesThornscrubTortoise 82946
    
```

```

Majority      XXXXXXXXXXXXXXXXXXXXXXXXXXXXXXXXXXXXXXXXXXXXXXXXXXXXXXXXXXXXXXXXXXXXXXX
              |-----|
              89850   89860   89870   89880   89890   89900   89910   89920
Human         ATGGGAATATAAAACTTAAATTAAGCGATAAAGTACTATATACAAATTAGATATATGTGGTACAGTGAAAGAGAAGT 88761
Kakapo       TCTACAGATCCAGTTCATTTGAAAGCAGTTCTCTGTGAGGCTGAACTGTTACCTTGATTCTGTTTCAATGACCAATGCTT 48140
GoldenEagle  57960
JapaneseQuail 43432
MediumGroundFinch TCTGCAGATCCAGTTAATTTGAAAGCAGTTCACTGACAGTCTGAACTGTTACCTTGATTCTGTTTAAATGACCAATACTT 31973
GoodesThornscrubTortoise 82946
    
```

Monday, May 02, 2022 06:51 PM

| Majority                 | XXXXXXXXXXXXXXXXXXXXXXXXXXXXXXXXXXXXXXXXXXXXXXXXXXXXXXXXXXXXXXXXXXXXXXXXXXXX        |
|--------------------------|-------------------------------------------------------------------------------------|
|                          | 89930 89940 89950 89960 89970 89980 89990 90000                                     |
| Human                    | CTTGACGGGAAGTTTTAACTTTAAGAATAACAGTGTACCCCGAGGAAGGAGATATTAAGACAAGACTGGAAATCAAT 88841 |
| Kakapo                   | TTTGAAATTGATGTACTTAGTTTCAAGATCCATAGATTCTGTTATCTATGTAGAGAGAGAAAAAAAACAAATGGTCA 48220 |
| GoldenEagle              | 57960                                                                               |
| JapaneseQuail            | 43432                                                                               |
| MediumGroundFinch        | TTTGAAATTGATGTACTTAGTTTCAAGATTCATAGATTCTGTTATCTATGTAGAAAAAAA-----GGTCA 32039        |
| GoodesThornscrubTortoise | 82946                                                                               |

| Majority                 | XXXXXXXXXXXXXXXXXXXXXXXXXXXXXXXXXXXXXXXXXXXXXXXXXXXXXXXXXXXXXXXXXXXXXXXXXXXX          |
|--------------------------|---------------------------------------------------------------------------------------|
|                          | 90010 90020 90030 90040 90050 90060 90070 90080                                       |
| Human                    | GGTATAAAAGACAGTTGAGAGAAAAAATGCACACAAGTTGGATTCTTTGAAAAGACTAAAAAATAGACAAACATCTA 88921   |
| Kakapo                   | TGTATATTTTCTATTAGTTGAGTTTTTACATCTTTAGAATTGTAAAATTCAGTCTAGTTTGAAAGTGGCACAATTAATA 48300 |
| GoldenEagle              | 57960                                                                                 |
| JapaneseQuail            | 43432                                                                                 |
| MediumGroundFinch        | TGTATATTTTCTATTAGTTGAGTTTTTACATCTTTAGAATTGTAAAATTCAGTATAGTTTGGAAGTGGCACAATTAATA 32119 |
| GoodesThornscrubTortoise | 82946                                                                                 |

| Majority                 | XXXXXXXXXXXXXXXXXXXXXXXXXXXXXXXXXXXXXXXXXXXXXXXXXXXXXXXXXXXXXXXXXXXXXXXXXXXX           |
|--------------------------|----------------------------------------------------------------------------------------|
|                          | 90090 90100 90110 90120 90130 90140 90150 90160                                        |
| Human                    | AAGATTGATTAATAAATGAGAGTGGTAACACAAAAAATTTTTTGAATTATAAAGGGGAGAAGCATTGATAAAGCTCCA 89001   |
| Kakapo                   | TTAATTTTCTAACAAAGTTGGGAGGTTTGACGGTGGTTTAATTTCAATTTTGTGTGACTCTGCTTACCTCTGTAGCATGC 48380 |
| GoldenEagle              | 57960                                                                                  |
| JapaneseQuail            | 43432                                                                                  |
| MediumGroundFinch        | TTAATTTTCTAACAAAGTTGGGAGGTTTGATGGTTGTTTAATTTCAATTTTGTGTGACTCTGCTTACCTCTGTAGCATGC 32199 |
| GoodesThornscrubTortoise | 82946                                                                                  |

| Majority                 | XXXXXXXXXXXXXXXXXXXXXXXXXXXXXXXXXXXXXXXXXXXXXXXXXXXXXXXXXXXXXXXXXXXXXXXXXXXX            |
|--------------------------|-----------------------------------------------------------------------------------------|
|                          | 90170 90180 90190 90200 90210 90220 90230 90240                                         |
| Human                    | GTTTCCACATCATATAAACACCACACTATGTCTGTAAATTTCTTGAGGTCTTTTAAATTTTATTATTTCGTTAATAATCTC 89081 |
| Kakapo                   | TCAATAAACACTTCTGTAGCTCTGTATTCACCTTTTCTGTCTTTCTCTGCTGCTTTCTCTCTCCTCTCTTTGTTTTT 48460     |
| GoldenEagle              | 57960                                                                                   |
| JapaneseQuail            | 43432                                                                                   |
| MediumGroundFinch        | TCAATAAACACTTCTGTAGCTCTGTATTCACCTTTTCTGTCTTTCTCTGCTGCTTTCTATCTTTTCTCTCTTTGTTTTT 32279   |
| GoodesThornscrubTortoise | 82946                                                                                   |

Monday, May 02, 2022 06:51 PM

```

Majority      XXXXXXXXXXXXXXXXXXXXXXXXXXXXXXXXXXXXXXXXXXXXXXXXXXXXXXXXXXXXXXXXXXXXXXX
                |-----|
                90250   90260   90270   90280   90290   90300   90310   90320
Human          TTCATAGATGGATTAAGGGAAATGTAAA-AAATTACATTAATCAAAAATGTCATTTCAATTGTGAAACATTGACTTTT 89160
Kakapo         CACTTCTACTGTGCTTCTAAATTCATGTTTATTTCTCTGCCAGGGTGGGAAAAGCATAATACTCCAAAATACAATTTACGG 48540
GoldenEagle   57960
JapaneseQuail 43432
MediumGroundFinch CACTTCTACTGTGCTTCTAAATTCATGTT-ATTCTCTGCCAGGGTGGGAAAAGCATAATATTA AAAACTGCTATTTATGG 32358
GoodesThornscrubTortoise 82946
    
```

```

Majority      XXXXXXXXXXXXXXXXXXXXXXXXXXXXXXXXXXXXXXXXXXXXXXXXXXXXXXXXXXXXXXXXXXXXXXX
                |-----|
                90330   90340   90350   90360   90370   90380   90390   90400
Human          TCCTTTATTTATGTCCTTGTCCATTTATGCCATATTTCTTGAATAGGAGAGTTCAGTGTAAGATTACATTGTTTAAAA 89240
Kakapo         CATTTTACCA-AAATCTGATGCTGTGAAAAATACCAGCTCTTTATTTTCACAAAGATAGTGACCCCTTTGCAGGCATATG 48619
GoldenEagle   57960
JapaneseQuail 43432
MediumGroundFinch CTTTTTACCATAAAATCTGATGCTGTGAAAAATACCAACTCTTTATGTTCA----GATAGTGACCCCTTTGCAGGCATATG 32434
GoodesThornscrubTortoise 82946
    
```

```

Majority      XXXXXXXXXXXXXXXXXXXXXXXXXXXXXXXXXXXXXXXXXXXXXXXXXXXXXXXXXXXXXXXXXXXXXXX
                |-----|
                90410   90420   90430   90440   90450   90460   90470   90480
Human          TTTTATTCATTTAAAATTAGTAATTCAGGTAATTTCTTCTGCTCTGTTTACTCCTTGTGTACTTTCAGTTTTTGACAAA 89320
Kakapo         TGCATATGAAACATTTCCACCCTGTTGTAACCTACTGCTTTAAAGACATAACTTTTATTGTAGTTCGTTAGCTCTCTCT 48699
GoldenEagle   57960
JapaneseQuail 43432
MediumGroundFinch TGCAAATTAAACATTTCCACCCTGTTA 32462
GoodesThornscrubTortoise 82946
    
```

```

Majority      XXXXXXXXXXXXXXXXXXXXXXXXXXXXXXXXXXXXXXXXXXXXXXXXXXXXXXXXXXXXXXXXXXXXXXX
                |-----|
                90490   90500   90510   90520   90530   90540   90550   90560
Human          GCTTTTGTTTTCTTTTACTTAAAAATTTGGTATTCTAATTATCATCCCCCTTCCCCTTTAGATCACTTCAGATCCTA 89400
Kakapo         TTCTATCTTTTGTAGTTTGAAGCAGATTTATGCACTAATAGATCTCTCAGGTTTGCCATGCTCTCTTGCTGCAGTTTCAT 48779
GoldenEagle   57960
JapaneseQuail 43432
MediumGroundFinch 32462
GoodesThornscrubTortoise 82946
    
```

Monday, May 02, 2022 06:51 PM

```

Majority      XXXXXXXXXXXXXXXXXXXXXXXXXXXXXXXXXXXXXXXXXXXXXXXXXXXXXXXXXXXXXXXXXXXXXXX
                |-----|
                90570   90580   90590   90600   90610   90620   90630   90640
Human          TTGTCAGCAATCAGCTGGCTAGAACTCTCTTGTACCTGGCTACTTCCTGAGGTAGCTGTTTGGTTATTTAGCTTTATTT 89480
Kakapo         CTCTCATTTTTTTGTGTCTGCTAAAGGTTTTCTACTAATCATAACAATATACTCATGGGCTACACTTACAAAGTTGGGCT 48859
GoldenEagle    57960
JapaneseQuail  43432
MediumGroundFinch 32462
GoodesThornscrubTortoise 82946
    
```

```

Majority      XXXXXXXXXXXXXXXXXXXXXXXXXXXXXXXXXXXXXXXXXXXXXXXXXXXXXXXXXXXXXXXXXXXXXXX
                |-----|
                90650   90660   90670   90680   90690   90700   90710   90720
Human          TAATCCCATTCCTCTATCACTCATCTGTCTGTATGCAGTTACTATGCCTGGGACTTATTTTCTTATTCTTTCCCTCCAT 89560
Kakapo         TTTTTTTTTTCATGCTAGATTAGTGGACCATACATATTTTACAGACCAGGATATTTACCTCATCGGAGACATGGGTTCAA 48939
GoldenEagle    57960
JapaneseQuail  43432
MediumGroundFinch 32462
GoodesThornscrubTortoise 82946
    
```

```

Majority      XXXXXXXXXXXXXXXXXXXXXXXXXXXXXXXXXXXXXXXXXXXXXXXXXXXXXXXXXXXXXXXXXXXXXXX
                |-----|
                90730   90740   90750   90760   90770   90780   90790   90800
Human          TATCTCAAAGCTCTGCTGTTTGTGCTGTCTTTTTATTTAGACAGCTTTTTTCTGACAACGTTAAGTCTACTTATTTATA 89640
Kakapo         TTGAATGTAAAACAGTTGGGATACTTTAATAGTGTTCCTTCATATTACTTTGAACTGATTGTTGTGGGGTTTTTTTCCC 49019
GoldenEagle    57960
JapaneseQuail  43432
MediumGroundFinch 32462
GoodesThornscrubTortoise 82946
    
```

```

Majority      XXXXXXXXXXXXXXXXXXXXXXXXXXXXXXXXXXXXXXXXXXXXXXXXXXXXXXXXXXXXXXXXXXXXXXX
                |-----|
                90810   90820   90830   90840   90850   90860   90870   90880
Human          TCACTTTATTTCTCAAACCTCACACTTAATAACACATTTTATCTGAGGTAGTTTATCTAAACAAAAGTTTGTTCACTTAAA 89720
Kakapo         CCCTCGATTAGCAATAGGATGAAAACTTTACAGAGTCTTCTTTTAAAGAGTAACTGTATGATCCCAAAGCATTACATTGG 49099
GoldenEagle    57960
JapaneseQuail  43432
MediumGroundFinch 32462
GoodesThornscrubTortoise 82946
    
```

Monday, May 02, 2022 06:51 PM

| Majority                 | XXXXXXXXXXXXXXXXXXXXXXXXXXXXXXXXXXXXXXXXXXXXXXXXXXXXXXXXXXXXXXXXXXXXXXXXXXXX           |
|--------------------------|----------------------------------------------------------------------------------------|
|                          | 90890 90900 90910 90920 90930 90940 90950 90960                                        |
| Human                    | ATAGTTATAGAACTTTAAAATTTTATAATTCAGTGGGTTTTATTGTAAAAGGATTTTATGTACTGTCACTGTAGATAATT 89800 |
| Kakapo                   | TAAAAGGTGTCAGTGTCAATTCAAAGCATATTGCTGTCACCTTCTCCAGTGCAGTACTGTAGATTTATTGATGTCAGAT 49179  |
| GoldenEagle              | 57960                                                                                  |
| JapaneseQuail            | 43432                                                                                  |
| MediumGroundFinch        | 32462                                                                                  |
| GoodesThornscrubTortoise | 82946                                                                                  |

| Majority                 | XXXXXXXXXXXXXXXXXXXXXXXXXXXXXXXXXXXXXXXXXXXXXXXXXXXXXXXXXXXXXXXXXXXXXXXXXXXX           |
|--------------------------|----------------------------------------------------------------------------------------|
|                          | 90970 90980 90990 91000 91010 91020 91030 91040                                        |
| Human                    | GGTTTTACAGGTGTAAGCGTAAATTTGCAAGTATATGAAATTAAGTATGTGAAATGCAGTGTGAGAAACAAATGAGAAAA 89880 |
| Kakapo                   | TTCTTTGTGACCTAATGCCTGTTCTTTGGGTGGCTTTCAAAATCAATAGCTATCAGCTTTTTAAAGGTCACGGTACAACA 49259 |
| GoldenEagle              | 57960                                                                                  |
| JapaneseQuail            | 43432                                                                                  |
| MediumGroundFinch        | 32462                                                                                  |
| GoodesThornscrubTortoise | 82946                                                                                  |

| Majority                 | XXXXXXXXXXXXXXXXXXXXXXXXXXXXXXXXXXXXXXXXXXXXXXXXXXXXXXXXXXXXXXXXXXXXXXXXXXXX           |
|--------------------------|----------------------------------------------------------------------------------------|
|                          | 91050 91060 91070 91080 91090 91100 91110 91120                                        |
| Human                    | TTCAGACTTGTGAGAAGATTGTTTTGTTTTTTTTCTGTGCTTAGCCTTGCGGAAAAATCTGAGAAAACCTAAAATATATA 89960 |
| Kakapo                   | TAGGGGGCTTGCATTAGTCTTCACCACATAAAATAAAATACATTTATCAGAAATACACCAAAGATACGACTTAAGGTATA 49339 |
| GoldenEagle              | 57960                                                                                  |
| JapaneseQuail            | 43432                                                                                  |
| MediumGroundFinch        | 32462                                                                                  |
| GoodesThornscrubTortoise | 82946                                                                                  |

| Majority                 | XXXXXXXXXXXXXXXXXXXXXXXXXXXXXXXXXXXXXXXXXXXXXXXXXXXXXXXXXXXXXXXXXXXXXXXXXXXX           |
|--------------------------|----------------------------------------------------------------------------------------|
|                          | 91130 91140 91150 91160 91170 91180 91190 91200                                        |
| Human                    | ACACTGGAGTGACAATCAGGAAGAGTGGACTCTTTTTTTTTTAAATTTTTTAAACAAATTAGGGAAGTAAAGTTCAATGG 90040 |
| Kakapo                   | TTGCAGTGTACCCAGTCTGAAATGCCAGTAGAATCAGATTCATCCATACCTGAAACATACGAATCGACATCTTTTTA 49419    |
| GoldenEagle              | 57960                                                                                  |
| JapaneseQuail            | 43432                                                                                  |
| MediumGroundFinch        | 32462                                                                                  |
| GoodesThornscrubTortoise | 82946                                                                                  |

Monday, May 02, 2022 06:51 PM

```

Majority      XXXXXXXXXXXXXXXXXXXXXXXXXXXXXXXXXXXXXXXXXXXXXXXXXXXXXXXXXXXXXXXXXXXXXXX
              |-----|
              91210   91220   91230   91240   91250   91260   91270   91280
Human         CTAGTGGTTATCATAATAAGAAAAATTTAAGGAAGTTATAGGTAAAATAAGAATTTTACTTTTGTTCCTTTCTGAATGG 90120
Kakapo        CAACTCATGCACCCAAACACGTTGATGTGATTATCTCCAGTTGACTCGATCAGTAGCTAAGGGTCTGATAGAGCTGATC 49499
GoldenEagle   57960
JapaneseQuail 43432
MediumGroundFinch 32462
GoodesThornscrubTortoise 82946
    
```

```

Majority      XXXXXXXXXXXXXXXXXXXXXXXXXXXXXXXXXXXXXXXXXXXXXXXXXXXXXXXXXXXXXXXXXXXXXXX
              |-----|
              91290   91300   91310   91320   91330   91340   91350   91360
Human         TACCTCATATTTTGACAGCATTATCCTTTTCAGATCTGTTTTATATTTAATTGGTTTATTATACATGTAAGTATGATTAG 90200
Kakapo        TTTTCAATTTTCCATCTATACGATATGATTTCCCATGTTTTTAAAGTAAAAATGCGTCTCACTTCCTTTGGCATAATCAG 49579
GoldenEagle   57960
JapaneseQuail 43432
MediumGroundFinch 32462
GoodesThornscrubTortoise 82946
    
```

```

Majority      XXXXXXXXXXXXXXXXXXXXXXXXXXXXXXXXXXXXXXXXXXXXXXXXXXXXXXXXXXXXXXXXXXXXXXX
              |-----|
              91370   91380   91390   91400   91410   91420   91430   91440
Human         ATTCATGGATTTAACCAGTTCCTTTGTATCTTCTGTGTCAAATGTATACTGTAGTATACTGTTTATATTAGAACTCTTT 90280
Kakapo        AACGTGCCTGCATGTTTCCACTAGAAATGTGAATCTCTTGCCAGGCTTATTTCTTCAGAAGAAGTTTCTATACTTCTCT 49659
GoldenEagle   57960
JapaneseQuail 43432
MediumGroundFinch 32462
GoodesThornscrubTortoise 82946
    
```

```

Majority      XXXXXXXXXXXXXXXXXXXXXXXXXXXXXXXXXXXXXXXXXXXXXXXXXXXXXXXXXXXXXXXXXXXXXXX
              |-----|
              91450   91460   91470   91480   91490   91500   91510   91520
Human         AAAAGTGGATGTTCTATTCTTAATTTCTGATCTTCCACATTGTCTTTATCTGTAACCTACTGTTTTTTGTTGGTTTTT 90360
Kakapo        CATTTTGAAGAGTTCGTGGCAAAAACCTCAAGGGAAAGAATATATATTGAATTTGATTTTTTATTTTTTAATCAATTC 49739
GoldenEagle   57960
JapaneseQuail 43432
MediumGroundFinch 32462
GoodesThornscrubTortoise 82946
    
```

Monday, May 02, 2022 06:51 PM

| Majority                 | XXXXXXXXXXXXXXXXXXXXXXXXXXXXXXXXXXXXXXXXXXXXXXXXXXXXXXXXXXXXXXXXXXXXXXXXXXXX       |       |       |       |       |       |       |       |       |
|--------------------------|------------------------------------------------------------------------------------|-------|-------|-------|-------|-------|-------|-------|-------|
|                          | 91530                                                                              | 91540 | 91550 | 91560 | 91570 | 91580 | 91590 | 91600 |       |
| Human                    | GTTTTTGTGTTTGGAGACAGAGTCTCGCTCTGTACCCAGGCTGGAGTGCACCTGTGGCACCATCTCAGCTCACTGTAACCTC |       |       |       |       |       |       |       | 90440 |
| Kakapo                   | AGGAACTTTTATTAGGAGGTTATATTTGTATCAGCCGAAATTAAGCAATGATAGTCATAATTGTCATGAAAGCATTTT     |       |       |       |       |       |       |       | 49819 |
| GoldenEagle              |                                                                                    |       |       |       |       |       |       |       | 57960 |
| JapaneseQuail            |                                                                                    |       |       |       |       |       |       |       | 43432 |
| MediumGroundFinch        |                                                                                    |       |       |       |       |       |       |       | 32462 |
| GoodesThornscrubTortoise |                                                                                    |       |       |       |       |       |       |       | 82946 |

| Majority                 | XXXXXXXXXXXXXXXXXXXXXXXXXXXXXXXXXXXXXXXXXXXXXXXXXXXXXXXXXXXXXXXXXXXXXXXXXXXX      |       |       |       |       |       |       |       |       |
|--------------------------|-----------------------------------------------------------------------------------|-------|-------|-------|-------|-------|-------|-------|-------|
|                          | 91610                                                                             | 91620 | 91630 | 91640 | 91650 | 91660 | 91670 | 91680 |       |
| Human                    | CGCCTCCTGGGTACAAGCAATCTGCCTCAGCCTCCTGAGTAACTGGGACCACAGGCACGAGCCACCACGCCAGCTAAT    |       |       |       |       |       |       |       | 90520 |
| Kakapo                   | TCATTAACCTCGGTGAAGAAAAATCACTGCTGCTGTATTGATACATAGTCTTTAAAGTGGGATCTCTTCAGAATACACAGG |       |       |       |       |       |       |       | 49899 |
| GoldenEagle              |                                                                                   |       |       |       |       |       |       |       | 57960 |
| JapaneseQuail            |                                                                                   |       |       |       |       |       |       |       | 43432 |
| MediumGroundFinch        |                                                                                   |       |       |       |       |       |       |       | 32462 |
| GoodesThornscrubTortoise |                                                                                   |       |       |       |       |       |       |       | 82946 |

| Majority                 | XXXXXXXXXXXXXXXXXXXXXXXXXXXXXXXXXXXXXXXXXXXXXXXXXXXXXXXXXXXXXXXXXXXXXXXXXXXX    |       |       |       |       |       |       |       |       |
|--------------------------|---------------------------------------------------------------------------------|-------|-------|-------|-------|-------|-------|-------|-------|
|                          | 91690                                                                           | 91700 | 91710 | 91720 | 91730 | 91740 | 91750 | 91760 |       |
| Human                    | TTTTGTATTTTGTAGTAGAGATGGGGTGTACCATATTGGCCAGGCTGGTCTCGAACTCCTAGACCTTGTGATCCGCCAC |       |       |       |       |       |       |       | 90600 |
| Kakapo                   | TTTCATATCCTAAACTCGAACTTTCCAAACCTTGTTTTCTTGAGACGGGACTGCATTTTGTATAGTAATTTGTACCTT  |       |       |       |       |       |       |       | 49979 |
| GoldenEagle              |                                                                                 |       |       |       |       |       |       |       | 57960 |
| JapaneseQuail            |                                                                                 |       |       |       |       |       |       |       | 43432 |
| MediumGroundFinch        |                                                                                 |       |       |       |       |       |       |       | 32462 |
| GoodesThornscrubTortoise |                                                                                 |       |       |       |       |       |       |       | 82946 |

| Majority                 | XXXXXXXXXXXXXXXXXXXXXXXXXXXXXXXXXXXXXXXXXXXXXXXXXXXXXXXXXXXXXXXXXXXXXXXXXXXX    |       |       |       |       |       |       |       |       |
|--------------------------|---------------------------------------------------------------------------------|-------|-------|-------|-------|-------|-------|-------|-------|
|                          | 91770                                                                           | 91780 | 91790 | 91800 | 91810 | 91820 | 91830 | 91840 |       |
| Human                    | CTCAGCCTCCCAAAGTGTGGGATTACAGGCGTGAGCCAACGCGCCCGGCATCTACTGTTAATACTTTATTATCTAGTTG |       |       |       |       |       |       |       | 90680 |
| Kakapo                   | TTTGTGTTATCAAAATGTAATAAGTTTCTGTATTTTGTAGCTCTTGGAATGTGAAAATGCAAAGCATCATTTTATTAA  |       |       |       |       |       |       |       | 50059 |
| GoldenEagle              |                                                                                 |       |       |       |       |       |       |       | 57960 |
| JapaneseQuail            |                                                                                 |       |       |       |       |       |       |       | 43432 |
| MediumGroundFinch        |                                                                                 |       |       |       |       |       |       |       | 32462 |
| GoodesThornscrubTortoise |                                                                                 |       |       |       |       |       |       |       | 82946 |

Monday, May 02, 2022 06:51 PM

```

Majority      XXXXXXXXXXXXXXXXXXXXXXXXXXXXXXXXXXXXXXXXXXXXXXXXXXXXXXXXXXXXXXXXXXXXXXX
                |-----|
                91850   91860   91870   91880   91890   91900   91910   91920
Human          ATTATAGTCATTTAGACCTTCAGTTTAGCCAAAGTGCATGACATATTAGAAATGGTCTTTTTTAGTTATTTGACTGGTG 90760
Kakapo         AATTTTACTACAAATAAGGTTCCCTTAGACTAGATTTTCTCTGCTGGAGCAATGACATCACTTGGGAAAGTCCAAAAGTG 50139
GoldenEagle    57960
JapaneseQuail  43432
MediumGroundFinch 32462
GoodesThornscrubTortoise 82946
    
```

```

Majority      XXXXXXXXXXXXXXXXXXXXXXXXXXXXXXXXXXXXXXXXXXXXXXXXXXXXXXXXXXXXXXXXXXXXXXX
                |-----|
                91930   91940   91950   91960   91970   91980   91990   92000
Human          AAT---AAAACA--TATAACTTTCTAGCATCAGACCAGTTCATTTAGTTTAAAAATGATCCAGCAGCTATGTCAAGAAAT 90835
Kakapo         ATTCTTCAATCAGGTAACGTCCACTGGCAAATACAATATAGAAGTGAAGTAAACCAGAGCCATTCTGACTAAAAATAGGG 50219
GoldenEagle    57960
JapaneseQuail  43432
MediumGroundFinch 32462
GoodesThornscrubTortoise 82946
    
```

```

Majority      XXXXXXXXXXXXXXXXXXXXXXXXXXXXXXXXXXXXXXXXXXXXXXXXXXXXXXXXXXXXXXXXXXXXXXX
                |-----|
                92010   92020   92030   92040   92050   92060   92070   92080
Human          AGTCATGTAATGTTCTGTTTTCACACACTGCACTATGTTCTGGGGTAGAGACAAAGGTTTGGATTTTGGAAATTTGCAT 90915
Kakapo         GCAAAACTTCAAATTTAAGTGAATGCACTTGAAAAGATTTCTTGTGTGTTGTTATTTACGTGTTACTAGAAGACACCTT 50299
GoldenEagle    57960
JapaneseQuail  43432
MediumGroundFinch 32462
GoodesThornscrubTortoise 82946
    
```

```

Majority      XXXXXXXXXXXXXXXXXXXXXXXXXXXXXXXXXXXXXXXXXXXXXXXXXXXXXXXXXXXXXXXXXXXXXXX
                |-----|
                92090   92100   92110   92120   92130   92140   92150   92160
Human          TATACCAATTGAGCTTCCCAAATCTGAAATGTTCCAATGAGCATTTCCCTTGAGCATCATGTTGGCCCTCAGTTTTGGAT 90995
Kakapo         TGCCCTGCAGGAATAACAGCTCCTGTGACTAGTTGTGAATTGCCATTTTGGATGTTTACATTAATTTTCAGTTCGTAA 50379
GoldenEagle    57960
JapaneseQuail  43432
MediumGroundFinch 32462
GoodesThornscrubTortoise 82946
    
```



Monday, May 02, 2022 06:51 PM

```

Majority      XXXXXXXXXXXXXXXXXXXXXXXXXXXXXXXXXXXXXXXXXXXXXXXXXXXXXXXXXXXXXXXXXXXXXXX
                |-----|
                92170   92180   92190   92200   92210   92220   92230   92240
Human          TTTGGAACATTTTCAGATTTTCAGATTTCTGCATTAAGGATACTCAACCTGTACAGACTGGGAAAGGTATAAGCCATGTTAA 91075
Kakapo         CAAGCCATCTTACGAAAGAAAATCCCTTTGATTCATTGTGAGTGTCCCTTGTGCTTATTGTAGTGTTTTACAGCATGACAG 50459
GoldenEagle    57960
JapaneseQuail  43432
MediumGroundFinch 32462
GoodesThornscrubTortoise 82946
    
```

```

Majority      XXXXXXXXXXXXXXXXXXXXXXXXXXXXXXXXXXXXXXXXXXXXXXXXXXXXXXXXXXXXXXXXXXXXXXX
                |-----|
                92250   92260   92270   92280   92290   92300   92310   92320
Human          AGAATGAGTTTCAACTTTGTCCTTAAGGGTTTTAAGCAGGTATTGACGTGATCAGATTTGTAATTTATGAAGGTCATCAA 91155
Kakapo         CACCCATCAGGCATTTATCTGCACTATTTAAGGCCTTAAATTTTCATACCCTGGTTTACTCTAGCTAATAGATCTAATTTT 50539
GoldenEagle    57960
JapaneseQuail  43432
MediumGroundFinch 32462
GoodesThornscrubTortoise 82946
    
```

```

Majority      XXXXXXXXXXXXXXXXXXXXXXXXXXXXXXXXXXXXXXXXXXXXXXXXXXXXXXXXXXXXXXXXXXXXXXX
                |-----|
                92330   92340   92350   92360   92370   92380   92390   92400
Human          GCTGCTGTATAGAAAATGGATTGGAAAATTTATCCAACAGGAAGACAAATATGAGACTGAGTTATCCAGATAAAAAATAA 91235
Kakapo         ATGCTTAGATAGTAAGTAGTCTGTGTGAAACACTAGAAAAGGGTGAGAATTGTGTCCTTCTCTGCAAACAGGTATATAA 50619
GoldenEagle    57960
JapaneseQuail  43432
MediumGroundFinch 32462
GoodesThornscrubTortoise 82946
    
```

```

Majority      XXXXXXXXXXXXXXXXXXXXXXXXXXXXXXXXXXXXXXXXXXXXXXXXXXXXXXXXXXXXXXXXXXXXXXX
                |-----|
                92410   92420   92430   92440   92450   92460   92470   92480
Human          TGTCAGCGAGAAGTAGAGAAACAGATCATGAATTTGAGGGACAATTAGGAGGAAGGCTATCACAATATTTAGCAATTAGG 91315
Kakapo         ATCCACTCGTCCACCTCACGAAGTAGTGTCCCACTATGAAATGTTTTACAGTGAGC 50676
GoldenEagle    57960
JapaneseQuail  43432
MediumGroundFinch 32462
GoodesThornscrubTortoise 82946
    
```

Monday, May 02, 2022 06:51 PM

```

Majority      XXXXXXXXXXXXXXXXXXXXXXXXXXXXXXXXXXXXXXXXXXXXXXXXXXXXXXXXXXXXXXXXXXXXXXX
                |-----|
                92490     92500     92510     92520     92530     92540     92550     92560
Human         ATGTGTAACAGAAGGGAGAAAAAGAGCTAGGGATGCTTATTAAGTTTCTTTCTTGTGTAGCTCACTATACGATTTGTTAG 91395
Kakapo              50676
GoldenEagle              57960
JapaneseQuail            43432
MediumGroundFinch       32462
GoodesThornscrubTortoise 82946
    
```

```

Majority      XXXXXXXXXXXXXXXXXXXXXXXXXXXXXXXXXXXXXXXXXXXXXXXXXXXXXXXXXXXXXXXXXXXXXXX
                |-----|
                92570     92580     92590     92600     92610     92620     92630     92640
Human         CAGGATTGTTGAGGAAGATAGATATTCATAATCTGGATTTTCATTCTATGAAAGTAGCTGGCTTTTTTGCCAGAATGCCT 91475
Kakapo              50676
GoldenEagle              57960
JapaneseQuail            43432
MediumGroundFinch       32462
GoodesThornscrubTortoise 82946
    
```

```

Majority      XXXXXXXXXXXXXXXXXXXXXXXXXXXXXXXXXXXXXXXXXXXXXXXXXXXXXXXXXXXXXXXXXXXXXXX
                |-----|
                92650     92660     92670     92680     92690     92700     92710     92720
Human         TGTCTAGTTCAAATGAAAATGTACTTAAGTCTTATCACCAGTGGCTATGGTAAATTGGTGATTTATTTTAAATCATAAG 91555
Kakapo              50676
GoldenEagle              57960
JapaneseQuail            43432
MediumGroundFinch       32462
GoodesThornscrubTortoise 82946
    
```

```

Majority      XXXXXXXXXXXXXXXXXXXXXXXXXXXXXXXXXXXXXXXXXXXXXXXXXXXXXXXXXXXXXXXXXXXXXXX
                |-----|
                92730     92740     92750     92760     92770     92780     92790     92800
Human         AAAATTCAAATTTTAAACTGTTACGTTAAAAGAATTATGTTTGTGTTTGTGCTTTGATATTGTTTGTAAATAGACATGCT 91635
Kakapo              50676
GoldenEagle              57960
JapaneseQuail            43432
MediumGroundFinch       32462
GoodesThornscrubTortoise 82946
    
```

```
Majority                XXXXXXXXXXXXXXXXXXXXXXXXXXXXXXXXXXXXXXXXXXXXXXXXXXXXXXXXXXXXXXXXXXXXXXXXXXXX
                          |-----|
                          92810     92820     92830     92840     92850     92860     92870     92880
Human                    TTCTTTTATAGCCATGAATCATCTTAATGGACAGAAATGTATGGAAAAATTTATTCGTGTTACTCTGTCTAAACATCAG 91715
Kakapo                                                            50676
GoldenEagle                                                      57960
JapaneseQuail                                                     43432
MediumGroundFinch                                                32462
GoodesThornscrubTortoise                                         82946
```

```
Majority                XXXXXXXXXXXXXXXXXXXXXXXXXXXXXXXXXXXXXXXXXXXXXXXXXXXXXXXXXXXXXXXXXXXXXXXXXXXX
                          |-----|
                          92890     92900     92910     92920     92930     92940     92950     92960
Human                    ACTGTACAGCTACCTCGAGAGGGACTTGATGATCAAGGGCTAACAAAAGATTTTGGTAATTCCCATTGCATCGTTTAA 91795
Kakapo                                                            50676
GoldenEagle                                                      57960
JapaneseQuail                                                     43432
MediumGroundFinch                                                32462
GoodesThornscrubTortoise                                         82946
```

```
Majority                XXXXXXXXXXXXXXXXXXXXXXXXXXXXXXXXXXXXXXXXXXXXXXXXXXXXXXXXXXXXXXXXXXXXXXXXXXXX
                          |-----|
                          92970     92980     92990     93000     93010     93020     93030     93040
Human                    GAAACCTGGATCCAAAATTTTCAAACATTTTTCCTCCTTCTGCCACCCTTCACCTATCTAATATCCCGTAAGTATATA 91875
Kakapo                                                            50676
GoldenEagle                                                      57960
JapaneseQuail                                                     43432
MediumGroundFinch                                                32462
GoodesThornscrubTortoise                                         82946
```

```
Majority                XXXXXXXXXXXXXXXXXXXXXXXXXXXXXXXXXXXXXXXXXXXXXXXXXXXXXXXXXXXXXXXXXXXXXXXXXXXX
                          |-----|
                          93050     93060     93070     93080     93090     93100     93110     93120
Human                    AGCTAGAGTGATTGAGATACATTCTATTTTGATAAAATATGAAATTTATCTTAATCTTCACTTTTCTTCCCATTCAA 91955
Kakapo                                                            50676
GoldenEagle                                                      57960
JapaneseQuail                                                     43432
MediumGroundFinch                                                32462
GoodesThornscrubTortoise                                         82946
```

Monday, May 02, 2022 06:51 PM

```

Majority      XXXXXXXXXXXXXXXXXXXXXXXXXXXXXXXXXXXXXXXXXXXXXXXXXXXXXXXXXXXXXXXXXXXXXXX
                |-----|
                93130   93140   93150   93160   93170   93180   93190   93200
Human         TTTTCTAGTCCATCAGTAGCAGAAGAGGATCTACGAACACTGTTTCGCTAACACTGGGGGCACTGTGAAAGCATTTAAGT 92035
Kakapo                                               50676
GoldenEagle                                         57960
JapaneseQuail                                       43432
MediumGroundFinch                                  32462
GoodesThornscrubTortoise                          82946
    
```

```

Majority      XXXXXXXXXXXXXXXXXXXXXXXXXXXXXXXXXXXXXXXXXXXXXXXXXXXXXXXXXXXXXXXXXXXXXXX
                |-----|
                93210   93220   93230   93240   93250   93260   93270   93280
Human         TTTTTCAGTAAGCAAGCTTCCTTATCTTTAAATTAGTGACCTGATAAAATTTTAAAGTAGTTTTTGTTCCTTTTCGTTTAT 92115
Kakapo                                               50676
GoldenEagle                                         57960
JapaneseQuail                                       43432
MediumGroundFinch                                  32462
GoodesThornscrubTortoise                          82946
    
```

```

Majority      XXXXXXXXXXXXXXXXXXXXXXXXXXXXXXXXXXXXXXXXXXXXXXXXXXXXXXXXXXXXXXXXXXXXXXX
                |-----|
                93290   93300   93310   93320   93330   93340   93350   93360
Human         AGAAATTTTGTATCCGGAATGGCCAAAATTCAAGTATTTAATAAGCCCTTCTAATTGTATGAAGTGCTAATTTTAT 92195
Kakapo                                               50676
GoldenEagle                                         57960
JapaneseQuail                                       43432
MediumGroundFinch                                  32462
GoodesThornscrubTortoise                          82946
    
```

```

Majority      XXXXXXXXXXXXXXXXXXXXXXXXXXXXXXXXXXXXXXXXXXXXXXXXXXXXXXXXXXXXXXXXXXXXXXX
                |-----|
                93370   93380   93390   93400   93410   93420   93430   93440
Human         AATTTTGTTCAGAAAGAGATCACAAAATGGCTCTTCTTCAGATGGCAACAGTGAAGAAGCTATTCAGGCCTTGATTGAT 92275
Kakapo                                               50676
GoldenEagle                                         57960
JapaneseQuail                                       43432
MediumGroundFinch                                  32462
GoodesThornscrubTortoise                          82946
    
```

Monday, May 02, 2022 06:51 PM

```

Majority      XXXXXXXXXXXXXXXXXXXXXXXXXXXXXXXXXXXXXXXXXXXXXXXXXXXXXXXXXXXXXXXXXXXXXXX
                |-----|
                93450   93460   93470   93480   93490   93500   93510   93520
                |-----|
Human          CTTCATAATTATAACCTTGGAGAAAACCATCATCTGAGAGTGTCTTTCTCCAAGTCAACAATTTAAAAATGGGAAGATGA 92355
Kakapo        50676
GoldenEagle   57960
JapaneseQuail 43432
MediumGroundFinch 32462
GoodesThornscrubTortoise 82946
    
```

```

Majority      XXXXXXXXXXXXXXXXXXXXXXXXXXXXXXXXXXXXXXXXXXXXXXXXXXXXXXXXXXXXXXXXXXXXXXX
                |-----|
                93530   93540   93550   93560   93570   93580   93590   93600
                |-----|
Human          AGATTGGGGGTGAATCACATTGTTCAATGTCATCACCTATTTGACTGTTCCAGAAAAGTGGGGACCAGAGTTTGATTTTTT 92435
Kakapo        50676
GoldenEagle   57960
JapaneseQuail 43432
MediumGroundFinch 32462
GoodesThornscrubTortoise 82946
    
```

```

Majority      XXXXXXXXXXXXXXXXXXXXXXXXXXXXXXXXXXXXXXXXXXXXXXXXXXXXXXXXXXXXXXXXXXXXXXX
                |-----|
                93610   93620   93630   93640   93650   93660   93670   93680
                |-----|
Human          TTGTTTTTGTTTTTTGGGGTTCTTTTTTTTTTCCATGCTGTTATCATTTCCTTGGTTATAAAATGAAATGGCATATGTA 92515
Kakapo        50676
GoldenEagle   57960
JapaneseQuail 43432
MediumGroundFinch 32462
GoodesThornscrubTortoise 82946
    
```

```

Majority      XXXXXXXXXXXXXXXXXXXXXXXXXXXXXXXXXXXXXXXXXXXXXXXXXXXXXXXXXXXXXXXXXXXXXXX
                |-----|
                93690   93700   93710   93720   93730   93740   93750   93760
                |-----|
Human          AAGGCAGAGTTGTTAACTGCTATATTTTCATCTGTTCTATAGGGAAGCCATTTTGTCTGTTTAAAATTTTCAGTTTAATTTT 92595
Kakapo        50676
GoldenEagle   57960
JapaneseQuail 43432
MediumGroundFinch 32462
GoodesThornscrubTortoise 82946
    
```

Monday, May 02, 2022 06:51 PM

```

Majority      XXXXXXXXXXXXXXXXXXXXXXXXXXXXXXXXXXXXXXXXXXXXXXXXXXXXXXXXXXXXXXXXXXXXXXX
                |-----|
                93770   93780   93790   93800   93810   93820   93830   93840
Human         GCTTTTTTTTTTTTTTTTTTTCCTTTCAACTTAGTTGACATACGTGCCTTAAAAAGGAAACTAGTGTGCTATTGTG 92675
Kakapo                                     50676
GoldenEagle                                     57960
JapaneseQuail                                 43432
MediumGroundFinch                             32462
GoodesThornscrubTortoise                       82946
    
```

```

Majority      XXXXXXXXXXXXXXXXXXXXXXXXXXXXXXXXXXXXXXXXXXXXXXXXXXXXXXXXXXXXXXXXXXXXXXX
                |-----|
                93850   93860   93870   93880   93890   93900   93910   93920
Human         CATTTACTAGAAAAAGGAATTGGTTGTTTAGGGCACACTGTTATATGGGAATTAAAATATGTTTAGGCAGGGGTGTGTA 92755
Kakapo                                     50676
GoldenEagle                                     57960
JapaneseQuail                                 43432
MediumGroundFinch                             32462
GoodesThornscrubTortoise                       82946
    
```

```

Majority      XXXXXXXXXXXXXXXXXXXXXXXXXXXXXXXXXXXXXXXXXXXXXXXXXXXXXXXXXXXXXXXXXXXXXXX
                |-----|
                93930   93940   93950   93960   93970   93980   93990   94000
Human         AAAAGGTTAAGTTTTTGTTCCTGCTTGGAACTTATTTTGAATTACTGGCTTGTCACCTTTTTTCTATTTAATCAAA 92835
Kakapo                                     50676
GoldenEagle                                     57960
JapaneseQuail                                 43432
MediumGroundFinch                             32462
GoodesThornscrubTortoise                       82946
    
```

```

Majority      XXXXXXXXXXXXXXXXXXXXXXXXXXXXXXXXXXXXXXXXXXXXXXXXXXXXXXXXXXXXXXXXXXXXXXX
                |-----|
                94010   94020   94030   94040   94050   94060   94070   94080
Human         TAAGATACATGATATTGAAAGAATAAAGCAGCATTTTTAGTTTTTACTACCTTAGGCTTTATTGCTTTGAAAACAACATT 92915
Kakapo                                     50676
GoldenEagle                                     57960
JapaneseQuail                                 43432
MediumGroundFinch                             32462
GoodesThornscrubTortoise                       82946
    
```

Monday, May 02, 2022 06:51 PM

```

Majority      XXXXXXXXXXXXXXXXXXXXXXXXXXXXXXXXXXXXXXXXXXXXXXXXXXXXXXXXXXXXXXXXXXXXXXX
                |-----|
                94090      94100      94110      94120      94130      94140      94150      94160
Human          GGCCTTTTGTATCTCACAAATCTGGTCTAGATTGAGTTATGAATGTAGGCATTAGTTAAAATTAACAAGATGCAGAGTAT 92995
Kakapo                                     50676
GoldenEagle                                     57960
JapaneseQuail                                   43432
MediumGroundFinch                             32462
GoodesThornscrubTortoise                      82946
    
```

```

Majority      XXXXXXXXXXXXXXXXXXXXXXXXXXXXXXXXXXXXXXXXXXXXXXXXXXXXXXXXXXXXXXXXXXXXXXX
                |-----|
                94170      94180      94190      94200      94210      94220      94230      94240
Human          TAATTTCTTAAGACAACAAAGTGATTTCTGTAAGTTTGAGCCCTATGTGGAAAGCATTTGTGGAATCTTAACCTTTTCGTA 93075
Kakapo                                     50676
GoldenEagle                                     57960
JapaneseQuail                                   43432
MediumGroundFinch                             32462
GoodesThornscrubTortoise                      82946
    
```

```

Majority      XXXXXXXXXXXXXXXXXXXXXXXXXXXXXXXXXXXXXXXXXXXXXXXXXXXXXXXXXXXXXXXXXXXXXXX
                |-----|
                94250      94260      94270      94280      94290      94300      94310      94320
Human          CACACTCTTGTTGGGACGTATCATATAAATGTCAGCACTAAGTAATGTCTTGTGTTGTGGCTGAATATTTTTCGTAGATGTT 93155
Kakapo                                     50676
GoldenEagle                                     57960
JapaneseQuail                                   43432
MediumGroundFinch                             32462
GoodesThornscrubTortoise                      82946
    
```

```

Majority      XXXXXXXXXXXXXXXXXXXXXXXXXXXXXXXXXXXXXXXXXXXXXXXXXXXXXXXXXXXXXXXXXXXXXXX
                |-----|
                94330      94340      94350      94360      94370      94380      94390      94400
Human          TTTGAAGTTGACATGACTTACGTGCATTTAAATATATATTGCCATCCTTAGTTTGTAAATTAAGATTTGGAATATGGTTGT 93235
Kakapo                                     50676
GoldenEagle                                     57960
JapaneseQuail                                   43432
MediumGroundFinch                             32462
GoodesThornscrubTortoise                      82946
    
```

Monday, May 02, 2022 06:51 PM

```

Majority      XXXXXXXXXXXXXXXXXXXXXXXXXXXXXXXXXXXXXXXXXXXXXXXXXXXXXXXXXXXXXXXXXXXXXXX
                |-----|
                94410   94420   94430   94440   94450   94460   94470   94480
                |-----|
Human          GGATTTCTGAGCATGTGCAGACTGGTCTAGCTAGTTTCAGGAACGGTGCATGTATTTTCAAAGATAAAGAAAGTGTACT 93315
Kakapo        50676
GoldenEagle   57960
JapaneseQuail 43432
MediumGroundFinch 32462
GoodesThornscrubTortoise 82946
    
```

```

Majority      XXXXXXXXXXXXXXXXXXXXXXXXXXXXXXXXXXXXXXXXXXXXXXXXXXXXXXXXXXXXXXXXXXXXXXX
                |-----|
                94490   94500   94510   94520   94530   94540   94550   94560
                |-----|
Human          GCGAAAATATGCAGGAAGATTAATTTTGTGGCAGTTTTCTAAAACGACAACCAGGTGGGACCAAAGTTTATGTGCCTTT 93395
Kakapo        50676
GoldenEagle   57960
JapaneseQuail 43432
MediumGroundFinch 32462
GoodesThornscrubTortoise 82946
    
```

```

Majority      XXXXXXXXXXXXXXXXXXXXXXXXXXXXXXXXXXXXXXXXXXXXXXXXXXXXXXXXXXXXXXXXXXXXXXX
                |-----|
                94570   94580   94590   94600   94610   94620   94630   94640
                |-----|
Human          AGTCTTAATTTACCTTGCATTGTAATATTCAGTTTTAATAAATCTTCAAAATATTTTGTATTTAGGAATAGATCTGACTT 93475
Kakapo        50676
GoldenEagle   57960
JapaneseQuail 43432
MediumGroundFinch 32462
GoodesThornscrubTortoise 82946
    
```

```

Majority      XXXXXXXXXXXXXXXXXXXXXXXXXXXXXXXXXXXXXXXXXXXXXXXXXXXXXXXXXXXXXXXXXXXXXXX
                |-----|
                94650   94660   94670   94680   94690   94700   94710   94720
                |-----|
Human          TAATAAAAACATGGCTCAGAATCTACAGGTCAAATTAATTTGAACAGTTCTTGTCAATCCGAATGTTGATTCTGTTTAA 93555
Kakapo        50676
GoldenEagle   57960
JapaneseQuail 43432
MediumGroundFinch 32462
GoodesThornscrubTortoise 82946
    
```



Monday, May 02, 2022 06:51 PM

```

Majority      XXXXXXXXXXXXXXXXXXXXXXXXXXXXXXXXXXXXXXXXXXXXXXXXXXXXXXXXXXXXXXXXXXXXXXX
              |-----|
              94730   94740   94750   94760   94770   94780   94790   94800
Human         ATGACCAACTACTTTTTGAAATGATGTACTTAGTTTCAAGATTCATAGATTCTGTTATCTATGTAGACAGAATGGTCATG 93635
Kakapo              |-----|
GoldenEagle              |-----|
JapaneseQuail              |-----|
MediumGroundFinch              |-----|
GoodesThornscrubTortoise              |-----|
    
```

```

Majority      XXXXXXXXXXXXXXXXXXXXXXXXXXXXXXXXXXXXXXXXXXXXXXXXXXXXXXXXXXXXXXXXXXXXXXX
              |-----|
              94810   94820   94830   94840   94850   94860   94870   94880
Human         TATATTTTCTATTAGTTGAGTTTTTACATCTTTAGAAATGTAATAATTCAGTATAGTTTGAAAGCGGCACAATTAATAAATT 93715
Kakapo              |-----|
GoldenEagle              |-----|
JapaneseQuail              |-----|
MediumGroundFinch              |-----|
GoodesThornscrubTortoise              |-----|
    
```

```

Majority      XXXXXXXXXXXXXXXXXXXXXXXXXXXXXXXXXXXXXXXXXXXXXXXXXXXXXXXXXXXXXXXXXXXXXXX
              |-----|
              94890   94900   94910   94920   94930   94940   94950   94960
Human         AATTTTCTAACAAGTTGGGAGGTTTGATGGTTGTTTAAATTCATTTGTGTGTACTCTGCTTACCCTGTAGCATGCTC 93795
Kakapo              |-----|
GoldenEagle              |-----|
JapaneseQuail              |-----|
MediumGroundFinch              |-----|
GoodesThornscrubTortoise              |-----|
    
```

```

Majority      XXXXXXXXXXXXXXXXXXXXXXXXXXXXXXXXXXXXXXXXXXXXXXXXXXXXXXXXXXXXXXXXXXXXXXX
              |-----|
              94970   94980   94990   95000   95010   95020   95030   95040
Human         AATAAACACTTCTGTAGCTCTATATTCACCTTTTCTGTCTTTCTCTGCTGCCTTTTCTCTCTCCTCTTCTTTGTTTTCAC 93875
Kakapo              |-----|
GoldenEagle              |-----|
JapaneseQuail              |-----|
MediumGroundFinch              |-----|
GoodesThornscrubTortoise              |-----|
    
```

Monday, May 02, 2022 06:51 PM

```

Majority      XXXXXXXXXXXXXXXXXXXXXXXXXXXXXXXXXXXXXXXXXXXXXXXXXXXXXXXXXXXXXXXXXXXXXXX
                |-----|
                95050   95060   95070   95080   95090   95100   95110   95120
Human         TCCACTGTGCTTCTGAATTCATGTTTATCTCTGCCAGGGTGGGAAAGGAGTAATAATATTACAATTCTATGGCTTTATA 93955
Kakapo                               50676
GoldenEagle                               57960
JapaneseQuail                             43432
MediumGroundFinch                         32462
GoodesThornscrubTortoise                  82946
    
```

```

Majority      XXXXXXXXXXXXXXXXXXXXXXXXXXXXXXXXXXXXXXXXXXXXXXXXXXXXXXXXXXXXXXXXXXXXXXX
                |-----|
                95130   95140   95150   95160   95170   95180   95190   95200
Human         CCATAAATAAATCTAGATGCTGTGAAAATATACCAGCTGGTTTTTTTTTAATTTAAAAGATGGTAACTGCTTTTCAGGAGG 94035
Kakapo                               50676
GoldenEagle                               57960
JapaneseQuail                             43432
MediumGroundFinch                         32462
GoodesThornscrubTortoise                  82946
    
```

```

Majority      XXXXXXXXXXXXXXXXXXXXXXXXXXXXXXXXXXXXXXXXXXXXXXXXXXXXXXXXXXXXXXXXXXXXXXX
                |-----|
                95210   95220   95230   95240   95250   95260   95270   95280
Human         ACACATATTAAACATTTCCACCCCTGTATAATCTACTGCTTTAAAGACATAACTTTTATTGTAGCTTGTTAATTCATC 94115
Kakapo                               50676
GoldenEagle                               57960
JapaneseQuail                             43432
MediumGroundFinch                         32462
GoodesThornscrubTortoise                  82946
    
```

```

Majority      XXXXXXXXXXXXXXXXXXXXXXXXXXXXXXXXXXXXXXXXXXXXXXXXXXXXXXXXXXXXXXXXXXXXXXX
                |-----|
                95290   95300   95310   95320   95330   95340   95350   95360
Human         TCTTTTGTCTTGTGTGTTTTTTTTTTTTTCCAGTAGATTTATGCACTAATAGATCTTTTGGATTTGCCATGCTCTCTTG 94195
Kakapo                               50676
GoldenEagle                               57960
JapaneseQuail                             43432
MediumGroundFinch                         32462
GoodesThornscrubTortoise                  82946
    
```

Monday, May 02, 2022 06:51 PM

```

Majority      XXXXXXXXXXXXXXXXXXXXXXXXXXXXXXXXXXXXXXXXXXXXXXXXXXXXXXXXXXXXXXXXXXXXXXX
                |-----|
                95370   95380   95390   95400   95410   95420   95430   95440
Human         CTGCAGTTTCATCTTTTCATCTTTTGTGTCTGCTAAAGATTCTTACTAATCTTAGACTACCTTGTGAGTTAACAAAAGA 94275
Kakapo                                     50676
GoldenEagle                                     57960
JapaneseQuail                                 43432
MediumGroundFinch                             32462
GoodesThornscrubTortoise                       82946
    
```

```

Majority      XXXXXXXXXXXXXXXXXXXXXXXXXXXXXXXXXXXXXXXXXXXXXXXXXXXXXXXXXXXXXXXXXXXXXXX
                |-----|
                95450   95460   95470   95480   95490   95500   95510   95520
Human         ACTTGATATTACTGGGAAGAAAGAGCAGCATATCTGCATATCAGCATATCTGCTTTTGCCTTGGGTGGGAAGAATGATAT 94355
Kakapo                                     50676
GoldenEagle                                     57960
JapaneseQuail                                 43432
MediumGroundFinch                             32462
GoodesThornscrubTortoise                       82946
    
```

```

Majority      XXXXXXXXXXXXXXXXXXXXXXXXXXXXXXXXXXXXXXXXXXXXXXXXXXXXXXXXXXXXXXXXXXXXXXX
                |-----|
                95530   95540   95550   95560   95570   95580   95590   95600
Human         ACATTCAAGTATTTAAAAACTTAGAGTAATTTGCATTTAAACAACTGAGGATGTTACTACTGTAACCTTGTTAAGCAGTTAC 94435
Kakapo                                     50676
GoldenEagle                                     57960
JapaneseQuail                                 43432
MediumGroundFinch                             32462
GoodesThornscrubTortoise                       82946
    
```

```

Majority      XXXXXXXXXXXXXXXXXXXXXXXXXXXXXXXXXXXXXXXXXXXXXXXXXXXXXXXXXXXXXXXXXXXXXXX
                |-----|
                95610   95620   95630   95640   95650   95660   95670   95680
Human         AATTAGGGTGCTATTTATATTCAAAATATTTTCGGTCAGTTTTTCTAAACAGATATATTGGTATCAAATAACTTTGGAGTT 94515
Kakapo                                     50676
GoldenEagle                                     57960
JapaneseQuail                                 43432
MediumGroundFinch                             32462
GoodesThornscrubTortoise                       82946
    
```

Monday, May 02, 2022 06:51 PM

```

Majority      XXXXXXXXXXXXXXXXXXXXXXXXXXXXXXXXXXXXXXXXXXXXXXXXXXXXXXXXXXXXXXXXXXXXXXX
                |-----|-----|-----|-----|-----|-----|-----|
                95690     95700     95710     95720     95730     95740     95750     95760
Human         ACACATGTTTCTTAGGTTTGTCTGTATAAAAATATCCACACTTATGCAAACCTTACACATAGGATAATAAAAAGTAAA 94595
Kakapo        50676
GoldenEagle   57960
JapaneseQuail 43432
MediumGroundFinch 32462
GoodesThornscrubTortoise 82946
    
```

```

Majority      XXXXXXXXXXXXXXXXXXXXXXXXXXXXXXXXXXXXXXXXXXXXXXXXXXXXXXXXXXXXXXXXXXXXXXX
                |-----|-----|-----|-----|-----|-----|-----|
                95770     95780     95790     95800     95810     95820     95830     95840
Human         TGAAGGAACATAAAATATGTTTACTATACTTAATGTAGTAATTCAGTTACCTCCAAGAAAGAAGTATAATAAGTAAA 94675
Kakapo        50676
GoldenEagle   57960
JapaneseQuail 43432
MediumGroundFinch 32462
GoodesThornscrubTortoise 82946
    
```

```

Majority      XXXXXXXXXXXXXXXXXXXXXXXXXXXXXXXXXXXXXXXXXXXXXXXXXXXXXXXXXXXXXXXXXXXXXXX
                |-----|-----|-----|-----|-----|-----|-----|
                95850     95860     95870     95880     95890     95900     95910     95920
Human         ATAATTTTGTTTTACACTAGTGTCACTGTGTGCATCTGAAGAAGAACCATTAGAGTCAACAGTCTGGGATGATTGGAAGC 94755
Kakapo        50676
GoldenEagle   57960
JapaneseQuail 43432
MediumGroundFinch 32462
GoodesThornscrubTortoise 82946
    
```

```

Majority      XXXXXXXXXXXXXXXXXXXXXXXXXXXXXXXXXXXXXXXXXXXXXXXXXXXXXXXXXXXXXXXXXXXXXXX
                |-----|-----|-----|-----|-----|-----|-----|
                95930     95940     95950     95960     95970     95980     95990     96000
Human         TAGGTGATCTGTGTTTTTTTCTTAAATAACATCGTAGCACAGGAACTCTACCAGCATCAGATAAGTCTAAAGTCTAA 94835
Kakapo        50676
GoldenEagle   57960
JapaneseQuail 43432
MediumGroundFinch 32462
GoodesThornscrubTortoise 82946
    
```

Monday, May 02, 2022 06:51 PM

```

Majority      XXXXXXXXXXXXXXXXXXXXXXXXXXXXXXXXXXXXXXXXXXXXXXXXXXXXXXXXXXXXXXXXXXXXXXX
                |-----|
                96010   96020   96030   96040   96050   96060   96070   96080
Human      AAAACCAATACCAGGGTTAGTGAATAGTAATTGAACAAAGCTTCTCAAGGTGAAGTTTTTCTCAGTAATTAGTGGTGGCT 94915
Kakapo     50676
GoldenEagle 57960
JapaneseQuail 43432
MediumGroundFinch 32462
GoodesThornscrubTortoise 82946
    
```

```

Majority      XXXXXXXXXXXXXXXXXXXXXXXXXXXXXXXXXXXXXXXXXXXXXXXXXXXXXXXXXXXXXXXXXXXXXXX
                |-----|
                96090   96100   96110   96120   96130   96140   96150   96160
Human      ATAATATTTGAAAGTAGGTTCTGTACCTTTTCAGGTGCTCATTGTGGGTGGGATTGCCTTGGGAAGGAGAACTAAGTC 94995
Kakapo     50676
GoldenEagle 57960
JapaneseQuail 43432
MediumGroundFinch 32462
GoodesThornscrubTortoise 82946
    
```

```

Majority      XXXXXXXXXXXXXXXXXXXXXXXXXXXXXXXXXXXXXXXXXXXXXXXXXXXXXXXXXXXXXXXXXXXXXXX
                |-----|
                96170   96180   96190   96200   96210   96220   96230   96240
Human      CTGAGCTGTGTGTGTGGACTTAGTTTTGTGCCAGTTGCTAAGCTGGTGGGAGTCCCAGTCTCCCTAGTGGGAGATAACCA 95075
Kakapo     50676
GoldenEagle 57960
JapaneseQuail 43432
MediumGroundFinch 32462
GoodesThornscrubTortoise 82946
    
```

```

Majority      XXXXXXXXXXXXXXXXXXXXXXXXXXXXXXXXXXXXXXXXXXXXXXXXXXXXXXXXXXXXXXXXXXXXXXX
                |-----|
                96250   96260   96270   96280   96290   96300   96310   96320
Human      GAAACCAGCTCTTCCTGCCTAAGGACTACAGCAGATTCTATACTGTCTTACAGTATGCCTAATACGGCCTTCCTTCCAA 95155
Kakapo     50676
GoldenEagle 57960
JapaneseQuail 43432
MediumGroundFinch 32462
GoodesThornscrubTortoise 82946
    
```

Monday, May 02, 2022 06:51 PM

Majority  
XXXXXXXXXXXXXXXXXXXXXXXXXXXXXXXXXXXXXXXXXXXXXXXXXXXXXXXXXXXXXXXXXXXXXXXXXXXX  
96330 96340 96350 96360 96370 96380 96390 96400  
Human AGCACCAAGTCACTAAAGGGGATTTTGACATTCTAGAATATTTTAAATTCAGTACATCAAATTAACCCAGGCCTTGGCA 95235  
Kakapo 50676  
GoldenEagle 57960  
JapaneseQuail 43432  
MediumGroundFinch 32462  
GoodesThornscrubTortoise 82946

Majority  
XXXXXXXXXXXXXXXXXXXXXXXXXXXXXXXXXXXXXXXXXXXXXXXXXXXXXXXXXXXXXXXXXXXXXXXXXXXX  
96410 96420 96430 96440 96450 96460 96470 96480  
Human TATAGTGAATTGCTTATTAAGTTAGGTAAAAATAAAAAACAGCTTTGTCGTATATTAGTACTCTATGACTCTTAGAGTG 95315  
Kakapo 50676  
GoldenEagle 57960  
JapaneseQuail 43432  
MediumGroundFinch 32462  
GoodesThornscrubTortoise 82946

Majority  
XXXXXXXXXXXXXXXXXXXXXXXXXXXXXXXXXXXXXXXXXXXXXXXXXXXXXXXXXXXXXXXXXXXXXXXXXXXX  
96490 96500 96510 96520 96530 96540 96550 96560  
Human AACAAAGCTAACAGTATTCTTAGGACTTAGCTGCTTTGTTAATAGAGGTCTTAACTTGAATATTTAGAAATAATCAGAAA 95395  
Kakapo 50676  
GoldenEagle 57960  
JapaneseQuail 43432  
MediumGroundFinch 32462  
GoodesThornscrubTortoise 82946

Majority  
XXXXXXXXXXXXXXXXXXXXXXXXXXXXXXXXXXXXXXXXXXXXXXXXXXXXXXXXXXXXXXXXXXXXXXXXXXXX  
96570 96580 96590 96600 96610 96620 96630 96640  
Human AATTATTTTTTGGTATTGAAGATGTATTTTGGAAATGGGTTTTAAAGTACCTACTTAAGGAAGAGATATCTACAGTTTAT 95475  
Kakapo 50676  
GoldenEagle 57960  
JapaneseQuail 43432  
MediumGroundFinch 32462  
GoodesThornscrubTortoise 82946

Monday, May 02, 2022 06:51 PM

```

Majority      XXXXXXXXXXXXXXXXXXXXXXXXXXXXXXXXXXXXXXXXXXXXXXXXXXXXXXXXXXXXXXXXXXXXXXX
                |-----|
                96650   96660   96670   96680   96690   96700   96710   96720
                |-----|
Human          ATTTAACGTTAGCATTTGAAAGCAATGAAGAAAATTTTTCCTTAACCAGGAAGTGTAAATGAATCATTATATTAGAGATTA 95555
Kakapo        50676
GoldenEagle   57960
JapaneseQuail 43432
MediumGroundFinch 32462
GoodesThornscrubTortoise 82946
    
```

```

Majority      XXXXXXXXXXXXXXXXXXXXXXXXXXXXXXXXXXXXXXXXXXXXXXXXXXXXXXXXXXXXXXXXXXXXXXX
                |-----|
                96730   96740   96750   96760   96770   96780   96790   96800
                |-----|
Human          AATTAACACTTTGGAAGCATTTTAGCTCCTAGAGTTAAGGTTAGTATAGTGAAATTATGGTGATTAGCTTAATTCATTCA 95635
Kakapo        50676
GoldenEagle   57960
JapaneseQuail 43432
MediumGroundFinch 32462
GoodesThornscrubTortoise 82946
    
```

```

Majority      XXXXXXXXXXXXXXXXXXXXXXXXXXXXXXXXXXXXXXXXXXXXXXXXXXXXXXXXXXXXXXXXXXXXXXX
                |-----|
                96810   96820   96830   96840   96850   96860   96870   96880
                |-----|
Human          TGTACATCTATTTGTATCACCATATAATTACTAGGGAAAGGACAAATCACTTTTCAAAGCCTCAATGTTATTTGTAAAT 95715
Kakapo        50676
GoldenEagle   57960
JapaneseQuail 43432
MediumGroundFinch 32462
GoodesThornscrubTortoise 82946
    
```

```

Majority      XXXXXXXXXXXXXXXXXXXXXXXXXXXXXXXXXXXXXXXXXXXXXXXXXXXXXXXXXXXXXXXXXXXXXXX
                |-----|
                96890   96900   96910   96920   96930   96940   96950   96960
                |-----|
Human          GGAGGCAATAAGTTCTGCTCTGCTCCCTCACAGGATTATTACAGAGGCTCAAATAGGATAAGTGAAGGAATGCTATGCA 95795
Kakapo        50676
GoldenEagle   57960
JapaneseQuail 43432
MediumGroundFinch 32462
GoodesThornscrubTortoise 82946
    
```

Monday, May 02, 2022 06:51 PM

```

Majority      XXXXXXXXXXXXXXXXXXXXXXXXXXXXXXXXXXXXXXXXXXXXXXXXXXXXXXXXXXXXXXXXXXXXXXX
              |-----|
              96970   96980   96990   97000   97010   97020   97030   97040
              |-----|
Human         ATTAGTTAACTAATGCCAGTTCACAGACTGCCAGATTGCCACAGTAAACTTCATTATCCACAATACATGTTATCCTAA 95875
Kakapo       50676
GoldenEagle  57960
JapaneseQuail 43432
MediumGroundFinch 32462
GoodesThornscrubTortoise 82946
    
```

```

Majority      XXXXXXXXXXXXXXXXXXXXXXXXXXXXXXXXXXXXXXXXXXXXXXXXXXXXXXXXXXXXXXXXXXXXXXX
              |-----|
              97050   97060   97070   97080   97090   97100   97110   97120
              |-----|
Human         TATGTCTTTTGTCTACAAAGAAATACTAATGTTTAAATTTACTAGTTTCATAAAGCAGAAAGATGTAATGCAG 95955
Kakapo       50676
GoldenEagle  57960
JapaneseQuail 43432
MediumGroundFinch 32462
GoodesThornscrubTortoise 82946
    
```

```

Majority      XXXXXXXXXXXXXXXXXXXXXXXXXXXXXXXXXXXXXXXXXXXXXXXXXXXXXXXXXXXXXXXXXXXXXXX
              |-----|
              97130   97140   97150   97160   97170   97180   97190   97200
              |-----|
Human         TTATAGAGAGCATCCAAGCCAGATGAAAAGAAACCATGGATTTAGCTTTATATTTTCTGTTTGAAGTTGATAGCCCAAT 96035
Kakapo       50676
GoldenEagle  57960
JapaneseQuail 43432
MediumGroundFinch 32462
GoodesThornscrubTortoise 82946
    
```

```

Majority      XXXXXXXXXXXXXXXXXXXXXXXXXXXXXXXXXXXXXXXXXXXXXXXXXXXXXXXXXXXXXXXXXXXXXXX
              |-----|
              97210   97220   97230   97240   97250   97260   97270   97280
              |-----|
Human         CATAAATGCACATATTTAATTATAGACTGCACCTAAGATTTTCATATGTATAAAAAAGTTGCTGTGAAACAGGTAATTTT 96115
Kakapo       50676
GoldenEagle  57960
JapaneseQuail 43432
MediumGroundFinch 32462
GoodesThornscrubTortoise 82946
    
```



Monday, May 02, 2022 06:51 PM

```

Majority      XXXXXXXXXXXXXXXXXXXXXXXXXXXXXXXXXXXXXXXXXXXXXXXXXXXXXXXXXXXXXXXXXXXXXXX
                |-----|
                97290   97300   97310   97320   97330   97340   97350   97360
                |-----|
Human          AACACTCAGGAATTTCAAGGCTAAGGAAGAAAGACATACTCTCATGAGCAGCTCTGAACTTCAAACAGGATTTTCTGGCT 96195
Kakapo        50676
GoldenEagle   57960
JapaneseQuail 43432
MediumGroundFinch 32462
GoodesThornscrubTortoise 82946
    
```

```

Majority      XXXXXXXXXXXXXXXXXXXXXXXXXXXXXXXXXXXXXXXXXXXXXXXXXXXXXXXXXXXXXXXXXXXXXXX
                |-----|
                97370   97380   97390   97400   97410   97420   97430   97440
                |-----|
Human          GCCTTAATATATATAAATGGAGCCTAAATCTGAAAACGTTTTTTTTCATTGAGAAAGTACAGAATTCAGTGAAATTGA 96275
Kakapo        50676
GoldenEagle   57960
JapaneseQuail 43432
MediumGroundFinch 32462
GoodesThornscrubTortoise 82946
    
```

```

Majority      XXXXXXXXXXXXXXXXXXXXXXXXXXXXXXXXXXXXXXXXXXXXXXXXXXXXXXXXXXXXXXXXXXXXXXX
                |-----|
                97450   97460   97470   97480   97490   97500   97510   97520
                |-----|
Human          GTATACTAGGAAATCTGATGGCAAGAATTCAGCAGAAAGTCTTAATTTTAAACCGTAATATTCATTGATTATGCAAACCC 96355
Kakapo        50676
GoldenEagle   57960
JapaneseQuail 43432
MediumGroundFinch 32462
GoodesThornscrubTortoise 82946
    
```

```

Majority      XXXXXXXXXXXXXXXXXXXXXXXXXXXXXXXXXXXXXXXXXXXXXXXXXXXXXXXXXXXXXXXXXXXXXXX
                |-----|
                97530   97540   97550   97560   97570   97580   97590   97600
                |-----|
Human          TTAGTTTTATAGTTATTCTTTGTTATTTTGAATAGCTTCCTTTAAATTTTCTAGTTTCAGATTTTGCAAATAAAAGTGT 96435
Kakapo        50676
GoldenEagle   57960
JapaneseQuail 43432
MediumGroundFinch 32462
GoodesThornscrubTortoise 82946
    
```

Monday, May 02, 2022 06:51 PM

```

Majority      XXXXXXXXXXXXXXXXXXXXXXXXXXXXXXXXXXXXXXXXXXXXXXXXXXXXXXXXXXXXXXXXXXXXXXX
                |-----|
                97610   97620   97630   97640   97650   97660   97670   97680
Human         ACATGTTAAAGTTATAGAGTATTAGATTATTCACATTAAGAAGTGTCAAATACGCGGAAAAATAAAACCGTAATGAACA 96515
Kakapo                               50676
GoldenEagle                               57960
JapaneseQuail                             43432
MediumGroundFinch                         32462
GoodesThornscrubTortoise                  82946
    
```

```

Majority      XXXXXXXXXXXXXXXXXXXXXXXXXXXXXXXXXXXXXXXXXXXXXXXXXXXXXXXXXXXXXXXXXXXXXXX
                |-----|
                97690   97700   97710   97720   97730   97740   97750   97760
Human         CCTATGCACTTCACTCAACTATATCACTACCTAACATATCCATATTTTAAACGTAATTATATATTAGTTGAAAGAAAAC 96595
Kakapo                               50676
GoldenEagle                               57960
JapaneseQuail                             43432
MediumGroundFinch                         32462
GoodesThornscrubTortoise                  82946
    
```

```

Majority      XXXXXXXXXXXXXXXXXXXXXXXXXXXXXXXXXXXXXXXXXXXXXXXXXXXXXXXXXXXXXXXXXXXXXXX
                |-----|
                97770   97780   97790   97800   97810   97820   97830   97840
Human         GTTACAGAATGAACTGAAATCCCATATGAACCTCTTTCTGATCTTAGTTCAAACCTTATTCTTTCCAAGAGGTAATTGT 96675
Kakapo                               50676
GoldenEagle                               57960
JapaneseQuail                             43432
MediumGroundFinch                         32462
GoodesThornscrubTortoise                  82946
    
```

```

Majority      XXXXXXXXXXXXXXXXXXXXXXXXXXXXXXXXXXXXXXXXXXXXXXXXXXXXXXXXXXXXXXXXXXXXXXX
                |-----|
                97850   97860   97870   97880   97890   97900   97910   97920
Human         TACCTTCAGTTTAGTATTTTATTATTCAGTGGTTGCTTTTCAAGAGGAATTTGTCCTATATTCTGTAGGCTAAATTCTTT 96755
Kakapo                               50676
GoldenEagle                               57960
JapaneseQuail                             43432
MediumGroundFinch                         32462
GoodesThornscrubTortoise                  82946
    
```

Monday, May 02, 2022 06:51 PM

```

Majority      XXXXXXXXXXXXXXXXXXXXXXXXXXXXXXXXXXXXXXXXXXXXXXXXXXXXXXXXXXXXXXXXXXXXXXXX
              |-----|-----|-----|-----|-----|-----|-----|
              97930   97940   97950   97960   97970   97980   97990   98000
Human         GTTTTCCTAGTTATAAAAATGGCAAATAATATGATATTGGGTGTTTAAATAGTACAATATTGTTCAAAACACACTTTAT 96835
Kakapo        50676
GoldenEagle   57960
JapaneseQuail 43432
MediumGroundFinch 32462
GoodesThornscrubTortoise 82946
    
```

```

Majority      XXXXXXXXXXXXXXXXXXXXXXXXXXXXXXXXXXXXXXXXXXXXXXXXXXXXXXXXXXXXXXXXXXXXXXXX
              |-----|-----|-----|-----|-----|-----|-----|
              98010   98020   98030   98040   98050   98060   98070   98080
Human         AATTTTAAACAGACTGTTTGGACATTGATAATTCCCCTATCAAATCTCATGACATTTAACCAATTTTAAACAAGGATTTT 96915
Kakapo        50676
GoldenEagle   57960
JapaneseQuail 43432
MediumGroundFinch 32462
GoodesThornscrubTortoise 82946
    
```

```

Majority      XXXXXXXXXXXXXXXXXXXXXXXXXXXXXXXXXXXXXXXXXXXXXXXXXXXXXXXXXXXXXXXXXXXXXXXX
              |-----|-----|-----|-----|-----|-----|-----|
              98090   98100   98110   98120   98130   98140   98150   98160
Human         AAATGTGTTTAAAGAAATAAGTCATTTGGGCCTCAGGTTTCTCTTAAGGATGTAACAAGGAGCTATATCATTGGTATTT 96995
Kakapo        50676
GoldenEagle   57960
JapaneseQuail 43432
MediumGroundFinch 32462
GoodesThornscrubTortoise 82946
    
```

```

Majority      XXXXXXXXXXXXXXXXXXXXXXXXXXXXXXXXXXXXXXXXXXXXXXXXXXXXXXXXXXXXXXXXXXXXXXXX
              |-----|-----|-----|-----|-----|-----|-----|
              98170   98180   98190   98200   98210   98220   98230   98240
Human         TAGACGCTGAATTATGTGTAAGGTCCTTAAATACAAACATACCCTTTGTAGCTTCACAGAGCCACCCGTTTGCACCTTCT 97075
Kakapo        50676
GoldenEagle   57960
JapaneseQuail 43432
MediumGroundFinch 32462
GoodesThornscrubTortoise 82946
    
```

Monday, May 02, 2022 06:51 PM

```

Majority      XXXXXXXXXXXXXXXXXXXXXXXXXXXXXXXXXXXXXXXXXXXXXXXXXXXXXXXXXXXXXXXXXXXXXXX
              |-----|
              | 98250 | 98260 | 98270 | 98280 | 98290 | 98300 | 98310 | 98320 |
              |-----|
Human          CTCGCTTTTCTTCCTCCTCTTTGGCTCCCATTTCAATGGACAGAAAGACTATGTGGCATCTCTATTTTCATTCACTTGG 97155
Kakapo        50676
GoldenEagle   57960
JapaneseQuail 43432
MediumGroundFinch 32462
GoodesThornscrubTortoise 82946
    
```

```

Majority      XXXXXXXXXXXXXXXXXXXXXXXXXXXXXXXXXXXXXXXXXXXXXXXXXXXXXXXXXXXXXXXXXXXXXXX
              |-----|
              | 98330 | 98340 | 98350 | 98360 | 98370 | 98380 | 98390 | 98400 |
              |-----|
Human          TTTATTGCTCTGGTATGTTGTATAGGTTTTGAATCAGAAAATTTTAACATTTTGTAGATATTTCAAACATACAAAAATA 97235
Kakapo        50676
GoldenEagle   57960
JapaneseQuail 43432
MediumGroundFinch 32462
GoodesThornscrubTortoise 82946
    
```

```

Majority      XXXXXXXXXXXXXXXXXXXXXXXXXXXXXXXXXXXXXXXXXXXXXXXXXXXXXXXXXXXXXXXXXXXXXXX
              |-----|
              | 98410 | 98420 | 98430 | 98440 | 98450 | 98460 | 98470 | 98480 |
              |-----|
Human          GAAGAATATTTAACAAACCCTTGTCAGCTTCAGTTAGCAACTTAGATCTTCCTCGTTTCCTCCACCCAATTCTCATCTCC 97315
Kakapo        50676
GoldenEagle   57960
JapaneseQuail 43432
MediumGroundFinch 32462
GoodesThornscrubTortoise 82946
    
```

```

Majority      XXXXXXXXXXXXXXXXXXXXXXXXXXXXXXXXXXXXXXXXXXXXXXXXXXXXXXXXXXXXXXXXXXXXXXX
              |-----|
              | 98490 | 98500 | 98510 | 98520 | 98530 | 98540 | 98550 | 98560 |
              |-----|
Human          TTTATTAATGCAGATCCCAGATATATTTTATCAAGAAATTTGTAGCATATATTTGTGTTGTTTATTTCGTGGTCATAGT 97395
Kakapo        50676
GoldenEagle   57960
JapaneseQuail 43432
MediumGroundFinch 32462
GoodesThornscrubTortoise 82946
    
```

Monday, May 02, 2022 06:51 PM

```

Majority      XXXXXXXXXXXXXXXXXXXXXXXXXXXXXXXXXXXXXXXXXXXXXXXXXXXXXXXXXXXXXXXXXXXXXXX
                |-----|
                98570   98580   98590   98600   98610   98620   98630   98640
Human         TGCTTTCTCTAATATCTAGACTAGCCTAGCTGGTCAATACTACTTTTCTTCAATCCTAGAACCTCCCTATTAAAAATAT 97475
Kakapo                |-----|
GoldenEagle                |-----|
JapaneseQuail                |-----|
MediumGroundFinch                |-----|
GoodesThornscrubTortoise                |-----|
    
```

```

Majority      XXXXXXXXXXXXXXXXXXXXXXXXXXXXXXXXXXXXXXXXXXXXXXXXXXXXXXXXXXXXXXXXXXXXXXX
                |-----|
                98650   98660   98670   98680   98690   98700   98710   98720
Human         AGTCACCAGACCAGTGGCAAATTAGTATCACCTAGGAGTTTATTAGAAACTCAGTCTATGAGCCTACTGAATCTACATT 97555
Kakapo                |-----|
GoldenEagle                |-----|
JapaneseQuail                |-----|
MediumGroundFinch                |-----|
GoodesThornscrubTortoise                |-----|
    
```

```

Majority      XXXXXXXXXXXXXXXXXXXXXXXXXXXXXXXXXXXXXXXXXXXXXXXXXXXXXXXXXXXXXXXXXXXXXXX
                |-----|
                98730   98740   98750   98760   98770   98780   98790   98800
Human         TGACAAGATTGGCAGGTGATGCATTTGGACATAAGTTGGAGAAGCACTCAATGCATTTTTTCAGTTCTATAAAAAATCAGC 97635
Kakapo                |-----|
GoldenEagle                |-----|
JapaneseQuail                |-----|
MediumGroundFinch                |-----|
GoodesThornscrubTortoise                |-----|
    
```

```

Majority      XXXXXXXXXXXXXXXXXXXXXXXXXXXXXXXXXXXXXXXXXXXXXXXXXXXXXXXXXXXXXXXXXXXXXXX
                |-----|
                98810   98820   98830   98840   98850   98860   98870   98880
Human         TTCAAAGTTTTTTCCTGAGTGTGGAAATTATTTTCATTAGTAATTTTAAGTTATGCAGATATAGTTAATACCAAGAAATAA 97715
Kakapo                |-----|
GoldenEagle                |-----|
JapaneseQuail                |-----|
MediumGroundFinch                |-----|
GoodesThornscrubTortoise                |-----|
    
```

Monday, May 02, 2022 06:51 PM

```

Majority      XXXXXXXXXXXXXXXXXXXXXXXXXXXXXXXXXXXXXXXXXXXXXXXXXXXXXXXXXXXXXXXXXXXXXXX
              |-----|
              98890   98900   98910   98920   98930   98940   98950   98960
Human         TTGAACTGAAAAGGAACCCGGATATCTAGTTTTTAAACAGCTGTTTAAAGATAAACAGTTCTAGAGATCAAATGAATAGT 97795
Kakapo                               50676
GoldenEagle                               57960
JapaneseQuail                             43432
MediumGroundFinch                         32462
GoodesThornscrubTortoise                  82946
    
```

```

Majority      XXXXXXXXXXXXXXXXXXXXXXXXXXXXXXXXXXXXXXXXXXXXXXXXXXXXXXXXXXXXXXXXXXXXXXX
              |-----|
              98970   98980   98990   99000   99010   99020   99030   99040
Human         TTAGCAACATATTTATTGTAACTTACCTGTAGTTAGAATCCAAGTCCCTGGCTTTCCAATCCAGTCTTCAATGTATAATA 97875
Kakapo                               50676
GoldenEagle                               57960
JapaneseQuail                             43432
MediumGroundFinch                         32462
GoodesThornscrubTortoise                  82946
    
```

```

Majority      XXXXXXXXXXXXXXXXXXXXXXXXXXXXXXXXXXXXXXXXXXXXXXXXXXXXXXXXXXXXXXXXXXXXXXX
              |-----|
              99050   99060   99070   99080   99090   99100   99110   99120
Human         CTGATCAAAAGAAATACAGGCCTGCTATTATTCATAAATTTAAACTATTATGTACAAGTTGATAGCTTATAATAGAAATC 97955
Kakapo                               50676
GoldenEagle                               57960
JapaneseQuail                             43432
MediumGroundFinch                         32462
GoodesThornscrubTortoise                  82946
    
```

```

Majority      XXXXXXXXXXXXXXXXXXXXXXXXXXXXXXXXXXXXXXXXXXXXXXXXXXXXXXXXXXXXXXXXXXXXXXX
              |-----|
              99130   99140   99150   99160   99170   99180   99190   99200
Human         AGTATGATTAGTGTTAAAAGTCAAATTTAGTCTGACAGGGAAGGAATGTCCATGTGAACTGATTTTTTTAATAGAATGC 98035
Kakapo                               50676
GoldenEagle                               57960
JapaneseQuail                             43432
MediumGroundFinch                         32462
GoodesThornscrubTortoise                  82946
    
```

Monday, May 02, 2022 06:51 PM

```

Majority      XXXXXXXXXXXXXXXXXXXXXXXXXXXXXXXXXXXXXXXXXXXXXXXXXXXXXXXXXXXXXXXXXXXXXXX
                |-----|
                99210   99220   99230   99240   99250   99260   99270   99280
Human         AAATTAATACTCAATTCCTGATTTGTTTATTACATTTTGTGGTTTAAATGAAATGATACTCAGGTCATTTTCATAAATAGC 98115
Kakapo        50676
GoldenEagle   57960
JapaneseQuail 43432
MediumGroundFinch 32462
GoodesThornscrubTortoise 82946
    
```

```

Majority      XXXXXXXXXXXXXXXXXXXXXXXXXXXXXXXXXXXXXXXXXXXXXXXXXXXXXXXXXXXXXXXXXXXXXXX
                |-----|
                99290   99300   99310   99320   99330   99340   99350   99360
Human         TTTTCTATTAATGCTTCCTCAGTCACATTCTCTATTTCCTATTGCATAGCACAGTCTAACAGTTGAAATGCCTAAGCCTTA 98195
Kakapo        50676
GoldenEagle   57960
JapaneseQuail 43432
MediumGroundFinch 32462
GoodesThornscrubTortoise 82946
    
```

```

Majority      XXXXXXXXXXXXXXXXXXXXXXXXXXXXXXXXXXXXXXXXXXXXXXXXXXXXXXXXXXXXXXXXXXXXXXX
                |-----|
                99370   99380   99390   99400   99410   99420   99430   99440
Human         CTGAATGATGACTGATATTCTCTGTGAGAGTTAGAGCTGTACTATAAATATACATTACCTGTGCAAAGTATGCCTTCAGG 98275
Kakapo        50676
GoldenEagle   57960
JapaneseQuail 43432
MediumGroundFinch 32462
GoodesThornscrubTortoise 82946
    
```

```

Majority      XXXXXXXXXXXXXXXXXXXXXXXXXXXXXXXXXXXXXXXXXXXXXXXXXXXXXXXXXXXXXXXXXXXXXXX
                |-----|
                99450   99460   99470   99480   99490   99500   99510   99520
Human         GGCTATTCCCATAACCTTAGCAAAATTTTAAATATTCTTATGGCTAGCAATCTTATCTATTGTCATGCTTACTATTT 98355
Kakapo        50676
GoldenEagle   57960
JapaneseQuail 43432
MediumGroundFinch 32462
GoodesThornscrubTortoise 82946
    
```

Monday, May 02, 2022 06:51 PM

```
Majority      XXXXXXXXXXXXXXXXXXXXXXXXXXXXXXXXXXXXXXXXXXXXXXXXXXXXXXXXXXXXXXXXXXXXXXX
                |-----|-----|-----|-----|-----|-----|-----|
                99530     99540     99550     99560     99570     99580     99590     99600
Human         CCTGCTTACCACCCCATTCTCTCTCAACCTTGTGCTGCATTAGCTGTCCATCACTTAACACTGTTTATTTCTCTGTT 98435
Kakapo         50676
GoldenEagle   57960
JapaneseQuail 43432
MediumGroundFinch 32462
GoodesThornscrubTortoise 82946
```

```
Majority      XXXXXXXXXXXXXXXXXXXXXXXXXXXXXXXXXXXXXXXXXXXXXXXXXXXXXXXXXXXXXXXXXXXXXXX
                |-----|-----|-----|-----|-----|-----|-----|
                99610     99620     99630     99640     99650     99660     99670     99680
Human         TTTCTTCCATCATTCTCTTCTTGCAACTAAATGATTAGACTTTTTATAACCATAATCAACCAGTTAGATTCTTTTAT 98515
Kakapo         50676
GoldenEagle   57960
JapaneseQuail 43432
MediumGroundFinch 32462
GoodesThornscrubTortoise 82946
```

```
Majority      XXXXXXXXXXXXXXXXXXXXXXXXXXXXXXXXXXXXXXXXXXXXXXXXXXXXXXXXXXXXXXXXXXXXXXX
                |-----|-----|-----|-----|-----|-----|-----|
                99690     99700     99710     99720     99730     99740     99750     99760
Human         TTGTGGTTATTGAGTTGATAAATGATAGTGCATTTTATGTAATATTCAGGTGTTATGCTATTTTATCTGGTTCACTTTA 98595
Kakapo         50676
GoldenEagle   57960
JapaneseQuail 43432
MediumGroundFinch 32462
GoodesThornscrubTortoise 82946
```

```
Majority      XXXXXXXXXXXXXXXXXXXXXXXXXXXXXXXXXXXXXXXXXXXXXXXXXXXXXXXXXXXXXXXXXXXXXXX
                |-----|-----|-----|-----|-----|-----|-----|
                99770     99780     99790     99800     99810     99820     99830     99840
Human         AAACCTCCCTCCCCCACTCCCTTTTTTGTGGGTTTTTTTTTATTATTATTATTTCCAGTTTGTGTTGTTTTGCTT 98675
Kakapo         50676
GoldenEagle   57960
JapaneseQuail 43432
MediumGroundFinch 32462
GoodesThornscrubTortoise 82946
```



Monday, May 02, 2022 06:51 PM

```

Majority      XXXXXXXXXXXXXXXXXXXXXXXXXXXXXXXXXXXXXXXXXXXXXXXXXXXXXXXXXXXXXXXXXXXXXXX
                |-----|
                99850   99860   99870   99880   99890   99900   99910   99920
Human         TTTAACTTCTGAGATTGCAGTGGTTCAGATGGTTGAAATCACTAGTAGTGATTACATGAAGCATTTCATGTATTTATTA 98755
Kakapo        50676
GoldenEagle   57960
JapaneseQuail 43432
MediumGroundFinch 32462
GoodesThornscrubTortoise 82946
    
```

```

Majority      XXXXXXXXXXXXXXXXXXXXXXXXXXXXXXXXXXXXXXXXXXXXXXXXXXXXXXXXXXXXXXXXXXXXXXX
                |-----|
                99930   99940   99950   99960   99970   99980   99990   100000
Human         CTGGTATATTCAACTATGGTGGAGGGAAATTGGTCGAAGAATTACGGTTAAAGAGCTCCTTTAAAAGGAGATTTGTAGA 98835
Kakapo        50676
GoldenEagle   57960
JapaneseQuail 43432
MediumGroundFinch 32462
GoodesThornscrubTortoise 82946
    
```

```

Majority      XXXXXXXXXXXXXXXXXXXXXXXXXXXXXXXXXXXXXXXXXXXXXXXXXXXXXXXXXXXXXXXXXXXXXXX
                |-----|
                100010  100020  100030  100040  100050  100060  100070  100080
Human         ATTCTAAAATGTGATTCTGATTCATATAGTCATGATTCTTAGAAATTAGCTACAGGAAGAGATAGAAACATTGCTATAGT 98915
Kakapo        50676
GoldenEagle   57960
JapaneseQuail 43432
MediumGroundFinch 32462
GoodesThornscrubTortoise 82946
    
```

```

Majority      XXXXXXXXXXXXXXXXXXXXXXXXXXXXXXXXXXXXXXXXXXXXXXXXXXXXXXXXXXXXXXXXXXXXXXX
                |-----|
                100090  100100  100110  100120  100130  100140  100150  100160
Human         TGCTTTGCCCTAAGTTTGGAGTTTTATAGTGTAAATATATATAAATAGCTCTAATTATAAATACACTTTTACTCTGGAA 98995
Kakapo        50676
GoldenEagle   57960
JapaneseQuail 43432
MediumGroundFinch 32462
GoodesThornscrubTortoise 82946
    
```

Monday, May 02, 2022 06:51 PM

```
Majority          XXXXXXXXXXXXXXXXXXXXXXXXXXXXXXXXXXXXXXXXXXXXXXXXXXXXXXXXXXXXXXXXXXXXXXX
                  |-----|-----|-----|-----|-----|-----|-----|
                  100170  100180  100190  100200  100210  100220  100230  100240
Human             AAAGCATAGACATTGACATAAGAGACATTTAAAAACCATTATTTTCTCATCTGTAAAATGGAGAGAATTACTTCATATGT 99075
Kakapo                                   50676
GoldenEagle                                   57960
JapaneseQuail                                  43432
MediumGroundFinch                             32462
GoodesThornscrubTortoise                       82946
```

```
Majority          XXXXXXXXXXXXXXXXXXXXXXXXXXXXXXXXXXXXXXXXXXXXXXXXXXXXXXXXXXXXXXXXXXXXXXX
                  |-----|-----|-----|-----|-----|-----|-----|
                  100250  100260  100270  100280  100290  100300  100310  100320
Human             TCACTTATAAGGATTATGTGAAATACTGTTCCATTCCATTAGTAGTTTTTCTTTTCCTCTAATTGGGGGTGGGGGCAGTT 99155
Kakapo                                   50676
GoldenEagle                                   57960
JapaneseQuail                                  43432
MediumGroundFinch                             32462
GoodesThornscrubTortoise                       82946
```

```
Majority          XXXXXXXXXXXXXXXXXXXXXXXXXXXXXXXXXXXXXXXXXXXXXXXXXXXXXXXXXXXXXXXXXXXXXXX
                  |-----|-----|-----|-----|-----|-----|-----|
                  100330  100340  100350  100360  100370  100380  100390  100400
Human             TTTGGCATTCTATTTATGGAAGGTGTTTTTTCCCTAAGATCATTTTGATGTCTCAGAAGACATTTGCTATGTACGTTGG 99235
Kakapo                                   50676
GoldenEagle                                   57960
JapaneseQuail                                  43432
MediumGroundFinch                             32462
GoodesThornscrubTortoise                       82946
```

```
Majority          XXXXXXXXXXXXXXXXXXXXXXXXXXXXXXXXXXXXXXXXXXXXXXXXXXXXXXXXXXXXXXXXXXXXXXX
                  |-----|-----|-----|-----|-----|-----|-----|
                  100410  100420  100430  100440  100450  100460  100470  100480
Human             ACATTTGCCATGTACATTGTAGAGAATACAAAGATAAACAGAACCACAGTACAGCTGGTTCTATTAGACATTGAAAATGC 99315
Kakapo                                   50676
GoldenEagle                                   57960
JapaneseQuail                                  43432
MediumGroundFinch                             32462
GoodesThornscrubTortoise                       82946
```

Monday, May 02, 2022 06:51 PM

Majority  
XXXXXXXXXXXXXXXXXXXXXXXXXXXXXXXXXXXXXXXXXXXXXXXXXXXXXXXXXXXXXXXXXXXXXXXXXXXX

100490 100500 100510 100520 100530 100540 100550 100560

Human ATATTTCTAGCATATTTAATATATATTAGGGAACAATTTAAGCATAATGTGAATTTTCATGTTTACTGAAGATTTTCATCCTGAG 99395  
Kakapo 50676  
GoldenEagle 57960  
JapaneseQuail 43432  
MediumGroundFinch 32462  
GoodesThornscrubTortoise 82946

Majority  
XXXXXXXXXXXXXXXXXXXXXXXXXXXXXXXXXXXXXXXXXXXXXXXXXXXXXXXXXXXXXXXXXXXXXXXXXXXX

100570 100580 100590 100600 100610 100620 100630 100640

Human AAACAAATGAAAGCAGAAAATTACAACCAACTGAACCAGCTGTGTAAGAAATATATATATGGTGTGCACACATGTACATA 99475  
Kakapo 50676  
GoldenEagle 57960  
JapaneseQuail 43432  
MediumGroundFinch 32462  
GoodesThornscrubTortoise 82946

Majority  
XXXXXXXXXXXXXXXXXXXXXXXXXXXXXXXXXXXXXXXXXXXXXXXXXXXXXXXXXXXXXXXXXXXXXXXXXXXX

100650 100660 100670 100680 100690 100700 100710 100720

Human CCTCAGACATCTATTAGCATTTCTCAGTTTCCACAAGTTAAAAGCCACGCTCATCCATATCTGGTGCTAATAACTTCCTA 99555  
Kakapo 50676  
GoldenEagle 57960  
JapaneseQuail 43432  
MediumGroundFinch 32462  
GoodesThornscrubTortoise 82946

Majority  
XXXXXXXXXXXXXXXXXXXXXXXXXXXXXXXXXXXXXXXXXXXXXXXXXXXXXXXXXXXXXXXXXXXXXXXXXXXX

100730 100740 100750 100760 100770 100780 100790 100800

Human TCCAATTTTCAGATAGCTGTTTTCAACACATCTGACACCTTCTTTTTTTCAAGCAAACCTTCAGGTCTTTTTCAAGATAAAG 99635  
Kakapo 50676  
GoldenEagle 57960  
JapaneseQuail 43432  
MediumGroundFinch 32462  
GoodesThornscrubTortoise 82946

Monday, May 02, 2022 06:51 PM

```

Majority      XXXXXXXXXXXXXXXXXXXXXXXXXXXXXXXXXXXXXXXXXXXXXXXXXXXXXXXXXXXXXXXXXXXXXXX
                |-----|
                100810  100820  100830  100840  100850  100860  100870  100880
                |-----|
Human          TCATTTATAGTAGTGTCTATATATTTCTTAACCATTTAACATGTAAACTGTGCTGCCTTTTAAGAAATTAATTCTATCCT 99715
Kakapo        50676
GoldenEagle   57960
JapaneseQuail 43432
MediumGroundFinch 32462
GoodesThornscrubTortoise 82946
    
```

```

Majority      XXXXXXXXXXXXXXXXXXXXXXXXXXXXXXXXXXXXXXXXXXXXXXXXXXXXXXXXXXXXXXXXXXXXXXX
                |-----|
                100890  100900  100910  100920  100930  100940  100950  100960
                |-----|
Human          TTTTAGTGTGCAGAGTTGAAGATTTTGAGTGTGTGCCCTAACCTTATCATTTTCCTCATAAGTCCTGTGGTTTTTATTGT 99795
Kakapo        50676
GoldenEagle   57960
JapaneseQuail 43432
MediumGroundFinch 32462
GoodesThornscrubTortoise 82946
    
```

```

Majority      XXXXXXXXXXXXXXXXXXXXXXXXXXXXXXXXXXXXXXXXXXXXXXXXXXXXXXXXXXXXXXXXXXXXXXX
                |-----|
                100970  100980  100990  101000  101010  101020  101030  101040
                |-----|
Human          ATGATTTTGCATAGTGTGGCAATTCTTGAAATGCTTATGTTGTGTTATAGTATAACTGACTTACTACTTTCAAATAGCT 99875
Kakapo        50676
GoldenEagle   57960
JapaneseQuail 43432
MediumGroundFinch 32462
GoodesThornscrubTortoise 82946
    
```

```

Majority      XXXXXXXXXXXXXXXXXXXXXXXXXXXXXXXXXXXXXXXXXXXXXXXXXXXXXXXXXXXXXXXXXXXXXXX
                |-----|
                101050  101060  101070  101080  101090  101100  101110  101120
                |-----|
Human          TCTAGTCTGATTCATGTTATGACAGTATACAGTATAGCAAATAAGGACATCAGGGAACAGGAGGCTGAGCATATCACCA 99955
Kakapo        50676
GoldenEagle   57960
JapaneseQuail 43432
MediumGroundFinch 32462
GoodesThornscrubTortoise 82946
    
```

Monday, May 02, 2022 06:51 PM

```

Majority      XXXXXXXXXXXXXXXXXXXXXXXXXXXXXXXXXXXXXXXXXXXXXXXXXXXXXXXXXXXXXXXXXXXXXXX
                |-----|
                101130  101140  101150  101160  101170  101180  101190  101200
Human         TTTACCAATGGTAGCTTGAGCAAGGCACTTCATTTATCGAAGTCCATTTTCTCATCTGTACAATGGAGGTGATGATAGTA 100035
Kakapo                                               50676
GoldenEagle                                         57960
JapaneseQuail                                       43432
MediumGroundFinch                                   32462
GoodesThornscrubTortoise                           82946
    
```

```

Majority      XXXXXXXXXXXXXXXXXXXXXXXXXXXXXXXXXXXXXXXXXXXXXXXXXXXXXXXXXXXXXXXXXXXXXXX
                |-----|
                101210  101220  101230  101240  101250  101260  101270  101280
Human         CATGTCTTTTCTGTCTTGTGTATTTTGTAGTTTCAAGTAAGATATGAAATATGCTGTAGAAATACAGGGTTGGGAATATC 100115
Kakapo                                               50676
GoldenEagle                                         57960
JapaneseQuail                                       43432
MediumGroundFinch                                   32462
GoodesThornscrubTortoise                           82946
    
```

```

Majority      XXXXXXXXXXXXXXXXXXXXXXXXXXXXXXXXXXXXXXXXXXXXXXXXXXXXXXXXXXXXXXXXXXXXXXX
                |-----|
                101290  101300  101310  101320  101330  101340  101350  101360
Human         TAGTGGTACAAAATCAACTTTTGGCCCAATTTTAAGGTGAGATAATTATGAGACATTTTTCGACCTCAAAGTCTTTGTT 100195
Kakapo                                               50676
GoldenEagle                                         57960
JapaneseQuail                                       43432
MediumGroundFinch                                   32462
GoodesThornscrubTortoise                           82946
    
```

```

Majority      XXXXXXXXXXXXXXXXXXXXXXXXXXXXXXXXXXXXXXXXXXXXXXXXXXXXXXXXXXXXXXXXXXXXXXX
                |-----|
                101370  101380  101390  101400  101410  101420  101430  101440
Human         CTTTCTCTCTACACCATTGTGAATAACACAGTGTATATATGAGATTAATTTATTACCTCGACTTTCATTTTGTGTTTG 100275
Kakapo                                               50676
GoldenEagle                                         57960
JapaneseQuail                                       43432
MediumGroundFinch                                   32462
GoodesThornscrubTortoise                           82946
    
```

Monday, May 02, 2022 06:51 PM

| Majority                 | XXXXXXXXXXXXXXXXXXXXXXXXXXXXXXXXXXXXXXXXXXXXXXXXXXXXXXXXXXXXXXXXXXXXXXXXXXXX    |        |        |        |        |        |        |        |        |
|--------------------------|---------------------------------------------------------------------------------|--------|--------|--------|--------|--------|--------|--------|--------|
|                          | 101450                                                                          | 101460 | 101470 | 101480 | 101490 | 101500 | 101510 | 101520 |        |
| Human                    | TAAAGTAGTTTAAATTTTTATATCTATTATAAAGTTAACTGCAGGAGTGTACCTGCAGTTAACTTTATACAGTTAAGAA |        |        |        |        |        |        |        | 100355 |
| Kakapo                   |                                                                                 |        |        |        |        |        |        |        | 50676  |
| GoldenEagle              |                                                                                 |        |        |        |        |        |        |        | 57960  |
| JapaneseQuail            |                                                                                 |        |        |        |        |        |        |        | 43432  |
| MediumGroundFinch        |                                                                                 |        |        |        |        |        |        |        | 32462  |
| GoodesThornscrubTortoise |                                                                                 |        |        |        |        |        |        |        | 82946  |

| Majority                 | XXXXXXXXXXXXXXXXXXXXXXXXXXXXXXXXXXXXXXXXXXXXXXXXXXXXXXXXXXXXXXXXXXXXXXXXXXXX  |        |        |        |        |        |        |        |        |
|--------------------------|-------------------------------------------------------------------------------|--------|--------|--------|--------|--------|--------|--------|--------|
|                          | 101530                                                                        | 101540 | 101550 | 101560 | 101570 | 101580 | 101590 | 101600 |        |
| Human                    | GAGGTTGGTTTCAGTTTAAAGATTGTATGTCAAGTGTAAACATCCATTATTATGCTTTCAGTAAATAGCTCCTAAAA |        |        |        |        |        |        |        | 100435 |
| Kakapo                   |                                                                               |        |        |        |        |        |        |        | 50676  |
| GoldenEagle              |                                                                               |        |        |        |        |        |        |        | 57960  |
| JapaneseQuail            |                                                                               |        |        |        |        |        |        |        | 43432  |
| MediumGroundFinch        |                                                                               |        |        |        |        |        |        |        | 32462  |
| GoodesThornscrubTortoise |                                                                               |        |        |        |        |        |        |        | 82946  |

| Majority                 | XXXXXXXXXXXXXXXXXXXXXXXXXXXXXXXXXXXXXXXXXXXXXXXXXXXXXXXXXXXXXXXXXXXXXXXXXXXX   |        |        |        |        |        |        |        |        |
|--------------------------|--------------------------------------------------------------------------------|--------|--------|--------|--------|--------|--------|--------|--------|
|                          | 101610                                                                         | 101620 | 101630 | 101640 | 101650 | 101660 | 101670 | 101680 |        |
| Human                    | ATATGGATTACTATCAACTTTCAGGAAAATAGCTCCTAAAAATATGGATTACTACCAACTTTCAGGAAAATAGCTCCT |        |        |        |        |        |        |        | 100515 |
| Kakapo                   |                                                                                |        |        |        |        |        |        |        | 50676  |
| GoldenEagle              |                                                                                |        |        |        |        |        |        |        | 57960  |
| JapaneseQuail            |                                                                                |        |        |        |        |        |        |        | 43432  |
| MediumGroundFinch        |                                                                                |        |        |        |        |        |        |        | 32462  |
| GoodesThornscrubTortoise |                                                                                |        |        |        |        |        |        |        | 82946  |

| Majority                 | XXXXXXXXXXXXXXXXXXXXXXXXXXXXXXXXXXXXXXXXXXXXXXXXXXXXXXXXXXXXXXXXXXXXXXXXXXXX       |        |        |        |        |        |        |        |        |
|--------------------------|------------------------------------------------------------------------------------|--------|--------|--------|--------|--------|--------|--------|--------|
|                          | 101690                                                                             | 101700 | 101710 | 101720 | 101730 | 101740 | 101750 | 101760 |        |
| Human                    | AGAAATATGGATTACTAGCCACATAAATGCTAACATTGCTTTTATTATTATTATTATTATTATTATTATTAGACACAGTCTT |        |        |        |        |        |        |        | 100595 |
| Kakapo                   |                                                                                    |        |        |        |        |        |        |        | 50676  |
| GoldenEagle              |                                                                                    |        |        |        |        |        |        |        | 57960  |
| JapaneseQuail            |                                                                                    |        |        |        |        |        |        |        | 43432  |
| MediumGroundFinch        |                                                                                    |        |        |        |        |        |        |        | 32462  |
| GoodesThornscrubTortoise |                                                                                    |        |        |        |        |        |        |        | 82946  |

Monday, May 02, 2022 06:51 PM

```

Majority      XXXXXXXXXXXXXXXXXXXXXXXXXXXXXXXXXXXXXXXXXXXXXXXXXXXXXXXXXXXXXXXXXXXXXXX
                |-----|
                101770   101780   101790   101800   101810   101820   101830   101840
Human         GCTCTGTCACCCAGGCTGGAGTGCGGTGGTATTATCTCGGCTCACTGCAACCTCCACCTCTCGGGTTCAAGCAATTCTCC 100675
Kakapo                                     50676
GoldenEagle                                     57960
JapaneseQuail                                 43432
MediumGroundFinch                             32462
GoodesThornscrubTortoise                       82946
    
```

```

Majority      XXXXXXXXXXXXXXXXXXXXXXXXXXXXXXXXXXXXXXXXXXXXXXXXXXXXXXXXXXXXXXXXXXXXXXX
                |-----|
                101850   101860   101870   101880   101890   101900   101910   101920
Human         TGCCTCAGCCTTCCGAGTAGCTGGAATTACAGGCACCCACCACCCAGCTAATTTTGTATTTTGTAGTAGAGACAG 100755
Kakapo                                     50676
GoldenEagle                                     57960
JapaneseQuail                                 43432
MediumGroundFinch                             32462
GoodesThornscrubTortoise                       82946
    
```

```

Majority      XXXXXXXXXXXXXXXXXXXXXXXXXXXXXXXXXXXXXXXXXXXXXXXXXXXXXXXXXXXXXXXXXXXXXXX
                |-----|
                101930   101940   101950   101960   101970   101980   101990   102000
Human         GGTTTTACCATGTGACCAGGCTGGTTTCGAACTCCTGACCTCAAATGATCCACCTGCCTCAGCCTCCCAAAGTCTGGGA 100835
Kakapo                                     50676
GoldenEagle                                     57960
JapaneseQuail                                 43432
MediumGroundFinch                             32462
GoodesThornscrubTortoise                       82946
    
```

```

Majority      XXXXXXXXXXXXXXXXXXXXXXXXXXXXXXXXXXXXXXXXXXXXXXXXXXXXXXXXXXXXXXXXXXXXXXX
                |-----|
                102010   102020   102030   102040   102050   102060   102070   102080
Human         TTACAGGTGTGAGCCACCGCTCCAGCCTATTTGCTAATATTTAACCTCTTGAGAGTCTTTAATCTTTTTTTCAACAAG 100915
Kakapo                                     50676
GoldenEagle                                     57960
JapaneseQuail                                 43432
MediumGroundFinch                             32462
GoodesThornscrubTortoise                       82946
    
```

Monday, May 02, 2022 06:51 PM

```

Majority      XXXXXXXXXXXXXXXXXXXXXXXXXXXXXXXXXXXXXXXXXXXXXXXXXXXXXXXXXXXXXXXXXXXXXXX
                |-----|
                |102090|  |102100|  |102110|  |102120|  |102130|  |102140|  |102150|  |102160|
                |-----|
Human          TG TTCATTACCTGCTATGTGCCAGCTTAGATGCTTTGGATGAAATACAGGTTGGTGC GAAAGTAATTGCGATTTT TGCCG 100995
Kakapo                                     50676
GoldenEagle                                     57960
JapaneseQuail                                   43432
MediumGroundFinch                             32462
GoodesThornscrubTortoise                      82946
    
```

```

Majority      XXXXXXXXXXXXXXXXXXXXXXXXXXXXXXXXXXXXXXXXXXXXXXXXXXXXXXXXXXXXXXXXXXXXXXX
                |-----|
                |102170|  |102180|  |102190|  |102200|  |102210|  |102220|  |102230|  |102240|
                |-----|
Human          TTAAAATTAGAAAAACCACAATTACTTTTGACCAACCTAAATAACTAAACACAATTTCTTCCTATCATGGGGCTTTC 101075
Kakapo                                     50676
GoldenEagle                                     57960
JapaneseQuail                                   43432
MediumGroundFinch                             32462
GoodesThornscrubTortoise                      82946
    
```

```

Majority      XXXXXXXXXXXXXXXXXXXXXXXXXXXXXXXXXXXXXXXXXXXXXXXXXXXXXXXXXXXXXXXXXXXXXXX
                |-----|
                |102250|  |102260|  |102270|  |102280|  |102290|  |102300|  |102310|  |102320|
                |-----|
Human          GTTCAGTATGAGATAAGTAAAGAATTATATGGGTTGATAAATTTCTGGAGGA ACTATTGGGTGTTATTACAGTGTGCTC 101155
Kakapo                                     50676
GoldenEagle                                     57960
JapaneseQuail                                   43432
MediumGroundFinch                             32462
GoodesThornscrubTortoise                      82946
    
```

```

Majority      XXXXXXXXXXXXXXXXXXXXXXXXXXXXXXXXXXXXXXXXXXXXXXXXXXXXXXXXXXXXXXXXXXXXXXX
                |-----|
                |102330|  |102340|  |102350|  |102360|  |102370|  |102380|  |102390|  |102400|
                |-----|
Human          AATCTTTAGCAGTTAGGAAAGGATTCTTGAAGGTAGTTGTATTACCTGGGTTGGAGGTAAGTGTGGGGACACAAGTGTT 101235
Kakapo                                     50676
GoldenEagle                                     57960
JapaneseQuail                                   43432
MediumGroundFinch                             32462
GoodesThornscrubTortoise                      82946
    
```



Monday, May 02, 2022 06:51 PM

```

Majority      XXXXXXXXXXXXXXXXXXXXXXXXXXXXXXXXXXXXXXXXXXXXXXXXXXXXXXXXXXXXXXXXXXXXXXX
              |-----|
              |102410| |102420| |102430| |102440| |102450| |102460| |102470| |102480|
              |-----|
Human          AGAAACAGAACAGTTTGTTTAAAGTTGGGGACAAAAAAGGACCAGAATCAAGATTACGGCACCTGGAGAAAGTTAAGC 101315
Kakapo        50676
GoldenEagle   57960
JapaneseQuail 43432
MediumGroundFinch 32462
GoodesThornscrubTortoise 82946
    
```

```

Majority      XXXXXXXXXXXXXXXXXXXXXXXXXXXXXXXXXXXXXXXXXXXXXXXXXXXXXXXXXXXXXXXXXXXXXXX
              |-----|
              |102490| |102500| |102510| |102520| |102530| |102540| |102550| |102560|
              |-----|
Human          ATGGCTCGGTCATAAATTAGGAGACAAGGAACAAATAGAGAAATACGTTTGGATAGAATAGTCAGATTATAGGCTGTGCT 101395
Kakapo        50676
GoldenEagle   57960
JapaneseQuail 43432
MediumGroundFinch 32462
GoodesThornscrubTortoise 82946
    
```

```

Majority      XXXXXXXXXXXXXXXXXXXXXXXXXXXXXXXXXXXXXXXXXXXXXXXXXXXXXXXXXXXXXXXXXXXXXXX
              |-----|
              |102570| |102580| |102590| |102600| |102610| |102620| |102630| |102640|
              |-----|
Human          AAGTTGTTTGGGCTCCACTAGGGTTTCTAAATGCAGTTATTGGTAAACTGGACTTAGGAGAAGGGACAGGGTTGACATGA 101475
Kakapo        50676
GoldenEagle   57960
JapaneseQuail 43432
MediumGroundFinch 32462
GoodesThornscrubTortoise 82946
    
```

```

Majority      XXXXXXXXXXXXXXXXXXXXXXXXXXXXXXXXXXXXXXXXXXXXXXXXXXXXXXXXXXXXXXXXXXXXXXX
              |-----|
              |102650| |102660| |102670| |102680| |102690| |102700| |102710| |102720|
              |-----|
Human          CAAATCTAGTGAATTTATGTTTCATTAATAATATCCCTTTTGAATTGATTTAGTTTTTGTATGTTTCTTTTTATAATTCCA 101555
Kakapo        50676
GoldenEagle   57960
JapaneseQuail 43432
MediumGroundFinch 32462
GoodesThornscrubTortoise 82946
    
```

Monday, May 02, 2022 06:51 PM

```
Majority      XXXXXXXXXXXXXXXXXXXXXXXXXXXXXXXXXXXXXXXXXXXXXXXXXXXXXXXXXXXXXXXXXXXXXXXX
              |-----|-----|-----|-----|-----|-----|-----|
              102730  102740  102750  102760  102770  102780  102790  102800
Human         AAAAATCATACAAATAAGTTAAACTTATCCATCTAAAAGCTGCACACAAAACCTTGATGTTAGATTCTTTTAAAATTACAA 101635
Kakapo       50676
GoldenEagle  57960
JapaneseQuail 43432
MediumGroundFinch 32462
GoodesThornscrubTortoise 82946
```

```
Majority      XXXXXXXXXXXXXXXXXXXXXXXXXXXXXXXXXXXXXXXXXXXXXXXXXXXXXXXXXXXXXXXXXXXXXXXX
              |-----|-----|-----|-----|-----|-----|-----|
              102810  102820  102830  102840  102850  102860  102870  102880
Human         AATTAAGACTTCCAAAAGAATCTTGTGAATAAGAGTAAAAGAAAGACCCTTACTCAGTAAAGCTGCGTAATACTTTGGC 101715
Kakapo       50676
GoldenEagle  57960
JapaneseQuail 43432
MediumGroundFinch 32462
GoodesThornscrubTortoise 82946
```

```
Majority      XXXXXXXXXXXXXXXXXXXXXXXXXXXXXXXXXXXXXXXXXXXXXXXXXXXXXXXXXXXXXXXXXXXXXXXX
              |-----|-----|-----|-----|-----|-----|-----|
              102890  102900  102910  102920  102930  102940  102950  102960
Human         AGTTTGAACCCATGGCCATGCCTCTCTGTGTGATAAGGATTTGGCAAACCATGGAAGAAACATGCATGTTTTTGAATTG 101795
Kakapo       50676
GoldenEagle  57960
JapaneseQuail 43432
MediumGroundFinch 32462
GoodesThornscrubTortoise 82946
```

```
Majority      XXXXXXXXXXXXXXXXXXXXXXXXXXXXXXXXXXXXXXXXXXXXXXXXXXXXXXXXXXXXXXXXXXXXXXXX
              |-----|-----|-----|-----|-----|-----|-----|
              102970  102980  102990  103000  103010  103020  103030  103040
Human         TCTTTCATGGTAACTTAAAACATTTTTTCATGAAACATGGATATATATCCTTAGAAAACGCAAAACATAAAGCTTGTA 101875
Kakapo       50676
GoldenEagle  57960
JapaneseQuail 43432
MediumGroundFinch 32462
GoodesThornscrubTortoise 82946
```

Monday, May 02, 2022 06:51 PM

```

Majority      XXXXXXXXXXXXXXXXXXXXXXXXXXXXXXXXXXXXXXXXXXXXXXXXXXXXXXXXXXXXXXXXXXXXXXX
                |-----|
                103050  103060  103070  103080  103090  103100  103110  103120
Human         AGTTATAAGACAAGATTTATCTCTTTTTTTTTTTTTTCTGAGAGAGAGTCTTGCTCTGTTGCCAGGCCGGAGTGCAACA 101955
Kakapo                                     50676
GoldenEagle                                     57960
JapaneseQuail                                 43432
MediumGroundFinch                             32462
GoodesThornscrubTortoise                       82946
    
```

```

Majority      XXXXXXXXXXXXXXXXXXXXXXXXXXXXXXXXXXXXXXXXXXXXXXXXXXXXXXXXXXXXXXXXXXXXXXX
                |-----|
                103130  103140  103150  103160  103170  103180  103190  103200
Human         GTGTGATCTCTGCTCACTGCACCTCCGCTCCCGGGTTCAAGCAATTCTCCTGCCTCAGCCTCCTGAGTAGCTGGGACT 102035
Kakapo                                     50676
GoldenEagle                                     57960
JapaneseQuail                                 43432
MediumGroundFinch                             32462
GoodesThornscrubTortoise                       82946
    
```

```

Majority      XXXXXXXXXXXXXXXXXXXXXXXXXXXXXXXXXXXXXXXXXXXXXXXXXXXXXXXXXXXXXXXXXXXXXXX
                |-----|
                103210  103220  103230  103240  103250  103260  103270  103280
Human         ACAGGCGTGTGCCCAAGCCCAGCTAATTTTTTGTATCTTTAGTAGAGACGGTTTCACCATGTTGCCAGGCTGGTCT 102115
Kakapo                                     50676
GoldenEagle                                     57960
JapaneseQuail                                 43432
MediumGroundFinch                             32462
GoodesThornscrubTortoise                       82946
    
```

```

Majority      XXXXXXXXXXXXXXXXXXXXXXXXXXXXXXXXXXXXXXXXXXXXXXXXXXXXXXXXXXXXXXXXXXXXXXX
                |-----|
                103290  103300  103310  103320  103330  103340  103350  103360
Human         CGAACTCCTGACCTCAAGTGATCTACCTGCCTCAGCCTTCTAAAGTGTTGGGATTACAGGCATGAGCCATGGCACCCGGC 102195
Kakapo                                     50676
GoldenEagle                                     57960
JapaneseQuail                                 43432
MediumGroundFinch                             32462
GoodesThornscrubTortoise                       82946
    
```

Monday, May 02, 2022 06:51 PM

```

Majority      XXXXXXXXXXXXXXXXXXXXXXXXXXXXXXXXXXXXXXXXXXXXXXXXXXXXXXXXXXXXXXXXXXXXXXX
              |-----|-----|-----|-----|-----|-----|-----|
              103370  103380  103390  103400  103410  103420  103430  103440
Human         CAAGATGAAATGTCAAGGCCATTTTAGCCACTATGCTTTTAAGACTACTTAAAGCTGTGCTTTCAGGTCTCCCCAGGAAT 102275
Kakapo              50676
GoldenEagle       57960
JapaneseQuail     43432
MediumGroundFinch 32462
GoodesThornscrubTortoise 82946
    
```

```

Majority      XXXXXXXXXXXXXXXXXXXXXXXXXXXXXXXXXXXXXXXXXXXXXXXXXXXXXXXXXXXXXXXXXXXXXXX
              |-----|-----|-----|-----|-----|-----|-----|
              103450  103460  103470  103480  103490  103500  103510  103520
Human         ACTTGTTCACTCTATACTATTGCTGCTGCTGTTCTGGCTTGAGAATTTTGAGAATCACTAAGATACAATTTTAAGTTTTG 102355
Kakapo              50676
GoldenEagle       57960
JapaneseQuail     43432
MediumGroundFinch 32462
GoodesThornscrubTortoise 82946
    
```

```

Majority      XXXXXXXXXXXXXXXXXXXXXXXXXXXXXXXXXXXXXXXXXXXXXXXXXXXXXXXXXXXXXXXXXXXXXXX
              |-----|-----|-----|-----|-----|-----|-----|
              103530  103540  103550  103560  103570  103580  103590  103600
Human         ACATGTAAATTATTTGGTTGAGTAGAAAGAATTAATGTAGATAAGCAAAAACCCCTTTATAAAAAATGCTTACCCTTTAA 102435
Kakapo              50676
GoldenEagle       57960
JapaneseQuail     43432
MediumGroundFinch 32462
GoodesThornscrubTortoise 82946
    
```

```

Majority      XXXXXXXXXXXXXXXXXXXXXXXXXXXXXXXXXXXXXXXXXXXXXXXXXXXXXXXXXXXXXXXXXXXXXXX
              |-----|-----|-----|-----|-----|-----|-----|
              103610  103620  103630  103640  103650  103660  103670  103680
Human         AAAATGTTGAATCCTCACAGTATGATTAATACTACTTGTAAAAGTGTCTGTAAACCATAATGTATTTTTTAGATAATTT 102515
Kakapo              50676
GoldenEagle       57960
JapaneseQuail     43432
MediumGroundFinch 32462
GoodesThornscrubTortoise 82946
    
```

Monday, May 02, 2022 06:51 PM

Majority  
XXXXXXXXXXXXXXXXXXXXXXXXXXXXXXXXXXXXXXXXXXXXXXXXXXXXXXXXXXXXXXXXXXXXXXXXXXXX  
103690 103700 103710 103720 103730 103740 103750 103760  
Human GAGTAGAATTATACGTGCAATATATTCTTGAGTTGTGACCAACAAGAAACAGATTAATGATTGAAAATTCACCATACA 102595  
Kakapo 50676  
GoldenEagle 57960  
JapaneseQuail 43432  
MediumGroundFinch 32462  
GoodesThornscrubTortoise 82946

Majority  
XXXXXXXXXXXXXXXXXXXXXXXXXXXXXXXXXXXXXXXXXXXXXXXXXXXXXXXXXXXXXXXXXXXXXXXXXXXX  
103770 103780 103790 103800 103810 103820 103830 103840  
Human TTACTACCTATGTCTCTCCACCTGCTATCTACTTCCAATTTTTTATATATATAAAAGTCATTAAAGTCATTTGTAATTGA 102675  
Kakapo 50676  
GoldenEagle 57960  
JapaneseQuail 43432  
MediumGroundFinch 32462  
GoodesThornscrubTortoise 82946

Majority  
XXXXXXXXXXXXXXXXXXXXXXXXXXXXXXXXXXXXXXXXXXXXXXXXXXXXXXXXXXXXXXXXXXXXXXXXXXXX  
103850 103860 103870 103880 103890 103900 103910 103920  
Human GTTTGTTTTTTTTTCTTGAGACAGGGTCTCACTCTGTCAACCAGGCTGGAGTGCAAATGGCATGATCACAGCTCACTGCA 102755  
Kakapo 50676  
GoldenEagle 57960  
JapaneseQuail 43432  
MediumGroundFinch 32462  
GoodesThornscrubTortoise 82946

Majority  
XXXXXXXXXXXXXXXXXXXXXXXXXXXXXXXXXXXXXXXXXXXXXXXXXXXXXXXXXXXXXXXXXXXXXXXXXXXX  
103930 103940 103950 103960 103970 103980 103990 104000  
Human GCCTCAACCTCCCAGGTTTCGATAGATCCTCCCACCTCAGTCCCCACAGGCATGCATCACCATGCCTGACTAGTTTTTGT 102835  
Kakapo 50676  
GoldenEagle 57960  
JapaneseQuail 43432  
MediumGroundFinch 32462  
GoodesThornscrubTortoise 82946

Monday, May 02, 2022 06:51 PM

```

Majority      XXXXXXXXXXXXXXXXXXXXXXXXXXXXXXXXXXXXXXXXXXXXXXXXXXXXXXXXXXXXXXXXXXXXXXX
                |-----|
                104010   104020   104030   104040   104050   104060   104070   104080
                |-----|
Human          GTTTTTTTGTAGAGACAAGGTTTGGCCATGTTGCCAGACTGGTCTCAAACCTGGGCCAAAGCCATCCACCTGCCTCGGC 102915
Kakapo                                               50676
GoldenEagle                                         57960
JapaneseQuail                                       43432
MediumGroundFinch                                   32462
GoodesThornscrubTortoise                           82946
    
```

```

Majority      XXXXXXXXXXXXXXXXXXXXXXXXXXXXXXXXXXXXXXXXXXXXXXXXXXXXXXXXXXXXXXXXXXXXXXX
                |-----|
                104090   104100   104110   104120   104130   104140   104150   104160
                |-----|
Human          TTCCAATGTGCTGGGATTACATGTGTGAGCCACCACCCAGTCATGAGAATTATTTTAAATCAGGTAAACAAAATGTC 102995
Kakapo                                               50676
GoldenEagle                                         57960
JapaneseQuail                                       43432
MediumGroundFinch                                   32462
GoodesThornscrubTortoise                           82946
    
```

```

Majority      XXXXXXXXXXXXXXXXXXXXXXXXXXXXXXXXXXXXXXXXXXXXXXXXXXXXXXXXXXXXXXXXXXXXXXX
                |-----|
                104170   104180   104190   104200   104210   104220   104230   104240
                |-----|
Human          TGTGGGAATATTGAGCTTTATGATAGATACCTAAGTTTTCCCAAAATAAATTGTGTTAGCATTTCAGTGAATCACTATAC 103075
Kakapo                                               50676
GoldenEagle                                         57960
JapaneseQuail                                       43432
MediumGroundFinch                                   32462
GoodesThornscrubTortoise                           82946
    
```

```

Majority      XXXXXXXXXXXXXXXXXXXXXXXXXXXXXXXXXXXXXXXXXXXXXXXXXXXXXXXXXXXXXXXXXXXXXXX
                |-----|
                104250   104260   104270   104280   104290   104300   104310   104320
                |-----|
Human          TTAACCTAGAAATCTAGGTTACCAATAACAGTCTCTTTCAGGTTTTTTCTTTTCCTGTGTCTTTCTTTTACTAAAATC 103155
Kakapo                                               50676
GoldenEagle                                         57960
JapaneseQuail                                       43432
MediumGroundFinch                                   32462
GoodesThornscrubTortoise                           82946
    
```

Monday, May 02, 2022 06:51 PM

---

Majority XXXXXXXXXXXXXXXXXXXXXXXXXXXXXXXXXXXXXXXXXXXXXXXXXXXXXXXXXXXXXXXXXXXXXXXXXXXX  
104330 104340 104350 104360 104370 104380 104390 104400

Human ATTCATAACTGGGATGACTTATGGAGTTGATACCTTAGGTCAAATCCAATTTAGAACTCCCAAAGCCTGTCAAATTT 103235  
Kakapo 50676  
GoldenEagle 57960  
JapaneseQuail 43432  
MediumGroundFinch 32462  
GoodesThornscrubTortoise 82946

---

Majority XXXXXXXXXXXXXXXXXXXXXXXXXXXXXXXXXXXXXXXXXXXXXXXXXXXXXXXXXXXXXXXXXXXX  
104410 104420 104430

Human TGACACATACTTTAAATGAACTGTTATTGAGTAGATATA 103274  
Kakapo 50676  
GoldenEagle 57960  
JapaneseQuail 43432  
MediumGroundFinch 32462  
GoodesThornscrubTortoise 82946
