# Supplementary material for: PTBP2 – a gene with relevance for both Anorexia nervosa and body weight regulation
Source: PubMed Central journal article supplement (PMC9184595; doi:10.1038/s41398-022-02018-5), 2022-06-09
Supplement: 41398_2022_2018_MOESM3_ESM.pdf [file 41398_2022_2018_MOESM3_ESM.pdf]

Dienstag, 3. Mai 2022 08:37

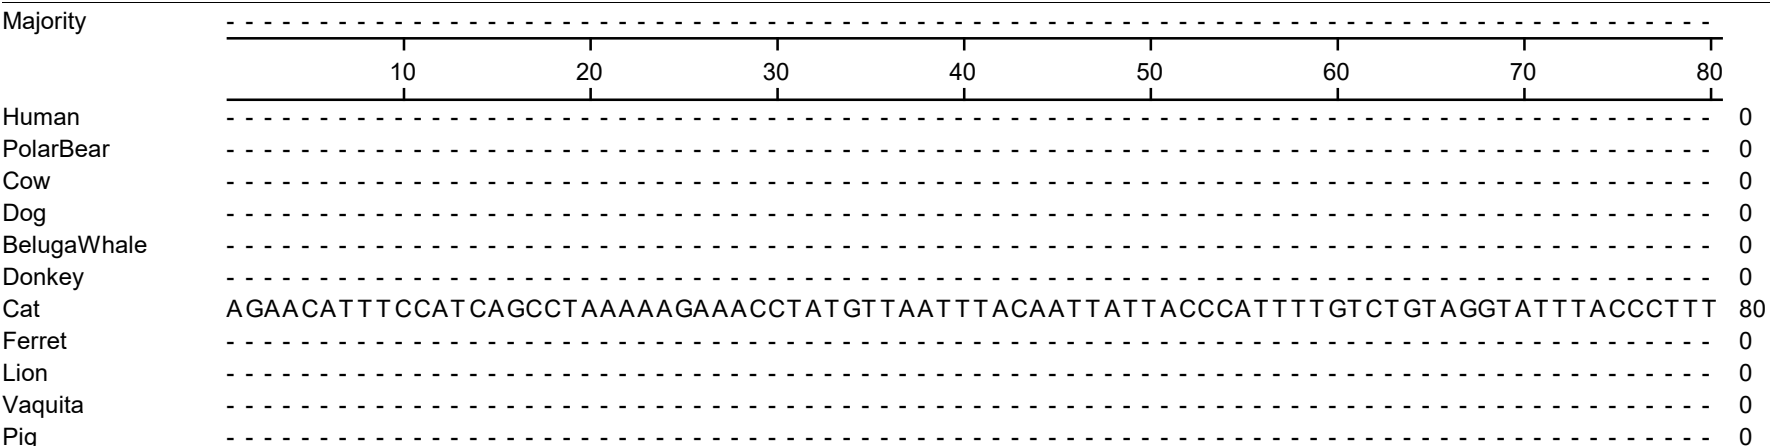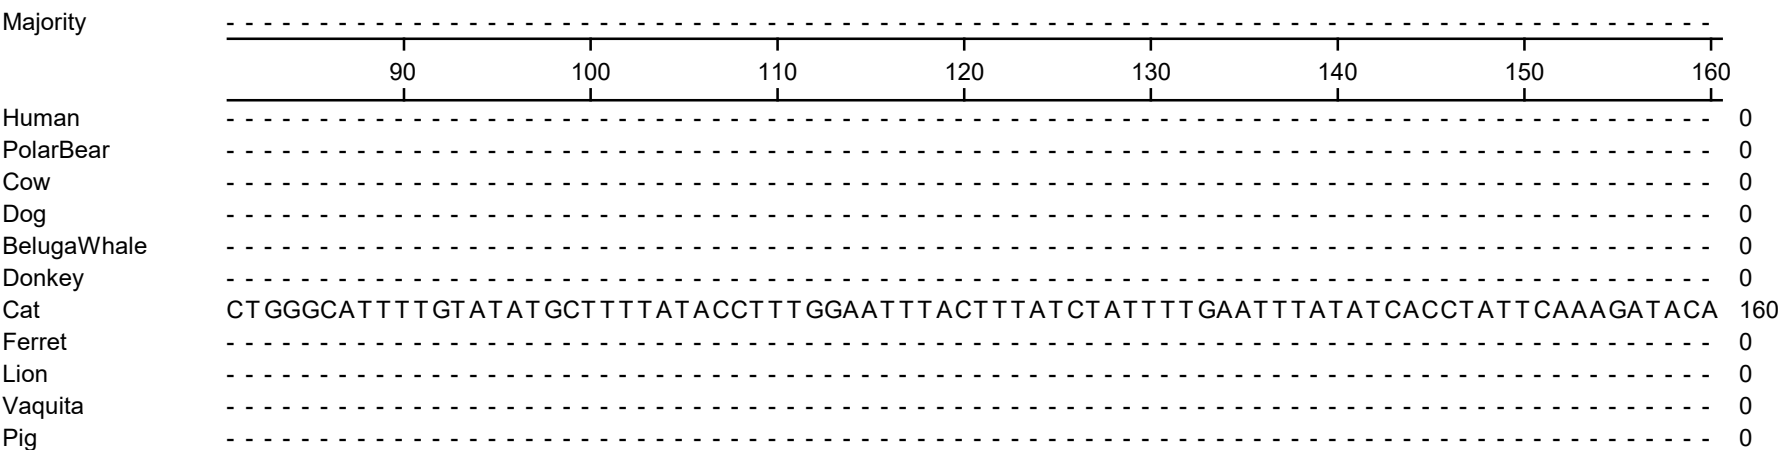









Dienstag, 3. Mai 2022 08:37

| Majority    | 810                                                                               | 820 | 830 | 840 | 850 | 860 | 870 | 880 |     |
|-------------|-----------------------------------------------------------------------------------|-----|-----|-----|-----|-----|-----|-----|-----|
| Human       | -----                                                                             |     |     |     |     |     |     |     | 0   |
| PolarBear   | -----                                                                             |     |     |     |     |     |     |     | 0   |
| Cow         | -----                                                                             |     |     |     |     |     |     |     | 0   |
| Dog         | GCCGGCGCGCTCGGCTCTTCCGCCGCCGCGCTGCCGCGCGCTGCCCGTGCGCTCCGGCACCTTCGGCAATTTCCGTC     |     |     |     |     |     |     |     | 89  |
| BelugaWhale | -----                                                                             |     |     |     |     |     |     |     | 0   |
| Donkey      | -----                                                                             |     |     |     |     |     |     |     | 0   |
| Cat         | CTAAATTTGTTACCGGTTTCTTGTGCGAGTGAATAACAGTTAATAAGTAAAAGAAGTATGATGATAGCAGTCTTTATTGAA |     |     |     |     |     |     |     | 880 |
| Ferret      | -----                                                                             |     |     |     |     |     |     |     | 0   |
| Lion        | -----                                                                             |     |     |     |     |     |     |     | 0   |
| Vaquita     | -----                                                                             |     |     |     |     |     |     |     | 0   |
| Pig         | -----                                                                             |     |     |     |     |     |     |     | 0   |

| Majority    | 890                                                                              | 900 | 910 | 920 | 930 | 940 | 950 | 960 |     |
|-------------|----------------------------------------------------------------------------------|-----|-----|-----|-----|-----|-----|-----|-----|
| Human       | -----                                                                            |     |     |     |     |     |     |     | 0   |
| PolarBear   | -----                                                                            |     |     |     |     |     |     |     | 0   |
| Cow         | -----                                                                            |     |     |     |     |     |     |     | 0   |
| Dog         | GGGCCCCGGCCGCCATTTTCTCGCCGCTTGTGTGTCTCGCTGGCTGCGTGGCTCGGTTCTGTGAGCGAAGCTTTGTC- C |     |     |     |     |     |     |     | 168 |
| BelugaWhale | -----                                                                            |     |     |     |     |     |     |     | 16  |
| Donkey      | -----                                                                            |     |     |     |     |     |     |     | 0   |
| Cat         | TATTTACCATAAACCATCACTGAACTAGAGAGATACTTTACATACATTAAGGCATTTGGACCTCACAACCATCTAGGATG |     |     |     |     |     |     |     | 960 |
| Ferret      | -----                                                                            |     |     |     |     |     |     |     | 19  |
| Lion        | -----                                                                            |     |     |     |     |     |     |     | 0   |
| Vaquita     | -----                                                                            |     |     |     |     |     |     |     | 0   |
| Pig         | -----                                                                            |     |     |     |     |     |     |     | 26  |

Dienstag, 3. Mai 2022 08:37

| Majority    | ----- TTTX- ----- XG- - - XTX- - XC- TX- - G- X- |           |          |            |             |           |                   |        |        |                     |       |            |        |      |         |     |    |     |     |    |    |     |        |         |     |
|-------------|--------------------------------------------------|-----------|----------|------------|-------------|-----------|-------------------|--------|--------|---------------------|-------|------------|--------|------|---------|-----|----|-----|-----|----|----|-----|--------|---------|-----|
|             | 970                                              | 980       | 990      | 1000       | 1010        | 1020      | 1030              | 1040   |        |                     |       |            |        |      |         |     |    |     |     |    |    |     |        |         |     |
| Human       | -----                                            |           |          |            |             |           |                   |        | 0      |                     |       |            |        |      |         |     |    |     |     |    |    |     |        |         |     |
| PolarBear   | -----                                            |           |          |            |             |           |                   |        | 0      |                     |       |            |        |      |         |     |    |     |     |    |    |     |        |         |     |
| Cow         | ----- GACTTAGAGTTCTGCTTTACATACGTTAGGACT          |           |          |            |             |           |                   |        | 33     |                     |       |            |        |      |         |     |    |     |     |    |    |     |        |         |     |
| Dog         | GGTT                                             | CGGCAAT   | GGA- - - | CGGGT      | ACGT        | AGT       | GCGGCCGGCGAGGAGGT | GT     | GT     | GAGCGGGGCGCCGGGCCGT | CCT   | GCCGCC     | 244    |      |         |     |    |     |     |    |    |     |        |         |     |
| BelugaWhale | AGTGT                                            | CACACAGCT | ACTAAAT  | GAAAAGAGCT | CAAATTT     | GAACCCAGT | CTTTAAT           | CAGCAT | GCTTTT | GT                  | GAT   | ATACATT    | 96     |      |         |     |    |     |     |    |    |     |        |         |     |
| Donkey      | -----                                            |           |          |            |             |           |                   |        | 0      |                     |       |            |        |      |         |     |    |     |     |    |    |     |        |         |     |
| Cat         | AAGT                                             | CCCT      | ATTTT    | AAATCCCT   | TTTTT       | CATTTTT   | CAGTAATAAAT       | CCCAT  | ATTTT  | CAGTAACAGAACT       | TTTTT | CCTGGAGGAG | 1040   |      |         |     |    |     |     |    |    |     |        |         |     |
| Ferret      | AGTCTT                                           | GCACTTTA- | - - -    | TTAGGAG    | AAAAAGCAAA- | GAAAAAT   | GT                | GT     | TTTTT  | GT                  | GAAT  | ATTGTA     | ACTTC- | TTTT | GGCGCCT | 93  |    |     |     |    |    |     |        |         |     |
| Lion        | ----- TTTTCAGTAACAGAACTTTTTTCTGGAGGAG            |           |          |            |             |           |                   |        | 32     |                     |       |            |        |      |         |     |    |     |     |    |    |     |        |         |     |
| Vaquita     | -----                                            |           |          |            |             |           |                   |        | 0      |                     |       |            |        |      |         |     |    |     |     |    |    |     |        |         |     |
| Pig         | TTGT                                             | GAT       | GT       | GT         | GT          | GCAT      | CAGCCT            | CACT   | CCT    | GACT                | CT    | AT         | GCT    | GT   | AT      | TTT | GT | CCT | TTT | GT | CT | CTT | CCCCTT | CATTTCA | 106 |

| Majority    | T- - - - XA- X- X- XCT- - - G- X- CX- XG- TX- X- X- T- - XX- - - - TXXXXTTTTXAAXTAGXA- TTXTTXAAXTXCXTTTT |           |         |      |           |         |            |        |              |         |        |        |        |           |         |           |        |     |
|-------------|----------------------------------------------------------------------------------------------------------|-----------|---------|------|-----------|---------|------------|--------|--------------|---------|--------|--------|--------|-----------|---------|-----------|--------|-----|
|             | 1050                                                                                                     | 1060      | 1070    | 1080 | 1090      | 1100    | 1110       | 1120   |              |         |        |        |        |           |         |           |        |     |
| Human       | -----                                                                                                    |           |         |      |           |         |            |        | 0            |         |        |        |        |           |         |           |        |     |
| PolarBear   | -----                                                                                                    |           |         |      |           |         |            |        | 0            |         |        |        |        |           |         |           |        |     |
| Cow         | TTTA                                                                                                     | AGGT      | CAGT    | CAT  | CTGGGAT   | GAAGGT  | CTT        | ATTTTT | TAA- - - - - | TCCCAT  | TTTTT  | ACTT   | ACAGT  | AGAGGAAAT | CCCATTA | 107       |        |     |
| Dog         | GGG                                                                                                      | CGGGGT    | CGGC    | GGGG | ACCCCG    | CGGGCGG | CCCT       | CCAG-  | GGCCGGG      | CT      | GCCGT  | TACCCA | ACCCCG | CCCCAT    | CGCA    | 322       |        |     |
| BelugaWhale | TGC                                                                                                      | ATTAGCCT  | CACT    | CCT  | GACT      | CCAT    | GTT        | GT     | ATTTT        | ATC     | TTTT   | GTTTT  | ATTT   | CCT       | TTTT    | TATATT-   | CACTTT | 175 |
| Donkey      | -----                                                                                                    |           |         |      |           |         |            |        | 0            |         |        |        |        |           |         |           |        |     |
| Cat         | TTAGT                                                                                                    | GAACATA   | CCCTAAT | GT   | CACACAGCT | GCTAAAT | GAAAAGAGCT | CAAAT  | CTGAAACT     | AGTTTTT | GAT    | CAACAT | GT     | TTTTT     | 1120    |           |        |     |
| Ferret      | ACG                                                                                                      | GACAGGCCT | CCCCT   | CATA | AAGAT     | AGTTT   | GT         | CTTT   | GCCAAT       | AGAT    | CGAT   | ATT    | GATT   | GAGT      | CAAT    | GTGGAGAAT | ACAGAA | 173 |
| Lion        | TTAGT                                                                                                    | GAACATA   | CCCTAAT | GT   | CACACAGCT | GCTAAAT | GAAAAGAGCT | CAAAT  | CTGAAACT     | AGTTTTT | AAAT   | CAACAT | GT     | TTTTT     | 112     |           |        |     |
| Vaquita     | ----- TTTGTTTTATTTCTTATTTCACTTTTTATATTTCACTTT                                                            |           |         |      |           |         |            |        | 39           |         |        |        |        |           |         |           |        |     |
| Pig         | TCT                                                                                                      | AGT       | ACTTT   | TAT  | GTAAAGA   | ACCT    | TAGCT      | TTTTT  | CTAGAAAG     | AGAT    | GAGGTT | AAATA  | AAGT   | AGGCAT    | GGAGTT  | CCCGT     | CG     | 186 |

Dienstag, 3. Mai 2022 08:37

|             |                                                                                                  |      |      |      |      |      |      |      |      |
|-------------|--------------------------------------------------------------------------------------------------|------|------|------|------|------|------|------|------|
| Majority    | - - - - ATATTGATTXXTAAA- - XX- XCCXTTGAXTXXTT- - XTXGXAAGTGTTGG- GCATAXXTCTTC- AAG- - - XT- - TG |      |      |      |      |      |      |      |      |
|             | 1130                                                                                             | 1140 | 1150 | 1160 | 1170 | 1180 | 1190 | 1200 |      |
| Human       | -----                                                                                            |      |      |      |      |      |      |      | 0    |
| PolarBear   | -----                                                                                            |      |      |      |      |      |      |      | 0    |
| Cow         | - - - - ACATCAGTTAATGAAACTTTTTCTTGGAGAGGTTAATGAACATGTCTAGTGT CACACATCTACTAAATGAAA- AGA           |      |      |      |      |      |      |      | 182  |
| Dog         | C- - - ACACCCCTCCCTCCG- - CTTCCCCGGCGGCTCCGCTCGGGAACCGGGGAAGAAAGCGGGCTCGGAGGCCGGGGCG             |      |      |      |      |      |      |      | 397  |
| BelugaWhale | TTGTGTCTTGACTTGTAAG- - - AACCTTAAATCTTTT- CTAGAAAGTGGTGGGGTTAAATAAGC- AAGCATAT- - TG             |      |      |      |      |      |      |      | 247  |
| Donkey      | -----                                                                                            |      |      |      |      |      |      |      | 0    |
| Cat         | GTG- ATATACATTGCTACA- - TTAGCCTCTTTTTGACTCCATGTTATATTTTTGTCCATTTGTCTTACTCCTTCTTATTT              |      |      |      |      |      |      |      | 1197 |
| Ferret      | A- - - ATTATGCTAGAGTTC- - TTGCCCTTTGGGAGCTCACATATTAATTGTTGAAGGAAAATACATGTACAAAATCACAA            |      |      |      |      |      |      |      | 248  |
| Lion        | GTG- ATATACATTGTTACA- - TTAGCCTCTTTTTGACTCCATGTTATATTTTTGTCCATTTGTCTTACTCC- - TTATTT             |      |      |      |      |      |      |      | 186  |
| Vaquita     | TTGTGTCTTGACTTGTAAG- - - AACCTTAAATCTTT- - CTAGAAAGTGGTGGGGTTAAATAAGC- AAGCATAT- - TG            |      |      |      |      |      |      |      | 110  |
| Pig         | TGGCGCAGTGGTTAACGAA- - TCCGACTAGGAACCATGAGGTGGCGGGTTCGGT- CCCTGCCCTTGCTCAGTGGGTAAAG              |      |      |      |      |      |      |      | 263  |

|             |                                                                                       |      |      |      |      |      |      |      |      |
|-------------|---------------------------------------------------------------------------------------|------|------|------|------|------|------|------|------|
| Majority    | GCT- TTGXTTTTTTGTXXTCTATXGTATAXGTXGXGGCXXTXGAAGXGXTTTTTGXXTTTTTGTGAXXXXX- - ATGGTCXT  |      |      |      |      |      |      |      |      |
|             | 1210                                                                                  | 1220 | 1230 | 1240 | 1250 | 1260 | 1270 | 1280 |      |
| Human       | -----                                                                                 |      |      |      |      |      |      |      | 0    |
| PolarBear   | -----                                                                                 |      |      |      |      |      |      |      | 0    |
| Cow         | GCTCTGATTTGAATCCAATCTTTAAT- CACCATGCTTTTGTGATATAGTTGTTGCATTAGTCTCACTTC- - - - TGGTTCT |      |      |      |      |      |      |      | 257  |
| Dog         | GCGGCGGGGCTGCGGGGGGCGACGGCGCGAGCGGCGGCCCGGGGGTGGGGTGGGGGCCCGC- - GGCGGCGGCCCG         |      |      |      |      |      |      |      | 475  |
| BelugaWhale | ACTATTGTTTGTGTGTAGTCTTGTGCTTTATTAGGAGAAAAAGAAAGGAAAATGTGTTTTTGTGAGTATTATTTTTCTT       |      |      |      |      |      |      |      | 327  |
| Donkey      | ----- TTGTGATATACGTTGTTGCACTAGCCTTTTTCTGATTCCATGTTATATT- - - - TTGTCT                 |      |      |      |      |      |      |      | 57   |
| Cat         | GACTTTGATATTTTCGTCTAGTATTTTATATGTCTTGACTTGTAAGAAGCTTTAAATCTTTCTAGAAAGTGGAGGGTTTA      |      |      |      |      |      |      |      | 1277 |
| Ferret      | ATAGGTGAAAAGTGAATTAATGGCATATAAAGGGCCCTTATGTATTGTTAAGTCAATGGTGAA- - GGCAAAGGGAAG       |      |      |      |      |      |      |      | 326  |
| Lion        | GACTTTGACATTTTGTCTAGTATTTTATATGTCTTGACTTGTAAGAAGCTTTAAATCTTTCTAGAAAGTGGAGGGTTTA       |      |      |      |      |      |      |      | 266  |
| Vaquita     | ACTATTGTTTGTGTGTAGTCTTTTGTGCTTTATTAGGAGAAAAAGAAAGAAAATGTGTTTTTGTGAGTATTATTTTTCTT      |      |      |      |      |      |      |      | 190  |
| Pig         | GATCCGGCGTTGCCGTGAGCTGTGGTGTAGGTTGCAGACACGGCTGGGATCCTGCGTTGCTGTGGCTCTGGCGTAGGCCG      |      |      |      |      |      |      |      | 343  |



Dienstag, 3. Mai 2022 08:37

|             |                                                                                            |                                         |
|-------------|--------------------------------------------------------------------------------------------|-----------------------------------------|
| Majority    | XTG- - - - X- X- - CXTGATAATTCTTTGTTTGT- - - CTTXATXTAT- TXACGAGCT- - - - - GCTTXAGXCATGXT |                                         |
|             |                                                                                            | 1290 1300 1310 1320 1330 1340 1350 1360 |
| Human       | -----                                                                                      | 0                                       |
| PolarBear   | -----                                                                                      | 0                                       |
| Cow         | ATG- TTGTATCACCCCTTTTATTTCTTTATTTCA- - - CTTTATATATTTTACCTACT- - - - - ACTTTTTGTGTCTT      | 323                                     |
| Dog         | GCCCTGCCCCCTCCGGGAGCCATTTCCATCCGA- GAGCCGGACCCGGGCCCCGGGCGGCCGCGCCGGGCGGGAGCGAGGCC         | 554                                     |
| BelugaWhale | TTG- - - - - CCTCCTAAGGCCAGGTTTGT- - - CCCCATGCA- - - ACAGTTT- - - - - GTTTTTGCCAGGAT      | 380                                     |
| Donkey      | TTT- - - G- - - - TTTTATTCTTTCTTATTTCA- - - CTTTATTTCTTTACCTAGT- - - - - ACTTTATGTGTCTT    | 115                                     |
| Cat         | AATAACAATCATATTGACTATTATTTGTTTCAT- ACTCTTGACTTTATTAGGAGAA- - AAAATAGAGAAAAACGTGGT          | 1353                                    |
| Ferret      | GCAAAGGGAAGGCAAAGGGAATATATATATAT- ATTTTTTTTATATCTCAGTAACA- - - - - CAATTTATTTTATTTG        | 398                                     |
| Lion        | AATAACAATCATATTGACTATTATTTGTTTCAT- ACTCTTGACTTTATTAGGAGAA- - AAAATAGAGAAAAACGTGGT          | 342                                     |
| Vaquita     | TTG- - - - - CCTCCTAAGGCCAGGTTTGC- - - CCCCATGCA- - - ACAGTTT- - - - - GTTTTTGCCAGGAT      | 243                                     |
| Pig         | GTGGCTACAGCTCCGATTCAACCCTGGCCTGGGAACCTCCATATGCCTCCGGAGCG- - - - - GCCCAAGAAATAGC           | 414                                     |

|             |                                                                                       |                                         |
|-------------|---------------------------------------------------------------------------------------|-----------------------------------------|
| Majority    | TATG- - AAGATXAAAAXAXTTAAXXTATTTAAGXXAATXACGXGAC- - CAAAXAAXXAXGCXATATTXACTXCTGTTTG   |                                         |
|             |                                                                                       | 1370 1380 1390 1400 1410 1420 1430 1440 |
| Human       | -----                                                                                 | 0                                       |
| PolarBear   | -----                                                                                 | 0                                       |
| Cow         | GACT- - - - TATAAAGAACTTAAATGTTTTCTAGAAAGTGATGGGTC- - TAAATAAGCAAGC- AACTGACTATTGTCTG | 396                                     |
| Dog         | TGTGGGGGGCGGCCGGGGGAGACGAGAGGGGAGGCAACGGCGTGACCCCCGGCCGCCCCCCCCCCCCCCCG- GTC          | 633                                     |
| BelugaWhale | AAAG- CAAGAGCTAATCAATCAACATTGGTTGAGTCATTGTGGGGAGTACAAAGAATTATGCTAGAGTTCCTGCCCTTG      | 459                                     |
| Donkey      | - - - - - GTAACAATCTTAAATCTTTCTAGAAAGTGATGGGTT- - TAAATAAAACAAGCATACTGACTACTGTTTG     | 184                                     |
| Cat         | TTTGTGAATATTATAACATCTTTTGCCATTTAAGG- ACAAGCTTCCCCTCATGGAGACAGTTTGTCTTTGACCATGCATC     | 1432                                    |
| Ferret      | TTTTTACAGATTTTCGGGTTTTTTTTAATTCAATTAATTAACATAATGTATTATTGGTTTCAGAGGTAGAGGTGAGT         | 478                                     |
| Lion        | TTTGTGAATATTATAATATCTTTTGCCATTTAAGG- ACAAGCTTCCC- TCATGGAGACAGTTTGTCTTTGACCATCAATC    | 420                                     |
| Vaquita     | AAAG- CAAGAGCTAATCAATCAACATTGGTTGAGTCAATTTGGGGAATACAAAGAAGTATGCTAGAGTTCCTGCCCTTG      | 322                                     |
| Pig         | AACAACAACAACAAAAGACCAAAAAAAAAAAAAAAAAAAAAATAATAAATAAATAAGTAGGC- ATATTGACTATTGTTTG     | 493                                     |

Dienstag, 3. Mai 2022 08:37

|             |                                                                                                                      |      |
|-------------|----------------------------------------------------------------------------------------------------------------------|------|
| Majority    | T- - - - GGTCTTATACATTXTGTAGAAGAXAGAAAAATAXAAXCGCGTTTTCTGTXAATAGGCTACTTTGXT- - - - - T                               |      |
|             | 1450            1460            1470            1480            1490            1500            1510            1520 |      |
| Human       | -----                                                                                                                | 0    |
| PolarBear   | -----                                                                                                                | 0    |
| Cow         | TCCGTAGTCTTGTA- TTTTATTAGGAGAAAAAAAAAAGAAAAACACGTTTTTGTGAATATTATAGTTTGGTCTTGGT- - - T                                | 472  |
| Dog         | CCTCCGGCCTCCCGGGCCTCCGGCCTCCGCGGCCCGCCCGGCCTCCCTCCCCTCCCGGCCCGCCCGCCCGCCCGGT                                         | 713  |
| BelugaWhale | G- - - - GAGCTTACATATTTAATTGTTGAGTGA- AAATACATGTACAAAACCACAAACGGGCTTCCCTGGT- - - GGC- - - A                          | 528  |
| Donkey      | TTTCTAATCTTGTACTTTATTAGGAGAAAAAAAAATAAGAAAACGTGTTTTTGTGAATACTATAAATTC- - - - -                                       | 252  |
| Cat         | AATATTGATTGAGTCAATATGGAGAATATAGAAAATTATGCTAGAGTTCCTGTCTTTGGGAGCTTACATATTTAA- - - T                                   | 1509 |
| Ferret      | TCATCGGTCTTATATGATATGCGGCGCTCATTACATCATGAGCCCTCCTTAATATCCA- - TCACCCAGGTAGCCCA- - - T                                | 553  |
| Lion        | AATATCGATTGAGTCAATATGGAGAATACAGAAAATTATGCTAGAGTTCCTGTCTTTGGGAGCTTACATATTTAA- - - T                                   | 497  |
| Vaquita     | G- - - - GAGCTTACATATTTCAATTGTTGAGTGA- AAATACATGTACAAAACCACAAACGGGCTTCCCTGGT- - - GGC- - - A                         | 391  |
| Pig         | T- - - - AGTGTGTACTTTTACTAGGAGAATAAGAAAGAAAAACGTGTTTTTGTGACTACTCTAATTTG- - - - -                                     | 557  |

|             |                                                                                                                      |      |
|-------------|----------------------------------------------------------------------------------------------------------------------|------|
| Majority    | X- - XGX- - XA- X- - - - TTX- C- X- - CCGCCACCTXAGGACAGGTTTTCTTG- CX- TXAXXGGGCAGTTTTXTATGCCAA                       |      |
|             | 1530            1540            1550            1560            1570            1580            1590            1600 |      |
| Human       | -----                                                                                                                | 0    |
| PolarBear   | -----                                                                                                                | 0    |
| Cow         | AACAGGATAAATTTTGTGTTGTTTGTGTTGACACCTAAGGACAGGTTTCTTT- - - - TGGTGGAGCAGTTTGTCTTTGCCAA                                | 548  |
| Dog         | CCCCGGCCTCCCGGCTCCCCCGGCTCCCCCGGCTCCCCCGGCTCCCCCGGCCTCCGCGGCCTGCCTCCCCCTCCG-                                         | 792  |
| BelugaWhale | CAGTGGTTGAGA- - - GTCCGCCTG- - CCGATGCAGGGGACACGGGTTCGTGCCCGGTCCGGGAGGCTCCCACATGCCGC                                 | 603  |
| Donkey      | ----- T- - - - TTTGCCACCTAAGGACAGTTTTCTTT- - - - CATGGAACAGTTTGTCTTTGCCAA                                            | 303  |
| Cat         | TGTTGAGGGAAAATACATGTACAACACCACAAATATATGAAAAGTGATAGGACTGATAATGGGTCTTTTATATATTGTAA                                     | 1589 |
| Ferret      | CCCCACCTCCCTCCCCTCCAGCAACCCTCAGTTTGTCTCCTGGGATTAAGAGTATTTCTTGTTTTATTTTTTCTCTC-                                       | 632  |
| Lion        | TGTTGAGGGAAA- TACATGTACAAAACCACAAATATATGAAAAGTGATAGGACTGATAATGGGTCTTTTATATATTGTAA                                    | 576  |
| Vaquita     | CAGTGGTTGAGA- - - GTCCGCCTG- - CCGATGCAGGGCACACGGGTTCGTGCCCGGTCCGGGAGGCTCCCACATGCCGC                                 | 466  |
| Pig         | ----- TT- - - - - TTGCCACCTAAGGACAGGCTTCTTTCCCTTCATGGAACAGTTTGTCTTTGCCAA                                             | 613  |

Dienstag, 3. Mai 2022 08:37

|             |                                                                                           |      |      |      |      |      |      |      |      |
|-------------|-------------------------------------------------------------------------------------------|------|------|------|------|------|------|------|------|
| Majority    | GXCAAAGCTGGAGCCAATGAXTCAXTXX- AAXTGAGTCTXTGXXG- GX- - - XATATGGAGXXTTACGGXAGAG- - - TXCC  |      |      |      |      |      |      |      |      |
|             | 1610                                                                                      | 1620 | 1630 | 1640 | 1650 | 1660 | 1670 | 1680 |      |
| Human       | -----                                                                                     |      |      |      |      |      |      |      | 0    |
| PolarBear   | -----                                                                                     |      |      |      |      |      |      |      | 0    |
| Cow         | GATAAAACAAGAGCTAATGAATCAACATTGATTGAGTCACTGTGGGGG- - - AATACAGAGAATTATGATAGAG- - - TTCC    |      |      |      |      |      |      |      | 622  |
| Dog         | GCCGCCCGGCCCGCCCTGGCTGGGGGAGATGCCGGTGGCGGGAGCGGGGGGTGGGGGGCGGGGAGGCCGAGCGGGCGGC           |      |      |      |      |      |      |      | 872  |
| BelugaWhale | GGAGCGGCTAG- GCGTGTGAGCCATGGC- TGCTGAGCCTGCGCGTCCGGAGCCTGTGCTCCGCAACGGGAGAG- - - GCCA     |      |      |      |      |      |      |      | 678  |
| Donkey      | GATAAAGCAGGAGCCAATCAATCAATATTGATTGAGTCCATGCTG- GG- - - AATACAGAGAATTATGTTAGAG- - - TTCC   |      |      |      |      |      |      |      | 376  |
| Cat         | GTCAATGGTGAAGGCAAAGACATTGTTGGAATAGATTTTTTAA- - - AATATTTATTTATTTTGAATGAGAGAGCGAGA         |      |      |      |      |      |      |      | 1666 |
| Ferret      | TTCCCCTATGATCCTCTGTTTTGTTTCTTAAATTCCACATGTCAGTGAGATCATATGATATTTGGCTTTCTCAGATTGAC          |      |      |      |      |      |      |      | 712  |
| Lion        | GTCAATGGTGAAGGCAAAGGCATTGTTGGAATAGATTTTTTTTTTAAATATTTATTTATTTTGAAGGAGAG- - - - - A        |      |      |      |      |      |      |      | 650  |
| Vaquita     | GGGGCGGCTAG- GCGCGT GAGCCATGGC- TGCTGAGCCT- - - - - GTGCTGCGCAACGGGAGAG- - - GCCA         |      |      |      |      |      |      |      | 526  |
| Pig         | AATAAAGCAAGAGCTAATCAATCAA- - - - AATTGACTCAATATGGGG- - - AATACAAAGGATGACGCTAGAA- - - TTGC |      |      |      |      |      |      |      | 682  |

|             |                                                                                         |      |      |      |      |      |      |      |      |
|-------------|-----------------------------------------------------------------------------------------|------|------|------|------|------|------|------|------|
| Majority    | XAXCGATXGGXAGCAXACXTATGTAATAATAGAATXAAAAXAC- - - - - GTXCAAAGCCACAAACACGTGAAAAG         |      |      |      |      |      |      |      |      |
|             | 1690                                                                                    | 1700 | 1710 | 1720 | 1730 | 1740 | 1750 | 1760 |      |
| Human       | -----                                                                                   |      |      |      |      |      |      |      | 0    |
| PolarBear   | -----                                                                                   |      |      |      |      |      |      |      | 0    |
| Cow         | TGGCCTTTGG- AGCTTACATATGTAATTGTTGAGTGAAAATACC- - T- - - - - GTTCAAACCCACAAACGTTTGAAGAG  |      |      |      |      |      |      |      | 692  |
| Dog         | GGGAGGAAGGGGAAGGCAGATGTCACTACTCTTTGTTTTCACTGGAGTCTGGTGGTGGGGGGGG- - - - AGACCGAAAAG     |      |      |      |      |      |      |      | 948  |
| BelugaWhale | CAACAATGAGAGGCCCGCGTACCGCAAAAAAAAAAAAAAAAA- - - - - GCCACAAACACGTGAAAAG                 |      |      |      |      |      |      |      | 736  |
| Donkey      | TGCCCTTTGGGAGCTTACATATTTAATTGTTGAGTGAAAATACA- - - - - TGTACAAAACCACAAATACATGAAAAG       |      |      |      |      |      |      |      | 447  |
| Cat         | GAGAGAGAGACAGAACACGAGCGGGG- AAGAGCAGAGAGAGAGGGAGACACAGAATTCAAAGCAGGGTCCAGGCTCTGGG       |      |      |      |      |      |      |      | 1745 |
| Ferret      | ATATTTCTGTTTTTATAAACAACACTCTTTTGTCCCTTTTGTTCATCCTCAT- TGTTGCAAATGGCAA- - - - ATTTCATTTT |      |      |      |      |      |      |      | 787  |
| Lion        | GAGAGAGAGACAGAACACGAGGGGGGGAAGAGCAGAGAGAGAG- - AGACACAGAATTCAAAGCAGGATCCAGGCTCTGGG      |      |      |      |      |      |      |      | 728  |
| Vaquita     | CAACGATGAGAGGCCCGCGTACCGTAAAAAAAAAAAAAAAAAAAAAAAAAAAAAAAAAGGCACAAACACGTGAAAAG           |      |      |      |      |      |      |      | 606  |
| Pig         | TAACCTTTGGGAGCTTCCATATTTAATTCTTGAGTGAAAATACA- - G- - - - - GGACAAAGCCACAAATGCGTGAACAG   |      |      |      |      |      |      |      | 753  |



Dienstag, 3. Mai 2022 08:37

| Majority    | AGTGCTTTGAAGAGTTCT- - - - - ATTTGGACAAGATGCTCTATAAGGTTT- GTCCAACTTAAAAA- TAATATAAT  |      |      |      |      |      |      |      |      |
|-------------|-------------------------------------------------------------------------------------|------|------|------|------|------|------|------|------|
|             | 1930                                                                                | 1940 | 1950 | 1960 | 1970 | 1980 | 1990 | 2000 |      |
| Human       | -----                                                                               |      |      |      |      |      |      |      | 0    |
| PolarBear   | -----                                                                               |      |      |      |      |      |      |      | 0    |
| Cow         | AGTGCTCTGAAGAGTTCT- - - - - ATTTGGACCAGATGTTCTATAAGTTTT- GTTCAAGTTAAAAA- CAATGTAAT  |      |      |      |      |      |      |      | 918  |
| Dog         | CCCACCCAGGGCCGTTTTTTTTTAAAGTCACTTTGACCAGTTTCTGGACAAACAAA- AAACAAGTCAAAA- - GACAAAAA |      |      |      |      |      |      |      | 1182 |
| BelugaWhale | AGTGCTTTGAAGAGTTCT- - - - - ATTTGGACAAGATGCTCTATAAGGTTT- GCCCAAGTTAAAAA- TAATATAAT  |      |      |      |      |      |      |      | 944  |
| Donkey      | AGTGCTTTGAAAAGTTCTATAACAAAATATTTGGACAAGATGCTCTTTTCAGTTTTTGTCCAAGTTCAAAAATTATATAAT   |      |      |      |      |      |      |      | 668  |
| Cat         | TATACTTTTAAGAGTTCTATAG- AAAATATTTGGACAAGATGCTCTTTAAGGTCT- GTCCACCTTAAAAA- TAGTATTAT |      |      |      |      |      |      |      | 1980 |
| Ferret      | TGTGCTTTGAATAGTTCCATAGCAAAAATATTTGGACAAGATGCTCTTTAAGGTTT- TTCCACCTTAAAAA- TAATATAAT |      |      |      |      |      |      |      | 1022 |
| Lion        | TATACTTTTAAGAGTTCTATAGCAAAAATATTTGGACAAGATGCTCTTTAAGGTCT- GTCCACCTTAAAAA- TAGTATTAT |      |      |      |      |      |      |      | 964  |
| Vaquita     | AGTGCTTTGAAGAGTTCT- - - - - ATTTGGACAAGATGCTCTATAAGGTTT- GCCCAAGTTAAAAA- TAATATAAT  |      |      |      |      |      |      |      | 814  |
| Pig         | AGGGCTTTGAAGAGTTCC- - - - - ATTTGGCCAAGATGCTCTACAAGGTCT- GCCCAACTGAAAAATAACATAAT    |      |      |      |      |      |      |      | 909  |

| Majority    | TTTATGAATXATACAGAAAGTACCATTTAGTACAGTGAAATTCCAAXTAXTAAAXGGGTAAAGAGGTTTGCATGAAGGAGA    |      |      |      |      |      |      |      |      |
|-------------|--------------------------------------------------------------------------------------|------|------|------|------|------|------|------|------|
|             | 2010                                                                                 | 2020 | 2030 | 2040 | 2050 | 2060 | 2070 | 2080 |      |
| Human       | -----                                                                                |      |      |      |      |      |      |      | 0    |
| PolarBear   | -----                                                                                |      |      |      |      |      |      |      | 0    |
| Cow         | TTTATGAATCAT- - - - AAAGTAT- ATTTAGTACAGTGAAATTCCAATAGTAAATGGATAAGAGATTTGTATGAAGGAGA |      |      |      |      |      |      |      | 993  |
| Dog         | CAAAAAACAAAAACCACCCGAGCCGGAACCGTGCGGCGACTCTGAAAGGCCGAGGAGGCGCAGTGCCGCTG              |      |      |      |      |      |      |      | 1262 |
| BelugaWhale | TTTATGAATCATACAGAAAGTACCATTTAGTACAGTGAAATTCCAATAGTAAAACGATAAGAGGTTTGTATGCAGAAGA      |      |      |      |      |      |      |      | 1024 |
| Donkey      | TTTATTAATTATACCGAAGGTACCAGTTAGTACACTGAAATTCCAATAGTACAGGGG- AAGAGGTTTCCCTGAAGGAGA     |      |      |      |      |      |      |      | 747  |
| Cat         | TTTATGAATTGTATAGAACGTACCGGTTAGTGCAGTGAAATACCAATCAATAAAGGAGTAAACAGGGTTGCATGTGGGAGG    |      |      |      |      |      |      |      | 2060 |
| Ferret      | TTTGTGAATTATACAGAAAGTAGCATTTAGTACAGCGAAATTCCAATTAATAAAGGGTAAAGAGTGTTGCATGAAGGATG     |      |      |      |      |      |      |      | 1102 |
| Lion        | TTTATGAATTGTATAGAACGTAGCGGTTAGTGCAGTGAAATACCAATCAATAAAGGAGTAAACAGGGTTGCATGTAGGAGG    |      |      |      |      |      |      |      | 1044 |
| Vaquita     | TTTATGAATCATACAGAAAGTACCATTTAGTACAGTGAAATTCCACATAGTAAAAGGATAAGAGGTTTGTATGCAGAAGA     |      |      |      |      |      |      |      | 894  |
| Pig         | TTTATGAATCATCCAGAAAATACCATTTAATACAGTGAAGTCCAATTAATAAAGGATAAGAGGTGTGTTTGAAGGAGA       |      |      |      |      |      |      |      | 989  |

Dienstag, 3. Mai 2022 08:37

| Majority    | TACAGGAAAACCC- XAGTGGGCATTGAGAGTAACTGGAGAGACAAAGGGAATAT- TTTTCXTXTCTCAGXGT- - - TX- GT |      |      |      |      |      |      |      |      |
|-------------|----------------------------------------------------------------------------------------|------|------|------|------|------|------|------|------|
|             | 2090                                                                                   | 2100 | 2110 | 2120 | 2130 | 2140 | 2150 | 2160 |      |
| Human       | -----                                                                                  |      |      |      |      |      |      |      | 0    |
| PolarBear   | -----                                                                                  |      |      |      |      |      |      |      | 0    |
| Cow         | TATCAGAAAACCCAGAGTGGTCATTGAGAGTAATTGGAGAGACAAAGAGAATAT- TTTTCATTTCC- AGGAT- - - TAGAG  |      |      |      |      |      |      |      | 1068 |
| Dog         | AGCGAGGCGAGGC- CGCGGCGCGGGGAGGCGGCCCGGGGTCTCCGGGT- CTC- CGGCGCTCGGCGTCTGAG- GG         |      |      |      |      |      |      |      | 1338 |
| BelugaWhale | TACAGGAAAGCCCATATAAGGCATTGAGAGTAACTGGAGAGACAAGGGATATTTGTGTGTGTGTGCACGCGC- - - - -      |      |      |      |      |      |      |      | 1096 |
| Donkey      | TATAGGAAAACCCAGAGCCGGCATTGAGGGTAACAGGAGAGACAGAGGAAATTT- TTCTCATTTCTCAGGAT- - - TAGAA   |      |      |      |      |      |      |      | 823  |
| Cat         | TATAGACCCAG- - - - AGTGGGCACTGAGAGTAACTGGAGAAATACAGAGAATAC- TTGTCTGTGTGTGTGTGTGTGTGT   |      |      |      |      |      |      |      | 2135 |
| Ferret      | CACAGGAAAACCA- GACTGGACACTGAGAGTAACTGGAGAAATATAAGGAATAT- TTTTCTTTTCTCAGTATTCTAA- GT    |      |      |      |      |      |      |      | 1179 |
| Lion        | TATAGACCCAG- - - - AGTGGGCACTGAGAGTAACTGGAGAA- TACAGAGAATAC- TTGTCTGTGTGTGTGTGTGTGTGT  |      |      |      |      |      |      |      | 1118 |
| Vaquita     | TACAGGAAAGCCCATATAAGGCATTGAGAGTAACTGGAGAGACAAGGGATATTTGTGTGTGTGTGCACGCGCACGCGCGT       |      |      |      |      |      |      |      | 974  |
| Pig         | TACAGGAAAACCCAGAGAAGCTATCCAGAGTAAGTGGATAGACAAAGGGAATAT- TTTGCATTTCCCAAGAT- - - TAAGT   |      |      |      |      |      |      |      | 1065 |

| Majority    | GTGTGTGTGTGTGTGTG- - - - TTGTGGTTGGGGGTG- AAGGGTGGAGGAGAGGGAAAATTGCTGGCAA- - - AGTCACCC-   |      |      |      |      |      |      |      |      |
|-------------|--------------------------------------------------------------------------------------------|------|------|------|------|------|------|------|------|
|             | 2170                                                                                       | 2180 | 2190 | 2200 | 2210 | 2220 | 2230 | 2240 |      |
| Human       | -----                                                                                      |      |      |      |      |      |      |      | 0    |
| PolarBear   | -----                                                                                      |      |      |      |      |      |      |      | 0    |
| Cow         | GTGTGCGTATGTGTGTG- - - - TTGTGGCTGCGGGGG- AAGGACGGAGGATAGAGAAAA- - - - - GTCGCCC-          |      |      |      |      |      |      |      | 1128 |
| Dog         | GC- - - - CCGCGGGGGCG- - - - - GTGCTGGGCGACC- GCGCCGCGTCCGCAGCCCTGCCGGGGGCTTG- - AAGCGGGT- |      |      |      |      |      |      |      | 1404 |
| BelugaWhale | - - - - - GTGTGTGTGTGTTGTGGTTGGGGGGG- AAAGGTGGAGGAGAGAGAAAATTGCTGGCAAAGCAGTTACCC-          |      |      |      |      |      |      |      | 1164 |
| Donkey      | GCGCATTTGTGTGTGTG- - - - TTGTGGTTGGGGGTG- TAGGGTGGAGCAGAGGAAAAGATGCTGGCAAAGCAGTCACTT-      |      |      |      |      |      |      |      | 897  |
| Cat         | GTGTGTGTGTGTGTGTGTGTTGTAGTTGCGGGGTG- ATGGA- - - - GAAGACGGTAAGTTGCTGGCCAG- - AGTCACCCC     |      |      |      |      |      |      |      | 2208 |
| Ferret      | ACATTTCTGTTTGTGTT- - - - - GTGGTTGGGGGTG- ATGGGTGGAGAAGAGGGCAAATTGCTGGCAAAGTAGTCACCC-      |      |      |      |      |      |      |      | 1251 |
| Lion        | GTGTGTGTGTGTGTGTG- - - - TTGTAGTTGCGGGGTG- ATGGATGGAGAAGAGGGTAAGTTGCCGGCCAG- - AGTCACCCC   |      |      |      |      |      |      |      | 1191 |
| Vaquita     | GTGTGTGTGTGTGTGTGTGTTGTGGTTGGGGGGGAAAGGTGGAGGACAGAGAAAATTGCTGGCAAAGCAGTTACCC-              |      |      |      |      |      |      |      | 1053 |
| Pig         | GTGTGTGTGTGTGGGGGGGGTTGTGGTTGGGAGTG- AAGGGTGGAGGAGAGAGAAAATTGCTGTTAAAGGAGTCACCT-           |      |      |      |      |      |      |      | 1143 |

Dienstag, 3. Mai 2022 08:37

| Majority    | ACTGAGCAAATTTTCCAAAAATGGATGCCTTTTCAAACCTTTGTTGAGCCTCTG- - AAAAACATGTTAAAGG- AAATGTCC   |      |      |      |      |      |      |      |      |
|-------------|----------------------------------------------------------------------------------------|------|------|------|------|------|------|------|------|
|             | 2250                                                                                   | 2260 | 2270 | 2280 | 2290 | 2300 | 2310 | 2320 |      |
| Human       | -----                                                                                  |      |      |      |      |      |      |      | 0    |
| PolarBear   | -----                                                                                  |      |      |      |      |      |      |      | 0    |
| Cow         | ACTGAGCAAATTTTCCAAAAACGGATGCCTTTTCAAAC- - - GTT GAGCCTCTGATAAAAAACACTTTAAAGG- AATTGTCC |      |      |      |      |      |      |      | 1204 |
| Dog         | GGTTCAGAAAGCCCCTGGAGTAGAATCCGTGGCAACATGCGGAGAGCCAAGTA- - AAATACGAGTTTATTTTAAATGTTC     |      |      |      |      |      |      |      | 1482 |
| BelugaWhale | ACTGAGCAAATTTTCCAAAAATGGATGCCTTTTCAAACGTTGTAGAACCTCTGATAAAA- CATTTTAAAGG- AAATTTCC     |      |      |      |      |      |      |      | 1242 |
| Donkey      | CCTGAGCAAATTTTCCAAAAATGGGTGCCTTCTCAGACTTTGTTGAGCCTCTCATAAAAAACACTTTAAAGG- AAATGTCC     |      |      |      |      |      |      |      | 976  |
| Cat         | ACTAAGCACATTTCCCCAAAAATGGATGCTTGTTCAAATTTTGTGAGCCCTG- - AAAAACATGTTAAAGG- AAAGGTCC     |      |      |      |      |      |      |      | 2285 |
| Ferret      | ACTGAGCAAATTTCCCCAAAAATGGATGCTTGTTCAAACCTTTGTTGAACCTCTG- - AAAAACATGTTAAAGA- AAAGGTCC  |      |      |      |      |      |      |      | 1328 |
| Lion        | ACTAAGCACATTTCCCCAAAAATGGATGCTTGTTGAAATTTTGTGAGCCCTG- - AAAAACATGTTAAAGG- AAAGGTCC     |      |      |      |      |      |      |      | 1268 |
| Vaquita     | ACTGAGCAAATTTTCCAAAAATGGATGCCTTTTCAAACGTTGTAGAACCTCTGATAAAAAACATTTTAAAGG- AAATTTCC     |      |      |      |      |      |      |      | 1132 |
| Pig         | ACTAAGCAAATTTTCCAAAAATGGATGCCTTTTCAAACCTTTGTTACGACTCTG- TAAAAACATGTTAAAGA- AAATGTCC    |      |      |      |      |      |      |      | 1221 |

| Majority    | AATATGCTATTTAAAATTTAAAATGGAGACT- GTGAGAGATA- - - - XAGAAAAGGGAGTCA- ATTTGXGTAGCCCATTTTA   |      |      |      |      |      |      |      |      |
|-------------|-------------------------------------------------------------------------------------------|------|------|------|------|------|------|------|------|
|             | 2330                                                                                      | 2340 | 2350 | 2360 | 2370 | 2380 | 2390 | 2400 |      |
| Human       | -----                                                                                     |      |      |      |      |      |      |      | 0    |
| PolarBear   | -----                                                                                     |      |      |      |      |      |      |      | 0    |
| Cow         | AATATGCTTTTAAAATTTAAAAGGAAACCAGTGAGAGATA- - - - TAGAAAAGGGAGTCG- ATTTGAGTAGCCCATCGTA      |      |      |      |      |      |      |      | 1278 |
| Dog         | GTGGAGTTTAGTGTTTTTTAAGACACATC- G- - AGGGAAG- - - - GACATACCAAAGTTAGAGTAACAGACTTACCCCA     |      |      |      |      |      |      |      | 1554 |
| BelugaWhale | AATATGCTATTTAAAATAAAAACAGAGACA- GTGAGAGATACTGTATAGAAAAGGGAGTCA- ATTTGAGTAGCCTTTCTTA       |      |      |      |      |      |      |      | 1320 |
| Donkey      | TATATGCTATTTAAAATTATAATGGAGACC- ATGAGACATA- - - - CAGAAAAGGGAGTCA- ATTTGTGTAGCCCATTTTA    |      |      |      |      |      |      |      | 1049 |
| Cat         | AATATACTATTAGAATTTAAAATGAAGACT- GTGAGATACA- - - - CAGAAAAGGGAGTCA- ATTTGTGTGGCCCATTTCA    |      |      |      |      |      |      |      | 2358 |
| Ferret      | AATATGGTATTAGAATTTAAAATGGGGACT- G- - AGATACA- - - - TGAAAAGGGAGTTA- ATTTGTGTAGCCCATTTTA   |      |      |      |      |      |      |      | 1399 |
| Lion        | AATATACTATTAGAATTTAAAATGAAGACT- GTGAGATACA- - - - CAGAAAAGGGAGTCA- ATTTGTGTGGCCCATTTCA    |      |      |      |      |      |      |      | 1341 |
| Vaquita     | AATATGCTATTTAAAATAAAAACAGAGACA- GTGAGAGATACTGTATAGAAAAGGGAGTCA- ATTTGAGTAGCCTTTCTTA       |      |      |      |      |      |      |      | 1210 |
| Pig         | AATATGCTATTTAAAC- - - - - GGAGACT- GTGAGAGATA- - - - CAGAAAAGGCAATCA- ATTTGAGTCGCTCACTTTA |      |      |      |      |      |      |      | 1288 |

Dienstag, 3. Mai 2022 08:37

| Majority    | ATGTTTCTTCCATCTCTAACC- A- TGGTGAAGACGGAGCTACCACTCCCATCCCCACTTGCCCTTTCAAGCCCCCAAATG  |      |      |      |      |      |      |      |      |
|-------------|-------------------------------------------------------------------------------------|------|------|------|------|------|------|------|------|
|             | 2410                                                                                | 2420 | 2430 | 2440 | 2450 | 2460 | 2470 | 2480 |      |
| Human       | -----TGCCTCCAAATG                                                                   |      |      |      |      |      |      |      | 12   |
| PolarBear   | -----                                                                               |      |      |      |      |      |      |      | 0    |
| Cow         | GTGTTTCCTCCATCTTTAACC- AACGGTAAAGATGGAGCTAGTACTTCCATCCCCACTTGCTCTTTCAAGCCTCCAAATG   |      |      |      |      |      |      |      | 1357 |
| Dog         | GAGGTTGTTTAGACATTGTTT- TCCAGTGAA- ACGTAGATCTAGAGAAGTTCACTATTCCTCCAGAGAAACCTGGAAACT  |      |      |      |      |      |      |      | 1632 |
| BelugaWhale | ATGCTTCTTCCATCTCTAATC- AGTGGTGAAGGTGGAGCTACCGCTCCCATCCCCACTTGCTCTTTCAAGCCCCCAAATC   |      |      |      |      |      |      |      | 1399 |
| Donkey      | ACGTTTCTTCCATCGCTAGCC- ACTGGGGAAGACTGAGCCACCACTTCCATCTCCACCTCCCCTTTCAAGCTCCCAAACC   |      |      |      |      |      |      |      | 1128 |
| Cat         | ATGTTCCCTTCCATCCCTAAC- - - CAATGAAGACTGAGGCACCACTCTCATCCCCACTTTCCTTTTCGAGCTCCCAAATG |      |      |      |      |      |      |      | 2434 |
| Ferret      | ACGTTCCCTTTTCATCTCTAACC- AGTGGTGAAGACTGAGGTACCACTCCCATCCCTACTTTCCTTTGAAGCCCCCAAATG  |      |      |      |      |      |      |      | 1478 |
| Lion        | ATGTTCCCTTCCATCCCTAAC- - - CAATGAAGACTGAGGCACCACTCTCATCCCCACTTTCCTTTTCGAGCTCCCAAATG |      |      |      |      |      |      |      | 1417 |
| Vaquita     | ATGCTTCTTCCATCTCTAATC- AGTGGTGAAGATGGAGCTACCGCTCCCATCCCCACTTGCTCTTTCAAGCCCCCAAATC   |      |      |      |      |      |      |      | 1289 |
| Pig         | ACGTTTCTTCCATCTCTAGCCCAATGCGGAAGATGGAGCTACCACTCCCATCCCCACCTGCTCTTTCAAGCCCCCGAAAG    |      |      |      |      |      |      |      | 1368 |

| Majority    | GTAGATCCTA- CTXTCGGTAGCAXTTTTTGTACCAACTCTTTAATACATCGCTCAACCTGTGTTCTTTTTCCATCCAGGT-       |      |      |      |      |      |      |      |      |
|-------------|------------------------------------------------------------------------------------------|------|------|------|------|------|------|------|------|
|             | 2490                                                                                     | 2500 | 2510 | 2520 | 2530 | 2540 | 2550 | 2560 |      |
| Human       | TTAAACTCC- - - - - A- - AC- - - - TATTGTAGCATTTTAAACACATGGCTCCATTTGTGTCTATTTCCACCTAGCGT  |      |      |      |      |      |      |      | 76   |
| PolarBear   | -----                                                                                    |      |      |      |      |      |      |      | 0    |
| Cow         | GTAGATCTTA- CTGTTGGTAGCAGATTTCTTACCAACTTTTTAATACATCTCTCAACCTGTGTTCTTTTTCCATCCAGGT-       |      |      |      |      |      |      |      | 1435 |
| Dog         | GGTGACTAGACTTGGCAGTGGAGTTCATGTTCCCTGAGTCTATCAAGATAGCTGAAGAGTTGGTTAAGTCTTCCATTAC          |      |      |      |      |      |      |      | 1712 |
| BelugaWhale | ATAGATCCTA- CCCTTGGTACCAGTTTTTGTACCAACTGTTAATACATCGCTCAACCTGTGTTCTTTTTCCATCCAGGT-        |      |      |      |      |      |      |      | 1477 |
| Donkey      | CTAGATCACAACCTATCGGT- - - - G- TTCTGTACCAACTCTTCAACACGT- - CTCAACCTGGGTGCTTTCCCATCCAGCT- |      |      |      |      |      |      |      | 1200 |
| Cat         | GTAGATCCTAACTATCGCT- GCATTTTTTCATACCTACTCTTTATTACAAGGCTCCACCTGTGTTCTTTTTCCATCCAAGGT      |      |      |      |      |      |      |      | 2513 |
| Ferret      | ATAGATCCTAACTTACGATAGCATTTTTTCGTCCCTACTCTTTATCACACAGCTCAAGCGGTCTTCTTTTTCCATCTAGGGC       |      |      |      |      |      |      |      | 1558 |
| Lion        | GTAGATCCTAACTATCGCT- GCATTTTTTCATACCTATTCTTTATTACAAGGCTCCACCTGTGTTCTTTTTCCATCCAAGGT      |      |      |      |      |      |      |      | 1496 |
| Vaquita     | ATAGATCCTA- CCCTTGGTACCAGTTTTTGTACCAACTCTTTAATACATCGCTCAACCTGTGTTCTTTTTCCATCCAGGT-       |      |      |      |      |      |      |      | 1367 |
| Pig         | GTAGCTCCT- - - - - CGGTAGCACTTTTTGTACCAACTCTTTAATAAATCACTCAACCTCGGCTCTTTCCAGCCAAGT-      |      |      |      |      |      |      |      | 1441 |



Dienstag, 3. Mai 2022 08:37

|             |                                                                                         |      |
|-------------|-----------------------------------------------------------------------------------------|------|
| Majority    | - ATTGTGACTATTTCTACAGGTGCCACTAATCATCAXCTGAGGGAAGTGTGACXCXTTXXTCXACTTGXCTTGGAAC          |      |
|             | 2570      2580      2590      2600      2610      2620      2630      2640              |      |
| Human       | - ATTGTGAATATTTCTACAGGCGCACACTAATCACCAACTGAAGTGAGAATCACATTTTCTCCACTTGGCTTGGTAC-         | 154  |
| PolarBear   | -----                                                                                   | 0    |
| Cow         | - ATTGTGAGTATTTCTACAGGTGCAGACTA- - - ATCAGCTGAGTGAGGTGAGAATCGTTATCTTCCTCCACTTGGAACT     | 1511 |
| Dog         | TAGTCTTAAGTGTAAAGCTTGGCAGAAATGGCACCACAGTGTTTGGAGTTTTTGTCTTTTTGGTAGATAAGGGT- - - -       | 1787 |
| BelugaWhale | - ATTGTGAATATTTCTAGGGTCCCCACTAATCATCAACTGAGTGAGGTGAGAATC- ACATCCTTCTCCACTTGGAACT        | 1555 |
| Donkey      | - ACGGTGACTATTTCTACAGGCGCTCACTGATCCTCAACTGAGAGAATT- - - - - - - - TCCTCCACTTGGCATAGAACG | 1270 |
| Cat         | - ACTGTGACTGTTTCTGTAAGTGCTCATTA- TCATTAGCTGAGGTGAGAATTACATTCTCTCCAGTTGGCAGGGAAC         | 2591 |
| Ferret      | - ATTGTGACTATTTCTACAGGTGTCCACTAATCATCAGTTGAGGTGAGAATCACATTTTTCTCCAGCTGGCGTG- - - -      | 1632 |
| Lion        | - ACTGTGACTGTTTCTGTAAGTGCTCATTA- TCATCAGCTGAGGTGAGAATTACATTCTC- - CCAGTTGGCAGGGAAC      | 1572 |
| Vaquita     | - ATTGTGAATATTTCTAGGGTCCCCACTAATCATCAACTGAGTGAGGTGAGAATC- ACATCCTTCTCCACTTGGTACT        | 1445 |
| Pig         | - ACCCTGACCATCTCCTACAGGTGCCACTCCTCATCAACCGATGCACCTGAGAGCC- CCATCTTCTCCACTTGGAAAGC       | 1519 |

|             |                                                                                              |      |
|-------------|----------------------------------------------------------------------------------------------|------|
| Majority    | XCAAGGGTCTGGAAGCAAAGCC- TAG- - GTTTCAGTCTGATG- - - - TTTACTTGCTTTGGAAA- TAT- - TTTTTACTA     |      |
|             | 2650      2660      2670      2680      2690      2700      2710      2720                   |      |
| Human       | - TACAGGTCTTGAAGCAAAGCC- TGT- - ATTTCACTGCTGAGGAG- - TTCTACTTGCTTGAGAAAGTACTGTTGTTACCA       | 228  |
| PolarBear   | -----                                                                                        | 0    |
| Cow         | TCAAGCGTCGGAAGCAAAGCCGAT- - GTTTCATCTGATG- - - - TCTACTTGCTTCCAGAAAG- CACAGTTTTCACTA         | 1583 |
| Dog         | - CGTGGGAACAATACCAAAGTT- CAGCGACTTTCATCTCAGG- - - - TTTGA- AAGCAATTTTCC- ACA- - - - AGACCGA  | 1855 |
| BelugaWhale | TCAAGTGTCTGGAAGCAAAGCG- TAT- - GTTTCATCTGATGATG- - TGTAAGTCTTTGGAAA- TACTGTTTTTACTA          | 1629 |
| Donkey      | ACAAATATCTGGAAGCAAAGCC- - - - - TGTTTCAGTCTGATGACA- - TCTACTTGCTTTGAAAAGTATTGTTTTTACTA       | 1343 |
| Cat         | ACAAGGGTCTGGAAGCAAAGCC- TAG- - GTTTCAGTCTGATT- - - - TGTACAAAGCAATGGTTT- CAT- - - - TTAGTGG  | 2658 |
| Ferret      | - GAAGGGTCTGGAAGCAAAGCC- TAG- - GTTTCAGTCTGATT- - - - CCTAATAAACAGTGGTCT- CAT- - - - TCAATGG | 1699 |
| Lion        | ACAAGGGTCTGGAAGCAAAGCC- TAG- - GTTTCAGTCTGATT- - - - TGTACAAAGCAATGGTTT- CAT- - - - TTAGTGG  | 1639 |
| Vaquita     | TCAAGTGTCTGGAAGCAAAGCG- TAT- - GTTTCATCTGATGATG- - TGTAAGTCTTTGGAAA- TACTGTTTTTACTA          | 1519 |
| Pig         | TCAAGTGTCTGGAAGCAAAGCC- TAG- - GTTTCAGTCTGATGATGCCCTGACCTGCTTTGGAAA- TAT- - TTTCTGCTA        | 1593 |





Dienstag, 3. Mai 2022 08:37

|             |                                                                                                                      |      |
|-------------|----------------------------------------------------------------------------------------------------------------------|------|
| Majority    | GACTTCGXAGAGGAACGT XCAAXAXXAAXCGAGXACGCCACGCT CCACAGCAGCAGGCCCGGGCCAG- - - - - AGXGCG                                |      |
|             | 3050            3060            3070            3080            3090            3100            3110            3120 |      |
| Human       | ----- AAACC- - AGGT----- CGCCGCGGTCTGCAGCAGAACGCCAGGTTCCAG----- AGGACG                                               | 521  |
| PolarBear   | -----                                                                                                                | 0    |
| Cow         | GACTTCGAGGAGGAACGTACAATAGAAAACCAAGCAAGCCACTCTGCTCAACAACAGGCCGAGGCCAG- - - - - AGCGCA                                 | 1948 |
| Dog         | TTTCAAGAGTTGGATTATGTAG- - - - - TTGATAATCTAAATGGACAAAACTAAGTTTTTTTTAG- - - - - AAAG- G                               | 2213 |
| BelugaWhale | GACTTCGGAGAGGAACGTACAAAAGAAACGGAGCACGCCACGCTGCACAGCAGCAGGCCCGGGCCAG- - - - - AGCACT                                  | 1982 |
| Donkey      | CACTTCTTCGAGGAGCATCCACGAGGAAGCCAGGGCGCCATGCTTCCCAGCGGCAAGGCCCGGGCCCGGGCGCGGAGGGCG                                    | 1703 |
| Cat         | GACTTCTCAGAGGCGCGTGCAAAAAGAAGCTAGGCCGCCCTGCTCCACCGCAGCAGGCCTGGGCCAC- - - - - AAGGCG                                  | 3020 |
| Ferret      | GACTTCTCAGTGCAAAACGCAG- - - - - GAAGCCGCGCGCTCTACATCAGCAGGCCCGGGCCAG- - - - - AGGGCG                                 | 2039 |
| Lion        | GACTTCTCACAGGCGCGTGCAAAAAGAAGCTAGGCCGCCCTGCTCCACCGCAGCAGGCCTGCGGCCAC- - - - - A- - - - -                             | 1976 |
| Vaquita     | GACTTCGGAGAGGAACGTACAAAAGAAACGGAGCACGCCACGCTGCACAGCAGCAGGCCCGGGCCAG- - - - - AGCGCT                                  | 1872 |
| Pig         | GATCTCGGCGAAGAAGCTACTAGAAAGAGCGCGCACGCCGCGCTCTCCAGCAGCAGGCCCGGGCGCAG- - - - - AGCGCG                                 | 1910 |

|             |                                                                                                                      |      |
|-------------|----------------------------------------------------------------------------------------------------------------------|------|
| Majority    | GAGGGCGGAGGGCGGAGGGCCCCAGGCGCGCGGGCGGCGCGG- - - - AG- - - - - GAGGCGACGGCGGGCGGCGC                                   |      |
|             | 3130            3140            3150            3160            3170            3180            3190            3200 |      |
| Human       | GCAGGCGGAGGGCGGAGGGAGAAAAGGCGCGCGAAGGCGCGG- - - - AG- - - - - GAGGCGTGGCTGCGGCGC                                     | 583  |
| PolarBear   | -----                                                                                                                | 0    |
| Cow         | AAGGGCGGAGGG- - - - - CCCAGGCGCGGGCGCGCGT- - - - AG- - - - - GAGGCCACTGCGGCGGCGC                                     | 2003 |
| Dog         | CAGTCTGTGAGAATAACATCTTAAAGTAGGTATGAGTGCTGTT CAGG- - - - - GAATGAAAAATGCTTT CGG                                       | 2279 |
| BelugaWhale | GAGAGCGGAGGGCGGAGGGCCTCACGCGCGCGTGGCGCGT- - - - AG- - - - - GAGGCGACGGCGGCTGCGC                                      | 2044 |
| Donkey      | GAGGGCGGAGGGCGGAGGGCCCCAGGCGCGCGGGCGGCGGAGGCGGAGGCGGCAAGCGGCGGCGGCGGCGGCGC                                           | 1783 |
| Cat         | GAGGGCGGAGGGCGGAGGGCCCCAGGCGCGCGGGCGCGGAG- GAA- - - - - GAGGCGGCGGCGACGGCGC                                          | 3085 |
| Ferret      | GAGGGCGAAGGGCGGAGGGCCCCAGGCGCGCGGGCGGCGCGG- - - - AG- - - - - GAAGCGACGGCGGCGGCGC                                    | 2101 |
| Lion        | - - GGGCGGAGGGCGGAGGGCCCCAGGCGCGCGGGCGCGGAG- GAA- - - - - GAGGCGGCGGCAACGGCGC                                        | 2039 |
| Vaquita     | GAGAGCGGAGGGCGGAGGGCCTCACGCGCGCGGGCGGCGCGT- - - - AG- - - - - GAGGCGACGGCGGCTGCGC                                    | 1934 |
| Pig         | GAGGGCGGGGGA- - - - - CCCAGGCGCGGGCGGCGCGT- - - - AG- - - - - GCGGCGACGGCGGCGGCGC                                    | 1966 |

Dienstag, 3. Mai 2022 08:37

|             |                                                                                 |      |
|-------------|---------------------------------------------------------------------------------|------|
| Majority    | CCACTCCCCTCGTCCCCGCGCCCCGCGCTCGCCXCCCGCAGCCGGGCGCCGGCGCGCTCGGCTCTTTCCGCCGCCGCC  |      |
|             | 3210      3220      3230      3240      3250      3260      3270      3280      |      |
| Human       | CCACTCCCCTAGTCCCAGCGCCCTGCCGCTCGCCTCCCGCTGCCGGGCGCCGGCGCGCTCGGCTCTTTCCGCCGCCGCC | 663  |
| PolarBear   | -----                                                                           | 0    |
| Cow         | CCCCTCCCCGCGTCCCCGCGCCCCGCGCTCGCCGCCCGCAGCCGGGCGCCGGCGCGCTCGGCTCTTTCCGCCGCCGCC  | 2083 |
| Dog         | ATATAGAGCTTTGAGAATATAAATAAATAGCTCAGTTTTTTGAGGAGAGATTACGATTTTAAATAGATAAGTGATTTGA | 2359 |
| BelugaWhale | CCACTCCCCTCGTCCCCGCGCCCCGCGCTCGCCGCCCGCAGCCGGGCGCCGGCGCGCTCGGCTCTTTCCGCCGCCGCC  | 2124 |
| Donkey      | CCACTCCCCTCGTCCCCGCGCCCCGGCGCTCGCCTCCCGCCGCCGGCGCCGGCGCGCTCGGCTCTTTCCGCCGCCGCC  | 1863 |
| Cat         | CCACTCCCCTCGTCCCCGCGCCCCGCGCTCGCCTCCCGCAGCCGGGCGCCGGCGCGCTCGGCTCTTTCCGCCGCCGCC  | 3165 |
| Ferret      | CCACTCCCCTCGTCCCCGCGCCCCGCGCTCTCCTCCCGCAGCCGGGCGCCGGCGCGCTCGGGTCTTTCCGCCAGCGCC  | 2181 |
| Lion        | CCACTCCCCTCGTCCCCGCGCCCCGCGCTCGCCTCCCGCAGCCGGGCGCCGGCGCGCTCGGCTCTTTCCGCCGCCGCC  | 2119 |
| Vaquita     | CCACTCCCCTCGTCCCCGCGCCCCGCGCTCGCCGCCCGCAGCCGGGCGCCGGCGCGCTCGGCTCTTTCCGCCGCCGCC  | 2014 |
| Pig         | CCACTCCCCTCGTCCCCGCGCCCCGCGCTCGCCGCCCGCCGCCGGGCGCCGGCGCGCTCGGCTCTTTCCGCCGCCGCC  | 2046 |

|             |                                                                                     |      |
|-------------|-------------------------------------------------------------------------------------|------|
| Majority    | GCTGCCGCGCGCTGCCCCGTGCGCTCCGGCACCTTCGGCAATTTCCGTCCGGGCCCTGGCCGCCATTT- TCTCGCCGCTTG  |      |
|             | 3290      3300      3310      3320      3330      3340      3350      3360          |      |
| Human       | GCTGCCGCGCGGTGCCCCGTGCGCCTCCGGCACCTTCGGCAATTTCCGTCCGGGCCCCAGCCGCCATTT- TCTCGCCGCTTG | 742  |
| PolarBear   | -----                                                                               | 0    |
| Cow         | GCTGCCACGCGCTGCCCCGTGCGCTCCGGCACCTTCGGCAATTTCCGTCCGGGCTCTAGCCGCCATTT- TCTCTCCGCTTG  | 2162 |
| Dog         | CCAAAATCGTGTGATTTTATTAATCTAATATTTTTTTGTACTTTTAATTGTGAAGACTAAACTATGTATTTCAATAATGA    | 2439 |
| BelugaWhale | GCTGCCGCGCGCTGCCCCGTGCGCTCCAGCACCTTCGGCAATTTCCGTCCGGGACCTGGCCGCCATTT- TCTCTCCGCTTG  | 2203 |
| Donkey      | GCGGCCGCGCGCTGCCCCGTGCGCTCCGGCACCTTCGGCAATTTCCGTCCGGGCCCCGGCCGCCATTT- TCTCGCCGCTTG  | 1942 |
| Cat         | GCTGCCGCGCGCTGCCCCGTGCGCTCCGACACCTTCGGCAATTTCCGTCCGGGCCCTGGCCGCCATTT- TCTAGCCGCTTG  | 3244 |
| Ferret      | GCTGCCGCGCGCTGCCCTGTGCGCTCCGGCACCTTCGGCAATTTCCGTCCAGGCCCTGGCCGCCATTT- TCTCGCCGCTTG  | 2260 |
| Lion        | GCTGCCGCGCGCTGCCCCGTGCGCTCCGACACCTTCGGCAATTTCCGTCCGGGCCCTGGCCGCCATTT- TCTAGCCGCTTG  | 2198 |
| Vaquita     | GCTGCCGCGCGCTGCCCCGTGCGCTCCGGCACCTTCGGCAATTTCCGTCCGGGATCTGGCCGCCATTT- TCTCTCCGCTTG  | 2093 |
| Pig         | GCCGCCGCGCGCTGCCCCGTGCGCTCCGCCAGCTTCGGCAATTTCCGTCCGGGCCCTGGCCGCCATTT- TCTCTCCGCTTG  | 2125 |

Dienstag, 3. Mai 2022 08:37

| Majority    | TGTGTCTCGCXGGCTGCGTGGCTCGGTTCTTGTGAGCGAAGCTTTGTCCGGTTCGGCAATGGACGGGTAXGTAATGGGGC                                                                                             |      |
|-------------|------------------------------------------------------------------------------------------------------------------------------------------------------------------------------|------|
|             | 3370                    3380                    3390                    3400                    3410                    3420                    3430                    3440 |      |
| Human       | TGTGGCTCGCTGGCTGCGTGGCTCGGTTCTTGTGAGCGAAGCTTTGTCCGGTTCGGCAATGGACGGGTATGTAATCGGGC                                                                                             | 822  |
| PolarBear   | -----                                                                                                                                                                        | 0    |
| Cow         | TGTGTCTCGCCGGCTGCGTGGCTCGGTTCTTGTGAGCGAAGCTTTGTTCCGGTTCGGCAATGGACGGGTAGGTAACGGGTT                                                                                            | 2242 |
| Dog         | GCCACATTAACAATCCGTTATCTTGATCCTTAAAAGAAATTTGTTTAGGCAATTAGCTTCAAATTAGAGTCAGAAGTTAA                                                                                             | 2519 |
| BelugaWhale | TGTGTCTCGCCGGCTGCGTGGCTCGGTTCTTGTGAGCGAAGCTTTGTCCGGTTCGGCAATGGACGGGTAGGTAACGAGGC                                                                                             | 2283 |
| Donkey      | TGTGTCTCGCTGGCTGCGTGGCTCGGTTCTTGTGAGCGAAGCTTTGTCCGGTTCGGCAATGGACGGGTAGGTCCTGGGCC                                                                                             | 2022 |
| Cat         | TGTGTCTCGCTGGCTGCGTGGCTCGGTTCTTGTGAGCGAAGCTTTGTCCGGTTCGGCAATGGACGGGTATGTAATGGGGC                                                                                             | 3324 |
| Ferret      | TGTGTCTCGCTGGCTGCGTGGCTCGGTTCTTGTGAGCGAAGCTTTGTCCGGTTCGGCAATGGACGGGTATGTAATGGGGC                                                                                             | 2340 |
| Lion        | TGTGTCTCGCTGGCTGCGTGGCTCGGTTCTTGTGAGCGAAGCTTTGTCCGGTTCGGCAATGGACGGGTATGTAATGGGGC                                                                                             | 2278 |
| Vaquita     | TGTGTCTCGCCGGCTGCGTGGCTCGGTTCTTGTGAGCGAAGCTTTGTCCGGTTCGGCAATGGACGGGTAGGTAACGAGGC                                                                                             | 2173 |
| Pig         | TGTGTCTCGCCGGCTGCGTGGCTCGGTTCTTGTGAGCGAAGCTTTGTCCGGTTCGGCAATGGACGGGTAGGTAACGGGGC                                                                                             | 2205 |

| Majority    | CGGCGAGGAGGTGTGTG- - AGAGGGGAGTXGGACCCXCCTTCGGCCCGGTCCGGGGTCGGGCAGAAACCCTCCGGCGGCC                                                                                           |      |
|-------------|------------------------------------------------------------------------------------------------------------------------------------------------------------------------------|------|
|             | 3450                    3460                    3470                    3480                    3490                    3500                    3510                    3520 |      |
| Human       | CGGCGAGAAGGTGTGTGTGAGAGAGGAGTTGGACCGTCCTTCGGCCCGGTCCCGGGCCGGGGAGAAACCCTCCCGCGGCC                                                                                             | 902  |
| PolarBear   | -----                                                                                                                                                                        | 0    |
| Cow         | TGGCGAGGTGGTGTGTG- - AGAGGGGAGTGGGGCCCGCCTGTGGCCCGTCCGGGGTCGGGCAGAAACCCTCTGGCGGCC                                                                                            | 2320 |
| Dog         | GAGCTGGTTTGTCTTTT- - CCATTAAGGAAATAGGCCTT- - - - GTGGTACAGATCATTTGGAATCTTTCC- - T- - - C                                                                                     | 2587 |
| BelugaWhale | CGGCGAGGAGGTGTGCG- - AGAGGGGAGTGGGGCCCGCCTTCGGCCTGGTCCAGGGTCGGGCCGAAACCCCCGGCGGTC                                                                                            | 2361 |
| Donkey      | CGGCGAGGAGGCGTGCG- - AGAGGGGAGCTGGAGCCTCCTTCGGCCCGGGCCGGGGTCGGGCAGGACCCCTCGG- CGGCC                                                                                          | 2099 |
| Cat         | CGGGAAGGAAGTGTGTG- - AGAGGGGATTTGGACCCTCCTTCGGCCCGGTTCGGGGTCGGCCAGAAACCCTCCGGCGGCC                                                                                           | 3402 |
| Ferret      | CAGCGAGGAGGTGTGTA- - CGAGGGGAGTCGTACGGTCTTCGGCCGGGTCCGGGGTCGTCCAGAAACCCTCCGGCGGCC                                                                                            | 2418 |
| Lion        | CGGGAAGGAAGTGTGTG- - AGAGGGGATTTGGACCCTCCTTCGGCCCGGTTCGGGGTCGGCCAGAAACCCTCCGGCGGCC                                                                                           | 2356 |
| Vaquita     | CGGCGAGGAGGTGTGCG- - AGAGGGGAGTGGGGCCCGCCTTCGGCCTGGTCCAGGGTCGGGCCGAAACCCCCGGCCGTC                                                                                            | 2251 |
| Pig         | CGGCGAGGAGGTGTGTG- - AGAGGGGAGCGGGGCCCGCCTTCGGCCCGGGCCGGGGTCCGACCGAAACCCTCCGGCGGCC                                                                                           | 2283 |

Dienstag, 3. Mai 2022 08:37

|             |                                                                                                                      |      |
|-------------|----------------------------------------------------------------------------------------------------------------------|------|
| Majority    | CCTCCC- AGGGCT GGGCT GCCGTT ACCCAACCCCGCCCCAT CGCACACACCCTCCCTXCGCTTCCCCC- GGCGGGCTC                                 |      |
|             | 3530            3540            3550            3560            3570            3580            3590            3600 |      |
| Human       | CCTCCC- AGGGCT GGGCT GCCGTT ACCCAACCCCGCCCCAT CGCACACACCCTCCCTTTGCTTCCCCC- GGCGGGCTT                                 | 980  |
| PolarBear   | -----                                                                                                                | 0    |
| Cow         | CCTCCC- AGGGCT GGGCT GCGGTT ACCCAACCCCGCCCCAT CGCACACACCCTCCCTGGGCTTCCCCC- GGCGGGCTC                                 | 2398 |
| Dog         | ACTTTT- TGGCCAGGAAACTACTTATTTAGATCTTCTTCTAATGCTTTGCTTTT- TCCTTGAATCCT- TGACATTT                                      | 2664 |
| BelugaWhale | CCTCCCCAGGGCT GGGCT GCAGTT ACCCAACCCCGCCCCAT CGCACACACCCTCCCTTGGGCTTCCCCCTGGCGGGCTC                                  | 2441 |
| Donkey      | CCTCCC- GGGGCT GGGCT GCCGTT ACCCAACCCCGCCCCAT CGCACACACCCTCCCTCCGCTTCCCCC- GGCGGGCGC                                 | 2177 |
| Cat         | CCTCCC- AGGGCT GGGCT GCCGTT ACCCAACCCCGCCCCAT CGCACACACCCTCCCTTCGCTTCCCCC- GGCGGGCTC                                 | 3480 |
| Ferret      | CCTCCC- TGGGCTTGGCT GCCGTT ACCCAACCCCGCCCCAT CGCACACACCCTCCCTTCGTTTCCCCC- GGCGGGCTC                                  | 2496 |
| Lion        | CCTCCC- AGGGCT GGGCT GCCGTT ACCCAACCCCGCCCCAT CGCACACACCCTCCCTTCGCTTCCCCC- GGCGGGCTC                                 | 2434 |
| Vaquita     | CCTCCCCAGGGCT GGGCT GCCGTT ACCCAACCCCGCCCCAT CGCACACACCCTCCCTTGGGCTTCCCCCTGGCGGGCTC                                  | 2331 |
| Pig         | CCTCCC- AGGGCT GGGCT GCCGTT ACCCAACCCCGCCCCAT CGCACACACCCTCCCCGGGCTTCCCCC- GGCGG- CTC                                | 2360 |

|             |                                                                                                                      |      |
|-------------|----------------------------------------------------------------------------------------------------------------------|------|
| Majority    | TGGTCGAGAAAATGXGAAGAAAGCGGGCTXGTAGACTGGAGAGGCXTTGXGGCGGTGGCGGGGGCGACGACCCCGGAGAG                                     |      |
|             | 3610            3620            3630            3640            3650            3660            3670            3680 |      |
| Human       | TGGTCGAGAAAATGAGAAGAAAGCGGGCTTGGAGGCTGGGGAGGCATAGGGGCGATGGCGGGGGT GAGGATCCCGGAGTG                                    | 1060 |
| PolarBear   | -----                                                                                                                | 0    |
| Cow         | TGGTCGAGAAAACGGGAAGAAAGCGGACTCGTAGGCTT- - - - - GGCCGGCATTGGGGCGACGACCCCGGAGAA                                       | 2466 |
| Dog         | TAAcAGTGTACTATGTCAAAATTTTTGTTTGCAAACCTGTCTG- - - CTGTGTTGGGGCATGGTTCTTTGGTTTTTTAAAA                                  | 2741 |
| BelugaWhale | TGGTCGAGAAAACGGGAAGAAAGCGGGCTTGTGGACTCGACAGGCCTTG- GGGAGACGGCGGGACGACGACCCCGGGAG                                     | 2520 |
| Donkey      | TGGTCGGGAAGATGAGGAGAAAGCGGGCTCGGAGGC- - - - -                                                                        | 2213 |
| Cat         | TGGTCGAGAAAATGAGAAGAAAGCGGGCTCGTAGACTGGAGAGGCATTGGGGCGATGGCGGGGGCGACGACCCCGGAGAG                                     | 3560 |
| Ferret      | TGGTCGAGAAAATGAGAAGAAAGCGGGCTTGTAGACTGGAGAGGCATTGGGGCGATGGCGGGGGCGACGACCTCGGAGGG                                     | 2576 |
| Lion        | TGGTCGAGAAAATGAGAAGAAAGCGGGCTCGTAGACTGGAGAGGCATTGGGGCGATGGCGGGGGCGACGACCCCGGAGAG                                     | 2514 |
| Vaquita     | TGGTCGAGAAAACGGGAAGAAAGCGGGCTTGTGGACTCGGCAGGCCTTG- GGGAGACGGCGGGACGACGACCCCGGGAG                                     | 2410 |
| Pig         | GGGCCGGGAAAACGGGCAAGAAAGCGGGCTCGGGGGCCCCGGGGGCGTGGGGGCCGCGCGGGGGCGACGGCCCGGCGGAG                                     | 2440 |

Dienstag, 3. Mai 2022 08:37

| Majority    | GGAGCGGGCCCCGGCGXGGCGGCGGGGGATGGGGT- - - GGGXACCCAGAACGTC- - - TGGCCCGGCCCTGCCCCC- TC   |      |
|-------------|-----------------------------------------------------------------------------------------|------|
|             | 3690 3700 3710 3720 3730 3740 3750 3760                                                 |      |
| Human       | GGAGCGGGCACCCGGCTTGGCGGCGGGGGATGGGGT- - - GGGAACCCCATAACGTCTCCCCGGTCTGTCCCTGCCCCC- TC   | 1136 |
| PolarBear   | -----                                                                                   | 0    |
| Cow         | GCAGCGGGTCTTGGAGGGGCGGCGAGGGATGCGGT- - - GGGGGCCCCAGAATGTC- - - TCGCCCGGCCCTTCCCCCCTC   | 2539 |
| Dog         | ATTTTCAGACCTGGCACATCTTTTAGGCCTAATAC- - - ACAATAACTTGTGTA- - - - TGAATGACGTTTCCCCCTTT    | 2813 |
| BelugaWhale | ACAGCGGGTCCCGGCGGGGCGAGCGGGGGATGGGCTCTGGGGGGTCCCAGGACGTC- - - TCGCCCGGCCCTGCCCCC- TC    | 2595 |
| Donkey      | AGGGGAGGCCCGGGGCGACGGCGGGGGCCGGGGA- - - GGGACCCCGAACGTC- - - TGGCCCGGCCCTGCCTCC- TC     | 2284 |
| Cat         | GGAGCGGGCACGGA CT TGGCGGCGGGGGATGGGGT- - - GGGAACCCAGAACGTC- - - TGGCCCGTCCCTGCCCCCTCT  | 3633 |
| Ferret      | GGAGCAGGCACCCGGCTTGACGGCGGGGGATGGGGC- - - GGGAACCCAGAACGCC- - - TGGCCCGTCCCTGCCCCCTCT   | 2649 |
| Lion        | GGAGCGGGCACGGA CT TGGCGGCGGGGGATGGGGT- - - GGGAACCCAGAACGTC- - - TGGCCCGTCCCTGCCCCCTCT  | 2587 |
| Vaquita     | ACAGCGGGTCCCGGCGGGGCGAGCGGGGGATGGGCTCTGGGGGGTCCCAGGACGTC- - - TCGCCCGGCCCTGCCCCC- TC    | 2485 |
| Pig         | GGAGCGGGCCGCGGCGGGGCGGCGGGCGCTGGGGT- - - GGGGGCCCCGGG- - - - - - CCGCCCGGCCCTGCCCCC- TC | 2507 |

| Majority    | TAGGAGCCATTTTCGATCCGTAACTGGGACCCGAACCCCGGGT XAGCGGCCTGTGGGAGCGAGTGTAGTGGCC- GAGA       |      |
|-------------|----------------------------------------------------------------------------------------|------|
|             | 3770 3780 3790 3800 3810 3820 3830 3840                                                |      |
| Human       | TAGGAGCCATTTTCGATCCGTACCTTGGGACCCGACCCTTGGGT TAGCGGTGCCTGTGAGAGCGAGTGGGATGGGCAGAGA     | 1216 |
| PolarBear   | -----                                                                                  | 0    |
| Cow         | TAGGAGCCATTTTCGATCCGTAACTGGGACCCGACCCGGACCCCGGACGAGCGGT TCCGGTGGGAGCGAGTGTAGCGCCGGAGA  | 2619 |
| Dog         | CAAGTATGAATAGTCTTGGGAGGCTATAGTGGTAGTGA CTGTT- GACAATATTTTTTGAATTCTTAAAATTTTC- - - - A  | 2887 |
| BelugaWhale | TAGGAGCCATTTTCGATCCGTAACTGGGACCCGACCCGCGGGGCGAGCGGCGCGGCTGGGAGCGGGTGTAGCGCCGGAGA       | 2675 |
| Donkey      | AAGGAGCCATTTTCGCTCTGTAACTGGGACCCGAACCCGGGGGAGCGGCGCCTG- GGGAGCGGGGTAGGGAC- - GAGA      | 2361 |
| Cat         | - AGGAGCCATTTTCGATCCGTAACTGGGACCCGAACCCCTGGGT- AGCCGCGCCTGTGGGAGCGAATGTTGTGGCCAAAGA    | 3711 |
| Ferret      | TAGGAGCCATTTTCGATCCGTAGCCTGGGACCCGAACCCCTGGGT- AGTCGCGCCTGTGGAAGCGAGTGTAGTGCC- - - - A | 2723 |
| Lion        | - AGGAGCCATTTTCGATCCGTAACTGGGACCCGAACCCCTGGGT- AGCCGCGCCTGTGGGAGCGAATGTTGTGGCCAAAGA    | 2665 |
| Vaquita     | TAGGAGCCATTTTCGATCCGTAACTGGGACCCGACCCGCGGGGCGAGTGGCGCGGCTGGGAGCGGGTGTAGCGCCGGAGA       | 2565 |
| Pig         | ACGGAGCCATTTTCGGCCGTAACTGGGACCCGAACCCCGGGGCGAGCGGCGCCGGGGGAGCGCGTGTGGCGGCCCGGGG        | 2587 |



Dienstag, 3. Mai 2022 08:37

| Majority    | G X G A G G C C T G T G T - - - G G G A G T C - - - - - C C C A G G G G A G A G X A G A G A G G X - X C C G X - - - - - T G C A C C C C A                       |      |      |      |      |      |      |      |  |  |      |
|-------------|-----------------------------------------------------------------------------------------------------------------------------------------------------------------|------|------|------|------|------|------|------|--|--|------|
|             | 3850                                                                                                                                                            | 3860 | 3870 | 3880 | 3890 | 3900 | 3910 | 3920 |  |  |      |
| Human       | C A G G C C T T T G G A T T G G G G G A G C C - - - - - T C T A G G G G A A G A G G A G A G A G G C A C C C - C - - - - - A T G T G G A C C C C A               |      |      |      |      |      |      |      |  |  | 1278 |
| PolarBear   | -----                                                                                                                                                           |      |      |      |      |      |      |      |  |  | 0    |
| Cow         | G C G A G G C C T A C G T T G G G G G A G G G G G G C G G C T C C C C G C T G A G A G A A C A G A G G C C C C C C C C C C T C C C C G G A C C C C C T C C C T A |      |      |      |      |      |      |      |  |  | 2699 |
| Dog         | T C T A C A A C A A T G T - - - G A T A T T C - - - - - C T T A G A A T A T C C T A A G G A G A T A T T T - - - - - T G T A T T T T C                           |      |      |      |      |      |      |      |  |  | 2941 |
| BelugaWhale | G C G A G G C C T G C G T - - - G G G A G T C - - - - - T C C C T G C G G A G A G A G A G G - - - - - C C G C C C C C A C C T A G G C C C C C - - C C A A       |      |      |      |      |      |      |      |  |  | 2737 |
| Donkey      | G G G A G G C C T G G G T - - - G G G C C T C - - - - - C C G G G G G A G A G C C G C G - - G - - C C C G - - - - - G G G C C C C C                             |      |      |      |      |      |      |      |  |  | 2410 |
| Cat         | G A G A G G C C T G T G T - - - G G G G T T - - - - - G T T A G G G G A T G G G A G A A A G G C G T C T G T G - - - - - T G C A C C C C A                       |      |      |      |      |      |      |      |  |  | 3768 |
| Ferret      | C A G A G G C C T G T G T - - - G G G G T G - - - - - G C T A G G G G A G A G G A G A G A G G C A T C T G T A - - - - - T G C A C C C C A                       |      |      |      |      |      |      |      |  |  | 2780 |
| Lion        | G A G A G G C C T G T G T - - - G G G G T T - - - - - G T T A G G G G A T G G G A G A A A G G C G T C T G T G - - - - - T G C A C C C C A                       |      |      |      |      |      |      |      |  |  | 2722 |
| Vaquita     | G C G A G G C C T G C G T - - - G G G A G G C - - - - - T C C C T G C G G A G A G A G A G G - - - - - C C G C C C C C A C C T A G G C C C C T - - C C A A       |      |      |      |      |      |      |      |  |  | 2627 |
| Pig         | G G G G G G G C A G G C C T G G G G G A G G G - - - - - C C C C G G G G G G A G A G C G G - - - - -                                                             |      |      |      |      |      |      |      |  |  | 2628 |

| Majority    | G C C G T C C T X A G C C T C C C C G G C C T C G C C C G G C C C G C - - - - - C C T G G C T G G G G G A G A T G C C G G T G G C G G G A G C T C C G G G G A A |      |      |      |      |      |      |      |  |  |      |
|-------------|-----------------------------------------------------------------------------------------------------------------------------------------------------------------|------|------|------|------|------|------|------|--|--|------|
|             | 3930                                                                                                                                                            | 3940 | 3950 | 3960 | 3970 | 3980 | 3990 | 4000 |  |  |      |
| Human       | G C C A T G A G C A A C C T C T C C G G C C T C G C C C G G C C C T C - - - - - C G T G G T C G G G A G A G A T G C C G G T G G C G G G A G C T C C G G G G A A |      |      |      |      |      |      |      |  |  | 1353 |
| PolarBear   | -----                                                                                                                                                           |      |      |      |      |      |      |      |  |  | 0    |
| Cow         | G A A G T C C C A G G C C T T C T T G G C C C C G C C T G G C C C G C - - - - - C C T G G C T G G G G G A G A T G C C G G T G G C G G G A G C T C C G G G G A A |      |      |      |      |      |      |      |  |  | 2774 |
| Dog         | T T T T T T C T G C T T A C T A A A T A T T T G T T C A T A C T T G - - - - - A T A T T T A G T C T T A T T T G T T G A G T T C A T A T T A C A T A G A T C A   |      |      |      |      |      |      |      |  |  | 3016 |
| BelugaWhale | G C C G T C C C A A G C C T C C C C G G T T T C G C C C G G C C C G C C C C C C C G G C T G G G G G A G A T G C C G G T G G C G G G A G C T C C C G G G A A     |      |      |      |      |      |      |      |  |  | 2817 |
| Donkey      | G G C C G G G G A G T C G T C C T C G G C G T C G C G C G G C C C G C - - - - - C G G G C G G G G G A - - T G C C G G T G G C G G G A G C C C C C G G G A G     |      |      |      |      |      |      |      |  |  | 2482 |
| Cat         | G C C G T C C T C C A C C T G C C C G G C C T C G C C C G G C G G G C - - - - - C C A G G C T G G G G G A G A T G C C G G T G G C G G G A G C T C G G G G G A A |      |      |      |      |      |      |      |  |  | 3843 |
| Ferret      | G C C G T C C T C A G C C T C C C C G G C C T C G C C C G G C C C G C - - - - - C C T G G C A G G G G G A G A T G C C G G T G G C G G G A G C T C G G G G G A A |      |      |      |      |      |      |      |  |  | 2855 |
| Lion        | G C C G T C C T C C A T C T G C C G G G C C T C G C C C G G C G G G C - - - - - C C A G G C T G G G G G A G A T G C C G G T G G C G G G A G C T C G G G G G A A |      |      |      |      |      |      |      |  |  | 2797 |
| Vaquita     | G C C G T C C C A A G C C T C C C C G G T T T C G C C C G G C C C G C - - - - - C C C G G C T G C G G G A G A T G C C G G T G G C G A G A G C T C C C G G G A A |      |      |      |      |      |      |      |  |  | 2702 |
| Pig         | - - - G C C C G T G G C C C C G C G G C C G C C C G G C C G C G C - - - - - C C T G G C G G A G G G G G A T G C G G G T G G C G G G A G C G C - G G G G A A     |      |      |      |      |      |      |      |  |  | 2699 |

Dienstag, 3. Mai 2022 08:37

| Majority    | AGCTAAGTGGGAGCCGCTGGGGAAGGGGGGGG- - - - GGGGXGGCGT GCGGCGGCGGGAGGAAG- GGGGAGGGCAGATGT     |      |
|-------------|-------------------------------------------------------------------------------------------|------|
|             | 4010 4020 4030 4040 4050 4060 4070 4080                                                   |      |
| Human       | AGCCTAGTGGGAGCCGCTGGGGAAGGGGGG- - - - - AGGGCGT GCGGCGGCGGGAGGAAG- GGGGAGGGCAGATGT        | 1422 |
| PolarBear   | -----                                                                                     | 0    |
| Cow         | AGCTAAGTGGGAGCCGCGGGGGAAGGGGGG- - - - - CGGGGAGGCGT GCGGCGGCGGGAGGAAG- GGGGAGGGCAGATGT    | 2847 |
| Dog         | GGGGAGAGAGAGT GAGCTTTTCTGGGGAAGGCA- - - ATCTTACTTGGCAGTGATATTTTCTAA- GTTGAAG- - - - - T   | 3085 |
| BelugaWhale | GGCTGAGTGGGAGCCGCGGGGGAAGGGGGGGG- - - CGGGGAGGCGT GCGGTGGCGGGAGGAAG- GGGGAGGGCAGATGT      | 2892 |
| Donkey      | AGCTGAGTGGGAGCCGC- - - - - GGGGAG- - - - - GCGT GCGGCGGCGGCGGCGGG- - - GAGGGCAGATGT       | 2538 |
| Cat         | AGCTAAGTGGGAGCCGCTGGGGAAGGGGGGGGGG- CGGGGAGGGCGT GCGGCGGCGGGAGGAAG- GGGGAAGGCAGATGT       | 3921 |
| Ferret      | AGCTAAGTGGGAGCCGCTGGGGAAGGGGGGGGGCG- - - GGGAGGGCGT GCGGCGGCGCGAGGAAG- GGGGATG- - - - - T | 2924 |
| Lion        | AGCTAAGTGGGAGCCGCTGGGGAAGGGGGGGGGGGCGGGGGGGGGGGGGGGGGGGGGGGAGGAAG- GGGGAAGGCAGATGT        | 2876 |
| Vaquita     | GGCTGAGTGGGAGCCGCGGGGGAAGGGGGGGGGG- - - CGGGGAGGCGT GCGGTGGCGGGAGGAAG- GGGGAGGGCAGATGT    | 2779 |
| Pig         | GGCGAAGTGGGAGCCGCGGGCGAAGGGGGG- - - - - CGGGGAGGCGCGGCGGCGGGAGGAAGGGGAGGGCAGATGT          | 2773 |

| Majority    | CATACTCCTTTGTTTTCACTXGAGTCTGGTAGTGGGGGCGGGAGGCTG- AAAAAATGCCTTTTT- GTGGGGCCTAAGAAC    |      |
|-------------|---------------------------------------------------------------------------------------|------|
|             | 4090 4100 4110 4120 4130 4140 4150 4160                                               |      |
| Human       | CATACTCCTTTGTTTTCATTTGAGTCTGGTAGTGGGGGCGGGAGGGAGGAAAAAATGCCTTTTT- GTGGGGACTGAAAAC     | 1501 |
| PolarBear   | -----                                                                                 | 0    |
| Cow         | CACACTCTTTTGTTCCTTTCACTGGAGTCTGCTAGTGGGGGCGGGAGGCTG- AAAAA- TGCCTTCT- GTGCGGCCTAAGAAC | 2924 |
| Dog         | AGT- - TGCAGGGTTTGAATTTGGGAATAGTT- CATGAGTGCAGGATAT- AGAATGTAAAATTACCATTGAAATAGATATC  | 3161 |
| BelugaWhale | CACACTCCTTTGTTTTCACTGGAGTCCGCTAGTGGGGGCGGGAGGCTGAAAAAAACGCCTTTTT- GTGTGGCCTAAGATC     | 2971 |
| Donkey      | CATACTCCTTTGTTTTCGCTGGAGTCTGGGAGTGGGGGCGGGAGGCGG- AAAAAATGCCTTTTT- GTGGGGCCTAAGAAC    | 2616 |
| Cat         | CATACTCCTTTGTTTTCACTT GAGTCTGGTAGTGGGGGCGGGAGACCG- AAAAAA- TGCCTTTTTGTGGGGCCTAAGC     | 3999 |
| Ferret      | CATACTCCTTTGTTTTCACTT GAGTCTGGTAGTGGGGGCGGGAGACAG- AAAAAATGCCTTTTTGTGGGGCCTAAGAAC     | 3003 |
| Lion        | CATACTCCTTTGTTTTCACTT GAGTCTGGTAGTGGGGGCGGGAGACCG- AAAAAAATGCCTTTTTGTGGGGCCTAAGC      | 2955 |
| Vaquita     | CACACTCCTTTGTTTTCACTGGAGTCCGCTAGTGGGGGCGGGAGGCTGAAAAA- CGCCTTTTT- GTGTGGCCTAAGATC     | 2857 |
| Pig         | CACACTCCTTTGTTTTCACTGGCAGCGGCTGGTGGGGGCGGGAGGCTGCAAAAA- GGCCTTCTTGTGGGGCCTGCGAGC      | 2852 |

Dienstag, 3. Mai 2022 08:37

|             |                                                                                                                      |      |
|-------------|----------------------------------------------------------------------------------------------------------------------|------|
| Majority    | GTTCAAGGCTTGGCAAAGGGCCCAGAAATTAATCATCT- -AAAAAACGAAGTGTTTGTGGTGGACATCAGT CACATGG                                     |      |
|             | 4170            4180            4190            4200            4210            4220            4230            4240 |      |
| Human       | ATTC AAGGCTTGGCAAAGGGCCCAGAAATTAATCATCT- -AAAAAACGAAGTGTTTGAAGCCGACATCAGT CACATGG                                    | 1579 |
| PolarBear   | -----                                                                                                                | 0    |
| Cow         | GTTGAAGGCTTGGCAGAAGGGCCCAGAAATTAATCATCT- CAAAAAACGAAGTGTTTGTGGTGGACATCAGT CACATGG                                    | 3003 |
| Dog         | CTCTGTAATTTTGTATAAATGAATGAATGATGTAAGTATGG- AGAGAACGAACTGATAAGAGCCACCAGGAGTAGGCTGA                                    | 3240 |
| BelugaWhale | GTTCCAAGCTTGGCAGAAGGGCCCAGCAATTAATCATCT- -AAAAAACGAAGTGTTTGTGGTGGACATCAGT CACATGG                                    | 3049 |
| Donkey      | ATTGGAGGCTTGGCAAGAGGGCCCAGAAATTAATCATCT- -CAGAAACGGAGTGTTTGTGGTGGCATCAGT CACATGG                                     | 2694 |
| Cat         | GTTCAAGGCTTGGCAAAGGGCCCAGAAATTAATCATCTG- AAAAACCCAAGTGTTTGTGGTGGCATCAGT CACATGG                                      | 4078 |
| Ferret      | ATTC AAGGCTTGGCAAAGGGCCCAGAAATTAATTTATCTT- AAAAATCAAGTGTTTGTGGTGGACATCAGT CACATGG                                    | 3082 |
| Lion        | GTTCAAGGCTTGGCAAAGGGCCCAGAAATTAATCATCTG- AAAAACCCAAGTGTTTGTGGTGGCATCAGT CACATGG                                      | 3034 |
| Vaquita     | GTTCCAAGCTTGGCAGAAGGGCCCAGCAATTAATCATCT- -AAAAAACGAAGTGTTTGTGGTGGACATCAGT CACATGG                                    | 2935 |
| Pig         | CTGGGCGGCTTGGCAGAGGGGCCGCGGAATTCAGT CATCTGCACAAAACGAAGCGTTTGTGGTGGACATCAGT CACATGG                                   | 2932 |

|             |                                                                                                                      |      |
|-------------|----------------------------------------------------------------------------------------------------------------------|------|
| Majority    | GCAAAGGCCAACAGCCATGGCAGAAACAAGAGCAGATA- GTCAACAC- AGGGCCATCTTTT XAGCTACTTTGACCAGTTT                                  |      |
|             | 4250            4260            4270            4280            4290            4300            4310            4320 |      |
| Human       | GCAAAGGCCAACAGCAATGGCAGAAACAAGAGCAGATA- GTCAACAA- AGGGCTATCTCTTTAGCTACTTTGGT CAGTTT                                  | 1657 |
| PolarBear   | -----                                                                                                                | 0    |
| Cow         | GCAAAGGCTAAGAGCTGTGGCAGAAAGAAGAGCAGATA- GTCAACAC- AGGGCCATCTTTT CAGCTACTTTGACCAGTTT                                  | 3081 |
| Dog         | CAGAAATGAGACAGAGAATCAGATGTCCAGTTATGGTTTATTGGTTT- AACAGTTTTCTATATAT- TAGTAGAGGAGA- -                                  | 3316 |
| BelugaWhale | GCAAAGGCCAACAGCCATGGCAGAAACAAGAGTAGATA- GTCAACAC- AGGGCCATCTTTT CAGCTACTTTGACCAGTTT                                  | 3127 |
| Donkey      | GCAGAGGCCAAAAGCCATGGCAGAGCCCAGAGCAGACA- GTCAACAC- AAGGCCATCTTTT TTAGCTCCTTTGACCAGTTT                                 | 2772 |
| Cat         | GCAAAGGCCAACAGCCATGGCAGAAACAAGAGCAGATA- GTCAACAC- AGGGCCATTTTTTTTTT- -AGCCACTTTGAC- -                                | 4152 |
| Ferret      | GCAAAGGCCAACAGCCACGGCAGAAACAAGAGCAGAGAAGTCAACAC- AGGGCCATTTTTTTTGGT C- ACTTTGACCAGTTT                                | 3160 |
| Lion        | GCAAAGGCCAACAGCCATGGCAGAAACAAGAGCAGATA- GTCAACAC- AGGGCCATTTTTTTTTT- -AGCCACTTTGAC- -                                | 3109 |
| Vaquita     | GCAAAGGCCAACAGCCATGGCAGAAACAAGAGTAGATA- GTCAACAC- AGGGCCATCTTTT CAGCTACTTTGACCAGTTT                                  | 3013 |
| Pig         | GCCGAGGCCACCAGCCATGGCAGAAACCAGAGCAGATA- GGCAGCACGAGGGCCGCTCTCCTCGGCTACTTTGACCAGTTT                                   | 3011 |

Dienstag, 3. Mai 2022 08:37

|             |                                                                                                                      |      |
|-------------|----------------------------------------------------------------------------------------------------------------------|------|
| Majority    | CTGGAAAAACXAAAACAACCT- CAAA- AAGCCAGAACCGTGCTGCATCTTTGAG- - CX- - AGTGGAGATAGAATGCTGAGT                              |      |
|             | 4330            4340            4350            4360            4370            4380            4390            4400 |      |
| Human       | CTGGAAAAACGACTATAA- - - - - A- - AACCCAGAACCATGCTGCATCTTTGCGAACCTGAGTCAAGACGGAATGCTGAGT                              | 1730 |
| PolarBear   | - - - - -                                                                                                            | 0    |
| Cow         | CGGGAAAAACA AAAACAACCTCTTAAAAAGCCAGAACCAT- CTGCACCTTTGAG- - - - - GCTGGCGATAGAATGCTAAGT                              | 3154 |
| Dog         | - - AAAAAATTGGAAAAAATGTAAA- AATAATTGCCAGCCGTTTTTTTTTAAAT- CCATTTTTTAATATAAAAAGTTTGAAT                                | 3392 |
| BelugaWhale | CTGGAAAAACA AAAACAACCTCCAAA- AAGCCAGAGCCGTGCTGCATCTTTGAG- - - - - GCTGGCGGTAG- - TGCTAAGT                            | 3198 |
| Donkey      | CTGGAAAAACGAAAACAGCTACCCA- AAACCAGAACCGTGTTGCATCCCTGAGAGCCCGAGTGGAAATAGAATGCTGAGT                                    | 2851 |
| Cat         | - - - CGGTTTTCGGGAAAAA- - - CAAA- AAGCCAGAACCGTGCTGCATCTTTGAGAGCCCTAGTGCAGATAGAATGCTGAGT                             | 4225 |
| Ferret      | CCGGAAAAACA AAAACAACCTACAAA- AAGCAAGACCCGTGCTGCATCTTTGATATCCCGAGTGGAGACAGAATGCTGAGG                                  | 3239 |
| Lion        | - - - CGGTTTTCGGGAAAAA- - - CAAA- AAGCCAGAACCGTGCTGCATCTTTGAGAGCCCTAGTGCAGGTAGAATGCTGAGT                             | 3182 |
| Vaquita     | CTGGAAAAACA AAAACAACCTCCCAA- AAGCCAGAGCCGTGCTGCATCTTTGAG- - - - - GCTGGCGATAG- - TGCTAAGT                            | 3084 |
| Pig         | GTGGACCCACAAAAGCAACTCCACCAAGCCCCAGCCGTGCTGCGTCTTTGAC- - - - - AGCGGCGGTAG- - TGCCCAGC                                | 3083 |

|             |                                                                                                                      |      |
|-------------|----------------------------------------------------------------------------------------------------------------------|------|
| Majority    | GAGGTGAGG- CAAGGGCTTTGGGAAATGATACGG- ACCXGGGTCTC- - CCTGGTACTTAACGCTCCACATCTGAAAAGAC                                 |      |
|             | 4410            4420            4430            4440            4450            4460            4470            4480 |      |
| Human       | GAGGTGAGAGGCAAGACTGTG- - AAATGGTAGGG- ACCGATGTCTC- - - - - GC- TCATATGCTTCACACCTGAAAAGAC                             | 1800 |
| PolarBear   | - - - - -                                                                                                            | 0    |
| Cow         | GAGGTGAGG- CAAAGGCTTCGGGAAATGATACGGGACCAGGGTTTC- - CCTG- CACTTAACGCTCCACACCTGAAAAGAC                                 | 3230 |
| Dog         | AACTGAAGT- TTTGTTTTGCGGACTTTTTCTAAGA- TGGTGGTTAAT- - AACTTTTGCTTTGGAGTCATGCCTGTGTATAA                                | 3468 |
| BelugaWhale | GAGGTGAGG- CAAGGGCTTCGGAAAATGTTACGG- ACCAGGGTCTCTCCCTGGTACTTAACGCTCCCCATCTGAAAAGAC                                   | 3276 |
| Donkey      | GAGGTGAGG- CGAGGGCTTAGGAAAATGGTATGG- TCCGGGGTCTC- - CCTGGTGCTCAACGCTCCACATCTGAAAAGAC                                 | 2927 |
| Cat         | GAGGTGAGGGCAAGGGCTTTGGGAAACGACCCGGG- ACCGGGGTCTC- - CCTGGTACTTAATGCTCTACATCTGAAAAGAC                                 | 4302 |
| Ferret      | GACGTGAGG- CAAGAGCTTTGGGAAATGATACTG- ACCCGGGTCTC- - CCTGGTACTTAATGCTCTACATCTGAAAAGAC                                 | 3315 |
| Lion        | GAGGTGAGGGCAAGGGCTTTGGGAAGCGACCAGG- ACCGGGGTCTC- - CCTGGTACTTAATGCTCTACATCTGAAAAGAC                                  | 3259 |
| Vaquita     | GAGGTGAGG- CAAGGGCTTCGGAAAATGATACGG- ACCAGGGTCTCTCCCTGGTACTTAACGCTCCCCATCTGAAAAGAC                                   | 3162 |
| Pig         | GAGGTGAGG- CCAGGGCTTTGGGCAGTGATGCGG- ACCAGGGTCTC- - CGTGGTGCTTAACGCTCCACACCTGAAAAGTC                                 | 3159 |

Dienstag, 3. Mai 2022 08:37

|             |                                                                                                                      |      |
|-------------|----------------------------------------------------------------------------------------------------------------------|------|
| Majority    | TCTT- AATAATTTAACTCATTGTTAGAAAGGAGGCACCCTT- TAGGGCGAAAATAXAGCTGTATTCAGCCCGTTTGG- - -                                 |      |
|             | 4490            4500            4510            4520            4530            4540            4550            4560 |      |
| Human       | TCA- - - GTAATTTAACTCAATGTTAGAAAGGGGGCACGCTT- AAGGTCAAAAATACAGCAGTATGCAGCTCTTTTGG- - -                               | 1873 |
| PolarBear   | -----                                                                                                                | 0    |
| Cow         | TCT- - - AATAATTTAACTCATTGTT- - - AAAGGAGGCACCCTT- TAGGGCGAAA- TGTAGCCGTATTCAGCCCGTTTGG- - -                         | 3301 |
| Dog         | GTAA- TTAAGTTTTCATATGTATATATATTCTTTTAATGTG- CCTGGTTAAAATTCATAGTGGTAAGTATTTCTCAC- - -                                 | 3543 |
| BelugaWhale | TCTTTAATAATTTAACTCATTGTTAGAAAGGAGGCACCCTT- TAGGGTAAAAAATAGCCGTATTCATCCCGTTTGG- - -                                   | 3352 |
| Donkey      | TAA- - - ATAATTTAACTCATTGTTAGGAAGGAGGCACCCTT- TAGGCCGAAAATGCAGCTGTATTAAGCCCATTTGGCAG                                 | 3003 |
| Cat         | TCTT- AATGATTT- - - - AATTGTTGGAAAGGAGGCACCCTT- GAGGGCGAAAAGAGAGCTGTATTGGGCCCATTTGG- - -                             | 4373 |
| Ferret      | TCAA- AGTGATTTAGCTAATTGTTAGAAAAGAGGCACCCTT- GAGGGCGAAAATATAGCTCTATTCAGCCCTTCTGG- - -                                 | 3390 |
| Lion        | TCTT- AATGATTT- - - - AATTGTTGGAAAGGAGGCACCCTT- GAGGGCGAAAAGAGAGCTGTATTGGGCCCATTTGG- - -                             | 3330 |
| Vaquita     | TCTTTAATAATTTAACTCATTGTTAGAAAGGAGGCACCCTT- TAGGGTAAAAATATAGCCGTATTCATCCCGTTTGG- - -                                  | 3238 |
| Pig         | CCTT- AATAATTTAACTCGTTAG- - - GAAGGAGGCACCCTGTAGGGCGAAAAGTACAGCTGTAGCCAACTCGTT- - - - -                              | 3229 |

|             |                                                                                                                      |      |
|-------------|----------------------------------------------------------------------------------------------------------------------|------|
| Majority    | GGGTATA- - AAAACAGTATCATTAAAAAGTACATTTATTAGAATCAGTGACA- GTATTTGAAGAGTCA- - AGTAAAATA                                 |      |
|             | 4570            4580            4590            4600            4610            4620            4630            4640 |      |
| Human       | GAGTGTA- - AACATAGTATCATTAAACAAGTACATTTATTAAAATCAGTGA- - - GTATTTGAAGAATCA- - - - - ACAATT                           | 1943 |
| PolarBear   | -----                                                                                                                | 0    |
| Cow         | GAGCATAGGAAAACAGTATCT- - - - - TTTATTGGAATCAGTGACT- GTATTTGAAGGGTCAGAAGTAAAATA                                       | 3367 |
| Dog         | TGAGTCCC- AGTCCTGTTTCTCAGGTGAGGTAATTACGTTAAATTTTTCTGGTGCATTTTTTCTGA- - AGTGTTTTT                                     | 3620 |
| BelugaWhale | GGGCATAGGAAAAGAGTATCACTTAAAAAATACGTTTATTGGAATCATTGACA- GTATTTGAAGGGTCAGAAGTAAAATG                                    | 3431 |
| Donkey      | GGGGCTATAAACACAGTATCGTTTAAAAAGTACATGTATTAGAATCGGTGACA- GTGTTTGAAGAGTCA- - AGTAAAATG                                  | 3080 |
| Cat         | GGGTAT- - - AAAAACGAATCATTAAAAAGTACATCTATTAGAATCAGTGGA- GTATATGAAGAGTCC- - TGTAAAGATA                                | 4447 |
| Ferret      | GGGTGTA- AAAACCGTATCATTAAAAAGAGCGTATTTATTAGAATCAGTGACA- ACATACGAAGAGCCA- - AATAAAATT                                 | 3466 |
| Lion        | GGGTAT- - - AAAAACGAATCATTAAAAAGTACATCTAGTAGAATCAGTGGTA- GTATATGAAGAGTCC- - TGTAAAATA                                | 3404 |
| Vaquita     | GGGCATAGGAAAACAGTATCACTTAAAAAGTACGTTTATTGGAATCCTTGACA- GTATTTGAAGGGTCAGAAGTAAAATG                                    | 3317 |
| Pig         | - - - - - GC- - - AACAAAGTCCA- - - - - TTTATTGGGCTCGTTGGCA- GTGCTTGAAGGGTCAGGAGTAAAATA                               | 3286 |

Dienstag, 3. Mai 2022 08:37

|             |                                                                                                                                                                              |      |
|-------------|------------------------------------------------------------------------------------------------------------------------------------------------------------------------------|------|
| Majority    | TGAGTTTATTTTAA- - - - GCGTCTGGAGTTTGGTGT- TTTTAAAAGATATTAAGTGXA- GATCATATAAAAAGTTA- - ACA                                                                                    |      |
|             | 4650                    4660                    4670                    4680                    4690                    4700                    4710                    4720 |      |
| Human       | TGGTTAAGC- - - - - GCCTAGAGTTTGGTGTGTTTTAAAAGGTAATAAAAACAAGATTTTATAAAAAGTTAACACA                                                                                             | 2012 |
| PolarBear   | - - - - -                                                                                                                                                                    | 0    |
| Cow         | CGAGGTTTTTTTAA- - - - GCATCTGGATTTTCGATGT- TTTTTAAGGATATCAAGTGCA- GATCTAGTAAAAGTTA- - ACA                                                                                    | 3439 |
| Dog         | TAGGTTTGTAT- - - - - ATTATCAAATATTAGCAT- CCTTGCTTATTTACACAAATG- GGTTTTCCACAAAT- - - - ACC                                                                                    | 3687 |
| BelugaWhale | TGAGTTTATTTTAA- - - - TCATCTGGAGTTTCGGTAT- TTTGTGAAGAACTAAGTGCA- GGTACATAAAAAGTTA- - ACA                                                                                     | 3503 |
| Donkey      | AGAGTTTATTTTCACTAAGCGTCTGAAGTTTGGTGT- TTTTAAAAGACATTGAGTGAA- GACCATGTAAAAGTTA- - CCA                                                                                         | 3156 |
| Cat         | TGAGTTTATTTTAAATTAAGTGTGGAGTTTGGTGT- TTTTAAAAGATATTAAGGGAA- GACCATATCAAAGTGA- - ACA                                                                                          | 4523 |
| Ferret      | TATTTTGTAT- - - - - TGTTTGGAGTTTAGTGT- TTTTAAAAGATATTATGGATA- GACCATATCAAAGT- - - - TAA                                                                                      | 3530 |
| Lion        | TGAGTTTATTTTAAATTAAGTGTGGAGTTTGGTAT- TTTTAAAAGATATTAAGGGAA- GACCATATCAAAGTGA- - ACA                                                                                          | 3480 |
| Vaquita     | TGAGTTTATTTTAA- - - - TCATCTGGAGTTTCGGTAT- TTTGTGAAGAACTAAGTGCA- GGTACATAAAAAGTTA- - ACA                                                                                     | 3389 |
| Pig         | CGAGTTTATTTTAA- - - - GCGCCTGGGTTGGGTGT- TTTTTAAGAGAGTAAGTAA- GATCCTGTAAAAGTTA- - GCA                                                                                        | 3358 |

|             |                                                                                                                                                                              |      |
|-------------|------------------------------------------------------------------------------------------------------------------------------------------------------------------------------|------|
| Majority    | GAGTAACAAAAXTTAAATCATCCTAGAGGTTATCTAGAGATTATTTTCCAGATGAAAC- T- - - - - AAATCCAGAGAAG                                                                                         |      |
|             | 4730                    4740                    4750                    4760                    4770                    4780                    4790                    4800 |      |
| Human       | GTCTCACAGAATTCAAATCATCCTAGATGTTACCTAAAGATTATTTTCCAGATGAAAC- - - - - AAATCCAGAGAAG                                                                                            | 2083 |
| PolarBear   | - - - - -                                                                                                                                                                    | 0    |
| Cow         | GACTAACGAAATTTGACTCATCCTAGGTGTTCTCTAAAGATTATTTTCTAGATGAAAC- - - - - AAATCCAGAT- - -                                                                                          | 3507 |
| Dog         | ATGTGTACTGGCTCACTACTTGCTTTTTTTTAAAAGATAGCTTTATTGAGAGAAAATTT- - - - - GACATAAAATAAA                                                                                           | 3760 |
| BelugaWhale | GATTAACAAAATTTGAATCTTCCTAGAGGTTCTCTGGAGATTATTTTCCAGATGAAAC- - - - - AAATCCAGAGAAG                                                                                            | 3574 |
| Donkey      | G- - TAACAGAACTTAAATCATCCTAGTGCTTATCTAGAGTTTATTTTCTAGAAAACAGATCATAGATAGATCTAGAGAAG                                                                                           | 3234 |
| Cat         | AAGTCAACAACTTAAAGTTGTCCGAGAGGTTATCTAGAGGTAATTTTCCACATGAAATCT- - - - - AGATCTAAAGAAG                                                                                          | 4596 |
| Ferret      | CAGTAACAAACTTACATTATCCTAGAGGTTATCTAGAGATTGTTTTCCACATGAAATGT- - - - - AAATCTAGAGAAG                                                                                           | 3603 |
| Lion        | AAGTAACCAAACTTAAAGTTGTCCGAGAGGTTATCTAGAGATAATTTTCCACATGAAATCT- - - - - AGATCTAAAGAAG                                                                                         | 3553 |
| Vaquita     | GATTAACAAAATTTGAATCTTCCTAGAGGTTCTCTGGAGATTATTTTCCAGATGAAAC- - - - - AAATCCAGAGAAG                                                                                            | 3460 |
| Pig         | GACTAACAAAATTTAAATCACCTCGAGATGCTCTAGAGAGCATTCTCCAGATGAAACCT- - - - - AAGTCCAGAGAAA                                                                                           | 3431 |

Dienstag, 3. Mai 2022 08:37

| Majority    | T T C A C T A T T T - C C C C A G A T C A A C A T G G A A A T T G A T G G C A A A A C T - - T G C A C T G G A A T T - - - C A T G T T T C C T G A T T C - - - - |      |
|-------------|-----------------------------------------------------------------------------------------------------------------------------------------------------------------|------|
|             | 4810 4820 4830 4840 4850 4860 4870 4880                                                                                                                         |      |
| Human       | T T C A G T A T T C C C C C A G A T C A A C A C G G A A A T T G A T G T C A A A A C T - - T G C A C T A G A A T T - - - C A T G T T T C C T G A T T C C T G G   | 2158 |
| PolarBear   | -----                                                                                                                                                           | 0    |
| Cow         | T T C A C T G T T T T C C C C A G A T C A G C A T G G A A A T A G A T G G C A A A A T T - - T G T A T T G A A T T T - - - C A T G T T T C C T C A T C C - - - - | 3578 |
| Dog         | C T G C A C T T A T - T A T T G G A C A T A T G A A T A C A C C T A T G A G A T C A T T A C C A T A A T G A A G A T - - - C A T G T - - - C T A T C A C - - - - | 3829 |
| BelugaWhale | T T C A C T C T T T C C C C C A G A T C A A T A T G G A A A T A G A T G G C A A A A C T - - T G C C C T G G A A T T - - - C A T G T T T C C T G T T T C - - - - | 3645 |
| Donkey      | T T C A G T A T T C - - C C C A G A T C A A C A T G A A A A T T G A T G G C A A A A C T - - T G C A C T G G A A T T - - - C A C G T T C C G A G A T T C - - - - | 3303 |
| Cat         | T T T G C T A T T T - C C C C A G G T T A A C A T G A A A A T T G A C G G C A A A A G T - T G G C A C T G G A A T T - - - C A T G T T T T C T G A T T C - - - - | 4667 |
| Ferret      | T T C A C T A T T T - C A C C A G A T A A A C A T G G A A A T T G A T G A C A G A A C T - T A G C A G T G G A A T T - - - G T T T C - - - C T G A T T C - - - - | 3671 |
| Lion        | T T T G C T A T T T - C C C C A G G T T A A A A T G A A A A T T G A C G G C A A A A G T - T G G C A C T G G A A T T - - - C A T G T T T T C T G A T T C - - - - | 3624 |
| Vaquita     | T T C A C T C T T T C C C C C A G A T C A A T A T G G A A A T A G A T G G C A A A A C T - - T G C C C T G G A A T T - - - C A T G A T T C C T G T T T C - - - - | 3531 |
| Pig         | T T C G C T A T T G - C C C C A G C T C A A C A T G G A A A C G G A T G G T A A A A C T - - T G C T C T G G A A T T A C T C A T G T T T C C T G A T T C - - - - | 3504 |

| Majority    | - - - - T A T C A A G A T T A C T A A A G A G T T G X T T T A A G T T T T A A A T T A T T A A T C T A A G T G T A C T G G C T T T G - T - - A A A T G G C A T T   |      |
|-------------|-------------------------------------------------------------------------------------------------------------------------------------------------------------------|------|
|             | 4890 4900 4910 4920 4930 4940 4950 4960                                                                                                                           |      |
| Human       | T T C C T G T G G A G A C T A C T A A A G A G T T - - - - T A A G C G T T A A A T T A T T A A T C T C A G T A T A C T G G C A T T G - T A G A A A T G G C A T -   | 2232 |
| PolarBear   | -----                                                                                                                                                             | 0    |
| Cow         | - - - - T A T T A A G A T T A C T A A A G A G T T G A A T T A A G T C T T A A A T T A T T A A C C T A A G T G T A G C G G G - - - - - - - - A C A T T A T G T -   | 3645 |
| Dog         | - - - - C C C C A G A A G T A - - - - - - - - T C A T T T T G C C C C T T G G T A A T C C C T T C C T C T G T C T G T C T T T C - C C C A A C A A C A A T         | 3895 |
| BelugaWhale | - - - - T A T C A A G A T T A C T A A A G A G T T - - - - - A A G T T T T A A A T C A - - - - - - - - A A G G G T A A A G G G - - - - - - - - - - G T A T T       | 3696 |
| Donkey      | - - - - T A T C A A G G T G A C T A A A G A G T T G A T T C A A A T T T T A A A T T A C T A A T C T A A G T G T A C C A G T T T T G - T A A A A G T G A C A T T   | 3378 |
| Cat         | - - - - T G T C A G G A T A A C T A A A G A A T T G T T T T A A G T T T T A A A C T A T T A A T C T A A G T A T A C T A G C T T T G - T G G A A A T G G C A T T   | 4742 |
| Ferret      | - - - - T A T C A A G A T A A A G A - - - - G T T G G T T T T A A G T T T T A A A T T A A T A T T T A G G T G T A C A A G C C T T G - A G T A A A T G A C A T T   | 3742 |
| Lion        | - - - - T G T C A G G A T A A C T A - - - - A A T T G T T T T A A G T T T T A A A C T A T T A A T C T A A G T A T A C T A G C T T T G - T G G A A A T G G C A T T | 3696 |
| Vaquita     | - - - - T A T C A A G A T T A C T A A A G A G T T - - - - - A A G T T T T A A A T C A - - - - - - - - A A G G G T A A A G G G - - - - - - - - - - G T A T T       | 3582 |
| Pig         | - - - - T A T C A G A A T T A C T G A A G A G T T G A A T T A A G T T T T A A A G T A C T A A T C T A A G T G T A A C T A G T T T G G T A A A A A G G G G G T T   | 3580 |

Dienstag, 3. Mai 2022 08:37

| Majority    | ATAGTC- TTTGGGGTTTTGTTCTTTTTG- CTATTTAAAGTGTT- TTAAAAA- - ATACCAXAAGTTTAGT- GAXTTTCATC        |      |      |      |      |      |      |      |  |  |      |
|-------------|-----------------------------------------------------------------------------------------------|------|------|------|------|------|------|------|--|--|------|
|             | 4970                                                                                          | 4980 | 4990 | 5000 | 5010 | 5020 | 5030 | 5040 |  |  |      |
| Human       | - - AGTGT TTTGGG- TTTTGTCTTTTTGGCTATTGAATGTGTTGTTAAAAA- - ATACCACAA- - - - - G- - - - - TTGTC |      |      |      |      |      |      |      |  |  | 2295 |
| PolarBear   | -----                                                                                         |      |      |      |      |      |      |      |  |  | 0    |
| Cow         | - - AGGC- TTTGGGGTTTTGTTCTTTTTG- CTATTTGAAAT- - - - TAAAAA- - AAAACACCGAAACTGT- GAGTTTCCTC    |      |      |      |      |      |      |      |  |  | 3714 |
| Dog         | TGATCC- TCT- - - - CTCTGTCACTGTAG- GGTCAAGTTTGCATTTTTTAGAA- - TTTTAAGGGAGTCAGG- - ATGTACCTC   |      |      |      |      |      |      |      |  |  | 3965 |
| BelugaWhale | ATAGGC- TTTGGGGGCTTGTTCAGTTTG- CTATTTGAAGTG- - - TAAAAA- - ATACCAAAGTGTGGT- GAGTTTCATC        |      |      |      |      |      |      |      |  |  | 3768 |
| Donkey      | GTAGTG- TTTGGGGTTTTGTTCTTTTTG- CTATTTAAAGTGTTAAAAAATACCATACCATAAGTTTAGT- GAATTTTCATC          |      |      |      |      |      |      |      |  |  | 3455 |
| Cat         | ATAGTTTCTTGGGGTTTTGTTCTTTTTG- GTATTTAATAGGTTATTTAAAAA- - ATACCAGGAGTTTAGT- - GATTTTCATC       |      |      |      |      |      |      |      |  |  | 4817 |
| Ferret      | CTAGTG- TTTGGGGTTTTGTTCTTTTTG- ATATTTAAAGGGTTGTTAAAAA- - AATACAGGAAGTTTAGTGAATTTTCATC         |      |      |      |      |      |      |      |  |  | 3818 |
| Lion        | ATAGTT- CTTGGGGTTTTGTTCTTTTTG- ATATTTAATAGGTTATTTAAAAA- - ATACCATGAGTTTAGT- - GATTTTCATC      |      |      |      |      |      |      |      |  |  | 3770 |
| Vaquita     | ATAGGT- TTTGGGGGCTTGTTCAGTTTG- CTATTTGAAGTG- - - TAAAAA- - ATACAAAAGTGTGGT- GAGTTTCATC        |      |      |      |      |      |      |      |  |  | 3654 |
| Pig         | AGAGGC- TTCGGGAGTTTGCTCTTTTTG- CTGTTTAAAGTG- - - TTGACAA- - ATAGCAAAGTGTAGT- GAGTTTCCTC       |      |      |      |      |      |      |      |  |  | 3652 |

| Majority    | TCACGTTTGAAAGTXATTTCTAGAAAACCAAGTTGATAATAGTACACXG- AACXATCAXTGA- - - - - T- TGTTT               |      |      |      |      |      |      |      |  |  |      |
|-------------|-------------------------------------------------------------------------------------------------|------|------|------|------|------|------|------|--|--|------|
|             | 5050                                                                                            | 5060 | 5070 | 5080 | 5090 | 5100 | 5110 | 5120 |  |  |      |
| Human       | TCACATTTGAAAGTTACTTTTAGAAAACCAAGTTGGTAACAGTACAGGTAAGTCACGGATCATCTGTGGTATTTTTTATC                |      |      |      |      |      |      |      |  |  | 2375 |
| PolarBear   | -----                                                                                           |      |      |      |      |      |      |      |  |  | 0    |
| Cow         | ACATGTTTGAAAGTCATTTCTAGAAAACCAAGTTGATAATGTTCCACCG- - ACCATCTTTGT- - - - - - - - - - - GTGTGTTT  |      |      |      |      |      |      |      |  |  | 3782 |
| Dog         | TTTGGTTTTATTTCACTTACTCTAATTATT- - TTGAGATTTACTCATGTTATCTATCAATAG- - - - - - - - - - - TCTATTT   |      |      |      |      |      |      |      |  |  | 4032 |
| BelugaWhale | ACACCTTTGAAAGTCATTTCTAGAAAACCAAGTTGATTATGTGCCACTG- - ACCATCTTT- - - - - - - - - - - GTTT        |      |      |      |      |      |      |      |  |  | 3830 |
| Donkey      | TCACGTTTGAAA- - - ATTTCAAGAAAACCAAGTTGATAATAGTGCAAAG- AAGTGTCACTGACCATCTGTGTATTTGTTT            |      |      |      |      |      |      |      |  |  | 3531 |
| Cat         | TTAAGTTTGAAAGCAATTTTTAGAAAACAGGTTTAAAATAGTACAAAG- AATTGTCACTGACCATCTGTGTATCTGTTT                |      |      |      |      |      |      |      |  |  | 4896 |
| Ferret      | TCAAGTTTGAAAGTAATTTCTAGAAAACAG- - TTGAAAATAGTACAGGG- AGGTGTCACTGA- - - - - - - - - - - CTTGTTT  |      |      |      |      |      |      |      |  |  | 3884 |
| Lion        | TTAAGTTTGAAAGCAGTTTTTAGAAAACAGGTTTAAAATAGTACAAAG- AATTGTCACTGACCATCTGTGTATCTGTTT                |      |      |      |      |      |      |      |  |  | 3849 |
| Vaquita     | ACACCTTTGAAAGTCATTTCTAGAAAACCAAGTTGATTATGTGCCACTG- - ACCATCTTT- - - - - - - - - - - GTTT        |      |      |      |      |      |      |      |  |  | 3716 |
| Pig         | TCACGTTTGAAAGTCATTTCTGGAAAACCAAGTTGGTAACACATCACTG- - ACCATCTTTTT- - - - - - - - - - - GT- TGTTT |      |      |      |      |      |      |      |  |  | 3719 |



Dienstag, 3. Mai 2022 08:37

| Majority    | TCCATCTGCATX- - - GTGAGT GGAAGATTTATGAATGATGAACTACCCT- AAAAAGTT- - - - TCAAACACTGAC- CATT   |      |
|-------------|---------------------------------------------------------------------------------------------|------|
|             | 5130 5140 5150 5160 5170 5180 5190 5200                                                     |      |
| Human       | CCCATCTGTGTGTGAGTGGCTGGAAGATTTATGAATGATGGACTATCCTAAAAAGTTTATAGAGCCAAAGAGTGAGTGATT           | 2455 |
| PolarBear   | -----                                                                                       | 0    |
| Cow         | TCCATCTGCATT- - - TTGAGT GGAAGATTTATGATTGATGAACTACCCT- AAAAAGTT- - - - TCTAACAGTGAC- CATT   | 3852 |
| Dog         | TTT- CTTGCTTA- - - GTAGTATTACATTTTATGGATATACAGCAATTTG- TTTATCCA- - - - TTCAACTCTTGG- GTTG   | 4101 |
| BelugaWhale | TCTGTCTGCGTT- - - GTGAGTGGAAAATTCATGAATGATGAACTACCCT- AAAAAGTT- - - - TCAAACAATGAC- CATT    | 3900 |
| Donkey      | TGCATCTGCATT- - - GTGAGT GGAAGGTTTATGAATGATGAACCACTCTTAAAAAGTTGAG- - TCAAACAGTGAC- CATT     | 3605 |
| Cat         | TCCATTTGCATG- - - GTTAGT GGAAGATTTATGAATGGTAACTACC- - - TAAAGTT- - - - TTAGAGACCAAC- AGTG   | 4964 |
| Ferret      | TCCATTTGCATG- - - ATGAGTGGATGATTTATGAATGATGAACCACCCT- AAAAAGTT- - - - TTAGAGTCCAAC- AGTG    | 3954 |
| Lion        | TCCATTTGCATG- - - GTTAGT GGAAGATTTATGAATGGTGAACCTACC- - - TAAAGTT- - - - TTAGAGACCAAC- AGTG | 3917 |
| Vaquita     | TCTGTCTGTGTT- - - GTGAGTAGAAAATTCATGAATGATGAACTACCCT- AAAAAGTT- - - - TCAAACAATGAC- CATT    | 3786 |
| Pig         | TCCATCTGCATC- - - GTGAGTGCAAGGTTTATGAATGATGACCCACCCT- AAAAAGTT- - - - TCTTTTGAGGA- - - - -  | 3784 |

| Majority    | AG- - - AATAACAAGAGGTTGAACTTATTCTTTTTTTTTTT- - - - - ACAGAATTGTCACTGAGGTTGCAGTTGGCGTGAA |      |
|-------------|-----------------------------------------------------------------------------------------|------|
|             | 5210 5220 5230 5240 5250 5260 5270 5280                                                 |      |
| Human       | AGAAGAATAACAGGAGGTTGAACTACTTATTTTTTCTTT- - - - - GCAGAATCGTCACTGAGGTTGCAGTTGGCGTGAA     | 2529 |
| PolarBear   | -----                                                                                   | 0    |
| Cow         | TG- - - AATAACTAGAGGTTGAAGCTTTTTGTTTGTGTTTT- - - - ACAGAATTGTCACTGATGTTGCAGTTGGCGTAAA   | 3925 |
| Dog         | TTTCCAGTTTTTGA CTATTGTAAATAAAGCTACTGTGAACA- - TCCTTGTAAAAGTCTTTGTGTGA ACTTTTTCATTTCTC   | 4179 |
| BelugaWhale | TG- - - AAGAACAAGAGGTTGAACTTGTTTTTTTTTTCATT- - - - - ACAGAATTGTCACTGAAGTTGCAGTTGGCGTGAA | 3970 |
| Donkey      | AGAAGAATAACAAGGAGTGTGAACTAACTGTTTTTTTTCTTT- - - - - ACAGAATTGTCACTGAGGTTGCAGTTGGCGTGAA  | 3680 |
| Cat         | AT- - - CATTAAGAATAA- GAGGTTGAACTATTTTTTTTT- CTTTACAGAATTGTCACTGAGGTTGCAGTTGGCGTCAA     | 5040 |
| Ferret      | AT- - - CATTAGAAAAATAATGAGGTTGAACTATTTTTTTTT- - TTCACAGAATTGTCACTGAGGTTGCAGTTGGCGTGAA   | 4030 |
| Lion        | AT- - - CATTAAGAATAA- GAGGTTGAACTATTTTTTTTTTCTTTACAGAATTGTCACTGAGGTTGCAGTTGGCGTCAA      | 3994 |
| Vaquita     | TG- - - AAGAACAAGAGGTTGAAATTTGTTTTTTTTTATT- - - - - ACAGAATTGTCACTGAAGTTGCAGTTGGCGTGAA  | 3856 |
| Pig         | - - - - - ATAACAAGAGGTTGAGACTTGTTTCTTTTTTTTTTTTTCATTGCAGAATTGTTACTGAGGTTGCAGTTGGCGTGAA  | 3858 |

Dienstag, 3. Mai 2022 08:37

| Majority    | GGTAGGAAAAAATTGTTT- XAACTAATGAAAACCTGGATTGCTGAATCTACTXT- - - TATTATCAA- - - X- - TGGAAAXTT   |      |      |      |      |      |      |      |      |
|-------------|----------------------------------------------------------------------------------------------|------|------|------|------|------|------|------|------|
|             | 5290                                                                                         | 5300 | 5310 | 5320 | 5330 | 5340 | 5350 | 5360 |      |
| Human       | GGTAGGAAAATACTAT- - - - - GTTTGAAAACCTGGGATTGTTGGATCTATTAT- - - CATAATTAC- - - - - TGGAAAATT |      |      |      |      |      |      |      | 2593 |
| PolarBear   | -----                                                                                        |      |      |      |      |      |      |      | 0    |
| Cow         | GGTAGGAAAACAGTGTTTAAAACCTAAGGAAAGCTGGGTTCCCTCGATCTACTGAGTGTATTATCATTAA- - - AAGGAAACTT       |      |      |      |      |      |      |      | 4002 |
| Dog         | TTGGGGAAATACCTTT- - - - GATTGG- AATGACTGGATCGTTTGGTATGCATA- - - TGCTATTAACCTTT- - TTTAAAGTT  |      |      |      |      |      |      |      | 4249 |
| BelugaWhale | GGTAGGAAAAAA- - GTTTAAAACCTAATGAAAACCTGGATTCCCTCAGTCAACTGAGTATATTATCATCATTAGTGGAAACTT        |      |      |      |      |      |      |      | 4048 |
| Donkey      | GGTAGGACAAGATTGA- - - - AACTAATGAAAACCTGGATTACTGCATCTGCTAT- - - TATCATTA- - - - - TGGAAATTT  |      |      |      |      |      |      |      | 3747 |
| Cat         | GGTAGGAAAAAATTGTTTGCAACTAATGAAAACAGAATGGCTGAATCTACTAT- - - TACCATCAA- - - T- - GGAAATTTT     |      |      |      |      |      |      |      | 5112 |
| Ferret      | GGTAGGAAAAAATTGA- - - - AACTAATGAAAACCTGAATTGCTGAATCTGTTGT- - - TACCATTGA- - - - - TGGAAATTT |      |      |      |      |      |      |      | 4097 |
| Lion        | GGTAGGAAAAAATTGTTTGAAAACCTAATGAAAACAGAATGGCTGAATCTACTAT- - - TACCATCAA- - - C- - GGAAATTTT   |      |      |      |      |      |      |      | 4066 |
| Vaquita     | GGTAGGAAAAAA- - GTTTAAAACCTAATGAAAACCTGGATTCCCTCAGTCAACTGAGCATATTATCATCATTAGTGGAAACTT        |      |      |      |      |      |      |      | 3934 |
| Pig         | GGTAGGAAAAGATTGCTTAAACCTAATGAAAACCTGGATTCCCTCAATCTGCTTTATGTATTATCATCATTGATAGAAGCTT           |      |      |      |      |      |      |      | 3938 |

| Majority    | TCAG- - TTAGCTTTTGAAAACCTATAATXXA- - - - - CAAAACXCAAGTGTAAAGTGTXXXTTTAATTTTAAAG- - TTG          |      |      |      |      |      |      |      |      |
|-------------|--------------------------------------------------------------------------------------------------|------|------|------|------|------|------|------|------|
|             | 5370                                                                                             | 5380 | 5390 | 5400 | 5410 | 5420 | 5430 | 5440 |      |
| Human       | TTAGCTTTTGCTTTTGAAAACCTATAACGTAGCT- AACAAAACCCAAGTGTAAAATGTTTCCTTTCATTTGTAAG- - TTG              |      |      |      |      |      |      |      | 2670 |
| PolarBear   | -----                                                                                            |      |      |      |      |      |      |      | 0    |
| Cow         | TCTG- - TTGACTTCTGAAAACCTATAATATAGCTTACAAAATTCCAGTGGAAAGTACTT- GTTGAATTTTAAACA- - TTG            |      |      |      |      |      |      |      | 4077 |
| Dog         | TTGA- - GAAACTCCAGAC- CATATT- CCAA- - - - - AATGG- - - - - TTGTATTATTTTACATTGCTACCAAAGGGTATG     |      |      |      |      |      |      |      | 4314 |
| BelugaWhale | TCTG- - TTGGCTTTTGAAAACCTGTAATACAGCTT- ACAAATTC AAGTGTAAAGTGTXXXTTTCAATTTTAAAG- - TTG            |      |      |      |      |      |      |      | 4123 |
| Donkey      | TCAC- - TTAGCGTTTGAAAACCTATAATATAGCT- AACAAAACCTAAATGTAAAGTGTXXXTTTAAATTTTAAAAA- - TTG           |      |      |      |      |      |      |      | 3822 |
| Cat         | TAAG- - TTAGCTTTTGAAAGTTAGAGTTAA- - - - - CAAAACCCAAGTGTAAAGTGTXXXTTTAAATTTTAAAG- - TTG          |      |      |      |      |      |      |      | 5182 |
| Ferret      | TCAG- - TTAGCTTTTGAA- GTTACAGTTAA- - - - - CAAA- - - - - GTGTAAAGTGTXXXTTTGAATTTTAAAAAAGTTG      |      |      |      |      |      |      |      | 4163 |
| Lion        | TAAG- - TTAGCTTTTGAAAGTTAGAGTTAA- - - - - CAAAACCCAAGTGTAAAGTGTXXXTTTAAATTTTAAAG- - TTG          |      |      |      |      |      |      |      | 4136 |
| Vaquita     | TCTG- - TTGGCTTTTGAAAACCTATAATACAGCTT- ACAAATTC AAGTGTAAAGTGTXXXTTTCAATTTTAAAG- - TTG            |      |      |      |      |      |      |      | 4009 |
| Pig         | TCTG- - TTGACTTTTAAAAACCTGTAATTT- - - - - TCAAACCTCAAGTGCAGAGTATT- - - T- - - - TTTCTAAAG- - TTG |      |      |      |      |      |      |      | 4001 |



Dienstag, 3. Mai 2022 08:37

|             |                                                                                     |      |
|-------------|-------------------------------------------------------------------------------------|------|
| Majority    | CCCAATTTTCTGAGG- GGAAATTATGGTTTTAAATGGACAGATAA- GTGATTTGACCTAAATCATATAATTTTATTAATC  |      |
|             | 5610      5620      5630      5640      5650      5660      5670      5680          |      |
| Human       | CCCAATTTTCTGAGG- GGAAATAATGATTTTAAATGGATGG- TAA- GTGGTTTGACCTATATCTTATAATTTTGTTAATC | 2885 |
| PolarBear   | -----                                                                               | 0    |
| Cow         | CCCAATTTTCTGAGG- GGAACCTTATGGTCTAAATGGACAGATAAAGTGATTTGACCTAAATGATATAATTATAGTAATA   | 4294 |
| Dog         | TTTTGCCAGCTGTAT- ATCATCTTTGATGAAGTGTGTCTATATCT- CTTGCCACTTTTTAAATTGGATTACTGTTGAGT   | 4534 |
| BelugaWhale | CCCAATTTTCTGAGA- GGATATGATGGTTTTAAATGGACAGATAA- GTGATTTGACCTAAATCATATAATTTTATTAATC  | 4351 |
| Donkey      | CCCAGTTTTCTGAAGCGGAAATTATGGCTTTAAATGGCCAGATAAAGTGATTTGACCTAAATTATGTAATTTTGTTAACC    | 4046 |
| Cat         | CCCAATTTTCTGAGG- GGAAGTTATGGTTTTAAGTGGGCAGATAA- GTGATTTGACATAAGTCATATAATTTTATTAATC  | 5398 |
| Ferret      | CCCAGTTTTCTGAGG- GAAAATTATGGTTTTAAATGGGTAGATAT- ATGATTTGACCTAAATCATGTAATTTTGTTAATC  | 4387 |
| Lion        | CCCAATTTTCTGAGG- GGAAGTTATGGTTTTAAGTGGGCAGATAA- GTGATTTGACATAAATCATATAATTTTATTAATC  | 4355 |
| Vaquita     | CCCAATTTTCTGAGA- GGATATGATGGTTTTAAATGGACAGATAA- GTGATTTGACCTAAATCATATAATTTTATTAATC  | 4237 |
| Pig         | TTTTTTTTTTTGGAGG- GGAAATTACGGTTTTAAGTGGACAGATAA- GTGATTTGAGCTAAATCACA- -----        | 4220 |

|             |                                                                                         |      |
|-------------|-----------------------------------------------------------------------------------------|------|
| Majority    | TAAGATTTTTTTT- ACT- - X- - XTTTTTGTATGAAGACTAAAATATT- - TTTGTCAATAATAAGCCACATTAGAAATCAG |      |
|             | 5690      5700      5710      5720      5730      5740      5750      5760              |      |
| Human       | TAAGTTTTTTTGTTTTTTATTACTTTTTGTTCATGAAAATGAATATATT- - TTGGTTAATAATAAAGCCACATTAGAAATGAA   | 2963 |
| PolarBear   | -----                                                                                   | 0    |
| Cow         | TAAGATTTTTTTTCACTC- TGCTTTTCTGTTATGAAGTCTGAGATATT- - TTCACTAGTAATAAGCTTCATTAGAAATCAG    | 4371 |
| Dog         | CTTAAGTCTTCA- ----- TTCTGGTTATAAGTCTTTTATCAGT- - TATATGGTTAATATTTTCTACCATTTGT- AT       | 4601 |
| BelugaWhale | TAAGATTTTTTTTAGCTC- TGCTTTTGTCTTACGAAGACTAAAATATT- - TTCACCAATAATAAGCCTCATTAGAAATCAG    | 4428 |
| Donkey      | TAAGAATATTTT- - TTT- CTCTTCTCTTTATGAGGACTAAAATATTTTTTTTGTAGTAATAAAGCCACATTGGAAAT- AG    | 4122 |
| Cat         | TAAGTGTTTTTT- AAC- ----- TTTTGATTATGAAGACTAAAA- ----- TGTGTCAGTAGTGAGCCACATTAGAAATCAG   | 5465 |
| Ferret      | TAAGATTTTTTTTAAAC- ----- TTTTCATTATGAATACTAAAATATG- - TATGTCAACAATGAACTACATTAGAAATCAG   | 4459 |
| Lion        | TAAGTGTTTCT- - AAC- ----- TTTTGATTATGAAGACTAAAA- ----- TGTGTCCGTAGTGAGCCACATTAGAAATCAG  | 4421 |
| Vaquita     | TAAGGTTTTTTTATAGCTC- TGCTTTTGTCTTACGAAGACTAAAATATT- - TTCACCAATAATAAGCCTCATTAGAAATCAG   | 4314 |
| Pig         | ---- ATTTTTTCCACTC- TCTTTTTTTGTCTTACAAT- - GAGAAATT- - TTTGCCAATAATAAGCCTCATTAGAA- TTAA | 4290 |

Dienstag, 3. Mai 2022 08:37

|             |                                                                                          |      |
|-------------|------------------------------------------------------------------------------------------|------|
| Majority    | - TTACCCTGATCTTTAAAAAGAA- - - - GAAACTTGTTTAGGCAXTTAGCTTCAAATTXGAGTCAGAAGTTA- AGAGCTGG   |      |
|             | 5770      5780      5790      5800      5810      5820      5830      5840               |      |
| Human       | - TTACACTGATCCTTAAAAAGGA- - - - - AGTTGTTGAGGCAGTTAGCTTCAAATTTGAATTAGAAGTTA- AGAGCTGG    | 3034 |
| PolarBear   | -----                                                                                    | 0    |
| Cow         | TTTACCCTGATTTTTAAAGAGAATAAAGAAACTTGTTTCAGGCAGTTAGCTTCAAATTTGAGTCAGAAGTTATAGAGTTGG        | 4451 |
| Dog         | - TTTCAATTGTCTCGATAG- - - - - TGTCTTTTGAAGAACAGCAGTTTTTAATTCTGAAGAACTG- AAGTTTA-         | 4665 |
| BelugaWhale | - TTGCTCTGATCTTTAAAGAGAA- - AAGAAACTTGTTTAGGCAGTTAGCTTCAAATTTGAGTCAGAAGTTATAAAGCTGG      | 4505 |
| Donkey      | - - TTACCTGACTCTTAAAAAGAA- - - - AAGATGTGTTTAGGCAATCAGCTTCAA- - AGAGTCACAAGTTA- AGAGCTGG | 4193 |
| Cat         | - TTATCTTGATCTTTAAAAACAAGC- - - GAAACTTGTTTCAGTAATTAGCTTCAAATTAGAGTCAGAAGTTA- AGAGCTGG   | 5540 |
| Ferret      | - TTATCTTGATACTTAAA- - - - - CTTGTTTAGGCAATTAGCTTCAAATTAGAGTCAGAAGTTA- AAAGCTGG          | 4524 |
| Lion        | - TTATCTTGATCTTTAAAAACAAGC- - - GAAACTTGTTTCAGTAATTAGCTTCAAATTAGAGTCAGAAGTTA- AGAGCTGG   | 4496 |
| Vaquita     | - TTGCTCTGATCTTTAAAGAGAA- - AAGAAACTTGTTTAGGCAGTTAGCTTCAAATTTGAGTCAGAAGTTATAAAGCTGG      | 4391 |
| Pig         | GTTACCCTGATCTGTAAAAAGAA- - AGGAAACCTGTTTAGGCAGTTGGCTTCAAATTTGAGTCAGAAATTAAGAGCTGG        | 4368 |

|             |                                                                                   |      |
|-------------|-----------------------------------------------------------------------------------|------|
| Majority    | TTTGTCTTTCTATTAAAGG- - - - - AAXATAGGCCTTAT- - - - -                              |      |
|             | 5850      5860      5870      5880      5890      5900      5910      5920        |      |
| Human       | TTTGTCTATTAAGAAAGTCTTTATGGTAGAGATCCTTTGGAATCCTTCCTTTTTGGCTAAGAAAACACTACTCATCGTTTA | 3114 |
| PolarBear   | -----                                                                             | 0    |
| Cow         | TTTGTGCGTCTACTAAAGA- - - - - AAGTTAGTCCTTACATAGAGATTGTTTAGAATCTTTCGTCACCTTTGGCCAG | 4525 |
| Dog         | - CCAATTTTATGTTGTATG- - - - - GCTCATTTCTAAGC- - - - -                             | 4697 |
| BelugaWhale | TTTGTGTGTCTGTTAAAGA- - - - - AAGATAGGCCTTA- - - - -                               | 4537 |
| Donkey      | CTTTTCTTGCTGTTAAAGG- - - - - GAAACAGGCCTTAT- - - - -                              | 4226 |
| Cat         | TTTGTCTTTCTATTAAAGG- - - - - AAAATAGCTGTTAT- - - - -                              | 5573 |
| Ferret      | TTTGGCTTTCCATTAAAGG- - - - - AAAATAGGCCTTAT- - - - -                              | 4557 |
| Lion        | TTTGTCTTTCTATTAAAGG- - - - - AAAATAGCTGTTAT- - - - -                              | 4529 |
| Vaquita     | TTTGTGTGTCTGTTAAAGA- - - - - AAGATAGGCCTTA- - - - -                               | 4423 |
| Pig         | TCTGTGTGTCTATTAAAGG- - - - - AAGGTAGGCTTT- - - - -                                | 4399 |

Dienstag, 3. Mai 2022 08:37

|             |                                                                                    |      |
|-------------|------------------------------------------------------------------------------------|------|
| Majority    | ----- GGTA- - GAGATCGTTTGAATCTT- - XCTCXCT- - CTTTTTGGCCAGGA                       |      |
|             | 5930 5940 5950 5960 5970 5980 5990 6000                                            |      |
| Human       | AACTTTAGTTCTAATGCTTAACATTTTCTTGAGTACTTGCAACTTTTAATGTCATGATGTATTGTAATTTTTTTTTGTTT   | 3194 |
| PolarBear   | -----                                                                              | 0    |
| Cow         | AAAACTATTCATACTTTAAACCTTAGATCTAGTGTAGAGATTGTTTAGAATCTTT- CCTCACT- - CTCTTTGGCCAGAA | 4602 |
| Dog         | ----- CAAA- - TTTGCCTAACAAAGATTT- - TTT- TCT- - CTTTTGGTTTTTCT                     | 4739 |
| BelugaWhale | ----- T- GGTA- - GAGATTGTTTGAATCTTT- CCTCACT- - CACTATGACCAGGA                     | 4582 |
| Donkey      | ----- GGTA- - GAGGTTCTTTGGGATCTTT- CCTCACAGACTTTTTGGTCAGGA                         | 4272 |
| Cat         | ----- AGTA- - CAGATCATTTGAATCTT- - TCCCTCA- - CTTTTTGGCCAGGA                       | 5616 |
| Ferret      | ----- GGTA- - CAGATAATTTGAATCTT- - TCC- TCA- - CTTTCTGGCCAGGG                      | 4599 |
| Lion        | ----- GGTA- - CAGATCATTTGAATCTT- - TCCCTCA- - CTTTTTGGCCAGGA                       | 4572 |
| Vaquita     | ----- T- GGTA- - GAGATCGTTTGAATCTTT- CCTCACT- - CACTATGGCCAGGA                     | 4468 |
| Pig         | ----- CTGGTG- - GAGATTGTGTGGCACCT- - - CCTCACT- - CTCTGTGGCCGGGA                   | 4443 |

|             |                                                                                         |      |
|-------------|-----------------------------------------------------------------------------------------|------|
| Majority    | AAACTACTCXT- CTTTAAACCTTAGTTCTAATGCTTAGGCCTTTXAT- TTCCTTGAATCCTTGCAXATTTTAA- - - CATC   |      |
|             | 6010 6020 6030 6040 6050 6060 6070 6080                                                 |      |
| Human       | TTTGTTTTTTTGAGACGGAGCCTCACTCTGTTGCCAGGCTGGATGCAGTGGCACGATCTTGGCCCACTGCAACCTCTGC         | 3274 |
| PolarBear   | -----                                                                                   | 0    |
| Cow         | AAACTATTCATACTTTAAACCTTAGATCTAGTGCTTAGGCCTTTCAT- TTCCTTGAATCCTTGTACATTTTAA- - - CATT    | 4678 |
| Dog         | AATAGAAGT- - - TTTACAGTTTTTGGGTTTGCATTTAAGTTTTTTTT- TTAGTTCATTTTTTTTTTAATACAGTG- CAAA   | 4814 |
| BelugaWhale | AAACTACTCATACTTTAAACCTTAGTTCTAGTGCTTAGGCCTTTCAT- TTTCTTGAATCCTTGCATATTTTAA- - - CATC    | 4658 |
| Donkey      | AAACTACTCATTCTTTAAACCTTAGTTCTAATGCTTAGGCCTCTTGT- GTCCTTTAATCCTTGCACATTTTAA- - - CATC    | 4348 |
| Cat         | AAACTACTC- - - CTTTAGACCTTAGTTCTAATACTTAGGCCTTTGAT- TTCCTTGAATCGTTGCACATTTTAA- - - CAGC | 5689 |
| Ferret      | AAACTACTC- - - CTTTAGACCTTAGTTCTAATGTTTAGGTCTTTTAT- TTCCTTGAATCCTTGCATATTTTAA- - - CAGA | 4672 |
| Lion        | AAACTACTC- - - CTTTAGACCTTAGTTCTAATACTTAGGCCTTTGAT- TTCCTTGAATCGTTGCACATTTTAA- - - CAGC | 4645 |
| Vaquita     | AAACTACTCATACTTTAAACCTTAGTTCTAGTGCTTAGGCCTTTCAT- TTTCTTGAATCCTTGCATATTTTAA- - - CATC    | 4544 |
| Pig         | AGACTACCCATTCTTTAAACCTCAATTCTAATGCATAGGCCTTTCAT- TTTCTTGCATCCTTGCATGTTTTGA- - - CATT    | 4519 |



Dienstag, 3. Mai 2022 08:37

|             |                                                                                                                      |      |
|-------------|----------------------------------------------------------------------------------------------------------------------|------|
| Majority    | TT-----TCCCCCTTCAAGTGTGAGTAGTCTTGAGAGGCTGTGTGC-----TAT-----AGTCCAGTTATT                                              |      |
|             | 6250            6260            6270            6280            6290            6300            6310            6320 |      |
| Human       | TCTTATGATCTGCCTGCCTTGACCTCCCAAAGTGCTGGGATTACAAGTGTGAGCCACCGTGCCCGGCCTGTATTGTCATT                                     | 3512 |
| PolarBear   | -----                                                                                                                | 0    |
| Cow         | TT--T-----AC-----CTCC-TTCAAGTATGAGTGGTCAAGAGAGGCAGTTTGC-----TCTTGAGAGTCCAGTTATT                                      | 4870 |
| Dog         | TG-----TATCCTTTTCCACTGACCCATTTTATCCATCTAGATGCC-----AAAAACAAACTGTGTTAAT                                               | 5014 |
| BelugaWhale | TTGGATGCAGTGACATTTCCCCCTTCAAGTGTGAGTAGTCTTGAGAGGCTGTGTGC-----TTA-----GTCCCGTTATG                                     | 4863 |
| Donkey      | TT-----TCCCCCTTGAAGTGTGAGTAGTCATGAGAGGCTGTGTGC-----TT-----AGCTCAGTGATG                                               | 4542 |
| Cat         | TT-----TCCCCCTTCAAATATGAGTAGTCTTGAGAGGCTGTGTCTTAGTATAGTGATGGTGACTGTT                                                 | 5892 |
| Ferret      | TT-----TCCCCCTTCAAGTGTGAGTAGTCTTGAGAGGATGGTGAC-----TATAATATTTTTTGAATT                                                | 4870 |
| Lion        | TT-----TCCCCCTTCAAGCGTGAGTAGTCTTGAGAGGCTGTGTCCGTAGTATAGTGATGGTGACTGTT                                                | 4848 |
| Vaquita     | TTGGATGCAGTGACATTTCCCCCTTCAAGTGTGAGTAGTCTTGAGAGGCTGTGTGC-----TTA-----GTCCAGTTATG                                     | 4749 |
| Pig         | TT--T-----CC-----CCCCCTTCAAGTGTGCGTAGTCCTGAGAGGCTATGGTG-----CCT-----AGTCCAGTGATG                                     | 4721 |

|             |                                                                                                                      |      |
|-------------|----------------------------------------------------------------------------------------------------------------------|------|
| Majority    | C-TGATTTTTCTA--AATAATTTTTGGAATTCTTAAATTTTCATCCATAACXGTGTGATATTT-----TTT-----                                         |      |
|             | 6330            6340            6350            6360            6370            6380            6390            6400 |      |
| Human       | TTTCATTTGCAAGCCTCTCTGTCTGAGAGGCTTTCTGCTTAGTCCAGTGATGCTGACTGTTCAAACATTTTTTTCGAATT                                     | 3592 |
| PolarBear   | -----                                                                                                                | 0    |
| Cow         | CCTGACCATTCTA--AATAATTTTTGGAATTCTTAAATTTTCATCAATAACAATGTGATATTC-----TTT-----                                         | 4934 |
| Dog         | TATGATGACTTTAGTCTTGAAATCAAGCAGTCAT-GGTCTCTTTGTTCTTTTTCAAAGTTGT-----TTT-----                                          | 5079 |
| BelugaWhale | C-TGATTGTTCCA--AATAATTTTTGGAATTCTTAAATTTTCATCCATAACAGTGTGATATTA--TTC-----                                            | 4926 |
| Donkey      | C-TGACTGGTCAC--AATACTTTTTGGAATTCTTGAAATTTTATCCTAAACAGTGTGAGATTC-----TTT-----                                         | 4605 |
| Cat         | CACAGTATTTTTGTAAATAGTCTTTAGAATACTTTAGGGAATATTTTGTATTTCTTGCTTAT--TTTCTGTCTCTGC                                        | 5969 |
| Ferret      | CTTAAATTTTCATCCACAACAATGTGGTATTCTTTAGAATACTTTAAGAGATATTTTGT-----TCT-----                                             | 4936 |
| Lion        | CACAGTATTTTTGTGATAGTCTTTAGAATACTTTAGGGAATATTTTGTATTTCTTGCTTAT--TTTCTGTCTCTGC                                         | 4925 |
| Vaquita     | C-TGATTGTTCCA--AATAATTTTTGGAATTCTTAAATTTTCATCCGTAACAGTGTGATATTA--TTC-----                                            | 4812 |
| Pig         | C-TGACTATTGCA--GCTAATTTTTGGAATTCTTAAAGTTTCATCCATAACAGTGTGATATT-----                                                  | 4780 |





Dienstag, 3. Mai 2022 08:37

|             |                                                                                        |      |
|-------------|----------------------------------------------------------------------------------------|------|
| Majority    | GGAGAAXTXATGAGCX- CTTTGTGGGAAGXTGTATTTATTTTATTTGGCAATGXTTTTTTC- - - A- GXTGAGAXTGT-    |      |
|             | 6570 6580 6590 6600 6610 6620 6630 6640                                                |      |
| Human       | CTGCACGTTGTACTCATGTACCCTAAAACCTTAAAGTATAATAATGATAATAATAATTGTATCCATAATGATGTGGTGTTC      | 3831 |
| PolarBear   | -----                                                                                  | 0    |
| Cow         | GGAGAAGTAATGAGCT- TTTTGTGGGAAGGTGTATTTATTTTATTCAGCAATGGTATTTTC- - - - - TAAGAGGGTC     | 5129 |
| Dog         | ----- TTTCTACAAAAAAG- - - - -                                                          | 5146 |
| BelugaWhale | GGAGAAATGATGAGCT- CTTTGTGGGAAGGTGTATTTATTTTATTTGGCAATGCTGTTTTCT- - - AAGTTGAGAGTGCA    | 5121 |
| Donkey      | GGAGAAATAATGAGCTTTTTGGGGGAAGATATATTTCTTTCTATTTGGCACTGATAGTTTCT- - - AAGTTGAGATAGT-     | 4797 |
| Cat         | CTCTGAGCTGTCAGCA- CAGAGCCTAACACGGGACTTGAACCTATGAACCTATGAGATCATGACCTGAGCCTGAGGTTATG     | 6206 |
| Ferret      | ----- TTTAGGCTTATTT- - - - -                                                           | 5002 |
| Lion        | CTCTGAGCTGTCAGCA- CAGAGCCCAACACGGGACTTGAACCTATGAACCTATGAGATCATGACCTGAGCCTGAGGTTATG     | 5162 |
| Vaquita     | GGAGAAATGATGAGCT- CTTTGTGGGAAGGTGTATTTATTTTATTTGGCAATGCTGTTTTCT- - - AAGTTGAGAGTGCA    | 5011 |
| Pig         | GGAGAAATAATGAG- - - TTTTGTGGGAAGATGTATTTATTTTATTTGGCAGTGATTTTCTTA- - - A- GTTGAGAGTGCA | 4962 |

|             |                                                                                                                |      |
|-------------|----------------------------------------------------------------------------------------------------------------|------|
| Majority    | A- XTGTAGAXA- - - X- G- X- - - - AX- - - CATCCAAXCX- - - - - - - - - CC- CTTGAAATGAT- X- - TX- - X- - - - X- - |      |
|             | 6650 6660 6670 6680 6690 6700 6710 6720                                                                        |      |
| Human       | TTTCAAATACTTTTGGGGATGGTACTGTGTTTTCTTGCTTATTTTCTGTCCCTTTTCCTATAGTGAAATAGATATTTGCC                               | 3911 |
| PolarBear   | -----                                                                                                          | 0    |
| Cow         | AGATGTAGTTA- - - - - AC- - - CATCCAAGCA- - - - - TATCTTCTGGAAGTGAA- - - - -                                    | 5169 |
| Dog         | ----- CTTGCTAGGATTT- - TATTGGAATTAA                                                                            | 5171 |
| BelugaWhale | AGATGTAGATATTATAGTT- - - - - AC- - - CATCCAAACAG- - - - - CCTCTGGAAGTGAA- - - - -                              | 5167 |
| Donkey      | - - - TGTAGG- - - - - A- - - - - - - - - - - - - - - TTAGAAATCAG- - - - -                                      | 4815 |
| Cat         | ACCTGAGTAAAAGTTGGATGCTTAAC- - - CAACTAAGCCATCCAGGCTCCCCACTTACCATGCTTTAATATTTAGGCTTA                            | 6283 |
| Ferret      | ----- TTTGAGTTCATAT- - TACGTAGATTGG                                                                            | 5027 |
| Lion        | ACCTGAGTAAAAGTTGGATGCTTAAC- - - TAACTAAGCCATCCAGGCTCCCCACTTACCATGCTTTAATATTTAGGCTTA                            | 5239 |
| Vaquita     | AGATGTAGATATTATAGTT- - - - - AT- - - CATCCAAACAG- - - - - CCTCTGGAAGTGAA- - - - -                              | 5057 |
| Pig         | AAATGTAGATGTTGTAGTT- - - - - AT- - - CATCCAAACAGA- - - - - TATCCCTTGAAAGTGAAGTT- TTTGTTTTTTTA                  | 5027 |



Dienstag, 3. Mai 2022 08:38

|             |                                                                                   |      |      |      |      |      |      |      |  |  |      |
|-------------|-----------------------------------------------------------------------------------|------|------|------|------|------|------|------|--|--|------|
| Majority    | -----XTX-----GAATTTTXTAAAAGAATAAATGATACAAGTCTGAGTTGTGCTCXXCTGTTA--GTGGATGAGGAGA   |      |      |      |      |      |      |      |  |  |      |
|             | 6890                                                                              | 6900 | 6910 | 6920 | 6930 | 6940 | 6950 | 6960 |  |  |      |
| Human       | ----ACAG-ATTTCTGTAAATTTTGTAAAAGAATAAATGATACAAGTGTGAGTTGTGCGACTGTTA--GTGGAAAAGGAGA |      |      |      |      |      |      |      |  |  | 4144 |
| PolarBear   | -----                                                                             |      |      |      |      |      |      |      |  |  | 0    |
| Cow         | -----TTTTTAAAAATATAAATGATGCAAGTCTGAGTTGTCA--ATTA--CTGGATAAGGAGA                   |      |      |      |      |      |      |      |  |  | 5223 |
| Dog         | TG----TACAGTTTTTGTACGTTTTTGTAGATT--TATCCCTTTTTTGTGTTTTTGGTGCTATTGTAAATGATGTTG     |      |      |      |      |      |      |      |  |  | 5374 |
| BelugaWhale | -----TTTTTAAAAGAATAAATGATTCAAGTCTGAGTTGTGAGCTGTTA--CTGGATGAGGAGA                  |      |      |      |      |      |      |      |  |  | 5225 |
| Donkey      | -----GC-----GAATTTTGTAAAAGAATAGGTGATAGAAGTCTGAGTTATGC--TATTA--GTGGATGGGGAGA       |      |      |      |      |      |      |      |  |  | 4939 |
| Cat         | -----GGTATCCTGTGGAATTTTGTAAAAGAATGAATGACCCAAGTCTGAGTTGTTCACTGTTA--GTGGGTGAGGAGA   |      |      |      |      |      |      |      |  |  | 6506 |
| Ferret      | TT----GGTATCCTCTGGAATTTTGTAAAAGAATGAATGATACAAGTCTGAGTTGCCACTATTAGTGTGGATGAGGAGA   |      |      |      |      |      |      |      |  |  | 5239 |
| Lion        | TAGGTAGGTATCCTGTGGAATTTTGTAAAAGAATGAATGACCCAAGTCTGAGTTGTTCACTGTTA--GTGGGTGAGGAGA  |      |      |      |      |      |      |      |  |  | 5477 |
| Vaquita     | -----TTTTTAAAAGAATAAATGATTCATGTCTGAGTTGTGAGCTGTTA--CTGGATGAGGAGA                  |      |      |      |      |      |      |      |  |  | 5115 |
| Pig         | CAGCTTATCCTGGATGTGAACTTTTTAAAAGAATAAATGATACAAGTCTGAATTGTGAGCTATTA--TTGGATGAGGAGA  |      |      |      |      |      |      |      |  |  | 5262 |

|             |                                                                                   |      |      |      |      |      |      |      |  |  |      |
|-------------|-----------------------------------------------------------------------------------|------|------|------|------|------|------|------|--|--|------|
| Majority    | GAAGGAACTCAG-CAXGACCCAGAAXGAGXAG-----AGAGAAATGAGGAGACTCGGAATAGGATGTCCAGXTXTGGTTT  |      |      |      |      |      |      |      |  |  |      |
|             | 6970                                                                              | 6980 | 6990 | 7000 | 7010 | 7020 | 7030 | 7040 |  |  |      |
| Human       | GGA-GTTTGTAGACAAGGCTCAGAATGAGTAGACAGGAAAAAACTGAGGAGACTTGGAATAGGATGTCCAGGTGTAATGT  |      |      |      |      |      |      |      |  |  | 4223 |
| PolarBear   | -----                                                                             |      |      |      |      |      |      |      |  |  | 0    |
| Cow         | AAAGGAATTCA--CAAAACCTAGAACAAGCAG-----AAAGAAATGAAGATGCTTGGAAGAGGGTGTTGAGATGTGGTTT  |      |      |      |      |      |      |      |  |  | 5296 |
| Dog         | TTTTTAAAAATCTCAAGTTTCCA-----GGGGCACCAGGAACTCC--ACTGA--GTTGAGGGTGACTCA             |      |      |      |      |      |      |      |  |  | 5434 |
| BelugaWhale | AAAGGAACTCA--TAGGACCCTGAACAAGCAG-----AGAGAAATGAGGATGCCTGGAAGAGGATGTACATATTTGGTTT  |      |      |      |      |      |      |      |  |  | 5298 |
| Donkey      | GAAGGAACTCAGGTAAAGACTGAGAATGAGTAGGCAT-AGAGAAATGAGGAGACTCGGAATCAGATGTCTAGATATGGTTT |      |      |      |      |      |      |      |  |  | 5018 |
| Cat         | GAAGGAATTGAGACAGGAGCCACCATGAGTAGGCC-AGAGATAGGAGGAGACTCAGGATTGGATGTCCAGGTATGGTTT   |      |      |      |      |      |      |      |  |  | 6585 |
| Ferret      | GAAGGAACTCAGACAAGAGGTA-----AGAAAAATGAGAAAAAGA--ATTGGATGTCCAGGTATGGTTT             |      |      |      |      |      |      |      |  |  | 5301 |
| Lion        | GAAGGAATTGAGACAGGAGCCACCATGAGTTGGCCC-AGAGATAGGAGGAGACTCGGGATTGGATGTCCAGGTATGGTTT  |      |      |      |      |      |      |      |  |  | 5556 |
| Vaquita     | AAAGGAACTCA--TAGGACCCCAAACAAGCAG-----AGAGAAATGAGGATGCCTGGAGGAGGATGTACATATTTGGTTT  |      |      |      |      |      |      |      |  |  | 5188 |
| Pig         | GAAGGAACTCAA-CAAGACCCAGAACGACCAG-----AGAGAAATGAGAAGACTCAGAAGAGGATGTTGAGATTTGGTTT  |      |      |      |      |      |      |      |  |  | 5336 |

Dienstag, 3. Mai 2022 08:38

|             |                                                                                                                      |      |
|-------------|----------------------------------------------------------------------------------------------------------------------|------|
| Majority    | ATTGGXTGT- - - - - TTTCTGTGTTAGTAGTTTTGAXGAGAAAAAAX- - XTAGAAAATGATXTAAAAXTAATTGCCAACCA                              |      |
|             | 7050            7060            7070            7080            7090            7100            7110            7120 |      |
| Human       | ATTGGTTACACCAG- TTTTTTTTTTTTTTTTTTTGA- GACAGAGTCTCACTCTTCGCCCAGGTGGAGTGCAGTGGCACGAT                                  | 4301 |
| PolarBear   | -----                                                                                                                | 0    |
| Cow         | ATTGGCAGT- - - - - TTTCTACATTAGTAGTTTTGAAGAGGGAATGTTGTTAGAAAATTATGTTAAGTGGTT- GCTAGCCT                               | 5369 |
| Dog         | GTGG- - - - - TTGAATGTTTGCCTTGGCTCAGGTCGTGAT- - CCTGGGGTCTGGGATCGAGTTCTGCAGCAG                                       | 5500 |
| BelugaWhale | ATTGGCAGT- - - - - TTTCTGTATTAGTAATTTGAAGAGAAAACA- - - TTAGAAAATGATATAAAAAGTAATTGCTAGCCA                             | 5369 |
| Donkey      | ATTGATTACACTAGTTTTCTATGTTAGTACTAGTTTTGAGGAGAAAGCATTAGGAAATGATATAAAAATAATTGCTAACTA                                    | 5098 |
| Cat         | ATTGGTTCTACCAG- TTTCTGTATTAGTGGTTTGAGGAGAAAAAAA- - TGGAAAATGATGTAAAAATAATTGCCAACCA                                   | 6662 |
| Ferret      | TACC- - - - - AGTTTTGTTAGTGGTTCAAGGAGAAGAAAAT- - TGGAAAATGATATGAAAATAATTGCCAACCT                                     | 5367 |
| Lion        | ATTGGTTCTACCAG- TTTCTGTGTTAGTGGTTTGAGGAGAAAAAAA- - TGGAAAATGATGTAAAAATAATTGCCAACCA                                   | 5632 |
| Vaquita     | ACTGGCAGT- - - - - TTTCTGTATTAGTAGTTTTG- - - - AAAACA- - - TTAGAAAATGATATAAAAAGTAATTGCTAGCTA                         | 5254 |
| Pig         | ATTGGCTGTGCCGATTTTCTGTGTTAGTAGTATGAAGAGAAAACA- - - TTAGGAAATGATATAAAAAGCAAT- GTCTAATC                                | 5412 |

|             |                                                                                                                      |      |
|-------------|----------------------------------------------------------------------------------------------------------------------|------|
| Majority    | TTTTTTTT- GTCCATTGTTTAATATAAAAAGTTTTGAATAACTGAAGTXXGTTTT- - - - XT- XXCTTTTCX- - - - AGTXG                           |      |
|             | 7130            7140            7150            7160            7170            7180            7190            7200 |      |
| Human       | CCTGGCTCACTACAAGCTCCGCCTT- - - - - CCGGGTTCACTCCATTCTTCTGCC- - - - - TCAGCCTCCC- - - - - GAGTAG                      | 4366 |
| PolarBear   | -----                                                                                                                | 0    |
| Cow         | TTTTTTTT- GTCTGTTGTTTAATATAAAAAGTTTTGATAACTGAAGTGTATTTTTATAATCTGCTGCTGCTGCTAAGTCG                                    | 5448 |
| Dog         | GCTCCCTA- TGGGGGAGCCTGCTTCTCCCCCTGCCTGTGTCTCTGCCTCTCTT- - - - TGTGTCTCTCATGAATAAATAA                                 | 5575 |
| BelugaWhale | ATTTTTTT- GTCCAGTGTTTAATATAAAAAGTTTTGATAACTAAAGTTATGTTTT- - - - -                                                    | 5422 |
| Donkey      | TTTTTTAT- - CCC- TTGTTTAATATAAAAAGTTTTGAGTAACTCAAGTTATGCTCT- - - - -                                                 | 5149 |
| Cat         | TTTTTTTTTATCCTTTGTTTAATATAAAT- TTTGAATAACCGAAGTTTTGTTTT- - - - ATGAACTTTTCTGAGACAGTGG                                | 6737 |
| Ferret      | TTTTTTTA- ATCCATTGTTGAACATAAAAAGTTTTGAATAACTGGAGTTTTGTTTT- - - - ACGAACTTTTCTGAGGTAGTGA                              | 5442 |
| Lion        | TTTTTTTTT- ATCCTTTGTTCAATATAAAAAGTTTTGAATAACCGAAGTTTTGTTTT- - - - ATGAACTTTTCTGAGACAGTGG                             | 5707 |
| Vaquita     | ATTTTTTT- GTCCAGTGTTTAATATAAAAAGTTTTGATAACTAAAGTTATGTTTT- - - - -                                                    | 5307 |
| Pig         | TTTATCTT- GTCTGTTGTTTAAAGT- - - - - TTTCAATAACTAAAATTATGTTTT- - - - ATCTAATTTTCTAGGATAATGG                           | 5482 |

Dienstag, 3. Mai 2022 08:38

|             |                                                                                                                      |      |
|-------------|----------------------------------------------------------------------------------------------------------------------|------|
| Majority    | XTAAXAATXTTGGCX- - XXXXT- CA- GCXTXXXTA- - - - AXGTX- TXXAGTT- X- - X- - - XATXTAATTTTCT- - - - -                    |      |
|             | 7210            7220            7230            7240            7250            7260            7270            7280 |      |
| Human       | CTGGGACTACAGGCGCCACCACCACGCCCGGCTA- - - - ATTTTTTGTATTTTGTAGTAGAGACGGGGTTTTCAC- - - - -                              | 4435 |
| PolarBear   | - - - - -                                                                                                            | 0    |
| Cow         | CTTCAGTCGTGTCCGACTCTGTGCAACCCTGTAAACGTGAGTCCACCAGGCTCCCCATCCCTGGGATTCTCCAGGCAAG                                      | 5528 |
| Dog         | ATAA- AACCTTTAAAAAAAAT- GAAGTAAAAAAA- - - AATGTTTCCGTTATTAGT- - GTAAGGA- ACTACT- - - - ACA                           | 5643 |
| BelugaWhale | - - - - - A- - - - - AA- - - - - T- - - - - AATTTTCT- - - - -                                                        | 5434 |
| Donkey      | - - - - - ATATGATTTTCT- - - - -                                                                                      | 5161 |
| Cat         | TTAAGAATTTTTGCTTTGGAGT- CATGCATACGTA- - - CAAGTAGTTGAGTTCTCATT- GTATATATATTTTCT- - - - ATG                           | 6808 |
| Ferret      | TTAAGAATTTTTGCTTTGGGAGT- GAAGCCTGTATA- - - TTAGTAATTAAGTTTTCAT- - ATATATA- TTTTTT- - - - TAA                         | 5511 |
| Lion        | TTAAGAATTTTTGCTTTGGAGT- CATGCATATGTA- - - CAAGTAGTTAAGTTCTCATT- GTATATATATTTTCT- - - - ATG                           | 5778 |
| Vaquita     | - - - - - A- - - - - AA- - - - - T- - - - - AATTTTCT- - - - -                                                        | 5319 |
| Pig         | TTAAGAATTTTTGCTATGGCAT- CAGACCTATATA- - - CAAGTAATTAAGCT- - - - - TTCATGAAATTTTTT- - - - TAA                         | 5548 |

|             |                                                                                                                      |      |
|-------------|----------------------------------------------------------------------------------------------------------------------|------|
| Majority    | - X- - XTXX- - - A- X- - TTCXTXGTG- - - - - - T- T- X- XAAXTXC- A- TX- XXXX- - T- AGGT- XAGX- - XXXXTXTT             |      |
|             | 7290            7300            7310            7320            7330            7340            7350            7360 |      |
| Human       | CGTGTTAGCCAGGATGGTCTTGATCTCCTGACCTTGTGGTTACACCAGTTTTTTGTAGTT- GTTTGAGGAGAACAACCTTT                                   | 4514 |
| PolarBear   | - - - - -                                                                                                            | 0    |
| Cow         | AACACTGGAGTGGGCTGCCATTTCTTCTCCA- ATGCATAAAAGTAAAAAGTGAAA- - GTGAAGTCACTCAGTCG- TGTC                                  | 5604 |
| Dog         | GTTTTTTG- - CATGT- TTTCTTGTG- - - - - - TTCTTCACTCTTGCCAAACTCACTTGTTAGATCTAGTAGCTTTTTTGT                             | 5712 |
| BelugaWhale | - - - - -                                                                                                            | 5434 |
| Donkey      | - - - - -                                                                                                            | 5161 |
| Cat         | TGCCCTTAAAAAAA- TTCAAAGTGAAGGTATGTCTCCCAAATCCCAGTCTGTTTCTCAGGTGTAGGTAATTATGTT                                        | 6887 |
| Ferret      | TGTACATGGTTAAAA- TTCATAGTGGTAAATATTTCTCCCTGAGTTCTAGTCCTATTTCTCAGGTGTAGGTAATTATGTT                                    | 5590 |
| Lion        | TGCCCTTAAAAAAA- - TTCAAAGTGAAGGTATGTTTCCCAAATCCCAGTCTGTTTCTCAGGTGTAGGTAATTATGTT                                      | 5856 |
| Vaquita     | - - - - -                                                                                                            | 5319 |
| Pig         | AAGGTAAAAGTAGGAGTTCTAGCGTGGAGCG- GTGGAAACAAATCCGACTAGGACCCATGAGGTTGCAGGTTCAATCCC                                     | 5627 |

Dienstag, 3. Mai 2022 08:38

| Majority    | AXAXTXXXXXGXT- - - - - XTXX- - C- CTGA- XXXTXX- X- XXT- - - TGTXXXXTXXXXXACAXTXX- AXX- X- - - |      |
|-------------|-----------------------------------------------------------------------------------------------|------|
|             | 7370 7380 7390 7400 7410 7420 7430 7440                                                       |      |
| Human       | AGAAGATGATAAAAAAAAAATTGCAAATCGTTTTTAAAAATCCATTGTTAATATAAAAAGTCTGAATAATTAAAGT- - - -           | 4589 |
| PolarBear   | - - - - -                                                                                     | 0    |
| Cow         | CAACTCTTCTTGACCCCATGGACTACAGC- CTACCAGGCTCCTCTGTCCATGGGATTTTCCAGGCAAGAGTACTGGAGT              | 5683 |
| Dog         | AGATACCATCAGAT- - - - - TTTCTACATAGACTGCTTATTTTAT- - - TTCTTCATTTTTTATCTTAATACCAT- - -        | 5777 |
| BelugaWhale | - - - - -                                                                                     | 5434 |
| Donkey      | - - - - -                                                                                     | 5161 |
| Cat         | AAATTTTTCTTGGTGCTTT- - - - TTTTCCCTCTGAGGTGTTACCATTT- - - TGTATATTATCAAACATTAGCATCCT- - -     | 6957 |
| Ferret      | AAATTTTTCTTGGTGCA- - - - - TTTTTTCTGAAGTATTAATAGTT- - - TGTATATTATCAAACAGTGGTATCCT- - -       | 5658 |
| Lion        | AAATTTTTCTTGGTGCTTT- - - - TTTCCCTCTGAGGTGTTACCATTT- - - TGTATATTATCAAACATTAGCATCCT- - -      | 5926 |
| Vaquita     | - - - - -                                                                                     | 5319 |
| Pig         | TGGCTTTGCTCAGTGGGTTAAGGATCCAGCACTGCTGTGAGCTGTGGTGTAGGTTGCAGACACGGCTTGGACCTGGTGT               | 5707 |

| Majority    | - - - - TGXTT- XXTXXX- - G- - XGGA- TTAXGXTTAAAGAXTXTTGGCTTTGGTGTGGA- - - TTTAAGTAC- AAGTAATTA |      |
|-------------|------------------------------------------------------------------------------------------------|------|
|             | 7450 7460 7470 7480 7490 7500 7510 7520                                                        |      |
| Human       | - - - - TAATTTAATTTTCTG- - - - GAATAATGGTTAAGAATTTTTGCTTTGGTGTGAGG- - - CCTGTGTAC- AAGTAATTA   | 4657 |
| PolarBear   | - - - - -                                                                                      | 0    |
| Cow         | GGGGTGCCTATAATTT- - GCTAGGA- TAATGGTTAAGAATTTTTCTTTGGCGTTGGA- - - TTTATGTGCCAAGTAATTA          | 5757 |
| Dog         | - - - - TTTTTTTTTTTTTGG- - GCGACCCGACACCCTGCCTAGGTCCTGTGCGGCGGAAATCTAGTATTAGTGCTGAGTAG         | 5851 |
| BelugaWhale | - - - - - A- - - GGA- TAATGGTTAAGAATTTTTGCTTTGGCGTCAGA- - - CTTAGGTAC- AAGTAATTA               | 5488 |
| Donkey      | - - - - - AGGA- - TACGATTAAGAGTTTTTATTTTGGTGTGAGA- - - CCTATGTAC- AAGTAATTA                    | 5214 |
| Cat         | - - - - TGCTTACTTACACAG- - ATGGATTCATAACACATGTAAGTGGCCACATCTTGCCTTTTAAAGAACATAACTTTATTG        | 7031 |
| Ferret      | - - - - TGCTTGTATACACAG- - ATGAGTTCATACCATGTGTAAGTGGCCACATCTTGCCTTTTAAAAAATAACTTTACT           | 5732 |
| Lion        | - - - - TGCTTACTTACACAG- - GTGGATTCATAACACATGTAAGTGGCCACATCTTGCCTTTTAAAAACATAACTTTATTG         | 6000 |
| Vaquita     | - - - - - A- - - GGA- TAATGGTTAAGAATTTTTGCTTTGGCGTCAGA- - - CTTAGGTAC- AAGTAATTA               | 5373 |
| Pig         | TCTGTGGCTGTGGTGTAGGCTGGCAGCTACAGCTCAGATTAGACCCCTAGCCTGGGAACCTCCAGGTGCGACCCTAAAA                | 5787 |

Dienstag, 3. Mai 2022 08:38

| Majority    | AGATTT    | CATGAAAT  | XTAAAAT   | - - -     | AAAATAAT  | XXXT      | GTTT      | TATGGTT   | -         | AAAAAAAAAT | TCAAAGT   | TAAAAGT   | ATTT      | CTCCC     |         |        |      |      |
|-------------|-----------|-----------|-----------|-----------|-----------|-----------|-----------|-----------|-----------|------------|-----------|-----------|-----------|-----------|---------|--------|------|------|
|             | 7530      | 7540      | 7550      | 7560      | 7570      | 7580      | 7590      | 7600      |           |            |           |           |           |           |         |        |      |      |
| Human       | AGTGTT    | CTTT      | AAAACT    | TAAAC     | ATTT      | GTGAAT    | TTGCTT    | TAAAG     | CACTGAT   | GCATGT     | GCATAT    | TTTAAAA   | AAATTCAG  | GCC       | 4737    |        |      |      |
| PolarBear   | - - - - - | - - - - - | - - - - - | - - - - - | - - - - - | - - - - - | - - - - - | - - - - - | - - - - - | - - - - -  | - - - - - | - - - - - | - - - - - | - - - - - | 0       |        |      |      |
| Cow         | AGCTTT    | CATGAAAT  | TTAAAA    | - - - -   | AAGTA     | ATACAT    | GTGT      | GAGTT     | - -       | AAAAAA     | AATTCAA   | -         | GTGAAAA   | ATTT      | CTCCC   | 5829   |      |      |
| Dog         | AAAAA     | AGGGAT    | GAGAG     | CCAGT     | - - -     | CAAAAA    | AATTC     | TTTGT     | CCCTT     | TATAT      | GAGGGG    | TCTA      | CTC       | -         | CCGGGG  | AAAAAC | 5927 |      |
| BelugaWhale | AGCTTT    | TATGAAAT  | TAAAAA    | - - - -   | AAAAT     | - - - - - | GTGCAT    | GGTT      | -         | AAAAAA     | AAATTT    | TAAAGT    | GAAAAGT   | ATTT      | CTCCC   | 5556   |      |      |
| Donkey      | AGCTTT    | CATAAA    | ATTTTT    | TTTT      | CTTTTT    | GTA       | AAAGT     | AATAC     | ATGCAC    | GTGGT      | TAAAA     | AAATTC    | CAGAGT    | TGGA      | AGTATTT | CTCCC  | 5294 |      |
| Cat         | AGATT     | CAATTT    | GATATA    | AAAAT     | - - -     | AAACT     | GGACAT    | ATTTT     | TAAGT     | ATACAG     | CATCT     | ATGAG     | ACCATT    | TACAA     | TCAAGAT | 7108   |      |      |
| Ferret      | GGAGC     | ACCTGG    | GTGG      | CTCAGT    | - - -     | GGGTT     | AGCCT     | CTGC      | CTCAG     | CTTGGG     | TATGGT    | CTGAG     | GGTC      | -         | CTGGG   | ATCGAG | GC   | 5808 |
| Lion        | AGATT     | CAATTT    | GATATA    | AAAAT     | - - -     | AAACT     | GGACAT    | ATTTT     | TAAGT     | ATACAG     | CATCT     | ATGAG     | ACCATT    | TACAA     | TCAAGAT | 6077   |      |      |
| Vaquita     | AGCTTT    | TATGAAAT  | TAAAAA    | - - - -   | AAAATA    | AAT       | - - - -   | GTT       | CATGGTT   | -          | AAAAAA    | AAATTT    | TAAAGT    | GAAAAGT   | ATTT    | CTCCC  | 5444 |      |
| Pig         | AGATT     | AAAAAAAA  | AAAAAAAA  | AAGGT     | AAAAGT    | AATAC     | ATGT      | ACATG     | TTTT      | AAAAAA     | AAATTC    | CAAAGT    | GAAAAGT   | ATTT      | CTCCC   | 5867   |      |      |

| Majority    | TGATAT    | CCAGT     | CCTAT     | TTTCT     | TAGGT     | GTAGG     | TATTT     | TATGTT    | AA        | CATX      | TTTT      | TTX       | - -       | GCAT      | TTTT      | TTX       | -         | CCTG      | AA        | TT        | AX        | TAG       |      |
|-------------|-----------|-----------|-----------|-----------|-----------|-----------|-----------|-----------|-----------|-----------|-----------|-----------|-----------|-----------|-----------|-----------|-----------|-----------|-----------|-----------|-----------|-----------|------|
|             | 7610      | 7620      | 7630      | 7640      | 7650      | 7660      | 7670      | 7680      |           |           |           |           |           |           |           |           |           |           |           |           |           |           |      |
| Human       | GGGCG     | CGGTGG    | GT        | CACAC     | CTGTA     | ATCCC     | AGCA      | CTTTGG    | GAGCC     | GAGGC     | GGGC      | - -       | GGAT      | CAC       | GAGT      | TTCAG     | GAG       | AGAC      | CCAT      |           |           |           | 4815 |
| PolarBear   | - - - - - | - - - - - | - - - - - | - - - - - | - - - - - | - - - - - | - - - - - | - - - - - | - - - - - | - - - - - | - - - - - | - - - - - | - - - - - | - - - - - | - - - - - | - - - - - | - - - - - | - - - - - | - - - - - | - - - - - | - - - - - | - - - - - | 0    |
| Cow         | TGATTT    | CCAGT     | CCTTTT    | TTTCT     | TAGGT     | GTAGG     | TATT      | TGTT      | AAAAT     | TTTTTT    | TG        | -         | TGCAT     | TTTT      | TTTCT     | GAAAT     | TACT      | AG        |           |           |           |           | 5908 |
| Dog         | CCACAC    | AAAC      | CCAAAT    | GGATA     | ATTT      | CTTG      | ATAT      | TTTCT     | TTATT     | GTCT      | TAGG      | - -       | GAAT      | CAAT      | GATT      | GGG       | CTTA      | ATGT      |           |           |           |           | 6004 |
| BelugaWhale | TGATAT    | CCAGT     | CCTG      | TTTCT     | TAGGT     | GTAGA     | AATT      | TATGTT    | AA        | CATTT     | TTTGGT    | GCAT      | TTTT      | - -       | CCTG      | AAAT      | TATT      | AG        |           |           |           |           | 5634 |
| Donkey      | TGATG     | CCAGT     | CCTAT     | TCTT      | TAGGT     | ATAT      | GTAGT     | TATGTT    | AA        | ATTTT     | CTGGT     | GGG       | ATTT      | TTTCT     | -         | CCTG      | AAAT      | TATT      | AG        |           |           |           | 5373 |
| Cat         | AATGA     | ACAT      | ATCAT     | TTTT      | GCC       | TTTT      | GTA       | ACC       | CTT       | CCTT      | CTGC      | TTT       | CTT       | CTC       | - - -     | CAAC      | CACT      | GAT       | CTG       | CTT       | CTGT      | CA        | 7185 |
| Ferret      | CCGCAT    | CAGG      | CTG       | CTCAG     | CAGG      | AGC       | CTG       | CTT       | CCT       | CTCT      | CTGT      | CTG       | CC        | - -       | TCT       | CTGC      | CTACT     | TGT       | GAT       | CT        | CC        | CT        | 5885 |
| Lion        | AATGA     | ACAT      | ATCAT     | TTTT      | GCC       | TTTT      | GTA       | ACC       | CTT       | CCTT      | CTGC      | TTT       | CTT       | CTC       | - - -     | CAAC      | CACT      | GAT       | CTG       | CTT       | CTGT      | CA        | 6154 |
| Vaquita     | TGATAT    | CCAGT     | CCTG      | TTTCT     | TAGGT     | GTAGT     | TAA       | TATGTT    | AA        | CATTT     | TTTGGT    | GCAT      | TTTT      | - -       | CCTG      | AAAT      | TATT      | AG        |           |           |           |           | 5522 |
| Pig         | TGATT     | ACCAGT    | TCTAT     | ATCT      | TAGGT     | ATAGG     | TAGT      | TATGTT    | AA        | AAAGAT    | CTTAC     | -         | TGCAT     | TTTT      | - - -     | CCTG      | AAAT      | TAA       | TAG       |           |           |           | 5943 |



Dienstag, 3. Mai 2022 08:38

| Majority    | TTTATATATTACCACACATA- - - XACATCCTTGTTTATXAACAC- - - - GXATTCATGCCATGTGTACTGGCXCATATCTT |      |
|-------------|-----------------------------------------------------------------------------------------|------|
|             | 7690      7700      7710      7720      7730      7740      7750      7760              |      |
| Human       | CCTGGCTAACACGGTGAAACCCTGTCTTTACTAAAAATACAAAAAATTAGCCGGGTGTGGTGACGGGTGCCTGTAGTCCC        | 4895 |
| PolarBear   | -----                                                                                   | 0    |
| Cow         | TTTACATATTACCACACATATA- AACATCCTTGTTTAGTTACACAAATGTATTCATGCCATGTGTACTGGCCCATATTGT       | 5987 |
| Dog         | TTGTGGGCATTCCAGTGAAA- - - - GTTGCCTGTGGGCCTGAT- - - - - GTTTATTTTCTTTGTGAAGTTTAAATGACAC | 6075 |
| BelugaWhale | TTTATATATTAGCACACATGTA- AACATCCTTGTTTAGCAACACAT- - GGATTCATGCCGTGTGTACTGGTCCATATCTT     | 5711 |
| Donkey      | TTTATATATTACCACACATATA- AACATCCTTATTTATTTACACAAATGGATTCATACCATGTGCCTGGCCCATATCTT        | 5452 |
| Cat         | CTATAGGGTGTGGCATT- - - - ATAGAATTTTAAATGAATCC- - - - GTATGTACTCCCCTTTTATTTGGTCTTATTTT   | 7257 |
| Ferret      | CTCTGTCAAATAAATAAATA- - - - AAATCTTTAAGAAAAAAG- - - - - ATTTAAAAACAACAGCAACAAAAACGGAGCT | 5956 |
| Lion        | CTATAGGTTGTGGCATT- - - - ATAGAATTTTAAATGAATCC- - - - GCATGTACGCCCTTTTATTTGGTCTTATTTT    | 6226 |
| Vaquita     | TTTATATATTAGCACACATGTA- AACATCCTTGTTTAGCAATACATATGGATTCATGCCGTGTGTACTGCTCCATATCTT       | 5601 |
| Pig         | TTTATTAATTACCACACATA- - - AATATCTTGTTTACTTACA- - AAAGCATTTCATGCCATGTGTATTGGCTTACATCTT   | 6018 |

| Majority    | GCTXTAA- - - - AAATAA- XCTTTATTGAGATAXAATT- - - - TGACATAAACTGCAXATATTTAAGGTATACTAGTATT          |      |
|-------------|--------------------------------------------------------------------------------------------------|------|
|             | 7770      7780      7790      7800      7810      7820      7830      7840                       |      |
| Human       | AGCTACTCGGGAGGCTGAGGCAGGAGAATGGCATGAACCTGCGAGGCAGAGGTTGCA- GTAAGCGGAGATTGC- ACCACT               | 4973 |
| PolarBear   | -----                                                                                            | 0    |
| Cow         | GCCTTAA- - - - - AAAGAA- GCTTTATTGAGATATAATT- - - - - TGAGATCAACCACCTATATTTAAGGTATAC- AGTGTT     | 6055 |
| Dog         | GTTTAAAT- - - - - TTAT- - - - - TTAATAGATACAGGACT- - - - - ATTCAGGTTATTTTTTCTGTTTATTTTTTATTATTTT | 6141 |
| BelugaWhale | GTTGTTA- - - - - AAAAAA- GCTTTATTGAGATACAATT- - - - - TGACATAAACTGCATATATTTAAGGTATACTAGTGTT      | 5780 |
| Donkey      | GCCCTTTCTGGAAAGAAAAACTTTATTGAGATATAATT- - - - - TGACATAAACTGCACGTATTTAAAGTATACAATGATT            | 5527 |
| Cat         | ACTGTG- - - - - ATTAT- - TTTGAAATTTACCCGTGTTGTCTGGCAATAGTCCATTCTTTTTATTGCTTAGTAGTATT             | 7328 |
| Ferret      | TTTAAAA- - - - - AAATAG- - CTTTATTGAGATAAAATTTGATATAAAATAAACTTACATATCTAAAGTGTACAATTTTT           | 6029 |
| Lion        | ACTGTGT- - - - - GATTAT- - TTTGAAGTTTACCCGTGTTGTCTGTCAATAGTCCATTCTTTTTATTGCTTAGTAGTATT           | 6299 |
| Vaquita     | GTTGTTA- - - - - AAAAAA- GCTTTATTGAGATACAATT- - - - - TGACATAAACTGCATATATTTAAGGTATACTAGTGTT      | 5670 |
| Pig         | GCCTTAA- - - - - AAAGAAAGCTTTATTGAGATATAATT- - - - - TGACATAAACTGCAATATTCAAGTTACAC- AGTATT       | 6087 |

Dienstag, 3. Mai 2022 08:38

| Majority    | TXAA- XATGTATACACCTATGAAACXATCACTA- - - XXAAGATAATGAAC- - - - - X- - - - XXX- XAGXATCAXTTTGCT |      |      |      |      |      |      |      |  |  |      |
|-------------|-----------------------------------------------------------------------------------------------|------|------|------|------|------|------|------|--|--|------|
|             | 7850                                                                                          | 7860 | 7870 | 7880 | 7890 | 7900 | 7910 | 7920 |  |  |      |
| Human       | GCACTCCAGCCTGGGCGACAGAGACAGACTCTATCTCAAAAAAAAAAAAAAAAAAAAAAAAAAAAAAAAAAATTCAA                 |      |      |      |      |      |      |      |  |  | 5053 |
| PolarBear   | -----                                                                                         |      |      |      |      |      |      |      |  |  | 0    |
| Cow         | TTTA- CATATATACACCTATGAA- CCACTACTA- - - TCAGGGTAATGAAC- - - - - C- - - - CCAGGAGTATCATTTTGCT |      |      |      |      |      |      |      |  |  | 6120 |
| Dog         | TTAAATTTATTCATGAGAGACACACACACAC- - - - - AGAGAGCAG- A- - - - - GACATAGGCAGAGGG                |      |      |      |      |      |      |      |  |  | 6199 |
| BelugaWhale | TTGA- CATGTATACCCCTATGAAACTATCACCACAATCAAGATAATGAAC- - - - - C- - - - CCAGAAGTATCATTTTGCC     |      |      |      |      |      |      |      |  |  | 5849 |
| Donkey      | TGACATATGTATACACCTATGAAATCATCATCACAAATCAAGGTAATGAACCTACATCACCTCCAAAAGTATTAGTTTGCT             |      |      |      |      |      |      |      |  |  | 5607 |
| Cat         | ACAT- TTTATGGATATACAGCAATTTATCATT- - - - - AACTCTTGATG- - - - - GACATTTGGTTTTTT               |      |      |      |      |      |      |      |  |  | 7386 |
| Ferret      | TGACATGTGAATACACTTAGGAGACCACTTAGG- - - - - AGACAACAA- A- - - - - GATAATGAACCCGTG              |      |      |      |      |      |      |      |  |  | 6087 |
| Lion        | ACAT- TTTATGGATATACAGCAATTTATCATT- - - - - AACTCTTGATG- - - - - GACATTTGGTTTTTT               |      |      |      |      |      |      |      |  |  | 6357 |
| Vaquita     | TTGA- CATGTATACCCCTATGAAACTATCACCACAATCAAGATAATGAAC- - - - - C- - - - CCAGAAGTATCATTTTGCC     |      |      |      |      |      |      |      |  |  | 5739 |
| Pig         | TCGA- CATGTGTACAACGATGAAACCATTAATAAAATCAAGACAATATCCATTGCTC- - - - - CCCAAAGTATCGCTTTGCC       |      |      |      |      |      |      |      |  |  | 6162 |

| Majority    | CTTTTATAAT- - - - XXX- TCTXCTTTCTTTCCCAAGCAACCACTGAT- CTGCTTTCTGTCACTATA- GATTAGTTTGC   |      |      |      |      |      |      |      |  |  |      |
|-------------|-----------------------------------------------------------------------------------------|------|------|------|------|------|------|------|--|--|------|
|             | 7930                                                                                    | 7940 | 7950 | 7960 | 7970 | 7980 | 7990 | 8000 |  |  |      |
| Human       | CTGCTTCACAGCTTTTTTTTGCTATTTCTTAGGTGTAGGTAATTG- TGTTAAAATTTTGTGCCTTTTTT- CTTGAAATTAT     |      |      |      |      |      |      |      |  |  | 5131 |
| PolarBear   | -----                                                                                   |      |      |      |      |      |      |      |  |  | 0    |
| Cow         | CCTTTGTAATTAATCCCTTCTGCCTTTCTTTCCCAAGCAACCACTGAT- CTGTTTTGTGTCACTGTA- GATTAGTTTGC       |      |      |      |      |      |      |      |  |  | 6198 |
| Dog         | AGAGGAGAA- - - - - GCAGGCTCTGTGCAGGCGGCC- - CGAT- GGGGA- CTGGATCCAGG- GATTCCAGGGT       |      |      |      |      |      |      |      |  |  | 6261 |
| BelugaWhale | CTTTTGTAAATCTCTCCCATCTGCCTTTCTTTCCCAAGCAACCACTGAT- CTGCTTTCTGTCACTATA- GATGAGTTTGC      |      |      |      |      |      |      |      |  |  | 5927 |
| Donkey      | CCTTTGTAGTCCTTCCCATCTGCCTTTCTTTGCCGAGCAACTGCTATTTCTGCTTTCTGTCACTATA- GGTTAATTTGC        |      |      |      |      |      |      |      |  |  | 5686 |
| Cat         | T- - CCAGTTT- - - - - TTG- ACTATTGTAATAAAGCTGTGAACATT- CCTGTAAAAGTCTTTGTGTGAACTTTTCGT   |      |      |      |      |      |      |      |  |  | 7454 |
| Ferret      | TTAGTATTGT- - - - - TTGCCCTGCCTTTCTCAAGCAACCATTGAT- GTACTTTCTGTCACTACA- GGTTAGTTTGC     |      |      |      |      |      |      |      |  |  | 6157 |
| Lion        | TTTCCAGTTT- - - - - TTG- ACTATTGTAATAAAGCTGTGAACATT- CCTGTAAAAGTCTTTGTGTGAACTTTTCGT     |      |      |      |      |      |      |      |  |  | 6427 |
| Vaquita     | CTTTTGTAAATCTCTCCCATCTGCCTTTCTTTCCCAAGCAACCACTGAT- CTGCTTTCTGTCACTATA- GATGAGTTTGC      |      |      |      |      |      |      |      |  |  | 5817 |
| Pig         | CTTTTATAAT- - - - CCCTTCCACATGCCTTTCAACCCGGTAACCACTGAT- CTGCTTTCTGTCACTATA- GATTAATGCGC |      |      |      |      |      |      |      |  |  | 6236 |

Dienstag, 3. Mai 2022 08:38

|             |                                                                                       |      |
|-------------|---------------------------------------------------------------------------------------|------|
| Majority    | AT- TTTT TAGAATTTTAAACAAATXGTCATACAXTATXTCCCCTXTTTTTXXCTGGATTATTCCACTTAGCATAATTATT    |      |
|             | 8010      8020      8030      8040      8050      8060      8070      8080            |      |
| Human       | TAATTTATATATTAGCACACATAT- - AAACATCTTTATTTACGTGATTGAATTCAAACTATTGTTTTGGCCACATCTT-     | 5208 |
| PolarBear   | -----                                                                                 | 0    |
| Cow         | AG- TTTT TAGAATTTTAAAGCAAAGAGTCATACAGTATGTATCCTCTTTTTCCCTGGATCATTCCACTCAGCATTATT- - - | 6274 |
| Dog         | CT- TGCCCTGAGCCAAAGGCAGATGCCCAACCACTGAACCACCTGGGCATCCCAGGTATCTAGTTCTTAAGTGAACCTT      | 6340 |
| BelugaWhale | AA- TTTT TAGAATTTTAAACAAATAGTCATACAGTATGTACCTTCTTTTTGCCTGGATTATTCCACTCAGCATATTTATT    | 6006 |
| Donkey      | ATATTTTTTTAATTTTGAATAAATGGAGTTAACACGTACCCTTTTCTTTGGTCTGGCTTATTGCACTTGGCATAATTATT      | 5766 |
| Cat         | TT- GTCTTGGGGAAATACCTTTGATGGGAATGGTTAGATCATATGATACACATATGTTCTTAACTTTTTAAGAAAATGCA     | 7533 |
| Ferret      | AT- TTTTAAAAATTTTAAATGAATCAAATGTACCTCCCCCCCCTTCTTTTTTGGTCTTTTTTCCCTCAGTGAATTATT       | 6236 |
| Lion        | TT- GTCTTGGGGAAATACCTTTGATGGGAATGGTTAGATCATATGATACACATATGTTCTTAACTTTTTAAGAACTGCA      | 6506 |
| Vaquita     | AA- TTTT TAGAATTTTAAACAAATAGTCATACAGTATGTACCTTCTTTTTGCCTGGATTATTCCACTCAGCATATTTATT    | 5896 |
| Pig         | AA- TTTT TAGAATTTTAAACTTAG- - TCGTACAATATGTACCCTCTTTTTGTCTGGATTATTCTACTTAGCATAATTATT  | 6313 |

|             |                                                                                       |      |
|-------------|---------------------------------------------------------------------------------------|------|
| Majority    | T- GGAATTTCACCCATGTTXTGTATCAGTAGTXCATTCCCTTTTTATTGCTTAGTAGTATTA- CATTGTATGGAXATACAG   |      |
|             | 8090      8100      8110      8120      8130      8140      8150      8160            |      |
| Human       | - - GCCTTTTTTTTTTTTTTTTTGAGTCGGAGTCTCCCTCTGT CATCAGGCTGGAGTGCAGTGGCATGATCTCGGCTTACTG  | 5286 |
| PolarBear   | -----                                                                                 | 0    |
| Cow         | - - GGAATTTCAGCCATGTTGTATATCAGTAGTTCATTCCCTTTTTATTGCTTAGTAGTACTA- CATTGTACAGACATACAG  | 6351 |
| Dog         | G- ATAATTTGTACCTCCCATAGAGTTAGTC- - - CATTCTTCCATTTGCATAG- AGTTGTT- TGTGAGACTACCTTTTTA | 6414 |
| BelugaWhale | TTGGGATTTCACCCATATTGTGTATCAGTAGTTCATTTCTTTTTATTGCTTTGTAGTATTG- CATTGTATGGATATACAG     | 6085 |
| Donkey      | T- TGAGATTTCACCCATGTTGTGTATCAGTAGTCTCTTCCCTTTTTATTGCTTATTAATATTA- TATTGTGCAGATATATAG  | 5844 |
| Cat         | G- ACTATTTTCCAAAGTGGTTGTATAATTTTA- CATTGCCACCAATAGGGTATGAGATTTT- CAGTCCTTCTGCCTCCTT   | 7610 |
| Ferret      | T- TGAGATTTACTTATGTTTGTCAATAGTC- - - CATTACTTTTTCTTGCTTAGTAATACTA- CATTTTATGGATATACAG | 6311 |
| Lion        | G- ACTATTTTCCAAAGTGGTTGTATAATTTTA- CATTGCCACCAATAGGGTATGAGATTTT- CATTCCCTTCTGCATCCTT  | 6583 |
| Vaquita     | TTGGGATTTCACCCATATTGTGTATCAGTAGTTCATTTCTTTTTATTGCTTTGTAATATTG- CATTGTATGGATATACAG     | 5975 |
| Pig         | TTGGGATTTCACTCATGTTGTGCATCAATAGTTCCTTCTTTTTTGTGCTTAGTAATATTA- CCTTTTATGGTTATAAGG      | 6392 |



Dienstag, 3. Mai 2022 08:38

| Majority    | ----- ATXTCXCTTGXGXX----- AATACCTATX- ATTGGAATGTCTAGA                            |      |      |      |      |      |      |      |      |
|-------------|----------------------------------------------------------------------------------|------|------|------|------|------|------|------|------|
|             | 8330                                                                             | 8340 | 8350 | 8360 | 8370 | 8380 | 8390 | 8400 |      |
| Human       | ----- CCGGTCTCCAGGCTGGAGTGCAGTGTGCGGATCTCTGCTCACTGCAACCTCTGCC                    |      |      |      |      |      |      |      | 5462 |
| PolarBear   | -----                                                                            |      |      |      |      |      |      |      | 0    |
| Cow         | ----- GCATCCCCCATCTACATCCTCTC- TAGTGCTTGTT- ACTGTTTTTTCTTAA                      |      |      |      |      |      |      |      | 6527 |
| Dog         | ----- TGTTCTCTAAATATCACCT- TTTGGTTTCTCTGAA                                       |      |      |      |      |      |      |      | 6560 |
| BelugaWhale | ----- ATTTCTCTTGGGGA----- AACACCTATG- ATTGGAATGGCTAGA                            |      |      |      |      |      |      |      | 6242 |
| Donkey      | ----- ATTTCTCTTGGGGG----- AATACCTATG- ATTGAAATGGCTGGC                            |      |      |      |      |      |      |      | 5997 |
| Cat         | ----- ATGTGTTTTCT- TTTGCCAGCTGCATA                                               |      |      |      |      |      |      |      | 7742 |
| Ferret      | ----- TCTTGGGGAATACTTTG- ATTGGAATGCCTGGA                                         |      |      |      |      |      |      |      | 6457 |
| Lion        | CTTGTGGTTTTAATTTGCATTTACCAATGTCTGTTATGTTAAATATCTTTTCATGTGTTTTCT- TTTGCCAGCTGCATA |      |      |      |      |      |      |      | 6815 |
| Vaquita     | ----- ATTTCTCTTGGGGA----- AATACCTATG- ATTGGAATGGCTAGA                            |      |      |      |      |      |      |      | 6132 |
| Pig         | ----- ATTTCTCTTGGGGA----- AATACCTATG- ATTGGAATGGCTAGA                            |      |      |      |      |      |      |      | 6548 |

| Majority    | TCAT- - ATGGTTAGGCATATGTX----- CT- - TTAACTTTTTAAGAAACTGCAAACCTATTTTCXAAA- - G- - XTTGG |      |      |      |      |      |      |      |      |
|-------------|-----------------------------------------------------------------------------------------|------|------|------|------|------|------|------|------|
|             | 8410                                                                                    | 8420 | 8430 | 8440 | 8450 | 8460 | 8470 | 8480 |      |
| Human       | TCCTGGGTTACGCCATTCTCCTGTCTCAGCCTCCCAAGTAGCTGGGACTACAGGCGCCTGCCACCACGCCTGGCTTCTT         |      |      |      |      |      |      |      | 5542 |
| PolarBear   | -----                                                                                   |      |      |      |      |      |      |      | 0    |
| Cow         | TTATAGACAGTCTGATGGATGTG- - - - - AACTGGTAATCTCTTTGTGGTTTTATTTTTCATTTTTCTAGT- GTCTTTGG   |      |      |      |      |      |      |      | 6600 |
| Dog         | TGTTCT- - GTTTCTATCTGTTTT- - - ATTTTCTGCTTGCATTTAGTTCTTTTTCAATTTATGTTGAAGCTTGAGGTCAT    |      |      |      |      |      |      |      | 6635 |
| BelugaWhale | CCAT- - ATGGTTAGGCATATGT- - - - - TTAACTTTTTAAGAAACTGCAAACCTATTTTCTAAA- - - - - GTGG    |      |      |      |      |      |      |      | 6301 |
| Donkey      | TCAT- - ATGGTAG- GCATATGT- - - - - TTAACTTTTTAAGAAACGGCCAACCTATTTTCCGTA- - - - - GTGG   |      |      |      |      |      |      |      | 6055 |
| Cat         | TCATCTTTGGTGAAGTATCTCTTGAGATTGCCTGCCCACTTTTTAAATTGGGTTACTATTGAGTTTTAAGAAGCCTTCAT        |      |      |      |      |      |      |      | 7822 |
| Ferret      | TCATAT- - GGTAG- GCATATGCT- - - TTTAACTTTTTAAAGTTTTAAGAAACGGCAGACCATTTTCCAAAGTGGTTGTAC  |      |      |      |      |      |      |      | 6531 |
| Lion        | TCATCTTTGGTGAAGTATCTCTTGAGATCGCCTGCCCACTTTTTAAATTGGGTTACTATTGAGTTTTAAGAAGCCTTCAT        |      |      |      |      |      |      |      | 6895 |
| Vaquita     | CCAT- - ATGGTTAGGCATATGT- - - - - TTAACTTTTTAAGAAACTGCAAACCTATTTTCTAAA- - - - - GTGG    |      |      |      |      |      |      |      | 6191 |
| Pig         | TCAT- - ATGGTTTGGCATATGT- - - - - TTAACTTTTTAAGAAACTGCAAACCTATTTTCCAAA- - - - - CTGG    |      |      |      |      |      |      |      | 6607 |

Dienstag, 3. Mai 2022 08:38

| Majority    | T- TTATAC- TATTTTAACAT- - - - - TGCXATCAGCAGGXTATGAGATTTTCXGTC- - - - GTCXACATC- XXTTCCAGTG                                                      |      |
|-------------|--------------------------------------------------------------------------------------------------------------------------------------------------|------|
|             | 8490                8500                8510                8520                8530                8540                8550                8560 |      |
| Human       | TTTTGTATATTCAGTAGAGACAGAGTTTCACCATGTTAGCCAGGATAGTCTCTATCTCCTGACCTCGTGATCTGCCTGCC                                                                 | 5622 |
| PolarBear   | -----                                                                                                                                            | 0    |
| Cow         | TGTTGAACATCTTTTCATGG- - - - - ACTTTTTTGCAGCTATATGTCATT- - - - - GGTAAAGTC- TATTTGAATG                                                            | 6664 |
| Dog         | TGACATACCTTTTCTAACATAG- AGGCTTAATGC- TAGGTGTTCCCTTTTAAGTA- - - - - CAGCTTT- CATAGCATTT                                                           | 6706 |
| BelugaWhale | - - TTATAC- TATTTTA- CAT- - - - - TGCCACCAGCAGGGTATGAGATTTCCAGTC- - - CATCTACATC- CTCTCCAGTG                                                     | 6367 |
| Donkey      | - - TTATAC- TATTTT- ACGT- - - - - TGCCACCAGCAGTGTATGAGATTTCCAGTC- - - CTTGCACATC- CTCTCCAATG                                                     | 6121 |
| Cat         | TCTGGTTATAAGTCCTTTATCAGATATATGGTTCATAGATTTTTTTTTTTTTTTTTTTTTTTTGGCAATTGT- AATTTCATTC                                                             | 7901 |
| Ferret      | TATTTTACATTGCCACCAGTAGGATGTGAGATAT- CCAGTCCTTCCATATTCTCTC- - - - - CAATACC- TGTGATTGTT                                                           | 6603 |
| Lion        | TCTGGTTATAAGTCCTTTATCAGATATATGGTTCATAGATTTTTTTTTTTTTTTTTTT- - - TGCCATTTGT- AATTTCATTC                                                           | 6971 |
| Vaquita     | - - TTATAC- TATTTT- - - - - - - - - - - - - - - - - - - - - - - - - - - - - - - - - - - - - - - - - - -                                          | 6252 |
| Pig         | - - TTATAC- TCTTTTAACAT- - - - - TCCTATCAGCAGGGTATGAGATTTT- - - - - - - - - - - - - - - - - - - - - -                                            | 6668 |

| Majority    | XCTGXTTCTGACTTTT- - - - XTTTXXAXTATTTAAATCTGAGTGAATTTGAAATX- - - - X- TXXTTATGG- - TTTTCAT                                                       |      |
|-------------|--------------------------------------------------------------------------------------------------------------------------------------------------|------|
|             | 8570                8580                8590                8600                8610                8620                8630                8640 |      |
| Human       | TCGGCCTCCCAAAGTGCTGGGATTACAAGCGTGAGCCACCGCGCCTAGCCAAAATGCCAGACTAATTTTTGTATTTTTAG                                                                 | 5702 |
| PolarBear   | -----                                                                                                                                            | 0    |
| Cow         | TCTGCTTTTCAAATTGA- - - - - TTT- ATTTCTTTAAGTTTTGAGAAGTCTACATTC- - - - - TGGTTACAGGTTCTTTAT                                                       | 6732 |
| Dog         | CTTAAATTTTGACACGCACAAGTATGTTTTTTGTGTATAGCATCAAGTTGGAATTTGATTTTTACATCCAACCTTACACCC                                                                | 6786 |
| BelugaWhale | CCTGTTGTCTGGTTTTT- - - - - TTT- GATTATAGAGATTCTAGTGGATGTGAAGTCGTAATGTCTTTGTAG- - TTTTCAT                                                         | 6439 |
| Donkey      | CCTGTCGTCTGTCTTTG- - - - - ATTCTCGACATTCTCGTGGGTGTGAAGTGGTAATC- - - - - - - - - - - - - - - - - -                                                | 6186 |
| Cat         | TCTCAGTAGTGTCTTTAAAGAACAGCAATTTTTAATTCTGATGACCTTTACCATTTTTGTCTTCTTATGGCTTGTGCTT                                                                  | 7981 |
| Ferret      | TTTGATTGGAGACATTCTGGTAGGTGTGGAGTGGTAATCTCCTTGTGGTTTTAATTTGCATTTCTCTAATATCTATGATA                                                                 | 6683 |
| Lion        | TCTCAGTAGTGTCTTTAAAGAACAGCAATTTTTAATTCTGATGACCTTTACCATTTTTGTCTTCTTATGGCTTGTACTT                                                                  | 7051 |
| Vaquita     | CCTGTTGTCTGGTTTTT- - - - - TTTTGATGATAGAGATTCTAGTGGATGTGAAGT- - - - - - - - - - - - - - - - - -                                                  | 6313 |
| Pig         | CCTGTTCTT- - GATTA- - - - - - - - - - T- - - - AGACATTAAGTGGATGTGAAATAGTAATC- - - - - TCTTTGTGG- - TTTTAAT                                       | 6729 |

Dienstag, 3. Mai 2022 08:38

| Majority    | T - - XTGCATT - TTTATAAXATCTT - - - - - TGGT - - - - - GXTXXACTTC - - TTTTCATGGGCTTTTTXC - - - - - |      |
|-------------|----------------------------------------------------------------------------------------------------|------|
|             | 8650 8660 8670 8680 8690 8700 8710 8720                                                            |      |
| Human       | TAGAGACAGGGTTT- CACCATTTTGGCCAGGA- - TGCTTCTTCTCTTGACTCCATCATCCGCCCGCCTTGACTTCCCA                  | 5779 |
| PolarBear   | - - - - -                                                                                          | 0    |
| Cow         | CAGATATATGGTTTGCAGTATTTT- - - - - CTGCCTTTTTTGTGTTTGATTC- - TCTCAATGGTGTGTTTGAA- - - - -           | 6795 |
| Dog         | CCTTCTTTTGACTAATAGCATTTT- - - - - AAAACGATTTTGTCTGTTTTTC- - TATTTATGCCTTGTGTTCTTCCC                | 6854 |
| BelugaWhale | T - - - TGCATT- TCTCTAATGTCTT- - - - - TGCT- - - - - GCTGAACAT- - - - TTTTCATGGGCTGTGTTTC- - - - - | 6489 |
| Donkey      | T - - - AGCGTT- TCTGTAATGTGTA- - - - - TGAT- - - - - GTTGAACATC- - CTTTCATGTGCTTTCTGC- - - - -     | 6238 |
| Cat         | TTCATGTCTTGTCTAAGCCATCTTTGCCTAACCCAAGGTCAGAAAGATTTTTTTC- - CTTTGATTTGTAATAGAAGTTTC                 | 8059 |
| Ferret      | TTGATTATCTTTTCAT- GTACTTT- - - - - AAAAAAAATTATTTATTTAT- - TTGACAGAGATCACAAGTAGATG                 | 6750 |
| Lion        | TTCAGGTCTTGTGTTAAGCCATCTTTGCCTAACCCAAGGTCACAAAGATTTTTTTT- - CTTTGATTTGTAATAGAAGTTTC                | 7129 |
| Vaquita     | T - - - TGCATT- TCTCTAATGTCTT- - - - - TGCT- - - - - GCTGAACATC- - TTTTCATGGGCTGTGTTTC- - - - -    | 6365 |
| Pig         | T - - - TACATT- TTTGTAACATCTG- - - - - TGCT- - - - - GTTGGACATC- - TTTTCATGGGCTTTT- - - - -        | 6778 |

| Majority    | AAXTTGX- TGTTTCAXCTTTGGTGCA- - - - - GTGTTTTTTTAAATX- - - - XT- TTTTTGTTCACTTTT       |      |
|-------------|---------------------------------------------------------------------------------------|------|
|             | 8730 8740 8750 8760 8770 8780 8790 8800                                               |      |
| Human       | AAGTGTTGGGATTACAGGCTTGAGCCACCGCGTCCGGCCCATATCTTGCTTTTAAAAA- - AATAGCTTTATTGAGATAT     | 5857 |
| PolarBear   | - - - - -                                                                             | 0    |
| Cow         | AAATAGCATTTTTTAATTCTGATGAATTTAAGTTTACCAG- - GTGTTTGCTAGTGTGGCTCATGCTTTTGGTCATATCT     | 6872 |
| Dog         | GTATTCC- TGCTTCTGCTTTTGTGCATACGGTACTACTGTTT- - - AATCCCTATATGTCTTGTAGTTGATTAGCTTGT    | 6930 |
| BelugaWhale | AAGCTG- - TGTATCATCTTTGGTACA- - - - - GTGCTTTTTTAAAT- - - - - TTCTTGTCCACTTTT         | 6542 |
| Donkey      | CAGCTG- - AATATCGTCTTTGGTGAA- - - - - GTGCTGTTTCAAT- - - - - CTCTTGCCTACTTTT          | 6291 |
| Cat         | ATAGTTTTGGGTTTTGCATTTGAGTTTTTTTTTTTTCTTTCTTTTCTTTTTTAAATATGGTGCATTTCTTTTTTGGGGGT      | 8139 |
| Ferret      | GAGAGGC- AGGCAAAGAGAGAGAGGAAGAAGCAG- GCTCCCT- - - GCTGAGCAGAGAGGCTGATGTGGGGCTCCATCCCA | 6825 |
| Lion        | ATAGTTT- GGGTTTTGCATTTGAGTTTTTTTTTTTTT- - - - - TTTTTTAAATATGGTGCATTTCTTTTTTGGGGGT    | 7202 |
| Vaquita     | AAGCTG- - TGTATCATCTTTGGTACA- - - - - GTGCTTTTTTAAAT- - - - - TTCTTGTACACTTTT         | 6418 |
| Pig         | AAATTTTCTGTGTCATCTTTGGTGCA- - - - - GTGCTGTTTAAAT- - - - - CTCTTGCCACATTT             | 6833 |

Dienstag, 3. Mai 2022 08:38

| Majority    | XAAA- - TTGATTTATXXC- - - CTTTTTTT XAGTTTTGAGXXGTCTACCTTTTAX- X- - CGTTACAXCTXCTTT- - - - -        |      |
|-------------|----------------------------------------------------------------------------------------------------|------|
|             | 8810 8820 8830 8840 8850 8860 8870 8880                                                            |      |
| Human       | AATTTGACATAAAATAAACTACCCATATTAATATACAATGTTTTATCTCATATATACCCTTGTGAAACCACTGCAATCA                    | 5937 |
| PolarBear   | -----                                                                                              | 0    |
| Cow         | AAGT- - CATCTTTAGGAT- - - CTTCCCTGGTGGCTCAGACGGTAAAGCATCTGCCT- ACAGTACCTACCATGTGGGAG- -            | 6944 |
| Dog         | GATTCTTTGTTATATTAATGGCTGTTTTTAGGAGTTGTAGCATAGATCTTTAACTTAACCGTAGTTCTTCCCTCAAGG- -                  | 7008 |
| BelugaWhale | TAAA- - TTGATTTA- - - - - TTTCTTTGAGTTTTGAGACGTCTACATTTCTG- - - - - GTTACAAGTTCTTT- - - - -        | 6600 |
| Donkey      | TTAA- - TTGGGTTATTTCT- - - TTATTATTGACTTTTTGAGAAGTCTTCATTCTG- - - - - GTTACGAGTCTTTT- - - - -      | 6354 |
| Cat         | ATGGAGTTAAACTTTTTCCAGCACTGTTGAAAAGGCTGTCTTTTGTTCATTGAATT- GCTTTGCACCTTTGTCAAAAATC                  | 8218 |
| Ferret      | GAACCCTGGGAATATGAC- - - CTGAGCTGAAGGCAGAAGCTTTAACCCACTGAGCCAGCCAGGCCCCCTTTTTCATGT- -               | 6900 |
| Lion        | ATGGAGTTAAACTTTTTCCAGCACTGTTGAAAAGGCTGTCTTTTGTTCATTGAATTCGCTTTGCACCTTTGTCAAAAATC                   | 7282 |
| Vaquita     | TAAA- - TTGATTTA- - - - - TTTCTTTGAGTTTTGAGAAGTCTACATTTCTG- - - - - GTTACAAGTTCTTT- - - - -        | 6476 |
| Pig         | TAAA- - TTGATTT- - - - - T- - - - TTTCTTTGAGTTTTGAGAAGTCTACATTCTG- - - - - GGTACCCATCCTCT- - - - - | 6891 |

| Majority    | - - - - ATCXGA- - T- XTXT- - - X- GXTTGTGAATATTTTCTG- - - - - CCACTTTTGXTTXXATTXCXCTCX- -   |      |
|-------------|---------------------------------------------------------------------------------------------|------|
|             | 8890 8900 8910 8920 8930 8940 8950 8960                                                     |      |
| Human       | AGATAATGAACATCTATCACTCCCTACAGTATCATCTTGCGCCTTTATAGTCCCTCCTTTCTGCTTTTCTTTCCCAAGG             | 6017 |
| PolarBear   | -----                                                                                       | 0    |
| Cow         | - - - - ACCCGGGTT- CAATCCCTCGGTGGGAAGATCTCCTGGAGAAGGAAATGGCAACCCACTCCAGTATTCTTGCCTGG        | 7019 |
| Dog         | - AGTATTTATGCCACTTCACATAAATTATGTGAGTATTAGAATACTTTATTTCTCCTCTCTTGGCATCTGTGCTATTGTT           | 7087 |
| BelugaWhale | - - - - ATCAGA- - T- ATAT- - - - - GGTTTAAAATATTTTCTG- - - - - CCACTTGTGTTTTATTCTCTTC- - -  | 6652 |
| Donkey      | - - - - ATCAGATACATGGTT- - - - - TACAGATATTATTTTCTG- - - - - CCACTTAATATTTTATTCTCTCA- -     | 6411 |
| Cat         | AGCTATCTGTATGAGTGGTTCTATTTCTGTAATGATCCTTTTCCATTGACCCATTTTGTCCATGTAGATGCCAAAAC               | 8298 |
| Ferret      | - ACTTTTTGCCAC- CTGTATATCATCTTGGATGATGTGTCTCTGTATCACTTGCCCACTTTTTGAATTGGTTACTGTTG           | 6978 |
| Lion        | AGCTATCTGTATGAGTGGTTCTATTTCTGTAATGATCCTTTTCCATTGACCCATTTTGTCCATGTAGATGCCAAAAC               | 7362 |
| Vaquita     | - - - - ATCAGA- - T- ATAT- - - - - GGTTTAAAATATTTTCTG- - - - - CCACTTGTGTTTTATTCTCTTC- - -  | 6528 |
| Pig         | - - - - ATCAGA- - T- AAAT- - - - - GGTTTAAAATATTTTCTG- - - - - CCACTTATGTTTGCACCTCTCTC- - - | 6942 |



Dienstag, 3. Mai 2022 08:38

|             |                                                                                                                      |      |
|-------------|----------------------------------------------------------------------------------------------------------------------|------|
| Majority    | A - - CAXTGTCTTGATTAXTGXTA - - GTXTAGTAGTTTTTAATTC - - - - - X - - - - - X - - - - - X - - - - -                     |      |
|             | 8970            8980            8990            9000            9010            9020            9030            9040 |      |
| Human       | AACCACTGATCTGCTTTCTGTCACTATAGATTAGTTCACACTTTTTAGAAATTTTAGATAA - - - - - ATGTAATCATATGGT                              | 6092 |
| PolarBear   | - - - - -                                                                                                            | 0    |
| Cow         | A - - AAATCCCATGGATGGTGGCA - - CC - TGGTAGGCTACAGTCCATGAGGTCGCAAAG - - - - - AGTCGGACAC - - - GA                     | 7084 |
| Dog         | A - - TACATCTTCCGTAGATGTTA - TAAATTCTATTGTTTGTATTGAAACAGCCAAT - - - - - TACCTTTTTTAAAAAA                             | 7158 |
| BelugaWhale | A - - CAGTGTTTTGAAGAGCAGTA - - GTGCAGCAGTTTTTAATTC - - - - -                                                         | 6692 |
| Donkey      | A - - CAGTGTCTTGA - - - - - AGAA - - - - - CAGCAGTTTTCAATTC - - - - -                                                | 6443 |
| Cat         | A - - TACTGTCTTAATTACTGTGACTTTTATGTTAAGGCTTGACATCAAGCAATCATGGTTTTCTTTATTTTTTTTT - AAAG                               | 8375 |
| Ferret      | A - - CTTTTAAGAGGTCTTCATTC - TGGTTATAAGTCCTTAATCAGATACATGGTTAATA - - - - - TTTCTACTATTTGTG                           | 7050 |
| Lion        | A - - TACTGTCTTAATTACTGTGACTTTTATGTTAAGGCTTGACATCAAGCAATCATGGTTTTCTTTATTTTTTTTTTAAAG                                 | 7440 |
| Vaquita     | A - - CAGTGTTTTGAAGAGCAGTA - - GTGCAGCAGTTTTTAATTC - - - - -                                                         | 6568 |
| Pig         | A - - AAGTATCTTGG - - - - - GGAA - - C - - AGTAGTTTTTAATTC - - - - -                                                 | 6974 |

|             |                                                                                                                      |      |
|-------------|----------------------------------------------------------------------------------------------------------------------|------|
| Majority    | - TGACXAAXTTCAGTTAX - CXXXTGXTAT - XTTAGAGGATTXXTTTTT - X - - - AGTGAGGCTTGC - - GTXTTTTATTAXA                       |      |
|             | 9050            9060            9070            9080            9090            9100            9110            9120 |      |
| Human       | ATGTACATTTTTGGTC - - - - - TGGGTTAGTCCACTCAGAATAATTATT - - - - - TTGAAATTCACCCATGTTGTCTTTCA                          | 6161 |
| PolarBear   | - - - - -                                                                                                            | 0    |
| Cow         | CTGAGCGACTTCACTCACTCACTCATTGT - CTTTACGGCTTCCCTGGTGGCTCAGTGAGGGCTTC - - TCAGTGGATCAGG                                | 7161 |
| Dog         | ATATCTTA - TTTATTCATTCATGAGAGACACAGAGAGGCAGAGACAATAGGCGAGAGGGATATGC - GGTCTCCCTTCACT                                 | 7236 |
| BelugaWhale | - CGATGAATTTTCAGTTTACCAGGTGCTCTGTGGTGTGTATTTTTTTTTGGTTTGGTGTGGCTCAT - - GCTTTTGGTCATA                                | 6769 |
| Donkey      | - TGACGAACTTCAGT - - - - - TTACCAATTTTTATCTC - - - - - GTATGGATCGT - - - - - GCTTTTA - -                             | 6492 |
| Cat         | TTGTTTTGGCTCTTCTATGTCCTTCATGTTTTTATAGGAGTCAGTTTCTAC - - AGAAAAGCTTGCTGGGATTTTATTGGA                                  | 8453 |
| Ferret      | TTAGCTTT - CTCAGTAATGCCTTTTAAAGAACAGCAGTTTTCAATTCTAATGAACTGAAGTTTGCCAATTTTATCTTGTA                                   | 7129 |
| Lion        | TTGTATTGGCTCTTCTATGTCCTTCATATTTTTTATAGGAGTCAGTTTCTAC - - AGAAAAGCTTGCTGGGATTTTATTGGA                                 | 7518 |
| Vaquita     | - CGATGAATTTTCAGTTTACCAGGTGTTCTGTGGTGTGTATTTTTTTTTGGTTTGGTGTGGCTCAT - - GCTTTTGGTCATA                                | 6645 |
| Pig         | - TGACGAACTTCAGT - - - - - TTAC - CAAGGTGGTTTTTTT - - - - - TTGGCAGGGGGTAG - - GTGTTGGATTA - -                       | 7032 |



Dienstag, 3. Mai 2022 08:38

| Majority    | TTTATXTGGTTXCAAGA- XGAGATTX- XXT- AXAGAG- AGACX- TGAGTGAGAATXCTAGGTCXTT- GTGGAACX- - XT      |      |
|-------------|----------------------------------------------------------------------------------------------|------|
|             | 9290 9300 9310 9320 9330 9340 9350 9360                                                      |      |
| Human       | TTTGTATGGACATATGCTTTCATTTCTCTTGGTGGGGCAGGCTATGATTGAAAAGTCTGGATCATGTGATAGGCATATGT             | 6387 |
| PolarBear   | -----                                                                                        | 0    |
| Cow         | TCCATGGAGTCACAAAA- - GAGTCTGAAGTGACTTAG- TGAC- - TAAGTAATAAAAAACAGGTCATT- GTGAAACC- - - - -  | 7369 |
| Dog         | TTTTATTTACTTTGATGAATGAGAG- - - - - - ACAGGT- AGAGATCGAAAGAGAGTCAGACGACACCCGGCAGAGTTCCGTG     | 7444 |
| BelugaWhale | TTTTTTGGGTTTCCATATGGACATTCACTTTTTCTAG- CAACACTCATTGAAAAGACTATTTTTTTTTCATTGAACTGGCTT          | 6985 |
| Donkey      | ----- A- -----                                                                               | 6554 |
| Cat         | TGCACATGTGTGCAGGAATGAGGGAGGGGC- AGAGGG- AAGGGGAGAGAGAGAATCCCAAGCAGGCTCTGTACTGACAGT           | 8690 |
| Ferret      | TTTTATTTCTTTATTTGACAGAGATC- - - - - ACAAGT- AGACAAAGTGATAGGCAGCGGGGTGGGGGGGGGAGCTGAGC        | 7348 |
| Lion        | TGCACATGTGTGCAGGCATGAGGGAGGGGC- AGAGAG- AAGGGGAGAGAGAGAATCCCAAGCGGGCTCTGTACTGACAGT           | 7755 |
| Vaquita     | TTTTTTGGGTTTCCATATGGACATTCACTTTTTCTAG- CAACACTCATTGAAAAGACTATTTTTTTTTCATTGAACTGGCTT          | 6861 |
| Pig         | ATCGAACCCATGCCACA- - GCAGTTGCCTTGAGTCAC- TGA- - - - - AGTGACAATGCTGGATCCTT- AACCCACTG- - - - | 7220 |

| Majority    | -- CACGXCCCATGXAXXTCT- TAACCTATGTA- - CXTTGTGXATCA- - TTATCTAAGXTXXAGTCATGC- - - - - - ATTTA   |      |
|-------------|------------------------------------------------------------------------------------------------|------|
|             | 9370 9380 9390 9400 9410 9420 9430 9440                                                        |      |
| Human       | TTAACTTTTTAAGGAACTGCAAACCTTTTTAAAAGTAGTTGTACCATCTTACAT- TGCCATCAGCATGGTATGAAATTTCC             | 6466 |
| PolarBear   | -----                                                                                          | 0    |
| Cow         | -- CAGG- GTCACAAAGATT- - TCTCCTTTGT- - - TTTCTGATAGA- - TTTTATAGTTTTTAGTTTTAC- - - - - - ATTTA | 7432 |
| Dog         | GAGCCGCCCATG- GGACTTTGATCCCCGGGA- - CTCCAGGATCAGATTCCCAGGCCAAATGCATGC- - - - - - GCTAA         | 7514 |
| BelugaWhale | TGCACCTGTATCAAAAATCAATTATGTATGTA- - CGTATGATTCTGTTTCTGTACTGTATTCTCGTCC- - - - - - ATT- G       | 7055 |
| Donkey      | ----- ATAGAAGTTT- TAT- ----- AGTTTAGGTTTTGC- - - - - - ATTA                                    | 6586 |
| Cat         | GAGGAGCCCGATGCAGGGCTCGAACCCACAAA- - CCGTGAGATCA- - TGATCTGAGCCGAAATCAGGCACTGGATGCTTA           | 8766 |
| Ferret      | AGAGAGCCCATG- TGGGTCTTGATCCCAGGA- - CCCTGAGATCA- - TGACCTAAGTGTAAAGGCAGAG- - - - - - GCTTA     | 7416 |
| Lion        | GAGGAGCCCGATGCAGGGCTCGAACCCACAAA- - CCGTGAGATCA- - TGATCTGAGCCGAAATCAGGCACTGGATGCTTA           | 7831 |
| Vaquita     | TGCACCTGTATCAAAAATCAATTATGTATGTA- - CGTATGATTCTGTTTCTGTACTGTATTCTCGTCC- - - - - - ATT- G       | 6931 |
| Pig         | -- CACC- ACCGAGGAACTCC- TCTCCTTTGT- - - CTTCTAAAAGAAGTTTCATAGTTTTTAGTTTTGC- - - - - - ATTTA    | 7286 |

Dienstag, 3. Mai 2022 08:38

|             |                                                                                                                      |      |
|-------------|----------------------------------------------------------------------------------------------------------------------|------|
| Majority    | ACCCATT- - - - - TXTAGGTACCTCTT- - - - - TTAATATGGTXXAXTGTCTGAATAAATT- - - - -                                       |      |
|             | 9450            9460            9470            9480            9490            9500            9510            9520 |      |
| Human       | AGTCCTTCCACATCCTCTTTAATGCCTGTTATCTTCTGTTTTTGATTATAGATATTGTAGTGTATATGAAGTGATATTTTC                                    | 6546 |
| PolarBear   | - - - - -                                                                                                            | 0    |
| Cow         | AGTTCTT- - - - - TTTAACT- - - TTTT- - - - - TTAATATGATGCAATGTATGAATCAAGA- - - - -                                    | 7478 |
| Dog         | AACCACTGAGCCAACGCGGTATCCCTC- - - - - GCGGGGGGTATGATCCCTTACCAGATT- - - - -                                            | 7569 |
| BelugaWhale | ACCCATT- - - - - TTTGTCTACCTAGT- - - - - AGCCAAAAGCGTACTGTCTTAATTACTG- - - - -                                       | 7104 |
| Donkey      | AGTCTTT- - - - - TTGAGTTAATTTTT- - - - - TGAATATGGTGCAAAGTCTGAATCAACG- - - - -                                       | 6635 |
| Cat         | ACCCATTGAGCCACCCAGGCGCCCCAGCAGTGTTTAGTTTTTCATTGTACAGTTTTTGTACATTTT- GTCATATTTATTCC                                   | 8845 |
| Ferret      | ACCACTGAGCCACCCAGGTGCCCAT- - - - - TTAATTTTTTTTAAATATGTGCAAAAATA- - - - -                                            | 7471 |
| Lion        | ACCACTGAGCCACCTAGGCGCCCCAGCAGTGCCTAGTTTTTCATTGTACAGTTTTTGGACATTTTTGTGAGATTTATTCC                                     | 7911 |
| Vaquita     | ACCCATT- - - - - TTTGTCTACCTAGT- - - - - AGCCAAAAGCGTACTGTCTTAATTACTG- - - - -                                       | 6980 |
| Pig         | AGTCTTT- - - - - TTGAGTTAATTTTT- - - - - TTAATACGGTCCAGTGTATGAATCAACT- - - - -                                       | 7335 |

|             |                                                                                                                      |      |
|-------------|----------------------------------------------------------------------------------------------------------------------|------|
| Majority    | - - - - - TTTTTGGTGTTG- - - - - GATATGGACATXAACTTTTTXTXGCATCATTTGTTGAAAAGACTATXCT                                    |      |
|             | 9530            9540            9550            9560            9570            9580            9590            9600 |      |
| Human       | ACTGTGGATTTAATTTG- CATTCCCTCTAATATCTATGATGTTGGACATCTTTTCGTGTGCTTTTTGTGAGCTGTTATCTT                                   | 6625 |
| PolarBear   | - - - - -                                                                                                            | 0    |
| Cow         | - - - - - TTTTTGGATTTG- - - - - AATATGGAAATTCACCTTTTTTAGCATGATTTGTTGAAAAGACTTTTTT                                    | 7540 |
| Dog         | - - CCCAGAGGCGTCTCG- - - - - GCTGTG- - C- - AAAGTCTCTTTGGTATTGTTTGTGAGAAAAACGACT                                     | 7629 |
| BelugaWhale | - - - - - TAGTTTTATATTA- - - - - AATCTTGAAATCAAGTAGAACTTTGTTCTTTTTCAAAGTTGTTTTGGCT                                   | 7166 |
| Donkey      | - - - - - TTTTTGGTGTTG- - - - - AATATGGACATCCACTTTTTCCGACACCATTTCGTTGAACAGGCTGTCCT                                   | 6697 |
| Cat         | TATTTCAAGTGTTTTTGGTGCTGTTATAAATGGTATTTTTAAAATCTCAGTTTCTAGTTAGTGGTGGAGAAAAATACAAA                                     | 8925 |
| Ferret      | - - AGTCAGCATTTTTGTTTCGG- - - - - GGTATGGACTTAACTTTTTCCAGCACCATTGTTGAAAAGGCTGTCCT                                    | 7541 |
| Lion        | TATTTCAAGTATTTTTGGTGCTGTTATAAATGGTATTTTTAAAATCTCAGTTTCTAGTTAGTAGTGGAGAAAAACACAAA                                     | 7991 |
| Vaquita     | - - - - - TAGTTTTATATTA- - - - - AATCTTGAAATCAAGTAGAACTTTGTTCTTTTTCAAAGTTGTTTTGGCT                                   | 7042 |
| Pig         | - - - - - TTTTTGGGAGTTG- - - - - GATGTGGACATCCACTTGTCTAGCACCATTGTTGAAAAGACTATTCT                                     | 7397 |

Dienstag, 3. Mai 2022 08:38

|             |                                                                                                                                                                 |      |
|-------------|-----------------------------------------------------------------------------------------------------------------------------------------------------------------|------|
| Majority    | T T T T T T G T T G A X T X X G C T T T X C A T C T T T G T C A A A A A C X A - - - C A X T T A T T T A T G T A T G T T - - - X T T T T T T T G A A X T G T A   |      |
|             | 9610            9620            9630            9640            9650            9660            9670            9680                                            |      |
| Human       | T - - G G T G A A G T G T C T G T T T A T A T C T T T A G C C C A A T T T T T - - - T A T T T G G T T A T T T A T T T T A A A T T G A G T T T T G A G A G G T C | 6700 |
| PolarBear   | -----                                                                                                                                                           | 0    |
| Cow         | T T T C T A A T T G A A T T G G C T G T G C A T C T T G G T C A G A A A C A A - - - T T A T T A T - - C T A C A T A T G - - - - A T T C T T T G T A C T G T A   | 7610 |
| Dog         | T - - A T T G T G G T C T C T G T G T G G A C T C C C T G T C - - - - - - - - - T A C T T A C T T A G G A G T T T T - - - T T T G G T T T T G A A G T T T G     | 7693 |
| BelugaWhale | C T T C T G G G T C C T T C A C A T T T T C C T G T G A G T C A G T T T C T A - - - C A A A A A G G C C T G C T G G G A - - - - T T T A A T T G A A A T T A A   | 7238 |
| Donkey      | T T C T C C C T T G A A T T G G C T T T G C A C C T T T G T C A A A A A T - - - - - C A C T T A T C T A T G T A T G T A T G - A T T C T A T C T G T A C T G G A | 6771 |
| Cat         | T A T T T T G T G T A T T G T T C T T G T A T T A T T C A C T C T T G C C A A A C T C A C T T G T T A A G A T A T A A T A G - C T T T T T T T G T A G G C G C T | 9004 |
| Ferret      | T T G T T C A T T G A A T T G G C T T T G C A C C T T T G T C A A A A A T C A A C - T A T C T T T T T A T G C A T C A T - - - T C T A T T T C T G T A C T G T A | 7617 |
| Lion        | T A T T T T G T G T A T T G T T C T T G T A T T A T T C A C T C T T G C C A A A C T C A C T T G T T A A G A T A T A A T A G - C T T T T T T T G T A G A C G C T | 8070 |
| Vaquita     | C T T C T G G G T C C T T C A C A T T T T C C T G T G A G T C A G T T T C T A - - - C A A A A A G G C C T G C T G G G A - - - - T T T A A T T G A A A T T A A   | 7114 |
| Pig         | T T C T C C A T T G A A T T G G C T T T G C A C C T T T G T C A A A A A T C A - - - A T A A T A - - - - - G T A T G T - - - - - A C C T G T G A T A C T G T A   | 7463 |

|             |                                                                                                                                                                 |      |
|-------------|-----------------------------------------------------------------------------------------------------------------------------------------------------------------|------|
| Majority    | T T C G T T T X C T T T G A C C A A T T T X T G T X A A T T T A X X X - C C X A A A A X T G X A T T C T C T T A - T T X T T G T - - - - - X T T A T A T T A     |      |
|             | 9690            9700            9710            9720            9730            9740            9750            9760                                            |      |
| Human       | T T C A T T G T G G T T A C A A G T C C T T T A T C A G C C A T A A G G C C T G C A A A T A T T T T C T G C C A C T C A T C T T C T T A T - T C T C G C A T T G | 6779 |
| PolarBear   | -----                                                                                                                                                           | 0    |
| Cow         | T T C T T T T T C A T T G A C C C G T T T T T G T C T A T T T A G T A - G C C A A A A A T G T A C T A T C C T A - C T - T A G T - - - - - T T T A T A T C A     | 7680 |
| Dog         | G C C G T T T T C T C C A C C C A A G C T G T G C C A T G G C C A G A G C C T G T G C C A T G G C C C G G T C - - T T T C - - T - - - - - C T T A A G A G A     | 7762 |
| BelugaWhale | C T T G A A T C A G T A G A G C A A T T T G G G G A A A A T T A A C A T C T T A A T G T T G A G T T T T C T C A - T C C A T G A - - - - - A C A C A A T T T     | 7310 |
| Donkey      | G T C G T - T C C A T T G G C T - G - - T C T A T T A G A T - - - - - G C C A A A A C A T A C T G T C T T A A C T G C T G T G - - - - A C T T T A T G T G A     | 6837 |
| Cat         | A T C A G G T T T T C T A C A T A G A C C G T C T T A C T T T T T C C T T T C C T A T C T G G A T G C C G T T T - T T T T C C T G T G A T A T C T T A G T A C A | 9083 |
| Ferret      | T C C T T T T C T T T T G A C C A T T T T T G T C C T T C C A G A T G C C T A A A A C C T G A T G T C T T A A - T T A C T A T G - - - - A T T T T A T A T T A   | 7692 |
| Lion        | A T C A G G T T T T C T A C A T A G A C C A T C T T A C T T T T T C C T T T C C T A T C T G G A T G C C G T T T - T T T T C C T G T G A T A T C T T A G T A C A | 8149 |
| Vaquita     | C T T G A A T C A G T A G A G C A A T T T G G G G A A A A T - - - - - C T T A A T G T T G A G T T T T C T C A - T C C A T G A - - - - - A C A C A A T T T       | 7180 |
| Pig         | T T C T T T T C C A T T G A C C A T T T T T G T T T A T T T A G T T - G C C A A A A C A T A C C G T C T T A - C T A T A G T - - - - - T T T A T A T G A         | 7534 |

Dienstag, 3. Mai 2022 08:38

|             |                                                                                                     |      |
|-------------|-----------------------------------------------------------------------------------------------------|------|
| Majority    | A- - - - GTCTTGAAXT- - - XCAXTTAGGXX- - - - - C- - - TTTXTTTTTTTTTTCAGAATTGTTTTGGCTTTTTCXTGTGT- - - |      |
|             | 9770      9780      9790      9800      9810      9820      9830      9840                          |      |
| Human       | T- - - - CTTTTGAAGAGCAACAGTTATTTAAA- - - - TCTGATGGACTCCAGTTTACCAATTTTTTTCTTTTATGGATTGTA- -         | 6849 |
| PolarBear   | -----                                                                                               | 0    |
| Cow         | A- - - - ATCTTGAAT- - - - AAAGTGGAAC- - - - - - - TGTGTTTGTTCAAAGTTGTTTTGGCTCTTC- TGGGT- - -        | 7738 |
| Dog         | G- ACTAAGCTGGAG- - - - GCAGTCATGGA- - - - - CTCATTCATTTGTTTTTTGAAT- - - TTCAGGGATCAATGTCC- - -      | 7825 |
| BelugaWhale | A- - - - TCTTTCCATT- - - - TACTTAGGTC- - - - - - - TTTCATTTCTTTCAGCATTGTTTTAGTTTTCACTGTAT- - -      | 7369 |
| Donkey      | A- - - - GTCTTAAAATCAAGTAGTCATGATC- - CTCCAACCTTTGTGCTTTTTCAAAGTTGTTTTGACTCCGGGCCTT- - -            | 6908 |
| Cat         | GTGCTGAATAGAAGTGATGATATTAGGGTGAACACCTAAATGCTATTCTTTCTTAAATGTTTGGGCAGTTCACCAGTGAA                    | 9163 |
| Ferret      | A- ATTGTCTTGAATCTAGCAGTCATGGT- - - - - CCTCTTTGTTCTTTCTCAGAGTTGTTTTGGCTCTTCCCATGT- - -              | 7762 |
| Lion        | GTGCTGAATAGAAGTGATGATATTAGGGTGAACCCCTAAATGCTATTCTTTCTTAAATGTTTGGGCAATTCACCAG- - -                   | 8225 |
| Vaquita     | A- - - - TCTTTCCATT- - - - TACTTAGGTC- - - - - - - TTTCATTTCTTTCAGCATTGTTTTAGTTTTCACTGTAT- - -      | 7239 |
| Pig         | A- - - - GTCTTGAAT- - - - CAAGTAGAAC- - - - - - - TTTGCTGTTTTTCAAATTTGTTTTGACTTTT- - TGGGT- - -     | 7591 |

|             |                                                                                       |      |
|-------------|---------------------------------------------------------------------------------------|------|
| Majority    | ----- TTXTGTTTTTXATGAXTCAATXXTCCATA- AAXXXGCTTGCTXGGTT- - - - TTAATT                  |      |
|             | 9850      9860      9870      9880      9890      9900      9910      9920            |      |
| Human       | ----- GTTTTGGGGTCTTGTCTGAGCCATTTTTGCCTGACTGTAAGCCATGAAGATTT- - - TTTTCCT              | 6909 |
| PolarBear   | -----                                                                                 | 0    |
| Cow         | ----- CCTTTACATTTTCTATGAGTCAGTT- - TCTACA- GAAAGGCCTGCTGGAAT- - - - TTAATT            | 7793 |
| Dog         | ----- ATCATTGTCTGATGTTCACTGGTTTTG- - - AAAACCATTGTTATG- - - - - TACATC                | 7873 |
| BelugaWhale | ----- AGATTTTGTATTTTTTGGTTCAGATTTATCCTTA- TTTTGTGTTTTTTGGTG- - - - ATATTT             | 7426 |
| Donkey      | ----- TATGTTTTCATATGAGCCAGTT- - TCTACAAAAAATGCCTGCTGAGAT- - - - TTTATT                | 6960 |
| Cat         | GTTGTGTGGGCCTGATGTTGTTTTCTTTGTGGAGTTTTAAATGACACATTTAGTTTATTTAATAGATCCAGGACTACTC       | 9243 |
| Ferret      | ----- CCTTTTGTATATGAGTCAATTTCTACA- - - AAAACGCTTGCTGGGAT- - - - TTTATT                | 7812 |
| Lion        | ----- T- - - - - - - T- - - TTCTTTGTGGAGTTTTAAATGACACATTTAGTTTATTTAATAGATCCAGGACTATTC | 8285 |
| Vaquita     | ----- AGATTTTGTACTTTTTTGGTTCAGATTTATCCTTA- TTTTGTGTTTTTTGGTG- - - - CTATTT            | 7296 |
| Pig         | ----- TCTTTACGTTTTCTTATGAGTCAGTT- - TCTACA- CAATAGCCTGCTGGGAT- - - - TTAATT           | 7646 |



Dienstag, 3. Mai 2022 08:38

| Majority    | X- TXX- - C- - - - - TTGGXCATXTGTGXCTTTT- - - - - ATTTGTTXTAATTCTGGGTGGTG- X- - - - T- - - - - TT |      |
|-------------|---------------------------------------------------------------------------------------------------|------|
|             | 10090 10100 10110 10120 10130 10140 10150 10160                                                   |      |
| Human       | TATAGGCACACAGCACCATGCCAGCTAACTTTT- - - - AAATTTTTTATAGACCCGGGTCTCTCT- - - GTTTTGCCCA              | 7132 |
| PolarBear   | -----                                                                                             | 0    |
| Cow         | - - - - - ATACAGATTTTTGTCTTTTTACTCAGATTTATCCTTATTTTGGGTTTTTTTTTTGGTGCTATTCT                       | 7991 |
| Dog         | CTTCATTC- - - - - TTTGTCATATGG- ACACAC- - - - - TGCAATATAGTTCCTACTTTGG- - - - - TG                | 8079 |
| BelugaWhale | CGCTGAGCCTGCGCGTCTGGAACCTGTG- CTCCGCAGCGGGAGAGGCCACAGCAGTGAGAGGCCCGCGTACTGCAAAAAA                 | 7658 |
| Donkey      | - - - - - TTGGTCAGCTTTATCTC- T- - - - - ATTTTCATGTTTTTTTTGGATGCTATT- - - - -                      | 7160 |
| Cat         | TTTCATTCTG- GTATTGATCATTGTGTCTTTTTCTTTTTTTTCATTGTGCTAGCTAGAGAT- - - - TATAGATTT                   | 9476 |
| Ferret      | TGTCAGAT- - - - - TTATCCCTATTTTCATGTTT- - - - - TTTGGTGCTATTGTAAATGGTG- - - - - AT                | 8019 |
| Lion        | TTTCATTCTG- ATATTGATCATTGTGTCTTTT- - - - - TTTTCGTTGTGCTAGCTAGAGAT- - - - TATTGATTT               | 8512 |
| Vaquita     | CGCTGAGCCTGCGCGTCCGGAACCTGTG- CTCCGCAGCGGGAGAGGCCACAACAGTGAGAGGCCCGCGTACTGCAAAATA                 | 7514 |
| Pig         | -----                                                                                             | 7685 |

| Majority    | XAXTAATAATXTAX- - - AATXTCCAGTTGTTATTAXTATATAGAXXTX- AAGATTATTTTTGTXCATTGCTCTTGTATTX       |      |
|-------------|--------------------------------------------------------------------------------------------|------|
|             | 10170 10180 10190 10200 10210 10220 10230 10240                                            |      |
| Human       | GGCTGGTGTGAACTCCTGGCCTCAAGCGATCTTTCTGCCTCAGCCTTCCAAAGTGTTGGGATTAAGG- - CATGAGCCA           | 7210 |
| PolarBear   | -----                                                                                      | 0    |
| Cow         | AAGTAATATTTAAAACAAATGTCCATTTGTTATTAATATATAGAAATA- AAGATTATTTTTGCCATTGCTTTTGTATT            | 8070 |
| Dog         | GCGTTATGGTTT- - - - - GATTCCAGTTTTTATCAG- GTAGCAG- - - - ACTGGCGATATTTTCCATTG- - CAGGTACAA | 8145 |
| BelugaWhale | AAGAAAAA- - AAATCAAATGTGTATTTGTTATTAATATATAGAAATA- CAGATTATTTATGCCATTGCTCTTGTATTC          | 7735 |
| Donkey      | - - TAAAAAATTC- - - - AATTTCCAGTTGTTA- - - GTGTATAGAAATACAA- ATGATTTTTGCATATTGCTCTTTTATTC  | 7230 |
| Cat         | TATTAATAGTCTCC- - - AAAAATCAGCTTTTTGGTTTTTCATTGAGTTTTCTATTTCTATTTTATTGAAAATACTGTTTTA       | 9553 |
| Ferret      | GATTTAAAATTTTC- - - AGTTTCCAGTTGTTACTAGTGTAAGA- - - - AATACAAATATTTTTGCATGTTCTTGTATTC      | 8091 |
| Lion        | TGTTAATAGTCTCA- - - AAAAATCAGCTTTTTGGTTTTTCATTGAGTTTTCTGTGTCCTATTTTATTGATAACTACTGTTTTA     | 8589 |
| Vaquita     | AAGAAAAA- - AAATCAAATGTGTATTTGTTATTAATATATAGAAATA- CAGATTATTTATGCCATTGCTCTTGTATTC          | 7591 |
| Pig         | -----                                                                                      | 7685 |



Dienstag, 3. Mai 2022 08:38

|             |                                                                                     |      |
|-------------|-------------------------------------------------------------------------------------|------|
| Majority    | ATCACCTTTGCCAAACTCXTTATTAXTXXA- - CAGCTXTTGTAGATGCCATCXGATTTTATATTTACCTTT           |      |
|             | 10250      10260      10270      10280      10290      10300      10310      10320  |      |
| Human       | CTACACTTGGCCACCTTTGTTTTCTAATAGAAGTTTTATACTTTGGTTAACATTTGGGTCTCTTTCATTTTGACTTAAT     | 7290 |
| PolarBear   | -----                                                                               | 0    |
| Cow         | AGCACATTTGCCAGACATTTTATTACAGTATA- - CAGCTTTTGGTAGATGCCATCAGATTTTCTGTGTACACTGTTT     | 8147 |
| Dog         | ATCAGTCTGCGTGTACAGTGAAATCACAATTA- - CAAAGTTTATGAAAACACATTGGCAAAGGATTCTTCACTAAT      | 8222 |
| BelugaWhale | AGCACCTTTGCCAAACTCATTTATTAGATCGAA- - CAGCTATTTGGTAGATGCCGTGAGATTTTATATACACTGTTC     | 7812 |
| Donkey      | TGCACTCTTGCCAAACTCACTTAATAG- ATCTAA- - TAGCTGTTTTGTAGACGCCGTGAGATTTTCTACATAGACCATTT | 7307 |
| Cat         | ATTTTCTTCTGCTTTGCATTTAGTTCTTTTTCAACTTAGTTATGTTGAAGCTGGTATTGTTGACGTGATACTTTTCTAAC    | 9633 |
| Ferret      | TTTACTCTTGCTAAACTCACTTGTAGATACCGA- - CATTTTTTTGTAGATATCAGATTTTACACATACTTACCTTTT     | 8168 |
| Lion        | ATTTTCTTCTGCTTTGCATTTAGTTCTTTTTCAAGTTAGTTATGTTGAAGCTGGTATTGTTGACGTGATACTTTTCTAAC    | 8669 |
| Vaquita     | AGCACCTTTGCCAAACTCATTTATTAGATCGAA- - CAACTATTTGGTAGATGCCATCAGATTTTATATACACTGTTC     | 7668 |
| Pig         | - AG- ----- CAGGCATTCTT-----                                                        | 7698 |

|             |                                                                                           |      |
|-------------|-------------------------------------------------------------------------------------------|------|
| Majority    | A- - - TCXTATTTTATAXCTGGATGTCTTTTTTTTTTTTTC- T- X- - XCATCAA- TTGTTCAATGTTTAAAT- - GTATT  |      |
|             | 10330      10340      10350      10360      10370      10380      10390      10400        |      |
| Human       | AT- - TTTGAATATGGTA- CAAAGTGTGGGTGAGAAGTATTTGGTTT- TGCATGGGGATATCCAGTGTTTACAGCATCATT      | 7366 |
| PolarBear   | -----                                                                                     | 0    |
| Cow         | A- - - TTATATTTTCTATCTGAATGTCTTTTCTTTTTCTTACCTAT- GGCATTTAGTTGTTTCAAGTCACTAAGTATGAAAA     | 8222 |
| Dog         | - - - - TTGTTTTCCACAACCTGGATATGGGAGTGCCTGTTTCT- - - - - CTACATCTTACCCATTTCTGG- - - GTTTT  | 8286 |
| BelugaWhale | A- - - TCATATTTATTATCTGGATGCCTTTTTGTTTTCTTGCCTGT- GGCATCTA- - GTACAATATTTAAATG- ATGAG     | 7883 |
| Donkey      | ATGTATCTTCTCTTCTATCTGGATACCGTTTTTTTTCTTGTCTTGCCTATGGCATCTAATACAATGATGAATA- - GAAGT        | 7385 |
| Cat         | A- - - TAGAGGTTTAGTGCTATATATTTTCTTTTTTTATTT- - - - AATTTAAATTTTTTTAATGTTTTTAT- - TTATT    | 9702 |
| Ferret      | - - - - TCATTTCTGT- - CTGGATGCCGTTTTTTCTTGCCTG- - - - - TGGCATCTTGTGCAGTGCTGAGTA- - GAAGT | 8232 |
| Lion        | A- - - TAGAGGTTTAGTGCTATGATTTTCTTTTTTTATTTTTTT- AATTTAAATTTTTTTAATGTTTTTAT- - TTATT       | 8742 |
| Vaquita     | A- - - TCATATTTATTATCTGGATGCCTTTTTGTTTTCTTGCCTGT- GGCATCTA- - GTACAATATTTAAATA- ATGAG     | 7739 |
| Pig         | ----- T----- GTTCAAT- - - T-----                                                          | 7707 |

Dienstag, 3. Mai 2022 08:38

| Majority    | AGXXAXAXXTAGXATGTTT- C- - - - - X- TTCATGGTXTTAGAGT- AXATAC- - - CCTAAATGA- - - XATTT |      |
|-------------|---------------------------------------------------------------------------------------|------|
|             | 10410 10420 10430 10440 10450 10460 10470 10480                                       |      |
| Human       | TGTTGAAAAGACTATCCTTTCTCCATTCACCTTGGCTTTGCAGCTTCATGAAAAATCACTTATGTCTGTATGTGTGATTTT     | 7446 |
| PolarBear   | -----                                                                                 | 0    |
| Cow         | AGCATCTAGTGCAGTGTAAATAGGGAGAGCAAGCATTCTTTGTTCCCTGAATTAATAC- - - CTAAATGACGTTATTT      | 8299 |
| Dog         | ATAAAAATTTAGAATGTTAGC- - - - - TAATTATAGGCTAAAAAGGTG- - - - - CTTTATAG- - - TTTA      | 8340 |
| BelugaWhale | AGCAGACCTTCTTACTTTT- - - - - TTCCTGATATTAGGGT- AAATAC- - - CTAAATGA- - - TATTT        | 7938 |
| Donkey      | GATGAGAACAGGTGACTTGAC- TT- - - - - TGTTCCCTGGTAGTAGGGT- AAACAA- - - CCTAAATGATATTCTTT | 7449 |
| Cat         | TTGGAGAGACAGAGCGTGAGC- - - - - AGGGGAGGGGCAGAGAGAGGGAGAC- - - ACAGAATCT- - - GAAG     | 9761 |
| Ferret      | GATGAGAGCAAGCATCTTTAC- - - - - TATGTTCCCTATGTCAGGGCGAACC- - - CCTATATGA- - - TATT     | 8291 |
| Lion        | TTGGAGAGACAGAGTGTGAGC- - - - - AGGGGAGGGGCAGAGAGAGGGAGAC- - - ACAGAATCT- - - GAAG     | 8801 |
| Vaquita     | AGCAGACCTTCTTACTTTT- - - - - TTCCTGATATTAGGGT- AAATAC- - - CTAAATGA- - - TATTT        | 7794 |
| Pig         | ----- CTAGAAT- ACATAT- - - CCTAAGTGA- - - TATTT                                       | 7734 |

| Majority    | TTTTCTTAAATGTTTGGTATA- - - - - GTTCAXXAGTGAAGCTGTGTGGACTTGATGTTT- T- - XCTTTGTGGAA     |      |
|-------------|----------------------------------------------------------------------------------------|------|
|             | 10490 10500 10510 10520 10530 10540 10550 10560                                        |      |
| Human       | ATGTCTGTA CTCTTTTGTATTGACCCATTTTCCTTTATCTAGATGCTGAAACATACTGTCT- TAATCATTGTAGCTT        | 7525 |
| PolarBear   | -----                                                                                  | 0    |
| Cow         | TTTTCTTAAATGTTTGGTACA- - - - - GTTCACCAGTGAAGCTGTATGGGTTTGTCTGTTT- - - - - TTGTGGGAA   | 8362 |
| Dog         | TATTTTGAAATGGTTGAGAT- - - - - TTAAAG- - - AATTTGAGAGTTTTAAATTTCTTGCCCTATGAACTAC        | 8403 |
| BelugaWhale | TTTTCTTAAAAGTTTGGTACA- - - - - GTTCACTAGTGAAGCTGTGTGGCCTGGTGTGTT- - - - - TCTTTGTGGAA  | 8004 |
| Donkey      | CTTTCTTAAATGTTGGGTACA- - - - - ATTCACCAGTGAAGCTGTGTAGACTGGTGTGTT- - - - - TTTGC- - - - | 7508 |
| Cat         | CAGGCTCCAGTTTTGAGCTGTTAGC- - - - - ACATCTGGGCTTGAACCTTGTGAAGTGAAGATCATGACCTGCGCCAAAG   | 9836 |
| Ferret      | ATTTCTTAAATGTTTGGGGGG- - - - - GCACCTGGG- - - TGGCTCAGTGGGTAAAGCCTCTGCCTTCGGCTCAGG     | 8359 |
| Lion        | CAGGCTCCAGTTTTGAGCTGTTAGC- - - - - ACAGCTGGGCTTGAACCTTGTGAAGTGAAGATCATGACCTGAGCCAAAG   | 8876 |
| Vaquita     | TTTTCTTAAAAGTTTGGTACA- - - - - GTTCACTAGTGAAGCTGTGTGGCCTGGTGTGTT- - - - - TCTTTGTGGAA  | 7860 |
| Pig         | TTTTCTTAAATGTTTGGTATA- - - - - GTTCACCAGTGAAGTTGTGTGGACCTGGTGTGTTATTTTCTTTGTGGGA       | 7804 |

Dienstag, 3. Mai 2022 08:38

|             |                                                                                                                                                                                                                                                                                                                                                                                                |       |       |       |       |       |       |       |       |
|-------------|------------------------------------------------------------------------------------------------------------------------------------------------------------------------------------------------------------------------------------------------------------------------------------------------------------------------------------------------------------------------------------------------|-------|-------|-------|-------|-------|-------|-------|-------|
| Majority    | XXTTTTAAATX- CAGATTCAATTTATTGAATAGXTXCAGGAXTATTC- - - ACATTATXTX- - - XXTTTTGAGTGAGCTT                                                                                                                                                                                                                                                                                                         |       |       |       |       |       |       |       |       |
|             | <table border="0"> <tr> <td style="text-align: center;">10570</td> <td style="text-align: center;">10580</td> <td style="text-align: center;">10590</td> <td style="text-align: center;">10600</td> <td style="text-align: center;">10610</td> <td style="text-align: center;">10620</td> <td style="text-align: center;">10630</td> <td style="text-align: center;">10640</td> </tr> </table> | 10570 | 10580 | 10590 | 10600 | 10610 | 10620 | 10630 | 10640 |
| 10570       | 10580                                                                                                                                                                                                                                                                                                                                                                                          | 10590 | 10600 | 10610 | 10620 | 10630 | 10640 |       |       |
| Human       | TATATTGAGTC- TTGAAACCACTTACTTAGTCTTGGCCCTCCAACCTCTG- TTCTTTTTCAAAGTTGTTTTAACTCTTCT 7603                                                                                                                                                                                                                                                                                                        |       |       |       |       |       |       |       |       |
| PolarBear   | ----- 0                                                                                                                                                                                                                                                                                                                                                                                        |       |       |       |       |       |       |       |       |
| Cow         | GGTTTTAAACTACACATTCAATTTATTGAATAGATACAGGATTATTC- - - AGATTATCC- - - - TTTTGAGTGAGCTT 8432                                                                                                                                                                                                                                                                                                      |       |       |       |       |       |       |       |       |
| Dog         | CCCTCTCTATACCTGACCTATTTTAATGATCATCTCTGTTAGATTTTC- - - TGTGTAAAAAGTGGTAGATTCATTGTAGGT 8480                                                                                                                                                                                                                                                                                                      |       |       |       |       |       |       |       |       |
| BelugaWhale | GGTTTTAAAC- - CACATTCAATTTATTGAATAGATATAGGACTATTC- - - ACATTATTC- - - - - TGGAGTGAGCTT 8070                                                                                                                                                                                                                                                                                                    |       |       |       |       |       |       |       |       |
| Donkey      | - - TTT- - - - - GTTTCATTTTTATTTAATGGGT- - AGAACTATTT- - - AGTTATGTTT- - CTTCCTGAGTGAGCTT 7569                                                                                                                                                                                                                                                                                                 |       |       |       |       |       |       |       |       |
| Cat         | TCGGACGCTTCACTGA- CTAAGCCATCGAGGTGCCCTATATATTAC- - - CCTCCTAAGTACAGCTTTCGTGGCCTCTCT 9912                                                                                                                                                                                                                                                                                                       |       |       |       |       |       |       |       |       |
| Ferret      | TCATG- - - ATCCCAGGATTCTGGGATCGAGCCCCTCATCGGGCTCTC- - - TGCTCAGCAGGGAGCCTGCTCTCTCTCTGC 8433                                                                                                                                                                                                                                                                                                    |       |       |       |       |       |       |       |       |
| Lion        | TCAGATGTTTCACTGA- CTAAGCCACCGAGGTGCCCTATATATTAC- - - CCTCCTAAGTACAGCTTTCGTGGCCTCTCT 8952                                                                                                                                                                                                                                                                                                       |       |       |       |       |       |       |       |       |
| Vaquita     | GGTTTTAAAC- - CACATTCAATTTATTGAATAGATATAGGACTATTC- - - ACATTATTC- - - - - TGGAGTGAGCTT 7926                                                                                                                                                                                                                                                                                                    |       |       |       |       |       |       |       |       |
| Pig         | GGTTTTAAACTACACATTAAATTTACTGCATGGATACAGGATTGTTCCGATAGATTACCTATTTTTTCTTGAGTGAGCTC 7884                                                                                                                                                                                                                                                                                                          |       |       |       |       |       |       |       |       |

|             |                                                                                                                                                                                                                                                                                                                                                                                                |       |       |       |       |       |       |       |       |
|-------------|------------------------------------------------------------------------------------------------------------------------------------------------------------------------------------------------------------------------------------------------------------------------------------------------------------------------------------------------------------------------------------------------|-------|-------|-------|-------|-------|-------|-------|-------|
| Majority    | TGGTAATTT- TGTTTTTC- ATAGA- XTTAGTCTXTTTCATCAAAXTTGCTGAA- - - - ATXCAXAG- - GGTTX- - TGTTTT                                                                                                                                                                                                                                                                                                    |       |       |       |       |       |       |       |       |
|             | <table border="0"> <tr> <td style="text-align: center;">10650</td> <td style="text-align: center;">10660</td> <td style="text-align: center;">10670</td> <td style="text-align: center;">10680</td> <td style="text-align: center;">10690</td> <td style="text-align: center;">10700</td> <td style="text-align: center;">10710</td> <td style="text-align: center;">10720</td> </tr> </table> | 10650 | 10660 | 10670 | 10680 | 10690 | 10700 | 10710 | 10720 |
| 10650       | 10660                                                                                                                                                                                                                                                                                                                                                                                          | 10670 | 10680 | 10690 | 10700 | 10710 | 10720 |       |       |
| Human       | GAGTCCTTTGTATTTTC- ATATGAGTCAGT- - - TCTTAGAAAACCTGCTTGGATTTTACTGGATTTGACTTGAATCTGTA 7679                                                                                                                                                                                                                                                                                                      |       |       |       |       |       |       |       |       |
| PolarBear   | ----- 0                                                                                                                                                                                                                                                                                                                                                                                        |       |       |       |       |       |       |       |       |
| Cow         | TGGCAATTT- TGTTTTTC- ATAGA- ATTAGTCTGTTTCATCAAAGTTGCTAAACTCTTCATCAAAGTTGCTAAGCTTTTTTC 8509                                                                                                                                                                                                                                                                                                     |       |       |       |       |       |       |       |       |
| Dog         | ACATTTTCT- TACATTCTTTGAA- - TTTGAGGTTTTTTCATGTAGTTTTAGGT- - - - ATATAGATTTATTTA- - TATTAA 8550                                                                                                                                                                                                                                                                                                 |       |       |       |       |       |       |       |       |
| BelugaWhale | TGGTAATTT- TGTTTTTC- ATAGA- ATTAGTCTGTTTCATCAAAGTTGCTGAACTTATTTGCATAG- - GGTTGTTTGTGT 8145                                                                                                                                                                                                                                                                                                     |       |       |       |       |       |       |       |       |
| Donkey      | TGGTAATTTGTGTGTCGTCGTCAGTAGA- CTTAGTCCATTTT- TCCAAATTATTGAA- - - - - TG- - - - - TATTTA 7627                                                                                                                                                                                                                                                                                                   |       |       |       |       |       |       |       |       |
| Cat         | CAGATTTTT- TTTTTTTTTTTAA- GTTTATTCAATTTGAGAGAAAGAGAGAGAGAGAAACCCCAAGCAGGCTC- - TGCACT 9988                                                                                                                                                                                                                                                                                                     |       |       |       |       |       |       |       |       |
| Ferret      | CTGCTTCTC- TGCCACTTGTGA- - TCTCTGTCTGTCAAATAAATAAATAAA- - - - ATCTTTAAAAAAAAA- - TGTTTG 8503                                                                                                                                                                                                                                                                                                   |       |       |       |       |       |       |       |       |
| Lion        | CAGATTTTT- TTTTTTTTTTTAAAGTTTATTCATTTGAGAGAAAGAGAGAG- - - AACCCCAAGCAGGCTC- - TGCACT 9025                                                                                                                                                                                                                                                                                                      |       |       |       |       |       |       |       |       |
| Vaquita     | TGGTAATTT- TGTTTTTC- ATAGA- ATTAGTCTGTTTCATCAAAGTTGCTGAACTTATTTGCATAG- - GGTTGTTTGTGT 8001                                                                                                                                                                                                                                                                                                     |       |       |       |       |       |       |       |       |
| Pig         | TGGTAATTT- TGTCTTCCATAGG- TTTAGTCTCTTTCATCTAAGTTGCTGA- - - - - 7933                                                                                                                                                                                                                                                                                                                            |       |       |       |       |       |       |       |       |



Dienstag, 3. Mai 2022 08:38

|             |                                                                                                                           |                                                           |                            |                   |         |       |       |       |  |           |      |      |
|-------------|---------------------------------------------------------------------------------------------------------------------------|-----------------------------------------------------------|----------------------------|-------------------|---------|-------|-------|-------|--|-----------|------|------|
| Majority    | - - - - - T X T T C A T T X T A T T G - X - - - - - X - - - - - T - - - - X - - - - - X - X - - - - T - - - - - T T T T A |                                                           |                            |                   |         |       |       |       |  |           |      |      |
|             | 10890                                                                                                                     | 10900                                                     | 10910                      | 10920             | 10930   | 10940 | 10950 | 10960 |  |           |      |      |
| Human       | AC- - - -                                                                                                                 | TGTAAATGATATTTTAAAACTTAATTTCCAATTGTTTGCTAG- - - - -       | TG- -                      | TATAGAAATGAT- - - | TATGGCA | 7898  |       |       |  |           |      |      |
| PolarBear   | - - - - -                                                                                                                 |                                                           |                            |                   |         |       |       |       |  |           | 0    |      |
| Cow         | - - - - -                                                                                                                 | TGTTTGTTGTATTGG- - - - -                                  |                            |                   |         |       |       |       |  | AT- TTTTA | 8560 |      |
| Dog         | ATACTACATACAGAATATCCAAA- TTTTAGAGCTTTAGGATATGTTGA- -                                                                      | AATTTCATTTTTTTTGTTATCT- - -                               | TTATA                      | 8768              |         |       |       |       |  |           |      |      |
| BelugaWhale | - - - - -                                                                                                                 |                                                           |                            |                   |         |       |       |       |  |           | A    | 8157 |
| Donkey      | - - - - -                                                                                                                 | CTTTTTATACTG- - - - -                                     |                            |                   |         |       |       |       |  | TTA       | 7665 |      |
| Cat         | GTTTCAGAATGCATTGTAATACATTTTTCTGCCCATGTGTTATGAGAAGTATGTTATTTATTTAATTGCCAAATATTATG                                          | 10215                                                     |                            |                   |         |       |       |       |  |           |      |      |
| Ferret      | TCTGTAGAATTAGTCCATTTCA- -                                                                                                 | TCCAAGTTACTGAATTTATTTGCA- -                               | TAGTCATTTATGATACTACCC- - - | TTTTA             | 8716    |       |       |       |  |           |      |      |
| Lion        | GTTCAAATGCATTGTAATACATTTTTCTGCCCATGTGTTATGAGAAGTATGTTATTTATTTAATTGCCAAATATTATG                                            | 9264                                                      |                            |                   |         |       |       |       |  |           |      |      |
| Vaquita     | AACCCGTGTCCCCTGCATCGGC- -                                                                                                 | AGGCAGACTCTCAACCACTGCGCCACCAGGGAAGCCCTGTTTTATTACAT- TTTTA | 8238                       |                   |         |       |       |       |  |           |      |      |
| Pig         | - - - - -                                                                                                                 | TGTTTCATGATATTG- - - - -                                  |                            |                   |         |       |       |       |  | TTA       | 7968 |      |

|             |                                                                                                                                                               |                                                |                             |       |       |       |       |       |  |  |   |
|-------------|---------------------------------------------------------------------------------------------------------------------------------------------------------------|------------------------------------------------|-----------------------------|-------|-------|-------|-------|-------|--|--|---|
| Majority    | T A T T T T T A A T A T A T G T A G A A T C T G T A G T G A T G T C A C T T C T C T C A T T C - - - - - C T X A T A T T G A T A G T T X G T G T C T T T T C C |                                                |                             |       |       |       |       |       |  |  |   |
|             | 10970                                                                                                                                                         | 10980                                          | 10990                       | 11000 | 11010 | 11020 | 11030 | 11040 |  |  |   |
| Human       | TATTGCTCATATGTTCTGAACCTTTGCTAAACTCATTTAGTAGATCTAATAGTTTTTTTTATATATTTTCATCAGATTTGC                                                                             | 7978                                           |                             |       |       |       |       |       |  |  |   |
| PolarBear   | - - - - -                                                                                                                                                     |                                                |                             |       |       |       |       |       |  |  | 0 |
| Cow         | TATTTTTTA- -                                                                                                                                                  | ATAACTAGAATCTATAGTGATGTCATCTCTCTCATTT- - - - - | CTGATATTGATAATTAGTGTCTTTTCC | 8632  |       |       |       |       |  |  |   |
| Dog         | AATTTGCTGTAGTTACATCCCTTGTTTTTAGACCCCTGTCCTTTTTG- - - - -                                                                                                      | GTTCTGCTTAAGGGAGATCCTAACAGG                    | 8842                        |       |       |       |       |       |  |  |   |
| BelugaWhale | TATTTTTATTATCTGTAGAATCTATAGTGATGTTGCTTCTCTCGTTC- - - - -                                                                                                      | CTGGTATTGATA- - -                              | GTGTCTTTTCC                 | 8227  |       |       |       |       |  |  |   |
| Donkey      | TACTTTTGGTATTTGTAGAGTCTGCAGTGATTTCA- -                                                                                                                        | TCTCTCATTC- - - - -                            | CTGATGCTGGTAATTTGTTTCTTCTCT | 7737  |       |       |       |       |  |  |   |
| Cat         | AGTGTTCCATAGATGTTTGTTACTTTTTCTCGTTAATTTTTTTTTTA- - - - -                                                                                                      | GTTTTTGAGAGAGCTAGAGCCCTCGCG                    | 10289                       |       |       |       |       |       |  |  |   |
| Ferret      | TACTCTTGATGTCTGTAGAATCTGTAGTGATGTCACCTTCTCTCATTC- - - - -                                                                                                     | CTTATACTGATAATTTGTCTTTTTTTT                    | 8790                        |       |       |       |       |       |  |  |   |
| Lion        | AGTGTTCCATAGATGTTTGTTACTTTTTTCATTTAATTTTTTTTTTTAGTTTGTTTTTGAGAGAGCTAGAGCCACGTG                                                                                | 9344                                           |                             |       |       |       |       |       |  |  |   |
| Vaquita     | TATTTTTATTATCTGTAGAATCTATAGTGATGTTGCTTCTCTCGTTC- - - - -                                                                                                      | CTGGTATTGATA- - -                              | GTGTCTTTTCC                 | 8308  |       |       |       |       |  |  |   |
| Pig         | TATTTTTTA- -                                                                                                                                                  | ATATGTATAGTCTGTAGTGATGGCGCCTTTCTCGTTC- - - - - | CTGATATTGATAGTTTGTGTCTTTTCT | 8040  |       |       |       |       |  |  |   |

Dienstag, 3. Mai 2022 08:38

| Majority    | CTTT-----XTCAGTCTGGCTAGAGA----TTXATTGATTTTATTAATATAAATCTXAAAT-XAGCCTTTGGX           |       |       |       |       |       |       |       |       |
|-------------|-------------------------------------------------------------------------------------|-------|-------|-------|-------|-------|-------|-------|-------|
|             | 11050                                                                               | 11060 | 11070 | 11080 | 11090 | 11100 | 11110 | 11120 |       |
| Human       | TTGAGAGGGAGTCTCAGTCACCCAGGCTGGAG-----TGCAGTGACGTGATCTTGGCTCACTGCAACCTGCACCTCCTGG    |       |       |       |       |       |       |       | 8053  |
| PolarBear   | -----                                                                               |       |       |       |       |       |       |       | 0     |
| Cow         | TTT-----ATCAGTCTGTCTAGAA----ATACATTGATTTTATTAATTTAAATA----AT-CAGCTTTTGGC            |       |       |       |       |       |       |       | 8690  |
| Dog         | AAAT-----T-----CCGGAATTTTAAATA-----AGAGGTTTGTTCATCTCTTTAAAAT--GTTTTTTTAC            |       |       |       |       |       |       |       | 8899  |
| BelugaWhale | CT-----ATCAGTCTGGCTAAAGGTTTATTTATTGATTTTCATTAATATAAAACAGAAAT-CAGCCTTTGGT            |       |       |       |       |       |       |       | 8292  |
| Donkey      | TTTTT-----TTCCTTGTCTCAGTCTGGCTGGAGG----TTTATTGATTTTATTAATATTCTCC-AAAACCTCAGCTTTTAGT |       |       |       |       |       |       |       | 7807  |
| Cat         | CACTCGTGCACATGTGCACATGCACGTGGGAGAG--GGGCAGAGAGAGAGGGAGACACACTCTGAAAC--AGGCTCCAAG    |       |       |       |       |       |       |       | 10365 |
| Ferret      | CCTT-----G-----TCATTTTAGCTAGAGA-----TTAATTTGTTAATATTCTCCAAAAAT--CATCTTTTGG          |       |       |       |       |       |       |       | 8847  |
| Lion        | CACT-----TGCGCACACGCATGTGGGAGAG--GGGCAGAGAGAGAGGGAGACACACTCTGAAAC--AGGCTCCAAG       |       |       |       |       |       |       |       | 9412  |
| Vaquita     | CT-----ATCAGTCTGGCTAAAGATTGATTTATTGATTTTATTAATATAAAACAGAAAT-CAGCTTTTGGT             |       |       |       |       |       |       |       | 8373  |
| Pig         | CTTTTT----TTCATTGTCTCAGTCTGGCTAGAG----TTTTATCGATTTTATTAATAAAAATATAAAATGCAGCCTTTGCT  |       |       |       |       |       |       |       | 8112  |

| Majority    | TTCATXGAXTTXTCTC----TTTTCTGTTTCCTATTTTATTGATTTCTGCTGTTTTAATXTTXTTCTGCTTTGTATTTA  |       |       |       |       |       |       |       |       |
|-------------|----------------------------------------------------------------------------------|-------|-------|-------|-------|-------|-------|-------|-------|
|             | 11130                                                                            | 11140 | 11150 | 11160 | 11170 | 11180 | 11190 | 11200 |       |
| Human       | GTCAAGCAATTCTCCT-----GCCTCAGCCTCATAAGTAGCTG-GGACTGCAGGTGCACACCACCGCCAGCTAATTT    |       |       |       |       |       |       |       | 8127  |
| PolarBear   | -----                                                                            |       |       |       |       |       |       |       | 0     |
| Cow         | TTCATTGAATTTTCTATG---TTTTCCATTTCCCATCTTATTGATTTCTGCTGTTTGAATGTT---CTGCTTTGTATTTA |       |       |       |       |       |       |       | 8764  |
| Dog         | AT-----TCTTTGTG---ATTTGTAATT--AATTTAG--GGTTTCTTCTATACCCTTAACCATTTTCCACTGCG       |       |       |       |       |       |       |       | 8963  |
| BelugaWhale | TTCATGGAGTTTTCTC-----TTTCCATTTTATTGATTTCTTCTGTTTTAATGTTTTTCTGCTTTGTATTTA         |       |       |       |       |       |       |       | 8360  |
| Donkey      | TTCATTGGATTTTCTCTGTTGTTTTCTGTTTCCTATTTTATTGATTTCTGCTGTTTTAATTTTCTTGTGCTTTGTATTTT |       |       |       |       |       |       |       | 7887  |
| Cat         | CTCCAAGCTGTCAGCACA---GAACCTGATACGGGGCTCGAATCCATGAACTGTGAGATAATGACCTGGGCCGAAGTTGG |       |       |       |       |       |       |       | 10442 |
| Ferret      | TT-----TCACTGCG---TTTTCTGTTTCCTATTTTATT--GATCTGCTGTTTTAGTTTTCTTCTGCTTTCCATTTA    |       |       |       |       |       |       |       | 8914  |
| Lion        | CTCCAAGCTGTCAGCACA---GAACCTGATACGGGGCTCGAATCCATGAACTGTGAGATAATGACCTGGGCTGAAGTTGG |       |       |       |       |       |       |       | 9489  |
| Vaquita     | TTCATGGAGTTTTCTC-----TTTCCATTTTATTGATTGCTTCTGTTTTAATGTTTTTCTGCTTTGTATTTA         |       |       |       |       |       |       |       | 8441  |
| Pig         | TTCATTGAGTTTTCTC----TTTTCTGTAGCTATTTTATTGATTTCTGCTGTTTTAGTTTT--CTGCTTTGTATTTA    |       |       |       |       |       |       |       | 8184  |

Dienstag, 3. Mai 2022 08:38

| Majority    | GTTTGXTTTCXXCTTAXTTAX- - - - CATTGAXGTTGATGTCATTGACATGATATCTTT- - - - TCTAAT- ATAGA- - GGT    |       |       |       |       |       |       |       |       |
|-------------|-----------------------------------------------------------------------------------------------|-------|-------|-------|-------|-------|-------|-------|-------|
|             | 11210                                                                                         | 11220 | 11230 | 11240 | 11250 | 11260 | 11270 | 11280 |       |
| Human       | TTGCATTTTTCAGTTGAGGCAGGGTTTCACC- ATGTTGGCCAGGCTGGTCTGGAACCTCCTGACCTCAAGTGATACACTTAC           |       |       |       |       |       |       |       | 8206  |
| PolarBear   | -----                                                                                         |       |       |       |       |       |       |       | 0     |
| Cow         | GTTTGCTTTTTTTCCTATTTAA- - - - TATTAAAGTTGATGTAGTTGACACGGTATCTTT- - - - TCTAAT- ACAGA- - GGA   |       |       |       |       |       |       |       | 8832  |
| Dog         | AAATCTTTGCAAATAATTG- - - - - GCCTTTAGTGAAAACAACCTGCCTGAAGTGTTT- - - - CCATAT- CAGGA- - ATT    |       |       |       |       |       |       |       | 9029  |
| BelugaWhale | GTTTGCTCTCTTCTTAGTTAA- - - - CATTGAAGCTGATGTAGTTGACA- - - TATCTTT- - - - TCTAAT- ATAGAGAGGT   |       |       |       |       |       |       |       | 8427  |
| Donkey      | GTTTACTTTTTTCTCCTTTGTTA- - - - CATTGAAGCTGATGTCATTGACACGATACCTTT- - - - TCTAAT- ATACA- - AGT  |       |       |       |       |       |       |       | 7956  |
| Cat         | GTGCTTAACCAACAGATGCC- - - - - CCAATGTGTCTATTATTTTAATTCAATTCCA- - - - TTGTGG- CTAGA- - GAA     |       |       |       |       |       |       |       | 10507 |
| Ferret      | GTTCTTTTCCAACCTTAGTTAT- - - - - GTTGATGCTGGTATCATTAAATATGATACCTCT- - - - TCTAAT- ATAGA- - GGC |       |       |       |       |       |       |       | 8981  |
| Lion        | GTGCTTAACCAACAGATGCCTAGACGCCCAATGTGTCTATTATTTTAATTCAATTCCA- - - - TTGTGG- CTAGA- - GAA        |       |       |       |       |       |       |       | 9562  |
| Vaquita     | GTTTGCTCTCTTCTTAGTTAA- - - - CATTGAAGTTGATGTAGTTGACA- - - TATCTTT- - - - TCTAAT- ATAGAGAGGT   |       |       |       |       |       |       |       | 8508  |
| Pig         | GTTTGCTCTCTTCTGCTTAGGTA- GCATTTAAGTTGATGTCATTGACATGATACCTTT- - - - TCTAAT- TCAGA- - GGT       |       |       |       |       |       |       |       | 8256  |

| Majority    | TTAATGCT- - - - ATGTATTTX- CATXTAAXTATTGCTT- - - - TXATGGC- - ATCCCTCAAATTTTGACATGTATA- - - - |       |       |       |       |       |       |       |       |
|-------------|-----------------------------------------------------------------------------------------------|-------|-------|-------|-------|-------|-------|-------|-------|
|             | 11290                                                                                         | 11300 | 11310 | 11320 | 11330 | 11340 | 11350 | 11360 |       |
| Human       | CTAGGCCTCCCAAAGTGTTAAGATTACAGGCGTGAGCCACCACCCCAAGCCTATGCCATTAATTTTCTACATAGA- - - T            |       |       |       |       |       |       |       | 8283  |
| PolarBear   | -----                                                                                         |       |       |       |       |       |       |       | 0     |
| Cow         | TTAATGTT- - - - ATGTATTTT- CATACAAATATTGCTT- - - - TTATGGC- - ATCCCTCAAGTTTTGACATGTAAG- - -   |       |       |       |       |       |       |       | 8896  |
| Dog         | CCTAGATT- - - - ATAACCTCGTTTGTTGAAATATTAACCT- - - - CTTTGG- - - - - ATAGATGTTTTAAATAGTGAAAATT |       |       |       |       |       |       |       | 9094  |
| BelugaWhale | TTAATGCC- - - - ATGTATTT- - CATACAAGTGTTGCTT- - - - TCATGGC- - ATCCCTCAAATTTTGACATTTATA- - -  |       |       |       |       |       |       |       | 8490  |
| Donkey      | TTAGTGCT- - - - ATATAGTTC- CCTTTAAATACTGCTT- - - - TCATGGC- - ATCTCTCAAATTTTGACATGTG- - - -   |       |       |       |       |       |       |       | 8018  |
| Cat         | CATATTTT- - - - AAGACTTGAATCTTTGTAATTTGTTGAGACTTGTTTT- - ATGATCCAAATATCATATATCTTAAGTT         |       |       |       |       |       |       |       | 10581 |
| Ferret      | TTACTGCT- - - - TTGTATTTCCTTTTAAGTACAGCTT- - - - TCATGGC- - ATCTCTCAAATTTTGACATGCATACTTT      |       |       |       |       |       |       |       | 9050  |
| Lion        | CATACTGT- - - - AAGACTTGAATCTTTGTAATTTGTTGAGACTTGTTTT- - ATGATCCAAATATCACATATCTTAAGTT         |       |       |       |       |       |       |       | 9636  |
| Vaquita     | TTAATGCC- - - - ATGTATTT- - CACATGTGTTGCTT- - - - TCATGGC- - ATCCCTCAAATTTTGACATTTATA- - -    |       |       |       |       |       |       |       | 8571  |
| Pig         | TTAATGCT- - - - ATGTGTTTT- CATATAAGTGTTGCTC- - - - TTATGGC- - ATCCCTCAAATTTGACTTGTG- - - -    |       |       |       |       |       |       |       | 8318  |

Dienstag, 3. Mai 2022 08:38

|             |       |                 |                  |                |               |               |              |              |                |       |     |       |              |       |       |
|-------------|-------|-----------------|------------------|----------------|---------------|---------------|--------------|--------------|----------------|-------|-----|-------|--------------|-------|-------|
| Majority    | ----  | XTTCTTTTCATT    | CAGTTC           | CAAATA-        | T--           | XCATT-        | -X-          | ----         | X-             | XT-   | -X- | ----- | TTATTATTTTTT | ----- |       |
|             |       | 11370           | 11380            | 11390          | 11400         | 11410         | 11420        | 11430        | 11440          |       |     |       |              |       |       |
| Human       | --    | AATTTATACCCAATT | GTTTTTAAATAGTTTT | CTTTCTTTCTATCT | GGATGCCATTTTT | TGTCTCCTTTTTT | -            | TGTCT        |                |       |     |       |              |       | 8360  |
| PolarBear   | ----- |                 |                  |                |               |               |              |              |                |       |     |       |              |       | 0     |
| Cow         | ----  | CTTCTTTTCATT    | CAGTTCAGAGTA-    | ----           | CAT-          | -----         | -----        | CTACCATGTTT- | -----          |       |     |       |              |       | 8934  |
| Dog         |       | GTAGTAGTTTT     | CCCTTTTTCCGGGT   | ACACTACCCAAT   | GACGCCTTTT    | AAAAAAAAACGGT | GCTACTTTATA- | -----        | CG             |       |     |       |              |       | 9168  |
| BelugaWhale | ----  | CTTCTTTTCATT    | CAGTTC           | CAAATA-        | ----          | CATT-         | -----        | -----        | CCAATATGCTTTT- | ----- |     |       |              |       | 8531  |
| Donkey      | ----- | TACTTTTCATT     | CTGTTCAAATA-     | ----           | CATT-         | -----         | -----        | CTAATAGTTTT- | -----          |       |     |       |              |       | 8056  |
| Cat         |       | TTATGTGCACTT    | GATAGAGATGT      | GTATTCTGCTCCT  | GGGTAGTGT     | TTTTATAAAT    | GTCATTTGTTT  | ATTGATAAT    | GTTGTT         |       |     |       |              |       | 10661 |
| Ferret      |       | TTATTCAGCT      | CAAATACATT       | CTGATATACT     | TTTGACCCAT    | GTATTATTCAGA  | AGTATGTTATTT | ATTTAATT-    | -----          | GC    |     |       |              |       | 9124  |
| Lion        |       | TTATGTGCACTT    | GATAGAGATGT      | GTATTCTGCTCCT  | GGGTAGTGT     | TTTTATAAAT    | GTCATTTGTTT  | ATTGATAAT    | GTTGTT         |       |     |       |              |       | 9716  |
| Vaquita     | ----  | CTTCTTTTCATT    | CAGTTC           | CAAATA-        | ----          | CATT-         | -----        | -----        | CCAATATGCTTTT- | ----- |     |       |              |       | 8612  |
| Pig         | ----- | TACTTTTCATT     | CAGCTCAAATA      | AATCCTCAT      | GTTTTTATT     | TATAATAATTT   | GTTCTTAT     | TTTTT-       | -----          |       |     |       |              |       | 8385  |

|             |              |              |              |              |            |             |               |                  |                |                 |       |
|-------------|--------------|--------------|--------------|--------------|------------|-------------|---------------|------------------|----------------|-----------------|-------|
| Majority    | GAATTTCTTT   | GACCCATGGATT | TATTGAGAA-   | TATX         | TATTTAATTT | CCATG       | TATTTXGAATTTT | CXATG            | TAXCTTTCT-     | -               |       |
|             | 11450        | 11460        | 11470        | 11480        | 11490      | 11500       | 11510         | 11520            |                |                 |       |
| Human       | GTGGTATCCAGT | ACAATGTTT    | AATAGAAGT    | GTTGAGAGA    | AATATCTTTT | CCTTGCTCCT  | GATATTAGGGT   | GAGAACTCTAA      |                |                 | 8440  |
| PolarBear   | -----        |              |              |              |            |             |               |                  |                |                 | 0     |
| Cow         | --           | ATTTCTTT     | GACCCATGGATT | TATTGAGAGGT  | ATGTTATTTA | ATTTCCAGGT  | ATTTGGAATTTT  | CCATATACTTTT-    | ----           |                 | 9008  |
| Dog         |              | GAAATAGTTT   | GTTACAAGC    | AGAAGTGGTTA- | GCAACT-    | TTCCA       | ACTGATTT      | CATTTATGTTTTT    | GAAAGCACCTACT- | --              | 9243  |
| BelugaWhale |              | TTATTTCTTT   | GACCCATGGATT | TATTGAGAAGT  | ATGTTATTT  | GATTTCCAAGT | ATTTGGAATTTT  | CCATGTATATTTCTG- |                |                 | 8610  |
| Donkey      | --           | ATCTCTTT     | GACCCATGGGCT | GTGGAGAA-    | ----       | GCATTTA     | ATTACCAAATA   | AATTTAAGTTTT     | CTATATATCTTTC- | --              | 8126  |
| Cat         |              | GAAGTGATCT   | CTGTCTTCTT   | GATTTTCTG-   | TGTATTGT   | GCTATCACATT | GAGAGAAGGAT   | ATTGAAATTT       | CCTCTTTTA      |                 | 10740 |
| Ferret      |              | CAGATATTT    | GGAGTTTTCC   | ATAGATGTTTC- | TGTTAC-    | TCTAATTT    | CATTGTAGCT    | AGAGGACATATT     | GTAAGACTT-     | --              | 9199  |
| Lion        |              | GAAGTGATCT   | CTGTCTTCTT   | GATTTTCTG-   | TGTATTGT   | GCTATCACATT | GAGAGAAGGAT   | ATTGAAATTT       | CCTCTTTTA      |                 | 9795  |
| Vaquita     |              | TTATTTCTTT   | GACCCATGGATT | TATTGAGAAGT  | ATGTTATTT  | GATTTCCAAGT | ATTTGGAATTTT  | CCATGTATTTTCTG-  |                |                 | 8691  |
| Pig         |              | AAATTTCTTT   | GACCTGTGGG   | TATTGAGAA-   | -          | ATGTTAT     | GTAAATTT      | CCAGCTATTT       | GGAATTTT       | CCATATATTTTCTA- | 8462  |



Dienstag, 3. Mai 2022 08:38

|             |                                                                                         |       |
|-------------|-----------------------------------------------------------------------------------------|-------|
| Majority    | --TATTTATTTCTAATTTAATTCXATTGTXXCTAGAGAAX- - - -ATXTTG- AAGACTTGAATXTTTGTAA- - - TTTATTT |       |
|             | ----- ----- ----- ----- ----- ----- -----                                               |       |
|             | 11530 11540 11550 11560 11570 11580 11590 11600                                         |       |
| Human       | --AATTTCTTCCTTAACTGACACAGTTCA--CTAGTGAAGCCATGTGGGGCCAGATGTTTGT-TTTGTCTGGGAGGTTTTTA      | 8515  |
| PolarBear   | -----                                                                                   | 0     |
| Cow         | --TGTTTGTTCCTAATTTAATTC-ATTGTGCCTGGAGAACAT--ATTTTGAAGACTTGAATCTTTGTAAT--TTTTTCT         | 9081  |
| Dog         | --GGTTTGTACATTGCTTCCC-----CTA-----CTTTCTT                                               | 9272  |
| BelugaWhale | -TTATTTATTTCTAATTTAATTCATTGTGCTTAGAGAAC- - - -ATTTTGTAAAGACTTGAATCTTTGTAA- - - -TTATTT  | 8681  |
| Donkey      | - - - -TGTTGTTCTAATTTAATTCATTGAAGCTAGAGAAAAT--AGTTTGTAAAGACTTGAATCTTTGAAA--ATTTGTTG     | 8198  |
| Cat         | CCGGTGCATGTCTAAGTTTCTCCTTGCAGTTCAGTATGTATGTATGTATGTATGTATGTATGTATGTATTTATTTATTT         | 10820 |
| Ferret      | --GAATCGTTTGTAAAGTTTGT-----TGAG-----A-----CTTGTTT                                       | 9230  |
| Lion        | CCTGTGCATGTCTAAGTTTCTGCTTGCAGTTCCA-----GTTTTTATTTATTT                                   | 9843  |
| Vaquita     | -TTATTTATTTCTAATTTAATTCATTGTGCTTAGAGAAC- - - -ATTTTGTAAAGACTTGAATCTTTGTAA- - - -TTATTT  | 8762  |
| Pig         | -TTATTTATTCAGATTTAATTCATTGTGCCTAGAGGACGT--ATATCAAACACTTGAGTCTTTGTGAC--TTTGTTT           | 8537  |

|             |                                                                                           |       |
|-------------|-------------------------------------------------------------------------------------------|-------|
| Majority    | XATTGTTT- - - - -TATGGTTTAAATATXATATATCCTGT- - - - -TTTATGTGXTTTTGTAGGGA- TGTGTATTCTGT    |       |
|             | ----- ----- ----- ----- ----- -----                                                       |       |
|             | 11610 11620 11630 11640 11650 11660 11670 11680                                           |       |
| Human       | AACTACATATTTCAACTTATTTAATAGATATAGGGCTATTCAGTTTGTTTAGTTCTTCTTGAGTGAACTTTGGTAATTTGT         | 8595  |
| PolarBear   | -----                                                                                     | 0     |
| Cow         | TA- - - TTT- - - - -TATGGTTTAGATATTATATATCCTGTT--AGT-TTTAAGTGCTTT--ATAGAGA-GGTGTATTCTGT   | 9147  |
| Dog         | AACTGTTT- - - - -AAATTTGGCTAGAGTATATGAA- - - - -AAGTTACCAACATTGGCTTTTATAGATAGT            | 9331  |
| BelugaWhale | TATTGTTT- - - - -TATGGTTCAAATAT- - - ATATCCTGT- - - - -TTAAGTGCATTTGATAGGGA- TGTGCATTCTGT | 8745  |
| Donkey      | AGACTTATTT- - - TATGGTCCAAATGTCATATATCCTCTT--AGTTTTATGTGCGCTTGATAGGGG- TGTGTATTCTGC       | 8271  |
| Cat         | ATTTATTTATGTTTTAAGTTTATGATTAGTACGTGAATGTTTAGGATTACTATGTCTTCTTTGTGCATTGACTCCTTTTT          | 10900 |
| Ferret      | TATCACCC- - - - -AAATATGTAACCTTACATTTTAC- - - - -ATGTATTTAATAGGGG- TGTGTATTCTGC           | 9288  |
| Lion        | ATTTTTT- - T- - - T- AAGTTTATGATTAGTACATAAATGTTTAGGATTACTATGTCTTCTTTGTGCATTGACTCCTTTTT    | 9917  |
| Vaquita     | TATTGTTT- - - - -TATGGTTCAAATAT- - - ATATCCTGT- - - - -TTAAGTGCATTTGATAGGGA- TGTGCATTCTGT | 8826  |
| Pig         | TACTGTTT- - - - -TATGGTTCAGACATCATATATCCTGTC--AGT-TTTATGTGCTTTTGTAGGGA- TGTGTATTCTGT      | 8608  |

Dienstag, 3. Mai 2022 08:38

| Majority    | TATTGTG- - TAXTGTGTTCTTTACATXT- - - TTAGGTCATGTTTATTGATATTGTTGTTTCATGATATCTGTCT- TTCCT  |       |
|-------------|-----------------------------------------------------------------------------------------|-------|
|             | 11690 11700 11710 11720 11730 11740 11750 11760                                         |       |
| Human       | ATCTTCTGTAGAAGTCCATTTCTTTAAGTTGCTGAATGTATTTGTGTAGAGTTGTTTCATGATACTACTATTTTTTT           | 8675  |
| PolarBear   | -----                                                                                   | 0     |
| Cow         | TGTTGGG- - - CGATGTGTTCTGTATATGTTAATTAGGTCGTGCTTATTGGTAATGTTGTTCAAGTGAT- - GTCT- TTCT-  | 9220  |
| Dog         | TGTAATG- - - AAATAATGCTCTTACTTTTT- - TTGTAACGATTGAACATAACTGGTTGTTTATAATAGGTGTGTTATTAA   | 9406  |
| BelugaWhale | TATTGT- - - - - TGTGTTCTATGCATGTCAATTAGGTCATGTTTATTGGTAGTGTTGCTCAAGTGATCTGCCT- TTCCT    | 8817  |
| Donkey      | TGCTGTTCCGGTGGTATGTTCTGTAAATG- - - TCAGGTCAGTTTATTGATAATGTTCAA- GTCATATCTGTCC- TTCCT    | 8345  |
| Cat         | TATTATG- - - TAGTGACCATTTTTATCCTTG- TAATACTCTTTGCTTTAAAAATCTACTTTTTATGATATAGCCAT- CTGGC | 10974 |
| Ferret      | TGTTGGG- - - TAGTGTTCTATAAATATCAA- - TTAGATTAAGTTTATTGATAATGTTGAC- GTGATTTCTGTATGGGAGT  | 9362  |
| Lion        | TATTATG- - - TAGTGACCATTTTTATCCTTGG- TAATACTCTTTGCTTTAAAAATCTACTTTTTATGATATAGCCATTCTGGC | 9993  |
| Vaquita     | TATTGT- - - - - TGTGTTCTGTGCATGTCAATTAGGTCATGTTTATTGGTAGTGTTGCTCAAGTGAGCTGCCT- TTCCT    | 8898  |
| Pig         | TACTGGG- - - TGATGTGCTCTATACGT- - - - TCCGGTTATGTTTGTGATATTGTTGCTCACAAGATCTGTCT- TTCCT  | 8679  |

| Majority    | GATTTTTTXXXT- - - GTT- - - GTTCTGTCACTTTTTTGAXAXAAXAAXATTGAAATCTCX- TATATT- TT- - - XTGCATTX |       |
|-------------|----------------------------------------------------------------------------------------------|-------|
|             | 11770 11780 11790 11800 11810 11820 11830 11840                                              |       |
| Human       | TTTTTTTTTTTTTTTGTGACGGAGCCTTGCTCTGTGCGCCGGGCTGGAGTGCAGTGGCACCATCTCGGCTCAATGCAACC             | 8755  |
| PolarBear   | -----                                                                                        | 0     |
| Cow         | ----- ATT- - - G- - CTGTCACTTACTGAAAAAATGACATTGAAATCT- - - - ATATT- - - - - GTGCGTTC         | 9270  |
| Dog         | AAATGCTTTGCTCAGGTT- - - - TTTTAGAATAGTATCTATTTCTTAAAATGCTATATATATATATATAT- - - ATATATTA      | 9479  |
| BelugaWhale | GATTTTTT- - - - - ATT- - - GTTCTGTCACTTATTGAGAAAACAATATTGAAATCTCC- TATATT- - - - - GTGCATTTC | 8880  |
| Donkey      | GATTTTCTGTCT- - - ATT- - - GTTTTATCCCTTTTTGAGAGAAGAATATTGAAATCTCCTCCTATACTT- - - GTGCATTT    | 8416  |
| Cat         | TTTCTTTTGAATAGGGTTCACATGGTATATCTTTTTCCATTCTTTTACTTTCAACCTATTTGTGTCCTT- - - AGATTTAA          | 11051 |
| Ferret      | ATCTGTTTCTCCACACCC- - - - TTTTGCAGTTCTGGGTTTTAGAAAAATTTAGACTGTTAGTTAATTTT- - - AGGCTAAA      | 9435  |
| Lion        | TTTCTTTTGAATAGGGTTCACATGGCATATCTTTTTCCATTCTTTTACTTTCAACCTATTTGTGTCCTT- - - AGATTTAA          | 10070 |
| Vaquita     | GATTTTTT- - - - - ATT- - - GTTCTGTCACTTACTGAGAAAACAATATTGAAATCTCC- TATATT- - - - - GTGCATTTC | 8961  |
| Pig         | GATTTTATGTCTATGGTT- - - GTTCTGTCACTTGTGAGAAAACAATATTGAAATCTCC- TATATTTTT- - - GTGCATTT       | 8752  |

Dienstag, 3. Mai 2022 08:38

| Majority    | GTTTGT TTTT - - - XCTTGCAXTTCTACCAGTTT - - - - - - - - - TACXTTATATTTTTGGXAT- TATGATTAGTXCATA |       |       |       |       |       |       |       |  |  |       |
|-------------|-----------------------------------------------------------------------------------------------|-------|-------|-------|-------|-------|-------|-------|--|--|-------|
|             | 11850                                                                                         | 11860 | 11870 | 11880 | 11890 | 11900 | 11910 | 11920 |  |  |       |
| Human       | TCCACGTCCCGGGTTCACGCGGTTCTCCTGCCTCAGCATCCCAAGTAGCTGGGATCACAGGCACACACCACCACACCTGG              |       |       |       |       |       |       |       |  |  | 8835  |
| PolarBear   | -----                                                                                         |       |       |       |       |       |       |       |  |  | 0     |
| Cow         | GTTTGT TTTTG- - - CTTGTGTTTCTATCATTTTC- - - - - - - - - ACTTTATATTTTTGAAAT- TACAATTAGTACATA   |       |       |       |       |       |       |       |  |  | 9334  |
| Dog         | TATACACACAC- - - ACACACATGTGTATAGCATG- - - - - - - - - CACATGCATCCTTAGGTAT- TTGTATCAGAAATTC   |       |       |       |       |       |       |       |  |  | 9544  |
| BelugaWhale | GTTTGT TTTT - - - CTTTGCAGTTCTACCAGTTTT- - - - - - - - - TGCTTTATGTTTTTGAAGT- TATAATTAGTACCTA |       |       |       |       |       |       |       |  |  | 8945  |
| Donkey      | GTCTGTTTCT- - - GCTTAAAGTTCTACCAGTTTT- - - - - - - - - TGCTTTATGTTTTTGAAG- TATGATGAGCACATA    |       |       |       |       |       |       |       |  |  | 8481  |
| Cat         | AATGTGTTTTT- - - TGTAGATAGCATAAAGTTGGAATTCCATTTTTACATCCAACCTTACACTCT- CTTGTTTTGACTAAT         |       |       |       |       |       |       |       |  |  | 11127 |
| Ferret      | AGAGTGCTTTT- - - TATAATTTACGTTTTTGAAG- - - - - - - - - TGGATGAGATTTGACCTTA- TATGTCTTGTCTGT    |       |       |       |       |       |       |       |  |  | 9500  |
| Lion        | AATGTGTTTTT- - - TGTAGATAGCATAAAGTTGGAATTCCATTTTTACATCCAACCTTACACTCT- CTTGTTTTGACTAAT         |       |       |       |       |       |       |       |  |  | 10146 |
| Vaquita     | GTTTGT TTTT - - - CTTTGCAGTTCTAACAGTTTT- - - - - - - - - TGCTTTATGTTTTTGAAGT- TATAATTAGTACATA |       |       |       |       |       |       |       |  |  | 9027  |
| Pig         | GTCTGTTTTT- - - CTTTGCATATCTACCAGTTT- - - - - - - - - TTATGTTTTTTG- - - - TAACATTAGTCCATA     |       |       |       |       |       |       |       |  |  | 8809  |

| Majority    | AAXGT- - - - - TTAXAATTA CT- - - - - AXGTCCTCTTTATTTATTGACCXCTTTATTATTTTTGCA- GTGACCTTTTTTAT |       |       |       |       |       |       |       |       |
|-------------|----------------------------------------------------------------------------------------------|-------|-------|-------|-------|-------|-------|-------|-------|
|             | 11930                                                                                        | 11940 | 11950 | 11960 | 11970 | 11980 | 11990 | 12000 |       |
| Human       | CTAATT- - TTTTGTATTTTTAGTAGAGACGGGTTTTCACTATGTTGGCCAGGTTGGTCTCGAACTTGTGATCTGCCCGCC           |       |       |       |       |       |       |       | 8913  |
| PolarBear   | -----                                                                                        |       |       |       |       |       |       |       | 0     |
| Cow         | AATGT- - - - - TTAAGATTA CT- - - - - ATGTCCTCTTGATATATTCACCTCTTTATTATTATACA- GTGACCATTTTTTAT |       |       |       |       |       |       |       | 9402  |
| Dog         | AAG- - - - - TTGAAGGCATT- - - - - TTAGTGTGTCTGTAAAGTGACAACATTGTTAACTTGTA- ATTCAAAGACTGA-     |       |       |       |       |       |       |       | 9610  |
| BelugaWhale | AACGT- - - - - TCAGGATTA CT- - - - - ATGTCCTCTTGATTCATTGACCCCTTTATTATTATGCA- GTGACCTTTTTTAT  |       |       |       |       |       |       |       | 9013  |
| Donkey      | AGTGT- - - - - TTAGGATTA CTGTGTCCTCTTGATTATTATGCAGTTACCATTTTTATCCCTGGTA- ATATTCTTTGCTTT      |       |       |       |       |       |       |       | 8555  |
| Cat         | AAGATTAGTTTTAAACTACT- - - - - TTGCTGTTTTTCTGTTTGTGCTTTGTGTTCTTTGTTCCCT- TTTTCTGCTATCTT       |       |       |       |       |       |       |       | 11202 |
| Ferret      | GAA- - - - - CTGCCTCTATA- - - - - TACCTGACCTATCTTAATGTTTATTATTAGATTTCT- GTGTAAAAATTGAC       |       |       |       |       |       |       |       | 9567  |
| Lion        | AAGATTAGTTTTAAACTACTAC- TTTGCTGTTTTTCTGTTTGTGCTTTGTGTTCTTTGTTCCCT- TTTTCTGCTGTCTT            |       |       |       |       |       |       |       | 10224 |
| Vaquita     | AACGT- - - - - TCAGGATTA CT- - - - - ATGTCCTCTTGATTCATTGACCCCTTTATTATTATGCA- GTGACCTTTTTTAT  |       |       |       |       |       |       |       | 9095  |
| Pig         | AATGT- - - - - TTAGAATTATT- - - - - ATGTCCTCTTTATTTGTTGATCTCTTTATTATTATGCA- GTGACCGTTTTTAT   |       |       |       |       |       |       |       | 8877  |



Dienstag, 3. Mai 2022 08:38

| Majority    | TCTTGTXT-CT- - - A-TTGXTXXXXXXXXAXXTX- - - XTGTXTA- - - CTTTAGCAGTAATATTTCTATTXXGTXTTCAXG |       |
|-------------|-------------------------------------------------------------------------------------------|-------|
|             | 12170      12180      12190      12200      12210      12220      12230      12240        |       |
| Human       | GATTGAAGTTT- - - - ATTGATTTTATTAATCTCCAAAATACCAG- - - CTTTTGGTTTGAGTTTTCTCTGCTGTTTTTCTG   | 9142  |
| PolarBear   | -----                                                                                     | 0     |
| Cow         | TCTTGTAGACT- - - A- CAGGTGGTCAGAGTATTG- GAGCTTCAG- - - CTTCAGCATCAGTCCTTCCAATGAATATTCAGG  | 9615  |
| Dog         | GCTCGGCTCTT- - - TCATTATGCTACATAAATCTCGGATGCGCA- - - TTTATACAGTAAAAAGATATGGAGTAAACACG     | 9816  |
| BelugaWhale | TCTTT-----G-----CTTT-----TTTTTAA-----                                                     | 9068  |
| Donkey      | TCTTTCTTTCTTTGAGGAAGAGTTGCCCTAAGCTAACATCTGCACCAGTCTTCCTCTACTTTGTGTGTGGGGTGCTCACA          | 8795  |
| Cat         | GCCTCTGTACT- - - A- TTGGTATCATATATTTTACTTTTGTATA- - - TGTTACAAGTCCTATAT- TATTTGTTGAAACAG  | 11415 |
| Ferret      | TTTCCTCAGGT- - - AGTTTTGGGCATATAGATTT- ATTTGTATT- - - ATTAAGTAGTATAATTTCTTCTTTTTTTTTGTAG  | 9777  |
| Lion        | GCCTCTGTACT- - - A- TTGGTATCGTATATTTTACTTTTGTATA- - - TGTTACATGTCATATAT- TATTTGTTGAAACAG  | 10440 |
| Vaquita     | TCTTT-----G-----CTTTC-----ATTTTTTTAA-----                                                 | 9154  |
| Pig         | TCTTGAG- TT- - - C- CCA-----TTGTG- - - GTTCAGCGGGAATGAATCTGACCAGTATCCATG                  | 8981  |

| Majority    | - X- X- T- T- TXXX- AAXATTXXC- - - - - XGTTTTXATXTXTTTTCTXGTAXXXGXAXAATAGA- - TXT- T- XXXAACTT |       |
|-------------|------------------------------------------------------------------------------------------------|-------|
|             | 12250      12260      12270      12280      12290      12300      12310      12320             |       |
| Human       | TTTTCTATTTTATTGATTTCTGCT-----ATTTTTATTTTGTTTTGCTTTGTGGTTAGTTTGATCTTCATTTTCTACTT                | 9216  |
| PolarBear   | -----                                                                                          | 0     |
| Cow         | GTTCAATTT- TCTTTAGGATTGAC- - - - - TGGTTTGATCTCCTTGCT- GTTCAGGGAACTCTGAACAGTTTTCTCCAGCAC       | 9688  |
| Dog         | CGCAATTT- TATTTCACTAGC- - - - - ATCTCTCATTTTTATCTGGAGATACACAAAAGAGCTGTATCTTTTAGAACT            | 9889  |
| BelugaWhale | -----A-----TTTCTTTGCT-----T-----                                                               | 9080  |
| Donkey      | GCATGGCTGTTGAGTGGGGTATGTCCGCACGTGGGATCTGAACCCGTGAACCCGGGCCACTGAAGCAGTGTCCAGAACTT               | 8875  |
| Cat         | CCAATTATCTTTTAAATACTACTTAAACAATAAGAAAAATATTTTCTGTATTACTCACAAACACAGTTGTGTGCATGCATT              | 11495 |
| Ferret      | TTTATTTAATCTTGAACATTTTT- - - - - AGCTTCTTCCATCTTTTAAAAAGGATTATAATAGCTTTGAAGATTAAATCT           | 9851  |
| Lion        | CTAATTATCTTTTAAATACTACTTAAACAATAAGAAAAATATTTTCTATATTAATCATAACACAGTTGTGTGCATGCATT               | 10520 |
| Vaquita     | -----A-----TTTCTTTGCT-----T-----                                                               | 9166  |
| Pig         | -----AGGAT- - GC- - - - - AGGTTTGATCTCTGGCCTTGCTCAGTGGGTTAAGGA- - - - - T- - - - CCAGCGT       | 9032  |

Dienstag, 3. Mai 2022 08:38

| Majority    | TAXTATT-XGX-X-AXTATX- - - - - TXTAAGTCXT-XXT-XXT-XXAC- - - - TTXGTACTTTGTXT-XGAC- - - - -             |       |
|-------------|-------------------------------------------------------------------------------------------------------|-------|
|             | 12330 12340 12350 12360 12370 12380 12390 12400                                                       |       |
| Human       | AGTTAACATTGAAGTTAATGTCATTAACCTTAGTACTTTTACTTATATAGGG- - ATTTATTGCTGTATGTTTCCCTTTTAA                   | 9294  |
| PolarBear   | -----                                                                                                 | 0     |
| Cow         | CACAGTTCAAAAATACCATTT- - - - - TTTGAGTGCTCAGCCTTCTTCAC- - - AGTCCAACCTCTCACATCTGTC- - - - -           | 9753  |
| Dog         | TCATATGAAGAGAATCGATT- - - - - AAGAAAGCACAACCTAGATCTTAA- - - - TAAGCACTATGTGCAACAT- - - - -            | 9951  |
| BelugaWhale | TACTTTT- - - - - T- - C- - - - -                                                                      | 9089  |
| Donkey      | TAACCACTAGGCCATGGGGCCAGCCCCTGAACTTAATTTTTGAATCCAAGCGTACACCCTCTTTTGATTAACACCATGTA                      | 8955  |
| Cat         | GAATATTCGGGGGGATTTTTCCACAGATTCCCAGAGCTGCCTCTGTGCAACTCTCTTTGGTACTTTGCTGCAGAAACCCTA                     | 11575 |
| Ferret      | GATTATGTAGAAAAAGTATTTTTCACAACTAGGTCTTCAGTTAATGTTAAC- TGATTTACACTACATACAGAATATTCAA                     | 9930  |
| Lion        | GAATTTTTCGGGGGGATTTTTCCACAGATTCCCAGAGCTGCCTCTGTGCAACTCTCTTTGGTACTTTGCTTCAGAAACCCTA                    | 10600 |
| Vaquita     | TACTTTT- - - - - T- - C- - - - -                                                                      | 9175  |
| Pig         | TGCTGT- - - GA- - - GCTGTGG- - - - - TGTAGGTCATAGGC- - - - - AC- - - GATGCGGATCTGGTGT- - GAC- - - - - | 9082  |

| Majority    | - - - - TTTTGXTATXACXGGAGTC- TXA- CTCTT- - - - - TXT- TAAAXTTTXXGCTATCTTCTXAATATTGTTTC- X- T- - |       |
|-------------|-------------------------------------------------------------------------------------------------|-------|
|             | 12410 12420 12430 12440 12450 12460 12470 12480                                                 |       |
| Human       | - - - GTACCGCTTTCACGGCATTCCCTCAAATTTT- - - - GACACGTATATTTTTATTCACTTCAAATACTTTTTTAAATAT         | 9367  |
| PolarBear   | -----                                                                                           | 0     |
| Cow         | - - - - CATGATTACTGGAAAAACC- ATAGCTTTG- - - - ACTATATGAACCTTTGTTGACCAAGTGATGTCTCTGCTTTTT- -     | 9823  |
| Dog         | - - - - TTTGGCTCTCAATAGGGTGAGGATTAAGT- - - - - TTGGTAACGGCTCCGAGTAGACTTCACAATAAGTAGGGT- -       | 10019 |
| BelugaWhale | - - - - TGATATTAATACAGCCATC- - - - - T- - - - - - TGGCTTTCTTTTGAATACAGTTA- - - - -              | 9133  |
| Donkey      | CAGTTAATGTTATTAATAATGTGGTTAGTTTTACAACCTACCACGTTGCTGTTTGTATATTCCTTGTGTTCTTCCCTCTTT               | 9035  |
| Cat         | CTTGCTTTGGTCTCCTTGGACTCATGTCCTCTTAGGGAGTTTTTGAAGTTTGGCCATTTTCTCCACCTGGGCTGTGCC- -               | 11653 |
| Ferret      | ATTTTTTAGCTTTAGGATATGTTGAAATTTTCAT- - - - - TTTTCATTATCTTTATAAATTTGCTGTAGTTACTCAGTT- -          | 10002 |
| Lion        | CTTGCTTTGGTCTCCTTGGACTCATGTCCTCTTAGGGAGTTTTTGAAGTTTGGCCATTTTCTCCACCTGGGCTGTGCC- -               | 10678 |
| Vaquita     | - - - - TGATATTAATACAGCCATC- - - - - T- - - - - - TGGCTTTCTTTTGAATACAGTTA- - - - -              | 9219  |
| Pig         | - - - - TGGGGCTGTGGCCAGCGTCTGCAACTCTG- - - - ATT- - - CAACCCTTACCTAGCCTGGGAATCTCCCTTC- - - - -  | 9145  |

Dienstag, 3. Mai 2022 08:38

| Majority    | - - - - XTXTGCTX- TTTCTTTTTGCATAATCTGTXTTAAAXATAAATTGTXTXTXTAATTTXXTGXXTTAAAGTTTXTT       |       |       |       |       |       |       |       |       |
|-------------|-------------------------------------------------------------------------------------------|-------|-------|-------|-------|-------|-------|-------|-------|
|             | 12490                                                                                     | 12500 | 12510 | 12520 | 12530 | 12540 | 12550 | 12560 |       |
| Human       | TTCTTTGACCCA- TGGGTTATTGGAAAGTATGTTATTTATGTTATTTAATTTCCAAATATTTGGAGTTTTCCATATATCT         |       |       |       |       |       |       |       | 9446  |
| PolarBear   | -----                                                                                     |       |       |       |       |       |       |       | 0     |
| Cow         | - - - AATGTGCTGTCTAGTTTTGT CATAGCTTTTCTTCCAAGGAGCTAGTGTCTTTAATTT CATGGCTGCAGTCTTTGTC      |       |       |       |       |       |       |       | 9900  |
| Dog         | - - - GATATGTGACATAGTATCAGGGTAACCAGTTTTGGAGAGAAATTGTGATATAACAAGTCGTAGATGTTGAAGGGTCT       |       |       |       |       |       |       |       | 10096 |
| BelugaWhale | - - - - - CATGGTA- TATCTTTTTCCATTATCTTACTTT CAGACTATTTGTATCCTTAGAT- - - - - TTTAAAGTGTATT |       |       |       |       |       |       |       | 9199  |
| Donkey      | TCTCTTCTTCTGCTTTCTTTTGGATTGGTTTTTTTTTTTCCATTTTATCTCTTGTAGCTGATTAGCTTATAACTCGTT            |       |       |       |       |       |       |       | 9115  |
| Cat         | - - - ATGGCCTGGTCTTTCAAGATAGTAAGCTGGGGCAATCATGGACTGACCTTACTTGTCTTCTGAATTT CAGGGATCAT      |       |       |       |       |       |       |       | 11730 |
| Ferret      | - - - GATTTGAGACTCCTTTTTGGTTAGCCTAGTGAGAGTATAAAAGGAAGTTTATAAATTTTAATAAGAGATCTGCAT         |       |       |       |       |       |       |       | 10079 |
| Lion        | - - - ATGGCCTGGTCTTTCAAGATAGTAAGCTGGGGCAATCATGGACTGACCT- - - TGTCTTCTGAATTT CAGGGATCAT    |       |       |       |       |       |       |       | 10751 |
| Vaquita     | - - - - - CATGGTA- TATCTTTTTCCATTATCTTACTTT CAGACTATTTGTATCCTTAGAT- - - - - TTTAAAGTGTATT |       |       |       |       |       |       |       | 9285  |
| Pig         | - - - - ATATGCTG- CGGCTGTGGCCCTAAAAGACAAAAAAGTGTCTTGTAG- - - ATGGC- ATAAAATAGACT          |       |       |       |       |       |       |       | 9215  |

| Majority    | TGC- - - - - TTGTAGGGTXXXTAAAATAXATTCT- XCXTXTGATTTXAXTXXTTT CAXXTTATTTXTTAXXXX- - AATTG    |       |       |       |       |       |       |       |       |
|-------------|---------------------------------------------------------------------------------------------|-------|-------|-------|-------|-------|-------|-------|-------|
|             | 12570                                                                                       | 12580 | 12590 | 12600 | 12610 | 12620 | 12630 | 12640 |       |
| Human       | TTCTGTTATGTATTCATAATTTTAGTTTTATTCTGGCCAGAGAACATATTTTCTAAGACTTGGATCTTTGTAAA- CATGG           |       |       |       |       |       |       |       | 9525  |
| PolarBear   | -----                                                                                       |       |       |       |       |       |       |       | 0     |
| Cow         | TGCAGTTATTTTGGAGCCCAGGAAAATAAAATCTGTCACTTGTTTGCCTTTTTCGCCTCTATTTGCCATTAAG- TGATG            |       |       |       |       |       |       |       | 9979  |
| Dog         | CCTCT- - - - TTATTGGGTATGCATGATTTATGGCAAATTTGTCGTTGACTGGGTGCGCACAAAATACGAACAA- - AACCC      |       |       |       |       |       |       |       | 10170 |
| BelugaWhale | TCC- - - - - TGTAGACAGCATAAAAATAGAGACT- - - - - TGATT- - - - - TTTA- - - - -                |       |       |       |       |       |       |       | 9235  |
| Donkey      | GTTTAGTTATGCTAGTGGCTGTCTTACGATTTATAGCATAACATCTCTAATGTATCACAGTCTTCCCTCAAGGAGTATTTG           |       |       |       |       |       |       |       | 9195  |
| Cat         | TGTCCATCATTGTCTGGTTCTTGAAAACCATTGTTACACATGTCTGTGTAAATTTTTTTTTTTTTTTTTTTTAAAGTT              |       |       |       |       |       |       |       | 11810 |
| Ferret      | TTCTT- - - - TAAAATGGTTTTTACATTTCTTGTAAATTTGTAAATTT CAGGGTTTCAATTTCTATACCCTTAACC- - AATTG   |       |       |       |       |       |       |       | 10153 |
| Lion        | TGTCCATCATTGTCTGGTTCTTGAAAACCATTGTTACACGTGTATGTGTAAATTTTTTTTTTTTTTTA- - - - - AAGTT         |       |       |       |       |       |       |       | 10825 |
| Vaquita     | TAC- - - - - TGTAGACAGCATAAAAATAGAGACT- - - - - TGATT- - - - - TTTA- - - - -                |       |       |       |       |       |       |       | 9321  |
| Pig         | TG- - - - - ATTTTTAAATCCTGTTTTATACGCTCT- - - - TTTGATTAAGACCCTGCACATTCAGT- GTTAATATA- TATTA |       |       |       |       |       |       |       | 9284  |

Dienstag, 3. Mai 2022 08:38

|             |                                                                                          |       |       |       |       |       |       |       |       |
|-------------|------------------------------------------------------------------------------------------|-------|-------|-------|-------|-------|-------|-------|-------|
| Majority    | XCAXTGGXXA- ATTXTATCXTAXTACXTXXX- TTTTGACTTTTA- XXCAATTCTTTCAC TXTTCTTTGTTT XAAXAAX      |       |       |       |       |       |       |       |       |
|             | 12650                                                                                    | 12660 | 12670 | 12680 | 12690 | 12700 | 12710 | 12720 |       |
| Human       | AGACTTGTT- - TTGTGGTCCAAATATATATGTTGTTAAGTATTCACTGAATACTCTGATGATTCTCTGCAGATTTGGAGA       |       |       |       |       |       |       |       | 9603  |
| PolarBear   | -----                                                                                    |       |       |       |       |       |       |       | 0     |
| Cow         | GGACTGGATG- ATATGATCTTAGTTTTTTTTATTTTTGAGTTTCAAGCCAACTTTTTCACTCTCCATTTTTTACCCTCATC       |       |       |       |       |       |       |       | 10058 |
| Dog         | AAAGTGAAGA- GCTTTTGTATGAGAGATGG- - TAGGTAGGTATATACTGGTTGTATCAATGTAGTCTGAGGCGCAAGAGA      |       |       |       |       |       |       |       | 10247 |
| BelugaWhale | ---- A- ---- ATCCTATCTTACACCCTCTT- - - TTGGTTGTTG- - - - AGACCCTTACATTCAATATTGTTATATTAAT |       |       |       |       |       |       |       | 9298  |
| Donkey      | CCACTTCACATATACTATGCGAATATTAGAAGATTTCTCTTCTTGCGTGTGTACTATTGTTATCATACATTTTACTTC           |       |       |       |       |       |       |       | 9275  |
| Cat         | TCAGTGGGAA- ACTCGTGCATATTACACCG- - TCTTGCCTGGAAGTACAAGTCCACCTACTTTTTCTTTTTTCAAAAAA       |       |       |       |       |       |       |       | 11887 |
| Ferret      | CCACTGTGAA- ATCTTTGCAAAGTAATTGGA- CTGTTACTTGGAAAACAAAATTCTGAAGTGATTGCATAGTAATTCC         |       |       |       |       |       |       |       | 10231 |
| Lion        | TCAGTGGGAA- ACTCGTGCATATTACACTG- - TCTTGCCTGGAAGTACAAGTCCACCTATTTTTCTTTTTTCAAAAAA        |       |       |       |       |       |       |       | 10902 |
| Vaquita     | ---- A- ---- ATCCTATCTTACACCCTCTTCTTTTGGTTGTTG- - - - AGACCCTTACAATCAATATTGTTATATTAAT    |       |       |       |       |       |       |       | 9387  |
| Pig         | ACA- TGGTTA- GTTTTATTTTATTTATTTATTTTGTCTTTTT- GCCATTTCTTGGGCTGCTCCGTGCGAAACTCCGAC        |       |       |       |       |       |       |       | 9361  |

|             |                                                                                             |       |       |       |       |       |       |       |       |
|-------------|---------------------------------------------------------------------------------------------|-------|-------|-------|-------|-------|-------|-------|-------|
| Majority    | AAGTTAAGTTXTXTAX- CTXTACTTTGTTATTTTXXCCTT- TATGTTCTXTAGT- - X- - X- - A- AAT- - CXTTTTTTATX |       |       |       |       |       |       |       |       |
|             | 12730                                                                                       | 12740 | 12750 | 12760 | 12770 | 12780 | 12790 | 12800 |       |
| Human       | AATCTCTGTGCAGTT- - CTTTTCTCTGGTACTTTGACCTGTATGTAAACTCTAGT- - - - - T- ACTTTGGTCTTCTCAGG     |       |       |       |       |       |       |       | 9674  |
| PolarBear   | -----                                                                                       |       |       |       |       |       |       |       | 0     |
| Cow         | AGGAGAAGGCAATGGCACTCCACTCCACTACTCTTGCTGG- AAAATCCCATGGA- - CGGAGGAGCCTGGTAGGCTGCAG          |       |       |       |       |       |       |       | 10135 |
| Dog         | AGATGGCACATAACCAG- CAGTAGGTTGTAAAGAAGGCCCCCTTAAGTGCCAGGG- - TATACAAAAT- - - - TTGTTATT      |       |       |       |       |       |       |       | 10320 |
| BelugaWhale | ATGGTTAGTTTTAAAAGTACCACTTTGTTGTTTTGTCTCT- - TATGTTCTTCATT- - C- - - - - - - - - - CTTTTTTTT |       |       |       |       |       |       |       | 9362  |
| Donkey      | TACATATGTTATAAATTCTATTCTGCATTATTTTTGTTTGTAAAGCAGCTAATTATCTTTTAAAAGATTTAAATAATA              |       |       |       |       |       |       |       | 9355  |
| Cat         | AAATTACATAATGTGGTCTGTAGTTCTAGATCTGCCTCATTCTTTGTTATATGGC- - TACACCACAATGTCGTTTCTATG          |       |       |       |       |       |       |       | 11965 |
| Ferret      | AGATGATACTCAGTA- - TGGTAAAATGTAACTTTTTGGGTGAAATTTTAA- - - - - ATAGTGAAAT- - - - TTGTTACA    |       |       |       |       |       |       |       | 10299 |
| Lion        | AA- TTACATAATGTGGTCTGTAGTTCTAGATCTGCCTCATTCTTTGTTATATGGC- - TACACCAGATGTAGTTTCTATG          |       |       |       |       |       |       |       | 10979 |
| Vaquita     | ATGGTTAGTTTTAAAAGTACCACTTTGTTGTTTTGTCTCT- - TATGTTCTTCATT- - C- - - - - - - - - - CTTTTTTTT |       |       |       |       |       |       |       | 9451  |
| Pig         | ATGGTTAGTTTTAGAAGTACCACTTTGTTGTTTTTTTTCTG- TTTGTCCCTTATT- - T- - - - - - TCTTTCTTCTTTTT     |       |       |       |       |       |       |       | 9431  |



Dienstag, 3. Mai 2022 08:38

| Majority    | TTCCTGCTXTCTTTTGAATTXAGTXAG-XTTTAAXXAXTXCATTTTAATCTTTXTAGCT--GAGTXGCTTACATATGTX       |       |       |       |       |       |       |       |       |
|-------------|---------------------------------------------------------------------------------------|-------|-------|-------|-------|-------|-------|-------|-------|
|             | 12810                                                                                 | 12820 | 12830 | 12840 | 12850 | 12860 | 12870 | 12880 |       |
| Human       | CTCTTGGCTCTTTCACAATTAAGTAGTCTTTGAGGCTCAGCCTGCTTTCCTCATAGCTATGCTATGGCCTGGACACTCA       |       |       |       |       |       |       |       | 9754  |
| PolarBear   | -----                                                                                 |       |       |       |       |       |       |       | 0     |
| Cow         | CCCATGGGGTCTCTAGAGTCGGACACA- ACTGAGCGACTTCACTTTCA- CTTTTCACTT- - - TCATGCATTGGAGAAGGA |       |       |       |       |       |       |       | 10210 |
| Dog         | TTACCATCGCTGTAGGCACTATTCTA- - - TTAGTAACTGCGTATAACCATACATAAC- - - AAGTATCTAGCATACTGT  |       |       |       |       |       |       |       | 10392 |
| BelugaWhale | TTCCTGCTTTCTTTTGGATTGAGTAAA- TTTTT- TAATTCATTTTAATCTCTTTAGCT- - - GATTAGCTTATAGCTGTT  |       |       |       |       |       |       |       | 9437  |
| Donkey      | ACAAAATAAATTCTGCATTACCTGTGACATTGTTAGGTGCATGCATTGAATACTAGGGT- - GCGGAATTCCTGCAGA       |       |       |       |       |       |       |       | 9433  |
| Cat         | TTGATGACATAGTTTGATTCTAGTTTGCAGTTAAAGAGTATGTGGAAATATTTACAATGG- - AAGTAAAAATCCTATGTC    |       |       |       |       |       |       |       | 12043 |
| Ferret      | GTTCTCTTACTAAATGAACTAAAGGAAGCCTTTAAGACTGGACAATTAATAAAGAATT- - - TAGTGGTTAAAATAGGTT    |       |       |       |       |       |       |       | 10375 |
| Lion        | TTGATGACATAGTTTGATTCTAGTTTGTAGTTAAAGAGTATGTGGAAATATTTACAATGG- - AAGTAAAAATCCTGTGTC    |       |       |       |       |       |       |       | 11057 |
| Vaquita     | TTCCTGCTTTCTTTTGGATTGAGTAAA- TTTTT- TAATTCATTTTAATCTCTTTAGCT- - - GATTAGCTTATAGCTGTT  |       |       |       |       |       |       |       | 9526  |
| Pig         | TTTCTGCTTTCTTTTGGATTGAGTATG- TTTTAAAA- TCCATTTTAT- CTGGTTAGCT- - - GATTGGCCTACATATA   |       |       |       |       |       |       |       | 9505  |

| Majority    | TXTTX- AATTT- - TXTTGTGXXXGTXG- - CTGTTATAXG- AATGCAXCXTGGAATTTTXATTTACCTCAGTCT- - - - GX          |       |       |       |       |       |       |       |       |
|-------------|----------------------------------------------------------------------------------------------------|-------|-------|-------|-------|-------|-------|-------|-------|
|             | 12890                                                                                              | 12900 | 12910 | 12920 | 12930 | 12940 | 12950 | 12960 |       |
| Human       | AGGGAGTATAAGCTGAGGCAAACATGGACTCATTTGTTTTCTAACTTTCAGGGATTATTGTCCATCATTGCCTGATGTCC                   |       |       |       |       |       |       |       | 9834  |
| PolarBear   | -----                                                                                              |       |       |       |       |       |       |       | 0     |
| Cow         | AATGGCAACCCACTCCAGTGTTTTTGC- - CTGGAGAATC- CCAGGGTCGGCGGAGTCTGGTGGGCTGCCGTCTA- - - TGG             |       |       |       |       |       |       |       | 10284 |
| Dog         | TATTCTGCTTT- TTTTTGGAATTGTGA- - GAAATAAACGAGAAGAAGTGGGGAAGAATGAATAAGTT- - CCAA- - - AGG            |       |       |       |       |       |       |       | 10464 |
| BelugaWhale | T- - - - - - - - - - TGTTATGTTGATAG- - CTGTTTTAGGATTTATAGCATACATCTTTAATTTATCACAGTCT- - - - -       |       |       |       |       |       |       |       | 9496  |
| Donkey      | TTTCCGAAGTTCTCTCTGTGCAACTCT- - CTTCTCTGGT- ACTCTGCCGTAGAACTCTAGTTGCTTTGGTCTCCTTGGA                 |       |       |       |       |       |       |       | 9510  |
| Cat         | AAATGAAATTT- ACAGTTTAAAAGTTT- - ATGAAAACCAGAATGCCAAAAGGATTCTTTCCACAACATATGTATG- - - GGA            |       |       |       |       |       |       |       | 12117 |
| Ferret      | GTTAGCATTTT- CCAAGTTGGATTTCA- - CTAGTATTTTAAAAGCACTGTTGTAAAGTGCTGAACTTAACTGTA- - - TAA             |       |       |       |       |       |       |       | 10449 |
| Lion        | AAATGAAATTT- ACAGTTAAAAGTTT- - ATGAAAACCAGAATGCCAAAAGGATTCTTTCCACAACATATGTATG- - - GGA             |       |       |       |       |       |       |       | 11131 |
| Vaquita     | T- - - - - - - - - - TGTTATGTTGATAG- - CTGTTTTAGGATTTATAGCATACATCTTTAATTTATCACAGTCT- - - - -       |       |       |       |       |       |       |       | 9585  |
| Pig         | T- TT- - - - - - - - TCTCACGTTGGTAG- - CTGTTATAAG- CCTACATC- - - - - - TCTGATTTACCGCAGTCT- - - - - |       |       |       |       |       |       |       | 9558  |

Dienstag, 3. Mai 2022 08:38

| Majority    | X- TCXC- - - - - TX- - GTAGXATTTA- XXXACTX- - CA- - - - - A- - - - X- C            |       |
|-------------|------------------------------------------------------------------------------------|-------|
|             | 12970 12980 12990 13000 13010 13020 13030 13040                                    |       |
| Human       | AGTGTC- TTGAAAAGCAATTATTCTGTATAGTTGCTTGATTGTTTGGTGTGTTTCGGCGAGGCAAATCTGGGTCATGTT   | 9913  |
| PolarBear   | - - - - -                                                                          | 0     |
| Cow         | GGTCGCACAG- - - - - AGTCCGACAGGACTGAAGTGACTTAGCAGTAGCAG- TAGCAGTGGCTC              | 10341 |
| Dog         | AATTGGCTTT- - - - -                                                                | 10474 |
| BelugaWhale | - - TAAC- - - - - TCAAGTAGTATTTATGCTACTTTACA- - - - - TA- - - - TAC                | 9531  |
| Donkey      | CCCTTGGCTTTCTCATCACAGAATGTTTTTGAAGTTCGGTGTGGTTTCCCCTTCTGAGCTGTGTGTCATGGCCTGAAATTTT | 9590  |
| Cat         | ATGCCTGTTTCTCCACACCCTTATTAATTCTGGGTTTTGAACAATTTAGAGTATCACCTAATTTTAGGCTAAAAAATTGT   | 12197 |
| Ferret      | GTTTTGGTAT- - - - -                                                                | 10459 |
| Lion        | ATGCCTG- - - - - G- - - - -                                                        | 11139 |
| Vaquita     | - - TAAC- - - - - TCAAGTAGTATTTATGCTACTTTACA- - - - - TA- - - - TAC                | 9620  |
| Pig         | - - TCCC- - - - - TCCAGTAGTATTTATGCCACTTTACA- - - - - T- - A- - - - CGC            | 9593  |

| Majority    | TXTXX- - - - GAATATTAGAATAXTTCT- - - - XCXXTTTTG- - XT- XGTAXTATXXTTAT- - - - -  |       |
|-------------|----------------------------------------------------------------------------------|-------|
|             | 13050 13060 13070 13080 13090 13100 13110 13120                                  |       |
| Human       | ATTCTGTCTTGACTGGAAGTAGAAGTCCACTGTTTTTTTTTAATTACATAATATGGTCTCAGCAGTTGTAGATCTACCTC | 9993  |
| PolarBear   | - - - - -                                                                        | 0     |
| Cow         | TTTGCCATTAAAGTATTAGAATACTTCT- - - - CCCCTTTTGGCCTGTGTAATTATTGTTATT- - - - -      | 10398 |
| Dog         | - - - - - ACTCTGTGGA- - - - -                                                    | 10484 |
| BelugaWhale | TATGT- - - - GAATATTAGAATACTTCT- - - - CCCCTTTTGGCCTCTGTAATTATTAT- - - - -       | 9582  |
| Donkey      | TCTCAAAGGAGTAAGCTGGGGCAATCATGGACTCTCATTTGCTTTCTGAGCTTAGTGATCATTGTCCATTGTTGTCTGA  | 9670  |
| Cat         | TTTACAATTTATATTTTGAATGGGTGA- - - - GATTTTGAATTTGACTTTATATATCTTGTCTGTGAAGTGCCTTTT | 12273 |
| Ferret      | - - - - - AGCTCTTGAA- - - - -                                                    | 10469 |
| Lion        | - - - - - GA- - - - -                                                            | 11141 |
| Vaquita     | TATGT- - - - GAATATTAGAATACTTCT- - - - CCCCTTTTGTCTCTGTAATTATTAT- - - - -        | 9671  |
| Pig         | TTTGT- - - - GAATATTAGAGTACTTCT- - - - CCCTTCTAGTCCAAGTACTGTTGTTAT- - - - -      | 9644  |

Dienstag, 3. Mai 2022 08:38

| Majority    | ----- T- XXXATTTTACTTCTAXGTXTTATAAATTCTATA- TGCATTCT----- T                          |       |       |       |       |       |       |       |  |  |       |
|-------------|--------------------------------------------------------------------------------------|-------|-------|-------|-------|-------|-------|-------|--|--|-------|
|             | 13130                                                                                | 13140 | 13150 | 13160 | 13170 | 13180 | 13190 | 13200 |  |  |       |
| Human       | ATTCTTTGTTAATGACAATGGAGG- - ATACTCGTGTGGCTGCACCACAGTGTAGTTACTGGA- CATACCACAAT----- T |       |       |       |       |       |       |       |  |  | 10065 |
| PolarBear   | -----                                                                                |       |       |       |       |       |       |       |  |  | 0     |
| Cow         | ----- AT- AACATTGTACTTCTACATGTTATAAATTCTATAGCGCATTCT----- T                          |       |       |       |       |       |       |       |  |  | 10443 |
| Dog         | ----- T- TTATTGTAGTGCTTTGAATTCAGAATACCAA- TGAA----- G                                |       |       |       |       |       |       |       |  |  | 10522 |
| BelugaWhale | ----- AACATTTTACTTCTACGTGTTATAAATTCTATAAGGCATTCT----- T                              |       |       |       |       |       |       |       |  |  | 9625  |
| Donkey      | TGTCCAGTGGTCTTCAAAGCAATATTTTATATATTTTGTGTGGTTTGTAGTTGTTTCAAGAGGGAATACTGGTCCATCT      |       |       |       |       |       |       |       |  |  | 9750  |
| Cat         | TGTATACCTGACCTATTTTAATGATCATCTTTGTTACACGTCTGTGTAAAATTGATTTCTG- TACACATT----- G       |       |       |       |       |       |       |       |  |  | 12344 |
| Ferret      | ----- T- TTATCAACATTGGCTGTTTAGATAGTTGCAA- - TGAA----- G                              |       |       |       |       |       |       |       |  |  | 10506 |
| Lion        | ----- A----- TCTTTGTTACACTTCTGTGTAAAATTGATTTCTG- TACACATT----- G                     |       |       |       |       |       |       |       |  |  | 11186 |
| Vaquita     | ----- AACATTTTACTTCTACGTGTTATAAATTCTATACGGCATTCT----- T                              |       |       |       |       |       |       |       |  |  | 9714  |
| Pig         | ----- GACATTTTACTCCCACATGTTATAAATTCTACACTGCTTTCT----- T                              |       |       |       |       |       |       |       |  |  | 9687  |

| Majority    | TAXGTTXXTTTTXTT----- AGXCATTTATCTTTTTAAXTGATTTAXAXAAXAT- - GATAAATAXXXT----- TC- ACXT    |       |       |       |       |       |       |       |  |  |       |
|-------------|------------------------------------------------------------------------------------------|-------|-------|-------|-------|-------|-------|-------|--|--|-------|
|             | 13210                                                                                    | 13220 | 13230 | 13240 | 13250 | 13260 | 13270 | 13280 |  |  |       |
| Human       | TAGTTTCCTACATCGATGGACATTTAGGTTTGATTCCAGTTTGTGTTATAACAT- - - GTGGACATATT----- TAGAAT      |       |       |       |       |       |       |       |  |  | 10137 |
| PolarBear   | -----                                                                                    |       |       |       |       |       |       |       |  |  | 0     |
| Cow         | TAAGT----- AGCCATTTATCTTTTTAAAAGACTTAAACAACAA- - GAGAAATA----- ACCT                      |       |       |       |       |       |       |       |  |  | 10494 |
| Dog         | TATCTTTAAACTGTT----- ATATCTTAATCTCCGTATTTGTGTTCTGTGTGCT- - GCTGTGAAGTAT----- TC- ATAG    |       |       |       |       |       |       |       |  |  | 10589 |
| BelugaWhale | TTTATTTGTTTAAAC----- AGCCATTTATCTTTTTAAAAGATTTAAACAACAA- - - - - GACAACCT----- TCTACTT   |       |       |       |       |       |       |       |  |  | 9686  |
| Donkey      | TAGATTATCTTGGCTGGAAGTAGAAATCCACCTTTTTTATTTTTTAAAAAATTGCATAGTAAGATCTCTGCAGTTACCGA         |       |       |       |       |       |       |       |  |  | 9830  |
| Cat         | TAGGTACATTTTCTT----- ACAGATTATTACTTTGAATTTCTTCATGTAGTGTTGGACATATAGATT----- TA- TTTG      |       |       |       |       |       |       |       |  |  | 12413 |
| Ferret      | TAA- TGCCAACACTGTT----- ACTTGTTAACAATTGAACATAAGTGATTGTTTAT- - AATAGGTATGTT----- AC- TGAA |       |       |       |       |       |       |       |  |  | 10572 |
| Lion        | TAGGTACATTTTCTT----- ACAGATTATTACTTTGAATTTCTTCATGTAGTGTTGGACATATAGATT----- TA- TTTG      |       |       |       |       |       |       |       |  |  | 11255 |
| Vaquita     | TTTATTTGTTTAAAC----- AGCCATTTATCTTTTTAAAAGATTTAAACAACAA- - GACAAATAATCT----- TCTACTT     |       |       |       |       |       |       |       |  |  | 9782  |
| Pig         | TGTGTTT----- AAA----- AGCCAGTTATCTTTTTAAAAGATTTAAACAACAA- - GAAAAGTAT- CT----- TCTACAT   |       |       |       |       |       |       |       |  |  | 9749  |

Dienstag, 3. Mai 2022 08:38

|             |                                                                                                                                                                                      |       |
|-------------|--------------------------------------------------------------------------------------------------------------------------------------------------------------------------------------|-------|
| Majority    | TATXCTTAACATATTTAXGXATATXCAXTGTATACTTAXGXAGGTTTCTCTGCAGAT-TTXCA--GAXTTCTCTTTGGG                                                                                                      |       |
|             | 13290                    13300                    13310                    13320                    13330                    13340                    13350                    13360 |       |
| Human       | AGAAGTAAAAATGCTGTGTCAAATGAAATTTATACTTAAAGAGTTACTGAAAACCACAATGCCA--GAACACTCATTGT                                                                                                      | 10215 |
| PolarBear   | -----                                                                                                                                                                                | 0     |
| Cow         | TCTACTTTACATAGTTATGCACGTGCATTGAATACTCAGGGAGGATTCTCTGCTGACCTTCCA--GAGTTCTCTTTGTG                                                                                                      | 10571 |
| Dog         | CTTTCTTAA--TTTAGTTTTAGA----CATATTGCATTAAGGGCTAATGTGGGTACGTAA--TATTTTTACTTTAG                                                                                                         | 10657 |
| BelugaWhale | TACCCTTAACATAGTTATGCACATGCATTGGATACTTAGGGAGGATTCTCTGCAGAT-TTCCA--GAGTTCTCTCCGTG                                                                                                      | 9762  |
| Donkey      | TCTCTCTCATTCTTTGTTGTATGAACGAACCACAATGTAGTTCCTACATTGGTGGACATTTTGATTTGATTCCAGTTTGC                                                                                                     | 9910  |
| Cat         | TATTATTAAGGAGTATAGTTTTTT--TATTTGATCTTAAATGTTTTTAGCTTCAGGTCCTTTA--CTTTTTAGATGAGA                                                                                                      | 12488 |
| Ferret      | AACTTTTAT--TCAGGATTT-----TAGATTCTGATGTTTCTTAAATGCTTTATAGA--TATTCATGCTTAGG                                                                                                            | 10637 |
| Lion        | TATTATTAAGGAGTATAGTTTTTTTATTATTTGATCTTAAATGTTTTTAGCTTCAGGTCCTTTA--CTTTTTAGATGAGA                                                                                                     | 11332 |
| Vaquita     | TACCCTTAACATAGTTATGCACATGCATTGGATACTTAGGGAGGATTCTCTGCAGAT-TTCCA--GAGTTCTCTCCGTG                                                                                                      | 9858  |
| Pig         | TCCCCTTAACATAGTTATGCACATACATTGAATACTCAGGGAGGAGTCTCCGAAGAT-TTCCA--GAGTTCTCTCTGTA                                                                                                      | 9825  |

|             |                                                                                                                                                                                      |       |
|-------------|--------------------------------------------------------------------------------------------------------------------------------------------------------------------------------------|-------|
| Majority    | XAGTAATATTTX-GAACTTTXCXATAXAATATGTAGTTACTTTGTT--TXTTGGATT-CATGACT--TXAXTAAATGTXA                                                                                                     |       |
|             | 13370                    13380                    13390                    13400                    13410                    13420                    13430                    13440 |       |
| Human       | TTTTCAAAAGTGTGTATGGGAGTGCCATTTTTTCCATACCCTTGGCAATTCTAGGTTTTATCAAATTTAAGAATACTAG                                                                                                      | 10295 |
| PolarBear   | -----                                                                                                                                                                                | 0     |
| Cow         | CAGCTCTCTGTT-GAACTCTGCCAAACAACTTGAGCTGCTTTGAT--CTTGGATT-TTTGACT----TTTAACTGTCA                                                                                                       | 10642 |
| Dog         | AAGTAATA----AAGTGTCAAAAAGCTTACGAAAATAAATTGTT--TTTTGAG-GACAAAAC-----ACAATTTTAA                                                                                                        | 10723 |
| BelugaWhale | CAGCTGTCTTTG-GAACTCTGCCATACAACTCTAGTTGCTTTGGTCCCCTTGGATT-CTTGCCTCTTTCTTAACTGTCA                                                                                                      | 9840  |
| Donkey      | AAGTAAAAAGTGTGGAAGTATTTAAAATATAAGTAAAAATGCTGTGTCAAATGAATTTTGCAGTTAAAAAGTTTATGAAA                                                                                                     | 9990  |
| Cat         | TTATAATAGTTTTGAAGATTAATGTGATTATGCATAAAAAGTATT--TTTCACAAACCAGGTCC--TCAGTTAATATTA                                                                                                      | 12564 |
| Ferret      | TATTTACATT--AGAATTTCCAGTTGCAGACTTTTTTAGTGTGTC--TACTAAATGACAACATT-----GTTAATTTAA                                                                                                      | 10707 |
| Lion        | TTATAATAGTTTTGAAGATTAATGTGATTATGCATAAAAAGTATT--TTTCACAAACCAGGTCC--TCAGTTAATATTA                                                                                                      | 11408 |
| Vaquita     | CAGCTGTCTTTG-GAACTCTGCCATACAACTCTAGTTGCTTTGGTCCCCTTGGATT-CTTGCCTCTTTCTTAACTGTCA                                                                                                      | 9936  |
| Pig         | CAGCACTCTG--GAACCCTGCCGTACCAGGTCTAGTTGCTTTGGTATCCTTGGATTCTTTGGCTCTTTTTTAGTTCTCA                                                                                                      | 9902  |

Dienstag, 3. Mai 2022 08:38

| Majority    | GXXA- - GTTT- TCAAAXGTTAACCTATXTTTCCXTATTTGAGCTGTGCCTTGTCC- - - - - TGGAATTTXTC- - ATTTT   |       |
|-------------|--------------------------------------------------------------------------------------------|-------|
|             | 13450 13460 13470 13480 13490 13500 13510 13520                                            |       |
| Human       | CTTATTTTACACTAAAAATTATTTTGTAAATTTATATTTTGAATGGGTGAGGTTTTTCAGATTTGGTTATTTAT- ATTTT          | 10374 |
| PolarBear   | -----                                                                                      | 0     |
| Cow         | GGGA- - ATTT- CTGAAGTTCAACCCAG- TTTCCCTATTGGAGCTGGGCCTTGACC- - - - - TGGACTTTTCTC- - AAGCT | 10709 |
| Dog         | CCCA- - GTTT- GTAAAAGAAAACATATAAAATGATAGTAAAAAAAACCAAATAA- - - - - AAGAATATACA- - ATATC    | 10791 |
| BelugaWhale | GGGA- - GTTT- TCCAGGTTTCGACCTGG- TTTCCCTATCTGAGCTGTGCCTTGACC- - - - - TGGACTTTTTTCTCAAGTG  | 9909  |
| Donkey      | ACCACAGTGC- CAAAAGGATTCCTCACAAGTGTATATGAGAGTGCCTGTTTTTCCACACCTTTAGAAATTCTGGGTTTTA          | 10069 |
| Cat         | ACTG- - ATTT- GCACTACATATAGAATATCTGAATTTTATAACTTTAGGGTTTGT- - - - - TGAAATTTTCAT- - TTTTC  | 12632 |
| Ferret      | TTTG- - TAAC- TCAAAGGCTGAGGGAATATGTGCTAATTGAGGGTAGAGGTATTC- - - - - AACAAATAGTT- - GTTTT   | 10775 |
| Lion        | ACTG- - ATTT- GCACTACATATAGAATATCTGAATTTTATAACTTTAGGGTTTGT- - - - - TGAAATTTTCAT- - TTTTC  | 11476 |
| Vaquita     | GGGA- - GTTT- TCCAAGTTTCGACCTGG- TTTCCCTATCTGAGCTGTGCCTTGACC- - - - - TGGACTTTTTTCTCAAGTG  | 10005 |
| Pig         | GGGA- - GTTT- TCAAAGTTGACCCA- - TTTCCCTGTCTGAGTTGTCCATGACC- - - - - TGGACTTTTTTCTTAAGTG    | 9970  |

| Majority    | AXTAAXCTXGGACXATCAAXG- CCXX- - - - -XXC- AGXTXGTTTTAT- AXT- XT- - - - - XTCATTGXTCATCATTGTCT |       |
|-------------|----------------------------------------------------------------------------------------------|-------|
|             | 13530 13540 13550 13560 13570 13580 13590 13600                                              |       |
| Human       | ATTTTCTGTGAACTGCCTGTTTGTGTAAGTGGACCTAGTTAATTCAAATATATATATTTGAATTAAGTGATTTTATTGTTT            | 10454 |
| PolarBear   | -----                                                                                        | 0     |
| Cow         | AGTAAGCTGGGACAGTCA- - - - - TGGCTTATC- - - - - CCATGGTGCATCGTTGTCA                           | 10755 |
| Dog         | AAAAACTTGAAAACAACAAGA- ACAC- - - - - ACCAAATCTG- - - - - T- - - - - CCACAAGCTCGAACATGC       | 10845 |
| BelugaWhale | AGTAAGCTGGGACGATGATGG- CTTTAC- - - - - CCCATGGTTGTTTTCTGACTCTGGG- - GGATCATTGTTTCATCATTGTCT  | 9983  |
| Donkey      | TAAAAATTTAGACTATTAGGT- AATTTTAGGTTAAAAAAGTTTTATAATTTTGAA- - ATGGATGAGATTTTCAAATTT            | 10146 |
| Cat         | ATTACCCTTATAAATTTGATG- TCGCTA- - - CTC- AGTTGATTTTAGACTT- - - - - CTTTTTGGTTAGCTTAGTGA       | 12698 |
| Ferret      | ATTGCTCCTCTATCATCAATA- GTACCT- - - GTT- AAGTAGTACA- - - - - T- - - - - ACTCAGTAAATAATTAAT    | 10834 |
| Lion        | ATTACCCTTATAAATTTGATG- TAGCTA- - - CTC- AGTTGATTTTAGACTTGT- - - - - CTTTTTGGTTAGCTTAGTGA     | 11546 |
| Vaquita     | AGTAAGCTGGGATGATGATGG- CTTTAC- - - CCCATGGTGGTTTTCTGACTCTGGG- - GGATCATTGTTTCATCATTGTCT      | 10079 |
| Pig         | AGTAAGCTGGGACCATCAC- - - C- - - - - TCGCTTGTGACTCTCAG- - GAATCATTGTCCACCATTGTCT              | 10030 |

Dienstag, 3. Mai 2022 08:38

| Majority    | GATGTCCAATGGTCTTGAAAAACATTTTTCTATAAXATTTTXXAAXXTTTTTATTTA- - - TT- X- - - - - TTTCTXAGXT |       |       |       |       |       |       |       |       |
|-------------|------------------------------------------------------------------------------------------|-------|-------|-------|-------|-------|-------|-------|-------|
|             | 13610                                                                                    | 13620 | 13630 | 13640 | 13650 | 13660 | 13670 | 13680 |       |
| Human       | AAAGTCCATTTGATGTGTAAACATTTTTAGCCTCAGCTTCTTCACCTTTTAAATTAGG- ATTTTAATAGTTCCACAAACT        |       |       |       |       |       |       |       | 10533 |
| PolarBear   | -----                                                                                    |       |       |       |       |       |       |       | 0     |
| Cow         | AGTGTCCAGTGGTCTTGAAAAACAGTGTTGTATAAATTATGTATGACTTTTTTGT- - - - - TTCCTAAGTA              |       |       |       |       |       |       |       | 10821 |
| Dog         | CCCCCAAAGAAAGGGGAACGTAGATACAAAAGGTTTTTAAACATATAAAGA- - - - - AGCAGACCA                   |       |       |       |       |       |       |       | 10910 |
| BelugaWhale | GATGTCCAGTGGTCTTGAAAGAACATCGTCTATATATTATGTGTGATTTTCTTTTT- - - TTTTATTTTTTTCTCAGTT        |       |       |       |       |       |       |       | 10060 |
| Donkey      | GACTTTATATTTCTTTTCTGTGGACTGCCTCTTGTATCCGTGACCTATTTTAAAGGATCTTTATTCTTGTTTATTACGA          |       |       |       |       |       |       |       | 10226 |
| Cat         | GAGTATAAAAAGAAATTTGTGAGTTTTCTT- AAAGATTTTAAAAAAATTTATTTATTTATTCTGGGTGGGGGCAGAAAG         |       |       |       |       |       |       |       | 12777 |
| Ferret      | GACTCCTAAAGGTCTCTGGCTTCAGTACTCTTATAATCTTGTAAAGCCACTTATCAA- - - - - TAAAAAGAT             |       |       |       |       |       |       |       | 10899 |
| Lion        | GAGTATAAAAATAAATTTGTGAGTTTTTTTTAAAGATTTTAAAAAAATTTATTT- - - ATTCTGCGTGGGAGCAGAAAG        |       |       |       |       |       |       |       | 11622 |
| Vaquita     | GATGTCCAGTGGTCTTGAAAGAACATCATTCTATATATTATGTGTGATTTTCTTTTT- - - TTTTATTATTTTTCTCAGTT      |       |       |       |       |       |       |       | 10156 |
| Pig         | GATGTCCAGTGGTCTTGAAATCATTGTTCTCTGTGTTTTCTTCTCCTCCCTC- - - - - TCTCTTCTCC                 |       |       |       |       |       |       |       | 10096 |

| Majority    | XGXCAAXTGTTXATTTTATACXCCTTCTTAGT- - TAGXATTAGTAGTTAAXTTTX- - - AAAAXATAATTXAGTXAT       |       |       |       |       |       |       |       |       |
|-------------|-----------------------------------------------------------------------------------------|-------|-------|-------|-------|-------|-------|-------|-------|
|             | 13690                                                                                   | 13700 | 13710 | 13720 | 13730 | 13740 | 13750 | 13760 |       |
| Human       | AGGTCTAATGTTAATGTATTTACATTTAGAATATCCAAGTTTTTATGGCTTTAGGATACAAATGAAATCTCATTTTCCAT        |       |       |       |       |       |       |       | 10613 |
| PolarBear   | -----                                                                                   |       |       |       |       |       |       |       | 0     |
| Cow         | GGGCAGATTGGTCCAT- TGTTACACCTTCTTGGC- - TAGAAGTAGAAGTTCACTTA- - - - - AAAATTTTACTTAATATG |       |       |       |       |       |       |       | 10892 |
| Dog         | GGACCAAAGTGGTGAATGTGAACGTTAGGAAAGT- - TAGGAAAAGTGGACACGAAGG- - - AAGAACAATTAGG- - -     |       |       |       |       |       |       |       | 10980 |
| BelugaWhale | GGGCAAAGTGGCTCATGTTATA- - CCTTCTTGGC- - CAAAATTAGAAGTTCACTTT- - - - - AAAAAAAATTATGTAAT |       |       |       |       |       |       |       | 10130 |
| Donkey      | CTCTATAAAAATTGATTTTATATGCATCGTAAGTACTTTTTCTTACAGTTTATTATTCTGATTTTCTTCGTATAGTTTT         |       |       |       |       |       |       |       | 10306 |
| Cat         | AGAGGGAGAGAGAATTCTTAGCAGGCTCCACACT- - CAGCACAGAGTCTGACAAGGGGCTTAATCTCATGATCAGGAGAT      |       |       |       |       |       |       |       | 12855 |
| Ferret      | AGACACCAATTTTATTTTACAACCTTCTTCTTT- - TAGCT- - - GAAATATGAAAG- - - AGCTATGTCTTTTAG- - -  |       |       |       |       |       |       |       | 10966 |
| Lion        | AGAGGGAGAGAGAATTCTTAGCAGGCTCCACATT- - CAGCACAGAGTCTGACAAGGGGCTTAAACTCATGATCAGGAGAT      |       |       |       |       |       |       |       | 11700 |
| Vaquita     | GGGCAAAGTGGCTGATGTTATATACCTTCTTGGC- - CAAAATTAGAAGTTCACTTTT- - - TAAAAAAATTATGTAAT      |       |       |       |       |       |       |       | 10231 |
| Pig         | TCCCCACTTCTTGCC- CCAAAGAAGTTCTTTTT- - TTTTTTTTTTTTTTTTTT- - - - - TTAAATT- ACGTATTCTG   |       |       |       |       |       |       |       | 10166 |

Dienstag, 3. Mai 2022 08:38

| Majority    | GACTXTGTAATTATAGATTAATXGT- - AGTCTTTXXXCX- - ATTGATGCACCXCA- XGTAGTTGCTTAACATATGAAGAT      |       |       |       |       |       |       |       |       |
|-------------|--------------------------------------------------------------------------------------------|-------|-------|-------|-------|-------|-------|-------|-------|
|             | 13770                                                                                      | 13780 | 13790 | 13800 | 13810 | 13820 | 13830 | 13840 |       |
| Human       | TATTTTATAAATTTGCTGTATTCAGCTTTTCTTGATTTTAGACTTTTTTTTGTAGCTCAGTGAGACTATTAAGAAAGAA            |       |       |       |       |       |       |       | 10693 |
| PolarBear   | -----                                                                                      |       |       |       |       |       |       |       | 0     |
| Cow         | GTCTCTGCAATTATAGTTTT- - - - - GTCTTGTTAC- - - ATTGGTGCCTCACACTGTAGTTGCTTTACACATCACAGT      |       |       |       |       |       |       |       | 10961 |
| Dog         | TACCAT- TGA- - - AACTAATGAAA- GATTACTAGA- - A- - ATACAGACAAGTTA- - ATCATTGATGAACGGATGCACCT |       |       |       |       |       |       |       | 11048 |
| BelugaWhale | ATTTCTGCAGTAATAGATTTATCTT- - ATTCTTTGTTCT- - GTGGATGCACCACAGTGTAGTTGCTTGACATAACAAAAT       |       |       |       |       |       |       |       | 10206 |
| Donkey      | GGGCATAAAGATATATTTGAATTGTTAAGTAGTATACTCTTATTTATTTTTGTCTATTTGATACTTAAACGTTTTTTAGTT          |       |       |       |       |       |       |       | 10386 |
| Cat         | CACGATCTGAGCTGAAATCACAAAGTTGGGTGCTTAACCA- - ACTGAGCCACCCAG- - GTGCCTCAGAAATTTGTGAATTT      |       |       |       |       |       |       |       | 12931 |
| Ferret      | GACCTTGTGT- - - AGTTGAAGAGATGAGTACCTAA- - C- - ATTTAAGCATGT- - - GCCATATGGCCATGATAGGAGAG   |       |       |       |       |       |       |       | 11034 |
| Lion        | CACGACCTGAGCTGAAATCACAAAGTTGGGTGCTTAACCA- - ACTGAGCCACCCAG- - GCGCCTCGGAAATTTATGAATTT      |       |       |       |       |       |       |       | 11776 |
| Vaquita     | ATTTCTGCAGTAATAGATTTATCTT- - ATTCTTTGTTCT- - ATGGATGCACCACAGTGTAGTTGCTTGAAATACCACGAT       |       |       |       |       |       |       |       | 10307 |
| Pig         | GTCTCTGCAGTTAGAGATATACCTC- - AGTCTTTGTAT- - - GTGGATGCACCACAGTGTAGTTGCTTGACACACAACACT      |       |       |       |       |       |       |       | 10241 |

| Majority    | TTAGTTTTCACATTG- ATTAACATTTTTXGTTTAATTCCXTTTG- - - - - CAGTTAAAAXT- - - - - TGTAATATATTX- - - AA |       |       |       |       |       |       |       |       |
|-------------|--------------------------------------------------------------------------------------------------|-------|-------|-------|-------|-------|-------|-------|-------|
|             | 13850                                                                                            | 13860 | 13870 | 13880 | 13890 | 13900 | 13910 | 13920 |       |
| Human       | TATTTGTGAGTTTGTAATAGGAGATTTGTTGCATTTCTTTAAAATGGCTTTTTATATTCT- - TCGTAATTTGTA- - - - AT           |       |       |       |       |       |       |       | 10767 |
| PolarBear   | -----                                                                                            |       |       |       |       |       |       |       | 0     |
| Cow         | TGAGTTCCACATCG- ACTAATATTTTTGATTTAATTATTTTTG- - - - - CAGTTAACAA- - - - - GTGAGAATATTA- - - AA   |       |       |       |       |       |       |       | 11026 |
| Dog         | TATATGACGAT- TA- ACTATCATCATTCAAGGGATACCAAATTGC- - TAAGAACGATT- - - - - TGTGAACTATCT- - - CA     |       |       |       |       |       |       |       | 11116 |
| BelugaWhale | TTAGATCCACATTG- ATGAACATTTTTGTTTTGATTCCTTTG- - - - - CAGTTAAAAAT- - - - - AGAAGCATACTA- - - AA   |       |       |       |       |       |       |       | 10272 |
| Donkey      | TCAGTTTCTTCATC- TTTAAAATTGGGATTATAATAGTTTTGAATAAAAAATGTGATTATGCATAAAAAAGTATTTTCCAC               |       |       |       |       |       |       |       | 10465 |
| Cat         | TTAATGAAGAGATT- TGTTGCATTTCTGTAAAATGGTTTTTTTTGT- - TCTTTGTAATT- - - - - TGTAATTAACTT- - - CA     |       |       |       |       |       |       |       | 13000 |
| Ferret      | ATTGGTTTGGT- TT- GGTAGGATCTGAGTAGAGTTCACAAA- - - - - AGTAGTGAAT- - - - - TGTGATATATG- - - CA     |       |       |       |       |       |       |       | 11096 |
| Lion        | TTAATAAAGAGATT- TGTTGCATTTCTGTAAAATGGTTTTTTTTGT- - TCTTTGTAATT- - - - - TGTAATTAACTT- - - CA     |       |       |       |       |       |       |       | 11845 |
| Vaquita     | TTAGATCCACATTG- ATGAACATTTTTGTTTTGATTCCTTTG- - - - - CAGTTAAAAAT- - - - - AGAAGCATACTA- - - AA   |       |       |       |       |       |       |       | 10373 |
| Pig         | TTGGTTTTCACATTG- ATGAACATTTTTAGTCTAATTCCCTTTG- - - - - CAGTTAAAAA- - - - - GTGGACATATTA- - - AA  |       |       |       |       |       |       |       | 10306 |

Dienstag, 3. Mai 2022 08:38

| Majority    | AAXAGAAGTATXAATGCTGTGT-CAAATGAXGTT-ACXGTTAAAAAATTTTTAAAAXCCAXTTTGXCAXGAAXTTXTTXA   |       |
|-------------|------------------------------------------------------------------------------------|-------|
|             | 13930 13940 13950 13960 13970 13980 13990 14000                                    |       |
| Human       | ATCAGGGGTGTCATTTCTGTACTCTTAACCATTTTTGCCAATGTGAAATCCTTGCAAAGTAATCGGCCTATTACTTGGGAA  | 10847 |
| PolarBear   | -----                                                                              | 0     |
| Cow         | AATAAAAGTAAAAATACTGTGT-CAAATTA AATT-ACAGCTAAAGAGTTTATTAAGCCACAATGCCAAGAGGATTCTTA   | 11104 |
| Dog         | CCCTCGACTTTTCGTCCCCTCC-CGGGATGTTGT-GCCGCGGGGAAAATTTCAACATACTGTTGCGCTAGA ACTTTTTTT  | 11194 |
| BelugaWhale | AATAGAAGTAAAAATGCAGTGT-CAAATGAAATTTACAGTTAAAAAGTTTGTAAAACCACAATACCACAAGTTTCCTTA    | 10351 |
| Donkey      | AAGCTAGGTCCTCAGTTAATGT-TAACTGATTTATGCTACATATAGAATATCCAGATTTTATAGCTTTGGGATATGTTGA   | 10544 |
| Cat         | TGGTTTCATTTCTATACTCTTA-ACCATTTTGCC-ACTGAAATCGCAGTATAATCGGCCTTTTACTGAGCAAACAGAAA    | 13078 |
| Ferret      | GTGTAATAATTTGGGATAGGA-GGTAAGTTGTA-TATGTTGAGGGAATGACATGGCCAAAGTTGTGTTGATGGACTGGC    | 11174 |
| Lion        | TGGTTTCATTTTTATACTCTTA-ACCATTTTGCC-ACTGAAATCGCAGTGTAAATCGGCCTTTTACTGAGGAAAACAGAAA  | 11923 |
| Vaquita     | AATAGAAGTAAAAATGCAGTGT-CAAATGAAATTTACAGTTAAAAAGTTTGTAAAACCACAATGCCACAAGTTTCCTTA    | 10452 |
| Pig         | AATAGAAATAAAAAATGCTGTAC-CAAATGAAGTTTACAGTTAAAAAATTTG- -GAGTTCCTGTTGTGGCGCAGTGGTTAA | 10383 |

| Majority    | CTXATTTGTTTX- - - - - XTACAGATTAXTGTGGGATTGCAXXTTTTTCGGTACXA- - - TTXTCAATTTTTGGATXTA |       |
|-------------|---------------------------------------------------------------------------------------|-------|
|             | 14010 14020 14030 14040 14050 14060 14070 14080                                       |       |
| Human       | GACAGAATTGTATGAAATGACTGTAGAATAATTCAGGATGGTCCCAATACGGTAAAA- - - TGTTAACTTTTTAGATGTA    | 10924 |
| PolarBear   | -----                                                                                 | 0     |
| Cow         | CTCATTTGTTTT- - - - - CTACAATTGTGTATGGGAGTGCTTGTTTTCTGTACCC- - - TTACCAATTCTGAGTTTTA  | 11173 |
| Dog         | TTTTTTCTTCG- - - - - TTTTTTTTTATGTAA- ATTCTTAAGTTTTCAACTCTA- - - CTTAGAATTTATATATATA  | 11262 |
| BelugaWhale | CTCATTTGTTTT- - - - - CTACAGTTGTGTATGGGAGTGCTGTTCTTCGACACCC- - - TTACCAATCGTGGGTTTTA  | 10420 |
| Donkey      | CATTTCAATTTTTCATGACCCTTATGAATTGCTGTGGTTATTCAGTTCTCATTGTTTTAGACTACTTTATTTTTGGTTAGC     | 10624 |
| Cat         | TGAATGAAGTGA- - - - - TTGCACAGTAATTCAAGATTATACTCCTTGTGGTAAAA- - - TGTTAACTTTTTGGATGGA | 13147 |
| Ferret      | GCAAATTCACAA- - - - - ACACAGAATAGCTTCT- GTAGCAATAGGTTGTTTCGTA- - - TAAGGGTTTGTGTATGGA | 11242 |
| Lion        | TGAATGAAGTGA- - - - - TTGCACAGTAATTCAAGATTATACTCCTTGTGGTAAAA- - - TGTTAACTTTTTGAATGGA | 11992 |
| Vaquita     | CTCATTTGTTTT- - - - - CTACAGTTGTGTATGGGAGCGCCTGTTCTTCTACACCC- - - TTACCAATCCTGGGTTTTA | 10521 |
| Pig         | CGAATCCG- - - - - ACTAGGAACCATGAGGTTGCGGGTT- - - - - CGATCCCTGGCCTTG                  | 10431 |



Dienstag, 3. Mai 2022 08:38

|             |                                                                                                 |       |
|-------------|-------------------------------------------------------------------------------------------------|-------|
| Majority    | - ATGX- - A- - AXXGT XAAATATGAGCTAGT TTTXATGT XAAATTAA- TXTTAAATGTATXXTT- - - - ATAXGTG- GATTA  |       |
|             | ----- ----- ----- ----- ----- ----- -----                                                       |       |
|             | 14090      14100      14110      14120      14130      14140      14150      14160              |       |
| Human       | GATTTTAAGTATGGTGAAATTTGTAGCAGTGTTCTTTAGTAAGTTAACTATTAATATATCAAGACCTATAACTG- GACAA               | 11003 |
| PolarBear   | -----                                                                                           | 0     |
| Cow         | - ATGA- - A- - AATTTAGAATATTAGCTAATTTTAGGGTAAAAAAGCTTTGTAATTTATATTTTGAATAGGTGAGATTT             | 11248 |
| Dog         | GATG- - - - - AATCTAATATATATTTTTTTT- ATATTTTTTTGTTTTTTTTTTTTTTTTTTT- - - - - - - - - - - GTTA   | 11320 |
| BelugaWhale | - ATAA- - A- - AATTTAGAATACTAGCTAATTT CACGGTAAAAA- - - - AAGTTTTGTAATTTGAAATGGGTGAGATTT         | 10491 |
| Donkey      | TTAGTGAG- - ATGATAAAACAAGAAAGGAAATTGGTGTATTTTAA- TAAGAGGTGTGTTGTGTTTCTTTAGAATGGTTT              | 10701 |
| Cat         | TATTTTAA- - ACAGTGAAATTGGTGCTAGCTCTCATACTAAATTAECTACTAAATGAAGCCTT- - - - TAAAAGTGGACAA          | 13221 |
| Ferret      | TATG- - - - - AGAGAAAAAGAAGATGGCAGT- ATGTTGTAGAAAGCCTCAAGTGCAG- - - - - - - - - - - GTTA        | 11296 |
| Lion        | TATTTTAA- - ACCGTGAAATTGGTGCTAGCTCTCATACTAAATTAECTACTAAATGAAGCCTT- - - - TAAAAGTGGACAA          | 12066 |
| Vaquita     | - ATAA- - A- - AATTTAGAATACTAGCTAATTT CACGGTAAAGAAAA- - - - AAGTTTTGTAATTTGAAATGGGTGAGATTT      | 10592 |
| Pig         | - CTC A- - G- - TGGGTTAAGGAT- - - CCGGCGTTGCCGTGAG- - - - - CTGTGGTGTAGGTT- - - - GCAGACGCGGCTC | 10491 |

|             |                                                                                              |       |
|-------------|----------------------------------------------------------------------------------------------|-------|
| Majority    | TXAAATTTTT- - - - ATTTXTTATTTXXATGAATTXXCTTTTTGXATATXGGA- - - - TCTAXTTCXAAXATTAT- - - CXX   |       |
|             | ----- ----- ----- ----- ----- ----- -----                                                    |       |
|             | 14170      14180      14190      14200      14210      14220      14230      14240           |       |
| Human       | CTAATAAATAACCTGTTTCTTAAAATGTTAGCTTTTTCTAAATATTCTGAAA- - - G TACTGGTTGTA AATTGCTGAACTC        | 11080 |
| PolarBear   | -----                                                                                        | 0     |
| Cow         | TAAAAGTTTG- - - - GCTTTCTGTTTCTGTGAACTGCCTCTTTGAATATGGGA- - - - TCTATTTTAATGATTAT- - - CAT   | 11316 |
| Dog         | TTATGTTTTT- - - - TTTTTTTTTTTTTTTTTTTTTTTTTTTTTTTTTTTTTTTTGT- - - - TTTTTTTTTTTTTTTTTTTTTTTT | 11391 |
| BelugaWhale | TCAAAATTTG- - - - ACTTTCTATTTCTGTGAACTGCCTCTTTGTATATGTGA- - - - TCTATTTCAATGATTAT- - - CTT   | 10559 |
| Donkey      | CTATGTTCTTTGTAATTTGTAATTTCAAGGGCTTTATTTCTCTACTCTTAACCATTTCCCACTGCGAAATCTTTGCGGCA             | 10781 |
| Cat         | TAGAGGACAT- - - - ATTTGTTAAAATAAGTTATTAGCATTTTCCATGTTGGA- - - - TCTCACTGGTATTTAGAAAGCAC      | 13292 |
| Ferret      | TGAAATTTGT- - - - ACTTCATCTGGT AAGCACTACTCTGTATACCTTTAAGT- - - - TCCCATTCATAAAAAGTAGCTCAC    | 11367 |
| Lion        | TAGAGGACAT- - - - ATTTGTTAAAATAAGTTATTAGCATTTTCCATGTTGGA- - - - TCTCACTGGTATATAGAAAGCAC      | 12137 |
| Vaquita     | TCAAAATTTG- - - - ACTTTCTATTTCTGTGAACTGCCTCTTTGTATATGTGA- - - - TCTATTTCAATGATTAT- - - CTT   | 10660 |
| Pig         | - - GGATCCCG- - - - CTTTGCTGTGGCCCTGGCGTAGGCCAGTGGCTACAGC- - - - - TCCGATTTGACCCCTA- - - - - | 10552 |

Dienstag, 3. Mai 2022 08:38

|             |                                                                                                |       |       |       |       |       |       |       |
|-------------|------------------------------------------------------------------------------------------------|-------|-------|-------|-------|-------|-------|-------|
| Majority    | TTTTGTTAXATTTCTATATAAAAATAAA- - - - - TTAGATTCAAATXCATXAXAGATAGTTTTTTCATAXAATTAA- -            |       |       |       |       |       |       |       |
|             | 14250                                                                                          | 14260 | 14270 | 14280 | 14290 | 14300 | 14310 | 14320 |
| Human       | ACAATTTAAATTATGATATGACTATTGA- - - - - ATTCATCCTCATTGGCTTGCATAGAAAATTACAATCAAATAATG 11152       |       |       |       |       |       |       |       |
| PolarBear   | ----- 0                                                                                        |       |       |       |       |       |       |       |
| Cow         | GTTTGTCC- AACTCTATATATAAAGATA- - - - - ATTGATTCATATGCATTATAGGTAAGTACTTTTTCTACAGTTTT- - 11384   |       |       |       |       |       |       |       |
| Dog         | TTTTTTTTTTTTTTTTGTGAGAATTAA- - - - - TAACCATCATGT- - AGTGGGAGAGTGAGACAGG- AAGAAA- - 11457      |       |       |       |       |       |       |       |
| BelugaWhale | GTTTGTTACAACCTCTATATAAAAAGAAA- - - - - ATTGATTCATATACATCATAGGTAAGTACTTTTTCTTACAGTTT- - - 10627 |       |       |       |       |       |       |       |
| Donkey      | TAATGCAGCAATTCCTTGGAAAGACAGAAAAGTATGCAGTGGTCGCAGAATAATACAAGATGGTACTCGATATGGTAAAAC 10861        |       |       |       |       |       |       |       |
| Cat         | TGTTTGTAAATTGCTGAACCTAACTGTT- - - - - TGAGATGTGAATTCACCAACATGGGCTTTTTAGATAATTGC- - 13361       |       |       |       |       |       |       |       |
| Ferret      | TATTATGCTGTTTTTGGAAATTTGGAGAA- - - - - TGAACCTCTGAAG- - ATTGGTTTTGGTATTACATG- GAATGC- - 11433  |       |       |       |       |       |       |       |
| Lion        | TGTTTGTAAATTGCTGAACCTAAC- - - - - TGAGATGTGAATTCACCAACGTGGGCTTTTTAGATAATTGC- - 12202           |       |       |       |       |       |       |       |
| Vaquita     | GTTTGTTACAACCTCTATATAAAAAGAAA- - - - - ATTGTTTCATATACATCATAGGTAAGTACTTTTTCTTACAGTTT- - - 10728 |       |       |       |       |       |       |       |
| Pig         | GCCTGGGA- ACCTCCATATGCCGCTGGA- - - - - GT- GGCCCAAAGAAATAGCAAAAAGACAAATAAATAAATAA- - 10619     |       |       |       |       |       |       |       |

|             |                                                                                              |       |       |       |       |       |       |       |
|-------------|----------------------------------------------------------------------------------------------|-------|-------|-------|-------|-------|-------|-------|
| Majority    | ATTAATTTAATGX- - - - - TGATXGAATTTAAXTG- TXXTTXXTAGTAGGTTTGTTA- - - - XAAAXT                 |       |       |       |       |       |       |       |
|             | 14330                                                                                        | 14340 | 14350 | 14360 | 14370 | 14380 | 14390 | 14400 |
| Human       | CTAAATGTAACCTTTTTTG- - - - - GTAATAGTTGTGTGTAACCTGGTTGTTTATTATAGATGTGTTA- - - - TTCAAA 11218 |       |       |       |       |       |       |       |
| PolarBear   | ----- 0                                                                                      |       |       |       |       |       |       |       |
| Cow         | ATTACTTTTTGATACA- - - - - GTTTTGGGCATTTAGATGTTGTTGCCACCAGGCTCGCTGG- TCCATGGG 11450           |       |       |       |       |       |       |       |
| Dog         | TCTAAGTTAGAACG- - - - - TACCCCAAACAAAAGAATGAGTCGGTGGAGGCACATCT- - - CACAAAT 11516            |       |       |       |       |       |       |       |
| BelugaWhale | ATTACTTT- - - - - TTTACCT- - - - - C- - - - ATACA 10648                                      |       |       |       |       |       |       |       |
| Donkey      | GTAACTTTTTGGATGCCTATTTTAAGTATGGTGAATTTGTGGCAGTACTGTTTTTAGTAAGTTAACTAA- ATGAAGCC 10940        |       |       |       |       |       |       |       |
| Cat         | AATGAAATAATGCTAGATGTTACTTTTTGTAACGATTGAATATAACTGGTTGTTTATAGTAAGTATGTTATTAATAAACTT 13441      |       |       |       |       |       |       |       |
| Ferret      | TATGAATTAGAATAA- - - - - TGAGTCTTTGTAATGTTAATATTTTATAGTCTCTTATTT- - - GGTCGAT 11493          |       |       |       |       |       |       |       |
| Lion        | AATGAAATAATGC- - - - - GATCGAATAATAACTGGTTGTTTATAATAAGTGTGTTA- - - AAAACTT 12259             |       |       |       |       |       |       |       |
| Vaquita     | ATTACTTT- - - - - TTTACCT- - - - - C- - - - ATACA 10749                                      |       |       |       |       |       |       |       |
| Pig         | ATAAAGTTAAAAAAA- - - - - ATTTGTGAAACCTACAA- - - - TGCCGAAAGGATTCTT- - - ACTAATTT 10677       |       |       |       |       |       |       |       |

Dienstag, 3. Mai 2022 08:38

| Majority    | GTTTTXGXXTXTXAGTATTGGAGTTXTT--TTTT-----                                          |       |       |       |       |       |       |       |       |
|-------------|----------------------------------------------------------------------------------|-------|-------|-------|-------|-------|-------|-------|-------|
|             | 14410                                                                            | 14420 | 14430 | 14440 | 14450 | 14460 | 14470 | 14480 |       |
| Human       | ACTTTGGGTTTTTAGGTTTTGACTTTTCTTAAAATACTTTTCTTAAATGCTACTTAATGCTTCTCTAGGGTATTTTTAT  |       |       |       |       |       |       |       | 11298 |
| PolarBear   | -----                                                                            |       |       |       |       |       |       |       | 0     |
| Cow         | GTTCTCCAGGCAAGAATACTGGAGTGGGTAGTCATTCTCTTCTCTGGGGGATTCTCCCAAC-----               |       |       |       |       |       |       |       | 11511 |
| Dog         | GTGTTTAAACGTCATAACCCTTAGGTTGTTTGGCTG-----                                        |       |       |       |       |       |       |       | 11551 |
| BelugaWhale | GTTTT-----GGGCATCTAGGTGTG-----                                                   |       |       |       |       |       |       |       | 10668 |
| Donkey      | CTTATAACTGGACAGTTAATAAAGGACCTGTTTGTTAACATAAGTTGTTGGCTTTTCCAAGTTGGATTTTACTGGTATTT |       |       |       |       |       |       |       | 11020 |
| Cat         | CTGTTTGGGCTTTTLAGAGTGTGATTTTTCTTTTTTTTTTTTTTAAATTTTTTCTTCAACGTTTTTATTTTTATTTTTG  |       |       |       |       |       |       |       | 13521 |
| Ferret      | TTGTATTGCTAAATTGTAATAGCTTTCTTAGTTTT-----                                         |       |       |       |       |       |       |       | 11528 |
| Lion        | CTGTTTGGACTTTTLAGAGTGTGATTTTTTCTT-----TT-----A-----                              |       |       |       |       |       |       |       | 12291 |
| Vaquita     | GTTTT-----GGGCATCTAGGTGTG-----                                                   |       |       |       |       |       |       |       | 10769 |
| Pig         | GTTTTCTACAACGTGTATGGGAGTGCTTATTTTTCTTCCCT-----T--A-----                          |       |       |       |       |       |       |       | 10722 |

| Majority    | -----                                                                             |       |       |       |       |       |       |       |       |
|-------------|-----------------------------------------------------------------------------------|-------|-------|-------|-------|-------|-------|-------|-------|
|             | 14490                                                                             | 14500 | 14510 | 14520 | 14530 | 14540 | 14550 | 14560 |       |
| Human       | TAGAATTTCAATTAACAGATATTTTGATGTCTGCGAAATGACAGTACTATGTTAGAAATTGATGTATTGGCTCC--TT--  |       |       |       |       |       |       |       | 11374 |
| PolarBear   | -----                                                                             |       |       |       |       |       |       |       | 0     |
| Cow         | -----                                                                             |       |       |       |       |       |       |       | 11511 |
| Dog         | -----                                                                             |       |       |       |       |       |       |       | 11551 |
| BelugaWhale | -----                                                                             |       |       |       |       |       |       |       | 10668 |
| Donkey      | TGAAAGCACTGTTTGTAAAGTTGCTGAATGCACAGTTTLAGTTGTGTTGTGGTTATTGAATTCACCATCATTGGCTTTCTT |       |       |       |       |       |       |       | 11100 |
| Cat         | GGACAGAGAGAGACAGAGCATGAACGGGCGAGGGGCGAGAGAGAGGGAGACACAGAATCGGAAACAGGCTCCAGGCTCT   |       |       |       |       |       |       |       | 13601 |
| Ferret      | -----                                                                             |       |       |       |       |       |       |       | 11528 |
| Lion        | -----                                                                             |       |       |       |       |       |       |       | 12291 |
| Vaquita     | -----                                                                             |       |       |       |       |       |       |       | 10769 |
| Pig         | -----                                                                             |       |       |       |       |       |       |       | 10722 |

Dienstag, 3. Mai 2022 08:38

| Majority    | 14570                                                                            | 14580 | 14590 | 14600 | 14610 | 14620 | 14630 | 14640 |       |
|-------------|----------------------------------------------------------------------------------|-------|-------|-------|-------|-------|-------|-------|-------|
| Human       | GAGGGCAGTGACCCTATTTGTTATGTTTGTTCTCAATCATTAAAGTACACATATTAATAGTAC                  |       |       |       |       |       |       |       | 11440 |
| PolarBear   | -----                                                                            |       |       |       |       |       |       |       | 0     |
| Cow         | -----                                                                            |       |       |       |       |       |       |       | 11511 |
| Dog         | -----                                                                            |       |       |       |       |       |       |       | 11551 |
| BelugaWhale | -----                                                                            |       |       |       |       |       |       |       | 10668 |
| Donkey      | AGATAATTGCAGTGAAATAATGCTGAACATTACTTTTTTGTAAAGCTGAACATAACCGGTTGTTTATAATAGGTATGC   |       |       |       |       |       |       |       | 11180 |
| Cat         | GAGCCATCAGCCCAGAGCCTGACGCAGGGCTCGAACTCACGGACCGCGAGATCGTGACCTGGCTGAAGTCGGACGCTTAA |       |       |       |       |       |       |       | 13681 |
| Ferret      | -----                                                                            |       |       |       |       |       |       |       | 11528 |
| Lion        | -----                                                                            |       |       |       |       |       |       |       | 12291 |
| Vaquita     | -----                                                                            |       |       |       |       |       |       |       | 10769 |
| Pig         | -----                                                                            |       |       |       |       |       |       |       | 10722 |

| Majority    | 14650                                                                             | 14660 | 14670 | 14680 | 14690 | 14700 | 14710 | 14720 |       |
|-------------|-----------------------------------------------------------------------------------|-------|-------|-------|-------|-------|-------|-------|-------|
| Human       | AAATGCAAXATATTCATGCTTAXXTGAGX- - AXX- XAAXT-                                      |       |       |       |       |       |       |       |       |
| Human       | ATATACACTTAATATTTAATAACTCTTAGAAGTGT CATAGGCTTTAATATGCTCATACTCTAATGAGCCATTTATCAATA |       |       |       |       |       |       |       | 11520 |
| PolarBear   | -----                                                                             |       |       |       |       |       |       |       | 0     |
| Cow         | CCAGGAATCGAACCTGTGTCTCCTGCATTGCAGGAAGATTCTTTACCATCTGAGCCACCAGGGAAGC               |       |       |       |       |       |       |       | 11578 |
| Dog         | AAATTCAAGAGCCTAATGCTTTAACTGACTGAGACCACCAG                                         |       |       |       |       |       |       |       | 11592 |
| BelugaWhale | ----- T - - TTGAA- -----                                                          |       |       |       |       |       |       |       | 10674 |
| Donkey      | TATTAAAAGCTTTGGGTTTTAGGTTTTGATTTTTCTTAAAATGCTACATATCCTTGTTAGGATATTTATATAAGAATTT   |       |       |       |       |       |       |       | 11260 |
| Cat         | CCGACTGAGCCACCCAGGCGCCCGTGTGATTTTTCTTAAAATGCTACATATTCATGCTTAGGTGTTTATATTTGAATTG   |       |       |       |       |       |       |       | 13761 |
| Ferret      | ----- AGATGTA CTGTAGTAGGGTTAACTTGGCTAAGTAATATTT                                   |       |       |       |       |       |       |       | 11569 |
| Lion        | ----- AAATGCTACATATGCATGCTTAGGTGTTTATATTTGAATTG                                   |       |       |       |       |       |       |       | 12332 |
| Vaquita     | ----- T - - TTGAA- -----                                                          |       |       |       |       |       |       |       | 10775 |
| Pig         | ----- ACCAATTCTGGGTTTTATAAATACTTAGAATATTTGCTA- - ATTTTAG- - - - - G- - G-         |       |       |       |       |       |       |       | 10770 |



Dienstag, 3. Mai 2022 08:38

| Majority    | TACTCXGTXAATXTTAAACAATTTXTAXTAGATATA- - GCATXAATATTCTTTTTATC- X- XX- XXTA- - TTTXTAXXT-                  |       |
|-------------|----------------------------------------------------------------------------------------------------------|-------|
|             | 14890 14900 14910 14920 14930 14940 14950 14960                                                          |       |
| Human       | AGAAAGAGTGGAGAGCAACAGGCGTTGAGAGAAGGACGTAACCAAAGTTGTGTCTATAGGTTGGCATAAATTTACAGCCA                         | 11757 |
| PolarBear   | -----                                                                                                    | 0     |
| Cow         | TCCTTTATTAATGTTAACCAATTTATACTACATATA- - GAATATCCAGTTTTTGTAGCTC- TGGGCTA- - TGTTGAAATC                    | 11808 |
| Dog         | TAAGAGGATAAAAAGGAACCAATTGTGGGTAAAAAT- - - TGTAATTGTTCCATAACATC- C- TAGAATT- - TTTTTTTGC-                 | 11817 |
| BelugaWhale | TCCTTTGTTAATGTTAACCAATTTATACTACATAAA- - GAACAAACAATTTTTATA- - - - - - - - - - - - - - - - - -            | 10862 |
| Donkey      | TACTCAGTAAATATTTAATGGTTCTTTAAGAGTCTCTGGCTTCAATACACTCATAATCTCATGAGCCA- - TTTACCAGTA                       | 11492 |
| Cat         | TACACACTAAATATTTAATAACTCCTAATGGGTCTG- - GCTTCAGTATGCTTTTTCATC- T- CAAGCCA- - CTTATCAGTG                  | 13989 |
| Ferret      | TCATCAATAAACCATTGGTAAAATTTGT- - GATAT- - - CCACTCTACTCTTCTCGTC- C- CGTAGTA- - TTTTGAGAC-                 | 11787 |
| Lion        | TACACACTAAATATTTAATAACTCCTAATGGGTCTG- - GCTTCAGTATGCTTATCATC- T- CAAGCCA- - CTTATCAGTG                   | 12560 |
| Vaquita     | TCCTTTGTTAATGTTAACCAATTTATACTACATAAA- - GAACAAACAATTTTTATA- - - - - - - - - - - - - - - - - -            | 10964 |
| Pig         | AACTGTGTAAAA- - - AGAAAATTGATGC- ATATGCA- - TCATAGGTACTTTTTCTTA- - - - - - - - - - - TA- - T- TTTA- - TT | 10950 |

| Majority    | - - AAXTTXTA- - - - - CATXXXTTTTTTTTTTCATXACATTCATCTTXXTTTA- TGAAGAXCCAAAAXAGXT- TGAXTTCTAGG  |       |
|-------------|-----------------------------------------------------------------------------------------------|-------|
|             | 14970 14980 14990 15000 15010 15020 15030 15040                                               |       |
| Human       | TTGATCAGTGAGTTGAATAGTTTGGCCTTTATGGCTAACAGCTTGTATATGGATATGAGAGAAAAGATAGAATGGCAGAT              | 11837 |
| PolarBear   | -----                                                                                         | 0     |
| Cow         | TCATTTTTTCATTATCCATATGAATGTTTTCATTAATTTTCAGTTCAGTTAGTTCAGTACCTCAGTTGTGTTCAACTCTTTG            | 11888 |
| Dog         | - - AGTTTT- - - - - TTTTTTTTTTTTTGTGGAAGGGGGAGATCAGGATCAAATAAGCAGTGACACATTTGCAATATGAATG       | 11890 |
| BelugaWhale | -----                                                                                         | 10862 |
| Donkey      | AAAAGATAAA- - - - - CACCAGTTTTATTGTACCACATTCTCCCTTTTTGCTGGAGATCCAAAAGAGTTATGTCTTCTAGG         | 11567 |
| Cat         | - - AAAAGATAA- - - ACATCAATTTTATTTTCATAACATTCTTCCCTTTTTGCTGGAGATCCAAAAGAGCTGTGTCTTCTAGG       | 14064 |
| Ferret      | - - AAGTTGCAA- - - TTAAGTATTTTTCATTATTACTGTTATTTTTTTTTTTAAAGAGAGAGAGTACTTCAGCAGGTGGGG         | 11862 |
| Lion        | - - AAAAGATAA- - - ACATCAATTTTATTTTCATAACATTCTTCCATTTGCTGGAGATCCAAAAGAGCTGTGTCTTCTAGG         | 12635 |
| Vaquita     | -----                                                                                         | 10964 |
| Pig         | - - ACTTTTTTAC- - TCCATAGAGTTTTGGGCATTAGATGTATTTGAACTA- TTAAGTAGTATAATT- - - - - TCATTTTTTTTG | 11021 |

Dienstag, 3. Mai 2022 08:38

| Majority    | AG- T- - XXX- G- TXA- XAX- - - A- X- XXX- - - TXAAGXXXGTXCXTXAXXCTX- - - - - GGA- - - TA- TXTGXTTTGGTX |       |
|-------------|--------------------------------------------------------------------------------------------------------|-------|
|             | 15050 15060 15070 15080 15090 15100 15110 15120                                                        |       |
| Human       | AGGTTATATAGAAGACCTCAATTACAGGTAGTGAAATTTGTA CTACTTCAT- CTGGTAGGCATTATTCTATATACCTGTAATT                  | 11916 |
| PolarBear   | -----                                                                                                  | 0     |
| Cow         | TGACCCCCACGGACTGCAGCACATCAGGCCTCCCTGTCCATCACCAACTCCT- - - - - GGAGTTTACTCAAACCTCATGT                   | 11961 |
| Dog         | AGATGCCTGTGGTAGGTCTTTTAAATATG- - TTAAGTCCGTTCACTTGGCTG- - - - - GGGCTTGCTTCTCATCTGTTC                  | 11961 |
| BelugaWhale | -----                                                                                                  | 10862 |
| Donkey      | ACCTTGTCTAGTTGAAGAG- - - ATAGAAGGTTTAAAGCAAGTTCACATGGCTACAGTAGGAGA- - - AATTTGGGTTGGTA                 | 11641 |
| Cat         | ACCTCATCTGGTTAAAGAGATAACACAAGGTTTAAAGCAAGTGCCTATGGCTGTTATAAAAAGAGATTAGTCTGGTTTGGTA                     | 14144 |
| Ferret      | AGGGGCATAGGATAAGGAAGGGGAGAGAA- - AGAATCTTAAGCATGGAGCCT- - - - - GACATGGGACTTGATTTTCATG                 | 11933 |
| Lion        | ACCTCATCTGGTTAAAGAGATAACACAAGGTTTAAAGCAAGTGCCTATGACTGTTATAAAAAGA- - TTAGTCTGGTTTGGTA                   | 12713 |
| Vaquita     | -----                                                                                                  | 10964 |
| Pig         | GG- - - - - GTCTATT- - TGATACTT- - - - - GAA- - - TGCTTATCTTTAGTT                                      | 11056 |

| Majority    | G- - CAXAGTAGAX- TAACG- AA- X- - TX- - TTTTGAXXT- T- X- TT- - XXXXTX- - TG- - - AXAX- AX- TGAXTCCXAX |       |
|-------------|------------------------------------------------------------------------------------------------------|-------|
|             | 15130 15140 15150 15160 15170 15180 15190 15200                                                      |       |
| Human       | T- - TCCACATAAAAGTAGCTCATTACTCTGCTTTCTTTCTTTCTTTTTTTTTTTTTTTTGGCTATAGCAAATTTATTGTAAC                 | 11994 |
| PolarBear   | -----                                                                                                | 0     |
| Cow         | C- - - CATTGAGTCGGTGATGCCATCCAACCATCTCATCTTCTGCCGA- GCCCTTCTCCTCCCACCTTCAATCTTTCCCAG                 | 12037 |
| Dog         | G- - - CGTAGTAGCATCAGCAGACAT- - TTGTTTTTGAAGAAAACGT- GTTGGTACCTGATACTAGAGACTGTCCCCCC                 | 12035 |
| BelugaWhale | -----                                                                                                | 10862 |
| Donkey      | GCATCAGAGTAGATTTT CATGAAATTAGTGGGTTGTGACCTGTGCTTTTGTAAATAGGTTGGGAGAGGAGATGAATACTAT                   | 11721 |
| Cat         | GGATCAGAGTAGACCTCACGAAAGTAGTGAGTTGTGACCTGTACATT- AAAAATAGTTGGGGAGAGGAGGTGAGTAGTGT                    | 14223 |
| Ferret      | A- - - CCCTGAGATCATAACCTGAAC- - TGAAATCAAGAGTCAGATTC- TTAAATGACTGA- - - - - GCCACCCAG                | 11996 |
| Lion        | GGATCAGAGTAGACCTCACGAAAGTAGTGAGTTGTGACCTATACATT- AAAAATAGTTGGGGAGAGGAGGTGAGTAGTGT                    | 12792 |
| Vaquita     | -----                                                                                                | 10964 |
| Pig         | T- - - CATTGAGAGTATAGTA- - - - - A- - - TTTTAA- - - - - AGATTAATGTGACTGTG                            | 11098 |

Dienstag, 3. Mai 2022 08:38

```
Majority AXX- - GAGGGATTGCCXTXGCCXXAGXTGTGTT- - - - X- - - - - - - - - - - XGCTX- CAXAATATTAGXAGCATTGX
            15210      15220      15230      15240      15250      15260      15270      15280
Human AACACAAAGTATTATCTTATAGTTTTGTAGGTGAGAAATCTGACACAGGTGGGCTAAAATCAAGGTGTTAGCAGGGCTGT 12074
PolarBear ----- 0
Cow CATCAGGGTCTTTTCAAATGAGTCAGCTCTTCTCATCA- - - - - - - - - - - GGTGGCCAAAGTATTGGGAGTTTCAC 12101
Dog CCCCCCGGACCGCCCCCCCCCCCCCCACCACCCG- - - - C- - - - - - - - - - - CGCCCCCTCGTTCTCGTGTCTATTGC 12095
BelugaWhale ----- G- - - - - - - - - - - CTTT- - 10867
Donkey ATGTTGAGGGAATGACGTGGCCAAAGTTGTGTTGATAGC- TGGCACCAGTTTCACAGCCATTGAAACAGTAAGCTGAATAA 11800
Cat ATGTTGAGGGAATGACATGGCCAGAGTTGTGTTGAT- G- - - - - - - - - - - GGCTGGCACAAATTGAGAACCACTGA 14286
Ferret GCACCCCTGTATTACTTTATTTGTAATGTTTT- - - - G- - - - - - - - - - - GTGTGTCTCTAAAAGGAAAGGACTCT 12056
Lion ATGGTGAAGGAATGACATGGCCAGAGTTGTGATAAT- G- - - - - - - - - - - GGCTGGCACAAATTGAGAACCACTGA 12855
Vaquita ----- G- - - - - - - - - - - CTTTT- 10970
Pig CAT- - GAAATATTTCCCATGAACTAAGTCTTCT- - - - - - - - - - - ATT- - - - AGTATTAAGTATTAT 11149
```

```
Majority ATAGXGTXT- X- TC- X- - - - - XTGTATTXGTXTTXXA- - - - AAXATTXXX- XXGGGTTXTTXGAAATCTCXXG- - - AXX
            15290      15300      15310      15320      15330      15340      15350      15360
Human GTTCCTTTTTCAGGATCTGGGGGAATTTGTTTCCT- - - - TGACATAACTCGGCTGTTAGCTTCATCTTCAAAGAAGGA 12150
PolarBear ----- 0
Cow CTTCAGCATCAGTCCTTCCAATGAGTATTCAGGCCTGA- - - TTTCTTTAGGATGGACTGGTTGAATCTCCTTGCA- GTC 12177
Dog AAG- - - TGTGTTTCTG- - - - - ATGTTGTCATATTTAA- - - - AAAATTGTCCAGGTGTCATTGCTCATGTTGGG- - - AGT 12159
BelugaWhale - - AGGGTAT- - - - - - - - - - - - - - - - - G- - - - - TTGAAATCTC- - - - - AT- 10887
Donkey TTTGGCTTTTATGGTGTATGGTTTGTATATGTGTATATAGGAAAGGATGCAGGTAGATTGTAGGAGGGCTCAAGTACAGG 11880
Cat ATAGCTTTTGTGTCAG- - - - ATTTGTATATGAATTTGAGAGAAAGATGGCACATAGGTTGTAGAAGGTCTCAAGTGCAGG 14362
Ferret C- - - - TCTTTCTCTC- - - - - CTGTTTCTTTTTTAA- - - - AAAAATAAATCACAATACTGTTAATTCCTTG- - - ATG 12118
Lion ATAGCTTTTGTGTCAGTA- GATTTGTATATGAATTTGAGAGAAAGATGGCATATAGGTTGTAGAAGGTCTCAAGTGCAGG 12934
Vaquita - - AGGGTAT- - - - - - - - - - - - - - - - - G- - - - - TTGAAATCTC- - - - - AT- 10990
Pig ATACTGTAT- - - - - - - - - - - ATAAAATATTCAATTTTAA- - - TAGCTTT- - - - - GGGTAATTGAAATTTTC- - - - - AT- 11203
```



Dienstag, 3. Mai 2022 08:38

|             |                                                                                                                              |       |
|-------------|------------------------------------------------------------------------------------------------------------------------------|-------|
| Majority    | XTAXXAAXT- TX- X- TTXXTTCTTTAGXCTCATTCTGTAAAGAATT- - - AGTTCCTCTGTATXCA- - - - TGCTTXTAGT                                    |       |
|             | ----- ----- ----- ----- ----- ----- -----                                                                                    |       |
|             | 15370            15380            15390            15400            15410            15420            15430            15440 |       |
| Human       | ATGGCAA- - GAAGACTCTGTCTCACATCACATCACTCCGACACATTCT- TGTGCCTCCGTTTCC- - - - CACTTACAGG                                        | 12222 |
| PolarBear   | -----                                                                                                                        | 0     |
| Cow         | CAAGGGACTCTCAAGAGTCTTCTCCAACACCACAGTTCAAAGTATA- - - AATTCTTTGGCACTTAGCCTTCTTTATAGA                                           | 12254 |
| Dog         | CTAGCGACTATCCTATTCGTTCTTTGTGTGTTGTTTTGTAATAGTT- TAAGTGGTAG- GTCT- - - - - - - - - GTTTTGT                                    | 12229 |
| BelugaWhale | ----- TT- - - - - - - - - TTCATTATCCTTATAAATGTGCTGTAG- - - ACTTACTCAGTTCCCAA- - - TGATTTTAGA                                 | 10943 |
| Donkey      | TTATGAAATTTGTGCTTCATCTGGTGGGCGCTATTCTATAAACCTGT- AAATCTCCATGTATAAG- - - TAGCTCATGTT                                          | 11955 |
| Cat         | TTATCAAATCTGTACTTCATCTGGTAGGCACTATTCTGTAAATACTGGTAAGTTCCCATACATAAAAAGTAGCTCATTAT                                             | 14442 |
| Ferret      | TTATCAAGTGCCAATTCTATGTTAAAATTTTACTTGACTCATGAAAG- TCAGTGTTTTTGCAG- - - - - - - - - GTTTTTTTT                                  | 12189 |
| Lion        | TTATGAAATCTGTACTTGATCTGGTAGGCACTATTCTGTAAATACTGGTAAGTTCCCATACATAAAAAGTAGCTCATTAT                                             | 13014 |
| Vaquita     | ----- TT- - - - - - - - - TTCATTATCCTTATAAATGTGCTGTAG- - - ACTTACTCAGTTCTCAA- - - TGATTTTAGA                                 | 11046 |
| Pig         | ----- TT- - - - - - - - - TTCATTAGCCTCATAAAT- - - ATGCTGT- - - AGTACTCGGTTCTCA- - - TTGATTTTAGA                              | 11257 |

|             |                                                                                                                              |       |
|-------------|------------------------------------------------------------------------------------------------------------------------------|-------|
| Majority    | TTCCTTTTTATTAGGATAGGTGATXGACTCTAAAAXGAXAAAGGT- - - - AATXTGTGGATTTTTAXTATTXAGATTGT                                           |       |
|             | ----- ----- ----- ----- ----- ----- -----                                                                                    |       |
|             | 15450            15460            15470            15480            15490            15500            15510            15520 |       |
| Human       | GACCTTGTGATTACAATGGGCCCAACTACATAAATAGAGGATAAATGTT- - TAAATTACAAATTAATGAAGTGGCAACTGA                                          | 12300 |
| PolarBear   | -----                                                                                                                        | 0     |
| Cow         | CCCCTTTTTATTTGGTTAGGTCAGTGAGACTGTGAAACA- GAAAGGA- - - - AATTGGTAGATTTT- AATACAAAGTTTGT                                       | 12328 |
| Dog         | TTGTTTTGTTCCACGCTAGAAAGACCTTGCTGTTTGATTGTGTGTGT- - - - - GTATTTTGGTTAATTTTTGTGGAATTGT                                        | 12304 |
| BelugaWhale | CTCCTTTGATTTGGTCAGGTCAGTGAGACTGTAAAACAAGAAAGGA- - - - AATTTGTGAATTTTTAATATGAAGTTTGT                                          | 11019 |
| Donkey      | TCTGCTGCTTTAGAATATGGAGACTGAGTTCCAAAAAGATTGGGTTTTGGGACTACGCAGAACACTATGAATTAGAAGCA                                             | 12035 |
| Cat         | TATCCTCTTGTTAGAATTTGGAGAATTAACCTCCAAGAAGACTGGCTTTGGTATTACGTGGGGTCTATAAATTAGAATCA                                             | 14522 |
| Ferret      | TTTTTTTTTAGTGGGAGGGGAAGATCAGGATCAAGTAAGATGAACACATTCAGTATATCGATATGCCTGTTTTATTTCTT                                             | 12269 |
| Lion        | TATCCTCTTGTTAGAATTTGGAGAATTAACCTCCAAAAAAGACTGGCTTTGGTATTACGTGGGGTCTATAAATTAGAATCA                                            | 13094 |
| Vaquita     | CTCCTTTGATTTGGTCAGGTCAGTGAGACT- - AAAACAAGAAAGGA- - - - AATTTGTGAATTTTTAATATGAAGTTTGT                                        | 11120 |
| Pig         | GTCCTTTCTATTTGGTTAGGTCCTAAGACTATCAAACAAGAAAGGA- - - - CATTTGAGAATTTTTAATATGAAGATTGT                                          | 11333 |

Dienstag, 3. Mai 2022 08:38

| Majority    | TGCATTTCTTX- AAXTXATTTTTTTTAXATXXTTGTGTXATTTGTTTXXXTT- XCAGAGTTTTA- ATTTCTGTACTTTTAAAC |       |
|-------------|----------------------------------------------------------------------------------------|-------|
|             | 15530 15540 15550 15560 15570 15580 15590 15600                                        |       |
| Human       | AACAAGTTTT - - AACCTATTCTCAAGAAAGGGCTTTGCTGGAATGGTGGC- TCACACCTGTA- ATCCCAGAACTTAGGGA  | 12376 |
| PolarBear   | -----                                                                                  | 0     |
| Cow         | TGCATTTCTTAAAAAAATTTTTTTTAAATTCTTTGTAATTTGTT- - - - - TCAGAGGTTT- - ATTTCTATACTTTTAAAC | 12399 |
| Dog         | GTGGTATGTT- - ATGTCTCAATGAG- - - - CGCGCTTGTCACTTCTTTTCCATTGTTTTGTGCTTCAGCATAGCCGG-    | 12377 |
| BelugaWhale | TGCATTTGTTTAAAATG- TTTTTTATGTTCTTTGTAATTTGTT- - - - - TCAGAGGTTTC- ATTTCTGTACTCTTAAAC  | 11090 |
| Donkey      | TGAGTTTCTAT- AATTAACTTTTTAA- A- - TCTCTTATTTTCGTCTCGGTTGCTAAACTGTAATAGCTTTCTTAATTTAGT  | 12111 |
| Cat         | TGAGTCTCTA- - AATTTAAAATTTAAACTCTTATGTGGTCTCTTTGTGTTGCTAAAGTGAATATTTAGTTTTGGACATA      | 14600 |
| Ferret      | TTAATCTGCA- - AGTTCTCCTTTCA- - - - CTCCTGTGGGTTTTTTGGTTTTCTTTGTTTTACATTGCATTTTATTTT- - | 12341 |
| Lion        | TGAATCTCTATAAATTTAAAATATAAACTCTTATGTGGTCTATTTGTGTTGCTAAAGTGAATATTTAGTTTTGGACATA        | 13174 |
| Vaquita     | TGCATTTGTTTAAAATG- TTTTTTATGTTCTTTGTAATTTGTT- - - - - TCAGAGGTTTC- ATTTCTGTACTCTTAAAC  | 11191 |
| Pig         | TGCATTTCTTAAAATGGTTTTTTTATACTCTTTGTAATTTGTTACTAATTTTCAGAGGTTTC- ATGTATGTACTCTTAAAC     | 11412 |

| Majority    | CXTTTTGACAGXTGAAATTCCTTGCAAGAATTATT- - - - GGT CXAAATAGTTAG- - - TTTTTTXGAAGTTAAATTTCACAA  |       |
|-------------|--------------------------------------------------------------------------------------------|-------|
|             | 15610 15620 15630 15640 15650 15660 15670 15680                                            |       |
| Human       | GGCTGAGGCAGGCAGATCACTTGAGCCCAGGAGTTTGAGACCAGCCTGGTCTT- - - CATAGCAAGACCCCATCTCTACAA        | 12453 |
| PolarBear   | -----                                                                                      | 0     |
| Cow         | CATTTTGCC- - TCTGAAATTCCTTGCAAGAATAATG- - - - GGCCCAAATAGTTAG- - - CTTTTTTGGGTTAAATTTCACTA | 12470 |
| Dog         | - - CTTGGTAAACACTGTCGTTCAACAGTGTCTTAAACAGATCTATAAAAGAAGGTGTATCTTAAAGGTTGCACTTAAAAG         | 12455 |
| BelugaWhale | CATTTTTGC- CTTTGAATTCCTTGCAAGAATAATG- - - - GGCCCAAGTAGTTAG- - - CTTTTTTCAAGTTAAATTTCACTA  | 11162 |
| Donkey      | - - TTTAGACATATTGCATTAGGAGCTAAGGTGGTT- - - AAGTAATATTTTAC- - - TTTAGAAGTAATAAAGTATCACAG    | 12183 |
| Cat         | CTGCATTAGGGCCTTAAGGTGGTTAAGTAATATTTTTACTTTAGAAGTGGTAAAAGTATCACAGAACTTATCATGAAAG            | 14680 |
| Ferret      | - - CGAAGAAAACCTTGTGGTCCCACAGAGTTGCC- - CCAGTCTGCAACTACTGATTGTGTTCTGATGTTGTAATTTAAAA       | 12417 |
| Lion        | CTGCATTAGGGGCTTAAGGTGGTTAAGTAATATTTTTACTTTAGAAGTGGTAAAGGTATCACAGAACTTATCATGAAAG            | 13254 |
| Vaquita     | CATTTTTGC- CTTTGAATTCCTTGCAAGAATAATG- - - - GGTCCAAGTAGTTAG- - - CTTTTTTCAAGTTAAATTTCACTA  | 11263 |
| Pig         | CATTTTGCCATTGTGAAATTCCTTGCAAAATAATA- - - - GGCCCAAGTAGTTAGTTTTTTTTTTAAGTTAAATTTCACTA       | 11488 |

Dienstag, 3. Mai 2022 08:38

| Majority    | XAATTTTTAAAACACAGGT- XATTAA- TGTTGAATGTA- - - - - GTTTAAAXTTXTGATATGGCTATTTTATTCATAXTT     |       |       |       |       |       |       |       |       |
|-------------|--------------------------------------------------------------------------------------------|-------|-------|-------|-------|-------|-------|-------|-------|
|             | 15690                                                                                      | 15700 | 15710 | 15720 | 15730 | 15740 | 15750 | 15760 |       |
| Human       | AAACTTTTTAAAATTAGATAGATCTG- - GTGGCATGGGCCTGTAGTCCCAGCTACTTGGGAGGCTGAGACAAGAGGATCA         |       |       |       |       |       |       |       | 12531 |
| PolarBear   | -----                                                                                      |       |       |       |       |       |       |       | 0     |
| Cow         | GAATTTTCAAAGCACCAGT- TGTAACCTGTTGAATGCAAAGACAGTTT- AAGTTGTAATATGGGTACTTTATTCAGCATC         |       |       |       |       |       |       |       | 12548 |
| Dog         | TTGCATAATGAAACCCGT- - ATAAATGTTAAATGTA- - - - - ACTTGAAAATTTTTGATGGTGGGACAAGGAATGGTT       |       |       |       |       |       |       |       | 12527 |
| BelugaWhale | GAATTTTCAAAGCACTGGT- TGTAATTGCTGAATGCA- - - - CAGTTTTAAGTTGTGATATGACTATTTTATTCATCATC       |       |       |       |       |       |       |       | 11237 |
| Donkey      | AAAGTTATGAAAGACATGTGTTTTGAGCAGTGATTGTT- - - - - TTTATAACTATGGTG- GTGAATTTTGAACATAGAA       |       |       |       |       |       |       |       | 12255 |
| Cat         | ATGTGTTTTTGAACAATG- - - ATTT- - TTTTATACCTA- - - - - TTGTGAAATTTGAACATAGAAAAAGACCTGATAGTT  |       |       |       |       |       |       |       | 14749 |
| Ferret      | T- GTCATGTATCACGGGT- - ATTGGATCTAGAGACTA- - - - - TCATATTCTTTTTTGGTGTGTTTTTGGTAATATT       |       |       |       |       |       |       |       | 12488 |
| Lion        | ATGTGTTTTTGAACAATG- - - ATTT- - TTT- ATACCTA- - - - - TTGTGAAATTTGAACATAGAAAAAGACCTGATAGTT |       |       |       |       |       |       |       | 13322 |
| Vaquita     | GAATTTTCAAAGCACTGGT- TGTAATTGCTGAATGCA- - - - CAGTTTTAAGTTGTGATATGACTATTTTATTCATCATC       |       |       |       |       |       |       |       | 11338 |
| Pig         | GTATTTTCAAATACTGGT- T- - - AATTGCAGAATGCA- - - - CAGTTT- AAGTTGTGATGTGGCTA- TTTATTCATCATT  |       |       |       |       |       |       |       | 11558 |

| Majority    | ATTG- GCXTTCTTAGXXAATTACAGTAAAXTATTACTAAXGAATCATTTTTTTG- - TAGTAGTXGA- ACATAACXXATTTXA      |       |       |       |       |       |       |       |       |
|-------------|---------------------------------------------------------------------------------------------|-------|-------|-------|-------|-------|-------|-------|-------|
|             | 15770                                                                                       | 15780 | 15790 | 15800 | 15810 | 15820 | 15830 | 15840 |       |
| Human       | CCTGAGC- - - C- - CAG- - GCGGCAGTGAGCTATGATTGTATCACTACACTCCA- - GCCTGGGCGAGAGGAGATCCAGTCT   |       |       |       |       |       |       |       | 12602 |
| PolarBear   | -----                                                                                       |       |       |       |       |       |       |       | 0     |
| Cow         | ATTG- GCTTTCTAGGTAATTGCAATAAATAGTACTAACATAACCTTTTTA- ATAGTAGTTGA- ATATAACTGATTGA            |       |       |       |       |       |       |       | 12625 |
| Dog         | TTC- - GC- - - - TGAATGTATTGTTGTCAATTAGAACAGGTGATTTCAGATTTGC- - TAGTCCTGAA- GGCTAGGGTT- TGA |       |       |       |       |       |       |       | 12597 |
| BelugaWhale | ATTG- GCTTTCTAGACATTTACAGTAAAATAATGCTAAAGGAAACTTTTTTTG- - TAATAGTTGA- ACATAACTGATTTA        |       |       |       |       |       |       |       | 11313 |
| Donkey      | CAAAGACATT- - - A- - TTTTTATCATGAACCATTATTTGTCACTCAGTCCCAA- - CAGTCATCAACACACAACCCATTGC     |       |       |       |       |       |       |       | 12328 |
| Cat         | ATGAACCACTATTTGTCACTTAGTCCCAATAATCATCAATAAACCAATTGCTAG- - AATTTGTGAT- ATTCACTGTACTTT        |       |       |       |       |       |       |       | 14826 |
| Ferret      | TATAAGC- - - - TGTGGTATGTTTTTTTATTAGAAAGACATGTGTTGCATGATG- - TGTGTGTGCG- TGTGTGTGTA- TGT    |       |       |       |       |       |       |       | 12560 |
| Lion        | ATGAACCACTATTTGTCACTTAGTCCCAATAATCATCAATAAACCAATTGCTAG- - AATTTGTGAT- ATTCACTGTACTTT        |       |       |       |       |       |       |       | 13399 |
| Vaquita     | ATTG- GCTTTCTAGACAATTACAGTAAAATAATGCTAAAGAAACTTTTTTTT- - TAATAGTTGA- ACATAACTGATTTA         |       |       |       |       |       |       |       | 11414 |
| Pig         | ATTG- GCATTCTTGGATAATTGCAGTAAATAATGCTAAAGATTTTTTTTTTTTTTTTGTGGTAGTTGA- ACATAACTGATTCA       |       |       |       |       |       |       |       | 11636 |

Dienstag, 3. Mai 2022 08:38

|             |                                                                                                                              |       |
|-------------|------------------------------------------------------------------------------------------------------------------------------|-------|
| Majority    | T AACAGXTATGTTAAAGAAAACTGT - TTGTTTGGGTTTTAGXTTTTGAGXTTTCTTA- AAATATTACATAATXCTTGC                                           |       |
|             | 15850            15860            15870            15880            15890            15900            15910            15920 |       |
| Human       | CAAAAAAAAAGGAAAAGGGCTTT CCTGAGGGTCAAATGAAGTACAGTTGACCCTTGAACAACATGATTT - TGAATTACAC                                          | 12681 |
| PolarBear   | -----                                                                                                                        | 0     |
| Cow         | TGACCAGTATTTTAAACAAAACTGTGTTATTCGGGTTTTAGGTTTTGAGTTTTCTTA- AAATGTTACATAATTCTTGC                                              | 12704 |
| Dog         | CCTCTATAACATTGAAGTAATTTCT- GAGCTTTAGTTTTAACTAATTTTTTATTTTT- AAATTTTTATTTATTTATT                                              | 12675 |
| BelugaWhale | T AACAGGTGGGTTA- AGAAAACTGTGTTGTTCCGGGTTTTAGATTTTTGAGTTTTCTTA- AAACATTACATAATGCTCGC                                          | 11391 |
| Donkey      | T AAAACTTACAACATCCATACTCTGCTTTTCTTCTCCTGCGTTATTTTTGAGACAAATTCAGATGTATCATTTCATCTGT                                            | 12408 |
| Cat         | TCTCC- - TATGTTATTAAAAAATTT- TTTTATGTTTATTCATTTTTGAAAGACAGAG- AGAAAGAGCACAAGCAGGGG                                           | 14902 |
| Ferret      | ATAGTGTTATTTCCCAGTAATATTTCT- TGTAAACTTCTTTCTCCTTGTTTGTGGTCA- GCGTAGTCTGTGCGCGGTAA                                            | 12638 |
| Lion        | TCTATGTTATTTAAAAAAAATTTT- TTTTATGTTTATTCATTTTTGAAAGACAGAG- AGAAAGAGCACAAGCAGGGG                                              | 13477 |
| Vaquita     | T AACAGGTAGGTTA- AGAAAACTGTGTTGTTTGGGTTTTAGATTTTTGAATTTTCTTA- AAACATTACATAATGCTTGC                                           | 11492 |
| Pig         | T AACAGGTGTGTTA- CAAAAACTGT- - TGTTTGGGTTTTAGATTTTTGAGCTTTCTTT- AAATGTTACATAATACTTGT                                         | 11712 |

|             |                                                                                                                              |       |
|-------------|------------------------------------------------------------------------------------------------------------------------------|-------|
| Majority    | TXGGGTATTTATATTAGGATTTAAAAAXAGAGAAATXTGTGCG- - XGTCTCXG- AGXXXXXTGGACAGXXCXX- XXGTGX                                         |       |
|             | 15930            15940            15950            15960            15970            15980            15990            16000 |       |
| Human       | AGGTCCACTTATGCATAGATCCACTTATACAGAATTTTCTTCTC- CCTCTTCCACCCAAGACAGAAAGACCAACTCGTCC                                            | 12760 |
| PolarBear   | -----                                                                                                                        | 0     |
| Cow         | TAGGGTATTTATGTTAGAATTTCAAATTAAGACATTTGTACTCTTGCCTGGAGAATCCCATGGACAGGGGAGCCTGGTA                                              | 12784 |
| Dog         | TGACAGAACAAGCAGGGGAAGCAGCAGAGGAAGAGGGAGAAGC- - TGGCTCCC- TGCCGAGCAGGGAGCCCCATGCAGGG                                          | 12752 |
| BelugaWhale | TAGGGTATTTGTATTAGAATTTCAAATTAGAGACATCAGTGTG- - - TCTGCT- - - - - - - - - - - - - - - - -                                     | 11440 |
| Donkey      | AAGTGTTTTGGTGTGTCTTGAaaaaataaggactcttgggg- - TGGCCTTGTGGTGTAGTGGTTAAGTTTGCATGCTC                                             | 12486 |
| Cat         | TGGGGCGGAGAGAAAGGGGGACACAGAACTGAAACAGGCTCC- - AGGCTCTG- AGCTGTcagcacagagccccgacatgg                                          | 14979 |
| Ferret      | ACATCTGTTcATcAGTTCTCTTAAAGAAATATGTAaaagaaGTG- - TATCTTAA- AGTTCACCTTATAATTTGTATAATAGA                                        | 12715 |
| Lion        | TGGGGCGGAGAGAAAGGGGGACACAGAACTGAAACAGGCTCC- - AGGCTCTG- AGCTGTCCGCACAGAGCCCCGATGTGG                                          | 13554 |
| Vaquita     | TAGGGTATTTGTATTAGAATTTCAAATTAGAGACATCAGTGTG- - - TCTGCT- - - - - - - - - - - - - - - - -                                     | 11541 |
| Pig         | TTGGGTATTCATATTAAGATTTTAAATTAGAGACCTTTATAGT- - - GTCTCT- - AATGCCATAGACAGGAAGG- - AGTTA                                      | 11785 |

Dienstag, 3. Mai 2022 08:38

| Majority    | GGCT - - - XXAXX- CA- G- - XT- XXXGAXXAT- X- CXTGAGXCGXAX- AAXATGXTTX- X- XX- T- - - XXX- - - X- - GCAX |       |
|-------------|---------------------------------------------------------------------------------------------------------|-------|
|             | 16010 16020 16030 16040 16050 16060 16070 16080                                                         |       |
| Human       | TCTTCCTCCTTAGCCTACTCAGCGTGAAGACAGTCAGGATGAAGACCTTTATTATGACTGATCTCCAAAAAGATTGGCTT                        | 12840 |
| PolarBear   | -----                                                                                                   | 0     |
| Cow         | GGCT - - - GCAGTCCATGGGGTCACTAAGAAT- TGGACACGACTGAGGGACTTCACTTTTCACTTTT- TACTTTTATGCAT                  | 12859 |
| Dog         | GGCT - - - GGATCCCA- GGACCTTGGGATCAT- GCCCTGAGCTGAAGGCAGATGCTTAACCAACT- - - AGCCACTCAGCAC               | 12824 |
| BelugaWhale | ----- G- ----- AATGTCA- ----- GCAC                                                                      | 11452 |
| Donkey      | TGCTTTGGCAGCCCAGAGTTTACATGTTTACAGATCCCTGGTGCAGACCTACACACCACTCATTAAAGC- CATGCTGTGGCAG                    | 12565 |
| Cat         | GGCT - - - CGAACTCATGAACTGCGAGATCAT- GACCTGAGCCGAAGTCGGATGCTTAACTGACTG- - AGCCTCCCAGGCG                 | 15053 |
| Ferret      | AGCA- - - CAATATTT- AATGTAAATTGAAGT- TATTGATGGTGGACAAGAATGTTTTTTCAA- T- - - GGAGGTTTTGTCA               | 12786 |
| Lion        | GGCT - - - CGAACTCACGAACTGCGAGATCAT- GACCTGAGCCGAAGTCGGATGCTTAACTGACTG- - AGCCTCCCAGGCG                 | 13628 |
| Vaquita     | ----- G- ----- AATGTCA- ----- GCAC                                                                      | 11553 |
| Pig         | T- CT- - - GTAG- - CATG- ----- CACAATAACAAA- ----- GCTT                                                 | 11813 |

| Majority    | TGTX- - - X- - - A- X- - - ATTXTAAXXTGXGXT- - - - X- X- XXXGTATXTXAAXA- XXAT- X- - X- - - XG- - XTAT- - AG-     |       |
|-------------|-----------------------------------------------------------------------------------------------------------------|-------|
|             | 16090 16100 16110 16120 16130 16140 16150 16160                                                                 |       |
| Human       | CAGTATTTTCATGGAGTGCTATGAATTAGAATCCTGAGTCTCTATAT- TGTTAATTATTTTAGTCTCTTGGTCTACGTGTG                              | 12919 |
| PolarBear   | -----                                                                                                           | 0     |
| Cow         | TGGCGAAGGAAATGGCAACCCACTCCAGTGTTCTTGCTTGGAGAATCTGAGGGACGGGGGAGCCTGGTGGGCTGCCTTCT                                | 12939 |
| Dog         | CCTTAATTGAACAA- - ATTTTAAAATGGACTT- - AATAGGATCTACTTCAAAAAGTCATTTTAAC- ACGGAATTATCAAGC                          | 12899 |
| BelugaWhale | TGT- - - - - - - - - - - G- - - T- - - - - - - - - - - AAAGA- - - - - - - - - - - C-                            | 11464 |
| Donkey      | TGTCCACATGCAAA- ATAGAAGATTGGGACAGACGTTAGATCTTCTCACCAAAAAAAAAAAAAAAAAACCAAAACAGAGAGA                             | 12644 |
| Cat         | CCCCTCTCCTATGTT- ATTTTGGAGATGAGTAG- - CAGATACAGTATTTTACTTGTAATGTTTTGGTGTGTCTCATAAAGA                            | 15130 |
| Ferret      | AGTTAAGAACATGT- - GATCTAGAATTTGCT- - - AGTAAGCTAGGTTTTGGCCTCTATAACGTTGAAGGTAATCTCTAAG                           | 12861 |
| Lion        | CCCCTCTCCTATGTT- ATTTTGGAGATGAGTAG- - CAGATACAGTATTTTACTTGTAATGTTTTGGTGTGTCTCATAAAGA                            | 13705 |
| Vaquita     | TGT- - - - - - - - - - - G- - - T- - - - - - - - - - - AAAGA- - - - - - - - - - - C-                            | 11565 |
| Pig         | TAG- - - - - - - - - - - AATCCAC- - - - - AAT- - - - - - - - - - - ATATAAAAA- - - - - - - - - - - CTCC- - - - - | 11839 |

Dienstag, 3. Mai 2022 08:38

| Majority    | XTAGAGTTXATTTAXAXTTTTXT- XATXTXAXXXTA- - - ATAXXXX- - - - ACAXTAAAGTXX- - - - XTTTXATGAX- -              |       |       |       |       |       |       |       |       |
|-------------|----------------------------------------------------------------------------------------------------------|-------|-------|-------|-------|-------|-------|-------|-------|
|             | 16170                                                                                                    | 16180 | 16190 | 16200 | 16210 | 16220 | 16230 | 16240 |       |
| Human       | TTCCTAAACTGTAGTAGCTTTCTTAATTTAGTTCTAGGCATACTACATTAGGGGATAAGGTGGTTAAGTGATATTTTCAC                         |       |       |       |       |       |       |       | 12999 |
| PolarBear   | -----                                                                                                    |       |       |       |       |       |       |       | 0     |
| Cow         | ATTGGGGTCACACGGAGTCCGAC- ACGACTGAAGTG- - - ACTTAGCAG- CAGCAGCACAGTGTGT- CTACTAAATGACAG                   |       |       |       |       |       |       |       | 13013 |
| Dog         | TTACCGTAAAGCTACGAATTAGTTTATTGGGTGGTA- - - GAATGACTA- - TATAATGTGCTTCA- - - AAGTGATGATCA                  |       |       |       |       |       |       |       | 12970 |
| BelugaWhale | - - - - TGGTGATTCCAGAGACA- - - - - - - - - - - - - - - - - - - - - - - - - - - - - - - - - - - - - - - - |       |       |       |       |       |       |       | 11480 |
| Donkey      | A- AAATAAGGCTTATCTTTCTCTTTTTTTTTTTA- - - GCAAAGAAACAAAACATAACTGCAATATTATTATGACAC                         |       |       |       |       |       |       |       | 12720 |
| Cat         | TAAGAATTTTTTTTTTTTTTTTTT- GATATAACCAGA- - - ATACTGTTAAGGACAGAAAAAAAAAACATTCCTTAATGT                      |       |       |       |       |       |       |       | 15206 |
| Ferret      | CTTTAGTTTAAACAAATTTTTAAGTGGTTTTAATTTA- - - GTAGGACC- - - TACCTCAAAGTTAA- - - TTTTGAAGATGA                |       |       |       |       |       |       |       | 12931 |
| Lion        | TAAGATTTTTTTTTTTTTTTTTTTGATATAACCACA- - - ATACTGTTA- GGACAGAAAAAAAA- - - ACATTCCTTAATGT                  |       |       |       |       |       |       |       | 13778 |
| Vaquita     | - - - - TGGTGATTCCAGAGACA- - - - - - - - - - - - - - - - - - - - - - - - - - - - - - - - - - - - - - - - |       |       |       |       |       |       |       | 11581 |
| Pig         | - TAGAAATCAGTAAGAAATAAAA- ACTATGAAGTTG- - - ACTTC- - - - - - - - - - - TATTAAAGTGCTC- CTTCTAAATGA- - -   |       |       |       |       |       |       |       | 11902 |

| Majority    | XAX- AXGX- AXXAATT- - - - - XTAAAXXTATTAAGA- - TATATGTGTCT- - - GGGTXGXGAXCTTAATTGTTTXATTGA         |       |       |       |       |       |       |       |       |
|-------------|-----------------------------------------------------------------------------------------------------|-------|-------|-------|-------|-------|-------|-------|-------|
|             | 16250                                                                                               | 16260 | 16270 | 16280 | 16290 | 16300 | 16310 | 16320 |       |
| Human       | TTTAAAAGTAATAAGGTGTCACAGAAAGTTATCACGAGATTTTTTTGAGCAGTACTTCTTTTTTAAACTATTATAATGA                     |       |       |       |       |       |       |       | 13079 |
| PolarBear   | -----                                                                                               |       |       |       |       |       |       |       | 0     |
| Cow         | CACTATGTTAAAAACTGGTGATTCAAAGACACTAAGA- ATATATGTGTCTTGAGAGCAGAGACCTTACTTATTTTGTGGA                   |       |       |       |       |       |       |       | 13092 |
| Dog         | TGCTGGGTGACTGACT- - - - - ATCAGCTCTTTATA- CCACCTCCTCCC- - - AGATTTGGACAGGAACACCTCAGTTGA             |       |       |       |       |       |       |       | 13039 |
| BelugaWhale | - - - - - T- - - - - TAAGAA- - - TAGAA- - TATATGTGTCTTGAGGGCAGGGACCTTTTTTGTATTATTGT                 |       |       |       |       |       |       |       | 11533 |
| Donkey      | CAAAAAGCTAACAGTT- - - - - GCTTAATGTTATCAAGTGCCAAATTTGCACTAAAATTTCTAATTGTCCTATAAAAGTCAT              |       |       |       |       |       |       |       | 12796 |
| Cat         | TATCAAGTGCCAAATT- - - - - TTAAAATTTTTAATT- TTTGGGGTGCCT- - - GGGTGGCTCAGTCAGTTGAGCATCCGA            |       |       |       |       |       |       |       | 15276 |
| Ferret      | GATAACACATAAAATT- - - - - TAGCACAGAAAGGC- ACATAAGTGCTC- - - AAATGATGATCATGATTGTTACTATAG             |       |       |       |       |       |       |       | 13000 |
| Lion        | TATCAAGTGCCAAATTAATG- - TTAAAATTTTTAATT- TG- GGGGCGTCT- - - GGGTGGCTCAGTCAGTTGAGCATCCGA             |       |       |       |       |       |       |       | 13851 |
| Vaquita     | - - - - - T- - - - - TAAGAA- - - TAGAA- - TATATGTGTCTTGAGGGCAGGGACCTTTTTTGTATTATTGT                 |       |       |       |       |       |       |       | 11634 |
| Pig         | - - - - - G- - A- TTTACAGTTTAAAGA- ACTACG- - - - ACAGGTATC- - - - - - - - - - - ATCATCATCATCTGAGCAC |       |       |       |       |       |       |       | 11953 |

Dienstag, 3. Mai 2022 08:38

| Majority    | TTXTXTATCATA XGTAGTTCTTATXGTATXGTAXATACGAGGXATATATXTAATXA - - CTTTTTGACAG- TCTCTGGCTT          |       |       |       |       |       |       |       |       |
|-------------|------------------------------------------------------------------------------------------------|-------|-------|-------|-------|-------|-------|-------|-------|
|             | 16330                                                                                          | 16340 | 16350 | 16360 | 16370 | 16380 | 16390 | 16400 |       |
| Human       | ATTTTAGACACAATAGTATCATGAACCATTGTGTATCTATCATT CAGTCCCCAAAACCATTAGTAACCCATAGCTAAAAT              |       |       |       |       |       |       |       | 13159 |
| PolarBear   | -----                                                                                          |       |       |       |       |       |       |       | 0     |
| Cow         | TTTTCCATCATTGGTAGTACATATTACATAGTACATAGT- - - ATA- - CTTAATGA- - CTCTTGGAAGG- TCTCTGGCTT        |       |       |       |       |       |       |       | 13163 |
| Dog         | TTCCAAA- ATAGAGAGTTTTTATGGTCTGTATTAGACGAGGACCAGGTTTTTTAA- - GTGTTTAAA- - AAAAAAGTTA            |       |       |       |       |       |       |       | 13114 |
| BelugaWhale | TTCTGTGTATCAGTAGTGCCTGTTAAATAGTACATACTCAGTATATATTTAATGA- - CTATTGAAGGG- TCTCTGGCTT             |       |       |       |       |       |       |       | 11610 |
| Donkey      | AGTGTTATTACAGGGC- TTTTTTGTAGTGGGGGATGGATCAGGATCAGATAGGATCAACACATTTGATTAATATGCCTTTT             |       |       |       |       |       |       |       | 12875 |
| Cat         | CTTTAGCTTATGTATCATGATCTCATGGTCTGT- GAGTTCGAGTCATGTGTCCGGTTC- - TGTGCTGACAGCTCAGAGCCTG          |       |       |       |       |       |       |       | 15353 |
| Ferret      | TTCTTTAT- ATACCTTATTTGGAAGGTGCACCACCTCTGGATGCCAAATAATATAA- - ATTTTTTACA- - TAGCTATTAG          |       |       |       |       |       |       |       | 13075 |
| Lion        | CTTTAGCTTAGGTATGATCTCATGGTCTGTTGAGTTCGAGTCCTGTGTCCGGTTC- - TGTGCTGACAGCTCAGAGCCTG              |       |       |       |       |       |       |       | 13929 |
| Vaquita     | TTCTGTGTATCAGTAGTGCCTGTTAAATAGTACATACTCAGTATATATTTAATGA- - CTATTGAAGGG- TCTCTGGCTT             |       |       |       |       |       |       |       | 11711 |
| Pig         | TTCTGTACCATTC- - - - - TGTGCTAAATTTTTTATACA- - - - TTA- - TCTAAT- - - - CTTCAGACAA- TTTTTGAGGT |       |       |       |       |       |       |       | 12016 |

| Majority    | AAATATGCTTATA- ATTTTCATGAACCXCTXATTTGTAAAACGGT- AATGXCAATTTTATTG- - - AXTCTTCTTCTCAATT      |       |       |       |       |       |       |       |       |
|-------------|---------------------------------------------------------------------------------------------|-------|-------|-------|-------|-------|-------|-------|-------|
|             | 16410                                                                                       | 16420 | 16430 | 16440 | 16450 | 16460 | 16470 | 16480 |       |
| Human       | GATGATATCCACACTCTGCTTTTCCACTTCTGTTATTTTGTAGATAAATTTT CAGATATTCATATTGTTTTATCTGTAAAGG         |       |       |       |       |       |       |       | 13239 |
| PolarBear   | -----                                                                                       |       |       |       |       |       |       |       | 0     |
| Cow         | CAATATGCTCATA- ATCTCATGAGCTACTTATCAGTAAAAAGGTCAATGCCAATTTTATTGCTTAACCTTCTTCCCTTTTC          |       |       |       |       |       |       |       | 13242 |
| Dog         | CAATGTTGTT- - - - - TTTTATTGAAGT- GCATTTAACATACAGT- ATTATAGTAGTTTCAA- - - AGGGTACATATCAATT  |       |       |       |       |       |       |       | 13184 |
| BelugaWhale | CAACATGCCATA- ATCTCATGAGCCACTTATCAGTAAAAAGGTAATACCAATTTTATTGCACAACATTCTTCCCTTTTT            |       |       |       |       |       |       |       | 11689 |
| Donkey      | AAATTTCTTTTAA- TCTACCTACAAGTTCTCCTTCCATCCCTGTGCTTGCACAAAATAATCTCTGAGCTTTTTTTTTAATG          |       |       |       |       |       |       |       | 12954 |
| Cat         | AGGTCTGCTTCTG- ATTCTGTGGATCCCCCTCTCTCTGCCCTC- CACCTCTTGTGCTCTG- - - TGTCTCTCTCTCAAAA        |       |       |       |       |       |       |       | 15428 |
| Ferret      | ACATAATTTT- - - - - TTGTCTAAAGTTTTAAATTTTTTAAATTGA- AGTGTAGTTAACATAT- - - AGTATTAATTTCAAGT  |       |       |       |       |       |       |       | 13146 |
| Lion        | AGGTCTGCTTCTG- ATTTTGTGGATCCCCCTCTCTCTGCCCTC- CACCTCTTGTGCTCTG- - - TGTCTCTCTCTCAAAA        |       |       |       |       |       |       |       | 14004 |
| Vaquita     | CAACATGCCATA- ATCTCATGAGCCACTTATCAGTAAAAAGGTAATACCAATTTTATTGCACAACATTCTTCCCTTTTT            |       |       |       |       |       |       |       | 11790 |
| Pig         | AGATCCTGTAAA- ACCGCTTAA- - - - - AACTGTAAAAGTGA- AACGCAGAGGTTAT- - - - - - - - - CTTGTCCAAC |       |       |       |       |       |       |       | 12076 |





Dienstag, 3. Mai 2022 08:38

|             |                                                                                                                                                                        |       |
|-------------|------------------------------------------------------------------------------------------------------------------------------------------------------------------------|-------|
| Majority    | GACCAGTATATT - - X TAAATTTTAAAGAG - - - - AGTGXGXAGTTTATGTTAA - - XAAAXXCATGTCAXATATTA - - - - GT                                                                      |       |
|             | 16650                  16660                  16670                  16680                  16690                  16700                  16710                  16720 |       |
| Human       | TTATAGGGTTTTT - - - - - TTTTTTAGTG - - - - GGGGAAGGAGTCACGATAAAATAAGATCAGCAAATTTAACAGGTCGT                                                                             | 13462 |
| PolarBear   | - - - - -                                                                                                                                                              | 0     |
| Cow         | GACCAGTACAT - - - - GTAAATGTTTGGGTGCAGAAGT GAGCAATATATGTTGAGGGAAAGACATGTCTAAAGTTG - - - TGT                                                                            | 13467 |
| Dog         | CAAGTGTATATT - - - - - AGTTTTTAAAGAG - - - - AGCCTGGAGTCCATGTTAAA - AATA - GCTAGTCAGATAACA - - - - CT                                                                  | 13386 |
| BelugaWhale | GACCTGTGTATT - - - - GTAAATGTTTGGGAGCAGAAGT GAGCAGTATATGCTGAGGGGAAGACATGGCCAAAGTTT - - - TGT                                                                           | 11914 |
| Donkey      | AATCGAGGTAAAATATTACAAATTAATTTTTTATGAGTGTGGAGTCAGGTTAA - - AAATAGCTAGTCAGATAGCA - - - - CT                                                                              | 13187 |
| Cat         | GATGAGCAAATTTCAATAGGTTGATAAGCC - - - - TTTTTTTAGTTTTTTTTTTTT - AATCTGCATGTTATCCTTTC - - - - GT                                                                         | 15637 |
| Ferret      | CGAGTGTACATTT - - TAAATTTTAAAGAG - - - - AACCTGGAGTCTGTGTTAAA - GAGATAACACTCAGATAACA - - - - CT                                                                        | 13351 |
| Lion        | GATGAGCAAATTTCAATAGGTTGATAAGCC - - - - TTTTTTTAGTTTTTTTTTTTT - AATCTGCATGTTATCCTTTCACTCGT                                                                              | 14231 |
| Vaquita     | GACCTCTGTATT - - - - GTAAATGTTTGGGAGCAGAAGT GAGCAGTATATGCTGAGGGGAAGACGTGGCCAAAGTTT - - - TGT                                                                           | 12011 |
| Pig         | GTCCACCATCA - - - - ATAA - - - - TTC - - - - - - - - - - - - - - - - CAATTTATGTT - - - - - AAA - - - - - - - - - - - - - - - TCT                                       | 12192 |

|             |                                                                                                                                                                        |       |
|-------------|------------------------------------------------------------------------------------------------------------------------------------------------------------------------|-------|
| Majority    | XAAXAG - GCTTTXATAAAXX - XXAX - TA - AX - - XACT - - - XT - - - C - X - TTXATTTT - XTACAXAGAGCATG - - AG - X -                                                         |       |
|             | 16730                  16740                  16750                  16760                  16770                  16780                  16790                  16800 |       |
| Human       | TATTACCTCTTAAATATCTTTTAAATGTACAAGCT - CTCCGTTCTGTTTTTTGTTTTTTTTTTAAGTTGCATTTTCATTTG                                                                                    | 13541 |
| PolarBear   | - - - - -                                                                                                                                                              | 0     |
| Cow         | CAATAG - GCTGGCACAGATT CATAACCATTGAACAATCAGCTGAATCGTTTGAATTTTACTGCAGAGTTTGTATGTGGGA                                                                                    | 13546 |
| Dog         | AAAGATAGAATTAGTGAAGTGAAGATAAAAATTAAGTCTGTTTAAACAGATAGCAACAAGCGAGATGAAAGATCGTAGAAG                                                                                      | 13466 |
| BelugaWhale | CAATAG - GCTGGCACA - - - - - - - - - - - - - - - - - - - - - - - - - - - - - - - - - A - - - - - ATT - - - - - CATAGCCCTTG - - - - -                                   | 11944 |
| Donkey      | AAAGGA - GAATTTGTGAATAGTAAAATAAAATTTACT - - - - - - - C - - - - - AGAATTTA - - - - ACACAGAGCAACAAAGGGC                                                                 | 13251 |
| Cat         | GAAGTTTGTTTTTTTTAAACATTGCATTTTATTAAACATTTTTTTTTTCATGTTTTATTTT - TTAGAGAGAGGGAGACAGAGA                                                                                  | 15716 |
| Ferret      | AAAGAGAGAATTGGTTAACTGAAAGATAAAAGTTACTTTGATTTAAACAAAGAGCAACAAAAAGATGAAAATAGTTGAGGGG                                                                                     | 13431 |
| Lion        | GAAGTT - - TTTTTTTTAAACATTGCATTTTATTAAACATTTTTTTTTTCATGTTTTATTTTATTTTTGAGAGAGAGAGAGACA                                                                                 | 14309 |
| Vaquita     | CAGTAG - GCTGGCACA - - - - - - - - - - - - - - - - - - - - - - - - - - - - - - - - - A - - - - - ATT - - - - - CATAGCCCTTG - - - - -                                   | 12041 |
| Pig         | TAATA - - - - - - - - - - C - - - - - - - - - - - - - - - - - - - - - - - - - - - - TTTATTTCTGTTACATAAATCTTA - - - - -                                                 | 12222 |

Dienstag, 3. Mai 2022 08:38

| Majority    | -- GAXAGA- A- - X- GGXA- GGA- - XX- AXT- - XAA- X- XX- ATCAXACTTTX- X- T- TCAG- A- - X- - - - - X- A- A- - X |       |       |       |       |       |       |       |       |
|-------------|--------------------------------------------------------------------------------------------------------------|-------|-------|-------|-------|-------|-------|-------|-------|
|             | 16810                                                                                                        | 16820 | 16830 | 16840 | 16850 | 16860 | 16870 | 16880 |       |
| Human       | TTGAAGAAAAC TGGTTATTGGTCTTACACAGTTGCCTATAGACTACATTTACTGATTGCGTTATGATTTTGTAAATTTAGT                           |       |       |       |       |       |       |       | 13621 |
| PolarBear   | -----                                                                                                        |       |       |       |       |       |       |       | 0     |
| Cow         | GGGAGAGAAAATATAGGATGTCAGATAGGTAGGCAGA- AAGATTGTA CTT CATGTGGTAGGCAGTATTCC- - ATATACCT                        |       |       |       |       |       |       |       | 13623 |
| Dog         | GGGGTAAATATTGAGGAAAGGAAAGACATTTATAAGATAGTACCGTAATTTAAGGTTTCAGAAACGAGAA- - ACGAAATA                           |       |       |       |       |       |       |       | 13544 |
| BelugaWhale | ----- ACCA- ATTT-----                                                                                        |       |       |       |       |       |       |       | 11952 |
| Donkey      | TTAAGGGACATGGAGGAAAGGAGGTGAAATTCTAACA- AACATCTGA- - TTAGAGTTTCAGGAAGAGAAATTAAGA- - T                         |       |       |       |       |       |       |       | 13326 |
| Cat         | CAGAGAGGGAGCAGGGGAGGGACAAAGAATCTGAATCAGGCTTCAGGCTCTGAGCTATCAGCACAGAGCCCTGCACAGAG                             |       |       |       |       |       |       |       | 15796 |
| Ferret      | TTAAAAGATACAGAGGAAAGAAAGAGGAATTCTAACA- AGTATCTAA- - TTAGAGTACCAGAAAGAGAAA- - GTAAAGAT                        |       |       |       |       |       |       |       | 13506 |
| Lion        | GAGAGAGGGAGCAGGGGAGGGACAAAGAATCTGAATCAGGCTTCAGGCTCTGAACTATCAGCACAGAGCCCTGCACAGAG                             |       |       |       |       |       |       |       | 14389 |
| Vaquita     | ----- AACA- ATTT-----                                                                                        |       |       |       |       |       |       |       | 12049 |
| Pig         | ----- ATCATACTT-----                                                                                         |       |       |       |       |       |       |       | 12231 |

| Majority    | -- X- A- XXGAGGT- GXXXX- T- A- AXGTATTAAGATCTTTACAXXXGXAGAXXTTGTXTGATAXA- - - GXTXAAXTXX |       |       |       |       |       |       |       |       |
|-------------|------------------------------------------------------------------------------------------|-------|-------|-------|-------|-------|-------|-------|-------|
|             | 16890                                                                                    | 16900 | 16910 | 16920 | 16930 | 16940 | 16950 | 16960 |       |
| Human       | ATGTTTTCCATATTTCCAGTAAATTGGTAGTTAGATCTAGAGACTTGCTCAGGGTCTCTATTTTTTTGGTAATATTTTTTA        |       |       |       |       |       |       |       | 13701 |
| PolarBear   | -----                                                                                    |       |       |       |       |       |       |       | 0     |
| Cow         | GTTGAGTTCAGTTCGGTTGCTCAGTTGTGTCTGGCTCTTTGCAACCCCATGGACTGCAGCACACC- AGGCTTCCCTGTCC        |       |       |       |       |       |       |       | 13702 |
| Dog         | TTGCAGCGGAAGTAGGCTA- TGACAAATTTGAAGATTCATAT- ATGGTCCAACAATTGATTTGAACCTCCTGAATTATTA       |       |       |       |       |       |       |       | 13622 |
| BelugaWhale | ----- A- ----- GCT----- GAATGATGGATTTTACAGC- GAAGGGTTTGTGTAATATA-----                    |       |       |       |       |       |       |       | 11994 |
| Donkey      | TGT- - AGAGAAGCAAAATT- TGAAAAGCTAAAAAGTGATAAT- TTTTCAAATTTGGTGAGCTACA- - - - TGAATTCTTA  |       |       |       |       |       |       |       | 13397 |
| Cat         | CCTGATGCGGGGCTGGAAA- TCACAGGCAGTAAGATCATGACCTGAGATGAAGTCGGATGCTTAACCAGCTAAGCCACCC        |       |       |       |       |       |       |       | 15875 |
| Ferret      | TGCAAAGAGAAGCAGAATA- TGAAAGTTTAAAATAGAAGAGTCATAATTTTCCAGAATTGATGAGCTTTATGCATTTTTTA       |       |       |       |       |       |       |       | 13585 |
| Lion        | CCTGATGCGGGGCTGGAAA- TCACAGGCAGTAAGCTCATGACCTGAGATGAAGTCGGATGCTTAACCAGCTAAGCCACCC        |       |       |       |       |       |       |       | 14468 |
| Vaquita     | ----- A- ----- GCT----- GAATGATGGATTTTACAGC- GAAGGGTTTGTGTAATATA-----                    |       |       |       |       |       |       |       | 12091 |
| Pig         | ----- TCATTT----- TTTTTTGCTCTTTATAGCTGCAC- - - CTGCAGCATATAGAAGTTTCCCTGG- -              |       |       |       |       |       |       |       | 12285 |

Dienstag, 3. Mai 2022 08:38

| Majority    | AX- - - XX- - - XGAXAGX- A- XTTXXXX- - - - - XGTXX- AATCXAAGA- GXAG- - C- - C- A- XCXX- AA- - - - X- - XT |       |
|-------------|-----------------------------------------------------------------------------------------------------------|-------|
|             | 16970 16980 16990 17000 17010 17020 17030 17040                                                           |       |
| Human       | AGTGGTGGGTTTTTTATTTCTGTTAGACATGGTTTCTGAC- TTTTCGTGTATGTCA- - TGTTTTTCCCAGGAACATTTCTT                      | 13778 |
| PolarBear   | -----                                                                                                     | 0     |
| Cow         | ATCGCCAACTCCTAGAGTTTACTCAAACCTCATGTCCGTTG- AGTCGGTGATGCTGTCCAACCATCTCATCCT- - CTG- TT                     | 13778 |
| Dog         | AAGTTGGGATGCAAGGAAAACCTTAGGTACATGTACATCACAGTGAAAGGTGCAGATGGACCAGCCAAAAGAGAGAGAA-                          | 13701 |
| BelugaWhale | ----- TGAGAG- ----- G- - - - GAGAGAAAAGATAG- ----- A- - - - - AT                                          | 12018 |
| Donkey      | GATTTAGGACACACAAGAAAACCTTAGACA- - - - - TGTCAACATGAAAGA- GCAGAACACCAAAGACTCAA- - - - AGAA                 | 13465 |
| Cat         | AGGCGTCTCATTGCATTTTTATTTTTGAAGAAAACCTTGTTGATTCCACAGA- ATTGCCCCCGAGTCTGCATCTACTAATT                        | 15954 |
| Ferret      | GGTTTAGGAAGCATAAAGAAAACCTTAAGACC- - - - - CATCATAGTTAAAGA- GCAGACCATCAGACCCAGAG- - - - -                  | 13650 |
| Lion        | AGGCGTCTCATTGCATTTTTATTTTTGAAGAATACTTGTTGATTCCACAGA- ATTGCCCCCGAGTCTGCATCTACTAATT                         | 14547 |
| Vaquita     | ----- TGGGAG- ----- G- - - - GAGAGAAAAAATAG- ----- A- - - - - AT                                          | 12115 |
| Pig         | ----- CTAGGG- ----- GTTG- AATTGGAGCTGCAG- ----- CTG- CT                                                   | 12314 |

| Majority    | GT- CT- TXA- GC- GXXATXGAAAA- - X- - - - - ATXXCXTAATTAGAGXX- - - TXCXGAAAATATCAXXTXTTTT- ATXT |       |
|-------------|------------------------------------------------------------------------------------------------|-------|
|             | 17050 17060 17070 17080 17090 17100 17110 17120                                                |       |
| Human       | ATACTTTACCTTGTTTGCTAGGCAT- - - - - AGTCTGTGCTCAATAATTGTCTCCTTTTTTTTTCTTTTTTTTTTTTT             | 13852 |
| PolarBear   | -----                                                                                          | 0     |
| Cow         | GTCCCCTTCTCCTCCTACCTTCAATCT- - - - - TTCCCAGCATCAGGGT- - CTTTTCAAATGAGTCAGCTCTTCTCATCA         | 13850 |
| Dog         | GTTCTATAAAGCAGCCATAGAAAAATC- - - - GTATTTTCTAACAAGAATAACGAACTGGA- - GACCATATGCATT- CTTT        | 13774 |
| BelugaWhale | G- - - - - G- - - CCGATAG- - - - - GTTGGAG- - - - - AAAATTTCAAGTATTTT- ATGT                    | 12055 |
| Donkey      | GATCTTTAAAGCAGCCAGAGGAAAATC- - - - AGATTTCCCTAAGAAGAATAAGAAATAGAAAGACACAGTGTGCTTCTTC           | 13541 |
| Cat         | GTGTTCTGATGTTATAATTTAAAATGTTTCATGTATCTGTCAATTGGTGTGGATCTAGAGACTATCATATTCTTT- TTGT              | 16033 |
| Ferret      | - CTCTTTAAAGCAGCCATAGAAAAATC- - - - AGATTTCTTAAGAAAGAATAAAAACCTGGAAAGATACAAAATGCT- GCTT        | 13724 |
| Lion        | GTGTTCTGATGTTATAATTTAAAATGTTTCATGTATCTGTCAATTGGTGTGGATCTAGAGACTGTATATTCTTT- TTGT               | 14626 |
| Vaquita     | G- - - - - G- - - CCGATAG- - - - - GTTGGAG- - - - - AAAATTTCAAGTATTTT- ATGT                    | 12152 |
| Pig         | G- - - - - CC- - - TACGCACAG- - - - - CCACAATCAGA- - - - - TCCAAGCTGTGCCGGGTCTGCA- ACCT        | 12363 |

Dienstag, 3. Mai 2022 08:38

| Majority    | -- GTTCGTCXGGATXXAXTAXATA- AG- - AXAGTATCTTTAAATXXXAGAAGCXAAATAX- - ACTAXTTTA- TTTAGGAT            |       |       |       |       |       |       |       |       |
|-------------|----------------------------------------------------------------------------------------------------|-------|-------|-------|-------|-------|-------|-------|-------|
|             | 17130                                                                                              | 17140 | 17150 | 17160 | 17170 | 17180 | 17190 | 17200 |       |
| Human       | TTTTTTCCTGCTTTTTGAGAGACA- - - - AGAGTCTTGCCCTGTTGCCAGGCTGGA- GTGCAGTGGCCAATCTCAGCT                 |       |       |       |       |       |       |       | 13926 |
| PolarBear   | -----                                                                                              |       |       |       |       |       |       |       | 0     |
| Cow         | -- GGTGGCCAAAGTATTGGAGTTACAGCTT CAGCATCAGTCCTTCCAATGAACATTCTGG- - ACTGATTTCTTTAGGAT                |       |       |       |       |       |       |       | 13926 |
| Dog         | -- CAGCAAGGAGATCCAGAATATA- TGGAAAAGTATCTTCAAATGTGAATGAATAACTA- - - ACTATTTTATTATATAGT              |       |       |       |       |       |       |       | 13848 |
| BelugaWhale | -- GGTAGGCAGTATTCCATATATCTG- - - TAAGCTTCCATCCATGAAAGTAGCTCATTAT- - TCTGCTATC- TTTAGAAT            |       |       |       |       |       |       |       | 12127 |
| Donkey      | AGCAACATGGGAATCCAGAAGATAGTGGGAGAGTATCTGCAAAGTGTGAGTGAAAATAACTATCCATTTATTATTGCAT                    |       |       |       |       |       |       |       | 13621 |
| Cat         | -- TTGTTTTTGGTAATATTTTATA- AGTGGTGGTATGTTTTTACATTAGAAGACATAT- - - TTGATTTTTGTGTGTGTC               |       |       |       |       |       |       |       | 16106 |
| Ferret      | -- CAACATAGGGGTGCAGAAGATAGTGAAATAGTATCTTCAAGGTGTTGAATAAAAATA- - - ACTACCT- ATTCTATAAT              |       |       |       |       |       |       |       | 13798 |
| Lion        | -- TTGTTTTTGGTAATATTTTATA- AGTGGTGGTATGTTTTTACATTAGAAGACATATAT- - TTGATTTTTGTGTGTGTC               |       |       |       |       |       |       |       | 14701 |
| Vaquita     | -- GGTAGGCAGTATTCCATATATCTG- - - TAAGCTTCCATACATGAAAGTAGCTCATTAT- - TCTGCTATC- TTTAGAAT            |       |       |       |       |       |       |       | 12224 |
| Pig         | -- GTACGCCACAGC- TCATGGCTACA- - - CCAGGACC- - TTAATCCACTGAGCA- - - - AG- GCCAG- - - - - - - - GGAT |       |       |       |       |       |       |       | 12420 |

| Majority    | GGG- XX- TT- XTX- C- XTXXXAATCCAAATXATACTAXATXGTXXGXTTCXT- AGTACXXTATTGTACCATCAXCTX- - X                   |       |       |       |       |       |       |       |       |
|-------------|------------------------------------------------------------------------------------------------------------|-------|-------|-------|-------|-------|-------|-------|-------|
|             | 17210                                                                                                      | 17220 | 17230 | 17240 | 17250 | 17260 | 17270 | 17280 |       |
| Human       | CAGTGCAACCTCTGCCTCCCGGATTCAAGCGATTCTCCTGCCTCAGCTTCCCAAGTAGCTGGAACACTACAGGCGCCTGC- C                        |       |       |       |       |       |       |       | 14005 |
| PolarBear   | -----                                                                                                      |       |       |       |       |       |       |       | 0     |
| Cow         | GGACTGGTTGAATCTCCTTGCAGTCCAAGGGACTCTCAAGAGTCTTCTCCAACACCACAGTTCAAAAGCATCAATTCTTC                           |       |       |       |       |       |       |       | 14006 |
| Dog         | CGCTAAATTGTTACGTTAAAGAGCAAAAATAAAAATAT- - - GACATTTTCATAACACCCTTCTTCTTCTTCCACTTCTTC                        |       |       |       |       |       |       |       | 13925 |
| BelugaWhale | GTG- - - - - - - - - G- - - - - - - AGACTGA- - GCTGCAAAAATAGTTGGCTTTGG- - - TACTGTATGG- AGCATCA- - TG- - - |       |       |       |       |       |       |       | 12179 |
| Donkey      | AATCAGCTAAATTATCACT- TAAGGAGGAGAACAATAAATGGCATTTCAGAAACACTCCCTTTTTCCCCCAAAAAGGC                            |       |       |       |       |       |       |       | 13700 |
| Cat         | TGTAATGTTATTCCCAATAATATTTCTTATAATAACTTCTTTACCTTTTTTGTGTTTATCATTGTCTGCTCAGCATAGT                            |       |       |       |       |       |       |       | 16186 |
| Ferret      | CAGCTTAATTATCACTTAGAAAAACAATAAGGAGTGCCTGGGTGGCTCAGTGAGTTAAAGCCTCTGCCTTCGGTTTAGG                            |       |       |       |       |       |       |       | 13878 |
| Lion        | TGTAATGTTATTCCCAATAATATTTCTTATAATAACTTCTTTACCTTTTTTGTGTTTATCATTGTCTGCTCAGCATAGT                            |       |       |       |       |       |       |       | 14781 |
| Vaquita     | GTG- - - - - - - - - G- - - - - - - AGACTGA- - GCTGCAAAAATAGTTGGCTTTGG- - - TACTGTATGG- AGCATCA- - TG- - - |       |       |       |       |       |       |       | 12276 |
| Pig         | GGA- - A- - - - - - - - - CCCGCATCCTTACGGATACTAATTGGATTCTTAC- - - - CCTCTGAGCCACAACAGGAACTC- - -           |       |       |       |       |       |       |       | 12481 |

Dienstag, 3. Mai 2022 08:38

| Majority    | XCX- - A- CXC- TTTGTTTTGAGTATAAT- - XAAXCAT- - GTX- XTGACXTTT- TCX- - AXGX- - ACXTGXAAATTTCTTX |       |       |       |       |       |       |       |       |
|-------------|------------------------------------------------------------------------------------------------|-------|-------|-------|-------|-------|-------|-------|-------|
|             | 17290                                                                                          | 17300 | 17310 | 17320 | 17330 | 17340 | 17350 | 17360 |       |
| Human       | ACTACACCTGGCTAATTTTTGTGTTTTAGTAGGGATGGGGTTTCACCACGT- TGGCCAGGCTGACTTGGAACTCCTGAC               |       |       |       |       |       |       |       | 14084 |
| PolarBear   | -----                                                                                          |       |       |       |       |       |       |       | 0     |
| Cow         | TGTGCT- CATCTTTGTTTGTAGTCCAACCTTTCACATCCATACATGACTACTGGAAAACCATATACCTGTAAGCTTCCAT              |       |       |       |       |       |       |       | 14085 |
| Dog         | CCTTTC- CGCTCCGTCCTCTGACCCCA- CAAAAGACA- GTTGGGAAATTTATCAACAGACCCATCGAAGAATTTCTAG              |       |       |       |       |       |       |       | 14002 |
| BelugaWhale | ----- A- ---- ATTAGAATATAGT- ----- CGT- ----- TAACTATT- ----- C- -- TGATCTCTTA                 |       |       |       |       |       |       |       | 12215 |
| Donkey      | AATTGAGGAAATTTATCAACAGACCCACTGAAGGAATTTCTAGAGGTTGTACTTCAAGAAGAAGGCCAGT- GACTCCAGA              |       |       |       |       |       |       |       | 13779 |
| Cat         | TCAGTA- GACATCTGTTATCAGTATTCT- TAAAGGATATGTAAAAGAAATGTATCTTAAAGTTCACTTAA- - TTTATATG           |       |       |       |       |       |       |       | 16262 |
| Ferret      | TCATGA- TCCCAGGGTCCTGGGATCGAG- CCCACATC- GGGCTCTCTGCTCAGCAGGAAGTCGGCTTCCTCCTCTCTCT             |       |       |       |       |       |       |       | 13955 |
| Lion        | TCAGTA- GACATCTGTTATCAGTATTCT- TAAAGGATATGTAAAAGAAATGTATCTTAAAGTTCACTTAAAATTTATATG             |       |       |       |       |       |       |       | 14859 |
| Vaquita     | ----- A- ---- ATTAGAATATAGT- ----- CGT- ----- TAACTATT- ----- C- -- TAATCTCTTA                 |       |       |       |       |       |       |       | 12312 |
| Pig         | ----- C- -- CTTAATTGGACTTTAAC- --- AACAT- ----- ACTTCT- ----- TTGTAGATATCCTT                   |       |       |       |       |       |       |       | 12524 |

| Majority    | ATG- - - - - TAG- XTCATA- TT- - - - T- - TAXATTGTGXTTACTGAACGTAAAAGXC- - - - - TTAGTX- TXGTCTTAA |       |       |       |       |       |       |       |       |
|-------------|--------------------------------------------------------------------------------------------------|-------|-------|-------|-------|-------|-------|-------|-------|
|             | 17370                                                                                            | 17380 | 17390 | 17400 | 17410 | 17420 | 17430 | 17440 |       |
| Human       | CTCAAGTGATCTGCCACC- TTGGCTTCCCAAAGTGCTGGGATTATAGGCATGAGCC- - - - - ACTGTGCCTGGCCAAT              |       |       |       |       |       |       |       | 14156 |
| PolarBear   | -----                                                                                            |       |       |       |       |       |       |       | 0     |
| Cow         | ATATGAAAGTAG- CTCATTATTCTATTTTTAGAATGTCTCAACTGAGCTGCAAAGTCCTTAGCTTTGGTATTATATGGAG                |       |       |       |       |       |       |       | 14164 |
| Dog         | AGG- - - - - TTGTACTTTAGAA- - AGAATACTGGTAACTCCAGGAAGGAGGA- - - - - TTTAGTAGGAAAATCAA            |       |       |       |       |       |       |       | 14063 |
| BelugaWhale | CT- - - - - TGG- TCCATT- - - - - T- - - - - GTGTTC- CTGAACTGTAATAGCT- - - - - T- - TCTTAA        |       |       |       |       |       |       |       | 12256 |
| Donkey      | AAGGAGGTCTGAGGTAGAAGTAACGTT- - AAGCAAGAAATTGGTAAGCCTGTGGTAAATTTAATTACTGACTGTATAAG                |       |       |       |       |       |       |       | 13857 |
| Cat         | ATGGAAAGACAGTATTAAAGTTCAACT- - TAAATTGTAGTTATTGATGGTAGACAAGAATT- TTTTAGTGGAGGTCTTGT              |       |       |       |       |       |       |       | 16339 |
| Ferret      | CTG- - - - - CTTCTCTCTGC- - CTGCTTGTGATCTCTCTGTCAAACAA- - - - - ATAAATAAAATCTTTAA                |       |       |       |       |       |       |       | 14016 |
| Lion        | ATGGAAAGACAGTATTAAAGTTCAACT- - TAAATTGTAGTTATTGATGGTAGACAAGAATT- TTTTAGTGGAGGTCTTGT              |       |       |       |       |       |       |       | 14936 |
| Vaquita     | CT- - - - - TGG- TCCATT- - - - - T- - - - - GTGTTC- CTGAACTGTAATAGCT- - - - - T- - TCTTAA        |       |       |       |       |       |       |       | 12353 |
| Pig         | A- - - - AGAATA- - CTGAT- - - - - GAACGTGTTTATTGAGC- - - - AAG- - C- - - - - TGTACTGAA           |       |       |       |       |       |       |       | 12566 |

Dienstag, 3. Mai 2022 08:38

| Majority    | XAA- X- - - - - T- X- - - - XX- XXXG- XX- X- A- - - XXTAG- - - - XCTAXX- - AXT- AAXG- XATX- - XAAGTTT XAG                                                                                                                                |       |
|-------------|------------------------------------------------------------------------------------------------------------------------------------------------------------------------------------------------------------------------------------------|-------|
|             | <div style="display: flex; justify-content: space-between; width: 100%;"> <span>17450</span> <span>17460</span> <span>17470</span> <span>17480</span> <span>17490</span> <span>17500</span> <span>17510</span> <span>17520</span> </div> |       |
| Human       | AAG- - - - - TGT- - - - CTCTTAATGAGTATTCTTAAAGGATATCTAAA- - AAGAAATGTAACCTTAAAATTCACAT                                                                                                                                                   | 14219 |
| PolarBear   | - - - - -                                                                                                                                                                                                                                | 0     |
| Cow         | CACTATGATTTAGAATCATGAGCCTCTGTAGTTAACTGTTTAGATATCTTATTTGGTTCATTTGTGTTGCTAAATTGAAA                                                                                                                                                         | 14244 |
| Dog         | AACAAG- - - - GTTTAACCCCGTACCGTGATTCAGGTATTATGGTTCCCGTTTTCTTCTTGCTGTTATTACCTAAGAA                                                                                                                                                        | 14138 |
| BelugaWhale | TTT- - - - - A- GTTTCAG                                                                                                                                                                                                                  | 12267 |
| Donkey      | AAAATAATAGCAGTGATGGTTTGATTTGAGGTTTAATAAATAGAA- - CTA AAAAATATTAATCATAACAACATGTGAGGG                                                                                                                                                      | 13935 |
| Cat         | CAAGAGCATGTGATTTAGAATTTGCTAGCAGGCTAGAGTATGGCCTCTCTATAACATTGAAGGTAATCTCTGAGCTTTAG                                                                                                                                                         | 16419 |
| Ferret      | AGAAAA- - - - AATAGTGACATTGTCAGAAACACATCAAGCACCTCCTCTCTGTCAAGAAAAGCAATTGGGGAAATTGAT                                                                                                                                                      | 14091 |
| Lion        | CAAGAGCATGTGATTTAGAATTTGCTAGCAGGCTAGAGTATGGCCTCTCTATAACATTGAAGGTAATCTCTGAGCTTTAG                                                                                                                                                         | 15016 |
| Vaquita     | TTT- - - - - A- GTTTCAG                                                                                                                                                                                                                  | 12364 |
| Pig         | CAC- - - - - AAGGTGAAG                                                                                                                                                                                                                   | 12578 |

| Majority    | AXTAACAGAGTT- X- XA- X- T- - - - TAGG- - - TXX- - AAGAAXTAAGGTTGTTXGXTAAXTATTTTTACTTGTAAAGT-                                                                                                                                             |       |
|-------------|------------------------------------------------------------------------------------------------------------------------------------------------------------------------------------------------------------------------------------------|-------|
|             | <div style="display: flex; justify-content: space-between; width: 100%;"> <span>17530</span> <span>17540</span> <span>17550</span> <span>17560</span> <span>17570</span> <span>17580</span> <span>17590</span> <span>17600</span> </div> |       |
| Human       | AATAGTAATACTATACAGTATTAACATTTAATGTAAGTTGGAAGTATTGATGGTGGACAAGAATGTTTTCTTGTCAAGA-                                                                                                                                                         | 14298 |
| PolarBear   | - - - - -                                                                                                                                                                                                                                | 0     |
| Cow         | GTAAATAAGTTTCCTAATTTAGTTTTAGCTATTCATGAAGGACTAAGGTGGTTAGGTAATTTTTTTACTTGAAAAGT-                                                                                                                                                           | 14323 |
| Dog         | AATTA- AGGGCAAGGATTGTTTTGATTTGGGGTGA- - AAAAATAGAAATCACATATTCATCAGAGTCCCTTTACACGC-                                                                                                                                                       | 14214 |
| BelugaWhale | ACATACTTCATT- - - - - AAGGGCTAAGGTGGTTAGGTAA- TATTTTTACTTTAAAAGT-                                                                                                                                                                        | 12319 |
| Donkey      | AGTAGTAGAGTAAATGAAGTT- - - - TAAGTTCTGATGACCTAGTATTGTTTTGAGCTC- - TCTTGTCCATTATGGAGCC                                                                                                                                                    | 14008 |
| Cat         | TTTAACAGATTTTTAAATGGTCTTAATAGGACTTACCTCAAAGTTATTTTTGGAGATTAATGAAATAACATGTAAGATT                                                                                                                                                          | 16499 |
| Ferret      | CAGCA- GACCCACTGAAGAATTTCTAGAGTTGTACTTTAGAAAGTAGGTCGATGACTCCAGAAAGGAGTTTTGAGGT-                                                                                                                                                          | 14169 |
| Lion        | TTTAACAGATTTTTAAATGGTCTTAATAGGACTTACCTCAAAGTTGTTTTGGAGATTAATGAAATAACATGTAAGATT                                                                                                                                                           | 15096 |
| Vaquita     | ACATACTTCATT- - - - - AAGGGCTAAGGTGGTTAGGTAA- TATTTTTACTTTAAAAGT-                                                                                                                                                                        | 12416 |
| Pig         | ACAAAGTTAG- - - - - AACAAGTAAGG- - - - - TTCTTGACAGAAACAC-                                                                                                                                                                               | 12615 |

Dienstag, 3. Mai 2022 08:38

|             |                                                                                           |       |       |       |       |       |       |       |  |  |       |
|-------------|-------------------------------------------------------------------------------------------|-------|-------|-------|-------|-------|-------|-------|--|--|-------|
| Majority    | - - - - - AATAAAATATAAGT - - AXAGATGAGGAAGGTATGTGTTTTTGXAXATTGATTCGTTTTACAXCTGATXTX - -   |       |       |       |       |       |       |       |  |  |       |
|             | 17610                                                                                     | 17620 | 17630 | 17640 | 17650 | 17660 | 17670 | 17680 |  |  |       |
| Human       | - - - - - ACATACGATTTAGAATGAAAA - - GATGAGGGTTTGACTTTTATAGCATTGAACAGGTTAACCTCTGAGCT - - - |       |       |       |       |       |       |       |  |  | 14366 |
| PolarBear   | - - - - -                                                                                 |       |       |       |       |       |       |       |  |  | 0     |
| Cow         | - - - - - AATAAAATATAATCAAAAAGTTATGGAAGAAATGTGTTTTTGAGAAATGATTCTTGTTATAGCTATTGTG - -      |       |       |       |       |       |       |       |  |  | 14393 |
| Dog         | - - - - - ATAGTAGTTTGGTACATTGATGTTGAAGGCTTGATGATTCTAGCTCTTACTACGCTGCTGTT - - - - -        |       |       |       |       |       |       |       |  |  | 14277 |
| BelugaWhale | - - - - - AATAAAATACA - - - - ACAGTTATGAAAGGTATGTGTTTTTGAGCAATGATTCGTCTTATAACTGTTGTGG -   |       |       |       |       |       |       |       |  |  | 12385 |
| Donkey      | ACT - - - - AGTTGTATGTGGTT - - ATTGAGCACTTGACACGTGGCTAGTCTAAATTGATCTGTTCCAATTGTAAAATACA   |       |       |       |       |       |       |       |  |  | 14081 |
| Cat         | TAGCACAGAATGGCACATAAGTGCTCAAATGAGGATCATGGTTGTTACTGTAGCTCTTACTCTGTACACCTGATTTGGG           |       |       |       |       |       |       |       |  |  | 16579 |
| Ferret      | - - - - - GGGAGAAGTAAGGTTAACCAAGAAATTGGTAGGACTGTGGTAAATTTAATTGCAGTATAA - - - - -          |       |       |       |       |       |       |       |  |  | 14230 |
| Lion        | TAGCACAGAATGGCACATAAGTGCTCAAATGAGGATCGTGGTTGTTACTGTAGCTCTTACTCTGTACACCTGATTTGGG           |       |       |       |       |       |       |       |  |  | 15176 |
| Vaquita     | - - - - - AATAAAATACA - - - - ACAGTTATGAAAGGTATGTGTTTTTGAGCAATGATTCGTCTTATAACTGTTGTGG -   |       |       |       |       |       |       |       |  |  | 12482 |
| Pig         | - - - - - CATAAA - TATATGCAAAA - - - AAGCAGATATCACGTCTTCCAATAGAAAACTTATCACTGCTTGTAT - - - |       |       |       |       |       |       |       |  |  | 12680 |

|             |                                                                                              |       |       |       |       |       |       |       |  |  |       |
|-------------|----------------------------------------------------------------------------------------------|-------|-------|-------|-------|-------|-------|-------|--|--|-------|
| Majority    | - - XXAATTTTAAACAT - - - - - TAAAAAAGXTTXAGTTGTATXAXATAGTGTTATTTTTATXTTAXXAAGTTXAAA          |       |       |       |       |       |       |       |  |  |       |
|             | 17690                                                                                        | 17700 | 17710 | 17720 | 17730 | 17740 | 17750 | 17760 |  |  |       |
| Human       | - - TCAGTTTTATACATT - - - - - TTTAAATGGTTTCAGTTGTA - - - CTTACTTCCAAAATTATTTTGAATG - - TTAGA |       |       |       |       |       |       |       |  |  | 14431 |
| PolarBear   | - - - - -                                                                                    |       |       |       |       |       |       |       |  |  | 0     |
| Cow         | - - - - AATTTTGAAGTT - - - - - AGAAAAAGACATAGTAGTATTATAAACTGTTATT - - - - TGTCACCTCAGCCCAA   |       |       |       |       |       |       |       |  |  | 14456 |
| Dog         | - - GTACCTTATAGTAT - - - - - TGAGCACGTTGACCTGGATAGTCTAAACCTATCTCCAAATTGCAAAGTGCACA           |       |       |       |       |       |       |       |  |  | 14344 |
| BelugaWhale | - - TGAATTTTAAACAT - - - - - TAAAAAAGACACAGTAGTATCACAAAGCGTTATTTATATGTCACTCAGCCCAA           |       |       |       |       |       |       |       |  |  | 12454 |
| Donkey      | CGTGGATTTCTAAGACTTCATGGAAAAAAGAAAGTA - ATTTTTATTACATGTTGAAATGATAATTTTTTTCAGTTAAATA           |       |       |       |       |       |       |       |  |  | 14160 |
| Cat         | AGGAACACCACAGTGGACTCCAGATAGGAACTTTTTTACCTGGCTGTTAGAGACAAAATTTTTTCTTTAAAAATTAAAA              |       |       |       |       |       |       |       |  |  | 16659 |
| Ferret      | - - GAAAGTAATGGCAG - - - - - TGATTGATTTGGATTTAAAAAATAGGACTAAAAATATTATATCATAATAACA            |       |       |       |       |       |       |       |  |  | 14297 |
| Lion        | AGGAGCACCACAGTGGACTCCCAAATACGAACTTTTTTAACTGGCTATTAGAGACAAAATTTTTTCTTTAAAAATTAAAA             |       |       |       |       |       |       |       |  |  | 15256 |
| Vaquita     | - - TGAATTTTAAACAT - - - - - TAAAAAAGACACAGTAGTATCACGAAGCGTTATTTATATGTCACTCAGCCCAA           |       |       |       |       |       |       |       |  |  | 12551 |
| Pig         | - - - - - TTCTGAA - - - - - AACAAAAAGA - - - - - A - TCTGTTATC - - - - TCTAGATC - - - - -    |       |       |       |       |       |       |       |  |  | 12715 |

Dienstag, 3. Mai 2022 08:38

|             |                                                                                                           |       |
|-------------|-----------------------------------------------------------------------------------------------------------|-------|
| Majority    | CAA- - - - XATXAAXAA- ACAACTTATTGCTA- - - - XAAXTTAXGXGATCCXXAC- CTACTTTGXTCCGTGTAGATAAT                  |       |
|             | 17770 17780 17790 17800 17810 17820 17830 17840                                                           |       |
| Human       | TGAG- - - - ATGAGGAA- AAGACTTATGCTGAAAGGATGAGAATGGTTGTTGTTGTAGTTCTTTAATCTGTAATCTACA                       | 14505 |
| PolarBear   | -----                                                                                                     | 0     |
| Cow         | CAA- - - T- CATCAACAA- ACAACCCATTGCTA- - - - AAATTTAGGCTATCCACACTCTACTTTTCTCCTCCTCTGTTAT                  | 14526 |
| Dog         | TA- - - - - TAAGGGA- TCCCTGTGTGGCCG- - - - CACGGTTGGGGAGCCTGGC- - - - CTGTGGCCCGTGTGTGAAT                 | 14406 |
| BelugaWhale | CAA- - - T- CATCAACGA- ACAACCCATTGCTA- - - - AAATTTAGGAGATCCACACTCTACTTTTCTCCTCCTGTATTAT                  | 12524 |
| Donkey      | AAATATATCATTGTATCACCTTTTCTTTTACTTTTTAAAATATGGCTACTAGAG- CTATTAGAAAATTTGTAGG- - AT                         | 14237 |
| Cat         | TTAAAATTTTTAAAAAG- TTTATTTATTTTTGAGAGAGAGTGTATGCACGCATGTGGCAGGTAGGGGAGGGCAGAGAGA                          | 16738 |
| Ferret      | CA- - - - - AAAGGGA- GTATCGAGTAGCTGATGTTTAAGTTCTGACATTGTAGTATTGTTTTGAGCTGTGTTGTCCAT                       | 14368 |
| Lion        | TT- - - - - TTTAAAAAG- TTTATTTATTTTTGAGAGAGAGTGTATGCACACATGTGCCAGGTAGGGGAGGGCAGAGAGA                      | 15329 |
| Vaquita     | CAG- - - T- CATCAACGA- ACAACCCATTGCTA- - - - AAATTTAGGAGATCCACACTCTACTTTTCTCCTCCTGTATTAT                  | 12621 |
| Pig         | CAA- - - C- TATCAAT- - - - TGACG- - - - - - - - - - - - - - - - - - - - - - - - - - - - - - - - - - - - - | 12746 |

|             |                                                                                                     |       |
|-------------|-----------------------------------------------------------------------------------------------------|-------|
| Majority    | TXTGGXAAC- - - - AATTXCAGGCTATTXGTXTTCAAXCATAGATTCTCTGXTGXGTGG- - CXTTXAAAGXTAXCGXCAGT              |       |
|             | 17850 17860 17870 17880 17890 17900 17910 17920                                                     |       |
| Human       | TTTGGAAGGAAC- ACTTTTATGGAAATCAAATACAGTAAATTAATTTCTAAGAGGTCCTGGAGTTCAAGTTAAAAATAGC                   | 14584 |
| PolarBear   | -----                                                                                               | 0     |
| Cow         | TTTGAGAAA- - - - AATTCGGG- TATTTGATTTCATTGAAAGTACTTTATTGTGTCT- - CTTTAAAGATAGAGTCAGT                | 14599 |
| Dog         | CCTGGAGAC- - - - - - - - - - - ACTTTCGAATCCCCACGTCTGGGCTCCCGGGGGCATGG- - AAGCCTGCTTCGCCTCTGGT       | 14473 |
| BelugaWhale | TTTGAGAAA- - - - AATTCAGGTTATTTGT- TTCATCCATAAATGTTTTGGTGTGTCT- - CTTTAAAGATAGGGTCAGT               | 12597 |
| Donkey      | TATGTGTGTT- - - GCTCACTTTCCATTTCT- TTCGGACAGTGTGAGTCTTGAGGGTGAAATTTAAAGTCAAAGTGAAT                  | 14313 |
| Cat         | GAGGGAGACGAGGATCTGAAGCCAGCTCCCCGCTGACAGCAGGGTCTCTGATGCAGGGCTCAAACCTCATGAGCCGAAGA                    | 16818 |
| Ferret      | TATAGTAGC- - - - - - - - - - - AACTAGTCATATATGATTATTGAGCACTTGATGTGTGACTAGTCTAAACTAATCTCCAGT         | 14437 |
| Lion        | GAGGGAGACTAGGATCTGAAGCCAGCTCCCCGCTGACAGCAGAGTCTCTGATGCGGGGCTCAAACCTCATGAGCCACAAGA                   | 15409 |
| Vaquita     | TTTGAGAAA- - - - AATTCAGGTTATTTGT- TTCATCCATAAATGTTTTGGTCTGTCT- - CTTTAAAGATAGGGTCAGT               | 12694 |
| Pig         | ----- AATTATAA- - TATCAGAATACAATCAGGAGTTGCAAACCTGCGT- - - - - - - - - - - - - - - G- - - - - GGCAAC | 12794 |



Dienstag, 3. Mai 2022 08:38

| Majority    | TCTCTXT- - - - C- - A- - TCAXT- TTCTXAXTTAAXGAAATAAAAXCAXAGTXCACTTA- - TTAAATCTCTCAAAGAA- - |       |
|-------------|---------------------------------------------------------------------------------------------|-------|
|             | 17930 17940 17950 17960 17970 17980 17990 18000                                             |       |
| Human       | CTCAGACAGCACTAAATATCTTTATTAGTGAACAAAAAATAAAAAATAACTTAGAATTTAGCACAGAGAAGCAAAGAGAT            | 14664 |
| PolarBear   | -----                                                                                       | 0     |
| Cow         | TCTCTCTGTCTACCCTCCTCCCT- CTCTGATTTAAAGAAATACAACCACAGTGCAC- - - - - TCCCTCCAAAAG- -          | 14666 |
| Dog         | CCTCT- - - - - CTGATGTCCTC- TGCATCTTTCCCGCGTTCCCTCACCCCCCCCCCCC- - CCACCTCTCTCTGTGAC- T     | 14542 |
| BelugaWhale | CCTCCCT- - - - - CTCT- TTCTGTTTTAAAGAAATACAATCACAGTACTGTTA- - GTGCACCCCCCCC- - - - -        | 12656 |
| Donkey      | GAGATCAGTTTACATTTTAAATT- GTAAGGGTGAGCACAGTAAAAATAGGGATAAAGTG- - TATAATTTCTAAAATAA- -        | 14388 |
| Cat         | TCATTATCTGAGCTGAAGTCAAA- TGCTTAACTGACTGAACCACACTGGTGCSCCCAAA- - TTAAATTTTTTATTGAAGT         | 16895 |
| Ferret      | TGTAAA- - - - ATGCACATAAAT- TTCCAAAACAGTATGATAAAAAAAGAATGTAATTT- - TTATACCTATTACATAT- T     | 14508 |
| Lion        | TCATTATCTGAGCTGAAGTCAAA- TGCTTAACTGACTGAACCACACTGGTGCSCCCAAA- - TTAAATTTTTTATTGAAGT         | 15486 |
| Vaquita     | CCTCCCT- - - - - CTCT- TTCTGTTTTAAAGAAATACAATCACAGTACTGTTA- - GTGCACCCCCCCCCAAA- -          | 12757 |
| Pig         | TCTCT- - - - - A- - - - A- GAACAATAACCA- - GT- - - - - TTTCTTCAAAA- -                       | 12827 |

| Majority    | - XAAATAGCAXAAAT- TGXATAATGTTCTXAAGTACXXAATTTXTTX- - - AAAGATTACTATTTXT- TX- TAAAAXTCAT |       |
|-------------|-----------------------------------------------------------------------------------------|-------|
|             | 18010 18020 18030 18040 18050 18060 18070 18080                                         |       |
| Human       | GAAATAGGAGAAGCGTTAAAAATGTGTTGGAAAGGAAGAGAAGTTCTAACAAACATCTAATTAGCGTTCAGAAATTA           | 14744 |
| PolarBear   | -----                                                                                   | 0     |
| Cow         | - AAAAAAGCAGCAAT- TGCTTAATGTTCTCAAGTGCCAAATTTGTGT- - - TAAGATTTCTATTTGTCTTGAAAAGTTGT    | 14741 |
| Dog         | ATCATAAATAAAAAA- TAAAAATAAATAAAGTGCACATAAATTTCCA- - - AGAC- TTAGTAGT- - - - - ATGATAAA  | 14608 |
| BelugaWhale | - AAAATAGCAACAAT- TGCTTAATGTTCTTAAGTGCCAGATTTGT- - - - - AAGATTTCTATTTGTCTCATGAAAGTCAT  | 12728 |
| Donkey      | - TTGGGGGTGGGAAG- - ATGTATAATCCAAAAGAAGTCAAGGAAAAAG- - - AAAAGTAAAAGAGAATAGGAAACAAAATGA | 14462 |
| Cat         | ATAGTTGACAAACAT- AGTATTAGTTTCAGGTGTACATATTTTTTTTTCAATAGCTTACTAATTTTTTTTTTAGTGATCTC      | 16974 |
| Ferret      | TACAATATTTTGAAT- TAAATATTATTTGTATCCTTTTTACTTTCTA- - - AAATATGACTATT- - - - - ACAACATT   | 14575 |
| Lion        | ATAGTTGACATACAT- AGTATTAGTTTCAGGTGTACATAAGTTTTT- CAATAGCTTACTAATTTTTTTTTTAGTAGTCTC      | 15564 |
| Vaquita     | - AAAATAGCAACAGT- TGCTTAATGTTCTTAAGTGCCAGATTTGT- - - - - AAGATTTCTATTTGTCTCATGAAAGTCAT  | 12829 |
| Pig         | - TAAAATGTAG- - - - - TTATCAAGAACC- - - - TTATAG- - - TAA- - - - - TAAAAGG- - -         | 12865 |

Dienstag, 3. Mai 2022 08:38

| Majority    | AGTAATTTTAAAX- - - - TAATTTT TAGTGATATGXAGGGXTCA- - ATCAA- ATAXTAACATATTTTTTAAAT- - - - - |       |
|-------------|-------------------------------------------------------------------------------------------|-------|
|             | 18090 18100 18110 18120 18130 18140 18150 18160                                           |       |
| Human       | AGATTGCAGAAAGGCAAATTTGAAATGCTAAAGGCTGATAATTTTTCA- GAATTGGTGAGCTATATGAGTTCTTAGATT          | 14823 |
| PolarBear   | -----                                                                                     | 0     |
| Cow         | AGTACGTTTACTGTCTTTATTTTTAGTGGTATGGAAGGTT CAGGATCAA- AGATCAACACATT CAGTAAAT- - - - -       | 14811 |
| Dog         | AA- AAGAATA- - - - - TAATTTTATACCTATTA- - - - - CATGT- T- - - - -                         | 14641 |
| BelugaWhale | AATATTTTACAGAGTTTCATTTTTCGTGGTGGGGAGGGATCAGGATCAA- ATAAGAACACATT CAGTAAATTGACATGCC        | 12807 |
| Donkey      | GCTCATTTTAATAGTATTAAGAGTAGCTCTATGGAGGATTCCTTTGAGCCTTTAAAAGTTAGAAATTTTCGAGGGTAGGGA         | 14542 |
| Cat         | TGTAATCTCAAG- - - - TAATCTT TAGTAATCTCAAGACCCCGAAATCAAAGGAGTCGCATGCTTTTCCAAGCTGAGCCAG     | 17050 |
| Ferret      | TGTAAGATCT- - - - - TAAGTGTTGCTCATCTTA- - - - - CATTTCTTTTGGAC- - - - -                   | 14617 |
| Lion        | TGTAATCTCAA- - - - TAATCTT TAGTAATCTCAAGACCCCAAATCAAAGGAGTCGCATGCTTTTCCAAGCTGAGCCAG       | 15640 |
| Vaquita     | AATATTTTACAGAGTTTCATTTTTCGTGGTGGGGAGGGATCAGGATCAA- ATAAGAACACATT CAGTAAATTGACATGCC        | 12908 |
| Pig         | AGAATTTGTAG- - ACTGAA- - - - AGGAATTTGAAAGGC- - - - - ATATTAATCTATCAAATTGA- - - - -       | 12917 |

| Majority    | - - - GAXACTXCTTTAAATCTACAAAATTTCTTTT- X- - XXTGXXTTTTTTAATAATTACATTTTTTTTXXTTCAAGA- - -         |       |
|-------------|--------------------------------------------------------------------------------------------------|-------|
|             | 18170 18180 18190 18200 18210 18220 18230 18240                                                  |       |
| Human       | TAGGAGGCACAAGAAAACCTGGACACATAACAGTAAAAGAGCAGAGCACCAAAGACATAGAGATCTTTAAAGCAGCCAGA                 | 14903 |
| PolarBear   | -----                                                                                            | 0     |
| Cow         | - - - - AAATTTCTTTTGATCTGCAAATTATCCTTTTATCCTTGTGAGGCTTTT- ATAATTACATTTTATTTTTGAAGA- - -          | 14883 |
| Dog         | - - - GATAATATTTTGGATTAATAAAAATATTTTGT- - - - ATCCTTTTCTTTTAAATTTCTAAAATATGGTACT- - -            | 14709 |
| BelugaWhale | TTTTAAATTTCTTTCACTTTACGAATTCTCCTTTTATCACTGTGAGGTTTTT CATAATTACATTTTATTTTTGAAGA- - -              | 12884 |
| Donkey      | CTTGGGGCTCATTCTAACCCCT- - - AGTTACCTCCCAAAG- TCTCTATCTCCAAATACCATCACGTTGTGGTTCACCGTAT            | 14618 |
| Cat         | CCAGGTATCCCCTCAAGTGTACATAAGTTTTTTTT- - - - - TTTTTTTTTTAAACATTTATTTATCTTTGAGAGAGAG- -            | 17122 |
| Ferret      | - - - ATTACCAGTCTGGAGGATGGAAATTTCTTTTT- - - - TTTTTTTTTTAAAGATTTTATTTATTTATCCAACAG- -            | 14687 |
| Lion        | CCAGGTACCCCTCAAGTGTACATAAGTTTTTTTTGT- - TTTTTTTTTTAAACATTTATTTATTTTTGAGAGAGAGAG                  | 15718 |
| Vaquita     | TTTTAAATTTCTTTCACTTTACGAATTCTCCTTTTATCACTGTGAGGTTTTT CATAATTACATTTTATTTTTGAAGA- - -              | 12985 |
| Pig         | - - - - AAACCTAT- - - - ACCTG- - AGGTTTTTCTCCACC- - - - - GTATCT- GCCATTCCATCTTCTCTCTCA- - - - - | 12972 |

Dienstag, 3. Mai 2022 08:38

| Majority    | - - - - - AAAXTXATTGTAGG- - TAGTACAAAACAGTCCGAA- TATGCTTAAACAGATT CXAT- TCTG- - - - - AXT |       |       |       |       |       |       |       |       |
|-------------|-------------------------------------------------------------------------------------------|-------|-------|-------|-------|-------|-------|-------|-------|
|             | 18250                                                                                     | 18260 | 18270 | 18280 | 18290 | 18300 | 18310 | 18320 |       |
| Human       | GAAAATCAGATTCCCTAAAGAATAAGAACTAGAAAAGTCTAA- TATGCTTCATCAGCATGGGCATCCAGAAGATAGTGGA         |       |       |       |       |       |       |       | 14982 |
| PolarBear   | -----                                                                                     |       |       |       |       |       |       |       | 0     |
| Cow         | - - - - - AAAGTATTGTTGG- - TGGTACAGAGTTATCCGTAGTCTGCATCTACTGATTGTAT- TCTG- - - - - A- T   |       |       |       |       |       |       |       | 14943 |
| Dog         | - - - - - ACAACATTTATAAG- ATTGTGTTGTACATCTTACATTTCTTTTGGACAGTACCAAT- CCGG- - - - - AGG    |       |       |       |       |       |       |       | 14771 |
| BelugaWhale | - - - - - AAAGTGGTTGTTGG- - TCTTACAGAGTTGTCCATAGTCTGCATATACTGATTGTAT- TCTG- - - - - A- T  |       |       |       |       |       |       |       | 12944 |
| Donkey      | GAATTTGAGGGCTCATAAACATTTAGTCCATAAACACCCTGCA- TATACTTCTCCACTTCCAC- CCCAGGTAACCACTAT        |       |       |       |       |       |       |       | 14696 |
| Cat         | - - - - - CATGAACAGGGGAGGGT CAGATGAAGAGGGAGACACAGAATCTGAAACAGGCTCCAG- GCTCTGAGCTGTCAGC    |       |       |       |       |       |       |       | 17195 |
| Ferret      | - - - - - ACAGAGATCACAGGCAGAGAGGCAGGCAGAGAGAGAGAGGGAAGCAGGCTCCGT- GCTG- - - - - AGC       |       |       |       |       |       |       |       | 14750 |
| Lion        | AGAGAGCATGAACAGGGGAGGGCCAGAGGAAGAGGGGAGACACAGAATCTGAAACAGGCTCCAG- GCTCTGAGCTGTCAGC        |       |       |       |       |       |       |       | 15797 |
| Vaquita     | - - - - - AAAGTGGTTGTTGG- - TCTTACAGAGTTGTCCATAGTCTGCATATACTGATTGTAT- TCTG- - - - - A- T  |       |       |       |       |       |       |       | 13045 |
| Pig         | - - - - - C- - - - - TCCCAAACCCTTTGC- - - - - CATAAATCCAAATTAT- TCTG- - - - - C- T        |       |       |       |       |       |       |       | 13010 |

| Majority    | ATAGAAATTGATXTGTXGTCCATATCXAT- - CAGTTTGXGGATATXTCTTXAGCCXATXXCGTTCXCTTAXCXTTXXTTAG        |       |       |       |       |       |       |       |       |
|-------------|--------------------------------------------------------------------------------------------|-------|-------|-------|-------|-------|-------|-------|-------|
|             | 18330                                                                                      | 18340 | 18350 | 18360 | 18370 | 18380 | 18390 | 18400 |       |
| Human       | ATAATATTTTCAATGTGTTGAGTGAAAATAGCTGCCACCTGTTATTTTATAGCCAGCCAAATTATCATATAAGGAGAAG            |       |       |       |       |       |       |       | 15062 |
| PolarBear   | -----                                                                                      |       |       |       |       |       |       |       | 0     |
| Cow         | GTTACAATTATTATGTTCTCCATATGTGT- - CAGTTGGTGGATGGATCTA- AGGCCATCACGTTCTCTTG- - ATTTTTAG      |       |       |       |       |       |       |       | 15018 |
| Dog         | ATAGAAATTT- - - CAGGTCCAAAATGAAT- - CAGATTAAGTTTACGTCTTAAATTGTAACGGTAAACTTTACCATTGTTA      |       |       |       |       |       |       |       | 14846 |
| BelugaWhale | GTTATAATTGTTATGTTGTCCATATA- GT- - CAGTTGGTAGATGGATCTACAGACCATCAGGTTCTCTTTCTGTTTTTAG        |       |       |       |       |       |       |       | 13021 |
| Donkey      | CCTGAAGTTG- - GTGTTTGCCATTCCATAT- - GAATTTCTTTATACCTTTGCTGCATGTATTGTTTCGTATA- TTTTCTTCC    |       |       |       |       |       |       |       | 14771 |
| Cat         | ACAGAGCCCAGCGGGGCTCGAACCCACA- GACCGCGAGATCATGACCTGAGCCGAAGTTGGACGCTTAACTGACTGAG            |       |       |       |       |       |       |       | 17274 |
| Ferret      | AGAGAGCCTGATGCGGGCCTCGATCCCAG- - GACCCTGAGATCATGACCTGAGCAGAAGGCAGTGGCTTAAACCACTAAG         |       |       |       |       |       |       |       | 14828 |
| Lion        | ACAGAGCCTGACGCGGGGCTCGAACCCACA- GACTGCGAGATCGTGACCTGAGCCGAAGTCGGATGCTTAACTGACTGAG          |       |       |       |       |       |       |       | 15876 |
| Vaquita     | GTTATAATTGTTATGTTGTCCATATA- GT- - CGGTTGGTAGATGGATCTACAGACCATCAGGTTCTCTTTCTGTTTTTAG        |       |       |       |       |       |       |       | 13122 |
| Pig         | G- - GCAGTTCAACGGCTGTGAATTTGTGC- - CAACTTACTGATATAACTT- TGGCCATGTCATCCCCTCA- - AC- - - - - |       |       |       |       |       |       |       | 13077 |



Dienstag, 3. Mai 2022 08:38

| Majority    | TCAAAAAATATCTXTGXAACAGTAXTXTTAX- - - ATTXT- - - - - XGA- XXT- - TAXXT- TA- - TX- T- - X- XXXT |       |
|-------------|-----------------------------------------------------------------------------------------------|-------|
|             | 18570 18580 18590 18600 18610 18620 18630 18640                                               |       |
| Human       | TCAAGAAATTGGTAGGTCT- - GTGAGTAAATCTAATTACTGACCATATAAGAATGTAATAGCAGTGATTGATAAGGGGTT            | 15298 |
| PolarBear   | -----                                                                                         | 0     |
| Cow         | TCGATAAGTATCTGTTTCATCAGTATTCTT- - - - -                                                       | 15187 |
| Dog         | CTTAATAGTGATTTAGGAA- - AAGGGTCTGTGGGATCCT- - - - - TTTGAGTCT- TTAATGTAGAATTTTGGAGGGT          | 15063 |
| BelugaWhale | TCAATAGACATCTGTTTGTGAGTATTCTT- - - - -                                                        | 13193 |
| Donkey      | ATAGTATATGATTATATGAATATACCGTTACCTGTTGACAAATATTGAGGTTGTTTCTAATTTTTTCTGTTACAAATA                | 15002 |
| Cat         | GGTAAAAGAGGAAAGGAAGAGAAATTCTAATAAATTATCTAGACTACCAGAAAGTGAAAGTTAAAGATTGCAGGGAAGT               | 17499 |
| Ferret      | CCAAAAGAAGTTGGGGGAATAAAGGGAAAATAATAGTAT- - - - - GCAAAGTGAATTCATTTTAATTGTTTTAAAGGT            | 15057 |
| Lion        | GGTAAAAGAGGAAAGGAAGAGAAATTCTAACAAATTAT- - - - CTACCAGAAAGTGAAAGTTAAAGATTGCAGGGAAGT            | 16096 |
| Vaquita     | TCAATAGACATCTGTTTGTGAGTATTCTTTTTTTTTTTT- - - - - TTTTTTTTT- TTAATTTATTTATTCATTTATT            | 13336 |
| Pig         | CCAAAACGAATCTCCCCACTGTAGTCAT- - - - -                                                         | 13194 |

| Majority    | X- - XX- T- XXX- - - T- - - - XXXXX- TA- - - X- XCAAAGTTTAT- A- ATTCAXXTAT- XTTAGAX- T- XGA- - - - XXX- - A |       |
|-------------|-------------------------------------------------------------------------------------------------------------|-------|
|             | 18650 18660 18670 18680 18690 18700 18710 18720                                                             |       |
| Human       | TAAAAATAGAAT- - TAAAAATATTAATCATAACAATATGTGAGAGAGTGGTAGAGACACTGGAGTTTGAGTTCTGATGA                           | 15376 |
| PolarBear   | -----                                                                                                       | 0     |
| Cow         | ----- AAAGGATAT- - - ATGCAAAGAT- - GGAAAG- - - - -                                                          | 15212 |
| Dog         | TGGACCTTAGGTACCCCTCCCCTTTATCCTCCCGAAGTCTCC- ATTGTCCACATACCATGACATTCGGGCGTTAACA                              | 15142 |
| BelugaWhale | -----                                                                                                       | 13193 |
| Donkey      | GCTGCTCTGAGCATTCTTGTGCATATA- - - CCAATAGATGTGAATATTCGAGTTTCTCTAGAAGTGGAATTGCTAGATT                          | 15078 |
| Cat         | GGAATATGAAAGTTTAAAAACCTCCTAATTTACCAAATTGATGAGCTTCATGAATTCCTAGATTTAGGAAGCACAAGAA                             | 17579 |
| Ferret      | TCTGTGGAGGATTCTTTGAAAATGTAGAATTTGGAGGGCAT- AGAGTTGGGTCT- CATTGAACCCTGATTATCTCCCA                            | 15135 |
| Lion        | GGAATATGAAAGTTTAAAAACCTCCTAATTTACCAAATTGATGAGCTTCATGAATTCCTAGATTTAGGAAGCACAAGAA                             | 16176 |
| Vaquita     | TATTTTTGGCTGTGTTGGGTCTTCGTTTCTGTGCGAGGGCTTT- - - CTCTAGTTGT- - GGCAAGCGGGGGTCACTCTTCA                       | 13411 |
| Pig         | ----- AGGGCATT- - - GCTTAAACCT- - TG- - - - -                                                               | 13215 |

Dienstag, 3. Mai 2022 08:38

| Majority    | ---X---X-X-T-----A--X-X---G-CATT-----C-----X-XTXXTACAXA-X---XG-XXXXX-X---TX       |       |       |       |       |       |       |       |  |  |       |
|-------------|-----------------------------------------------------------------------------------|-------|-------|-------|-------|-------|-------|-------|--|--|-------|
|             | 18730                                                                             | 18740 | 18750 | 18760 | 18770 | 18780 | 18790 | 18800 |  |  |       |
| Human       | -TCTAGTATTGATTGGAGCTGTGTTGTCAGTTACAGTAGCTACTAGTCATTTGTTACTGAGC-----ACTTGACATGTATG |       |       |       |       |       |       |       |  |  | 15451 |
| PolarBear   | -----                                                                             |       |       |       |       |       |       |       |  |  | 0     |
| Cow         | -----TCCAAA-----                                                                  |       |       |       |       |       |       |       |  |  | 15218 |
| Dog         | CTTCAAGCATCGTGA-----ATTTGGGGGGTCATAATCACTTCACGTCCACTTGCACTCATCTGTATCATACCTTTCTCTC |       |       |       |       |       |       |       |  |  | 15217 |
| BelugaWhale | -----                                                                             |       |       |       |       |       |       |       |  |  | 13193 |
| Donkey      | ATATGGTGTGTCTGTTTTCAAGTTGATTGGATATTGAC-----TT--GTTGCTTTCCTAAGTGGTTAGGCTAGTTTATACT |       |       |       |       |       |       |       |  |  | 15152 |
| Cat         | AACCTAGCCACATCACAGTGAAAGAGCAAGCCATTAGACACACGGAAGAGCTTTAAAGCAGCCATAGAAAAACCAGATTT  |       |       |       |       |       |       |       |  |  | 17659 |
| Ferret      | AAGTCTCCATTTTCC-----AGATACCATGACATTGGGAGTTATAACTTCAGCATGTGAATTTTAGGCATCATTAAACGTT |       |       |       |       |       |       |       |  |  | 15210 |
| Lion        | AACCTAGCCACGTACAGTGAAAGAGCAAGCCATTAGACACACGGAAGAGCTTTAAAGCAGCCATAGAAAAACCAGATTT   |       |       |       |       |       |       |       |  |  | 16256 |
| Vaquita     | TCGCGGTGCGCGGGCCTCTCACTGTGCGGGCCTCTCTTGCTGCGGAGCACAGGCTCCAGACGCGCAGAGCTCAGTATTTG  |       |       |       |       |       |       |       |  |  | 13491 |
| Pig         | -----TA-----                                                                      |       |       |       |       |       |       |       |  |  | 13217 |

| Majority    | CXXXX-A-XG-X--X-X-AX--TX--X--X---XX--CTT-XX--A--A---X---X-X---AXX-TG-TX-XXX-XT-X  |       |       |       |       |       |       |       |  |  |       |
|-------------|-----------------------------------------------------------------------------------|-------|-------|-------|-------|-------|-------|-------|--|--|-------|
|             | 18810                                                                             | 18820 | 18830 | 18840 | 18850 | 18860 | 18870 | 18880 |  |  |       |
| Human       | TAGTTTAAGTTGATCTTCTACTTAATTGAAAAATACACATTTCTGAGCCTTAGTCTGAAAGAAGAATGTAAAATATCCCA  |       |       |       |       |       |       |       |  |  | 15531 |
| PolarBear   | -----                                                                             |       |       |       |       |       |       |       |  |  | 0     |
| Cow         | -----                                                                             |       |       |       |       |       |       |       |  |  | 15218 |
| Dog         | CCGTCCACTCCCCAGTAACCACTCTTGAATTTGGTGTGTTGATGCAGTACTGTGTAACCTTTCAATGTGTTATTTACTTTT |       |       |       |       |       |       |       |  |  | 15297 |
| BelugaWhale | -----                                                                             |       |       |       |       |       |       |       |  |  | 13193 |
| Donkey      | CCATTAGCAGTGAATGAGAATATCTGTTTCTGCACATCCTTTCTAATAATTGGCATTGTTGAACTTTTTAATTGTTGTCA  |       |       |       |       |       |       |       |  |  | 15232 |
| Cat         | CCCAAGAAGGAGT-AACAACGTAAAGATACAATACGCTTCTTCAGCAACATGGGGTCCAGAAGATGGTGAAATAGTAT    |       |       |       |       |       |       |       |  |  | 17738 |
| Ferret      | CAGTTCATTGCATCCTCCAT-ATACTTTCCCTCTATTTTACCTTAGGTAACCATTATCTTGAATTTGGTGTGTTACCTTT  |       |       |       |       |       |       |       |  |  | 15289 |
| Lion        | CCCAAGAAGGAGT-AACAACGTAAAGATACAATATGCTTCTTCAGCAACATGGGGATCCAGAAGATGGTGAAATAGTAT   |       |       |       |       |       |       |       |  |  | 16335 |
| Vaquita     | TAGCTCACGGGCCCAGCTGCTCCGTGGCACGTGGGATCTTCCCAGACCAGGGCTTGAACCCATGTCCCCTGCATTGGCAG  |       |       |       |       |       |       |       |  |  | 13571 |
| Pig         | -----                                                                             |       |       |       |       |       |       |       |  |  | 13217 |

Dienstag, 3. Mai 2022 08:38

| Majority    | - XX- X- X- T- XT- - X- - XX- - TA- - T- - - - - X- T- - TX- X- TATTTTXXTTAAT- ATAATGTAAAAAGAAGTATAAXT |       |
|-------------|--------------------------------------------------------------------------------------------------------|-------|
|             | 18890 18900 18910 18920 18930 18940 18950 18960                                                        |       |
| Human       | AGTTTTCATATTGGTTACATGTACAGCGGATAAATATTTTGGTAT- TTTGGGTAAATGAAATACATTATG- TGTGTTGCC                     | 15609 |
| PolarBear   | -----                                                                                                  | 0     |
| Cow         | ----- TAAAATTTTATA- ATAAAGCAGAGTCGGACACGACT                                                            | 15254 |
| Dog         | TTGTTGTATGTTCAACAAAGATATATGGTT- - - TGTTTTTACATGGTTGAACTAGT- ATAGTATAATACTACAAAGAGAA                   | 15373 |
| BelugaWhale | ----- AAAG- GATTTGTACAAAGAAGTATGTCT                                                                    | 13220 |
| Donkey      | TTCTTATGTACATGTGAATGGTACAT- - - - - TA- - - - - GATTGTTTTAATTTGAATTCGTAAGTATTAGTATT                    | 15296 |
| Cat         | CTTCAAGGTGTTGAATGAAAATAACTACCTACATGTTATTTTGTAGTCCGCTAAATTATCACTTAAAGAGAAGAACAAAA                       | 17818 |
| Ferret      | CCTGTGTATACTTTCCCTGTGTGTGTTGTT- - - TATCTTTTTGTATATTAAGCAAT- ATATGGTTTTGTTTTGCATGTTT                   | 15365 |
| Lion        | CTTCAAGGTGTTGAATGAAAACAAGTACCTACCTGTTATTTTGTAGTCTGCTAAATTATCACTTAAAGAGAAGAACAAAA                       | 16415 |
| Vaquita     | GCAGACTCTCAACCACTGCGCCACCAGGGAAGCCCTGTTTGTGAGTATTCTTAAAG- GATATGTACAAAGAAGTATATCT                      | 13650 |
| Pig         | ----- TTTATTTCTT- - - - - AAAACTAGATGAAGCATAAAA                                                        | 13248 |

| Majority    | TAXTXATCTCATTAACX- - X- TTCTXTAXXAXCAGTAXCTTXXAATGXAATATAGATT- - GGATTTACTXATTATGTTAA       |       |
|-------------|---------------------------------------------------------------------------------------------|-------|
|             | 18970 18980 18990 19000 19010 19020 19030 19040                                             |       |
| Human       | TTTTCTCTTTTTTCTTTCTTTTTTAAAGATAGGGTCTTGCTCTGTCCACCAGGCT- - GGAGTGCCGTGGCATGATCA             | 15687 |
| PolarBear   | -----                                                                                       | 0     |
| Cow         | GAAGCGACTTAGCAGAA- - - - GCAGCAGCAGCAGTAT- - TAAAATGTAATATAGATT- - GGAGTTATTGATGATGAAAA     | 15325 |
| Dog         | AATGTGCCCTATGC- - - TTGTGTGTAGTCTCGGTAACCTTGCTTTCCTGTTAAATTA- TGTATTTTGGTATTTTTTTTA         | 15448 |
| BelugaWhale | TGAAAGTCCAATTAATT- - - TTCTATAATAGAAATATATTAATAATTGAACATAAATT- - GGCATTACTGATGGTGGACA       | 13295 |
| Donkey      | TTCTTAGTTTTATTGGCCATTCTTGTTTCTTGCTGTTAAATGCTAGTTCATATAGTCTGTCCATTTTCTTTCTTTCTT- -           | 15374 |
| Cat         | TAGTTATTTTCAAGAAACCCCTTTTCCCTTACCCTCCCCCAAAAAAGGCAATTGAGGAAATTTATCAACAGACTCAGTGAA           | 17898 |
| Ferret      | AGCTTATGTCTGGGCCACATACTGTGTGTATTCTGTAACCTTGTCTTTCCGTTTGTAT- TAGTTTTACTTTTTAACCTAA           | 15444 |
| Lion        | TAGTCATTTTCAAGAAACCCCTTTTCCCTTACCCTCCCCCAAAAAAGGCAATTGAGGAAATTTATCAACAGACTCACTGAA           | 16495 |
| Vaquita     | TGAAAGTCCAATTAATT- - - TTCTATAATAGAAATATATTAATAATTGAACATAAATT- - GGCATTACTGATGGTGGACA       | 13725 |
| Pig         | CATACAGCTCTTCTGGA- - - - TCTCTAGCAAAAAGAA- - TGAT- TGCAATA- AAACT- - GATATTATCTCTT- - - - - | 13310 |

Dienstag, 3. Mai 2022 08:38

| Majority    | XGATATXTTTTGTTAATGAAGGTCCXGTCAAATTAATAACACCTGATXTXGAATTAACAGACTX- A- XXTAACGTTAACA          |       |       |       |       |       |       |       |       |
|-------------|---------------------------------------------------------------------------------------------|-------|-------|-------|-------|-------|-------|-------|-------|
|             | 19050                                                                                       | 19060 | 19070 | 19080 | 19090 | 19100 | 19110 | 19120 |       |
| Human       | TGGCAGCCTCAACCTCCTGGGCTCCAGTGACCCTCCCA- CCTCAGCCTCCCAAGTAGCTGGG- - - - ACTACAGTTGTGT        |       |       |       |       |       |       |       | 15761 |
| PolarBear   | -----                                                                                       |       |       |       |       |       |       |       | 0     |
| Cow         | AGAAATGTTTTGT CAGTGTAGGTCTTGTCAAATTA AAAACACATGATTTAGAATTAACAGAC- - - - - GA- GTTAACA       |       |       |       |       |       |       |       | 15396 |
| Dog         | CTTTATCTATGCCTATAACAACGTCTTCACTTCAGTGCCATCTGTACTTTGACTATATAAGTGTACCATAACCCTATTG             |       |       |       |       |       |       |       | 15528 |
| BelugaWhale | AGAAAT- TTTTTTCAATGAAGGGCTTGTCAAATTA AAAGCACGTGATGTAGAATTAACAGACTAGAGTTGGCCTCTAACA          |       |       |       |       |       |       |       | 13374 |
| Donkey      | - TCTTTTTTTTGTGCTGAGGAAGATTAGCCC- - TGAGCTAACATCTGTTGC- CAATCTTCCGTCTTTTTTTTTCTTGTGGAAG     |       |       |       |       |       |       |       | 15450 |
| Cat         | GAATTTCTAGAGTTTATGCTGTAGGAAGAAAGCTGATGACTCCAGAAAGGAGGTTTGGGGTAGGAAAAGTAAGGTTAACC            |       |       |       |       |       |       |       | 17978 |
| Ferret      | TCTTATATGTGGCTCTAATTCATTGCT- - TTCATTGCCATTTGGTATGTGATTATG- - AGTGTACCATTACCCTATTG          |       |       |       |       |       |       |       | 15519 |
| Lion        | GAATTTCTAGAGTTTATGCTGTAGGAAGAAAGCTGATGACTCCAGAAAGGAGGTTTGGGGTAGGAAAAGTAAGGTTAACC            |       |       |       |       |       |       |       | 16575 |
| Vaquita     | AGAAAT- TTTTTTCAATGAAGGGCTTGTCAAATTA AAA- CACGTGATGTAGAATTAACAGACTAGAGTTGGCCTCTAACA         |       |       |       |       |       |       |       | 13803 |
| Pig         | - - - - - TTTTATTGATAAGTGACCCATAAGATTATCAGCACATT- - - - - GAAGCCAGACAC- - - - - CC- TTCCGGA |       |       |       |       |       |       |       | 13369 |

| Majority    | ATGAA- - - - - TAAGGTAGTTTCTGAGTTTTXGTTTTTACACTTTGAGAATGX- TTTAACXGGXATTATXTC- AXAAGTTG     |       |       |       |       |       |       |       |       |
|-------------|---------------------------------------------------------------------------------------------|-------|-------|-------|-------|-------|-------|-------|-------|
|             | 19130                                                                                       | 19140 | 19150 | 19160 | 19170 | 19180 | 19190 | 19200 |       |
| Human       | GCCACCACACCTGGCTAATTTTTGAGTTTTTTTTGTAGAGACAGCGTCTCGCTGTATCGCTTAG- GCTGGTCTCAAAC             |       |       |       |       |       |       |       | 15840 |
| PolarBear   | -----                                                                                       |       |       |       |       |       |       |       | 0     |
| Cow         | TTGAA- - - - - TAAGGTAGCCTCTGAGTTTCAGTTTTACAGCTTTTAAAATGGGTTTAAACGGGACCTATTTTC- AAAAGTTG    |       |       |       |       |       |       |       | 15470 |
| Dog         | ACAAA- - TATTGAGGTGGTTTCCAGTTTTTCTGTTATAAATTGTGAGTAT- TATTTTGCATAT- ATCAATAAAAGTCA          |       |       |       |       |       |       |       | 15604 |
| BelugaWhale | TTGAA- - - - - CAAGGTAACCTCTGAGTTTCAGTTTTTCAACTTTTAAAGATGGGTTTAAACAGGACCTACCTC- AGAAATTA    |       |       |       |       |       |       |       | 13448 |
| Donkey      | ATTAG- - CCCTGAGCCAGCATTGTGCCATTCTTCCCTCACTTT- - - - - TTATATGTGGGTTATCACCACAGCATG          |       |       |       |       |       |       |       | 15519 |
| Cat         | AAGAAGTTGGTAGGCCTGTGGGTAAATATAATTATTGACAGTATGAGAAAGT- GATAGCAGTGATTGTTTG- ATTTGGGG          |       |       |       |       |       |       |       | 18056 |
| Ferret      | ATAAA- - TACTGAGGTTGTTTCTAAATTTTTCTGTTACAAATTGTGAGTAT- TCTTGTGCATATTATCAATAATTGTTA          |       |       |       |       |       |       |       | 15596 |
| Lion        | AAGAAGTTGGTAGGCCGGTGGGTAAATATAATTATTGACAGTATGAGAAAGT- GATAGCAGTGATTGTTTG- ATTTGGGG          |       |       |       |       |       |       |       | 16653 |
| Vaquita     | CTGAA- - - - - CAAGGTAACCTCTGAGTTTCAGTTTTTCAACTTTTAAAGATGGGTTTAAACAGGACCTACCTC- AGAAATTA    |       |       |       |       |       |       |       | 13877 |
| Pig         | GTCAT- - - - - TAAATTA- TTCCTGAGTATGTGCT- - - - - A- - - - - TTTAACATGCACTATT- - - - - GATG |       |       |       |       |       |       |       | 13418 |



Dienstag, 3. Mai 2022 08:38

| Majority    | TXTT - - AAATTGAACTATA XGTAAAATAACTAG - - ATXATAGT GXGT XAXTG- CTCAATXXAGTTTGAXXTTGGATXTT |       |
|-------------|-------------------------------------------------------------------------------------------|-------|
|             | 19210 19220 19230 19240 19250 19260 19270 19280                                           |       |
| Human       | CCT - - GGGCTCAAGTGATCCTCCTGCT- TTAGCCTTGCAAAGTGCTGGGATTACAGGACTGAGTCTGGCCACCTTTTTTC      | 15916 |
| PolarBear   | -----                                                                                     | 0     |
| Cow         | TCTTG - - ATTGAACAATATGTAAGAATTAGCACAAACATGGTACATAACTA- CTCAAATGATGGTGATGCTTTTTTATT       | 15546 |
| Dog         | CTTTTCAAATGTCTCTGGAATTGGAATCACTGG- - ATTTTAGTGTCTGTTTT- - TCATTTCAAGTTGA- - TTGGATATT     | 15677 |
| BelugaWhale | TGTTGAAGATTGAATAATATGTAAGAATTTAGCACAGAATGGC- CGTAAGTG- CTCAAA- - - - - TGATGCTTGGTATT     | 13520 |
| Donkey      | GCT - - GAACGCTGGTGTAGGTCCATACCCAAG- - ATCTGAACCTGCGAACCCGGGCTGCCAAAGTGGAAATGTGCCGAA      | 15593 |
| Cat         | TTTAAGAAGTTGAACTAAAAATATTATAACAAC- - GTGTAAGAGAGTAGTTGAGTAACTGATGTTTAAGTTCTGATGCT         | 18133 |
| Ferret      | CTATTC AAGTTTCTCTGGAGGTGGAATCACTGG- - ATTGTAGTGTGTGTCTA- - T- - TTTCAATTTAG- - TTACATGTT  | 15667 |
| Lion        | TTTAAAAAGTTGAACTAAAAATATTATAACAAC- - GTGTAAGAGAGTAGTTGAGTAACTGATGTTTAAGTTCTGATGCT         | 16730 |
| Vaquita     | TGTTGAAGATTGAATAATATGTAAGAATTTAGCACAGAATGGC- CGTAAGTG- CTCAAA- - - - - TGATGCTTGGTATT     | 13949 |
| Pig         | TC- - - - - GGAAGAACA- GTAAAACA- - - - - AATAAGGTCTCCGCC- - CTCAAG- AAGCATGTGTTCTATTCTT   | 13477 |

| Majority    | G- - - TAGTTXTTTAAXXTGTAGXXCC- - CATTTAXTTGCTGCCCTTTATTAGTAGTCAATGXG- X- T- - - - -   |       |
|-------------|---------------------------------------------------------------------------------------|-------|
|             | 19290 19300 19310 19320 19330 19340 19350 19360                                       |       |
| Human       | TTTCTTTCTTTTTTTTTTAGACGGAGTCTCCCTTTGTTGCCCAGGCTGGAGTACAGTGGCTCTATCTCTGCTTCCTGCAA      | 15996 |
| PolarBear   | -----                                                                                 | 0     |
| Cow         | A- - - TAGTTCTTTAATCTGTAAGTGAG- CGAGTAAGTGAAGTCGCTCAGTCGTGTCCGACTCTTTGT- - - - - G    | 15610 |
| Dog         | GATGTTATATTTCTAAGTGGTGTGTCAT- CACTTATATACTCCAA- - TACGAGTAGTGTGTGAGAATTCCTGTTTCTGTT   | 15754 |
| BelugaWhale | G- - - TAGTTCTTTAATTTGTAAATCC- - TATTTAGAAGGAGCCCTTTATTAGAAGTCAACTTT- - - - -         | 13578 |
| Donkey      | C- - - TTAACCTCTATGCCACAGGGCTGGCCCTGTCCATTTTCTTTTTAATGTAGTTTTTATCTTTTTTC- - - - - TT  | 15661 |
| Cat         | TCTAATATTGTTTTGAGCTATGGTGTCC- ATTATAGTAGCCACTAGTCATACGTAGTCATTGAGCACTTG- - ACATATG    | 18209 |
| Ferret      | G- - - - - CATTTCTCAGTGGTGTAC- - - - - TAATTGATACTC- - TACTAGCAGTGTATGAGAAAT- - - - - | 15720 |
| Lion        | TCTAATATTGTTTTGAGCTATGGTGTCC- ATTATAATAGCCACTCGTCATACGTAGTCATTGAGCACTTG- - ACATATG    | 16806 |
| Vaquita     | G- - - TAGTTCTTTAATTTGTAAATCC- - TATTTAGAAGGAGCCCTTTATTAGAAGTCAACTTT- - - - -         | 14007 |
| Pig         | A- - - GTGTCCTTGAATC- ACCAGTTTT- TAAAAGAGTGCTGTCATTTA- - - GTGGCA- - - - -            | 13526 |

Dienstag, 3. Mai 2022 08:38

```

Majority   -- X- - TCTGAXTXTATTTTT- - - ATGTTACXCATTC- XTGGAXCTTTT- - A- X- - GTATA X- - A- XA- XGCXTGCTATTGT
              |           |           |           |           |           |           |           |
            19370     19380     19390     19400     19410     19420     19430     19440
Human      GCTCTGCCTCCTGGGTTCTCCTGCCTCAGCCTCCCAGTAGCTGGGACTACAGGCGCCTGCCACCAC 16072
PolarBear ----- 0
Cow      ATCCCATGGACTGTAGCCTACCAGGCTCCTCCTCCATGGAATTTCCAGGCAAGAATACT- G- GAGTGGTTGCCATTTT 15688
Dog      CTGTGTCTGCCCATATTCCTTGATACTGGGCAATA- GTTGGACTTTGTGTGCAGTTGTAA- - G- GACCCCGTTGAATGGT 15830
BelugaWhale ----- GAAGTTTTTATTTTT- - - TTGTTACTGATTTCTAGGAGTTTTT- - - - - ATATATT- G- - - - TGGGTAATAAAGC 13638
Donkey   AGTGATTCTAGGAGTTTTTGTATATTATGGACAC- - TAAAGCTTTGTTATATGTATTACAGA- TAACTCCTTCCTGTCT 15738
Cat      GCTAGTCTAAATTGATCTCCAGTTGTAAAATGTAC- ATAAACTTCCAAGACTTAGTAT- - - A- AAAAAAATGTAATTTT 18283
Ferret   - TGTCTGCACATCTTTTCTGATAATTGACATT- - GTTGGACTTTTAAATTGTCCGTCT- - A- AGGAACATGTTAATGG 15794
Lion     GCTAGTCTAAATTGATCTCCAGTTGTAAAATGTAC- ATAAACGTCCAAGACTTAGTATGATAA- AAAAAAATGTAATTTT 16884
Vaquita ----- GAAGTTTTTATTTTT- - - TTGTTACTGATTTCTAGGAGTTTTT- - - - - ATATATT- G- - - - TGGGTAATAAAGT 14067
Pig      ----- AGACTGGATCC- - - - AAGCTGCATCT- - - - - GCAACCTT----- TCGTACACC 13565

```

```

Majority   TTTXTTATTTAXTTTTX- - AXT- - - - GGGTAXAAATAAAAATXTT- - TXCTXTXTTGTCTT XACTAATTTGCGXTACTG
              |           |           |           |           |           |           |           |
            19450     19460     19470     19480     19490     19500     19510     19520
Human      ACCCGGCTAATTTTTTGTATTTTAGTAGAGATGGGTTTTACCATGGTCTCGATCTCCTGACCTCCTGATCTGCCACCAC 16152
PolarBear ----- 0
Cow      TTTCTCCAAAAGATCTT- - CCCGACCCAGGGATCGAACCGAGGTC- - TCCTGCATTGTAGGCAGACGCTTTAC- CGTCTG 15763
Dog      TTATCTGTTTTAGTTT- - AATTCGGGAGTATGAATGATACATT- - TTCTTAGTT- - - - - CACTCATGTTTCTTCTC 15899
BelugaWhale ----- TTTGTTAGTTATATGT- - - - - GGTACAGATAAATTCCT- - TCCTGTCTGTGGCTTGATTTTTTGCATTGATG 13704
Donkey   GTGGCTTCTTTTTTTTACATTGAT- - GAATAGAAATTGGAAAGT- - TTTTTATTAAAGGTTGGCAACTGAGCAACAA 15814
Cat      ATATTTATTACATGTTAGTATTATTTGTGTTCAATAAAAATTGTG- - TTCTTTTTTGTCTTTTTAAAATATGGTTATTA 18361
Ferret   TGTCTTGTAAAGCTTG- - AATTCCTGAGTATGAATGATACATT- - TTCTTAGTTTATAGGCCACTAATGTTGTTACTC 15870
Lion     ATATTTATTACATGTTGATATTATTTGTGTTCAATAAAAATTGTG- - TTCTTTTTTGTCTTTTTAAAATATGGTTATTA 16962
Vaquita ----- TTTGTTAGTTATATAT- - - - - GGTACAGATAAATTCCT- - TCCTGTCTGTGGCTTGATTTTTTGCATTGATG 14133
Pig      TTG- - C----- AGCAA- - - - - TCCTGCATC- - - - - CTTAAC- CCACTG 13595

```



Dienstag, 3. Mai 2022 08:38

| Majority    | GXAXXTAAX- - - CTAG- GXTTGXATXXAT- XXTTXT- - - - - - - - - - - TAATTGGXGAATXGGGGXTA- TGAAATTXXAX- C |       |       |       |       |       |       |       |       |
|-------------|-----------------------------------------------------------------------------------------------------|-------|-------|-------|-------|-------|-------|-------|-------|
|             | 19690                                                                                               | 19700 | 19710 | 19720 | 19730 | 19740 | 19750 | 19760 |       |
| Human       | GCATTTTAAAATCCTAAGGGTAAATGCAATAGAGATAGAACGCAAATAATTGGGGAGGGGGTTGACTGAAATTAAGAT                      |       |       |       |       |       |       |       | 16391 |
| PolarBear   | -----                                                                                               |       |       |       |       |       |       |       | 0     |
| Cow         | GAATTGTGGTACTAAAGCTTTGTTGTACAAGGTACAGA- - - - - TAAACTTCCTGTCTGTGGCTATTTTTTTTTTAA- T                |       |       |       |       |       |       |       | 15983 |
| Dog         | ATAGTTAACT- - - CCTGTCTGTGGCTGTTTTGTTTT- - - - - - GCATTGATGAACAGAAGTTG- - GAAATTT- AA- C           |       |       |       |       |       |       |       | 16105 |
| BelugaWhale | -----                                                                                               |       |       |       |       |       |       |       | 13741 |
| Donkey      | GCACCCAGGATCCAAACCAGTGAATCCTGGGCTGC- - - - - - CGAAGTGGAGTGTGCGAACTTAACCACTCAGCCAC                  |       |       |       |       |       |       |       | 16025 |
| Cat         | CACAGTAAAT- - - ATAGGGATAGAATATATAACTTCTAAA- - - - - ATAATTGGAGAATGGGGTACTAAAATTAAG- C              |       |       |       |       |       |       |       | 18576 |
| Ferret      | ATGTCTATGG- - CTTGTTTTTTGTT- - - - - TTTTT- - - - - - TAATTGATGAATAGAATTTG- - GAAATTTTAA- C         |       |       |       |       |       |       |       | 16054 |
| Lion        | CACAGTAAAC- - - ATAGGGATAGAATATATAACTTCTAAA- - - - - ATAATTGGAGAATTGGGGCAACTAAAATTAAGAC             |       |       |       |       |       |       |       | 17178 |
| Vaquita     | GGGCCAGCCGCTCCGCGGCATGTGGGATCTTCCCGGAC- - - - - CGGGGCACGAACCCGCGTCCCCTGCATCGGCAG- G                |       |       |       |       |       |       |       | 14356 |
| Pig         | ----- G- - - - - - - - - - - - - - - - - A- - - - - - - - - - - T- - - - - TTTAGTTTTAA- -           |       |       |       |       |       |       |       | 13687 |

| Majority    | ATXAXATTCAA- - - - - TTCXGGXTAAA- - - - - - - - - - - AAAXX- - AAATATGTTTTAAT- TTGAAGAAAT- TTTTATTAA |       |       |       |       |       |       |       |       |
|-------------|------------------------------------------------------------------------------------------------------|-------|-------|-------|-------|-------|-------|-------|-------|
|             | 19770                                                                                                | 19780 | 19790 | 19800 | 19810 | 19820 | 19830 | 19840 |       |
| Human       | GTATAATCCAAAAGAAGGCAAAAAAAGGAAAGACACAAAGTGAGCTTATATGTTAATAGCGTGGAAAGGTTCTATGAA                       |       |       |       |       |       |       |       | 16471 |
| PolarBear   | -----                                                                                                |       |       |       |       |       |       |       | 0     |
| Cow         | TG- ATGGTTAGA- - - - - TTTGGAAATACT- - - - - - AAC- ATTAATTTGTTTTAGC- TTTAGGAAAT- TTGTATTAA          |       |       |       |       |       |       |       | 16045 |
| Dog         | ATCATTTTTATG- - - - - TTTTGGCTTAAG- - - - - - - AAAATAGATTTGGTCTTTAAA- CCTCACTCAG- GT- - GTTAA       |       |       |       |       |       |       |       | 16167 |
| BelugaWhale | -----                                                                                                |       |       |       |       |       |       |       | 13763 |
| Donkey      | GCGGCCAGCCAGAAAGTTGGAAATTTTA- - - - - - ACATCACATTTATGTTTTAGT- CTGAAGAAATCTTTTTTTTA                  |       |       |       |       |       |       |       | 16094 |
| Cat         | ATCTAATCCAAAAGAATTGAGGGGGGAA- - - - - - AAAAGTAAAAAAGGTCAAAA- GTGAACTCAT- TTTAATGGT                  |       |       |       |       |       |       |       | 18644 |
| Ferret      | ATCACATTTATG- - - - - TTTTGGTTTTAA- - - - - - GAAAT- - - - - TTTTCTTTAAC- TCGGGTTC- - - - - - TTAC   |       |       |       |       |       |       |       | 16106 |
| Lion        | ATCTAATCCAAAAGAATTGAGGGGGGAA- - - - - - AAAAGTAAAAAAGGTCAAAA- GTGAACTCAT- TTTAATGGT                  |       |       |       |       |       |       |       | 17246 |
| Vaquita     | CGGACTCTCAAC- - - - - CACTGCGCCACC- - - - - - - AGGGAAGCCCTACGTTTTAGT- TTTAAGAAAT- CTTTCTTAA         |       |       |       |       |       |       |       | 14420 |
| Pig         | -----                                                                                                |       |       |       |       |       |       |       | 13707 |

Dienstag, 3. Mai 2022 08:38

|             |                                                                                                                                                                                                          |       |
|-------------|----------------------------------------------------------------------------------------------------------------------------------------------------------------------------------------------------------|-------|
| Majority    | A- - - - TTCAGGGT X T T T X A X T - T A T A G T X T T T T X G A X T T T A T T T T G A A X A T T T A A A A A T T T T G A T T T T - C A C A T T T A G G                                                    |       |
|             | <hr/> 19850                      19860                      19870                      19880                      19890                      19900                      19910                      19920 |       |
| Human       | GGGT T G T T T A G A G C C T T T A A G G G C A A A A T T T T C T T G T C T G G T T G C A G G A A A G A G T G G C A T T G T T T T T G T T C A C T T T T A A A                                             | 16551 |
| PolarBear   | -----                                                                                                                                                                                                    | 0     |
| Cow         | A- - - - TT- - - GATCTTTTA- - - TATAGTCTTCCAGATTTTATTTTGAACATTTAAAAATTTTGATTTT- CACATTTAGG                                                                                                               | 16113 |
| Dog         | C- - - - TACAGTAATTTCTGTTTGCCAGTTTTGATACAGTAGATTTTAT- TTGGAAAGTTTTGAAAGTT- TGTTTTTCAC                                                                                                                    | 16240 |
| BelugaWhale | A- - - - CTCAAGGTTTTATACTATATAGCCTTCTGGATTTTATTTTAAAAATTTTTAAATTTTGATTTT- CACATTTAGG                                                                                                                     | 13837 |
| Donkey      | A- - - - CTCAGGTTCTTACA- - - TACAACCTTTGGGATTTTATTTTGAAGTTTAAAAATTTTGATTTTTTACGTTTAGG                                                                                                                    | 16166 |
| Cat         | G- - - - TTAGGAAAGGTTTCGTTGGAGGGTTTCTTT- - - - CAGCCTTTAA- ATGTAGAATTTTGAAGGTA- TGGAGTTGGA                                                                                                               | 18713 |
| Ferret      | A- - - - TACGGTGACTTTATTTTGAAGTTTTTTT-----GAAATTTTTGGTTTT- CACATTTAAG                                                                                                                                    | 16160 |
| Lion        | G- - - - TTAGGAAAGGTTTCATTGGAGGGTTTCTTT- - - - CAGCCTTTAA- ATGTAGAATTTTGAAGGTA- TGGAGTTGGA                                                                                                               | 17315 |
| Vaquita     | A- - - - CTCAAGGTTTTATACTATATAGTCTTCTGGATTTTATTTTAAAAATTTTTAAATTTTGATTTT- CACATTTAGG                                                                                                                     | 14494 |
| Pig         | ----- GGT T T T A C A - - - T A T A G T C C T T T G G A C T T T A T T T T G A A A T T T T T T A A T T T T T A T T T T - C A T A T T T A G G                                                              | 13772 |

|             |                                                                                                                                                                                                          |       |
|-------------|----------------------------------------------------------------------------------------------------------------------------------------------------------------------------------------------------------|-------|
| Majority    | G- C C T C A G T C T A C C T G X A A T T T A A T T T T T G T G T A X X - T X T T A X - A A A G - T T A A A T G A T T T T T T - X C - - X T T A T G G X T A A C                                           |       |
|             | <hr/> 19930                      19940                      19950                      19960                      19970                      19980                      19990                      20000 |       |
| Human       | GCTACAAAACAAGTAATGATGAGGAAAATTGGGACATGTTGAGGAAG- - TAAGTAATTTTTTGGAA- TGTAGGTTGAGT                                                                                                                       | 16628 |
| PolarBear   | -----                                                                                                                                                                                                    | 0     |
| Cow         | G- C C T C A G T C T A C C T T G A A A T T T A A T T T T A G T G T - - - - - G T T A T - A A A G G T T A C A T G G T T T T T T T C C C - C T T A T G G C T A A C                                         | 16185 |
| Dog         | A- T T T A A G G C C T C C T G G A A T T T A A G T T T T G T G T A G T A T A T G A - - A A A G G T T T A A T G A T A T T T T T T C T - - C T T A C A G A T A A C                                         | 16315 |
| BelugaWhale | G- C C T C A G T T T A C C T G T A A T T T A A T T T T T G T G T A A - - - - - T G T G T T G T A - - - - - A A T G G C T A A C                                                                           | 13890 |
| Donkey      | G- C C T C A A C C T A C C T G G A A T T T A A T T T T T G T G T A G T G T A T G G T - A A A G A T T T A A T G A T C A T T C - - C - - C T T A T G G T T A A T                                           | 16240 |
| Cat         | C- T T A A T T T A A C C C T A A T T A T C T C C C A G A G T C T C C A T T T T C A A A T A C C A T C A C A T T G G G A A T T A C A A - T T T G A A T G T A T G                                           | 18791 |
| Ferret      | G- C C T C A G T C T A C C T G G A A T T T A A T T T T T G T A T A G T G T A T T A T C A A G G T T T A A A T G A T T T C T T C C C C C T T A T G G G T A A C                                             | 16239 |
| Lion        | C- T T A A T T T A A C C C T A A T T A T C T C C C A A A G T C T C C A T T T T C A A A T A C C A T C A C A T T G G G A A T T A C A A - T T T G A A T G T A T G                                           | 17393 |
| Vaquita     | G- C C T C A G T T T A C C T A T A A T T T A A T T T T T G T G T A A - - - - - T G T G T T G T A - - - - - A A T G G C T A A C                                                                           | 14547 |
| Pig         | - - C A T C A G T C T A C C T T G G A A T T T A A T T T T T G T G T A C T C T G T T G T - A A A G G T T T A A T G A T T T T T - - - C C - T T T A T G G T T A A C                                        | 13845 |

Dienstag, 3. Mai 2022 08:38

| Majority    | AAATTTGGTACAAACTCA- ATTGAATAGTTCATGTTTT- - - - - CCCACTGATCTG- - - - - CAGTGT          |       |       |       |       |       |       |       |       |
|-------------|----------------------------------------------------------------------------------------|-------|-------|-------|-------|-------|-------|-------|-------|
|             | 20010                                                                                  | 20020 | 20030 | 20040 | 20050 | 20060 | 20070 | 20080 |       |
| Human       | TAGAGTAGTAGAAGACAAAATTTAAAAAGTAGTTTTTGACAGTAATATGGAGAGCTTTGAGTGCAAAGGATTTGCAGTGA       |       |       |       |       |       |       |       | 16708 |
| PolarBear   | -----                                                                                  |       |       |       |       |       |       |       | 0     |
| Cow         | AAATTTGCTACAAACTTG- ATTGAT- - - TTCATGTTTT- - - - - CCTACTGATCTG- - - - - CAGTAT       |       |       |       |       |       |       |       | 16238 |
| Dog         | AAACTTTGTACCAACTTA- ATTGAATAGTTCGTGTTTTA- - - T- TTTCCCACTACTATAATCTT- GCCGTTTGTCACTCG |       |       |       |       |       |       |       | 16389 |
| BelugaWhale | AAATCTGGTACAAACTCA- GTTGAATGGTTCATATTTT- - - - - CCTACTGATCTG- - - - - CAGTGT          |       |       |       |       |       |       |       | 13945 |
| Donkey      | AAATTTAGTACCAACTCA- GTTGAATAGCTCATGTGTTT- - - - - TTCCACTGATGTG- - - - - CAGTGT        |       |       |       |       |       |       |       | 16297 |
| Cat         | AATTTTGGTGGTCATTAACATTTCAGTTCGTTGCATCCTA- - - TATTTCCCTCCACTTCCACCCCAGGTAACCGCTATCTT   |       |       |       |       |       |       |       | 18868 |
| Ferret      | AGATTTAGTATCCACTTA- ATTGAATAGTTCATGTTTT- - - - - TTCCCCAGT GATCTG- - - - - CAGTGT      |       |       |       |       |       |       |       | 16297 |
| Lion        | AATTTTGGTGGTCATTAACATTTCAGTTCATTGCATCCTG- - - TATTTCCCTCCACTTCCACCCCAGGTAACCACTATCTT   |       |       |       |       |       |       |       | 17470 |
| Vaquita     | AAATCTGGTACAAACTCA- GTTGAATGGTTCATATTTT- - - - - CCTACTGATCTG- - - - - CAGTGT          |       |       |       |       |       |       |       | 14602 |
| Pig         | AAATTTG- - AATAGTTCA- GTAG- - - - - TTCATGTTTTT- - - - - CCCACAAATCTG- - - - - CAGTGT  |       |       |       |       |       |       |       | 13894 |

| Majority    | TAGTTGTC- - AGGTTXCCAT- ATATGTGTGAAACTGTCCCTGGGCTATCTCTTCTGTTTCATTGTTTGTXTCTTTC- - - -      |       |       |       |       |       |       |       |       |
|-------------|---------------------------------------------------------------------------------------------|-------|-------|-------|-------|-------|-------|-------|-------|
|             | 20090                                                                                       | 20100 | 20110 | 20120 | 20130 | 20140 | 20150 | 20160 |       |
| Human       | GGACCTTTGAAAATTGAACCTGCTTTCTCCTATCAGTATTTATGTTTA- - AATAAACTTGATTCTTTGTGAGTATTGTTA          |       |       |       |       |       |       |       | 16786 |
| PolarBear   | -----                                                                                       |       |       |       |       |       |       |       | 0     |
| Cow         | TAGTTGTC- - GTGTTGCCAT- ATATGTGAGAAACTT- CCCTGGGCTATCTCTTCTGTTTCATTGTTTGTGACTATCG- - -      |       |       |       |       |       |       |       | 16311 |
| Dog         | CTGTTATC- - AGGTTGCCAT- ATATGCATGGAACTATTTCTGGGTTA- - - - - TCTGTTTTATTGTTTGTCTTTTCC- - - - |       |       |       |       |       |       |       | 16457 |
| BelugaWhale | TAGTTGTC- - AGGTTTCCAT- ATATGTGTGAAACTTCCCTGGGCTATCTCTTTTGTTCATTGTCTATTAATGTC- - - -        |       |       |       |       |       |       |       | 14018 |
| Donkey      | CAGCTGTC- - AGATTTCTGTTATATGCATGGAACTG- TTTT GAGCTATCTCTTCTCTTTTATTATTTATCTATTCCTGTA        |       |       |       |       |       |       |       | 16374 |
| Cat         | GAATTTGG- - TGTTTGCCAT- TCCTGTGAATGTCTGTACTTTCCCTGTGTG- TGTTATTTATGTTTGTGT CATAA- - - -     |       |       |       |       |       |       |       | 18940 |
| Ferret      | CAGCTCTC- - AGGTTTCCAT- ACATGCATGGAACTGTTTCTGGACTATCTATTCTGTTTCATTGTTTATTTGTACC- - - -      |       |       |       |       |       |       |       | 16370 |
| Lion        | GAATTTGG- - TGTTTGCCAT- TCCTGTGAATGTCTGTACTTTCCCTGTGTG- TGTTATTTATGTTTGTGT CATAA- - - -     |       |       |       |       |       |       |       | 17542 |
| Vaquita     | TAGTTGTC- - AGGTTTCCAT- ATATGTGTGAAACTTTCCCTGGGCTATCTCTTTTGTTCATTGTCTATTAATGTC- - - -       |       |       |       |       |       |       |       | 14675 |
| Pig         | TTGCTGTC- - AGGTTTCCAT- TTA- GTATGAAACTTTCCCTGAGCTATCTGTTATGTTTCATTGTCTTTTCTGTC- - - -      |       |       |       |       |       |       |       | 13966 |

Dienstag, 3. Mai 2022 08:38

| Majority    | -- X- XX- - ACAATGTCTTAATTTAATGTAGCATCXXAGTAAXTTTTGG- - - XXAATCTTGXAGXGTG- XATTTTXXCAACT |       |       |       |       |       |       |       |       |
|-------------|-------------------------------------------------------------------------------------------|-------|-------|-------|-------|-------|-------|-------|-------|
|             | 20170                                                                                     | 20180 | 20190 | 20200 | 20210 | 20220 | 20230 | 20240 |       |
| Human       | TATATGTTTTTATAACTACTGTTGTAGTAACGTTTCTTTTTTTTTACTAGCTTGCTTTCATGCCACGCTGTTGATTAAAT          |       |       |       |       |       |       |       | 16866 |
| PolarBear   | -----                                                                                     |       |       |       |       |       |       |       | 0     |
| Cow         | CTATCAATACA- TGTCTTAATTTAATGTAGCATCATGATAAATCCTGGC- TGAATTTTGGT GAGTA- AATTTCCAACT        |       |       |       |       |       |       |       | 16388 |
| Dog         | ----- ACAGTGTCTTAATTTACTGTAGCGTCTTGGAGTCTTGTGGA- ATGATTTTACAATA- - TGTTCTTCAAAA           |       |       |       |       |       |       |       | 16526 |
| BelugaWhale | TTACTACCCAAATGTCTGAATTTAATGTGGCATCACAGTAAGTTTTGG- - - - AATCTTGGAGAGTG- AATTTTGCAACT      |       |       |       |       |       |       |       | 14092 |
| Donkey      | CCAGTACCACAGTGTCTTAATTTAGTGTAGCATTACAGTAAATCTTGG- - - - AATCTCGTAGAGTG- AATTTCCATAACT     |       |       |       |       |       |       |       | 16448 |
| Cat         | ----- GCAATATATGGTTTTGTTCTA- CATGTTTAACTATGTATATGTGCCACATGCTGCTTG- TATTCTCTAACT           |       |       |       |       |       |       |       | 19010 |
| Ferret      | ----- ATTGTGTCTTAATTTACTGAAGCATCTTGGAACTTTGTGGG- GTGAATTTCCAACTT- - TGTTCTTCCAGAA         |       |       |       |       |       |       |       | 16439 |
| Lion        | ----- GCAATATATGGTTTTGTTTTA- CATGTTTAACTGTGTATATGTGCCACATGCTGCTTG- TATTCTCTAACT           |       |       |       |       |       |       |       | 17612 |
| Vaquita     | TTACTACCCAAATGTCTGAATTTAATGTGGCATCACAGTAAGTTTTGG- - - - AATCTTGGAGAGTG- AATTTTGCAACT      |       |       |       |       |       |       |       | 14749 |
| Pig         | CCACTACCACAATGTCTTAACCTAATGCAACATCACAGTAAGTCTTGA- - - - AATCTTGGAGAGTA- AATTTTCCAAC       |       |       |       |       |       |       |       | 14040 |

| Majority    | TTXT----- TTTTTTXXXCATTTTCTTTATT- - ATATXTTTTTTAAG- ATCAGTTGGCTAX- - GTTCCATGAAGA        |       |       |       |       |       |       |       |       |
|-------------|------------------------------------------------------------------------------------------|-------|-------|-------|-------|-------|-------|-------|-------|
|             | 20250                                                                                    | 20260 | 20270 | 20280 | 20290 | 20300 | 20310 | 20320 |       |
| Human       | ATTTATGGGCCATTTTAAAGGCTTCTAATCTTCATTTGTGATGAACTTTTGGAGGAAGAGTTAGGTTTTGTAAGTGTGAACT       |       |       |       |       |       |       |       | 16946 |
| PolarBear   | -----                                                                                    |       |       |       |       |       |       |       | 0     |
| Cow         | T----- TT- CTTAAAAACTGTCCTTG- - - GCATTTTTTTTTCAT- - - TTATTTATATA- - - - TACA- - AATA   |       |       |       |       |       |       |       | 16441 |
| Dog         | TTGT----- CTTGA- - - - CTTTTTCTTTATC- - ATGTG- TATTTTAAAG- ATCAATTGGCTG- - AGTTCCATGAAGA |       |       |       |       |       |       |       | 16587 |
| BelugaWhale | TCAA- - - - - ATTGTCTTGGCATTTTCTTCACTGTATATATATTTTTAAG- ATCAGTTGGCTAA- - GTTCCATGAAGA    |       |       |       |       |       |       |       | 14162 |
| Donkey      | TTGTTCTTCAAATTGTCTTGGCATTTTCTTTAAC- - ATAGG- TATTTTAAAG- ATCAGTTGGCTAA- - GTTCCATGAAAA   |       |       |       |       |       |       |       | 16522 |
| Cat         | TGTT----- CTTTTTGTTC AATGTTATTATT- - TTTTAAATTTTTTAAAC- GTTTGTACTTTTGGAGAGCACAAA         |       |       |       |       |       |       |       | 19078 |
| Ferret      | TTGT----- TTTGAAGAACATTTTCTTTATC- - ATGTG- TATTTTAAAG- ATCATTGGCTG- - AGTTCCGTGAAGA      |       |       |       |       |       |       |       | 16504 |
| Lion        | TGTT----- CTTTTTGTTC AATGTTATTATT- - TTTTAAATTTTTTAAAC- GTTTGTACTTTTGGAGAGCACAAA         |       |       |       |       |       |       |       | 17680 |
| Vaquita     | TCAA- - - - - ATTGTCTTGGCATTTTCTTCACTGTATATATATTTTTAAG- ATCAGTTGGCTAA- - GTTCCATGAAGA    |       |       |       |       |       |       |       | 14819 |
| Pig         | T----- TC- CTTTAAATTGTC- TCG- - - - GCATTTTCTTTAAG- ATCAATTAATAA- - GTTCTA- - AAGA       |       |       |       |       |       |       |       | 14097 |

Dienstag, 3. Mai 2022 08:38

| Majority    | CXTTXXAGGTTTTGATTXAA- - TGTACTAAATTTATAAGTTAATTGGG- - - TXXXGTATTTGCATTATCAA- AAAATAA     |       |       |       |       |       |       |       |       |
|-------------|-------------------------------------------------------------------------------------------|-------|-------|-------|-------|-------|-------|-------|-------|
|             | 20330                                                                                     | 20340 | 20350 | 20360 | 20370 | 20380 | 20390 | 20400 |       |
| Human       | TCCAATAAACACAGTTCCAC- - TTTCTTAACTTCTCAGAAAGATACTTTGCTATTTGATACAGATAGTTGTCTAGGCAA         |       |       |       |       |       |       |       | 17024 |
| PolarBear   | -----                                                                                     |       |       |       |       |       |       |       | 0     |
| Cow         | TATATATGTGTTTGTGTGTA- - TATACAAGAT- - - AAGGTGGCTGGG- - - TTCCATGAAGACTTTT- - - - GATTTTT |       |       |       |       |       |       |       | 16506 |
| Dog         | CACTTTGGGTTTTGATTAAA- - TTGACTAAGTTTATAAGATAAATTGGG- - - GGGAGTATTTACATTATCAATAAAAATAA    |       |       |       |       |       |       |       | 16661 |
| BelugaWhale | CTTTTCAGGTTTTGATTATAGTTGTTACTAAATTTATAAGTTAATTGGAGA- GTATTGTATTTGTATTATCAAAAAAATAA        |       |       |       |       |       |       |       | 14241 |
| Donkey      | CTGTTTGGGTTTAAATTGCA- - - - - CTAATTTGTCTGTTAATTGAGGAAGTGTTGTATTTGCATTATCAA- TAAATAA      |       |       |       |       |       |       |       | 16595 |
| Cat         | CAGGGGAGGGGCAGAGAGAG- - AGGGAGAAACAGAATCTGAAGCAGTC- - - TCCAGGCTCTGAGCTGTGAGCACAGAAC      |       |       |       |       |       |       |       | 19152 |
| Ferret      | C- TTTGGGTTTCTAGTGTAT- - TGCACTAAGTTTATAAGATAAT- GGG- - - GGGAGTATTTACATTACCAATACAATAA    |       |       |       |       |       |       |       | 16576 |
| Lion        | CAGGGGAGGGGCAGAGAGAG- - AGGGAGAAACAGAATCTGAAGCAGGC- - - TGCAAGGCTCTGAGCTGTGAGCACAGAAC     |       |       |       |       |       |       |       | 17754 |
| Vaquita     | CTTCTCAGGTTTTGATTATAGTTGTTACTAAATTTATAAGTTAATTGGAGA- GTATTGTATTTGTATTATCAAAAAAATAA        |       |       |       |       |       |       |       | 14898 |
| Pig         | GTTTTCAGGTTTTGATTATAAATTGTATTAATTTATAAGTTAATTGGGA- GTACCATATTTGCATTATCAA- AAAATAA         |       |       |       |       |       |       |       | 14175 |

| Majority    | GATG- - - GCAGTGCTTGAGCTCAXAGTGAXAGATTXCTTATAACAT- - - - - TTCTTXCX- - - - TXATTTXC      |       |       |       |       |       |       |       |       |
|-------------|------------------------------------------------------------------------------------------|-------|-------|-------|-------|-------|-------|-------|-------|
|             | 20410                                                                                    | 20420 | 20430 | 20440 | 20450 | 20460 | 20470 | 20480 |       |
| Human       | GCTATTAGCAGGGTTTTCAGGTAAGACATATGTGTTTGCTATTTGTTTTAA- - - - - GCACTCTTCCC- - - - TCATTTAT |       |       |       |       |       |       |       | 17093 |
| PolarBear   | -----                                                                                    |       |       |       |       |       |       |       | 0     |
| Cow         | GATT- - - GTAGTTGT- - - - ACTACATTTATAAATTAATTGGAGAGC- - - - - ATATTTTC- - - - - TTCT    |       |       |       |       |       |       |       | 16556 |
| Dog         | GATG- - - GCAGTACTTGAACCTCAGAGGGAGAGA- - - ACTATAACGT- - - - - TTTTTTTTTGAAAATTTAC       |       |       |       |       |       |       |       | 16721 |
| BelugaWhale | GATG- - - GCAGAGCTGGAGAGAACAGTGATACTTTTCTTTGAAGAA- - - - - TTTTTCCT- - - - TTACTTCT      |       |       |       |       |       |       |       | 14300 |
| Donkey      | GATG- - - ACAATGCTTGAGCTCAAAGACAGAGA- - - AGTATAACAT- - - - - TTCTTT- - - GAAGAATTTTC    |       |       |       |       |       |       |       | 16652 |
| Cat         | CTGAT- - - GCAGGGCTTGAACCTCTGACTGTGAAATAGGTCATGACCTGAGCCAAAGTCAGATGCTTAACCAACTGAGCCAC    |       |       |       |       |       |       |       | 19230 |
| Ferret      | GATG- - - GCAATACTTGAACCTCAAAGGGAGAGA- - - CCTATAACAT- - - - - CTCTTT- - - GAAAATTTTA    |       |       |       |       |       |       |       | 16633 |
| Lion        | CTGAT- - - GCAGGGCTCGAACTCTGACTGTGAGATAGGTCATGACCTGAGCCAAAGTCAGACGCTTAACCAACTGAGCCAC     |       |       |       |       |       |       |       | 17832 |
| Vaquita     | GATG- - - GCAGAGCTGGAGAGAACAGTGATAGTTTTCTTTGAAGAA- - - - - TTTTTCCT- - - - TTACTTCT      |       |       |       |       |       |       |       | 14957 |
| Pig         | GATG- - - GTAGTGCTTGAGAGAACAAATGATATATTTCTTTGAAGAA- - - - - TTTTCCCC- - - - TTATTTCC     |       |       |       |       |       |       |       | 14234 |



Dienstag, 3. Mai 2022 08:38

| Majority    | CCATGTTXTTTTAXXTT-T- - - X- - - X- XATXCTTAXTGXAGAXA- CTTAATGCTTTAGGCAAAAAGGAAAAT        |       |
|-------------|------------------------------------------------------------------------------------------|-------|
|             | 20490 20500 20510 20520 20530 20540 20550 20560                                          |       |
| Human       | TCAAATTGTAGCAAACATCTACTACACCCATTTCCAGTTCCTTGTCTTAATAGTTCAACTATTATAAAAAGGAGTGGTAT         | 17173 |
| PolarBear   | -----                                                                                    | 0     |
| Cow         | CCATGATATTTTCTTT- - ATT- TG- T- AAAA- - GACATGCTCAATGCAGAAA- CTTGATGCTTTAGGCAAAAAGGAAAAT | 16628 |
| Dog         | CTCTGTTTTTCTGTGTAATATTTTCT- - - - - CTAATTATA- GAGGTTATG- CTTAATGCTTTAGGCAAAAAGGAAAAT    | 16792 |
| BelugaWhale | CCATACTATTTTGTFTA- - - - - ATGCTTAATGCAGAAA- CTTAATGCTTTAGGCAAAAAGGAAAAT                 | 14360 |
| Donkey      | CCCCTTCTTTCTCATGATGTTCTAATTATGAAAGACATGCTTAACATAGAAAACCTTATTGCTTTAGGCAG- - AGGAAAAT      | 16730 |
| Cat         | CCAGGTCCCCATTTTGTFTTTTTTTTTAACCACGTTTACATGTGGCTCTA- ATTCAATTTTCATTGCCATATGGTATAT         | 19309 |
| Ferret      | CTCT- TTCTTCCATATAACATTTTCT- - - - - CTAATTATA- GAGGTTATG- CTTAATGCTTTAGGCAAAAAGGAAAAT   | 16703 |
| Lion        | CCAGGTCCCCGTTTTTGTFTTTTT- - - TAACCAGGTTTACATGTGGCTCTA- ATTCAATTTTCATTGCCATATGGTATAT     | 17908 |
| Vaquita     | CCATACTATTTTGTFTA- - - - - ATGCTTAATGCAGAAA- CGTAATGCTTTAGGCAAAAAGGAAAGT                 | 15017 |
| Pig         | CTATGATTTTTTTTTTAATTATA- T- AAAA- - AGCATGCTTGATGCAGAAA- C- - AGCGTTTTAGGCAAAAAGGAAAGT   | 14307 |

| Majority    | AAATTA- - - - CCGTAATTTTACCAAAGCTAATCAGCATTGTATGTA- - - - CTTCCCATCATTTT- XCCTATATXTTA       |       |
|-------------|----------------------------------------------------------------------------------------------|-------|
|             | 20570 20580 20590 20600 20610 20620 20630 20640                                              |       |
| Human       | ATATATA- - - - TATAAACTCTTGCTTGGCTTTGGTTTGATTGAATTAATA- - - - AGGTGAGTTTTTTTTGTTTGTGTTGTTT   | 17246 |
| PolarBear   | -----                                                                                        | 0     |
| Cow         | AAGTCA- - - - - CTGGCAGTTTTACCAAAGCTAAT- - GCATTGTA- - - - - CTTCCCATCATTTG- TCCTACATGTTG    | 16691 |
| Dog         | AGATGAC- - - - - CGGAGACTTTACCCAAGTTAATCAGCACCATACGTA- - - - - CTTTCGCATCATTTT- TGCTACATATCA | 16861 |
| BelugaWhale | AAATTAATTCAGTACTGATAATTTTACCAAAGCTAATCAGCACTGTATGTA- - - - - CTTCCCATCATTTT- CCCTATATGTTA    | 14434 |
| Donkey      | AAAATAAACACCAGTAATTTTACCAAAGTTAATCAACATTGTATGTA- - - - - CTTCCCTATCATTTT- - CCCTATGTTA       | 16803 |
| Cat         | GATTATGTG- - - AATGTACCTTACCCTA- CTGACAAATATCGAGGTTG- - - - - TTTCTAATTTTTTCTGTTATAAATTA     | 19380 |
| Ferret      | AAATTAAGCAACAGTGATTTTACCCAAGTTAATTAGCACTATACGTA- - - - - CTTT- CATCATTTT- CCCTGTGTATTA       | 16776 |
| Lion        | GATTATGTG- - - AATGTACCTTACCCTA- CTGACAAATATTGAGGTTG- - - - - TTTCTAATTTTTTCTGTTATAAATTA     | 17979 |
| Vaquita     | AAATTAATTCAGTACTGATAATTTTACCAAAGCTAATCAGGACTGTATGTA- - - - - CTTCCCATCATTTT- CCCTACATGTTA    | 15091 |
| Pig         | AAAT- - - - - CCGTAATTTT- CCAAAGCTAATCAGCATTGTATGTACCTCCCATCCCATCATTTT- CCCTACATATTA         | 14378 |

Dienstag, 3. Mai 2022 08:38

|             |                                                                                                                                                         |       |       |       |       |       |       |       |       |  |
|-------------|---------------------------------------------------------------------------------------------------------------------------------------------------------|-------|-------|-------|-------|-------|-------|-------|-------|--|
| Majority    | - - - - CAAGXATTTTAAACAGCT - - TATGTGTAAXGXATGAGGAAAGAGAGATGCTTXXXX- - - - - AATAGTTCXATTTT C                                                           |       |       |       |       |       |       |       |       |  |
|             | <table border="1"> <tr> <td>20650</td><td>20660</td><td>20670</td><td>20680</td><td>20690</td><td>20700</td><td>20710</td><td>20720</td> </tr> </table> | 20650 | 20660 | 20670 | 20680 | 20690 | 20700 | 20710 | 20720 |  |
| 20650       | 20660                                                                                                                                                   | 20670 | 20680 | 20690 | 20700 | 20710 | 20720 |       |       |  |
| Human       | TGAGATGGAGTCTCGCTCTGTTGCCAGGCTGGAGTGCAGTGGTGGGATCTCGGCTCACT- - - - - GCAGGCCATTCTC                                                                      | 17319 |       |       |       |       |       |       |       |  |
| PolarBear   | - - - - -                                                                                                                                               | 0     |       |       |       |       |       |       |       |  |
| Cow         | - - - - CAAGGATTTTAAACAAC- - TGTGTGAAGGCATGAGGAAAGAGAGAGCCTTTTTTTTGGACAAATAGTTTGGATTTT                                                                  | 16765 |       |       |       |       |       |       |       |  |
| Dog         | - - - - TAAGAATTTTAAAGCAGCACATATATGTAAGGGTGAAGAAAGAGGGATACTTTG- - - - - AATAGTTCATTTT                                                                   | 16929 |       |       |       |       |       |       |       |  |
| BelugaWhale | - - - - GAAGGATTTTAAAAGCT- - TATGTGTA- GGCATGAGGAAAGAGAGATGCTTCTTT- - - - - GCCAGTTTGGATTT                                                              | 14501 |       |       |       |       |       |       |       |  |
| Donkey      | - - - - CAAGAATTTTAAAGCAGCT- - TATGTGTAAGGAATGAGGAGAGGGGGATACTTCTTT- - GACAAATACTTCATTTT                                                                | 16875 |       |       |       |       |       |       |       |  |
| Cat         | CTGCTGTGAGTATTCTTGTGCATGCATTAATAAATGCCACTATTCAGGTTTCTCTGGAAGT- - - GGAATTGCTGGATTAT                                                                     | 19457 |       |       |       |       |       |       |       |  |
| Ferret      | - - - - CAAGGATTTTAAAGCAGCT- - TATATGTAAGGGTGGAGAAAGAGGGATACTTTGAC- - - - AAATAGTTGAATTT                                                                | 16845 |       |       |       |       |       |       |       |  |
| Lion        | CTGCTGTGAGTATTCTTGTGCATGCATTAATAAATGCCACTATTCAGGTTTCTCTGGAAGT- - - GGAATTGCTGGATTAT                                                                     | 18056 |       |       |       |       |       |       |       |  |
| Vaquita     | - - - - GAAGGATTTTAAAAGCT- - TATGTGTA- GGCATGAGGAAAGAGAGATGCTTCTTT- - - - - GCCAGTTTGGATTT                                                              | 15158 |       |       |       |       |       |       |       |  |
| Pig         | - - - - CAAAGATTTTAAACAGCT- - TAGGTGTAAGGCATGAGGAACAAGAGATGCTTTTTT- - GACATATAGTTCAGTTT                                                                 | 14450 |       |       |       |       |       |       |       |  |

|             |                                                                                                                                                         |       |       |       |       |       |       |       |       |  |
|-------------|---------------------------------------------------------------------------------------------------------------------------------------------------------|-------|-------|-------|-------|-------|-------|-------|-------|--|
| Majority    | TT- CCAAAGTTATT- - - - GXTTTATTX- XT- XT- - - - - X- - - - - X- - - - - ATX- - AGTXTT- - TTTXTATAG                                                      |       |       |       |       |       |       |       |       |  |
|             | <table border="1"> <tr> <td>20730</td><td>20740</td><td>20750</td><td>20760</td><td>20770</td><td>20780</td><td>20790</td><td>20800</td> </tr> </table> | 20730 | 20740 | 20750 | 20760 | 20770 | 20780 | 20790 | 20800 |  |
| 20730       | 20740                                                                                                                                                   | 20750 | 20760 | 20770 | 20780 | 20790 | 20800 |       |       |  |
| Human       | CTGCCTCAGCCTCC- - - - - CGAGTAGCTGGGACTGCAGGTGCCTGCCACACACCTGGCTA- - ATTTTTTGTATTTT TAG                                                                 | 17392 |       |       |       |       |       |       |       |  |
| PolarBear   | - - - - -                                                                                                                                               | 0     |       |       |       |       |       |       |       |  |
| Cow         | TT- CCAAAGTTATTTTTTTCAGATTTATTCTTTTTAAT- TGGAGGATAATTGTCTCTCAATAT- AGTATTGGCTTCTGCAA                                                                    | 16842 |       |       |       |       |       |       |       |  |
| Dog         | CT- TCAAAGTTACT- - - - - GGTTTATTTAGTGTTTTTCTG- - - - - CTGAAAATCATGTTTTTATTG- - GGCTTCAGATTTCTCAG                                                      | 16998 |       |       |       |       |       |       |       |  |
| BelugaWhale | TTTCCAAAGTTATT- - - - - GATTTATTC- - - - - A- - - - - GTACT- - TTTCTATT-                                                                                | 14538 |       |       |       |       |       |       |       |  |
| Donkey      | TT- CCAAAGTTATT- - - - - GTTTATTC- - - - - ACTACT- - TTCCTAGAA                                                                                          | 16911 |       |       |       |       |       |       |       |  |
| Cat         | AT- TGTGTGTCTGT- - - - - TTGCAAGTTGATATTGACACGTTGCATTCTAAATGGTTGTGCTAATTTATACTTTACTAG                                                                   | 19531 |       |       |       |       |       |       |       |  |
| Ferret      | TT- TCAAAGTTAGT- - - - - GGTTTATTCAGTGTTTTTCTG- - - - - CTAGAAAATTAGGTTTTACTG- - GGCTTCAGATTTCTCAG                                                      | 16914 |       |       |       |       |       |       |       |  |
| Lion        | AT- TGTGTGTCTAT- - - - - TTGCAAGTTGATATTGACATGTTGCATTCTAAATGGTTGTGCTAATTTATACTTTACTAG                                                                   | 18130 |       |       |       |       |       |       |       |  |
| Vaquita     | TTTCCAAAGTTATT- - - - - GATTTATTC- - - - - A- - - - - GTACT- - TTTCTATT-                                                                                | 15195 |       |       |       |       |       |       |       |  |
| Pig         | TT- CTAAGATCATT- - - - - GATTTATTCAGT- - T- - - - - ATTC- AGTACT- - TTCCTACAC                                                                           | 14495 |       |       |       |       |       |       |       |  |

Dienstag, 3. Mai 2022 08:38

| Majority    | XATTGTX- - - - - XX- - - - T- X- - X- - - - - - - - - - - XX- - - - G- - - - XX- - - - - - - - - - - X- X- TX |       |       |       |       |       |       |       |       |
|-------------|---------------------------------------------------------------------------------------------------------------|-------|-------|-------|-------|-------|-------|-------|-------|
|             | 20810                                                                                                         | 20820 | 20830 | 20840 | 20850 | 20860 | 20870 | 20880 |       |
| Human       | TAGAGATGGGGTTTCAACCGTGT TAGCCAGGATGGTCTAGATCTCCTGACCTTGTGATCCGCCCGCCTCGGAAATACTTTG                            |       |       |       |       |       |       |       | 17472 |
| PolarBear   | -----                                                                                                         |       |       |       |       |       |       |       | 0     |
| Cow         | TACAACAACATGAATCAGCCATAGGTATACATGTCCCCTCCCTCTTGATCCATGCTCCCACCTCTCATCAAAGTTTACTG                              |       |       |       |       |       |       |       | 16922 |
| Dog         | AATTGTATAACATTTTTTAAATTCTCCTCT- - - - - - CATATTCTGTTTATTTCTCTTGTCAGAGAGCTTATTTTATTA                          |       |       |       |       |       |       |       | 17070 |
| BelugaWhale | -----                                                                                                         |       |       |       |       |       |       |       | 14538 |
| Donkey      | AATTAT- - - - - - CT- - - - - -                                                                               |       |       |       |       |       |       |       | 16919 |
| Cat         | CAGTGTATGAGAATTCTTGTTTCTGTACGTCT- TCTCTGATAATTGGCGTTGTTGGAATTTTTAATTGTCAGACTGAGGA                             |       |       |       |       |       |       |       | 19610 |
| Ferret      | AATTGTATAGCATTTGTATTGCTGATATTA- ATATTTATATTCTGTTTATTTCTCTTGTCAGAGA- - - CATTCTACTA                            |       |       |       |       |       |       |       | 16990 |
| Lion        | CAGTGTATGAGAATTCTTGTTTCTGTACGTCT- TCTCTGATAATTGGCGTTGTTGGAATTTTTAATTGTCAGACTGAGGA                             |       |       |       |       |       |       |       | 18209 |
| Vaquita     | -----                                                                                                         |       |       |       |       |       |       |       | 15195 |
| Pig         | CATTAC- - - - - - CTG                                                                                         |       |       |       |       |       |       |       | 14504 |

| Majority    | XTTGTXXAXXXX- TCAGXTTTTTX- - - - - - - - - - - AGAATTTTATAGCATTTTTTTAATTCTCXCTTTTTATA- TTTT   |       |       |       |       |       |       |       |       |
|-------------|-----------------------------------------------------------------------------------------------|-------|-------|-------|-------|-------|-------|-------|-------|
|             | 20890                                                                                         | 20900 | 20910 | 20920 | 20930 | 20940 | 20950 | 20960 |       |
| Human       | CATTGTTGGATTGATTGGGTTTGAGCCCCT- - - - - - - - GTTGTACTTAAGTATTATGAACAAGTCTTTTATAATCTGA        |       |       |       |       |       |       |       | 17543 |
| PolarBear   | -----                                                                                         |       |       |       |       |       |       |       | 0     |
| Cow         | ATTTATTCGGTTATTCAGTACTTTGCTAT- - - TTTC- - AGAATTTTATAGCATTTTTTTAATTCTCCCCTTTTTTA- TTTT       |       |       |       |       |       |       |       | 16996 |
| Dog         | GTCTGTACAAAGA- CCAGCTTTTC- - - - - - - - - - - - CATAATTCTTTAATC- TCTGTTTTTATCATTIT           |       |       |       |       |       |       |       | 17125 |
| BelugaWhale | ----- T- - - - - CCC- - - - - - - - - - - AGAATTTTATAGCATTTTAAAATTCTGCCTTTTTAAA- TTTT         |       |       |       |       |       |       |       | 14583 |
| Donkey      | GTTTACTGGGTT- - TCATATTTCTC- - - - - - - - - - - AGAATTGTATAGCAGTTTTGAATTCTCTCCTTTGTTTCTCC    |       |       |       |       |       |       |       | 16984 |
| Cat         | ACATGTGAATAGATCTCTTGTTTACTTTGAATTTTCCCTGAGAATGGATACATTTTCTTATTTATAGGCCATTCTTGTTAA             |       |       |       |       |       |       |       | 19690 |
| Ferret      | GTCTGTACAAAGAACCAACTTTTCTATTTTTTTTT- - - - - GTTTCCATAATTCATTAGTC- TCTGTTTTTATC- TTTA         |       |       |       |       |       |       |       | 17062 |
| Lion        | ACATGTGAATAGATCTCTTGTTTAGTTTGAATTTCCCTGAGAATGGATACATTTTCTTATTTATAGGCCGTTCTTGTTAA              |       |       |       |       |       |       |       | 18289 |
| Vaquita     | ----- T- - - - - CCC- - - - - - - - - - - AGAATTTTATAGCATTTTAAAATTCTCCCTTTTTAAA- TTTT         |       |       |       |       |       |       |       | 15240 |
| Pig         | TTTTATTGAGTT- - TGAGATTTCTG- - - - - - - - - - - AGAATTTTATAGCATTTTTTTAATTCTCCCTTTTTAAAAGTTTT |       |       |       |       |       |       |       | 14569 |

Dienstag, 3. Mai 2022 08:38

|             |                                                                                                 |       |       |       |       |       |       |       |       |
|-------------|-------------------------------------------------------------------------------------------------|-------|-------|-------|-------|-------|-------|-------|-------|
| Majority    | TTTTCTCATTACAXATTTATATTTTA- - - TXTTTTT- XXTTTTATTTTT- - - - CTTXTXAAAGACCTTATTTXACXGGTT        |       |       |       |       |       |       |       |       |
|             | 20970                                                                                           | 20980 | 20990 | 21000 | 21010 | 21020 | 21030 | 21040 |       |
| Human       | ATTTCCCTTTCTAGTTTGTAATATTGAGGATAA- TAATTTCTAACTTGCATGATTGTTGTGAAGATTAATAAGACAAT                 |       |       |       |       |       |       |       | 17622 |
| PolarBear   | -----                                                                                           |       |       |       |       |       |       |       | 0     |
| Cow         | TGCTAAAAGCACATATTCATATTTTA- - - TCC- - - - - TTTAATTTTT- - - - CTTGTCAGAGGCCTTATTTTACTGGTT      |       |       |       |       |       |       |       | 17062 |
| Dog         | TTTTCTCACACTAGATTAATTTTGTC- - - TTTTAGTACACTTTAGATCCTGAACTCATTGACTTTCTTGTTTAAAAAATG             |       |       |       |       |       |       |       | 17202 |
| BelugaWhale | TATTAACAGTACACATTCATATTTTA- - - TCCTTTTGCTTTTTTTTTTTTTCTTTCTTATCAGAGACCTTATTTTACTGGTC           |       |       |       |       |       |       |       | 14660 |
| Donkey      | TGTAATAATTTAAACAT- - - CTGTA- - - - - - - - - - - TTTTCTTTCT- - - - CTTGTCAGAGACGTTATTTTATTGGTC |       |       |       |       |       |       |       | 17044 |
| Cat         | ATACCTGTTTCATGGATATAGTCTATCCATTTTCTTTTTAATGTAGTTTTTATCCTTTTTTAAATTGTTTCCTAGGAGTTT               |       |       |       |       |       |       |       | 19770 |
| Ferret      | TTTTTTTTGCTTCATGCCAGACTTGTT- - - TTTTAGTCCACTTTAGATCCTGAACTCATTGACTTTCTTGTTTAAAAAATA            |       |       |       |       |       |       |       | 17139 |
| Lion        | ATACCTGTTTCATGGATAGAGTCTATCCATTTTCTTTTTAATGTAGTTTTTATCCTTTTTTAAAGTTGTTTCCTAGGAGTTT              |       |       |       |       |       |       |       | 18369 |
| Vaquita     | TATTAACAGTACACATTCATATTTTA- - - TCCTTTTGCTTTTTTTTTTTT- - - TCTTATCAGAGACCTTATTTTACTGGTG         |       |       |       |       |       |       |       | 15314 |
| Pig         | CATTAATATTTTCGTATGTGTATTTTA- - - CCCATTT- - - TCTTTGTTTTT- - - - CTTGTCAAAGACCTTATTTTACTGGTC    |       |       |       |       |       |       |       | 14640 |

|             |                                                                                           |       |       |       |       |       |       |       |       |
|-------------|-------------------------------------------------------------------------------------------|-------|-------|-------|-------|-------|-------|-------|-------|
| Majority    | TTTTCAAAGTACCAGCTTTTGX- AATTTTTXTTTTTTGTTTCATXTTTACTAATTTCTGTTTTXTCTTTTTTTTTTCCA          |       |       |       |       |       |       |       |       |
|             | 21050                                                                                     | 21060 | 21070 | 21080 | 21090 | 21100 | 21110 | 21120 |       |
| Human       | GATAT- TGGTAGGAGCTCTTTATAATCTTTCTCTCTTATGTACAATTCAAATATATGTCGGTTTAAATACCAAATACCA          |       |       |       |       |       |       |       | 17701 |
| PolarBear   | -----                                                                                     |       |       |       |       |       |       |       | 0     |
| Cow         | TTTTCAAAGTACCACCTTCTGT- AATTTTTTTT- - CATATTTCA- - - - - - CTAATTTCTGTTTTTATCTCTTTCTACCCA |       |       |       |       |       |       |       | 17132 |
| Dog         | TGTTCAAGATTAAGGAAGATTA- GGTGATACTTTTGAGAATAAGGTTTTTTTTTTTTTTTTTTTTCTTTAATGATAGTCACAG      |       |       |       |       |       |       |       | 17281 |
| BelugaWhale | TTTTCAAAGTACCAGCTTTTGTTAATTTTTTTTTGTTTGTTTCATGATTCACTAATTTATGTTTTGTCTTTTTTTGCCCCA         |       |       |       |       |       |       |       | 14740 |
| Donkey      | TTTTCAGAGAACCAACTTTTGA- ATTTTTTTTTGTTTTGTTTCGTAATTCACTAATTTCTATTTTTATCTTTCTGCTTC- A       |       |       |       |       |       |       |       | 17122 |
| Cat         | TATACATTATGGGCCGTAAAGC- CATGTTACTTACATACATTAACCTCTGTCTGTGGCTTGTGTTTTTTTTTTTTTTTTTT        |       |       |       |       |       |       |       | 19849 |
| Ferret      | CATTCAAGATGAAGGAAGATTA- GGTGATACTTTTGGCAATAAGTTTTTGTCTTTAGAGGTCTCTTT- - - - - - - - - - - |       |       |       |       |       |       |       | 17205 |
| Lion        | TATACATTATGGGTCCTAAAGC- CATGTTACTTATGTACATTAACCTCTGTCTGTGGCTTGTGGTTTTTTTTTTTTTTTTC-       |       |       |       |       |       |       |       | 18447 |
| Vaquita     | TTTTCAAAGTACCAGCTTTTGTTAATTTTTTTTTGTTTGTTTCATGATTCACTAATTTATGCTTTTGTCTTTTTTTGCCCCA        |       |       |       |       |       |       |       | 15394 |
| Pig         | TTTTCAAAGTACCAGCTTTTGTTAATTTTTTTT- - TTTGTTTCATAATTCTCTAATTTCTGTTTTTATCTTCTGCTTTC- -      |       |       |       |       |       |       |       | 14716 |

Dienstag, 3. Mai 2022 08:38

| Majority    | - XCTAGATAXATTTTGGTA- ATT- X- XA- - TTTTATGTATACTTTA- - - - - A- X- - - - - XATXCTGAACATGTTT |       |       |       |       |       |       |       |       |
|-------------|----------------------------------------------------------------------------------------------|-------|-------|-------|-------|-------|-------|-------|-------|
|             | 21130                                                                                        | 21140 | 21150 | 21160 | 21170 | 21180 | 21190 | 21200 |       |
| Human       | CTTTAAAAAATCTGGGCTGAAATGGACACTTCTAATGTAGGAGTAGTGCTTTAGAAAATAATGCTTTGTTTCGTATTCTT             |       |       |       |       |       |       |       | 17781 |
| PolarBear   | -----                                                                                        |       |       |       |       |       |       |       | 0     |
| Cow         | - GCTAGATTTGTTTTATTA- - - - - TTTTTTGTC- ACTTT- - - - - A- - - - - CATGCTGAACATGTTT          |       |       |       |       |       |       |       | 17181 |
| Dog         | AGAGAGAGAGAGAGGGGCAGAGACACAG- - GCAGAGGGAGAAGCAGGCTCTATGCACCGGAAGCCTGACGTGGGATTTGA           |       |       |       |       |       |       |       | 17359 |
| BelugaWhale | CACTAGATCTATTTTACTGTATT- ATTA- - TTTTTGTCTACTTTAA- - - - - ATT- - - - CCATCCCGAACATGTTT      |       |       |       |       |       |       |       | 14804 |
| Donkey      | CGCTAGATTTGTTCTAGTG- - TT- - - A- - TTTTTGTCCACTTTAA- - - - - AGTAG- - - ATCCTGAACTTGTTT     |       |       |       |       |       |       |       | 17181 |
| Cat         | AATTGAATAGAATTTGGAAATTTCACTG- - TCACATTTATGTTTTAGTTCTAAGAAATTTTTCTTTAACTCAAGATCTTA           |       |       |       |       |       |       |       | 19927 |
| Ferret      | ----- TAA- - GTTGAGAAATAATC- - - - - - - - - - - - - - - - GACATATAATGCTG                    |       |       |       |       |       |       |       | 17236 |
| Lion        | - GTTGAATAGAATTTGGAAATTTTAATG- - TCACATTTATGTTTTAGTTCTAAGAAATTTTTCTTTAACTCAAGATCTTA          |       |       |       |       |       |       |       | 18524 |
| Vaquita     | CACTAGATCTATTTTACTGTATT- ATTA- - TTTTTGTCCACTTTAA- - - - - ATT- - - - CCATCCCGAACATGTTT      |       |       |       |       |       |       |       | 15458 |
| Pig         | - ACTAGATTGATTTTGTTACAT- - - - - TTTTCTGTTGACTTT- - - - - A- - - - - TATCCTGAACACATTT        |       |       |       |       |       |       |       | 14769 |

| Majority    | XTTTTCGTGTTTAAAAXTGCTXTC AAGATXAAGAAAXATXAGTTXATAXTTTGGXCA- - - - GTAAGCTTTGAATTTTAGA |       |       |       |       |       |       |       |       |
|-------------|---------------------------------------------------------------------------------------|-------|-------|-------|-------|-------|-------|-------|-------|
|             | 21210                                                                                 | 21220 | 21230 | 21240 | 21250 | 21260 | 21270 | 21280 |       |
| Human       | TTCCTAGTATTTTATGTCTAGTAACTCATAAGGAAAAAATGATCAGATAAGTATATTTT- - - TTAGATGCTGATTACAGC   |       |       |       |       |       |       |       | 17858 |
| PolarBear   | -----                                                                                 |       |       |       |       |       |       |       | 0     |
| Cow         | ATTTTCTTATTTAAAATGCATTTAAGATTAAGAAAAATCAGTTGATACGTTTGGCA- - - - GTAAGCTTTGATTTGTAGA   |       |       |       |       |       |       |       | 17257 |
| Dog         | TCCCGGGTCTCCAGGATCGCGCCCTGGGCCAAAGGCAGGCGCTAAACCGCTGCGCCACCCAGGAATCCCTGAGAATAAGT      |       |       |       |       |       |       |       | 17439 |
| BelugaWhale | A- - - - - AAAATGCATTCAAGGTGAAGAAAGATCAGTTGATAGTTTGGGCA- - - - GTAAGCTTTGACTTTTAGA    |       |       |       |       |       |       |       | 14868 |
| Donkey      | ATTTTCCTGTTTAAAATGCAGTCAAGATTAAGAAAGATCAGTTGATACTTTGGCGT- - - - TAAGTTTTGACTTTTAGA    |       |       |       |       |       |       |       | 17256 |
| Cat         | TATATAGTGGTTTTTGTGATGAAAGTTTTGAAATTTTGGTTTTTACATTTAGGGCCTC- - - AGTCTACCTGGAATTTAAC   |       |       |       |       |       |       |       | 20004 |
| Ferret      | TTTCACATGTACAGCATAATGATTTGATATATGTGTATGTTATAAAACAGT- - - - - TACCTGAGTAGGTTT          |       |       |       |       |       |       |       | 17302 |
| Lion        | TATATAGTGGTTTTTATCATGAAAGTTTTGAAGTTTTGGTTTTTACATTTAGGGCCTC- - - AGTCTACCTGGAATTTAAC   |       |       |       |       |       |       |       | 18601 |
| Vaquita     | ATTTTCTTGTAAAATGCATTCAAGGTGAAGAAAGATCAGTTGATAGTTTGGGCA- - - - GTAAGCTTTGACTTTTAGA     |       |       |       |       |       |       |       | 15534 |
| Pig         | ATTTTCATGTTTAAAATGCATTCAAGATTAAGAAAGATTAGTTGATACCTTTGGCA- - - - GTAAGCTTTGAATTTTAGA   |       |       |       |       |       |       |       | 14845 |

Dienstag, 3. Mai 2022 08:38

|             |                                                                                                              |       |
|-------------|--------------------------------------------------------------------------------------------------------------|-------|
| Majority    | GTT- - - - CATTXXXXTTTTTXXXXT - - TXX- AAGATTGAGGTATAATTGAT- XATAAAAAAXTGTATTATTT- - - G- GT                 |       |
|             | ----- ----- ----- ----- ----- ----- ----- -----                                                              |       |
|             | 21290 21300 21310 21320 21330 21340 21350 21360                                                              |       |
| Human       | ATTATTTAAATAGTAGAAATAACAACCTGTTTCAGTGATAAGACAATGAATAAATTCTGTTTCATAAACATTACAAATGTTTT                          | 17938 |
| PolarBear   | -----                                                                                                        | 0     |
| Cow         | GTT- - CTCTTTTTCTTTTTTTTTT- - - - - GAGATTGTGATATAATTGAC- - ATATAACATTATATTATTTTCAG- GT                      | 17326 |
| Dog         | TTT- - - - TAAAGTTCTT- CTTTTCTGTTTTTATGTTGAGCTATAATTTACCTATAACT- - CTGTTTGACT- - - T- GT                     | 17508 |
| BelugaWhale | GTT- - CCCTTTTATCTTTTTTTTTTTTTTTTTTAAAGATTGAGGTGTAATTGAT- GTAGAAACATTGTGTTATTTTCAG- GT                       | 14944 |
| Donkey      | GTT- - - - - - - - - - - - - CTTTCTCT- - - - - - - - - - - TTGTTGAGATATAATTGCT- - ATATAAAATTGTAATGTTTCAGGTGT | 17312 |
| Cat         | TTTAGTATATGATAAAGGTTTAATGATTTTTTCCCCCTTATGAATAACCCATTTAGTACCAACTTAATTGAAT- - - A- GT                         | 20080 |
| Ferret      | AGT- - - - TAA- - - - - - - - - - - CTATATGTGGTGATAAATGTATCACC- - - - - - - - - - - - - - - - - -            | 17334 |
| Lion        | TTT- - - - - ATGATAAAG- TTTAATGATTTTTTCCCCCTTATGAATAACCCATTTAGTACCAACTTAATTGAAT- - - A- GT                   | 18671 |
| Vaquita     | GTT- - CCCTTTTATCTTTTTTATTTT- - - - - TAAGATTGAGGTGTAATTGAT- GTAGAAACATTGTGTTATTTTCAG- GT                    | 15605 |
| Pig         | - - - - - - - CTTTTTAACTTTTTTTTTT- - - - - AAGATTAAGCTACAGTTGACCAAAAAAAACTGTATTATTT- CGG- GT                 | 14910 |

|             |                                                                                         |       |
|-------------|-----------------------------------------------------------------------------------------|-------|
| Majority    | ACA- CATAATGATTTGATGTATGTATA- TA- - XTGTGAAATAATTACCAGAA- TAAGTTTAGTTAAXATCCATCACCACA   |       |
|             | ----- ----- ----- ----- ----- ----- ----- -----                                         |       |
|             | 21370 21380 21390 21400 21410 21420 21430 21440                                         |       |
| Human       | TTA- AATATTTTTCATATGTGTGAAAAGTAGGATTA AAAATAACTTTGACAAATGCATACAATTTATATGTGTCCCCAAA      | 18017 |
| PolarBear   | -----                                                                                   | 0     |
| Cow         | ATA- CAGCATGATTTGATGTACGTATA- AAAATTGTGAAACAATTACCAGAA- TAAGTATAGTAAACATCCATTGCCACA     | 17403 |
| Dog         | ACA- CATAATGATTTGATATATGTGTA- TGTTA- - TGAACAATTACCAAGA- TAAGTTTATTTAATATCTATCACAATA    | 17583 |
| BelugaWhale | GCA- CAAAATGAATTGATGTATGTATA- TA- - TTGTGAAATGATTACCAGAA- TAAGTTTAGTTAACATCCATCACCACA   | 15019 |
| Donkey      | ACAACATAAATAATTTGATATATGTGTG- TA- - TTGTGAAACAATTACCAGAA- TAAGTTTAGTTAACATCCATCCCGCA    | 17388 |
| Cat         | TCA- TGTTTTTTTCCCCACTGATCTGCAGTGTACCTGTCAGATTTCCATAGA- TGGATGGAACCTGTTTCTGGGCTATCTG     | 20158 |
| Ferret      | ACA- CATAGTTAAAAAAATTTTTCT- TATAA- - TGAGAATTTTTAAGATT- TTA CTCTATTAGCTCTTCAACGCA- TA   | 17408 |
| Lion        | TCA- TGTTTTTTTCCCCACTGATCTGCAGTGTACAGTGTGATTTCCATAGA- TGGATGGAACCTGTTTCTGGGCTATCTG      | 18749 |
| Vaquita     | GCA- CAACATGAATTGATGTATGTATA- TA- - TTGTGAAATGATTACCAGAA- TAAGTTTAGTTAACATCCATCACCACA   | 15680 |
| Pig         | GCA- GAACATGATTTGATACATGTATA- TA- - TTGTGAAATGAT- ACTAGA- - TAAGTTTAGTTAACATCTGTCACCACA | 14983 |

Dienstag, 3. Mai 2022 08:38

|             |                                                                                                                                                                                                                            |       |
|-------------|----------------------------------------------------------------------------------------------------------------------------------------------------------------------------------------------------------------------------|-------|
| Majority    | CATAGTTAAATTTTTTTC- - - CTTGTGATGAGAAGTTXTAAXGTTTATTXXXX- AX- - TCTCGX- - - A- - - - T- - T- -                                                                                                                             |       |
|             | <div style="display: flex; justify-content: space-around;"> <span>21450</span> <span>21460</span> <span>21470</span> <span>21480</span> <span>21490</span> <span>21500</span> <span>21510</span> <span>21520</span> </div> |       |
| Human       | AGCTGGAGGGCAGTGTACCAAATAG- - AGTAGTTTTCTCCAGGTTGATGGGATTAGTTTTTTGTAATTC TTATATATT                                                                                                                                          | 18095 |
| PolarBear   | -----                                                                                                                                                                                                                      | 0     |
| Cow         | CATAGTTAAATTTTTTTC- - - CTTGTGCTGAGAACTTTTAAGATTTACTTTAGGAAACTTTTGGAGAAGGCAATGGCAC                                                                                                                                         | 17479 |
| Dog         | TAACATTA AAAATTTTTTTC- - - GT- - - TATGAGAATTTTAAAGATTTTATTAGCACTTTGAAATGTACAATATAGTAT                                                                                                                                     | 17655 |
| BelugaWhale | CATAGTTAAATTATTTTC- - - CTTGTGATGGGAATTTCTAAGATTTAT- - - - - TCTCTG- - - - -                                                                                                                                               | 15070 |
| Donkey      | CATAGCTACAATTTTTTTTTGGACTTGTGATGAGAAGTTTTAAAATTTACTCTCTCAGCAACTTTT CAGATATACAGTATTG                                                                                                                                        | 17468 |
| Cat         | TTCTGTTTCATTGTTCGT- - - CTGTCCTGTACCAGTACCACAGTGTCTTAATTTAGTGTAGCGTCACAGTAAGTCTTGG                                                                                                                                         | 20234 |
| Ferret      | CAATGCAAAAAC- - - - - - - - - - - - - AGTAACAGCGCTGTTTCATTGCGTCTCCAGGATTCAT- - - TTATCT                                                                                                                                    | 17462 |
| Lion        | TTCTGTTTCATTGTTTGT- - - CTATCCTGTACCAGTACCACAGTGTCTTAATTTAGTGTAGCGTCACAGTAAGTCTTGG                                                                                                                                         | 18825 |
| Vaquita     | CATAGTTAAATTATTTTC- - - CTTGTGATGGGAATTTCTAAGATTTAT- - - - - TCTCTG- - - - -                                                                                                                                               | 15731 |
| Pig         | TATAGTTAATTTTTTCT- - - CTTGTGATGAGAA- - - - - - - - - - - - - - - - - - T- TC- - - - -                                                                                                                                     | 15017 |

|             |                                                                                                                                                                                                                            |       |
|-------------|----------------------------------------------------------------------------------------------------------------------------------------------------------------------------------------------------------------------------|-------|
| Majority    | X- X- - T- TAXX- - - X- TXXXA- A- - TT- - ATC- TXAXGX- X- X- - TXXXX- - TX- - TXX- - - - - TXTGTXT- TT- - XAXC                                                                                                             |       |
|             | <div style="display: flex; justify-content: space-around;"> <span>21530</span> <span>21540</span> <span>21550</span> <span>21560</span> <span>21570</span> <span>21580</span> <span>21590</span> <span>21600</span> </div> |       |
| Human       | TTCTCTATATCCACATTTTAAGTATTTTATGATAAAGTTATTAATATTGATAAAGTTATTAATGTTGCTTAATTGATTA                                                                                                                                            | 18175 |
| PolarBear   | -----                                                                                                                                                                                                                      | 0     |
| Cow         | CCCTGTCCAGTACTCTTCTTGCCTGGAAAATCCCATGGACGGAGGCCTGGTAGGCTA- - CAGTCCATGGGGTCGCTGA                                                                                                                                           | 17557 |
| Dog         | TTTTATTTACAGTAACTGCTATACGTTGCATCCTCAGGATTCATTTATCTTATAACTGC- - AAGTTTGTATGTTTTGACC                                                                                                                                         | 17733 |
| BelugaWhale | -----                                                                                                                                                                                                                      | 15070 |
| Donkey      | T TAACTCTAGTCACCATTCTGTACATTACATCCCCAGGACTCAGATATTTTATAACTGC- - AAGTTTGTACCTTTT GATC                                                                                                                                       | 17546 |
| Cat         | AACCTTGTAGAGTGAATTT CACA ACTTTGTTCTTCAAAATTGTCTTG GCACTTTCTTTA- - CCATGTGTATTTTAAGATC                                                                                                                                      | 20312 |
| Ferret      | TG TAACTGCCAACAA- - AACATAACTTGTATGTTTTGG- - CCATCCATTTTGTCTATCC- - - - - TTTACCTCTGGCAACC                                                                                                                                 | 17533 |
| Lion        | AACCTTGTAGAGTGAATTT CACA ACTTTGTTCTTCAAAATTGTCTTG GCACTTTCTTTA- - CCATGTGTATTTTAAGATC                                                                                                                                      | 18903 |
| Vaquita     | -----                                                                                                                                                                                                                      | 15731 |
| Pig         | -----                                                                                                                                                                                                                      | 15017 |





Dienstag, 3. Mai 2022 08:38

| Majority    | -----X-----X---G-----X-----X-----TXXX--T-TTTGTTTTTTTTTXXCAACATX                  |       |       |       |       |       |       |       |       |
|-------------|----------------------------------------------------------------------------------|-------|-------|-------|-------|-------|-------|-------|-------|
|             | 21770                                                                            | 21780 | 21790 | 21800 | 21810 | 21820 | 21830 | 21840 |       |
| Human       | ATTGCAAAACCCATCTCCAGAACTTTTTGGAGAAGTGAAGTCTATACTGATTTTAAAACTCCCTCTTTTGTCTTCTGC   |       |       |       |       |       |       |       | 18411 |
| PolarBear   | -----                                                                            |       |       |       |       |       |       |       | 0     |
| Cow         | ACTGAAGTGACTTAGCGTAGCGTAGTGTAGCATAGCGTAGCGTTAGGCAACTTTCAAATATTGTAACTATATCAGCATG  |       |       |       |       |       |       |       | 17792 |
| Dog         | -CCCTCAAGGCCCATCCATGTCATAAATGATAGGGT-TTCCGTTTTTTTTTTTTTTTTTTTTTTTTTTTTTTCTAATGGC |       |       |       |       |       |       |       | 17963 |
| BelugaWhale | -----ATTGTAACTATATCAGCATG                                                        |       |       |       |       |       |       |       | 15110 |
| Donkey      | -----TT-----TTTTTGTGGCTTGTCTGTCTTTTGTGAGGAAGAT                                   |       |       |       |       |       |       |       | 17660 |
| Cat         | GACTGCACAGTGTGCTTGGGATTCTCTTTCTGCCCC-TCCCCTGCTCCCGTGCATGCTCTCCCTCTGTCTCTCAAACATT |       |       |       |       |       |       |       | 20548 |
| Ferret      | -TCCTCAAGGTCCATCCATGTTGTTGTAATGG-----TAGGATTTCTTTTTTTTTGTTTAAATGCC               |       |       |       |       |       |       |       | 17719 |
| Lion        | GACTGCACAGCGTGCTTGGGATTCTCTTTCTGCCCC-TCCCCTGCTCCCATGCATGCTCTCCCTCTGTCTCTCAAACATT |       |       |       |       |       |       |       | 19139 |
| Vaquita     | -----ATTGTAACTATATCAGCATG                                                        |       |       |       |       |       |       |       | 15771 |
| Pig         | -----                                                                            |       |       |       |       |       |       |       | 15025 |

| Majority    | TGXAXXATXTTX-AXX-XX-ATTGTCAXTATTCATTTAT-TTATTAATT-X-----X--X-----X-G-----GGT     |       |       |       |       |       |       |       |       |
|-------------|----------------------------------------------------------------------------------|-------|-------|-------|-------|-------|-------|-------|-------|
|             | 21850                                                                            | 21860 | 21870 | 21880 | 21890 | 21900 | 21910 | 21920 |       |
| Human       | TGG---TAACCAGCATTCTATTTTCTGTGTCTATGAATTTGACTACTTTAAA-----TACCTCACATA-----AGT     |       |       |       |       |       |       |       | 18474 |
| PolarBear   | -----                                                                            |       |       |       |       |       |       |       | 0     |
| Cow         | TGTTACATGGTCAGGGCTA-ATTTATGGGCTTCTTGGT-AGCTCAGCTGGTAAACAATCCGCCTGCAGTGTGGGA-GAT  |       |       |       |       |       |       |       | 17869 |
| Dog         | TGAATAATATCCACACCACATTGTCTTTATCCATTCAT-TCATTGATGGACATTTAGGTTAGTTTCCATGTCTT--GGT  |       |       |       |       |       |       |       | 18040 |
| BelugaWhale | CGGTACATTAT-----ATTGTCAGGAGTCATTTAT-GTCATAACT-----                               |       |       |       |       |       |       |       | 15149 |
| Donkey      | TGGCCCTGAGCTAACATC-TGTTGCCAATCTTCATCTTTTTGCTTGAGG-----AG-----G-ATT----GTC        |       |       |       |       |       |       |       | 17717 |
| Cat         | TAAAGAAGTTTATAGGATA-ATTGTAATATTATATTTACATTATCAATAAAATAAGATGGCAGTGCTTGAGCTCAAAGGT |       |       |       |       |       |       |       | 20627 |
| Ferret      | TGAATAATATCCACACCACATTGTCTTTATCCATTCAT-CCATCGAAGGACATTTAGGTTAGTTTCCATGGCTT--GGT  |       |       |       |       |       |       |       | 17796 |
| Lion        | TAAAGAAGTTTATAGGATA-ATTGTAATATTATATTTACATTATCAATAAAATAAGATGGCAGTGCTTGAGCTCAAAGGT |       |       |       |       |       |       |       | 19218 |
| Vaquita     | CGGTACATTAT-----ATTGTCAGGAGTCATTTAT-GTCATAACT-----                               |       |       |       |       |       |       |       | 15810 |
| Pig         | -----                                                                            |       |       |       |       |       |       |       | 15025 |

Dienstag, 3. Mai 2022 08:38

| Majority    | XGGAAXTT- TAXCATTGACA- - TCAXCCTTCXCTT- AT- X- ATXTTXXCCXCTACAGAGTTXTT- XCCTGXAGXG      |       |       |       |       |       |       |       |       |
|-------------|-----------------------------------------------------------------------------------------|-------|-------|-------|-------|-------|-------|-------|-------|
|             | 21930                                                                                   | 21940 | 21950 | 21960 | 21970 | 21980 | 21990 | 22000 |       |
| Human       | GGAATTATACAGTATAGTTAA- - GCATCCCTAATCTGAAAATCCAAAGTCTGAATGCTACAAAATCTGAAACTGGTGTG       |       |       |       |       |       |       |       | 18552 |
| PolarBear   | -----                                                                                   |       |       |       |       |       |       |       | 0     |
| Cow         | CTGAGTTTGTTCCTCGGTTG- - GCAAGATCCCCAGATGAGGGAACGGCTACCCACTGCAGTATTCTGGCCTGGGAAA         |       |       |       |       |       |       |       | 17946 |
| Dog         | TGTA AATT- CTGCATTGAACA- - TGGGGATGCAGGTATCTTTGAGATAGTGATATCCTTCAGATAAATCCCAGAAGTG      |       |       |       |       |       |       |       | 18116 |
| BelugaWhale | CTGAGTTTGTACCTTTTGACC- - ACCACCTTCACTAATT- - - - - CCTATCCCCCT- - CCGTCCCTCCCTAAAAGG    |       |       |       |       |       |       |       | 15216 |
| Donkey      | ACTGAGCT- - AACGTCTGTC- - - CCAGTCTTCTTGTTTTT- ACGTGGGATGCCACCACA- - - CTGTGGCTTGGT GAG |       |       |       |       |       |       |       | 17787 |
| Cat         | AGGAAACTGTAACATTTGAAAAATTTACCTCTTTCTTCCCCATAATATTTTCTGCAATTATAGAGGTTATGCTTAATGCG        |       |       |       |       |       |       |       | 20707 |
| Ferret      | TGTA AATT- TTGCAGTGGCCAA- - TAGGCATCTTTTTTGGAGATCGTGATTTTCTCTCCTTCAGGTATATCCCAGGAGTG    |       |       |       |       |       |       |       | 17873 |
| Lion        | AGGAAACT- - AACATTTGAAAAATTTATCTCTTTCTTCCCCATAATATTTTCTGCAATTATAGAGGTTATGCTTAATGCA      |       |       |       |       |       |       |       | 19296 |
| Vaquita     | CTGAGTTTGTACCTTTTGACC- - ACCACCTTCACTAATT- - - - - CCTATCCCCCTACGTGTCCTCCCTAAAAGG       |       |       |       |       |       |       |       | 15880 |
| Pig         | ----- CCCCCA- - - - - TACCCGCTACA- - - T- - - - - GGAAA                                 |       |       |       |       |       |       |       | 15049 |

| Majority    | X- - - - - X- - TX- TAGXTTATATTAC- X- - - - - X- TTXGACAAAATTGX- - - - - X- - - - ACXTT |       |       |       |       |       |       |       |       |
|-------------|-----------------------------------------------------------------------------------------|-------|-------|-------|-------|-------|-------|-------|-------|
|             | 22010                                                                                   | 22020 | 22030 | 22040 | 22050 | 22060 | 22070 | 22080 |       |
| Human       | TGTTTTTTTTTTTTTTTTTTTTTTTGGAGACGGAGTCTTACTCTGTGCGCCAGGCTGGAGTGCAGTGGCGCG- ATCTC         |       |       |       |       |       |       |       | 18631 |
| PolarBear   | -----                                                                                   |       |       |       |       |       |       |       | 0     |
| Cow         | TGGACAGAGGGGTCTGGCAGGCTACAGTCCATGGGGTCGCAAAGAGTTGGACACGACTGAGCGACTTCCACTTTCACTTT        |       |       |       |       |       |       |       | 18026 |
| Dog         | ----- GGATTGCTGGATTATATAATTAT- - - - - ACTTTTAAAAATTTGG- - - - - GGGAGAACCTT            |       |       |       |       |       |       |       | 18166 |
| BelugaWhale | C- - - - - CTGGCTGTGCTTC- - - - - TGGATACCACTG- - - - - TT                              |       |       |       |       |       |       |       | 15244 |
| Donkey      | C- - - - - AGTGCTAGGT- - C- - - - - CGTGCCAGGATTCA- - - - - GACCTA                      |       |       |       |       |       |       |       | 17820 |
| Cat         | TTAGCCAAAAAGGAAAGTAAATTAATCACCAGTG- - - - - ATTTTACCAAAGTTAATCAGCACT- GTATGCACTTC       |       |       |       |       |       |       |       | 20777 |
| Ferret      | ----- GGATTGCTAGATTGTATAATGAT- - - - - ACTTTAACAAAATTCGTGGGTG- - - GGGGGACCTT           |       |       |       |       |       |       |       | 17929 |
| Lion        | TTAGCCAAAAAGGAAAGTAAATTAATCACCAGTG- - - - - ATTTTACCGAAGTTAATCAGCACT- GTATATACTTC       |       |       |       |       |       |       |       | 19366 |
| Vaquita     | C- - - - - CTGGCTGTGCTTC- - - - - TGGATACCACTG- - - - - TT                              |       |       |       |       |       |       |       | 15908 |
| Pig         | -----                                                                                   |       |       |       |       |       |       |       | 15049 |

Dienstag, 3. Mai 2022 08:38

| Majority    | TTCTC- TTXCX- - - - - A- A- - GGTTTCTGCCAGCTTA- XX- - - - AX- - - - AG- X- A- XXGXGTGTTTCXXTTTTTC |       |
|-------------|---------------------------------------------------------------------------------------------------|-------|
|             | 22090 22100 22110 22120 22130 22140 22150 22160                                                   |       |
| Human       | TGCTCACTGCAA- GCTCCACCACCCGGGTT CACGCCATCTTCCTGAGTAGCTGGGACTACAGGCGCCCGCCACCACGCCC                | 18710 |
| PolarBear   | -----                                                                                             | 0     |
| Cow         | T TCACTTTATGTCAGAATTCCAAGTTTGTACCTTTTGGCCACCATCTTTATTTACTGCCCCAGACTGTGCTTCGGAATTC                 | 18106 |
| Dog         | TACTGTTTTCC- - - - - ATAGGGGCTGCA- CCAGTTTACATTCCTACCAGTAGTGAATAAGGG- ATCTCTTTTCCC                | 18234 |
| BelugaWhale | TTC- - - - - TGTATCTGTGAGTTCA- - - - - GTGTTTTGGGTTTT                                             | 15277 |
| Donkey      | TGAACCCTGGGC- - - - - TCCCAAAGCAGAGTCTGCAAACCTTA- - - - - ACCACTATGCCACCAGACTGGTCTGGTTTTT         | 17888 |
| Cat         | CCATCATTTCTCTATATATTATAAAGATTTTAAAGCAGCTTGTATATAAAGGGTGAGGAAAGAGGGACATGTCTTTGATA                  | 20857 |
| Ferret      | TACTGTTTTCC- - - - - ATAGTGGCTGC- - CCAGTTTACATTCCTACCAGTAGTATAACAAGGA- ATCTCTTTTTTC              | 17996 |
| Lion        | CCATCATTTCTCTATATATTACAAAGATTTTATGCAGCTTATATATAAAGGGTGAGGAAAGAGGGATACGTCTTTGATA                   | 19446 |
| Vaquita     | TTC- - - - - TGTATCTGTGAGTTCA- - - - - GTGTTTTGGGTTTT                                             | 15941 |
| Pig         | ----- GTTCCTCCCGGCCA- - - - - G- - - - -                                                          | 15064 |

| Majority    | TATX- - T- - - - TTTTTAXAAAT- TACATX- - - TTTAXTTCATACXGTGTTT- XCTXTCTCT- - TTXTAACTXGTTTTCA |       |
|-------------|----------------------------------------------------------------------------------------------|-------|
|             | 22170 22180 22190 22200 22210 22220 22230 22240                                              |       |
| Human       | GGCTAATT- - - TTTTGTATATATATATATATTTTTTTAGTAGAGACGGGGTTTCACTGTAGCCAGGATGGACTCTTATCTC         | 18787 |
| PolarBear   | -----                                                                                        | 0     |
| Cow         | AGTGTTTTGCGTTTTTTAAGAGTTTACAGGTAATGAGATCATACAGTGTGTTGTCTCTCTCTCTCTGACTTATTTTAC               | 18186 |
| Dog         | TACA- - - - - TTCTTATAAAA- TACTT- - - - TTTATTTATTGTTTTTTTTTTGTAATAACCATTATAACAGGTGTGAG      | 18301 |
| BelugaWhale | TGTTTGTT- - - - TTTTAAAGAATCTACATATAAATGAGATCATATGGTGTGTTTGTCTTTCTCT- - - - - GACTTGTTTAC    | 15347 |
| Donkey      | TAT- - - - - TTTTAA- - GTTCAACATATAAGTACATCTTACAGTATTTGTTTTTCTCT- GTTTTATTTTGCATAGT          | 17956 |
| Cat         | AATAGTTCA- ATTTCTTCCAAAGTTACTAG- - - TTTATTTACTGCTTTCTTA- - GAAAATTATATTTTACTGGGTTTAC        | 20931 |
| Ferret      | CACA- - - - - TTCTACCAA- - TACTT- - - - TTTATTTCTTGTCTTTTTG- - ATAATAGCCTTTCTAACAGGTGTGAG    | 18060 |
| Lion        | AATGGTTCA- ATTTCTTCCAAAGTTACTAG- - - TTTATTTACTGCTTTCTTA- - GACAATTATATTTTACTGGGCTTAC        | 19520 |
| Vaquita     | TGTTTGTT- - - - TTTTAAAGAATCTACATATAAATGAGATCATATGGTGTGTTTGTCTTTCTCT- - - - - GACTTGTTTAC    | 16011 |
| Pig         | -----                                                                                        | 15064 |

Dienstag, 3. Mai 2022 08:38

| Majority    | XTAGCCC- ATGACCXCATT- - - - GTTGTTCACAAATTGCATXATTTXCT- XTTT- TGXTGCTGAGTAXTXTT- A- - - - |                                            |                                                       |                 |               |           |           |       |       |
|-------------|-------------------------------------------------------------------------------------------|--------------------------------------------|-------------------------------------------------------|-----------------|---------------|-----------|-----------|-------|-------|
|             | 22250                                                                                     | 22260                                      | 22270                                                 | 22280           | 22290         | 22300     | 22310     | 22320 |       |
| Human       | CCGACCTCGT                                                                                | GATCCGCCTGCCTCGGCCT                        | CCCAAAGTGC-                                           | TGGGATTACAGGCCT | GAGCCACCGCGC- | CTGGCC-   | - - - - - |       | 18859 |
| PolarBear   | - - - - -                                                                                 | - - - - -                                  | - - - - -                                             | - - - - -       | - - - - -     | - - - - - | - - - - - |       | 0     |
| Cow         | TTAGCCCTATGACCTC                                                                          | ATTTGCATGTTGTTGCAAATGGTAAATTCTTCTT-        | - - - - T-                                            | TATAGCTGT-      | - - - - -     | TATGAATGT |           |       | 18255 |
| Dog         | GTGATAG- ATA-                                                                             | CCCCATT- - - - -                           | GTGATTTTAATTTGCATTACTCTGATGATTCGTGATGTTGACCACTTTTTTA- | - C-            |               |           |           |       | 18371 |
| BelugaWhale | TTAGCCTAATGACCTC                                                                          | ATTTGCATGTTGTTGCAAATGGTAGGATTTTCTTCTGTT-   | TATAGCTGAATAGTATTTCAATTGT                             |                 |               |           |           |       | 15426 |
| Donkey      | ATAATGCCCTCAAGACCCATCCATGTTGTCACAAATGACAAGATTTTCT-                                        | - TTTTTATGGCTGAATAATATCCACTAT              |                                                       |                 |               |           |           |       | 18034 |
| Cat         | ATATCTC- AGAATTCTATA-                                                                     | - - - - - GCATTTTTAAATTCCTTTTTGTTGCTAATTT- | TGATCATTTGTATTCTGTTT-                                 | - - - -         |               |           |           |       | 21000 |
| Ferret      | GTGGTA- - - - -                                                                           | CTTCATT- - - - -                           | GTGGTTTTGAATTGCATTACTCTGATGATCTGTGATGTTGAGTACTTT-     | - - - - -       |               |           |           |       | 18121 |
| Lion        | ATATCTC- CGAATTCTATA-                                                                     | - - - - - GCATTTTTAAATTCCTTTTTATTGCTAATTT- | TGATAATTTGTATTCTGTTTATTT                              |                 |               |           |           |       | 19593 |
| Vaquita     | TTAGCCTAATGACCTC                                                                          | ATTTGCATGTTGTTGCAAATGGTAGGATTTTCTTCTGTT-   | TATAGCTGGATAATATTTCAATTGT                             |                 |               |           |           |       | 16090 |
| Pig         | - - - - -                                                                                 | - - - - -                                  | - - - - -                                             | - - - - -       | - - - - -     | - - - - - | - - - - - |       | 15064 |

| Majority    | - T- - ATTXACCACXTTTTX- - - - - TTTAC- XGTTGXTX- AXACCTATGTTXTTCCATXTTTTTCTTTT- - - - - TX |                                                                |                                            |             |           |           |           |       |       |
|-------------|--------------------------------------------------------------------------------------------|----------------------------------------------------------------|--------------------------------------------|-------------|-----------|-----------|-----------|-------|-------|
|             | 22330                                                                                      | 22340                                                          | 22350                                      | 22360       | 22370     | 22380     | 22390     | 22400 |       |
| Human       | - - - - AATCTGAAACTTTTTGAGCA-                                                              | - - - CTTACTTGATGCTCAAAGGAAGT                                  | GCTTAGTGGAGCATTTTGGATTTTAGATTT             |             |           |           |           |       | 18932 |
| PolarBear   | - - - - -                                                                                  | - - - - -                                                      | - - - - -                                  | - - - - -   | - - - - - | - - - - - | - - - - - |       | 0     |
| Cow         | GTAGATTAACCACATTTTC-                                                                       | - - - - - TTCATCCATTGATGGAGACCTAAGTTGTTTCC-                    | - - - - -                                  | CT-         | - - - - - | G         |           |       | 18309 |
| Dog         | - - - - - ATGATGACCACTTT-                                                                  | - - - - - CTTAC-                                               | - - - - - ATACCAAGTGGCCATCAGCCTTTTTTCTTTG- | - - - - -   |           |           |           |       | 18421 |
| BelugaWhale | ATAGATTAACCACATTTTC-                                                                       | - - - - - TTCATGTGTTGATGGAGACCTAGGTTGTTCCCATGTCTTGACTGTTGTAATA |                                            |             |           |           |           |       | 15498 |
| Donkey      | ATGTATATACCACAATTTCTTGATCCATTCACCTACTGATGGACACTTATATTGTTTGCATGTCTTGGTTGTTGTAATA            |                                                                |                                            |             |           |           |           |       | 18114 |
| Cat         | CTCTTGTCAGAGACCTTAT-                                                                       | - - - - - TTTACTGGTCTGTA-                                      | AAAAGAATCAGCTTTTCTTATTTTTTTTTTTT-          | - - - GTTTC |           |           |           |       | 21068 |
| Ferret      | - - - - -                                                                                  | - - - - - CTTAC-                                               | - - - - - ATACTTATTGGCCATATACCTGTCTTCTTTG- | - - - - -   |           |           |           |       | 18157 |
| Lion        | CTCTTGTCAGAGACCTTAT-                                                                       | - - - - - TTTACTGGTCTGTA-                                      | AAAAGAATCAGCTTTTCTTATTTTTTTTTTTTTTTT       | GTTTC       |           |           |           |       | 19664 |
| Vaquita     | ATAGATTAACCACATTTTC-                                                                       | - - - - - TTCATGTGTTGATGGAGACCTAGGTTGTTCCCATGTCTTGACTGTTGTAATA |                                            |             |           |           |           |       | 16162 |
| Pig         | - - - - -                                                                                  | - - - - -                                                      | - - - - -                                  | - - - - -   | - - - - - | - - - - - | - - - - - | G     | 15065 |

Dienstag, 3. Mai 2022 08:38

| Majority    | GTGXTATAATXAATCTGGGG- TGTAXXTATCTTTTATTGAXTGTGATTTTATTTCTTTTCATATAAATTCXTXGXA- TGGA  |       |       |       |       |       |       |       |       |
|-------------|--------------------------------------------------------------------------------------|-------|-------|-------|-------|-------|-------|-------|-------|
|             | 22410                                                                                | 22420 | 22430 | 22440 | 22450 | 22460 | 22470 | 22480 |       |
| Human       | TCAGATTAGGAATGCTCAGGTTGTGTTTGTCTTTTGTGACTG- GCTTATATTCACTTAATATAATGTCCTCAGGGTCCA     |       |       |       |       |       |       |       | 19011 |
| PolarBear   | -----                                                                                |       |       |       |       |       |       |       | 0     |
| Cow         | GTGCTACAGTGAACATGGGGGTGCAAATGTCT- - - - AGATAGTGATTTTATTTCTTTAGATAAATATCCAGAAATGGC   |       |       |       |       |       |       |       | 18384 |
| Dog         | GAAAGATGTCTATTCAGATCATCTGCCATTTTTAATTAGATTTTTTCAACCCTGAGTCATATGAATTCATTGTAT- - - -   |       |       |       |       |       |       |       | 18497 |
| BelugaWhale | GTGCTACAATGAATACAGGG- TGCAGATATCTTTTATAGATAGTGATTTTATTTCTTTTCGGGTAAATACTTAGG- - TGGT |       |       |       |       |       |       |       | 15575 |
| Donkey      | ATGCTGCACTGAACATGGAGGTGCAGATATCTTTTCAATACAGTGATTTTATTTCTTTCAGATAAATACCCAGAAGTGAG     |       |       |       |       |       |       |       | 18194 |
| Cat         | TGTAATTGATTAATCTGTGCTTTTATCCTTATTTTTCTGCCTCACATGAAATTTATTTTATTGTCTTTTAGTCTACTTGA     |       |       |       |       |       |       |       | 21148 |
| Ferret      | GAAAGATGTTTATTCAGAGCATCTGCCATTTTTAATT- GTTTTACTTTTTTCTGAGTCATATAAATTCCTTATATTATA     |       |       |       |       |       |       |       | 18236 |
| Lion        | TGTAATTGATTAATCTGTGCTTTTATCCTTATTTTTCTGCCTCACATGAGATTTATTTTATTGTCTTTTAGTCCACTTGA     |       |       |       |       |       |       |       | 19744 |
| Vaquita     | GTGCTACAATGAATACAGGG- TGCAGATATCTTTTATAGATAGTGATTTTATTTCTTTTCGGGTAAATACTTAGG- - TGGT |       |       |       |       |       |       |       | 16239 |
| Pig         | GA-----                                                                              |       |       |       |       |       |       |       | 15069 |

| Majority    | ATTXTTGGATCATATAAATTTTACTTTTTAAAATTTTTTGAAGG- - - TGXATTCCATTXTCTTTAGTGGATACATCAATXT  |       |       |       |       |       |       |       |       |
|-------------|---------------------------------------------------------------------------------------|-------|-------|-------|-------|-------|-------|-------|-------|
|             | 22490                                                                                 | 22500 | 22510 | 22520 | 22530 | 22540 | 22550 | 22560 |       |
| Human       | TCCATTTTGTAGCATGTGACAAGATTTCTCCTTTTTTAAGG- - - CTACATAGCATTCCATT- - GTGG- TACACAAAAGT |       |       |       |       |       |       |       | 19085 |
| PolarBear   | -----                                                                                 |       |       |       |       |       |       |       | 0     |
| Cow         | ATTACTGGATCATGCAGTTTTACTTTGTAAAATTTTTGAGAACTTGCATAGTGTTTTCTTAGTGGGTACATCAGTTT         |       |       |       |       |       |       |       | 18464 |
| Dog         | - ATTTTGGATATACCATAGTATCCTCTTAGTGTCCCCATGGG- - - TACATTCCAACATCTGTAGTGGATGCTTAAAAC    |       |       |       |       |       |       |       | 18573 |
| BelugaWhale | ATTGTTGGATCATACAGTTGTACTTTTTCAAATTTTTGAGGAACCTGTTTTCC- TTTTCTTAGTGGGTACACCAATTT       |       |       |       |       |       |       |       | 15654 |
| Donkey      | ATTGCTGGATCATGTAATAGTACTTT- TAAAAGTTTTGAAGAACCTCTATACTATTTTCCATAGTGGCTACATCAGTTT      |       |       |       |       |       |       |       | 18273 |
| Cat         | GATCCTGAACTCACTGACTTTCTTGTTTAAAAATGGATTGAGG- - - GGGCGCTTAGTCTGTTGAGCGTACGATTTTGGCT   |       |       |       |       |       |       |       | 21225 |
| Ferret      | ATTCTTGAATATTATCAAGTACCATAGTATCCCCTTATCCCA- - - GGGGGTACATTCTATCCAGTGGATGCCTAAAAC     |       |       |       |       |       |       |       | 18313 |
| Lion        | GATCCTGAACTCATTGACTTTCTTGTTTAAAAATGGATTGAGG- - - GGGCGCTCAGTCTGTTGAGCATACGATTTTGGCT   |       |       |       |       |       |       |       | 19821 |
| Vaquita     | ATTGTTGGATCATACAGTTGTACTTTTTAAAATTTTTGAGGAACCTGTTTTCC- TTTTCTTAGTGGGTACACCAATTT       |       |       |       |       |       |       |       | 16318 |
| Pig         | ----- GAAC----- TTGGG-----                                                            |       |       |       |       |       |       |       | 15078 |

Dienstag, 3. Mai 2022 08:38

| Majority    | AXATTCXXATCATCAXTGCCXCATG- - TXXCCCTXTTTTTCACXT- XXTGTCAATACTTGTTATAXCTTXXAATTTXCAT     |       |
|-------------|-----------------------------------------------------------------------------------------|-------|
|             | 22570 22580 22590 22600 22610 22620 22630 22640                                         |       |
| Human       | TCATTTGAAGCCCCCTGTGTCATA- - - ACTCAGACTTCCATAACAAAATACCATAGACTG- AGTGACTTAAAAACAGAG     | 19161 |
| PolarBear   | -----                                                                                   | 0     |
| Cow         | ACATTTCCATCGTCATTGCGCAAG- - TGTTCCCATTTCTTCAAATCCCTGCCAATGCTTGTTATTTCTTTTTGATAGCAT      | 18542 |
| Dog         | GA- - - ATAATATCTAATTCTATG- - TATATGCTGTTTTTACT- - TGTATGTATACCTGTGGTAAAGTTTAATTTACAA   | 18645 |
| BelugaWhale | ACATTTCCATCATCAGTGCACAAG- - TCTTCCTTTTTCTCCACATCCTCAACAGTGCTTGTTATTTCTTATTTTTTTTGT      | 15732 |
| Donkey      | GTATTTCCATCAACAGTGCCCAAGGGT- - - TCCT- TTTTCTATTTCTTGCCAACATTTGTTACCTCTTGTCTTTTTGGT     | 18349 |
| Cat         | CAGGTCATGATCTCATGGTTCATGAGTTCAGCCCTATGTCAGGC- TCTGTGTTGACAGCCCAGAACCTGGAACCTGCTT        | 21304 |
| Ferret      | AA- - - ATAGTACCTAATCCTATA- - TATATTGAGTTTTTTGCTG- TACATGCATACTTGT- - - AAACTTAACTTACAA | 18383 |
| Lion        | CAGGTCATGATCTCACGGTTCATGATTTCAAGCCCTATGTCAGGC- TCTGTGTTGACAGCTCAGAGCCTGGAACCTGCTT       | 19900 |
| Vaquita     | ACATTTCCATCATCAGTGCACAAG- - TCTTCCTTTTTCTCCACATCCTCGACAGTGCTTGTTATTTCTTATTTTTTTGGT      | 16396 |
| Pig         | -----                                                                                   | 15078 |

| Majority    | AATATCCATTCTAACAGGTGTGAGGXGATACCTCAT- GTGATTTTGATTTGXATXTC- CAGXTAAXTGATXXTGAXCACX        |       |
|-------------|-------------------------------------------------------------------------------------------|-------|
|             | 22650 22660 22670 22680 22690 22700 22710 22720                                           |       |
| Human       | ATTCGTT- TTCTCACAGTTCTGGAAACTGGGAAGTCCAAGATCAAGGTACCAGCAAGGCAACTTTCTTTCTGAGGCCACT         | 19240 |
| PolarBear   | -----                                                                                     | 0     |
| Cow         | C- CATCCAC- CTAACAGGTGTGAGGTGATACTTCATTGTGATTTTGATTGGCATTTCCTGATCCATGATT- - GAGTACC       | 18618 |
| Dog         | ATTAGGCACAGTAAGAGATTAATAACAATAG- - - - - AATAGTACTTTTTATAT- - - - - AGCTAGGTGAATGTGATCTCT | 18714 |
| BelugaWhale | AATATCCATTCTAACAGGTGTGAGGTGATATCTCATTGTGGTTTTGATTGGCATTTCCTGATTAGTGATGTTGAGCACC           | 15812 |
| Donkey      | AATAGCCATTCTAACAGGTGTGAGGTGATACCTCATTGTGCTTTTTGATTTGCATTACTCTGATGATTAGTGATGTTTGAG         | 18429 |
| Cat         | CAGATTCTGTGTCTCCTCTCTTTGCCCTTCTCTGC- GTGCGTGCTCTCTCTGTCTCTAAACTAAATAAACATTAAAAA           | 21383 |
| Ferret      | ATGAGGTACAGTAAGTGATTAGCAACAATAACTAAT- AAAATAGTACCATTTAT- - - - - AGTTAGGTGAATTTGATCTCT    | 18457 |
| Lion        | CAGGTTCTGTGTCTCCTCTCTTTGCCCTTCTCTGC- GTGCGTGCTCTCTCTGTCTCTAAACTAAATAAACATTAAAAA           | 19979 |
| Vaquita     | AATATCCATTCTAACAGGTGTGAGGTGATATCTCATTGTGGTTTTGATTGGCATTTCCTGATTAGTGATGTTGAGCACC           | 16476 |
| Pig         | ----- TC- - - - - ACAGGAGTGA- - - - - CCATGCTG- - GA- - - - -                             | 15100 |

Dienstag, 3. Mai 2022 08:38

| Majority    | TTT- - TCXC- - - G- - TXCCTXTTGTACTGTGTXTGTCTT- - - - - XTGATGAAAT- - - - TGGCTATGCGXXXAGATT     |       |       |       |       |       |       |       |       |
|-------------|--------------------------------------------------------------------------------------------------|-------|-------|-------|-------|-------|-------|-------|-------|
|             | 22730                                                                                            | 22740 | 22750 | 22760 | 22770 | 22780 | 22790 | 22800 |       |
| Human       | TCTCTTGAAGTGAGGCCACCATTT- TACTTTGTGTGCCTC- - - - - ACATGACCTT- - TTCTTTGTGAGCACACTTT             |       |       |       |       |       |       |       | 19308 |
| PolarBear   | -----                                                                                            |       |       |       |       |       |       |       | 0     |
| Cow         | TTT- - TCGT- - - G- - TACCTATTGGTCATTTGTATGTCAA- - - - - TTTATGTCCTC- - - TGCCCATTTCTTTAATCTT    |       |       |       |       |       |       |       | 18680 |
| Dog         | T- - - - TCA- - - - G- - - - ACTAATTGCACTGTACTCATCTTTCTTG- - TGATATGAGATAAAATGGCTATGCGATGACATA   |       |       |       |       |       |       |       | 18780 |
| BelugaWhale | TTT- - TCAT- - - G- - TTCCTGTTGGTTGTTTGTGTGTCTT- - - - - TGGAAGAA- - - - - TGTCTACTGT- - - GTCTT |       |       |       |       |       |       |       | 15868 |
| Donkey      | CATCTTTTC- - - ACATACCTGTTGGCCTTGTGTGTGTCTT- - - - - TGGAA- - - - - AGACATCTGTTTCAGATC           |       |       |       |       |       |       |       | 18488 |
| Cat         | TTTTTTTTTCTCAGACTGTCTTATAGTACTGTACTCACCCT- - - - - TGTGATGAAATA- - ATGGCTATGCGAGGAGATG           |       |       |       |       |       |       |       | 21454 |
| Ferret      | CTCTCTCTCTGAGAATGTTTTATTGTACTGTACTTACTCACCCTTCTTGTGATTGGATAAAATGGCTACGTGATGAGATG                 |       |       |       |       |       |       |       | 18537 |
| Lion        | TTTTTTTTTCTCAGACTGTCTTATTGTACTGTACTCACCCT- - - - - TGTGATGAAATA- - ATGGCTATGCAAGGAGATG           |       |       |       |       |       |       |       | 20050 |
| Vaquita     | TTT- - TCAT- - - G- - TTCCTGTTGGTTGTTTGTGTGTCTT- - - - - TGGAAGAA- - - - - TGTCTGTTGT- - - GTCTT |       |       |       |       |       |       |       | 16532 |
| Pig         | -----                                                                                            |       |       |       |       |       |       |       | 15100 |

| Majority    | AAGTGAG- - - AATGATXTAGG- - CATTGTXATXTXTTTCAGAATAGTATXXATCTTXTGA- - - ATACTTTAGAX- AATG      |       |       |       |       |       |       |       |       |
|-------------|-----------------------------------------------------------------------------------------------|-------|-------|-------|-------|-------|-------|-------|-------|
|             | 22810                                                                                         | 22820 | 22830 | 22840 | 22850 | 22860 | 22870 | 22880 |       |
| Human       | GGGGGAG- TGGGTGGCAGAAGCTCTCTGGTATTTCTTCTCATAAAGGCATTAATCCCATCATGAAGGCCTTACTCTCATG             |       |       |       |       |       |       |       | 19387 |
| PolarBear   | -----                                                                                         |       |       |       |       |       |       |       | 0     |
| Cow         | TAATGTT- - - TATTTTTAATCTTTAATGTTTATTTTTT- CTGAGTTCTATGAGTTTCTTGT- - - ATATTTTTGAT- ATTG      |       |       |       |       |       |       |       | 18752 |
| Dog         | AAGTGAGGTGAATGATGTAGA- - CATTGTGATGTAGGATTAGGATGCTTTGACCTTCTGA- CAATACTTCAGAAGAAGG            |       |       |       |       |       |       |       | 18857 |
| BelugaWhale | C- - TGCT- - - CATTCTTTGATCATACTGTTTCATTTTTTTCTGAGTAGTATGAGTTCTTT- - - - - ATTTTTGAT- ACTA    |       |       |       |       |       |       |       | 15935 |
| Donkey      | CTCTGCC- - - CATTTTTTA- - - - - ATTGAATTTCTTTTTTCTGAGTTGTATGTGTTCTTTAT- - - ATGTTTTAGAT- ATTA |       |       |       |       |       |       |       | 18556 |
| Cat         | AAGTGAGGTGAATGACATAGGTGCATTGTGATGTAGGATTAGGATACTCTTGACCTTCTGA- CAATACCTCAGAAGAAGG             |       |       |       |       |       |       |       | 21533 |
| Ferret      | AAGTGAG- TGAATGACACAGG- - CATTGTGATGTAGGATTAGGATAGTATTGACCTTCTGAACAGTACTTCCGAAGAGGG           |       |       |       |       |       |       |       | 18614 |
| Lion        | AAGTGAGGTGAATGACATAGGTGCATTGTGATGTAGGATTAGGATGCTCTTGACCTTCTGA- CAATACCTCAGAAGAAGG             |       |       |       |       |       |       |       | 20129 |
| Vaquita     | C- - TGCT- - - CATTCTTTGATCATACTGTTTCATTTTTT- CTGAGTAGTATGAGTTCTTT- - - - - ATTTTTGAT- ACTA   |       |       |       |       |       |       |       | 16598 |
| Pig         | -----                                                                                         |       |       |       |       |       |       |       | 15100 |

Dienstag, 3. Mai 2022 08:38

| Majority    | ATCTTCTAXXTXXXXTCTXTAGTTAXCTAX- X- XAATTCAA- - T- - - - - X- - XX- TA- XAXXT- - - X          |       |       |       |       |       |       |       |       |
|-------------|----------------------------------------------------------------------------------------------|-------|-------|-------|-------|-------|-------|-------|-------|
|             | 22890                                                                                        | 22900 | 22910 | 22920 | 22930 | 22940 | 22950 | 22960 |       |
| Human       | ATCTCATG- - - AAATCCTCCAGTTAACTCCTAAAGGCCCTGTTTCAAATTGCATCACATTTGGGGTTAGGACTTCAGCA           |       |       |       |       |       |       |       | 19464 |
| PolarBear   | -----                                                                                        |       |       |       |       |       |       |       | 0     |
| Cow         | ACATTTACAGTATGATGTGCAGATTTTCC- TTCCATCCATCTTGTTGAT- GGTTTTCTTACCCTACAGAAGCTAAAGT             |       |       |       |       |       |       |       | 18830 |
| Dog         | ATCATATGGTT- - - GACCATGGGTAACTA- - - - AAATTATAGCTA- - - - - AGAGGAGACAATTGTATATGACTTGC- AA |       |       |       |       |       |       |       | 18923 |
| BelugaWhale | ACTTTCTATATATGATTTGTAAATATTTTC- TCCCATTCAG- - - - -                                          |       |       |       |       |       |       |       | 15975 |
| Donkey      | ACCTCTTG- - TCAGATATATGGTTTGC- - - - - AATTAT- - - - - T- - - - -                            |       |       |       |       |       |       |       | 18588 |
| Cat         | ATCATCTACTTCCAGGCTATGGTTGGCCATGAGTAACTGAAATTATAGGTAAGAGGGGACAACACTGTATATGACTTGA- AA          |       |       |       |       |       |       |       | 21612 |
| Ferret      | ATCATCTGCTTCCAGACTGCAGTTGACCATGTGAAATTACATGTAGAT- - - AAGAGGGGCAACTGTTTATGACTTGG- AA         |       |       |       |       |       |       |       | 18690 |
| Lion        | ATCATCTACTTCCAGGCTATGGTTGGCCATGAGTAACTGAAATTATAGGTAAGAGGGGACAACACTGTATATGACTT- - - AA        |       |       |       |       |       |       |       | 20206 |
| Vaquita     | ACTTTCTATATATGATTTGTAAATATTTTC- TCCCATTCAG- - - - -                                          |       |       |       |       |       |       |       | 16638 |
| Pig         | -----                                                                                        |       |       |       |       |       |       |       | 15100 |

| Majority    | - X- - - XT- X- - X- TTCTX- XGGTCXTTAGGTTGCCTTT- C- - TTGXTGTCAAATCCAAAAA- TCATTGCCXAGACT- - T |       |       |       |       |       |       |       |       |
|-------------|------------------------------------------------------------------------------------------------|-------|-------|-------|-------|-------|-------|-------|-------|
|             | 22970                                                                                          | 22980 | 22990 | 23000 | 23010 | 23020 | 23030 | 23040 |       |
| Human       | TGTGATTTTTGGGGAAACATAAGCATTGAGTTGATAATACCCTGCATATAGTTGACCCATACTTCTCCACTCCAGGTAAT               |       |       |       |       |       |       |       | 19544 |
| PolarBear   | -----                                                                                          |       |       |       |       |       |       |       | 0     |
| Cow         | TTGACATAGTCCTAATTACTGTTGCTTTTGTTCCTTTGCTTTTGGTGTCAAATCCAAAAAG- TCACTGCTAAGATTGAT               |       |       |       |       |       |       |       | 18909 |
| Dog         | ATATTTTCTCCATTCTGTAGGTCCTCAGGTTGCCTTTGCTTTTGGTGTCAAATCCAAAAAATCATTGCCTAGACTAAT                 |       |       |       |       |       |       |       | 19003 |
| BelugaWhale | ----- TAGGTTGCCTTTTC- - - - -                                                                  |       |       |       |       |       |       |       | 15989 |
| Donkey      | ----- TTCTCCTGGTCTGTCATTTGCCTTC- CTTTTAGTGTGCAATACAAAAA- TGGTTGCCAAGACCAAT                     |       |       |       |       |       |       |       | 18653 |
| Cat         | ATATTTTCTCCATTCTGTAGGTCCTCAGGTTGCCT- - - - - TTGGTGTCAAATCCAAAATA- TCATTGCCTAGACTCTT           |       |       |       |       |       |       |       | 21685 |
| Ferret      | ATATTTTCTCACATTCTGGAGGTCCTTAGGTTGCCTTTGCTTTTGTG- TGTCAAATCCAAAAA- TCATTACCTAGGCTG- T           |       |       |       |       |       |       |       | 18767 |
| Lion        | ATATTTTCTCCATTCTGTAGGTCCTCAGGTTGCCT- - - - - TTGGTGTCAAATCCAAAATA- TCATTGCCTAGACCCTT           |       |       |       |       |       |       |       | 20279 |
| Vaquita     | ----- TAGGTTGCCTTTTC- - - - -                                                                  |       |       |       |       |       |       |       | 16652 |
| Pig         | ----- TGATTA- - - - -                                                                          |       |       |       |       |       |       |       | 15106 |



Dienstag, 3. Mai 2022 08:38

| Majority    | XTTAAGGAGCTTA- X- - - - CCTXXXTTTTCTT- T- - GAGTTTTATGXTTTCAG- TTTTATXTTCAX- TTTXTXA- - - AT |       |       |       |       |       |       |       |          |
|-------------|----------------------------------------------------------------------------------------------|-------|-------|-------|-------|-------|-------|-------|----------|
|             | 23050                                                                                        | 23060 | 23070 | 23080 | 23090 | 23100 | 23110 | 23120 |          |
| Human       | - - TACTATACTAAATTTGATGTTTACCATTCCCATAAATTTCTCATTACTACATGTTTATGTATTTTTATCTTAAGCAA            |       |       |       |       |       |       |       | 19622    |
| PolarBear   | -----                                                                                        |       |       |       |       |       |       |       | 0        |
| Cow         | TTCAAGGAGCTTACTTACTACTTACATTTTTTC- TGGGAGTTTTATAGTTTCAGCCCTTATGTTCAAATTTTAAATATAT            |       |       |       |       |       |       |       | 18988    |
| Dog         | GTTGAGGAGTTTATC- - - - - CCTGTATTTTCTTCTAGGAGTTTTATGGTTTTAGATTTTATATTCAATTATTTAACTTAT        |       |       |       |       |       |       |       | 19078    |
| BelugaWhale | -----                                                                                        |       |       |       |       |       |       |       | AT 15991 |
| Donkey      | GTCAGGGTGCTTTTTT- - - - - CCTATGTCTTCTT- GAAGAGTTTTATGGTTTCAGGTCTTATGTTCA- - - - - AT        |       |       |       |       |       |       |       | 18716    |
| Cat         | GTTAAGGAGCTTAGCA- - - - - CCTAAGTTTTCTT- T- - GAGTTTTATGCTTTCAGATCTTATATTCAAGTATTTAATTCAT    |       |       |       |       |       |       |       | 21758    |
| Ferret      | GTTAAGGAGCTTATCA- - - - - CCTGTGTTTTTTTCTAGGAGTTTTATGGTTTCAGGTCTTATGTTCAAGTATTTAACCTGT       |       |       |       |       |       |       |       | 18843    |
| Lion        | GTTAAGGAGCTTAGCA- - - - - CCTATGTTTTCTT- T- - GAGTTTTATGCTTTCAGATTTTATATTCAAGTATTTAATTCAT    |       |       |       |       |       |       |       | 20352    |
| Vaquita     | -----                                                                                        |       |       |       |       |       |       |       | AT 16654 |
| Pig         | -----                                                                                        |       |       |       |       |       |       |       | AT 15108 |

| Majority    | TTTGAGTTX- TTTTTGTGTXTGXT- TXAGXTAGTXGTCTAGTTTCATTCTTTT- XXATGTGGCTGTXCAXTTTTTC- - - - - |       |       |       |       |       |       |       |       |
|-------------|------------------------------------------------------------------------------------------|-------|-------|-------|-------|-------|-------|-------|-------|
|             | 23130                                                                                    | 23140 | 23150 | 23160 | 23170 | 23180 | 23190 | 23200 |       |
| Human       | TATATGGT- TTTGTTTTGCATG- TTTAAACTATAGATGTAATCATGCTGTATGTATTCTGTAATTTGCTTTTTCTTG- T       |       |       |       |       |       |       |       | 19699 |
| PolarBear   | -----                                                                                    |       |       |       |       |       |       |       | 0     |
| Cow         | TTTGAGTTAATTTTTATGTGTGATGAAAGATGGTGGTCCAGTTTCTTTCTTCT- GCATGAGACTGTCCAGGTTTC- - - - -    |       |       |       |       |       |       |       | 19062 |
| Dog         | TTTGAGTTGATTTTTGTGTGTGGTGTGAAGTAGTAGTCTAGTTTCATTCTTTT- ACATGTGGCTATTTTCTTAGCATCAT        |       |       |       |       |       |       |       | 19157 |
| BelugaWhale | CTTGT- - - - - - T GATGGT- - - - - - TCCT- - - - - -                                     |       |       |       |       |       |       |       | 16008 |
| Donkey      | TTTGAGTTACTTTTGTGTGTGTGGTGTAAAGACAGTAGTCTAGTCTCATTCTTTT- GCATGTGGCTGTCCATTTTTTC- - - - - |       |       |       |       |       |       |       | 18790 |
| Cat         | TTTGAGTTAGTTTTTGTGTATAGTTTGAAGTAGTAGTCTAGTTTCATTCTTTTTATATGTGGCTGTTCAAGTTTTTC- - - - -   |       |       |       |       |       |       |       | 21833 |
| Ferret      | TTTGAGTTAATTTTTGTGTATGGTATGAGGTAGTATTCTAGTTTCATTCTTTT- GCATGTAGCTGTTCAAGTTTTTC- - - - -  |       |       |       |       |       |       |       | 18917 |
| Lion        | TTTGAGTTAGTTTTTGTGTATAGTTTGAAGTAGTAGTCTAGTTTCATTCTTTTTATATGTGGCTGTTCAAGTTTTTC- - - - -   |       |       |       |       |       |       |       | 20427 |
| Vaquita     | CTTGT- - - - - - T GATGGT- - - - - - TCCT- - - - - -                                     |       |       |       |       |       |       |       | 16671 |
| Pig         | CT- - - - - - GGTGGG- - - - - - CCA- - - - - -                                           |       |       |       |       |       |       |       | 15119 |



Dienstag, 3. Mai 2022 08:38

| Majority    | AATCTATX- TAT- C- - GTTTTTATGCCXGTACCATX- TG- TTTTGATTACT- - - - - AGT- - TTAAATXAGGX  |       |       |       |       |       |       |       |       |
|-------------|----------------------------------------------------------------------------------------|-------|-------|-------|-------|-------|-------|-------|-------|
|             | 23370                                                                                  | 23380 | 23390 | 23400 | 23410 | 23420 | 23430 | 23440 |       |
| Human       | AAGCATTAAATATGCATATTCTAACGTGTTAATATTAGAGTTTCTCATAGATTGTGTCTTTTCAAATCGATTGAAT- - ATT    |       |       |       |       |       |       |       | 19931 |
| PolarBear   | -----                                                                                  |       |       |       |       |       |       |       | 0     |
| Cow         | AATCTATAATAG- TCTGCTTTTATGCCCATATTGTAAGT- TTTTGAGTTACTCTTTATATTACAGT- - TTAAGACCAAGA   |       |       |       |       |       |       |       | 19238 |
| Dog         | GATCTGTG- TAT- CAAGTTTTTATGCCCGTGCCATCCTG- TTTTGAGTACT- - - - - GGT- - TTGAAATCAGGA    |       |       |       |       |       |       |       | 19337 |
| BelugaWhale | AGTCCA- AAT- - - - - TTAT- - - - - TTTTG- - - - -                                      |       |       |       |       |       |       |       | 16055 |
| Donkey      | GACCT- - - - TTG- TGGGTTTTTATGGCAGTACCATATTG- TTTTGATTACTGTAGTTTTGTGATACAGCTTGAATCAGGA |       |       |       |       |       |       |       | 18982 |
| Cat         | GATCTATG- TAT- CTAGTTTTTATGGCCAGTACCATCGTG- TTTTGATTACT- - - - - AGT- - TTGAAATCAGGG   |       |       |       |       |       |       |       | 22038 |
| Ferret      | AATCTGTG- TAT- CTGGTTTTTATGCCAGTACCATCCTAATTTTGATTACT- - - - - AGT- - TTGAAATCAGGA     |       |       |       |       |       |       |       | 19082 |
| Lion        | GATCTATG- TAT- CTAGTTTTTATGCCAGTACCATCGTG- TTTTGATTACT- - - - - AGT- - TTGAAATTAGGG    |       |       |       |       |       |       |       | 20630 |
| Vaquita     | AGTCCA- AAT- - - - - TTAT- - - - - TTTTG- - - - -                                      |       |       |       |       |       |       |       | 16718 |
| Pig         | ACTC- - - - - T- - - - - TTTG- - - - -                                                 |       |       |       |       |       |       |       | 15140 |

| Majority    | AGTGTGATGCCTXCA- CTT- - TTGTTCTTTXTCAAGATTGCTTTGGCTCTTXAGGGTCCTTTGTGGTTCCATACAAATAT  |       |       |       |       |       |       |       |       |
|-------------|--------------------------------------------------------------------------------------|-------|-------|-------|-------|-------|-------|-------|-------|
|             | 23450                                                                                | 23460 | 23470 | 23480 | 23490 | 23500 | 23510 | 23520 |       |
| Human       | AACATATTGCTTTCA- - TAGGTAATTATAT- TAATTATACTGTTAGCGCTGCATGTAGATTCTTGTTTCTATACATTCTT  |       |       |       |       |       |       |       | 20008 |
| PolarBear   | -----                                                                                |       |       |       |       |       |       |       | 0     |
| Cow         | GGTGTGCTGCCTCCA- CTT- - TTGTTCTTTCTCACGATTGCTTTGGTCTTAAGGATTTTTTGTGTTTCTGATAGACTT    |       |       |       |       |       |       |       | 19315 |
| Dog         | AGTGTGAGGCCTCTAGCTT- - - TGTTCTTTTTCAAGATTTCTTTGGCTATTTGGGATCCTTCACAGTTCCATACAAATA-  |       |       |       |       |       |       |       | 19413 |
| BelugaWhale | ----- CTT- - TTGTTGTCT- - - - - TTGCTTTTGGTGTCAAAGCCAAAAGTCATTGC- TAAGACTGA          |       |       |       |       |       |       |       | 16109 |
| Donkey      | AGTGTGATGCCTCCAGCTTTGTTCTTTCTTTCTCAAGATTGCTTTGGTGTTCGGGGTCCTTTGGGGTTCCATACAAATCT     |       |       |       |       |       |       |       | 19062 |
| Cat         | AGTGTGATGCCTTCCAGCTTTGTTCTT- - - TATCAAGATTGCTTTAACTCTTCAGGGTCCTTTGTGGTTCTGTACAAATAG |       |       |       |       |       |       |       | 22115 |
| Ferret      | AGTGCGATGCCTCCGGCTTTCTTGTTATTTCTCAAATCACTTCGGCTATATGGG- TCCTTTGCAGTTCCATACAAATAG     |       |       |       |       |       |       |       | 19161 |
| Lion        | AGTGTGATGCCTTCCAGCTTTGTTCTTTATCAAGATTGCTTTAACTCTTCAGGGTCCTTTGTGGTTCCGTACAAATAG       |       |       |       |       |       |       |       | 20710 |
| Vaquita     | ----- CTT- - TTGTTGTCT- - - - - TTGCTTTTGGTGTCAAAGCCAAAAGTCATTGC- TAAGACTGA          |       |       |       |       |       |       |       | 16772 |
| Pig         | ----- TTGTTCTTTCTCA- - ATTGTTTTGGTCTTAGGGTCCTTGGTGGTTCCATATAAATTT                    |       |       |       |       |       |       |       | 15197 |

Dienstag, 3. Mai 2022 08:38

| Majority    | TAGGATTGTGTTTTCTATT- TXTGTGAAAAATGCCXTTGGAATTTTGATAGG- - GATTGCATTGAATCT- GTAGATTGCT       |       |
|-------------|--------------------------------------------------------------------------------------------|-------|
|             | 23530 23540 23550 23560 23570 23580 23590 23600                                            |       |
| Human       | TGAAAATCGGCATTGTTGGACTTTTTAATTTTGTGATCAAATGTACATGGGAAGGATATCTTGTGGTT- TTAATTTGCA           | 20087 |
| PolarBear   | -----                                                                                      | 0     |
| Cow         | TAGGATTTTTTTTTCTAT- TTTATGAAAAATGTGATTGGAATTTTGAT- - - - GATTGCATTGAATCT- GTAGATTGCT       | 19388 |
| Dog         | - - GGATTGTGT- - TCTAT- - TTTGTGAAAAATGCCGTTGGAATTTTGATAGG- - GATTGCATTGAATCT- GTAGATTGCT  | 19484 |
| BelugaWhale | TGCCAAGGGGCTTA- - - GT- TATACTAAA- - - TCCTTAG- - TTTGATAAG- - GATTGCATTGAATCT- GTAGATTGTT | 16175 |
| Donkey      | CAGCATTTTTTTTTCTATT- TCTGTGAAAAATGCCATTGGAATTTTGATAGG- - GATTGCATGGAATCT- GCAGATTGCA       | 19138 |
| Cat         | TAGGATTGTGTGTTCTATT- TCTGTGAAAAATGCTGTTGGAATTTTGATAGG- - GATTGCATTGAATTT- GTAGATTGCT       | 22191 |
| Ferret      | TAGGATTGTGTAGTCTATG- TCTGTGAAAAATGCCACTGGAATTTTGATAGG- - GATTACATTGAACT- - - AGATTGCT      | 19235 |
| Lion        | TAGGATTGTGTGTTCTATT- TCTGTGAAAAATGCTGTTGGAATTTTGATAGG- - GATTGCATTGAATTTTGTAGATTGCT        | 20787 |
| Vaquita     | TGCCAAGGGGCTTA- - - GT- TATACTAAA- - - TCCTTAG- - TTTGATAAG- - GATTGCATTGAATCT- GTAGATTGTT | 16838 |
| Pig         | TGGGATTGTCTTTT- CTGT- TTTGTGAAAAATGCCATTGGAATTTTGATAAG- - GATTACATTAATCT- TTAGATAGCT       | 15272 |

| Majority    | TTGGGTAGTA- TG- AACATTTTAAACAXTA- TXATTCTT- - CCAXTCCATGAGCAXAGA- - - - - - ATATCTTTCCA- - -        |       |
|-------------|-----------------------------------------------------------------------------------------------------|-------|
|             | 23610 23620 23630 23640 23650 23660 23670 23680                                                     |       |
| Human       | TTCCCTATTAATGCAAAAAAAAAAAAAACATTGATTCCTG- GGAGTTTTTATATACTGTGCAGACTAATTGTTTTGTTATT                  | 20166 |
| PolarBear   | -----                                                                                               | 0     |
| Cow         | CTGAGTTGTA- TG- GGCATTTTAAACAGTA- - - - TACTT- - CCAATCCATGAGCATAAATGGAAAGAATATCTTTCCA- - -         | 19457 |
| Dog         | TTGTGTAGTA- TA- AACACTTTAAACAGTATTGATTTTC- - CCAATCCCTGAGCACAAA- - - - - - ATGTCTTTCTA- - -         | 19549 |
| BelugaWhale | TTGGGTAGTG- TG- AACATTTTAAACAGTA- - - - TTCTT- - CCAGTCCATGAGCATGGA- - - - - - ATATCTTTCCACTT       | 16239 |
| Donkey      | TTGGGAAGAA- TG- AACATTTTGACAATATTAATTCTT- - CCAGCCCATAGGCATGGA- - - - - - ATATCTTTCTGTTT            | 19206 |
| Cat         | TTGGGTAGTA- TG- AACATTTTAAATGATACTGATTTTTTTTCCAAACCAGGAGCACAGA- - - - - - ATGTCTTTCCA- - -          | 22258 |
| Ferret      | TTGGGTAGTA- TG- AACA- TTTAAACAGTATTGATTTTT- - CTAATCCGTGGGCACAAA- - - - - - ATGTCTTTCCA- - -        | 19299 |
| Lion        | TTGGGTAGTA- TG- AACATTTTAAATGATACTGATTTTTTTTCCAAACCAGGAGCACAGA- - - - - - ATGTCTTTCCA- - -          | 20854 |
| Vaquita     | TTGGGTAGTG- TG- AACATTTTAAACAGTA- - - - TTCTT- - CCAGTCCATGAGCATGGA- - - - - - ATATCTTTCCACTT       | 16902 |
| Pig         | TGGGTAGTA- TG- G- - - - - - - ATAATA- - - - TTCTT- - CCAGTCCAGGAGCATGCA- - - - - - ATATCTTTCCA- - - | 15325 |

Dienstag, 3. Mai 2022 08:38

|             |                                                                                                                                                                                                                                          |       |
|-------------|------------------------------------------------------------------------------------------------------------------------------------------------------------------------------------------------------------------------------------------|-------|
| Majority    | - TXTGTATTTXCTTCAA- TTTTTTTCATCAXTXXTTAXATXTTTTTAACTTTXX- AX- XT- - TTATGAAAGXTTCAAGA                                                                                                                                                    |       |
|             | <div style="display: flex; justify-content: space-between; width: 100%;"> <span>23690</span> <span>23700</span> <span>23710</span> <span>23720</span> <span>23730</span> <span>23740</span> <span>23750</span> <span>23760</span> </div> |       |
| Human       | TTTTTTGGTTTGTTTGTTTGTTTGTTTCATTTTTGTTTTGTTTTGAGAGACAGAGTCTCACTGTGTCATCCAGGCTG                                                                                                                                                            | 20246 |
| PolarBear   | -----                                                                                                                                                                                                                                    | 0     |
| Cow         | - TTTGCATCTTCTTCAA- TTTCTTCCATCAGTGTCTTTACCTTTTTCACTTTTTTAAGCT- - TTGTGAAAGCTTCAAAA                                                                                                                                                      | 19533 |
| Dog         | - - - TATATTTGTGTCAA- - TTTTTTCA- - - - TTTTAA- - - - TTTTTTAAACTTCA- - - - - TTATTAAACTTTCAAGA                                                                                                                                          | 19608 |
| BelugaWhale | ATTTGTGTCTTCTTCAA- TGTGTTTCATCAACGTCTTACAGCTTTTTCACTTTTT- AAGCT- - TTGTGAAAGCTTCAAGG                                                                                                                                                     | 16315 |
| Donkey      | ATGTGTGTTGTCTTCAA- TTTCTTTCATCAGTGTCTTGCATCTTTTTATTTTTTAAACTTCTTATAAAAAGTTTCAAGA                                                                                                                                                         | 19285 |
| Cat         | - - - TTTATTTGTGTCAA- - TTTTTTTTTCCCTTTTTTAAATTTTTTAAACTTCA- - - - - TTATTAAACTTTCAAGA                                                                                                                                                   | 22325 |
| Ferret      | - - - TATATTTGT- - CAA- - TTTTTTCA- - - - TTTTAA- - - - TTTTTTAAAGCTTCA- - - - - TTTTTAAACATTCAAGA                                                                                                                                       | 19356 |
| Lion        | - - - TTTATTTGTGTCAA- - TTTTTTTT- CCCTTTTTTAAATTTTTTAAACTTCA- - - - - TTATTAAACTTTCAAGA                                                                                                                                                  | 20920 |
| Vaquita     | ATTTGTGTCTTCTTCAA- TGTGTTTCATCAACGTCTTACAGCTTTTTCACTTTTTTAAAGCT- - TTGTGAAAGCTTCAAGG                                                                                                                                                     | 16979 |
| Pig         | - TTTATTTGTGCTTTGAGTTTCTTTCATCACTGTCTTTTATCTTTTTCACTTTTTTAAAGCT- - TTACGAAGG- TTTAAGA                                                                                                                                                    | 15401 |

|             |                                                                                                                                                                                                                                          |       |
|-------------|------------------------------------------------------------------------------------------------------------------------------------------------------------------------------------------------------------------------------------------|-------|
| Majority    | T- ATACAAAAGTAGXGTGAATGGTA- - - - - TAATAATACACTA- - - - XTXXCCTTCCTGTTGGAGAATATTAAGTAAA                                                                                                                                                 |       |
|             | <div style="display: flex; justify-content: space-between; width: 100%;"> <span>23770</span> <span>23780</span> <span>23790</span> <span>23800</span> <span>23810</span> <span>23820</span> <span>23830</span> <span>23840</span> </div> |       |
| Human       | GAGTGCAGTGGCTCGGTACAGTCACTGCAGTCTTGACATCCCAGGCTCTAGCAATTCTCTCACCTTTGTTTCCTGAGTA                                                                                                                                                          | 20326 |
| PolarBear   | -----                                                                                                                                                                                                                                    | 0     |
| Cow         | T- GTACAAAAGTGGGGTGAATGGTA- - - - - TAATAGTACACTT- - C- TTTGCCTTCCTTTGGAAGAATATTAAGCAA                                                                                                                                                   | 19603 |
| Dog         | T- ACACAAAATAGTATGAATGGTA- - - - - CAGTGATACGCAA- - - - - ATCCTTTCTTTGGGAATATTAAGTAAA                                                                                                                                                    | 19675 |
| BelugaWhale | T- ATACAAAAGTAGGGTGAATGGTA- - - - - TAATAATATACTT- - CCTTTGCCTTCCTGTGGGAGAATATTAAGTAAA                                                                                                                                                   | 16386 |
| Donkey      | T- ACACAGAAGTAGTGTGAATGGTA- - - - - TAATACTCTT- - CTTTTCTTCCTGTTGGAGAATATTAAGCACA                                                                                                                                                        | 19353 |
| Cat         | TACATAAAAAGTAGTGTGAATGGTAATGGTACAGTAATACACAA- - - - - ATCCTTCCTGTTGGAGAATATTAAGTAAA                                                                                                                                                      | 22399 |
| Ferret      | TCACATAAAAAGTGGTATGACTGGTA- - - - - CAGTAATACACAA- - - - - ATCCTTCCTTTTGGAGAACATTAAGGAAA                                                                                                                                                 | 19424 |
| Lion        | TACATAAAAAGGAGTGTGAATGGTAATGGTACAATAATACACAA- - - - - ATCCTTCCTGTTGGATAATATTAAGTAAA                                                                                                                                                      | 20994 |
| Vaquita     | T- ATACAAAAGTAGGGTGAATGGTA- - - - - TAATAATATACTT- - CCTTTGCCTTCCTGTGGGAGAATATTAAGTAAA                                                                                                                                                   | 17050 |
| Pig         | T- GTAAAAAAGTAGGATGAATGGTA- - - - - TAATAATGTACT- - - - - TTTGCCTTCCACTGGGAGAATATTAAGCAA                                                                                                                                                 | 15469 |

Dienstag, 3. Mai 2022 08:38

| Majority    | TCTCAGAGATCAT- TTTATATCATT- - - CCTAAATACTTTATTGTGTGTCTCTAACAGATATAATCTCTTAAGGAT- - - G        |       |       |       |       |       |       |       |       |
|-------------|------------------------------------------------------------------------------------------------|-------|-------|-------|-------|-------|-------|-------|-------|
|             | 23850                                                                                          | 23860 | 23870 | 23880 | 23890 | 23900 | 23910 | 23920 |       |
| Human       | GCTGGGACTACAGGAATACACCACTATGCCAGCTAATTTTTCAATTTTTTTGTAGAGATGGAGTCTCACTGTATTACCC                |       |       |       |       |       |       |       | 20406 |
| PolarBear   | -----                                                                                          |       |       |       |       |       |       |       | 0     |
| Cow         | TCTTAGCGATGAT- TTTATATCATT- - - CCTAAATATTTCAATGTGTATCTCTAACAGATACAGTCTCTTGAA- - - - - G       |       |       |       |       |       |       |       | 19673 |
| Dog         | TCTCAGAGGTCAT- TTCATACCATC- - - CCTAAATATCTTATTGTGTGTCTC- - - - - ATATAATCTCCTAAGGAT- - - T    |       |       |       |       |       |       |       | 19742 |
| BelugaWhale | TCTCAGTGATTAT- - - - - ATCATT- - - CCTAAATACTTCAATGTGTATTTCTAGTAGATATAATCTCTTAAAGAT- - - G     |       |       |       |       |       |       |       | 16454 |
| Donkey      | TCTCAAAGATCAT- TTCA- - - TATT- - - ACCAAATGCTT- - GTGTGTGTTTCTAAC- - ATATACTCTCTTAAAGAT- - - G |       |       |       |       |       |       |       | 19419 |
| Cat         | TCTCAGAGATCAT- TTCATGTCCTC- - - ACTAAATACTTTATCGTGTGTCTCTAAC- TAATAATCTCCTAAGGAT- - - G        |       |       |       |       |       |       |       | 22471 |
| Ferret      | TCT- - - AGATAAT- TTTATACCATC- - - CCTAAGTATTTTATTGTGTGTCTCTAACAGATGTAATCTCCTCAGGAT- - - G     |       |       |       |       |       |       |       | 19494 |
| Lion        | TCTCAGAGATCAT- TTCATGTCCTC- - - ACTCAATACTTTATTGTGTGTCTCTAAC- TAATAATCTCCTAAGGAT- - - G        |       |       |       |       |       |       |       | 21066 |
| Vaquita     | TCTCAGTGATTAT- TTTATATCATT- - - CCTAAGTACTTCAATGTGTATTTCTAATAGATATAATCTCTTAAAGAT- - - G        |       |       |       |       |       |       |       | 17123 |
| Pig         | TCTCAGAGGTTGTGTTTATATCACT- - - CCTAAATACTTCAGTGTGTTGTATCTAATAGATATATTCTGTAAAGA- T- - - G       |       |       |       |       |       |       |       | 15542 |

| Majority    | ATATTTATACC- - AXT- TTATACCT- AATAAAAATTT- - AAAATAATTTXTTAATAT- - - - - T- XXXTAATXTCTAG- - -  |       |       |       |       |       |       |       |       |
|-------------|-------------------------------------------------------------------------------------------------|-------|-------|-------|-------|-------|-------|-------|-------|
|             | 23930                                                                                           | 23940 | 23950 | 23960 | 23970 | 23980 | 23990 | 24000 |       |
| Human       | AGGTTTGTGCGAACTCCCAGGCTCAAGCAGTTCTCCCGCATTGGCCTCCTAAAGTGCTGAGATTACAGGCGTGAGTCGC                 |       |       |       |       |       |       |       | 20486 |
| PolarBear   | -----                                                                                           |       |       |       |       |       |       |       | 0     |
| Cow         | ATATTT- - - - - TTATACAT- AATAAAAATTT- - TAAAGAATTTTTTGTGT- - - - - T- - GTTTAAGTGTAG- - -      |       |       |       |       |       |       |       | 19728 |
| Dog         | ATATTGGTACC- - ATTATTAACCTAAATAAAAATTT- - AAAATAATTTCTTAATAT- - - - - T- ATCTAATTCAG- AG        |       |       |       |       |       |       |       | 19810 |
| BelugaWhale | ACATTTATATC- - A- - - TCACACCT- AATAAAAATTT- - TAAATAAGTTTTTCTTT- - - - - TTTATTGAAGTATAT- - -  |       |       |       |       |       |       |       | 16517 |
| Donkey      | CCATTGATACA- - ATTATTATACCT- AATAAAAATTT- - AAAATAATTTATTAATAT- - - - - CCTCTAATCTCCTAGTGG      |       |       |       |       |       |       |       | 19488 |
| Cat         | ATATTGATACC- - ATTATTATACCTTAATAAAAATTT- - AAAATAATTTCTTAATA- - - - - TCTAATTTCCAG- - -         |       |       |       |       |       |       |       | 22534 |
| Ferret      | ATATTCATACC- - ATTGTTATACTTAATAAAAATAT- - AAAATAGTTTGTTAATAT- - - - - A- ATCTAATTTCCAATAG       |       |       |       |       |       |       |       | 19563 |
| Lion        | ATATTGATACC- - ATTATTATACCTTAATAAAAATTT- - AAAATAATTTCTTAATA- - - - - TCTAATTTCTAG- - -         |       |       |       |       |       |       |       | 21129 |
| Vaquita     | ACATTTATATC- - A- - - TCACACCT- AATAAAAATTT- - TAAATAAGTTTTTCTTT- - - - - TTTATTGAAGTATAT- - -  |       |       |       |       |       |       |       | 17186 |
| Pig         | ATATTTATATC- - A- - - TTGTACCT- AATAAAAATTT- - AAAATAACTTTTTATTTT- - - - - TTAATTGATGTAAAG- - - |       |       |       |       |       |       |       | 15605 |

Dienstag, 3. Mai 2022 08:38

| Majority    | TAGTCATAATTTAXTATXTXCXTTAAAGATGT--C-----GTA---CAXCXTTATGAXTCAAXATTTAAAGAC--AXTA   |       |       |       |       |       |       |       |       |
|-------------|-----------------------------------------------------------------------------------|-------|-------|-------|-------|-------|-------|-------|-------|
|             | 24010                                                                             | 24020 | 24030 | 24040 | 24050 | 24060 | 24070 | 24080 |       |
| Human       | TGTGCCTGGCCTGTTTTGTAGTTACATGTCCTACAGATAACTCTCTCCTCTCTCTGACCTGTTTTTTTTTACACTGATGA  |       |       |       |       |       |       |       | 20566 |
| PolarBear   | -----                                                                             |       |       |       |       |       |       |       | 0     |
| Cow         | TTGACATACTGTATTATG---ATTTAGGA-----GTA---CAACATAATGATTCAACATTTATACAT--ATTA         |       |       |       |       |       |       |       | 19788 |
| Dog         | TAGTCAAAATTTCCAGTTCCTTCAAAGATGT--C-----TTTTTCCCCTTTTCAAATCAGGAATTAAGGAC--AGTC     |       |       |       |       |       |       |       | 19880 |
| BelugaWhale | TTGACATACAATATTATGTTAGTTTTAGGT-----GTAA--TAACATAATGATTCAAAATTTACATAC--ATTA        |       |       |       |       |       |       |       | 16582 |
| Donkey      | TAGTCAAAATTTTCTAGTTGCCTCAAAAATAT--CTTTCACGTTTCTTTTCTTTCAAATCAAGAACCAAGGAA--AGTC   |       |       |       |       |       |       |       | 19564 |
| Cat         | CAGTAAGAATTTTCCATTTGCCTCAGAAATGT--C-----TTGG--CGCCTGGGTGGCTCAGT---TAAG---TGTC     |       |       |       |       |       |       |       | 22596 |
| Ferret      | TAGTCCAAATTTCCCAATTGCCTTGAAAATGT--C-----TTTC--CCCCCTTTCAAATCAGGAATCAAGGGA--AGTT   |       |       |       |       |       |       |       | 19631 |
| Lion        | CAGTAAGAATTTTCCATTTGCCTCAGAAATGT--C-----TTGG--CGCCTGGGTGGCTCAGTCAGTTAAG---TGTC    |       |       |       |       |       |       |       | 21195 |
| Vaquita     | TTGACATACAATATTATGTTAGTTTTAGGT-----GTA---TAACATAATGATTCAAAATTTACATAC--ATTA        |       |       |       |       |       |       |       | 17250 |
| Pig         | TTGACATAAAATATTATGTTAGTTCCAGGTGT--T-----GTA---CAACATCATGAGTCAACATTTACATAC--ATTA   |       |       |       |       |       |       |       | 15672 |
| Majority    | CAAATTXAXXA-TTTAAGT-----CATXTGTCAXXATATAAAAATTTTTA-----C-TATTACATTCXCXATAG        |       |       |       |       |       |       |       |       |
|             | 24090                                                                             | 24100 | 24110 | 24120 | 24130 | 24140 | 24150 | 24160 |       |
| Human       | ATAGTTGTAATTTTAAATGGGACATTTATGTTTTCTTTTAAAAAACATTTA-----ACCTAAGGCCTTACGTATAG      |       |       |       |       |       |       |       | 20639 |
| PolarBear   | -----                                                                             |       |       |       |       |       |       |       | 0     |
| Cow         | CAAATTTGGTCACTGTAATCTAGTAG-TCATTTGTGACCATATAAAAATTATTACAATATTATT-ATTACATTTCCCATGC |       |       |       |       |       |       |       | 19866 |
| Dog         | AATATTTAAACA-TCTAGTT-----AATGTTTAGTTAATTTAATGTTTAGTTA-ATGACTTTTAAAGTCTCTTTATAA    |       |       |       |       |       |       |       | 19949 |
| BelugaWhale | CAGATTGATCACCATAAC-----CATCTGTCACTGTAAAAAATTATTA-----ATTATATTCCCCAAGC             |       |       |       |       |       |       |       | 16641 |
| Donkey      | AGAATGTTGAATTGGTTGATACCTTTTATATCTGTAATCAGTTTATCTTCCCAC----T--CACCTTTTTTTCTTTGTTA  |       |       |       |       |       |       |       | 19638 |
| Cat         | TGACTTTGG--CTCAGGT-----CATGATCACACAGTTTGTGGGTTTG--A-GCCCCGTGTCAGGCTCTGCGCAG       |       |       |       |       |       |       |       | 22661 |
| Ferret      | GATATGTTG-A-TTTAGTT-----AATGTCTTTTTAAAAAATTTTT-----TTTAACTTTTTTTAAAG              |       |       |       |       |       |       |       | 19688 |
| Lion        | TGACTTTGG--CTCAGGT-----CATGATCGCACAGTTTGTGGGTTTG--A-GCTCCGTGTCAGGCTCTGCGCAG       |       |       |       |       |       |       |       | 21260 |
| Vaquita     | CAGATTGATCACCATAAA-----CATCTGTCACTGTAAAAAATTATTA-----ATTATATTTCCCAAGC             |       |       |       |       |       |       |       | 17309 |
| Pig         | CAAATTGATAGTGGTAAGTCTATTAACCATCTGTCACCATACAGAGGTATTACAATACTGTTGACTGCATTCCCTGTGG   |       |       |       |       |       |       |       | 15752 |





Dienstag, 3. Mai 2022 08:38

|             |                                                                                                                                            |            |
|-------------|--------------------------------------------------------------------------------------------------------------------------------------------|------------|
| Majority    | X- - XXX- - - X- - - - C- - - - XX- - - X- T- X- - - - - XX- - - - X- - - - - - - - - - - - - - - - - - - - - - - TXX- - - - X- - - - C- C |            |
|             | 24330 24340 24350 24360 24370 24380 24390 24400                                                                                            |            |
| Human       | GCTCAGCTTTTCTCCAATGATCTGCTTTCTCAGCTCTTCAGGTTTCCGTATATTCACAGAACCATTTCTGTGCTATGTCT                                                           | 20870      |
| PolarBear   | -----                                                                                                                                      | 0          |
| Cow         | GCTTTCTCTAGTTGCGGTGTGTGGGCTTCTCATTGTGGTGGCCTCTCTTGTTGTGGAGCAGGGACTCTATAATGGGCT- C                                                          | 20093      |
| Dog         | GGCTTGACCAGATTCAG- GTTTAAATTTTA- GCAGGGATA- - TTTTGTGGATATTCTCTATGTAATTCCTATTGTA- T- C                                                     | 20180      |
| BelugaWhale | -----                                                                                                                                      | C- C 16730 |
| Donkey      | AGCTTGATCAGATTCA- - GGTAAATTTTAGCAAGAATA- - TTTTATAGATATACTCTGTAATTCCTGTTGTATCAC                                                           | 19834      |
| Cat         | GGTTTGGTTAACGTC- - TTTTAAGTCTCT- ATAAAGATA- - ACTATGAATCAGTTTACCTTCCATTCCCTTTATT- G- C                                                     | 22888      |
| Ferret      | -----                                                                                                                                      | 19690      |
| Lion        | GATTTGGTTAACGTC- - TTTTAAGTCTCT- ATAAAGATA- - ACTATGAATCAGTTTACCTTCCATTCCCTTTATT- G- C                                                     | 21486      |
| Vaquita     | -----                                                                                                                                      | C- C 17398 |
| Pig         | -----                                                                                                                                      | C- C 15842 |

|             |                                                                                                                             |            |
|-------------|-----------------------------------------------------------------------------------------------------------------------------|------------|
| Majority    | - - - - - TT- XXTTAXTTCTTX- T- - - - - X- - - - X- - - - - - - - - - - - - - - - - - - - - - X- - - - X- - - - TX- - - - T- |            |
|             | 24410 24420 24430 24440 24450 24460 24470 24480                                                                             |            |
| Human       | TGTAGCAGTACAACAGTGTCTTAATTACTTATGGCATCAGCATTAAAGTTTTGGAATCTTGTACAGTGAGTGTCAAAACTT                                           | 20950      |
| PolarBear   | -----                                                                                                                       | 0          |
| Cow         | AGTTGTTCTGGCGCATACACTCAGTTCCTCTTCTGCATGTGGAATCTTCCCGGACCAGGGATCAAAC- CCGTGTGCCCTA                                           | 20172      |
| Dog         | A- - CAACAGGAGGAATATATTTATTTCTTTGTAGTGATAACATTTATCAGTGGATTTGGT TTTGTATTGTGATGTATC                                           | 20258      |
| BelugaWhale | -----                                                                                                                       | 16730      |
| Donkey      | ATCAGGAAGAACATGTTTAGTTACCTCTTT- TGATGTTAGCATTTATCAATAGTTTAGTTGTTGTCAGCTTGATGCATC                                            | 19913      |
| Cat         | T- - TT- - - - - TTCTTTTATTGCTTATTAGAGAACTGGGTCATCTATTCTGTACGGTTTTCCACTTTGTTGATTT                                           | 22956      |
| Ferret      | -----                                                                                                                       | 19706      |
| Lion        | T- - TT- - - - - TTCTTTTATTGCTTATTAGAGAAACCGGGTCATCTATTCTGTACGGTTTTCCACTTTGTTGATTT                                          | 21554      |
| Vaquita     | -----                                                                                                                       | 17398      |
| Pig         | -----                                                                                                                       | C- - 15843 |

Dienstag, 3. Mai 2022 08:38

|             |                                                                                                                   |       |
|-------------|-------------------------------------------------------------------------------------------------------------------|-------|
| Majority    | - ATTA- A- XXT- XT- XCXXXTX- XX- - - - - - - - - T - - CTAAXATAATTTCTAATGTCATGTAAT- - - - GTC                     |       |
|             | <u>          24490        24500        24510        24520        24530        24540        24550        24560</u> |       |
| Human       | TGTTTTTCAAATTGTCTTGGTGTCTTCTTCACTGCATTTATT- - TTAAGATCATTTGGCTAAGTTCTGTGAAGGCTCTT                                 | 21028 |
| PolarBear   | - - - - - - - - - - - - - - - - - - - - - - - - - - - - - - - - - - - - - - - - - - - - - - - - - -               | 0     |
| Cow         | CATTAGCAGGTGGGGTCTTATCCACTGTTAGAACTATGGAAGTCCCTAAAATAATTTCCCAATGCCATGTAAT- - - - CTC                              | 20248 |
| Dog         | CAGTATAGAGTGCTCCAAAATCCTTTTACCTTCGTTTTTTTTTTTTTTTTTAAAGAATTTTATTTATTCAGAAAGA- - - - GAG                           | 20334 |
| BelugaWhale | - ATCA- - - - - - - - - - - - - - - - - - - - - - - - - - - - - - - - - - - - - - - - - - - - - - - - - -         | 16765 |
| Donkey      | TGGTGTAGAGTTCTCCATCATCCTT- - - - - - - - - - - - - - - - - - - - - - - - - - - - - - - - - - - - -                | 19971 |
| Cat         | TGGTG- ATTATACTTCCATGTCATTGTTTTACATGTTCCCTCATGTCCTA- - - - - TTTCTGAGGTGAGGCTTG- - - - ATC                        | 23026 |
| Ferret      | - - - - - - - - ACAGAGATCACAAGT- - - - - - - - - - - - - - - - - - - - - - - - - - - - - - - - - - - -            | 19731 |
| Lion        | TGGTG- ATTATACTTCCATGTCATTGTTTTACATGTTCCCTCATGTCCTG- - - - - TTTCTGAGGTGAGGCTTG- - - - ATC                        | 21624 |
| Vaquita     | - ATCA- - - - - - - - - - - - - - - - - - - - - - - - - - - - - - - - - - - - - - - - - - - - - - - - - -         | 17433 |
| Pig         | - ATTA- - - - - - - - - - - - - - - - - - - - - - - - - - - - - - - - - - - - - - - - - - - - - - - - - -         | 15877 |

|             |                                                                                                                   |       |
|-------------|-------------------------------------------------------------------------------------------------------------------|-------|
| Majority    | XXACAXXAGTTAA- ATTTTCCCAGXXAXTTTTAAGGAAATCTTCTGTATXTTCTTTTTGXATCAXGAATCAAGGAAAGTCA                                |       |
|             | <u>          24570        24580        24590        24600        24610        24620        24630        24640</u> |       |
| Human       | TGGGTCTTATTTATACTTGCCTTAAATTTAGTAGTTAATTTGGGAGAACATTATAGCTGCATTATCAAATAAAAATGGCAA                                 | 21108 |
| PolarBear   | - - - - - - - - - - - - - - - - - - - - - - - - - - - - - - - - - - - - - - - - - - - - - - - - - -               | 0     |
| Cow         | CAACAGTAGTAATCAATTTCCCTGATCACTTTAAAGAAATCTTGTGTATTTTCTTTTAAATCAGGGATCAAGGAAAGTCA                                  | 20328 |
| Dog         | AGAGAAACAGAGACATAGGCAGAGGGAGAAGCAGGCTCCATGCAGGAAGCCCGATATGGGGCTCAGTCCCAGGACTCTGG                                  | 20414 |
| BelugaWhale | TAAACAGTAGTCAA- AGTTTTCCAGTCACTTTAAAGAAGTCTTTTATATTTTCTCTTTGAATCAGGGATCAAGGAAAGTCA                                | 16844 |
| Donkey      | GCAAAAATGATGATATTCTCTCCCCTCTTCCCCG- - - CTTCCCTCCATATGTTTGTTAGAATTCTTCTAAGAACTTTTTTC                              | 20048 |
| Cat         | AGATTCAGGTTTAAATTTTTAGCAGGAATATTTTTGTAGATGCACTGTGTGTTTTTCTGTTGTATCACACCAGGAGGAACA                                 | 23106 |
| Ferret      | GCAGGCAGAGAGAGAGAAGGGGAAGCAGGCTCC- CACCGAGCAGAGAGCCCATGTGGGGCTTGATCCCAGGACTCTGA                                   | 19810 |
| Lion        | AGATTCAGGTTTAAATTTTTAGCAGGAATATTTTTGTAGATGCACTGTGTGTTTTTCTGTTGTATCACACCAGGAGGAACA                                 | 21704 |
| Vaquita     | TAAACAGTAGTCAA- AGTTTTCCAGTCACTTTAAAGAAGTCTTTTATATTTTCTCTTTGAATCAGGGATCAAGGAAAGTCA                                | 17512 |
| Pig         | CAACAGTAGTCAG- AATTTCCCAGTAACTTCAAAAAAGTCTTTTATATTTTCTTTTTGCATCGGGAACCAGGGAAAGTCA                                 | 15956 |

Dienstag, 3. Mai 2022 08:38

| Majority    | GATXX- ATGATCTGXT- - - T- GTGAAGTATAAXATTTX- XTXGX- G- - CT- - XX- CTTCACCCCTCCTGTTTTCTTGATTT- |       |       |       |       |       |       |       |       |
|-------------|------------------------------------------------------------------------------------------------|-------|-------|-------|-------|-------|-------|-------|-------|
|             | 24650                                                                                          | 24660 | 24670 | 24680 | 24690 | 24700 | 24710 | 24720 |       |
| Human       | TTTTTTTTGAGCTGAAAGGCAGAGAACTATAACATTTCTTTGAAGAATT- - - - - TTCCACTTTCTTCTTCATGGTATTTT          |       |       |       |       |       |       |       | 21183 |
| PolarBear   | -----                                                                                          |       |       |       |       |       |       |       | 0     |
| Cow         | GCTTA- CTGATTTGGTAC- T- TTAAGGTCTGTATCCCTGCTGGAGGGGCA- TGACAACCCACTCCAGTATTCTTGCTTGG           |       |       |       |       |       |       |       | 20404 |
| Dog         | GATC- - ATGCCCTGAT- - - G- CTCAACTGCAGAGTCACCCAGGCATCCT- - - - - CTACCTTCTGGTTTTTATAATGG-      |       |       |       |       |       |       |       | 20480 |
| BelugaWhale | ACATG- TTGATTTGGTTC- T- TTTAAGTCTATTTAT- - GTCAG- - - - TT- TTCCTTCTCCCTCCCCCTTTCTTGATTT-      |       |       |       |       |       |       |       | 16912 |
| Donkey      | CATCAAATAATTTGGTCA- TGCTGAAATACCCTTTTTATAAGAAAAGCAGGATAAGATTTTGACTTAAAAAAAAAATTTT              |       |       |       |       |       |       |       | 20127 |
| Cat         | TATCTCATTATCTTTT- - - T- GTGACGTAAACATTTATCAGGAGGTTT CAGGTTTGGTTAGCATGATGTATCCAGTATAG-         |       |       |       |       |       |       |       | 23181 |
| Ferret      | GATC- - ATGCCCTGAA- - - T- GTAAGGCAGAGGCTTAACCCACTGAGC- - - - - CACCCAGGTTCCCCTAGTG- -         |       |       |       |       |       |       |       | 19871 |
| Lion        | TATCTCATTATCTTTT- - - T- GTGACGTAAACATTTATCAGGAGGTTT CAGGTTTGGTTAGCATGATGTATCCAGTATAGA         |       |       |       |       |       |       |       | 21780 |
| Vaquita     | GCATG- TTGATTTGGTTC- T- TTTAAGTCTATTTAT- - GTCAG- - - - TT- TTCCTTCTCCCTCCCCCTTTCTTGATTT-      |       |       |       |       |       |       |       | 17580 |
| Pig         | GCATG- TTGAAATGAT- - - - - TAAGGTATAAGTCA- - GTTTT- - - - - CTTCCCCCTCCCCTTTTCTTGATTT-         |       |       |       |       |       |       |       | 16015 |

| Majority    | - - - - - ATTCTTTATTAA- - XXTTAATCTGX- - XGTCAATAATTX- X- T- TTGTTGAGTTTTXCGA- AAXGXTGA     |       |       |       |       |       |       |       |       |
|-------------|---------------------------------------------------------------------------------------------|-------|-------|-------|-------|-------|-------|-------|-------|
|             | 24730                                                                                       | 24740 | 24750 | 24760 | 24770 | 24780 | 24790 | 24800 |       |
| Human       | CCCTAAGAGACATGCTTAATGCAGAAAATATATTTAAAAGGATTTTAAACAGCTTATATGTAAGGGATGAGGGAACAGGGA           |       |       |       |       |       |       |       | 21263 |
| PolarBear   | -----                                                                                       |       |       |       |       |       |       |       | 0     |
| Cow         | - - - - - AGAATCCTCATGGACAGAGGAGCCTGGC- GGGCTATAGTTCATAGGGTGGAAAAGAGTCAGACACAACCTGA         |       |       |       |       |       |       |       | 20474 |
| Dog         | - - - - - TTTAAAACGATTTATTAATCATTTAAAATGATTAAT- AATGACTGCAGTTTCATTGAGCATTGCAAAAATGGTGA      |       |       |       |       |       |       |       | 20554 |
| BelugaWhale | - - - - - TCTTTGTTAG- - - - AGAAACTG- - - GGT CATCTATTC- - - - - TGTACAATTTTCTGA- - - - - A |       |       |       |       |       |       |       | 16958 |
| Donkey      | CCGTTGAGTTGGTACTCTAGCAAACCTCT- GGTGTAACCAGTGTCCCTCTTTATTCTTGTAGTGTCTTTGTGAAGGCAGG           |       |       |       |       |       |       |       | 20206 |
| Cat         | - TGCTCCCATATCCTTTCATACCTTCTTGATTTTATTAGTTAATAATTGCAGTTTCGTTGGGTATTGCAAAAATGGTGA            |       |       |       |       |       |       |       | 23260 |
| Ferret      | - - - - - AATGCCTTTTAAGTCTCTTTATA- - - - AAG- AGAAACTGGGT CATCTATGTGATTTTCTACTTTGTTGA       |       |       |       |       |       |       |       | 19935 |
| Lion        | GTGCTCCCATATCCTTTCATACCTTCTTGATTTTATTAGTTAATAATTGCAGTTTCGTTGGGTATTGCAAAAATGGTGA             |       |       |       |       |       |       |       | 21860 |
| Vaquita     | - - - - - TCTTTGTTAG- - - - AGAAACTG- - - GGT CATCTATTC- - - - - TGTACAATTTTCTGA- - - - - A |       |       |       |       |       |       |       | 17626 |
| Pig         | - - - - - TCTTTGTTGA- - - - G- AATCTG- - - GGTCTACTGTTT- - - - - TGTACAATTTTCAGA- - - - - A |       |       |       |       |       |       |       | 16060 |

Dienstag, 3. Mai 2022 08:38

```
Majority      TAT- - - - - X- TATACTTX- - XXX- - - - - GTTXATTA- TACTTTXATGTTGTTAXTTTATATGTTTCTCATACCGTATTT
              |          |          |          |          |          |          |          |
              24810       24820       24830       24840       24850       24860       24870       24880
```

|             |                                                                                                       |       |
|-------------|-------------------------------------------------------------------------------------------------------|-------|
| Human       | TACTTGGACTAATATTTCAATATTTCTAAAATTATTGGTTTATTGAGTACGTTCCCTAGAAAACGTTTATTGAAAGCTT                       | 21343 |
| PolarBear   | -----                                                                                                 | 0     |
| Cow         | AGCGACATAGCATGCATA- - CAAGCA- - AGTCTATTAATAGGACAGTTTTGTTTTTTT- TTTTTTCTCTCCCCCTTTAT                  | 20549 |
| Dog         | TATTCTTTTTTACCCCTG- - CATATTTTGTAGATTCTTTCT- - - - - TTTTTACATCAAATATTTGTACTACTGAAATA                 | 20627 |
| BelugaWhale | AAT- - - - - TATAATT- - TT- - - - - GCTGATTA- TACCTTCATGTTGTCATTTTGTGTGTTTCCCATGTCTTGAT               | 17020 |
| Donkey      | GAT- - - - TTTTACGTTTA- - TTT- - - - - TCCAGTCTTATTGCAATGGTTCTTCTTTTCAAATTCTTGAATTGTTTTA              | 20273 |
| Cat         | TCCACTCCTCCCCCGGCC- - CCCGCCTATTTTGTAGATTTTCTGTTAACTTTTTACGTCAGTATTTTGTACTACTGGAATT                   | 23338 |
| Ferret      | TTTTGGTGACTATACCTC- - CATGTC- - - - - - - - - - - - - - - - - - - - - - - - - - - - - - - - - - - - - | 19980 |
| Lion        | TCCACTCCTCCCCCTGCC- - CCCGCCTATTTTGTAGATTTTCTGTTAACTTTTTACGTCAGTATTTTGTACTACTGGAATT                   | 21938 |
| Vaquita     | AAT- - - - - TATAATT- - TT- - - - - GCTGATTA- TACCTTCATGTTGTCATTTTGTGTGTTTCCCATGTCTTATAT              | 17688 |
| Pig         | AGT- - - - - CTTACTT- - TT- - - - - GCCGATTA- TACCTCCATGTTGTCATTTG- TGTGTTTCTCATATCCTGTAT             | 16121 |

```
Majority      - - - - TTTCTGT- - X- - - - AACT- - - - - - - - - - T- - - TG TAGTT- X- - - - A- XATGX- GCTTXXX- - GATT- - - - -
              |          |          |          |          |          |          |          |
              24890       24900       24910       24920       24930       24940       24950       24960
```

|             |                                                                                                                    |       |
|-------------|--------------------------------------------------------------------------------------------------------------------|-------|
| Human       | CAAATTTCTCAGAATTGTATAGCATTTTTGAATTCTCTCTTTTACTAATATCAAGCACCTATGTTTCTCCTATTTTC                                      | 21423 |
| PolarBear   | -----                                                                                                              | 0     |
| Cow         | TGATTTTCTGTTAGAG- - AAAGTGGGCATC- TATTCTGTACAATTTTTTG- AAAATTATGCTTTTGCTGATTTTACCTC                                | 20625 |
| Dog         | CCCTTTTTTGTA AAAAACAGGGTAGATTTTGA CTTTAAAAACGTTTCCCTGATGAGTTGGTACTGTAGCAGCCTCCATTTT                                | 20707 |
| BelugaWhale | - - - - TTCCTGT- - - - - G TACT- - - - - - - - - - - - - - - TGTAGTT- - - - - A- GATGAGGCTTGATTGGATT- - - - -      | 17059 |
| Donkey      | - - - - TCTTGGGCCAGCAGGAGCT- - - - - CA- TGACACAAGTAGCTTT- GATATTTACTTGCTTTGAAGAATC- - A- - - -                    | 20335 |
| Cat         | CCCTTTTTATAAGAAAACAGGCT- - - - - T- - - - CTACATTTATTTCC- - - - - - - - - - - - - - - - - - - - -                  | 23377 |
| Ferret      | -----                                                                                                              | 19980 |
| Lion        | CCCTTTTTATAAGAAAACAGGCT- - - - - T- - - - CTACATTTATTTCC- - - - - - - - - - - - - - - - - - - - -                  | 21977 |
| Vaquita     | - - - - TTCCTGT- - - - - G TACT- - - - - - - - - - - - - - - TGTGGTT- - - - - A- GATGAGGCTTGATTAGATT- - - - -      | 17727 |
| Pig         | - - - - TTCCTG- - - - - G - GTACT- - - - - - - - - - T- - - - GTAGT- - T- - - - A- GATGAGGCTTGATCAGATT- - - C- - - | 16161 |

Dienstag, 3. Mai 2022 08:38

| Majority    | ----- X-----XXAAX-----A-----TT-XXXTG-T                                          |       |       |       |       |       |       |       |       |
|-------------|---------------------------------------------------------------------------------|-------|-------|-------|-------|-------|-------|-------|-------|
|             | 24970                                                                           | 24980 | 24990 | 25000 | 25010 | 25020 | 25030 | 25040 |       |
| Human       | TTGATTTGTCTTGTACAGAAATTTATTTTACTGGTCTTTTCAAAGAACCAACCTTTTACTTGTTTTCTTTTTTGTGGG  |       |       |       |       |       |       |       | 21503 |
| PolarBear   | -----                                                                           |       |       |       |       |       |       |       | 0     |
| Cow         | T-----ATGTTGTCATTTTTT-TCTATTCCTCATATCCTTTAT-CTCTTGTTGA--CTTGTAG--TTAGGTAA-T     |       |       |       |       |       |       |       | 20688 |
| Dog         | AGCCAGTGTGAAGTTTTTGTGTTA-AGAATCATTGTGATGGCAAGGACTTTTACATTAATTTTCCAGTCTTAGGATGAT |       |       |       |       |       |       |       | 20786 |
| BelugaWhale | -----C-----AG-----                                                              |       |       |       |       |       |       |       | 17062 |
| Donkey      | -----TTTCCTGCT--TC-AGACTTTTCATTAACCATTTCTTTAAAAAGTGCTGGTCTTTGGGTGGGAAGT         |       |       |       |       |       |       |       | 20400 |
| Cat         | -----AGTCT--T-----A-----TTGCAATGAT                                              |       |       |       |       |       |       |       | 23394 |
| Ferret      | -----                                                                           |       |       |       |       |       |       |       | 19980 |
| Lion        | -----AGTCT--T-----A-----TTGCAATGAT                                              |       |       |       |       |       |       |       | 21994 |
| Vaquita     | -----C-----AG-----                                                              |       |       |       |       |       |       |       | 17730 |
| Pig         | -----AGGTT-TGATTTTTA-GCAA-----GAATGTTAAAT-GT--TAAAT-----TTTTAG--CAAGAATG-T      |       |       |       |       |       |       |       | 16212 |

| Majority    | -AX-CTTXAXX--X-----XTTTAATTTGAGCAAGTATGATCTC----ATXACACCTGTAXCTTTGAXAGTXACTT       |       |       |       |       |       |       |       |       |
|-------------|------------------------------------------------------------------------------------|-------|-------|-------|-------|-------|-------|-------|-------|
|             | 25050                                                                              | 25060 | 25070 | 25080 | 25090 | 25100 | 25110 | 25120 |       |
| Human       | GGCAGTGGAGGGATTCACCTTAATTTGATCCTGAACTCCTTTATTTTCTTTTAAAATGCATTCAAGGTTAAAGGTAATCA   |       |       |       |       |       |       |       | 21583 |
| PolarBear   | -----                                                                              |       |       |       |       |       |       |       | 0     |
| Cow         | AAGACTTGATCAGAT--TCAA-GTTTAATTTT CAGCAAGAATACTTTGT-AAATGTACGGTGTAAATTTCTAATGTATCAC |       |       |       |       |       |       |       | 20764 |
| Dog         | CATTCTTTAAAAGTCTTTG--TTTCATCTAGAGCCAGTGAGAGCTC---ATAACACAGGTAGCTTTGATACTTACTT      |       |       |       |       |       |       |       | 20859 |
| BelugaWhale | -----GTTTAATTTT TAGCAAGAATATTTTAT-AAATGTACTCTGTAATTTCTAATGTATCAC                   |       |       |       |       |       |       |       | 17119 |
| Donkey      | GGTCCTTAGAGACCA--C----AATAATCTTGGGCCAGCAGGAGCTC---ATGACACAAGTAGCTTTGATATTTACTT     |       |       |       |       |       |       |       | 20469 |
| Cat         | CATTCTTTAAGAAGTCTTTAATTTTTCATTTT GAGCTATTGAGAGCTT---ATAACACCAGTAGCTATGATACTTACTT   |       |       |       |       |       |       |       | 23470 |
| Ferret      | -----TTATTTCTTGAGCCAGTAAGAACTC---GTAACACGGATAGCTTTGATACTTACTT                      |       |       |       |       |       |       |       | 20033 |
| Lion        | CATTCTTTAAGAAGTCTTTAATTTTTCATTTT GAGCTGTTGAGAGCTT---ATAACACCAGTAGCTATGATACTTACTT   |       |       |       |       |       |       |       | 22070 |
| Vaquita     | -----GTTTAATTTT TAGCAAGAATATTTTAT-AAATGTACTCTGTAATTTCTAATGTATCAC                   |       |       |       |       |       |       |       | 17787 |
| Pig         | TAAATTTTGTT-----GTTAACTTTT TAGCAAGAATGTT-----AAATGTACTCTGTAATTTCTAATGTATCAC        |       |       |       |       |       |       |       | 16276 |

Dienstag, 3. Mai 2022 08:38

| Majority    | GCTT- GAAGXATCATTTCCTTGTTXCAXATTTGTXA- TXGCCATTTCTTTAAGAAAAG- - CTGGTTTCTTTGGGTGGGT-                         |       |
|-------------|--------------------------------------------------------------------------------------------------------------|-------|
|             | 25130 25140 25150 25160 25170 25180 25190 25200                                                              |       |
| Human       | GCTG- ATAGCTTTGGCTTTTTTTTTTTTTTACTTTTAGAGTTCTCTTTTATTG- - TAAACTTCATTTAAAGGTTT                               | 21659 |
| PolarBear   | -----                                                                                                        | 0     |
| Cow         | CCTA- GAAGGAACATGCCTAGTTATCTTTTTGTGA- - TGTT- - - - - - - - - - - - - - - - - - - - - - - GACATTTATTAGTAGGTT | 20820 |
| Dog         | GCTT- GAAGTAGGATTTCTTGTTCCAGACCTTTTGTGGCCACTTCTTTAAGAAAAT- - TCTGGTTCCTTTGGGTGGGT-                           | 20935 |
| BelugaWhale | ACCA- GGAGGAACACGTCTAGTTACCTCTTTGTGA- - TGTTTTATCAGTAGGTTTCTAG- TACTGACATTTATCAGTAGGTT                       | 17195 |
| Donkey      | GCTTTGAAGAATCATTTCCTGCTTCAGACTTTTCATTAGCCATTTCTTTAAAAAAGTG- - CTGGTTTCTTTGGGTGGGA-                           | 20545 |
| Cat         | GCTT- GAAGTATCATTTCCTTGTTCTAGATC- - T- - - TAGCCATTTCTTTAAAAAAAATCCTGGTTTCTTTGGGTGAGT-                       | 23543 |
| Ferret      | GCTT- GAAGTACCATTTCTTGGTCCAGACCCCT- ATTAGCCATTTCTTTATGAAAAT- - TCTGGTTCCTCTGGGTGGGT-                         | 20108 |
| Lion        | GCTT- GAAGTATCATTTCCTTGTTCTAGATC- - T- - - TAGCCATTTCTTTAAAAAAA- TCCTGGTTTCTTTGGGTGAGT-                      | 22142 |
| Vaquita     | ACCA- GGAGGAACATGTCTAGTTACCTCTTTGTGA- - TGTTTTATCAGTAGGTTTCTAG- TACTGACATTTATCAGTAGCTT                       | 17863 |
| Pig         | TCTG- GAAGGAGTATGTCTAGTTACTTCTTTGTG- - - - - GT- - - - - - - - - - - - - - - - - - - - - - - GTAGGTT         | 16318 |

| Majority    | - AGGGGTCTXAGGACTACA- GTAATGT- GAGTGCAA- XTGCTAATTGTTGTCAGGTGGTCTTTA- TTCAAAGCT- T         |       |
|-------------|--------------------------------------------------------------------------------------------|-------|
|             | 25210 25220 25230 25240 25250 25260 25270 25280                                            |       |
| Human       | TAAG- - - CTACACAAAAGTAGAGGGAATG- - GTATATAAT- ACACTTTTTCTGTTGGATAATATTAATGCAAATCTCAG      | 21733 |
| PolarBear   | -----                                                                                      | 0     |
| Cow         | CAGGTGTTCTCTGCTTGATGCATCCAGTATAGAGTGCTCC- ATCATCTGTCTGTACTAGTGGGTTTTA- - - - GTAGCT- A     | 20894 |
| Dog         | - AG- - - TCCTTA- GAGACCAC- - - - AATGT- GGGTGCCAACGTGCTAATTGTTGTAAGGTTGTTACTACTTCAAAGCTCT | 21005 |
| BelugaWhale | CAAGTGTCTCAGCTTGATGCATCCAGTGTAGAGTGCTCTTATCATCC- TTTACCTAGTGGGCTTTA- - - - GTAGCT- G       | 17269 |
| Donkey      | - AGTGGTCTTA- GAGACCACA- ATAATGT- GGGTGCAAAGGTGCTAATTGTGTTAGGTTGTCTTTGCTTCAAGGCCCT         | 20621 |
| Cat         | - AGTGGTCTTAAGAGACTACC- GTAAGGT- GGGTGCAAAGGTGCTAATTGCTGTTAGGTGGTCATTACTTCAAAGGCCCT        | 23620 |
| Ferret      | - AGTGGTCTTA- GAGACCACA- GTAATGT- GAGAGCAAAGGTGTTAATTGCTGTTAGGTTGTTACTACTTCAAAGCT- T       | 20183 |
| Lion        | - AGTGGTCTTAAGAGACCACA- GTAATGT- GGGTGCAAAGGTGCTAATTGCTGTTAGGTGGTCA- - - - TTCAAAGGCCCT    | 22215 |
| Vaquita     | CAAGTGTCTCAGCTTGATGCATCCAGTGTAGAGTGCTCT- ATCATCC- TTTACCTAGTGGGCTTTA- - - - GTAGCT- G      | 17936 |
| Pig         | AAGGCCTCTCAGCTGGATGTATGGAGTAGAGAGTGCCAT- ATCATCC- TTTCCCCTAGTGGGTTTTATTTAGTAGTT- G         | 16395 |

Dienstag, 3. Mai 2022 08:38

| Majority    | TTXAGTGAATAAAGCXAGXAGXTATTTXAAAA- - - AXX- - - - X- TGTGAGXTCATTT- TTATTTCCAGXATA- - TTTTAC     |       |       |       |       |       |       |       |       |
|-------------|-------------------------------------------------------------------------------------------------|-------|-------|-------|-------|-------|-------|-------|-------|
|             | 25290                                                                                           | 25300 | 25310 | 25320 | 25330 | 25340 | 25350 | 25360 |       |
| Human       | ATCATTTCATATAATCTGCAGATATATCAGAATGTGTGTCTCTCTATTAATGTGACATTGGTACCATTATAAAGTTTAA                 |       |       |       |       |       |       |       | 21813 |
| PolarBear   | -----                                                                                           |       |       |       |       |       |       |       | 0     |
| Cow         | ATAATTGCATAAATCCACTGGGTATTGCAAAA- - - ATG- - - - - GTGATAC- - - - - TCTTCTCCTGCATA- - TGTTAC    |       |       |       |       |       |       |       | 20956 |
| Dog         | TTTAGTAGATTAAGCTAGCAG- TGTTTTGAGG- - - GCA- GATACTTTGGGCTCATTTGTTATTTCCAGTTCGTATTTTAC           |       |       |       |       |       |       |       | 21080 |
| BelugaWhale | ATAATTGAGTAATTTTCATTGGGTATTGCAAAA- - - ATG- - - - - GTGATATTATTT- TTTTCTCCTGCATA- - TATTTT      |       |       |       |       |       |       |       | 17336 |
| Donkey      | TTCAGTGGACAGAGCTAACAAAT- TTATAGAA- - - ATA- - - CATTGTAAGCCTGT- - - GTATTTCCAAT- - - - - - TCAT |       |       |       |       |       |       |       | 20684 |
| Cat         | TTTAGTGAACAGAGCTAGCAAATAATTTGGAG- - - ACATAATATTGTGAGCTCATTTGTTATTTCCAATTTA- ACTTTAC            |       |       |       |       |       |       |       | 23696 |
| Ferret      | TTTAGTGGACAGAGCTAGTAG- TGTTTTGAAG- - - ACA- AATACTGTGAGCTCATTTGTTATTTTTCAGCTTATATTTAAC          |       |       |       |       |       |       |       | 20258 |
| Lion        | TTTAGTGAACAGAGCTAGCAAATAATTTGGAG- - - ACATAATATTGTGAGCTCATTTGTTATTTCCAATATA- ACTTTAC            |       |       |       |       |       |       |       | 22291 |
| Vaquita     | ATAATTGAGTAATTTTCATTGGGTATTGCAAAA- - - ATG- - - - - GTGATACTATTT- TTTTCTCCTGCATA- - TATTTT      |       |       |       |       |       |       |       | 18003 |
| Pig         | GTAACTGCATAATCTCAGTGGGTCTTACAAA- - - ACG- - - - - GTGGTAG- - - - - TCTTATCACCC- - - - - - CTGC  |       |       |       |       |       |       |       | 16452 |

| Majority    | - - - - - TTTTTAT- TTTTCTGA- - TTTXXTATTX- GXACCTXTTGTATXAATTATXTAATTTTGCTT- XTAAXACTAX-      |       |       |       |       |       |       |       |       |
|-------------|-----------------------------------------------------------------------------------------------|-------|-------|-------|-------|-------|-------|-------|-------|
|             | 25370                                                                                         | 25380 | 25390 | 25400 | 25410 | 25420 | 25430 | 25440 |       |
| Human       | AATAATTTCTTAATGTCGTCTAATCTCCAGTATTCAGAATACTTTCTTTTCATTATTTTATTTTTCTTGCCTTTTCTTT-              |       |       |       |       |       |       |       | 21892 |
| PolarBear   | -----                                                                                         |       |       |       |       |       |       |       | 0     |
| Cow         | - - - - - TTAGTAT- TTTTCTA- - - TTCAGAA- - - - GAACTTTTCTCTCAAATATTTGGTTTTACCA- - AAACACCCT-  |       |       |       |       |       |       |       | 21018 |
| Dog         | - - - - - ATTTTTAT- TCTTCTGA- - TTTTATATTT- GTATCTCTTGTACG- - TTGCATAATTTTCGCTT- TTAATATTAA-  |       |       |       |       |       |       |       | 21146 |
| BelugaWhale | - - - - - TAAATAT- TTTTCTG- - - TTGGAA- - - - GAACTTTTTTCGTCAAATATTTAGTCATACTG- - AAACACCCT-  |       |       |       |       |       |       |       | 17397 |
| Donkey      | - - - - - ATTTAAT- TATACAA- - - CTTATATTT- GTGTGTCTTGTACAT- TGAAAAAATCTTGCTTGCTAATGTTAA-      |       |       |       |       |       |       |       | 20749 |
| Cat         | - - - - - AGTTTTTAC- TTTTCTGA- - TTTTATATTT- CTACCTCTTGTATAAATTGAATAATTTTGCTTGCTAACATTAAA     |       |       |       |       |       |       |       | 23767 |
| Ferret      | TTTATAATTTTTAC- TTTTCTGA- - TTTAATATTT- GTACCTCTTGTACA- - TTGAATGTTTTTGCTTGCTAATAGTAA-        |       |       |       |       |       |       |       | 20331 |
| Lion        | - - - - - AGTTTTTAC- TTTTCTGA- - TTTTATATTT- CTACCTCTTGTATAAATTGAATAATTTTGCTTGCTAATATTAAA     |       |       |       |       |       |       |       | 22362 |
| Vaquita     | - - - - - TAAATAT- TTTTCTG- - - TTGGAA- - - - GAACTTTTTTCATCAAATATTTGGTCATACTG- - AAACACCCT-  |       |       |       |       |       |       |       | 18064 |
| Pig         | - - - - - ATGTTAT- TCTTCTAA- - TTTAGCA- - - - GAACATTTTTTCATCAAATATTTGGTCATACCA- - AAACACCTT- |       |       |       |       |       |       |       | 16515 |

Dienstag, 3. Mai 2022 08:38

|             |                                                                                               |       |       |       |       |       |       |       |
|-------------|-----------------------------------------------------------------------------------------------|-------|-------|-------|-------|-------|-------|-------|
| Majority    | - - - - - TATTAAXAGATATXTAGACTAGXTTTTTA- - TAAAAAAXXTXACTATTAAACTGXT- - ATTTTAATTATA          |       |       |       |       |       |       |       |
|             | 25450                                                                                         | 25460 | 25470 | 25480 | 25490 | 25500 | 25510 | 25520 |
| Human       | - - - - - TTTGTT- GTTGTTAGATAAAGTGAGTCATC- - TGTACAATTTCCACTTTCTGGCTGGGC- GTGGTGGCTCAC        |       |       |       |       |       |       |       |
| PolarBear   | - - - - -                                                                                     |       |       |       |       |       |       |       |
| Cow         | - - - - - TATTA AAAAGAAAAACAGGAGAGATTTTTG- - CTAAAAATTTTCCTTATGAGCTGCT- - AACTCTAGCCTA        |       |       |       |       |       |       |       |
| Dog         | - - - - CAA- - TAT- - - TACATATGTATACTAGTTTTTTG- - AAAAGGAGCATCAATATTATACTGAT- - ATTGTAATTACT |       |       |       |       |       |       |       |
| BelugaWhale | - - - - - TACCAAAAAGAAAAGCAGGGTAGATTTTT CAGTTAAAAATTTTTCTCATGAGCTGGT- - AACTCCAG- - TA        |       |       |       |       |       |       |       |
| Donkey      | - - - - - CATTATTACATGTATATACTAGGTTTTTAAAAAGTATTACACTAACATTGTAATTGTTGAATATAGTTTTA             |       |       |       |       |       |       |       |
| Cat         | ATTGTAATATATGTACATATATATACTAGTTA- - - - - AAAAGGAACATCAGTATTACACTGAC- - ATTATAATTACT          |       |       |       |       |       |       |       |
| Ferret      | - - - - CAAAATAC- - TGCATATGTATACTAGTTTTTTT- - TAAAGGAACATCAGTACTACACTGAC- - ATTGTAATTACT     |       |       |       |       |       |       |       |
| Lion        | ATTGTAACATATGTACATATATATACTAGTTAGTTA- - AAAAGGAACATCAGTATTACACTGAC- - ATTATAATTACT            |       |       |       |       |       |       |       |
| Vaquita     | - - - - - TATCAAAAAGAAAAGCAGGGTAGATTTTT CAGTTAAAAATTTTTGCTCATGAGCTGGT- - AACTCCAG- - TA       |       |       |       |       |       |       |       |
| Pig         | - - - - - TATTA AAAAGAAAAGCAGGATAGATTTTTCACTTCAAAAATTTTTACTTTAAAAAGCC- - A- CTCCACTGTA        |       |       |       |       |       |       |       |

|             |                                                                                               |       |       |       |       |       |       |       |
|-------------|-----------------------------------------------------------------------------------------------|-------|-------|-------|-------|-------|-------|-------|
| Majority    | XACTACAGTTTTAAXGT- - - T- - - TCTTTGAAGTTXATXTTGT- - - - - CTTATAGTGXAGXCACAGAATTTTAAAGTTTA   |       |       |       |       |       |       |       |
|             | 25530                                                                                         | 25540 | 25550 | 25560 | 25570 | 25580 | 25590 | 25600 |
| Human       | GCCTGTAATCCCAGCA- - C- - - - TTCGGGAGGCTGAGGCGGG- - - - - CAGATCACGAGGTCA- GGAGATCAAGACCATT   |       |       |       |       |       |       |       |
| PolarBear   | - - - - -                                                                                     |       |       |       |       |       |       |       |
| Cow         | AACTCCAGTACAACGTGAAT- - - TCTTTATTGTTGATGAAAGT- - - - - GTTATTTTGAAGGCAAAGATTTTTACATTTAG      |       |       |       |       |       |       |       |
| Dog         | GACGATAGGTA AAGGT- - - T- - - TCTTTGTGGTTATTTTTGTT- - - - - CTTACAGTATAATTACAGAATTCCAAAGTTTA  |       |       |       |       |       |       |       |
| BelugaWhale | A- CTCCAGTGAATGTGAGT- - - TCTTTAACATTGATGTTAG- - - - - GTCGTTGTGAAGGCAAGGATTTTTACGTTTAT       |       |       |       |       |       |       |       |
| Donkey      | AGATTTCTTTGCAGTTATTTTTATCCTTAAAATGATTCCACGAAGAGTTTATAGTATAGTTACAGAATTTTAAAGTTTA               |       |       |       |       |       |       |       |
| Cat         | GAATACAGTTTTAAACT- - - T- - - CCTTTGCAGTTATTTTTGTC- - - - - CTTATAGTATAAAAACAGAATATCAAAGTTTA  |       |       |       |       |       |       |       |
| Ferret      | GAATATAGTTT GAGGT- - - T- - - TCTTTGCAGTTATTTTTGTC- - - - - CTAATAGTGAATTACAGAATTCTGAAGTTTA   |       |       |       |       |       |       |       |
| Lion        | GAATACAGTTTTAATGT- - - T- - - TCTTTGCAGTTATTTTTGTC- - - - - CTTATAGTATAAAAACAGAATATCAAAGTTTA  |       |       |       |       |       |       |       |
| Vaquita     | A- CTCCAGTGAATGTGAGT- - - TCTTTAACATTGATGTTAG- - - - - GTCGTTGTGAAGGCAAGGATTTTTACGTTTAT       |       |       |       |       |       |       |       |
| Pig         | A- CTA CTGTGCGTTCT- - - - - - TTGTTGTTGTTTCATGTCTTT- - - - - CTCGCCATGAAGGCAAGGATTTTTACATTTAT |       |       |       |       |       |       |       |



Dienstag, 3. Mai 2022 08:38

| Majority    | TTGACAGAXTTXTTXCXGTGGTTATTCTACTAAAXAXXAT- - TTAGXTTXXTXGTTTTCTXTXGGTTXXGAXTTTTAATX   |       |       |       |       |       |       |       |       |
|-------------|--------------------------------------------------------------------------------------|-------|-------|-------|-------|-------|-------|-------|-------|
|             | 25610                                                                                | 25620 | 25630 | 25640 | 25650 | 25660 | 25670 | 25680 |       |
| Human       | TTGGCTAACACAGTGAAAACCTGTCTCTACTAAAAATACGAAAAAATTAGCCAGGC- - GTGGTGGGGGGCACCTGTAGTC   |       |       |       |       |       |       |       | 22105 |
| PolarBear   | -----                                                                                |       |       |       |       |       |       |       | 0     |
| Cow         | T- - - - - CTTATTGCAGTGATCATTCTTTAAAAATGT- - TTGAATTTCTCATCTTGCGCCATCAGCAGCTCATAATA  |       |       |       |       |       |       |       | 21227 |
| Dog         | TTGAGAGATTTCTCT- TGTGGTTGACTACCAAGTTGA- - - TAGGTTAATGGTTTCATTTTGGTTTGGATTTTTAGGG    |       |       |       |       |       |       |       | 21357 |
| BelugaWhale | T- - CCAGTTTTATTGCAATGATCATTCTTTAAAAATGT- - TAAATTTCTC- - - - GGGCCAGCAGCAGCTCATAATA |       |       |       |       |       |       |       | 17605 |
| Donkey      | TTGAGAGAATTCTATTTGTAGTTCTCCCACTAAGCTGATAGTTAGGTTTATTTGTTTAAATTTTGGTTTTGATTTTCACTT    |       |       |       |       |       |       |       | 20980 |
| Cat         | TTGAAAGAATTCTGTGTGTGGTTCTACTACCAAGCTGA- - - TAGGTTTCATGTTTTCATTT- GGTTTTGATTTTTAGGG  |       |       |       |       |       |       |       | 23983 |
| Ferret      | TTGAGAGAATTCTATGTGTAGTTGACTACCAAGTTGATAGTTAGGCTTAATGGTTTCATTTTGGTTTTGATTTTTAAGG      |       |       |       |       |       |       |       | 20549 |
| Lion        | TTGAAAGAATTCTGTGTGTGGTTCTACTACCAAGCTGA- - - TAGGTTTCATGTTTTCATTT- GGTTTTGATTTTTAGGG  |       |       |       |       |       |       |       | 22582 |
| Vaquita     | T- - CCAGTCTTATTGCAATGATCATTCTTTAAAAATGT- - TAAATTTCTCATCTTGGGCCAGCAGCAGCTCATAATA    |       |       |       |       |       |       |       | 18277 |
| Pig         | TTTCCAGACTTATTGCAAT- ATCAGTCTTAAAAAATGT- - TTACATTTG- TCATCTTGGGCCAGCAGCAGCACATAATA  |       |       |       |       |       |       |       | 16726 |

| Majority    | XXTGTAATTTTG- X- - - - - AXCTXAAGXATAATTTTTTCTACTXAAAXTTAAATTA- XCTACATTTATAAXAAATC- - - G |       |       |       |       |       |       |       |       |
|-------------|--------------------------------------------------------------------------------------------|-------|-------|-------|-------|-------|-------|-------|-------|
|             | 25690                                                                                      | 25700 | 25710 | 25720 | 25730 | 25740 | 25750 | 25760 |       |
| Human       | CCAGCTACTCGGGAGGCTGAGGCAGGAGAATGGTGTGAACCCGGGAGGCGGAGCTTGCAGTGGCGCCACTGGACTCCAGC           |       |       |       |       |       |       |       | 22185 |
| PolarBear   | -----                                                                                      |       |       |       |       |       |       |       | 0     |
| Cow         | TCACTAGTTTTGCT- - CTTTACCTAAAGTATTATTTTTTCTCCAAAATTTTAGTTA- GCTG- - - - - GAAAT- - - C     |       |       |       |       |       |       |       | 21292 |
| Dog         | ATTCCACC- - - - - CAAGTGAAAAGTAAA- - - ACTCCATTTATAATGATC- - - G                           |       |       |       |       |       |       |       | 21399 |
| BelugaWhale | CCGTAATTTTGAT- - ACTTACCTAAGTATCATTCTTCTCCTCCAAAACCTTCAATTA- GCCATTTCTTT- - AAAAA- - - G   |       |       |       |       |       |       |       | 17677 |
| Donkey      | TTGGCTAAATT- - - - - T- - - TCCAAAGCCAAAACGTAAAAAAAAAAAAAAAAAAGCCACGTTGATAGAAGTA- - -      |       |       |       |       |       |       |       | 21047 |
| Cat         | ATTTTTTTTCCCC- - TAACATTTTTGGCTAAATTTTCCCAAATCAAAGTAAAATAAACTACATTTATAGAAGTCT- GG          |       |       |       |       |       |       |       | 24060 |
| Ferret      | ATTCACC- - - - - ATCTTTGGCTTAATTTTCCCAAAGTAAAAGTAAAAC- AAACTACATTTATAATGATC- - - C         |       |       |       |       |       |       |       | 20613 |
| Lion        | ATTTTTTC- CCCC- - TAACATTTTTGGCTAAATTTTCCCAAATCAAAGTAAAATAAACTACATTTATAGAAGTCT- GG         |       |       |       |       |       |       |       | 22658 |
| Vaquita     | CCGTAATTTTGAT- - ACTTACCTAAGTATCATTCTTCTCCTCCAAAACCTTCAATTA- GCCATTTCTTT- - AAAAA- - - G   |       |       |       |       |       |       |       | 18349 |
| Pig         | CCAGTAGTTTTGAT- - - - - ACCTA- - GTATCATTGTTCCTCAGAGACTTTAATTA- GCCATTTCTTTAAAAGC- - - C   |       |       |       |       |       |       |       | 16794 |

Dienstag, 3. Mai 2022 08:38

|             |                                                                                              |       |       |       |       |       |       |       |       |
|-------------|----------------------------------------------------------------------------------------------|-------|-------|-------|-------|-------|-------|-------|-------|
| Majority    | XTAGGTCTTXXTTGT CXXXCTXGTXTTCTGTGXCTATACCAXTATAGGTGXX- - - GTTTXCATTAATTTTX- - GGTTTGT       |       |       |       |       |       |       |       |       |
|             | 25770                                                                                        | 25780 | 25790 | 25800 | 25810 | 25820 | 25830 | 25840 |       |
| Human       | CTGGGTGACAGAGCAAGACTCCGTCTTAAAAAAAAAAAAAAAAAATTCCACTTTCTGGATTCTGCTGATTGTACCGCTGTGT           |       |       |       |       |       |       |       | 22265 |
| PolarBear   | -----                                                                                        |       |       |       |       |       |       |       | 0     |
| Cow         | ATGGGTCTTTAGTGGGACCTGGTCTTTAGAGACAATAATAATGTGGGTGCAAAGGTGCCAATGTCTTTTA- - GGTTTGT            |       |       |       |       |       |       |       | 21370 |
| Dog         | TTAAA- - TTCTTATCCACTCTAATTTGCTTTTTCTATCCCATTATAGCT- - - - - ATTTTCATTAATATTT- - GGTTTAT     |       |       |       |       |       |       |       | 21469 |
| BelugaWhale | AATGGTCTTTGGT GAGACCTGGTCTTAGAGACCACAGTAATGTGGGTGCAAAGGTGCCAATTGCTTTTA- - GGTT- GT           |       |       |       |       |       |       |       | 17754 |
| Donkey      | - - - - - TAGTTGTCTACTCTCCTTTGCTTTTTCTCTCCCCTTA- - - GT- - - - - GTTTTCACTAATTTTT- - GGTTTCT |       |       |       |       |       |       |       | 21109 |
| Cat         | TTAATACTTCCTGTCCACTCTCCTTTGCTTTGTCTATCCCATTATAGGTGTC- - - ATTTTCATCAATTTTT- - GGCTTAT        |       |       |       |       |       |       |       | 24135 |
| Ferret      | TTAAA- - TTCATGTCTACTCTAATTTTCTGTTTCTATACCATTATATC- - - - - ATTTTCATTAATTTTT- - GGTTTTA      |       |       |       |       |       |       |       | 20682 |
| Lion        | TTAATACTTCCTGTCCACTCTCCTTTGCTTTGTCTATCCCATTATAGGTGTC- - - ATTTTCATCAATTTTT- - GGCTTAT        |       |       |       |       |       |       |       | 22733 |
| Vaquita     | AATGGTCTTTGGT GAGACCTGGTCTTAGCGACCACAGTAATGTGGGTGCAAAGGTGCCAGTTGCTTTTA- - GGTT- GT           |       |       |       |       |       |       |       | 18426 |
| Pig         | ATGGGTCTTTGGTAGGACCTGGTCTTGAGACCACAATGATGTAGGTGCACAGGTCCCAAT- TGCTTTA- - GGTT- GT            |       |       |       |       |       |       |       | 16870 |

|             |                                                                                             |       |       |       |       |       |       |       |       |
|-------------|---------------------------------------------------------------------------------------------|-------|-------|-------|-------|-------|-------|-------|-------|
| Majority    | TXTTXTTTCXAG- - ATGTXTTXXAATXTXAAAXGCTTXCTACATTCTCXT- - - TCCXATXAAXXTAXAGAGAX- - - GTTX    |       |       |       |       |       |       |       |       |
|             | 25850                                                                                       | 25860 | 25870 | 25880 | 25890 | 25900 | 25910 | 25920 |       |
| Human       | TGTCATTTTATA- - - TGTTCTTCATGTAACAAGTTTACCTGAAATACAGGGGTTTGATCAGACTCTGGTGTAATTTTTA          |       |       |       |       |       |       |       | 22342 |
| PolarBear   | -----                                                                                       |       |       |       |       |       |       |       | 0     |
| Cow         | TATTGTTTCAA- - ATTTTTT- CACTTGAGAAAGCTAATAAAATA- - - - - AGACATATATATCTGTGTTTCAT- - - - TTC |       |       |       |       |       |       |       | 21437 |
| Dog         | CCTTCTTTATCG- - A- ATATAAACATGTGAATTGCTTCCTGCATTCTTTC- - - ACCTGGGCAGTGAAAGAGAA- - AGAGG    |       |       |       |       |       |       |       | 21541 |
| BelugaWhale | TATTGTTTCAAG- - GTTTTTTCAATTCACAAAGCTAACAAAAATTTTTTGGAGACAAATGTATTTGAACTCATTTATTTT          |       |       |       |       |       |       |       | 17832 |
| Donkey      | TCTTTTATTTAA- - - TGTAAGCAAATGTGAATTTCTTCCTACATCCTCCC- - - TCCTACTACCTTAGAGAAAAAGTGGCA      |       |       |       |       |       |       |       | 21183 |
| Cat         | CCTTCTTTTGTGTAATGTAACAAATGTGAATTGCTTCCTACATTCTCCT- - - TCCCATCACCTAGAGAGA- - - GTGA         |       |       |       |       |       |       |       | 24208 |
| Ferret      | TACTCTTACGCG- - ATATAACAAACGTGAACTGCTTCCTACATTCTCCC- - - TCCCATCACCTAGAGAGAA- - AGTGG       |       |       |       |       |       |       |       | 20755 |
| Lion        | CCTTCTTTTGTGTAATGTAACAAATGTGAATTGCTTCCTACATTCTCCT- - - TCCCATCACCTAGAGAGA- - - GTGA         |       |       |       |       |       |       |       | 22806 |
| Vaquita     | TATTGTTTCAAG- - ATTTTTT- CAATTCACAAAGCTAACAAAAATTTTTTGGAGACAAATGTATTTGAACTCATTTATTTT        |       |       |       |       |       |       |       | 18503 |
| Pig         | TGTAGTTTC- AG- - GCCTTTT- CAATTGACAAAACCTAACAGATTTTTTTTTCAGGTAAGTGTATTTGAGCGCAT- - - - TTC  |       |       |       |       |       |       |       | 16942 |

Dienstag, 3. Mai 2022 08:38

|             |                                                                                                                              |       |
|-------------|------------------------------------------------------------------------------------------------------------------------------|-------|
| Majority    | CAGTGTATACAXAATXTTACAGCTTTXCCT- - TCCTGTTTATTGGTAAGTATATCCTGXAXAT- - - TGCATGGTXTTGCT                                        |       |
|             | 25930            25940            25950            25960            25970            25980            25990            26000 |       |
| Human       | CCAAGAATATTTTGCAGATGTAATTCCTGTTGTATGTCAGCTTGCTCCATCTATTACAGAGCGCATCATCC                                                      | 22422 |
| PolarBear   | -----                                                                                                                        | 0     |
| Cow         | CAATTCGTACATAAATTTACTGTGTTTCCTTTTCCAATTTTTTTGTTGGTATCTCTTGTAGGT- - - TGAAAATTCTTGCT                                          | 21514 |
| Dog         | CAGTGTATTCAGAGTATTAATGCTAAG- - - - - - TGTATCCTGGAAATCACACCATAGCTA- - - - TACATGGACAT- - -                                   | 21606 |
| BelugaWhale | CAGTTCGTATGTAATTTTACAATTTTTCTCTTCCAGTTTTTT- GTTTGTATCTCTTGTATGT- - - TGTAAACTCTTGCT                                          | 17908 |
| Donkey      | CAGTATACACAGGGTTTTATATCTTGCCTT- - TTCTGCTTAATGATAAATATATCCTGGAGATCACGCCATTGCTATATA                                           | 21261 |
| Cat         | CAGTGTATACAGGTTATAACAGCTACAAC- - TCCTTTTTAATGATAAGTTTATCCTGGAGATCACTCCATGGCTGTACA                                            | 24286 |
| Ferret      | CAGTGTATACAGACTATAACAGCTATAACT- - TCCTTTTTAATGGTAAGTGTATCCTGGAAATCATTCCATGGTTAT- - -                                         | 20830 |
| Lion        | CAGTGTATACAGGTTATAACAGCTACAAC- - TCCTTTTTAATGATAAGTTTATCCTGGAGATCACTCCATGGCTGTACA                                            | 22884 |
| Vaquita     | CAGTTCGTATGTAATTTTACAATTTTTCTCTTCCAGTTTTTT- GTTTGTATCTCTTGTATGT- - - TGTAAACTCTTGCT                                          | 18579 |
| Pig         | CAATTCATATTTAATTTTATGATTTTTCTATTCCAGTTTCTT- GTTTGTATCTTTTGTACAT- - - TGAAAACCTCTTGCT                                         | 17018 |

|             |                                                                                                                              |       |
|-------------|------------------------------------------------------------------------------------------------------------------------------|-------|
| Majority    | ----- TXTTGTTATTTTTXTTTXTTXXTACTXCTGTATAGAAAATACATGAGTGXXTCT- - - - - ATTCXCAA                                               |       |
|             | 26010            26020            26030            26040            26050            26060            26070            26080 |       |
| Human       | TTTCACCTAATAGTTTTTAGTAGCTAATGATTGCATACTT- TTATTAGGTATTGCAAAAGTGCGCTATTCTTTTTTTCT                                             | 22501 |
| PolarBear   | -----                                                                                                                        | 0     |
| Cow         | AA- - - - - - - - - - - TGTTAACATAATTGCATATATATTT- CTTTAAAAAGCAACATCAGTGGTAACATTGTAGTATATT                                   | 21580 |
| Dog         | - - - - - - - - - - - TTTTTTTTTTTTTTTTTTTTTTGTGTATTGCTGTATAGAAAGTATATGAGTACCTCT- - - - - GTTCCCAA                            | 21669 |
| BelugaWhale | TGC- - - - - - - TAGTGTTAACATAAATTGCATTTATACTAGTTTCTGTAAAAAGCAACATCAGTGTT- - - - - AACATTAA                                  | 17974 |
| Donkey      | - - - - - - - - - - - TGAAAATTTTCTCATTCTTTTGTCTGCTGAATAGAAAGTACGAGTGTGCTTCT- - - - - CTTCCCCA                                | 21324 |
| Cat         | GGGAAATTTTTGTCTTTTTTTTTTTTTTTTTTTTTTGTACTGCTGTATAGAAAATATATGAGTGCCTCC- - - - - ATTCCCGA                                      | 24361 |
| Ferret      | - - - - - - - - - - - AAATGGAATTTTTTTTTTTTCTGGTACCACTATATAGAAAGTACATGAATGTCTCG- - - - - GTTCCCAG                             | 20893 |
| Lion        | GGGAAATTTTTGTTTTTTTTTTTTTTTTTTTTTTTTTGTACTGCTGTATAGAAAATATATGAGTGCCTCC- - - - - ATTCCCGA                                     | 22959 |
| Vaquita     | TGC- - - - - - - TAGTGTTAACATAAATTGCATATATACTAGTTTCTGTAAAAAGCAACATCAGTGTT- - - - - AACATTAA                                  | 18645 |
| Pig         | - - - - - - - - - - - TGCTAATGT- - - TTACATTTATTGCA- TGTATACTAGTTTTTTTTTTTTTTTTTTTAAAGAGACATTAA                              | 17080 |

Dienstag, 3. Mai 2022 08:38

| Majority    | TAGXGTXTTAAATTTXT - - AGAATA- TATTGTTCAGTXATXXGGGTTTTGCAAGTCTAATTTATGAXXTXGCAXCXGTAT    |       |
|-------------|-----------------------------------------------------------------------------------------|-------|
|             | 26090 26100 26110 26120 26130 26140 26150 26160                                         |       |
| Human       | GTGTATATTAGAATTCTTAAGAATTATATCCATCAACTGTTTGGTCATACGTAAGTACCTTTTTATAAGAAAAGCAGGAG        | 22581 |
| PolarBear   | -----                                                                                   | 0     |
| Cow         | TTTTGTAATATAATTTT - - AAGATT- TGTTTTGCAATTATTTTTGTCCTCAAAGTGTATTTTCATGAAAAATGTATAGTAT   | 21657 |
| Dog         | TAACCTGTCCAAT- - - - - AGAATA- TATTGTTCAGTGATTGGAGTTTTGCTAGTCTGATATATGAGATGGCACCTTTAT   | 21742 |
| BelugaWhale | CATTGTAATACAGTTTT - - AAGAT- - - GTTT- GCAGTTATTTTTGTCCTTAAAGTGTATTTTGCAAAGAATGTATAGTAA | 18048 |
| Donkey      | TAGCCTGCCCAAC- - - - - AGAGTA- TACTGTAAATGATTGGGGCTTTGCCACTCTGATGGGTGAGATGGCATCTAAGT    | 21397 |
| Cat         | TAGCTTGTTGAAT- - - - - AGAGTA- TATTGTTCAGTGATTGGGGTTTTGCCAGTCTGATAGATGAGGTGGCACCTAAAT   | 24434 |
| Ferret      | TAGCCTGTCCAATTTTT - - AGAGTA- TATTGTTCAGTGATTGGGGTTTTGCTAGTCTAACACATGAGATGGCAC- TTAAA   | 20969 |
| Lion        | TAGCTTGTTGAAT- - - - - AGAGTA- TATTGTTCAGTGATTGGGGTTTTGCCAGTCTGATAGATGAGGTGGCACCTAAAT   | 23032 |
| Vaquita     | CATTGTAATACAGTTTT - - AAGAT- - - GTTT- GCAGTTATTTTTGTCCTTAAAGTGTATTTTGCAAAGAATGTATAGTGA | 18719 |
| Pig         | CATTGTAATATAGTTTT - - AGGATT- TGTTT- ACAGTTATTTTTGTCCTTAAAATGCATTTTCGCAAAGAATGTATAGTAT  | 17156 |

| Majority    | - - AGTATTAATXXGAAT - - XTXXX- T - - TXXA- CAAGAT- AAAC- XC- - TTTTC- - - - AGGTTAATTT- - - - - TGT             |       |
|-------------|-----------------------------------------------------------------------------------------------------------------|-------|
|             | 26170 26180 26190 26200 26210 26220 26230 26240                                                                 |       |
| Human       | AGAATTTGACTTCTTAAGTTTTCTGATGAGTTGTTACCCTAAAACCTCCAGTATAATCAATATGAGTTCCTTTTTGTTGC                                | 22661 |
| PolarBear   | -----                                                                                                           | 0     |
| Cow         | TGGGTTTGCCAACAGGTTCAATTTGTTTTTTCCATAAGATGACTCTAGTATTGCT- - - - TAGTTATCTT- - - - - TGT                          | 21725 |
| Dog         | T - - GTATTAATTTGAAT - - GTTTT- TATTGTGAGCAAGATAAAAACAG- - TTTTC- - - - AGTTTAATCT- - - - - TCT                 | 21803 |
| BelugaWhale | - - AATC- - - - A- CAG- - - - AATTTTT- - - - - AAAT- - - - - CTATT- - - - GAGATAATTC- - - - - TGT               | 18085 |
| Donkey      | CTAGTATTAATTTGAATGTGTTTT- TAATGTGAGCAAGATTAACAGCTTTTCACTTGAAGGATAATTTCCATTTTCATGT                               | 21476 |
| Cat         | GTAGTATTAATTTGAATTTTTTT- - - - CTATGATCAGGGTTAAACAGC- - TTTTC- - - - ATATTAATCT- - - - - TTT                    | 24496 |
| Ferret      | T - - GTATTAATTTGAATTTGTTTT- TATTGTAAGCAAGATGAAATGGC- - TTTTC- - - - AGTTTAATCC- - - - - TTT                    | 21032 |
| Lion        | GTAGTATTAATTTGAATTTGTTTTGTTCTATGATCAGGGTTAAACAGC- - TTTTC- - - - ATATTAATCT- - - - - TTT                        | 23098 |
| Vaquita     | - - AATC- - - - A- CAG- - - - AATTTTT- - - - - AAAT- - - - - CTATT- - - - GAGATAATTC- - - - - TGT               | 18756 |
| Pig         | - - AGTT- - - - A- CAG- - - - AATTT- - - - T- - - - - AAAGT- - - - - CTATTGCC- - - - AG- - - AATTT- - - - - TGT | 17193 |

Dienstag, 3. Mai 2022 08:38

| Majority    | GCCXAG- - - - - TTTTTTAA- XXXGXAACTAGTCTTTCTAXATTTTTATAA- CAXTCTGCATTT- - - - X        |       |
|-------------|----------------------------------------------------------------------------------------|-------|
|             | 26250 26260 26270 26280 26290 26300 26310 26320                                        |       |
| Human       | TGTTAGTATCGTCGCAACAGCAAAGAGTTTTAATAACATTTATTTTCTAGTGTATTGCAGTAATCATTCTTCTTTTTTTTA      | 22741 |
| PolarBear   | - - - - -                                                                              | 0     |
| Cow         | ATTAAC- - - - - TTCAGTTGAAACAATTTTGGTAGTTGTTTTTTTTTA- - A- CTTTGTTCACCTTGAAAC          | 21785 |
| Dog         | GCCTATATAT- - - - - TTTTTTTTAAATGGAGTAACTGGTCTTTCTAAATTTTACACAG- TAGTCTGTATTT- - - - G | 21867 |
| BelugaWhale | GTGCGG- - - - - TTCTACC- - - ATCAAGCTAATAGTTAGTTTTATTTGTTA- CATTTTGGTTTT- - - - C      | 18140 |
| Donkey      | ACTGAGAACTAATCTTTTGCCTGTTTTTTTAAAGAGTAACTTGTCTTTCTAAATTTTACATAA- TGGTCTGTATTT- - - - C | 21551 |
| Cat         | GCCCAG- - - - - TTTTTTAAATGGGGTAACTAGTCTTTCTAAAATTTTATAA- TCGTCTGCATTT- - - - G        | 24555 |
| Ferret      | GCCTAT- - - - - TTTTTTAAAGGGGTAAT- - GTCTTTCTAAATTTTCTCA- - - AGTCTGTATTT- - - - T     | 21086 |
| Lion        | GCCCAG- - - - - TTTTTTAAATGGGGTAACTAGTCTTTCTAAAATTTTATAA- TAGTCTGCATTT- - - - G        | 23157 |
| Vaquita     | GTGCGG- - - - - TTCTACC- - - ACCAAGCTAATAGTTAGTTTTATTTGTTA- CATTTTGGTTTT- - - - C      | 18811 |
| Pig         | GTGTGG- - - - - TTCTACC- - - ACCAAATTGGTAGTTAAGTTTGTT- - - - A- CATTGTGGTTTTAAGAG      | 17248 |

| Majority    | AAXTTTAX- - ATTXTTTTTTGTATCXAAAG- - - - TXATT- TAXGAACTATTTCAAAGTTCATXT- ATAAAACHTAXXAAA  |       |
|-------------|-------------------------------------------------------------------------------------------|-------|
|             | 26330 26340 26350 26360 26370 26380 26390 26400                                           |       |
| Human       | AATTTCTAAGCTGTTTTATTAAATGAAAAGAGAACAATGCTAAGCAGCTTGTATGGTGTGTGTGTGGTTTTTAT                | 22821 |
| PolarBear   | - - - - -                                                                                 | 0     |
| Cow         | AATTTTGTAGATTGTATTGTGACAGCTG- - - - TCATA- TCAGCATGCATTTTAAAGAAAACHTATTAAAATTGGTGAA       | 21859 |
| Dog         | AAGTTCAT- - AAGTACTTTTTGATCAAAG- - - - TTATT- TAGAAACTATTTGAAAATTTTCATCTGATTAAACTA- - - - | 21934 |
| BelugaWhale | ATTTTTA- - GGGAATTTTTTTCATG- - - - - T- - TGAATAAATTTTCCAAAG- - - - - TCAAAACHTGCAAAA     | 18196 |
| Donkey      | AAGTTTA- - GATTCTTTTTTGTACCAAG- - - - TCATT- TAGGAACTATTTCAAAGTTCCTTCTAATGAAACTAAAATA     | 21623 |
| Cat         | AAGTTTAT- - ATTCTCATTTTGTACCAAG- - - - TTATA- TAGGAACTATTTCAAAGTTCATCTGATTAAAACATTGAA     | 24627 |
| Ferret      | AAGTTTAT- - ATGCTCATTTTGTACCAAG- - - - TTATT- TGGGAACCATTTCAAAGTTCATTTAATCAATCTA- - - -   | 21153 |
| Lion        | AAGTTTAT- - ATTCTCATTTTGTACCAAG- - - - TTATA- TAGGAATTATTTCAAAGTTCATCTGATTAAAACATTGAA     | 23229 |
| Vaquita     | ATTTTTA- - GGGAATTTTTTTCATG- - - - - T- - TGAATAAATTTTCCAAAG- - - - - TCAGAACHTGCAAAA     | 18867 |
| Pig         | AGTTT- A- - - - - TGTTTTTTCAC- - - - - TT- TGACTAAATTTTCCAAAG- - - - - TGAAAACHTGAAAA     | 17299 |

Dienstag, 3. Mai 2022 08:38

| Majority    | ----- CAA- TTACA- T----- XATGGATGTXTXTCXACXXTTXCTGTXCAXTCTACTTTAXTATTTTCAXX-           |       |       |       |       |       |       |       |       |
|-------------|----------------------------------------------------------------------------------------|-------|-------|-------|-------|-------|-------|-------|-------|
|             | 26410                                                                                  | 26420 | 26430 | 26440 | 26450 | 26460 | 26470 | 26480 |       |
| Human       | TTTGTATGAATGTTAAAAACACGGTGGCTAAAGCCTGTAATCCCAGCATT TTTGGGAGGCCAAGGTGGTTGGATCACAAGG     |       |       |       |       |       |       |       | 22901 |
| PolarBear   | -----                                                                                  |       |       |       |       |       |       |       | 0     |
| Cow         | TTTTTGTGCAG- - CCATTTTACAGTTGAGGATGGAAGGGAAAGCAACATTTTCGGCATATTATGCTTTATTATTTCAAGG     |       |       |       |       |       |       |       | 21937 |
| Dog         | -----                                                                                  |       |       |       |       |       |       |       | 21934 |
| BelugaWhale | ----- CAAACTACATT----- CATAGATGTCTAGTCTTTCACTCCTGTCCACTCTACTTTGCTTTTTCTGT-             |       |       |       |       |       |       |       | 18257 |
| Donkey      | GTTGAGTTTTCGGTCTGTTTTTTTATTTTCTCTCTTTTTCATTAAAATGTCTTACTGCGTCTGACCAAATATTATGGTC        |       |       |       |       |       |       |       | 21703 |
| Cat         | TTTTTCAGAGTG- - CTGCCTGGGTAGCTCAGCTGGTTAAGTGTCTGACTCTTTGATTTGAGCTCAGGTCATGATCTCAGGG    |       |       |       |       |       |       |       | 24705 |
| Ferret      | -----                                                                                  |       |       |       |       |       |       |       | 21153 |
| Lion        | TTTTTCAGAGCG- - CTGCCTGGGTAGCTCAGCTGGTTAAGTGT T T GACTCTTTGATTTGAGCTCAGGTCATGATCTCAGGG |       |       |       |       |       |       |       | 23307 |
| Vaquita     | ----- CAAGCTACATT----- CATAGATGTCTAGTCTTTCACTCCTGTCCACTCTACTTTGCTTTTTCTAT-             |       |       |       |       |       |       |       | 18928 |
| Pig         | ----- CAAGCTACA- T----- GCATAGAAGTCTGGTCTTCTACTCCTGTATATTCTACTTTGCTTTTTCTAT-           |       |       |       |       |       |       |       | 17360 |

| Majority    | --- X- A----- X----- C- - X- X- - X- - - C- - - - TCT----- TATAGAXAT- TTA                |       |       |       |       |       |       |       |       |
|-------------|------------------------------------------------------------------------------------------|-------|-------|-------|-------|-------|-------|-------|-------|
|             | 26490                                                                                    | 26500 | 26510 | 26520 | 26530 | 26540 | 26550 | 26560 |       |
| Human       | TCAGGAGCTTGAGACCAGCCTGGCTCTACTAAAAATAAAATGTG- GTGAAACCCCGTCTCTACTAAAAATACAAAAATTA        |       |       |       |       |       |       |       | 22980 |
| PolarBear   | -----                                                                                    |       |       |       |       |       |       |       | 0     |
| Cow         | AAGGTAAAATGCAAC- - TGAAAC- - - - ACAAAAAACGAC- T- - - - TGTGTAGT- - - - - ATATGGAGAAGGTG |       |       |       |       |       |       |       | 21993 |
| Dog         | -----                                                                                    |       |       |       |       |       |       |       | 21934 |
| BelugaWhale | ----- C----- C----- CCT----- TATAGGTAT- CTA                                              |       |       |       |       |       |       |       | 18274 |
| Donkey      | TATACAGTTTTTTCTTTATGGAATTTATTGAGGTATTCATTACATAGTATGTGATCTACTTTTGTGACTTGTAGATATTT         |       |       |       |       |       |       |       | 21783 |
| Cat         | TCGGGAGATCGAGCCTCTTTCTGCCCTTACCCACTGTATCTC- - - - TCTCTATTTAAAAAAAAAAAAAAAAAAGGTAA       |       |       |       |       |       |       |       | 24781 |
| Ferret      | -----                                                                                    |       |       |       |       |       |       |       | 21153 |
| Lion        | TCGGGAGATCGAGCCTCTTTCTGCCCTTACCCACTGTATCTC- - - - TCTCTATT- - - - - AAAAGAAAAAAAAAAGGTAA |       |       |       |       |       |       |       | 23378 |
| Vaquita     | ----- C----- C----- CCT----- TATAGGTAT- CTA                                              |       |       |       |       |       |       |       | 18945 |
| Pig         | - AGGTATA- - - - - TAGAA- - - - - AAATATATC- T- - - - TCT----- TATAGATATGTTT             |       |       |       |       |       |       |       | 17398 |

Dienstag, 3. Mai 2022 08:38

|             |                                                                                                                |       |
|-------------|----------------------------------------------------------------------------------------------------------------|-------|
| Majority    | - X- TA- AATAGTTGAATTTTXXXX- ATTCTT- - TTAXCCAAXTGAXCAAATGT- - GAATTTGTTTGAGCAXXTATGGTT                        |       |
|             | 26570          26580          26590          26600          26610          26620          26630          26640 |       |
| Human       | GCCCTTTGTTGTTGCACGCGCCTATAGTCCCAGCTACTCGGGAGGCTGAGGCAGAAAAATTGCTTGAACCTGGGGAGGCT                               | 23060 |
| PolarBear   | -----                                                                                                          | 0     |
| Cow         | CTGTG- CCTGGTCAAATGTGTCAAAGTGGT- - TAATCGAAGTTTTTCATGCTGG- - GGATTTTTTGGCTGGATGAGTAGGT                         | 22068 |
| Dog         | - - - - A- AACAAATTTAATTTTTTCT- ATTTTT- - TTCCCC- - TCATCAAATGTCTTACTGTGTTTGAGCAAATATGGTT                      | 22003 |
| BelugaWhale | TTTTTC- ACTAGTT- - - TTTGGCTT- ATTCTT- - TTATTTAATAGAAGTAAATGT- - GAATTTCTTTTTACGTGCTAGCTC                     | 18345 |
| Donkey      | AAATACAGTGGGTAAATTGTATATAACTGAA- - ATATGCAAGTGCGGAATTTAAAAAACCATGGTACACCA- ATGTACTA                            | 21860 |
| Cat         | AATAA- AACAAATTGAATTTTGTTC- AATTTTT- - TTTCCCC- - T- - - CAAAATATCTTATTCTGTTTGAGCAAATATGGTT                    | 24852 |
| Ferret      | - - - - A- AACAAATTGAATTTTTATT- TTTCTT- - TTTCCCCCATCAAACAAAATGTCTTACTGTGTTTGAGCAAATATGGTT                     | 21225 |
| Lion        | - - - - - AACAAATTGAATTTTGTTC- AGTTTT- - TTTCCCC- - T- - - CAAAAT- - - - ATTCTGTTTGAGCAAATATGGTT               | 23439 |
| Vaquita     | TTTTTC- ACTAGTT- - - TTTGGCTT- ATTCTT- - TTATTTAATAGAAGTAAATGT- - GAATTTCTTTTTACGTGCTAGCTC                     | 19016 |
| Pig         | TTATT- AATGTTTGG- TTTATTTTGA CTCTT- - TTATTTAATAGATGAAAATGT- - GGATGTCTTTCTGCATGCCCCCTC                        | 17472 |

|             |                                                                                                                |       |
|-------------|----------------------------------------------------------------------------------------------------------------|-------|
| Majority    | TGAACAATTTAGTCTXT- - - - - ATGGAGXATATTGAGXTATTCATTXCXTA- - GXTTATATTXTGCCTTTGTGXXTTTA                         |       |
|             | 26650          26660          26670          26680          26690          26700          26710          26720 |       |
| Human       | GAGGCAGAAAAATTACT- - - - - - TGAACCCGG- - GAGACAGAGGTTGCAGCGAGCCGAGATTGCGCCACTGCACTCCAG                        | 23131 |
| PolarBear   | -----                                                                                                          | 0     |
| Cow         | TGGGTAGACCAGTTGAAGTCCATAGTGATCAAATTGAGACATTCATTGAGAACAGTTGATATTACCCATGTGGGAGATA                                | 22148 |
| Dog         | TGTACAATTC- TTCTTT- - - - - ATGGAGTTTATTGAGTTACTCATTACAGA- - GATTATGATCTGCTTTTGTGACTTTC                        | 22074 |
| BelugaWhale | CCACCATCTTAGGGAAA- - - - - AGGTAGCACA- - - - - GAATACACAGGGT- - - - TTAATATCTTACC- TTTTTTACTTA                 | 18409 |
| Donkey      | GAATGCTATGAAGCTGTTGATAAATGAAGTAGATTA- - GTATGTACTGAATT- - - AAAAAATCTTTAAGCTTTGTTATTA                          | 21935 |
| Cat         | TGCACAATTTCTTCTTT- - - - - ATGTAATTTATTGAGTTACTCATTACATA- - GATTATGATCTGCTTTTGTGACTTTC                         | 24924 |
| Ferret      | TGTACAATT- - - TCTTT- - - - - ATGGAATTTATTGAGTTACTGGTTATGTA- - GCTTATGATCTGCTTTTGTGACTTTC                      | 21294 |
| Lion        | TGCACAATTTCTTCTTT- - - - - ATGGAATTTATTGAGTTACTCATTACATA- - GATTATGATCTGCTTTTGTGACTTTC                         | 23511 |
| Vaquita     | CCACCATCTTAGGGAAA- - - - - AGGTAGCACA- - - - - GAATACACAAGGT- - - - TTAATATCTTACC- TTTTTTACTTA                 | 19080 |
| Pig         | CGATCACTTTAGTGAAA- - - - - AGGGAGCACA- - - - - GAATACACAGGGT- - - - TTTATATCTTTTCTTCTTTATTTA                   | 17537 |

Dienstag, 3. Mai 2022 08:38

| Majority    | AXTGATAXATAAACACXXGGA- - AXCATTXCATATAACTGXATCXTA- - XAGTTTTXAGTATTTAAAXAATAXTAGTAT |                                       |       |       |       |       |       |       |   |
|-------------|-------------------------------------------------------------------------------------|---------------------------------------|-------|-------|-------|-------|-------|-------|---|
|             | 26730                                                                               | 26740                                 | 26750 | 26760 | 26770 | 26780 | 26790 | 26800 |   |
| Human       | CCTGGGCAACAGACTGAGATTCCATCTAAAAACAAAACCATGTATA- - -                                 | TATGTAAGTTTTGAGGAAAAGAGTTGTATGA       | 23207 |       |       |       |       |       |   |
| PolarBear   | -----                                                                               |                                       |       |       |       |       |       |       | 0 |
| Cow         | GCTGACATACTCAAAATAGTCAGATCAAGCCTTGAAAATGGGTGGCAC-                                   | CAGCTTGGTTATGTTAATTGTTTTGATGTCT       | 22227 |       |       |       |       |       |   |
| Dog         | CTAGATATTTAAATACAAGGA- - TGAGTTGCACATAACTGAAACATAT-                                 | CAGTTGAAGAATTTAAAAAATCATAGTATAC       | 22151 |       |       |       |       |       |   |
| BelugaWhale | A- TGAGAAATACACTCTGGAA- - ATCACTCCATGGGTATATATGGAA-                                 | - - AATCTCATT- - - TCTTTATACCACTGTAT  | 18479 |       |       |       |       |       |   |
| Donkey      | AATGAAAAGGGGACAATGCTA- - AGCAGCACATAGAGCATGATCCTGTTTT                               | GTATCAATATTTAAATCATGTAGATGTAT         | 22013 |       |       |       |       |       |   |
| Cat         | ACAGGTATTTAAATACAAGGA- - TGAATTGCACATAACTGAAACATAT-                                 | CAGTTGGAGAATTTAAAAAACCGTAGTATAC       | 25001 |       |       |       |       |       |   |
| Ferret      | ATGAGTATTTAAATACAAGGA- - TGAATTGCATATAACTGAAACATAA-                                 | CAGCTTGGAGAATTTAAAAAACTATGATACAC      | 21371 |       |       |       |       |       |   |
| Lion        | ACAGGTATTTAAATACAAGGA- - TGAATTGCACATAACTGAAACAT- -                                 | CAGTTGGAGAATTTAAAAAACCGTAGTATAC       | 23586 |       |       |       |       |       |   |
| Vaquita     | A- TGAGAAATACACTCTGGAA- - ATCACTCCATGGGTATATATGGAA-                                 | - - AATCTCATT- - - TCTTTATACCACTGTAT  | 19150 |       |       |       |       |       |   |
| Pig         | A- TGATAAATATACATTGGCT- - ATCACTCCATGATTGTGTATGGAA-                                 | - - AATCTCATT- - - TCTTTGTAAGTGTGGTAT | 17607 |       |       |       |       |       |   |

| Majority    | AAATATAATAGAATXXCATGAAXTXX- TGTTGATAAAATGAAGTATATTTATAXTGTTXAATTTTTTTT- - - - GAATXTC |                 |       |       |       |       |       |       |   |
|-------------|---------------------------------------------------------------------------------------|-----------------|-------|-------|-------|-------|-------|-------|---|
|             | 26810                                                                                 | 26820           | 26830 | 26840 | 26850 | 26860 | 26870 | 26880 |   |
| Human       | AAATTCAGGATAATTAATAAAAGTAAACGAGAACTTCTTTACATATATATATATTTTTTTAATTTTCTC-                | - - AGTTAATGTT  | 23285 |       |       |       |       |       |   |
| PolarBear   | -----                                                                                 |                 |       |       |       |       |       |       | 0 |
| Cow         | GGGTTCTACATAAATGAAAAAACCT- TCTTGATGCTGTTCTCTACTTGGACATAGTGAAAACGTTCT-                 | - - - - GTTTTTA | 22301 |       |       |       |       |       |   |
| Dog         | CAATATATTAGAATGCTATGTGAAGC- TGTTGGTAAAATGAAGTACATTAGTAGTGTTGAGTTTTTTTC-               | - - AGAATCTC    | 22227 |       |       |       |       |       |   |
| BelugaWhale | AGAAAGTATGCAAGTGCCTCAG- TTC- CCCCTAGCCAT- - - ATTATA- GTATATTGTCAAATGCTTGG-           | - - - - GGTTTTG | 18548 |       |       |       |       |       |   |
| Donkey      | GTAAATTTGGGAAAGACAATTAATT- TAAGGATAATAAATTTGGACTGAGGGAGGTCTTTCTCTTTACATTTTCTGTC       | 22092           |       |       |       |       |       |       |   |
| Cat         | TAATATACTAGAATGCTACGAAGC- - - TGTTGATAAAATGAACTCGATTAGTAGTGTTGATCTTTTTTTAAAAAATCTC    | 25078           |       |       |       |       |       |       |   |
| Ferret      | CAGTATACTAGAATGCGATGAAAA- - - TGTTGATAAAATGAAGTATATTTGTAGTGTTGAGTTTTTAA-              | - - - AGAATCTC  | 21444 |       |       |       |       |       |   |
| Lion        | TAATATACTAGAATGCTACGAAGC- - - TGTTGATAAAATGAACTAGATTAGTAGTGTTGATCTTTTTTTAAAAAATCTC    | 23663           |       |       |       |       |       |       |   |
| Vaquita     | AGAAAGTATGCAAGTGCCTCAG- TTC- CCCCTAGCCAA- - - AGTATA- GTATATTGTCAAATGCTTGG-           | - - - - GGTTTTA | 19219 |       |       |       |       |       |   |
| Pig         | AGAAAGCATATAAGTGCCTTAG- TTC- CCTGTATCCTGCCAGTACA- ATATATTGTCAAATGGTTGG-               | - - - - GGTTTTG | 17679 |       |       |       |       |       |   |



Dienstag, 3. Mai 2022 08:38

| Majority    | TAA- - TGTTTTGA- - TAAATGAAATGAXATTGGTXXTTAAGXAGTAAXTXXGTTTTGATTC- - - TATTGTG- - - ATGAAT |       |
|-------------|--------------------------------------------------------------------------------------------|-------|
|             | 26890 26900 26910 26920 26930 26940 26950 26960                                            |       |
| Human       | TGAATTTTTTTAA- - CGTAGAAAATGTCAATGGGTTATCTGGGGAGAAAGATTATAGTCCATGAGTCCCCCTGTTGTAT          | 23363 |
| PolarBear   | -----                                                                                      | 0     |
| Cow         | AAACAAACTGTGA- - CAAGCAGTGAAAAGTGGATACTGTACAATCAGGTGGAATGGAAGA- - - GATTGTGGGACAAGAGA      | 22376 |
| Dog         | TTAGCTGTTTTAT- - TAAATGAAAGGAAAGCAGTGTGAAGCAGCATGTATGGTATGATTA- - - TGTTTTG- - - TATGAAT   | 22299 |
| BelugaWhale | TC- - - AGTCTGA- - GAGGTGAAATGGCATCTAAATCTAGTATTAATTTGAATTTGTTTT- - - TACTGTG- - - AGCAAG  | 18615 |
| Donkey      | TTTTTGGATTTGAGTTTTATAAATTAATATTTGGAATTGATAATTATTGTTGAATGTTACCAATACTGTTGCATATGTCT           | 22172 |
| Cat         | TAAGCTGTTTTAT- - TAAATGAAAGGAGAATGGTGTAAAGCAGCAGGTATGGTGTGATTC- - - TGTTTTG- - - TATGAAT   | 25150 |
| Ferret      | TAAACTGTTTTGT- - TAAATGAAAGGAAGATGGTGTGAAGCAGCATTTGTGGTGTGATTC- - - TCTTCT- - - - ATGAAT   | 21514 |
| Lion        | TAAGATGTTTTAT- - TAAATGAAAGGAGAATGGTGTAAAGCAGCAGGTATGGTGTGATT- - - - GTTTTG- - - TATGAAT   | 23733 |
| Vaquita     | TC- - - AGTCTGA- - GAGGTGAAATGACATCTAAATCTAGTATTAATTTGAATTTGTTTT- - - TACTGTG- - - AGCAAG  | 19286 |
| Pig         | CT- - - GGTGTGA- - TAGGTGAGATGGTGTCTAAATCCTGTATTAATTTGAACTTGTTTT- - - TACTATG- - - AGGAAG  | 17746 |

| Majority    | ATTAAAXAACT- - - - - X- - - X- - AXTTTTTGTXXAGGAATAATT- - - TTTATTTTCATATATTTTTGXAXT- - GAAGAA |       |
|-------------|------------------------------------------------------------------------------------------------|-------|
|             | 26970 26980 26990 27000 27010 27020 27030 27040                                                |       |
| Human       | ATATACCTGTATTAATAATATGCAATAAATGCTATTTTAAAAAATGT- - - - CTTATTACATAGAACAGAAG- - - ACCAGAA       | 23436 |
| PolarBear   | -----                                                                                          | 0     |
| Cow         | GTTGAAGTACCACCAGCCAAACACCAGTCTTCATCCA- AAGAAAGT- - - GATGTTGTATATATGGTGGGATTGGAAAGC            | 22451 |
| Dog         | ATTAGAAACA- - - - - TAATTTTTGGAAAAGAATTGTA- - - AATTTAATGATAAATTTTGGACTGAGGAGAA                | 22362 |
| BelugaWhale | ATGAAACAACT- - - - - TTTCTGTTTACGGATAATT- - - TCCATTTTCGTGTGTGCTGAA- - - AACTAA                | 18671 |
| Donkey      | ATACGTTCTTTTTAACCCCTCTTACTCTGCCATGAGTAGTGACTGCCATGAATTATTTATGTCTTATTCTTTTCATATA                | 22252 |
| Cat         | ATTAAAAATGTA- - - GATATATATACATTTTTTGGAAAGGAATTGTATTGAATTTAAGGACAAATTTTGGACTGTGGAGAA           | 25227 |
| Ferret      | ATTAGAAACAGA- - - - TAAGTATAAGTTTTTGGAAAGGAATTATA- - - ATAAATTTAATGATTTTTTGGACTGGGGAGAA        | 21586 |
| Lion        | ATTAAAAATGTA- - - GATATATATACATTTTTTGGAAAGGAATTGTATTGAATTTAAGGACAAATTTTGGACTGTGGAGAA           | 23810 |
| Vaquita     | ATGAAACAACT- - - - - TTTCTGTTTACGGATAATT- - - TCCATTTTCGTGTGTGCTGAA- - - AACTAA                | 19342 |
| Pig         | ATTGAACAACT- - - - - TTTCAAGTTTA- AGATAATT- - - TCTGCTTCATGTACCGAG- - - - - AAGAGA             | 17799 |

Dienstag, 3. Mai 2022 08:38

| Majority    | TTTTATCTTTT- - - - CTXAXTTTTTGXACT- - - - TGAATXTCTA- CTAATAT- TTGTAATTAXTTG- - TATTTG- - -          |       |       |       |       |       |       |       |       |
|-------------|------------------------------------------------------------------------------------------------------|-------|-------|-------|-------|-------|-------|-------|-------|
|             | 27050                                                                                                | 27060 | 27070 | 27080 | 27090 | 27100 | 27110 | 27120 |       |
| Human       | TACTAGCTCTCCACGTCTTATGTCTTG- ATCAGTGAAGATTAGCTAGCAAAACAACCATAACTTAGGGATAGCTTTATTT                    |       |       |       |       |       |       |       | 23515 |
| PolarBear   | -----                                                                                                |       |       |       |       |       |       |       | 0     |
| Cow         | AGTTATCTAATAAGAGCTCCCTCTGGGGAACCAAATGATTAATTTCAATAAATAT- TGCTACCAATTAGACCAACTG- - -                  |       |       |       |       |       |       |       | 22527 |
| Dog         | TTTTACATTTT- - - - CT- - CTTTTTGACT- - - - TGAATTTTCTA- - - - AATAT- TTGGAATTAAT- - - - - - - - -    |       |       |       |       |       |       |       | 22413 |
| BelugaWhale | TCTTATCTCTT- - - - GCCTATTTTTTT- - - - - - - - - ATGAGTAACTGGTCTAAATTT- TCATAGGAATCTG- - TATATG- - - |       |       |       |       |       |       |       | 18734 |
| Donkey      | TATGATTTTGTCTGTCAAGCTGCTCC- - ATGAGGTTATTTCACTGGGCCAAGTTTCTTTTATCTTGTTGCTTCATTATTC                   |       |       |       |       |       |       |       | 22330 |
| Cat         | CTTTACGTTTG- - - - C- ATCATTTTGGACT- - - - TGAAGTTTCTAAATTAATAT- TTGGAATTAATTA- - ATATGG- - -        |       |       |       |       |       |       |       | 25291 |
| Ferret      | CTTCACATTTT- - - - CTAATTTTTTGGACT- - - - TGAATTTTCTA- - - - AATAT- TTGGAATTAATTA- - ATT- - G- - -   |       |       |       |       |       |       |       | 21645 |
| Lion        | CTTTATGTTTT- - - - CTATCATTTTGGACT- - - - TGAAGTTTCTA- - - - AATAT- TTGGAATTAATTA- - ATATGG- - -     |       |       |       |       |       |       |       | 23871 |
| Vaquita     | TCTTATCTCTT- - - - GCCTATTTTTTT- - - - - - - - - ATGAGTAACTGGTCTAAATTT- TCATAGGAATCTG- - TATTTG- - - |       |       |       |       |       |       |       | 19405 |
| Pig         | CCTTATCTCTT- - - - GCCTATTTTTTTGTAAC- - - - TGATCTTTCTGTCTAAATTT- TTATAGTAATCTG- - TATTTG- - -       |       |       |       |       |       |       |       | 17865 |

| Majority    | - - - - AAXGTTXXXX- TTCTATTGTATXTGTTTATGXGTTCTTTXTAATCTCTCTXAAACTCTXCTXTGX- TAATGACTXC         |       |       |       |       |       |       |       |       |
|-------------|------------------------------------------------------------------------------------------------|-------|-------|-------|-------|-------|-------|-------|-------|
|             | 27130                                                                                          | 27140 | 27150 | 27160 | 27170 | 27180 | 27190 | 27200 |       |
| Human       | GTGGGAAGTGTCATTTAGTATGTCATGTATTA- AAAATCATTGTAGTCTTTTCTCAGAGAGCATCTTATC- - - - TTTCTTGT        |       |       |       |       |       |       |       | 23590 |
| PolarBear   | -----                                                                                          |       |       |       |       |       |       |       | 0     |
| Cow         | - - - - AAAGGAGCACCCAATAAAAAGTGTGTGGATTTATTCAACAGAAAATGCAT- AATCTTCTATCAGGATAATGCAATA          |       |       |       |       |       |       |       | 22602 |
| Dog         | - - - - AATGTTATCAATTCTGTTGAATATGCTTATGTATTCTTTTTAATCTCCCTTCTACTCTGCCATGAGTAGTGACTGC           |       |       |       |       |       |       |       | 22489 |
| BelugaWhale | - - - - AAGG- - - - - - - - TTTGATTCTATTTTTGGCTCAGGTTTTAGGAACAGTTTCAAATTTTATCTG- - - AATAACCTA |       |       |       |       |       |       |       | 18800 |
| Donkey      | CCT- AAGCTTTTGTCTTCTCTGCCTGGTCTGATGATGTATAATTGACTCTCTCCCCCTCCCCCCTAAATTTCTCTC                  |       |       |       |       |       |       |       | 22409 |
| Cat         | - - - - AATGTTTTCAAGTCTGTTGTATATGCTTATGTGTTTCTTTTAAATATCCCT- CTACCCTGCTATGAGTAGTGACTGC         |       |       |       |       |       |       |       | 25366 |
| Ferret      | - - - - AATATTACCAATGCTATTGCATATGGTT- TGTGTTCTTTTAAATTTCCCTTCTACCCTGCCATGAGTAGTGACTGC          |       |       |       |       |       |       |       | 21720 |
| Lion        | - - - - AATGTTTTCAAGTCTGTTGTATATGCTTATGTGTT- - - - - - - - - - - - - - ACCCTGCTATGAGTAGTGACTGC |       |       |       |       |       |       |       | 23929 |
| Vaquita     | - - - - AAGG- - - - - - - - TTTGATTCTATTTTTGACTCAGGTTTTAGGAACAGTTTCAAATTTTATCTG- - - AATAAATA  |       |       |       |       |       |       |       | 19471 |
| Pig         | - - - - AAGC- - - - - - - - ATAGATAATGTTTTCCCAAGTTTTTAGGATTTATTTCAAATTTTATCTG- - - AATGAATTA   |       |       |       |       |       |       |       | 17929 |

Dienstag, 3. Mai 2022 08:38

|             |                                                                                                                                       |       |
|-------------|---------------------------------------------------------------------------------------------------------------------------------------|-------|
| Majority    | CAXXAATTATATTXTCTTTXTA- - - - XTAT- - - - TTTTGTCCAC- T- - X- ATX- CAAAAAT- TAT- - - TGT- TATXTTTT                                    |       |
|             | 27210        27220        27230        27240        27250        27260        27270        27280                                      |       |
| Human       | AGGTGATAGTATTGGCTATCTATGTAGTGTCTTAAGTTCCTTAAAT- - - TATCCTTATTCTTACTTTTTTGTGTACATTGT                                                  | 23667 |
| PolarBear   | - - - - - - - - - - - - - - - - - - - - - - - - - - - - - - - - - - - - - - - - - - - - - - - - - - - - - - - - - - - - - - - - - - - | 0     |
| Cow         | CCGCATGTTTATTTGATGACCA- - - - GCCC- - - - CCCCCCCCCC- - AAAAAAAAAAAAAAAAAAAC- - - TAT- TACAACCTT                                      | 22667 |
| Dog         | CAAGAATTATTTTATCCTTTTC- - - - ATATGTGATTTTGTCCACATGTATATGGCAAAAATGTAT- - - TGT- TTTGTGTT                                              | 22560 |
| BelugaWhale | CAACGATTAGATTTTGTT- CTA- - - - TTTT- - - - TCTTTTTTC- - - - - - - - - - - - - - - - - - - - - - - - - - - - - -                       | 18843 |
| Donkey      | CTGAGATTTGTCTGTTTTGTTAAAAAAAAAATCAACTTTTGGTTTTCTTGGTCTTCTTCAGTTTATCATTGT- TATCTGTA                                                    | 22488 |
| Cat         | CCAGAATTATTTTATCCTTTTC- - - - GTAT- - - - TTTGTCCATGT- - AAATGACAAAAATGTAT- - - TGT- TTTATATT                                         | 25430 |
| Ferret      | CAGGAATTATATTATCCTTTTC- - - - ATATATGAATTTGTCCATAT- - ATATGGCAAAAATATAT- - - TAT- TCTGTGTT                                            | 21788 |
| Lion        | CCAGAATTATTTTATCCTTTTC- - - - ATAT- - - - TTTGTCCATGT- - AAATGACAAAAATGTAT- - - TGT- TTTATATT                                         | 23993 |
| Vaquita     | CAACGATTAGATTTTGTT- CTA- - - - TTTT- - - - TCTTTTTTC- - - - - - - - - - - - - - - - - - - - - - - - - - - - - -                       | 19514 |
| Pig         | CAGCAATTGGATTTGGGTTCTA- - - - TTTT- - - - TCTTTTCTC- - - - - - - - - - - - - - - - - - - - - - - - - - - - - -                        | 17973 |

|             |                                                                                                                           |       |
|-------------|---------------------------------------------------------------------------------------------------------------------------|-------|
| Majority    | TTTTAAAATATXXTGAXA- - - ATGGTATXCC- XATTTT- TTTTTTTA- TGA CTXXTTTT- - - - TTTTACAATTTXTTTA                                |       |
|             | 27290        27300        27310        27320        27330        27340        27350        27360                          |       |
| Human       | TTATAAATAATGTGATCATCTTAATCTACCATTTTGATTATGGTTTGATCATTCTTTTACTATTTCCACTTGTTAGCAA                                           | 23747 |
| PolarBear   | - - - - - - - - - - - - - - - - - - - - - - - - - - - - - - - - - - - - - - - - - - - - - - - - - - - - - - - - - - - - - | 0     |
| Cow         | ATCTGGAAAGTTCTGAT- - - - TGATCAGCTGTATTC- - - ACCAGATA- TTGCACCTTTG- - - - GATTTCCATTTATTTT                               | 22734 |
| Dog         | TTCTTGAGTCTTAC- AAA- - - ATGGTATGCC- CATTTTATGTTTTCCA- TGACTTGTGT- - - - TTAAACAATGGTTTTA                                 | 22629 |
| BelugaWhale | CATTAAAATATTTTTATT- - - GTGTTTGACCAGATATTATGATCTGTA- TGATTTCTCCT- - - - CTATGGAACCTTACTGA                                 | 18915 |
| Donkey      | GTCTGATTTTTTATTGGTTGATGAACTAGTGCTTTCACAGCTTCTTG- TAGGTAGGTAGCATACACTTCACCTGTTTCAG                                         | 22567 |
| Cat         | TTT- - - AATTTTGTGAAA- - - ATGGTATGCC- TATTTTCTGTTTCTC- - TCACTTGTGTTTTACTTTAACAGTGTTTTTA                                 | 25501 |
| Ferret      | TTCTTGAGTCTTATGAAA- - - ATGGTATGCC- CATTTTATGTTTTATG- TGACTTAAATTTTTTATTAAACGATGTTTTTA                                    | 21863 |
| Lion        | TTT- - - AGTTTTGTGAAA- - - ATGGTATGCC- TTTTTTCTGTTTCTC- - TCACTTGTGTTTTACCTTGACAGTGTTTTTA                                 | 24064 |
| Vaquita     | CATTAAAATATTTTTATT- - - GTGTTTGACCAGATAT- - - GATCTGTA- TGATTTCTCCT- - - - CTATGGAACCTTACTGA                              | 19583 |
| Pig         | CATTAAACATCTTG- - - - - - - - TGTGGTGGACCATAC- - - CACCTATA- CAGTTTCTTCT- - - - TTATGGAACCTTAGTGG                         | 18038 |

Dienstag, 3. Mai 2022 08:38

| Majority    | AXTATTAXCXATXXTTTTXXTGAGTTATATXATAX- - - - ATCTTXXTACTXTTGTATAAATCT- - - - TTT- - - AAAA           |       |       |       |       |       |       |       |       |
|-------------|----------------------------------------------------------------------------------------------------|-------|-------|-------|-------|-------|-------|-------|-------|
|             | 27370                                                                                              | 27380 | 27390 | 27400 | 27410 | 27420 | 27430 | 27440 |       |
| Human       | AGCCTTTATACTTACTAAATTATGATAAAAATGATTATTATAACATGCCCGTTTTACTTAAATGTCTTATTT- - - A- AA                |       |       |       |       |       |       |       | 23823 |
| PolarBear   | -----                                                                                              |       |       |       |       |       |       |       | 0     |
| Cow         | GGTCTTTACAAAATTCACCTAATGGAAAAGATTTCAA- - - - TTCCTAGAAAGACTGTAAAAAGCA- - CCTGG- - - AACA           |       |       |       |       |       |       |       | 22804 |
| Dog         | ATTATTAGCCATGTTTTGTGTATAGTTATATAATA- - - - - CTCATTGTAGTATAATATTAATCTATCTGTT- - - AAAA             |       |       |       |       |       |       |       | 22700 |
| BelugaWhale | GGTATTCATTACA- TAGTAT- GTGATCCACATTTGTG- - - - - ACTTACATACTCATGTATAAA- - - - - CATAA- - - AATA    |       |       |       |       |       |       |       | 18980 |
| Donkey      | CTTCTTGGCAACACCTCTTTGTTCAAGGAGACCAGAGTGAGTACCTTCCTTCTCCTCCAAGAATCTAGTTTTCCCTCAGGA                  |       |       |       |       |       |       |       | 22647 |
| Cat         | ATTATTAGCCATGCTTTTGTAAATAGTTATGTAATAA- - - - - CTCTTTGCAATGTAGTATTCATCC- - - - - GTT- - - AAAA     |       |       |       |       |       |       |       | 25569 |
| Ferret      | ATTATTAGCTATGCTTTTGT- - - - AGTTATAACAATA- - - - - TTCATTGCAGTATAGTATTAATCT- - - - - GTG- - - AAAA |       |       |       |       |       |       |       | 21926 |
| Lion        | ATTATTAGCCATGCTTTTGTATATAGTTATGTAATA- - - - - CTCTTTGCAATGTAGTATTCATCT- - - - - GTT- - - AAAA      |       |       |       |       |       |       |       | 24131 |
| Vaquita     | GGTATTCATTACA- TAGTAT- GTGATCCACTTTTGTG- - - - - ACTTACATACTCATGTATAAA- - - - - CATAA- - - AATA    |       |       |       |       |       |       |       | 19648 |
| Pig         | GGTATTCAC- - - - - T- ACATAGTATGTAACTTTTTTG- - - - - ATTTACATACTGATGTAAAGA- - - - - - - - - - - CA |       |       |       |       |       |       |       | 18092 |

| Majority    | TXXCTXATGTATATCX- - TTTCTTGTTGXAXTTCTTTGGGTCATGTXTCXTXTTGAXTX- AAGAATAATGCTGCTC-          |       |       |       |       |       |       |       |       |
|-------------|-------------------------------------------------------------------------------------------|-------|-------|-------|-------|-------|-------|-------|-------|
|             | 27450                                                                                     | 27460 | 27470 | 27480 | 27490 | 27500 | 27510 | 27520 |       |
| Human       | CGTTCTGATTGTTATTC- - TTTCTTATTCAGGTTTCTTATTGTCATGTTTTATGTCTGTTTTTCAGGTGTAATTGTCCTC-       |       |       |       |       |       |       |       | 23900 |
| PolarBear   | -----                                                                                     |       |       |       |       |       |       |       | 0     |
| Cow         | GTTCTTTACTCAAACAAGTTTTTAGTTATAGAATTATGAAGTTATGCCTGA- AAAATGGCA- GAAAATAGTGGAACAAA         |       |       |       |       |       |       |       | 22882 |
| Dog         | TACCCTGATGTGTCTCT- - TTTCTGTTGGAATTCACCTTGGTCATTTACTATTTTTGACTT- AAGAACAATGCTGCTC-        |       |       |       |       |       |       |       | 22776 |
| BelugaWhale | TTTTCTTCTGAAAAAT- - - TTTAAAGTCTTAT- - CTGTTGCGTT- TGTCTCTTAATTCATCA- GAAAAAAT- - - - - - |       |       |       |       |       |       |       | 19045 |
| Donkey      | ACTTCATATTTGCATCCT- TCCCCCGTGACTTTTGTATGGTCCCTCTTCTCCATAGGAGAAAGTCTTTGTGCTGCTCT           |       |       |       |       |       |       |       | 22726 |
| Cat         | TACCCTGATCTATCTCT- - TTTCTTGTGGAATTCCTCTGGGTCATTTACTGTTTTTACTTTAAGAATAATGCTGCTC-          |       |       |       |       |       |       |       | 25646 |
| Ferret      | TACCCTGATGATTTTCT- - CTTCTTGTGGAATTCAACTGGCTCATATACCATTTT- GACTT- AAGAATAGTGCTGCTC-       |       |       |       |       |       |       |       | 22001 |
| Lion        | TACCCTGATCTATCTCT- - TTTCTTGTGGAATTCCTCTGGGTCATTTACTGTTTTTACTTTAAGAATAATGCTGCTC-          |       |       |       |       |       |       |       | 24208 |
| Vaquita     | TTTTCTTCTGAAAAAT- - - TTTAAAGTCTTAT- - CTGTTGCGTT- TGTCTCTTAATTCATCA- GAAAAAAT- - - - - - |       |       |       |       |       |       |       | 19713 |
| Pig         | TTTTCTTATAAAAAAC- - - TGTAAGTTTTAT- - TTATTACGTT- TGTCTCT- AATTCATCA- GAAAAAAT- - - - - - |       |       |       |       |       |       |       | 18156 |

Dienstag, 3. Mai 2022 08:38

|             |                                                                                            |                |                         |               |                            |                         |              |       |   |
|-------------|--------------------------------------------------------------------------------------------|----------------|-------------------------|---------------|----------------------------|-------------------------|--------------|-------|---|
| Majority    | - - - - XXAACATATTTATT- XACTTCTTGGT- - - - - XCAXGTGGGCAACAGTTTTTGTGTA- - - - - TAXTTCTAAG |                |                         |               |                            |                         |              |       |   |
|             | 27530                                                                                      | 27540          | 27550                   | 27560         | 27570                      | 27580                   | 27590        | 27600 |   |
| Human       | - T- - - - CACAAATGTATCC- CATT                                                             | TTTGGGTGACAA   | AATACCTGATCAC           | CTTATCCTTATAG | TT- - - - -                | TTCTCCCTAG              |              | 23967 |   |
| PolarBear   | -----                                                                                      |                |                         |               |                            |                         |              |       | 0 |
| Cow         | ACAGTGAATGTGTT                                                                             | CAGTAAAGTTCTT  | GGT- - - - -            | AAAAATGAAAAAT | GTGTCTTTTATTTT- - - - -    | TACTTAAAAA              |              | 22949 |   |
| Dog         | - - - - - TGAAC                                                                            | TTTTTTTTTTTACT | ACTTGGT- - - - -        | ACATGTGTGCAAA | AGTTATTGCGAGTA- - - - -    | TA- - - - -             | TAAG         | 22835 |   |
| BelugaWhale | - - - - - - - -                                                                            | TTAATTCATTTATT | GTACAAG- - - - -        | GTGGGGATCCAAT | TTTCATTTTTTC- - - - -      | TTCTGTCTTA              |              | 19099 |   |
| Donkey      | CAGTCCTGAAACCT                                                                             | AGCAGAGCCTGGG  | AGTGTGTCA               | CCCGCAGCCTT   | CAGTTTTTGTCTT              | GCCGTCTG                | GGTAGTTCCAGC | 22806 |   |
| Cat         | - - - - - TGAAC                                                                            | ATATTTGT- - -  | ACTACTTGGT- - - - -     | TCATGTGTGCAAA | AGTTTTTGTAGGGTA- - - - -   | CATATCTAAG              |              | 25706 |   |
| Ferret      | - - - - - TGAAC                                                                            | ACTTTTGT- - -  | ACCACTTGGT- - - - -     | GCATGTGCGCA   | AGTTTTTGTAGAGTATA- - - - - | TAT- - - -              | CTAAG        | 22059 |   |
| Lion        | - - - - - TGAAC                                                                            | ATATTTGT- - -  | ACTACTTGGT- - - - -     | TCATGTGTGCAAA | AGTTTTTGTAGGGTA- - - - -   | CATATCTAAG              |              | 24268 |   |
| Vaquita     | - - - - - - - -                                                                            | TTAATTCATTTATT | GTACAAG- - - - -        | GTGGGGATCCAAT | TTTCATTTTTTC- - - - -      | TTCTGTCTTA              |              | 19767 |   |
| Pig         | - - - - - - - -                                                                            | TT- TTA        | ACTAATCATATTAG- - - - - | G- - - -      | TGGGGATT                   | CAGTTTTTTTTTTT- - - - - | TGTTCTTATA   | 18208 |   |

|             |                                                                                              |                 |              |             |                       |                        |                   |             |   |
|-------------|----------------------------------------------------------------------------------------------|-----------------|--------------|-------------|-----------------------|------------------------|-------------------|-------------|---|
| Majority    | GAXATATATTGCTAXGATX- XTACA- - GTXTGTXXATXTTTTTXXAGGTAATA- - AAGAATATTTATTT- XX- - - - G- TA- |                 |              |             |                       |                        |                   |             |   |
|             | 27610                                                                                        | 27620           | 27630        | 27640       | 27650                 | 27660                  | 27670             | 27680       |   |
| Human       | AATCTTTTTT                                                                                   | GTTATATTAAT     | CAAAGTTTATTT | GTGAGAATGTT | TATGAAATAT- AAG       | AAAATGAACATCA- - -     | T- - - - -        | 24037       |   |
| PolarBear   | -----                                                                                        |                 |              |             |                       |                        |                   |             | 0 |
| Cow         | CAAATTTTTT                                                                                   | GGTTAGACCA      | AATACA- -    | ATTACAGGGT  | TTTTTTTAAAGTTTAT- TGA | AATAATTTTGT- - - - -   | GT-               | 23016       |   |
| Dog         | AATAAAAAT                                                                                    | TGCTAGGATG- -   | TAGA- -      | GTATGTTGA   | ACTTTGCAGGGTAGTA- -   | TAGATTTTTTT- - - - -   |                   | 22894       |   |
| BelugaWhale | GAGATAGCC                                                                                    | CAGTTAAAAT- -   | ATGCA- -     | GTGTCA- - - | TTTTTTTTT             | CACATTAC- AGATA        | CATATATTTTAG- - - | GGTA- 19166 |   |
| Donkey      | AACTCTT                                                                                      | CCATCTGGGGAT    | GATAGATGGT   | AGTTGGATGGG | ATTATGATGATA          | AACAGAATGTCCA          | AATAACCAAGAGGAAA  | 22886       |   |
| Cat         | GACAAGT                                                                                      | ATTGCTAGGATG- - | TACA- -      | GTGTGTTAA   | ACTTTCATAAGGTAGTA- -  | CAGATTATTTGTTGGT       | TTTTGCTC-         | 25779       |   |
| Ferret      | AATAAAT                                                                                      | AGTTCTACAAT     | GTGTAGA- -   | GTATGTTGAG  | CTTTTCAAGGTAATAC- TAG | ATTATTTTCAAAGT         | ATTGCTC-          | 22135       |   |
| Lion        | GACAAGT                                                                                      | ATTGCTAGGATG- - | TACA- -      | GTGTGTTAA   | ACTTTCATAAGGTAGTA- -  | CAGATTATTTGTCGGT       | TTTTGCTC-         | 24341       |   |
| Vaquita     | GAGATAGCC                                                                                    | CAGTTAAAAT- -   | ATGCA- -     | GTGTCA- - - | TTTTTTTTT- CACATTAC-  | AGATATATATATTTTAG- - - | GGTA-             | 19833       |   |
| Pig         | GAGATAAT                                                                                     | TAAAATATAT- GGT | ACC- -       | ATTTTT- - - | TTCCTATTAAGATATAT-    | AAGTATATACTT- - - - -  | TA-               | 18271       |   |

Dienstag, 3. Mai 2022 08:38

|             |                                                                                            |       |       |       |       |       |       |       |       |
|-------------|--------------------------------------------------------------------------------------------|-------|-------|-------|-------|-------|-------|-------|-------|
| Majority    | - - - - - XAGTTTATG- CCAATAXAAGAAXATAAGAATXCTXACTXTT- - ATATTCTXATCAXCA- - - - - TTGXTCA   |       |       |       |       |       |       |       |       |
|             | 27690                                                                                      | 27700 | 27710 | 27720 | 27730 | 27740 | 27750 | 27760 |       |
| Human       | - - - - - GAACCTGTCACTCAAATAAAAAAAGCTTGAATGTTACCAATACTATTGTATATTCCATATGCAGCAATATTGC        |       |       |       |       |       |       |       | 24109 |
| PolarBear   | - - - - -                                                                                  |       |       |       |       |       |       |       | 0     |
| Cow         | - - - - - GTGGTTCTG- CCATCACCCCTAATAGTTAGAT- TTGTTTGT- - ACATTTTGATTTTCAT- - - - - TTTTAGG |       |       |       |       |       |       |       | 23078 |
| Dog         | - - - - - CAATGTAT- - - AACAGTAGTATATAAGAATTCTTCGTGTTTTAGATTCTCATCAAGAA- - - - - TTGGTCA   |       |       |       |       |       |       |       | 22956 |
| BelugaWhale | - - - - - AAGGCTAAG- CCACTATAACAAAATGGTAATGCAGAACATA- - GTGGTGTAATAAC- - - - - CT- - AGA   |       |       |       |       |       |       |       | 19225 |
| Donkey      | AAAAAAGAAATTTATG- TCACTGGAATGAATGCAAATGTCGTTTAAACTGTACTTTTGTACTTATATTTGTCTGTGCT            |       |       |       |       |       |       |       | 22965 |
| Cat         | - - - - - CAGTTAATG- TTAACAGTAGTATACAAGAGTTCTTACTGTTTCAGATTCTCATCAGCAC- - - - - TTGGTCA    |       |       |       |       |       |       |       | 25844 |
| Ferret      | - - - - - CAATTTAT- - - GATAATAGTATATAAGAGTTCTTGCCGTTTCACATTCTCATCAGCCC- - - - - TTGGTCA   |       |       |       |       |       |       |       | 22197 |
| Lion        | - - - - - CAGTTAATG- TTAACAGTAGTATACAAGAGTTCTTACTGTTTCAGATTCTCATCAGCAC- - - - - TTGGTCA    |       |       |       |       |       |       |       | 24406 |
| Vaquita     | - - - - - AAGGCTAAG- CCACTATAACAAAATGGTAATGCAGAACATA- - GTGGTGTAATAAC- - - - - CT- - AGA   |       |       |       |       |       |       |       | 19892 |
| Pig         | - - - - - AAGACTATG- CAACTGTAACAAAATGCAA- - - ACATAA- - ACAGCCTAACAGC- - - - - CT- - ACA   |       |       |       |       |       |       |       | 18325 |

|             |                                                                                             |       |       |       |       |       |       |       |       |
|-------------|---------------------------------------------------------------------------------------------|-------|-------|-------|-------|-------|-------|-------|-------|
| Majority    | AGTTTTTTTTTCA- - - - - TXAGTXXATGXC- ATXTTGGTXXTAAX- AAXTTCTXXGTCTTXXTTT- - ATATXXTCXT      |       |       |       |       |       |       |       |       |
|             | 27770                                                                                       | 27780 | 27790 | 27800 | 27810 | 27820 | 27830 | 27840 |       |
| Human       | TTTTTTTTTTTTAGAGTCTTGCTCTGATACCCACGCTGGAGTGCAGTGGTGTCTCTCGGCTCACAGCAAGCTTCGCCTC             |       |       |       |       |       |       |       | 24189 |
| PolarBear   | - - - - -                                                                                   |       |       |       |       |       |       |       | 0     |
| Cow         | GAATAGTTTTTCACTT- - - TGAATAAATTTT- CCAGAGTTGCAAAAC- AAGCCACATTCATAGATGTC- - TTCTACTCCT     |       |       |       |       |       |       |       | 23151 |
| Dog         | AGTTTTAAATTCC- - - - - TTAATATTTGCT- ATTTTGGTATGTAAAT- ATTTTCTTTGGTCTTTTTTT- - ATATTTTCTT   |       |       |       |       |       |       |       | 23026 |
| BelugaWhale | AGTTGATTTTTCA- - - - - TAAGTGAAAGTC- CTGCAGTTGTAAGA- - AAATGGTATCAGT- - ACGCT- - CCATGAGGTT |       |       |       |       |       |       |       | 19292 |
| Donkey      | GATTTCTTTCTCTAATTGGTATGTAGATTGT- ATCTTCCTATATTA- - GTATTTTCTAATTGTTTTT- - TTGGGATGCT        |       |       |       |       |       |       |       | 23040 |
| Cat         | AGTGTTAAATTCC- - - - - TTGGTTTTTGCC- ATCTTGGTATGTAGT- AATTTCTTTGGTCTTTCTT- - ATATTTCCCT     |       |       |       |       |       |       |       | 25913 |
| Ferret      | AGTATTAATTCA- - - - - TTAATTTTAAAG- ATTTTAGTGTGTAAT- ATTTTCTTTGGTCTTGCTTT- - ATATTTTCTT     |       |       |       |       |       |       |       | 22267 |
| Lion        | AGTGTTAAATTCC- - - - - TTGGTTTTTGCC- ATCTTGGTATGTAAAT- AATTTCTTTGGTCTTTCTTT- - ATATTTCCCT   |       |       |       |       |       |       |       | 24476 |
| Vaquita     | AGTTGATTTTTCA- - - - - TAAGTGAAAGTC- CTGCAGTTGTAAGA- - AAATGGTATCAGT- - ATGCT- - CCATGAGGTT |       |       |       |       |       |       |       | 19959 |
| Pig         | AGTTATTTTTTCA- - - - - TAAGCAAAGTT- CTACAGCTATAAGA- - AAATGATATCAA- - ACTGTT- - CCATGAGGTT  |       |       |       |       |       |       |       | 18392 |

Dienstag, 3. Mai 2022 08:38

| Majority    | AXTTAXTAATXX- - GGXTAC- - - XTTTTTTTCCC- - - - CAAXATGTTTATGTT- - X- - - TAAX- - - - GTTTTGAT- - - |                 |                                              |          |                                 |                          |                                                           |                      |            |         |          |  |       |       |
|-------------|----------------------------------------------------------------------------------------------------|-----------------|----------------------------------------------|----------|---------------------------------|--------------------------|-----------------------------------------------------------|----------------------|------------|---------|----------|--|-------|-------|
|             | 27850                                                                                              | 27860           | 27870                                        | 27880    | 27890                           | 27900                    | 27910                                                     | 27920                |            |         |          |  |       |       |
| Human       | CCTGGTT                                                                                            | CACCCATT        | TCTCCTGC                                     | CTCAGCCT | CCCGAGT                         | AGCTGGG                  | ACTTCAGG                                                  | CACCCGCC             | ACCA- - -  | CACCCGG | GCTAA    |  |       | 24265 |
| PolarBear   | -----                                                                                              |                 |                                              |          |                                 |                          |                                                           |                      |            |         |          |  | 0     |       |
| Cow         | G TTCATT                                                                                           | CTACTTT         | GCTTATT- -                                   | GTATTCCC | CCTTA- - -                      | CAAAGGG                  | T TTTCTACT-                                               | TTCATTA              | AAT- - - - | TTTTTGT | TTTAT    |  |       | 23219 |
| Dog         | AATTACT                                                                                            | AATTTA- - - - - | T- TTTCCC                                    | C- - -   | TAACATG                         | T T TATGAC-              | CAT- -                                                    | TAGT- - - -          | G TTTCT-   | - - - - |          |  | 23075 |       |
| BelugaWhale | ATTCACT                                                                                            | G- - - - -      | GGCTAA- - -                                  | GTTTTTTT | CAT- - - - -                    | CTGTTTTT                 | T T T- - - -                                              | CATGAC-              | - - - -    | CTAATG  | A T- - - |  |       | 19342 |
| Donkey      | AGTTTCT                                                                                            | CATGAAGT        | GGTCATTG                                     | T T TACT | A T A C C A G A G G A A A A A T | G G T C T G T            | G G T C A T A T T T A A C A A G G G G C A T C G A T G C T |                      |            |         |          |  |       | 23120 |
| Cat         | AATTATTA                                                                                           | AATGAGGCG       | T T T A C A T C T T T A T T T T C T C C- - - | CGACATA  | C T T A T T T T- - -            | T T T T T T A A T- - - - | T T T T T T T T C A A                                     |                      |            |         |          |  |       | 25983 |
| Ferret      | TATTATT                                                                                            | AGTGAAGT        | G T T A C A T T T T A T T T T T C C C T- - - | CAATATG  | T T T A T G G C- -              | CAT- -                   | TAGT- - - -                                               | G T T T C T A C- - - |            |         |          |  |       | 22332 |
| Lion        | AATTATTA                                                                                           | AATGAGGCG       | T T T A C A T C T T T A T T T T C C C C- - - | CGACATA  | T T T T A- - - - - - - -        | T- - - - - - - -         | - - - - - - - - - - -                                     |                      |            |         |          |  |       | 24523 |
| Vaquita     | ATTCACT                                                                                            | G- - - - -      | GACTAA- - -                                  | GTTTTTTT | CAT- - - - -                    | CTGTTTTT                 | T T T- - - -                                              | CATGAC-              | - - - -    | CTAATG  | A T- - - |  |       | 20009 |
| Pig         | ATTCACT                                                                                            | G- - - - -      | GGCTAGG- -                                   | GTTTTTTT | CCAT- - - -                     | CAGGTTG                  | C T T C A G T A T T C C G T G A G- - - -                  | G T T T T G T T- - - | T          |         |          |  |       | 18452 |

| Majority    | - - - T X T G T A T A A T T A- - - X A A T- - - T A T T T T T T T T T- - - - T- - G X T X X T T A- - - C T T A- - - X- A- T X T A A C C C X- - T               |                                                                                |                                      |                                                         |                                 |                                  |                             |       |  |  |  |  |       |       |
|-------------|----------------------------------------------------------------------------------------------------------------------------------------------------------------|--------------------------------------------------------------------------------|--------------------------------------|---------------------------------------------------------|---------------------------------|----------------------------------|-----------------------------|-------|--|--|--|--|-------|-------|
|             | 27930                                                                                                                                                          | 27940                                                                          | 27950                                | 27960                                                   | 27970                           | 27980                            | 27990                       | 28000 |  |  |  |  |       |       |
| Human       | T T T T T T                                                                                                                                                    | G A A T T T T T                                                                | A G T A G A G A C G G G G T T T      | C A C C C T G T                                         | T A G C C A G G A T G G T T T T | G A T C T C A T G- A C C T C G T | G A T C C G T C T           |       |  |  |  |  |       | 24344 |
| PolarBear   | -----                                                                                                                                                          |                                                                                |                                      |                                                         |                                 |                                  |                             |       |  |  |  |  | 0     |       |
| Cow         | T C T T C                                                                                                                                                      | A T T T A A T A G A A G C A A A T G T G A G T T T T T T C T G C A T G C T- -   | CCCTCCT                              | A G C A T C T T A G A G A A A A T A T A G C A C A G A A |                                 |                                  |                             |       |  |  |  |  |       | 23297 |
| Dog         | - - -                                                                                                                                                          | T T T G T G A A A T T T T A T G A A A T A C C T A T T T G T T T C T T- - -     | T- -                                 | G C C T A A T A A A A A T T T G- - -                    | A- A-                           | T T T A A C C A G- - T           |                             |       |  |  |  |  |       | 23139 |
| BelugaWhale | - - - - -                                                                                                                                                      | A T A T A A T T A- - - - - - - - -                                             | T G T T T T T T T T- - - - -         | G T- -                                                  | T T T G C T T A- - -            | C C T A- - - -                   | A T T C T C A C C C A A A G |       |  |  |  |  |       | 19389 |
| Donkey      | C G A T G C T T A T C T T A A C A C T C A A T T T C T T T C T T T G A T T G A A T A T A A G A T C A A T T G A C G T C T A T C- T T A G A T G A A T T A A A T T |                                                                                |                                      |                                                         |                                 |                                  |                             |       |  |  |  |  |       | 23199 |
| Cat         | C G T T T A T T T A T T T T T T T G G G A C A G A G A G A C A G A G C A T- - -                                                                                 | A- -                                                                           | A A T G G G G G A G G G G C A G- - - | A G A- G A G A G G G A G- -                             | A                               |                                  |                             |       |  |  |  |  |       | 26051 |
| Ferret      | - -                                                                                                                                                            | T T T T G T G A A A T T T T T G T C A A A T A C C T A C T T G T A T C T T- - - | T- -                                 | G C C T A A T A A A A A T T T G- - -                    | A- A-                           | T C T A A C C A G- - T           |                             |       |  |  |  |  |       | 22397 |
| Lion        | -----                                                                                                                                                          |                                                                                |                                      |                                                         |                                 |                                  |                             |       |  |  |  |  | 24523 |       |
| Vaquita     | - - - - -                                                                                                                                                      | A T A T A A T T A- - - - - - - - -                                             | T G T T T T T T T T- - - - -         | G T- -                                                  | T T T G C T T A- - -            | C C T A- - - -                   | A T T C T C A C C C A A A G |       |  |  |  |  |       | 20057 |
| Pig         | T T G T C T G C A T G C C T G A T- - -                                                                                                                         | A A T G T G T A A T T A T G C T G- - - - -                                     | T- -                                 | C T T T T T T C- - - - -                                | C T T A- - - - -                | A- - -                           | T A G T T C T- - -          |       |  |  |  |  |       | 18507 |

Dienstag, 3. Mai 2022 08:38

| Majority    | TACX-AG-GTTTAT--TATGTTGTATTGTTTTXATXATXTTAA--AT-----TTAXGTTTTAXTXAT-ACT-CT-----  |       |
|-------------|----------------------------------------------------------------------------------|-------|
|             | 28010 28020 28030 28040 28050 28060 28070 28080                                  |       |
| Human       | GCCTCGGCCTCCCAAAGTGC-TGGGATTATAGGTGTGAGCTACTGCGCCCAGCCCA-ATATTGCTTTTTAATCCCCCTTC | 24422 |
| PolarBear   | -----                                                                            | 0     |
| Cow         | TACACAGGGTTTTAA--TATCTTGACTTTTTAACATAATGTTAA--ACATATCCTAGAAGGTAAATAT-ACC-CTGGAAA | 23370 |
| Dog         | TACATAGTTTTT-----TATGTATCA--TTGTTGCTGATTCTCT--ATTGGTTAT-----TGCTAAT-ATT-CTCTC--  | 23200 |
| BelugaWhale | TTT-----GTCTAT--TCTGTTGTCTTGTTCCTCAAAAAATCAA--AT-----TTTGGTTTTATTGAT-CCT-CT----- | 19447 |
| Donkey      | TAAAAAACACTTATTCTTATAAGAGATTGTTATTCTGAGTTAAGTACTACTAATGTGTTTCATCAGCCACTACTGTAGA  | 23279 |
| Cat         | CACAGAATCGGAAA--CAGGCTCCAGGCTCTGAGCCATCAGCC--CAGAGCCTGACGCGGGGCTCAA-ACT-CACGG--  | 26122 |
| Ferret      | TTTGTAGTTTTTTT--TATGTATTA--TTGTTACTGATTTTCT--ATTGGTTATATGTGTTGCTAAT-ATT-CTCTC--  | 22466 |
| Lion        | -----                                                                            | 24523 |
| Vaquita     | TTT-----GTCTAT--TCTGTTGTCTTGTTCCTCAAAAAATCAA--AT-----TTTGGTTTTATTGAT-CCT-CT----- | 20115 |
| Pig         | TACTCAGAGTTTGT--TTTGTGTCTTGTTCCTCAAAAAATCAG--AT-----TTTGGTTTTATTGAT-CCT-CT-----  | 18570 |

| Majority    | TTAGTTTTGTAXTTX-XATATGGX-----TTTTATTTTTTTAT-----TGGXT-GAATG-----T--X--X-A-         |       |
|-------------|------------------------------------------------------------------------------------|-------|
|             | 28090 28100 28110 28120 28130 28140 28150 28160                                    |       |
| Human       | TTACCCTGCCATGGGTAGGTGGCTGCCACAACCTTTTGCTTATTTTTTCAATATGGATTTT--TCATGTAAATGACAAAA   | 24500 |
| PolarBear   | -----                                                                              | 0     |
| Cow         | TCACCTTCATTGCTA-TATATGGAAAATCTTCTCATTCTTTATACTGC-TGGTTAGAATGCAGATTCCTCAGTTCCCCAT   | 23448 |
| Dog         | ACAGTTTGTAGCTT-TACTTGGCA--CTTCTTAATGGTGTGTTTTGA-TGAACAGAACCTGCTAATTTTAAT-GTATAG    | 23274 |
| BelugaWhale | TCGGTATGTCATTG--TATGTA-----TTTTATTTTTTTAT-----TGGTT-GTATG-----                     | 19491 |
| Donkey      | ATACCCTTCAATCACTATGCTGTTGAGTCATTTCGATTTTATATCCCAAGTTAAACAACCTGTGCCAGGGTATTTCAAATAA | 23359 |
| Cat         | ACCGCGAG-ATCGT-GACCTGGTT--GAAGTCGGATGCTTAACCGAC-TGCGCCACCCAGGCGCCCCTCTCC-CGACAT    | 26195 |
| Ferret      | CTAGTTGGTAGTTT-TCCTTGGCA--CTACTTAATGCTGTGTTTTGA-TGAACAAAAGCTGCTAATTTTAAT-GAATAG    | 22540 |
| Lion        | -----                                                                              | 24523 |
| Vaquita     | TTGGTATGTCATTG--TATGTA-----TTTTATTTTTTTAT-----TGGTT-GTATG-----                     | 20159 |
| Pig         | TTGGTGTGTTGTTA-ATATGTG-----TTTTGTATTTTTAT-----TGGTT-GAATG-----                     | 18615 |



Dienstag, 3. Mai 2022 08:38

| Majority    | AG- - TTTX- - XXXX- - XXTXXA- TTGCTTGXXCAATTTTTAGTAXXAX- TXXTX- XXT- TTCGTATGTTXAGCATTXAG |       |
|-------------|-------------------------------------------------------------------------------------------|-------|
|             | 28170 28180 28190 28200 28210 28220 28230 28240                                           |       |
| Human       | ATATATTT- - - AGTTTTTTTTTTAGTTTATGGAAACGGTATGCCTATATAATGTTTTCCATGTCTTGTGTT- TTAATTCAA     | 24576 |
| PolarBear   | -----                                                                                     | 0     |
| Cow         | AG- - - CCTGC- CCAGCATATTGAAATGCTTGGAATTTTGCTAGTCTGAGAAGTGAGATGGCATATATGTCTAGTATTAAT      | 23524 |
| Dog         | AG- - - TTT- A- ATATGGCCACAAATTCCCTGTGCCATCATAATTAATAA- TATT- - TGTGTTCTTTTTCTACCTGTTTGG  | 23346 |
| BelugaWhale | AG- - - TTTG- ----- TGCTTTACAGCTTTTAGC- ----- AGGTAGGT- - AGCACTCAG                       | 19533 |
| Donkey      | AACGTTCTGTGAGATAACATGGAATGTTAACGTTATCAGTACTGTAGAAGCACTTCTTTTGCCTATAATAGTGGTTAAG           | 23439 |
| Cat         | AC- - - TTA- T- GGTCAATTAGTGTCTTTTTGTGAAATTTTATGAAATATCTATTTATGTCTTTGCCTAATAAAAATTTGA     | 26270 |
| Ferret      | AG- - - TTTTA- ATATGGCTACAAGTTCTCTGTGCCATCATAATTAATAA- TATTTATGTGTTCTTTTTCTACCCATTTAA     | 22615 |
| Lion        | ----- GGTCAATTAGTGTCTTTTTGTGAAATTTTATGAAATATCTATTTATGTCTTTGCCTAATAAAAATTTGA               | 24592 |
| Vaquita     | AG- - - TTTG- ----- TGCTTTACAGCTTTTAGC- ----- AGGTAGGT- - AGCACTCAG                       | 20201 |
| Pig         | AG- - - TCTG- ----- T- ----- GCCTTCACAGTTTCTAGT- ----- AGATATGT- - AGCACTCAG              | 18657 |

| Majority    | TTXTXTTCCTT- - - - - TTTATCXTTTTT- A- - - TTTGXTAXTGATTGTXXGAAATXTXTAX- - - - - ATGAGT- TG |       |
|-------------|--------------------------------------------------------------------------------------------|-------|
|             | 28250 28260 28270 28280 28290 28300 28310 28320                                            |       |
| Human       | TAATGATTCTAATAAATAGCCGATTTTTTTGGATAGTTTTATAATACTCATTGCTGTGATATACTCTTTTGTGAAAATAC           | 24656 |
| PolarBear   | -----                                                                                      | 0     |
| Cow         | TTTTTTTTCTTT- - - - - TCTTTTTTTTTTAAACTGTGATCAAGATTAAGGGTAATTTTCATT- - - - TCATGTGC- TG    | 23591 |
| Dog         | ATCTTTCCC- - - - - TTGTTCTTATGGCAGTCTTAGCTGTTGATTGTTGGAAATCTTT- - - - - TT- - T- - -       | 23401 |
| BelugaWhale | TCCACCTCCTT- - - - - TGTAGCACCTTT- - - - - GTGTTTGTGGAGGCCAGAAATAC- - - - - ATGAG- - TG    | 19586 |
| Donkey      | CTTTGTACTIONACTGGAAAAGCAAACATAGTTGCCTTTTTATTAAAAAAGTGATACATTTATAAATATCTCAAATTTGCA          | 23519 |
| Cat         | ATTTAACCAAC- - - - - TTTATAGTTTTTTATGTATTGCTATTGATTCTCTGTTATTTATGTTACTCATATCATTCT          | 26342 |
| Ferret      | ATATTTCC- - - - - TTGTTCTTTTGGGAATCTTAGCTGTTGATTGTTGGAAATCTTTAAAGCAGTCTCTAATAAT            | 22684 |
| Lion        | ATTTAACCAAC- - - - - TTTATAGTTTTTTATGTATTGCTATTGATTC- CTGTTATTTATGTTACTCATATCATTTC         | 24663 |
| Vaquita     | TCCACCTCCTT- - - - - TGTAGCACCTTT- - - - - GTGTTTCGTGGAGGCCAGAAATAC- - - - - ATGAG- - TG   | 20254 |
| Pig         | TCCACCTCCTT- - - - - GTAGCACCTTT- - - - - GTGTTGAAGAAGGCTAGAAATACTCAT- - - - - ATGAG- - TA | 18714 |



Dienstag, 3. Mai 2022 08:38

| Majority    | CTAAGTXTTGAAACCTTTCATAGCTCXTAAAGATACCATGXTTX-XXAAATGTTX--AX-----TCTTTXTTTT-- |            |            |            |          |           |          |           |           |          |               |              |
|-------------|------------------------------------------------------------------------------|------------|------------|------------|----------|-----------|----------|-----------|-----------|----------|---------------|--------------|
|             | 28490                                                                        | 28500      | 28510      | 28520      | 28530    | 28540     | 28550    | 28560     |           |          |               |              |
| Human       | CCAACATAGT                                                                   | GAAACCCCAT | CTCTACTAAA | AATACCATAA | TAGCGGGG | TATGGTGGT | GGG----- | TGCCTGTAG | TCC 24885 |          |               |              |
| PolarBear   | -----                                                                        | -----      | -----      | -----      | -----    | -----     | -----    | -----     | 0         |          |               |              |
| Cow         | TTCTGTTTT                                                                    | CTCTTCTT   | ACTTTTCA   | TAAAAAT    | ATCATGTT | TGATCAA   | AATATTAC | GATCTGT   | ACAATTT   | CCTTATTT | TG 23815      |              |
| Dog         | CTAGGCCAA                                                                    | AGGCAGGC   | GCTAAACT   | GCTGCACC   | ACCCAGG  | GATC-CC   | GATTGTT  | GGAAA--   | -----     | TCT----- | T-- 23595     |              |
| BelugaWhale | CTCAGTCCT                                                                    | GAAACCTG   | TGAGAGCC   | CA--AG     | GA--CT   | GTGATA--  | ---AGAT  | GTTA--    | -----     | TCTCTGT  | TTTTTCT 19764 |              |
| Donkey      | GCATGTCCT                                                                    | GTCACCAC   | ACATCAA    | AATTAC     | AGGCTTT  | CTTTTTT   | ACTTAAT  | GGACTT    | AGGTTCC   | ACACCCT  | TTCATCT       | CCA 23759    |
| Cat         | CCACCATTT                                                                    | GAATCTT    | TGCCTT     | GTTCTT     | ATTGAT   | ATCTTT    | GCTG-TT  | GATTGTT   | GGAAA--   | -----    | TCTT-----     | 26537        |
| Ferret      | ATACATTAC                                                                    | AAAAAT     | TTTTAA     | AGTTAT     | GCCTTT   | TACAAT    | GGTCT-CT | AATTCAT   | CAGAAAT   | TTA---   | TTTTTT        | GTTTGT 22912 |
| Lion        | CCACCATTT                                                                    | GAATCTT    | TGCCTT     | GTTCTT     | ATTGAT   | ATCTTT    | GCTG-TT  | GATTGTT   | GGAAA--   | -----    | TCTT-----     | 24858        |
| Vaquita     | CTCAGTCCT                                                                    | GAAACCTG   | TGAGAGCC   | CA--AG     | GA--CT   | GTGATA--  | ---AGAT  | GTTA--    | -----     | TCTCTGT  | TTTTTTT 20432 |              |
| Pig         | CTCAGTCTT                                                                    | GAAATCTT   | TGAGAGCT   | CACGAAG    | A--CT    | ATGATAT   | A-ATGTT  | A-----    | -----     | TCTCTGT  | TTTTGC 18896  |              |

| Majority    | XAA-----TXAGGAAGCXATGXCTTAGAATAXXTTTTA--TTXCCAXXTACATA-GTXGTTGAXAXXTGAXXT-XTA |         |        |         |          |           |         |         |        |          |         |         |         |           |           |
|-------------|-------------------------------------------------------------------------------|---------|--------|---------|----------|-----------|---------|---------|--------|----------|---------|---------|---------|-----------|-----------|
|             | 28570                                                                         | 28580   | 28590  | 28600   | 28610    | 28620     | 28630   | 28640   |        |          |         |         |         |           |           |
| Human       | CAGCT--                                                                       | ACTCAGG | AGGCTG | AGACAGG | AATCGCTT | GA---     | ACCCAGG | AGGCGG  | AGGTTG | CAAGT    | GAGCTG  | AGACCG  | C 24959 |           |           |
| PolarBear   | -----                                                                         | -----   | -----  | -----   | -----    | -----     | -----   | -----   | -----  | -----    | -----   | -----   | 0       |           |           |
| Cow         | AAACT-                                                                        | TATTGAG | GATTTC | ATTACAT | AGTATGT  | GATCCACT- | TTTGT   | GACTTAC | ACTCAT | AGATAAAA | AAGATAT | TTTTCT  | G 23893 |           |           |
| Dog         | -----                                                                         | TAAAG-  | C-AAT  | CTCTA   | AATGTT   | TTTTTA--  | AGTT--  | ---TTC  | ATCTAT | TGTTGG   | GATA--  | GTTTTTT | T 23653 |           |           |
| BelugaWhale | AAA-                                                                          | -----   | TGAGT  | AAGTTA  | AGGTTT   | AGAACA-   | GGTAAG  | TAAATTT | TACCAG | TGACATA- | GTAGGT  | GAAAGCT | GAA---  | CTA 19833 |           |
| Donkey      | GAATT-                                                                        | ACTTAT  | GAATCC | ACTGGG  | TGGAA    | GATTTTG-  | ---ACT  | CACAAG  | TAAAG  | CAACAT   | CTAAAG  | AGTAA   | ACTGG   | T 23834   |           |
| Cat         | -----                                                                         | TAAAG-  | ---CC  | ATCTCT  | AGTAAT   | AGTTTTTA- | ---TG   | TT---   | TTCAT  | CTGTT    | GTTGGG  | ATACAG  | TTTTCT  | T 26597   |           |
| Ferret      | GTATTGT                                                                       | GTTAAG  | GATCCA | ATTTCT  | TTTTT    | ATCTTTTT  | TT--    | CTTCCC  | CCCCT  | TTATAG   | AGATA-  | GCCAG   | T 22987 |           |           |
| Lion        | -----                                                                         | TAAAG-  | ---CC  | ATCTCT  | AGTAAT   | AGTTTTTA- | ---TG   | TT---   | TTCAT  | CTGTT    | GTTGGG  | ATACAG  | TTTTCT  | T 24918   |           |
| Vaquita     | AAA-                                                                          | -----   | TGAGT  | AAGTTA  | AGGTTT   | AGAACA-   | GGTAAG  | TAAATTT | TACCAG | TGACATA- | GTAGGT  | GAAAGCT | GAA---  | CTA 20501 |           |
| Pig         | AAA-                                                                          | -----   | TGAGG  | AAGTTA  | AGGCTT   | AGAATA-   | ---GTT  | CA---   | TTTACC | AGTTAC   | ACA-    | GTAGGT  | GGAAGCT | GAA---    | CTG 18961 |

Dienstag, 3. Mai 2022 08:38

| Majority    | CAGAXACATTTX- X- - T- XTTGCCATATTGTATGATTATCXTAXAXAXAAAXAXAA- TX- XTXAAT- CA- - XXAX- A- TX    |       |
|-------------|------------------------------------------------------------------------------------------------|-------|
|             | 28650 28660 28670 28680 28690 28700 28710 28720                                                |       |
| Human       | CCATTACACTCCAGCCTGTGTGACAGACTGAGACTCCATCTCAAAAACAAACAAAAAAAAACAACAACAAAAAAGATTT                | 25039 |
| PolarBear   | -----                                                                                          | 0     |
| Cow         | CTGAAAAATTTTAA- - - - AGTCTTATCTATTCTGTTTCTAATTCATCAAAAAATATTTTAGTTACTACACTGTTTAGGTG           | 23969 |
| Dog         | AATAGAGATTT- - - - - T- GTGTCCACTCTGTAGGAGAATTTA- - - - - T- - - - - - - - - - - - - - - - - C | 23691 |
| BelugaWhale | CAGAATCCTTTTTCTTA- AATGCCATATGGCATAATTGTCATAGAAACAAAGAAAAGTTAATTCATCACATCAATC                  | 19912 |
| Donkey      | ATATGTATTTGCACAGA- GGTCAAATATACTCTTGAAAAGTGAAGAAGGCAATGTTTTTTGAGAAGAAGGGTAGTTGTT               | 23913 |
| Cat         | TAGAGAAATTT- - - - - T- GTGGCCACTCTCTAGGAGTATTT- - - - - - - - - - - - - - - - - - - - - -     | 26632 |
| Ferret      | AAATTACAGTTCCA- - T- TTCTTCACATTTTAGGTAATAAAAGGGTGAAGGCTAAGTTACTGTATTAATGCAGAACAT              | 23064 |
| Lion        | TAGAGAAATTT- - - - - T- GTGGCTACTCTGTAGGAGTATTT- - - - - - - - - - - - - - - - - - - - - -     | 24953 |
| Vaquita     | CAGAATCCTTTTTCTTA- AATGCCATATGGCGTAATTGTCATAGAAACAAAGAAAAGTTAATTCATCACATCAATC                  | 20580 |
| Pig         | CAGAATCCTTTTTCTT- - AATGCTATATTGCATACTTGTGTCATAGAAACAGAGAAAAGTTGTTAATCCATCACATCAATG            | 19039 |

| Majority    | GX- - TTXAACAXGAATAATTTTCT- - - - TATTTXATAACX- - - XX- XGG- TTAAXAATTCGTTAXATTTTC- - - A- XATCA  |       |
|-------------|---------------------------------------------------------------------------------------------------|-------|
|             | 28730 28740 28750 28760 28770 28780 28790 28800                                                   |       |
| Human       | TGACTTTAAGAACAATACTGCTGTGAACCTTCTTTGTAAGTCTGTTTCTGGTGCATTTATGCAAGCGTTTTTGGAGAGGGTAT               | 25119 |
| PolarBear   | -----                                                                                             | 0     |
| Cow         | GGG- ATCCAATTTTATTTCTTTTT- - - - GCTTATATAGAGCT- AGTCAGTTGAAGTATGCAGTGTCTTTTTTTTCTATTA            | 24043 |
| Dog         | AGTATTTTTCATGATTCATTTTCT- - - - TGTGTTCTAAA- - - - - C- - - TTAAGAAGTCCTTGCATACTCAAATCATGA        | 23757 |
| BelugaWhale | GA- - CTAAGAAGAAAAATCAT- - - - - GATCATATCACTAG- ATGAGGATAAAACATTTGACAGAATTC- - - - - AGCA        | 19977 |
| Donkey      | AATAATCAGCATTCAATTTATTTATT- - - TATTTCAACAATTATGTGTGGACCCTGTGCTTGGTTGACACTTGGAAATATTA             | 23990 |
| Cat         | - - - - TCTCACACGGTTCATTTTCT- - - - TGTGTTATAAC- - - - - - - - - TAAAAAGTCCTTACATGACCTGAGGGTCA    | 26693 |
| Ferret      | AGTGTTATAAATAAGTTTATTTTCT- - - - CATAAGCTAAAGTCCTGCTGGTTAAGAAAATGGTATCAGTCTCCTTGATGA              | 23140 |
| Lion        | - - - - TCTCACACGGTTCATTTTCT- - - - TGTGTTATAAC- - - - - - - - - TAAAAAGTCCTTACATGACCTGAGGGTCA    | 25014 |
| Vaquita     | GA- - CCAAAGAAGAAAAATCATAT- - - - GATCATATCACTAG- ATGAGGATAAAACATTTGACAGAATTC- - - - - AGCA       | 20647 |
| Pig         | GA- - AAAAAAAGAAAAATTATGT- - - - GATTGTATGGTG- - - AGGAAAAAGAAAGTCT- CAGTAA- - - - - - - - - ATTA | 19098 |

Dienstag, 3. Mai 2022 08:38

| Majority    | XXXAX- - - X- ATG- - - A- - - XT- XX- - - XX- - TA- - XXAXAXXTTCAXX- - TAXCAAAAX- TTTT- - XAC- - - - - A- X- A |       |
|-------------|----------------------------------------------------------------------------------------------------------------|-------|
|             | 28810      28820      28830      28840      28850      28860      28870      28880                             |       |
| Human       | ATTTAAAGGTATAGGTATATATTACTAGTGTGTAAAATAAACTTTATGAGACAGTACTAGATTATTTTCCAGTGTATTGT                               | 25199 |
| PolarBear   | -----                                                                                                          | 0     |
| Cow         | CCCGTATTACAGGGGTATGTATCAGTTCAGTTCAGTTTAGTCTGCTCAGTCTGTCCGAAT- CTTTGCGACC- - CCATGAA                            | 24120 |
| Dog         | AG- ----- ATTATTTTCATACATTACAAAA- TTTT-----                                                                    | 23785 |
| BelugaWhale | CCCAT- - - TCATGATAAAAATTCTCACTAACTAGAACAGAGGGGA- - - - - ACTTCAAC- TT- - - - GAC- - - - AAAGA                 | 20038 |
| Donkey      | TAGTGGTATAGTGACTIONACTGATGTGGGCCAGATACTTTACCTGGTAAGCACTATCCATGTATTACCACATTTAATCTCAA                            | 24070 |
| Cat         | TAAAG- ----- ATATCTTCATATGTTACAGAAG- TTTT-----                                                                 | 26724 |
| Ferret      | GGTTA- - - TTATTCAGTCTCCAGCTTTCTTTACCTTGTGCTTCATTATTTTCTAAGC- TTTTGTCTGTCTGCATG                                | 23216 |
| Lion        | TAAAG- ----- GTATCTTCATACGTTACAAAA- TTTT-----                                                                  | 25044 |
| Vaquita     | CCTAT- - - TCATGATAAAAATTCTCACTAACTAGAACAGAGGGGA- - - - - ACTTCAAC- TT- - - - GAC- - - - AAAGA                 | 20708 |
| Pig         | ----- GGATGGAAAGGAACTTGCTCAACTTGACAAAGAACATC- - - - TACCAGAA- - - - - AGACC- - CTAAAAA                         | 19156 |

| Majority    | - XXTAAX- A- - T- - - - X- AAGTCATXCTTATGATATTTAXCTCT- - - - - AACCCCTCTCACACTTAGX- T- - - - -   |       |
|-------------|--------------------------------------------------------------------------------------------------|-------|
|             | 28890      28900      28910      28920      28930      28940      28950      28960               |       |
| Human       | TCCTATTTATGTTCTCACCAGTAGTGCCTAGGAGTTCTTGCTGTTTCAGATCCCCACCAGCACTTGGCTAGGTATTTAAT                 | 25279 |
| PolarBear   | -----                                                                                            | 0     |
| Cow         | TTGCAGC- ACGC- - - - C- AGGCCTCCCTGTCCATCACCAACTCCCG- - - GAGTTCAGTCTCAGACTCAAGTC- - - - -       | 24181 |
| Dog         | - - - TAA- - - - - - - - AGTTATACATTTTATATTTGTCTCT- - - - - AATCCATCAGAAAATTA- - - T- - - - -    | 23831 |
| BelugaWhale | ACCCTAC- AGCT- - - - A- ACATCATATTAATGGTGAAGAACTCC- - - - - AACTTTTCTCATGAAGA- - - - -           | 20093 |
| Donkey      | GGACTGTGATGT- - - - GGACGTTATCCCTGTTGTATATATGAGGAAGTTAAGGCTTTGAATAGTTAATTTACCAGTTACA             | 24146 |
| Cat         | - - - TAA- - - - - - - - ATTAACGCCTCTTACATTTGTCTGT- - - - - AACCCATCAGAAAATTACTIONACTAT- - - - - | 26773 |
| Ferret      | GTCTGATCATAT- - - - A- TAATTGTGCTGTTTATTTTCTTT- - - - - GGCTATTCTCACACTGAGGTT- - - - -           | 23276 |
| Lion        | - - - TAA- - - - - - - - ATTAATGCCTCTGACATTTGTCT- - - - - AACCCATCAGAAAATTACTIONACTAT- - - - -   | 25091 |
| Vaquita     | ACCCTAC- AGCT- - - - A- ACATCATATAAATGGTGAAGAACTCC- - - - - AACTTTTCTCATGAAGA- - - - -           | 20763 |
| Pig         | ACAAACTIONAAAT- - - - G- ACGTCATATTGATGGTCAAGAACTC- - - - - AGCACTTTCTACTIONAAGA- - - - -        | 19212 |

Dienstag, 3. Mai 2022 08:38

| Majority    | TTTCTAGTXCTTGAXA- - - - TAGATAXAGC- XCXTXTTCACTTTTTTTCAACCTTCTCXTGXT- - XXXXATTACTTXCA |                                                                |                           |                 |       |       |       |       |   |
|-------------|----------------------------------------------------------------------------------------|----------------------------------------------------------------|---------------------------|-----------------|-------|-------|-------|-------|---|
|             | 28970                                                                                  | 28980                                                          | 28990                     | 29000           | 29010 | 29020 | 29030 | 29040 |   |
| Human       | TTCTTAATTTTTAAACAATTT-                                                                 | GGTGTGTAGTATATTCTCT                                            | GGTCTTCCTTTGTCTTACCCTGAT- | TATTAATGAGGTCTT | 25357 |       |       |       |   |
| PolarBear   | -----                                                                                  |                                                                |                           |                 |       |       |       |       | 0 |
| Cow         | TTTCGAGTCCGTGAT- - - - -                                                               | GCCATCCAGCCATCTCATCCTCTGTCGTCCCCTTCTCCTCCTGCCACCAATCCCTCCCA    | 24255                     |                 |       |       |       |       |   |
| Dog         | TTTTTGTATTATTGAAG- - - - -                                                             | TAGATAGGGATCCAATTTCTTTTTTTTTTTTTCTCCCTGTGTAGAGATAGCTAGTTAAA    | 23906                     |                 |       |       |       |       |   |
| BelugaWhale | - - TCAAGTACAAGGCA- - - - -                                                            | AGGATGTCCC- TCCTCACCACCTCTTTTCAACATCCTCCTGGA- - - - -          | ATTCCTTGCT                | 20159           |       |       |       |       |   |
| Donkey      | TACCTAGTAGGTGGAAGCTGGACTATAGAACCCTTTTGTTCCTTTTTAAAATTATTTTATTGAGGTCATATTGGCTTATA       | 24226                                                          |                           |                 |       |       |       |       |   |
| Cat         | TTTTTGTGTATTGTAT- - - - -                                                              | TAGATAGGGATCCAATTTCAATTTTTGT- GACCTTATAGAGATAACCAGTTAAATAAAA   | 26847                     |                 |       |       |       |       |   |
| Ferret      | TGTCTGTTCTTTTATT- - - - -                                                              | TTGTTTAAAACCTCAATTTTGTTCCTTTTATTGATCCTTTCAGTGTATCCTTGCCATCCGTA | 23351                     |                 |       |       |       |       |   |
| Lion        | TTTTTGTGTATTGTAT- - - - -                                                              | TAGATAGGGATCCAATTTCAATTTTTGT- GACCTTATAGAGATAACCAGTTAAATAAAA   | 25165                     |                 |       |       |       |       |   |
| Vaquita     | - - TCAAGTACAAGGCA- - - - -                                                            | AGGATGTCCC- TCCTCACCACCTCTTTTCAACATCCTCCTGGA- - - - -          | ATTCCTTGCT                | 20829           |       |       |       |       |   |
| Pig         | - - TCAAGTACAAGACA- - - - -                                                            | GACATCTAGC- ATCTCAGCACTTCTTTTCAACATTCTTTGGG- - - - -           | ATTCCTTGCT                | 19278           |       |       |       |       |   |

| Majority    | ATTGCAGTGAXATTTTCCXCAAXXT- - TA- - ATAGGTA- - - - TATATATGTXGGGGA- AAGGXATAGAA- XXGTAX- TTTXT |                                           |                                           |            |       |       |       |       |   |
|-------------|-----------------------------------------------------------------------------------------------|-------------------------------------------|-------------------------------------------|------------|-------|-------|-------|-------|---|
|             | 29050                                                                                         | 29060                                     | 29070                                     | 29080      | 29090 | 29100 | 29110 | 29120 |   |
| Human       | ACATCTTTTTTCCCCCACATTTATGGCCATGGATG- - - -                                                    | TTTCTCTTTTGTGAA- ATTCTGTTAAATGCCTATTTGTGT | 25432                                     |            |       |       |       |       |   |
| PolarBear   | -----                                                                                         |                                           |                                           |            |       |       |       |       | 0 |
| Cow         | GCATCAGAGTCTTTTCAGTGAG- - - - -                                                               | TCAGCTC- - - -                            | TTCGCATGAGGTGGCCAAAGTACTGGAGTTCAGCTTTAG   | 24324      |       |       |       |       |   |
| Dog         | ATTGCAGTGC- ATTTCTTCACAT- - TA- - -                                                           | TAGGTA- - - -                             | AATATGTGTTAGGGTGAAGGCTAAGTTACTGTAT- TAAA- | 23974      |       |       |       |       |   |
| BelugaWhale | GATGCAGTAAGGCAAGAAAAGGAAATT- -                                                                | AAAGGTA- - - -                            | TACAGATTGAGAAGG- AAGGTATAAAA- - - - -     | CTTGT      | 20224 |       |       |       |   |
| Donkey      | ACATTGTGTAATTTTGGGTGTACATTATTATATATCAGTTTCTGTATGTACTCCATCGTGCTCACCCTAATAGTCTAGT               | 24306                                     |                                           |            |       |       |       |       |   |
| Cat         | ATGGCAGTGCCATTTCTTCACAT- - TA- - -                                                            | CAGGTA- - - -                             | AATATGTGTTAGGGTGAAGGCTAAGTTACTGTAA- TAAAA | 26917      |       |       |       |       |   |
| Ferret      | GTCTGTATTT- ATTTATTTATTTATTTATTTACTTA- - - -                                                  | TTTATTTGACAGAGAGAGATCACAGAGGCAGGCA- GAGA- | 23424                                     |            |       |       |       |       |   |
| Lion        | ATGGCAGTGCCATTTCTTCACAT- - TA- - -                                                            | CGGTA- - - -                              | AATATGTGTTAGGGTGAAGGCTAAGTTACTGTAA- TAAAA | 25235      |       |       |       |       |   |
| Vaquita     | AATGCAGTAAGGCAAGAAAAGGAAATT- -                                                                | AAAGGTA- - - -                            | TACAGATTGAGAAGG- AAGGTATAAAA- - - - -     | CTTGT      | 20894 |       |       |       |   |
| Pig         | GATGCAGTAAAGCAAGAAAAGG- - - - -                                                               | AAAGGTA- - - -                            | TACAGATGGAGAAGA- AAAGTATAAAA- - -         | CCATTCTTGT | 19342 |       |       |       |   |

Dienstag, 3. Mai 2022 08:38

| Majority    | T X T A X X X C X T T G T A G A A G A C A T - - - - - X G X T A G T C T A T T T - A C A A X A T - C C A A X X C C X T X X - C T G A T X A - - T T T A T G       |       |       |       |       |       |       |       |       |
|-------------|-----------------------------------------------------------------------------------------------------------------------------------------------------------------|-------|-------|-------|-------|-------|-------|-------|-------|
|             | 29130                                                                                                                                                           | 29140 | 29150 | 29160 | 29170 | 29180 | 29190 | 29200 |       |
| Human       | T T T T - T G C T T G A T A A A A T G T G A G C T T A T - T A T T T A A C T G A T T T T G T A G T T T T A A A A A A T T G C T G G G G G C G G T G G C T T G C G |       |       |       |       |       |       |       | 25510 |
| PolarBear   | -----                                                                                                                                                           |       |       |       |       |       |       |       | 0     |
| Cow         | C A T C A T T C C T T C C A A A G A A C A C C C A - - - - G G G C T G A T C T C C T T C A G A A T G G A C T G G T T G G A T C T C C T T G C A G - - T C C A T G |       |       |       |       |       |       |       | 24398 |
| Dog         | T G C A G A A C A T T G T G G T A T A A A T - - - - - A G A C A A G T T T A T T T T T C A T A A G G C A A A G T C C - - - - - T C T T G G - T T T A A G         |       |       |       |       |       |       |       | 24039 |
| BelugaWhale | ----- T T G C A G A T G A C A T - - - - - G A T A G T C T A T G T - A C A A C A T - C C A A A A G A A T T G A C A A A A A A - T T T C A T G                     |       |       |       |       |       |       |       | 20283 |
| Donkey      | T T T T A T C C G T C A C C A T A C A T A T G T G C C C C T T T A C A A C C C T T T C G C C C G C A C T C C C A C T C C C T T C T C T G G T A A C C A C T A T C |       |       |       |       |       |       |       | 24386 |
| Cat         | T G C A G A A C A T A G T G G C A G A A A T - - - - - A G G C A A G T T T A T T T T C T C A T A A G C C A A A G T C C - - - - - T G C T G G - C T T A A -       |       |       |       |       |       |       |       | 26981 |
| Ferret      | G A G A G A G A G G N N N N N N N N N N N N - - - - - N N N N N N N N A T G C G G G A C T C A A T C C C A G G A C C C T G A G A T C A T G A - - C C T G A G     |       |       |       |       |       |       |       | 23495 |
| Lion        | T G C A G A A C A T A G T G G C A G A A A T - - - - - A G G C A A G T T T A T T T T C T C A T A A G C C A A A G T C C - - - - - T G C T G G - C T T A A -       |       |       |       |       |       |       |       | 25299 |
| Vaquita     | ----- T T G C A G A T G A C A T - - - - - G A T A G T C T A T G T - A C A A C A T - C C A A A A G A A T T G A C A A A A A A - T T T C A T G                     |       |       |       |       |       |       |       | 20953 |
| Pig         | T A T C A T G T C T T G T A G A T G A C A T - - - - - G A T A A C C T A T G T - A G A A C A T - T C A A A A G G A T C G A C A A A A A A A T T T C A T G         |       |       |       |       |       |       |       | 19411 |

| Majority    | T A - - - - - A X T G G T A T C A G T T T A T T C C A T G A X T G C - A X T T C A C G A G G T T A A T T T X T T - - T C T G - - - G A C T X A X T T T           |       |       |       |       |       |       |       |       |
|-------------|-----------------------------------------------------------------------------------------------------------------------------------------------------------------|-------|-------|-------|-------|-------|-------|-------|-------|
|             | 29210                                                                                                                                                           | 29220 | 29230 | 29240 | 29250 | 29260 | 29270 | 29280 |       |
| Human       | T C - - - - - T G T A A T C T C A G C T T T T T G G G A G G C T G A A G G A G G A G G A - - T T G C T T G T G G G G C C C A G G A G T T T G A G G C T           |       |       |       |       |       |       |       | 25578 |
| PolarBear   | -----                                                                                                                                                           |       |       |       |       |       |       |       | 0     |
| Cow         | G G - - - - - A C T C T C A A G A G T C T T C T C C A A C A C C A C - A G T T C A A A A G C A T C A G T T C T T - - - C G G - - - C A C T C A G C T T           |       |       |       |       |       |       |       | 24461 |
| Dog         | A A - - - - - A A T G G T A T C A G T C T G C T C C A T C A - G G T - T A T T C A - - - - - C T G - - - G G C C A A C T T T                                     |       |       |       |       |       |       |       | 24086 |
| BelugaWhale | T A - - - - - A C T G A T A A G T A G T T A T T G C A G G A T T G C - A G G G T A C A A G G T T A A T A T A T T A A T A G G - - - A A A G T A A A T T           |       |       |       |       |       |       |       | 20349 |
| Donkey      | T G T T C T C T T T A T C T A T G T G T T T A T C T T C C C C A T A T G A G T G A A A T C A T G T G G T G G T T G T C T T T C T C T G T C T G C C T T A T T T T |       |       |       |       |       |       |       | 24466 |
| Cat         | ----- A A T G G T A T C A G T T T G T T C C A T A A A G G T - T A T T C A C T A G G C C A G C T T C A T C T T G T G - - - G C T T C A T T A T                   |       |       |       |       |       |       |       | 27045 |
| Ferret      | C C - - - - - G A A G G C A G C G G C T T A A C C C A C T G - A G C - C A C C C A G G C G C C C C A - T G A G C C A C C C A - - - G G C G C C C C G T           |       |       |       |       |       |       |       | 23559 |
| Lion        | ----- A A T G G T A T C A G T T T G T A C C A T A A A G G T - T A T T C A C T A G G C C A G C T T C A T C T T G T G - - - G C T T C C T T A T                   |       |       |       |       |       |       |       | 25363 |
| Vaquita     | T A - - - - - A C T G A T A A G T A G T T A T T T C A G G A T T G C - A G G G T A C A A G G T T A A T A T A T T A A T A G G - - - A A A G T A A A T T           |       |       |       |       |       |       |       | 21019 |
| Pig         | G A - - - - - A C T G A T A A G T G A T T A T T G C A A G A T T G C - A G G G T A T G A G G T T A A A A T A - - - - - C A G - - - A A G T T A A - T T           |       |       |       |       |       |       |       | 19471 |

Dienstag, 3. Mai 2022 08:38

| Majority    | GCTTTACXGTATAAXTGTTGT- GTGCATGXXTAATTTGAXGATAAAX- CAAXATTXTGTTTXXXTTAGCACCCCC- - - AA    |       |       |       |       |       |       |       |       |
|-------------|------------------------------------------------------------------------------------------|-------|-------|-------|-------|-------|-------|-------|-------|
|             | 29290                                                                                    | 29300 | 29310 | 29320 | 29330 | 29340 | 29350 | 29360 |       |
| Human       | GCAGTGAGCTATGATCGTTCATTGCACTC- TAGCTTGGTGACAGAG- CAAGACTTTGTCTGAAAAAAAAAAAAAAAAAAAAA     |       |       |       |       |       |       |       | 25656 |
| PolarBear   | -----                                                                                    |       |       |       |       |       |       |       | 0     |
| Cow         | TCTTCACAGTCCAACCTCTCAC- ATCCATACACGACCACAGGAAAAAC- CATAGCCTTGACTAGACGGACCTTTGTTGGCA      |       |       |       |       |       |       |       | 24539 |
| Dog         | CTTTCA- - - - - TCTTGTTGC- TTCATTA- - - - - T- TTTTTAAGCTTTTGTGTTTGT- - - - -            |       |       |       |       |       |       |       | 24129 |
| BelugaWhale | GCTTTCTGTATAACAGTGGT- GAGCAAGTGCAATTTGAAATTA AAAACAAAATACAGTTTACATTAGCACCCCC- - - AA     |       |       |       |       |       |       |       | 20425 |
| Donkey      | GCTTGACATAATAACCCTCACAGTCCATCCATGTTGCTGCAAATGGGATGAGTGTCTTTTTTTTATGGCTTAGTCATTGT         |       |       |       |       |       |       |       | 24546 |
| Cat         | TTCCTAAGCTTTTGTCTTGT- CTGCATGGTTTGGTGATGTATAATTGTGCTGTCTTGTTTCATTTTTTTTCTTT- - - GA      |       |       |       |       |       |       |       | 27121 |
| Ferret      | AGTCTG- - - - - TATTTTTAT- TCGCTTGGATGAGTTAGTGCTTCCCCAAAGCTTCTGGTAGGTAGCTAGCACCC- - - AG |       |       |       |       |       |       |       | 23629 |
| Lion        | TACTAAGCTTTTGTCTTGT- CTGCATGGTTTGGTGATGTATAATTGTGCTGTCTTGTTTCATTTTTTTTCTTT- - - GA       |       |       |       |       |       |       |       | 25439 |
| Vaquita     | GCTTTCTGTATAACAGTGGT- GAGCAAGTGCAATTTGAAATTA AAAACAAAATACAGTTTACATTAGCACCCCC- - - AA     |       |       |       |       |       |       |       | 21095 |
| Pig         | GCTTTCTGTATATCAGTGAT- GAACAAGTGCAATTTGAAGTTAAAA- CAAAATACCATTTGCATTAGCACCCCC- - - AA     |       |       |       |       |       |       |       | 19546 |

| Majority    | AXXTTATCTXCTTXG- - TGTAAT- - - CTAXGAAXAT- - - - AXAAATAXXCTCT- - - - - XXATXAAGTT- - X- XXXTT |       |       |       |       |       |       |       |       |
|-------------|------------------------------------------------------------------------------------------------|-------|-------|-------|-------|-------|-------|-------|-------|
|             | 29370                                                                                          | 29380 | 29390 | 29400 | 29410 | 29420 | 29430 | 29440 |       |
| Human       | GTGTGTGTTTTACAGTTACTGATTGTCTTTTGGTTATTTGTGTTGCTGGTGTCTTTTCCCAGTTTGTAGCTTGCCTTGTC               |       |       |       |       |       |       |       | 25736 |
| PolarBear   | -----                                                                                          |       |       |       |       |       |       |       | 0     |
| Cow         | AAGTAATGTCTCTGCT- TTTCAATATGCTATCTAGGTT- - - GGTCATAACTTTT- - - - - CTTCCAAGGAGTAAGCGTT        |       |       |       |       |       |       |       | 24608 |
| Dog         | - - - - TGTCTGTGTGG- - - - - T- - - CTGATAATAG- - - - ATAATTGTAATC- - - - - TCTGTTTTTATTTTT    |       |       |       |       |       |       |       | 24178 |
| BelugaWhale | ATTTGAAAATCTTAGG- TATAAAT- - - CTAACAAAAT- - - - ACATATAAGATCT- - - - - ACATGAGGAC- - - - -    |       |       |       |       |       |       |       | 20481 |
| Donkey      | CCGTTGTGTATATACACTGTATCTTCTTTATGCATTTATCAGTTGATGGGCTCTTGGGTTGCTTCCATGTCTTCGCTGTT               |       |       |       |       |       |       |       | 24626 |
| Cat         | TCATTCTCAACCTGA- - GGTTTGT- - - CAAGGACACC- - - - AGGAATAGTCATG- - - - - TGAGTGAGTTCCTTCTTT    |       |       |       |       |       |       |       | 27185 |
| Ferret      | AGCATGTCTCCTTGGC- AGCACCT- - - CTATGTTTAA- - - - AGAAATACTCAC- - - - - TGAGTACCTGCTTTT         |       |       |       |       |       |       |       | 23689 |
| Lion        | TCATTCTCAACCTGA- - GGTTTGT- - - CAAGGACACC- - - - AGGAATAGTCATG- - - - - TGAGTGAGTTCCTTCTTT    |       |       |       |       |       |       |       | 25503 |
| Vaquita     | ATTTGAAAATCTTAGG- TATAAAT- - - CTAACAAAAT- - - - ACATATAAGATCT- - - - - ACATGAGGAC- - - - -    |       |       |       |       |       |       |       | 21151 |
| Pig         | AATTGAAGTGCTTAAG- TGTAAT- - - CTAAAAAGGT- - - - GTATATAAGATCT- - - - - ACATGAGGAA- - - - -     |       |       |       |       |       |       |       | 19602 |



Dienstag, 3. Mai 2022 08:38

| Majority    | ----- TXACTATATAG----- CTTTTATCATXAACTXCA----- TXGGA--- AXCCTTAXACXTA---         |       |       |       |       |       |       |       |       |
|-------------|----------------------------------------------------------------------------------|-------|-------|-------|-------|-------|-------|-------|-------|
|             | 29450                                                                            | 29460 | 29470 | 29480 | 29490 | 29500 | 29510 | 29520 |       |
| Human       | ACTTCTTTATGCTGTCTTGTCTGTCTGTCTGTCTGTCTCCCTCCCTCCCTCCCCCTCCCTCCGTCCGTCTGTCCCTCCC- |       |       |       |       |       |       |       | 25815 |
| PolarBear   | -----                                                                            |       |       |       |       |       |       |       | 0     |
| Cow         | ----- TTTTAATTTT CAGGG----- CTGCAGTACCATCTGCAGTGATTTTGGA--- GCCCCCAAAAATA---     |       |       |       |       |       |       |       | 24664 |
| Dog         | ----- T- T----- CTCTTTTGAT----- T----- ATTCTCACACC-----                          |       |       |       |       |       |       |       | 24202 |
| BelugaWhale | ----- AACTACAAAA----- CTTTGATAAATGAAACCAA----- AGA--- ACCAA-ATAAATG---           |       |       |       |       |       |       |       | 20525 |
| Donkey      | GTGAATGATGAACATATGGGTGCATAAATTTCTTGTATTATTGATTTTCATGTTCTTTGGAAAAATACCCAGTGATAGGG |       |       |       |       |       |       |       | 24706 |
| Cat         | ----- TGAAAATCTAG----- TTTTTCTCAGGAACTTG----- TTGGC--- ATCCTTGCCCC- A---         |       |       |       |       |       |       |       | 27230 |
| Ferret      | ----- C- TGAGAATCTAG----- CTTTTCTCATGTACTTGATGTTGGTTGGC--- ATCCTTGCCCCA---       |       |       |       |       |       |       |       | 23743 |
| Lion        | ----- C- TGAAAATCTAG----- TTTTTCTCAGGAAATTTGATG--- TTGGC--- ATCCTTGCCCC- A---    |       |       |       |       |       |       |       | 25552 |
| Vaquita     | ----- AACTACAAAA----- CTTTGATAAATGAAACCAA----- AGA--- ACCAA-ATAAATG---           |       |       |       |       |       |       |       | 21195 |
| Pig         | ----- AACTATAAAA----- CTCTGATGAACAAAACCAG----- AGA--- ACCAAAATAAATG---           |       |       |       |       |       |       |       | 19647 |

| Majority    | TGGCTTGAT--- ATXCTGTTTTXCATCXTT----- CCAGAAAACCTCXTTTTTTGTGXAGATXTCAGTXCTXCAAXATTT   |       |       |       |       |       |       |       |       |
|-------------|--------------------------------------------------------------------------------------|-------|-------|-------|-------|-------|-------|-------|-------|
|             | 29530                                                                                | 29540 | 29550 | 29560 | 29570 | 29580 | 29590 | 29600 |       |
| Human       | TCCCTCCCTCCCTCCCTCCCTCCCTCCCT----- CCCTCCCTTCTTCCCTTCTTCCCTTCTTCCCTTCTTCCCTACTTTACTT |       |       |       |       |       |       |       | 25889 |
| PolarBear   | -----                                                                                |       |       |       |       |       |       |       | 0     |
| Cow         | AAGTCTGAC--- ACT-- GTTTCCACTGTT--- TCCCCATCTATTTCCCATGAAGTGATGGGACCAGATCTTCATTTTTT   |       |       |       |       |       |       |       | 24735 |
| Dog         | --- CTGAGG--- TTGTTCTTTTCTGTTTT--- T- TTTTAAAAACTCGCTTTTTGGTGGG--- GGTCCCGGGGTGCAG   |       |       |       |       |       |       |       | 24266 |
| BelugaWhale | TGGATAGAT--- ATTCCACGTTTCATGGAT----- AGGAAGACTCAGTATTGTTAAGATGTCAGTTCTTCTGAAATT      |       |       |       |       |       |       |       | 20593 |
| Donkey      | TAGCTGGATCATATAGTGTTTTTATTTTAAATTTGTTGAGAAATCTCCATACTGTTTTCCATAGTGGCTGTACCAGTTTG     |       |       |       |       |       |       |       | 24786 |
| Cat         | TGACTTTCT--- GTCGTGGTTCCTTCT----- CCAGAAAAGAAAGTCTTCGGGCAGTTCTTAGTCCTGAAACCTGG       |       |       |       |       |       |       |       | 27298 |
| Ferret      | TGACTTTGG--- GTCATGGTTCCTTCTC--- T- CCAGAAAAGAAAGTCTTTGGGCAGTTCTCAGTCCTGAAACCTAA     |       |       |       |       |       |       |       | 23814 |
| Lion        | TGACTTTCT--- GTCGTGGTTCCTTCTT--- T- CCAGAAAAGAAAGTCTTTGGGCAGTTCTTAGTCCTGAAACCTGG     |       |       |       |       |       |       |       | 25623 |
| Vaquita     | TGGGTAGAT--- ATTCCACGTTTCATGGAT----- AGGAAGACTCAGTATTGTTAAGATGTCAGTTCTTCTGAAATT      |       |       |       |       |       |       |       | 21263 |
| Pig         | TGGGTAGAT--- ATTC- ATGTTTCATGGAT----- AGGGAGACTCAATGTGGTCAAGATGTCAGCTCTTCCCAAATT     |       |       |       |       |       |       |       | 19714 |

Dienstag, 3. Mai 2022 08:38

| Majority    | CAGAGCC- - GXXATTTTAGTCAAX- - - TTXAGTCCCTGTTAATXTXCAGCAXG- - - TTGXTAGXTXXTGTGXGATCTT      |       |       |       |       |       |       |       |       |
|-------------|---------------------------------------------------------------------------------------------|-------|-------|-------|-------|-------|-------|-------|-------|
|             | 29610                                                                                       | 29620 | 29630 | 29640 | 29650 | 29660 | 29670 | 29680 |       |
| Human       | TAGATT CAGGGTTACATGTGCAGGTTTGTACATGGGTATATGGCATGAAGCTGAGG- - TTTGCAATACAAGTGATCCTG          |       |       |       |       |       |       |       | 25967 |
| PolarBear   | -----                                                                                       |       |       |       |       |       |       |       | 0     |
| Cow         | GAAAGTT- - GAGTTTT CAGCCAAC TTTT CACTCTCCTCTTTAACCTTCATCAAGAGGCTTTTTAGTTCTTCTTCACTTT        |       |       |       |       |       |       |       | 24813 |
| Dog         | CAGCGT- - - - - ATTT CAGAGCGC- - - CTAGGCCGCGGCCAG- - - - - GGGCCGATCCTGGAGACACG            |       |       |       |       |       |       |       | 24320 |
| BelugaWhale | GA- - - - - TATATAAATT CAG- - - TGCAGTCCCAGTCAA AATTCCAGCAAG- - - TAGTTA- - - - TATGGATGTC  |       |       |       |       |       |       |       | 20651 |
| Donkey      | CATTCCCACCAGCAGTGTACCAAGGA- - TTCCCTCTTTGCATCTTCTCCAACATTTGTTGTTTTTGTCTTGTTAATTGT           |       |       |       |       |       |       |       | 24864 |
| Cat         | CAGAGCCCAGG- ACTCTTGT CAGT- - - CTCAGCCTCCAGT TACT- - - GCTCGCCTTCTGGTAGTTTCAGCAGCTCTT      |       |       |       |       |       |       |       | 27369 |
| Ferret      | CAGAGCCCAGGGACTCTAGTCAAC- - - CTACCTCAGTGTTCAGTTCTTGCTTGCCTTCTGGGTAGCTTCAGCAGGCCTT          |       |       |       |       |       |       |       | 23890 |
| Lion        | CAGAGCCCAGG- ACTCTTGT CAGC- - - CTCAGCCTCCAGT TATT- - - GCTTGCCTTCTGGTAGTTTCAGCAGCTCTT      |       |       |       |       |       |       |       | 25694 |
| Vaquita     | GA- - - - - TATATAAATT CAG- - - TGCAGTCCCAGTCAA AATTCCAGCAAG- - - TAGTTA- - - - TATGGATGTC  |       |       |       |       |       |       |       | 21321 |
| Pig         | GA- - TCT- - GATCTATAGATTAAA- - - TGAAATTCCAGTAAAAATTCCAGCAAG- - - TTTTTA- - - - TGTGCGTATG |       |       |       |       |       |       |       | 19777 |

| Majority    | A- AC- CTGAGAGTGATGTAAGGTA CTTATA- GGAXAXGTXAAAA- - - - ACCCAGXAAXX- - - - - A- - XTT          |       |       |       |       |       |       |       |       |
|-------------|------------------------------------------------------------------------------------------------|-------|-------|-------|-------|-------|-------|-------|-------|
|             | 29690                                                                                          | 29700 | 29710 | 29720 | 29730 | 29740 | 29750 | 29760 |       |
| Human       | TCAGCCAGAGAGTGAGCTCAGTACCCAACAGTTAGATTTACAATCCTTTCTCCCTCCCCC- - - - - ACCACTAGTTCC             |       |       |       |       |       |       |       | 26040 |
| PolarBear   | -----                                                                                          |       |       |       |       |       |       |       | 0     |
| Cow         | ATGCCATAAGGGTGGTGT CATCTGCATATCTGAGGTTATTGATATTTCTCCCTGCAATCTTGATTCCAGCTTGTGCTTCT              |       |       |       |       |       |       |       | 24893 |
| Dog         | GGAT- CGGAATCCCACGTCAGGGCCTC- - - - - TCCCTT                                                   |       |       |       |       |       |       |       | 24352 |
| BelugaWhale | A- - - - ACAAGCTGATTCTGAAATTTATAT- - GGAAAAGCAAAAAG- - - - ACCCAGAAAGCC- - - - -               |       |       |       |       |       |       |       | 20701 |
| Donkey      | AGCCATTCTGACAGGTGTAAGGTGATAGCTCATTGTAGTTTTTATTT- GCATTTCCCTAATAGTGATGTTGCACATCTTT              |       |       |       |       |       |       |       | 24943 |
| Cat         | CCAC- CTGGGAGTGATGGATGGTACTTGGATTGTA CTATTATGATGA- ACATAATACCTAATAATAAAAATTAAAAAATT            |       |       |       |       |       |       |       | 27447 |
| Ferret      | CTAC- CTGGGAGTGGTAGATGGTACTTAGA- - - - - AACCTT                                                |       |       |       |       |       |       |       | 23925 |
| Lion        | CCAC- CTGGGAGTGACGAATGGTACTTGGATTGTA CTATTATGATGA- ACATAATATCTAATAATAAAAATTTAAAAAATT           |       |       |       |       |       |       |       | 25772 |
| Vaquita     | A- - - - ACAAGCTGATTCTGAAATTTATAT- - GGAAAAGCAAAAAG- - - - ACCCAGAAAGCC- - - - -               |       |       |       |       |       |       |       | 21371 |
| Pig         | A- - - - ATGAATGGATTCTAAAGTATATATATGGAGAAGCAAAAAG- - - - ACCCCGGAAT- - - - - AGC- - - - - C- - |       |       |       |       |       |       |       | 19831 |

Dienstag, 3. Mai 2022 08:38

| Majority    | TCAAXCACAGTATTGA- GGATAAATAXX- TTTXX- AAA- GTTTXGTA CTXATGCX- XT- T- TACXCCCTTTTCXTTXXT     |       |
|-------------|---------------------------------------------------------------------------------------------|-------|
|             | 29770 29780 29790 29800 29810 29820 29830 29840                                             |       |
| Human       | CAGTGCATATTGTTGC- GGATTAATACAGATTCTTAAT- - GTATAGTTTTAATGTGGCCACAAATTCCTTTGCATCTTA          | 26117 |
| PolarBear   | -----                                                                                       | 0     |
| Cow         | TCTAGCCCAGTGTTTCTCATGATGTACTCTGCATAGAA- GTTAAAGAAGCAGGGTGACAGTATACAGCCTTGATGTACTC           | 24972 |
| Dog         | TCATGGGCCTATCTC- - - - TTCTCCATTCCTTGC- - - - - TTTCTCTCCTTCTGCCTCTGCCTGTGTCCCTTACCTCTCT    | 24422 |
| BelugaWhale | - - - AACACAGTATTGAAGGAGAATAAC- - - - - AAA- GTTGGAGGACTGATGC- - - - - CACTCAACTTCCAAG- - - | 20759 |
| Donkey      | TCATGTGCCTCTTGGCCATCTGTATATCTTTGGAAAAATGTTTCATATCCTCAGTCCACTTTTTGACTGGGTTGTTTTGTT           | 25023 |
| Cat         | TCAAATACTGGAATGATTGTAAAATGTCATTTAAATGT- GCTTTTATACTTAATCCTATATGTTTATGCTTATTTTTTCT           | 27526 |
| Ferret      | TCAAGTACTGGAATA- - - - TAAAACGTCATTTAA- - - - - TTTTTCTGCTCATACTATTTTCTACACCTATTTTTTTCT     | 23995 |
| Lion        | TCAAATACTGGAATGATTGTAAAATGTCATTTAAATGT- GCTTTTATACTTA- TCCTATGTGTTTACGCTTATGTTTTCT          | 25850 |
| Vaquita     | - - - AACACAGTATTGAAGGAGAATAAC- - - - - AAA- GTTGGAGGACTGATGC- - - - - CACTCAACTTCCAAG- - - | 21429 |
| Pig         | - - - AACACAGTACTGAAGGAAAAGAAC- - - - - AAA- GTTGGAGGACTGATGT- - - - - TACTAATTTTTCAAGCTC   | 19892 |

| Majority    | XTT- - ATTTAATTTGTAT- - - - - CTAX- - - - - XXAGTAXTT- - - - TCATGAXTG- - - - - X- X- TATGATTATTGXTX |       |
|-------------|------------------------------------------------------------------------------------------------------|-------|
|             | 29850 29860 29870 29880 29890 29900 29910 29920                                                      |       |
| Human       | GATAAAAATAATTTATATGA- - - TCCCATTCCTTACACATTCCAAATTTTCTTTGCTCTTCTGGACATCTTCCATGTTG                   | 26194 |
| PolarBear   | -----                                                                                                | 0     |
| Cow         | CTT- - TTCCTATTTGGAA- - - - - CCAG- - - - - TCTGTTGTT- - - - CCATGTCCAG- - - - - TTCTAACTGTTGCTT     | 25026 |
| Dog         | CTC- - - - - TC- - TCTC- - - - TCTCTCTGG- - - - - GTGTGTTG- TGACTACAT                                | 24457 |
| BelugaWhale | - - - - - ATTTAGTATGAAG- - - - - ATA- - - - - CAGTGAT- - - - - CATGACAG- - - - - TGTGGTTTTGGTGA      | 20804 |
| Donkey      | GTTGTTGTAAAGTTGTATGAGTTCTTTATATATTTTGGAAATTAACCCCGTGTGAGATACATGATTTGCAAATATTTTCT                     | 25103 |
| Cat         | TTGACGTATAAGTTGTAT- - - - - CTTTCCATGTTAGCATT- - - - - TTCTGATTGTTTT- TGTGGGATACTAATTTCTC            | 27594 |
| Ferret      | TTTACATGCAGATTGTAT- - - - - CTTTGCATATTAACATT- - - - - TCCTGATTT- - - - - GTGGGATGTTCACTTCTC         | 24058 |
| Lion        | TTGACGTATAAGTTGTAT- - - - - CTTTCCATGTTAGCATT- - - - - TTCTGATTGTTTT- TGTGGGATACTAATTTCTC            | 25918 |
| Vaquita     | - - - - - ATTTAGTATGAAG- - - - - ATA- - - - - CAGTGAT- - - - - CATGACAG- - - - - TGTGGTTTTGGTGA      | 21474 |
| Pig         | AAG- - ATTTAATATGAAG- - - - - CTA- - - - - CGGTAAT- - - - - CAAGACTG- - - - - TCTGATTTTGGTGA         | 19940 |

Dienstag, 3. Mai 2022 08:38

| Majority    | AAGAATAGXXAATTTGATCT- - - - - AAGAAACAGATTAXATXGTCAXGXATTA AAAAGCXCXTCATAAA- - - - - TAT    |       |
|-------------|---------------------------------------------------------------------------------------------|-------|
|             | 30000                                                                                       |       |
| Human       | ATTGCTGGAAGTCTTGAAGG- - - - - CAATCCCAAATAACAGTTTTTGTCTTTTCAACTGTTGCTGTGATACGGTTTTCTT       | 26268 |
| PolarBear   | - - - - -                                                                                   | 0     |
| Cow         | CCTGACCTGCATATAGGTTTCTC- - - AAGAGGCAGGT CAGGTGGTCTGGTATTCCCATGCCTTT CAGAAC- - - - - TTT    | 25096 |
| Dog         | AAAAAAAAAAAAAATTA AAAAAAAAAAAAAAAAAAAAAAAAAAAAAAAAAAAAAA CAAAAAAAAAGAAAAAAAAAA- - - - - AAC | 24530 |
| BelugaWhale | AAGAATAGACAGGTTGATCA- - - - - GTGAAACAGAATGGAGAGCCCAGAATAGAGCCCCCCCCCATAAA- - - - - TAT     | 20871 |
| Donkey      | CCTAGTAGGTTGGGTTG- TCTTTTT- - GTTTTGTTCATGGTTTTCTCTGCCATGCCGAAGCTTTTTTAGTCTGATGTAGTCC       | 25180 |
| Cat         | ATGAAATGGTCATT- - - - - ATA- - CAGGAAAAAGTTTTCTGTGGTCAGATTTTAAAAAGCACGTCAATGCGTATCTTAAC     | 27666 |
| Ferret      | ACGAAATGGTTATTTTTATTACACAGGAGAAAAAGTTTTCTGTGGTCAGATTTTAAAAGGGACATCAGTGTCTATCTTAAT           | 24138 |
| Lion        | ATGAAATGGTCATT- - - - - ATA- - CAGGAAAAAGTTTTCTGTGGTCAGATTTTAAAAAGCACGTCAATGCGTATCTTAAC     | 25990 |
| Vaquita     | AAGAATAGACAGGTTGATCA- - - - - GTGAAACAGAATGGAGAGCCCAGAATAGAGCCCCCCCCCATAAA- - - - - TAT     | 21541 |
| Pig         | AAGAATGGACAATTTGATCT- - - - - ACGAAACAGATTAGAGAGCCCAGAAT- - - AGAGCCCTCCATAAA- - - - - TAT  | 20004 |

| Majority    | ACTCAATTTATTTTTGX- - XA- - XA- TCTAAGXTTAATTGACATXCATCTTAGCXGAGXTAX- - - T- AXXAX- - - TXTCT |       |
|-------------|----------------------------------------------------------------------------------------------|-------|
|             | 30080                                                                                        |       |
| Human       | ATAGAGATTTTTGTAGTAGAATTTATCAGTATTTTTCTTTCATGTTTCAGTTTTCTTGTGTCTTAATTTAAAAATCCTTACA           | 26348 |
| PolarBear   | - - - - -                                                                                    | 0     |
| Cow         | CCACAG- TTTCTTGTGATCCACACAGTCAAAGGTTTTGGCATAGTCAATAAAGCAGAAATAGATGTTTTTCTGGA ACTCT           | 25175 |
| Dog         | ACTCATCTTGTTTTT- - - - - TTTATTAATAATTGTTAGTGGTAATCATTGGCAAC- - - - - CCAATAGTCTTATTT        | 24596 |
| BelugaWhale | AGTCAACTTATTTTTGA- - - - - CAAAGG- - - - - A- - - - - GCAAAGGTAG- - - - - TCT                | 20908 |
| Donkey      | CATTTGTGTATTTGTTTTCTTTTATTTCTTTTCTGAGTAGACATGGTATTCGAAAAGATG- - TACTGCCTGTATTTTCT            | 25258 |
| Cat         | ACTTCATTTCTTTT- - - - - AACGGAATCTAAAATTAATTGACATCCATCTTAGATGAATTAATTATAAAAAATATGTATTT       | 27741 |
| Ferret      | ACTTAATTTCTTTTT- - - AATTGAATCTACCATTACTT GACATCCATCTTAGGTGAATTT- - - - TGAGAATACCTATTT      | 24211 |
| Lion        | ACTTCATTTCTTTTTT- - - AACGGAATCTAAAATCAATTGACATCCATCTTAGATGAATTAATTATAAAAAATATGCATTT         | 26068 |
| Vaquita     | AGTCAACTTATTTTTGA- - - - - CAAAGG- - - - - A- - - - - GCAAAGGTAG- - - - - TCT                | 21578 |
| Pig         | AGTCAT- TTATTTTTGA- - CAGAGGCTCAAAGGCAATACAGCGG- - AACAAAGCAAAGATAG- - - - - TCT             | 20064 |



Dienstag, 3. Mai 2022 08:38

| Majority    | AAATAAACTXAAC- - XXXCAGXAXAGAT- - GTAAAXATTAATGTAAAGCTA- - - XAXACAATTAXXAGATXAGGXAAX           |       |       |       |       |       |       |       |       |
|-------------|-------------------------------------------------------------------------------------------------|-------|-------|-------|-------|-------|-------|-------|-------|
|             | 30250                                                                                           | 30260 | 30270 | 30280 | 30290 | 30300 | 30310 | 30320 |       |
| Human       | TAATGACTTTTTCA- - - TATTACAGGTATATATATCGTAAGGCCAAAGGCTG- - - - AAAAAACTATCATAACAA- - - AA       |       |       |       |       |       |       |       | 26574 |
| PolarBear   | -----                                                                                           |       |       |       |       |       |       |       | 0     |
| Cow         | AGATGAGTGCAATT- GTGCGGTAGGGATATGTATATGTTAG- TGTAAAGTCT- - - - AAGCCACTGTAACAAAATGCAAA           |       |       |       |       |       |       |       | 25399 |
| Dog         | TGTTATACTCTTCT- GGCCAGCATTAT- - GTGT- - - - GATTTTAATTCATG- - TGTGAAATTATTTGAGTGGATA- -         |       |       |       |       |       |       |       | 24805 |
| BelugaWhale | AAATTAACCTCAA- - ATGGATCATAGACC- - TAAATATAGAATGCAGAACTAT- - AAAACTTTTAGAAGATAAGGTAAG           |       |       |       |       |       |       |       | 21053 |
| Donkey      | GTATGTTCTTGGCTCCATTGTGCAAGATTTGCTGTCCCTAGATATGTGATTTTATTTCTGGGCTTTTCAGTACTGTTCCAT               |       |       |       |       |       |       |       | 25498 |
| Cat         | AAATAAAATTGTCC- TATCAGTTAATGT- - GGAAACATTAACGTTATTAGTAC- - TATAGAATCACTTATTTTGGGCAT            |       |       |       |       |       |       |       | 27959 |
| Ferret      | AGACAGAGATCACA- AGCAGGCAGAGAG- - GCAGACA- - GAGAGGAAGGGAAA- - CAGGCGCCCTGTAGAGCAGAGAAC          |       |       |       |       |       |       |       | 24430 |
| Lion        | AAATAAAATTGTCC- TATAAGTTAATGT- - GGAAACATTAATGTTATTGGTAC- - TATAGAATCACTTATTTTGGGCAT            |       |       |       |       |       |       |       | 26286 |
| Vaquita     | AAATTAACCTCAA- - ATGGATCATAGACC- - TAAATATAGAATGCAGAACTAT- - AAAACTTTTACAAGATAAGGTAAG           |       |       |       |       |       |       |       | 21732 |
| Pig         | AAATTAACCTCAA- - - - - GGT- - GGAT- - - CACAGACTAGATGTAAAGT- - - - - - - - - - - GCGAAAT- - AAG |       |       |       |       |       |       |       | 20181 |

| Majority    | AGAAGAAGTAGGTGG- TTAXATAXX- TXXAAGXTXTXTTTTTTAGXX- - - XAX- X- TAXAACTTTAATTAAX- - - - - - T |       |       |       |       |       |       |       |       |
|-------------|----------------------------------------------------------------------------------------------|-------|-------|-------|-------|-------|-------|-------|-------|
|             | 30330                                                                                        | 30340 | 30350 | 30360 | 30370 | 30380 | 30390 | 30400 |       |
| Human       | TGCAGAATATGGTGGCATAAATAAAAGAGTTTTTTTTGTTTCTTTTTCTGTGCATAGCAGAAGTCCTGTTGGTATAAGAAAG           |       |       |       |       |       |       |       | 26654 |
| PolarBear   | -----                                                                                        |       |       |       |       |       |       |       | 0     |
| Cow         | TGAAGAACATAGTGGCATAAATAGCCTAGAAGTTTATTTTTTCATAA- - - AAGTCCTGCAACTGTAAGAAAAT- - - GGTAT      |       |       |       |       |       |       |       | 25473 |
| Dog         | TGGATGATTAAGCCG- CCACACAAATATAAGCATTTTTTTAAAACC- - - AAGTAGACAAGACTTGGCCAATT- - - CCATT      |       |       |       |       |       |       |       | 24878 |
| BelugaWhale | AGAAGATCTAGATGAGTTGGGTAT- - - - AAAGATGTCTTTTTAGG- - - - - - - TACCACACCAAAGA- - - - - - -   |       |       |       |       |       |       |       | 21108 |
| Donkey      | TGATATACGTGTCTGTTTTGTGCCAGTACCATGCTGTTTTGATGACTGTAGCTTTGTAGTATATTTTGAAGTCAGCGAT              |       |       |       |       |       |       |       | 25578 |
| Cat         | AGTAGTGGTAAGCTT- - TATATTCAGTGGAAAAGCCAACATAACTT- - TAAAAAAAAATTTTTTTTTTAATGTTTATTTT         |       |       |       |       |       |       |       | 28034 |
| Ferret      | CCAATGCAGAGCTTGATCCCAGGACCCTGGGGTCATGACTTGAGCT- - - GAAGGCAGAGGCTTTAACCCACTGAGCCACC          |       |       |       |       |       |       |       | 24507 |
| Lion        | AGTAGTGGTAAGCTT- - TATATTCAGTGGAAAAGCCAACATAACTT- - TAAAAAAAAATTTTTTTTTTAATGTTTATTTT         |       |       |       |       |       |       |       | 26361 |
| Vaquita     | AGAAGATCTAGATGAGTTGGGTAT- - - - AAAGATGTCTTTTTAGG- - - - - - - TACCACACCAAAGA- - - - - - -   |       |       |       |       |       |       |       | 21787 |
| Pig         | AGAAAATCTAGATGACTTAGGTA- - - TAAAAGGTATCTTTTTAGA- - - - - - - TGCAACACCAAAGA- - - - - - -    |       |       |       |       |       |       |       | 20237 |



Dienstag, 3. Mai 2022 08:38

| Majority    | - AAXATCAAGGGCTT- A- X- - - XTTAGTCAA- - - - - AXTATACAAATAATTTTXXXXAAAT- - - - - TATTTAATAATAT |       |       |       |       |       |       |       |       |
|-------------|-------------------------------------------------------------------------------------------------|-------|-------|-------|-------|-------|-------|-------|-------|
|             | 30570                                                                                           | 30580 | 30590 | 30600 | 30610 | 30620 | 30630 | 30640 |       |
| Human       | GTATTTTCATTGTCTTTTTTTTTTAAAGTCAGCTTTTGATTTTACTGATCCTCTTCATTGTACCATTGTTTTCTCTATTTT               |       |       |       |       |       |       |       | 26890 |
| PolarBear   | -----                                                                                           |       |       |       |       |       |       |       | 0     |
| Cow         | AAAAATCAAAAGCTTGA- TTTTATTGATCCT- - - - - CTTTTGTGTGTCATTGTTAAATT- - - - - TATTTTGTATTTT        |       |       |       |       |       |       |       | 25688 |
| Dog         | TACTTCAGTAGATCTAA- GA- - T- - - - - ATCTCACTCCTCATCTCCAGAAT- - - - - TACATGAATCCAC              |       |       |       |       |       |       |       | 25057 |
| BelugaWhale | - - - - AATAAGGGCT- - - - - GTTATCCAA- - - - - AATATACAAAAAACTTTTAAACT- - - - - CAGC- AATAAGAA  |       |       |       |       |       |       |       | 21217 |
| Donkey      | TAATATGGATGTTTTAACTATGTTTAGTCTT- - - - - CTAATTCTTGAACATGGAATATCT- - - TTCCATTTGTTTATTT         |       |       |       |       |       |       |       | 25809 |
| Cat         | GACGCTCA- CCGACTGA- GC- - CACCCAGGC- - - - - ACCCCATAACTTTTTTTAAAAATA- - - ATGTTTATAAACATAT     |       |       |       |       |       |       |       | 28247 |
| Ferret      | TAGAATGGTGAGCTTTA- TA- - CTCACTGGA- - - - - AAGACCAACATAATTTAAAAAAA- - - - - TGTTTATAAACAT      |       |       |       |       |       |       |       | 24709 |
| Lion        | GACGCTCAACCGACTGA- GC- - CACCCAGGC- - - - - ACCCCATAACTTTTTTTAAAAATA- - - ATGTTTATAAACATAT      |       |       |       |       |       |       |       | 26581 |
| Vaquita     | - - - - AATAAGGGCT- - - - - GTTATCCAA- - - - - AATATACAAAAAACTTTTAAACT- - - - - CAGC- AATAAGAA  |       |       |       |       |       |       |       | 21896 |
| Pig         | - AAAACGGTGGGCT- - - - - GTTAGCCAA- - - - - AATATATGTAGAATTTTTTAAA- - - - - AATTAGCAGTAA        |       |       |       |       |       |       |       | 20429 |

| Majority    | TATAAGTAGXXTTAGTAAAXATATCA- AXAATTTTAAATA- - TAGATATTTTACAX- - - - - GACACGATTTTCAAXG        |       |       |       |       |       |       |       |       |
|-------------|----------------------------------------------------------------------------------------------|-------|-------|-------|-------|-------|-------|-------|-------|
|             | 30650                                                                                        | 30660 | 30670 | 30680 | 30690 | 30700 | 30710 | 30720 |       |
| Human       | TATTGGTTGCGTGAGTCAGGGCTTTTGCAAGTCTTTAATAGGTAGGTGGTATTTCAGTCCACTTCTTCATCATCTTGGTGG            |       |       |       |       |       |       |       | 26970 |
| PolarBear   | -----                                                                                        |       |       |       |       |       |       |       | 0     |
| Cow         | TATTGGTTGTGTGAGTTTGTGCTCTC- ATGGTGTTTCAAGCAGGTAGATTCCTCTCT- T- - - - - CGTGAATCTTCAAAG       |       |       |       |       |       |       |       | 25759 |
| Dog         | TGGAGGAAGGAGAGGAAGGATTTTTG- AATTTTTATATTTTTTTTTGTTTTTACT- C- - - - - AACACAAACATCCTAA        |       |       |       |       |       |       |       | 25128 |
| BelugaWhale | AACAAACCG- ATTAGGAAATAGACCA- AGGAACCTAAC- - - - - AGACATCTCACC- A- - - - - AAGAAGATATACAGA-  |       |       |       |       |       |       |       | 21281 |
| Donkey      | CTTTGATTTCTTTCAATAACGTGTT- - GTAGTTTTTATTGTATAGGTCTTTCACC- TCCTGGGTGAAATGTATTCCAAGA          |       |       |       |       |       |       |       | 25886 |
| Cat         | TTTCAGTAATTTTGGTAAAAATATCA- AGAATTGCAAATAATTTTATATTCTACT- - - - - GACTCTGTTATGAAGG           |       |       |       |       |       |       |       | 28317 |
| Ferret      | TTTCAGTAGTTTTGGTAAAAATATCT- AGAATTGCAAATAACTTGATATTCTGCT- - - - - GACTCAGATATGAAGG           |       |       |       |       |       |       |       | 24779 |
| Lion        | TTTCAGTAATTTTGGTAAAAATATCA- AGAATTGCAAATAATTTTATATTCT- - - - - GACTCTGTTATGAAGG              |       |       |       |       |       |       |       | 26648 |
| Vaquita     | AACAAACCG- ATTAGGAAATAGACCA- AAAAAGCTAAC- - - - - AGACATCTCACC- A- - - - - AAGAAGATATACAGA-  |       |       |       |       |       |       |       | 21960 |
| Pig         | GAAAACCTCG- ATTAGGAAATGAACCA- AAGGCCTTAAG- - - - - AGACACCTCACC- A- - - - - GAGAAGATATGCAGA- |       |       |       |       |       |       |       | 20493 |



Dienstag, 3. Mai 2022 08:38

| Majority    | XGGTTAATACTXATXTGATAAG- - GTACT- X- T- - - TXAXAT- CATTTGTGX- ATTAAGGAAATGCAX- - - X- AACTXAA |       |       |       |       |       |       |       |       |
|-------------|-----------------------------------------------------------------------------------------------|-------|-------|-------|-------|-------|-------|-------|-------|
|             | 30730                                                                                         | 30740 | 30750 | 30760 | 30770 | 30780 | 30790 | 30800 |       |
| Human       | CACCTCTGTTTAAGGAGACCAGGAATACTCACCTGGGTACGTACCTTTCTTCTCTCTGATAATCTATTTTTCTCAGGA                |       |       |       |       |       |       |       | 27050 |
| PolarBear   | -----                                                                                         |       |       |       |       |       |       |       | 0     |
| Cow         | TGAGAAATACTGGAGTGGGTTG- - CCATTTCTTCTCCAGGG- GATCTTCCCAATCCAGGGATTGAACCTGC- ATCTCTT           |       |       |       |       |       |       |       | 25835 |
| Dog         | CATTGTAAACTGATAAGAT- - - - - GTATTTCAA- - AGAAGT- CACGTCTCACTTTTTTGAAGGTTGGG- AAAGTGG         |       |       |       |       |       |       |       | 25199 |
| BelugaWhale | TGAAAATAAGCATATGAAAAG- - ATGCT- - - - - TCACAT- CAAATGTC- - ATTAAGGAAATGCA- - - - - AACTGAA   |       |       |       |       |       |       |       | 21343 |
| Donkey      | TATTTTATTCTTTT- TGTTGCA- - GTTCTCTTTTCTAGTT- CATTATTAGTGTGTAG- AAATGCAACGGA- TTTTAT           |       |       |       |       |       |       |       | 25960 |
| Cat         | CTGTAAACCTACTGTAGTTTA- - GCAGCATGTG- - TGAAAT- CATTTGAGGGAGAAAC- AAGACCACAAAT- AGAATG-        |       |       |       |       |       |       |       | 28389 |
| Ferret      | CTGTAAACCTGTTCTTGTA- - - - GCAGCATGTG- - TGAAAT- CATTTGAAGGAGAAAAAAGCCACAAAT- AAAGGAT         |       |       |       |       |       |       |       | 24851 |
| Lion        | CTGTAAACCTACTGTATTTTA- - GCAGCATGTG- - TGAAAT- CATTTGAGGGAGAAAC- AAGACCACAAAT- AGAATG-        |       |       |       |       |       |       |       | 26720 |
| Vaquita     | TGAAAATAAGCATATGAAAAG- - ATGCT- - - - - TCACAT- CATATGTC- - ATTAAGGAAATGCA- - - - - AACTGAA   |       |       |       |       |       |       |       | 22022 |
| Pig         | TGGCAAATAAGCATATGAAAAG- - ATATT- - - - - CCACAT- CATATACC- - GTTAAGGAAATGCA- - - - - AACTAAA  |       |       |       |       |       |       |       | 20555 |

| Majority    | ATATCXTTTTTAT- - XX- - - - - XXTGCT- X- - - T- XTTACTTCTGAAXAGCC- TX- T- - - X- - - XX- AGTGTCTGA |       |       |       |       |       |       |       |       |
|-------------|---------------------------------------------------------------------------------------------------|-------|-------|-------|-------|-------|-------|-------|-------|
|             | 30810                                                                                             | 30820 | 30830 | 30840 | 30850 | 30860 | 30870 | 30880 |       |
| Human       | ACTTAATATTTGTGTCCTTGCCCGGTGTCTTTCTGTCATGGTCCCTAGGCTGCCATCTCCACAGGAGAAAATGTTTGGT                   |       |       |       |       |       |       |       | 27130 |
| PolarBear   | -----                                                                                             |       |       |       |       |       |       |       | 0     |
| Cow         | ACATCTCCTGTATTGGCA- GGTGGATTCTTTACCACTTGCATCACCTGGGAAGTCCATATTC- ATGTATAGAAATACTCA                |       |       |       |       |       |       |       | 25913 |
| Dog         | TGGTTTTTTTTGAGGAAC- - - - - GATGGG- ACAATTGTTAATTACAAAACATTCATCTTCA- CTTTATTGTTGTCCCA             |       |       |       |       |       |       |       | 25271 |
| BelugaWhale | ATAACAATGAGAT- - - - - ACTGCT- - - - - ACACTGTCAGAATAGCC- - - - - AGAGTCTGGA                      |       |       |       |       |       |       |       | 21389 |
| Donkey      | GTTGATTTTGTACCCTGCAACTCTGTTGTAGTTGTTGATTATTTCTCATAGTTTTCTGGTAG- ATTCTTTAGGGTTTTCT                 |       |       |       |       |       |       |       | 26039 |
| Cat         | - - - - - TAAAAAAA- - - - - AAATTAATTCGTTAATGAACATATATTGTAG- GAAGGAGAGTGTCTGC                     |       |       |       |       |       |       |       | 28446 |
| Ferret      | TTTTTTTTTTAAGAAATCAACAAGACGTT- GTCATTCTACTTCTACATACATTGTAGGA- AGGAGAGGGTGTCTGC                    |       |       |       |       |       |       |       | 24929 |
| Lion        | - - - - - TAAAAAAA- - - - - AAATTAATTCATTGAACATATGTTGTAG- GAAGGAGAGTGTCTGC                        |       |       |       |       |       |       |       | 26777 |
| Vaquita     | ATAACAATGAGAT- - - - - ACTGCT- - - - - ACACTGTCAGAATAGCC- - - - - AGAGTCTGGA                      |       |       |       |       |       |       |       | 22068 |
| Pig         | ACAACACTAGAAT- - - - - ACTGCT- - - - - ACACTATCAGAATAGCC- - - - - AAAATCTGGA                      |       |       |       |       |       |       |       | 20601 |

Dienstag, 3. Mai 2022 08:38

| Majority    | ACACXGXAAATCATAAATXCTGGCXAXGATX- - - - TAGAXTCAGXGAAATCTXAX- - - X- AT- TCCTGATGCCTTAT-        |       |       |       |       |       |       |       |       |
|-------------|------------------------------------------------------------------------------------------------|-------|-------|-------|-------|-------|-------|-------|-------|
|             | 30890                                                                                          | 30900 | 30910 | 30920 | 30930 | 30940 | 30950 | 30960 |       |
| Human       | TAGTTCTCAGTCCCAAACCATAGCAGAGCCC- - - - AGAGACTCTTGTCAACCCTCAGCCTTCAGTCCTTGGTTGCCTTCTT          |       |       |       |       |       |       |       | 27206 |
| PolarBear   | -----                                                                                          |       |       |       |       |       |       |       | 0     |
| Cow         | ATATTGTCAGGTGTCACCTTCTTCCCAAATGATCTATAGAGTCAGTGCAATCCCAGTCA- AAAT- TCCAGCAA- GTTAT-            |       |       |       |       |       |       |       | 25989 |
| Dog         | ACA- ATTGTTTGTGAACCCTTTAGTGTGGTT- - - - TCGTGACACTTTGGGGTACT- - - - - AT- CGTAGAGGTGACA- -     |       |       |       |       |       |       |       | 25336 |
| BelugaWhale | ACACTGGAAACCATAAATGCTGGCAAGTATG- - - TGGAGTGTGAG- GAATTCTCAT- - - - ATAT- TGGGAATGCAAAAT-      |       |       |       |       |       |       |       | 21459 |
| Donkey      | ATATATAGAATCATAGCTCCTGACAACAGCAAGAGTTTTACTTTGTCCTTTCCAATTTGTATATCTTTAAATATTTCTTT               |       |       |       |       |       |       |       | 26119 |
| Cat         | ACACCACACATCAGAATTACAGGCT- - - - TT- - - - - TATACTTCAGAAGACCTAAG- - - - - AT- TCCTCACCCCTTATC |       |       |       |       |       |       |       | 28510 |
| Ferret      | ATGCATCACATCAGGATTACAGGCTTTCTTT- - - - - TATACTTAAGTAGATCTAAG- - - - - AT- TCCTCACTCCTCATC     |       |       |       |       |       |       |       | 24997 |
| Lion        | ACACCACACATCAGAATTACAGGCT- - - - TT- - - - - TATACTTCAGAAGACCTAAG- - - - - AT- TCCTCACCCCTTATC |       |       |       |       |       |       |       | 26841 |
| Vaquita     | ACACTGGAAACCATAAATGCTGGCAAGGATG- - - TGCAGTGTGAG- GAATGCTCAT- - - - ATAT- TGGGAATGCAAAAT-      |       |       |       |       |       |       |       | 22138 |
| Pig         | ACACAGGCAACCATAAATGCTGGTGAAGGATG- - - - TGGAG- CATTGGAAACTCAT- - - - ACAT- TCCTGGTG- GGAGT-    |       |       |       |       |       |       |       | 20668 |

| Majority    | TACATAGCTACTTAX- - - - - - - - GAACXC- - XXTGGAGTTTAXCTATT- - - - - - - TATTACAACAAACAACA- - -        |       |       |       |       |       |       |       |       |
|-------------|-------------------------------------------------------------------------------------------------------|-------|-------|-------|-------|-------|-------|-------|-------|
|             | 30970                                                                                                 | 30980 | 30990 | 31000 | 31010 | 31020 | 31030 | 31040 |       |
| Human       | CGCAGACCTGGCAGCTCTTCCACCTGAAAGTGATACATGGTATTAATAGTTGGACTAGACTATTATGATAAACAGAGTAT                      |       |       |       |       |       |       |       | 27286 |
| PolarBear   | -----                                                                                                 |       |       |       |       |       |       |       | 0     |
| Cow         | TATATGGGTATCAAC- - - - - - - - ATATTGATTGTGAAGTTTATATGGAGAAGCAAAAACCTCCAGAATAGCCAACA- - -             |       |       |       |       |       |       |       | 26056 |
| Dog         | - - CACTGCTGAATGT- - - - - - - - GAGCCC- - ACGGCATTCATGCTGTC- - - - - - - - TTCTGACTAATCACA- - -      |       |       |       |       |       |       |       | 25387 |
| BelugaWhale | TATATAGCCACTTTG- - - - - - - - GAAA- - - - - - - ACAGTTTGGCTCT- - - - - - - - TCTTACAAAACCTGACCA- - - |       |       |       |       |       |       |       | 21508 |
| Donkey      | TTCTTGCCTAATTGCTCTGCA- - - - GAGCACTTTTTCTTAATGCCATATTGCATACTTATCATAAAACAGAGAACAC- - -                |       |       |       |       |       |       |       | 26193 |
| Cat         | TCCAGAGTTACTTAT- - - - - - - - GAACCCCACTGGTATGGAAGGATTAT- - - - - - - - GACTCCCGCAAACATCT- - -       |       |       |       |       |       |       |       | 28569 |
| Ferret      | TCCAGATTTACTTAT- - - - - - - - GAATCC- - ACTGGGATGGAAGCATT- - - - - - - - TTGACGCATACATCT- - -        |       |       |       |       |       |       |       | 25050 |
| Lion        | TCCAGAGTTACTTAT- - - - - - - - GAACCCCACTGGTATGGAAGGATTAT- - - - - - - - GACTCCTGCAAACATCT- - -       |       |       |       |       |       |       |       | 26900 |
| Vaquita     | TATATAGCCACTTTG- - - - - - - - GAAA- - - - - - - ACAGTTTGGCTCT- - - - - - - - TCTTACAAAACCTGACCA- - - |       |       |       |       |       |       |       | 22187 |
| Pig         | TACATAGCTACTTTC- - - - - - - - AAA- - - - - - - GAGTTTGGCTG- - - - - - - - TTCTTAAATAGTGAACA- - -     |       |       |       |       |       |       |       | 20714 |

Dienstag, 3. Mai 2022 08:38

|             |                                                                                                                              |       |
|-------------|------------------------------------------------------------------------------------------------------------------------------|-------|
| Majority    | -- AAAAAGTAAAGTAXTATAA-- - AXT- - - - - - - - - - - T- - AAACAAC T CXAX- AXTTTGT TTTAAXCTATAGGAGTCT                          |       |
|             | 31050            31060            31070            31080            31090            31100            31110            31120 |       |
| Human       | CTAATAACCATGAGAATAAAAAACAAGAAATTTGTAACATTGAAATGAGTGCTA- AATGGCCTTTAATCTG TACTTGCTT                                           | 27365 |
| PolarBear   | -----                                                                                                                        | 0     |
| Cow         | -- CAGTATTGAAGGAGAATAACAAAGTTGGAGGACTGATACTACTCAACTTCAAGATTTAATATGAAGCTACAGTAATCA                                            | 26134 |
| Dog         | -- AAAAATCACTGTGGTTTAG- - - AAT- - - - - - - - - - - TATCAACAAC TTAATCAACTTAATCCCAGATTTGGATGATT                              | 25450 |
| BelugaWhale | -- TACTCGTACTGTACGATCC- - - AG- - - - - - - - - - - CAACTCG- - - - - TTGGTATTTATCCAAAGGAGTTT                                 | 21559 |
| Donkey      | - TTGGGCCAGCCCCAGTATAGCCTAGTGCTTAAGTT CAGCTTGCTCCACTT CAGTGGCCTGGGTTTGGT TCCCAGGCGCT                                         | 26272 |
| Cat         | -- AAAAAGTAAACTAATAATATA- TATA- - - - - - - - - - - TACATGAAAACAGGTCAAGTATACTTTTGAAAAGTATGGGAGTCT                            | 28639 |
| Ferret      | -- AAAAAGCAAAC T GATAAGACC- TAT- - - - - - - - - - - TGAAAAGAATT CAGGTATACTTTTGAAAAGTATGGGAGTCT                              | 25115 |
| Lion        | -- AAAAAGTAAACTAATAATATA- TATA- - - - - - - - - - - TACATGAAAACAGGTCAAGTATACTTTTGAAAAGTATGGGAGTCT                            | 26970 |
| Vaquita     | -- TACTCGTACTGTACGATCC- - - AG- - - - - - - - - - - CAACTCG- - - - - TTGGTATTTATCCAAAGGAGTTT                                 | 22238 |
| Pig         | -- TACTCTTAAAGAAGCA- - - - - - - - - - - G- - - - - - - - - - - CAACTCC- - - - - TTGGTATTTACCCAGAGGAATGG                     | 20761 |

|             |                                                                                                                              |       |
|-------------|------------------------------------------------------------------------------------------------------------------------------|-------|
| Majority    | ATGX- - - - T- AGTTTTTGTGCAXXTXX- - - AATAAXAAXCTGCAXXTAXXCTTAATAAACA- XGATATATXCACXCTGG                                     |       |
|             | 31130            31140            31150            31160            31170            31180            31190            31200 |       |
| Human       | TTGCACATTTTTTTTTAAGTGGTTTCTTCTCTGACGTGTAGAGTGTATCTTCCTATTTCTGAATTTTCTTGTTTCTGTG                                              | 27445 |
| PolarBear   | -----                                                                                                                        | 0     |
| Cow         | AGGCAGCCT- GGTTTTCGT GAAACAGAA- - TAGAGAGCCCAGCATAGAGCCCCCTATAAATATAGTCAAACCTATTTTTG                                         | 26211 |
| Dog         | TTGTAAAT- - GTGTTCTCTCCATATATG- - AATGAGGA- ATATTCTAAAGCTTAGAATAGTTAAGAAATTT- - ACTAGGT                                      | 25523 |
| BelugaWhale | AA- - - - - - - AACTTACGTATA- - - - - - - - - - - CACAGAAACCTGCACGTGGATCTTAATAG- CA- - GCTTTATTCATAATAG                      | 21620 |
| Donkey      | GACCCACACTGCTCTGTTAGCAGCCA- - - TGCTGTACTGGCAGCCCACACACTGAAAAATAGAGGAATATTGGCACAGA                                           | 26348 |
| Cat         | GTGTTTTCTGAGAACTTGGGCAACTGTT- - AATAAT- - - CAGCATT CATT CATTAGTCAACAGTTATATATGGACCCTGT                                      | 28714 |
| Ferret      | TTGTTTTTTAAGAACTAGGGCAATTGTT- - AATAAGCA- TTCATTCACTTATTTAGTTAGCAATTACATGTGCACCCTGT                                          | 25192 |
| Lion        | GTGTTTTCTGAGAACTTGGGCAACTGTT- - AATAATAATCAGCATT CATT GATTAGTCAACAGTTATATATGGACCCTGT                                         | 27048 |
| Vaquita     | AA- - - - - - - AACTTACGTATA- - - - - - - - - - - CACAGAAACCTGCACGTGGATCTTAATAG- CA- - GCTTTATTCATAATAG                      | 22299 |
| Pig         | AA- - - - - - - T- ACTTTATGTACA- - - - - - - - - - - CATGGAAACCTGCACATAGATCTTAATAGGCA- - GCTTCATT CACAGTTG                   | 20824 |

Dienstag, 3. Mai 2022 08:38

| Majority    | GCXTXGCTGGXAXXX- AXAAXAXX- - X- - - AXGAT- GTCTTTCTGXTCGGTGCXAATGGXCTXA- TAAACTXXATGTGXX |       |
|-------------|------------------------------------------------------------------------------------------|-------|
|             | 31210 31220 31230 31240 31250 31260 31270 31280                                          |       |
| Human       | GGATGTTAGTTTCTCTTGAAATGGTCATTGATATTACTCAGGAAGAAAAGTTTCTGTGGTCAGATTTAATAAGAGATATC         | 27525 |
| PolarBear   | -----                                                                                    | 0     |
| Cow         | ACAAAGAGGGCAAAGGCCAAAACAGTGGAGCAAAGATAGTCTTTCTGACAGGTGCTAGTGAACAACCTGAAATCCATGTGCA       | 26291 |
| Dog         | ACTTGGCTGGCAGGTGG- AAG- ----- CTAACCTATCGGAGCCCCTTTTCTTT- TTTTTTTTTTTTTTT                | 25584 |
| BelugaWhale | GCAAAACATGGAAG- - CAACCAA- ----- GAT- GTCTTTCAG- TAGGTG- - AATGGATTAA- CAACTG- TGGTACG   | 21683 |
| Donkey      | TGTTAGCTCAGGGTGAATCTTCCTCAGCAAAAAACAAAAACAAAAACAAAGAAAACAGGTTAATTTCATCACATGAACA          | 26428 |
| Cat         | GCTTGGTTGACACTTCGGAATATTATAGTGAACACTGCTGCGGTGGGCTAGGCACACTGTCTGG- TAACCACTGTTTGTG        | 28793 |
| Ferret      | GCTTGGTTGTCACTTGGGAATATTGTAGTGAACACTGCCCATGTGGGCCAGGCATGCTGTCTGG- TAATAAGTGTTTGTG        | 25271 |
| Lion        | GCTTGGTTGACACTTCAGAATATTATAGTGAACACTGCTGCGGTGGGCTAGGCACAC- - - TGG- TAACCACTGTTTGTG      | 27123 |
| Vaquita     | GCAAAACATGGAAG- - CAACCAA- ----- GAT- GTCTTTCAG- TAGGTG- - AATGGATTAA- TAGACTG- TGGTGCA  | 22362 |
| Pig         | CCAAAACGTGGAAG- - AAATCAG- ----- GAT- GTCCTTCTG- TGGGTG- - AATGGATTAA- TAAAGT- - ATGTACA | 20886 |

| Majority    | TXTXA- AX- ATTTAAACAXA- - T- GXTTTTTXTATAAATATTTAAATCAATATXATTAAT- GAG- CXATTTAAAACCTTATG |       |
|-------------|-------------------------------------------------------------------------------------------|-------|
|             | 31290 31300 31310 31320 31330 31340 31350 31360                                           |       |
| Human       | TATGCTAGTCTTAACATTTA- - ATTTCTTTTAGTTGAATCTAAAATTGATATCATTCTTAGAT- TAATTAAAATTTTTT        | 27602 |
| PolarBear   | -----                                                                                     | 0     |
| Cow         | AAAGAATGAATTGAGACAGACGTTAAACTTTTCACAAAAATTAACCTCAAGGTGGATCATAGAC- CTAAATATAAAATGCT        | 26370 |
| Dog         | TTTTTTTTTTTTTATTTTTT- - TTTTTTTTTTTTTTTTTTTTGGAGCCCCTTTTCTTAAT- GCC- ATATTGCATACTTGTC     | 25660 |
| BelugaWhale | ----- TCCCAACAA- - - T- GGGTAATTATCAGCAGTAAAACAAAATGAGTTATAAAG- CCATGAAAAGG- CATG         | 21747 |
| Donkey      | GACTAGAAAAAAGGAAAAATCACATGATCATATCAGTAGATGCAGAGAAAGTATTTGACAGAATCCAACACCCATTTCATG         | 26508 |
| Cat         | TGTTACAGCATTTAATCCCA- - AGGATTTTAAATGTAAATACTTTCTTCATATTACAAAT- GAG- GAAGTTAAAACCTTAGG    | 28869 |
| Ferret      | TATCATAACATTTAATCCCA- - AGGATTTTGAATGTAAATGTTCTGTCCATGTTATGAAT- GAG- GAAGCTTAGAATAGTT     | 25347 |
| Lion        | TGTTACAGCATTTAATCCCA- - AGGATTTTAAATGTAAATACTTTCTCCATATTACAAAT- GAG- GAAGTTAAAACCTAAG     | 27199 |
| Vaquita     | ----- TCCCAACAA- - - T- GGGTAATTATCAGCAGTAAAACAAAACGAGTTATCAAG- CCATGAAAAGG- CATG         | 22426 |
| Pig         | ----- TCCAGGTAG- - - T- GGAGTATTTATTAGCAGTAAAACAAAATGAGTTTT- - - - - CAAGTCC- - - - TGCA  | 20942 |

Dienstag, 3. Mai 2022 08:38

| Majority    | AXAGTAAXTTACTACTTXAAAAGCAGGTTGGTAAATXATATAATTCAAX- - - - TTXTGATAATGCTATATXGCATAXXT      |       |       |       |       |       |       |       |       |
|-------------|------------------------------------------------------------------------------------------|-------|-------|-------|-------|-------|-------|-------|-------|
|             | 31370                                                                                    | 31380 | 31390 | 31400 | 31410 | 31420 | 31430 | 31440 |       |
| Human       | AAAGAGCATGTATTCTTTAGTATTTTATTCTAAGTACCACTAATTTGATTTGTTTCAACAGTCATTAATGTGGGGCAGT          |       |       |       |       |       |       |       | 27682 |
| PolarBear   | -----                                                                                    |       |       |       |       |       |       |       | 0     |
| Cow         | AAACTATAAAATTTTGTAGAAAATAATGTGGGAGAAAAATCTCGATAATTA- - - GGTACAAAGGTATCTTTTCAGGTACAA     |       |       |       |       |       |       |       | 26447 |
| Dog         | ATA- CAA- - - CACAATGAAAAATTAGGTTTGTTAATAATAATAATCTAA- - - - TTGTAGGTCACATCAAACAACAACATA |       |       |       |       |       |       |       | 25731 |
| BelugaWhale | AGGGGTCCGTGGTACCATAAATGCAAATTACTAAATGAAAGAAGCCAAC- - - - - TGAGAATGCTACATACTGTGTGA       |       |       |       |       |       |       |       | 21819 |
| Donkey      | ATA- - AAAACTCTTTTCAGTAACCTAGGAGTAGAGGGGAACTTCTCAACTTGATAAAGGGGCATCTACAAAAAACTATAG       |       |       |       |       |       |       |       | 26586 |
| Cat         | ATAATTATTTACTAGTTACATAGCTGGTAGGTGGAAGCTAGACTACAGAGCCCCTTTTCTTAATGCAATATTGCATACTT         |       |       |       |       |       |       |       | 28949 |
| Ferret      | AAG- TAATTTCTAGTTACATAGCTGGTAGGTGGAAGCTAAACTATGAG- CACTTTTCTTAATGCTATATTGCATTCTT         |       |       |       |       |       |       |       | 25425 |
| Lion        | ATAGTTATTTACTAGTTACATAGCTGGTAGGTGGAAGCTAAACTACAGAGCCCCTTTTCTTAATGCAATATTGCATACTT         |       |       |       |       |       |       |       | 27279 |
| Vaquita     | AGGGGTACGTGGTACCATAAATGCAAATTACTAAATGAAAGAAGCCAAC- - - - - TGAGAATGCTACATACTATGTGA       |       |       |       |       |       |       |       | 22498 |
| Pig         | GAGGCATGGGAGTACCTTAAATGCATATTACTAAATGAAGTCAATC- - - - - TGAGAATGTTATATCCTATGTGT          |       |       |       |       |       |       |       | 21011 |

| Majority    | TTCCAA- AACATAA- TXAAAAA- AAGTXAATATTTA- XAGCAACAATAAX- - - - AAXXAAXXAATT- - - - XX- X- - - - |       |       |       |       |       |       |       |       |
|-------------|------------------------------------------------------------------------------------------------|-------|-------|-------|-------|-------|-------|-------|-------|
|             | 31450                                                                                          | 31460 | 31470 | 31480 | 31490 | 31500 | 31510 | 31520 |       |
| Human       | CATCAATCACTACCATTGATCATTATTTTATTTATATACATTGTAAGTTAAATGACCAGGCTGAAATAATTCAGATGAAATTA            |       |       |       |       |       |       |       | 27762 |
| PolarBear   | -----                                                                                          |       |       |       |       |       |       |       | 0     |
| Cow         | CACCAA- AGACATAA- TCCAAGA- AAGACATAATTGATTAGCTGGACTTGATT- - AAAATCAGTAATTTTTTTGTC- - - -       |       |       |       |       |       |       |       | 26518 |
| Dog         | CTAAAA- AAACAAGT- TCAAAGTCACGATGATAATAATCAGCAACAGTAGGTG- - AATAAGAAAAAAA- - - - -              |       |       |       |       |       |       |       | 25795 |
| BelugaWhale | TTCCAG- CTATAT- - - TCTGAAA- AAGGCAAAACTGA- - GGAGACAACAAA- - - - AAGATAAGGGGTT- - - - -       |       |       |       |       |       |       |       | 21876 |
| Donkey      | TACTGTCATACTTAA- TGGTGAAAAACTCAATGCTTTCTCCCTAAGATCAGGTACAAGACAAGTATGTCCCCTCTCACCA              |       |       |       |       |       |       |       | 26665 |
| Cat         | GTC- AT- AAAAACA- TGAAAAGTAACTAATCTATTACATCAGTAGACTGAA- - AAAAGAAAAATCACATTTGACAAA-            |       |       |       |       |       |       |       | 29023 |
| Ferret      | TGCTGT- AAAAACA- TGAAAATTAGGATAATCTCTCACATCAACAGTCCAGA- - AAAAGAAAAAAT- - - - -                |       |       |       |       |       |       |       | 25489 |
| Lion        | GT- - - - AAAAACA- TGAAAAGTAACTAATCTATTACATCAGTAGACTGAA- - AAAAGAAAAAATCACATTTGACAAA-          |       |       |       |       |       |       |       | 27350 |
| Vaquita     | TTCCAG- CTATAT- - - TCTGAAA- AAGGCAAAACTGA- - GGAGACAACAAA- - - - AAGGTCAGGGGTT- - - - -       |       |       |       |       |       |       |       | 22555 |
| Pig         | TTCCAA- CCACGT- - - TCTTGAG- AAGGCAAAATTA- - TGGATACAACAAA- - - - AAGATCAGTGGTTGCCAGGGC- - - - |       |       |       |       |       |       |       | 21076 |

Dienstag, 3. Mai 2022 08:38

| Majority    | -----XACATGXGTTTAGAAGAAXAGCCAGAXX-AGAX-----XA-----XXTTGAT--AX-----A-T-           |       |       |       |       |       |       |       |       |
|-------------|----------------------------------------------------------------------------------|-------|-------|-------|-------|-------|-------|-------|-------|
|             | 31530                                                                            | 31540 | 31550 | 31560 | 31570 | 31580 | 31590 | 31600 |       |
| Human       | TTCTGTCAGTTAATGTGGTAATGTTAACATTTATCAGTAGTGCTGAATCACTTCTTTTGGGCATAATAGTGGTAAGCTTT |       |       |       |       |       |       |       | 27842 |
| PolarBear   | -----                                                                            |       |       |       |       |       |       |       | 0     |
| Cow         | -----TGTGAAATATATCTAGAAGACAAGCCACAGACTTGGAGAAAATACTTGCAAATAATACACGGAGCAAAGGGCTA  |       |       |       |       |       |       |       | 26592 |
| Dog         | -----AGCATTTGTTTTGGGCAGAATCCAACATCAGTT-----TGTGAT-----                           |       |       |       |       |       |       |       | 25834 |
| BelugaWhale | -----GGGAGGAGTTTGGATGAATAGGCAGAG-----                                            |       |       |       |       |       |       |       | 21903 |
| Donkey      | CCACTTTTCAACATTCTACTGGAATTCTTGCTAATGTGGTAAGGCAAGAA---AAGAAAATAAAAAGATACACAGATTG  |       |       |       |       |       |       |       | 26741 |
| Cat         | -----TCTAATATCCACTTATGACAGAGGCTAGAAATAGATGAGAACTTCCTCAACTTGATGAAAAATATCTACAAAAA  |       |       |       |       |       |       |       | 29097 |
| Ferret      | -----CACATGATAATAGCAATAGATGCAGAAAAAGCA-----TTTGATGGAATCCAGCATCCACT-              |       |       |       |       |       |       |       | 25545 |
| Lion        | -----TCTAACATCCACTTATGACAAAAGGCTAGAAATAGATGAGAACTTCCTCAACTTGATGAAAAATATCTACAAAAA |       |       |       |       |       |       |       | 27424 |
| Vaquita     | -----GGGAGGAGTTTGGATGAATAGGCAGAG-----                                            |       |       |       |       |       |       |       | 22582 |
| Pig         | -----C-TGGAACAGGGTTGGATGAATAGGCAGAG--CACAGAGATTATTTTTAAATT-TTT-----ATTA          |       |       |       |       |       |       |       | 21133 |

| Majority    | -TA-AAAAACTAXAXATAAXCTTC--TXGCTTTATGX-XAXAACTCAACXTTXXT-AAAAACATCTACAA-----G-GA   |       |       |       |       |       |       |       |       |
|-------------|-----------------------------------------------------------------------------------|-------|-------|-------|-------|-------|-------|-------|-------|
|             | 31610                                                                             | 31620 | 31630 | 31640 | 31650 | 31660 | 31670 | 31680 |       |
| Human       | TTGCTCAATGCAAAGACAGGCATAATTGCTTTTTTCAAATAAAAATGTAATTTGTAAAAATACTCCAGTAATTTTTGTAA  |       |       |       |       |       |       |       | 27922 |
| PolarBear   | -----T-GAAAAACATCTACAG-----G-GG                                                   |       |       |       |       |       |       |       | 19    |
| Cow         | TTATCTAAAATACCCAGAACTTT--CAAACCTCAGCAGTAAGAAAGCAACCTGATTAGAAAGTGGACCAAAAAA-TTT-GA |       |       |       |       |       |       |       | 26668 |
| Dog         | ----AAAAACTAGAAATAGTTTC--CAGTTTTAGGAGAACCTCCTCAACCTGGT--GAAGAACGTCTACAA-----A-GA  |       |       |       |       |       |       |       | 25900 |
| BelugaWhale | -----                                                                             |       |       |       |       |       |       |       | 21903 |
| Donkey      | TGAAAGAAGACATGAAACTCTCG--TTGTTTTGCAGATGACATGATAGTCTATGTTTGAAATTCAAA-AGAATCAACA-AA |       |       |       |       |       |       |       | 26817 |
| Cat         | ATAAAAAACCTACAGGTAACATC--GAACTTAATGGTGAGAACTCAACACTTTC-TAAGATTAGGTACAAGGAAAG-GA   |       |       |       |       |       |       |       | 29173 |
| Ferret      | -TACAAAAACTAGAAAGTAGTTTC--TAGTTTTAGGAGAACTTTCTCAGCTTGATG-AAAAACATCTAC-----G-GG    |       |       |       |       |       |       |       | 25613 |
| Lion        | ATAAAAAACCTACAGGTAACATC--GTACTTAATGGTGAGAACTCAACACTTTC-TAAGATTAGGTACAAGGAAAG-GA   |       |       |       |       |       |       |       | 27500 |
| Vaquita     | -----                                                                             |       |       |       |       |       |       |       | 22582 |
| Pig         | TTATTATTATTTTTTTGGTCTTT--TTGCCTTTTC--TAGGGCTGCTCCCGCGGCATGTGGAGGTTCCCAGG--CTA-GG  |       |       |       |       |       |       |       | 21206 |

Dienstag, 3. Mai 2022 08:38

| Majority    | CACCXCATCA- - - - - ATXXATTXATTTTCAGCATC- - - - - AAXXXTT- X- TXAXXTCAT- - - - - GGTACA            |       |
|-------------|----------------------------------------------------------------------------------------------------|-------|
|             | 31690 31700 31710 31720 31730 31740 31750 31760                                                    |       |
| Human       | AATCTCAAATTGCAAATAATTTGACGTTATTCTCAGTAATGAAGGCT- - GTTAAATCTCCTCTCTTAACGGCAGGTATG                  | 28000 |
| PolarBear   | TGCCTGGGTG- - - - - GCTCATTGAGTTAAGCATC- - - - - TACCTTTGGCTCAGGTCAT- - - - - GATCCC               | 73    |
| Cow         | CACCTCACCAAAGAAGATATACAGATGGCAGATACACATATGAAAAGATGCTCCACATCATATGTCATAAAGTAAATACA                   | 26748 |
| Dog         | AACTAAAACAT- - - - - ACTTAATGGTGACAAAATC- - - - - AGCACTTA- TAAGATTA- - - - - GGTACA               | 25953 |
| BelugaWhale | - - - - - C- - - - - A- - - - -                                                                    | 21905 |
| Donkey      | ATCTCCTTGAACATAAAGCAATTATTGCAGGATTGCAGGATACAAGGTTAAT- ATACAAGTCAATTGCATTCCCTGTATA                  | 26896 |
| Cat         | CATTCCATCTC- - - - - ATCACTTCCTTTCAACATCCTATTGGAAGCTTTTGCTAATGTGGT- - - - - AGGGCA                 | 29235 |
| Ferret      | CACCTGGGTG- - - - - GCTCAGTCGATTAAGCGTC- - - - - TGCTCTT- - - TCAAGTCAT- - - - - GGTCCC            | 25664 |
| Lion        | CATTCCATCTC- - - - - ATCACTTCCTTTCAACATCCTATTGGAAGCTTTTGCTAATGTGGT- - - - - AGGGCA                 | 27562 |
| Vaquita     | - - - - - C- - - - - A- - - - -                                                                    | 22584 |
| Pig         | GGTCCAATCGGAGC- - - - - TGTAGCTGCCAG- - - CGCTTGCCAGAG- - - - - CCACAGCA- - - - - ACACAG- - GATCTG | 21264 |

| Majority    | AGAXXXAGGAATGGAACXXAG- ATCAGGXXCXCAGAXXX- - A- - - - - X- - - X- CTCAACATXCTATXCCXA      |       |
|-------------|------------------------------------------------------------------------------------------|-------|
|             | 31770 31780 31790 31800 31810 31820 31830 31840                                          |       |
| Human       | AAATCATTGAGGAAGAAAAAGTTTATAAATACAACTTAAAAAAAATGGA- - AAGACTTTTCCATGCAAAAAGATGC           | 28078 |
| PolarBear   | AGGGTCCTGGGATGGAGCCCCGCATTGGGCTCCTTGCTCGGCGGGGAGCCTGCTTTG- - CCCTCTGCCTACCACTCCCC        | 150   |
| Cow         | AACGGAAACAACAGTGAAATACTGCTACACTATCAGAATAGCCAAAATACTGTTTCAGAATAGTTAAAACACTGGCACCC         | 26828 |
| Dog         | AGG- - CAAGGATGTTGCCTCTTATCAGTTTCTTT- - - - - CAACATTCTATTGCAA                           | 26001 |
| BelugaWhale | - - - - -                                                                                | 21905 |
| Donkey      | CAAATGAACAAGTGCAATTTGAAATTAAAAACACAATACCATTTACA- - - - - TTAGCCCCCAAAAATGAAATACTTA       | 26969 |
| Cat         | AGAAAAGAGAAAAGGTACACAG- ATCAAGAAAGAAGAGATAAAAT- - - - - TGTTCA- - - CAGATGACATGGTATATGTA | 29305 |
| Ferret      | AGGGTCCTGGGAGGGAGCCCTGCATCAGGCTCTCTGCCTG- - - - - CTCTGCCTGCCACTCCCT                     | 25722 |
| Lion        | AGAAAAGAGAAAAGGTACACAG- ATCAAGAAAGAAGAGATAAAATCG- - - TTGTTCA- - - CAGATGACATGGTATATGTA  | 27635 |
| Vaquita     | - - - - -                                                                                | 22584 |
| Pig         | AGCCG- - - CGTCTGCAACCTACAGCACGGCTCACAGCAACGCCAGA- - - - - TCCTCAACCCACTGAGC- - -        | 21324 |

Dienstag, 3. Mai 2022 08:38

| Majority    | GTAAATGTGAAXGAX- - - T GAAATXTXTCTAGXACAAATAAAT- - - - AATXAAAAT- CTX- - - - XAAAA- - - - -  |       |       |       |       |       |       |       |  |  |       |
|-------------|----------------------------------------------------------------------------------------------|-------|-------|-------|-------|-------|-------|-------|--|--|-------|
|             | 31850                                                                                        | 31860 | 31870 | 31880 | 31890 | 31900 | 31910 | 31920 |  |  |       |
| Human       | ATTGCAG- GAAGGAGGAAGAGTGTCTTCATAGCACACCACAAGTCAGTATTAGAGGCTTGCTTTTCT- ACTTGA- - - GT         |       |       |       |       |       |       |       |  |  | 28153 |
| PolarBear   | GTGCTTGTGTGTGCA- - - - TGCTCTCTCTGTCTGACAAATAAAT- - - - AAATAAAATGTT- - - - - AAAA- - - - -  |       |       |       |       |       |       |       |  |  | 206   |
| Cow         | GTAAAGGCCGGGAGGATATTGAGTGTGAGGAAATCTCATAGATTCCTGGTGGGAATGCAGAATTATATAGCCACTTTGG              |       |       |       |       |       |       |       |  |  | 26908 |
| Dog         | GTTTTTGCTAATGTG- - - - - GTGTTTTTCTTAGGGCAAAAAAAC- - - - AAAAAAA- - - - - AAA- - - - -       |       |       |       |       |       |       |       |  |  | 26051 |
| BelugaWhale | ----- C-----                                                                                 |       |       |       |       |       |       |       |  |  | 21906 |
| Donkey      | GTATAAATCTAACAAAATATAAATAAGATCTATGTGAGGAAAAT- - - - - GACAAAACCTCTGATGAACGAAACCAAAGGGC       |       |       |       |       |       |       |       |  |  | 27044 |
| Cat         | GAAAATCTGAAAGAAC- - - TGAAAAAAATCTAGAACTAAGAAGC- - - - AATAATTGCACTG- - TTGCAGGATTC- - - - - |       |       |       |       |       |       |       |  |  | 29370 |
| Ferret      | GTGCTTGTGCATGA- - - - - GCCATTTCTCTCTGACAAATAAAT- - - - AAATAAAATCTT- - - - - TAAA- - - - -  |       |       |       |       |       |       |       |  |  | 25776 |
| Lion        | GAAAATCTGAAAGAAC- - - TGAAAAAAATCTAGAACTAAGAAGC- - - - AATAATTGCACTG- - TTGCAGGATTC- - - - - |       |       |       |       |       |       |       |  |  | 27700 |
| Vaquita     | ----- C-----                                                                                 |       |       |       |       |       |       |       |  |  | 22585 |
| Pig         | - - - AAGGCCAGGGA- - - - - CCGAACCTC- - A- ACCTCAT- GGTTCCTAGTCGGATTTGTTAACCCTGAGCCGTGACGG   |       |       |       |       |       |       |       |  |  | 21392 |

| Majority    | AAAATCAAXXAGAAAXTTXAXCTTAGTGX- - AXATAXTGG- - - TGTATAATCTCAAXAC- TXATAAAATATATAT- - - -        |       |       |       |       |       |       |       |       |
|-------------|-------------------------------------------------------------------------------------------------|-------|-------|-------|-------|-------|-------|-------|-------|
|             | 31930                                                                                           | 31940 | 31950 | 31960 | 31970 | 31980 | 31990 | 32000 |       |
| Human       | AGACCCAAGATTCCCCACCTATCGTCTTCCAAAGTTACTTGTGATCCACTGCAATCACAAGTTTTACAGTGTGTATACTC                |       |       |       |       |       |       |       | 28233 |
| PolarBear   | AAAATCTACAAAGAAACTACAGCTAACAT- - - ACTTAATGG- - - - TCAGAAACTCAACACTTTCTAAGATTAGGTA- - - -      |       |       |       |       |       |       |       | 275   |
| Cow         | AAAACAAATTAGCTGTTTTTACAAAGCTGA- - ACATACTTGTACTATATGATCCATAACCTCTTGATACTTATTCAAAG               |       |       |       |       |       |       |       | 26986 |
| Dog         | AAAAAAAAACAAAAAAAAAAAAAAAAAAAA- - - AAAAAAAAA- - - - AAAAAAAAAAAAAACAAAAAAAAAAAA- - - - -       |       |       |       |       |       |       |       | 26113 |
| BelugaWhale | - - - - - AGAGGATTTTTAAGGTAGTGA- - AGATACTG- - - - TGTATGATGTTACAA- - - - - TGACGGATATGT- - - - |       |       |       |       |       |       |       | 21962 |
| Donkey      | TAAATAAATAGAGTTGTTCCATGTTTGTGG- - ATAGGAAGACTCAGTATTATCACGATGT- TAGTAATTCCCATCTCGAT             |       |       |       |       |       |       |       | 27121 |
| Cat         | AAGGTTCATATACAAACATCGGCTGCTTTCCTATATATCAGTGGTGAACAAGTGAATTTGAGATTAAAAACACAA- - - -              |       |       |       |       |       |       |       | 29446 |
| Ferret      | AAACTCTACAAAGAAACTACAGCTAACATCATACTTAATGT- - - - GCAGAAACTCAGCACTTTGTAGGA- - - - -              |       |       |       |       |       |       |       | 25841 |
| Lion        | AAGGTTCATATACAAACATCGGCTGCTTTCCTATATATCAGTGGTGAACAAGTGAATTTGAGATTAAAAACACAG- - - -              |       |       |       |       |       |       |       | 27776 |
| Vaquita     | - - - - - AGAGGATTTTTAAGGTAGTGA- - AGATACTG- - - - TGTATGATGTTATAA- - - - - TGACGGATATGT- - - - |       |       |       |       |       |       |       | 22641 |
| Pig         | GAACTCCCAGAGAATTTTTAAGGTAGTGA- - AAATATTT- - - - TGTATGATGTTATTA- - TAATGATGTGTATC- - - - -     |       |       |       |       |       |       |       | 21459 |



Dienstag, 3. Mai 2022 08:38

| Majority    | - TATTACA- - AATATATCCAAACACATAAATATACAAATGTATAATATTGAAAX- AATATACATAAGTXXTAAGACATGA         |       |       |       |       |       |       |       |       |
|-------------|----------------------------------------------------------------------------------------------|-------|-------|-------|-------|-------|-------|-------|-------|
|             | 32010                                                                                        | 32020 | 32030 | 32040 | 32050 | 32060 | 32070 | 32080 |       |
| Human       | TAGGTGTATGGAAGGATTTGAATTCACAAATAGTCAAACATCAGAAGAATAAGCTGATAATAATACATTTGAAAAGAGGT             |       |       |       |       |       |       |       | 28313 |
| PolarBear   | - CAAGGCA- - AAGACATTCTCTCTCATCAGTTCCTTTCAACATTCTGTTGGAAC- TTTTGTCTCATGTGGTAGGGCAAGA         |       |       |       |       |       |       |       | 351   |
| Cow         | GTGTTGAA- - AACTTACGTATACACAGAAACCTGCACATGTATCTTAACAGCAGCTTTATTTCATAATTGCCAAAACATGA          |       |       |       |       |       |       |       | 27064 |
| Dog         | - - - - - AAA- - AAAAAAAAAAAAAAAAAAAAAAAAAAAAAAAAAAAAAAAAAAAAAAAAAAAAAAAAAAAAAAAAAAAAAAAAAA  |       |       |       |       |       |       |       | 26185 |
| BelugaWhale | - CATTACA- - CATTTGTCCAAACCCTTAGGCATTTAAATGTACAGTATTAA- - - - - ACCCTTAG- - - - - GTAA       |       |       |       |       |       |       |       | 22022 |
| Donkey      | TTATAGATTCAGTGCAATCCTAATCACAATTCAGCAAGTTATTTTATGGATATCAGCAAACATTCTGAAGTTTATATGG              |       |       |       |       |       |       |       | 27201 |
| Cat         | - TATCACT- - GACAGAACCGCAGAAAGTGAATACCTAGGTATAAATCTGACAA- AATATATAGAAGATCTATGTGAGGA          |       |       |       |       |       |       |       | 29522 |
| Ferret      | - - - - GGCA- - AGGACATTCCCTCTCATCAGTTCCTTTAAACATTCTATTGGAAG- TTTTGTCTGATGTGGTAGGGCAAGG      |       |       |       |       |       |       |       | 25914 |
| Lion        | - TATCACT- - GACAGAACCGCAGAAAGTGAATACCTAGGTATAAATCTGACAA- AATATATAGAAGATCTATGTGAGGA          |       |       |       |       |       |       |       | 27852 |
| Vaquita     | - CATTACA- - CATTTGTCCAAACCCTTAGGTATTTAAATGTACAGTATTAA- - - - - ACCCTTAG- - - - - GTAA       |       |       |       |       |       |       |       | 22701 |
| Pig         | - - ATTACA- - TATTTATCCAAACACATTGA- - - - - GTGTACAATA- - - - - TCATGA- - - - - A- - - - TGA |       |       |       |       |       |       |       | 21505 |

| Majority    | AAAGAACAAAAXT- - - - - TTGAGTAC- - - - - X- - AGAXCAAGAXGCAAAAXAA- - - - AGAXTTATC- - - - GT        |       |       |       |       |       |       |       |       |
|-------------|-----------------------------------------------------------------------------------------------------|-------|-------|-------|-------|-------|-------|-------|-------|
|             | 32090                                                                                               | 32100 | 32110 | 32120 | 32130 | 32140 | 32150 | 32160 |       |
| Human       | CAAGTATATTTTTGAAAAGTACTAGGAGAGTTAAAGTGTTTTTGTGAACTAAGGAACAAAT- AA- - - - GGCATTGACAATATT            |       |       |       |       |       |       |       | 28388 |
| PolarBear   | AAAGGA- AATAAA- - - - - AGGTATAC- - - - - AGATCAAGAAGGAAAACAT- - - - AAAATTGTT- - - - GT            |       |       |       |       |       |       |       | 401   |
| Cow         | AATCAATCAAGATGTCCTACTTCAGTAGGTGAATGGATTAGTAAACTGTGGTACATAACAATGTGGTATTTATC- - - - AG                |       |       |       |       |       |       |       | 27140 |
| Dog         | AAAAAATAAAGGG- - - - - ATGGATACC- - - - - AGATCAAGATGGTAGAGAAC- - AAAAATTATT- - - - GT              |       |       |       |       |       |       |       | 26239 |
| BelugaWhale | ACAGAAGT- - - - - TTGGGTG- - - - - A- - - - TTATGATGTGTCAAAT- - - AGGTTTCATC- - - - CT              |       |       |       |       |       |       |       | 22066 |
| Donkey      | AGA- GGCAAAAGACTCAGTATCCAACACAGTATTGA- - - AAGAGAACAATAATGGAGCACTGACACTACCCGACTTCGAC                |       |       |       |       |       |       |       | 27277 |
| Cat         | AAACTGCAAAACT- - - - - CTGATTAAT- - - - - GAACCAAAAACCAAATAAATGGAGAGATATTCCATGT                     |       |       |       |       |       |       |       | 29582 |
| Ferret      | AAAGGA- GACAAA- - - - - AGGTATAC- - - - - AGATCAAGAAGCAAAACAT- - - - AAAATTATT- - - - GT            |       |       |       |       |       |       |       | 25964 |
| Lion        | AAACTGCAAAACT- - - - - CTGATTAAT- - - - - GAACCAAAAACCAAATAAATGGAGAGATATTCCATGT                     |       |       |       |       |       |       |       | 27912 |
| Vaquita     | ACAGAAGT- - - - - TTGGGTG- - - - - A- - - - TTATGATGTGTCAAAT- - - AGGTTTCATC- - - - CT              |       |       |       |       |       |       |       | 22745 |
| Pig         | AC- - - - TC- - - - - TTGGGTA- - - - - A- - - - - AGTGGACTTTGGGTGATAA- - - - TGATATTTCATC- - - - CT |       |       |       |       |       |       |       | 21549 |



Dienstag, 3. Mai 2022 08:38

|             |                                                                                                           |       |
|-------------|-----------------------------------------------------------------------------------------------------------|-------|
| Majority    | A- - - XA- TAAATXCAGT- - - TTGAAATAAAATTGAA- - - - - - X- - - - - - A- - ATXTXXGXA- T- - - - - -          |       |
|             | 32330      32340      32350      32360      32370      32380      32390      32400                        |       |
| Human       | ATTTTG- TATGTGGAGTAACTTGACCTTCAGTTTTTTTTGGTCTGAGAACAAAGGCCAAAAAATATGTAACAGTTA- - ATA                      | 28620 |
| PolarBear   | GT- - GAACAAACGCAGT- - - TTGAAATGAAAAA- - - - - - - - - - - - - - - - - - - - - - - - - - - - - - - - - - | 560   |
| Cow         | AGACAACAAAATT CAGGAGGTTGGAAGGAGTTTGGATGAAAATAGCCAGAGCACAGAGGATTTTGGGGGTAGTAAAAATA                         | 27365 |
| Dog         | A- - - - AATTAATTAAT- - - TTGAAATTAATTTAA- - - - - - - - - - - - - - - - A- - ATCGCAATATT- - - - - - - -  | 26408 |
| BelugaWhale | - - - - - - - - - - - - - - - - - - - - - - - - - - - - - - - - - - - - - - - - - - - - - - - - - - - - - | 22112 |
| Donkey      | AATGGAGGAAAGACAGCCTCTTTAACAAATGCTGCTGGAACAACCTGGACATCTACTGGAACAACCTGGAATTGAGACACAG                        | 27516 |
| Cat         | AA- - TAGTCAACACAATA- - TTGAAGAAGAACAGAATCGGAGGACTGATCCTGCCCA- - ATTT CAGCACTTACTGTGAAG                   | 29809 |
| Ferret      | GT- - GAACAAATGTAGT- - - TTGAAATAAAAAAAA- - - - - - - - - - - - - - - - A- - ATTCTTTTTTTT- - - - - - - -  | 26129 |
| Lion        | AA- - TAGTCAACACAATA- - TTGAAGAAGAACAGAATCGGAGGACTGATCCTGCCCA- - ATTT CAGCACTTACTGTGAAG                   | 28139 |
| Vaquita     | - - - - - - - - - - - - - - - - - - - - - - - - - - - - - - - - - - - - - - - - - - - - - - - - - - - - - | 22791 |
| Pig         | - - - - AA- - - AATTTTTTTTTTTGGGGGGTCTTTTTAGGGCTATA- CCTGTGGGCATA- - - - - T- GGAGGTTCCCAGGCTA            | 21738 |

|             |                                                                                                            |       |
|-------------|------------------------------------------------------------------------------------------------------------|-------|
| Majority    | - - - - - XTA- - - - - - T- - - X- - TX- - X- - - - - - AXX- X- XTACAAATAXXXC- CAGAAX- A- - AXAXG- ATXCTA  |       |
|             | 32410      32420      32430      32440      32450      32460      32470      32480                         |       |
| Human       | ACGTAATTCACCTTACTTAGTCAATAAATATGTGGGGACATTGTA CT TGGT TGACACTTGGGAATATTGTAGTGAGCACTA                       | 28700 |
| PolarBear   | - - - - - - - - - - - - - - - - - - - - - - - - - - - - - - - - - - - - - - - - - - - - - - - - - - - - -  | 565   |
| Cow         | ATGTTAAAAAATAAATGTTAAAAGATGGATAT- - - - - ATGTTACTACACATTTGTC- CAGACCCACTGAATGTACAGTA                      | 27439 |
| Dog         | - - - - - GTT- - - - - - - - - - - - - - - - - - - - - - - - - - - - - - - - - - - - - - - - - - - - - - - | 26446 |
| BelugaWhale | - - - - - - - - - - - - - - - - - - - - - - - - - - - - - - - - - - - - - - - - - - - - - - - - - - - - -  | 22112 |
| Donkey      | ATGTTACACCCTT CACAAAAATTAAC TCAAATGTATCATAGACCTAAATGTAAAATGCAAAC T AGTAGACG- ATAACA                        | 27595 |
| Cat         | CTACCGTAATTGAGA- CAGTGTGGTTTTGGTGA- - - - - AAGAATAGACAAATAGGT CAGTGGAACAGAATAGAGATCCTA                    | 29883 |
| Ferret      | - - - - - TTTTTTTAAG- TGATAGAAGTATATTAA- - - - - GTGAAGATACAGAAAAAGCTCTCAAGAGTGAGAGGGGTCCCA                | 26198 |
| Lion        | CTACCGTAATTGAGA- CAGTGTGGTTTTGGTGA- - - - - AAGAATAGACAAATAGGT CAGTGGAGCAGAATAGAGATCCTA                    | 28213 |
| Vaquita     | - - - - - - - - - - - - - - - - - - - - - - - - - - - - - - - - - - - - - - - - - - - - - - - - - - - - -  | 22791 |
| Pig         | GGGGTTAA- - A- - - - - - - - - - TCAGAGCTGTAGCT- - - - - ACTGGCCTGCAC- CATGGC- CACAGC- - - - - AATGTGGGGT- | 21795 |

Dienstag, 3. Mai 2022 08:38

| Majority    | - XA- AGCXXXCCCTG- AGTX- TX- - - - - - TGCTCATG- ACXATGCAAX- - CAAGA- CAGTGAAATAAXX- - - - - |       |       |       |       |       |       |       |       |
|-------------|----------------------------------------------------------------------------------------------|-------|-------|-------|-------|-------|-------|-------|-------|
|             | 32490                                                                                        | 32500 | 32510 | 32520 | 32530 | 32540 | 32550 | 32560 |       |
| Human       | CTGATGTGAGCCAGGCACTTTGCCTGGTAATCACTGTTCTGTATAATTTAATCCTAAGGGCTGTGATGTAGATGTTATC              |       |       |       |       |       |       |       | 28780 |
| PolarBear   | - - - - - TACTCTTG- AC- - AGCACC- - CCAGA- AAATGAAATAAATA- - - - -                           |       |       |       |       |       |       |       | 600   |
| Cow         | TTA- AACCTTAATTAAGTATTAAACTGGACTTTGGGTGATT- ATGATACATTAATAATC- TTTGGTAATAAATG- TACC          |       |       |       |       |       |       |       | 27515 |
| Dog         | - - AAAAC- TAACCTA- GGTAATAA- - - - - ATCTACTA- ACCAAACAAA- - CCATA- GAGAAGAAGAG- - - - -    |       |       |       |       |       |       |       | 26500 |
| BelugaWhale | - - - - -                                                                                    |       |       |       |       |       |       |       | 22112 |
| Donkey      | TAGGAGAAAACCTAGATGTCCCTTGGATGTGATGATGCCTTTT- TAGATACAACACCAAAC- ATACAATCCATGAAAGAAA          |       |       |       |       |       |       |       | 27673 |
| Cat         | GTATAGAGCCCCCTGTAAACGTAG- - - - CTTATCTTTGATG- ACAGAGCAAAGGCAAGA- CAGTGGAGCAAATAATGGC        |       |       |       |       |       |       |       | 29956 |
| Ferret      | - - ACAGCGTTGCCTA- AAACACCA- - - - - TACTCTTG- AC- - TGCATC- - CCAGA- AAATGAAATAG- - - - -   |       |       |       |       |       |       |       | 26251 |
| Lion        | GTATAGAGCCCCCTGTAAACATAGTC- AGCTTATCTTTGATG- ACAGAGCAAAGGCAAGA- CAGTGGAGCAAATA- TGGC         |       |       |       |       |       |       |       | 28289 |
| Vaquita     | - - - - -                                                                                    |       |       |       |       |       |       |       | 22791 |
| Pig         | CTG- AGCCGTGTCTGCAGC- - - - - CTACACCACAGCTCATG- GCAATGCAG- - - GATC- CCT- - - - - A- -      |       |       |       |       |       |       |       | 21847 |

| Majority    | - - XCTA- - A- AXAXAAG- - - - - XCTGAAATAAXTGXACATCTAXTGT- - GAXAAAGTATAXGXGAATCTG- - - - - AAT            |       |       |       |       |       |       |       |       |
|-------------|------------------------------------------------------------------------------------------------------------|-------|-------|-------|-------|-------|-------|-------|-------|
|             | 32570                                                                                                      | 32580 | 32590 | 32600 | 32610 | 32620 | 32630 | 32640 |       |
| Human       | CCTGTTTTACAAATAAAGAACTTCAGGCTTAGAATGATTAAGTACTGTTACCTAACTGATAAGTGGAAGCTG- - - - - AGC                      |       |       |       |       |       |       |       | 28855 |
| PolarBear   | - - CCTA- - G- GTATAAA- - - - - TCTAACACAA- - - - A- ATATA- - - - - GAAGATCTATGTGAGGAA- - - - - AAC        |       |       |       |       |       |       |       | 649   |
| Cow         | AGTCTGGTG- GAGGATGCTGATAATGGAGGAGGCTGTGCATGTGTGGTGGCAGGGAGTATATGAGAAATCTGTTC- - - CT                       |       |       |       |       |       |       |       | 27591 |
| Dog         | - - - - - A- - A- AGAGAAG- - - - - CCGAGAAGGA- - - - AGATCTG- - - - - GAGGAGGAAAAAAAAAGGAATAA- - - - - AAC |       |       |       |       |       |       |       | 26551 |
| BelugaWhale | - - - - - G- - - - GCGACGCATCTTTGGTAGCAGCGGGTATATGGGAAATCTGTTCTTCT                                         |       |       |       |       |       |       |       | 22161 |
| Donkey      | TAATTGATA- A- ACTGGACGTCATTAATAA- - AATCTTCTACTCTGTGAAAGACTATCAAGAAAATCAGAAAGCAAG                          |       |       |       |       |       |       |       | 27749 |
| Cat         | GTTTT- - - A- ACAAATGGCT- - - GCTGGAATAATTGGACATCTACTT- - - GCAAAAGAATGAATCCAGACGC- - - - - AGT            |       |       |       |       |       |       |       | 30021 |
| Ferret      | - - - CTA- - G- GCATTAA- - - - - TCTAACACAA- - - - A- ATATA- - - - - GAAGATCTTTGTGAGGAA- - - - - AAC       |       |       |       |       |       |       |       | 26299 |
| Lion        | GTTTTT- - - A- ACAAATG- CT- - - GCTGGAATAATTGGACATCTACTT- - - GCAAAAGAATGAATCCAGACGC- - - - - AGT          |       |       |       |       |       |       |       | 28354 |
| Vaquita     | - - - - - G- - - - GTGACGCATCTTTGGTGGCAGCGGGTATATGGGAAATCTGTTCTTCT                                         |       |       |       |       |       |       |       | 22840 |
| Pig         | - ACCCACTG- AGAGAGGCC- - - - - - - AGGGATTGAACTCAGGTCCTCATGGATACTACTCAGG- - - - - - - - - - TT             |       |       |       |       |       |       |       | 21903 |

Dienstag, 3. Mai 2022 08:38

| Majority    | TCXCAAXCTTCTGATAAATXX- - - - AACAAXXXT- - XX- XXAAACXTTAAAAA- AAA- - CAAAXTAGGAAACATTTTTCGA |              |            |            |               |              |                   |                   |                        |                      |               |       |
|-------------|---------------------------------------------------------------------------------------------|--------------|------------|------------|---------------|--------------|-------------------|-------------------|------------------------|----------------------|---------------|-------|
|             | 32650                                                                                       | 32660        | 32670      | 32680      | 32690         | 32700        | 32710             | 32720             |                        |                      |               |       |
| Human       | TC-                                                                                         | CAGAGCACCC   | TTTCTTAA-  | - - -      | TACAGTATTTT   | CTACTTGT     | CATGAAAACAT       | GAAGAAAGCT        | AGGAAACATTTTCTG        | 28930                |               |       |
| PolarBear   | TA-                                                                                         | CAAAGCTCT    | GATGACTGG- | - - -      | AACAA-        | - - - - -    | AAAC-             | - - - - -         | AAA- -                 | ATAAATGGAGAGATATTCCA | 701           |       |
| Cow         | TCTCAATTTT                                                                                  | ATTTTAAATTT- | - - -      | AACAAGTGT- | TCTAAAAAAT    | TAAAAAGAAAA- | CAA               | ACTAGGAAACATTTTGT | 27664                  |                      |               |       |
| Dog         | TA-                                                                                         | CAAATTTCT    | GATGAATGA- | - - -      | AACCA-        | - - - - -    | AAACAACCAACCCAAA- | - -               | ACAAATGGAGAGATATTCCA   | 26612                |               |       |
| BelugaWhale | TCTCAATTTT                                                                                  | ATTTTAAACCT- | - - -      | AA-        | AAGTGT-       | TCTAAAAAAT   | TTTTAAAA-         | - - - -           | AATACTAGGAAAT- TTTTTGT | 22227                |               |       |
| Donkey      | CCACAGACTGGT                                                                                | AAAAAATATTT  | GCAAAAAGAT | ACATCT     | GGGGT         | GGCCAGT      | GGCACAACAGT       | TAAGT             | GCGCATGTTCTA           | 27829                |               |       |
| Cat         | TAACTCTTCT                                                                                  | GAAAAATTA-   | - - -      | ACTCAAAGT  | ATATCATAAACCT | AAATG        | TAAAATGCAAAACT    | GTAAAATTCTTAGA    | 30097                  |                      |               |       |
| Ferret      | TA-                                                                                         | CAAATTTCT    | GATGAATGA- | - - -      | AATAA-        | - - - - -    | AACCC-            | - - - - -         | AAA- -                 | ATAAGTGGAGAGATAGTCCA | 26352         |       |
| Lion        | TAACTCTTCT                                                                                  | GAAAAATTA-   | - - -      | ACTCA-     | - - - - -     | T-           | AAACCTAAAT        | GAAAATGCAAAACT    | GTAAAATTCTTAGA         | 28420                |               |       |
| Vaquita     | TCTCAATTTT                                                                                  | ATTTTAAACCT- | - - -      | AA-        | AAGTGT-       | TCTAAAAAAT   | TTTTAAA-          | - - - -           | AATACTAGGAAAT- TTTTTGT | 22906                |               |       |
| Pig         | CCTTAACCTC-                                                                                 | - -          | TGAGCCAT-  | - - -      | GACAGGAAC-    | -            | TCCTAAAT          | TTTTTAAAA-        | AATC-                  | CAA                  | ACTAGGAAGCATT | 21972 |

| Majority    | TGTTGATAGXGAA- - - - - XAAATCATXTATATXAXCAGG- - - - - XTGTTAATCCTT- - - - - AGCA |              |           |                 |                |                            |                  |              |           |       |       |
|-------------|----------------------------------------------------------------------------------|--------------|-----------|-----------------|----------------|----------------------------|------------------|--------------|-----------|-------|-------|
|             | 32730                                                                            | 32740        | 32750     | 32760           | 32770          | 32780                      | 32790            | 32800        |           |       |       |
| Human       | TGTTGATAAT                                                                       | GAG-         | - - - - - | CCAATAAT        | GTGTATCAGT     | GGT-                       | - - - - -        | TCTTAAACTTT- | - - - - - | AGCA  | 28979 |
| PolarBear   | TGTTTGT                                                                          | GAATA-       | - - - - - | GAAGACTCA-      | ATATTGTCAAG-   | - - - - -                  | ATGTCAGTTCTTTCC- | - - - - -    | AACT      | 752   |       |
| Cow         | TGTTGATAGTTAA-                                                                   | - - - - -    | CCAGTAAT  | GTTTATCAGCAGT-  | - - - - -      | TCTTAAACTTT-               | - - - - -        | AGCA         | 27713     |       |       |
| Dog         | TGTTTGT                                                                          | GGATAG-      | - - - - - | GAAGACTCA-      | ATATTGTCAAG-   | - - - - -                  | ATGTCAGTTCT-     | - - - - -    | AACT      | 26660 |       |
| BelugaWhale | TGTTGATAGT                                                                       | GAA-         | - - - - - | CCAATAAT        | GGATGTCAGCAGT- | - - - - -                  | TCTTAAACTTC-     | - - - - -    | AGCA      | 22276 |       |
| Donkey      | CTTTGGT                                                                          | GGCCTGGGGTTT | GCCAGTTT  | GGATCCCCGGT     | GCGGACAT       | GGCACTGCTT                 | GTCAAGCCAT       | GCTGTGGTA-   | GGCA      | 27908 |       |
| Cat         | AGATAATATAGGA-                                                                   | - - - - -    | GAAAACCT  | ATATGATCTTGGGT- | - - - - -      | ATGATGATGCCTTTTTAGATATAACA | 30158            |              |           |       |       |
| Ferret      | TGTTTGT                                                                          | GGATAA-      | - - - - - | GAAGCCTCA-      | GTAGTGTCAAG-   | - - - - -                  | ATGTCAGTTCTTTCC- | - - - - -    | AAAT      | 26404 |       |
| Lion        | AGATAATATAGGA-                                                                   | - - - - -    | GAAAACCT  | ATATGATCTTGGGT- | - - - - -      | ATGATGATGCCTTTTTAGATATAACA | 28481            |              |           |       |       |
| Vaquita     | TGTTGATAGT                                                                       | GAA-         | - - - - - | CCAATAAT        | GGATGTCAGCAGT- | - - - - -                  | TCTTAAACTTC-     | - - - - -    | AGCA      | 22955 |       |
| Pig         | TGTTGCTAGT                                                                       | GAA-         | - - - - - | CGAGTAAT        | GTATATCAGTAGT- | - - - - -                  | TCTTAACTTT-      | - - - - -    | GGCA      | 22021 |       |

Dienstag, 3. Mai 2022 08:38

| Majority    | TGCAXCAGAAACAXCXGGAAAXCTTXXAAAAA-CTTAGXTCA-GTTGGATCCTATXTA-CCAXTGTTTTXTTCAGTAG    |       |
|-------------|-----------------------------------------------------------------------------------|-------|
|             | 32810 32820 32830 32840 32850 32860 32870 32880                                   |       |
| Human       | TGCATCAGAAACACTTGGGGATTTTTTTTTTTAAACCTGGGGT-TTTTAGATCCCACCCTCAGAGTTTCTTATTTCAGTAG | 29058 |
| PolarBear   | TGATCTATAGATTTAATGCAATCCCAGTCAAAA--TTAGAGCAGGTTTTTTGTAGATA-TCAGCAGGTGGATTCTAAA    | 828   |
| Cow         | TTCATTAGAAGCACCTGGAGGGCTTGTTAAGGAA-CTTAGGTT--GTTGGATCCTGTCT--CCATTGTTTTCTTCAGTAG  | 27788 |
| Dog         | TGATCTATAGATTTAATGCAATCCCAGTCAAAA--TTAGAGCAAGTTGATTT-TAGAGA-ATGGTTATCAACCAAACAG   | 26735 |
| BelugaWhale | TGCATCAGAAGCATCTGAAAGACTTGTTAA--AA-CTCAGGTT--GTTGGATCCTGTCT--CCATTGTTCTGTTTCAGTAT | 22349 |
| Donkey      | TCCCACATATAAAATGGGGGAAGACGGGCACAGATATTAGCTCAGGGCCAGTCTTCCTCA-GCAAAAAGAGGAGGATGGG  | 27987 |
| Cat         | CCAACGACATAGTCCATGAAAATATAATTGATAATGCTGGACCACATTAATAA-TAAAAA-CTTCTCTTTAAAAGACAGT  | 30236 |
| Ferret      | TGATCTATAGATTTAATGTAGTCCCATTTCAGAC--TCAGAGCAAATTTATTTTCTGGATA-TCAGCAAGCGGTTTCTGAA | 26480 |
| Lion        | CCAACGACACAGTCCATGAAAATATAATTGATA-TGCTGGACCACATTAATAA-TAAAAA-CTTCTCTTTAAAAGACAGT  | 28558 |
| Vaquita     | TGCATCAGAAGCATCTGAAAGGCTTGTTAA--AA-CTCAGGTT--GTTGGATCCTGTCT--CCATTGTTCTGTTTCAGTAT | 23028 |
| Pig         | CGCATCAGAAGCACCTGGAGAGCTTGTTAA--A-CTCAGGTT--GTTGGACCTTATCCG-TCATTGTTTTATTTAGTAG   | 22094 |

| Majority    | --GTCTAGGXTAG-ATCXGGGAACATATGTTGCTXAAGAAATXXCCAGGTCXA-----XATACTGCTCTAG          |       |
|-------------|----------------------------------------------------------------------------------|-------|
|             | 32890 32900 32910 32920 32930 32940 32950 32960                                  |       |
| Human       | --GTCTGGGATTGGACCTGAGAACATATACTGTC-AGTAAGCTTCCAGGTCTAATCTTAGGATTAGGGACCACACTTTGA | 29135 |
| PolarBear   | --GTTTCTGGGA-----AGG-----GCAGAAGATCCAAAATAGCCAA-----CACAGTACTGAAG                | 876   |
| Cow         | --GTCTAGGATGG-ATCTGAGAACATATTTTCGCTAAGGAAATTTCCAGGTTTTT-----TATATTGCTCTAG        | 27852 |
| Dog         | --ACGAAAAGGA-----GGG-----GCAGAAGCCAGAAACAGATTTCG-----AGCGAAAGTTTCT               | 26783 |
| BelugaWhale | --ATCTAGGATGG-ATCTGAGAACGTATGTTGCTAAGGAAATTTCCACGTCT-----AATGCTGCTCTAG           | 22411 |
| Donkey      | CAGTGGATGTTAG-CTCAGGGCTAATCTTCCTCAAAAAAAAAAAGAGATAAATCT-----GATAAAGGACTGT        | 28055 |
| Cat         | --ATCAAGAGAAT-TAGAAGCTAAGCCCCAGACTGGAGAAGGCATTTGCAAAA-----GATACATCTGATA          | 30299 |
| Ferret      | --GTTTCTAGGC-----AGGTTATGGGGACACAGAAGATACAGAATAGCCAA-----CACAAATATTGAGG          | 26539 |
| Lion        | --ATCAAGAGAAT-TAGAAGCTAAGCCCCAGACTGGAGAAGGCATTTGCAAAA-----GATACATCTGATA          | 28621 |
| Vaquita     | --ATCTAGGATGG-ATCTGAGAACATACGTTGCTAAGGAAATTTCCACGTCT-----AATGCCGCTCTAG           | 23090 |
| Pig         | --GTGTTGAAAG-ATGTGACATCATATGTTGCTAAGCAGGTGTCCAGGTCT-----AATGCTGCTCTAG            | 22156 |



Dienstag, 3. Mai 2022 08:38

| Majority    | TGXCAXTXAGGTAXTGTTXATT- - - - - TAATTCTTGTATATCXCTXAXTTTXXATGCXAAXATGTAGAAAXCT      |       |       |       |       |       |       |       |       |
|-------------|-------------------------------------------------------------------------------------|-------|-------|-------|-------|-------|-------|-------|-------|
|             | 33130                                                                               | 33140 | 33150 | 33160 | 33170 | 33180 | 33190 | 33200 |       |
| Human       | TCAATGTGGCTTGAAACTGGTTG- - - TATTTTTCTGTTTTTTTTTTTCTTTGTGCATTTGATGCTAATAAGTAGAAAGCT |       |       |       |       |       |       |       | 29372 |
| PolarBear   | CCCC- GTA AATATAGTCAACT- - - - - CATCTTTGACAAAGGCACAAATGCAATACCA- - - TGGAGCAAAT-   |       |       |       |       |       |       |       | 1072  |
| Cow         | T- - - - - T- - - - TTATTT- - - - - TTCTTCTTGTATGTCTCTGAGCTTGATGTTAATAAATAGTTTGAT   |       |       |       |       |       |       |       | 28035 |
| Dog         | TGCCC- - - ATGGGTTGGCGAC- - - - - AAGCAACAGCGGTTGGGTTGGTTTTTTTGGG- - - TTGGTTTTTTT  |       |       |       |       |       |       |       | 26973 |
| BelugaWhale | TGATACTATGTTTTTATTTTTTCT- - - - - TCATGCTTGTATTTCTGTGAAC TTGATGCTAGCAAGTAGAAAGCT    |       |       |       |       |       |       |       | 22613 |
| Donkey      | TGTCATCAAGGAAATACAGATTA AACAACAATGAGATAACTACTATACACCTATCAGAATAGCCAAAATCTGGAACACT    |       |       |       |       |       |       |       | 28278 |
| Cat         | TGTCATTGAGGAAATGTAAACT- - - - - AAAACAAGATACACACCTATCAGAATTGCCAAAATGTGGAGCACT       |       |       |       |       |       |       |       | 30506 |
| Ferret      | CCCCCTGTAAGTACAGTTGACT- - - - - AATCTTTGACAAAGGCTCAAGTGAATACCA- - - TGGAGCAAAT-     |       |       |       |       |       |       |       | 26736 |
| Lion        | TGTCATTGAGGAAATGTGAAC T- - - - - GAAACAAGATACACACCTATCAGAATTGCCAAAATGTGGAGCACT      |       |       |       |       |       |       |       | 28828 |
| Vaquita     | TGATACTATGTTTTTATTTTTTCT- - - - - TCATGCTTGTATTTCTGTGAAC TTGATGCTAGCAAGTAGAAAGCT    |       |       |       |       |       |       |       | 23292 |
| Pig         | C- - - - - A- - - - TTTTTG- - - - - TCATGCTTGTAA TTCTCTGAGTTTGATACTAATGAGTAGGAAGCT  |       |       |       |       |       |       |       | 22338 |

| Majority    | XXCAAAXTXAT- - AXGGAGATGAXGTATGGAXATXTTGGATCATTCTTATATTX- - TGTAATAGAATTTATTAAGGTAT            |       |       |       |       |       |       |       |       |
|-------------|------------------------------------------------------------------------------------------------|-------|-------|-------|-------|-------|-------|-------|-------|
|             | 33210                                                                                          | 33220 | 33230 | 33240 | 33250 | 33260 | 33270 | 33280 |       |
| Human       | CTTAA AATATTTAAGGGAGACAACCTATGGATATCTGTTACTCTTCTCATATTTGTTGTAATACAGTTTATTCATTATG               |       |       |       |       |       |       |       | 29452 |
| PolarBear   | - ACAGTCTCAT- - TAGCAAATGCTGC- TGGAA- CAATTGGA- - - - - CATCCACT- - - TGCAAAAAGAATGAATCGAGACAC |       |       |       |       |       |       |       | 1139  |
| Cow         | TTTTAAACAATG- AGGACAATGACATACGAATATTT- - - - - ATCATTTTTATATT- - - - - GTAATACAGCTTATTAAGAAT   |       |       |       |       |       |       |       | 28106 |
| Dog         | GGCGGGTTGGT- - TTGGCGACCCTGCCTTTGGGCTTGTGGC- - - - - CGTATGTT- - - AGGGCGTGGATCCGTTAGGGC- C    |       |       |       |       |       |       |       | 27042 |
| BelugaWhale | TTTTAAA- - - - - AAGGGGATGACGTATAAATATTTTTTTCATCACTGTGATACTTATTATAATACAGCTTATTAAGTAT           |       |       |       |       |       |       |       | 22687 |
| Donkey      | GACAACCATAA- - GTGCTGATGAGGATGTGGAGTAACAGAAACCCTCATACGTTG- - CTGGTGGGAATACAAAATGGTAT           |       |       |       |       |       |       |       | 28354 |
| Cat         | GACAATCTTTA- - ATGCTGATGAGGATGTGAAGCAACAGGAATTTTCATATGTTG- - TTAGTGGGAATGCAAAAATGGTAT          |       |       |       |       |       |       |       | 30582 |
| Ferret      | - ACAGTCTCAT- - TAATAAATGCTGC- TGGAAACAATTGGA- - - - - CATCCACT- - - TGGAAAAGAATGAATTGAGACAC   |       |       |       |       |       |       |       | 26804 |
| Lion        | GACAGTCTTTA- - ATGCTGACGAGGATGTGAAGCAACAGGAATTTTCGATGTTG- - TTGGTGGGAATGCAAAAATGGTAT           |       |       |       |       |       |       |       | 28904 |
| Vaquita     | TTTTAAA- - - - - AAGGGGATGACGTATAAATATTTTTTTCATCACTGTGATACTTATTATAATACAGCTTATTAAGTAT           |       |       |       |       |       |       |       | 23366 |
| Pig         | TTTTAAACAATT- AGGGAGATGATGTATGGATATTT- - - - - ATCATTGTTATTTTT- - - TATAATATAGCTTGTT- - - GTAT |       |       |       |       |       |       |       | 22408 |





Dienstag, 3. Mai 2022 08:38

| Majority    | TCTGCTAGTXAXGAXTTAG- - XTATT- TTAAATATTAAT- - - - - XC- XTXTATGTAXGTATAAXATAAATAAAAAAT- AX |       |       |       |       |       |       |       |       |
|-------------|--------------------------------------------------------------------------------------------|-------|-------|-------|-------|-------|-------|-------|-------|
|             | 33450                                                                                      | 33460 | 33470 | 33480 | 33490 | 33500 | 33510 | 33520 |       |
| Human       | TCAGCCAGTATTAATTTAA- - CCTATT- TTCAATACTAAT- - - - - ATCCATGTATGTAAATATCCATAACTAA          |       |       |       |       |       |       |       | 29660 |
| PolarBear   | TCTACTGA- - AAGACTTTTGGTTGCTC- CCAAGTTTTGAC- - - - - AACTATGAATAAGGATGCTATAAAT- AT         |       |       |       |       |       |       |       | 1338  |
| Cow         | TCAGCTAGTATTGATTTAG- - TTATT- TTAAATATTGCTT- - - ACCAATGTATGTAAGTATACACATACTTCAAAT- AG     |       |       |       |       |       |       |       | 28318 |
| Dog         | TATCATAA- - ATAAAAATATA- - - - - AAAAAAAAAAAAAA- - - - - AAAAATTAATTAATAAAAAACAAAAAA- AA   |       |       |       |       |       |       |       | 27225 |
| BelugaWhale | TCAGCTAGTGTTGATTTAG- - TTATT- TTAAATATTA- - - - - CCCATGTATGTAAGTATACACATAATTTAAAT- AT     |       |       |       |       |       |       |       | 22895 |
| Donkey      | CATAATTGCCAAAACCTTGGAAACAACCAAGAGGTCACAAGGTGAAGCTTTTTTCAGTAGGTGAATGGATGATTAACCTGTA         |       |       |       |       |       |       |       | 28588 |
| Cat         | CCTTATAGTCAAAAACCTTGGGAACATCC- AAAAGTGTGTTGTG- - GTATGTCTAGACACTGGGATAATTTTCAGAAGT- AA     |       |       |       |       |       |       |       | 30803 |
| Ferret      | TCTCCTGA- - AAGACTTGA- - - - - CCAAGTCTTGAC- - - - - AACTATTAATAAGGTTGCTATAAGT- AT         |       |       |       |       |       |       |       | 26998 |
| Lion        | CCTTATAGTCAAAAACCTTGGGAGCATCC- AAAAGTCTGTTGTG- - GTATGTCTAGACACTGGGATAATTTTCAGAAGT- AA     |       |       |       |       |       |       |       | 29125 |
| Vaquita     | TCAGCTAGTGTTGATTTAG- - TTATT- TTAAATATTAATA- - - ACCCATGTATGTAAGTATACACATAATTAAGAT- AT     |       |       |       |       |       |       |       | 23577 |
| Pig         | TCAGCTAGTGTTCGATTT- - - - - ATT- TTAAACATTAAT- - - - ACCCATGTATGTAAGTATACACATA- - - - - AT |       |       |       |       |       |       |       | 22608 |

| Majority    | GTXAA- ACAGTTXATTTAGCTXTTTTTAAA- TATTAGT- AGCTCACACATACTTTTGT- - - - A- - - - - AGGTACAXA- |       |       |       |       |       |       |       |       |
|-------------|--------------------------------------------------------------------------------------------|-------|-------|-------|-------|-------|-------|-------|-------|
|             | 33530                                                                                      | 33540 | 33550 | 33560 | 33570 | 33580 | 33590 | 33600 |       |
| Human       | GGCAAAACAGTTGATTTTAGCTAGTTTAAATATT- - - - AGTCCATTCATATTTTTGT- - - - - AAGTACATAA          |       |       |       |       |       |       |       | 29723 |
| PolarBear   | CTGTGTACAGTGTTTTTGTGTATATCA- - - - - AATTTTCAACTCCTTTGGG- - - - - AGTTGAAGA-               |       |       |       |       |       |       |       | 1394  |
| Cow         | GCAAA- ACAGTTGATTTAGCTGTTTTAAA- TATTAGTGTGCTCATATGTACTTTTGTAAAGTACGCACATTACGTACGTA-        |       |       |       |       |       |       |       | 28395 |
| Dog         | AAAAA- - - AGCTTTTTTTTTTTTTTAC- - - - - AGTAATCAGATAGTGTAGGTT- - T- - - - TGGTGTGT-        |       |       |       |       |       |       |       | 27282 |
| BelugaWhale | GCAAA- ACAGTTGATTTAGCTATTTTTAAA- TATTAGTCTGCTCACACATACTTTTGT- - - - - ATGTACACA-           |       |       |       |       |       |       |       | 22959 |
| Donkey      | GTACACCCAGACAATGGAATATTTTTTTCAG- - - - CAGTAACTCAAAATGAGCTATTGAGC- CATGAGAAAGGACCTTAAA-    |       |       |       |       |       |       |       | 28662 |
| Cat         | AAGAAAATGACCTATCAAGCCAAGAAAAGATAAAGGGT GAGCCTTAAATCCATGTTACTA- - AATGAA- - - AGAAGCCAT-    |       |       |       |       |       |       |       | 30877 |
| Ferret      | CTGTG- - CAGGGTTTTGTGTGTACATTG- - - - - AATTTTCAGTCCCTTTGGGTA- - A- - - - ATACCAAGG-       |       |       |       |       |       |       |       | 27055 |
| Lion        | AAGAAAATGACCTATCAAGCCAAGAAAAGATAAAGGGGAAACCTTAAATCCATGTTACTA- - AATGAA- - - AGAAGCCAT-     |       |       |       |       |       |       |       | 29199 |
| Vaquita     | GCAAA- ACAGTTGATTTAGCTATTTTTAAA- TATTAGTCTGCACACACATACTTTTGT- - - - - ATGTACACA-           |       |       |       |       |       |       |       | 23641 |
| Pig         | GTGAA- ACAGTTGATTTAGCTATTTTTAAA- TATTAGTTTGTCTCACACATACTTTC- - - - - A- - - - - AGGTACGTA- |       |       |       |       |       |       |       | 22671 |

Dienstag, 3. Mai 2022 08:38

| Majority    | TATTTAAAAATAGATAAAXTAACATTGGX- AGTTTAAACA- TXTXTGXAGTTCAAAAAT- - ATAX- XX- - XAXAACTT |            |               |           |          |           |           |             |                                          |
|-------------|---------------------------------------------------------------------------------------|------------|---------------|-----------|----------|-----------|-----------|-------------|------------------------------------------|
|             | 33610                                                                                 | 33620      | 33630         | 33640     | 33650    | 33660     | 33670     | 33680       |                                          |
| Human       | CATTTTCAA                                                                             | AATAGCTAAA | ATGTCAC       | TGGCTGGT  | TTGAACA- | ACTGTGC   | AGTTACCG  | AAGAG- ATG- | - - - - - AATGT 29792                    |
| PolarBear   | TGCATAATT                                                                             | GTTGGATT   | GTGT- - - - - | AAG- AGT  | ATATTTT  | GTTTTATA  | AAAAC     | TTTCAA      | ACT- - - - - ACTTTTCAAAGTAGCTC 1465      |
| Cow         | CACTTA-                                                                               | AAAACAG    | CTGAAACA      | ACATTG    | CTTGGT   | TTGAACA   | AAATTGT   | GTAGTTCT    | AAGAAC- - ATATGAACATACGATTC 28472        |
| Dog         | TTTTTGA                                                                               | AACA       | CAATAG        | GGT CAG-  | - - TGA- | ACGATGG   | AAAGAAT   | AGAGGG      | CCCTCGTAAT- - AGATCCTGTGATAGCCC 27356    |
| BelugaWhale | CATTTTTAA                                                                             | AATAGTTG   | AAACAAC       | ATTGGT    | TGGT     | TTGAACA-  | - - ACTGC | AGTTCTG     | AAG- - - - - ATA- - - - - - CGATTT 23026 |
| Donkey      | TCCATATTA                                                                             | AAGTGAA    | AGAAGT        | CACTCTG   | GAGAAG   | GCTACATA- | - - CTGT  | ATGATTCCA   | ACTATATAATGTTCTGGAAAAGGC 28740           |
| Cat         | TCTACGA                                                                               | AGTCTAC    | ATACTGT       | ATGATT    | CTA- ACT | TTATGAC   | GTCTGG    | AAAAGGC     | AAGTCTAGAGACCGTAAAACTT 30956             |
| Ferret      | TGCACAATT                                                                             | GTTGGATT   | GTGTGG-       | - - TAAG- | AGTGT    | ATTTTGT   | TTTATA    | AAAAC       | TTCCAACT- - ATTTTCTAAAGTAACTC 27129      |
| Lion        | TCTGAGA                                                                               | AGTCTAC    | ATACTGT       | ATGATT    | CTA- ACT | ATACA     | ACGTCT    | GGAAA       | AGGCAGAACTCTAGAGACCGTAAAACTT 29278       |
| Vaquita     | CATTTTTAA                                                                             | AATAGTTG   | AAACAAC       | ATTGGT    | TGGT     | TTGAACA-  | - - ACTGC | AGTTCTG     | AAG- - - - - ATA- - - - - - CGACTT 23708 |
| Pig         | CATTTA-                                                                               | AAAATAG    | CTAAA         | ACAGT     | GTTG-    | - - - - - | GTTTTGC   | AGTTC       | AAAAAC- - AT- - - - - - - GATTT 22724    |

| Majority    | AT- AACCTTATCAGTAAAGGATTTA- - - - - AAGXAAXGATGAA- - - - - TATAGATGAGCAGAAAGAAAXTTTTTXAGTC |           |         |            |           |         |             |             |                                            |
|-------------|--------------------------------------------------------------------------------------------|-----------|---------|------------|-----------|---------|-------------|-------------|--------------------------------------------|
|             | 33690                                                                                      | 33700     | 33710   | 33720      | 33730     | 33740   | 33750       | 33760       |                                            |
| Human       | AT- AACCT                                                                                  | TTTTCTG   | TAAAGA  | ATTTT-     | - - - - - | AAGACAT | GACCT-      | - - - - -   | TATTTTTTTGCAGAAAGAAATCTCTTCATT 29858       |
| PolarBear   | C- - -                                                                                     | CCCTCAC   | CAGAGAT | GGGGTTC-   | - - - - - | GGGGAAG | GATGAA-     | - - - - -   | TAAAGCAGAGCATAGAGAATTTTTT- AGGG 1529       |
| Cow         | ATGTGAT                                                                                    | TTTTTCT   | TAAAGG  | ATTTG-     | - - - - - | AAAACAT | GATTG-      | - - - - -   | TCTCTTCTTATATTGGCAGAAAGAAATTTCTCATTC 28545 |
| Dog         | C- - -                                                                                     | CCCT- - - | GTAAAT  | ATATATC-   | - - - - - | AACTTAC | CTTTGA-     | - - - - -   | CAAAG- - GAGCAAATACAATACTGC- - GGA 27413   |
| BelugaWhale | AT- AACCT                                                                                  | TTTTCT    | TAAAGG  | ATTTA-     | - - - - - | AAGACAT | GATTCA-     | - - ATCC    | CTTATATTGGTAGAAGGAAATTTCTCATTC 23098       |
| Donkey      | AAAAC                                                                                      | TGGAGAC   | AGTAAAA | AGATCAG    | TGGT      | TGGGAG  | GAGTAG      | GGTGG       | AGGGATGAATAGGCAGAGCACAGAGGATG 28820        |
| Cat         | AA- GTGG                                                                                   | TACCAGG   | GATGGG  | T- - - - - | GGGGA     | AGGATG  | AA- - - - - | TAAAG       | CAGAGCACAGAGAATTTCTT- AGGT 31021           |
| Ferret      | C- - -                                                                                     | TCCCTAC   | CAGGGAT | AGGGTTA-   | - - - - - | GGGGA   | AGGATG      | AA- - - - - | TAGAGCAGAGCATAGATAATTTTTTTAGGG 27194       |
| Lion        | AA- GTGAT                                                                                  | CACCAGG   | GATGGG  | T- - - - - | GGGGA     | AGGATG  | AA- - - - - | TAAAG       | CAGAGCACAGAGAATTTCTT- AGGT 29343           |
| Vaquita     | AT- AACCT                                                                                  | TTTTCT    | TAAAGG  | ATTTA-     | - - - - - | AAGACAT | GATTCA-     | - - ATCC    | CTTATATTGGTAGAAGGAAATTTCTCATTC 23780       |
| Pig         | AT- CATCT                                                                                  | TATCACT   | AAAGG   | ATTTA-     | - - - - - | AAGATGT | GATGC       | ATTCTCT     | TTTTTATATTAGCAGGAGGAAATGTTCCATTC 22798     |

Dienstag, 3. Mai 2022 08:38

| Majority    | CAXAGAATAT - G-XTXTGTTTACAATATTCTAXCGATXGAAATATAXC- TTACXTATTTGTTCAAAXXTAATGAATXTAA |             |            |            |               |                     |            |                  |                   |
|-------------|-------------------------------------------------------------------------------------|-------------|------------|------------|---------------|---------------------|------------|------------------|-------------------|
|             | 33770                                                                               | 33780       | 33790      | 33800      | 33810         | 33820               | 33830      | 33840            |                   |
| Human       | CCAAAGATTTT                                                                         | GCCTTTGCTTT | CGGTGTTCT  | AGCCACTGA  | AGTATA- - -   | TACCTGTTTA- - -     | ATTTTAATA  | AATGATGA         | 29930             |
| PolarBear   | CAGTGAAAT- - -                                                                      | ACTTTATACA  | ACATA- - - | ATGATAGA   | AGTATGTC      | CTTACACAT           | TTGTTCAA   | ACCCATCG         | AATGTAT 1602      |
| Cow         | CATAGATTTT- -                                                                       | GCCTTTGCTT  | TACAGTGTT  | CTAGCCATT  | GAAACATA- - - | CACCTGTTTA- - -     | TTTCAAT    | GATTATGA         | 28616             |
| Dog         | TCAGGTACAT- - -                                                                     | TCTCATTA    | ACAAATGCT  | GCTGG- AAC | AGTTGGAC      | ATCACTTACT          | TG- CAAA   | AGGAT- GAAT- CAA | 27484             |
| BelugaWhale | CATAGATTTT                                                                          | GCCTTTGTTT  | TACAGTGTT  | CTAGCCATT  | AGAATATA- - - | TACCTAATT           | GTTAATTT   | TAAATGATT        | ATGA 23174        |
| Donkey      | TATAGGGTAGT                                                                         | GAAAATACT   | CGATATATT  | TAAACGAT   | GGATATGT      | GTGCATCGT           | ACGTTTGT   | CTAAACCC         | ACTGAATGTAC 28900 |
| Cat         | CAATGAAAT- - -                                                                      | CCTCTATAT   | GATATTATA  | AATGATAGA  | AAATACAT      | CCTAACAC            | ATTTGTTCAA | ACCTGGTGA        | ATGTAC 31097      |
| Ferret      | CAGTGAAAT- - -                                                                      | ACTGTATA    | CAACATAG   | TAAATGAT   | AGAATATG      | TCGTTATAT           | TTTGTTC    | AAACCCAT         | TGAATGTAC 27270   |
| Lion        | CAGTGAAAT- - -                                                                      | CCTCTATAT   | GATATTATA  | AATGATAGA  | AAATACAT      | CCTAACAC            | ATTTGTTCAA | ACCTGCTGA        | ATGTAC 29419      |
| Vaquita     | CATAGATTTT                                                                          | GCCTTTGTTT  | TACAGTGTT  | CTAGCCATT  | AGAATATA- - - | TACCTAATT           | GTTAATTT   | TAAATGATT        | ATGA 23856        |
| Pig         | CAAGATTTT- -                                                                        | GTCTTTGTTT  | TACAGTGTT  | CTAGCCATT  | TAAATACA- - - | TACCTAATTG- - - - - | TTTAA      | TGATTATGA        | 22867             |

| Majority    | AAX- ATCAATAGTCCACCTCAT- GGTAAACTG- - GATTTTCAGTGATTATGAXXGTXCTTATXTGCTGA- - - - XGACAA |                   |                |            |            |             |               |                 |              |              |
|-------------|-----------------------------------------------------------------------------------------|-------------------|----------------|------------|------------|-------------|---------------|-----------------|--------------|--------------|
|             | 33850                                                                                   | 33860             | 33870          | 33880      | 33890      | 33900       | 33910         | 33920           |              |              |
| Human       | AGATATTGATA- T                                                                          | CTAACTCA- - - - - | - - - - -      | - - - - -  | - - - - -  | C- - CAGA   | ATGAAGTT      | CTAATTTT        | CTAA- - - -  | AGACCT 29981 |
| PolarBear   | AAC- ATCAAGAGT                                                                          | GAACCCTCG- GGT    | AAACTG- -      | GATTTTCAGT | GATTATGAT  | GTGTGTCATT  | GCAGGTTGAT    | CCTTGG- AA      | 1677         |              |
| Cow         | AG- - ATGAGTTGT                                                                         | CCAGATCA- - -     | T- - - - -     | - - - - -  | T- - - - - | AGTGTGAAGT  | TCTCATTTT     | CTGA- - - -     | AGACCT 28666 |              |
| Dog         | GAC- ACTGCTAAC- -                                                                       | ATCTTAC- AAAAAA   | AATT- -        | AACTCAAGAT | GTATTAGAA  | ACCTAAATATA | AAGCTG- - - - | CGA- AA         | 27552        |              |
| BelugaWhale | AA- - ATGAATTGT                                                                         | CCAGCTCAT- G      | TAAATGAGT- TGT | CCAACTCACC | ATTGTGAAGT | TCTCATTTT   | CTAA- - - -   | AGACCT 23246    |              |              |
| Donkey      | AAC- ATCAAGAGT                                                                          | GAACCTCTTAG       | GTAAACTGT      | GGATTTTGGG | TATGATGT   | GTGTCAGT    | ATAGGTT       | CATCCTTT        | GTAA 28979   |              |
| Cat         | AAC- ATCAATA- - - -                                                                     | CCCTCC- GGT       | AAACTGCAG      | ACTTTT     | CAGTGATT   | ATGATGTGT   | CCATGCGGG     | TGATCCTT        | GGTAA 31170  |              |
| Ferret      | AG- - ATCAAGAGT                                                                         | GAACCCTCA- GGT    | AAACTG- -      | GATTTTCAGT | GATTATGAT  | GTGTCACT    | GCAAGTTGAT    | CCTTGGTAA 27345 |              |              |
| Lion        | AAC- ATCAATA- - - -                                                                     | CCCTCT- GGT       | AAACTGCAG      | ACTTTT     | CAGTGATT   | ATGATGTGT   | CCATGCAGG     | TGATCCTT        | GGTAA 29492  |              |
| Vaquita     | AA- - ATGAATTGT                                                                         | CCAGCTCAT- G      | TAAATGAGT- TGT | CCAACTCACC | ATTGTGAAGT | TCTCATTTT   | CTAA- - - -   | AGACCT 23928    |              |              |
| Pig         | AA- - ATGAGTTATT                                                                        | CAGCTCA- - -      | G- - - - -     | - - - - -  | C- - - - - | AGAGTGAAGT  | TCTCATTTT     | CTAA- - - -     | AGACCT 22917 |              |

Dienstag, 3. Mai 2022 08:38

| Majority    | GAATTX- ACCTCTATGATGAGAGGT- TTTGAGGATGAXGGATTCAATGAATGTXGTGGG- - - XAGXGTATAGATGTTT                                                                                              |
|-------------|----------------------------------------------------------------------------------------------------------------------------------------------------------------------------------|
|             | ----- ----- ----- ----- ----- ----- ----- ----- <br>33930            33940            33950            33960            33970            33980            33990            34000 |
| Human       | GAATT- - ATCTGGATGAATAAAGGACCATTGGGATGGAGGATTTATAGAACGTTTTCTGAG- - - - AAAGTCTAGCTGTTG 30054                                                                                     |
| PolarBear   | TAGCT- - ACCACTTTGTTGGGAGGT- TTTGGTAATGAGGGATGCGATGTATGTATGGGGGCAGGGAGTGTATAGAAATCT 1754                                                                                         |
| Cow         | GAGTT- - ATCTGGATGAGTAAAGGA- TATGAGGTTGAAGGATTCG- - GAGTGTCTGTGAG- - - - AAAGTTCAACTGCTT 28736                                                                                   |
| Dog         | CTGTAG- ACCTCTTAGAAGATAAGA- GGAGGGGAGAACAACCTAGATG- ACCTTTTTCGGTTATTAGCGTATATTTTATAC 27629                                                                                       |
| BelugaWhale | GAATT- - ATCTGGATGAGTAAAGGGCTATGAGGCTGAAGGATTCAC- - AGTGTCTGTGAG- - - - AAAGTCCAGGTGCTG 23317                                                                                    |
| Donkey      | TAAATGTACCACTCTTTGGGCACT- - GTGGTAATGAGGAAGGCTAT- - GCGTTTGTGGGGGTAGAGTGTATGAGAAATT 29055                                                                                        |
| Cat         | AAACTGTACCACTGTGGTGGGAGTT- GTTGGTCATGAGGGAGGCTATGTATGTATGGGGGAAGGGAGTAAATAGAAGTCT 31249                                                                                          |
| Ferret      | TAACTGTACCACTGTGCTGGGAGGT- TTTGATAATGAGGGATACAATGTATGTTTGGGGACAGGGAGTATATAGAAATCT 27424                                                                                          |
| Lion        | AAACTGTACCACTGTGGTGGGAGTT- GTTGTATCATGAGGGAGGCTATGTATGTATGGGGGAAGGGAGTAAATAGAAGTCT 29571                                                                                         |
| Vaquita     | GAGTT- - ATCTGGATGAGTAAAGGGCTATGAGGCTGAAGGATTCAC- - AGTGTCTGTGAG- - - - AAAGTCCAGGTGCTG 23999                                                                                    |
| Pig         | GAGTTT- ATCTGGATGAATAGAGGGCTTTGAGGTTGGAGGATTCACAGAATGTCTCT- - - - - AAGTCCAGCTTCTT 22987                                                                                         |

| Majority    | CXG- - - - XXXTTXCTTATTTTTTATTAAAAXCTAAAGCAGCTCTXXAAAACCTTATA- - - - ATTAXGAAAXCT- X- - - TC                                                                                     |
|-------------|----------------------------------------------------------------------------------------------------------------------------------------------------------------------------------|
|             | ----- ----- ----- ----- ----- ----- ----- ----- <br>34010            34020            34030            34040            34050            34060            34070            34080 |
| Human       | TGG- - - - CTTTGGTTTGTGTTGT- - - AAACAATTGAGATAGCTTTCCAAAGCTTTTGC- - - - TTATAGAATCTAA- - - TC 30119                                                                             |
| PolarBear   | CTGTTG- TCGCCTTCTCATTTTTATTGTAAACCTAAAACCTGCTCTTAAAAA- - - - - AGAGA- - - - - AC 1812                                                                                            |
| Cow         | TGG- - - - TATTTGCTTATT- - - - - AAAAAATTGATGTAGTTTTCCTTTCCTTAA- - - - - ATTATGAAACCTGG- - - TC 28798                                                                            |
| Dog         | CT- - - - - TTTTTAGTTTTATAACCAAAAGACCTCAATCCATGAAAA- - - - - AAACAA- - - - - TT 27680                                                                                            |
| BelugaWhale | TGG- - - - CATTAGTTTGTGTTATTT- AAAAAATGATGTAGTTCTCCAAGGCTTCTG- - - - ACTATGAAACCTAA- - - TC 23384                                                                                |
| Donkey      | CCTT- - - - TTCCTCCTCAATTTTTATTGTAAACCTATAACTGCTCTAAAAAAATAA- A- - - - ACTAGGAAA- - - - - C 29117                                                                                |
| Cat         | CTGTTGGCTGCCTTCTCAATTTTTCTTGCAAACCTAAATCTGCTCTTAAAAATAAAAGAAAAAAAGAAAAGCTTGGAAAC 31329                                                                                           |
| Ferret      | CTGTTG- CTGCCTTCTCATTTTTATTGTAAACCTAAAACCTGCTCTTAAAAATAAAAGCACAAGAAAAGAAA- - - - - AC 27495                                                                                      |
| Lion        | CTGTTGGCTGCCTTCTCAATTTTTCTTGCAAACCTAAAGCTGCTCTTAAAAATAAAAGAAAAAAAGAAAAGCTTGGAAAC 29651                                                                                           |
| Vaquita     | TGG- - - - CATTAGTTTGTGTTTATTT- AAAAAATGATGTAGTTCTCCAAGGCTTCTG- - - - ATTATGAAACCTAA- - - TC 24066                                                                               |
| Pig         | TGG- - - - CATTAGTTTGTGTTTATTT- AAAAAATGATGTAGTTCTCCAAGGCTTCTG- - - - ATTATGAAACCTG- - - TC 23055                                                                                |

Dienstag, 3. Mai 2022 08:38

| Majority    | ATTTTACTATTGATTGTCAATXAGX- - - - AT- - - - - TTAGGTGAAAGGAAGGA- - AGGAAACACTGTTGGCT |       |       |       |       |                                 |       |                    |       |
|-------------|-------------------------------------------------------------------------------------|-------|-------|-------|-------|---------------------------------|-------|--------------------|-------|
|             | 34090                                                                               | 34100 | 34110 | 34120 | 34130 | 34140                           | 34150 | 34160              |       |
| Human       | ACTTTTTCTATTTATTGTCTTTTGGG-                                                         |       |       |       |       | CTTAGAGTAAAGAAGGGA-             |       | AGGGAACACTGTTGCCT  | 30180 |
| PolarBear   | ATTTTATTGTTGATAGTGAACCAAC-                                                          |       |       |       |       | TTAGGTGAAAGGAAAGA-              |       | AGGAAAACTGTTGGCT   | 1874  |
| Cow         | ATTTTTCCTATTTATTGCCTTTTGG-                                                          |       |       |       |       | TGGGTTAATGGAAGGA-               |       | AGGACCTACTGTTGGCT  | 28859 |
| Dog         | GATTGTGCTCTGGATTACAAATTAA-                                                          |       |       |       |       | AAGTAAAAAGACTCT-                |       | TGCTCTTATA- AAGACA | 27736 |
| BelugaWhale | AGTTTTCCTATTTATTGTCTATTGGA-                                                         |       |       |       |       | GGGTGAATGGAAGGA-                |       | AGGAAACACTGTTGGCT  | 23445 |
| Donkey      | ATTTTATTGTTGATAGTAAACCAATGATGCATATCAGTGGTACTTAACTTTAGCATGCATCAGAAGCACCTGGAGGGG      |       |       |       |       |                                 |       |                    | 29197 |
| Cat         | ATTTTATTATTGGTAGTGAGCCAGT-                                                          |       |       |       |       | TTAGGTGAAAGGAAGAA-              |       | AGGAAGCCCTGTTGGCT  | 31391 |
| Ferret      | ATTTTATTGTTGATAGTGAACCAAT-                                                          |       |       |       |       | TTAGGTGAAAGGAAAGA-              |       | AGGAAAACT- TAGGCT  | 27556 |
| Lion        | ATTTTATTATTGGTAGTGAGCCAAAT-                                                         |       |       |       |       | TTAGGTGAAAGGAAGAA-              |       | AGGAAGCCCTGTTGGCT  | 29713 |
| Vaquita     | AGTTTTCCTATTTATTGTCTGTTGGA-                                                         |       |       |       |       | GGGTGAATGGAAGGA-                |       | AGGAAACACTGTTGGCT  | 24127 |
| Pig         | ATTTTTCCTGTTTCTTGTCCCTAAGA-                                                         |       |       |       |       | TTATAAATTGTCTTTGGGTGAAAGGAAGGA- |       | AGGAAACACTGTTGGTT  | 23128 |

| Majority    | TTGTGAAAAGGAAGAGAG- TGGACAXGAGAGT- - - - - GGAGTTAATTTTTT- - ATTT- TAGGGATTAAX- - - - TT |       |       |       |       |       |                  |               |                                        |                  |                        |            |            |       |
|-------------|------------------------------------------------------------------------------------------|-------|-------|-------|-------|-------|------------------|---------------|----------------------------------------|------------------|------------------------|------------|------------|-------|
|             | 34170                                                                                    | 34180 | 34190 | 34200 | 34210 | 34220 | 34230            | 34240         |                                        |                  |                        |            |            |       |
| Human       | TTGTGAGAATGGGAGAGGGATAGATGGGAGAGTAGAGGGATGAAGTTAATTTTTT-                                 |       |       |       |       |       | ATTA-            | TAGGGATTAACA- | - - - - TT                             | 30253            |                        |            |            |       |
| PolarBear   | TTGTGAAAAGGGAGACAGATTGACAAGAAAGT-                                                        |       |       |       |       |       | GCAGTTAATTTTCT-  | ATTT-         | TAGGGTTAAAA-                           | - - - - TT       | 1939                   |            |            |       |
| Cow         | TTGTGAGAAAGGAAGTTAC-                                                                     |       |       |       |       |       | GGATAGGAGAGT-    |               | GGAGTTAACTTATT-                        | GTTT- CAGGAATTA- | - - - - TT             | 28921      |            |       |
| Dog         | TTATCAAGAGAAATAGAAGATGAGCCACAGACT-                                                       |       |       |       |       |       | GGAGAAAAT-       |               | ATTTGCAGAAGATGTG-                      | - - - - TC       | 27796                  |            |            |       |
| BelugaWhale | TTGTGAAAAGGAAGAGAT-                                                                      |       |       |       |       |       | GGATAGGAGAGT-    |               | GGAGTTAACTTT-                          | - - - - ATTT-    | TAGGGATTA-             | - - - - TT | 23505      |       |
| Donkey      | TTGTTAAACTCAGGTTGC-                                                                      |       |       |       |       |       | TGGACTCTACCCTCA- |               | GGGTTTTATTTCAGTAGATCTGAGTGGGTCTGAGAATC |                  |                        | 29270      |            |       |
| Cat         | TTGTGAAAAGAGAGAGA-                                                                       |       |       |       |       |       | TTGACAAGAAAGT-   |               | TAATTTTCTATTTT-                        |                  | AGTGGTTAACTTTTAAATATT  |            | 31459      |       |
| Ferret      | TTGTGAAAAGGAGAAAGATTGACAAGAAAGT-                                                         |       |       |       |       |       | AGAGTTAATTTTTT-  |               | TTTTGTAGGGTTGAAA-                      |                  | - - - - TT             | 27622      |            |       |
| Lion        | TTGTGAAAAGAGAGAGA-                                                                       |       |       |       |       |       | TTGACAAGAAAGT-   |               | TAATTTTCTATTTT-                        |                  | AGTGGTTACAATTTTAAATATT |            | 29779      |       |
| Vaquita     | TTGTGAAAAGGAAGAGAT-                                                                      |       |       |       |       |       | GGATAGGAGAGT-    |               | GGAGTTAACTTTTT-                        |                  | ATTT-                  | TAGGGATTA- | - - - - TT | 24189 |
| Pig         | TTGTGAAAAGGAAGAGATCTGGATGGGAGAGT-                                                        |       |       |       |       |       | GGAGTTAACTTTTT-  |               | ATTT-                                  |                  | TAGGGATTGAA-           | - - - - AT | 23192      |       |



Dienstag, 3. Mai 2022 08:38

| Majority    | ----- GTTTTTATAGAGAGGATCTGACGAACTACTCTCAGGCAGT- GTTCTCAGT- - AGTCCAAA- - CT            |       |       |       |       |       |       |       |       |
|-------------|----------------------------------------------------------------------------------------|-------|-------|-------|-------|-------|-------|-------|-------|
|             | 34410                                                                                  | 34420 | 34430 | 34440 | 34450 | 34460 | 34470 | 34480 |       |
| Human       | ----- GTTTTTCATAGAGAGGATCTGACGAACTACTCTCAGGCAGT- GTTCTCAGT- - AGTCCGAA- - CT           |       |       |       |       |       |       |       | 30409 |
| PolarBear   | ----- GTTTTTATAGAGAGGATCTGACGAACTACTCTCAGGCAGT- GTTCTCAGT- - AGTCCAAA- - CT            |       |       |       |       |       |       |       | 2118  |
| Cow         | ----- GTTTTTATAGAGAGGATCTGACGAACTACTCTCAGGCAGT- GTTCTCAGT- - AGTCCAAA- - CT            |       |       |       |       |       |       |       | 29103 |
| Dog         | ----- ACATGGAAAGATGGCACCACAAATCATCAAGCATAGGGCATTCAAGGAAA- AACGCAAATTAACAAGA- - TA      |       |       |       |       |       |       |       | 27986 |
| BelugaWhale | ----- GTTTTAACAGAGAGGATCTGACGAACTACTCTCAGGCAGT- GTTCTCAGT- - AGTCCAAA- - CT            |       |       |       |       |       |       |       | 23705 |
| Donkey      | TGTGGCTCAATGCTATGTTTTATTTTTCTCATGCT- TGTATTTCTCTTGAGCATTGATGCTAGT- GAGTAGAAAGCTT       |       |       |       |       |       |       |       | 29505 |
| Cat         | ----- GTTTTTCTAGAGAGGATCTGACGAACTACTCTCAGGCAGT- GTTCTCAGT- - AGTCCAAA- - CT            |       |       |       |       |       |       |       | 31641 |
| Ferret      | TGTTTTGTGTTTTGTTTTGTTTTATAGAGAGGATCTGACGAACTACTCTCAGGCAGT- GTTCTCAGT- - AGTCCAAA- - CT |       |       |       |       |       |       |       | 27818 |
| Lion        | ----- GTTTTTCTAGAGAGGATCTGACGAACTACTCTCAGGCAGT- GTTCTCAGT- - AGTCCAAA- - CT            |       |       |       |       |       |       |       | 29962 |
| Vaquita     | ----- GTTTTAACAGAGAGGATCTGACGAACTACTCTCAGGCAGT- GTTCTCAGT- - AGTCCAAA- - CT            |       |       |       |       |       |       |       | 24389 |
| Pig         | ----- GTTTTTCTAGAGAGGATCTGACGAACTACTCTCAGGCAGT- GTTCTCAGT- - AGTCCAAA- - CT            |       |       |       |       |       |       |       | 23371 |

| Majority    | CTAATATGAGCAGCATGGTG- GTTACAGGTAAGTGTTA- CTCTCTT- - - - - AACAXTX- T- - - TCTCATTA- TTTG        |       |       |       |       |       |       |       |       |
|-------------|-------------------------------------------------------------------------------------------------|-------|-------|-------|-------|-------|-------|-------|-------|
|             | 34490                                                                                           | 34500 | 34510 | 34520 | 34530 | 34540 | 34550 | 34560 |       |
| Human       | CTAATATGAGCAGCATGGTA- GTTACAGGTAAGTGTTA- CTCTCTT- - - - - AGCAG- - - T- - CTGTCAT- - - - TTG    |       |       |       |       |       |       |       | 30469 |
| PolarBear   | CTAATATGAGCAGCATGGTG- GTTACAGGTAAGTGTTT- CTTTCTT- - - - - AACAGTGTT- - GCTTAATTA- TTTG          |       |       |       |       |       |       |       | 2184  |
| Cow         | CTAACATGACCAGCATGGTG- GTTACAGGTAAGTGTTA- CTCTCTT- - - - - AACAA- - - - G- - - TCTCATTA- TTTG    |       |       |       |       |       |       |       | 29164 |
| Dog         | CTACCACACAT- GTATCAGA- ATAGCCAAAATGTATTT- AGAACTG- - - - - AATC- TGAA- - ACCCCATAA- ATGC        |       |       |       |       |       |       |       | 28050 |
| BelugaWhale | CTAACATGAGCAGCATGGTG- GTTACAGGTAAGTGTTAACTCTCTT- - - - - AACAA- - - - G- - - TCTCATTA- TTTG     |       |       |       |       |       |       |       | 23767 |
| Donkey      | TTAAAACAATTTGGGAGATGAGCTACAAATATTTGTTTACCTTTTTGATCTTTGTTATAATACAGCTTATTATAAATTTA                |       |       |       |       |       |       |       | 29585 |
| Cat         | CTAATATGAGCAGCATGGTG- GTTACAGGTAAGTGTTA- CTCTCTT- - - - - AACAGTGTTAATTTAATTA- TTTG             |       |       |       |       |       |       |       | 31709 |
| Ferret      | CTAATATGAGCAGCATGGTG- GTTACAGGTAAGTGTTT- CTTTCTT- - - - - AACAGTGTT- - GCTTAATTA- TTTG          |       |       |       |       |       |       |       | 27884 |
| Lion        | CTAATATGAGCAGCATGGTG- GTTACAGGTAAGTGTTA- CTCTCTT- - - - - AACAGTGTTAATTTAATTA- TTTG             |       |       |       |       |       |       |       | 30030 |
| Vaquita     | CTAACATGAGCAGCATGGTG- GTTACAGGTAAGTGTTAACTCTCTT- - - - - AACAA- - - - G- - - TCTCATTA- TTTG     |       |       |       |       |       |       |       | 24451 |
| Pig         | CTAATATGAGCAGCATGGTG- GTTACAGGTGAGTGTTG- CTCTCTT- - - - - TAACA- - - - G- - - TCTCAT- - - - TTG |       |       |       |       |       |       |       | 23431 |



Dienstag, 3. Mai 2022 08:38

| Majority    | CCA- - - - - TTTTATGGGGCAGAATGTTAAAA- - - - - CTAAAATTTAGT- - - GTGTTTTACCAG- - AATAGCCTTTX   |       |
|-------------|-----------------------------------------------------------------------------------------------|-------|
|             | 34570 34580 34590 34600 34610 34620 34630 34640                                               |       |
| Human       | CCA- - - - - TTTTAGGGGGCAGAATGTTAAAA- - - - - CTCAAATTTAAC- - CCTGTTATACCAG- - GAAAGCCTTTC    | 30531 |
| PolarBear   | CCA- - - - - TTTTATGGGGCATAATGTTAAAA- - - - - CTAAAATTTA- - - - - GTCTTTTATCAG- - AATAGCCTTTT | 2243  |
| Cow         | CCA- - - - - TTTTGCAGGGCAGAATGTTACA- - - - - AGTTTGGT- - - GTGCTTTACCAG- - AGTAGCCTTTG        | 29220 |
| Dog         | TGA- - - - - CAAGGAGGAGTGTGAAGCAAGCA- - - - - CAGGAATTAGTC- - - ATATGTGTTGAGTTGATGTGAAATG     | 28113 |
| BelugaWhale | CCA- - - - - TTTTGCAGAGCAGAATGTTAAA- - - - - AGTTTAGT- - - GTGTTTTACCAG- - AATAGCCATTA        | 23823 |
| Donkey      | ACAACAAATTAGCATAAGGTTTATGGTTAATTTGGATTGTCTTGAACCTTCTGAGATGCTTTGATAAATTGTCTCCTTTA              | 29665 |
| Cat         | CCA- - - - - TTTTATGGGTGAGAATATTTAAAA- - - - - CTAATATTTAGT- - - CTGCTTTACCAG- - AATAGCCTTTT  | 31770 |
| Ferret      | CCA- - - - - TTTTATGGGGCAGAATATTTAAAA- - - - - CTAAAATTTATA- - - GTCTTTTGTGAG- - AATAGCCTTTT  | 27945 |
| Lion        | CCA- - - - - TTTTATGGGTGAGAATATTTAAAA- - - - - CTAATATTTAGT- - - CTGCTTTACCAG- - AATAGCCTTTT  | 30091 |
| Vaquita     | CCA- - - - - TTTTGCAGAGCAGAATGTTAAA- - - - - AGTTTAGT- - - GTGTTTTACCAG- - AATAGCCTTTA        | 24507 |
| Pig         | CCA- - - - - TTTTACAGGGCAGAATGTTAAAC- - - - - CTGAAGTTTAGT- - - GTGTTTTA- - AT- - AGCCCTTGTTA | 23490 |

| Majority    | TTATTAXATGCT- - - - - ATX- TTXTGTTGAAACATTTTA- - - GA- - GAAATTTTACTAAAGTAT- - - T- ATAT     |       |
|-------------|----------------------------------------------------------------------------------------------|-------|
|             | 34650 34660 34670 34680 34690 34700 34710 34720                                              |       |
| Human       | TTTTTAAATGCG- - - - - TGTGAAACATTTTA- - - GAG- TAAATTTTACTAAAGTAT- - - - ATAT                | 30583 |
| PolarBear   | ATAATTTATATTAA- - - - - ATGTTTCTGTTGAAATGCGACA- - - GG- - - AAATTTTACTAGAGTATATAT- ATGT      | 2306  |
| Cow         | TTTTTAAATGCT- - - - - TTGTGTTGAAACATTTTA- - - GAG- GAAATTTTGTGCTGTAGTAG- - - - ATAT          | 29275 |
| Dog         | CGAATGCAGACTGGTT- T- - - - ATAGTCCCTTTGAAAAATAGTT- - - TGG- - CAGTTTTATAGAAGTACTAGCTAT- ACTT | 28180 |
| BelugaWhale | TTTTTAAATACT- - - - - CTGTGTTGAAACAGTTTA- - - GA- - GAAATTTTACTATAGTAT- - - - GTAT           | 23877 |
| Donkey      | - TATTATACATTTTTTTCATTTTGGATTGTTGCACTTCTTTATTCTGACTGGTTTTTAAATCAACTACTGTTAATTT               | 29744 |
| Cat         | ATAATTTATGTTAAATGTTTTAAATGTTTCTGTTGGAGAAAAAAA- - - AA- - - TGTTTTTGTGAAACAC- - - T- ACAG     | 31839 |
| Ferret      | CTAATTTATGTTAAGTGTTTTTAAATGTTTCTGTTGAAATGCTGCA- - - GAGTAAAATTTTAAATAGAGTATATAT- GTGT        | 28020 |
| Lion        | ATAATTTATGGTAAATGTTTTAAATGTTTCTGTTGGA- AAAAGA- - - AA- - - TGTTTCTGTTGAAACAC- - - T- ACAG    | 30159 |
| Vaquita     | TTTTTAAATACT- - - - - CTGTGTTGAAACAGTTTA- - - GA- - GAAATTTTACTATAGTAT- - - - GTAT           | 24561 |
| Pig         | TTTTTAAATGCT- - - - - CTGTATTGAAACATTTTA- - - GAA- GAAATTTTACTATAGTAT- - - - ATAT            | 23545 |









Dienstag, 3. Mai 2022 08:38

| Majority    | TTTXATXTAAGTATTTCTT- - - - - CTCXATCCCGXAA- - - - - ATCCTAAGXCXCAXAGTGTATGX- TGA |           |                                                              |                    |                                              |                                 |                           |           |         |
|-------------|----------------------------------------------------------------------------------|-----------|--------------------------------------------------------------|--------------------|----------------------------------------------|---------------------------------|---------------------------|-----------|---------|
|             | 35370                                                                            | 35380     | 35390                                                        | 35400              | 35410                                        | 35420                           | 35430                     | 35440     |         |
| Human       | TTTACTTTAAGTATTTAT-                                                              | - - - - - | - - - - -                                                    | - - - - -          | GCCACAA-                                     | - - - - -                       | ACCCTAAAACCCAAATTTTAAGT-  | - - -     | A 30818 |
| PolarBear   | TTTTACATA- GTCCCGT-                                                              | - - - - - | - - - - -                                                    | - - - - -          | GCCTCCCTGAGAGATAAGTTCCAAGACTTGCAGGGAATGCCTGA | - - - - -                       | - - - - -                 | - - -     | 2578    |
| Cow         | TTTACTGTAAGTGTTCCTT-                                                             | - - - - - | - - - - -                                                    | - - - - -          | CTCAGTCCCACAA-                               | - - - - -                       | ATCCTACAGCCCCAAGTACAA-    | - - - - - | 29503   |
| Dog         | TTAAGTCTATGTTATTA-                                                               | - - - - - | GGA-                                                         | AAGGAGCCATTCTGAGA- | - - - - -                                    | - - - - -                       | AGGCTACATACTGTATGTATGG    | - - - - - | 28475   |
| BelugaWhale | TTCATTTTAAGTATTTCTT-                                                             | - - - - - | - - - - -                                                    | - - - - -          | CTCTATCCCATAA-                               | - - - - -                       | ATCCTAAAGCCCAAACCTGTAAAA- | - - -     | 24100   |
| Donkey      | TTTTATTTTAGGGATTAAT-                                                             | - - -     | TTTTTAACTATTTCCAGTAGTGTAATACCTGACGTTTGTTCGTTTTCGGTGAATATTTGA | - - - - -          | - - - - -                                    | - - - - -                       | - - - - -                 | - - -     | 30458   |
| Cat         | TTTTATAATAGTTCACCC-                                                              | - - - - - | - - - - -                                                    | - - - - -          | ACCTCCCTGGGC-                                | ATGTGTTCCAAGATTTGCAGTGGATGCCTGA | - - - - -                 | - - -     | 32100   |
| Ferret      | TTTTACATA- GTCCCTCATCAACCCCGGCCACCCCACTCTTCTGAGACATATGTTCCAAGACTCACAGTGGATGCCTGA | - - - - - | - - - - -                                                    | - - - - -          | - - - - -                                    | - - - - -                       | - - - - -                 | - - -     | 28713   |
| Lion        | TTTTATAATAGTTCACCC-                                                              | - - - - - | - - - - -                                                    | - - - - -          | ACCTCCCCGGGC-                                | TTGTTTTCCAAGTTTTGCAGTGGATGCCTGA | - - - - -                 | - - -     | 30417   |
| Vaquita     | TTTTATTTAAGTATTTCTT-                                                             | - - - - - | - - - - -                                                    | - - - - -          | CTCTATCCCATAA-                               | - - - - -                       | ATCCTAAAGCCCAAACCTCTAAAA- | - - -     | 24773   |
| Pig         | TTT- - - - TAAGTATTTCTT-                                                         | - - - - - | - - - - -                                                    | - - - - -          | CTCTATCCCACAA-                               | - - - - -                       | ATCCTAAAGCCCAAACCTATAAAT- | - - -     | 23764   |

| Majority    | AA- - CTXXAGXTAGT- - ACAAGACTC- AGATXCATAGTTGT- - - - - TTTTCXTATAAXTXXXXGC- - - - - T- X |                             |                                               |           |           |                                |             |                |       |
|-------------|-------------------------------------------------------------------------------------------|-----------------------------|-----------------------------------------------|-----------|-----------|--------------------------------|-------------|----------------|-------|
|             | 35450                                                                                     | 35460                       | 35470                                         | 35480     | 35490     | 35500                          | 35510       | 35520          |       |
| Human       | AAAACCG- - - - -                                                                          | - - - - -                   | AAGAATTCAGCTACATAGTTGTTTAAAACCATGCAACCATAGTT- | - - - - - | - - - - - | - - - - -                      | GC- - - - - | TATGG          | 30877 |
| PolarBear   | AA- - CTGCAGGTAGT- -                                                                      | ACAAAACCCCTAAATATACTATGCT-  | - - - - -                                     | - - - - - | - - - - - | TTTTCTATACATACATAC-            | - - -       | CTATGA         | 2640  |
| Cow         | - - - - -                                                                                 | - - - - -                   | GATTC- AGTTGCATAGTTGT-                        | - - - - - | - - - - - | CTTTTTTATG- - T-               | - - -       | GG- - - - - T- | 29536 |
| Dog         | AA- - CTATATGCCAT- -                                                                      | CCTGGA- - - -               | AAAGGCACCAAACC-                               | - - - - - | - - - - - | TAGAGAGACA- GTCCAAAGTTACAAAGAT | - - - - -   | - - -          | 28536 |
| BelugaWhale | AA- - - AAA- - - TACC- -                                                                  | ATAAGATTC- AGTTGCATAGCTGT-  | - - - - -                                     | - - - - - | - - - - - | TTTTTT- ATG- - T-              | - - -       | GC- - - - - T- | 24145 |
| Donkey      | AAAGTTACAGATAAGTGACAGGCCTTCAGATTAATGTTTTAAATTTAAAGTTGTCTTATGCTAATGTGTTTGTTCCTT            | - - - - -                   | - - - - -                                     | - - - - - | - - - - - | - - - - -                      | - - - - -   | - - -          | 30537 |
| Cat         | AA- - CTGTAGATGGT- -                                                                      | ACAAAACCCCTATATATACAGTGTT-  | - - - - -                                     | - - - - - | - - - - - | TTTTCTGTACATACATAT-            | - - - - -   | CTG            | 32159 |
| Ferret      | AA- - CTGCAGGTGGT- -                                                                      | ATAAAAACCCCTAAATATACTATGCT- | - - - - -                                     | - - - - - | - - - - - | TTTTCTATACATACATACATACCTATGA   | - - - - -   | - - -          | 28779 |
| Lion        | AA- - CTGTAGATGGT- -                                                                      | ACAAAACCCCTGTATATACAGTGTT-  | - - - - -                                     | - - - - - | - - - - - | TTTTCTGTACATACATAT-            | - - - - -   | CTA            | 30476 |
| Vaquita     | AA- - AAAAAATACC- -                                                                       | ATAAGATTC- AGTTGCATAGCTGT-  | - - - - -                                     | - - - - - | - - - - - | TTTTTTTTATG- - T-              | - - -       | GC- - - - - T- | 24822 |
| Pig         | AA- - - TAG- - - - C- - -                                                                 | AAAAGATTC- AGTTGCATAGTTGT-  | - - - - -                                     | - - - - - | - - - - - | TTTTTTAATG- - T-               | - - -       | GC- - - - - T- | 23807 |

Dienstag, 3. Mai 2022 08:38

| Majority    | TXAAGCTTATTTTA-XXXCTGTGCA-XTXACAGTATTXTCAACXCTTXAAAXTGGXATACTT--A--AXXATATXX--XA  |       |       |       |       |       |       |       |       |
|-------------|-----------------------------------------------------------------------------------|-------|-------|-------|-------|-------|-------|-------|-------|
|             | 35530                                                                             | 35540 | 35550 | 35560 | 35570 | 35580 | 35590 | 35600 |       |
| Human       | TTTTAACTAATT-----TTTTGCT-GAAACAGTATTTT-AAT--TCTGAGTTGATCCTTTT-----ATGT-----       |       |       |       |       |       |       |       | 30933 |
| PolarBear   | TAAAGCTTAGTTTATAAACTGGGCATATTAAGAAATTAACAAC--TAAAAATGGAACAATG-ATAACAATATAGTATA    |       |       |       |       |       |       |       | 2715  |
| Cow         | TTCAATATGTTT-----CTTTGCT-GTAACAGTATTTT-AATTCTTTGAATTGACTTCCTT-----TAT-----        |       |       |       |       |       |       |       | 29593 |
| Dog         | TTAAGGTTGGGGAGAAGGATATGAA-ATTATAATAATAAAAAGC--CTGAGAATAGAGTTTTTC-AGGACAACATGG-AAA |       |       |       |       |       |       |       | 28611 |
| BelugaWhale | TGAAACCTTTTTTTT---CTGTGTG-GTAACAGTATTTTAACTCTTTGGATTGGTTTCCTT-----TAT-----        |       |       |       |       |       |       |       | 24205 |
| Donkey      | TAGAGAGGATCTGACGAACTGCTCT-CTGGCAGTGTTCTCAGTAGTCCAAACTCGAATATGAGCAGCATGGTGGTTACAG  |       |       |       |       |       |       |       | 30616 |
| Cat         | TAAAGCTTAATTTATAAATTAGGCACATTAAGAGATTAACGAAAACATAAAATAGGACAGTG-ATAACAATAAACTGTA   |       |       |       |       |       |       |       | 32237 |
| Ferret      | TAAAGCTTAGTTTATAAATTGGGCATATTAAGAGATTAACAACAACATAAAATGGAAGAATG-ATAACAGTATAGTATT   |       |       |       |       |       |       |       | 28857 |
| Lion        | TAAAGCTTAATTTATAAATTAGGCACATTAAGAGATTAACGAAAACATAAAATAGGACAGTG-ATAACAATAAACTGTA   |       |       |       |       |       |       |       | 30554 |
| Vaquita     | TTAAATCTTTTTTTT---CTGTGTG-GTAACAGTATTTTAACTCTTTGGATTGGTTTCCTT-----TAT-----        |       |       |       |       |       |       |       | 24882 |
| Pig         | TTCAGTCTTTTTT-----CTTTGCT-GTAACAGTATTTT-AATTCTTGAATTGATTTTCCTT-----TATGG-GAA      |       |       |       |       |       |       |       | 23870 |

| Majority    | ATAAAAG-----T-XA---XXX-TTTGTXTTXX--XG                                          |       |       |       |       |       |       |       |       |
|-------------|--------------------------------------------------------------------------------|-------|-------|-------|-------|-------|-------|-------|-------|
|             | 35610                                                                          | 35620 | 35630 | 35640 | 35650 | 35660 | 35670 | 35680 |       |
| Human       | ---TGT-----                                                                    |       |       |       |       |       |       |       | 30936 |
| PolarBear   | ATAAAAGGA-----TGTACTCACCTTTGTCTACTGATG                                         |       |       |       |       |       |       |       | 2749  |
| Cow         | -----                                                                          |       |       |       |       |       |       |       | 29593 |
| Dog         | ATATTTG-----TATAACAACCATTCTTCTGATATAG                                          |       |       |       |       |       |       |       | 28643 |
| BelugaWhale | -----                                                                          |       |       |       |       |       |       |       | 24205 |
| Donkey      | GTAAGTGTTACTCTTATCAGGCTGTCACCTTTGCCATTTTTTTGGGGCAGAGATTAAACTGTAGTCTGTTTTACCAGA |       |       |       |       |       |       |       | 30696 |
| Cat         | ATAAAAGCTATGTGAATGTGCATACTCTCTCCCTCTGTCTCTCAAATATTGTATTGTACTCACCTTTGTCTTCCTGTG |       |       |       |       |       |       |       | 32317 |
| Ferret      | ATGAAGGG-----TGTACTCACCTTTGTCTTCCTAAG                                          |       |       |       |       |       |       |       | 28890 |
| Lion        | ATAAAAGCTATGTGAATGTGCATACTCTCTCCCTCTGTCTCTCAAATATTGTATTATACTCACCTTTGTTTTCTGTG  |       |       |       |       |       |       |       | 30634 |
| Vaquita     | -----                                                                          |       |       |       |       |       |       |       | 24882 |
| Pig         | ATGTAAG-----ATGATTTTGCTTC                                                      |       |       |       |       |       |       |       | 23890 |

Dienstag, 3. Mai 2022 08:38

| Majority    | ATX- - - TXAXXT- TTAAAXTGGXT- - XX- - - X- - - - - TTAXXTGAAXXTA- ATTXAATGATGT- - - - - A- - - - X- XX- |       |       |       |       |       |       |       |       |
|-------------|---------------------------------------------------------------------------------------------------------|-------|-------|-------|-------|-------|-------|-------|-------|
|             | 35690                                                                                                   | 35700 | 35710 | 35720 | 35730 | 35740 | 35750 | 35760 |       |
| Human       | ----- CTACCTGCATATT- - TAAGATGATTT- - - - - GT- - - - -                                                 |       |       |       |       |       |       |       | 30962 |
| PolarBear   | ATGATGTGAGATGATAAAATGGCT- - GTGTGA- - - - TAAGATGAAGCTA- GGTGAATAATGT- - - - - A- - GGCATTG             |       |       |       |       |       |       |       | 2812  |
| Cow         | ----- TTA- - - - - T- - - - - TTACTTGAAA- - - ATGTAAG- ATTT- - - - - G- - - - -                         |       |       |       |       |       |       |       | 29615 |
| Dog         | ATAATGTCATTTATTTAAATTTGTTCAACCCAG- - - - TGAATTGTACAAA- ACATCAAGATGT- - - - - G- - AAACCTA              |       |       |       |       |       |       |       | 28708 |
| BelugaWhale | ----- TTA- - - - - T- - - - - TTACTTGAAA- - ATAAAATGATTT- - - - - A- - - - -                            |       |       |       |       |       |       |       | 24234 |
| Donkey      | ATAACTTTTATTTTTAAATGCTTTCTGTTGAAAAATTTTAGAGGAAAATTTTACTAGAGTATGTCAAATGAAAAACCTGA                        |       |       |       |       |       |       |       | 30776 |
| Cat         | ATGGTGTGAGATTATAAAATGGCT- - GTGTGA- - - - TGAGATGAAGCAA- GGTGAATGATGT- - - - - ATAGGCATTG               |       |       |       |       |       |       |       | 32382 |
| Ferret      | ATG- - - TGAGATGAAGAGATGGTT- - GTGTGA- - - - TAAGATGAAGCTA- GGTGAGTATGT- - - - - A- - GGCATTG           |       |       |       |       |       |       |       | 28950 |
| Lion        | ATGGTGTGAGATTATAAAATGGCT- - GTGTGA- - - - TGAGATGAAGCAA- GGTGAATGATGT- - - - - ATAGGCATTG               |       |       |       |       |       |       |       | 30699 |
| Vaquita     | ----- TTA- - - - - T- - - - - TTACTTGAAA- - ATAAAATGATTT- - - - - A- - - - -                            |       |       |       |       |       |       |       | 24911 |
| Pig         | ATC- - - TTCATAATTAGGGTGGTT- - - - - TTTCTTGAACCTT- ATTTATGATTT- - - - - A- - - - -                     |       |       |       |       |       |       |       | 23937 |

| Majority    | - XXTTTAATCTTXAG- TXC- - - - - X- TXT- XX- - XX- - - - - TX- TGXXXCXGGAXXTGTTGACT  |       |       |       |       |       |       |       |       |
|-------------|------------------------------------------------------------------------------------|-------|-------|-------|-------|-------|-------|-------|-------|
|             | 35770                                                                              | 35780 | 35790 | 35800 | 35810 | 35820 | 35830 | 35840 |       |
| Human       | --- TTTAATCTTCA- - - - - AAGTTAGAGTTAAAA                                           |       |       |       |       |       |       |       | 30988 |
| PolarBear   | TGATACAGTGTTAAGCTAC- - - - - AGTATTTTAGAAGGATGATCATC- TGCTTCTGGTCTGTGGTTGACA       |       |       |       |       |       |       |       | 2876  |
| Cow         | --- TTTAATCTT- - - - -                                                             |       |       |       |       |       |       |       | 29624 |
| Dog         | CAGTTTAACTTGTGATTTT- - - - - CCAGTTTCAGTGAAGTATGATTGATGTGTCCAGACGCAAGTTGATC        |       |       |       |       |       |       |       | 28773 |
| BelugaWhale | --- TTTAACCTTCAT- - - - -                                                          |       |       |       |       |       |       |       | 24246 |
| Donkey      | AGATGGT GACTTCTGTGGGCAAGTAACTAAGTCTGATTTTTTTGTATCACTTAGTAGTATAACCCTTTTCTTTTCATGTT  |       |       |       |       |       |       |       | 30856 |
| Cat         | TGATACAGTGTTAGGGTACTGTTGGCCTTTT GACAGTATTTTAGAAGGAGGATCATC- TGCTTCTGGATCATGGTTGACT |       |       |       |       |       |       |       | 32461 |
| Ferret      | TGATACAATGTTAAGGTAC- - - - - AGTATCTCAGAAGG- - - - - TC- TGCTCCTGGGCTGTGATTGACA    |       |       |       |       |       |       |       | 29007 |
| Lion        | TGATACAGTGTTAGGGTACTGTTGGCCTTTT GACAGTATTTTAGAAGGAGGATCATC- TGCTTCTGGATCATGGTTGACT |       |       |       |       |       |       |       | 30778 |
| Vaquita     | --- TTTAATCTTCA- - - - -                                                           |       |       |       |       |       |       |       | 24922 |
| Pig         | --- TTTTGTCTTTTTTGGT- - - - - CT- - - - - TT- TAGGGCCACACCCGTGTCATAT               |       |       |       |       |       |       |       | 23979 |



Dienstag, 3. Mai 2022 08:38

| Majority    | AXTGGT- - - - - AXC- - - - XXX- XXX- G- AX- - - AAAGTGC- - GATXAXGXGXATTACXATGTTTTAAGTATTCTCTAT |       |       |       |       |       |       |       |       |
|-------------|-------------------------------------------------------------------------------------------------|-------|-------|-------|-------|-------|-------|-------|-------|
|             | 35850                                                                                           | 35860 | 35870 | 35880 | 35890 | 35900 | 35910 | 35920 |       |
| Human       | A- - - - - AAATTGTA- - - T- - ATGTCTGAAATAATGTTGTTTGTAGCATCTGT                                  |       |       |       |       |       |       |       | 31030 |
| PolarBear   | ACTGGT- - - - - AACTG- - AAACCATGGAAAACAAAGCTGCA- - GATAAAGGGAATTACTGTGTTTTAAGTATTTGATAT        |       |       |       |       |       |       |       | 2946  |
| Cow         | - - - - -                                                                                       |       |       |       |       |       |       |       | 29624 |
| Dog         | ATTGGTCAAG- - AACTTGTAAGACAGGGCAAGGAAGTTTT- - - GATAATGAGGGATACAATGTATGATGTGATGCGTGG            |       |       |       |       |       |       |       | 28848 |
| BelugaWhale | - - - - -                                                                                       |       |       |       |       |       |       |       | 24246 |
| Donkey      | GTAAGTCCCCTCATTCTTGCCACTTTTGTACTTTTGTGTTTGTGTTTGTGTGCTTAGAATAATTTTAGTATTCTCTAT                  |       |       |       |       |       |       |       | 30936 |
| Cat         | ACTGGT- - - - - ACCTG- - AAACCATAGAAAGTGAAACAGCA- - GATAAAGGGAATTACTATATTTGAAGTATTCTCTAT        |       |       |       |       |       |       |       | 32531 |
| Ferret      | ACTGGT- - - - - AACTG- - AAACCATGGAAAGCAAAGCTGCA- - GATAAAGGGAATTACTGTGTTTTAAGTATTTTGCAT        |       |       |       |       |       |       |       | 29077 |
| Lion        | ACTGGT- - - - - AAC- - - AAATCATGGAAAGTGAAACAGCA- - GATAAAGGGAATTACTATATTTGAAGTATTCTCTAT        |       |       |       |       |       |       |       | 30846 |
| Vaquita     | - - - - -                                                                                       |       |       |       |       |       |       |       | 24922 |
| Pig         | GGAGGT- - - - - TC- - - - - CCAGGCTAC- - - - - G- GATCCAGTCGGAAGTGTAGTCACCAG                    |       |       |       |       |       |       |       | 24023 |

| Majority    | CCCAXA- - AGCXCAAAGCCAAACTAAATAXAAXXAXXAA- - GATTXAXCTA- ATAGTTXTCXTTT- T- TGTGXTTTC-  |       |       |       |       |       |       |       |       |
|-------------|----------------------------------------------------------------------------------------|-------|-------|-------|-------|-------|-------|-------|-------|
|             | 35930                                                                                  | 35940 | 35950 | 35960 | 35970 | 35980 | 35990 | 36000 |       |
| Human       | C- - - - - A- - GTAAAACAATATA- GA- - - - -                                             |       |       |       |       |       |       |       | 31047 |
| PolarBear   | CCCATA- - AGCCCTAAAGCCGAACTAAATAAAAATAAAAA- - GATTCAGCTGTATAGTTGTCTTTTTTGTGTGCTTTCA-   |       |       |       |       |       |       |       | 3021  |
| Cow         | - - - - - CACGGGGTA- - - - -                                                           |       |       |       |       |       |       |       | 29633 |
| Dog         | GGCGTAGTAGAGTAAGAATAGAGTCAAGAGTAGAGAGTAAG- AGTACATTTTTCTAAGAACAAGTCTCTGTG- TGCCA-      |       |       |       |       |       |       |       | 28925 |
| BelugaWhale | - - - - - AGTTAGGGTG- - - - -                                                          |       |       |       |       |       |       |       | 24256 |
| Donkey      | CCCACAA- GTCTTAAAGCCCAAAGTAAATAAAAACCAAAGATTCAACTACATAGTTGTCTTTTTTGTGTAAGTTTCAA        |       |       |       |       |       |       |       | 31015 |
| Cat         | CCCACA- - AGCTCTAAAGCCCAAAGTAAATAAAAAGTCAAAA- - GATTGAGCTAGATAGTTTTCTTTTCTGTGTGCTTTCAA |       |       |       |       |       |       |       | 32607 |
| Ferret      | CCCACA- - AGCTCTAAAGCCCAAAGTAAATAAAAATAAAAAAGATTGAGCTACATAGTTGTCTTTTTT- TGTGTTTTCA-    |       |       |       |       |       |       |       | 29153 |
| Lion        | CCCACA- - AGCTCTAAAGCCCAAAGTAAATAAAAAGTCAAAA- - GATTGAGCTAGATAGTTTTCATTTCTGTGTGCTTTCAA |       |       |       |       |       |       |       | 30922 |
| Vaquita     | - - - - - TAGGGTG- - - - -                                                             |       |       |       |       |       |       |       | 24929 |
| Pig         | CCTATGCCAGAGCCACAGCAACACGGGATCCAAGCAGCAT- - CTGCAACCTACACCACGGGCTCATGGC- AACGCCGGATC   |       |       |       |       |       |       |       | 24100 |

Dienstag, 3. Mai 2022 08:38

|             |                                                                                                                                                                                      |       |
|-------------|--------------------------------------------------------------------------------------------------------------------------------------------------------------------------------------|-------|
| Majority    | CCT- TTTTCTTTGCTXTAACAXTATTTTAATTCTTTXAATTG- GTTXCTTAATGT- - - - - T- T                                                                                                              |       |
|             | 36010                    36020                    36030                    36040                    36050                    36060                    36070                    36080 |       |
| Human       | ----- CCAAT-----                                                                                                                                                                     | 31053 |
| PolarBear   | CCCTTTTTCTTTGCTGTAAACAGTATTTTAATTCTTTGAATTGCATTCCTTAATGT- - - - - TAT                                                                                                                | 3080  |
| Cow         | -----                                                                                                                                                                                | 29633 |
| Dog         | CCTCTCTTTTATTATTAACCTAAAATACTGCTTCTTAAAAATATTAACAAAATGA- - - - - GTT                                                                                                                 | 28984 |
| BelugaWhale | -----                                                                                                                                                                                | 24256 |
| Donkey      | TGT- TTTTCTCTGCCTAACAGTATTTTAATTCTTTAATTGAGTTCCTTTATTTACATACTTGGAAATTACTTCATCT                                                                                                       | 31094 |
| Cat         | CCTTTTTTCTTTGCTATAACAATATTTTAATTCTTTGAATTGGGTTTTTAAATGT- - - - - TTT                                                                                                                 | 32666 |
| Ferret      | CCCTTTTTCTTTGCTCTAATAATATTTTAATTGTTTGAATTGAGTTCCTTAATGT- - - - - TCT                                                                                                                 | 29212 |
| Lion        | CCTTTTTTCTTTGCTATAACAATATTTTAATTCTTTGAATTGGGTTTTTAAATGT- - - - - TTT                                                                                                                 | 30981 |
| Vaquita     | -----                                                                                                                                                                                | 24929 |
| Pig         | CTTAACCCACTGAGTGAGGCCAGGGATCGAACCCACATCGTCATGGATGCTAGTTG- - - - - GGT                                                                                                                | 24159 |

|             |                                                                                                                                                                                      |       |
|-------------|--------------------------------------------------------------------------------------------------------------------------------------------------------------------------------------|-------|
| Majority    | XTXC- XATXATCTTXXTA- - - T- - X- X- TTTAAATTTTAT- - - - ATGTTTGAAAT- - - - AATAXTGTTGGTTGTTTGTA                                                                                      |       |
|             | 36090                    36100                    36110                    36120                    36130                    36140                    36150                    36160 |       |
| Human       | ----- TTTAGACCTTAGTTTTATGGCTGATG- - - - - GGCCAAATTTTTTTT- - - TGT                                                                                                                   | 31097 |
| PolarBear   | CTCCCTATTATCTTCATACT- TAGGGTATTTTTTTTTTAT- - - - ATGTCTGAAAT- - - - AACATTGTTGGTTGT- - - - AA                                                                                        | 3147  |
| Cow         | ----- TTTAAACTTTTAT- - - - ATGTTTGAAAT- - - - AAT- - - - TGGTTGGTTGTAT                                                                                                               | 29672 |
| Dog         | GTATTGGTGTGCCTGGT- - - - - GAAACCCAGATGGTTA- - - - GCCTCACACCT- - - - AACCTATTTACGGA- - AAAA                                                                                         | 29047 |
| BelugaWhale | ----- TTTAAGCTTTTAT- - - - ATGTTTGAAAC- - - - ATTACTGTTGGTTGGTTGTAA                                                                                                                  | 24300 |
| Donkey      | ACTTGGATGATTTATTTAATCTTCATAGTTAAGGTTTTATTCTTACATTGTATGTCTGCAGTAACGTTGGTTGTTTGTA                                                                                                      | 31174 |
| Cat         | CTCCATATTATCTTCATAGGGTATTTTTCTTAAATTGTAT- - - - ATATGTCTGA- - - - AATAAAGTTGGTTGGTTGTAA                                                                                              | 32737 |
| Ferret      | CTCCCTATGATCTTCATACT- TAGGATATTTTTCTTGTAT- - - - ATGTGTGAAGT- - - - AACATTGTTAGTTGTTTGTA                                                                                             | 29283 |
| Lion        | CTCCATATTATCTTCATAGGGTATTTTTCTTAAATTGTAT- - - - ATATGTCTGA- - - - AATAAAGTTGGTTGTGTGTAA                                                                                              | 31052 |
| Vaquita     | ----- TTTAAGCTTTTAT- - - - ATGTTTGAAAC- - - - ATTACTGTTGGTTGGTTGTAA                                                                                                                  | 24973 |
| Pig         | TGCCTAACTGCTGAGCCACGATGGGAACTCTGAACTTTA- - - - ATGTTTCAAAC- - - - AGTATTGTTGGTTGTTTGTA                                                                                               | 24230 |

Dienstag, 3. Mai 2022 08:38

| Majority    | TGTCTGTCT- - AAATAAATATAAACTAATTTTTAGACCTTAG- TTTTATGGCCCAAAXXXAAA- TTTGAATXTGATGAT         |       |
|-------------|---------------------------------------------------------------------------------------------|-------|
|             | 36170 36180 36190 36200 36210 36220 36230 36240                                             |       |
| Human       | ATTTTGTTT- - AGTTTTGCTTGAATTGACGT- - - GTTCTCATCTGAATGGGCCAAATTTTGAA- TTTGATTATTATTAT       | 31170 |
| PolarBear   | TGTTTGTCT- - AAACAAATGTAACTAATTTTTGGACCCCTAG- TTTTATGGACCAAATTTTGAA- TCTGATGATGATGAT        | 3223  |
| Cow         | TGTCTGTCTGTAAATA- - TGTGGACCAATATTTAGATCTTAGATTTT- TGCCACTGGACCAA- TTTGAATCCGATGAT          | 29748 |
| Dog         | AGAAAGGAA- - AAAAAAAAAAAAAATG- - - - - TTTTGG- CTTTGTGGGAGAAAACAAAGA- GGGGA- GGGGAGATT      | 29112 |
| BelugaWhale | TGTCTGTCTATAAATAAATACAGACTAATTTTTAGAGCTTAG- TTTTATGGCCAGTGGACCAA- TATGAATCTGATGAT           | 24378 |
| Donkey      | TGTCTGTTTGTAAATAAATATAGACTAATTTTTAGACCTTAG- TTTTATGACTGATGGACCAAATTTTAACTGATGAT             | 31253 |
| Cat         | GGTCTGTCT- - AAACAAATATAAACTAATTTTTAGACTCTTG- TTTTATGGATCAAATTTGAT- ATGGG- GATAATGAT        | 32812 |
| Ferret      | TGTCTGTCT- - AAACAAATATAAACT- - - C- - TAG- - TTTAG- TTTTATGGACCAAATTTTGAA- TCTGATGATAATGAT | 29352 |
| Lion        | GGTCTGTCT- - AAACAAATATAAACTAATTTTTAGACTCTTG- TTTTATGGATCAAATTTGAT- ATGGG- GATAATGAT        | 31127 |
| Vaquita     | TGTCTGTCTCTAAATAAATACAGACTAATTTTTAGAGCTTAG- TTTTATGGCCAGTGGACCAA- TATGAATCTGATGAT           | 25051 |
| Pig         | TATCTGTCTATAAATAA- TATGAAGTATTTTTTAGACCTTAATTTTTATGGCCAGTGGACCAA- TTTGAATCTGATGAT           | 24308 |

| Majority    | GATXA- - - - - A- TGAATTAGTTTGCCTTATAACCCTACATTTTACATTGTTTACCTAAAACCAAAGTT            |       |
|-------------|---------------------------------------------------------------------------------------|-------|
|             | 36250 36260 36270 36280 36290 36300 36310 36320                                       |       |
| Human       | TAT- - - - - CAAATGAATTTACCTCACAACCTCCACATTTTACATTATTTACCTGAAACCAAAGTT                | 31229 |
| PolarBear   | GATGATGACGACAACGACGACAACCTGGATTAGTTTACCTTATAACCCTGCATTTTACATTGTTTACCTAAAACCAAAGTT     | 3303  |
| Cow         | GA- - - - - A- TGAATTAGTTTGCCTTATAACTGTACATTTTATGTTATTTACCTTAA- CCAAGGTT              | 29806 |
| Dog         | GGACAGGAGAGGAGAGA- GAAACGAGAGATGGAGAGGGAGAGGGGAATTGAACATGAGAGTG- - - GAGGAGAGGCGAGATT | 29188 |
| BelugaWhale | GA- - - - - C- TGAATTAGTTTGCCTTATAACCCTACATTTTATATTATT- ACCTAAAGCCAAAGTT              | 24436 |
| Donkey      | GATGATG- - - - - ATTGAAGTAGTTTGCCT- AAGACCTTACATTTTACGTTGTTTACTTAAAATCAAAGTT          | 31317 |
| Cat         | GATGATAATGACGAT- - - - - GAATTAATTATTCTGCCT- ATACCCCTGCATTTTACATTGTTTACCTAAAACCGAAGTT | 32885 |
| Ferret      | GATGACGACAACAAC- - - - - AACTGAATTAGTTTACCTTATAACCCTGCATTTTACATTGTTTACCTAAAATCAGAGTT  | 29426 |
| Lion        | GATGATAATGACGAT- - - - - GAATTAATTATTCTGCCT- ATACCCCTGCATTTTACACTGTTTACCTAAAACCGAAGTT | 31200 |
| Vaquita     | - - - - - TGAATTAGTTTGCCTTATAACCCTACATTTTATATTATT- ACCTAAAGCCAAAGTT                   | 25106 |
| Pig         | - - - - - TAGTTTGTCTTACAGCCCTACATTTATATTATTTACCTAAAACCGAGATT                          | 24359 |

Dienstag, 3. Mai 2022 08:38

```
Majority      CCTTTTTCTAAACCCTTTCCTGAATTACTTGCTTGAGGAATTAATTGTATTGGGCAATAAAAGGATTGTAAAAGACTXG
                36330      36340      36350      36360      36370      36380      36390      36400
Human         CCTTTTTCTGATTTTAACTTTGAATTATTTGCTTGAAGAACAAATTATATTTGGCAATAAAAGGATCATGAAAGACTAG 31309
PolarBear    CCTTT-----CCTGAATTACTTACTTGAGGAATTAATTGTATTGAATAGTAAAAGGGCTGTAAAAGACTGG 3369
Cow          TCTTTTTACTAAACCCTTTCCTAAATTACTTGTTTGAGGAATCAA- - - ATTGGGCAATGTAAAGATTGTAAAGGAATGA 29882
Dog          -----GAGATAGAGAACAGGGAGGACAGGGGGAGAGGATTGAGACAAA- - - TAGGAGATT- G 29241
BelugaWhale  TCTTTTTCTAAACCCTTTCCTGAATTACTTGTTTTAGGAATCGT- - - ATTGGGCAATATAAAGATTGTAAAAGAATGG 24512
Donkey       - CTTTTATCTAAACCGTCTGCTGAATTACCTACTTGAGGAATTAATTGTATTGGGCAATAAAGGGATTGTAAAAGACTGG 31396
Cat          CCTTTTTCTGAACCCTTTCCTGAATTACTTGCTTGAGGAATTAATTGTTTTGGGTAGTAAAAGGATTGTAAAAAACTAG 32965
Ferret       CCTTT-----CGTGAATTACGTTCTTGAGGAATTAATTGTATTGGATAGTAAAAGGGTTGTAAAAGACTAG 29492
Lion         CCTTTTTCTGAACCCTTTCCTGAATTACTTGCTTGAGGAATTAATTGTTTTGGGTAGTAAAAGGATTGTAAAAAACTAG 31280
Vaquita    TCTTTTTCTAAACCCTTTCCTGAATTACTTGTTTTAGGAATCGT- - - ATTGGGCAATATAAAGATTGTAAAAGAATGG 25182
Pig          TCTTTTTCTGAACCCTTTCAGAGTTACCTGTTTGAGGAATTAATTATATTGGGCAATACAAAGATTATAAAAAGAATAG 24439
```

```
Majority      AAG- CATT TTTGAT TTXCTTCAGGTAGCTATTGCTTATGTATATGTACACCTXAGCACACACATACA- - - - - CATXCC
                36410      36420      36430      36440      36450      36460      36470      36480
Human         AAGACATTTTGATTTCCCTTAGGTAGCTGTGCTTAATGTATACATACATCTTGACACACACAAACACAAACACACATCTC 31389
PolarBear    AAG- CATT TTTGAT TTTACTCCAGGTAGCTATTGCTTATGAATATGTACACCTCAGCACACACATACA- - - - - CATGTC 3440
Cow          AAG- CATT TTTGAT TTTCTTTAGATAACCAC- ACCCATGTATATGTACACCTCAGTGCACACACACA- - - - - GACC- C 29951
Dog          AGG- AGCATTGACCCAAACAAGGGAGTT- - - - - TACAT- TTTCTTTGTTTTAGGGTTTTTAT- - - - - TTTTTT 29302
BelugaWhale  AAG- CATT TTTGAT TTTCTTTCAGGTAGCCAT- GTTTGTGTATATGTACACCTCAGTGCACATGTACA- - - - - CATCCC 24582
Donkey       AAG- CATT TTTAAT TTTCTTTCATATAGCCATTGCTTGTGTATATGTACACTGTGGCACGCAGATGCA- - - - - CGTTTC 31467
Cat          AAG- CATT TTTGAT TTTATTTAGGTAGCCATTGCTTATGTATAGGTGCGCCTTGGCACACACATACA- - - - - TATGCC 33036
Ferret       AAG- CATT TTTGAT TTTACTTTAGGTAGCTATTGCTTATGT- TATGTGCACTTAAGCACGCACATGCA- - - - - CATGCC 29562
Lion         AAG- CATT TTTGAT TTTATTTAGGTAGCTATTGCTTATGTATAGGTGTGCCTTGGCACACACATACA- - - - - TATGCC 31351
Vaquita    AAG- CATT TTTGAT TTTCTTTCAGGTAGCCAT- GCTTGTGTATATGTACACCTCAGTGCACATGTACA- - - - - CATCCC 25252
Pig          AAG- TACT TTTAAT TTTCTTTCAGGTAGCTGTTGCTTGTATGTATGTATACCTCAGTGCACATATACA- - - - - TGTAAC 24510
```

Dienstag, 3. Mai 2022 08:38

| Majority    | TGACAGTTCAGTTAAGTAAAAATTATAATGAAGTACTTAXCAAATATAGTCATAATGATGTGAAAATGAATTTGTCTACA     |       |
|-------------|--------------------------------------------------------------------------------------|-------|
|             | 36490 36500 36510 36520 36530 36540 36550 36560                                      |       |
| Human       | TGACAATTCAGTTAACTAAAAATTATAAGG- - - ACTTA- - ACAGATAATAGTCATGATGTGAAGATAAATTTGTCAACA | 31463 |
| PolarBear   | TGGCAGTTCAGTTAAATAAAAACTGTAATGAAGTATTTACCATATCTAGTCATAATAATGTGAAAATGAATTTGCCTACA     | 3520  |
| Cow         | TGCAAGTT- - - - AAATACAAATTACAATGAAGTATTCTCCAAATATAGTTATAATAATGATAGGATGAATTTTTCTTCA  | 30026 |
| Dog         | TAAAAATTT- - TAAACTATTCCTAATAGTGTAACACCTG- - ACATTTGTTTTTCATGGTGAATAGTTTTCTTGAAAAAA  | 29378 |
| BelugaWhale | TGACAATT- - - - AAGTAAAAATTATAATGAAGTATTTTTCAAATATAGTTATAATGATGTTAAGATGAATTTTTCTGCA  | 24657 |
| Donkey      | TGACAGTTCAGTTAAGTAAAAACTAAAAATGAAGTACTTACCTAGTATAGTCATAATGAGGTGAAAATGAATTTGTCCACA    | 31547 |
| Cat         | TGGCAGTTCAGTTAAGTAAAAACTATAATGAAGTACTTA- - - ACATAGTCATAATGATGTGATAATGAATTTGCCACA    | 33112 |
| Ferret      | TGGCAGTTCAGTTAAATAAAAAACGGTAATGAAGTACTTACCAAATATGGTCATAATAGTGTGGAAATGTATTTGCCACA     | 29642 |
| Lion        | TGGCAGTTCAGTTAAGTAAAAACTATAATGAAGTACTTA- - - ACATAGTCATAATGATGTGATAATGAATTTGCCACA    | 31427 |
| Vaquita     | TGACAATT- - - - AATTAATAATTATAATGAAGTATTTTTCAA- - - - TATAATGATGTTAAGATGAATTTTTCTGCA | 25321 |
| Pig         | TGACAGTT- - - - AAGTAAAAATTACAGTGAAACTTAGTAAATATAGTCATAACGATGTTAAGGTGAATTTTTCTGCA    | 24585 |

| Majority    | C- ATCATTATTATTGACTTTTTCCATGTXA- XATTACAAAGCAAAA- TCACTAGGCCATGATTTT- - GATAGTCAAAGTAC   |       |
|-------------|------------------------------------------------------------------------------------------|-------|
|             | 36570 36580 36590 36600 36610 36620 36630 36640                                          |       |
| Human       | G- GTCATTATCATTGATTTTGGCTATGTAATGATTACAAAGCAAAA- TCACTGGGCCTTGATTTT- - GATAGTCAAAGTAC    | 31539 |
| PolarBear   | C- ATTATTATTATTGGCTTTTTCCATG- - - - AGTACAAAGCAAAA- TCACTAGGCCATGATTTT- - GATAGTCAAAGTAT | 3591  |
| Cow         | C- ATTGTCATTACTGAGTTTTCCATGTCACAATTACAAAACAAA- TTACTAGGCCATGATTTT- - GAAAGTCAGGGTAC      | 30102 |
| Dog         | CCAGCAGATTAGTTGGACCATTTATA- - - - TTTTTAAATTTTAA- A- AAT- - GTTCTGATGTTTATATA- TGTTTGT   | 29448 |
| BelugaWhale | C- ATCATCATTACTGAGTTTTCCATGTCATGATTACAAAGCAAAG- TCACTAGGCCATGATTTT- - GATAGTTAAGGTAC     | 24733 |
| Donkey      | C- ATCATTAGTACTGACTTTTTGCATGTCATGATTACAAAG- AAAA- TCACTAGGCCATGGTTTT- - GATAGTCAAAGTAC   | 31622 |
| Cat         | C- ATCATTATTATTGACTTTTTCCGTG- - - - ATTACAAAACAAA- TCACTAGGCCATGATTTT- - GATAGTCAAATAC   | 33183 |
| Ferret      | C- ATCATTATTATTGACTTTTTCCATG- - - - ATTATAAAAACAAAG- TCACTAGGCCATAGTTTTTTGATAGTCAAAGTAT  | 29715 |
| Lion        | C- ATCATTATTATTGACTTTTTCCGTG- - - - ATTACAAAACAAA- TCACTAGGCCATGATTTT- - GATAGTCAAATAC   | 31498 |
| Vaquita     | C- ATCATCATTACTGAGTTTTCCATGTCATGATTACAAAGCAAAG- TCACTAGGCCATGATTTT- - GATAGTTAAGGTAC     | 25397 |
| Pig         | C- ATAATTATTACTGAGTTTTCCATGTCAGGATTACAAAGCAAAAATCACTAGGCCATGGTTTT- - AATACTCAAGGTAT      | 24662 |

Dienstag, 3. Mai 2022 08:38

| Majority    | CATGTACAAATAATTGAACAAATAGG- - CAAATGTCTGTA ACTCTGCTTTGCCAGTTT XATTTTTTTAAA ACT- - AATAC    |       |       |       |       |       |       |       |       |
|-------------|--------------------------------------------------------------------------------------------|-------|-------|-------|-------|-------|-------|-------|-------|
|             | 36650                                                                                      | 36660 | 36670 | 36680 | 36690 | 36700 | 36710 | 36720 |       |
| Human       | CATGTACACATAATTGAACAAATAGG- - CAGAAGTGTGTA ACTCTGGTTTGT CCGTT- TCTCTTTTTGTTTTTACAATGC      |       |       |       |       |       |       |       | 31616 |
| PolarBear   | GGTATACAAATAATTA AACAGGTT- - - CAAATGTCTGTA ATGCTGCTTTGCTA- - - TCATTTTTTAGAAC- - - AATAT  |       |       |       |       |       |       |       | 3660  |
| Cow         | CATGTGCAAATAATTGAACAAACAAGCTCAGATGTCTGTATCTCTGC- - - - CAGTTTCATTTTTTTGAAACT- - AC- - -    |       |       |       |       |       |       |       | 30172 |
| Dog         | TTTACAGAGAGGATCTGACGAATA- - - CCACATCCTTCAGGCAGTCCAAGTTGTTTCTCATTAGTCCCAACTCGAATAT         |       |       |       |       |       |       |       | 29524 |
| BelugaWhale | CATGTACAAATAATTGAACAAACAGGCTCAAATATCTGTATCTCTGCTTTGCCAGTTTCATGTTTTTTGAAAT- - AGTAC         |       |       |       |       |       |       |       | 24811 |
| Donkey      | CATGTACAAATAATTGAACAAATAGGCTCAAATGTCTGTA ACTCTGCTCTGCTGGTTAATTTTTCTTAAA ACT- - ATACA       |       |       |       |       |       |       |       | 31700 |
| Cat         | TGTGTACAAATAATTGAACAAATAGG- - TTCAAATGTCTAACGCTGCTTTGCCACTTTGATTTTTTTAAAAC- - - AATTC      |       |       |       |       |       |       |       | 33258 |
| Ferret      | GGTATACAAATAATTA AACAGGTT- - - CAAATGTCTGTA ATGGT GCTTTGCTAGTT- TCATTTTTTTAAAAC- - - AATAT |       |       |       |       |       |       |       | 29787 |
| Lion        | TGTGTACAAATAATTGAACAAATAGG- - TTCAAATGTCTAACGCTGCTTTGCCACTTTGATTTTTTTAAAAC- - - AATAC      |       |       |       |       |       |       |       | 31573 |
| Vaquita     | CATGTACAAATAATTGAACAAACAGGCACAAATATCTGTATCTCTGCTTTGCCAGTTACATGTTTTTTGAAAT- - AGTAC         |       |       |       |       |       |       |       | 25475 |
| Pig         | CATGTACAAATAATTGAACAAACAGGCTCTAACGTCTGTACCTCTGCTTTGCCAGTTTCATTTTTTTT GAAAC- - A- - -       |       |       |       |       |       |       |       | 24736 |

| Majority    | ATATAGTGATGXATAATGGAAA- - TGTTTT- AAA- - AATT- - - AATATGTAGGGCTA- TGACAGAGTAACTGXTAGCAG    |       |       |       |       |       |       |       |       |
|-------------|---------------------------------------------------------------------------------------------|-------|-------|-------|-------|-------|-------|-------|-------|
|             | 36730                                                                                       | 36740 | 36750 | 36760 | 36770 | 36780 | 36790 | 36800 |       |
| Human       | ATACTGTGATCGATAATGGGAAATTAATTTGGAATTAATTTCCAAATATTTAGGGCTAGTGACAGAGTAACTAGTAGCAG            |       |       |       |       |       |       |       | 31696 |
| PolarBear   | ATATAGTGATGAATAGTTGAAA- - CATTTT- AAA- - AATT- - - AATATGTAGGGCTA- TGACAGAATAACTGATAGCAG    |       |       |       |       |       |       |       | 3730  |
| Cow         | GTTTAATGATGGATAATGGAAA- - TGTTTT- AAA- - AACT- - - GATTCGTAGGGCTG- TGACAGACTA- CTGGTAGCAG   |       |       |       |       |       |       |       | 30241 |
| Dog         | GAGCCGC- ATGCATGGTGGTTA- - CAGGT- - AAG- - TGTT- - - TCTCTGTAA- CAA- TGCTTAATTATTTGCCATTAA  |       |       |       |       |       |       |       | 29591 |
| BelugaWhale | ATTTAATGATTGATAATGGAAA- - TGTTTT- CTA- - AATT- - - AATATGTAGGGCTA- TGACAGAGTA- CTGGTAGCAG   |       |       |       |       |       |       |       | 24880 |
| Donkey      | TAGTAGCAATTGATAATGGAAA- - TGTTTT- AAA- - AATT- - - AATATGTAGGGCTA- TGACAGAGTAACTAGTAGCAA    |       |       |       |       |       |       |       | 31770 |
| Cat         | ATATAGTGATGAATAGTTGAAA- - TGTTTT- AAA- - AATT- - - AGTATGTAGGGCTA- TGACAGAATAACTGATAGCAC    |       |       |       |       |       |       |       | 33328 |
| Ferret      | ATGTAGTGATGAATAGTTGAAA- - CATTTTTAAA- - AATT- - - AATATGTAGGGCTA- TGACAGAATAACTGATAATAG     |       |       |       |       |       |       |       | 29858 |
| Lion        | ATATAGTGATGAATAGTTGAAA- - TGTTTT- AAA- - AATT- - - AGTATGTAGGGCTA- TGACAGAATAACTGATAGCAC    |       |       |       |       |       |       |       | 31643 |
| Vaquita     | ATTTAATGATTGATAATGGAAA- - TGTTTT- CTA- - AATT- - - AATATGTAGGGCTG- TGACAGAGTA- CTGGTAGCAG   |       |       |       |       |       |       |       | 25544 |
| Pig         | GAACATT- - TTAATAAAGGAGA- - CATTTT- TAA- - AATT- - - GATGTATAGGACTT- CGACAGAGTA- CTGATAGCAG |       |       |       |       |       |       |       | 24803 |

Dienstag, 3. Mai 2022 08:38

| Majority    | CCTTTCCTTCTX- - TTTCAATTT- - CCCCCAAAATCAAAAACCTATAAAACTGAATAAAATATATGGGACAACCTGTTGTC        |       |       |       |       |       |       |       |       |
|-------------|----------------------------------------------------------------------------------------------|-------|-------|-------|-------|-------|-------|-------|-------|
|             | 36810                                                                                        | 36820 | 36830 | 36840 | 36850 | 36860 | 36870 | 36880 |       |
| Human       | CCTTGGCCCCCTT- - TTTTCAGTCT- - CCCCCAAAACCAAAAAGTATGTAACCTGAATAAAATACGTGGAACAACCTGTTGTT      |       |       |       |       |       |       |       | 31772 |
| PolarBear   | CTTTCCCTTCTCCCACCTGATATG- - CCCTCCAAAATCAACAACCTATGAAACTGTGTAATAATATATTGGACAACCTGTTGTC       |       |       |       |       |       |       |       | 3808  |
| Cow         | CCTTTCCTTTC- - - - TTTCCATCT- - TCCCTCAAAAATGGAAAACCTATAAAAATAGAGTAAAATATGTAGGACAGCTGTTGTC   |       |       |       |       |       |       |       | 30315 |
| Dog         | AATGTCAAA- - - - - ACTAAAATT- - TAGTCTTTTATAGAAATTTAGCACTTTTTATTTAATTTTATGTTAAGGGTGCTTTT     |       |       |       |       |       |       |       | 29664 |
| BelugaWhale | CCTTTCCTTTC- - - - TTTCCATCT- - TTCCCCAAAATCAAAAACCTACAAAACCTGAATAAAATATATGGGACAACCTGTTGTC   |       |       |       |       |       |       |       | 24954 |
| Donkey      | CCTTTCCTTCTCTCCTCATGTTCCACCCCCCTGTATCAAACCTGTAACCACTGAGTGAAATATATGGGACAACCTGTTGTC            |       |       |       |       |       |       |       | 31850 |
| Cat         | CCTTTCCTTCTCC- TTCCATGTG- - CCCTCCAAAAAAAAATAAT- - - - AACTACA- - - AAACCTGTATAAAAATATATTGTC |       |       |       |       |       |       |       | 33398 |
| Ferret      | ACTTCCCTTCTCCCCCTGAGATG- - CCCTCCAAAATGAAAAACT- - GAAATTGTATAAAGTATATTGGAAAACCTGTTGTC        |       |       |       |       |       |       |       | 29934 |
| Lion        | CTTTTCCTTCTCC- TTCCATGTG- - CCCTCCAAAAAAAAATAAT- - - - AACTACA- - - AAACCTGTATAAAAATATATTGTC |       |       |       |       |       |       |       | 31713 |
| Vaquita     | CCTTTCCTTTC- - - - TTTCCATCT- - TTCCCCAAAATCAAAAACCTACAAAACCTGAATAAAATATATGGAACAACCTGTTGTC   |       |       |       |       |       |       |       | 25618 |
| Pig         | TA- - - - - CT- - TCTCCAAAATTGAAAACCTGTAACCACTGAATAAAATATCTGGGACAACCTAATGTC                  |       |       |       |       |       |       |       | 24862 |

| Majority    | T GGAATTGATGAGCAGACAGTACAAGATAA- - - TGATCCCTGAGAGAAGGGGAA- - - - - ACATATGAGGTGAGTC           |       |       |       |       |       |       |       |       |
|-------------|------------------------------------------------------------------------------------------------|-------|-------|-------|-------|-------|-------|-------|-------|
|             | 36890                                                                                          | 36900 | 36910 | 36920 | 36930 | 36940 | 36950 | 36960 |       |
| Human       | T GGAAGT GATGAGCAGACGGTATAAGATCA- - - - - TCCTTGAGAGAAGGGGT- - - - - ACACGTGAGGTAAGTA          |       |       |       |       |       |       |       | 31835 |
| PolarBear   | T AGAATTGATGAGCAGACAGTACTAGATAA- - - TGATCCCTGAAAGAAGGGGAATAGGGTCATTATTATATGAGGTGAATC          |       |       |       |       |       |       |       | 3885  |
| Cow         | T GGAATTGATGAGTAAATAGTATAGGATGG- - - TGATCCTTGAGATAAAGGAA- - - - - ACATGTGAAATGAACC            |       |       |       |       |       |       |       | 30381 |
| Dog         | T AAGATCGCGCTGCTGAGTGTTCGTTTAA- - - ACACTAC- - AGCAAATTGTAAGTATAGATG- - TAATATATGGTGTCAAAT     |       |       |       |       |       |       |       | 29737 |
| BelugaWhale | T GGAATTGATGAGTAAATAGTACAAGATAA- - - TGAAACCTGAGATAAAGGGAA- - - - - ACATATGAAGT GAGTC          |       |       |       |       |       |       |       | 25020 |
| Donkey      | T GGAATTGATGAGCAGACACTACAAGATAACAATGATCCTTGAGAGAAGGGGAAT- - A- - - - - AAATGAGGTGAGTC          |       |       |       |       |       |       |       | 31919 |
| Cat         | T TGAATCGATGAGCAGACAGTACCAGATAA- - - AGATCCCTGAGAG- - - GGAA- - - AT- C- - - - - CATGAGGGGAGTC |       |       |       |       |       |       |       | 33461 |
| Ferret      | T GGAATTAATGAACAGACAGTAGTAGATAA- - - TGATCTCTGAAAGAAGGGGAATAAGATCATTATCACATGAGGTGAATC          |       |       |       |       |       |       |       | 30011 |
| Lion        | T TGAATTGATGAGCAGACAGTACCAGATAA- - - AGATCCCTGAGAGAAGGGAA- - - AT- C- - - - - CATGAGGGGAGTC    |       |       |       |       |       |       |       | 31779 |
| Vaquita     | T GGAATTGATGAGTAAATAGTACAAGATAA- - - TGAAACCTGAGATAAAGGGAA- - - - - ACATATGAAGT GAGTC          |       |       |       |       |       |       |       | 25684 |
| Pig         | T GGAATTGATGAATAAATAGTACAGGGTAA- - - CGTTCCTTGAGATAAAGGAAA- - - - - ATGAATGAGGTGAGTT           |       |       |       |       |       |       |       | 24928 |









Dienstag, 3. Mai 2022 08:38

| Majority    | AAGGATCACACACTATAGTAAGTGCCAACCT- - - - TAAGACTAAG- - TTAAGAACTG- - - AGATAGT- - - - - - - -     |       |       |       |       |       |       |       |       |
|-------------|-------------------------------------------------------------------------------------------------|-------|-------|-------|-------|-------|-------|-------|-------|
|             | 37450                                                                                           | 37460 | 37470 | 37480 | 37490 | 37500 | 37510 | 37520 |       |
| Human       | AAGGATCACACCCTATAGGAAAGTGCCATCTATAAGACTGAGATAAAAACCAGAAACCTAGCCCGATAGGAAAGTGAAGGAT              |       |       |       |       |       |       |       | 32349 |
| PolarBear   | GTGGATCACACACTATAGCAAGTGCCAACCT- - - - TAGGACTAAG- - TTAAGAACTG- - - ATATAGT- - - - - - - -     |       |       |       |       |       |       |       | 4383  |
| Cow         | AAGGATCATACTAATACTAATAGTAAGTGA- - - - CAATCATAAGA- CTAAGGGACTG- - - TGATAGT- - - - - - - -      |       |       |       |       |       |       |       | 30876 |
| Dog         | GCGTAACTCCTCCCCTCACAAA- - - CAAAAT- - - - GAACGGTAGG- - TAATAATAC- - - - AAGTCAA- - - - - - - - |       |       |       |       |       |       |       | 30203 |
| BelugaWhale | AAGGATCATACTATAGTAAGTGACAGCCA- - - - TAAGACTAAG- - TTAATAAACTC- - - TGATAGT- - - - - - - -      |       |       |       |       |       |       |       | 25514 |
| Donkey      | AAGAATCACTCACTGTACTAAGTGCCAACAACCA- - TAATACCAAG- - TTAAGAACTG- - - AGATAGT- - - - - - - -      |       |       |       |       |       |       |       | 32440 |
| Cat         | ATGGATCACCCATTACACTAAGCACCAACCT- - - - TAAAACAAAGAGTGAAGAAGCT- - - - AGATAGT- - - - - - - -     |       |       |       |       |       |       |       | 33957 |
| Ferret      | ATGGATCACACACTATATTAAGTGCCAACCT- - - - TAAGACTAAG- - TTAAGAACTG- - - AGATAGT- - - - - - - -     |       |       |       |       |       |       |       | 30498 |
| Lion        | ATGGATCACCCATTACACTAAGCACCAACCT- - - - TAAAAGGAAGAGTGAAGAAGCT- - - - AGATAGT- - - - - - - -     |       |       |       |       |       |       |       | 32277 |
| Vaquita     | AAGGATCATACTATAGTAAGTGACAGCCA- - - - TAAGACTAAG- - TTAATAAACTC- - - TGATAGT- - - - - - - -      |       |       |       |       |       |       |       | 26178 |
| Pig         | AAGGATCACACACTATAGTAAGTGACGGCCGT- - - - TAAGACTAAG- - TTAAGAAATAG- - - TGATAGT- - - - - - - -   |       |       |       |       |       |       |       | 25417 |

| Majority    | - - - - - CTAGCCTGACAAG- - AC- - ATGAAGGATTCAACCAGTAATTT- AATTGCCTGCCTAAAXAAAACAATACCCCCT       |       |       |       |       |       |       |       |       |
|-------------|-------------------------------------------------------------------------------------------------|-------|-------|-------|-------|-------|-------|-------|-------|
|             | 37530                                                                                           | 37540 | 37550 | 37560 | 37570 | 37580 | 37590 | 37600 |       |
| Human       | TCACCAGTTAATCTAACCAGTAACTGATGAAGGATTAATCAGTAATTT- AGTTGCCTTCCAAAACAAAACAACACCCCC-               |       |       |       |       |       |       |       | 32427 |
| PolarBear   | - - - - - TTAGCCTGACAAC- - AC- - ATTAAGGAT- CACCAGTAATTT- AGTTGCTTGCCTAAAGAAAACAATACCTCCT       |       |       |       |       |       |       |       | 4450  |
| Cow         | - - - - - CCAGTCTGACAAG- - AC- - GTGAAGAATTCACCAGTAATTT- AATTGCCTGCCTAAATAAAAACAGTATCCCCT       |       |       |       |       |       |       |       | 30944 |
| Dog         | - - - - - CCAATATGACTGT- - A- - - ATTAAG- - - - - CGGTAATCC- - - - - ATCCACTGTGGTGCCTCTTGTTGATG |       |       |       |       |       |       |       | 30260 |
| BelugaWhale | - - - - - CCAGCCTGACAAG- - AC- - ATGAAGGATTCAACCAGTAATTG- AATTGCCTGCCTAAATAAAAACAATGTGCCCT      |       |       |       |       |       |       |       | 25582 |
| Donkey      | - - - - - CTAGCCTGACAAG- - AC- - ATGAAGGCTTCATCAGTAGTTT- GATTGCCTGCCTAAACAAAACAACATCCCCT        |       |       |       |       |       |       |       | 32508 |
| Cat         | - - - - - TTGGCCTGACAAG- - AC- - AATAAGGAT- CACCAGTAATTT- AATTGCTTGCCTAAACAAAGCCACACCCCCCT      |       |       |       |       |       |       |       | 34024 |
| Ferret      | - - - - - TTAGCCTGACAAC- - AC- - ATTAAGGAT- CACCAGTAATTTAATTGCTTGCCTAAACCAAACAGTACCCACT         |       |       |       |       |       |       |       | 30566 |
| Lion        | - - - - - TTGGCCTGACAAG- - AC- - AATAAGGAT- CACCAGTAATTT- AATTGCTTGCCTAAACAAAACCACACCCCCCT      |       |       |       |       |       |       |       | 32344 |
| Vaquita     | - - - - - CCAGCCTGACAAG- - AC- - ATGAAGGATTCAACCAGTAGTTG- AATTGCCTGCCTAAATAAAAACAATGTGCCCT      |       |       |       |       |       |       |       | 26246 |
| Pig         | - - - - - CCACCCTGACAAG- - AT- - - GTGAAGGATTCAACCAGTGATTT- AATTGCCTGCCTAAATAAAAACAACACATTGT    |       |       |       |       |       |       |       | 25485 |

Dienstag, 3. Mai 2022 08:38

| Majority    | AAGGAAGACA- - - TGATT CAGTCT- - - - TCCGXCAACTATCATCCACAATATCCTGCAT- - - - - - - - - - - - - - - - - - -                                                                                                                                                                                                                                                                                        |       |
|-------------|-------------------------------------------------------------------------------------------------------------------------------------------------------------------------------------------------------------------------------------------------------------------------------------------------------------------------------------------------------------------------------------------------|-------|
|             | <span style="margin-right: 100px;">37610</span> <span style="margin-right: 100px;">37620</span> <span style="margin-right: 100px;">37630</span> <span style="margin-right: 100px;">37640</span> <span style="margin-right: 100px;">37650</span> <span style="margin-right: 100px;">37660</span> <span style="margin-right: 100px;">37670</span> <span style="margin-right: 100px;">37680</span> |       |
| Human       | AAGAAAGACA- - - TGATATAGTTT- - - - TCCTGCAACTATCTTCCATAATATCTAGTAT- - - - - - - - - - - - - - - - - - -                                                                                                                                                                                                                                                                                         | 32479 |
| PolarBear   | AAGGAAGACA- - - TGATT CAGTCTTTATTTTGTGAACCGTCATTCACAGTATCCACCAT- - - - - - - - - - - - - - - - - - -                                                                                                                                                                                                                                                                                            | 4506  |
| Cow         | AAGGGAGACAACATGATT CAGTCT- - - - TCCCACAATT- - - ATCCACAATATCCTACCT- - - - - - - - - - - - - - - - - - -                                                                                                                                                                                                                                                                                        | 30996 |
| Dog         | TATGTGGGTG- - - TGATTAATGT- - - GTCTGGTCTTCTGTGATTAAGA- TGAAAATGAGGTGCATTGAC- - - - - - - - - - - - - - - - - - -                                                                                                                                                                                                                                                                               | 30323 |
| BelugaWhale | AAGGAAGACA- CATGATT CAGTCT- - - - TCCCACAACTATCATCCACAATATCCTGCAT- - - - - - - - - - - - - - - - - - -                                                                                                                                                                                                                                                                                          | 25636 |
| Donkey      | AGGGAAGACC- - ATGATT CAGTCT- - - - TCCTACA ACTATCATCCATAATATCCTGCAT- - - - - - - - - - - - - - - - - - -                                                                                                                                                                                                                                                                                        | 32561 |
| Cat         | AAGGAAGACA- - - TGTCTGAGTCTT- TTTTTGTGA ACTATCATT CATAATATCCCCCGT- - - - - - - - - - - - - - - - - - -                                                                                                                                                                                                                                                                                          | 34079 |
| Ferret      | AAGGAAGACA- - - TGATT CAGTCTTCATTTTGTGA ACTGTCATT GACACTATCCACCATTGT CATT CACAATATCTACCA                                                                                                                                                                                                                                                                                                        | 30643 |
| Lion        | AAGGAAGACA- - - TGACTCAGTCTT- TTTTTGTGA ACTATCATT CATAATATCCCCCAT- - - - - - - - - - - - - - - - - - -                                                                                                                                                                                                                                                                                          | 32399 |
| Vaquita     | AAGGAAGACAGCATGATT CAGTCT- - - - TCCCACA ACTATCATCCACAATATCCTGCAT- - - - - - - - - - - - - - - - - - -                                                                                                                                                                                                                                                                                          | 26301 |
| Pig         | AAGAAAGACAGCATAATT CAGTCT- - - - TCCCACA ACTGT CATCTACAGTATCCTGCAT- - - - - - - - - - - - - - - - - - -                                                                                                                                                                                                                                                                                         | 25540 |

| Majority    | - - - - - ACCATCAAAAATTACAAATTATGTGAAG- - - CATGX- AAXATTCCATXAAXTAGAGA- AGCAT- T- CAATAGGA                                                                                                                                                                                                                                                                                                     |       |
|-------------|-------------------------------------------------------------------------------------------------------------------------------------------------------------------------------------------------------------------------------------------------------------------------------------------------------------------------------------------------------------------------------------------------|-------|
|             | <span style="margin-right: 100px;">37690</span> <span style="margin-right: 100px;">37700</span> <span style="margin-right: 100px;">37710</span> <span style="margin-right: 100px;">37720</span> <span style="margin-right: 100px;">37730</span> <span style="margin-right: 100px;">37740</span> <span style="margin-right: 100px;">37750</span> <span style="margin-right: 100px;">37760</span> |       |
| Human       | - - - - - ACCATCAAAAATTACAAAGTGATGTGCAGAAGCAGGAAAGTAACCCTATGAAATATAAAGAACACATTTAATAGGA                                                                                                                                                                                                                                                                                                          | 32553 |
| PolarBear   | - - - - - ACCATCAAAAATTGCAAATTATGGAAAG- - - CATGAGAACATTCCATAAAATTGAGA- AGCAT- T- AAATAGGA                                                                                                                                                                                                                                                                                                      | 4574  |
| Cow         | - - - - - AC- ATCAGATGTTA- AAATCATGTAAAG- - - - - - - - - - - - - - - - - - - A- - - - - - - - - ACCAT- T- CAATAAGA                                                                                                                                                                                                                                                                             | 31037 |
| Dog         | - TGGCTGTTGAATGAGGTAGGACATTGTGAGTAG- - - CGCGCTAGTGTTGT- TAAGCTACAGT- ATTTT- TCGAATAACA                                                                                                                                                                                                                                                                                                         | 30396 |
| BelugaWhale | - - - - - ACCATCAAAATTTTACGAATCCTTTGAAG- - - - - - - - - - - - - - - - - - - A- - - - - - - - - AGCAT- T- CAATAAGA                                                                                                                                                                                                                                                                              | 25679 |
| Donkey      | - - - - - ACCATCAAAAATTATAAATCGTGTGAAGAAGCATGAAAAAATTCCATAAATTAGAGA- AGCAG- CATGCAATAG                                                                                                                                                                                                                                                                                                          | 32633 |
| Cat         | - - - - - ACCATCAAAAATTACAAATTATGGAAAGAAGCATGAAAACATTCCATCTAATAGAGA- AGCAT- T- CAACAGGA                                                                                                                                                                                                                                                                                                         | 34150 |
| Ferret      | ATATCCACCATTAGAAATCACAAATTATGGAAAG- - - CATG- - AACATTCCATAAAGTAGAGA- AGCAT- T- AAATAGGA                                                                                                                                                                                                                                                                                                        | 30715 |
| Lion        | - - - - - ACCATCAAAAATTACAAATTATGGAAAGAAGCATGAAAACATTCCATCTAATAGAGA- AGCAT- T- CAACAGGA                                                                                                                                                                                                                                                                                                         | 32470 |
| Vaquita     | - - - - - ACCATCAAAATTTTACGAATCCTTTGAAG- - - - - - - - - - - - - - - - - - - A- - - - - - - - - AGCAT- T- CAATAAGA                                                                                                                                                                                                                                                                              | 26344 |
| Pig         | - - - - - ACCATCAAATACTACAAATTTTGTGGAA- - - - - - - - - - - - - - - - - - - A- - - - - - - - - AACAA- T- CAGTAGGA                                                                                                                                                                                                                                                                               | 25583 |

Dienstag, 3. Mai 2022 08:38

| Majority    | GCAGACXCCAAAATGACC- TAGATATTGGAAT- TAGCAGACAAGGACTATAAATATTT- TTAAAGCTATAAAGGAAAATA |                   |                                                   |       |                        |            |             |       |       |
|-------------|-------------------------------------------------------------------------------------|-------------------|---------------------------------------------------|-------|------------------------|------------|-------------|-------|-------|
|             | 37770                                                                               | 37780             | 37790                                             | 37800 | 37810                  | 37820      | 37830       | 37840 |       |
| Human       | ACAGATTCCAAAATGACC-                                                                 | TAGA- GTTAGAAT-   | TAGCAGACAAGGACGATAAGTAT-                          | - -   | TTTAAGCTGTAAAGGAAAAGA  |            |             |       | 32627 |
| PolarBear   | CCAGACACAAGAATGATC-                                                                 | TAGATAATGGAAT-    | TGACAGACAAGGACTATAAATATTT-                        |       | TTAAAGCTATAAAGGAAAATA  |            |             |       | 4651  |
| Cow         | ATAGACCTCAAATGACC-                                                                  | TAAATACTGGAAT-    | TTGCAGACAGAGACTATAAGTATTT-                        |       | TTAAAGCTGTAAAAGAAAATA  |            |             |       | 31114 |
| Dog         | GGAGGGATTTCATCGGCTTCTGGAATATGGTTTGCAACTAGCAGGGGGTAAGGAC-                            |                   |                                                   |       | - - - -                | CTGAGGATA- | ACTTGGAAAGG |       | 30470 |
| BelugaWhale | ATAGACCTCAAATGACC-                                                                  | TTGATATTGGAAT-    | TAGCAGACAAGGACTATATATATTT-                        |       | TTAAAGCTATAAAAGAAAATA  |            |             |       | 25756 |
| Donkey      | TAAGACCCCAAATGACC-                                                                  | TAGATATTGGATT-    | - AGCAGATAGAGATTATAAATATTTTTTTAAAGCTATAAAGGAAAATC |       |                        |            |             |       | 32710 |
| Cat         | GCGGACACCAAATGACC-                                                                  | TAGATAGTGGAAT-    | TAACACACAAGGATTATAGATATTT-                        |       | TTAAAGCTATAAAGGAAAATA  |            |             |       | 34227 |
| Ferret      | GCAGACACCAAATGAT-                                                                   | - - AGATCATGAAAT- | TAACAGACAAGGACTATAAATATTT-                        |       | TTAAAGCTATAAAGGAAAATA  |            |             |       | 30790 |
| Lion        | GCGGACACCAAAGTGACC-                                                                 | TAGATAGTGGAAT-    | TAACACACAAGGATTATAGATATTT-                        |       | TTAAAGCTATAAAGGAAAATG  |            |             |       | 32547 |
| Vaquita     | GTAGACCTCAAATGACC-                                                                  | TTGATATTGGAAT-    | TAGCAGACAAGGACTATATATATTT-                        |       | TTAAAGCTATAAAAGAAAATA  |            |             |       | 26421 |
| Pig         | ATAGACCTCAGTATGACC-                                                                 | TAGATATTGGAAT-    | TAGCAGATAAGGACTATGAATACGT-                        |       | TTAAAGCTATAAAAGGAAAATA |            |             |       | 25660 |

| Majority    | TT- - - - TAATGAGTGA- - ACATGGAGGAATGTGTTGAAAXAG- - - - - - CTATAAAGAAAGC- TATAGAAA- TGTTGTA |                                |                              |                                     |                         |                |           |         |         |       |
|-------------|----------------------------------------------------------------------------------------------|--------------------------------|------------------------------|-------------------------------------|-------------------------|----------------|-----------|---------|---------|-------|
|             | 37850                                                                                        | 37860                          | 37870                        | 37880                               | 37890                   | 37900          | 37910     | 37920   |         |       |
| Human       | TTGAAATAATGAGTG-                                                                             | - - - -                        | ATGGAGGAGTGTGTTG-            | AAGAGATAAAAACTATAAAGAAAGCATGTAGAAA- | TATTCTA                 |                |           |         | 32700   |       |
| PolarBear   | TTAAA- TAGTGAGTGA-                                                                           | - ACACGTAGAGGCATGTGTTAAGAG-    | - - - - -                    | AGAAAAGAGAAGT-                      | AGAGAGCA-               | TACAGAA        |           |         | 4718    |       |
| Cow         | TT- - - - GAAAGAATAA-                                                                        | - ACATGGAAGAATGTGTTGAGAAAG-    | - - - - -                    | CTATAAAGAAAGTATATAGAAA-             | TGCTGTA                 |                |           |         | 31179   |       |
| Dog         | TCAGG- TAGCGAATTG-                                                                           | - GTCTATAGTAG-                 | - - - - -                    | ACAGGGC-                            | - - - - -               | ATATACTATGTTT- | - -       | TTTGTA- | TGTCTAT | 30529 |
| BelugaWhale | TT- - - - AAAATAAT-                                                                          | - - - -                        | ACATGGAAGAATGTGTTGAGAAAAGAA- | - - - -                             | CTATAAAGAAAGCATATAGAAA- | TGCTCTA        |           |         | 25822   |       |
| Donkey      | TTGAAATGATGAGTGAACGCTTGGAGGAATATGTTAAGAAAGAAAGAGAAGTATAAAGAAAGCATATAGAAAATGTTGTA             |                                |                              |                                     |                         |                |           |         | 32790   |       |
| Cat         | T- - - - - TAGTGAGTGA-                                                                       | - ACACACAGAGA-                 | - - - - -                    | - - - - -                           | - - - - -               | CTGTG-         | - - - - - | TGTTGAT | 34261   |       |
| Ferret      | CTATG- TAGTGAGTGA-                                                                           | - ATACATAGAGGTATGTGTTAAGAG-    | - - - - -                    | AGAAAAGAGAGG-                       | - - - -                 | GAGCA-         | TATAGAA   | 30853   |         |       |
| Lion        | C- - - - - TAGTGAGTGA-                                                                       | - ACACACAGAGA-                 | - - - - -                    | - - - - -                           | - - - - -               | CTGTG-         | - - - - - | TGTTGAT | 32581   |       |
| Vaquita     | TT- - - - GAAATAATGA-                                                                        | - ACATGGAAGAATGTGTTGAGAAAAGAA- | - - - -                      | CTATAAAGAAAGCATATAGAAA-             | TGCTCTA                 |                |           |         | 26489   |       |
| Pig         | TTTTGCAAAATAATGA-                                                                            | - ACATGGAAGAATGTGTTGAAACAA-    | - - - - -                    | CTGTAAGAAAGC-                       | TATAGAAG-               | TGCTCTA        |           |         | 25728   |       |

Dienstag, 3. Mai 2022 08:38

| Majority    | ATTGAAAAA- - - - - A- - XAATATTTGGAATGAAAAATTCACTXGTTGAGACTAACAGCAGXTTGGAGACAACTGA          |       |       |       |       |       |       |       |       |
|-------------|---------------------------------------------------------------------------------------------|-------|-------|-------|-------|-------|-------|-------|-------|
|             | 37930                                                                                       | 37940 | 37950 | 37960 | 37970 | 37980 | 37990 | 38000 |       |
| Human       | ATTGAAAAATACAGTTTTTG- - AAATAGTTGGGAC- - - TGATTCACTGGTTGGAAGTACTAGCAGATTGGAGACAATAGA       |       |       |       |       |       |       |       | 32775 |
| PolarBear   | ATCT- - GAA- - - - - - A- - - TATATTTGAGATGAAAAATTC- - - - ACTGGGGCTAACAGCAGATTGGAGACAACTAA |       |       |       |       |       |       |       | 4779  |
| Cow         | ACTGAAAAATACAATATTCACACCATATTTGGAATGAAAAATTCACTGATTGAGACTAACAGAAGTTTGGAGACAACTGA            |       |       |       |       |       |       |       | 31259 |
| Dog         | ATCTCCCC- - - - - A- - - CCTTCCACCAAGTCAAACA- - - - GGAAAGTCCAAGT- - - - GGCGGAAGCAATCAA    |       |       |       |       |       |       |       | 30587 |
| BelugaWhale | ATTGAAAAA- - - - - T- - - ACAAATTTGGAATGAAAAATTCACTGGTTGAGAGTAACAGCAGTTTGAAGACAACCTGA       |       |       |       |       |       |       |       | 25891 |
| Donkey      | ACTGAA- AA- - - - - - ATACAGTATGTGAAATGAAAAATTCACTGGTTGGGACTAACATCAGATTGCAGACAACCTGA        |       |       |       |       |       |       |       | 32859 |
| Cat         | GTTT- - - - - A- - - TATGACAACAG- - - CACTAA- - - - GTGAAGATAAATA- - - - - GAATTTTACAGT     |       |       |       |       |       |       |       | 34308 |
| Ferret      | ATCTCTGAA- - - - - A- - - TATATTTGAGATGAAAAACTC- - - - ACTGGGGCTAACA- - - GACTGGGGACAACCTGG |       |       |       |       |       |       |       | 30913 |
| Lion        | GTTT- - - - - A- - - TATGACAACAGTTAGCACTAA- - - - GTGAAGATAAATA- - - - - GAATTTTACAGT       |       |       |       |       |       |       |       | 32632 |
| Vaquita     | ATTGAAAAA- - - - - T- - - ACAAATTTGGAATGAAAAATTCACTGGTTGAGAGTAACAGCAGTTTGACGACTACTGA        |       |       |       |       |       |       |       | 26558 |
| Pig         | ATTGGAAAA- - - - - ACACAGTATTTGGAATGAAAAGTTAACTCTTTGAGACTAACAGCCGTTTGGAGACAACCTGA           |       |       |       |       |       |       |       | 25798 |

| Majority    | AGAAAGGTTATTGAACTTGAA- TACAGATGGATAGAAAX- ATTCAGTTTCCCAGAGAGAG- AAAXTATATCTTT- - - - -        |       |       |       |       |       |       |       |       |
|-------------|-----------------------------------------------------------------------------------------------|-------|-------|-------|-------|-------|-------|-------|-------|
|             | 38010                                                                                         | 38020 | 38030 | 38040 | 38050 | 38060 | 38070 | 38080 |       |
| Human       | AGAAATGTTAGTGAACCTTGAA- TACTGTTGAATACAGTG- ATTAATCTGTGAGAGAGGA- GAAAGTATATCTAAT- - - -        |       |       |       |       |       |       |       | 32848 |
| PolarBear   | AGAAAGGTTTTTGAACCTTGAA- TACACATGGATAGAAAA- ATTAAGTTTCCCAGAGAGAA- GAAAATCTATCAT- - - - AG      |       |       |       |       |       |       |       | 4852  |
| Cow         | AGAAAGGTTAGTGAACCTTGAG- TACAGATTGACAGAAAGTATTCAGTT- TCCAGAGAGAATAAAAAGTATGTCTTT- - - -        |       |       |       |       |       |       |       | 31332 |
| Dog         | ACCAGA- TCATCGCACCTGAGCTGGATGTGAGAGGCCAA- AGTTGTATGCTTGTGTGTG- AACTTTGAACCTG- - - - -         |       |       |       |       |       |       |       | 30658 |
| BelugaWhale | AGAAAGGTTAATGAACCTTGAA- TACAGATTGATAGAAATTACTCAGTTTTCCAGAGAGAGTAAAAGTATATCTTTG- - - -         |       |       |       |       |       |       |       | 25966 |
| Donkey      | AGAAAGGTTAGTAACTTGAG- TACAGACGAACAGAAATTATTCAGTTTACCAGAGAGAA- CAAAATATATGTTTG- - - -          |       |       |       |       |       |       |       | 32933 |
| Cat         | TGTAAGGTTTTTA- - - TT- - - - TACATG- AAGTGATAGA- ATATTAAGTCTGACTTAAAG- TAGATTCTATTAA- - - - - |       |       |       |       |       |       |       | 34372 |
| Ferret      | AGAAAAGTTATTGAACTTGAA- TACACATGGATAGAA- - - ATTAAGTTTCCCAGAGAGAA- GAAAATGAATCAGTCTAAT         |       |       |       |       |       |       |       | 30988 |
| Lion        | TGTAAGGTTTTTA- - - TTATT- TACATG- AAGTGATAGA- ATATTAAGTCTAAGTAAAG- TAGATTCTATTAA- - - - -     |       |       |       |       |       |       |       | 32699 |
| Vaquita     | AGAAAGGTTAATGAACCTTGAA- TACAGATTGATAGAAATTACTCAGTTTTCCAGAGAGAGTAAAAGTATATCTTTG- - - -         |       |       |       |       |       |       |       | 26633 |
| Pig         | AGAAAGGTTAATGAACCTTGAG- TACAGATTGATAGAAATTATTCAGTTATCCAGAAAGGGTAAAATATATCTTTA- - - -          |       |       |       |       |       |       |       | 25873 |

Dienstag, 3. Mai 2022 08:38

| Majority    | GGACGATTAAGCAGTCTAACATA- CATGTAA- - TTGGAGTTTCA- - GAGAGGGAATAAA- - - - - - - - - - - - - - - - - - GAGAAT                                                                                         |
|-------------|----------------------------------------------------------------------------------------------------------------------------------------------------------------------------------------------------|
|             | 38090                      38100                      38110                      38120                      38130                      38140                      38150                      38160 |
| Human       | GGACAATGAAGCAGTCTGACATGTAAGTTGAATTTTCAGAGTGAGAATGTGGGGGAATAAACATCTATCTGTTTGAGATA 32928                                                                                                             |
| PolarBear   | GGACAATTAAACTGTCTAATAACA- CGTATAA- - - TTGGAGTTCCA- - GAGAGGAAATAAA- - - - - - - - - - - - - - - - - - GAGAAT 4912                                                                                 |
| Cow         | GGATGATCAGGCAGTCTAACGTA- TGTGTCC- - - TTGGAGTTTTC- AGAGAGGGAATGAA- - - - - - - - - - - - - - - - - - GAGAAT 31393                                                                                  |
| Dog         | GTTTTGGTTGCGCGGT- - - - - - - - - - - - AG- CGTGTGA- - - TCAAGATGTTA- - TTGTGTGAATTAT- - - - - - - - - - - - - - - - - - TGAATT 30712                                                              |
| BelugaWhale | GGGAGATCAAGTAGTCTAACATA- CATGTAA- - - TTGCAGTTTCA- - GAGAGGGAGTAAA- - - - - - - - - - - - - - - - - - GAGAAT 26026                                                                                 |
| Donkey      | GGACAATCAAGCAGTCCAACATA- TGTGTAA- - - TTGGAGTTCTA- - GAGTGGGAGTAAA- - - - - - - - - - - - - - - - - - GAGAAT 32993                                                                                 |
| Cat         | - - - - GGTTGCATACT- - - - - - - - - - - - GAAATAA- - - - - TTAATA- - - - - - - - - - - - - - - - - - AAAACATACAA- - - - - - - - - - - - - - - - - - GGAAGT 34413                                  |
| Ferret      | ATATGTATAAGCTGTCTA- TAAA- TGTATAA- - - TTGGAGTTCCA- - GTGAGGAAGTAAA- - - - - - - - - - - - - - - - - - GAGAAT 31047                                                                                |
| Lion        | - - - - GGTTGCATACT- - - - - - - - - - - - GAAATAA- - - - - TTAATA- - - - - - - - - - - - - - - - - - AAA- CATACAA- - - - - - - - - - - - - - - - - - GGAAGT 32739                                 |
| Vaquita     | GGGAGATCAAGTAGTCTAACATA- CATGTAA- - - TTGCAGTTTCA- - GAGAGGGAGTAAA- - - - - - - - - - - - - - - - - - GAGAAT 26693                                                                                 |
| Pig         | GGACAGTTGAGCAGTCTAATATAACATGCAA- - - TTGGAGTTTTCAGAGAGAGAGAATAAA- - - - - - - - - - - - - - - - - - GAGAAT 25936                                                                                   |

| Majority    | GGXG- - - CCAAATATGT- - - TAATTGAAGCAGTAA- - - TAGCTGAAAACCTTCTAAAATTTGAAGAAAAATAT- CAAGTA                                                                                                         |
|-------------|----------------------------------------------------------------------------------------------------------------------------------------------------------------------------------------------------|
|             | 38170                      38180                      38190                      38200                      38210                      38220                      38230                      38240 |
| Human       | GTAATGACTGAGAACTTCTAAAATTTGAATAAAATATATCAACTTACATTCTAAGAAGCTCAGGTAAACTCCTCATGTA 33008                                                                                                              |
| PolarBear   | GGGG- - - CCAAGTATGTG- - TAATTGAAGCAGTAA- - - TGGCTGAAAACCTTCTAAAATTTTAAGAAAAATAT- CAAGTT 4982                                                                                                     |
| Cow         | GTTG- - - CCAAATATGTCTATAAATTGAAGCATTAA- - - TAACTGAAAATGTCTAAAATCTGAAGAAAAATGC- TAGGTA 31465                                                                                                      |
| Dog         | GTGAGTTTCAATAATGTG- - ATGCTGCCATAGTTC- - - TCTTTCATAGCTTGCGGGGTCTTTGGTGGAGTA- - - AATGT 30783                                                                                                      |
| BelugaWhale | GGTG- - - CCAAATATAT- - GTAATTGAAGCAGTAA- - - CAGTTGAAAACCTTCTAAAATTTGAAGAAAACTGT- CAGGTA 26096                                                                                                    |
| Donkey      | GGGG- - - CCAAATATATT- GTAATTGAGACAGAGAC- - - TTGCTGAAAACCTTAAAACATTTGAAGAAAAATAT- CAAGTA 33065                                                                                                    |
| Cat         | ACAG- - - TTAATAAGTGA- - - ATAGAGAAAAGGTTG- - - GGAGGACTGATTCCTGTTTTCAAGTTACAATA- - - AAGCT 34480                                                                                                  |
| Ferret      | ACAG- - - CCAAGTATGT- - - TAGTTCAGTAGTAA- - - TGGTGGAAAACCTTCTAAAATTTTAAGAAAAATAT- CAAGTT 31116                                                                                                    |
| Lion        | ACAG- - - TTAATAAGTGA- - - ATAAAGAAAAGGTTG- - - GGAGGACTGATTCCTGTTTTCAAGTTACAATA- - - AAGCT 32806                                                                                                  |
| Vaquita     | GGTG- - - CCAAATATAT- - GTAATTGAAGCAGTAA- - - TAGTTGAAAACCTTCTAAAATTTGAAGAAAACTGT- CAGTTA 26763                                                                                                    |
| Pig         | GGGG- - - CCAGATGTATACGTAATTGAAGCAGTAA- - - TAGCTGAAAACCTTCTAAAATTTGAAGAAAAATAT- CAAGTA 26008                                                                                                      |

Dienstag, 3. Mai 2022 08:38

| Majority    | GGATAAATAAAA- AGAAACATACTXAGGCACATAATAGTCAA- ATATTGAAAACX- ATAATAAAGAGCAAATCT- TAC |              |               |                |             |             |                   |        |       |
|-------------|------------------------------------------------------------------------------------|--------------|---------------|----------------|-------------|-------------|-------------------|--------|-------|
|             | 38250                                                                              | 38260        | 38270         | 38280          | 38290       | 38300       | 38310             | 38320  |       |
| Human       | GGCTAAATAAAA-                                                                      | AGAACCATACTT | AGACACATAGT   | AGTCAA- ATATT  | GAAAACX-    | GAAATGAAGAG | CAAATCTAAAC       |        | 33085 |
| PolarBear   | GGGTAAATAAAA-                                                                      | AGAACCACGCTT | AGGCACATAAT   | AGTCAA- ATATT  | GAAAATCTAAT | GATAAAGAG   | CAAATCT- TAC      |        | 5059  |
| Cow         | GGATAAGAAAAA-                                                                      | AGAAACATTTT  | GTTGTTCA- GTC | ACTAAGTCAT     | GTCAGCCTCT- | - - TTGTGAC | CCCGT- GGAC-      | TG-    | 31537 |
| Dog         | GTGTATGTGCTA-                                                                      | AGTGACGTAATA | AAGACAATAA    | ATTGTCGGT-     | TGTTTGTAA   | TGTCCAGTCT  | ACTAAACAA- - -    | C- TAC | 30857 |
| BelugaWhale | GGATAAGTAAAA-                                                                      | AGAAACATACCA | AGGCACACAATA  | AATCAA- ATATT  | GAAAACX-    | ATAATAAAG   | AGAAAATCT- TAT    |        | 26172 |
| Donkey      | GGATAGATAAAA-                                                                      | AGAAACACATTT | AGGTAGTTAAT   | AGTCAAT- ATATT | GAAAACX-    | ATGATAAAG   | AACAAATCT- TTA    |        | 33141 |
| Cat         | GAGTAATCAAAAC                                                                      | AGTATCATAGT  | GGCATAAAGAA   | GATAAAT- AGAT- | - - GAA- T- | - AGAACAGA  | AATAGAA- - - -    | TCC    | 34548 |
| Ferret      | GGATAAATAAAA-                                                                      | AGAACCATACTT | AGGCACATAAT   | AGTCAA- ATATT  | GAAA-       | CTAATGATA   | AAGAGCAAATCT- TAC |        | 31192 |
| Lion        | GAGTAATCAAAAC                                                                      | AGTATCATAGT  | GGCATAAAGAA   | GATAAAT- AGAT- | - - GAA- T- | - AGAACAGA  | AATAGAA- - - -    | TCC    | 32874 |
| Vaquita     | GGATAAATAAAA-                                                                      | AGAAACATACCA | AGGCACACAATA  | AATCAA- ATATT  | GAAAACX-    | ATAATAAAG   | AGAAAATCT- TAC    |        | 26839 |
| Pig         | GGATAAGTAAAA-                                                                      | AGAAATATACCA | AGGCACATAAC   | AGTCAA- ATATT  | GAAAACX-    | - - TAATAAG | CATCTAGGAA- AA-   |        | 26081 |

| Majority    | AGTCAXGCAAAAAAATCTAAC- - - GACX- - CXCCCXXATTXAAXTXAAAGACAXA- - CGAACTTTAGXTTGAATAGAA |             |             |             |              |             |             |                     |                     |
|-------------|---------------------------------------------------------------------------------------|-------------|-------------|-------------|--------------|-------------|-------------|---------------------|---------------------|
|             | 38330                                                                                 | 38340       | 38350       | 38360       | 38370        | 38380       | 38390       | 38400               |                     |
| Human       | AGCTGCGAAAAA                                                                          | ACGTCTAACAG | GAGACCAACAC | CCTCGTATTAA | AGGGGGAAAA   | AAAAAGCGAAT | TTTC- - TTT | AGACTGAA            | 33163               |
| PolarBear   | AGTCAGGAAGA                                                                           | AGCCATCTCAC | AGGAGACCAAC | ACCTTCACTAA | AAGGAAAAA    | AAG- - CTA  | ACTTTAGAT   | TGAATAGAA           | 5137                |
| Cow         | CATTACTCCAG                                                                           | GATCCCTGTC  | CCTCACCAG-  | CTCCCAGAG   | TGTGCTCAG    | ACTCA- - -  | TGTCCATT    | GAGTCA- - -         | GTGA 31609          |
| Dog         | AG- - AGTTAA                                                                          | CAAATTTTTT  | TAT- - - -  | GG- - - - - | CCCTGAGTT    | GTTTTGTGC   | AC- - - -   | CCAAGTGT            | ATTTGAATCTGGA 30920 |
| BelugaWhale | AAGCAAGCAAG                                                                           | AAAAAGATAT  | CTCACAGGAG  | ACTAACACCT  | TGCATTAAA    | AGAAAAA     | AGTTCTTT    | AGGCTGGATGGAA 26252 |                     |
| Donkey      | AAACAAGCAG                                                                            | AAAAAGACAT  | C- - - - -  | TACACAGT-   | - - - - -    | AGACTGA-    | - C- -      | ACCTTGC             | ACTAAA- AGAA 33195  |
| Cat         | AG- - - - -                                                                           | AAATAAAC    | CTAC- - - - | A- - - - -  | TAATT- - - - | ATGGAC-     | - - - -     | AACTGGT             | TTTTGACTAAGG 34593  |
| Ferret      | AGTCAGGAAAA                                                                           | AGCCATTT    | CACAGGTGAC  | CAACACCTT   | TAAGGGGG     | GAT- - G-   | CTA         | ACTTTGGAT           | TGAATAGAA 31268     |
| Lion        | AG- - - - -                                                                           | AAATAAAC    | CTAC- - - - | A- - - - -  | TAATT- - - - | ATGGAC-     | - - - -     | AACTGGT             | TTTTGACTAAGG 32919  |
| Vaquita     | AAGCAAGCAAG                                                                           | AAAAAGATAT  | CTCACAGGAG  | ACTAACACCT  | TGCATTAAA    | AGAAAAA     | AGTTCTTT    | AGGCTGAATGGAA 26919 |                     |
| Pig         | AGTTATCTCAC                                                                           | AGGAGACTG   | ACGCTTTG    | CA- - TTCAA | AGAAAAA      | CAAAACAG    | AAA- -      | CGTTCTTT            | AGGTTGAACGGAA 26157 |



Dienstag, 3. Mai 2022 08:38

| Majority    | T G A C A C T A G G C A A A A A C T T G G A T C T G C A G G A A A T A A - C A A G G A G T A C C A G G A A T G G T A A A T A T A T G T G T X A A - - - - T T A A |       |       |       |       |       |       |       |       |
|-------------|-----------------------------------------------------------------------------------------------------------------------------------------------------------------|-------|-------|-------|-------|-------|-------|-------|-------|
|             | 38410                                                                                                                                                           | 38420 | 38430 | 38440 | 38450 | 38460 | 38470 | 38480 |       |
| Human       | T G G C - - - - - A T A A C T T G G C T C T A C A G G G G A T A A - - G A G G A G T A C T G G G A A T G G T T A A T A T G T G T A T A A A - - T T T T A A       |       |       |       |       |       |       |       | 33231 |
| PolarBear   | T G A T A C T A C G T A A A A A C T T G G A T T T G C A G G A G G T A A A C C A G G A G T A C C G G G A A T G G T A A A T G T G T G T G T A A A - - - - T T A A |       |       |       |       |       |       |       | 5213  |
| Cow         | T G C C A T C C A A C T G T C T C A T C C T C T T G T C G C C C C C T T - C - - - T T C T G C C C T C A G T C C T - - - - - T G C C A G C A - - - - T C A G     |       |       |       |       |       |       |       | 31674 |
| Dog         | T G A T G A T G A G G A G G G A G G A G A G G A A G G A A G G A G G A G G A G G A A G A C A C T G A A A T T A G T T G G C G T A T A A T C G T G - - - - A C A G |       |       |       |       |       |       |       | 30996 |
| BelugaWhale | T A G C A C T A G A C A A A A C C T T G G A T C T G C A G G A A A T A A - C A A G G A G T A C C A G G A A T G G T A A A T A A A T G T G C G A A A A T T T T A A |       |       |       |       |       |       |       | 26331 |
| Donkey      | A G A A A A A A G C T G A T T T G T T T A G G C T G A A T G G A A T G A - - - - - C A C T A G A A A A A A G - - - - - T T A A                                   |       |       |       |       |       |       |       | 33248 |
| Cat         | T A T C C G T A T G C A A A A A C C A A A A - - - - - A C A A A A C A C - C A A A A C A C A C T T G G A T G T G T - A C C C C A T A C - C A T A - - - - T T - G |       |       |       |       |       |       |       | 34660 |
| Ferret      | T G A C A C T A T G T A A A A A C T T G G A T T T G C A G G A A G T A A - C C A G G A G T A C C A G G A A T G G C A A A T A T G T G T G T A A A - - - - T T A G |       |       |       |       |       |       |       | 31343 |
| Lion        | T A T C - - T A T G C A A A A A C C A A A A - - - - - A C A A A A C A C - C A A A A C A C A C T T G G A T G T G T - A C C C C A T A C - C A T A - - - - T T - G |       |       |       |       |       |       |       | 32984 |
| Vaquita     | T A G C A C T A G A C A A A A C C T T G G A T C T G C A G G A A A T A A - C A A G G A G T A C C A G G A A T G G T A A A T A G A T G T G T G A A A A T T T T A A |       |       |       |       |       |       |       | 26998 |
| Pig         | T G A C A C T A G A C A G T A A C T T G G A T C T A T A G G A A G T A A - C - - - G A G T A C C A G G A A T G G C A G A G G T G T G T A T G A A - - - - T T A A |       |       |       |       |       |       |       | 26229 |

| Majority    | A A A G A T - T C T C T T T T A A T C C T T T A A A T T T C T T T G A A A G A - - C T G T - - C T X T X A A A X A A A A A A A C T T T G T A T T A T G - T G G |       |       |       |       |       |       |       |       |
|-------------|---------------------------------------------------------------------------------------------------------------------------------------------------------------|-------|-------|-------|-------|-------|-------|-------|-------|
|             | 38490                                                                                                                                                         | 38500 | 38510 | 38520 | 38530 | 38540 | 38550 | 38560 |       |
| Human       | A A G G G C - T C T C T C T T T T C C T A T C A G - T T T C T T T G A A A G C - - - - - C T T T A T G T A A A C A A C A A C T T T G T A T T A T G - G G G     |       |       |       |       |       |       |       | 33300 |
| PolarBear   | A A A A G C - T C T C T T T T A A T C C T T T A A A T C T C T T T G A A A G A - - C T G T T - T A C G T A C A T T T A A A A A A A A A A C A T - - - - -       |       |       |       |       |       |       |       | 5281  |
| Cow         | A A - - - - T C T T T T C T A A T C A G T A G G T T C T A G A C A T C A G G - - T G A C - - C A G C G T A T T G A A G - - - - - C T T C A A C A A A G A T G C |       |       |       |       |       |       |       | 31740 |
| Dog         | T T T T A C - A T T T T T T A G C C C A G T C A A A A C C T T T - - - - - T T G C T - T T T T G G G T G C A C G T A A A C C T T G T A C - - - - -             |       |       |       |       |       |       |       | 31058 |
| BelugaWhale | A A A G C T A T C T C T T T A C T C C T T T A A A C T T C T T T G A A A G A - - C T G T - - T T A G G G A T A C A G A A A A C C T T T G A A T T A T G - T G G |       |       |       |       |       |       |       | 26406 |
| Donkey      | A A A G A C T C C T C T T T T A A T C C A T T A A A T T T C T T T G A A A G A C A C T G T T T C T G T A T A A A G A A A A A A C T T T G T A T T - - - - T G G |       |       |       |       |       |       |       | 33324 |
| Cat         | A A G A A T - T C A C T C T G A G T G G A C C T A G A A G A A A C - - - - - A T A G T A A A A A A A T T T T G T G A C C T - - - - -                           |       |       |       |       |       |       |       | 34715 |
| Ferret      | A A A G A T - T T T C T T T T A T T C C T T T A A A T C T C T T T G A A A G A - - C T G T A - C A T T A A A A A A A A A A A C T T T G T A T T A T G T G G T   |       |       |       |       |       |       |       | 31419 |
| Lion        | A A G A A T - T A A C T C T G A G T G G A C C T A G A A G A A A C - - - - - A T A G T A A A A A A A T T T T G T G A C C T - - - - -                           |       |       |       |       |       |       |       | 33039 |
| Vaquita     | A A A G C T A T C T C T T T A C T C C T T T A A A C T T C T T T G A A A G A - - C T G T - - T T A G G G A T A C A G A A A A C C T T T G A A T T A T G - T G G |       |       |       |       |       |       |       | 27073 |
| Pig         | A A G G C - - T A T C T T T T A A T C C T T T G T C T T T G A A A G A C T G T - - T T A T - - C A A A A A A C A A A A A A C C T T T A A A T G A T G G T G G   |       |       |       |       |       |       |       | 26303 |

Dienstag, 3. Mai 2022 08:38

| Majority    | TT- ATTATGTAC- - GTAGATGTTTATATGAC- AACAXTTAGCACAAAAGTGAAXATAAAXGG- - AAATTTACAGG- - - AAX        |       |       |       |       |       |       |       |       |
|-------------|---------------------------------------------------------------------------------------------------|-------|-------|-------|-------|-------|-------|-------|-------|
|             | 38570                                                                                             | 38580 | 38590 | 38600 | 38610 | 38620 | 38630 | 38640 |       |
| Human       | TTTATTATGTAA- - ATGGATGTTTATATGAC- AACAGTTAGTACAAAAGTGAAGATAAATGG- - AATTCTTCAGTGGTAAG            |       |       |       |       |       |       |       | 33375 |
| PolarBear   | - - - - - ATGTAT- - GTAGATGTTTCTGTGAC- AACAG- - - - CACTAAGTGAAGTAGAATTTTACAGTTGTAGG- - - - -     |       |       |       |       |       |       |       | 5342  |
| Cow         | ATAGTTAAAAGCTAGTACAAATTTGGAGGACTGACTCCTGTTTTGAAGTTATTGTAAACCCT- AAAGTAATCAA- - - AAC              |       |       |       |       |       |       |       | 31816 |
| Dog         | - - - - - TGAGC- - GTGGACTTGCTTGAGGG- TATAGT- - ATAGTAAACGATTGTAAAA- - - GGACCTATCAG- - - - -     |       |       |       |       |       |       |       | 31116 |
| BelugaWhale | TTCATTCTGTAC- - ATAGATGTTTATATGAC- AATGATTAGCACAAAAGTGAAGATAAATGG- - AATTTTACAGTT- TAAG           |       |       |       |       |       |       |       | 26480 |
| Donkey      | TTTATTATGTGT- - ATAGATGTTTATATGAC- AGCAATTAGCACAAAAGTAAAGATAAATGG- - AATTTTACAGTTGTAAAG           |       |       |       |       |       |       |       | 33399 |
| Cat         | - - - - TGATTAG- - GCAGACGTTTCTTTGAT- AGGAC- - - - CCCAAAAGTACTATAAAA- - - G- AACAAAGTGG- - - - - |       |       |       |       |       |       |       | 34773 |
| Ferret      | TTATTTATATAT- - GTAGATGTTCTTAGAAC- AACAGTTAGCACTAAATGAAAATAGAATTTTACAGTTACAGG- - - - -            |       |       |       |       |       |       |       | 31490 |
| Lion        | - - - - TGATTAG- - GCAGACGTTTCTTTGAT- AGGAC- - - - CCCAAAAGTACTATAAAA- - - G- AACAAAGTGG- - - - - |       |       |       |       |       |       |       | 33097 |
| Vaquita     | TTCATTCTGTAC- - ATAGATGTTTATATGAC- AGTATTAGCACAAAAGTGAAGATAAATGG- - AATTTTACAGTT- TAAG            |       |       |       |       |       |       |       | 27147 |
| Pig         | TTTATTCTGTAC- - GTAGAGTTTTATGTGAC- AACAAATTAGCACAAAAGTGAAGTTAAGTGG- - AATTTTATAGAT- TAAG          |       |       |       |       |       |       |       | 26377 |

| Majority    | GTTTTTATATTTTACATGAAATGATAGAGTATTAACCTCTTACATAAX- - - - - GAATATTX- GATAAXTTAAA      |       |       |       |       |       |       |       |       |
|-------------|--------------------------------------------------------------------------------------|-------|-------|-------|-------|-------|-------|-------|-------|
|             | 38650                                                                                | 38660 | 38670 | 38680 | 38690 | 38700 | 38710 | 38720 |       |
| Human       | GTTCTTATATTTTACCTGAAGTGATACAGTGTAACTCTAACATAAAA- - - AGATTCTGTTAAGGTT- - - GCATATCAA |       |       |       |       |       |       |       | 33449 |
| PolarBear   | GCTTTTATTATTTATATGAAAAGATAGAATATTAACCTTGAACATAGACTCTTTTAAAGGTTGCATATTGAAATGATCTCCA   |       |       |       |       |       |       |       | 5422  |
| Cow         | AATATTATATTA- ACGTAAAGGTACATAG- ATGAG- - TAGAACA- - - - - GAATA- - - GAGAGTCCAAG     |       |       |       |       |       |       |       | 31872 |
| Dog         | AGTACCACTTTTGATTTGCTTCAGTGGTGGCTTAGCTATTGCTTA- - - - - TGTATAT- - - ATACACCTTG       |       |       |       |       |       |       |       | 31178 |
| BelugaWhale | GTTTTTATATTA- - CATGAAATGATAGATTATTAACCTCTTACATAA- - - - - GAATATTCTGGTAAATTTAAA     |       |       |       |       |       |       |       | 26544 |
| Donkey      | GTTCTTATATTTTACATGAAATGAAAGAATATTAACCTCTAACACAA- - - - - GTAGATTCTAGTAAGTTAAG        |       |       |       |       |       |       |       | 33465 |
| Cat         | GATTTTCATCAGCT- TT- - - - - TAGACTCTAAGTTCTTTTGACAG- - - - - ATACTG- - ATAGTAGAAT    |       |       |       |       |       |       |       | 34826 |
| Ferret      | GTTTTTATTATTTATATGAAATGATAGAATATTAACCTCTTATGTAGATTCT- - - AAGGCTATATATTGAGATAATTGCCA |       |       |       |       |       |       |       | 31567 |
| Lion        | GATTTTCATCAGCT- TT- - - - - TAGACTCTAAGTTCTTTTGACAG- - - - - ATACTG- - ATAGTAGAAT    |       |       |       |       |       |       |       | 33150 |
| Vaquita     | GTTTTTATATTA- - CATGAAATGATAGATTATTAACCTCTTACATAA- - - - - GAATATTCTGGTAAATTTAAA     |       |       |       |       |       |       |       | 27211 |
| Pig         | ATTCTTAAATTTTACATGAAGTGATAGAGTATTAACCTCTTACATG- - - - - GAATATCCTGATAAACTAAG         |       |       |       |       |       |       |       | 26442 |

Dienstag, 3. Mai 2022 08:38

| Majority    | G- - - AAAATAXAAACAATXTCTATAAAGXA- GTAXAATTA- - - - - TAAATAGAGAGAAAAGTTGGAGGACTGATTC             |
|-------------|---------------------------------------------------------------------------------------------------|
|             | 38730 38740 38750 38760 38770 38780 38790 38800                                                   |
| Human       | ATTCTAAGTGTAATCTCATTTAAAAAGATAAAAAGAAGTATAACGAAAAGCCAATAGAGGAAAAATTGGAGCATTGACTA 33529            |
| PolarBear   | A- - - AAAAAAAAAAAAAAAAAAGATACAAGGAA- GTACAGTTAAGTG- - - - - TGAATAGAGAGAAAAGTTGGAGGACTGATTC 5492 |
| Cow         | A- - AAAAAGCCACACAATTAT- - - - - 31891                                                            |
| Dog         | G- - - TGCACACGTAC- - - ACATGCCTAGCA- GTTCAGTT- - - - - TAAAAAGAAAACTATACGAAGTTTATTTA 31240       |
| BelugaWhale | GTTGCATATTGAAACAATGTCTTTAAAAAG- GTACAAAGACTTACATTCAAAGCAAATAGAAAAGTTGGAGGGCTGACTC 26623           |
| Donkey      | GTTGCGTATTGAAATAATCTCTAAAAAATACAAAGAAATACAGTTAAAAGCAAAGAGAGGGGATGTTGGAGGACTGACT- 33544            |
| Cat         | G- - - AAAACACAAAC- - - - - CATAGAGTA- GCAGAATA- - - - - TCTTTACAGAGCATAT- GGAACTTTGATCC 34884    |
| Ferret      | A- - - AAAAAAAAAAA- - - AGATACAAGGAA- GTATTGTTAAATG- - - - - TGAATAGAGAAAAAGTTGGAGGACTGATTT 31634 |
| Lion        | G- - - AAAACACAAAC- - - - - CATAGAGTA- GCAGAATA- - - - - TCTTTACAGAGCATAT- GGAACTTTGATCC 33208    |
| Vaquita     | GTTGCATATTGAAACAATGTCTTTAAAAA- GTACAAAGACTTACATTCAAAGCAAATAGAAAAGTTGGAGGGCTGACTC 27290            |
| Pig         | GTTGCATATTGAAACAGTGTC- - - - - 26463                                                              |

| Majority    | CCAATTTTCAAX- - T- TAATATAAGACTGAGTAATCAAAACAATGTCATAT- - - - XGGCATAAAGAAAGA- AAATAGATT        |
|-------------|-------------------------------------------------------------------------------------------------|
|             | 38810 38820 38830 38840 38850 38860 38870 38880                                                 |
| Human       | CCAGTTTTCAAGAAT- TACTGCAAAGCTACGGTAATTA AAAATAGCATCAT- - - - - AATA- ACATAAAGATAAATAGGTC 33602  |
| PolarBear   | CCTGTTTTCAAATGT- TAATATGAAGCTGAGAAATCAAAACAATGCCATAT- - - - TGGCATAAAGAAAGATAAATAGATT 5567      |
| Cow         | - - - - - 31891                                                                                 |
| Dog         | CCAAAATATA- - - GT- CCATACGTGACTGTGTAAATGGAATTTTGCCTTGC- - - - AGATACTTTTATTGA- TTTTTTATT 31311 |
| BelugaWhale | CTGCTTTTAAAAGTTATTGTAAACCATACAGTAATCAAAACAAGTCGTATTTATTAGCATAAAGAAAGATAAATAGATT 26703           |
| Donkey      | CTGTTTTCCAAAGTTATTGTA- AAGCTCCAGTAGTCACAATAATGTCACAT- - - - TGGCATAAAGAAAGATAAATAGATC 33619     |
| Cat         | AGAATATATA- - - - - TAAATTCAGACTGTATAAATGCTAAAACCTTAA- - - - - GGCAACAAACAACC- - - - - T- 34941 |
| Ferret      | CCTATTTTCAAACAT- TATTATAAAGCTGAGTAGTCAAAACAATGTCACAT- - - - TAGCATAAAGAAAG- - AAATAGATT 31707   |
| Lion        | AGAATATATA- - - - - TAAATTCAGACTGTATAAATGCTAAAACCTTAA- - - - GGCAACAAACAACC- - - - - T- 33268   |
| Vaquita     | CTGCTTTTAAAAGTTATTGTAAACCATACAGTAATCAAAACAAGTCGTATT- - - - AGCATAAAGAAAGATAAATAGATT 27366       |
| Pig         | - - - - - 26463                                                                                 |

Dienstag, 3. Mai 2022 08:38

| Majority    | AATGGAACAGAATAGA- - - XCCAGAAAT- - - - X- XCATAATTATGGACAACCTGGTTTTTGGACAAAGGTACAAAGXCAXTT |       |
|-------------|--------------------------------------------------------------------------------------------|-------|
|             | 38890 38900 38910 38920 38930 38940 38950 38960                                            |       |
| Human       | AGTGAGACAGAGCAGAGAGTTCAGAAGTTAACTCACACAATTATGGATAACTGATTTTTTGGACAAAGGTGCAAAGTCAATT         | 33682 |
| PolarBear   | AATAGAACAGAATAGAA- - TCCAGAAAT- - - - CTACATAATTATGGACAGCTGTTTTTGGACTAAGATACCCATATGTAA     | 5641  |
| Cow         | - - - - - GGACAACCGTTTTTGGACAAAGGTACAAAGGCAGTT                                             | 31927 |
| Dog         | GATTTACAATACAAGCC- - CCCCCAAAT- - - - - TATCACTA- - GATCATTGATTTTGGATTAGCCATAGCC- CAAGTTC  | 31379 |
| BelugaWhale | AATGGAACAGAATAGAGAGTCCGGAAATAAAGCCACATAGTTATGGACAACCTGGTTTTTGGACAGAGGCACAAAGGCAATT         | 26783 |
| Donkey      | AGTGGAACAGAATAGA- - - - CTTAAAATAAACCCACGCAATAATGGACAACCTGGTTTTTGGACGGATGCACAAAGGCAATT     | 33695 |
| Cat         | AGTGTAATAAATTGG- - - - - CAAAAAT- - - - - ACTT- - GATAGTT- - - - - CAGCAAAAACATATGGCA      | 34992 |
| Ferret      | AATAGAACAGAATAGAA- - TCCAGAAATAAACCTGTGTAATTATGGACAGCTAGTTTTTGGACTAAGGTAGCCATATGTTT        | 31785 |
| Lion        | AGTGTAATAAATTGG- - - - - CAAAAAT- - - - - ACTT- - GATAGTT- - - - - CAGCAAAAACATATGGCA      | 33319 |
| Vaquita     | AATGGAACAGAATAGAGAGTCCGGAAATAAAGCCACATAGTTATGGACAACCTGGTTTTTGGACAGAGGCACAAAGGCAATT         | 27446 |
| Pig         | - - - - - GGGAGTCCCCTCGTGGCGCAGTGGTTAACGAATCC                                              | 26499 |

| Majority    | CAGTAGAXXCAAAAAAXAGAATTTTCAXC- - AGXXXTCTGTAACA- - TAGXATATCTAT- - - GTGCCAACXTGAACTGC           |       |
|-------------|--------------------------------------------------------------------------------------------------|-------|
|             | 38970 38980 38990 39000 39010 39020 39030 39040                                                  |       |
| Human       | CAGTGGAGAAAAAGTAG- - - - ACTTCCAACAAAGGGTGCTACAGCAGTTGGAGCTATCCGTATGCAAAAAAATGATCTTG             | 33758 |
| PolarBear   | AAAAAAAAACAAGAAAACAAAAAAAACCTT- - GAACCTGTATCTCA- - TACCATAGTTAA- - - GAACTAGCTCTGAGTGG          | 5714  |
| Cow         | CAGTAGAGGGGAAAAAATAGATTTTTTTCAG- - CAGAGTTGTATAACAG- TAAGATATCCAT- - - ATGCTGCCAACAGCAAC         | 32001 |
| Dog         | TATGGTGT- CAAAATAATTAAGT- - GGTC- - AGATGTCTGTAACG- - CTGCTTTGCTA- - - GTTTCATTTTTTAAAAAC        | 31448 |
| BelugaWhale | CAGTGGAGGAAAAAAA- TAGATTTTTTTCAGCAAAGGATTCTGTAACAA- TAGGCTATCCATGTGCTGCCAACAAACAGCAGC            | 26861 |
| Donkey      | CAATGGAGAGAGAAGA- - GACTTTTTTCAGCAAAGGGTGCTGTAACAGTTGGGTTATCTAT- - - ATGCAAAAACAAAAGAC           | 33769 |
| Cat         | AATAAGTA- CATGAAAA- - - - - AGAT- - - - GCTCTATGTCATT- - AATCAT- - - TA- - - - GATGCAAATTGAAGTGA | 35050 |
| Ferret      | AAACAAA- CAAAACAA- AAAAACAAAGTT- - GGATCTATATCTCA- - AACCATAGTTAA- - - GAATTATCTCTAAGTGG         | 31856 |
| Lion        | AATAAGCA- CATGAAAA- - - - - CGAT- - - - GCTCTATGTCATT- - AATCAT- - - TA- - - - GATGCAAATTGAAGTGA | 33377 |
| Vaquita     | CAGTGGAGGAAATAA- - TAGATTTTTTTCAGCAAAGGATTCTGTAACAA- TAGGCTATCCATATGCTGCCAACAAACAGCAGC           | 27523 |
| Pig         | GACTAGGAACCATGAGGTTGCGGGTTCGGT- CCCTGCCCTTGCTCAG- TGGTTAACGATCCGGCGTTGCCGTGAGCTGT                | 26577 |

Dienstag, 3. Mai 2022 08:38

| Majority    | AAXAT- - - - - ACATGCTGCAAATAAAA- TTGA- - - - -                                   |       |       |       |       |       |       |       |       |
|-------------|-----------------------------------------------------------------------------------|-------|-------|-------|-------|-------|-------|-------|-------|
|             | 39050                                                                             | 39060 | 39070 | 39080 | 39090 | 39100 | 39110 | 39120 |       |
| Human       | GATCTG- T- - - - - ATCTCACACTGCATATGAAAATTAACCTCAA- - - - - ATGGA                 |       |       |       |       |       |       |       | 33801 |
| PolarBear   | ACCAT- - - - - ACATGATGTAATAAAA- TCTA- - - - -                                    |       |       |       |       |       |       |       | 5740  |
| Cow         | AGCA- - - - - GCAGCAAACCTTG- - TTGG- - - - -                                      |       |       |       |       |       |       |       | 32021 |
| Dog         | AATAT- - - - - ATATAGTATGAATAG- - - T- - - - -                                    |       |       |       |       |       |       |       | 31469 |
| BelugaWhale | AACAAAGCTATCGATACTTGGATCTATACTTCATACAAAAAATGAGCTCAAATGGACTTTGATGTAAATGTAGAACCTAAA |       |       |       |       |       |       |       | 26941 |
| Donkey      | AAAAAACTTGGGTCT- - - - - AT- - - - - ACCTCATACGATATACAAAAATTAGCTCCAG- - - - - GTG |       |       |       |       |       |       |       | 33820 |
| Cat         | GATA- - - - - ACATTACGCACCTGTTA- T- - - - -                                       |       |       |       |       |       |       |       | 35072 |
| Ferret      | GCCAT- - - - - ACATGATGTAATAAAA- TCTA- - - - -                                    |       |       |       |       |       |       |       | 31882 |
| Lion        | GATA- - - - - ACATTACGCACCTATTA- T- - - - -                                       |       |       |       |       |       |       |       | 33399 |
| Vaquita     | AACAAAGCTATCGATACTTGGATCTATACTTCATACAAAAAATGAGCTCAAATGGACTTTGATGTAAATGTAGAACCTAAA |       |       |       |       |       |       |       | 27603 |
| Pig         | GGTGT- - - - - AGGTCGCAGACACGGCTCGG- - - - -                                      |       |       |       |       |       |       |       | 26602 |

| Majority    | - - - - - A- ATTAXAAAATCTTTAGGAGATTGAGTAGAX- - - - - XATXTTT- X- - - -                 |       |       |       |       |       |       |       |       |
|-------------|----------------------------------------------------------------------------------------|-------|-------|-------|-------|-------|-------|-------|-------|
|             | 39130                                                                                  | 39140 | 39150 | 39160 | 39170 | 39180 | 39190 | 39200 |       |
| Human       | TCATG- - - GCCTAATGTAAAACCAAAAATTATAAAATCTCTAGAAAAAAATACAGAAAATCTTCGTGACTTTGGATTAAG    |       |       |       |       |       |       |       | 33878 |
| PolarBear   | - - - - - AAATTATAAAACTTCTAGAAGACATAGTAGAA- - - - - AATCTTTGTT- - - -                  |       |       |       |       |       |       |       | 5782  |
| Cow         | - - - - - A- TCTATGTTTTGTTTAGTT- - - - - GTTA- - - - -                                 |       |       |       |       |       |       |       | 32044 |
| Dog         | - - - - - TG- - AAACATTTAAAAAATTAATTACAT- - - - - AGCCCC- - - - -                      |       |       |       |       |       |       |       | 31501 |
| BelugaWhale | AATTATAAAACTTCTAGAAGAAAGCATAGTAGAAAATCTTTGTGACCTTGGGTTATGCA- - - - GAGATTTCTTTGCATA    |       |       |       |       |       |       |       | 27016 |
| Donkey      | GACCATGACGTAAATGTAGAACCTAAAATTATAAAACTTGTAGGAGAAAACATAGTAGA- - - - AAATCTTTGTGCCT      |       |       |       |       |       |       |       | 33894 |
| Cat         | - - - - - AATGGCTAATATTTAAGAGATTGACCATA- - - - -                                       |       |       |       |       |       |       |       | 35101 |
| Ferret      | - - - - - AAATTATAAAGCTTCTAGAAGACATAGTAGAA- - - - - AATCTTTATG- - - -                  |       |       |       |       |       |       |       | 31924 |
| Lion        | - - - - - AATGGCTAATATTTAAGAGATTGACCATA- - - - -                                       |       |       |       |       |       |       |       | 33428 |
| Vaquita     | AATTATAAAACTTCTAGAAGAAAGCATAGTAGAAAATCTTTGTGACCTTGGGTTATGCA- - - - GAGATTTCTTTA- - - - |       |       |       |       |       |       |       | 27674 |
| Pig         | - - - - - A- TCC- TGC GTT GCT GT GCT- - - - - TCTG- - - - -                            |       |       |       |       |       |       |       | 26624 |

Dienstag, 3. Mai 2022 08:38

| Majority    | - - - - - CTATGTGATGXGACCC- - CAAAAGCACAAATCTATGAAAGAACAAATGGXACTTXAT- CAGAXTTTAAAAXTTA |                                          |              |                                 |                  |         |              |       |           |         |       |
|-------------|-----------------------------------------------------------------------------------------|------------------------------------------|--------------|---------------------------------|------------------|---------|--------------|-------|-----------|---------|-------|
|             | 39210                                                                                   | 39220                                    | 39230        | 39240                           | 39250            | 39260   | 39270        | 39280 |           |         |       |
| Human       | CAGGAATGTATTTGATATGACCC-                                                                | TAAAAGCACAAATCTATTTAAA-                  | - - -        | AAATGGAATTTGACATCAGAATTTAAATCTT |                  |         |              | 33952 |           |         |       |
| PolarBear   | - - - - - ACCTTGGGTTAGGACCC-                                                            | CAAAAGCATAATCTATAAAAGAACAAATGGA          | ACTTCAT-     | CAGGTTTTAAA                     | ACTTA            |         |              | 5853  |           |         |       |
| Cow         | - - - - - ATTTGACCC-                                                                    | CAAAAGCATGGTCTGTGAGAGAACAAATGGG          | ATTTGAT-     | CAGTTTTAAA                      | AACTTA           |         |              | 32107 |           |         |       |
| Dog         | - - - - - CCCTATGACAGGA-                                                                | AATAC-                                   | TGATTT-      | - - - - - CAAGC-                | - - -            | CTTTAC- | CTCCCCTTGAG- | T- A  | 31549     |         |       |
| BelugaWhale | ATCTATGAAAGATTATGCAATCTATGAAAAGCACAAATCTATGAAAGAACAAATGGGACTTCAT-                       | TAGTTTTAAA                               | AACTTA       |                                 |                  |         |              | 27095 |           |         |       |
| Donkey      | TGGGTTAAGCAGAAATTTGATATCTCAAAAGCACAGTCTGCGAAAGAATAAATA-                                 | - - - - -                                | GGACTTCATCA- | - - -                           |                  |         |              | 33959 |           |         |       |
| Cat         | - - - - - CTAAGTGTTGGAA-                                                                | A-                                       | G-           | GATGT-                          | - - - - -        | GGAT-   | - - - - -    | GA    | ACTGTAAC- | - - - - | 35135 |
| Ferret      | - - - - - ACTTTGGGTTAGGACCC-                                                            | TAAAAGCATAATCTATAAAAGAACAAATGGGACTTTGT-  | GAGATTTTTAAA | ATTTA                           |                  |         |              | 31995 |           |         |       |
| Lion        | - - - - - CTAAGTGTTGGAA-                                                                | A-                                       | G-           | GATGT-                          | - - - - -        | GGAT-   | - - - - -    | GA    | ACTGTAAC- | - - - - | 33462 |
| Vaquita     | - - - - - ACGTGACCC-                                                                    | CAAAAGCACAAATCTATGAAAGAACAAATGGGACTTCAT- | TAGTTTTAAA   | AACTTA                          |                  |         |              | 27737 |           |         |       |
| Pig         | - - - - - GCGTAGGCC-                                                                    | GGTGGCTACAG-                             | CTCCGATTCA   | ACCCTAGCCTGGGAA-                | CCTCCATATGCCGCGG |         |              | 26686 |           |         |       |

| Majority    | - XGTTXTTCAAAGACA- - GXTA- GAGAATGAXAAGATAAGCCATAGAGTGG- TGAAXATCTXTAXAAA- - - - - |                                               |                                              |            |               |             |       |        |         |           |       |
|-------------|------------------------------------------------------------------------------------|-----------------------------------------------|----------------------------------------------|------------|---------------|-------------|-------|--------|---------|-----------|-------|
|             | 39290                                                                              | 39300                                         | 39310                                        | 39320      | 39330         | 39340       | 39350 | 39360  |         |           |       |
| Human       | CTGCCATTCAAAGAAACTGCTA-                                                            | GGAATGAAAAGACAAGCCATAAACTGGAAGAACATCATAACAAA- | - - - - -                                    |            |               |             |       | 34020  |         |           |       |
| PolarBear   | AAGTTTTTCAGAAGACATTGATAGTAGAATGAAAAACAAGCCATAGAATATCTGAACATCTTTAT-                 | AA-                                           | - - - - -                                    |            |               |             |       | 5921   |         |           |       |
| Cow         | ACATTATTCAAAATACA-                                                                 | GTTAAGAGAATAAAAAGACAAGCCATAGAGTGG-            | CAGACATCTTTACAAA-                            | - - - - -  |               |             |       | 32173  |         |           |       |
| Dog         | TGGTCCCCTCCAATA-                                                                   | - - -                                         | GGAAAAAATATGAAGCTGTATCA-                     | AATATAT-   | TGGATAGCTGTT- | - - - - -   |       | 31608  |         |           |       |
| BelugaWhale | - CATTATTCAAAAGACATTGTTAAGAGAATGAGAAGATAAGCCACGGAGTGG-                             | CAGATCTTTACAAAGATGTCTGATACA                   |                                              |            |               |             |       | 27173  |         |           |       |
| Donkey      | - - - - - GTTTAAAAA-                                                               | - - - - -                                     | GAACAAAAAGACAAGCCATGGAGAGGCAGAATGTCTTTACAAA- | - - - - -  |               |             |       | 34012  |         |           |       |
| Cat         | - - - - - TCTCATGTTG-                                                              | - - - - -                                     | GTGAGAATGTAAA-                               | C-         | - - - - -     | T-          | - - - | TGAAGA | ACTACT- | - - - - - | 35172 |
| Ferret      | AAGTATTTCAAAGACATTGATAGTGGAATGAAAAAATAAGCCGTAAAATATCTGAACATCTTTCTGAA-              | - - - - -                                     |                                              |            |               |             |       | 32064  |         |           |       |
| Lion        | - - - - - TCTCATGTTG-                                                              | - - - - -                                     | GTGAGAACGTAAA-                               | C-         | - - - - -     | T-          | - - - | TGAAGA | ACTACT- | - - - - - | 33499 |
| Vaquita     | - CATTATTCAAAAGACATTGTTAAGAGAATGAGAAGATAAGCCATGGAGTGG-                             | CAGATCTTTACAAAGATGTCTGATACA                   |                                              |            |               |             |       | 27815  |         |           |       |
| Pig         | GAGCGGCCCAAGGAATA-                                                                 | - GC-                                         | - -                                          | AACAACAACA | CAAAAGACA     | AAAAAAGACA- | AAAAA | AAAAA  | AAGAA-  | - - - - - | 26749 |

Dienstag, 3. Mai 2022 08:38

| Majority    | ----- GCATATAGCTGATAAAGGATTTT XATCCAGAATATA XATAAATTCAGACTATXTAXA----- CT    |                                                                    |       |       |       |       |       |       |  |
|-------------|------------------------------------------------------------------------------|--------------------------------------------------------------------|-------|-------|-------|-------|-------|-------|--|
|             | 39370                                                                        | 39380                                                              | 39390 | 39400 | 39410 | 39420 | 39430 | 39440 |  |
| Human       | -----                                                                        | GCATATAGCTGATAAAGGACTTCTATCCAGAATATTAAAAGATTCAGTATATGTAAA--A-----  | T     | 34079 |       |       |       |       |  |
| PolarBear   | -----                                                                        | GCATATGGCTGGCAAAGAACTTTGATTCAGAATATATATAAATTTGGACTGTATAAACG-----   | CT    | 5982  |       |       |       |       |  |
| Cow         | -----                                                                        | GCATGCAGTTGATAAAGGATTTTATCCAGAATAAAAAT-----                        |       | 32212 |       |       |       |       |  |
| Dog         | -----                                                                        | GCCTGGGATTGATGAATAGGAATAATAC-----TACGCCGTACTAGATTAC-TGATCC-----    | CT    | 31662 |       |       |       |       |  |
| BelugaWhale | TATACATATGTATATATATAGCTGATAAAGGATTTTATCCAGAATATACATAAATTCAGACTACATATATAA---- | ACT                                                                | 27249 |       |       |       |       |       |  |
| Donkey      | -----                                                                        | GCATAAAGCTGATAAAGGA--CTTGTCTAGAATATATATAAATTCAGACTATATAGACTCCAAAAC | T     | 34077 |       |       |       |       |  |
| Cat         | -----                                                                        | TGGACAAA-----ATAATCT-----TGCAGATTCT-----                           | T     | 35198 |       |       |       |       |  |
| Ferret      | -----                                                                        | GCATATAGCTGATAAAGAAGCTTTAATCCAAGGTATATATAAATTTGGACTATATAAGCT-----  | CT    | 32125 |       |       |       |       |  |
| Lion        | -----                                                                        | TGGACAAA-----ATAATCT-----TGCAGATTCT-----                           | T     | 33525 |       |       |       |       |  |
| Vaquita     | TATACATATGTATATATATAGCTGATAAAGGATTTTATCCAGAATGTACATAAATTCAGACTACATATATAA---- | ACT                                                                | 27891 |       |       |       |       |       |  |
| Pig         | -----                                                                        | ACA-GTGTCTTAAAAAAGATACAAA--GAGGTGTAGTT-----                        |       | 26784 |       |       |       |       |  |

| Majority    | AAA- AAXC- - - XAXTAAACA- - ACCAAATGAAGTAAATTGACAAATTTXTXTTGAT- - - XCAGCAGGAA- - - - - CXC        |                                                                                                  |       |       |       |       |       |       |       |
|-------------|----------------------------------------------------------------------------------------------------|--------------------------------------------------------------------------------------------------|-------|-------|-------|-------|-------|-------|-------|
|             | 39450                                                                                              | 39460                                                                                            | 39470 | 39480 | 39490 | 39500 | 39510 | 39520 |       |
| Human       | CAGCAGTC- AAGCAACAAACT- - ACTCAATG- AATTGGCCAAAATATTTGAACAGGTAGTACAGCACAAAAGATACACAG               |                                                                                                  |       |       |       |       |       |       | 34155 |
| PolarBear   | AAA- AATGAAGGCAACAAACA- - ACCCAATGT AATAAATTGGCAAAAAGTACTTGAT- - - CAGCAAAAA- - - - -              | CAT                                                                                              | 6048  |       |       |       |       |       |       |
| Cow         | -----                                                                                              | TAAAG- - - - - - - - - - - - - - - - - - - - - - - - - - - - - - - - - - - - - - - - - - - - - - |       | 32231 |       |       |       |       |       |
| Dog         | GAG- AAAAGGGGAAAAAAAAA- - ATAACACGAAGTGAATCCCTTTTCATTTTGGCC- - - TCTCCTGCAC- - - - -               | CTT                                                                                              | 31729 |       |       |       |       |       |       |
| BelugaWhale | CTA- AAACCTCAACAATAAGGC- - AGCAAACAACCCAATTTGATAAATTGGCAAAAAGTAATTGAATTGGTC- - - - -               | AGC                                                                                              | 27319 |       |       |       |       |       |       |
| Donkey      | GAACAGGTGAGGCAACAAAAACAACCCAACCTTAGTAAATTGACAAAA- ATACTTGATAGTTCATCAAGAAAGATACACAA                 |                                                                                                  | 34156 |       |       |       |       |       |       |
| Cat         | AAA- AAGT- - - - - - - - - - - - - - - - - - - - - - - - - - - - - - - - - - - - - - - - - - - - - | TGC                                                                                              | 35255 |       |       |       |       |       |       |
| Ferret      | AAA- ACTC- - - - - - - - - - - - - - - - - - - - - - - - - - - - - - - - - - - - - - - - - - - - - | CAT                                                                                              | 32187 |       |       |       |       |       |       |
| Lion        | AAA- AAGT- - - - - - - - - - - - - - - - - - - - - - - - - - - - - - - - - - - - - - - - - - - - - | TGC                                                                                              | 33582 |       |       |       |       |       |       |
| Vaquita     | CTA- AAACCTCAACAGTAAGGC- - AGCAAACAACCCAATTTGATAAATTGGCAAAAAGTAATTGAATTGGTC- - - - -               | AGC                                                                                              | 27961 |       |       |       |       |       |       |
| Pig         | -----                                                                                              | TAAGGC- - - - - - - - - - - - - - - - - - - - - - - - - - - - - - - - - - - - - - - - - - - - -  |       | 26806 |       |       |       |       |       |





Dienstag, 3. Mai 2022 08:38

| Majority    | XGAACTGTAAACTCA- TATACTGTTGATGGGAATGTAAAATTXTAGAACTACTTTGGAAAACAATTTGGCA- - - GTTTC         |       |       |       |       |       |       |       |       |
|-------------|---------------------------------------------------------------------------------------------|-------|-------|-------|-------|-------|-------|-------|-------|
|             | 39690                                                                                       | 39700 | 39710 | 39720 | 39730 | 39740 | 39750 | 39760 |       |
| Human       | AGAATGTTAATATTCACAATACTGCTGATGGGAATGTAAAATCGTAG- - - TACTTTGGAAAACAATCTGGTA- - - GTTTC      |       |       |       |       |       |       |       | 34384 |
| PolarBear   | A- AGAACCATAACTCT- TATACTGTTGGTGGGAATGTAACTTGTAGAACTGCTTGGGCAAATAATCTGACA- - - GTTTC        |       |       |       |       |       |       |       | 6269  |
| Cow         | GGTACTGTAACACTCA- TATACTGTTGATGGGAATGTAAAATT- TAGAACTATTTTGGAAAACAGGTTGGCA- - - GTTTC       |       |       |       |       |       |       |       | 32368 |
| Dog         | GCAGGAGAGTAGATGA- GAGACGGCCAG- - - - - CAGAGACC- - - ATAAGTGCAGAGGGAGAAAAGAAGGAA- - - GAGTT |       |       |       |       |       |       |       | 31940 |
| BelugaWhale | GGAACTGTAACACTCA- TATACTGTTGATGGGAAAGTAAAATTGTAGAACTACTTTGGAAAACAATTTGGCA- - - GTTTC        |       |       |       |       |       |       |       | 27546 |
| Donkey      | GGAACTGTAACACTCA- TATATTGTTGATGGAAATGTAAAATTATAGAACTACGTTGGAAAACAATTTGGCA- - - GTTTC        |       |       |       |       |       |       |       | 34380 |
| Cat         | A- TGGCTCAGAGCCTG- GAGCCTGTTTC- - - - - - CGATTC- TGTGTCTCCCTCTCTCTCTGCCCTCCC- - - CTGTT    |       |       |       |       |       |       |       | 35457 |
| Ferret      | A- TGAACCATAGCTCA- TATACTGTTGG- - - AAATGTAACTTGTAGAACTACTTGGGCAAGTAATCAGGCC- - - ATTTC     |       |       |       |       |       |       |       | 32405 |
| Lion        | -----                                                                                       |       |       |       |       |       |       |       | 33616 |
| Vaquita     | GGAACTGTAACACTCA- TATACTGTTGATGGGAAAGTAAAATTGTACAACACTTTAGAAAACAATTTGGCA- - - GTTTC         |       |       |       |       |       |       |       | 28188 |
| Pig         | ATTAGCATAAAGATAA- ATAGTAGTAGAGCAAAATAGAGAATC- CAGAAATAAACCACACAATTATGGACACCTGGTTT           |       |       |       |       |       |       |       | 26950 |

| Majority    | TTAAAA- - GTTAAACATXTA- - - CXGTATGATCCAGCTATTTGTCTCTTAGGCATTTAXCCAAGXAAAATGAAGGCATXT         |       |       |       |       |       |       |       |       |
|-------------|-----------------------------------------------------------------------------------------------|-------|-------|-------|-------|-------|-------|-------|-------|
|             | 39770                                                                                         | 39780 | 39790 | 39800 | 39810 | 39820 | 39830 | 39840 |       |
| Human       | TC- - - - - - - - - CAT- - - - - - - - - GATCCAGGTTATTTGTCTCCTAAGCATTTACCCAAGAGAAAAGAAGGCATCT |       |       |       |       |       |       |       | 34441 |
| PolarBear   | TTAAAA- CTTGAACATCTA- - - TGAATGATGCAGCTGTTTGTCTCTTAGGCATTGATGCAGGAAAAATGAAGACAT- -           |       |       |       |       |       |       |       | 6343  |
| Cow         | TTAAAACACTGTTAAACATTTA- - - CAGTATGATCCAACCTTTGT- TTCCTAGGTACTIONAACCCAAGAAAAATGGTAGCATAT     |       |       |       |       |       |       |       | 32444 |
| Dog         | CAGCAA- - - - - GGCTCCAA- - - TGCGGGACTCGAGTCCGATCACCTTTGTGACTCTTCCATTGAACAT- - - GCCCTGG     |       |       |       |       |       |       |       | 32008 |
| BelugaWhale | TTAAAA- GTTAAACATTTA- - - CTGTATGATCCAGCTATTTGTTTCCTAGGTGCTTACCCAAGGAATATGAAGGCATAT           |       |       |       |       |       |       |       | 27622 |
| Donkey      | TGAA- - - - GTTAAAGTATGTA- - - CTGTATGATCCAGCTGTTTGTCTCCTGTGCAAGAGGAGAAAAGAAAACCCAAGAAA- -    |       |       |       |       |       |       |       | 34451 |
| Cat         | CATGCT- - CT- - - GTCTCTC- - - T- CTGTCCCAAAAATAAATAAACGTTGAAAA- - - AAAAAAGAAAATAAAAAAAA- -  |       |       |       |       |       |       |       | 35523 |
| Ferret      | TTAAAA- - TTCAAACATCTA- - - TGAATGATGCAGCTGTTTGTCTCTTAGGCATTTATGCATGAGAAATGAAGGCATAT          |       |       |       |       |       |       |       | 32480 |
| Lion        | ----- C- -----                                                                                |       |       |       |       |       |       |       | 33617 |
| Vaquita     | TTAAAA- GTTAAACATTTA- - - CTGTATGATCCAGCTATTTGTTTCCTAGGTGCTTACCCAAGGAATATGAAGGCATAT           |       |       |       |       |       |       |       | 28264 |
| Pig         | TCAATAAAGGTACAAAGTCAATT CAGTGAAGAAAAAATTAATTTTTT CAGTAAAGGGTCTATAACAATAA- GTTATCC             |       |       |       |       |       |       |       | 27029 |

Dienstag, 3. Mai 2022 08:38

| Majority    | ACTCA- - - - - T TAAAAAACTC- - ATATGAATGTTTCATAGTAGCTTTXTTTGT- AATATCCAAAXCCCAAAC            |       |       |       |       |       |       |       |       |
|-------------|----------------------------------------------------------------------------------------------|-------|-------|-------|-------|-------|-------|-------|-------|
|             | 39850                                                                                        | 39860 | 39870 | 39880 | 39890 | 39900 | 39910 | 39920 |       |
| Human       | ATTCA- - - - - T TAAAAAACTCTCATGTTAATGTTTCATAGCCATTTTATTTGT- AATCACCAAATGTGAAAC              |       |       |       |       |       |       |       | 34507 |
| PolarBear   | GTTTCATT- - AAAAAAGCTTAAAAACTTA- - AGATGAATGTTTCATAGTAGCTCTTTTGTTAATACCCAAAGCCCAAAC          |       |       |       |       |       |       |       | 6419  |
| Cow         | ACTCA- - - - - TCA- - - - CAC- - ATGTAAATGTTTATAGTAGTTTTATTTGT- AATATCTAAAGCCTAGAAC          |       |       |       |       |       |       |       | 32503 |
| Dog         | GCCCA- - - - AA- - - GGGCTTCAGGACCC- - - - TCAACTGCTTGTAGGGTTCCACCCAGGGAGGTCCCGAAC- - - AAGT |       |       |       |       |       |       |       | 32073 |
| BelugaWhale | ACTCA- - - - - T TAAAAACTC- - ATATGAATGTTTCATAGTAGCTTTATTCGT- AATATCTAAAATCCAGAAC            |       |       |       |       |       |       |       | 27686 |
| Donkey      | AATGAGGGCATATATTCCTTAAAAAACTTGTATATGAATGTTTCATAGTAGCTTTTTTTGT- ACCATTGAAGACCCCAAAC           |       |       |       |       |       |       |       | 34530 |
| Cat         | ACCCA- - - - - AAAAACTAAAAAACTC- - AGTTGAATGTTTCATAATAGCTTGTTT- GT- AATAAGCAAAGCCATAAAC      |       |       |       |       |       |       |       | 35591 |
| Ferret      | GTTCACTTAAAAAAAATACTAAAAAACTA- - AGATGAATGTTTCATAGTAGCTTTTTTTGT- AATACTCAAAGCCCAAAC          |       |       |       |       |       |       |       | 32557 |
| Lion        | - - CCA- - - - - AAAAACTAAAAAAATC- - AGTTGAATGTTTCATAATAGCTTGTTT- GT- AATAAGCAAAGCCATAAAC    |       |       |       |       |       |       |       | 33683 |
| Vaquita     | ACTCA- - - - - T TAAAAACTC- - ATATGAATGTTTCATAGTAGCTTTATTCGT- AATATCTAAAATCCAGAAC            |       |       |       |       |       |       |       | 28328 |
| Pig         | ATTTA- - - - - CTG- - - - CCA- - AAAACAACAGCAGCAAACGACTTAGAGCT- ATGGACTTCATACTGAAAT          |       |       |       |       |       |       |       | 27088 |

| Majority    | AATCCAAATGTCCATCAACAGATGAATGGATAAATA- GATTGCTGTTTTGGCATTGTATTCCATTGCATACAXTGAAATA       |       |       |       |       |       |       |       |       |
|-------------|-----------------------------------------------------------------------------------------|-------|-------|-------|-------|-------|-------|-------|-------|
|             | 39930                                                                                   | 39940 | 39950 | 39960 | 39970 | 39980 | 39990 | 40000 |       |
| Human       | AA- - - - ACATTCATCAACAGATGAACTAATAAGTA- GATTCCTGTTTTGGCATCATATGCTTTTCCATACAGTGGAATA    |       |       |       |       |       |       |       | 34581 |
| PolarBear   | AATCCAGATGTCCATCAACAGCTGAATGGATAAATG- GATTGCAGTTTTGACATTGTATTCCATTGCATACTATGAACTA       |       |       |       |       |       |       |       | 6498  |
| Cow         | AACCCAAGGGTCCATCAGT- GATGAATGGATAAATG- AATGACTCTTTTGGCATTGAATTTTCATGA- ATACAGTGAAATG    |       |       |       |       |       |       |       | 32580 |
| Dog         | ACTATTATTACCAACCTAACATCAAAACACTAACT- AGTCACATTGCTTAAAT- GTACTCCATTG- GTTCAAAGAAAAA      |       |       |       |       |       |       |       | 32150 |
| BelugaWhale | AACCCAAGTGTCCATCAGCAGATGAATATATAAAAA- GATAGCTCTTTTGGTATTGAATTCCATTGCATACAGTAAAATA       |       |       |       |       |       |       |       | 27765 |
| Donkey      | TACCCAATGTCCATCAACAGATGAATGGATAAAAAGTGATTACTGTTTTGGCATTGTATTCTATTGCATACATTGAAATG        |       |       |       |       |       |       |       | 34610 |
| Cat         | AATCCACATGTCCATCAACAGATGAATGGATAAATA- GATTGCAATTTTGGCCTTGTATTCCCTTTGGATACAATGAAATA      |       |       |       |       |       |       |       | 35670 |
| Ferret      | AATCTAGATGTCTACTAGTAGCTGAATAGATAAATA- GATTGTAGTTTTGGCATTGTATTCCATTTAATATCATGAAATA       |       |       |       |       |       |       |       | 32636 |
| Lion        | AATCCACATGTCCATCAACAGATGAATGGATAAATA- GATTGCAATTTTGGCCTCGTATTCCCTTTGCATACAATGAAATA      |       |       |       |       |       |       |       | 33762 |
| Vaquita     | AACCCAAGTGTCCATCAGCAGATGAATATATAAAAA- GATAGCTCTTTTGGTATTGAATTCCATTGCATACAGTAAAATA       |       |       |       |       |       |       |       | 28407 |
| Pig         | GAGCTCCAGATGGACTTTT- GAT- - - - - ACAAATG- TAGAACTTGAAAATTATAAAACTTCTAAG- AGAAAGCATAGTA |       |       |       |       |       |       |       | 27159 |



Dienstag, 3. Mai 2022 08:38

| Majority    | ----- C- CC----- A- XXGTGGAGATTGXATTCATGAC- CTXAGGA- - TCAAGA- - - -                    |       |       |       |       |       |       |       |
|-------------|-----------------------------------------------------------------------------------------|-------|-------|-------|-------|-------|-------|-------|
|             | 40170                                                                                   | 40180 | 40190 | 40200 | 40210 | 40220 | 40230 | 40240 |
| Human       | TATATAAAACTCTGGGAAATGC-----AAACTAATCTAAAGCAAATTCATGGTTCTTAGGAGTTTAAGA- - - G 34760      |       |       |       |       |       |       |       |
| PolarBear   | ----- C- CC----- A- TCGTTGTGCTTGAAGCTGATGAC- CT- GGA- - TCAAGA- - - - 6583              |       |       |       |       |       |       |       |
| Cow         | ----- C- TC----- AGTGGTAAAGAACCCGCCTGCCAA- TACAGGAGGTGTGGG- - - - 32671                 |       |       |       |       |       |       |       |
| Dog         | ----- C- TC----- A- GTGTTGGGGTCTCAGT- - TGAG- CT- - - - - TTGAAA- - - - 32204           |       |       |       |       |       |       |       |
| BelugaWhale | GTTGCTTGGAATTTAGAGGTGGGTAGAGCAAGGGAGAGGGTTGTAAAGGGCATAAGGAAA- TTTGGGGGTGATGGATATG 27999 |       |       |       |       |       |       |       |
| Donkey      | ----- 34630                                                                             |       |       |       |       |       |       |       |
| Cat         | ----- C- CC----- A- ATGTGGGGCTTGAATTCATGAC- CCCAACA- - TCAAGA- - - - 35754              |       |       |       |       |       |       |       |
| Ferret      | ----- C- CC----- A- GCGTGGGGCTTAAACTCATGAC- CTCAGGA- - TCAAGAA- - G 32709               |       |       |       |       |       |       |       |
| Lion        | ----- C- CC----- A- ATGTGGGGCTTGAATTCATGAC- CCCAACA- - TCAAGA- - - - 33850              |       |       |       |       |       |       |       |
| Vaquita     | GTTGCTTGGAATTTAGAGGTGGGTAGAGCAAGGGAGAGGGTTGTAAAGGGCATAAGGAAA- TTTGGGGGTGATGGATATG 28643 |       |       |       |       |       |       |       |
| Pig         | ----- C- GC----- AGTCTATAAAAGAACACATGGGAC- CTTATCAGTTTTAAA- - - - 27256                 |       |       |       |       |       |       |       |

| Majority    | - G- - - - XCTTATGCTGTA- - - TTGACXXA- - - - - X- ACX- - - X- ACTC- - C- XAGAGTAA- - - - XATXXTGATXTAT         |       |       |       |       |       |       |       |
|-------------|----------------------------------------------------------------------------------------------------------------|-------|-------|-------|-------|-------|-------|-------|
|             | 40250                                                                                                          | 40260 | 40270 | 40280 | 40290 | 40300 | 40310 | 40320 |
| Human       | TGGGAAAGGACAGGCAGGAGGGGTGGCAA- - - - GGGACACAGGAAAACCTC- - - - GGGAGTGA- - - - - TGGACATATAA 34826             |       |       |       |       |       |       |       |
| PolarBear   | - G- - - - TCTCCTGCTGTA- - - CCGACTGA- - - - GCCAACCA- - G- ACTC- - C- TAGAATAA- - - - GCCACTGATACAT 6639      |       |       |       |       |       |       |       |
| Cow         | TT- - - - CCAT- TCCTGGG- - - TTGAG- - A- - - - - A- - - - - G- ATCCCCTGGAGAATGA- - - - AGTGGCAACCTAC 32721     |       |       |       |       |       |       |       |
| Dog         | ----- CTTGTTGCT- - - TGGGTT- - - - - CCTAC- - - - A- ACTG- - - - TAGGGTTG- - - - TATTGTCATGTGT 32250           |       |       |       |       |       |       |       |
| BelugaWhale | TATATTCCCTTATGCTGAAGTTTTACAGATGTAAATATATGTCAAACCTTGTGAGATTGTAACCTTCATAGACATCTTAT 28079                         |       |       |       |       |       |       |       |
| Donkey      | ----- T- - - - - ATTGATCTGT 34641                                                                              |       |       |       |       |       |       |       |
| Cat         | - G- - - - TCTTATGCTGTA- - - CTGAGCC- - - - - GCC- - - - - ACTC- - C- TGGAATAA- - - - GATATTGATGCAT 35803      |       |       |       |       |       |       |       |
| Ferret      | AG- - - - TCTCATGCTCTA- - - CCAGCTGA- - - - GCCAGCCA- - G- ACTCGCC- TAGAGTAA- - - - GCTACTGATATAT 32768        |       |       |       |       |       |       |       |
| Lion        | - G- - - - TCTTATGCTGTA- - - CTGAGCCA- - - - - GTCAGCC- - - - - ACTC- - C- TAGAATAA- - - - GATATTGATGCAT 33904 |       |       |       |       |       |       |       |
| Vaquita     | TATATTCCCTTATGCTGAAGTTTTACAGATGTAAATATATGTCAAACCTTGTGAGATTGTAACCTTCATAGACATCTTAT 28723                         |       |       |       |       |       |       |       |
| Pig         | AA- - - - CTTA- GGCTA- - - - TTCAA- - A- - - - - A- - - - - G- ACTGTTAAGAGAGTGA- - - - AAAGACAAGCCAC 27304     |       |       |       |       |       |       |       |

Dienstag, 3. Mai 2022 08:38

| Majority    | GTAATAGCAGGGATAAATCTCXAATA- - - - - ATAAXGCTGTGTAAAAGAAATAG- TXT- - G- ATA            |       |       |       |       |       |       |       |       |
|-------------|---------------------------------------------------------------------------------------|-------|-------|-------|-------|-------|-------|-------|-------|
|             | 40330                                                                                 | 40340 | 40350 | 40360 | 40370 | 40380 | 40390 | 40400 |       |
| Human       | ATTATTGTGATGGTGGTTTTATGGATGTATGCATATGTCAAACCTTGTCAAATTTTATAATTTAAATACATATACACATC      |       |       |       |       |       |       |       | 34906 |
| PolarBear   | GTAGTAGCAGGGATAAATCTCCAATA- - - - - ATTATGCTGTG- - AAAGAAGTGG- - - - - G- AAA         |       |       |       |       |       |       |       | 6691  |
| Cow         | TC- - CAGTATTCTTGCTTGGGAAATCCCAT- - - - - GG- - - ACAGAGGAGTCTGATGGGCTACGGTCTGTG- GTG |       |       |       |       |       |       |       | 32784 |
| Dog         | GTGGCACATGGTGTGTTTTCAAAT- - - - - TCA- - - - - AAAGGACCCG- - - - - T- ATC             |       |       |       |       |       |       |       | 32293 |
| BelugaWhale | TTTTATGTGAATTGTACCTCAAAAAGACTATTTAAAAAGAAAAGCCCATAGAGGAATTAAAATGGAATAC- TATCAA- ATA   |       |       |       |       |       |       |       | 28157 |
| Donkey      | GCAACAGCAGGGATAAATCTCCAATA- - - - - ATTATGCTGTGTGAAAGAAGCAA- - - - - GGA              |       |       |       |       |       |       |       | 34694 |
| Cat         | GTAATAGCAGGGATAAATACCCAATA- - - - - ATGCTACTGTGTAAAAGAAATGGCGGGGG- GGG                |       |       |       |       |       |       |       | 35863 |
| Ferret      | GTAGTAGCAGGGATAAATGTCCAATA- - - - - ATTATGCTGTGTGAAAGAAGTGG- - - - - G- AAA           |       |       |       |       |       |       |       | 32822 |
| Lion        | GTAATAGCAGGGATAAATACCCAATA- - - - - ATGCTACTCTGTAAAAGAAATGGACGGGGG- AGG               |       |       |       |       |       |       |       | 33964 |
| Vaquita     | TTTTATGTGAATTGTACCTCAAAAAGACTATTTAAAAAGAAAAGCCCATAGAGGAATTAAAATGCAATAC- TATCAA- ATA   |       |       |       |       |       |       |       | 28801 |
| Pig         | GGAGTGGCAGACAT- CTTCAAAAGCATGT- - - - - AGCTTATAAAGATCTTTATCCAGAATATATATAAA- TTC      |       |       |       |       |       |       |       | 27371 |

| Majority    | AAGGAATAXATTCAGTATGAAT- - CXATTTATATAAAAXACAAGGAXATACAXGCTAAAX- - - - - CA- - - - -      |       |       |       |       |       |       |       |       |
|-------------|------------------------------------------------------------------------------------------|-------|-------|-------|-------|-------|-------|-------|-------|
|             | 40410                                                                                    | 40420 | 40430 | 40440 | 40450 | 40460 | 40470 | 40480 |       |
| Human       | CTAGAATGGCCGAACTTCAGAACATTGATAACACCAAATGCTGGCAAGGATGTGGAGCAA- - - - - CAGGAACTCT- - CAC  |       |       |       |       |       |       |       | 34979 |
| PolarBear   | AAGGAGTACATTCTGTGTGATT- - CCATTTATATAAAACACAAGGAAATGCAAACAAA- - - - - CA- - - - -        |       |       |       |       |       |       |       | 6750  |
| Cow         | TTGCAACAGAGTCAGACCCAA- - - CTTAGCAACTAAACAACAACAAGCAAAGGG- - - - - CA- - - - -           |       |       |       |       |       |       |       | 32838 |
| Dog         | AAAGAGTA- - - - - AGTGAAGAAGAATTGCAAGATTCCTTTTTAACT- - - - - CA- - - - -                 |       |       |       |       |       |       |       | 32337 |
| BelugaWhale | TAGCAAGAGAAGAACAACAACAACAACAAGGACTGGACAGTTAGAAAATAAAGAGCTAGGTGTTAAACCCAGTCATAAAGGTAATGT  |       |       |       |       |       |       |       | 28237 |
| Donkey      | AAAAAATACATTTTGTATGATT- - CCATTTATATGAAGCACTAGGAAATGCAAGCCAAAAGTA- - CAT- - - - - TGG    |       |       |       |       |       |       |       | 34761 |
| Cat         | GGGGAGTACATTCTGTATGAAT- - TCATTTATATAAAACCCAAGGAGATACAAACTGAAG- - - - - CA- - - - -      |       |       |       |       |       |       |       | 35923 |
| Ferret      | AAGGAGTA- - - - - TGATT- - CCATTTATATAAAATGCAAGGAGACGCAAACAAAAG- - - - - CA- - - - -     |       |       |       |       |       |       |       | 32873 |
| Lion        | GGA- AATACATTCTGTATGAAT- - TCATTTATATAAAACCCAAGGAGATACAAACTGAAG- - - - - CA- - - - -     |       |       |       |       |       |       |       | 34023 |
| Vaquita     | TAGCAAGAGAAGAACAACAACAACAACAAGGACTGGACAGTTAGAAAATAAAGAGCTAGGTGTTAAACCCAGTCATAAATGTAAATGT |       |       |       |       |       |       |       | 28881 |
| Pig         | AGACTACATATGTAGTCTAAAA- - CTCAACAGTAAGGCAACAACAACAACCTAATGT- - - - - AA- - - - -         |       |       |       |       |       |       |       | 27426 |

Dienstag, 3. Mai 2022 08:38

| Majority    | ----- GTTTGGAT----- TXGGGAGTGGGGAGGXGCGXGGGGGAGGGGGTTGTXAAGAGTATAAGGAAATT |       |                           |       |                           |       |              |           |
|-------------|---------------------------------------------------------------------------|-------|---------------------------|-------|---------------------------|-------|--------------|-----------|
|             | 40490                                                                     | 40500 | 40510                     | 40520 | 40530                     | 40540 | 40550        | 40560     |
| Human       | TTACTGCTCAGTGGAA-----                                                     |       | TGCAGAGTGGTACAGCCACTTTT   |       | GGAAGACAATTTGGCAATTTCTT   |       | TAGAAA       | ACT 35048 |
| PolarBear   | ----- GTTTGGAT-----                                                       |       | TTGGGGGTGGGGATGTCCGAAGGGG |       | ACGTGGTTGCAAAGAGTAAAAGG   |       | GAGATT       | 6811      |
| Cow         | ----- TGGG-----                                                           |       | GCGGGGGGAGCGGGGAAGGGGAGG  |       | AGGGGAT-TGTAAAGGACATAAGG  |       | AATTT        | 32894     |
| Dog         | ----- GTTT-----                                                           |       | TTTAAACT----- ATCACCC     |       | TGTGAGTACAGAGTTGTGCAG-    |       | TAAAAGTATGAG | 32388     |
| BelugaWhale | AAATTGGTTAAACTAACATAGTTT                                                  |       | AGTGCAGTAACCACTAGTTTTGT   |       | GAGACTGTGGAGCATGTGGAATGT  |       | GACTACTCC    | 28317     |
| Donkey      | TGGTTGCTTGGAA-----                                                        |       | TCAGAGGTGGGGAAGAGTAAGG    |       | AGGAGG-TGTTGCCAAAGGCACA   |       | AAGAAATT     | 34827     |
| Cat         | ----- GATTGGAT-----                                                       |       | TTGGGGGTGGGGAGGAGCCAGGGG  |       | GATG-GGTTGCAAAGGGTACAAGG  |       | AAATT        | 35983     |
| Ferret      | ----- GTTTGGAT-----                                                       |       | TTGGGTGTGGGGAAGTGCAAGGGG  |       | GACATGGTTGTGAAGAGTAAAAGG  |       | AAATT        | 32934     |
| Lion        | ----- GATTGGAT-----                                                       |       | TTGGGAGTGGGGAGGAGCAAGGGG  |       | GATG-GGTTGCAAAGGGTACAAGG  |       | AAATT        | 34083     |
| Vaquita     | AAATTGGTTAAACTAACATAGTTT                                                  |       | AGTGCAGTAACCACTAGTTTTGT   |       | GAGACTGTGGAGCATGTGGAATGT  |       | GACTACTCC    | 28961     |
| Pig         | ----- TAAATTA-----                                                        |       | GCAAAAATAATTGAATTGGTCAGT  |       | AAGATATACAGAAGGTAAGTAAGCA |       |              | 27486     |

| Majority    | TX- - - GGGXTG- - - ATGGATATGTATAXTTTTAAAAGCTG- - - - - GAAGATTTTCATAGATGTAT- GCATAT- ATCAA |       |                          |       |                                  |       |                           |       |
|-------------|---------------------------------------------------------------------------------------------|-------|--------------------------|-------|----------------------------------|-------|---------------------------|-------|
|             | 40570                                                                                       | 40580 | 40590                    | 40600 | 40610                            | 40620 | 40630                     | 40640 |
| Human       | ATA- - CGGCCGGGCACAGTGGCTT                                                                  |       | ACGCCTGTAATCCCAGCGCTTT   |       | GGGAAGCCAAGGCAGGCGGATCAC         |       | CCTGAGGTCAG               | 35126 |
| PolarBear   | TG- - - GGGGTG- - - AT- -                                                                   |       | ATATATACTTACAGTATTTCTT   |       | AT- - - AGAAGATTTTCATGGAT        |       | GTAT- GAATAT- ATCAA       | 6878  |
| Cow         | G- - - - GAGATG- - - ATGG                                                                   |       | ATATATTCTTTTATGCTG- - -  |       | - - - - - A- AGGTTTCATAGA-       |       | - - - - - TGTA            | 32944 |
| Dog         | TG- - - TTGATG- - - AA- - -                                                                 |       | TATATAAATATAAAAAGCTC-    |       | - - - - - AGAAA- - CC- TG        |       | AAAATAT- AAA- - - - ATAAA | 32441 |
| BelugaWhale | TAACTGAGATGTAAATGGGTTT                                                                      |       | GTGTGTTGTTCAAAGACGTA-    |       | - - - CCAAAAAAACCAAAAATAAT-      |       | CTCATTTTTTAA              | 28393 |
| Donkey      | TG- - - GGGGTG- - - GTGGG                                                                   |       | TATATCTCTTATGGT- - - - - |       | GAAGGTTTCATAGAGGAAT-             |       | ACATAG- GTC               | 34889 |
| Cat         | TA- - - GGGGTG- - - AATG                                                                    |       | ATATATACTCTCTTAGGGT-     |       | - - - - - GAAGATGTCATGGATGTTT-   |       | GCATAT- GTCAG             | 36046 |
| Ferret      | TG- - - GGGGTG- - - AGGG                                                                    |       | ATATATACTTTTATTTCTT      |       | AG- - - - - AGAAGATTTTCATGGAT    |       | GTGT- GCATAT- ATCAA       | 33003 |
| Lion        | TA- - - GGGGTG- - - AATG                                                                    |       | ATATATACTTTCTTAGGGT-     |       | - - - - - GAAGATTTTCGTTGGATGTTT- |       | GCATAT- ATCAG             | 34146 |
| Vaquita     | TAACTGAGATGTAAATGGGTTT                                                                      |       | GTGTGTTGTTCAAAGACGTA     |       | AGTACCAAAAAAACCAAGAGT            |       | AAC- CTCATTTTTTAA         | 29040 |
| Pig         | T- - - - GCGAAG- - - AAG                                                                    |       | ATGCTCAGCATCTTTAGTCACTG- |       | - - - - - G- AGAAAT- GCAA-       |       | - - - - - TTAA            | 27535 |



Dienstag, 3. Mai 2022 08:38

| Majority    | GGAAGTAAT- XGTAAAATAA- - - - - XTCAATAATATCA- - - - - AAT |                            |               |                        |       |       |       |       |       |
|-------------|-----------------------------------------------------------|----------------------------|---------------|------------------------|-------|-------|-------|-------|-------|
|             | 40810                                                     | 40820                      | 40830         | 40840                  | 40850 | 40860 | 40870 | 40880 |       |
| Human       | GGAGGTGGAGGTTGCAGT                                        | GAGCCAGGATCACGCC           | CATTTCACTCCA- |                        |       |       | ACC-  | TGGGC | 35314 |
| PolarBear   | TAGTGCAGT- - GCAAGACAA-                                   | - - - GACCACCACCAAAAACA-   | - - - C-      |                        |       |       |       | TGGGT | 7043  |
| Cow         | GGAATTA AAAATGGA- -                                       | ATACT- - - - - GTCA-       | - AATATTG-    |                        |       |       |       |       | 33074 |
| Dog         | TGG- ACATT- - GCAGAACAT-                                  | - - - TTCTTTTGGATATTACTA-  | - - ATC-      |                        |       |       |       | TAAGA | 32561 |
| BelugaWhale | GGAAGAAATAGAAAATATAAACA                                   | AACTGGTCATAAGCACTGAAATT    | GAAACTGTGATTA | AAAAATCTTCCAACACACAAAA |       |       |       |       | 28630 |
| Donkey      | GGAATTAAC- - - - - ATGG-                                  | - - - - - AATACTATCA-      |               |                        |       |       |       | GAT   | 35005 |
| Cat         | TGGAGGAAT- - - TAAAATGG-                                  | - - - - - AATATTATCA-      |               |                        |       |       |       | AAT   | 36163 |
| Ferret      | TGGCTCAGTTGGTTAAGCAGC-                                    | - TGCCTTCGGCTCAGGTCATGATC- |               |                        |       |       |       | CCAGC | 33156 |
| Lion        | TGGAGGAAT- - - TAAAATGG-                                  | - - - - - AATATTATCA-      |               |                        |       |       |       | AAT   | 34263 |
| Vaquita     | GGAAGAAATAGAAAATATAAAC                                    | AGACTAGTCATAAGCACTGAAATT   | GAAACTGTGATTA | AAAAATCTTCCAACACACAAAA |       |       |       |       | 29277 |
| Pig         | GCAATTGATGGGAAC- ATAAA-                                   | - - - - - ATTGT- AGAACTG-  |               |                        |       |       |       |       | 27670 |

| Majority    | ATCCAGGG- - ATAGXGCXTXXCAA- - - - - X- - - - - TTTACAG- - - - - XX- - - - - X- - - - - C- GA- - - - - X |                                           |                          |             |         |       |       |       |       |
|-------------|---------------------------------------------------------------------------------------------------------|-------------------------------------------|--------------------------|-------------|---------|-------|-------|-------|-------|
|             | 40890                                                                                                   | 40900                                     | 40910                    | 40920       | 40930   | 40940 | 40950 | 40960 |       |
| Human       | AACAAGAGCGAGACTCCATCTCAA                                                                                | ATATACTTTTATTGTATGATCC                    | AGAGTTGTGCTCCCTGGTATTT   | GCCTAAAGGAG |         |       |       |       | 35394 |
| PolarBear   | AGTTAGGA- - ATAGCACATTTCAA-                                                                             | GTGCTCATAGC- - - - - TTCACATAGCTACTGAT-   | - - - - TA-              | CTACAGA-    |         |       |       | T     | 7103  |
| Cow         | - - CAAGAGCAGAACAAACAAACAC-                                                                             | - - - - - TGGACAG-                        |                          |             |         |       |       | T     | 33104 |
| Dog         | ATTAAGAG- - GCAAAGGTTGTGAG-                                                                             | - - - - ACTGGAT- - - - TAAAAAGCAAGGCCACC- | - - - - TAAACTGCCA-      | - - - - C   |         |       |       |       | 32618 |
| BelugaWhale | GTCCAGGACCAGATGGCTT                                                                                     | CACAGGTGAATTCTATCACACATTT                 | ACAGAAGAGCTAACATCCATCCTT | CTCAA       | ACTCTTC |       |       |       | 28710 |
| Donkey      | ATTTTAT- - - TAATACTTTGCAA-                                                                             | - - - - -                                 |                          |             |         |       |       | G     | 35026 |
| Cat         | ATTCTGT- - - TAGTGCAGTGCAA-                                                                             | - - - - -                                 |                          |             |         |       |       | GA-   | 36186 |
| Ferret      | GTCCTGGG- - ATCGAGTCCCACATCGGGCTCCTTGC-                                                                 | - - - - TCGGCAGGGAGCCTGCT-                | - - - - TCTCCCTCTGC-     | - - - - C   |         |       |       |       | 33219 |
| Lion        | ATTCTGT- - - TAGTGCAGTGCAA-                                                                             | - - - - -                                 |                          |             |         |       |       | GA-   | 34286 |
| Vaquita     | GTCCAGGACCAGATGGCTT                                                                                     | CACAGGTGAATTCTATCACACATTT                 | ACAGAAGAGCTAACACCCATCCTT | CTCAA       | AGTCTTC |       |       |       | 29357 |
| Pig         | - - CTTTGG- AAAGCAATTTGGCAG-                                                                            | - - - - - TTTTC-                          |                          |             |         |       |       | T     | 27697 |



Dienstag, 3. Mai 2022 08:38

| Majority    | TAGAAA  | ACTGX  | -----  |        |        |        |                                              |                                       | TTTAXCCAGXTGCC   | -             | AACTAG   | -     | XAAAAA |
|-------------|---------|--------|--------|--------|--------|--------|----------------------------------------------|---------------------------------------|------------------|---------------|----------|-------|--------|
|             | 40970   | 40980  | 40990  | 41000  | 41010  | 41020  | 41030                                        | 41040                                 |                  |               |          |       |        |
| Human       | TTGAAA  | ACTTAG | CTGCGC | AGAAAG | TAGCAC | ATGGAT | GTTTAT                                       | AGCACCTTTCTTTATAGTTGCCAGAACTTCATAGCAA |                  |               |          | 35474 |        |
| PolarBear   | TAAGGT  | TTTTGG | -----  |        |        |        | GTTTGT                                       | TTTTTTTTTTTTTTT                       | GCC              | -             | AATTTT   | -     | ACACA  |
| Cow         | TAGAAA  | AATT   | -----  |        |        |        | AATGGG                                       | TAGATGT                               | TAAACCCAGTCATAAA |               |          |       | 33142  |
| Dog         | TACACCT | CTGG   | -----  |        |        |        | CTATAG                                       | TCCATCGGA                             | -                | GGCGA         | AGGACAGG |       | 32657  |
| BelugaWhale | CAAAAA  | ATTG   | CAGAGG | AAGGA  | CACTCC | CAAAC  | TCTTCTGTGAGGCCACCATCACCTGATACCAAACCAGACAAAGA |                                       |                  |               |          | 28790 |        |
| Donkey      | -       | AGAAGA | ATA    | -----  |        |        |                                              | ACAACA                                | AAACACC          | -             | -----    | AGA   |        |
| Cat         | AAGAAC  | ACCAC  | -----  |        |        |        | GAAAAC                                       | ACCAGGC                               | -                | AATAAG        | -        | AAA   |        |
| Ferret      | CACCATT | CTGTCT | GC     | -----  |        |        |                                              | CTGTGCTCGCTCTCTCCCCTCTC               | -                | TCTTTCTGAGAAA |          | 33271 |        |
| Lion        | AAGAAC  | ACCAT  | -----  |        |        |        | GAAAAC                                       | ACCAGGC                               | -                | AATAAG        | -        | AAAG  |        |
| Vaquita     | CAAAAA  | ATTG   | CAGAGG | AAGGA  | CACTCC | CAAAC  | TCTTCTGTGAGGCCACCATCACCTGATACCAAACCAGACAAAGA |                                       |                  |               |          | 29437 |        |
| Pig         | TAAAAA  | AGA    | -----  |        |        |        | TTCAGC                                       | TATTTGTC                              | -                | TCCTAG        | GCATTTA  |       | 27733  |

| Majority    | TAAATA    | XAA      | -                   | ATTAAATAGATA                                        | ----- |                                                    |                       | ACTGAT       | -                      | AAXATAAATGTAGATXA            | -                | X       | -     | XXTAT | -    | A     | ----- |
|-------------|-----------|----------|---------------------|-----------------------------------------------------|-------|----------------------------------------------------|-----------------------|--------------|------------------------|------------------------------|------------------|---------|-------|-------|------|-------|-------|
|             | 41050     | 41060    | 41070               | 41080                                               | 41090 | 41100                                              | 41110                 | 41120        |                        |                              |                  |         |       |       |      |       |       |
| Human       | CCAAGA    | AGTCCT   | TTAGG               | AGGTG                                               | -     | AATGGCCAAATAAACTGTGGTGTATATTCAGACAGTATAATGTTAATCAG | -                     | -            | -                      | -                            |                  |         |       |       |      | 35546 |       |
| PolarBear   | TCAGTT    | TAGTGTTT | TAGAAG              | TTA                                                 | ----- |                                                    |                       | GTTTAA       | CATCTATTTATTTTC        | -                            | -----            | TAACTAC | -     | ----- | CCAG | -     | TAA   |
| Cow         | T-        | CTCTAA   | ATGTA               | AATTGG                                              | CTA   | -                                                  | -----                 | AACTAAC      | -                      | ATAGTCTCATAGTAACCATTGGTTATAT | -                | -----   |       |       |      | 33198 |       |
| Dog         | AGGATAGAA | -        | ATCGAGGAGAAA        | -----                                               |       |                                                    | GGGGGAAACGAGGGGAGGGAA | -            | -----                  | TGG                          | -                | -----   | GGAG  | -     | G    | 32707 |       |
| BelugaWhale | TACTACA   | AAAAA    | AAGATTACAGACCAATGTA | AACTGATGAACATAGATGCAGAAATCCTCAACAAAATACTAGCAAATAGAA |       |                                                    |                       |              |                        |                              |                  |         |       |       |      | 28870 |       |
| Donkey      | CAATTAGAA | -        | AATAAATAGCTA        | -----                                               |       |                                                    | GA                    | -            | TGTTAAACGTAAACCCATTGTA | -                            | -----            |         |       |       |      | 35096 |       |
| Cat         | TAAACAGAT | -        | GTTAAACATAAA        | -----                                               |       |                                                    | TGTGTA                | AAATGTAAATTA | -                      | -----                        |                  |         |       |       |      | 36258 |       |
| Ferret      | TAAATA    | AAATCTT  | AAAAA               | AAATGGAA                                            | -     | TACTATCAAATATTAGTG                                 | CAGTGCAAAAAATAGATGT   | -            | -----                  | TAAAC                        | -                | TAA     |       |       |      | 33343 |       |
| Lion        | TAAATAGAT | -        | GTTAAACATAAA        | -----                                               |       |                                                    | TGTGTA                | AAATGTAAATTA | -                      | -----                        |                  |         |       |       |      | 34358 |       |
| Vaquita     | TACTACA   | AAAAA    | AAGATTACAGACCAATGTA | AACTGATGAACATAGATGCAGAAATCCTCAACAAAATACTAGCAAATAGAA |       |                                                    |                       |              |                        |                              |                  |         |       |       |      | 29517 |       |
| Pig         | C-        | CCAAGA   | AGAATGA             | AGGCGTA                                             | ----- |                                                    |                       | GACTCAT      | -                      | ATATGAATGTT                  | CATAGCTTTATTTGTA | -       | ----- |       |      | 27788 |       |

Dienstag, 3. Mai 2022 08:38

| Majority    | -----XA-ACAAAAAAGATXXAAAAGCAXXTGA-----CAAAXAAAX                                |       |       |       |       |       |       |       |       |
|-------------|--------------------------------------------------------------------------------|-------|-------|-------|-------|-------|-------|-------|-------|
|             | 41130                                                                          | 41140 | 41150 | 41160 | 41170 | 41180 | 41190 | 41200 |       |
| Human       | ---CACTAAATGGAAATGAGCTATCAAGCCATGGAGAACCTTCAGT-----GAACATTACTAAATAAAA          |       |       |       |       |       |       |       | 35607 |
| PolarBear   | CTTCTAAACACTAAACTAATGTGTAAAAGTAAATTGG-----CAAAAAAAC                            |       |       |       |       |       |       |       | 7249  |
| Cow         | -----AAGGCTGTAGAGCATG-----CAAATGT--                                            |       |       |       |       |       |       |       | 33222 |
| Dog         | ----GGAAGAGGAGGAGAAGATAGGGGAAAAGACGGA-----CAAGAGAAGA                           |       |       |       |       |       |       |       | 32750 |
| BelugaWhale | TCCAACAACACATTAAGGATCATACACCATGATCAAGTGGGATTTATGCCAGGGATGCAGGGATTCTTCAATATATGC |       |       |       |       |       |       |       | 28950 |
| Donkey      | -----AGTCTGTAATGTAAATTGG-----CAAACATA--                                        |       |       |       |       |       |       |       | 35124 |
| Cat         | -----GCAAAAAACAACAACAACAACA-----CAAAAAAAC                                      |       |       |       |       |       |       |       | 36296 |
| Ferret      | CTTCTCAACACAAAATAATGTGTAAAAGTAAACTGG-----CAAAAAAAA                             |       |       |       |       |       |       |       | 33390 |
| Lion        | -----GCAAAAAA-----AAAAACCAA-----AAAAACA                                        |       |       |       |       |       |       |       | 34387 |
| Vaquita     | TCCAACAACACATTAAGGATCATACAGCATGATCAAGTGGGATTTATCCCAGGGATGCAAGGAGCCTTCAGTATATGC |       |       |       |       |       |       |       | 29597 |
| Pig         | -----ATATCTGAAGGCCATA-----CAACAGTT--                                           |       |       |       |       |       |       |       | 27813 |

| Majority    | XAAA-A-X-----AAAXACTTTAXTXTA-ATGXAGTAAXCAATA-----GCTGTATGAAGCAAT-GAACACTGGAA--   |       |       |       |       |       |       |       |       |
|-------------|----------------------------------------------------------------------------------|-------|-------|-------|-------|-------|-------|-------|-------|
|             | 41210                                                                            | 41220 | 41230 | 41240 | 41250 | 41260 | 41270 | 41280 |       |
| Human       | GAAGCCACTCTGAAAATTCTGCATACCATATGATTCCAACATATGACAT-TCTGGAAAAAGCAA--AATTATGGAG--   |       |       |       |       |       |       |       | 35681 |
| PolarBear   | GC-----CCAAAACCTTAATCT---GTAGTAATCAGT-----GCTATGTGAAGCTAT-GAGCACTTGAA--          |       |       |       |       |       |       |       | 7304  |
| Cow         | -GACTACTC-----TTA-ATTGATAAGTGAATGGG-----TGTGTGCTTCAA--AGACGTAGTA--               |       |       |       |       |       |       |       | 33272 |
| Dog         | GGGAAGGATA--TAGACACCTGAAAACA-A-AAACGGACCAGA-----AGAAAGAATAGTAAT-AATCTATGCAG--    |       |       |       |       |       |       |       | 32815 |
| BelugaWhale | AAATCAGTCAGTGTGATACCATATTA-GCAAATTGAAGAATGAAAACCATATGATCATCTCAAT-AGATGCAGAAAAA   |       |       |       |       |       |       |       | 29028 |
| Donkey      | -----A-----TTTAGTTTA-ATGTGGTAACAGCTA-----GCCATATGAGGCCATTGAGCACTTGGA--           |       |       |       |       |       |       |       | 35176 |
| Cat         | AA-A-----AAACCCTTTAATCTG-CTGTAGTAACCACTA-----GCTGTATGAGGCCGT-GAAC--TGT---        |       |       |       |       |       |       |       | 36351 |
| Ferret      | AAAAA-----CCAAAACCTTATTCTA-GTGTAGTAATCACTAGC--TAGCTGTATGAAGCCAT-GAACACTTGAA--    |       |       |       |       |       |       |       | 33461 |
| Lion        | GA-A-----AAACCCTTTAATCTG-CTGTAGTAACCCCTA-----GCTATATGAGGCCAT-GAAC--TGT---        |       |       |       |       |       |       |       | 34442 |
| Vaquita     | AAATCAATCCATGTGATAAACCATATTA-ACAAACTGAAGAATAAAACCCATATGATCATCTCAAT-AGATGCAGAAAAA |       |       |       |       |       |       |       | 29675 |
| Pig         | -AAGTGTTTA-----TCA-GGGAATGAATGGATGGA-----TGGCTGTTTT-----GTCATTGAA--              |       |       |       |       |       |       |       | 27861 |

Dienstag, 3. Mai 2022 08:38

| Majority    | - ATGT- - AXTATTCCXAATXG- - - - -                                                   |       |       |       |       |       |       |       |       |
|-------------|-------------------------------------------------------------------------------------|-------|-------|-------|-------|-------|-------|-------|-------|
|             | 41290                                                                               | 41300 | 41310 | 41320 | 41330 | 41340 | 41350 | 41360 |       |
| Human       | - ACAGTAAAAATCAGTGGTTGCTAGGGTTTAGGGGTGGAGGGAGGGATGAACTGGTGGAGTACAGAGGATTTTAGGGTAC   |       |       |       |       |       |       |       | 35760 |
| PolarBear   | - ATGT- - GCTATTCCTAATTG- - - - -                                                   |       |       |       |       |       |       |       | 7322  |
| Cow         | - CTGA- - AAAAATAAGGATGT- - - - -                                                   |       |       |       |       |       |       |       | 33290 |
| Dog         | - AC- - - - GACAAGCACAA- - - - -                                                    |       |       |       |       |       |       |       | 32828 |
| BelugaWhale | GCTTT- GACAAGATTCAACACCATTTATGGTAAAACTCTCCAGAAAGTGGGCATAGAAGGAATCTA- - - - ATATAATA |       |       |       |       |       |       |       | 29102 |
| Donkey      | - ATGT- GACTACCCCTAATTG- - - - -                                                    |       |       |       |       |       |       |       | 35195 |
| Cat         | - GC- - - - - TGTTCCCTAATGG- - - - -                                                |       |       |       |       |       |       |       | 36365 |
| Ferret      | - ATGT- - GATATTCCCAGTTG- - - - -                                                   |       |       |       |       |       |       |       | 33479 |
| Lion        | - GC- - - - - TGTTCCCTAATGG- - - - -                                                |       |       |       |       |       |       |       | 34456 |
| Vaquita     | GCTTTTGACAAAATTCAACAC- - - - - AAAA ACTCTTCAGAAAGTGGGCATAGAGGGAACCTACCTCAACATAATG   |       |       |       |       |       |       |       | 29745 |
| Pig         | - TTCC- - ATTGCATACAGTGA- - - - -                                                   |       |       |       |       |       |       |       | 27879 |

| Majority    | - - - - - AGATGTATXTCTG- - - - - ATGCATGTGTGTTTCAAAGA- TATAGTAX- -                  |       |       |       |       |       |       |       |       |
|-------------|-------------------------------------------------------------------------------------|-------|-------|-------|-------|-------|-------|-------|-------|
|             | 41370                                                                               | 41380 | 41390 | 41400 | 41410 | 41420 | 41430 | 41440 |       |
| Human       | TGAAAATATTCTGCATGATACTATAATGATAGATACATG- - - TCATACATTTTTCCA- AACCCATAGAATGTAAGACAC |       |       |       |       |       |       |       | 35835 |
| PolarBear   | - - - - - AGATGTATATGTG- - - - - GTGCATGTGTGTTTCAAAGA- CGTAGTA- - -                 |       |       |       |       |       |       |       | 7362  |
| Cow         | - - - - - AA- - - - - A- - - - - ACATCTCAAAAAATTTTAAAA- -                           |       |       |       |       |       |       |       | 33314 |
| Dog         | - - - - - AAAAGTTAATCTG- - - - - ATTATTGTA- GCTTCAGA- - - - CAGAAT- -               |       |       |       |       |       |       |       | 32864 |
| BelugaWhale | AAGGCCATATAAAACAAACCCACAGCAAACATCATTCTCAATGGTGAAAACTGAAAGCGTTTCTCTAAGATCAGGA- -     |       |       |       |       |       |       |       | 29180 |
| Donkey      | - - - - - AGATGTATTTGGG- - - - - AGGACGTGTGTTTCAAAGA- TGTAGTA- - -                  |       |       |       |       |       |       |       | 35234 |
| Cat         | - - - - - AGATGTATGTGTGGAGAT- - - GTATGCCTTTGTGTTTCAAAA- CATAGTA- - -               |       |       |       |       |       |       |       | 36412 |
| Ferret      | - - - - - AGATGTATGTCTG- - - - - GTGCATGTGTGTTTCAAAGA- TGTAGTAA- -                  |       |       |       |       |       |       |       | 33520 |
| Lion        | - - - - - AGATGT- - - - - ATGCCTTTGTGTTTCAAAA- CATAGTA- - -                         |       |       |       |       |       |       |       | 34489 |
| Vaquita     | AAGGCCATATATGGCAGACCCACAGCAAACATCATTCTCAATGGTGAAAACTGAAAGCATTTCTCTAAGATCAGGA- -     |       |       |       |       |       |       |       | 29823 |
| Pig         | - - - - - AG- - - - - T- - - - - ACTGCTCAGCCA- TATGGAGT- -                          |       |       |       |       |       |       |       | 27902 |

Dienstag, 3. Mai 2022 08:38

| Majority    | T C A A A A X T A G - - - - - A A T G T T A A A T A A T T T A T T T T T G A A A A T A T T G A X T - - - - - X T A T G T T A A T A T G G                         |       |
|-------------|-----------------------------------------------------------------------------------------------------------------------------------------------------------------|-------|
|             | 41450 41460 41470 41480 41490 41500 41510 41520                                                                                                                 |       |
| Human       | T T G G A G T G A A C C T G G A G G T A A C T A C A G A C T T T G A G T G A T T A T A A T G T G T C A G T G T A G G T T C A T C A G T T G T A A C A A T G T G C | 35915 |
| PolarBear   | T C A A A A A T A G - - - - - A A T G T A A A A T A C T T G A T T T T T A A G A A T A A T G - - - - - T G T G T T G A T A C G G                                 | 7416  |
| Cow         | C T A - - - - - C T G A - - T T A T - - A T G T T G A T G T G G T G G C T C A G A T T - - - - - G T A A A G A A T C T G C C                                     | 33362 |
| Dog         | T C A A G A C A A G - - - - - G A T T G T T A - - - - - C T A A T A T T A A A A C A T T T C A T - - - - - A G T G T T A A A G G G T                             | 32915 |
| BelugaWhale | A C A A G A C A A G G A T G T C C A C T C T C G C C A C T A T T A T T C A A C A T A G T T T T G G A A G T C C T A G C C A C A A C A G T C A A A G A A G A A A A | 29260 |
| Donkey      | T C A A A - - - - - A A A G A A G A A - - - - - T C T C A T T A A A A A A T C T T A - - - - - C G T T G A T A C A G                                             | 35277 |
| Cat         | T C A A A A G T A A T - - - - - A A T G T A A A A T A T T T C A T T T T T T A A A A T A T T G A C T - - - - - A T A T G T T G A T A T G G                       | 36471 |
| Ferret      | T C A G A A G T A G T A - - - - - A G A A T G C A A A A T A C T T A A T T T T T A A A A A T A T T G A T T - - - - - G T A T G T T G A T A T G G                 | 33582 |
| Lion        | T C A A A A G T A A T - - - - - A A T G T A A A A T A T T T C A T T T T T T A A A A T A T T G A C T - - - - - A T A T G T T G A T A T G G                       | 34548 |
| Vaquita     | A C A A G A C A A G G A T G T C C T C T T T G G C A C T A T T A T T C A A C A T A G T T T T G G A A G T C C T A G C C A T G G C A A T C A G A G A A G A A A A   | 29903 |
| Pig         | G A A - - - - - C T G T - - T G C T - - A C A T G T A T C A G C A G G G A T A A A T C - - - - - T C C A A A T A A T T A T G                                     | 27950 |

| Majority    | T A A T A T T T C A G A T A T A T T G A T T X G A A - - - - - A - - - T C T A T T X - - - G - A - - A A T T A A T T T C A T T C C T - - - -                     |       |
|-------------|-----------------------------------------------------------------------------------------------------------------------------------------------------------------|-------|
|             | 41530 41540 41550 41560 41570 41580 41590 41600                                                                                                                 |       |
| Human       | C A T C T G G T G G G A G A T G T T G A T A A A G G - - - - - G G A G G C T A T T T G G G G C A G G A G G C A G G G A A A T C T C T C T G C                     | 35980 |
| PolarBear   | T A A T A T T T C A G A T A T A T T G A A C T G A A - - - - - A - - - T A T A T T A - - - - - A - - A A T T A A T T T C A C T C C T - - - -                     | 7467  |
| Cow         | T G C A A T G C A A G A G A C C C A G G T T C G A - - - - - T C C C T G G - - - - - G - - - - - T C G G C A A G A T C C - - - - -                               | 33407 |
| Dog         | T A A T C T A T T G G A A A C A T T T A T A T A A - - - - - C - - - A G T A A T A - - - - - A C A G A G C C T C A G A G T T - - - -                             | 32965 |
| BelugaWhale | A G A A A T A C A A G G A A T C C A A A T T A G A A A A G A A G A A G T T A A A C T G T C A C T G T T T G C A G - A T G A C T T G A T A C T A T A C A T G G A T | 29339 |
| Donkey      | T A A T A T T T C A G A T A T A T T G A G T T C A A - - - - - A T A T T G A - - - - - A A T T A A T T T C A C T C C T - - - -                                   | 35326 |
| Cat         | T A A T A T T T C A G A T A T A T T G A T C T A A A - - - - - A - - - T C T A T T C T T - A - A - A A T T A A T T T C A C T C C T - - - -                       | 36525 |
| Ferret      | T A G T A T T T C A G A T A T A T T G A A C T G A A - - - - - A - - - T A T A T T A T T - A - A - A A T T A A T T T T A T T C C T - - - -                       | 33636 |
| Lion        | T A A T A T T T C A G G T A T A T T G A T C T A A A - - - - - A - - - T C T A T T C T T - A - A - A A T T A A T T T C A C T C C T - - - -                       | 34602 |
| Vaquita     | A G A A A T A A A A G G A A C C C A A A T T A G A A A A G A A G A A G T T A A A C T G T C A C T G T T T G C A G - A T G A C T T G A T A C T A T A C A T G G A T | 29982 |
| Pig         | T G A A A G A T G G G G A A A A A G A A T A C A - - - - - T C T G T A T - - - - - G - A T T C A T T T A T A T A A A A C - - - - -                               | 28000 |

Dienstag, 3. Mai 2022 08:38

| Majority    | -- TXXTAXATATTG- - - - ATATGGTTAATAGAAAXATTTAAAXTTATXTGAC- - - - TTGCAGAAT- - - - - - - - - - - - - - - - - - -                                          |       |       |       |       |       |       |       |       |
|-------------|----------------------------------------------------------------------------------------------------------------------------------------------------------|-------|-------|-------|-------|-------|-------|-------|-------|
|             | 41610                                                                                                                                                    | 41620 | 41630 | 41640 | 41650 | 41660 | 41670 | 41680 |       |
| Human       | TTTCCTCTCCATTTTGTGTGTACCTAAACTTACTCTGAAAAATGTCTTTGAAAATTTACTCAT- - - - - - - - - - - - - - - - - - - G- - - -                                            |       |       |       |       |       |       |       | 36045 |
| PolarBear   | -- TTTTACTTTTTG- - - - GTATGGTTAATAGAATATTTAAGATTATATGAC- - - - TTGCTGAAC- - - - - - - - - - - - - - - - - - -                                           |       |       |       |       |       |       |       | 7521  |
| Cow         | -- C- CTGGAGAAGG- - - - AAA- - - - TGGCAAATCAATCCAGTGTTCTTGCC- - - - - TGGAGAAT- - - - - - - - - - - - - - - - - - -                                     |       |       |       |       |       |       |       | 33455 |
| Dog         | -- CATTAAATAT- - - - - GTAAAACTAAAGAGAGAAACAAATCTATAATCA- - - - TTATTGGAT- - - - - - - - - - - - - - - - - - -                                           |       |       |       |       |       |       |       | 33017 |
| BelugaWhale | AATCCTAAAGATGCCACCAGAAAAGTAGTAGAGCTAATCAATGAATTTGGTAAAGTTGCAGGATACAAAATTAAGCACA                                                                          |       |       |       |       |       |       |       | 29419 |
| Donkey      | -- TTTTACTTTTTG- - - - ATATGGTTACTAGAATATTTAAAGTT- - - - - GTGTC- - - - - TTTTCAGTCT- - - - - - - - - - - - - - - - - - -                                |       |       |       |       |       |       |       | 35378 |
| Cat         | -- CATT- - - - TTTTG- - - - ACATGGTTAATGGAATATTTAAAATTACATGAC- - - - TTGCAGAAT- - - - - - - - - - - - - - - - - - -                                      |       |       |       |       |       |       |       | 36576 |
| Ferret      | -- TTTTACTCTTTG- - - - ATGTGGTTAATAGAATATTTAAGATTATGTGAT- - - - TTGCAGAAC- - - - - - - - - - - - - - - - - - -                                           |       |       |       |       |       |       |       | 33690 |
| Lion        | -- CATT- - - - TTTTG- - - - ACGTGGTTAATAGAATATTTAAAATTACATGAC- - - - TTGCAGAAT- - - - - - - - - - - - - - - - - - -                                      |       |       |       |       |       |       |       | 34653 |
| Vaquita     | AATCCTAAAGATGCCACCAGAAAAGTAGTAGAGCTAATCAATGAATTTGGTAAAGTTGCAGGATACAAAATTAAGCACA                                                                          |       |       |       |       |       |       |       | 30062 |
| Pig         | -- T- CTAG- GATAT- - - - - GCA- - - - - TGTTAAAGCAGACTGGTGG- - - - - TTGCT- - - - - - - - - - - - - - - - - - - TGG- - - - - - - - - - - - - - - - - - - |       |       |       |       |       |       |       | 28040 |

| Majority    | - - - - - - - - - - - - - - - - - - - ATTTXCXT- - - - - - - - - - TTAGAC- - - - - XTTAGTGGTCTAAGAAG- - - - - - - - - - - - - - - - - - - - - - - - - TCCAAT                  |       |       |       |       |       |       |       |       |
|-------------|------------------------------------------------------------------------------------------------------------------------------------------------------------------------------|-------|-------|-------|-------|-------|-------|-------|-------|
|             | 41690                                                                                                                                                                        | 41700 | 41710 | 41720 | 41730 | 41740 | 41750 | 41760 |       |
| Human       | - - - - - - - - - - - - - - - - - - - CGCTTGCATTGCATTTCTT- - - - - - - - - - TTGGAT- - - - - ATTACTGGTCTAAGTAG- - - - - - - - - - - - - - - - - - - TCCAGT                   |       |       |       |       |       |       |       | 36093 |
| PolarBear   | - - - - - - - - - - - - - - - - - - - ATTTCTT- - - - - - - - - - TTGGAC- - - - - ATTACTGATCTAAGAAT- - - - - - - - - - - - - - - - - - - TCCAAT                               |       |       |       |       |       |       |       | 7557  |
| Cow         | - - - - - - - - - - - - - - - - - - - T- - - - - - - - - - - - - - - - - - - CCATG- - - - - - - - - - GACAGAG- - - - - GAGAGAAGCCTGGTGGG- - - - - CTATAGT- - - - - CCATGGGGT |       |       |       |       |       |       |       | 33501 |
| Dog         | - - - - - - - - - - - - - - - - - - - ATTT- - - - - - - - - - - - - - - - - - - TAACA- - - - - GTAATTGATTTAACAG- - - - - - - - - - - - - - - - - - - TAAT                    |       |       |       |       |       |       |       | 33046 |
| BelugaWhale | GAAATCTCTTGCATTCTATGCACTAACAAAGAAAGATCAGAAAGAGAAATGAAGGAAACGATCCCGTTCACCATTGTAA                                                                                              |       |       |       |       |       |       |       | 29499 |
| Donkey      | - - - - - - - - - - - - - - - - - - - TTT- - - - - - - - - - - - - - - - - - - TTGGAC- - - - - ACTACTGGTGTAGGAAA- - - - - - - - - - - - - - - - - - - TCCAAT                 |       |       |       |       |       |       |       | 35410 |
| Cat         | - - - - - - - - - - - - - - - - - - - ATTTCCT- - - - - - - - - - GTGGAC- - - - - TTTAGTGGTCTAAGAAG- - - - - - - - - - - - - - - - - - - TCCAAT                               |       |       |       |       |       |       |       | 36612 |
| Ferret      | - - - - - - - - - - - - - - - - - - - ATTTCTT- - - - - - - - - - TCAGAC- - - - - ATTACTGATCTAAGAAG- - - - - - - - - - - - - - - - - - - TCCAGT                               |       |       |       |       |       |       |       | 33726 |
| Lion        | - - - - - - - - - - - - - - - - - - - ATTTCCT- - - - - - - - - - TTGGAC- - - - - ATTAGTGGTCTAAGAAG- - - - - - - - - - - - - - - - - - - TCCAAT                               |       |       |       |       |       |       |       | 34689 |
| Vaquita     | GAAATCTCTTGCATTCTATGCACTAACAAAGAAAGATCAGAAAGAGAAATGAAGGAAACAATCCCGTTCACCATTGTAA                                                                                              |       |       |       |       |       |       |       | 30142 |
| Pig         | - - - - - - - - - - - - - - - - - - - C- AT- - - - - - - - - - - - - - - ATAGAG- - - - - GTGGGAAGAATGG- - - - - - - - - - - - - - - - - - - GGGT                             |       |       |       |       |       |       |       | 28066 |

Dienstag, 3. Mai 2022 08:38

| Majority    | TAAAAGGCAX- - - - - GATTGTCAGACTGGA- - - TAAAAAGCAAGXGCTXACTXXA                |           |           |           |                  |           |                         |       |       |
|-------------|--------------------------------------------------------------------------------|-----------|-----------|-----------|------------------|-----------|-------------------------|-------|-------|
|             | 41770                                                                          | 41780     | 41790     | 41800     | 41810            | 41820     | 41830                   | 41840 |       |
| Human       | TAAAAGACAA-                                                                    | - - - - - | A-        | - - - - - | GATTGTCAGACTTGA- | - - -     | TAAAAAGCAAGGCCTAACTACA  |       | 36142 |
| PolarBear   | TAAAAGTCAG-                                                                    | - - - - - | A-        | - - - - - | GATTGTCAGACTGGG- | - - -     | TAAAAAGCAAGACCTAACTGCA  |       | 7606  |
| Cow         | TGCAAAGAGT-                                                                    | - - - - - | CA-       | - - - - - | AACATGACT-       | - - - - - | GAGTGACTAACACTTCACTTTC  |       | 33544 |
| Dog         | TGATAG-                                                                        | - - - - - | - - - - - | - - - - - | GACAGTTAGATCT-   | - - - - - | TAAATACATAGAGGGAGTTTT-  |       | 33087 |
| BelugaWhale | TAAAAAGAATAAAATACCTAGGAATAAACCTATCTAAGGAGGTAAAAGACGTGTACTCAGAAAATAAAGACGCTGATG |           |           |           |                  |           |                         |       | 29579 |
| Donkey      | TAAAAGGCAA-                                                                    | - - - - - | A-        | - - - - - | GATTGTGAAACTGGA- | - - -     | TAAAAAGCAAGGCTTAACTTCA  |       | 35459 |
| Cat         | TAAAAGGCAA-                                                                    | - - - - - | A-        | - - - - - | GATTGTCAGACTGGA- | - - -     | TAAAAAGCAAGGTCTGACTGCA  |       | 36661 |
| Ferret      | TAAAGG- CAG-                                                                   | - - - - - | A-        | - - - - - | GATTGTCAGACTGGA- | - - -     | TTGTCAGACTGGTGCTAACTGTA |       | 33774 |
| Lion        | TAAAAGGTAA-                                                                    | - - - - - | A-        | - - - - - | GATTGTCAGACTGGA- | - - -     | TAAAAAGCAAGGTCTGACTGCA  |       | 34738 |
| Vaquita     | TGAAAAGAATAAAATACCTAGGAATAAACCTATCTAAGGAGGTAAAAGACGTGTACTCAGAAAATAAAGACGCTGATG |           |           |           |                  |           |                         |       | 30222 |
| Pig         | GAGGAAGGGT-                                                                    | - - - - - | CA-       | - - - - - | TAAAAGACA-       | - - - - - | AGGAAATTTGGGGTGATATGT   |       | 28109 |

| Majority    | XTATCTATXA- - - - - CTAGAGTCAGATTGAGGTATA- - - - - X- - - AGATAT- - - - -        |           |                         |           |           |           |            |           |       |
|-------------|----------------------------------------------------------------------------------|-----------|-------------------------|-----------|-----------|-----------|------------|-----------|-------|
|             | 41850                                                                            | 41860     | 41870                   | 41880     | 41890     | 41900     | 41910      | 41920     |       |
| Human       | CTGTCAAT- A-                                                                     | - - - - - | CGAGGGTCAGGTAGAAATATC-  | - - - - - | A-        | - - - - - | AGATGC-    | - - - - - | 36179 |
| PolarBear   | GTACCTATTA-                                                                      | - - - - - | CTAGAGTCAGACTGAGGTAAA-  | - - - - - | - - - - - | A-        | - - -      | GGACAC-   | 7644  |
| Cow         | ACAGGAATA-                                                                       | - - - - - | TTTCAGATATATTGAGTTAAA-  | - - - - - | - - - - - | - - - - - | ATATATATC- | - - - - - | 33583 |
| Dog         | - TTTTTTTTT-                                                                     | - - - - - | TTTGAACAATGGTATACTTCT-  | - - - - - | - - - - - | T-        | - - -      | CAGCTG-   | 33124 |
| BelugaWhale | AAAGAAATCAAAGATGACACAAACAGATGGAGATATATACCATGTTCTTGGATTGGAAAAATCAATATTGTGAAAATGAC |           |                         |           |           |           |            |           | 29659 |
| Donkey      | CTGTCTGCTA-                                                                      | - - - - - | CTAGAGTCAGATTGAAGTAAA-  | - - - - - | A-        | - - - - - | AGACAC-    | - - - - - | 35497 |
| Cat         | GTATCTT-                                                                         | - - - - - | CTAGAGTCAGGTTGAAGTACA-  | - - - - - | - - - - - | C-        | - - -      | AGAT-     | 36694 |
| Ferret      | GTACCTATTA-                                                                      | - - - - - | CTAGAGTCAGACTGAGGTAGA-  | - - - - - | - - - - - | A-        | - - -      | AGACAG-   | 33812 |
| Lion        | GTATTTT-                                                                         | - - - - - | CTAGAGTCAGGTTGAAGTACA-  | - - - - - | - - - - - | C-        | - - -      | AGAT-     | 34771 |
| Vaquita     | AAAGAAATCAAAGATGACACAAACAGATGGAGATATATACCATGTTCTTGGATTGGAAAAATCAATATTGTGAAAATGAC |           |                         |           |           |           |            |           | 30302 |
| Pig         | AAAAAGAT-                                                                        | - - - - - | TCTCTGACG- GTGAAGGTTTA- | - - - - - | - - - - - | - - - - - | ATAGATGT-  | - - - - - | 28145 |

Dienstag, 3. Mai 2022 08:38

|             |                                                                                    |       |
|-------------|------------------------------------------------------------------------------------|-------|
| Majority    | ----- AGATTGAAAGTAAAAAGGATGGAAAATAATATT- - - CTGTGCAAACAACAAGCACAAG                |       |
|             | ----- ----- ----- ----- ----- ----- -----                                          |       |
|             | 41930     41940     41950     41960     41970     41980     41990     42000        |       |
| Human       | ----- AGGTTGAAAGTAAAAAG- ATGGAAAATGATATT- - - CCGTGCAAACAGTAAGCACAAG               | 36233 |
| PolarBear   | ----- AGACTGAAAGTAAAAAGGATGGAAAATAATATT- - - CTGTGTGGACAGCAAGCACAAG                | 7699  |
| Cow         | ----- AAAGTTAATTTCACTTTCTTTAACTTCTCCATACGGTT- - - - - - - - - ACTAG                | 33626 |
| Dog         | ----- GGCTTTAAACACTCTTTCCAGGGAGGAAACTATA- - - CCTTGCCTGCAG- AATTACATA              | 33178 |
| BelugaWhale | TATACTACCCAAAGCAATCTACAGATTCAAGTACAACCCCTATCAAATTACCAATGGCATTTTTTTATAGAACGAGAACAAA | 29739 |
| Donkey      | ----- AGATTGAAAGTAAAAGGGATGGAAAATAATATT- - - CCATGCAAATAGTAGACACAAG                | 35552 |
| Cat         | ----- AGGCTGAAAGTAAAGAGGATTGAAAATAATACT- - - CTGTGCAAACAACAAGCACAAG                | 36749 |
| Ferret      | ----- AGAATGAAAGTAAAAAGGGTGAAGAAATGATAT- - - CTGTGCAAACAACAAGCACAAG                | 33866 |
| Lion        | ----- AGGCTGAAAGTAAAGAGGATTGAAAATAATATT- - - CTGTGCAAACAACAAGCACAAG                | 34826 |
| Vaquita     | TATACTACCCAAAGCAATCTACAGATTCAAGTACAATCCCTATCAAATTACCAATGGCATTTTTTTATAGAACTAGAACAAA | 30382 |
| Pig         | ----- AACATACGTTAAACCTGTCAAATTGTACT- - - TT- - - - - - - - - ATATG                 | 28185 |

|             |                                                                                                        |       |
|-------------|--------------------------------------------------------------------------------------------------------|-------|
| Majority    | AAAGTTGAX- TGATTATXTTAGCXTCAAXACAGX- - - TAGAATTCAAGAC- - - X- - - GGAGTATTACCAGATAX- - - -            |       |
|             | ----- ----- ----- ----- ----- -----                                                                    |       |
|             | 42010     42020     42030     42040     42050     42060     42070     42080                            |       |
| Human       | AAAGTTGATATGATTATATTA- - - CTAGACAGA- - - AAAATTTAAGAC- - - - - - - - AAATATTACCAGATAT- - - -          | 36291 |
| PolarBear   | AAAGTTGATCTGATTACATTAACCTCAGACAGAG- - TAGAATTCAAGAC- - - - - - - - GGAGTATTACCAGATAT- - - -            | 7763  |
| Cow         | AAACTTAA- - AA- - - GTATG- - - - - - - - - T GACTTATATATA- - - TTTTTTGGATATTAGTGG- - - - - -           | 33672 |
| Dog         | AACTTTGTCAAAGTGTACATAGCCGTTCCAGGGG- - TTTTATTATAGGAC- - - T- - - GACGTTATATCAGGACCA- - -               | 33245 |
| BelugaWhale | AAATCTTA- - AAATTTCTATGGCGACACAGAAGACCCTGAATAGCCAAAGGAGTCTTGAGGGAAAAAAAGGGAGCTGGAG                     | 29817 |
| Donkey      | AAGGTTAATGTGATTGATTAACATCAGATAG- - - TAGAATTCAAGACA- - - - - - - - AGAAATATTACCAGATA- - - -            | 35615 |
| Cat         | AAAGTTCATCTGATTATATTAGCCT- - - CAGAG- - TAAAATTCAAGAC- - - A- - - GGAGTATTACCAGATAT- - - -             | 36810 |
| Ferret      | AAAGTTGA- - GATTATTTTAACTTCAGTCAG- - - TAGAATTCAAGACC- - - A- - - GGAGTATTACCAGATGC- - - -             | 33927 |
| Lion        | AAAGTTCATCTGATTATATTAGCCT- - - CAGAG- - TAAAATTCAAGAC- - - A- - - GGAGTATTACCAGATAT- - - -             | 34887 |
| Vaquita     | AAATCTTA- - AAATTTCTATGGCGACACAGAAGACCCTGAATAGCCAAAGGAGTCTTGAGGGAAAAAAAGGGAGCTGGAG                     | 30460 |
| Pig         | CAGCTTT- - - - - - - - TTATG- - - - - - - - - TGAATTGTGC- - - - - - - - CTCATAAAAAAGAAAAG- - - - - - - | 28223 |

Dienstag, 3. Mai 2022 08:39

| Majority    | ----- T----- AAAAAAAGCATATTTTAT----- GTGXTXAAAGGG                                        |       |       |       |       |       |       |       |
|-------------|------------------------------------------------------------------------------------------|-------|-------|-------|-------|-------|-------|-------|
|             | 42090                                                                                    | 42100 | 42110 | 42120 | 42130 | 42140 | 42150 | 42160 |
| Human       | ----- AAAAAAGCATATTTT CAC----- AATGTTGAAGGG 36320                                        |       |       |       |       |       |       |       |
| PolarBear   | ----- A----- AAAAAAAGCATATTTT CAT----- GTGTTTAAAGTG 7794                                 |       |       |       |       |       |       |       |
| Cow         | ----- T----- CT----- AAGAAGTTCAATTAA----- A----- AGACAAAAGTC 33701                       |       |       |       |       |       |       |       |
| Dog         | ----- T----- TT----- AAAATAAACTCCCTGGAC----- TTTTTCAAATG 33278                           |       |       |       |       |       |       |       |
| BelugaWhale | GAATCAGACTCGCTGACTTCAGACTAGACTACAAAGCTACAGTAATCAAGACAATATGGTACTGGCACAACAAAACAGAAGT 29897 |       |       |       |       |       |       |       |
| Donkey      | ----- GGAAAAAGCATATTGCATA----- GTGCTGAAAGGG 35646                                        |       |       |       |       |       |       |       |
| Cat         | ----- AAAAATACCATATTTTGT A----- GTGCTTAAAGGG 36841                                       |       |       |       |       |       |       |       |
| Ferret      | ----- T----- AAAAA- GCATCTTTTGT----- GTGTTTAAAGGG 33957                                  |       |       |       |       |       |       |       |
| Lion        | ----- AAAAATATCATATTTTGT A----- GTGCTTAAAGGG 34918                                       |       |       |       |       |       |       |       |
| Vaquita     | GAATCAGACTTGCTGACT----- AGACTACAAAGCTACAGTAATCAAGACAATATGGTACTGGCACAACAAAACAGAAGT 30533  |       |       |       |       |       |       |       |
| Pig         | ----- C----- CT----- ACAGTGAATACTAT----- C----- AACATAGCA 28252                          |       |       |       |       |       |       |       |

| Majority    | TTAAT----- ATATTAGAAAACAC----- TTTGTACXXC- GTAATAACAGA- CT-----                          |       |       |       |       |       |       |       |
|-------------|------------------------------------------------------------------------------------------|-------|-------|-------|-------|-------|-------|-------|
|             | 42170                                                                                    | 42180 | 42190 | 42200 | 42210 | 42220 | 42230 | 42240 |
| Human       | TCAGT----- TTATCAGAAAACAT----- TTCTTAATTTGTATGCCAATAATAACAAA----- 36368                  |       |       |       |       |       |       |       |
| PolarBear   | TTAAT----- ATATTAGAAAACA----- TTTGTATGTC- AGTAATACAGAGCT----- 7836                       |       |       |       |       |       |       |       |
| Cow         | ATAGT----- GGATTA AAAAGTAC----- TACCT----- AACT----- 33729                               |       |       |       |       |       |       |       |
| Dog         | TGCTG----- AAGTTGACAAATGG----- CCCATATATC- TAATTATAG----- 33316                          |       |       |       |       |       |       |       |
| BelugaWhale | ATAAATCAATGGAACAGGATAGAAAGCCCAG- AGATAAACCCACGCACCTC- TGGTCAACTGATCTATGACAAAGGAGGC 29975 |       |       |       |       |       |       |       |
| Donkey      | TCAAT----- ATTT CAGAAAACATAATATTTCTTAATTTGTATGCTAGTAATAACAGAACT----- 35702               |       |       |       |       |       |       |       |
| Cat         | TTAAT----- ATATTGAAAACAC----- TTTATAC- CA- GTAATAACAGAGCT----- 36883                     |       |       |       |       |       |       |       |
| Ferret      | TTAAT----- ATATTGAAAACG----- TTTGTATACT- GTAATAACAGAACT----- 33999                       |       |       |       |       |       |       |       |
| Lion        | TTAAT----- ATATTGAAAACAC----- TTTATAC- CA- GTAATAACAGACCT----- 34960                     |       |       |       |       |       |       |       |
| Vaquita     | ATAAATCAATGGAACAGGATAGAAAGCCCAG- AGATAAACCCACGCACCTC- TGGTCAACTGATCTATGACAAAGGAGGC 30611 |       |       |       |       |       |       |       |
| Pig         | AGAGA----- AGAACAAACAAGT----- CACTG----- GAC----- 28277                                  |       |       |       |       |       |       |       |



Dienstag, 3. Mai 2022 08:39

| Majority    | ----- TCAAAGTTTATTAAAAAAT----- XTAAA                                             |       |       |       |       |       |       |       |       |
|-------------|----------------------------------------------------------------------------------|-------|-------|-------|-------|-------|-------|-------|-------|
|             | 42250                                                                            | 42260 | 42270 | 42280 | 42290 | 42300 | 42310 | 42320 |       |
| Human       | ----- TCAAAGTATATTAAGAAAAACAT--- CACAGA                                          |       |       |       |       |       |       |       | 36397 |
| PolarBear   | ----- TTAGAGTTCATTAATAAAC-----                                                   |       |       |       |       |       |       |       | 7855  |
| Cow         | ----- ACACTCTCTACTGCTGAA----- GTCAG                                              |       |       |       |       |       |       |       | 33752 |
| Dog         | ----- TGGAATTTAAGTAGAAAT-----                                                    |       |       |       |       |       |       |       | 33334 |
| BelugaWhale | AAGGATATACAGTGGAGAAAAGATAGTCTCTTCAATAAGTGGTCTGGGAAAACCTGGACAGCTACATGTAAATGAATGAA |       |       |       |       |       |       |       | 30055 |
| Donkey      | ----- TCCGAGTACATTAAAAAAAT-- G--- ATAGA                                          |       |       |       |       |       |       |       | 35728 |
| Cat         | ----- TCAAAGTTTATGACAAAATACAT--- GTATG                                           |       |       |       |       |       |       |       | 36911 |
| Ferret      | ----- TTAGCATTCAATTAATATA-----                                                   |       |       |       |       |       |       |       | 34018 |
| Lion        | ----- TCAAAGTTTATGAAAAAATACAC--- GTATG                                           |       |       |       |       |       |       |       | 34988 |
| Vaquita     | AAGGATATACAGTGGAGAAAAGATAGTCTCTTCAATAAGTGGTCTGGGAAAACCTGGACAGCTACATGTAAATGAATGAA |       |       |       |       |       |       |       | 30691 |
| Pig         | ----- AGAAAATAAATTGCTAGAT----- GTTAA                                             |       |       |       |       |       |       |       | 28301 |

| Majority    | AXTAAAX----- ACAGAAATAAA----- TCTATAATCATAGTTGGATATTTTAAAXATTGAT-----           |       |       |       |       |       |       |       |       |
|-------------|---------------------------------------------------------------------------------|-------|-------|-------|-------|-------|-------|-------|-------|
|             | 42330                                                                           | 42340 | 42350 | 42360 | 42370 | 42380 | 42390 | 42400 |       |
| Human       | ACTAAG----- TAGAGAAACAAA-- AATCCACAATCATAGCCTGGTTTTTTAAAACATA-----              |       |       |       |       |       |       |       | 36449 |
| PolarBear   | -- TAAGG----- AGAGAAACAAG--- TCTGTAATCATTGTTGGATATTTTAAACATTAATT-----           |       |       |       |       |       |       |       | 7905  |
| Cow         | GTTAAA----- GTACAGAGAT-- A----- CAGATTGGAAA-- ATATTTTCATGC- AGATAGTA---         |       |       |       |       |       |       |       | 33799 |
| Dog         | -- CAAAA----- ACAGTAAGAAA--- TCTAGGAA- ATGACCAAATATTTAGAAATTGAAC-----           |       |       |       |       |       |       |       | 33383 |
| BelugaWhale | ATTAGAACACTCCCTAACACCATACACAAAAATAAATTCAAATGGATTAGAGACCTAAATGTAAGGCCAGGCACTATAA |       |       |       |       |       |       |       | 30135 |
| Donkey      | ACTAAAG----- AGAGAAACAGA-- AATCTGCAATCATAGTTGGATATTTTAAACATTCT-----             |       |       |       |       |       |       |       | 35781 |
| Cat         | TGTGAAGT----- T-- AAAGAGAGAAACCAGTCTATAATCATTGTTGGATATTTTAAACATT-----           |       |       |       |       |       |       |       | 36965 |
| Ferret      | -- TAAAGC----- C-- AAAGAGAAAAA--- TCTATAATCATTGTTGGATATTTTAAAATTAGTT-----       |       |       |       |       |       |       |       | 34070 |
| Lion        | TGTAAAAC----- T-- AAAGAGAGAAACCAGTCTATAATCATTGTTGGATATTTTAAACATT-----           |       |       |       |       |       |       |       | 35042 |
| Vaquita     | ATTAGAACACTCCCTAACACCATACACAAAAATAAATTCAAATGGATTAGAGACGTAATGTAAGGCCAGGCACTATAA  |       |       |       |       |       |       |       | 30771 |
| Pig         | ACTGAA----- ACACAAA- AT-- G----- TAAATTAGCTA-- A- ACTTAACGT- AGTCT-----         |       |       |       |       |       |       |       | 28343 |

Dienstag, 3. Mai 2022 08:39

| Majority    | ----- AATATAXXAG-----                                                            |       |       |       |       |       |       |       |       |
|-------------|----------------------------------------------------------------------------------|-------|-------|-------|-------|-------|-------|-------|-------|
|             | 42410                                                                            | 42420 | 42430 | 42440 | 42450 | 42460 | 42470 | 42480 |       |
| Human       | ----- ATTTATGG-----                                                              |       |       |       |       |       |       |       | 36457 |
| PolarBear   | ----- GATTTAACAG-----                                                            |       |       |       |       |       |       |       | 7915  |
| Cow         | ----- AGCACAGGAAA----- G----- T----- T-----                                      |       |       |       |       |       |       |       | 33813 |
| Dog         | ----- CTTGCATAAT-----                                                            |       |       |       |       |       |       |       | 33393 |
| BelugaWhale | AACTCGTAGAGGAAAACGTAGGAACAACACTCTTTGACATAAATCAAAGCAAGATCTTCTTTGATCCACCTCCTAGAGTA |       |       |       |       |       |       |       | 30215 |
| Donkey      | ----- CACAA-----                                                                 |       |       |       |       |       |       |       | 35786 |
| Cat         | ----- TCTTACAG-----                                                              |       |       |       |       |       |       |       | 36973 |
| Ferret      | ----- GATTTAACAG-----                                                            |       |       |       |       |       |       |       | 34080 |
| Lion        | ----- TCTTATAG-----                                                              |       |       |       |       |       |       |       | 35050 |
| Vaquita     | AACTCGTAGAGGAAAACGTAGGAACAACACTCTTTGACATAAATCAAAGCAAGATCTTCTTTGATCCACCTCCTAGAGTA |       |       |       |       |       |       |       | 30851 |
| Pig         | ----- AATACAG-----                                                               |       |       |       |       |       |       |       | 28350 |

| Majority    | ----- TAATTGATAGGACA----- AGATCTT----- TAA                                       |       |       |       |       |       |       |       |       |
|-------------|----------------------------------------------------------------------------------|-------|-------|-------|-------|-------|-------|-------|-------|
|             | 42490                                                                            | 42500 | 42510 | 42520 | 42530 | 42540 | 42550 | 42560 |       |
| Human       | ----- CAATTGATAGGATAGTA----- C----- AGTCCT----- AGCCCCCA                         |       |       |       |       |       |       |       | 36489 |
| PolarBear   | ----- TAACCGATAGGACAGTT----- AGATCTT----- TAA                                    |       |       |       |       |       |       |       | 7942  |
| Cow         | ----- TGTGTAATTG----- TATTG----- ACA----- TCA                                    |       |       |       |       |       |       |       | 33834 |
| Dog         | ----- GTCCCGAACGAACA----- AGTTGTT----- TGT                                       |       |       |       |       |       |       |       | 33417 |
| BelugaWhale | ATGGAAATAAAAACCAGAATAAACAAATGGGACCTAATGAAACTTAAAAGCTTTTGCAAAGCAAAGGAAACTACAAACAA |       |       |       |       |       |       |       | 30295 |
| Donkey      | ----- TAATTGATAGGACAATT----- AGATCTTT----- AAA                                   |       |       |       |       |       |       |       | 35814 |
| Cat         | ----- TAATTGATAAGACA----- GATCTT----- TAA                                        |       |       |       |       |       |       |       | 36996 |
| Ferret      | ----- TAATTGATAGGACAATT----- AGATCTT----- TAA                                    |       |       |       |       |       |       |       | 34107 |
| Lion        | ----- TAATTGATAAGACA----- GATCTT----- TAA                                        |       |       |       |       |       |       |       | 35073 |
| Vaquita     | ATGGAAATAAAAACCAGAATAAACAAATGGGACCTAATGAAACTTAAAAGCTTTTGCAAAGCAAAGGAAACTACAAACAA |       |       |       |       |       |       |       | 30931 |
| Pig         | ----- TGACCACTAG----- TTTT-----                                                  |       |       |       |       |       |       |       | 28364 |

Dienstag, 3. Mai 2022 08:39

| Majority    | AATAAATA- X- XXA- - ATTXGAACAGXGXT- AACAT- - - - - A- - - - - C- - - TGGGXTTAACTCATATTXAGA |       |
|-------------|--------------------------------------------------------------------------------------------|-------|
|             | 42570 42580 42590 42600 42610 42620 42630 42640                                            |       |
| Human       | AATAAAAAGATACATAATTTGAAAAGTGCT- ATCAT- - G- - - - - TTGGCTTAACTCACATTTATA                  | 36546 |
| PolarBear   | AATATTTT- - - - - TTTAAACAATGT- - - CCTTC- - - - A- - - - - GC- - - TGGGCTTAAATTCATATTCAGG | 7991  |
| Cow         | GATGAATT- GGAA- - - TTCAAGACAAGG- - - AGTAT- - - - C- - - - - AGTTGTATTGGTA- TAAAA         | 33882 |
| Dog         | TGTAAATT- - - - - ACAAGGA- - - - - AGATATCACG- ATATA- AGG                                  | 33450 |
| BelugaWhale | GATGAAAA- GACAACCCTCAGAATGGGAGAAAATATTTGCAAATGAATCAGTGGACAAAGGATTAATCTCCAAAATATGT          | 30374 |
| Donkey      | AAAAAGTACATAGAAGATTTGAACAGTCCTGTCAAT- - - - - CAGCTTGGCTTAAATTGACATTTATA                   | 35875 |
| Cat         | AATAAATA- - - - GAGGATTTGAACAGTGCTGAACATT- - - - CA- - - - - GC- - - TGGGCTTAACTCACATTCACA | 37054 |
| Ferret      | AATAGGTACATAGAGAGTTTGAACAGTGTTGTCTTT- - - - A- - - - - GC- - - TGGACTTAACTCATATTCAGG       | 34168 |
| Lion        | AATAAATA- - - - GAGGATTACAA- AGCTGTCATCATCAAGACA- - - - - GCA- - TGGTATTGGCATAAAAACAGA     | 35135 |
| Vaquita     | GATGAAAA- GACAACCCTCAGAATGGGAGAAAATATTTGCAAATGAATCAGTGGACAAAGGATTAATCTCCAAAATATGT          | 31010 |
| Pig         | - ATGAG- - - GCCA- - - TTGAGCATGTGG- - - AATGT- - - - A- - - - - ACTACTCCTAATAGTAAGT       | 28410 |

| Majority    | AAACTXTACCCT- - - - - AAXTTCA- - - GAATAACTX- TCAAGTGXACATAGAAXC- - AA- - - - - AATXAAATXXCT-         |       |
|-------------|-------------------------------------------------------------------------------------------------------|-------|
|             | 42650 42660 42670 42680 42690 42700 42710 42720                                                       |       |
| Human       | AAACTATACCCAG- - - - TAACTGTA- - - AAATAACT- - TCAAGTGTACATAGAACATTCAC- - - - - AATGATAGACCT-         | 36610 |
| PolarBear   | AAACTACAACCT- - - - - GACTTCA- - - GAATAACTTTTCAAGTGTACATAGCACC- - AT- - - - - GATAGACTGACT-          | 8052  |
| Cow         | AGACATATTT- - - - - CTTAGTGTCA- - - - - A- AA- - - - - GGGTCAATATATTGG- - - AA- - - - - AACACGTTCT-   | 33934 |
| Dog         | GAATATTTTCT- - - - - GATT- - - - - GAATAA- - - - - AAGTGAAAATA- TATC- - AA- - - - - AATTTGATGGCT-     | 33501 |
| BelugaWhale | AAACAGCTTAAGCAGCTCAATATTAGAAAAATAAACAACCTAATCAAAAAATGGGCAGAAGACCTAAATAGACATTTCTC                      | 30454 |
| Donkey      | AAACTTTACCTAA- - - - TAACTGCA- - - GAATAACTTTTCAAGTGTACATAGAATATTTAC- - - - - CATGAGACCA- - -         | 35939 |
| Cat         | AAACTATACCCT- - - - - AACTGCA- - - GAAAAACTTCTCAAGTGTATATAGCACC- - AT- - - - - GATCGACTA- - -         | 37112 |
| Ferret      | AAACTGTACCCT- - - - - GACTTCA- - - GAATAACTTTTCAAGTGTACATAGCACT- - GT- - - - - GATAGACTGTCT-          | 34229 |
| Lion        | CACATAGACCAATG- - - GAATAGAA- - - TAGAAACCCCAGAACTAGACCACAAACGTAT- - - - - GGCCAACTCA- T-             | 35200 |
| Vaquita     | AAACAGCTTAAGCAGCTCAATATTAGAAAAATAAACAACCTAATCAAAAAATGGGCAGAAGACCTAAATTGACATTTCTC                      | 31090 |
| Pig         | AAATGGGTGT- - - - - TTCAAAGACA- - - - - T- AG- - - - - TAACAAAGAAATAGG- - - AA- - - - - TGTAAGATACCT- | 28462 |

Dienstag, 3. Mai 2022 08:39

| Majority    | ----- TATTTTAGAXCATAAAATAA-----                                                  |       |       |       |       |       |       |       |       |
|-------------|----------------------------------------------------------------------------------|-------|-------|-------|-------|-------|-------|-------|-------|
|             | 42730                                                                            | 42740 | 42750 | 42760 | 42770 | 42780 | 42790 | 42800 |       |
| Human       | ----- TATATTGGATTATAAAATAA-----                                                  |       |       |       |       |       |       |       | 36630 |
| PolarBear   | ----- A---TATATTAGGACATAAAATAG-----                                              |       |       |       |       |       |       |       | 8073  |
| Cow         | ----- TAATCTGTATATTAGTAATAA-----                                                 |       |       |       |       |       |       |       | 33955 |
| Dog         | ----- G---TAATGCAAGGGA-AATACAT-----                                              |       |       |       |       |       |       |       | 33521 |
| BelugaWhale | CAAAGAAGACATACAGATGGCCAAGAAGCACGTGAAAACCTACTCAACATCACTAATTATTAGAGAAATGCAAATCAAAG |       |       |       |       |       |       |       | 30534 |
| Donkey      | ----- TATACTAGGACATAAAATAA-----                                                  |       |       |       |       |       |       |       | 35959 |
| Cat         | ----- TATATTAGGGCATAAAATAA-----                                                  |       |       |       |       |       |       |       | 37132 |
| Ferret      | ----- A---TATTTTAGGACATAAAATAA-----                                              |       |       |       |       |       |       |       | 34250 |
| Lion        | ----- C---TTTGACAAAGCAGGAAAGAA-----                                              |       |       |       |       |       |       |       | 35221 |
| Vaquita     | CAAAGAAGACATACAGATGGCCAAGAAGCACATGAAAACCTACTCAACATCACTAATTATTAGAGAAATGCAAATCAAAG |       |       |       |       |       |       |       | 31170 |
| Pig         | ----- CTTTTTTTAAATATTGATTGT-----                                                 |       |       |       |       |       |       |       | 28484 |

| Majority    | ----- CTXAATAGATTTCAAATGAXTGAAA----- GCXAATATAGCA-----                            |       |       |       |       |       |       |       |       |
|-------------|-----------------------------------------------------------------------------------|-------|-------|-------|-------|-------|-------|-------|-------|
|             | 42810                                                                             | 42820 | 42830 | 42840 | 42850 | 42860 | 42870 | 42880 |       |
| Human       | ----- CTCAATAAATTTCAAATGATTGACA----- GCTAATGTATCT-----                            |       |       |       |       |       |       |       | 36667 |
| PolarBear   | ----- CTCAATAGATTTCAAATGGCTGAAAA----- GCTCATATAGTA-----                           |       |       |       |       |       |       |       | 8111  |
| Cow         | ---CAGTTCAAGAACATTTTAAAAATGACAAA----- AAGAGAAATCTA-----                           |       |       |       |       |       |       |       | 33996 |
| Dog         | -T-----TAGGGGGGAAGAAAAATGTTGGAAGA----- GCAAACGT-----                              |       |       |       |       |       |       |       | 33556 |
| BelugaWhale | CTACAGTGAGGTATCACCTCAGACTAGTTAGAAGGGGCATCATCAGAAAATCTACAAACAACAATGCTGGAGAGGGTGT   |       |       |       |       |       |       |       | 30614 |
| Donkey      | ----- CTCAATAAATCTCAAATGATTGAAC----- TCTCATATAGCA-----                            |       |       |       |       |       |       |       | 35996 |
| Cat         | ----- TAGATTTCAAATGACTGAAA----- GCTTATATAGTA-----                                 |       |       |       |       |       |       |       | 37164 |
| Ferret      | -A-----CTCAATAGATTTCAAATGGCTGAGA----- GCTCATGTAGTA-----                           |       |       |       |       |       |       |       | 34288 |
| Lion        | ----- CATCCAATGGAAAAAGACA----- GTCTCTTTAACA-----                                  |       |       |       |       |       |       |       | 35253 |
| Vaquita     | CTACAGTGAGGTATCACCTCGGACTAGTTAGAAGGGGCATCATCAGAAAATCTACCAACAACA- -TGCTGGAGAGGGTGT |       |       |       |       |       |       |       | 31248 |
| Pig         | ---CGATATGGTAATATTTTCAGATATATTAGA----- TTAAAATATAT-----                           |       |       |       |       |       |       |       | 28524 |

Dienstag, 3. Mai 2022 08:39

| Majority    | ----- TCTGATTXTAGT-----                                                            |       |       |       |       |       |       |       |       |
|-------------|------------------------------------------------------------------------------------|-------|-------|-------|-------|-------|-------|-------|-------|
|             | 42890                                                                              | 42900 | 42910 | 42920 | 42930 | 42940 | 42950 | 42960 |       |
| Human       | ----- G----- ACTGACTATAGT-----                                                     |       |       |       |       |       |       |       | 36680 |
| PolarBear   | ----- TCTGATTATAGT-----                                                            |       |       |       |       |       |       |       | 8123  |
| Cow         | ----- CAATTTT-----                                                                 |       |       |       |       |       |       |       | 34003 |
| Dog         | ----- TTTGGTCTTCCT-----                                                            |       |       |       |       |       |       |       | 33568 |
| BelugaWhale | GGAGAAAAGGGAACCCCTTTTGCAC TGTGGTGGGAATGTAGATTGATACAGCCACTATGGAGAACAGTATGGAGGTTTCCT |       |       |       |       |       |       |       | 30694 |
| Donkey      | ----- CCTGATTATAGT-----                                                            |       |       |       |       |       |       |       | 36008 |
| Cat         | ----- TCTGATCATAGT-----                                                            |       |       |       |       |       |       |       | 37176 |
| Ferret      | ----- TCTGATTATAGT-----                                                            |       |       |       |       |       |       |       | 34300 |
| Lion        | ----- AATGGTGCTGGG-----                                                            |       |       |       |       |       |       |       | 35265 |
| Vaquita     | GGAGAAAAGGGAACCCCTTTTGCAC TGTGGTGGGAATGTAGATTGGTACAGCCACTATGGAGAACAGTATGGAGGTTTCCT |       |       |       |       |       |       |       | 31328 |
| Pig         | ----- TATTATT-----                                                                 |       |       |       |       |       |       |       | 28531 |

| Majority    | --- AAAATTAAXTAGGAA----- TCXAAAAGTGX----- XC----- AA----- TCTAXGA               |       |       |       |       |       |       |       |       |
|-------------|---------------------------------------------------------------------------------|-------|-------|-------|-------|-------|-------|-------|-------|
|             | 42970                                                                           | 42980 | 42990 | 43000 | 43010 | 43020 | 43030 | 43040 |       |
| Human       | --- GGAATTAATTAGAAA----- TCAAAAATAGA----- CA----- TCTAGGA                       |       |       |       |       |       |       |       | 36716 |
| PolarBear   | --- GGAATTTAAGTAGAAC----- TCAAAAACAGAAA----- TCTAAGA                            |       |       |       |       |       |       |       | 8159  |
| Cow         | --- AAATTTAAAAGTGGAC----- ATTTTAATATTG----- TTCATAGTAA----- T- CAAGA            |       |       |       |       |       |       |       | 34047 |
| Dog         | --- AATATCCATGTA----- TAGAAGCTG----- CTTATA                                     |       |       |       |       |       |       |       | 33595 |
| BelugaWhale | TAAAAAACTAAAAGCAGAATTAACATATGACCCAGCAGTCCCCTACTGGGCGTATATCCAGAGAAACCATAATTCAGAA |       |       |       |       |       |       |       | 30774 |
| Donkey      | --- GAAATTTAATTAGAAA----- TCCAAAACAG----- T----- ATGAAA----- TCTAGGA            |       |       |       |       |       |       |       | 36048 |
| Cat         | --- AGAATTTAAGTAAGAATCACCAAAT----- ATTTGAAAATTGAAC----- TACACAA----- TTCTGAA    |       |       |       |       |       |       |       | 37230 |
| Ferret      | --- GAAATTTAAGTAGGAA----- TCAAAAACAGTAA----- G----- GGA----- TCTGAGA            |       |       |       |       |       |       |       | 34340 |
| Lion        | --- AGAACT- GGACAGCAACATGCAGAA----- GGTTGAAAAGTACCCTT- TCTCACACCA----- TTCACAA  |       |       |       |       |       |       |       | 35325 |
| Vaquita     | TAAAAAACTAAAAGCAGAATTACCATATGACCCAGCAGTCCCCTACTGGGCGTATATCCAGAGAAACCATAATTCAGAA |       |       |       |       |       |       |       | 31408 |
| Pig         | --- AAAATTAATTTAGGG----- AGTTCTCTGATG----- GCCTAGCGGG----- T- TGAGG             |       |       |       |       |       |       |       | 28575 |

Dienstag, 3. Mai 2022 08:39

| Majority    | AAATACA- - - - - AAATATTX- - - - - AGAAATTTTACTA- - - - - T GAAA- - XCCTGAAXAXXA- T- - - - |                       |                                                              |       |                                      |                                |                         |       |       |
|-------------|--------------------------------------------------------------------------------------------|-----------------------|--------------------------------------------------------------|-------|--------------------------------------|--------------------------------|-------------------------|-------|-------|
|             | 43050                                                                                      | 43060                 | 43070                                                        | 43080 | 43090                                | 43100                          | 43110                   | 43120 |       |
| Human       | AAGTACT- - - - -                                                                           | AAATATT- - - - -      | AGAAATTACACAA- - - - -                                       |       |                                      |                                | TCGTGAACAATACA- - - - - |       | 36757 |
| PolarBear   | AATTACC- - - - -                                                                           | AAATA- TTT- - - - -   | AGAAATTGAACTA- - - - -                                       |       |                                      | CGTAA- - TTCTGAACATGA- - - - - |                         |       | 8204  |
| Cow         | AGACAAAT- - - - -                                                                          |                       | CAATCTTAAAATATA- - - - -                                     |       | CATAGAAG- - ATTTGAACAG- - - T- - - - |                                |                         |       | 34089 |
| Dog         | TCTTAGA- - - - -                                                                           | AAAAA- - - - -        | AAAAGTTTTTCCC- - - - -                                       |       | T- - - - -                           | CCCTCAAGAAAA- - - - -          |                         |       | 33633 |
| BelugaWhale | AGACACATGTA                                                                                | CTTCAGTGT             | TGACTGCAGCACTATTTTACAATAGCCAGGTCATGGAAGCAACCTAAATGCCCATCGACA |       |                                      |                                |                         |       | 30854 |
| Donkey      | AATAACT- - - - -                                                                           | AAATATTT- - - - -     | AGAAATTGAGCTA- - - - -                                       |       |                                      | CACAATTCCTTTTTTTTTTTT- - - - - |                         |       | 36096 |
| Cat         | TAATACA- - - -                                                                             | TGAAGATATAAA- - - - - | GGGCATCTGACTGAATGAA- - - - -                                 |       | AAGTGAAA- - ATATAATAAAATTTG- - - -   |                                |                         |       | 37291 |
| Ferret      | AATTACC- - - - -                                                                           | AAATAATTT- - - - -    | AGAAATTGAACTA- - - - -                                       |       | TGTAA- - TTCTGAACAATACA- - - -       |                                |                         |       | 34388 |
| Lion        | AAATAAAC- - -                                                                              | TCAAAATGGATA- - - - - | AAGGACCTGAATG- - TGAG- - -                                   |       | ACAGGAAA- - CCATCAAAACCTTAG- - - -   |                                |                         |       | 35385 |
| Vaquita     | AGACACATGTA                                                                                | CTTCAGTGT             | TGACTGCAGCACTATTTTACAATAGCCAGGTCATGGAAGCAACCTAAATGCCCATCAACA |       |                                      |                                |                         |       | 31488 |
| Pig         | CTCCTG- - - - -                                                                            |                       | CGTTCTCAC- - - - -                                           |       | CGCTGTGG- - CTCTGGTTGC- - - T- - - - |                                |                         |       | 28609 |

| Majority    | - - - - - XGGXTAAAGAAAGTGTXTX- - - - - X- XC- - - - - X- - - T- - - -            |                |       |       |                     |       |                       |          |       |
|-------------|----------------------------------------------------------------------------------|----------------|-------|-------|---------------------|-------|-----------------------|----------|-------|
|             | 43130                                                                            | 43140          | 43150 | 43160 | 43170               | 43180 | 43190                 | 43200    |       |
| Human       | - - - - - TGGATTATAGAAGTGT                                                       | TACCA- - - - - |       |       | CAA- - - - -        |       |                       |          | 36781 |
| PolarBear   | - - - - - ATTAAGGAAAATACAAGGG-                                                   |                |       |       |                     |       |                       | T- - - - | 8224  |
| Cow         | - - - - - G- - CTGTTG-                                                           |                |       |       | GCTCGGC- - - - -    |       | TTAACT- - - -         |          | 34109 |
| Dog         | - - - - - GGAAAAGAAAAC                                                           | TACAATC-       |       |       |                     |       |                       |          | 33652 |
| BelugaWhale | GACAAATGGGTAAAGAAGATGTGGTACATATATAGAATGAAATATTACTCAGCCATAAAAAGGAACAAAATTGGGTCGTT |                |       |       |                     |       |                       |          | 30934 |
| Donkey      | - - - - - GGT- - AAGATTTT                                                        | GTT- - - - -   |       |       |                     |       |                       |          | 36110 |
| Cat         | - TTGGCTCATTTGAGAAAGTACATGGGGA-                                                  |                |       |       | AAATGTCTAT- - - - - |       | GTATATACCCATAT- - - - |          | 37343 |
| Ferret      | - - - - - T GACTTAAGAAAGTATAAGG-                                                 |                |       |       |                     |       |                       |          | 34408 |
| Lion        | - AGGAGAAAGCAGGAAAAGACCTCTCTGA-                                                  |                |       |       | CCTCAGCCGT- - - - - |       | AGCAATCTCTTACT- - - - |          | 35437 |
| Vaquita     | GACAAATGGGTAAAGAAGATGTGGTACATATATAGAATGAAATATTACTCAGCCATAAAAAGGAACAAAATTGGGTCGTT |                |       |       |                     |       |                       |          | 31568 |
| Pig         | - - - - - G- - CTGTG-                                                            |                |       |       | CGGC- - - - -       |       | GTAGGT- - - -         |          | 28625 |

Dienstag, 3. Mai 2022 08:39

| Majority    | ----- X- TATATXTXTAAXTG----- AATXGAAGT----- A----- AAAAT----- |       |       |                                     |       |       |                         |       |       |
|-------------|---------------------------------------------------------------|-------|-------|-------------------------------------|-------|-------|-------------------------|-------|-------|
|             | 43210                                                         | 43220 | 43230 | 43240                               | 43250 | 43260 | 43270                   | 43280 |       |
| Human       | GGACATATTTTGGACTG                                             |       |       | AATGAAAATATATCAAAATTTGTTGGATACTACCC |       |       |                         | AAG   | 36836 |
| PolarBear   | GGGTATCTTTATGACTG                                             |       |       | AATAAAAGT                           |       | G     | AAAAT                   |       | 8256  |
| Cow         | TATATTTATAAAAC                                                |       |       | AT- GCAGTAA                         |       |       | CTGAAGAAT               | AA    | 34143 |
| Dog         | AATGCCATAGTTA                                                 |       |       | TCAGGAAGG                           |       | A     | ATGAT                   |       | 33680 |
| BelugaWhale | TGTAGAGACATGGATGGATCTAGAGACT                                  |       |       | CATACAGAGTGAAGTAAATCAGAAAGT         |       |       | GAAAAACAGATATCGTATAAACG |       | 31012 |
| Donkey      | TTTCCTCCTTCTCC                                                |       |       | CCAAAGC                             |       | T     | CCCCAGTAC               |       | 36141 |
| Cat         | TAGAAAATACCTACTTT                                             |       |       | AGAAAAAGC                           |       | T     | TTAGAGG                 |       | 37377 |
| Ferret      | TATCTTTCTGATTG                                                |       |       | AATAAAAGT                           |       | G     | AAAAT                   |       | 34437 |
| Lion        | CGGCACATCCCCAAAGG                                             |       |       | CAAGGGAAT                           |       | T     | AAAAGCA                 |       | 35471 |
| Vaquita     | TGTAGAGACGTGGATGGATCTAGAGACTGT                                |       |       | CATACAGAGTGAAGTAAATCAGAAAGT         |       |       | GAAAAACAGATATCGTATAAACG |       | 31648 |
| Pig         | TCAATCCCTGGCCC                                                |       |       | AG- GAATT                           |       |       | CCCACATAC               | TG    | 28657 |

| Majority    | ---- TG- ATGGCAXAAATAGT----- AT-- A- A- AATAAXTGTAAXGXAAACAAGXAXAXAAAGG----- |       |       |                                                            |       |       |                                      |       |         |
|-------------|------------------------------------------------------------------------------|-------|-------|------------------------------------------------------------|-------|-------|--------------------------------------|-------|---------|
|             | 43290                                                                        | 43300 | 43310 | 43320                                                      | 43330 | 43340 | 43350                                | 43360 |         |
| Human       | GGTGTGTATGGTGAAAAGTAT                                                        |       |       | GTCTTCAAATACCTATATTACAAAAAAGGTTTAAAACCTCC                  |       |       |                                      | C     | 36899   |
| PolarBear   | ATATCACAATTTGT                                                               |       |       | TGGCTGTAATGCAAGAAAGTACCTGAGGG                              |       |       |                                      |       | 8299    |
| Cow         | CTTTTTAAGCCAATATAGG                                                          |       |       | ATATTCAACATGATTTTA                                         |       |       | AAATAACTTACAGTAAATTT                 |       | C 34201 |
| Dog         | ATGATGCAAGTAG                                                                |       |       | GTAGAGGAAACCACTACAGATCGG                                   |       |       |                                      |       | 33717   |
| BelugaWhale | CATTTGCAGGGCAGAAATAGAGACACAGATGT                                             |       |       | AGAGAACAACATATGGACAACAAGGGGAGAAACTGGTGGAGTGGTGC            |       |       |                                      |       | 31092   |
| Donkey      | ATAGTTGTATATAT                                                               |       |       | T                                                          |       | T     | TAGTTGTGAGTCCTTCTAGTTGTGGT           |       | 36183   |
| Cat         | TGCCTGAGTGGCTCAGTCAGT                                                        |       |       | TAAGCATCAAACCTCTTGATTT                                     |       |       | CGGCTCAGGTCAGGATCTCATGGTTCGGGAGTTCAA |       | 37455   |
| Ferret      | ATATCAAATTTGT                                                                |       |       | TGGCTGTAATGCAAGAAAGTACATGGGGG                              |       |       |                                      |       | 34481   |
| Lion        | AAAGTGAATTACTGGGACCTTA                                                       |       |       | TGAAGATAAAAAGCTTCTGCACAGCAAAGGAAACAACCAACAAAACCTAAAAGGCAAC |       |       |                                      |       | 35550   |
| Vaquita     | CATTTGCAGGGCAGAAATAGAGACACAGATGT                                             |       |       | AGAGAACAACGATGGACAACAAGGGGAGAAAGTGGTGGAGTGGTGC             |       |       |                                      |       | 31728   |
| Pig         | CCTGTGTGGCAAAAAAGAA                                                          |       |       | AAAAAAAAAAAAAATACA                                         |       |       | AAAAAACAAAAAAAAAAAA                  |       | 28711   |

Dienstag, 3. Mai 2022 08:39

| Majority    | ----- AAXATXAGATTACAC----- XX- -X- -X- -X- -A----- X-----                           |       |       |       |       |       |       |       |       |
|-------------|-------------------------------------------------------------------------------------|-------|-------|-------|-------|-------|-------|-------|-------|
|             | 43370                                                                               | 43380 | 43390 | 43400 | 43410 | 43420 | 43430 | 43440 |       |
| Human       | ----- AATTTAAGACTGACC----- AAG----- G-----                                          |       |       |       |       |       |       |       | 36918 |
| PolarBear   | ----- AAAATATGTCTACAC----- C-----                                                   |       |       |       |       |       |       |       | 8315  |
| Cow         | ----- AAATGATAGA- - AAGCTGCTTCTCATTATCCTAGGAG----- TTAAC----- T                     |       |       |       |       |       |       |       | 34242 |
| Dog         | ----- AGAAAGGGAATAGA-----                                                           |       |       |       |       |       |       |       | 33731 |
| BelugaWhale | TGGTAGGAT- GAATTGGGAGATTGGGATTGACATGTATACACTAATATGTATAAAATGGATAACTAATAAGAACCTGCTG   |       |       |       |       |       |       |       | 31171 |
| Donkey      | ----- ACATGGGATGCTTCCCC-----                                                        |       |       |       |       |       |       |       | 36200 |
| Cat         | GCCTTGTGTCAGGTTCTACGTTGACAGTGTGGATGGAGCTTGCTTGAGATTCTCTCTCTCCCTGTCTGTCTGCCCTCTG     |       |       |       |       |       |       |       | 37535 |
| Ferret      | ----- AAAATATGTCTACAC----- C-----                                                   |       |       |       |       |       |       |       | 34497 |
| Lion        | CAACGGAATGGGAAAAGATATTTACAA- - ATGACACA- - TCGACAAAGGGCTAGTATCCAAAATCTATAAAGAGCTCAC |       |       |       |       |       |       |       | 35626 |
| Vaquita     | TGGTAGGAT- GAATTGGGAGATTGGGATTGACATGTATACACTAATATGTATAAAATGGATAACTAATAAGAACCTGCTG   |       |       |       |       |       |       |       | 31807 |
| Pig         | ----- AAAAGAGAGA- - GAACCTGAAATAAACGTTGCAACTC----- TCATT----- T                     |       |       |       |       |       |       |       | 28752 |

| Majority    | -- X- - AXAAAACTTAAATTCACXAX- XT- X- AXTX- ATGCXXATATTAXTACTAAAAATTTA- - - - ATTATGCXXX |       |       |       |       |       |       |       |       |
|-------------|-----------------------------------------------------------------------------------------|-------|-------|-------|-------|-------|-------|-------|-------|
|             | 43450                                                                                   | 43460 | 43470 | 43480 | 43490 | 43500 | 43510 | 43520 |       |
| Human       | ----- AAAAAGACATAAATTACCAATACTGGAAATCAAGGTCGAGATAATCACTTTCAGAGAAAGTGGATATATGCAGA        |       |       |       |       |       |       |       | 36992 |
| PolarBear   | ----- TATATACGTATATTAGAAA----- ATGCTTATATTAGAA- - AAAAGTTTA- - - - ATAATCCT- -          |       |       |       |       |       |       |       | 8367  |
| Cow         | AGAA- - ATAAAAAC- AGTAAGAAATC- TAGGAAATTACCAATATTTAGAAATTTCCATAATTCTGTACAGCACATGAT      |       |       |       |       |       |       |       | 34318 |
| Dog         | ----- AAAGTTGACT----- GCCAGTATCAATA- - GTAGAGTTAC- - - - GTTA- - - -                    |       |       |       |       |       |       |       | 33769 |
| BelugaWhale | AAATTCAAAAAAATTAAGTTCACTCC- CTTTTACTTTTTG- - ATGTGGTACTAGAATACTTAA- - AATTTATGTGGC      |       |       |       |       |       |       |       | 31245 |
| Donkey      | ----- A- - GCATGGCCCGGTCCA----- CGACCAGGATTTGAACCGCTGAAACCC----- TGGGCTGC               |       |       |       |       |       |       |       | 36251 |
| Cat         | CTGCTTGTACATATGTATACTCTCCTT- GTCTCTCTC- AAATAAGCATTTTTT- TAAAAAGTTTC- - - - ATCAGTCAAG  |       |       |       |       |       |       |       | 37607 |
| Ferret      | ----- TATATACTTATATTAGAAA----- AGGCTTATATTAGGC- - AAAAAGTTTA- - - - ATAATCCTCT          |       |       |       |       |       |       |       | 34551 |
| Lion        | CAAACCTCCACACCCGAAAAACAAATAA- CCCAGTGAAGAAATGGGCAGAAAACATGAATAGACAC- - - - TTC- - TCTAA |       |       |       |       |       |       |       | 35698 |
| Vaquita     | AAATTCAAAAAAATTAAGTTCACTCC- CTTTTACTTTTTG- - ATGTGGTACTAGAATACTTAA- - AATTTATGTGGC      |       |       |       |       |       |       |       | 31881 |
| Pig         | AAAA- - AAAAAAATT- AATTTCACTCC- TTTTTACTTTCTG- - GTATGGTACTACAATATTTA- - - AAATTATATGAT |       |       |       |       |       |       |       | 28822 |



Dienstag, 3. Mai 2022 08:39

| Majority    | TTATXATATXTATATTA- - - TGAATA- TCAGGAATXXAAGAAGXGXTATCAA- - TAC- - AAXATCXTACAGAATATTAAT |                               |                                                              |                        |                          |       |       |       |  |
|-------------|------------------------------------------------------------------------------------------|-------------------------------|--------------------------------------------------------------|------------------------|--------------------------|-------|-------|-------|--|
|             | 43530                                                                                    | 43540                         | 43550                                                        | 43560                  | 43570                    | 43580 | 43590 | 43600 |  |
| Human       | GTATAATA-                                                                                | GTATAACA-                     | - - TAAATAATATAAAGTGGAGATAGCACTTTCAATAAAAAGCAGAGATATATAGAAT- | ATAAT                  | 37067                    |       |       |       |  |
| PolarBear   | - - ATCAGAACTATAATG-                                                                     | - - CCAATA-                   | TCAGGAATGAAAGTAGAGGTACCAG-                                   | TAC-                   | - - GGATCCTACAGAATGTTAAT | 8436  |       |       |  |
| Cow         | TCATAGGATATTTCTGACAGTGAAAA-                                                              | TGAAAACATAACAAAATTGTATTTCTTG- | - GAATATAGAAGAAAATATAGAA                                     | 34395                  |                          |       |       |       |  |
| Dog         | - - GTTAGTAGTAT-                                                                         | - - - - - CAGGTA-             | CCAGTAA-                                                     | GCAGGAGGGTTACCAACCTAT- | - - AGATCCTACAGAATGTTAAT | 33834 |       |       |  |
| BelugaWhale | TTTTAGTATGTTTCTTT-                                                                       | - - TGGACA-                   | TTTGTAGTCTAAGAAGTCCAGTTAAAAGGCCAAAGAATATCATACTGGATTAAA       | 31321                  |                          |       |       |       |  |
| Donkey      | TGAAGCAGAGCGTGCGAACTTAACCA-                                                              | CTCGGCCACGGGGCCGGCCCCTGAAC-   | TACACAATTCTGAACAACACATGAAT                                   | 36329                  |                          |       |       |       |  |
| Cat         | AAAAGAAAGCTATATTA-                                                                       | - - CCAATA-                   | TCAGGAATGAAAGTAGAGGTACCAC-                                   | TAC-                   | - - AGATCCTACAGAA-       | CTAAC | 37676 |       |  |
| Ferret      | - - GTCAAACTATAATA-                                                                      | - - CTGATA-                   | TCAGGAATGAAAGTAGAGGTACCAG-                                   | TAC-                   | - - AGATCCTACAGAATATTAAT | 34620 |       |       |  |
| Lion        | AGAAGACATCCGGATGG-                                                                       | - - CCAA-                     | - - - CAGGCACATGAAAAGATGTTCAAC-                              | GTC-                   | - - GCTCCTTATCAGG-       | GAAAT | 35764 |       |  |
| Vaquita     | TTTTAGTATGTTTCTTT-                                                                       | - - TGGACA-                   | TTTGTAGTCTAAGAAGTCCAGTTAAAAGGCCAAAGAATATCATACTGGATTAAA       | 31957                  |                          |       |       |       |  |
| Pig         | CTGCGGTATCTTTCTTT-                                                                       | - - TGAACA-                   | TTCGTAGTCTAAGAAGTCTATTAGGAGGCAGAAAATGTCAGACTGTATTAAA         | 28898                  |                          |       |       |       |  |

| Majority    | AGG- AAAATAAGACAATAXTACAAACTGCAG- - - TAATGCCAXTAAATT- CAGCAACTTAXGTGAAAAAGATAAAAXCC |                                                  |                               |                                    |       |       |       |       |  |
|-------------|--------------------------------------------------------------------------------------|--------------------------------------------------|-------------------------------|------------------------------------|-------|-------|-------|-------|--|
|             | 43610                                                                                | 43620                                            | 43630                         | 43640                              | 43650 | 43660 | 43670 | 43680 |  |
| Human       | AGG- AAAATAAGTCAATATTAGTAATGTTGT-                                                    | - - - TAAGGCTAACAAATT-                           | CAGCAACTTAGATGAAAAGTTTCTTGACA | 37141                              |       |       |       |       |  |
| PolarBear   | AGG- AAAATAAGGCAATATTACAAACGGCAG-                                                    | - - - TAATGCCAATAAATT-                           | CAGCAACTTAGGTGAAATAGACAAAATCC | 8510                               |       |       |       |       |  |
| Cow         | ATATTCACCATCACCTCCAAGAAGTGCCTGGGGGAAATAGT                                            | TTTGTACCTATATTAGATACTTATCTCTTATCTACC             | 34475                         |                                    |       |       |       |       |  |
| Dog         | GGGGAAAATGAGACAATGTTACAAACAGCAAGCAGTAATGCCAATAGTTT-                                  | CACCAACTTAGGTGAAATAGACAAAATCC                    | 33913                         |                                    |       |       |       |       |  |
| BelugaWhale | AAGTAAGACCTAATTACGCTGTCTACTGCTGTCGTCAGG-                                             | - - - TTGAAGTACAGAGACACAAGTTGAAAG-               | TAAAAGGG                      | 31395                              |       |       |       |       |  |
| Donkey      | CAA- GATATAAGGGCATATTTCTGACTGAATG-                                                   | - - AAAATATATCAAATTTGTTAACTGCAACCCAAGAAATGGAGAGA | 36405                         |                                    |       |       |       |       |  |
| Cat         | AGG- AAAATAAGGCAGTACCACAAAGAGTAG-                                                    | - - - TAATGCCAATAAATT-                           | CAGCAACTTAGGTGATATAGACAAGATCC | 37750                              |       |       |       |       |  |
| Ferret      | AGG- AAAATAAGGCAATATTACAAGCGGCAA-                                                    | - - - CAATGCCAATAAATT-                           | CAGCAACTTAGGTGAAATAGACAAAATCC | 34694                              |       |       |       |       |  |
| Lion        | AC- - AAATCAAACCACACT-                                                               | CAGATACCACC-                                     | - - - TCACGCCAGTCAG-          | - - - AGTGGCCAAAATGAAGAAATCAGGAGAC | 35834 |       |       |       |  |
| Vaquita     | AAGTAAGACCTAATTACGGTGTCCACTGCTGTCGTCAGG-                                             | - - - TTGAAGTACAGAGACACAAGTTGAAAG-               | TAAAAGGG                      | 32031                              |       |       |       |       |  |
| Pig         | AAGCAATACCGAACTACACTGTCCAGTGTCTAGTCAGACTGCTTGAAGTACAGAGACACAATGAAAG-                 | TAAAAGGG                                         | 28976                         |                                    |       |       |       |       |  |

Dienstag, 3. Mai 2022 08:39

| Majority    | TTXAGAAACCTTATTTXAXG- - A- - - - X- - - - - AAGAAAAXTGATATXA- - - - - ATACTATTACTXCCATAXXAAAT |       |       |       |       |       |       |       |       |
|-------------|-----------------------------------------------------------------------------------------------|-------|-------|-------|-------|-------|-------|-------|-------|
|             | 43690                                                                                         | 43700 | 43710 | 43720 | 43730 | 43740 | 43750 | 43760 |       |
| Human       | AATGCAAAACTGACTTAAGTATATAGCT- - - - - TAACAGCTATATACT- - - - - ACTGTATTATACAAATTGGAATT        |       |       |       |       |       |       |       | 37207 |
| PolarBear   | TTCAGAAACCTAATT- - - - - TATCAAAAAGTGACAT- - - - - AAATACTACT- CCATAATATAT                    |       |       |       |       |       |       |       | 8562  |
| Cow         | TTTGTGGCTCTATGAGCTTAAAAATATTA- - AAAAAATAATGGTTTGAA- - - - - ATTCCTTTTCGAGAA- AGA- AAAGT      |       |       |       |       |       |       |       | 34546 |
| Dog         | TTCATAAACCTAATTATAATTAACCCCCC- - CCAAGAGAAGTACAAACCTTACAAAAAACTATTACT- CCATAA- - AAT          |       |       |       |       |       |       |       | 33988 |
| BelugaWhale | ATGGAGAATAATATTTACGCAAACAGTAAGCACAAAGAAAGTTGATGTGA- - - - - TTGTATTAACATCAGATGAAGT            |       |       |       |       |       |       |       | 31467 |
| Donkey      | GAGAGAAA- AATATGT- - - - - CTATACCTATATTA- - - - - GATACATTTATACCTATATTAGAA                   |       |       |       |       |       |       |       | 36458 |
| Cat         | TTCACAAACCTAACTTAGCA- - - - - AAACACTGACAT- - - - - AAATACTACT- CCATAATATAT                   |       |       |       |       |       |       |       | 37804 |
| Ferret      | TTTAGAAACCTAATT- - - - - TATCAAAAAGTGATAT- - - - - AAA- - - - - CT- CCATAATAAAT               |       |       |       |       |       |       |       | 34740 |
| Lion        | TATAGATGCTGGAGAGGATGT- - - - - GGAGAAACAGGAAC- - - - - CCTCTTGCCTGTTGGTGGGAAT                 |       |       |       |       |       |       |       | 35892 |
| Vaquita     | ATGGAAAATAATATTTACGCAAACAGTAAGCACAAAGAAAGTTGATGTGA- - - - - TTGTATTAACATCAGATGAAGT            |       |       |       |       |       |       |       | 32103 |
| Pig         | ATGGAAAATAATATTCATGCGAAGAGTAA- - ATAAGAAAGGTGGTATGA- - - - - TCGTGTAAACAT- AGATAAAGT          |       |       |       |       |       |       |       | 29045 |

| Majority    | ACAAATTAXGTCTATGACTATTATXAAAAATAAAATGG- - AAATTTCTTTCAGXCAGAAAGA- TC- AGATATXGGAAAX-           |       |       |       |       |       |       |       |       |
|-------------|------------------------------------------------------------------------------------------------|-------|-------|-------|-------|-------|-------|-------|-------|
|             | 43770                                                                                          | 43780 | 43790 | 43800 | 43810 | 43820 | 43830 | 43840 |       |
| Human       | TATAATTAAAA- AAATCTTTCCACAAAGATTACTCTAGTCATAGATGGTTTCACTATTGAATTTTATGAAATTTTAAAGG              |       |       |       |       |       |       |       | 37286 |
| PolarBear   | ACAGATTAGCTCTATGTCTATTATAAAAAATAAACTTA- - AAATTTTTC- CACAAAGA- - - - -                         |       |       |       |       |       |       |       | 8617  |
| Cow         | GAGAGTGAAGTCACTCAGTCATGTCCGACCCTTAGCGACCCCATGGACTGCAGCCTACCAGGCTC- CTGTGTCCATGGGA              |       |       |       |       |       |       |       | 34625 |
| Dog         | ACAGATTATGTCTGTGTCCATTATAAAAAATCAGATTTA- - TAATTTTTTTCATCCACCAAAG- - - - - A- - - - T- - - - - |       |       |       |       |       |       |       | 34050 |
| BelugaWhale | AGAATTCAAGACAAGGAGTATTACCGGGTATAAAAAGG- CATATTTCTTAGGGTC- GAAAGAGTCAATATATTGGAAAAT             |       |       |       |       |       |       |       | 31545 |
| Donkey      | AGAAGGAAGGTTTAAACTCCTATCAAGAAAAGAAAGGAAACGTAAATTACCAATATTGGGA- - - - - G- - - - -              |       |       |       |       |       |       |       | 36521 |
| Cat         | ACAGATTAGCTCTATGTCTATTATAAAAAATTAGATTAG- - TAATCTTCT- CACAAAGATGACTCC- AGGCATAGGTGATT          |       |       |       |       |       |       |       | 37880 |
| Ferret      | ACAGATTAGCTCTGTGTCTTTTATAAAAAATTGAACTTA- - AAATTTTCTC- CATGAAGGGACGCCT- GGGTGGCTCAGTTG         |       |       |       |       |       |       |       | 34816 |
| Lion        | GCAAATTGG- - - TGCAGCCGCTCTGGAAAGCAGTGTGG- - - AGGTTCTC- CAGAAAATTAATAAAT- AGACCTACCCTAT-      |       |       |       |       |       |       |       | 35963 |
| Vaquita     | AGAATTCAAGACAAGGAGTATTACCGGGTATAAAAAGG- CATATTTCTTAGGGTC- GAAAGAGTCAATATATTGGAAAAT             |       |       |       |       |       |       |       | 32181 |
| Pig         | AAGAGTTGAGACAAGGAGTATAACCAGGTATAAAAAGGTTTATTTCTTAGTGCCTCAAAGAACCACTATATCGGAAAAC                |       |       |       |       |       |       |       | 29125 |

Dienstag, 3. Mai 2022 08:39

| Majority    | - - - ACAXTXXTTAATTTAGATATTAG- ATXAACAATTTCAAXGTACAGTTTAAGAAA- - ACAAAA- - - XATAGGAX- - - C |       |       |       |       |       |       |       |       |
|-------------|----------------------------------------------------------------------------------------------|-------|-------|-------|-------|-------|-------|-------|-------|
|             | 43850                                                                                        | 43860 | 43870 | 43880 | 43890 | 43900 | 43910 | 43920 |       |
| Human       | A                                                                                            | A     | A     | A     | A     | A     | A     | A     | 37366 |
| PolarBear   | -                                                                                            | -     | -     | -     | -     | -     | -     | -     | 8649  |
| Cow         | T                                                                                            | -     | T     | C     | C     | A     | G     | G     | 34696 |
| Dog         | -                                                                                            | -     | -     | -     | -     | -     | -     | -     | 34088 |
| BelugaWhale | A                                                                                            | T     | A     | A     | C     | A     | A     | A     | 31623 |
| Donkey      | -                                                                                            | -     | -     | -     | -     | -     | -     | -     | 36575 |
| Cat         | T                                                                                            | C     | A     | C     | T     | C     | A     | T     | 37951 |
| Ferret      | -                                                                                            | G     | T     | T     | A     | A     | G     | C     | 34883 |
| Lion        | -                                                                                            | G     | A     | C     | C     | A     | G     | A     | 36027 |
| Vaquita     | A                                                                                            | T     | A     | A     | C     | A     | A     | A     | 32259 |
| Pig         | A                                                                                            | -     | A     | C     | A     | T     | T     | A     | 29196 |

| Majority    | AGAGAAATCTACAATTTAAAATTTACAATTGGCTATTTAACATTCCTCATAGTAAT- CAGTAGGACGAATTGATCTTAA |       |       |       |       |       |       |       |       |
|-------------|----------------------------------------------------------------------------------|-------|-------|-------|-------|-------|-------|-------|-------|
|             | 43930                                                                            | 43940 | 43950 | 43960 | 43970 | 43980 | 43990 | 44000 |       |
| Human       | T                                                                                | G     | A     | C     | A     | A     | A     | A     | 37444 |
| PolarBear   | -                                                                                | -     | -     | -     | -     | -     | -     | -     | 8660  |
| Cow         | A                                                                                | A     | G     | T     | C     | G     | T     | C     | 34774 |
| Dog         | -                                                                                | -     | -     | -     | -     | -     | -     | -     | 34103 |
| BelugaWhale | A                                                                                | G     | A     | A     | A     | T     | T     | A     | 31702 |
| Donkey      | -                                                                                | -     | -     | -     | -     | -     | -     | -     | 36604 |
| Cat         | A                                                                                | T     | A     | A     | T     | A     | A     | T     | 38019 |
| Ferret      | C                                                                                | T     | T     | G     | C     | T     | T     | C     | 34957 |
| Lion        | C                                                                                | C     | T     | G     | T     | A     | T     | A     | 36098 |
| Vaquita     | A                                                                                | G     | A     | A     | A     | T     | T     | A     | 32338 |
| Pig         | A                                                                                | G     | G     | A     | A     | T     | T     | A     | 29275 |

Dienstag, 3. Mai 2022 08:39

|             |                                                                                                         |       |
|-------------|---------------------------------------------------------------------------------------------------------|-------|
| Majority    | A - - A - - - - - XXTATAGGATTTGTAAAAAXATG - - A - - X - AG - - - - - CTTAAATCACXXTTATAAAAXATC - CAATGAC |       |
|             | <hr/>                                                                                                   |       |
|             | 44010 44020 44030 44040 44050 44060 44070 44080                                                         |       |
| Human       | TAAATCACCTCCGGTAGAATATGAGAGACAATTCTG - - - - AGA - - - - CTTATCGCAGGATTGTAAGGTTTGTTTAACAT               | 37515 |
| PolarBear   | - - - - - AAGTATG - - - - - AAGC - - - - TCAAAGTAAGAAATAATAG - - - - CCAT - - -                         | 8695  |
| Cow         | A - - G - - - - - GCAAGAGTACTGGAGTGGGGTGCCATTTAAGAAAAAACATAAATTACTGGTAGCAGTAGTGGAAGTGGC                 | 34845 |
| Dog         | - - - - - AATGCGTGTACAATGA - - A - - - - GGCT - - - - CTCAGAGTATGAACATAAAT - - - AGCCAT - A -           | 34151 |
| BelugaWhale | AAAAACAATACGTAGAGGATTTGAACAATGCTGTCAGCTTGG - - - - - CTTAACTCACATTTACAAGACATC - CAATAAC                 | 31775 |
| Donkey      | A - - - - - TTCAACAACCTTAGATGCAGT - - - - - AG - - - - - ACAAATTTACTTTACAAAACCTTACAAAAT - - -           | 36656 |
| Cat         | GATG - - - - - CTGCTATGACTGATACCAAAACCTAACAAAGAGG - - - - ATATAAGAAATCAAG - ATTTCAAACCAATATT            | 38088 |
| Ferret      | - - - C - - - - - TCTCTCTGACAAATAAATAAATA - - A - - - - AATC - - - - TTTAAAAAAAAAAAAAAAAAATTTCTCCATGAA  | 35018 |
| Lion        | - - - A - - - - - CTGATG - AATGGATAAAGAAATT - - - - GTGGTTT - - - - ATATACACAATGGAATACTACATGGCAATGAG    | 36160 |
| Vaquita     | AAAAACAATACGTAGAGGATTTGAACAATGCTGTCAGCTTGG - - - - - CTTAAGTCACATTTACAAGACATC - CAATAAC                 | 32411 |
| Pig         | A - - G - - - - - ATTTAGGATTTGAAAAGTGCTGTCAGTTTAG - - - - - CTTAACTCACATTTATGAAATGTT - AAATGAC          | 29339 |

|             |                                                                                                                |       |
|-------------|----------------------------------------------------------------------------------------------------------------|-------|
| Majority    | XX - AAAAXAAXXTATTAXATAT - - ATXXXATAT - - - TCAATGTGATATTTAAAATAXCTXA - - - - AAATTTTCA - - - - TG            |       |
|             | <hr/>                                                                                                          |       |
|             | 44090 44100 44110 44120 44130 44140 44150 44160                                                                |       |
| Human       | TTGAAAATGAACTCAGTGTAAATTTGTCACAATGATAGAATGAAGAAAGAAGAATTTCTCTCAGAAAACCTAGGAAGAGAAG                             | 37595 |
| PolarBear   | - - - - - CTTCGG - - - - TA                                                                                    | 8703  |
| Cow         | GGTATTACTATAGATCCTATAC - CGTGATCTATAGATCCTTGTTATAGGAAAATAAGACA - - - - GTATTACAGGCATCAG                        | 34920 |
| Dog         | - - - - - TTCAATATAC - - - - - TT - TTTTAG - - - - TA                                                          | 34171 |
| BelugaWhale | TGCACAATAGCCTTTTAAATGTACATAGGATAT - - - TCAACGTGATGTTAAAATAACTTACAATAAATTTCAAATGATTG                           | 31852 |
| Donkey      | - - - - - C - - TATTATTCTATAATAGAT - - - - - ACATATTAG - - - - CTG                                             | 36687 |
| Cat         | TTTCATTAACATAAATGCAGAT - - ATTCCTAAC - - - AAAATGTTAGATTATCATATCTGG - - - - CAGTTTGTA - - - - AA               | 38154 |
| Ferret      | GATTACTCAAGGCATAGGTGAT - - TTCATTAG - - - GTTATGAAGCTTCAAAGTATACTT - - - - TTTCTTCAG - - - - TA                | 35084 |
| Lion        | - - - - - AAAAAATGAAATATGGCC - - TTTTGTAGC - - - AACATG - - - G - - - ATGGAACCTGGA - - - - GAGTGTG - - - - - A | 36213 |
| Vaquita     | TGCACAATAGCCTTTTAAATGTACATAGGATAT - - - TCAATATGATGTTAAAATAACTTACAATAAATTTCAAATGATTG                           | 32488 |
| Pig         | AGCAGAACAACCTTTTTCAGGTGTACATAGAATAT - - - TCAGCATGACATGAAAATAATTCT - - - - AAATTTCAAATGCTTG                    | 29412 |

Dienstag, 3. Mai 2022 08:39

|             |                                                                                                                                                                                                    |       |
|-------------|----------------------------------------------------------------------------------------------------------------------------------------------------------------------------------------------------|-------|
| Majority    | TAA- TXXXATATAXTA- ACTGATTG- - AXXAGGGAG- ATTTACTXXAAATTCTA- ACTTTA- - AAGTGATATTG- TATAT                                                                                                          |       |
|             | 44170                      44180                      44190                      44200                      44210                      44220                      44230                      44240 |       |
| Human       | GAGCTTTTACAATGTAATAAAGGGGTATCTACTAAGAACCTACAACAAATTTTCATACTTAATGGAGAAATATTG- AATGT                                                                                                                 | 37674 |
| PolarBear   | TAC- TTTTTTA- GAAAA- - TAGAG- - AAGCAGGGA- - A- - TATTGCAAATTCT- - ACTTTA- - - - - TGATGCTG- TGTAG                                                                                                 | 8765  |
| Cow         | TAATGCCAATAAATTCAACAAATG- - AAATAGAGAG- TTTCTTTTATAAATCTA- GTTTAAAAAACCAATATTT- TAGAT                                                                                                              | 34995 |
| Dog         | GAA- GATTGAG- AGAATGTTAGAA- - AATCATGGA- - AAATACTCCAATTC- - - ACGTTA- - - - - TGATCCTGCTATAA                                                                                                      | 34237 |
| BelugaWhale | AAG- - CTCATATAGTACCTGATTG- - - - - TAGTGGG- ATTTA- - CAGAAGTCTA- GGA- AATTACCAAATATTTAGAAAT                                                                                                       | 31920 |
| Donkey      | CGTATTTACTATAAAAATTGAAC- - - - - TCATGGGG- CTGGCCAGTGGCATAG- TCGTTAAGTTTGGATGCTC- TGCTT                                                                                                            | 36759 |
| Cat         | TGA- TAATTCATGATTATTAATTG- - AGGCGGGCCC- AAGGATTGTAAGGTTTA- ACATTTCAAAGTGAAGTCAAGTGTAA                                                                                                             | 38229 |
| Ferret      | TAC- TTTTTCA- GAAAA- - TAGAG- - AAGCAGGGA- - A- - TACTGCAAATTTT- - ACTTTA- - - - - TGATGCTGCTATAA                                                                                                  | 35147 |
| Lion        | TGC- TAAGTGA- AATAAGCCATAC- - AGAGAAAGAC- AGATACCATATGGTTTC- ACTCTT- - ATGTGGATCCTGAGAAA                                                                                                           | 36285 |
| Vaquita     | AAG- - CTCATATAGTACCTGATTA- - - - - TAGTGGG- ATTTA- - CAGAAATCTA- GGA- AATTACCAAATATTTAGAAAT                                                                                                       | 32556 |
| Pig         | AAA- GCTCATATAGTATCTGATT- - - - - A- TAGTGAA- ATTTGACTAGAAATCAA- GAATCAGTAAGAAATCTAG- GAAAT                                                                                                        | 29483 |

|             |                                                                                                                                                                                                    |       |
|-------------|----------------------------------------------------------------------------------------------------------------------------------------------------------------------------------------------------|-------|
| Majority    | TTXCTX- XCATAATCAAAXACAGAAGATX- AAGAAAXCXATAATGGXAATAXATATGAXTGAATGAA- - - - -                                                                                                                     |       |
|             | 44250                      44260                      44270                      44280                      44290                      44300                      44310                      44320 |       |
| Human       | TTTCTTCTTAAAAACAGAAATGAAGCA- - - AGGATGTCTGTTTTCTCAATTTTTCCCTTAGCTTTCTGCTTACATTAAG                                                                                                                 | 37751 |
| PolarBear   | C- - - - -                                                                                                                                                                                         | 8766  |
| Cow         | TACCTCTCTATATGTCAATAGATAGTATTGTAGGCATCAGTAATGCCAATAAATTCAACA- AGTGAA- - - - -                                                                                                                      | 35061 |
| Dog         | TTGATA- CAAAACCTAACAAAGA- - - TGTAAAGAAATCAAGATTTCAAACCTAATATTTTTTCATTAAC- - - - -                                                                                                                 | 34300 |
| BelugaWhale | TTACAC- - AATTCTGAAAAGCACATGAATCACAGAAGATATAAAGGGCATATTTTTGACTGAATGAAAATACATCATATT                                                                                                                 | 31998 |
| Donkey      | CAGCGGCCCAGGGTTC- - - ACAGGTTCT- - - - GATCCCAGGTGTAGACCTACATACCGCTCATCAA- - - - -                                                                                                                 | 36818 |
| Cat         | TT- - TA- TCACAATAATAGAATGAAGGGGAAAAAATGTCAATAGGAGAATAGGACAGATACAATAGG- - - - -                                                                                                                    | 38293 |
| Ferret      | CTGATG- CAAAATCTAACAAAGAAGATGTAAGGAGTCAAGGTTTTCAAACCTAATATATTTTTATTAAC- - - - -                                                                                                                    | 35213 |
| Lion        | CG- - TA- ACAGAAACCCATGGGGGAGGGGAAGGAAAA- - AAAAAAAAAAAAAAGAGGTTAGAGTGGG- - - - -                                                                                                                  | 36347 |
| Vaquita     | TTACAC- - AATTCTGAAAAGCACATGAATCACAGACGATATAAAGGGCATATTTTTGACTGAATGAAAATACATCATATT                                                                                                                 | 32634 |
| Pig         | TACCA- - - AATAGAACTTACACAATTCTGAACAAAGGTGTAAAGGGTATATTTCTGACAGAATGAA- - - - -                                                                                                                     | 29547 |

Dienstag, 3. Mai 2022 08:39

| Majority    | -----ATAAATACACATCTAXATTTT- TTTGAAAXAXAGAAA-----XTAGXAA- XXXTXCT----- |               |                |                 |             |               |            |            |             |       |
|-------------|-----------------------------------------------------------------------|---------------|----------------|-----------------|-------------|---------------|------------|------------|-------------|-------|
|             | 44330                                                                 | 44340         | 44350          | 44360           | 44370       | 44380         | 44390      | 44400      |             |       |
| Human       | GCAG-                                                                 | GTGAAATAAAAG- | ACATAAAGATTGTA | AAGGAAGAAAAGAAA | ACTGTCTTATT | CACCATTCAACAT | GCTTT      |            | 37824       |       |
| PolarBear   | -----                                                                 | -----         | -----          | -----           | -----       | -----         | -----      | -----      | 8766        |       |
| Cow         | -----                                                                 | CTAGACAAATTC  | CCCTTACAAATCT  | AGTTTAAAAAA     | ACTGATA-    | -----         | ATAGTAG-   | ATTACCT-   | 35116       |       |
| Dog         | -----                                                                 | ATAAATGC-     | -----          | -----           | -----       | -----         | -----      | -----      | 34308       |       |
| BelugaWhale | T                                                                     | TAAATCATA     | CACCAAATGAAA   | ATACATCTAT      | TTTT-       | CTTGGAATAT    | AGAAGAAAAT | ATAGAAATAT | TTTTCCCCACA | 32077 |
| Donkey      | -----                                                                 | GCCATGCTGT    | GGTGGCGTCT     | ATGTACAAAG      | TAG-        | -----         | A-         | -----      | 36853       |       |
| Cat         | -----                                                                 | ACAGATACAG    | CATTTTCATTC    | ATGATAAA        | ACTCAGAAA   | ACT-          | GGTAAGGG-  | AACTTC-    | 38347       |       |
| Ferret      | -----                                                                 | ACAAATGC      | AGGCATTTTT     | TTTTTTTT        | TAAATTTT    | AAAAATTT-     | TTTAATGT-  | ATAATGTT-  | 35269       |       |
| Lion        | -----                                                                 | AGAGAGCC      | AAAGCATA       | AAGAGACT        | GTTAAAA     | ACCAGAA       | CA-        | AACTGAGG-  | 36401       |       |
| Vaquita     | T                                                                     | TAGTCATA      | CACCAAATGAAA   | ATACATCTAT      | TTTT-       | CTTGGAATAT    | AGAAGAAAAT | ATAGAAATAT | TTTTCCCCACA | 32713 |
| Pig         | -----                                                                 | C-            | ATGAAGATA      | CATCAGA         | ATTTG-      | TTGGAATGC     | AGCC-      | -----      | TAGGAA-     | 29594 |

| Majority    | -----GXGAGATGTAGTTCTATACATATATTAX-----TX- XTATATTAXAAAATATCTATTTTAGCAAAAAA |           |          |          |          |         |          |          |          |             |           |       |
|-------------|----------------------------------------------------------------------------|-----------|----------|----------|----------|---------|----------|----------|----------|-------------|-----------|-------|
|             | 44410                                                                      | 44420     | 44430    | 44440    | 44450    | 44460   | 44470    | 44480    |          |             |           |       |
| Human       | T                                                                          | TAAAGTAGA | AGACCTGA | AGGACTCT | ACAACAG  | ATTTGGT | AGAACTA- | ATAAGTGA | ATTTAGA  | ATAATTATAGG | ATACAA    | 37903 |
| PolarBear   | -----                                                                      | AGCTG-    | -----    | -----    | -----    | -----   | -----    | -----    | ATGGCA-  | -----       | 8777      |       |
| Cow         | -----                                                                      | CTTATATG  | TATTATAG | ATATAGG  | TAT-     | -----   | CTTTATAT | CTATTAT  | CAAAATT  | GAATTTT     | TAAATTA   | 35182 |
| Dog         | -----                                                                      | AGATAT-   | -----    | -----    | -----    | -----   | -----    | -----    | TCTTA    | ACAA-       | 34323     |       |
| BelugaWhale | A                                                                          | GTGCATG   | GGGGGAAA | ATAGTTCT | ATATCTAT | ATTAGT  | ACTTATCT | ACCTAC   | ATTGGAAA | ATATCTGT    | AGTAGAAAA | 32157 |
| Donkey      | -----                                                                      | GGAAG-    | -----    | A-       | -----    | TTG-    | -----    | GC-      | -----    | ATGGAT      | GTTAGCT   | 36881 |
| Cat         | -----                                                                      | CACAGAT   | TGAGTG   | AGGGAC   | ATCCAG   | TAAGA-  | -----    | GCCTAAA  | ACAAAT   | TCCATT      | CTTTAA    | 38409 |
| Ferret      | -----                                                                      | ATTAGCT   | GTGGGG   | TATAGG   | TCTGT    | GAATCT  | CCAGTTT  | TACAC    | ACTT     | CACAG       | CACT      | 35340 |
| Lion        | -----                                                                      | GGGGGT    | GGGAGG   | GAGGG    | CAGGG    | TGGGT   | GAT-     | -----    | GGGT     | ATTGAG      | GAGGG     | 36462 |
| Vaquita     | A                                                                          | GTGCATG   | GGGGGAAA | ATAGTTCT | ATATCTAT | ATTAGT  | ACTTATCT | ACCTAC   | ATTGGAAA | ATATCTGT    | AGTAGAAAA | 32793 |
| Pig         | -----                                                                      | GAGGAAA   | ATTGTTCT | ATCCAT   | ATATT    | AGA-    | -----    | TACTTT   | ACCTAT   | ATTAGAAA    | ATATCTAT  | 29663 |

Dienstag, 3. Mai 2022 08:39

| Majority    | G- - - GTTT XAAAX TTTT ATXAX- - - - GAATXXGXAX- - ATAAATTXTCAGTATXXGGAATXXAAXTXX- - AGATXTCAC |       |
|-------------|-----------------------------------------------------------------------------------------------|-------|
|             | 44490 44500 44510 44520 44530 44540 44550 44560                                               |       |
| Human       | GTTCTATGTACAGAAATAGTCTCCTTATACTTGGCA- - - GCAAATTCCTTAGAAAATGAAATTTTAAAAAATCTGTTTATA          | 37980 |
| PolarBear   | -----                                                                                         | 8777  |
| Cow         | T- - - - GTT- - AGTCTCTCAGTT- - - - - GTCTCTGAGTCTTTGCTTTGTGACCCTGTGGACTATAGCCTGCCAGGCCCCAC   | 35251 |
| Dog         | -----                                                                                         | 34323 |
| BelugaWhale | GAAAGGTTTTAAATTTCTGTTAAGAAAGAAAAAGGAAACATAAATTACCAGAATCAGGAATGAAAGTGG- - AGATATCAC            | 32235 |
| Donkey      | -----                                                                                         | 36881 |
| Cat         | A- - - - TATTGAATGTTTTCTTTATTTATTTT- TATTTATTTTTATTTTTTATTTTTATTTATTTTTT- - TTATATATGA        | 38482 |
| Ferret      | C- - - - CTTCCAATGTCCATAACCCCACCACCCTCAAGTGCAGACGTTCTTTTTTTTTTTTTTAAATTTA- ATTTCTTTTC         | 35415 |
| Lion        | G- - - - CACTGGGTGTTGTATGGAAACCAATTTGACAGTAAATTTCATATATTAATAAATAAATAAATAA- TTAAAAA            | 36537 |
| Vaquita     | GAACGGTTTACAATTTCTGTTAAGAAAGAAAAAGAAACATAAATTACCAGAATCAGGAATGAAAGTGG- - AGATATCAC             | 32871 |
| Pig         | G- - - - GTTTAAACTCTTATCAA- - - - GAAAAAGAAAGCATAAATTATCAGTATCAGGACTGAAAGTGG- - AGATGGCAC     | 29733 |

| Majority    | AATAXATC- - - CTAXAXAGT- - GTAATACXATAGXXAGAXXTAT- - - - AACATCXGTCATCCTGA- AAACCCA- X- - - - |       |
|-------------|-----------------------------------------------------------------------------------------------|-------|
|             | 44570 44580 44590 44600 44610 44620 44630 44640                                               |       |
| Human       | AAAGTATCAGACAAAATATCAGGAAAAAAATTTGACAAAAGATATGTAAGACATCTACACCAATATGAAACACTGC- - - -           | 38056 |
| PolarBear   | ----- AACTCGTGCC- - - - - A- AAACCTA- - - - -                                                 | 8795  |
| Cow         | TGTCCATGGAATTGTACAGGCAGGAATACTGGAGTGGGTAGCTGT- - - - - TCCCTTCTCCGTGGGATCTTC- - - - -         | 35317 |
| Dog         | ----- AATGTTAGCA- - - - - GA- TCATCTA- - - - -                                                | 34342 |
| BelugaWhale | TACAGATC- - - CTACACAGT- - GTAATAGGACAGAAAGACAGTATCACAAGCATCGGTAATGCTGATAAATTCAGCAACT         | 32310 |
| Donkey      | ----- GCCAGTCTTCCTCACACACATA- - - - -                                                         | 36903 |
| Cat         | AATTTATTGACAAAT- TGGTT- TCCATACAACACCCAGTGCTCATCCC- AAAAGGTGCCCTCCTCA- ATACCCATCA- - C        | 38556 |
| Ferret      | AGTGTAACAGAATTCATTGTT- TATGCACCATACCCAGTGCTCTATGC- AATATGTGCCCTCCATA- ATACCCACCA- - C         | 35490 |
| Lion        | AATAAATAAATAGA- - - GGAT- TTGA- ACAGTGCTGAACATTCAGCTG- GGCTTAACTCACATTCACAAAATATAC- - C       | 36609 |
| Vaquita     | TACAGATC- - - CTACACAGT- - GTAATAGGACAGAAAGACAGTATCACAAGCATCGGTAATGCTGATAAATTCAGCAACT         | 32946 |
| Pig         | AGCAGATG- - - CTACACAGT- - GTAATAGGATAGTGAGATAGTAT- - - - - ATTACTAACATTGGTAAC- - - - -       | 29791 |

Dienstag, 3. Mai 2022 08:39

| Majority    | -----X-----X--X-T-----XCTXATAAAXCAAAXXTG-----T-----A-AXTACAATATTAT               |       |       |       |       |       |       |       |       |
|-------------|----------------------------------------------------------------------------------|-------|-------|-------|-------|-------|-------|-------|-------|
|             | 44650                                                                            | 44660 | 44670 | 44680 | 44690 | 44700 | 44710 | 44720 |       |
| Human       | -----TA-AGAGAAGTTTTAAAAAGACTTACATGAAGACGTAGACCATGTTTCATGAATTAGAAGGCTCAATATGTT    |       |       |       |       |       |       |       | 38126 |
| PolarBear   | -----                                                                            |       |       |       |       |       |       |       | 8795  |
| Cow         | CC-----AGCCCAGGGATCAAACCTG-----GGTTTCCTGCATTGA                                   |       |       |       |       |       |       |       | 35353 |
| Dog         | -----                                                                            |       |       |       |       |       |       |       | 34342 |
| BelugaWhale | TAGGTGAAATAGACAAACTCTTTTATAAATCTAGTGAACCAAATTGATATAATAGATTATCTCTATATTATAATATTAT  |       |       |       |       |       |       |       | 32390 |
| Donkey      | -----CAGAAAAAT                                                                   |       |       |       |       |       |       |       | 36912 |
| Cat         | CCACC----CTCCCCTC--CCTCTCACCCCCCATCAACCCTCAGTTTGTCTCAATTTTTTAACA--GTCTCTTATGCTTT |       |       |       |       |       |       |       | 38628 |
| Ferret      | CAGGC----TCCCCCAA--CCTCCCCTCCCTGCCCTTCAAACCGTCAGATTGTTTTTACAGTCCATAGTCTCTCAT     |       |       |       |       |       |       |       | 35564 |
| Lion        | CTAAC----TGCAGAAAAACTTGTCAAGTGTATATAGCACCATGATCGACTATATATTAGGACATAAAATAATAGATTTT |       |       |       |       |       |       |       | 36685 |
| Vaquita     | TAGGTGAAATAGACAAACTCTTTTATAAATCTAGTGAACCAAATTGATATAATAGATTATCTTTATATTATAATATTAT  |       |       |       |       |       |       |       | 33026 |
| Pig         | -----GCTGATAAATTCAAC-----A-ACGTCAGTAAAAT                                         |       |       |       |       |       |       |       | 29820 |

| Majority    | AGATAXA---TACCTTXAX-TCTXTTATAACAATXXATTTTTTAATAXT-XXX---TXXTTXXXGAAGATTACTC-AX   |       |       |       |       |       |       |       |       |
|-------------|----------------------------------------------------------------------------------|-------|-------|-------|-------|-------|-------|-------|-------|
|             | 44730                                                                            | 44740 | 44750 | 44760 | 44770 | 44780 | 44790 | 44800 |       |
| Human       | AACATGCCAGTTCTCCCTAAATTGGGATGGCATTGAATCTATAAAGACTTATAAA-----TTGAGAGTACATTCTAAAAT |       |       |       |       |       |       |       | 38201 |
| PolarBear   | -----                                                                            |       |       |       |       |       |       |       | 8795  |
| Cow         | AGGCAGA---TTCTTTACTGTCTGAGCCACCAGGAAAGCCCTAAGTTA-----TTTTCCACAAAGATTACTC-AA      |       |       |       |       |       |       |       | 35420 |
| Dog         | -----                                                                            |       |       |       |       |       |       |       | 34342 |
| BelugaWhale | AGATATAGATTACCTTTAT-----TATCAAAATTGAATTTTTAATAATAAAAAACATCTTTTACGGAGATTACTC-AG   |       |       |       |       |       |       |       | 32463 |
| Donkey      | GAAT-----TC---ATGATAAAAAATGTTTC--CACT-----GA---TACTTCGG                          |       |       |       |       |       |       |       | 36950 |
| Cat         | GGCTCTCTCCCCTCTAACCTCTTTTTTTTTTTTTTTTCTTCCCCTCCCCCATGGGTTCTG-TTAAGTTTCTCAGGAT    |       |       |       |       |       |       |       | 38707 |
| Ferret      | GGTTCATCTCCCCTCCAATTTCTCTCAACTCCCTTCTCCTCTCCATCTCCCCTGTCCTCCATGTTATTTCTTATGCT    |       |       |       |       |       |       |       | 35644 |
| Lion        | AAATGACTGAAAGCTCATATAGTATCTGATCATAGTAGAATTTGAATCACCAAATATTTGAAAATTGAACTACACAAT-T |       |       |       |       |       |       |       | 36764 |
| Vaquita     | AGATATAGATTACCTTTATCTCTGTTATCAAAATTGAATTTTTAATAATAAAAAACATCTTTTACGGAGATTACTC-AG  |       |       |       |       |       |       |       | 33105 |
| Pig         | AGTAAA---TACCTTTACATCTGTTATAAAGATGGACTTTTTAGTAAAAA-----TCTTTGCGTGAAGATTACTCCAG   |       |       |       |       |       |       |       | 29892 |



Dienstag, 3. Mai 2022 08:39

| Majority    | GCATAXGTGATTTCACTCXXA- TATGXTAATTACXT- TAGGTGGTTTTACTCAGGCATGGXTGGTTXCACTGTTGAATTT   |       |       |       |       |       |       |       |       |
|-------------|--------------------------------------------------------------------------------------|-------|-------|-------|-------|-------|-------|-------|-------|
|             | 44810                                                                                | 44820 | 44830 | 44840 | 44850 | 44860 | 44870 | 44880 |       |
| Human       | TTATGTGAAATAAAAAGGAGCTAGGACAATTA- - - - AAACCATTTTGAAAAAGTAAATTTTGCCACAGTTCTCAAGAC   |       |       |       |       |       |       |       | 38276 |
| PolarBear   | - - ACAAAGAAG- - - - - A- TATGAGAAAT- - - - - CAAGAT- - - - -                        |       |       |       |       |       |       |       | 8821  |
| Cow         | GCATAGGTGATTTCACTGGTC- AGTGGTTTTCTCTTGAAGGTGGTTTTACTCGGGTATAGGTGGTTTCACTGTTGAATTG    |       |       |       |       |       |       |       | 35499 |
| Dog         | - - ACAA- TATAT- - - - - G- AATGATAATT- - - - - CATGATTAT- T- - - - -                |       |       |       |       |       |       |       | 34372 |
| BelugaWhale | GCATAGGTGATTTCACTCGTA- GGTGGTTTTCACTTGTAGGTGGTTTTACTCAGGCATGGGTGGTTTCACTGTTGAATTT    |       |       |       |       |       |       |       | 32542 |
| Donkey      | GCATGGGTGGTTTCACTCAGG- CATAAGTAAT- - - - - TTCACTCATAGATGGGTGGTTTCACTGTTAAATTT       |       |       |       |       |       |       |       | 37016 |
| Cat         | CCACATAAGAGTGAAACC- - A- TACGGTATCTGTCTTCTCTGTATGGCTTATTTCACTTAGCATCACACTCTCCAGTTC   |       |       |       |       |       |       |       | 38784 |
| Ferret      | CCACAAATAAGTGAAACC- - A- TATGATAATTGGCTTCTCTGCTTGACTTATTTCACTCAGCATAATCTCTTCCAGTCC   |       |       |       |       |       |       |       | 35721 |
| Lion        | CTGAATAATACATGGATTGAA- CATATTAAGGGCATCTTCTGACTGAATGAAAGTGAA- AATATTAATTTGTTGGCT      |       |       |       |       |       |       |       | 36842 |
| Vaquita     | GCATAGGTGATTTCACTCGTA- GGTGGTTTTCACTTGTAGGTGGTTTTACTCAGGCATGGGCGGTTTCACTGTTGAATTT    |       |       |       |       |       |       |       | 33184 |
| Pig         | GCATATGTGATTTCACT- - T- - - - GGCTTCACTCATAGGTGGTTTTACTCAGGCATGGGCGGTTTCACTACTGAATT- |       |       |       |       |       |       |       | 29964 |

| Majority    | TATGAAA- - - - AAAGXAAXAAATAATAXXCATCTTTAACCTTTTTTC- - - - - AGAAAA- - - - - AGAGAAXXXX-      |       |       |       |       |       |       |       |       |
|-------------|-----------------------------------------------------------------------------------------------|-------|-------|-------|-------|-------|-------|-------|-------|
|             | 44890                                                                                         | 44900 | 44910 | 44920 | 44930 | 44940 | 44950 | 44960 |       |
| Human       | TCACTAC- - - - AACCTGTAGTTAATCCAAAACAGTTTACTACTAGC- - - - - ATAGTTAGTGACACAGAATAGCGT          |       |       |       |       |       |       |       | 38343 |
| PolarBear   | - - - - - TTGAAAC- - - - - TAATATTT-                                                          |       |       |       |       |       |       |       | 8836  |
| Cow         | TATGAAA- - - - TGTCAAAGAAATAATAGCCATCTTTAACCTTTT- - - - - AGACAA- - - - - AGAGAAGAA- - -      |       |       |       |       |       |       |       | 35555 |
| Dog         | A- - - - - ATTGAAGC- - - - - TTACC- - - - - CAAGGA- - - - - TTATAAGGTAT-                      |       |       |       |       |       |       |       | 34403 |
| BelugaWhale | TATGAAACTTCAAAGTAAGAAATAATAGCCATCTTTAACCTTTTTT- - - - - AGAAAA- - - - - GGAGAAGGG- - -        |       |       |       |       |       |       |       | 32604 |
| Donkey      | TATGAAACTTGAAAGTAAGAAATAATAATCTTCAGTATACATTTTT- - - - - AGAAAA- - - - - TAGAGAAACGG           |       |       |       |       |       |       |       | 37079 |
| Cat         | CATCCAC- - - - GTTGCTACAAAAGGC- - - CATATTTCATTTTTTCTC- - - - - ATTGCC- - - - - ACGTAATATTCC  |       |       |       |       |       |       |       | 38842 |
| Ferret      | CTTCCAT- - - - GTTGATACAAAAAGTT- - - GGGTATTCATCCTTTCTG- - - - - ATGGAG- - - - - GCATAATACTCC |       |       |       |       |       |       |       | 35779 |
| Lion        | CATTTGA- - - - GAAAGTACATGGGAAAATACGTCTATGTATATACC- - - - - CATATT- - - - - AGAAAATACCTA      |       |       |       |       |       |       |       | 36903 |
| Vaquita     | TATGAAACTTCAAAGTAAGAAATAATAGCCATCTTTAACCTTTTTT- - - - - AGAAAA- - - - - AGAGAAGGG- - -        |       |       |       |       |       |       |       | 33246 |
| Pig         | TTTGAAC- - - - AAAGTTAGAAATGATAGCCATCTTTAACCTTTTTTTTTTTTTTTTGTAGAAAATACAGAAGGGAAGAAAAT        |       |       |       |       |       |       |       | 30040 |

Dienstag, 3. Mai 2022 08:39

|             |                                                                                                     |       |       |       |       |       |       |       |
|-------------|-----------------------------------------------------------------------------------------------------|-------|-------|-------|-------|-------|-------|-------|
| Majority    | - - - - - TTXCTCACTAAXTCAXTTTATXAAGCTACCGAAAX- - - AAXCTAACXAAGTTAATATAAGAAAT- - - XTT              |       |       |       |       |       |       |       |
|             | 44970                                                                                               | 44980 | 44990 | 45000 | 45010 | 45020 | 45030 | 45040 |
| Human       | - - - - - TCAGGGAATAACTCATGCATTAAAGTTGCCTTGAT- - - CACTCAGTGAAGAAAGAGAAGGCCTT- - - TCA 38407        |       |       |       |       |       |       |       |
| PolarBear   | - - - - - TTCATTAA- - - - - 8844                                                                    |       |       |       |       |       |       |       |
| Cow         | - - - - - TGCTCTTTAATTCACTTTATGAAGCTACTGAAAT- - - AATCTAACAAAGATAATATAAGAAATACAGATT 35622           |       |       |       |       |       |       |       |
| Dog         | - - - - - ATTTA- GAAATTGAACTG- - - - - 34420                                                        |       |       |       |       |       |       |       |
| BelugaWhale | - - - - - GGATACTCCCTAATTCACTTTATGAAGCTACCAAAACCAAATATAACAAAGATAATATAAGAAATCAGGATT 32677            |       |       |       |       |       |       |       |
| Donkey      | GGTACTCCCTGGTTCACTTTGTGAAGCTATACTATAACTGACACCAAACCTAACAAAGATAATATAAGAAATGAAGTTT 37159               |       |       |       |       |       |       |       |
| Cat         | - - - - - ATTGTGTATA- - - - - TAAACCACAATTTCTTTAT- - - CCATTCA- TCAGTTGATGGACA- - - - - TTT 38895   |       |       |       |       |       |       |       |
| Ferret      | - - - - - ATAGTGTATAGTGTATATGGACCACATCTTCCTTAT- - - ACATTCA- TCCGTTGAAGGGCATCTTGGTTCCC 35847        |       |       |       |       |       |       |       |
| Lion        | - - - - - CTTTAGAAAA- - - - - AGCTTTAGAGGTGCCTGAG- - - TGGCTCAGTCAGTTAAGCATCAAAC- - - - - TCT 36960 |       |       |       |       |       |       |       |
| Vaquita     | - - - - - GGATACTCCCTAATTCACTTTATGAAGCTACCAAAACCAAATCTAACAAAGATAATATAAGAAATCAGGATT 33319            |       |       |       |       |       |       |       |
| Pig         | GGGGGGGGGCACTTGCTAATTCACTTTATAAAGCCACTGAAACCAAATCTAACAAAGGTAATACAAGAAATCAAAT 30120                  |       |       |       |       |       |       |       |

|             |                                                                                                |       |       |       |       |       |       |       |
|-------------|------------------------------------------------------------------------------------------------|-------|-------|-------|-------|-------|-------|-------|
| Majority    | TCACACT- AATATTTTTTCATGAACATAAATGCAGACATTCTTAACAAAATXTTAGCAAATCACAT- TCAGCAGTATGTA-            |       |       |       |       |       |       |       |
|             | 45050                                                                                          | 45060 | 45070 | 45080 | 45090 | 45100 | 45110 | 45120 |
| Human       | ACAGATGTGCTAGAACAGCTGAATATACATACAAAAAAGC- - AAAAGAACTTAA- - - ACCCTACATCA- TTCTGTATAA 38481    |       |       |       |       |       |       |       |
| PolarBear   | - - - - - CATAAATTCAGACATTCTTAACAAAGTGTTAG- - - ATCACAT- CTGGCAATATGTA- 8896                   |       |       |       |       |       |       |       |
| Cow         | TCACACT- AATACTTTTTCATTTACATAAATGTGGACATTCTTCACAAGATATTAGCAAATCACAT- TCAGCAGTATGTA- 35699      |       |       |       |       |       |       |       |
| Dog         | - - - - - CATAATTCTGAACAACACATAAAGAAGATAAAAAGGGTAACTTTCTGACTGAATGAA- 34476                     |       |       |       |       |       |       |       |
| BelugaWhale | TCACACT- AACATTTTTTCATTAACATAAATGCAGACATTCTTAACAAGATATTAGCAAATCACTT- TCAGCAGTATGTA- 32754      |       |       |       |       |       |       |       |
| Donkey      | TCAGACTTAATATTTTTTCATTAATGTAATGCAGACGTT- - TAACAAAATGCTGGCAAATCACATCC- - - - - TATATA- 37230   |       |       |       |       |       |       |       |
| Cat         | AGGCTCT- TTCCATAATTTGGCT- - - ATTGTTGAGAGTGCTGCTATGAACATTGG- - - GGTACAAGT- GGCCCTATGCAT 38967 |       |       |       |       |       |       |       |
| Ferret      | TCCACAG- TTTGGCCACCGTGGCCATAAATGCAGACATTCTTAACAAAATGTTAGCAGATTACAT- CCAGCAATATGTA- 35924       |       |       |       |       |       |       |       |
| Lion        | TGATTTT- GGCTCAGGTCAGGATCTCATGGTTTCAGGAGTTCAAGCCTTGTGTGAG- - - GTTCTACGTTGACAGTGTGGAT 37036    |       |       |       |       |       |       |       |
| Vaquita     | TCACACT- AACATTTTTTCATTAACATAAATGCAGACATTCTTAACAAGATATTAGCAAATCACTT- TCAGCAGTATGTA- 33396      |       |       |       |       |       |       |       |
| Pig         | TCATAGT- AATATCTTTTCATGAACATAAATACAGGTGTTTCGTAACAAGATGTTAGCAAATCACAT- CCAGCAGTACATG- 30197     |       |       |       |       |       |       |       |

Dienstag, 3. Mai 2022 08:39

| Majority    | AAAGATAATTC- ATGATGACTAATTGAGGCTTACCTCXTGATTGTAAGGTT- TAACATTT- GAAAATGAAXTCA- - XTAT    |                                          |                              |       |       |       |       |       |  |
|-------------|------------------------------------------------------------------------------------------|------------------------------------------|------------------------------|-------|-------|-------|-------|-------|--|
|             | 45130                                                                                    | 45140                                    | 45150                        | 45160 | 45170 | 45180 | 45190 | 45200 |  |
| Human       | AACAATGAGATTA- -                                                                         | ATTATATAAAAACTAATATATAGAGTTTTTAGGAA- - - | AAAGCATAGGATATACTTGCAA- CTTT | 38555 |       |       |       |       |  |
| PolarBear   | AATGATAATTC- ATGATTATTAATTGAGGCTTACGTGAGGATTGTAAGGTT- TAACATTAAGCAAGTGAAGTCA- - GTAT     | 8972                                     |                              |       |       |       |       |       |  |
| Cow         | AAAGATAATTC- ATGATGACTAATTGAGATTTACCCCTTGATTGTAGGGTT- TATCAGTG- GCAAATGAAGTCT- - ACAT    | 35774                                    |                              |       |       |       |       |       |  |
| Dog         | AGTGAAAAGGGTA- ACTTTCTGACTGAA- TGAAAGTGAAAAGGGTAACCTTTCTGACTGAATGAAAGTGAAAATA- - TATC    | 34552                                    |                              |       |       |       |       |       |  |
| BelugaWhale | AAAGGTAATTC- ATGATGACTAATTGAGGCTTACCTCTTGATTGTAAAAT- - - AACAGTC- GAAAAGGAATTCA- - GTGT  | 32827                                    |                              |       |       |       |       |       |  |
| Donkey      | AAAGATAATTC- ATGATGACTGACTGAG- AGTACCCAGGATTGTAAAGTTTTAATATTT- GAAAATGAATTCAAATTAT       | 37307                                    |                              |       |       |       |       |       |  |
| Cat         | CAGTACTCCTGTA- - - - - TCCCTTGGATAAATTCCTAGCAGTGCTATTGCTGGGT CATAGGGTAGGTCTATTTT- - TAAT | 39040                                    |                              |       |       |       |       |       |  |
| Ferret      | AATAATAATTCGATAATTATTAATTGAGGCATACTGGAGGATTGTAAGTTT- TAACATTT- GCAAGTGAAGTCA- - GTAT     | 36000                                    |                              |       |       |       |       |       |  |
| Lion        | GGAGCCTGCTTGAGATTCTCTCTCTCCCTGTCTGTCTGCCCTCCGCTGCTTGTGCATATGTATGCTCTCCTTG- - TCTC        | 37114                                    |                              |       |       |       |       |       |  |
| Vaquita     | AAAGGTAATTC- ATGATGACTAATTGAGGCTTACCTCTTGATTGTAAGGTT- TAACAGTC- GAAAAGGAATTCA- - GTGT    | 33471                                    |                              |       |       |       |       |       |  |
| Pig         | AGTGATAATTT- GTGATGACTGATTGAGGCTTACCCCTTGATGGTGAGGTT- TAGCAATT- GAAGATGAAGTCA- - CTGT    | 30272                                    |                              |       |       |       |       |       |  |

| Majority    | AATTTA- - TCACAA- - TAATAGAATAAAGG- - - - - - AGGAAAAAAATCAT- - - GTTAATAGAAGCAGXAAAAX- GCA      |       |       |       |       |       |       |       |  |
|-------------|--------------------------------------------------------------------------------------------------|-------|-------|-------|-------|-------|-------|-------|--|
|             | 45210                                                                                            | 45220 | 45230 | 45240 | 45250 | 45260 | 45270 | 45280 |  |
| Human       | GGGATAAATGAAGATTTCTTAAAATAGAAAAATCTTAAAGGAATATATAAACTTGACTCCATCAAATGGGAAATTTCTG                  | 38635 |       |       |       |       |       |       |  |
| PolarBear   | AATTTA- - TCACAA- - TAATAGAATGAAGGTGCGGGTGGGGGGGAATCAT- - - GTCACTAGAAGGAT- AAAAA- GCA           | 9043  |       |       |       |       |       |       |  |
| Cow         | AAT- - - - - CACAG- - TAATAGAATAACAG- - - - - - - AGGGGAAAAAATCATCCAGTTAATAGAAGCAGAAAAA- - GCA   | 35836 |       |       |       |       |       |       |  |
| Dog         | AGTCTAATTTATAA- - TAATAGAATGAAGG- - - - - - - AGAAAAAATCAT- - - TTTAATAGAAGGAA- AAAAA- GCA       | 34615 |       |       |       |       |       |       |  |
| BelugaWhale | AATTTA- - TCACAA- - TA- - - GAATAACGG- - - - - - - AGAAAAAGAATCATCATGTTAATAGAAGCAGAAAAG- - GCG   | 32890 |       |       |       |       |       |       |  |
| Donkey      | AATTTA- - TCACAA- - TGAGAGACTAAAGG- - - - - - - AGAAAAGAACATTCT- - - ATCAATAGAAGCAGGAAAA- - GCA  | 37370 |       |       |       |       |       |       |  |
| Cat         | TTTCTGAGGAAC- - - - CTCCACACTGCTTTCCAGAGCGGCTGCACCAATTTGC- - - ATTCGCACCAACAGTGCAAG- AGG         | 39112 |       |       |       |       |       |       |  |
| Ferret      | AATTTA- - TCACAA- - TAATAGAATGAAGA- - - - - - - AGAAAAAATTTTTCAT- - - GTCAATAGAAAGAG- AAAAA- GCA | 36063 |       |       |       |       |       |       |  |
| Lion        | TCTCAAATAAGCATTTTTTTTTAAAAAGTTTAAATCTGTCAAGAAAAGAAAGCTAT- - - ATTACCAATATCAG- GAATG- AAA         | 37189 |       |       |       |       |       |       |  |
| Vaquita     | AATTTA- - TCACAA- - TA- - - GAATAATGG- - - - - - - AGAAAAAGAATCATCATGTTAATAGAAGCAGAAAAG- - GCA   | 33534 |       |       |       |       |       |       |  |
| Pig         | AATTTA- - TCACAG- - TAGTGGAATAAAGG- - - - - - - AGGAAGAAAAATCAT- - - GTTAATAGAAGCAGAAAAA- GCA    | 30336 |       |       |       |       |       |       |  |

Dienstag, 3. Mai 2022 08:39

| Majority    | TTTGACAAAA- - TACAGCATCCATTTCATGATAAAAAXTTCTCAGAAAAGCTAGCAAGA- TAAGGGAAGCTTCCACAAGGTAX    |       |       |       |       |       |       |       |       |
|-------------|-------------------------------------------------------------------------------------------|-------|-------|-------|-------|-------|-------|-------|-------|
|             | 45290                                                                                     | 45300 | 45310 | 45320 | 45330 | 45340 | 45350 | 45360 |       |
| Human       | CTTCATCAAAA- GACATTGTTAAGACATTGAAAAGACAAGGCACAGACTTGGAGAATATAATATTTGTGTATCAATACAT         |       |       |       |       |       |       |       | 38714 |
| PolarBear   | TTTGATAAAA- - TACAGCATTTCATTTCATGATAAAAATCTCTCAGATAACTAGCAAGG- TAAGGGAAGCTTCCACAAGGTGT    |       |       |       |       |       |       |       | 9119  |
| Cow         | TTTGACAAAAAATACAGCATCTACTCATGGTAAAAAGTTCTCAGAAAAGCTAACAAAGA- AAAGGGACCTTCTGCAGGATAC       |       |       |       |       |       |       |       | 35915 |
| Dog         | TTTGATAAAA- - TACAACATTTCATACATGATAAAAAGTCTTCCAGA- AGCTAGCAAGAATAAAGGAAGCTTTCACAACGTG-    |       |       |       |       |       |       |       | 34691 |
| BelugaWhale | TTTGACAAAAA- TACAGCATCCATTTCATGATAAAAAGTTCTCAGAAAAGCTAATAAGA- AAGGGGAAGCTTCTACAGGGTAG     |       |       |       |       |       |       |       | 32968 |
| Donkey      | TTTGACAAA- - TACAGCATGCATTTCATGATCAAAATCTCTCAGAAAAGCTAGCAAGG- GAAGGGAAGCTTCCACAAGG- - -   |       |       |       |       |       |       |       | 37443 |
| Cat         | GTTCCCGTTT- - CTCCACATCCTCTCCAGCATCTA- - TAGTCTCCTGATTTGTTT- - ATTTTGGCCACTCTGACTGGTGTG   |       |       |       |       |       |       |       | 39187 |
| Ferret      | TTTGATAAAA- - TACAATTTTTCATTTCATGATAAAAATCTC- - AGAAAAGCTAGCAAGA- TAAGGGAAGCTTCCACAAGGCG- |       |       |       |       |       |       |       | 36136 |
| Lion        | GTAGAGGTAC- - CACTACAGATCCTACAGAAAGCTAACTGGAAAATAAGGCAGTACTGCAAAGAGTAGTAATACCAATAAA       |       |       |       |       |       |       |       | 37267 |
| Vaquita     | TTTGACAAAAA- TACAGCATCCATTTCATGATTAAGTTCTCAGAAAAGCTAATAAGA- AAGGGGAAGCTTCTACAGGGTAG       |       |       |       |       |       |       |       | 33612 |
| Pig         | TTTGACAAAAA- CATAGCATCCATTTCATGAGAAAATGTAATCAGAAAAGCTTA- - - - - GCAAGGAGTTCCCGTCGTG- GC  |       |       |       |       |       |       |       | 30408 |

| Majority    | ACATGAGGCXTXTATT- - - - AAGAGCCTAAAACAAA- - TTCCATTCT- XATXXTGA- - AATATTGAATGTTTTX- - - - T     |       |       |       |       |       |       |       |       |
|-------------|--------------------------------------------------------------------------------------------------|-------|-------|-------|-------|-------|-------|-------|-------|
|             | 45370                                                                                            | 45380 | 45390 | 45400 | 45410 | 45420 | 45430 | 45440 |       |
| Human       | GCATATGAC- - - - - T- - - - - GTATTAGTCCATTTTCATGCTGCT- GATAAAGA- - CGTACCCGAGACTGGGCGGGC        |       |       |       |       |       |       |       | 38777 |
| PolarBear   | GAATAAGGGGCGTCT- - - - - AAGAGCCTAAAACAAA- - TTCCAATATTTAAT- - - GA- - AGTATTGAATGTTTTC- - - - T |       |       |       |       |       |       |       | 9183  |
| Cow         | ACA- GAGGGATCTACT- - - - AAGAGCCTACAACAAA- - TTTCATTTCGT- GATAATGG- - AACACTGAATATTTTC- - - - T  |       |       |       |       |       |       |       | 35981 |
| Dog         | - AATAAGGTGCACCTTATCAAAGAGACTAAAACAA- - TTCCATTCTTTTATGGTAA- - AATATTGAATATTTTC- - - - T         |       |       |       |       |       |       |       | 34761 |
| BelugaWhale | ACAAGGGGCATCTACT- - - - AAGAGCCTACAATAAA- - TTTCATTTCAT- AATGGTGA- - AATATTGAATGTTTT- - - - T    |       |       |       |       |       |       |       | 33034 |
| Donkey      | - - - - - TTTCC- - - AGC- - T- - - - TTTTGCTTACCTT- - - - -                                      |       |       |       |       |       |       |       | 37466 |
| Cat         | AAGTGATACCTGAGTG- - - - - TGGTTTTGATTTGT- - - - - ATTTCCCTGATAAGGAGCGACGCTGAACATCTTT- - - - T    |       |       |       |       |       |       |       | 39252 |
| Ferret      | - AATAAAGGTCTAAT- - - - - AAGAGCCTAAAACAAA- - TTCCATTCTTTAATAGTGA- - AATACTGAATGTTTTT- - - - T   |       |       |       |       |       |       |       | 36202 |
| Lion        | TTCAGCAACCTAGGTGA- - - TATAGACAAGATCCTTCACAAACCTAACTTACTAAAAGCTGACATGAAGTGTACT- - - - C          |       |       |       |       |       |       |       | 37340 |
| Vaquita     | ACAAGGGGCATCTACT- - - - AAGAGCCTACAATAAA- - TTTCATTTCAT- AATGGTGA- - AATATTGAATGTTTTCTTTTT       |       |       |       |       |       |       |       | 33683 |
| Pig         | GCA- GTGGT- - - - - TA- - ACGAA- - TCCGACTAG- - GTTGCGGG- - TTCAGTCCCTGTCCTT- - - - G            |       |       |       |       |       |       |       | 30457 |

Dienstag, 3. Mai 2022 08:39

| Majority    | CTTTAA- - AAATAGGAATGAAGTA- A- GGATGTCTATTTTCAXAATXTTXXC- AGCTXT- TGCTTACATTAAGGXATGTAX   |       |
|-------------|-------------------------------------------------------------------------------------------|-------|
|             | 45450 45460 45470 45480 45490 45500 45510 45520                                           |       |
| Human       | AATTTATGAA- - AGAAACCAGTTTAAATGAATTTACAATTCTATGTGACTGGGGAAGCCTCATAATCATGGTGAAGGCAA        | 38855 |
| PolarBear   | CTTTAA- - AAACAGGAATGAGGTA- AAGGATGTCTGTTTTCACAAATTTCCAGCTTTTTGCTTACATTAGGGCAAGTAG        | 9260  |
| Cow         | TCTTAA- - AATTAGGAATGAAGT- - AAGGATGTGTCTTCCCTGAATATTTCTAGCTTT- TACTTTCTTTAAGGCAAGTAA     | 36056 |
| Dog         | CTTGAA- - AAACAGGAATGAAGTA- AGGATATTCTGTTTTCACAAATTTCCAGCTTCTTGCTTGTATTAGGGCAAGTAG        | 34838 |
| BelugaWhale | TTTTCC- - ACTTTAAATTCAATTTTATTGAGGTATAATTTCCGTACA- - - - -ATAAAT- TGCATCCATTTAA- ATTGTAC  | 33105 |
| Donkey      | - - - - - GAGGTAAGTAAA- - - ATATTACCTTAGGTAA- - - - - ATATTACTAAAGGTAA                    | 37510 |
| Cat         | CATG- T- - GCCTGTTGGCCATCCG- G- - - ATGTCTTCTTTAGAGAAGTGTCTATTCATGTTTTTC- TGCCCATTTCTTCAC | 39324 |
| Ferret      | CTTGAATTAACAGGAATGAAGTA- A- GAATTTCTGTGTTTACAATTTTCCAACCTTTTTGCTTACATAAGTGCATGTAG         | 36280 |
| Lion        | CATAAT- - ATATACAGATTAGCTC- T- - - ATGTCTATTATAAAAATTAGATTAGTAATCTTCTCACAAAGATTACTCCAG    | 37414 |
| Vaquita     | TTTTCC- - ACTTTAAATTCAATTTTATTGAGGTATAATTTCCATACA- - - - -ATAAAT- TGCATCCATTTAA- ATTGTAC  | 33754 |
| Pig         | CTC- - - - - AGTGGGTT- - AACGATCCGGCGTTGCCGTG- - - - - AGCTGT- AGTGTAGGTT- - G- CAGGTAC   | 30512 |

| Majority    | AGTA- - - - - AXXA- CATAAACTTAGAAAGGXAGAAGTAAAAGTGTCTTATTGAGAGTCAACATATT- - TTTTATXTTAG         |       |
|-------------|-------------------------------------------------------------------------------------------------|-------|
|             | 45530 45540 45550 45560 45570 45580 45590 45600                                                 |       |
| Human       | GGAGGAGCAAGTCACATCTTACGTAGATGGCAACAGGCCAAAGAAAAGAGAGCTTGTGCGGGGAAACT- - CTCCCCTTTTT             | 38933 |
| PolarBear   | AATA- - - - - AAAAGCATAAAGTTTAAAAA- - - AGAAGTAAAAGTATCTTATTCACAGTCAACATTTTTTTTTTTTT            | 9332  |
| Cow         | AATAA- ATAAAAAGCATAAAGTTTAAAGGAAGAAGTAAAAGTGTCTTATTCATAGTCAACATGAT- - TTTTAAATAG                | 36133 |
| Dog         | AATA- - - - - AAA- - TACAAAAGTAAATGGAAGAAATAAAAAGTATCTTATTCACAA- CATGGTTTT- - - CATTTTTTTG      | 34907 |
| BelugaWhale | AGTCAGATAAGTATTGAAAGATGTATACACTCATGAAATCA- CTGACAGTCAAATATATATCCATC- - ACACATACTAG              | 33182 |
| Donkey      | AG- - - - - CATAAATATTGGAAA- - - - - AGACTGTCTTATTCATAGTCAACATGAT- - TTTTAAACAG                 | 37566 |
| Cat         | - - - T- - - - GGGT- TATTTGTTTTTTCGGGTGTGGAGTTTGGTGAGCTCTTTATAGATTTTGGATACT- AGCGCTTTGTCT       | 39394 |
| Ferret      | AATA- - - - - AAACCATAAATATTA AAAAGGTAGAAGTCAAAGTCAACTATCTTATTCACAGTCAGCATTTT- - GTTTTTATTT     | 36353 |
| Lion        | GCGT- - - - - AGGT- GATTTCACTCATAGGTG- - - AGTTTACTCAGATATGGGTGGTTTC- - - - - ACT- GTTGTATTTTAT | 37479 |
| Vaquita     | AGTCAGATAAGTATTGAAAGACGTATACACCCATGAAATCA- CTGACAGTCAAATATATATCCATC- - ACACATACTAG              | 33831 |
| Pig         | AGTT- - - CGGATCCCGTGTTGCT- - GTGGCTCTGGCGTAGG- CCGGACGCTACAGCTCCGATTGGAC- - CCCTAGCCTGG        | 30584 |

Dienstag, 3. Mai 2022 08:39

| Majority    | GAAACTCAA- - - - - TGTCTTATATXACTGTXXXATXXXXTXXXT- - - AATTACAAAXA- - - - - AXT       |       |       |       |       |       |       |       |       |
|-------------|---------------------------------------------------------------------------------------|-------|-------|-------|-------|-------|-------|-------|-------|
|             | 45610                                                                                 | 45620 | 45630 | 45640 | 45650 | 45660 | 45670 | 45680 |       |
| Human       | AAAACCATGA- - - - - GACTTACTTCACTGTCACGAGAACAGCATTGGAAAGACCTGCCCCCATGATTCAGTTA        |       |       |       |       |       |       |       | 39001 |
| PolarBear   | GAAATTGAGT- - - - - TTATTTGTAT- - - - - AATTACAGAGA- - - - - AGT                      |       |       |       |       |       |       |       | 9366  |
| Cow         | AAAACTCAAAGGAATCCAGGTGATTTTTTAGAACAGATACAGGATACAGTTCA- ACATACAAAGATAGTTTTTCTGATA      |       |       |       |       |       |       |       | 36212 |
| Dog         | GAAATTGAAT- - - - - TATTTTATAG- - - - - AATTACAAGTA- - - - - TAG                      |       |       |       |       |       |       |       | 34941 |
| BelugaWhale | ATTCCTCATAGCCCTTT- - GTAGCCATCCCTTCTGTTTTATCCCCTTTCC- - - AATCACTGATCT- GCTTTTTGTCACT |       |       |       |       |       |       |       | 33256 |
| Donkey      | AAAACCCAAA- - - - - GGAATCT- - - - - ACAA- - - - - AGT                                |       |       |       |       |       |       |       | 37590 |
| Cat         | GATATGTCAT- - - - - TTGCGAATATCTTTTCC- CATTCCGTTGGTTGCCTTTT- - - - - A- - - - - GTT   |       |       |       |       |       |       |       | 39445 |
| Ferret      | GAAATTGAGT- - - - - TTAATTTTATTATATTTATTACATTTGTTTATTAATTACAGAGA- - - - - AGT         |       |       |       |       |       |       |       | 36410 |
| Lion        | GAAACTTCAA- - - - - AGTAGGAAATAATAGCCATCTTCAGTATACTGCTTTTAGAAAA- - - - - GAG          |       |       |       |       |       |       |       | 37536 |
| Vaquita     | ATTCCTCATAGCCCTTT- - GTAGCCATCCCTTCTGTTTTATCCCCTTCCC- - - AATCACTGATCT- GCTTTTTGTCACT |       |       |       |       |       |       |       | 33905 |
| Pig         | GAACCTCCAT- - - - - ATGCCGTGGGAGCGGCCCAAGAAATAGCA- A- AAAGACAAAA- - - - - ACA         |       |       |       |       |       |       |       | 30638 |

| Majority    | ATX- - - - XAGTTTC- - - - - TAXC- XACTTXXAATACTACA- - - - - XTACG- - - - -                                |       |       |       |       |       |       |       |       |
|-------------|-----------------------------------------------------------------------------------------------------------|-------|-------|-------|-------|-------|-------|-------|-------|
|             | 45690                                                                                                     | 45700 | 45710 | 45720 | 45730 | 45740 | 45750 | 45760 |       |
| Human       | ACTCCCACCAGGTCCCTCCCACAACACATGGGAATTC AAGAGG- AGATGTGGGTGGGGACACAGCCAAACCATATCAATG                        |       |       |       |       |       |       |       | 39080 |
| PolarBear   | GTAG- - - ATGCTTC- - - - - TGGC- - AGTTCACGATACTACA- - - - - TAGG- - - - -                                |       |       |       |       |       |       |       | 9401  |
| Cow         | GTCTTAGCAAATTTTTGGACAATGAACTTTTTAAAAATCCATTTATGGAAACTTT- - - - - AG- AAAGAAAAAATATCAAG                    |       |       |       |       |       |       |       | 36286 |
| Dog         | AT- - - - - GTTTC- - - - - TGGC- - AGTTCACAATATTTCA- - - - - TACG- - - - -                                |       |       |       |       |       |       |       | 34972 |
| BelugaWhale | ATTA- ATTAGTTTGAATTCTATAGAATTTTGTATAAACAGAATCATGTA- - - - -                                               |       |       |       |       |       |       |       | 33306 |
| Donkey      | GT- - - - - TTGGTAGA- - - - - GTAAG- T- - - - -                                                           |       |       |       |       |       |       |       | 37610 |
| Cat         | TTGT- - - TGGTTGT- - - - - TTCC- - - - - TTTGCTGTGCAGAAG- - - - - CTTT- - - - -                           |       |       |       |       |       |       |       | 39479 |
| Ferret      | GT- - - - - GTTTC- - - - - TGGC- - AATTCACAGTACTGCA- - - - - TATG- - - - -                                |       |       |       |       |       |       |       | 36441 |
| Lion        | AAGC- - - AGAGTAT- - - - - ACTCCAAATTCACCTTTGTGATGC- - - - - TGCT- - - - -                                |       |       |       |       |       |       |       | 37574 |
| Vaquita     | ATTA- ATTAGTTTGAATTCTATAGAATTTTGTATAAACAGAATCATGTA- - - - - GAATTCTATAGAATTTTGTATAAACAGAA                 |       |       |       |       |       |       |       | 33984 |
| Pig         | AAC- - AACAAC- - - - - AACAAAAA- - - - - AATAAGAA- - - - - A- - - - - GGAAACTT- - - - - GTATAAGGTAGACAAGG |       |       |       |       |       |       |       | 30693 |

Dienstag, 3. Mai 2022 08:39

| Majority    | ----- A----- TATTTGG- - TTATTATATTXAAATAACTGACTTTX- - - TATAAAAXTGATTTGC- - - - - ATTTGTX    |       |       |       |       |       |       |       |       |
|-------------|----------------------------------------------------------------------------------------------|-------|-------|-------|-------|-------|-------|-------|-------|
|             | 45770                                                                                        | 45780 | 45790 | 45800 | 45810 | 45820 | 45830 | 45840 |       |
| Human       | ACAAAGGACTTGTATCCCAAAGGACTTGTAAAAAATAACTCCTCCAATCAATAAATATGAGCAGC- CC- - - AATTTTTT          |       |       |       |       |       |       |       | 39156 |
| PolarBear   | ----- G----- TATTTGG- - TTCCTATTTTTAAATATCTGACTTTG- - - TATAAACTTGCTATTC- - - - - GACTCT-    |       |       |       |       |       |       |       | 9457  |
| Cow         | AAATTTAACAAAAAGTTGCATGTGTTATACTAAGGAGACTGAACTTT- - - TTTAGAAAAGATTTACACTT- TAGAAAGGA         |       |       |       |       |       |       |       | 36362 |
| Dog         | ----- G----- TATTTGG- - TTGCTATACTTAAATATCTGACTTTG- - - TACAAACCTGCTTTTC- - - - - AGCTCTT    |       |       |       |       |       |       |       | 35029 |
| BelugaWhale | ----- ATGTA CTCTTCTGTGTTGTACTGCTTTCACTTCCTTTCTTTACTGCTGAGTAGTGTTTGCATCTTGTT                  |       |       |       |       |       |       |       | 33377 |
| Donkey      | ----- GAATT- - - - TCAATGGTTACAAGATACAAGTTCAATATACAAAATAAATTGT- - - - - TTCCTGA              |       |       |       |       |       |       |       | 37667 |
| Cat         | ----- T----- TATCT- - - - TCATAAGGTCCCAGTAATTCACCTTTT- - - GCTTTAATTCCCTTGC- - - - - CTTTGGG |       |       |       |       |       |       |       | 39534 |
| Ferret      | ----- A----- TATTTGG- - TTACTATTTTTAAATATCTGACTTCG- - - TATTA ACTTGCCATTC- - - - - AACT- - - |       |       |       |       |       |       |       | 36495 |
| Lion        | ----- A----- TAACTGATACCAGAGGATATAAGAAATCAAGATTT- - - CAAACCAATATTTTTTC- - - - - ATTAACA     |       |       |       |       |       |       |       | 37633 |
| Vaquita     | TCATGTA CTATGTA CTCTTCTGTGTTTACTGCTTTCACTTCCTTTCTTTACTGCTGAGTAGTGTTTGCATTTTGT                |       |       |       |       |       |       |       | 34064 |
| Pig         | GACGTCTACAAGAAATTTTCATTCATAATGGCAA- ATACTGAATTCC- - - TTTAATCAGGATGA- - - - - AGTAAGGA       |       |       |       |       |       |       |       | 30762 |

| Majority    | TATTTGTTX- - - - - XGTAATTTTTT- - - - - AXA- - AAATGTAAATTAACTAATXAXAGXX- - - -        |       |       |       |       |       |       |       |       |
|-------------|----------------------------------------------------------------------------------------|-------|-------|-------|-------|-------|-------|-------|-------|
|             | 45850                                                                                  | 45860 | 45870 | 45880 | 45890 | 45900 | 45910 | 45920 |       |
| Human       | TTTAAGTGGCAAAGAAGTGACATTATAAGGATGGGTAACAAGCACATGAAAAGATAATGTTAGTCATCAGGTGATCACA        |       |       |       |       |       |       |       | 39236 |
| PolarBear   | - ATTTGCTA- - - - - TGTAATTTCT- - - - - TT- - - AAATGCAACTTATGTAAGTT- - - - -          |       |       |       |       |       |       |       | 9498  |
| Cow         | TTTTTGTCTGT- - TTGGTGGTTTTTTT- - TTTTTTTTTTTAGAAAGGC- AGAGGCAAATTGGAGATATCAGGGTCTTAA   |       |       |       |       |       |       |       | 36437 |
| Dog         | TATTTGCTA- - - - - TGTAATTTTTT- - - - - A- - - - AAATTTAAATTCAACTAATGTAAGTT- - - - -   |       |       |       |       |       |       |       | 35076 |
| BelugaWhale | TATTCATTCAGCCATTGATGGACACTTAAGTCATTTCCCTTTGGGGAC- TATTATGAGTAAA ACTGTTAGGAGCAATCAT     |       |       |       |       |       |       |       | 33456 |
| Donkey      | TATTGGTA- - - - - GCAAATTATT- - - - - GGAAAATGAAATTTTTAAAC- - - - -                    |       |       |       |       |       |       |       | 37705 |
| Cat         | GATGTGTTG- - - - - AGTAAGAGATT- - - - - GCTG- CAGCTGAGGTGAGAGGTCTTTTCC- - - - -        |       |       |       |       |       |       |       | 39584 |
| Ferret      | - ATTTGCTA- - - - - TGTAATTTTTT- - - - - AA- - - AAATTTAAATTCAACTAATTTA- - - - -       |       |       |       |       |       |       |       | 36538 |
| Lion        | TAAATGCAG- - - - - ATATTCTTAAC- - - - - AAAA- TGTTAGATTTTAGAATTATCATTTGT- - - - -      |       |       |       |       |       |       |       | 37683 |
| Vaquita     | TATTCATTCAGCCATTGATGGACACTTAAGTCATTTCCCTTTGGGGAC- TATTATGAGTAAA ACTGTTAGGAGCAATCAT     |       |       |       |       |       |       |       | 34143 |
| Pig         | TATCTGCT- - - - - TCCGCAATTTTTT- - TTCTACCTTTTGCTTACAT- TAAGGCAAGCAAATAAATAAAAAGCATAAA |       |       |       |       |       |       |       | 30833 |

Dienstag, 3. Mai 2022 08:39

| Majority    | AGTTAACAX- - TAAXGTGTAGXAT- - - - - T- - TGTTTCAX- - - - - A- AATTTAATGATTGAXCAAT- - - - -   |       |       |       |       |       |       |       |       |
|-------------|----------------------------------------------------------------------------------------------|-------|-------|-------|-------|-------|-------|-------|-------|
|             | 45930                                                                                        | 45940 | 45950 | 45960 | 45970 | 45980 | 45990 | 46000 |       |
| Human       | AGTCAAACCATTAGAGATAGAATTTACACCAACTAGAATGGCTA- - - - - A- AATTAATAGATTGGCAAT- - ACC           |       |       |       |       |       |       |       | 39304 |
| PolarBear   | AGTTAACA- - - TATAGTGTAGTAT- - - - - T- - GGTTCAG- - - - - AATTGAGTGATTCATCACT- - - - -      |       |       |       |       |       |       |       | 9547  |
| Cow         | TTTTAGAGTC- TGAGAAGTAGAATATGGAGAAAATGATGTATCAAGAAATTAGAAGAATTTCTGAGTTGGGAAGTAGACT            |       |       |       |       |       |       |       | 36516 |
| Dog         | AGTTAACT- - - TACGGCGTAGTAT- - - - - T- - AGTTTCAGG- - - - - AGAATTTAGTGATGGATTTCAT- - - - - |       |       |       |       |       |       |       | 35128 |
| BelugaWhale | GTTCAAGTCT- TTACGTGAACATCC- - - - - ACTGTTATTCCTCTTG- - - AGTAAATGCTGAGGAGTGGAATGCCTCTT      |       |       |       |       |       |       |       | 33525 |
| Donkey      | TCTTCACA- - - - AAAACATAAGAC- - - - - AA- - - - - AAAACAAGGAATAAGT- - - - -                  |       |       |       |       |       |       |       | 37743 |
| Cat         | TGCTTTCTCC- TCTAAGTTTTGA- - - - - T- - GGTTCCTGTC- T- - - CACATTTAGGTCCTTTATCCAT- - - - -    |       |       |       |       |       |       |       | 39642 |
| Ferret      | AGTTAACA- - - TAAAGTATAGTAT- - - - - T- - GGTTCAG- - - - - AATTTAATGATTCATCACT- - - - -      |       |       |       |       |       |       |       | 36587 |
| Lion        | AAATGATAAT- TCATGATTATTA- - - - - T- - TGAGGCGGACC- C- - - AAGGATTGTAAGGTTTAAAC- AT- - - - - |       |       |       |       |       |       |       | 37740 |
| Vaquita     | GTTCAAGTCT- TTACGTGAACATCC- - - - - ACTGTTATTCCTCTTG- - - AGTAAATGCTGAGGAGTGGAATGCCTGTT      |       |       |       |       |       |       |       | 34212 |
| Pig         | GATCAGAAAG- GAAGACGTAAAC- - - - - TGTCTTGTCTACAG- TTAACGTGATTTTTAAATAGAAAAC- - - - -         |       |       |       |       |       |       |       | 30896 |

| Majority    | - - - - - TTGXAGGAATATXTAGAACXTTATT- - - - - TCAATAAGTAACCX- - - - - TTCAATA- - XCCATTACC- - - - - CA  |       |       |       |       |       |       |       |       |
|-------------|--------------------------------------------------------------------------------------------------------|-------|-------|-------|-------|-------|-------|-------|-------|
|             | 46010                                                                                                  | 46020 | 46030 | 46040 | 46050 | 46060 | 46070 | 46080 |       |
| Human       | GAATGTTGATG- AAGATGTGGAACGTCTTTAATTACTGCTGAGTAT- - - - - ATAACA- - - TAGTTGGG- - - - - AA              |       |       |       |       |       |       |       | 39366 |
| PolarBear   | - - - - - TATGTATAATATCCAGTGC- TCATC- - - - - CCAGCAAGTGTCT- - - CTTTAATG- - CCCGTCATC- - - - - CA     |       |       |       |       |       |       |       | 9604  |
| Cow         | T- - - - TGATAGAAGTATTAAGAGTTTTAGCCTGGAATCACTGGGTAATGGATAGTACAGTAGTTCATTAAC- - - - - AAA               |       |       |       |       |       |       |       | 36587 |
| Dog         | - - - - - TACTTA- - - CATTAAACAC- - CATC- - - - - TCAGTAAGTGTCT- - - CTTTAATA- - CCCATCACC- - - - - CA |       |       |       |       |       |       |       | 35181 |
| BelugaWhale | TTGTATGGTAGGTGTATGTTTAAATCCTTATGTACATTTAATGCCAAACAGTT- - TTCAAAAGTGCTTATACCATTTTACA                    |       |       |       |       |       |       |       | 33603 |
| Donkey      | - - - - - TTAACAAAATATGTAAGACGTCTAT- - - - - ACCGATAACTAG- - - - - AAGA- - - - - CA- - - - -           |       |       |       |       |       |       |       | 37786 |
| Cat         | - - - - - TTGGAGTTTTATTTTTGTGAATGGTG- - - - - TGAGAAAGTGGTCTAG- TTTCAACC- - TTCTGCATG- - - - - TT      |       |       |       |       |       |       |       | 39702 |
| Ferret      | - - - - - TACCTATAACCCCAGTGC- TCATC- - - - - CCAATAAGTGTCT- - - CTTTAATA- - TTCATCACC- - - - - CA      |       |       |       |       |       |       |       | 36644 |
| Lion        | - - - - - TTCAAAAGTGAACCTCAGTG- - TAATT- - - - - TATCACAATAATAGAA- TGA- AGGG- - GAAAAAATG- - - - - TC  |       |       |       |       |       |       |       | 37797 |
| Vaquita     | TTGTATGGTAGGTGTATGTTTAAATCCTTATGTACATTTAATGCCAAACAGTT- - TTCAAAAGTGCTTATACCATTTTACA                    |       |       |       |       |       |       |       | 34290 |
| Pig         | - - - - - CCAAAGGAATCTATGGAATATTTGT- TAGGACTAATAGGTGA- - - AT- - - TCAGGA- - - TTGTTAA- - - - - GGA    |       |       |       |       |       |       |       | 30955 |







Dienstag, 3. Mai 2022 08:39

| Majority    | TCTA- X- TTAGGCCAATATGATTTTTTAAAA- - TAAAA- - - - - AACCCAAAG- - - AAATCTATAA- - - - - AAT         |       |
|-------------|----------------------------------------------------------------------------------------------------|-------|
|             | 46410 46420 46430 46440 46450 46460 46470 46480                                                    |       |
| Human       | TCTGAC- CTAGTTTACTATTTTCTTACGGAGTTAAACA- - - - - TTAACCTA- - - - - TTTTATGGTCCAT- - - - AAC        | 39734 |
| PolarBear   | TCCA- TGTTGTCCCAACATGATTTTTTAAAA- - TAAAA- - - - - AACCCAAAG- - - GAATCTACAA- - - - - AAT          | 9882  |
| Cow         | ATT- - - TGAATC- ATTAAGACCTTTGAAAACCAGTAGCTGTACTTAGCTAGAA- - - AAATATACAGTTGTCATCCAA-              | 36951 |
| Dog         | CCCA- TGTTACGTCAACATGATTTTTTAAAA- - TA- - - - - AACCGACAG- - - AAATCTATAA- - - - - AAT             | 35480 |
| BelugaWhale | CTTACATTAAGGCGAGTAAATAAATAAAAAGCATAAAGATCAGAAGGGAAGAAGTAAAAGTGTATTATTACAGTCAAC                     | 33990 |
| Donkey      | GTCA- - - - AGCCCAATAGG- CTCTTT- - - - - TTTTTTTT- - - - -                                         | 37938 |
| Cat         | TCTTCTGCTCAATAAACATAAATTTTTTAAAA- - TAAAA- - - - - AACCCAAAG- - - GAATCTAAAA- - - - - AAT          | 40032 |
| Ferret      | TTCG- TGTTGTGCCAGCATGATTTTTTAAAA- - TAAAA- - - - - AACCCAAAG- - - GACTCTCAA- - - - - AAT           | 36916 |
| Lion        | TCTT- - - CTCAGTAAACATAAATTTTTTAAAA- - TAAAA- - - - - AACCCAAAG- - - GAATCTAAAA- - - - - AAT       | 38118 |
| Vaquita     | CTTACATTAAGGCGAGTAAATAAATAAAAAGCATAAAGATCAGAAGGGAAGAAGTAAAAGTGTATTATTACAGTCAAC                     | 34678 |
| Pig         | AC- - - - - AGGC- ATTTA- - - CATTGAAAGTGATTA- - - - - CTTGATCTAAA- - - - - ATCTATGTGG- - - - - AA- | 31288 |

| Majority    | - - - - - GTTTXAXAGAACTGATCATTGAXXTT- - - - - AGAATGGTXXATGATT- - CAAGTTCAATATACAAAA                |       |
|-------------|-----------------------------------------------------------------------------------------------------|-------|
|             | 46490 46500 46510 46520 46530 46540 46550 46560                                                     |       |
| Human       | TTCTACTTTTAGTTTTTTACCCAGTAAGAAC- - - ATGTTTGCTGTAAAACCTTGTATGTGTATCAAAAACCTTA- CTGATA               | 39810 |
| PolarBear   | - - - - - GTTTTGTAGAACTGATCATTGAATTT- - - - - AGAAGGGTTACATAATA- - CAAGTCCAATATACAAAA               | 9943  |
| Cow         | - - - ATGTCTCAA- AACAGACTTTACAGACA- - - AATATTACTAGGACATTTTTATGATTGTGATGCAAAAATAGTATT               | 37024 |
| Dog         | - - - - - GTTTTGTAAAATAATCATTGAAT- - - - - G- - - - GTTACATGATA- - CAAATTCAATATATAAAA               | 35534 |
| BelugaWhale | ATGATTTTTTAAAATAGAAAACCCAAAGGAATCTAAATGATTTTAGAATGGTTTACAGGATAC- - AGTTCACCATACAAAG                 | 34068 |
| Donkey      | - - - - - TTTTAAA- - - - - GATTTTC- - - - - TTTTTTATT- - - - - TATTGTT                              | 37968 |
| Cat         | - - - - - GGTGCATAGAACTGATCAGTGAATTT- - - - - AGAATGGTTATATGATG- - CCAGTTCAGTATACAAAA               | 40093 |
| Ferret      | - - - - - ATTTCATAGAACTGATCACTGAATTT- - - - - AGAAGGGTTACATAATA- - CAA- - - - A- - - AAAAA          | 36969 |
| Lion        | - - - - - GTTGCATAGAACTGATCAGTGAATTT- - - - - AGAATGGTTATATGATG- - CCAGTTCAGTATACAAAA               | 38179 |
| Vaquita     | ATGATTTTTTAAAATAGAAAACCCAAAGGAATCTAAATGATTTTAGAATGGTTTACAGGATAC- - AGTTCACCATACAAAG                 | 34756 |
| Pig         | - - - A- - T- - - AAA- AAAGAACCTAGGAGAGT- - - AAAAC- - - - - CATTTTGAAAA- - - - - AGGAAAAAAGTTGGGAT | 31343 |

Dienstag, 3. Mai 2022 08:39

| Majority    | ATAGTTTC- - - CTGATATTATTAGCAAATTTTTGGAAAATGAAATTTAAAAAAA- - - TCCATTTATAAAAATXTCAGA    |       |       |       |       |       |       |       |       |
|-------------|-----------------------------------------------------------------------------------------|-------|-------|-------|-------|-------|-------|-------|-------|
|             | 46570                                                                                   | 46580 | 46590 | 46600 | 46610 | 46620 | 46630 | 46640 |       |
| Human       | ATGGTCCCAAACCTTGAAATAACCCAAATGTTTATCAACAGGAAAATGGATAAATTGTGGTATAATCATATAGTATATTAC       |       |       |       |       |       |       |       | 39890 |
| PolarBear   | ATAGTTTG- - - CTGATATTATTAGCATATTATTGGAAAATGAAATTTAAAAAAA- - - TGCTTTTATAAAAAT- - - - - |       |       |       |       |       |       |       | 10010 |
| Cow         | TCATTTTTAT- GTTCCAGCTTTTTCCATGTCTGTTGTAATTGACTTT- - - ACTA- - - TATAGAATTCTTGTTTCCAAT   |       |       |       |       |       |       |       | 37095 |
| Dog         | ATTGCTTC- - - CTGATATTATTAGCAAATTATTGAAAAATGAAATTTAAAAAAG- - - TCCATTTACAAAAATATGCG-    |       |       |       |       |       |       |       | 35605 |
| BelugaWhale | ATAATTTTTT- TCTGATATTATTAGCAAAGTTTTGGAAAATGAAATTTAAAAAAA- - - TCCGTTTATAGAAACATCAGA     |       |       |       |       |       |       |       | 34143 |
| Donkey      | TTTTTCCC- - - CCTCTTCTCCCAGTACGTAGTTGTATATTTTAGTTGTGGGTCT- - - TCTATTTGTGGCAT- - - - -  |       |       |       |       |       |       |       | 38034 |
| Cat         | ATTGTTTC- - - CTGATATTATTAGCAAATTACTGGAAAATGAAATGAAAAAAA- - - - TCCATTTACAAAAA- TACCA   |       |       |       |       |       |       |       | 40163 |
| Ferret      | ATAGTTTC- - - CTGATATTATTAGCTAATTATTAGAAAATGAAAATTTAAAAA- - - - TGCTTTTACAAAAATATGAGA   |       |       |       |       |       |       |       | 37040 |
| Lion        | ATTGTTTC- - - CTGATATTATTAGCAAATTCCTGGAAAATGAAATGAAAAAAA- - - - TCCATTTACAAAAA- - TACCA |       |       |       |       |       |       |       | 38248 |
| Vaquita     | ATAATTTTTT- TCTGATATTATTAGCAAAGTTTTGGAAAATGAAATTTAAAAAAA- - - TCTGTTTATAGAAACATCAGA     |       |       |       |       |       |       |       | 34831 |
| Pig         | ACCATCTGAT- TTCAAGATTGATTGTAAAGTTGAAGTAATCAA- - - - - ACAA- - - TTTAGTATTAGCACAGTTAG-   |       |       |       |       |       |       |       | 31410 |

| Majority    | XAGACA- AAATATC- AAAGAATAAATTTAACAAATAATGTGGG- AGACATGTACAXCAGTAACTATAXAAGACG- - XCAA        |       |       |       |       |       |       |       |       |
|-------------|----------------------------------------------------------------------------------------------|-------|-------|-------|-------|-------|-------|-------|-------|
|             | 46650                                                                                        | 46660 | 46670 | 46680 | 46690 | 46700 | 46710 | 46720 |       |
| Human       | TACTTACTAATAACAAAAGAATGGTTAGTAGTACATGCGAAAACATGGGTGAATAGTAAGCATTGTATGAAGCA- - - AA           |       |       |       |       |       |       |       | 39966 |
| PolarBear   | - - GAGG- AAATATC- AAGGAATAAATTTAACAAATAATGTGAG- AGACATGGACACCAGTAACTATACAAGACATAGCAA        |       |       |       |       |       |       |       | 10085 |
| Cow         | AG- - - - - CATGTC- TCAGCAGCCTTTCCCTGTCTAGACTGT- - CTTCCTCTACAGCTGTATTTCTGTCAA- G- - AAAA    |       |       |       |       |       |       |       | 37163 |
| Dog         | - AGACA- GAATATC- AGAGAGTAAATGTAACAAATAATGTGGGGAGACATGTACACCAGTAACTATACAGGACA- - - CAA       |       |       |       |       |       |       |       | 35679 |
| BelugaWhale | AGGACA- AAATATC- AAAGAATAAATTTAACAAAAAATGTGCA- TGATAACTACATCAATAACTGCAAGGCATG- - GCAA        |       |       |       |       |       |       |       | 34218 |
| Donkey      | - - - - - GTGGGATGCCTCCTCAGCATGGCTTG- - - - ATGAGTGCTGCTAGGTCTGTGCT- - - C- - - - -          |       |       |       |       |       |       |       | 38084 |
| Cat         | GAAACACAAATATC- AAGGAATACATTTAATAAATAATTTGGG- AGACAAGTATACCAGTAACTATATAAGATGCTACAA           |       |       |       |       |       |       |       | 40241 |
| Ferret      | AAGACA- AAATATT- AAGGAATAAATTTAACAAATAGTGTGGG- AGACATTAATACCAGTAACTATACAAGACATGGCAG          |       |       |       |       |       |       |       | 37117 |
| Lion        | GAAACACAAATATC- AAGGAATACATTTAAAAAATAATTTGGG- AGACAAGTATATCAGTAACTATATAAGATGCTACAA           |       |       |       |       |       |       |       | 38326 |
| Vaquita     | AGGACA- AAATATC- AAAGAATAAATTTAACAAAAAATGTGCA- TGATAACTACATCAATAACTGCAAGGCATG- - GCAA        |       |       |       |       |       |       |       | 34906 |
| Pig         | - - - - - TGTC- ACAGAATAGTGTTTACAGAAATAAAGT- - - CTACGTTTACAGTCAATTATTTA- C- - - - - - - - A |       |       |       |       |       |       |       | 31465 |

Dienstag, 3. Mai 2022 08:39

| Majority    | AGAGATATTAXAGACCTAAATGAGTAAAAA- - ACCATGTTTCATGAA- TTAGAAGGCTCAATATGTT- AAAATGTCATTTT            |       |       |       |       |       |       |       |       |
|-------------|--------------------------------------------------------------------------------------------------|-------|-------|-------|-------|-------|-------|-------|-------|
|             | 46730                                                                                            | 46740 | 46750 | 46760 | 46770 | 46780 | 46790 | 46800 |       |
| Human       | AGAAACCAGACAGACCTGAAAGAGTACATAG- - - TGTGATTCCATTTCTTGAAAGTTTAAAGAGCAG- - - - - ATCATTAA         |       |       |       |       |       |       |       | 40037 |
| PolarBear   | AAAGATATTAGAGACCTAAGTGAGAAAGAA- - ACTATGTTTCATGAA- TTAGAAGGCTCAATATGTT- AAAATGTCATTTT            |       |       |       |       |       |       |       | 10161 |
| Cow         | AAAGAATTTTGTAAAGTGGGGGAAGTTAATGTTATTAGAACTTAGTCTTGGGGAAATAATCTTACTCAAAC- - TATTTT                |       |       |       |       |       |       |       | 37241 |
| Dog         | AGAAATATTAGAGACCTAAATGAGAAAGAA- - ACCATGTTTCATGAA- TTAAAAGGCTCAGTATGTT- AAAATGTCATTTT            |       |       |       |       |       |       |       | 35755 |
| BelugaWhale | AGAGAAATTAAGACCTAAATAAATAGATAC- ACCATGTTTCATGAG- - TAGAAGGCTCAATGTGTTAAAGATGTCATTTT              |       |       |       |       |       |       |       | 34295 |
| Donkey      | - - AGAATCCGA- - - - - - ACCAGCAAAC- - - CCTGGGTCGCCAA- - - AGCAGAGCCCACGGACTTAA- - - - CCACTCA  |       |       |       |       |       |       |       | 38144 |
| Cat         | AGAGATATTAAGACCTGAATGAGGAAGAA- - ACCATGTTTCATGAA- TTAGAAGGCTCAATATGTT- AAAATGTCATTTT             |       |       |       |       |       |       |       | 40317 |
| Ferret      | AGAGATATTAGAGACCTAAATGAGAAAGAA- - ACCATGTTTCATGAA- TCAGAAAGCTCAATATGTT- AAAATGCCATTTT            |       |       |       |       |       |       |       | 37193 |
| Lion        | AGAGATATTAAGACCTGAATGAGAAAGAA- - ACCATGTTTCATGAA- TTAGAAGGCTCAATATGTT- AAAATGTCATTTT             |       |       |       |       |       |       |       | 38402 |
| Vaquita     | AGAGAAATTAAGACCTAAATAAATAAATAC- ACCATGTTTCATAAG- - TAGAAGGCTCAATGTGTTAAAGATGTCATTTT              |       |       |       |       |       |       |       | 34983 |
| Pig         | AAGGTGTCTTG- - - - - - GTCATTTAATG- - - - - GGAAA- - - - - - AGGGAAGTCTTTTTTTT- - - - - - TTTTTT |       |       |       |       |       |       |       | 31515 |

| Majority    | CCCCTAAATTGGAT- - - - TTGAATCTATAAGTCAGTCAAGCTCAACAGGCTTTTTAAATTGAAATTGACAAG- TTGATTCT         |       |       |       |       |       |       |       |       |
|-------------|------------------------------------------------------------------------------------------------|-------|-------|-------|-------|-------|-------|-------|-------|
|             | 46810                                                                                          | 46820 | 46830 | 46840 | 46850 | 46860 | 46870 | 46880 |       |
| Human       | TTTTTTGTTTAGAA- - - - - - A- CCAGAATGTTGGAGATTAAACAGAAAGGGAATATGGTGGCATTCTTCTGGTGTGATGGA       |       |       |       |       |       |       |       | 40109 |
| PolarBear   | CCCCTAAATTGAATGGAGTTGAATCTATAAGTCAGTCAAGCTCAACAGGCTTTTTAAATTGAAATTGACAA- - TGGATTCT            |       |       |       |       |       |       |       | 10239 |
| Cow         | GTATTAACACTAGTT- - - - TC- - - TTTAGAAGTTAAACATTTCAAAGACACAGCTCTAATGGATTGGAATTGGATTTTATT       |       |       |       |       |       |       |       | 37314 |
| Dog         | CCCCTAAATTGGATGGAATTAATCTGT- - GTCAGTGAAACTCAACAGGCTTTTTAAAATGAAATTGACAAG- TTGGTTCT            |       |       |       |       |       |       |       | 35832 |
| BelugaWhale | TCCCCTAATTGGGA- - - - TGGAATTTATAAATCAGTCAAGCTGAACAGGCATTTACGTTGAAAGTGA- - TGAATTGATCT         |       |       |       |       |       |       |       | 34369 |
| Donkey      | GCCGTGGCACCAC- - - - - - CC- - - - - - CCAAGCCCAATAGGCTTTTTAAATTGAAATTGACAAG- TCGATTCT         |       |       |       |       |       |       |       | 38204 |
| Cat         | CCCCCAAATTGGATGGAATTGAATCTATAAGTCACTCAAGCTCAACAGGCTTTTTAAATTGAAATTGACAAG- TTGATTCT             |       |       |       |       |       |       |       | 40396 |
| Ferret      | CTCCTAAATTGAATGGAATTGAATCTTCAAGTCAGTCAAGCTCAACAGGCTTTTTAAATTGAAATTGACAAG- TGGATTCT             |       |       |       |       |       |       |       | 37272 |
| Lion        | CCCCCATATTGGATGGAATTGAATCTATAAGTCAGTCAAGCTCAACAGGCTTTTTAAATTGAAATTGAGAAG- TTGATTCT             |       |       |       |       |       |       |       | 38481 |
| Vaquita     | TCCCCTAATTGGGA- - - - TGGAATTTATAAATCAGTCAAGCTGAACAGGCATTTACGTTGAAAGTGA- - TGAATTGATCT         |       |       |       |       |       |       |       | 35057 |
| Pig         | GTCTTTTTGCTGTC- - - - TC- - - TT- - - GGGCCACTCCCGCAGCATATGGAGGTCCCAGGCTAGG- - - - G- ATCTAATC |       |       |       |       |       |       |       | 31580 |

Dienstag, 3. Mai 2022 08:39

| Majority    | AAAATTTA- - - - - TGTGGAAATAAAAAAXGACCTAGATX- - A- CTAAA- - - - CXTTTTCCAAAAGAAAAAATAX- |                                       |                                      |          |        |                            |            |       |       |
|-------------|-----------------------------------------------------------------------------------------|---------------------------------------|--------------------------------------|----------|--------|----------------------------|------------|-------|-------|
|             | 46890                                                                                   | 46900                                 | 46910                                | 46920    | 46930  | 46940                      | 46950      | 46960 |       |
| Human       | AACGTCC-                                                                                | TATGTTAATAAACTAAGTTGCAAAACAAATCCAAAA- |                                      |          |        | GTTGTTTGAAGCAGTAGATTATC    |            |       | 40175 |
| PolarBear   | AGAATTTA-                                                                               | TGTGGAAATAAAAAAGAACCTAGATG-           | AACTAAA-                             |          |        | ACCATTTTCCAAAAGAAAAATGTTG- |            |       | 10305 |
| Cow         | GGAAGGAA-                                                                               | TGTGTAATTATTTG-                       | AAAGTGGG-                            |          | GAGGA- | GGCTTGACAGTG-              | GTAAGATAG- |       | 37370 |
| Dog         | AAAATTTAGAATTAGATGTGGAAATTAAAAAGGACCTAGATATAAGCTAAA-                                    |                                       |                                      |          |        | ATCATTTTCCAAAAGAAAAA-      |            |       | 35908 |
| BelugaWhale | ACACTTTA-                                                                               | TATGGAAATAAAAA-                       | GACCTAGAAT-                          | AACTAAA- |        | GCCATTTGAAAAAGAAAAAGAA-    |            |       | 34430 |
| Donkey      | AAAATTTA-                                                                               | TGTGGTAATAAAAAAGGACCTGGAA-            |                                      |          | TAAA-  | ACCATTTTGAAAAAGAAAAAGTTGGG |            |       | 38267 |
| Cat         | AAAATTTA-                                                                               | TGTGGAAATAAAAA-                       | GACCTAGATT-                          |          | AAAA-  | CCATTTTCCAAAAGAAAAAAGT     |            |       | 40457 |
| Ferret      | AAATTTTA-                                                                               | TGTGGAAATAAAAAAGAACTAGATG-            | AACTAAATAAAACCATTTCCAAAAGAAAAAAGTCA- |          |        |                            |            |       | 37341 |
| Lion        | AAAATTTA-                                                                               | TGTGGAAATAAAAAAGGACCTAGATG-           |                                      |          | AAAA-  | CCATTTTCCAAAAGAAAAAAGT     |            |       | 38544 |
| Vaquita     | ACACTTTA-                                                                               | TATGGAAATAAAAA-                       | GACCTAGAAT-                          | AACTAAA- |        | GCCATTTGAAAAAGAAAAA-       |            |       | 35118 |
| Pig         | AGAGC-                                                                                  | TGTAAGTACC-                           | AGCCTACA-                            |          | CCAGA- | GCCACAGCAACGCGGGATCCAA-    |            |       | 31630 |

| Majority    | - XCAXGAT- - CTGATTTCAAGATTCACCTGTAAGTGTAGTAATCAAACA- - GTTTAATATTAGCATGATTAGT- TTTAC |                                                          |                     |       |       |                               |           |       |       |
|-------------|---------------------------------------------------------------------------------------|----------------------------------------------------------|---------------------|-------|-------|-------------------------------|-----------|-------|-------|
|             | 46970                                                                                 | 46980                                                    | 46990               | 47000 | 47010 | 47020                         | 47030     | 47040 |       |
| Human       | TCTGAGAACTCTGAATTTCCAGTA-                                                             | GTTGTG-                                                  | TCTTGCTGTAATGAGAAA- |       |       | TATGAGATTGG-                  | GAATGAC-  | TAG   | 40244 |
| PolarBear   | - ACATGAT-                                                                            | CTGATTTCAAGATTCACCTGTAAGTGTAGTAATCAAACA-                 |                     |       |       | GTTTAATATTAGCAAGGTTAGTATTTAC  |           |       | 10380 |
| Cow         | - - - - - GGT-                                                                        | CTTTCTTGAGTCCATTTTATATAGGTACAGAAATGAGATACCTCTTTAAGTTAGG- | TATATTTT-           | TGCCA |       |                               |           |       | 37441 |
| Dog         | - TCACAA-                                                                             | CTGATTTCAAGATTCACCTGTAAGTGTAGTAATCAAACA-                 |                     |       |       | GTTTAACATTAGCAAGATTAGTTTTTAT  |           |       | 35982 |
| BelugaWhale | - - - - - GAG-                                                                        | TTGGAATACTATTTGATTTCAAGAGTAAAGTAATCGCAGC-                |                     |       |       | AGTTTAGTATAGCATGATTAGT-       | GTCTC     |       | 34500 |
| Donkey      | ACACTCACTGTCTGATTCAGGATTCACCTGTAAGTGTAGTAATCAAACA-                                    |                                                          |                     |       |       | GTTTAGTATTAGCATGATTAGT-       | GTCTC     |       | 38345 |
| Cat         | GACACTAT-                                                                             | CTGATTTCAAGATTCACCTGTAAGTGTAGTAATCAAACA-                 |                     |       |       | GTTTAATATTAGCAAGGATTAGTATTTAT |           |       | 40533 |
| Ferret      | - ACACGAT-                                                                            | CTAATTTCAAGATTCACAGTAGACTTGTAGTAATCAGACA-                |                     |       |       | GTTTAGTATTAGCAAGGTGAGTATTTAC  |           |       | 37416 |
| Lion        | GACACTAT-                                                                             | CTGATTTCAAGATTCACCTGTAAGTGTAGTAATCAAACA-                 |                     |       |       | GTTTAATATTAGCAGGATTAGTATTTAT  |           |       | 38620 |
| Vaquita     | - - - - - GAG-                                                                        | TTGGAATACTATTTGATTTCAAGAGTAAAGTAATCACAGC-                |                     |       |       | AGTTTAGTATAGCATGATTAGT-       | GTCTC     |       | 35188 |
| Pig         | - - - - - GCC-                                                                        | GCATCTGCAACCTACACCACA-                                   | GCTCACGGCAACGCCCGA- |       |       | TCCTTAACCCAC-                 | TGAGCAAC- | GGCAG | 31697 |

Dienstag, 3. Mai 2022 08:39

| Majority    | AGAATAGTGTXCAGAAATAAACTCCTACATTTAAGGTCAGC- TGATTATTTACAAAGGTGCCTTGGTCATTCAA- - - - -     |       |       |       |       |       |       |       |       |
|-------------|------------------------------------------------------------------------------------------|-------|-------|-------|-------|-------|-------|-------|-------|
|             | 47050                                                                                    | 47060 | 47070 | 47080 | 47090 | 47100 | 47110 | 47120 |       |
| Human       | GTGAGTCCATGTAGCAGGGGCC- - - TAGATGTGGGATTTGA- TGTGTGTGTGTGTGTGTGTGTGTGTGTGTGTG- - - - -  |       |       |       |       |       |       |       | 40314 |
| PolarBear   | AGAATAGCGTACAGAAATAAACTCCTACATTTAAGGTCAC- TGATTACTTACAAAGGTGTCTTGGTCATTCAA- - - - -      |       |       |       |       |       |       |       | 10453 |
| Cow         | GTGCTGCTGTTAATCTGTAGCATCAGGATTTTGTGAAAGTATGACTTTTTATTTTATTATGTGAATCATTTTA- - CGGA        |       |       |       |       |       |       |       | 37519 |
| Dog         | AGAATAGTGTACAGAAATAAAC- - - TACAGTTAAGGTCAGC- TGATTACTTACAAAGGTGTCTTGGTCATTTCAG- - - - - |       |       |       |       |       |       |       | 36052 |
| BelugaWhale | AGAACAGTATTTATAAATAAACTCCTACATTTAAGGTCAGT- TGATTATTTACAAAGTCCCTTGGTCATTTAATGGTGA         |       |       |       |       |       |       |       | 34579 |
| Donkey      | AGAATAACGTTTACAGAAATAGACTCCTACATTTAAGGTCAAT- TGATTATTTACAAAGGTGCCTTGGTCATTCAA- - - - -   |       |       |       |       |       |       |       | 38418 |
| Cat         | AGAATAGTGTGCAGAAAGAAGCTCCTATATTTATGATCAAC- TGATTATTTACAAAGGTGCCTTGGTCATTTCAT- - - - -    |       |       |       |       |       |       |       | 40606 |
| Ferret      | AGAATAGAGTGCAGAAAGTAAACACCTACATTTAAGGTCAC- TGATTACTTACAAAGGTGTCTTGGTCATTTCAG- - - - -    |       |       |       |       |       |       |       | 37489 |
| Lion        | AGAATAGTGTGCAGAAAGAAGCTCCTATATTTATGATCAAC- TGATTATTTACAAAGGTGCCTTGGTCATTTCAT- - - - -    |       |       |       |       |       |       |       | 38693 |
| Vaquita     | AGAACAGTATTTATAAATAAACTCTTACATTTAAGGTCAGT- TGATTATTTACAAAGTCCCTTGGTCATTTAATGGTGA         |       |       |       |       |       |       |       | 35267 |
| Pig         | GGATCG- - - - - AACCACAGCCTCATGGTTCC- TAGTCAGATTGGTTAACCCTGCGCCACGATGAGAACTCCA- - GGGA   |       |       |       |       |       |       |       | 31769 |

| Majority    | - - - - - T - - TGGAGAAATGGTG CXAGAAXACTXX- - GAAACACATATGAAAAAAA- GAAACXCAAAC- - - - -  |       |       |       |       |       |       |       |       |
|-------------|------------------------------------------------------------------------------------------|-------|-------|-------|-------|-------|-------|-------|-------|
|             | 47130                                                                                    | 47140 | 47150 | 47160 | 47170 | 47180 | 47190 | 47200 |       |
| Human       | - - - - - TGTGTGTGTGTAGCTTGGACTTTAACAGATTTACATTTTAGAAAAGA- - ATTTTTGTTC- - - - -         |       |       |       |       |       |       |       | 40370 |
| PolarBear   | - - - - - T - - TGGAGAAATGGTGCCAGAAAACAATTGGAAACACATATGAAAAAAAAGAAACTCAAAC- - - - -      |       |       |       |       |       |       |       | 10512 |
| Cow         | T- - - - - TCTGTTACATGTTACTCAGAACTGTTTGA- GATATGTCTGTTTTAACTTTTATATACAGACGTTTTTGT        |       |       |       |       |       |       |       | 37589 |
| Dog         | - - - - - T - - TGTGGAAATGGTGCCAGAAAACAGTTGAAACAGATATGAGAAAAA- GAAACTCAAAC- - - - -      |       |       |       |       |       |       |       | 36110 |
| BelugaWhale | AAGGGAAGTATTTTTAACAAAGTGGTGCTAGAACAGTTG- - GATACACAAATGAAAACAACAAAAAATTAGAAACTCAA-       |       |       |       |       |       |       |       | 34656 |
| Donkey      | - - - - - TGGGG- - - - - AAAGAGAAGTTTTCTCAA- CAA- - - - -                                |       |       |       |       |       |       |       | 38444 |
| Cat         | - - - - - T - - TGGGGAAATGGTGCCAGAAAACA- - - GAAACACATATGAAAAAAA- GAAAC- - AAAC- - - - - |       |       |       |       |       |       |       | 40658 |
| Ferret      | - - - - - T - - TGGAGAAATGGTG- - - - - GAAACACATATGAAAAAAA- GAAACTCAAAT- - - - -         |       |       |       |       |       |       |       | 37533 |
| Lion        | - - - - - T - - TGGGGAAATGGTGCCAGAAAACA- - - GAAACACATATGAAAAAAA- GAAAC- - AAAC- - - - - |       |       |       |       |       |       |       | 38745 |
| Vaquita     | AAGGGAAGTATTTTTAACAAAGTGGTGCTAGAACAGTTG- - GATACACAAATGAAAACAACAAAAAATTAGAAACTCAA-       |       |       |       |       |       |       |       | 35344 |
| Pig         | AG- - - - - TCTAGCACAAATGGTGCTAGAACAATTG- - GATATGCACATGAAAACCTCACATTAGAAAC- - - - -     |       |       |       |       |       |       |       | 31830 |

Dienstag, 3. Mai 2022 08:39

| Majority    | -----T-----ACTTXATACTGTA-----CAGAAAAAGT-----AGATG-----AATX--TATACCTAAA-----CCTA |                     |               |               |               |              |                   |                   |            |            |
|-------------|---------------------------------------------------------------------------------|---------------------|---------------|---------------|---------------|--------------|-------------------|-------------------|------------|------------|
|             | 47210                                                                           | 47220               | 47230         | 47240         | 47250         | 47260        | 47270             | 47280             |            |            |
| Human       | -----C                                                                          | ATTTGTATTT          | CACAGG--      | TAGGATCAGTAT- | TGTATAGAG--   | GGGAGAATAGT  | TTTTAAAA--        | ----              | CATT 40430 |            |
| PolarBear   | -----T-----                                                                     | ACTTAATACAGTA-      | -----         | CAGAAATAAT-   | ----AGATG-    | -----        | AATA--TATACCTAAA- | -----             | CCTA 10559 |            |
| Cow         | ATGATGTCATTTT                                                                   | ATTTTATTGTAACG      | TTTTGAAAATATT | CCAGCACGTTG   | TTTCAGTTTGAAT | CTCTATAAGGGT | CCTA              |                   | 37669      |            |
| Dog         | -----T-----                                                                     | ACTTAATATTGTA-      | -----         | CAGAAATATT-   | ----AGATG-    | -----        | GATA--TATACCTAAA- | -----             | CCTA 36157 |            |
| BelugaWhale | -----                                                                           | ACCTTACTTCATGCCATA- | -----         | CGGAAAAAG-    | -----         | ATG-         | -----             | AATT-ACATACCTAAA- | -----      | CCTA 34705 |
| Donkey      | -----                                                                           | ATGGTG-             | -----         | CTAGAACAGT-   | -----         | TG-          | -----             | GATA--CACGTATGAA- | -----      | 38476      |
| Cat         | -----T-----                                                                     | ACCTGATACTGTA-      | -----         | CAGAAAAGTT-   | ----AGATG-    | -----        | GATG--TATATCTAAA- | -----             | CCTA 40705 |            |
| Ferret      | -----T-----                                                                     | ACTTAATACAGTA-      | -----         | CAGAAATAAT-   | ----AGATG-    | -----        | AATA--TATACCTAAA- | -----             | CCTA 37580 |            |
| Lion        | -----T-----                                                                     | ACCTGATACTGTA-      | -----         | CAGAAAAGTT-   | ----AGATG-    | -----        | GATG--TATATCTAAA- | -----             | CCTA 38792 |            |
| Vaquita     | -----                                                                           | ACCTTACTTCATGCCGTA- | -----         | CGGAAAAAG-    | -----         | ATG-         | -----             | AATT-ACATACCTAAA- | -----      | CCTA 35393 |
| Pig         | -----                                                                           | TCAGTCCTTCATACTGTA- | -----         | CAGAAAAAG-    | ----AGGATG-   | -----        | AATT-ACATACCTAAA- | -----             | CCTC 31882 |            |

| Majority    | AAAAA--TAAATATACAAAGCTTTTTXAGAAAAAAA--TTATAGAATAT-ATCCTCAACCTTGA--GGTAAATG--AAG |                  |                      |                    |               |          |       |       |       |
|-------------|---------------------------------------------------------------------------------|------------------|----------------------|--------------------|---------------|----------|-------|-------|-------|
|             | 47290                                                                           | 47300            | 47310                | 47320              | 47330         | 47340    | 47350 | 47360 |       |
| Human       | ACGGTAGTTCATTC-                                                                 | CAAAGATACCAAGGT  | CCTGAATTTTAGGGT      | CTTGGAAGGAGAAT     | GCAGGAAATGATA | AAAACGAG |       |       | 40508 |
| PolarBear   | AGAAAC--TAAATATATA                                                              | AAAGCTTTTTTAAAA  | AAAA--TTGTAGAATAT-   | ATTCATGAACTTGA-    | GGTAAATA-     | -----    |       |       | 10626 |
| Cow         | ACAACATGTCCTCCT                                                                 | GCATAGAGGTGATGAG | AGCCT-TCCTCTAATATAGT | CTGCATGCTTAGT      | CGGTCAGTCGT   | CAGTC    |       |       | 37748 |
| Dog         | AAAAA--TATATA                                                                   | AACTTTTTTA--     | AAAA--TTACATTATAT-   | AT-CACAAACTTGA-    | GGTAAATGA-    | -----    |       |       | 36217 |
| BelugaWhale | AAATC--TAAATATGCAA                                                              | AGCTTTTAAGAAAA   | AAAAAATCCTAGAATGT-   | ATCCTCAACCTTGG-    | GGTAAAT--     | GAAG     |       |       | 34775 |
| Donkey      | -----                                                                           | AAAAGCTTTAAGAAAA | AAAA--TCATAGACTGT-   | ATTCTCAACCTTAG-    | CATAAATG-     | ----     |       |       | 38532 |
| Cat         | AAAAAC--TAAATACATA                                                              | AAAGCATTTTG--    | AAAA--ATATAGAGTAT-   | ATATCTAACCTTCA-    | GGTAAATGAAG   | ATTT     |       |       | 40776 |
| Ferret      | AAAAAC--AGAATGTA-                                                               | AAAGCTTTTTTA-    | AAAA--TTATAGAATAT-   | ATTCAC-AACTTGA-    | GGTAAAGA-     | -----    |       |       | 37644 |
| Lion        | AAAAAC--TAAATACATA                                                              | AAAGCATTTTG--    | AAAA--ATATAGAGTAT-   | ATATCTAACCTTCA-    | GGTAAATGAAG   | ATTT     |       |       | 38863 |
| Vaquita     | AAATC--TAAATATGCAA                                                              | AGCTTTTAAGAAAA   | AAAAAATCCTAGAATGT-   | ATCCTCAACCTTGG-    | GGTAAAT--     | GAAG     |       |       | 35463 |
| Pig         | ACAAC-TATAAATAGGCAA                                                             | AGCTTTTGAGAAAA   | AAAA--CCCTAAAATAT-   | GTCTTCAATCTTAAGGGT | AAAT--        | GAGA     |       |       | 31955 |



Dienstag, 3. Mai 2022 08:39

| Majority    | TTTTCT- AGAXAAGAC- - - - - ACAAAAA- CCACTAXCCATAAAGGAATAATTTATAAACTCTACAXTXCATCTAAATGA |                                                                 |                    |                   |           |       |       |       |  |
|-------------|----------------------------------------------------------------------------------------|-----------------------------------------------------------------|--------------------|-------------------|-----------|-------|-------|-------|--|
|             | 47370                                                                                  | 47380                                                           | 47390              | 47400             | 47410     | 47420 | 47430 | 47440 |  |
| Human       | TTATCTGGAAGAAGACAAGTTT                                                                 | GGAATAA- - - - T- -                                             | ATTAAAGAGTTTTGTCTT | AGAATCACTGGGTTGGT | AGAAGATGA | 40582 |       |       |  |
| PolarBear   | TTTTTT- AGAGAAGAC- - - - -                                                             | ACAAAAA- CCACTACCCATAAAGCAATAATTTATAAACTAGACAGTTTACCTAAATGA     | 10698              |                   |           |       |       |       |  |
| Cow         | ATGTCTGACTATTTGTGACCCTATGGAATGTAGCCTGCCAGGCTCTTCTGTCTTGGAAATTCTACAGGCAAGAATACTGG       | 37828                                                           |                    |                   |           |       |       |       |  |
| Dog         | TTTTTT- AGAGAAGAC- - - - -                                                             | AC- AAA- - - - - CTACCCATAAAGGAATAGTTTATAAACTAGACATTTACCTAAATTT | 36284              |                   |           |       |       |       |  |
| BelugaWhale | ATTTCTTAGAAAAGGT- - - - -                                                              | ACAAAAATACACTAACCATAAAGGAATACTTTACAAA- - CTAGAGTCCATCTAAATGA    | 34847              |                   |           |       |       |       |  |
| Donkey      | CTTTCTCACACAAGAC- - - - -                                                              | AAAAAA- - - CACTGACTGTAAAGGAATAATTTATAAA- - CTAGACTCCATCTAAACTA | 38601              |                   |           |       |       |       |  |
| Cat         | TTTTTT- AGAGAACAC- - - - -                                                             | ACAAAAA- CCACTACCCATAAAGAATAATTTATAAACTAGACATTTACCTAAATGA       | 40848              |                   |           |       |       |       |  |
| Ferret      | TTTATT- AGGAAAGAC- - - - -                                                             | ACGAAAA- CCACTACCCATAAAGCAATAGTTTATAAACTCCACATCTTACCTAAATGA     | 37716              |                   |           |       |       |       |  |
| Lion        | TTTTTTTTAGAGAACAC- - - - -                                                             | ACAAAAA- CCACTACCCATAAAGAATAATTTATAAACTAGACATTTACCTAAATGA       | 38936              |                   |           |       |       |       |  |
| Vaquita     | ATTTCTTAGAAAAGGT- - - - -                                                              | ACAAAAATACACTAACCATAAAGGAATACTTTACAAA- - CTAGAGTCCATCTAAATGA    | 35535              |                   |           |       |       |       |  |
| Pig         | ATTTCTGAG- ATAGGTTACC- -                                                               | AAAAAAACCCACTAACCAAAAAGGACTGCTTTACCAA- - CTAGAGGCCATCTCAATGA    | 32030              |                   |           |       |       |       |  |

| Majority    | XAXAA- TT- - - - - - CTCATCAAAG- ACATTGTT- AAGACAATGAAAAGGCAA- GG- - - - - CACAGATTGGGAAAAGA |                                                        |                                |                    |       |       |       |       |
|-------------|----------------------------------------------------------------------------------------------|--------------------------------------------------------|--------------------------------|--------------------|-------|-------|-------|-------|
|             | 47450                                                                                        | 47460                                                  | 47470                          | 47480              | 47490 | 47500 | 47510 | 47520 |
| Human       | TG- - - - -                                                                                  | CCATTAACAA- AGGGGG- -                                  | AAAAGTAGGAAAAGGAGACTCG- - -    | TTTTTGGTGGGAAAAAAG | 40640 |       |       |       |
| PolarBear   | - AAAACTT- - - - -                                                                           | CTCATCAGAAG- ACATTGTT- AAGACAGTAAAAAGGCAA- GT- - - - - | CACAGATTGGAAAAAGA              | 10761              |       |       |       |       |
| Cow         | AGTAGGTTGCTATTTGCTCCTCCAGGGTATCTTCCC- GACCCAGGGTTGAACCCACATTTTCTCCTGTATTGGCAGGTGG            | 37907                                                  |                                |                    |       |       |       |       |
| Dog         | TAAAAATT- - - - -                                                                            | CTCATCAAAG- ACGTT- - - -                               | AAGACCATGAAA- GCCAA- AT- - - - | CACAAATTGGGAAAAGA  | 36344 |       |       |       |
| BelugaWhale | AA- ACCTT- - - - -                                                                           | CTCATCAAACG- ACATTATT- AAGAGAATGAAAAGGC- ACGG- - - -   | CACAGGCTGAGAGAAAA              | 34910              |       |       |       |       |
| Donkey      | GA- - - - -                                                                                  | CTCATCCAAAA- ACATT- - - -                              | AAGACAATGAAAAGGCAA- GG- - - -  | CACAGACTGGGAGGAAA  | 38656 |       |       |       |
| Cat         | - AAAA- - - - -                                                                              | CTCATCAAAG- TCACTGTT- AAGACAATGAACAGGCAA- GG- - - -    | CACGGGTTGGGAAAAGA              | 40908              |       |       |       |       |
| Ferret      | - AAACCTT- - - - -                                                                           | CTCATCAGGAG- ATGTTGTTAAGATAATGAAAAGACAA- GT- - - -     | CACAGATTGGGAAAAGA              | 37780              |       |       |       |       |
| Lion        | - AAAA- - - - -                                                                              | CTCATCCAAAG- TCACTGTT- AAGACAATGAACAGGCAA- GG- - - -   | CACGGGTTGGGTAAAGA              | 38996              |       |       |       |       |
| Vaquita     | AA- ACCTT- - - - -                                                                           | CTCATCAAACG- ACATTATT- AAGAGAATGAAAAGGC- ACGG- - - -   | CACAGGCTGAGAGAAAA              | 35598              |       |       |       |       |
| Pig         | AA- AA- - - - -                                                                              | CTCCTCAAAG- ACATTGTT- AAGACAATGAAAAGGTGA- GG- - - -    | CACAGACTGGAAGAAAA              | 32090              |       |       |       |       |

Dienstag, 3. Mai 2022 08:39

| Majority    | TAXTAATATTCACATATTTATXCATA- - TXTCTGA- CAAAGGACTT- - - - GTATCCAGAGTATGTAAGAATTCTTT- - -       |       |
|-------------|------------------------------------------------------------------------------------------------|-------|
|             | 47530 47540 47550 47560 47570 47580 47590 47600                                                |       |
| Human       | AATAATCCGCTACTGTTCTGTTTTTTTTGTTTGTGTTTTGTTTTTATTTTTTATTGATCATTCTTGGGTGTTTCTCGC                 | 40720 |
| PolarBear   | TACTAATATTCACATATTAATACATA- - TATTTG- - CAAAGGACTT- - - - GTATGCAGAGTATATAAGAATTCTTTCAA        | 10833 |
| Cow         | - ATTCTTTACAACACTGAGCCACC- - - - - - - - TGG- GAATCCACTT- - TGTTGGCCAGTCACTCAGTCACGTCCAAC- - - | 37970 |
| Dog         | TGCTAATACTCACATATTAATACATA- - TATCTAA- CAAAGGACTT- - - - GTATGCAGATTATATACAGAATTCTTT- - -      | 36414 |
| BelugaWhale | TATTAATATTCATTCAGATATCAATACATGTCTGA- CATAATAAATACTTATATCCAGAGTACGTAAGAATTCTTG- - -             | 34986 |
| Donkey      | GAGCAGTATTCACATATCAATACGTA- - TGTCTA- - CAAAGGACTT- - - - GTATCCAGAGTATGTACAAAATGCTTC- - -     | 38725 |
| Cat         | TCCTAATATTCACATATTTGTGCATA- - TATCTGA- CAAAGGACTT- - - - GTATCCAAAATAGCTTAAGAATTCTTT- - -      | 40978 |
| Ferret      | TACTAATATTCACATATTAATACATA- - TTTTTG- CAAAGGACTT- - - - CTCTGCAGAATATATAAGAATTTTCTTTC          | 37853 |
| Lion        | TCCTAATATTCACATATTTGTGCTTA- - TATCTGA- CAAAGGACTT- - - - GTATCCAAAATAGCTTAAGAATTCTTT- - -      | 39066 |
| Vaquita     | TATTAATATTCATTCAGATATCAATACATGTCTGA- CATAATAAATACTTATATCCAGAGTATGTAAGAATTCTTG- - -             | 35674 |
| Pig         | TATTAATGTCCACATATTTATC- - - - - - - - TGA- CAAAGGACTTA- TAATACCCAGAGTATGTAAGAAATTCTTC- - -     | 32155 |

| Majority    | - - - - - XACATCTXTAAATACAAACAGCCTAAT- - TTTTTTAAATAGACAAAAGAAGGTATATGAATG               |       |
|-------------|------------------------------------------------------------------------------------------|-------|
|             | 47610 47620 47630 47640 47650 47660 47670 47680                                          |       |
| Human       | AGAGGGGGATTTGGCAGGGT CATAGGACAATAGTGGAGGGAAAGGT CAGCAGATAAACAAGTGAACAAAGGTCTCTGGTTT      | 40800 |
| PolarBear   | AAAAAGAAAGGATTCTTTCACATCTATAAATACAAACAGCCTAAG- - TTTTTGAAAAAGACAAAAGAAGGTATATGAATG       | 10911 |
| Cow         | - - - - - TGTGTTG- CAGCACGCCAGGTTTCCCT- GTCCTT CACCGACTTGCAGAGTTTGCTCAAAC                | 38028 |
| Dog         | - - - - - GAAAAAATTCTTTCACATCTATAATTACAAACAGCATAATT- TTTTTGAAATAGGTGAAAGAA- - CATATGAATA | 36486 |
| BelugaWhale | - - - - - CATGTC- AAATACAAAGAGACTAAT- - - TTTTTAAATGGACAGAAGAAGGTACACGAA- -              | 35040 |
| Donkey      | - - - - - ACATCAATAAATAGAAACAACCTAAT- - - GTTTTTAATGAGTGAAAGAAGATATACAAATA               | 38783 |
| Cat         | - - - - - CACATCTGTAAGCACAAACAGCCTAATTTTTTTTTGAAATAGACCAAAGAAGGTATATGAATG                | 41040 |
| Ferret      | TT- - TGAAATAATTCTTTCACATCTATAAATACAAATAGCCTAA- - - TTTTTGAAATAGATAAAAAGAAGGTATATGACTG   | 37928 |
| Lion        | - - - - - CACATCTGTAAGCACAAACGGCCTAATTTTTTTTTGAAATAGACCAAAGAAGGTATATGAATG                | 39128 |
| Vaquita     | - - - - - CATGTC- AAATACAAAGAGACTGAT- - - TTTTTAAATGGACAGAAGAAGGTACACGAA- -              | 35728 |
| Pig         | - - - - - CACAT- - CGGTACGAACAGCTTAATC- TTTTTTAAATGGACAAAAGAAGGTACATGAA- T               | 32211 |

Dienstag, 3. Mai 2022 08:39

| Majority    | ----- GCT ----- AATAAGCACATGAAAATAT----- XTATTAGTCATCAGGAAAACACAAGTTATAA ACTACTGTGAGG |                               |                         |                                            |                                 |                         |       |       |
|-------------|---------------------------------------------------------------------------------------|-------------------------------|-------------------------|--------------------------------------------|---------------------------------|-------------------------|-------|-------|
|             | 47690                                                                                 | 47700                         | 47710                   | 47720                                      | 47730                           | 47740                   | 47750 | 47760 |
| Human       | TC-----                                                                               | CTAGGCAGAGGACCCTGCGGACTTCCGC- | AGTGT                   | TTGTGTCCCTGGGT                             | CCTT                            | GAGATTAGGGAGTGGT        | GATG  | 40873 |
| PolarBear   | -----                                                                                 | GCT-----                      | GATGAGCACATGAAAATA-     | - C-                                       | ATATTAGTCATCAAGAAA-             | - CACGTTATACCTACTGTGAGG |       | 10973 |
| Cow         | CATGCCCGTTGAGTTGGTGATATCATCCAAGCATCTCATCCTCTGTCATCCCTTTCTCCTCCTTTCCCAGCATTAGGGTC      |                               |                         |                                            |                                 |                         |       | 38108 |
| Dog         | -----                                                                                 | GCTG-                         | ATAATAAGCACATGAAAATA-   | - T-                                       | GTATTAGTCATCAAGAAAACACGGGTTATAA | ACTGCTGTGAGA            |       | 36553 |
| BelugaWhale | -----                                                                                 | TGGCTAAATAAGCACATGAAAAGAT-    | - - -                   | TTATTAGTCATAAGGAAATCACAATTTATAGCTAATATGAGA |                                 |                         |       | 35107 |
| Donkey      | -----                                                                                 | GCT-----                      | AATAAGCACAGGAAAACAT-    | - - -                                      | ACATTAGTCATCAGGAGAAAACAAGTTATAA | ACCACTGTGGGG            |       | 38847 |
| Cat         | -----                                                                                 | GTT-----                      | GATAAATGCACGAAAATAA-    | - T-                                       | ATATTTGTCATCAGGAAAACACAAGTTATAA | ACTGCTGTGAGG            |       | 41105 |
| Ferret      | -----                                                                                 | GCT-----                      | AATGAGCACATGAAAATA-     | - T-                                       | ATACTAGTCATCAAGAAAAAGCAAGTTATAA | ATTGCTATGAGG            |       | 37992 |
| Lion        | -----                                                                                 | GCT-----                      | GATAAATGCACAAAAA-       | - - - - -                                  | TATTTGTCATCAGGAAAACACAAGTTATAA  | ACTGCTGTGAGG            |       | 39188 |
| Vaquita     | -----                                                                                 | TGGCTAAATAAGCACATGAAAAGAT-    | - - -                   | TTATTAGTCATAAGGAAATCACAATTTATAA            | ACTAATATGAGA                    |                         |       | 35795 |
| Pig         | -----                                                                                 | G-----                        | GCTAATAGGCACATGTAAAGAT- | - - -                                      | TTATTAGTCATAAGGAAATCACGGTTTATAA | ACCACTACAAGA            |       | 32276 |

| Majority    | TATCAXGTCACACCAACT- - - AGAATCTAGGCTAAA- ATTAACAGATTGG- - - - - - - - - - CAATGCTAAATGTT- - - G |                  |        |                  |                     |                           |                     |                        |       |
|-------------|-------------------------------------------------------------------------------------------------|------------------|--------|------------------|---------------------|---------------------------|---------------------|------------------------|-------|
|             | 47770                                                                                           | 47780            | 47790  | 47800            | 47810               | 47820                     | 47830               | 47840                  |       |
| Human       | ACTCTTAACGAGCATGCT- - - -                                                                       | GCCTTCAAGCATCT-  | GTTTAA | CAAAGCACATCTTG-  | - -                 | CACCGCCCTTAATCCATTTA      |                     | 40945                  |       |
| PolarBear   | CGTCCTGTGATGCCAACT- - -                                                                         | AGAATCTTGGCTAAA- | ATTAAC | AGATTGG-         | - - - - - - - - - - | CAACA- AAAACA-            | T- - - G            | 11033                  |       |
| Cow         | TTTTCTAATAAGTTGGCTCCTTGCATCAGGAATATTCATTGGAAGGACTGATTCTGAAGCCACAGTACTGGAGCTTCCA                 |                  |        |                  |                     |                           |                     | 38188                  |       |
| Dog         | TAT- - -                                                                                        | GTCACACCAACC-    | - - -  | AGAATTTAGGCTCAC- | ATTAAC              | AGATTGG-                  | - - - - - - - - - - | CAACA- TAAGCGTT- - - G | 36611 |
| BelugaWhale | TACCACTTTAGACCAACT- - -                                                                         | AGAATCTAGGCTAAA- | GTTAA  | ACAAATCGG-       | - - - - - - - - - - | TAATGCCAAATGTT- - - G     |                     | 35169                  |       |
| Donkey      | TACCACTTACGCCAACT- - -                                                                          | AGAATCTAGGCTAAA- | GTTAA  | ACAGATTGG-       | - - - - - - - - - - | CAATGCCAAATGTT- - - G     |                     | 38909                  |       |
| Cat         | TAT- - -                                                                                        | GTCACACCCACT-    | - - -  | GGAATTTAAGCTAAA- | ATTAAC              | CGGATTGG-                 | - - - - - - - - - - | CAATG- TAAATGTT- - - G | 41163 |
| Ferret      | TATCTTGTGATGCCAACT- - -                                                                         | AGAATTTTGGCTAAA- | GTTAA  | ACAGATTGG-       | - - - - - - - - - - | CAACA- TAAA- - - T- - - G |                     | 38050                  |       |
| Lion        | TAT- - -                                                                                        | GTCACACCCACT-    | - - -  | GGAATTTAAGCTAAA- | ATTAAT              | GGATTGG-                  | - - - - - - - - - - | CAATG- TAAATGTT- - - G | 39246 |
| Vaquita     | TACCACTTACGCCAACT- - -                                                                          | AGAATCTAGGCTAAA- | GTTAA  | ACAAATCGG-       | - - - - - - - - - - | TAATGCCAAATGTT- - - G     |                     | 35857                  |       |
| Pig         | TACCACTACAGATCAACT- - -                                                                         | AGAATCTAGGCTAAA- | ATTAAC | AGATTGG-         | - - - - - - - - - - | CAGTGCCAAATGTT- - - G     |                     | 32338                  |       |

Dienstag, 3. Mai 2022 08:39

| Majority    | ATGAGGA- - - TGTGXGAGCAAAT- - - TGGAACAATTTGCCATTGCTGGTGAXAGTGTAAAATAGTTTGGAAAACAAC- - - |                                               |                                                                      |                                                        |       |           |             |       |       |
|-------------|------------------------------------------------------------------------------------------|-----------------------------------------------|----------------------------------------------------------------------|--------------------------------------------------------|-------|-----------|-------------|-------|-------|
|             | 47850                                                                                    | 47860                                         | 47870                                                                | 47880                                                  | 47890 | 47900     | 47910       | 47920 |       |
| Human       | ACCCTGA-                                                                                 | GTGGACACAGCACATGTTTCAGAGAGCAGAGGGTTGGGGTAAGGT | CACAGATCAA-                                                          | CAGGATAAGAAT-                                          | - - - | 41020     |             |       |       |
| PolarBear   | ATGAGGA- - - -                                                                           | TATAGAGCAA-                                   | - - -                                                                | TGGAACAGTTTACCATGGCTGGTAAAAATGTAAAATAGTTTGGTAAACAGC-   | - - - | 11102     |             |       |       |
| Cow         | ATCAGTC-                                                                                 | - - -                                         | CTTCCAGTGAATATTCAGAATTGATTTCTTTAGCATTGACTGGTTTTATCTCCTTGCAGTCCAAGGGA |                                                        |       | 38264     |             |       |       |
| Dog         | ATGAGGA- - - -                                                                           | CGTAGCGAGGAC-                                 | - - -                                                                | TGGAACAACCTCACCATGGCTGGTAAAAATATAAAAATAGTTTGGAAAACAAC- | - - - | 36681     |             |       |       |
| BelugaWhale | ATGAGGA- - - -                                                                           | TGTGGAGCAGCT-                                 | - - -                                                                | GAAACTATATGCCATTGTTGGTGAGTG-                           | -     | TAAAATAG- | TTGGAACACA- | G-    | 35234 |
| Donkey      | ATGAGGA- - - -                                                                           | TGCAGAGCACCTG-                                | - -                                                                  | GCACTTTTTTGGCATTGTTGGTGAGAGTGTAAAATAGTTTGGAAAACA-      | - - - | G-        |             |       | 38978 |
| Cat         | ATGAGGAAGGATGTGGAGCAGT-                                                                  | - - -                                         | TGGAACAACCTTGGCATTGCTGGTGAAAGTGTAAAATAGTTTGGAAAACAAC-                | - - -                                                  | 41236 |           |             |       |       |
| Ferret      | ATGCAGA- - - -                                                                           | TATAGAGCAAG-                                  | - - -                                                                | TGGAACAATTCACCATGGCTGGTAAAAGTGTAAAATAGTTTGGAAAACAGC-   | - - - | 38119     |             |       |       |
| Lion        | ATGAGGAAGGATGTGGAGCAAT-                                                                  | - - -                                         | TGGAACAACCTTGGCATTGCTGGTGAAAGTGTAAAATAGTTTGGAAAACAAC-                | - - -                                                  | 39319 |           |             |       |       |
| Vaquita     | ATGAGGA- - - -                                                                           | TGTGGAGCAGCT-                                 | - - -                                                                | GAAACTATATGCCATTGTTGGTGAGTG-                           | -     | TAAAATAG- | TTGGAACACA- | G-    | 35922 |
| Pig         | ATGAGGA- - - -                                                                           | TGTGGAGCAAAC-                                 | -                                                                    | T-AAAACATACGCCATTGCAGGTGAGAGTGTAAAATAGTTTGGAAAACA-     | G-    | 32407     |             |       |       |

| Majority    | - - TTTGGCAGTATCTTATA- - - - - AAGTTAAACA- - - - - |                 |                                                         |                                                   |           |       |       |       |       |
|-------------|----------------------------------------------------|-----------------|---------------------------------------------------------|---------------------------------------------------|-----------|-------|-------|-------|-------|
|             | 47930                                              | 47940           | 47950                                                   | 47960                                             | 47970     | 47980 | 47990 | 48000 |       |
| Human       | - TTTTCTTAGTACAGAACA-                              | - - - - -       | AAATGAAAAGTCTCCCATGTCTACCTCTTTCTACACAGACACGGCAACCATCCGA |                                                   |           |       |       |       | 41093 |
| PolarBear   | - - TT-                                            | GGCTGTATCTTACA- | - - - - -                                               | AAGTTAAACA-                                       | - - - - - |       |       |       | 11128 |
| Cow         | CTCTCAGGAGCCTTTCCAACATCACAATTCAAAAG-               |                 |                                                         |                                                   |           | C-    |       |       | 38300 |
| Dog         | - - TT-                                            | GGCAGTATCTTATA- | - - - - -                                               | AAGTTAAGCAGCCTATGACCCAGTACTTCTACATCAAGTTTTCTACCT- | - - - - - |       |       |       | 36746 |
| BelugaWhale | - - TTTGGCAGTTTCTTATA-                             | - - - - -       | AAGTTAAAC-                                              | - - - - -                                         |           |       |       |       | 35260 |
| Donkey      | - - TTTGGCAATTTCTTAGA-                             | - - - - -       | AAGTTAGACA-                                             | - - - - -                                         |           |       |       |       | 39005 |
| Cat         | - - TTTGGCAGTATTTTATA-                             | - - - - -       | AAGTTAAACATGAATACAGCTTATGACCTCGTACTTTCTGGTCTAGGTTTTTTTT |                                                   |           |       |       |       | 41308 |
| Ferret      | - - TT-                                            | GTCATTATCTTATA- | - - - - -                                               | AAGTTAAACA-                                       | - - - - - |       |       |       | 38145 |
| Lion        | - - TTTGGCAGTATTTTATA-                             | - - - - -       | AAGTTAAACATGAAGACAGCTTATGACCTCGTACTTTCTGGTCTAG-         | - - - - -                                         |           |       |       |       | 39382 |
| Vaquita     | - - TTTGGCAGTTTCTTATA-                             | - - - - -       | AAGTTAAAC-                                              | - - - - -                                         |           |       |       |       | 35948 |
| Pig         | - - TTTGGGAGTTTCTTAGA-                             | - - - - -       | AGGTCAAAA-                                              | - - - - -                                         |           |       |       |       | 32433 |

Dienstag, 3. Mai 2022 08:39

| Majority    | -----ATAAACA-X-----                                                          |       |       |       |       |       |       |       |       |
|-------------|------------------------------------------------------------------------------|-------|-------|-------|-------|-------|-------|-------|-------|
|             | 48010                                                                        | 48020 | 48030 | 48040 | 48050 | 48060 | 48070 | 48080 |       |
| Human       | TTTCTCAATCTTTTCCCCACCTTTCCCCCTTTCT-----A-----TTCCACAAAACCGCCATTGTCATCATGGC   |       |       |       |       |       |       |       | 41158 |
| PolarBear   | -----TGAACATG-----                                                           |       |       |       |       |       |       |       | 11136 |
| Cow         | -----ATGAATTCT-----                                                          |       |       |       |       |       |       |       | 38309 |
| Dog         | -----AG-----TGAAAAAGA-----                                                   |       |       |       |       |       |       |       | 36757 |
| BelugaWhale | -----ATAAACA-----                                                            |       |       |       |       |       |       |       | 35267 |
| Donkey      | -----TAA-CC-----                                                             |       |       |       |       |       |       |       | 39010 |
| Cat         | TTTTTTTTTTTTTTTCCAACGTTTATTTATTTTGGGACAGAGAGACAGAGCATGAACGGGGGAGGGGCAGAGAGAG |       |       |       |       |       |       |       | 41388 |
| Ferret      | -----TAAACATG-----                                                           |       |       |       |       |       |       |       | 38153 |
| Lion        | -----                                                                        |       |       |       |       |       |       |       | 39382 |
| Vaquita     | -----ATAAACA-----                                                            |       |       |       |       |       |       |       | 35955 |
| Pig         | -----ATAAATA-----                                                            |       |       |       |       |       |       |       | 32440 |

| Majority    | -----GCCTA-X-TXTGACCCAGXXXXT-----                                               |       |       |       |       |       |       |       |       |
|-------------|---------------------------------------------------------------------------------|-------|-------|-------|-------|-------|-------|-------|-------|
|             | 48090                                                                           | 48100 | 48110 | 48120 | 48130 | 48140 | 48150 | 48160 |       |
| Human       | CCGTTCTCAATGAGCTGTTG--GG-----TACACCTCCCAGACGGGGTGGTGGCCGGGCAGAGGGGCTCCTCACT     |       |       |       |       |       |       |       | 41226 |
| PolarBear   | -----GCCTA-----TGACCCGGTACTT-----                                               |       |       |       |       |       |       |       | 11154 |
| Cow         | -----TTGGTGC--TCAGCCTTCTTTATGGTCCAAC--T-----                                    |       |       |       |       |       |       |       | 38339 |
| Dog         | -----CTTGTGC--AGCCTA-----TGACCCAGTACTT-----                                     |       |       |       |       |       |       |       | 36783 |
| BelugaWhale | -----T-----GTCCTATGACCCAG-----                                                  |       |       |       |       |       |       |       | 35282 |
| Donkey      | -----CTACCCTACAGCCTAGTACTT-----                                                 |       |       |       |       |       |       |       | 39031 |
| Cat         | AAGGAGACACAGAATCGGAAACAGGCTCCAGGCTCTGAGCCATCAGCCAGAGCCTGACGCGGGGCTCGAACTCCCGGCC |       |       |       |       |       |       |       | 41468 |
| Ferret      | -----GCCTA-----TCACCCAGTACTT-----                                               |       |       |       |       |       |       |       | 38171 |
| Lion        | -----                                                                           |       |       |       |       |       |       |       | 39382 |
| Vaquita     | -----T-----GTCCTATGACCCAG-----                                                  |       |       |       |       |       |       |       | 35970 |
| Pig         | -----AATCTACCTTGTGACCTCG--T-----                                                |       |       |       |       |       |       |       | 32460 |

Dienstag, 3. Mai 2022 08:39

```
Majority ----- CT- C- ----- XTCTAGGTTTTTTACCC- AG
                    48170      48180      48190      48200      48210      48220      48230      48240
Human      TCCCAGTAGGGG- - - CGGCCGGGCAGAGGCCGCCCTCACTCCCCAGTAGGGGCAGCCGGGCAGAGGCGCCCCTCACCTCC 41303
PolarBear ----- ATACA----- TCTAGGTTTTTTCCCCAA 11177
Cow        ----- CT----- CTTATCCGTACATGACT- CC 38360
Dog        ----- CTACA----- TCAAGGTTTTTCTACCTAG 36806
BelugaWhale ----- TACTTCCATTTCT----- 35295
Donkey     ----- CTAC----- TTCTAGGTTTTTTACCC- AG 39053
Cat        CGCGAGATCGTGACCTGGCTGAAGTCGGACGCTCAACCGACTGCGCCACCCAGGCGCCCGTTCTAGGTTTTTATCC- AG 41547
Ferret     ----- CTACA----- TCTAGGTTTTTTACCC- AA 38193
Lion      ----- GTTTTTACGC- AG 39394
Vaquita  ----- TACTTCCATTTCT----- 35983
Pig       ----- AT----- TTCCTAGGTTTTTTACCC- AT 32481
```

```
Majority TGAAAA- X- - X- C- X- - - AGACTTGTACAAATATGTGTATAAAAAAC- - - - - TTTATTTATGATGGTCCCAAACCTTGA
                    48250      48260      48270      48280      48290      48300      48310      48320
Human      CGGATGGGGCGGCTGGCCGGGCGGGGGGCTGACCCCCCACCTCCCTCCCGGATGGGGCAGCTGGCCGGGCGGGGGGCTG 41383
PolarBear  TGAAAA- - - - - GGACTTGTACAAATATGTATATAAAAAAC- - - - - TTTATTCATCATGGTCCCAAATGTGA 11237
Cow        TGGAAAAACATGCACAGCCTTAACGATACCGACCTTTGTGAGCAAAGTAACGTCTCTACTTTTAAATACTAAGCTTGT 38440
Dog        TGAAAA- - - - - AGACTTGTGCAAATATGCATATAAAAAAA- - - - - TTTATTCATGATAATCCCAAACCTTGA 36867
BelugaWhale ----- AGTTGTACAAATGTGTGTATAAAAAA- - - - - CTATTTATAATGGTCCCAAACCTTGA 35346
Donkey     TGAAAACACGTTCCCTACAAGACTTGTGCAAATATGTGTATAAAAAAC- - - - - TTCATTTCGTGATGGTCCCAAACCTTGA 39127
Cat        TGTA AACATGTTCACTGTAAGACTTGTACAAA- - TGTGTATAAAAAAC- - - - - TTGATTTATGATGGTCCCAAACCTTGA 41619
Ferret     TGAAGG- - - - - AGACTTGTACAAA- ATGTATATAAAAAAA- - - - - TTTATTCATGATGGTCCCAAACCTTGA 38253
Lion      TGTA AACATGTTCACTGTAAGACTTGTACAAA- - TGTGTATAAAAAAC- - - - - TTGATTTATGATGGTCCCAAACCTTGA 39466
Vaquita  ----- AGTTGTACAAATGTATGTATAAAAAAA- - - - - CTATTTATAATGGTCCCAAACCTTGA 36035
Pig       TGAAAACATGTTCACTACAAGAGTTATACAAATGTGTGTATAGAAAA- - - - - CTATTTATAATGGTCCCAAACCTGT 32553
```

Dienstag, 3. Mai 2022 08:39

| Majority    | AATTACCCAAAT- GTCTGTCA- - - - - ATAGGAAAATGGGTCAATGAATTGTTG- TATAATCATACAGTXGATTACT- - -          |       |       |       |       |       |       |       |       |
|-------------|---------------------------------------------------------------------------------------------------|-------|-------|-------|-------|-------|-------|-------|-------|
|             | 48330                                                                                             | 48340 | 48350 | 48360 | 48370 | 48380 | 48390 | 48400 |       |
| Human       | ACCCCCCACCT- CCCTCCCGGACGGGGCGGCTGGCCGGGCTGGGGGCTGACCCCCGCCACCTCCCTCCCGGACGGGGC-                  |       |       |       |       |       |       |       | 41461 |
| PolarBear   | AATTA- CCCAGT- GTCTGTCA- - - - - GTAGGAAAATGGGTCAATGAATTGTTG- TATAATCATACAGTAGATTACT- - -         |       |       |       |       |       |       |       | 11305 |
| Cow         | CATTGCTT- - - - - TTCTTCGA- - - - - AGGAGCAAGCATCTTTAATTTTCATTGCTCCAGGCACCATCTGCATTGATGTT         |       |       |       |       |       |       |       | 38509 |
| Dog         | AATTATCCAAAT- GTCTGTCA- - - - - GTAGAAAATGGGTCAATGAATTCT- - - - - AATCATGCAGTAGATTAGT- - -        |       |       |       |       |       |       |       | 36931 |
| BelugaWhale | AACAATCTAAATGTTTTATCA- - - - - ACAGGAAAATGGATTAAGAAGTTAGTCATACAG- - - - - TGGATTACTACT            |       |       |       |       |       |       |       | 35412 |
| Donkey      | AATAA- - C- - - - - GTCTGTCA- - - - - TCAGGAAAATGGATCAGTAAATTGTTG- TGTAGTCATATAGTGGATTACT- - -    |       |       |       |       |       |       |       | 39190 |
| Cat         | AATTACCCAAAT- GTCTGTAA- - - - - ATAGGAAAATG- - TCAGTGAATTGTAG- TATAATCAAACAGTAGATTACT- - -        |       |       |       |       |       |       |       | 41686 |
| Ferret      | AATTA- CCAAAT- GTCTGTGACACAGAATAGGAAAATGGGACAATGATTTGTGG- TATAATCATATAGTAGAGTACT- - -             |       |       |       |       |       |       |       | 38327 |
| Lion        | AATTACCCAAAT- GTCTGTAA- - - - - ATAGGAAAATA- - TCAGTGAATTGTAG- TATAATCAAACAGTAGGTTACT- - -        |       |       |       |       |       |       |       | 39533 |
| Vaquita     | AACAATCTAAGTGTCTTATCA- - - - - ACAGGAAAATGGATTAAGAAGTTAGTCATACAG- - - - - TGGATTACTACT            |       |       |       |       |       |       |       | 36101 |
| Pig         | ATCCAGAT- - - - - GTCTATCA- - - - - ATAGGAAAATAA- - - - TAAGTT- - - - - G- - - - - TGGATTGTT- - - |       |       |       |       |       |       |       | 32597 |

| Majority    | - - - ACTTA- T- ATAACAAAAGAATGACTATTAATAC- - - - - ATG- CAXAAACATGAGTGAATATT          |       |       |       |       |       |       |       |       |
|-------------|---------------------------------------------------------------------------------------|-------|-------|-------|-------|-------|-------|-------|-------|
|             | 48410                                                                                 | 48420 | 48430 | 48440 | 48450 | 48460 | 48470 | 48480 |       |
| Human       | - - - GGCTGGC- CGGGCTGGGGGCTGACCCCCGACCTCCTTCCCGG- - - - - ACG- - GGGCGGCTGGCCGGGCAGA |       |       |       |       |       |       |       | 41525 |
| PolarBear   | - - - AATTA- - - GTAACAAAAGAATGACTATTAACAA- - - - - ATAACAAAACCATGAGTGAAGATT          |       |       |       |       |       |       |       | 11359 |
| Cow         | GGAGCCCAAAAAGATAAAGTCTGTCACTGTTTTCATTGTTTCCCATTATTGCCATG- AAGTGATAGGACCGGATGCC        |       |       |       |       |       |       |       | 38588 |
| Dog         | - - - AATTA- - - GTGACAAAAGAATGACTATTA- - - T- - - - - ACA- - A- AAACATGAGTGAATATT    |       |       |       |       |       |       |       | 36979 |
| BelugaWhale | T- - ACTCATTAAAGAGCAAAGAATTACTATTAATAC- - - - - ATG- TAGCAACACAAGTGAATATT             |       |       |       |       |       |       |       | 35469 |
| Donkey      | - - - ACTCA- - - ATAATAACAGAATGACTGTCTATAC- - - - - TTG- GAACAAACTGAGTGGATATT         |       |       |       |       |       |       |       | 39243 |
| Cat         | - - - GCTTACTCATAACAAAAGAATGATTATTA- - - - - ACA- CAAAAACATGAGTGAATATT                |       |       |       |       |       |       |       | 41738 |
| Ferret      | - - - AATTA- - - GTAACAAAAGAATGACTATTAACAA- - - - - ATA- CAAAAACATGAGTGAATATT         |       |       |       |       |       |       |       | 38380 |
| Lion        | - - - ACTTACTCATAACAAAAGAATGATTATTA- - - - - ACA- CAAAAACATGAGTGAATATT                |       |       |       |       |       |       |       | 39585 |
| Vaquita     | T- - ACTCATTAAAGAGCAAAGAATTACTATTAATAC- - - - - ATG- TAGCAACACAAGTGAAAATT             |       |       |       |       |       |       |       | 36158 |
| Pig         | - - - ACTCATTAAAGAACAAAAGAATTACTATTAATAT- - - - - GTG- TAGTAGCGTGAGTGAATATT           |       |       |       |       |       |       |       | 32653 |

Dienstag, 3. Mai 2022 08:39

| Majority    | AA- - - - - AACXTTATATG- - AAGC- - - - - AAAAGAAGCCAGACA- - - - - CAAAAXAGTA             |       |       |       |       |       |       |       |       |
|-------------|------------------------------------------------------------------------------------------|-------|-------|-------|-------|-------|-------|-------|-------|
|             | 48490                                                                                    | 48500 | 48510 | 48520 | 48530 | 48540 | 48550 | 48560 |       |
| Human       | GGG- - - - - GCTCCTCACTTCCCAGTAGGGGCGGCC- - - - - GGGCAGAGGCGCCCTCACCTCCCGGAAGGGGCGG     |       |       |       |       |       |       |       | 41590 |
| PolarBear   | AA- - - - - GACAGCATATG- - AAGC- - - - - AAAAGAAGCCAGACA- - - - - GAAAACAGAA             |       |       |       |       |       |       |       | 11401 |
| Cow         | ATGATCTTTGATTTTGAATGTTGAGTTTTAAGCCAGCTTTTTCACTCTCCATCAAGAGGCTCTTTTGTTCCTCCTCATT          |       |       |       |       |       |       |       | 38668 |
| Dog         | AA- - - - - GACAATATATG- - AAGC- - - - - AAAAGAAGCCATACC- - - - - CAA- - - - GTG         |       |       |       |       |       |       |       | 37017 |
| BelugaWhale | AAG- - - - - A- - - - - AACGTTATATG- - AAGC- - - - - AAGAGAAGCCAGACG- - - - - CAAAAGAGTA |       |       |       |       |       |       |       | 35513 |
| Donkey      | GT- - - - - TAAATGTTATATG- - AAAC- - - - - AAAGGAAGCTAGATA- - - - - CAAAACATTG           |       |       |       |       |       |       |       | 39287 |
| Cat         | AGT- - - - - AGACCTTCTATG- - AACC- - - - - AAAAGAAGCTAGACA- - - - - CAAG- - AGTA         |       |       |       |       |       |       |       | 41780 |
| Ferret      | AA- - - - - GACAGTATATG- - AAGC- - - - - ACAAGAAGCCAGACA- - - - - GAAAACAGAA             |       |       |       |       |       |       |       | 38422 |
| Lion        | AG- - - - - ACCTTCTATG- - AACC- - - - - AAAAGAAGCTAGACA- - - - - CAAG- - AGTA            |       |       |       |       |       |       |       | 39624 |
| Vaquita     | AAG- - - - - A- - - - - AACGTTATATG- - AAGC- - - - - AAGAGAAGCCAGATG- - - - - CAAAAGAGTA |       |       |       |       |       |       |       | 36202 |
| Pig         | AG- - - - - TAAACATTGCG- - - - - AAGC- - - - - AACAGGAGACAGA- - - - - CAAAAGATTA         |       |       |       |       |       |       |       | 32693 |

| Majority    | XXTACTGTG- - TGATTC- - - - - CCATTTTTATAAAGT- - - - - ACXGATAXTTAATTTT- TAGTATAGAAACC-        |       |       |       |       |       |       |       |       |
|-------------|-----------------------------------------------------------------------------------------------|-------|-------|-------|-------|-------|-------|-------|-------|
|             | 48570                                                                                         | 48580 | 48590 | 48600 | 48610 | 48620 | 48630 | 48640 |       |
| Human       | CTGGCCGGGCGGGGGTCTGACCCCCCACCTCCCTCCTGGAT- - - - - GGGGCGGCTGGCCTGGCGGGGGCTGACCCC             |       |       |       |       |       |       |       | 41662 |
| PolarBear   | ATCACTGAAA- TGAATCATTGTGTGATTCCATTTTTATAAAATT- - - - AAAGAACAGATAATCAA- TTTTATAGTATA- - -     |       |       |       |       |       |       |       | 11472 |
| Cow         | TCTACCATA- - TGGTTG- - - GTGTCAT- CTGCATATCTGAGGTT- - - - ATTGGTATTTCTTCCTGCAGTCTTGATTCC-     |       |       |       |       |       |       |       | 38736 |
| Dog         | AATACTCAAC- TGATTC- - - - - CGT- - - - TTTTTACAAAGTT- - - - AAAGAACAGATAATTTT- TAGTAAAGAAACC- |       |       |       |       |       |       |       | 37079 |
| BelugaWhale | TATACTATG- - TGATT- - - - - CCCTTTCTGTAAAGA- - - - - GCAGATAATTAATTTT- CAGTATAGAAACC-         |       |       |       |       |       |       |       | 35571 |
| Donkey      | CATACTGTGTGTGATT- - - - - CCATTTCTATAAAGTT- - - - - AGGAGCAGATAATTTT- TAGTATAGAAACC-          |       |       |       |       |       |       |       | 39348 |
| Cat         | CTCACTGTG- - TGGTTC- - - - - CATTTTTGTAAAG- - - - - AACAGATAATCAAGTTT- TAGTATAGTAGCC-         |       |       |       |       |       |       |       | 41838 |
| Ferret      | ATCACTGAAA- TGAATC- - - - TGTGATCCATTTTTATAAAGTTTAAATAAAGAACAGATAATCTA- TTTTAAAGTATA- - -     |       |       |       |       |       |       |       | 38493 |
| Lion        | CTCACTGTG- - TGATTC- - - - - CATTTTTATAAAG- - - - - AACAGATAATCAAGTTT- TAGTATAGTAGCC-         |       |       |       |       |       |       |       | 39682 |
| Vaquita     | TATACTGTG- - TGATT- - - - - CCCTTTCTGTAAAGA- - - - - GCAGATAATTAATTTT- CAGTATAGAAACC-         |       |       |       |       |       |       |       | 36260 |
| Pig         | TATACTGTG- - TGATT- - - - - CTATTTCTCTGAAGA- - - - - GTAGATAATTAATTTT- CAGTATAGAAACC-         |       |       |       |       |       |       |       | 32751 |



Dienstag, 3. Mai 2022 08:39

Majority - AAAATAATXGTTGCCTG- - TGGGTGTT- - - - - XXGATGAACAGXAAGTACAAGGX- - - - AATTCTCTGGGGTATTGGAC  
 48650 48660 48670 48680 48690 48700 48710 48720

Human CACCTCCCTCCCAGACGGGGT GACTGCCGGGCGGAGACGCTCCTCACTTCCCAGACGGCGTGGCTGCCGGGCGGAGGGGC 41742  
 PolarBear - - - AATAGTGGTTGCCTG- - TGGGTGTT- - - - - GGGATTAACAGGAAGTACAAGG- - - - AATTCTCTGCAGTATTGGAC 11537  
 Cow - AGCTTGTGCTCCATCCAGTCCAGCATTCTC- ATGATGTATTCTGCATATAAGTTA- - - AATAAACAGGGTGCAGTAT 38811  
 Dog - AAAATAATGGTGGCCTG- - TGGGTGTT- - - - - GGGATTAACAGCAAGTACAAGGT- - - - AATTCTCTGGGGTATTGGAC 37147  
 BelugaWhale - AAAATAATCATTGCTTG- - TGGGTGT- - - - - TGGGGATTAATAAGTATTAGGAC- - - ATTTTCTGGGGTGA- GGGAC 35637  
 Donkey - AAAATATTAGTTGCCTG- - TGGGTGT- - - - - TGGGAATTAGCAGGAAGGGAA- - - - - TCTGGGCTGATGGGC 39408  
 Cat - AGAATAAGGGTTGCCTG- - TGGGTGTT- - - - - CGGATGAACAGGAAGTACAAGGAAATTAATTCTCTGTGGTGTGGAC 41910  
 Ferret - - - AAT- - - - GTTGCCTA- - TGGGTTTG- - - - - AGGTTTAACAAGAAGCACAAGGG- - - - AATTCTCTGCAGTATTGGAC 38555  
 Lion - GGAATAAGGGTTGCCTG- - TGGGTGTT- - - - - CGGATGAACAGGAAGTACAAGGGAATTAATTCTCTGTGGTGTGGAC 39754  
 Vaquita - AAAATAATCGTTGCTTG- - TGGGTGT- - - - - TGGGGATTAATAAGTATTAGGAC- - - ATTTTCTGGGGTGA- TGGAC 36326  
 Pig - AA- - - - - - - - - - - - - - - - - AGTA- - - - - - - ATGTTGCCTGTGGGTATTGGGT- - - - - ATTGACAGAA- - - - - AGGAT 32795

Majority ATG- TTCT- - - ATATCAATTAACAAAGTTGTAAAACAAATCCAAAATT- - - - - TGTGTTGAAACAGTAGGCTACC  
 48730 48740 48750 48760 48770 48780 48790 48800

Human TCCTCACT- - - - TCTCAGATGGGGCGGCTGCTGGGCGGAGGGACTCCTCG- - - - - CTTCTCAGATGGGGCGGCCGGG 41810  
 PolarBear ATG- TTCC- - - ATATCAATTAACAAAGTTGT- - - ACAA- TCCAAAAT- - - - - TTGTGTTGAAACAGTAGGGTATG 11598  
 Cow ACAGCATTGACATACTCCTTGGCTCAATTTTGA- ACCAGTCCGTTGTTG- - - - - CATGTCTGGTTCTAACTGTTGCT 38882  
 Dog ATA- CCC- - - ATATCAATTAACAAAGTTGT- - - ACAG- TCTAAAAGTGGTT- - - - - TGAAACTGGGAAAGGCTACCACC 37214  
 BelugaWhale ATGTTCTT- - - - TGTC AATGAACAAAGCTGTAAAATAAATA- ACAATT- - - - - TATTTGAAATAGTAGGCTACC 35701  
 Donkey ATG- TTCT- - - GTATCAATTAACAAAGTTGTAAAGCAGATCCAAAATT- - - - - TGTGTTGAAACAGTAGGCTGCC 39473  
 Cat ATG- TTCT- - - ATATGGATTTACAGAGTTTTCAAACAAGTCCAAAAT- - - - - TAGTTTGAACACTGTAGAATACC 41975  
 Ferret ATG- TTCC- - - ATATCAGTTAACTAAGTTGT- - - GCAA- TCCAAAATAAGTTGGATTTCTGTTTGAACAGTAGGCTATC 38627  
 Lion ATG- TTCT- - - ATATGGATTTACAAAGTTTTCAAACAAGTCCAAAAT- - - - - TCGTTTGAACACTGTAGAATACC 39819  
 Vaquita ATGTTCTT- - - - TGTC AATGAACAAAGCTGTAAAATAAATA- ACAAT- - - - - TTGAAATAGTAGGCTACC 36386  
 Pig ATA- TATT- - - CATATCGGTGAGCAAAGTTGTAAAGATAAATCCAAAATT- - - - - TGTGTTGAAATAGAAGGCTACC 32861

Dienstag, 3. Mai 2022 08:39

| Majority    | TCTGGGAAC- CATGAACTACTXGT- - A- - - - - GTTTTGTCTT- - - - - GCTGGAAT- - GTGAAATATGAGAAGGGGX- |                                                        |                      |       |       |       |       |       |  |
|-------------|----------------------------------------------------------------------------------------------|--------------------------------------------------------|----------------------|-------|-------|-------|-------|-------|--|
|             | 48810                                                                                        | 48820                                                  | 48830                | 48840 | 48850 | 48860 | 48870 | 48880 |  |
| Human       | CCGAGACGCTCCTCACCTCCCAGACGGGGT                                                               | CGCGGCCGGGTAGAGGCGCTCCTCACAT-                          | CCCAGACGGGGCGGCGGGGC | 41888 |       |       |       |       |  |
| PolarBear   | TGTGGGAAT- CATGAACTATGCCT- - A- - - - -                                                      | GTAAAAATAGAGAGGGGGGG                                   | 11660                |       |       |       |       |       |  |
| Cow         | TCTTGACCTGCATACAGGGTTTGC- - AGAGGCAGTAAGGTAGT- - - - -                                       | CTGGTATTTTCATTCTCTTTAAGAATTTTCC                        | 38954                |       |       |       |       |       |  |
| Dog         | TCTGGGAAC- CATGAACTACCC- - - A- - - - -                                                      | GTAAAAATAGAGAGGGAGGG-                                  | 37274                |       |       |       |       |       |  |
| BelugaWhale | TGTGGAAACCCATCAACTACTTGT- - AGA- - - - -                                                     | GTTCTGTCTT- - - - - TCTGCAAT- - GTAAAATGTGAGAAGGG- - G | 35764                |       |       |       |       |       |  |
| Donkey      | TCTGGGAAG- CATGAACTGCTTGT- - A- - - - -                                                      | GCTTTGTCTT- - - - - GCTAGAGT- - GTAAAATAGGAGAAGGGG- -  | 39533                |       |       |       |       |       |  |
| Cat         | TCTGGGAAC- CATGAGCTAGTCCT- - A- - - - -                                                      | GTAAAAATAGGAGAAGGGGA-                                  | 42036                |       |       |       |       |       |  |
| Ferret      | TCTGGGAAT- CAGGAACTACCCTT- - A- - - - -                                                      | GTAAAAATAGAGAGGGGGG-                                   | 38694                |       |       |       |       |       |  |
| Lion        | TCTGGGAAC- CATGAGCTAGTCCT- - A- - - - -                                                      | GTAAAAATAGGAGAAGGGGA-                                  | 39880                |       |       |       |       |       |  |
| Vaquita     | TGTGGAAACCCATCAACTACTTGT- - AGA- - - - -                                                     | GTTCTGTCTT- - - - - TCTGCAAT- - GTAAAATGTGAGAAGGG- - G | 36449                |       |       |       |       |       |  |
| Pig         | TCTGGAAAC- CATCAACTATTTGT- - A- - - - -                                                      | ATTTTGTATT- - - - - TTTGCAATTTGTAAAATACGAGAAGGG- - G   | 32923                |       |       |       |       |       |  |

| Majority    | AATGACTAAAGTTGAGTCCTGATAGGXA- - GGGGTTTGGATATAGG- - - - ATTTGATT- - - TGTTGTAATAAGGAGCTTG    |       |       |       |       |       |       |       |  |
|-------------|----------------------------------------------------------------------------------------------|-------|-------|-------|-------|-------|-------|-------|--|
|             | 48890                                                                                        | 48900 | 48910 | 48920 | 48930 | 48940 | 48950 | 48960 |  |
| Human       | AGCGGCGCTCCCCACATCTCAGACGATG- - GGCGGCCGGGCAGAGACGCTCCTCACTTCTAGATGGGATGGCGGCCGGG            | 41966 |       |       |       |       |       |       |  |
| PolarBear   | AATGACTTAAGTTGAGTCCTGATAGGTGTAGGGTTTGGATATAGG- - - ATTTGATT- - - TGTTG- - - - AGGAGTTTG      | 11728 |       |       |       |       |       |       |  |
| Cow         | ACAGTTTGTGT- - GATCCACATAGCCA- - AAGCCTTTAGTGTAGTC- - - AGTGAAGCAGATGTTCTTCTAGAATTCTCT       | 39027 |       |       |       |       |       |       |  |
| Dog         | AATGACTAAAGTTGAACCCTGATAGGTT- - GGGGTTTGGATATAGG- - - ATTTGATT- - - TGCTG- - - - AGGAGCTTG   | 37340 |       |       |       |       |       |       |  |
| BelugaWhale | AATGAGTAAAA- - TGTTCTGGTGGGCA- - GGGGCTGGATATAGG- - - ATTTGATT- - - TGTTGTAATAAGGAGATTG      | 35833 |       |       |       |       |       |       |  |
| Donkey      | AATGACTAAAGTTGAGTCACGATAGGCA- - GGGATCTGGATATGGG- - - ATTTGATT- - - TGTTATACTGAGGAGCTAG      | 39604 |       |       |       |       |       |       |  |
| Cat         | - GTGACTAAAGTTGAGTTCTGATAGGTA- - GAGGTTTGCATATAAG- - - ATTTGATT- - - TGTTATGTTAGGGAGCTTG     | 42106 |       |       |       |       |       |       |  |
| Ferret      | AATGACTGAAGTTGAGTCCAGATAG- - - - - GGGTTTGGATATAGG- - - ATTTGATT- - - TGTTG- - - - AGGACTTTA | 38756 |       |       |       |       |       |       |  |
| Lion        | - GTGACTAAAGTTGAGTTCTGATAGGTA- - GAGGTTTGCATATAAG- - - ATTTGATT- - - TGTTATGTTAGGGATCTTG     | 39950 |       |       |       |       |       |       |  |
| Vaquita     | AATGAGTAAAA- - TGTCCTGGTGGGCA- - GGGGCTGGATATAGG- - - ATTTGATT- - - TGTTGTAATAAGGAGATTG      | 36518 |       |       |       |       |       |       |  |
| Pig         | AATGGCTACCAA- - AGTCCTGTTGGGCA- - GGTGTCTGGATATAG- - - - ATTTGATT- - - TGTTTTACTAAGGGGTTTG   | 32991 |       |       |       |       |       |       |  |



Dienstag, 3. Mai 2022 08:39

| Majority    | ----- TXTCAG- ATTT- G- ----- TATTXTATXXAGAAX- - AG- ----- CTT- - - X- - X- - - A- -----     |       |       |       |       |       |       |       |       |
|-------------|---------------------------------------------------------------------------------------------|-------|-------|-------|-------|-------|-------|-------|-------|
|             | 49130                                                                                       | 49140 | 49150 | 49160 | 49170 | 49180 | 49190 | 49200 |       |
| Human       | GCTGCAATCTCGGCACTTTGGGAGGCCAAGGCAGGCGGCTGGGAGGTGGAGGTTGTAAACGAGCCGAGATCACGCCACTGC           |       |       |       |       |       |       |       | 42206 |
| PolarBear   | -----                                                                                       |       |       |       |       |       |       |       | 11739 |
| Cow         | ----- TTCCT- - - CTT- G- ----- TGTTTTCTAAATCCA- - A- ----- CTT- - - - GAACA- - - - -        |       |       |       |       |       |       |       | 39104 |
| Dog         | ----- TCTTAGAATATGAAGGAAATGTTGTATCAAGAAATTAGGGG- - - - - GTCCCTGG- - GTGGCGCAGCGGTTTG       |       |       |       |       |       |       |       | 37530 |
| BelugaWhale | ----- TTTCA- - - TTT- G- ----- CATTTTTTAGGGG- - - - -                                       |       |       |       |       |       |       |       | 35890 |
| Donkey      | ----- TATGGGATTTGA- - - - TTTGTTATACTGAGGAGCTAG- GA- - - - - CTTT- - ACTA- - - - - G- - - - |       |       |       |       |       |       |       | 39688 |
| Cat         | ----- TCTTAGAATATGGAAGAAATAATGTATCAAGAAATTAGAACTTCTGAGTTATTTG- - GAAGTAGACTGGTTTG           |       |       |       |       |       |       |       | 42321 |
| Ferret      | CTCG- - ATCCCAGGACCCTGAGACCATGACCTGAGCCGAAGGCAGCGGCCT- - AACCCTGA- - GCCACCCAGGCGCCCC       |       |       |       |       |       |       |       | 38985 |
| Lion        | ----- TCTTAGAATATGGAAGAAATAATGTATCAAGAAATTAGAACTTCTGAGTTATTTG- - GAAGTAGACTGGTTTG           |       |       |       |       |       |       |       | 40169 |
| Vaquita     | ----- TTCCA- - - TTT- G- ----- CATTTTTTAGGGA- - - - -                                       |       |       |       |       |       |       |       | 36575 |
| Pig         | ----- TTCCA- - - TTT- G- ----- TATTTTGTGGGG- G- A- - - - - CCG- - - - - ACGGG- - - - -      |       |       |       |       |       |       |       | 33061 |

| Majority    | ----- XTTTACXTTXXGGT GAGGATT- ATTACTCXATATXTGGAXGATAGT- - - - - X- - TTGGGATGACTXTGC- - A  |       |       |       |       |       |       |       |       |
|-------------|--------------------------------------------------------------------------------------------|-------|-------|-------|-------|-------|-------|-------|-------|
|             | 49210                                                                                      | 49220 | 49230 | 49240 | 49250 | 49260 | 49270 | 49280 |       |
| Human       | ACTCCAGCCTGGGCACCATTGAGCACTGAGTGAACCAGACTCCGTCTGCAATTCGGC- ACCTCGGGAGGCCGAGGC- - T         |       |       |       |       |       |       |       | 42283 |
| PolarBear   | ----- ATTTACATTTTAGAAAGGATT- TTTCTTCCATTTGTATTTTGTG- - - - - GGGGTCACTAACCGTA              |       |       |       |       |       |       |       | 11799 |
| Cow         | ----- TTCAACGTACTATTGAAGCCT- AGCTCGGAGAATTTTGAACATTAC- - - - - TTAGCTTGCATGTGA- - A        |       |       |       |       |       |       |       | 39165 |
| Dog         | G- - - - CACCTGCCTTTGGCCCAGGGCG- CGA- TCCTGGAGACCCGGGATAGAATCCC- - ACGTCGGGCTCCCGGTGC- - A |       |       |       |       |       |       |       | 37600 |
| BelugaWhale | ----- GCAGAGGGGGGT- ACTACTGTACAT- - - - AGGACAGT- - - - - TTAA- - - - -                    |       |       |       |       |       |       |       | 35927 |
| Donkey      | ----- ATTTACATTTTAGAAAGGATT- TTTGTTCCATTTGTGTTTTGAGGGAAGCAGAGGAGTCACTACTGTACATC            |       |       |       |       |       |       |       | 39761 |
| Cat         | GGAGAAGTATTCGTTTGGGCTTAGATA- ATCACTAGATTGATGGATGATAGTCCCATTAACAAAGGAAGATCATGGAAA           |       |       |       |       |       |       |       | 42400 |
| Ferret      | C- - - - AATTTACATTTTAAAAGGATT- TTTCTTCCATTTGTATTTTCGTGTATGTGT- - ATGTGGGGTCACTGCTC- TA    |       |       |       |       |       |       |       | 39057 |
| Lion        | GGAGAAGTATTCATTTGGGTTTAGATA- ATCACTAGATTGATGGATGATAGTCCCATTAACAAAGGAAGATCATGGGAA           |       |       |       |       |       |       |       | 40248 |
| Vaquita     | ----- GCAGAGGGGGGT- ACTACTGTACAT- - - - AGGACAGT- - - - - TTAA- - - - -                    |       |       |       |       |       |       |       | 36612 |
| Pig         | ----- GGTGGGGTGGGGTGGGGT- ACTACTGTAAAATTGGAGGACAGT- - - - - TTAA- - - - -                  |       |       |       |       |       |       |       | 33110 |

Dienstag, 3. Mai 2022 08:39

| Majority    | AGGAGATTAGTTATAXX- - XGATTTAXACAATAXTCTGCTTCXXACATTTTAAA- - - GTCTCATXAGXAAAAXTCXAXGTA            |       |       |       |       |       |       |       |       |
|-------------|---------------------------------------------------------------------------------------------------|-------|-------|-------|-------|-------|-------|-------|-------|
|             | 49290                                                                                             | 49300 | 49310 | 49320 | 49330 | 49340 | 49350 | 49360 |       |
| Human       | GGCGGATCACTCGCGGTTAGGAGCTGCAGACCAGCCCGGCCAACACAGCGAAACCCCGTCTCCACCAAAAAAATACGAAA                  |       |       |       |       |       |       |       | 42363 |
| PolarBear   | CATAGGACAGTTAAA- - - - - AGTTTTACAATAATCTGCCTCGGACATATTAAG- - - GTATGAT- - - - - TTTTAGGTT        |       |       |       |       |       |       |       | 11863 |
| Cow         | ATGAGTGCAATTGTGCAG- TAGTTTTGAACATTGTTTGGCATTACCTTTCTTTGG- - - GATTGGAATGAAAAGTACCTTT              |       |       |       |       |       |       |       | 39241 |
| Dog         | TGGAGCCTGCTTCTCC- - - - - CTCTGCCTATGTCTCTGCCTC- - - - - TCTCTCT- - - CTCTCTCTCT- - - - CTCTGACTA |       |       |       |       |       |       |       | 37663 |
| BelugaWhale | - - - AACTTTACAATAATC- TGCTTTAGAGACACCGAGG- - TCCTGAATTTTAGA- - - GTCTCAGAAGTAGAA- - - - - -      |       |       |       |       |       |       |       | 35990 |
| Donkey      | AGGAAGACAGCTAAA- - - - - AACTTTAAAAAGCTCTGCTCTGGAGATACTGAAG- - TCTTGAATTTTAGGGTCTTAAAA            |       |       |       |       |       |       |       | 39833 |
| Cat         | AGGAGATTGGGTTTTGGT- GGAAAGAAACAATAATTTGTTACTATCTTTTTAAAA- - GTATCTTTAGGAAAGACAATGTA               |       |       |       |       |       |       |       | 42477 |
| Ferret      | CATAGAGTAGTTAAGC- - - - - ACTTTTACAATAATCTGCTCCAGAGATATTAAG- - - GTGTCCTCAG- - - - TTTTATGTT      |       |       |       |       |       |       |       | 39125 |
| Lion        | AGGAGATTGGGTTTTGGT- GGAAAGAAACAATAATTTGTTACTATCTTTTTAAAA- - GTATCTTTAGGAAAGACAATGTA               |       |       |       |       |       |       |       | 40325 |
| Vaquita     | - - - AACTTTACAATAATC- TGCTTTAGAGACACCGAGG- - TCCTGAATTTTAGA- - - GTCTCAGAAGTAGAA- - - - - -      |       |       |       |       |       |       |       | 36675 |
| Pig         | - - - - - AACTTTAATC- TGCTCTAGAGATACTGAGGTGTCTGAATTTTAGA- - - GTCTCAGAAGAAAA- - - - - -           |       |       |       |       |       |       |       | 33169 |

| Majority    | CTT- - - XGAATATGGAGAXAATGA- - - - - TGTATCAAGAAATTAGA- - AXTTCTGAGX- - - TTATTT- XA- AG- AGAAA       |       |       |       |       |       |       |       |       |
|-------------|-------------------------------------------------------------------------------------------------------|-------|-------|-------|-------|-------|-------|-------|-------|
|             | 49370                                                                                                 | 49380 | 49390 | 49400 | 49410 | 49420 | 49430 | 49440 |       |
| Human       | ACCAGTCAGGCGTGGCGGCGCGTG- CCTGCAATAGCAGGCACTCGGC- - AGGCTGAGGCAGGAGAATCAGGCAGGGAGGT                   |       |       |       |       |       |       |       | 42440 |
| PolarBear   | CTT- - - AGAATATGGAGGAAATGA- - - - - TGTATCAAAAAATTAGA- - ACTTCTTAG- - - - - TTATTT- - - - - - GGAAA  |       |       |       |       |       |       |       | 11921 |
| Cow         | TCT- - - AGTCTTGTGGCCACTGCTG- - - - - AGTTTTCTAAATTTGTTGGCCCATGAGTGCAGCACTTGAACAGCATCAT               |       |       |       |       |       |       |       | 39313 |
| Dog         | TCA- - - TAAATAAATAAAAATTAA- - - - - AAAAAAAGAAATTAGA- - ACTTCTGAG- - - - - TTACTT- - - - - - GGAAA   |       |       |       |       |       |       |       | 37721 |
| BelugaWhale | - - - - - TATGGAGAGAATGA- - - - - TATATGAAGAAATTAGACAATTTCTGAGT- - - - TATTTAGA- AGTAG- AC            |       |       |       |       |       |       |       | 36048 |
| Donkey      | GT- - - - AGAATATGGAGGAAATGA- - - - - TGTATCAAGAAACTAGAAGAATTCTAAG- - - - TTATTT- - - - - - GGAAG     |       |       |       |       |       |       |       | 39892 |
| Cat         | CTTCAGTGACTAAAGAATGATTGAGTCTTGTGTTCTGATGGAATAAA- - ATTCCTTAAAGCCTTGTTTTAACATAAGAAA                    |       |       |       |       |       |       |       | 42555 |
| Ferret      | CTT- - - AGAATATGGAGGAAATGA- - - - - TGTATCAAGAAATTAGA- - ACTTTTGAAG- - - - - TTATTT- - - - - - GGAAA |       |       |       |       |       |       |       | 39183 |
| Lion        | CTTCAGTGACTAAAGAATGATTGAGTCTTGTGTTCTGATGGAATAAA- - ATTCCTTAAAGCCTTGTTTTAACATAAGAAA                    |       |       |       |       |       |       |       | 40403 |
| Vaquita     | - - - - - TATGGAGAGAATGA- - - - - TATATGAAGAAATTAGACAATTTCTGAGT- - - - TATTTAGA- AGTAG- AC            |       |       |       |       |       |       |       | 36733 |
| Pig         | - - - - - TATGGAGATGTATA- - - - - TGTATCAAGAAATTAGAAGAATTCTGAGT- - - - CATTGGA- AGCAG- AT             |       |       |       |       |       |       |       | 33227 |

Dienstag, 3. Mai 2022 08:39

| Majority    | TTAGTAGATTXGAAGTAGTATTAGTTTCGGC- - - TTAGAATC- - - ACTGGGTTGATGGATXGTAGTTCATTAAACAAA |                                       |                                            |                                               |                           |                                    |                                     |                                   |       |
|-------------|--------------------------------------------------------------------------------------|---------------------------------------|--------------------------------------------|-----------------------------------------------|---------------------------|------------------------------------|-------------------------------------|-----------------------------------|-------|
|             | 49450                                                                                | 49460                                 | 49470                                      | 49480                                         | 49490                     | 49500                              | 49510                               | 49520                             |       |
| Human       | TGCAGT                                                                               | GAGTC-                                | GAGATGGCAGCAGTACAGTCCAGCTTCGGCTCGTCATCAGA- | -                                             | GGGAGACTGTGAAAGAGAGGGGAGA | 42517                              |                                     |                                   |       |
| PolarBear   | TAGACT                                                                               | GGTTTGGGAGAAGTGTTAGTTTGGGC-           | -                                          | TTAGAATC-                                     | -                         | ACTGGGTTGATGGATGATAGTCCCATTAAACAAA | 11994                               |                                   |       |
| Cow         | CTTTT                                                                                | AGGATGTGAAATAGCTCAGCTGGAATT-          | -                                          | CCATCACCTCCACTAGCTTTGTTTCGTAGTAATGCTTCCTAAGGC | 39389                     |                                    |                                     |                                   |       |
| Dog         | TAGATT                                                                               | AGTTTGGGAGAAGTATTAGTTTGGGC-           | -                                          | TTAGAATC-                                     | -                         | ACTGGGTTGATGGATGATAGTCCCATTAAACAAA | 37794                               |                                   |       |
| BelugaWhale | TTTGGT                                                                               | AGA-                                  | -                                          | AGTATTAAGAGTTTCGGC-                           | -                         | CTAGAATC-                          | -                                   | ACTGGGTTGATGGATAGTAGTTCATTAAACAAA | 36116 |
| Donkey      | TAGAGT                                                                               | GAG-                                  | AGAAGTATTAG-AGTTTTGGC-                     | -                                             | TTAGAATC-                 | -                                  | ACTGGGTTGATGGATAAATAGTCCCGTTAAACAAA | 39962                             |       |
| Cat         | TTTACAT                                                                              | GCTTTCAATTTATTTTACCTTCATTACATTGGAAAC- | -                                          | CCTGAGTTTTAAGATGTTTTTTTCTTAAACAAAA            | 42632                     |                                    |                                     |                                   |       |
| Ferret      | TAGACT                                                                               | AGTTTGGGAGAAGTATTAGTTTGGGC-           | -                                          | TTAGACTT-                                     | -                         | GATGGGTTGATGGATGATAGTTCACCTTTCAA   | 39256                               |                                   |       |
| Lion        | TTTACAT                                                                              | GCTTTCAATTTATTT-ACCTTCATTACATTGGAAAC- | -                                          | CCTGAGTTTTAAGATGTTTTTTTCTTAAACAAAA            | 40479                     |                                    |                                     |                                   |       |
| Vaquita     | TTTGGT                                                                               | AGA-                                  | -                                          | AGTATTAAGAGTTTCGGC-                           | -                         | CTAGAATC-                          | -                                   | ACTGGGTTGATGGATAGTAGTTCATTAAACAAA | 36801 |
| Pig         | TTTGGT                                                                               | AGAAGAGAAGTATTACGAGTTTTGGC-           | -                                          | CTAGAATC-                                     | -                         | ACTGGGTTGATGGATAGTAGTCCCCACAAAGGG  | 33300                               |                                   |       |

| Majority    | GGG- - - AAGAXAGTGGAXAAXGGGATTTGT- X- TTTTGAT- XGXAAAGA- - X- - - - G- - ATTGTCTT- - - - - TTAAA- - - |                                                  |                                                           |                                 |                            |                            |                     |           |       |
|-------------|-------------------------------------------------------------------------------------------------------|--------------------------------------------------|-----------------------------------------------------------|---------------------------------|----------------------------|----------------------------|---------------------|-----------|-------|
|             | 49530                                                                                                 | 49540                                            | 49550                                                     | 49560                           | 49570                      | 49580                      | 49590               | 49600     |       |
| Human       | GGG- - -                                                                                              | AGACCGT                                          | GGGGAGAGGA                                                | GGGAGGGGGAGGGGGAGGGGGAGGGGGAG-  | -                          | G-                         | GCTGTTCTGTTTTTTTAA- | -         | 42585 |
| PolarBear   | GGG- - -                                                                                              | AAGATAGTAGAAAAGGAGATTTGT-                        | -                                                         | TTTTGGT-                        | -                          | GGAAAGA-                   | -                   | ATTATCTG- | 12048 |
| Cow         | CCACTT                                                                                                | GACTTCGCACTCCAG-                                 | GATGTCTGGCCCTAGGTGAGTGATCCCACCATCGTGGTTATCTGGGTCATGAAAATC | 39467                           |                            |                            |                     |           |       |
| Dog         | GGG- - -                                                                                              | AAAATAGTGGAAAAGGAGATTTAT-                        | -                                                         | TTTCAGT-                        | -                          | GGAAAGA-                   | -                   | ATTATCTG- | 37848 |
| BelugaWhale | GGG- - -                                                                                              | AGCAAAGTAGAGAAAAGTATTTGTTTTGTTGAAAAGAAAAGAACAAT- | CTGTTACTGTTTTCTTTTTTTTAA-                                 | 36191                           |                            |                            |                     |           |       |
| Donkey      | GGA- - -                                                                                              | AAAAGTGGAAAATGAGATTTGG-                          | -                                                         | TTTTGAT-                        | -                          | GGAAAGAATAATCTGTTACTGTCTT- | -                   | TTAAA-    | 40025 |
| Cat         | AAG- - -                                                                                              | ATGAGAGTCTGTATGTGATCTCACAGACCCCAATTTGAATATG-     | -                                                         | ATTGCTTA-                       | -                          | TAGGAGCA                   | 42694               |           |       |
| Ferret      | GGG- - -                                                                                              | AAGATAGTGGAAAAGGGGATTTGT-                        | -                                                         | TTTTGGT-                        | -                          | GGAAAGA-                   | -                   | ATTGTCTG- | 39310 |
| Lion        | AAG- - -                                                                                              | ATGAGAGTCTGTACATGATCTCACAGACCCCAATTTGAATATT-     | -                                                         | ATTGCTTA-                       | -                          | TAAGAGCA                   | 40541               |           |       |
| Vaquita     | GGG- - -                                                                                              | AGCAAAGTAGAGAAAAGTATTTGTTTTGTTGAAAAGAAAAGAACAAT- | CTGTTACTGTTTTCTTTTTTTTAA                                  | 36877                           |                            |                            |                     |           |       |
| Pig         | - - A-                                                                                                | - - -                                            | ACAAAGTGGAGAAA-                                           | GATTTGTTTTTATTGAAAAGAGAGAACAAT- | CTGTTACTATCTTACTTTTTTAAAA- | -                          | 33369               |           |       |



Dienstag, 3. Mai 2022 08:39

| Majority    | TTXACATTGG- - - - - GTTXTAAAA- - XTXAXACCTCTTATCCTAAAAT- - ACXTGAGAT- - - TCTGTGTATGT   |       |       |       |       |       |       |       |       |
|-------------|-----------------------------------------------------------------------------------------|-------|-------|-------|-------|-------|-------|-------|-------|
|             | 49770                                                                                   | 49780 | 49790 | 49800 | 49810 | 49820 | 49830 | 49840 |       |
| Human       | TGTACAGAGGAAAT- - ACTGAGTTTTAAAGA- - TTTTCTATTTTTTTTCTGACA- - AAAATGAAAG- - TCTGCATATAT |       |       |       |       |       |       |       | 42782 |
| PolarBear   | TTCACAGTGGAAAC- - ACTGAGTTTTAAAATTTTT- - TCCCCATAACATAAAA- - - AGATGGGAAGAGTCTGTTTATGT  |       |       |       |       |       |       |       | 12252 |
| Cow         | TCTATTTT- - - - - TTTGCATTGTTCACTTAAAAAGGCTTTCTTATTTCTCCTTGCTAT- - - TCTTTGGTACT        |       |       |       |       |       |       |       | 39685 |
| Dog         | TTCACAGTGGATACTCACTGAGTTTTAAAGATTTTTTTTCCCCCTAACATAGAG- - - AGGTGAGAT- - - TCTGTGTATGT  |       |       |       |       |       |       |       | 38045 |
| BelugaWhale | TTTACCTT- - - - - TTTGAACAA- - - AGGAAACATTGAGTTTTAAAATTGTTCTGTGTT- - - TTTCCCTAACAT    |       |       |       |       |       |       |       | 36373 |
| Donkey      | TGCACAGAGGAAAC- - ACTAAGTTTTAAAGA- - TTTTCTGTTTTTTTCTAACGT- AGAATGAGAG- - - TCTGTATATGT |       |       |       |       |       |       |       | 40233 |
| Cat         | CCCACATTGG- - - - - GTTCTA- - - - TGCTGACAGCTCTGAGCCTAGAGCCTGCTTGGGAT- - - TCTGTGTCTCC  |       |       |       |       |       |       |       | 42891 |
| Ferret      | - - - - - TCCCCTTATCATAAAA- - - AGATGAGAA- - - TCTGTTTATGT                              |       |       |       |       |       |       |       | 39439 |
| Lion        | CCCGCATTGG- - - - - GTTCTA- - - - TGCTGACAGCTCTGAGCCTAGAGCCTGCTTGGGAT- - - TCTGTGTCTCC  |       |       |       |       |       |       |       | 40738 |
| Vaquita     | TTTACCTT- - - - - TTTGAACAA- - - AGGAAACATTGAGTTTTAAAATTGTTCTGTGTT- - - TTTCCCTAACAT    |       |       |       |       |       |       |       | 37059 |
| Pig         | TTTATCT- - - - - TTTGAACAG- - - AGGAAACATGGAATTTTAAATTT- - CTTGTGAG- - - TCTGTG- - - -  |       |       |       |       |       |       |       | 33544 |

| Majority    | - TCTCATAGAXCCCAATTTGAATATTGTTGCXTAT- AAGAGCXXATAGCATAAXXGACCTTTAAAAACTAGTGAT- - - - -      |       |       |       |       |       |       |       |       |
|-------------|---------------------------------------------------------------------------------------------|-------|-------|-------|-------|-------|-------|-------|-------|
|             | 49850                                                                                       | 49860 | 49870 | 49880 | 49890 | 49900 | 49910 | 49920 |       |
| Human       | - TCTAAGAGACACCAATTTGAATACTGTTGCTTAT- AAGAGCAAATAGCATAAAAAGACCTTTAAAAATTGGTGAT- - - - -     |       |       |       |       |       |       |       | 42855 |
| PolarBear   | - TCTCACAGAGCCTAATTTGAATATTGTTGCATATTAAGAGCAAATTGCAAAAAAGACTTTTAAAGAACTAGTGAT- - - TG       |       |       |       |       |       |       |       | 12328 |
| Cow         | - TTGCATTTACATAGGTAAATCTTCCCTTTTCTCT- TTTGCCTTTCACTTCTC- - TTCTTTTCTCAGCTATTTGT- - - - -    |       |       |       |       |       |       |       | 39756 |
| Dog         | - TTTCACAGACCCCAATATTAATATTGTTGCTTAT- AAGAGCAGATAGCATAAAAATACCTTTAAAAACCGAGTGAT- - - T-     |       |       |       |       |       |       |       | 38119 |
| BelugaWhale | - AGAAAGATGAGAGTCTGTGTATGTTCAAACAGAC- CCCAATTTGAATAATAA- - GACCTTTAAAAACGAGTGAC- - - - -    |       |       |       |       |       |       |       | 36444 |
| Donkey      | - TCTAACAGACCCCAATTTGAATGCTGTTGCTTAT- AAGAGCAAATAGCATAGAAGACCTTTAAAGACTAGTGAT- - - - -      |       |       |       |       |       |       |       | 40306 |
| Cat         | CTCTCTTTCTGCCCTCCCCACTCATGCTGTCCCTCCCTCCCTCA- - - - - CTCTCTCAAAAATAAATAAAACATT             |       |       |       |       |       |       |       | 42961 |
| Ferret      | - TCTCA- - GAGTCTGATTTGAATTTTCTTTCATAT- - - AAGCAAATGGCAAAAAAGACCTTTAAGAACTAGTGAT- - - T-   |       |       |       |       |       |       |       | 39509 |
| Lion        | CTCTCTTTCTGCCCTCCCCACTCATGCTGTCCCTCCCTCCCTCATTCTCTCTCTCTCTCTCAAAAATAAATAAAACATT             |       |       |       |       |       |       |       | 40818 |
| Vaquita     | - AGAAAGATGAGAGTCTGTGTATGTTCAAACAGAC- CCCAATTTGAATAATAA- - GACCTTTAAAAACCGAGTGAC- - - - -   |       |       |       |       |       |       |       | 37130 |
| Pig         | - - TATGTTCAAACAGATTTGAATACTGTTGCTTAT- AAGAGCCTATAAGACC- - - - - TTTGAAAACCTAGTGAT- - - - - |       |       |       |       |       |       |       | 33609 |



Dienstag, 3. Mai 2022 08:39

| Majority    | -- TATACTTGCCTGGAAAAATATGCCATTGTGCATCCAGGTGTCTCAAAA- GGGACTTTTACAG- - - - - ACAGTATTAC     |       |       |       |       |       |       |       |  |  |       |
|-------------|--------------------------------------------------------------------------------------------|-------|-------|-------|-------|-------|-------|-------|--|--|-------|
|             | 49930                                                                                      | 49940 | 49950 | 49960 | 49970 | 49980 | 49990 | 50000 |  |  |       |
| Human       | -- TATATTTGCCTGGAAAAATACTCCA- TGTAAATTCAGATGACTCAAAAG- - - GACGTTGGTAG- - - - - ACAATGTTAC |       |       |       |       |       |       |       |  |  | 42923 |
| PolarBear   | ATTATACTTGCCTGGAAAAATATGCCATTGTGCATCCAGGTGTCTCAAGGA- - - TAGTTTTATAG- - - - - ACCATGTTAT   |       |       |       |       |       |       |       |  |  | 12399 |
| Cow         | -- AAGGCCTCCTCAGATAAACATTTTGCCTTTTTGCATTTCTTTTTCTTG- GGAAGTCCCTAGCCTTCTATTATTTTCC          |       |       |       |       |       |       |       |  |  | 39833 |
| Dog         | -- - AACTTGCCTGGAAAAATATGCCACTGTGCATCCAGGTGTCTCAAAA- GGTACTTTTACAG- - - - - ACTGTATTAC     |       |       |       |       |       |       |       |  |  | 38189 |
| BelugaWhale | -- TATACTTACCTGGACAAATATGCAGTTGTGCATCAAGATGGCTCAAAA- GGGACTTTTACAG- - - - - ACAGGATTAC     |       |       |       |       |       |       |       |  |  | 36515 |
| Donkey      | -- TATACTTGCCTAGGAAAAATATGCTGTTGTC- - - CAGATGTCTCAAAA- GGGACTTTTACAG- - - - - ACAGTATTAC  |       |       |       |       |       |       |       |  |  | 40374 |
| Cat         | AACAAAGTTTATTAATAAAAAAATGCCATTGTGCATCCAAGTGTCTCAAAA- GGTACTTTTACAG- - - - - ACAGTATTAC     |       |       |       |       |       |       |       |  |  | 43034 |
| Ferret      | -- - AACTTGCCTCGAAAAATATGCTATTGTGCATCTAAGTGTCTCAAAAAGGTACTTTTATAG- - - - - ACCATATTAT      |       |       |       |       |       |       |       |  |  | 39580 |
| Lion        | AAAAAAGTTTATTAATAAAAAAATGCCATTTTCATCCAAGTGTCTCAAAA- GGTACTTTTACAG- - - - - ACAGTATTAC      |       |       |       |       |       |       |       |  |  | 40891 |
| Vaquita     | -- TATACTTACCTGGACAAATATGCAGTTGTGCATCCAGGTGGCTCAAAA- GGGACTTTTACAG- - - - - ACAGGATTAC     |       |       |       |       |       |       |       |  |  | 37201 |
| Pig         | -- TATACTTACT- GGAAAAATATATGATTGTGATAGAGATGTCTCAAAA- TGGACCTTTATAG- - - - - ACAGTGTTAC     |       |       |       |       |       |       |       |  |  | 33679 |

| Majority    | AAGG- AAAC- TT- - TTATGGTTATCAG- - - - - ATACAG- - - - - AACAGGATTTTCATTCTTATATTCCAGCTT- -       |       |       |       |       |       |       |       |  |  |       |
|-------------|--------------------------------------------------------------------------------------------------|-------|-------|-------|-------|-------|-------|-------|--|--|-------|
|             | 50010                                                                                            | 50020 | 50030 | 50040 | 50050 | 50060 | 50070 | 50080 |  |  |       |
| Human       | AAGG- ACAC- TT- - TTATGGTTATCAG- - - - - ATATAGT- - - - - ACAGGATTTTCATTTTTATGTTCCAGCTTCC        |       |       |       |       |       |       |       |  |  | 42983 |
| PolarBear   | AAAG- AAAC- TT- - TTATGGTTATCAG- - - - - ATACAG- - - - - AACAGGATTTTCATTCTTATATTCTAGCCA- -       |       |       |       |       |       |       |       |  |  | 12457 |
| Cow         | AAGTCATGCATAAGTTACATTTGGCAGCTAGGCTGTGCAGCTACTCAGAAATAGAGTTACAGGCAGGTTTTACAGTAA- -                |       |       |       |       |       |       |       |  |  | 39911 |
| Dog         | AAGG- AAAC- TT- - TTATGGTTATCAG- - - - - ATACAG- - - - - AACAGATTTCA- - - - TATATTCCAGCTA- -     |       |       |       |       |       |       |       |  |  | 38243 |
| BelugaWhale | AAGG- ACAT- TT- - TTATCATTATCAG- - - - - ATACAA- - - - - AACAGAATTTTCATTCTTACATTCCAGCTT- -       |       |       |       |       |       |       |       |  |  | 36573 |
| Donkey      | AAGG- AAAC- TT- - TTGTAGTTATCAG- - - - - ATACAGC- - - - - ACAGGATTTTGTCTTCTGTTCCGGCTT- -         |       |       |       |       |       |       |       |  |  | 40432 |
| Cat         | AAGG- AAAC- TT- - TTATGATTATCAG- - - - - ATACAG- - - - - AAGAGGATTTTCATTCTTCTATTCCAGCTT- -       |       |       |       |       |       |       |       |  |  | 43092 |
| Ferret      | AAAG- AAAC- TT- - CTATGGTTATCAG- - - - - ATACAG- - - - - AACAGCATTTTCATTGTTATATTCCAGATT- -       |       |       |       |       |       |       |       |  |  | 39638 |
| Lion        | AAGG- AAAC- TT- - TTATGATTATCAG- - - - - ATACAG- - - - - AAGAGGATTTTCATTCTTCTATTCCAGCTT- -       |       |       |       |       |       |       |       |  |  | 40949 |
| Vaquita     | AAGG- ACAT- TT- - TTATCATTATCAG- - - - - ATACAA- - - - - AACAGAATTTTCATTCTTACATTCCAGCTT- -       |       |       |       |       |       |       |       |  |  | 37259 |
| Pig         | AAGG- ATGC- TT- - TTACGGTTATCAG- - - - - ATACAG- - - - - A- - - ACAGAATTTTCATTCTTATATTCCAGCTC- - |       |       |       |       |       |       |       |  |  | 33737 |

Dienstag, 3. Mai 2022 08:39

| Majority    | - - - - TATCCAAA- ATGTTTCTTCTAATTCACCTTTACTATAGAATTCTGTT- - - - TCTAAAAGCATCTA- - - - - TCT |                       |                    |                   |                        |                 |       |       |      |       |
|-------------|---------------------------------------------------------------------------------------------|-----------------------|--------------------|-------------------|------------------------|-----------------|-------|-------|------|-------|
|             | 50090                                                                                       | 50100                 | 50110              | 50120             | 50130                  | 50140           | 50150 | 50160 |      |       |
| Human       | AGCTTTATCTAAA-                                                                              | ATATTTCTTGTAATAGATTTT | ACTGTAGAATT-       | GTT-              | TCTAAGGCATCTG-         |                 |       |       | TCT  | 43048 |
| PolarBear   | - - - - - TATCCAAA-                                                                         | ATGTTTCTTCAATTTCACTTT | ACTATAGAATTTGGTT-  |                   | TCTAAAAG-              |                 | TA-   |       | TCT  | 12515 |
| Cow         | - - - - - ACCTAGTAAGATTTTTTTTT                                                              | GTTT-                 |                    | GACATCTGTTGGAATTA | ACTAACAGCTAAAAAGTATTCT |                 |       |       |      | 39974 |
| Dog         | - - - - - TATCCAAA-                                                                         | ATGCTTCTCAAATTCACCTTT | ACTATAGAATTCGGTT-  |                   | TCTAAAAGCATCTA-        |                 |       |       | TCT  | 38305 |
| BelugaWhale | - - - - - TTCCCAA-                                                                          | ATGTTTCTTCTGACTT-     |                    | CACTAGAATTCCTTT-  |                        | TCCAACAGCATCTA- |       |       | TCT  | 36629 |
| Donkey      | - - - - - TATCCAAA-                                                                         | ATACTTCTTCTAATTGACCTT | ACTCTAGAATTTTGGTT- |                   | TCTACTGAATCTG-         |                 |       |       | ACT  | 40494 |
| Cat         | - - - - - TATCCAAA-                                                                         | ATGTTTCTCAAATTCACCTTT | ACTATAGAATTCATT-   |                   | TCTAAAATGTCTG-         |                 |       |       | T- T | 43153 |
| Ferret      | - - - - - TATCCAAA-                                                                         | ATGTTTCTCAAATTTACCTT  | ACTATAGAATTTTGGTT- |                   | TCTAAAA-               |                 | AA-   |       | TCT  | 39696 |
| Lion        | - - - - - TATCCAAA-                                                                         | ATGTTTCTCAAATTCACCTTT | ACTATAGAATTCGTT-   |                   | TCTAAAATGTCTG-         |                 |       |       | T- T | 41010 |
| Vaquita     | - - - - - TTCCCAA-                                                                          | ATGTGTCTTCTGACTT-     |                    | CACTAGAATTCCTTT-  |                        | TCCAACAGCATCTA- |       |       | TCT  | 37315 |
| Pig         | - - - - - TTTCCATG-                                                                         | GTGTTTCTTCTAATT-      |                    | GAATTCTGTT-       |                        | TTTGACAGCATCT-  |       | A-    | TCT  | 33787 |

| Majority    | C- AACAGCCTTT- CCCTTATCTGTCCAGAC- - - - TTTCTT- - - A- XTACA- - - - TACCTGTTTTTT- GTGT CAGAAAAA |                        |                 |                   |                    |                |                |                       |                   |       |
|-------------|-------------------------------------------------------------------------------------------------|------------------------|-----------------|-------------------|--------------------|----------------|----------------|-----------------------|-------------------|-------|
|             | 50170                                                                                           | 50180                  | 50190           | 50200             | 50210              | 50220          | 50230          | 50240                 |                   |       |
| Human       | C- AACAGCCTTT-                                                                                  | CCCTTATCTGTGCAGAC-     |                 | TTTTCTTCTCTGTACTT | GTTGAATAGGTGCTTTTT | GTCAAAGAAAA    |                |                       |                   | 43123 |
| PolarBear   | C- AACGGCCTTT-                                                                                  | CCCTTATCTGTCCAGAC-     |                 | TTTCTTCTAAATATA-  |                    | TACCTGGTTTTT-  | GTGTCAA-       |                       |                   | 12579 |
| Cow         | CTATCAGTATAT-                                                                                   | ACCTACATTTCTGGTTAACT   | GTTCTT-         |                   | TGAA-              |                | ATTTATTTTCCCAT | GTAGGGAT-             | GG                | 40040 |
| Dog         | C- AACAGCCTTTT                                                                                  | CCCTTATCTGTCCAGACAGACT | TTTCTTTAAATATA- |                   | TACCTGTTTTTT       | GTGTCAAAGAAAA  |                |                       |                   | 38380 |
| BelugaWhale | C- AACAGCCTTT-                                                                                  | CCCTG-                 |                 | TCCAGACTTTCTTCTC- |                    | TACA-          |                | CGTATATTTGTGTCAAAGAA- | AA                | 36688 |
| Donkey      | T- AACAGGCTTT-                                                                                  | CCCTCCTCTGTCCAGAC-     |                 | TTTGT-            |                    | G-             | TACAG-         | TACCTATTTT            | TG- GGGTCAAAGAAAA | 40558 |
| Cat         | C- AGTGGCCTTT-                                                                                  | CCCTCATCTGTCCAGAC-     |                 | TTTCTTCTATATACA-  |                    | TGCCAGTTTTT    | C-             | GTGT CAGGAAAAA        |                   | 43222 |
| Ferret      | C- AGTGGCCTTT-                                                                                  | CCGTTATGTGTCTAGAC-     |                 | TTTCTTCTAAATATACT | CCTACCTGGTTTTT-    | GTGT CATAAAAA- |                |                       |                   | 39768 |
| Lion        | C- AATGGCCTTT-                                                                                  | CCCTCATCTGTCCAGAC-     |                 | TTTCT-            |                    | ATATACA-       |                | TGCCAGTTTTTT-         | GTGT CAGAAAAA     | 41075 |
| Vaquita     | C- AACAGCCTTT-                                                                                  | CCCTG-                 |                 | TCCAGACTTTCTTCTC- |                    | TACA-          |                | TGTATATTTGTGTCAAAGAA- | AA                | 37374 |
| Pig         | C- AACAGCTTTT-                                                                                  | CCCTG-                 |                 | TCCAGACTTCTTTGTT- |                    | TGCA-          |                | ACCTATTTT             | TGAGTCAAAGGAA- AA | 33848 |

Dienstag, 3. Mai 2022 08:39

| Majority    | AAAXAATTTT- - - - AGAAGTGAGAAAAGTTAAT- GTTATTAGAAACTTAGTCTCAGGTAATAA- - - - - TTTATTAA |                       |                                 |                       |              |          |       |       |       |
|-------------|----------------------------------------------------------------------------------------|-----------------------|---------------------------------|-----------------------|--------------|----------|-------|-------|-------|
|             | 50250                                                                                  | 50260                 | 50270                           | 50280                 | 50290        | 50300    | 50310 | 50320 |       |
| Human       | AAATAATTTT- - - -                                                                      | ACAGGTGAAAAAATTT      | CAT- GTTATTAGAAACTT             | AATCTCAGGTAATAA       | ATG- - - - - | TTTAATAA |       |       | 43193 |
| PolarBear   | - - - - -                                                                              | GAAGTGAAAAAAGTTAAT-   | GTCAATTAGAACCTAAGTCTCCGGTAAATA- | - - - - -             | TCTAATAA     |          |       |       | 12634 |
| Cow         | AAAGA- TAAG- - - -                                                                     | AAAGATAAGTATGATCATT   | CATTTTCCTTAGCTCAGATTCTTTGTTTTT- | - - - - -             | TTTTTTTTA    |          |       |       | 40108 |
| Dog         | AAATAATTTT- - - -                                                                      | AATAGTGAGAAAAGTTAAT-  | ACTGTTAGAACCTTAGTCTCAGGTAAGTA-  | - - - - -             | TCTACTAA     |          |       |       | 38446 |
| BelugaWhale | AAAGAATTTT- - - -                                                                      | AGAAGTGAGAAAAGTTAAT-  | GTTATTAGAAACTTAGTCTTGGGGAATAA-  | - - - - -             | TCTTATTCA    |          |       |       | 36756 |
| Donkey      | AAATAATTTT- - - -                                                                      | AGAAGTGAGAAAAGTTAAT-  | GTTATTAGAAACTTTGTGT             | CAGGTAATAA-           | - - - - -    | TTTAATAA |       |       | 40624 |
| Cat         | AAAAAATTT- - - -                                                                       | AGAAGTGAGAAAAGTTAAA-  | GTCAATTAGAATTTTAGTCTCAGGTA      | ACTAAGAAGTCG-         | TGCATTAA     |          |       |       | 43295 |
| Ferret      | - - - TAATTTT- - - -                                                                   | AGAAGTAACCAAAGTTAAT-  | GTCAATTAGAACCTTAGTCTCCGGTAAATA- | - - - - -             | TCTATTAA     |          |       |       | 39831 |
| Lion        | AAAAATTTTTTTTTT                                                                        | TAGAAGTGAGAAAAGTTAAC- | GTCAATTAGAATTTTAGTCTCAGGTA      | AATAAGAAGTCCCTGCATTAA |              |          |       |       | 41154 |
| Vaquita     | AAAGAATTTT- - - -                                                                      | AGAAGTGAGAAAAGTTAAT-  | GTTATTAGAAACTTAGTCTTGGGGAATAA-  | - - - - -             | TCTTATTCA    |          |       |       | 37442 |
| Pig         | AAAGAATTTT- - - -                                                                      | AGAAATGAGGAAAGTTAAT-  | GTTATTAGAAACTTAGTTTTGGGGAATGA-  | - - - - -             | TTTTATTCA    |          |       |       | 33916 |

| Majority    | A- - - - - TCAGTXAATTAAG- - - - - XT- ATTTTGTAAATGC                               |                |           |                  |       |       |       |       |       |
|-------------|-----------------------------------------------------------------------------------|----------------|-----------|------------------|-------|-------|-------|-------|-------|
|             | 50330                                                                             | 50340          | 50350     | 50360            | 50370 | 50380 | 50390 | 50400 |       |
| Human       | A- - - - -                                                                        | TTGATACAGTAAG- | - - - - - | GACATTTTCTAATGA  |       |       |       |       | 43222 |
| PolarBear   | G- - - - -                                                                        | TCAGTGCATTAAG- | - - - - - | ATTAATTTGTAATAC  |       |       |       |       | 12663 |
| Cow         | A- - - - -                                                                        | AGCTAGC-       | - - - - - | AGCTTGTGTAACAC   |       |       |       |       | 40130 |
| Dog         | G- - - - -                                                                        | TCAGTGCATTAAG- | - - - - - | ATTATTTTGTAAATGC |       |       |       |       | 38475 |
| BelugaWhale | A- - - - -                                                                        | AACTA-         | - - - - - | TTTTGTAATAA      |       |       |       |       | 36773 |
| Donkey      | A- - - - -                                                                        | CCAATGCATTAAG- | - - - - - | AC- TATATTGT     |       |       |       |       | 40648 |
| Cat         | GAATATTTTGTAAATAGAGGCCCTGGGTGGCTCAGTCAGTTAAGCGGCCGACTTCAGCTCAGGTCATGATCTCACGGTGC  |                |           |                  |       |       |       |       | 43375 |
| Ferret      | G- - - - -                                                                        | TTAGTGTATTAAG- | - - - - - | ATTAAATTGTAAAGC  |       |       |       |       | 39860 |
| Lion        | GAATATTTTGTAAATAGAGGCCCTGGGTGGCTCAGTCAGTTAAGCAGGCCGACTTCAGCTCAGGTCATGATCTCACGGTGC |                |           |                  |       |       |       |       | 41234 |
| Vaquita     | A- - - - -                                                                        | AACTA-         | - - - - - | TTTTGTAATAA      |       |       |       |       | 37459 |
| Pig         | A- - - - -                                                                        | AACTA-         | - - - - - | TTTTGTAATAA      |       |       |       |       | 33933 |





Dienstag, 3. Mai 2022 08:39

| Majority    | ----- CTTC                                                                  |       |       |       |       |       |       |       |       |
|-------------|-----------------------------------------------------------------------------|-------|-------|-------|-------|-------|-------|-------|-------|
|             | 50730                                                                       | 50740 | 50750 | 50760 | 50770 | 50780 | 50790 | 50800 |       |
| Human       | ----- CTTC                                                                  |       |       |       |       |       |       |       | 43237 |
| PolarBear   | ----- T----- TCC                                                            |       |       |       |       |       |       |       | 12675 |
| Cow         | ----- GCCT                                                                  |       |       |       |       |       |       |       | 40142 |
| Dog         | ----- C----- TTC                                                            |       |       |       |       |       |       |       | 38487 |
| BelugaWhale | ----- CTTC                                                                  |       |       |       |       |       |       |       | 36785 |
| Donkey      | ----- C                                                                     |       |       |       |       |       |       |       | 40657 |
| Cat         | AATAAACGTTGAAAAAAAAAATTTTTTTTAAAATAAAAAAAAAAATTAAGAAATATTTTGTAAACATATTCCTTC |       |       |       |       |       |       |       | 43775 |
| Ferret      | ----- C----- TTC                                                            |       |       |       |       |       |       |       | 39872 |
| Lion        | ----- AAAAAAAAA----- GAATATTTTGTAAATATTCCTTC                                |       |       |       |       |       |       |       | 41418 |
| Vaquita     | ----- CTTC                                                                  |       |       |       |       |       |       |       | 37471 |
| Pig         | ----- CTTT                                                                  |       |       |       |       |       |       |       | 33945 |

| Majority    | AGAAATAAAAGTGAAAC- TTTCAAAAACA- - - - - TAGCTCXA- ACTAGT- - - ATTGG- AATTGGATTTTATTGAA        |       |       |       |       |       |       |       |       |
|-------------|-----------------------------------------------------------------------------------------------|-------|-------|-------|-------|-------|-------|-------|-------|
|             | 50810                                                                                         | 50820 | 50830 | 50840 | 50850 | 50860 | 50870 | 50880 |       |
| Human       | AGATATAAAAGTGAAATATTTCAAAAATA- - - - - CAACTGTTCTAAGTAGCATTAG- AATTTGATTTTGTAAA               |       |       |       |       |       |       |       | 43306 |
| PolarBear   | AGAAGTAAAAGTGAAAC- ATTAACCAAAACCTAACCCTAACTCCA- ACTAGT- - - ATTGG- GATTGGATTTTATTGAA          |       |       |       |       |       |       |       | 12749 |
| Cow         | TGAAGTCTAACTAAAC- TTTTAGTCATA- - - - - CAACTCAATACCAGAGAAACAAACAACCTCAATGAAAGTGGG             |       |       |       |       |       |       |       | 40211 |
| Dog         | AGAAATAAAAGTGAAAC- ATTCCAAAACAA- - - - C- - - TAGCTCCA- ACTAGT- - - ATTGG- GGTTGGATTAT- TTGAA |       |       |       |       |       |       |       | 38552 |
| BelugaWhale | AGAAGCGTAACA- - - - - TTTCAAAGACA- - - - - CAGCTCTA- ATTAGT- - - ATTGG- AATTGGATTTTATTGGA     |       |       |       |       |       |       |       | 36844 |
| Donkey      | TTAAATAAAAGTGAAACATTTCAAAAACA- - - - - CAGCTAGCTTCA- ATTAGT- - - ATTAA- AATTGAATTTTAAATGAA    |       |       |       |       |       |       |       | 40726 |
| Cat         | AGAAATAAAAGTGAAAC- ATTAATAAA- - - - - ACCTAGCTCTG- ACTAGT- - - ATTGG- ATTTGGCTTTTATTGAA       |       |       |       |       |       |       |       | 43841 |
| Ferret      | AGAAATAAAAGTGAAAC- ATTAACAAAGAA- - - AACAACTAGCTCCA- GCTAGT- - - ACTGA- GATTGGACTTCATTGAA     |       |       |       |       |       |       |       | 39943 |
| Lion        | AGAAATAAAAGTGAAAC- ATTAACAAATAAA- AAAACCTAGCTCCA- ATTAGT- - - ATTGG- ATTTGGCTTTTATTGAA        |       |       |       |       |       |       |       | 41491 |
| Vaquita     | AGAAGCGTAACA- - - - - TTTCAAAGACA- - - - - CAGCTCTA- ACTAGT- - - ATTGG- AATTGGATTTTATGGGA     |       |       |       |       |       |       |       | 37530 |
| Pig         | AGAAGTGAAACA- - - - - TTTCAAAAACA- - - - - TAGCTCTTAACTAGT- - - ATTAA- AATTGGATTTTATTGAA      |       |       |       |       |       |       |       | 34005 |

Dienstag, 3. Mai 2022 08:39

| Majority    | AGGAA- - - - TTTGTAAC TATTTGT CAGTGGGGAGGAGGC- - - - - TTGACAA- - - TTGTAAAATATGGTCTC- - - - - TT   |       |       |       |       |       |       |       |       |
|-------------|-----------------------------------------------------------------------------------------------------|-------|-------|-------|-------|-------|-------|-------|-------|
|             | 50890                                                                                               | 50900 | 50910 | 50920 | 50930 | 50940 | 50950 | 50960 |       |
| Human       | - - - - - TTTGTAAC TATTTAGCAGT GACTATGAGGC- - - - - TTGACAA- - - TTCTAAGGTACAGTCTCTTTAA- TT         |       |       |       |       |       |       |       | 43367 |
| PolarBear   | AGGAG- - - - TTTGTAAC TGT TTTGT CAGTG- - AAGGAACC- - - - - TTGACAG- - - TTGTAAAA- - - - - TT        |       |       |       |       |       |       |       | 12799 |
| Cow         | AAAAAGACCTAAACAGACATTTCTCCAAAGAAGACATACAGATAGCTAATAAACACTTGAAAAGATGCTCAA- - - - - C-                |       |       |       |       |       |       |       | 40284 |
| Dog         | AGGAG- - - - TTTTAACTATTTGTCTGTGGGGAGGAACC- - - - - TTGACAG- - - CTGTAAAA- - - - - TT               |       |       |       |       |       |       |       | 38604 |
| BelugaWhale | AGGAA- - - - TTTTAACTCTTTGGAAGTGGGGAGGAGGC- - - - - TTGACAA- - - TTGTAAAATATGGTCTC- - - - - T-      |       |       |       |       |       |       |       | 36904 |
| Donkey      | AGGAA- - - - TTTGTAAGTATTTGGCAGTGGGGAGAATAC- - - - - TTAACAG- - - TTGTAAGATATGGTCTCTTTAG- TT        |       |       |       |       |       |       |       | 40792 |
| Cat         | AGGAA- - - - TAACTAGTTTTTTCATTGGAG- - - AGGAGGT- - - - - TTGACAG- - - TTGTAAAATATGGTCTCTTTAATTT     |       |       |       |       |       |       |       | 43905 |
| Ferret      | AGGAG- - - - TTTGTAACAATTTGTTAGTGGGAAGGAGCC- - - - - TTGACAA- - - CTGTAAAA- - - - - TT              |       |       |       |       |       |       |       | 39995 |
| Lion        | AGGAA- - - - TAACTAGTTTT- CATTGGGG- - - AGGAGGT- - - - - TTGACAA- - - TTGTAAAACATGGTCTCTTTAATTT     |       |       |       |       |       |       |       | 41554 |
| Vaquita     | AGGAA- - - - TTTTAACTCTTTGGAAGTGGGGAGGAGGC- - - - - TTGACAA- - - TTGTAAAATATGGTCTC- - - - - TC      |       |       |       |       |       |       |       | 37591 |
| Pig         | AGGAA- - - - TTTGTAAC TGT TTTGGCAGTGGAGAGCGTGC- - - - - TTGACAA- - - TTTTAAAGATATGGTCTC- - - - - T- |       |       |       |       |       |       |       | 34065 |

| Majority    | TTTGAGTCA TTTCTTTATAGCTGTGGAT- - - A- - - - - TGGAATAT- - - - - CCXTTAAAGTX- X- - AT- - - - -      |       |       |       |       |       |       |       |       |
|-------------|----------------------------------------------------------------------------------------------------|-------|-------|-------|-------|-------|-------|-------|-------|
|             | 50970                                                                                              | 50980 | 50990 | 51000 | 51010 | 51020 | 51030 | 51040 |       |
| Human       | TTCTAGTGATTTCTTTGTAGCTACGGA- - - - - AC- - - - - TGGAATAT- - - - - CCCTTTAGGT- - - - - AT- - - - - |       |       |       |       |       |       |       | 43416 |
| PolarBear   | CTTGAGTCA TTTCTTTATAGCTGTGGAT- - - A- - - - - TGGAATATT- - - - - CCTTTAA- - - - -                  |       |       |       |       |       |       |       | 12844 |
| Cow         | - ATCGCTCATTATTAGAGAAATGCAGATCAAAACTACAGTGAGATATCACCTCACACCATTAAGAATGGCCATAATCAA                   |       |       |       |       |       |       |       | 40363 |
| Dog         | TTTGAGTCA TTTCTTAAATAGCTTTGGAT- - - A- - - - - TGGAATATT- - - - - CCTCTAAGGT- - - - - AT- - - - -  |       |       |       |       |       |       |       | 38654 |
| BelugaWhale | - TGAGTCCATTTTTTTTATAGGTGTGGA- - - AA- - - - - TGGAATAC- - - - - CTCTTTAAGTTAGGTAT- - - - -        |       |       |       |       |       |       |       | 36957 |
| Donkey      | TTTGAGTTATTTCTTTGCAGCTTTGGA- - - A- - - - - GTGGTATAT- - - - - CACTTTAAGTTAAGTAT- - - - -          |       |       |       |       |       |       |       | 40846 |
| Cat         | TTTGAGTCA TTTCTTCATAGCTCTGGAT- - - A- - - - - TGGACTGTC- - - - - CCTTTAAGT- - - - - AT- - - - -    |       |       |       |       |       |       |       | 43955 |
| Ferret      | TTTGAGTCA TTTCTTTATAGCTGTGGAT- - - A- - - - - TGGAATATT- - - - - CCTTTAAGTTAAGTAAT- - - - -        |       |       |       |       |       |       |       | 40050 |
| Lion        | TTTGAGTCA TTTCTTCATAGCTCTGGAT- - - A- - - - - TGGACTGTC- - - - - CCTTTAAGT- - - - - AT- - - - -    |       |       |       |       |       |       |       | 41604 |
| Vaquita     | TTGAGTCCATTTTTTTTATAGGTGTGGA- - - AA- - - - - TGGAATAC- - - - - CTCTTTAAGTTAGGTAT- - - - -         |       |       |       |       |       |       |       | 37645 |
| Pig         | - TGGATTCATTTTTTTTATAGGTGTGGA- - - AA- - - - - TGGAATA- - - - - GCCCTTTAAGTTGGGTAT- - - - -        |       |       |       |       |       |       |       | 34118 |

Dienstag, 3. Mai 2022 08:39

| Majority    | -- ACATAT- - - - - TTCTGCCAGTGCTGCT- - - - - AATTGTTATTCTATAAT- - - - - AGXAGG- ATTTAA- |                  |                  |                 |                    |                    |         |                   |       |
|-------------|-----------------------------------------------------------------------------------------|------------------|------------------|-----------------|--------------------|--------------------|---------|-------------------|-------|
|             | 51050                                                                                   | 51060            | 51070            | 51080           | 51090              | 51100              | 51110   | 51120             |       |
| Human       | -- ACATAT-                                                                              | ----- TTCTGCCAGT | GCTGCT-          | -----           | AATTGTTACTCTGTAAT- | -----              | AGCAGG- | ATTTTCT           | 43465 |
| PolarBear   | -----                                                                                   | TTCTGCCAGT       | GCTGCT-          | -----           | AATTGTTATTCTATAAT- | -----              | AGCAGG- | ATTTAC-           | 12889 |
| Cow         | AAATCTACAAAAAATAAAT                                                                     | GCTGGAGAGGGT     | GTGGAGAAAAGGGAAT | GCTCCTGCACTGTTT | GTGGGAATGTAAATTGA  |                    |         |                   | 40443 |
| Dog         | -- ATATGT-                                                                              | ----- TTCTGCCAGT | GTTGCT-          | -----           | AATTGTTATTCTGTCAT- | -----              | AG-     | ----- ACTTAT-     | 38701 |
| BelugaWhale | -- ACATGT-                                                                              | ----- TTCTGCCAGT | GCTAC-           | -----           | TGCTTTTCTTTAAT-    | -----              |         | ----- GTCAG       | 36997 |
| Donkey      | -- ACATAT-                                                                              | ----- TTCTGCCAGT | GCTGCT-          | -----           | AATTGTTATTCTGTAGT- | -----              | AGTAGG- | ATTTAT-           | 40897 |
| Cat         | -- ACATAT-                                                                              | ----- TTCTGCCAGT | AATCCT-          | -----           | GATTGTTATTCTATAAT- | -----              | AGTAGG- | ATTTAAA           | 44007 |
| Ferret      | -- ATATAT-                                                                              | ----- TTCTGCCAGT | GCTGCT-          | -----           | AATTATTATTCTATAAT- | -----              | AGCAGG- | ATTTAT-           | 40101 |
| Lion        | -- ACATAT-                                                                              | ----- TTCTGCCAGT | AATTCT-          | -----           | GATTGTTATTCTATAAT- | -----              | AGTAGG- | ATTTAAA           | 41656 |
| Vaquita     | -- ACATGT-                                                                              | ----- TTCTGCCAGT | GCTAC-           | -----           | TGCTTTTCTTTAAT-    | -----              |         | ----- ATCAG       | 37685 |
| Pig         | -- ATGTAT-                                                                              | ----- TTCTGGCACT | GCTGC-           | T-              | -----              | AATTGTTACTCTGCTAT- | ---     | ATTGGGATTTATTTTAT | 34174 |

| Majority    | TATTGCTA- - - - AAAGXTTGACATTTTGCTTTATGTGAA- - - - AGAACTGAAATCATTCCATAGATTCTGTTA- CATGT- |                   |                                  |             |        |       |       |       |       |
|-------------|-------------------------------------------------------------------------------------------|-------------------|----------------------------------|-------------|--------|-------|-------|-------|-------|
|             | 51130                                                                                     | 51140             | 51150                            | 51160       | 51170  | 51180 | 51190 | 51200 |       |
| Human       | GAAAATTATTGCTAAACATGACATTTTGCTCTACCTGAA-                                                  | -----             | AGCAGTTAAACCATTCCATAGAGTCTGGAA-  | CATTT-      |        |       |       |       | 43539 |
| PolarBear   | TATTGCTA- - - - AAAGTGTGACATTTTGCTTTGTGTGAA-                                              | -----             | AGAACTGAAATCATTCCATAGATTCTGTT-   | ---         | ATGT-  |       |       |       | 12957 |
| Cow         | TACAGCCACTATGGAATATGGTATGGAGATTCCCTTAGAACACTAGGAATAAAAGCACCATAT-                          | GACCCAGCAATCCCAC- |                                  |             |        |       |       |       | 40521 |
| Dog         | TATTGCTA- - - - AAAGT- - AATATTT- - - - TCACGTGAA-                                        | -----             | AGAACTGAAATCATTCCAAGGATTCTGTTT-  | GATATA      |        |       |       |       | 38766 |
| BelugaWhale | TATTATTGCTG- AAAGTATGAC- TTTTTCTCTATGTAAA-                                                | -----             | AGAACTGAAATCATTTTATAGATTCTGTTA-  | CATGT-      |        |       |       |       | 37069 |
| Donkey      | TAGTGCTA- - - - AAAGTGTGACTTTTTGCTTTATGTGAA-                                              | -----             | AGAACTGAAATCATTCTATAGGTAATGGTG-  | TATGT-      |        |       |       |       | 40967 |
| Cat         | TATTGTTA- - - - AAAGTGTGATATTTTGCTTTATGTGAA-                                              | -----             | AAAACCTGAAATCATCCCATAGATTCTGGTA- | TATGT-      |        |       |       |       | 44077 |
| Ferret      | TATTGCTG- - - - AAAGTGTGACATTTTGCTTTATGTGAA-                                              | -----             | AGAACTGAAATCATTCCCTCAGATTCTGAT-  | ---         | ATATG  |       |       |       | 40170 |
| Lion        | TATTGTTA- - - - AAAGTGTGATATTTTGCTTTATGTGAA-                                              | -----             | AAAACCTGAAATCATCCCATAGATTCTGGTA- | TATGT-      |        |       |       |       | 41726 |
| Vaquita     | TATTACTGCTG- AAAGTATGAC- TTTTTCTCTATGTAAA-                                                | -----             | AGAACTGAAATCATTTTATAGATTCTGTTA-  | CATGT-      |        |       |       |       | 37757 |
| Pig         | TATTACTG- - - - AAAGTATGACATTTTATTTTGTGAA-                                                | -----             | AGAACTGAAATCATTTATA-             | GATTCTGTTA- | CACAT- |       |       |       | 34243 |





Dienstag, 3. Mai 2022 08:39

| Majority    | - XAAXA- - - - - X- XTG- A- A- X- - - - - - G- - - - - XXCTTCTAGTTTAGTCTAGCCTTCTA- - - - TTTT |       |
|-------------|-----------------------------------------------------------------------------------------------|-------|
|             | 51370 51380 51390 51400 51410 51420 51430 51440                                               |       |
| Human       | TTAACAACTCATCTTCTTGCATATAAAGG- - - - TAGTGAGA- - - - GCCTTATTTTCATAGTGTTACTATTTATGAGGGTT      | 43742 |
| PolarBear   | - - - - - A- - - - - CTTCTAGTTTAGTCTAGGCTTCTG- - - - TTTT                                     | 13085 |
| Cow         | GGAATATTACTCGGCCATGAAAAGGAACACA- - - - TTTGAGTCAGTTCTAATGAGGTGGGATGAACCTAGAAA- - CTAT         | 40748 |
| Dog         | - - - - - A- - - - - CTTCTAGTTTAGTCTAGGCTTCTA- - - - TTTT                                     | 38904 |
| BelugaWhale | CTAACAGCATGTCTTCTTGCATAGAGGTGTAGAGATAATGTGAGCCTTCTCTAATTTAGTGTAGCCTTCTA- - - - TATT           | 37273 |
| Donkey      | CTAACAACTCATCTTCTTGCAGATAGAGAGG- - - - TAATGAGAGCCTTCTCCAGTTTAGCCT- - - - TCTA- - - - TGTT    | 41168 |
| Cat         | - - - - - T- - - - - CTTCTAGTTTAGCCT- - - - TCTA- - - - TTTT                                  | 44200 |
| Ferret      | - - - - - A- - - - - CTTCTAGTTTAGTCTAGGTGTCTA- - - - TTTT                                     | 40304 |
| Lion        | - - - - - T- - - - - CTTCTAGTTCAGCCT- - - - TCTA- - - - TTTT                                  | 41849 |
| Vaquita     | CTAACAGCATGTCTTCTTGCATAGAGGTGTAGAGATAATGTGAGCCTTCTCTAATTTAGTGTAGCCTTCTA- - - - TATT           | 37954 |
| Pig         | CTAACAA- - - - - GTTTTGTATAGAGGTA- - - - - TT- GAGATCCTTCTCTAATTTAGTGTAGCTTT- - - - - CTCT    | 34432 |

| Majority    | TTTCCAGCTCATGC- - - - GTAAGGTA- - - - - CTTTTGGCAAGTAGGC- - - TATGCAG- - - - CTTCTXAAAAA          |       |
|-------------|---------------------------------------------------------------------------------------------------|-------|
|             | 51450 51460 51470 51480 51490 51500 51510 51520                                                   |       |
| Human       | TTAACAACTTATCTTCTTGTATATAAAGGTAGTGAGAGCCTTCTCTAGGTGCCT- - - TCTGTGTTTTTCCAGCTCATGCC               | 43819 |
| PolarBear   | TTTCTAGCTCATGT- - - - GTATGGTA- - - - - CTTTTGGCAAGTAGGC- - - TATGCGG- - - - CTTCTTAAAAA          | 13141 |
| Cow         | TATACAGCACAAA- - - - - GTAAGTCAGAGAGAGATAAATATCTTATTCTAACGCATATATACGG- - - - AATCTAGAAAA          | 40818 |
| Dog         | CT- CTAGCTCATCT- - - - GTAAGGTA- - - - - CTTTTGGCAAGTAGGC- - - TGTACAG- - - - CTGCTTAAAAA         | 38959 |
| BelugaWhale | TTACCAGCTCATGC- - - - ATAAGTTA- - - - - CTTTTGACAAGTAGGC- - - TATGCAG- - - - CTAAGCAGAAA          | 37329 |
| Donkey      | TTTCCAACTCATGC- - - - ATAAGGCA- - - - - CTTTTGGCAAGTAGAC- - - TATGCAG- - - - CTAAGCAGAAA          | 41224 |
| Cat         | TTCCTAGCTCATGC- - - - GTAAGGTA- - - - - CTTCTGGCAAGTAGGC- - - TGTGCAGTGCAGCTTCTTGAAAA             | 44261 |
| Ferret      | TT- CTAGCTCACGC- - - - GTAAGGTG- - - - - CTTTTGGAAAGTGGGC- - - TGTGCAG- - - - CTTCTTAAAAA         | 40359 |
| Lion        | TTCCTAGCTCATGC- - - - GTAAGGTA- - - - - CTTCTGGCAAGTAGGC- - - TGTGCAGTGCAGCTTCTTGAAAA             | 41910 |
| Vaquita     | TTTCCAGCTCATGC- - - - ATAAGTTA- - - - - CTTTTGACAAGTAGGC- - - TATGCAG- - - - CTAAGCAGAAA          | 38010 |
| Pig         | TAGACTGCTCACAC- - - - GTAAGTTA- - - - - C- - - - - TTTTGGCATAAGGC- - - TATGCAG- - - - CTAAGCAGAAA | 34487 |

Dienstag, 3. Mai 2022 08:39

| Majority    | ----- TGCAGAGTT----- ACAGC--- CAG- TTTTACAGTAAACCTAAGATTT-----                     |       |       |       |       |       |       |       |       |
|-------------|------------------------------------------------------------------------------------|-------|-------|-------|-------|-------|-------|-------|-------|
|             | 51530                                                                              | 51540 | 51550 | 51560 | 51570 | 51580 | 51590 | 51600 |       |
| Human       | ----- TAATATGCTTTTG--- ACAACTACACCACACAAC--- TACTTGAAATACAAGAGTTAATAGTTACC----- TT |       |       |       |       |       |       |       | 43882 |
| PolarBear   | ----- TGCAG- TT----- ACAGC--- CAG- TTTTACAATAAACCTAAGATTT-----                     |       |       |       |       |       |       |       | 13179 |
| Cow         | GTGATATTGAAGAATTTATGTACAGGGCAAAGTGGAGAAG--- TAGACATAGAGAATAAACCTACACACA-----       |       |       |       |       |       |       |       | 40886 |
| Dog         | ----- TGTAG- TT----- ACAGCATCTAG- TTTTACAATAAGCCTAAGATTTATTTATTTT                  |       |       |       |       |       |       |       | 39009 |
| BelugaWhale | ----- TGCAGAGTT----- ACAGG--- CAG- CTTTACAGTAAACCTA-----                           |       |       |       |       |       |       |       | 37363 |
| Donkey      | TG----- CAAAGAGTT----- ATGGC--- CAG- CTTTACAGTCAGCCTAG-----                        |       |       |       |       |       |       |       | 41261 |
| Cat         | ----- TGCAGAGTT----- ATAGC--- CAG- TTTTACATTAATCTAAGATTT-----                      |       |       |       |       |       |       |       | 44301 |
| Ferret      | ----- TGCAG- TT----- ACAGC--- CAG- TTTTACAGTAAACCTAAGATTT-----                     |       |       |       |       |       |       |       | 40397 |
| Lion        | ----- TGCAGAGTT----- ATAGC--- CAG- TTTTACATTAAGCCTAAGATTT-----                     |       |       |       |       |       |       |       | 41950 |
| Vaquita     | ----- TGCAGAGTT----- ACAGG--- CAG- CTTTACAGTAAACCTA-----                           |       |       |       |       |       |       |       | 38044 |
| Pig         | ----- TGAAGAGCT----- ACAGG--- TAG- CTTTATAGTAAACCTA-----                           |       |       |       |       |       |       |       | 34521 |

| Majority    | ----- XXXXXX- TTTTGTGTGGTGGCTGTTGGACTT- - AACTAA- - - ACAGCTAGCAGAATAA- - -                |       |       |       |       |       |       |       |       |
|-------------|--------------------------------------------------------------------------------------------|-------|-------|-------|-------|-------|-------|-------|-------|
|             | 51610                                                                                      | 51620 | 51630 | 51640 | 51650 | 51660 | 51670 | 51680 |       |
| Human       | TTACGGAAACCTGG--- TGAGGCTTTTTGCGTGGTGGCTGTTGCAG- - - - - AA- - - - ACAGCCAACAGAATAG- - - - |       |       |       |       |       |       |       | 43943 |
| PolarBear   | ----- TTT- GTGTGGTAGCTGTTGGTCTT- - GGCTTA- - - - ACAGCTAGCAGAATAA- - - -                   |       |       |       |       |       |       |       | 13224 |
| Cow         | - TGGGGAGAGGGGAGTGGAGGGT GAGATGTATGGAAAGAGTTAACATGGAAACTTACACTACCAATTGTAAAATAGATAG         |       |       |       |       |       |       |       | 40965 |
| Dog         | GTTTTTATTTTTATTTTTATTTTTTTTGTGGTAGCTGTTGGTCTT- - GACTAA- - - - ACAACTGTCAGAATAA- - - -     |       |       |       |       |       |       |       | 39079 |
| BelugaWhale | ----- GTAAGATTTTTGTGTGTGTGTGCGGTGACTGTTGGAGTT- - AACTAA- - - - AGCTAGTAGAATAA- - - -       |       |       |       |       |       |       |       | 37422 |
| Donkey      | ----- TAAGATTTTTTTGTGTGGTGGCTGTTGGAGTT- - AGCGAA- - - - ACGCCTATCAGGATAA- - - -            |       |       |       |       |       |       |       | 41315 |
| Cat         | ----- TTTGTGTGGTGGCTGTTGGACCT- - GACTAA- - - - ACAGCTAGCAGAATAA- - - -                     |       |       |       |       |       |       |       | 44346 |
| Ferret      | ----- TTTTGTGTGGTGGCTGTTAGTC- - - - - TTA- - - - ACAGCTAGCAGAATAA- - - -                   |       |       |       |       |       |       |       | 40438 |
| Lion        | ----- TTTGTGTGGTGGCTGTTGGACCT- - GACTAA- - - - ACAGCTAGCAGAATAA- - - -                     |       |       |       |       |       |       |       | 41995 |
| Vaquita     | ----- GTAAGATTTTTGTGTGTGTGTGCGGTGACTGTTGGAGTT- - AACTAA- - - - AGCTAGTAGAATAA- - - -       |       |       |       |       |       |       |       | 38103 |
| Pig         | ----- GTAAGATTTTTCTTATTTGTGCAGCGGCTGTTGACATTTTAACTAA- - - - ACAGCTAGTAGAATAG- TAA          |       |       |       |       |       |       |       | 34587 |



Dienstag, 3. Mai 2022 08:39

| Majority    | ATT- TTTTCTAAAGCCAXCAGC- TTCTATAACAXTXTGCTTTGCCCT- - - - - G- AAGTCTAACTTAA                 |       |       |       |       |       |       |       |  |
|-------------|---------------------------------------------------------------------------------------------|-------|-------|-------|-------|-------|-------|-------|--|
|             | 51850                                                                                       | 51860 | 51870 | 51880 | 51890 | 51900 | 51910 | 51920 |  |
| Human       | TTGTTTTTCTAAAGCTAGAA- - - - - AACACT- - GCTTTGCCCT- - - - - G- AAGT- - - - - CTAA           | 44120 |       |       |       |       |       |       |  |
| PolarBear   | ATT- TTTT- TAAAGCCAACAGC- TTCTATAATATTATGCTTTGCCCT- - - - - G- AAGTCTAACTTAA                | 13409 |       |       |       |       |       |       |  |
| Cow         | AAAATTCTGTAAAGCAATTATCCTTCAATAAAAAATTAATTAATTTAAAAAATAAAACTATTTGGGAAAATAAATTTCAA            | 41203 |       |       |       |       |       |       |  |
| Dog         | AGT- TGTC- TACAGCCAGCAGC- TTCTTTAACTTTATGCTTTGCCCT- - - - - G- AAATCTAACTTAA                | 39261 |       |       |       |       |       |       |  |
| BelugaWhale | TGT- TTTTCTAAAGCCAGCAGC- TTGTATAACACTGTGCTTTGCCCA- - - - - G- AAGTCTAACTAAA                 | 37615 |       |       |       |       |       |       |  |
| Donkey      | AT- - TTTTCTAAAGCTAGCAGC- TTCTATAACACTGTGCTTTGCTCT- - - - - GAAGTCTTAACTAAA                 | 41512 |       |       |       |       |       |       |  |
| Cat         | ATT- TTTC- TAAAGCCAACAGC- TTTTATAACAT- - - GCTTTGCCCT- - - - - G- AAGCCTTAACTAA             | 44528 |       |       |       |       |       |       |  |
| Ferret      | ATT- TTTTCTAAAGCCAACAGC- TTCTATAACGTTATGCTTTTCCCT- - - - - G- AAGTCTAACTTAA                 | 40628 |       |       |       |       |       |       |  |
| Lion        | ATT- TTTC- TAAAGCCAACAGC- TTTTATAACATTATGCTTTGCCCT- - - - - G- AAGC- TTA ACTAA              | 42179 |       |       |       |       |       |       |  |
| Vaquita     | TGT- TTTTCTAAAGCCAGCAGC- TTGTATAACACTGTGCTTTGCCCA- - - - - G- AAGTCTAACTAAA                 | 38295 |       |       |       |       |       |       |  |
| Pig         | G- - - TTTTTTAAAGCCAACAGC- TTCTGTAAACTGTGCTTTCTTTG- - C- - - - - CTT- - - G- AAGTCCAACCTCAC | 34779 |       |       |       |       |       |       |  |

| Majority    | AACTGCTTGGAATTAAAACCTGCTTTGCCCTCTCAGTTTC- ATATTTGATAAAGGAAGTTACCAGTGC- XTTTTTATAAATG    |       |       |       |       |       |       |       |  |
|-------------|-----------------------------------------------------------------------------------------|-------|-------|-------|-------|-------|-------|-------|--|
|             | 51930                                                                                   | 51940 | 51950 | 51960 | 51970 | 51980 | 51990 | 52000 |  |
| Human       | AACTGCTTAGAATTAAAACCTTCTTTGCCCTCTCAGTTTC- ATATTTGATAAAGAGAGTTAGGAAAA- - - CTTTTATAAATG  | 44196 |       |       |       |       |       |       |  |
| PolarBear   | AACTGCTTGGAATTGAAACTGCTTTTCTTCTCAGTTTC- ACATTTGATAAAGGATGCTACCAGTGCCTTTTTTATAAATG       | 13488 |       |       |       |       |       |       |  |
| Cow         | ACATTTTTAGGATTAAAACCTGCATTGCCTTTTCAGTTACCATATTTGATAAATGAAGTTACTAGTGC- TTTTTTATAAGTG     | 41282 |       |       |       |       |       |       |  |
| Dog         | AACTGCTTGGAGTTGAAACCACTTTTCTACTCAGTTTC- ACATTTGATAAAGGAAGCTAGCATTA- - CTTTCTATAAATG     | 39338 |       |       |       |       |       |       |  |
| BelugaWhale | AC- TGCTTGAGAGTAAAACCTGCTTTGCCCTCTCAGTTAT- AT- TTCGATAAAGGAAGTTACGAGTGC- - TTTTTATAAATG | 37690 |       |       |       |       |       |       |  |
| Donkey      | AACTGCTTGGAATTAAAACCTGCTTTGCCCTCTCAGTCCT- ATATTTGATAAAGGAAGTTACCAATG- - - CTTTTATAAATG  | 41588 |       |       |       |       |       |       |  |
| Cat         | AACTGATTGGAATTGAAACTGCTTTTCTCCTCTCAGTTTC- ACATTTGATAA- GGATGTTACCAATGC- TTTTTTATACATG   | 44605 |       |       |       |       |       |       |  |
| Ferret      | AATTGCTTGGAAATTGAAACTGTTTTTCTCCTCTCAGTTTC- GCGTTTGTAAATGGATACTACCAGAG- - TTCTTTATTAATG  | 40705 |       |       |       |       |       |       |  |
| Lion        | AACTGATTGGAATTGAAACTGCTTTTCTCCTCTCAGTTTC- ACATTTGATAA- GGATGCTACCAATGC- TTTTTTATAAATG   | 42256 |       |       |       |       |       |       |  |
| Vaquita     | AC- TACTTGAGAGTAAAACCTGCTTTGCCCTCTCAGTTAT- AT- TTCGATAAAGGAAGTTACAAGTGC- - TTTTTATAAATG | 38370 |       |       |       |       |       |       |  |
| Pig         | AC- TGCTTGGGATTAAAACCTGCTTTGCCCTTCTGTTACCATATTTGATAAAGTAAGTTACTGGTG- - - TTTTTATAAATG   | 34855 |       |       |       |       |       |       |  |

Dienstag, 3. Mai 2022 08:39

| Majority    | CTTGAGTCTG- - AAAGACTT- GGAGAATGA- - - - - GAATGTACTTATGTTTT- - - GTTAAATAGTTTTCACTGXA |                                             |                        |                    |       |       |       |       |  |
|-------------|----------------------------------------------------------------------------------------|---------------------------------------------|------------------------|--------------------|-------|-------|-------|-------|--|
|             | 52010                                                                                  | 52020                                       | 52030                  | 52040              | 52050 | 52060 | 52070 | 52080 |  |
| Human       | TGTGTCTCTG- - AAAGACTT- GGAGAATGA- - - - -                                             | AGATGTACCTAAGTTTT- - -                      | GTC- -                 | ACTGATTTTTCAATTGGA | 44259 |       |       |       |  |
| PolarBear   | CTTGAGTGTG- - AAAGACTTAAGAGATTGA- - - - -                                              | GAATGTACTTATTTTTTTTAGTTTTGCTAATTTCTGCTGTA   | 13557                  |                    |       |       |       |       |  |
| Cow         | CTTGTATCTG- - AAAGACTT- GGAAAACGAAAATAAGGAGAGTATACTTAAGTTTT- - -                       | GTTAAA- TAATTTTCACTGAA                      | 41355                  |                    |       |       |       |       |  |
| Dog         | CTGGAATGTG- - AATGACTTAAGAGAATGA- - - - -                                              | CAGTGTACTAAT- - - - -                       | ATTTTTTTTAGTTTCCAGTATA | 39400              |       |       |       |       |  |
| BelugaWhale | CTTGAGTCTG- - GAAGAATT- GGAGAATGA- - - - -                                             | GAATGTACTTATATTTT- - -                      | GTTAAAATAGTTTTCACTGGA  | 37755              |       |       |       |       |  |
| Donkey      | CTTTAGTCTG- - AAAGACTT- GGAGAATGA- - - - -                                             | GAATGTGCTTATGTTTTGTTACATATAT- GTCTTCA- TAGA | 41654                  |                    |       |       |       |       |  |
| Cat         | GTTGGGTCTG- - AAAGACTTTAGAGAATGA- - - - -                                              | GAATGTACTTATCTTT- - - -                     | TCTTAAATAGTTTCTACTGTA  | 44670              |       |       |       |       |  |
| Ferret      | CTTGAGTGTGTGAAAGACTTAAGAGATTGA- - - - -                                                | GAATGTACTTAC- - - - -                       | ATTTTGTTAGTTTCCACTATA  | 40768              |       |       |       |       |  |
| Lion        | GTTGGGTCTG- - AAAGACTTCAGAGAATGA- - - - -                                              | GAATGTACTTATCTTT- - - -                     | TGTTAAATAGTTTCCACTGTA  | 42321              |       |       |       |       |  |
| Vaquita     | CTTGAGTCTG- - GAAGAATT- GGAGAATGA- - - - -                                             | GAATGTACTTATATTTT- - -                      | GTTAAAATAGTTTTCACTGGA  | 38435              |       |       |       |       |  |
| Pig         | CCTTGGTCTT- - TAGGACTT- GGAGAATGA- - - - -                                             | GAGTGTACTTATGTTTT- - -                      | GCT- - - - -           | TTCACTGGA          | 34911 |       |       |       |  |

| Majority    | TAGATGAXTT- - - - - ATAAAGTTTTGAAATGTTGCACTTCAXGTTGGTATACA- - GTTGAAAGTATAGAATTAGAA- TAT |                                                                    |                              |                            |       |       |       |       |  |
|-------------|------------------------------------------------------------------------------------------|--------------------------------------------------------------------|------------------------------|----------------------------|-------|-------|-------|-------|--|
|             | 52090                                                                                    | 52100                                                              | 52110                        | 52120                      | 52130 | 52140 | 52150 | 52160 |  |
| Human       | CAGAAGTA- - - - -                                                                        | TAAGGTTTTGCCGTGTCGATTTTATATTTGTACACA- -                            | GTTGAAAGTATAA- - - - -       | 44317                      |       |       |       |       |  |
| PolarBear   | TAAATAGGTAGAAGCATAAAGTTTTGAAATGTTGCACTTCAGGTTGATAGACA- -                                 | GTTGGAAGTATAGAATTAGAA- TAT                                         | 13634                        |                            |       |       |       |       |  |
| Cow         | TAGATGGA- - - - -                                                                        | AGTAGTTTTTGAATTTTTGCACTTCAAGTTGGTATATACAGTTGGAAGTATACAATTAGAA- TAT | 41427                        |                            |       |       |       |       |  |
| Dog         | TAAATAAGTA- - - - -                                                                      | TAAAGTTCTGAAGTGTGTACTTCAAGTTGATACACA- -                            | GTTGGAA- - ATAAAATTAGAG- TAT | 39469                      |       |       |       |       |  |
| BelugaWhale | CAGATGAAGT- - - - -                                                                      | AAAAAGTTTTGAGATGTTGCACTTCAAGTTGGTATATACACTTGAAAGTATAGAAGTAAATAT    | 37830                        |                            |       |       |       |       |  |
| Donkey      | CAGATGAAGT- - - - -                                                                      | ATAAAGTTTTGAAATGT- - - -                                           | GCTCAGGTTGGTATGCA- -         | GTTGAAAGTATAGAATTAGAT- TAT | 41722 |       |       |       |  |
| Cat         | TAAATAAGTGAAGTATAAAGTTTTGTAATGTTGCACTTCAGGCTGATG- -                                      | CA- -                                                              | GTGGAAAGTATAGAATTAGAA- AAT   | 44745                      |       |       |       |       |  |
| Ferret      | TAAATAAGTGAAGTATAAAGTTTTGAAATGT- - -                                                     | ACTTCAGGTTGATAAATA- -                                              | GTTGGAAGTGTAGAATTAGAA- TAT   | 40842                      |       |       |       |       |  |
| Lion        | TAAATAAGTGAAGTATAAAGTTTTGTAATGTTGCACTTCAGGCTGATG- -                                      | CA- -                                                              | GTTGAAAGTATAGAATTAGAA- AAT   | 42396                      |       |       |       |       |  |
| Vaquita     | CAGATGAAGT- - - - -                                                                      | AAAAAGTTTTGAGATGTTGCACTTCAAGTTGGTATATACAGTTGAAAGTATAGAAGTAAATAT    | 38510                        |                            |       |       |       |       |  |
| Pig         | CAGATGATCT- - - - -                                                                      | AAAAAGTTTAGAGACGTTGCACTTCAAGTTGGTACATG- -                          | GTTGAAAGTATAGAGTTAGAA- TAT   | 34983                      |       |       |       |       |  |



Dienstag, 3. Mai 2022 08:39

| Majority    | - - - GCCAGAACAGCTTGGGGAXATCCCAACCATTATTGGGAATGAATGAGTAAGCAGAGGGTT- CAAAGCAGCTXT- - - - |                                             |                                                  |       |       |       |       |                                 |       |
|-------------|-----------------------------------------------------------------------------------------|---------------------------------------------|--------------------------------------------------|-------|-------|-------|-------|---------------------------------|-------|
|             | 52330                                                                                   | 52340                                       | 52350                                            | 52360 | 52370 | 52380 | 52390 | 52400                           |       |
| Human       | CCAGCCTGGCCAACATGGT                                                                     | GAAACCCCATCT-                               | CTACTGAAAATAGAAAAATTAGCTGGGTGTGGTGGTGCACACCTGAAT |       |       |       |       |                                 | 44527 |
| PolarBear   | - - - GCCAAAACAGCTTGAAGA                                                                | ACTCCCAACTATTATTGGGAATGAATATGTAAGCAGAGGGTT- |                                                  |       |       |       |       | TGAAGCAGCTAT- - - -             | 13816 |
| Cow         | G- GGTGTGTGTGGGCGGGTGTCACTGTA                                                           | AACCATTTTGGACGTA                            | AAATGAGTTAGCAGAGGGGT-                            |       |       |       |       | CAGTGTGTGTGTGTAT                | 41665 |
| Dog         | - - - GCCAAT- TAGCT- GTGGACCTCCCA                                                       | ACTATTATTGGGAATGAGTACATAAGCAGACAGTT-        |                                                  |       |       |       |       | CAAAGGAGCTGT- - - -             | 39648 |
| BelugaWhale | - - - - CCAGAACACGTTGGGG-                                                               | CAGTCCAACCATTTTGGGAAGTAAATGAGTTAGCAGAGGGGT- |                                                  |       |       |       |       | CAAAGCAGGTAT- - - -             | 38008 |
| Donkey      | - - - ACCAAAACAGGTTGGGG-                                                                | - - - - - A- - - - - TCTGG-                 | - - - - - GAATGAATAAGTAGAGGGTT-                  |       |       |       |       | CAAAGCACAGGTAT- -               | 41893 |
| Cat         | - - - GCCAGTACAGCTTGAGGAATTCCCA-                                                        | CCATTACTGGGAATGCATGCTTAA-                   |                                                  |       |       |       |       | CAGAAAGTT- CAAA- CAACTAT- - - - | 44915 |
| Ferret      | - - - GCCAAAACGGCTTGAGGA                                                                | ACTCCCAACTATTACTGGGAATGAGTACATAAGCAGAGGGTT- |                                                  |       |       |       |       | TGAAGCAGCTGT- - - -             | 41022 |
| Lion        | - - - GTCAGTACAGCTTGAGGA                                                                | ATTCCCA- CCATTACTGGGAATGCGTGCTTAA-          |                                                  |       |       |       |       | CAGAAAGTT- CAAA- CAACTAT- - - - | 42566 |
| Vaquita     | - - - - CCAGAACACGTTGGGG-                                                               | CAGTCCAACCGTTTTGGGAAGTAAATGAGTTAGCAGAGGGGT- |                                                  |       |       |       |       | CAAAGCAGGTAT- - - -             | 38688 |
| Pig         | - - - ATCAGAATAGTTGGGG-                                                                 | - CACTCCAGCCATTTTGG-                        | - - - - - AAATGAGTCAGCTGAGGGTC-                  |       |       |       |       | CAAGGCAGGTGT- - - -             | 35160 |

| Majority    | - CAAATGAGTCAGGGAAGTAAGXA- - - - - AACTAGAAATGAATTGTTAA- - GGATGCTGTGAGAA- - - - - CAGA |                                                  |       |       |       |       |       |                               |       |
|-------------|-----------------------------------------------------------------------------------------|--------------------------------------------------|-------|-------|-------|-------|-------|-------------------------------|-------|
|             | 52410                                                                                   | 52420                                            | 52430 | 52440 | 52450 | 52460 | 52470 | 52480                         |       |
| Human       | TCCCAGCTACATGGGAGGCTGTGGCACGA-                                                          | - - GAATCACTTAAACCTGGGAAGTGGAGGTTGTAGTCAA-       |       |       |       |       |       | - - - - - CCAAG               | 44598 |
| PolarBear   | - AAAATGAATCAGGGAAGTAAGAA-                                                              | - - - - - AACTAGAAATGAATTGTTAA-                  |       |       |       |       |       | GGGTGTTGTGAGAA- - - - - CAGA  | 13877 |
| Cow         | GCCTGCTTGTGTGTGCACTCAGTCATGTCCA                                                         | ACTTTTGTGACCCCATGGGCTGTAGCCCGCCAAGCTCCTCTATCCACA |       |       |       |       |       |                               | 41745 |
| Dog         | - AAAATGAATAAGGGAAGTAA-                                                                 | - - - - - AACTAGAAAGGAATTGTTAA-                  |       |       |       |       |       | GGGTATTGTGGAA- - - - - CAGA   | 39706 |
| BelugaWhale | - CAAATGAGTCAGGGAAGTAAGGA-                                                              | - - - - - AACTAGAAGTAAGTTATTAA-                  |       |       |       |       |       | GGATGCTGTGAGAA- - - - - CAGA  | 38069 |
| Donkey      | - CAAATGAGTCAGGGAAGTAAGAA-                                                              | - - - - - AACTAGACATGAATTGTTAG-                  |       |       |       |       |       | GGGTCTGTGAGAA- - - - - CAGA   | 41954 |
| Cat         | - ACAGTGAGTCAGGGAAGTAAGAA-                                                              | - - - - - AACCAGATGTGAATTGTTAG-                  |       |       |       |       |       | GGGTGCTGTGAGAA- - - - - CAGA  | 44976 |
| Ferret      | - AAAATGAATCAGGGAAGTAAGAA-                                                              | - - - - - AACAAGAAATGAATTGTTAA-                  |       |       |       |       |       | GGATG- - TGAGAA- - - - - CAGA | 41080 |
| Lion        | - ACAGTGAGTCAGGGAAGTAAGAA-                                                              | - - - - - AACTAGATGTGAATTGTTAG-                  |       |       |       |       |       | GGGTGCTGTGAGAA- - - - - CAGA  | 42627 |
| Vaquita     | - CAAATGAGTCAGGGAAGTAAGGA-                                                              | - - - - - AACTAGAAGTAAGTTATTAA-                  |       |       |       |       |       | GGATGCTGTGAGAA- - - - - CAGA  | 38749 |
| Pig         | - CAGATGAGTCGGGGGTACGGAG-                                                               | - - - - - ACTTGAAAGAAGTCATTAG-                   |       |       |       |       |       | GGAGACTGTGAGGC- - - - - CAGA  | 35219 |



Dienstag, 3. Mai 2022 08:39

|             |                                                                                              |       |       |       |       |       |       |       |  |  |       |
|-------------|----------------------------------------------------------------------------------------------|-------|-------|-------|-------|-------|-------|-------|--|--|-------|
| Majority    | GAGATTT- - - GGT AAGGAT GAGAGGGCTCACAGT- - XTTTCGGCCATGGATGGATTTAACAAATT- - - - - - - ACCCAG |       |       |       |       |       |       |       |  |  |       |
|             | 52490                                                                                        | 52500 | 52510 | 52520 | 52530 | 52540 | 52550 | 52560 |  |  |       |
| Human       | ATCATGCCACTGCACTCCAGCCTGGCAATACAGCAAGACTCTGTCTTAGATAGATA- GATAGATAGATAGATAGATAGAT            |       |       |       |       |       |       |       |  |  | 44677 |
| PolarBear   | GAAATTT- - - GGT AAGGAT GAGAGGGCTCACAGT- - ATTTTGACCATGGATGGATTTAACAAATT- - - - - - - ACAAAT |       |       |       |       |       |       |       |  |  | 13943 |
| Cow         | GAATTTTCCAGGCAAGAATACTGGAATGCGTTGCCATTTCTACTCGAGGGGATCATCCTGACCCTGGGATCAAACCCGG              |       |       |       |       |       |       |       |  |  | 41825 |
| Dog         | GACATTT- - - GGTAGGGATGAGAGGGCTCACAGT- - ATTTTGACCATGGATGAATTTAACAAATT- - - - - - - ACCCAG   |       |       |       |       |       |       |       |  |  | 39772 |
| BelugaWhale | GAGATTT- - - GGT AAGGTTGAAAGGGCTCACAGC- - TCTTCCGCCACTGGTGGATTTAACAAATT- - - - - - - ACCCAG  |       |       |       |       |       |       |       |  |  | 38135 |
| Donkey      | GACATTC- - - AGTAAGGCTGAGAGGGCTCACAGT- - TCTTCCGGCTGCGGATGGGTTT AACAAATT- - - - - - - ACCTAG |       |       |       |       |       |       |       |  |  | 42020 |
| Cat         | GATAT- - - - GGT AAGTATGAGAGGGCTTACAGT- - ATTTTGGCCATGGATGGATTTAACAAATT- - - - - - - ACCCAG  |       |       |       |       |       |       |       |  |  | 45040 |
| Ferret      | GAGATT- - - - GGT AAGTGTGAGAGGGCTCACAAAT- - ATTTTGATCCTGGATGGATTTAACAAATG- - - - - - - ATAAT |       |       |       |       |       |       |       |  |  | 41145 |
| Lion        | GATAT- - - - GGT AAGTATGAGAGGGCTTACAGT- - ATTTTGGCCATGGATGGATTTAACAAATT- - - - - - - ACCCAG  |       |       |       |       |       |       |       |  |  | 42691 |
| Vaquita     | GAGATTT- - - GGT AAGGTTGAGAGGGCTCACAGC- - TCTTCCGCCACAGGTGGATTTAACAAATT- - - - - - - ACCCAG  |       |       |       |       |       |       |       |  |  | 38815 |
| Pig         | GAGATTT- - - GATAAGGATAAGAGGGCTCGTAGC- - TCTTCCACCAGGGGTGGATTTAATAAATC- - - - - - - ACCCAG   |       |       |       |       |       |       |       |  |  | 35285 |

|             |                                                                                                              |       |       |       |       |       |       |       |       |
|-------------|--------------------------------------------------------------------------------------------------------------|-------|-------|-------|-------|-------|-------|-------|-------|
| Majority    | GATCTTGGTGA- - - - AAXTTTTATGTGAAAAC- - - - GCAGGTA AAC- ACCAGTAAAAAGCAAAGGTCAGTCAAGG- AAA                   |       |       |       |       |       |       |       |       |
|             | 52570                                                                                                        | 52580 | 52590 | 52600 | 52610 | 52620 | 52630 | 52640 |       |
| Human       | AGA- TAGATACTGTGAAACCCAGTGCTAGAGT- - - - - GTTTATATTTAATAAGTAAAGATAGGTAGAGTATCGGAACAAA                       |       |       |       |       |       |       |       | 44751 |
| PolarBear   | TAG- TGAG- - - - - ACCGTTTATGTAAAAGCT- - - - GCAAGTAAAT- ACCAGTAAAGAACAAAGGTCAGTCAAGG- AAA                   |       |       |       |       |       |       |       | 14009 |
| Cow         | TCTCTTGCACCT- CCTGTATTGGCAGGCAAATTTCTTTACCACTGCACCACC- - TGGGAAGTAGCAGAGGGTCCAACAGG                          |       |       |       |       |       |       |       | 41902 |
| Dog         | CATCTTAGTG- - - - - AACTTAATATGAGAACT- - - - GCAGGTA AAC- ACTAGTAAAGAGCAAAGGTCAGTCAAGG- AAA                  |       |       |       |       |       |       |       | 39841 |
| BelugaWhale | GATCTTGGTGA- ACCCTTTTG- TGTGAAAAC- - - - ACAGTTAAAAAGCCAGTAGAAGACAAAAGTCAGTCAAAG- AGA                        |       |       |       |       |       |       |       | 38208 |
| Donkey      | GGTCTTATAAG- - - - GTCACCTTATGTGAAAAGCT- - - - GCAGGCAGAA- GCCAGTAGAGAACAAAGGTCAGTCAAGG- AGA                 |       |       |       |       |       |       |       | 42090 |
| Cat         | AATCTTGGTGA- - - - GACTGTTACGTGAAAAC- - - - GT- GATAAAC- ACCAGTAAAAAGCAAAGGTCAGTCAAGG- GAA                   |       |       |       |       |       |       |       | 45109 |
| Ferret      | TAG- TGAGTGAAGCATT TTTTATGTCAAAAAC- - - - GTAGGTA AAC- ACCACTGAAGAGCAAAGGTCATTCAAGG- AAA                     |       |       |       |       |       |       |       | 41218 |
| Lion        | AATCTTGGTGA- - - - GACTGTTACGTGAAAAC- - - - GT- GATAAAC- ACCAGTAAAAAGCAAAGGTCAGTCAAGG- GAA                   |       |       |       |       |       |       |       | 42760 |
| Vaquita     | GATTTTGGTGA- - - - - G- TGTGAAAAC- - - - ACAGTTAAAAAGCCAGTAGAAGACAAAAGTCAGTCAAAG- AGA                        |       |       |       |       |       |       |       | 38888 |
| Pig         | GACCTTG- - - - - - - - - - - G- TGAG- - - - - - - - - - ACCCCTGTG- - - - - - TGTGAA- - AACTGCAGGTA AAAAGGAGA |       |       |       |       |       |       |       | 35331 |

Dienstag, 3. Mai 2022 08:39

| Majority    | AAAXAXATGGACT- - GATTAAAGGTGAAGGXA- ATGTTCACTTTAGAATTGAGGTAGAAAACCACTTTTGAXXTTGGXAG |                           |                                          |                   |            |                  |           |       |       |       |
|-------------|-------------------------------------------------------------------------------------|---------------------------|------------------------------------------|-------------------|------------|------------------|-----------|-------|-------|-------|
|             | 52650                                                                               | 52660                     | 52670                                    | 52680             | 52690      | 52700            | 52710     | 52720 |       |       |
| Human       | AACAGCATGGGA- - -                                                                   | ACTAACAATTTTGGGGAATG- - - | AATGAGTAATCAGGATTC                       | CAAAGCAAGTATCAA-  | TGAGT      | CG               |           |       | 44824 |       |
| PolarBear   | AAAGAGATAGAGT- -                                                                    | GATCAAAGGTGAAG- - -       | ATGTTCTCTATAGAATT                        | GAGGTAGAAAATGACTT | CTGAGTTT   | GGAAG            |           |       | 14083 |       |
| Cow         | TATCAAATGAATTAGGAATTAAAGAACTGGAAATG- - -                                            | AGTATTGGGGT               | GCTGTAAGAAA-                             | - - - - -         |            |                  |           | AG    | 41962 |       |
| Dog         | AAG- - -                                                                            | AGAGACT- -                | GACGAAAGGTGAAG- - -                      | ATGTTCACTATAGAATT | GAGGTTGAAA | ACTTTT           | GAGTTT    | GGAAG | 39912 |       |
| BelugaWhale | AATGAGATGGACTGGGACTGTTCAAAGTGAAGATGTTCACTTTAGA                                      | ACTGAGGTAGAAA             | ACTTTT                                   | AAGTTT            | GTATT      | GGA              |           |       | 38288 |       |
| Donkey      | GAAGAGATGGACT- -                                                                    | GATCAAAGGTGAAG- - -       | ATGCTCACTTTAGATTT                        | GAAGTAGAAA        | ACCACTTTT  | GAGATT           | GGAAG     |       | 42164 |       |
| Cat         | AAA- - -                                                                            | AGAGACT- -                | GATTAAAGGTGAATGAACATGGTCACTTTAGAATTGTGGT | AGAAA             | ACCACTTTT  | GAATTT           | GGCAG     |       | 45184 |       |
| Ferret      | GAA- - - -                                                                          | TAGACT- -                 | GATCAGAGGTGAAG- - -                      | ATGTTCACTATAGAATT | GAGGTAGAAA | ACCACTT- - - - - | G         |       | 41276 |       |
| Lion        | AAA- - -                                                                            | AGAGACT- -                | GATTAAAGGTGAATGAACATGGTCACTTTAGAATTGAGGT | AGAAA             | ACCACTTTT  | GAATTT           | GGCAG     |       | 42835 |       |
| Vaquita     | AAAGAGATGGACTGGGACTGTTCAAAGTGAAGATGTTCACTTTAGA                                      | ACTGAGGTAGAAA             | ACTTTT                                   | AAGTCTATATT       | GGA        |                  |           |       | 38968 |       |
| Pig         | AAACAAAGG- - - - -                                                                  | TCAGTAAA                  | GGGAAAAG- - -                            | AGG- -            | TGGACT     | GGTA-            | - - - - - |       |       | 35370 |

| Majority    | AG- AAGTATTCAAATAGAAATAGTTTTTGCATTTTTTTX- - ACATATTATTX- - - - T- GAATTTGAGAAGAACATCT- - T |                           |                          |                   |                   |                 |       |       |       |
|-------------|--------------------------------------------------------------------------------------------|---------------------------|--------------------------|-------------------|-------------------|-----------------|-------|-------|-------|
|             | 52730                                                                                      | 52740                     | 52750                    | 52760             | 52770             | 52780           | 52790 | 52800 |       |
| Human       | GGAAATTAGAAAAGTAGAAAT- - - - -                                                             | TGAAGTTTTT                | AG- -                    | GGGTGCTATTAG- - - | AGAAATTCAGT       | GAGGAAGAGA- - - |       |       | 44890 |
| PolarBear   | AG- AAGTATACAAATAGAAATAGTTTTTACATTTTTTT- -                                                 | AACATATTATTG- -           | TTTCGCATTT               | GAAAGA            | ACATCT- -         | T               |       |       | 14156 |
| Cow         | AG- GTTTGGTAAGATGAGAGGG- CCCATGGCTC- TTTGAC- CCATATGGAT- - - - -                           | T- TAACA- - - - -         | AATAACCA- -              | G                 |                   |                 |       |       | 42025 |
| Dog         | AG- AAGTATT- AAGTAGACATAGGTTTTACATTTTTTTTTTACATACTATTTT- -                                 | TTCGAATTT                 | GAGAGGA                  | ACATCT- -         | T                 |                 |       |       | 39986 |
| BelugaWhale | AT- GTTCACTTAGAAACAAGTT- TCTGTGTCTTGTTTTGA- ATTTGTGAGT- - - - -                            | A- GAAGAGCTCTATTAAGCCA- - | A                        |                   |                   |                 |       |       | 38357 |
| Donkey      | AG- AAGTGTTCAAATAGAAACAGTTTTTACGTTTTCTTTG- -                                               | TTTTGAATT- - - -          | TGTGAGTAGAAGAATATCTTTGCT |                   |                   |                 |       |       | 42236 |
| Cat         | AGGAAGTATTCAAATAGAAACAGTTTTTGCATATTTTT- -                                                  | ACATATTATTTT              | GTTTCAAATTT              | GAGAAGA           | ACATCT- -         | T               |       |       | 45259 |
| Ferret      | GG- AAGTATTCAAATAGAAATAGTTTTTACTTTTTTTTTTAACATATTATT- - - - -                              | TTGAATTT                  | AGGAAGA                  | ACATCT- -         | T                 |                 |       |       | 41348 |
| Lion        | AG- AAGTATTCAAATAGAAACAGTTTTTGCATATTTTT- -                                                 | ACATACTATTTT              | GTTTCAAATTT              | GAGAAGA           | ACATCT- -         | T               |       |       | 42909 |
| Vaquita     | AT- GTTCACTTAGAAACAAGTT- TCTGTGTCTTGTTTTGA- ATTTGTGAGT- - - - -                            | A- GAAGAGCTCCATTAAGCCA- - | A                        |                   |                   |                 |       |       | 39037 |
| Pig         | - - - - -                                                                                  | CTGATCAAATGTGAAG- - - - - | ATGTTA- CTTTA- - - - -   | GGAT- - - - -     | T- GAGGT- - - - - | AGAAGGTTT- -    | G     |       | 35418 |

Dienstag, 3. Mai 2022 08:39

| Majority    | AAGXX- - AGGCTTTAAGAAGGCTGAATAATAT- - GGAAAATAAT- - - ATTAAAGATTTCTXCAATTTATATACAACCTAT                         |       |       |       |       |       |       |       |       |
|-------------|-----------------------------------------------------------------------------------------------------------------|-------|-------|-------|-------|-------|-------|-------|-------|
|             | 52810                                                                                                           | 52820 | 52830 | 52840 | 52850 | 52860 | 52870 | 52880 |       |
| Human       | GGTTTACAGTTCCTTGTTGACTGATGGATGT- - - - - GGTGATTTAAC- - AAATTACCCATGATCCTTGC- CGACACCC                          |       |       |       |       |       |       |       | 44961 |
| PolarBear   | AA- - - - - AAGCCTTAAGAAGTCTGAATAACATATGGGAAATGATGTGATTAAGATTTCTTCAATTTATATACAACCTAT                            |       |       |       |       |       |       |       | 14231 |
| Cow         | AA- - - - - - - - TCTTGGTGAGACTTTTTTGT- - - - - GTTAAAAC- - - A- - - - CAATATAAGCCACTAG- - - - - AAAATAA        |       |       |       |       |       |       |       | 42080 |
| Dog         | AAGCA- - AAACTTTAAGAAGGCTAAATAATACATGGAAAATGATGTGATTACAGATTTCTGCAATTT- - ATACAACCTGT                            |       |       |       |       |       |       |       | 40062 |
| BelugaWhale | AGG- - - - CTTTTTAAAGAAGGCATATATGGAA- - - GACAGTATA- - - A- - - - AGATTTCTACAATTTATATGCAGCTTAC                  |       |       |       |       |       |       |       | 38423 |
| Donkey      | AAGCAAAAAGGCTTTAAGAAGACCAAATTATATATGGAAAATGGTGTAAATTAATGATTTCTATAATTTATATGTAACCTTAT                             |       |       |       |       |       |       |       | 42316 |
| Cat         | AAGCAAAAAGGCTTTAAGAAGGCTGAATAATATATGGAAAATAAT- - - ATTAAAGGTTTCTGCAATTTATATACAACCTGT                            |       |       |       |       |       |       |       | 45336 |
| Ferret      | AAGCATAAGGCTTTAAGAAGGCTGAATAACAT- - GGGAAATGTTGTGATTAGAGGTTTCTGTAATTTTTATACAACCTAT                              |       |       |       |       |       |       |       | 41426 |
| Lion        | AAGCAAAAAGGCTTTAAGAAGGCTGAATAATATATGGAAAATAAT- - - ATTAAAGATTTCTGCAATTTATATACAACCTGT                            |       |       |       |       |       |       |       | 42986 |
| Vaquita     | AGG- - - - CTTTTTAAAGAAGGCATATATGGAA- - - GACAGTATA- - - A- - - - AGATTTCTACAATTTATATGCAGCTTAC                  |       |       |       |       |       |       |       | 39103 |
| Pig         | AA- - - - - - - - TTTGGAAGAGG- - - - - - - - - - - - - AATATT- - - C- - - - AAATAGAAACAGTTT- - - - - - - - TTAC |       |       |       |       |       |       |       | 35457 |

| Majority    | ATGCATGAATAAAGCATTACTAC- - AGTTGTTGCXTAA- - - CXTAGAAATCATTTTA- ATTATTACT- - GGTTTTACAT                 |       |       |       |       |       |       |       |       |
|-------------|---------------------------------------------------------------------------------------------------------|-------|-------|-------|-------|-------|-------|-------|-------|
|             | 52890                                                                                                   | 52900 | 52910 | 52920 | 52930 | 52940 | 52950 | 52960 |       |
| Human       | ATTTATG- - TAAAAATTGCAGGTAAAAGCTAGTGGAGAA- - - C- - AAAGGTCAGTCAGCAGGAGAAAAGTGATGTACTGA                 |       |       |       |       |       |       |       | 45034 |
| PolarBear   | GTACATAAATAAAGCATTACTACATTGTTGTTGCCTTAGTTCTTCGAAATCATTTTA- ATTATTACT- - GATTTTACAT                      |       |       |       |       |       |       |       | 14308 |
| Cow         | AC- TGTGG- - - AAAATTCTGAGAG- - AGTTGGGAATACC- - - - - - - AGACCACCTGA- CCTGCCTCTTGAGAAATCTGT           |       |       |       |       |       |       |       | 42145 |
| Dog         | ATGCATAAATAAAGCATTACGAC- - - GTTGTGCCTTA- TTCTTAGAAATCATTTTA- ATTATGACT- - GGTTTTACAT                   |       |       |       |       |       |       |       | 40135 |
| BelugaWhale | ATGCATGAGTAAAAGCATTACTAC- - ATCTGTTGTTGAA- - - - - - - AAACAGTCTT- - TAAAAATTCTTTAGTTTTACAT             |       |       |       |       |       |       |       | 38491 |
| Donkey      | GTGCATAAGTAAAAGCATTACTAT- - - GTTGCATACATTA- - CATAAGAATTATTTTA- ATTATTACT- - GGTTTTACAT                |       |       |       |       |       |       |       | 42388 |
| Cat         | ATGCATAAATAAAGTATTACTATATTGTTGTTGCCTAAGTTCTTAGAAATCATTTTA- ATTGTTACT- - GGTTTTACAT                      |       |       |       |       |       |       |       | 45413 |
| Ferret      | ATGCACGAATAAAGCATTACTACATTGTTGTTGCCTTGGTTCTTCGAAATCATTTCA- ATTATTACT- - GGTTTTACAT                      |       |       |       |       |       |       |       | 41503 |
| Lion        | ATGCATAAATAAAGTATTACTATATTGTTGTTGCCTAAGTTCTTAGAAATCATTTTA- ATTGTTACT- - GGTTTTACAT                      |       |       |       |       |       |       |       | 43063 |
| Vaquita     | ATGCATGAGTAAAAGCATTACTAA- - ATCTGTTGTTGAA- - - - - - - AAACAGTCTT- - TAAAAATTCTTTAGTTTTACAT             |       |       |       |       |       |       |       | 39171 |
| Pig         | AT- CTTG- - - - - - - - TCTTGA- - - - - ATTTGTGAGTAGA- - - - - - - AAAACATCC- - - - - - - - - - - TCCCT |       |       |       |       |       |       |       | 35496 |

Dienstag, 3. Mai 2022 08:39

| Majority    | ACACAAACCAAAGTTTCTGGATTTACXTGGG- - - GAGTGGAAGGGAAAAGAT- XATG- GAAAGAAGTCCAAA- TTATT |       |       |       |       |       |       |       |   |   |   |   |   |   |   |   |   |   |   |   |   |   |   |   |   |   |   |   |   |   |   |   |   |   |   |   |   |   |   |   |   |   |   |   |   |   |   |   |   |   |   |   |   |   |   |   |   |   |   |   |   |   |   |   |   |       |       |       |       |       |       |       |   |   |   |   |       |
|-------------|--------------------------------------------------------------------------------------|-------|-------|-------|-------|-------|-------|-------|---|---|---|---|---|---|---|---|---|---|---|---|---|---|---|---|---|---|---|---|---|---|---|---|---|---|---|---|---|---|---|---|---|---|---|---|---|---|---|---|---|---|---|---|---|---|---|---|---|---|---|---|---|---|---|---|---|-------|-------|-------|-------|-------|-------|-------|---|---|---|---|-------|
|             | 52970                                                                                | 52980 | 52990 | 53000 | 53010 | 53020 | 53030 | 53040 |   |   |   |   |   |   |   |   |   |   |   |   |   |   |   |   |   |   |   |   |   |   |   |   |   |   |   |   |   |   |   |   |   |   |   |   |   |   |   |   |   |   |   |   |   |   |   |   |   |   |   |   |   |   |   |   |   |       |       |       |       |       |       |       |   |   |   |   |       |
| Human       | T                                                                                    | C     | A     | G     | A     | G     | G     | T     | G | A | A | A | C | T | T | T | T | A | G | A | A | T | T | G | A | G | - | - | - | - | G | T | G | A | A | A | A | C | T | G | T | T | T | T | G | A | G | T | T | T | T | G | A | A | G | A | G | T | A | T | - | - | - | C | A | A     | 45105 |       |       |       |       |       |   |   |   |   |       |
| PolarBear   | T                                                                                    | C     | A     | C     | A     | A     | C     | C     | A | A | A | A | G | T | T | T | G | T | G | C | T | T | T | A | C | C | T | G | G | - | - | - | G | A | G | C | G | G | A | A | A | A | G | A | T | - | C | A | T | G | - | G | A | A | G | A | A | G | T | C | C | A | A | - | T | T     | A     | T     | 14381 |       |       |       |   |   |   |   |       |
| Cow         | A                                                                                    | T     | G     | C     | A     | G     | G     | T     | C | A | A | G | C | A | A | C | A | G | T | T | A | G | A | A | C | T | G | G | A | C | A | T | G | G | A | C | A | C | A | C | A | G | A | C | T | G | G | T | T | C | C | A | A | A | T | A | - | G | G | A | A | A | G | G | A | G     | T     | A     | C     | G     | -     | T     | C | A | A | G | 42223 |
| Dog         | T                                                                                    | C     | A     | C     | A     | A     | C     | C     | A | A | A | G | T | T | T | C | T | G | G | T | T | T | A | C | C | T | C | A | G | - | - | - | G | A | C | T | A | G | A | A | G | G | A | A | G | A | T | T | A | T | A | - | G | A | A | G | A | A | G | T | C | C | A | A | A | T     | T     | A     | T     | G     | 40210 |       |   |   |   |   |       |
| BelugaWhale | A                                                                                    | C     | C     | T     | A     | A     | -     | C     | C | A | A | G | T | T | T | C | T | G | T | C | T | G | G | A | T | T | A | C | C | T | G | - | G | G | A | A | G | T | A | A | G | G | A | A | G | A | T | T | G | T | G | - | G | A | A | G | A | A | G | T | C | C | A | A | - | T     | T     | A     | T     | A     | 38567 |       |   |   |   |   |       |
| Donkey      | A                                                                                    | A     | C     | C     | A     | A     | A     | C     | C | A | A | A | G | T | T | T | C | T | G | G | A | C | T | T | A | C | C | T | G | G | - | - | - | G | A | G | T | G | G | A | A | A | G | A | A | C | - | A | G | C | A | - | G | A | A | G | A | A | G | T | C | C | A | A | - | T     | T     | A     | T     | 42461 |       |       |   |   |   |   |       |
| Cat         | A                                                                                    | C     | A     | C     | A     | A     | C     | C     | A | G | A | A | G | T | T | T | C | T | G | G | A | T | T | A | C | T | T | G | A | G | - | - | - | G | A | G | T | G | G | A | A | A | A | G | A | T | - | C | A | T | G | - | G | A | A | G | A | G | T | T | C | A | A | - | - | -     | T     | T     | 45483 |       |       |       |   |   |   |   |       |
| Ferret      | T                                                                                    | C     | A     | C     | A     | T     | A     | C     | C | A | A | A | G | T | T | T | G | T | G | G | A | T | T | A | C | C | T | G | G | - | - | - | G | A | G | T | G | G | A | A | A | A | G | A | T | - | C | T | T | G | - | G | A | A | G | A | A | G | T | C | C | A | A | - | T | T     | A     | T     | 41576 |       |       |       |   |   |   |   |       |
| Lion        | A                                                                                    | C     | A     | C     | A     | A     | C     | C     | A | A | A | G | T | T | T | C | T | G | G | A | T | T | A | C | T | T | G | A | G | - | - | - | G | A | G | T | G | G | A | A | A | A | G | A | T | - | C | A | T | G | - | G | A | A | G | A | A | G | T | C | A | A | - | - | - | T     | T     | 43133 |       |       |       |       |   |   |   |   |       |
| Vaquita     | A                                                                                    | C     | C     | T     | A     | A     | -     | C     | C | A | A | G | T | T | T | C | T | G | T | C | T | G | G | A | T | T | A | C | C | T | G | - | G | G | A | A | G | G | A | A | G | A | T | T | G | T | G | - | G | A | A | G | A | A | G | T | C | C | A | A | - | T | T | A | T | 39247 |       |       |       |       |       |       |   |   |   |   |       |
| Pig         | A                                                                                    | T     | G     | C     | A     | -     | -     | -     | A | A | A | G | G | C | T | T | T | C | T | T | A | A | G | A | - | G | G | A | - | - | - | - | - | - | - | - | - | - | - | - | A | A | C | T | A | G | T | - | A | T | A | T | - | G | G | A | A | A | G | G | T | G | T | A | T | -     | T     | G     | G     | A     | G     | 35553 |   |   |   |   |       |

| Majority    | GTACTTTGTCTTCTGAAGAATCATAGATCTGTAACCCAGAGAGACCCAATCTTCCTTACTTCTCTGATAGGGTAATAAAT |       |       |       |       |       |       |       |   |   |   |   |   |   |   |   |   |   |   |   |   |   |   |   |   |   |   |   |   |   |   |   |   |   |   |   |   |   |   |   |   |   |   |   |   |   |   |   |   |   |   |   |   |   |   |   |   |   |   |   |   |   |   |   |   |   |   |       |   |   |       |   |       |       |       |       |       |   |   |   |   |   |   |       |
|-------------|----------------------------------------------------------------------------------|-------|-------|-------|-------|-------|-------|-------|---|---|---|---|---|---|---|---|---|---|---|---|---|---|---|---|---|---|---|---|---|---|---|---|---|---|---|---|---|---|---|---|---|---|---|---|---|---|---|---|---|---|---|---|---|---|---|---|---|---|---|---|---|---|---|---|---|---|---|-------|---|---|-------|---|-------|-------|-------|-------|-------|---|---|---|---|---|---|-------|
|             | 53050                                                                            | 53060 | 53070 | 53080 | 53090 | 53100 | 53110 | 53120 |   |   |   |   |   |   |   |   |   |   |   |   |   |   |   |   |   |   |   |   |   |   |   |   |   |   |   |   |   |   |   |   |   |   |   |   |   |   |   |   |   |   |   |   |   |   |   |   |   |   |   |   |   |   |   |   |   |   |   |       |   |   |       |   |       |       |       |       |       |   |   |   |   |   |   |       |
| Human       | G                                                                                | T     | A     | G     | A     | A     | C     | C     | A | T | T | T | T | A | A | A | T | T | T | T | T | T | G | C | T | T | T | G | A | A | T | C | C | G | T | G | A | T | A | C | A | T | C | T | T | C | C | C | T | A | A | G | C | - | - | A | A | G | A | G | G | C | T | T | G | A | A | 45183 |   |   |       |   |       |       |       |       |       |   |   |   |   |   |   |       |
| PolarBear   | G                                                                                | T     | A     | C     | T     | T     | T     | G     | T | C | T | T | C | T | G | A | G | A | A | T | C | A | C | A | G | A | T | C | T | G | T | A | A | C | C | C | A | G | A | G | A | G | A | C | C | C | A | A | T | C | T | T | C | C | T | T | A | C | T | T | - | - | - | - | G | G | T | A     | A | A | A     | T | 14456 |       |       |       |       |   |   |   |   |   |   |       |
| Cow         | G                                                                                | C     | T     | G     | T     | A     | T     | T     | G | T | C | - | - | - | - | A | T | C | C | T | G | C | T | T | A | T | T | T | A | T | T | A | T | - | - | - | A | - | - | - | - | - | - | - | T | G | C | A | G | A | G | T | A | C | - | - | - | A | T | C | A | T | G | A | G | A | A | A     | T | G | C     | T | 42282 |       |       |       |       |   |   |   |   |   |   |       |
| Dog         | G                                                                                | T     | A     | C     | T     | T     | T     | G     | T | C | T | T | C | T | G | A | G | A | A | T | C | A | C | A | G | A | T | C | T | - | - | A | A | C | C | T | A | G | A | G | A | G | A | C | C | C | A | - | - | - | T | C | T | T | T | A | C | T | T | C | T | G | A | T | A | G | G | A     | T | A | A     | A | T     | 40285 |       |       |       |   |   |   |   |   |   |       |
| BelugaWhale | G                                                                                | T     | A     | C     | T     | T     | T     | G     | T | C | T | T | C | T | G | A | G | A | A | T | C | A | T | A | G | A | T | C | T | G | T | A | A | C | C | C | A | G | A | G | A | G | A | C | C | C | A | T | C | T | T | C | C | T | T | A | C | T | T | C | T | A | A | T | A | G | G | T     | C | A | T     | A | A     | A     | T     | 38647 |       |   |   |   |   |   |   |       |
| Donkey      | G                                                                                | T     | A     | T     | T     | T     | T     | G     | T | C | T | T | C | T | G | A | A | A | A | T | C | A | T | A | G | A | T | C | T | G | T | A | A | C | C | C | A | G | A | G | A | G | A | C | C | C | A | G | T | C | T | T | C | C | T | T | A | C | T | T | C | T | G | A | G | A | G | G     | T | G | A     | T | A     | A     | A     | T     | 42541 |   |   |   |   |   |   |       |
| Cat         | A                                                                                | T     | T     | C     | T     | T     | T     | G     | C | C | T | - | T | G | A | A | G | A | A | T | C | C | T | A | G | A | T | C | T | G | T | A | A | C | C | C | A | G | A | G | A | G | A | C | C | C | A | A | T | C | T | T | C | C | T | T | A | C | T | T | C | T | G | A | T | A | G | G     | T | A | A     | A | T     | 45562 |       |       |       |   |   |   |   |   |   |       |
| Ferret      | G                                                                                | T     | A     | C     | T     | T     | T     | G     | T | C | T | T | C | T | G | A | G | A | T | C | A | C | A | G | A | T | C | T | A | A | C | C | C | A | G | A | G | A | G | A | C | C | C | T | G | A | C | T | T | C | C | T | T | A | C | T | T | C | T | G | A | T | A | G | G | T | A | A     | A | T | 41656 |   |       |       |       |       |       |   |   |   |   |   |   |       |
| Lion        | A                                                                                | T     | T     | C     | T     | T     | T     | G     | C | C | T | - | T | G | A | A | G | A | A | T | C | C | T | A | G | A | T | C | T | G | T | A | A | C | C | C | A | G | A | G | A | G | A | C | C | C | A | A | T | C | T | T | C | C | T | T | A | C | T | T | C | T | G | A | T | A | G | G     | T | A | A     | A | T     | 43212 |       |       |       |   |   |   |   |   |   |       |
| Vaquita     | G                                                                                | T     | A     | C     | T     | T     | T     | G     | T | C | T | T | C | T | G | A | G | A | A | T | C | A | T | A | G | A | T | C | T | G | T | A | A | C | C | C | A | G | A | G | A | G | A | C | C | C | A | T | C | T | T | C | C | T | T | A | C | T | T | C | T | A | A | T | A | G | G | T     | C | A | T     | A | A     | T     | 39327 |       |       |   |   |   |   |   |   |       |
| Pig         | -                                                                                | -     | -     | -     | -     | A     | T     | T     | T | C | T | C | - | - | - | - | - | - | - | A | A | C | T | T | G | - | - | T | A | T | G | C | A | A | C | C | C | A | T | - | - | - | - | - | - | - | A | - | - | - | - | - | - | - | - | T | G | C | T | A | - | - | - | - | - | - | - | -     | - | - | A     | G | T     | A     | A     | A     | G     | C | A | T | T | A | C | 35601 |

Dienstag, 3. Mai 2022 08:39

| Majority    | GGCCTATATGTTTCATAAGCTAA- - - GGGCTATAXATTTTCTTGTGTCCTTTTTCTTTTCTAGGGXTGGAGTGTTTTT- -         |       |       |       |       |       |       |       |       |
|-------------|----------------------------------------------------------------------------------------------|-------|-------|-------|-------|-------|-------|-------|-------|
|             | 53130                                                                                        | 53140 | 53150 | 53160 | 53170 | 53180 | 53190 | 53200 |       |
| Human       | GAGTTGAATAATGTATGGAAAATGGTGTGCTTAAAGATTTTTTACATTCATA- - - - TACAATGAATAAAA- - TTTAT- -       |       |       |       |       |       |       |       | 45254 |
| PolarBear   | GGCCTACTTGTTTCATAAGCTAA- - - GGGCTGTACATTTTCTTGTGTCCTTTTTCTTTTCCAGGGATGGAGTGTTTTT- -         |       |       |       |       |       |       |       | 14531 |
| Cow         | GGGCTGGATGAAGCACAAGCTGG- - - - AATAAAGATTGCTG- GGAGAAATA- - - - TC- - AATAACCTCAGAT- - - - - |       |       |       |       |       |       |       | 42343 |
| Dog         | GGCCTATGTGTTTGATAAGCTAA- - - GGGCTATACATTTTCTTGTGTCCTTTTTCT- - - - - AGGGCTGGAGTTTTTTTT- -   |       |       |       |       |       |       |       | 40354 |
| BelugaWhale | GGCCTACATGTTTCATAAGTTGA- - - - GACCACACTTTGTTTTATTTATTTATTTATTTTGGCTGCGTTGGGTCTTCAT          |       |       |       |       |       |       |       | 38723 |
| Donkey      | GGCCTAGATGTTTTATAAGCTGA- - - GGACCACATGTTTTCTTATGCCTTTTTCTTTTCCAGGCCTGGGGTGTTTTT- -          |       |       |       |       |       |       |       | 42616 |
| Cat         | GGCCTATGTGTTTTATAAGCTAA- - - GGGCTATATATTTTCTTGTGCCCTTTTTCTTTTCTAGGGCTGGAGTGTTTTT- -         |       |       |       |       |       |       |       | 45637 |
| Ferret      | GGCCTATGTGTTTCATGAACATAACAGGCTATATATTTTCTTGTGTCCTTTTTCTTTTCCAGGTATGGAGTGTTTTTCT              |       |       |       |       |       |       |       | 41736 |
| Lion        | GGCATATGTGTTTTATAAGCTAA- - - GGGCTATATATTTTCTTGTGCCCATTTTCTTTTCTAGGGCTGGAGTGTTTTT- -         |       |       |       |       |       |       |       | 43287 |
| Vaquita     | AGCCTACATGTTTCATAAGTTGA- - - - GGCCACACTTTGTTTTATTTATTTA- - - - TTTTTGGCTGCGTTGGGTCTTCAT     |       |       |       |       |       |       |       | 39399 |
| Pig         | CCATTCGTTGTTGCATAAATTC- - - - - TTAAA- ATTATT- - - - TTAATTA- - - - TT- - ACTAGTCT- - - - -  |       |       |       |       |       |       |       | 35651 |

| Majority    | -----                                                                                       |       |       |       |       |       |       |       |       |
|-------------|---------------------------------------------------------------------------------------------|-------|-------|-------|-------|-------|-------|-------|-------|
|             | 53210                                                                                       | 53220 | 53230 | 53240 | 53250 | 53260 | 53270 | 53280 |       |
| Human       | -----                                                                                       |       |       |       |       |       |       |       | 45254 |
| PolarBear   | -----                                                                                       |       |       |       |       |       |       |       | 14531 |
| Cow         | ----- ATGCAGATGA- - - - - CACCACGCTTATGGCAGAA- - - - A- GCGAAAAAGA- - - - -                 |       |       |       |       |       |       |       | 42383 |
| Dog         | -----                                                                                       |       |       |       |       |       |       |       | 40354 |
| BelugaWhale | TGCT- - - GCACGCGGGCTTTCTCT- AG- - TTGCGGCGAGCAAGGGGCTACTCTTCGTTGCAGTACACAGGC- - - - - TT-  |       |       |       |       |       |       |       | 38790 |
| Donkey      | -----                                                                                       |       |       |       |       |       |       |       | 42616 |
| Cat         | -----                                                                                       |       |       |       |       |       |       |       | 45637 |
| Ferret      | TTTTTTAATTTTTAAATTTTTTTTTTAAATTTTTTTTATAAACATAATGTATTTTTATCCCCAGGGGTACAGTCTTTGAATTG         |       |       |       |       |       |       |       | 41816 |
| Lion        | -----                                                                                       |       |       |       |       |       |       |       | 43287 |
| Vaquita     | TGCT- - - GCACGCGGGCTT- - T- - - - - TGCGGCGAGCAAGGGGCTACTCTTCGTTGCAGTACACAGGC- - - - - TT- |       |       |       |       |       |       |       | 39459 |
| Pig         | ----- TGCAAAC- - - - - CCAAACCAAAGTTGCA- - - - - T- G- - - - ATTTA- - - - -                 |       |       |       |       |       |       |       | 35682 |

Dienstag, 3. Mai 2022 08:39

| Majority    | ----- ATATATGAAAATATGCTTTAGTXA- TATGATTXXAAAXGTCX                                     |       |       |       |       |       |       |       |       |
|-------------|---------------------------------------------------------------------------------------|-------|-------|-------|-------|-------|-------|-------|-------|
|             | 53290                                                                                 | 53300 | 53310 | 53320 | 53330 | 53340 | 53350 | 53360 |       |
| Human       | ----- ATGCATAAATAAAAGCATTACCTCATGCCTTCTTAA- - - - CT                                  |       |       |       |       |       |       |       | 45292 |
| PolarBear   | ----- ATATAGGAAAGTGTGCTT- AGTCG- TATGATT- - - - -                                     |       |       |       |       |       |       |       | 14561 |
| Cow         | ----- ACTAAAGAGCCT- - - - - CT- TGATGAAAGTGAAAGAGG- - AGAGTGAAAAAGTT- - AAATCTCA      |       |       |       |       |       |       |       | 42437 |
| Dog         | ----- ATGTATGAAAGTATGCTT- AGTCA- TATGATTTAAAAAGTCC                                    |       |       |       |       |       |       |       | 40394 |
| BelugaWhale | ----- CTCATTGGACGGCTT- - - - - CTCTTATTGCAGAGCATGGGCTCTAGGTACGCAGGCTT- CAGTAGCT       |       |       |       |       |       |       |       | 38851 |
| Donkey      | ----- ATATATGAAATTAGGCTT- AGTTG- TGTGATTAAGAAATC-                                     |       |       |       |       |       |       |       | 42655 |
| Cat         | ----- ATAGATGAAAGTATGCTTTAGTCG- TATGATTAAGAAGTCC                                      |       |       |       |       |       |       |       | 45678 |
| Ferret      | CCAGCAGGTTTACACACTTCACAGCATGGAGTGT TTTTATATATGAAAATATGCTT- AGTCA- TATGATTA AAAA- GTCC |       |       |       |       |       |       |       | 41893 |
| Lion        | ----- ATATATGAAAGTATGCTTTAGTCAATATGATTAAGAAGTCC                                       |       |       |       |       |       |       |       | 43329 |
| Vaquita     | ----- CTCATTGGACGGCTT- - - - - CTCTTATTGCAGAGCATGGGCTCTAGGTACGCAGGCTT- CAGTAGCT       |       |       |       |       |       |       |       | 39520 |
| Pig         | ----- CCTGGGGA- - - - - ATGGAAGGGAAGGGT- - GCGGAAAGAAGTCC- AAATGATT                   |       |       |       |       |       |       |       | 35729 |

| Majority    | GTATTTXCCAATTTTCATGTT- TCAT- - - - -                                           |       |       |       |       |       |       |       |       |
|-------------|--------------------------------------------------------------------------------|-------|-------|-------|-------|-------|-------|-------|-------|
|             | 53370                                                                          | 53380 | 53390 | 53400 | 53410 | 53420 | 53430 | 53440 |       |
| Human       | GAACATAAACATTTGAATTACT- - - - -                                                |       |       |       |       |       |       |       | 45317 |
| PolarBear   | -----                                                                          |       |       |       |       |       |       |       | 14561 |
| Cow         | ACATTCAGAAA ACTAAGA- - - TCAT- - - - -                                         |       |       |       |       |       |       |       | 42459 |
| Dog         | TCATTTCCCAATTTTCATGTTCTCAT- - - - -                                            |       |       |       |       |       |       |       | 40419 |
| BelugaWhale | GTGGCATGCGGGCTCAGTAG- TTGT- - - - -                                            |       |       |       |       |       |       |       | 38875 |
| Donkey      | - - ATTTTCCAGTTTTGCATTCTCATAATGTCGTTATTTTAAATGAAGATTTTTCATCATAT- - - - -       |       |       |       |       |       |       |       | 42713 |
| Cat         | TTATTTCCCAATTTTCATGTTCTCAT- - - - -                                            |       |       |       |       |       |       |       | 45703 |
| Ferret      | ACATTCCTCATTTTATGTTTTCTTTTTGGTTTTTATTTATCTATTTTTTTATTAGCATATGTATTATTTGTTTCAGGA |       |       |       |       |       |       |       | 41973 |
| Lion        | TTATTTCCCAATTTTCATGTTCTCAT- - - - -                                            |       |       |       |       |       |       |       | 43354 |
| Vaquita     | GTGGCATGCGGGCTCAGTAG- TTGT- - - - -                                            |       |       |       |       |       |       |       | 39544 |
| Pig         | GTACTTTGTCTTCTGAA- - - - - A- - - - -                                          |       |       |       |       |       |       |       | 35747 |







Dienstag, 3. Mai 2022 08:39

| Majority    | 53770                                                                             | 53780 | 53790 | 53800 | 53810 | 53820 | 53830 | 53840 |       |
|-------------|-----------------------------------------------------------------------------------|-------|-------|-------|-------|-------|-------|-------|-------|
| Human       | -----                                                                             |       |       |       |       |       |       |       | 45317 |
| PolarBear   | -----                                                                             |       |       |       |       |       |       |       | 14561 |
| Cow         | -----                                                                             |       |       |       |       |       |       |       | 42459 |
| Dog         | -----                                                                             |       |       |       |       |       |       |       | 40419 |
| BelugaWhale | -----                                                                             |       |       |       |       |       |       |       | 38875 |
| Donkey      | GGGATTCTCCTATAGTAAATTAAGAGCACAGGCTGTGGAGTCATATACTTCCTGAGTTTTAATCCTTTTTCTGCCACTTC  |       |       |       |       |       |       |       | 42949 |
| Cat         | ----- TCTC-----                                                                   |       |       |       |       |       |       |       | 45709 |
| Ferret      | ATTTTTTTGATGGTTGCATAACATTCTTTTTTCATCTATCTATCTATCTCACATCTTCTTCATCCATTCATCTGTTGATGG |       |       |       |       |       |       |       | 42373 |
| Lion        | ----- TCTC-----                                                                   |       |       |       |       |       |       |       | 43360 |
| Vaquita     | -----                                                                             |       |       |       |       |       |       |       | 39544 |
| Pig         | -----                                                                             |       |       |       |       |       |       |       | 35747 |

| Majority    | 53850                                                                            | 53860 | 53870 | 53880 | 53890 | 53900 | 53910 | 53920 |       |
|-------------|----------------------------------------------------------------------------------|-------|-------|-------|-------|-------|-------|-------|-------|
| Human       | ----- G                                                                          |       |       |       |       |       |       |       | 45318 |
| PolarBear   | -----                                                                            |       |       |       |       |       |       |       | 14561 |
| Cow         | -----                                                                            |       |       |       |       |       |       |       | 42459 |
| Dog         | -----                                                                            |       |       |       |       |       |       |       | 40419 |
| BelugaWhale | -----                                                                            |       |       |       |       |       |       |       | 38875 |
| Donkey      | CCGTCTTCACCACTTAGTAACTGTCTGACCTTGGCAACTTCACTAGCTGTCATCATAAATGGGATTGATGGGTCATGATA |       |       |       |       |       |       |       | 43029 |
| Cat         | -----                                                                            |       |       |       |       |       |       |       | 45709 |
| Ferret      | ATATCTAGGCTCTTTCCATAGTTTGGCTATTGTGGACATTGCTGCTGTAAACTTTGGGGTGCACTTGCCCCTTCTGATCA |       |       |       |       |       |       |       | 42453 |
| Lion        | -----                                                                            |       |       |       |       |       |       |       | 43360 |
| Vaquita     | -----                                                                            |       |       |       |       |       |       |       | 39544 |
| Pig         | -----                                                                            |       |       |       |       |       |       |       | 35747 |

Dienstag, 3. Mai 2022 08:39

| Majority    | -----XGCATXC-----AATCTTAAGXG                                                     |       |       |       |       |       |       |       |       |
|-------------|----------------------------------------------------------------------------------|-------|-------|-------|-------|-------|-------|-------|-------|
|             | 53930                                                                            | 53940 | 53950 | 53960 | 53970 | 53980 | 53990 | 54000 |       |
| Human       | -----GTTTTACACGCCCAAACAAAAGTTCTGGGTT                                             |       |       |       |       |       |       |       | 45349 |
| PolarBear   | -----                                                                            |       |       |       |       |       |       |       | 14561 |
| Cow         | -----GTCATCC-----AGTCCCATCAC                                                     |       |       |       |       |       |       |       | 42477 |
| Dog         | -----                                                                            |       |       |       |       |       |       |       | 40419 |
| BelugaWhale | -----GGCTCGC-----GAGCTCTAGCG                                                     |       |       |       |       |       |       |       | 38893 |
| Donkey      | ATAGCATCTTAGAGGTGTAAGTAGTTAACTTCCAGAGAATGTTAAATATCTATGCAAAAGAAAAGTAGCATCTTTTCTG  |       |       |       |       |       |       |       | 43109 |
| Cat         | -----ATTATCTAAACTGAA-AACTTTAATAA                                                 |       |       |       |       |       |       |       | 45735 |
| Ferret      | CTACATCGTATCTTTGGAGTAAATACCCAGTAGTGCTGGATGAGAGATAGCTCTGTTTTCAACTTGAGGAATCTCCATGC |       |       |       |       |       |       |       | 42533 |
| Lion        | -----ATTATCTAAAATGCA-AACTTTAATAA                                                 |       |       |       |       |       |       |       | 43386 |
| Vaquita     | -----GGCTCGC-----GAGCTCTAGCG                                                     |       |       |       |       |       |       |       | 39562 |
| Pig         | -----AATCCTAGGTT                                                                 |       |       |       |       |       |       |       | 35758 |

| Majority    | TACTTXXCAAATAGAT-X-----GTA-----AXXATTAGCTGXCTTTCCTTTCTT-----                     |       |       |       |       |       |       |       |       |
|-------------|----------------------------------------------------------------------------------|-------|-------|-------|-------|-------|-------|-------|-------|
|             | 54010                                                                            | 54020 | 54030 | 54040 | 54050 | 54060 | 54070 | 54080 |       |
| Human       | TACTGGAGGAATGGA-----AGGGAAAGATCTCTTTCATTCCCC--A-----                             |       |       |       |       |       |       |       | 45390 |
| PolarBear   | -----                                                                            |       |       |       |       |       |       |       | 14561 |
| Cow         | TTCATGGGAAATAGATGG-----GCA-----AACAGTGGCTGACTTTATTTTCTG-----                     |       |       |       |       |       |       |       | 42523 |
| Dog         | -----                                                                            |       |       |       |       |       |       |       | 40419 |
| BelugaWhale | TGCAGGTTCAGTAGCTGTGGT-----GTA-----AGGCTTAGCTGCTCCGCGGCATGTG-----                 |       |       |       |       |       |       |       | 38942 |
| Donkey      | TATTTCTCCAAAAAACAGGTTGTCT--TCTTTGACTGTAAAACATCTACCTTCTTGTATTTCAGCTTTTTTA--       |       |       |       |       |       |       |       | 43184 |
| Cat         | TATTTACACCAAATATGAATATTTAGTACTAAAGTATGAATATTTAGTAGCTACCCCTTCTA-----              |       |       |       |       |       |       |       | 45799 |
| Ferret      | TGTTTTTCAGAGTGGCTGCATCAGCTTGCATTCCCACAACAGTATAGGAGGGTTCTCCTTTCTCTGCATCCTCGTCAACA |       |       |       |       |       |       |       | 42613 |
| Lion        | TATTTACACCAAATATAAATATTTAGTACTAAAGTATGAATATTTAGTAGCTACCCCTTCTA-----              |       |       |       |       |       |       |       | 43450 |
| Vaquita     | TGCAGGTTCAGTAGCTGTGGT-----GTA-----AGGCTTAGCTGCTCCGTGGCATGTG-----                 |       |       |       |       |       |       |       | 39611 |
| Pig         | TTCAACCCAGAGAGA-----GCCCATCTTCCTTACTT-----                                       |       |       |       |       |       |       |       | 35790 |

Dienstag, 3. Mai 2022 08:39

| Majority    | -----AGX--TCTCAACTAACAGX-G-X-XAACACATXGTGX-----CTGTATXTTT-----                |       |       |       |       |       |       |       |       |
|-------------|-------------------------------------------------------------------------------|-------|-------|-------|-------|-------|-------|-------|-------|
|             | 54090                                                                         | 54100 | 54110 | 54120 | 54130 | 54140 | 54150 | 54160 |       |
| Human       | -----GTAAACCTTTCCCATTCAGGATCATGGGAAGATGCTGAAGAATTGTAGAAGTCTG                  |       |       |       |       |       |       |       | 45443 |
| PolarBear   | -----                                                                         |       |       |       |       |       |       |       | 14561 |
| Cow         | -----AG----CTCCAAAATCAC-----TGCGAGATGGTGA-----CTGCAGCCATG                     |       |       |       |       |       |       |       | 42560 |
| Dog         | -----A-----T-----                                                             |       |       |       |       |       |       |       | 40421 |
| BelugaWhale | -----GGA--TCTCGCGGACCAGG-GCTCGAACCCATGTCCC-----CTGTATTGGCA                    |       |       |       |       |       |       |       | 38987 |
| Donkey      | -----CTTCTGCTTTTACCACCCACTGTCCAGAAATTATCTAACACAAATCCTTAACAATAAACTATTC         |       |       |       |       |       |       |       | 43248 |
| Cat         | -----AAC--TATTAACAACTGAGGGAATATCAGAGTGTGACCAAAGTGTAAAGTTTT                    |       |       |       |       |       |       |       | 45850 |
| Ferret      | TCTGTCAATTCCTGACTTGCTAATTGTAGCCATTTTGAAGTGTGAGGTGGATCTCATTGTGGTTTTGATTTGATTTT |       |       |       |       |       |       |       | 42693 |
| Lion        | -----AAC--TATTAACAACTGAGGGAATATCAGAGTGTGACAAAAGTGTAAAGTTTT                    |       |       |       |       |       |       |       | 43501 |
| Vaquita     | -----GGA--TCTCCCGGACCAGG-GCTCGAACCCATGTCCC-----CTGTATTGGCA                    |       |       |       |       |       |       |       | 39656 |
| Pig         | -----CTCAAATAGGAA-----AATAAATGGT-----CTGTATGTTT-----                          |       |       |       |       |       |       |       | 35822 |

| Majority    | X-----XXATTAXAAACAGATGXGCTCCTXGGXAAGATATATGATGACAXAT                         |       |       |       |       |       |       |       |       |
|-------------|------------------------------------------------------------------------------|-------|-------|-------|-------|-------|-------|-------|-------|
|             | 54170                                                                        | 54180 | 54190 | 54200 | 54210 | 54220 | 54230 | 54240 |       |
| Human       | T-----AACACAGGCAGACCTAATGCTTCATAAGCTA-ATGTTTCCATTT                           |       |       |       |       |       |       |       | 45487 |
| PolarBear   | -----                                                                        |       |       |       |       |       |       |       | 14561 |
| Cow         | -----AAATTTAAAGATGATG-GCCCCTTGG-AAGACAAGTTATGACCAAC                          |       |       |       |       |       |       |       | 42604 |
| Dog         | -----T-----                                                                  |       |       |       |       |       |       |       | 40422 |
| BelugaWhale | GGC-----AGATTCTAAACCACTGCGCCACCAGGGAAGCCCCAAGGCCACACAT                       |       |       |       |       |       |       |       | 39036 |
| Donkey      | TATTCT-----CTTCATAATAGGTTTAGGGAGACTTTACCTTTTGGAAATCATATTCTAAAAGTCAT          |       |       |       |       |       |       |       | 43310 |
| Cat         | GATGTT-----ACATGGTCTTTGGAAGAAAAGGACAGATCCTCTCTTGGCAATTGTGTATAATGCAATAT       |       |       |       |       |       |       |       | 45915 |
| Ferret      | CATGATGCCGAGTGTGTCGAGCACTTTTTCATGTGTTAGCCATCTGATGTCTTCTTTGGAGAAATGTCTGTTTCTT |       |       |       |       |       |       |       | 42773 |
| Lion        | GATGTT-----ACATGGTCTTTGGAAGAAAAGGACAGATCCTATCTTGGCAATTGTGTATAATGCAATAT       |       |       |       |       |       |       |       | 43566 |
| Vaquita     | GGC-----GGATTCTAAACCACTGCGCCACCAGGGAAGCCCCAAGGCCACACAT                       |       |       |       |       |       |       |       | 39705 |
| Pig         | -----CATAAGCTGAGG-GCCAC-----ACATTTTGTGCCTTTT                                 |       |       |       |       |       |       |       | 35855 |

Dienstag, 3. Mai 2022 08:39

| Majority    | TTGGAXX- - - - - C- T- - - ATTTTXCAGTGTTXGGGTA                                   | CT- - - - - TTTATAXATGAAAGTCAGT                               | XTAGTT                     |           |           |           |           |              |       |
|-------------|----------------------------------------------------------------------------------|---------------------------------------------------------------|----------------------------|-----------|-----------|-----------|-----------|--------------|-------|
|             | 54250                                                                            | 54260                                                         | 54270                      | 54280     | 54290     | 54300     | 54310     | 54320        |       |
| Human       | TTGGACC- - - - -                                                                 | CTTTTTCGGTGTTGCTGGAGTGTG- - - - -                             | TTTATATTTGAAAATAGGCTTTGTT  |           |           |           |           |              | 45543 |
| PolarBear   | - - - - -                                                                        | - - - - -                                                     | - - - - -                  | - - - - - | - - - - - | - - - - - | - - - - - | - - - - -    | 14561 |
| Cow         | CTAGACA- - - - - AC- - - - -                                                     | ATATTA AAAAGCGGAGACATTA- - - - -                              | CTTTGCCAGCAAAGGTCTGTCTAGTC |           |           |           |           |              | 42661 |
| Dog         | - - - - -                                                                        | - - - - -                                                     | - - - - -                  | - - - - - | - - - - - | - - - - - | - - - - - | - - - - - C- | 40423 |
| BelugaWhale | TCAGTGT- - - - -                                                                 | CCTTTCTCTTTTCCAGGGTTGGGGTACT- - - - -                         | TTTATATATGAAAGTCAGCTTAGTT  |           |           |           |           |              | 39096 |
| Donkey      | TTGAAAAGAGAAGCCT- - - - -                                                        | TTTTT CACCCTATATATACAGTGATAGGTGGTATCTTTATTATGGTGCTTTTTTCTCGAC |                            |           |           |           |           |              | 43386 |
| Cat         | TTGTCTTTGGGATCCTTGTATAGTGTGGTGGGTAAAGACCACAGGCCATGGAGTCCTATTTCTGAGTTTCAGTCTTTTT  |                                                               |                            |           |           |           |           |              | 45995 |
| Ferret      | TTGCCCATTTCTTCTTGGATTATTTGTTCTTTGGGTATTGAGTTCCTATAAGGTCTTTGTAGATTTTGGATACTAGCCCT |                                                               |                            |           |           |           |           |              | 42853 |
| Lion        | TTGTCTTTGGGATCCTTGTATAGTGTGGTGGGTAAAGACCACAGGCCATGGAGTCCTATTTCTGAGTTTCAGTCTTTTT  |                                                               |                            |           |           |           |           |              | 43646 |
| Vaquita     | TCAGTGC- - - - -                                                                 | CCTTTCTCTTTTCCAGGGTTCCGGTACT- - - - -                         | TTTATATATGAAAGTCAGCTTAGTT  |           |           |           |           |              | 39765 |
| Pig         | TTAAA- - - - -                                                                   | GTTTTCCAAGGTTGGAGTGT- - - - -                                 | TTTGTAAATGAAAGTTAGCTTAGTT  |           |           |           |           |              | 35906 |

| Majority    | XTATTTXXAGA- - - - -                                                              | AXTCATCATTCTCAATTTGAXAG- - - - -       | TTCA- - CATA- - - - -  |           |           |           |           |           |       |
|-------------|-----------------------------------------------------------------------------------|----------------------------------------|------------------------|-----------|-----------|-----------|-----------|-----------|-------|
|             | 54330                                                                             | 54340                                  | 54350                  | 54360     | 54370     | 54380     | 54390     | 54400     |       |
| Human       | ATATTATTAAGGAGCCCCCATTCCCAGTTTCACTTCTCATAG- - - - -                               | TATCATTTAT- - - - -                    |                        |           |           |           |           |           | 45597 |
| PolarBear   | - - - - -                                                                         | - - - - -                              | - - - - -              | - - - - - | - - - - - | - - - - - | - - - - - | - - - - - | 14561 |
| Cow         | AAAGATTTGGTT- - - - -                                                             | TTTCCATTAGTCACGTATGGATGTGAGAG- - - - - | TTGGACCATAA- - - - -   |           |           |           |           |           | 42713 |
| Dog         | - - - - -                                                                         | - - - - -                              | - - - - - TC- - - - -  | - - - - - | - - - - - | - - - - - | - - - - - | - - - - - | 40425 |
| BelugaWhale | TTATTTAAAGA- - - - -                                                              | AATCATCATTCTCAATTTTACA- - - - -        | TTCT- - CATA- - - - -  |           |           |           |           |           | 39138 |
| Donkey      | CTATTTCCAGAAGGAAAAGGACAGACTAAATTAGAA- AAAACTGAAGTTTGCTGTTTTGAGTTTCCTGATACCAAAACCT |                                        |                        |           |           |           |           |           | 43465 |
| Cat         | CTATTA CTCTTGTCTTTTACTACTTAATGTCTGACCTTGGTCGACTTAACTAGCTCTTATCCATAAATGGGATTGACT   |                                        |                        |           |           |           |           |           | 46075 |
| Ferret      | TTATCTGATATGTCATTTGCAAATATCTTCTCCATTCTGTTGGTTGTCTTTGGTTTTGTTGACTGTTTCCTTTGCTATG   |                                        |                        |           |           |           |           |           | 42933 |
| Lion        | CTATTA CTCTTGTCTTTTACTACTTAATGTCTGACCTTGGTCGACTTAACTAGCTCTTATCCATAAATGGGATTGACT   |                                        |                        |           |           |           |           |           | 43726 |
| Vaquita     | TTATTTAAAGA- - - - -                                                              | AATCATCATTCTCAATTTTACA- - - - -        | TTCT- - CATA- - - - -  |           |           |           |           |           | 39807 |
| Pig         | ATATTTAAAGA- - - - -                                                              | AATCATCGTTTCCCAATTTTACA- - - - -       | CTCG- - CATAA- - - - - |           |           |           |           |           | 35949 |

Dienstag, 3. Mai 2022 08:39

| Majority    | ATAAAXTT-----G-----XT-----AGACTTACXTAATATTTAGGACTA                               |       |       |       |       |       |       |       |       |
|-------------|----------------------------------------------------------------------------------|-------|-------|-------|-------|-------|-------|-------|-------|
|             | 54410                                                                            | 54420 | 54430 | 54440 | 54450 | 54460 | 54470 | 54480 |       |
| Human       | TTAAAATG-----A-----AGACTTTTATAATATTTGGCACTA                                      |       |       |       |       |       |       |       | 45630 |
| PolarBear   | -----                                                                            |       |       |       |       |       |       |       | 14561 |
| Cow         | AGAAAGCT-----G-----AGCAC-----AGAAGAATTGAATCTTTTGAAGCTG                           |       |       |       |       |       |       |       | 42751 |
| Dog         | --AT-----                                                                        |       |       |       |       |       |       |       | 40427 |
| BelugaWhale | GTATCATTATTT-AA-----AATTG-----AGACTTCCATAATATTTAGCACTA                           |       |       |       |       |       |       |       | 39181 |
| Donkey      | ATAACTTTAGGTTGAATTACGAAGTATTTGTTCTTGTTATTCAAACAAACGAATGAACAAGAACACAAAATGTCAGAATT |       |       |       |       |       |       |       | 43545 |
| Cat         | ATAGAGTTGTACAGT-----GT-----T-----TGCAATGTAGTTAATTTGCAGGGAAT                      |       |       |       |       |       |       |       | 46119 |
| Ferret      | CAAAAGCTTTTTAGCTTGATGAAGTCCCAATAGTTCATTTTGTCTTGCTTTCCTTGCCTTTGACTATGTGTCTAGGAAGA |       |       |       |       |       |       |       | 43013 |
| Lion        | ATAGAGTTGTACAGT-----GT-----T-----TGGCATGTAGTTAATTTGCAGGGAAT                      |       |       |       |       |       |       |       | 43770 |
| Vaquita     | GTATCATT---T-AA-----AATTG-----AGACTTCTATAATATTTAGCACTA                           |       |       |       |       |       |       |       | 39847 |
| Pig         | GTACCACT-----G-----TTTA-----AGACTTTCGTGATATTTAAGACTA                             |       |       |       |       |       |       |       | 35986 |

| Majority    | AAATAT-----XGA-----                                                            |       |       |       |       |       |       |       |       |
|-------------|--------------------------------------------------------------------------------|-------|-------|-------|-------|-------|-------|-------|-------|
|             | 54490                                                                          | 54500 | 54510 | 54520 | 54530 | 54540 | 54550 | 54560 |       |
| Human       | AGATAT-----GAA-----                                                            |       |       |       |       |       |       |       | 45639 |
| PolarBear   | -----                                                                          |       |       |       |       |       |       |       | 14561 |
| Cow         | TGGTGTT-----GGAGAAG-----                                                       |       |       |       |       |       |       |       | 42765 |
| Dog         | -----                                                                          |       |       |       |       |       |       |       | 40427 |
| BelugaWhale | AAATAT-----GA-----                                                             |       |       |       |       |       |       |       | 39189 |
| Donkey      | CTCTATAGACTGCTTAGCCAAGAAGAGTCCTTGGTCTTACATAAGAAGAA-----T-----                  |       |       |       |       |       |       |       | 43596 |
| Cat         | GTTAAATGT---TGATGTAGAAGAAAAG-----                                              |       |       |       |       |       |       |       | 46144 |
| Ferret      | AATTGCTATGGCTGAGGTTGAAGAGGTTGCTGCCTGTGTTCTTCTGAAGAATTTTGATGGATTCTGTGTACATTTAGG |       |       |       |       |       |       |       | 43093 |
| Lion        | GTTAAATAT---TGATGTAAAAGAAAAG-----                                              |       |       |       |       |       |       |       | 43795 |
| Vaquita     | AAATAA-----GA-----                                                             |       |       |       |       |       |       |       | 39855 |
| Pig         | AAATAT-----GA-----                                                             |       |       |       |       |       |       |       | 35994 |

Dienstag, 3. Mai 2022 08:39

| Majority    | 54570                                                                            | 54580 | 54590                                                          | 54600 | 54610 | 54620 | 54630 | 54640 |       |
|-------------|----------------------------------------------------------------------------------|-------|----------------------------------------------------------------|-------|-------|-------|-------|-------|-------|
| Human       |                                                                                  |       |                                                                |       |       |       |       |       | 45639 |
| PolarBear   |                                                                                  |       |                                                                |       |       |       |       |       | 14561 |
| Cow         |                                                                                  | A-    |                                                                |       |       |       |       |       | 42766 |
| Dog         |                                                                                  |       |                                                                |       |       |       |       |       | 40427 |
| BelugaWhale |                                                                                  |       |                                                                |       |       |       |       |       | 39189 |
| Donkey      |                                                                                  |       | ATGCATTTGTATGCCGATTATGTGTTTTAAGGTATATATGTATTTTTTTTATTCCTGCTTAA |       |       |       |       |       | 43658 |
| Cat         |                                                                                  | TA-   |                                                                |       |       |       | GC-   |       | 46148 |
| Ferret      | TCTTTCATCCATTTTTAAATCTATTTTTGTGTGTGGTGTATGGAAGTGGTCCATTTTCATTCTTCTGCATGTGGTTTTCC |       |                                                                |       |       |       |       |       | 43173 |
| Lion        |                                                                                  | TA-   |                                                                |       |       |       | GC-   |       | 43799 |
| Vaquita     |                                                                                  |       |                                                                |       |       |       |       |       | 39855 |
| Pig         |                                                                                  |       |                                                                |       |       |       |       |       | 35994 |

| Majority    | 54650                                                                            | 54660 | 54670                                  | 54680 | 54690 | 54700 | 54710 | 54720         |       |
|-------------|----------------------------------------------------------------------------------|-------|----------------------------------------|-------|-------|-------|-------|---------------|-------|
| Human       |                                                                                  |       | TACTTAGTAGT CACCT-                     |       |       |       |       |               | 45655 |
| PolarBear   |                                                                                  |       | TTGAAAAG-                              |       |       |       |       |               | 14569 |
| Cow         |                                                                                  |       | CTCTTTAAGAGTCCCTTGG-                   |       |       |       |       | A-            | 42786 |
| Dog         |                                                                                  |       | CTAAAGAGAAAAGTCTT-                     | T-    |       |       |       |               | 40443 |
| BelugaWhale |                                                                                  |       | ATATTTAATAGCCACCCT-                    |       |       |       |       |               | 39207 |
| Donkey      | CTTACATTTTCTTTCTTTTTTAAAAAGATTTTATTTTTCTTTTTCTCCCAAAGCCCCCGGGTACATAGTTGTGTCT-    |       |                                        |       |       |       |       |               | 43737 |
| Cat         |                                                                                  |       | TTCAAAAATAAGGTTATTTATTTTCTTTGACTTTTCA- |       |       |       |       | AAACGATTCCAC- | 46198 |
| Ferret      | AATTTTCCCAACACCATTTGTTGAAAAGATTGTCTTTTTTCCACTGGACATTCTTTCCTGCTTTGTCAAAGATTAGTTGA |       |                                        |       |       |       |       |               | 43253 |
| Lion        |                                                                                  |       | TTCAAAAATAAGGTTATTTATTTTCTTTGACTTTTCA- |       |       |       |       | AAATGATTCTAC- | 43849 |
| Vaquita     |                                                                                  |       | ATATTTAATAGCCACCCT-                    |       |       |       |       |               | 39873 |
| Pig         |                                                                                  |       | ATATTTGGTAGCCACCCT-                    |       |       |       |       |               | 36011 |

Dienstag, 3. Mai 2022 08:39

| Majority    | ----- TTTXGAAGCTATT- AACTG- ----- T-----                                         |       |       |       |       |       |       |       |       |
|-------------|----------------------------------------------------------------------------------|-------|-------|-------|-------|-------|-------|-------|-------|
|             | 54730                                                                            | 54740 | 54750 | 54760 | 54770 | 54780 | 54790 | 54800 |       |
| Human       | ----- CATGGAAGCTATT- AACTGAG-----                                                |       |       |       |       |       |       |       | 45675 |
| PolarBear   | -----                                                                            |       |       |       |       |       |       |       | 14569 |
| Cow         | ----- CTGCAAGGAGATCCAACCAAGTCCAT----- CCTG-----                                  |       |       |       |       |       |       |       | 42815 |
| Dog         | ----- CACTCA-----                                                                |       |       |       |       |       |       |       | 40449 |
| BelugaWhale | ----- TTCTGAAGCTATT- AACGG-----                                                  |       |       |       |       |       |       |       | 39225 |
| Donkey      | ----- TTTTAGTTGTGGGTCTTCTAGTTGTGGCATGTGTGATGCAGCCTCAGCATGGCTTGA                  |       |       |       |       |       |       |       | 43795 |
| Cat         | ----- CTTTCCATATTATTTAACTG----- TTTT-----                                        |       |       |       |       |       |       |       | 46222 |
| Ferret      | CCATAGAGTTGAGTGTCCATTTCTGGGCTCTCTGTTCTGTTCCATTGATCTGTGTCTCTGTTTTTATGCCAGTACCATGC |       |       |       |       |       |       |       | 43333 |
| Lion        | ----- CTTTCCATATTATTTAACTG----- TTTT-----                                        |       |       |       |       |       |       |       | 43873 |
| Vaquita     | ----- TTCTGAAGCTATT- AATGG-----                                                  |       |       |       |       |       |       |       | 39891 |
| Pig         | ----- TTTTGAAGCTGTT- AACTA----- CCTG-----                                        |       |       |       |       |       |       |       | 36033 |

| Majority    | ----- A- X- ----- GAGTATCAXGTTGXCTAAAGAX-----                                     |       |       |       |       |       |       |       |       |
|-------------|-----------------------------------------------------------------------------------|-------|-------|-------|-------|-------|-------|-------|-------|
|             | 54810                                                                             | 54820 | 54830 | 54840 | 54850 | 54860 | 54870 | 54880 |       |
| Human       | ----- G----- GAGTGT CAGGTAGTGTAAATGT-----                                         |       |       |       |       |       |       |       | 45698 |
| PolarBear   | -----                                                                             |       |       |       |       |       |       |       | 14569 |
| Cow         | ----- AAGGAAATCAGT CCTGAATATTCATTGGAAGGACTG-----                                  |       |       |       |       |       |       |       | 42851 |
| Dog         | ----- GCCG-----                                                                   |       |       |       |       |       |       |       | 40453 |
| BelugaWhale | ----- AGAG----- GAGTATCAAGTAGTGTAAAGACA-----                                      |       |       |       |       |       |       |       | 39252 |
| Donkey      | TAAGCAGTGCCATGTCCGGGCCAGGATTTGAACTGACAAAATCCTGGGTGGCGGAAGCAGA-----                |       |       |       |       |       |       |       | 43857 |
| Cat         | ----- A----- CTAACGTT CACAATTCACACTGCCAGGAAT----- T-----                          |       |       |       |       |       |       |       | 46255 |
| Ferret      | TGTCTGATGATTACAGCTTTGTAATAGAGCTTGAAGTCAGGCATTGTGATGCCTGCAGCTTTGGTTTTCTTTTT CAGCCT |       |       |       |       |       |       |       | 43413 |
| Lion        | ----- A----- TTAACGTT CACAATTCACACTGCCAGGAAT----- T-----                          |       |       |       |       |       |       |       | 43906 |
| Vaquita     | ----- AGAG----- GAGTATCAAGTAGTGTAAAGACA-----                                      |       |       |       |       |       |       |       | 39918 |
| Pig         | ----- AGAG----- GTGTATCAGGTGGTGTAAAGA-----                                        |       |       |       |       |       |       |       | 36058 |

Dienstag, 3. Mai 2022 08:39

|             |                                                                               |       |       |       |       |       |       |       |
|-------------|-------------------------------------------------------------------------------|-------|-------|-------|-------|-------|-------|-------|
| Majority    | ----- XXGTAAAAGTTG----- X- TT-- AXTTTCTTGGCTTTTGXTTGAAAAGAACAGATXXTCT         |       |       |       |       |       |       |       |
|             | 54890                                                                         | 54900 | 54910 | 54920 | 54930 | 54940 | 54950 | 54960 |
| Human       | ----- TGATAGTTTACT----- ACAGTAACTGGCTTGGTCTTTGGGAGAAGAGGACAGATCTTTT           |       |       |       |       |       |       |       |
| PolarBear   | -----                                                                         |       |       |       |       |       |       |       |
| Cow         | ----- ATGTTAAGGCTGA----- AACTCTAATACTTTGGCCACATGACGGGAAGAAGACTGACTCATT        |       |       |       |       |       |       |       |
| Dog         | -----                                                                         |       |       |       |       |       |       |       |
| BelugaWhale | ----- GTGTAAATGTTG----- TT-- AGTTACATGGCATTTTGGGAGAAAAGAACAGATCTTCT           |       |       |       |       |       |       |       |
| Donkey      | ----- GCGCGCGAACTTAACCACTCAGCCATGGGGCTGGACTTCTTAACCTTAGATTTTCAATTAACAGACCCAGT |       |       |       |       |       |       |       |
| Cat         | ----- ACCCAACACAAATCCA----- GAACAATAAACTATCCTATTTTCTTTATAATGGGAAAATGCAGG      |       |       |       |       |       |       |       |
| Ferret      | TTCTGTGCCACGCAGGGGTTTTCTGTTTCCATACAAATTTTAGGATTATTTGTTCCATTTTGTAAAAAAAATGTTCA |       |       |       |       |       |       |       |
| Lion        | ----- ACCCAACACAAATCCA----- GAACAATAAACTATCCTATTTTCTTTATAATGGGAAAATGCAAG      |       |       |       |       |       |       |       |
| Vaquita     | ----- GTGTAAATGTTG----- TT-- AGTTACATGGCATTTTGGGAGAAAAGAACAGATGTTCT           |       |       |       |       |       |       |       |
| Pig         | ----- GTGTAAATGTTG----- TT-- AGTTACATGGAGTTGGAGCGAAAAGGACATATCTTCT            |       |       |       |       |       |       |       |

|             |                                                                                 |       |       |       |       |       |       |       |
|-------------|---------------------------------------------------------------------------------|-------|-------|-------|-------|-------|-------|-------|
| Majority    | CTA-- - GGCCTTXATAXX-- TTACATAAAGTTTGTATTT-----                                 |       |       |       |       |       |       |       |
|             | 54970                                                                           | 54980 | 54990 | 55000 | 55010 | 55020 | 55030 | 55040 |
| Human       | TTAGGCAACCTGTATG- - - - TAATGTAATGTTTGTTTTT-----                                |       |       |       |       |       |       |       |
| PolarBear   | -----                                                                           |       |       |       |       |       |       |       |
| Cow         | GGAAAAGACCCTGATGC- - - TGCAAAAGAGTGAAGGCAGGAC-----                              |       |       |       |       |       |       |       |
| Dog         | CCATT- TGCTTTGACACGGAT-----                                                     |       |       |       |       |       |       |       |
| BelugaWhale | CTA- - - GGCCATTATATA- - TTACCTGAAGTTTGTCTTTAT-----                             |       |       |       |       |       |       |       |
| Donkey      | GATGATTTTGTTAGATAAGATGCCACAAAATAGAAAATTCAGTCTTTCTTCTTTCTGATA- - - - AGTTCAGATGC |       |       |       |       |       |       |       |
| Cat         | CTGTAAACCTTT- - TGAGGATCATATTCTAAAAATAATTT----- A-----                          |       |       |       |       |       |       |       |
| Ferret      | TCACAGTACTTTGGTAGGGATTGCATTAATGTGTAGATTGTTCTTGGTAGCATGGACATTTTACAATATTTGTTCTTC  |       |       |       |       |       |       |       |
| Lion        | CTGTAAACCTTT- - TGAGGATCATATTCTAAAAATAACTT----- A-----                          |       |       |       |       |       |       |       |
| Vaquita     | CTA- - - GGCCATTATATA- - TTACCTGAAGTTTGTCTTTAT-----                             |       |       |       |       |       |       |       |
| Pig         | CTA- - - GGCCTTCATATA- - TTGCACAAAGTTTGTCTT-----                                |       |       |       |       |       |       |       |





Dienstag, 3. Mai 2022 08:39

| Majority    | 55210          | 55220               | 55230                | 55240            | 55250         | 55260             | 55270 | 55280   |
|-------------|----------------|---------------------|----------------------|------------------|---------------|-------------------|-------|---------|
| Human       |                |                     |                      |                  |               |                   |       | 45788   |
| PolarBear   |                |                     |                      |                  |               |                   |       | 14569   |
| Cow         |                |                     |                      |                  |               |                   |       | G 42947 |
| Dog         | GG-            |                     |                      |                  |               |                   |       | 40495   |
| BelugaWhale |                |                     |                      |                  |               |                   |       | 39339   |
| Donkey      | ATGGAAATATATT  | CAGAACCAGAGCTT      | ACTACTCTTTT          | GTACAAAGCCAACCTA | AAGGGGATTTT   | TAAAGTGCATCAGCTGG |       | 44186   |
| Cat         |                |                     |                      |                  |               |                   |       | 46354   |
| Ferret      | TCTTCTGTCTTGTT | GGTTTATAGAAATGCAACT | GCTTTCTGTGCATTGAATTT | TATATCCTGCCATTTT | TATTGAATTCTTG |                   |       | 43813   |
| Lion        |                |                     |                      |                  |               |                   |       | 44005   |
| Vaquita     |                |                     |                      |                  |               |                   |       | 40005   |
| Pig         |                |                     |                      |                  |               |                   |       | 36142   |

| Majority    | 55290                                                                            | 55300    | 55310                                    | 55320              | 55330       | 55340 | 55350      | 55360 |
|-------------|----------------------------------------------------------------------------------|----------|------------------------------------------|--------------------|-------------|-------|------------|-------|
| Human       |                                                                                  |          |                                          |                    |             |       |            | 45832 |
| PolarBear   |                                                                                  |          |                                          |                    |             |       |            | 14569 |
| Cow         | AG-                                                                              |          | AAGGGGATGACAGAGGATGAGATGGTTGGATGGCATCAC- | CAA-               | GTCAATGGAC- |       |            | 43001 |
| Dog         |                                                                                  | AAGTGGA- |                                          | G-                 |             |       | G-         | 40504 |
| BelugaWhale |                                                                                  |          | AAGGGTCCTCCTGTAGT-                       | AGTGGGTTGAGACTACA- |             |       | GACTATGGA- | 39382 |
| Donkey      | CCATTCATGTATGTAAACTTGGGTGAAACTCTTAGAGTAAAACATGACTTAAGTATAACTTGACAAGTAAATTATCAAGT |          |                                          |                    |             |       |            | 44266 |
| Cat         | A-                                                                               |          | AAAGGGAAGCCTTTATGTATGCAGTAATA-           |                    |             |       | GATAG- TA- | 46391 |
| Ferret      | TATGAGTCCTAGCAGGTTTGAAGTGGAGAATTTTGGGTTTCCACATAAAATGTCATATATCATCTGCAAAGAATGTGAA  |          |                                          |                    |             |       |            | 43893 |
| Lion        | A-                                                                               |          | AAAGGGAAGCCTTTATGTATGCAATAATA-           |                    |             |       | GATAG- TA- | 44042 |
| Vaquita     |                                                                                  |          | AAGGGTCCTCCTGTAGT-                       | AGTGGGTTGAGACTACA- |             |       | GACTATGGA- | 40048 |
| Pig         |                                                                                  |          | TAGGGACCTCTAATAGTGTAGTGAGTTGAGAGCAT-     |                    |             | G-    | GACTATGGA- | 36187 |

Dienstag, 3. Mai 2022 08:39

| Majority    | ----- TXATAXT                                                                    |       |       |       |       |       |       |       |       |
|-------------|----------------------------------------------------------------------------------|-------|-------|-------|-------|-------|-------|-------|-------|
|             | 55370                                                                            | 55380 | 55390 | 55400 | 55410 | 55420 | 55430 | 55440 |       |
| Human       | ----- ATCATGCT                                                                   |       |       |       |       |       |       |       | 45840 |
| PolarBear   | -----                                                                            |       |       |       |       |       |       |       | 14569 |
| Cow         | ----- ATGAGTTT                                                                   |       |       |       |       |       |       |       | 43009 |
| Dog         | ----- GTATT                                                                      |       |       |       |       |       |       |       | 40509 |
| BelugaWhale | ----- GTCATACT                                                                   |       |       |       |       |       |       |       | 39390 |
| Donkey      | GAGTTCACATATTATCTTCTAGAGATACCTTCTCTGATTCATCCAATAAAGTCACTATCACACCACTCTCTTCTAGTCTT |       |       |       |       |       |       |       | 44346 |
| Cat         | ----- T----- C- TT----- TATT                                                     |       |       |       |       |       |       |       | 46399 |
| Ferret      | TTTCATGACTTCTTTGCTGATTTGGATGCTTTTTATTTCTTTTTGTTGTCTTGATTACTGAGGCTAGGACTTCTAGTACT |       |       |       |       |       |       |       | 43973 |
| Lion        | ----- T----- C- TT----- TATT                                                     |       |       |       |       |       |       |       | 44050 |
| Vaquita     | ----- GTCATACT                                                                   |       |       |       |       |       |       |       | 40056 |
| Pig         | ----- GTCACACT                                                                   |       |       |       |       |       |       |       | 36195 |

| Majority    | CTG- TGAGTTTTXAXTX- TT- TXX----- GCCATT                                         |       |       |       |       |       |       |       |       |
|-------------|---------------------------------------------------------------------------------|-------|-------|-------|-------|-------|-------|-------|-------|
|             | 55450                                                                           | 55460 | 55470 | 55480 | 55490 | 55500 | 55510 | 55520 |       |
| Human       | CC- CTGAGTTTAAATCCTTTCTCT----- GCTACT                                           |       |       |       |       |       |       |       | 45868 |
| PolarBear   | -----                                                                           |       |       |       |       |       |       |       | 14569 |
| Cow         | GAG- TGAATTTTATTGACTATGCCAA----- G----- GCCTTT                                  |       |       |       |       |       |       |       | 43041 |
| Dog         | ATGCTGAGT-----                                                                  |       |       |       |       |       |       |       | 40518 |
| BelugaWhale | CC- - TGAGTTTTAATCCTTTTCT----- GCCATT                                           |       |       |       |       |       |       |       | 39418 |
| Donkey      | CTGCTAAGTCACCTTTAATCACATCACTNAAAATCATAGATCTGTAACCCAGAG----- AGACCC              |       |       |       |       |       |       |       | 44406 |
| Cat         | GTGATGTAC----- TT                                                               |       |       |       |       |       |       |       | 46410 |
| Ferret      | ATGTTGAATAGCAATGGTGATAGAGGACATCCCTGCCATCTTCTGACCTTAGGGGAAAAGCTCTTGGTTTTTCTCCATT |       |       |       |       |       |       |       | 44053 |
| Lion        | GTGATGTAC----- TT                                                               |       |       |       |       |       |       |       | 44061 |
| Vaquita     | CC- - TGAGTTTTAATCCTTTTCT----- GCCATT                                           |       |       |       |       |       |       |       | 40084 |
| Pig         | CCC- TGAGTTTTAATCCTTTTCT----- GCCACT                                            |       |       |       |       |       |       |       | 36224 |

Dienstag, 3. Mai 2022 08:39

| Majority    | TTCTGTCTTTACCTCTTTXTXAX-                                                         |                                                 |
|-------------|----------------------------------------------------------------------------------|-------------------------------------------------|
|             |                                                                                  | 55530 55540 55550 55560 55570 55580 55590 55600 |
| Human       | TCCTGTCTATACCACTTAGTAACTAT-                                                      | 45894                                           |
| PolarBear   | -----                                                                            | 14569                                           |
| Cow         | GACTGTGTGGATCACAAATAAAGTGA-                                                      | 43067                                           |
| Dog         | -----                                                                            | 40518                                           |
| BelugaWhale | TTCTGTCTTTACCCCTTAGTAACTCT-                                                      | 39444                                           |
| Donkey      | AGTCTTCCTTACTTCTCTGAGAGGGTGATAAATGGCCTAGATGTTTTATAAGCTGAGGAC-C-                  | 44467                                           |
| Cat         | TTTTTTTGCCTTTTTTTT-                                                              | 46427                                           |
| Ferret      | TTTTTTTTTAATTTTTTTTTTAAAGATTTTTATTATTTATTTATTTGACAGAGAGAGATCACAAGTAGGCAGAGAGGCAG | 44133                                           |
| Lion        | TTTTTTTGCCTTTTTTTT-                                                              | 44079                                           |
| Vaquita     | TTCTGTCTTCACCCCTTAGTAACTCT-                                                      | 40110                                           |
| Pig         | TCCTGTCTTTACCACTTTATCTC-                                                         | 36247                                           |

| Majority    | -----                                                                            |                                                 |
|-------------|----------------------------------------------------------------------------------|-------------------------------------------------|
|             |                                                                                  | 55610 55620 55630 55640 55650 55660 55670 55680 |
| Human       | -----                                                                            | 45894                                           |
| PolarBear   | -----                                                                            | 14569                                           |
| Cow         | -----A-                                                                          | 43068                                           |
| Dog         | -----                                                                            | 40518                                           |
| BelugaWhale | -----G-                                                                          | 39445                                           |
| Donkey      | -----A-                                                                          | 44468                                           |
| Cat         | -----                                                                            | 46427                                           |
| Ferret      | GAAGAGAAAGAGGAGGAAGCAGGCTCCCTGCCGAGCAGAGAGCCCGATGCGGGACTCGATCCCAGGACCCTGAGATCATG | 44213                                           |
| Lion        | -----                                                                            | 44079                                           |
| Vaquita     | -----G-                                                                          | 40111                                           |
| Pig         | -----                                                                            | 36247                                           |

Dienstag, 3. Mai 2022 08:39

| Majority    | 55690                                                                            | 55700 | 55710 | 55720 | 55730 | 55740 | 55750 | 55760 |
|-------------|----------------------------------------------------------------------------------|-------|-------|-------|-------|-------|-------|-------|
| Human       |                                                                                  |       |       |       |       |       |       | 45894 |
| PolarBear   |                                                                                  |       |       |       |       |       |       | 14569 |
| Cow         |                                                                                  |       |       |       |       |       |       | 43068 |
| Dog         |                                                                                  |       |       |       |       |       |       | 40518 |
| BelugaWhale |                                                                                  |       |       |       |       |       |       | 39445 |
| Donkey      |                                                                                  | C-    |       |       |       |       |       | 44469 |
| Cat         |                                                                                  |       |       |       |       |       |       | 46427 |
| Ferret      | ACCTGAGCCGAAGGCAGCGGCTTAACCCACTGAGCCACCCAGGCGCCCGGTTTTTCTCCATTTATAATGATATTCTCATT |       |       |       |       |       |       | 44293 |
| Lion        |                                                                                  |       |       |       |       |       |       | 44079 |
| Vaquita     |                                                                                  |       |       |       |       |       |       | 40111 |
| Pig         |                                                                                  |       |       |       |       |       |       | 36247 |

| Majority    | 55770                                                                             | 55780 | 55790 | 55800 | 55810 | 55820 | 55830     | 55840 |
|-------------|-----------------------------------------------------------------------------------|-------|-------|-------|-------|-------|-----------|-------|
|             |                                                                                   |       |       |       |       |       | XCTTTAGXA |       |
| Human       |                                                                                   |       | C-    | TA-   |       |       | ATCTTGGG  | 45905 |
| PolarBear   |                                                                                   |       |       |       |       |       |           | 14569 |
| Cow         |                                                                                   |       |       |       |       |       | AATTCTGAA | 43077 |
| Dog         |                                                                                   |       |       |       |       |       | GAA       | 40521 |
| BelugaWhale |                                                                                   |       |       |       |       |       | ACCTTGGGC | 39454 |
| Donkey      | ATGTTTTCTTATGCCTTTTTTCTTTTCCAGGCCTGGGGTGTTTTTATATATGAAATTAGGCTTAGTTGTGTGATTAAAGA  |       |       |       |       |       |           | 44549 |
| Cat         |                                                                                   |       |       |       |       |       | CCCCAGAA  | 46435 |
| Ferret      | ATATGGGTTTTTCTTAGATGGCTTTTATGATATTGAGGTATGTTCCCTCTAACCCCTACACTGTGGAGTTTTAATCAAGAA |       |       |       |       |       |           | 44373 |
| Lion        |                                                                                   |       |       |       |       |       | CCCCAGAA  | 44087 |
| Vaquita     |                                                                                   |       |       |       |       |       | ACCTTGGGC | 40120 |
| Pig         |                                                                                   |       |       |       |       |       | ACTTTTGGC | 36256 |

Dienstag, 3. Mai 2022 08:39

| Majority    | AG- - - - - TTXAAXTAXC- - - - - TCTXATCTA- - - - TAAATGXA- - -                    |       |       |       |       |       |       |       |       |
|-------------|-----------------------------------------------------------------------------------|-------|-------|-------|-------|-------|-------|-------|-------|
|             | 55850                                                                             | 55860 | 55870 | 55880 | 55890 | 55900 | 55910 | 55920 |       |
| Human       | CA- - - - - TTTAACTAAT- - - - - TGTTACCTG- - - - TAAATGGG- - -                    |       |       |       |       |       |       |       | 45934 |
| PolarBear   | - - - - -                                                                         |       |       |       |       |       |       |       | 14569 |
| Cow         | AGAG- - - - - A- - - - - TGGGAATACCAGA- CCATCTGACCTGCCTCTTGAGAAACC-               |       |       |       |       |       |       |       | 43121 |
| Dog         | AGAA- - - - -                                                                     |       |       |       |       |       |       |       | 40525 |
| BelugaWhale | AG- - - - - CTTAAGTACC- - - - - TCTCATTTA- - - - TAAATGGG- - -                    |       |       |       |       |       |       |       | 39483 |
| Donkey      | AATCATTTTCCAGTTTTGCATTCTCATAATGTCGTTATTTTAAATGAAGATTTTTCATCATATTTAGCTATATGTGAATAT |       |       |       |       |       |       |       | 44629 |
| Cat         | AGAA- - - - - AAGGACAGACTAAATTAGGAAAACTG                                          |       |       |       |       |       |       |       | 46466 |
| Ferret      | AGGATGCTATACTTTGTCAAATACTTTTTCTGTATCAATTGAGAGTATCTCATGTTTCTTGTTCTTTTATTAATATATTG  |       |       |       |       |       |       |       | 44453 |
| Lion        | AGAA- - - - - AAGGACAGACTAAATTAGGAAAACTG                                          |       |       |       |       |       |       |       | 44118 |
| Vaquita     | AG- - - - - CTTAAGTACC- - - - - TCTCATTTA- - - - TAAATGGG- - -                    |       |       |       |       |       |       |       | 40149 |
| Pig         | AG- - - - - TTTAAGTACC- - - - - TCTCATCCA- - - - TAAAGGGA- - -                    |       |       |       |       |       |       |       | 36285 |

| Majority    | - - ATTXATXGGTXAX- AT- - - - - AGCAXTC- - - - - TAAGAXTTGTA AATTGCATXGCAXATAGG        |       |       |       |       |       |       |       |       |
|-------------|---------------------------------------------------------------------------------------|-------|-------|-------|-------|-------|-------|-------|-------|
|             | 55930                                                                                 | 55940 | 55950 | 55960 | 55970 | 55980 | 55990 | 56000 |       |
| Human       | - - GTTGATAGGTCATAATG- - - - - ATAGCAATC- - - - - TGAGAGTTGTA AATTGCCCGGCATGTAGT      |       |       |       |       |       |       |       | 45989 |
| PolarBear   | - - - - -                                                                             |       |       |       |       |       |       |       | 14569 |
| Cow         | - TATATGAAGGTCAGGA- - - - - AGCAACAG- - - - - TTAGA AACTGGACATGGAACAACAGACTGA         |       |       |       |       |       |       |       | 43174 |
| Dog         | - - - - - GT- - - - -                                                                 |       |       |       |       |       |       |       | 40527 |
| BelugaWhale | - - ATTGATGGGTTATAAT- - - - - AGCACTCT- - - - - TAAGAGTTGTA AAGTGCCTGGCATGTAGG        |       |       |       |       |       |       |       | 39536 |
| Donkey      | TTAGTAGCCACCCTCTCTGAAGCTCTT- AACTGAGGGAGTATCAGAGTGTGAAGAGAGTGTAAATTTTGGTACTTACATG     |       |       |       |       |       |       |       | 44708 |
| Cat         | AAATTTACTGAT- - - - - ACCA- - - - - TAACCTATAACTCCCGGGGCTCTAGATTGGATTATGAAGTATTCGTTCT |       |       |       |       |       |       |       | 46531 |
| Ferret      | TATCATGTTGGTTGATATGTGCATGTTGAACCAACCTAGCAGTCCAGGAATAAATCCCACTTGGTTGTATTGAACAAACC      |       |       |       |       |       |       |       | 44533 |
| Lion        | AAATTTACTGAT- - - - - ACCA- - - - - TAACCTATAACTCCTGGGGCTCTAGATTGGATTATGAAGTATTCATTCT |       |       |       |       |       |       |       | 44183 |
| Vaquita     | - - ATTGATGGGTTATAAT- - - - - AG- - TCT- - - - - TAAGAGTTGTA AAGTGCCTGGCATGTAGG       |       |       |       |       |       |       |       | 40199 |
| Pig         | - - ATAGTTGGGTCATGAT- - - - - AGCAATC- - - - - TTAGAGGTGTA AATTGCTTGGGACATAGG         |       |       |       |       |       |       |       | 36337 |

Dienstag, 3. Mai 2022 08:39

| Majority    | TTTCTTTCAGTGAATGGXAXATATCAA-----CG                                             |       |       |       |       |       |       |       |       |
|-------------|--------------------------------------------------------------------------------|-------|-------|-------|-------|-------|-------|-------|-------|
|             | 56010                                                                          | 56020 | 56030 | 56040 | 56050 | 56060 | 56070 | 56080 |       |
| Human       | TAATTAGCAGTGAATATTAATATTGA-----TG                                              |       |       |       |       |       |       |       | 46018 |
| PolarBear   | -----                                                                          |       |       |       |       |       |       |       | 14569 |
| Cow         | TTCCAAATAGGAAAAGGAATACATCAAGG-----CTG                                          |       |       |       |       |       |       |       | 43206 |
| Dog         | -----CAGTCGGAGAA-----                                                          |       |       |       |       |       |       |       | 40538 |
| BelugaWhale | TTACTTTCAGTGAATGTTAAATATCAA-----CG                                             |       |       |       |       |       |       |       | 39565 |
| Donkey      | -GTCTTTGAGAGGAAAGGACATGTCTTTGA-----CA                                          |       |       |       |       |       |       |       | 44739 |
| Cat         | TGTTATTCCAACAAATGAACAAATGAGAACACAA-----TCA                                     |       |       |       |       |       |       |       | 46568 |
| Ferret      | TTTTAATGTAAGTGGATCCTATTGGCTAGTATTTTGCTGAGAATTTTACATGCATGTTCCATCCGGGATATCGGTCTG |       |       |       |       |       |       |       | 44613 |
| Lion        | TGTTATTCCAACAAATGAACAAATGAGAACACAAACTG-----TCA                                 |       |       |       |       |       |       |       | 44224 |
| Vaquita     | TTACTTTCAGTGAATGTTAAATATCAA-----CA                                             |       |       |       |       |       |       |       | 40228 |
| Pig         | TTTCTTTCAGTGAATGTTAAATATCA-----TTG                                             |       |       |       |       |       |       |       | 36366 |

| Majority    | XGAAA- -GTAAAXTATCTTCTTTXCTATA-----XTA-----             |       |       |       |       |       |       |       |       |
|-------------|---------------------------------------------------------|-------|-------|-------|-------|-------|-------|-------|-------|
|             | 56090                                                   | 56100 | 56110 | 56120 | 56130 | 56140 | 56150 | 56160 |       |
| Human       | CAAAA- -TAAAATTACATCTTTTCTATA-----TT-----               |       |       |       |       |       |       |       | 46046 |
| PolarBear   | -----                                                   |       |       |       |       |       |       |       | 14569 |
| Cow         | TATATT- GTCACCCCTGCTTATAACTTATATGCAGA-----GTA-----      |       |       |       |       |       |       |       | 43243 |
| Dog         | -----G- GA-----                                         |       |       |       |       |       |       |       | 40541 |
| BelugaWhale | CAAAA- -GAAAAGTACCTTCTTTTCTACA-----                     |       |       |       |       |       |       |       | 39592 |
| Donkey      | GGAAAGTGTATAATATGAATTTTGTGGGATTCTCCTATAGTAAA-----T      |       |       |       |       |       |       |       | 44787 |
| Cat         | GGATTCTGTAAGTCCGTTTGTGGGATTCTCCTATAGTAAA-----GTA-----   |       |       |       |       |       |       |       | 46608 |
| Ferret      | TGCTTCTTTTGTAGGGTCTTTGTGGGATTCTCCTATAGTAAA-----GTA----- |       |       |       |       |       |       |       | 44693 |
| Lion        | GGATTCTGTAAGTCCGTTTGTGGGATTCTCCTATAGTAAA-----GTA-----   |       |       |       |       |       |       |       | 44264 |
| Vaquita     | CAAAA- -GAAAAGTACCTTCTTTTCTACA-----                     |       |       |       |       |       |       |       | 40255 |
| Pig         | TGAAA- -GAAAAGTATCTTCTTTTCCATA-----A-----ATC-----       |       |       |       |       |       |       |       | 36398 |





Dienstag, 3. Mai 2022 08:39

| Majority    | ----- CXT- - - AXXAG- ATXTATTTXT- -----                                           |       |       |       |       |       |       |       |       |
|-------------|-----------------------------------------------------------------------------------|-------|-------|-------|-------|-------|-------|-------|-------|
|             | 56330                                                                             | 56340 | 56350 | 56360 | 56370 | 56380 | 56390 | 56400 |       |
| Human       | ----- TTTTCCAAGAAGTCAAGATCTTT- -----                                              |       |       |       |       |       |       |       | 46069 |
| PolarBear   | -----                                                                             |       |       |       |       |       |       |       | 14569 |
| Cow         | ----- CATCATGAGAAACACTGGGCTGT- - A- -----                                         |       |       |       |       |       |       |       | 43267 |
| Dog         | -----                                                                             |       |       |       |       |       |       |       | 40541 |
| BelugaWhale | ----- - AGTTATTTAT- - C- -----                                                    |       |       |       |       |       |       |       | 39603 |
| Donkey      | CCACTTAGTAACTGTCTGACCTTGCCAACCTTCACTAGCTGTCATCATAAATGGGATTGATGGGTCATGATAATAGCATCT |       |       |       |       |       |       |       | 44936 |
| Cat         | ----- CTTACATAAGAGTATATGTTTGT- - - - - A- - - - -                                 |       |       |       |       |       |       |       | 46634 |
| Ferret      | TTAGGTTTTCTGTTTCTGCCTAGTTCAGTTTTGGTAGTTTATATGTTTCTAGGAATGCATTCATTTCTTCCAGATTGTCT  |       |       |       |       |       |       |       | 44933 |
| Lion        | ----- CTTACATAAGAGTATATGTTTGT- - - - - A- - - - -                                 |       |       |       |       |       |       |       | 44290 |
| Vaquita     | ----- - AGTTATTTAT- - C- -----                                                    |       |       |       |       |       |       |       | 40266 |
| Pig         | ----- CAAAAAAAAAAAAAAAAAAAAA- - A- -----                                          |       |       |       |       |       |       |       | 36422 |

| Majority    | ----- XTXXCAATAXTTG- X- TTAA- -----                                             |       |       |       |       |       |       |       |       |
|-------------|---------------------------------------------------------------------------------|-------|-------|-------|-------|-------|-------|-------|-------|
|             | 56410                                                                           | 56420 | 56430 | 56440 | 56450 | 56460 | 56470 | 56480 |       |
| Human       | ----- GTCTTATCCTTTGATTCTCAGA- -----                                             |       |       |       |       |       |       |       | 46091 |
| PolarBear   | -----                                                                           |       |       |       |       |       |       |       | 14569 |
| Cow         | ----- GGAAGCACAAGCTGGAATCAA- -----                                              |       |       |       |       |       |       |       | 43288 |
| Dog         | -----                                                                           |       |       |       |       |       |       |       | 40541 |
| BelugaWhale | ----- ATCTTCTTTAACTG- -----                                                     |       |       |       |       |       |       |       | 39617 |
| Donkey      | TAGAGGTGTAAAGTAGTTAACTTCCAGAG- -----                                            |       |       |       |       |       |       |       | 44965 |
| Cat         | ----- TGCCAATTATAAGTCTTAA- AG- ----- T- -----                                   |       |       |       |       |       |       |       | 46656 |
| Ferret      | AATTTGTTGGCAATAGTTGCTCATAATAAGTTCTTGTTATTGTTTGTATTTCTTTGGTGTGTTTGTGATTTCTTTGTGA |       |       |       |       |       |       |       | 45013 |
| Lion        | ----- TGCCAATTATAAGTCTTAA- AG- ----- T- -----                                   |       |       |       |       |       |       |       | 44312 |
| Vaquita     | ----- ATCATCTTTAACT- -----                                                      |       |       |       |       |       |       |       | 40279 |
| Pig         | ----- AACACCAACAGGTG- ATTTAT- -----                                             |       |       |       |       |       |       |       | 36442 |









Dienstag, 3. Mai 2022 08:39

| Majority    | ----- |                                     |                                               |       |       |       |       |       |       |       |
|-------------|-------|-------------------------------------|-----------------------------------------------|-------|-------|-------|-------|-------|-------|-------|
|             | 57130 | 57140                               | 57150                                         | 57160 | 57170 | 57180 | 57190 | 57200 |       |       |
| Human       | ----- |                                     |                                               |       |       |       |       |       | 46091 |       |
| PolarBear   | ----- |                                     |                                               |       |       |       |       |       | 14569 |       |
| Cow         | ----- |                                     |                                               |       |       |       |       |       | 43288 |       |
| Dog         | ----- |                                     |                                               |       |       |       |       |       | 40542 |       |
| BelugaWhale | ----- |                                     |                                               |       |       |       |       |       | 39617 |       |
| Donkey      | ----- |                                     |                                               |       |       |       |       |       | 44969 |       |
| Cat         | ----- |                                     |                                               |       |       |       |       |       | 46656 |       |
| Ferret      | T     | GAATATATCTGTGAAGTCCATCTGGTCCAGTGTGT | CATTTAAAGCCTTTATTTCCCTTGTTGATGTTTTGCTTGGATGAT |       |       |       |       |       |       | 45733 |
| Lion        | ----- |                                     |                                               |       |       |       |       |       | 44312 |       |
| Vaquita     | ----- |                                     |                                               |       |       |       |       |       | 40279 |       |
| Pig         | ----- |                                     |                                               |       |       |       |       |       | 36442 |       |

| Majority    | -----      |                                                                        |       |       |       |       |       |       |       |
|-------------|------------|------------------------------------------------------------------------|-------|-------|-------|-------|-------|-------|-------|
|             | 57210      | 57220                                                                  | 57230 | 57240 | 57250 | 57260 | 57270 | 57280 |       |
| Human       | -----      |                                                                        |       |       |       |       |       |       | 46091 |
| PolarBear   | -----      |                                                                        |       |       |       |       |       |       | 14569 |
| Cow         |            | G-                                                                     |       |       |       |       |       |       | 43289 |
| Dog         | -----      |                                                                        |       |       |       |       |       |       | 40542 |
| BelugaWhale | -----      |                                                                        |       |       |       |       |       |       | 39617 |
| Donkey      | T-         | TAA-                                                                   |       |       |       |       |       |       | 44973 |
| Cat         | -----      |                                                                        |       |       |       |       |       |       | 46656 |
| Ferret      | CTGTCCATTT | CAGTGAGGGGGCTGTTAAAGTCCCCTACTATTACTGTGTTATTGTCTATGTGTTTCTTTGATTTGTTATT |       |       |       |       |       |       | 45813 |
| Lion        | -----      |                                                                        |       |       |       |       |       |       | 44312 |
| Vaquita     | -----      |                                                                        |       |       |       |       |       |       | 40279 |
| Pig         |            | C-                                                                     |       |       |       |       |       |       | 36443 |

Dienstag, 3. Mai 2022 08:39

| Majority    | 57290                                                                             | 57300 | 57310 | 57320 | 57330 | 57340 | 57350 | 57360 |
|-------------|-----------------------------------------------------------------------------------|-------|-------|-------|-------|-------|-------|-------|
| Human       |                                                                                   |       |       |       |       |       |       | 46091 |
| PolarBear   |                                                                                   |       |       |       |       |       |       | 14569 |
| Cow         |                                                                                   |       |       |       |       |       |       | 43289 |
| Dog         |                                                                                   |       |       |       |       |       |       | 40542 |
| BelugaWhale |                                                                                   |       |       |       |       |       |       | 39617 |
| Donkey      |                                                                                   |       |       |       |       |       |       | 44973 |
| Cat         |                                                                                   |       |       |       |       |       |       | 46656 |
| Ferret      | AATTGGCTTATATAATTGGCTGCTCCCATATTGGCATTAAATATTTACAACCTGTAGAACTTCGTGTTGGATAAACCTTTT |       |       |       |       |       |       | 45893 |
| Lion        |                                                                                   |       |       |       |       |       |       | 44312 |
| Vaquita     |                                                                                   |       |       |       |       |       |       | 40279 |
| Pig         |                                                                                   |       |       |       |       |       |       | 36443 |

| Majority    | 57370                                                                            | 57380 | 57390   | 57400 | 57410 | 57420 | 57430 | 57440 |
|-------------|----------------------------------------------------------------------------------|-------|---------|-------|-------|-------|-------|-------|
| Human       |                                                                                  |       |         |       |       |       |       | 46091 |
| PolarBear   |                                                                                  |       |         |       |       |       |       | 14569 |
| Cow         |                                                                                  |       | ATTGCC- |       |       |       |       | 43295 |
| Dog         |                                                                                  |       |         |       |       |       |       | 40542 |
| BelugaWhale |                                                                                  |       |         |       |       |       |       | 39617 |
| Donkey      |                                                                                  |       | ATATCT- |       |       |       | AT-   | 44981 |
| Cat         |                                                                                  |       | ATACAT- |       |       |       |       | 46662 |
| Ferret      | TAAGTATGATATAGTGTCTTTCCTCATCTCTTATTATTATAGTCTTTGGCTTAACTAAAATCTAATTGAACTGATATAAG |       |         |       |       |       |       | 45973 |
| Lion        |                                                                                  |       | ATACAT- |       |       |       |       | 44318 |
| Vaquita     |                                                                                  |       |         |       |       |       |       | 40279 |
| Pig         |                                                                                  |       | TTCTTT- |       |       |       |       | 36449 |







Dienstag, 3. Mai 2022 08:39

| Majority    | ----- T----- AXAACTXTCC- AATTCCTT                                    |                               |       |       |       |       |       |       |       |
|-------------|----------------------------------------------------------------------|-------------------------------|-------|-------|-------|-------|-------|-------|-------|
|             | 57770                                                                | 57780                         | 57790 | 57800 | 57810 | 57820 | 57830 | 57840 |       |
| Human       | ----- AGTTTCCTACGTTCTTTCTG                                           |                               |       |       |       |       |       |       | 46111 |
| PolarBear   | ----- T                                                              |                               |       |       |       |       |       |       | 14570 |
| Cow         | GG-                                                                  | ----- GAGAAATATC- - AATAACCTC |       |       |       |       |       | 43316 |       |
| Dog         | ----- AA- CATT- TATGGTCTC                                            |                               |       |       |       |       |       |       | 40559 |
| BelugaWhale | T-                                                                   | ----- GAAAACTGTCCCATTACCTT    |       |       |       |       |       | 39639 |       |
| Donkey      | AAAAGTAGCATCTTTTCTGTATTTCTCCAAAAACCAGTTGTCTTCTTTGACTGTTAAACTATCC-    | TACCTTCCT                     |       |       |       |       |       |       | 45064 |
| Cat         | AT-                                                                  | ----- ATCCTTA- AAT- TCCTT     |       |       |       |       |       | 46679 |       |
| Ferret      | TCAATATTTCTTGTTAGGGCTGGTTGGTGATTACAAATCTTTAGTTTCTATTTGTCTGGAAGCTTTT- | TATATCTCT                     |       |       |       |       |       |       | 46372 |
| Lion        | GT-                                                                  | ----- ATTCTTA- AAT- TCCTG     |       |       |       |       |       | 44335 |       |
| Vaquita     | ----- GAAAACTGTCCCATCTACCTT                                          |                               |       |       |       |       |       |       | 40300 |
| Pig         | GT-                                                                  | ----- TAAAACTGTCCCACCTACCTT   |       |       |       |       |       | 36472 |       |

| Majority    | TTTTATTCAGATXTT- - - X- T- XXCTTACCATCXACT- - - - - TCAAGAAATTATCCAACACAAAT |                                                           |                                  |       |                               |       |       |       |       |
|-------------|-----------------------------------------------------------------------------|-----------------------------------------------------------|----------------------------------|-------|-------------------------------|-------|-------|-------|-------|
|             | 57850                                                                       | 57860                                                     | 57870                            | 57880 | 57890                         | 57900 | 57910 | 57920 |       |
| Human       | TGTTATTCAGCTATTTTACTTCTGCTTAATATCCACTA-                                     | ----- TCCAGAAAACATCCAACACAAAT                             |                                  |       |                               |       |       | 46172 |       |
| PolarBear   | CCTTATTT-                                                                   | -----                                                     |                                  |       |                               |       |       |       | 14578 |
| Cow         | AGATATGCAGATGACACCACC- GCTATGGCAGAAAGT-                                     | G-                                                        | ----- AAGAGGAACTATAAAAAGCCTCT    |       |                               |       |       | 43376 |       |
| Dog         | ATTCATTT-                                                                   | GGG-                                                      | ----- AATATA- - -                |       |                               |       |       | 40577 |       |
| BelugaWhale | TTTTACTCAGTTGTT-                                                            | T-                                                        | TACTCACCATCCACT-                 | G-    | ----- TCAAGAAATCATCCAACACAAAT |       |       |       | 39694 |
| Donkey      | TGTTATTCAGCTTTTTTACTT-                                                      | CTGCTTTTACCACCCACT-                                       | ----- G- TCCAGAAATTATCTAACACAAAT |       |                               |       |       | 45127 |       |
| Cat         | CTTTACTTACATTTTCGGCTA-                                                      | ACAGACCCAG-                                               | ----- TCATGATTTTGTTC AATAAAATG   |       |                               |       |       | 46733 |       |
| Ferret      | CTTTATTTTTCAGTGACAGCCT-                                                     | AGCTGGGTATAGTATTCTTGGCTGCATATTTTCTTGTTCAGTACCCTGAATATATCA | -----                            |       |                               |       |       |       | 46451 |
| Lion        | CTTTACTTACATTTTCGGCTA-                                                      | ACAGACCCAG-                                               | ----- TCATGATTTTGTTC AATAAAATG   |       |                               |       |       | 44389 |       |
| Vaquita     | TTTTACTCAGTTGTT-                                                            | T-                                                        | TAATCACCATCCACT-                 | G-    | ----- TCAAGAAATCATCCAACACAAAT |       |       |       | 40355 |
| Pig         | TATTATTCAGTCGTC-                                                            | T-                                                        | GACTTACCATCCACT-                 | G-    | ----- TCCAGAAATTATCCAACACAAAT |       |       |       | 36527 |







Dienstag, 3. Mai 2022 08:39

| Majority    | ----- AAXTAAAC----- TCTTTTATTCTTTTAATAXX-----                                    |       |       |       |       |       |       |       |       |
|-------------|----------------------------------------------------------------------------------|-------|-------|-------|-------|-------|-------|-------|-------|
|             | 58410                                                                            | 58420 | 58430 | 58440 | 58450 | 58460 | 58470 | 58480 |       |
| Human       | ----- AAAATAAAT----- TATTTAATTTCTTAATAAT-----                                    |       |       |       |       |       |       |       | 46203 |
| PolarBear   | -----                                                                            |       |       |       |       |       |       |       | 14578 |
| Cow         | ----- AAAGTGAGAGAGGAGA- GTGAAAAAGTTCTCAACATTA-----                               |       |       |       |       |       |       |       | 43418 |
| Dog         | ----- AAAAATAGTGAA-----                                                          |       |       |       |       |       |       |       | 40589 |
| BelugaWhale | ----- ACAATAAAC----- TCTTGTATTCTTTTAATAAT-----                                   |       |       |       |       |       |       |       | 39728 |
| Donkey      | ----- ACAATAAAC----- TATTCTATTCTCTTCATAAT-----                                   |       |       |       |       |       |       |       | 45161 |
| Cat         | ----- AAAGAGAAAATTCAGCCTCTTTCTTCTTTCTAA-----                                     |       |       |       |       |       |       |       | 46771 |
| Ferret      | AACCTTTTTGATTTCAACTGTTAGATTTTATTTCTCCAGAAAGGGATTCTCTAGTTTCTTCTATGCTTTTTTCAAGCCCA |       |       |       |       |       |       |       | 47011 |
| Lion        | ----- AAAGAGAAAATTCAGCCTCTTTCTTCTTTCTA-----                                      |       |       |       |       |       |       |       | 44426 |
| Vaquita     | ----- ACAATAAAC----- TCTTGTATTCTTTTAATAAT-----                                   |       |       |       |       |       |       |       | 40389 |
| Pig         | ----- ACAGTAAAC----- TCTTATATGCTCTTAATA-----                                     |       |       |       |       |       |       |       | 36559 |

| Majority    | ----- AGGTTTAGGCA----- GGTTTTXGCCTTTTGGGAAT                                      |       |       |       |       |       |       |       |       |
|-------------|----------------------------------------------------------------------------------|-------|-------|-------|-------|-------|-------|-------|-------|
|             | 58490                                                                            | 58500 | 58510 | 58520 | 58530 | 58540 | 58550 | 58560 |       |
| Human       | ----- AGGTTTAGGCA----- GGCTTTTGCCTTTTGGGAAT                                      |       |       |       |       |       |       |       | 46234 |
| PolarBear   | -----                                                                            |       |       |       |       |       |       |       | 14578 |
| Cow         | --- AGAAA----- ACGAAGATCATGGCATC----- TGGTCCCATCACTTCGTGGGA                      |       |       |       |       |       |       |       | 43461 |
| Dog         | -----                                                                            |       |       |       |       |       |       |       | 40589 |
| BelugaWhale | ----- AGGTTTAGGCA----- GGTTTTTGCCTTTTGGGAAT                                      |       |       |       |       |       |       |       | 39759 |
| Donkey      | ----- AGGTTTAGGGA----- GA- CTTTACCTTTTGGAAAT                                     |       |       |       |       |       |       |       | 45191 |
| Cat         | ----- TATATTCAGGTGCTTGTGCAT                                                      |       |       |       |       |       |       |       | 46792 |
| Ferret      | GATAGTATCTTTATAATCATCATTCTGAACTCTAGTTCCAACATCTTACTAAGTCCATGTTGATTAGGTCCCTAGCAGTT |       |       |       |       |       |       |       | 47091 |
| Lion        | ----- TATATTCAGATGCTTGTGCGT                                                      |       |       |       |       |       |       |       | 44447 |
| Vaquita     | ----- AGGTTTAGGCA----- GGTTTTTGCCTTTTGGGAAT                                      |       |       |       |       |       |       |       | 40420 |
| Pig         | ----- GGTTTTAGGCA----- GATTTTAGCCTTTTGGGAAT                                      |       |       |       |       |       |       |       | 36590 |







Dienstag, 3. Mai 2022 08:39

| Majority    | GTTAXXCA- ATATAT- - XT- A- - - - -                                               |       |       |       |       |       |       |       |       |
|-------------|----------------------------------------------------------------------------------|-------|-------|-------|-------|-------|-------|-------|-------|
|             | 58890                                                                            | 58900 | 58910 | 58920 | 58930 | 58940 | 58950 | 58960 |       |
| Human       | GTTATTCAAACAAACTAATGA- - - - -                                                   |       |       |       |       |       |       |       | 46471 |
| PolarBear   | - - - - -                                                                        |       |       |       |       |       |       |       | 14578 |
| Cow         | AGTAGTCACGTATGTATGTTAGAGTTGG- - - - -                                            |       |       |       |       |       |       |       | 43690 |
| Dog         | - - - - -                                                                        |       |       |       |       |       |       |       | 40671 |
| BelugaWhale | GTTGGACTGAATTATTTGTTCTTGTTA- - - - -                                             |       |       |       |       |       |       |       | 39956 |
| Donkey      | GTTATTCAAACAAACGAATGAACAAGAACACA- - - - A- - - - -                               |       |       |       |       |       |       |       | 45431 |
| Cat         | - - - - - ATATA- - - - -                                                         |       |       |       |       |       |       |       | 46978 |
| Ferret      | TATATGCACACACATAGATAAACAAAAATAAGGGTAAATACAATGAAGGGATGGAATATGACTATAAAAATGAAAAGTAG |       |       |       |       |       |       |       | 47489 |
| Lion        | - - - - - ATATA- - - - -                                                         |       |       |       |       |       |       |       | 44633 |
| Vaquita     | GTTGGACTGAATTATTTGTTCTTGTTA- - - - -                                             |       |       |       |       |       |       |       | 40617 |
| Pig         | GTTATTTAAATAAATGAATGAAA- - - - -                                                 |       |       |       |       |       |       |       | 36758 |

| Majority    | - - - - - AAAXAAATGAATGATC- - - - AAGAATTAGGACT                                        |       |       |       |       |       |       |       |       |
|-------------|----------------------------------------------------------------------------------------|-------|-------|-------|-------|-------|-------|-------|-------|
|             | 58970                                                                                  | 58980 | 58990 | 59000 | 59010 | 59020 | 59030 | 59040 |       |
| Human       | - - - - - ACAAGAACAATTATC- - - - AAGTTTCTGTACT                                         |       |       |       |       |       |       |       | 46500 |
| PolarBear   | - - - - -                                                                              |       |       |       |       |       |       |       | 14578 |
| Cow         | - - - - - A- - - - CTGTGAAGAAAGCTGAATGCTG- - - - AAGAATTGATGCT                         |       |       |       |       |       |       |       | 43726 |
| Dog         | - - - - - A- - - - - ATGAACTAGGGGT                                                     |       |       |       |       |       |       |       | 40685 |
| BelugaWhale | - - - - - TTCAAACAAATGAATGAAC- - - - AAGAGCACAGTCT                                     |       |       |       |       |       |       |       | 39988 |
| Donkey      | - - - AATGTC- - - - - AGAATTCTCTATAGACTGCTTAGCCAAGAAGAGTCCTTGGTCTTACATAAGAAGAATATGCATT |       |       |       |       |       |       |       | 45501 |
| Cat         | - - - - - AACTTCAGTAAAGCTCTTAGCATAAAATAGGACT                                           |       |       |       |       |       |       |       | 47012 |
| Ferret      | AAAAGATTTTAAAAAAGAATTGGTAAGATAAAAAGTTAGTTGAAAAAAGAAAGGAAAAATTTAATAATAAAAAAGAGAA        |       |       |       |       |       |       |       | 47569 |
| Lion        | - - - - - AACTTCAGTAAAGCTCTTAGCATAAAATATGACT                                           |       |       |       |       |       |       |       | 44667 |
| Vaquita     | - - - - - TTAAACAAATGAATGAAC- - - - AAGAGCACAGTCT                                      |       |       |       |       |       |       |       | 40649 |
| Pig         | - - - - - AAGAACACAAACTGTT- - - - - AGATTTTATACT                                       |       |       |       |       |       |       |       | 36787 |

Dienstag, 3. Mai 2022 08:39

| Majority    | TX- AGATTGCTTTGXTAAGXAAAGG- - TTXGXA- - - - -                                         |       |       |       |       |       |       |       |       |
|-------------|---------------------------------------------------------------------------------------|-------|-------|-------|-------|-------|-------|-------|-------|
|             | 59050                                                                                 | 59060 | 59070 | 59080 | 59090 | 59100 | 59110 | 59120 |       |
| Human       | C- - AGACTGCTTTGTCAAAAAAAGGTCTTAGTCCT- - - - -                                        |       |       |       |       |       |       |       | 46533 |
| PolarBear   | - - - - -                                                                             |       |       |       |       |       |       |       | 14578 |
| Cow         | TTTGAAGTGGGGTGTGGAGAAGACTCTTGAGAGT- - - - -                                           |       |       |       |       |       |       |       | 43761 |
| Dog         | GG- TGAAGGGGAGGTGGGCGG- - - - - G- - - - -                                            |       |       |       |       |       |       |       | 40708 |
| BelugaWhale | ATCAGATTGCTTTGCTAAGAAAAGGCGTTAGAAG- - - - -                                           |       |       |       |       |       |       |       | 40022 |
| Donkey      | TGTATGCCGATTATGTGTTTTAAGGTATATATGATTTTTTTTATTCCCTGCTTAACTTACATTTTCT- - - - - TTCTTTTT |       |       |       |       |       |       |       | 45576 |
| Cat         | TA- AATTTAACTTAATAAGTTAA- - - - -                                                     |       |       |       |       |       |       |       | 47034 |
| Ferret      | TG- TGATCAGACAGGTGAATAGAACAAAGCCAACAGGTGAATAGAACAAAGCCATACACTAGACTTAGAGTATATTTTGG     |       |       |       |       |       |       |       | 47648 |
| Lion        | TA- AATTTAACTTAATAAGTTAA- - - - -                                                     |       |       |       |       |       |       |       | 44689 |
| Vaquita     | ATCAGATTGCTTTGCTAAGAAAAGGCGTTAGAAG- - - - -                                           |       |       |       |       |       |       |       | 40683 |
| Pig         | C- - AGTTACTCTGCCAAGAAAAGGCCTTAGAAA- - - - -                                          |       |       |       |       |       |       |       | 36819 |

| Majority    | - - - - - X- - - - -                                                           |       |       |       |       |       |       |       |       |
|-------------|--------------------------------------------------------------------------------|-------|-------|-------|-------|-------|-------|-------|-------|
|             | 59130                                                                          | 59140 | 59150 | 59160 | 59170 | 59180 | 59190 | 59200 |       |
| Human       | - - - - - GT- - A- - - - - T- - - - -                                          |       |       |       |       |       |       |       | 46537 |
| PolarBear   | - - - - -                                                                      |       |       |       |       |       |       |       | 14578 |
| Cow         | - - - - - C- - - - - C- CTT- - - - - GGA- - - - -                              |       |       |       |       |       |       |       | 43769 |
| Dog         | - - - - - G- - - - -                                                           |       |       |       |       |       |       |       | 40709 |
| BelugaWhale | - - - - - AA- - - - -                                                          |       |       |       |       |       |       |       | 40024 |
| Donkey      | TTAAAAAGATTTTATTTTTCTTTTTCTCCCAAAGCCCCCGGTACATAGTTGTGTCTTTTTAGTTGTGGTCCTTCTA   |       |       |       |       |       |       |       | 45656 |
| Cat         | - - - - -                                                                      |       |       |       |       |       |       |       | 47034 |
| Ferret      | TCTCTTAGAAGAACTGTATCCCAAATTTTAAAGAAAGAAGAACTTACATAAAAGTCCTACTAAAGACACAATAGAATA |       |       |       |       |       |       |       | 47728 |
| Lion        | - - - - -                                                                      |       |       |       |       |       |       |       | 44689 |
| Vaquita     | - - - - - AA- - - - -                                                          |       |       |       |       |       |       |       | 40685 |
| Pig         | - - - - - A- - - - -                                                           |       |       |       |       |       |       |       | 36820 |

Dienstag, 3. Mai 2022 08:39

| Majority    | ----- X- ----- AXGTGGATGTXTGT CXGTTATAT                                          |       |                                                        |       |       |                            |       |       |       |
|-------------|----------------------------------------------------------------------------------|-------|--------------------------------------------------------|-------|-------|----------------------------|-------|-------|-------|
|             | 59210                                                                            | 59220 | 59230                                                  | 59240 | 59250 | 59260                      | 59270 | 59280 |       |
| Human       | CA-                                                                              |       | GAATAATATGTGTTCTTGTGACTGATGCCGATTGTTGTGTGTGCCCATATATGT |       |       |                            |       |       | 46594 |
| PolarBear   |                                                                                  |       |                                                        |       |       |                            |       |       | 14578 |
| Cow         |                                                                                  |       |                                                        |       | CT-   | GCAAGGAGATCAGTCCTGGGTGTTCT |       |       | 43796 |
| Dog         |                                                                                  |       |                                                        |       |       | GTGGGGGTGACTGGGTGACGG      |       |       | 40730 |
| BelugaWhale |                                                                                  |       |                                                        |       |       | TATGCATTTGTATGTCAGTTATAT   |       |       | 40048 |
| Donkey      | GTTGTGGCATGTGTGATGCAGCCTCAGCATGGCTTGATAAGCAGTGCCATGTCCGGGCCAGGATTTGAACTGACAAAAT  |       |                                                        |       |       |                            |       |       | 45736 |
| Cat         |                                                                                  |       |                                                        |       | TT-   | ATCGAGTGAGTTCACATATTA      |       |       | 47057 |
| Ferret      | GGTGATGTTTTATGTAAAACCATTTGAAGACCTTGCAGTCTATCCACTATTCCTTATTAGTGGTTCCAAATGGTCTATGG |       |                                                        |       |       |                            |       |       | 47808 |
| Lion        |                                                                                  |       |                                                        |       | TT-   | ATCAAGTGAGTTCACATATTA      |       |       | 44712 |
| Vaquita     |                                                                                  |       |                                                        |       |       | TATGCATTTGTATGTCAGTTATAT   |       |       | 40709 |
| Pig         |                                                                                  |       |                                                        |       |       | ATAGGCATCTGTGTGTGACTTAT    |       |       | 36843 |

| Majority    | GTTTTAAGGTAT----- ATXTTAATXTGTTGATTCACT----- XTX- - -XA- CT- TGXATTA             |       |                                                        |                                |       |               |         |         |       |
|-------------|----------------------------------------------------------------------------------|-------|--------------------------------------------------------|--------------------------------|-------|---------------|---------|---------|-------|
|             | 59290                                                                            | 59300 | 59310                                                  | 59320                          | 59330 | 59340         | 59350   | 59360   |       |
| Human       | GTTTTAAAGTAT-                                                                    |       |                                                        | ATGTGTATTTTTTGATTCTGTG-        |       | CTT-          | TAGCT-  | TACATTT | 46644 |
| PolarBear   |                                                                                  |       |                                                        |                                |       |               |         |         | 14578 |
| Cow         | TTTGAAGGAATG-                                                                    |       |                                                        | ATGCTAAAGCTGAAACTCCAGTA-       |       | CTTTGGCCACCT- | CGTGTGA |         | 43851 |
| Dog         | GCACTGAGGGGT-                                                                    |       | G-                                                     | CACTTGACAGGATGAGC-             |       | A-            | CT-     |         | 40763 |
| BelugaWhale | GTTTTAAGGTAT-                                                                    |       |                                                        | ATG- TGTATTTTTTGATTCCCT-       |       |               |         | GCAGTA  | 40087 |
| Donkey      | CCTGGGTGGCGGAAGC-                                                                |       | AGAGCGCGGAACTTAACC-                                    | ACTCAGCCATGGGGCTGGACTTCTTAACT- |       | TAGATTT       |         |         | 45807 |
| Cat         | TTTCCTAGAGATA-                                                                   |       | TTCTTTAATCATCCAATAAAGTCACTAACACACCACCTTCTTCTAGTTCTCTG- |                                |       |               |         |         | 47123 |
| Ferret      | ACTAAAAGATGTTTCTGAAACTAAAACAAAGGATACTTAATAAGCTGAGAAATATACATGTACACTCCACTTGTGTATAA |       |                                                        |                                |       |               |         |         | 47888 |
| Lion        | TTTCCTAGAGATAACC-                                                                |       | TTCTTTAATCATCCAATAAAGTCACTATCACACCACCTTCTTCTGGTTCTCTG- |                                |       |               |         |         | 44780 |
| Vaquita     | GTTTTAAGGTAT-                                                                    |       |                                                        | ATG- TGTATTTTTTGATTCCCT-       |       |               |         | GCAGTA  | 40748 |
| Pig         | GTTTTAAGGTAT-                                                                    |       |                                                        | ATGTTTTATTTGTTGATTCTTC-        |       | CTTTAAACAAAT- |         | TACATTA | 36897 |



Dienstag, 3. Mai 2022 08:39

| Majority    | AXAAXT- TXX- T- - - - -                                                            |       |
|-------------|------------------------------------------------------------------------------------|-------|
|             | 59530 59540 59550 59560 59570 59580 59590 59600                                    |       |
| Human       | ACAAATCTTTGTCAGTAGTGAAAGGACATGTGATAGCTTCCTGTAGTTTTTTCATATTTCTGGAGTGGTGAAGAG- - - - | 46817 |
| PolarBear   | - - - - -                                                                          | 14578 |
| Cow         | ATGAATTTGAGTG- - - - -                                                             | 43972 |
| Dog         | - - - - -                                                                          | 40816 |
| BelugaWhale | AGATGTTTTCTT- - - - -                                                              | 40184 |
| Donkey      | AAAAATCTTCCTTA- - - - -                                                            | 45922 |
| Cat         | GAG- - - - -                                                                       | 47237 |
| Ferret      | GGGATAGAATATGATTTCCAGAAAGTGGCCGCTTTTCTGTTCATAATTGCTGCTTTTCTTTGATCTCCTGTTGAGTTCGT   | 48128 |
| Lion        | GAGA- - - - -                                                                      | 44895 |
| Vaquita     | AGATGTTTTCTT- - - - -                                                              | 40856 |
| Pig         | ATAAATCTCCTT- - - - -                                                              | 36997 |

| Majority    | - - - - - AXTTXXGGXAGXAXXTG- - - - TGGAGAGCTTXCTGTAGT- X- C-                    |       |
|-------------|---------------------------------------------------------------------------------|-------|
|             | 59610 59620 59630 59640 59650 59660 59670 59680                                 |       |
| Human       | - - - - CT- - - - - ACCCAGCCAAGATTTTCAGGGCAATATATTCAGAAGCCAGAGCTTACTCTTCTGTACA  | 46877 |
| PolarBear   | - - - - -                                                                       | 14578 |
| Cow         | - - - - - AACTCCAGGAGTTGTTGA- - - - TGGACAGGGAGGCCTGGCGTGC-                     | 44012 |
| Dog         | - - - - -                                                                       | 40816 |
| BelugaWhale | - - - - - ACTTATGAAAGGAAGTG- - - - TGGAG- GCTTTTTGTAGT- - - -                   | 40218 |
| Donkey      | - - - - - GTTGTGCAAGAGGAGATG- - - - TGGAGAGCTTCCTGTAGTTTTT-                     | 45962 |
| Cat         | - - - - - CATTGGGGATCTTACTGATCATTTTGTTCACTGCTGTATCCCCCA                         | 47282 |
| Ferret      | AGGTGCTTAGAATGGTTTGATAACTCTCTAGCTAAATTCCCGGACCAGATGAAATCTAGGTCTCTAACTCTTCCACCCT | 48208 |
| Lion        | - - - - - GCATTGGGGATCTTACTGATCATTTTGTTCATTGCTGTATCCCCCA                        | 44941 |
| Vaquita     | - - - - - ACTTATGAAAGGAAGTG- - - - TGGAGAGCTTTTTGTAGT- - - -                    | 40891 |
| Pig         | - - - - - CCTTAAAGAGGAGGTG- - - - TGGAGAGCTTTTTGTTAT- TTC-                      | 37034 |

Dienstag, 3. Mai 2022 08:39

| Majority    | ----- TXCTATTTTTAGXXTCTTGAAGAGCXATXCAGCAAGATXTTCTGATAATATXTX- XAG- - - - AAA             |       |       |       |       |       |       |       |
|-------------|------------------------------------------------------------------------------------------|-------|-------|-------|-------|-------|-------|-------|
|             | 59690                                                                                    | 59700 | 59710 | 59720 | 59730 | 59740 | 59750 | 59760 |
| Human       | AAGACAACCTAAGGGGATTTTTAAATGCATTGGCTTGCCGTTCAAGTATATAAACCTAAGTGAAACTCCTAGA- - GTAAA       | 46955 |       |       |       |       |       |       |
| PolarBear   | ----- CCTCATTTTCATGTTCTTATAT- CTCATCTAAAATGAAAACCTTTCATAATATTTAGCAC- - - TAAA            | 14639 |       |       |       |       |       |       |
| Cow         | ----- TGCGATTCATGGGGTCGCAAAGAGTCGGACACGACTGAGCGACTGA- ACTGAACT- GACT- - - GAA            | 44073 |       |       |       |       |       |       |
| Dog         | ----- AAAAAAGAAAACCTTTCATAA- - - TATTTAGCACTAAAA- - - TAAGAATATTTAGTAC- - - TAAA         | 40872 |       |       |       |       |       |       |
| BelugaWhale | ----- TCTTATTTTTGGAATGATGAAGAGCTAACCAGCAAGATTTTTCTGGTAATATATT- CAG- - - - AAG            | 40279 |       |       |       |       |       |       |
| Donkey      | ----- TTGTATTTCTGGAGTGATGAAGAGCTAGTTAACAAGATTTTTCATGGAAATATATT- CAG- - - - AA            | 46022 |       |       |       |       |       |       |
| Cat         | GAGCCTCAAACAGTGCTAAA- - CATGTTCTTG- A- - - CACTCAGTAACTGGTTTTTTTTGATACTCAGTAA- - - - AAA | 47350 |       |       |       |       |       |       |
| Ferret      | CTTGCTAGCCCTCCCCTCATTTTCATGTTCTTATATTCTGATCTGAAATGAAAATTTTTCATAATATTTA- CAC- - - TAAA    | 48283 |       |       |       |       |       |       |
| Lion        | GAGCCTCAAACAGTGCTAAAAACATGTTCTTG- A- - - CACTCAGTAACTGGTTTTTTTTGATACTCAGTAACTCTTAAA      | 45016 |       |       |       |       |       |       |
| Vaquita     | ----- TCTTATTTTTGGAATGATGAAGAGCTAACCAGCAAGATTTTTCTGGTAATATATT- CAG- - - - AAA            | 40952 |       |       |       |       |       |       |
| Pig         | ----- TTTTATTTCTGGAGTGGTAAAGAGCTAACCAGTAAAGATTTTTCTGGTAATACATT- TAG- - - - AAG           | 37095 |       |       |       |       |       |       |

| Majority    | XTATAACT- - - - - TACTACTCXCTTCTATACATAGTCAAC- - CXAAGGGAATTTTTXAATG- - - - - TATTG        |       |       |       |       |       |       |       |
|-------------|--------------------------------------------------------------------------------------------|-------|-------|-------|-------|-------|-------|-------|
|             | 59770                                                                                      | 59780 | 59790 | 59800 | 59810 | 59820 | 59830 | 59840 |
| Human       | ATATGACT- - TAAGTATAGCTTGAGTCCATATATTATCACT- - TAGAGATACCTTCTCTGATCATCCAATAAAGTCATTA       | 47031 |       |       |       |       |       |       |
| PolarBear   | ATATGAGTATTTAGTAGCCACCCCTTCTAAAACCTATTCACCCACCGAGGGAGTATCAG- - - - -                       | 14697 |       |       |       |       |       |       |
| Cow         | GTAGAACT- - - - - TACTAGT- - TTTATGTTGAAAGTCAAC- - CTACGCA- ATTTTTAAATG- - - - - CGTTG     | 44129 |       |       |       |       |       |       |
| Dog         | ATAGGAAT- - - - AATAGCCACCCTTTCTAAAACCTATTAAGTACTGAGAGAGTATCAGTATGAGGAG- - - T- - - T- TTG | 40940 |       |       |       |       |       |       |
| BelugaWhale | CCATAGCT- - - - - TACTACTCTCTTCTGTACAGAGTCAAC- - TTAAGGGAATTTTTAAATG- - - - - TATTG        | 40338 |       |       |       |       |       |       |
| Donkey      | CCAGAGCT- - - - - TACTACT- - CTTTTGTACAAAGCCAAC- - CTAAGGGGATTTTTAAGTGCATCAGC- - TGGCCATTC | 46090 |       |       |       |       |       |       |
| Cat         | GAATCAGT- - - - - GTGTAAGTGAATTTTTAAAGCCACTTAGAGATCAAGTTGATCTTAGAATTT- - - - - TATAG       | 47413 |       |       |       |       |       |       |
| Ferret      | ATATAAATTTTTATTAGCCACCCCTTCTAAAAATAGTCAACAACCGAGGGACTAACAGTATGAAGAGAATGTAGGTTTTG           | 48363 |       |       |       |       |       |       |
| Lion        | GAATCAGT- - - - - GTGTAATGAATTTTTAAAGCCACTTAGAGATCAAATTGATCTTAGAATTT- - - - - TATAG        | 45079 |       |       |       |       |       |       |
| Vaquita     | CCATAGCT- - - - - TACTACTGTCTTCTGTACAGAGTCAAC- - TTAAGGGAATTTTTAAATG- - - - - TATTG        | 41011 |       |       |       |       |       |       |
| Pig         | CCAGAACA- - - - - TACGACT- - CATTTGTACAGAGTCAAC- - CCAAGGGGATTTTTAAATG- - - - - CATTG      | 37152 |       |       |       |       |       |       |



Dienstag, 3. Mai 2022 08:39

|             |                                                                                                                                                                 |       |
|-------------|-----------------------------------------------------------------------------------------------------------------------------------------------------------------|-------|
| Majority    | XXTCTCT- TCTATXCCXCTG- - - - CTAAGXCACTTTTAAXCACATTXCTGT- GCTTTACTTTCTXCATAGCAXTT- - - - -                                                                      |       |
|             | 60010            60020            60030            60040            60050            60060            60070            60080                                    |       |
| Human       | G TTC A C T C T C T G T A C C C T C A G A A C G T A A A C A T T G C T A G A C A C A T C C C T G A A T A C C C A G T A A A T G T T T A A G G A A T T A A T G     | 47258 |
| PolarBear   | -----                                                                                                                                                           | 14713 |
| Cow         | A C C C T C T - T C C A G T C C T C T G - - - - T T A T G T T A C T T T T A A T C T C A T T A C T G T - G C T T T A C T T T C T C C A T A G C A C T - - - - -   | 44313 |
| Dog         | G T T C A C T - C C T G T A C C C C T G G A G C C T C A A A T A G T G C C A A A C A C A T T C T T G A - T A C T C A G T A A C A A C A T C A T C A T C A T C A T | 41158 |
| BelugaWhale | A C C C T C T - T C C A G T C C T C T G - - - - C T A A G T C A C T T T T A A T C A C A T T A C T G T - G C T T T A C T T T C T C C A T A G C A C T T - - - - - | 40520 |
| Donkey      | A C T C T C T - T C T A G T C T T C T G - - - - C T A A G T C A C C T T T A A T C A C A T C A C T C T - G C T T T A C T T T C T T C A T A G C T C T T - - - - - | 46297 |
| Cat         | G T T T - C A - G A A A T A T C C C T T A G T C T T T A G A C A A T T A G G A A C - T A C T C T T G T - G G A A T A T T G G A T A G A T T G C A A G T C C T T C | 47636 |
| Ferret      | G T T C A C T - G C T G T A C C C C C A G A G C C T C A A A C A G T G C C A A A C A C G T T C T T G A - T A C T A A T T A A C T T T T C T G T T T A T G T T T T | 48598 |
| Lion        | G T T T - C A - G A A A T A T C C C T T A G T C T T T A G A C A A T T A G G A A C - T A C T C T T G T - G G A A T A T T G G A T A G A T T G C A A G T C C T T C | 45303 |
| Vaquita     | A C C C T C T - T C C A G T C C T C T G - - - - C T A A G T C A C T T T T A A T C A C A T T A C T G T - G C T T T A C T T T C T C C A T A G C A C T T - - - - - | 41205 |
| Pig         | A C C C T T T - T C T A A T C C T C T G - - - - C T A A G T C G C A T T T A A T C A C A T C A C T C T - T C T T T A C T T T C T T C A T G A C A G T T - - - - - | 37323 |

|             |                                                                                                                                                                 |       |
|-------------|-----------------------------------------------------------------------------------------------------------------------------------------------------------------|-------|
| Majority    | AATCACTTTXA- - - - - GAAATXA- TCTGGTTCGTGTA CTGGTAGT- - CTXTCTCTCXCACTAGACTACG                                                                                  |       |
|             | 60090            60100            60110            60120            60130            60140            60150            60160                                    |       |
| Human       | A G T G A A T T A A T T T T G A A G A T A C G T T G G A G A C C A A G A T A A T C T G A C A G T C T T A T A G A T G T T G T T G A A C A T A C A C A A A C A C A | 47338 |
| PolarBear   | -----                                                                                                                                                           | 14713 |
| Cow         | - A C T A C T T C T A - - - - - G A A G T T A - T C T G G T T C A T G T A C T A G G T A G G - - C C A T C T G T C T C A G T A G A C A A C G                     | 44374 |
| Dog         | C A T T A T T A T T A T T A T T A T T G A G A G A A A G A A T G T - G A G C A T G T G A G T A G T G G T G A G G G G C T G A A A G A G T G A C G G G A G A G A G | 41237 |
| BelugaWhale | A A T C A C T A T A A - - - - - G A A A T A A - T C T G G T T C G T G T A C T G G G T A G T - - C C A T C T C T C C C A C T A G A C T A C A                     | 40582 |
| Donkey      | A A T C A C T G T A A - - - - - G A A A T T A - T C T G G T T C A T G T A C T G G T T A C T - - C T G C C T C T C C C G C T A G - - - - C C                     | 46355 |
| Cat         | A A A C A G T T T T A C - - - - - A T A A A A T A T C A - C C A A T T T T G T G T T T T A G T A G G A C C T T T A T T T T T G G T G A G G C T T T G             | 47705 |
| Ferret      | A C T T A T T T T T A - - - - - G A G C A T - G C A C A C T C C A A T G G T G G G G A G T G G C A G A G G T A G A G G G A G A G A G A G G                       | 48661 |
| Lion        | A A A C A G T T T T A C - - - - - A T A A A A T A T C A - C C A A T T T T G T G T C T T T A G T A G G A C T T T T C T T T T T G G T G A G G C T T T G           | 45372 |
| Vaquita     | A A T C T C T A T A A - - - - - G A A A T A A - T C T G G T T C G T G T A C T G G G T A G T - - C C A T C T C T C C C A C T A G A C T A C A                     | 41267 |
| Pig         | A A T C A C T C T A A - - - - - G A A A T T A - C C T G G T T C A T G T C C T A G A T A G T - - C C A C C T C T C C C A C T A G A T T A C A                     | 37385 |



Dienstag, 3. Mai 2022 08:39

| Majority    | GGATAACAXCAGGXATCTTAXTGCTTGCCX- - GTTT- - - - - ACTGCTGTACCXT- - - - - CAGAATC        |       |       |       |       |       |       |       |       |
|-------------|---------------------------------------------------------------------------------------|-------|-------|-------|-------|-------|-------|-------|-------|
|             | 60170                                                                                 | 60180 | 60190 | 60200 | 60210 | 60220 | 60230 | 60240 |       |
| Human       | TTATA- - - - TAGTTTATAGGTTGTGTTGAATGTTTTAGGAAATACCATAAATTACCTAAAGTTTTATACAAAATGGAGTA  |       |       |       |       |       |       |       | 47414 |
| PolarBear   | -----                                                                                 |       |       |       |       |       |       |       | 14713 |
| Cow         | AGAGAACATCAGGGCTCTTATTGCTTGCT- - GTC- - - - - ATTGATGTACTC- - - - - CAGAATC           |       |       |       |       |       |       |       | 44425 |
| Dog         | GATCTTAAGCAGGTTCCATGCCTCGTGTGGAGTTTAAACACAGGCCTGGATCTCACAATTCTGAAATCATGACCTGATATG     |       |       |       |       |       |       |       | 41317 |
| BelugaWhale | GGACAGCATCAGGGATCTTACTGCTTACT- - GTTC- - - - - ACTGCTGTACCCT- - - - - CAGAACC         |       |       |       |       |       |       |       | 40635 |
| Donkey      | ----- CAGA- - TCTTATTGATCTT- - - GTTC- - - - - ACTGCTGTACCCT- - - - - CAGAGCC         |       |       |       |       |       |       |       | 46396 |
| Cat         | GAATAAAGGCAGGTAACATAATTTGTTG- - - - GATAAAAATATATCAGTTTATTTTA- - - - - A- - - - AGGTC |       |       |       |       |       |       |       | 47763 |
| Ferret      | ATCTTAGAGTAGGCTCCACACCCAGTGCAGAGCCTGACCTGGGGCAGGATCTTA- - - - - TGACCTGAGCTG          |       |       |       |       |       |       |       | 48727 |
| Lion        | GAATAAAGGCAGGTAACATAATTTGTTG- - - - GATAAAAATATATCAGTTTATTTTA- - - - - A- - - - AGGTC |       |       |       |       |       |       |       | 45430 |
| Vaquita     | GGACAGCATCAGGGATCTTACTGCTTACT- - GTTC- - - - - ACTGCTGTACCCT- - - - - CAGAACC         |       |       |       |       |       |       |       | 41320 |
| Pig         | GGAGAGCATCCGGGATCTTACTGCTTACT- - GTTT- - - - - GCTGCTGCACCC- - - - - CAGAACG          |       |       |       |       |       |       |       | 37437 |

| Majority    | XAA- - - - - AACAGT- - GCCAGTCAAG- TTCTTGATX- - - - CTCA- - - - - X- A- - - - GTAA- TGXTTAAAGAATTA     |       |       |       |       |       |       |       |       |
|-------------|--------------------------------------------------------------------------------------------------------|-------|-------|-------|-------|-------|-------|-------|-------|
|             | 60250                                                                                                  | 60260 | 60270 | 60280 | 60290 | 60300 | 60310 | 60320 |       |
| Human       | TACATGTATATTTCTGAATGTGTCAAGATCCTTCATTTAGCTAAGTCTCAGAAATATCCTTGAGATCCTAAAAGACTAA                        |       |       |       |       |       |       |       | 47494 |
| PolarBear   | -----                                                                                                  |       |       |       |       |       |       |       | 14713 |
| Cow         | TAA- - - - - AAG- - - - - GCCAGACATT- TTCTTGATA- - - - CTCAAG- - - - - A- AA- - - - GTAAGTCTTAAAGAGTTG |       |       |       |       |       |       |       | 44478 |
| Dog         | AAAGAAATCAGGAGTGGGACACTTAAC- TAACTGAGCCA- - CCCAGGTGCCCTGGTACTC- GTAA- CTCTTACAGAATCA                  |       |       |       |       |       |       |       | 41392 |
| BelugaWhale | TAA- - - - - AGAAGT- - GCCAGACATA- TTCTTGATAA- - - - CTCA- - - - - GTAA- TGTTTAAAGAATTA                |       |       |       |       |       |       |       | 40686 |
| Donkey      | TAA- - - - - AACAGT- - GCCAGACACA- TTCTTGATT- - - - TTCA- - - - - GTGGCTGTTTAAAGAATCA                  |       |       |       |       |       |       |       | 46447 |
| Cat         | AGA- A- - T- AACAGTAAGTTAATGAAG- TCCATGAGTTT- - T- - - - - ATATAGATGTTGA- TAGTGACAAAATAC               |       |       |       |       |       |       |       | 47825 |
| Ferret      | AAA- - - - TCAAGAGTCAGACACTTAAC- TGAAGTACTGAGCCT- - CTCAGGTACCTCAATACTCAGTAA- CTCGTAAGGAATCA           |       |       |       |       |       |       |       | 48799 |
| Lion        | AGA- A- - T- AACAGTAAGTTAATGAAG- TCCATGAGTGT- - TTTATAT- - - TACATAGATGTTGA- TAGTGACAAAATAC            |       |       |       |       |       |       |       | 45499 |
| Vaquita     | TAA- - - - - AGAAGT- - GCCAGACATA- TTCTTGATAA- - - CTCA- - - - - GTAA- TGTTTAAAGAATTA                  |       |       |       |       |       |       |       | 41371 |
| Pig         | AAA- - - - - AACAGT- - GCCGCTCATG- TTCTTGATA- - - - CTCA- - - - - GTAAGTCTTAAAGAATTA                   |       |       |       |       |       |       |       | 37488 |



Dienstag, 3. Mai 2022 08:39

| Majority    | AGTACCXAAAATTATAT - - AAAA- TGGAGTATACATGTATATTTCTCA- CTGTTTAAGGATTCTTCATTTTAGTTAG- - T  |       |       |       |       |       |       |       |       |
|-------------|------------------------------------------------------------------------------------------|-------|-------|-------|-------|-------|-------|-------|-------|
|             | 60490                                                                                    | 60500 | 60510 | 60520 | 60530 | 60540 | 60550 | 60560 |       |
| Human       | TTTACTTTAAATCTCACG- GTAACAGAATAAGGTAATTAAGTTCATGAGTGATTTAGAGTATATTGATGTTAAT- AG- - T     |       |       |       |       |       |       |       | 47726 |
| PolarBear   | -----                                                                                    |       |       |       |       |       |       |       | 14713 |
| Cow         | AGTACC AAAATTTGTATACAAA AATGGAGTATACATGTATATTTCTCT- GTGTGTAAGAGTTTTTCATTTTAAT- AGATT     |       |       |       |       |       |       |       | 44643 |
| Dog         | AGTATCTAAAGTTACAT- - AGTAGTGGTGTATACATGTATATTTTCAACTTATCAAGTATCCTTCATTTTAGTTAG- - T      |       |       |       |       |       |       |       | 41622 |
| BelugaWhale | AGTACC AAAAATCATAT- CAAAA- TGGAGTATACATGCATATTTCTCA- CTGTGTAAGGATTCTTCAGGTTAGTTAGATT     |       |       |       |       |       |       |       | 40855 |
| Donkey      | AGTACC AAAAGTATCTACAAA A- TGGAGTGTACAGGTATATTTCTCA- ATGTATAAGCATTCTTCATTTTAATGAGAAC      |       |       |       |       |       |       |       | 46658 |
| Cat         | - ATTTTCCAAATTAAC- - - - - CATT AATAATTT- - - - CTTATCA- - - - CCCTAATTTTTGCTAA- - G     |       |       |       |       |       |       |       | 48003 |
| Ferret      | AGTACGTAAAGTTATAC- - ACAAGTGGAGTGTACATGTATATTTCTCAGCTTATTAAGTATCCTTTGTTTTAGTT- - - -     |       |       |       |       |       |       |       | 49020 |
| Lion        | - ATTTTCCAAATTAAC- - - - - CATT AATAATTT- - - - CTTATCA- - - - CCCTAATTTTTGCTAA- - G     |       |       |       |       |       |       |       | 45677 |
| Vaquita     | AGTACC AAAAATCATAT- CAAAG- TGGAGTATACATGCATATTTCTCA- CTGTGTAAGGATTCTTCAGGTTA- - TAG- - T |       |       |       |       |       |       |       | 41536 |
| Pig         | AATACC AAAAATTTTATACAAA A- TGGAGCTTACATGTATATTTTTCAGTGTGTAAGGATTCTTCATTTTAGTTAGGTT       |       |       |       |       |       |       |       | 37651 |

| Majority    | CTCAGAAATATCCTTGAGTTTTTAGAAGATTAXGAACCA- T- XTAAGX- - - - C- - AATXXATAGATTXTAAGATCTTTAA     |       |       |       |       |       |       |       |       |
|-------------|----------------------------------------------------------------------------------------------|-------|-------|-------|-------|-------|-------|-------|-------|
|             | 60570                                                                                        | 60580 | 60590 | 60600 | 60610 | 60620 | 60630 | 60640 |       |
| Human       | CACA- AAATATTAGGTAGTTT TAGACGGCAATAGTAATATATCAGGAGAGGCTCATTGTAGATAAGCCATAATATGGATTG          |       |       |       |       |       |       |       | 47805 |
| PolarBear   | -----                                                                                        |       |       |       |       |       |       |       | 14713 |
| Cow         | CTTAGAACTATCCTTGAGTCTT- - - - - AGA- - - - T- - GATATTCTGTTTATTGCATCTTTCA                    |       |       |       |       |       |       |       | 44694 |
| Dog         | TTCAGAAATATCCTTTAGTCTGTAGACAGTTAGGAACCACTGATACAG- - - - AATAAGGAATAGACTGTAAGTTCTTCAA         |       |       |       |       |       |       |       | 41698 |
| BelugaWhale | CTCAGAAATATCCTTGAGTTCTTAGAAGATTAAGAACCA- T- - CAAAA- - - - C- - ATCACATATTTTATTGATTCTTTAG    |       |       |       |       |       |       |       | 40926 |
| Donkey      | CTCAGAAATTGCTTTGAGTCTTAGAAGTT- - - - AACTACCAGTGTGG- - - - AATAGTGGATAGACTGTAAGTTCTTCAA      |       |       |       |       |       |       |       | 46730 |
| Cat         | T- C- - A- ATATTTCACACTTTTTGTATTTCTGTTAGTCTGTAATAA- G- - - - - ATGATTAAATTGTAAGA- - T- - - A |       |       |       |       |       |       |       | 48065 |
| Ferret      | - TCAGAAACATCTTTTAGTCCATAGACCATTTGGAACCACTAATAAGG- - - - AATAGTGGATAGACTGCAAGGTCTTCAA        |       |       |       |       |       |       |       | 49095 |
| Lion        | T- C- - A- ATATTTCACACTTTTTGTATTTCTGTTAGTCTATAATAA- G- - - - - ATGATTAAATTGTAAGA- - T- - - A |       |       |       |       |       |       |       | 45739 |
| Vaquita     | CTCAGAAATATCCTTGAGTTCTTAGAAGATTAAGAACCA- T- - CAAAA- - - - C- - ATCACATATTTTATTGATTCTTTAG    |       |       |       |       |       |       |       | 41607 |
| Pig         | CTCAGAAATATCCTTGAATTTTTTAGAAGATTTAGA- CCA- T- - TAAGA- - - - C- - ATCACTTATTTTATTGCATCTTTAG  |       |       |       |       |       |       |       | 37721 |



Dienstag, 3. Mai 2022 08:39

| Majority    | ATAAGXTAATCAAGTC- CATGA- GTGATT- TATAATATATAGATGTTGATAGTGACAAA- - - - -                    |       |       |       |       |       |       |       |       |
|-------------|--------------------------------------------------------------------------------------------|-------|-------|-------|-------|-------|-------|-------|-------|
|             | 60810                                                                                      | 60820 | 60830 | 60840 | 60850 | 60860 | 60870 | 60880 |       |
| Human       | ATAAGATGATTAAATTACAAGATACAGTCATAAATCTTGGGGATAGTGATGAGGATACTCTCGGAGAAATGCATTGTTAG           |       |       |       |       |       |       |       | 48044 |
| PolarBear   | - - - - -                                                                                  |       |       |       |       |       |       |       | 14713 |
| Cow         | AAAAGATAATCAAGTC- CATGA- GTGATAATATAATAGGTAGATGTTGATAGTGATAAA- - - - -                     |       |       |       |       |       |       |       | 44852 |
| Dog         | ATAAGTTAATCAAGTC- CATGA- GTATTT- TATAGTATATAGATGTTGAATGTTATTAG- - - - T- - - GACAAAATATTTA |       |       |       |       |       |       |       | 41905 |
| BelugaWhale | ATAAGATAATCAAGTC- CATGA- GTGATT- TATA- - - - GTAGATTTTGATAGTGACAAA- - - - -                |       |       |       |       |       |       |       | 41093 |
| Donkey      | ATACGTTAATCAAGTC- CATGA- ATGATT- TATAGTATATAGATGTTGATAGTGACAACAT- ATTTAGATAGATTAGGTG       |       |       |       |       |       |       |       | 46919 |
| Cat         | AACATTTACCCAGTAG- TTACC- TTAATT- GGTAACATA- - - ATTTTATTTGATAATAATT- - - - - CT            |       |       |       |       |       |       |       | 48238 |
| Ferret      | AAAAGTTAATCAAGTC- CATGA- GTGTTT- CATAGAATATAGATGTTGATAGTGACAAAAT- ATTTAGGTAGATTATGTG       |       |       |       |       |       |       |       | 49308 |
| Lion        | AACATTTACCCAGTAG- TTACC- TTAATT- GGTAACATA- - - ATTTTATTTGATAATAATT- GGTGGATATGATTTTTCT    |       |       |       |       |       |       |       | 45941 |
| Vaquita     | ATAAGATAATCAAGTC- CATGA- GTGATT- TATA- - - - GTAGATTTTGATAGTGACAAA- - - - -                |       |       |       |       |       |       |       | 41774 |
| Pig         | GTAAGATAATCAAGTC- CATGA- GTGATT- TATAATGGATAGATGTTGATAGTGACAAA- - - - -                    |       |       |       |       |       |       |       | 37881 |

| Majority    | - - ATATTTT- - AAAGTAGAGGAXT- X- AXX- T- - GTAAGC- CATAAT- G- TGGATT- GACTGCATAATTATTTTTACAGC          |       |       |       |       |       |       |       |       |
|-------------|--------------------------------------------------------------------------------------------------------|-------|-------|-------|-------|-------|-------|-------|-------|
|             | 60890                                                                                                  | 60900 | 60910 | 60920 | 60930 | 60940 | 60950 | 60960 |       |
| Human       | GTAATTTTGTCACTGCATAAATGTCATAGAGTACATTTGCACAAACCTGCTACACATGTAGGCTATATGGTATATGTAGC                       |       |       |       |       |       |       |       | 48124 |
| PolarBear   | - - - - -                                                                                              |       |       |       |       |       |       |       | 14713 |
| Cow         | - - ATATTT- - - - AGGTAGAGGAAT- - - - - - - - - ATAAGC- CATACT- G- TGGATT- GACTGCATAATAATTTTTAAAGC     |       |       |       |       |       |       |       | 44912 |
| Dog         | G- ATAGATAATAAATTAGGAGAGTCTCATTGTAGGTAAGC- CATAAT- G- TGGATTTGATTGCATAATTATTTTTACAGC                   |       |       |       |       |       |       |       | 41981 |
| BelugaWhale | - - ACATTTT- - - AGGTAGAGGAAT- - - - - - - - - GTGACC- CATAGT- G- TGGAGT- GACTGCATAATAATTTTTACAGC      |       |       |       |       |       |       |       | 41154 |
| Donkey      | GTAATTTTAACAAATTAGGAGAGGCTCATTGTAGGTAAGC- CATAATGG- TGGATT- GACTGCATGATCATTTTTTACAGC                   |       |       |       |       |       |       |       | 46996 |
| Cat         | CTCTCCCTTTGAAAGCCAGTTTTTTAATTTTTAGAAATT- ATTCAG- G- TATACTCAGCTATGTTTTTTAATTTAAAAA                     |       |       |       |       |       |       |       | 48315 |
| Ferret      | GTATTATGAATAAATTAGGAGAGGCTTATTGTAAGTAAGC- C- - - - T- G- TGGATT- GACTGCATAATTATTTTTACAGC               |       |       |       |       |       |       |       | 49380 |
| Lion        | CTCTCCCTTTGAAAGCCAGTTTTTTAATTTTTAGAAATT- ATTCAG- G- CATACTCAGCTATGTTTTTAAGTTAAAAA                      |       |       |       |       |       |       |       | 46018 |
| Vaquita     | - - ACATTTT- - - AGGTAGAGGAAT- - - - - - - - - GTGACC- CATAGT- G- TGGAGT- GACTGCATAATAATTTTTACAGC      |       |       |       |       |       |       |       | 41835 |
| Pig         | - - ATGTTT- - - - AAGTAGAGGAAT- - - - - - - - - GTAAGC- CA- - - - - G- TGGATT- GACTGCATAATTATTTTTACAGC |       |       |       |       |       |       |       | 37937 |

Dienstag, 3. Mai 2022 08:39

| Majority    | ATTG- - - CTTTCTTTGATTCCATTTTTTAGTATATT- - - TTCCAAT- TGAG- - CAATTTAGAATTTCTCAGGTAAAAT      |       |
|-------------|----------------------------------------------------------------------------------------------|-------|
|             | 60970 60980 60990 61000 61010 61020 61030 61040                                              |       |
| Human       | CTTTTGCTCCTAGGCAA- CAAATTTGACAGCATGTTACTGTTCTGAATACTGGAGGCAGTTGCAA- - - CACAGTAATAAG         | 48200 |
| PolarBear   | -----                                                                                        | 14713 |
| Cow         | ATTA- - - TCTGATTCCATT- - - TTTTTAGTACATT- - - TTCCAATT- TGAG- - CAATTTAGAATTTTTCTCAGGTAAAAT | 44978 |
| Dog         | ACTA- - - CTTTCTTTGCTTCCATTTTTTACTATGATAC- ATTCCAAT- TGTGAACCATTTATAATTTCCCAGGTAAAAA         | 42056 |
| BelugaWhale | ATTG- - - CTTTCTTTGATTCCATTTTTTAGCACATT- - - TTTCAAAT- TGAA- - CAATTTAGAATTTCTCAGGTAAAAT     | 41224 |
| Donkey      | ATTG- - - CTTTCTTCGATCTCATTTTTGAGTAGAATA- - - TTTTAAAT- TGAA- - CAATATATAATTTCTAAGGTAAAAT    | 47067 |
| Cat         | AAA- - - TTTTTTTTAAATGTTTATTTTTGAGAGACAG- AGACACAGC- AGGGGAGGGGT- - - - - AGAGAGAGAGAGA      | 48382 |
| Ferret      | ATTG- - - CTTTCTTTGTTCCCAGTTTTGAGTATATT- - - TTCTAAAT- TG- - AACCATTTATAATTTTCCCAGGTAAAA     | 49450 |
| Lion        | AAAAATTTTTTTTTTAAATGTTTATTTTTGAGAGACAG- AGACACAGT- GGGGGAGGGGGGGGGGGAGAGAGAGAGAGA            | 46096 |
| Vaquita     | ATTG- - - CTTTCTTTGATTCCGTTTTTTAGCACATC- - - TTTCAAAT- TGAA- - CAATTTAGAATTTCTCAGGTAAAAT     | 41905 |
| Pig         | ATTG- - - CTTTCTTCGATTCCATTTTTCAGTGTATT- - - TTACAAAT- CAAAA- TAATTTAGAATTTCTCAGGTAAAAT      | 38008 |

| Majority    | T- ATAAT- TCCXTAATTTTTGCTAAGTCAAATTTTTCAAX- TT- TTTTGTATTTTTCTXAGTCT- - - - - XT- - - AC |       |
|-------------|------------------------------------------------------------------------------------------|-------|
|             | 61050 61060 61070 61080 61090 61100 61110 61120                                          |       |
| Human       | TATTGATGTATCTAAACA- - GAAAAGGTACAATAAAAATATGGTATTATAATCTTATGGGACCACCATTGTATATGTGGC       | 48278 |
| PolarBear   | -----                                                                                    | 14713 |
| Cow         | - - ATAGTGTCCCTAATTTTTGCTAAGTCAAATTTTTCAC- TGATTTTGTATATTCCTTAGTCT- - - - - G            | 45039 |
| Dog         | TTACAATCTCCT- AATTTTTGCTAAGTCAAAGTAGAGT- TTTTTTTTTTTTTTTTTGTATTT- - - - - CTGTTAG        | 42124 |
| BelugaWhale | T- ATAAT- - - - TAATTTTTGCTAAGTCAAATTTTTCAC- TT- TTTTGTATTTTCTTAGTCTTAGACTAAGTCTTAGAC    | 41296 |
| Donkey      | T- ATGATGTCCCTACTTTTTGCTAAGTCAAATTTTTCAT- TTTTTTGTGTTTTTGTAGTCT- - - - - G               | 47129 |
| Cat         | GGGAGA- - ACAGAATCAAAGCAGGCTCCAAGGC- - - - - TCTGAGCTCTGAGC- - - - - ACAGAAT             | 48435 |
| Ferret      | TTACAACCTCCTAATTTTTGCCAGGTCAGAAGT- - - - - TTAACTTTTTTTTTTCCATTT- - - - - CTGTTAG        | 49513 |
| Lion        | GAGAGAG- AGAGAGACAGACACAGAATCAAAGCA- - G- - - - - TCTCCAAGGCTCTGAGC- - - - - ACAGAGC     | 46155 |
| Vaquita     | T- ATAAT- - - - TAATTTTTGCTAAGTCAAATTTTTCAC- TT- TTTTGTATTTTCTTAGTCTTAGACTAAGTCTTAGAC    | 41977 |
| Pig         | T- ATAATCTCCATAATTTTTGCTGAGTCAGATTTTTCAC- - - - TTTTAAATTTCTTTCAGTCT- - - - - C          | 38067 |

Dienstag, 3. Mai 2022 08:39

| Majority    | TCC- XAXTXX- - - - AATXAGATGATTGAATTGTAAG- ATAATTGTGTTCTTTAGCCATTGG- - - - ACXATTTCTTTATG                |       |
|-------------|----------------------------------------------------------------------------------------------------------|-------|
|             | 61130 61140 61150 61160 61170 61180 61190 61200                                                          |       |
| Human       | CTGTCAATGACCAAAATGTAGTTATGTGGCACATGACTGTGATTGTATTCTTTAGTCATTGG- - - - ACAGTTTCTTTATG                     | 48354 |
| PolarBear   | -----                                                                                                    | 14713 |
| Cow         | TTC- - - - - - - - - - - AGATGATTGAATTGTAAG- ATAATTGTTTTGTATAGCCACTG- - - - - ACCATTTCTTTATG             | 45097 |
| Dog         | TTCATAATAA- - - - - AATAAAATGATTAAATTGTAAG- ATAATTGTGTTCTTTAGGCATTGG- - - - - ACAATTTATT- - - - -        | 42190 |
| BelugaWhale | TCCTTATTAGTCTCTAATAAGACGATTGAATTGTAAG- ATAATTGTGTTCTATAGCCATTG- - - - - ACCATTTCTTTATG                   | 41370 |
| Donkey      | T- - - - - - - - - - - AATAAGATGATT- AATTGCAA- ATAATTG- - - - - TTTCTTTAGCCATTGC- - - - - ACAGTTTCTTTATG | 47187 |
| Cat         | CCGACATGGG- - - - - GCTCAAACCCACGAACCGTGAG- ATCATGACCTGAACT- GAAGTCGG- - - - - ATGCTCAACAGACG            | 48504 |
| Ferret      | TCAGTAATAA- - - - - AAT- - - - - GATTAAATTATAAG- ATAATTGTGTTCTTTAGCCATTGG- - - - - ACAATTTCTTTATG        | 49578 |
| Lion        | CCGACATGGG- - - - - GCTCGAACCCACGAACCGTGAG- ATCATGACCTGAACT- GAAGTCAG- - - - - ATGCTCAACGGACG            | 46224 |
| Vaquita     | TCCTTATTAGTCTCTAATAAGACGATTGAATTGTAAG- GTAATTGTGTTCTATAGCCATTG- - - - - ACCATTTCTTTATG                   | 42051 |
| Pig         | T- - - - - - - - - - - AATAAGTTGATTGAATC- ATAGCTGTGTTCTGTAACCATTGGACCCATCATTTCTTTATG                     | 38127 |

| Majority    | AAATTACATTTTAATGTTTTTGATTATCATTTGTTACTCTTTACA- - - - - - - - - - - TATACTGTTCCAGAAATAT- - TTAC |       |
|-------------|------------------------------------------------------------------------------------------------|-------|
|             | 61210 61220 61230 61240 61250 61260 61270 61280                                                |       |
| Human       | AGATTACATTTTAATGTTGTTGCTTATTAATAAATTACTCTTTATA- - - - - - - - - - - ATACTGTTAAGAAACAT- - - - - | 48416 |
| PolarBear   | ----- ATCATTTGTTACTTTTTACA- - - - - - - - - - - TATATTGTTCCAGAAACAT- - GTAT                    | 14755 |
| Cow         | AAATTTCAATTTTAATGTTTTTGATTGTCAGTTGTTACTCT- - ACA- - - - - - - - - - - TATGCTATCCAGAGATGTCTCTAC | 45164 |
| Dog         | AAATTGCCTTTTAATATTTTTGCTTATCATTTGTTACTCTTTATG- - - - - - - - - - - TATACAGTTCCAGAAATAT- - TTAC | 42257 |
| BelugaWhale | AAATTGCATTTTAATGTTTTTGATTATCACTTGCTACTCTTTACA- - - - - - - - - - - TATGCTATCCAGAAATATATTTAC    | 41439 |
| Donkey      | AAATTACATTTTAATATTTTTGCTTATCTCTTGTTACTTGTTGCA- - - - - - - - - - - TATACTGTTCCAGAACTTACTTAC    | 47256 |
| Cat         | GAGCCACCCAGGCGCCCTTTAAAAATTTTTTTTTAATGTTTATG- - - - - - - - - - - CTTATTTTTGAGACAGAG- - AGA-   | 48570 |
| Ferret      | AAATTGCATTTTAATATTTTTACTTATCATTTGTTATCTGTGACAGTACCAGAAACTGTTCTGTTCCAGAAACAT- - TTAC            | 49656 |
| Lion        | GAGCCACCCAGGCGCCCTTTAAAAATTTTTTTTTAATGTTTATG- - - - - - - - - - - TTTATTTTTGAGACAGAG- - AGA-   | 46290 |
| Vaquita     | AAATTGCATTTTAATGTTTTTGATTATCACTTGCTACTCTTTACA- - - - - - - - - - - TATGCTATCCAGAAATATATTTAC    | 42120 |
| Pig         | AA- TTACATTTTTATGTTTTTTATTATTGCTTGTTACTCTTTACA- - - - - - - - - - - TATACTGTCCAGAAATATATTTAT   | 38195 |

Dienstag, 3. Mai 2022 08:39

| Majority    | CCAATAGTAATCTTAATTGATG- - GTAATTTCAATTAATAGTA- - - - - ATTGGTGGATATGA- TTTTCTCTATTXCTTT |                |                 |                    |               |                  |                  |                  |                 |       |
|-------------|-----------------------------------------------------------------------------------------|----------------|-----------------|--------------------|---------------|------------------|------------------|------------------|-----------------|-------|
|             | 61290                                                                                   | 61300          | 61310           | 61320              | 61330         | 61340            | 61350            | 61360            |                 |       |
| Human       | -                                                                                       | TAACAGCAATCTTA | AATAGTTG-       | ATAATTTCAATTA      | AATAA-        | - - - - -        | ATAGGTGGATATGA-  | TTT-             | - - - TATTCCTTT | 48483 |
| PolarBear   | C                                                                                       | AATAATTATCTTA  | AATTGATAATGTA   | AATTTCTATTTA       | AATA-         | - - - - -        | ATTGGTGGATATGA-  | TTTTCTCTATT      | CCTTT           | 14825 |
| Cow         | C                                                                                       | AATAATAATCTTA  | AATTGATG- - - - | AGATCATTTAGTAGTA-  | - - - - -     | ATTGGTGGATAAGAGT | TTTTTCCATTACTCT  |                  |                 | 45233 |
| Dog         | C                                                                                       | AATAGTGATCTTA  | AATTGATAATGTA   | AATTTTATTAATTTT    | ATTTAATAATGGT | GGATATTA-        | TTTTCTCTATT      | CCTTT            |                 | 42336 |
| BelugaWhale | C                                                                                       | AATAGTAATCTTA  | AATTGATG- - - - | ATTTCAATTTAGTAGTA- | - - - - -     | ATTGGTGGATATGA-  | TTTTCTCTGTTACTTT |                  |                 | 41507 |
| Donkey      | C                                                                                       | CAGTAATAGTCTTA | AATTAATTG-      | ATAATTTCAATTA      | AATGATA-      | - - - - -        | ATTGGTGGTATGA-   | TTTTCTTTATT      | CCTTT           | 47328 |
| Cat         | - -                                                                                     | GACAG- - ATCAT | GAGCGGGG- -     | GAAGGGCGGAGAA      | AGA-          | - - - - -        | GGGAGACACAG-     | AAAGCGAAGCAGGCTC |                 | 48631 |
| Ferret      | C                                                                                       | AATAGTTATCTTA  | AATTGATAATGTA   | AATTTTATTTAATAGTA- | - - - - -     | ATTGGTGAATATGA-  | TTTTCTCTATTTCTTT |                  |                 | 49729 |
| Lion        | - -                                                                                     | GACAG- - ATCAT | GAGCGGGG- -     | GAAGGGCAGAGAA      | AGA-          | - - - - -        | GGGAGACACAG-     | AAAGCGAAGCAGGCTC |                 | 46351 |
| Vaquita     | C                                                                                       | AATAGTAATCTTA  | AATTGATG- - - - | ATTTCAATTTAGTAGTA- | - - - - -     | ATTGGTGGATATGA-  | TTTTCTCTGTTACTTT |                  |                 | 42188 |
| Pig         | C                                                                                       | AATAGTAATCTTA  | AATTGATG- - - - | GTTTCATTTAGTAATA-  | - - - - -     | ATTGGTAGATATGA-  | TTTTCTCCATTACTTT |                  |                 | 38263 |

| Majority    | GAAAXCCTGGTTTTGAATTTTTAGGAATTA- TTCAAGTATXCTCAGCTGTGTTTTTAAGTTCTTTTTTAAAXTTTG- - - |                           |                                                                     |                                                |                                                    |               |             |             |     |       |
|-------------|------------------------------------------------------------------------------------|---------------------------|---------------------------------------------------------------------|------------------------------------------------|----------------------------------------------------|---------------|-------------|-------------|-----|-------|
|             | 61370                                                                              | 61380                     | 61390                                                               | 61400                                          | 61410                                              | 61420         | 61430       | 61440       |     |       |
| Human       | G                                                                                  | AAGCCTGGC                 | ATTTGAATTTTTCA                                                      | AAGAAATTA-                                     | TTTAAGTATTCTC                                      | AGCTATGTTTTTA | AGTTCTTTTTT | GAAATTTGTAG |     | 48562 |
| PolarBear   | G                                                                                  | AAGCCTGGCT                | TTTTGAATTTTTA-                                                      | - - - - -                                      | TTCAAGTATTCTC                                      | AGCTATGTTTTTA | AGTTCTTTTTT | AAACTTTG-   | - - | 14894 |
| Cow         | G                                                                                  | AAAACCGT                  | GTTTGTAATTTTTAGTA-                                                  | TCA-                                           | - - - CAGGTATGCTTAGCTATGTTTTTAAGTTCTCTGTTGAAGTTTG- | - -           |             |             |     | 45306 |
| Dog         | - - - - -                                                                          | TGCTTTTTGA                | ATTTTTAGGAATTA-                                                     | TTCAAGTATTCTC                                  | AGCTATGTTTTTA                                      | AGTTCTTTTTT   | TAA-        | - - - - -   |     | 42400 |
| BelugaWhale | G                                                                                  | CAAACCTGG                 | TTTTGAATTTTTAGGAAGTATCCCAAGTATGCTCAGTTCTGTTTTTAAGTTCTTTATTAAAGTTTG- | - -                                            |                                                    |               |             |             |     | 41584 |
| Donkey      | G                                                                                  | AAGTCCAG                  | TTTTGAATTTTTAGGAATTA-                                               | TTCAAGTATACTCAGCTGTGTTTTT-                     | - - - - -                                          | GT-           | - - - - -   |             |     | 47386 |
| Cat         | - - - - -                                                                          | CAGGCTCTGAGCTGTGAGCACAGA- | GCCCAATGTGACCCAGGGCTCAATTAAGTTCTTTTTTAAACTTTG-                      | - -                                            |                                                    |               |             |             |     | 48700 |
| Ferret      | G                                                                                  | AAGCCTGGCT                | TTTTGAATTTTTAGGAAATA-                                               | TTCAAGTATTCTCAGCTATGTTCTTAAGTTCTTTTTTAAACTTTG- | - -                                                |               |             |             |     | 49805 |
| Lion        | - - - - -                                                                          | CAGGCTCTGAGCTGTGAGCACAGA- | GCCCAATGTGACCCAGGGCTCAATTAAGTTCTTTTTTAAACTTTG-                      | - -                                            |                                                    |               |             |             |     | 46420 |
| Vaquita     | G                                                                                  | CAAACCTGG                 | TTTTGAATTTTTAGGAAGTATCCCAACTATGCTCAGCTCTGTTTTTAAGTTCTTTATTAAAGTTTG- | - -                                            |                                                    |               |             |             |     | 42265 |
| Pig         | G                                                                                  | AAAACCTAG                 | TTTTGAATTTTTGGGAATTATC-                                             | CATTTGCACTCAGCTGTGCTTTCACATTATTTATTAAAGTTTG-   | - -                                                |               |             |             |     | 38339 |



Dienstag, 3. Mai 2022 08:39

| Majority    | - - - TTTTGTG- - - - - XTTTTT- TACACAAATGAGGAAAATTAATATAXTXA- XACTX- TTTTXXAATGTCTTTCAGCC          |       |       |       |       |       |       |       |       |
|-------------|----------------------------------------------------------------------------------------------------|-------|-------|-------|-------|-------|-------|-------|-------|
|             | 61450                                                                                              | 61460 | 61470 | 61480 | 61490 | 61500 | 61510 | 61520 |       |
| Human       | TTTTTTTACACAAATAGGAAAATTCATACATTCTTTTATTGTTGATATAT- AAGGACTG- TTTTTTAATGTCTTTCAGCC                 |       |       |       |       |       |       |       | 48640 |
| PolarBear   | - - - TTTTGTG- - - - - GTTTTTA- TGCA- AA- TGAGGAAAATTAATAAAG- - - - - ACT- - TTTTTAAATGTCTTTCAGCC  |       |       |       |       |       |       |       | 14955 |
| Cow         | - - - TTTTGTG- - - - - ATTTTTT- T- - TTTTTTTTACGCACATAAGATAAACACAACCTGTTTCTTTACTTTCTTTCAGCC        |       |       |       |       |       |       |       | 45374 |
| Dog         | - - - TTTTGTG- - - - - GTTTTTA- TGCA- AA- TGAGGAAAATTAATAAAGG- - - - - ACT- - TTCTAAAATGTTTTACAGCC |       |       |       |       |       |       |       | 42461 |
| BelugaWhale | - - - TTTTGTG- - - - - ATTTTTT- TATGCAAATAAGGAAAATCAATATACTAAAGACTGTTTCTTTAATGTCTTTCAGCC           |       |       |       |       |       |       |       | 41654 |
| Donkey      | - - - - TTTGTG- - - - - TTTTTTA- - - TGCAAATAAGGAAAAGTAATATAATAAAGACTTCTTTTTCAATGTCTTTCAGCC        |       |       |       |       |       |       |       | 47453 |
| Cat         | - - - TTTTGTGGGGTTTCTTTTTTTTACATAAATGGGAAAATTAATAAACT- - - - ATT- - TTTTTAAATGTCTTTCAGCC           |       |       |       |       |       |       |       | 48771 |
| Ferret      | - - - TTTTGTGTGG- - - GTTTTTAATGCA- AAATGAGGAAAATTAATAAAA- - - - - ACT- - TTTTAAATGTCTTTCAGCC      |       |       |       |       |       |       |       | 49871 |
| Lion        | - - - TTTTGTGGGGTTTCTTTTTTTTACACAAATGGGAAAATTAATAAACT- - - - ATT- - TTTTTAAATGTCTTTCAGCC           |       |       |       |       |       |       |       | 46491 |
| Vaquita     | - - - TTTTGTG- - - - - ATTTTTT- TATGCAAATAAGGAAAATCAATATACTAAAGACTGTTTCTTTAATGTCTTTCAGCC           |       |       |       |       |       |       |       | 42335 |
| Pig         | - - - TTTTGTG- - - - - ATTTTTTA- T- - GCAAATAAGGAAAATTAATATAATAAAGATTGTTTCTTTAATGTCTTTCAGCC        |       |       |       |       |       |       |       | 38407 |

| Majority    | AATGGTAATGATAGTAAAAAATTTAAAGGAGAAGATAAAAATGGATGGTGCTCCTTCTCGTGTACTTCATATTCGAAAATT  |       |       |       |       |       |       |       |       |
|-------------|------------------------------------------------------------------------------------|-------|-------|-------|-------|-------|-------|-------|-------|
|             | 61530                                                                              | 61540 | 61550 | 61560 | 61570 | 61580 | 61590 | 61600 |       |
| Human       | AATGGTAATGATAGTAAAAAATTTAAAGGAGAAGATAAAAATGGATGGTGCTCCTTCTCGTGTACTTCATATTCGAAAATT  |       |       |       |       |       |       |       | 48720 |
| PolarBear   | AATGGTAATGATAGCAAAAAATTTAAAGGAGAAGATAAAAATGGATGGTGCTCCTTCTCGTGTACTTCATATTCGAAAATT  |       |       |       |       |       |       |       | 15035 |
| Cow         | AATGGTAATGATAGTAAAAAATTTCAAAGGAGAAGATAAAAATGGATGGTGCTCCTTCTCGTGTACTTCATATTCGAAAATT |       |       |       |       |       |       |       | 45454 |
| Dog         | AATGGTAATGATAGCAAGAAAATTTAAAGGAGAAGATAAAAATGGATGGTGCTCCTTCTCGTGTACTTCATATTCGAAAATT |       |       |       |       |       |       |       | 42541 |
| BelugaWhale | AATGGTAATGATAGTAAAAAATTTAAAGGAGAAGATAAAAATGGATGGTGCTCCTTCTCGTGTACTTCATATTCGAAAATT  |       |       |       |       |       |       |       | 41734 |
| Donkey      | AATGGTAATGATAGTAAAAAATTTAAAGGAGAAGATAAAAATGGATGGTGCTCCTTCTCGTGTACTTCATATTCGAAAATT  |       |       |       |       |       |       |       | 47533 |
| Cat         | AATGGTAATGATAGTAAAAAATTTAAAGGAGAAGATAAAAATGGATGGTGCTCCTTCTCGTGTACTTCATATTCGAAAGTT  |       |       |       |       |       |       |       | 48851 |
| Ferret      | AATGGTAATGATAGCAAAAAATTTAAAGGAGAAGATAAAAATGGATGGTGCTCCTTCTCGTGTACTTCATATTCGAAAATT  |       |       |       |       |       |       |       | 49951 |
| Lion        | AATGGTAATGATAGTAAAAAATTTAAAGGAGAAGATAAAAATGGATGGTGCTCCTTCTCGTGTACTTCATATTCGAAAGTT  |       |       |       |       |       |       |       | 46571 |
| Vaquita     | AATGGTAATGATAGTAAAAAATTTAAAGGAGAAGATAAAAATGGATGGTGCTCCTTCTCGTGTACTTCATATTCGAAAATT  |       |       |       |       |       |       |       | 42415 |
| Pig         | AATGGTAATGATAGTAAAAAATTTAAAGGAGAAGATAAAAATGGATGGTGCTCCTTCTCGTGTACTTCATATTCGAAAATT  |       |       |       |       |       |       |       | 38487 |

Dienstag, 3. Mai 2022 08:39

| Majority    | ACCTGGTGAAGTGACAGAACTGAAGTTATTGCTTTAGGCTTACCTTTTGGTAAGGTGACCAACATCCTTATGCTGAAAG  |       |       |       |       |       |       |       |       |
|-------------|----------------------------------------------------------------------------------|-------|-------|-------|-------|-------|-------|-------|-------|
|             | 61610                                                                            | 61620 | 61630 | 61640 | 61650 | 61660 | 61670 | 61680 |       |
| Human       | ACCTGGGGAAGTAACAGAACTGAAGTTATTGCTTTAGGCTTACCTTTTGGTAAGGTGACCAACATCCTTATGCTGAAAG  |       |       |       |       |       |       |       | 48800 |
| PolarBear   | ACCTGGTGAAGTGACAGAACTGAAGTCATTGCTTTAGGCTTACCTTTTGGTAAGGTGACCAACATCCTTATGCTGAAAG  |       |       |       |       |       |       |       | 15115 |
| Cow         | GCCTGGTGAAGTGACAGAACTGAAGTTATTGCTTTAGGCTTACCTTTTGGTAAGGTGACCAACATCCTTATGCTGAAAG  |       |       |       |       |       |       |       | 45534 |
| Dog         | ACCTGGTGAAGTGACAGAAACAGAAGTTATTGCTTTAGGCTTACCTTTTGGTAAGGTGACCAACATCCTTATGCTGAAAG |       |       |       |       |       |       |       | 42621 |
| BelugaWhale | ACCTGGTGAAGTGACAGAACTGAAGTTATTGCTTTAGGCTTACCTTTTGGTAAGGTGACCAACATCCTTATGCTGAAAG  |       |       |       |       |       |       |       | 41814 |
| Donkey      | ACCTGGTGAAGTGACAGAACTGAAGTTATTGCTTTAGGCTTACCTTTTGGTAAGGTGACCAACATCCTTATGCTGAAAG  |       |       |       |       |       |       |       | 47613 |
| Cat         | ACCTGGTGAAGTGACAGAACTGAAGTTATTGCTTTAGGCTTACCTTTTGGTAAAGTGACCAACATCCTTATGCTGAAAG  |       |       |       |       |       |       |       | 48931 |
| Ferret      | ACCTGGTGAAGTGACAGAACTGAAGTTATTGCTTTGGGCTTACCTTTTGGTAAGGTGACCAATATCCTTATGCTGAAAG  |       |       |       |       |       |       |       | 50031 |
| Lion        | ACCTGGTGAAGTGACAGAACTGAAGTTATTGCTTTAGGCTTACCTTTTGGTAAAGTGACCAACATCCTTATGCTGAAAG  |       |       |       |       |       |       |       | 46651 |
| Vaquita     | ACCTGGTGAAGTGACAGAACTGAAGTTATTGCTTTAGGCTTACCTTTTGGTAAGGTGACCAACATCCTTATGCTGAAAG  |       |       |       |       |       |       |       | 42495 |
| Pig         | ACCTGGTGAAGTGACAGAACTGAAGTTATTGCTTTAGGTTTACCTTTTGGTAAGGTGACCAACATCCTTATGCTGAAAG  |       |       |       |       |       |       |       | 38567 |

| Majority    | GAAAAAATCAGGTA- TACTTC- TTTCAGGACTTATAAAA- - TGTTAAGCCCCAAACTATCCAGTAXGTGTGAATTAGCTA   |       |       |       |       |       |       |       |       |
|-------------|----------------------------------------------------------------------------------------|-------|-------|-------|-------|-------|-------|-------|-------|
|             | 61690                                                                                  | 61700 | 61710 | 61720 | 61730 | 61740 | 61750 | 61760 |       |
| Human       | GAAAAAATCAGGTA- CACTTC- TTTCAGGGTTTATGAAA- - TGTTAAACCCCAAACTATCCAGCAGGTGTGAATTAATTG   |       |       |       |       |       |       |       | 48876 |
| PolarBear   | GAAAAAATCAGGTA- TGCTTC- TTTCAGGACCTATAAAA- - TGTTAAGCTGCAAACACTACCCAGTATGTGTGAATTAGCTA |       |       |       |       |       |       |       | 15191 |
| Cow         | GAAAAAATCAGGTA- TACTTA- TTTCTGGACTTATACCA- - TGTTAAGCTCCAAACTATCCAGCAAGTG- GATTTAGCTG  |       |       |       |       |       |       |       | 45609 |
| Dog         | GAAAAAATCAGGTA- TGCTTCCTTTT CAGGACCTATAAAA- - TGTTAAGCCTGAAACTACCCAGTATGTGTGTATTAGCTA  |       |       |       |       |       |       |       | 42698 |
| BelugaWhale | GAAAAAATCAGGTA- TATTTT- TTTCAGGACTTATAAAA- - TGTTAAGCCCCA- ACTATCCAGCAGGTGTGAATTAGCTG  |       |       |       |       |       |       |       | 41889 |
| Donkey      | GAAAAAATCAGGTA- TACTTC- TTTCAGGACTTATATAAAAACGTTAAGCCCCAAACTACCCAGCAGGTGTAAATTAGCTA    |       |       |       |       |       |       |       | 47691 |
| Cat         | GAAAAAATCAGGTA- TGCTTC- TTTCAAGACTTACAAAAC- TGTTAAGCCCCAAGCTATCCTGTGTGTGTGAATTAGCTA    |       |       |       |       |       |       |       | 49008 |
| Ferret      | GAAAAAATCAGGTAATGCTTC- TTTTAGGTTCTGTAAAA- - TGTTAAGCCCCAAACTACCCTGTATGAGGGAATTAGCTA    |       |       |       |       |       |       |       | 50108 |
| Lion        | GAAAAAATCAGGTA- TGCTTC- TTTCAGGACTTACAAAAC- TGTTAAGCCCCAAGCTATCCTGTGTGTGTGAATTAGCTA    |       |       |       |       |       |       |       | 46728 |
| Vaquita     | GAAAAAATCAGGTA- TATTTT- TTTCAGGACTTATAAAA- - TGTTAAGCCCCA- ACTATCCAGCAGGTGTGAATTAGCTG  |       |       |       |       |       |       |       | 42570 |
| Pig         | GAAAAAATCAGGTA- TACTTC- TTTCAGGACTTATAAAA- - TGTTAAGCCCCACACTATCCAATAGGTGTGAATTAGGTA   |       |       |       |       |       |       |       | 38643 |

Dienstag, 3. Mai 2022 08:39

| Majority    | TTTCCTAATAAAAAGGATAGA- - ATATAG- - - - TAGTAGGTTACTTTTCTAAAAGAACATXACAGAAGTCTTATTCTGAC         |       |       |       |       |       |       |       |  |
|-------------|------------------------------------------------------------------------------------------------|-------|-------|-------|-------|-------|-------|-------|--|
|             | 61770                                                                                          | 61780 | 61790 | 61800 | 61810 | 61820 | 61830 | 61840 |  |
| Human       | - TA- - - - - AAAGGGAGAAA- - - - ATAG- - - - - TAGGTTATTTTTCTTAAAGA- - - - ACAGAAGTCTTATTCTCAC | 48932 |       |       |       |       |       |       |  |
| PolarBear   | ACTCCTAATAAAAAGGATAGA- - ATATAG- - - - T- - - - CCTGACTTTTCTAAAAGAACATAACA- AAGTCTTACTCTGAC    | 15259 |       |       |       |       |       |       |  |
| Cow         | TGGCCTGATGAAATGATAGTTTATATAATTATACATAAGGTTACTTTTCTTAAAGGAACATGACAGAAGTTTTACTCTGAC              | 45689 |       |       |       |       |       |       |  |
| Dog         | ATTCTTAATAAAAAGGATAGA- - ATATAG- - - - TATGTCTTAACTTTTCTAAAAGAACATAACAGAAGTCTTATTCTGAT         | 42771 |       |       |       |       |       |       |  |
| BelugaWhale | TTGCCTGATGAAAGGATAGT- - - - ATA- - - - - TAGTAGGTTACTTTTCTTAAAGAACATGACAGAAGTCTTACTCTGAC       | 41959 |       |       |       |       |       |       |  |
| Donkey      | TTGCCTAATACGAGGATAGA- - - - ATA- - - - - TTGTAGGTTGTTTTCTAAAAGAACATAACAGAAGTCTTATTCTGAC        | 47761 |       |       |       |       |       |       |  |
| Cat         | TCTCCTAATAAAAAGGGTAGA- - ATATAG- - - - TAGGTCCTAACTTTTGTAAAAGAGTATGACAGAAGT- - - - TCTTGAC     | 49077 |       |       |       |       |       |       |  |
| Ferret      | ATTCCTAATAAAAAGGATAGA- - ATATAG- - - - TAGGTCCTAACTTTTCTAAAAGAACATAACAGAAGTCTTATTTTGT          | 50181 |       |       |       |       |       |       |  |
| Lion        | TCTCCTAATAAAAAGGGTAGA- - ATATAG- - - - TAGGTCCTAACTTTTGTAAAAGAGCATAACAGAAGT- - - - TCTTGAC     | 46797 |       |       |       |       |       |       |  |
| Vaquita     | TTGCCTCATGAAAGGATAGT- - - - ATA- - - - - TAGTAGGTTACTTTTCTTAAAGAACACGACAGAAGTCTTACTCTGAC       | 42640 |       |       |       |       |       |       |  |
| Pig         | TCTCCTGATAAAAAGGTAGT- - - - ATT- - - - - CAGTAGAGTGCTTTTCTCAGAGAACATGACAGAAGTCTTACTCTGAT       | 38713 |       |       |       |       |       |       |  |

| Majority    | TTTTCTGAGTGTGTTGGGAAACTAATGCTAGGGAGCCAAAATGAATGAGTCACTGTAGTTTTCAAATTTTGCCTT       |       |       |       |       |       |       |       |  |
|-------------|-----------------------------------------------------------------------------------|-------|-------|-------|-------|-------|-------|-------|--|
|             | 61850                                                                             | 61860 | 61870 | 61880 | 61890 | 61900 | 61910 | 61920 |  |
| Human       | TTTTTCGAGTAGATGTCTGTGGGAAACTAATGCTAGGTAGCCAAAAGTGAATGAATCACTATAGTTTTTAACTTTTGTCTT | 49012 |       |       |       |       |       |       |  |
| PolarBear   | TTTTCTGAGTGTGTTGGGAAACTAATGCTAGGAAGCCAAAATGAATGAGTCACTATAGTTTTCAAATTTTGCCTT       | 15339 |       |       |       |       |       |       |  |
| Cow         | TTTTCTGAGTGTGATAAGAAATTAATGCTAGGGAATTAATGAATGAGTCACTATAGTTTTCAAATTTTGCCTT         | 45769 |       |       |       |       |       |       |  |
| Dog         | TTTTCTGAGTGTGTTGGGAAACTAATGCTGTGGAGCCAGAACGAGTGATTCACTGTAGTTTTCAAATTTTGCCTT       | 42851 |       |       |       |       |       |       |  |
| BelugaWhale | TTCTCCTTGTAGTGTGTTGGGAAACTAATGGTAGGGAGCTAAAATGAATAAGTCACTGTAGTTTTCAAATTTTCAAATT   | 42039 |       |       |       |       |       |       |  |
| Donkey      | TTTTCTGAGTGTATGTGGTAAACTAATCCTAGGGAGCCAAAATGA- - ATCTCACCATCGTTTTCAAATTTTCTT      | 47839 |       |       |       |       |       |       |  |
| Cat         | TTTTCTGAGTGTGTTGGGAAATTAATACTAGGGAGCCAAAATGAATGAGTTACTGTAGTTTT- AAATTTGCCTT       | 49156 |       |       |       |       |       |       |  |
| Ferret      | TTTTCTGAGTGTATTTGAGAAACTAATGCTAGGGAGCCAAAAT- - - - GAGCCAATGTAGTTTTCACATTTTGCCTT  | 50257 |       |       |       |       |       |       |  |
| Lion        | TTTTCTGAGTGTGTTGAGAAATTAATACTCGGGAGCCAAAATGAATGAGTTACTGTAGTTTT- AAATTTGCCTT       | 46876 |       |       |       |       |       |       |  |
| Vaquita     | TTCTCCTTGTAGTGTGTTGGGAAACTAATGGTAGGGAGCTAAAATGAGTCACTGTAGTTTTCAAATTTTCAAATT       | 42720 |       |       |       |       |       |       |  |
| Pig         | TTTTCTGAGTGTGTTGGGAAACTAAAGCTAGGGAGCTGAAATGAATAAG- - - - - GTTTTTCAAATTTCTGCCAT   | 38785 |       |       |       |       |       |       |  |

Dienstag, 3. Mai 2022 08:39

| Majority    | TTGAATTCAC TTTAGGACTCTAATTGAACAATTGTTATAATGAGATTGTGGAAAATAC- - - - - AAATGAAGTATT   |       |       |       |       |       |       |       |
|-------------|-------------------------------------------------------------------------------------|-------|-------|-------|-------|-------|-------|-------|
|             | 61930                                                                               | 61940 | 61950 | 61960 | 61970 | 61980 | 61990 | 62000 |
| Human       | TTGAATTGACTTTAGGGCTCTAATTGAATAATTGTT- - - ATGAAATTGTGGAAAATAC- - - - - AAATGAAGTATT | 49079 |       |       |       |       |       |       |
| PolarBear   | TTGAATTCGCTTTTGG- - - - - TTGTTATAAAGAGATTGTGGAAAATACAAATGAATGCAAATGAAGGATT         | 15405 |       |       |       |       |       |       |
| Cow         | ATAAATTCAC TTTAGGACTGTAGTTGAACTATTGTT- CAAGGAGATTGTGGGAAAATAC- - - - - AGATGAAATATT | 45838 |       |       |       |       |       |       |
| Dog         | T- GAATTCATTTTTAGA- - - - - TGGTTATAATGAGATTGTGGAAAATACAAATGTATATAAATGCAGTTTT       | 42916 |       |       |       |       |       |       |
| BelugaWhale | TTAAATTCCTTTAGGACTCTAATTGAACTACTGGT- CAATGAGATTGTAGGAAAATAC- - - - - AGATGAAATACT   | 42108 |       |       |       |       |       |       |
| Donkey      | TTGAATTCCTTTCAGGACTCTAATTGAACAATTATTATAATAAGATT- - GGAAAATAT- - - - - AAATGAAGTATT  | 47907 |       |       |       |       |       |       |
| Cat         | TTGAATTCAC TTT- GGACTCTAATTGAACAGTTGTTATAATGAGATTGTGGAAAATAC- - - - - AAATGAAATATT  | 49225 |       |       |       |       |       |       |
| Ferret      | TTGAATTCAC TTTTGG- - - - - TTGTTATAATGAGATTGTGAAAATAC- - - - - AAATGAAGGATT         | 50313 |       |       |       |       |       |       |
| Lion        | TTGAATTCAC TTTTGGACTCTAATTGAACAGTTGTTATAATGAGATTGTGGAAAATAC- - - - - AAATGAAGTATT   | 46946 |       |       |       |       |       |       |
| Vaquita     | TTAAATTCCTTTAGGACTCTAATTGAACTACTGGT- CAATGAGATTGTAGGAAAATAC- - - - - AGATGAAATACT   | 42789 |       |       |       |       |       |       |
| Pig         | TTGAATTCAC TGTAGGACTCTAACTGAGCCATTGTT- CGGTAAGATTATGGGAAAATAC- - - - - AGATGAAATGTT | 38854 |       |       |       |       |       |       |

| Majority    | T- CTTTTATTGTGGCTTTGCTCTTTGTAATATCAGAAATCAG- - - - -                          |       |       |       |       |       |       |       |
|-------------|-------------------------------------------------------------------------------|-------|-------|-------|-------|-------|-------|-------|
|             | 62010                                                                         | 62020 | 62030 | 62040 | 62050 | 62060 | 62070 | 62080 |
| Human       | T- CTTTTACTGTGGCTCTGTTCTTTG- - GTATCAGAAATCAG- - - - -                        | 49118 |       |       |       |       |       |       |
| PolarBear   | T- CTTTTATTGTGACTCTACTCTTTGTAATATCAGAAAACAG- - - - -                          | 15446 |       |       |       |       |       |       |
| Cow         | TTTTTTTGTGGGGCGTTGCTCTTTGTAATATCAGAAATCAG- - - - -                            | 45880 |       |       |       |       |       |       |
| Dog         | TTCTTTTATTGTGTCTCTACCGTTTGTAAATATCAGAAAACGGGATACTAGTAGCTTTTTTTAAATATTTATTTATT | 42996 |       |       |       |       |       |       |
| BelugaWhale | TCTTTT- ATTGTGGCTTTGCTCTTTGTAATATCGGAAATCAG- - - - -                          | 42149 |       |       |       |       |       |       |
| Donkey      | T- CTTTTATTGTGGCTCTGCTCTTTATAATATCAGAAATCAG- - - - -                          | 47948 |       |       |       |       |       |       |
| Cat         | T- CTTTTATTGTGGCTTTG- - - - - A- TATCAGAAAACAG- - - - -                       | 49257 |       |       |       |       |       |       |
| Ferret      | T- CTTTTATTGTGGCTCTACT- - TTGTAATAACACAAACTAG- - - - -                        | 50352 |       |       |       |       |       |       |
| Lion        | T- CTTTCATTGTGGCTTTG- - - - - A- TATCAGAAAACAG- - - - -                       | 46978 |       |       |       |       |       |       |
| Vaquita     | TCTTTT- ATTGTGGCTTTGCTCTTTGTAATATCGGAAATCAG- - - - -                          | 42830 |       |       |       |       |       |       |
| Pig         | TGT- - - - - GGCTTTAAT- TTTGTAATTTTCAAGAAATTGG- - - - -                       | 38886 |       |       |       |       |       |       |

Dienstag, 3. Mai 2022 08:39

| Majority    | 62090 | 62100 | 62110 | 62120 | 62130 | 62140 | 62150 | 62160 |       |
|-------------|-------|-------|-------|-------|-------|-------|-------|-------|-------|
| Human       |       |       |       |       |       |       |       |       | 49118 |
| PolarBear   |       |       |       |       |       |       |       |       | 15446 |
| Cow         |       |       |       |       |       |       |       |       | 45880 |
| Dog         | T     | A     | T     | T     | T     | A     | T     | T     | 43076 |
| BelugaWhale |       |       |       |       |       |       |       |       | 42149 |
| Donkey      |       |       |       |       |       |       |       |       | 47948 |
| Cat         |       |       |       |       |       |       |       |       | 49257 |
| Ferret      |       |       |       |       |       |       |       |       | 50352 |
| Lion        |       |       |       |       |       |       |       |       | 46978 |
| Vaquita     |       |       |       |       |       |       |       |       | 42830 |
| Pig         |       |       |       |       |       |       |       |       | 38886 |

| Majority    | 62170 | 62180 | 62190 | 62200 | 62210 | 62220 | 62230 | 62240 |       |
|-------------|-------|-------|-------|-------|-------|-------|-------|-------|-------|
| Human       |       |       |       | C     | A     | G     | G     | G     | 49123 |
| PolarBear   |       |       |       | C     | G     | G     | G     | G     | 15451 |
| Cow         |       |       |       | T     | A     | G     | G     | G     | 45885 |
| Dog         | G     | C     | G     | G     | G     | A     | T     | C     | 43156 |
| BelugaWhale |       |       |       | T     | A     | A     | G     | G     | 42154 |
| Donkey      |       |       |       | T     | A     | G     | G     | G     | 47953 |
| Cat         |       |       |       | T     | G     | T     | G     | G     | 49262 |
| Ferret      |       |       |       | T     | G     | G     | G     | G     | 50357 |
| Lion        |       |       |       | G     | G     | T     | G     | G     | 46983 |
| Vaquita     |       |       |       | T     | A     | A     | G     | G     | 42835 |
| Pig         |       |       |       | T     | A     | G     | G     | G     | 38891 |

Dienstag, 3. Mai 2022 08:39

| Majority    | ----- A C A C T A G - T A G C A T C T T A T C C T T T A A G C T T A T C C C A T G G A A A T                                                                     |       |       |       |       |       |       |       |       |
|-------------|-----------------------------------------------------------------------------------------------------------------------------------------------------------------|-------|-------|-------|-------|-------|-------|-------|-------|
|             | 62250                                                                                                                                                           | 62260 | 62270 | 62280 | 62290 | 62300 | 62310 | 62320 |       |
| Human       | ----- G T A C T A G - T C G C A T C T T - - T C C T T A A G C T - - - - -                                                                                       |       |       |       |       |       |       |       | 49149 |
| PolarBear   | ----- G C A C C A G - T A G C A T C T T A T C C T T T A A T C T T A T C C C A T G G A A A T                                                                     |       |       |       |       |       |       |       | 15493 |
| Cow         | ----- A C G T T A G - T A T C A T C T T A C C T T T T A A G C T T A T C C C A G G G A A A T                                                                     |       |       |       |       |       |       |       | 45927 |
| Dog         | G G C A G A T G T T T A A C C A T T T G A C C C A C C C A C A C G C C C C A C A C T A G - T A G C A T C T T A A C C T T T A A G C T T A T C T C A T G G A A A T |       |       |       |       |       |       |       | 43235 |
| BelugaWhale | ----- A C A C T A G - C A G C A T C T T A T C C T T T A A G C T T A T C C C A G G G A A A T                                                                     |       |       |       |       |       |       |       | 42196 |
| Donkey      | ----- G C A C T A A A T A G C A T C T T T T C C T T T A A G C T T A T C C C A T G G A A A T                                                                     |       |       |       |       |       |       |       | 47996 |
| Cat         | ----- A T A C T A G - T A G C A T C T T - - - C T T T A A G T T T A T C T C A T G G A A G T                                                                     |       |       |       |       |       |       |       | 49301 |
| Ferret      | ----- G C A C T A G - T A G C A T C T T A T C C T T T A A G T T T A T C A G A T G G A A A T                                                                     |       |       |       |       |       |       |       | 50399 |
| Lion        | ----- A T A C T A G - T A G C A T C T T - - - C T C C T T T A A G T T C T C A T G G A A G T                                                                     |       |       |       |       |       |       |       | 47022 |
| Vaquita     | ----- A C A C T A G - C A G C A T C T T A T C C T T T A A G C T T A T C C C A G G G A A A T                                                                     |       |       |       |       |       |       |       | 42877 |
| Pig         | ----- A C C T T A G - T A G C A T C T - G T C C T T T A A G C T T A T C C C A G G G A A A T                                                                     |       |       |       |       |       |       |       | 38932 |

| Majority    | A T T T A T C T G A T A G C A T T A G A A G A A A A T A G T C A T T A A T C C T A G A T A - T T C T T C A T T G A A T A X A T G T A C C T G T A G C A G X A G G   |       |       |       |       |       |       |       |       |
|-------------|-------------------------------------------------------------------------------------------------------------------------------------------------------------------|-------|-------|-------|-------|-------|-------|-------|-------|
|             | 62330                                                                                                                                                             | 62340 | 62350 | 62360 | 62370 | 62380 | 62390 | 62400 |       |
| Human       | ----- T T A T G A G A A - - - - - T A - - - T - - - - -                                                                                                           |       |       |       |       |       |       |       | 49161 |
| PolarBear   | A T T T A T C T G A T A G C A T T A G A A G A A A A T A G T C A C T A A T C C T A G G T A - T T C T T C A T T G A A T A A A T G T A T C T G T G G C A G A A A G   |       |       |       |       |       |       |       | 15572 |
| Cow         | A T T T A T C T G A T A G C A T T A G A A A A A A T T A G T G T T A G - T C C C A G A T A T T - C T A T A C T G A A T A G A T A T A T C T G T A G C A G T A G G   |       |       |       |       |       |       |       | 46005 |
| Dog         | A C T T A T C T G G T A G C A T T A G A A G A A A A T A A T T A T T A A T C C T A G A T A - T T C T T C A T T G A A T A A A T A T C C C T G T G G C A A A A A A   |       |       |       |       |       |       |       | 43314 |
| BelugaWhale | A T T T A T C T T A T A G C A T T A G A A G A A G A T A G T C A T T A G T C C C A G A T A T T - C T A T A T T G A A T A G T T A T A C C T G T A G C A G T A G G   |       |       |       |       |       |       |       | 42275 |
| Donkey      | A T T T - - C T G A T A G C A T T A G A G G A A A A T A G T C A T T A A T C C T G T A T A - T T T T T C A T T G C A T A G A T G T A C C T G T A G C A A T A G G   |       |       |       |       |       |       |       | 48073 |
| Cat         | G T T T A T C T G A T A G C A T T A G A A G A A A A T A G T C A T T A A T C C T A G A T A A C T C T T C A T T T A A T A A A T G T A T C T G T T G C A G A G G T   |       |       |       |       |       |       |       | 49381 |
| Ferret      | A T T T A T C T G A T A G C A T T A G A A G A A A A T A G T C A C T A A T C C T A G G T A - T T C T T C A T T G A A T A A A T G T A C C T G T G G C A G A A A G   |       |       |       |       |       |       |       | 50478 |
| Lion        | G T T T A T C T G A T A G C A T T A G A A G A A A A C A G T C A T T A A T C C T A G A T A A T T C T T C A T T T A A T A A A T G T A T C T G T G G C A G A G G T   |       |       |       |       |       |       |       | 47102 |
| Vaquita     | A T T T A T C T G A T A G C A T T A G A A A A A A G A T A G T C A T T A G T C C C A G A C A T T - C T A T A T T G A A T A G T T A T A C C T G T A G C A G T A G G |       |       |       |       |       |       |       | 42956 |
| Pig         | A T T T A T C T G A T A G C A T T A G A A A A A A A T T G T C A T T A - T C C C A G A T G T T T C T G T A T C G C A T A G A T G T A C C T A T A G C A A T A G G   |       |       |       |       |       |       |       | 39011 |



Dienstag, 3. Mai 2022 08:39

| Majority    | CTTTAAAAATGACTTGGAGATCTCTT- - - ATGTTCTCTAGGXTAGGAGTGGTAAAATTCTGATGCTAGAAAA- - TGTTTA |                                                      |                             |        |       |       |       |       |  |
|-------------|---------------------------------------------------------------------------------------|------------------------------------------------------|-----------------------------|--------|-------|-------|-------|-------|--|
|             | 62570                                                                                 | 62580                                                | 62590                       | 62600  | 62610 | 62620 | 62630 | 62640 |  |
| Human       | CTTTTAAAAATGACTTGGAAATCTT- - - -                                                      | ACATTCTCTAGGGTAGAAGTGGTAAAATTCTGATGCTAGAAAA- -       | TGTTTA                      | 49367  |       |       |       |       |  |
| PolarBear   | CTTTAAAAAAAACCTCTGAGATCGCTT- - -                                                      | ATGTTTTCTAGTATCGGAATGGTAAAATTCTGATATTGAAAAA- -       | TGTCTA                      | 15802  |       |       |       |       |  |
| Cow         | CTTTAAAAATGACTTGGAGATCTC- - - -                                                       | ATGTTTTCTAGGTTAGGCATGGTAAAATTCTGTTTCTAGAAAA- -       | TGTTTG                      | 46222  |       |       |       |       |  |
| Dog         | CTTTAAAAATGACTTTGAGATCTCTT- - -                                                       | ATGTTCTCTAATAGGGGAATGGTAAAATTCTAATATTAGAAAA- -       | TGTTTA                      | 43531  |       |       |       |       |  |
| BelugaWhale | CTTTAAAAATGACTTGGTGTCTCTT- - -                                                        | ATGTTTTCTAGGTTAGGAGTGGTAAAATTCTGGTGCTGGAAAA- -       | TGTTTA                      | 42497  |       |       |       |       |  |
| Donkey      | CTTTAAAAATGACTTTGAGATCTCTT- - -                                                       | ATGTTCTCTAGGTTAGGATTGGTAAAATTCTGAAGCTAGAAAAAAGTGT    | TGTTTA                      | 48296  |       |       |       |       |  |
| Cat         | CTTTAAAAATGACT- - GAT- TTTCTT- - -                                                    | ATGT- CTTTA- - A- - G- AGTGGTAAAATTCTGATGTTAGAAAA- - | CGTTTA                      | 49594  |       |       |       |       |  |
| Ferret      | CTTTAAAAATGACTTTGAAATCCCTTTTTGTGTTCTCTAGTATCGGAATGGTAAAATTCTGATACTGAAAAA- -           | TGTTTG                                               | 50706                       |        |       |       |       |       |  |
| Lion        | CTTTAAAAATGACT- - AAGATTTCTT- - -                                                     | ATGT- CTCTA- - A- - G- AGTGGTAAAATTCTGATGTTAGAAAA- - | CGTTTA                      | 47313  |       |       |       |       |  |
| Vaquita     | CTTTAAAAATGACTTGGTGTCTCTT- - -                                                        | ATGTTTTCTAGGTTAGGAGTGGTAAAATTCTGGTGCTGGAAAA- -       | TGTTTA                      | 43178  |       |       |       |       |  |
| Pig         | CTTTAAAAATGACTTGGAGATCTCTT- - -                                                       | ATATTCTCTAGGTTAT- - -                                | TGGTAAAATACTGGTGCTAGGAAA- - | TATTTA | 39234 |       |       |       |  |

| Majority    | GATTTTA- - - - - TTTTCTCTAGCTTTTTGTTGGAXGA- XTACATTTGTGGTGTATGGAAA- - - - - |                                                            |                                                     |       |       |       |       |       |  |
|-------------|-----------------------------------------------------------------------------|------------------------------------------------------------|-----------------------------------------------------|-------|-------|-------|-------|-------|--|
|             | 62650                                                                       | 62660                                                      | 62670                                               | 62680 | 62690 | 62700 | 62710 | 62720 |  |
| Human       | CATTT- - - - -                                                              | T- -                                                       | CTCTAGCATTTGTTGCAAGA- ATAGATTTGTGG- GTGTGAAAAATCATA | 49420 |       |       |       |       |  |
| PolarBear   | GATTTTA- - - - -                                                            | TTTTCTCTAGCCTTTGTTGGA- - -                                 | CTACATTTGTGGTGTACAGAAA- - - - -                     | 15852 |       |       |       |       |  |
| Cow         | GATTTTA- - - - -                                                            | TTTTCTCTAGCCTTTTTTTGAGGAGTTACATTTGTAATGTATGGAAAT- CAGA     | 46281                                               |       |       |       |       |       |  |
| Dog         | GATTTTACTTTGTCAAAAAAAAAGATTTTTGTCTAGTTTTTTGTTAGA- - -                       | CTACATTTGTGGTGTGTGGAAA- - - - -                            | 43601                                               |       |       |       |       |       |  |
| BelugaWhale | GATTTTA- - - - -                                                            | TTTTCTCTAGCCTTTGTTGAAATGGGTACATTTGTAGTGTATGGAAA- - - - -   | 42551                                               |       |       |       |       |       |  |
| Donkey      | GACTTAA- - - - -                                                            | TTTTTTTAGCTTCTCTTGAA- - -                                  | GTACATTTGTGGTATATGGAAAATCAGA                        | 48352 |       |       |       |       |  |
| Cat         | GATTTTA- - - - -                                                            | TTTTCTTTAGCTTTTTGTTGGGGGA- CTATATTTGTGGTATATGGAAA- - - - - | 49647                                               |       |       |       |       |       |  |
| Ferret      | GATTTTA- - - - -                                                            | TTTTCGCTAGCTTTTTGTTG- - - -                                | TCACATTTGTGGTGTATGGAAA- - - - -                     | 50755 |       |       |       |       |  |
| Lion        | GATTTTA- - - - -                                                            | TTTTCTTTAGCTTTTTGTTGGGGGA- CTATATTTGTGGTATATGGAAA- - - - - | 47366                                               |       |       |       |       |       |  |
| Vaquita     | GATTTTA- - - - -                                                            | TTTTCTCTAGCCTTTGTTGAAATGGGTACATTTGTAGTGTATGGAAA- - - - -   | 43232                                               |       |       |       |       |       |  |
| Pig         | GATTTTA- - - - -                                                            | TTTTCTCTAGG- TTTATTGGGGGAAGTACATTTGCAGTGTACAGAAAG- ATCA    | 39292                                               |       |       |       |       |       |  |



Dienstag, 3. Mai 2022 08:39

|             |                                                                                                                                                          |       |
|-------------|----------------------------------------------------------------------------------------------------------------------------------------------------------|-------|
| Majority    | -- T- AAAGGCAGAAGT- - - - TXTA- - CGGATAXCTT- - - - CTXAG- TT- - - - - AATTGTATATCTAAACTTXAACAAGG                                                        |       |
|             | 62730          62740          62750          62760          62770          62780          62790          62800                                           |       |
| Human       | GGTGAAGGCAGAAGCAGCGTGTACTCGGTTTTCTT- - - - CTGAGGTTAGCTTTAACTGTATACCTAAACTTCAACAAGA                                                                      | 49496 |
| PolarBear   | - - - - ATAAG- GAAAGT- - A- - - - - AGGATAACTT- - - - - - - - - - - - - - - - - - - - - - - - - - - - - - - - - - - - - - - - -                          | 15900 |
| Cow         | GATGGAAGGCAGAAATACTGTGTACGCTAAGAGCTTTCTACTAAGGTTAGCTTTAATTGTATTTCTAAGCTTCAATAA- G                                                                        | 46360 |
| Dog         | - - - - TAAGG- ATAAGT- - - - - - - - - - - AGGATAACTT- - - - - - - - - - - - - - - - - - - - - - - - - - - - - - - - - - - - - - - -                     | 43647 |
| BelugaWhale | - ATCAGAGGTGGAAGT- - - - TGTATTCTAAGAGCTT- - - - CTGAGTTTAACTTTAATTGTATCTCTGAACTTCAAGTAAGA                                                               | 42622 |
| Donkey      | GATCGAAGGCAGAAGCACCATGTACTCAAAGAGCTTTTTTCTGAGGTTAGCTTTAGTTGTATACCTAAACTTGAATAAAG                                                                         | 48432 |
| Cat         | - - - - ATAAGGATAAGT- - A- - - - - - - - - - AGGATAACTT- - - - - - - - - - - - - - - - - - - - - - - - - - - - - - - - - - - - - - - -                   | 49694 |
| Ferret      | - - - - ATA- - - - - - - - - - - - - - - - - - - - - - - - - - - - - - - - - - - - - - - - - - - - - - - - - - - - - - - - - - - - - - - - - - - - - - - | 50793 |
| Lion        | - - - - ATAAGGATAAGT- - A- - - - - - - - - - AGGATAACTT- - - - - - - - - - - - - - - - - - - - - - - - - - - - - - - - - - - - - - - -                   | 47414 |
| Vaquita     | - ATCAGAGGTGGAAGT- - - - TGTATTCTAAGAGCTT- - - - CTGAGTTT- - - - - - - - - - - AATTGTATCTCTAAACTTCAAGTAAGA                                               | 43297 |
| Pig         | GGTGAAGGCAGAAGTACTGTATATGCAAAGAGCTTTCTTCTGAGGTTACCTTTAATTGTGTATCAAAGTGAATAAAG                                                                            | 39372 |

|             |                                                                                                                                                  |       |
|-------------|--------------------------------------------------------------------------------------------------------------------------------------------------|-------|
| Majority    | GATTTCTGATTXTACTTA- XAGXXCA- - - - - - - - - - - - - - - - - - - - - - - - - - - - - - - - - - - - - - - - - - - - - - - - - - - - - - - - - - - |       |
|             | 62810          62820          62830          62840          62850          62860          62870          62880                                   |       |
| Human       | GATTTCTAATTCTGCTTATCAGAACATTTAAAAGTAACTGAAGGATTATATTCTAGATAATTGATTAA- - AATCATCTG                                                                | 49574 |
| PolarBear   | AA- - - - - GGTTATACTC- - - - - - - - - - - - - - - - - - - - - - - - - - - - - - - - - - - - - - - - - - - - - - - - - - - - -                  | 15938 |
| Cow         | GATTTCTGATTCTACCTATTAGGGCA- - - - - - - - - - - - - - - - - - - - - - - - - - - - - - - - - - - - - - - - - - - - - - - - - - - -                | 46415 |
| Dog         | AA- - - - - GGTTATACTC- - - - - - - - - - - - - - - - - - - - - - - - - - - - - - - - - - - - - - - - - - - - - - - - - - - - -                  | 43685 |
| BelugaWhale | GATTTCTAATTCTACCTACTAGAGCATCTAAATGTAACCTTAAAGGTTATATTCTAGATACTGATTTTCTAATGAACCA                                                                  | 42702 |
| Donkey      | GATTTCTAATTTTATTATTAGAGCATCTAGATGTAACCTTGAAAAGTATATTCTAGATACTGATTTTCTAGTTAGTTG                                                                   | 48512 |
| Cat         | AA- - - - - GGTTATAGTC- - - - - - - - - - - - - - - - - - - - - - - - - - - - - - - - - - - - - - - - - - - - - - - - - - - - -                  | 49731 |
| Ferret      | AA- - - - - GGTTATACTC- - - - - - - - - - - - - - - - - - - - - - - - - - - - - - - - - - - - - - - - - - - - - - - - - - - - -                  | 50831 |
| Lion        | AA- - - - - GGTTATAGTC- - - - - - - - - - - - - - - - - - - - - - - - - - - - - - - - - - - - - - - - - - - - - - - - - - - - -                  | 47451 |
| Vaquita     | GATTTCTAATTCTACCTACTAGAGCATCTAAATGTAACCTTGAAAAGTATATTCTAGATACTGATTTTCTAATGAACCA                                                                  | 43377 |
| Pig         | GATTTCTGATTCTACCTACTAGAGCATCTGAATGTGACTTGACAGTTTATGTTTTAGATAGTGATTTTCTAAGGAGCTG                                                                  | 39452 |

Dienstag, 3. Mai 2022 08:39

| Majority    | AATAGATTACACAGATA- TTGAAGTTTATTTGAA- TXTAATTCATAGTATTTAAAATTTTGTCTATTTAAATTTTCAGGCA     |       |       |       |       |       |       |       |       |
|-------------|-----------------------------------------------------------------------------------------|-------|-------|-------|-------|-------|-------|-------|-------|
|             | 62890                                                                                   | 62900 | 62910 | 62920 | 62930 | 62940 | 62950 | 62960 |       |
| Human       | AATAGATTGCTTAGATA- - TTAATTTTATTTGAA- - - - - TTTATAGTATTTAAAATTTGTGCTACTTAAATTTTCAGGCA |       |       |       |       |       |       |       | 49646 |
| PolarBear   | AATAAGTTATA- - GATA- ATGAGGTTTACTTTGAA- TATAATTCATAGTATTTCCAATTTTGTCTATTTAAATTTTCAGGCA  |       |       |       |       |       |       |       | 16014 |
| Cow         | AATAGATTACACAGATA- TGAAGTTTATTTGAA- TTTAATTCATAGTATTATAATTTTGTCTATTTAAATTTTCAGGCA       |       |       |       |       |       |       |       | 46493 |
| Dog         | AATAGATTACACAGATA- CTGAAGTTTACCTGAAATATAATTCCTAGTATTTAAAATTTTGTCTATTTAAATTTTCAGGCA      |       |       |       |       |       |       |       | 43764 |
| BelugaWhale | AACAGATTACACAGATA- TTGAAGTTTATTTGAA- TTTTATTCATAATATTAAGATTTTGTCTATTTAAATTTTCAGGCA      |       |       |       |       |       |       |       | 42780 |
| Donkey      | AATAGATTACACAGATA- TTGAAGTTTGTTTGAA- TTTAATTCACAGTATTAACCTTTTGTCTATTTAAATTTTCAGGCA      |       |       |       |       |       |       |       | 48590 |
| Cat         | AATATATTACACAGATA- CTTACGTTTATTTGAA- TATAATTCATGGTATTTAAAATATTTGTCTATTTAAATTTTCAGGCA    |       |       |       |       |       |       |       | 49809 |
| Ferret      | AATAGATTACACAGGTA- TTGAGGTTTACTTTGAA- TATAATTCATAGTATTTCCAATTTTCTCTTTAT- TTTACAGGCA     |       |       |       |       |       |       |       | 50908 |
| Lion        | AATATATTACACAGATA- CTGAGGTTTATTTGAA- TATAATTCATGGTATTTAAAATGTTTGTCTATTTAAATTTTCAGGCA    |       |       |       |       |       |       |       | 47529 |
| Vaquita     | AACAGATTACACAGATA- CTGAAGTTTATTTGAA- TTTTATTCATAATATTAAGATTTTGTCTATTTAAATTTTCAGGCA      |       |       |       |       |       |       |       | 43455 |
| Pig         | GATAGATTAAGCAGATAATTGAAGTTTATTCAAT- TTTAATTCATGGCAGTAAAATTTTG- - TATTTAAATTTTCAGGCA     |       |       |       |       |       |       |       | 39529 |

| Majority    | TTTTTGGAAGCTAGCAACAGAGGAAGCAGCTATTACTATGGTTAATTACTATTCTGCTGTGACACCTCATCTTCGTAACCA |       |       |       |       |       |       |       |       |
|-------------|-----------------------------------------------------------------------------------|-------|-------|-------|-------|-------|-------|-------|-------|
|             | 62970                                                                             | 62980 | 62990 | 63000 | 63010 | 63020 | 63030 | 63040 |       |
| Human       | TTTTTGGAAGCTAGCAACCGAGGAAGCAGCTATTACTATGGTTAATTACTATTCTGCTGTGACACCTCATCTTCGTAACCA |       |       |       |       |       |       |       | 49726 |
| PolarBear   | TTTTTGGAAGCTAGCAACAGAGGAAGCAGCTATTACTATGGTTAATTACTATTCCGCTGTGACACCTCATCTCCGTAACCA |       |       |       |       |       |       |       | 16094 |
| Cow         | TTTTTGGAAGCTAGCAACAGAGGAAGCAGCTATTACCATGGTTAATTACTATTCTGCTGTGACACCTCACCTTCGTAACCA |       |       |       |       |       |       |       | 46573 |
| Dog         | TTTTTGGAAGCTAGCAACAGAGGAAGCAGCTATTACTATGGTTAATTACTATTCTGCTGTGACACCTCATCTCCGTAACCA |       |       |       |       |       |       |       | 43844 |
| BelugaWhale | TTTTTGGAAGCTAGCAACAGAGGAAGCAGCTATTACTATGGTTAATTACTATTCTGCTGTGACACCTCACCTTCGTAACCA |       |       |       |       |       |       |       | 42860 |
| Donkey      | TTTTTGGAAGCTAGCAACAGAGGAAGCAGCTATTACTATGGTTAATTACTATTCTGCTGTGACACCTCATCTTCGTAACCA |       |       |       |       |       |       |       | 48670 |
| Cat         | TTTTTGGAAGCTAGCAACAGAGGAAGCCGCTATTACTATGGTTAATTACTATTCTGCTGTGACACCTCATCTCCGTAACCA |       |       |       |       |       |       |       | 49889 |
| Ferret      | TTTTTGGAAGCTAGCAACAGAGGAAGCAGCTATTACTATGGTTAATTACTATTCTGCTGTGACACCTCATCTCCGTAACCA |       |       |       |       |       |       |       | 50988 |
| Lion        | TTTTTGGAAGCTAGCAACAGAGGAAGCCGCTATTACTATGGTTAATTACTATTCTGCTGTGACACCTCATCTCCGTAACCA |       |       |       |       |       |       |       | 47609 |
| Vaquita     | TTTTTGGAAGCTAGCAACAGAGGAAGCAGCTATTACTATGGTTAATTACTATTCTGCTGTGACACCTCACCTTCGTAACCA |       |       |       |       |       |       |       | 43535 |
| Pig         | TTTTTGAGGCTAGCAACAGAGGAAGCAGCTATAACTATGGTTAATTACTATTCTGCTGTGACACCTCATCTTCGTAACCA  |       |       |       |       |       |       |       | 39609 |

Dienstag, 3. Mai 2022 08:39

| Majority    | ACCAATTTATATCCAGTACTCCAATCACAAAGAACTAAAAACAGATAATACATTTAAACCAAGTGAGTATGTGTAGGTACA  |       |
|-------------|------------------------------------------------------------------------------------|-------|
|             | 63050 63060 63070 63080 63090 63100 63110 63120                                    |       |
| Human       | ACCAATATATATCCAGTACTCGAATCACAAAGAACTAAAGACAGATAATACATTTAAACCAAGTAAGTATGTGTAGGTACA  | 49806 |
| PolarBear   | ACCAATTTATATCCAGTACTCCAATCACAAAGAATTA AAAACAGATAATACGTTAAACCAAGTGAGTATGTGTAGATACA  | 16174 |
| Cow         | ACCGATTTATATCCAGTACTCCAATCACAAAGGAACTAAAAACAGATAATACATTTAAACCAAGTGAGTATGTGTAGGTTCA | 46653 |
| Dog         | ACCAATTTATATCCAGTACTCCAATCACAAAGAACTAAAAACAGATAATACGTTAAACCAAGTGAGTATGTGTTGGTACA   | 43924 |
| BelugaWhale | ACCGATTTATATT CAGTACTCCAATCACAAAGAACTAAAAACAGATAATACATTTGAACCAAGTGAGTATGTGTAGGTACA | 42940 |
| Donkey      | ACCAATTTATATCCAGTACTCCAATCACAAAGAACTAAAAACAGATAATACGTTAAACCAAGTGAGTATATGTAGGTACA   | 48750 |
| Cat         | ACCAATTTATATCCAGTACTCCAATCACAAAGAACTAAAAACAGATAATACATTTAAACCAAGTGAGTATGTGTAGGTACA  | 49969 |
| Ferret      | ACCAATTTATATCCAGTACTCCAATCACAAAGAACTAAAAACAGATAATACATTTAAACCAAGTAAGTATGTGTAGGTACA  | 51068 |
| Lion        | ACCAATTTATATCCAGTACTCCAATCACAAAGAACTAAAAACAGATAATACATTTAAACCAAGTGAGTATGTGTAGGTACA  | 47689 |
| Vaquita     | ACCGATTTATATT CAGTACTCCAATCACAAAGAACTAAAAACAGATAATACATTTGAACCAAGTGAGTATGTGTAGGTACA | 43615 |
| Pig         | ACCGATTTATATCCAGTACTCTAATCACAAAGAACTAAAAACAGATAATACATTTAAACCAAGTGAGTATATGTAGGTACA  | 39689 |

| Majority    | TAAATAAAATGGCCTAGAACATATTAAGAATCTCATAAATATX- - - - - AACAGAAAG- - - - XTTAXAATTATTAAGATA         |       |
|-------------|--------------------------------------------------------------------------------------------------|-------|
|             | 63130 63140 63150 63160 63170 63180 63190 63200                                                  |       |
| Human       | TAAATAAAATGGCCTAGAACATATTATGAATCTCATAAACATT- - - - - AATAGGAAGGAAATGTTTACCTGTT CAGATG            | 49880 |
| PolarBear   | TAAATAAAATGG- - - - - ACATATTAAGAATCTCAAACCTTATT- - - - - AACAGAAAG- - - - ATGTA ACTAA- - GGGCA  | 16235 |
| Cow         | TAAACAAAATGTCCTAGAGCGTATTAAGACTCATATTAG- - - - - GAGAAAAT- TTTTAACCATTGAGAAGATT                  | 46720 |
| Dog         | TAAATAAAATGGCCTAAGACATATTAAGAATCTCAAATGTATG- - - - - AATGGAAAGTAATCATTTAACCGTTTAACCA             | 43998 |
| BelugaWhale | TAAATAAAATGGCCTAGAACGTATTAAGAATCTCATAAACAT- - TAGCAGAAAAAAATT- TTTTACCATT CAGAAGATT              | 43017 |
| Donkey      | TAAATAAAATGTCCAGACAATACTAAGAATCTCATGAACATATT- - - - - AAAAGAAAA- - - - - TAAAATTTTAAATGTT        | 48820 |
| Cat         | CAAATAAAATGGCCTAGGACATATTAAGAGTCTGAAACATATT- - - - - AACAGAAAG- - - - - TAAAATTTTAAACCA          | 50037 |
| Ferret      | TAAATAAAACGG- - - - - ACATATTAAGAATCTCAAACCTTATT- - - - - AACAGAAAG- - - - - ATGTAATTAT- - GGGTA | 51128 |
| Lion        | CAAATAAAATGGCCTAGGACATATTAAGAGTCTGAAACATATT- - - - - AACAGAAAG- - - - - TAAAATATTTAAACCA         | 47757 |
| Vaquita     | TAAATAAAATGGCCTAGAACGTATTAAGAATCTCATAAACATATTAGCAGAAAAAAATT- TTTTACCATT CAGAAGATT                | 43694 |
| Pig         | TCAATAAAACGGCCTAGAACATATTAAGAATCTCAT- - - - - AAACA- - - TATTAACAGAAAATAAGAAA                    | 39750 |

Dienstag, 3. Mai 2022 08:39

| Majority    | TTT- - - - - GAAT- TTCTTGTXGTTTTTTTTGTTGTT- - TTTTA- GACATTTTCTTGCAGTATGTCCCTAAGTATTTAAATA |       |       |       |       |       |       |       |       |
|-------------|--------------------------------------------------------------------------------------------|-------|-------|-------|-------|-------|-------|-------|-------|
|             | 63210                                                                                      | 63220 | 63230 | 63240 | 63250 | 63260 | 63270 | 63280 |       |
| Human       | TTC- - - - - CTTATAGGCATTTTCTTGTTATTTTAAAGGATTTTTCATGCAGAATGTTTCTAAGTATTTAAATA             |       |       |       |       |       |       |       | 49947 |
| PolarBear   | TTT- - - - - TCTTGTTATT- - TTTAAAGATACTTTCTTGTAATATGTCCCTAAATATTAAGTA                      |       |       |       |       |       |       |       | 16290 |
| Cow         | TTT- - - - - GTATGATCTTTTAAATTTTTGTTGT- - TGTGCTATATTTTCTTACAGTATGTCCCTAAGTATTTAAATA       |       |       |       |       |       |       |       | 46791 |
| Dog         | TTCA- - - - - GAAGATTAACATGGCATTGTTATT- - TTCAA- CACATTTTCTTGTAGTACATCCCTAAATGTTAAATA      |       |       |       |       |       |       |       | 44070 |
| BelugaWhale | TTTCTGTGAGCATTTTCTTGTTTTTGTGTTTCTGGTTTTTGTGGCATTCTTGTAGCATGT- - TAAGTATTAACCA              |       |       |       |       |       |       |       | 43094 |
| Donkey      | TCAG- - - - - AAGATGTCTCTGTGGGCATTTTCTTGTTATTTTAAAGACATTTTCTTGCAGCA- - T- - - - - TAAATA   |       |       |       |       |       |       |       | 48884 |
| Cat         | TTCA- - - - - GAAG- CTATGGGCATTTTCTTGTTATT- - TAAA- GACATTTTCTTGCAGTATGTCCCTAAGTATTTAAATA  |       |       |       |       |       |       |       | 50108 |
| Ferret      | TTT- - - - - TCTTATTATT- - TTTAA- GATATTCTTGCAGTATGTCCCTAAATATTTAAATA                      |       |       |       |       |       |       |       | 51182 |
| Lion        | TTCA- - - - - GAAG- CTATGGGCATTTTCTTGTTATT- - TAAA- GACATTTTCTTGCAGTATGTCCCTAAGTATTTAAATA  |       |       |       |       |       |       |       | 47828 |
| Vaquita     | TTTCTGTGAGCATTTTCTTGTTTTTGTGTTTCTGGTTTTTGTGGCATTCTTGTAGCCTGT- - TAAGTATTAACCA              |       |       |       |       |       |       |       | 43771 |
| Pig         | TT- - - - - GAACCATTAAGAAGATTTTCTTTGGGTATATTCTTGT- TTTTTCGCAGTATGTTCCCTAAGTATTTAAATA       |       |       |       |       |       |       |       | 39822 |

| Majority    | TTATGTTAATTTACAAAAGTATGTGCAGTCTATTATTTTCATGTT- - TTAAATTGGTACTXGATAAATTAGTTAAATAG      |       |       |       |       |       |       |       |       |
|-------------|----------------------------------------------------------------------------------------|-------|-------|-------|-------|-------|-------|-------|-------|
|             | 63290                                                                                  | 63300 | 63310 | 63320 | 63330 | 63340 | 63350 | 63360 |       |
| Human       | CTATGTCATTTT- - - GAA- - TTCCTTTAATCCCCTGGTCAAATGTTCTTTTTCTTGTTGCAAGTTAAAATTTTTGTGTAG  |       |       |       |       |       |       |       | 50022 |
| PolarBear   | TTATGTTAATTTACAAAAGTATGTGCAGTCTATTATTTTCATGTT- - TTAAATTGGTACTTGA- - ATTAATAATT- -     |       |       |       |       |       |       |       | 16363 |
| Cow         | TTATATTACTTTACAGAACATATGTGCAGTCTTTTATTTTCATATT- - TTAAATTAGTACTGGATAAATTA- - - AATAG   |       |       |       |       |       |       |       | 46865 |
| Dog         | TTATGTTAGTTTACAAA- - - TGTGCAGTCTATTATTTTCATGTT- - TTAAATTGGTACTTGTATGAATTAGTTAAGTAA   |       |       |       |       |       |       |       | 44144 |
| BelugaWhale | TTATGTTAATTTACAGAAAGTATGTGTGGTCTCTTATTTTCATATT- - TTAAATTAATACTGGATAAATTAGTTAAATAG     |       |       |       |       |       |       |       | 43172 |
| Donkey      | TTATGTTAATTTATAAAAAGTATGTGTGGTCTGTTATTTTCATATT- - TTAAATTGGTACAGGATCAATTA- - AA- TAG   |       |       |       |       |       |       |       | 48958 |
| Cat         | TTATGTTAATTTACAAAATGTATGTGAAGTCTATTATGTGCATGTT- - TTAAATTGGTACTTGTATGAAGTAAATAA- TA-   |       |       |       |       |       |       |       | 50184 |
| Ferret      | TTATGTTAATTTACAAAAGTATGTACAGTCTATTATTTTCATGTT- - CTAAATTGGTTCCTGATGAATTAGTTAAATA-      |       |       |       |       |       |       |       | 51259 |
| Lion        | TTATGTTAATTTACAAAATGTATGTGAAGTCTATTATGTGCATGTT- - TTAAATTGGTACTTGTATGAAGTA- - - A- TA- |       |       |       |       |       |       |       | 47900 |
| Vaquita     | TTATGTTAATTTACAGAAAGTATGTGTGGTCTCTTATTTTCATATT- - TTAAATTAATACTGGATAAATTAGTTAAATAG     |       |       |       |       |       |       |       | 43849 |
| Pig         | TTACGTTAACTTAGAAGAGATATGTACAGTCAGATGCTTTTCGTATT- - TTAAATTAGTACTGGTAAATTAGTTAAATGG     |       |       |       |       |       |       |       | 39900 |

Dienstag, 3. Mai 2022 08:39

| Majority    | XATTTTTT- - CAXAG- TTTTAAGGT- - - - -                                         |       |       |       |       |       |       |       |       |
|-------------|-------------------------------------------------------------------------------|-------|-------|-------|-------|-------|-------|-------|-------|
|             | 63370                                                                         | 63380 | 63390 | 63400 | 63410 | 63420 | 63430 | 63440 |       |
| Human       | AAACTTATCAGGTAGGATTTATTATTAGCATAAAC- - - - - TGTTTAT- ACAACTCTCCTGC           |       |       |       |       |       |       |       | 50077 |
| PolarBear   | - - TTTTTT- - CAAAG- CTTTAAGGT- - - - -                                       |       |       |       |       |       |       |       | 16383 |
| Cow         | TATCTTTT- - CAGTTTTTTTAAGGT- - - - -                                          |       |       |       |       |       |       |       | 46888 |
| Dog         | TACTTTTT- - CAAAG- CTTTAATGT- - - - -                                         |       |       |       |       |       |       |       | 44166 |
| BelugaWhale | CATTTTTTT- CAGTGATTTTAAGGT- - - - -                                           |       |       |       |       |       |       |       | 43196 |
| Donkey      | TATTTTTT- - CAGTGCTTTTAAAGT- - - - -                                          |       |       |       |       |       |       |       | 48981 |
| Cat         | - - TTTTTT- - CAAAG- CTTTAAGGT- - - - -                                       |       |       |       |       |       |       |       | 50204 |
| Ferret      | - - TTTTTT- - CAAAG- TCTTAAGGT- - - - -                                       |       |       |       |       |       |       |       | 51279 |
| Lion        | - - TTTTTT- - CAAAG- CTTTAAGGT- - - - -                                       |       |       |       |       |       |       |       | 47920 |
| Vaquita     | CATTTTTTT- CAGTGATTTTAAGGT- - - - -                                           |       |       |       |       |       |       |       | 43873 |
| Pig         | TATTTTTTTTTCAGTGCTTTTAAAGATCTGTACAGTGTTCTTTTTTTTTTTTTTTTTTTTTTTTATTATTTTCCCAC |       |       |       |       |       |       |       | 39980 |

| Majority    | - - - - -                                                                        |       |       |       |       |       |       |       |       |
|-------------|----------------------------------------------------------------------------------|-------|-------|-------|-------|-------|-------|-------|-------|
|             | 63450                                                                            | 63460 | 63470 | 63480 | 63490 | 63500 | 63510 | 63520 |       |
| Human       | TTAGAATTTAAGGTAAGAAGTTCAGTGCCTTTGGTTATTTGATTTTTTTTATAGGTCTTAATTTCTTACGGAAAATTTTT |       |       |       |       |       |       |       | 50157 |
| PolarBear   | - - - - -                                                                        |       |       |       |       |       |       |       | 16383 |
| Cow         | - - - - -                                                                        |       |       |       |       |       |       |       | 46888 |
| Dog         | - - - - -                                                                        |       |       |       |       |       |       |       | 44166 |
| BelugaWhale | - - - - -                                                                        |       |       |       |       |       |       |       | 43196 |
| Donkey      | - - - - -                                                                        |       |       |       |       |       |       |       | 48981 |
| Cat         | - - - - -                                                                        |       |       |       |       |       |       |       | 50204 |
| Ferret      | - - - - -                                                                        |       |       |       |       |       |       |       | 51279 |
| Lion        | - - - - -                                                                        |       |       |       |       |       |       |       | 47920 |
| Vaquita     | - - - - -                                                                        |       |       |       |       |       |       |       | 43873 |
| Pig         | TGTACAGCAAGGGGGTCAGGTCATCCTTAGATGTATACATTGCAGTTACAGTTTTTTCCCCACCTTTCTTCTGTTGCG   |       |       |       |       |       |       |       | 40060 |

Dienstag, 3. Mai 2022 08:39

| Majority    | ----- TCTGGTCAAATGTTCA----- TTTTCA                                                 |       |       |       |       |       |       |       |       |
|-------------|------------------------------------------------------------------------------------|-------|-------|-------|-------|-------|-------|-------|-------|
|             | 63530                                                                              | 63540 | 63550 | 63560 | 63570 | 63580 | 63590 | 63600 |       |
| Human       | TTTTGAAGATGTGTTAATGGTTTTCTGGAAA- - - AGAAATCTTAAGGATGAAGAATATGTGAATGTATTGATGTTTTAA |       |       |       |       |       |       |       | 50234 |
| PolarBear   | ----- TCTGGTCAAATGTTCA----- TTTTCA                                                 |       |       |       |       |       |       |       | 16406 |
| Cow         | ----- TCTGGTCAAAGTTCT----- TTTTCT                                                  |       |       |       |       |       |       |       | 46909 |
| Dog         | ----- TCTGGTCAAATGTTCA----- TTT- CA                                                |       |       |       |       |       |       |       | 44188 |
| BelugaWhale | ----- TCTGGTCAAAGTGTCT----- TTTTCT                                                 |       |       |       |       |       |       |       | 43219 |
| Donkey      | ----- CCTTGTGAGAATGTTGG----- T----- TTTTTT                                         |       |       |       |       |       |       |       | 49005 |
| Cat         | ----- TCTAGTCAAATGTTCA----- TTTTCA                                                 |       |       |       |       |       |       |       | 50227 |
| Ferret      | ----- TCTGGTCAAGATGTTCA----- TTTTCA                                                |       |       |       |       |       |       |       | 51302 |
| Lion        | ----- TCTAGTCAAATGTTCA----- TTTTCA                                                 |       |       |       |       |       |       |       | 47943 |
| Vaquita     | ----- TCTGGTCAAAGTGTCT----- TTTTCT                                                 |       |       |       |       |       |       |       | 43896 |
| Pig         | ACATGAGTATCTAGACATAGTTCTCAATGCTATTGAGCAGGATCTCCTTATAAATCTTTTCTAGGTAGTGTTCGTTTTCT   |       |       |       |       |       |       |       | 40140 |

| Majority    | TGTTGCAA- XTTXAAATTTTTGTATAGAAACTGT-----                                           |       |       |       |       |       |       |       |       |
|-------------|------------------------------------------------------------------------------------|-------|-------|-------|-------|-------|-------|-------|-------|
|             | 63610                                                                              | 63620 | 63630 | 63640 | 63650 | 63660 | 63670 | 63680 |       |
| Human       | AAATGTAATATAGAAGATATTGTTTAAAATTAATGTATTCAAAAATAGCATTAGAATGTTTTCCGACCTACATTATA- - - |       |       |       |       |       |       |       | 50311 |
| PolarBear   | TGTTGCAA- CTTGAGATTTTTGTATAGAAACTGTT-----                                          |       |       |       |       |       |       |       | 16440 |
| Cow         | TTGTACAA- ATTAAGACTT- - GTACAGAAACTGT-----                                         |       |       |       |       |       |       |       | 46940 |
| Dog         | TGTTGTAA- GTTCAGATTTTTGTATAGGAACT-----                                             |       |       |       |       |       |       |       | 44219 |
| BelugaWhale | TTGTGCAA- ATTAAGTTTTTTGTATAGATACTGT-----                                           |       |       |       |       |       |       |       | 43252 |
| Donkey      | TGTTACAA- GTTAAGATTTTTGTGTAGAAACCGTT-----                                          |       |       |       |       |       |       |       | 49039 |
| Cat         | TGTTGCAA- GTTCAAATTTTTGTATAGAAACTGTA-----                                          |       |       |       |       |       |       |       | 50261 |
| Ferret      | TGTTGCAA- GTTCAGATTGCTCTATAGAAACTGTT-----                                          |       |       |       |       |       |       |       | 51336 |
| Lion        | TGTTGCAA- GTTCAAATTTTTGTATAGAAACTGCA-----                                          |       |       |       |       |       |       |       | 47977 |
| Vaquita     | TTGTGCAA- ATTAAGTTTTTTGTATACATACTGT-----                                           |       |       |       |       |       |       |       | 43929 |
| Pig         | TTATGCAG- ATTAAGTTTTTTGTATAGAAGCTATGAGGTAGGGACTTCAGCATAAACTTTTTTTTTTTTTTTTGTCTTTTA |       |       |       |       |       |       |       | 40219 |

Dienstag, 3. Mai 2022 08:39

Majority -----

|             | 63690                                                                               | 63700 | 63710 | 63720 | 63730 | 63740 | 63750 | 63760 |       |
|-------------|-------------------------------------------------------------------------------------|-------|-------|-------|-------|-------|-------|-------|-------|
| Human       | --- AGACTGCTGTAATGATCTAAAAGCTTTAGCTGTTTTAATATAGTTTTAAAAGCTAATGATATCTTTCTCTGTCAGTAAA |       |       |       |       |       |       |       | 50388 |
| PolarBear   | -----                                                                               |       |       |       |       |       |       |       | 16440 |
| Cow         | -----                                                                               |       |       |       |       |       |       |       | 46940 |
| Dog         | -----                                                                               |       |       |       |       |       |       |       | 44219 |
| BelugaWhale | -----                                                                               |       |       |       |       |       |       |       | 43252 |
| Donkey      | -----                                                                               |       |       |       |       |       |       |       | 49039 |
| Cat         | -----                                                                               |       |       |       |       |       |       |       | 50261 |
| Ferret      | -----                                                                               |       |       |       |       |       |       |       | 51336 |
| Lion        | -----                                                                               |       |       |       |       |       |       |       | 47977 |
| Vaquita     | -----                                                                               |       |       |       |       |       |       |       | 43929 |
| Pig         | GGCATGGCACATGGAGGTTCCCAGGCTAGGGGTCCAGTCATAGCTGTAGCCACGGGCTATGCCACAGCAACACCAGATC     |       |       |       |       |       |       |       | 40299 |

Majority ----- ATGAGATAGGACT-----

|             | 63770                                                                              | 63780 | 63790 | 63800 | 63810 | 63820 | 63830 | 63840 |       |
|-------------|------------------------------------------------------------------------------------|-------|-------|-------|-------|-------|-------|-------|-------|
| Human       | ATACAAACTTTTTCTTAATAAAAATGTAATGGAAAAGCTGTTCCCTCATAGATTTTTGTCACTTTACAAAGTGACAAAATCA |       |       |       |       |       |       |       | 50468 |
| PolarBear   | ----- AGGAGATTGGGCT-                                                               |       |       |       |       |       |       |       | 16453 |
| Cow         | ----- CTGAGGTAGGAC--                                                               |       |       |       |       |       |       |       | 46952 |
| Dog         | ----- ATGAGATTGAGCT-                                                               |       |       |       |       |       |       |       | 44232 |
| BelugaWhale | ----- CTGAGGTAGGAC--                                                               |       |       |       |       |       |       |       | 43264 |
| Donkey      | ----- TATGACGTAGGAGT-                                                              |       |       |       |       |       |       |       | 49053 |
| Cat         | ----- CATGAGATTGGGCT-                                                              |       |       |       |       |       |       |       | 50275 |
| Ferret      | ----- TATGAGATTGGGC--                                                              |       |       |       |       |       |       |       | 51349 |
| Lion        | ----- CATGAGATTGGGCT-                                                              |       |       |       |       |       |       |       | 47991 |
| Vaquita     | ----- CTTAGGTAGGAC--                                                               |       |       |       |       |       |       |       | 43941 |
| Pig         | TGAGCCACATCTGCGACCTACACTGCAGCTTACAGCTACGCTGGATCCTAACCCACTGAGTGAGGCCAGGGATAGAACCCT  |       |       |       |       |       |       |       | 40379 |

Dienstag, 3. Mai 2022 08:39

| Majority    | ----- TACTATTAAC-----ATAAACTGT--ATACAACTCTGCTGCTT                                |       |       |       |       |       |       |       |       |
|-------------|----------------------------------------------------------------------------------|-------|-------|-------|-------|-------|-------|-------|-------|
|             | 63850                                                                            | 63860 | 63870 | 63880 | 63890 | 63900 | 63910 | 63920 |       |
| Human       | TTTTGTTAGTTTATGGAAAATAAGCTTGTA--A-----CTTTTACCTAAAAGATAGGACTGAAATTTTCAGCTTTT     |       |       |       |       |       |       |       | 50539 |
| PolarBear   | -----CACTATTTGC-----ATAAACTGT--AC-----TCTGCTGCTT                                 |       |       |       |       |       |       |       | 16484 |
| Cow         | -----TAAACTA-----TAAACTGTTTATACAACTTTGATT---                                     |       |       |       |       |       |       |       | 46983 |
| Dog         | -----TGCTATTCAC-----ATAAACTAT--ATAGAACTCTGTTGCCT                                 |       |       |       |       |       |       |       | 44268 |
| BelugaWhale | -----TAAAGCA-----TAAACTGTTTATGCAACTCTGCTGCTT                                     |       |       |       |       |       |       |       | 43298 |
| Donkey      | -----TTTTATTAGC-----ATAAACTAT--ATACAACTCTCCTGCTT                                 |       |       |       |       |       |       |       | 49089 |
| Cat         | -----TACTATTAGC-----GTAAACTGT--ATA--GGTCTGTTGCTT                                 |       |       |       |       |       |       |       | 50309 |
| Ferret      | -----CACTATTAAC-----ATAAACTGT--AGA--AGTCTGCTGCTT                                 |       |       |       |       |       |       |       | 51383 |
| Lion        | -----TACTATTAGC-----ATAAACTGT--ACA--GGTCTGTTGCTT                                 |       |       |       |       |       |       |       | 48025 |
| Vaquita     | -----TAAAGCA-----TAAACTGTTTATGCAACTCTGCTGCTT                                     |       |       |       |       |       |       |       | 43975 |
| Pig         | GTGTATGAATGATGGTCAGGTTCAATTAACCACTGAGCCACGCCGGAAGTCCATAAACTATTTATACAGCTCTGCTTCTT |       |       |       |       |       |       |       | 40459 |

| Majority    | AGACTTT-AAGGTATGATGTTCAATXCCTTTGGTT---ATTTGACTTTTTX-----                             |       |       |       |       |       |       |       |       |
|-------------|--------------------------------------------------------------------------------------|-------|-------|-------|-------|-------|-------|-------|-------|
|             | 63930                                                                                | 63940 | 63950 | 63960 | 63970 | 63980 | 63990 | 64000 |       |
| Human       | TTAATTTGATGATGAGTTTTTAATTTCTTTTGA AAAAGAATGTATGCTTCTAATAATTTATCAAGAGGAAGAATACCAA     |       |       |       |       |       |       |       | 50619 |
| PolarBear   | AGACTTTTAAGGTATGATGTTTAATGCTTTTAGTT---ATT-----                                       |       |       |       |       |       |       |       | 16522 |
| Cow         | AGA-TTT-CTGTGTGAAATTCAGTACCTTTGGTT---ATTTGACTTTTT-----                               |       |       |       |       |       |       |       | 47028 |
| Dog         | GGACTTTTAAAGTATGTT-----TA----T-----ATT-----                                          |       |       |       |       |       |       |       | 44292 |
| BelugaWhale | AGACTTC-AGTGTACGAAGTTCAGTCCCTTTGGTA---ATTTGACTTTTA-----                              |       |       |       |       |       |       |       | 43344 |
| Donkey      | ATACTTT-AAGGTATGAAGTTC AATGCCTTTGGTT---ACTTGACTTTTT-----                             |       |       |       |       |       |       |       | 49134 |
| Cat         | AGAGTTTTAAGGTATGTT---TAATACCTTTAGTT---ATTAATAACTAA-----                              |       |       |       |       |       |       |       | 50353 |
| Ferret      | AGACTTT-AAAGTATGATGTTTAATGCCTTTAGTT---ATT-----                                       |       |       |       |       |       |       |       | 51420 |
| Lion        | AGAGTTTTAAGGTATGTT---TAATACCTTTAGTT---ATTAATAACTAA-----                              |       |       |       |       |       |       |       | 48069 |
| Vaquita     | AGACTTC-AGTGTACGAAGTTCAGTCCCTTTGGTA---ATTTGACTTTTA-----                              |       |       |       |       |       |       |       | 44021 |
| Pig         | AGACTTT-AGTGCATGAAATTCAGTGCCTTTGGTT---ATTTGACTTTTTTTTTTTTTTTTTTTTTTTTGTCTTTTTAGGGCTG |       |       |       |       |       |       |       | 40535 |



Dienstag, 3. Mai 2022 08:39

| Majority    | 64010                                                                            | 64020 | 64030 | 64040 | 64050 | 64060 | 64070 | 64080 |       |
|-------------|----------------------------------------------------------------------------------|-------|-------|-------|-------|-------|-------|-------|-------|
| Human       | AGAAAATATCTGCTCTTCTTTCTTTTTACTTAGATTTTTTGCATTTTTAACTTATTTTTAACAAATAATTGTTTATACT  |       |       |       |       |       |       |       | 50699 |
| PolarBear   | -----                                                                            |       |       |       |       |       |       |       | 16522 |
| Cow         | -----                                                                            |       |       |       |       |       |       |       | 47028 |
| Dog         | -----                                                                            |       |       |       |       |       |       |       | 44292 |
| BelugaWhale | -----                                                                            |       |       |       |       |       |       |       | 43344 |
| Donkey      | -----                                                                            |       |       |       |       |       |       |       | 49134 |
| Cat         | ----- AATTAGAA-----                                                              |       |       |       |       |       |       |       | 50361 |
| Ferret      | -----                                                                            |       |       |       |       |       |       |       | 51420 |
| Lion        | ----- AATTAGGA-----                                                              |       |       |       |       |       |       |       | 48077 |
| Vaquita     | -----                                                                            |       |       |       |       |       |       |       | 44021 |
| Pig         | TACCTGCAGCATATGGAGGTTCCCAGGCTAGGGGGCGAATTGGAGCTATAGCTGCCGGCCTACACCACAGCCATAGCAGT |       |       |       |       |       |       |       | 40615 |

| Majority    | 64090                                                                            | 64100 | 64110 | 64120 | 64130 | 64140 | 64150 | 64160 |       |
|-------------|----------------------------------------------------------------------------------|-------|-------|-------|-------|-------|-------|-------|-------|
| Human       | TATGGTGTACAATGTGATGTTTTAATACATATATATTATGGAATGATCAAATCTGGCTGGTTAACATATTCATCTCTTCA |       |       |       |       |       |       |       | 50779 |
| PolarBear   | ----- T- - GAC-----                                                              |       |       |       |       |       |       |       | 16526 |
| Cow         | -----                                                                            |       |       |       |       |       |       |       | 47028 |
| Dog         | ----- T- - GAC-----                                                              |       |       |       |       |       |       |       | 44296 |
| BelugaWhale | -----                                                                            |       |       |       |       |       |       |       | 43344 |
| Donkey      | ----- T-----                                                                     |       |       |       |       |       |       |       | 49135 |
| Cat         | ----- ATAAAAATGTTAGAAATAAAA-----                                                 |       |       |       |       |       |       |       | 50382 |
| Ferret      | ----- TTATAAC-----                                                               |       |       |       |       |       |       |       | 51427 |
| Lion        | ----- ATAAAAATGTTAGAAATAAAA-----                                                 |       |       |       |       |       |       |       | 48098 |
| Vaquita     | -----                                                                            |       |       |       |       |       |       |       | 44021 |
| Pig         | GCCAGGTCAGAGCCGAGTCTGACCTATACACCACAGCTCATGGCGACGCCAGATCTTTAACCCACTGAGTGAGGCCAGGG |       |       |       |       |       |       |       | 40695 |

Dienstag, 3. Mai 2022 08:39

| Majority    | ----- TTTXTATAGGX----- CAT                                                        |       |       |       |       |       |       |       |       |
|-------------|-----------------------------------------------------------------------------------|-------|-------|-------|-------|-------|-------|-------|-------|
|             | 64170                                                                             | 64180 | 64190 | 64200 | 64210 | 64220 | 64230 | 64240 |       |
| Human       | GTACTTACAATTTCTTTATGGTAAGAACATTTAAAATTCTTTAGCTATTTTGGAAGTATACAGTGGAATGTGGAAAAAC   |       |       |       |       |       |       |       | 50859 |
| PolarBear   | ----- TTTTTATAGGT----- CTT                                                        |       |       |       |       |       |       |       | 16540 |
| Cow         | ----- AT                                                                          |       |       |       |       |       |       |       | 47030 |
| Dog         | ----- TTTGTATAGGT----- CTT                                                        |       |       |       |       |       |       |       | 44310 |
| BelugaWhale | ----- AT                                                                          |       |       |       |       |       |       |       | 43346 |
| Donkey      | ----- AT                                                                          |       |       |       |       |       |       |       | 49137 |
| Cat         | ----- ATATTTCTATAAGAAA----- CCT                                                   |       |       |       |       |       |       |       | 50401 |
| Ferret      | ----- TTTTTATAGGA----- CTC                                                        |       |       |       |       |       |       |       | 51441 |
| Lion        | ----- ATATTTCTATAAGAAA----- CTT                                                   |       |       |       |       |       |       |       | 48117 |
| Vaquita     | ----- AT                                                                          |       |       |       |       |       |       |       | 44023 |
| Pig         | ATCGAACCTGCATCCTCATGGATGCTTGTGAGATTTCGTGTCTGCTGAGCCATGACAGGAACTCCTTATTTGACTTTTTAT |       |       |       |       |       |       |       | 40775 |

| Majority    | AGGTCTTA- ATTTCTTATGGAAAAATTXTTATTGAAGATGTGTTA- ATGGTTTTCC- - TGGGGGXGGG- - - X- - - - XGA |       |       |       |       |       |       |       |       |
|-------------|--------------------------------------------------------------------------------------------|-------|-------|-------|-------|-------|-------|-------|-------|
|             | 64250                                                                                      | 64260 | 64270 | 64280 | 64290 | 64300 | 64310 | 64320 |       |
| Human       | TGTTTTCTCTGCTCACACCACAACAATCAACACAGAAGGCTTCTGTGGCCTCAAATGTGGGGGAATTTTTTTCCACGC             |       |       |       |       |       |       |       | 50939 |
| PolarBear   | AGGTT- - - - - TCTCATGGAAATATTTTTATTGAAGATGTGTTA- ATGGTTTTCT- - TTGGGGGG- - - - -          |       |       |       |       |       |       |       | 16596 |
| Cow         | AGGTTTTA- ATTTCTTATGGATAAATTCCTATTAAAGATGAATTA- ATGATTTTC- - - TTGG- - - - - AG- - - - GGA |       |       |       |       |       |       |       | 47092 |
| Dog         | AGGTT- - - - - TC- - ATGGAAGAATTTTTACTGCAGATGTGTTT- ATGGTCTTCC- - TGGAGGAAGCAAT- - - - -   |       |       |       |       |       |       |       | 44369 |
| BelugaWhale | AGGTCTTA- ATTTCTTATGGAAAAACTCCTACTGAGGATGTGTTA- ATGGTTTTCC- - TGGGGGGGGG- - - - - A        |       |       |       |       |       |       |       | 43411 |
| Donkey      | AGGTCTTA- ATTCCTTATGGAAAAATTCCTATTGAAGATATGTTA- ATGGTTTTCC- - TGTGGGGA- - - - - A          |       |       |       |       |       |       |       | 49200 |
| Cat         | AAGACCTATAGGTCTTATGGAAATATTTTTATTGAAGATGTGTGA- ATGGTTTTCT- - GGTGGGAGTGGGGGTGTTTGGG        |       |       |       |       |       |       |       | 50478 |
| Ferret      | AGGTT- - - - - TCTCATGGAAATATTTTTATTGAAGATCTGTTA- ATGGTTTTCC- - TTGGGGAGGGA- - - - -       |       |       |       |       |       |       |       | 51500 |
| Lion        | AAGACCTGTAGGTCTTATGAAAATATTTTTATTGAAGATGTGTGA- ATGGTTTTCT- - GGTGGGAGTGGGGGTGTTTGGG        |       |       |       |       |       |       |       | 48194 |
| Vaquita     | AGGTCTTA- ATTTCTTATGGAAAAACTCCTACTGAGGATGTGTTA- ATGGTTTTCC- - GGGGGGGGGG- - G- - - - GGA   |       |       |       |       |       |       |       | 44092 |
| Pig         | TGGTCTTA- ATTTCTTGTGGAAAAATTCCTGTTGGAGATATGTTA- ATGGTTTTCC- - TTTGGGATGTCCAG- - - - GGG    |       |       |       |       |       |       |       | 40846 |

Dienstag, 3. Mai 2022 08:39

```

Majority  AATGTAAG- AATTGAGAATATATG- - - AATATATTTATTXATTTTTTAAAAATGTGATGTAGAAGATA- - - CTAATTATT
           |           |           |           |           |           |           |           |
           64330     64340     64350     64360     64370     64380     64390     64400
Human     CAAGCAAGCAGTCAGGCTGCAGTGTTCTCCAACCTTAGCTCAGTTTCAACACTGTCTGCCGGGAGATAGCATCAGATCCC  51019
PolarBear - ATGTAAG- AATTGAGAATATATG- - - AATATATTGATTTGTTTTTAAAAATGT- - - - AGAAGATA- - - CTGAGTATT 16663
Cow       AATAAAAG- AATTGAGAATATATG- - - - A- - - ATGTGTT- ATCTTTTAAAAATGCAAGGTAGAAGTTT- - - CTAGTTATT 47160
Dog       - ATGTAAG- AATTGAAAATATATG- - - AATATTTTGATTTATTTTTTAAAA- TGTGATATAGAAGATA- - - TTAATTATT 44440
BelugaWhale AATGTAAG- AATTGAGAATATTTGTTGAGAATATGTGTTGATCTTTTTAAAAATGTGATGTAGAAGATA- - - TTAATTATC 43487
Donkey    AATGTAAG- AAGGGAGAATATATG- - - - A- - - ATGTATGGATCTTTTTAAGCATGTGATGTAAAAGACA- - - TTAATTATT 49269
Cat       AATGTAAG- AATTGAGAATGTATG- - - AATATATTGA- - - ATTTTTTTTAAAG- TGTGATGTAGCAGATA- - - CCAATTATT 50547
Ferret    - ATGTAAG- AATTGAGAGTATATA- - - AATATATTGATGTATTTCTTAAAAATGTGATGTAGAAGATA- - - CTAATTATT 51572
Lion     AATGTAAG- AATTGAGAATATATG- - - AATATATTGA- - - ATTTTTTTTAAAG- TGTGATGTAGAAGATA- - - CCAATTATT 48263
Vaquita AATGTAAG- AATTGAGAATATATGTTGAGAATATGTGTTGATCTTTTTAAAAATGTGATGTAGAAGATA- - - TTAATTATC 44168
Pig      GATTCAAG- AATTGAGAATATGTG- - - - A- - - ATGTATTGATTTTTTAAAAACGTGATATGGAAGATA- - - CTG- - - - TT 40911

```

```

Majority  TAAAATTAATATTT- - - TTTTXAAAAAGTAX- - TATAAGA- ATGGTTTTAGACCT- - - AAATACA- TAGXATTGCAXT
           |           |           |           |           |           |           |
           64410     64420     64430     64440     64450     64460     64470     64480
Human     ACAGGTTGAGGGCTCAGTCCCACAAGATCTCCTGAGACACCAGCAAGTCAGGCCTCTGAACTTCTGATTGACCAGCTTC  51099
PolarBear TAAAATTAATATAT- - - T- - - - - - - - - - - TTTA- - - - ATGGGTTTATACCT- - - - AAATATA- TAGCATTGCAGA 16715
Cow       TAAAATTAATGTTT- - - CTTTAGAAAAAGTATCATAGAAGA- GTGGTTTTAGATAT- - - - AAACACT- TAGGATTGCAGT 47230
Dog       TAAAATTAATATAT- - - TTTTTTAAAAATGG- - TATAAG- - AACGGTTTAAAGCCT- - - - AAATACATAGAGCATTGCAAG 44509
BelugaWhale TAAAATTATT- - TT- - - TTTAGAAAAAGTAT- - - - - AAGA- ATGGTTTTAGATCT- - - - AAGTATA- TAGGATTGCAAT 43550
Donkey    TAAAATTAATATAT- - - - - TAAAAAAATAG- - TATATGA- ATGGCTTTAGACCT- - - - AAATAGG- TAGGGCTGCAAT 49334
Cat       TAAAATTAATATGTATATATTTTTTTAAATAG- - TATAGGA- ATGATTTTAGACCT- - - - AAAAAACA- TAGCATTTAAGG 50618
Ferret    TAAAATCAATATTT- - - TAA- - - AAAAGTAA- - TATAGGA- ATGGGTTTATACCT- - - - AAATACA- GAGCATCACAGG 51637
Lion     TAAAATTAATATGTATATATTTTTTTAAATAG- - CATAGGA- ATGATTTTAGACCT- - - - AAAAAACA- TAGCATTTAAGG 48334
Vaquita TAAAATTATT- - TT- - - TTTAGAAAAAGTAT- - - - - AAGA- ATGGTTTTAGATCT- - - - AAATACA- TAGGATTGCAAT 44231
Pig      TAAAATTAATATTT- - - TTTAGAAAAAGTAT- - - - - AAGA- ATGGTTTTAGATAC- - - - AAATTCA- TAGGATTACAAT 40976

```

Dienstag, 3. Mai 2022 08:39

| Majority    | AA- - - TGGTCTAAAACTTTAGCTCTTTAATATAGTTTTAGCTAATTATAT- XTTTCTGTTTCAGTAAAATCTAAA-       |       |       |       |       |       |       |       |       |
|-------------|----------------------------------------------------------------------------------------|-------|-------|-------|-------|-------|-------|-------|-------|
|             | 64490                                                                                  | 64500 | 64510 | 64520 | 64530 | 64540 | 64550 | 64560 |       |
| Human       | AAGTTGGGTTCCCACAACCCCTTTTTGGATTTCATTAATTTGCTAGA- GCAGCACACAGAAGCTCAAGGAAACATTTAC       |       |       |       |       |       |       |       | 51178 |
| PolarBear   | AA- - - TGGTCAAAAATCTTTAGCTCCTTTAATATAGTTTTAGCTAACTAT- - - CTTTCTGTTTCGGGAAGATCTAAA-   |       |       |       |       |       |       |       | 16787 |
| Cow         | AAACAGTGATATAGAAACTTTAGCTCTTTAATGTAGCTTTTAGCTAATTTTA- - - - TCTGTTTTAGTAAAATATAAAG     |       |       |       |       |       |       |       | 47305 |
| Dog         | AA- - - TGGTCTAAAAATTGTAAGCTCTTTAATACAGTTTTAGCTAATTATATCTTTTCTGTTTCAGTAAATATCTAAA-     |       |       |       |       |       |       |       | 44584 |
| BelugaWhale | AAAAACTGGGCTAAAA- - - - - GCTCTTCAAATGTAGTTTTAGCTAATTATA- - - - TCTGTTTTAGTAAAATCTAAA- |       |       |       |       |       |       |       | 43618 |
| Donkey      | AA- - - TGATCTAAAACTTTAGCTCTTTAATATAGTTTTAGCTAATTATAT- CTTTCTGTTTCAGTAAAATGTAAA-       |       |       |       |       |       |       |       | 49408 |
| Cat         | AA- - - CGGT- - - - - CTTTTAGCTCTTTAATACAGTTTTAGCTAATTGTATGTTTTATGTTTCAGTAAAATATAAA-   |       |       |       |       |       |       |       | 50687 |
| Ferret      | GA- - - AGG- - AAAAC- - T- AGCTCTTTAATATAGTTTTAGCTAATTATATCTTTTCTGTTTCAGTAAAATCTAAA-   |       |       |       |       |       |       |       | 51707 |
| Lion        | AA- - - TGGT- - - - - CTTTTGGCTCTTTAATACAGTTTTAGCTAATTATATGTTTTATGTTTCAGTAAAATATAAA-   |       |       |       |       |       |       |       | 48403 |
| Vaquita     | AAAAACTGGTCTAAAA- - - - - GCTCTTCAAATGTAGTTTTAGCTAATTATA- - - - TCTGTTTTAGTAAAATCTAAA- |       |       |       |       |       |       |       | 44299 |
| Pig         | AAAAACTGTTCTAAAAACTTGAGCTCTTTAATGTAGTTTTAGCTAAGTATAC- - TTTCTGTTTTAGTAAACT- - - - -    |       |       |       |       |       |       |       | 41048 |

| Majority    | CTATXTCTGGCXXTTGTCTTA- - GAAAATXTAATGGAA- AATAATTCCTCA- - TAGATTTT- AACCTTCA- - TAAAAAG         |       |       |       |       |       |       |       |       |
|-------------|-------------------------------------------------------------------------------------------------|-------|-------|-------|-------|-------|-------|-------|-------|
|             | 64570                                                                                           | 64580 | 64590 | 64600 | 64610 | 64620 | 64630 | 64640 |       |
| Human       | TGAGATTTACTAGTTTATTATATAGGATATTA AAAAGGATAATAAGCCTCTAATCATGCCTTGATCTTTCAGGTGACCAG               |       |       |       |       |       |       |       | 51258 |
| PolarBear   | CTATATATGACCCTTGTCTTATTGAAAATGTAATGGAG- AATAACTCCTCA- - TAGATTTT- AACCATCA- - TAAAAAG           |       |       |       |       |       |       |       | 16861 |
| Cow         | CTGTGTCTGGC- TTCTGCCTT- - - - - AG- - CAAATGGAA- AATAAT- CCTCA- - CAAAATTT- AACCTTTG- - TAGAAAA |       |       |       |       |       |       |       | 47370 |
| Dog         | CTATATTTGGCTCTTGTCTT- - - GAAAATGTAGTGGAA- TGAATTCCTCA- - TAGATTTT- AACCATCA- - TAAAAAG         |       |       |       |       |       |       |       | 44655 |
| BelugaWhale | CTGTGGCTCTT- - - - - ATCAA- - - - - AAATTAATGGAA- AATAATTCCTCA- - TAGATTTT- AATCTTTG- - TAAAAAA |       |       |       |       |       |       |       | 43682 |
| Donkey      | CTGTACCTGGC- - TCTGTCTCACTGAAAATTTAATGGAA- AATTATTCCTTA- - TAGATTTT- AACCTTTG- - TAAAAAG        |       |       |       |       |       |       |       | 49480 |
| Cat         | CTAT- - CTGGCTGTTTGTCTTACTGAAAATGTAATGGAA- AATAATTCCTCA- - TATATTTT- AACCTTCA- - TAAAAAC        |       |       |       |       |       |       |       | 50759 |
| Ferret      | GTATGTCTTACTCTTGTCTTACAGAAAATGTCATGGACTAATAATTCCTCA- - TAGATTTTTAACCATCA- - TAAAAAG             |       |       |       |       |       |       |       | 51783 |
| Lion        | CTAT- - CTGGCTGTTTGTCTTACTGAAAATGTAATAGAA- AATAATTCCTCA- - TATATTTT- AACCTTCA- - TAAAAAC        |       |       |       |       |       |       |       | 48475 |
| Vaquita     | CTGTGGCTCTTGTCTTATCAA- - - - - AAATTAATGGAA- AATAATTCCTCA- - TAGATTTT- AACCTTTG- - TAAAAAA      |       |       |       |       |       |       |       | 44368 |
| Pig         | CTGTCTCTGGT- TCATGTTGA- - - - - AAATTAATGGAA- AATAATTCCTTA- - TGGATTTT- AACCTTTG- - TAAAGAA     |       |       |       |       |       |       |       | 41116 |



Dienstag, 3. Mai 2022 08:39

| Majority    | ----- TTTAATTTGXTAXTA-----                                                      |       |       |       |       |       |       |       |       |
|-------------|---------------------------------------------------------------------------------|-------|-------|-------|-------|-------|-------|-------|-------|
|             | 64810                                                                           | 64820 | 64830 | 64840 | 64850 | 64860 | 64870 | 64880 |       |
| Human       | AGTAGTTGCCATGCTGTGCGGTAGATCACCAGAACCTATTCTTCCTGTCTGAAACTTTGTA- CCATCATCACCC     |       |       |       |       |       |       |       | 51497 |
| PolarBear   | ----- TTTAATTTGATAATA-----                                                      |       |       |       |       |       |       |       | 16971 |
| Cow         | ----- TTTAAGTTTGGTA-----                                                        |       |       |       |       |       |       |       | 47477 |
| Dog         | ----- TTTAATTTGACAATA-----                                                      |       |       |       |       |       |       |       | 44753 |
| BelugaWhale | ----- A----- AATTTGATA-----                                                     |       |       |       |       |       |       |       | 43781 |
| Donkey      | ----- TTTAATTTGGTA-----                                                         |       |       |       |       |       |       |       | 49587 |
| Cat         | ----- TTTAATTTGGTAATA-----                                                      |       |       |       |       |       |       |       | 50863 |
| Ferret      | ----- TTTAATTTGCTGTTA-----                                                      |       |       |       |       |       |       |       | 51896 |
| Lion        | ----- TTTAATTTGGTAATA-----                                                      |       |       |       |       |       |       |       | 48579 |
| Vaquita     | ----- A----- AATTTGATA-----                                                     |       |       |       |       |       |       |       | 44466 |
| Pig         | CTGGGTTACAGGATCTGTTGTTGCCAGCTGTGGCATAGGTTGCAAGTGTGGCGTGAGTTCATTTGATCCCTGGCCTAGG |       |       |       |       |       |       |       | 41331 |

| Majority    | ----- ATTTTCATTA----- CTTTTGAACCAGAAGTTGTA-CTTCTAAGA                                 |       |       |       |       |       |       |       |       |
|-------------|--------------------------------------------------------------------------------------|-------|-------|-------|-------|-------|-------|-------|-------|
|             | 64890                                                                                | 64900 | 64910 | 64920 | 64930 | 64940 | 64950 | 64960 |       |
| Human       | CTTCCCTGTTCACTCCTCCCTCCCCAGCCTCTGGTGACTATTTTCTACTCTCTACTAATGTGAGTTCAGCTTTTT- TA      |       |       |       |       |       |       |       | 51576 |
| PolarBear   | ----- ATTTTCATTA----- CTTTTGAACCAGAAATTGTA-CTTCTAAAA                                 |       |       |       |       |       |       |       | 17010 |
| Cow         | ----- ATTTTCGTTA----- CTTTTGAACCAGAAGTTGTA-CTT-----                                  |       |       |       |       |       |       |       | 47510 |
| Dog         | ----- ATTTTCATTA----- CCTTTGAACCAGAAATTATGCTTCAAAAA                                  |       |       |       |       |       |       |       | 44792 |
| BelugaWhale | ----- ATTTTCATTT----- CTTTTGAACCAGAAGTTGTA-CTTCTCAGA                                 |       |       |       |       |       |       |       | 43820 |
| Donkey      | ----- ATTTTCGTT----- CTTTTGAACCAGAAGTTGTA-CTT- TAAGA                                 |       |       |       |       |       |       |       | 49625 |
| Cat         | ----- ATTTTCATTC----- CTTTTGAACCAGAAATTGTA-CTTCTAGGA                                 |       |       |       |       |       |       |       | 50902 |
| Ferret      | ----- ATTTTATTA----- CTTTTGAACCAGAAATTGTA-CTTCTAAAA                                  |       |       |       |       |       |       |       | 51935 |
| Lion        | ----- ATTTTCATTC----- CTTTTGAACCAGAAATTGTA-CTTCTAGGA                                 |       |       |       |       |       |       |       | 48618 |
| Vaquita     | ----- ATTTTCATTT----- CTTTTGAACCAGAAGTTGTA-CTTCTCAGA                                 |       |       |       |       |       |       |       | 44505 |
| Pig         | AACTTTCACATGCTGCGAGTGCAGCAAAAAATATATTTTTTTTAAAAATTTCTTTTGA-CTAGATGTTGTA-CTCA- - - GA |       |       |       |       |       |       |       | 41408 |

Dienstag, 3. Mai 2022 08:39

| Majority    | ATTTATCATGAGGAAATATACCAAAGAAAA- T- - - TATTCTATATTCXTTTTACTTAG- - - - - AAT- - - - - T    |       |       |       |       |       |       |       |       |
|-------------|-------------------------------------------------------------------------------------------|-------|-------|-------|-------|-------|-------|-------|-------|
|             | 64970                                                                                     | 64980 | 64990 | 65000 | 65010 | 65020 | 65030 | 65040 |       |
| Human       | GATTA- CATATGTAAGTGAGATAATGTGTTATTTGTCTTTCTTTGTTTGACTTATTCACCTTAGCACACACAGTGTCTCT         |       |       |       |       |       |       |       | 51655 |
| PolarBear   | ATTTATCTTT- GGAAATATACTAGAAGAAAA- - - - TATTCTATATTCATTTTACTTAG- - - - - AAT- - - - - T   |       |       |       |       |       |       |       | 17067 |
| Cow         | - CTTAA- - - - - AATTTTATCAAAGGAAAA- TGCCTATTCTCTATTCTTTTTACTT- - - - -                   |       |       |       |       |       |       |       | 47558 |
| Dog         | ATTTATCATT- GGAAATATACCAAAGAAAA- - - - TCTTCTATACTCATTTTACTTAT- - - - - AAT- - - - - T    |       |       |       |       |       |       |       | 44849 |
| BelugaWhale | ATTTATCATGAGGAAATATACCAAAGAAAA- TATGTATTCTCTATTCTTTTTACTTAG- - - - - AGT- - - - - T       |       |       |       |       |       |       |       | 43882 |
| Donkey      | ATTTATCGTGAAGAAATATGCCAAAGAAAA- TAGCTATTCCATGTTCTTTTTATTTAG- - - - - AAT- - - - - T       |       |       |       |       |       |       |       | 49687 |
| Cat         | ATTTATCATGAGGAAATATGCCAAAGGAAGA- - - - TATTCTATATTTATTTTACTCAG- - - - - AAT- - - - - T    |       |       |       |       |       |       |       | 50960 |
| Ferret      | ATTTA- CATT- GGAAATATTCTAAAAGAAAA- - - - TACTCTGTTTTCATTTTACTTAG- - - - - AAT- - - - - T  |       |       |       |       |       |       |       | 51991 |
| Lion        | ATTTATCATGAGGAAATATGCTAAA- - - AGA- - - - TATTCTATATTTATTTTACTCAG- - - - - AAT- - - - - T |       |       |       |       |       |       |       | 48673 |
| Vaquita     | ATTTATCATGAGGAAATATACCAAAGAAAA- TATGTATTCTCTATTCTTTTTACTTAG- - - - - AGT- - - - - T       |       |       |       |       |       |       |       | 44567 |
| Pig         | ATTTAGCATAAGGAATAATACCAAAGAAAAATGTCTATTCTGTATTCTTTTTACTTTA- - - - - AGT- - - - - T        |       |       |       |       |       |       |       | 41471 |

| Majority    | TAAAATGGCATTTTAATATCCCAATTTTATTTT- - - - ATATXTTAGTATTTT- CAGTAAAGTAA- - - - -         |       |       |       |       |       |       |       |       |
|-------------|----------------------------------------------------------------------------------------|-------|-------|-------|-------|-------|-------|-------|-------|
|             | 65050                                                                                  | 65060 | 65070 | 65080 | 65090 | 65100 | 65110 | 65120 |       |
| Human       | TAAAATGACATTTTAATATCCCATTTCTAGTTCGTTATTATTTAAGTAATTTGCAAGTACATTCTCATTTTAAAAGATTAA      |       |       |       |       |       |       |       | 51735 |
| PolarBear   | TAAAATGGTATTTA- TATTTTCAGTTTTATTTT- - - - ATATGTTAGTATTTT- TAGTAAAGTAA- - - - -        |       |       |       |       |       |       |       | 17124 |
| Cow         | - AAAGTGGCATTTTAATATCCCAGTTGGGTTTA- - - - ACATATTAATATTTT- CAGTAAAGTAA- - - - -        |       |       |       |       |       |       |       | 47615 |
| Dog         | TAAAATGGCATTTTAGTATTTCAATTTTATTTT- - - - ATATGTTAGTATTT- - TAATAAGGTAA- - - - -        |       |       |       |       |       |       |       | 44906 |
| BelugaWhale | TAAAATGGCATTTTAATATCCCAATTTTATTTT- - - - ACATGTTAGTATTTT- CAGT- - - - AA- - - - -      |       |       |       |       |       |       |       | 43935 |
| Donkey      | TAAAATGGCATTTTAATATCCCAATTTTATTTT- - - - ATATATTAGTATTTT- CAGTAAAGTAA- - - - -         |       |       |       |       |       |       |       | 49745 |
| Cat         | TAAAATGGCATTTCAGTATTTCAATTTTATTTT- - - - ATATATTAGTATTTT- TAGTAAAGTAATTTTATTTATATATTAG |       |       |       |       |       |       |       | 51034 |
| Ferret      | TAAAATGGTATTTA- TATATCAATTTTATTTT- - - - ATATATTAGTATTTT- TAGTAAAGTAA- - - - -         |       |       |       |       |       |       |       | 52048 |
| Lion        | TAAAATGGCATTTCAGTATTTCAATTTTATTTT- - - - ATATATTAGTATTTT- TAGTAA- - - - -              |       |       |       |       |       |       |       | 48725 |
| Vaquita     | TAAAATGGCATTTTAATATCCCAATTTTATTTT- - - - ACATGTTAGTATTTT- CAGT- - - - AA- - - - -      |       |       |       |       |       |       |       | 44620 |
| Pig         | AAAAATGGCATTTTGACATCCCAGTTTTATTTT- - - - ACATGTTAGAATTTT- CAGT- - - - AA- - - - -      |       |       |       |       |       |       |       | 41524 |

Dienstag, 3. Mai 2022 08:39

| Majority    | ----- TTAGTGAA- - TGCATTCTCATTTTAAAAGATTCCAATGXAAA- - - - GAACATGAAAAGGATA |                                                                   |                                         |       |       |       |                     |       |       |
|-------------|----------------------------------------------------------------------------|-------------------------------------------------------------------|-----------------------------------------|-------|-------|-------|---------------------|-------|-------|
|             | 65130                                                                      | 65140                                                             | 65150                                   | 65160 | 65170 | 65180 | 65190               | 65200 |       |
| Human       | ACGAAAGGAACATGTA                                                           | AAAGAATAAAGCTGGGGGCTGGGCTTGGTGGCTTATACTGGTAATCCCAGCACTTTGGGAGGCTG |                                         |       |       |       |                     |       | 51815 |
| PolarBear   | -----                                                                      | TTCATGAA- -                                                       | GATATTCTCATTTTAAAAGCTTCCAATGGAAG- - - - |       |       |       | GAACATGAAAAGGATA    |       | 17180 |
| Cow         | -----                                                                      | TTAGTGAA- -                                                       | TTCATTCTCATTTTAAAAGATTGAAATTAATA- - - - |       |       |       | GGATGTTGAAAGGACA    |       | 47671 |
| Dog         | -----                                                                      | TTCATGAA- -                                                       | TGCATTCTCATTTTAAAAGCTTCCAGTGCAAA- - - - |       |       |       | GATCATGAAAAA- ATA   |       | 44961 |
| BelugaWhale | -----                                                                      | TTAGTGAA- -                                                       | TGCATTCTCATTTAAAAGATTCAAATGAAAA- - - -  |       |       |       | TGATGTGGAAAGAATA    |       | 43991 |
| Donkey      | -----                                                                      | TTCATGAA- -                                                       | TATATTCTTTTTTTTATTGAGTTCATAATAGT- - - - |       |       |       | TTATATCATTGT- - - - |       | 49797 |
| Cat         | TATTTTTAGTAAAGTAATTTGTGAA- -                                               | TGCATTCTCATTTTAAAAGATTCCATTGCAGG- - - -                           |                                         |       |       |       | GAACATGAAAAA- - - - |       | 51103 |
| Ferret      | -----                                                                      | TTCATGAA- -                                                       | GGCATTCTCATTTTAAAAGCTTCCAATGCAAG- - - - |       |       |       | GAACATGAAAAGGATA    |       | 52104 |
| Lion        | -----                                                                      | TTTGTGAA- -                                                       | TGCATTCTCATTTTAAAAGATTCCATTGCAGG- - - - |       |       |       | GAACATGAAAAA- - - - |       | 48777 |
| Vaquita     | -----                                                                      | TTAGTGAA- -                                                       | TGCATTCTCATTTAAAAGATTCAAATGAAAA- - - -  |       |       |       | TGCTGTGGAAAGAATA    |       | 44676 |
| Pig         | -----                                                                      | TTAGTGAA- -                                                       | TGCATTCTCATTTTAAAAGATTGAAATGAAAA- - - - |       |       |       | TGATGTGTACAGGACA    |       | 41580 |

| Majority    | A- - - AGATAAGGCATCTATAGAXAGATGTATGTA- - - - - GGGGAX- - - - - GGGGATTTX- - - TAATTTTAAATAGG |                                                       |                            |                 |       |                |            |                |       |
|-------------|----------------------------------------------------------------------------------------------|-------------------------------------------------------|----------------------------|-----------------|-------|----------------|------------|----------------|-------|
|             | 65210                                                                                        | 65220                                                 | 65230                      | 65240           | 65250 | 65260          | 65270      | 65280          |       |
| Human       | AGGCGGGTGGATTACCTGAGGT                                                                       | CAGGAGTTCAAGACCCGCCTGACCAACATGGT                      | GAAACCCTGAGTCTACTAAAAATACA |                 |       |                |            |                | 51895 |
| PolarBear   | A- - -                                                                                       | AGATAAGGCATCTTTA- - - - -                             |                            |                 |       |                | T- - - - - | AATCTTAAATAGG  | 17211 |
| Cow         | A- - -                                                                                       | AGAAAAACATCTGTAGATAGATGTCTGTGG- TGGGGTGTGGAG- - - - - |                            |                 |       | GGGGCCTTG- - - |            | TAATTTCAAATAGG | 47738 |
| Dog         | A- - -                                                                                       | AGATAAGGCATCTATAGACAAATGTATGTA- - - - -               |                            | AGGAAA- - - - - |       | GGGTATTTA- - - |            | TAATTTTAAATAGG | 45021 |
| BelugaWhale | A- - -                                                                                       | AGATAAGGCATCTGTAGATAGATAGATAGATATATGTAGGGGAG- - - - - |                            |                 |       | GGGGATTTG- - - |            | TAATTTCAAATAGG | 44059 |
| Donkey      | -----                                                                                        | GAAAGTTCAGTTGTA- - - - -                              |                            |                 |       | CA- - -        |            | TTATTTCTTGTCTG | 49828 |
| Cat         | -----                                                                                        | AGATAAGGCATCTATAGACAAATGCATGTA- - - - -               |                            | AGGGAA- - - - - |       | GGGGATTTA- - - |            | TAATTTTAAATAGA | 51162 |
| Ferret      | A- - -                                                                                       | AGATAAGGCATCTTTA- - - - -                             |                            |                 |       | TTTA- - -      |            | TGATCTTAAATAGG | 52139 |
| Lion        | -----                                                                                        | AGATAAGGCATCTATAGACAAATGCATGTA- - - - -               |                            | AGGGAA- - - - - |       | GGGGATTTA- - - |            | TAATTTTAAATAGA | 48836 |
| Vaquita     | A- - -                                                                                       | AGATAAGGCATCTATAGATAGATACATAGATATATGTAGGGGAG- - - - - |                            |                 |       | GGGGATTTG- - - |            | TAATTTCAAATAGG | 44744 |
| Pig         | A- - -                                                                                       | AGACAAGGCATCTATAGATAGATGTATGTA- - - - -               |                            | GGGGAG- - - - - |       | GGGGATTAG- - - |            | TAATTTTAAATAGG | 41640 |



Dienstag, 3. Mai 2022 08:39

| Majority    | ATAACCAGTGAAAGCCCCATGAACA- AGTGACATTTGA- - GTAACAA- - - - ACTTCAAAGTGATTAGXAAATAAAT- CA  |       |       |       |       |       |       |       |       |
|-------------|------------------------------------------------------------------------------------------|-------|-------|-------|-------|-------|-------|-------|-------|
|             | 65290                                                                                    | 65300 | 65310 | 65320 | 65330 | 65340 | 65350 | 65360 |       |
| Human       | AAAAAAAAAAAAAAAAATTAGCCAGGCATGGTGCCAGGTGCCTGTAATCCCAGCTACTTGGAGGCTGAGGCAAGAGAGAATTG      |       |       |       |       |       |       |       | 51975 |
| PolarBear   | ATAAACAGCGAAAGCCCCATGAAGA- AGTGACATTTGA- - GTAACAA- - - - ACTTTAAAGTGGTTAGGAAATAAACGCA   |       |       |       |       |       |       |       | 17283 |
| Cow         | ATAACCAGTGGAAGCCTGATTGACA- AGTGACATTTGA- - GTAACAA- - - - ACCTCAGAA- - ATTAAGAGTAAAA- CA |       |       |       |       |       |       |       | 47807 |
| Dog         | ATAAACCATGAAATCTCCATGAAGA- AGTGACATTTGA- - GTAACACTAATCACTTCAAAGTGATTAGGAAGTAAATGCA      |       |       |       |       |       |       |       | 45098 |
| BelugaWhale | ATAACCAGTGGAAGCCCCAACCAACA- AGTGACATTTGA- - GTAACAA- - - - ACTTCAAAGTGATTAGAGAATAAGG- TA |       |       |       |       |       |       |       | 44130 |
| Donkey      | TCACCACATAATGCTCCTCTTTACC- CCCTGTGTCCAC- - CCCTCACCCCCCTTCCCTTGGTAACCACTGAAGTGTTTTC      |       |       |       |       |       |       |       | 49905 |
| Cat         | ATACTTAGTGAAAACCCCATGAACA- GGTGACATTTCA- - GTAACAA- - - - ACTTCAAAGTGATTTGGAAATAAATACA   |       |       |       |       |       |       |       | 51234 |
| Ferret      | ATAAACAGTGAAAGCCCCATGAAGA- AGGGACATTTGA- - GTAACAA- - - - ACTTAAAAGTGGTTAGGAAGTAAATGTA   |       |       |       |       |       |       |       | 52211 |
| Lion        | ATACTTAGTGAAAACCCCATGAACA- GGTGACATTTCA- - GTTACAA- - - - ACTTCAAAGTGATTTGGAAATAAATACA   |       |       |       |       |       |       |       | 48908 |
| Vaquita     | ATAACCAGTGGAAGCTCAACCAACA- AGTGACATTTGA- - GTAACAA- - - - ACTTCAAGGTGATTAGAGAATAAGG- CA  |       |       |       |       |       |       |       | 44815 |
| Pig         | CTAACAAGTGAAAGTCCTATTAGGA- AGTGATATTTAG- - GGAGCAC- - - - ATTTCAAAGTGGTTGGAGAATAAC- - CA |       |       |       |       |       |       |       | 41710 |

| Majority    | CTTA- - - - - TTCTGGTCTG- GGTTA- - - - - TTCCAG- - - - ACATAGGGAACAATCAATGCAA- AG      |       |       |       |       |       |       |       |       |
|-------------|----------------------------------------------------------------------------------------|-------|-------|-------|-------|-------|-------|-------|-------|
|             | 65370                                                                                  | 65380 | 65390 | 65400 | 65410 | 65420 | 65430 | 65440 |       |
| Human       | CTTGAACCCGGGGGGTGGAGCTTGCGGTGATCCCAGATGCGTCACTGCACTCCAGCCTGGGTGACAG- - AGCGAGACTC      |       |       |       |       |       |       |       | 52053 |
| PolarBear   | CTTA- - - - - TTTTGGTCTG- GGTTA- - - - - TTCCAG- - - - ATTCAGGGAACAATCAATGCAA- AC      |       |       |       |       |       |       |       | 17332 |
| Cow         | CTTA- - - - - TTACAGTTTT- GGTTA- - - - - TTTTGT- - - - ACATAGGGAATAATCAGTGCAA- CG      |       |       |       |       |       |       |       | 47856 |
| Dog         | CTTC- - - - - TTCTGACCT- - GGTTA- - - - - TTCCAG- - - - AAATAGGGAGC- - - - AATGCAA- AG |       |       |       |       |       |       |       | 45142 |
| BelugaWhale | CTTA- - - - - CTGCAGTCTT- GGTTAT- - - - - GTTCCAG- - - - ACATAGGGAGCAGTCAGTGCAAG- TG   |       |       |       |       |       |       |       | 44181 |
| Donkey      | TTTG- - - - - TCCATGTGTTT- GTTTAT- - - - - ATTCCAC- - - - ATATGAGTGAAA- TCATNNNNNNNN   |       |       |       |       |       |       |       | 49957 |
| Cat         | CTTA- - - - - TTCTGGCCTG- GACTA- - - - - TTCCAG- - - - ACATAGGGAACAGTCAATGCAACAG       |       |       |       |       |       |       |       | 51284 |
| Ferret      | CTTA- - - - - TTCTGGTCTA- GGTTA- - - - - TTCCAGGTAGATATAGGGAACGATCAATGCGA- AG          |       |       |       |       |       |       |       | 52264 |
| Lion        | ATTA- - - - - TTCTGGCCTG- GACTA- - - - - TTCCAG- - - - ACATAGGGAACAATCAATGCAACAG       |       |       |       |       |       |       |       | 48958 |
| Vaquita     | CTTA- - - - - TTGCAGTCTT- GGTTAT- - - - - GTTCCAG- - - - ACATAGGGAGCAGTCAGTGCAA- TG    |       |       |       |       |       |       |       | 44866 |
| Pig         | CTTAGT- - - - - AATTACAGTTTG- GATTA- - - - - TTCCAG- - - - ACACAGGGGACAATCAATACAG- TA  |       |       |       |       |       |       |       | 41763 |

Dienstag, 3. Mai 2022 08:39

| Majority    | TTGCTTCTGTTGA- - - - - AAAAAAXAATXXAACAGCC- - - - - ATGTTTTTG- - - - -            |       |       |       |       |       |       |       |       |
|-------------|-----------------------------------------------------------------------------------|-------|-------|-------|-------|-------|-------|-------|-------|
|             | 65450                                                                             | 65460 | 65470 | 65480 | 65490 | 65500 | 65510 | 65520 |       |
| Human       | TATCTCAAAAAAAAAAAAAAAAAAAGAGTAAAGCTGAGGCCTACACATGGATGGATGTGGAGGAGGGGCACTTAGG      |       |       |       |       |       |       |       | 52133 |
| PolarBear   | TTGCTTCTCTTGG- - - - AAAAAAAAAAAACCAAAAAAAC- - - - - CTGGTTTT- - - - -            |       |       |       |       |       |       |       | 17375 |
| Cow         | TTCCTTCTGTTGA- - - - - AAAAAAGGTT- - - - ACAGCC- - - - - ATATTTTTG- - - - -       |       |       |       |       |       |       |       | 47894 |
| Dog         | TTGCTTCTGTTGA- - - - - AGAAAACCTGGTTTTGTAGCC- - - - - ATAATTTTTG- - - - -         |       |       |       |       |       |       |       | 45185 |
| BelugaWhale | TTC- TTATGTTGA- - - - - AAAAAATTTTTTTGACAGCC- - - - - ATATTTTTG- - - - -          |       |       |       |       |       |       |       | 44222 |
| Donkey      | NNNNNNNNNNNNNN- - - - - NNNNNNNNNNNNNNNNNNN- - - - - NNNNNNNNN- - - - -           |       |       |       |       |       |       |       | 49999 |
| Cat         | TTGCTTGTGTTGG- - - - - GAAAACAAAACAAAACAA- - - - - TTGTTTTTGCAG- - - - - CCGTATTT |       |       |       |       |       |       |       | 51335 |
| Ferret      | TTGCTTCTGTTGGGGGAAAAAAAAACAAACAAAAAAC- - - - - TTGGTTTTGCAG- - - - - CCATATAT     |       |       |       |       |       |       |       | 52323 |
| Lion        | TTGCTTGTGTTGG- - - - - GAAAACAAAACAAAACAA- - - - - TTGTTTTTGCAG- - - - - CCATATTT |       |       |       |       |       |       |       | 49009 |
| Vaquita     | TTC- TTATGTTGA- - - - - AAAAAATTTTTTTGACAGCC- - - - - ATATTTTTG- - - - -          |       |       |       |       |       |       |       | 44907 |
| Pig         | CTCCTTCTGTTGA- - - - - AAAAACTTTTTCTGACAGCC- - - - - GTGTTTTTG- - - - -           |       |       |       |       |       |       |       | 41805 |

| Majority    | - - - ATTTTCAGAAGCCCTTT- - - - - X- TTTTTTGATAATCTTTTTTA- - GTTGC- - - - AXTTGGTCA- XXXXX- - X |       |       |       |       |       |       |       |       |
|-------------|------------------------------------------------------------------------------------------------|-------|-------|-------|-------|-------|-------|-------|-------|
|             | 65530                                                                                          | 65540 | 65550 | 65560 | 65570 | 65580 | 65590 | 65600 |       |
| Human       | ATGACTAGTGGAAGCCCCATTGAGAGGGGATATTTGAATAATGAACTTCAAAGTGGTTAGGGAATAAGCCACTTATTCCA               |       |       |       |       |       |       |       | 52213 |
| PolarBear   | - - - - -                                                                                      |       |       |       |       |       |       |       | 17375 |
| Cow         | - - - ACTTAAAAAATTCTT- - - - - CTTTGATAGCCTTTTTAT- - ATTAC- - - - ACCTGGTCA- - - - -           |       |       |       |       |       |       |       | 47942 |
| Dog         | - - - GTTTTCAGAAGCCCTTT- - - - - AATCTTTTCTGATCATCTTTTTTAATATTAC- - - - AATTGGTCA- TGTTTTAT    |       |       |       |       |       |       |       | 45250 |
| BelugaWhale | - - - ATTTTCAAAGTTCTT- - - - - TTCTTTGATACCCTTTTTAC- - CTCGT- - - - AGTTGGTCA- - - - -         |       |       |       |       |       |       |       | 44272 |
| Donkey      | - - - NNNNNNNNNNNNNNN- - - - - NNNNNNNNNNNNNNNNNNN- - NNNNN- - - - NNNNNNNNNNGGTGCCAT          |       |       |       |       |       |       |       | 50057 |
| Cat         | TTAATTTTCAGAAGCCCTTT- - - - - AATCTTTTTTGTATAATCCTTTTTAG- GTTAC- - - - AATTGGTCAGTGTTTTGT      |       |       |       |       |       |       |       | 51403 |
| Ferret      | TTAGTTTTTCAGAAGCCCTTT- - - - - AATCTTTTCTGATCATTTTTTTTA- TGTTGC- - - - AGTTCATCA- TGTTTTAT     |       |       |       |       |       |       |       | 52390 |
| Lion        | TTAATTTTCAGAAGCCCTTT- - - - - AATCTTTTTTGTATAATCCTTTTTAG- GTTAC- - - - AATTAGTCAGTGTTTTGT      |       |       |       |       |       |       |       | 49077 |
| Vaquita     | - - - ATTTTCAAAGTTCTTC- - - - - TTTTCTTTGATACCCTTTTTAC- - GTCGT- - - - AGTTGGTCA- - - - -      |       |       |       |       |       |       |       | 44960 |
| Pig         | - - - ATTTTCAAATCTCTTT- - - - - TTCTTTGATCATCCTTTTTA- - ATTGC- - - - AGTTAGTCA- - - - -        |       |       |       |       |       |       |       | 41856 |

Dienstag, 3. Mai 2022 08:39

| Majority    | XXTT-----CTTTAAGGA-----TACTAATTAATAA-----TATT-TT-----AA-AA                      |       |       |       |       |       |       |       |       |
|-------------|---------------------------------------------------------------------------------|-------|-------|-------|-------|-------|-------|-------|-------|
|             | 65610                                                                           | 65620 | 65630 | 65640 | 65650 | 65660 | 65670 | 65680 |       |
| Human       | GACAGAAGGAATAATCAATGCAAAGTTCCTTCTGTTGAAAAAATGCTTTTATAATTTTATTTTTCATCTTCTAAAGCCC |       |       |       |       |       |       |       | 52293 |
| PolarBear   | -----                                                                           |       |       |       |       |       |       |       | 17375 |
| Cow         | --TT-----GTTTATGGA-----TACTAATTAATGG-----TATT-TT-----TA-AA                      |       |       |       |       |       |       |       | 47976 |
| Dog         | TATTTTACAGTTCTTTAAGG-----TACTAATTAACAA-----TATT-TT-----AAAAGA                   |       |       |       |       |       |       |       | 45295 |
| BelugaWhale | --TT-----CTTTACAGT-----TACTAATTAATG-----TATT-TT-----AA-AA                       |       |       |       |       |       |       |       | 44305 |
| Donkey      | GTCTG-----CGCCCAGGA-----TCTGAACCAGCAAA-----ACC-CC-----GGGA                      |       |       |       |       |       |       |       | 50094 |
| Cat         | GATTTTACAATTCTTTAAGGA-----TACTACTAATTAATAGTATTTT-TAAAAATACCTCACTCTATCTAAATTAT   |       |       |       |       |       |       |       | 51474 |
| Ferret      | GATTTTCATAGTTCTTTAAGGA-----TTCGAATTAACAGTGCTTTGTT-TTATTATTTATTTATTAGTTTAAAAAAA  |       |       |       |       |       |       |       | 52461 |
| Lion        | GATTTTACAATTCTTTAAGGA-----TACTACTAATTAATAGTATTTT-TAAAAATACCTCACTCTATCTAAATTAT   |       |       |       |       |       |       |       | 49148 |
| Vaquita     | --TT-----CTTTACAGT-----TACTAATTAATGG-----TATT-TT-----AA-AA                      |       |       |       |       |       |       |       | 44994 |
| Pig         | --TT-----CTTTACAGT-----TAATAATTGT--A-----TTTT-TT-----AA-AA                      |       |       |       |       |       |       |       | 41888 |

| Majority    | TAC---TT---XGCTAXATCTTTT---ATTTTCTTTAGTATTAGCTAXTATGTTTATC-----TTGTTCT-GTTTA       |       |       |       |       |       |       |       |       |
|-------------|------------------------------------------------------------------------------------|-------|-------|-------|-------|-------|-------|-------|-------|
|             | 65690                                                                              | 65700 | 65710 | 65720 | 65730 | 65740 | 65750 | 65760 |       |
| Human       | TTCAGTCTCCTTTGGTCATCTTTTTTTTGTAGTTGGTTATGCCTTAACAACAGTACTTTGAGGATACTAGTTACAGTATT   |       |       |       |       |       |       |       | 52373 |
| PolarBear   | -----                                                                              |       |       |       |       |       |       |       | 17375 |
| Cow         | CAC---TC---TGCT--ATCTTTT---ACTTTCCTTAGTATTAGCT-----GTTTATC-----TTGCTCT-CCTC-       |       |       |       |       |       |       |       | 48029 |
| Dog         | TAC---TAT---ATGTTAATTATCTT---ATTTTCTTCAGTGTTAGCTATTATGT-----TTGTCTT-GTATA          |       |       |       |       |       |       |       | 45353 |
| BelugaWhale | TAC---TT---GACT--ATCTTTT---ACCTTCTTTAGAATTAGCTGTTATGTTTATC-----TTGTTCT-CTCTA       |       |       |       |       |       |       |       | 44364 |
| Donkey      | CACTGAAGC-AGAGCTCACAAACTT---AACCACCTCCGCCACAGGCCAGCCCCTGT-TT-----TTCTCTT-GTTAA     |       |       |       |       |       |       |       | 50160 |
| Cat         | TTCATTCTTTTCAAGTGTAGCTGTTAT---GTTTATCT-TCTGTCCATCTGTCTGTCTTCTCCTCCCCCTAGTTGT-GTTTA |       |       |       |       |       |       |       | 51548 |
| Ferret      | TAC--TTTTAAAAAAAAAAGATTTT---ATTTATTTATTTGAGAGGGAGAAGGCGGAGTGGGGGGCGGGTGT-GCAGA     |       |       |       |       |       |       |       | 52533 |
| Lion        | CTCATTCTTTTCAAGTGTAGCTGTTAT---GTTTATCT-TCTGTCCATCTGTCTGTCTTCTCCTCCCCCAGTTGT-GTTTA  |       |       |       |       |       |       |       | 49222 |
| Vaquita     | TAC---TT---GACTGTATCTTTT---ACTTTCTTTAGAATTAGCTGTTATGTTTATC-----TTGTTCT-CTCTA       |       |       |       |       |       |       |       | 45055 |
| Pig         | TAC---TT---GACTGTATCTCCT---AATTTCGTTAGTATTAGCTATTATGTTTATC-----TTGTTCT-CTCTT       |       |       |       |       |       |       |       | 41949 |

Dienstag, 3. Mai 2022 08:39

| Majority    | TXCATCT- - - CTTXCTCCXXCCCGCCCTAATTGTCTGTTT- - - - -                                     |       |
|-------------|------------------------------------------------------------------------------------------|-------|
|             | 65770 65780 65790 65800 65810 65820 65830 65840                                          |       |
| Human       | TAAAAAATACGTCACTATATGCTGAGTTATTTTTTTCAGTGTTAGCATTTATGTTTATCTTGTTCTCATTCTCTTCATCCC        | 52453 |
| PolarBear   | - - - - -                                                                                | 17375 |
| Cow         | - - - - - CTT CATCCCACCCGCTCTCATTGCTTGTTT- - - - -                                       | 48060 |
| Dog         | TCCATCT- - GTCTATCCCTTCTCCCCCAGTAGTCTGTT- - CAT- - - A- - - - -                          | 45394 |
| BelugaWhale | TTCTTCT- - - CTT CCTCCCACCCACCCTCATTGTCTGTTT- - - - -                                    | 44401 |
| Donkey      | TCTGTCTTTTGT CAGTCTAATTTAC- - - AGGCCTCAGGTGGAGAACCCTAAGATAGGGAGAGGAAGAGATTTTCCCT- - - - | 50233 |
| Cat         | TATATTTTAGAATGGACAATTAGGTTTTATTGGACTGGTATGCTTTCCTCTAGAGTAAAATAAGGAGTTTGGACACTGAG         | 51628 |
| Ferret      | GGGAGAT- - GCAGACTCCCTGCTGAGCAAGGAGCCTGATTCCAAGCTCAATCCCAGGACCACTGAGATCATGACCTGAGC       | 52611 |
| Lion        | TATATTTTAGAAAGGACAATTAGGTTTTATTGGACTGGTATGCTTTCCTCTAGAGTAAAATAAGGAGTTTGGACACTGAG         | 49302 |
| Vaquita     | TTCTTCT- - - CTT CCTCCCACCCACCCTCATTGTCTGTTT- - - - -                                    | 45092 |
| Pig         | TCCCTGT- - - CTCCCTCCTACCCACCCTCATTGTTTGT- - - - -                                       | 41986 |

| Majority    | - - - - - ATATTT CAGAATGGACAATTAGGTTTTX- - - - TTGXAAXTTGCATGCTTTCCTCTAXAGTAAG          |       |
|-------------|-----------------------------------------------------------------------------------------|-------|
|             | 65850 65860 65870 65880 65890 65900 65910 65920                                         |       |
| Human       | CCCTTTGTTGTCTTTTCGTGTTTCAGAATGGACAATTAGATTTTG- - - - TTAAAGTTGTATGCTTTCCTCTAGGATAAA     | 52528 |
| PolarBear   | - - - - -                                                                               | 17375 |
| Cow         | - - - - - ATATTT CAGAATGGGCAGTTAGGTTTTA- - - - CTGGACTTTACATGCTTTCCTCTAGAGTAAA          | 48119 |
| Dog         | - - - - - TTT CAGAATGGATAGTTAAGTTTTACTGTTTG- - GACTGGTAGGCTTTTATTACAGTAAA               | 45452 |
| BelugaWhale | - - - - - ATATTT CAGAATGGACAATTAGGTTTTA- - - - TTGGA- CTTGCATGCTTTCCTCTAGAGTAAG         | 44459 |
| Donkey      | - - - - - TCCCT- - ACATCTCA- - TTGGACATGTGGATATAGCTAAATAGAAGACACCAGCCTG- - GGC ACTGCAAT | 50297 |
| Cat         | CTCT- - GGGATCCCA- - TAAATACGAAAGAGGTCTTACTCTGGGCCTGTAAA ACTCTCTTTAGAATTTCTTTCTTTTAA    | 51704 |
| Ferret      | CACCCAGGTGCCCT- - AATTAACAGTATTA AAAAAAATACTTCACTATGTGTA AATTACTGAATTTCTTCACTGTTAG      | 52689 |
| Lion        | CT- - - GGGATCCCA- - TAAATACCAAAGAGCACCTTATTCTGGGCCTGTAAA ACTCTCTTTAGAATTTCTTTCTTTTAA   | 49376 |
| Vaquita     | - - - - - ATATTT CAGAATGGACAGTTAGGTTTTT- - - - TTGGA- CTTGCATGCTTTCCTCTAGAGTAAG         | 45150 |
| Pig         | - - - - - ATATTT CAGATTGGATGATTAGGTCTT- - - - TTGACACTTGCATGTTTTCTCTAGAGTAAG            | 42044 |

Dienstag, 3. Mai 2022 08:39

|             |                                                                                                                |       |
|-------------|----------------------------------------------------------------------------------------------------------------|-------|
| Majority    | GTAATGAG- - - - - TTAXTTGGATATTAAXCTG- - - - - GGAXXCTCTC- C- AAATGXCA- - - - XA- -                            |       |
|             | 65930          65940          65950          65960          65970          65980          65990          66000 |       |
| Human       | GTAATGAAGAGCGTTTACTAAGCTGTTACCCCCATTCCCCCAAATACCAAAGAGGCTCTTATTCTGGGTCAACAAAAC                                 | 52608 |
| PolarBear   | -----                                                                                                          | 17375 |
| Cow         | GTAAT- - - - - GAGTTGGATACTAAGCTG- - - - - GGATCCCCC- C- AAATGCCAA- - - - A- -                                 | 48163 |
| Dog         | GTAATGAG- - - - - TTT- - - GGATATTAAGCTG- - - - - GGATTCTC- C- AAATACCA- - - AAA- -                            | 45496 |
| BelugaWhale | GCAACGAG- - - - - GACTTGGATACTAACCTG- - - - - GGATCCCCC- CCAAATGCCA- - - - -                                   | 44505 |
| Donkey      | GTTATACG- - - - - TACTTTGGA- ATGAAAGTG- - - - - ACTAATTAGAGT- - - ATATTTTAA- - - GA- -                         | 50346 |
| Cat         | AGGAGGAT- - - - - TTTTT- GTTTGTGTTGTTTGTGTTTAAATGATAAGGGAGAGAGATGATG- A- GGAAATGGGAGAAA- -                     | 51773 |
| Ferret      | CTGTTAAG- - - - - TTTATCGTGTATCCATCTGTCTGCCCTTCCTCCCCAGTAGTCTATT- C- ATATTTCA- - - GAA- -                      | 52756 |
| Lion        | GGGAGGAT- - - - - TTT- - - - - GTTGGTTTTTTTTAAATGATAAGGGAGAGAGATGATG- A- GGGAATGGGAGAAA- -                     | 49439 |
| Vaquita     | GTAATGAG- - - - - GACTTGGATACTAACCTG- - - - - GGATCCCCC- CCAAATGCCA- - - - -                                   | 45196 |
| Pig         | GTAATAAG- - - - - GAGTTGGATACTAAGCTG- - - - - GGATTCTCC- - - AAATGCCAA- - - - A- -                             | 42090 |

|             |                                                                                                                |       |
|-------------|----------------------------------------------------------------------------------------------------------------|-------|
| Majority    | - - - - GAGGTCTTTATTC- - TAGGCCTGT- - - - AAAACTC- - - CXTTTAG- - - - -                                        |       |
|             | 66010          66020          66030          66040          66050          66060          66070          66080 |       |
| Human       | CCCTTTAGAATTTCTGGTACCAGGCTGTGCGTGGTGGCTCACACTTGTAATCCCAGCACTTTGGGAGGCTGAGGTGGGCG                               | 52688 |
| PolarBear   | -----                                                                                                          | 17375 |
| Cow         | - - - - GAGGTCTTTACT- - - TAGGCCTTT- - - - AAAACCC- - - TCTTTAG- - - - -                                       | 48198 |
| Dog         | - - - - AAGGTCCTTATT- - CTGGGTCAGT- - - - AAAACTC- - - CTTTAG- - - - A- - - - - AT- - - - -                    | 45535 |
| BelugaWhale | - - - - GAGGTCTTTATTC- - TTGGCCTTC- - - - AAAACTC- - - CTTTAG- - - - -                                         | 44541 |
| Donkey      | - - - - TAAGGTTTTA- - - - TGAACCTATA- - - - AAATATG- - - TCTTTGG- - - - -                                      | 50380 |
| Cat         | - - - - GAGGAATTTGTTTCATTAGGCAGACTTTCCATTAACC- - - CTTTGATTTTCGTCTAGGACTCTGCCAGTTTCTAAT                        | 51846 |
| Ferret      | - - - - TTAGGTTTTACTGGTTATACTGGT- - - - ATGCTTT- - - CTTTCAGGTTAAGTAATGAGTTTGGATACCAAGCTGG                     | 52824 |
| Lion        | - - - - GAGGAATTTGTTTCATTATGCAGACTTTCCATTAACC- - - CTTTGATTTTCATCCTAGGACTCTGCCAGTTTCTAAT                       | 49512 |
| Vaquita     | - - - - GAGGTCTTTATTC- - TTGGCCTTC- - - - AAAACTC- - - CTTTAG- - - - -                                         | 45232 |
| Pig         | - - - - GAAGCCTTCATTC- - TTGGCCAGT- - - - GAAACTT- - - CTTTAG- - - - -                                         | 42126 |

Dienstag, 3. Mai 2022 08:39

| Majority    | ----- AGTTTCTGTTCTTTTAA----- GGGAGCATTXXGTTGTT                                       |       |       |       |       |       |       |       |       |
|-------------|--------------------------------------------------------------------------------------|-------|-------|-------|-------|-------|-------|-------|-------|
|             | 66090                                                                                | 66100 | 66110 | 66120 | 66130 | 66140 | 66150 | 66160 |       |
| Human       | GATCACGAGGT CAGGAGAT CGAGACCAT GGT GAAACCCCGT CTGTACTAAAATACGAAAATTAGCTGGGCGTGGTGGCG |       |       |       |       |       |       |       | 52768 |
| PolarBear   | -----                                                                                |       |       |       |       |       |       |       | 17375 |
| Cow         | ----- AGTTTCTGTTCTTTTAA----- GGGGGTGTTTAGTTGTT                                       |       |       |       |       |       |       |       | 48232 |
| Dog         | ----- TCCTG- TTTCTTT- - - TAAA----- GGGAGCATTXXGTTGTT                                |       |       |       |       |       |       |       | 45568 |
| BelugaWhale | ----- AGTTTCTGTTCTTTTAA----- GGGAGTGTTTAGTTGTT                                       |       |       |       |       |       |       |       | 44575 |
| Donkey      | ----- A----- CCATTTTTTACTCATGTCA----- AGTGTATGCACATCTC                               |       |       |       |       |       |       |       | 50416 |
| Cat         | CTGACATAATGTGGCGGTTAACAGTGCAAACCCGTGTTTGTCTGTGTTCACCTAAGCTTTCTTTGTTCCCATTGTTTCCA     |       |       |       |       |       |       |       | 51926 |
| Ferret      | GATTCCCCAGAAAGGCCTGGGCCAATAGAACTCTTTAGAATTCCTCTTTCTTTAA----- GGGAGCATTXXGTTATT       |       |       |       |       |       |       |       | 52896 |
| Lion        | CTGACATAATGTGGCGGTTAACAGTGCAAACCCGTGTTTGTCTGTGTTCACCTAAGTCTTCTTTGTTCCCATTGTTTCCA     |       |       |       |       |       |       |       | 49592 |
| Vaquita     | ----- AGTTTTTGTCTTTTAA----- GGGAGTGTTTAGTTGTT                                        |       |       |       |       |       |       |       | 45266 |
| Pig         | ----- AATTTCTGTTCTTTTAA----- GGAAGCATTXXGTCATT                                       |       |       |       |       |       |       |       | 42160 |

| Majority    | - TTGXTTTT- GTTXXTTTATTXAATA- - ATAAAAGXGX- - - XTGXTGATGA- - - GGAGGAAGAGX- - - - - AGCTG       |       |       |       |       |       |       |       |       |
|-------------|--------------------------------------------------------------------------------------------------|-------|-------|-------|-------|-------|-------|-------|-------|
|             | 66170                                                                                            | 66180 | 66190 | 66200 | 66210 | 66220 | 66230 | 66240 |       |
| Human       | GGCGCCTGTAGTCCCAGCTACTCGGGAGGCTGAGGCAGGAGAATGGTGCAGACCCAGGAGGCGGAGCTTGCAGTGAGCCG                 |       |       |       |       |       |       |       | 52848 |
| PolarBear   | -----                                                                                            |       |       |       |       |       |       |       | 17375 |
| Cow         | - - - GATTTT- GTTTTTATTAAGTTG- - - - GTTGA- - - - - TGGT GAGGA- - - GGAAGAAGAGTTT- - - - - AGCTG |       |       |       |       |       |       |       | 48285 |
| Dog         | - TTTGTTTT- TTAATGGTTAAAGGGGA- GAGAGAGATG- - - ATGGGGGTGG- - - GGTGGGGAGGC- - - - - AGCAG        |       |       |       |       |       |       |       | 45629 |
| BelugaWhale | GTTGCTTTT- GTTTTTATTGTTTAATA- - ATAAGTTGGT- - - TGATGGTGA- - - GAAGGAAGAG- - - - - GATG          |       |       |       |       |       |       |       | 44634 |
| Donkey      | - TAGATCTT- CTTCCAATATCAC- - - - - TAAAAAAG- - - GGGAAAAAAG- - - AGAGAAAAA- - - - - AGCCA        |       |       |       |       |       |       |       | 50470 |
| Cat         | - TTTATTTT- CTGCATTCCAGGAATTTTGGTAAAAGTATTCTATGCTAATGA- - - GGACATTCTCTCT- - - - - ATTCA         |       |       |       |       |       |       |       | 51994 |
| Ferret      | - TTTGTTTT- TTAATGGTTAAAGAGATGATGGGGAG- - - GGGAGGAAGA- - - GGAGTTTAATT- - - - - ATTTG           |       |       |       |       |       |       |       | 52958 |
| Lion        | - TTTATTTT- CTGCATTCCAGGAATTTTGGTAAAAGTATTCTATGCTAATGA- - - GGACATTCTCTCT- - - - - ATTCA         |       |       |       |       |       |       |       | 49660 |
| Vaquita     | GTTGCTTTT- GTTTTTATTGTTTAATA- - ATAAGTTGGT- - - TGATGGTGA- - - GGAGGAAGAG- - - - - GATG          |       |       |       |       |       |       |       | 45325 |
| Pig         | - - - GCCTTT- ATTTTTGCTATTTCACT- - ATTAAGGGT- - - GTGGGGTAGG- - - GGGAGAGGAACTG- - - - - AGCTG   |       |       |       |       |       |       |       | 42221 |

Dienstag, 3. Mai 2022 08:39

|             |                                                                                                             |       |       |       |       |       |       |       |       |
|-------------|-------------------------------------------------------------------------------------------------------------|-------|-------|-------|-------|-------|-------|-------|-------|
| Majority    | - - - TTTGTTAGCTATACTTTATGTTA- ACCCTTTTA- - - - - - - - TTTTCATTAACT- T- - - TTCAXXTT- - - - - - X- -       |       |       |       |       |       |       |       |       |
|             | 66250                                                                                                       | 66260 | 66270 | 66280 | 66290 | 66300 | 66310 | 66320 |       |
| Human       | AGATCGCGCCACTGCACTTCAGCCTGGGCGACAGAGCGAGACTCTGTCTCAAAAAAAAAAAAAAAAAAAGAATTCTTGTA                            |       |       |       |       |       |       |       | 52928 |
| PolarBear   | -----                                                                                                       |       |       |       |       |       |       |       | 17375 |
| Cow         | - - - TTTGTTAGCCAGGCTTTCTGTTA- ATCCTTTTA- - - - - - - - TTTTCACATTCCAT- - - TTCACCT- - - - - - - -          |       |       |       |       |       |       |       | 48338 |
| Dog         | - - - TTTACCTGTTGCTCATTAGGTAG- A- - - - - - - - - - - - - - CTTTCCATTAACCCT- - - TTTATTTT- CCCCCTCT-        |       |       |       |       |       |       |       | 45684 |
| BelugaWhale | - - - TTTGTTAGCCATACTTTCTGTTA- ACCCTTTTA- - - - - - - - TTTTCA- - - - - - - - TTCTCCTT- - - - - - - -       |       |       |       |       |       |       |       | 44680 |
| Donkey      | - - - - - - CAATAAAACCTTTTAAAAAAC- - - - - - - - - - - - - - T- CCAC- AATA- - - - - TTCAGATT- - - - - - - - |       |       |       |       |       |       |       | 50508 |
| Cat         | - - - GTGTTTGGGTTTATTCCATGTTGTATTAATTTATAGGCATTTTATTTTAAATTTTAAATTTCCAGTGT- AGGTAACA-                       |       |       |       |       |       |       |       | 52069 |
| Ferret      | - - - TTCATTAGGCTGACTTTACTTTA- ACCCTTTTATCCCACCCCTCCCGTAACTCT- - - CCCAGTTT- CTCTGCCA-                      |       |       |       |       |       |       |       | 53029 |
| Lion        | - - - GTGTTTGGGTTTATTCCATGTTGTATTAATTTATAGGCATTTTATTTTAAATTTTAAATTTCCAGTGT- AGGTAACAC                       |       |       |       |       |       |       |       | 49736 |
| Vaquita     | - - - TTTGTTAGCCATACTTTCTGTTA- ACCCTTTTA- - - - - - - - TTTTCA- - - - - - - - TTCTCCTT- - - - - - - -       |       |       |       |       |       |       |       | 45371 |
| Pig         | - - - TTTGTTAGCTAGACTTTCTGTTA- ACTCTTTTA- - - - - - - - ACCCTGTAACTCT- - - TTCACCTT- CTCC- - CT-            |       |       |       |       |       |       |       | 42281 |

|             |                                                                                                      |       |       |       |       |       |       |       |       |
|-------------|------------------------------------------------------------------------------------------------------|-------|-------|-------|-------|-------|-------|-------|-------|
| Majority    | CCTCCTGTGTACXTT- - - - CXAATTTCTAATTTGATTCCTXTG- - - - - - - - GTTXCTATCAGTGCAAACCCTGTTT- - -        |       |       |       |       |       |       |       |       |
|             | 66330                                                                                                | 66340 | 66350 | 66360 | 66370 | 66380 | 66390 | 66400 |       |
| Human       | CCAGCAGGGCACTTTGGCTCATGCCTGTAATCCCAGCACTTTGAGAAGCTGAGGTAATTCAGGGCAG- CAGTGAACCTGG                    |       |       |       |       |       |       |       | 53007 |
| PolarBear   | -----                                                                                                |       |       |       |       |       |       |       | 17375 |
| Cow         | CCTCCTGTGTACCTG- - - - CCAGTTTCTAATTTGATTCCTATG- - - - - - - - GCTGCTACCAATGCAAATGCTGTTT- - -        |       |       |       |       |       |       |       | 48402 |
| Dog         | GCCCTTTGTGACTGC- - - - CAGAT- TCTAATGT- - - - - - - - CAC- - - - - TCATGTAAGTGTGAGTGCAGACCCTGTT- - - |       |       |       |       |       |       |       | 45743 |
| BelugaWhale | CCTCCTGTGTACCTA- - - - CCAATTTCTAATTTGATTCCTGTG- - - - - - - - GATGCTACCAGTGCAAACCCTGTTTT- -         |       |       |       |       |       |       |       | 44745 |
| Donkey      | - - - - TTGCATACTTT- - - - AGAACTTCTGAGGTTGAGCCA- - G- - - - - - - ACATGAC- ATGAATAAAGTTCATCTTT- - - |       |       |       |       |       |       |       | 50567 |
| Cat         | - GTGTTAATTAGTTT- - - - TAGGTGTACAATATAGTGATTCAGCAATTCTGTATGTTACTCAGTGCTTACCATGATAAGG                |       |       |       |       |       |       |       | 52144 |
| Ferret      | TGAGCCAGGTACCAC- - - - CTGTT- TATAATTCAGGTATTCTAC- - - - TAGTATGATTCATGTGGCAAACCCTGTT- - - -         |       |       |       |       |       |       |       | 53096 |
| Lion        | AGTGTTAATTAGTTT- - - - TAGGTGCACAATATAGTGATTCAGCAATTCTGTATGTTACTCAGTGCTTATCATGATAAGG                 |       |       |       |       |       |       |       | 49812 |
| Vaquita     | CCTCCTGTGTACCTA- - - - CCAATTTCTAATTTGATTCCTATG- - - - - - - - GATGCTACCAGTGCAAACCCTGTTTT- -         |       |       |       |       |       |       |       | 45436 |
| Pig         | CCTCCTGTGTACCTG- - - - CCAATTTCTAATCTGATTCCTGTG- - - - - - - - GCTGCTAGCAGTGCAAACCCTGTTT- - -        |       |       |       |       |       |       |       | 42345 |

Dienstag, 3. Mai 2022 08:39

|             |                                                                                                                              |       |
|-------------|------------------------------------------------------------------------------------------------------------------------------|-------|
| Majority    | - XGCTATGTGTTCACTXTGTCTTCTGT- CCATGCATTT- - AT- - - - TXTC- TGXXTTXCAGXAA- TTTGATAAAATTXTT                                   |       |
|             | 66410            66420            66430            66440            66450            66460            66470            66480 |       |
| Human       | TCACACCAC- TGCCTCCAGCCTCAG- - CAACAAAGCAAGACACAGTCTCTTAAAAAAAAAAAAAAAAAGGAAGAAATTCTGGT                                       | 53084 |
| PolarBear   | -----                                                                                                                        | 17375 |
| Cow         | - - GCTATGTGTTCACTGTGTCTTCTGT- CCATGCAATT- - - - - - - - TC- TGTGTTCCAGGAA- TCTGATAAAATTATT                                  | 48467 |
| Dog         | - TGCTATGTGTTCACTGTGTCTTCTGT- - - - ATTTGTTTCCATTCATTTTC- TGTATACCAG- TATTTTGATAAAAGTATT                                     | 45816 |
| BelugaWhale | - - GCTATGTGTTCACTGTGTCTTCTGT- CCATGCATTT- - - - - - - - TC- TGAGTTTTGGGAA- TTTGATAAAATTATT                                  | 44810 |
| Donkey      | - TGCCAAAGATTTTCT- TG- CTTCCAAACAGTACTATTTAAT- - - - - - - - TGTGT- - - - - AAGTGTAAAGCAGAATGT-                              | 50628 |
| Cat         | GTACTCTTTAATCCCATCACCTCATTTATATGCATTTTCTGGGCTTTCATAAATAGAAGAGAGCCAGTAAATATGAG                                                | 52224 |
| Ferret      | - TGCTATGTGTTCACTATGTCTTCTGTGTGATTCCTTTCTATTAATTTTG- CGTATTCCAG- GAATTTGATGAAAGTGTG                                          | 53173 |
| Lion        | GTACTCTTTAATCCCATCACCTCATTTATAGGCATTTTCTGGGCTTTCATAAATAGAAGAGAGTCCAATAAATATGAG                                               | 49892 |
| Vaquita     | - - GCTATGTGTTCACTATGTCTTCTGT- CCATGCATTT- - - - - - - - TC- TGAGTTTTGGGAA- TTTGATAAAATTATT                                  | 45501 |
| Pig         | - - GGTACATGTCCACTGTGTCATCTGT- CCATTTAGTTCCATTCATTTTC- TGTGTTTCAGGA- - TTTGATAAAATTATT                                       | 42419 |

|             |                                                                                                                              |       |
|-------------|------------------------------------------------------------------------------------------------------------------------------|-------|
| Majority    | CTCAGCTAGTG- - - - - - ATGACCTT- - CTCTXTTCAGTA- - - - - - TCTGCGTTTATTCCATT- - - - - - - - TT                               |       |
|             | 66490            66500            66510            66520            66530            66540            66550            66560 |       |
| Human       | TCCTTTAAGGGAGATTTGTTGTTGTTTCTTCTTTAATGGTGAGGGTACAAGTTGGTCACAGGAGGGAGAAGAGAAATT                                               | 53164 |
| PolarBear   | -----                                                                                                                        | 17375 |
| Cow         | CTTGGCCAGTG- - - - - - ATGACCT- - - - - CTCTTCAGTG- - - - - TCTGCATTTATTCCATT- - - - - - - - TT                              | 48514 |
| Dog         | CTCAGCTGATG- - - - - - ACAACACTCTTTCTATTCAATA- - - - - - TTTGGGTTTATTCCATT- - - - - - - - TT                                 | 45868 |
| BelugaWhale | CTGAGCTAGTG- - - - - - ATAACCTT- - TTCTCTTCAGTA- - - - - - TCTGCATTTATTCCATT- - - - - - - - TT                               | 44860 |
| Donkey      | - TTAG- - AATA- - - - - - GCAGCTTATAAACTGTTTCCAA- - - - - - - - GCACCTTCGACACC- - - - - - - - CT                             | 50674 |
| Cat         | TCAACCTTGAATTCTTCCATGATCCTTCTCAAATTACCAA- - GTCTTACCAGTTCACTCTTGT- - - - - - - - TA                                          | 52288 |
| Ferret      | CTCAGCCAATG- - - - - - ATGACGTTCTCTCTATTTCAGTA- - - - - - TTTGGGTTTATTCCATT- - - - - - - - TT                                | 53225 |
| Lion        | TCAACCTTGAATTCTTCCATGATCCTTCTCAAATTACCAA- - GTCTTACCAGTTCACTCTTGT- - - - - - - - TA                                          | 49956 |
| Vaquita     | CTGAGCTAGTG- - - - - - ATAACCTT- - TTCTCTTCAGTA- - - - - - TCTGCATTTATTCCATT- - - - - - - - TT                               | 45551 |
| Pig         | CTCAGT- GATG- - - - - - ACCTTCT- - - - - CTCGTCTGTG- - - - - - TCTGTGTTTATTCCATT- - - - - - - - TT                           | 42465 |



Dienstag, 3. Mai 2022 08:39

|             |                                                                                                        |       |
|-------------|--------------------------------------------------------------------------------------------------------|-------|
| Majority    | GTATTTATTTA- - - - TAGTCATTTT- AXTAGTGTTTTATAATTCAAGAAXAXTTAXXGAATG- - TGTATXTCAATCATX                 |       |
|             | 66570      66580      66590      66600      66610      66620      66630      66640                     |       |
| Human       | TAGCTCTTTTGTAAATGAAGTACTTTCTGTTCTGTTCTGTTTTTCAACCACTCCCTCCTCCTGTGAACCTGCCAATTTCT                       | 53244 |
| PolarBear   | -----                                                                                                  | 17375 |
| Cow         | - - - - TTATTTA- - - - TAGGCATTTT- - AATAGTGTTTTATAACAAAAGAGAGA- - - CGAATA- - TGTACATCAACCATG         | 48578 |
| Dog         | ATATTCATTAA- - - - TGGGTGTTTTTAATTCA- - - - - - - - - - ATTCCAGTATAGTTAATATATGGTATTATACTAGTTTTCA       | 45935 |
| BelugaWhale | GTACTTATTTA- - - - TAGTCATTTT- - AATAGTGTTTTATAATAGAAGAGAGACAAATGAATG- - TGTGTGTCAATCATG               | 44932 |
| Donkey      | CGAGTACTTCAGAAGTAGTTAATTTGCA- - - - - - - - - - T- - ACAATTGATATGCTAGTTATGATTA- - - ATATATGAATAA- -    | 50740 |
| Cat         | ATATCTGCCTAGTTTTTCATCATCTTTCTTGCTACTTTAGTAGCTCAGACACAGTTACCTTTTTGGCTGTACTGTGATAACA                     | 52368 |
| Ferret      | GTATTGATTTA- - - - CAGGCATTTTTTATTAAGTTTTTAAAATTCCAGTATAGTTACTATATGGGGTTATACTAGTTTTTA                  | 53301 |
| Lion        | ATATCTGCCTAGTTTTTCATCATCTTTCTTGCTACTTTAGTAGCTCAGACACAGTTACCTTTTTGGCTGTACTGTGATAACA                     | 50036 |
| Vaquita     | GTACTTATTTA- - - - TAGTCATTTT- - AATAGTGTTTTATAATAGAAGAGAGACAAATGAATG- - TGTGTGTCAATCATG               | 45623 |
| Pig         | GTATTCATTTA- - - - TAGGCATTGT- - AATAGGGTTTTGTAATAGAAGAAA- - - - - - - - - - CAAATG- - TGTGTGTCAACCGTG | 42531 |

|             |                                                                                                       |       |
|-------------|-------------------------------------------------------------------------------------------------------|-------|
| Majority    | GAT- T- - CTTCTAGAXCXXTT- - CATXAAATCAX- CATGTXCTXXGTATTCAXTCTTCTCAGTXXCXCTXAG- TTTCX-                |       |
|             | 66650      66660      66670      66680      66690      66700      66710      66720                    |       |
| Human       | GATTTGGTTCCTGTGGCTGCTACCAGTATAACACCTGTTGCTGTGTGTTCACTGTGTCTCCAGTCCATTTGG- - TTCCA                     | 53322 |
| PolarBear   | -----                                                                                                 | 17375 |
| Cow         | AAT- T- - CTTCCACAACCTTT- - TATCAAGTCA- - CAAGTCGTATGAATTCCTCTTCTCAATATCTGCCAGTTTTTCAT                | 48651 |
| Dog         | GGTGT- - ATAGTGAGTCAACA- - ATTTTATACAATTTTATACTTAGTGCTCATCATA- - - AGTGTACTCTTTAATCCCCA               | 46008 |
| BelugaWhale | AAT- T- - CTTCCAGAACCTTT- - CATCAAATCAG- TAGGTTCTGTGAATTCCTCTTTTCAATATCTGCCAGTTTTTC- -                | 45004 |
| Donkey      | - - - - T- - TCTT- - - ATCTATT- - CATTAAATCAGTC- - - CCCTCAGGATTTTTATTAGTCAGCATATCGTTA- - - - - - - - | 50798 |
| Cat         | GCTCT- - CTTATTGATCTGCT- - TTTTTGCTTTCCCCTCT- TGAATTCCTTCTCCCTCCCTACTTCCCTCTCCC- TTCCA                | 52442 |
| Ferret      | GGTGT- - ACAGTATCGTGGTT- - CAACAATTTTATACATTACTCATTGTTTCATCATGATCAGTGTACTCTTTTCATACCCA                | 53377 |
| Lion        | GCTCT- - CTTATTGATCTGCT- - TTTTTGCTTTCCCCTCT- TGAATTCCTTCTCCCTCCCTACTTCCCTCTCCCCTTCCCC                | 50111 |
| Vaquita     | AAT- T- - CTTCCAGAACCTTT- - CATCAAATCAG- TAGGTTCTGTGAATTCCTCTTTTTCAGTATCTGCCAGTTTTTC- -               | 45695 |
| Pig         | AGT- T- - CCTCCATAACCTTT- - CATCAAATCAT- CAAGTCCATTGAATTCCTCTTCTCAGTGTCTGCCTAGATTTTC- -               | 42603 |

Dienstag, 3. Mai 2022 08:39

| Majority    | TTCAXTTTTXCTTCTTCACTTGCTCAXAAACAXTCATCTC- - - GCCAXAT- AATAT- XCT- AA- XAT- AATTCTTTTXT-   |       |
|-------------|--------------------------------------------------------------------------------------------|-------|
|             | 66730 66740 66750 66760 66770 66780 66790 66800                                            |       |
| Human       | TTCATTTTCTGTGTTCCAGGAATTTGATAAAATTATTCTCAGCTAATGATAACCTTCCCTCCCTTCAGTGTGTTGTTTATT          | 53402 |
| PolarBear   | -----                                                                                      | 17375 |
| Cow         | TTCTTTTTTCTACTTCAGTTGCTCAGACATAGCCATGTCTTAGCTATAT- AATAATCTTACCTAAT- AACTCTCTTGAA          | 48729 |
| Dog         | T- CACCTCA- TTTATAGGCATTTTCATGGGCTTTCATAACAGAGGCAAATAAATATGAGTCAACCACGAATTCTTCCATG         | 46086 |
| BelugaWhale | TTCTTTCTTGCTACTTCATTTGCTCAGACACAGTCATCT-----                                               | 45043 |
| Donkey      | - - - ACTGTAAGAGTTTGAGTTGCTTAAGACTTGATA- - - - - GCTGAATGAGTAAGGCGAAATTGTGAAATATTTTCTG     | 50868 |
| Cat         | TACACTTCCGCCTCTCCCCTTCCCTATTAGTCTCTTTCCCCCACCCTCGTCCCTCTCTCT- AAATATATATATTTATATC          | 52521 |
| Ferret      | T- CACTTCA- TTTATACGCATTTTCATGGGCATTTCATAATAGAGGCAAATGAATATGAGTCAACAATGAATTCTTCTGTG        | 53455 |
| Lion        | TACACTTCC- CCTCTCCCCTTCCCTATTAGTCTCTTTCCCCTCACCCCGTCCCTCTCTCTTAAATATATATATTTATATA          | 50190 |
| Vaquita     | TTCTTTCTTGCTGCTTCGTTTGCTCAGACACAGTCATCT-----                                               | 45734 |
| Pig         | TTCTTTCTTGCTACTTCAACAGCTGAGATACAGTCAGCTCTTGGCTATAT- TATA- - TATA- - - - AT- AGCTCTCTT- - - | 42672 |

| Majority    | - T- XTTX- - - - XTX- XXTTX- - - X- T- X- - - - - - - - - X- X- - - C- - - TTXG- - - TCTGCX- XGX- - - CX- - X- |       |
|-------------|----------------------------------------------------------------------------------------------------------------|-------|
|             | 66810 66820 66830 66840 66850 66860 66870 66880                                                                |       |
| Human       | TTATATTCATTCACTTCTAGGCATTTTAATAGAGTTTCATAATAGAAGACATGCAAATGAGTATGCATTAACCATGAATT                               | 53482 |
| PolarBear   | -----                                                                                                          | 17375 |
| Cow         | GTGAAGCCACTCAGTCGTGT- CTGACTCTTTGGCAACCCATGGATTTTAACCTACCAG- - - GCTCCTCCGTCCATGGGAT                           | 48805 |
| Dog         | ATCCTTT- - - - GTCAAGTTACCAAGTCTTACC- - - - - AATTTATTCTTCTTAG- TATCTGCCTAGTTTTTCATCAT                         | 46151 |
| BelugaWhale | -----                                                                                                          | 45043 |
| Donkey      | CTCTTTCTCGTTGTCAAATAA- - - - - - - - - - - - - - - AC- - - TTGGACATTTGCCCTTTCTCA- - G-                         | 50914 |
| Cat         | TTTTTTTTAATGGTTGGTTTATTTATTTTGGAGTGGGGGAGAGTGTGTGCAAGTAGGGGAGGGACAGAGAGCGGGAG                                  | 52601 |
| Ferret      | ATCATTC- - - - ATCAGATTAAGTCTTTTC- - - - - AGTATACTCTTTTTAAATGTCTGCCTAGTTTTTCATCAT                             | 53521 |
| Lion        | TTTTTTTTAATAGTTGGTTTATTTATTTTGGAGTGGGGGAGAGTGTGTGCAAGTAGGGGAGGGACAGAGGGGGCGGGGG                                | 50270 |
| Vaquita     | -----                                                                                                          | 45734 |
| Pig         | ----- ACTGG- - - TCTCCT- - - - - - - - - - -                                                                   | 42683 |

Dienstag, 3. Mai 2022 08:39

| Majority    | -----X-----AXX---X-AG-TXGXA-A-XT-----X--ACTTXX--TXX--C---AXCAG--C                |       |       |       |       |       |       |       |       |
|-------------|----------------------------------------------------------------------------------|-------|-------|-------|-------|-------|-------|-------|-------|
|             | 66890                                                                            | 66900 | 66910 | 66920 | 66930 | 66940 | 66950 | 66960 |       |
| Human       | CTTTCACATCCGTTTCATGAAATCACCAGGTCTATTAGTTCACACTTTTTAATTATCTGCCTGGTTTTCTCCATCTTTCC |       |       |       |       |       |       |       | 53562 |
| PolarBear   | -----                                                                            |       |       |       |       |       |       |       | 17375 |
| Cow         | TTTCCAAGCAAGATTACTGGAGTGG-TTGCC-ATTTCTTCTCCAGGGGATCTTCCCAACCCAGGGATCAAACCCAGGTC  |       |       |       |       |       |       |       | 48883 |
| Dog         | C-----GTTCTTGCTACTCGCATAGCTCAAACACACACT-----ATCACCTCTTGGCTATATTA--CTATGATAGCTC   |       |       |       |       |       |       |       | 46217 |
| BelugaWhale | -----                                                                            |       |       |       |       |       |       |       | 45043 |
| Donkey      | -----AG-----ACTCTCCCAACTTGTTG-GT-----ACCTCTTTTTTTAGGATCCAACACCATTAC              |       |       |       |       |       |       |       | 50966 |
| Cat         | G--GGAGAGAGAGAGAGAGAGAGAATGAATGAATGAATGAATGAATGAATGAATGAATATATAT--CCCAACCAGGCT   |       |       |       |       |       |       |       | 52677 |
| Ferret      | C-----TTTCTTGTTACTTTGAATAGCTCAGACACACACA-----GTCGCCTCTTGGCTATATTG--TTTTAATAGCTC  |       |       |       |       |       |       |       | 53587 |
| Lion        | GAGGGGGAGAGAGAGAGAGAGAGAGAGAGAGAGAATGAATGAATGAATGAATGAATATATATATCCCAACCAGGCT     |       |       |       |       |       |       |       | 50350 |
| Vaquita     | -----                                                                            |       |       |       |       |       |       |       | 45734 |
| Pig         | -----T-----TCGTA-ATTT-----TCCTCT-----                                            |       |       |       |       |       |       |       | 42699 |

| Majority    | XC-TACXX-----A--TXX-TXGX-T-----CATGAXXTX----T-CTCTCT--XAXCXAXAT----X---          |       |       |       |       |       |       |       |       |
|-------------|----------------------------------------------------------------------------------|-------|-------|-------|-------|-------|-------|-------|-------|
|             | 66970                                                                            | 66980 | 66990 | 67000 | 67010 | 67020 | 67030 | 67040 |       |
| Human       | TGCTACTTGTATTGCTCAAACACACTCACCTGTTGGCTATATTACTACGACAGTTCTCTTTATAAACTACTTTCTTTTTC |       |       |       |       |       |       |       | 53642 |
| PolarBear   | -----                                                                            |       |       |       |       |       |       |       | 17375 |
| Cow         | TCCTGC-ATTGTAGGCAGATGCTTTACTGTCTGAGCCACTAGGAAAGTTA-GTAACTCTCT--TACTGATGTTTA-ATT- |       |       |       |       |       |       |       | 48957 |
| Dog         | TCATACTCATCT-----ACTTCTTTACTTTCTC----TCTTGATTTCT----TTCTCCCTAGTACCTCTCTTTCACCC   |       |       |       |       |       |       |       | 46284 |
| BelugaWhale | -----                                                                            |       |       |       |       |       |       |       | 45043 |
| Donkey      | ATCTGCCGA-----AAATATCCACTTA-----CATAGGCCATAGAGCAATTTTTGTAGACAAAATTA-----         |       |       |       |       |       |       |       | 51023 |
| Cat         | CCCACTGGCAGTGCAGAGCTCCATGTGGTGTTCGAAAGTCATGAACTGTGAGATCATGACCTGAGACGAAATCAAGAGTC |       |       |       |       |       |       |       | 52757 |
| Ferret      | TCTTACTGATCT-----ATTTTTTTACTTTCCCC----TCTTGAATTCT----TTCTCCCTAGTACCTCCCT-----    |       |       |       |       |       |       |       | 53646 |
| Lion        | CCCACTGGCAGTGCAGAGCTCCATGTGGTGTTCGAAATCATGAACTGTGAGATCATGACCTGAGACGAAATCAAGAGTC  |       |       |       |       |       |       |       | 50430 |
| Vaquita     | -----                                                                            |       |       |       |       |       |       |       | 45734 |
| Pig         | -----T--A-----AATT-----CTTTCT--TACCAGTAC----AGC-                                 |       |       |       |       |       |       |       | 42723 |

Dienstag, 3. Mai 2022 08:39

| Majority    | ----- TCT- - C- - - - TTX- TTTCXX- X- X- XXC- - - - XX- - GX- TATXTCTTTCTAAAAXA- XXXAATCTGA- TTX- - TT |       |       |       |       |       |       |       |       |
|-------------|--------------------------------------------------------------------------------------------------------|-------|-------|-------|-------|-------|-------|-------|-------|
|             | 67050                                                                                                  | 67060 | 67070 | 67080 | 67090 | 67100 | 67110 | 67120 |       |
| Human       | TTTTCCCTTCTGGAATTTTTTTCTCGCTAGTAC- A- - GCCAGTACGTATCTTTCTCAAATGCACATATCTAAGTTA- - CT                  |       |       |       |       |       |       |       | 53717 |
| PolarBear   | -----                                                                                                  |       |       |       |       |       |       |       | 17375 |
| Cow         | ----- TTTGTCTTGAATACTTTCTCCCTAGTACAAATGTGTGTGTATCTCTTTCTAAAATGCACAGATCTAACTTG- - CT                    |       |       |       |       |       |       |       | 49030 |
| Dog         | CACTGTCT- - CCCTTTTCCTTTTCTACCTCCCCCA- - - - - - - - TATGTCCTTGTAACA- - - - AATCTGACTTAG- TT           |       |       |       |       |       |       |       | 46349 |
| BelugaWhale | -----                                                                                                  |       |       |       |       |       |       |       | 45044 |
| Donkey      | ----- CTAACAAAAGTATGGTTTTTCATCTTATGGGGTTCAGAAAATGCTACCCCAAAATATGAGAAGTTG- - - - - - - -                |       |       |       |       |       |       |       | 51088 |
| Cat         | AGGTATTTAACCAGCTGAGCTGCCAGGTGCTCCTAAGTATGTATATACTTTTGTAAAACAGACAAATCTGATTTTAGTT                        |       |       |       |       |       |       |       | 52837 |
| Ferret      | ----- TCT- - CTTCCTTTCTTCCTCCCTTTCTCAT- - - - - - - - TATCTCTCTCCCTAACA- - - - AATCTGACTTAGGT          |       |       |       |       |       |       |       | 53707 |
| Lion        | AGGTACTTAACCAGCTGAGTCACCCAGGTACCCCTAAGTATGTATATATCTTTGTAAAACAGACAAATCTGATTTTAGTT                       |       |       |       |       |       |       |       | 50510 |
| Vaquita     | -----                                                                                                  |       |       |       |       |       |       |       | 45735 |
| Pig         | ----- TCTG- - - - - - - - TGT- - - - - - - - G- - - - TGTGTGTGTCTGTCTTTCTAAA- TGCACAAATCTGAGTTA- - TC  |       |       |       |       |       |       |       | 42772 |

| Majority    | XXCCTXCAGCA- - - - - - - - GATCCTTTTTCATGCTCAGGATAAAGGCCCTXAGAAGAGATGGCTACTATTT- - - CTGTCTT    |       |       |       |       |       |       |       |       |
|-------------|-------------------------------------------------------------------------------------------------|-------|-------|-------|-------|-------|-------|-------|-------|
|             | 67130                                                                                           | 67140 | 67150 | 67160 | 67170 | 67180 | 67190 | 67200 |       |
| Human       | CCCATGCAGTA- - - - - - - - GGTCCTGTTTCATGCTCAGGCTAAAGGCCCTTTCT- GAGCTTACTACTTTTTGTCTTGTCTT      |       |       |       |       |       |       |       | 53788 |
| PolarBear   | -----                                                                                           |       |       |       |       |       |       |       | 17425 |
| Cow         | CCCCTGCAGCA- - - - - - - - GTTTGTTTTTCATGCTCAGGATAAAGGTCCTTTCT- GAGATGACTACTGTTT- - - CTGTCT-   |       |       |       |       |       |       |       | 49097 |
| Dog         | ACTCCCCTGCAA- - - - T- AGATCCTTTTTCATGCTCAAGATAAAGGCCCCAGAAAAGATGGCTA- - - TTT- - - CTATCTT     |       |       |       |       |       |       |       | 46418 |
| BelugaWhale | ----- CAGCA- - - - - - - - AATCCTTTTTCATGCTCAGGGTAAAGGCCCTTT- - - GAGATGAGTACTGTTT- - - CTGTCTT |       |       |       |       |       |       |       | 45104 |
| Donkey      | ----- GCA- - - - - - - - TGTTGAATATCTTCAATTGAAGGATTTAAGAAAAAGCAGAAGCAAGGA- - - GT- TCAC         |       |       |       |       |       |       |       | 51146 |
| Cat         | ACTCTCCTGCAG- - - - CCATATCCTTTTTCATGCTCAGGATAAAGGCCCTT CAGAAGAGATGGTTACTATTT- - - CTGTCTT      |       |       |       |       |       |       |       | 52910 |
| Ferret      | ACTATCCTGCAG- - - - C- AGATTCTTTTTCATGTTTCATGATAAAGGCCCT CAGAAGAGGTGGCTACTATTT- - - CTGTTTT     |       |       |       |       |       |       |       | 53779 |
| Lion        | ACTCTCCTGCAG- - - - CCATATCCTTTTTCATGCTCAGGATAAAGGCCCTT CAGAAGAGATGGCTACTATTT- - - CTGTCTT      |       |       |       |       |       |       |       | 50583 |
| Vaquita     | ----- CAGCA- - - - - - - - AATCCTTTTTCATGCTCAGGGTAAAGGCCCTTT- - - GAGATGAATACTGTTT- - - CTGTCTT |       |       |       |       |       |       |       | 45795 |
| Pig         | CTCCTGCAGCAAATCTTCAGATCTTTTCTTGTCAAGATAAAGGCCCTTTCT- GAGATGATTACTTATT- - - CTGTCTT              |       |       |       |       |       |       |       | 42848 |

Dienstag, 3. Mai 2022 08:39

| Majority    | AT- GGCTACTCXC- - - - - TATTTGCCT- ATGCTTCTAXCCCAAAGTAATTGTAATCCTCTAACCTGGCATGCTTTCTC |              |            |               |                  |                   |           |       |       |
|-------------|---------------------------------------------------------------------------------------|--------------|------------|---------------|------------------|-------------------|-----------|-------|-------|
|             | 67210                                                                                 | 67220        | 67230      | 67240         | 67250            | 67260             | 67270     | 67280 |       |
| Human       | AT- GACTACTCCCACC-                                                                    | CTATTTGCTT-  | ATGCTTCTGT | CCCAAAGTAAT   | GGTGCATCCT       | GTAACCTGGCAT      | GTTTTCTC  |       | 53865 |
| PolarBear   | ATTGGCTATA- - - - -                                                                   | TATTTGCCT-   | ATGCTTCTA- | CCCAAAGTAATT  | GTA- - - - -     | ACCTGGCATG-       | - - - - - |       | 17480 |
| Cow         | GT- GGCTGCTCCCCCT                                                                     | CCATTTTCT-   | GTGCTTCTAT | CTCAGTAGTAAT  | GATAGATCCT       | ATAACTTGGCATA     | ACCTTCTC  |       | 49175 |
| Dog         | ATTGGCTATA- - - - -                                                                   | TATTTGCCT-   | ATGCGTCTA- | CCCAAAGTAATT  | GTAACCTCTT       | CTAACCTGACATT     | CTTTCTC   |       | 46488 |
| BelugaWhale | AT- GGCTACTCCCACC-                                                                    | CTATTTTCT-   | GTGCTTCTAT | CACAGTAGTAAT  | GTAAGTGCCT       | GTAACCTGGCAT      | GCTTTCTC  |       | 45181 |
| Donkey      | GCCAACCTCTCTC- - - - -                                                                | CGTCCCCCT    | CACCCTTCTT | CCCTGAAACAGAT | CATAAAC-         | TCTCATGTGAAAT     | ATGCTCTT  |       | 51220 |
| Cat         | AC- GGCTGTA- - - - -                                                                  | TGTTTCCT-    | GTGCTTCTA- | CCCAAAGTAATT  | GTAATCCTCCAACCT  | GGCATGCTTTCTC     |           |       | 52979 |
| Ferret      | ATTTGCTATA- - - - -                                                                   | TATTTGCCT-   | ATGCTTCTA- | CCCAAAGTAATT  | GTA- - - - -     | ACCTTGCATGCTTTCTC |           |       | 53841 |
| Lion        | AC- GGCTGTA- - - - -                                                                  | TGTTTCCT-    | GTGCTTCTA- | CCCAAAGTAATT  | GTAATCCTCCAACCT  | GGCATGCTTTCTC     |           |       | 50652 |
| Vaquita     | AT- GGCTACTCCCACC-                                                                    | CTATTTTCT-   | GTGCTTCTAT | CCCGGTAGTAAT  | GTAGCGCCTATAACCT | GGCATGCTTTCTC     |           |       | 45872 |
| Pig         | AC- GGCTCCTCCCACT                                                                     | GTTATTTGAGT- | ATGCTTCCAT | CCCAATAGTAAT  | GTAGGTTCTGTAAT   | CCAGTATGCTTTCTC   |           |       | 42926 |

| Majority    | TTATTTXXAGTCT- - TTTGAGGCCACTGTGTTTCTGTGATGTCACTTTTGCCTGGAA- TATTGTGGCCTG- CCTGCCTTT |                |                 |               |                |               |               |           |       |
|-------------|--------------------------------------------------------------------------------------|----------------|-----------------|---------------|----------------|---------------|---------------|-----------|-------|
|             | 67290                                                                                | 67300          | 67310           | 67320         | 67330          | 67340         | 67350         | 67360     |       |
| Human       | TTGATGTCAGTCG- -                                                                     | TTTGCTGCCATTAT | GTCACCTGC-      | TCTCA- - -    | T- GCATGGAA-   | TATTGTGGGTT   | GGCCTGCCTTT   |           | 53936 |
| PolarBear   | - - - - -                                                                            | - - - - -      | - - - - -       | - - - - -     | - - - - -      | - - - - -     | - - - - -     |           | 17480 |
| Cow         | TTATTTT- -                                                                           | GTCT- -        | TTGGAGGCCACT    | GT- -         | TTCTGTGATGTAAC | TTTTGCCTGAAA- | TATTGTGACCTG- | CCTATGTTT | 49247 |
| Dog         | TTACTTCTAGTAT- -                                                                     | TTTGGGACCACT   | GTGTTTCTGT      | GATGTTAATTTTT | CCTGGAA-       | TATTATGACCTG- | CCTGCCCTT     |           | 46564 |
| BelugaWhale | TTATTTT- -                                                                           | GTCT- -        | TTGGAGGCCATT    | GTGCTTCTGT    | GCTGTCAC       | TTTTACCTGGAA- | TATTGTGGCCTG- | CCTGCCTTT | 45255 |
| Donkey      | CTTGTACCAGGAG- - -                                                                   | GAAGGACGACATT  | CTTATCACCAGAGAC | GGGAACTGAGGGT | CAAGAAATCTG-   | TACAAACAA     |               |           | 51295 |
| Cat         | TTATTTCCAGTCT- -                                                                     | TTTGAGGCCACT   | GTGTTTCTGT      | GATGTCAC      | TCTTGCCTGGAA-  | TATTAAGGCCTG- | CCTACCCTT     |           | 53055 |
| Ferret      | TTATTTCCAATCTT                                                                       | ATTTCCAGCCACT  | GTGTTTCTGT      | GATGTTA-      | CTTTGCCTGGAA-  | TATTATGGCCTG- | CCTGCTTTT     |           | 53918 |
| Lion        | TTATTTCCAGTCT- -                                                                     | TTTGAGGCCACT   | ATGTTTCTGT      | GATGTCAC      | TCTTGCCTGGAAAT | ATTAAGGCCTG-  | CCTACCCTT     |           | 50729 |
| Vaquita     | TTATTTT- -                                                                           | ATCT- -        | TTGGAGGCCATT    | GTGCTTCTGT    | GCTGTCAC       | TTTTACCTGGAA- | TATTGTGGCCTG- | CCTGCCTTT | 45946 |
| Pig         | ATATATT- -                                                                           | GTAT- -        | TTTGAGGCCTTT    | GTGTTTCTGT    | GCTGACACT      | TTTTGCCTGCAC- | TGTTGTGGCCG-  | CCTGCCATT | 43000 |



Dienstag, 3. Mai 2022 08:39

| Majority    | ----- TGGATTAGG----- TTTG                                                       |       |       |       |       |       |       |       |       |
|-------------|---------------------------------------------------------------------------------|-------|-------|-------|-------|-------|-------|-------|-------|
|             | 67530                                                                           | 67540 | 67550 | 67560 | 67570 | 67580 | 67590 | 67600 |       |
| Human       | ----- GTAGATTAGG----- TTTG                                                      |       |       |       |       |       |       |       | 54057 |
| PolarBear   | -----                                                                           |       |       |       |       |       |       |       | 17480 |
| Cow         | ----- TGGATTAGG----- TTTG                                                       |       |       |       |       |       |       |       | 49359 |
| Dog         | ----- CTGGATTAGG----- TTTG                                                      |       |       |       |       |       |       |       | 46678 |
| BelugaWhale | ----- TGGATTAGG----- TTTG                                                       |       |       |       |       |       |       |       | 45368 |
| Donkey      | ----- TTGTTT----- CTTTG                                                         |       |       |       |       |       |       |       | 51402 |
| Cat         | TCAGTTAAGCATCCAACCTCTTGTTTTGGCTTAGGATCTGATTTACAGTTCAGGAGTTTGAGCCCCATGTTGGGCTTTG |       |       |       |       |       |       |       | 53284 |
| Ferret      | ----- GTAGTTTAGG----- TTTG                                                      |       |       |       |       |       |       |       | 54031 |
| Lion        | TCAGTTAAGCGTCCAACCTCTTGTTTTGGCTTAGGATCTGATTTACAGTTCAGGAGTTTGAGCCCCATGTTGGGCTTTG |       |       |       |       |       |       |       | 50958 |
| Vaquita     | ----- TGGATTAGG----- TTTG                                                       |       |       |       |       |       |       |       | 46059 |
| Pig         | ----- TGAATTAGG----- TTTG                                                       |       |       |       |       |       |       |       | 43114 |

| Majority    | GATT-----                                                                       |       |       |       |       |       |       |       |       |
|-------------|---------------------------------------------------------------------------------|-------|-------|-------|-------|-------|-------|-------|-------|
|             | 67610                                                                           | 67620 | 67630 | 67640 | 67650 | 67660 | 67670 | 67680 |       |
| Human       | GATT-----                                                                       |       |       |       |       |       |       |       | 54061 |
| PolarBear   | -----                                                                           |       |       |       |       |       |       |       | 17480 |
| Cow         | GATT-----                                                                       |       |       |       |       |       |       |       | 49363 |
| Dog         | CATT-----                                                                       |       |       |       |       |       |       |       | 46682 |
| BelugaWhale | GATC-----                                                                       |       |       |       |       |       |       |       | 45372 |
| Donkey      | TAT-----                                                                        |       |       |       |       |       |       |       | 51405 |
| Cat         | CACTGCCAGTGGAGAGCCTGCTTGAGATTCTCGCCCTCTCTCTCTGCCCTTCCCTGCTAGCATGTGAATGTGTATGCTC |       |       |       |       |       |       |       | 53364 |
| Ferret      | CATT-----                                                                       |       |       |       |       |       |       |       | 54035 |
| Lion        | CACTGCCAGTGGAGAGCCTGCTTGAGATTCTCTCCCTCTCTCTCTGCCCTTCCCTGCTAGCATGTGAATGTGTATGCTC |       |       |       |       |       |       |       | 51038 |
| Vaquita     | GATT-----                                                                       |       |       |       |       |       |       |       | 46063 |
| Pig         | GATT-----                                                                       |       |       |       |       |       |       |       | 43118 |

Dienstag, 3. Mai 2022 08:39

| Majority    | ----- AAGAAXCTTTAAXACAAATTTAAAATCAC                                                |       |       |       |       |       |       |       |       |
|-------------|------------------------------------------------------------------------------------|-------|-------|-------|-------|-------|-------|-------|-------|
|             | 67690                                                                              | 67700 | 67710 | 67720 | 67730 | 67740 | 67750 | 67760 |       |
| Human       | ----- GAGAGTGTT----- AACTCCGAA-----                                                |       |       |       |       |       |       |       | 54079 |
| PolarBear   | -----                                                                              |       |       |       |       |       |       |       | 17480 |
| Cow         | ----- AAGAACCTTTAATGCAATTTAAAATCAC                                                 |       |       |       |       |       |       |       | 49391 |
| Dog         | ----- AAGAAATCTTAACACAAATTTAAAATCAC                                                |       |       |       |       |       |       |       | 46710 |
| BelugaWhale | ----- AAGAACCCTTAATACAAATGAAAATCAC                                                 |       |       |       |       |       |       |       | 45400 |
| Donkey      | ----- AAAAGATGTAA- - CAGCTTCCTGTTCT                                                |       |       |       |       |       |       |       | 51430 |
| Cat         | TTTTCTCTCTTCTCTCTCTCAATAAATAAATAAACTTAAAAAAAAAAAAAAAAAGAACTTTGACATAAATTTAAAACCAC   |       |       |       |       |       |       |       | 53444 |
| Ferret      | ----- AAGGAACTTCAACGCAAATTTAAAATCAC                                                |       |       |       |       |       |       |       | 54063 |
| Lion        | TTTTCTCTCTTCTCTCTCTCAATAAATAAATAAACTTTTAAAAAAAAAAAAAAAAAGAACTTTGACATAAATTTAAAACCAC |       |       |       |       |       |       |       | 51118 |
| Vaquita     | ----- AAGAACCCTTAATACAAATGAAAATCAC                                                 |       |       |       |       |       |       |       | 46091 |
| Pig         | ----- AAGAACCTTTAATACAAATTTAAAATCAC                                                |       |       |       |       |       |       |       | 43146 |

| Majority    | AGTGAGATACTGCCATGTACTAX- - CAXATTGGCTAAAATTAAGACXGGTAATGCCAAGTGTTGG- AACCAATGTAGAGAA        |       |       |       |       |       |       |       |       |
|-------------|---------------------------------------------------------------------------------------------|-------|-------|-------|-------|-------|-------|-------|-------|
|             | 67770                                                                                       | 67780 | 67790 | 67800 | 67810 | 67820 | 67830 | 67840 |       |
| Human       | -- TGAGATACTGCTATGCACATAACCAGAGTGGCTAAAATTA- - A- - - - - AAGGATAGGTAATA- - - - -           |       |       |       |       |       |       |       | 54134 |
| PolarBear   | -----                                                                                       |       |       |       |       |       |       |       | 17480 |
| Cow         | G- TGAGATACTGCCATGTGCTAC- - CATATTGGATACATTGA- - - - - GGTAAATCCAAGTGTTGG- AACCAATGTAGAAAA  |       |       |       |       |       |       |       | 49462 |
| Dog         | AGTGAGATACTACCATGTACTAA- - TAGATTGC- TAAAATTAAGATGGATGATGCCAGGTGTTGGTAACAAGG- - - AGAA      |       |       |       |       |       |       |       | 46784 |
| BelugaWhale | AGTGAGATACTGCCATGTA- TAC- - CATACTGGATAAAAATTAAGACCGGTAAATACCAAGTATTGG- AACCAATGTAGAGAA     |       |       |       |       |       |       |       | 45476 |
| Donkey      | GGT- - - - TATT- TCAGGT- CTTTATTCTCTTGTGAAGGCTCT- - - CACGTACATCTAAAAATTG- - AGTAACATTTGTGT |       |       |       |       |       |       |       | 51499 |
| Cat         | ATTGAGCTACTACCATGTACTGTGTCTGATTGCCTATGATTAAGATGGGTAAATGCCAGATGTTGGTAACAAGGTTGGGAA           |       |       |       |       |       |       |       | 53524 |
| Ferret      | AGTGAGATACTACCATGTACCAT- - CAGATTGA- TGAGAT- - - GAGTGATGCCGAGTGTTGGTAACAAGGTAG- - - AGAA   |       |       |       |       |       |       |       | 54134 |
| Lion        | ATTGAGCTACTACCATGTACTGTGTGAGATTGCCTATGATTAAGATGGGTAAATGCCAGATGTTGGTAACAAGGTTGGGAA           |       |       |       |       |       |       |       | 51198 |
| Vaquita     | AGTGAGATACTGCCATGTA- TAC- - CATACTGGATAAAAATTAAGACCGGTAAATACCAAGTATTGG- AACCAATGTAGAGAA     |       |       |       |       |       |       |       | 46167 |
| Pig         | -- TGAGATATTGCTGTGTACTAC- - CATATTGGCTAAAATTAAGACAGGTAAATACCAATGTTGG- AACAGTGTAGAGAA        |       |       |       |       |       |       |       | 43221 |



Dienstag, 3. Mai 2022 08:39

| Majority    | GCTTGAAC TTT- XTAXATAAGT GATGGGAATGTAAATTGGT AGAATXATX TTTAAAACTTGA AATATCTAXTAAAGCTG     |       |
|-------------|-------------------------------------------------------------------------------------------|-------|
|             | 67850 67860 67870 67880 67890 67900 67910 67920                                           |       |
| Human       | ----- AAATACTGGTGAC - - AA - - - - - CCATTTTTGAAACTCGAAATATCTACTAAAGTTG                   | 54184 |
| PolarBear   | -----                                                                                     | 17480 |
| Cow         | GCTTGAAC TCTTATAAATAAGT GATGGGAATGTAAAGTTGGT AGAATAGTTTTTAAATCTTCATTTATCAGCTAAAGCTG       | 49542 |
| Dog         | TCTGGAGCTTTCATATATACATT- TGGGAATGTAAATTCTTAGAATTGTGTTTAAAACTTGA AACATATAGTAAAGCTG         | 46863 |
| BelugaWhale | GCTTGAAC TTC- GTAAATAAGT GATGAGAATGTAAATTGGT AGAATCATTTTTAAAACTTGA AATATCTACTAAAGCTG      | 45555 |
| Donkey      | GCTTGT- CTCCTGTAAATCTGTCTTGT CAGTTAATTTTT CAGACCCA- GCCAGAGACCCCAAGA- - - G- GGTGGAG- - G | 51571 |
| Cat         | ACTGGAAC TTTTCATATATACATGCTAAGAATGTAAATTAGTAGACTTATGTTTAAAACTTGA AATATGTAGTAAAGCTG        | 53604 |
| Ferret      | GCTAGAAC TTTTGTATACGTG- TGGGAATGTAAAGTTCATAGAATGATGTTTAAACTTTGACATATGTAGTGAAGGTG          | 54213 |
| Lion        | GCTGGAAC TTTTCATATATACATGCTAAGAATGTAAATTAGTAGACTTATGTTTAAAACTTGA AATATGTAGTAAAGCTG        | 51278 |
| Vaquita     | GCTTGAAC TTC- GTAAATAAGT GATGAGAATGTAAATTGGT AGAATCATTTTTAAAACTTGA AATATCTACTAAAGCTG      | 46246 |
| Pig         | ACTTGAAC TC- - - - - AAGTGATGGGAATATAAATTGATAGAATTGTTTTAAAACTTGA AATATCTACTTAAGCTA        | 43293 |

| Majority    | AGCATATACAT- - ATTCTTTGACTTAGTAAATCTX- - CCTAGTTA- CATACTGAGAAAATATA- AXATATGTGCATCAA                 |       |
|-------------|-------------------------------------------------------------------------------------------------------|-------|
|             | 67930 67940 67950 67960 67970 67980 67990 68000                                                       |       |
| Human       | AGCATATAGCT- - ATTCTTTGATGTAGTAAACTCGCTCCTAGTTAACATACCTGAGAACATGT- - ACATAGGTATGTTAA                  | 54260 |
| PolarBear   | -----                                                                                                 | 17480 |
| Cow         | AGCATATTCCT- - GTTCTTTGACACAGTAATTTT- - - ACTAGTCA- TATATCTGAGAAAATTTATATATATGTGCATCAA                | 49616 |
| Dog         | AGCATATACAT- - ATTCTTTGACTTAGTGAATCTACTCCTAGTTA- TACAAATGTGCAT- - - CA- AAAGATATGTATGAA               | 46936 |
| BelugaWhale | AGCATATACAT- - ATTCTTTGACTTAGTAAATTTTT- - ACTAGTCA- CGTATCTGAGAAAATAAATACATATGTGCATGAA                | 45630 |
| Donkey      | AAAAC TTTCTTC- - CTCTCCTACCCATC- - - TCT- - - - CCAGTT- - - - - - - - - - - - - - - - - - - - - - - - | 51636 |
| Cat         | AGCATATACAT- - AATCTTTGTCTTAGTAAATCTA- TCCTAGTTA- CATACTGAGAAAATATG- TAATATGTGCATCAG                  | 53679 |
| Ferret      | AGCATATACATGTATTCTTTGACTCAGTAAATCTACTCCTAGTTA- CATACTGAGAAAACACA- TTGTATGTACATCAA                     | 54291 |
| Lion        | AGCATATACAT- - AATCTTTGTCTTAGTAAATCTA- TCCTAGTTA- CATACTGAGAAAATATG- TAATATGTGCATCAG                  | 51353 |
| Vaquita     | AGTATATACAT- - ATTCTTTGACTTAGTAAATTTTT- - ACTAGTCA- TGTATCTGAGAAAATAAATACATATGTGCATGAA                | 46321 |
| Pig         | AACATACACAT- - AATCTTTGATTTAGTAAATCT- - - ACTAGTTA- CATACTGAGAAAAC- - - - ACGTGTGTGTGTCGA             | 43363 |

Dienstag, 3. Mai 2022 08:39

| Majority    | AAGATA- TGTATXAGAAAGTTCATGGXACACTA- TATGTAATAGCCCAA- - AGCTGGAAATGATCCACATGTT CAGCAGC    |       |       |       |       |       |       |       |       |
|-------------|------------------------------------------------------------------------------------------|-------|-------|-------|-------|-------|-------|-------|-------|
|             | 68010                                                                                    | 68020 | 68030 | 68040 | 68050 | 68060 | 68070 | 68080 |       |
| Human       | AAGATA- TGTACAAGAAAGTTCATGGAACACTG- TATGTAATAGCCCAAAAACTATAAATCATCCAAATGTTCAACAGC        |       |       |       |       |       |       |       | 54338 |
| PolarBear   | -----                                                                                    |       |       |       |       |       |       |       | 17480 |
| Cow         | AAGATA- TGTATGGGCAAGTTCATCGCACACTA- TATGTAATTACCCAA- - GGCTGGAAATGATCTAAATGTTGAGCAGC     |       |       |       |       |       |       |       | 49692 |
| Dog         | GAAGTT- - - - - CAT- - - - GGAACACTAATACATAATAGTCCAA- - AGCTGGAAATGATCCACATGTT CAGCAGC   |       |       |       |       |       |       |       | 46999 |
| BelugaWhale | AAGATA- TGTATAAGAAAGTTCATGGCACACTG- TATGTAATAGCCCAG- - AGCTGGAAATGATCCACATGTT CAGCAGC    |       |       |       |       |       |       |       | 45706 |
| Donkey      | ATCCT- - - - - GCTCA- - ACATATTT- TCTGTAGTAACC- - - - ATTTGGAAGCCTTTCA- - - - TTGAAAAAC  |       |       |       |       |       |       |       | 51691 |
| Cat         | AAGATAATGTATGAGAAAGTTCATGGAACACTAATACATAATAGTCCCA- - AACTAGAAATCATCTACATGTT CAGCAGC      |       |       |       |       |       |       |       | 53757 |
| Ferret      | AAGATC- - - - - TGTATGAGAAAATTCATGGAACACTAATGCAA- - AGATAGAAATGATTCATATGTT CAGCAGC       |       |       |       |       |       |       |       | 54358 |
| Lion        | AAGATA- CGTATGAGAAAGTTCATGGAACACTAATACATAATAGTCCCA- - AACTAGAAATCATCTACATGTT CAGCAGC     |       |       |       |       |       |       |       | 51430 |
| Vaquita     | AAGATA- TGTATAAGAAAGTTCATGGCACACTG- TATGTAATAGCCCAG- - AGCTGGAAATGATCCACATGTT CAGCAGC    |       |       |       |       |       |       |       | 46397 |
| Pig         | AAGATA- GGTATGAGAAAGTTGACAGCACACAC- TGTGAAA- - - CCCAA- - AGCTGGAAGCGATCCGTACGTT CAGCAGC |       |       |       |       |       |       |       | 43436 |

| Majority    | AGTAGAATXTGTTGTGGXATATTCATTTGTTGGAATATTXTAG- - TXCAAAAAGAA- - - - - TGAACAAGCTAC          |       |       |       |       |       |       |       |       |
|-------------|-------------------------------------------------------------------------------------------|-------|-------|-------|-------|-------|-------|-------|-------|
|             | 68090                                                                                     | 68100 | 68110 | 68120 | 68130 | 68140 | 68150 | 68160 |       |
| Human       | AGCAGAATATGTTGTGTTGTATT CATT TAGTGAATATTGTAT- - AGTAATAAAAA- - - - - TGAACAAGCTAC         |       |       |       |       |       |       |       | 54404 |
| PolarBear   | -----                                                                                     |       |       |       |       |       |       |       | 17480 |
| Cow         | AGTAGAATGTGTTGTGGTATATTTATTTGTTGGAATACTCCCT- - GGCAAAAAGAA- - - - - TGAACAAGCTAC          |       |       |       |       |       |       |       | 49758 |
| Dog         | AGTAGGGTATGCTGTGGCATATTCATT CATTAG AATTTGTTAGAATACAAAAAAAAAAAAAAAAAATTGACCAAGCTGC         |       |       |       |       |       |       |       | 47079 |
| BelugaWhale | TGTAGAATGTGTTGTGGTATATTTATTCGTTGGAATACTGACT- - GGCAAAAAGAA- - - - - TGAACAAGCTAC          |       |       |       |       |       |       |       | 45772 |
| Donkey      | AAACTGCGGTGCCGCAGC- - - - - TTTGCTGGCATCCT- - - GAGCACAAAGTTAGCCTGAT- - - TATTCATTAATCCAG |       |       |       |       |       |       |       | 51758 |
| Cat         | AGTAGAATATGTTGTGGCATATTCATTTGTTGGAATTTCTTAGAATACAAAAAGAA- - - - - TGATCAAGCTAC            |       |       |       |       |       |       |       | 53825 |
| Ferret      | GGAA- - - TATGCTGTGGCATATTTATTCATTGGAATTTGTTAGAATACAAAAAA- - - - - TGACCAAGCTGC           |       |       |       |       |       |       |       | 54422 |
| Lion        | AGTAGAATATGTTGTGGCATATTCATTTGTTGGAATTTCTTAGAATACAAAAAGAA- - - - - TGATCAAGCTAC            |       |       |       |       |       |       |       | 51498 |
| Vaquita     | TGTAGAATGTGTTGTGGTATATTTATTCGTTGGAATACTGACT- - GGCAAAAAGAA- - - - - TGAACAAGCCAC          |       |       |       |       |       |       |       | 46463 |
| Pig         | AGTAGAATGTGTTGTGGTATATTCATTGACTAGGTTATTGTC- - - AGTAAAAAGAA- - - - - TTAATAAGCTAC         |       |       |       |       |       |       |       | 43501 |

Dienstag, 3. Mai 2022 08:39

|             |                                                                                |       |
|-------------|--------------------------------------------------------------------------------|-------|
| Majority    | TGGTACCTGCAAAACXTGGATGAACATCATAAAAATAATGTTTATTGXAAGAAGCCA-----                 |       |
|             | 68170 68180 68190 68200 68210 68220 68230 68240                                |       |
| Human       | TGCTGCCTGCAAAACATGGGTA-----GTGTACATCATAATTATTGGAAGAAGCCA-----                  | 54455 |
| PolarBear   | -----                                                                          | 17480 |
| Cow         | TGGTGCATCCAAAACCTTGAATGGACATCATAAAAATTATGTTTATTGGAAGAAGCCA-----                | 49815 |
| Dog         | TGGTACCTGCAAAACATGTATGTACACCATAACAATAATATTTATTGAAAGAAGCCAAA---CCAAAAATAAATAAAT | 47155 |
| BelugaWhale | TGGTGTCTCTAGAACTTGGATGAACATCATAAAAATTATGTTTATTGGAAGAAGCCA-----                 | 45829 |
| Donkey      | CATTAGCC-----ACTAGAGTGACCAACCTGACAAGCTTTTTCCAGGCAATGACCTGAA-----               | 51812 |
| Cat         | TTATACTTGCAAAACATGGATGTATATCATAAAAATAATGTTTAGTGAAAGAAGCCA-----                 | 53882 |
| Ferret      | TAGTACCTGCAAAACATGAATGCACATCATGAAAGTAATATTTACTGAAAGAAGCCAACCCCCCAAAAAGCAAAAAAC | 54502 |
| Lion        | TTATACTTGCAAAACATGGATGTATATCATAAAAATAATGTTTAGTGAAAGAAGCCA-----                 | 51555 |
| Vaquita     | TGGTATCTCTAGAACTTGGATGAACATCATAAAAATTATGTTTATTGGAAGAAGCCA-----                 | 46520 |
| Pig         | TGGTGCCTCCAGAACTTGGATGATTATCATAAAAACCATGTTAATTGCAAGAAGCTA-----                 | 43558 |

|             |                                                                                   |       |
|-------------|-----------------------------------------------------------------------------------|-------|
| Majority    | -----GACCAAAGTAGAACA-----TXCXATATGATTCCATTT-ATATAACTGGGAGAAAGCATGAGTGTG           |       |
|             | 68250 68260 68270 68280 68290 68300 68310 68320                                   |       |
| Human       | -----AACCAAAGTAGAATACA-----TCTGATATGATTCCATTT-ATGTAACCTTGGAGGAAGCGTGAGTATG        | 54517 |
| PolarBear   | -----                                                                             | 17480 |
| Cow         | -----GACCAGAGTAGTACA-----TTCCATTT-ACATAACTGGGAGAAAACGTGTGTG--                     | 49863 |
| Dog         | AAATAAGCCAGACGAAAGTAAAACA-----TACTATATGACGCCATTT-ATTTAACTGATAGAAACCATGAATGTG      | 47225 |
| BelugaWhale | -----GATCAAAGTAGAACACG-----TACTATATGGTTCCATTT-ATATAACTGGGAGAAAGCATGTGTGTG         | 45891 |
| Donkey      | -----CCAGCCAAAGGAGAAC-----TGAGAGTCAGC---ACTTATCTTTAAGAACAGATGCCTATG               | 51866 |
| Cat         | -----GACCAAAGTAGAACA-----C-ATATGATGCCATTTTATATAACTAGGAGAAAGCATGAATGTG             | 53940 |
| Ferret      | AAAAATGCCAAAACCTAAGTAGAACACATCATATGTATTCTATGATACAATTT-ATATAACTGAGAGAAAACATGAATGTA | 54581 |
| Lion        | -----GACCAAAGTAGAACA-----C-ATATGATGCCATTTTATATAACTGGGAGAAAGCATGAATGTG             | 51613 |
| Vaquita     | -----GATCAAAGTAGAACACA-----TACTATATGGTTCCATTT-ATATAACTGGGAGAAAGCATGTGTGTG         | 46582 |
| Pig         | -----GACCAAAGTAGAACACA-----TACTGCAGAATTCCATTT-ATATAATTGGGAGAACGCGTGTGTGCG         | 43620 |

Dienstag, 3. Mai 2022 08:39

| Majority    | GCTTCTGGAGTGTTGATAATGTTCTGTTTTTXX- XCTAGATAGTCXTTTCACAGATATGTCCAATTTGTGATATTTTATT     |       |       |       |       |       |       |       |       |
|-------------|---------------------------------------------------------------------------------------|-------|-------|-------|-------|-------|-------|-------|-------|
|             | 68330                                                                                 | 68340 | 68350 | 68360 | 68370 | 68380 | 68390 | 68400 |       |
| Human       | GCTTCTAGAGTGTTGATAATACTGTTTTTTA- TCTGGGTAATTATTTACAGAGATGTCCAATTTGTGGTATTTTATG        |       |       |       |       |       |       |       | 54596 |
| PolarBear   | -----                                                                                 |       |       |       |       |       |       |       | 17480 |
| Cow         | GCTTTTGGAGTGTTGGTAATGTTCTTTTTTTTA- TCTCGATAGTGCTTTCAT- GATATGGTTTATTTGA- - TATTTTATT  |       |       |       |       |       |       |       | 49939 |
| Dog         | GCTTTTAGAGTTTTGATAATGTTCTTTTTTTAT- - CTAGGTAGTCATTTACAGATATGTCCAATTTGTGATGTTT- - - -  |       |       |       |       |       |       |       | 47299 |
| BelugaWhale | GTTTCTGGAGTGTTGGTAATGTTCTATTTTTTTATCTAGATAATCCTTTTACAGATATGTTCTATTTGTGAAATTTTATT      |       |       |       |       |       |       |       | 45971 |
| Donkey      | GTTTTTGGTACAGGGTTGGTATAATGTGACTTTACTT- - GTAGCCAGCCACAGGAATTTACAACA- GT- - TACTGAATG  |       |       |       |       |       |       |       | 51941 |
| Cat         | GCCTCTAGGGTTTTGACAATGCTCAATTTTT- - - - - ATCTAGTCATTTTATAGATATGTCCAATTTGTGATGTTTTATT  |       |       |       |       |       |       |       | 54014 |
| Ferret      | GCTTTTGGAACTTTGATAATGTTCTGTTTT- - - - - TATCTAGTCATTTTCATAGATCTGTCCAATTTGTGATGTTTTATT |       |       |       |       |       |       |       | 54656 |
| Lion        | GCCTCTAGGGTTTTGACAATGCTCTGTTTT- - - - - ATCTAGTCATTTTACAGATATGTCCAATTTGTGATGTTTTATT   |       |       |       |       |       |       |       | 51687 |
| Vaquita     | GTTTCTGGAGTGTTGGTAATGTTCTATTTTTTTATCTAGATAGTCCTTTTACAGATATGTTCTATTTGTGAAATTTCTATT     |       |       |       |       |       |       |       | 46662 |
| Pig         | GCTTCTGGAGTGCTGGTAATGTTCTCTTTTTAAATCTAGATAGTCCTTTCATAGATATGTTCAATTTGT- - AA- - - TATT |       |       |       |       |       |       |       | 43695 |

| Majority    | GAGCTGTATACACTTAGGATTTGTGTCTTTTTATGTGTATATGTATG- - TTCTATACXAAGTTTAATTAATACTAGGTT            |       |       |       |       |       |       |       |       |
|-------------|----------------------------------------------------------------------------------------------|-------|-------|-------|-------|-------|-------|-------|-------|
|             | 68410                                                                                        | 68420 | 68430 | 68440 | 68450 | 68460 | 68470 | 68480 |       |
| Human       | GAGCTTTATA- - CTTAGGTTTTGTGTCTTTTTGTGTGTGTGTGTAATATTTTGATAAGAAGTTTTATTAAAATCTAGGTT           |       |       |       |       |       |       |       | 54674 |
| PolarBear   | -----                                                                                        |       |       |       |       |       |       |       | 17480 |
| Cow         | GAGCTGTGTATACTCATGATTTGTGTCTTTTTAT- - GTGTATGATTG- TTTCAATACAAAGTTTAATTAATACTAGATT           |       |       |       |       |       |       |       | 50016 |
| Dog         | - - - - - - - - ACACTTAGGATTTGTGTCTTTTCATATGTGTATATATG- - TGGTTTGCCAAATTAATACTAGGTT- - - - - |       |       |       |       |       |       |       | 47363 |
| BelugaWhale | GAGCTGTATATACTTACGATTTGTGTCTTTTTATGTGTATATGATTG- TTTCAATATGAAGTTTAATTAATACTAGGTT             |       |       |       |       |       |       |       | 46050 |
| Donkey      | CACATGTGT- TTCTGGCTATCCA- GTCTCTCTTAGAAAATTTACATG- - TGCTATCCTAGTACT- - CTGATGTTTAAAA        |       |       |       |       |       |       |       | 52015 |
| Cat         | GAGCTGTATACTCTTAGGATCTGTGTCTTTTTATATGTATATGTA- A- - TAGTTCACTAAGTTTCAAGTTAAAATCTTTGTT        |       |       |       |       |       |       |       | 54091 |
| Ferret      | GAGCT- TATACCCTTCTGATTTGTGTCTTTTTATGTGTGTATGTA- A- - TGGTTCACTAGTTTAATTAATACTTA- - - -       |       |       |       |       |       |       |       | 54728 |
| Lion        | GAGCTGTATACTCTTAGGATCCGTGTCTTTTTATATGTATATGTA- A- - TAGTTCACTAAGTTTCAAGTTAAAATCTTTGTT        |       |       |       |       |       |       |       | 51764 |
| Vaquita     | GAGCTGTATATACTTATGATTTGTGTCTTTTTATGTGTATATGATTG- TTTCAATATGAAGTTTAATTAATACTAGGTT             |       |       |       |       |       |       |       | 46741 |
| Pig         | GAGCTGTATACGCTTACAGTTTGTGTCTTTC- - - - - GTTTATGATTGCTTTCAGTATGAAAGTTAAT- AAAATCTAGATT       |       |       |       |       |       |       |       | 43769 |

Dienstag, 3. Mai 2022 08:39

| Majority    | GGCAAGCCAACACTCTGXTCCATGAA- - - TTAATAAATAATGTATGAAX- - - - XATAXTTG- - - - TTAA- TGATAXTTGAA |       |       |       |       |       |       |       |       |
|-------------|-----------------------------------------------------------------------------------------------|-------|-------|-------|-------|-------|-------|-------|-------|
|             | 68490                                                                                         | 68500 | 68510 | 68520 | 68530 | 68540 | 68550 | 68560 |       |
| Human       | TGCAAGCCAACACTGCTCCATGAATTATAAGAAAAAATATATGAAGTCATTAATAAATGAAATCATAAAGAAATGTATGAA             |       |       |       |       |       |       |       | 54754 |
| PolarBear   | -----                                                                                         |       |       |       |       |       |       |       | 17480 |
| Cow         | GGCAGGTCACCTCTGCTCCATGAATATTTTTAAGACATGTATGAAA- - - - CATGAATGA- - AGTTCTTTGTTAATAGAG         |       |       |       |       |       |       |       | 50089 |
| Dog         | GGCAAGCCAACACTCTGTTCCATCAA- - - TTAATAAATAACAGAAAA- - - - GTTATTTG- - - - TTAA- TGATATTTGTT   |       |       |       |       |       |       |       | 47428 |
| BelugaWhale | GGCAAGCCAACACTCTGCTCCATGAATTTTTTTTTTAAACGTATGAAG- - - - AGGCTTCCCTGGTGGCACAGTGGTTAAG          |       |       |       |       |       |       |       | 46124 |
| Donkey      | TGTCA- - CGCCCTTGTTATATGAA- - - - AATGACAGTGCTGAGC- - - - TGTGCTT- - - - TGAGTTGTTTATTCAA     |       |       |       |       |       |       |       | 52076 |
| Cat         | GGCAAGCCAACACTCTGTTTCATCAG- - - TTAATAAATAATGGAAA- - - - GTTATTTG- - - - CTAA- TCATAGTAGAA    |       |       |       |       |       |       |       | 54156 |
| Ferret      | GGTTGGCAAGCACTGTTTCATCAA- - - CTAAAAAATAACAGAAA- - - - GTTATTTG- - - - TTAA- TGGAGAACCTA      |       |       |       |       |       |       |       | 54792 |
| Lion        | GGCAAGCCAACACTCTGTTTCATCAA- - - TTAATAAATAATGGAAA- - - - GTTATTTG- - - - TTAA- TGATAGTAGAA    |       |       |       |       |       |       |       | 51829 |
| Vaquita     | GGCAAGCCAACACTCTGCTTCATGAATTTTTTTTTAAACGTATGAAG- - - - AGGCTTCCCTGGTGGCACAGTGGTTAAG           |       |       |       |       |       |       |       | 46815 |
| Pig         | GGCAAGCCATCTCTGCCCAT- - - - TTTTTAAA- ATGTATGAAG- - - - ATACTTG- - - - TTAA- TGATAATGAAG      |       |       |       |       |       |       |       | 43831 |

| Majority    | A- - AXCTAAT- - - - TGTTAAAX- A- - - - - - - - GXXGATGGAGAX- - - - - - - - AAGAXAAAAAGTATTGGAAAGA                  |       |       |       |       |       |       |       |       |
|-------------|--------------------------------------------------------------------------------------------------------------------|-------|-------|-------|-------|-------|-------|-------|-------|
|             | 68570                                                                                                              | 68580 | 68590 | 68600 | 68610 | 68620 | 68630 | 68640 |       |
| Human       | GTAATTTGTTACTGATGTGAGAGAACATGATTGTTAAGCCATAAAAGGAAGATAGAGAACAATGAATAGTATTAATAAAA                                   |       |       |       |       |       |       |       | 54834 |
| PolarBear   | -----                                                                                                              |       |       |       |       |       |       |       | 17480 |
| Cow         | A- - ACATAAT- - - - TGTTAAGGTAAAAAAG- - - - GAAGATGTAGAG- - - - - - - - AGTGAGTATA- GTATTGGAAAGA                   |       |       |       |       |       |       |       | 50148 |
| Dog         | ATTTGTTAAT- - - - AATAGAAAGCTATTTGTTATTGATAATGGAGAACCCTAATTATTAAGCCAAAAAGAGATGGAGGA                                |       |       |       |       |       |       |       | 47503 |
| BelugaWhale | A- - ATCCACC- - - - TGCCAATACAGGAGATA- - - - CGGGTTCGAGCCCTGGTCCAGGAAGATCCCACATGCTGCAGAGC                          |       |       |       |       |       |       |       | 46193 |
| Donkey      | A- - - - - GGC- - - - AGTGAAAGGTC- - - - - - - - AACTATCCAGTCACTCTTTTTTTCTCCTGTTCCCTCTTATAAAAG                     |       |       |       |       |       |       |       | 52135 |
| Cat         | A- - ACCTAAT- - - - TGTTAA- - - - - - - - - - - - - - GCTAA- - - - - - - - - - - - - - AAAGAGAAGATGGAGAA           |       |       |       |       |       |       |       | 54192 |
| Ferret      | ATTATTAAGC- - - - TATAAAA- - - - - - - - - - - - - - GAAGATGGAGAA- - - - - - - - - - - - - - AAGTGAATAGTATTGGGAAGA |       |       |       |       |       |       |       | 54843 |
| Lion        | A- - ACCTAAT- - - - TGTTAA- - - - - - - - - - - - - - GCTAA- - - - - - - - - - - - - - AAAGAGAAGATGGAGAA           |       |       |       |       |       |       |       | 51865 |
| Vaquita     | A- - ATCCACC- - - - TGCCAATACAGGAGATA- - - - CGGGTTCGAGCCCTGGTCCAGGAAGATCCCACATGCTGCAGAGC                          |       |       |       |       |       |       |       | 46884 |
| Pig         | A- - ACATAAT- - - - TATTAAGGTAAAAAT- - - - - - - - GGAGATGGAGAAC- - - - - - - - AATGACTA- - - GTATTGGAAAGA         |       |       |       |       |       |       |       | 43887 |

Dienstag, 3. Mai 2022 08:39

| Majority    | AAGTTAAACAGTAXTGAAX-CAAATACTTATA-X-XT-TATAGAXTATATA- - - - -TACATACATXXX                     |       |
|-------------|----------------------------------------------------------------------------------------------|-------|
|             | 68650 68660 68670 68680 68690 68700 68710 68720                                              |       |
| Human       | AGTATGAATAGTATTGAATAAAAATATGAATAGTATTGAAAAAATACAGACTAAGTATAATATTTATATATATATGCTT              | 54914 |
| PolarBear   | -----                                                                                        | 17480 |
| Cow         | AAGATATGCAGTAGATAA- - - - -GTGCTTATATG- - C- - - - -TTGTATGGAGTATATATG- - - - -TACATACATGCTT | 50209 |
| Dog         | AAGTTCAATAGTATTGGGGAAGAAAGTTTGTATA- - CATCCTTTTTATAGACTAGATACA- - - - -TATTTACTCATAT         | 47574 |
| BelugaWhale | AACTAAGCCCATGCACCA- - CAACTACTGAGCCT- - G- - - -CTCTCTAGAGCCTGCAAA- - - - -C- CACAATTAC- T   | 46255 |
| Donkey      | GTAACATGCATCCTTGAGAGGGATGACTCAGA- - - - -ATAGAGTTTATGTA- - - - -T- - -TGAATGCTT              | 52191 |
| Cat         | AAGTG- AATAGTACTGGGGGAAAGGTATGTA- - - - -ATAGACATATCGCA- - - - -CACACACACCTAG                | 54250 |
| Ferret      | ATGT- - - - -ATGTTGTAGACATACACCTATGTA- - C- - - -TTATACAGACTAGATACA- - - - -TATATGCTTGTGT    | 54903 |
| Lion        | AAGTG- AATAGTACTGGGGGAAAGGTTTGTA- - - - -ATAGACATATCGCA- - - - -CACACACACCTAG                | 51923 |
| Vaquita     | AACTAAGCCCATGCACCA- - CAACTACTGAGCCT- - G- - - -CTCTCTAGAGCCTGCAAA- - - - -C- CACAATTAC- T   | 46946 |
| Pig         | CAAGTATGCAGTAGCTAAT- CAAGTACTTATGTG- - C- - - -TTGTGTAGAGTACATATA- - - - -TACGTGTCTATGT      | 43952 |

| Majority    | G- - - -TG- A- - -XATATCTCTGGAAGGATACCCA- - - - -AGATAAATATTG- TGAGGAXTGGGTAGGGGAAAGCAGACAGG |       |
|-------------|----------------------------------------------------------------------------------------------|-------|
|             | 68730 68740 68750 68760 68770 68780 68790 68800                                              |       |
| Human       | GTAGATGTAGCTAGTATCTCTGGAAGGATATCGA- - - - -AGATAAATACTG- TGAGGGGTTGGTAGGGGAAAATAGACTGG       | 54988 |
| PolarBear   | -----                                                                                        | 17480 |
| Cow         | GAATATGTAGGTGATGTCTCTGGAAGAATACCCA- - - - -AGAT- -TATTG- TGAGGG- TTCGTAGGGGAAAGCATAACAGG     | 50280 |
| Dog         | G- - - -TGAAGATGGTATCTCTGGAAGGATACCCA- - - - -TGATAAATATTGGTGAGGAATGTTTAGGGGAAAGCAGACAGG     | 47645 |
| BelugaWhale | GAGCCACATGCCACAATACTGAAACCCACGCGCTTAGAGCCCGTGCTC- TGCAAC- AAGAGGAGCCACCGCAATGAGA             | 46333 |
| Donkey      | - - - - -C- - - -CTATGTGT- GAGGCATA- - - - -TGCT- - - -AGGCAGGCGGGAGACAAGGCAGGATCA           | 52239 |
| Cat         | G- - - -TG- - - - -ATATATGGAAGGGTACCCA- - - - -TGATAAATATCGGTATGGAATGGGTATGAGAAAGGATACAGG    | 54313 |
| Ferret      | G- - - -TGTAGATGGTATCTCTGGAAGGATACCCA- - - - -TGATAAATATTGGTGAGGAATGCGTTTGGGAAAGCAGCTAGG     | 54974 |
| Lion        | G- - - -TG- - - - -ATATATGGAAGGGTACCCA- - - - -TGTTTATATCGGTATGGAATGGGTATGAGAAAGGATACAGG     | 51986 |
| Vaquita     | GAGCCACATGCCACAATACTGAAACCCACGCGCTTAGAGCCCGTGCTC- TGCAAC- AAGAGAAGCCACCACAATGAGA             | 47024 |
| Pig         | G- - - - -GATGTCCCTGGAAGGATACCCA- - - - -AGGTAATATTGGTGAGGG- TGTGTAGGGTAAAGCAGCCAGG          | 44015 |

Dienstag, 3. Mai 2022 08:39

| Majority    | G- TGACAGGGTTGCAGAGGAAACTT- - AACCTTTTGTACCATTT- GXATAGTATXCC- - - - - A- TGATCATGTGA      |       |       |       |       |       |       |       |       |
|-------------|--------------------------------------------------------------------------------------------|-------|-------|-------|-------|-------|-------|-------|-------|
|             | 68810                                                                                      | 68820 | 68830 | 68840 | 68850 | 68860 | 68870 | 68880 |       |
| Human       | G- TGACAGAGTTCAG- GGAATTTTAACTCTTAAATACCACTT- TTATACCAT- - - - - GATCATG- GA               |       |       |       |       |       |       |       | 55048 |
| PolarBear   | -----                                                                                      |       |       |       |       |       |       |       | 17480 |
| Cow         | - - TGAGTGAGTTGCAGAGGAAAGTT- - AACTTTTTATACTGTTT- GGATAGTATGCC- - - - - A- TGATCATGTGA     |       |       |       |       |       |       |       | 50344 |
| Dog         | G- TGATAGGGTTGCAGAGGAAAC- - - - AACCATTTGTACCATTT- GAATAGCATAACC- - - - - A- TGATCATGTGA   |       |       |       |       |       |       |       | 47708 |
| BelugaWhale | AGCCTGTGCACCGCGATGGAGAGTA- - GCCCCTACTCGCCACAA- CTAGAGAAAGCCCGCGCACAGCAACGAAGACGCGA        |       |       |       |       |       |       |       | 46410 |
| Donkey      | GTTTGA AAAAGCTATAGTGGGGCCT- - - TCCTGCCTTGAC- TTTAGAATAG- ATGGT- - - - - T- CATTGGCAAATGGG |       |       |       |       |       |       |       | 52306 |
| Cat         | G- TGACAGGGTTGCAGAGGAAACTTTTAACTTTTGTCCATTTTGGATAGTAT- - - - - ATCATGTGA                   |       |       |       |       |       |       |       | 54375 |
| Ferret      | G- TGATAGGGTTGCAGAGGAAACTT- - AACCATTTGTACCATTT- GGATAATATATC- - - - - A- TGATCATGTGA      |       |       |       |       |       |       |       | 55039 |
| Lion        | G- TGACAGGGTTGCAGAGGAAACTTTTAACTTTTGTCCATTT- GGATAGTAT- - - - - ATCATGTGA                  |       |       |       |       |       |       |       | 52047 |
| Vaquita     | AGCCCATGCACCGCGATGGAGAGTA- - GCCCCTACTCGCCACAA- CTAGAGAAGGCCAGCGCACAGCAACGAAGACGCGA        |       |       |       |       |       |       |       | 47101 |
| Pig         | G- TGCCTGGTTCCAGAAGAAACAT- - AACTTTTCGTA CTGTTT- GTGTAGTATTCC- - - - - A- TGCTCATGCGA      |       |       |       |       |       |       |       | 44080 |

| Majority    | TTCCTGTTTTAAAAG- ACA- - - - - TTCATTATTTGAAXTAG- A- - - GATGTTAGTGTTTTCTAAG- - - - -       |       |       |       |       |       |       |       |       |
|-------------|--------------------------------------------------------------------------------------------|-------|-------|-------|-------|-------|-------|-------|-------|
|             | 68890                                                                                      | 68900 | 68910 | 68920 | 68930 | 68940 | 68950 | 68960 |       |
| Human       | TTCCTATTTTAGAAAACA- - - - - TTTTATTATTTGAAGCAG- - - - - ATGTTAGTGTTTTCTAAG- - - - -        |       |       |       |       |       |       |       | 55103 |
| PolarBear   | -----                                                                                      |       |       |       |       |       |       |       | 17480 |
| Cow         | TTCCTGTTTAGAAAAGGTAT- - - - - TTGATTCAGTTATTTGAAATAGTA- - - GCAGA- AGGGTTGTTCTAAG- - - - - |       |       |       |       |       |       |       | 50406 |
| Dog         | TTCCTGTTTCAGAAAAG- ACAG- - - - - TCATTCCATTATTTGAAAGAGGA- - - GATGTTAGTGTTTTCTAAA- - - - - |       |       |       |       |       |       |       | 47771 |
| BelugaWhale | TGCAGCCAAAAATAAATAAATAAATGTCAGTTTATTTATTTAAAAAATAAATGGGGGAGGGAGATGCAAGAGGGAGGAGA           |       |       |       |       |       |       |       | 46490 |
| Donkey      | TTTTTATTTCTTGGTTTGTCTGCTTGCTTGTTTGTGTTTGGTAA- - - - - AATGTATCCACAAG- - - - -              |       |       |       |       |       |       |       | 52368 |
| Cat         | CTCCTGTTTTAAAAG- ACA- - - - - TTCATTATTTGAAGTAGGA- - - GATGTTAGTATTTTCCAAG- - - - -        |       |       |       |       |       |       |       | 54434 |
| Ferret      | TTTTATTTTAAAAG- ACA- - - - - TTCATTATTTGAAAGAG- - - - - ATGTTAGTATTTTCTATG- - - - -        |       |       |       |       |       |       |       | 55095 |
| Lion        | TTCCTGTTTTAAAAG- ACA- - - - - TTCATTATTTGAGGTAGGA- - - GATGTTAGTATTTTCTAAG- - - - -        |       |       |       |       |       |       |       | 52106 |
| Vaquita     | TGCAGCCAAAAATAAATAAATAAATGTCATTTTATTTATTTAAAAAATAAATGGGGGAGGGAGATGCAAGAGGGAGGAGA           |       |       |       |       |       |       |       | 47180 |
| Pig         | TTCCTGTTTTAAAAG- - - - - ACATTCCGTTATATGAAGTAGCA- - - AATGCTAGAGTTGTTCAAAG- - - - -        |       |       |       |       |       |       |       | 44139 |

Dienstag, 3. Mai 2022 08:39

|             |                                                                                                                              |       |
|-------------|------------------------------------------------------------------------------------------------------------------------------|-------|
| Majority    | -- TTGTGATATTT CXATGCTTATAAT- AXATAAATAT- - - - - ATGTAAGGACATG- TTCACTAATGAAGAA- AGTAAT                                     |       |
|             | 68970            68980            68990            69000            69010            69020            69030            69040 |       |
| Human       | -- TTGTGGTAG- TCTATGCTTGTTATTATAGATAAAT- - - - - ACAGTAAGAACATG- TTCACTAATGAAGAA- GATAAT                                     | 55172 |
| PolarBear   | -----                                                                                                                        | 17480 |
| Cow         | -- TTGTGATATTTCCATGCTTATTA- - TAATAAATGT- - - - - ATGTA- - GACATG- TTCACTAATGAAGAA- AGTGAT                                   | 50471 |
| Dog         | -- TTGTGATATTTCTTTG- - TAGTAACAGATAACTAT- - - - - ATTCAAGGACATGCTCCACTAATGAAGTA- ATTAAT                                      | 47839 |
| BelugaWhale | TATGGTGATATATGTATATGTATAGC- TGATTCACITTTGTTATAAAGTAGAACTAA- CACACCATTGTAAAGCAATTAT                                           | 46568 |
| Donkey      | ---- AAGATGTTACCTCACCATGGCTA- - AAATAC- - - - - AAAATGTGGAT- - - - - TTCATAATTCCAAAGTCTTAAG                                  | 52431 |
| Cat         | -- TTGTGATATTTCCCATGCTTGCAATAACATAAATAT- - - - - ATGTAAGGACATGCTTCACTAGTGAAGGA- AGTAAT                                       | 54504 |
| Ferret      | -- TTGTGATATTTCTTTGCTTATAGTAACATAAATAT- - - - - ATCCAAGGACATGGTTTACTAATGAAAGA- AGTAAT                                        | 55165 |
| Lion        | -- TTGTGATATTTCCATGCTTGCAATAACATAAATAT- - - - - ATGTAAGGACATGCTTCACTAGTGAAGGA- AGTAAT                                        | 52176 |
| Vaquita     | TATGGTGATATATGTATATGTATAGC- TGATTCACITTTGTTATAAAGTAGAACTAA- CACACCATTGTAAAGCAATTAT                                           | 47258 |
| Pig         | -- TTGTGATAGTTCATGCTTGTTA- - TAATAAACGTT- - - - - ATGTAAGGACATG- TTCACTAATGAAGAA- AGTGAC                                     | 44207 |

|             |                                                                                                                              |       |
|-------------|------------------------------------------------------------------------------------------------------------------------------|-------|
| Majority    | ATTGCAGTAAAXTACTTAAAATACT- - - - T- - - - - TXAXTCA- - - - -                                                                 |       |
|             | 69050            69060            69070            69080            69090            69100            69110            69120 |       |
| Human       | ATTGCAATGAGCTACTTAAAATATT- - - - - TAAAT- - - - -                                                                            | 55202 |
| PolarBear   | -----                                                                                                                        | 17480 |
| Cow         | ATTGCAATGAGCTACTTAAAATACTTTATTTAAATTTGTATTGGACTA- - - AATATGTTCAAATATTTA- - AA- - - - -                                      | 50539 |
| Dog         | ATTGCAGTACACTACTTAAAATACT- - - - T- - - - - TGAGTCA- - - - -                                                                 | 47872 |
| BelugaWhale | ATGCCAATAAA- GATGTTAAACAAAAAAGCTACACATAAATGAGACCAAAAAATGTATGAAGTTACTTGTTAATGATAAT                                            | 46647 |
| Donkey      | CTTACTGTAAA- - - - - GAAAACTCTTAATT- - - - TTTATTGTGAAACA- - - - -                                                           | 52470 |
| Cat         | ATTGCAGTACACTACTTAAAATACT- - - - T- - - - - CAAGTCA- - - - -                                                                 | 54537 |
| Ferret      | ATTGCAGTACATTACTTAAAGATACT- - - - T- - - - - TGAGTCA- - - - -                                                                | 55198 |
| Lion        | ATTGCAGTACACTACTTAAAATACT- - - - T- - - - - CAAGTCA- - - - -                                                                 | 52209 |
| Vaquita     | ATGCCAATAAA- GATGTTAAACAAAAAAGCTACACATAAATGAGACCAAAAAATGTATGAAGTTACTTGTTAATGATAAT                                            | 47337 |
| Pig         | ATTGCAGTGAG- TGCTTAAAATAAT- - - - - AAATATGTATTGGGTCA- - - AATATATT- AGATATTTA- - AAT- - - - -                               | 44268 |



Dienstag, 3. Mai 2022 08:39

| Majority    | ----- TTTAGTCA--A--XTATATAA-----                                                 |       |       |       |       |       |       |       |       |
|-------------|----------------------------------------------------------------------------------|-------|-------|-------|-------|-------|-------|-------|-------|
|             | 69130                                                                            | 69140 | 69150 | 69160 | 69170 | 69180 | 69190 | 69200 |       |
| Human       | ----- ACA----- TTTAAACATTTGAATAGATAC----- TGC-----                               |       |       |       |       |       |       |       | 55229 |
| PolarBear   | -----                                                                            |       |       |       |       |       |       |       | 17480 |
| Cow         | --- AAAC--- ATTGTTCTAGAAATACTTTTCATCCCTCTTTT-ATAA--- TATCTATAAG----- TCGTGTAAATG |       |       |       |       |       |       |       | 50599 |
| Dog         | ----- T----- TTTAGCCA- A--- TATATAA-----                                         |       |       |       |       |       |       |       | 47889 |
| BelugaWhale | AGAGAACGTAATTGTTAAGGTAAAAAAGGAAGATGGAGAACAGTGAATAGTATTGGAAAGAAAAGTATGCAGTAGATAAG |       |       |       |       |       |       |       | 46727 |
| Donkey      | ----- TTTCATACAGACAATACACAA-----                                                 |       |       |       |       |       |       |       | 52491 |
| Cat         | ----- C----- CTCAGCCA- A--- TATATAG-----                                         |       |       |       |       |       |       |       | 54554 |
| Ferret      | ----- C----- GTTAGCCA- G--- TATAGAA-----                                         |       |       |       |       |       |       |       | 55215 |
| Lion        | ----- C----- CTCAGCCA- A--- TATATAG-----                                         |       |       |       |       |       |       |       | 52226 |
| Vaquita     | AGAGAACGTAATTGTTAAGGTAAAAAAGGAAGATGGAGAACAGTGAATAGTATTGGAAAGAAAAGTATGCAGTAGATAAG |       |       |       |       |       |       |       | 47417 |
| Pig         | -- TAAAC--- ATTGCTCTAGAAATCCTTTTATCTCTTTTTTATAACTATTCTCTATAA----- TGGTATAAATG    |       |       |       |       |       |       |       | 44333 |

| Majority    | ----- TTTAT----- XAGGT XATAT- T- X- ATT-----                                       |       |       |       |       |       |       |       |       |
|-------------|------------------------------------------------------------------------------------|-------|-------|-------|-------|-------|-------|-------|-------|
|             | 69210                                                                              | 69220 | 69230 | 69240 | 69250 | 69260 | 69270 | 69280 |       |
| Human       | ----- TCTAT----- AAAACTAATTTTACCAATT----- T                                        |       |       |       |       |       |       |       | 55254 |
| PolarBear   | -----                                                                              |       |       |       |       |       |       |       | 17480 |
| Cow         | TGTCCTA----- TTGTATTAAATATTTAT--- CATATATTTCAAATGT- TGGATT- TTAGTCACTTTAGCTAACATAA |       |       |       |       |       |       |       | 50667 |
| Dog         | ----- A----- TTTGT----- AGGCCTAAT- T--- ATT-----                                   |       |       |       |       |       |       |       | 47908 |
| BelugaWhale | TACTTAACATGTTTGTATGGAGTACATATATACATATATGCTTGTGTATGTAGGGAAAGCAGACAGGGT GACTGAGTTGC  |       |       |       |       |       |       |       | 46807 |
| Donkey      | ----- A- TGTTCATAAACATTTTAAAGAATATTAATGAAAT-----                                   |       |       |       |       |       |       |       | 52526 |
| Cat         | ----- A----- TCTGT----- AGGTCATAT- T--- ATTG-----                                  |       |       |       |       |       |       |       | 54574 |
| Ferret      | ----- G----- TTTAT----- AGGCCATAT- T--- ATT-----                                   |       |       |       |       |       |       |       | 55234 |
| Lion        | ----- A----- TCTGT----- AGGTCATAT- T--- ATTG-----                                  |       |       |       |       |       |       |       | 52246 |
| Vaquita     | TACTTAACATGCTTGTATGGAGTACATATATACATATATGCTTGTGTATGTAGGGAAAGCAGACAGGGT GACTGAGTTGC  |       |       |       |       |       |       |       | 47497 |
| Pig         | TATCT----- TTCTAAAAAATATTTGT--- TTCAAAATGTTGGAT- T- TGAATTAATGAGTCACTTTGGCTAACTTCA |       |       |       |       |       |       |       | 44401 |



Dienstag, 3. Mai 2022 08:39

| Majority    | ----- AXTT -----                                                                   |       |       |       |       |       |       |       |       |
|-------------|------------------------------------------------------------------------------------|-------|-------|-------|-------|-------|-------|-------|-------|
|             | 69450                                                                              | 69460 | 69470 | 69480 | 69490 | 69500 | 69510 | 69520 |       |
| Human       | ----- AATT -----                                                                   |       |       |       |       |       |       |       | 55331 |
| PolarBear   | ----- ATTT -----                                                                   |       |       |       |       |       |       |       | 17518 |
| Cow         | TCTTTGCGACCCCA- TGAATCGCAACACGCCAG- GCCTCCCTGTCCATCACCAACTCCCGGAGTTCACCCAGACTCACGT |       |       |       |       |       |       |       | 50883 |
| Dog         | ----- ATTT -----                                                                   |       |       |       |       |       |       |       | 47997 |
| BelugaWhale | CACTAATGAAGAAAGTGAACAGTGAGCTACTTGCAATGAGCTACTTAAATACTTTATTTAAATATATATTGGGTAAAT     |       |       |       |       |       |       |       | 47046 |
| Donkey      | ----- CTGGCC- - - GAGCT- -----                                                     |       |       |       |       |       |       |       | 52625 |
| Cat         | ----- ATGT -----                                                                   |       |       |       |       |       |       |       | 54664 |
| Ferret      | ----- AATT -----                                                                   |       |       |       |       |       |       |       | 55323 |
| Lion        | ----- ATGT -----                                                                   |       |       |       |       |       |       |       | 52336 |
| Vaquita     | CACTAATGAAGAAAGTGAACAGTGAGCTACTTGCAATGAGCTACTTAAATACTTTATTTAAATATATATTGGGTAAAT     |       |       |       |       |       |       |       | 47734 |
| Pig         | ----- AGTT -----                                                                   |       |       |       |       |       |       |       | 44503 |

| Majority    | -----                                                                               |       |       |       |       |       |       |       |       |
|-------------|-------------------------------------------------------------------------------------|-------|-------|-------|-------|-------|-------|-------|-------|
|             | 69530                                                                               | 69540 | 69550 | 69560 | 69570 | 69580 | 69590 | 69600 |       |
| Human       | -----                                                                               |       |       |       |       |       |       |       | 55331 |
| PolarBear   | -----                                                                               |       |       |       |       |       |       |       | 17518 |
| Cow         | CCATCGAGTTAGTGATGCCATCCAG- - CCATCTCATCCTCTGTCGTCGCCCTTCTCCTCCTGCCCCA- ATCCCTCCCAGC |       |       |       |       |       |       |       | 50960 |
| Dog         | -----                                                                               |       |       |       |       |       |       |       | 47997 |
| BelugaWhale | ATGTTCAGATGTTTAAATTAACA- - - - TTGTTCTAGAAATCTTTTTATCCCTCTTTTTTATAACTATATTCTTTATAGT |       |       |       |       |       |       |       | 47122 |
| Donkey      | ----- G- -----                                                                      |       |       |       |       |       |       |       | 52626 |
| Cat         | -----                                                                               |       |       |       |       |       |       |       | 54664 |
| Ferret      | -----                                                                               |       |       |       |       |       |       |       | 55323 |
| Lion        | -----                                                                               |       |       |       |       |       |       |       | 52336 |
| Vaquita     | ATGTTCAGATGTTTAAATTAACAAACATTGTTCTAGAAATCTTTTTATCCCTCTTTTTTATAACTATATTCTTTATAGT     |       |       |       |       |       |       |       | 47814 |
| Pig         | -----                                                                               |       |       |       |       |       |       |       | 44503 |

Dienstag, 3. Mai 2022 08:39

| Majority    | ----- CAGTGAATTAA-----                                                                |       |       |       |       |       |       |       |       |
|-------------|---------------------------------------------------------------------------------------|-------|-------|-------|-------|-------|-------|-------|-------|
|             | 69610                                                                                 | 69620 | 69630 | 69640 | 69650 | 69660 | 69670 | 69680 |       |
| Human       | ----- AGTAAGTCA----- T-----                                                           |       |       |       |       |       |       |       | 55341 |
| PolarBear   | ----- CAGTGAACTA-----                                                                 |       |       |       |       |       |       |       | 17528 |
| Cow         | ATCAGGGTCTTTTCCAATGAATCAACTCTTTGCATGAGGTGGCCAAAGTACTGGAGTTTCA----- GCTTTAGCA          |       |       |       |       |       |       |       | 51030 |
| Dog         | ----- CAGTGAACTG-----                                                                 |       |       |       |       |       |       |       | 48007 |
| BelugaWhale | AGTGTA AATATGCCCATTTGTATTAAGTATTTATTGTATGTT- TCAAAATGTTGGATTTGAATTAACAAGTCACCTTTAACA  |       |       |       |       |       |       |       | 47201 |
| Donkey      | ----- TAGGGGAGACAAG-----                                                              |       |       |       |       |       |       |       | 52639 |
| Cat         | ----- CAATGAAATGAC-----                                                               |       |       |       |       |       |       |       | 54676 |
| Ferret      | ----- CATTGAACTA-----                                                                 |       |       |       |       |       |       |       | 55333 |
| Lion        | ----- CAATGAAATGAC-----                                                               |       |       |       |       |       |       |       | 52348 |
| Vaquita     | AGTGTA AATGTGCCCATTTGTATTA AATATTTATTGTATGTT- TCAAAATGTTGGATTTGAATTAACAAGTCACCTTTAACA |       |       |       |       |       |       |       | 47893 |
| Pig         | -----                                                                                 |       |       |       |       |       |       |       | 44503 |

| Majority    | ----- TTTTTTT----- X----- XT----- ATXTCCA----- ACT-----                          |       |       |       |       |       |       |       |       |
|-------------|----------------------------------------------------------------------------------|-------|-------|-------|-------|-------|-------|-------|-------|
|             | 69690                                                                            | 69700 | 69710 | 69720 | 69730 | 69740 | 69750 | 69760 |       |
| Human       | ----- TTTGACT-- A----- ATACATA----- AAT-----                                     |       |       |       |       |       |       |       | 55359 |
| PolarBear   | ----- TTTTTTT----- T----- GTTTCCA----- GCT-----                                  |       |       |       |       |       |       |       | 17546 |
| Cow         | TCA----- TTCCTTCAAAGAAATCCAAGGCTGAT- CTCAGTCAAATGAGC----- ATCCCCT----- CACC----- |       |       |       |       |       |       |       | 51087 |
| Dog         | ----- TTTCTTT----- T----- TT----- ATTTCTA----- GCT-----                          |       |       |       |       |       |       |       | 48027 |
| BelugaWhale | TAAATTTATAGGTCATATTTTATCAGCATTTAGATGATGAAGTTTGACTAGATGAGTGTGTGATCTCTTTGAGTACCAAG |       |       |       |       |       |       |       | 47281 |
| Donkey      | ----- GTCCTTG----- AGCTACAGCAGAAATAA-----                                        |       |       |       |       |       |       |       | 52663 |
| Cat         | ----- TTTTTTT----- T----- TT----- GTTTCCA----- GCT-----                          |       |       |       |       |       |       |       | 54696 |
| Ferret      | ----- TTTTTT----- GTTTCCA----- GCT-----                                          |       |       |       |       |       |       |       | 55349 |
| Lion        | ----- TTTTTTT----- T----- TTTTTTT----- GTTTCCA----- GCT-----                     |       |       |       |       |       |       |       | 52373 |
| Vaquita     | TAAATTTATAGGTCATATTTTATTAGCATTTAGATGATGAAGTTTGACTATATGAGTGTGTGATCTCCTTGAGTACCAAG |       |       |       |       |       |       |       | 47973 |
| Pig         | ----- TAC----- T----- GAAATGACC----- ATCCTCTA----- CACC-----                     |       |       |       |       |       |       |       | 44528 |

Dienstag, 3. Mai 2022 08:39

| Majority    | ----- TTATTGAG- ATAAAA- - TAGAT- ACA- - TTGTGTAA- XTTTAAGGTATATAATGTGTTGATTTG |                     |                                 |                |                     |                    |              |            |       |
|-------------|-------------------------------------------------------------------------------|---------------------|---------------------------------|----------------|---------------------|--------------------|--------------|------------|-------|
|             | 69770                                                                         | 69780               | 69790                           | 69800          | 69810               | 69820              | 69830        | 69840      |       |
| Human       | -----                                                                         | TTATAGA-            | - - TAAAA-                      | TTAAGTAGCA-    | TTTAAATGATTGTTT     | TAGATATATA-        | TCTGGACTCTCA |            | 55417 |
| PolarBear   | -----                                                                         | TTATTGAG-           | ATATAA-                         | - TTGAT- ATA-  | - TTGTGTAA-         | - TATAAGGTATACAGT  | GTGTTGACTTG  |            | 17602 |
| Cow         | --- T-                                                                        | -----               | TTGTTGAG-                       | ATAATAGACATAT- | ACA-                | - TTGTGTAAATTTT    | AAGATATACAAC | TATTTATTTG | 51148 |
| Dog         | -----                                                                         | TTATTGAG-           | ATAAAA-                         | - TGGAT- ATA-  | - TTGTGTAA-         | - TTTAAGGGATATAAT  | GTATTGATTTG  |            | 48083 |
| BelugaWhale | CTATATGATTTT                                                                  | CCTGGTTATGTAATATTTT | CAGTCAAATGACCATCCTCCCACCTTTTTTT | GAGATATAATT    | CACATATACA          |                    |              |            | 47361 |
| Donkey      | ----- T-                                                                      | -----               | GGCCACAGGG-                     | ATATGG-        | - CTGATGTCTCTTTTTTT | CCTTCTTAAGGTTGCTAT | GTTCTGTCTCC  |            | 52727 |
| Cat         | -----                                                                         | TTGTTGAG-           | ATAAAA-                         | TTGAT- ACA-    | - TTGTGTAA-         | - TTTAAGGTATATAATT | GTGTTGATTTG  |            | 54754 |
| Ferret      | -----                                                                         | TTATTGAG-           | ATATAA-                         | - TAAAT- ATT-  | - TTGTATAA-         | - TTTAAGATATATAAT  | GTGTTGATTTG  |            | 55405 |
| Lion        | -----                                                                         | TTATTGAG-           | ATAAAA-                         | TTGAT- ATA-    | - TTGTGTAA-         | - TTTAAGGTATATAATT | GTGTTGATTTG  |            | 52431 |
| Vaquita     | CTATATCATTTT                                                                  | CCTGGTTATGTAATATTTT | CAGTCAAATGACAATCCTCCCACCTTTTTTT | GAGATATAATT    | CACATATACA          |                    |              |            | 48053 |
| Pig         | --- T-                                                                        | -----               | TTATGGAGTATGATTGGT              | TAGATGACC-     | - TGGTGTGAGT        | TTTAAGGCCTGTAGCTT  | GTTGATTTG    |            | 44591 |

| Majority    | ATACATT----- T- ATATATTGCAAAATGATTACCACCA- - - - - TAGCTAATATGTTXXC |                    |                          |                    |                      |              |                  |       |       |
|-------------|---------------------------------------------------------------------|--------------------|--------------------------|--------------------|----------------------|--------------|------------------|-------|-------|
|             | 69850                                                               | 69860              | 69870                    | 69880              | 69890                | 69900        | 69910            | 69920 |       |
| Human       | AGCC-                                                               | -----              | -----                    | -----              | GTGTGATCTGTGGTT-     | -----        | ATATAATATTTTAGT  |       | 55451 |
| PolarBear   | ATACACT-                                                            | -----              | -----                    | TTATATATTTT        | CAGAATGATTACCGCT-    | -----        | TAGCAAATGTGCTGCT |       | 17652 |
| Cow         | ATTTATTTATGTTTTG-                                                   | CAAAATGAT-         | TTATTTATGTTTT            | GCAAAATGATTACCAAC  | CACTTTAGCTAAC        | AGGTCCAG     |                  |       | 51226 |
| Dog         | ATACACT-                                                            | -----              | -----                    | T- ATATATTGCAAAAT  | GATTACCACCA-         | -----        | TAACAAATGTGTTGTC |       | 48132 |
| BelugaWhale | TTGTGTGGGTTTTA                                                      | AAGGTGATTTGAT-     | ATATTTATATTT             | CGCAAAATGATTACCACC | ACCACATTAGTTAAT      | AGGTCCAG     |                  |       | 47440 |
| Donkey      | AGCTCTCAGGAGTAAAT                                                   | CAAACTAATCATACTTCT | CTATGGTCAAATCAGGGCTCTCA- | -----              | GCTAATACAGCAGC       |              |                  |       | 52799 |
| Cat         | ACACACT-                                                            | -----              | -----                    | T- ACGGATTGCAAAAT  | TATTTCTACCA-         | -----        | TAGTATATGTGCTTTC |       | 54803 |
| Ferret      | ATACAC-                                                             | -----              | -----                    | ATATATTGCAAAAT     | GTTTACCGCCA-         | -----        | TAGCAAATATGCTGCT |       | 55452 |
| Lion        | ACAC-                                                               | -----              | -----                    | ACGGATTGCAAAAT     | TATTTCTACCA-         | -----        | TAGTATATGTGCTGTC |       | 52476 |
| Vaquita     | TTGTGTGGGTTTTA                                                      | AAGGTGATTTGAT-     | ATATTTATATTT             | CGCAAAATGATTACCACC | ACCACATTAGTTAAT      | AGGTCCAG     |                  |       | 48132 |
| Pig         | ATATATT-                                                            | -----              | -----                    | -----              | GCAGAATGATTACTACCACC | ACCATTAGTAAT | AGGTCCC          |       | 44638 |

Dienstag, 3. Mai 2022 08:39

| Majority    | AAAGAA- - - - AXCACTXXATGA- TTT- - - GTTTATTCTXGTA- AGTGTTGTGCTAATCTT- - - XTGT- - T- - TXCCTTTT |       |       |       |       |       |       |       |  |  |       |
|-------------|--------------------------------------------------------------------------------------------------|-------|-------|-------|-------|-------|-------|-------|--|--|-------|
|             | 69930                                                                                            | 69940 | 69950 | 69960 | 69970 | 69980 | 69990 | 70000 |  |  |       |
| Human       | AAAATG- - - - - ACT- - - - - TTTCTTGTTTATTCTCCTG- - - - AGTGCCTAATTCTTTTGTAT- - - - - TCTCTTT    |       |       |       |       |       |       |       |  |  | 55507 |
| PolarBear   | AGAGGG- - - - AGCACTGACTATTTGT- - - GTTTATTCTCATA- AGTGTTGGCCTAATTCTTTTGTGTTCT- - - TCCTTTT      |       |       |       |       |       |       |       |  |  | 17721 |
| Cow         | AAAAAATGTGACACTTCATGAATTTGGGGGT CATATTTGCATAGGACCATGTTAAACT- - - - CTGTATTGTTTCAATGT             |       |       |       |       |       |       |       |  |  | 51302 |
| Dog         | AAAGGG- - - - AGCACT- - - - - GTTTGTTTTCATA- AGTGTTGTCTAATTCT- - - - - AT- - - - -               |       |       |       |       |       |       |       |  |  | 48176 |
| BelugaWhale | AAAAAATGTGACACTTCATGATTTTGGGG- TCATATTTGCATAGGGCCATGCTAATCT- - - - CTGTGTTGTTCCAGTTT             |       |       |       |       |       |       |       |  |  | 47515 |
| Donkey      | AACGCATGAAGGGAAAAAAGA- - - - - AACTTCACTAGCAAATAGTCAAGCTAAATC- - - - - AATCACATAT                |       |       |       |       |       |       |       |  |  | 52861 |
| Cat         | AAAGTT- - - - ACCAGT- - - - - TTT- - - GTTTATTCTCTTA- TCTTTTGTGTTTCGCCTT- - - - - CCTTTT         |       |       |       |       |       |       |       |  |  | 54854 |
| Ferret      | AGAGGG- - - - AGCACTGACTATTTTT- - - GTTTATTCTTATA- AGTGTTGGCCTAATTCTTTTGTGTTCTCCTTCCTTTT         |       |       |       |       |       |       |       |  |  | 55524 |
| Lion        | AAAGTT- - - - ACCAGT- - - - - TTT- - - GTTTATTCTCATA- TCTTTTGTGTTTGCCTT- - - - - CCTTTT          |       |       |       |       |       |       |       |  |  | 52527 |
| Vaquita     | AAAAAA- TGTGACACTTCATGATTTTGGGG- TCATATTTGCATAGGGCCATGCTAATCT- - - - CTGTGTTGTTCCAGTTT           |       |       |       |       |       |       |       |  |  | 48206 |
| Pig         | CAGAAA- TGTAACACTTCATGAATTTGGGGT TATGTTTGCATAGGTCCATGCTAATCTTCT- CTGTATTGTTCCAATTT               |       |       |       |       |       |       |       |  |  | 44716 |

| Majority    | CAGXTTTTATGCTGCTXAGTTGA- TATTXCTATTCATTTAXCAATATA- - - GXTTTTTT- - T- - - - - - - - - - -           |       |       |       |       |       |       |       |  |  |       |
|-------------|-----------------------------------------------------------------------------------------------------|-------|-------|-------|-------|-------|-------|-------|--|--|-------|
|             | 70010                                                                                               | 70020 | 70030 | 70040 | 70050 | 70060 | 70070 | 70080 |  |  |       |
| Human       | CA- - - - TTAACCTGTTGATATAGATTTTTCAAACCTGTAAACCTATGTATAGGTATTTGT- - - - - - - - - - - - - - - -     |       |       |       |       |       |       |       |  |  | 55562 |
| PolarBear   | CGTATATCATGGTGTGCAGTTGA- TATTCCTATTCATATGCCAATATA- - - GGTTTTTC- - - - - - - - - - - - - - - -      |       |       |       |       |       |       |       |  |  | 17776 |
| Cow         | TGGTATGTGTGCTGCTAAAGGGAGCACGGATCCTTCCTTATACATAGT- - - GTTCTTATTCTTTTGTGTTTGTCTTCCTT                 |       |       |       |       |       |       |       |  |  | 51379 |
| Dog         | - - - - - CATGGTGTTCAGTTGA- TATTCCTATTCATCTGCCAATACA- - - GCTTTTTTC- - - - - - - - - - - - - - - -  |       |       |       |       |       |       |       |  |  | 48224 |
| BelugaWhale | TAGTATATGTGCTGCTGAAGGGAACACTGATCATTCTTATTATCATAAATGTTCTCATTCTTTTGTATCCGCCTTCCTT                     |       |       |       |       |       |       |       |  |  | 47595 |
| Donkey      | AAGGATCTGAGGTGGGCTTATTAGAGTCTTTAGCCATTAAAGAGTAACTGGGACATGAC- - T- - - - - - - - - - - - - - - -     |       |       |       |       |       |       |       |  |  | 52921 |
| Cat         | CAT- - - TTATCATGCTCAGTTTA- TATTCCTATTCATCTGCCAGTACA- - - GCTTTTTCTTTTTTAAAAAAAATTTTT               |       |       |       |       |       |       |       |  |  | 54927 |
| Ferret      | CTTTTATCAAGGTGTTTTCAGTTGA- TATTTCTGTTTCATCTCTT- - TCAA- - - GCTTTTTT- - - - - - - - - - - - - - - - |       |       |       |       |       |       |       |  |  | 55577 |
| Lion        | CAT- - - TTATCATGCTGAGTTTA- TATTCCTATTCATCTGCCAGTACA- - - GCTTTTTTC- - - - - - - - - - - - - - - -  |       |       |       |       |       |       |       |  |  | 52579 |
| Vaquita     | TAGTATATGTGCTGCTGAAGGGAACACTGATCATTCTTATTATCATAAATGTTCTCATTCTTTTGTATCCGCCTTCCTT                     |       |       |       |       |       |       |       |  |  | 48286 |
| Pig         | TAGTGTATGAACTGCCGAAACAAGCACTGATCATTCTTTATTCTCATA- - - AGTGCCTCATTTTGTGC- - - TGTCCTTT               |       |       |       |       |       |       |       |  |  | 44790 |

Dienstag, 3. Mai 2022 08:39

|             |                                                                                                                                                                                                                                                                                                                                   |       |       |       |       |       |       |       |       |
|-------------|-----------------------------------------------------------------------------------------------------------------------------------------------------------------------------------------------------------------------------------------------------------------------------------------------------------------------------------|-------|-------|-------|-------|-------|-------|-------|-------|
| Majority    | ----- TXXX----- X-                                                                                                                                                                                                                                                                                                                |       |       |       |       |       |       |       |       |
|             | <table border="0" style="width:100%"> <tr> <td style="width:10%">70090</td> <td style="width:10%">70100</td> <td style="width:10%">70110</td> <td style="width:10%">70120</td> <td style="width:10%">70130</td> <td style="width:10%">70140</td> <td style="width:10%">70150</td> <td style="width:10%">70160</td> </tr> </table> | 70090 | 70100 | 70110 | 70120 | 70130 | 70140 | 70150 | 70160 |
| 70090       | 70100                                                                                                                                                                                                                                                                                                                             | 70110 | 70120 | 70130 | 70140 | 70150 | 70160 |       |       |
| Human       | ----- 55562                                                                                                                                                                                                                                                                                                                       |       |       |       |       |       |       |       |       |
| PolarBear   | ----- 17776                                                                                                                                                                                                                                                                                                                       |       |       |       |       |       |       |       |       |
| Cow         | TTCATTTATCGCTGTGCTTTGTTTATAT- ATACGCCTGTTCTGCCAGTACAAC- TCTTCAAAGTAAAG- - - CA 51453                                                                                                                                                                                                                                              |       |       |       |       |       |       |       |       |
| Dog         | ----- 48224                                                                                                                                                                                                                                                                                                                       |       |       |       |       |       |       |       |       |
| BelugaWhale | TTCATTCATCACTGTGCTCTGTTT- - - - ATATTCCTGTTTCTGCAATACAAC- TTTTCAAAGTAAAG- - - CA 47665                                                                                                                                                                                                                                            |       |       |       |       |       |       |       |       |
| Donkey      | ----- TGCC----- CT 52927                                                                                                                                                                                                                                                                                                          |       |       |       |       |       |       |       |       |
| Cat         | TCAACGTTTATTTATTTTTGGGACAGAGAGACAGAGCATGAACGGGGGAGGGGCAGAGAGAGGGGAGACACAGAATC 55007                                                                                                                                                                                                                                               |       |       |       |       |       |       |       |       |
| Ferret      | ----- 55577                                                                                                                                                                                                                                                                                                                       |       |       |       |       |       |       |       |       |
| Lion        | ----- 52579                                                                                                                                                                                                                                                                                                                       |       |       |       |       |       |       |       |       |
| Vaquita     | TTCATTCATCACTGTGCTCTGTTT- - - - ATATTCCTGTTTCTGCAATACAAC- TTTTCAAAGTAAAGAAAGCA 48360                                                                                                                                                                                                                                              |       |       |       |       |       |       |       |       |
| Pig         | TTCATTCATCACTGTGCTTTATT- - - - - AT- - - CCTATTCATCTGCCAGTACAGCTCTTTTCAAAGTAAAG- - - CA 44857                                                                                                                                                                                                                                     |       |       |       |       |       |       |       |       |
| Majority    | X- - XX- AGGTATTXGTCAXTATTAXAT- XAAC- - TX- XXTGXCXXX- XXT- - GXXXT- XXXXXXXX- AGAXAAGGTAGAAA                                                                                                                                                                                                                                     |       |       |       |       |       |       |       |       |
|             | <table border="0" style="width:100%"> <tr> <td style="width:10%">70170</td> <td style="width:10%">70180</td> <td style="width:10%">70190</td> <td style="width:10%">70200</td> <td style="width:10%">70210</td> <td style="width:10%">70220</td> <td style="width:10%">70230</td> <td style="width:10%">70240</td> </tr> </table> | 70170 | 70180 | 70190 | 70200 | 70210 | 70220 | 70230 | 70240 |
| 70170       | 70180                                                                                                                                                                                                                                                                                                                             | 70190 | 70200 | 70210 | 70220 | 70230 | 70240 |       |       |
| Human       | ----- GGTATTTGTCATTGTTATATTTTAGAACTATTTGCCTTTGTAT-- GTTTTTTGACCAC- AGATAAGGTAGAAA 55632                                                                                                                                                                                                                                           |       |       |       |       |       |       |       |       |
| PolarBear   | ----- 17776                                                                                                                                                                                                                                                                                                                       |       |       |       |       |       |       |       |       |
| Cow         | GCATAGAGGTGTTAGTTACTATTATATTTAACAGTTATTTGCCTTTATATAGGTTTTTTGACCCCAAATAAGGTAGAAA 51533                                                                                                                                                                                                                                             |       |       |       |       |       |       |       |       |
| Dog         | ----- 48224                                                                                                                                                                                                                                                                                                                       |       |       |       |       |       |       |       |       |
| BelugaWhale | ATGTAGAGGTATTTGTCATTATTATATCTAACAGTTATTTGCCTTTATATAGGTTTTCTGACCCC- AGATAAGGTAGAAA 47744                                                                                                                                                                                                                                           |       |       |       |       |       |       |       |       |
| Donkey      | GTGTGAAAATAAAAAATAGTAGAA- - - - AAC- - T- - - - - T- - G- - - - - - - - AAG- - AAATATAAA 52969                                                                                                                                                                                                                                    |       |       |       |       |       |       |       |       |
| Cat         | GGAAACAGGCTCCAGGCTCTGAGCCATCAGCCCAGAGCCTGACGCGGGGCTCGAACTCACGGACTGCGAGATCGTGACCT 55087                                                                                                                                                                                                                                            |       |       |       |       |       |       |       |       |
| Ferret      | ----- 55577                                                                                                                                                                                                                                                                                                                       |       |       |       |       |       |       |       |       |
| Lion        | ----- 52579                                                                                                                                                                                                                                                                                                                       |       |       |       |       |       |       |       |       |
| Vaquita     | GTGTAGAGGTATTTGTCATTATTATATCTAACAGTTATTTGCCTTTATATAGCTTTTTCTGACCCC- AGATAAGGTAGAAA 48439                                                                                                                                                                                                                                          |       |       |       |       |       |       |       |       |
| Pig         | GTGTAGAGGTATTTGTCACTATTATATTTAACTGTTCTTTGCCTTTATATAGGTTTTCTGACCCC- AGATAAGGTGGGAA 44936                                                                                                                                                                                                                                           |       |       |       |       |       |       |       |       |

Dienstag, 3. Mai 2022 08:39

| Majority    | GAAAXTAXT- - - XCXXXTXA- - GA- - XXG- CA- - - - XATAATAGXAAAGXXATAATAGTAAXCAATGCAGXAATTTAGGA |                                                                      |                                                          |                                            |       |       |                       |       |       |
|-------------|----------------------------------------------------------------------------------------------|----------------------------------------------------------------------|----------------------------------------------------------|--------------------------------------------|-------|-------|-----------------------|-------|-------|
|             | 70250                                                                                        | 70260                                                                | 70270                                                    | 70280                                      | 70290 | 70300 | 70310                 | 70320 |       |
| Human       | GAAATTATTT- -                                                                                | CCTTATCATAGA- -                                                      | CTGTCATCATAATAACAGGAAAGGGATAATAGTAATAAAGGCAGTCTTTTTGG- A |                                            |       |       |                       |       | 55707 |
| PolarBear   | -----                                                                                        | -----                                                                | -----                                                    | -----                                      | ----- | ----- | AAACTCTAAAGCAATGTAACG |       | 17797 |
| Cow         | ACAATTATTT- -                                                                                | CCTTATCAGTGAATCTGTCAGAGAAATAATAGAAAAGACATAATGGTAATAAAGGCAGTGTTTCTGGA |                                                          |                                            |       |       |                       |       | 51611 |
| Dog         | -----                                                                                        | -----                                                                | -----                                                    | -----                                      | ----- | ----- | AAACTATAAAGCAATGTAGCA |       | 48245 |
| BelugaWhale | GAAATTATT- - -                                                                               | CCTTATCAGTGAATCTGTCAGT- -                                            | AATAATAGGAAAGGCATAATAGTAATAAAGGCAGTCTTTTTGGA             |                                            |       |       |                       |       | 47819 |
| Donkey      | GAAACAA- - - - - -                                                                           | -----                                                                | -----                                                    | ACATTTTCATACATAGGACAACAACCAGTGCAAGAAAAGGGG |       |       |                       |       | 53019 |
| Cat         | GGCTGAAGTCGGACGCTTAACCGACTGCGCCACCCAGGCGCCCCCAGTACAGCTTTTTTCAA                               | ACTGTAAAACAATGTAGTA                                                  |                                                          |                                            |       |       |                       |       | 55167 |
| Ferret      | -----                                                                                        | -----                                                                | -----                                                    | -----                                      | ----- | ----- | AAACTCTACAGCGATATAACA |       | 55598 |
| Lion        | -----                                                                                        | -----                                                                | -----                                                    | -----                                      | ----- | ----- | AAACTGTAAAACAATGTAGTA |       | 52600 |
| Vaquita     | GAAATTATT- - -                                                                               | CCTTATCAGTGAATCTGTCAGT- -                                            | AATAATAGGAAAGGCATAATAGTAATAAAGGCAGTCTTTTTGGA             |                                            |       |       |                       |       | 48514 |
| Pig         | GATACTATTT- - -                                                                              | CCTTATCAGTGAATCTGCCAGT- -                                            | AATAATAGGAAAGGCATAATAGTAATAAAGGTAGTCTTTTGAAG             |                                            |       |       |                       |       | 45012 |

| Majority    | GXATTTGACATXG- - XTTAGTTXACA- ATTXTCTGCAAXTAT- TGXGTTTTTTTCAACTCCAGATATATA- XXX- - - CAXA |                                                                          |                                                     |       |       |       |       |       |       |
|-------------|-------------------------------------------------------------------------------------------|--------------------------------------------------------------------------|-----------------------------------------------------|-------|-------|-------|-------|-------|-------|
|             | 70330                                                                                     | 70340                                                                    | 70350                                               | 70360 | 70370 | 70380 | 70390 | 70400 |       |
| Human       | GCATTTAACATAAATATTTGATTGACAGATTTCTACAAATAC- TGTGTTTATTCAATTTTATGGGTATA- TTTTTTTCGCA       |                                                                          |                                                     |       |       |       |       |       | 55785 |
| PolarBear   | GTATTTGTCATTG- - -                                                                        | TTACTTAACA- GTTATTTGCCTTTATGTAGGTTTTTTT- GACTCCAGATAGGTA- - - - - - GAAA |                                                     |       |       |       |       |       | 17865 |
| Cow         | GCATTTAACATAG- ATTTAGTTGACA- -                                                            | TTTCCTAAAAATAC- TGTATTTTCTCAATTCTGTATATAT- -                             | TTTTTTTCACT                                         |       |       |       |       |       | 51685 |
| Dog         | GTATTTGTCATTG- - -                                                                        | TTGTTTAATA- ATTATTTGCCATTATATAGGTTTTTTT- GACTCCAGATAGGTA- - - - - - GAAA |                                                     |       |       |       |       |       | 48314 |
| BelugaWhale | ACATTTAACATATGATTTAGTTGACAGATTTCCCAAAATAC- TGTATTTTTTCAGCTCCATATATATAATTTTTTTT            | CACA                                                                     |                                                     |       |       |       |       |       | 47898 |
| Donkey      | AAAAATGAGGTGA- -                                                                          | ATGAGCCCTGA- - -                                                         | TCTCTCCAGCTTTGTGCCTGTAGTCACTTTCTGGAATATGCCAAGGCAAGA |       |       |       |       |       | 53094 |
| Cat         | CTATTTGTTGTTG- - -                                                                        | TTACTTAACA- ATTATTTGCCTTTATATAGGTTTTTTT- GACCCCAGATAGGTA- - - - - - GAAA |                                                     |       |       |       |       |       | 55235 |
| Ferret      | GTATTTGTCATTG- - -                                                                        | TTACTTAACA- ATTATTTGCCTTTATGTAGGTTTTTTT- GACTCCAGATAG- - - - - - - AAA   |                                                     |       |       |       |       |       | 55662 |
| Lion        | GTATTTGTTATTG- - -                                                                        | TTACTTAACA- GTTATTTGCCTTTGTATAGGTTTTTTT- GACCCCAGATAGGTA- - - - - - GAAA |                                                     |       |       |       |       |       | 52668 |
| Vaquita     | ACATTTAACATATGATTTAGTTGACAGATTTCCCAAAATAC- TGTATTTTTTCAGCTCCATATATATATTTTTTTT             | CACA                                                                     |                                                     |       |       |       |       |       | 48593 |
| Pig         | GCATTTAATATA- - -                                                                         | TTTAGTTGACAGATTTCTAAAAATTC- TGTATTTTTTCAATTCATATGTAT- -                  | TTT- - -                                            | CACA  |       |       |       |       | 45083 |



Dienstag, 3. Mai 2022 08:39

| Majority    | TTTTAXTATCTC- - AAATCAATAX- - - - - GATCTGTCATAGTXXXXTXAGCAATATCXTATTXXTXGTA         |       |       |       |       |       |       |       |       |
|-------------|--------------------------------------------------------------------------------------|-------|-------|-------|-------|-------|-------|-------|-------|
|             | 70410                                                                                | 70420 | 70430 | 70440 | 70450 | 70460 | 70470 | 70480 |       |
| Human       | TTTTAAAATCTCAGAAATTTGA- TGTGTCCTGCAATAGTCTATCTTCCATAGTTCAATTGGCAACATCTTATTAGTCATA    |       |       |       |       |       |       |       | 55864 |
| PolarBear   | AATTATTTTCTT- - - - ATCAATG- - - - - AATCTGTCACAGT- - - - - AGTAATATTCTGTT- - CTGTA  |       |       |       |       |       |       |       | 17916 |
| Cow         | TTTTAAAATCTCAGAAATCAAGATATGTCTTATA- - AGTTGATCTGTCATGGTTCAATTAGCAATATCTTATTAGTCCTA   |       |       |       |       |       |       |       | 51763 |
| Dog         | AATTATTTTCTT- - - - ATCAAT- - - - - CTGTCACAGT- - - - - AGGAATAGTCTATT- - CTGTA      |       |       |       |       |       |       |       | 48361 |
| BelugaWhale | TTTTAAAATCTCAGAAATCAAGATGTGTCTTATAATAGTTGATCTGTCATGGTTCAATTATCAGTATCTTCTTAGTCCTA     |       |       |       |       |       |       |       | 47978 |
| Donkey      | GTTAAGTAACACAGAATATGATA- - - - - GTCTTACTAAGTTGAGGTGACAGATATCAGATTTAGGAGA            |       |       |       |       |       |       |       | 53157 |
| Cat         | TACTATTTTCTT- - - - ACTGGTG- - - - - AATCTATCATAGT- - - - - AGTAATACTCTAGT- - ATGTA  |       |       |       |       |       |       |       | 55286 |
| Ferret      | AATTATTTTCTT- - - - TTTAATGG- - - - - AATCTGTCACAGT- - - - - AGTAATACTCTGTT- - CTGTA |       |       |       |       |       |       |       | 55714 |
| Lion        | TACTATTTTCTT- - - - ACTGGTG- - - - - AATCTATCATAGT- - - - - AGTAATATTCTAGT- - ATGTA  |       |       |       |       |       |       |       | 52719 |
| Vaquita     | TTTTAAAATCTCAGAAATCAAGATGTGTCTTATAATAGTTGATCTGTCATGGTTCAATTATCAATATCTTCTTAGTCCTA     |       |       |       |       |       |       |       | 48673 |
| Pig         | TTTTAAAATCTC- - AAATCAAGAT- - - - - GGTCTGTCATGGTTCAATTAGCAATATCTTATTAGTCGTA         |       |       |       |       |       |       |       | 45145 |

| Majority    | XATAAXATTATTXXACATTT- - - - - T- - X- - A- - XXAAAA- - - - - TXCTCCA- ATTTTAT-          |       |       |       |       |       |       |       |       |
|-------------|-----------------------------------------------------------------------------------------|-------|-------|-------|-------|-------|-------|-------|-------|
|             | 70490                                                                                   | 70500 | 70510 | 70520 | 70530 | 70540 | 70550 | 70560 |       |
| Human       | CATAAAACAATAGTGCATTTTATAATTAATGGTGTATTTGATACCATAAAATGTATGGGAAATATTCTTCATATTATATC        |       |       |       |       |       |       |       | 55944 |
| PolarBear   | TTT- - - - TTTTTTTCACATTT- - - - - T- - - - - AAAA- - - - - T- CTCAG- TGATTAAA          |       |       |       |       |       |       |       | 17951 |
| Cow         | CATAAAAGGATAGTGCATTTTACCATTAATGATATATTAGAAACAATAACATGGATGGGAAAGATTCTTTATATTTTATC        |       |       |       |       |       |       |       | 51843 |
| Dog         | TGTAT- ATTTTTTTCACATTT- - - - - T- - - - - AAAA- - - - - T- CTCA- - - - -               |       |       |       |       |       |       |       | 48390 |
| BelugaWhale | CGTAAAATTATAGTGTATTA- - - - - GATACCATAACATGTATGGAAAATATTCTTCATATTTTATT                 |       |       |       |       |       |       |       | 48039 |
| Donkey      | GGCTAAATCACCTGAAATTTGA- - - - - GGTGCTGAGAAGTGAAGAGGAAAGAGAGCAGAGAAAGAGCTCCAGAAATC- - - |       |       |       |       |       |       |       | 53229 |
| Cat         | TAT- - - - TTTTTTTCACATTT- - - - - T- - - - - AAAA- - - - - T- CTCA- - - - -            |       |       |       |       |       |       |       | 55311 |
| Ferret      | TTT- - - - TTTTT- CACATAT- - - - - T- - - - - AAAA- - - - - T- CTCAT- AAATTAAA          |       |       |       |       |       |       |       | 55748 |
| Lion        | TAT- - - - TTTTTTTCACATTT- - - - - T- - - - - AAAA- - - - - T- CTCC- - - - -            |       |       |       |       |       |       |       | 52744 |
| Vaquita     | CGTAAAATTATAGTGTATTA- - - - - GATACCATAACATGTATGGAAAATATTCTT- - - ATTTTATT              |       |       |       |       |       |       |       | 48731 |
| Pig         | CATAAGAAAATTGTGCATTC- - - - - A- - - - TGTAT- - GGAAAATA- - A- - - - TTCTTCATATTTTATC   |       |       |       |       |       |       |       | 45197 |

Dienstag, 3. Mai 2022 08:39

| Majority    | TTGAAG- - TTCCTGAAATTAAXATGGGTTTTGAACTGTGGTATAAXATC- - - TXCTGGTTTAATX- AXTAGTATTT CAGAAG |                                    |            |        |       |       |       |       |  |
|-------------|-------------------------------------------------------------------------------------------|------------------------------------|------------|--------|-------|-------|-------|-------|--|
|             | 70570                                                                                     | 70580                              | 70590      | 70600  | 70610 | 70620 | 70630 | 70640 |  |
| Human       | TTGAAGTTTACCTGAGAATTTTGTGGTTTTG                                                           | GGACTAGACTACACGTTGGTTTCTATTCTAAAA- | ATTTTGGTGT | CAGAAG | 56023 |       |       |       |  |
| PolarBear   | AAAAAATTCTAAGAAATTAAGATGTGTCTCAACAGTAGTGAATCTC- - - TCCCGGTTTAATT-                        | AGCAGTATCTTAGAAG                   | 18027      |        |       |       |       |       |  |
| Cow         | TTGAAGTTTTCCTGAAAATTTTATGGCTGTGTACTGTGGTATACATCGGTTTCTGTTGTAAAA-                          | ATTTTGGTTTCAAAG                    | 51922      |        |       |       |       |       |  |
| Dog         | - - - - - GAAATTAAGATGTGTTTCAACAGTAATTGATCTG- - - TCCTGGTTTAATT-                          | AGCAGTATCTTAGAAG                   | 48453      |        |       |       |       |       |  |
| BelugaWhale | TTGAAGTATTCCTGAAAATTTTATGGCTTTGTAGTATGGTATACATCAATTTCTGTTCTAAAA-                          | ATTTTGGTTT CAGAAG                  | 48118      |        |       |       |       |       |  |
| Donkey      | - - - - - TGCAAGAGTTACCCTAGAGTCTATTGGTGATACTGAGC- - - TGCCACATGCATAGGGTAAAACCTCCATCAG     | 53297                              |            |        |       |       |       |       |  |
| Cat         | - - - - - GAAATTAAGATGTGCCTTAAGTGTCTGTTGATTTG- - - TC- TGGTTTAATT-                        | AGTAGTATTTTAGAAG                   | 55373      |        |       |       |       |       |  |
| Ferret      | AAAATA- - - - TCAGAAATTAAGAGGTGTCTTAACAGTAGTACATCTC- - - TCCTGGTTTAATTTAATAGTATCTTAGAAG   | 55821                              |            |        |       |       |       |       |  |
| Lion        | - - - - - GAAATTAAGATGTGTCTTAAGTGTCTGTTGATTTG- - - TC- TGGTTTAATT-                        | AGTAGTATTTTAGAAG                   | 52806      |        |       |       |       |       |  |
| Vaquita     | TTGAAGTATTCCTGAAAATTTTATGGCTTTGTAGTATGGTATACATCAATTTCTGTTCTAAAA-                          | ATTTTGGTTT CAGAAG                  | 48810      |        |       |       |       |       |  |
| Pig         | TTGAAGCATTCTGAAATTTCTGTGGTTTTGTACTATGGCATAACATCAATTTCTGCTTTAA- - - - TTT-                 | AGATTCAGAAG                        | 45272      |        |       |       |       |       |  |

| Majority    | - - TTATGCTAGTATGAAAAAGA- - CTTAATXTGTAT- CTGAATATTCCTCXTTTAAGATTXTATTAGAAATAATAAGCT   |       |       |       |       |       |       |       |  |
|-------------|----------------------------------------------------------------------------------------|-------|-------|-------|-------|-------|-------|-------|--|
|             | 70650                                                                                  | 70660 | 70670 | 70680 | 70690 | 70700 | 70710 | 70720 |  |
| Human       | - TTAAGTGTAGTATGAAAAA- - - - - TGTATTTTCTGAATGTTTCTTATTTTAAGATTGTATTAGAAATAATAAGCT     | 56092 |       |       |       |       |       |       |  |
| PolarBear   | - - TTATGCTAGTATGAAAAAGGA- - CTTAATATGTATTCTGAGTATTCCTCCTTTAAGATTGTATTAGAAATAATAAGCT   | 18103 |       |       |       |       |       |       |  |
| Cow         | - - TTACACTAGTATCAAAAAA- - - - - ATTTGTAT- CTGAATGTTTCTCTTTTAGGATT- TATTAGAAATAATAAGCT | 51992 |       |       |       |       |       |       |  |
| Dog         | - - TTACGCTAGTCTGAAAAAGA- - CTTAATATGTATCCTGAATATTCCTCCCTTAAGATTATATTAGAAATAATAAGCC    | 48529 |       |       |       |       |       |       |  |
| BelugaWhale | - - TTATGCTAGTATGAAAAAGA- CTTAATTTGTAT- CTGAATATTCCTCTTTTAGGATT- TATTGGAAATAATG- - - T | 48190 |       |       |       |       |       |       |  |
| Donkey      | GCTGGTCAAAGAATGATTGAGGAGCTGTAAGCTGAGCAATGCCATTGCTCATACAGAGCT- TATACAGAGCCAAA- G- -     | 53373 |       |       |       |       |       |       |  |
| Cat         | - - TTATGCTACTATGAAAAA- GA- - CTTAATATATGTCCTGAATATTCCTCCTTTAAGATTGTATTAGAATTAATAAACT  | 55448 |       |       |       |       |       |       |  |
| Ferret      | - - TTATGGTAATAT- - - - - GTATTCCTCCTTAAGATTGTATTAAAAATAATAAGCT                        | 55871 |       |       |       |       |       |       |  |
| Lion        | - - TTATGCTACTATGAAAAA- GA- - CTTAATATATGTCCTGAATATTTCTCCTTTAAGATTGTATTAGAAATAATAAACT  | 52881 |       |       |       |       |       |       |  |
| Vaquita     | - - TTATGCTAGTATGAAAAAGA- CTTAATTTGTAT- CTGAATATTCCTCTTTTAGGATT- TATTGGAAATAATG- - - T | 48882 |       |       |       |       |       |       |  |
| Pig         | - - TTATACTAGTTTGAAGAAAAAGGCTTGATTTGTAT- CTGAATGTTTCTATTT- AGGATT- TATTAGAAATAATAAGCT  | 45347 |       |       |       |       |       |       |  |



Dienstag, 3. Mai 2022 08:39

| Majority    | XTGAATCTGXCAAACACTATATCTTG- - TTCTTTTGAAAATAAATTACATTGCCTXTCTTTGCTTGTTCAATA- - - TTGGTC |                |                  |                   |                    |            |        |       |       |
|-------------|-----------------------------------------------------------------------------------------|----------------|------------------|-------------------|--------------------|------------|--------|-------|-------|
|             | 70890                                                                                   | 70900          | 70910            | 70920             | 70930              | 70940      | 70950  | 70960 |       |
| Human       | ATGTATTTATAAAA                                                                          | ACTACATCTTG- - | TTCTTTTGAGAATA   | AAATTACATATCATA   | CCTTTGCATGTTCAACA  | - - -      | TTGATC |       | 56294 |
| PolarBear   | GTGAATTTGCCAAAC                                                                         | TATATTTTG- -   | TTCTTTTGAAAATA   | AAATTATACTGCCTGT  | CTTTGCCTGTTCAAGTA  | - - -      | TAGGTC |       | 18296 |
| Cow         | - - - AATCTGTCAGAC                                                                      | TACATCATG- -   | CTGTTTTGAGAATA   | AAATTACATGACTTAT  | CTAT- CTTGTTCAAGCA | - - -      | TTGGTC |       | 52187 |
| Dog         | GTGAATTTGCCAAAC                                                                         | TATATTTTG- -   | TTCTTTTGAAAATA   | AAACTACACTGCCTAT  | CTTTGCTTGTTCAATA   | - - -      | AAGGTT |       | 48745 |
| BelugaWhale | - - - AATCTGTCAGAC                                                                      | TACATCTTG- -   | TTGTTTTAAGAGTAA  | ATTACACTGACTGTCTT | - CTTGTTCCACA- - - |            | TTGGTC |       | 48383 |
| Donkey      | GTCAAACCTGATCAA                                                                         | AAAGTAACTTAAAT | GCCTACCAAACAGA   | AATCAACACTTTTTAT  | TTTATTTATTTATTTA   | - - -      | TTTATT |       | 53591 |
| Cat         | ATGAATCTGCCAAAC                                                                         | TATATTTTG- -   | TTCTTTTGAAAATA   | AAGTTACGTTGCCTT   | TCTTCGTTGTTCAATT   | TATCTAGGTC |        |       | 55658 |
| Ferret      | GTGAATCGGCCCAAC                                                                         | TGATT- - - -   | CTCTTTTGAAAATA   | AAATTACATTGCCTGT  | CTTTGCTTGTTCAAGTA  | - - -      | TAGGTC |       | 56072 |
| Lion        | ATGAATCTGCCAAAC                                                                         | TATATTTTG- -   | TTCTTTTGAAAATA   | AAATTATGTTGCCTT   | TCTTCGTTGTTCCATT   | TATCTAGGTC |        |       | 53092 |
| Vaquita     | - - - AATCTGTCAGAC                                                                      | TACATCTTG- -   | TTGTTTTAAGAGGAA  | ATTACACCAACTGTCTT | - CTTGTTCCACA- - - |            | TTGGTC |       | 49073 |
| Pig         | ATGAGTGTGTCAAAC                                                                         | TATATCTTG- -   | TTCTCTTG- GGATGA | ATTACATGGCCTATCT  | TTTTCTTGTTCAAGCA   | - - -      | TTCATC |       | 45553 |

| Majority    | CCAAACCCTAGATAAATTGTTTTGAAG- - - - TAAATACTAGTAGAATACTTGAATTAT- AAACAGATAAATACCTGGCTCA |                |                |                        |                            |                 |          |       |       |
|-------------|----------------------------------------------------------------------------------------|----------------|----------------|------------------------|----------------------------|-----------------|----------|-------|-------|
|             | 70970                                                                                  | 70980          | 70990          | 71000                  | 71010                      | 71020           | 71030    | 71040 |       |
| Human       | CCAAAGCCTGGATAA                                                                        | TTTTTTTGAAT- - | - - - -        | GAAATACTAGTAGA         | AATTTGATTTATTA             | AAACAGGTAGTACCT | GGCTCA   |       | 56369 |
| PolarBear   | CCAAACCCTAGATAA                                                                        | TGTTTTGAAG- -  | - - - -        | TAAATACTGGTAGA         | ATACTTGAATTAT- AAACAGATAA  | ATACCTGGCTCA    |          |       | 18370 |
| Cow         | CCAAACCCTCAATAA                                                                        | CTGTTTTGAGG- - | - - - -        | TAAATACTAGTATG         | ATACTTGAATTGT- AAACAGGCAAT | ATGTGGCTTA      |          |       | 52261 |
| Dog         | CCAAACCCTAGATAA                                                                        | TGTTTTGAAT- -  | - - - -        | TAAAGATTAGTAGA         | CTTGAATTAT- AAACAGATAA     | ATACCTGGTTCA    |          |       | 48819 |
| BelugaWhale | CCAAACCCTAGATAA                                                                        | TGTTTTGAAGTAA  | AAATAAATACTAGT | AATAACTTGAATTAT- AATC- | - - - - -                  | CTTGGCTCA       |          |       | 48454 |
| Donkey      | TATTTATTTATTTA                                                                         | TTTTATTGTTATTT | CAGATTGGCCCTGA | AATAACAACCTG- -        | TTGC- CAAT-                | - - - - -       | CTTCCTCT |       | 53659 |
| Cat         | CCAAACCTTAGATAA                                                                        | TGTTTTGAAG- -  | - - - -        | TAAATACCAGTAGG         | ATACTTGAATTAT- AAACGATAA   | ATACCTGGCTCA    |          |       | 55732 |
| Ferret      | CCAAACCCTAGATAA                                                                        | TGCTTTGAAG- -  | - - - -        | TAAATACTAGTAGA         | ATACTTGAATTAT- AAACAGGTGGT | ACCTGGCTCA      |          |       | 56146 |
| Lion        | CCAAACCTTAGATAA                                                                        | TGTTTTGAAG- -  | - - - -        | TAAATACCAGTAG-         | ATACTTGAATTAT- AAACGATAA   | ATACCTGGCTCA    |          |       | 53165 |
| Vaquita     | CCAAACCCTAGATAA                                                                        | TGTTTTGAAGTAA  | AAATAAATACTAGT | AATAACTTGAATTAT- AATC- | - - - - -                  | CTTGGCTCA       |          |       | 49144 |
| Pig         | CCAAACCTTAGATGA                                                                        | TATTTTAAA- - - | - - - -        | TAAATACTAGTAGA         | ATACTTGAATTAT- AAACAGACAAA | ACCTGGCTCA      |          |       | 45627 |



Dienstag, 3. Mai 2022 08:39

| Majority    | AGCGTGCTCAAGCAGTTCTTCAAGCTGTGACAGCTGTCCAGACAGCAAATACTCCTCTTAGTGGCACCACAGTTAGTGAG   |       |       |       |       |       |       |       |       |
|-------------|------------------------------------------------------------------------------------|-------|-------|-------|-------|-------|-------|-------|-------|
|             | 71210                                                                              | 71220 | 71230 | 71240 | 71250 | 71260 | 71270 | 71280 |       |
| Human       | AGCGTGCTCAGGCAGTTCTTCAAGCTGTGACAGCTGTCCAGACAGCAAATACTCCTCTTAGTGGCACCACAGTTAGCGAG   |       |       |       |       |       |       |       | 56598 |
| PolarBear   | AGCGTGCTCAAGCAGTTCTTCAAGCTGTGACAGCTGTCCAGACAGCAAATACTCCTCTTAGTGGCACCACAGTTAGTGAG   |       |       |       |       |       |       |       | 18602 |
| Cow         | AGCGTGCTCAAGCAGTTCTTCAAGCTGTGACTGCTGTCCAGACAGCAAATACTCCTCTTAGTGGCACCACAGTTAGTGAG   |       |       |       |       |       |       |       | 52491 |
| Dog         | AGCGTGCTCAAGCAGTTCTTCAAGCTGTGACAGCTGTCCAGACAGCAAATACTCCTCTTAGTGGCACCACAGTTAGTGAG   |       |       |       |       |       |       |       | 49027 |
| BelugaWhale | AGCGTGCTCAAGCAGTTCTTCAAGCAGTGACAGCTGTCCAGACAGCAAATACTCCTCTTAGTGGCACCACCGTTAGTGAG   |       |       |       |       |       |       |       | 48676 |
| Donkey      | -GTATATTCTAGTTGTAGGTNNNNNNNNNNNNNNNNNNNNNNNNNNNNNNNNNNNNNNNNNNNNNNNNNNNNNNNNNNNNNN |       |       |       |       |       |       |       | 53885 |
| Cat         | AGCGTGCTCAAGCAGTTCTTCAAGCTGTGACAGCTGTCCAGACAGCAAATACGCCTCTTAGTGGCACCACAGTTAGTGAG   |       |       |       |       |       |       |       | 55963 |
| Ferret      | AGCGTGCTCAAGCAGTTCTTCAAGCTGTGACAGCTGTCCAGACAGCAAATACTCCTCTTAGTGGCACCACAGTTAGTGAG   |       |       |       |       |       |       |       | 56378 |
| Lion        | AGCGTGCTCAAGCAGTTCTTCAAGCTGTGACAGCTGTCCAGACAGCAAATACGCCTCTTAGTGGCACCACAGTTAGTGAG   |       |       |       |       |       |       |       | 53396 |
| Vaquita     | AGCGTGCTCAAGCAGTTCTTCAAGCAGTGACAGCTGTCCAGACAGCAAATACTCCTCTTAGTGGCACCACAGTTAGTGAG   |       |       |       |       |       |       |       | 49366 |
| Pig         | AGCGTGCTCAAGCAGTTCTTCAAGCTGTGACGGCTGTCCAGACAGCAAATACTCCTCTTAGCGGCACCACAGTTAGTGAG   |       |       |       |       |       |       |       | 45844 |

| Majority    | AGTGCAGTGACTCCAGCCCAGAGTCCAGTGCTTAGAATAATTATTGACAATATGTAACCCTGTAACAACCTTGATGTTCT      |       |       |       |       |       |       |       |       |
|-------------|---------------------------------------------------------------------------------------|-------|-------|-------|-------|-------|-------|-------|-------|
|             | 71290                                                                                 | 71300 | 71310 | 71320 | 71330 | 71340 | 71350 | 71360 |       |
| Human       | AGTGCAGTGACTCCAGCCCAGAGTCCAGTACTTAGAATAATTATTGACAACATGTAACCCTGTAACAACCTTGATGTTCT      |       |       |       |       |       |       |       | 56678 |
| PolarBear   | AGTGCAGTGACTCCAGCCCAGAGTCCAGTGCTTAGAATAATTATTGACAATATGTAACCCTGTAACAACCTTGATGTTCT      |       |       |       |       |       |       |       | 18682 |
| Cow         | AGTGCAGTGACTCCAGCCCAGAGTCCAGTGCTTAGAATAATTATTGACAATATGTAATTATCCTGTAACAACCTTGATGTTCT   |       |       |       |       |       |       |       | 52571 |
| Dog         | AGTGCAGTGACTCCAGCCCAGAGTCCAGTGCTTAGAATAATTATTGACAATATGTAACCCTGTAACAACCTTGATGTTCT      |       |       |       |       |       |       |       | 49107 |
| BelugaWhale | AGTGCAGTGACTCCAGCCCAGAGTCCAGTGCTTAGAATAATTATTGACAATATGTAATTACCCTGTAACAACCTTGATGTTCT   |       |       |       |       |       |       |       | 48756 |
| Donkey      | NNNNNNNNNNNNNNNNNNNNNNNNNNNNNNNNNNNNNNNNNNNNNNNACAACCATA-TTTTAAATTTCAAACCTTTTAATCTTCT |       |       |       |       |       |       |       | 53964 |
| Cat         | AGTGCAGTGACTCCAGCCCAGAGTCCAGTGCTTAGAATAATTATTGACAATATGTAACCCTGTAACAACCTTGATGTTCT      |       |       |       |       |       |       |       | 56043 |
| Ferret      | AGTGCAGTGACTCCAGCCCAGAGTCCAGTGCTTAGAATAATTATTGACAATATGTAACCCTGTAACAACCTTGATGTTCT      |       |       |       |       |       |       |       | 56458 |
| Lion        | AGTGCAGTGACTCCAGCCCAGAGTCCAGTGCTTAGAATAATTATTGACAATATGTAACCCTGTAACAACCTTGATGTTCT      |       |       |       |       |       |       |       | 53476 |
| Vaquita     | AGTGCAGTGACTCCAGCCCAGAGTCCAGTGCTTAGAATAATTATTGACAATATGTAATTACCCTGTAACAACCTTGATGTTCT   |       |       |       |       |       |       |       | 49446 |
| Pig         | AGTGCAGTGACTCCAGCCCAGAGTCCAGTACTTAGAATAATTATTGACAACATGTAATTACCCTGTAACAACCTTGATGTTCT   |       |       |       |       |       |       |       | 45924 |







Dienstag, 3. Mai 2022 08:39

| Majority    | ----- TA----- GCTAATGTTAT----- TAATACTGACATAACTTAG                                                |       |       |       |       |       |       |       |
|-------------|---------------------------------------------------------------------------------------------------|-------|-------|-------|-------|-------|-------|-------|
|             | 71690                                                                                             | 71700 | 71710 | 71720 | 71730 | 71740 | 71750 | 71760 |
| Human       | ----- TA----- TAT----- ATGTATGTATA- CTTAA 56964                                                   |       |       |       |       |       |       |       |
| PolarBear   | ----- TA----- GCTAATGTTAT----- TAATACTAACATAACTTGG 19011                                          |       |       |       |       |       |       |       |
| Cow         | ATGTAAC TAATATCGTTAATATTATTATTTACATATTAATATTAATATTATGTCAGTAACTAATATTGACATAACTTAG 52924            |       |       |       |       |       |       |       |
| Dog         | ----- TC----- ACGAATGTCAT----- TAATACTGACATA----- 49426                                           |       |       |       |       |       |       |       |
| BelugaWhale | GT----- G- TA----- GCTAATGTTAT----- TAATACTGACATAACTTAG 49066                                     |       |       |       |       |       |       |       |
| Donkey      | ----- CCG----- AAAAGGTCT----- TTGTTCTGGTCCA- - TCA- 54276                                         |       |       |       |       |       |       |       |
| Cat         | ----- TT----- GCTGATGTTAC----- TAATACAGACATAACTTGG 56368                                          |       |       |       |       |       |       |       |
| Ferret      | AC----- ATA----- GCTAACATTAA----- TAATACTGACATAACTTGG 56780                                       |       |       |       |       |       |       |       |
| Lion        | ----- TT----- GCTGATGTTAC----- TAATATGGACATAACTTGG 53808                                          |       |       |       |       |       |       |       |
| Vaquita     | GT----- G- TA----- GCTAATGTTAT----- TAATACTGACATAACTTAG 49757                                     |       |       |       |       |       |       |       |
| Pig         | AT----- ATCTA- - T- - - G- - - - T- - - ATATA- - G- - - CTAATGCTAT----- TAATACTGGTGTAACTTAG 46250 |       |       |       |       |       |       |       |

| Majority    | CAATACCATGTAGCATT TTTAGATGGCACAAATTGXTGTCATTTAGATAXTATTAGAAAAGCTTAGTA- - - - TX- TAAXAA             |       |       |       |       |       |       |       |
|-------------|-----------------------------------------------------------------------------------------------------|-------|-------|-------|-------|-------|-------|-------|
|             | 71770                                                                                               | 71780 | 71790 | 71800 | 71810 | 71820 | 71830 | 71840 |
| Human       | TGATATCTTGTAGCATTACAGATAGTAGAAATTGATGGCAT- - - - TAATATTAAGAAACCTTAATATT- - TGTCATAAA 57037         |       |       |       |       |       |       |       |
| PolarBear   | CAATACCATGTAGCATTATAGATGGT GCAAATTGATGTCATTTAGATACTATTAAGAAAGCTTAAAT- - - - TTATGATAA 19087         |       |       |       |       |       |       |       |
| Cow         | CAGTACCATATAGCATT TTTAGATGACACAGATTAATGTCATAGAGATAGTATTAGAAAG- CTTAGTATTTGTGATAAAAA 53003           |       |       |       |       |       |       |       |
| Dog         | - - - - - CCATGTAGCTTTATGGATGGCACAAATTGGTGT CATTAGATATTATTAGGAAAGCTTAATA- - - - TT- - - - TGT 49493 |       |       |       |       |       |       |       |
| BelugaWhale | CGATACCATATAGCATT TTTAGATGGCACACATTATTGTCATTAAGGTAATATTGAAAAGCTTAGTATTTATGATAAAAA 49146             |       |       |       |       |       |       |       |
| Donkey      | - AACTTCCTGTAGAATTTCTGGTTCCTTTAAGGGAGG- - ATTTTGTTAGTGT TTTTAAATTGTAA- - - - - GCCAG 54343          |       |       |       |       |       |       |       |
| Cat         | CAATACCATGTAGCATTGTAGATGGCACAAATTGGTGT CATTAGATACAATTAGAAAAGCTTAGTA- - - - TT- TGTGAT 56443         |       |       |       |       |       |       |       |
| Ferret      | CAATACCTTATAGCATTAT- GATGGCACAAATTGGTGT CATTAGATACTATTAGGAAAGCT- - - - - TAA 56844                  |       |       |       |       |       |       |       |
| Lion        | CAATACCATGTAGCATTGTAGATGGCACAAATTGGTATCATTACATACAGTTAGAAAAGCTTGGTA- - - - TT- TGTGAT 53883          |       |       |       |       |       |       |       |
| Vaquita     | CGATACCATATAGCATT TTTAGATGGCACACATTATTGTCATTAAGGTAATATTGAAAAGCTTAGTATTTATGATAAAAA 49837             |       |       |       |       |       |       |       |
| Pig         | - - - TACCGTATAGCATT TTTAAATGACACAGATTGCTGT CATTAAAGATAATGTTAGAAAA- ACC- - - - - TAGTAATAA 46318    |       |       |       |       |       |       |       |

Dienstag, 3. Mai 2022 08:39

| Majority    | AGAAATGTTTATTTTAAAGGATAGTCATATTTGTAGTTATCTATAATATAGGCTTXT- TTATTTTGCATTTTT- GTTTGA       |       |       |       |       |       |       |       |       |
|-------------|------------------------------------------------------------------------------------------|-------|-------|-------|-------|-------|-------|-------|-------|
|             | 71850                                                                                    | 71860 | 71870 | 71880 | 71890 | 71900 | 71910 | 71920 |       |
| Human       | AGAAATATTTATTTTAAAGGAA- AATCATAGTTGTAGTTAACCATGATGTGGGTTTCTATTATTTTACTTTTTTTTTTTTT       |       |       |       |       |       |       |       | 57116 |
| PolarBear   | AGAAGTGTTCCTTTTAAAGGATAGTTATATGTGTAGTTATCTATAATATAGACTTCTCTTATTTTGCATTTTT- GTTTGA        |       |       |       |       |       |       |       | 19166 |
| Cow         | GAAA- TGTTTATTTTAAACAATTGTCATATTTGTAGTTATCTATAATATAGGCTT- - - ATATTCTGCATTTTT- GTTTTA    |       |       |       |       |       |       |       | 53078 |
| Dog         | GATAGTGTTCCTTTTAAAGGATAGTTACATGTGTAGTTTCTGTAATACAGGTTTCTGTTATTTTGCACCTTG- ATTTGA         |       |       |       |       |       |       |       | 49572 |
| BelugaWhale | AGAAATGTTTATTTTAAACA- - - GTCATATTTGTAGTTATATGTAATATAGGCTT- - - ATAGTTTGCATTTGT- GTTTGA  |       |       |       |       |       |       |       | 49219 |
| Donkey      | GGAGATGTTCTGGGGAGGGGAGGAAGGGGAGTTTAGCTGTTTGTT- TATGAGCCA- - - GACTTTGCATTAACCCTTTTA      |       |       |       |       |       |       |       | 54418 |
| Cat         | AGAAATGTTTATTTCTAAGGATAGTTCTATCTATAGTTATCTATAATATTGACTTCTATTACTGTCCATTTTT- - - - GA      |       |       |       |       |       |       |       | 56518 |
| Ferret      | AGAAGTGTTCCTTTTAAAGGATAATGGTATGTGTAGTTATCTATA- - - CATACTTTTGTATTTTGCATTTTTTTGTTTGA      |       |       |       |       |       |       |       | 56921 |
| Lion        | AGAAATGTTTATTTCTAAGGATAGTTCTATCTATAGTTATCTATAAT- - TGATTTCTGTTACTTTCCATTTTT- - - - GA    |       |       |       |       |       |       |       | 53956 |
| Vaquita     | AGA- - TGTTTATTTTAA- - - - GTCATATTTGTAGTTATATGTAATATAGGCTT- - - ATAGTTTGCATTTTT- GTTTGA |       |       |       |       |       |       |       | 49906 |
| Pig         | AAAA- TGTTTATTTTAAACAATGTACATATTTGTAGGTATCTATAATATAGGCTT- - - GTATTTTGTGTTTTT- GTTT- -   |       |       |       |       |       |       |       | 46391 |

| Majority    | TTTAGGTCCAAA- GT- - - - TTTXTGCTCTTGAGGATATAGCAGGATTATATTGTGCATGCACAC- XAGTXAAGATTTTA  |       |       |       |       |       |       |       |       |
|-------------|----------------------------------------------------------------------------------------|-------|-------|-------|-------|-------|-------|-------|-------|
|             | 71930                                                                                  | 71940 | 71950 | 71960 | 71970 | 71980 | 71990 | 72000 |       |
| Human       | TTTTAATTTAAGGACAAAAGTTTGTACTCTTAAGAAAAAGCAGGACTATATTGTGAATGTGCACCAGCATAAGATTTGA        |       |       |       |       |       |       |       | 57196 |
| PolarBear   | CTTAGGTCCAAA- GT- - - - TTTAAGCTCTTGAGGATATAACAGGATTAATTTGTGCGTGCACAC- CAGTAAAGATTTTA  |       |       |       |       |       |       |       | 19239 |
| Cow         | TCTAGGTCCAAATAT- - - - TTTGTGCTCTTGAGGATATAGCAGGATTATATTATGCATGCATACCTGTTTAAAGATTTTA   |       |       |       |       |       |       |       | 53153 |
| Dog         | TTTAGGTCTGAA- AT- - - - TTTAAGCTCTTGAGGATATAGCAGGATTAATTTGTGCATGTACAC- TAGTAAAGATTTTA  |       |       |       |       |       |       |       | 49645 |
| BelugaWhale | TTTAGGTCCAGAAGT- - - - TTTGTGCTCTTGAGGATATATCAGGATTGTATTGTGCATGCATACCTGTATAAGATTTTA    |       |       |       |       |       |       |       | 49294 |
| Donkey      | TTTTCACTCCTTCCT- - - - CCTGTGAACCTGACAATTTCT- - GGTCTGATTCATGTGGTTGTTATCAGTGCAAACCTCTG |       |       |       |       |       |       |       | 54491 |
| Cat         | TTTAGGTCCAAA- GT- - - - TTTATGCTCCTAAGGATATGGCAGGAT- ATATTGTGCATGAACAC- CAGTAAAGATTTTG |       |       |       |       |       |       |       | 56590 |
| Ferret      | CTTAGGTCCAAA- GT- - - - TTTAAGCTCTTGAGGATATAGCAGGATTAATTTGTACATGCACAC- CAGTAAAGATTTTA  |       |       |       |       |       |       |       | 56994 |
| Lion        | TTTAGGTCCAAA- GT- - - - TTTATGCTCCTGAGGATATGGCAGGAT- ATATTGTGCATGAACAC- CAGTAAAGATTTTG |       |       |       |       |       |       |       | 54028 |
| Vaquita     | TTTAGGTCCAGAAGT- - - - TTTGTGCTCTTGAGGATATATCAGGATTGTATTGTGCATGCATACCTGTATAAGATTTTA    |       |       |       |       |       |       |       | 49981 |
| Pig         | - - - - - GATGTA- - - - - CATGCATACCTG- - TATTTAAGATTTTA                               |       |       |       |       |       |       |       | 46423 |

Dienstag, 3. Mai 2022 08:39

| Majority    | AGTGTTTTCCAGTGGGAGTTTTCAAAGTAATTAATTTAGCTATCAAGATAGTTTG- GCTGAAATATATCATTACA- CATGT |              |                 |              |               |                |              |              |             |       |       |
|-------------|-------------------------------------------------------------------------------------|--------------|-----------------|--------------|---------------|----------------|--------------|--------------|-------------|-------|-------|
|             | 72010                                                                               | 72020        | 72030           | 72040        | 72050         | 72060          | 72070        | 72080        |             |       |       |
| Human       | AGTGGCTTTT                                                                          | GCTGGGAATTT  | CAAAGTAATT      | - - - -      | AGTTTTCAA     | AAGAGTTTG-     | GCTGAAATA-   | - - - -      | TACA- GATGT | 57263 |       |
| PolarBear   | AATGTTTTCCAGT                                                                       | GGGAGTTTT    | CACAGTAATTC     | ATTTAGCTAT   | CAAGACAGTTTG- | GCTAAAGTATAT   | CATCACG-     | CATGT        | 19317       |       |       |
| Cow         | CA- - TTTTCCAGT                                                                     | GGGAGTTTT    | CAAAGTACTTAATT- | AGCTGT-      | AAGGTA        | CTTTG-         | GCTGAAATATAT | CAGTACT-     | CATGT       | 53227 |       |
| Dog         | AGTGTTTTCCAGTA-                                                                     | - ATT-       | - - - - -       | AATT-        | - - -         | TAGCTATCAAG    | ACCGTTTG-    | GCTAAAGTATAT | CATCACA-    | CATAT | 49709 |
| BelugaWhale | CA- - TTTTCCAGT                                                                     | GGGAGTTTT    | CAAAGTAATAA     | ATTTATCTAT-  | AAGATAGTTTG-  | GCTGAAATACAT   | CAGTAGA-     | CATGT        | 49369       |       |       |
| Donkey      | TTTGCTGTGCATT                                                                       | CACTATGTCTT- | - CTGTCCATTT    | GCTTCTGTT    | CGTTTTCTGT    | GTTTTAGG       | AGTTTGATAAA- | - - TTT      | 54566       |       |       |
| Cat         | AGTGTTTTCCAGT                                                                       | GGGAGTTTT    | CAGAGTAATTA     | ATTTAGCTAT   | CAAGACACTTGG- | GCTGAAATA-     | ATCATCACA-   | CACGT        | 56667       |       |       |
| Ferret      | AGTGTTTTCCAGT                                                                       | GGGAGTTTT    | CAGAGTAATT-     | - - -        | TAGCTGTCAAG   | AGAGTTTG-      | GCTAAAATATAT | CATCACA-     | CATGT       | 57068 |       |
| Lion        | AGTGTTTTCCAGT                                                                       | GGGAGTTTT    | CAG-            | - TAATTAATTT | AGCTATCAAG    | ACACTTGG-      | GCTGAAATA-   | ATCATCACA-   | CATGT       | 54103 |       |
| Vaquita     | CA- - TTTTCCAGT                                                                     | GGGAGTTTT    | CAAAGTAATAA     | ATTTATCTAT-  | AAGATAGTTTG-  | GCTGAAATACAT   | CAGTAGA-     | CATGT        | 50056       |       |       |
| Pig         | AG- - TTTTACAGT                                                                     | AGAAGTTTT    | CAAAGTAATTA     | ATTTAGCTAT-  | AAGGTAGTTTG-  | GCTGAAATATATTA | AACAATATGT   | 46499        |             |       |       |

| Majority    | GGCTCAGATGCT- ATGATAGGCTCTCAGTTT- ATTTAAGACTACXXTXT- TTTAATATTCTTTTTAAXGATTTTTTTX- - |              |             |               |            |              |                     |       |  |
|-------------|--------------------------------------------------------------------------------------|--------------|-------------|---------------|------------|--------------|---------------------|-------|--|
|             | 72090                                                                                | 72100        | 72110       | 72120         | 72130      | 72140        | 72150               | 72160 |  |
| Human       | GGCTCAAATGCT-                                                                        | ATGATAGGCTCT | CAGTTT-     | ATTTAAACTAT-  | - - - - -  | ATATTCTCTTTA | ATGTCTTTTTTTT-      | 57330 |  |
| PolarBear   | GGCTCCGATGTT-                                                                        | ATGATAGGCTGT | CAGTTT-     | ATTTAAGACTAC  | AGTATATTTA | ATTTCTTTTTTA | AAGA- - - - -       | 19385 |  |
| Cow         | GGCTCAAATGCT-                                                                        | GTAATAAGCTCT | CAGTTG-     | ATTT- - - - - | C- - - - - | CGATATTCTTTT | AAGTATTTTTT- - -    | 53286 |  |
| Dog         | GGCTCAGACGTT-                                                                        | ATGATAGGTTCT | CAGTTT-     | ATTTAAGACTAT  | GGTATATTTA | ATTTCTTTTTTA | AAGTTTTTTTTTTT      | 49787 |  |
| BelugaWhale | GGCTCAGTT- CT-                                                                       | ATGATAGGCTCT | CAGCT- -    | ATTT- - - - - | C- - - - - | CAGTATTCTTTT | AAGTATTTTTTTA- -    | 49428 |  |
| Donkey      | TTCTCGGCTACT                                                                         | GATGATCTCCT  | CTCTCTTCAGT | GTTTGCATTT    | ATTCTGTTTT | GTATTTATTT   | TATAGGTGTTTTAT- -   | 54643 |  |
| Cat         | GGTTCAGATATT-                                                                        | ATGATAAGCTCT | CAGTGT-     | ATTTAAGACTAC  | AGTATGTTTA | ATACTCTCTTTA | AAG- CCTTTTTTTT     | 56744 |  |
| Ferret      | GGCTCAGATGTT-                                                                        | ATGATGGGCTCT | CAGTTT-     | ATGTAAGACTAC  | AGTATATTTA | ATTTCTTTTT   | GAAGATTGTTTTAA-     | 57145 |  |
| Lion        | GGTTCAGATATT-                                                                        | ATGATAAGCTCT | CAGTTT-     | ATTTAAGACTAC  | AGTATATTTA | ATACTCTCTTTA | AAGGCTTTTTTTTTT     | 54181 |  |
| Vaquita     | GGCTCAATT- CT-                                                                       | ATGATAGGCTC- | - AGCT- -   | ATTT- - - - - | C- - - - - | CAGTATTCTTTT | AAGTATTTTTTTA- -    | 50113 |  |
| Pig         | TGCTCAGATGCT-                                                                        | TTTATAGGCTCT | CAGTTT-     | ACTT- - - - - | C- - - - - | CAGTATTTTTTT | AAAATATTTTTT- - - - | 46557 |  |

Dienstag, 3. Mai 2022 08:39

| Majority    | - - - - AAGATAGGTTTTTTGAATAGGTTCTAGTCTACTTTTTTATTCACATCATTACCTTTTT- GTX- XT- - TGTTATAT |                                                                               |                                           |                  |          |          |       |       |       |
|-------------|-----------------------------------------------------------------------------------------|-------------------------------------------------------------------------------|-------------------------------------------|------------------|----------|----------|-------|-------|-------|
|             | 72170                                                                                   | 72180                                                                         | 72190                                     | 72200            | 72210    | 72220    | 72230 | 72240 |       |
| Human       | - - - - A-                                                                              | AAGGTTTTATGAATAGGTTTCTAGTC-                                                   | ACTTTTTTATTCATATCATTATCTTTTTTGT           | CAT-             | - - -    | TGTTACAT |       |       | 57399 |
| PolarBear   | - - - - -                                                                               | GCTTTTTTGAATAGGTTCTTAGTCTACTTTTTTATTTACATCCTTTATATTTTTTAT-                    | - - - - -                                 | TGTTACAT         |          |          |       |       | 19449 |
| Cow         | - - -                                                                                   | AAAAATAGGTTTTTTTCGATACGCTCTTGGTCTCCTTTTTTATTCCAATCACTTACCTTTTT-               | GTTGTTGTTGTTGTAT                          |                  |          |          |       |       | 53362 |
| Dog         | TTTAAAGA                                                                                | AACTGTTCTGAAT-                                                                | GGTCTTAGTCTACTTTTTTATTTACAACATACATATTTTT- | - - - - -        | TATTATGT |          |       |       | 49857 |
| BelugaWhale | - - -                                                                                   | AAAGATAGGTTTTTTGAATAAGTTCTTAGTCTCCCTTTTTATTCACATTACTTACCTTT-                  | - - -                                     | GTTGTTGTTGTTATAT |          |          |       |       | 49502 |
| Donkey      | - - - - -                                                                               | TGGGGTTTTACAGT-                                                               | AGAAGAGAGGCAAGTGAATATTTGTGTTAACCATGAATTC- | - - - - -        | TTCCAT   |          |       |       | 54703 |
| Cat         | T- - -                                                                                  | AAGACTGCTTTTTTTGAATAGATTCTGATCTGCTTTTTTATTCACATCATTACATTTTTTTTT-              | - -                                       | GT- -            | TGTTATAT |          |       |       | 56817 |
| Ferret      | - - -                                                                                   | AAAGACAGCTTTTTTAAATAGGTTCTTAGGCTACTTCTTATTTACATCCTTTATATTTTT-                 | AT-                                       | - - - - -        | TGTTATAT |          |       |       | 57215 |
| Lion        | T- - -                                                                                  | AAGACTGCTTTTTTTGAATACATTCTGATCTGCTTTTTTATTTCCATCATTACGTTTTTTTTTTGT-           | - -                                       | TGTTCTAT         |          |          |       |       | 54256 |
| Vaquita     | - - -                                                                                   | AAAGATAGGTTTTTTGAATAAGTTCTTAGTCTCCCTTTTTATTCACATTACTTACCTTTTTTGTGTTGTTGTTATAT |                                           |                  |          |          |       |       | 50190 |
| Pig         | - - - - -                                                                               | AAGTTTTCTCAATAAGTCCCTAGTCTCCTTTTTTATTCACTTCACTTACCTTTTA-                      | GTTGCT-                                   | - - - - -        | ATAT     |          |       |       | 46621 |

| Majority    | ATGGAGGGTAAGAACTATTAAAA- GAAGTAAAAT- ATCTTCCCATATCATGGCCACCATTGAAAACCTGCATACCAATC |                                                       |                                                         |                                          |       |                                      |       |       |       |
|-------------|-----------------------------------------------------------------------------------|-------------------------------------------------------|---------------------------------------------------------|------------------------------------------|-------|--------------------------------------|-------|-------|-------|
|             | 72250                                                                             | 72260                                                 | 72270                                                   | 72280                                    | 72290 | 72300                                | 72310 | 72320 |       |
| Human       | ATGGAGGATGTAAGGTCATTGAGA-                                                         | GATGTAAAAT-                                           | - - -                                                   | TTCCC-                                   | - -   | ATCAAGGCTGCCACTGAAAACCTGCGCACCACATC  |       |       | 57472 |
| PolarBear   | ATGGAGGGTAAGAACTATTAAAA-                                                          | GAAATAAAAAT-                                          | ATGTTCTCACATCATGGCCATCCTTGAAAACCTGCATACCATATC           |                                          |       |                                      |       |       | 19527 |
| Cow         | ATGGAGGGTAAGAACTATTCAAA-                                                          | GCAGCAAAAAT-                                          | - -                                                     | TTGCTCATGTTACAGCTAGCATTGAAAACCTGCATACCA- | - - - |                                      |       |       | 53434 |
| Dog         | ATGGAGGGTGAGAACTATTAAAA-                                                          | GAAGTAACTTATGTTCCACATCATGACCACCTTTCAAACCTTCGTACCGTATC |                                                         |                                          |       |                                      |       |       | 49936 |
| BelugaWhale | ATGGAGGGTAAGAACTGTTCAA-                                                           | GCAGTAAAAT-                                           | - -                                                     | CTACCC-                                  | - -   | GTCATAGCTACCACTGAAAACCTGCATACCACTGTC |       |       | 49576 |
| Donkey      | A-                                                                                | ACCCTTTATCAAATCATTAGGT-                               | CCTGTCAGTTCATTCTCCTTCATATCTGTCTAGTTTTAATCTTTCTTACTACTTC |                                          |       |                                      |       |       | 54781 |
| Cat         | ATGGAGGATAAGAACTACTAAAA-                                                          | GAAGTAAAAT-                                           | ATCTTCCCATATCATGACCACCTATTGAAAACCTGCATATCATATC          |                                          |       |                                      |       |       | 56895 |
| Ferret      | ATGGAGGGTAAGAACTATTAAAA-                                                          | GAAGTAAAGT-                                           | ATGTTCTCATATTATGGCCACCCTTGAAAACCTACATATCCTATC           |                                          |       |                                      |       |       | 57293 |
| Lion        | ATGGAGGATAAGAACTACTAAAA-                                                          | GAAGTAAAAT-                                           | ATCTTCCCGTATCATGACCACCTATTGAAAACCTGCATATCATATC          |                                          |       |                                      |       |       | 54334 |
| Vaquita     | ATGGAGGGTAAGAACTGTTCAA-                                                           | GCAGTAAAAT-                                           | - -                                                     | CTACCC-                                  | - -   | GTCATAGCTACCACTGAAAACCTGCATACCACTATC |       |       | 50264 |
| Pig         | TTGAAGAGTAAGAACTATTCAAAAGTAGTAAAAT-                                               | - -                                                   | CTACCCATGTCATGGCTATCATTAAAAACCTACATACCACCTC             |                                          |       |                                      |       |       | 46698 |

Dienstag, 3. Mai 2022 08:39

| Majority    | TTTGCTTCTAAATGCCTTAATCTTCTGTTTGTGTATCATATTT- AAATCTACCTTTGXTCTAXCTCTTTAACTTCTTGTG    |       |       |       |       |       |       |       |       |
|-------------|--------------------------------------------------------------------------------------|-------|-------|-------|-------|-------|-------|-------|-------|
|             | 72330                                                                                | 72340 | 72350 | 72360 | 72370 | 72380 | 72390 | 72400 |       |
| Human       | TTTGCTTCCAAGTACCTTAATCTTCTGTTTGTG- - - - TATATCTTAAATCTACTTTTGTCTGTCTCTTTAACTTTTTGTG |       |       |       |       |       |       |       | 57547 |
| PolarBear   | TTTGCTTCTAAATGCCTTAATCTTCCATTTGTGTATCGTATTTTAAATCTACCTTTGTTCTAGCTCTTTAACTTCTTGTG     |       |       |       |       |       |       |       | 19607 |
| Cow         | -----GTCTT-----TGTCTTATTT- AAATCTTCCTTTG- TCT- - - - CTTTAACTTCTTGTG                 |       |       |       |       |       |       |       | 53480 |
| Dog         | TTTGCTTCTAAATGCCTTAATCTTCTGTTTCTGTATCATATTT- AATTCTACCTTTGCCCTAGCTGTTTAACTTCTTGTG    |       |       |       |       |       |       |       | 50015 |
| BelugaWhale | TTTGTTTCTAAATGC- CTAATCTTCTGTTTGTGTATCATATTT- AAATCTACCTTTT- TCTGTCTCTTTAACTTATTGTG  |       |       |       |       |       |       |       | 49653 |
| Donkey      | TGTAATTC- AGACACAATCACCTCTTGCCTATAT- TACTATAATAGCTCTCTTGCTAATTTATTTTCTTTCTTTCTCTC    |       |       |       |       |       |       |       | 54859 |
| Cat         | TTTGCTACCAACTGCCTTAATCTTCTATTTGTGTATCGTATTT- AAATCTACCTTTGCTCTAGCTCTTTAACGTCTTGTG    |       |       |       |       |       |       |       | 56974 |
| Ferret      | TTTGCTTCTAAATGCCTTAATCTTAAAGTTTGTGTATCATATTT- AAATCTGCCTTGTATCTAGTTCTTTAAGTTCTTGGG   |       |       |       |       |       |       |       | 57372 |
| Lion        | TTTGCTACCAACTGCTTTAATCTTCTATTTGTGTATCGTATTT- AAATCTACCTTTGCTCTAGCTCTTTAACGTCTTGTG    |       |       |       |       |       |       |       | 54413 |
| Vaquita     | TTTGTTTCTAAATGC- CTAACCTTCTGTTTGTGTATCTTATTT- AAATCTACCTTTT- TCTGTCTCTTTAACTTCTTGTG  |       |       |       |       |       |       |       | 50341 |
| Pig         | TTTGCTTCTAAATGC- TTCGTCTTCTGTCTAGGTGTCTTATTT- AAATCTACCTTTT- TCTGTGCTTTAACTTCTTATG   |       |       |       |       |       |       |       | 46775 |

| Majority    | CCATATTATCTCATTGTXATTATTATTCCATTATTAACCATTAAATATTCAATTATTAACCATTAC-----            |       |       |       |       |       |       |       |       |
|-------------|------------------------------------------------------------------------------------|-------|-------|-------|-------|-------|-------|-------|-------|
|             | 72410                                                                              | 72420 | 72430 | 72440 | 72450 | 72460 | 72470 | 72480 |       |
| Human       | CCATAGTATCTCATTATTATTACTATTCCATTATTAAGCCATTAAAAATTCAATTATTAAGCCATTATTAT-----G      |       |       |       |       |       |       |       | 57618 |
| PolarBear   | TCATATTATCTCACTGTGATTATTATTCTGTTGTTAAACCATTAAATATT- - - - ATTAAACCATCAC-----       |       |       |       |       |       |       |       | 19670 |
| Cow         | CTGTAGTATAATATTGTTATTTTATTCCACTATTAATAAATTAATATTTATTAA-----                        |       |       |       |       |       |       |       | 53536 |
| Dog         | TCATATTATTTCAATTGTGATTAT- - - TCCATTGTTAAACCATTAAATATTCAATTGTTAAACCATTAC-----      |       |       |       |       |       |       |       | 50079 |
| BelugaWhale | CTGTAGTATCTCATTTTTA-----TTCCATTATTAACATTAATATTTATTATTA-----                        |       |       |       |       |       |       |       | 49705 |
| Donkey      | TTGAATTCTTTCTCCCTGGT- - ACAGTCAAGTATATATCTTTCTAAAATGCACAAATCTGACTTAA-----          |       |       |       |       |       |       |       | 54923 |
| Cat         | CCGTGTTATCTCATTGTGATTATTATTCTGTTGTTAAATGATTAAATATTCAATTATTAACCATTAC-----           |       |       |       |       |       |       |       | 57041 |
| Ferret      | TCATATTTTTTCAATTGTAATTATTATTCTGTTGTTAAACCATTACATATTCAATTATTAACCATTAC-----          |       |       |       |       |       |       |       | 57439 |
| Lion        | CCATGTTATCTCATTGTGATTATTATTCTGTTGTTAAACGATCAAATATTCAATTATTAACCATTAC-----           |       |       |       |       |       |       |       | 54480 |
| Vaquita     | CTGTAGTATCTCATTTTTA-----TTCCATTATTAACATTAATATTTATTATTA-----                        |       |       |       |       |       |       |       | 50393 |
| Pig         | CCATATTATCTCATTGTTA- - - TTATTTCAATTATTAACCATTAAACGTTTATTACTATACCATTGTTATTAACAATTA |       |       |       |       |       |       |       | 46852 |



Dienstag, 3. Mai 2022 08:39

| Majority    | GTTTCATTGTXTTCCATCCTCAGAATCTCATTTGGGGAGCAAAAATAGCTTCAGGTAGCAGAAAGXCTATACXXGTAAT       |       |       |       |       |       |       |       |       |
|-------------|---------------------------------------------------------------------------------------|-------|-------|-------|-------|-------|-------|-------|-------|
|             | 72650                                                                                 | 72660 | 72670 | 72680 | 72690 | 72700 | 72710 | 72720 |       |
| Human       | GTTTCATTGCATTTCCATCCACACAACCTCATTTTGGGAGCAAAATTAGTTGTAGGTAGCAGAAAGGCTATACAAGTAAT      |       |       |       |       |       |       |       | 57846 |
| PolarBear   | GTTTCATTGTGTTTCCATCCTCAGAATCTCATTTGGG- - - - - TAGCACAAAGTCTGTACTGTTAAT               |       |       |       |       |       |       |       | 19880 |
| Cow         | - - TCCATGGAATT- CTCCC- - - - - GGCAAGAATA- - TTGGAGTGGTTAAACCATTAAATCAGCCAT          |       |       |       |       |       |       |       | 53675 |
| Dog         | GTTTCATTGTGTTTCCATCCTCAGAATCTCATTTGGGGAGC- - - AAA- - - - AAATAGCACAAAGTCTGTACCGTTAAT |       |       |       |       |       |       |       | 50299 |
| BelugaWhale | GTTTCATTGTATT- CCATCCTTAGAATCTCATTTGGAGAGCAAAAATAGCTTCAGGTAGCAGAAAGGCTTTACTAGTAAT     |       |       |       |       |       |       |       | 49920 |
| Donkey      | - TTTTGAGGCCACTGTGTCTCTGTGATGTCACTTTTG- - CCTAGAATA- - TTGTGGCCTGCTTGCTTTTGTGCCTGTTTT |       |       |       |       |       |       |       | 55147 |
| Cat         | GTTTCATTGTGTTTCCAACCTCAGCATATCATTTGGGGAGCAAAAATAGCTTCAGATATTTTTG- - CTATACCGTTTAT     |       |       |       |       |       |       |       | 57257 |
| Ferret      | GTTTCATTGTGTTTCCATCCTCAGAATCTCATTTGGGGAGCTGATATAGCTTCAAGTAGCACAAAGTCTGTACTGTTAAT      |       |       |       |       |       |       |       | 57661 |
| Lion        | GTTTCATTGTGTTTCCAACCTCAGCATGTCACTTTGGGAAGCAAAAATAGCTTAAGATATTTTTG- - CTATACCGTTTAT    |       |       |       |       |       |       |       | 54701 |
| Vaquita     | GTTTCATTGTATT- CCATCCTTAGAATCTCATTTGGGGAGCAAAAATAGCTTCAGGTAGCAGAAAGGCTTTACTAGTAAT     |       |       |       |       |       |       |       | 50606 |
| Pig         | GTTTCATTGCATT- CCACCCTGAGAATCTCATTTGGGGATCCAAAATAGCTTCAGGTAGCAGAAATGCTATACTAGTAAT     |       |       |       |       |       |       |       | 47069 |

| Majority    | ATTGGC- ATAATTGAAATGG- - - TTTACCAAGTGCTGTTATCTCA- TTTTTTXCTAATAAX- - - - - T- - - - -      |       |       |       |       |       |       |       |       |
|-------------|---------------------------------------------------------------------------------------------|-------|-------|-------|-------|-------|-------|-------|-------|
|             | 72730                                                                                       | 72740 | 72750 | 72760 | 72770 | 72780 | 72790 | 72800 |       |
| Human       | AATAGC- ATAATTGTAATAG- - - TTTACCAAGTGCCGTAGTCTCA- TTTTTTCTGACCACT- - - - -                 |       |       |       |       |       |       |       | 57902 |
| PolarBear   | ATTGGC- ATAATTGAAATGG- - - TTTAGCAAGTGCTGTTATCTCA- TTTTTTCTGGTATT- - - - - T- - - - -       |       |       |       |       |       |       |       | 19937 |
| Cow         | CTTC- - - - CACTTAAAATGGT- - - CTTACCTCTTTTTCTCTCTTT- CACTCTTTTACTTTAGACTGATTATGGTATATT     |       |       |       |       |       |       |       | 53748 |
| Dog         | ATTGAC- ATAATTGAAATGG- - - TTTAGCAAGTGCTGTTATGTCAATTTTTTCTGATATT- - - - - T- - - - -        |       |       |       |       |       |       |       | 50357 |
| BelugaWhale | AATAAC- ATAATTGAAATGG- - - TTTACCAAGTGCTGTTACCTCA- TTTTTTCTG- - - - - ACT                   |       |       |       |       |       |       |       | 49974 |
| Donkey      | CTACCCTACACTTCACATGGCCAGTTGCTAGACATCTTCAGGTCTCCCCTTAGCTA- - - - -                           |       |       |       |       |       |       |       | 55203 |
| Cat         | ATTGGC- ATAATTGAAATG- - - TTTACCAAGTGCTGTTATCTCGTTTTTTTCTAATA- - - - - T- - - - -           |       |       |       |       |       |       |       | 57312 |
| Ferret      | ATTGGC- ATAATTGAAATGG- - - TTTAGCAAGTGCTGTTCTCTCA- TTTTTTCTGATATT- - - - - TC- - - - - TGAT |       |       |       |       |       |       |       | 57723 |
| Lion        | ATTGGC- ATAATTGAAATG- - - TTTACCAAGTGCTGTTATCTCGTTTTTTTCTAATA- - - - - T- - - - -           |       |       |       |       |       |       |       | 54756 |
| Vaquita     | AATAAC- ATAATTGAAATGG- - - TTTACCAAGTGCTGTTACCTCA- TTTTTTCTG- - - - - ACT                   |       |       |       |       |       |       |       | 50660 |
| Pig         | AATAAC- ATAATTGAAATGG- - - CTTACCCAGTGTTGTTAGCTCA- TTTTTTCTGACTATTTTGTAAATAGAACAGGATT       |       |       |       |       |       |       |       | 47144 |





Dienstag, 3. Mai 2022 08:39

| Majority    | 72970                                                                                   | 72980 | 72990 | 73000 | 73010 | 73020 | 73030 | 73040 |       |
|-------------|-----------------------------------------------------------------------------------------|-------|-------|-------|-------|-------|-------|-------|-------|
| Human       | -----                                                                                   |       |       |       |       |       |       |       | 57980 |
| PolarBear   | -----                                                                                   |       |       |       |       |       |       |       | 20015 |
| Cow         | AATGATTTACCAAGTGCTATTATCT- - - - - CATTCTTTTTCTGACTACTCTGTATTGTAAACT- - - GAACAGGAATTTT |       |       |       |       |       |       |       | 53968 |
| Dog         | -----                                                                                   |       |       |       |       |       |       |       | 50435 |
| BelugaWhale | CGCGGGCCTCTCACTGTTGTGGCCT- - - CTCCCGTTGCGGAGCGCAGGCTCAGCGCCCATGGCT- C- - - ACGGGCCCAGC |       |       |       |       |       |       |       | 50173 |
| Donkey      | -----                                                                                   |       |       |       |       |       |       |       | 55290 |
| Cat         | -----                                                                                   |       |       |       |       |       |       |       | 57383 |
| Ferret      | -----                                                                                   |       |       |       |       |       |       |       | 57805 |
| Lion        | -----                                                                                   |       |       |       |       |       |       |       | 54827 |
| Vaquita     | -----                                                                                   |       |       |       |       |       |       |       | 50763 |
| Pig         | ACCCACTGAGCAAGGCCAGGGATCGAACCTGCAACCTCATGGTTCCTATTTGGATTCAATTAACCACCGAACCACAATAGG       |       |       |       |       |       |       |       | 47383 |

| Majority    | 73050                                                                              | 73060 | 73070 | 73080 | 73090 | 73100 | 73110 | 73120 |       |
|-------------|------------------------------------------------------------------------------------|-------|-------|-------|-------|-------|-------|-------|-------|
| Human       | ----- AATXTACACTATATGTAAGGTAGACATTTTTTTCAGTC                                       |       |       |       |       |       |       |       | 58017 |
| PolarBear   | -----                                                                              |       |       |       |       |       |       |       | 20052 |
| Cow         | TCCTGTTAGCAGATACTAAGATTCAAAGAGGTAAATGATTTATAATGTACAC- ATCTGTAAAGTAGACATTTTTTTCAGTC |       |       |       |       |       |       |       | 54047 |
| Dog         | -----                                                                              |       |       |       |       |       |       |       | 50472 |
| BelugaWhale | CGCTCCGCGGCATGTGGGATCTTCCCAGACCGGGGCACGAACCCGTGTCCCCTGCATTAAGGTTGACATTTTTTTTAGTC   |       |       |       |       |       |       |       | 50253 |
| Donkey      | -----                                                                              |       |       |       |       |       |       |       | 55323 |
| Cat         | -----                                                                              |       |       |       |       |       |       |       | 57420 |
| Ferret      | -----                                                                              |       |       |       |       |       |       |       | 57842 |
| Lion        | -----                                                                              |       |       |       |       |       |       |       | 54864 |
| Vaquita     | -----                                                                              |       |       |       |       |       |       |       | 50775 |
| Pig         | AACT- CCAAGGGGTGCTAAGATTTAAAGAGGTAAATTAATAAAAATACACCATCTTTAAGGCAGACATTTTTTT- AGTC  |       |       |       |       |       |       |       | 47461 |

Dienstag, 3. Mai 2022 08:39

| Majority    | TX- - - XTTTTCTCCAGTATGTTGCTACTCACTGGTTCTXAAGTTACA- - AXCTAATCTTATTATATTTTCCTTTTCAGG        |       |       |       |       |       |       |       |       |
|-------------|---------------------------------------------------------------------------------------------|-------|-------|-------|-------|-------|-------|-------|-------|
|             | 73130                                                                                       | 73140 | 73150 | 73160 | 73170 | 73180 | 73190 | 73200 |       |
| Human       | TTAGCCTTTCTCTCCAGTATGCTGCTTCTCACTGGTTCTCGGGT- ATA- - ATCTAATCTTACTGTGCTTTCCGCTTCAGG         |       |       |       |       |       |       |       | 58094 |
| PolarBear   | TG- - - TTTTTCTCCAGTATGTTGCTACTCACTGATTCTTAAGTTATG- - ACCTAATCTTATTATATTTTCCTTTGCAGG        |       |       |       |       |       |       |       | 20126 |
| Cow         | TA- - - CTCTTCTCCAGTATGTTTCTACTCAGTGGTTCCCAATT- GCA- - - - TGATCTAATCATACTTCCCTTTTCAGG      |       |       |       |       |       |       |       | 54117 |
| Dog         | TG- - - T- - - - T- - - - - - - - GCTACTCACTGGTTCTTAAGTTACATGATCTAATCTTATTATATTTTCCTTTTCAGG |       |       |       |       |       |       |       | 50533 |
| BelugaWhale | TA- - - CTTTTCTCCAGCGTGTTCCTACTCACTGGTTCCCAATT- GCA- - - - TGATCTAATCCTATTATGTTTCCCTTT      |       |       |       |       |       |       |       | 50323 |
| Donkey      | TA- - - AGAGGGGTAAA- - - - TACCAAGTGTGGTAATAATGTAGAGAAGCTTGAATTC- TCATATGTAAGTGATGGGA       |       |       |       |       |       |       |       | 55393 |
| Cat         | TG- - - ATTTTCTCCAGTGTGTTGCTACTCACTTGTCTTAAGTTACATGATCTAATCTTATTATATTTTCCTTTTCAGG           |       |       |       |       |       |       |       | 57496 |
| Ferret      | TG- - - TTTTTCTCCAATATGTTGCTACTTACTGGTTCTTAATTACATTACCTAATCTT- CTATATTTTCCTTTTCAGG          |       |       |       |       |       |       |       | 57917 |
| Lion        | TG- - - ATTTTCTCCAGTATGTTGCTACTCACTTGTCTTAAGTTACATGATCTAATCTTATTATATTTTCCTTTTCAGG           |       |       |       |       |       |       |       | 54940 |
| Vaquita     | TA- - - CTTTTCTCCAGTGTGTTTCTACTCACTGGTTCCCAATT- GCA- - - - TGATCTAATCCTATTATGTTTCCCTTT      |       |       |       |       |       |       |       | 50845 |
| Pig         | TA- - - CTTTTCTCAG- - TGTTGCTACTCACTGGTTCCAGTTTGCA- - - - TGATCTTATTATATTTCTCTTTCCAGG       |       |       |       |       |       |       |       | 47529 |

| Majority    | CATACATTAACAXT- - TAGAATTCTTTTTTCCAA- - - AAATAATGATTTTC- TCTTXACATGCCCCAGCCCTCCAACCTTT    |       |       |       |       |       |       |       |       |
|-------------|--------------------------------------------------------------------------------------------|-------|-------|-------|-------|-------|-------|-------|-------|
|             | 73210                                                                                      | 73220 | 73230 | 73240 | 73250 | 73260 | 73270 | 73280 |       |
| Human       | CATAGGTTAATAAT- - TAGAATTCTTTTTTTTG- TCCAAAAAATGA- T- - - - - - - - TATCCTCCTTTCACATGCCCT- |       |       |       |       |       |       |       | 58160 |
| PolarBear   | CATACATTAACACT- - TGGAATTCTTTTTTCCAA- - - AAATAATGATTTTC- TCTTTACATGCCCCAGCCCTCCAACCTTT    |       |       |       |       |       |       |       | 20199 |
| Cow         | AATAAATTAGCAATTATAAAGTTGTT- TTTTCAA- - - AAATAATCAACTT- TCCTAACATGCTTCAGCCCTTCAACTTT       |       |       |       |       |       |       |       | 54191 |
| Dog         | CATACATTAACACT- - TGGAATTCTTTTTTCCAA- - - AAATAATGATTTTC- TCTTTACATGCCCCAGTCTCCTCCAACCTTT  |       |       |       |       |       |       |       | 50606 |
| BelugaWhale | - - - - - TCAGCAAT- - TAGAGTTCTTCTTTAAAA- - - AAATAATTGTCTT- TCCTAACATGCCCCAGCCCTCCAACCTTC |       |       |       |       |       |       |       | 50390 |
| Donkey      | - - - ATGTAAT- - TGATAGAATCATTTTTAAAACTTGAAATATCTGTTAAAGCTGAGCATATACATTTTCTTTGACTTA        |       |       |       |       |       |       |       | 55468 |
| Cat         | CATACATTAACACT- - TGGGATTCTTTTTTCCAA- - - AAATACTGATTTTC- TCTTTACATGTCCCTGACCTCTAACTTT     |       |       |       |       |       |       |       | 57569 |
| Ferret      | CACACATTAACATT- - TGGAATTCTTTTTTCCAA- - - AAATAATGATTTTC- TCTTTACATGTCCCAGCCCTCCTACTTT     |       |       |       |       |       |       |       | 57990 |
| Lion        | CATACATTAACACT- - TGGGATTCTTTTTTCCAA- - - AAATAATTGATTTTC- TCTTTACATGTCCCTGACCTCTAACTTT    |       |       |       |       |       |       |       | 55013 |
| Vaquita     | - - - - - TCAGCAAT- - TAGAGTTCTTCTTTAAAA- - - AAAGAATTGTCTT- TCCTAACATGCCCCAGCCCTCCAACCTTT |       |       |       |       |       |       |       | 50912 |
| Pig         | AATAAGTTAAC- - - - TAGAGTTCTT- TTTATCA- - - AAATAAT- - - - - TGTAACATGCTGCAGCCCTCCACCTTT   |       |       |       |       |       |       |       | 47592 |

Dienstag, 3. Mai 2022 08:39

| Majority    | GGAGA- TATTTTAT- - ATTTAAAGAGTTACCAAATCCATGTGGTATGAGGTTTGATCAGTAGCAGAC- - AATCTAGAAG   |       |       |       |       |       |       |       |       |
|-------------|----------------------------------------------------------------------------------------|-------|-------|-------|-------|-------|-------|-------|-------|
|             | 73290                                                                                  | 73300 | 73310 | 73320 | 73330 | 73340 | 73350 | 73360 |       |
| Human       | ----- GGCTACCAAATCAATGTGGTATGAGGTTTTATGAATAGGAGAC- - AATCTAGAAG                        |       |       |       |       |       |       |       | 58214 |
| PolarBear   | GGAGA- TATTTTAT- - ATTTAAAGAGTAACCAAATCCATATGGTATGAGGTTTGATCAGTAGCA- - - - - ATCTAGAAG |       |       |       |       |       |       |       | 20270 |
| Cow         | GGAGA- TAA- - - - - AAATAGATACCAAATAATTGTGGTATGAGGTTTGATCAATAGCAGAC- - AATCTAGAAG      |       |       |       |       |       |       |       | 54257 |
| Dog         | GGAGAATATTTTATGTATTTAAAGAGTAACCAAATACATGCGGTATGAACTTTGATCAGTAGCAGAC- - AGTCTAAAAG      |       |       |       |       |       |       |       | 50684 |
| BelugaWhale | GGAGA- TATTTTAT- - ATTTAAAGAGTTACTGAAATCATTGTGGTATGAGGTTTGATCAGTAGCAGAC- - AATCTAGAAG  |       |       |       |       |       |       |       | 50465 |
| Donkey      | GTAAATCTCCTTCT- - AGTTACATACCTGAGAAAATACATGCA- TATGTACGTCAAAGATATGTATGGGAAAGTTCATG     |       |       |       |       |       |       |       | 55545 |
| Cat         | GGAGA- TATTTTAT- - ATTTAAAGAGTAACCAAATCCATGTGGTATGAGGTTTGATCAGTAGCAGAC- - GGTCTAGAAG   |       |       |       |       |       |       |       | 57644 |
| Ferret      | GGAGA- TATTTTAT- - ATTTAGAGAGTAGCCAAATCCATGTGGTATGAGGTTTGGTCAGTAGCAGAGAAAATCTAGAAG     |       |       |       |       |       |       |       | 58067 |
| Lion        | GGAGA- TATTTTAT- - ATTTAAAGAGTAACCAAATCCATGTGGTATGAGGTTTGATCAGTAGCATA- - GGTCTAGAAG    |       |       |       |       |       |       |       | 55088 |
| Vaquita     | GGAGA- TATTTTAT- - ATTTAAAGAGTTACTGAAATCATTGTGGTATGAGGTTTGATCAGTAGCAGAC- - AATCTAGAAG  |       |       |       |       |       |       |       | 50987 |
| Pig         | GGAGA- TATTT- AT- - ATTTAAAGGGTTACCAAATCATTGTGGTATGAGGTTTGATCAATAGCAGAC- - AGTCTAGAAG  |       |       |       |       |       |       |       | 47666 |

| Majority    | CCATGATCTTTATGGCATTTTTCACA- - - - - ACTTCAXAACAXATTTAAA- TATAGTGCATXTTTTT- CTTAA         |       |       |       |       |       |       |       |       |
|-------------|------------------------------------------------------------------------------------------|-------|-------|-------|-------|-------|-------|-------|-------|
|             | 73370                                                                                    | 73380 | 73390 | 73400 | 73410 | 73420 | 73430 | 73440 |       |
| Human       | TCATGGTTTCTGTGACATTTTTTCACA- - - - - ACTTCA- - - AACGTTTAAA- TATAGTCTACATTTTTT- CTTGG    |       |       |       |       |       |       |       | 58277 |
| PolarBear   | CCATAATCTTTATGGCATTTTTTTTTGC- - - - - AACTTCACAACATATTAGAA- TATAGTGCATGTTTTT- CTTAA      |       |       |       |       |       |       |       | 20340 |
| Cow         | CCATGTTCTTGATGGCATTTTTCACA- - - - - ACTTCA- AACAAATTTAAA- TATAGTGCACATTTTTT- CTTAA       |       |       |       |       |       |       |       | 54322 |
| Dog         | TCATGATCTTTATGGCATTTTTTT- - GC- - - - - AACTTCACAACATATTTAAAATATAGTGTATGTTTGT- CTTAA     |       |       |       |       |       |       |       | 50751 |
| BelugaWhale | CTGTGTTCTCGATGGCACTTTTCACA- - - - - ACTTCA- AACAAATTTAAA- TATAGTGCACATTTTTT- CTTAA       |       |       |       |       |       |       |       | 50530 |
| Donkey      | GCATACTATATGTAATAGCCCAAAGCT- - - - - GGAAACAGTCCAAAGTCCAAATATGTTTCCAGCAGCAGAATATAT       |       |       |       |       |       |       |       | 55615 |
| Cat         | CCAGGATGTTTATGGCACTTTTCACA- - - - - GCTTCAAATATTTAAA- TATAGTGCATGTTTTT- CTTAA            |       |       |       |       |       |       |       | 57708 |
| Ferret      | CCATGATCTTTATGGCATTTTTTTTTCCCC- - - - - ACCATGACAACATATTTAAA- TATAGTGCAT- - TTC- - CTTAA |       |       |       |       |       |       |       | 58136 |
| Lion        | CCAGGATGTTTATGGCACTTTTCACACTTCCAAATATTTCACTTCCAAATATTTAAA- TATAGTGCATGTTTTT- CTTAA       |       |       |       |       |       |       |       | 55166 |
| Vaquita     | CCGTGTTCTCGATGACACTTTTCACA- - - - - ACTTCA- AACAAATTTAAA- TATAGTGCACATTTTTT- CTTAA       |       |       |       |       |       |       |       | 51052 |
| Pig         | CCATGTTCTC- - - GGCAATTTTCATA- - - - - GCTTCA- AACAAATCTAAA- TATAGTGCATGTTTTT- CTTAA     |       |       |       |       |       |       |       | 47728 |

Dienstag, 3. Mai 2022 08:39

| Majority    | TGTGGAATATTTT- - - - TTGTC- - ATCCCTTCTGATXCAGAGGGAA- GAGTA- - - - TTTGGTAAAGG- ACCAATGAAATG        |
|-------------|-----------------------------------------------------------------------------------------------------|
|             | 73450 73460 73470 73480 73490 73500 73510 73520                                                     |
| Human       | TGTGGAATATTTT- - - - CCTTG- - - CTCTTCTGACCCCAAAGAAA- - AGTA- - - - TTTGTTAGAGG- ACCAATTAAATG 58342 |
| PolarBear   | TGTGTAATATTTT- - - - TTGTG- - ATCCCTTCTGAGGCAGAGGGAA- GAGTA- - - - TTTGGTAAAAG- ACCAATGAAATG 20408  |
| Cow         | TGTGGAATATTTTCTTTTTGTCA- TTCCCTTCTGATCCAGAGGAAC- - ACAC- - - - TTTAGTAAAGG- ACCAGTGAAATG 54394      |
| Dog         | TGTGGAATATTTT- - - - CTGTC- - ATCCTTCTGATGCGGAGGGAA- GAGTA- - - - TTTGGTAAAGG- ATCAATGAAATG 50819   |
| BelugaWhale | TATGGAATATTTTC- - - TTTGTCA- TTCCCTTCCGATCCAGAGGAAG- - AGTA- - - - TTTGGTGAAGG- ACCAGTGAAATG 50600  |
| Donkey      | TGTGGTATATTCATTCATTGAA- - ATTCATTGGAATACACAAAGAGTGAATAAGCTCCTAGTACCTGCAGTAATACATGG 55693            |
| Cat         | TGTGGAATATTTT- - - - TTGTC- - ATCCCTTCTGATGGAGAGGGGAAGAGTA- - - - TTTGGTAGAAG- G- CAATGGAATG 57776  |
| Ferret      | TGTGAAATATTTT- - - - TTTTATCACCTCTTCTGGTGCAGAGGGAA- GAGTA- - - - TTTGGTAAAAG- ACCAATGAAATG 58206    |
| Lion        | TGTGGAATATTTT- - - - TTGTC- - ATCCCTTCTGATGGAGAGGGGA- GAGTA- - - - TTTGGTAGAAG- G- CAATGGAATG 55233 |
| Vaquita     | CATGGAATATTTTC- - - TTTGTCA- TTCCCTTCCGATCCAGAGGAAG- - AGTA- - - - TTTGGTGAAGG- ACCAGTGAAATG 51122  |
| Pig         | CGTGAATATATT- - - - TTTGCAA- TTCCCTTCTGATCCAGAAGACT- - A- - - - - TTTGGTAAACGG- ACCAATGAAATG 47794  |

| Majority    | GAATTTGATTTGGAATTATACTGCATTTGGGCTATA- - ATTC AATGGGGAAAGTAGTTTATATGTGTXTTTTGTCTGAXG                  |
|-------------|------------------------------------------------------------------------------------------------------|
|             | 73530 73540 73550 73560 73570 73580 73590 73600                                                      |
| Human       | AAATTTGAGTGGGGATTATACTGTGTTTGAGCTATAATTCTTAA- GGGGAAAATTGTTTATATGTGTATCTTGTCTGAAG 58421              |
| PolarBear   | GAATTTGATTTGGAATTATACTGCACTGGGGCTATA- - GTTCAGTGGGGAAAGTAGTTTATATGTGTGTTTTGTCTGAAA 20486             |
| Cow         | GAATTTGTTTCAGAATTGTACCTCATTTGGGCTATGTGATTCAATGGGGAAAGTAGTTTATATATATTTTT- - - C- - A- G 54468         |
| Dog         | GAATT- - - - - - - - - - - - ACACTGTGTTTGGGCTGTA- - ATTCAGTGGGGAAAGTAGTTTATATGTGTGTTTTGTCTGAAG 50885 |
| BelugaWhale | GAATTTGATTCAGAATTATACTGCATTTGGGCTATACAATTCAAGTGGTTAAAGTAGTTTATATATATCTTT- - - C- - A- G 50674        |
| Donkey      | ATGTGCGTCTTAAAAATAACGTTTCTTGAAAGAAGCCAGACCAACGTAGATCACATACTAT- - ATG- ATTCATTT- ATG 55769            |
| Cat         | GAATTTAATTTGAAATTACACTGCATTTGGGGTATA- - ATCCAATGGGGAAAGTAGTTTAT- - GTG- - TTTTGTCTGAGG 57850         |
| Ferret      | GAATTTGATTTGAAATTACACTATATTTTGGGCTATA- - ATTC AA- GGGGAAAGTAGTTTATGTGTGTGTTTCATCTGAAA 58283          |
| Lion        | GAATTTAATTTGAAATTACACTGCATTTGGGGTATA- - ATCCAATGGGGAGAGTAGTTTAT- - GTG- - TTTTGTCTGAGG 55307         |
| Vaquita     | GAATTTGATTCAGAATTATACTGCATTTGGGCTATACAATTCAAGTGGTTAAAGCAGTTTATATATATCTTT- - - C- - A- G 51196        |
| Pig         | AAATTTGAATTGGAATTATACTACATTGGGGCTATATAATTCAAGTGGGGAAAGTAGTTTATATATATATCTTC- - - C- - A- G 47868      |



Dienstag, 3. Mai 2022 08:39

| Majority    | TXTACAGTTGTAATTCCAAGAGAGT- - - AGGTAATTATTX- - - ATTA- - - TTAATTAXCTA- TTCTGGTATCTGA- AC |                                                     |                                |                                |                                |       |       |       |  |
|-------------|-------------------------------------------------------------------------------------------|-----------------------------------------------------|--------------------------------|--------------------------------|--------------------------------|-------|-------|-------|--|
|             | 73770                                                                                     | 73780                                               | 73790                          | 73800                          | 73810                          | 73820 | 73830 | 73840 |  |
| Human       | TCTAAAGTTATAATTCTAAGAGAGT- - - -                                                          | AGATAATTGT- - - - -                                 | TTTA- - - -                    | CTAAGTACTTA- TTCTGGTATCAGA- AC | 58637                          |       |       |       |  |
| PolarBear   | TACACAGTTGTAATTCCAAAAGAGT- - - -                                                          | AGGTAATTATTGAATATTA- - - -                          | TTAATTAAGT- TTCTGGTATCTGA- AC  | 20705                          |                                |       |       |       |  |
| Cow         | TCTACAG- - - - -                                                                          | AGATAATTAC- - - -                                   | TTTA- - - -                    | TTAAGCTTTTA- TTCTGGTATCTGA- GC | 54618                          |       |       |       |  |
| Dog         | TGTACCATTGTAATTCCAAGAGAAT- - - -                                                          | AGGTAATTGTTTGATATTA- - -                            | TTAATTAGCTA- TTCTGGTATCTGA- AC | 51096                          |                                |       |       |       |  |
| BelugaWhale | TGCGCAG- - - - -                                                                          | CAAAGGCTCC- - - -                                   | AGACACACAGG- - - -             | CTTA- - - -                    | GCGGCCATGGC- TCATGGGCCCAGCCAC  | 50808 |       |       |  |
| Donkey      | TGTGTAAT- - - -                                                                           | GTTTCAATAAGTT- - - - -                              | TAATTAATA- - -                 | TCTAG- -                       | ATTGGCAAGCCAGCTCTGCTTTATGA- AT | 55970 |       |       |  |
| Cat         | TCTACAGTTGTAATTCAGAGGGAGTTATTAGGTAATTATTTAATATTTCG- - -                                   | TTATTTAACTA- TTCTGGTATCTGA- AC                      | 58069                          |                                |                                |       |       |       |  |
| Ferret      | TGTATAATTGCAATTCCAAGAGAGC- - - -                                                          | AGGTAATTATTTAGTATTAATTATTAATGAAC- TTTTGGTATCTTA- AC | 58504                          |                                |                                |       |       |       |  |
| Lion        | TCTACAGTTGTAATTCAGAGGGAGTTATTAGGTAATTATTTAATATTTC- - -                                    | TTATTTAACTA- TTCTTGTATCTGA- AC                      | 55526                          |                                |                                |       |       |       |  |
| Vaquita     | TGCGCA- - - - -                                                                           | ACACAGG- - - -                                      | CTCA- - - -                    | GCGGCCATGGC- TCATGGGCCCAGCCAC  | 51330                          |       |       |       |  |
| Pig         | TCTACAATTGTTATTCTAAGAAATT- - - -                                                          | AGGTGATTATA- - -                                    | TTTA- - - -                    | CCAAGTTTTTA- TTCTGGTATCTGA- AC | 48041                          |       |       |       |  |

| Majority    | TCAACTTCATTTTAC- - TTATTAG- AGAAGGAAAAAAGAGTTTATTTCCCAAACCTTGCTT- GCCCCATTATCTTGTA- - |                                                                    |                                                                  |                  |       |       |       |       |  |
|-------------|---------------------------------------------------------------------------------------|--------------------------------------------------------------------|------------------------------------------------------------------|------------------|-------|-------|-------|-------|--|
|             | 73850                                                                                 | 73860                                                              | 73870                                                            | 73880            | 73890 | 73900 | 73910 | 73920 |  |
| Human       | TCA- - - -                                                                            | CACTTAC- -                                                         | TTATTAC- AGAAGGAAAAAAGAAATTTGTTTCTAAACTTGCTTTGCCCCATTACCTTGTA- - | 58708            |       |       |       |       |  |
| PolarBear   | TCAAGTTCACTTACTATTATTAG- AGAAGGAAAAA- - -                                             | GTTTATTTCCAGACTTGCTT- GCCCCATTATCTTATA- -                          | 20778                                                            |                  |       |       |       |       |  |
| Cow         | TTA- CTGTATTGCAC- -                                                                   | TTATTGGTGAAGGAAAAAAGGAATCTATTTCTAATCTTGCTT- GTCCCATTATCTTGTA- -    | 54692                                                            |                  |       |       |       |       |  |
| Dog         | TCAACTTTATTTTAC- -                                                                    | TACTAG- AGAAGGAAAAA- AGTTTATTTCCCAAACCTTGCTT- GCTCCATTATCTTGTA- -  | 51169                                                            |                  |       |       |       |       |  |
| BelugaWhale | TCTGTGACATGTGGG- -                                                                    | ATCTTCCCGACCGGGGCACGAACCCATGTCC- - - -                             | CCTGCAT- CGGCGGGCGGACTCTGAAG                                     | 50881            |       |       |       |       |  |
| Donkey      | TAAAAAATGTAA- GCATTTATTAATGATAATGGAGA- - -                                            | ACATAATTGTTAAGCTAAAAA- AGGAGGATGGAGAACAGTG                         | 56045                                                            |                  |       |       |       |       |  |
| Cat         | TGAACATTGTTTAC- -                                                                     | TTATTAG- AGAAGGAAAAAAGAGGTCGTTTCCCGAACTTGCTT- GCCCCATTATCTTGTA- -  | 58143                                                            |                  |       |       |       |       |  |
| Ferret      | T- - - -                                                                              | TCATTTCACTATTATTAG- AGAAGGAAAAA- -                                 | GTTTATTTCCCAAACCTTG- - - -                                       | CCCATTATTTATA- - | 58569 |       |       |       |  |
| Lion        | TGAACATCATTTAC- -                                                                     | TTATTAG- AGAAGGAAAAAAGAGGTCGTTTCCCGAACTTGCTT- GCCCCATTATCTTGTA- -  | 55600                                                            |                  |       |       |       |       |  |
| Vaquita     | TCTGTGACATGTGGG- -                                                                    | ATCTTCCCGACCGGGGCACGAACCCGTGTCC- - - -                             | CCTGCAT- CGGCAGGCGGACTCTGAAC                                     | 51403            |       |       |       |       |  |
| Pig         | TCAATTATTTTAC- -                                                                      | ATTTTAG- AAAAGAAAAAAGGAGTTTGTGTTTCTAAACTTGCTT- GCTCCATTATAATCCAGAG | 48117                                                            |                  |       |       |       |       |  |

Dienstag, 3. Mai 2022 08:39

| Majority    | ----- CCCAGACXC -----                                                            |       |       |       |       |       |       |       |       |
|-------------|----------------------------------------------------------------------------------|-------|-------|-------|-------|-------|-------|-------|-------|
|             | 73930                                                                            | 73940 | 73950 | 73960 | 73970 | 73980 | 73990 | 74000 |       |
| Human       | ----- TCTAGACCC -----                                                            |       |       |       |       |       |       |       | 58717 |
| PolarBear   | ----- CC- TGATAC -----                                                           |       |       |       |       |       |       |       | 20786 |
| Cow         | ----- TCCAGACT -----                                                             |       |       |       |       |       |       |       | 54700 |
| Dog         | ----- CCCTGACAC -----                                                            |       |       |       |       |       |       |       | 51178 |
| BelugaWhale | CACTGC-----GCCACCAGGGAA-----                                                     |       |       |       |       |       |       |       | 50899 |
| Donkey      | AATAGT-----ATGGGAGAAAACGTGGAGTA-----G-----                                       |       |       |       |       |       |       |       | 56072 |
| Cat         | ----- TCCAGATTC -----                                                            |       |       |       |       |       |       |       | 58152 |
| Ferret      | ----- CCCTGACAC -----                                                            |       |       |       |       |       |       |       | 58578 |
| Lion        | ----- TCCAGATTC -----                                                            |       |       |       |       |       |       |       | 55609 |
| Vaquita     | CACTGC-----GCCACCAGGGAA-----                                                     |       |       |       |       |       |       |       | 51421 |
| Pig         | CCGCACCCATGGCATACAGAAGTTCACAGGCTAAAGGTTAATTAGAGCTGCAGCTGCTGGCCACAGCCACAGCCACGCAG |       |       |       |       |       |       |       | 48197 |

| Majority    | -----                                                                            |       |       |       |       |       |       |       |       |
|-------------|----------------------------------------------------------------------------------|-------|-------|-------|-------|-------|-------|-------|-------|
|             | 74010                                                                            | 74020 | 74030 | 74040 | 74050 | 74060 | 74070 | 74080 |       |
| Human       | -----                                                                            |       |       |       |       |       |       |       | 58717 |
| PolarBear   | -----                                                                            |       |       |       |       |       |       |       | 20786 |
| Cow         | -----                                                                            |       |       |       |       |       |       |       | 54700 |
| Dog         | -----                                                                            |       |       |       |       |       |       |       | 51178 |
| BelugaWhale | -----                                                                            |       |       |       |       |       |       |       | 50899 |
| Donkey      | -----                                                                            |       |       |       |       |       |       |       | 56072 |
| Cat         | -----                                                                            |       |       |       |       |       |       |       | 58152 |
| Ferret      | -----                                                                            |       |       |       |       |       |       |       | 58578 |
| Lion        | -----                                                                            |       |       |       |       |       |       |       | 55609 |
| Vaquita     | -----                                                                            |       |       |       |       |       |       |       | 51421 |
| Pig         | GAACCAAGCTGCAGCTGCGACTTACACCACAGCTCATGAAAACACAGGGATCGAACCTGCATCCTCATGGATACTAGTCG |       |       |       |       |       |       |       | 48277 |

Dienstag, 3. Mai 2022 08:39

| Majority    | ----- CTTGTTAAAACATATACTTTTGATGACTCTAGTAATTTTTCTT--- CATGC                        |       |       |       |       |       |       |       |       |
|-------------|-----------------------------------------------------------------------------------|-------|-------|-------|-------|-------|-------|-------|-------|
|             | 74090                                                                             | 74100 | 74110 | 74120 | 74130 | 74140 | 74150 | 74160 |       |
| Human       | ----- TTTGGTAAAATTTGCATTTTTGATAACTACAGTAATGTTTCATTTTACTTGC                        |       |       |       |       |       |       |       | 58768 |
| PolarBear   | ----- CTTGTT----- TTGATGACTGTAGTAATCTTTCTT--- CATGC                               |       |       |       |       |       |       |       | 20821 |
| Cow         | ----- CCTTTTAAAACCTATACTTTGGATGACTCCAGTATTTTTCTT--- CATA                          |       |       |       |       |       |       |       | 54748 |
| Dog         | ----- TTTGTTGAAACAGA- - CTTTTGATGACTGTAGTAATTTTTCTT--- CATGC                      |       |       |       |       |       |       |       | 51224 |
| BelugaWhale | ----- G- - - - CCCTAAACATATACTTTTGATGACTCCAGTCATTTTTCTT--- CATGC                  |       |       |       |       |       |       |       | 50945 |
| Donkey      | ----- AAATATACTTAAATG- - - - - CTTGTTTGAACAGATGTACACATG- - - CATGC                |       |       |       |       |       |       |       | 56117 |
| Cat         | ----- CTTGTTAAAACATATACTTTTGATGACTCTAGTAATCTTTCTT--- CATGC                        |       |       |       |       |       |       |       | 58200 |
| Ferret      | ----- CT----- GACTGTAGTAATCTTTCTT--- CATGC                                        |       |       |       |       |       |       |       | 58604 |
| Lion        | ----- CTTGTTAAAACATATACTTTTGATGACTCTAGTAATCTTTCTT--- CATGC                        |       |       |       |       |       |       |       | 55657 |
| Vaquita     | ----- G- - - - CCCTAAACATATA- - - - - ATGACTCCAGTCATTTTTCTT--- CGTGC              |       |       |       |       |       |       |       | 51461 |
| Pig         | GGTTCGTTAATACTGAGCCACGACAGGAACTCCTTCAAACATACACTTTTGATGACTCTAGTAATTTTTCTT--- CATGC |       |       |       |       |       |       |       | 48354 |

| Majority    | CTGTATCTGGACT- - - - GTTGAGTGTACCTAGAGAATATC- ACATAATCTAG- CAGTTGGTACCAGTTTAAATTCATCAG         |       |       |       |       |       |       |       |       |
|-------------|------------------------------------------------------------------------------------------------|-------|-------|-------|-------|-------|-------|-------|-------|
|             | 74170                                                                                          | 74180 | 74190 | 74200 | 74210 | 74220 | 74230 | 74240 |       |
| Human       | CTGCATCTGGGCTCTACTTAGAGAATAT- CACATAAATATT- ACATAATCTGA- CAATTGGTACCAGTTTAAATCCATCAA           |       |       |       |       |       |       |       | 58845 |
| PolarBear   | CAGTATCTGACT- - - - GTTGAGTATACCTAGAGAATATC- ATATAATCTAG- CAATTGGTACCAGTTGAAATTCATCAT          |       |       |       |       |       |       |       | 20895 |
| Cow         | CTT- ATCTGGACT- - - - ATTGAGTGTAGCCAGAGAATATC- ACATAATCTAACCAGTTGATAGCAGTTTAAACTCATCAG         |       |       |       |       |       |       |       | 54822 |
| Dog         | CCATATATGGACT- - - - GTTGAGTATACCTAGAGAATGTC- ATATAATCTAG- CAGTTGGTACCAGTTGAAATTCATCAG         |       |       |       |       |       |       |       | 51298 |
| BelugaWhale | CTTTATCTGGACT- - - - GTGGACTGTACCTAGAGAATATC- ACATAATCTAGCCAGT- - - - ACTAATTTAAATTCTTCAG      |       |       |       |       |       |       |       | 51016 |
| Donkey      | TTGTGTATGTA- - - - - AATGGTTTCTCTGGAAGGATACC- - CAAGATAAGGTTGGTGAGGAGTGGGTTGGGAAAGCAG          |       |       |       |       |       |       |       | 56189 |
| Cat         | CTGTATCCAGACT- - - - GTTGGGTGTACCTAGGGAATATC- CTGTAATCTAG- CAGTTGATACCAGTTGAAGTTTATCAG         |       |       |       |       |       |       |       | 58274 |
| Ferret      | CTGTAT- - - - - - - - - - - ATTGAGTATAC- TAGAGAATATC- CTATAATCTAG- CAATTGTTACCGGTCGAAATTCATCAT |       |       |       |       |       |       |       | 58670 |
| Lion        | CTGTATCCAGACT- - - - GTTGGGTGTAGCTAGAGAATATC- CTGTAATCTAG- CAGTTGATACCAGTTGAAGTTTATCAG         |       |       |       |       |       |       |       | 55731 |
| Vaquita     | CTTTATCTGGACT- - - - GTGGACTGTACCTAGAGGATATC- ACATAATCTAGCCAGT- - - - ACTAATTTAAATTCTTCAG      |       |       |       |       |       |       |       | 51532 |
| Pig         | TTTTATCTGGACT- - - - GTTGAGTGTGCCTAGAGAATAACTACATAATCTAAGCAGTTGGTACCAGTTTAAATTCATCAG           |       |       |       |       |       |       |       | 48430 |





Dienstag, 3. Mai 2022 08:39

| Majority    | CCTACTGCTTCTCAGAAAAAATA- GAAACTATCAGATGGAAACTCCCATCAGCTTTTCTCACAAAATCTACTTATACCX-    |       |       |       |       |       |       |       |       |
|-------------|--------------------------------------------------------------------------------------|-------|-------|-------|-------|-------|-------|-------|-------|
|             | 74410                                                                                | 74420 | 74430 | 74440 | 74450 | 74460 | 74470 | 74480 |       |
| Human       | CTT- - - - - GAAGAGGAAAA- - - - - TCACATGGAAGCTTC- ATCAGCTTTTCTTGCAAAATCTGCTAATACTCA |       |       |       |       |       |       |       | 59045 |
| PolarBear   | CCTCCCCTTCTCAGGAAAAAATA- GAAACTATCAGATGGAAACTCCCATCAGCTTTTCTCACAAAATCTACTTAAAACA-    |       |       |       |       |       |       |       | 21121 |
| Cow         | CCTACTGCTTCTCAGAAAAAAGAAACTATCAGATGGAAAGTCTTATCAGCCTTTCTCACAAAATATACTTATACC- -       |       |       |       |       |       |       |       | 55044 |
| Dog         | TGTA CTGCTTCTCAGGAAAAAATA- GAAACTATCAGATGGAAACTCCCATTAGCTTTTCTCACAAAATCTAATTATATCA-  |       |       |       |       |       |       |       | 51523 |
| BelugaWhale | CCTGCTGCTTCTCAGAAAAAATA- GAAACTATCAGATGGAAACTCC- ATCAGTATTTCTCACAAAATCTACTTATACC- -  |       |       |       |       |       |       |       | 51228 |
| Donkey      | GTT- CGAATCCTGGGCGCGGACATGGCACTGCTCATCGGACCACGCTGGGGCGGCGTCCC GCATGCCACAGCTGGGAG- -  |       |       |       |       |       |       |       | 56419 |
| Cat         | CCTACTATTTCTCAGAAAAAATA- GAAAGTATCAGATGGAAACGCCCATCAGCTTTTCTCACAAAATCCACTTATACCA-    |       |       |       |       |       |       |       | 58486 |
| Ferret      | CCTCCTGCTTCTTAGGAAAAAATA- GG- - - - - TGGACACTCCCATCAGCTTTTCTCACAAAATCTACTCATACCA-   |       |       |       |       |       |       |       | 58882 |
| Lion        | CCTACTATTTTTTCAGAAAAAATA- GAAGGTATCGGATGGAAACTCCCATCAGGTTTTCTCACAAAATCCACTTATACCA-   |       |       |       |       |       |       |       | 55943 |
| Vaquita     | CCTGCTGCTTCTCAGAAAAAATA- GAAACTATCAGATGGAAACTCC- ATCAGTATTTCTCACAAAATCTACTTATACC- -  |       |       |       |       |       |       |       | 51744 |
| Pig         | CCTACTGCTTCTCTGTAAAAAATA- GAAACTGTCAAATGGAAAGTCC- ATCAGCTTTTCTCGCAAAATCTACTTATACC- - |       |       |       |       |       |       |       | 48653 |

| Majority    | CACCTATCTT- - - - - TCTCTTCTA- ATAA- AAGGCATAGATATTT- - - - - CTAAGACC                |       |       |       |       |       |       |       |       |
|-------------|---------------------------------------------------------------------------------------|-------|-------|-------|-------|-------|-------|-------|-------|
|             | 74490                                                                                 | 74500 | 74510 | 74520 | 74530 | 74540 | 74550 | 74560 |       |
| Human       | CACTTGTCTT- - - - - TCTCTTTTA- ATAA- AAGGCATAGATGTTTAGTTATCTAAGACC                    |       |       |       |       |       |       |       | 59097 |
| PolarBear   | CACCTATCTT- - - - - TCTCTTCTA- ATAA- AAGGCATAGATATTT- - - - - CTAAGACC                |       |       |       |       |       |       |       | 21167 |
| Cow         | CACACATTTT- - - - - TTTCTTCTAGATAT- AAGGCATAGATATTT- - - - - CTAAGACC                 |       |       |       |       |       |       |       | 55091 |
| Dog         | CACCTATCTT- - - - - TCTCTTCTA- ATAA- AAGGCATAGATATTT- - - - - CTAAGACC                |       |       |       |       |       |       |       | 51569 |
| BelugaWhale | CACACATATCTG- - - - - TCTCTTCTAAATAA- AAGGCATAGATATTT- - - - - CTAAGACC               |       |       |       |       |       |       |       | 51277 |
| Donkey      | GACCCACAACGAAGAATATACA ACTATGTACCGGGGGGCTTTGGGGACAAAAGGAAAAAATAAAA- - - - - TCTTTAAA  |       |       |       |       |       |       |       | 56493 |
| Cat         | CACCTATCAT- - - - - TCTCTTCTA- ATAA- AAGGCATAGATAACT- - - - - TTAGGACA                |       |       |       |       |       |       |       | 58532 |
| Ferret      | CACCTATCTT- - - - - TCTCTTCTA- TTAA- AAGGCATAGCTATTT- - - - - CTAAGATC                |       |       |       |       |       |       |       | 58928 |
| Lion        | CACCTATCGT- - - - - TCTCTTCTA- ATAA- AAGGCATAGATGACT- - - - - TTAGGACA                |       |       |       |       |       |       |       | 55989 |
| Vaquita     | CACACATATCTG- - - - - TCTCTTCTAAATAA- AAGGCATAGATATTT- - - - - CTAAGACC               |       |       |       |       |       |       |       | 51793 |
| Pig         | CACATAGTCTCACAAAATCTACTTATACCCATACATATCTTCTAAATA- - AAGGCATAGATATTT- - - - - CTAAGGCT |       |       |       |       |       |       |       | 48725 |

Dienstag, 3. Mai 2022 08:39

| Majority    | AGTAAACACCAGATCCTATCCTCTTCTGCCTTTCAAGAGACTTTGCACT- - CTTTCATCCCCTCTTTCTTATATTTTT       |       |       |       |       |       |       |       |       |
|-------------|----------------------------------------------------------------------------------------|-------|-------|-------|-------|-------|-------|-------|-------|
|             | 74570                                                                                  | 74580 | 74590 | 74600 | 74610 | 74620 | 74630 | 74640 |       |
| Human       | AATAAACACCAAAGCCTATCGTCTTCTGCCTGTCAAGAGACTGCACTAT- - CTGTCATCCC- - CTTTCTCATTTATTTCT   |       |       |       |       |       |       |       | 59173 |
| PolarBear   | AGTAAACACCAGATCCTGTCCTCTTCTGCCCTCCAAGAGACTGCACGAT- - CTGTTATCCCCTCTTTCTC- - ATATTTTT   |       |       |       |       |       |       |       | 21243 |
| Cow         | AGTAAACACCAGACACCACCCTCTTCTGCCTCTTAGGAGTCTTTGACT- - - - TTTATCTCCCCTTTCTCTTGTATTTTT    |       |       |       |       |       |       |       | 55167 |
| Dog         | AGTAAATACCAGATCCTGTTCTCTTCTGCCCTCCAAAAGACTTTGCA- - - - CTATCATCCCTTCTTTCTCTTATATTTTT   |       |       |       |       |       |       |       | 51645 |
| BelugaWhale | AGTAAACACCAGATACCATCCTGTTCTGCCTCATAAGAGCCTTTGCATT- - - - TTCATCCCCTCTTTCTCTTGTATTTTT   |       |       |       |       |       |       |       | 51353 |
| Donkey      | AAAAAAAAAGATATTCATGATTT- - GAAATTGCAGATGTTAGTGTTTATGAGAGTGTTTACTGTCATACATATCTTTTG      |       |       |       |       |       |       |       | 56571 |
| Cat         | AGTAAACACCAGATCCTGTCCTTCTTCTCCCCTTCAAGAGACTTTGCACTATCGTTCATCCCCTCTTTCTCTTACATTTTT      |       |       |       |       |       |       |       | 58612 |
| Ferret      | AGTAAACACCCCATCCTGTCCTTTTCTGCCCTCCAAGAGACTTTGCA- - - - CTGTCATCCACTCTTTCTC- - ATATTTTC |       |       |       |       |       |       |       | 59002 |
| Lion        | AGTAAACTCCAGATCCTGTCCTTCTTCTCCCCTTCAAGAGACTTTGCACTATCGTTCATCCC- TCTTTCTCTTACATTTTT     |       |       |       |       |       |       |       | 56068 |
| Vaquita     | AGTAAACACCAGATACCATCCTGTTCTGCCTCATAAGAGCCTTTGCATT- - - - TTCATCCCCTCTTTCTCCTGTATTTTT   |       |       |       |       |       |       |       | 51869 |
| Pig         | GGTAGACACCAGATCCCATTCTCT- CTGCCT- - - GAGAGCCTTTGCACTA- - TCTTTCTTTCTCTCTCTGTTATATTTTT |       |       |       |       |       |       |       | 48799 |

| Majority    | CTCTATGTTGGC- TACTTCTCACCAGTGTTTTCAAGTATCCTTAAATXTCTCTCA- - - - - TTTTAAXTGAATTTAC- - - -      |       |       |       |       |       |       |       |       |
|-------------|------------------------------------------------------------------------------------------------|-------|-------|-------|-------|-------|-------|-------|-------|
|             | 74650                                                                                          | 74660 | 74670 | 74680 | 74690 | 74700 | 74710 | 74720 |       |
| Human       | CTCTATATTGGC- CACTTTTACCAG- - TTTCAAGCATTCTCAGCTTC- TTTCA- - - - - TTTTAAATGAATTTACCTTC        |       |       |       |       |       |       |       | 59243 |
| PolarBear   | TTCTCTGTTGGC- TACTTCTCACTAGTGTTTTCAAATATCCTTAAATCTCTCTCA- - - - - TTGTAAGTAAATTTAC- - - -      |       |       |       |       |       |       |       | 21312 |
| Cow         | CTCCATGTTAGT- TACTTCTCACCAGTTTTTCAAGTGTGCCTAAATGTCTCTCTCTTTTTTTTTTAAATGAATTTATT- - -           |       |       |       |       |       |       |       | 55243 |
| Dog         | CTCTTTGTTGGC- TATTTCTCACCAGTGTTTTAAGTATCCTTATATCTCCTTCA- - - - - CTGTAATTGAATTTAC- - - -       |       |       |       |       |       |       |       | 51714 |
| BelugaWhale | CTCTTTGTTGGT- TACTTCTCACCAGTGTTTTCAAGTGTGCTTAAGTGT- TCTCTC- - ATTTTTTAAATGAATTTAC- - - -       |       |       |       |       |       |       |       | 51425 |
| Donkey      | ATGTACACATGCATGTGTTTTCTCAGGTATGTAAGTGGAGTAGATTTACTAAG- - - - - TCAAAGAAAATGTATA- - -           |       |       |       |       |       |       |       | 56641 |
| Cat         | CTCTGTGTTGGC- TACTTGTACCAGTGTACAAGCATCATTAAATTTCTCTCA- - - - - TTTTGAGTGAATTTAC- - - -         |       |       |       |       |       |       |       | 58681 |
| Ferret      | CTCTCTGTTGGC- TATTTCTCACCAGTATTTCAAACATCCTTAAATCTCT- - CA- - - - - TTGTATGTGAATTTAC- - - -     |       |       |       |       |       |       |       | 59069 |
| Lion        | CTCTGTGTTGGC- TACTTGTACCAGTGTACAAGCATCATTAAATTTCTCTCA- - - - - TTTTGAGTGAATTTAC- - - -         |       |       |       |       |       |       |       | 56137 |
| Vaquita     | CTCTTTGTT- - - - - ACTTCTCACCAGTGTTTTCAAGTGTGCTTAAGTGT- TCTCTC- - ATTTTTTAAATGAATTTAC- - - -   |       |       |       |       |       |       |       | 51937 |
| Pig         | CTCTACTTTGGC- CACCT- - - - - AGTATTTCAGGTATACTTAAGTGTCTCTC- - - - - ATTTTTTAAATGAATTTAT- - - - |       |       |       |       |       |       |       | 48864 |

Dienstag, 3. Mai 2022 08:39

```
Majority      -- CCTXAAXTCCACA- - - - - TATCTCT- - - - - CCATCTATCCCCCTXTTXXTCTTCCTTTTCA- - - TTTATAXCCAGA
                74730          74740          74750          74760          74770          74780          74790          74800
Human        AACTTTCAATCCATCCATC- TATAACTCTACGTACTTTCTATCACCCCTGCCTCCCCTCTCCCTTTTCACTCATAACCAGA 59322
PolarBear   -- CCTGAACTCCACA- - - - - TAACTCT- - - - - CCATCTATTACCCATTCTCCCTTTTT- - CA- - - TTTATAGCCAGA 21373
Cow         ACCCTTAACTCCATAAATTGATATTTAT- - - - - CCATCTAACACCTCATCTCCCTTTCTTTTCA- - - TTTATAACTACA 55315
Dog         -- CCTGAGTTCACA- - - - - TCTTTCT- - - - - CCATCTAT- CACCCTTTCTTCTCTCTTTTCA- - - TTTATAGCCAGA 51776
BelugaWhale -- CCTTAATTCTGTATTCCATATATCTGT- - - - - CCATCTAACACCTTGTCTCTCTTCCGTTTCTTCATTTATAACTAGA 51498
Donkey      TGCTCAGCTTTAACAGATATTTCAAGTTT- - - - - TTAAAAATGATTCTATCAATTTACATTCCCATCACTTATATATGAG 56716
Cat         -- CCTGAACTCCACA- - - - - T- - - - - - - - - - - ATGTAT- CACCCTTTCTTCTCCCTTTTCA- - - TTTATAGCCAGA 58735
Ferret     -- CCTGAACTCCACA- - - - - TAACTCT- - - - - CCAGCTATTCCCCTATTCTTCTCTTGTCA- - - TTTATAGCCAGA 59132
Lion       -- CCTGAACTCCACA- - - - - C- - - - - - - - - - - ATGTAT- CACCCTTTCTCCTCCCTTTTCA- - - TTTATAGCCAGA 56191
Vaquita   -- CCTTAATTCTGTATTCCATATATCTGT- - - - - CCATCTAACACCTTGTCTCTCTTCCCTTTCTTCATTTATAACTAGA 52010
Pig        -- CCTTAATTCCACA- - - - - TATCTGT- - - - - CCTCGTATCCCCTTGTTTCTTCTCCCTTTT- - - CGTATAACCACA 48926
```

```
Majority      CTTXTTAAATAA- - - - - - - - - - - - - - - - - GCTCTCTTTGTTTGCTGTT- - - - -
                74810          74820          74830          74840          74850          74860          74870          74880
Human        CTTCTTAAATAGT- - - - - - - - - - - - - - - - - CTATCTTTG- TTGTT- - - - - - - - - - - - 59349
PolarBear   TTTATTAATAA- - - - - - - - - - - - - - - - - GCTCTCTTTGTTTGCTGTT- - - - - - - - - - - - 21404
Cow         CTTCTTAAATAA- - - - - - - - - - - - - - - - - GTTGTCTTTGCTTATT- - - - - - - - - - - - 55343
Dog         TTTACTAAATAA- - - - - - - - - - - - - - - - - GCTCTCTTTGTTTGCTGTT- - - - - - - - - - - - 51807
BelugaWhale ATTCTT- - - - - - - - - - - - - - - - - - - - - - - - - - - - - - - - - - - - 51504
Donkey      AATTCAAGCTT- - - - - - - - - - - - - - - - - CTCTACATTATTACCAACT- - - - - - - - - - - - 56748
Cat         CCTACTAAATAA- - - - - - - - - - - - - - - - - GCTCTCTTTGTTTGCTGTG- - - - - - - - - - - - 58766
Ferret     TTTACTAAATAG- - - - - - - - - - - - - - - - - GCCC- - TTTGTTTGCTGTT- - - - - - - - - - - - 59161
Lion       CCTACTAAATAA- - - - - - - - - - - - - - - - - GCTCTCT- - GTTTGCTTTG- - - - - - - - - - - - 56220
Vaquita   ATTCTTTTTTTTTTTTTTTTAAACATCTTTATTGGGGTATAATTGCTTTACAATGGTGTGTTAGTTTCTGATTTATAAC 52090
Pig        CTTCTTAAAGTAA- - - - - - - - - - - - - - - - - GCTGTCTTTGCTTGCTGATG- - - - - - - - - - - - 48959
```

Dienstag, 3. Mai 2022 08:39

| Majority    | ----- TATACTTACTCCCTTTTT- - - TTT- CTCTACCTACTATAATTTGGTTTTXAGCCCCCATT         |       |       |       |       |       |       |       |       |
|-------------|--------------------------------------------------------------------------------|-------|-------|-------|-------|-------|-------|-------|-------|
|             | 74890                                                                          | 74900 | 74910 | 74920 | 74930 | 74940 | 74950 | 74960 |       |
| Human       | ----- TA- TTATCTCATTT- - - - - - CTCTACTTACTATTATTTGGTTTTAGCACT- GTT           |       |       |       |       |       |       |       | 59395 |
| PolarBear   | ----- TATACTTACCTCCTTTTT- - - - - CTCTACCTACTGCAGTTTAGTTTTCAACCCCCATT          |       |       |       |       |       |       |       | 21456 |
| Cow         | ----- AACTTATTCCCTTCT- - - TATTTCTCTACTTATTGTAATTTGGTTTCAGCACCCATT             |       |       |       |       |       |       |       | 55398 |
| Dog         | ----- TATACTT- CTTTTTATTT- - - - - CTCTACCTACTATAATTTGGTTTCAACCCCCTTT          |       |       |       |       |       |       |       | 51858 |
| BelugaWhale | -----                                                                          |       |       |       |       |       |       |       | 51504 |
| Donkey      | ----- TG- - - - - GTATTTAC- - CCCTCTTAATTTTAGCCAATCTGGTAGGACATGGTAGTGTCTCATGGT |       |       |       |       |       |       |       | 56806 |
| Cat         | ----- TATACTTTTTCCCTTTTTA- - TTT- CCTCACCTACTATAATTTGGTTTCAGCCCCGATT           |       |       |       |       |       |       |       | 58822 |
| Ferret      | ----- TATACTTACCTCCTTTTTA- - TTTCTCTACCTCTTGCAATTTGGTTTTGACCCTCCTT             |       |       |       |       |       |       |       | 59218 |
| Lion        | ----- TATACTTTTTCCCTTTTTA- - TTT- CCTCACCTACTATAATTTGGTTTCAGCCCCGATT           |       |       |       |       |       |       |       | 56276 |
| Vaquita     | AAAGTGAATCAGCTATACATACATGTGCTCCCATGTGTCTTCCCTCTTGGCTCTCCCTCCCTCCCACTCTCCCCCTCC |       |       |       |       |       |       |       | 52170 |
| Pig         | ----- ACACTTACTCTCCTCTCT- TCTTTCTTTAATGATTGTGCTTTGGTTTTAGCCTCCATT              |       |       |       |       |       |       |       | 49016 |

| Majority    | TACCCAAATTGTTCTTC- CCAGTGTACCAGTGATCACTACAGTAGCTAAATCTCAGCAG- X- TTATTCAGTX- - - - -     |       |       |       |       |       |       |       |       |
|-------------|------------------------------------------------------------------------------------------|-------|-------|-------|-------|-------|-------|-------|-------|
|             | 74970                                                                                    | 74980 | 74990 | 75000 | 75010 | 75020 | 75030 | 75040 |       |
| Human       | GACCCAAATTGCTCTTCCTCAGCGTCACCAGCGATTAGTAGAGTAGCTAAATGCTAGTGATA- TGATTTAGTC- - - - -      |       |       |       |       |       |       |       | 59467 |
| PolarBear   | TACCCAAATTGTTCTTC- CCAGTGTACCAGCGATTGCTATAGT- GCTAAATCTCAGCG- - - - TAATTCATC- - - - -   |       |       |       |       |       |       |       | 21523 |
| Cow         | TACTCAACAAGAGATCA- CTGGAGTAGCTAAATCTCATCAGAATTGTTCAAGTCC- - - - - TT- A- - - -           |       |       |       |       |       |       |       | 55454 |
| Dog         | T- CCCAAATTGTTCTTTTCCAGTGTGATCAGTATCACTACAGTAGGAAAATCTAAAAAGCA- TTATTCAGTTTAATGAA        |       |       |       |       |       |       |       | 51936 |
| BelugaWhale | -----                                                                                    |       |       |       |       |       |       |       | 51504 |
| Donkey      | GATTTTAATTTGTATTA- - - AAGGTTCTTAATCCCAACC- - - TAATCCCCTCTTAGGAG- ATGGGGATATTTCCATACT   |       |       |       |       |       |       |       | 56878 |
| Cat         | TACTCAAATTATTCTTC- CCAGTGTCCCAG- GATCACTACACTAGGTAAATCTCACCAGCC- TTATTCAGTC- - - - -     |       |       |       |       |       |       |       | 58892 |
| Ferret      | TACCCAAATTGTTCTTC- CTAAGTGTACCAGTGATTGCCACAGT- GCTAAATCTCAACAGTA- TTATTCATC- - - - -     |       |       |       |       |       |       |       | 59288 |
| Lion        | TACTGAAATTATTCTTC- CCAGTGTCCCAG- GATCACTACAGTAGGTAAATCTCACCAGCC- TTATTCAGTC- - - - -     |       |       |       |       |       |       |       | 56346 |
| Vaquita     | CACCCCTCCAGGCTGTC- CCAAAGCCCCGAGCTTATATCCCTGTGCCTTGGGGCTGCTTCCCCCTAGCTATCT- A- - - -     |       |       |       |       |       |       |       | 52243 |
| Pig         | TACCCAAGTTGTTCTTC- CCAGGGTACCAGTGATCACTGGAGTAGCCAGATGTCAGC- - - - - AG- - AATT- A- - - - |       |       |       |       |       |       |       | 49080 |

Dienstag, 3. Mai 2022 08:39

| Majority    | ----- CTT --- A - - CCTATCCTCTAGGTAACATTTG- ACACTGTG- ----- XGCCATTCTCT                |       |       |       |       |       |       |       |
|-------------|----------------------------------------------------------------------------------------|-------|-------|-------|-------|-------|-------|-------|
|             | 75050                                                                                  | 75060 | 75070 | 75080 | 75090 | 75100 | 75110 | 75120 |
| Human       | ----- CTTGTCTTACTTAATACCTAGATAATATTTG- GCACTGTGC- ----- ACCATTGTCT                     | 59517 |       |       |       |       |       |       |
| PolarBear   | ----- CTGATCATCCATAT- - - CTAGGTAACATTTG- ACACTGTG- ----- AGCCATTCTCT                  | 21570 |       |       |       |       |       |       |
| Cow         | ----- TCTT --- A - - CCTAACCTCTAGGTAACCTTTG- ACACTGAATCT- ----- GTCTTTCCCT             | 55502 |       |       |       |       |       |       |
| Dog         | TTCAGTTCTTATCATCCCTAACCTCTAGGTAACATTTG- ACACTGTA- ----- AGCCATTCTCT                    | 51993 |       |       |       |       |       |       |
| BelugaWhale | -----                                                                                  | 51504 |       |       |       |       |       |       |
| Donkey      | TGTAATAATAGACAGGTATAG- - TGTAAGGACCTGTTCACTAATGAA- ----- GAAATAATAT                    | 56933 |       |       |       |       |       |       |
| Cat         | ----- CTTACCCTCTAGGTACCTTTGATACAGCGTG- ----- AGCCATTCTCT                               | 58934 |       |       |       |       |       |       |
| Ferret      | ----- CTTATTGTCCCCATTCTCTAGGTAACATTTG- ACTCTG- ----- AGCCATTCTCT                       | 59336 |       |       |       |       |       |       |
| Lion        | ----- CTTACCCTCTAGGTACCTTTGATACAGCGTG- ----- AGCCATTCTCT                               | 56388 |       |       |       |       |       |       |
| Vaquita     | ----- CCTTA- - C - - TACGTTTGTAGTGTGTATATG- TCCATGACTCTCTCTCGCCCTGTCAAAACTCACCCCTTCCCC | 52312 |       |       |       |       |       |       |
| Pig         | ----- TCT --- G - - CCTGTCCTCTAGGTAGCACTTG- ACACTGAGC- ----- TATTCCTT                  | 49124 |       |       |       |       |       |       |

| Majority    | TTCTTAAAATCXTCTXTTCTCCTGGTCTCTAACACTTCTCACCTAGAT- ATATTCCACCTCTCTGXT- - - - A- - - - -   |       |       |       |       |       |       |       |
|-------------|------------------------------------------------------------------------------------------|-------|-------|-------|-------|-------|-------|-------|
|             | 75130                                                                                    | 75140 | 75150 | 75160 | 75170 | 75180 | 75190 | 75200 |
| Human       | T- - - - AAAATTCTCTTTCTTCTCCTGGTCTCTGATACTTCTCACCTGGAT- TTATCCTACCTCTCTATTT- - - - -     | 59580 |       |       |       |       |       |       |
| PolarBear   | TTCTTAAAATCATCTCTTCTCCTGGTCTCCAACACTTCTTGCTTAGAT- GTATTCTACCTCTCTGACT- - - A- - - - -    | 21638 |       |       |       |       |       |       |
| Cow         | TTCTTAAAATCCTTTTTTCTCCTGGTCTTTAACACTTCTCACCTAGAT- ACATCCCACCTCTCTGTTC- - - A- - - - -    | 55570 |       |       |       |       |       |       |
| Dog         | TTCTTAAAATTGTCTCTTCTCCAGGTCTTTAACACTTATCAACTGGAT- ATATTCCACCTCTCT- - - - - A- - - - -    | 52057 |       |       |       |       |       |       |
| BelugaWhale | -----                                                                                    | 51504 |       |       |       |       |       |       |
| Donkey      | TGCAGTGAAGTCTTAAAAAACTA- - TTTAAATATGTATTAGGTAAATATATTCAAACATTTAAATTAATA- - - - AACA     | 57007 |       |       |       |       |       |       |
| Cat         | TTCTTAAAATCTTCTTTTCTCCTGGCCTC- AACACTTCTTGCTAGAT- ATGTTCCACCTCTCT- - T- - - - -          | 58997 |       |       |       |       |       |       |
| Ferret      | T- - - - AAAATCATCTCTTCTCCTGGTCTCTAACTCTTCTCGCTTAGATTATATTTTACCTCTCTGACT- - - A- - - - - | 59401 |       |       |       |       |       |       |
| Lion        | TTCTTAAAATCTTCTTCTCCTGGTCTC- AACACTTCTTGCTAGAT- ATGTTCCACCTCTCT- - T- - - - -            | 56451 |       |       |       |       |       |       |
| Vaquita     | CTCCCCATATCCTCAAGTCCGTTCTCCAGTAGGTCTGCGCCTCTATTC- CTGTCTTATCCCTAGGTTCTTCATGACATTT        | 52391 |       |       |       |       |       |       |
| Pig         | TCTTAAAATGTTCTTTTCTCCTGGTCTCTGACACTTCTCATCTAGAT- TTATCCCACCTCTCTGAC- - - - -             | 49190 |       |       |       |       |       |       |

Dienstag, 3. Mai 2022 08:39

| Majority    | - TGTCTTATCA- - - - - TATCCTTCCC- - - - CTTCTGCCTGGGGGACTTCACCTGTTCT |           |                              |                                            |             |                              |                              |       |
|-------------|----------------------------------------------------------------------|-----------|------------------------------|--------------------------------------------|-------------|------------------------------|------------------------------|-------|
|             | 75210                                                                | 75220     | 75230                        | 75240                                      | 75250       | 75260                        | 75270                        | 75280 |
| Human       | CTTCCTTGTCT-                                                         | - - - - - | - - - - -                    | TGTA                                       | ACTCCC-     | - - - -                      | CTTCTACCTGGGAGGCCTCACCTGCTGT | 59629 |
| PolarBear   | - TGTCTTATCA-                                                        | - - - - - | - - - - -                    | TATCCCTCCCTACCCTTCTGCATGGGGGACTTCATCTATTCC | 21690       |                              |                              |       |
| Cow         | - TTATTTGTT-                                                         | - - - - - | - - - - -                    | G-                                         | TATCCCTCCC- | - - - -                      | CTTCTTTTAGGGTGACCTCACCTGTTAT | 55618 |
| Dog         | - TGTCTTATCA-                                                        | - - - - - | - - - - -                    | TATCCCTCCC-                                | - - - -     | TTCTGCCTGGGGGACTTCATCTATTCC  | 52104                        |       |
| BelugaWhale | - - - - -                                                            | - - - - - | - - - - -                    | - - - - -                                  | - - - - -   | - - - - -                    | - - - - -                    | 51504 |
| Donkey      | TTGCTCTAGAAAT-                                                       | - - - - - | - - - - -                    | CTTTTTATCCTGCTTTATTTTCTGTATAACTGTATTCTCCAT | 57062       |                              |                              |       |
| Cat         | - TGTCTCATCA-                                                        | - - - - - | - - - - -                    | TATCCTTCCCTTCTTTCTGCCTGGGGGACTTCACCTGTTCC  | 59049       |                              |                              |       |
| Ferret      | - TATCTTATTA-                                                        | - - - - - | - - - - -                    | TATCCTTCC-                                 | - - - -     | CTTCCGCAGGGGGGACTTAATCTGTTTT | 59449                        |       |
| Lion        | - TGTCTCATCA-                                                        | - - - - - | - - - - -                    | TATCCTTCTCTTCTTTCTGCCTGGGGGACTTCACCTGTTCC  | 56503       |                              |                              |       |
| Vaquita     | TTTCCCCTTAAATTCCATATATATGTGTTAGCATACGGTATTTGTCTT-                    | - - - -   | TGTCTTTCTGACTTACTTCACTCTGTAT | 52467                                      |             |                              |                              |       |
| Pig         | - TTCTTTCTT-                                                         | - - - - - | - - - - -                    | T-                                         | TTTCATCCCT- | - - - -                      | CTTCTGCCAGGGGGACCTCACCTGTCCT | 49238 |

| Majority    | - - - - - CAXAGCTCAATTACAC- - - - CTTTGTGACTCTGACAGTGCXC- - - ACAT |           |                         |                                             |            |                               |                                |            |       |
|-------------|--------------------------------------------------------------------|-----------|-------------------------|---------------------------------------------|------------|-------------------------------|--------------------------------|------------|-------|
|             | 75290                                                              | 75300     | 75310                   | 75320                                       | 75330      | 75340                         | 75350                          | 75360      |       |
| Human       | - - - - -                                                          | - - - - - | - - - - -               | CACAGCTCCATTAAACC-                          | - - - -    | TCTTATGATTTCAGACAGAGTTC-      | - - - ACAT                     | 59672      |       |
| PolarBear   | - - - - -                                                          | - - - - - | - - - - -               | CACAGCTGAATTATACTATACTTTGTGACTCTGACAGTGCCC- | - - - CCAT | 21736                         |                                |            |       |
| Cow         | A-                                                                 | - - - - - | - - - - -               | CACAGCTTAGTTACAC-                           | - - - -    | TTTGTGATTCTGACAGTACTC-        | - - - ATAT                     | 55660      |       |
| Dog         | - - - - -                                                          | - - - - - | - - - - -               | CGCAGCTGAGTCACAC-                           | - - - -    | CTTTGTGACTCTGACAGTGCCTTTGACAT | 52149                          |            |       |
| BelugaWhale | - - - - -                                                          | - - - - - | - - - - -               | - - - - -                                   | - - - - -  | - - - - -                     | - - - - -                      | 51504      |       |
| Donkey      | A-                                                                 | - - - - - | - - - - -               | GTAGTGTA                                    | ACTGTG-    | - - - -                       | TTTATTGTATTAA- - ATATTTATCAAAT | 57103      |       |
| Cat         | - - - - -                                                          | - - - - - | - - - - -               | CATAGCTCAATTATAC-                           | - - - -    | CTTCATGACTCTGACT- TGCCC-      | - - - ACGT                     | 59090      |       |
| Ferret      | - - - - -                                                          | - - - - - | - - - - -               | CACCACTGAATTACAC-                           | - - - -    | CTTTGTGACTCTGACAGTGTCC-       | - - - ACGT                     | 59491      |       |
| Lion        | - - - - -                                                          | - - - - - | - - - - -               | CATAGCTCAATTATAC-                           | - - - -    | CTTCATGACTGTGACA- TGCCC-      | - - - ACGT                     | 56544      |       |
| Vaquita     | GACAGACTCTAGGTCTATCCATCTCATTACAAATATCTCAATTTCAATTT-                | - - - -   | CTTTTAAAGGCTGAGTAATATT- | - - - CCAT                                  | 52542      |                               |                                |            |       |
| Pig         | - - - - -                                                          | - - - - - | - - - - -               | CATAGCTCAGTTGCACC-                          | - - - -    | TTTGTGATTCTGACAGA             | ACTC-                          | - - - ACAT | 49280 |

Dienstag, 3. Mai 2022 08:39

| Majority    | GACTCT- - - - - TCTAGC- TCAGATCTXTTCTAAGAGACCCAGXCTAGGAACTTAGTGGACCAT- TAGGCACCTT      |       |       |       |       |       |       |       |       |
|-------------|----------------------------------------------------------------------------------------|-------|-------|-------|-------|-------|-------|-------|-------|
|             | 75370                                                                                  | 75380 | 75390 | 75400 | 75410 | 75420 | 75430 | 75440 |       |
| Human       | CACATT- - - - - TTCTAGC- TCAGACCTCTCCTAAGAGACCCACACTAAGAACCTGGCGGACTAA- TGAATATCTT     |       |       |       |       |       |       |       | 59740 |
| PolarBear   | GACTCT- - - - - CTAGCATCAGATCCTTTCTAAGAGACCCAGGCTAGGAACTTAGTGGACCAT- CAGGCACTTT        |       |       |       |       |       |       |       | 21803 |
| Cow         | AACTTT- - - - - ATTTCTAGG- TCACACATCTTCTGAGAGACCCAGGCTAGGA- - - - - CGGT- GGAGCACCTT   |       |       |       |       |       |       |       | 55720 |
| Dog         | GATTCT- - - - - CTAGTGTTATATCCT- - - - AAGAGACTCAGACTAGGAACTTAGTGAACCAT- TAGGCACCTT    |       |       |       |       |       |       |       | 52212 |
| BelugaWhale | -----                                                                                  |       |       |       |       |       |       |       | 51504 |
| Donkey      | GTTTCCA- - - - - AATATTGGGTTTGAAT- - TAA- TGAGTCACTTTAGCTAACAAATTTATAGGTCAAATTATTATTTT |       |       |       |       |       |       |       | 57173 |
| Cat         | GGCTCTT- - - - - TCTAGC- TCAGATCTCTTCTGAGAGACCCAGACTAGGAACTTAGTGGACCAT- TAAGCACCTT     |       |       |       |       |       |       |       | 59158 |
| Ferret      | GACTCT- - - - - CTAGCATCAGATCCTTTCTAAGAGACCCAGACTAGGAAATTAATGGACCAT- CAGGAACCTT        |       |       |       |       |       |       |       | 59558 |
| Lion        | GGCTCTT- - - - - TCTAGC- TCAGATCTCTTCTGAGAGACCCAGAGTAGGAACTTAGTGGACCAT- TAGGCACCTT     |       |       |       |       |       |       |       | 56612 |
| Vaquita     | TGTGTATATGTGCCACATCTTCT- TTATCCATTCTGTCGATGATGGGCGCTTAGGTTCTTTCCATCTCC- GGGCTATTGT     |       |       |       |       |       |       |       | 52620 |
| Pig         | GACTC- - - - - TTCTAGC- TCAGACCCCTTCTAGGAGACCCAGGGTAGGAACCCTGTGGACTGT- GGGGCACTCG      |       |       |       |       |       |       |       | 49347 |

| Majority    | - - - CAGACTTAGTGTGTTCAXTTCACTCC- TGTCACX- - - - - TAC- - - - -                            |       |       |       |       |       |       |       |       |
|-------------|--------------------------------------------------------------------------------------------|-------|-------|-------|-------|-------|-------|-------|-------|
|             | 75450                                                                                      | 75460 | 75470 | 75480 | 75490 | 75500 | 75510 | 75520 |       |
| Human       | - - - CAAAC- - AGTGTGTTCAATCTAGCTCC- TGTTTTTGGTGTCCGCTGTGTTAG- GAAAGTGCAAG- - - ATACCAACTT |       |       |       |       |       |       |       | 59810 |
| PolarBear   | - - - CAGACTTAGTGTGTTCACTTCAACTCC- TGTAACT- - - - - TA- - - - -                            |       |       |       |       |       |       |       | 21839 |
| Cow         | - - - CAGACTTAGTGTGTTCAATTAAGCTCC- TGTCACCCCGCCACCACCACCAAAAATAC- - - - - TAAAATCT         |       |       |       |       |       |       |       | 55788 |
| Dog         | - - - CAAACTTCGTGTGTT- - - - - CAACTCC- TGTCACT- - - - - TAC- - - - -                      |       |       |       |       |       |       |       | 52244 |
| BelugaWhale | -----                                                                                      |       |       |       |       |       |       |       | 51504 |
| Donkey      | TTTTTAATTATTTTTTTTTGAGGAAGAT- - - - TAACCCT- - - - - GAACTAA- - - - -                      |       |       |       |       |       |       |       | 57215 |
| Cat         | - - - CAGACTTAGTGTGATCAGTTCAGCTCC- TGTCACC- - - - - TAC- - - - -                           |       |       |       |       |       |       |       | 59195 |
| Ferret      | - - - CCAAATTAGTGTGTTTAGTTTAACTCC- TGTAACT- - - - - TAA- - - - -                           |       |       |       |       |       |       |       | 59595 |
| Lion        | - - - CAGACTTAGTGTGATCAGTTCAGCTCC- TGTCACC- - - - - TAC- - - - -                           |       |       |       |       |       |       |       | 56649 |
| Vaquita     | AAATAGAGCTGCAATGAACATTTTGGTACATGACTCTTTTTGAATTTTGGTTTTCTCAGGGTATATGCCAGTAGTGGGA            |       |       |       |       |       |       |       | 52700 |
| Pig         | AA- CAGACTCAGCATGTTCAAGTAAACTC- - TCTTACCCCTGCCACCACCCTCCCCAAAGATACA- - - - - TATAAAA      |       |       |       |       |       |       |       | 49417 |





Dienstag, 3. Mai 2022 08:39

| Majority    | XCCCCCXXCCTX- - A- TT- XTGTCAAAXAAATCCT- - X- GCCTCTATCTCTC- - - X- - - - - ACTGTGGTATTAACTX |       |       |       |       |       |       |       |  |
|-------------|----------------------------------------------------------------------------------------------|-------|-------|-------|-------|-------|-------|-------|--|
|             | 75690                                                                                        | 75700 | 75710 | 75720 | 75730 | 75740 | 75750 | 75760 |  |
| Human       | GTCTCTCAAGGTAGTAGTGTGTGTCAAACGAAATCAGCATACTTCTAGCAACAGTATGC- - - - - TTAATGTCAATATTG         | 60045 |       |       |       |       |       |       |  |
| PolarBear   | - CCCC- - - - - CCACAAAAAAATCCT- - - - - TGCCCAT- - - - - CTGTGGTGCTCACTG                    | 21890 |       |       |       |       |       |       |  |
| Cow         | ATTTTAGATCCTA- - AGTTTTTGTTC- GTCTATCCTTTT- GCCTCCAACCTTTAATTGTCGTCAGTGCAGCCTAAGCTA          | 55988 |       |       |       |       |       |       |  |
| Dog         | - CCCCACCA- - - - - CCCCAAAACAAATCCT- - - - - GCCTC- AC- - - - - CTGTGGTGTTCCCAG             | 52307 |       |       |       |       |       |       |  |
| BelugaWhale | ATAAGCTGTCTTT- - ATTTGCTGTTTATACTTATTATCCT- GTTCTTATTTCTCTACTTAGAGTAATTTGGTTTCAGCCC          | 51583 |       |       |       |       |       |       |  |
| Donkey      | AAGACTGGCCCTG- - AGCTAACGTCTGTGCCATCTTTCTCTACTTTATATGTGGGACGCC- - TACCTCAGCATGGCTTG          | 57324 |       |       |       |       |       |       |  |
| Cat         | - CCCCCCCCC- - - - - AAAAAAAAAAACCA- - - - - AACCTTCCTCAC- - - - - CTGTGTCAGTAAAAA           | 59267 |       |       |       |       |       |       |  |
| Ferret      | - CCTCGTCCTTC- - - - - CCCCCAAAAAACCT- - - - - GCCTCTGTGTTGTT- - - - - CACTGTGGTAGTAAGTC     | 59674 |       |       |       |       |       |       |  |
| Lion        | - CCCCCCCCCCCC- - CCCCCAAAAAAACCA- - - - - AACCTTCCTCAC- - - - - CTGTGTCAGTAAAAA             | 56731 |       |       |       |       |       |       |  |
| Vaquita     | ATAAGCTGTCTTT- - ATTTGCTGTTTATACTTATTATCCT- CTTCTTATTTCTCTACTTAGAGTAATTTGGTTTCAGCCC          | 52935 |       |       |       |       |       |       |  |
| Pig         | AGTCTAGATCCTA- - AATTTCTATTGA- ATCTATCCTTTT- GTCTTCAACTCTC- - TTGCCATCACTGTAGTTTAAGTTA       | 49608 |       |       |       |       |       |       |  |

| Majority    | GC- - - - TCAAGGTACCXA- ATTTTCATGTC- - - AXTAACAAGCCAGAA- - - - X- AACATGCAT- - - XX- - - - X- X-       |       |       |       |       |       |       |       |  |
|-------------|---------------------------------------------------------------------------------------------------------|-------|-------|-------|-------|-------|-------|-------|--|
|             | 75770                                                                                                   | 75780 | 75790 | 75800 | 75810 | 75820 | 75830 | 75840 |  |
| Human       | GCATAAATTTTGACACAGACTTCTTATATTCATGCAGAGTAGCCTGGGCTTCTGGACCGTCAATCATAATTTAAGTAGCA                        | 60125 |       |       |       |       |       |       |  |
| PolarBear   | T- - - - - GTACCAA- ATTGGACATC- - - AGTAACAAGCCAGAA- - - - - AACATGGCT- - - - -                         | 21932 |       |       |       |       |       |       |  |
| Cow         | GTGTTTTTCAAAGTGCTAGTCTCCAATGCT- - - ATAAG- AAGCTTGTG- - - - - CCAACATTCAA- - - - - ATT- - - - - AGCT    | 56050 |       |       |       |       |       |       |  |
| Dog         | G- - - - - GTACCAA- ATTCTATGTC- - - AGTAACAAGCCAGAA- - - - - AACATGACTT- - - - -                        | 52350 |       |       |       |       |       |       |  |
| BelugaWhale | CTATTTATCCATATTTTTCTCCCTCGTGTC- - - ACCAGTGATCACTAGAGTAGCTAAATCTCAACAGAATT- - - - - ACTC                | 51655 |       |       |       |       |       |       |  |
| Donkey      | CCAAGCGGTGCCGTGTCCGCACTGGGGATCCAAACTGGCGAACCTGG- GCCACCAAAGCGGAAC- - - - - ATG                          | 57391 |       |       |       |       |       |       |  |
| Cat         | GC- - - - - TCAGGGTATCGA- ATTCCATGTC- - - AGTAACAAGCCAGAA- - - - - AACATGTCT- - - - -                   | 59315 |       |       |       |       |       |       |  |
| Ferret      | TC- - - - - AGGGTACCAA- ATTTACATC- - - AGTAACAAGCCAGAA- - - - - AACACTTTTATT- CCA- - - - - TTTG         | 59730 |       |       |       |       |       |       |  |
| Lion        | GC- - - - - TCAGGGTATCGA- ATTCCATGTC- - - AGTAACAAGCCAGAA- - - - - AACATGTCT- - - - -                   | 56779 |       |       |       |       |       |       |  |
| Vaquita     | CTGTTTATCCATATTTTTCTCCCTCGTGTC- - - ACCAGTGATCACTAGAGTAGCTAAATCTCAACAGAATT- - - - - ATTC                | 53007 |       |       |       |       |       |       |  |
| Pig         | GT- - - - - CAAATTTCTGGTATCTGAGGCT- - - ACAAG- GAGCTTGTA- - - - - CAAAACACAA- - - - - ATC- - - - - AGCA | 49664 |       |       |       |       |       |       |  |



Dienstag, 3. Mai 2022 08:39

| Majority    | ----- XCTAGT--CTAAA----- CCAXGTGTTXTTCAAAGTG----- CTGGTCTCTGATTXTACCAGGAGCTTTT   |                      |                                                  |                                    |       |                               |             |       |       |
|-------------|----------------------------------------------------------------------------------|----------------------|--------------------------------------------------|------------------------------------|-------|-------------------------------|-------------|-------|-------|
|             | 76010                                                                            | 76020                | 76030                                            | 76040                              | 76050 | 76060                         | 76070       | 76080 |       |
| Human       | ACTTTTTTGT                                                                       | CCTTGCAATAAAGT       | CCACAG-                                          | TCCTTATCATGGCTTA-                  | ---   | TAAGACTCTAAATCAGT             | CCTCAGCTTGC |       | 60359 |
| PolarBear   | ----                                                                             | TCTAGT--CTAAG-       | -----                                            | CCAGGTGTCACTCAAAGTG-               | ----- | CTGGTCTCTGATGTTACCAGGAGCTTTT  |             |       | 22090 |
| Cow         | GCCTTCTAGT--                                                                     | CTAAATCCACCACTGTGAG- | TTTTAAGAATGATCTCAACTTAAAGTCATATTTCTTCCTTTCTCTGTA |                                    |       |                               |             |       | 56284 |
| Dog         | ----                                                                             | TCTAGT--CTAAG-       | -----                                            | CCAGGTGTTCTTCAAAGTG-               | ----- | CTAGTCTCTGATGTTACCAGGAGCTTTT  |             |       | 52506 |
| BelugaWhale | GGACCTCAGCTGTTACACACAGCTCAATTACACCTTTGTGATTCTGACTACTCACATCACTTTTTCTAGCTCAGACCTCT |                      |                                                  |                                    |       |                               |             |       | 51890 |
| Donkey      | -CTATATGATCCCTTGG-                                                               | -----                | TTATATGATATTT-                                   | CAGTGA-                            | ----- | AATATTTATTTTTTTTCCCCCAGCTCTTT |             |       | 57589 |
| Cat         | ----                                                                             | CCTCGT--CTAAA-       | -----                                            | CCAGGTGTTATTCAAAGTG-               | ----- | CTGGTCTCTGATGGTACCAGGAGCGTTT  |             |       | 59470 |
| Ferret      | ----                                                                             | CCTGGT--CTAAG-       | -----                                            | CCACGTGTTACTCAGAGTG-               | ----- | CTGGTCTCTGATGTTACCAGGAGCTTTT  |             |       | 59887 |
| Lion        | ----                                                                             | CTTCGT--CTAAA-       | -----                                            | CCAGGTGTTATTCAAAGTG-               | ----- | CTGGTCTCTGATGGTACCAGGAGCGTTT  |             |       | 56934 |
| Vaquita     | GGACCTCAGCTGTTACACACAGCTCAATTACACCTTTGTGATTCTGACTACTCACATCACTTTTTCTAGCTCAGACGTCT |                      |                                                  |                                    |       |                               |             |       | 53242 |
| Pig         | --CTGCCAGC--CT--A----                                                            | CACCACGGC-           | TCGTAGCAATG-                                     | CCGATTCTTAGCCGGGATTGAACCTGTGTTCTCA |       |                               |             |       | 49862 |

| Majority    | GCCAAAATA--CAAGTTAGCATCCTTCTAGCTATAATGTGXTTAX----TGA-XATGTTGATAT-AXATTCTGACACA-A |                                                                       |                  |                          |                 |                 |              |                |       |
|-------------|----------------------------------------------------------------------------------|-----------------------------------------------------------------------|------------------|--------------------------|-----------------|-----------------|--------------|----------------|-------|
|             | 76090                                                                            | 76100                                                                 | 76110            | 76120                    | 76130           | 76140           | 76150        | 76160          |       |
| Human       | CTCTCCATT-                                                                       | CTCCTCTCATGCCTTTTTAGCTATATTGGACTTCTTTAAATAGCTTGCATATACTGTATTTTCTCTGA- |                  |                          |                 |                 |              |                | 60436 |
| PolarBear   | GCCAAGATA--                                                                      | CAAGTCAGCATGCTTCTAGCTATAATGTGTG-                                      | -----            | ATTATTGATAC-             | AGATTCTGACATAGA |                 |              |                | 22156 |
| Cow         | CCCTTCAATGACTGATTTGTGTCTTGGTATAAAAATGCTCTTTC-                                    | ---                                                                   | TTAACATACTTATAT- | AAAACCTTAAATCT           |                 |                 |              |                | 56360 |
| Dog         | GCCAAAATA--                                                                      | CAAGTCTGCATGCTTCTAGCTATGATGTGTTTAG-                                   | ---              | TGT-                     | GATATTGATAT-    | ATATGCTGACATAGA |              |                | 52578 |
| BelugaWhale | TCTAAGAGACCCAGATTAGGAACCCATGGACCATGGCGCACCTTCAAACCTTAGCGTGTTCAATT-               | AACTCCTGTCACCAC                                                       |                  |                          |                 |                 |              |                | 51969 |
| Donkey      | TGAGATATAATTGACATATAAATATTGTGTAAGTTTAGGTGCACAA-                                  | ----                                                                  | CC--             | TGTTGATTTGATACACTTATATA- | T               |                 |              |                | 57660 |
| Cat         | GCCAAAATA--                                                                      | CAAGTCAGCATACTTCTAG-                                                  | --               | TAGTGTGTTTAG-            | ---             | TGC-            | GCTGTTAATAC- | AGATTCTGACACA- | 59537 |
| Ferret      | GCCAAAATA--                                                                      | CAAGTCAACATACTTCTAGCTATAATGTGTTTAG-                                   | ---              | TGT-                     | GATATTGATAC-    | AGATTCTGACATAGA |              |                | 59959 |
| Lion        | GCCAAAATA--                                                                      | CAAGTCAGCATACTTCTAG-                                                  | --               | TAGTGTGTTTAG-            | ---             | TGC-            | GCTGTTAATAC- | AGATTCTGACACA- | 57001 |
| Vaquita     | TCTAAGAGACCCAGATTAGGAACCCATGGACCATGGCGCACCTTCAAACCTTAGCGTGTTCAATT-               | AACTCCTGTCACCAC                                                       |                  |                          |                 |                 |              |                | 53321 |
| Pig         | TGGACACTAGTCAGATTCGTTTCCGCTGAGCCACAATGGGAACTC-                                   | ---                                                                   | CTGA-            | --                       | TGTTGATAT-      | AAATTCTGACGCAA  |              |                | 49935 |

Dienstag, 3. Mai 2022 08:39

| Majority    | CTCCTXA- - TTCATGCAGATTG- - XTTTGGGCTGCTA- - - - - |                                                                         |                                                          |                                          |       |       |       |       |       |
|-------------|----------------------------------------------------|-------------------------------------------------------------------------|----------------------------------------------------------|------------------------------------------|-------|-------|-------|-------|-------|
|             | 76170                                              | 76180                                                                   | 76190                                                    | 76200                                    | 76210 | 76220 | 76230 | 76240 |       |
| Human       | TGTCTCG-                                           | ATCTTACAGATTGCTGTTCCATTTGCTAATACTATTTTTTCTCTTCATCTCTTTATGCCCAACTTCTGCTT |                                                          |                                          |       |       |       |       | 60514 |
| PolarBear   | TTCCTTACCTTCATGCAGATAG-                            | GTTTGGGCTGATA-                                                          |                                                          |                                          |       |       |       |       | 22191 |
| Cow         | TGCCTCT- -                                         | CCAGTCTCATCT-                                                           | TACACCTCTGTAA-                                           | CCATATTGGGCTTTTTTTTTTTTTTTTATGATTTTTATTG |       |       |       |       | 56432 |
| Dog         | CTCCTTATCTTCATGCGGATAG-                            | GTTTGGGCTGCTA-                                                          |                                                          |                                          |       |       |       |       | 52613 |
| BelugaWhale | CACCCCC-                                           | ACCACCAAAAATA-                                                          | CGAAAGCCTGTATTTTCTGTATCAATAAAGGTCAAGGTACTATGAATCTTAAGAAA |                                          |       |       |       |       | 52046 |
| Donkey      | TGCAAAATGATTATCACCATAGC-                           | ATGTGTGCTGCCG-                                                          |                                                          |                                          |       |       |       |       | 57696 |
| Cat         | CTCCTT- - -                                        | TTCATGCAGAGTG-                                                          | ATTTGGACAGCTA-                                           |                                          |       |       |       |       | 59569 |
| Ferret      | CTCCTTATCTTTAGCCAGATAG-                            | GTTTCGGCTGCTA-                                                          |                                                          |                                          |       |       |       |       | 59994 |
| Lion        | CTCCTT- - -                                        | TTCATGCAGAGTG-                                                          | ATTTGGACAGCTA-                                           |                                          |       |       |       |       | 57033 |
| Vaquita     | CACCCCC-                                           | ACCACCAAAAATA-                                                          | CGAAAGCCTGTATTTTCTGTATCAATAAAGGTCAAGGTACTATGAATCT-       | AAGAAA                                   |       |       |       |       | 53397 |
| Pig         | CTCCTCT- - -                                       | TCATGCGGAGTG-                                                           | ACCTGGGCTGCTA-                                           | GTGTATGAACAGTAGTACTGTTTCAAGCCATCCTCTCTT  |       |       |       |       | 50007 |

| Majority    | - - - - - X- - - - - GACCAXG- - - AATCAXX                                        |           |                                                  |           |                       |              |           |         |       |
|-------------|----------------------------------------------------------------------------------|-----------|--------------------------------------------------|-----------|-----------------------|--------------|-----------|---------|-------|
|             | 76250                                                                            | 76260     | 76270                                            | 76280     | 76290                 | 76300        | 76310     | 76320   |       |
| Human       | CTCTTTGTCTTTCAAGTATCAGTTTAGAAGCCTCTTCCTGAGATAAGTCTTCTGTAACATTTCAACTAGATTAGATCCCT |           |                                                  |           |                       |              |           |         | 60594 |
| PolarBear   | - - - - -                                                                        | - - - - - | - - - - -                                        | - - - - - | - - - - -             | - - - - -    | GTCCATG-  | AATCA-  | 22203 |
| Cow         | TGGTAAAAGTCACG-                                                                  | - - - - - | TAAAAATACTATTTTAACCATATTTAACTGCACAGTTC-          | AGTGGC-   | ACTAAGC               |              |           |         | 56498 |
| Dog         | - - - - -                                                                        | - - - - - | - - - - -                                        | - - - - - | - - - - -             | - - - - -    | GTTTCATG- | AATCA-  | 52625 |
| BelugaWhale | CAAGCCAGAAAACG-                                                                  | - - - - - | TTGAATCTTCCTTTATTCCTCTTCCTTTCAGCTTATCACCAAATAGT- | ACTCATT   |                       |              |           |         | 52114 |
| Donkey      | - - - - - AAG-                                                                   | - - - - - | A-                                               | - - - - - | GT-                   | - - - - -    | AAACAAG-  | AATGGTT | 57716 |
| Cat         | - - - - -                                                                        | - - - - - | - - - - -                                        | - - - - - | - - - - -             | - - - - -    | GTCCAAG-  | AATCC-  | 59581 |
| Ferret      | - - - - -                                                                        | - - - - - | - - - - -                                        | - - - - - | - - - - -             | - - - - -    | GGCCATG-  | AATCACA | 60008 |
| Lion        | - - - - -                                                                        | - - - - - | - - - - -                                        | - - - - - | - - - - -             | - - - - -    | GTCCAAG-  | AATCC-  | 57045 |
| Vaquita     | CAAGCCAGAAAACG-                                                                  | - - - - - | TTGAATCTTCCTTTATTCCTCTTCCTTTCAGCTTATCACCAAATAGT- | ACTCATT   |                       |              |           |         | 53465 |
| Pig         | AAATCTGTGCTTCA-                                                                  | - - - - - | T-                                               | - - - - - | TGGCTTTCTGACTAAACTCA- | CCACTTTGAAT- | ATTAAG-   | AATGATC | 50066 |

Dienstag, 3. Mai 2022 08:39

| Majority    | XCXT- CCGTAAAGCTCT- - - - AATTTATCCCATCATC- - - - TCTTAAATTCCTTACXTTAT- - - - - TGG- - - - - |       |       |       |       |       |       |       |       |
|-------------|----------------------------------------------------------------------------------------------|-------|-------|-------|-------|-------|-------|-------|-------|
|             | 76330                                                                                        | 76340 | 76350 | 76360 | 76370 | 76380 | 76390 | 76400 |       |
| Human       | TCCTTTCTTAGTTCTCAGTATCACACATAAAATTTATAATT- TGTAAATGTGTATATTTTCTGTCGGACTGTAAGTTCT             |       |       |       |       |       |       |       | 60673 |
| PolarBear   | GTTT- GAGTAAAGCACT- - - - GATTTAAGCCATCATC- - - - TCTTAAATCCTTACTTCAT- - - - - TGG- - - - -  |       |       |       |       |       |       |       | 22257 |
| Cow         | ACATT- CATATTGTTGTGC- - AACTTTCCACCATCATCCATG- TCTGAATTTTCCACCTTCC- - - TAAACTGA- AACTCT     |       |       |       |       |       |       |       | 56569 |
| Dog         | GCTT- GAGTAAAGCCCT- - - - AATACAAGCCATCATC- - - - TTTTAAATCCTTATTTCAA- - - - - TGG- - - - -  |       |       |       |       |       |       |       | 52679 |
| BelugaWhale | CTAGACCCTAAATTTCTGTTGAATCTATCCTTTTGTCTCCA- ACTCTTTTGCATCACCATAGTCTAAGCTAGTGTCTATT            |       |       |       |       |       |       |       | 52193 |
| Donkey      | TATTCTCATAAGTGTCC- - TAATTCTTTTGCATTCTCCTTTCTTTTTATTTCATCACTGTGC- - - - - T- - - - -         |       |       |       |       |       |       |       | 57776 |
| Cat         | - - - - - CAGAAGGCCTCT- - - - GACTCACCTCACCA- - - - - CTTTGAGTTCTTCCCCTA- - - - -            |       |       |       |       |       |       |       | 59625 |
| Ferret      | GCTT- GAGTAAAGCACC- - - - AATCCAAGCCATCATC- - - - TCTTAAATCCTTACTTCAG- - - - - TGG- - - - -  |       |       |       |       |       |       |       | 60062 |
| Lion        | - - - - - CAGAAGGCCTCT- - - - GACTCACCTCACCA- - - - - CTTTGAGTTCTTCCCCTA- - - - -            |       |       |       |       |       |       |       | 57089 |
| Vaquita     | CTAGACCCTAAATTTCTGTTGAATCTATCCTTTTATCTCCA- ACTCTTTGCCATCACCATAGTCTAAGCTAGTGTCTATT            |       |       |       |       |       |       |       | 53544 |
| Pig         | TCAA- - CTAAAGTTGT- - - - A- TTTCTTCCTTTCTTCCTT- TCTCAGTGCCCTTCAGTGAA- - - TGCTTTGG- GTTTTT  |       |       |       |       |       |       |       | 50134 |

| Majority    | - - - - - CTTTTCACT- - - - - CXAXTCATAX- - - - -                                               |       |       |       |       |       |       |       |       |
|-------------|------------------------------------------------------------------------------------------------|-------|-------|-------|-------|-------|-------|-------|-------|
|             | 76410                                                                                          | 76420 | 76430 | 76440 | 76450 | 76460 | 76470 | 76480 |       |
| Human       | GAGTACCATGTCTGCTTTGCTTTCTGCTGTATTTATTAACATTGACATTCAGGGTGAAAATCAGAAGTCATAGTAACAA                |       |       |       |       |       |       |       | 60753 |
| PolarBear   | - - - - - C- - - - - CTTCTGACT- - - - - CAGTTCAC- - - - -                                      |       |       |       |       |       |       |       | 22275 |
| Cow         | GTCTCTATTAACA- CTAACTCCCCAGTTCCCCTCCCCAACTTCCACTCCAGTCC- - - - CCTGGCATCTACCA- - - GTG         |       |       |       |       |       |       |       | 56641 |
| Dog         | - - - - - T- - - - - CTTCTGACT- - - - - CCGCTCACAA- C- - - -                                   |       |       |       |       |       |       |       | 52700 |
| BelugaWhale | CAAAGTGCTAGTCT- TAGATGCTACAAGGCACTTGTGCAAAAATACAAATCAGCAT- - - - ACTTCTAGCTATAGTTTGT           |       |       |       |       |       |       |       | 52268 |
| Donkey      | - - - - - CTGTTA- - - - - TATTCAT- - - - -                                                     |       |       |       |       |       |       |       | 57790 |
| Cat         | - - - - - CACTTAT- - - - -                                                                     |       |       |       |       |       |       |       | 59632 |
| Ferret      | - - - - - C- - - - - CTTCTCACT- - - - - CAGCTCACAA- C- - - -                                   |       |       |       |       |       |       |       | 60083 |
| Lion        | - - - - - CACTTAT- - - - -                                                                     |       |       |       |       |       |       |       | 57096 |
| Vaquita     | CAAAGTGCTAGTTT- TAGATGCTACAAGGCACTTGTGCAAAAATACAAATCAGCAT- - - - ACTTCTAGCTATAGTTTGTG          |       |       |       |       |       |       |       | 53619 |
| Pig         | TTGTTTGTT- - - TG- TTTGCTTTTTTGGT- - CTTTTTTCAGGGCCCACCCATGGCAT- - - - ATGAAAATTCCCAG- - - GTC |       |       |       |       |       |       |       | 50201 |

Dienstag, 3. Mai 2022 08:39

| Majority    | ----- TTXXXTCTX----- X----- TTXTXCCACAX----- X- X- T-----                        |            |       |                                                   |               |       |             |       |       |
|-------------|----------------------------------------------------------------------------------|------------|-------|---------------------------------------------------|---------------|-------|-------------|-------|-------|
|             | 76490                                                                            | 76500      | 76510 | 76520                                             | 76530         | 76540 | 76550       | 76560 |       |
| Human       | TCTTAATTATCAATAAAAAGTATTTTATGCGATCCTCATATTTATTAAGAAAACACCTTAATACCTTTCAGAAAATCTT  |            |       |                                                   |               |       |             |       | 60833 |
| PolarBear   | ----- CTA-----                                                                   |            |       |                                                   | TTTTCCAC----- |       |             |       | 22287 |
| Cow         | TACTTTCTGACTATGAATTGGAGTATTCTAG--                                                |            |       | GTATCTCATAAATGGAATCAAACAGTATTTGTCTGCATCTAATGTG    |               |       |             | 56718 |       |
| Dog         | ---- TTTTACTTC-----                                                              |            |       | TTAGCCACAC-----                                   |               |       | CTGTTT----- | T     | 52727 |
| BelugaWhale | TAGTGTCAAGTGTGATAATAAATTTGGACACAAAGTTCTCTTCATGCAGAGTGACTTGGGTTGCTAGTCCATGAACCACA |            |       |                                                   |               |       |             |       | 52348 |
| Donkey      | ---- TTTCATCTACCAG- T-----                                                       | A- CAG- -- |       | TTTTTTCAAAC-----                                  |               |       |             |       | 57819 |
| Cat         | ----- TT-----                                                                    |            |       | TTCTCC-----                                       |               |       |             |       | 59641 |
| Ferret      | ---- TTTGACTTC-----                                                              |            |       | TTCCCCACTC-----                                   |               |       | CTGTTT----- | T     | 60110 |
| Lion        | ----- TT-----                                                                    |            |       | TTCTCC-----                                       |               |       |             |       | 57105 |
| Vaquita     | TAGTGTCAAGTGTGATAATAAATTTGGACACAAAGTTCTCTTCATGCAGAGTGACTTGGGTTGCTAGTCCATGAACCACA |            |       |                                                   |               |       |             |       | 53699 |
| Pig         | AGGGGTCAGATTG- GAGCTACAGCTGCTCGC--                                               |            |       | CTATGCCACAG- CAATGCCAGATCCAAGCTATGT- CAGCGAATG- A |               |       |             |       | 50274 |

| Majority    | ----- TTC- --- A- XAGAGTACTAAG- TA----- X----- TGATC----- T--                   |                                                                      |        |       |                     |       |       |       |          |       |
|-------------|---------------------------------------------------------------------------------|----------------------------------------------------------------------|--------|-------|---------------------|-------|-------|-------|----------|-------|
|             | 76570                                                                           | 76580                                                                | 76590  | 76600 | 76610               | 76620 | 76630 | 76640 |          |       |
| Human       | GTTTATTTATTGAAAGTAGTGTATTAGGCAAAGATGCGTCTTCTCTTGGCTTTCTAATTCAGCTTTTATAATGTTGAGG |                                                                      |        |       |                     |       |       |       | 60913    |       |
| PolarBear   | -----                                                                           | AGAGTACTAA--                                                         | A----- |       | TGATC-----          |       |       |       | T--      | 22304 |
| Cow         | TATTGAACTTC- ---                                                                | TTTAAATTCTTGTG- TATGCTGTGTATTCTCTGATCTCATGGGCTTACAACCTTGCTATATT- CTA |        |       |                     |       |       |       |          | 56792 |
| Dog         | ----- TTC- ---                                                                  | CACAGAATACTAAG- AA-----                                              |        |       | TGATC-----          |       |       |       | T--      | 52752 |
| BelugaWhale | GTTTGAGTAGC- ---                                                                | ACTGATGTAAGCCA- TCATCTCTTAAATCTGTGTTTCATTGGTCTTCTGACAAAACCTCACCCTT   |        |       |                     |       |       |       |          | 52423 |
| Donkey      | ----- TAT- ---                                                                  | AAAGCAATGTTGAG- GTCTTTGTCA- ----                                     |        |       | CTGTTATATT-----     |       |       |       | T-----   | 57857 |
| Cat         | -----                                                                           | GAGCACTAAG- GA-----                                                  |        |       | TGAT-----           |       |       |       | T--      | 59658 |
| Ferret      | ----- TCC- ---                                                                  | AGAGTACTAAG- AA-----                                                 |        |       | TGATC-----          |       |       |       | T--      | 60132 |
| Lion        | -----                                                                           | GAGCACTAAG- GA-----                                                  |        |       | TGAT-----           |       |       |       | T--      | 57122 |
| Vaquita     | GTTTGAGTAGC- ---                                                                | ACTGATCTAAGCCA- TCATCTCTTAAATCTGTGTTTCATTGGTCTTCTGACAAAACCTCACCCTT   |        |       |                     |       |       |       |          | 53774 |
| Pig         | CACCACACCTC- ---                                                                | ACGGCAATGCTGGA- TA- - C- - TTAACCCACTGAGC- ---                       |        |       | AAGGTCAGGGATTG- --- |       |       |       | ACC- CTC | 50336 |

Dienstag, 3. Mai 2022 08:39

| Majority    | -----X-----CAACTTAAAGTCXTATAACTT-----CCATTCTCA-GTGCCCTTCAGTG--ACTGACTTTTGTCTT     |       |       |       |       |       |       |       |       |
|-------------|-----------------------------------------------------------------------------------|-------|-------|-------|-------|-------|-------|-------|-------|
|             | 76650                                                                             | 76660 | 76670 | 76680 | 76690 | 76700 | 76710 | 76720 |       |
| Human       | AATATAATTACTTGATGCATAAAAATATCAATCTTTTTAATAGTATAATAAGACATATAATGTAATCTCCTTTTACCTG   |       |       |       |       |       |       |       | 60993 |
| PolarBear   | -----CAACTTAAAGTCCTATAACTT-----C-ATTCTCA-GTGCCCTTCAGTG--ACTGACTTTTGTCTT           |       |       |       |       |       |       |       | 22362 |
| Cow         | TGTGCTAAAATACTTTTCTCAAGACTATACTTTGAGGGATCATTCTA-TAGTTCATTACTG--GA-GAAGTTTCTCTGA   |       |       |       |       |       |       |       | 56868 |
| Dog         | -----CAACTTAAAGTTCTGTAAGTT-----C-ATTCTCA-GTGCCCTTCAGTG--ACT-----TTTTCTT           |       |       |       |       |       |       |       | 52805 |
| BelugaWhale | TGAGTTTTAAGAATGATCTCAAAGTCATATATCTT-----CCTTTCTCA-GTGCCCTTCAGTG--ACTGATTTTTGTTCTA |       |       |       |       |       |       |       | 52496 |
| Donkey      | -----AACAAATTATTTGGCTTTATATAGATTTTC-TGACCCAG-GTAAGGTAGAAAG--A--AATTATTTCTT        |       |       |       |       |       |       |       | 57921 |
| Cat         | -----CAACATAAAGTCCTATTACTT-----CCATTCTCA-GTGCCCTTCAGTG--ACT-----TTTGTCTT          |       |       |       |       |       |       |       | 59713 |
| Ferret      | -----CAACTTAAAGTCCTATAACTT-----CCATTCTCA-GTGCCCTTCAGTG--ACTGACTTTTGTCTT           |       |       |       |       |       |       |       | 60191 |
| Lion        | -----CAACATAAAGTCCTATTACTT-----CCATTCTCA-GTGCCCTTCAGTG--ACTGGCTTTTGTCTT           |       |       |       |       |       |       |       | 57181 |
| Vaquita     | TGAGTTTTAAGAATGATCTCAAAGTCATATATCTT-----CCTTTCCA-GTGCCCTTCAGTG--ACTGATTTTTGTCTA   |       |       |       |       |       |       |       | 53847 |
| Pig         | TGTCTGAGGGATACTAGTCGGGTTTCGTTAACCACTGAGCCACGACGG-GAACTCCCT-----GATTTTTGTCTT       |       |       |       |       |       |       |       | 50406 |

| Majority    | A-GTATAAAGTCCTCA-XTCCTTAA--CATGGCTTACAAAAC-----TCTAAATCTATCCTC-----X--AGTX-TTGT |       |       |       |       |       |       |       |       |
|-------------|---------------------------------------------------------------------------------|-------|-------|-------|-------|-------|-------|-------|-------|
|             | 76730                                                                           | 76740 | 76750 | 76760 | 76770 | 76780 | 76790 | 76800 |       |
| Human       | GGATTTAAAATTGTTTTACATAGTCCTTACATTATAACACACATAAGTAGGAAATGGTTCTT-----TTTGGTTTTTGT |       |       |       |       |       |       |       | 61069 |
| PolarBear   | A-GTATAAAGTCCTCA-GTCCTTAA--CATGGCTTACAAAAC-----TCTTAATCAATCCTC-----AGC--TTGT    |       |       |       |       |       |       |       | 22422 |
| Cow         | ACGTGTAGAGCACCCG-AAACCACG--AGGAGGAGATAAAGCGTTCTTCTGAGTGTGAAGTCGGCTTTTGGTG-TTGC  |       |       |       |       |       |       |       | 56944 |
| Dog         | A-GTATAAAGTCCTTA-CTCCTTAA--CAAGGCTTGCAAAAAC-----TCTTCATCTATCCTC-----AGC--TTGT   |       |       |       |       |       |       |       | 52865 |
| BelugaWhale | A-ATATAAAATCCTCC-TTCCTTAA--CATAGCTTATAAAAAC-----TAAATCTTGCCTC---TCCAGTA-TCAT    |       |       |       |       |       |       |       | 52558 |
| Donkey      | ATCAGTGAATCTGTCATAGTAATAA--TAGGAAAGGCATAAGAATAA---TAAAGGCAGTCTTAAA-AGGAACATTTAA |       |       |       |       |       |       |       | 57994 |
| Cat         | A-GTATAAACTTCTCA-GCCCTTAA--CATGGCTTACAGAAC-----TTTAAAGCAATCCTC-----AGTGTTTGT    |       |       |       |       |       |       |       | 59775 |
| Ferret      | A-GTATAAAGTGCT--GTCCTTAA--CGTGGCTTACAAAAT-----T--TAATCAGTCCAC-----AGC--TTTT     |       |       |       |       |       |       |       | 60247 |
| Lion        | A-GTGTAAACTTCTCA-GTCCTTAA--CATGGCTTACAGAAC-----TCTAAAGCAATCCTC-----AGTGTTTGT    |       |       |       |       |       |       |       | 57243 |
| Vaquita     | A-ATATAAAATCCTCC-TTCCTTAA--CATAGCTTATAAAAAC-----TAAATCTTGCCTC---TCCAGTA-TCAT    |       |       |       |       |       |       |       | 53909 |
| Pig         | A-GTGTAAAGTCCTCC-TTCCTCAA--CAAAGCTGACAAAAC-----CCCAAGTCTTGACTC---TCCAGTC-TCAT   |       |       |       |       |       |       |       | 50470 |



Dienstag, 3. Mai 2022 08:39

| Majority    | CTT- - - - - ACCTTTTACTAT- - - - ATTGGACTTTTTAXAAXXTAGXXTATTTTTTXXG- - - - - TATTTTCTCT     |       |       |       |       |       |       |       |       |
|-------------|---------------------------------------------------------------------------------------------|-------|-------|-------|-------|-------|-------|-------|-------|
|             | 76810                                                                                       | 76820 | 76830 | 76840 | 76850 | 76860 | 76870 | 76880 |       |
| Human       | TATTAGAAACAGCTTTTCAGAAACATGTCTTTATTAGGAATATCTTTAGTTGACACTGGACAGTATATTGTGTCTTCTGG            |       |       |       |       |       |       |       | 61149 |
| PolarBear   | CTC- - - - - GCCTTTTACT- - - - - GACTTTTTA- - AAA- TAGCTTGCAAATGCTG- - - - - TATTTTCTCT     |       |       |       |       |       |       |       | 22473 |
| Cow         | TTCTGCAGCTGCCATTAGCCATTGATGATCGTTCTTCTTTTCTTTTAGGAGATGAAGAGGGAAAGA- - ACGTAATCTGA           |       |       |       |       |       |       |       | 57022 |
| Dog         | CTC- - - - - ACCTTTTACTAT- - - - ATTGGACTTTTTA- - AAA- TAGATTGCATGTGCTG- - - - - TTTTTTCTCT |       |       |       |       |       |       |       | 52922 |
| BelugaWhale | CTT- - - - - CCACCTTTAACCAT- - - - ATTGGACTTCTTTAAATGCTTGCATATTCTA- - - - - TATATTCTCT      |       |       |       |       |       |       |       | 52616 |
| Donkey      | CAT- - - - - ATGATTTAGTTG- - - - ACAGATTTCTGAAAATACTGTATTTCTTCAATTCTCTAG- - GTATTTTTTTT     |       |       |       |       |       |       |       | 58060 |
| Cat         | CTT- - - - - TCCAATCTCATC- - - - TCTCCTCTTTTAACTAAATTGGAATTTTTTTAAAG- - - - - TTTTTCCTTT    |       |       |       |       |       |       |       | 59835 |
| Ferret      | CTT- - - - - GCCTTTTACTAT- - - - ATTGGACTTTTTA- - AAAATAGCTTTCATGTGCAG- - - - - CATTTTCTCT  |       |       |       |       |       |       |       | 60305 |
| Lion        | CTT- - - - - TCCAATCTCATC- - - - TCTCTTCTTTTAACTAAATTGGAATTTTTTTAAAG- - - - - TTTTTCATTT    |       |       |       |       |       |       |       | 57303 |
| Vaquita     | CTT- - - - - CCACCTTTAACCAT- - - - ATTGGACTTCTTTAAATGCTTGCATATTCTA- - - - - TATATTCTCT      |       |       |       |       |       |       |       | 53967 |
| Pig         | CTC- - - - - CTACCTCTAAGTAT- - - - ATCAAACCTTATGTTTGTGCTTGTGTATGCTG- - - - - TATTTTCTCA     |       |       |       |       |       |       |       | 50528 |

| Majority    | GATTT- - CTTAGXCTTA- CAXCTTGATGTTCCATTTGCTTA- - TTCTTTTCTCTTCGTCTATTTATGCCCAAATCTTTCC  |       |       |       |       |       |       |       |       |
|-------------|----------------------------------------------------------------------------------------|-------|-------|-------|-------|-------|-------|-------|-------|
|             | 76890                                                                                  | 76900 | 76910 | 76920 | 76930 | 76940 | 76950 | 76960 |       |
| Human       | AAGTCCTGTTTATATGATCATTTTATTTTAAACATATAAGTGGGTTGTTTCTTATTC- TTTATTTCTTCCAGGAGATTCCA     |       |       |       |       |       |       |       | 61228 |
| PolarBear   | GATTT- - CTCAGGCTTC- CAGCTTGATGTTCCATTTGCTTCTATTCTTTTTCTTTGTCTTTTTATGTCC- AGCTCTTCC    |       |       |       |       |       |       |       | 22549 |
| Cow         | GTGGA- - AAAAAAAAAA- TAAATAAA- - - - - A- - TACTTTTCTCTTCATCTCTTTATGACCAACTCATTTT      |       |       |       |       |       |       |       | 57083 |
| Dog         | AATTT- - CTCAGACTTA- CAGCCTCATGTTCCATTTGCTTC- - TGCTTTCTCTTTGGTTTTTTATCTCC- AACTTTT- - |       |       |       |       |       |       |       | 52993 |
| BelugaWhale | GATCT- - CATGGGCTTA- CAACTTGCTGTTCTGTTTGCTAA- - AACTGTTCTCTCCATCTCTTTATGCCCAAATCCTACC  |       |       |       |       |       |       |       | 52691 |
| Donkey      | GCATT- - TTAAAATCTCAGAAATCAGGGTGTGTCTCACAGCAGTTCATCTGTCTGGTTTAAATTAGCAGT- - ATCTTCTT   |       |       |       |       |       |       |       | 58136 |
| Cat         | TATTTATTTTATAGAGAGAGTGCAGTGGTGGGGAGTGGGACAGAGGAGGAGGAG- - - - - GAGGAGACAGAGAATCCT     |       |       |       |       |       |       |       | 59906 |
| Ferret      | GATTT- - CTCAGGCTTAACAGCTGGATGTTCCATTTGCTTCTACTGCTTTCTCTTTGTCTTTTTATGTCCCAACTTTTCC     |       |       |       |       |       |       |       | 60383 |
| Lion        | TATTTATTTTATAGAGAGAGTGCAGTGGTGGGAAAGTGGGACAGAGGAGGAGGAGAAGGAGGAGGAGGAGACAGAGAATCCT     |       |       |       |       |       |       |       | 57383 |
| Vaquita     | GATCT- - CATGGGCTTA- TAACTTGCTGTTCTGTTTGCTAA- - AACTGTTCTCTCCATCCCTTTATGCCCAAATCCTACC  |       |       |       |       |       |       |       | 54042 |
| Pig         | GATCT- - CATAAGCTCA- CAGCTTG- - - - - CTCTTTTACTTGCTAAAATTTTTTCTTAGCTC- TTTA           |       |       |       |       |       |       |       | 50586 |

Dienstag, 3. Mai 2022 08:39

| Majority    | TGTC- - - TTT CAGGTTT- - - - - - AAXTCACATCTC- AGAGAGGT- - - - CTTCCATAAXCTTTCAAC- - - TAXATTAX     |       |
|-------------|-----------------------------------------------------------------------------------------------------|-------|
|             | 76970 76980 76990 77000 77010 77020 77030 77040                                                     |       |
| Human       | TTTCATCACTAACTGATAAT- - - - AAAAATAAATATGAGATAAAACATTTGCAGCAGTAAGATTATGTCATTTCATTTTCCT              | 61304 |
| PolarBear   | TGTCTTCTTTTCAGGTTT- - - - - - G- - - CAAGTCTC- AGAGAGGT- - - - CTTCCATAAAGTTCCAAC- - - TACATTAT     | 22609 |
| Cow         | TGTC- - - TTT CAGGTTTTCAGTTT AGAAATCTCTTCTCCAGAGAGGT- - - - CTTCTATAACCTTTCAAC- - - TAGATTTG        | 57152 |
| Dog         | - GTC- - - TTTGAGGTTT- - - - - - A- - - CACATCTC- AGAGAGGT- - - - CTC- GTAAACTTCTAAC- - - TACATCAT  | 53048 |
| BelugaWhale | TCTC- - - TTTCAAGTATCAGTTT AGAAGTCTCTTCTC- AGAGAGGT- - - - CTTTCATAACCTTTCAAC- - - TAGATTGG         | 52759 |
| Donkey      | AGTCATACATGAAAAATCATACTGCATTTTGTAAATTT- - ATGGTGTA- - - TTCCTGAAAATTTTGTGCCTTTGTACCAA               | 58210 |
| Cat         | AAGCAGGCTCCATGCTC- - - - - - AGCACAGAGCTC- AACACGGGACTCATTTCCACAACCCTGGGAT- - - CATGACCC            | 59974 |
| Ferret      | TGTC- - - TTT CAGGTTT- - - - - - G- - - CAGGTCTC- AGAGAGGT- - - - CTTCCATAAACTTCCATC- - - TACATTAT  | 60440 |
| Lion        | AAGCAGGCTCCATGCTC- - - - - - AGCACAGAGCTC- AACACGGGACTCATTTCCACAACCCTGGGAT- - - CATGACCC            | 57451 |
| Vaquita     | TCTC- - - TTTCAAGTATCAGTTT AGAAGTCTCTTCTC- AGAGAGGT- - - - CTTTTATAACCTTTCAAC- - - TAGATTGG         | 54110 |
| Pig         | TGCC- - - CCTCAGATTT- - - - - - GAAGTCTCTTCTT- - - - - AGAT- - - - CATCTGTAAACTTTGAAC- - - TAGATTAG | 50643 |

| Majority    | ATCCC- - - - - - - - - - - - TTCCTTTC- - - TTAGTTCTC- - - ACXACC- - - ACACATCAAATTTATAATTATTTGTTAAAT- - -   |       |
|-------------|-------------------------------------------------------------------------------------------------------------|-------|
|             | 77050 77060 77070 77080 77090 77100 77110 77120                                                             |       |
| Human       | TCTCACAGAGTACACATTGCTTTATGCAGATTCTTTGAGAGACCTA- ATGGAATTATCCTTTGCTAATTTCTTGGGCAA                            | 61383 |
| PolarBear   | ATCCC- - - - - - - - - - - - TTC- - - - - - TTAGTTCTC- - - ACTACC- - - ACACATCAAATTTATAATTATTTGTTAGAT- - -  | 22662 |
| Cow         | ATCCC- - - - - - - - - - - - TTCTTTTC- - - TTAGTTCTC- - - ACCACC- - - ATGGATCAAATTTATGATTACTTATTAAGT- - -   | 57210 |
| Dog         | AGCCC- - - - - - - - - - - - TTCCTTTC- - - TTAGTTCTC- - - GCTACC- - - ACACATTAATTTATTT- - - ATAATTACTT- - - | 53103 |
| BelugaWhale | ATCCC- - - - - - - - - - - - TTCCTTTC- - - TTAGTTCTC- - - ATCACT- - - GCACATCAAATTTAAAATTACTTGTAAAGT- - -   | 52817 |
| Donkey      | AGTACAGTAGATCAATTTTCGGTTC- - TAAAGATTTT- - GGTGTC- - - AGAAGTTACACTAGTATGAAAAAAGACAT- - -                   | 58280 |
| Cat         | AAGCTGAAATCAAGAGTTGGACAC- - TCAAGTAACTGAGCCACCCAGGCACCCCAACTATATTGGACTTTGTAAAATA- -                         | 60050 |
| Ferret      | ATCTC- - - - - - - - - - - - TTCCTTTC- - - TTAGTTCTC- - - ACTACC- - - ACAAATCAAATTTGTA- - - TTTGTTAGAT- - - | 60494 |
| Lion        | AAGCTGAAATCAAGAGTTGGACAC- - TCAAGTAACTGAGCCACCCAGGCACCCCAACTATATTGGACTTTGTAAAATA- -                         | 57527 |
| Vaquita     | ATCCC- - - - - - - - - - - - TTCCTTTC- - - TTAGTTCTC- - - ATCACT- - - GCACATCAAATTTATAATTAGTTGTAAAGT- - -   | 54168 |
| Pig         | ATACC- - - - - - - - - - - - TTCCTTTC- - - TTAGTTCTC- - - ACTGCC- - - ACACATTACATTTATA- - TATTTGTTAAAT- - - | 50699 |

Dienstag, 3. Mai 2022 08:39

| Majority    | GTCTG-----                                                                        |       |       |       |       |       |       |       |       |
|-------------|-----------------------------------------------------------------------------------|-------|-------|-------|-------|-------|-------|-------|-------|
|             | 77130                                                                             | 77140 | 77150 | 77160 | 77170 | 77180 | 77190 | 77200 |       |
| Human       | GATTCTCCTTGACATCTGCTTAATTTACAATCTGTATATTTTACATTTCATATTAATGGAGAATTTATGATGAAATCAGTG |       |       |       |       |       |       |       | 61463 |
| PolarBear   | GTCTG-----                                                                        |       |       |       |       |       |       |       | 22667 |
| Cow         | GTCTGAATTCTGGAGGAAGAAATGGCAACCCACTCCAGTATTCTTGCCTGGGAAATCCCACGGACAGAAGACCTGCTGGG  |       |       |       |       |       |       |       | 57290 |
| Dog         | GTCTG-----                                                                        |       |       |       |       |       |       |       | 53108 |
| BelugaWhale | GTCAG-----                                                                        |       |       |       |       |       |       |       | 52822 |
| Donkey      | GTATC----- C- - TGAATATTCCTCTATTAAGATCGTATT- -                                    |       |       |       |       |       |       |       | 58313 |
| Cat         | GCTTG-----                                                                        |       |       |       |       |       |       |       | 60055 |
| Ferret      | GTCTG-----                                                                        |       |       |       |       |       |       |       | 60499 |
| Lion        | GCTTG-----                                                                        |       |       |       |       |       |       |       | 57532 |
| Vaquita     | GTCTG-----                                                                        |       |       |       |       |       |       |       | 54173 |
| Pig         | ATAT-----                                                                         |       |       |       |       |       |       |       | 50703 |

| Majority    | ----- TATTTTCTG- TTTTACT                                                           |       |       |       |       |       |       |       |       |
|-------------|------------------------------------------------------------------------------------|-------|-------|-------|-------|-------|-------|-------|-------|
|             | 77210                                                                              | 77220 | 77230 | 77240 | 77250 | 77260 | 77270 | 77280 |       |
| Human       | GTTTTAGGATGCTTTAGGAAAATCCTGCATAATCTACCAGGGTGGGGTTATTTGATATTGGTAAATAATTAGTCTGAAGT   |       |       |       |       |       |       |       | 61543 |
| PolarBear   | ----- TATTTTCTG- TTTTACT                                                           |       |       |       |       |       |       |       | 22683 |
| Cow         | CTGTAGTCCATAGGGTTGCAAAAAGAGTTGGGCATGACTGAGCAACTAAACAAAAAAGTGTCTGTGTTATCTG- TTGGACT |       |       |       |       |       |       |       | 57369 |
| Dog         | ----- TATTTTTTG- TTTTACT                                                           |       |       |       |       |       |       |       | 53124 |
| BelugaWhale | ----- TATTATCTG- TTGGACT                                                           |       |       |       |       |       |       |       | 52838 |
| Donkey      | - - - - AG- - - - - AA- - - - - ATAATAAGGTTTA- - T                                 |       |       |       |       |       |       |       | 58331 |
| Cat         | ----- CATATGCTGTATTTTCT                                                            |       |       |       |       |       |       |       | 60072 |
| Ferret      | ----- TATTTCCAGGTTTTACT                                                            |       |       |       |       |       |       |       | 60516 |
| Lion        | ----- CATATGCTATATTTTCT                                                            |       |       |       |       |       |       |       | 57549 |
| Vaquita     | ----- TATTATCTG- TTGGACT                                                           |       |       |       |       |       |       |       | 54189 |
| Pig         | ----- TTTTCCG- TTGGACT                                                             |       |       |       |       |       |       |       | 50717 |

Dienstag, 3. Mai 2022 08:39

| Majority    | X T A A G T T - - - - A T A T A A G A G T G G G T - - A T C T T G T C T G C T T T G T T - - - - C T C T G C T G T A T T X T T A G A A C C T A G C A C A - -     |       |       |       |       |       |       |       |       |
|-------------|-----------------------------------------------------------------------------------------------------------------------------------------------------------------|-------|-------|-------|-------|-------|-------|-------|-------|
|             | 77290                                                                                                                                                           | 77300 | 77310 | 77320 | 77330 | 77340 | 77350 | 77360 |       |
| Human       | A T T A C A T T A G T A T T A T A A G C T T A A T T T T G T G T T G T T G A T T T T G A T A A T - - T T T T C A T G A C T T G C C A A A T A T T A A A A A G T A |       |       |       |       |       |       |       | 61621 |
| PolarBear   | G T A A G T C - - - - A T G T A A G A G T G G G T - - A C C T T T T C T T C T T T G T T - - - - C T C T G C T G T A T T C T T A G A A C G T A G C A C A - -     |       |       |       |       |       |       |       | 22749 |
| Cow         | A T A A G C T - - - - G T A T A A G A G T G G T T - - G T C A T G T C T G C T T T G T T - - - - C T C T G C T G T G T T C T T A G A A C C T A A C A C A - -     |       |       |       |       |       |       |       | 57435 |
| Dog         | C T A A G T T - - - - A T G T A A G A G T G A G T - - A C C T T G T C T G C T T T G T T C T T T G C T C T G C T G T A T T C C T A G A A C A T A G T G C A - -   |       |       |       |       |       |       |       | 53195 |
| BelugaWhale | A T A A G T T - - - - A T A T A T G A G T G G G T - - A T C A T G T C C A C T T T G T T - - - - C C C T G C T A C A T T T T T A G A A C C T A G C A C A - -     |       |       |       |       |       |       |       | 52904 |
| Donkey      | G G G A G T T C T T - - T T G G A T A A T C T A G T - - A A T C C G C T T G T T A A G - - - - - A T T T A C C G T G T T T C T T T T T A T G G A G T G - -       |       |       |       |       |       |       |       | 58398 |
| Cat         | C T G A T T T C T C A G G C T T A G A A C C T G A T - - G T T T C A T T T G C T T C T A C T G C T T T C T C T T T G T C T T T T T A T G T C - C A C C T C T - - |       |       |       |       |       |       |       | 60147 |
| Ferret      | G T A A G T C - - - - A C A T A A A A G T G G G T - - A C C T T G T C T T T T T - - - - - C T C T G C T G T A T T C C T A G A A C A C A A C A C A - -           |       |       |       |       |       |       |       | 60579 |
| Lion        | C T G A T T T C T C A G G C T T A G A A C C T G A T - - G T T T C A T T T G C T T C T A C T G C T T T C T C T T T G T C T T T T T A T G T C - C A C C T C T - - |       |       |       |       |       |       |       | 57624 |
| Vaquita     | G T A A G T T - - - - A T A T A T G A G T G G G T - - A T C A T G T C T A C T T T G T T - - - - C C C T G C T A C A T T T T T A G A A C C T A G C A C A - -     |       |       |       |       |       |       |       | 54255 |
| Pig         | C C A A G T T - - - - A T A T A A G A G T A G G T - - A T C A T G T C T G C T T T G T T - - - - C T C T G C T A T G T T C C T A G A A C C C G G C A C A - -     |       |       |       |       |       |       |       | 50783 |

| Majority    | - X T G T A T G G T A C A T T G T A G G T A T T A G A A C T T T C T C A A - - C A T G T C A C A A C T - - T T C C C A G C A T C T G X T G T G C T A C A G - A T |       |       |       |       |       |       |       |       |
|-------------|-----------------------------------------------------------------------------------------------------------------------------------------------------------------|-------|-------|-------|-------|-------|-------|-------|-------|
|             | 77370                                                                                                                                                           | 77380 | 77390 | 77400 | 77410 | 77420 | 77430 | 77440 |       |
| Human       | G A T A T T T A A A G A A T T T G G A A G T T A A G G T T T C T C T C A G T G T G T G T A A A T C T G A T C C C C A A C A A T C T C T T C A A A A A A G T A A   |       |       |       |       |       |       |       | 61701 |
| PolarBear   | - G T G T A T G G C A C A T T G T A G G T A T T A G A A C T T T C A T C G - - C A T G T C A C A A C T - - C T C C C A G C A T C T G T T G T G C T A C - - - - - |       |       |       |       |       |       |       | 22819 |
| Cow         | - T T A T A - G A T A T - - - G A G G G C A T T - - - - - T T T T T C A A - - C A T G A C A C A A C T - - T A G C C G A C A G C T G G T G T G C T G T A G - A T |       |       |       |       |       |       |       | 57500 |
| Dog         | - G T G T A T A G C A C - - - - - - - - - - T T A G A A C T T T C A T C C - - C G T G T C A C A A C T - - C T T C C A G C A T C T G C T C T G C T A C A G - A T |       |       |       |       |       |       |       | 53259 |
| BelugaWhale | - G T G T A T G G T G T A T T A C A G G T A T T A G G G C T T T T T C A A C C C A T G T C A C A A C T - - T T C C C A G C A C C T A G A G T G C T G T A G - A T |       |       |       |       |       |       |       | 52980 |
| Donkey      | - A A T A A T G T T A C A T T G - A A G T T T T A T T G T T C T C T G A - - - - A A G T T T C T G T T - - T T C T G A T T A T A T G G A T - - C T A C C A - A A |       |       |       |       |       |       |       | 58467 |
| Cat         | - A C C T G T C T T C C T C T T T C A G G T T T A G A A G T C T C - - - - - - - - - - T G A G A A G T - - C T T C C G T A A A C T T C C A - G C T A C A T - C A |       |       |       |       |       |       |       | 60212 |
| Ferret      | - A T A T A T G G C A C A T T G T T G G T A T T A G A A C T T T C C T C T - - C A T G T C A C A A C T - - C T C C C A G C A T C T G C T A T G T T A C A A - A T |       |       |       |       |       |       |       | 60653 |
| Lion        | - A C C T G T C T T C C T C T T T C A G G T T T A G A A G T C T C - - - - - - - - - - T G A G A A G T - - C T T C C G T A A A C T T C C A - G C T A C A T - C A |       |       |       |       |       |       |       | 57689 |
| Vaquita     | - G T G T A T G G T G T A T T A C A G G T A T T A G G G C T T T T T C A A C C C A T G T C A C A A C T - - T T C C C A G C A T C T A G A G T G C T G T A G - A T |       |       |       |       |       |       |       | 54331 |
| Pig         | - G T G T A T G G T G T A T T G T A G G T A T T G G A - C T T A C T C A A G C T G T G T C A C A A C T - - T T C C C A G C A T C T G G T T T G C T A T A G - A T |       |       |       |       |       |       |       | 50858 |



Dienstag, 3. Mai 2022 08:39

| Majority    | GTTTGGGAAGAGAATCTXAAGCCTACTTCTCCTTTTCTATTG- XTGATAGTT- - - CCATATGAATGAGAGA- TGAAAAAX    |       |       |       |       |       |       |       |       |
|-------------|------------------------------------------------------------------------------------------|-------|-------|-------|-------|-------|-------|-------|-------|
|             | 77610                                                                                    | 77620 | 77630 | 77640 | 77650 | 77660 | 77670 | 77680 |       |
| Human       | ATTTACATGAAAACTTTTTTTTCTGATTGTTTTGCTTACTGTCTAAACCTTCA- CTGTGAGTAGGCACATTTGGAAGGT         |       |       |       |       |       |       |       | 61940 |
| PolarBear   | GTTTAGAAAGAGAATCTCAAGCCTACC- - - - TCTCCTAGTG- ACAGTTGTT- - - CTATATGAATGGGAGA- TGAAAAAT |       |       |       |       |       |       |       | 23021 |
| Cow         | GTTTGGGAAGAGAATTTCAAGCCTGCTTCTCTACTTCTATAG- - TGATAGTTGA- TCAGATGATTGAGAGAATGAAAAAA      |       |       |       |       |       |       |       | 57718 |
| Dog         | GTTTAGAAAGAGAATCTCAAGCCTACCTCTACTTTTCTAGTG- GCAATTGTT- - - CCAAATGAATGGAAGA- TGAAAAAT    |       |       |       |       |       |       |       | 53474 |
| BelugaWhale | ATTTGGGAAGGGAATCGTAAGCCTGCTTCTCCACTTCTATAG- - TGATTGTTGT- TCAAATGAATGAGAGAATGACAAAA      |       |       |       |       |       |       |       | 53197 |
| Donkey      | GCTTGTGGCAGGTGCTCAAAAGTATTTATTGAGTGGGTGTTAAATTTTATTTAATCTATATGTGTTCTAGA- - AAAGAAC       |       |       |       |       |       |       |       | 58686 |
| Cat         | CACGGTGTATAGCACATTGTAGGTATTAGAACTTTCATACTGTGTCACAAC- - - CTCCTAGCACTTGTGG- GGAACATC      |       |       |       |       |       |       |       | 60427 |
| Ferret      | GTTTAGAAAGAGAATCTCAAGCCTACCGT- - CTCATCTTTTA- GTGACAGTT- - - CCATATGAGTGGGAGA- TGAAAAAT  |       |       |       |       |       |       |       | 60866 |
| Lion        | CACGGTGTATAGCATATTGTAGGTATTAGAACTTTCATACTGTGTCACAAC- - - CTCCTAGCACTTGCGG- AGAACATC      |       |       |       |       |       |       |       | 57904 |
| Vaquita     | ATTTGGGAAGGGAATCTTAAGCCTGCTTCTCCACTTCTATAG- - TGATTGTTGT- TCAAATGAATGAGAGAATGACAAAA      |       |       |       |       |       |       |       | 54548 |
| Pig         | GTTTGTGAAGGGAACCTCAAGCCTTCTCTCTGTTTCTGCAG- - TGATAGT- - - - TCATATGAATGAGAGAATGAAAAAA    |       |       |       |       |       |       |       | 51061 |

| Majority    | - X- - - - - ATCT- CTTAAGCXCTGGXAATT- - - CAGTT- - - - - AGCAGGCAXAGTGTACCTTTAGGTTTTG- - GXG |       |       |       |       |       |       |       |       |
|-------------|----------------------------------------------------------------------------------------------|-------|-------|-------|-------|-------|-------|-------|-------|
|             | 77690                                                                                        | 77700 | 77710 | 77720 | 77730 | 77740 | 77750 | 77760 |       |
| Human       | CTTTCTGCAAATTATCTTGAGCTTTTAAATGTCAGAAATCTTTGCTCCAACAAGATCACCACATTCCTGATTGCTGAACCA            |       |       |       |       |       |       |       | 62020 |
| PolarBear   | - - - - - ACAT- CTTAAGCACTGGA AATT- - - CAGTT- - - - - AGCCAGCAAAGTGTACCTTTAGGTTTTG- - CAG   |       |       |       |       |       |       |       | 23078 |
| Cow         | - T- - - - - ATCA- CCTATGCCTTGGGAATT- - - CATTT- - - - - AGCAGGCATAGTGTATCTTTAGGTTTGGAGGGG   |       |       |       |       |       |       |       | 57778 |
| Dog         | - - - - - A- - - - - - AGCACTGGGAATT- - - CAGTT- - - - - AGCCGACAAAATGTACCTTTACATTTTG- - GTA |       |       |       |       |       |       |       | 53524 |
| BelugaWhale | - T- - - - - ATTG- CTTACGCCCTGGGAATT- - - CATTT- - - - - AGCAGGCATAGTGTACCTTTAGGTTTGG- - GGG |       |       |       |       |       |       |       | 53255 |
| Donkey      | AA- - - - - ATAG- TGTAACATGTAGCAAAGTAAAAGTGC- - - - - AAATACTGGATGTGTTTCTTAAGTGCTTA- - T- -  |       |       |       |       |       |       |       | 58748 |
| Cat         | - - - - - ACCT- GCTGTGCTACAGATCTCTTCCTGTTTTG- - - CAGTCATCCTTGTATATCTCAGTATACTA- - C- A      |       |       |       |       |       |       |       | 60490 |
| Ferret      | - - - - - ACAT- CTTAAGCACTTGG AATT- - - CAGTT- - - - - AGCTGGCAAAGTGTACCTTTAGGTTT- - - - -   |       |       |       |       |       |       |       | 60918 |
| Lion        | - - - - - ACCT- GCTGTGCTACAGATCTCTTCCTGTTTTG- - - CAGTCATCCTTGTATATCTCAGTATACTA- - C- A      |       |       |       |       |       |       |       | 57967 |
| Vaquita     | - T- - - - - ATTG- CTTACGCCCTGGGAATT- - - CATTT- - - - - AGCAGGCATAGTGTACCTTTAGGTTTGG- - GGG |       |       |       |       |       |       |       | 54606 |
| Pig         | AT- - - - - ATCA- TTTATGCACTGAATATT- - - CATTT- - - - - AGCAGGCAAAAGTGTACCTTTAGGTTTTT- GGGG  |       |       |       |       |       |       |       | 51121 |

Dienstag, 3. Mai 2022 08:40

| Majority    | - AAGAGAATTTATAGTXTTC- T- - - - - T TAAAGTATGGT- - - - - CCAGAGCCT- - - - - AAGXAGGXTXTTGT CATGT  |       |
|-------------|---------------------------------------------------------------------------------------------------|-------|
|             | 77770 77780 77790 77800 77810 77820 77830 77840                                                   |       |
| Human       | CAGGACTGGTTTGTGTGCTACTGCTATTTCTTGGGATTTTGCAAATACATGAGCTTGAAGTGAGCTTGCATATATTTTTT                  | 62100 |
| PolarBear   | - AAGAGAATTTATAGTGTTT- T- - - - - TCAAAGTATGGT- - - - - CCAGAGCCC- - - - - ACGTAGGTTCTTGT CATGT   | 23138 |
| Cow         | - AAGAGAACTTAGAGTGTTCTT- - - - - T TAAAGTATGGT- - - - - TCAGAACCT- - - - -                        | 57820 |
| Dog         | - AAGAGAATTTATAGTGTC- T- - - - - TCAGAGTATGAT- - - - - CCAGAGCTC- - - - - ACCTAGGTTCTTGT CCTAT    | 53584 |
| BelugaWhale | - AAGAGAA- TTATAGTATTC- T- - - - - T TAAAGTATGGT- - - - - CCAGAGCCCATTCTTATCAGACTGTGGTCCAGA       | 53319 |
| Donkey      | - CTTTCAATTTTCAGCGTGC- - - - - TCAAGCAGTTCT- - - - - TCAAGCTGT- - - - - GACAGCTGTCCAGACAG         | 58805 |
| Cat         | - AAGTGAATTGGTTCTAAAC- T- - - - - TTGTAGTTCAGTTG- - - - - CCACATTTTT- - - - - AAAAAAGTTTTTTTAATGT | 60553 |
| Ferret      | - AAGAGAATTTATAGTTTTT- T- - - - - TCTGACTGTGGT- - - - - CTAGAGCCC- - - - - ACCTAGGTTCTTGT CATGT   | 60978 |
| Lion        | - AAATGAATTGGTTCTAAAC- T- - - - - TTGTAGTTCATTTG- - - - - CCACATTTTT- - - - - AAAAAAGTTTTTTTAATGT | 58030 |
| Vaquita     | - AAGAGAA- TTATAGTATTC- T- - - - - T TAAAGTATGGT- - - - - CCAGAGCCCATTCTTATCAGACT- - GGTCCAGA     | 54668 |
| Pig         | - AAGAGAATTTATAGTA- - - - - T- - - - - T TAAAGTATGAT- - - - - CCAGAGCCTAT- - - - - CT- - - - -    | 51163 |

| Majority    | XAATTTCTTTTCATATAAXATTACXCATAAXAG- - - - - AATGGGACTCTTAGG- TATCCTGAACTAAG- AGTCAT          |       |
|-------------|---------------------------------------------------------------------------------------------|-------|
|             | 77850 77860 77870 77880 77890 77900 77910 77920                                             |       |
| Human       | AAATTTGATTTTACTCCCTTTCTTATTTGTGGTCACCTCCTTTAACCAACTATTTAAAATACCTGGATTTTGTCTCAT              | 62180 |
| PolarBear   | AGATTGCTTGTGGAAAAAAAAAAAAAAAAA- - - - - AAAAGGACTCTTAGG- TATCCTGACCTAAGAAGTCAT              | 23206 |
| Cow         | - - - - - TCTTTTCATATAGATTGCTTATAAAA- - - - - AATGGGACTCTTAGGCTCCTCTGAGCTAAC- AGTTAT        | 57882 |
| Dog         | AGATTGCATCTATATATAGATATGCATATATACATATGCATCTAATGGGACTCTTAAGATATCCTGAACTAAGAAATCAT            | 53664 |
| BelugaWhale | TACATTCTTATCATATAGATTGCTTACACAG- - - - - AATGGGACTCTTAGGCCATTCTGAACTAAC- AGTTCT             | 53386 |
| Donkey      | CAAATACTCCTCTTAGTGGCACCACAGTGAGT- - - - - GAGAGTGCAGTGACTCCA- - GCCCAGAGTCCAGTGCTTAG        | 58875 |
| Cat         | TTATTTATTTTT- - - - - GAGGAAGACAGAGTGT- - - - - GAGCAGGGGAGGTGCAGG- - - GAGAGAGCGAGAGACACAG | 60618 |
| Ferret      | AGATTGCTTGT- - - - - AAAAAAACAAAAAAC- - - - - ATTGGGACTCTTCAG- TATCCTGAACTAAGAAATCAT        | 61042 |
| Lion        | TTATTTATTTTT- - - - - GAGGAAGACAGAGT- - - - - GAGCAGGGGAGGGGCAGG- - - GAGAGAGCGAGAGACACAG   | 58093 |
| Vaquita     | TACATTCTTATCATATAGATTGCTTACACAG- - - - - AATGGGACTCTTAGGCCATTCTGAACTAAC- AGTTCT             | 54735 |
| Pig         | - ACATTCTTATCATATAGATTGCTTATAAAA- - - - - AATGGGGCTCTTAGGCCATCCTGAACTAAC- AGTCTT            | 51229 |

Dienstag, 3. Mai 2022 08:40

| Majority    | AATCTTTGGGGTTGGGAGCCCAGTACTCTGTTT- - - TTGAAAGCCCTGGGAATXAC- TGCCATGTAAAGGCAGCTTGAG |                          |                            |                                             |                       |                        |       |                        |         |       |
|-------------|-------------------------------------------------------------------------------------|--------------------------|----------------------------|---------------------------------------------|-----------------------|------------------------|-------|------------------------|---------|-------|
|             | 77930                                                                               | 77940                    | 77950                      | 77960                                       | 77970                 | 77980                  | 77990 | 78000                  |         |       |
| Human       | ACACCCT-                                                                            | CAGCTCCTATTTCTTTCTTTTTG- | - - -                      | CCAACAGATGATTAATTTACATCTTGTTTGCTTATTTCTCTAG | 62255                 |                        |       |                        |         |       |
| PolarBear   | AATCTTTGGGGATGGCAGCTGAGCACT-                                                        | -                        | GTTT-                      | - - -                                       | TTGGAAGCTCTGGGAACCAC- | TGCTGTGTAAAGGAAGCTTGAG | 23279 |                        |         |       |
| Cow         | AATCTTTGGGATTGGGAGCCCAGTACTGCTCTGTTTAGTTTTTCAAGCCCTGGGAATCAC-                       | TGCCATGTAAAGGCAGCTTGAG   | 57961                      |                                             |                       |                        |       |                        |         |       |
| Dog         | AATCTTTGGGGGTGGGACCCCAGTACTCTGTTT-                                                  | - - -                    | TTGAAAG-                   | - - - - -                                   | - - - - -             | TGCTATGTAAAGGCAGCTTGAG | 53726 |                        |         |       |
| BelugaWhale | AATCTTTGGGGTTGGGAGCCCAGTACTCTGTTTGTGTTTGAATGCCCTGGGAATCAC-                          | TGCCATGTAAAGGCAGCTTGAG   | 53465                      |                                             |                       |                        |       |                        |         |       |
| Donkey      | AATAATTATTGACAACA-                                                                  | TGTA                     | ACTACCCTGTAACA-            | -                                           | CTTGATGTCT-           | - - - - -              | T-    | CACCAAGTAAGTTTACTTTAAT | 58943   |       |
| Cat         | AATTT-                                                                              | - -                      | GAAGCAGGCTCCAAGCTCTGAGCTG- | - - -                                       | TCAGCAC-              | - - - - -              | AG-   | AGCCCAACATGGG-         | GCTTGAA | 60677 |
| Ferret      | AATCTTTGGGGATGGCAGCTCAGTACTCTGTTT-                                                  | - - -                    | TTGAAAGCTCTGGGTACCAC-      | TGCTACGTAAAGGCAGCTTGAG                      | 61117                 |                        |       |                        |         |       |
| Lion        | AATCT-                                                                              | - -                      | GAAGCAGGCTCCAAGCTCTGAGCTG- | - - -                                       | TCAGCAC-              | - - - - -              | AG-   | AGCCCAACATGGG-         | GCTTGAA | 58152 |
| Vaquita     | AATCTTTGGGGTTGGGAGCCCAGTACTCTGTTTGTCTTGAATGCCCTGGGAATCAC-                           | TGCCATGTAAAGGCAGCTTGAG   | 54814                      |                                             |                       |                        |       |                        |         |       |
| Pig         | TGGGAGCCCAGTACTCTTTGTTTGTCTTGTGTTTGTGTTTGAAGCCCTGAGAAT-                             | -                        | C-                         | TGCCATGTACAGGTAGCTTGAG                      | 51306                 |                        |       |                        |         |       |

| Majority    | TGACAGAGCC- - AACCAA                                    |                |                                |                                             |                                                           |                                             |               |       |        |                   |       |
|-------------|---------------------------------------------------------|----------------|--------------------------------|---------------------------------------------|-----------------------------------------------------------|---------------------------------------------|---------------|-------|--------|-------------------|-------|
|             | 78010                                                   | 78020          | 78030                          | 78040                                       | 78050                                                     | 78060                                       | 78070         | 78080 |        |                   |       |
| Human       | CTCTTGACCTTAGGTATACTTCTGCATCTTCCACCTACATAAAGTTTTTGTGTT- | TTGTTTTAATGTTT | CAGAGGGAAAA                    | 62334                                       |                                                           |                                             |               |       |        |                   |       |
| PolarBear   | TGATCGCGCC-                                             | AATGAAATTCT-   | -                              | TTTTTTATACTAG-                              | TTAAAATTTTGGGCAGTTATTTTCAGTTAATTGGAAAATTT                 | 23354                                       |               |       |        |                   |       |
| Cow         | TGACATTGCC-                                             | AACCAGACTCT-   | TGCCATGTATTAG-                 | TTACGATCTTTGGCAATTACTTTTCAGTTAATTGGAA- TTAT | 58035                                                     |                                             |               |       |        |                   |       |
| Dog         | GGATAGAACC-                                             | AACC           | AACTCT-                        | TATTATATA-                                  | - - - -                                                   | TTACAGTTTTTGGCAATTAATTTTAGTTAATTGGAAGATAT   | 53797         |       |        |                   |       |
| BelugaWhale | TGACAGAGCC-                                             | AACC           | AACT-                          | - - -                                       | TTCCATATATTAG-                                            | TTATGATCTTTGGCAATTATTTTCATTTAATTGGAA- TTCT  | 53537         |       |        |                   |       |
| Donkey      | TTGCATGTTT-                                             | ACCTATAAATT-   | GGAGAAATAATACAGTAGATAAAGTTGTT- | -                                           | TTGATTTTGATGTTTTAACAGATAT                                 | 59017                                       |               |       |        |                   |       |
| Cat         | CTCATGA                                                 | AACT-          | A-                             | TGAGATCAT-                                  | GACCTGAGCCGAA-                                            | GT                                          | CAGGCACTCAATG | GA    | CTGAGT | CACCCAGGCGCCCTCAG | 60751 |
| Ferret      | TGATAGAGTC-                                             | AATGAAATTCT-   | -                              | TTTTATACTGG-                                | TTAAAATTTTGGGCAGTTATTTTCAGTTAATTGGAAAATTT                 | 61192                                       |               |       |        |                   |       |
| Lion        | CTCATGA                                                 | AACT-          | A-                             | TGAGATCAT-                                  | GACCTGAGCCGAA-                                            | GT                                          | CAGGCACTCAACG | GA    | CTGAGT | CACCCAGGCGCCCTCAG | 58226 |
| Vaquita     | TGACAGAGCC-                                             | AACC           | AACT-                          | - - -                                       | TTCCATATATTAG-                                            | TTATGATCTTTGGCAATTAATTTTCATTTAATTGGAA- TTCT | 54886         |       |        |                   |       |
| Pig         | TGACAGAGCC-                                             | AACC           | AGACTCC-                       | -                                           | TTCCATATTCTAGGTTATGATCTTTGGCAGTTACTTTTCAGTTAATTGGAA- TTCT | 51381                                       |               |       |        |                   |       |



Dienstag, 3. Mai 2022 08:40

| Majority    | TTCCCCCTAGCATT TTT - - - GCTTTATAAGAGAATAACA AACTCXGTAAAAAAXAGATTAACAGTGGAG- - GTATTAGT - - -   |       |       |       |       |       |       |       |       |
|-------------|-------------------------------------------------------------------------------------------------|-------|-------|-------|-------|-------|-------|-------|-------|
|             | 78090                                                                                           | 78100 | 78110 | 78120 | 78130 | 78140 | 78150 | 78160 |       |
| Human       | TTTCAAAGGGTCTTGGAGGGCTTTCTAACAATTGGCATATTCATTGTTAGATAATTTGGCAGTCGG- - - ACCTCAGT- - -           |       |       |       |       |       |       |       | 62408 |
| PolarBear   | TGCCCCCTAGCATT TTT - - - GCTTTATAAGAGAATAACAGCT- - - TGGAAAA- AATTTAATAATGGAG- - GTATTAGT- - -  |       |       |       |       |       |       |       | 23422 |
| Cow         | TTCCCCCTAGCATT TTT - - - ATTTTATAAGAGAATAGTAACTCAGGAAAAAAAAATCTTAAAAATGGAGTTGTATTAGT- - -       |       |       |       |       |       |       |       | 58109 |
| Dog         | TTCCCCCTAGCATT TTT - - - GCTTTATAAGAGAATAACA AACT- - - CAGGAAA- AGATTAACAATGGAA- - GTATTAG- - - |       |       |       |       |       |       |       | 53864 |
| BelugaWhale | TTCCCCCTAGCATT TTT - - - GCTTTATAAGAGAAGAGCAACTCGG- - AAAAAACATTAACAATGGAGTTTTATTAGT- - -       |       |       |       |       |       |       |       | 53609 |
| Donkey      | TTTCTA- - AGTTTGGT- - - GCTGTGTTGAAGATAATCACATTTACAAAAAATAACCAGTTTCAAGCTCTCCTTCAGT- - -         |       |       |       |       |       |       |       | 59089 |
| Cat         | TTGCTAC- ATTTTTAT- - - GCTTATTAAGACAATGAAGGCTATATAAAAAACAGATTAACAGTGGA- - - GCATTTGT- - -       |       |       |       |       |       |       |       | 60821 |
| Ferret      | TGCCCCCTAGCATT TTT - - - GCTTTATAAGAGAAGAACAGCT- - - CAGAAAA- AGACTAACAGTGGAG- - GTATTAGTAGT    |       |       |       |       |       |       |       | 61263 |
| Lion        | TTGCTAC- ATTTTTAT- - - GCTTATTAAGACAATGAAGGCTATGTAAAAAACAGATTAACAGTGGA- - - GCATTAGT- - -       |       |       |       |       |       |       |       | 58296 |
| Vaquita     | TTCCCCCTAGCATT TTT - - - GCTTTATAAGAGAAGAGCAACTCGG- - AAAAAACATTAACAATGGAGTTTTATTAGT- - -       |       |       |       |       |       |       |       | 54958 |
| Pig         | TTCCCTGTAGCATT TTT - - - GCTTTATAAGAGAATAGCAACTCAG- - - AAAACATACCAACAGTGGAGTTTTATTAGT- - -     |       |       |       |       |       |       |       | 51452 |

| Majority    | GAGGGTTGGAGGG- AAAAATTCAACA- ATCTCXTGAATTTGTXXTGAGGTT- GT- - - - - - - - - - - - - - - T- X- X- |       |       |       |       |       |       |       |       |
|-------------|-------------------------------------------------------------------------------------------------|-------|-------|-------|-------|-------|-------|-------|-------|
|             | 78170                                                                                           | 78180 | 78190 | 78200 | 78210 | 78220 | 78230 | 78240 |       |
| Human       | - ATTGCTGGGA- - - AAGAATTCAACT- - CCTAAAAAACTTAGTGTGTGTTTAGTA- ATTTTGTATCAGCACTTTTAGCAT         |       |       |       |       |       |       |       | 62481 |
| PolarBear   | GAGGGTTGGAGCG- AAAAATTCAACA- GTCCTGAGGATTCGTGTGTGTGTGTGTGTG- - GTTGTGTGTGTGTGTGTGTGTG           |       |       |       |       |       |       |       | 23498 |
| Cow         | GAGGGTTGGAGGGGAAAAATTTAACC- ATCACCTGAATTTGTTCTGAGGTTTCGTGTATATTGCAGTCCAGTCTCTCTTAA              |       |       |       |       |       |       |       | 58188 |
| Dog         | - - - GGTTGGAGGG- AAATATTCAACA- ATCTCTTGAATTT- - - - - - - - - - - GT- - - - - - - - - - - -    |       |       |       |       |       |       |       | 53901 |
| BelugaWhale | GAGGGTTGGAGGGGAAAAATGTA ACT- ATCTCCTGAATTTGTCCTGAGGTTGG- - - - - - - - - - - CTTTAAA            |       |       |       |       |       |       |       | 53668 |
| Donkey      | - ATGGTGATCCAGTAAATGCTCAACAGGCAAAACTGGTAAGTCTAGACCTTTTT- - - - - - - - - - - - - - - -          |       |       |       |       |       |       |       | 59142 |
| Cat         | GAGTGTTGGA- - - - AAAAATTCAACA- ATCTCTTGAATTT- - - - - - - - - - - GT- - - - - - - - - - -      |       |       |       |       |       |       |       | 60857 |
| Ferret      | GAGGGTTGGAAGG- GAAAATTCAACA- ATCTCTTGAATTT- - - - - - - - - - - AT- - - - - - - - - - -         |       |       |       |       |       |       |       | 61303 |
| Lion        | GAGTGTTGGA- - - - AAAAATTCAACA- ATCTCTTGAATTT- - - - - - - - - - - GT- - - - - - - - - - -      |       |       |       |       |       |       |       | 58332 |
| Vaquita     | GAGGGTTGGAGGGGAAAAATGTA ACT- ATCTCCTGAATTTGTCCTGAGGTTGG- - - - - - - - - - - CTTTAAA            |       |       |       |       |       |       |       | 55017 |
| Pig         | GAGGATAGAAGGGGAAAAATGTA ACCCATCTCCCAAATTTGTCCTGAGGTTGATGTCTGTTACAGTCTAGACTCTTTAAA               |       |       |       |       |       |       |       | 51532 |

Dienstag, 3. Mai 2022 08:40

| Majority    | - A- CCCTAAXGTTCA- - - - - TAT- - - - - ATA- - - - TT- TC                                  |       |       |       |       |       |       |       |       |
|-------------|--------------------------------------------------------------------------------------------|-------|-------|-------|-------|-------|-------|-------|-------|
|             | 78250                                                                                      | 78260 | 78270 | 78280 | 78290 | 78300 | 78310 | 78320 |       |
| Human       | TAACCTAGATACTGTGACTCAAACCCAGCTCTTTTCTCATAAGGTATCATTTTCTCTTTGATAACATTGAAGTAGTCACC           |       |       |       |       |       |       |       | 62561 |
| PolarBear   | TATTCCTAAGGTTCA- - - - - TAT- - - - - ATA- - - - TT- TC                                    |       |       |       |       |       |       |       | 23523 |
| Cow         | AACCTCTGAAGTCAGGGGACACATGTACACCCATGGCTAATTCATGTCTATGTATGGCAAAAAACATTACAATATTG- TC          |       |       |       |       |       |       |       | 58267 |
| Dog         | - - - - CCTAAGATT CG- - - - - TATTC- - - - - TGTA- - - - TT- TT                            |       |       |       |       |       |       |       | 53925 |
| BelugaWhale | AAGCTCTTAAGTCA- - - - - A- - - - - CA- - - - -                                             |       |       |       |       |       |       |       | 53685 |
| Donkey      | - - TTTATAAAGTGA- - - - - - - - - - TATT- - TT- TC                                         |       |       |       |       |       |       |       | 59162 |
| Cat         | - - - - CCCAAGGTTCA- - - - - TAT- - - - - ATA- - - - TT- TC                                |       |       |       |       |       |       |       | 60878 |
| Ferret      | - - - - CCTAAGGTTCA- - - - - TGT- - - - - ATA- - - - TT- TC                                |       |       |       |       |       |       |       | 61324 |
| Lion        | - - - - CCTAAGGTTCA- - - - - TAT- - - - - ATA- - - - TT- TC                                |       |       |       |       |       |       |       | 58353 |
| Vaquita     | AAGCTCTTAAGTCA- - - - - A- - - - - CA- - - - -                                             |       |       |       |       |       |       |       | 55034 |
| Pig         | AAGC- C- - AAGTCGTAGTTTTTGTGCATGGCTCA- - GCAGA- - AATGAATCTGACTAGCATTACAGAGGACA- CAGGT- TC |       |       |       |       |       |       |       | 51603 |

| Majority    | AGTCC- - - - - AATATXTAAAXXTT XT- - - - TXAA- - - - - AG                                 |       |       |       |       |       |       |       |       |
|-------------|------------------------------------------------------------------------------------------|-------|-------|-------|-------|-------|-------|-------|-------|
|             | 78330                                                                                    | 78340 | 78350 | 78360 | 78370 | 78380 | 78390 | 78400 |       |
| Human       | TAAGAGTGAATTTTGCTACTTATCTTTTGATATTTATCTATTGT- - - GTAGAAACATCAGTTCTATTACTTATCTCACAT      |       |       |       |       |       |       |       | 62638 |
| PolarBear   | AGTCC- - - - - AATTTCTAAA- - - - - AA- - - - - GG                                        |       |       |       |       |       |       |       | 23542 |
| Cow         | AAGTCATGATCTTTTAATTAGTTAATTAATAAATAAACCCTCTTAAGTCAACCAACAAGGTAATGTTACGTATATTGAG          |       |       |       |       |       |       |       | 58347 |
| Dog         | AGTCC- - - - - AATCTCTAAA- - - - - AA- - - - - GG                                        |       |       |       |       |       |       |       | 53944 |
| BelugaWhale | - - - - - G- - - - - AAAAGATAATGTATAT- - - TGAG- - - - - G                               |       |       |       |       |       |       |       | 53707 |
| Donkey      | ATT- - - - - GGCACATAGATGTCC- - - - - ACAA- - - - - AC                                   |       |       |       |       |       |       |       | 59186 |
| Cat         | AGTCC- - - - - AGTCTTCAAACGTCTGC- - - AAAA- - - - - AA                                   |       |       |       |       |       |       |       | 60906 |
| Ferret      | AGTCC- - - - - CATTTCTAAA- - - - - AA- - - - - GG                                        |       |       |       |       |       |       |       | 61343 |
| Lion        | AGTCC- - - - - AGTCTTCAAAGTCTGC- - - AAAA- - - - - AA                                    |       |       |       |       |       |       |       | 58381 |
| Vaquita     | - - - - - G- - - - - AAAAGATAATGTATAT- - - TGAG- - - - - G                               |       |       |       |       |       |       |       | 55056 |
| Pig         | AATCCCTGGCCTT- - GCTCAGTGGGTTAAGGATTTGGTGTGCT- - - GTGAG- - - GTGTGGTG- TCTGTTGAAGACTTGG |       |       |       |       |       |       |       | 51674 |

Dienstag, 3. Mai 2022 08:40

| Majority    | TXXXXCAAAXAGAATGGTAXTC- C- - - - - A- CTATTAXAATAAT- ATAGTTCTAXATTXAAATATATAATG            |       |       |       |       |       |       |       |       |
|-------------|--------------------------------------------------------------------------------------------|-------|-------|-------|-------|-------|-------|-------|-------|
|             | 78410                                                                                      | 78420 | 78430 | 78440 | 78450 | 78460 | 78470 | 78480 |       |
| Human       | TTTCCCTATAGGAATGCTACATTAGTAAATGAATACCTATCTTCAGTGCTTTCTTCACCTTTACACCAGGGTATTCAATT           |       |       |       |       |       |       |       | 62718 |
| PolarBear   | TCATGCAAA- GACGT- - - - - A- CTATTAAAATAAT- ATAGTTCTAGATTTACATCCCTAGTG                     |       |       |       |       |       |       |       | 23596 |
| Cow         | GTTGGCATTTTAGGGTGGTAGTCACCACCAGTAATCACCAATCATTGTAAAAATAATGATTATCAAATAAAAAGTAAATTA          |       |       |       |       |       |       |       | 58427 |
| Dog         | TCTTGCAAA- AGAATGTTGATC- T- - - - - A- CTATTAAAATAAT- ATTGTTCTAGATTTATATACCTAATG           |       |       |       |       |       |       |       | 54006 |
| BelugaWhale | GTTGACATTTAGGGTGGTAATCAC- - - - A- - - - - AGTCATTTTAAACAATCATAATTGTCAAGTAAAAAGTAAATTG     |       |       |       |       |       |       |       | 53774 |
| Donkey      | TCATATATA- CACATGTAAATA- - - - - TAGCTAATGTTATTAATACTGTCATAACTTAGCA- ATATCATG              |       |       |       |       |       |       |       | 59249 |
| Cat         | ACAAACAAACAAAAAAACTG- G- - - - - T- CTACTAAAGTACT- ATAGTTCTAGATGTATACATATAATG              |       |       |       |       |       |       |       | 60969 |
| Ferret      | TCATGCAAA- AACATGTTGGTC- T- - - - - A- CTATTAAAATCAT- ATAGTTCTAGCTTTACATACCTAATG           |       |       |       |       |       |       |       | 61405 |
| Lion        | A- AAAAAAAAAAATGCTGGTC- T- - - - - A- CTACTAAAGTACT- ATAGTTCTAAATATATACATATAATG            |       |       |       |       |       |       |       | 58443 |
| Vaquita     | GTTGACATTTAGGGTGGTAATCAC- - - - A- - - - - AGTCATTTTAAACAATCATAATTGTCAAGTAAAAAGTAAATTG     |       |       |       |       |       |       |       | 55123 |
| Pig         | CTCGG- ATCTGGTGTGGCTGTGGC- - - - ATAGGCCAGCAGCTACTGCTCCAATTCAGCCTCTAGGCTGGAA- - - - A- - - |       |       |       |       |       |       |       | 51741 |

| Majority    | - - - - - GATCTTGGTXTATG- TAAAXATCA- - GGCTCAA- - - - - TCTATAAXAT- - - - - XTATTATCAAAA |       |       |       |       |       |       |       |       |
|-------------|------------------------------------------------------------------------------------------|-------|-------|-------|-------|-------|-------|-------|-------|
|             | 78490                                                                                    | 78500 | 78510 | 78520 | 78530 | 78540 | 78550 | 78560 |       |
| Human       | AATAGTTATGTTATTCTGGCTGATAAAGTTGATTGATACATGGCTTCCACTTTTATGTGATGATAGGTACCTTGCCTAAC         |       |       |       |       |       |       |       | 62798 |
| PolarBear   | - - - - - GATCTTGGTCTATA- TAAACATCA- - GGTTTAA- - - - - TCTGTTGAT- - - - - GTATTATCAGAA  |       |       |       |       |       |       |       | 23647 |
| Cow         | TTTTAAATGATCCTCACATTTATTAATGAAAA- - GGCCCTAATGCCTTTTTTCAGAAATCTTTTTTCAGTGTATTGGCAAAC     |       |       |       |       |       |       |       | 58505 |
| Dog         | - - - - - GATCTTGGTCTATG- TAAACATCA- - AGCTTAA- - - - - TCTCTTGAT- - - - - ATTTAATCAGAA  |       |       |       |       |       |       |       | 54057 |
| BelugaWhale | TTTTAAATGATCTTCACATTTATTAAGAAAA- - TGCCCTAATGCCTTTTTCAAAAATCTT- - - - - GTTTATTGGCAAGC   |       |       |       |       |       |       |       | 53847 |
| Donkey      | T- - - - - AGCATTATAGATGGCACAAAATG- - GTATCATTAAAATATTGGAAAAGCTT- - - - - ATTTGTGATAAAG  |       |       |       |       |       |       |       | 59312 |
| Cat         | - - - - - GATCTTGGTCTATG- TAAACATCA- - GGCTTAA- - - - - TCTATTGAT- - - - - CTATTATCAGAA  |       |       |       |       |       |       |       | 61020 |
| Ferret      | - - - - - GATTTTGGTCTGTA- TAAACATCA- - GGCTTAA- - - - - TCTATTGAT- - - - - GTATTATCAGAA  |       |       |       |       |       |       |       | 61457 |
| Lion        | - - - - - GATCTTGGTCTATG- TAAACATCA- - GGCTTAA- - - - - TCTATTGAT- - - - - CTATTATCAGAA  |       |       |       |       |       |       |       | 58494 |
| Vaquita     | TTTTAAATGATCTTCACATTTATTAAGAAAA- - TGCCCTAATGCCTTTTTCAAAAATCTT- - - - - GTTTATTGGCAAGC   |       |       |       |       |       |       |       | 55196 |
| Pig         | - - - - - CCTC- TATGTGCTGCAGGTGC- - GGCCCC- - - - - CCCAAAA- - - - - AAACAAAAGCAAAA      |       |       |       |       |       |       |       | 51789 |

Dienstag, 3. Mai 2022 08:40

| Majority    | XAA- - - - - CT- - - - - T- - - - - XTXTTATTTTCAAGGT- - - GGTTATAGAGC- - - TAAXCA-               |       |
|-------------|--------------------------------------------------------------------------------------------------|-------|
|             | <hr/>                                                                                            |       |
|             | 78570 78580 78590 78600 78610 78620 78630 78640                                                  |       |
| Human       | CCAAATGTAATTCAAATCCTGATGTGTATGAACTC- - TCTTTCAGTTTTTACCAGTGCTGTATTGAAGTGGATGAATCT-               | 62875 |
| PolarBear   | GAA- - - - - CTG- - - - - T- - - - - CATTTCATTTTACAGTG- - ACTTATAGAGC- - - TAAACAT               | 23690 |
| Cow         | AAAAATATCATTCACTTACTGTGGCTTCTAGTTTCAAGGTATAGAAAGTGAAGTCGCTTAGTCAT                                | 58585 |
| Dog         | GAA- - - - - CTG- - - - - T- - - - - TGCTTCATTTTCAACGTG- - GGTTATAGAGC- - - TAAACAT              | 54100 |
| BelugaWhale | AG- - - - - T- - - - - - - - - - - - - - - GTATTGGCCAAAGAT- - - - - A- - TCA-                    | 53869 |
| Donkey      | AAA- - - - - - - - - - - - - - - - - - - - - TGTTTATTTTTAAGATT- - AGTCATATCTGCAGTTATCTAT         | 59354 |
| Cat         | GAA- - - - - CT- - - - - - - - - - - - - - - - TGTTTCATTTTCAT- - - - - GGTGATTTAGC- - - TAAAC- - | 61055 |
| Ferret      | GAA- - - - - CTG- - - - - T- - - - - CACT- - - - - TTTACAGTG- - ATTTATAGAGG- - - TAAACAT         | 61495 |
| Lion        | GAA- - - - - CT- - - - - - - - - - - - - - - - TGTTTCATTTTCATTTTCATGGTGATTTAGC- - - TAAAC- -     | 58535 |
| Vaquita     | AG- - - - - T- - - - - - - - - - - - - - - GTATTGGCCAAAGAT- - - - - A- - TCA-                    | 55218 |
| Pig         | AAAAA- - - - - ACGTAGGTCAACATAAAAGGTAATGCTGTGTATGTTGAGGGT- TGGCATTTAGGGCGG- - TGATCA-            | 51857 |

| Majority    | - - - - - AXTCTTCAT- - - - TTCTGAACTATTGTTTTATACAG- TAAATGTTTXTTCTTCTAAT- - - - - GAAAAATTA-        |       |
|-------------|-----------------------------------------------------------------------------------------------------|-------|
|             | <hr/>                                                                                               |       |
|             | 78650 78660 78670 78680 78690 78700 78710 78720                                                     |       |
| Human       | - - - - - GTGTTGAATTATTTTCTAGGTTAGTTTTAGGTAGGTAGATTAGTCCATAAAAAAATT- - - - - CGTATATTAAG            | 62944 |
| PolarBear   | - - - - - ATTTTTTCAT- - - - TTCTGAACTGTTATTTTATACAG- TAAATGTTTATTCTTCTAAT- - - - - GAAAAATTAAC      | 23753 |
| Cow         | GTCCGACTCTTTGTGACCCCGTGGACTGTAGCCTACCAGGC- TCCTCCGTCCATGGGATTCTCCAGGCAAGAATACTGG-                   | 58663 |
| Dog         | - - - - - ATTCTTCAT- - - - TTCTGAA- - - TTGTCTTATACAG- TAAATGTTTATTCT- - - AAT- - - - - GAAAAATTAAC | 54157 |
| BelugaWhale | - - - - - - - - - - - - - - - CTTAACTGTGGCTTCTATCT- AGTTCAGTTTCTATATTTTC- - - - - GAGAAATAGA-       | 53920 |
| Donkey      | AATATAGGCTT- ATATTACTTTGCATTTTTGTTTGATTTAGGTCCAGAAGTTTTGTGCTCTT- - - - GAGGATATAGCAGG               | 59429 |
| Cat         | - - - - - AGTCTTCAT- - - - TTCTGAACTATTGTTTTATACAG- TAAATGTTTATTCTTCTAAT- - - - - GAAAAATTA-        | 61117 |
| Ferret      | - - - - - AGTTTTTCAT- - - - TTCTGAACCATTATTTTATACAG- TAAATGTTTCTTCTTCTAAT- - - - - AAAAAATTAAC      | 61558 |
| Lion        | - - - - - ATTCTTCAT- - - - TTCTGAACTATTGTTTTATACAG- TAAATGTTTATTCTTCTAAT- - - - - GAAAAATTA-        | 58597 |
| Vaquita     | - - - - - - - - - - - - - - - CTTAACTGTGGCTTCTATCT- AGTTTAGTTTCTATATTTTT- - - - - GAGAAATAGA-       | 55269 |
| Pig         | - - - CAAGTGATAGTAGCAATCGTAATTATCAAATAGAAAGT- AAATTGTTTTAAATGATCCT- - - - - CACATTTATTA-            | 51927 |

Dienstag, 3. Mai 2022 08:40

| Majority    | AGTATATTCC- CTTGTTCTTT- - - - - AGTTTTTTCTAGTC- - - - - G- - TTATATC- - - - - - - - - - - XCACXCTGGAGTAGA |                                        |                     |       |       |       |       |       |  |
|-------------|-----------------------------------------------------------------------------------------------------------|----------------------------------------|---------------------|-------|-------|-------|-------|-------|--|
|             | 78730                                                                                                     | 78740                                  | 78750               | 78760 | 78770 | 78780 | 78790 | 78800 |  |
| Human       | AGAAAAGGTTTTATATTTCCAGAGGTGAGAATATTTGAATTA-                                                               | AAAGCTTTATATA-                         | CTTAAGCAACTGTAGAGGT | 63018 |       |       |       |       |  |
| PolarBear   | AATATATTCT- CCTGTTCTTT- - - - - AGTTTGTTTTAGGC-                                                           | TTATATC-                               | CAGCTGGAGTAGA       | 23807 |       |       |       |       |  |
| Cow         | AGTGAGTTGC- CATTTCTCCTCCAGGGGATCTTCCGGACC-                                                                | CAGGGATCGAACCCAGGTCTACCGCATTTTCAGGCAGA | 58740               |       |       |       |       |       |  |
| Dog         | AATATATTCC- CTTGTTCTTT- - - - - AGTTTGTTCTAGTC-                                                           | TTATATC-                               | CAGCCAGAGTAGA       | 54211 |       |       |       |       |  |
| BelugaWhale | AGTAATCTCC- TTTTACCTT- - - - - GACTTTTAAAAAATT-                                                           | GTTTTATAACA-                           | ACCCTGAAATTATAACACA | 53983 |       |       |       |       |  |
| Donkey      | ATTGTATTGTGCATGTACACCTGTATAAGATTTTAAAGTGTTTTCCAGTAGGAGTTT-                                                | CAAAGTAATTAATTTAGC                     | 59503               |       |       |       |       |       |  |
| Cat         | - - TATATTCC- CTTGTTCTTT- - - - - AGTTTCTTCTAGGC-                                                         | TTACATC-                               | CAGCTGGAGTAGC       | 61169 |       |       |       |       |  |
| Ferret      | AATATATTCC- CTTGTTCTTT- - - - - AGTTTGTTCTAGCC-                                                           | TTCTATC-                               | CAGCTGGAATAGA       | 61612 |       |       |       |       |  |
| Lion        | - - TATATTCC- CTTGTTCTTT- - - - - AGTTTCTTCTAGGC-                                                         | TTATATC-                               | CAGCTGGAGTAGC       | 58649 |       |       |       |       |  |
| Vaquita     | AGTAATCTCC- TTTTACCTT- - - - - GACTTTTAAAAAATTA-                                                          | TTTGTTTTATAACA-                        | ACCCTGAAATTATAACACA | 55336 |       |       |       |       |  |
| Pig         | AGAAAATACC- CTAATGCCTTTTTTCAGAAATCTTGTTTATTGGCAAGCAGTGTATT-                                               | GGGCAAACAAGATTTGGGCAA                  | 52005               |       |       |       |       |       |  |

| Majority    | AATGG- - - - - TGATTATATAG- - - - - X- - - GAGXAGXAAAAAAAA- CXCATAXTCATCT- - - - - - - - - - - TAACAGC |                       |       |       |       |       |       |       |  |
|-------------|--------------------------------------------------------------------------------------------------------|-----------------------|-------|-------|-------|-------|-------|-------|--|
|             | 78810                                                                                                  | 78820                 | 78830 | 78840 | 78850 | 78860 | 78870 | 78880 |  |
| Human       | TTACTTTTTCCATAACACGACATGTTTATTCTTCTAATGAAAAGTTAACAGTATGTTACCTGTTCTCTAGTTTGTTC                          | 63098                 |       |       |       |       |       |       |  |
| PolarBear   | AATGT- - - - - TGATTATATAG- - - - - GACCAGGAAAAAAAA- CCCGTAATAATCA-                                    | TAACACC               | 23858 |       |       |       |       |       |  |
| Cow         | TGCTTTAACCTCTGAATCACCAGGGAAGCCCTCAAGGTATAGAAGTAGACTCCTTTTCACCCAGGATCT-                                 | TTTAAAT               | 58817 |       |       |       |       |       |  |
| Dog         | AATGG- - - - - TGATTATATAG- - - - - GAGCAGGAAAAAAC- - CCCATAATAA-                                      | TAACAGT               | 54258 |       |       |       |       |       |  |
| BelugaWhale | CATGGTAGAAAGTAGCTGTTTTT- - - - - GTTTTTGTAT- TAGAGACAG- - - - - CTTTTCAGGT-                            | GTGTTATC              | 54044 |       |       |       |       |       |  |
| Donkey      | CAGTG- - - - - AGATAGTTT- - - - - CT- - - - - GAAATATGTTAATAACTTGTGCTCAAAT-                            | GCT- - - - - GTGATAGG | 59561 |       |       |       |       |       |  |
| Cat         | AATTG- - - - - TGATTATATAG- - - - - GAGCAGGAAAAAAC- - CCCATAATAATCA-                                   | TAACAGC               | 61220 |       |       |       |       |       |  |
| Ferret      | AATGG- - - - - TGATTATATAG- - - - - TACCAGGAAAAAAAACCTCATAATAATCA-                                     | TAGCAGC               | 61664 |       |       |       |       |       |  |
| Lion        | AATTG- - - - - TGATTATATAG- - - - - GAGCAGGAAAAAAA- ACCATAATAATCA-                                     | TAACAGC               | 58700 |       |       |       |       |       |  |
| Vaquita     | CATGGTAGAAAGTAGCTGTTTTT- - - - - GTTTTTGTAT- TAGAGACAG- - - - - CTTTTCAAGT-                            | GTGTTATC              | 55397 |       |       |       |       |       |  |
| Pig         | CAAAG- ATTCTTTCAGTTTCCAT- - - - - ATTTTCGAGAAATAGAATTAACCTCCTTTTCACCT-                                 | GTA                   | 52076 |       |       |       |       |       |  |

Dienstag, 3. Mai 2022 08:40

| Majority    | AGCAT-----A----GTCTT--A-T-----TATAA--CTCACATTGTA----XCTTTCACA-----TA-----      |       |       |       |       |       |       |       |       |
|-------------|--------------------------------------------------------------------------------|-------|-------|-------|-------|-------|-------|-------|-------|
|             | 78890                                                                          | 78900 | 78910 | 78920 | 78930 | 78940 | 78950 | 78960 |       |
| Human       | AGCTTATATCCAGCTGAAGTGAAGTGGTATTATATAGGAGCAGAAAAAGTACAAGATAATCATAGCGGTAACATAGTC |       |       |       |       |       |       |       | 63178 |
| PolarBear   | AGCAT-----AT---GTCTT----T-----TATAA--CTCACATTGTA----CTTTCACA-----TA-----       |       |       |       |       |       |       |       | 23897 |
| Cow         | TATTTA-ATTTATACAACCCTGAAAT-----TGTA--CACACTTGGTAGAAAATTGTAACA-----CAGCTTT      |       |       |       |       |       |       |       | 58878 |
| Dog         | AGAAT-----AT---GTCT-----TATAA--CTCACATTGTA----CTTTTGCA-----TA-----             |       |       |       |       |       |       |       | 54295 |
| BelugaWhale | TATCT-----CTATTAGGAATG-----TGTA-----CAGTTGACACTGGACAGTGACA-----CT-----         |       |       |       |       |       |       |       | 54089 |
| Donkey      | CTCTT-----GG-CTT--ATT-----TAAGA--C-TGTATCCAATGTTCTCTTTAAA-----GA-----          |       |       |       |       |       |       |       | 59604 |
| Cat         | AGCAT-----G---GTCTT----T-----TATAA--CTCACATTATA-----CTTACACA-----TA-----       |       |       |       |       |       |       |       | 61258 |
| Ferret      | AGCA-----A--T-----TATAA--CTCACATTGTA----CTTTCACA-----TA-----                   |       |       |       |       |       |       |       | 61696 |
| Lion        | AGCAT-----G---GTCTT----T-----TATAA--CTCACATTATA-----CTTACACA-----TA-----       |       |       |       |       |       |       |       | 58738 |
| Vaquita     | TATCT-----CTATTAGGAATG-----TGTA-----CAGTTGACACTGGACAGTGACA-----TT-----         |       |       |       |       |       |       |       | 55442 |
| Pig         | TGTTT-----TATACAGTTCTGAAGT-----TATAA--CACATGTGGTAGAAAATACCTGTT-----TG--TTT     |       |       |       |       |       |       |       | 52131 |

| Majority    | ---TGTGATTTTTTAT-----TTAATXCTCAAGGT-----AACTTTGTGAGGATCC-----TGGCAGCC             |       |       |       |       |       |       |       |       |
|-------------|-----------------------------------------------------------------------------------|-------|-------|-------|-------|-------|-------|-------|-------|
|             | 78970                                                                             | 78980 | 78990 | 79000 | 79010 | 79020 | 79030 | 79040 |       |
| Human       | CTTTATAATTCATGATGATTTTTCACATATGTTGTCTTTAATTTACTCCTCTTAATAACCCTTGAAGAAGCATGACAGCC  |       |       |       |       |       |       |       | 63258 |
| PolarBear   | ---TGTGATCTTTTTAT-----TTAATCCTCAAGGT-----AACCTTGTGAGGATCC-----TGGCAGCC            |       |       |       |       |       |       |       | 23948 |
| Cow         | TAGGGGTATTATCCAC---TTTTATTAGGAATATGTGCAGTTGACACTGCACAGTGACACT---GTGTCTTTTGGAAAT   |       |       |       |       |       |       |       | 58951 |
| Dog         | ---TGTGATCTTTTTAT-----TTAATCCTCAAGGT-----AACTCTGTGGGGATTA-----TGGCAGCC            |       |       |       |       |       |       |       | 54346 |
| BelugaWhale | --GTGTCTTTTGGAAA-----TCCTTTAATATGGT-----CACTCTGTTTTAATAT---GCAAGT---GGATTG        |       |       |       |       |       |       |       | 54145 |
| Donkey      | ---TTTTTTTTGAAAGACAGGTTTTCTGAATAGGTTGCTTGTCTATTTTTATTACATCA-----TTTACATTT         |       |       |       |       |       |       |       | 59671 |
| Cat         | ---TGTGATCTTTTTGT-----TTAATCCTCAAAGT-----AACC-TGTGAGGATCA-----TGGCAGCC            |       |       |       |       |       |       |       | 61308 |
| Ferret      | ---TGTGATCTTTTTAT-----TTAATCCTCAAGGT-----ACTCTTGTGAGGATCC-----TGGCAGCC            |       |       |       |       |       |       |       | 61747 |
| Lion        | ---CGTGATCTTTTTGT-----TTAATCCTCAAAGT-----AACC-TGTGAGGATCA-----TGGCAGCC            |       |       |       |       |       |       |       | 58788 |
| Vaquita     | --GTGTCTTTTGGAAA-----TCCTTTAATATGGT-----CACTCTGTTTTAATAT---GCAAGT---GGATTG        |       |       |       |       |       |       |       | 55498 |
| Pig         | ATATGTTATTAGAGACAGCTTTTCAAGTAGTAGTGT-TGCTTTTTTTATTTTACCTAAGTACA---GTTAATTTAGCAGAG |       |       |       |       |       |       |       | 52207 |

Dienstag, 3. Mai 2022 08:40

| Majority    | ATTATCATCTXTG- - - TTTTCCAGATTAAGAAAGATCCTGA- GATTCAGAGAGGTTAAGTAACTTGTTTAAAXATGACCT |                                                          |                                       |                                     |                |            |       |       |       |
|-------------|--------------------------------------------------------------------------------------|----------------------------------------------------------|---------------------------------------|-------------------------------------|----------------|------------|-------|-------|-------|
|             | 79050                                                                                | 79060                                                    | 79070                                 | 79080                               | 79090          | 79100      | 79110 | 79120 |       |
| Human       | ATTGTCATCATT                                                                         | CTGTTTTCCCGATTAAGA                                       | - - AAT- - TGA-                       | GATTCAGAGAGG                        | CAAATAACTTGCTT | AAGATGACCG |       |       | 63332 |
| PolarBear   | ATTATCATCTCTG- - -                                                                   | TTTTCCAGATTAAGAAAGATCCTGA-                               | GATTCAGAGAGGTTAAGTAACTTGTTCAAGATGACCT |                                     |                |            |       |       | 24023 |
| Cow         | CCTATCATTAATGATTTCCCTTCCAGGAGAATATATTTTCATTAAGTTTCATTAGTGGCTTTTCCTATTTTTTATCCATATG   |                                                          |                                       |                                     |                |            |       |       | 59031 |
| Dog         | ATTATTACCTCTG- - -                                                                   | TTTTCTAGATTAAGATAGATCCTGA-                               | GATTCAGAGAGGTTAAGTAACTTGTTCAAGATGACCT |                                     |                |            |       |       | 54421 |
| BelugaWhale | TTTCTCATTAATGATT-                                                                    | CCTTCCAGGAGAGTGTATTTTCATTA-                              | GTTTCATTGGTGGCTTTTCCTGTTTTTAATCCATATG |                                     |                |            |       |       | 54223 |
| Donkey      | GTTGTTGTTGTTA- - -                                                                   | TAGAGGGAGGGTAAGAAAGTATTAAGAAAGTAGAATCATCCCATGTCATGGCT- - | ACCATTGA                              |                                     |                |            |       |       | 59746 |
| Cat         | ATTACCATCTTTG- - -                                                                   | TTTTCCAGATTAAGAAAGATCCTGA-                               | TACTCAGAGAGGTTAAGTAACTTGCTCAGTATGACGT |                                     |                |            |       |       | 61383 |
| Ferret      | ATTATCTTCTCTG- - -                                                                   | TTTTCCAGATTAAGAAAGATCCTGA-                               | GATTCAGAGAGGTTAAGTAACTTGCTCAATATGACGT |                                     |                |            |       |       | 61812 |
| Lion        | ATTACCATCTTTG- - -                                                                   | TTTTCCAGATTAAGAAAGATCCTGA-                               | TACTCAGAGAGGTTAAGTAACTTGCTCAATATGACGT |                                     |                |            |       |       | 58863 |
| Vaquita     | TTTCTCATTAATGATT-                                                                    | CCTTCCAGGAGAGTGTATTTTCATTA-                              | GTTTCATTGGTGGCTTTTCCTGTTTTTAATCCATATG |                                     |                |            |       |       | 55576 |
| Pig         | TGTATAATTTCTG- - -                                                                   | CTGTATAGCAGAGTG-                                         | GCTCAGTTA- - -                        | TACATGTATGTTTTCTGCTGTATAGCAGAGTGGCT |                |            |       |       | 52279 |

| Majority    | AATT- GAATATAGGCTTTTT- - - TAGCTCTAGAGCCTGTACTCTTCTAT- - - TCCTGAGCTTTTC- - - - - - TGGGATGA- |                                                   |                                         |                                            |           |       |       |       |       |
|-------------|-----------------------------------------------------------------------------------------------|---------------------------------------------------|-----------------------------------------|--------------------------------------------|-----------|-------|-------|-------|-------|
|             | 79130                                                                                         | 79140                                             | 79150                                   | 79160                                      | 79170     | 79180 | 79190 | 79200 |       |
| Human       | AAAA-                                                                                         | GAGTCTAGGCTTTTTAATTAATCCTAGACCTGGCACTCGTCAGT- - - | TCAGAACTTTTC- - - - - -                 | GGAATGA-                                   |           |       |       |       | 63400 |
| PolarBear   | AATT-                                                                                         | GAGTGTAGGCTTT- - - -                              | CAGCTCTAGAGCTTGCCTCTTCTAT- - -          | TCCAAGCTTTCC- - - - - -                    | TGGGATGA- |       |       |       | 24087 |
| Cow         | CAGTGTTCATTGTGGTGT- - -                                                                       | TAATTATTCATTCTATA-                                | TTAACATCTTTACTGAGTTTATCATGTTTTTGACATAAA |                                            |           |       |       |       | 59107 |
| Dog         | AATT-                                                                                         | GACTATAGGCTTT- - - -                              | CAGTTCTAGAGTTTGCCTCTTCTAT- - -          | TCCTAAGCTTTTC- - - - - -                   | TGGGATGA- |       |       |       | 54485 |
| BelugaWhale | CAATGTTT-                                                                                     | ATTGTGTTGT- - -                                   | TAACATACATTCTGTA-                       | TTAACATCTTTACTGAGTTTATCATGTTTTTGCCATAAA    |           |       |       |       | 54298 |
| Donkey      | AAACTGCATACCACATGTT- - -                                                                      | TGCTTCTAAAAGCCATAATCTTCTGT- -                     | TTGTCTGTCTTATT- - - - - -               | TAAATCTAC                                  |           |       |       |       | 59814 |
| Cat         | AATT-                                                                                         | GAATGTAGACTTT- - - -                              | CAGCTCTAGAGCCTGTACTCTTCTAT- - -         | TCCAGAGCTTTCC- - - - - -                   | TGGGATGA- |       |       |       | 61447 |
| Ferret      | GATTTGAGTGTAGGCTTT- - - -                                                                     | TAGATTTAGAGCTTGCCTCT- - -                         | AT- - -                                 | TCCTGGGCTTTCC- - - - - -                   | TGGGATAA- |       |       |       | 61874 |
| Lion        | AATT-                                                                                         | GAATGTAGACTTTT- - - -                             | CAGCTCTAGAGCCTGTACTCTTCTAT- - -         | TCCAGAGCTTTCC- - - - - -                   | TGGGATGA- |       |       |       | 58928 |
| Vaquita     | CAATGTTT-                                                                                     | ATTGTGTTGT- - -                                   | TAACATACATT- - - -                      | A- TTAACATCTTTACTGAGTTTATCATGTTTTTGCCATAAA |           |       |       |       | 55647 |
| Pig         | CAGTTATACATGTATGTTT- - -                                                                      | TCATATTTTTGCTATGGTTTATCACAGGATTGAGTATGT- -        | TCCCCATGAATAGAG                         |                                            |           |       |       |       | 52354 |

Dienstag, 3. Mai 2022 08:40

```
Majority      T G T T X T A T T T T C T A A - T T C A A C A T T T T A T T C T G A T T X T G G T - - T G A A C A C T T C A A G T T A T - - - - G G A A A T A A T - - - - - A
                |          |          |          |          |          |          |          |
              79210    79220    79230    79240    79250    79260    79270    79280
Human         C A T T G G A T T T G C T A A T T T C A T C A A G A T A A T C T G A T T G G G G G - - T G A A C A T T T C A G G T T A A G G A A A A T A C T A G T T T T T T T C 63478
PolarBear    T G T T C T A T T T T C T A A - T T C A A C A G T C C A T T T T G A T T C G G G T - - T G A A C A C C T C A A G T T A A - - - - G G A A A T A A T - - - - - A 24154
Cow          T C T T A T A T T T A C T A T - G A A G A T A T T T T T C C T G A T T G T T T T C A T G T A C T C T C C A A A C T T T C C C T T T G C A T A G A - - - - - T 59180
Dog          T G T T A C A T T T T C T A A - T T C A A C A A - - - G T T T T G A T T A G G - - - T G G A C A T C T C A A T - - - - - G A A A T A A T - - - - - A 54542
BelugaWhale  T C T T A T A C T T A G T A T - G A A A A T A C T T T T T C C T G A T T G T T T T - - T G T G T A T T C C A A C C T T C C C T T T G C A T A G A - - - - - C 54369
Donkey       C T T T C C T C T C T C T C - - T T T A A C T T C T T T G C C G T G T A T T T C A T T G T T A T T T T C A T T C C A T - - - - - C A T T A T - - - - - A 59879
Cat          T G T T G G A T T T T C T A A - T T T A A G T T - - - A T T T T G A T T C A G G T - - T G A A C A C C T C A A G T T A C - - - - G G A A A T A A T - - - - - A 61511
Ferret       T G T T G C A T T T T C T A A - T T C A A C A A T C T A T T T G G A T C C A G G T - - T C A A C A C C T C A A G T T A A - - - - G G A A A T A A T - - - - - A 61941
Lion         T G T T G G A T T T T C T A T - T T C A A G T T - - - A T T T T G A T T C A G G T - - T G A A C A C C T C A A G T T A C - - - - G G A A A T A A T - - - - - A 58992
Vaquita     T C T T A T A C T T A G T A T - G A A A A T A C T T T T T C C T G A T T G T T T T - - T G T G T A C T C C A A C C T T C C C T T T G C A T A G A - - - - - C 55718
Pig          T C C C T G T C C C C T A - - - A A T A C A G T A G G A C C T T G T T A T - - - - A G G A A T A T T G C C T G T T T C T A T T A G G A A T G T G - - - - - C 52421
```

```
Majority      G T A T T T G C C X C G T T T T A T X G G A A T T G C T A T T A T G C A T T - A T A G T G A T A X X T X T T T G G C T T A A G G C X C T T C X T A A A A T G T G
                |          |          |          |          |          |          |          |
              79290    79300    79310    79320    79330    79340    79350    79360
Human         T T T T T T G C C T C A T T T T A T G G G A A T T G C T A T T A T G T G T T - - - - A G G A T A - - A T T T G G T T T G A A G C A A C T T T G T A C A A T G T G 63552
PolarBear    G T G T T T G C C C C A T T T C A T G G C A A T C G C T A T T A T G C A T T - A T A G T G A T A C T T A T T T G G C T T G A G G C G C T T C A T A A A A T G T G 24233
Cow          A C A T T T G A G A G G C T T T T T T G C A A A T T A A C T T G G G C T T T T A C T G T C A G A A A T C T T T G C T C C A G C A A G A T C A C T A C A A T C T T 59260
Dog          G T T T C T G C C C C A T T T C A T G G G A A T T G C T C T T A T G C A T T - A T A G T G A T A - - T A T T T G G C T T G A A G C A C T T C A T A A A A T G T G 54619
BelugaWhale  A C A T T T G A G A G G C C T T T C T G C A A A T T A A C T T G A G C T T T T A C T G T G A G A A A T C T T T G C T C T A G C A A G A T C A C T G C A A T C C C 54449
Donkey       C C A T T A A A T A - - - T T C A T T A T T A A A C C A T T A A T T C A A T T G T C T T T A C T T A C C T T T G T C T T A C C T C T T T T T C T T T A T T T C A 59956
Cat          G T T T T T G C C C T G T T T T A T G G G A C T T G C T A T T A T G C C A T - A T A G T G A T A C T T A C T T G G C T T G A G G C A C T T C A T A A A A T G T G 61590
Ferret       G T G T T T G C - - - - - - - - - - - - - - - A T T A C T A C T A T A C A T T - A T A G T G A T A C T T A T T T G G C T T G A G G C A C T T C A T A A A A T G T G 62006
Lion         G T T T T T G C C C C G T T T T A T G G G A C T T G C T A T T A T G C C T T - A T A G T G A T A C T T A C T T G G C T T G A G G C A C T T C A T A A A A T G T G 59071
Vaquita     A C A T T T G A G A G G C C T T T C T G C A A A T T A A C T T G A G C T T T T A C T G T G A G A A A T C T T T G C T C T A G C A A G A T C A C T G C A A T C C C 55798
Pig          A C A G T T G A C G - - - - - - - - - - - - - - - C T G G A C A T G A C A C T G T G T C T T - - - - - T T G G C A G T C C T T - - - - - T T A T A A T G G T C A C T C T T A T T T T 52486
```



Dienstag, 3. Mai 2022 08:40

| Majority    | GCAT - - CAAACAAAAGTTACCTTATAAAAATTCTTCTAAGT - - - - ACTGCCAT - - - - - CCAGCAAAAAAT          |       |       |       |       |       |       |       |       |
|-------------|-----------------------------------------------------------------------------------------------|-------|-------|-------|-------|-------|-------|-------|-------|
|             | 79370                                                                                         | 79380 | 79390 | 79400 | 79410 | 79420 | 79430 | 79440 |       |
| Human       | GCAT - - CAAATAGCAGTTACCTTCTAAAAGTGTACTGAATCATATAAGT - - - - ACTGCCAT - - - - - CCAGCAATAAAT  |       |       |       |       |       |       |       | 63619 |
| PolarBear   | ACAT - - CAAACAAAAGTTACCTTATAAAAATTACACCAATTCTTCTAAGT - - - - ACTGCCAT - - - - - CCAGCAAAAAAT |       |       |       |       |       |       |       | 24300 |
| Cow         | GATTGCTGAACACTGACTGACTTGTGTGCTACTGTTATTTCTTGGAAAGTTG - - GCAAATAACAATGAACTTAAAGTGAGC          |       |       |       |       |       |       |       | 59338 |
| Dog         | GCAT - - CAAACAAAAGTTACCATATAAAAATTATACCAATTTTTCTAAGT - - - - ACTGCCAT - - - - - CCAGCAAAAAAT |       |       |       |       |       |       |       | 54686 |
| BelugaWhale | GATTGCTGAACACAGACTGACTTGTGTGCTGCCATTATTTCTTGGAAATTTT - - GCAAACAC - - ACGAGCTTGAAGTGAGC       |       |       |       |       |       |       |       | 54525 |
| Donkey      | CTCT - - CAGACTAATTATGGTATGTAATACATCAGTGCTTCTTCCAAGTCAAGATAGCTTGTATCGAACCCGGACCGGTT           |       |       |       |       |       |       |       | 60034 |
| Cat         | TCAT - - CAAACAAAAGTTACCTTACAAAATTCTAACAATTCTTCTAAGT - - - - ACTGCCAT - - - - - CCAGCAAAAAAT  |       |       |       |       |       |       |       | 61657 |
| Ferret      | ACCT - - CAAACAAAAGTTATGTTCTAAAATTACACCAATTCTTCTAAGT - - - - ACTACCAT - - - - - CCAGCAAAAAAT  |       |       |       |       |       |       |       | 62073 |
| Lion        | TCAT - - CAAACAAAAGTTACCTTACAAAATTGGAACAATTCTTCTAAGT - - - - ACTGCCAT - - - - - CCAGCAAAAAAT  |       |       |       |       |       |       |       | 59138 |
| Vaquita     | GATTGCTGAACACAGACTGACTTGTGTGCTGCCATTATTTCTTGGAAATTTT - - GCAAACAC - - ACGAGCTTGAAGTGAGC       |       |       |       |       |       |       |       | 55874 |
| Pig         | AAC - - - - - ATGC - AATGGATTCAATTAGTTACTAATAGTAAAAATATGTAA - - ACATTAGGTAAAATATTTGCAGC - AGT |       |       |       |       |       |       |       | 52556 |

| Majority    | XTGTATXTATAATAAAAATT - - - - - AAAGTATTATGCAGACTATTATGGTAXGACTTTXGAXAGGACTG               |       |       |       |       |       |       |       |       |
|-------------|-------------------------------------------------------------------------------------------|-------|-------|-------|-------|-------|-------|-------|-------|
|             | 79450                                                                                     | 79460 | 79470 | 79480 | 79490 | 79500 | 79510 | 79520 |       |
| Human       | ATAT - - GTATAATAAAAATT - A - - - - - ACCTTATTGAGCAGAGTAGTGTGGTACTACTTT - GGTAGGACT -     |       |       |       |       |       |       |       | 63679 |
| PolarBear   | GTGTATGTATAATAAAAATT - - - - - AAATTATTACGTAGACTATTATGGTGTGACTTT - GGCAGGACTG             |       |       |       |       |       |       |       | 24362 |
| Cow         | TTGCATATATAGTTTACTTTAATTTTTCTT - - - CTTACTTCACTTGTCAATTTTACCTCAGCCAGCTGTTGAAAATGCCTG     |       |       |       |       |       |       |       | 59415 |
| Dog         | ATGTATGTATAATAA - - - - - AGTATTATGCAGACCATTATGGTACAACCTCT - TGTAGGACTG                   |       |       |       |       |       |       |       | 54742 |
| BelugaWhale | TTGCATATCTAGTTTACTC - - - - - ATTTG - - - - - TAGTCATCTTCCCTCAGCCAGCTATTGAAAGTGCCTG       |       |       |       |       |       |       |       | 54586 |
| Donkey      | TTGATT - TCTGGTTCATTGCA - - - - TTTCCATCCTCAGAATCTCATTGTTGGGAGCAAAAATAGCTTTCAGGGAGCAGAAAG |       |       |       |       |       |       |       | 60109 |
| Cat         | GTGT - - - - ATAATAAAAATT - - - - - AAAGTATTATGCAGACTATTATGGTATGACTTT - GACAGGACTG        |       |       |       |       |       |       |       | 61715 |
| Ferret      | GTGTATGTATAATAAAAATT - - - - - AAAGTATTATTGAGGCTATTATGGTATGACTTTTGGCAGGACTG               |       |       |       |       |       |       |       | 62136 |
| Lion        | GTGT - - - - ATAATAAAAATT - - - - - AAAGTATTAAAGCAGACTATTATGGTATGACTTT - GACAGGACTG       |       |       |       |       |       |       |       | 59196 |
| Vaquita     | TTGCATATCTAGTTTACTC - - - - - ATTTG - - - - - TAGTCATCTTCCCTCAGCCAGCTATTGAAAGTGCCTG       |       |       |       |       |       |       |       | 55935 |
| Pig         | AAGAACATGTCATTCATTTCTTCTTACTTGATACTTACTGCTTTATGCAGATTCTTTGAGAAAATAATGAAATTTCT -           |       |       |       |       |       |       |       | 52635 |



Dienstag, 3. Mai 2022 08:40

| Majority    | - - - TTGTGGAAAXAAATATATGTAC- - - - - AGCTGGGAXAXCXAAGAATGATXTATXATATTTGGTCC- CTTTCCTGG |                                                   |                                                       |       |       |       |       |       |  |
|-------------|-----------------------------------------------------------------------------------------|---------------------------------------------------|-------------------------------------------------------|-------|-------|-------|-------|-------|--|
|             | 79690                                                                                   | 79700                                             | 79710                                                 | 79720 | 79730 | 79740 | 79750 | 79760 |  |
| Human       | - - TTGGGGGAAAGTAATACATGGAC-                                                            | - - - - -                                         | AGCTGGAACAGCAAAATTTGATATATGAAATTTGAATCCTTTTCCTGG      | 63885 |       |       |       |       |  |
| PolarBear   | - - - TTGTGGAAACGAATACATGTAC-                                                           | - - - - -                                         | AACTGGGACAACAAAGAATGATGTATGGTATTTGATCC- CTTTCCTGG     | 24563 |       |       |       |       |  |
| Cow         | C- CTACATAAAGGTGGTTTTTTTTTTTTTTTTTTGGTTAAAGGTTTCTAGACAGCTTTCAAGCAGTTAGCAT-              | AATCATT-                                          | A                                                     | 59650 |       |       |       |       |  |
| Dog         | - - - TTGTGGAAACAGATACATGTAC-                                                           | - - - - -                                         | AGCTGGGATA- - - - ATAATGATACATGCTATTTGATCC- CTTTCCTGG | 54932 |       |       |       |       |  |
| BelugaWhale | TTTTAATTAAGGAAGAAT-                                                                     | - - - - -                                         | GTCAAAGGCTTCTAGAGGGCTTTCTAGCAGTTAGCAT- ATTCATAGT      | 54796 |       |       |       |       |  |
| Donkey      | - - - TTATCCTAATGCACAT- TGTCTGT-                                                        | - - - - -                                         | AAGGTAAGTACTAGCCAGAAAATAGGAGTCATCCTTTATTCCTCTTCCTTTC  | 60321 |       |       |       |       |  |
| Cat         | - - - TTGTGGAAACAAATA- ATGTAC-                                                          | - - - - -                                         | AGCTGGGATAACGAAGAATGATGCATGATACTTGGTCC- CTTTCCTGG     | 61903 |       |       |       |       |  |
| Ferret      | - - - TTGTGGAAACAAATACATGTAC-                                                           | - - - - -                                         | AACTGGGATAACAAATAATAATGTATAATATGTGATCC- CTTTCCTGG     | 62341 |       |       |       |       |  |
| Lion        | - - - TTGTGGAAACAAATA- ATGTAC-                                                          | - - - - -                                         | AGCTGGGATAACGAAGAATGATGCATGATACTTGGTCC- GTTTCCTGG     | 59384 |       |       |       |       |  |
| Vaquita     | TTTTAATTAAGGAAGAAT-                                                                     | - - - - -                                         | GTCAAAGGCTTCTAGAGGGCTTTCTAGCAGTTAGCAT- ATTCATAGT      | 56145 |       |       |       |       |  |
| Pig         | - - CTAATCTGGGGTGGTATTTATGTTGGG-                                                        | - AAGTAAATTGGTCCAAAGTATTATTATTATTATTATTTTAAATTTT- | T                                                     | 52863 |       |       |       |       |  |

| Majority    | TGTCTTTTATXTGCAGGTCTTCATTGTTGGGTTTTA- - - - - TTGTCAAAGTCATA- - - TTTCTTXXTTAATTTTCATTCCCT |                        |                                             |       |       |       |       |       |  |
|-------------|--------------------------------------------------------------------------------------------|------------------------|---------------------------------------------|-------|-------|-------|-------|-------|--|
|             | 79770                                                                                      | 79780                  | 79790                                       | 79800 | 79810 | 79820 | 79830 | 79840 |  |
| Human       | TAGCTTTTAAGTTCGAGTTTTTGTGTTGAGTTTTA-                                                       | - - - - -              | TACTAAAATTATACTTTCACTAATTTTTATTTTTTGT       | 63960 |       |       |       |       |  |
| PolarBear   | TGTCTTTTATGTGCAGGTCTTCATTGTTGGGTTTTA-                                                      | - - - - -              | TTGTCGAAGTCCTG- - - TTTCTTGCTAATTTTCATTCCCT | 24635 |       |       |       |       |  |
| Cow         | AGATATTTGGCAGT- CAACCTCTTTGATAGAACCTG-                                                     | - - - - -              | GCCCCAAAGAAACT- - - GCTTGTTTTGAAGTTAGTCATT  | 59721 |       |       |       |       |  |
| Dog         | TGTTTTTTATGTGCAGGTCTTCATTGTTGGGTTTTA-                                                      | - - - - -              | TTGTCGAAGTCCTG- - - TTTCTTGATAATTTTCATTCCCT | 55004 |       |       |       |       |  |
| BelugaWhale | AGATATTTGGCAGT- CAACCTCATTGAAAGAACTCA-                                                     | - - - - -              | GCCCCAAAGAAACTCT- GCTTATTGTGAAGTTAGTGATT    | 54869 |       |       |       |       |  |
| Donkey      | AGCCTATCACAAA- TCTCATTGATTCTAGATCCTAAATTTCTATTGAATCTATCCT-                                 | TTTGTCTTCAACTCTCTTGCCA | 60399                                       |       |       |       |       |       |  |
| Cat         | TGGCTTTTATGTGCAGGTCTTCAATATTGGGTTTTA-                                                      | - - - - -              | TTGTCGAAATCCTA- - - TTTCTTGCTAATTTTCATTCCCT | 61975 |       |       |       |       |  |
| Ferret      | TGTCTTTTATATGCAGGTCTTCATTGCTGGGTTTTG-                                                      | - - - - -              | TTGTCGAAGTCCTG- - - TTTCTTATTAATTTTCATTCCCT | 62413 |       |       |       |       |  |
| Lion        | TGGCTTTTATGTGCAGGTCTTCAATATTGGGTTTTA-                                                      | - - - - -              | TTGTCGAAATCCTA- - - TTTCTTGCTAATTTTCATTCCCT | 59456 |       |       |       |       |  |
| Vaquita     | AGATATTTGGCAGT- CAACCTCATTGAAAGAACTCA-                                                     | - - - - -              | GCCCCAAAGAAACTCT- GCTTATAGTGAAGTTAGTGATT    | 56218 |       |       |       |       |  |
| Pig         | TATTTTCCCACTGTACAGCAAGGGGGTCAAGTTATC-                                                      | - - - - -              | CTCACATGTATACA- - - TTACAATTACAGTTTTCCCCC   | 52935 |       |       |       |       |  |



Dienstag, 3. Mai 2022 08:40

| Majority    | TAAAAGTAGGG- - ATTATACT- - - CGACCTG- - ATCTTCCATCTGGGGATGGACA- - - - - - - - - - - ACC- TGCATTGGA                                                                     |       |
|-------------|------------------------------------------------------------------------------------------------------------------------------------------------------------------------|-------|
|             | 80010                  80020                  80030                  80040                  80050                  80060                  80070                  80080 |       |
| Human       | TAAAAGTAGGG- - ATTATACT- - - CGACCTG- - ATCTTCCATCTGGGGATGGACA- - - - - - - - - - - ACC- TGCATTGGA                                                                     | 64146 |
| PolarBear   | TAAAAGTAGGG- - ATTATACT- - - CGACCTG- - ATCTTCCATCTGGGGATGGACA- - - - - - - - - - - GCC- TGCATTGGA                                                                     | 24821 |
| Cow         | TAGAGACATAG- - ATTCTATTACATGACTCGCCATTTCCCCTATAGGAATGAGTA- - - - - AATGAAGACC- TATTTTCGG                                                                               | 59924 |
| Dog         | TAAAAGTAGGG- - ATTATACT- - - CGACCTG- - ATCTTCCATCTGGGGATGGACA- - - - - - - - - - - ACC- TGCATTGGA                                                                     | 55190 |
| BelugaWhale | GAGAGATATAG- - ATTCTATTACTTGGCTCAACATTTCCCCTATAGGAATGAGTA- - - - - AAAGAAGACC- TGTTTTCAA                                                                               | 55095 |
| Donkey      | TTAATGCAGAGTGACCTGGGCTGCTAGTCTATGAATCACAGTTT GAGTAGCACTGATCTAAGCCATCATCATCTCTTAAA                                                                                      | 60622 |
| Cat         | TAAAAGTAGGG- - ATTATACT- - - CGACCTG- - ATCTTCCATCTGGGGATGGACA- - - - - - - - - - - ACC- TGCATTGGA                                                                     | 62161 |
| Ferret      | TAAAAGTAGGG- - ATTATACT- - - CGACCTG- - ATCTTCCATCTGGGGATGGACA- - - - - - - - - - - GCC- TGCATTGGA                                                                     | 62599 |
| Lion        | TAAAAGTAGGG- - ATTATACT- - - CGACCTG- - ATCTTCCATCTGGGGATGGACA- - - - - - - - - - - ACC- TGCATTGGA                                                                     | 59642 |
| Vaquita     | GAGAGATATAG- - ATTCTATTACTTGGCTCAACATTTCCCCTATAGGAATGAGTA- - - - - AAATAAGACC- TATTTTCAA                                                                               | 56444 |
| Pig         | CAGCCACAGTC- - TTTTCTCCAAGTCCATGATTTTCTTTTCTGAGGAGATGTTCATTTGTGCTGGATATT- AGATTCCAG                                                                                    | 53152 |

  

| Majority    | CCC- - - AGCTATTGCTGCAGCAT- - - - - - TTGCCAAGGAGACTTCTCTC- - - TTAGGTATGATT- - - - - - - - - - -                                                                      |       |
|-------------|------------------------------------------------------------------------------------------------------------------------------------------------------------------------|-------|
|             | 80090                  80100                  80110                  80120                  80130                  80140                  80150                  80160 |       |
| Human       | CCC- - - AGCTATTGCTGCAGCAT- - - - - - TTGCCAAGGAGACATCCCTC- - - TTAGGTATGATTT- - - - - - - - - - -                                                                     | 64199 |
| PolarBear   | CCC- - - AGCTATTGCTGCAGCAT- - - - - - TTGCCAAGGAAACATCCCTC- - - TTAGGTATGATT- - - - - - - - - - -                                                                      | 24873 |
| Cow         | TGCTTTGTTTGCTTTTACAGCAG- - AGTATTGAATTAATTACTTATTAGGTATTGAATAAGAAT- - - TAATTACTTATGA                                                                                  | 59999 |
| Dog         | CCC- - - AGCTATTGCTGCAGCAT- - - - - - TTGCCAAGGAGACCTCCCTC- - - TTAGGTATGATT- - - - - - - - - - -                                                                      | 55242 |
| BelugaWhale | TGCTTTGTTTGTCTTTACAGAAG- - AGTATTGAATTAAT- ACTTATATTA CTCTGGCTGAGAG- - - - - - - - - - -                                                                               | 55155 |
| Donkey      | TCTCTGTTTCATTGGCCTTCTGACTAACTCACCGCTTTGACTTCTTCTTCCACACCTGTTGCT- - - - - TTTCCACAGA                                                                                    | 60696 |
| Cat         | CCC- - - AGCTATTGCTGCAGCAT- - - - - - TTGCCAAGGAGACCTCTCTC- - - TTAGGTATGATT- - - - - - - - - - -                                                                      | 62213 |
| Ferret      | CCC- - - AGCTATTGCTGCAGCAT- - - - - - TTGCCAAGGAGACATCCCTC- - - TTAGGTATGATT- - - - - - - - - - -                                                                      | 62651 |
| Lion        | CCC- - - AGCTATTGCTGCAGCAT- - - - - - TTGCCAAGGAGACCTCTCTC- - - TTAGGTATGATT- - - - - - - - - - -                                                                      | 59694 |
| Vaquita     | TGCTTTGTTTGTCTTTACAGAAG- - AGTATTGAATTAAT- ACTTACATTA CTCTGGCTGAGAG- - - - - - - - - - -                                                                               | 56504 |
| Pig         | TAATAAGTGATATCATATGGTATTTATCTTTGTCTTTCTGGCTCATTTCACTCAGGATGAGATTCTCTAGTTCCATCCAT                                                                                       | 53232 |

Dienstag, 3. Mai 2022 08:40

|             |                                                                                                           |       |       |       |       |       |       |       |
|-------------|-----------------------------------------------------------------------------------------------------------|-------|-------|-------|-------|-------|-------|-------|
| Majority    | - - - - - T - - - - TTATTGTCTATACCACTTT - - - - - T - - - - CTCCCATTT - - - TGCCAX- ATGGGAA- AGTGCC       |       |       |       |       |       |       |       |
|             | 80170                                                                                                     | 80180 | 80190 | 80200 | 80210 | 80220 | 80230 | 80240 |
| Human       | - - - - - TTATTGTCTTAACCACTTT - - - - - T - - CTCCCATTT - - - TGCCAA- ATGGAAA- - - AGTA 64245             |       |       |       |       |       |       |       |
| PolarBear   | - - - - - T - - - - TTATTGTCTATACCACTTT - - - - - T - - - - CTCCCATTT - - - TGCCAA- ATGGGAA- GGTGCC 24922 |       |       |       |       |       |       |       |
| Cow         | AGTATTG- AATTAATATTTATATTACTCTGCCTGAGAGAGTTGATACTTCCCATTCTCATGTGATGATAGGTGCTTTCCC 60078                   |       |       |       |       |       |       |       |
| Dog         | - - - - - T - - - - TTATTGTCTATACCACTTT - - - - - T - - - - CTCCCATTT - - - TGCCAA- ATGGGAA- AGTGCC 55291 |       |       |       |       |       |       |       |
| BelugaWhale | - - - - - AGTTGATACT - - - - - T - - - GGTTTTCATTCTCATATGATGATAGGTACATTGCC 55201                          |       |       |       |       |       |       |       |
| Donkey      | GT - - - - - ACTAAGAATGATCTCAACTAAAAATCGTCTTTCTTCCATTCTCACTGCCCTTCAGTGACTGAGT- CTTGTC 60768               |       |       |       |       |       |       |       |
| Cat         | - - - - - T - - - - TTATTGTCTATACCACTTT - - - - - T - - - - CTCCCATTT - - - TGCCAA- ATGGGAA- AGTGCC 62262 |       |       |       |       |       |       |       |
| Ferret      | - - - - - T - - - - TTATTGTCTATACCACTTT - - - - - T - - - - CTCCCATTT - - - TGCCAC- GTGGAAA- GGTGCC 62700 |       |       |       |       |       |       |       |
| Lion        | - - - - - T - - - - TTATTGTCTATACCACTTT - - - - - T - - - - CTCCCATTT - - - TGCCAA- ATGGGAA- AGTGCC 59743 |       |       |       |       |       |       |       |
| Vaquita     | - - - - - AGTTGATACT - - - - - T - - - GGTTTTCATTCTCATATGATGATAGGTACATTGCC 56550                          |       |       |       |       |       |       |       |
| Pig         | GTTGCTGCAAATGGCATT- ATGTCATTCTTTTTTA- - - TG- - GCTGAGTGCTATTC- CATGGTGT- ATATATACCACATC 53304            |       |       |       |       |       |       |       |

|             |                                                                                                  |       |       |       |       |       |       |       |
|-------------|--------------------------------------------------------------------------------------------------|-------|-------|-------|-------|-------|-------|-------|
| Majority    | T - - - - - ATTXAAATCCCAGTAAGTATAATGAATCCTTC - - - - ATTTTGGAAATTTAXGAAATT - - - GTGTTAGG        |       |       |       |       |       |       |       |
|             | 80250                                                                                            | 80260 | 80270 | 80280 | 80290 | 80300 | 80310 | 80320 |
| Human       | C - - - - - CAGTAAGTATAATGAATCCCCC - - - ATTTTGGACCTTACCAAATT - - - GTGTTAGG 64297               |       |       |       |       |       |       |       |
| PolarBear   | T - - - - - GTTAAACTCC- AGTAAGTATAATGAATCCCC - - - ATTTTGGAAATTTAAGAAATT - - - GTGTTAGG 24982    |       |       |       |       |       |       |       |
| Cow         | TAATTCAAATAGAATTCAAATCCTGATGTGCATGTAGTCTCTTTATGTGAATATAGAAATGGGGAAACT - - TGTGTTGAA 60156        |       |       |       |       |       |       |       |
| Dog         | T - - - - - GTTAAACTCC- AGTAAGTATAATGAATCCCTC - - - ACTTTGTAATTTAGCAAATT - - - GT - - TGGG 55349 |       |       |       |       |       |       |       |
| BelugaWhale | TAATTCAAATATAATTCAAATCTGATGTGTATGTAGTCCCTTTAAGTGAGTTT - - - TCATCAGTAAT - - - TATTGAA 55273      |       |       |       |       |       |       |       |
| Donkey      | TTTAGTATAAAGTCCCTCATTCTTAACATGGTTTACAGAACTTTAAATCAATCCTCAGTTTGCCTCTCTG - - GTCTCATC 60846        |       |       |       |       |       |       |       |
| Cat         | T - - - - - ATTAAAACACTACAGTAAGTATAATAAATCCTCC - - - ATTTTGGAAATTTAAGAAATT - - - GTGTTAGG 62323  |       |       |       |       |       |       |       |
| Ferret      | T - - - - - GTTAAACTCCCAGTAAGTATAACGAATACCCC - - - ATTTTGGAAATTTAAGAAATT - - - GTGTTAGG 62761    |       |       |       |       |       |       |       |
| Lion        | T - - - - - ATTAAAACACTACAGTAAGTATAATAAATCCTCC - - - ATTTTGGAAATTTAAGAAATT - - - GTGTTAGG 59804  |       |       |       |       |       |       |       |
| Vaquita     | TAATTCAAATATAATTCAAATCCTGATGTGTATGTAGTCCCTTTAAGTGAGTTT - - - TCATCGGTAAT - - - TATTGAA 56622     |       |       |       |       |       |       |       |
| Pig         | T - - TCCGAATCCAAT- CATCTGTGATGGACATTTGGGTTGTTCCATGTCTTGGCTATTGTGAATAGTGCTGCAATGAA 53381         |       |       |       |       |       |       |       |

Dienstag, 3. Mai 2022 08:40

| Majority    | T- X- - - - - TTTAATT- T- - - - - TT- - - - - TTT- - - - - TTTTTTTA- XTAAGATG- CATATGAATGCTGTTGGGAGA- - - - - |       |
|-------------|---------------------------------------------------------------------------------------------------------------|-------|
|             | 80330 80340 80350 80360 80370 80380 80390 80400                                                               |       |
| Human       | TTT- - - - - CGTGAGTTT- - - - - TCT- - - - - TTTTCTCAAGTGAGAAGGCATATGAATACTGTTAAGAAA- - - - AAC               | 64354 |
| PolarBear   | T- - - - - TTTATTTTAA- - TTTTACTCT- - - - TTTTTTAGATAAAGAGG- CATTGAAAGCTGTTGGGAGG- - - - -                    | 25041 |
| Cow         | T- TGTGTTTTTAAGT- TAGCTTTTAGCTTGGTAAATATATTCACCTAAAT- - CTTAATTTTGTATGTTAAAGG- - AAAGG                        | 60230 |
| Dog         | T- - - - - TTTATTTAT- - - - - TTTTTTAGATAAAGAGG- CATATGAATGCTGTTGGGAGA- - - - -                               | 55396 |
| BelugaWhale | ATTG- - - - - GTGAAC- - - - - TTGGGTTG- - AATTGTGTTT- - TTAGGT- - - - TAGTTTTTAGCTTGGTAAA- - - - -            | 55326 |
| Donkey      | TCCCATCTTTTAATTATATTGAACCTCTTTAAATACTTTGCATATACTGTA- TTTTTTCTCTGATCTCTCAGG- - - - -                           | 60918 |
| Cat         | T- - - - - TATTTT- - - - - TTTTT- - - - - TATGATG- TATATGAATGCTGTTGGGAGA- - - - -                             | 62364 |
| Ferret      | T- - - - - TTTACTTTT- - - - - TTTTTTTTTT- - - - - TTTTTTAAGATAAAGGAG- CATTCAATGCTGTTGGGAGA- - - - -           | 62819 |
| Lion        | T- - - - - TATTATTAT- - - - - TAT- - - - - TTTTTT- - - - - TATGATG- CATATGAATGCTGTTGGGAGA- - - - -            | 59851 |
| Vaquita     | ATTG- - - - - GTGAAC- - - - - TTGGGTTG- - AATTGTGTTT- - TTAGGT- - - - TAGTTTTTAGCTTGGTAAA- - - - -            | 56675 |
| Pig         | CATGCGGGTGCATGTGTCTCTTTTAAAGTAG- - AGTTTTGTCCAGATAGATG- CCCAAGAGTGGGATTGCGGGTCATATG                           | 53458 |

| Majority    | - - - - - AAAACTTAAAGTGTTAX- - - - - TAAAAATTCTATCX- - - - - GCTXTAT- TCTTTTCATC- - - - - A             |       |
|-------------|---------------------------------------------------------------------------------------------------------|-------|
|             | 80410 80420 80430 80440 80450 80460 80470 80480                                                         |       |
| Human       | CCAAAGTATTCTTTATAAGTCTAA- - - - - TTAAAATTATATGT- - - - TAGTTTTGTTCTTTTAATACCTTCAG- - - C               | 64420 |
| PolarBear   | - - - - - AAAACCTAAAGTGTTAA- - - - - TAAAAAATCTATTA- - - - - GCTGTAT- TCCTTTCACC- - - - - A             | 25090 |
| Cow         | GTTTTCTCTTTTACAGAGTGGGAGTATTTTAAATATAAATTTT- - - - TAACTATAA- ACTTTATATACAAAGCAGCTA                     | 60305 |
| Dog         | - - - - - AAAACCTAAAATGTTA- - - - - TGAAAATTCTGTCA- - - - - GCTGTAT- TCCTTTCACT- - - - - G              | 55444 |
| BelugaWhale | - - - - - TATATTCACA- - - - - TAAATCTTAACTTT- - - - - TTTTGA- ATTTTATTTT- - - - - A                     | 55367 |
| Donkey      | - - - - - TTTGCAACTTGCTAACCCA- - - - - TTTGCTGATATTGCTTTCT- - - - - CTTCATCTCTTTATGCC- - - A- - - - - G | 60976 |
| Cat         | - - - - - AAAGCTTAAAGTGTTAA- - - - - TTACAGTTCTATCA- - - - - GCTATAT- TCCTTTCATC- - - - - A             | 62413 |
| Ferret      | - - - - - AAAACCTAAAGTGTTA- - - - - TGAAAATTCTGTCA- - - - - GCTGTAT- TCCTTTCACC- - - - - G              | 62867 |
| Lion        | - - - - - AAAGCTTAAAGTGTTAA- - - - - TTACAGTTCTATCA- - - - - GCTATAT- TCCTTTCATC- - - - - A             | 59900 |
| Vaquita     | - - - - - TATATTCACA- - - - - TAAATCTTAACTTT- - - - - TTTTGA- ATTTTATTTT- - - - - A                     | 56716 |
| Pig         | GAAGTTCTATGTATAGATTTCTAAGGTATCTCCAAACTGTTCTCCATAGTGGCTGTACCAGTTTACATTCCCACCAGCAG                        | 53538 |

Dienstag, 3. Mai 2022 08:40

| Majority    | TXCTCA- - - - TTTTCTTXXTTCCAAAATAAAAG- - - - - AAGAXAAGT- - - - - TCT- - - - -        |                       |                    |              |       |       |       |       |  |
|-------------|---------------------------------------------------------------------------------------|-----------------------|--------------------|--------------|-------|-------|-------|-------|--|
|             | 80490                                                                                 | 80500                 | 80510              | 80520        | 80530 | 80540 | 80550 | 80560 |  |
| Human       | TTCTCTTCCATGCCACTCTCCAGAACA                                                           | AAAAG- - - - -        | AAGAAAAGC- - - - - | TCT- - - - - | 64464 |       |       |       |  |
| PolarBear   | TCCTCA- - - - TTTTCTC- TCCAAAATGAAAG- - - - -                                         | AAGAAAAGC- - - - -    | TCT- - - - -       | 25129        |       |       |       |       |  |
| Cow         | TTGAGG- - - - TTTTCTTTTCCATAACAGAAC- ACTCTTGACTATTTTAAAGTGTTTCAGTTACGTTCTTCT- - CCAAT | 60378                 |                    |              |       |       |       |       |  |
| Dog         | TCCTCA- - - - TTTTTTCTCCAAAATGAAAG- - - - -                                           | AAGAAAAGT- - - - -    | TCT- - - - -       | 55484        |       |       |       |       |  |
| BelugaWhale | TTTAGT- - - - - TTTTTGTACAGCAGGTT- - - - -                                            | CTTATTATCTGT- - - - - | TTT- - - - -       | 55405        |       |       |       |       |  |
| Donkey      | CTCCTCCTTCCCTTCCCTCTTTCAAGTTTCAGT- - - - -                                            | TTAGAAGT- - - - -     | CTCT- - - - -      | 61020        |       |       |       |       |  |
| Cat         | TCCTCA- - - - GTTTCTC- TGTCAAATAAAAG- - - - -                                         | AAGA- - - GC- - - - - | TCT- - - - -       | 62449        |       |       |       |       |  |
| Ferret      | TCCTCA- - - - TGTTCTT- TCCAAAATAAGAG- - - - -                                         | AAGAAAAGC- - - - -    | TCT- - - - -       | 62906        |       |       |       |       |  |
| Lion        | TCCTCA- - - - GTTTCTC- TGT- - - - TAAGAG- - - - -                                     | AAGA- - - GC- - - - - | TCT- - - - -       | 59931        |       |       |       |       |  |
| Vaquita     | TTTAGT- - - - - TTTTTGTACAGCAGGTT- - - - -                                            | CTTATTATCTGT- - - - - | TTT- - - - -       | 56754        |       |       |       |       |  |
| Pig         | TGCAGGAGGGTTCCTTTCTCCACAGCTCCTCCAGCACTTGTTATTTGTGGATTTATTAATGATGGCCATTCTGACTGGT       | 53618                 |                    |              |       |       |       |       |  |

| Majority    | - - - - - AATGAAGAAATACT- - - - - X- TGTA- - - AAGTXATTTTTACACGTT- - - - - AAATTTG      |                                        |         |       |       |       |       |       |  |
|-------------|-----------------------------------------------------------------------------------------|----------------------------------------|---------|-------|-------|-------|-------|-------|--|
|             | 80570                                                                                   | 80580                                  | 80590   | 80600 | 80610 | 80620 | 80630 | 80640 |  |
| Human       | - - - - - AATGAAGAAATACTGTTGAATTCTT- - AATGCCATATTTACACTTT- - - - -                     | AAACTTG                                | 64515   |       |       |       |       |       |  |
| PolarBear   | - - - - - CATGAAGAAATACT- - - - -                                                       | GTT- - - GAGTTCTTATTTACGTT- - - - -    | AAATTTG | 25171 |       |       |       |       |  |
| Cow         | A- - ATACAGCCATTAAAATAGT- CATACTGAAGTAATATA- AAAATTCTCTTTCAAACATC- - - AAGTGTGAAAAATACG | 60451                                  |         |       |       |       |       |       |  |
| Dog         | - - - - - AGAGAAGAAATACT- - - - -                                                       | GTT- - - GAGTT- - TATTTACGTT- - - - -  | GAACTTG | 55524 |       |       |       |       |  |
| BelugaWhale | - - - A- - - - - TACATATT- - - - -                                                      | AGTGTATACATGTCAATCCAATCTCCC- - - - -   | AGTTCA  | 55448 |       |       |       |       |  |
| Donkey      | - - - - - T- - ATC- - - - -                                                             | AGAGAGGTCTTTTCATAACCTTT- - C- - - - -  | AACTAG  | 61054 |       |       |       |       |  |
| Cat         | - - - - - AATAAAGAAATACT- - - - -                                                       | GTT- - - GAGTT- - ATTTACACGTT- - - - - | AAACTTG | 62489 |       |       |       |       |  |
| Ferret      | - - - - - AATGAAGAGATACTA- - - TACTGTA- - - GAGTTGTTATTTTCATGTT- - - - -                | AAATTTG                                | 62953   |       |       |       |       |       |  |
| Lion        | - - - - - AATAAAGAAATACT- - - - -                                                       | GTT- - - GAGTT- - ATTTACACGTT- - - - - | AAACTTG | 59971 |       |       |       |       |  |
| Vaquita     | - - - A- - - - - TACATATT- - - - -                                                      | AGTGTATACATGTCAATCCAATCTCCC- - - - -   | AATTCTG | 56797 |       |       |       |       |  |
| Pig         | GTGAGGTGGTATCTCATGGAACACACCCTCACACCATGCACAAAATAAACTCAAATGGCTGAAAGACTTAAATATACG          | 53698                                  |         |       |       |       |       |       |  |





Dienstag, 3. Mai 2022 08:40

| Majority    | ----- ATAGAAACAXTGAAAAGTXAACAGATAAAACAT----- GTAATAGTATT- AGTCATA----- GG |                                                         |                            |            |          |       |       |       |  |
|-------------|---------------------------------------------------------------------------|---------------------------------------------------------|----------------------------|------------|----------|-------|-------|-------|--|
|             | 80810                                                                     | 80820                                                   | 80830                      | 80840      | 80850    | 80860 | 80870 | 80880 |  |
| Human       | ----- ATGGAAACAGT                                                         | GAAATGTTAAGAGACAAAACAT-                                 | ----- ACATAATGGGTGG-       | AGGCATATG- | ----- GG | 64653 |       |       |  |
| PolarBear   | ----- ATAGAAACAGT                                                         | GAAAAGTGAACAGGTAACAT-                                   | ----- GTAATGGAAAGT-        | AGTCATAA-  | ----- TG | 25312 |       |       |  |
| Cow         | TA                                                                        | CTTCTTCTAATAAAAAAATCAACAATATATTCTCCTGTTGTGTAGTTTGTCCAAG | 60684                      |            |          |       |       |       |  |
| Dog         | ----- ATAGAAGCAAT                                                         | GAAAAGTGAATAGACCAAAC-                                   | ----- GTAACAGGAGT-         | AGTCATAG-  | ----- GG | 55661 |       |       |  |
| BelugaWhale | ----- A-                                                                  | TTAAAGGAACGGGTTTTCTTTTTTTAGAGTGG-                       | ----- GAATATTTT-           | AATTAT-    | ----- AA | 55556 |       |       |  |
| Donkey      | ----- TCTCTGCTACTTTTCTAGAACCTAGCATAAGGTAT-                                | ----- GGCATATTGTA-                                      | AATATTA-                   | ----- GG   | 61228    |       |       |       |  |
| Cat         | ----- ACAGAAACGGT                                                         | GAAAAGTGAACAGGTGAAACAT-                                 | ----- GTAATGGGATT-         | AGTCATAT-  | ----- GG | 62629 |       |       |  |
| Ferret      | ----- ATAGAAACAGT                                                         | GAAAAGTGAAGAGGCCAAAACAC-                                | ----- GTAACGGAAGT-         | GGTCATA-   | ----- TG | 63094 |       |       |  |
| Lion        | ----- ACAGAAACGGT                                                         | GAAAAGTGAACAGGTGAAACAT-                                 | ----- GTAATGGGATT-         | AGTCATAT-  | ----- GG | 60111 |       |       |  |
| Vaquita     | ----- A-                                                                  | TTAAAGGAACGGGTTTTCTTTTTTTAGAGTGG-                       | ----- GAATATTTT-           | AATTAT-    | ----- AA | 56905 |       |       |  |
| Pig         | AAAGGAAACCAAAAAGAAAACAAAAGACA                                             | ACTTACAGAATGG-                                          | GAGAAAATAGTTTCAAATGATGCAA- | CGGACAAGG  | 53931    |       |       |       |  |

| Majority    | GTTTTTTCT-- ATA-- ATATTATAGCCTGTCTCTTAAAAAA----- CAATTTA----- AAC-- G--         |                                                                     |                    |           |       |       |       |       |  |
|-------------|---------------------------------------------------------------------------------|---------------------------------------------------------------------|--------------------|-----------|-------|-------|-------|-------|--|
|             | 80890                                                                           | 80900                                                               | 80910              | 80920     | 80930 | 80940 | 80950 | 80960 |  |
| Human       | ATTTTTTTT--                                                                     | GAAGCATATTGTAGTGGCCTTTTAAAAAA                                       | ----- CAATTTA----- | AACTAGA-- | 64706 |       |       |       |  |
| PolarBear   | GATTTT-----                                                                     | ATAGCCTGTCTGTTGAA-----                                              | CAATTTA-----       | AACTGGG-- | 25349 |       |       |       |  |
| Cow         | CTTCTGTCTAGCTGGAGTATAAATGGCGATTATATAGGAAGAGAAAAAACATAACAGCAGCATATTTTTTTATATGCTT | 60764                                                               |                    |           |       |       |       |       |  |
| Dog         | TTTTTTTCA--                                                                     | ACAC- ATATTATAGCCTATCTCTTAAAAAG-                                    | ----- CAATTTA----- | AACTAGG-- | 55713 |       |       |       |  |
| BelugaWhale | GCTTTATAT-----                                                                  | ACATAAGGAGCTGTTATAGAGGTT-----                                       | 55589              |           |       |       |       |       |  |
| Donkey      | GTTTTTTTC-                                                                      | ATCCCATGTCATAGCTTTCCAGCACCTGG- TG-                                  | TGCTGCA-----       | 61276     |       |       |       |       |  |
| Cat         | GTTTTTTTCA--                                                                    | ATG- ATATTATAATCTGTCTCTTAAAAAA                                      | ----- CAATTTA----- | AAC-- G-- | 62677 |       |       |       |  |
| Ferret      | GATTTTTTT--                                                                     | CAAT- ATATTATAGCGTGTCTCTTAAAAAA                                     | ----- CAATGTA----- | AACTAGG-- | 63146 |       |       |       |  |
| Lion        | GTTTTTTTCA--                                                                    | ATG- ATATTATAATCTGTCTCTTAAAAAA                                      | ----- CAATTTA----- | AAC-- G-- | 60159 |       |       |       |  |
| Vaquita     | GCTTTATAT-----                                                                  | ACATAAGGAGCTATTATAGAGGTT-----                                       | 56938              |           |       |       |       |       |  |
| Pig         | GCTTAATCT-                                                                      | CTAGAATATATAAACAACTTACACAATCCAACAGCAAAAAGCCAATCAATCAATGGAAAATGGGCAA | 54009              |           |       |       |       |       |  |

Dienstag, 3. Mai 2022 08:40

| Majority    | - AAGAATTTTCTAT- - - - - AAAATTTATTA- - - - - TGXTTATTXAXATTTTGTC- - - - - TTA- - - - - |                                                         |                 |           |                         |                  |           |           |       |  |
|-------------|-----------------------------------------------------------------------------------------|---------------------------------------------------------|-----------------|-----------|-------------------------|------------------|-----------|-----------|-------|--|
|             | 80970                                                                                   | 80980                                                   | 80990           | 81000     | 81010                   | 81020            | 81030     | 81040     |       |  |
| Human       | - AGAAATTTTCTGT-                                                                        | - - - - -                                               | AAAATTAATTT-    | - - - -   | TGCTATTTCTTTGCATTTTGTC- | - - - - -        | TTA-      | - - - - - | 64755 |  |
| PolarBear   | - AAGAATTTTCTAT-                                                                        | - - - - -                                               | AAAATTTTTTT-    | - - - - - | TG- - -                 | TATTCACATTTTGTC- | - - - - - | TTA-      | 25393 |  |
| Cow         | TATATGCCTTTTTCTGTGCTTTATAAATTCATGATACTTGCACACATGGTCTTTTATC-                             | - TAATCCTTACAATAATCCT 60842                             |                 |           |                         |                  |           |           |       |  |
| Dog         | - AAGAATTTTCTAT-                                                                        | - - - - -                                               | AAAATTTATTT-    | - - - - - | TGGTTTTCTCTTTTTTTGTC-   | - - - - -        | TTA-      | - - - - - | 55760 |  |
| BelugaWhale | - - - - TACTTTTTCC-                                                                     | - - - - -                                               | ATAACAGGGCA-    | - - - - - | CTCTTGATTATATTTTAGTC-   | - - - - - 55630  |           |           |       |  |
| Donkey      | GATAGGTCTCTTCCCA-                                                                       | - CCTTTCAACTAGCCATGAACATGTCAGTATATTATGGAATGAGTTGGTTCTA- | - - - - - 61344 |           |                         |                  |           |           |       |  |
| Cat         | - AAGAATTCGCTATG-                                                                       | - - - - -                                               | AAAATTTATTC-    | - - - - - | TGG- -                  | TATTCACATTTTGTC- | - - - - - | TCA-      | 62723 |  |
| Ferret      | - AAGAATTTTCTAT-                                                                        | - - - - -                                               | TAAATTTATTT-    | - - - - - | TGG- -                  | CATTTATGTTTTTC-  | - - - - - | TTA-      | 63191 |  |
| Lion        | - AAGAATTCGCTATG-                                                                       | - - - - -                                               | AAGATTTATTC-    | - - - - - | TGG- -                  | TATTCACATTTTGTC- | - - - - - | TCA-      | 60205 |  |
| Vaquita     | - - - - TACTTTTTTC-                                                                     | - - - - -                                               | ATAACAGGGCA-    | - - - - - | CTCTTGATTATATTTTAGTC-   | - - - - - 56979  |           |           |       |  |
| Pig         | AAGACAT- TTCTCCAAAGATATACAGATGGCCA- ACAAACACATGAAAAATGCTCATCATTGCTGATTATAAGAGAAAT       | 54087                                                   |                 |           |                         |                  |           |           |       |  |

| Majority    | - - - - - ATCATTATATTTTA- - - - - CTTGTTCTACAATG- GA- - TTTGAC- - - - TCACCTXACATA- - - - - |           |                                                  |           |                     |                  |                    |           |       |
|-------------|---------------------------------------------------------------------------------------------|-----------|--------------------------------------------------|-----------|---------------------|------------------|--------------------|-----------|-------|
|             | 81050                                                                                       | 81060     | 81070                                            | 81080     | 81090               | 81100            | 81110              | 81120     |       |
| Human       | - - - - - ATCATTATATTTTA- - - - -                                                           | - - - - - | CTTTGTACCACAATG- GA- -                           | - - - - - | CTTGAG- - - -       | CCACCTAATA-      | - - - - -          | - - - - - | 64803 |
| PolarBear   | - - - - - ATCATTATATTTCA- - - - -                                                           | - - - - - | CCTCATTCTACAATG- GA- -                           | - - - - - | TTTGAC- - - -       | TCA-             | - - - - -          | - - - - - | 25434 |
| Cow         | GCAAG- - GAAGCATGGCAGCCATTGTCA-                                                             | - - - - - | TCTGTCTTCCAGATTCTGAGATTAGAAAATATTAATAAATTGTTCAAG | 60917     |                     |                  |                    |           |       |
| Dog         | - - - - - ACCATTATATTTCA- - - - -                                                           | - - - - - | CTTTGTTCTCCAGTG- GA- -                           | - - - - - | TTTGAC- - - -       | TCACCACACACACAGA | 55816              |           |       |
| BelugaWhale | - - - - - T- - - -                                                                          | - - - - - | GTTTCAGTTACTTT- - - - -                          | - - - - - | CCTTCTTCAACAGTGTGA- | - - - - -        | CAATTAATAATAGTCATA | 55680     |       |
| Donkey      | - - - - - AACTTTGTAAATCAGTTCCTACGTTTTTATGCTTATTA- AAA-                                      | - - - - - | TGGTC- ATGTAAAATTAAGGCAAGGA                      | 61411     |                     |                  |                    |           |       |
| Cat         | - - - - - ATCATTATATTTCA- - - - -                                                           | - - - - - | CCTGTTCTACAATG- GA- -                            | - - - - - | TTTGAG- - - -       | TCACCTCCATA-     | - - - - -          | - - - - - | 62773 |
| Ferret      | - - - - - TTCATTATTTTTCA- - - - -                                                           | - - - - - | CCTCATTCTGCGATG- GA- -                           | - - - - - | TTTGAC- - - -       | TTACCTCACAGAA-   | - - - - -          | - - - - - | 63242 |
| Lion        | - - - - - ATCATTATATTTCA- - - - -                                                           | - - - - - | CCTGTTCTACAATG- GA- -                            | - - - - - | TTTGAG- - - -       | TCACCTCCATA-     | - - - - -          | - - - - - | 60255 |
| Vaquita     | - - - - - T- - - -                                                                          | - - - - - | GTTTCAGTTACTTT- - - - -                          | - - - - - | CCTTCTTCAACAGTGTGA- | - - - - -        | CAATTAATAATTCATA   | 57029     |       |
| Pig         | GCAAATTAAGTATTATTAATATAATGAAACTTTTTGTTCTTGATTTTGAAATTTTTCATGACTAGCTGAAGTTAGATAT             | 54167     |                                                  |           |                     |                  |                    |           |       |



Dienstag, 3. Mai 2022 08:40

| Majority    | -----T-----X-XTGAA-TGATTTATAACTT---AAGATGAAATTTTACAGTTTT---                      |       |       |       |       |       |       |       |       |
|-------------|----------------------------------------------------------------------------------|-------|-------|-------|-------|-------|-------|-------|-------|
|             | 81290                                                                            | 81300 | 81310 | 81320 | 81330 | 81340 | 81350 | 81360 |       |
| Human       | -----T--GTGCAAAGTGATTTATAAGTT---AAGATGGAATTTTACAGTTTCCTT                         |       |       |       |       |       |       |       | 64940 |
| PolarBear   | ---T-----GAGTGAA-TGATTTATAAATTT---AAGATGAAATTTTACAGTTTT---                       |       |       |       |       |       |       |       | 25559 |
| Cow         | TAATTTAAATATTTGCAGGTTTTTAAAATTGAAAGTATATTAGCACATATATTTAACTGGTTATATTTTATATTTAAGTA |       |       |       |       |       |       |       | 61155 |
| Dog         | ---T-----GAGTAAAGTGATTTATAAC-----AAGATGAAATTTTACAGTTTT---                        |       |       |       |       |       |       |       | 55956 |
| BelugaWhale | ---T-----ATTAATATAGGTCT-----GGTTTTACACACTTAA---                                  |       |       |       |       |       |       |       | 55769 |
| Donkey      | -----T-GCCTTCAAGTTTTGAGGAAGAAAATTTACGGTATT---                                    |       |       |       |       |       |       |       | 61565 |
| Cat         | -----TGAG-TGATTTATAACTT---GGGATGAAATTTT-AGTTTT---                                |       |       |       |       |       |       |       | 62906 |
| Ferret      | ---T-----GAGTGAAGTGATCTATAACTT---AAGATGCAATTTTACAGTTCT---                        |       |       |       |       |       |       |       | 63372 |
| Lion        | -----TGAG-TGATTTATAACTT---AGGATGAAATTTT-AGTTTT---                                |       |       |       |       |       |       |       | 60387 |
| Vaquita     | ---T-----ATTAATATAGGTCT-----GGTTTTACACACTTAA---                                  |       |       |       |       |       |       |       | 57116 |
| Pig         | T--TTCACTCTGTTGTTAACTATGCGTCCTATGTCTTTACT-GTGTATCTTTTCTGATGTTTTTGTGTACTCTTCAA    |       |       |       |       |       |       |       | 54401 |

| Majority    | --ATTTGCTGTGTTTAGGAAXX-----TCTTGATATCTAATAT-----XTGTAA-----GATT                 |       |       |       |       |       |       |       |       |
|-------------|---------------------------------------------------------------------------------|-------|-------|-------|-------|-------|-------|-------|-------|
|             | 81370                                                                           | 81380 | 81390 | 81400 | 81410 | 81420 | 81430 | 81440 |       |
| Human       | TTATTTGATGTATTTCTTGA-----TT---TCTAGTAT-----TGGTAA-----GATT                      |       |       |       |       |       |       |       | 64980 |
| PolarBear   | --ATTTGCTGTGTTTGGGAAAT-----TCTTGATTTCTTATATA-----TTTGTA-----GATT                |       |       |       |       |       |       |       | 25607 |
| Cow         | GCACCTTCTATTTAAAGACA-----GTAGTATTTGTGGAAAACAATATACATACAGCTAGTGTAGCAAAGAAAAGAGT  |       |       |       |       |       |       |       | 61228 |
| Dog         | --ATTTGCTGTGTTTGGGAAAT-----TCTTGATTTCTGACAT-----GTGTAA-----GATT                 |       |       |       |       |       |       |       | 56002 |
| BelugaWhale | --TCTTGGTCTGCATAGATA-----T-CAG-----                                             |       |       |       |       |       |       |       | 55791 |
| Donkey      | --CTTCAAAGTGTGGTCCTA-TG-----TTCTTGTTATATAGATTGC-----TTATACAA-----AAT            |       |       |       |       |       |       |       | 61615 |
| Cat         | --ATTTGCTGTGTTTCAAGAGT-----TCTTGACATTTGATAT-----TTGTAA-----GATT                 |       |       |       |       |       |       |       | 62952 |
| Ferret      | --ATTTGCTGTGTTTGGGAAA-----TTGATTTCTTATATA-----TGTGTAA-----GATT                  |       |       |       |       |       |       |       | 63417 |
| Lion        | --ATTTGCTGTGTTTCAAGAAAT-----TCTTGACATTTGATAT-----TTGTAA-----GATT                |       |       |       |       |       |       |       | 60433 |
| Vaquita     | --TCTTGGTCTGCATAGATA-----T-CAG-----                                             |       |       |       |       |       |       |       | 57138 |
| Pig         | ACTTCCCTTTGCATAGACAAATTCGAGAAGTCTTTCTGCAAATTAAGTTGAGCTTTAACTGT-CAG--AAATATTGCAT |       |       |       |       |       |       |       | 54478 |

Dienstag, 3. Mai 2022 08:40

| Majority    | AT- - - CTTTAAATCATX- - - - - TTTGTGXCATATGGAACCC- - - - AATATTGATGAXTTATAAACT- AGCT       |       |       |       |       |       |       |       |       |
|-------------|--------------------------------------------------------------------------------------------|-------|-------|-------|-------|-------|-------|-------|-------|
|             | 81450                                                                                      | 81460 | 81470 | 81480 | 81490 | 81500 | 81510 | 81520 |       |
| Human       | AT- - - CTTTAAAGTCATG- - - - - ATTTTATATATATGGAACCTC- - - - AAAATTGATAGTTGACAAACT- AGCT    |       |       |       |       |       |       |       | 65040 |
| PolarBear   | AT- - - CTTTAAATCAGA- - - - - GTTCTGTCCATATGGAACCC- - - - AAAATTGATGAGTTATAAACT- AGCT      |       |       |       |       |       |       |       | 25667 |
| Cow         | ATGGAATTTGATCCCTT- - - TCCGGGCAACTTTTA- TTATGTACAGCTTTTC- - - ATTGTTGA- - GTTTTTTGTGAGAGT- |       |       |       |       |       |       |       | 61299 |
| Dog         | AT- - - GTTTAAATCAG- - - - - TTTCTGTCCATATGGAACCC- - - - AAGATTGATGAATTACAAACT- AGTT       |       |       |       |       |       |       |       | 56060 |
| BelugaWhale | - - - - - GCTTGATCTATT- - - - - T- ATGT- - - - - ATTGTTAT- - - - -                         |       |       |       |       |       |       |       | 55816 |
| Donkey      | GGGAGTCTCAGACCAT- - - - - CCTGAATTAACCTTAGCAT- - - - - AATTTTGGGGATTGGGAGCCCAATAC          |       |       |       |       |       |       |       | 61675 |
| Cat         | TT- - - CTTTAAATCAG- - - - - AGTGTGTCCATATGGAACCC- - - - AAGATTGAGGAGTTAAAAACT- AGCT       |       |       |       |       |       |       |       | 63010 |
| Ferret      | AT- - - CTTTAAATCAGC- - - - - ATTCCTGTCCATATGGAACCC- - - - AAGATTAATGAGTTATAAACT- AGCT     |       |       |       |       |       |       |       | 63477 |
| Lion        | TT- - - CTTTAAATCAG- - - - - AGTGTGTCCATATGGAACCC- - - - AAGATTGAGGAGTTAAAAACT- AGCT       |       |       |       |       |       |       |       | 60491 |
| Vaquita     | - - - - - GCTTGATCTATT- - - - - T- ATGT- - - - - ATTGTTAT- - - - -                         |       |       |       |       |       |       |       | 57163 |
| Pig         | ATATAGTTTAAATTTTTCTGTTAGCTCATTTGTAGTCATCTTAACCTCCACCAACTATTGACAGTACCTAGACTTCTTT            |       |       |       |       |       |       |       | 54558 |

| Majority    | CTTACAGTTT- - AGTTTATGTCCCTCAGTC- - A- - - AGAAAAAXCATTTTATAATTAAGTAGTTCTTGGA- - - - - AAT  |       |       |       |       |       |       |       |       |
|-------------|---------------------------------------------------------------------------------------------|-------|-------|-------|-------|-------|-------|-------|-------|
|             | 81530                                                                                       | 81540 | 81550 | 81560 | 81570 | 81580 | 81590 | 81600 |       |
| Human       | TTTACAATTT- - AGTTTATGTCTGTCTCATTTCAA- - AAGAAAAAATAG- - TATAATTAAGTAGTTATTGGA- - - - - AAT |       |       |       |       |       |       |       | 65107 |
| PolarBear   | CTTAGAGTTC- - AGTTTATGTCTCTCAGTCAGA- AAAAAAAAAAGCATATTATAATAAAGTAAT- CTTGCA- - - - - AGT    |       |       |       |       |       |       |       | 25736 |
| Cow         | CGTACTTTTTCTAATTTTTATCTCT- - - TAAAATTGCTGATATACTTTATTCACTTTTACAGGCCCTAGATGGTCAGAAT         |       |       |       |       |       |       |       | 61376 |
| Dog         | CTTACAGTTC- - AGTTTATATACCTCAGTCAGATAAAGAAAAACCATCTTATAATGAAGTAATTCTTGGA- - - - - AGT       |       |       |       |       |       |       |       | 56131 |
| BelugaWhale | - - - - - C- - - - - AGAAGAATTGTTTTCATTTTTGAGGT- - - - -                                    |       |       |       |       |       |       |       | 55843 |
| Donkey      | TCTGTTGTTTTTTGTTTTTTGTTTTGAAGTTGT- - - GGAACCCACAGC- TATATCAAAGCAGCTT- - - GAGTGACAGAGC     |       |       |       |       |       |       |       | 61748 |
| Cat         | CTTACAGTTT- - AGTTTGTGTCCCTCAGTC- - - - - AGAAAAAGCAT- - TATAATGAAGTAATTCTTATA- - - - - AAT |       |       |       |       |       |       |       | 63073 |
| Ferret      | CTTAGAGTTT- - AGTTTATGCCCTCAG- - - AA- AAAGAAAAAGTGTATTATAATGAAGTAATTCTTGCA- - - - - AGT    |       |       |       |       |       |       |       | 63544 |
| Lion        | CTTACAGTTT- - AGTTTGTGTCCCTCAGTC- - - - - AGAAAAAGCATATTATAATGAAGTAATTCTTAGA- - - - - AAT   |       |       |       |       |       |       |       | 60556 |
| Vaquita     | - - - - - C- - - - - AGAAGAATTGTTTTCATTTTTGAGGT- - - - -                                    |       |       |       |       |       |       |       | 57190 |
| Pig         | CCTTATGTTTTCAGCTCTTGTTCCCTCTCTTCTGTTGCTAATAGGCAGTTTTCATTTACATTGTTTGCTGATTTCTCTAAC           |       |       |       |       |       |       |       | 54638 |

Dienstag, 3. Mai 2022 08:40

| Majority    | AGATATA- TATTTACTGTA- - - - - GATATGTAACAXTTGTGXTTTC- - - - - AATTATAAATATGTAGTA- -     |       |       |       |       |       |       |       |       |
|-------------|-----------------------------------------------------------------------------------------|-------|-------|-------|-------|-------|-------|-------|-------|
|             | 81610                                                                                   | 81620 | 81630 | 81640 | 81650 | 81660 | 81670 | 81680 |       |
| Human       | ATTTA- - - - CTTCCC- - A- - - - - ATATATAACAGTCATGCCATC- - - - - AGTTTGTGAATATGAAATC- - |       |       |       |       |       |       |       | 65159 |
| PolarBear   | AGATACA- TATTTACTATA- - - - - GATATATAACAATTGTGCTGT- - - - - TATAAATATGTAGTAAA          |       |       |       |       |       |       |       | 25792 |
| Cow         | ATTTATAATGCTTGCTGTACCCTAAGGATTGATTTTTCCAAGCTTGTGAATTTGAATGTAAAATACAACAATGATAAAAG        |       |       |       |       |       |       |       | 61456 |
| Dog         | AGATATA- TATTTACTGTA- - - - - GATATGTAACAGTTCTGCTATC- - - - - TGTTGTAAATATGTAGTAA-      |       |       |       |       |       |       |       | 56190 |
| BelugaWhale | - - - - - G- - - - AATTATAGAGCT- - - - -                                                |       |       |       |       |       |       |       | 55856 |
| Donkey      | CAACCAAACCTTTCCATA- - - - - TGCTAGTTGTGTTCTTTAGCAATTACTTCAGATAATTGG- AGT                |       |       |       |       |       |       |       | 61809 |
| Cat         | AGATTTA- TATTTATTGTG- - - - - GATATGTAACAATGGTGTTC- - - - - CA- - TTGAAAGTGCAGTA- -     |       |       |       |       |       |       |       | 63129 |
| Ferret      | AGATATA- TATTT- TTGTA- - - - - GATATGTAACACTTGAACATC- - - - - CATTATAAATATGTAGTAA-      |       |       |       |       |       |       |       | 63602 |
| Lion        | AGATTTA- TATTTATTGTG- - - - - GATATGTAACAATGGTGTTC- - - - - CA- - TTGAAAGTGCAGTA- -     |       |       |       |       |       |       |       | 60612 |
| Vaquita     | - - - - - G- - - - AATTATAGAGCT- - - - -                                                |       |       |       |       |       |       |       | 57203 |
| Pig         | TCTTGTA- TCTTTGTTATACTATGTATCTTCGGTCTACATAATTT- TGTTTT- - - TTTTAATTAGAAGAATGTGCAATG    |       |       |       |       |       |       |       | 54713 |

| Majority    | T- - - - TAA- - - - - GTGATAT- - - ATCTXTGAACAGA- - - - - GACACC- - - - - TAATGC- - - - A      |       |       |       |       |       |       |       |       |
|-------------|------------------------------------------------------------------------------------------------|-------|-------|-------|-------|-------|-------|-------|-------|
|             | 81690                                                                                          | 81700 | 81710 | 81720 | 81730 | 81740 | 81750 | 81760 |       |
| Human       | T- - - - GTAA- - - - - GTGGTAT- - - ATATGTAGAGAGAGATACTCTAAGGCAGTTGG- - - TATT- - TGATTCTGGTAA |       |       |       |       |       |       |       | 65219 |
| PolarBear   | T- - - - AATAA- - - - TATGTAGTAAT- - AAACATGAACAGA- - - - - GACACC- - - - - TTATGC- - - - A    |       |       |       |       |       |       |       | 25835 |
| Cow         | TAGGGATTATACTCGACCTGATCTTCCATCTGGGGATGGACAACCTGCATTGGACCCAGCTATAGCTGCAGCATTG- - -              |       |       |       |       |       |       |       | 61533 |
| Dog         | T- - - - GTAA- - - - - GTGATAC- - - ATCCATGAACAAA- - - - - GACACC- - - - - TGATGC- - - - A     |       |       |       |       |       |       |       | 56228 |
| BelugaWhale | - - - - - A-                                                                                   |       |       |       |       |       |       |       | 55857 |
| Donkey      | TTCTTCCC- - - - - CTTAGCATTGCTTTATAAGAAA- - - - - AGAGC- - - - - AACTCA- - - - -               |       |       |       |       |       |       |       | 61852 |
| Cat         | - - - - - TAA- - - - - GTGATAC- - - ATCTGTGAACAGA- - - - - GACACCC- - - - - TAATGC- - - - A    |       |       |       |       |       |       |       | 63166 |
| Ferret      | T- - - - GTAA- - - - - GTGATAA- - - ATCCATTAACAGA- - - - - GACACC- - - - - TTATACTATAAA        |       |       |       |       |       |       |       | 63645 |
| Lion        | - - - - - TAG- - - - - GTGATAC- - - ATCTGTGAACAGA- - - - - GACACCC- - - - - TAATGC- - - - A    |       |       |       |       |       |       |       | 60649 |
| Vaquita     | - - - - - A-                                                                                   |       |       |       |       |       |       |       | 57204 |
| Pig         | TTTCTAGAAGGCTCT- CTTAACATTTAGCGTATTCAATTGCAGA- - TACTCGGCACTCAGCCTCTTTAAGAGAATTTCGGCT          |       |       |       |       |       |       |       | 54790 |





Dienstag, 3. Mai 2022 08:40

| Majority    | ATCATGAX- - - - - TTT- AACAGATTCTTAAGGTTGTX- - A- - - - - ATATTC                  |       |       |       |       |       |       |       |       |
|-------------|-----------------------------------------------------------------------------------|-------|-------|-------|-------|-------|-------|-------|-------|
|             | 81930                                                                             | 81940 | 81950 | 81960 | 81970 | 81980 | 81990 | 82000 |       |
| Human       | ATTATGAC- - - - - TGT- AGTAGATGCTTTAGGTCAC- - - - - TACACTC                       |       |       |       |       |       |       |       | 65355 |
| PolarBear   | ATCATGAT- - - - - TTT- AACAGATTGTTCAAGTTAAT- - A- - - - - ACATTC                  |       |       |       |       |       |       |       | 25975 |
| Cow         | ATGAATACTGTTGGAAGAAAAACCTAAATTTCATAAGTATAATTAAGTTGTGTACATTGCTTTTACCTATCTCATCTTC   |       |       |       |       |       |       |       | 61770 |
| Dog         | ATCATGAT- - - - - TTT- AACAGATTCTTTAG- - - - - CATTTC                             |       |       |       |       |       |       |       | 56358 |
| BelugaWhale | ATTCT- - - - - T- CTAATGAAAAATTAACAGTGTG- - - - - TTC                             |       |       |       |       |       |       |       | 55934 |
| Donkey      | ACACCTAATGAGTCTTGG- - - - - TGTCTGTAAACATCAGGCTTGATCTATG- - - - - CGTGTGTTG       |       |       |       |       |       |       |       | 62029 |
| Cat         | ATCATGAC- - - - - TTTAACAGAGTCTTAAGGTTGGT- - A- - - - - ATATTT                    |       |       |       |       |       |       |       | 63307 |
| Ferret      | ATCATGAT- - - - - TTT- AA- AGATTCTTTAGGTTAAT- - A- - - - - ACATTC                 |       |       |       |       |       |       |       | 63782 |
| Lion        | TTCATGAC- - - - - TTT- AACAGAGTCTAAAGGTTGGT- - A- - - - - ATATTT                  |       |       |       |       |       |       |       | 60784 |
| Vaquita     | ATTCT- - - - - T- CTAATGAAAAATTAACAGTGTG- - - - - TTC                             |       |       |       |       |       |       |       | 57281 |
| Pig         | CTGCTCATCTTTGAT- - - - - A- TTCGTATATTGGGTCGAGACAGTG- - ATTCTGTTAGGTGCCTTAGCATTTC |       |       |       |       |       |       |       | 55010 |

| Majority    | TTTTCTGACAG- - - - - AATCTCTA- T- - - - - CACTGTG- - - - -                         |       |       |       |       |       |       |       |       |
|-------------|------------------------------------------------------------------------------------|-------|-------|-------|-------|-------|-------|-------|-------|
|             | 82010                                                                              | 82020 | 82030 | 82040 | 82050 | 82060 | 82070 | 82080 |       |
| Human       | TTTCCTGACAG- - - - - AATCTCTACTAC- - - - - CTCTGTG- - - - -                        |       |       |       |       |       |       |       | 65385 |
| PolarBear   | TTTTCTGACAG- - - - - AATCTCTTAT- - - - - CACTGTG- - - - -                          |       |       |       |       |       |       |       | 26003 |
| Cow         | TCTCCAAAATAGAAGAGGAAAAGCTCTAATGAAAAATACTGTTGAGTTCTTAATAAACATTTACACTTTAAAGTCAT      |       |       |       |       |       |       |       | 61850 |
| Dog         | TTTTCTGACAG- - - - - AATTTCTA- - - - - TACTGTG- - - - -                            |       |       |       |       |       |       |       | 56384 |
| BelugaWhale | CC- - - - - CTGTT- - - - - C- - - - -                                              |       |       |       |       |       |       |       | 55942 |
| Donkey      | TTATCAGA- AG- - - - - AAGTGTTGTTTCATTTATACAGTAATTTATAGATCTAAACATGT- - - - - TCAT   |       |       |       |       |       |       |       | 62087 |
| Cat         | TTTTCTGACAG- - - - - AATCTCTA- T- - - - - CACAGTG- - - - -                         |       |       |       |       |       |       |       | 63334 |
| Ferret      | TTTTCTGACA- - - - - ATTCTCTTAT- - - - - CACTGTG- - - - -                           |       |       |       |       |       |       |       | 63809 |
| Lion        | TTTTCTGACAG- - - - - AATCTCTA- T- - - - - CACAGTG- - - - -                         |       |       |       |       |       |       |       | 60811 |
| Vaquita     | CC- - - - - CTGTT- - - - - C- - - - -                                              |       |       |       |       |       |       |       | 57289 |
| Pig         | CCTATAGGAAT- GAGTAAGGGAAGACCTATTTTCAGTGCTTTGTTTGCCTTTACAGCAGAGAATTG- AATTAATACTTAA |       |       |       |       |       |       |       | 55088 |

Dienstag, 3. Mai 2022 08:40

| Majority    | ----- T-- GG- ----- GTTTATTTTAAGCCTTTATTCCCTC----- AACTTGGCTTGTTX----- AXTT-        |       |       |       |       |       |       |       |
|-------------|-------------------------------------------------------------------------------------|-------|-------|-------|-------|-------|-------|-------|
|             | 82090                                                                               | 82100 | 82110 | 82120 | 82130 | 82140 | 82150 | 82160 |
| Human       | ----- T-- GT- ----- GTCTAGCTTAATTTCGTAATT-- C- ----- AAGTTAATAAGATT-----            | 65423 |       |       |       |       |       |       |
| PolarBear   | ----- T-- GC- ----- GCTTAGTTTTAAACCTTTATTCCCTC----- AACTTGGCTTGTT-----              | 26044 |       |       |       |       |       |       |
| Cow         | GCTATCTAGAAGCCATTGTGCATATTCAGTCTTAATTGTTTCAGTTAGATTGGAAAACCAATCTGATT-- GTTTCAGTTT   | 61928 |       |       |       |       |       |       |
| Dog         | ----- T-- GG- ----- GCTTAGTTTTAAGCCTTTATTCCCTC----- AACTTGGCTTGTTA----- AGTT-       | 56430 |       |       |       |       |       |       |
| BelugaWhale | ----- TCTAG- ----- TTCGTTCCAGGTTTCTATC-----                                         | 55966 |       |       |       |       |       |       |
| Donkey      | CATTTCTGACTG-- - TTGTATACAGTAAGTCTTTGTTCTTCTAAT----- GAAAAATTAATACATTC-- - CCCTGTT- | 62153 |       |       |       |       |       |       |
| Cat         | ----- T-- GG- ----- GCCTACTTTAAGCCTTTACTCCCTT----- AACTTGGCTTCTTA----- AATT-        | 63380 |       |       |       |       |       |       |
| Ferret      | ----- T-- GG- ----- GCTTAATTTAAACCTTTATTTCCCTC----- AGCTTGGCTTGTTA----- AGTT-       | 63855 |       |       |       |       |       |       |
| Lion        | ----- T-- GG- ----- GCCTACTTTAAGCCTTTACTCCCTT----- AACTTGGCTTCTTA----- AATT-        | 60857 |       |       |       |       |       |       |
| Vaquita     | ----- TCTAG- ----- TTCGTTCCAGGTTTCCATC-----                                         | 57313 |       |       |       |       |       |       |
| Pig         | TTACTCTGGCTGAGAGAGTTGGTCCTCGGCTTTCATT- CTCATGTGATGATAGGTACCTTCCCTAATTCAAATATAATTC   | 55167 |       |       |       |       |       |       |

| Majority    | ----- GAXTATTTTCGTAGTGTGC- CATTTTTA- XT-----                                       |       |       |       |       |       |       |       |       |
|-------------|------------------------------------------------------------------------------------|-------|-------|-------|-------|-------|-------|-------|-------|
|             | 82170                                                                              | 82180 | 82190 | 82200 | 82210 | 82220 | 82230 | 82240 |       |
| Human       | -----                                                                              | ----- | ----- | ----- | ----- | ----- | ----- | ----- | 65449 |
| PolarBear   | -----                                                                              | ----- | ----- | ----- | ----- | ----- | ----- | ----- | 26070 |
| Cow         | AGCCCTGCACAAAAA-- - AAACCCAGAAAGTTAACAGAGGC- AGCATATAATGGGAGTAGGTATATGGATTTTTCAAAC | 62004 |       |       |       |       |       |       |       |
| Dog         | -----                                                                              | ----- | ----- | ----- | ----- | ----- | ----- | ----- | 56456 |
| BelugaWhale | -----                                                                              | ----- | ----- | ----- | ----- | ----- | ----- | ----- | 55989 |
| Donkey      | -----                                                                              | ----- | ----- | ----- | ----- | ----- | ----- | ----- | 62183 |
| Cat         | -----                                                                              | ----- | ----- | ----- | ----- | ----- | ----- | ----- | 63406 |
| Ferret      | -----                                                                              | ----- | ----- | ----- | ----- | ----- | ----- | ----- | 63890 |
| Lion        | -----                                                                              | ----- | ----- | ----- | ----- | ----- | ----- | ----- | 60883 |
| Vaquita     | -----                                                                              | ----- | ----- | ----- | ----- | ----- | ----- | ----- | 57336 |
| Pig         | AAATCCTGATGTGTATGTAATCCTTTTAAGTGAGTTTTACCAGTATTGTATTGAACTAGGTGAACTTGTGTTTTAGAT     | 55247 |       |       |       |       |       |       |       |

Dienstag, 3. Mai 2022 08:40

| Majority    | ----- AAAGGT----- X- X----- X- A- XAA-----                                          |       |       |       |       |       |       |       |       |
|-------------|-------------------------------------------------------------------------------------|-------|-------|-------|-------|-------|-------|-------|-------|
|             | 82250                                                                               | 82260 | 82270 | 82280 | 82290 | 82300 | 82310 | 82320 |       |
| Human       | ----- AAGGC----- AA-----                                                            |       |       |       |       |       |       |       | 65456 |
| PolarBear   | ----- AAGGT----- AA-----                                                            |       |       |       |       |       |       |       | 26077 |
| Cow         | ATATCGTAGTCTTAAAACACAGGTTTAACTAGGA-- - AGAATTTTATATAAAAATTTTTTTTGGTATTTATTTGCATTTTG |       |       |       |       |       |       |       | 62081 |
| Dog         | ----- AAGGT----- AA-----                                                            |       |       |       |       |       |       |       | 56463 |
| BelugaWhale | ----- ATATAGGAACAGAAAAA----- ACATAA-----                                            |       |       |       |       |       |       |       | 56013 |
| Donkey      | ----- GGAGTAGAAATGATGATTATATAGAATCAGTGGGAAAAAACATAAT-----                           |       |       |       |       |       |       |       | 62229 |
| Cat         | ----- AGGT----- AA-----                                                             |       |       |       |       |       |       |       | 63412 |
| Ferret      | TTATT- TATTTATTTTTTAAAGATTTTATTTATT- - - - TATTTGACAGAGA-----                       |       |       |       |       |       |       |       | 63936 |
| Lion        | ----- AGGT----- AA-----                                                             |       |       |       |       |       |       |       | 60889 |
| Vaquita     | ----- ATATAGGAACAGAAAAA----- ACATAA-----                                            |       |       |       |       |       |       |       | 57360 |
| Pig         | TAGTTTTAGCTTGGTAAATATATTCATGTAAAACACTCAGTTTTGTATATTAAGAGTTTTCTTTCAGAGTGGGAATATT-    |       |       |       |       |       |       |       | 55326 |

| Majority    | ---- AGTCAX----- GAGTAX- - X- XGAGACATTTA- - GTGATA-----                            |       |       |       |       |       |       |       |       |
|-------------|-------------------------------------------------------------------------------------|-------|-------|-------|-------|-------|-------|-------|-------|
|             | 82330                                                                               | 82340 | 82350 | 82360 | 82370 | 82380 | 82390 | 82400 |       |
| Human       | ---- AGTCAG----- GAAT----- GAAAGA----- GTGAAA-----                                  |       |       |       |       |       |       |       | 65478 |
| PolarBear   | ---- AGTCAA----- GAGT----- GAGACAATCA- - GTGATA-----                                |       |       |       |       |       |       |       | 26103 |
| Cow         | TCTTAGTTATTATATTTTACCTCATTGAGCAATGGGTTTGACCCACCTAATAAAAAAACACAAATATTTGCAACTAATA     |       |       |       |       |       |       |       | 62161 |
| Dog         | ---- AGTCAA----- GAGT----- GAGACAATGA- - GTGATA-----                                |       |       |       |       |       |       |       | 56490 |
| BelugaWhale | -- T- AATCAT----- AACAGCAGCACAGTCCTTTT- - ATAATTC-----                              |       |       |       |       |       |       |       | 56047 |
| Donkey      | ---- AATCAT----- AACAGCAGCATAGTCTTTT- - ATAATTT-----                                |       |       |       |       |       |       |       | 62261 |
| Cat         | ---- AGGCAA----- GAGT----- GAGACA----- GTGATA-----                                  |       |       |       |       |       |       |       | 63434 |
| Ferret      | ---- GATCAC----- AAGTAGACGAAGAGGCAGGCA- - GAGAGAGAGAGAGAGAGAGG- GAAGCAGGCT          |       |       |       |       |       |       |       | 63993 |
| Lion        | ---- AGGCAA----- GAGT----- GAGACAATGA- - GTGATA-----                                |       |       |       |       |       |       |       | 60915 |
| Vaquita     | -- T- AATCAT----- AACAGCAGCACAGTCCTTTT- - ATAATTC-----                              |       |       |       |       |       |       |       | 57394 |
| Pig         | -- TTAATTAC- AAGCTCTATACTTAAGCAGTTATAGAGGCTTTTTCCATAACAG- - - - - GACATTCTTGACTATTT |       |       |       |       |       |       |       | 55396 |

Dienstag, 3. Mai 2022 08:40

| Majority    | ----- XX-XX----- CATGATCTTTGA-----                                                        |       |       |       |       |       |       |       |       |
|-------------|-------------------------------------------------------------------------------------------|-------|-------|-------|-------|-------|-------|-------|-------|
|             | 82410                                                                                     | 82420 | 82430 | 82440 | 82450 | 82460 | 82470 | 82480 |       |
| Human       | ----- CATGGTTTTTGC-----                                                                   |       |       |       |       |       |       |       | 65490 |
| PolarBear   | ----- CATGATCTTTGC-----                                                                   |       |       |       |       |       |       |       | 26115 |
| Cow         | GTTGACAGAGTCAAGATGAAGAAAAAATAACAGAAAATGTTATTTTGTAAAGTAAAATAAGTGATTTATAACTTCAGATGA         |       |       |       |       |       |       |       | 62241 |
| Dog         | ----- CAAGATCTTTGT-----                                                                   |       |       |       |       |       |       |       | 56502 |
| BelugaWhale | ---- ATATATCTTACAT----- ATGTG-----                                                        |       |       |       |       |       |       |       | 56065 |
| Donkey      | ----- ATGATGTGCTTTTACATATGTGATCTTTTGG- T----- T---                                        |       |       |       |       |       |       |       | 62294 |
| Cat         | ----- CATGATCTTTGA-----                                                                   |       |       |       |       |       |       |       | 63446 |
| Ferret      | TCCTGCCGAGCAGAGAGCCCGATGCGGGACTCGATCCCAGGACCCTGAGATCATGACCTGAGCCGAAGGCAGCGGCTTAA          |       |       |       |       |       |       |       | 64073 |
| Lion        | ----- CATGATCTTTGA-----                                                                   |       |       |       |       |       |       |       | 60927 |
| Vaquita     | ---- ATATATTTTACAT----- ATGTG-----                                                        |       |       |       |       |       |       |       | 57412 |
| Pig         | TTAAATTTGCTTTAGTT- - ACTTTATTTGGTCAACAATATG- - - - GCAATTAAAATA- GTCATACAGGG- - - GAGTTCC |       |       |       |       |       |       |       | 55465 |

| Majority    | -----                                                                                    |       |       |       |       |       |       |       |       |
|-------------|------------------------------------------------------------------------------------------|-------|-------|-------|-------|-------|-------|-------|-------|
|             | 82490                                                                                    | 82500 | 82510 | 82520 | 82530 | 82540 | 82550 | 82560 |       |
| Human       | -----                                                                                    |       |       |       |       |       |       |       | 65490 |
| PolarBear   | -----                                                                                    |       |       |       |       |       |       |       | 26115 |
| Cow         | CATTTTAGTTTTCTTTTGTGAATTCAGGAAATTCCTGGTTTCTGAAGTTTGTAAAGATT- ATCATTAAATGAATGT- TTC       |       |       |       |       |       |       |       | 62319 |
| Dog         | -----                                                                                    |       |       |       |       |       |       |       | 56502 |
| BelugaWhale | -----                                                                                    |       |       |       |       |       |       |       | 56065 |
| Donkey      | -----                                                                                    |       |       |       |       |       |       |       | 62294 |
| Cat         | -----                                                                                    |       |       |       |       |       |       |       | 63446 |
| Ferret      | CCCACTGAGCCAGCC- - - AGGCGCCCCATAATGTGCCATTTTTAAAGGG- - - - AAAGTT- AAGAGTGAGACAATGAGTGA |       |       |       |       |       |       |       | 64145 |
| Lion        | -----                                                                                    |       |       |       |       |       |       |       | 60927 |
| Vaquita     | -----                                                                                    |       |       |       |       |       |       |       | 57412 |
| Pig         | CATCCTGGCTCAGCGGAAATGAATCC- GA- - - - CTAGCTTCCATGAAGACGCAGGTTT GATGCCTGATTCAGTGGTTA     |       |       |       |       |       |       |       | 55539 |

Dienstag, 3. Mai 2022 08:40

| Majority    | ----- TTATAATTATTA- - CTGTAGA- - - - TTCTTA- AATT- - - TTTACTGATA- - - - - - - - GAAAX                       |       |       |       |       |       |       |       |                  |       |
|-------------|--------------------------------------------------------------------------------------------------------------|-------|-------|-------|-------|-------|-------|-------|------------------|-------|
|             | 82570                                                                                                        | 82580 | 82590 | 82600 | 82610 | 82620 | 82630 | 82640 |                  |       |
| Human       | ----- TTATAATTATTA- - CTATAGA- - - - TTATTA- AACTC- - - TTTACTGATA- - - - - - - -                            |       |       |       |       |       |       |       | 65530            |       |
| PolarBear   | ----- TTATAATTATTA- - CTGTAGA- - - - TTCTTA- CATT- - - ATTTACTGATA- - - - - - - - GAAAT                      |       |       |       |       |       |       |       | 26160            |       |
| Cow         | TGGACGTATGGAACCCAAGATTGATGAATCGCAAACCTTGTTCTTAGAGTTTAGCTTATTGCTATTATTCAGTTGCTAAGT                            |       |       |       |       |       |       |       | 62399            |       |
| Dog         | - - - A- - - - - - - - ATTCTTACTTGCT- - - - TGTAGA- - - - TTCTTA- AGTT- - - ATTTACAAATA- - - - - - - - GAAA- |       |       |       |       |       |       |       | 56547            |       |
| BelugaWhale | -----                                                                                                        |       |       |       |       |       |       |       | T- - - - - - - - | 56066 |
| Donkey      | ----- AATCCTCATAATAACCCTGTGAG- - GATTATGGCAGCCATTATCATCTCTGT- - - - - - - - TTTCCAGAT                        |       |       |       |       |       |       |       | 62353            |       |
| Cat         | ----- TTATAATCCTTA- - CTGTAGA- - - - TTCTTC- AATT- - - CTTTACTGATA- - - - - - - - GAAAT                      |       |       |       |       |       |       |       | 63491            |       |
| Ferret      | TACAA- - - - - - - - GGTTATAGTTATTA- - CTGTAGA- - - - TTCTTA- AATT- - - ATTTACTGATA- - - - - - - - GAAA-     |       |       |       |       |       |       |       | 64196            |       |
| Lion        | ----- TTATAATCATT- - CTATAGA- - - - TTCTTC- AATT- - - CTTTACTGATA- - - - - - - - GAAAT                       |       |       |       |       |       |       |       | 60972            |       |
| Vaquita     | -----                                                                                                        |       |       |       |       |       |       |       | T- - - - - - - - | 57413 |
| Pig         | AGGATCTGGCGTGGCTGTGGCTGTGG- - - CGTAGGCCAGTGGTTACAGCT- - - CTGATTGA- ACTCCTAGCTTGGGAACC                      |       |       |       |       |       |       |       | 55612            |       |

| Majority    | - - - ATATXATTTTG- TATAG- - - - AAAAA- - - - - - - - AAAAAT- - - - - - - - CAACATTTATTG- - - - - - - - AA |       |       |       |       |       |       |       |       |
|-------------|-----------------------------------------------------------------------------------------------------------|-------|-------|-------|-------|-------|-------|-------|-------|
|             | 82650                                                                                                     | 82660 | 82670 | 82680 | 82690 | 82700 | 82710 | 82720 |       |
| Human       | - - - - - GACATTGTTTTAG- - - - - A- - - - - - - - AAGAAT- - - - - CAAAATTTATTG- - - - - - - - AG          |       |       |       |       |       |       |       | 65564 |
| PolarBear   | T- - GTATTATTTTG- TACAAGAGAAAAA- - - - - - - - AAAAAT- - - - - CAACATTTATTG- - - - - - - - AA             |       |       |       |       |       |       |       | 26206 |
| Cow         | ATTATCCAACCTCTT- TGTGTCCCATGGACTGTAGCATGCCAGGCTCCTCTATCCACTGTCTCCCGGAGTTTGATGAACA                         |       |       |       |       |       |       |       | 62478 |
| Dog         | - - - - - TTATTTTA- CAGAA- - - - GAGAA- - - - - - - - AAAAAT- - - - - CAACATTTATTG- - - - - - - - AA      |       |       |       |       |       |       |       | 56585 |
| BelugaWhale | - - - AAAATATACATATGTGCT- - - - - - - - - - - - - - - - - - T- - - - - - - -                              |       |       |       |       |       |       |       | 56085 |
| Donkey      | TAAGAAAGATTTTG- - AGATTGAGAGAAG- - - - - - - - TTAAGTAACTTGCTCAACGTGACCTG- - - - - - - - AC               |       |       |       |       |       |       |       | 62408 |
| Cat         | G- - ATACGATTTT- - TACAG- - - AAGAGG- - - - - - - - AAACAT- - - - - CAACATTTATCA- - - - - - - - AG        |       |       |       |       |       |       |       | 63533 |
| Ferret      | - - - - - TTATTTTA- TATAG- - - - AAAAA- - - - - - - - AAAAAT- - - - - CTACATTTATTG- - - - - - - - AA      |       |       |       |       |       |       |       | 64234 |
| Lion        | G- - ATATGATTTT- - TACAG- - - AAGAGA- - - - - - - - AAACAT- - - - - CAACATTTATCG- - - - - - - - AG        |       |       |       |       |       |       |       | 61014 |
| Vaquita     | - - - GAAATATACATATGTGCT- - - - - - - - - - - - - - - - - - T- - - - - - - -                              |       |       |       |       |       |       |       | 57432 |
| Pig         | TCCATATGCCACAGGTGTGGCCCTAAAAA- - - - GATTTTAAAAATATAGTGGGCA- TGTCCATTGTGGCCCTTTGGAAA                      |       |       |       |       |       |       |       | 55687 |





Dienstag, 3. Mai 2022 08:40

| Majority    | ----- T----- TGTC----- AAGAA-- ATTCC----- AGCTAGCAT- CAAGCATA- GACCATAATAAT |                                                    |                     |                  |                       |              |       |       |
|-------------|-----------------------------------------------------------------------------|----------------------------------------------------|---------------------|------------------|-----------------------|--------------|-------|-------|
|             | 83050                                                                       | 83060                                              | 83070               | 83080            | 83090                 | 83100        | 83110 | 83120 |
| Human       | ----- TACC-----                                                             | ----- AAGAA--                                      | ACTCC-----          | ----- AGCTAGTAT- | TAACAATG-             | GACTACAATAAT |       | 65783 |
| PolarBear   | ----- T----- GTC-----                                                       | ----- AAGAA--                                      | ATTCC-----          | ----- GGGTAGCAT- | CAAGCACAAGACCATAACAAT |              |       | 26411 |
| Cow         | TCCATCACTCTGTGG- GCTTAGTTT--                                                | AAAGCTTTATTTTC--                                   | CTCAACTTGGCTTGTAAG- | TA-              | AATAATATTAAC          |              |       | 62859 |
| Dog         | ----- T----- GTC-----                                                       | ----- AAGAA--                                      | ATTCC-----          | ----- AGCTAGCAT- | CAAGCACAGGATCATAATAAT |              |       | 56782 |
| BelugaWhale | ----- CTGT-----                                                             | T-----                                             | ----- TTC-----      | ----- CAGA-----  |                       |              |       | 56166 |
| Donkey      | ----- TGTG-----                                                             | ----- GCGTCAAACAGAAAGTTACCTTATAAAACTAGACCAATTCTTAT |                     |                  |                       |              |       | 62657 |
| Cat         | ----- T----- ACC-----                                                       | ----- AAGAA--                                      | ATTCC-----          | ----- AGCTAGTGA- | CAAGCATAGGACCATAACAAT |              |       | 63719 |
| Ferret      | ----- T----- ATC-----                                                       | ----- AAGAA--                                      | ATTCC-----          | ----- AGTTACCAT- | CAAGCACA-             | GACCTTAACAGT |       | 64438 |
| Lion        | ----- T----- ACC-----                                                       | ----- AAGAA--                                      | ATTCC-----          | ----- AGCTAGTGA- | CAAGCATAGGACCATAACAAT |              |       | 61198 |
| Vaquita     | ----- CTGT-----                                                             | T-----                                             | ----- TTC-----      | ----- CAGG-----  |                       |              |       | 57513 |
| Pig         | AGCGTTGATCTACGCATGTTCTGTTATCAGAAGAAGTGTTCATTTTTGAGGTGATTTATAGAGCTA-         | AAACATGTTCTT                                       |                     |                  |                       |              |       | 56081 |

| Majority    | CACTTCC-- TTGGACT----- CGAAAGAXTX----- TX----- T--                               |                                                           |       |       |                 |        |         |           |
|-------------|----------------------------------------------------------------------------------|-----------------------------------------------------------|-------|-------|-----------------|--------|---------|-----------|
|             | 83130                                                                            | 83140                                                     | 83150 | 83160 | 83170           | 83180  | 83190   | 83200     |
| Human       | CACTTCT-- TTGGACC-----                                                           | -----                                                     | ----- | ----- | CTACTGAGGT----- | -----  | -----   | 65807     |
| PolarBear   | CACTTCC-- TTGTAAT-----                                                           | -----                                                     | ----- | ----- | CGAAGGAGTT----- | T----- | TG----- | TGC 26441 |
| Cow         | AATTTTATGGTGTACCATTTTTTAAAGTCAAGAATGAGACAGTAATGAATGAATCATGGCCTTTGCTTGTAAATTGTTAC |                                                           |       |       |                 |        |         | 62939     |
| Dog         | CACTTT-- TTGGACT-----                                                            | -----                                                     | ----- | ----- | CTACAGAGT-----  | -----  | -----   | 56804     |
| BelugaWhale | --- TTCA-----                                                                    | -----                                                     | ----- | ----- | GAAAGA-----     | -----  | -----   | 56176     |
| Donkey      | AAGTTAT- GCT-- ATCC-----                                                         | -----                                                     | ----- | ----- | ATCAAAAATA----- | -----  | -----   | 62682     |
| Cat         | CAGTTCC-- TTGGACT-----                                                           | -----                                                     | ----- | ----- | CTTAAGGAGT----- | T----- | TG----- | TG- 63748 |
| Ferret      | CACTTCC-- TTGGACT-----                                                           | -----                                                     | ----- | ----- | CAGAGGAGT-----  | -----  | TG----- | TGC 64466 |
| Lion        | CAGTTCC-- TTGGACT-----                                                           | -----                                                     | ----- | ----- | CTTAAGGAGT----- | T----- | TG----- | TG- 61227 |
| Vaquita     | --- TTCA-----                                                                    | -----                                                     | ----- | ----- | GAAAGA-----     | -----  | -----   | 57523     |
| Pig         | CATTTCC-- TGAAGTGTGTTT                                                           | GACACAGTAAATGTTTATTCTAATGAAAAATTAACAGTGTATTCCCCTGTTCTCTAG |       |       |                 |        |         | 56157     |



Dienstag, 3. Mai 2022 08:40

| Majority    | TTT - - TTGCXCATTTGGGTATAGTTAG - - - AT - - - AXGGCTXAGTGTGTTTGGATTCTGGATGG- AGTCCXGGT - - TA      |       |       |       |       |       |       |       |       |
|-------------|----------------------------------------------------------------------------------------------------|-------|-------|-------|-------|-------|-------|-------|-------|
|             | 83210                                                                                              | 83220 | 83230 | 83240 | 83250 | 83260 | 83270 | 83280 |       |
| Human       | - - - - - GTGTGTATTTGCCCAT - - CTGG - - - AT - - - A TACTTAGATGTGCTTGGATCCTGGGTGGGAGGCTTGGT - - TA |       |       |       |       |       |       |       | 65870 |
| PolarBear   | TTT - - TTGCCCATTTGGATATAGTTAG - - - AT - - - GTGTCTGTGTGTTTGGATTCTGGGTGG- AGTCCTGGT - - TA        |       |       |       |       |       |       |       | 26508 |
| Cow         | TATGAATTCTAATTTTTTACTGATAGA A CTTATAGAAAAGACAAAAATCAACATTTATTGAATAG- CTTCTAGATCCTA                 |       |       |       |       |       |       |       | 63018 |
| Dog         | TTT - - GTGCCCATTTACGTATAGTTAG - - - AT - - - AAGCTGCGTGTGTTTGGATTCTGGGTAG- AGTCCTGGT - - TA       |       |       |       |       |       |       |       | 56870 |
| BelugaWhale | - - - - - TTCTGAGATTC- - - - - A - - GAAAGGTTAAATA - - - ACTTGTTCAAGATGA- CCTTTCAACTCTA            |       |       |       |       |       |       |       | 56229 |
| Donkey      | CATGTATGATAAAATTA A CTTTAA - - AG - T - ATCGTGCAGGCTACTATGGTACTACTTTGGCAGG- ACTGACTATATTT          |       |       |       |       |       |       |       | 62756 |
| Cat         | TGT - - GTGCTCATTTGGGTATAGTTAG - - - AT - - - GTGCCTCTGTGTGTTTGGATTCTGGATGG- AATACAGGT - - TA      |       |       |       |       |       |       |       | 63815 |
| Ferret      | ATT - - TTGCCCATTTGGGTATAGTCA - - - - - TGTCTGTGTGTGTGGATTCTGGGTGG- AGTCCTGGT - - TA               |       |       |       |       |       |       |       | 64529 |
| Lion        | TGT - - GTGCTCATTTGGGTATAGTTAG - - - AT - - - GTGCCTCTGTGTGTTTGGATTCTGGATGG- AATACAGGT - - TA      |       |       |       |       |       |       |       | 61294 |
| Vaquita     | - - - - - TTTT GAGATTC- - - - - A - - GAAAGGTTAAATA - - - ACTTGTTCAAGATGA- CCTTTCAACTCTA           |       |       |       |       |       |       |       | 57576 |
| Pig         | TTTG- - TTCCAGGCTTCTGTCCAGCTGGA - - ATAGAAATGGTGATTATATAGGAACAGAAAAAAA- CATAAAAGTTGTA              |       |       |       |       |       |       |       | 56231 |

| Majority    | GAAGTCATG- TXXATTCTTCTAGGG- AATTCATCACTGTTTTCTTGT - - - AACCTCAT - - - - GGCCCTGGTGAAATT     |       |       |       |       |       |       |       |       |
|-------------|----------------------------------------------------------------------------------------------|-------|-------|-------|-------|-------|-------|-------|-------|
|             | 83290                                                                                        | 83300 | 83310 | 83320 | 83330 | 83340 | 83350 | 83360 |       |
| Human       | GAAGTCACG- TGGATTCTTCTAGGG- AATTTATCACCATTTTTCTTGT - - - GATCTTAT - - - - GACCTTGCTGAAACT    |       |       |       |       |       |       |       | 65939 |
| PolarBear   | GAAGTCACT- TG- GGTCTT CAGGG- AGTTCATCACTGTTTTCTTGT - - - AACCTCAT - - - - GGCCCTGGTGAAATT    |       |       |       |       |       |       |       | 26576 |
| Cow         | GGGGTTCTG- CAAGGTA CTTGGCAG- - ATACATTATTTAATTCTTAAA - - GTAACCAAAGTAGAAGATGATACGAAGATT      |       |       |       |       |       |       |       | 63093 |
| Dog         | GAAGTCAGC- TGGATTCTTCTAGGG- AATTCATCACTGTTTTCTTGC - - - AATTT CAT - - - - GGCCCTGGTGAGATT    |       |       |       |       |       |       |       | 56939 |
| BelugaWhale | GAGGT - - - - - GTACTCCTCT - - ATTCCAGA - - - ACTTTCTGG - - - - - GATGACGTTGAATTT            |       |       |       |       |       |       |       | 56278 |
| Donkey      | GTGGCCCTTACTAATTTTTTTAAATTA A CTTTGCAGGTTTTTTGA - - - - ATAAA - - - - AGTATTAGCACATTT        |       |       |       |       |       |       |       | 62825 |
| Cat         | GAAGTCATG- AAGATTCTTCTAGGG- AGTTCATCACTGTTTTCTTGT - - - AACCTCAT - - - - AGCCCTGATGAAATT     |       |       |       |       |       |       |       | 63884 |
| Ferret      | GAAGTCACC- TG- ATTCTTCTAGGG- AATTCATCACT - - CTTCTTGT - - - AACCTCAT - - - - GGCCCCAGTGAAATT |       |       |       |       |       |       |       | 64595 |
| Lion        | GAAGTCATG- AAGATTCTTCTAGGG- AGTTCATCACTGTTTTCTTGT - - - AACCTCAT - - - - AGCCCTGATGAAATT     |       |       |       |       |       |       |       | 61363 |
| Vaquita     | GAGGT - - - - - GTACTCCTTCT - - ATTCCAGA - - - ACTTTCTGG - - - - - GATGACATTGAATTT           |       |       |       |       |       |       |       | 57625 |
| Pig         | ACAG- - CAG- CATAGTCCTTTATA - - - ATTCATGATGCACTTTTCCATATGTGATCTTTTATCTAGACCTCAGTAACCCT      |       |       |       |       |       |       |       | 56305 |

Dienstag, 3. Mai 2022 08:40

| Majority    | TTT- - - - - TTTAAGTAATAXTAAAATX- - TGTTTT- - CTCAT- - - - - AAAXATTATGAAG- - - -                |       |       |       |       |       |       |       |       |
|-------------|--------------------------------------------------------------------------------------------------|-------|-------|-------|-------|-------|-------|-------|-------|
|             | 83370                                                                                            | 83380 | 83390 | 83400 | 83410 | 83420 | 83430 | 83440 |       |
| Human       | TTT- - - - - AAAACAATAATAAAGTCATTTTTTTT- - CTCTTT- - - - - GAGAT- - GGAATCTCAC                   |       |       |       |       |       |       |       | 65989 |
| PolarBear   | TCT- - - - - TTTAATAATAATGAAAT- - - - - GTCTG- - - - - AATAATAATGA- - - - -                      |       |       |       |       |       |       |       | 26613 |
| Cow         | TTATAGTCATTTCTAAGGAGTTTAAAATTT- - TACTTTGAACTCATTAAAGAAACAGTGGTAAAAGACCGAGAAATTTCA               |       |       |       |       |       |       |       | 63171 |
| Dog         | TTTTTTTTTTTTTAAGTAATAATGAAATAAATGTCTTT- - TTCATA- - - - - AAAGATTATGAAG- - - - -                 |       |       |       |       |       |       |       | 56997 |
| BelugaWhale | GCTTA- - - - - TTTAGCAAGTTA- - - - - TTC- - TGATTC- - - - -                                      |       |       |       |       |       |       |       | 56304 |
| Donkey      | GCTTAGCTGGTTTTATTTAGGTGTATGTAG- CACTTTCTATTTAAAGAAGA- - - - - T- AATATTTGTGGAAACT- A             |       |       |       |       |       |       |       | 62894 |
| Cat         | TTT- - - T- - - - TTTAAGTAATAGTAAAAC- - - - - ATTTTT- - CTCAT- - - - - AAAAAATATGAAG- - - - -    |       |       |       |       |       |       |       | 63930 |
| Ferret      | TCT- - - - - TTTAAGTAATAATGAAAT- - - - - GTCTTT- - CTCATT- - - - - AAAGATCACGAGT- - - - -        |       |       |       |       |       |       |       | 64641 |
| Lion        | TTT- - - T- - - - TTTAAGTAATAGTAAAAC- - - - - ATTTTT- - CTCAT- - - - - A- - - AATATGAAG- - - - - |       |       |       |       |       |       |       | 61406 |
| Vaquita     | GCTTA- - - - - TTCAGCAAGTTA- - - - - TTC- - TGATTC- - - - -                                      |       |       |       |       |       |       |       | 57651 |
| Pig         | GTGAGAAAGCATGGTAGCTATTGTCATCTC- - TGTTTT- - - - - CTAGCTGCAGAAAGATT- - CTAAGATTGAGAAAGGTTAA      |       |       |       |       |       |       |       | 56378 |

| Majority    | - C- - XCTG- - - GC- - A- - - - TAATTA- ACAT- - - - - GTATCTTCCTCTATACTTTTCATTATTCATTTTTTCAGGTTTTCTG |       |       |       |       |       |       |       |       |
|-------------|------------------------------------------------------------------------------------------------------|-------|-------|-------|-------|-------|-------|-------|-------|
|             | 83450                                                                                                | 83460 | 83470 | 83480 | 83490 | 83500 | 83510 | 83520 |       |
| Human       | TCTGTCGCCCGTGTGAGAGTGTGGTGGCGCAG- - - TCTCGGCTCACTGCAACTTCCGCCTCCCGGGTTCAAGCGATTCTC                  |       |       |       |       |       |       |       | 66066 |
| PolarBear   | - - - - - ATT- - - - - GTATCTTCCTCTATACTTTTATTAGTCATTTTTTCAGGTGTTCTG                                 |       |       |       |       |       |       |       | 26660 |
| Cow         | GCTAGTTTCAAACATAGTACTTCCCTTAGACCC- - - GTAATCACTTCCCTGGGACCCTAAGAGCTATGTGTATTTGCCTATTG               |       |       |       |       |       |       |       | 63249 |
| Dog         | - C- - CCTG- - - GC- - A- - - - TAATTA- ACTT- - - - - GTATCTTC- TCTATACTTTTATCATTCATTTTTCAGGTGTTCTG  |       |       |       |       |       |       |       | 57058 |
| BelugaWhale | - - - - - A- - - - - GGTTGAACAA- - - - - CCTAGGTTAAGGAAGATAATATTGGATTGGCCAAAATGTTTGTTG               |       |       |       |       |       |       |       | 56360 |
| Donkey      | ACACATGTACAGCT- GG- - - - - GATCACAAAGAACGATGTATATGAAATTTCTTTTCATTCTTTCTGGTGGCTTTTATG                |       |       |       |       |       |       |       | 62968 |
| Cat         | - C- - ACTG- - - GC- - A- - - - TAATTA- ACTT- - - - - GTGTCTTCCTCTGTACTTTTCATTATCCATTTTTTCATGTATTGTG |       |       |       |       |       |       |       | 63992 |
| Ferret      | - C- - CCTG- - - GC- - A- - - - TAATT- - - - - TTATCTTCCTCTATACTTTTATTATTAATTTTTCAAGTGTTCTG          |       |       |       |       |       |       |       | 64698 |
| Lion        | - C- - ACTG- - - GC- - A- - - - TAACTA- ACTT- - - - - GTGTCTTTCTCTGTACTTTTCATTATCCATTTTTTCAGGTATTGTG |       |       |       |       |       |       |       | 61468 |
| Vaquita     | - - - - - A- - - - - GGTTGAACAA- - - - - CCTAGGTTAAGGAAGATAATATTGGATTGGCCAAAATGTTTGTTG               |       |       |       |       |       |       |       | 57707 |
| Pig         | ACAACCTTGCTCACG- ATGACCTAATTGAATGTAGGCTTTCAACTCCATGGATTGCGCTCTTCTATTCCAAAACCTTTCTG                   |       |       |       |       |       |       |       | 56457 |

Dienstag, 3. Mai 2022 08:40

| Majority    | XXTT-----TXTTTGCACTAAAAGTGTATGAGTAAAGTTCA-----TTCACCTAATTAATAAAA-----TT |                                                           |                             |           |       |       |       |       |
|-------------|-------------------------------------------------------------------------|-----------------------------------------------------------|-----------------------------|-----------|-------|-------|-------|-------|
|             | 83530                                                                   | 83540                                                     | 83550                       | 83560     | 83570 | 83580 | 83590 | 83600 |
| Human       | CCGC-----C---                                                           | TCAGCCTCCTGAGCATCTGGGACTACAGGCCTGTACCACCACCCCTGGCTAA----- | CTTT                        | 66127     |       |       |       |       |
| PolarBear   | CATT-----T-                                                             | TTTGCATTAAGCAT--GAGTAAAGTT-G-----                         | TTCACCTAA---ATAAA-----      | TT        | 26707 |       |       |       |
| Cow         | GGGGGGTAGTTGATGAATTTATGTAT--                                            | GTTTTTTGGATTCTGGTTGGAGTCATGGATTTGTCTATGGAGTTTATCATT       | 63326                       |           |       |       |       |       |
| Dog         | CATG-----T-                                                             | TTTGCCTAAAAGCAT--GAGTTAAGTT-G-----                        | TTCACCTACTTAATAAAA-----     | TT        | 57108 |       |       |       |
| BelugaWhale | GGGT-----                                                               | TTTCCTTAA--GATGTTATGGA--AAACCCAA--                        | ATGAACTTATTGGCCAACCCAAGAGTT | 56419     |       |       |       |       |
| Donkey      | TGTAGG-----                                                             | TTTTCACTGTTGAGTTTTATTGTTAAAGTC-----                       | ATACCTTTTTCTGG-----         | TT        | 63020 |       |       |       |
| Cat         | TAT-----T-                                                              | TTTGCCTAAAAGCATATGAGTAAAGTTCA-----                        | CTCCTTAATAAATAAATGTGGCT-    | AG        | 64051 |       |       |       |
| Ferret      | CATT-----T-                                                             | TTTGCATTAAGCATATGAGTAAAGTT-G-----                         | CCCACTACTT-ATAAA-----       | TT        | 64749 |       |       |       |
| Lion        | TAT-----T-                                                              | TTTGCCTAAAAGCATATGAGTAAAGTTCA-----                        | CTCCTTAATAAAT---            | GTGGCT-AG | 61523 |       |       |       |
| Vaquita     | GGGT-----                                                               | TTTCCTTAA--GATGTTATGGA--AAACCCAA--                        | ATGAACTTATTGGCCAACCCAAGAGTT | 57766     |       |       |       |       |
| Pig         | GGATGACATAGGACTTTTTTATTCAACGGTTTTTTCTGATT                               | CAGGTTCCA--CCATTG-CAGGTTAAGGAAAATAATAGTT                  | 56534                       |           |       |       |       |       |

| Majority    | TGTCTTCX-----XTCTTCG-XCTCTATTTAAGTATTTTAGTAXA-----TCTTTXTTCTGCACTTT-XTTTAAT |                                           |                            |         |       |       |       |       |
|-------------|-----------------------------------------------------------------------------|-------------------------------------------|----------------------------|---------|-------|-------|-------|-------|
|             | 83610                                                                       | 83620                                     | 83630                      | 83640   | 83650 | 83660 | 83670 | 83680 |
| Human       | TGTCTTTT-----                                                               | TTCGTAGAGATGAGATTTACCATGTTGGCCAG--        | GCTGGTCTGGAACCTCTGATCTC-   | AGGTGAT | 66198 |       |       |       |
| PolarBear   | TGTCTTCA-----                                                               | TCTTCTAGCTCTATTCTGAATATTTAGTATA-----      | TCTTTATTTCTGCAGTGT-        | GCTTGAT | 26772 |       |       |       |
| Cow         | TTTCTTGTAATGGCCTTGTTGGAATTTCTTTTTTAGAGTAATAATAAATAAGAAATCTTTCTCATAAAAGATT-  | ATACAAT                                   | 63405                      |         |       |       |       |       |
| Dog         | TGTCTTCA-----                                                               | TCTTCTAGCTCTATTTTGAATATTTAATATA-----      | TCTT-GTTTCTGCACTCT-        | GATTAAA | 57172 |       |       |       |
| BelugaWhale | TTTGCTCA-----                                                               | TTTCATGGTAGTTGCTGTTATGCATCATAGTGAT-       | ATTTAGTTGTCTTGAGGCACCTC-   | ATTTAAT | 56491 |       |       |       |
| Donkey      | TTTATTCCTTGAGATTGCT---                                                      | GATATACTTTATTTCCCTTTTACAGGC-----          | CCTAGATGGTCAGAATAT-        | TTATAAT | 63090 |       |       |       |
| Cat         | TGTCTTCT-----                                                               | CCTTC--ACTCTGTTTTGACTATTTAATATA-----      | TCTTTGTTTCTGCACTCTTGCTTGGT | 64115   |       |       |       |       |
| Ferret      | TGTCTTCA-----                                                               | TCT-----TCTATTTAATATTTAGTATA-----         | TCTTTATTTCTTCACTCT-        | GCTTGAT | 64808 |       |       |       |
| Lion        | TGTCTTCT-----                                                               | CCTTC--GCTCTGTTTTGACTATTTAATATA-----      | TCTTTGTTTCTGCACTCTTGCTTGGT | 61587   |       |       |       |       |
| Vaquita     | TTTGCTCA-----                                                               | TTTCATGGTAGTTGCTATTATGCATCATAGTGAT-       | ATTTAGTTGTCTTGAGGCACCTC-   | ATTTAAT | 57838 |       |       |       |
| Pig         | TTTGCTCT---                                                                 | G-TTTCATAGGAGTTGCTATCATGTATCATAGTAAT----- | ATTTGTCTTGAGGCACCTT-       | ATTTAAT | 56603 |       |       |       |

Dienstag, 3. Mai 2022 08:40

| Majority    | G - TGGXATXA- XXAAATGTTGXCTTGT- - - GAACATATGTGAATTTTCAXCCTTGTTTTACTA- AATGACTTCATXGTTXA |       |       |       |       |       |       |       |       |
|-------------|------------------------------------------------------------------------------------------|-------|-------|-------|-------|-------|-------|-------|-------|
|             | 83690                                                                                    | 83700 | 83710 | 83720 | 83730 | 83740 | 83750 | 83760 |       |
| Human       | C - T                                                                                    | G     | C     | C     | C     | C     | C     | C     | 66275 |
| PolarBear   | A - A                                                                                    | G     | A     | A     | A     | A     | A     | A     | 26829 |
| Cow         | CC - T                                                                                   | G     | G     | C     | A     | T     | A     | A     | 63482 |
| Dog         | G - A                                                                                    | G     | A     | A     | A     | A     | A     | A     | 57237 |
| BelugaWhale | G - T                                                                                    | G     | G     | C     | A     | T     | C     | A     | 56560 |
| Donkey      | G                                                                                        | C     | T     | T     | G     | C     | T     | T     | 63167 |
| Cat         | A - A                                                                                    | G     | A     | A     | A     | A     | A     | A     | 64184 |
| Ferret      | A - A                                                                                    | G     | A     | A     | A     | A     | A     | A     | 64871 |
| Lion        | A - A                                                                                    | G     | A     | A     | A     | A     | A     | A     | 61656 |
| Vaquita     | G - T                                                                                    | G     | G     | C     | A     | T     | C     | A     | 57907 |
| Pig         | G - T                                                                                    | G     | G     | C     | A     | T     | C     | A     | 56669 |

| Majority    | T - GTGTTTTAT- TGXTTTTACATTTTAGTA- - - - - T- AATTTGGTTTTACTXT- - - - - X- - - TAAGTAT |       |       |       |       |       |       |       |       |
|-------------|----------------------------------------------------------------------------------------|-------|-------|-------|-------|-------|-------|-------|-------|
|             | 83770                                                                                  | 83780 | 83790 | 83800 | 83810 | 83820 | 83830 | 83840 |       |
| Human       | A - -                                                                                  | G     | C     | G     | T     | T     | G     | T     | 66335 |
| PolarBear   | - - -                                                                                  | -     | -     | -     | -     | -     | -     | -     | 26840 |
| Cow         | T - G                                                                                  | T     | G     | A     | G     | T     | A     | A     | 63543 |
| Dog         | C - C                                                                                  | T     | G     | T     | T     | T     | A     | A     | 57289 |
| BelugaWhale | T - G                                                                                  | T     | G     | T     | A     | A     | T     | A     | 56638 |
| Donkey      | T                                                                                      | T     | A     | T     | A     | C     | C     | C     | 63242 |
| Cat         | T - C                                                                                  | T     | A     | T     | T     | C     | A     | G     | 64234 |
| Ferret      | T - A                                                                                  | T     | G     | T     | T     | T     | A     | A     | 64923 |
| Lion        | T - C                                                                                  | T     | A     | T     | T     | C     | A     | G     | 61706 |
| Vaquita     | C - G                                                                                  | T     | G     | T     | A     | A     | T     | A     | 57985 |
| Pig         | G - G                                                                                  | T     | G     | T     | A     | T     | T     | A     | 56728 |



Dienstag, 3. Mai 2022 08:40

| Majority    | ATAAAAATCA- XXTATX- A- TTCAGT- - - - TCTXTGTXATGTTTTTTTXXTAATTGTT- ATTTTT- - GTAAXAATTTTT- |                                |                                                              |                                        |                                 |                     |               |       |       |
|-------------|--------------------------------------------------------------------------------------------|--------------------------------|--------------------------------------------------------------|----------------------------------------|---------------------------------|---------------------|---------------|-------|-------|
|             | 84010                                                                                      | 84020                          | 84030                                                        | 84040                                  | 84050                           | 84060               | 84070         | 84080 |       |
| Human       | GGGCTTTTTA-                                                                                | ACTATA--                       | CTCAAAAATAGGTTAAAAGTAGGTGAGTTAAAGTTTTTAAAAATCAGATAATGGACCCTG |                                        |                                 |                     |               |       | 66569 |
| PolarBear   | ATTTAAACCACACTGT--                                                                         | G- TGCAGT- - - -               | TCT- - - -                                                   | GTGTTTTATTATAATTGTT- ATTTTA- -         | GTAAGAATTTAA-                   |                     |               |       | 27046 |
| Cow         | ACATAATACTATTTGCACACTTAAAC- - -                                                            | TACCATATAGTGTCAACGTAGAAAAAT- - | ATTTTGGGGTGAAAATATGTG                                        |                                        |                                 |                     |               |       | 63774 |
| Dog         | TTAAAAATCACTCTGTAAG- CGTAGT- - - -                                                         | TCT- - - -                     | GTGTTTTATTGTAATTGTT- ATTTTA- -                               | GTAAGAATTTTTT                          |                                 |                     |               |       | 57496 |
| BelugaWhale | GTAAAGAACAGGGTATGGAATTTGATCCCTTTCTTGGTGACTTTTTATGTGCAGTTTTTCATCGTTGAGTTTTATTGTCAA          |                                |                                                              |                                        |                                 |                     |               |       | 56872 |
| Donkey      | AGAAGGCGTA- TGAATGCTGTTGGGAGAAAAACC- TAAAGTGTTCTTC- ATAAGCGTAATTTTGTCTGTTATATTCCTTT        |                                |                                                              |                                        |                                 |                     |               |       | 63471 |
| Cat         | ATTTAAATCA- - -                                                                            | CAT- - - -                     | TGCAGT- - - -                                                | TTTGTG- -                              | ATATGTTCT- - -                  | AATTGTT- ATTTT- - - | GTAAGAATTTTT- |       | 64441 |
| Ferret      | ATTTAAATTA- -                                                                              | CTAT- -                        | G- TGCAGT- - - -                                             | TCTTTATTATGTTTTATTGTAATTACT- ATTTTA- - | GTAAGAATTTTT-                   |                     |               |       | 65126 |
| Lion        | ATTTAAATCA- - -                                                                            | CAC- - -                       | TGCAGT- - - -                                                | TTTGTG- -                              | ATATGTTGTTATAATTGTT- ATTTT- - - | GTAAGAATTTTT-       |               |       | 61916 |
| Vaquita     | GTAAAGAACAGGGTATGGAATTTGATCCCTTTCCCTGGTGACTTTTTATGTGCAGTTTTTCATCGTTGAGTTTTATTGTCAA         |                                |                                                              |                                        |                                 |                     |               |       | 58219 |
| Pig         | GCAAAGAACAAAGTATGGAATTTGATCCCTTTCCGGGTGACTTTCATGTGCAGTTTTTCATTGTTGAGTTTTATTGTCAA           |                                |                                                              |                                        |                                 |                     |               |       | 56963 |

| Majority    | - - X- - - AATAXTTTTAATAACTX- X- XTTATTXTTXXAGATTTCTAATATXTTGGAAAGTACCTTTACXX- - CGACATTT |                                                                        |                                                          |                                      |          |       |       |       |       |
|-------------|-------------------------------------------------------------------------------------------|------------------------------------------------------------------------|----------------------------------------------------------|--------------------------------------|----------|-------|-------|-------|-------|
|             | 84090                                                                                     | 84100                                                                  | 84110                                                    | 84120                                | 84130    | 84140 | 84150 | 84160 |       |
| Human       | GTTTTGATAATTCACAAGAGATAACCATT- TATTTTCATATTTTTTATGTAATACATGTTTCTGTACAAAATTAAAATT          |                                                                        |                                                          |                                      |          |       |       |       | 66648 |
| PolarBear   | - - - - -                                                                                 | AAAAAACTTAATAGCTTCTTAGCATGCTAGTGGATTTGTAGTACTTGAGAAAGCACCTTTATC- - -   | AGACATTT                                                 |                                      |          |       |       |       | 27118 |
| Cow         | AATTCATCTTCCTTTACTAAATGAC- TTCATTGTTTACATGTTTTAACGGGGATTTTTAAATTTTTAAATATCCTCAAAT         |                                                                        |                                                          |                                      |          |       |       |       | 63853 |
| Dog         | TGAA- AAATAATTTTAATAGCTATCTAGCATGCTGGTGGATCTGTAATACTTTTGAAAGTACTTTTACTTCCAGACGTTT         |                                                                        |                                                          |                                      |          |       |       |       | 57575 |
| BelugaWhale | AGT- - -                                                                                  | CATACTTTTTCTAATT- - - -                                                | TTTATTTCTTAAGATTGCTGATATAT- TTTGTTCACTTTTACAGGCCCT- AGAT |                                      |          |       |       |       | 56943 |
| Donkey      | - - - - -                                                                                 | CACTACCTCACCTTTT- -                                                    | CTCCTATTCTCCTAGTCTCCCAAATAG- -                           | AAGAAAAGCTCTACTGA- AGAAATAC          |          |       |       |       | 63540 |
| Cat         | - - - - -                                                                                 | TTGAAAACATA- - - - -                                                   | - - - - -                                                | ATTT- TAATATTTTTGAAAGTACCTTTGTT- - - | GGACATTG |       |       |       | 64488 |
| Ferret      | - - - - -                                                                                 | AAAAAA- TTTAATAGCTGTCTAGCATGCTAGTGGATTTGTAGTACTTTTGAAAGTACCTTTATT- - - | GGACATTT                                                 |                                      |          |       |       |       | 65197 |
| Lion        | - - - - -                                                                                 | TTGAAAACATA- - - - -                                                   | - - - - -                                                | ATTT- TAATATTTTTGAAAGTACCTTTGTT- - - | GGACATTG |       |       |       | 61963 |
| Vaquita     | AGT- - -                                                                                  | CATACTTTTTCTAATT- - - -                                                | TTTATTTCTTAAGATTGCTGATATAT- TTTGTTCACTTTTACAGGCCCT- AGAT |                                      |          |       |       |       | 58290 |
| Pig         | AGT- - -                                                                                  | TATACTTTTATTAATT- - - -                                                | TTTATTTTTTAAGATTCCTGATACACCTTTGTTTACTTTTACAGGCCCT- AGAT  |                                      |          |       |       |       | 57035 |

Dienstag, 3. Mai 2022 08:40

|             |                                                                                                 |       |       |       |       |       |       |       |
|-------------|-------------------------------------------------------------------------------------------------|-------|-------|-------|-------|-------|-------|-------|
| Majority    | AXTCT- - ATTTTTATAXTTTTTX- - - XTATACXXTAAAXATGGCXT- - - - X- AXTGTXXAAXATACAATGTAAAAACA        |       |       |       |       |       |       |       |
|             | 84170                                                                                           | 84180 | 84190 | 84200 | 84210 | 84220 | 84230 | 84240 |
| Human       | GCTCTGTATTTGCAGATTTGCATTATCT- TTTATTGTAATTGACATT- - - - - T TACTTAGAATTTGTTTTAAAAGATA 66720     |       |       |       |       |       |       |       |
| PolarBear   | AATCT- - AGTTCATACTTTTTATTTATATA- - - TATATATGGC- - - - - ATTTTGATAAACACCCTGTACATAACT 27184     |       |       |       |       |       |       |       |
| Cow         | AGTT- - - TTTTAAAGGTGAGTT- - - ATAAATTTTAAAAATCAAAT- - - - AAAGGAATATATTTATAATTCATAAGATA 63921  |       |       |       |       |       |       |       |
| Dog         | TATTA- - ATATATGTGGCATTGTGACAAATACCCTGTACATAACTTTTTTGTATTGGGTCAAAGAAAATGTTAAAGGCT 57653         |       |       |       |       |       |       |       |
| BelugaWhale | GGTCAGAATATTTATAATGCTTG- - - CTGTACCCTAAGGATTGATTTTTCCAACTTGTGAATTTG- AATGTAAAATACA 57019       |       |       |       |       |       |       |       |
| Donkey      | TGTTGAGTTCTTAATAAAATATT- - - TAAACTTCAAACCTTGATGT- - - CACACTATCTAGGTCTAAGTCTAGGGCTCT 63612     |       |       |       |       |       |       |       |
| Cat         | AATCT- - TCTTCTATACTTTTTTA- - - T- TAG- - TATATATGGC- - - - - ATGTGACAGATACCCTGTACATAACT 64549  |       |       |       |       |       |       |       |
| Ferret      | AACTT- - ACTTCATACTTTTTTA- - - AAATA- - - TAAACATGGC- - - - - ATTGTGGCAAACACCCTGTGAATAACA 65260 |       |       |       |       |       |       |       |
| Lion        | AATCT- - TCTTCTATACTTTTTTA- - - T- TAA- - CATATATGGC- - - - - ATGTGACAGATACCCTGTACATAACT 62024  |       |       |       |       |       |       |       |
| Vaquita     | GGTCAGAATATTTATAATGCTTG- - - CTGTACCCTAAGGATTGATTTTTCTAACTTGTGAATTTG- AATGTAAAATACA 58366       |       |       |       |       |       |       |       |
| Pig         | GGTCAGAATATTTATAATGCTTG- - - CTGTACCCTAAGGATTGATTTTTCCAACTCGTGAATTTG- AATGTAAAATACA 57111       |       |       |       |       |       |       |       |

|             |                                                                                                |       |       |       |       |       |       |       |
|-------------|------------------------------------------------------------------------------------------------|-------|-------|-------|-------|-------|-------|-------|
| Majority    | TCTTTG- TATTTCTXGAGATTATTCTCTX- - - - - A- ACTAGTXX- XTATCTAGAGXTAG- - - - - ATT               |       |       |       |       |       |       |       |
|             | 84250                                                                                          | 84260 | 84270 | 84280 | 84290 | 84300 | 84310 | 84320 |
| Human       | GCTTTAATACCTGCGTAGCATGTTTCATGG- - - - - GTATGCCATACCTTTGAAAGTGG- - - - - ACA 66775             |       |       |       |       |       |       |       |
| PolarBear   | TTTTTG- TCTTTC- - - GGGTATTTTCTG- - - - - AGACTAG- - - - - ATTCCTAGTGCTAG- - - - - ATT 27233   |       |       |       |       |       |       |       |
| Cow         | ACTACC- TATATTTTGA- - - TATATTTT- - - - - TCTTATTTTCTATGTAATACATAT- - - - - TTG 63974          |       |       |       |       |       |       |       |
| Dog         | CCTGAT- TCTTCCTGTAATTTCTTTCTGGAAAGATGATATTAAGTAGTATGGTATTTGAGGCTGGCCATTCT- - - ACT 57729       |       |       |       |       |       |       |       |
| BelugaWhale | ACAATGATAAAAGTAGGGATTATACTCGA- - - - - CCTGATCTTCCATCTGGGGATGGACAACCTGCATTG 57084              |       |       |       |       |       |       |       |
| Donkey      | TGTGCA- TATTCTTAGGGCTAATCTGATTG- - - - - TTTTAATTTAACA- - - CTGCATAGAACAG- - - - - T 63669     |       |       |       |       |       |       |       |
| Cat         | TTTT- G- TCTTTC- - - AAATTATTCCCTT- - - - - AAAGTAG- - - - - ATGCCTAGAGCTAG- - - - - AAT 64597 |       |       |       |       |       |       |       |
| Ferret      | TTTTTA- TCTTTC- - - AGATTATTTCTG- - - - - AGACTAG- - - - - ATTTCTAGAGCTAG- - - - - ATT 65309   |       |       |       |       |       |       |       |
| Lion        | TTTT- G- TCTTTC- - - AAATTATTCCCTT- - - - - AAAGTAG- - - - - ATGCCTAGAGCTAG- - - - - AAA 62072 |       |       |       |       |       |       |       |
| Vaquita     | ACAATGATAAAAGTAGGGATTATACTCGA- - - - - CCTGATCTTCCATCTGGGGATGGACAACCTGCATTG 58431              |       |       |       |       |       |       |       |
| Pig         | ACAATGATAAAAGTAGAGATTATACTCGA- - - - - CCTGATCTCCCATCTGGGGATGGACAGCCTGCATTG 57176              |       |       |       |       |       |       |       |

Dienstag, 3. Mai 2022 08:40

| Majority    | TACTAA-XXA-XXTCAAAGAXTTTXX--X- - - -AAATXTTTGTGAXTTXTGA- - - TTTTACTGCAAATTTCTTTTAGA |                       |                                   |                      |       |                           |       |       |       |
|-------------|--------------------------------------------------------------------------------------|-----------------------|-----------------------------------|----------------------|-------|---------------------------|-------|-------|-------|
|             | 84330                                                                                | 84340                 | 84350                             | 84360                | 84370 | 84380                     | 84390 | 84400 |       |
| Human       | TGTAGGCT-                                                                            | -ATTCCATACTTTTTATTAA- | A-ACACCCTTGTACTTTTTTGT-           | - - -                | CCT-  | CTCAAATTATTTTCTTAGA       |       |       | 66844 |
| PolarBear   | TATTGG-                                                                              | - - - -GTCAAAGA-      | - - - - - - - - - - - - - - - - - | AAATGTTAGAGACTCCTGA- | - -   | TTCTTACTGCAAATTTCTTTTAGA  |       |       | 27291 |
| Cow         | TAAAAAATTA                                                                           | AAAATCACACTGTTTGC-    | - - - - -                         | AGTTTTGTGTTTGCATTT-  | - -   | TATT-GAGGGTTTTTTTTTTTTTCC |       |       | 64043 |
| Dog         | TTTTTGCCTACCAGCATTGATTTTTTTTTTTTTTCAAATATTTGTCATTTTTAAAAATTTTTTTTTTTCTTTTTTTTTTTTATG |                       |                                   |                      |       |                           |       |       | 57809 |
| BelugaWhale | GACCCAGCTATTGCTGCAGCATTGCCAAGGAGACATCTCTCTTAGGTATGA-                                 | - -                   | TTTTTATTGTCTATAACCACTTTTCT        |                      |       |                           |       |       | 57161 |
| Donkey      | GAAAAGTTAACAGACAAAACATGTAGTGAGAGTAGGCATATGGGTTTTTTCAAACATG-                          | - -                   | TGATAGCCTCTCTTTTAA                |                      |       |                           |       |       | 63746 |
| Cat         | TACTAA-                                                                              | - - - - -ATCAAAA-     | - - - - - - - - - - - - - - - - - | AAGTGTAAAGACTCCTGA-  | - -   | TTCTTACTGCAAATTTCTTTCTAGA |       |       | 64655 |
| Ferret      | TATTGG-                                                                              | - - - - -ATCAAAGA-    | - - - - - - - - - - - - - - - - - | AAATGTTAGAGACTCCTGA- | - -   | TTCTTACTGCAAATTTATTTCTAGA |       |       | 65367 |
| Lion        | TACTAA-                                                                              | - - - - -ATCAAAA-     | - - - - - - - - - - - - - - - - - | AAGTGTAAAGACTCCTGA-  | - -   | TTCTTACTGCAAATTTCTTTCTAGA |       |       | 62130 |
| Vaquita     | GACCCAGCTATTGCTGCAGCATTGCCAAGGAGACATCTCTCTTAGGTATGA-                                 | - -                   | TTTTTATTGTCTATAACCACTTTTCT        |                      |       |                           |       |       | 58508 |
| Pig         | GACCCAGCTATTGCTGCAGCATTGCCAAGGAGACATCTCTCTTAGGTATGA-                                 | - -                   | TTTT-ATTGTCTGTACCACTTTTCT         |                      |       |                           |       |       | 57252 |

| Majority    | XAXATXATACTAAATTAGAAAGAGXGTGTTA- -X- - - - - AAATAAGTATAATAAGACTCTXAXTTTGX- - - X- X- - X- - |                                    |                                           |                                           |       |       |       |       |       |
|-------------|----------------------------------------------------------------------------------------------|------------------------------------|-------------------------------------------|-------------------------------------------|-------|-------|-------|-------|-------|
|             | 84410                                                                                        | 84420                              | 84430                                     | 84440                                     | 84450 | 84460 | 84470 | 84480 |       |
| Human       | CTAGATTCCTAGAATTAGAATTATTGGGTCA-                                                             | - - - - -                          | AAGAAAATGTAAAGCCTGTTTACTTTA-              | - - - - -                                 |       |       |       |       | 66903 |
| PolarBear   | AGGATGATACTAAATTA-                                                                           | - - - - -                          | ATATGAATGGTATATGAGGCTGGCTAT-              | - - - - -                                 |       |       |       |       | 27335 |
| Cow         | CGAAAAATGGTAATTGTAATAG-                                                                      | - CAAGATAGACTG-                    | - -                                       | CTAATGGATATAT-AATACTTTTGTATTTATGTTGAACGTT |       |       |       |       | 64117 |
| Dog         | ATAGTCACACAGAGAGAGAGAGAGAGAGAGAGAGGCA-                                                       | - GAGACATAGGCAGAGGGAGAAGCAGGCTCCA- | - - - - -                                 |                                           |       |       |       |       | 57875 |
| BelugaWhale | CCCATTTTGCCAAATGGGAAAGTGCCTGTTAAACT-                                                         | - - -                              | CCAGTAAGTATAATGAATCTCCCATTTTGGAAATTAAGAAA |                                           |       |       |       |       | 57237 |
| Donkey      | GAAAACAATTTAAGCTAGAAGGAATTTTCTA-                                                             | - - - - -                          | TAAAATTTATTTTGTATTGCTTTTTGTCCTAATCATT     |                                           |       |       |       |       | 63817 |
| Cat         | AAGGTGATATTAACATAATATGAATGG-                                                                 | - - - - -                          |                                           |                                           |       |       |       |       | 64682 |
| Ferret      | AAGATGATACTAAACTA-                                                                           | - - - - -                          | ATATGAATGGTATATGAGACTGGCTAT-              | - - - - -                                 |       |       |       |       | 65411 |
| Lion        | AAGGTGATATTAACATAATATGAATGGGGGCGCCTTGGTGGCTCAGTCGGTTAAGCGTCTGACTTCGGCTCAGGTCATG              |                                    |                                           |                                           |       |       |       |       | 62210 |
| Vaquita     | CCCATTTTGCCAAATGGGAAAGTGCCTGTTAAACT-                                                         | - - -                              | CCAGTAAGTATAATGAATCTCCCATTTTGGAAATTAAGAAA |                                           |       |       |       |       | 58584 |
| Pig         | CCCATTTTGCCAAATGGGAGAGGGCCTGTTAAATT-                                                         | - - -                              | CCAGTAAGTATA-ATGACTCTCATTTCGGAATTAAGAAA   |                                           |       |       |       |       | 57326 |



Dienstag, 3. Mai 2022 08:40

|             |                                                                                                  |                                                 |
|-------------|--------------------------------------------------------------------------------------------------|-------------------------------------------------|
| Majority    | X - - X - - - - - XX - - - - - A - TGCAC - XTGXXX - C - X - X - - - - XXX - - - - - XXXAATTCAT - |                                                 |
|             |                                                                                                  | 84490 84500 84510 84520 84530 84540 84550 84560 |
| Human       | ----- TTTGCA ----- AATTTCTT                                                                      | 66917                                           |
| PolarBear   | ----- TCCACT -----                                                                               | 27341                                           |
| Cow         | TAGTTTCCCTTCATACTTTTCATT - - - - AATATAAATGGCATTGTGACCACCAGTACCTGTATGTAACGTTTTTTGCCT             | 64192                                           |
| Dog         | ----- TGCACCGGAAGCCCGACG - - - - - TGGGATTTCGA -                                                 | 57903                                           |
| BelugaWhale | TTATGTTAGGTTTCTCCCCGCATC - - - - AGGTAAGAAAGCAT - ATGTATGCTGTTGGAAGAAAAC - - CCTAAGTTCATA        | 57309                                           |
| Donkey      | TATGTTTCATTTT - - - - - ATTCTACAATGGATTTGACCCACTTAATAAAAAACACAATGCAA                             | 63874                                           |
| Cat         | -----                                                                                            | 64682                                           |
| Ferret      | ----- TCCACT -----                                                                               | 65417                                           |
| Lion        | ATCTCACGGTCTGTGAGTTCGAGCCCCGCGTCGGGCTCTGTGCTGACAGCTCAGAGCCTGGAGCCTGTTTCAGATTCTGT                 | 62290                                           |
| Vaquita     | TTATGTTAGGTTTCTCCCCGCATC - - - - AGGTAAGAAAGCAT - ATGTATGCTGTTGGAAGAAAAC - - CCTAAGTTCATA        | 58656                                           |
| Pig         | TTGTACTTTTTTTCCCTCTCA - - - - - GGTA - AGAAGGCAT - ATGAATGCTATTACAAGAAAAAACCTAAACTCATC           | 57397                                           |

|             |                                                                                               |                                                 |
|-------------|-----------------------------------------------------------------------------------------------|-------------------------------------------------|
| Majority    | X - X - TX - - - - AXATTATATCAXCTAGAATCCTX - T - AT - X - - - - - X - - - - - XAX - - - - - X |                                                 |
|             |                                                                                               | 84570 84580 84590 84600 84610 84620 84630 84640 |
| Human       | CATCTAA - - - AGGTGATATTA ACTTAAACTAA - - - CAT - - - - - TA - - - - -                        | 66951                                           |
| PolarBear   | ----- TTTTTGCCTACCAGCATTG - - - - -                                                           | 27360                                           |
| Cow         | TTATTTACTTAGACTATAG - AACTAGAATCATTGT - GTCAGAGAAATGTTAAAGCCTTGTGATTCTTGTTTGAATTTCT           | 64270                                           |
| Dog         | ----- TCCCGGGTCTCCAGGATCGC - GCCCT - - - - -                                                  | 57928                                           |
| BelugaWhale | AGTATAATGAAAATTATATCAGTTATATTCTTTTTACC ACTCTCATCTTCTCTCCAGAATAGAAGAGGAAAAGCTCTA               | 57389                                           |
| Donkey      | AATCTG - - - CAACTAGTAGTTGATAGAGTCAAGATGAAGA - - - - - AAGAAT - - - - - AAGGAAAATGTTA         | 63931                                           |
| Cat         | -----                                                                                         | 64682                                           |
| Ferret      | ----- TTCTTGTTTACCAGCATTG - - - - -                                                           | 65436                                           |
| Lion        | GTCTCCCTCTCTCTCTGACCCCTCCCCGTTTCATGCTCTGTCTCAAAAATAAATAAACATTTAAAAAACAACAAAACAAA              | 62370                                           |
| Vaquita     | AGTATAATGAAAATTATATCAGTTATATTCTTTTTACC ACTCTCATCTTCTCTCCAGAATAGAAGAGGAAAAGCTCTA               | 58736                                           |
| Pig         | AGAATAGTTAAAATTATGTCAGTTATATTCTTTTT - ACTA - - - - - CTCTCATCTTCTCTCCAAAACAAAAGCTGTA          | 57468                                           |

Dienstag, 3. Mai 2022 08:40

| Majority    | - X- - - - - AT- - TATTTAATXCTGGATAAAATAXTTTTA- - - CCTTCAAGTXTACXTXATGXTTTTTTTGGATTTGCT       |       |
|-------------|------------------------------------------------------------------------------------------------|-------|
|             | 84650 84660 84670 84680 84690 84700 84710 84720                                                |       |
| Human       | - - - - - ATTATATATGAGGCTGGGTGTCCTACTTTTTCC- CCTGCCAGCATAC- - - - - TATTTTTTAATTTTCCAC         | 67013 |
| PolarBear   | - - - - - AGTATTA- - - - - TTTTTTGGATTTGAT                                                     | 27382 |
| Cow         | TTCCAGAATG- GTGATAATTAATTTAACATACATGGTATGTGAGGCTGGCTATTCTACTTTTTTCTGTTGAGCATTGAGT              | 64349 |
| Dog         | - - - - - GGGCCAAAGGCAGGCACCAAACCTGCTGCG- CCACCCAGGGATCCCCTAT- TTTTTTTGATTTGCT                 | 57991 |
| BelugaWhale | ATGAAGAA- - - ATACTGTTGAGTTCTTAATAAAATATTTACA- - - - CTTTAAATTGAAGTCATGCTGTCTAGGGCCCCTT        | 57462 |
| Donkey      | TT- - - - - TTG- TAAGTAAAATGAGTGAAGTGATTTATAG- - - CTTAAGATGAAATTTTAGTTTTCTTTTGTGTTGAT         | 63998 |
| Cat         | - - - - - TACATGAGGCTGGCTATTCCACTTTTTTC- CCTACTAGCATTGAGTATTATTTTTTTGATTTACT                   | 64746 |
| Ferret      | - - - - - ACTATTA- - - - - TTTTTTGGATTTGCT                                                     | 65458 |
| Lion        | AACTAATATGAATGGTATATGAGGCTGGCTATTCCACTTTTTTC- CCTACTAGCATTGAGTATTATTTTTTTGATTTACT              | 62449 |
| Vaquita     | ATGAAGAA- - - ATACTGTTGAGTTCTTAATAAAATGTTTACA- - - - CTTTAAATTGAAGTCATGCTGTCTAGGACCCCTT        | 58809 |
| Pig         | ATGAAGAA- - - ATACTGTTGAGTTTTGAATAAAATATTTATA- - - CTTTAAAGTTGACGTCATGTTGTCTAGGGCCCTGT         | 57542 |
| Majority    | - TGGATATTAATTTG- - - GGCATAGGXATXTGTCAGATTXTA- - - TTTAATTTXTATT- - - TA- TTTATGAGCTAXCTTA    |       |
|             | 84730 84740 84750 84760 84770 84780 84790 84800                                                |       |
| Human       | - - - AAGATTAATTTG- - - - - ATAGGCAAATGCC- - - TAT- - - - TTTAATTTCTGT- - - - - TAAGATTTAGTTTA | 67067 |
| PolarBear   | - AGGATATTAATTTGGTAGGAATAGGAATGTGTCAAATTAT- - - - TTTAATTTTAT- - - - TATTTTATGAGCTAGCTTA       | 27453 |
| Cow         | ATTAGTATTTTTATT- - - TGCTAGGGTATTAATAAGGATGTCAGATTATTTTAATTTTATCATTTTATGAACTAGTTTA             | 64426 |
| Dog         | TAGAATATTAATTTGATAGGAATAGGAATGTGTCAAGTTTTATTATTTAACTTTTATGAGCTAACTTATTAGACATTTTT               | 58071 |
| BelugaWhale | GTGCATATTCTTTAG- - - GGCCAATCTAATTGTTTCAATTTAGCACTGCACAGACAATGAAAAGTTAACAGATGCAACAT            | 57539 |
| Donkey      | GTGTTTGGGAATTCT- TGATTTCTGATGTTTGAAGATTCTC- - - TTTAATCACAGTGTCTA- TCCATATG- GAACCCA           | 64072 |
| Cat         | - - GGATATTAATTTG- - - - - ATAAGAATGTGTCAGGTTATT- - - - TTAATTTT- TA- - - - - TTATGAGCTAGCTTG  | 64806 |
| Ferret      | - AGGATATTAATTAGATAGGAATAGGAATGTGTCAAATTGT- - - - TTTAATCTTTAT- - - - TATTTTATGAGCCAACCTTA     | 65529 |
| Lion        | - - GGATATTAATTTG- - - - - ATAAGAATGTGTCAGGTTATTAT- TTTAATTTT- TA- - - - - TTATGAGCTAGCTTG     | 62512 |
| Vaquita     | ATGCATATTCTTTAG- - - GGCCAGTCTAATTGTTTCAAGTTTAGCACTGCACAGACAATGAAAAGTTAACAGATGCAACAT           | 58886 |
| Pig         | AC- - ATATTCTTTAG- - - GGCTAATCTAATTGTTTTAATTTAACACTGCACAGAAATCAGAAAGTTAACAGACCCAACAA          | 57617 |

Dienstag, 3. Mai 2022 08:40

| Majority    | XAATTTTTAAGTGCTTATTAGACATTT- - - AAGTCTCTGAATTGGTTGTCTAGXTTCTTTCTXXTGGGATGTACA- - - AT |                                                                           |       |       |       |       |       |       |
|-------------|----------------------------------------------------------------------------------------|---------------------------------------------------------------------------|-------|-------|-------|-------|-------|-------|
|             | 84810                                                                                  | 84820                                                                     | 84830 | 84840 | 84850 | 84860 | 84870 | 84880 |
| Human       | CAATCTTTAAATGTTTATTTGATAGTCAC-                                                         | AATTTGCTAAATTGCTTGCCTGCATTCTTTCTGTTAGGATGTACGGTAAT                        |       |       |       |       |       | 67146 |
| PolarBear   | TAATTTTTAAGTGCTCATTAGACATTTAC-                                                         | AATTCCTGAATTGGTTGTCTAGGTTCTTTCTATTGGGATGTACA- - - AT                      |       |       |       |       |       | 27529 |
| Cow         | TAATTTCTAAATGCTCATCAGATATTTA-                                                          | - - - CAAATCTGAATTGGTTGTGTGGATTCTTTCTTTGGAGTATACA- - - AG                 |       |       |       |       |       | 64500 |
| Dog         | AAATTTTTAAATTCTTATTAGACATTTAC-                                                         | ACGTCTCTGAATTGGTTGTCTAGGTTTTT- - - - - GGGATATACA- - - AT                 |       |       |       |       |       | 58141 |
| BelugaWhale | ATAATGG- GAGTAGGTGTATAGAATTT-                                                          | - - - - - TTTCAAAGCATATTATACTCTCT- - TTTAAACAAT- TTTA- - - AT             |       |       |       |       |       | 57604 |
| Donkey      | AGATTGTTGAGTTGCAAAGTAGCTCTT-                                                           | - - - - - ACAGTTTAGTTTATG- TCTA- - - TCGATAAAAAAAGAAAAAGC- - - AT         |       |       |       |       |       | 64140 |
| Cat         | TAATTTTTAAATGCTTACTAGACAG-                                                             | - - - - - AAGTCTCTGAATTGGTT- TCT- - - TTCTAT- - - - - TGGGATGTAC- - - - - |       |       |       |       |       | 64867 |
| Ferret      | GAATTTTTAAGTGCTTATTAGACATTTTCCAAGTCTCTGAATTGGTTGTCTAGGTTCTTTCTGTTGGGATGTACA- - - AT    |                                                                           |       |       |       |       |       | 65606 |
| Lion        | TAATTTTTAAATGCTTATTAGACAG-                                                             | - - - - - AAGTCTCTGAATTGGTTGTCT- - - TTCTAT- - - - - TGGGATGTAC- - - - -  |       |       |       |       |       | 62574 |
| Vaquita     | ATAATGG- GAGTAGGTGTATAGAATTT-                                                          | - - - - - TTTCAAAGCATATTATACTCTCTCTTTTAAACAAT- TTTA- - - AC               |       |       |       |       |       | 58953 |
| Pig         | GTATTGG- GAGTAGGTATAAGGATTTT-                                                          | - - - - - TTTCAAAGCATATTATAGCTTCTCTTAAAAACAAT- TTTA- - - AC               |       |       |       |       |       | 57684 |

| Majority    | TXATATAAAXTGTXATTAAGGTTATTX- - ATATT- - - - - T- - - CXTATGAGCTGAGCCTTCAACTTGATXC- - - - |                                                               |       |       |       |       |       |       |
|-------------|------------------------------------------------------------------------------------------|---------------------------------------------------------------|-------|-------|-------|-------|-------|-------|
|             | 84890                                                                                    | 84900                                                         | 84910 | 84920 | 84930 | 84940 | 84950 | 84960 |
| Human       | TCTTATAAAATGCATAGTAAGGATATTAATATGCATATT-                                                 | - - - - - TTGGATGAGCCAAGCCTTCAAGCTTTATTCACTT                  |       |       |       |       |       | 67218 |
| PolarBear   | ACATATAAATTGTGTATTAAGGGTATTC-                                                            | - - ATACT- - - - - T- - - CATATGAGCTGAGTCTTCAACTTGAT- - - - - |       |       |       |       |       | 27589 |
| Cow         | ACATGTTAAATGTATATTAAGGATATTTTGCTCCT-                                                     | - - - - - ATTTTATGAGCTGAGCATTCAAGCTTTATAC- - TG               |       |       |       |       |       | 64567 |
| Dog         | ATATGTA AAATGTGTATTAAGGATATAC-                                                           | - - ATATT- - - - - T- - - CATATGAGCTGAGTCTTCAACTTGAT- - - - - |       |       |       |       |       | 58201 |
| BelugaWhale | TAGAA- - - - TTTCATATAAAATTTATTTTGGTATTTATCAGTATTTGCGTTTTGTCTTAATCATTGTATTTCACCTCATT     |                                                               |       |       |       |       |       | 57680 |
| Donkey      | TATAATGAAGTAATTCTTGAAATAGATAATTATTTACCGTGGAT-                                            | - - ATGTAACAATTGTGCTGTCCATTTCGTTAA- - - -                     |       |       |       |       |       | 64214 |
| Cat         | - - ATGTA AAATGTGTTTTAAGGTTATCC-                                                         | - - ATATT- - - - - T- - - CATATAAGCTGAGTCTTCAACTTGATTC- - - - |       |       |       |       |       | 64927 |
| Ferret      | ACATGTA AAGTGTGTATTAAGGGTATTC-                                                           | - - ATACT- - - - - T- - - AGTATAAGCTGAGTCTCCAAGCTTGATA- - - - |       |       |       |       |       | 65667 |
| Lion        | - - ATGTA AAGTGTGTTTTAAGGTTATCC-                                                         | - - ATATT- - - - - T- - - CATATAAGCTGAGTCTTCAACTTGATTC- - - - |       |       |       |       |       | 62634 |
| Vaquita     | TAGAAAGAATTTTATATAAAATTTATTTTGGTATTTATCAGTATTTGCATTTTGTCTTAATCATTGTATTTCACCTCATT         |                                                               |       |       |       |       |       | 59033 |
| Pig         | TAGAAAGAATTTTATAGAAAATTTATTTTGGTATT-                                                     | - - - - - GCATTTTGTCTTGAACATCACATTTTGCCTG- TT                 |       |       |       |       |       | 57752 |

Dienstag, 3. Mai 2022 08:40

| Majority    | - - - TTACAATATTTT XGACXAACCTXTT TATAGAAAAATT- - - - - ATTTTTAAATAATT- - TATCTCAATCCAAA   |       |       |       |       |       |       |       |       |
|-------------|-------------------------------------------------------------------------------------------|-------|-------|-------|-------|-------|-------|-------|-------|
|             | 84970                                                                                     | 84980 | 84990 | 85000 | 85010 | 85020 | 85030 | 85040 |       |
| Human       | ATGTTAGGTCAGTTTTTGGAAAAGTATTTTTCAATAATCTCT- - - - - CTTTTTAAATAATT- - GATCTCAATCCAAA      |       |       |       |       |       |       |       | 67289 |
| PolarBear   | - - - TCACAATATTTT TAGACTAGCCAGTTTATAGAAAAATT- - - - - ATTTTTAAATAGTT- - TATCTCAATCCAAA   |       |       |       |       |       |       |       | 27655 |
| Cow         | - - - T TACTGTAGATTGG- - CCAGTTA- - TGGAAAAAAT- - - - - GTTTTTAAATAATT- - CATCATAATCCAAAC |       |       |       |       |       |       |       | 64628 |
| Dog         | - - - TCACAGTATTTT TAGAC- - ACCAGCTTATAGATGAGTT- - - - - ATTTTGAATAATT- - TATCTCAATCCAAA  |       |       |       |       |       |       |       | 58265 |
| BelugaWhale | - - - CTACAATGGATTTGACCCACCTAATCAAAAACAAAACAAAACACAGATTTGCAACTAATAGTTGACAGAGTCAAGAT       |       |       |       |       |       |       |       | 57757 |
| Donkey      | - - - ATATGTTATAAGTGATAAACATCTATGTGGGACACCT- - - - - GCCACACCACAGGT- - TGGCTTGAT- AAGCA   |       |       |       |       |       |       |       | 64279 |
| Cat         | - - - ACACAGTATTTTACACTAGCCAGTTTATAGAAAAATT- - - - - ATTTTTAAAT- - - T- - TATCTCAATCCAAAG |       |       |       |       |       |       |       | 64990 |
| Ferret      | - - - TTACAATATTTAAGACTAGCCAGTTTATAGAAAAATT- - - - - ATTTTTTAAATAATT- - TATCTCAATCCAAA    |       |       |       |       |       |       |       | 65733 |
| Lion        | - - - ACACAGTATTTTACGCTAGCCAGTTTATAGAAAAATT- - - - - ATTTTTAAAT- - - T- - TATCTCAATCCAAAG |       |       |       |       |       |       |       | 62697 |
| Vaquita     | - - - CTACAATGGATTTGACCCACCTAATCAAAAACAAAACAAAACACAAATTTGCAACTAATAGTTGACAGAGTCAAGAT       |       |       |       |       |       |       |       | 59110 |
| Pig         | - - - CTACAATGGATTTGACCCACCTAACCAAAAATAAAA- - - - - ATTTGAAACTAATAG- TGACAGAGTCAAGAT      |       |       |       |       |       |       |       | 57818 |

| Majority    | GTATCCATTTATAGGACATGAAGTTAATTTTTTAC- C- - - - - CCXACACATTTGTGGX- - ATATTGTAATCTTTAT     |       |       |       |       |       |       |       |       |
|-------------|------------------------------------------------------------------------------------------|-------|-------|-------|-------|-------|-------|-------|-------|
|             | 85050                                                                                    | 85060 | 85070 | 85080 | 85090 | 85100 | 85110 | 85120 |       |
| Human       | GTATTCATTTGTAGGACATGAAGACACAATTTTCT- - - - - TCTTCATACGTTTGGTGAATATTTTGATCTC- - -        |       |       |       |       |       |       |       | 67355 |
| PolarBear   | GTATCCATTTATTGGACATGAAGTTAACTTTTTTC- C- - - - - CCCACACATTTGTGG- - - CTATTGTGATCTTTAT    |       |       |       |       |       |       |       | 27722 |
| Cow         | ATTTCCATTTATAGGACATTAAGGTAACTTTGCAC- CCTCGCCCGCTTCACTCGCCTTTGGTGGATAGTATAATCTTCAT        |       |       |       |       |       |       |       | 64707 |
| Dog         | ATACCCATTTATAGGACTTGAAGTTAACTTTTTTC- C- - - - - CCCACACATTTGTGG- - - ATATTGTGATCTTTAT    |       |       |       |       |       |       |       | 58332 |
| BelugaWhale | GAAGAAAAATAAAGGAA- - AATGTTATTTTGTAA- - - - - AGTAAAATAAGTGATTTATAATTTAAGATGAAATTTT- - - |       |       |       |       |       |       |       | 57826 |
| Donkey      | GTGTGTATGTCCGCGCCCGGGATCCAAACCAGTGAATCCTGGGTGCGGAAGCAAGAGTGCATGAACTTTTAGCTGCTAC          |       |       |       |       |       |       |       | 64359 |
| Cat         | ATATCTATTTATCGGACATGAAGTTAATTTTTTCC- C- - - - - CC- - - ACATTGGTGG- - - ATATTGTCATCTTTAT |       |       |       |       |       |       |       | 65054 |
| Ferret      | ATATCCATTTATGGAACATGAAGTTAACTTTTTTC- C- - - - - CC- ATACATTTTGG- - - ATATTGTCATCTTTAT    |       |       |       |       |       |       |       | 65799 |
| Lion        | ATATCTATTTATCGGACATGAAGTTAATTTTTTCC- C- - - - - CT- - - ACATTGGTGG- - - ATATTGTCATCTTTAT |       |       |       |       |       |       |       | 62761 |
| Vaquita     | GAAGAAAAATAAAGGAA- - AATGTTATTTTGTAA- - - - - AGTAAAATAAGTGATTTATAATTTAAGATGAAATTTT- - - |       |       |       |       |       |       |       | 59179 |
| Pig         | GAAAAAATAAAGGGA- - - - AATGTTATTTTGTAA- CGAAAGTAAGTGAAGTGATTTGTAATCTAAGATGAAATTTT- - -   |       |       |       |       |       |       |       | 57890 |

Dienstag, 3. Mai 2022 08:40

| Majority    | - A - - XGAGTCACTTAXTATTTTXXCCTTTT - - - AAAGTAGTTTTCAAAC - - ACCGTTTATAG- G- - TAACATCCAAT - - - - |                                                  |                                                  |                                                    |                    |                    |                    |       |       |
|-------------|-----------------------------------------------------------------------------------------------------|--------------------------------------------------|--------------------------------------------------|----------------------------------------------------|--------------------|--------------------|--------------------|-------|-------|
|             | 85130                                                                                               | 85140                                            | 85150                                            | 85160                                              | 85170              | 85180              | 85190              | 85200 |       |
| Human       | - - - - -                                                                                           | AGTTTC- - - -                                    | CACTTCTCTTTTT- - - - -                           | - - - - -                                          | GCTTTTTAAAC- -     | ATTGTTTATGG- - - - | TGATATCCAAT- - - - |       | 67407 |
| PolarBear   | AA- -                                                                                               | GGAACCTCTTA- TGCTTTGCCTTTT- - -                  | AAAGTAGTTTTCAAAC- -                              | ATCCTTTATAG- TAATAACATCCAGT- - - -                 |                    |                    |                    |       | 27789 |
| Cow         | GA- -                                                                                               | AGAATCACTTACTATTTTACTTTTTT- -                    | AAAGTAGTGATCAGAC- -                              | GCTGTTTGTAGTGACTAGTGACATGC- AGT                    |                    |                    |                    |       | 64780 |
| Dog         | TA- -                                                                                               | GGAACCACTTA- TATTTTGCCTTTTTTAAAAGTTGTTTTCAAAC- - | ACCGTTTATAA- A- - -                              | GACCTCCAAT- - - -                                  |                    |                    |                    |       | 58399 |
| BelugaWhale | - - - -                                                                                             | ACAGTT- - - - -                                  | TTATTTGATGTATTC- -                               | AGGAAATTCTTGGTTTTCTGAAGTTTGTAA- GATTATCATTAAATGAGT |                    |                    |                    |       | 57894 |
| Donkey      | -                                                                                                   | ACCACCATGCCAGCCTCTTTAATTTTTT- - -                | ACATAGTCTTCAAAC- -                               | ACCCTGTATAG- - - -                                 | TGACATCCAGT- - - - |                    |                    |       | 64424 |
| Cat         | AA- -                                                                                               | GGAGCCACTTACTATTTTGCCTTTT- - -                   | ATAGTAGCTTTCAGGC- -                              | ACCCTTTATAG- C- - -                                | AACATCCAAT- - - -  |                    |                    |       | 65119 |
| Ferret      | AAAAGGAACCATCTA- TGTTTTGCCTTTT- - -                                                                 | AAAGTAGTTTTCAAAC- -                              | ACCCTTTATAG- T- - -                              | AACATCCAGT- - - -                                  |                    |                    |                    |       | 65865 |
| Lion        | AA- -                                                                                               | GGAGCCACTTACTATTTTGCCTTTT- - -                   | ATAGTAGCTTTCAGGC- -                              | ACCCTTTATAG- C- - -                                | AACATCCAAT- - - -  |                    |                    |       | 62826 |
| Vaquita     | - - - -                                                                                             | ACAGTT- - - - -                                  | TTATTTGATGTATTC- -                               | AGGAAATTCTTGGTTTTCTGAAGTTTGTAA- GATTATCATTAAATCAGT |                    |                    |                    |       | 59247 |
| Pig         | - - - -                                                                                             | ATAGTTTCCTTTTATTTGATGTATTC- -                    | AGGAAATTTTTGGTGCCTGAAGTTTGTGAAACTTATCTTTAAGTGAGA |                                                    |                    |                    |                    |       | 57964 |

| Majority    | - ATTACTTTAGTXAGGTCATGCCTTCTGGAATGGTAACTAAATCTTTTCTAT- GTTTA- TTTGCCTCCAAXTGATATTTAA |                                                                                    |                                                                |            |              |       |       |       |       |
|-------------|--------------------------------------------------------------------------------------|------------------------------------------------------------------------------------|----------------------------------------------------------------|------------|--------------|-------|-------|-------|-------|
|             | 85210                                                                                | 85220                                                                              | 85230                                                          | 85240      | 85250        | 85260 | 85270 | 85280 |       |
| Human       | -                                                                                    | ATTGCATGAGTGAGGTCATGCCTTTT                                                         | TAGAATAATAACTGAATCTTTTC- - - - -                               | T- - - - - | TCTAATTAT- - | TTAA  |       |       | 67469 |
| PolarBear   | -                                                                                    | ATTACTTTAGTGAGGTCATGTCTTCTGGAATGGTAACTAAATCTTTTCTAT- GTTTA- TTTGCCTCCAGTGAAATT- AA |                                                                |            |              |       |       |       | 27865 |
| Cow         | -                                                                                    | ATTGTTTTAGTAAGGTCATACCTTCTGGAATGGTGA                                               | CTAAATTTTTTCTCTGTTTA- TTTGCTTCCATTGATATCTAA                    |            |              |       |       |       | 64858 |
| Dog         | -                                                                                    | ATTACTTTTAATA- - - - -                                                             | GCCTTCTGGAGTGGTAACTAAATTTTTCTCTAT- GTTTA- TTTTCTCCAATGATATTTAA |            |              |       |       |       | 58470 |
| BelugaWhale | TGTTTCTATACATATGGAACCCAAGATTGATGAGT                                                  | CACAACTAGTTCTTACAGTTTAGTTTATGTTTATCAAT- - -                                        | TAA                                                            |            |              |       |       |       | 57971 |
| Donkey      | -                                                                                    | ATTGCTTTAGGGAGGTCCTGCTGTCTGGAATGGTAA                                               | CTAAATCTTTTCTAT- GTTTA- TTTGCCTCCAGTGATACGTAA                  |            |              |       |       |       | 64501 |
| Cat         | -                                                                                    | ATTACTTTAGTAAGGTCATGCCCTCTGGAATGGTAA                                               | CTAAATCTTTTCTAT- GTTTA- TTTGCCTGCAATGATATTTAA                  |            |              |       |       |       | 65196 |
| Ferret      | -                                                                                    | ATTACCTTAGTGAAGTCATGTTTTCTGGAATGGTAA                                               | CTAAATCTTCTCTAT- GCTTA- TTTGTCTCCAGTGAAATTTAA                  |            |              |       |       |       | 65942 |
| Lion        | -                                                                                    | ATTACTTTAGTAAGGTCATGCCCTCTGGAATGGTAA                                               | CTAAATCTTTTCTAT- GTTTA- TTTGCCTGCAATGATATTTAA                  |            |              |       |       |       | 62903 |
| Vaquita     | TGTTTCTATACATATGGAACCCAAGATTGATGAGT                                                  | CACAACTAGTTCTTACAGTTTAGTTTATGTTTATCAAT- - -                                        | TAA                                                            |            |              |       |       |       | 59324 |
| Pig         | -                                                                                    | ATTTCTGTACATATGTAACCCAAGATTGATGAGT                                                 | CACAACTGGTTCTTAGAGTTTAGTTTATGTTTATCAAT- - -                    | TAA        |              |       |       |       | 58040 |

Dienstag, 3. Mai 2022 08:40

| Majority    | T - - GTCAGGTGACTTCAA | AATACAAC-   | AACTAXTATTGAT-          | GXXA-                  | - GATCCATTTCTCTGCTGAGTCTTXCTCAAGCAG |                                         |           |           |
|-------------|-----------------------|-------------|-------------------------|------------------------|-------------------------------------|-----------------------------------------|-----------|-----------|
|             | 85290                 | 85300       | 85310                   | 85320                  | 85330                               | 85340                                   | 85350     | 85360     |
| Human       | T - - - CAGATGACTTCA- | - - - GCA-  | - - - AACTAATATTGGTGGG- | - - -                  | ATTA                                | ACTTCTCTGCTCAGTCTTCCAGTAACAG            |           | 67532     |
| PolarBear   | TAAGTCAGGTGACTTTCAA-  | - - - - -   | - - - - -               | - - - - -              | - - - - -                           | - - - - -                               | - - - - - | CAG 27888 |
| Cow         | T - - - CAGGTGACTTCA  | GATTACAAC-  | AACTAATATTGAT-          | AAGATCCATTTT           | CAGCTTG-                            | - - AGTCTTTCTTAAGCTG                    |           | 64929     |
| Dog         | TAAGTCAGGTGACTTTGAC   | ATACAAC-    | CAACTAGTATC-            | AT-                    | TG-                                 | - - - GATCCATTTCTCTGCTGAGTCTTCTTCAAACAG |           | 58543     |
| BelugaWhale | A - - - AAAGAAAAAGC-  | - ATTATAAT- | GAAGTAATTTTT            | GGAAATAGATATTT         | ACTTACTGT-                          | GAATATATAGCATGTGT                       |           | 58043     |
| Donkey      | TAAGTCAGATGACTTCAA    | AGTATGACC   | AACTAGTATTGATCCA-       | - - - -                | ATCCATTTTCTGCTAAGTCTTTCTCAAACAA     |                                         |           | 64576     |
| Cat         | T - - GTCAGGTGACTTCA  | ACATACAAC-  | AACTGGTATTGAT-          | GGTATTGATCCGTTT        | CTCTGCTGAGACTTCCTCAAGCAG            |                                         |           | 65272     |
| Ferret      | TAAGTCAGGTGACTTCA     | GCATACAAC-  | TCCCTAGTATCGAT-         | GG-                    | - - - GATCCATTTCTCTGCTGAGTCTTCCT-   | - - - CAG                               |           | 66012     |
| Lion        | T - - GTCAGGTGACTTCA  | ACATACAAC-  | AACTGGTATTGAT-          | GGTATTGATCCATTT        | CTCTGCTGAGACTTCCTCAAGCAG            |                                         |           | 62979     |
| Vaquita     | A - - - AAAGAAAAAGC-  | - ATTATAAT- | GAAGTAATTTTT            | GGAAATAGATATTT         | ACTTACTGT-                          | GAATATATAGCATGTGT                       |           | 59396     |
| Pig         | A - - - AAAGAAAAAGC-  | - ATTATAAT- | GAAGTAATTCTTA-          | - GATATTTATGTAGATATGT- | - - AACATTT                         | - - - - GTGT                            |           | 58103     |

| Majority    | TACTTGTTCAA   | AATGAAATAA  | ATTGATAG-                       | - - - - - | XTGACCCTTTATTTCAA | - - GATTCTGTAAGAACACAAGTACA-           | - A                          |           |
|-------------|---------------|-------------|---------------------------------|-----------|-------------------|----------------------------------------|------------------------------|-----------|
|             | 85370         | 85380       | 85390                           | 85400     | 85410             | 85420                                  | 85430                        | 85440     |
| Human       | TACTTGTTCAA   | AATGAAATAA  | ATTGATA-                        | - - - - - | GAGTATTTATTTCAA   | - - AATTTT-                            | TAAGAACACAAATATA-            | - A 67598 |
| PolarBear   | TACTTGTTCAA   | ATGAAATAA   | ATTGAT-                         | - - - - - | CTCCCTTTATTTAAA-  | - GATTCTGTAAGAACACAAGTACT-             | - A 27954                    |           |
| Cow         | TACTTGTTCAA   | AGTGAAATAA  | TTTATAG-                        | - - - - - | GTATCCCTGTGTTTCAA | - - AATTCTGTAAGAACACAGATAGAAA          |                              | 65001     |
| Dog         | TACTTGTTCAA   | ATAAATAA    | ATTGATAGCTAGCTATCTCTCTTTATTTCAA | - - - - - | GATTCT-           | TAAGAACACAAGTACT-                      | - A 58618                    |           |
| BelugaWhale | TATCCATTTATAA | ATGTAA-     | - TATAA-                        | - - - - - | GTGATAC-          | ATCTATGAACTGAGACACACTAATGCACAAGAGAAGCA |                              | 58114     |
| Donkey      | TACTTGTTCAA   | ATGAAATAA   | ATTGATGG-                       | - - - - - | ATATCCCTTTATTTCAA | - - GATTCTGTAAGAACACAAGTACA-           | - A 64646                    |           |
| Cat         | TACTTGTTCAA   | ATGAAATAA   | ATTGATAG-                       | - - - - - | ATGACCCTTTATTTCAA | - - GATTCTGTAAGAACACAAGTACT-           | - A 65342                    |           |
| Ferret      | TACTTGTTCAA   | ATGAAATAA   | ATTGATAG-                       | - - - - - | CTTCCTTTGTTTCAA   | - - GATTGTATAAGAACACAAGTACTT-          | A 66079                      |           |
| Lion        | TACTTGTTCAA   | ATGAAATAA   | ATTGATAG-                       | - - - - - | ATGACCCTTTATTTCAA | - - GATTCTGTAAGAACACAAGTACT-           | - A 63049                    |           |
| Vaquita     | TATCCATTTATAA | ATGTAA-     | - TATAA-                        | - - - - - | GTGATAC-          | ATCTATGAACTGAGACACACTAATGCACAAGAGAAGCA |                              | 59467     |
| Pig         | TAGCCGTTTGTA  | AAATAGGTAA- | - TATAA-                        | - - - - - | GTGATTC-          | ATCTTTGAAC-                            | - AGAGATACTAATGTACAAGAGAAGCA | 58172     |

Dienstag, 3. Mai 2022 08:40

| Majority    | AXTGATAC- - - - - TTXTTTTCTGCAAATATTTAGGGG- - - GATTCACCTTTACCTTGTAT- - - - - AATTTTT- - - ATA |           |            |        |         |         |          |           |               |           |         |           |       |
|-------------|------------------------------------------------------------------------------------------------|-----------|------------|--------|---------|---------|----------|-----------|---------------|-----------|---------|-----------|-------|
|             | 85450                                                                                          | 85460     | 85470      | 85480  | 85490   | 85500   | 85510    | 85520     |               |           |         |           |       |
| Human       | GGTGATAC-                                                                                      | - - - - - | TCTTTT     | GCTAAA | ATTTGT  | GGGGG-  | GCTTCA   | CTTTAC    | CTTGTAT-      | - - - - - | GATTTTT | TATATTA   | 67661 |
| PolarBear   | AGTGATCC-                                                                                      | - - - - - | TTCTTT     | TCTGCA | AATATTT | AGGGG-  | GATTAAC  | CTTTAC    | CTTGTAT-      | - - - - - | AATTTTT | - - - ATA | 28015 |
| Cow         | GAAAGTAAGTGAAGTCG-                                                                             | -         | CTCAGTAGT- | ATCCA  | ACTCTTT | GCGACCC | CATGGACT | GTAGCC    | CACCAGGCTCCT- | CTATC     |         |           | 65077 |
| Dog         | GATGGTCC-                                                                                      | - - - - - | TCCTTT     | TCTGCA | AATATTT | GGGGG-  | AATTCCT  | TTTACCT   | TGTAT-        | - - - - - | AATTTTT | - - - ATA | 58679 |
| BelugaWhale | TTTGACATGTGAAATTAATTCTGGTAAT-                                                                  | -         | TTTAGACA   | AAA    | ACTGACC | CTTTATT | CTA-     | - - - - - | GTTGTC-       | TAATA     |         |           | 58180 |
| Donkey      | GTTGATAAT-                                                                                     | - - - - - | TCTTTT     | TCTGCA | AATATTT | AGGGG-  | GATTCAC  | TTTGC     | CTTGTAT-      | - - - - - | AATTTTT | - - - ATA | 64708 |
| Cat         | AATA-                                                                                          | - - - - - | TTTTCT     | GCAA   | AATATTT | AGGG-   | AATTCAC  | TTTAC     | CTCGTAT-      | - - - - - | AATTTT- | - - - ATA | 65394 |
| Ferret      | AGTGATGC-                                                                                      | - - - - - | TTCTTT     | TCTGCA | AATATTT | AGGGG-  | GATTCAC  | TTTTC     | CTTGTAT-      | - - - - - | AATTTTT | - - - ATA | 66140 |
| Lion        | AATA-                                                                                          | - - - - - | TTTTCT     | GCAA   | AATATTT | AGGG-   | AATTCAC  | TTTAC     | CTCGTAT-      | - - - - - | AATTTT- | - - - ATA | 63101 |
| Vaquita     | TTTGATATGTGAAATTAATTCTGGTAAT-                                                                  | -         | TTTAGACA   | AAA    | ACTGACC | CTTTATT | CTA-     | - - - - - | GTTGTC-       | TAATA     |         |           | 59533 |
| Pig         | ATTGGTATTTGAAATTAATTTGGTAATTATTTATCTATTTGTTTGTCTTTTGGCCATTTCTTGGGCTGCTGCTGCGGTA                |           |            |        |         |         |          |           |               |           |         |           | 58252 |

| Majority    | TCTAAGG- - - ACTTGGCTGAATTT- - - GTAATCAAXAXX- - - XTAATA- - - CATTTTAATTGGTTTATTTTACAXAGTGATTT |        |         |           |          |         |            |         |          |           |          |            |          |       |       |
|-------------|-------------------------------------------------------------------------------------------------|--------|---------|-----------|----------|---------|------------|---------|----------|-----------|----------|------------|----------|-------|-------|
|             | 85530                                                                                           | 85540  | 85550   | 85560     | 85570    | 85580   | 85590      | 85600   |          |           |          |            |          |       |       |
| Human       | GATCTAG-                                                                                        | CTACTT | GACTGA  | AATTTA    | AATTACT  | TTTAGA  | ATCAGT     | ACTATA  | AAATTTT  | AATTGAT   | TTTATTTT | TACACAGT   | AATTT    | 67740 |       |
| PolarBear   | TTTAAGA-                                                                                        | - - -  | ACTTGA  | CTGA      | AATTT- - | GCAATCA | GTA- - - - | TAATA-  | CATTTTA  | AAT-      | GGTTTAT  | TTTACACT   | GTAATTT  | 28082 |       |
| Cow         | CGTTGGATTTTCCAGGCTAGAGTA-                                                                       | -      | CTGTAGT | GGGTT-    | GCCATTT  | CCTTTT  | CCAGGG     | GAATCTT | CCCGAT   | CCAGGGAT  |          |            |          | 65153 |       |
| Dog         | TCTGAGA-                                                                                        | - - -  | ACTTGA  | CTGA      | AATTT- - | GGAATCA | ATA- - - - | TAGTA-  | CATTTTA  | AATTGAT   | TTTGT    | TTTACACAGT | AATTT    | 58747 |       |
| BelugaWhale | CATCTAG-                                                                                        | - - -  | CACAAGT | CATAGCAG- | TTTATCAT | GACC-   | ATAATAG    | ATTCTTT | AGGTTGGT | AACATTCT  | TTTCTT   | GAGA-      |          | 58253 |       |
| Donkey      | TCTAAGT-                                                                                        | - - -  | ACATGA  | CTGA      | AATTTA   | AATTACT | TTTGA      | ATCAGT  | ATTATA   | AAATTTT   | AATTGAT  | TTTATTTT   | TACACAGT | AATT- | 64784 |
| Cat         | TCTAAGG-                                                                                        | - - -  | ATTTGG  | CTGA      | AATTC-   | GGAATCA | ATA- - - - | TTATA-  | CATTTTA  | AATTGG    | TTTAT    | TTTACATA   | AATGGTTT | 65462 |       |
| Ferret      | TCTAAGA-                                                                                        | - - -  | ACTTGA  | CTGA      | AATTT- - | GGAATCA | ATAACA-    | ATAATA- | CATTTTA  | AATTGG    | TTTAT    | TTTACACAGT | AATTT    | 66211 |       |
| Lion        | TCTAAGG-                                                                                        | - - -  | ATTTGG  | CTGA      | AATTC-   | GGAATCA | ATA- - - - | TTATA-  | CATTTTA  | AATTGG    | TTTAT    | TTTACATA   | AATGGTTT | 63169 |       |
| Vaquita     | CATCTAG-                                                                                        | - - -  | CACAAGT | CATAGCAG- | TTTATCAT | GACC-   | ATAATAG    | ATTCTTT | AGGTTGGT | AACATTCT  | TTTCTT   | GAGA-      |          | 59606 |       |
| Pig         | TATGGAGGTTCCAGGCTAGGGGT-                                                                        | -      | CTAATCG | GAGCT-    | GTAGCC   | GCCGGC  | CTATGCC    | CACAGCC | CCAGCA   | ACGCGGGAT |          |            |          | 58328 |       |

Dienstag, 3. Mai 2022 08:40

| Majority    | X- - - - TTAAGACT- - AGCTTTTATACTTGGCTTCTXTT- - - - - TT- ATTTTCT- - - - - X- - - - TTAGTGA- - -   |       |
|-------------|----------------------------------------------------------------------------------------------------|-------|
|             | 85610 85620 85630 85640 85650 85660 85670 85680                                                    |       |
| Human       | T- - - - TTAAGACT- - AACATTTATGTCTGGCTTTTCTG- - - - - TTTCT- - - - - TTAATG- - -                   | 67784 |
| PolarBear   | T- - - - TTAAGACT- - AGCTTTTATACCTGGCTTTTTTATACCTTTTCTTTTCT- - - - - T- - - - TTAGTAA- - -         | 28139 |
| Cow         | CGAACCCGGGTCT- - - - CCCACATTGTAGGCAGCCACTTCACCATCTGAGCCACCAGGGAAACAGATAACTAGGTGAT- -              | 65227 |
| Dog         | C- - - - TTAAGACT- - AGCCTTTATACCTGGCTCCTCTT- - - - - CTTTTTCT- - - - - T- - - - TTTATTA- - -      | 58794 |
| BelugaWhale | - - - - - GAATCT- - - - CTGTCACTGTGTGGGGCTAATTTAAGGCTTTATTCCT- - - - - CAACTTGG- - - - -           | 58305 |
| Donkey      | - - - - - TT- - T- - TAAGCTTCTAAT- - - - - TTCTTT- - - - - TAGTG- - -                              | 64810 |
| Cat         | A- - - - TTAAGACT- - AGCATTTATACTTGGCTTCTCTT- - - - - T- TTCTTTTAGT- - - - - G- - - - CTAGGGC- - - | 65513 |
| Ferret      | TA- - - TTAAGACT- - AGCTTTTATACTTAGCTTCTCTT- - - - - TTTTCT- - - - - T- - - - TTGGTAA- - -         | 66258 |
| Lion        | A- - - - TTAAGACT- - AGCATTTATACTTGGCTTCTCTT- - - - - T- TTCTTTTAGT- - - - - G- - - - CTAGGGA- - - | 63220 |
| Vaquita     | - - - - - GAATCC- - - - CTGTCACTGTGTGGGGCTAATTTAAGGCTTTATTCCT- - - - - CAACTTGG- - - - -           | 59658 |
| Pig         | CCAAGCCACATCTGCAACCTACACCACAACAGCTCATGGCAACGCCGGATCCTCAACCCACTGAGCAAGGCCAGGGATTG                   | 58408 |

| Majority    | - - - - - C- TA- AGGATCACAGT- - GTCTCAGAA- - - AATGTAXTTTTTTC- AAGAAGGXAGACTGAGTG- - CTTTGT |       |
|-------------|---------------------------------------------------------------------------------------------|-------|
|             | 85690 85700 85710 85720 85730 85740 85750 85760                                             |       |
| Human       | - - - - - C- TA- GGTATCACAGT- - GTCTCAGAA- - - AATGTAATTTGTTCAAAGAAAGGAGACTGAGTG- - CTTTGT  | 67846 |
| PolarBear   | - - - - - C- TA- GGGATTACAGT- - GTCTCAGAA- - - AATGTAATTTTTC- AAGAAGGAAGACTGAGGG- - CTTTGT  | 28200 |
| Cow         | AATTCCTTTCTGCCAAATATTTAGGGGATTCACTTTATTTTGTATCATTTTTGTATCTAAGCAGTTGACTGAGTTTAGT             | 65307 |
| Dog         | - - - - - C- TA- GGGATTACCGT- - GTTTCAGAA- - - AATGTAACTTTTTC- AAGAAGGAAGACTGAGTG- - CTTTGT | 58855 |
| BelugaWhale | - - - - - CTTGTAAGTAGATAAT- - - ATTGACTA- - TGGTGTACCATTTTTTAAAGTCAAGAGT- - - - - GAGA      | 58361 |
| Donkey      | - - - - - C- TA- GGGATCACTGT- - GTCTCAGAA- - - AATGTAATTTATTC- CAGAAGGGAGACCGAGTG- - CTTTGT | 64871 |
| Cat         | - - - - - T- TACAGTGTCTCAGT- - GTCTCAGAA- - - AATGTACTTCTTTC- AAGAAGGGAGACCTAGTG- - CTTTGT  | 65575 |
| Ferret      | - - - - - C- TA- AGGATTACAGT- - GTCTCAGAA- - - AATAGAATTTTTCCAGGAAGGAAGACTGAGGG- - CTTTGT   | 66320 |
| Lion        | - - - - - T- TACAGTGTCTCAGT- - GTCTCAGAA- - - AATGTACTTCTTTC- AAGAAGTGAAGACCTAGTG- - CTTTGT | 63282 |
| Vaquita     | - - - - - CTTGTAAGTAGATAAT- - - ATTGACTA- - TGGTGTACCATTTTTTAAAGTCAAGAGT- - - - - GAGA      | 59714 |
| Pig         | AACTCGCAACCTCCTGGTTCCTAGTCGGATTGTTAACCATTGAGCCATGACGGGAACTCCTAATTTTGGTAACTTGAGA             | 58488 |



Dienstag, 3. Mai 2022 08:40

| Majority    | AATT- - - - AATTAGAAATCTGACATCTAAATA- CATAATC- AC- AAATCXGGCAGACTATTAGTTATT- - - - CACATAT |                                                                                |            |       |       |       |       |       |  |
|-------------|--------------------------------------------------------------------------------------------|--------------------------------------------------------------------------------|------------|-------|-------|-------|-------|-------|--|
|             | 85770                                                                                      | 85780                                                                          | 85790      | 85800 | 85810 | 85820 | 85830 | 85840 |  |
| Human       | AATG- - - -                                                                                | AGTTTAAAATCTGACATCTAAAATACATAATC- AC- AAATGTGGCCGACTATTAGTCATT- - - -          | CACATAT    | 67915 |       |       |       |       |  |
| PolarBear   | AATT- - - -                                                                                | AATTAGAAATCTGACATCTAAATA- CATAATC- AC- AAACCTGTCAGACTATTAGTTATT- - - -         | CATATAT    | 28268 |       |       |       |       |  |
| Cow         | CATTTT                                                                                     | GGAATCAATATTATAAAATTTTAATTGGTTTATTTTACACAGTAAGTTTTTATGTGGCTTCTCTGCTTCTTTCTT    | 65387      |       |       |       |       |       |  |
| Dog         | TATT- - - -                                                                                | AATTAGAAATCTGACATCTAAATA- CATAATC- AC- AAACCCGGCCAACACTATTAGTTATT- - - -       | CACGTAT    | 58923 |       |       |       |       |  |
| BelugaWhale | CA- - - -                                                                                  | GTAATGAGTGATACA- - - - TGGCCT- - TTGCTT- - - - - GTAATTGTTACTGTGAATTCCTTA- - - | AATTTTTT   | 58421 |       |       |       |       |  |
| Donkey      | AATT- - - -                                                                                | AGTTAGAAATCTGACGTCTAAATA- CATAATC- AC- AAACGTGGCAGACTATTAGTTATT- - - -         | CACATAT    | 64939 |       |       |       |       |  |
| Cat         | AAAT- - - -                                                                                | AATTAGAAATCTGACATCTAAATA- CATAATC- AC- AAATCCAGCAGACTATTAGTTATT- - - -         | CACGTAT    | 65643 |       |       |       |       |  |
| Ferret      | AATT- - - -                                                                                | AATTGGAAATCTGACATCTAAATA- CATAATC- A- - AAACCTGGCAGAGTATTAATTATT- - - -        | CACATAT    | 66387 |       |       |       |       |  |
| Lion        | AAAT- - - -                                                                                | AATTAGAAATCTGACATCTAAATA- CATAATC- AC- AAATCCAGCAGACTATTAGTTATT- - - -         | CACGTAT    | 63350 |       |       |       |       |  |
| Vaquita     | CA- - - -                                                                                  | GTAATGAGTGATACA- - - - TGGCCT- - TTGCTT- - - - - GTAATTGTTACTGTGAATTCCTTA- - - | AATTTTTT   | 59774 |       |       |       |       |  |
| Pig         | CA- - - -                                                                                  | A- AATTAACCTTTTA- - TTCTAATTT- TCTGATACATCTAGCACACGTCATAGTAGTTTATC- -          | ATGACCATAT | 58558 |       |       |       |       |  |

| Majority    | TCTACTTCAGAGAACAAXGTGAT- - - AAAAATCCTTGAGATT- TATAAATTGAGACATCGTTATTATG- ATCATTTTA- - |                                                                  |                                        |       |       |       |       |       |  |
|-------------|----------------------------------------------------------------------------------------|------------------------------------------------------------------|----------------------------------------|-------|-------|-------|-------|-------|--|
|             | 85850                                                                                  | 85860                                                            | 85870                                  | 85880 | 85890 | 85900 | 85910 | 85920 |  |
| Human       | TCTGTTTCAAAGAACACAGT                                                                   | GAT- - CAAAAATCCTTCAGATT- -                                      | ATAAATTGAGACATCATTATAATGGATCATTTTA- -  | 67989 |       |       |       |       |  |
| PolarBear   | TCTACTTCATATAACAAAGT                                                                   | GAT- - AAAAATCCTTGAGATT- TATAAATTGAGACATCGTTACTATG- ATCATTTTA- - | 28341                                  |       |       |       |       |       |  |
| Cow         | TCAGAGTTAGGAATCACTGTGTCTTCAAAAATGCAGTTTATT- TAAGAATGGAGATGAGTGCTTTGTA- ATTAGTTAGAA     | 65465                                                            |                                        |       |       |       |       |       |  |
| Dog         | TCTACTTCATAGAACAAGT                                                                    | GAT- - AAAAATCCTTGAGATT- TATAAATTGAGACATCATTACTATG- ATCATTTTA- - | 58996                                  |       |       |       |       |       |  |
| BelugaWhale | TAACTGATAGAAATTATTTATA- GAAAAGACAAAAATCAGCATTTACTGAATAGTTTCTATGTCATA- GGCATTCTGCA      | 58499                                                            |                                        |       |       |       |       |       |  |
| Donkey      | TCTACTT- - - - -                                                                       | CAAGGTGAT- - CAGAAATCCTTGAGATT- -                                | ATAAATTGAGACATCATTATAATG- ATCATTTTA- - | 65005 |       |       |       |       |  |
| Cat         | TCTACTTCAAAGAACAAGGT                                                                   | GAT- - AAAAATCCTTGAGATT- -                                       | ATAAATTGAGACGTTGTTACTATG- ATCATTATA- - | 65715 |       |       |       |       |  |
| Ferret      | TCTACTTCATAGAACAAGAT                                                                   | GAT- - AAAAATTCTTGAGATT- TATAAATTGAGACATTGTTACTATG- ATCATTTTA- - | 66460                                  |       |       |       |       |       |  |
| Lion        | TCTACTTCAAAGAAAAAGGT                                                                   | GAT- - AAAAATCCTTGAGATT- -                                       | ATAAATTGAGATGTCGTTACTATG- ATCATTTTA- - | 63422 |       |       |       |       |  |
| Vaquita     | - AACTGATAGAAATTATTTATA- GAAAAGACAAAAATCAGCATTTACTGAATAGTTTCTATGTCATA- GGCATTCTGCA     | 59851                                                            |                                        |       |       |       |       |       |  |
| Pig         | TCATCTTGAGATAACATTCTTCCCAGAGAATCTGTGTACCGTGTGGCGTAATTTAAGCCTTTAT- - -                  | TCCCTTA- - -                                                     | 58632                                  |       |       |       |       |       |  |



Dienstag, 3. Mai 2022 08:40

| Majority    | GGAA- - - - -                           | GATAATGTGTACAAAGAXTACTTAA- -          | TGTTAGAGCTTTCCATGTATTTTGAGT- - - - -           |       |
|-------------|-----------------------------------------|---------------------------------------|------------------------------------------------|-------|
|             | 86090                                   | 86100                                 | 86110                                          | 86120 |
|             | 86130                                   | 86140                                 | 86150                                          | 86160 |
| Human       | GAGA- - - - -                           | GAGACTGTGTACAAAGAGTGT- A- -           | TTTTAGAGCTTTCTTGTATTTCAAAT- - - - -            | 68147 |
| PolarBear   | GGAA- - - - -                           | GATAATGTGTACAAAGAATACTTAA- -          | TGTTAGAGCTTTCTATGCATTTTGAGT- - - - -           | 28501 |
| Cow         | GGGGTGGATCACTTTT                        | TAGAAAATTGCTAAAAGTAATTTTCA- -         | TGATCACGCTATCTACATTTTTTAAATTAATGCAGT           | 65701 |
| Dog         | GAAA- - - - -                           | GATAATGTGTACAAAGAATACTTAA- -          | TGTTAGAACTTTCTATGCATTTTGAGT- - - - -           | 59148 |
| BelugaWhale | AGAA- - - - -                           | ACAAGGGTAAAATACCAAGAAA- - - -         | CTTCA- - - GCTAGCGTCAAACATATGACCGTAGTAATCACTTT | 58678 |
| Donkey      | GGCA- - - - -                           | GATAATGTATAAAAAGAATACTTA- -           | TTTTAGAACTTTCTAAGTATTTTGAGT- - - - -           | 65164 |
| Cat         | GGAA- - - - -                           | GGTGCCGTGTACAAAG- TACTT- - - -        | TG- - - GAGCTTTCCATGCATTTTGAGT- - - - -        | 65868 |
| Ferret      | GGAA- - - - -                           | GATAATATATACAAGGA- TACTTA- - -        | TATTAAGCTTTCTGTGCATTTTGAGT- - - - -            | 66619 |
| Lion        | GGAA- - - - -                           | GGTACTGTGTACAAAGAGTACTT- - -          | TA- - - GAGCTTTCCATGCGTTTTGAGT- - - - -        | 63577 |
| Vaquita     | AGAA- - - - -                           | ACAAGGGTAAAATACCAAGAAA- - - -         | CTTCA- - - GCTAGCGTCAAACATATGACCGTAGTAATCACTTT | 60053 |
| Pig         | CCTGCGACCTACATCGCAGCTGTGGCAACTGGGTCTTTA | ACCCTGCACTGGGC- CATGGGTTGAACCCGTGCCTC |                                                | 58855 |

| Majority    | - - - - - TGAAT- - - - -                                 | AAAGTA- - - - -            | XXGTCAGCCATCTCATCATAT- GGCCTTAACAGAAAGGC        | AAAACAAACTTTTT                       |       |
|-------------|----------------------------------------------------------|----------------------------|-------------------------------------------------|--------------------------------------|-------|
|             | 86170                                                    | 86180                      | 86190                                           | 86200                                | 86210 |
|             | 86220                                                    | 86230                      | 86240                                           |                                      |       |
| Human       | - - - - - TGAAT- - - - -                                 | AAAGTA- - - - -            | AACAGGCATTCTCATCATAAAGTTTTTAAAAGAAAGGC          | AAAGCAGACTTTCT                       | 68204 |
| PolarBear   | - - - - - TGAAT- - - - -                                 | AAAGTGG- - - - -           | CAGTCAGCCATTTTCATCATAT- GGCCTTAACAGAAAGGC-      | AAACAAATTTTTT                        | 28564 |
| Cow         | T- - AATACATTCCAAGAATAGAGCCTTCTGTGTGGCAGCCTTTCTCAT-      | CATATAGTTTTAAAAGAAAAGCAA   | AACTTTGT                                        |                                      | 65778 |
| Dog         | - - - - - TGAAT- - - - -                                 | AAAGTAA- - - - -           | GAGCAAGGTATCTCATCATAT- GACCTTAACAGAAAGGC        | CAGACCAAATTTTTT                      | 59212 |
| BelugaWhale | CT- - - TGGACCCTAAGAGC- - - - -                          | TATGTGTGTTTGCTTATTTGG- - - | GTGTA- - - - - -                                | GTTAGATGAG- - -                      | 58733 |
| Donkey      | - - - - - TGAAT- - - - -                                 | AAAGTA- - - - -            | TTAGTCAGCCATTC- - TCAAAG- GATCTTAGCAGAAAGGC     | CAGAGCACTTTTT                        | 65226 |
| Cat         | - - - - - TGAAT- - - - -                                 | AAAGTAA- - - - -           | TTGTCATCCATTTCTTCATAT- GGCCTTAACAAAAGGCAATACAAA | AACTTTTTT                            | 65932 |
| Ferret      | - - - - - TGAAT- - - - -                                 | AAAGTAG- - - - -           | CAGTCAGCCATCT- - - - -                          | TAT- GGCCTTAACAGAAAGGCTAAACAAGTTTTTT | 66678 |
| Lion        | - - - - - TGAAT- - - - -                                 | AAAGTAA- - - - -           | TTGTCATCCATTTCTTCATAT- GGCCTTAACAAAAGTCAATACAAA | AACTTTTTT                            | 63641 |
| Vaquita     | CT- - - TGGACCCTAAAAGC- - - - -                          | TATGTGTGTTTGCTTATTTGG- - - | GTGTA- - - - - -                                | GTTAGATGAG- - -                      | 60108 |
| Pig         | TGCAGTGGATTCTAACCCTGCACTGCACTGGGC- CATGGGTTGAACCCGTGCCTC |                            |                                                 |                                      | 58929 |



Dienstag, 3. Mai 2022 08:40

| Majority    | TXAG- GAGTGXGTCCCAGCA- GTTTGTAGTTTTTTAAGA- TCCCAAGATGGTTTTACTATGTAGTGGGAGTTGATAATTA |              |                 |            |                 |                 |               |       |       |
|-------------|-------------------------------------------------------------------------------------|--------------|-----------------|------------|-----------------|-----------------|---------------|-------|-------|
|             | 86410                                                                               | 86420        | 86430           | 86440      | 86450           | 86460           | 86470         | 86480 |       |
| Human       | TTAAAGAGTGGGT                                                                       | CACAGGC-     | ATTCCTATGTTTT   | TAGGA-     | TCTCAAGATGGTTTT | ACTATGTAGCAAGAG | TTGAGAATTA    |       | 68431 |
| PolarBear   | TAAG- TAGTGAGT                                                                      | CCTAGGA-     | GTTTGTAGTTT-    | - - AAGA-  | TCTCAAGATGGTTTT | ACTGTGTAATGAGAG | TTGATAATTA    |       | 28787 |
| Cow         | CTGC- AAGTGGGGT                                                                     | TCCGTGCATTT  | GTAATTGTTT      | AAGT-      | TCCAAGATGGTTTT  | ACTATGTAGTGGG   | AGTTGAGCATT   |       | 65999 |
| Dog         | TGTG- GAGTGAGT                                                                      | CCTAGCA-     | GTCCATAGTTT     | CTTAAGA-   | TCTCAAGATGCTTTT | ACTGTGTAATGGG   | AGTCTGATAAT   |       | 59418 |
| BelugaWhale | TAC- - - - -                                                                        | AGTTACACCATA | ACT- - AACTTCT- | - GTC-     | TTATTCAGTGCTTTT | ATCATTTC        | CAAGTGTTCACAT |       | 58918 |
| Donkey      | TTAG- GAGCGGGT                                                                      | CCCAGAC-     | GTTTCGTATTTTT   | TAAAGA-    | TCCCAGATGGT-    | TTACCATGCAGTGGG | AGTTGAGAATTA  |       | 65458 |
| Cat         | TGAG- GAGTGTGT                                                                      | CCCAGTA-     | GTTTGTAGTTTT    | CAAGA-     | TCCAAGATGGTTTT  | ACTCTGTAGTGG-   | AGTTGATAAATA  |       | 66162 |
| Ferret      | TGAA- TAGAGTCT                                                                      | CCTAGGA-     | GTTTGTAGTTTT    | TAAAGA-    | TCTCAAGATGGTTTT | ACTATGTAATGTGA  | ATTGATAATTA   |       | 66905 |
| Lion        | TGAG- GAGTGTGT                                                                      | CCCAGTA-     | GTTTGTAGTTTT    | CAAGAA     | TCCAAGATGGTTTT  | ACTGTGTAATGGG   | AGTTGATAAATA  |       | 63873 |
| Vaquita     | TAA- - - - -                                                                        | AGTTACACCATA | ACT- - AACTTCT- | - GTC-     | TTATTCAGTGCTTTT | ATCATTTC        | CAAGTGTTCACAT |       | 60295 |
| Pig         | CAGG- CTAGGGGT                                                                      | TGAATCGGAGCT | GTAGCCACC-      | GG- - - C- | CTACGCCAGAGCC   | ACAGCAACGTGGG   | ATCCGAGCCGCG  |       | 59140 |

| Majority    | - CTGCTATAGAGAAAAGTTXGTAA- - TTTTGTAGATGCTAAATTT- AGCTTTTTTA- - - - GCAAAGTTAATGGTGTCTCAA |               |                    |                  |                    |                      |             |         |       |
|-------------|-------------------------------------------------------------------------------------------|---------------|--------------------|------------------|--------------------|----------------------|-------------|---------|-------|
|             | 86490                                                                                     | 86500         | 86510              | 86520            | 86530              | 86540                | 86550       | 86560   |       |
| Human       | - CTGCTACAGAAA-                                                                           | G- - - - -    | - - - - -          | - - - - -        | - - - - -          | - - - - -            | - - - - -   | AGCTTGT | 68452 |
| PolarBear   | - CTGTTACAGAGAAA                                                                          | AGTTTGTAA-    | - TTCTTAGATGCTAAAT | TTTTAGCTTTTT     | AGCTAGCAAAGTTA     | AGGGTGTCTCAA         |             |         | 28864 |
| Cow         | - CTGCTATAGAGAAA                                                                          | AGTATGTAAT-   | - ATTTTAGATGCTTT   | ATTTTAGCTTTTTA-  | - - - GCACAGTTATT  | AGTGTCTCAT           |             |         | 66072 |
| Dog         | - CTGCTATAGAGAAA                                                                          | AGTTCGTAA-    | - TTTTGTAGATGGTAA  | ATTTTAGCTTTTTA-  | - - - GCAAAGTTAAT  | GGTGTCTCAA           |             |         | 59491 |
| BelugaWhale | - TTGC- ATTA                                                                              | AAAAGACTATG-  | - - - - -          | AGTAAAGTTGCTCAG  | TTT- - - TTAGTAA-  | - - - ATAAATTTGGT    | GTCTTCTTCAG |         | 58983 |
| Donkey      | - CTGCTATAGAGAAA                                                                          | AGTTTGTAAAT   | TTTTTAAAGTTCTAA    | ATTTTAGCTTTTTAG- | - - - - CAAAGTTATT | GGTGTCTCGT           |             |         | 65532 |
| Cat         | - C- - - - -                                                                              | AGAGAAAAGTTAG | TAA- - TTTTGTAGAT  | GCTAAATTT- AGCT  | TGTTA- - - -       | GCAAAGTTAACAGA       | ATTCTCAA    |         | 66228 |
| Ferret      | - CTGCTATTGAGAA-                                                                          | - GTTTGTAA-   | - TTTTGTAGATCCTA   | AGTTTAGCTTTTTA-  | - - - GCAAAGTTAAG  | AGTGTCTCAA           |             |         | 66976 |
| Lion        | - C- - - - -                                                                              | AGAGAAAAGTTAG | TAA- - TTTTGTAGAT  | GCTAAATTT- AGCT  | TTTTA-             | - - - GCAAAGTTAACAGA | ATTCTCAA    |         | 63939 |
| Vaquita     | - TTGC- ATTA                                                                              | AAAAGATTATG-  | - - - - -          | AGTAAAGTTGCTCAG  | TTT- - - TTAGTAA-  | - - - ATAAATTTGGT    | GTCTTCTTCAG |         | 60360 |
| Pig         | TCTGCAACCTACACC                                                                           | ACAGCTCAC-    | - GGCAACGCCGGAT    | CGTTA- ACCCACT   | GA- - - -          | GCAAGGGCAGGGAC       | GGAACCCG    |         | 59213 |



Dienstag, 3. Mai 2022 08:40

|             |                                                                                                   |       |       |       |       |       |       |       |
|-------------|---------------------------------------------------------------------------------------------------|-------|-------|-------|-------|-------|-------|-------|
| Majority    | ATAAAATTAACAAGTAAACTTTTTAAAT- - - - ATTCTTTTAAAATTATTTTTAAGTGATTTCTGAAAGCTT- - - - -              |       |       |       |       |       |       |       |
|             | 86730                                                                                             | 86740 | 86750 | 86760 | 86770 | 86780 | 86790 | 86800 |
| Human       | ATAAAATTAACTGGAAAACCTT- - - - - TGATTT- - - - - TCTTTCTTTG- - - - T- - T- - - - - - - - - - 68589 |       |       |       |       |       |       |       |
| PolarBear   | ATAAAATTAATAAGTAAACTTTAAAAT- - - - ATTCTTTTAATGTTATTTTTAAGTGATTTCTGAAGC- - - - - - - - - 29063    |       |       |       |       |       |       |       |
| Cow         | ATAAAATTAACAAGCAAACCTTGTTTTT- TAAATATTTTTAAAAACAATATTTTTAAAACCTTAAATGACTTGTGAAC- - - T 66301      |       |       |       |       |       |       |       |
| Dog         | ATAAGATTAACATGTAAACTT- - AAAT- - - - ATTTTTTAAAATTATTTTTAAGTGGTTTCTGAAATCTTTGGTTTT- CT 59691      |       |       |       |       |       |       |       |
| BelugaWhale | - - - - - TTTAGCAATAAAGTATTTTGT- - - AATTAAGGTATATACATTTTTTTTAGACATAATGATGTTTACACAC- - - T 59189  |       |       |       |       |       |       |       |
| Donkey      | TTAAAATCAACAAGTAAACTTATTTTTAAACTTAATTTTTAAAACCTTATTTTTAAAAGAGTTCTGAAAACCTTTTGTTTTTCT 65762        |       |       |       |       |       |       |       |
| Cat         | ATAAAATCAACAAGTAAACTTTAAAAC- - - - ATTCTTTTAAAATTATTTTTAAGTAATTTCTGAAAGCTT- - - - - - 66422       |       |       |       |       |       |       |       |
| Ferret      | ATAAAATTAACAATAAGCTTTGAAAT- - - - TTTCTTTGAAAGCTATTTTTAAATGATTTCTGACAC- - - - - - - - - 67181     |       |       |       |       |       |       |       |
| Lion        | ATAAAATCAACAAGTAAACTTTAAAAT- - - - ATTCTTTTAAAATTATTTTTAAGTAATTTCTGAAAGCTT- - - - - - 64141       |       |       |       |       |       |       |       |
| Vaquita     | - - - - - TTTAGCAATAAAGTATTTTGT- - - AATTAAGGTATATACATTTTTTTTAGACATAATGATGTTTACACAC- - - T 60567  |       |       |       |       |       |       |       |
| Pig         | CATTATTTAATCCTTAAATAACCAAAGCAGATGGCAACAAAATT- TATTTTCATAGTTTCTGAGAGGTTTAAA- - - - - 59438         |       |       |       |       |       |       |       |

|             |                                                                                                    |       |       |       |       |       |       |       |
|-------------|----------------------------------------------------------------------------------------------------|-------|-------|-------|-------|-------|-------|-------|
| Majority    | TTGTTACTTTTGAATGGGTTATTCACATGGTAATTTTTTAAAAC- TTTTTACTATCAXAGATTTTCAGTCATCATATACTA                 |       |       |       |       |       |       |       |
|             | 86810                                                                                              | 86820 | 86830 | 86840 | 86850 | 86860 | 86870 | 86880 |
| Human       | - - - - - ACATTTGTATGGGTTATTCATTTGGTAATATTT- - - - ATTAATTTATTATTAGAGATTTCA- - - GCTATTTGCTA 68657 |       |       |       |       |       |       |       |
| PolarBear   | TTGTTACTTTTGAATGGGTTATTCACATGGTAATTTTTAAGAGC- TTTTTACTGTTAAAG- - TTCAGTCATCATATAGCA 29140          |       |       |       |       |       |       |       |
| Cow         | CTTTTTTTTTTGAATGGGTTATTTACATGGTGATTTTTTAA- AAGCTTTTATTAAAGTTTTTTTTTTTTTATCATATACTG 66380           |       |       |       |       |       |       |       |
| Dog         | TTGTTACTTTTGAATGGATTATTTGCGTAGTAATTTT- - - AAAC- TTTTTACTATGAAAG- - ATTT- CAGTCATATACTA 59764      |       |       |       |       |       |       |       |
| BelugaWhale | - - - - TAATAGACTACAGTATACTGTAAACATAGCTTTTTGTA- TGCACAGGAAAATGATAAAATTTGTGTGACTCACTTTA 59264       |       |       |       |       |       |       |       |
| Donkey      | TTGTTACTTTTGAATGGATTATTCACATGGTAATTTTTTAAAAC- TTTTTATCATCAGAGATTTTCAGTCATCATATACTA 65841           |       |       |       |       |       |       |       |
| Cat         | TTGTTATTTTCAATGGGTTATTCATATGGTAGGTTTTAAAAC- TTTTTACTATCAAAGATTTTCAGTCATCATATACCA 66501             |       |       |       |       |       |       |       |
| Ferret      | TTGTTACTTTTGAATGGGTTAT- - - CATGGTAATTTTTTAAAAAAGTTTCTACTGTCAGAG- - TTCAGTCATTATATAGCA 67256       |       |       |       |       |       |       |       |
| Lion        | TTGTTATTTTCAATGGGTTATTCATATGGTAGGTTTTAAAAC- TTTTTACTATCAAAGATTTTCAGTCATCATATACCA 64220             |       |       |       |       |       |       |       |
| Vaquita     | - - - - TAATAGACTACAGTATACTGTAAACATAGCTTTTTGTA- TGCACAGGAAAATGATAAAATTTGTGTGACTCACTTTA 60642       |       |       |       |       |       |       |       |
| Pig         | - - - - - TTTGATGTGCAGGTCATTAAAGAAACAGTTTAAAGGTAATAAGCAAGAACTTCAGCTAGTGTCAAACATAGGA 59513          |       |       |       |       |       |       |       |





Dienstag, 3. Mai 2022 08:40

| Majority    | TTTCTT-----ACCAAACCATAATATGATTATCACACXXATCAAATTTGACAATGATTTCTT                  |       |       |       |       |       |       |       |       |
|-------------|---------------------------------------------------------------------------------|-------|-------|-------|-------|-------|-------|-------|-------|
|             | 87050                                                                           | 87060 | 87070 | 87080 | 87090 | 87100 | 87110 | 87120 |       |
| Human       | TTTCTT-----ACCAAACCATAATATGATTATTACACTTACCAGAATTGACAATGATTTCTT                  |       |       |       |       |       |       |       | 68866 |
| PolarBear   | TTTCTT-----ATCAAACCATAATATGATGATCATACCCATCAAGTTTGACAATGATTTCTT                  |       |       |       |       |       |       |       | 29343 |
| Cow         | TTTCTTA---GCAACCATACCTGATGGAAGTTGATTA AACCTGATCATAAACTTACCAAATTTGAGAATGGTCTCTT  |       |       |       |       |       |       |       | 66602 |
| Dog         | TTTCTTTTTTTAATAATGACATTTTCTTATCAAACCATAATATGATTATCACACTCATCAAATTTGACAGTGATTTCTT |       |       |       |       |       |       |       | 59997 |
| BelugaWhale | TAT-----GTGAATTCACCTTCCTTTACCAAAT---GACTTCATCG-----TTTACCTGTTTT---AATGGTTTTAC   |       |       |       |       |       |       |       | 59446 |
| Donkey      | TTTCTT-----ACCAAACCATAATGTGATTATCA-ACCTATCAAATTTTTCAATGATTTCTT                  |       |       |       |       |       |       |       | 66046 |
| Cat         | TTTCTT-----ACCAAACCATAATATGATTATCACACCCATCAAATTTGACAGTGACTTCTT                  |       |       |       |       |       |       |       | 66712 |
| Ferret      | TTTCTT-----ATCAAACCATAATATGATTATCATACCCATCAAATTTGACAGTGATTTCTT                  |       |       |       |       |       |       |       | 67464 |
| Lion        | TTTCTT-----ACCAAACCATAATATGATTATCACACCCATCAAATTTGACAGTGACTTCTT                  |       |       |       |       |       |       |       | 64431 |
| Vaquita     | TAT-----GTGAATTCACCTTCCTTTACCAAAC---GACTTCATCG-----TTTACCTGTTTT---AATGGTTTTAC   |       |       |       |       |       |       |       | 60824 |
| Pig         | TTTTTCC---TTGAAAGCTCATGGCCTTGGTGGATTTTTTTTTAAGTA-ATAACAAGTCTTTTTGAAGAAAGATTATGA |       |       |       |       |       |       |       | 59727 |

| Majority    | AATGTCATTGAATACCCAATCCATCTTCAAATTTCCCCAGTTGTCTCAAAAAA-TGTXTTTTAAGXGTTGATTTGTTTCAG  |       |       |       |       |       |       |       |       |
|-------------|------------------------------------------------------------------------------------|-------|-------|-------|-------|-------|-------|-------|-------|
|             | 87130                                                                              | 87140 | 87150 | 87160 | 87170 | 87180 | 87190 | 87200 |       |
| Human       | AATGTCCTCAAATACCCAGCTTACATTTAAATTTCCCCAATTATTTTGAAAAT---GCTTTTAAAGTTTGATTTGTTTCAG  |       |       |       |       |       |       |       | 68943 |
| PolarBear   | AATGTCATTGAATACCCAATCCATGTTCAAATTTCCCCAGTTGTCTCAAAAAA-TGATTTTTAAGAGTTGATTTGTTTCAG  |       |       |       |       |       |       |       | 29422 |
| Cow         | AATGTTG-A-ATACCCAGTTCATCTTGAA-TTTCCCCAATTGTCTCAAAAAA-TGTTTTTAAAGGTTGATTTGTTTCAG    |       |       |       |       |       |       |       | 66677 |
| Dog         | AATGTCACTGAATACCCAATCCATCTTCAAATTTCCCCAGTTGTCTCAACA-----TATTTTAAAGACTTGATTTGTTTCAG |       |       |       |       |       |       |       | 60072 |
| BelugaWhale | ATCTT-----ATAACTGGGTTTTTTTA-----TTTTAAATGTCTGCAGATAG-TTTTTGAAAATGGGTGAGTTATAAGT    |       |       |       |       |       |       |       | 59514 |
| Donkey      | AATGTCGTTGAATACCCAGTCCATCTTCAAATGTCCCCAGTTGTCTCAAGAAATGTTTTTTAAGGTTTATTTGTTCAA     |       |       |       |       |       |       |       | 66126 |
| Cat         | AATGTCATTGAGTACTCAATCCATCTTCAAATTTCCCTGGTTTTCTCAAAAAA-TGATTTTTAAGAGTTGCTTTGTTTCAG  |       |       |       |       |       |       |       | 66791 |
| Ferret      | AATGTCATTGAATACCCAATCCATCTTCAA-TTTCCCCAGTTGTCTCAAAAAAATGATTTTTAAGAGTTGATTTGTTTCAG  |       |       |       |       |       |       |       | 67543 |
| Lion        | AATGTCATTGAGTACTCAATCCATCTTCAAATTTCCCCGTTTTCTCAAAAAAATGATTTTTAAGAGTTGCTTTGTTTCAG   |       |       |       |       |       |       |       | 64511 |
| Vaquita     | ATCTT-----ATAACTGGGTTTTTTTA-----TTTTAAATGTCTGCAGATAG-TTTTTGAAAATGGGTGAGTTATAAGT    |       |       |       |       |       |       |       | 60892 |
| Pig         | AGCCCTG-ACATAACTAACTTGTGTC-----TTGTTTCAGTGCTTTTATAAGT-CATTTTTCAAGTACTGCACATTTTGC   |       |       |       |       |       |       |       | 59799 |



Dienstag, 3. Mai 2022 08:40

|             |                                                                                                                              |       |
|-------------|------------------------------------------------------------------------------------------------------------------------------|-------|
| Majority    | - - - GAGAAAGTCCTACAGTCTGGATTGGTGTGGCTGTTT- - - CTTTGTAGTGT CATCTT- - - - - AACTTGTTCTC- -                                   |       |
|             | 87370            87380            87390            87400            87410            87420            87430            87440 |       |
| Human       | - - - - AGAAAGTTTCACAGATTAGACTAGTCTGGCTGTTT- - - - CTTTAGAGTGT CATGTT- - - - - AACTTGTTCTC- -                                | 69142 |
| PolarBear   | - GAGAAAAAGCCCTACTGTCTTAATTGGTGTGGCTGTTT- - - - CTTTGTAGTGT CACCTTT- - - - - AACTTGTTCTC- -                                  | 29623 |
| Cow         | AGAAACCTAGTTATATCCTTTTAGAAAAATGCCACAGTCTG- - GATTGGTCTGGCTATAGTAGCATTAACTTGTTCTT- - -                                        | 66910 |
| Dog         | - - GGGGAAAGTCCTACAAACTTGATTGGTGTGGCTGTTT- - - - CTTTGTAGTGT CATCTT- - - - - AACTTGTTCTC- -                                  | 60270 |
| BelugaWhale | - - - - ACTGAG- - AATTTTTTTTAAAAATTGATAATTATAATA- GCTTCATAACATTCTAGTGGATATATAATACTTTTG- -                                    | 59713 |
| Donkey      | - - - - AGAAACTTCCACAGTCTGGATTG- TCTGGCTGTTT- - - - CTTTGTAGTGT CATCTT- - - - - AACTTGTTCTTC- -                              | 66323 |
| Cat         | - - - GAGAAAGTCCTACAGTCTGGATTGGTGTGGCTCTTT- - - - TTTTGTAGTGT CATCTT- - - - - AACTTGTTCC- -                                  | 66982 |
| Ferret      | - GAGAAAAAATCCTTTAGTCTTGATTGGTGTGGCTGTT- - - - CTTTGTAGTGT CATCGT- - - - - AACCTGTTCTC- -                                    | 67736 |
| Lion        | - - - GAGAAAGTCCTACAGTCTGGATTGGTGTGGCTCTTT- - - - TTT- GTAGTGT CATCTT- - - - - AACTTGTTCC- -                                 | 64693 |
| Vaquita     | - - - - ACTGAG- - AATTTTTTTTAAAAATTGATAATTA- - - - - GCTTTATAACATTCTAGTGGATATATAATACTTTTG- -                                 | 61083 |
| Pig         | GCAAATTGA- - - AGGTTCCATGGCAACCCTCCCTTGT CAGATGATGGGTAGCATTCTTTTAGCAGTAATATGTTTTTAAC                                         | 60031 |

|             |                                                                                                                              |       |
|-------------|------------------------------------------------------------------------------------------------------------------------------|-------|
| Majority    | - CATCCAT- TG- CATTTTTTATGTAAACCAGAAGTTAGCTCCAAAAGCTTGATTAGATTTAGATTCTGT- - - - TATT- - -                                    |       |
|             | 87450            87460            87470            87480            87490            87500            87510            87520 |       |
| Human       | - TATCTGC- TG- TGTTTCTTATATAAACTTAAAGTTAGTTCCAAAAGCTTGATAAGATTTAGAGCCTTT- - - - - - - - - - -                                | 69208 |
| PolarBear   | - CATCCAT- TG- CATTTTTTATGTAAACCAGAAGTTAGCTCCAAAAGCTTGATTAGATTTAGGTTCTGT- - - - TATTTAT                                      | 29696 |
| Cow         | CAATCCAC- TG- CATCTTTTATATAAATAAGAAATTAGCTCCAAAAGCTAGATTAGATTCAGATTCTGT- - - - TATT- - -                                     | 66981 |
| Dog         | - CATCCAC- TG- CATATTTTATGTAGACCAGAAGTTCGCTTCCAAAAGCTTGATTAGATTTATGTCCTGT- - - - TA- - - - -                                 | 60338 |
| BelugaWhale | - GAAGTAT- - - - - GTTGGACATTTAGTC- - - - - - - - - - - TACTTTCATAC- - - - - - - - - - - TTTTCAT- TAGTA- - - TAAA- - -       | 59762 |
| Donkey      | - CATCCACTGCGTTTTTTTTAATGTAAACTAGAAGTTAGCTCCAAAAGCTTGATGAAGTTTAGGTTTTGTTATTTGTTTGC                                           | 66402 |
| Cat         | - - - - - - - - - - - A- - - - - - - - - - - TGTGAACCAGAAGTTAACTCCAAAAGCTTGATTAAATTTAGATTCTGT- - - - TATT- - -               | 67035 |
| Ferret      | - CATCCAT- TGGCATTTTTTTATGTAAACCAGAATTTAGCTCCAAAAGCTTCATTAGATTTAGGTTCTGT- - - - TATTTAT                                      | 67810 |
| Lion        | - - - - - - - - - - - A- - - - - - - - - - - TGTGAACCAGAAGTTAACTCCAAAAGCTTGATTAAATTTAGATTCTGT- - - - TATT- - -               | 64746 |
| Vaquita     | - GAAGTAT- - - - - GTTGGACATTTAGTC- - - - - - - - - - - TACTTTCATAC- - - - - - - - - - - TTTTCAT- TAGTA- - - TAAA- - -       | 61132 |
| Pig         | TAAGGTATATA- CATTGTTTTTTTAGACATAATGCTGTTTGCACA- - CTTAAC- AGATTACAATATAGTG- - - TAAA- - -                                    | 60101 |

Dienstag, 3. Mai 2022 08:40

| Majority    | - TATATTTTTCAA- - - - - XCAAGAATACTTAATAG- - - XTXTTCTTGTGTTTCATATTGTATXT- - GTTGGAAGCAT |           |                                                             |                              |                                         |                             |           |           |       |
|-------------|------------------------------------------------------------------------------------------|-----------|-------------------------------------------------------------|------------------------------|-----------------------------------------|-----------------------------|-----------|-----------|-------|
|             | 87530                                                                                    | 87540     | 87550                                                       | 87560                        | 87570                                   | 87580                       | 87590     | 87600     |       |
| Human       | - TTTTTTTTTGA-                                                                           | - - - - - | - - - - -                                                   | - - - - -                    | - - - - -                               | - - - - -                   | - - - - - | - - - - - | 69260 |
| PolarBear   | TTATATTTTTCAA-                                                                           | - - - - - | GCAAGAGTACTTTATAG-                                          | - - - - -                    | GTGTTCTTGTGTTTCATATTGTATCTCAGTTGGAAGCAT | - - - - -                   | - - - - - | - - - - - | 29765 |
| Cow         | - TACATTTTTAAA-                                                                          | - - - - - | GCAAGAATATGGAATAT-                                          | GATGTTCTTGTGATCTCAGTTGGAAGC- | - - - - -                               | GTAAAATATAT                 | - - - - - | - - - - - | 67049 |
| Dog         | - CATTTTTTTCAA-                                                                          | - - - - - | GCAGGAATACTTTATAGTAGGTGTTCTTGTGTTTCATGTTGTATCTTAATTGGAAACAT | - - - - -                    | - - - - -                               | - - - - -                   | - - - - - | - - - - - | 60409 |
| BelugaWhale | - TGGTGCTGTGAC-                                                                          | - - - - - | AAACACCTGTACA-                                              | - - - - -                    | TAACTTTTTTGTCTCTTATT-                   | - - - - -                   | - - - - - | TACTTAG   | 59814 |
| Donkey      | TTATATTTTTAAA-                                                                           | - - - - - | GCAAGAATACTTTATAG-                                          | - - - - -                    | GTGTTCTTGTGCTTCATATTGTATCTTGGTTGGAAGCAT | - - - - -                   | - - - - - | - - - - - | 66472 |
| Cat         | - TCTATTTCTCAAGAATATTCATAGGAATACTTCATAG-                                                 | - - - - - | - - - - -                                                   | GTGTTCTTGT-                  | - - - - -                               | TTCATGTTGTATGTCTATTGGAAGCAT | - - - - - | - - - - - | 67109 |
| Ferret      | TCATATTTTTCA-                                                                            | - - - - - | GCAAGAATACTTCATAG-                                          | - - - - -                    | GTATTCTTGTGTTTCATA-                     | - - - - -                   | - - - - - | - - - - - | 67857 |
| Lion        | - TCTATTTCTCAAGAATATTCATAGGAATACTTCATAG-                                                 | - - - - - | - - - - -                                                   | GTGTTCTTGT-                  | - - - - -                               | TCCATATTGTATGTCTATTGGAAGCAT | - - - - - | - - - - - | 64820 |
| Vaquita     | - TGGTGCTGTGAC-                                                                          | - - - - - | AAACACCTGTACA-                                              | - - - - -                    | TAACTTTTTTGTCTCTTATT-                   | - - - - -                   | - - - - - | TACTTAG   | 61184 |
| Pig         | - CATAGTCTTTAT-                                                                          | - - - - - | ATGC- ACTGGGAAACTA-                                         | AACAAATTGTATGACTCACGTTATG-   | - - - - -                               | GCAATGCTCAC                 | - - - - - | - - - - - | 60165 |

| Majority    | AAAACATCTGGTTATCCCAC- - - - - TTTTAGTGATGCTTTAAGATAGATTG- TGGTTCAGGTGGTGACATTCTGAT |           |                                                    |                          |                          |           |           |           |       |
|-------------|------------------------------------------------------------------------------------|-----------|----------------------------------------------------|--------------------------|--------------------------|-----------|-----------|-----------|-------|
|             | 87610                                                                              | 87620     | 87630                                              | 87640                    | 87650                    | 87660     | 87670     | 87680     |       |
| Human       | CTAATATCTGGTTGCCCACTTTTAGTGATTTTAATGATGCTTTAAGACTGATTGTGGATTTGGGTGTTGACATTCTGAT    | - - - - - | - - - - -                                          | - - - - -                | - - - - -                | - - - - - | - - - - - | - - - - - | 69340 |
| PolarBear   | AAAATATCTGGTTATCCCAC-                                                              | - - - - - | GTTTGGTGATGCTTCAAGATGAATTG-                        | TGGTTCAGGTGGTGACATTCTGAT | - - - - -                | - - - - - | - - - - - | - - - - - | 29835 |
| Cow         | GGTTGGGTCACTTTTAGTGA-                                                              | - - - - - | TTTAGTGATACTTTAAGATTGT-                            | - - - - -                | GGTTTCAGGTGGTGACATTCTGAT | - - - - - | - - - - - | - - - - - | 67116 |
| Dog         | AAAACATCTGGTTATCCCAC-                                                              | - - - - - | ATTGAGTGTGCTTTAAGACAGATTG-                         | TGGTTCAGGTGGTGACATTCTGAT | - - - - -                | - - - - - | - - - - - | - - - - - | 60479 |
| BelugaWhale | ACTAG- - - - ATTCCTAGAAC-                                                          | - - - - - | TAGAATCATTGGGTCAAAGAAAA-                           | - - - - -                | TGTAAAGCCTTCTGAATCTTGTT  | - - - - - | - - - - - | - - - - - | 59877 |
| Donkey      | AAAACGTCTGATTATCCCAC                                                               | - - - - - | TTTAGTGATGTTTTAAGATTGATTGTCGTTTCAGGTAGTGACATTTTGTT | - - - - -                | - - - - -                | - - - - - | - - - - - | - - - - - | 66552 |
| Cat         | AAAACATCTGGTTATCCCAC-                                                              | - - - - - | TTTAGTCATGTTTTAAAATAGATTG-                         | TAGTTTAGGTG-             | - - - - -                | TTATGAT   | - - - - - | - - - - - | 67173 |
| Ferret      | - AAACATCTGGTTATCCCAT-                                                             | - - - - - | GTTTAGTGATGCTTTAAGATGGATTG-                        | TGGTTCAGGTGGTGACATTCTGAT | - - - - -                | - - - - - | - - - - - | - - - - - | 67926 |
| Lion        | AAAACATCTGGTTATCCCAC-                                                              | - - - - - | TTTAGTCATGTTTTAAAATAGATTG-                         | TAGTTTAGGTG-             | - - - - -                | TTATGAT   | - - - - - | - - - - - | 64884 |
| Vaquita     | ACTAG- - - - ATTCCTAGAAC-                                                          | - - - - - | TAGAATCATTGGGTCAAAGAAAA-                           | - - - - -                | TGTAAAGCCTTCTGAATCTTGTT  | - - - - - | - - - - - | - - - - - | 61247 |
| Pig         | TTTCCTATGATACTTGCT-                                                                | - - - - - | TTATTGTGGTGGTCCGGAACCAA-                           | - - - - -                | AGCTGCAGTATCTGAAGTATTCT  | - - - - - | - - - - - | - - - - - | 60230 |



Dienstag, 3. Mai 2022 08:40

| Majority    | ATTTTCC- - - - - TTCATCAACT- - - - - AGGXCTGTTTACCTTGTAAATTXAATTTGTTCAAGAC- - - T- - - AGTT |                                                                        |                                                 |          |       |       |       |       |  |
|-------------|---------------------------------------------------------------------------------------------|------------------------------------------------------------------------|-------------------------------------------------|----------|-------|-------|-------|-------|--|
|             | 87850                                                                                       | 87860                                                                  | 87870                                           | 87880    | 87890 | 87900 | 87910 | 87920 |  |
| Human       | ATTTTCC- - - - -                                                                            | TTCATCAACT- - - - -                                                    | AGAATTATCAACCTTGTAAATTCAATTTGTGCAGGACAATT- - -  | AGTT     | 69556 |       |       |       |  |
| PolarBear   | GTTCTCC- - - - -                                                                            | TTCATCGACT- - - - -                                                    | AGGGCTGTTTACCTTGTAAATACAGTTTGTACAGGAC- - - - -  | AGTT     | 30040 |       |       |       |  |
| Cow         | CCTTTGTCAACTAGGGCTATTTACAGTTTGTGCAGGACAGTTAGTTAAGTTCTTGAATTTATTTGCTAATTTTTTA- - -           | GT                                                                     | 67335                                           |          |       |       |       |       |  |
| Dog         | GTTTTCC- - - - -                                                                            | TTCATCAACT- - - - -                                                    | AGGACTGTTTACCTTGTAAATGCAATTTGTGCAGGAC- - - - -  | AGTT     | 60679 |       |       |       |  |
| BelugaWhale | TATTAG- - - - -                                                                             | GTACTTACA- - - - -                                                     | AGTCTCTGAATTGGTTGTCTGGATTCTTTCTAT- - - - -      | TAGGACGT | 60070 |       |       |       |  |
| Donkey      | ATTTTCC- - - - -                                                                            | TTCTTCAACT- - - - -                                                    | AGGGCTGTTTACCTTGTAAAT- TGGTTTCTGCAGGACAGTT- - - | AGTT     | 66764 |       |       |       |  |
| Cat         | ATTTTCC- - - - -                                                                            | TTCATCAACT- - - - -                                                    | AAGGCTGTTTACCTTATAAT- TGGTTTGTCTAGAC- - - - -   | AGTT     | 67370 |       |       |       |  |
| Ferret      | GTTTTCC- - - - -                                                                            | TTCATCAACT- - - - -                                                    | AGGTCTATTTACTTTGTAAACAATTTGTACAGGAC- - - - -    | AGTT     | 68124 |       |       |       |  |
| Lion        | ATTTTCC- - - - -                                                                            | TTCATCAACT- - - - -                                                    | AAGGCTGTTTACCTTATAAT- TGGTTTGTCTAGAC- - - - -   | AGTT     | 65081 |       |       |       |  |
| Vaquita     | TATTAG- - - - -                                                                             | GTACTTACA- - - - -                                                     | AGTCTCTGAATTGGTTGTCTGGATTCTTTCTAT- - - - -      | TAGGATGT | 61436 |       |       |       |  |
| Pig         | AATTTTTA- - -                                                                               | TGGCTATACTCACAGCAGGTGGAAGTTC- CCAGGCCAGGGATTGAATCTGAGCCACAGCTGTGGCATGT | 60453                                           |          |       |       |       |       |  |

| Majority    | - - AAATTCTTGCATTTATTTTXXT- - - - - TGGTTTTAGGTGGAAGAAATTGATGCCAGCTTT- - - - -    |                                                         |       |       |       |       |       |       |  |
|-------------|-----------------------------------------------------------------------------------|---------------------------------------------------------|-------|-------|-------|-------|-------|-------|--|
|             | 87930                                                                             | 87940                                                   | 87950 | 87960 | 87970 | 87980 | 87990 | 88000 |  |
| Human       | - - AAATTCTTGCATTTGTTTGCT- - - - -                                                | AATTTTAAAGTTGGTGCCAGCTTT- - - - -                       | 69601 |       |       |       |       |       |  |
| PolarBear   | - - AAATTCTTGCATTTATTTTTT- - - - -                                                | TGGTTTTGGTGAAGAAATTGATGCCAGCTTT- - - - -                | 30095 |       |       |       |       |       |  |
| Cow         | GGAAGAAGTTATGTCCAGATTTTGCTTTTAGTTTATTATG- TGTGAGTGGGTACAGACTAGATTCTTCCCTACTTCTGCT | 67414                                                   |       |       |       |       |       |       |  |
| Dog         | - - GAATTCTTGAATTATTTGTT- - - - -                                                 | AGTTTTGGTGAAGAAATTGACGCCAGCTTT- - - - -                 | 60732 |       |       |       |       |       |  |
| BelugaWhale | ACAAAACGTAAAATGTATATTA- - - - -                                                   | AGGATATTATGTTTCATATTTGGTATGAACTA- AGCATTCA- - - - -     | ACT   | 60134 |       |       |       |       |  |
| Donkey      | - - AAATTCTTGCATTTATTTGCT- - - - -                                                | AGTTTTGAGTGAAGAAATTGATTCCCAGCTT- - - - -                | 66817 |       |       |       |       |       |  |
| Cat         | - - AAATTCTTGCATTTATTTACT- - - - -                                                | AGTTTTAGGTGAAGAAATTGATGCCAGCTTT- - - - -                | 67424 |       |       |       |       |       |  |
| Ferret      | - - AAATTGTTGCATTTATTTGTTGGA- - - TTTATTTGTTGGTTTTTCTGGAAGAAATTGATGCCAGCTTTG- - - | TTT                                                     | 68195 |       |       |       |       |       |  |
| Lion        | TTAAATTCTTGCATTTATTTACT- - - - -                                                  | AGTTTTAGGTGAAGAAATTGATGCCAGCTTT- - - - -                | 65137 |       |       |       |       |       |  |
| Vaquita     | ACAAAACGTAAAATGTATATTA- - - - -                                                   | AGGGTATTATGTTTCATATTTGGTATGAACTA- AGCATTCA- - - - -     | ACT   | 61500 |       |       |       |       |  |
| Pig         | GATGTACGCTGCATGCTGGAT- - -                                                        | CCTTTAACCCACTGTGCTGTGTTGGGGATCAAACCTTGCCTTCCCCTGCAGTGAC | 60530 |       |       |       |       |       |  |

Dienstag, 3. Mai 2022 08:40

| Majority    | - TGTTTTT- - - - - T- ATTAATTATTTAAACCAGTTT- - A- XTGAATGGGTACAX- - - - CCTAGATTCTTCCCAA |           |                              |           |                   |         |                  |       |
|-------------|------------------------------------------------------------------------------------------|-----------|------------------------------|-----------|-------------------|---------|------------------|-------|
|             | 88010                                                                                    | 88020     | 88030                        | 88040     | 88050             | 88060   | 88070            | 88080 |
| Human       | - TGTTTTCA-                                                                              | - - - - - | GGTAAGTACTTAAACCAGCTT-       | - - - -   | ATGAACAGGTACAG-   | - - - - | TATAGATTCTTCCCAC | 69660 |
| PolarBear   | - TGTTTTT-                                                                               | - - - - - | TCATTAATTATTTAAACCAGTGT-     | - -       | GTATGAATGGGTACAG- | - - - - | CCTAGATTCTTCACAA | 30157 |
| Cow         | TTAAACTTGAAACTCTTAGTTACTTCCAGTTTTGATAGCCCTAGAGTGGTTTGAGATGGTGACCTTACCCTAGAAGTGA          |           |                              |           |                   |         |                  | 67494 |
| Dog         | - TGTTTTT-                                                                               | - - - - - | TTCATTTATTATGTAAACCTTTTC-    | - A-      | TGAATGGGTACAA-    | - - - - | CCTAGATTCTTTCCAA | 60793 |
| BelugaWhale | TTATACTTATA-                                                                             | - TTTTAG- | ACTGGCTAGTTACGGAA-           | - - - -   | AAATATTTTAAAATAA- | - - - - | TTCATCACAATCCAA  | 60199 |
| Donkey      | - TGGTTTT-                                                                               | - - - - - | TACTAAACCAATTTA-             | - - - - - | TGAAAGGATCAAG-    | - - - - | CCTAAATTCTTCCCAG | 66868 |
| Cat         | - TGTTTTT-                                                                               | - - - - - | T- GTTAATTATTTAAACCAGTTT-    | - A-      | TGAATGGGTACAA-    | - - - - | CCTAGATTGTTCCCAA | 67483 |
| Ferret      | TTGTTTTTGT                                                                               | TTTTTGT   | TTTTTTATTAATTATTTAAACCAGTAT- | - G-      | TGAATTGGTACAG-    | - - - - | CCTAGATTCTTCTAG  | 68267 |
| Lion        | - TGTTTTT-                                                                               | - - - - - | T- GTTAATTATTTAAACCAGTTT-    | - A-      | TGAATGGGTACAA-    | - - - - | CCTAGATTCTTCCCAA | 65196 |
| Vaquita     | TTATACTTATA-                                                                             | - TTTTAG- | ACTGGCTAGTTACGGAA-           | - - - -   | AAATATTTTAAAATAA- | - - - - | TTCATCACAATCCAA  | 61565 |
| Pig         | CCAAGCCGCTGCATTTGGATTCTTAACCCACTGTGCCACAGTGGGAATGCCAGATTTTTAAATTTTAAATATCCTCAA           |           |                              |           |                   |         |                  | 60610 |

| Majority    | XTTCTGCT- - - - - T- - - - TTAAACTTTAGAACT- - - - - GTAGGTTGTTTCX- - - - - |           |                                          |                                  |                                           |           |           |       |
|-------------|----------------------------------------------------------------------------|-----------|------------------------------------------|----------------------------------|-------------------------------------------|-----------|-----------|-------|
|             | 88090                                                                      | 88100     | 88110                                    | 88120                            | 88130                                     | 88140     | 88150     | 88160 |
| Human       | TGTCTGCT-                                                                  | - - - - - | TTAAACTTTTGAACCT- - - - -                | GTCAGTTGTTTGC-                   | - - - - -                                 | - - - - - | - - - - - | 69697 |
| PolarBear   | - TACTGCT-                                                                 | - - - - - | T- - - - TAAACTTTAGAACT- - - - -         | GCAGGTTGCCTCC-                   | - - - - -                                 | - - - - - | - - - - - | 30193 |
| Cow         | GTGTTTTT-                                                                  | - - - -   | TAATTTATTTATGTTGTTATTAT-                 | - - - -                          | TA- TTTGATCTTCAGTTCAGTTCAGTCGCTCAGTCGTGTC |           |           | 67564 |
| Dog         | - CTACAGT-                                                                 | - - - - - | T- - - - TAAACTTCAGAAAGTAAGTAAGTTGCCTCT- | - - - - -                        | - - - - -                                 | - - - - - | - - - - - | 60835 |
| BelugaWhale | ACGTTTCC-                                                                  | - - - - - | ATTTACAGGACATTAAG-                       | - - - - -                        | GTGGCTTTTTTTTACCCCCACACCTTTGGTGG-         | - - - -   |           | 60257 |
| Donkey      | CTTCTGCT-                                                                  | - - - - - | TTAAACTTTAGAACT- - - - -                 | GTTGGTTGTTTCC-                   | - - - - -                                 | - - - - - | - - - - - | 66905 |
| Cat         | CTTCTGCT-                                                                  | - - - - - | T- - - - TAAACTTCAGAACT- - - - -         | GTAGGTTGCTTCTGCTTTAACTTCAGAACTG- | - - - -                                   |           |           | 67540 |
| Ferret      | - TACTCCT-                                                                 | - - - - - | T- - - - TAAACTTTATAGACT- - - - -        | GCAGGTTGCCTTC-                   | - - - - -                                 | - - - - - | - - - - - | 68303 |
| Lion        | CTTCTGCT-                                                                  | - - - - - | T- - - - TAAACTTCAGAACT- - - - -         | GTAGGTTGCTTCC-                   | - - - -                                   | T-        | - - - - - | 65234 |
| Vaquita     | ACGTTTCC-                                                                  | - - - - - | ATTTACAGGACATTAAG-                       | - - - - -                        | GTGGCTTTTTTTTACCCCCACACCTTTGGTGG-         | - - - -   |           | 61623 |
| Pig         | TAGTTTTTGAAGTAGGTAAGTTATGTTTTAAAAATCAAATA-                                 |           |                                          |                                  | GTGGAATTTAAGAGATAGCCACTTATATTTT           | GATGTC    |           | 60689 |

Dienstag, 3. Mai 2022 08:40

| Majority    | - AGGTT- - CTGGTAGCCCCAGA- GTGA- - - - - T- - - TTGAGATAGTGACCTTAGTCCAGAGGTGA- XCAGTT  |       |
|-------------|----------------------------------------------------------------------------------------|-------|
|             | 88170 88180 88190 88200 88210 88220 88230 88240                                        |       |
| Human       | - AGGTT- - CTGGTAGCCCCAGAG- - TGG- - - - - TTTGAAATGGTGACCTTAGCCCAGAAGT- - - - -       | 69747 |
| PolarBear   | - AGGTT- - CTGGTAGCCCCAGA- GTGA- - - - - T- - - TTGAGATAGTGACTTTTCGTCCAGAGGTGA- GCTGTT | 30252 |
| Cow         | CAACTC- - TTGGCCACCCCATGAGTCACAGCACGCCAGGCCTCCCTGT- - CCATCACCATCTCCCAGAGTTCACTCAAAC   | 67640 |
| Dog         | - AG- TG- - CTGGTAGCCTCAAATGTGG- - - - - T- - - TTGAGATAGTGACCTTATTCCAGATGTGA- GCTGTC  | 60894 |
| BelugaWhale | GTACCG- - TTATCTTTATGAGGAACCA- - - - - CTTACTGT- - - - - TTTGCTTTTTAAAGTAGTCA- TCAA- - | 60314 |
| Donkey      | - AGGTT- - CTGATAGCCCCAGA- GTGA- - - - - TTTGAGATAGTGACCTTAGCCTAGAGGTGA- TCAGTT        | 66964 |
| Cat         | TAGGTT- - CTGGTAGCCCCAGA- GTGG- - - - - T- - - TTGAGATAATGGCCTTAGCCCAGAGGTGA- GCAGTT   | 67600 |
| Ferret      | - AGGTT- - CTGGTAGCCCCAGA- GTGA- - - - - T- - - TTGAGATAGTGACTTTAGTCCAGAGGTGA- GTAGTT  | 68362 |
| Lion        | - - GGT- - CTGGTAGCCCCAGA- GTGG- - - - - T- - - TTGAGATAATGGCCTTAGCCCAGAGGTGA- GCAGTT  | 65292 |
| Vaquita     | GTACCG- - TTATCTTTATGAGGAACCA- - - - - CTTACTGT- - - - - TTTGCTTTTTAAAGTAGTCA- TCAA- - | 61680 |
| Pig         | GTTCTTATTTTTCTATGTAATAGATATTTTGTACAGAATCACCTGTATTTACTATTTTATTTGAACTGTCACTCTA- C        | 60768 |

| Majority    | T- - TXTTTAT- - - - GTAATAATGATTTT- - - - TTATTTTG- GTCTTAGCCAGTGGXCCAAAAAAGGGAAAX- - AGTGGT     |       |
|-------------|--------------------------------------------------------------------------------------------------|-------|
|             | 88250 88260 88270 88280 88290 88300 88310 88320                                                  |       |
| Human       | - - - - - AT- - - - - GTAAT- - TATT- - - - - TAATTTG- GCCTTGACCAGTGGCCAAAAAAGGAAGG- - - GGTGG    | 69800 |
| PolarBear   | T- - TGTTTATTAACGTAATAATTATTTT- - - - - TTATTTTG- GTCTTAGCCAGTGGTCCAGAAAAGGGAAT- - - - G- GGT    | 30319 |
| Cow         | TCACGTCCATCGAGTCAGTGATGCCATC- - CAGCCATCTCATCCTCTGTCTGCCCTTCTCCTCCTGCCCC- - AATCCC               | 67716 |
| Dog         | T- - GGCTTATCAATGTAATAATGTTTTT- - - - - TTATTTTA- GTCTTAGCCAGTGGCCAAAAGAGGGAAGC- - AG- GGT       | 60963 |
| BelugaWhale | - - ACACTCTA- - - - - AATAGTGACATACACTGTTATGTTA- GTGAGGTCATGCCTTC- - TGAATGGTGAATAATTTT          | 60383 |
| Donkey      | T- - GATTTAT- - - - - GTGA- - ATTTTGGGGTTTTTTT- - - - - GACTTGCCCAATGGCCAAAACAGGAACG- - - - - GG | 67025 |
| Cat         | T- - TATTTAT- - - - - GTAATAATAATTTT- - - - - TTATTTTG- GTCGTAGCCAGTGGCCAAAAAAGAAAAG- - GGTGGT   | 67666 |
| Ferret      | T- - TGTTTATTAATGTAATAATTATTTT- - - - - TTATTTTG- GTCTTACTTAGTGGTCCAAAAAAGGGAAT- - - - G- GGT    | 68429 |
| Lion        | T- - TATTTAT- - - - - GTAATAATAATTTT- - - - - TTATTTTG- GTCATAGCCAGTGGCCTAAAAAAGAAAAG- - GGTGGT  | 65358 |
| Vaquita     | - - ACACTCTT- - - - - AATAGTGACATACACTGTTATGTTA- GTGAGGTCATGCCTTC- - TGAATGGTGAATAATTTT          | 61749 |
| Pig         | TGAGGATTTTTGGGAAAATGATAATTCTAATAGCTGCATAGCATGGTAATGGGTATATAACATAATACTTTTGGAAAGTAT                | 60848 |







Dienstag, 3. Mai 2022 08:40

| Majority    | GT TTA- - - - - TACTTTTTAAATAT- - GATTCTATAAGA- TATGCAGTAAAAACAX- - - - - ACATCTTTTGTGAAAC   |       |       |       |       |       |       |       |  |
|-------------|----------------------------------------------------------------------------------------------|-------|-------|-------|-------|-------|-------|-------|--|
|             | 88650                                                                                        | 88660 | 88670 | 88680 | 88690 | 88700 | 88710 | 88720 |  |
| Human       | GT TTA- - - - - TTCTTTTTGAATA- - - - - GGATGATA- TGTACAATTAAAAAAA- - - - - ATCTTTTGTGAAAT    | 70109 |       |       |       |       |       |       |  |
| PolarBear   | GT TTA- - - - - TACTTTTTAAATAT- - GATTCTATAAGA- TGTGCAGTAAAAACAA- - - - - ACATCGTTAGT GAAAC  | 30636 |       |       |       |       |       |       |  |
| Cow         | ATTCAGTCAAAAAGTTAGCATCTTTTTCCTTGTATCCATATGTATGTTTGTCTGTGTCTTTTATTTTTTAAATATGAT               | 68109 |       |       |       |       |       |       |  |
| Dog         | GT TTA- - - - - TACTTTTTAACTGT- - GATTCTATAGGT- TATGCAGTAAAAACA- - - - - TCTTTTGTGAAAC       | 61292 |       |       |       |       |       |       |  |
| BelugaWhale | ATTTG- GAATCCGTATTATAAAATTTTAAATTGGTTTATTT- TACACAGTAATTTT- - - - - TTAAGACTAGCATTCTTGGCT    | 60722 |       |       |       |       |       |       |  |
| Donkey      | GT TTA- - - - - TTCTTTTTGAATAT- - GATTCTATAACA- TATTCAATAGAAACA- - - - - TCTTTTGTGAAAC       | 67338 |       |       |       |       |       |       |  |
| Cat         | GT TTA- - - - - TACATTTTTAATAT- - GGTTCTATAAGC- TATGCAGTAAAAACAA- - - - - ACATCTTTTATGCAAC   | 67983 |       |       |       |       |       |       |  |
| Ferret      | ATTTA- - - - - TACTTTTTAAATA- - - - - TTCTGTGGGA- TGTGCAGTAAAAACAA- - - - - ACATCTTTTGTGAAAC | 68732 |       |       |       |       |       |       |  |
| Lion        | GT TTA- - - - - TACATTTTTAATAT- - GGTTCTATAAGA- TATGCAGTAAAAACAA- - - - - ACATCTTTTATGCAAC   | 65676 |       |       |       |       |       |       |  |
| Vaquita     | ATTTG- GAATCCGTATTATAAAATTTTAAATTGGTTTATTT- TACACAGTAATTTT- - - - - TTAAGACTAGCATTCTCGGCT    | 62087 |       |       |       |       |       |       |  |
| Pig         | TTTTA- TGAGCTAGTTTATAAATTTTAAATGCTTATTAGATGTTTACAAGTCCT- - - - - TG- AGTTGGTTGTCTGGAT        | 61233 |       |       |       |       |       |       |  |

| Majority    | ATTGCTTTCTTA- TATATGCTATTTCA- - - - - GTAGAGTGATGAG- GGGGAAAAC TACAAAXCTAGACTAATTGGAAC T     |       |       |       |       |       |       |       |  |
|-------------|----------------------------------------------------------------------------------------------|-------|-------|-------|-------|-------|-------|-------|--|
|             | 88730                                                                                        | 88740 | 88750 | 88760 | 88770 | 88780 | 88790 | 88800 |  |
| Human       | GTGGTTTTCTTA- AATACATTATTGCATTTTCATACACAGTGATGAA- GGGGAAAAC TACAAAGCTAGACAGATTGCAA- -        | 70185 |       |       |       |       |       |       |  |
| PolarBear   | ATTGCTATCTTA- TATATGCTATTTCA- - - - - GTAGAGAGATGAG- GGGGAGAACTGCAAAGCTAGACTAATTGGAA- -      | 30706 |       |       |       |       |       |       |  |
| Cow         | TCCGTAGGTGTGCAGTAAAAACATCTTCT- - - GTGAAACATGTCT- CATGTATCCCATTACAATAGAGCAATGGGGGCA          | 68185 |       |       |       |       |       |       |  |
| Dog         | ATTGCTATCTTA- CATGTCTTATTTCA- - - - - GTAGAGTGATGAT- GGGGAAAAC TACAAAGCTAAACTAATTGGAAAT      | 61364 |       |       |       |       |       |       |  |
| BelugaWhale | TCTTTTTTTTAGTGCTAGGGACCAC- - - - - AGTGTCTC- - CAAAAATGTAATTTATTCAAG- - AATGGAGACT           | 60786 |       |       |       |       |       |       |  |
| Donkey      | AGGGCTATCTTA- TGTATGCAATTACA- C- - - - TAGACTGATGAGTGGGGGAAAAAACAAAGGCAGACTAATTGGAAAT        | 67411 |       |       |       |       |       |       |  |
| Cat         | ATTGC- - - - - A- - ATATGCTGTTTCA- - - - - GTAGGGTGATGAG- GGGGAAAAC TACAAATCCAGACAAATTGGAAAT | 68048 |       |       |       |       |       |       |  |
| Ferret      | ATTGCTGTCTTACTGTATGCTATTTCA- - - - - GTAGATTGGTGAG- G- - - - AAAGTCAAAGCTAGACTAATTGGAAC T    | 68801 |       |       |       |       |       |       |  |
| Lion        | ATTGC- - - - - A- - ATATGCTGTTTCA- - - - - GTAGGGTGATGAG- GGGGAAAAC TACAAATCCAGACAAATTGGAAAT | 65741 |       |       |       |       |       |       |  |
| Vaquita     | TCTTTTTTTTAGTGCTAGGGACCAC- - - - - AGTGTCTC- - CAAAAATGTGATTTATTCAAG- - AATGGAGACT           | 62151 |       |       |       |       |       |       |  |
| Pig         | TCTTTCTATGGGATGTGCAAAACAT- - - - - GTAAAATGTGTAT- TTAGGATATTACATTTATATT- TAGTATGAGCT         | 61303 |       |       |       |       |       |       |  |

Dienstag, 3. Mai 2022 08:40

| Majority    | TA- - - - - ATTAGTATGT- AGTAGTGAGCTAATAGAGCAGTACTCAXAT- ATTTTXXTTATA- - - - - ATTTAAGTGAT   |       |       |       |       |       |       |       |       |
|-------------|---------------------------------------------------------------------------------------------|-------|-------|-------|-------|-------|-------|-------|-------|
|             | 88810                                                                                       | 88820 | 88830 | 88840 | 88850 | 88860 | 88870 | 88880 |       |
| Human       | - - - - - ATTAGTATTGCAGTAGTGAGGTAATAGAGCAATACCCAAATGTTTTCTTAAAA- - TATATGTAGGTGAT           |       |       |       |       |       |       |       | 70252 |
| PolarBear   | - - - - - ATTAGTATGT- AGCAGTGAGCTGTTAGAGCAGTATTCATAT- ATTTTCTTATA- - - - - TTTAAGTGAT       |       |       |       |       |       |       |       | 30767 |
| Cow         | GGGAACTACAAAGTTGAAAATTAGTATTGAGCTAATAGAGCAGTAATCGAATATTGTCTTAACAAATATATTTAAGTGCT            |       |       |       |       |       |       |       | 68265 |
| Dog         | TA- - - - - ATTAGTATGTTAGCAGTGAGCTAATCGAGCAGTACTCATATTATTTCTTATA- - - - - TTTAAGTGAT        |       |       |       |       |       |       |       | 61429 |
| BelugaWhale | GAGGGCTTTTTAATTAGTTAGAAATCTGACATTTAAA- - - - - TACGTAATCACAACTTGGCA- - - - - GACTATTAGTT    |       |       |       |       |       |       |       | 60855 |
| Donkey      | TA- - - - - ATTAGTATTGTAGTAGTGAGCTAATAGAGTGGTACTCTCTT- TTCTTACAGTAT- - - - - ATTTAATGAT     |       |       |       |       |       |       |       | 67476 |
| Cat         | TA- - - - - ATTAGTATGT- CGCAATGAGC- AATAGACCAATACTCATCT- ATTTTCTTATAA- TATATTTAAGTGAT       |       |       |       |       |       |       |       | 68115 |
| Ferret      | TA- - - - - ATTAGTAGGT- AGCAGTGAGCTAATAGAGCAGTACTCATAT- ATTTTCTTATA- - - - - TTTAAGTGAT     |       |       |       |       |       |       |       | 68864 |
| Lion        | TA- - - - - ATTAGTATGT- CGCAATGAGC- AATAGACCAATACTCATCT- ATTTTCTTATAA- TATATTTAAGTGAT       |       |       |       |       |       |       |       | 65808 |
| Vaquita     | GAGGGCTTTTTAATTAGTTAGAAATCTGACATTTAAA- - - - - TACATAATCACAACTTGGCA- - - - - GACTATTAGTT    |       |       |       |       |       |       |       | 62220 |
| Pig         | AA- AGCTTCAACTTTATACATATATTTTAGACTGGC- - - - - CATTATGGAAAAAATTTTAAAA- - - - - TAATTCATCCCA |       |       |       |       |       |       |       | 61374 |

| Majority    | GCCTATGTTTTCC- CATTGTGTAT- - - - - TTTTAGAAAATAAA- ATATTCATT- - - - - ATTGTC- - TTTTAGATATT            |       |       |       |       |       |       |       |       |
|-------------|--------------------------------------------------------------------------------------------------------|-------|-------|-------|-------|-------|-------|-------|-------|
|             | 88890                                                                                                  | 88900 | 88910 | 88920 | 88930 | 88940 | 88950 | 88960 |       |
| Human       | GCCTGTGTTCTTTACTTTTGTGTGTGTGTATGTGTTT- TTAACAAG- - - - - ATTCATT- - - - - GTAGTC- - TTTTAGATATA        |       |       |       |       |       |       |       | 70322 |
| PolarBear   | GCCTTTGTTTTCC- CACGTGTGTGT- - - - - TTTTAGAAAATAAG- ATATTTACTC- - - - - GTTGTC- - TTTTAGATATT          |       |       |       |       |       |       |       | 30832 |
| Cow         | GCCTGTGATTTTC- CTTTTGTATATG- - - - - TTTTAGAAAATAAA- ATATATT- - - - - TAGTGTTGTTTGTAGATACT             |       |       |       |       |       |       |       | 68331 |
| Dog         | GCCTGTGTTTTGC- CATGTGTGTAT- - - - - TTTTAGGAAATAAG- ATGCTCATT- - - - - GTTGTC- - TTTTAGGTATT           |       |       |       |       |       |       |       | 61493 |
| BelugaWhale | ATTCACATATTCT- ACATCAGAGAA- - - - - CAAGGTGATCAA- AAATCCTTGA- - - - - GATTATAAATTGAGATGTCA             |       |       |       |       |       |       |       | 60921 |
| Donkey      | GCCTATATGTTTG- CTTTTGTGTGCATATTTCTTTTTAGAAAATAGATACATTTATTCCTGTTGTC- - TTTTAGATAGT                     |       |       |       |       |       |       |       | 67553 |
| Cat         | GCCCATGTTTTCC- CGTGTGTG- GT- - - - - TTT- - - - - AAAATGAG- ATACTCATT- - - - - ATTGTC- - TTTTAGATATT   |       |       |       |       |       |       |       | 68175 |
| Ferret      | ACCTATGTTTTCC- CATGTGTGTAT- - - - - TTTTAGAAAATAAA- ACATTCATT- - - - - A- - - - - T- - - - - TAGGTA- - |       |       |       |       |       |       |       | 68919 |
| Lion        | GCCCATGTTTTCC- CATGTGTG- GT- - - - - TTT- - - - - AAAATAAG- ATACTCATT- - - - - ATTGTC- - TTTTAGATATT   |       |       |       |       |       |       |       | 65868 |
| Vaquita     | ATTCACATATTCT- ACATCAGAGAA- - - - - CAAGGTGATCAA- AAATCCTTGA- - - - - GATTATAAATTGAGATGTCA             |       |       |       |       |       |       |       | 62286 |
| Pig         | ATCCAAAAGTTTT- CATTTATAAAAC- - - - - ATCAACACTTTTTA- CCCTCTTCTT- TGGTGTGAATAGTATGGTCT                  |       |       |       |       |       |       |       | 61444 |

Dienstag, 3. Mai 2022 08:40

| Majority    | ATTTAATAAATTTAGGCTGTTTAAG- - - T- - - - - TATCCTCCAAAGGTGAATGCTATTTGGAAATTC- - - - TTXCTTG |                       |                      |                               |             |       |       |       |       |
|-------------|--------------------------------------------------------------------------------------------|-----------------------|----------------------|-------------------------------|-------------|-------|-------|-------|-------|
|             | 88970                                                                                      | 88980                 | 88990                | 89000                         | 89010       | 89020 | 89030 | 89040 |       |
| Human       | ATTTAATAAATTTAGGCTGTTT                                                                     | CAGGGTTTC- - A-       | GTATCCTACAAAGAAGA    | ACGCTGCTTCTAAGTTTTT           | GGGTTTCTTG  |       |       |       | 70399 |
| PolarBear   | ATTTAATAAATTTAGGCTGTTT                                                                     | CAG- - - - -          | TATCCTCCAA-          | GGTGAATGCCATTTGGAAATTC- - - - | TACTTT      |       |       |       | 30896 |
| Cow         | TTGTAATAAATTTAAGCTATTC                                                                     | CATGGTTTCT- - -       | GTATCCTCCAAAGATGAAT  | GTTATTTGGAAATTC- - - -        | TTGTTTCA    |       |       |       | 68404 |
| Dog         | ATTTAGTAAATTTAGGCTGTTT                                                                     | CAG- - - - -          | TAGCCTCCAA-          | GGTGAATGCCATTTGGAAATTC- - - - | TT- - - - - |       |       |       | 61552 |
| BelugaWhale | TTATAATGATTTTATCATGTTT                                                                     | AAGAAGTGTAGTTAATTT    | ATTAAGGGGTGGTCACTTTT | AGAAAAC- - - - -              | TGCTAG      |       |       |       | 60995 |
| Donkey      | ATTTAATAAATTTAGGCTGTT                                                                      | GAAGGTTTC- - A-       | GTATCCTCCAAAGGTGAAT  | GTTATTTGGAAATTC- -            | TGTATTTTG   |       |       |       | 67628 |
| Cat         | ACTTAATAAATTTAGGTTGTT                                                                      | TACAG- - - - -        | TATCCTCCAAAGTTGAAT   | GCTATTTAGAAATTC- - - -        | TTGTGTG     |       |       |       | 68240 |
| Ferret      | - TTTAGTAAATTTAAGCTGTTT                                                                    | CAG- - - - -          | TATCTTCCAA-          | GTTGAATATCATTGGAAATTC- - - -  | TACTT-      |       |       |       | 68981 |
| Lion        | ACTTAATAAATTTAGGTTGTT                                                                      | TACAG- - - - -        | TATCCTCCAAAGGTGAAT   | GCTATTTAGAAATTC- - - -        | TTGTGTG     |       |       |       | 65933 |
| Vaquita     | TTATAATGATTTTATCATGTTT                                                                     | AAGAAGTGTAGTTAATTT    | ATTAGGGGGTGGTCACTTTT | AGAAAAC- - - - -              | TGCTAG      |       |       |       | 62360 |
| Pig         | TTGCAAGGACCACTTGCTGTT                                                                      | AATGCTTTCTAAAGTAGTCTT | CAAGTACTCTTCATAGTAT  | GACATACA- -                   | GTATTGCTG   |       |       |       | 61522 |

| Majority    | - - - - GTXTTTTTACT- - - - - GAACCATT CAGTTGXT- CAGAGCTTAGGAAGAATX- - - - AAATTATCAXTTGGTAT |                        |                          |                           |                    |       |       |       |       |
|-------------|---------------------------------------------------------------------------------------------|------------------------|--------------------------|---------------------------|--------------------|-------|-------|-------|-------|
|             | 89050                                                                                       | 89060                  | 89070                    | 89080                     | 89090              | 89100 | 89110 | 89120 |       |
| Human       | AACCAGAGCTTAGAAAGAACA                                                                       | AAAAATATGGCATGGTATTTT  | CATGGTTTAGTAAGGCTACTTTT  | AGTTAATTATTGTGAT          |                    |       |       |       | 70479 |
| PolarBear   | - - - - -                                                                                   | GTTTTTCTACT- - - - -   | GAACCATT CAGTAGCCACAG    | AGCTTAGGAAGAATA- - - -    | AAATTATCACTTGGTAT  |       |       |       | 30959 |
| Cow         | - - - - -                                                                                   | GTGTTTTTGTGCT- - - - - | GAACCATT CAGTAGCACCAG    | AGCTTAGGAAGAATA- - - -    | AAAATTGCCACTTGGTAT |       |       |       | 68467 |
| Dog         | - - - - -                                                                                   | GTTTTTCTACT- - - - -   | GAACCATT CAAT- - - - -   | AGCTTAGGAAGAACA- - - -    | AAATTATCAGTTGGTAA  |       |       |       | 61607 |
| BelugaWhale | - - - - -                                                                                   | AAGTAATTAAT- - - - -   | TTT- CATGATCATGTTGTCT    | ACATTTTAAAAATT- - - - -   | AAT- - GCAGATAATAT |       |       |       | 61053 |
| Donkey      | GG- -                                                                                       | AGTTTTTTTACCCCCTGCT    | GAAACTATTCAGTTGCTCC      | AGAGCTCAGGAAGAACA- - - -  | AAATTATCACTTGGTAT  |       |       |       | 67702 |
| Cat         | - - - - -                                                                                   | GTTTTTTTTTTT- - - - -  | GTTTTTGTTTTT- - - - -    | GTTTTTTTTTCTGAAC- - - - - | CAT- - TCAGTAG     |       |       |       | 68288 |
| Ferret      | - - - - -                                                                                   | GTTTTTCTACT- - - - -   | GAACAATTCAGTGTCCAC       | AGAGATTAGGAAGAACA- - - -  | AAATTATCACTTGGTAT  |       |       |       | 69044 |
| Lion        | - - - - -                                                                                   | TTTTTTTTT- - - - -     | TTT- - - - - - - - - - - | CTGAAC- - - - -           | CAT- - TCAGTAG     |       |       |       | 65960 |
| Vaquita     | - - - - -                                                                                   | AAGTAATTAAT- - - - -   | TTTTCATGATCATGTTGTCT     | ACATTTTAAAAATT- - - - -   | AAT- - GCAGATAATAT |       |       |       | 62419 |
| Pig         | - - - - -                                                                                   | GAGTGGTGACT- - - - -   | AAATTATTTTTTCTGTTT       | ATTTGCCTAAGAAGACTTT- -    | AAAGTAAGCAGATGATAT |       |       |       | 61587 |

Dienstag, 3. Mai 2022 08:40

| Majority    | T-----TTCAX-----GAATTT-----XX-X-GTA-----A---GGC-----                            |       |
|-------------|---------------------------------------------------------------------------------|-------|
|             | 89130 89140 89150 89160 89170 89180 89190 89200                                 |       |
| Human       | GTAGGCCATTAAGTAGACTTTTCTAAAACGAAACCCAGAGGAGAGGGGTTTTGAAGATACATATATACTGGTTTCTAAG | 70559 |
| PolarBear   | T-----TTCAT-----GAATTT-----GTA-----A---GGC-----                                 | 30978 |
| Cow         | ATTG-TAAGGCCACTTAAAGTTCATCTTTATGATATAGGTAATAAATACTTTTGAGAAGGAAATGGC---ATTCCA    | 68543 |
| Dog         | T-----TTCAT-----GAATTT-----GTA-----G---GGC-----                                 | 61626 |
| BelugaWhale | GTAC-AAAGAATACTTTAGAGCCTTCTGTGTATTTTGAGTTAATAAGTA-----GCAGC-----                | 61106 |
| Donkey      | T-----TTCAT-----GAGTTT-----GTA-----AGGC-----                                    | 67721 |
| Cat         | C-----CTCA-----GAGCTT-----A---GTC-----                                          | 68303 |
| Ferret      | T-----TTCAA-----GTATTTCTCAGTATTTTATA-----A---GGC-----                           | 69074 |
| Lion        | C-----CTCA-----GAGCTT-----A---GTC-----                                          | 65975 |
| Vaquita     | GTAC-AAAGAATACTTTAGAGCCTTCTGTGTATTTTGAGTTAATAAGTA-----GCAGC-----                | 62472 |
| Pig         | -----TGATGGCATCCAT--TTCCTGCTTGAGTCCTCCTTAAACAGTACTTGTTCAAATGAAAT-----AATTGATAG  | 61654 |

| Majority    | ---TXXTTTTCAATTAATTATTXTGATXXGTAG-----GCCAT-----TAA-----GTAGACTT                |       |
|-------------|---------------------------------------------------------------------------------|-------|
|             | 89210 89220 89230 89240 89250 89260 89270 89280                                 |       |
| Human       | AACTAATCTTTTTGGATCATTGGTATTGGTAGAAGGGATTGCTATGTTTTCTGCCACCATTGGATCTCTGTATAAAGTT | 70639 |
| PolarBear   | ---TGCTTTCAGTTAATTATTGTGCTGTGTAA-----GCCAT-----TAA-----GTAGGCTT                 | 31023 |
| Cow         | CAGTATTCTTGCCTGGAGAATCCATGGACAG-----AGAAGCCTGGCGGGCTACAGTCTACAGGGTTGCAAAGAG     | 68614 |
| Dog         | ---TACTTTCAGTTAATTATTACGAT--GTAG-----GCCAT-----TAA-----GGAGACTT                 | 61669 |
| BelugaWhale | ---CGTTCTCATTATACGGTTTTAACAGAAAA-----GCAA-----G---CAA                           | 61148 |
| Donkey      | ---TACTTTCAGTTAATTATTGCGAT--GTAG-----GCCGT-----TAA-----ACAGACTT                 | 67764 |
| Cat         | ---TGATTTCAATTAATTATTATGAT--GTAG-----GCCAT-----TAA-----GTAGACTT                 | 68346 |
| Ferret      | ---TATTTTCAGTTAGTTATTGTGATACGTAG-----GCCAT-----TAA-----GTAGACTT                 | 69119 |
| Lion        | ---TGATTTCAATTAATTATTATGAT--GTAG-----GCCAT-----TAA-----GTAGACTT                 | 66018 |
| Vaquita     | ---CGTTCTCATCATATGGTTTTAACAGAAAA-----GCAA-----G---CAA                           | 62514 |
| Pig         | GTATTCCTTTGTTTCAAAGATTCTGTAGAAGAAC-----ACAGA--TGTTAGGTGATAATCCTTTT--CTGTTAAATA  | 61721 |

Dienstag, 3. Mai 2022 08:40

| Majority    | T-----TTXA-----AAAAGA-----XTXCTTGTGGA-----AATA--X-GAG-----TCTT                     |       |
|-------------|------------------------------------------------------------------------------------|-------|
|             | 89290 89300 89310 89320 89330 89340 89350 89360                                    |       |
| Human       | TGGCTCCACTATCAAAATGCTTAGATAGATGCCTTTGCAATAGTTGCC- ACCCTAGGAATAGCTCAAAAATTATTA ACTT | 70718 |
| PolarBear   | T-----TCTA-----AAAAGAA-----ATGCTGGTTGA-----AAT-----GAG-----TCTT                    | 31056 |
| Cow         | T-----CTGACACA ACT- GAAGGACTCACACTTTCTAGAAAGAAATGGTGGTGA AA- AAGGAG-----TCTT       | 68674 |
| Dog         | T-----TCTA-----AAAAGAT-----ATGCTTGCTGA-----AATCCTTAAAG-----TCTT                    | 61707 |
| BelugaWhale | T-----GTA-----T---AGGA-----TATCTTTTGAG-----GTGAAAATA- GTTGAT-----AATT              | 61187 |
| Donkey      | T-----TCTA-----C---AAAGAA-----ATGCTGATAAA-----AAAA-----GAG-----TCTT                | 67798 |
| Cat         | T-----TTAA-----AAAAGA-----TCCTTGTGGA-----AAG-----GAG-----TCTT                      | 68377 |
| Ferret      | T-----CCTA-----AAAAGAA-----ACACTGGTAGA-----AAT-----GAG-----TTTT                    | 69152 |
| Lion        | T-----TTTA-----AAAAGA-----TCCT- GTGGA-----AAG-----GAG-----TCTT                     | 66048 |
| Vaquita     | T-----GTA-----T---AGGA-----TATCTTTTGAG-----GTGAAAATA- GTTGAT-----AATT              | 62553 |
| Pig         | T-----TTA-----GGGGGATTCCCTTTACCTTGTGTG- ATTCTTTTATG- TTATA-----CCTG                | 61770 |

| Majority    | AAGAATACA--TTAXA-CCAGTTTCT-----AAGAAGT- GGGXXTTTTT TAGATGATTGGTATTGATAGAAG- GGAT- TA |       |
|-------------|--------------------------------------------------------------------------------------|-------|
|             | 89370 89380 89390 89400 89410 89420 89430 89440                                      |       |
| Human       | A AACTGGTTACTTAAATCCACCTCTGTTGCTTGGAGTTGTGCTTTTTTTTTTTTTTTTTTTTTTTTTTTTGGATAGAGTCTG  | 70798 |
| PolarBear   | AAGGATACT---TTGTA-CCAGTTTCT-----AAAAAGT- GGGGTCTTTTAGATGATTGTTATTGATAGAAG- GAAT- TA  | 31124 |
| Cow         | AAAAATACA--CATAGACCAGTTTCT-----AAGGAGT- GAGATTTTTTGGATAATTGGTATTGATAGAAGGGGGT- TA    | 68744 |
| Dog         | AAGGATAC---TTACA-CCAG-----GGGTCTTTTATGTGATTGGTATTGATAGAAG- ATAT- TA                  | 61762 |
| BelugaWhale | GAGAACAGA--TATAA--CAACCATT-----TATTCAT- AAGG---GTAAATATGTAGTTCTTATAGA-----T- CA      | 61245 |
| Donkey      | AAGATATGC--ATATA-CCAGTTTCT-----CAGAAGTGGGATCTTTCTGGATGATTGATATTGATAGAAG- GGAT- TA    | 67867 |
| Cat         | TAGGATACT---TTATA-CCACTTTCT-----AAGAAGTGGGGTCTTTTTGGATGATGGGTATTGACAGAAG- AGAT- AA   | 68446 |
| Ferret      | AAGGGTACA--CTATA-CCAGTTTGT-----AAAAAGT- GGGGTCTTTTAGATGATTGGTGTGGTGAAG- GAAT- TA     | 69220 |
| Lion        | GAGGATACT---TTATA-CCACTTTCT-----AACAAGTGGGGTCTTTTTGGATGATGGGTATTGACAGAAG- AGAT- AA   | 66117 |
| Vaquita     | GAGAACAGA--TATAA--CAACCATT-----TATTCAT- AAGG---GTAAATATGTAGTTCTTATAGA-----T- CA      | 62611 |
| Pig         | AGCACTTGA--TTAAATTTAATTACT-----TTAGAGT- CAG---TATTACAAGTTTTGATTTATTTTACACAG---TA     | 61835 |

Dienstag, 3. Mai 2022 08:40

| Majority    | GCTGTTTTTTC- - TACCA- - - - - CTATTTGCTCTCCCTATAAAA- - - - - AATTTGGCTC- - - - CACTAT   |       |       |       |       |       |       |       |       |
|-------------|-----------------------------------------------------------------------------------------|-------|-------|-------|-------|-------|-------|-------|-------|
|             | 89450                                                                                   | 89460 | 89470 | 89480 | 89490 | 89500 | 89510 | 89520 |       |
| Human       | GCTCTGTACCCAGGCTGGAGTGCAGTGGCATGCAATCTCGGCTCACTGCAAGCTCCGCCTCCTGGGTTCACGCCATTCT         |       |       |       |       |       |       |       | 70878 |
| PolarBear   | GCTGTTTTTTC- - TACCA- - - - - CTATTTGCTTTCTCTATAAAA- - - - - AATTTGTATC- - - - CACTGT   |       |       |       |       |       |       |       | 31176 |
| Cow         | GCTTTTTTTTCT- - - ACCA- - - - - CTGTTTTCTCTCCCTATAAAA- - - - - AGTTTGGCTC- - - - CACTAT |       |       |       |       |       |       |       | 68795 |
| Dog         | GCTGTTTTTTTCC- TACCA- - - - - CTATTTGCTTTCCCTATAGG- - - - - AATTGGGCTC- - - - CACTAT    |       |       |       |       |       |       |       | 61815 |
| BelugaWhale | GTTTTTCTCAA- - - ACT- - - - - TTCCTGCATATCAAAAT- - - - - TACCAGGC- - - - - CTTAC        |       |       |       |       |       |       |       | 61289 |
| Donkey      | GCTGTTTTTTC- - TACCA- - - - - CCATTTGCTCTCCCTATAAAA- - - - - AATTTGGCT- - - - - TAACAT  |       |       |       |       |       |       |       | 67918 |
| Cat         | GCTGTTTTTTTTCCTAACA- - - - - CTATTTGCTTTCCCTAGAAA- - - - - AATATGGCTC- - - - CACTGT     |       |       |       |       |       |       |       | 68500 |
| Ferret      | GCTGTTTTTTC- - TACCA- - - - - CTATTTGTTTTGCCTATAAAA- - - - - AATTTGACTG- - - - CACTGT   |       |       |       |       |       |       |       | 69272 |
| Lion        | GCTGTTTTTTTTCCTAACA- - - - - CTATTTGCTTTCCCTAGAAA- - - - - AATATGGCTC- - - - CACTGT     |       |       |       |       |       |       |       | 66171 |
| Vaquita     | GTTTTTCTCAA- - - ACT- - - - - TTCCTGCACATCAAAAT- - - - - TACCAGGC- - - - - CTTAC        |       |       |       |       |       |       |       | 62655 |
| Pig         | ATTTTTTTTTT- - - CTTT- - - - - TTTTTCCCTCTTTTTGCTAT- - - - - TTCTTGGG- C- - - - CGCTCC  |       |       |       |       |       |       |       | 61885 |

| Majority    | CA- - - - - A- A- - - - ATXCCTAGATCTCT- - - - TTGGG- - - - - GTAATTCCTATGATA    |       |       |       |       |       |       |       |       |
|-------------|---------------------------------------------------------------------------------|-------|-------|-------|-------|-------|-------|-------|-------|
|             | 89530                                                                           | 89540 | 89550 | 89560 | 89570 | 89580 | 89590 | 89600 |       |
| Human       | CCTGCCTCAGCCTCCCAAGTAGCTGGGACTACAGGCGCACGCCACCACGCCAGCTAATTTCTTCATATTTTTTTTAGTA |       |       |       |       |       |       |       | 70958 |
| PolarBear   | CA- - - - - A- A- - - - ATGCCTAGATCTTT- - - - TGGGG- - - - - GTAATTCCTGTGATA    |       |       |       |       |       |       |       | 31214 |
| Cow         | CA- - - - - AAGTGCCTTAGGGAGATCCTT- - - - TTTGGG- - - - - ATAGTTCCTACCACA        |       |       |       |       |       |       |       | 68839 |
| Dog         | AA- - - - - A- A- - - - ATGCCTACATATTT- - - - TGGGG- - - - - GTAGTTCCTGTGATA    |       |       |       |       |       |       |       | 61853 |
| BelugaWhale | C- - - - - CTAGACTGAGAATCCC- - - - - TAATGATTAGTGGG                             |       |       |       |       |       |       |       | 61320 |
| Donkey      | CA- - - - - AAATG- CATAGATAGATCTCT- - - - CTGGG- - - - - ATAGTTCCTTTTATA        |       |       |       |       |       |       |       | 67960 |
| Cat         | CA- - - - - A- A- - - - ATGCCTAGA- - TCT- - - - TTTGC- - - - - ATAATTCCCATGATA  |       |       |       |       |       |       |       | 68536 |
| Ferret      | C- - - - - T- T- - - - TAGGG- - - - - GTCATTCTGTGATA                            |       |       |       |       |       |       |       | 69295 |
| Lion        | CA- - - - - A- A- - - - ATGCCTACA- - TCT- - - - TTTGG- - - - - GTAATTCCCATGAGA  |       |       |       |       |       |       |       | 66207 |
| Vaquita     | C- - - - - CTAGACTGAGAATCCC- - - - - TAATGATTAGTGGG                             |       |       |       |       |       |       |       | 62686 |
| Pig         | C- - - - - GCGTCATATGGAGGTTCCCAGGCTAGGG- - - - - GTCAAATCAGAGCTG                |       |       |       |       |       |       |       | 61929 |





Dienstag, 3. Mai 2022 08:40

|             |                                                                                                                                                                        |       |
|-------------|------------------------------------------------------------------------------------------------------------------------------------------------------------------------|-------|
| Majority    | A A T A C T A T G G C T T A G A A T G A A A T T - - - - G T C T C A - T - C C - G G A X - - - - A A A G T T T G T C T G A T G C A T A T G G A T A C T A A T -          |       |
|             | 89770                  89780                  89790                  89800                  89810                  89820                  89830                  89840 |       |
| Human       | A A T A C T G T A G C T T A G A A T G A A A T T - - - - G T C T C A A T C C T A G G A - - - - G C C A A A A G T T T G A T G A A T A T G A A T A C T A A T -            | 71186 |
| PolarBear   | A A T A C T C T G G C T T A G A A T G A A A T T - - - - G T C T C A G T G C C T G G A A C C - A A A A G G T T A T C T G A T G C A T A T G G A T A C T A A T -          | 31387 |
| Cow         | A A T A T T G T G C T T T A G A A T G G A A T T - - - - G T C C C A - A T C C C A G A A - - - - A C C A A A A G G T A G A T G C A T A T G G G T A T T G C - -          | 69008 |
| Dog         | A A T A C T A T G G C T T A A A A T G A A A T T - - - - G T C T C A A T G C C G G G A A C C C A A A A G G T T G T C T G A T G C A T A T G G A T A C T A A T -          | 62026 |
| BelugaWhale | T T T T T T A G G T - - - - - G C T T T - - - - A T T T T A - - - - - G T T T T T T A G C A A A G T T A T - - T A G T G T T C T - -                                    | 61446 |
| Donkey      | A A T A C T A C A G T T T A G A A T G G A A T T C T A A G G A A C C A G T T C C A G G A A C C - A A A A G T T T G T C T G A T G T A T A T G G A T A C T A A T A        | 68143 |
| Cat         | A A T A C T A T G G C T T A G A A T G A A A T - - - - - T G T C T G A T G C A T A T G G A T A C T A A T -                                                              | 68686 |
| Ferret      | A A T A C A - T G G C T T A G A A T G A A A T G - - - - G T C T C A A T G C C T G G A A C C - A A A A G T T T G T C T G A T A C A T A T G G A T A C T A A T -          | 69467 |
| Lion        | A A T A C T A T G G C T T A G A A T G A A A T - - - - - T G T C T G A T G C A T A T G G A T A C T A A T -                                                              | 66357 |
| Vaquita     | T T T T T T A G G T - - - - - G C T T T - - - - A T T T T A - - - - - G T T T T T T A G C A A A G T T A T - - T A G T G T T C T - -                                    | 62803 |
| Pig         | C C C A C T G A G C A A G G G C A G G G A C C G - - - - A A C C C G C A A C C T C A T G - - - G T T C C T A G T C G G A T T T G T - T A A C C A C T G C G -            | 62090 |

|             |                                                                                                                                                                        |       |
|-------------|------------------------------------------------------------------------------------------------------------------------------------------------------------------------|-------|
| Majority    | C A X T A A C C A T - - - - T T X T T G A A T A T G T A T T A T G T - - G C C A G G - C A T T G T T C T T A G C C - - - - X T T A T G A G T T A A T C C T C A          |       |
|             | 89850                  89860                  89870                  89880                  89890                  89900                  89910                  89920 |       |
| Human       | - A T T A A C C A T - - - - - T T T T G T G T T C T G T - - G T C A G G - C A C T G T T C T T A G C C C - - - - T T T A C A A G T A A G T T A A T A                    | 71247 |
| PolarBear   | C A T T A G C C A T - - - - T T C T T G A A T A T G T A T T A A G T - - G C C T A - - C A T C A T T C T T A G C C - - - - C T T G T G A G T T A A T C C T C A          | 31454 |
| Cow         | - - - T A A T A G T - - - - C T A T C A T T T A T T G A G T A T A T - - G C C A A T G C A T C A T T C T T A A C C - - - - C T C T T G T G A G T T A A T C C T          | 69074 |
| Dog         | C A C T A A C C A T - - - - T T C G T G A A T A T G T A T G A A G T - - G C C A G G - C A T C A T T C T T A G C C - - - - T T T G T G A G T T A A T C C T C A          | 62094 |
| BelugaWhale | - C A T A A A A A C A - - - - - T A C T T - - - A C C T A T - T G A G C C A G T A T T C T A A T A C T T T C C - - - - T T T A T T C A T G C C A T G T A A              | 61509 |
| Donkey      | T A A T A A C T G A C T G T T T A T C G A G T A T A T A T T A T G T - - T C C A G G - C G T T G T T C T T A G C C A T T T G C T T G T G A G T T A A C T T C A          | 68220 |
| Cat         | C A C T A G C C A T - - - - T A A T T G A A T A T G C G T T A T G T - - G C C A G G - C A T T G T T C C T A A C C - - - - C T T A T G A G T T A G T C C T C A          | 68754 |
| Ferret      | C A C T A G C C A T - - - - T T C T T G G C T A T G T A T T A A G T - - G C C T G - T A T C A T T C T T A G C C - - - - A T T A T G A G T T A A T C C T T A            | 69534 |
| Lion        | C A C T A G C C A T - - - - T G A T T G A A T A T G C G T T A T G T - - G C C A G G - C A T T G T T C C T A A C C - - - - C T T G T G A G T T A G T C C T C A          | 66425 |
| Vaquita     | - C A T A A A A A C A - - - - - T A C T T T A T A C C T A T - T G A G C C A G T A T T C T G A T A C T T T C C - - - - T T T A T T C A T G C C A T G T A A              | 62869 |
| Pig         | C C A C G A C A G G A A - - C T C C T A C A C A G T A A T T T T A T A A G G C G A G C A T T T G T C C C T G G C T - - - - T C T C T T A C T G C T A G G G A T          | 62163 |

Dienstag, 3. Mai 2022 08:40

|             |                                                                                                           |       |       |       |       |       |       |       |  |
|-------------|-----------------------------------------------------------------------------------------------------------|-------|-------|-------|-------|-------|-------|-------|--|
| Majority    | CATTATCCCTAAATGAAGTTA- CTCTTAT- - - TGCXCCCXTTTTATAGATTTAGAAACTGGGACACAAAAAGATTAGCAG                      |       |       |       |       |       |       |       |  |
|             | 89930                                                                                                     | 89940 | 89950 | 89960 | 89970 | 89980 | 89990 | 90000 |  |
| Human       | CATCATCTCTAAATGTAGTTA- CCATTAT- - - CGATCCCATTTTATAGATTTGGAAAGTAGGGT- - ACAAAGAACAG- - - 71318            |       |       |       |       |       |       |       |  |
| PolarBear   | CATTATCCCTAAATGAAGTTA- CTCTTA- - - - - - - CCCTCTTCATAGATTTAGAAATTGGGACACGAAAAGATTAGCAG 31525             |       |       |       |       |       |       |       |  |
| Cow         | CACCATTCTTAAATGAATTTA- TCCTTAT- - - TGCCCCCATTTTACAGATTTAAAGCCTGGAACACAAACTGATTAGCAG 69150                |       |       |       |       |       |       |       |  |
| Dog         | CATTATCCCTAAATGTAGTTA- TTCTTAT- TGTCC- CTCACTTCATAGTTTAGAAACTGGGACACACAAAAGATTAGCAG 62171                 |       |       |       |       |       |       |       |  |
| BelugaWhale | ATCTGTCTTGGTATCGGTACA- ATTCCAC- - - TGATACTGTTTTAGCTGTT- - - - - - - - - - - - - AAATTGAAT- - - - - 61564 |       |       |       |       |       |       |       |  |
| Donkey      | CATCATCCTTAAATGAAGTTA- CCCTTAT- - - TGCCCCCGTTTTACAGATTTAAAAACTGGGACACAAAGAGATTAGC- - 68294               |       |       |       |       |       |       |       |  |
| Cat         | CATTGTCCATAAATGAAGTTAACCCCTTAACTGTCCGCCTGCTTTATCGACTTAGAAACTGGAATACAAAAAGATGAGCAG 68834                   |       |       |       |       |       |       |       |  |
| Ferret      | CATTATCCCTAAAAGAAGTTA- TTCTTAT- TGTCC- CCCACTTCATAGATTTGGGAAGTGGGACACAAAAAGATAAGCAG 69611                 |       |       |       |       |       |       |       |  |
| Lion        | CATTGTCCGTAATGAAGTTAACCCCTTAACTGTCCGCCTACTTTATCAGTTTAGAAACTGGAATACAAAAAGATGAGCAG 66505                    |       |       |       |       |       |       |       |  |
| Vaquita     | ATCTGTCTTGGTATCGGTACA- ATTCCAC- - - TGATACTGTTTTAGCTGTT- - - - - - - - - - - - - AAATTGAAT- - - - - 62924 |       |       |       |       |       |       |       |  |
| Pig         | CACAGTATCTCCAAAATCTA- ATTTATT- - - CAAGAGTGGATAGAATACTTCTA- TAAAGAATGGAGACTGAGT- GCTT 62237               |       |       |       |       |       |       |       |  |

|             |                                                                                                |       |       |       |       |       |       |       |  |
|-------------|------------------------------------------------------------------------------------------------|-------|-------|-------|-------|-------|-------|-------|--|
| Majority    | TTTGCTCAGATTCCTATAATTAGTGAGTGGCTGAGXXAX- - - - - X- AX- CXGGCAGTCTGGCTCCAA- AGTTCATACT         |       |       |       |       |       |       |       |  |
|             | 90010                                                                                          | 90020 | 90030 | 90040 | 90050 | 90060 | 90070 | 90080 |  |
| Human       | TTTGCCCAGATTCCTTTAACTTTTGAGTGGCCGAGCCCTAGCACTGAAAGCCAGGTAGTCTGGTTCCAA- AGTCCGTACT 71397        |       |       |       |       |       |       |       |  |
| PolarBear   | TTTGCTCAGATTCCTATAATTAGTGAGTGGCCGAGACCG- - - - - GCATTCTGGCAGTCTGGCTCCCA- AGTTCATGCT 31597     |       |       |       |       |       |       |       |  |
| Cow         | TTTGCTCAAATTCCTCATATTAGTGAGGGCCTGAGCCAG- - - - - CCAGGCAGTATGGCTCCAACAATCTGTCTT 69219          |       |       |       |       |       |       |       |  |
| Dog         | TTTGCTCCGATTCCTATAATTAGTGAGTGGTTGAGATAG- - - - - GCATTCTGGCAGTCCGGCTTCAA- AGTTCATACT 62243     |       |       |       |       |       |       |       |  |
| BelugaWhale | - - - - - TTGGTTTTCTTTTCTA- - TGTGTTTATGATGCA- - - - - TAAAATTAACAAGTA- - - - AACTTGTTTT 61620 |       |       |       |       |       |       |       |  |
| Donkey      | - - - - - AATTA- - GAGTGGGTGAGAT- - - - - GGGTAGTCTGGCCCAA- AGTCCATGCT 68339                   |       |       |       |       |       |       |       |  |
| Cat         | TTTGCTCAGATTCCTATAATTAGTGGGTGGCTGAGGTATT- - - CAGGGATGCTGGCAGTCTGGCTCCAG- AGTTCATACT 68910     |       |       |       |       |       |       |       |  |
| Ferret      | TTTGCTCATAGTCCATAATTAGTGAGTGGCTGAGATAGT- - - TAGGCATTCTGGCAGTCTGGCTCCAA- AGTTCATGCT 69687      |       |       |       |       |       |       |       |  |
| Lion        | TTTGCTCAGATTCCTATAATTAGTGGGTGGCTGAGGTATT- - - CAGGGATGCTGGCAGTCTGGCTCCAG- AGTTCATACT 66581     |       |       |       |       |       |       |       |  |
| Vaquita     | - - - - - TTGGTTTTCTTTTCTA- - TGTGTTTATGATGCA- - - - - TAAAATTAACAAGTA- - - - AACTTGTTTT 62980 |       |       |       |       |       |       |       |  |
| Pig         | TGTAATTAGAAATCTGACATC- - TAAATACATAATCA- - - - - CAAACCTGGCGGATT- - ATTAATTATTTA 62299         |       |       |       |       |       |       |       |  |

Dienstag, 3. Mai 2022 08:40

| Majority    | CCTAACAAACAA- - - - - TAGAATAAAATATACTATAGATTAGXTGGGCCTTTTAGCCTGACTTCTTTTC- - - - - |           |                                                              |                                      |           |       |       |       |       |
|-------------|-------------------------------------------------------------------------------------|-----------|--------------------------------------------------------------|--------------------------------------|-----------|-------|-------|-------|-------|
|             | 90090                                                                               | 90100     | 90110                                                        | 90120                                | 90130     | 90140 | 90150 | 90160 |       |
| Human       | CCTGACTAATAA-                                                                       | - - - - - | ATAGTGAATAAAAT-                                              | TAGATTAGCTTGACATTTTAGCCTGTCGTCTTCTC- | - - - - - |       |       |       | 71459 |
| PolarBear   | CCTAACCAACGA-                                                                       | - - - - - | TTGAATAAAATATACTATAGATTAGCTGGGCTTTTAGCCTGTCTTCTTTC-          | - - - - -                            |           |       |       |       | 31660 |
| Cow         | TCTAATAAACAT-                                                                       | - - - - - | TAAAATGAAATGTGCTACAGATTAGCTAAGGCTTTTAGCCTACCTTTTTTCCCCTATGG  |                                      |           |       |       |       | 69291 |
| Dog         | CCTAACAAACAAATTTGAATTTGAATAAAATATACTATAGATTAG-                                      | - - -     | GCCTGTTAGCCTGCCTTCTTTTT-                                     | - - - - -                            |           |       |       |       | 62311 |
| BelugaWhale | TAAAAT- - TTTT-                                                                     | - - - - - | TAAAACCTTACTTTAAACTTAATATTTTAAAATTTATTTTAAATGACTTCTGAAAGCTTT |                                      |           |       |       |       | 61690 |
| Donkey      | CCTAACTAATAAAC-                                                                     | - - -     | AACAGAATAAAATGTACTTTAGATTAGCTGGGCCTTTTGGCATGCCTTTTCCC-       | - - - - -                            |           |       |       |       | 68406 |
| Cat         | CCTAACAGACAA-                                                                       | - - - - - | TTGAATAAAATATGCAGTAGATTAGTTGGGCCTCTTAGTCTGACTAACTCCCCCCTC    |                                      |           |       |       |       | 68982 |
| Ferret      | CCTAACAAACAA-                                                                       | - - - - - | TTGAATAAAATATACTACAGATTAGCTGGGCCTTTTAGCCTGTCTCCTTTT-         | - - - - -                            |           |       |       |       | 69750 |
| Lion        | CCTAACAGACAA-                                                                       | - - - - - | TTGAATAAAATATGCAGTAGACTAGTTGGGCCTCTTAGTCTGACTAACTCC-         | - - - - -                            |           |       |       |       | 66645 |
| Vaquita     | TAAAATATTTT-                                                                        | - - - - - | TAAAACCTTACTTTAAACTTAATATTTTAAAATTTATTTTAAATGACTTCTGAAAGCTTT |                                      |           |       |       |       | 63052 |
| Pig         | CATATTCTACAT-                                                                       | - - - - - | CAAAGAACAAGGTGATCAAAAATCCTTGAGGTTATAAATTAAGATGTTTTTATAATCGTT |                                      |           |       |       |       | 62371 |

| Majority    | - CCCTATGGAGTTAA- AATA- GAAXAATGTCATACATATAGTAAATATGTAAGTCCTATAATTTTAATTTXCTTT- - - - - |                                                             |                                                          |                                           |                      |       |       |       |       |
|-------------|-----------------------------------------------------------------------------------------|-------------------------------------------------------------|----------------------------------------------------------|-------------------------------------------|----------------------|-------|-------|-------|-------|
|             | 90170                                                                                   | 90180                                                       | 90190                                                    | 90200                                     | 90210                | 90220 | 90230 | 90240 |       |
| Human       | - ACCTGTAGAATAGTTATCAAGAATAGTAATATACATATAGTAAAAATTTAAGTCCCATCATTTTAGCTTGCTTT-           | - - - - -                                                   |                                                          |                                           |                      |       |       |       | 71533 |
| PolarBear   | - CCCTATGGAGTTAATAATA-                                                                  | GAACAATGTCATACATCTAGTAAATACGTAAGTCCTATAATTTTAATTTCCCCCACAT  |                                                          |                                           |                      |       |       |       | 31738 |
| Cow         | AGTTCATGTAGAATA-                                                                        | ATGT-                                                       | CATGCATATAGTAAATT-                                       | GGTAAGCCTGTAGTTTTAAT-                     | TTCCTTCTTTTTTATATAGT |       |       |       | 69367 |
| Dog         | - CCCTATGGAGTTAATAATA-                                                                  | - - - - -                                                   | ATGTCATATATGTAGTAAATACATACGTCCTATAATTTTAATTTCCCTT-       | - - - - -                                 | T                    |       |       |       | 62380 |
| BelugaWhale | TGTTTTTGTT-                                                                             | - - - - -                                                   | ACTTTTGAATG-                                             | AGTTATTTACATGGTGTTTTTTTTTAAGTTTTTATTATC-  | - -                  |       |       |       | 61750 |
| Donkey      | - - - CTGTGGAGTTAACAGGT-                                                                | CA-                                                         | - - ATGTCATACATGTAGTAAATACGTAAGTCCTATTATTTCAATTTCCCTC-   | - - - - -                                 |                      |       |       |       | 68474 |
| Cat         | CCCCCATGGAGTTAA-                                                                        | AATG-                                                       | GAATAATGTCATACATATAGTAAATATGTAAGTCCTATAGTTTTAATTTCCCTTT- | - - - - -                                 |                      |       |       |       | 69055 |
| Ferret      | - CTCCTGGAGCTAATAATA-                                                                   | GAACAGTGTTATACATGTAGTCAATATGTAAGTGCTATAATTTTAATTTTCCCCCATAT |                                                          |                                           |                      |       |       |       | 69828 |
| Lion        | CCCCCATGGAGTTAA-                                                                        | AATA-                                                       | GAATAATGTCATACATATAGTAAATATGTAAGTCTTATAGTTTTAATTTCCCTTT- | - - - - -                                 |                      |       |       |       | 66718 |
| Vaquita     | TGTTTTTGTT-                                                                             | - - - - -                                                   | ACTTTTGAATA-                                             | AGTGATTTACATGGTGTTTTTTTTTAAGTTTTTATTATC-  | - -                  |       |       |       | 63112 |
| Pig         | TTATCATGTTAAGA-                                                                         | AGTA-                                                       | TAGTTAATTAAGAGATA-                                       | GGTCACTTTTTAGAAAGACTGCTAGAAGTAATTAATTTTTC |                      |       |       |       | 62448 |

Dienstag, 3. Mai 2022 08:40

| Majority    | --- AATTTT XTCTCC- ----- TATACTAAGGTGTTTTCTGTTGCCAAGAXA- XTTGTTTTTT   |                                                 |       |                                            |                           |       |               |       |
|-------------|-----------------------------------------------------------------------|-------------------------------------------------|-------|--------------------------------------------|---------------------------|-------|---------------|-------|
|             | 90250                                                                 | 90260                                           | 90270 | 90280                                      | 90290                     | 90300 | 90310         | 90320 |
| Human       | ----- TTTTTTAC-                                                       |                                                 |       |                                            | ATACTAAGATATTTTTTGTACCAA- |       |               | 71566 |
| PolarBear   | ACTAAACCCCCCCC-                                                       |                                                 |       | CATATACTAAGGTGTTTTCTGTTGCCAAGAAAGATTGTTTTT |                           |       |               | 31796 |
| Cow         | G- GGATGTTTTCTGTT-                                                    | GCTATGACAGATTTTTTTGTTGCCAAGTCCATCCAGTGTTAACCTG- |       |                                            |                           |       |               | 69439 |
| Dog         | TTTAATTTCTCTCCC-                                                      |                                                 |       | CATATACTTAAATGTTTTCTGTTACCAAGATG-          |                           |       | TTG-          | 62431 |
| BelugaWhale | --- AAAGACTTCAGTT-                                                    | ATCATATCCATTATCTCAATTCAGTTCCACACTTGTTTT-        |       |                                            |                           |       | ATCTGTTTCAT   | 61816 |
| Donkey      | ----- TTTTTTAT-                                                       |                                                 |       | ATAATAAGATGTTTTCTGCTGCCATGACAGATTATTTTTT   |                           |       |               | 68522 |
| Cat         | ----- TTGTCCCTCC-                                                     |                                                 |       | TATACTAAGGTGTTTTGTGTTGCCAAGACA-            |                           |       | TTGGCTTTT     | 69104 |
| Ferret      | ACTAATTTCCCCCATATACTAATTTCTTTTTCCCGCATATACTAAGGTATTTTTCTGTTGCTAAGACA- |                                                 |       |                                            |                           |       | TTGTTTTTT     | 69906 |
| Lion        | ----- TTGTCCCTCC-                                                     |                                                 |       | TATACTAAGGTGTTTTGTTTTGCCAAGACA-            |                           |       | TTGGCTTTT     | 66767 |
| Vaquita     | --- AGAGACTTCAGTT-                                                    | ATCATATCCATTATCTCAATTCAGTTCCACACTTGTTTT-        |       |                                            |                           |       | ATCTGTTTCAT   | 63178 |
| Pig         | A- TGATCATGTCTAC-                                                     | ATTTTAAAATAATGCAGATAATATGTACAAAGAATACTTCA-      |       |                                            |                           |       | G- AGCTTTCCAT | 62516 |

| Majority    | TGTGCCAAGTCCATTAXGTGTTTAACTGXTTATXATA- TGATTGCAA- A- --- AACXAAAXGTATTGTTTCAT- ----- |       |       |       |                                      |                        |                               |          |
|-------------|--------------------------------------------------------------------------------------|-------|-------|-------|--------------------------------------|------------------------|-------------------------------|----------|
|             | 90330                                                                                | 90340 | 90350 | 90360 | 90370                                | 90380                  | 90390                         | 90400    |
| Human       | ----- GTCCATTAAGTATTTAGCCTGATTATCTTATTGATTAAAATAC-                                   |       |       |       |                                      | CAAAAATGTGTATTGTTTCAT- |                               | 71629    |
| PolarBear   | TGTGCCAAGTCCATTAGTGTGTTTAACTGGTTATTATA-                                              |       |       |       | TGATTGCAA-                           |                        | AACCAAAAGTATTGTTTCAT-         | 31863    |
| Cow         | GATTACAAAACCAAATATGAGTATACCTACTCTATAAT-                                              |       |       |       | TGGATCCAGAATAGGAGCTGTGTGC-           |                        | CTGTGTATTTATAT                | 69516    |
| Dog         | - - TTACCAAGTCCATTTAGTGTGTTTAACTGGTTATTATA-                                          |       |       |       | TGATTACAA-                           |                        | AGCCAGAAGTACTGTTTAT-          | 62496    |
| BelugaWhale | TTTTTCTGTTGTATTTTGAGGCAAATCCTTAACATCAAG-                                             |       |       |       | TCATCTCAA-                           |                        | ACATTACCATAATTT- CTCTAAAATAA- | TG 61892 |
| Donkey      | - GTTGCCAAGTCCACTCACTGTTTAACTGGTTTTTATA-                                             |       |       |       | TGAGTACAAAAC-                        |                        | CAAAAGTGGGTATTGTTTCAT-        | 68592    |
| Cat         | TGTGCCCAGCCCATTAGGTGTTGAACGTGCTTATTATA-                                              |       |       |       | TGATTGCAA-                           |                        | AAACAAAAGTATTGTTTCAT-         | 69171    |
| Ferret      | - GTTGCCCAGCCCATTCCATGTTTAACTGATTATTTTA-                                             |       |       |       | TGATTGCAA-                           |                        | AACCAAGGGTATTGTTTCAT-         | 69972    |
| Lion        | TGTGCCCAGCCCATTAGGTGTTGGACCTGGTTATTATA-                                              |       |       |       | TGATTGCAA-                           |                        | AAACAAAAGTATTGTTTCAT-         | 66834    |
| Vaquita     | TTTTTCTGTTGTATTTTGAGGCAAATCCTTAACATCAAG-                                             |       |       |       | TCATCTCAA-                           |                        | ACATTACCATAATTT- CTCTAAAATAA- | TG 63254 |
| Pig         | GTATTTTGAATTAATAATGTAGCAGCCAGTCTCATCATA-                                             |       |       |       | TGGTTTTAACAGAAAGGCAAAACAAACTTTGTATG- |                        | - - GG                        | 62592    |



Dienstag, 3. Mai 2022 08:40

| Majority    | - - - - GXCTAATCTATAATATTC- - - - TAAGACT- - - - AATTATAGCAAAGAAAATT- - TGGTCATAA- AATCAAACCA            |       |       |       |       |       |       |       |  |
|-------------|----------------------------------------------------------------------------------------------------------|-------|-------|-------|-------|-------|-------|-------|--|
|             | 90570                                                                                                    | 90580 | 90590 | 90600 | 90610 | 90620 | 90630 | 90640 |  |
| Human       | - - - - - TCCTTTTCTATATTTTAT- - - - - TAAGACT- - - - - AATTATAGCAAATAATA- - - - - GCCATAA- AATTAAACCA    | 71813 |       |       |       |       |       |       |  |
| PolarBear   | - - - - - GCCCTAATCTATAATATCCCATTATAAGACT- - - - - GCATTATAGCAAAGAAAATT- - - - - GTCATAA- AATCAGACTG     | 32066 |       |       |       |       |       |       |  |
| Cow         | - - - - - ATCCTAATCTATAATATTC- - - - - TAAGACT- - - - - AATTATAGCAAAGA- CAGTTATGGCCAGAA- AATCACACCA      | 69739 |       |       |       |       |       |       |  |
| Dog         | - - - - - GCTTTAATCTATAA- - - - - GACT- - - - - ACATTATAGCAAAGAAAATTT- TGGTTGTAA- AATCAAACCTT            | 62693 |       |       |       |       |       |       |  |
| BelugaWhale | TGT- TTTTTAAGCATTGATTTGT- - - - - TCAGAAT- - - - - A- - - - - G- - - - - GATCTTCTCA                      | 62065 |       |       |       |       |       |       |  |
| Donkey      | - - - - - AACTAATGTATAATATTTCCATTATAAGACT- - - - - GATTATGGTAAAGGAAATTA- TGGCCATAAAAATCAAACCA            | 68800 |       |       |       |       |       |       |  |
| Cat         | - - - - - GCCT- - - - - GTCTATAATATTTCCATTATAAGACT- - - - - GAATTATAGCAAAGAAGATTC- TGGTCATAA- AATCAAGCCA | 69347 |       |       |       |       |       |       |  |
| Ferret      | - - - - - AGCCTAATCTATAATATCCCATTATAAGACT- - - - - GCATTATAGCAAAGAAAATTA- TGGTCATAA- AATCAGACTG          | 70191 |       |       |       |       |       |       |  |
| Lion        | - - - - - GCCT- - - - - GTCTATAATATTTCCATTATAAGACT- - - - - GAATTATAGCAAAGAAAATTC- TGGTCATAA- AATCAAGCCA | 67039 |       |       |       |       |       |       |  |
| Vaquita     | TGT- TTTTTAAGCATTGATTTGT- - - - - TCAGAAT- - - - - A- - - - - G- - - - - GATCTTCTCA                      | 63427 |       |       |       |       |       |       |  |
| Pig         | TGGGGTCCCTTGCATTTATTTT- - - - - TAAGATTCCAAAATGATTTTACTGAGTAGTGGAAGTTGAGA- ACTACTACTA                    | 62819 |       |       |       |       |       |       |  |

| Majority    | - - - - AATAATTCATCTACTGCAGACACATTTGAAAGTTATCGXCCAACAAAAX- XAAATAATXACAAATAXAXA- - - AA              |       |       |       |       |       |       |       |  |
|-------------|------------------------------------------------------------------------------------------------------|-------|-------|-------|-------|-------|-------|-------|--|
|             | 90650                                                                                                | 90660 | 90670 | 90680 | 90690 | 90700 | 90710 | 90720 |  |
| Human       | - - - - - AAAAATTCATCTACTGCAGACATATTTGAAAGCTGTCCCCAAGAAAGACCAAAGTAATCACACATACCTA- - - AA             | 71886 |       |       |       |       |       |       |  |
| PolarBear   | - - - - - AATAATTCATCTACTGCAGGCACATTTACAAGTCATTGTCCAACAAA- - - - -                                   | 32113 |       |       |       |       |       |       |  |
| Cow         | - - - - - AATAATTCATGTATTGCAGTCACATTTGAAAGCTCCAAGAGACCAAAT- - - AATTACTACAAATATGAA- - - AA           | 69809 |       |       |       |       |       |       |  |
| Dog         | - - - - - ACTAATCTA- CTGCAG- - - - - A- CACATTTGCAAATCATCCTCCAACAAAACACTAAAATGATTACAAATATACA- - - AA | 62762 |       |       |       |       |       |       |  |
| BelugaWhale | - - - - - GGGGCCACACATGGCATTGTTGGTAGTTATGTCTCCTGAATGTCTAT- - - - - TACTCTGTTATAC- - - - - TC         | 62125 |       |       |       |       |       |       |  |
| Donkey      | - - - - - AATAACTCATATACTGCAGACGCAGTTGAGAATCATCCTCCAAGAAAAGCCTAAATAATTATATACAAATACACAA               | 68876 |       |       |       |       |       |       |  |
| Cat         | - - - - - AATAACTCATTTACTGCAGACACATTTGCAAGTCATCACCACAAAGACTAAGAGAATTACAAGTACACA- - - CA              | 69420 |       |       |       |       |       |       |  |
| Ferret      | - - - - - AATAATTCATCTGTTA- - - - - CACATTTGTGAGTCATTGTCCAACAAAACACTAAATT- - - TACAAATACACA- - - AA  | 70257 |       |       |       |       |       |       |  |
| Lion        | - - - - - AATAACTCATTTACTGCAGACACATTTGCAAGTCATCACCACAAAGATTAAGATAATTACAAGTATACA- - - CA              | 67112 |       |       |       |       |       |       |  |
| Vaquita     | - - - - - GGGGCCACACATGGCATTGTTGGTAATTATGTCTCCTGAATGTCTAT- - - - - TACTC- - - - -                    | 63477 |       |       |       |       |       |       |  |
| Pig         | TAGAGAAAATTTGTTTTAGATGCTTTATTTTAGCCTTTTAGCAGAATTATTA- - - GTGTCTCATAAAAT- - - A- - - TT              | 62891 |       |       |       |       |       |       |  |

Dienstag, 3. Mai 2022 08:40

| Majority    | CATTCTAGAAATATTTCC- - - CAGAAATATTTAAAC- TACATAGATTTTTTAAAGTGTATCACTGAATGCCATAA- - CAXCA |                        |                                         |                            |                 |              |         |       |       |
|-------------|------------------------------------------------------------------------------------------|------------------------|-----------------------------------------|----------------------------|-----------------|--------------|---------|-------|-------|
|             | 90730                                                                                    | 90740                  | 90750                                   | 90760                      | 90770           | 90780        | 90790   | 90800 |       |
| Human       | CATGCTAG-                                                                                | - - TATTTCC-           | - - CAGAAATATTTAAA                      | AATACATAGATT-              | TTGAAGCACATTGCT | GAATGCCATAG- | - TAACA |       | 71957 |
| PolarBear   | CATTTT                                                                                   | TAGAAATATTTAAAC-       | AACATAGATTTTTAGAGT                      | GTATCACTGAATGCCATAA-       | - CATT          |              |         |       | 32187 |
| Cow         | CATCCTAGAAATATTTCC-                                                                      | - - TGGAAGTACTGAAC-    | CACACCCATT-                             | TTAAAGTATATCACTGAGTCT      | CAAAAC-         | TAACA        |         |       | 69883 |
| Dog         | CATTCTAGAAATACTTT-                                                                       | - - - TAAAAATATTTAAAC- | TCCATGGATTTTTAGAGT                      | GTATCACTGAATGCCATAA-       | - CATT          |              |         |       | 62835 |
| BelugaWhale | TGTTAAAGTCTCTCCCTCTGCCCCAACCCCTCAGT-                                                     | TCCATTGAC-             | - TTATTGTGGAAACCTAGTTATATTATT-          | TAAGA                      |                 |              |         |       | 62201 |
| Donkey      | CATCCTAGGAATATTTCC-                                                                      | - - CAGAAATATTTAAAC-   | TACGTACATTTTTTAAACCATATCACTTAATGCCATAA- | - CACCA                    |                 |              |         |       | 68950 |
| Cat         | CATTCTAGAAATATTTCC-                                                                      | - - CAGAATTATGAAAC-    | TACATAAATCTTTAAAGTGTATCGGTGAATATCATGA-  | - CATCA                    |                 |              |         |       | 69494 |
| Ferret      | CATTTT                                                                                   | TAGAAATATTTAAAC-       | TACATAGATTTTTAGAGT                      | GTATCACTGAATGCCATAAAACATTA |                 |              |         |       | 70333 |
| Lion        | CATTCTAGAAATATTTCC-                                                                      | - - CAGAAATATGAAAC-    | TACATAAATCTTTAAAGTGTATTGGTGAATGTCATGA-  | - CATCA                    |                 |              |         |       | 67186 |
| Vaquita     | TGTTGAAGTCTCTCCCTCTGCCCCAACTCTCAGT-                                                      | TCCATTGAC-             | - TTATTGTGGAAACCTAGTTATATTCTT-          | TAAGA                      |                 |              |         |       | 63553 |
| Pig         | CTTCATAGCTATTGATCAGTATTTTAATACTTTTC-                                                     | TTTATTCATG-            | CTGT-                                   | GTAATGCTCTTGGTACAATTCT-    | TGATA           |              |         |       | 62967 |

| Majority    | AAATTTTTTTTAAAAAACCATATAATTAGAAAAGC- AGT- - ATTTTATCATGTTCAACATAAATCAT- - - - - ATTT- - - - |                          |                                           |                              |                 |                      |                    |       |       |
|-------------|---------------------------------------------------------------------------------------------|--------------------------|-------------------------------------------|------------------------------|-----------------|----------------------|--------------------|-------|-------|
|             | 90810                                                                                       | 90820                    | 90830                                     | 90840                        | 90850           | 90860                | 90870              | 90880 |       |
| Human       | CCAAACT-                                                                                    | - - AAAAAATACATGTA       | AATTTAAAAATT-                             | AAT-                         | ATTTTATT-       | - - TTCAACATAAATCAG- | - - - - AAATACTTGG |       | 72025 |
| PolarBear   | AAATTTTTTTTAAAAAGCCATATAATTAGAAAACC-                                                        | AGT-                     | ATTTTATCATGTTCAATATCAATCAT-               | - - - - - ATTTTTGG           |                 |                      |                    |       | 32258 |
| Cow         | AAAGTTTTTTAAAA-                                                                             | - ACTACATAATTTAAAAGCC-   | AGT-                                      | ATTTTATCATTTTTCAACATAAATCAG- | - - - - - AATT- | - - - -              |                    |       | 69948 |
| Dog         | GCAATTTTTTTAAAAAGCCATA-                                                                     | AATTAGAAAAGC-            | AGT-                                      | ATTTTGTTCATGTTCAATA-         | AAATCAA-        | - - - - - ATTTTTTCG  |                    |       | 62904 |
| BelugaWhale | AAATGCC-                                                                                    | - - - - - ACAATCTGGATTG- | - - GTCTGGCT-                             | ATTTATTTTCTTATAGTGCATCTT-    | - - - - - TTT-  | - - - - -            |                    |       | 62257 |
| Donkey      | AACTTCCCTTTAAAAAAATCATAACTAAAAAGGC-                                                         | AGT-                     | ATTTTATCATGTTTCAACATAAATAAATCATAAATTTTTGG |                              |                 |                      |                    |       | 69027 |
| Cat         | AAATTTTTTTTAAAAA-                                                                           | CCATATAATTAGAAAAGC-      | AGT-                                      | ATTTTATCATATTAGACATAAAT-     | - - - - -       | - - - - -            |                    |       | 69553 |
| Ferret      | AAAAAAAATTTTTAAAGCCATATAATTAGAAAAGC-                                                        | AGT-                     | ATTTTATCATGTTTCAAGTAGAAATTAT-             | - - - - - ACTTTTGG           |                 |                      |                    |       | 70404 |
| Lion        | AAAATTTTTTTAAAAA-                                                                           | CCATATAATTAGAAAAGC-      | AGT-                                      | ATTTTATCATATTAGACATAAAT-     | - - - - -       | - - - - -            |                    |       | 67245 |
| Vaquita     | AAATGCC-                                                                                    | - - - - - ACAATCTGGATTG- | - - GTGAGGCT-                             | ATTTATTTTCTTATAGTGCATCTT-    | - - - - - TTTA- | - - - - -            |                    |       | 63610 |
| Pig         | TCGTGGTTTTGATATTATAATATTGTTTAGCCGTTGAGTTGAGTTTATTTTGGTTTACTTTTCTATG-                        | - - - - - TGTT-          | - - - - -                                 |                              |                 |                      |                    |       | 63037 |





Dienstag, 3. Mai 2022 08:40

| Majority    | GGATTATTGA | ACTATCCTCX | ATTTTGCTAT  | GGCTGAATTTT   | XAAAATATTA  | A- - -     | TTTTTCAGT  | CTTTAAAAT | GTTTCTT     |           |       |       |
|-------------|------------|------------|-------------|---------------|-------------|------------|------------|-----------|-------------|-----------|-------|-------|
|             | 91050      | 91060      | 91070       | 91080         | 91090       | 91100      | 91110      | 91120     |             |           |       |       |
| Human       | GGATTATTGA | ACTGTCCTCT | GCTTTGCTAT  | AGCTGAATTTT   | TAAAATGTTAA | - - -      | TTTTGAAGT  | CTTAAAAT  | GTGTCTT     | 72242     |       |       |
| PolarBear   | GGATTATTGA | ACTATCCTCC | ATTTTGCTAT  | GGCTGAATTTT   | TAAATATTA   | - - -      | TTTCTCAGT  | CTTTAAAAT | GTTTATT     | 32491     |       |       |
| Cow         | GGATTATTA  | AAAGTATCCT | CTATTTTCT   | ATGGCTGAATTTT | AAAAACTGG   | -          | GTTTTCCAGT | TTTTAAAAT | ATCTCTT     | 70173     |       |       |
| Dog         | GGATTATTA  | AAACTAACC  | - - AATTTT  | GCTGTGGCT     | GAGTTTTTAA  | AGTATTA    | - -        | TTTCTCAGT | CTTTAAAAT   | ACTTCTT   | 63131 |       |
| BelugaWhale | G- ACCA-   | - GGGATCAA | ACCCAGGCC   | CCCTGCATT     | GGGAGCAC    | AGAGTCTTAA | -          | CCACTTTCT | GTCTTTAAAAT | GTCTCTT   | 62441 |       |
| Donkey      | GAATTATTCA | ACTGCCT-   | CTATTTTGCT- | TGGCTGAATTTT  | AAAAACTAA   | - - -      | TTTTTTGT   | CTTTAAAAT | GTCTTTT     | 69255     |       |       |
| Cat         | GGATTATTGA | ACTATCCTCT | GTTTTCTC    | AGGGCTGAATTTT | CAAAATATTA  | - -        | TTTCTCAGT  | CTTTAAGAT | GTTTCTT     | 69784     |       |       |
| Ferret      | GGATTATTG  | ACCTATCCT  | CCATTTTGCT  | GTGGCTAAATTTT | AAAAATATT   | - - - - -  | TCTCAGT    | CTTTAAAAT | GTTTACT     | 70626     |       |       |
| Lion        | GGATTATTGA | ACTATCCTCT | ATTTTCTC    | AGGGCTGAATTTT | AAAAATTA    | - -        | TTTCTCAGT  | CTTTAAGAT | GTTTCTT     | 67476     |       |       |
| Vaquita     | G- ACCA-   | - GGGATCAA | ACCCAGGCC   | CCCTGCATT     | GGGAGCAC    | AGAGTCTTAA | -          | CCACTTTCT | GTCTTTAAAAT | GTCTCTT   | 63801 |       |
| Pig         | - - ACTA   | ATACAGTGA  | ATCCACAT    | ATTCATCAT     | TTCAATTC    | ACTAGT     | TCCCAT     | ACTTGT    | TTTTATCT    | GTTAAGTTT | GTTC  | 63260 |

| Majority    | TTAGAA-   | - - - -    | AXGAAGTT   | XXXAGAGCT  | AXAATAGTT | CXATTTXAA | TTTTXTAAC | XGTGGATA   | AAAA-       | -         | TTTTAACT | TXTX     |         |       |       |
|-------------|-----------|------------|------------|------------|-----------|-----------|-----------|------------|-------------|-----------|----------|----------|---------|-------|-------|
|             | 91130     | 91140      | 91150      | 91160      | 91170     | 91180     | 91190     | 91200      |             |           |          |          |         |       |       |
| Human       | TTGGAA-   | - - - -    | AAAACATT   | GGAAGAGCT  | AAAGTAGAT | AGAGTTGTT | CATTTAAAT | TGTTATTT   | TTTTTAT     | TTTTTATT  | TTTTTATT | TTTTTATT | 72317   |       |       |
| PolarBear   | TTAGAA-   | - - - - -  | GTAGTGAG   | CTGAGATAGA | ATTGTTT   | -         | ATTTAAAAT | ACCTGTCAGT | GGACAAA     | -         | TTTTAACT | TCTA     | 32561   |       |       |
| Cow         | CTAAA-    | - - - -    | AAGGAAGT   | GCAAGAGCT  | GA-       | - -       | AGTTGAAT  | TGTTTAAAT  | TTGGATAA    | -         | AA-      | TTTTCACT | TGTG    | 70243 |       |
| Dog         | TCAGAA-   | - - - -    | AAGAAGTA   | ATCTGAGATA | AAAATTGTT | C-        | ATT-      | AAAATAACT  | GTCAGTAGATA | AAAAGT    | TTTTAAC  | CTCTA    | 63204   |       |       |
| BelugaWhale | TTAAA-    | - - - -    | GAGGAAGT   | GCAAGAGCT  | GG-       | - -       | GGTAGAAT  | TGTTTAAAT  | TTGGATTA    | -         | CA-      | TTTTTACT | TGTG    | 62511 |       |
| Donkey      | AGAAAAGA  | AGTTGGAAG- | - GGCTGAGG | TAGAGTTGTT | CATTTTAA  | ATTTGT-   | -         | CAGTAGATA  | AAAA-       | -         | TTTTAAC  | - - - -  | 69324   |       |       |
| Cat         | TTAGAA-   | - - - -    | AAGAAGTA   | ATGAGAGCT  | GAGATAGA- | - -       | ATT-      | - AAGTCCC- | - - - - -   | -         | AGAA-    | - - -    | TTGATT- | - - - | 69835 |
| Ferret      | TTAGAAA-  | -          | ATAAGTA    | AATGAGCT   | GAAATAGA  | ATTGTTT-  | -         | ATTTTAAAT  | ACCTGTCAGT  | GGATAAAA- | -        | TTTTAACT | TCTA    | 70701 |       |
| Lion        | TTAGAA-   | - - - -    | AAGAAGTA   | ATGAGAGCT  | GAGATAGA- | - -       | ATT-      | - AAGTCCC- | - - - - -   | -         | AAAA-    | - - -    | TTGATT- | - - - | 67527 |
| Vaquita     | TTAAA-    | - - - -    | GAGGGAGT   | TGCAAGAGCT | GG-       | - -       | GGTAGACT  | TGTTTAAAT  | TTGGATTA    | -         | CA-      | TTTTTACT | TGTG    | 63871 |       |
| Pig         | TTATATTTT | GAAGCAA    | ATCCTTAAT  | GTCATGTC   | CATCTCAA  | ACAACC    | ATTTCT    | CTAAAAT    | AGTGA-      | -         | CATCTT   | CTTAAC   | 63339   |       |       |



Dienstag, 3. Mai 2022 08:40

|             |                                                                                              |       |       |       |       |       |       |       |       |
|-------------|----------------------------------------------------------------------------------------------|-------|-------|-------|-------|-------|-------|-------|-------|
| Majority    | - - - - - TGGAGGTATAATGGGCCACAGATATGAGG- GA- - - - TAGA- GAAACAATXTTA- - - TXTCXGTXCATATTTAC |       |       |       |       |       |       |       |       |
|             | 91370                                                                                        | 91380 | 91390 | 91400 | 91410 | 91420 | 91430 | 91440 |       |
| Human       | TTT - - TTTGTAGTTTTAGTAGA- GACAGGCTTTCCACCGTG- - TTAGCCAGGATGGTCTCA- - ATCTCCTGACCTCGTGAT    |       |       |       |       |       |       |       | 72547 |
| PolarBear   | - - - - - CGGAAGTATAACGGGCCCTCAGGTGTGATATGAACATTAGAAGAAATAACGTTACCATGTCCGGTGCATATTTGC        |       |       |       |       |       |       |       | 32778 |
| Cow         | - - - - - TGAAGATACAATGGGCGA- AAACATTGGG- - - - - AGA- AAAACATTAATG- - - CATCAGTTTGCATTTAC   |       |       |       |       |       |       |       | 70447 |
| Dog         | - - - - - TGGAAATATAATAGGTACAGATGTGATATGAATGTTAGA- GAAATAATGTTACCATGTCCATGCACATTTAC          |       |       |       |       |       |       |       | 63416 |
| BelugaWhale | CATACTTTGGAGGTATAGTGGGCCATAAACATTAGG- - - - - AGA- AATACATTATTA- - - CATCAGTTCATATTTAC       |       |       |       |       |       |       |       | 62726 |
| Donkey      | - - - - - TGGAGGTGTAATGGGCCACAGATATAAAC- - A- - - TTAGGAGAAGTAT- GTTATTACATCAGTTTGTGTTTAT    |       |       |       |       |       |       |       | 69542 |
| Cat         | - - - - - AAGCTCA- - - - - CACAGAAATGGGGGGG- - - GCAGGGAACAA- - - - - TGTAGGGGCAGAGCTAG      |       |       |       |       |       |       |       | 69985 |
| Ferret      | - - - - - TGGAGGTATAACAGGCCACAGATGTGATATGAACATTAGAAGAAATAACATTTTTCATGTTGGTGCATATTTAC         |       |       |       |       |       |       |       | 70920 |
| Lion        | - - - - - AAGCTCA- - - - - CACAGAAATGGGGGGG- - - - - CGGGGAACAA- - - - - TGTAGGGGCAGAGCTAG   |       |       |       |       |       |       |       | 67675 |
| Vaquita     | CATACTTTGGAGGTATAGTGGGCCATAAACATTAGG- - - - - AGA- AATACAGTATTA- - - CATCAGTTCATATTTAC       |       |       |       |       |       |       |       | 64086 |
| Pig         | - - - - - TAAGGATTGATTTATTCA- GCATATGATCCTC- - - - TGGA- GGGCCGCAGATGG- - CATTGTTAGT- CTCCC  |       |       |       |       |       |       |       | 63544 |

|             |                                                                                          |       |       |       |       |       |       |       |       |
|-------------|------------------------------------------------------------------------------------------|-------|-------|-------|-------|-------|-------|-------|-------|
| Majority    | TTATTTGCCAGCATTCTCAAATGGAATAAGCTTATTXCTGTAGGACTAXA- - ATGT- TATTCATAGGCTGCCTTTTAACT      |       |       |       |       |       |       |       |       |
|             | 91450                                                                                    | 91460 | 91470 | 91480 | 91490 | 91500 | 91510 | 91520 |       |
| Human       | CCGCCACCTTGGTCTCCCAAAGTGCTGGGATTACAGTCAT- GAGCCACCGTGCCTGGCCTCATTTAAAATTTTTTAAACA        |       |       |       |       |       |       |       | 72626 |
| PolarBear   | TTATTCGCCAGCATTCTCAGATA- - - - - TTCCTGTTGGGCTA- - AAATGT- TATTCATAGACTGCCTTTTAACT       |       |       |       |       |       |       |       | 32844 |
| Cow         | TCATGCACCAGCATTCTCAAATGGAATAAACTTGTAAGTGTAGTACTAAA- - ATGTAATTCATAGGCCGCTTTTAACT         |       |       |       |       |       |       |       | 70525 |
| Dog         | TTATTTGCCAGCATTCTCAAATAGGATAAGTTTATTCTGTAGGGCTATAAGATGT- TGTTTCATAGACTGCCATTTAACT        |       |       |       |       |       |       |       | 63495 |
| BelugaWhale | TTATTTACCAGCCTTCTCAAATGGAACAAGCTTATAACTGTAGGACTAAA- - ATGT- TATTCATAGGCTGCTTTTAACT       |       |       |       |       |       |       |       | 62803 |
| Donkey      | T - - T - - ATCAGCATTCTCAAATGGAATAAGCTTGTATGATAGGACTAAA- - ATGC- TATTCATAGGCCACCTTTTAACT |       |       |       |       |       |       |       | 69615 |
| Cat         | A - - - - GCCAGAA- - CTGAAGTCG- - - - - TCATTT- - - - - GTGT- AGTCTATATTCTTTCTCCTCACC    |       |       |       |       |       |       |       | 70035 |
| Ferret      | TTATTTGCTAGCATTCTCAAATAGTATAAGCTTATTCTGTAGGACTA- - AAATGT- TATTCATAGATTGCCTTTTAACT       |       |       |       |       |       |       |       | 70997 |
| Lion        | A - - - - GCCAGAA- - CCGAAGTCG- - - - - TCATTT- - - - - GTGT- AGTCTATATTCTTTCTCCTCACC    |       |       |       |       |       |       |       | 67725 |
| Vaquita     | TTATTTACCAGCCTTCTCAAATGGAACAAGCTTACAACGTAGGACTAAA- - ATGT- TATTCATAGGCTGCTTTTAACT        |       |       |       |       |       |       |       | 64163 |
| Pig         | TCCTGAGTCAGGCCTCTCCCTCCACCCTCAGTC- CCATTGAGTTATTAGAG- AAATCTAGTTATAGGTAGTCTTTGAGAA       |       |       |       |       |       |       |       | 63622 |

Dienstag, 3. Mai 2022 08:40

| Majority    | AT- - CCAGGGTA- AAATTTTCATXTAAA- GTTCTTAATGGA- - TGATCATATAGTCTTTXCTTGAAC TAATXTGTT- ATG        |       |       |       |       |       |       |       |       |
|-------------|-------------------------------------------------------------------------------------------------|-------|-------|-------|-------|-------|-------|-------|-------|
|             | 91530                                                                                           | 91540 | 91550 | 91560 | 91570 | 91580 | 91590 | 91600 |       |
| Human       | CT- - - - GGGTA- AAATTTTTATTTTTGAGTCACAAATTAATTTGAAGCTGTGTCTTTTAGAGAGCTTATTCAACTCTTA            |       |       |       |       |       |       |       | 72700 |
| PolarBear   | AT- - TCAGGGTA- AAATTTTCATATGAA- GTTCTTAATGGA- - TGATCATGTAGACTTTGCTTGAAC TAATCTGTT- AGG        |       |       |       |       |       |       |       | 32917 |
| Cow         | AT- - CTTGGATGCAAATTTTCATTCCCAAGTTCCTAATGGG- - TGATAATATAGTCTTTGCTTAACTGATTTTGTT- ATG           |       |       |       |       |       |       |       | 70600 |
| Dog         | GT- - CCAAGGTA- ATATTTTCATATAAAA- GTTCTTAATGGA- - TAATCCCATAACCTTTGCTTGAAC TA- - - TGTT- AGG    |       |       |       |       |       |       |       | 63565 |
| BelugaWhale | AT- - CCAGGGTACACATTTTCATTTCAGA- GTTCTTAATGGT- - TGATTTTATAGTCTCTAAACTGA- - - - TTTGTT- ATG     |       |       |       |       |       |       |       | 62872 |
| Donkey      | AT- - CCGGGGGCAAAGTTTTATATAAAA- ATTCTTAGTGGA- - TGACGATGTAGTCTTTACTTAAACTGATCCATT- ATA          |       |       |       |       |       |       |       | 69689 |
| Cat         | AT- - T- - - - - - GTGTTTTTATGAAAA- AAAGGAAAAGGG- - GAAACAGAT- - - - - - - GAAGGAA- - - - - GGG |       |       |       |       |       |       |       | 70084 |
| Ferret      | AT- - CCGAGGTA- AAAATTTTCATATAAAA- GTTCTTAATGGA- - CGATCACATAGCTTTTGCTTGAAC TAATCTGTT- AGG      |       |       |       |       |       |       |       | 71070 |
| Lion        | AT- - T- - - - - - GTGTTTTTATGAAAA- AAAGGAAAAGGG- - GAAACAGAT- - - - - - - GAAGGAA- - - - - GGG |       |       |       |       |       |       |       | 67774 |
| Vaquita     | AT- - CCAGGGTACACATTTTCATTTCAGA- GTTCTTAATGGT- - TGATTTTATAGTCTCTAAACTGA- - - - TTTGTT- ATG     |       |       |       |       |       |       |       | 64232 |
| Pig         | AATGCCTCAGTCTGAATTGGTCTGGCT- - GTTCCTTATAG- - TGTCAACTTGTTCTCCATCACCTCTGCTTTAT- ATA             |       |       |       |       |       |       |       | 63696 |

| Majority    | XTCACCCATTATATTGTTCTCAGCTA- - TA- GXTTTAA- - - - GAAAT- - - - TTTATTTATX- XX- - - - - X- XXXXT- CT     |       |       |       |       |       |       |       |       |
|-------------|--------------------------------------------------------------------------------------------------------|-------|-------|-------|-------|-------|-------|-------|-------|
|             | 91610                                                                                                  | 91620 | 91630 | 91640 | 91650 | 91660 | 91670 | 91680 |       |
| Human       | ATTCCATTATAAATAATATTTGAATGAATGTGTTTTACATCTGGAATGATTTTAT- CATCTGAGTAAAGGAAATATGTT                       |       |       |       |       |       |       |       | 72779 |
| PolarBear   | TTCACCCGTTATATT- - - CTCAGCTA- - TG- GTTTTAA- - - - GAAAT- - - - TTTATTTAC- - - - - - - - - - - CT     |       |       |       |       |       |       |       | 32965 |
| Cow         | GTCATTGATTATATTGTTCTCAGCTG- - TA- GCTTTAA- - - - GGAAT- - - - TTCTTTTACTAATCCCGTATTTACCTTCT            |       |       |       |       |       |       |       | 70669 |
| Dog         | TTCACTCATCATATTGTTCTCAGCTG- - TA- GTTTTAA- - - - GAAAT- - - - TCTATTTAC- - - - - - - - - - - CT        |       |       |       |       |       |       |       | 63616 |
| BelugaWhale | GTCATCCATTCTATTGTTCTCAGCTA- - TA- GCTTTAA- - - - GAAAT- - - - TTCTTTTATTAATCCTACGTTTACCTCCT            |       |       |       |       |       |       |       | 62941 |
| Donkey      | TTCACCCATTGTATTATTCTCAGCTA- - TA- GTTTTAA- - - - GAAATGTCTTCCTTTTGTTAATCCCATGTTTACCTTAT                |       |       |       |       |       |       |       | 69762 |
| Cat         | AGGACTTCTGAAATTG- - GTTGG- - A- - AA- ACCTGAG- - - - GGGAT- - - - TCTG- - - GT- - - - - - - - - - - CT |       |       |       |       |       |       |       | 70128 |
| Ferret      | TTCACCCATTGTATTATTCTCGGCTA- - TA- GTTTTAA- - - - GAAAT- - - - TTTATTTAC- - - - - - - - - - - CT        |       |       |       |       |       |       |       | 71121 |
| Lion        | AGGACTTCTGAAATTG- - GTTGG- - A- - AA- ACTTAAG- - - - GGGAT- - - - TCTG- - - AT- - - - - - - - - - - CT |       |       |       |       |       |       |       | 67818 |
| Vaquita     | GTCATCCATTCTATTGTTCTCAGCTA- - TA- GCTTTAA- - - - GAAAT- - - - TTCTTTTATTAATCCTACGTTTACCTCCT            |       |       |       |       |       |       |       | 64301 |
| Pig         | AACTACGCATTAGCTCCAAAAGCTTGATTA- GATTCAG- - - - ATTCA- - - - TTCATTCAATTTATTTGGC- TGTGCCTGCA            |       |       |       |       |       |       |       | 63766 |









Dienstag, 3. Mai 2022 08:40

| Majority    | TXTTTTTTTT - - CTGAGTTCTTCCTAACTTCATATTTA- TTTCCCTTTTAGXTTCTATA- - - - - TTTT      |       |       |       |       |       |       |       |       |
|-------------|------------------------------------------------------------------------------------|-------|-------|-------|-------|-------|-------|-------|-------|
|             | 92170                                                                              | 92180 | 92190 | 92200 | 92210 | 92220 | 92230 | 92240 |       |
| Human       | AGAAATTGTGTTTTAAGAGTTGACAAATATATGTTGTATGGCTAAAACAAAGAAAATACTTCTGTTGCTTCTGCATTTA    |       |       |       |       |       |       |       | 73337 |
| PolarBear   | TTTTTTTTCC- - CTAAGTTCTTTCTAACTTCATATTTTGTTCCTTTTAGCTTCTGTG- - - - - CTTTT         |       |       |       |       |       |       |       | 33423 |
| Cow         | TTTTTTTTGT- - GTGAGTTCTTCCTAGCTTCATATTTT- TCTCTCATTGTC- - AATA- - - - - TTTC       |       |       |       |       |       |       |       | 71124 |
| Dog         | TCTTTTTTTTCCCTGAGCTCTTCCTAATTTTCATATTTA- CTTCCCTTTTAGCTTTTGTGATTTTTTTGTGGGTTTTTTTT |       |       |       |       |       |       |       | 64087 |
| BelugaWhale | TTTTGTTGTT- - CTGAGCTCCTCCTAACTTCATATTTT- TCTTCCTTTTAATTTCTATA- - - - - TTTT       |       |       |       |       |       |       |       | 63402 |
| Donkey      | CCTTTTTTTT- - CTGAGTTCTTGCTAACTTCATATCTA- - TTCGTTTTTAGTTT- TACA- - - - - TTT      |       |       |       |       |       |       |       | 70238 |
| Cat         | - - - - - T- - - - - TTA- - - - - GGCTACATTG- - - - -                              |       |       |       |       |       |       |       | 70359 |
| Ferret      | TCTTTTCCCCT- CTGAGTTCTTTCTAACTTCATGTTTAGCTTCCCTTTTATCTTCTATA- - - - - CTTTA        |       |       |       |       |       |       |       | 71562 |
| Lion        | - - - - - T- - - - - TTA- - - - - GGCTACATTG- - - - -                              |       |       |       |       |       |       |       | 68049 |
| Vaquita     | TTTTTTTTTTTT- CTGAGCTCCTCCTAACTTCATATTTT- TCTTCCTTTTAATTTCTATA- - - - - TTTT       |       |       |       |       |       |       |       | 64763 |
| Pig         | CCTTGATTTT- - GGAAGGCAGGGGAAGAGTCGGAGTCC- TACCTTATGTAATT- - CATG- - - - - ATTT     |       |       |       |       |       |       |       | 64219 |

| Majority    | TT- X- - - - TTTCCCTGTTGATCTTGAT- - TTCAATTTAAAXATGGTATT- X- XCTCTGA- TCTAC- CTTTXCTTTXTGCC      |       |       |       |       |       |       |       |       |
|-------------|--------------------------------------------------------------------------------------------------|-------|-------|-------|-------|-------|-------|-------|-------|
|             | 92250                                                                                            | 92260 | 92270 | 92280 | 92290 | 92300 | 92310 | 92320 |       |
| Human       | GTAGAAGAAAACTATATATGTTTGTGACCAAAGTATAAAATATGATTCTTTCCAGGGAGGTAAAGGTT- ATGCAGAAGA                 |       |       |       |       |       |       |       | 73416 |
| PolarBear   | TTTTT- - - TCCCCTGTTGATATTGAT- - TTCAGTATAAAGGTGTTACT- - - - TTTTGAGTTTAC- GTTTCCTCTATGCC        |       |       |       |       |       |       |       | 33493 |
| Cow         | TT- - - - - TTTCCCTGTTAATCTT- - - - - AATTTTAAAATGGTATTTTATCTCTGA- GTCTT- CCTTTCCTTTTTTGC        |       |       |       |       |       |       |       | 71188 |
| Dog         | TTTTT- - - GTGCCTGTTGATCTTGAT- - TTCAATTTAAAGGTGTTACT- - - - CTCTGA- - GTAC- CTTTCCTATATGCC      |       |       |       |       |       |       |       | 64155 |
| BelugaWhale | TTCTT- - - TTTCCCTGTTAATCTTGAT- - TTTAATTTAAAATGGTATTCTGTCTCTGAATCTAC- CTCTCCTTTTTGCC            |       |       |       |       |       |       |       | 63476 |
| Donkey      | TCTTG- - - TTTCCCTGTTGATCTTGAT- - TCTAATTTAAAAGTGGTATCCTCTCTCTCAGAATCTGCCTCTCTATTTGCC            |       |       |       |       |       |       |       | 70313 |
| Cat         | - - - - - TGAAGTCAAG- - TCCAG- - GAAGA- - - - - A- - - - -                                       |       |       |       |       |       |       |       | 70380 |
| Ferret      | TTTT- - - - - CC- CTGTTGATCTTGAT- - TTCAGATTAAGATACTATT- - - - CT- - - - - TCTAC- CTTTTCTCTATGCC |       |       |       |       |       |       |       | 71624 |
| Lion        | - - - - - TGAAGTCAAG- - TCCAG- - GAAGA- - - - - A- - - - -                                       |       |       |       |       |       |       |       | 68070 |
| Vaquita     | TT- - - - - TTTCCCTGTTAATCTTGAT- - TTTAATTTAAAATGGTATTCTGTCTCTGAATCTAC- CTCTCCTTTTTGCC           |       |       |       |       |       |       |       | 64834 |
| Pig         | TG- - - - - TACCACGATGGCCTG- - - - - AATATGCACCTCCAAGCACACCTCCAATGATAA- AATTTATTTGCTCAT          |       |       |       |       |       |       |       | 64284 |

Dienstag, 3. Mai 2022 08:40

| Majority    | CACTTTCTAGATATTTCTTATA- C- - - - TTAAGTAATTGCCATGAGCATTTCAXATCCCTAGAAG- - GATTCTGCCTCA   |       |       |       |       |       |       |       |       |
|-------------|------------------------------------------------------------------------------------------|-------|-------|-------|-------|-------|-------|-------|-------|
|             | 92330                                                                                    | 92340 | 92350 | 92360 | 92370 | 92380 | 92390 | 92400 |       |
| Human       | TTTTCACTAGCAGCTCTAAAAGGCTACCCTCAATTAATTGCCATGAACATTTTCATAGCCCTAGAAG- - GATGTTGGCTCA      |       |       |       |       |       |       |       | 73494 |
| PolarBear   | CACTTCCTAGATATTTCTGATA- CCCTTATTAAGTAATTACCATGAGCATTTCATATCTGTGGAAG- - AATTCTGCCTCA      |       |       |       |       |       |       |       | 33570 |
| Cow         | ACCCTTGTGAATTTTTCTTACC- C- - - - TTAAGTAATTGCACTGAGCTTTTACATTCCTTGAAG- - GATTCTGCCTCA    |       |       |       |       |       |       |       | 71260 |
| Dog         | TGCTTTCTAGATATTTCCC- ATA- ACTTTGTAAAGTATTTGGCATGAGCATTTCATAGCCCTGAATG- - GATTCTGCCTCA    |       |       |       |       |       |       |       | 64231 |
| BelugaWhale | CACTTTCTGAATTTTTCTTACC- C- - - - TCC- TTAATTGCTGTGAGCTTTTACATTCCTAGAAG- - GATTCTACCTCA   |       |       |       |       |       |       |       | 63547 |
| Donkey      | CACTTTCTAATATCCTTC- - - - - TTAATTGCCATGAGCATTTCACATCCCTAGCAA- - GATTCTGCTTCA            |       |       |       |       |       |       |       | 70376 |
| Cat         | - - - - - TAGAAAGGGCTAAAA- - - - - TAAATAAAGGCCACAAG- - T- - - - - G- GATT- - - C- - - - |       |       |       |       |       |       |       | 70419 |
| Ferret      | CACTTCCTAGATATTTCTGATA- CCCTTGTTAAGTAATTGC- ATGAGTATTTTCATATCCCTGATAG- - GATTCTGCCTCA    |       |       |       |       |       |       |       | 71700 |
| Lion        | - - - - - TAGAAAGGGCTAAAA- - - - - TAAATAAAGGACACAAG- - T- - - - - G- GATT- - - C- - - - |       |       |       |       |       |       |       | 68109 |
| Vaquita     | CACTTTCTGAATTTTTCTTACC- C- - - - TCC- TTAATTGCTGTGAGCTTTTACATTCCTAGAAG- - GATTCTACCTCA   |       |       |       |       |       |       |       | 64905 |
| Pig         | TTTTTAGTGGAAGAAGTTTATG- C- - - - CTA- GTTTTTGT- TTGCTTTTAATTAATTATTTAAACCCATTTATGAGTGG   |       |       |       |       |       |       |       | 64356 |

| Majority    | CCTCAGTG- GCATCCTGGTTTATTCATTGATTATTGAGCAGTCATTTTAGCACTXTGCTAGGTAAGTGTAGGGAXT         |       |       |       |       |       |       |       |       |
|-------------|---------------------------------------------------------------------------------------|-------|-------|-------|-------|-------|-------|-------|-------|
|             | 92410                                                                                 | 92420 | 92430 | 92440 | 92450 | 92460 | 92470 | 92480 |       |
| Human       | TTTCAGTG- TCATCCTGGTTTATTC- TTTATTGTATTATTGAGCAGTCATTTTAACACTATGCTAGACACTTTAGAGATT    |       |       |       |       |       |       |       | 73572 |
| PolarBear   | CCTCAGTG- GCATCCTGGTTAATTCATTGATTATTGAGCAGTCATTTTAGCACTATGCTAGGCACTG- - - - -         |       |       |       |       |       |       |       | 33641 |
| Cow         | ACTCAGTG- GCATCCTGCTTTATTCATTGATTATTGAGCAGTCATTTTAGCACTGTGCTGGGTAAGTGTAGGGTCT         |       |       |       |       |       |       |       | 71336 |
| Dog         | TGTCAGTG- ACATCCTGGTTAATTCATTGATTATTGAGCAGTCATTTTAGCACTGTGCTAGGCACTGCAGAGATT          |       |       |       |       |       |       |       | 64310 |
| BelugaWhale | CCTCAGTG- GCATCCTGCTTTATTCATCAATTGATTATTGAGCAGTCATTTTAGCACTGTGCTGGGTAAGTGTAGGGGCT     |       |       |       |       |       |       |       | 63626 |
| Donkey      | CCCCAGTG- GCACCTGGTTTATTCATTGATTATTGAGCAGTCATTTTAGCACTGTGCTAGGTAAGTGTAGGGACT          |       |       |       |       |       |       |       | 70455 |
| Cat         | - - - - AGTG- G- - - - - TTGTATGGGGTAGAATTGAGAAAGATGGAAG- - AATG- - - - -             |       |       |       |       |       |       |       | 70459 |
| Ferret      | CCTCAGTG- GCATCCTGGTTAATTCATTGATTATTGAGCAGTCATTTTAGCACTATCTTAGGCACTGCCAGAATT          |       |       |       |       |       |       |       | 71779 |
| Lion        | - - - - AGTG- G- - - - - TTGTATGGGGTAGAATTGAGAAAGATGGAAG- - AAGG- - - - -             |       |       |       |       |       |       |       | 68149 |
| Vaquita     | CCTCAGTG- GCATCCTGCTTTATTCATTAATTGATTATTGAGCAGTCATTTTAGCACTGTGCTGGGTAAGTGTAGGGGCT     |       |       |       |       |       |       |       | 64984 |
| Pig         | GTACAGCCTGGATTCCTCCCAACCTCTGCCTTAACTTTTGG- - - AACTATTGGTTACT- - - TCCAGTTTTTTGTAGCTC |       |       |       |       |       |       |       | 64430 |

Dienstag, 3. Mai 2022 08:40

| Majority    | CAGAA- AATTACAAGGTTTC- - - - - - - - - TGTGCTTATAATCTGGTAGAGG- - - AAACATATAAAT- AGCTCTAATG                                  |       |
|-------------|------------------------------------------------------------------------------------------------------------------------------|-------|
|             | 92490            92500            92510            92520            92530            92540            92550            92560 |       |
| Human       | CAGAAGAGTAACAGGGTTTCTG- - - - - - - - - TTCTCATGAAGCTTATCAGAGACAGAAAACATATGAGTTAGATCTAATT                                    | 73643 |
| PolarBear   | - - - - - - - - - - - - - - - - - - - - - - - - - GTTTAAAATCTGGTGGAGGCAACAAACATCTGAGT- AGCTCTAATG                            | 33686 |
| Cow         | CAGAGAAATTACACAATTTTC- - - - - - - - - TGTGCTTATAATCTGGCAGCAA- - - GCATCTGAATAT- ATATCTATTA                                  | 71400 |
| Dog         | CAG- - - AATTACAAGGT- - - - - - CTATAACTTGATTTACAATCTGGTGGAAAGCAGCAAACATCTGAGT- AGCTCTAATT                                   | 64380 |
| BelugaWhale | CAGAAAAATTACAAGGTTTC- - - - - - - - - TGTGCTTGTAAATCT- - - - - - - - - TGTTTATA- - - - - CTCTGGT-                            | 63675 |
| Donkey      | CAGAAGAATTACAAGATTTTC- - - - - - - - - TGTTCCTATAATCTGGTGGAGGCAGCAAACATCTGAGT- GGCTTTAATT                                    | 70523 |
| Cat         | - - - - - - - - - - - - - - - - - - - - - - - - - AAGTCGGGAAAGG- - - - - A- GATTTAAAT- GTTAGAAATG                            | 70492 |
| Ferret      | CAGAAGAATTACAGGGTTTCTGTTCTGTAATCTGGTTTACAATCTGGTGGAGGCAGCAAACAAATGAAT- AGCTCTAATG                                            | 71858 |
| Lion        | - - - - - - - - - - - - - - - - - - - - - - - - - AAGTTGGGAAAGG- - - - - A- GATTTAAAT- GTTAGAAATG                            | 68182 |
| Vaquita     | CAGAAAAATTACAAGGTTTC- - - - - - - - - TGTGCTTGTAAATCT- - - - - - - - - TGTTTATA- - - - - CTCTGGT-                            | 65033 |
| Pig         | CAGAATGGTTTGAGA- - TA- - - - - - - - - GTGACTTTAGCCTGGAAGCTA- - - - GTGTTTTTA- AT- TTATTTAT- -                               | 64487 |

| Majority    | TGAGGCAAACTGAAA- - TATAATAGAGTTGGTGTAGT- ATTAGAGCATAATGAAATG- - - - - X- GATTCAT- ATCX- AA                                   |       |
|-------------|------------------------------------------------------------------------------------------------------------------------------|-------|
|             | 92570            92580            92590            92600            92610            92620            92630            92640 |       |
| Human       | GGAGGCAAACTGAAATATATAGTGGAGTTAGTGTGGTTATCAGCACATAAATGAGTG- - - - - - - - - ATCCATCAACAAAA                                    | 73714 |
| PolarBear   | TGAGGCAAAGTGAAATCTGTAAATAGAGTTGGTGTGGT- ATTAGAGCATAATGAAATGCATAACAAGATTCATTATCTGAA                                           | 33765 |
| Cow         | TGAGGCAAACTGAAA- - TATGTAATAGTTATTATAGT- ATTAGAGCATAATTAACG- - - - G- GCACTTTATCATCCAAA                                      | 71472 |
| Dog         | TGAGGCAAAGTGAAATCTGTAAACAGAGTTGGTGTGGT- ATTAGAGCATAATGAGATACACAGTGAGATTCAT- - - CTGAA                                        | 64456 |
| BelugaWhale | - - - - GGAGGCAGCA- - TATGCCTGAATATCTCTA- - - - - - - - - - - - - - - - - - - ATGTGAGGC- - -                                 | 63712 |
| Donkey      | CGAGGCAAATTGAAATACATAATATAGTTAGTGTAGT- ATCAG- - CACAATGAAATGA- - - - - GTAATTCATCATCCAAA                                     | 70595 |
| Cat         | GATGGCAAACAAAA- - - - - AGAAAAAAGATGTAGC- AAGAGAAGTTGCTGAAATG- - - - - GATTGAT- - - - -                                      | 70550 |
| Ferret      | TGAGGCAAAGTGAAATCTGTAAATAGAGTTGGTGTGGT- ATTTGAGCATAATGAAATGCATGATGAGATTCATTATCTGAA                                           | 71937 |
| Lion        | GATGGCAAACAAAA- - - - - AGAAAAA- - GATGTAGC- GAGAGAAGTTGCTAAAATG- - - - - GATTGAT- - - - -                                   | 68238 |
| Vaquita     | - - - - GGAGGCAGCA- - TACGCCTGAATATCTCTA- - - - - - - - - - - - - - - - - - - ATGTGAGGC- - -                                 | 65070 |
| Pig         | - - - - GTAATTATTAT- - TATGTTTTAGTCTTTCTA- - - AGTGGCCAAAAAGGAAAG- - - - A- GGGGTAGAT- AGCT- - A                             | 64550 |

Dienstag, 3. Mai 2022 08:40

| Majority    | - GGAAAATTGGGAGXGTTT- XTGGGC- - - - - AAA- - - - - AATAGXXX- - - - -              |       |       |       |                                                   |       |                          |       |       |
|-------------|-----------------------------------------------------------------------------------|-------|-------|-------|---------------------------------------------------|-------|--------------------------|-------|-------|
|             | 92650                                                                             | 92660 | 92670 | 92680 | 92690                                             | 92700 | 92710                    | 92720 |       |
| Human       | - GGAGAAATTGGGAGGGTTTTATGGGC-                                                     |       |       |       | CAAAAACAGCATGATTAATGTGATAGAGTATATGTCATGT          |       |                          |       | 73781 |
| PolarBear   | - GGAGTAATTGGGAGGGTTTTATGGGC-                                                     |       |       |       | CAAA-                                             |       |                          |       | 33795 |
| Cow         | AGAGAAAGTTGAAGGGCATT- GTAGGC-                                                     |       |       |       | CAAAAGCCATTTGATTGGGATAAAAAGACAGGACTTATTTATTTTACTT |       |                          |       | 71548 |
| Dog         | - GGAGATATTGGGAATGTTTTATGGCCATTTGATTTGGATACAAATAAAAAGGGATGCCTGGGTGGCTCAGTGATTGTCT |       |       |       |                                                   |       |                          |       | 64535 |
| BelugaWhale | - - - - - AAACTGAAATACAT-                                                         |       |       |       |                                                   |       | AATAGAGT-                |       | 63734 |
| Donkey      | - GGAAAATTGGGAGGGTTTTATGGGA-                                                      |       |       |       | CAAAGAGCATTTGATTTGGATAAG-                         |       | AATAAAAAGGATTAAAAAACCCAC |       | 70669 |
| Cat         | - GTAAAATTATCAAAG- - - - - T-                                                     |       |       |       | AGA-                                              |       |                          |       | 70570 |
| Ferret      | - GGAGAAGTTGGGAGGGTTTAATGGGC-                                                     |       |       |       | CAAA-                                             |       |                          |       | 71967 |
| Lion        | - GTAAAATTATCAAAG- - - - - T-                                                     |       |       |       | AGA-                                              |       |                          |       | 68258 |
| Vaquita     | - - - - - AAACTGAAATATAT-                                                         |       |       |       |                                                   |       | AATAGAGT-                |       | 65092 |
| Pig         | - GTAAAATTTCAGATATGTT- - CATCT-                                                   |       |       |       | CAAAAATAATTCCATTAATAACTAGGACGCATT-                |       | ACTATTATTC               |       | 64623 |

| Majority    | - - - - - X- - - - TT- AGTTX- - - - - T- - X- X- XXGT- T- A- - GC- - - - -      |       |       |       |                                                   |       |       |       |                                               |       |
|-------------|---------------------------------------------------------------------------------|-------|-------|-------|---------------------------------------------------|-------|-------|-------|-----------------------------------------------|-------|
|             | 92730                                                                           | 92740 | 92750 | 92760 | 92770                                             | 92780 | 92790 | 92800 |                                               |       |
| Human       | TTTAGGTGTGATGAACATTCAGTTAT-                                                     |       |       |       | GTGTGACGAATAGGATAATTG-                            |       |       |       | A-                                            | 73829 |
| PolarBear   | - - - - - G- CCATTTGATTT-                                                       |       |       |       | GGAT-                                             |       |       |       |                                               | 33811 |
| Cow         | ACTTTTTGTTTTGTT- - TTTAGCTATGTCG-                                               |       |       |       | AGTCTTCATTGCTGTGTGAGGGCTTTCTCCAGTTTGCAGTGAGCGAGGG |       |       |       | 71625                                         |       |
| Dog         | GCCTTCAGCTCAGGTCATCAAGTCTGCATCAAGCTGCCCCACAGGGAAGTTGCTTCACCCTCTGCCTATGTCTCTGCCT |       |       |       |                                                   |       |       |       | 64615                                         |       |
| BelugaWhale | - - - - - T- TAATGTAGTATTAGAGC-                                                 |       |       |       |                                                   |       |       |       | 63752                                         |       |
| Donkey      | AGCATGGGGGCCAGCCACTGAGTGCTAA-                                                   |       |       |       | AAGTTCTGTGCCCTCACTCTGCT-                          |       |       |       | 70721                                         |       |
| Cat         | - - - - - AGTTT-                                                                |       |       |       |                                                   |       |       |       | 70575                                         |       |
| Ferret      | - - - - - GGCCATTTGATT-                                                         |       |       |       | GGTT-                                             |       |       |       | 71983                                         |       |
| Lion        | - - - - - AGTTT-                                                                |       |       |       |                                                   |       |       |       | 68263                                         |       |
| Vaquita     | - - - - - T- TAATGTAGTATTAGAGC-                                                 |       |       |       |                                                   |       |       |       | 65110                                         |       |
| Pig         | TCATTAAACTA- - - - - CTAGACTATAA-                                               |       |       |       |                                                   |       |       |       | TTCACCTTCTATCTTAAAGCTAATTGTAAGAAAAATAACCTCCGG | 64691 |

Dienstag, 3. Mai 2022 08:40

| Majority    | - XX- - - - - XAAGTGAATAAATX- - - - - XXXXX- XAGX- TXAXCXXXTGT- ATAAAGCATAG      |                                  |                                            |       |       |       |       |       |       |
|-------------|----------------------------------------------------------------------------------|----------------------------------|--------------------------------------------|-------|-------|-------|-------|-------|-------|
|             | 92810                                                                            | 92820                            | 92830                                      | 92840 | 92850 | 92860 | 92870 | 92880 |       |
| Human       | - AAA-                                                                           | - AATATGAAAGGCTATG-              | - ATGCCAGAAAGTATTATGGGACAAGATCTTAAAACCAGT  |       |       |       |       |       | 73887 |
| PolarBear   | - - - - -                                                                        | - ACGAATAAGAAT-                  | - AAAAAACAGCATGAGCAGATGTGATAAAGTATAT       |       |       |       |       |       | 33857 |
| Cow         | CTA- - - -                                                                       | CTCTTCATCGGAGTGTGCGACTTC-        | - TCCTTGTGGTGGC- T- - TCTCTTGTTGTGGAGCATGG |       |       |       |       |       | 71686 |
| Dog         | CTCTCTGTGCCTCTCATGAATGAATAAATATATTCTTAAAAAGAATAAAAATTAGTGTGAGCAGATGTGAGAAAGTATAT |                                  |                                            |       |       |       |       |       | 64695 |
| BelugaWhale | ATAA- - - - -                                                                    | - TGAAGTGAGTAATTT-               | - A- - - - - TCATCCAAAG                    |       |       |       |       |       | 63782 |
| Donkey      | - - - - -                                                                        | TTGGTGGCCTAGGTGCGCAGGTTTCAGATCC- | - TGGCACAGACCTACTCCACTCATCAGCCATGCTGTGGAG  |       |       |       |       |       | 70790 |
| Cat         | - - - - -                                                                        | - TAAA-                          | - G- - - - AAA-                            |       |       |       |       |       | 70583 |
| Ferret      | - - - - -                                                                        | - ATGAATAAA-                     | - AAATAAGAGCATGAGCAGATGTGATAAAATATAT       |       |       |       |       |       | 72026 |
| Lion        | - - - - -                                                                        | - TAAA-                          | - G- - - - AAA-                            |       |       |       |       |       | 68271 |
| Vaquita     | ATAA- - - - -                                                                    | - TGAAGTGAGTAATTT-               | - A- - - - - TCATCCAAAG                    |       |       |       |       |       | 65140 |
| Pig         | ATAAAAATTTTCTTTTCGAAGTTGATGATTACAT-                                              |                                  | - AGTCTTTGCTTAAGC- TGATTTGTTGTCATCATCCATTG |       |       |       |       |       | 64762 |

| Majority    | GT- - - - TTTAGAG- - - AG- XXCAAXXAT- - AGTGATTTATAAGCCATA- - - - - |                                                                        |                                                           |                                |       |       |       |       |       |
|-------------|---------------------------------------------------------------------|------------------------------------------------------------------------|-----------------------------------------------------------|--------------------------------|-------|-------|-------|-------|-------|
|             | 92890                                                               | 92900                                                                  | 92910                                                     | 92920                          | 92930 | 92940 | 92950 | 92960 |       |
| Human       | GTTACCCAGGGAGTATGAATTTAATA-                                         | - - TGGGAATTCTTAAACTCC-                                                | - - - - - T- - TTATGACTGGAAGATGAG                         |                                |       |       |       |       | 73950 |
| PolarBear   | ATCATGTTTtaggg-                                                     | - - AGTGACAAGCATTTCAGTTATTAGTAAGCTCTA-                                 | - - - - -                                                 |                                |       |       |       |       | 33902 |
| Cow         | GC- - - -                                                           | TCTAGAGTTCAGGCTCAATAGT-                                                | - TGGGGTTTCACGGACTT- - - - - AGTTGCTCTGCACCGTGTGGGATCTTCC |                                |       |       |       |       | 71754 |
| Dog         | ATCACATTTtaggg-                                                     | - - AG- GACAA- CATTGAGTTATGATTAAGCCATAGGGTAATTGGTAAACTGTGAAAGGCAGTGGTA |                                                           |                                |       |       |       |       | 64770 |
| BelugaWhale | G- - - - -                                                          | AGA- - - - - AAGTGGA-                                                  | - AGGGCTTTATGGGCCA-                                       |                                |       |       |       |       | 63809 |
| Donkey      | GCATCCCACATAGAGGGTGGAGGAGGATTGACACAAATGTTAGCTCTGGG-                 | - - - CTAATCTGC-                                                       | - - - - -                                                 |                                |       |       |       |       | 70849 |
| Cat         | - - - - -                                                           | TTGTGAG- - - AC- - - CAG- - - - -                                      | AGTGTTAGACATATCACA-                                       |                                |       |       |       |       | 70613 |
| Ferret      | ATCATGTTTtagag-                                                     | - - AGTGACAAGCATTTCAGTTATTAATAAGCCATA-                                 | - - - - -                                                 |                                |       |       |       |       | 72071 |
| Lion        | - - - - -                                                           | TCTCGAG- - - AT- - - CAG- - - - -                                      | AGTGTGTTGACATATCACA-                                      |                                |       |       |       |       | 68301 |
| Vaquita     | G- - - - -                                                          | AGA- - - - - AAGTGGA-                                                  | - AGGGCTTTATGGGCCA-                                       |                                |       |       |       |       | 65167 |
| Pig         | TT- - - -                                                           | TTCAGC- TCTAGCTTCAAGAAA-                                               | - TTTTTTTTCTTAACCCTATA-                                   | - ATTTACCTTCTTTTCTATGGTAGCCTGC |       |       |       |       | 64833 |



Dienstag, 3. Mai 2022 08:40

| Majority    | ATTTAG- AACTTGATXATAAXX- - - XT- X- - AXXA- - - - - - - - - - - - - - - GG- - XXT-   |       |       |       |       |       |       |       |       |
|-------------|--------------------------------------------------------------------------------------|-------|-------|-------|-------|-------|-------|-------|-------|
|             | 93130                                                                                | 93140 | 93150 | 93160 | 93170 | 93180 | 93190 | 93200 |       |
| Human       | TTTTAGGCAGTTGGGTAAAA- - - - - AT- - - - - - - - - - - - - - - - - - - - GACCAATT     |       |       |       |       |       |       |       | 74102 |
| PolarBear   | ACTTGGCACCTTATTGAT- - - - - - - - - - - - - - - - - - - - - - - - - - - - - -        |       |       |       |       |       |       |       | 34031 |
| Cow         | ATTTAGGAAGTTGACAAGTATTCAGTTGTGAATGAG- - - - - GCA- - - - - - - - - - TAGGG- GCATA    |       |       |       |       |       |       |       | 71935 |
| Dog         | ACTTGGCATCTTATTGATACAAGTACTTAGAAAGAATTAACTGGGGATCCCTGGGTGGCTCAGCGTTTAGCGCCTGCC       |       |       |       |       |       |       |       | 65009 |
| BelugaWhale | GTTT- TAG- GAATTGACAAGTATTCAGTTGTGAATGAG- - - - - GCA- - - - - - - - - - TAGGGTAATTG |       |       |       |       |       |       |       | 63935 |
| Donkey      | GTTT- TAG- GGAGTGACAAGCATTTCAGTTATGAATGAGGCA- - - - - - - - - - TAGGGTAATTG          |       |       |       |       |       |       |       | 71017 |
| Cat         | CCC- GGTAACCTGATGGT- - - - - - - - - - - - - - - - - - - - - - - - - - - -           |       |       |       |       |       |       |       | 70708 |
| Ferret      | ACTTGACATTTTATTGATA- - - - - - - - - - - - - - - - - - - - - - - - - - -             |       |       |       |       |       |       |       | 72195 |
| Lion        | CCCCGGTAACCTGATGGT- - - - - - - - - - - - - - - - - - - - - - - - - - -              |       |       |       |       |       |       |       | 68395 |
| Vaquita     | GTTT- TAG- GAAGTGACAAGTATTCAGTTGTGAATGAG- - - - - GCA- - - - - - - - - - TAGGGTAATTG |       |       |       |       |       |       |       | 65292 |
| Pig         | ATTTA- - ATCTTGAAAAAATTTGCTTTT- - - - AA- - - - - - - - - - - - - - - GA- GTTGA      |       |       |       |       |       |       |       | 64996 |

| Majority    | XXA- - XXATGAAAGGXA- TGXXG- - X- AAAGAA- - XAGTXXXXX- - AAGATXX- - - - - X- - X- - X- XGCTAXX |       |       |       |       |       |       |       |       |
|-------------|-----------------------------------------------------------------------------------------------|-------|-------|-------|-------|-------|-------|-------|-------|
|             | 93210                                                                                         | 93220 | 93230 | 93240 | 93250 | 93260 | 93270 | 93280 |       |
| Human       | TAGTTTTAAGAAACTGACTGTGGCTCCAGAGTATGTTGGAGAAGTGAAAATG- - - - - - - - - - GAGACT                |       |       |       |       |       |       |       | 74160 |
| PolarBear   | - - - - - - - - - - - - - - - - - - - - - - - - - - - - - - - - - - - - - - - -               |       |       |       |       |       |       |       | 34031 |
| Cow         | GGAAAACATGAAAGGCAGTGAGGAGAAAAAGAATTAAGTTTGGGTGAGGATCTT- - - - - AGAATGGATGCTATC               |       |       |       |       |       |       |       | 72004 |
| Dog         | TTTGGCCCAGGGTGCATCCTGGAGTCCCAGGATCGAGTCCCACGTGAGGCTCCCGGCATGGAGCCTGCTTCTCCCTCCT               |       |       |       |       |       |       |       | 65089 |
| BelugaWhale | GGAAAACATGAAAGGCAGTGATGTCAGAAAGAAC- TAGTTT- GAGAGAAGATCTT- - - - - AGAACTGATGCTATC            |       |       |       |       |       |       |       | 64003 |
| Donkey      | GGAGTATATGAAAGGCAATGATGCCGGAAAGAAC- TAGTT- CGGGACAAGATCTT- - - - - AGAACAGATGCTATC            |       |       |       |       |       |       |       | 71085 |
| Cat         | - - - - - - - - - - - - - - - - - - - - - - - - - - - - - - - - - - - - - - - -               |       |       |       |       |       |       |       | 70708 |
| Ferret      | - - - - - - - - - - - - - - - - - - - - - - - - - - - - - - - - - - - - - - - -               |       |       |       |       |       |       |       | 72195 |
| Lion        | - - - - - - - - - - - - - - - - - - - - - - - - - - - - - - - - - - - - - - - -               |       |       |       |       |       |       |       | 68395 |
| Vaquita     | GGAAAACATGAGAGGCAGTGATGTTAGAAAGAAC- TAGTTT- GAGAGAAGATCTT- - - - - AGAACTGATGCTATC            |       |       |       |       |       |       |       | 65360 |
| Pig         | CAATCCTGTGAATAGTATGGCTGAAACAAAGAA- - AAATCTTG- - CAAAATGT- - - - - ATTACTGCTGCTTCT            |       |       |       |       |       |       |       | 65060 |





Dienstag, 3. Mai 2022 08:40

| Majority    | ----- ----- ----- ----- ----- ----- ----- -----                                                       |       |       |       |       |       |       |       |       |
|-------------|-------------------------------------------------------------------------------------------------------|-------|-------|-------|-------|-------|-------|-------|-------|
|             | 93450                                                                                                 | 93460 | 93470 | 93480 | 93490 | 93500 | 93510 | 93520 |       |
| Human       | ----- TATGA-----                                                                                      |       |       |       |       |       |       |       | 74316 |
| PolarBear   | ----- ----- ----- ----- ----- ----- ----- -----                                                       |       |       |       |       |       |       |       | 34045 |
| Cow         | TAAACTTGTGAGAAG- - - TCGACCTAGACAGTAGGATAT- - TCATTTCCTAGGACTTAGGAAAGAGTT- - CTTTGGGGTTGAG            |       |       |       |       |       |       |       | 72231 |
| Dog         | GAAAGAAAAAAGAAAAAAGAAAAAAGAAAAAAGAAAAAAGAAAAAAGAAAAAAGAAAAAAGAAAAAAGAAAAAAGAAAAAAGAAAAAAGAAAAAAGAAAAA |       |       |       |       |       |       |       | 65324 |
| BelugaWhale | TAAACTTGTGGAGGAGTCCACCTAGACAGTAGGAAAT- - TCCGTC- TAGGACTTAGGCAGGAGTT- - CTGTGGGGTTGAG                 |       |       |       |       |       |       |       | 64233 |
| Donkey      | ----- ----- ----- ----- ----- ----- ----- -----                                                       |       |       |       |       |       |       |       | 71234 |
| Cat         | ----- ----- ----- ----- ----- ----- ----- -----                                                       |       |       |       |       |       |       |       | 70718 |
| Ferret      | ----- ----- ----- ----- ----- ----- ----- -----                                                       |       |       |       |       |       |       |       | 72222 |
| Lion        | ----- ----- ----- ----- ----- ----- ----- -----                                                       |       |       |       |       |       |       |       | 68405 |
| Vaquita     | TAAACTTGTGGAGGAGTCCACCTAGA- - - - - - - T- - TCAGCC- TAGGACTTAGGCAGGAGTT- - CTGTGGGGTTGAG             |       |       |       |       |       |       |       | 65580 |
| Pig         | T- - - - TTTTGAGC- - - TCTTCTAACTTCTTATTTCTTCTTCAATTTTAATGTTTCTATATTTTTTTTCTTTCCTATCGTT               |       |       |       |       |       |       |       | 65278 |

| Majority    | ----- ----- ----- ----- ----- ----- -----                                                            |       |       |       |       |       |       |       |       |
|-------------|------------------------------------------------------------------------------------------------------|-------|-------|-------|-------|-------|-------|-------|-------|
|             | 93530                                                                                                | 93540 | 93550 | 93560 | 93570 | 93580 | 93590 | 93600 |       |
| Human       | ----- ----- ----- ----- ----- ----- ----- -----                                                      |       |       |       |       |       |       |       | 74316 |
| PolarBear   | ----- ----- ----- ----- ----- ----- ----- -----                                                      |       |       |       |       |       |       |       | 34045 |
| Cow         | AATTTGAAAGACCAGAGGATTGATACCTAAAACCTTTGGTTTAAAGAGATCAGATCAGACAGA- - - - GGGCTTGTGGATGG                |       |       |       |       |       |       |       | 72307 |
| Dog         | AAAAGAAAAAAGAAAAAAGAAAAAAGAAAAAAGAAAAAAGAAAAAAGAAAAAAGAAAAAAGAAAAAAGAAAAAAGAAAAAAGAAAAAAGAAAAAAGAAAA |       |       |       |       |       |       |       | 65404 |
| BelugaWhale | AATTTGAAAGGCCAGAGGAGTGTTGTTT- TGGTTTAGAGAGATCAGATTTGTAGTTGCCAGACACAGGGCTTGGGGGTGG                    |       |       |       |       |       |       |       | 64312 |
| Donkey      | ----- ----- ----- ----- ----- ----- ----- -----                                                      |       |       |       |       |       |       |       | 71234 |
| Cat         | ----- ----- ----- ----- ----- ----- ----- -----                                                      |       |       |       |       |       |       |       | 70718 |
| Ferret      | ----- ----- ----- ----- ----- ----- ----- -----                                                      |       |       |       |       |       |       |       | 72222 |
| Lion        | ----- ----- ----- ----- ----- ----- ----- -----                                                      |       |       |       |       |       |       |       | 68405 |
| Vaquita     | AATTTGAAAGGCCAGAGGAGTGTTGTTT- TGGTTTAGAGAGATCAGATTAGTAGTTGCCAGACACAGGGCTTGGGGGTGG                    |       |       |       |       |       |       |       | 65659 |
| Pig         | CATTTAGAATGGTATTTTATCTCTGAATACACCTTTTCTTTTTCCTTCCACATGCTAGATTTTCTTACCCTCATGTAATT                     |       |       |       |       |       |       |       | 65358 |

Dienstag, 3. Mai 2022 08:40

| Majority    | ----- XAAAXATCAAAC T AXGGGATAA XT CX- X TAGAXAGT AXGAAATTTTGT                         |       |       |       |       |       |       |       |       |
|-------------|---------------------------------------------------------------------------------------|-------|-------|-------|-------|-------|-------|-------|-------|
|             | 93610                                                                                 | 93620 | 93630 | 93640 | 93650 | 93660 | 93670 | 93680 |       |
| Human       | ----- G----- AAAAATGAAGCATGTGGAGGAGTCCACTGGACAGTAGGAAATTCAGC                          |       |       |       |       |       |       |       | 74364 |
| PolarBear   | ----- AAGAATTA AACTTGGGGAGAAGTCCACTAGACAGTAGGAAATTTCTGC                               |       |       |       |       |       |       |       | 34092 |
| Cow         | GGAGAAATGGGATAAAGGTGGACAAAAAATACAAACGTCTGGTTATAGAATAAATA- - GTACTAGGGTTATAAAGTATT     |       |       |       |       |       |       |       | 72385 |
| Dog         | GAAAGAAAGAAAGAAAGAAAGAAAGAAAGAAAGAAAGAAAGAAAGAAAGAAAGAAAGAAAGAAAGAAAGAAACTTGT         |       |       |       |       |       |       |       | 65484 |
| BelugaWhale | GGAGAAATTTGGATAAAGGTGGTCAACAGG- TACAAACTTCCAATTATAAGATAAATAA- GTACTAGGG- - ATGTAATGTA |       |       |       |       |       |       |       | 64388 |
| Donkey      | ----- TAAGAATTAACCTTGTAGATGAGTCCACTGGACAGTAGGAAATTCGGT                                |       |       |       |       |       |       |       | 71282 |
| Cat         | ----- AGAAA----- T-- GA- - TTTCGT                                                     |       |       |       |       |       |       |       | 70732 |
| Ferret      | ----- AAAAAATTA AACTAGGGGAGAAGTCCACTAGACAGTAGGAAATTTCTGC                              |       |       |       |       |       |       |       | 72270 |
| Lion        | ----- AGAAA----- T-- GA- - TTTCAT                                                     |       |       |       |       |       |       |       | 68419 |
| Vaquita     | GGAGAAATTTGGATAAAGGTGGTCAACAGG- TACAAACTTCCAGTTATAAGATAAATAA- GTACTAGGG- - ATGTAATGTA |       |       |       |       |       |       |       | 65735 |
| Pig         | GCTGTGA- GCATTTACATTCCTAGAAGGATTCGGCCTCCTGTCATTGGCATCCTGT- - TTATTGATTCATCCCATTTCT    |       |       |       |       |       |       |       | 65435 |

| Majority    | CCAGXAXTXXT- TGAXTAATAG- - - - TTCTGTGAGATAGTGAATT- - - - GGGAGAAXAAATGTGTGGTATTTTTAAAAXCX                |       |       |       |       |       |       |       |       |
|-------------|-----------------------------------------------------------------------------------------------------------|-------|-------|-------|-------|-------|-------|-------|-------|
|             | 93690                                                                                                     | 93700 | 93710 | 93720 | 93730 | 93740 | 93750 | 93760 |       |
| Human       | CTAAGACT- - - - TGGGTAAGAG- - - - TTCTGTGGAGTTGTGAATTC- - - - AGAGGCCAGAGATGTGATAT- TTAAAATTT             |       |       |       |       |       |       |       | 74431 |
| PolarBear   | CTACA AACT- - - - TGGACAATAG- - - - TTCTGTGAGCTTGTGAATT- - - - GGGAGAACAGATGTGTGATATATTTAAAAGCT           |       |       |       |       |       |       |       | 34160 |
| Cow         | ACGTGATAAATATGATTTATACTGCTGTATGTTATATATGAAA- - - - - - - - - - GAGTAAATCCTAAGAGTTCTCATTACA                |       |       |       |       |       |       |       | 72455 |
| Dog         | GGAGAAGTCCACTGGGTAGTAGGAAATTTCTGTGAGCTTGTGAATT- - - - GGAAAAACAG- - GTGTGATATTTTTAAAAGCT                  |       |       |       |       |       |       |       | 65558 |
| BelugaWhale | ACATGGTACATATAACGAACACTGCTCTATGTTATATAAGAAGGTTGTTAGGAGAGTAAATCCTAAGAGTTCTCATCACA                          |       |       |       |       |       |       |       | 64468 |
| Donkey      | CTAGGACT- - - - TGGGCAAGAG- - - - - - - - - - TTCTGTGGGTTGTGAATTT- - - - AGAGGCTAGAGATGTGATATTTAAA AACTTT |       |       |       |       |       |       |       | 71349 |
| Cat         | GCAGAAGCTGTCTTAATTGATG- - - - ATGGTGGGACAGCAGTCT- - - - GAAAGAAACACTGGGTGGTGGGGTAGAATGA                   |       |       |       |       |       |       |       | 70803 |
| Ferret      | CTACA AACT- - - - TGGACAGTAG- - - - TTCCATGA ACTTGTGAATT- - - - GGGAGAACAGATGTGTGATATTTTAAAAGCT           |       |       |       |       |       |       |       | 72338 |
| Lion        | GCAGAAGCTGTCTTAATTGATG- - - - GTGGTGGGACAGCAGTCT- - - - GAAAGAAACACTGGGTGGTGGGGTAGAATGA                   |       |       |       |       |       |       |       | 68490 |
| Vaquita     | ACATGGTACATATAACGACCACTGCTCTATGTTATATAAGAAGGTTGTTAGGAGAGTAAATCCTAAGAGTTCTCATCACA                          |       |       |       |       |       |       |       | 65815 |
| Pig         | TCAACATTCAC TTTAGC- ACTGTGTTTTGTACTATATAGG GACTT- - - - - - - - - - GGGAAAATCACAAGAAA- CAAATAGGG          |       |       |       |       |       |       |       | 65505 |

Dienstag, 3. Mai 2022 08:40

| Majority    | TGGATAAXAGATTCTTTAGGTATAAGXTGGCAXGAGGATTAA- - TGAXXTGAAAA- T- - - - T- - - - - GAAACTTAA- - GC |                                     |              |                      |                                  |                     |             |                |       |       |
|-------------|------------------------------------------------------------------------------------------------|-------------------------------------|--------------|----------------------|----------------------------------|---------------------|-------------|----------------|-------|-------|
|             | 93770                                                                                          | 93780                               | 93790        | 93800                | 93810                            | 93820               | 93830       | 93840          |       |       |
| Human       | TGGTTCA-                                                                                       | AGATTTCCCAGGTATAAGAAAGCAAGAGGATTAA- | - -          | AGCATTGTAA-          | - - - - -                        | T- - - - -          | TAAACTTTAA- | GC             | 74495 |       |
| PolarBear   | TGGCTTA-                                                                                       | AGATTCTTCAGGTATAAGAGGGCAAGAGGATTAA- | -            | TGACTTGAAAAGTAAAATT- | - - - -                          | GAAACTTAA-          | -           | GC             | 34231 |       |
| Cow         | GGA- -                                                                                         | GAAAAATTTTTTCTGTTTCTTCT-            | TGTT- -      | ATCTG-               | -                                | TGAGGTGATGGATGTTCA- | - - -       | CTATACTTAACTGT | 72524 |       |
| Dog         | TGGCTTA-                                                                                       | AGATTCTTTAGGTGTAAGAGGGCAAGAGGATCAA- | -            | TGGCTTGAAAT-         | TACAATT-                         | - - - -             | GAAACTTAA-  | -              | GC    | 65628 |
| BelugaWhale | AGGAGAAAAAATTTTTTCTATTTCTTTAATGTTGTATCTGTATGAGATGATGGATGTTCA-                                  | - - -                               | CTAAACTTAT-  | TGT                  |                                  |                     |             |                | 64543 |       |
| Donkey      | GGTTTTTAAGATTCTTCAGGTATAAAAAAGCAGGGCGGTTAA-                                                    | -                                   | AGACTTGAAAT- | - - - - -            | - - - - -                        | TGAAACTTTAA-        | -           | GC             | 71415 |       |
| Cat         | TGAATAATACATCCTTTCTCTTTCTTTGGGGCAGGGTTTAG-                                                     | -                                   | GGAGGTAAAAA- | - - - - -            | T- - - - -                       | GACTTTTTG-          | -           | AA             | 70868 |       |
| Ferret      | TGGCTTA-                                                                                       | AGATTCTTCAGGTATAAGAGGGCAAGAGGATTAA- | -            | TGGCTTGAAAT-         | TAAAATT-                         | - - - -             | GAGACTTGA-  | -              | GC    | 72408 |
| Lion        | TGAATAATACATCCTTTCTCTTTCTTTGGGGAAGGGTTTAT-                                                     | -                                   | GGAGGTAAAAA- | - - - - -            | T- - - - -                       | GACTTTTTG-          | -           | AA             | 68555 |       |
| Vaquita     | AGGAGAAAAAATTTTTTCTATTTCTTTAATGTTGTATCTGTATGAGATGATGGATGTTCA-                                  | - - -                               | CTAAACTTAT-  | TGT                  |                                  |                     |             |                | 65890 |       |
| Pig         | AAA- -                                                                                         | AATTAAGCATAAAAGTAATAGGACT-          | TGCC-        | -                    | ATCTTACTGATACGATGACTTACGAAGAATTA | AACTTACATAG         |             |                | 65580 |       |

| Majority    | AGTGAXCA- TTATATTGTGGGTAAA- - AATTAATXA- - - - - TTAGGGATGAAGTAAACX- - - TTAAAATTAXAAGTTXC |                   |                                         |                 |                           |                     |                |                   |       |                   |           |            |       |
|-------------|--------------------------------------------------------------------------------------------|-------------------|-----------------------------------------|-----------------|---------------------------|---------------------|----------------|-------------------|-------|-------------------|-----------|------------|-------|
|             | 93850                                                                                      | 93860             | 93870                                   | 93880           | 93890                     | 93900               | 93910          | 93920             |       |                   |           |            |       |
| Human       | AGTGCATATTTATGTTATAGATAAGATAAAACAAGAAA-                                                    | - - - -           | TCTAGGGATCAAATAGGA-                     | - - - -         | TTAAAATTAGTAGTGAT         |                     |                |                   | 74567 |                   |           |            |       |
| PolarBear   | AGTAAACATTTATATTGTGGGGAAA-                                                                 | -                 | AAATAAGAAA-                             | - - - -         | TTGAGGGATGAAATAAATAGGATTA | AAAATTAGAAAGTTCC    |                |                   | 34305 |                   |           |            |       |
| Cow         | GGTGATCA-                                                                                  | TCTCATGGTGTATG-   | - - - -                                 | AGTCAAATCA-     | - - - - -                 | TTATGCTGTCTGTACACC- | - - -          | TTAAATTTATACAGTGC | 72591 |                   |           |            |       |
| Dog         | AGTGCACAATTATATTGTGGG-                                                                     | AAA-              | AATTA AAC-                              | - - - - -       | TTAGGGATGAGATAAATAGCATTAA | AAAATTAAAAGTTCC     |                |                   | 65698 |                   |           |            |       |
| BelugaWhale | GATAATCA-                                                                                  | TCTCATGGTGTATGTA- | -                                       | AGTCAAATCA-     | - - - - -                 | TTATGCT-            | - - - -        | GTACACC-          | - - - | TTAAATTTATACAGTGC | 64608     |            |       |
| Donkey      | AGTGCACATGTCTATTGTGGGAAAAATAAAGAAGCAAAAAACTGAGAGGTGAAATACATAGGATTA                         | AAAATTAGAAAGTGCC  |                                         |                 |                           |                     |                |                   | 71495 |                   |           |            |       |
| Cat         | AGGG-                                                                                      | - - - - -         | TTATAAG-                                | AGA-            | -                         | AGTTCCAT-           | - - - - -      | GAGGACAAAGCAAGC-  | - - - | TTTTAATTAAAA-     | - - - -   | 70917      |       |
| Ferret      | AGTGCCCATTTATATTGTGGGGGAA-                                                                 | -                 | AAATAAGCAAGAACTTGAGGGATGAAATAAATAGGATTA | AAAATTTGAAGTTCC |                           |                     |                |                   | 72486 |                   |           |            |       |
| Lion        | AGGG-                                                                                      | - - - - -         | TTATAAG-                                | AGA-            | -                         | AGTTCCAA-           | - - - - -      | GAGGACAAAGCAAGC-  | - - - | TTTTAATTAAAA-     | - - - -   | 68604      |       |
| Vaquita     | GATAATCA-                                                                                  | TCTCATGGTGTATGTA- | -                                       | AGTCAAATCA-     | - - - - -                 | TTATGCT-            | - - - -        | GTACACC-          | - - - | TTAAATTTATACAGTGC |           | 65955      |       |
| Pig         | AGGAATC-                                                                                   | - - -             | CACCTGGACGGGA-                          | - - - -         | AATTGAGTC-                | - - - - -           | TAGGCTTTAGGCA- | ACC-              | - - - | GT-               | - - - - - | TCTGTGGGGT | 65637 |

Dienstag, 3. Mai 2022 08:40

| Majority    | T GTTCAGTCCTXTAGTTTCCATAAGGTTAATCATXAAAAX- - - - T- - - - - XGGTATAAA- - - - TCCAATTA |                        |       |       |       |       |       |                |  |                              |
|-------------|---------------------------------------------------------------------------------------|------------------------|-------|-------|-------|-------|-------|----------------|--|------------------------------|
|             | 93930                                                                                 | 93940                  | 93950 | 93960 | 93970 | 93980 | 93990 | 94000          |  |                              |
| Human       | CATTCAGTACAGTAGTTAC-                                                                  | GTACTGTTATTCCACAAGAGT- |       |       |       |       |       | ATATAAA-       |  | TCAAATTA 74621               |
| PolarBear   | TGTTCAGTTCCGTAGTTCCCATATGGTTATTCATGAGGG-                                              |                        |       |       |       |       |       | GGGTATAAA-     |  | TCAAATTA 34362               |
| Cow         | TGTATGTACATTATCTCTCAATAAAACTGAAAGAAAAAAA-                                             |                        |       |       |       |       |       | T- TTTTAAGATT- |  | CCCAACTG 72652               |
| Dog         | TACTCAGTTCAGTAGTTCCCATAAAGGTTATTCATGAAGG-                                             |                        |       |       |       |       |       | GGGTATAAA-     |  | TCAAATTA 65755               |
| BelugaWhale | TGTATGTCCATTATATCTCAGTAAACTGAAAGAAAAAAA-                                              |                        |       |       |       |       |       | CTT-           |  | TGGTTTAAGATT- CTCAGGTA 64671 |
| Donkey      | TGTTCAGTTC AATAGTTACCATTTGCTTATTCACAAGAGATGTGATATTTAAACTTTGGTTTTTAAGATTCCTCAGGTA      |                        |       |       |       |       |       |                |  | 71575                        |
| Cat         | - - - - - AGTTTCTCTAAGGAACACGTTGAAAA-                                                 |                        |       |       |       |       |       | AGAAAA-        |  | TTTGATTG 70958               |
| Ferret      | TGTTCAGT- - - - - AGTCCCATAAAGGTTATTCATGAGGGG-                                        |                        |       |       |       |       |       | GGGTATAAA-     |  | TCAAATTA 72539               |
| Lion        | - - - - - AGTTTCTCTAAGGAACACGTTGAAAA-                                                 |                        |       |       |       |       |       | AGAAAA-        |  | TTTGATTG 68645               |
| Vaquita     | TGTATGTCCATTATATCTCAGTAAACTGAAAGAAAAAAAACCTT-                                         |                        |       |       |       |       |       | TGGTTTAAGATT-  |  | CTCAGGTA 66021               |
| Pig         | T- TGAGAACTTAGAAGGCCAGAGGAGTGATGTTTAAAC-                                              |                        |       |       |       |       |       | TT-            |  | TGCTTTAAATT- CCCAGGTA 65698  |

| Majority    | T AAXAGATXXAAGAGGATTAAGXCTTGAGAAXG- AX- - ACTTTAAGCATTGAAGATTTGTGTTGTAGXAAA- - XXAAGA |                                                               |       |       |       |       |       |                                                                                   |
|-------------|---------------------------------------------------------------------------------------|---------------------------------------------------------------|-------|-------|-------|-------|-------|-----------------------------------------------------------------------------------|
|             | 94010                                                                                 | 94020                                                         | 94030 | 94040 | 94050 | 94060 | 94070 | 94080                                                                             |
| Human       | CAAGGAATTAA-                                                                          | GGATATAAACGTGATAAGAAAGTATGCACTGTACTCTTTGAGGAAGTTTGCCATAGAAAG- |       |       |       |       |       | GAAGA 74697                                                                       |
| PolarBear   | TTATGGATTAA-                                                                          | GGGTA-                                                        |       |       |       |       |       | TAAGAAAG- AT- - TTACTACTCTTTGAAGAAGTGTGATGTAATAAA- - GGAAAG 34427                 |
| Cow         | TAAAAG-                                                                               | GGCAGGAGGGCTAAAGTCTTGAAA-                                     |       |       |       |       |       | CTTTAAGCAGTGTACATTTATGTTGTGGGAAAA- - - - GA 72717                                 |
| Dog         | TGATGGATTAAAGGGTATAAATATGATAAGAAAGCAT-                                                |                                                               |       |       |       |       |       | TTACTACTCTTTGAAGAAGTGTACTATAAAAAA- GGAAAG 65832                                   |
| BelugaWhale | TAAAGAG-                                                                              | AGCAAGAGGGCTAAAGACTTGAAATTG- AA-                              |       |       |       |       |       | ACTTTAAGCACTACACATTTATGTTGTGGGAAAG- TAAAGA 64746                                  |
| Donkey      | TAAAAAA-                                                                              | GCAGGGCGGTTAAAGACTTGAAATTG- AA-                               |       |       |       |       |       | ACTTTAAGCGGTGCACATGTCTATTGTGGGAAAAATAAAGA 71651                                   |
| Cat         | TTAATGATAGAAAAGAATGGATT-                                                              |                                                               |       |       |       |       |       | CCAGCAGGCAC- - A- ATAAGGAATTGAAGGGTAGGTTTGTAGAAGA- - - - - GG 71026               |
| Ferret      | AAATGGATTAA-                                                                          | GGATAGAAATGTGATAAGAAAGCAT-                                    |       |       |       |       |       | TTATTATTCTTTGAAGAAGTGTGCTATAAAAAA- - GGAAAA 72614                                 |
| Lion        | TTAATGATAGAAAAGAATGGATT-                                                              |                                                               |       |       |       |       |       | CCAGCAGGTAC- - A- ATAAGGAATTGAAGGGTAGGTTTGTAGAAGA- - - - - GG 68713               |
| Vaquita     | TAAAGAG-                                                                              |                                                               |       |       |       |       |       | CAAGAGGGCTAAAGACTTGAAATTG- AA- - ACTTTAAGCACTACACATTTATGTTGTGGGAAAG- TAAAGA 66094 |
| Pig         | CAAGAGAGGGAACAGGGTTAAAGACTTGAAAATA-                                                   |                                                               |       |       |       |       |       | AA- - ACTTTAAGCAGTGCATATTTATGTTGTGGGAAAACCTAAAGA 65775                            |

Dienstag, 3. Mai 2022 08:40

| Majority    | AGAAATGGATTGAGGGXTG- - - - - AAATAAATAGGXTTAXA- TTAGAGGTGCXTGTXCAGTTTXXGTA                      |       |       |       |       |       |       |       |       |
|-------------|-------------------------------------------------------------------------------------------------|-------|-------|-------|-------|-------|-------|-------|-------|
|             | 94090                                                                                           | 94100 | 94110 | 94120 | 94130 | 94140 | 94150 | 94160 |       |
| Human       | AGAAATAGGATGGTAGATC- - - - - A- - - - - G- - - - - AAGTAAAGCAGGACCCAGTGGGGGGAGTGTTTGCAGTGAGGCCA |       |       |       |       |       |       |       | 74761 |
| PolarBear   | AGAAATGGAATGGTAGTTG- - GAGTAGAGCAGGGCCAGGGAGAA- ATGTTTGA- TTGAGGAACCATGCATAACTGTATG             |       |       |       |       |       |       |       | 34503 |
| Cow         | AGCAAGAGATCAAGGGATA- - - - - AAATAA- - - - GATTAAAATTAGAAGTGCTTTTTTCAGTTTAGTA                   |       |       |       |       |       |       |       | 72775 |
| Dog         | AGAAATGGAATG- TAGTTG- - - - - AGAA- - TGTTGTA- TTGAGGGACTGTGTATAATTGTATG                        |       |       |       |       |       |       |       | 65888 |
| BelugaWhale | AGTAAGGGATTGAGGGATG- - - - - AAATAAATAGGGTTAAA- TTAGAAGTGCCTATTCAGTTTAGTA                       |       |       |       |       |       |       |       | 64807 |
| Donkey      | AGCAAAAACTGAGAGGTG- - - - - AAATACATAGGATTTAAATTAGAAGTGCCTGTTTCAGTTCAATA                        |       |       |       |       |       |       |       | 71713 |
| Cat         | AGGCATGGATTGAGGATAG- - - - - AATAGTGTCTCA- TTTTTGTCAAAGCAAATTTTT- -                             |       |       |       |       |       |       |       | 71082 |
| Ferret      | AGAAATGGACTGGTAGTTGAGGAGTAAAGCAGGGTGGGAGGGGATGTGTTTGA- CCGAGGAATATATATAATCATAGG                 |       |       |       |       |       |       |       | 72693 |
| Lion        | AGGCATGGATTGAGGATAG- - - - - AATAGCGTTTCTCA- TTTTTGTCAAAGCAAATTTTT- -                           |       |       |       |       |       |       |       | 68769 |
| Vaquita     | AGTAAGGGATTGAGGGATG- - - - - AAATAAATAGGATTTAAA- TTAGAAGTGCCTATTCAGTTTAGTA                      |       |       |       |       |       |       |       | 66155 |
| Pig         | AGCAAGAAATTGAAGGATG- - - - - AAATAAATAGGATTTAAATTTAGAAGTGCCTTTTTTCAGTTTAGTA                     |       |       |       |       |       |       |       | 65837 |

| Majority    | GTTTCCATAATC- TTXATXXTTATTGTTXAGAATXGGTXTAAATCTCATTGTAATGGAXTCGAAATXT- - - - - XAATATG   |       |       |       |       |       |       |       |       |
|-------------|------------------------------------------------------------------------------------------|-------|-------|-------|-------|-------|-------|-------|-------|
|             | 94170                                                                                    | 94180 | 94190 | 94200 | 94210 | 94220 | 94230 | 94240 |       |
| Human       | GTATGTATAATCATTTAAAACATGGGTTTGGAGTCCTCTCAGGTTCCATGTT- - TGTAATGGACATA- - - - ATGATAATA   |       |       |       |       |       |       |       | 74835 |
| PolarBear   | GGCTCCAAAATC- CAGATGTCCTGAGTTCAAATCTGTCTCAACTTCACTGTCTTGGCCTCCAAATTTGTAATGGATATA         |       |       |       |       |       |       |       | 34582 |
| Cow         | GTGACCATAAAG- TTTATTCTTATTCATAAGAATGGGTATAAATCAAATTATAAAGAATTAGGAATAT- - - - AAATATG     |       |       |       |       |       |       |       | 72849 |
| Dog         | GGCTCCAGA- TC- CAGGTGTCATGAGTTCAGAATTCATCTTAGCTTCACTGTCTTAGCCTCCCATGTGTAGTGGTTATA        |       |       |       |       |       |       |       | 65966 |
| BelugaWhale | GTTACCATAAAG- TTTATTCTTATTCGTAAGAATGGGTATAAATCAAATTATAATGGATTAGGAATGT- - - - AAATTTG     |       |       |       |       |       |       |       | 64881 |
| Donkey      | GTTACCATT- - - - - TGCTTATTCACAAGAGTGGGTATAAATCTACTTTTAAATGGATC- - - AA- - - - - TG      |       |       |       |       |       |       |       | 71769 |
| Cat         | AGTTTCAA- TC- AGGAAATAAAATGTTCTAAAACCTCC- - TCCCACTGA- - AAACCCAATACTT- - - - - TATG     |       |       |       |       |       |       |       | 71146 |
| Ferret      | GGCTCCAAA- TC- CAGATGTCCTGAGTTCAAATCTGTCTCAGCTTCACTGTCTTGACCTCCATATTTGTAATGGATATA        |       |       |       |       |       |       |       | 72771 |
| Lion        | AGTTTCAA- TC- AGGAAATAAAATGTTCTAAAACCTCCC- - TCCTCACCGA- - AAACCCAATACTT- - - - - TATG   |       |       |       |       |       |       |       | 68834 |
| Vaquita     | GTTACCATAAAG- TTTATTCTTATTCGTAAGAATGGGTATAAATCAAATTATAATGGATTAGGAATGT- - - - AAATTTG     |       |       |       |       |       |       |       | 66229 |
| Pig         | GTCACCATAAAG- TTTATTCTTTT- - - - AAGAATGGATATGAATCCAATTTAAATGGATTAAGGATGC- - - - AAATATG |       |       |       |       |       |       |       | 65907 |

Dienstag, 3. Mai 2022 08:40

|             |                                                                                                                |       |
|-------------|----------------------------------------------------------------------------------------------------------------|-------|
| Majority    | ATAX- XAXGTTATAAGGCCXTTTTGA- GTAXTGXATT- - TGGTAGXAAGXAAAAA- - - TTGGATAGTACTTGAXATGCAA                        |       |
|             | ----- ----- ----- ----- ----- ----- -----                                                                      |       |
|             | 94250          94260          94270          94280          94290          94300          94310          94320 |       |
| Human       | ATCCCTTTTCATTTAAGGCTGTTGTGA- GGATTAATG- - TGTTAATGTGCAAATAACTTTACACAGTGCCTGGTATATAA                            | 74912 |
| PolarBear   | ATGACAGTGTTACAAGGCTATTGTGA- GGATTAATG- - TGTTAA- - - GTGAAGT- - - TTGTATAGTGCTTGGCATATAA                       | 34653 |
| Cow         | ATA- - - AAATATTTACTCCTCTTTGAAGTAATGCACTCTTGGAAAGGAAGGAAAAA- - - TGGGATGGTAGTTGAAAAGCAA                        | 72923 |
| Dog         | ATGACAGTGTTACAAGGGTATTATGA- GTATTAATG- - TGTTAATAAGTATAGT- - - TTGTATAGTGCTTGGCATATAA                          | 66040 |
| BelugaWhale | ATAAGAAAGTACTTACTACTCTTTGAGTAAGTGCTTT- - AGGAAGGAAGGAGAAA- - - TGGGATGGTAGTTGAGGAGCAA                          | 64956 |
| Donkey      | T- - - - - - - - - - - - - - ACTACTCTGA- - - AGTGTGCTGTAGAAAGGAAGGAGAAA- - - TGGGATGGTAATTGAGAAGTAA            | 71828 |
| Cat         | A- - - - - - - - - - - - - - ATTAGAAGGCCCTTCCAATATACTGTGT- - - CAGTAGTATGTGAGAC- - - TTGAA- ACTACCAGATGTCCTA   | 71213 |
| Ferret      | ATAACAGTGTTGCAAGGCCATTGTGA- AGATTAAGTG- - TATTAATAAGTGCAGT- - - TTGTATAGTGCTGGGCATACGA                         | 72845 |
| Lion        | A- - - - - - - - - - - - - - ATTAGAAGGCCCTTCCAGTATACTGTGT- - - CAGTAGTATGTGAGAC- - - TTAAA- ACTACCAGATGTCCTA   | 68901 |
| Vaquita     | ATAAGAAAGTACTTACTACTCTTTGAATAAGTGCTTT- - AGGAAGGAAGGAGAAA- - - TGGGATGGTAGTTGAGGAGCAA                          | 66304 |
| Pig         | ATA- - - AAGTATTGACTACTTTTTGAAGAAGTGACA- TAGCAAAGAAGGAGAAA- - - TGGGATGGTAGTTGAAGAGCAA                         | 65980 |

|             |                                                                                                                |       |
|-------------|----------------------------------------------------------------------------------------------------------------|-------|
| Majority    | - TXAAGGCTCAAGAGGTAATGACTAXXATAAGGAAXXTXGCATAAT- - - CATTTTGAGTATTGGTTXC- - - - - - AAATC                      |       |
|             | ----- ----- ----- ----- ----- -----                                                                            |       |
|             | 94330          94340          94350          94360          94370          94380          94390          94400 |       |
| Human       | - TAAATGCTTGCTACCTATTAAGTAGTATTTGTTTCTAAGGCTAATTT- AAGTCTAGAAATTTGATTGC- - - - - - AA- -                       | 74980 |
| PolarBear   | - TGAATGTTCACTTCATATTAAGTAGTATTTGGGTTTT- - - GTGGG- - GTTTTTTGAAAGATTTATTTATTTTAGAGAGCA                        | 34727 |
| Cow         | - - - - - - - - - - - - - - - - - - - - - - - - GGAAGTATGCATAAT- - - CATTTTGAGTGTAGGCTCA- - - - - - AAATC      | 72962 |
| Dog         | - TGAATGCTCATTTTCATATTAAGTAGTATTTGTTTTTTT- - - GTGGG- - - ATTTTGGGGGA- - GACTTA- - - - - - GAGCA               | 66104 |
| BelugaWhale | ATCAGGGCCCAAGAGGAAATGTTTACAGTAAAGGAGTATGCATAAT- - - CATTAAAGAGTATGTGGTCC- - - - - - AAATC                      | 65026 |
| Donkey      | AGCAAGACCCAAGGGGAAAGTGTTCAGTACGGAAGTATGCATAAT- - - CATTAAAGAGTATTGGCTCC- - - - - - AAATC                       | 71898 |
| Cat         | - AACAGGGTAAAGAAGTAA- GACCAAGAGAAATAATTTA- - ATGGA- - - - - CTTTGGATATAAGTTTT- - - - - - A- -                  | 71273 |
| Ferret      | - TGAATGCTCAATTTATA- - AACTAGTATTTGTTTTTTTTTGTGGATTGTTTTTTGAAGATTTATTTATTTTAGAGAACA                            | 72922 |
| Lion        | - AACAGGGTAAAGAAGTAA- GACCAAGAGAAATAATTTA- - ATGGA- - - - - CTTTGGGATATAAATTTT- - - - - - A- -                 | 68961 |
| Vaquita     | ATCAGGGCCCAAGAGGAAATGTTTACAGTAAAGGAGTATGCATAAT- - - CATTAAAGAGTATGTGGTCC- - - - - - AAATC                      | 66374 |
| Pig         | AT- AGGGCCCGAGGGGAAATGTTTGCAGCGAGCAAGTGTGCATAAT- - - CATTAAAGAGTATGGGCTCC- - - - - - AAATC                     | 66049 |

Dienstag, 3. Mai 2022 08:40

| Majority    | CAXATGXGATCAGTACAAAA- CTGGCACAGXTTAACTGTCGCAGXTTCCACATTTATCATGGA- - TAAAATGX- XXTAA   |                                                                    |                 |       |       |       |       |       |  |
|-------------|---------------------------------------------------------------------------------------|--------------------------------------------------------------------|-----------------|-------|-------|-------|-------|-------|--|
|             | 94410                                                                                 | 94420                                                              | 94430           | 94440 | 94450 | 94460 | 94470 | 94480 |  |
| Human       | - GGATTAGATCAGGA- - - - -                                                             | GTATAGTGGACATGTTGGGATTTAAATATTTA- AATATA- - -                      | GAGATG- - - - - | 75038 |       |       |       |       |  |
| PolarBear   | CAAGTGGGAGGGGGAGAAGAAGAGGAAGAGAGAATCTCAAGTAGACTCCGCGTTGATCGTGGAGCCTGACACAGGGCTCG      | 34807                                                              |                 |       |       |       |       |       |  |
| Cow         | CAGACATCCTCAATTCAAATCTGGCTCAGCTTTGCTGTCTTAGATTTTACATTTTGTGATGGA- - TATGAT- - -        | AGTAA                                                              | 73036           |       |       |       |       |       |  |
| Dog         | CAAGTGGGAAGGGGA- - - - -                                                              | GAGGGAGAGAGAATCTCAAGCAAATGCTCACTGAGCATGGAGCCCAACACAGGGCTCA         | 66178           |       |       |       |       |       |  |
| BelugaWhale | CAGACATCCTCAGTTCAAAGCTGGCTCAACTTCACTGTCTCAGCTTTTACATTTTGTGATGGA- - TATAATGATGGTAA     | 65103                                                              |                 |       |       |       |       |       |  |
| Donkey      | TAGGTGTCTGAGTTCAAATCTAGCTCAGCTTCACTGTCTGAGCTTCAAATTTGTAATGGA- - TGTAATGGCATTAA        | 71975                                                              |                 |       |       |       |       |       |  |
| Cat         | - GAATGGGAAATGAA- - - - -                                                             | GGGATAAAACAAATTGTGCA- - - TCCTTAAAATCATGGG- - - TAAAATAAT- - - - - | 71333           |       |       |       |       |       |  |
| Ferret      | TGAATGGGAGGGGGAGAAGAGAGGAGGAAGAGAGAATCTTAAGCAGACTCCATGTTAAGTGCGGAGCCTGACACGGG- - TTG  | 73000                                                              |                 |       |       |       |       |       |  |
| Lion        | - GAATGGGAAATGAA- - - - -                                                             | GGGATAAAACAAATTGTGCA- - - TCCTTAAAATCATGGG- - - TAAAA- - - - -     | 69017           |       |       |       |       |       |  |
| Vaquita     | CAGACATCCTCAGTTCAAAGCTGGCTCAACTTCACTGTCTCAGCTTTTACATTTTGTGATGGA- - TATAATGATAGTAA     | 66451                                                              |                 |       |       |       |       |       |  |
| Pig         | CACACATCCTCAGTTCAGAATCTGGCTCAGCTTCGCTGTCTCTGCTTTTACATTTTGTGTAATGGA- - TATAACGA- AGTTA | 66125                                                              |                 |       |       |       |       |       |  |

| Majority    | XTCCCATGTX- TXAGGCT- XXG- - - - XAGGAXXACAT- XTSTTAAACXXAAACAAAGAATTTT- - - - GATGCTTGACAAA                |             |       |       |       |       |       |       |  |
|-------------|------------------------------------------------------------------------------------------------------------|-------------|-------|-------|-------|-------|-------|-------|--|
|             | 94490                                                                                                      | 94500       | 94510 | 94520 | 94530 | 94540 | 94550 | 94560 |  |
| Human       | - CTT- - T- - - - - - - - TT- - - - - - - - AGGA- - CCATTGTTAGAACC- - AGAAGAGATTTTT- - - - -               | TACCAAGTTCA | 75086 |       |       |       |       |       |  |
| PolarBear   | ATCTCAAGAACTGAGCCTCGTGACCTGAGAGAGATCACGACCTGAGCTGAAACCAAGAGTTG- - - - GA- GCTTAACCAA                       | 34881       |       |       |       |       |       |       |  |
| Cow         | TCCCCATGTTCTAAAGCTAGTGTG- GAGGATTGAATTATGTTAATGCATACAGAGAACTTTTACAAATGCCTGACATA                            | 73115       |       |       |       |       |       |       |  |
| Dog         | ATCTCACAC- - - - - CCTT- - - - - - - - GAGT- - TCATCTCCTGATCCAAAACCAAGAATTG- - - - GATGCTTAACCAG           | 66236       |       |       |       |       |       |       |  |
| BelugaWhale | TCCCCATGTTTTAAGGCTAGCGT- - - - GAGGATTAAT- GTTTTAAT- - - - ACAGAGAACTTTTACAGTGTCTGGCATA                    | 65174       |       |       |       |       |       |       |  |
| Donkey      | TTCTGTGTTCTAAGGCTCTTGC- - - - GAGGATTACAT- GTGTTAAC- - GTGTAAGAAATTT- - GCTGTGCTTGGCAGA                    | 72046       |       |       |       |       |       |       |  |
| Cat         | - - - - - - - - - - - - - - CCT- - - - - - - - AAGG- - - - ACAAGTCAAGAGAAGCCTAAGGGGAT- - - - GAGACATGACTAA | 71379       |       |       |       |       |       |       |  |
| Ferret      | ATCTCAAGA- - - - - CCCT- - - - - - - - GAGA- - TCATGACCTGAGCCAAAACCAAGAGTTG- - - - GATGCTTAACCAA           | 73058       |       |       |       |       |       |       |  |
| Lion        | - - - - - - - - - - - - - - GG- - - - - ACAAGTCAAGAGAAGCCTAAGGGGAT- - - - GAGACATGACTAA                    | 69058       |       |       |       |       |       |       |  |
| Vaquita     | TCCCCATGTTTTAAGGCTAGTGT- - - - GAGGATTAAT- GTTTTAAT- - - - ACAGAGAACTTTTACAGTGTCTGGCATA                    | 66522       |       |       |       |       |       |       |  |
| Pig         | ATTCCATGTTGTAAGGCTAGTGC- - - - GAGGATTAAT- GCGTTAATACGTACAAAGAATTTTGCACAGTGCTTGGCATA                       | 66200       |       |       |       |       |       |       |  |

Dienstag, 3. Mai 2022 08:40

| Majority    | CAXTGAATGCTAGTTTTCAT - - TXGCTAGTATTTGTTTTTAAGGCTAGCTTAAGTCCTAGAATTGATTGTAGTXGATTGGA            |       |
|-------------|-------------------------------------------------------------------------------------------------|-------|
|             | 94570 94580 94590 94600 94610 94620 94630 94640                                                 |       |
| Human       | CACAGAAATGTAGGTGCAT - - TGGCTGGGCATGGTGGCTCACACCTGC - - AATCCCAGCAC - - - - -                   | 75143 |
| PolarBear   | CTGTGCCACCGAGGCATCC - - - - CTGGTGTATTATTTTTAAGGCTAGCTTAAGTCCTAGAATTGATGGTAGAGGATTGGG           | 34956 |
| Cow         | TAATGAGTGAAATTTTTCATATTAGCTAGTATTTGTTTTGAAGGCTAGCTTAAATCCTAGAATTGATTGTAGTGAATTGGA               | 73195 |
| Dog         | CTGTGCCACCCAGTCACCC - - - - CTAGTATTTATTTTTAAGGCTAGCTTCAGTCCTAGAATTGAATGTA - - - - -            | 66301 |
| BelugaWhale | GAATGAATGCTAACTTCATATTAGCTAGTATTTGTTTTGAAGGCTAGCTTAAGTCCTAGAATTGATTGTAGTAGATTGGA                | 65254 |
| Donkey      | TAATGAATGCTCATTTTCATATTAGGTAGTATTTGTTTTAAGACTAGCTTAAAGTCCTAGAGTTGATTGTAGTTTGTGGGA               | 72126 |
| Cat         | ATGTATT - - - - GGAGGTTC - - - - TTGGAACAAAAAAG - AATATTAGATGCACACCAAGGA - - - AATCTG - - - - - | 71436 |
| Ferret      | CTGTGCCATCCAGGCACCC - - - - CTAGTATTTGTTTTAAGGCTAGCACAAGTCCTAGAAGTTGATTGTAGAGGATTGGT            | 73133 |
| Lion        | ATGTATT - - - - AGAGGATC - - - - TTGGAACAAAAAAG - AATATTAGATGCACACCAAGGA - - - AATCTG - - - - - | 69115 |
| Vaquita     | GAATGAATGCTAACTTCATATTAGCTAGTATTTGTTTTGAAGGCTAGCTTAAAGTCCTAGAAGTTGATTGTAGTAGATTGGA              | 66602 |
| Pig         | TAATGAATGCTTATTTTCATGTTAGCTGGTGTGTTTTGAAGGCTAGCTTAAAGTCCTAGAATTGATTATGGTGGATTGGA                | 66280 |

| Majority    | TCXAGAXTATAGTGGAAATGTTGGGGCCTAGXAAATAAAGAGA - - - - TACTT - TTTAGGACCATTGTGA - GAACTGGAA     |       |
|-------------|----------------------------------------------------------------------------------------------|-------|
|             | 94650 94660 94670 94680 94690 94700 94710 94720                                              |       |
| Human       | - - - - - TTGGGAAGGCTGAGGCAGAAGAACTGCTTGAGGC - - CAACATTTTGAGACCAGCCTGGGCAACATATT            | 75209 |
| PolarBear   | TCTAGAGTATAGTGAAAATGCTGGGGTCTAAAAAATAA - - - - - TGCTTGCTTAGGATCATTGTGA - GAACTAGAA          | 35025 |
| Cow         | TTGAGAATA - ATGGAAGTGTTGAGGCA - - - AAATATATAGA - - - - AAATT - TTTAGGACCATTGTGA - GAACTAAAA | 73262 |
| Dog         | - - - - - TAGTGAAAATGCCAAGGCCTAGAAAATAGAA - - AGG - - TACTTGTTGAGGATCATAATGAAGAAGCTGGAA      | 66367 |
| BelugaWhale | TCAAGAATATAGTGGAAATGTTGGGGCCTACGAAATACAGAGA - - - - TACTT - TTCAGGACCATTGTGA - GAACTGGAA     | 65327 |
| Donkey      | TCAAGAGTGTAGTGGAAATGTTGGCATCTAGAAAATATAGAGA - - - - TACTT - TTTAGGACCATTGTGA - GAACTAGAA     | 72199 |
| Cat         | - - - - - ACAAAGTATGGAATTCAGTTGATGA - - - - - TAATATATCAGTATTAGT - TGATTAATTGCAA             | 71492 |
| Ferret      | TCTAGAGTATAGTTTAAATGCTGGAGCCTAAAAAATAGAAAAGTACTTGCTTGCTTAGGATCATCCTGA - GAACTAGAA            | 73212 |
| Lion        | - - - - - ACAAAGTGTGGAATTCAGTTGATGA - - - - - TAATATATGAGTATTAGT - TGATTAATTGCAA             | 69171 |
| Vaquita     | TCAAGAATATAGTGGAAATGTTGGGGCCTACGAAATACAGAGA - - - - TACTT - TTCAGGACCATTGTGA - GAACTGGAA     | 66675 |
| Pig         | TCAATAATACAGTGGAAAGGTTGGGGGAGTAAATATAGAGA - - - - TACTT - TTTACAACCATGGTGA - GAACTGGGA       | 66353 |



Dienstag, 3. Mai 2022 08:40

| Majority    | GGGATTTTT- ATCAAGCTCACATAGAA- - - - - ATTTAGGGGCAGAGCTGGAGCCAGAAGTGAAGTCATC           |       |       |       |       |       |       |       |       |
|-------------|---------------------------------------------------------------------------------------|-------|-------|-------|-------|-------|-------|-------|-------|
|             | 94730                                                                                 | 94740 | 94750 | 94760 | 94770 | 94780 | 94790 | 94800 |       |
| Human       | AAGACCCCGTCTCCACCAAAAAAAAAAAAAAAAAAG- - - - - AAGTAGGTGCAGAGCTGGAAGCAGAACCGAAATCATC   |       |       |       |       |       |       |       | 75280 |
| PolarBear   | GGGATTATC- ATCAAGCTCACATAGAA- - - - - ACGTAGGGGCAGAGCTGGGGCCAGAAGTGAAGTCATC           |       |       |       |       |       |       |       | 35088 |
| Cow         | GGAACCTTCT- GTCAAGCTCACATAGAA- - - - - ATTTAGGAGCAGAGTTGGAGCCAGAAGTGAAGTTGTC          |       |       |       |       |       |       |       | 73325 |
| Dog         | AGGATT- - - - AGCAAGCTCTTATAGAAATGTAGGGGAAGGAAAATGTAGGGGCAGAGCTGGAGCCAGAAGTGAAGTCATC  |       |       |       |       |       |       |       | 66443 |
| BelugaWhale | GGAATTTTT- ATCAAGCTCACAGAGAG- - - - - ATTTAGGGGCAGAGCTGGAGCCAGAAGTAAAGTCATC           |       |       |       |       |       |       |       | 65390 |
| Donkey      | GGGATTTTT- ATTAAGCTCACATAGAA- - - - - ATTTAGGGGCAGAGCTGGAGCCAGAAGTGAATCATT            |       |       |       |       |       |       |       | 72262 |
| Cat         | TAATT- - - - - AACTAACGTAAAA- - - - - TGTTAA- TGGGAAAAGGAAGTG- - - - TGCA             |       |       |       |       |       |       |       | 71536 |
| Ferret      | GGGATTATT- ATCAAGCTCACATAGAATTGTCTGGGGGA- - - - AATGCAAGGGTGGAGTGGGGCCAGATCTGAAGTTATC |       |       |       |       |       |       |       | 73287 |
| Lion        | TAATT- - - - - AACTAACGTAAAA- - - - - TGTTAA- TGGGAAAAGGAAGTG- - - - TGCA             |       |       |       |       |       |       |       | 69215 |
| Vaquita     | GGAATTTTTTATCAAGCTCACAGAAAG- - - - - ATTTAGGGGCAGAGCTGGAGCCAGAAGTAAAGTCATC            |       |       |       |       |       |       |       | 66739 |
| Pig         | TGGATTTTT- TTCAAGCTCCCCTAGAA- - - - - ATTTTGAACATGGCTGTAGCCCGACCTGAAGTCATC            |       |       |       |       |       |       |       | 66416 |

| Majority    | AGCTTT- - ATAGTCCATATTCTTT- CTTCTCACCATTTTGTGTCTTTAT- - - - - GXAGAAAGGGGAACAGATGAAA    |       |       |       |       |       |       |       |       |
|-------------|-----------------------------------------------------------------------------------------|-------|-------|-------|-------|-------|-------|-------|-------|
|             | 94810                                                                                   | 94820 | 94830 | 94840 | 94850 | 94860 | 94870 | 94880 |       |
| Human       | AGTGTT- - ACAGTCATTATTCTTT- CCTGTCACCATTATATGTCTTTAT- GAAGCAAGGGAGAAAGAAGAACAGATGAAA    |       |       |       |       |       |       |       | 75356 |
| PolarBear   | AGCTAT- - GTAGTCCATGTTCTTT- CCTCTCACCATTCTATGTTTTTCTGAAGAAAGGGAAGAGGGGAAAACAGATGAAA     |       |       |       |       |       |       |       | 35165 |
| Cow         | AGTTTTTTACAGTCTGTATTCTTT- CTTCTCACCATTT- GTATCTTCAT- - - - - AAAGAAAGGGGAACAGATGAAA     |       |       |       |       |       |       |       | 73394 |
| Dog         | AGTTAT- - GTAGCCCATATTCTTTCTTCTCACCATTCTGTGTTTTTAT- GAAGAAAGGAAAAGGGGGGAACAGATGAAA      |       |       |       |       |       |       |       | 66520 |
| BelugaWhale | AGCTTTTGATAGTCCATATTCTTT- CTTCTCACCATTT- GTATCTTTAT- - - - - GAAGAAAGGGGAACAGATGAAG     |       |       |       |       |       |       |       | 65459 |
| Donkey      | AGCTTT- - ATCGTCCATATTCTTG- - TTCTCACCATCATGTATCTTTAT- GAAGAAAGACAGGAAGGGGAACAGAGGAAA   |       |       |       |       |       |       |       | 72337 |
| Cat         | GGTTAT- - ATAG- - - GAACTCTGT- - - - - AGAAGCTTCAGTTTTTCT- - - - - GTAAATCTAAAAGTGTCTAA |       |       |       |       |       |       |       | 71594 |
| Ferret      | AGCTGT- - GTAGTCCATATTCTTT- CTAATCACCATTCTTTGGTTTTATGAAGAAAGGGAGAAAGGGGAAAACAGATTAAA    |       |       |       |       |       |       |       | 73364 |
| Lion        | GGTTAT- - ATAG- - - GAACTCTGT- - - - - AGAAGCTTCAGTTTTTCT- - - - - GTAAATCTAAAAGTGTCTAA |       |       |       |       |       |       |       | 69273 |
| Vaquita     | AGCTTTTGATAGTCCATATTCTTT- CTTCTCACCATTT- GTATCTTTAT- - - - - GAAGAAAGGGGAACAGATGAAG     |       |       |       |       |       |       |       | 66808 |
| Pig         | AGCTTTTTATAGTCTACGTATATA- TAGTCTACCATTTTGTATCTTTGT- - - - - AGAGAAAGGGGAATAAATGTAA      |       |       |       |       |       |       |       | 66486 |

Dienstag, 3. Mai 2022 08:40

| Majority    | GAAGGGAGX- - ACTTTTGAAGTTGGTTGAAAATTTTGAG- - - - -                                    |       |       |       |       |       |       |       |       |
|-------------|---------------------------------------------------------------------------------------|-------|-------|-------|-------|-------|-------|-------|-------|
|             | 94890                                                                                 | 94900 | 94910 | 94920 | 94930 | 94940 | 94950 | 94960 |       |
| Human       | GAAGTGAGGA- - - TTTTGAAGTTGGTTGAAAGATTTGAT- - - - -                                   |       |       |       |       |       |       |       | 75392 |
| PolarBear   | GAAGGGAGT- - ACTTTTGAAGTTGGTTGAAAATTTTGAG- - - - -                                    |       |       |       |       |       |       |       | 35202 |
| Cow         | GAAGGGAGA- - ACTTTTGAAGTTGGTTGAACATTTTAAG- - - - -                                    |       |       |       |       |       |       |       | 73431 |
| Dog         | GAAAGGA- - - - CTTTGAAGTTGGTAGAAAATTTTGAG- - - - -                                    |       |       |       |       |       |       |       | 66554 |
| BelugaWhale | AAAGAGAGAGGACTTTTGAAGTTGATTGAAAATTTGGGG- - - - -                                      |       |       |       |       |       |       |       | 65498 |
| Donkey      | AAAAGGAGG- - ACTTTTGAAGTTGGTTGAAAATTTGTAAG- - - - -                                   |       |       |       |       |       |       |       | 72374 |
| Cat         | AATAAAA- - - - - - - - - ACCTTATTA AAAA ACCATGGG- - - - -                             |       |       |       |       |       |       |       | 71621 |
| Ferret      | GAAGGGAGT- - ACTTTTTAAGTTGGTTGAGAACTTGAAATTC TTTTTTTTTTTTTTTTGT TTTATATTTATTTATTTGACA |       |       |       |       |       |       |       | 73442 |
| Lion        | AATAAAA- - - - - - - - - ACCTTACTAAA A ACCATGGA- - - - -                              |       |       |       |       |       |       |       | 69300 |
| Vaquita     | AAAGAGAGAGGACTTTTGAAGTTGATTGAAAATTTGGGG- - - - -                                      |       |       |       |       |       |       |       | 66847 |
| Pig         | GAAGGAAGG- - CCTTCTGAAGTTGGTTGAAAATTTTGGA- - - - -                                    |       |       |       |       |       |       |       | 66523 |

| Majority    | - - - - -                                                                         |       |       |       |       |       |       |       |       |
|-------------|-----------------------------------------------------------------------------------|-------|-------|-------|-------|-------|-------|-------|-------|
|             | 94970                                                                             | 94980 | 94990 | 95000 | 95010 | 95020 | 95030 | 95040 |       |
| Human       | - - - - -                                                                         |       |       |       |       |       |       |       | 75392 |
| PolarBear   | - - - - -                                                                         |       |       |       |       |       |       |       | 35202 |
| Cow         | - - - - -                                                                         |       |       |       |       |       |       |       | 73431 |
| Dog         | - - - - -                                                                         |       |       |       |       |       |       |       | 66554 |
| BelugaWhale | - - - - -                                                                         |       |       |       |       |       |       |       | 65498 |
| Donkey      | - - - - -                                                                         |       |       |       |       |       |       |       | 72374 |
| Cat         | - - - - -                                                                         |       |       |       |       |       |       |       | 71621 |
| Ferret      | GAGATGACAGAGAGGCAGAAAGGCAGGCCAGAGAGAGAGGAAGGGAAAGCAGGCTTAGCAGAGAGCCCTATGTGGGGCTTA |       |       |       |       |       |       |       | 73522 |
| Lion        | - - - - -                                                                         |       |       |       |       |       |       |       | 69300 |
| Vaquita     | - - - - -                                                                         |       |       |       |       |       |       |       | 66847 |
| Pig         | - - - - -                                                                         |       |       |       |       |       |       |       | 66523 |

Dienstag, 3. Mai 2022 08:40

| Majority    | ----- GG                                                                                |       |       |       |       |       |       |       |
|-------------|-----------------------------------------------------------------------------------------|-------|-------|-------|-------|-------|-------|-------|
|             | 95050                                                                                   | 95060 | 95070 | 95080 | 95090 | 95100 | 95110 | 95120 |
| Human       | ----- TG 75394                                                                          |       |       |       |       |       |       |       |
| PolarBear   | ----- GA 35204                                                                          |       |       |       |       |       |       |       |
| Cow         | ----- GG 73433                                                                          |       |       |       |       |       |       |       |
| Dog         | ----- GG 66556                                                                          |       |       |       |       |       |       |       |
| BelugaWhale | ----- GG 65500                                                                          |       |       |       |       |       |       |       |
| Donkey      | ----- GG 72376                                                                          |       |       |       |       |       |       |       |
| Cat         | ----- TA 71623                                                                          |       |       |       |       |       |       |       |
| Ferret      | ATCCTAGGAACTGGGATCATGACCTGAGCCAAAGGCAGAGGCTTTAACCCACTGAGCCACCCAGATGCCCCAAAACCTTGA 73602 |       |       |       |       |       |       |       |
| Lion        | ----- TA 69302                                                                          |       |       |       |       |       |       |       |
| Vaquita     | ----- GG 66849                                                                          |       |       |       |       |       |       |       |
| Pig         | ----- GA 66525                                                                          |       |       |       |       |       |       |       |

| Majority    | AATTCTGATCTCATTCTTAGA- - - XACTTGCTGAACATAACAAGATTGAGAGTAGGATATAGGACTTAAG- - TCTAGTGG            |       |       |       |       |       |       |       |
|-------------|--------------------------------------------------------------------------------------------------|-------|-------|-------|-------|-------|-------|-------|
|             | 95130                                                                                            | 95140 | 95150 | 95160 | 95170 | 95180 | 95190 | 95200 |
| Human       | AATTCTGATCTAAAAATTATAAGGCACTT- - - - G- TTTAACA- AGTTGAAAGTAGGAAAGTAGACATAAAGACTCTACTAG 75468    |       |       |       |       |       |       |       |
| PolarBear   | AATTCTGATCTTATTCTTAGA- - - - CTTTCTGAACATAACAAGATTGAGAGTAGGATGTGGGGCTTAAG- - TCTGGTGG 35277      |       |       |       |       |       |       |       |
| Cow         | AATTCTCATCTCAGTCTTCCAAGATATTTGCTGAACATAA- - GAATGAGGGTCGGTA- TAGGA- - - - G- TCTAGTGG 73502      |       |       |       |       |       |       |       |
| Dog         | AATTCTGATGCCATTCTCAGA- - - - CTTTATGAATATAACAAGATTGAGAGTAGGATGTGGGACATAAA- - TCTCGTAA 66629      |       |       |       |       |       |       |       |
| BelugaWhale | AATTCTGATCTCAGTCTTACAAGATACTTGCTGAACATAACAAGGTTGAGAATAGGGTACAGGACTTAAG- - TCTAGTGG 65578         |       |       |       |       |       |       |       |
| Donkey      | AATTCTGATCTCAATCTTACAAGATACTTGCGGAACATAACAAGATTGAGAGTAGGATACAGGGCTT- - G- TCTAGTGG 72452         |       |       |       |       |       |       |       |
| Cat         | AATTTGTAATTATTTAAAG- - - - - - - - GAAGTTAACAAAA- - - AGGTTAGTTTTTTGGGGC- - AG- CTGGGTGG 71684   |       |       |       |       |       |       |       |
| Ferret      | AATTCTGATCTCATTCTTAGA- - - - CTTTCTGAACATAACAAGATTGAGAGTAGGATGTGGCAGTTGAG- - TCTGGTGG 73675      |       |       |       |       |       |       |       |
| Lion        | AATTTGTAATGATTTAAAG- - - - - - - - GAAGTTAACAAAA- - - AGGTTAGTTTTTTGGGGC- - AG- CTGGGTGG 69363   |       |       |       |       |       |       |       |
| Vaquita     | AATTCTGATCTCAGTCTTACAAGATACTTGCTGAACATAACAAGGTTGAGAATAGGGTACAGGACTTAAG- - TCTAGTGG 66927         |       |       |       |       |       |       |       |
| Pig         | AATTCTGATCTCGGTCTTT- - - - - TATTTGCTGAACATGA- - - GATTGGGAGTAGGAAATAGGACTTAAG- - TCTAGTGG 66595 |       |       |       |       |       |       |       |

Dienstag, 3. Mai 2022 08:40

| Majority    | ATTTXTAGGGAATTCTTGAAAATAGACTAGGAAAT- CAGCTAATGTTA- - - - - AATAACAAA- - XTTTGTGGAATCAAT |                                               |                     |               |                             |                             |               |       |       |
|-------------|-----------------------------------------------------------------------------------------|-----------------------------------------------|---------------------|---------------|-----------------------------|-----------------------------|---------------|-------|-------|
|             | 95210                                                                                   | 95220                                         | 95230               | 95240         | 95250                       | 95260                       | 95270         | 95280 |       |
| Human       | ATTTG-                                                                                  | GGGAACTCTCAAAAATGGACTGGAAATT-                 | CAGCTAAAAGTG-       | - - - - -     | GATAACAAAATATTTCTAGAATTA-   | -                           |               |       | 75538 |
| PolarBear   | CTTTGTAGGAAACCTT-                                                                       | GAAAGTAGACTCAGATAT-                           | CAGGTAATGTTA-       | - - - - -     | CATACCAAAAATGTTTATGGAATCAAT |                             |               |       | 35349 |
| Cow         | ATTTTTAGGGAATTCTTGAAAACAGACTAGGAAAT-                                                    | CAGCTAATGTTG-                                 | - - - - -           | AATAACAAA-    | - - - -                     | ATGTGGACTCATA               |               |       | 73571 |
| Dog         | ATTTGTAGGGAACCCTTGGAAGTAGACTCCAAAAT-                                                    | CGGCTAACGTTAGATTTAAATAGCAAAAATGTTTATGGAATCAGT |                     |               |                             |                             |               |       | 66708 |
| BelugaWhale | ATTTTTAGGGAATTCTTGAAAATAGAATAGGAAATGCGGCTAACATCA-                                       | - - - - -                                     | AATAACAAA-          | - - - -       | ATGTGGAATCAGT               |                             |               |       | 65648 |
| Donkey      | ATTTTTAGGGAATTCTTGAAAAGAGACTAGGAAAT-                                                    | TAGCTGATGTTG-                                 | - - - - -           | AACAACAAA-    | - - - -                     | ATGTGGAATCA-                |               |       | 72519 |
| Cat         | TTCAGTCAGTAAGC-                                                                         | - - - - - A-                                  | - - - -             | TCCAACCTT-    | CAGCTCAGGTCAT-              | - - - -                     | GATCTCACA-    | -     | 71744 |
| Ferret      | ATTTATAGGGGACCT-                                                                        | -                                             | GAAAATAGACTTGGATAT- | CAGCTAGTGTTA- | - - - - -                   | AATACCAAAAATGTTTGTGGAATAAAT |               |       | 73746 |
| Lion        | CTCAGTCAGTAAGC-                                                                         | - - - - - A-                                  | - - - -             | TCCGACTT-     | CAGCTCAGGTCAT-              | - - - -                     | GATCTTACA-    | -     | 69423 |
| Vaquita     | ATTTTTAGGGAATTCTTGAAAATAGAATAGGAAATGCGGCTAACATCA-                                       | - - - - -                                     | AATA-               | - -           | AA-                         | - - - -                     | ATGTGGAATCAGT |       | 66994 |
| Pig         | GTTTTTAGGGAATTCTTGAAACTACACTAGGAAAT-                                                    | CCACTAATGTGG-                                 | - - - - -           | AATAACAAA-    | - - - -                     | TTGTGGAATCA-                |               |       | 66662 |

| Majority    | TT- XGGTTGT- - - GGTGTGTGTGTGTGT- - - XG- GX- - - - - - - - - - G- - X- TGTTTTCACTTTAXTATTTTACAAACCC |                                                                    |                                                                   |           |                                   |           |                                   |                            |       |
|-------------|------------------------------------------------------------------------------------------------------|--------------------------------------------------------------------|-------------------------------------------------------------------|-----------|-----------------------------------|-----------|-----------------------------------|----------------------------|-------|
|             | 95290                                                                                                | 95300                                                              | 95310                                                             | 95320     | 95330                             | 95340     | 95350                             | 95360                      |       |
| Human       | - - - -                                                                                              | GCATTT- - -                                                        | GTGGGGTGTGTGTGT-                                                  | - - - - - | - - - - -                         | - - - - - | - - - - -                         | TTTTCACTCTAGTATTTGTCAAGCCC | 75584 |
| PolarBear   | TTTTGGGTGTGCGTATGTGTGTGTTCACTCTAGTGCTTGCCTCGGCAGCACATACTAAAGTTGGAATGTTTTCACTCT                       |                                                                    |                                                                   |           |                                   |           |                                   |                            | 35429 |
| Cow         | T- - -                                                                                               | GCTTTT- - -                                                        | TGAGTGTGTGTGTGT-                                                  | - - - -   | G-                                | - - - - - | - - - - -                         | TTTTCACTTTAATATTTTACAAACCC | 73620 |
| Dog         | TTTGGGGTGT-                                                                                          | - - -                                                              | GTATGTGTTTTCACTCTAGTGCTCACTTCGGCAGCACATGACTAAAATTGGAATATTTTTACTTT |           |                                   |           |                                   |                            | 66784 |
| BelugaWhale | TTGGGGTTGT-                                                                                          | - -                                                                | AGGGTGTGTGTGTGTGTGTGTGTG-                                         | -         | T-                                | - - - - - | GTGTGTGTTTTCACTCTAATATTTTACAAACCT | 65718                      |       |
| Donkey      | - - - - -                                                                                            | GTTTT- - -                                                         | GGGGTGCCTGTGTGT-                                                  | - - - - - | - - - - -                         | - - - - - | GTTTTCTCTCTAATACTTTACAAACCC       | 72566                      |       |
| Cat         | CCCCACATCA-                                                                                          | -                                                                  | GGCTCTGTGCTTACAGCTCAGAGCCTG-                                      | - - - - - | GAGCCTGCTTCAGATTCTGTGTCTCCCTCTCTC |           |                                   |                            | 71814 |
| Ferret      | TTTTGGGGTGT-                                                                                         | TGTATGTGTTTTTCACTCTAGTGCTCACTTGGGCAGCACATACTAAAATTGAAATGTTTTCACTCT |                                                                   |           |                                   |           |                                   |                            | 73825 |
| Lion        | CCCCACATCA-                                                                                          | -                                                                  | GGCTCTGTGCTGACAGCTCAGAGCCTG-                                      | - - - - - | GAGCCTGCTTCAGATTCTGTGTCTCCCTCTCTC |           |                                   |                            | 69493 |
| Vaquita     | TTGGGGTTGT-                                                                                          | - -                                                                | AGGGTGTGTGTGTGT-                                                  | - - - -   | G-                                | - - - - - | TTTTCACT- -                       | AATATTTTACAAACCT           | 67044 |
| Pig         | - - - - -                                                                                            | GTTTT- - -                                                         | GCATTGTGTATATGT-                                                  | - - - -   | G-                                | - - - - - | TTTTCACTCTATCACTTTACAAACCC        | 66709                      |       |

Dienstag, 3. Mai 2022 08:40

| Majority    | AG- - - - - ATGAAAGCATAGCCAAAATAXAAGATTGGATTTATCCAAGTCTGGCATTGTAGAACATTAA- XGAT      |       |
|-------------|--------------------------------------------------------------------------------------|-------|
|             | 95370 95380 95390 95400 95410 95420 95430 95440                                      |       |
| Human       | AG- - - - - ATGAAAGCATAGACAGAATGTAAGACTGGATTTATCTAAGTCTGGAATTGTGTAACATTAAAGGAA       | 75652 |
| PolarBear   | AATACTTA- CCGAGATGAAAGCTTAGCCAAAATACAAGATTGGACTTATCTATGTCTGGCATTGAAGAACATC- - - - -  | 35501 |
| Cow         | AG- - - - - ATGAAGACATGTCCACAATATAAGATTTAATTTATCCAAGCCTGGCACAGTAGAGCATTAAACAGAT      | 73688 |
| Dog         | AATACTTA- CCTAGATGAAAGCTTAGCAAAAATACAAGATTGGATTTATCCAAGCCTGGCGCTGAAGAACATC- - - - -  | 66856 |
| BelugaWhale | AG- - - - - ATGAAAGCATATCCAAAATATAAGATTTGATTTATCCAAGTCTGGCATTGTAGAGCATTAAATGGAT      | 65786 |
| Donkey      | AG- - - - - ATGAAAGTGTAGCCAAAATATAAAATTTAATTTATCCAAGTGTGGCATTGTAGAGCATTAAAAGAT       | 72634 |
| Cat         | TCTGCC- - - - - CCTACCGCACTCACACG- CTGTCTCTCTC- - - - - ATAAATACATACAT- - - - -      | 71862 |
| Ferret      | AGTACTTAACCCCGATGAAAGTTTAGCTAGAATACAAGATTGGATTTATCCATGTCTGGCACTGAAGAACAACCTTAAAAA    | 73905 |
| Lion        | TCTGCT- - - - - CCTACCCCACTCACACA- CTGTCTCTCTCT- - - - - CAAAATAAATAAATACAT- - - - - | 69547 |
| Vaquita     | AG- - - - - ATGAAAGCATATCCAAAATATAAGTTTGGATTTATCCAAGTCTGGCATTGTAGAGCATTAAATGGAT      | 67112 |
| Pig         | AG- - - - - ATGAAAGCATAGCCAAAAA- - ATTCTCGATTTATCCAAGTCTAGCATTGTAGAGCATTAAACAAGT     | 66775 |

| Majority    | TAGAX- XXAX- - - - - CXXGCCAAAAT- - - - GCTTAAGCTACATTGTAAX- - - - TCAAGCCAAGGGA   |       |
|-------------|------------------------------------------------------------------------------------|-------|
|             | 95450 95460 95470 95480 95490 95500 95510 95520                                    |       |
| Human       | TAGTAGCAAATGAGCAGAGTGTTGGCTCAAGCCTAAGCTTGAGCCTAAGCTTGACTCTATGGTAAAGTCAAGTCAAGGGA   | 75732 |
| PolarBear   | - AAA- - - - - AAAAC- - - - ACTTAGCCTACATTGTAAA- - - - GTCAAGCCAAGAAA              | 35542 |
| Cow         | GAGTAGCGAG- - - - - CAAGCCAAAAT- - - - GCTCCAGCTACATAGTAAG- - - - TCTAATCAAGGGA    | 73741 |
| Dog         | - AAA- - - - - AAAAC- - - - ACTTAGGCTACATTGTAATAAA- GTCAAGCCAAGAAA                 | 66901 |
| BelugaWhale | TAGGAACAAG- - - - - CAAGCCAAAAT- - - - GCTCTAG- - ACATAGTATAG- - - - TCTAGCCAAGGGA | 65838 |
| Donkey      | TAGTAGGAAG- - - - - CGAGCCAAAAC- - - - GCTTAGTCTACATTGTA AAC- - - - TCAAGCCAAGGGA  | 72688 |
| Cat         | - ACA- - - - - TACAT- - - - ATATACA- TACATAATA- - - - - TAAA                       | 71890 |
| Ferret      | AAAA- - - - - AAAAT- - - - ACTTGGGCTATACTGTAAA- - - - ATCAAGCCAAGGAA               | 73947 |
| Lion        | - AAA- - - - - TACAT- - - - AAATATA- TACATAATAAATAA- - ATACTAAATATAAA              | 69590 |
| Vaquita     | TAGGAACAAG- - - - - CAAGCCAAAAT- - - - GCTCTAG- - ACATAGTATAG- - - - TCTAGCCAAGGGA | 67164 |
| Pig         | TAGTACAAG- - - - - CAGGCCAAAAT- - - - GCTC- AGCTGCATTGTAAGG- - - - TCTAGCCAAGGGA   | 66828 |

Dienstag, 3. Mai 2022 08:40

| Majority    | GAATAGAAAGGGAA- - X- - - TXATCATAAAGGCCAAAAGTGG- - - GTTCAGTGGTTG- TATGGXAGTAGGAGGATC- A- |                          |                            |                                     |                       |               |                     |                 |       |
|-------------|-------------------------------------------------------------------------------------------|--------------------------|----------------------------|-------------------------------------|-----------------------|---------------|---------------------|-----------------|-------|
|             | 95530                                                                                     | 95540                    | 95550                      | 95560                               | 95570                 | 95580         | 95590               | 95600           |       |
| Human       | GAATAGAAAGGGGG-                                                                           | -----                    | TCACCATAAAGGTCAA           | AAGTGG-                             | ---                   | GTTTAGTGGTTG- | TGTGGGAATAGGCAGATC- | ---             | 75798 |
| PolarBear   | AAACAG-                                                                                   | ---                      | GGAACTAG-                  | TCAACAGAGAGGCCAAAAGTGG-             | ---                   | GTTCAGTGATTG- | TGTGG-              | AGTAGGAGAATTGAG | 35610 |
| Cow         | GAATAGAAAGGGAAAGTGGATTTGT                                                                 | CATATAGTCTAAAAATGG-      | ---                        | CTTAAGTGGTTGGTATAGAAGTAGAA-         | ---                   | TCAA-         |                     | 73813           |       |
| Dog         | AAACAG-                                                                                   | -----                    | AA-                        | TTAGCATAAAGCCAAAAGTGG-              | ---                   | GTTCAGTAATTG- | CATGG-              | AATAGGAGAATTAAG | 66963 |
| BelugaWhale | GAACAGAAAGGGAAAG-                                                                         | G-                       | TTATCATATAGGCTAAAAATGGGTTG | GTTTCAGTGGCTGGTATGGGAGTAGGAGGATCTA- |                       |               |                     | 65913           |       |
| Donkey      | GAATAGAAAGGGAGG-                                                                          | -----                    | GCCATAAAGGCCAAAAGTGG-      | ---                                 | GTTCAGTGGTTG-         | --            | TGGGAGTAGGAAGATCAA- | 72753           |       |
| Cat         | AAACAA-                                                                                   | -----                    | AAAAAT--                   | AAATTAG-                            | ---                   | GTTTTTTAATTC- | TTCTG-              | AGCAAGA-        | 71935 |
| Ferret      | AAATAGAAAGGGAACTAG-                                                                       | TCAACATAGAGGCCAAAAGTGG-  | ---                        | GTTCAGTAATTG-                       | TATGT-                | AGTAGGAGAATT- | ---                 | 74016           |       |
| Lion        | AAATAA-                                                                                   | -----                    | AAAAAT--                   | AAATTAG-                            | ---                   | GTTTTTTAATTC- | TTCTG-              | GGCAAGA-        | 69635 |
| Vaquita     | GAGCAGAAAGGGAAA-                                                                          | G-                       | TTATCATATAGGCTAAAAATGGGTTG | GTTTCAGTGGCTGGTATGTGAGTAGGAGGATCTA- |                       |               |                     | 67239           |       |
| Pig         | GAATAGAAAGGTAATTG-                                                                        | CTCGTCATATAGGCTAAAGGTGG- | ---                        | GTTCAGTGGTTG-                       | TATGGGAGTAGGAGGATCGA- |               |                     | 66900           |       |

| Majority    | AAAGATGGAAGAATGAAGTCAGGAAA- GGGGATTTXAATGTTAGAAATGAATGG- - - - ACAA- - - AGAAAAAXAAAAA |                               |                     |                                     |           |                  |                          |       |       |
|-------------|----------------------------------------------------------------------------------------|-------------------------------|---------------------|-------------------------------------|-----------|------------------|--------------------------|-------|-------|
|             | 95610                                                                                  | 95620                         | 95630               | 95640                               | 95650     | 95660            | 95670                    | 95680 |       |
| Human       | - AAGA-                                                                                | - AAAGAATGAAGTTAGGAAA-        | GGAGATATAAGTGTTG-   | AATGACCATTACAAAAAGAGACAGAGGAAAGAAAA |           |                  |                          |       | 75872 |
| PolarBear   | AAAGATGAAAGAATGAAGTCAGGAAAAGGGGATTTTAAATACTGGAAATGAATGGCA-                             | TAACAGATAAAGAGAAAGAAAAA       |                     |                                     |           |                  |                          |       | 35689 |
| Cow         | GAAAATGGAAGAATGGAGTCAGGAAA-                                                            | GAGGATTTAAATGTTAGCAATGAATGG-  | -----               | TGAA-                               | --        | AGAAG-           | ---                      | AAAG  | 73879 |
| Dog         | AAAGATGGGAAAAT-                                                                        | --                            | GTTGGGAAA-          | G-                                  | -----     | CAGAAATGAATGGCA- | AAACACAAAAAGAGAAAGAAAAAC |       | 67025 |
| BelugaWhale | TAAGATGGAAGAACGAAGTCAGGAAA-                                                            | GGAGATGT-                     | AATGTTAGAAATGAATGG- | -----                               | CAAA-     | --               | GAAAGAAAAAAA             |       | 65982 |
| Donkey      | GAAGATGGAAGGATGATGTCAGGAAA-                                                            | GGGGATTTGAAATGTTGGAAATGAATGG- | -----               | CAAAAAAAGAAAAGAAAAA                 |           |                  |                          |       | 72826 |
| Cat         | AAGGATGTCTGTGTGACCTTAAGATA-                                                            | -----                         | AATAAGTAGTA-        | TCACTTC-                            | --        | ATCCCACTGGACT    |                          |       | 71992 |
| Ferret      | - AAGATGGAAGAATAAAGTCAGGAAAAGGGGATTTTAAATACTAGAAATGAATGG-                              | --                            | TGACAAA-            | AAAGAGAAAGAAAAA                     |           |                  |                          |       | 74091 |
| Lion        | AAGGATGTCTGTGTGACCTTAAGATA-                                                            | -----                         | AATAAGTAATA-        | TCACTTC-                            | --        | ATCTCACTGGACT    |                          |       | 69692 |
| Vaquita     | TAAGATGGAAGAACGAAGTCAGGAAA-                                                            | GGGGATGT-                     | AATGTTAGAAATGAATGG- | -----                               | CAAA-     | --               | GAAAGAAAAAAA             |       | 67308 |
| Pig         | GAAGATGGAAGAAAAAAGTCAGGAAAAGGGGATGTTAATATGAGAAATGAATAG-                                | -----                         | GAAA-               | --                                  | GAAAAGGA- | AAAA             |                          |       | 66970 |

Dienstag, 3. Mai 2022 08:40

| Majority    | TCAAAGATGTAGCAAAAGAAGTTGCTAAAATGGA- TTGATGT- AGTAAAATTGTCAAAGTAGAAGTTTTXAAGAAATTX                     |
|-------------|-------------------------------------------------------------------------------------------------------|
|             | 95690 95700 95710 95720 95730 95740 95750 95760                                                       |
| Human       | ATGAAGATGTATCAAAAGAAGTTGCTAATATGGA- - - - TGG- - - - - - - - - CAAAGTAGATGTTTTTAAGAAATCA 75934        |
| PolarBear   | GCAAAGATGTAGCAAGAGAAGTTGCTAAAATGGA- TTGATGT- AGTAAAAGTTGTCAAAGTAGAAGTTTTAAAGAAATTG 35767              |
| Cow         | TCAAAGATGTAGCAGAAGAAGTTGATAAAAATAGA- TTGATAT- AGTAAAA- - - - TCAAGGTAGAAGTT- - - AAGGAATCA 73950      |
| Dog         | TCAAAGATGTAGCAAGAGAAGTTGCTAAAATGGA- TTGATGT- - - - AAAAATTGTCAAAGTAGAAGTTTTAAAGAAATTT 67100           |
| BelugaWhale | TCAAAGATGTAGCAAAAGAAGTTGGTAAAACAGA- CTGATAC- AGTAAAATCATCAAAGTAGAAGTTTTTAAGAAATAG 66060               |
| Donkey      | TCAAAGAGGTAACAAGAAAAGTTGCTAAAAGGA- TTGATGT- AGTAAAATTGTCACA- - AGTAGTTTTTAAGAAACTT 72902              |
| Cat         | TTGAACCTGTATCAT- ATACATGGCTG- - - TGTG- TTCATCC- - - - - - - - - GTTTCAGTGGTGAAGGGTTAGTAATGTGT 72059  |
| Ferret      | TCAAAGATGTGGCAAGAGAAGTTGCTAAA- TGG- TTAATGT- AGTAAAATTGTCAGAGTAGAAGTTTTAAAGAAATTA 74168               |
| Lion        | TTGAACCTGTATCAT- ATACATGGCTG- - - TGTG- TTCATCC- - - - - - - - - ATTTTCAGTGGTGAAGGGTTAGTAATGTGT 69759 |
| Vaquita     | TCAAAGATGTAGCAAAAGAAGTTGGTAAAACAGA- CTGATAC- AGTAAAATCATCAAAGTAGAAGTTTTTAAGAAATAG 67386               |
| Pig         | TCAAAGGTGTAG- - AAAAAGT- - - TAAAATAGGCTTGATATTAGTAAAATCATCAAAGTAGACATTTTTTAAGAAATTG 67045            |

| Majority    | TGAGACCAGAGTGTGAGATCTATXAXXGATGATGA- - - GAGCTGAGA- AGAAGGAGGAAATAAAGCCAGGTGCTGAA- -             |
|-------------|--------------------------------------------------------------------------------------------------|
|             | 95770 95780 95790 95800 95810 95820 95830 95840                                                  |
| Human       | TGAGACCAGAGTCTTGGAAAAGTCATAGGATGATGCAGGGAATGGAGA- - - - AGAGGGAATAAAGCCAGGTGCTGAA- - 76008       |
| PolarBear   | TGAACCAAGGGT- TGT- - - TTGACATAAGATAACGA- - - G- - CTGGTAGAGAAGGAGGAAATAAAGCCAGGTGCTAAA- - 35836 |
| Cow         | TGAGACCAGCATGTCGGACAGATTGCAGGATGACAA- - - GAGCTGAGC- - - AAGGAAAAGGAAA- - TAAGGTGTGAAA- - 74020  |
| Dog         | TGAGCCAAGAGTGTGTTGACATATCATAGGTTGATGACAGGGTCTGGGAGAGAAGGAAGAAATAAAGCCAGGTGCTGTATG 67180          |
| BelugaWhale | TGAGACCAGTGTGTCAGATC- ACAGGATGAGGACAA- - - GAGCTGAGATAGAAGGAAGAAATAAAGCCAGGTGCCAAA- - 66134      |
| Donkey      | TGAGGCTAGAGTGTGGACAGATCACAGGGTGTGAC- - GGGCTGAGA- - - GAGATGGAAATAAAGGCACATGCCTAA- - 72975       |
| Cat         | CAGAACTAACATGAGAAATCTATAA- - AATTGCTGA- - - G- - TCAACTCAAAATATCTGGGTGAT- CCACCTGATGAA- - 72129  |
| Ferret      | TGGACTAAGGGTGTGTGACCTATCACAAAGATGATGATGGG- - CTGGGAGAGAAGGAGGAAATAAAGCCAGGTGCTGAA- - 74244       |
| Lion        | CAGAACTAACATGAGAAATCTATAA- - AATTGCTGA- - - G- - TCAACTCAAAATATCTGGGTGAC- CCACCTGATGAA- - 69829  |
| Vaquita     | TGAGACCAGTGTGTCAGATC- ACAGGATGAGGACAA- - - GAGCTGAGATAGAAGGAAGAAATAAAGCCAGGTGCCAAA- - 67460      |
| Pig         | TGAGACCAGAGTGTGAGGTC- ACAGGATGATGACAG- - - GAGCTGAGA- - - GAGGAGGAGATAAATCCAGGTGCTGAA- - 67116   |

Dienstag, 3. Mai 2022 08:40

|             |    |              |           |            |             |          |          |        |           |           |           |       |       |      |          |
|-------------|----|--------------|-----------|------------|-------------|----------|----------|--------|-----------|-----------|-----------|-------|-------|------|----------|
| Majority    | -- | GTCTTTAT     | GTAAT     | GAGAGAAAAT | GTCCCAGT    | GACCT    | GATGGCT  | GTTTT  | GATGA-    | - - - - - | GAAAT     | GATT  | GGAT  | GG   |          |
|             |    | 95850        | 95860     | 95870      | 95880       | 95890    | 95900    | 95910  | 95920     |           |           |       |       |      |          |
| Human       | -- | GTCTTTAT     | GTAAT     | GGGAGGAGAT | GTTCCAGT    | AATCCAAT | GGCTAT   | TTTT   | GATGGG    | AAAGAGT   | GTGGT     | AT    | GATT  | GGGT | GG 76086 |
| PolarBear   | -- | GTCTTTCT     | GTGAT     | GAGAGAAAAT | GTTCTAGT    | GACCT    | GATGGT   | GGTTTT | GATGA-    | - - - - - | GAAAT     | GATT  | GGAT  | GC   | 35904    |
| Cow         | -- | GTCTTTAT     | GTTGT     | GAGAGACAAT | GTCCCAGT    | GAC-     | - - -    | TGACT  | GTTTT     | GATGA-    | - - - - - | GAGAT | GTTT  | ACAT | GA 74084 |
| Dog         | T  | AGTCTTTCT    | GTAAT     | GAGAGAAA-  | TGTCCCAGT   | AATCCGAT | GGTT     | CTTTT  | GATGAT    | GA-       | - - - - - | GAAAT | GATT  | GGAT | GA 67252 |
| BelugaWhale | -- | GTCTTAAT     | GTAAT     | GAGAGAAAAT | GTGCGAGT    | GACCT    | AATGGCT  | GTTTT  | GATGA-    | - - - - - | GAAAT     | GATT  | GCAT  | GG   | 66202    |
| Donkey      | -- | GTCTTTAT     | GTAAT     | GAGAGAGAAT | GTCCCTGGT   | GACCT    | GATGGCT  | ATTTT  | GATGA-    | - - - - - | GAATT     | GATT  | ACAT  | GA   | 73043    |
| Cat         | -  | GATCACTTTAT- | ATGAAAAGG | ATTTCCT    | GTTACACCTTT | GTGT     | GGCAGTTT | TATGA- | - - - - - | - -       | AGCT      | CTTT  | GACAT |      | 72195    |
| Ferret      | -- | GTCTTTCT     | GTGAT     | GAGAGAAAAT | GTTCTAGT    | GGCCT    | GATGGT   | TGTTTT | GATGA-    | - - - - - | GAAAT     | GATT  | GGAT  | GC   | 74312    |
| Lion        | -  | GATCACTTCAT- | ATGAAAAGG | ATTCTT     | GTTACACCTTT | GTGT     | GGCAGTTT | TATGA- | - - - - - | - -       | AGCT      | CTTT  | GACAT |      | 69895    |
| Vaquita     | -- | GTCTTAAT     | GTAAT     | GAGAGAAAAT | GTCCCAGT    | GACCT    | AATGGCT  | GTTTT  | GATAA-    | - - - - - | GAAAT     | GAT   | GGCAT | GG   | 67528    |
| Pig         | -- | GTCTTTAT     | GTAAT     | GA-        | AGAAAAT     | GTCCCAGT | GACCCGAT | GGCT   | GTTTT     | GATGA-    | - - - - - | GAAAT | GATT  | GTAT | GG 67183 |

|             |   |             |            |           |            |         |              |              |          |              |          |        |         |           |       |       |       |
|-------------|---|-------------|------------|-----------|------------|---------|--------------|--------------|----------|--------------|----------|--------|---------|-----------|-------|-------|-------|
| Majority    | T | A-          | -          | XAC-      | TCX-       | AAGCXAT | CCTAATT      | GATGAT       | GGT      | AGAACAGCAGT- | CTGAAAGT | AACATT | GGGT    | GGT       | GGGXT | AGXGT | GA    |
|             |   | 95930       | 95940      | 95950     | 95960      | 95970   | 95980        | 95990        | 96000    |              |          |        |         |           |       |       |       |
| Human       | C | ATTGACAT    | CGGAAGCCAT | CCTCATT   | GATGGT     | GGT     | GGAACAGCAGT- | TTGAAAGT     | AACATT   | GTGCGGT      | GAGGT    | AGAGT  | GG      |           |       |       | 76165 |
| PolarBear   | A | G-          | - - - - -  | AAT-      | GTCTTAATT  | GATGGT  | GGT          | AGAAGT       | GCAAGT-  | ATGAAAGT     | AACATT   | GGGT   | GGT     | AGGGT     | AGAAT | GA    | 35971 |
| Cow         | T | ATTAACCTCA- | AAGGCATT   | CTAATT    | GGT        | GATAGA  | AGAATAGCAGT- | TGGAAAGT     | AACATT   | GGAT         | GGT      | GGGAT  | AGTAGGA |           |       |       | 74162 |
| Dog         | A | G-          | - - - - -  | AATCTGT   | CTTAATT    | GATGGT  | GGT          | GGGACT       | GCAAGT-  | CTGAAAGT     | AACATT   | GGGT   | GGT     | AGGGT     | AGAAT | GA    | 67321 |
| BelugaWhale | T | A-          | CGACCTCA-  | AAGACATT  | CTAATT     | GGT     | GATGGC       | GGAACAGCAGT- | CTGAACGT | AACATT       | GGGT     | GGT    | GAGAT   | AGTGGGA   |       |       | 66279 |
| Donkey      | C | ATTGACAT    | CAGAAGCT   | CTTCTAATT | GATGGT     | GGT     | GGAACAGCAAT- | CTGAAAGT     | AACAT    | GGGGT        | AGGG-    | - -    | TAGGGT  | GA        |       |       | 73119 |
| Cat         | T | A-          | - - - - -  | TTT-      | TATCCTTAT- | AACAAT  | CCTAGAAGT    | AGAAC-       | - - - -  | AGGCAT       | TTTTT    | TATGT  | CTCA-   | - - - - - | TCA   |       | 72250 |
| Ferret      | A | G-          | - - - - -  | AATCTGT   | CTTAATT    | GATGGT  | GGT          | AGAAGT       | GCAAGT   | TATGAAAG     | CAACATT  | GGGT   | GTT     | AGGGT     | AGAAT | GA    | 74382 |
| Lion        | T | A-          | - - - - -  | TTT-      | TATCCTTAT- | AACAAT  | CCTAGAAGT    | AGAAT-       | - - - -  | AGGCAT       | TTTTT    | TATGT  | CTCA-   | - - - - - | TCG   |       | 69950 |
| Vaquita     | T | A-          | CGACCTCA-  | AAGACATT  | CTAATT     | GGT     | GATGGC       | GGAACAGCAGT- | CTGAAAGT | AACATT       | GGGT     | GGT    | GAGAT   | AGTGGGA   |       |       | 67605 |
| Pig         | T | ATCGACCTCA- | AAGGCCTT   | CTGATT    | GGT        | GACGGT  | AGAACAGCAGT- | CGGAAGGT     | AACATT   | GGGT         | GGT      | GGGAT  | AGTGGGA |           |       |       | 67261 |







Dienstag, 3. Mai 2022 08:40

| Majority    | 96330                                                                            | 96340 | 96350 | 96360 | 96370 | 96380 | 96390 | 96400 |       |
|-------------|----------------------------------------------------------------------------------|-------|-------|-------|-------|-------|-------|-------|-------|
| Human       | ATGTGCCTTCCAGACCCCTTGGTGGTATACATGGGAGATTGGTTCTAGGACACACACAGTCCCATCCCCACCCTCTGAC  |       |       |       |       |       |       |       | 76549 |
| PolarBear   | TTGTAAAAAACTGCCCTTCCCCACCCAAGGCCCTGTACTTTATGAATTAGAAAGGGCCTCGAAGTCCCACCCCTGTCT   |       |       |       |       |       |       |       | 36355 |
| Cow         | -----                                                                            |       |       |       |       |       |       |       | 74415 |
| Dog         | -----                                                                            |       |       |       |       |       |       |       | 67586 |
| BelugaWhale | -----                                                                            |       |       |       |       |       |       |       | 66543 |
| Donkey      | TTAGAAACTGCCCTCCCCACCCAGGACCCTATAATTTATGAATTAGAAGGGGCCTCTAAGACTCACCACCAGACCTCTGT |       |       |       |       |       |       |       | 73503 |
| Cat         | -----                                                                            |       |       |       |       |       |       |       | 72475 |
| Ferret      | -----                                                                            |       |       |       |       |       |       |       | 74644 |
| Lion        | -----                                                                            |       |       |       |       |       |       |       | 70172 |
| Vaquita     | -----                                                                            |       |       |       |       |       |       |       | 67864 |
| Pig         | -----                                                                            |       |       |       |       |       |       |       | 67532 |

| Majority    | 96410                                                                              | 96420 | 96430 | 96440 | 96450 | 96460 | 96470 | 96480 |       |
|-------------|------------------------------------------------------------------------------------|-------|-------|-------|-------|-------|-------|-------|-------|
| Human       | CCCATACACCCCTGGATACTCAAATCCAATGATGCTCAAGTTCCTTGCATAAAATGGTATAGTGTTTGCATGTGACCTA    |       |       |       |       |       |       |       | 76629 |
| PolarBear   | CTGTTCAAGTAATACATGAGACAACTACCAGATGTCTTGAACAGGGTAAAGAAGTAAGACCAAAGAAAT- - -GTAATCAA |       |       |       |       |       |       |       | 36432 |
| Cow         | -----                                                                              |       |       |       |       |       |       |       | 74415 |
| Dog         | -----                                                                              |       |       |       |       |       |       |       | 67586 |
| BelugaWhale | -----                                                                              |       |       |       |       |       |       |       | 66543 |
| Donkey      | TCAGTAGCGTGTGAGACTAATAACTGTCAGATGTCTTGAACAGAGAAAAGAAGTAAGACCAAAGGAAATCATGTGATTGA   |       |       |       |       |       |       |       | 73583 |
| Cat         | -----                                                                              |       |       |       |       |       |       |       | 72475 |
| Ferret      | -----                                                                              |       |       |       |       |       |       |       | 74644 |
| Lion        | -----                                                                              |       |       |       |       |       |       |       | 70172 |
| Vaquita     | -----                                                                              |       |       |       |       |       |       |       | 67864 |
| Pig         | -----                                                                              |       |       |       |       |       |       |       | 67532 |

Dienstag, 3. Mai 2022 08:40

| Majority    | 96490                                                                               | 96500 | 96510 | 96520 | 96530 | 96540 | 96550 | 96560 |       |
|-------------|-------------------------------------------------------------------------------------|-------|-------|-------|-------|-------|-------|-------|-------|
| Human       | TACACAACCTCTTATGTGTACTTTAAATCATCTCTAGATTACTTATATTACCCAGTACAATATAAATGTTATGTAAATGG    |       |       |       |       |       |       |       | 76709 |
| PolarBear   | CTTTGGATAGAAGTTTTAGAAATGGGAAATGAAGGGATAAAAATAAATTCTGTATCTTTAAAAATCATGGATAAAAATTGTCA |       |       |       |       |       |       |       | 36512 |
| Cow         | -----                                                                               |       |       |       |       |       |       |       | 74415 |
| Dog         | -----                                                                               |       |       |       |       |       |       |       | 67586 |
| BelugaWhale | -----                                                                               |       |       |       |       |       |       |       | 66543 |
| Donkey      | CTTTGGATTGAAGTTTTAGAAATGGGAAATGAAGGGATAAAAACAAATTCTGCATCCTTAAAAATGATGGATAAAAAGTGTCA |       |       |       |       |       |       |       | 73663 |
| Cat         | -----                                                                               |       |       |       |       |       |       |       | 72475 |
| Ferret      | -----                                                                               |       |       |       |       |       |       |       | 74644 |
| Lion        | -----                                                                               |       |       |       |       |       |       |       | 70172 |
| Vaquita     | -----                                                                               |       |       |       |       |       |       |       | 67864 |
| Pig         | -----                                                                               |       |       |       |       |       |       |       | 67532 |

| Majority    | 96570                                                                               | 96580                                        | 96590 | 96600 | 96610 | 96620   | 96630 | 96640              |       |
|-------------|-------------------------------------------------------------------------------------|----------------------------------------------|-------|-------|-------|---------|-------|--------------------|-------|
| Human       | TTGTTATAGTGTATTGTTTAGGGAATAATGACAAGAACAACCTTTCTATACATTTGCAGTACACCATTGTTTTAC- - CCCC |                                              |       |       |       |         |       |                    | 76787 |
| PolarBear   | TAAACAAGAGGAGCCTAAGGAGACATGACTACATGTAATATGAGATCCTGGAACAGAAAA- GGGTATTAGATGCACACCA   |                                              |       |       |       |         |       |                    | 36591 |
| Cow         | -----                                                                               |                                              |       |       |       | CAAAG-  |       | TA-                | 74423 |
| Dog         | -----                                                                               |                                              |       |       |       | CAAAA-  | G-    | TG-                | 67594 |
| BelugaWhale | -----                                                                               |                                              |       |       |       | CAAAG-  |       | TA-                | 66551 |
| Donkey      | TAGTCAAGAGGACCCTAAGGAGACATGACTAAATGTAATATGGGGTCTGGAACAAAAAAGGACATCAGATGCAAACCTA     |                                              |       |       |       |         |       |                    | 73743 |
| Cat         | -----                                                                               |                                              |       |       |       |         |       | TG-                | 72477 |
| Ferret      | -----                                                                               | AAGGAGACATGACTAAATGTAATATGGGATCCTGGAACAAAAA- |       |       |       |         |       | GGTATTAGATGCACACCA | 74707 |
| Lion        | -----                                                                               |                                              |       |       |       |         |       | TG-                | 70174 |
| Vaquita     | -----                                                                               |                                              |       |       |       | CAAAG-  |       | TA-                | 67872 |
| Pig         | -----                                                                               |                                              |       |       |       | CAGCAG- |       | TA-                | 67540 |

Dienstag, 3. Mai 2022 08:40

| Majority    | --- AAATTTT-----TXTTTTCTAGTCAAGAAXTAAAATATTA--- AXACTGXCTTCTTXACTCAAGXXCCTATACT |               |                                                                 |                |                                 |                            |                        |          |                         |       |
|-------------|---------------------------------------------------------------------------------|---------------|-----------------------------------------------------------------|----------------|---------------------------------|----------------------------|------------------------|----------|-------------------------|-------|
|             | 96650                                                                           | 96660         | 96670                                                           | 96680          | 96690                           | 96700                      | 96710                  | 96720    |                         |       |
| Human       | A-                                                                              | AATATTTT      | TGATCCAAGG                                                      | TGGTTGAAT      | CGGAACCC                        | CAGAGATAC                  | ---                    | AGAGGGCT | GACTATACTTTAAGAATTAGAAT | 76863 |
| PolarBear   | AAAAAGT                                                                         | CTA-----      | GACTATAGTTAATAA-                                                | TAATATATCA-    | ---                             | GTATTGGCT                  | GATTAATTGCAGCAACTATACT | ---      | ---                     | 36657 |
| Cow         | ---                                                                             | AAATTTT-----  | TATTTTCAAATCAGGAAATA-                                           | ---            | TATTGTAAAAACT                   | GCCCTCCCCACCCAGGACCCTATACT | ---                    | ---      | ---                     | 74489 |
| Dog         | ---                                                                             | AACTTA-----   | GTTTCAAGTCAGGAAATAAAAATGTAA-                                    | ---            | AAACCGTTCTCCCCACCCAAGCCCCTGTACT | ---                        | ---                    | ---      | ---                     | 67658 |
| BelugaWhale | ---                                                                             | AAATTTT-----  | TATTTTCAAGTCAGGAAATAAAAATATTGTAAAAACTGCCCCCTCACCCAGGACCCTATACT  | ---            | ---                             | ---                        | ---                    | ---      | ---                     | 66620 |
| Donkey      | AAGAAATCTGA-                                                                    | ---           | AGTATGGACTTTAGTTAATAA-                                          | TAATGTGTCA-    | ---                             | GTATTGGCT                  | GATGAATTGCAACAAGCTTACC | ---      | ---                     | 73816 |
| Cat         | --                                                                              | TAAGTAAA----- | T---AGTGCATCA-                                                  | TGAAATATT----- | TTGTAGGTTTTTTATTTATTTTATTTTATT  | ---                        | ---                    | ---      | ---                     | 72534 |
| Ferret      | AATAAATCTGATGAAGTATGGGCTTTAGTTAATAA-                                            | ---           | TAATATATCA-                                                     | ---            | GTTTTGGCT                       | GATTAATTGGAGCAACTATACT     | ---                    | ---      | ---                     | 74783 |
| Lion        | --                                                                              | TAAATAAA----- | T---AGTGCATCA-                                                  | TGAAATATT----- | TTGTAGGTTTTTTATTT-----          | TTTTTATT                   | ---                    | ---      | ---                     | 70225 |
| Vaquita     | ---                                                                             | AAATTCT-----  | TATTTTCAAATCAGGAAATAAAAATATTGTAAAAACTGCCCCCTCACCCAGGACCCTATACT  | ---            | ---                             | ---                        | ---                    | ---      | ---                     | 67941 |
| Pig         | ---                                                                             | AAGTTTT-----  | TGTTTTCTAATCAAGAAATAAAAATGTTACAAAAACTGCCTTCCCCACCCAGGACCTTATATT | ---            | ---                             | ---                        | ---                    | ---      | ---                     | 67609 |

| Majority    | AT-----TATGAAT-----TAGA----- AXGAACCTCATAG- TCCCXCCACT                          |              |                                               |                                                        |                         |            |       |       |       |
|-------------|---------------------------------------------------------------------------------|--------------|-----------------------------------------------|--------------------------------------------------------|-------------------------|------------|-------|-------|-------|
|             | 96730                                                                           | 96740        | 96750                                         | 96760                                                  | 96770                   | 96780      | 96790 | 96800 |       |
| Human       | TAGCTGGGTGTGGTGGTGGTGCCTGTAGTCCCAGCTACTCGGGAGGCTGACGCAGGAGAAAGGCGTGAACCCGGGAGGT | ---          | ---                                           | ---                                                    | ---                     | ---        | ---   | ---   | 76943 |
| PolarBear   | ATACTAATGTAAGATGTTAATA-                                                         | ---          | ATAGAGGGAAAAGGAAGTACCCAGGTTATATAGGAACTGTATAG- | ---                                                    | AATCTTCAAT              | ---        | ---   | ---   | 36733 |
| Cow         | AC-----                                                                         | ATGAAT-----  | TAGG-----                                     | ---                                                    | ATAAACCTCAAAGTCCCACCACC | ---        | ---   | ---   | 74525 |
| Dog         | TT-----                                                                         | TATGAAT----- | TAGA-----                                     | A---A-----                                             | GAGCCTCAAAG-            | TCCCACCACC | ---   | ---   | 67694 |
| BelugaWhale | AC-----                                                                         | ATGAAT-----  | TATA-----                                     | ---                                                    | ACAGGCCTCAAAG-          | TCCCACCACC | ---   | ---   | 66655 |
| Donkey      | ATACTAA-----                                                                    | GGTGTTAATA-  | ---                                           | ATGGGGGGGAAATGGAATGCCTGGGTATGTAGGAACTCTGTAGAACCTTCTATT | ---                     | ---        | ---   | ---   | 73888 |
| Cat         | TT-----                                                                         | TATTTT-----  | TTTA-----                                     | ---                                                    | A-CGTTTTAT-             | TTTTTTTATT | ---   | ---   | 72566 |
| Ferret      | ATGCTAATGTAAGATGTTAATA-                                                         | ---          | ATAGAGGGAATAGGAAGTACCCAGGTTATATAGGAACTCTGTAG- | ---                                                    | AATCTTCAGT              | ---        | ---   | ---   | 74859 |
| Lion        | TT-----                                                                         | TATTTT-----  | TTTA-----                                     | ---                                                    | A-CGTTTTAT-             | TTTTTTTATT | ---   | ---   | 70257 |
| Vaquita     | AC-----                                                                         | ATGAAT-----  | TATA-----                                     | ---                                                    | ACAGGCCTCAAAG-          | TCCCACCACC | ---   | ---   | 67976 |
| Pig         | GC-----                                                                         | ATGAAT-----  | TAGA-----                                     | ---                                                    | ACAGGCCTCAAAA-          | TCCCACCACC | ---   | ---   | 67644 |

Dienstag, 3. Mai 2022 08:40

| Majority    | TATTCTTCTXTTCAGXXATAX-----T-----                                                  |       |
|-------------|-----------------------------------------------------------------------------------|-------|
|             | 96810 96820 96830 96840 96850 96860 96870 96880                                   |       |
| Human       | GGAGCTTGCAGTGAGCCGAGATCGTGCCACTGCACTCCAGCCTGGGCGACAGAGCGAGACTCTGTCTCTAAAAAAAAAAAA | 77023 |
| PolarBear   | TTTTCTGTAAATCTAAAATATAAACCTTATTTTTTTTAAAAGATTTTATTTATTTATTTGACAGAGACAGCCAGCGAGAG  | 36813 |
| Cow         | AAATCCTCTGTTGAGTCATATG-----T-----                                                 | 74548 |
| Dog         | TATCCT-----CTAA-----T-----                                                        | 67705 |
| BelugaWhale | AA-TCCTCTGTTGAGTCGTATG-----T-----                                                 | 66677 |
| Donkey      | TT-TCTGTAAATCTAAAAT-----                                                          | 73907 |
| Cat         | TATTT-----                                                                        | 72572 |
| Ferret      | TTTTCTGTAAATCTAAAATATAAAC-----TTTATTT-----                                        | 74891 |
| Lion        | TATTT-----                                                                        | 70263 |
| Vaquita     | AA-TCCTCTGTTGAGTCGTATG-----T-----                                                 | 67998 |
| Pig         | AG-TCCTCTGTTGAGTAATA-----                                                         | 67663 |

| Majority    | --X-----AGAATAACAACCA-----TX----AGATGTCTTGAGTAAGX-----                           |       |
|-------------|----------------------------------------------------------------------------------|-------|
|             | 96890 96900 96910 96920 96930 96940 96950 96960                                  |       |
| Human       | AAAAAATTAGAAGGGGCTGTCAGGCGTGGTGTCTCATGCCTATAATCCAGTCATGCCTGTAATCCCAGCACTTTGGG    | 77102 |
| PolarBear   | AGGGAACACAAGCAGGTGGAGTGGGAGAGGAAGAAGCAGGCTCCTAGCGGAGGAGCCTGATGTAGGGCTCGATCCCAGAA | 36893 |
| Cow         | --G-----AGAATAACAATCA-----AT----AGATGTCTTGAACAGGGA--A-----                       | 74583 |
| Dog         | -----CAGAAGTA-----T----GTGAG-----                                                | 67719 |
| BelugaWhale | --G-----AGAATAACAACCA-----CC----AGATGTCTTGAACAGGGA--A-----                       | 66712 |
| Donkey      | --GTTCTAAAAAAGTAGTTTATTAAAAAAGCATAGATAAA--ATTTGTAAATGATTTAAAGTAAG-----           | 73968 |
| Cat         | -----TGAG-----                                                                   | 72576 |
| Ferret      | -----AAAGTCATAGATAAACTTGTA----AATGGTTTAAAGTAAG-----                              | 74928 |
| Lion        | -----TGAG-----                                                                   | 70267 |
| Vaquita     | --G-----AGAATAACAACCA-----CC----AGATGTCTTGAACAGGGA--A-----                       | 68033 |
| Pig         | -----AGAATAACAACCA-----CC----AGATGGCTTGAACAGGGA--A-----                          | 67697 |



Dienstag, 3. Mai 2022 08:40

| Majority    | AATTGACCTT - - GGATAGAGGTTTAAAGAAXX- GGAAATXAAAXCAT- - - A- - - - - XTCAXAAACAAG- - - - -    |       |       |       |       |       |       |       |       |
|-------------|----------------------------------------------------------------------------------------------|-------|-------|-------|-------|-------|-------|-------|-------|
|             | 97130                                                                                        | 97140 | 97150 | 97160 | 97170 | 97180 | 97190 | 97200 |       |
| Human       | CTTGAACCCAGGAGGTGGAGGTTGCAGTGAGCTGAGATCATGCCATTGCACTCCAGCCTGTGTGACAGAGTGAAACTCCA             |       |       |       |       |       |       |       | 77337 |
| PolarBear   | ATGTGACCTTAAGGGAAGAGGGATAGGTA- G- TTATATCACTTCATGCCACTGGACTTTGTATCATATACATGGCTGTGT           |       |       |       |       |       |       |       | 37131 |
| Cow         | AATTGACATT - - GGATGGAAGTTTTAGAATA- GGAAATGAAAGGAT- - - - - A- AAACAAG- - - - -              |       |       |       |       |       |       |       | 74664 |
| Dog         | - - - TGAGC- - A- GGGTAAAGAAGTAAGAC- - - CAAAAGAAATTC AATCAACT- - - - - TTGGATACAAG- - - - - |       |       |       |       |       |       |       | 67790 |
| BelugaWhale | AATTGACTTT - - GGATAGATGTTTCAGAATA- GGAAATGAAAGGAC- - - - - A- GAACAAA- - - - -              |       |       |       |       |       |       |       | 66810 |
| Donkey      | GA- AGAGGTGGTAGATACATAATTTATATCA- CTTTCATCCTGCTGGTC- - TTTGAATCTTTATCAGATAAAGG- CTGTGT       |       |       |       |       |       |       |       | 74121 |
| Cat         | - - - TGAAC- - - - GGGGGAGGGTCAGAGA- - - GAGGGAGACACAG- - - A- - - - - ATCTGAAACAGG- - - - - |       |       |       |       |       |       |       | 72637 |
| Ferret      | - TGTGACCTTAAGGAATGAGGGATAAGTAAG- TTAATCACTTCATCCCCTGGACTTCATATCATATACATGGCTGTGT             |       |       |       |       |       |       |       | 75051 |
| Lion        | - - - TGAAT- - - - GGGGGAGGGTCAGAGA- - - GAGGGAGACACAG- - - A- - - - - ATCTGAAACAGG- - - - - |       |       |       |       |       |       |       | 70328 |
| Vaquita     | AATTGACTTT - - GGATCGATGTTTCAGAATA- GGAAATGAAAAGAT- - - - - A- GAACAAA- - - - -              |       |       |       |       |       |       |       | 68131 |
| Pig         | AATTGACTTC- - AGATAGAAATTTTAGAGTG- GGAAATGAAAGGAT- - - - - A- AAACAAA- - - - -               |       |       |       |       |       |       |       | 67775 |

| Majority    | - - - - - TTCTG- - - - X- - XAGGXXTGAAATAATA- - - TXTCAGAA- - - - CCAAX- - - - - XT     |       |       |       |       |       |       |       |       |
|-------------|-----------------------------------------------------------------------------------------|-------|-------|-------|-------|-------|-------|-------|-------|
|             | 97210                                                                                   | 97220 | 97230 | 97240 | 97250 | 97260 | 97270 | 97280 |       |
| Human       | TCTCAAAAATACAAAAAGAATTAGAAAGGGCTTTAGAGTCCCACCACTAATGCTCTTCTGTT CAGTAGTACACAAGACTA       |       |       |       |       |       |       |       | 77417 |
| PolarBear   | GTTTCATCCATTTTAGTGGAGGAAGGGTTAGTAATAATA- - - TGT CAGAA- - - CTAACATGAGAAATTCATTAAATTGCT |       |       |       |       |       |       |       | 37204 |
| Cow         | - - - - - TTATG- - - - -                                                                |       |       |       |       |       |       |       | 74669 |
| Dog         | - - - - - TTT- - - - - T- - A- GAATGTGAAATGAAG- - - TTACAAAA- - - CCAA- - - - - T- TCT  |       |       |       |       |       |       |       | 67826 |
| BelugaWhale | - - - - - TTCTG- - - - -                                                                |       |       |       |       |       |       |       | 66815 |
| Donkey      | ATCCATCAGTTTTGGTGGAGGAAGGGTTAGTAATAATAATTTATCAAAA- - - CTAACA- - - GAAATTTATAAAATTACT   |       |       |       |       |       |       |       | 74194 |
| Cat         | - - - - - CTCC- - - - - AGGCTCTGAGCTGTCA- - - GCACAGAG- - - CCCAA- - - - - T            |       |       |       |       |       |       |       | 72671 |
| Ferret      | GTTTCATCCATTTCCGTGAAGGAAGGGTTAGTAATAATAATGTGT CAGAA- - - CTAAAATGAGAAATTTATAAACTTGCT    |       |       |       |       |       |       |       | 75127 |
| Lion        | - - - - - CTCC- - - - - AGGCTCTGAGCTGTCA- - - GCACAGAG- - - CCCGA- - - - - C            |       |       |       |       |       |       |       | 70362 |
| Vaquita     | - - - - - TTCTG- - - - -                                                                |       |       |       |       |       |       |       | 68136 |
| Pig         | - - - - - TTCTAA- - - AATAAATAAATAAATTAATT- - - AATTAAAA- - - TAAAAAACAAAAAACCCCAAATTCT |       |       |       |       |       |       |       | 67836 |



Dienstag, 3. Mai 2022 08:40

| Majority    | GCATCTCTXAAAATCA- TGGAT- - - - - AAAAAGATCATAGXCAAGAGGAG- - - - - CCT- - AAXGAGACX- - - - -          |       |       |       |       |       |       |       |       |
|-------------|------------------------------------------------------------------------------------------------------|-------|-------|-------|-------|-------|-------|-------|-------|
|             | 97290                                                                                                | 97300 | 97310 | 97320 | 97330 | 97340 | 97350 | 97360 |       |
| Human       | ATAACTACGAGATGTTATGAACAGGGAAAAGAAGTAAGACCAAAGAATCATAAATTA- CTTTGGATGGAACCTTTTAGA                     |       |       |       |       |       |       |       | 77496 |
| PolarBear   | GAATCACTCAAATATCTGGGTGGCCACCTGATGAAGATCATTTACATGGAAT- - - - - CCC- - TGTGATACCTTT- - -               |       |       |       |       |       |       |       | 37274 |
| Cow         | - CATCTTTAAAAGCA- TAGAC- - - - - AAAACTGCCATAGTCAAGAGGAG- - - - - CCTT- AAGGAGAC- - - - -            |       |       |       |       |       |       |       | 74724 |
| Dog         | GCATCTTTAAAATCA- TGGAT- - - - - AAAAAGTTCATAGTCAGGAGGAG- - - - - CCT- - AAAGAGAC- - - - -            |       |       |       |       |       |       |       | 67881 |
| BelugaWhale | - CATCTCTAAAAGCA- TGGAT- - - - - AAAACTGTCATAGTCAAGAGGAG- - - - - CCT- - AAGGAGGT- - - - -           |       |       |       |       |       |       |       | 66869 |
| Donkey      | GAATCACTCAAATGTCTGGGTGGCCAGCTGATGAAGATCATTTACGTGGAAAGGATCCCTGTGTTACTACCTTCCTT                        |       |       |       |       |       |       |       | 74274 |
| Cat         | GTGGGGTCTCGAACTCA- CAGACCC- - - - - GCGAGATCATGACC- - - - - TGAG- - - - - CC- - - GAAGTCAGC- - - - - |       |       |       |       |       |       |       | 72723 |
| Ferret      | GAATTACTIONCAAATGGCTGGATGGCCACCTAATGAAGATCATTTACATGGAAAATTAACCC- - TGTGATACCTTT- - -                 |       |       |       |       |       |       |       | 75202 |
| Lion        | GCGGGGTCAAACCTCA- CGGACC- - - - - GCGAGATCATGAC- - - - - TGAG- - - - - CC- - - GAAGTCGGC- - - - -    |       |       |       |       |       |       |       | 70412 |
| Vaquita     | - CATCTCTAAAAGCA- TGGAT- - - - - AAAACTGTCGTAGTCAAGAGGAG- - - - - TCT- - AAGGAGGT- - - - -           |       |       |       |       |       |       |       | 68190 |
| Pig         | CCATCTTTAAAAGCA- TGGGT- - - - - AAAACTATCATGGTCAAGAGTAG- - - - - CCT- - AAAGAGGC- - - - -            |       |       |       |       |       |       |       | 67891 |

| Majority    | - - - - - ATGACTAAAT- - - - - XTA- - ATAATXG- - - - - X- - CATCCTGGAACAAA- - AAXAGGX- A   |       |       |       |       |       |       |       |       |
|-------------|-------------------------------------------------------------------------------------------|-------|-------|-------|-------|-------|-------|-------|-------|
|             | 97370                                                                                     | 97380 | 97390 | 97400 | 97410 | 97420 | 97430 | 97440 |       |
| Human       | ATGGCAGATGGAGGGATAAATTTGACATTGTTCAAATCATAGAGTAAACTCTCAAAGTAAGGGGAACCTAAGGAGACA            |       |       |       |       |       |       |       | 77576 |
| PolarBear   | - - - - - ATATGGTAAACT- - - - - GCCATACAACATTATTTTATCGTTACAATAATCCTGGAGGTAG- - AACAGGC- A |       |       |       |       |       |       |       | 37337 |
| Cow         | - - - - - ATGACTAAAT- - - - - TTA- - ATAATAG- - - - - CATCCTGAAATAAA- - AAAC- ATGA        |       |       |       |       |       |       |       | 74766 |
| Dog         | - - - - - ATGACTAAAT- - - - - GT- - - ACTATGG- - - - - GATCCTGGAACAAA- - AAAAGG- - -      |       |       |       |       |       |       |       | 67920 |
| BelugaWhale | - - - - - ATGACTAAAT- - - - - CTA- - ATAACGG- - - - - CATCCTGAAACAAA- - AA- - - - - A     |       |       |       |       |       |       |       | 66906 |
| Donkey      | TTCTTTAGCATATGGTGGTTTATGAAGCTCTTTAATGATGTTTTATCCTTATA- CTGTCCTGGAAGCAG- - AACAGGC- -      |       |       |       |       |       |       |       | 74349 |
| Cat         | - - - - - CGCTCAACC- - - - - G- - ACTG- - - - - AGCCACCCAGGCGCCCC- - AATGTAG- G           |       |       |       |       |       |       |       | 72762 |
| Ferret      | - - - - - GTATAGCAGTTTATGAAGCTCTTCAACATTATTTATTGTTCTAACAATCCTGGAAGTAG- - AATAGGC- G       |       |       |       |       |       |       |       | 75270 |
| Lion        | - - - - - CACTCAACT- - - - - G- - ACTG- - - - - AGCCACCCAGGTGCCCC- - AATGTAG- G           |       |       |       |       |       |       |       | 70451 |
| Vaquita     | - - - - - ATGACTAAAT- - - - - CTA- - ATAACGG- - - - - CATCCTGAAACA- - - - - A             |       |       |       |       |       |       |       | 68223 |
| Pig         | - - - - - ATGACTAGCT- - - - - CTA- - ATAACAG- - - - - GATCCTGGAACAAA- - AAAAGAAA          |       |       |       |       |       |       |       | 67934 |

Dienstag, 3. Mai 2022 08:40

| Majority    | ATGXCATTATATGAAXATXAA- - - - - XAATAAT- - - - - XA- - XX- - - - - TTTAGCTAAAXATGTAATXXT    |       |       |       |       |       |       |       |       |
|-------------|--------------------------------------------------------------------------------------------|-------|-------|-------|-------|-------|-------|-------|-------|
|             | 97450                                                                                      | 97460 | 97470 | 97480 | 97490 | 97500 | 97510 | 97520 |       |
| Human       | AGATGATTAATGTAATAGGAGATACTGGAACAACAAAAAGGGACATTAGATGCAATTTGAGGAAATCTGATAATGGAC             |       |       |       |       |       |       |       | 77656 |
| PolarBear   | TTTTTAATCTCTTATCATCAACATGCATTAGTAATGTTTTTCCAGCATGCCTACAGCCCTAGCTAAACATGTAATCTT             |       |       |       |       |       |       |       | 37417 |
| Cow         | ATG- CATTCTGTGCTCAGTCATGT- - - CTGACTCT- - - - TTGCA- - ACCCCATGGACTGTAGCCCACCAGGCTCCTCTC  |       |       |       |       |       |       |       | 74835 |
| Dog         | - - - - - ACAGATAAACACCAA- - - - - AGAAAT- - - - - CTGACAAAG- - TGTGGACTTT                 |       |       |       |       |       |       |       | 67960 |
| BelugaWhale | AGGACATTAGATGCAAATTAA- - - - - AGAAATCTGAATAC                                              |       |       |       |       |       |       |       | 66941 |
| Donkey      | ATTTTTATCCCCATTGTCAATA- - - CTCATAGTGTTTTCTCCAGCATACCTGCTGCCTTAGCTAAAGATTTAAATCGT          |       |       |       |       |       |       |       | 74425 |
| Cat         | TT- - - - - GTTTTTAATGTAGA- - - - - AGACAT- - - - - TTAGGTTAAA- CTGAAATTTTT                |       |       |       |       |       |       |       | 72805 |
| Ferret      | TTTTTAATCTCTCATCATCAAAATGCATTAATTAT- TTTTTTCCAGCATACCTGATGTCTTAGCTAAA- ATGTAATCAT          |       |       |       |       |       |       |       | 75348 |
| Lion        | TT- - - - - GTTTTTAATGTGGA- - - - - AGACAT- - - - - TTAGGTTAAA- CCGAAATTTTT                |       |       |       |       |       |       |       | 70494 |
| Vaquita     | AGGACATTAGATGCAAATTAA- - - - - AGAAATCTGAATAC                                              |       |       |       |       |       |       |       | 68258 |
| Pig         | ATGACATTATTTACATAATGGGCT- - - TTAATTAA- - - - CATCA- - ATATTGGCTGATTAAGTGCAACAACACTATATCAT |       |       |       |       |       |       |       | 68004 |

| Majority    | TXTAXTXAAA- - - - - GTT- ATTAATAATAA- X- - - XXG- - AXTGTATGT- TATTAGXTTCT- - - - - |       |       |       |       |       |       |       |       |
|-------------|-------------------------------------------------------------------------------------|-------|-------|-------|-------|-------|-------|-------|-------|
|             | 97530                                                                               | 97540 | 97550 | 97560 | 97570 | 97580 | 97590 | 97600 |       |
| Human       | TTTTGTTGATTTATCGATATTGGTTGATTAATTGCAAGAACTAATAAATTGTAATACCATACTAATGTATGATGCTAATA    |       |       |       |       |       |       |       | 77736 |
| PolarBear   | CAAATTACA- - - - - GCT- AAAAATAATTT- ACTGGAGCCAATGTATGT- AACATGTTTTTATACATTTTTTA    |       |       |       |       |       |       |       | 37482 |
| Cow         | TCCATGGAAT- - - - - TTT- CCAGGCAAGAATACTGGAG- - AGGGTTTGC- CATTTCCTTCTC- - - - -    |       |       |       |       |       |       |       | 74888 |
| Dog         | - - - - A- - - - - GTT- AATAATTATAT- - - - - GTCAGTAT- - - - -                      |       |       |       |       |       |       |       | 67983 |
| BelugaWhale | TTTATGGACC- - - - - TTA- ATTAATAATAA- - - - - CATAT- TAATAGTGGCT- - - - -           |       |       |       |       |       |       |       | 66981 |
| Donkey      | TAAAATTAAAATAATTTCTACAGCT- AGAAATAATCC- ATCGGAGCAAATGTATATATAACATGTTTCATATAATTTTTA  |       |       |       |       |       |       |       | 74503 |
| Cat         | T- - - - -                                                                          |       |       |       |       |       |       |       | 72806 |
| Ferret      | TAAAATTAGA- - - - - GCT- AAAAATAATTTTATTGGAGCCAGTGTATGT- AATATGCTTTAA- ACAGTTTTTA   |       |       |       |       |       |       |       | 75413 |
| Lion        | T- - - - -                                                                          |       |       |       |       |       |       |       | 70495 |
| Vaquita     | TTTATGGACC- - - - - TTA- ATTAATAATAA- - - - - CATAT- TAATACTGGCT- - - - -           |       |       |       |       |       |       |       | 68298 |
| Pig         | ACTATTGTAA- - - - - GAT- GTTAATAAGGGGGGAGGG- - TGCCCAGGT- TATTAGGAACTT- - - - -     |       |       |       |       |       |       |       | 68057 |

Dienstag, 3. Mai 2022 08:40

| Majority    | ----- TXG- - XATTTAXTGA----- A- C- - - - AGTTA----- AAATACAATXCA-----                      |       |       |       |       |       |       |       |       |
|-------------|--------------------------------------------------------------------------------------------|-------|-------|-------|-------|-------|-------|-------|-------|
|             | 97610                                                                                      | 97620 | 97630 | 97640 | 97650 | 97660 | 97670 | 97680 |       |
| Human       | ATGGGGGAACTGCGGTTTCCAGGTTATATAAGAACTCTGTAATGTCTTAAATTTGTTTGTAAATCTAAACCTTTTAAAAT           |       |       |       |       |       |       |       | 77816 |
| PolarBear   | CAAAGGGAAGATAGTAAGTTTATTGACCTA- - - - TAGCTAGGAGTAAATATGA- - - - AAAATACAATACAG- - - AATT  |       |       |       |       |       |       |       | 37549 |
| Cow         | ----- CAGGG- - GATCTTCCC----- AACCCAGAGATC----- GAACCCGTGTCTC- - - CTGC                    |       |       |       |       |       |       |       | 74931 |
| Dog         | ----- TGGCTGATTAATTG----- TAAC----- AGT----- AACACCATAC-----                               |       |       |       |       |       |       |       | 68014 |
| BelugaWhale | ----- GATT----- AGTTG----- GAACATATATCA-----                                               |       |       |       |       |       |       |       | 67002 |
| Donkey      | CAAAGGGAAGATGATAAACTTACTGTCTTCCATTGTAGCTTGGAGTTAACAGTAATATGAAAATAGAATACAGAATTTTC           |       |       |       |       |       |       |       | 74583 |
| Cat         | ----- TTTCTGA-----                                                                         |       |       |       |       |       |       |       | 72814 |
| Ferret      | CAAAGGGAAGATGGTAAGTTTATTGACTTAA- - - - TAGCTAGGAGTTAATATGA- - - - AAAATACAATACAG- - - AACT |       |       |       |       |       |       |       | 75481 |
| Lion        | ----- TTTCTGAC-----                                                                        |       |       |       |       |       |       |       | 70504 |
| Vaquita     | ----- GATT----- AGTTG----- GAACATATATCA-----                                               |       |       |       |       |       |       |       | 68319 |
| Pig         | ----- TCTAG- - AATCTTTTTTA- TA- - - - AATGTAAGCTGTTCT----- AAAATAAAAGTTTA- - - TTTA        |       |       |       |       |       |       |       | 68109 |

| Majority    | XXX- - - X- - - - TA- - AXTXTXTTATTAATGTTTC- - - - G- AA----- A- GAAXA- - - - X      |       |       |       |       |       |       |       |       |
|-------------|--------------------------------------------------------------------------------------|-------|-------|-------|-------|-------|-------|-------|-------|
|             | 97690                                                                                | 97700 | 97710 | 97720 | 97730 | 97740 | 97750 | 97760 |       |
| Human       | AGCTAAAAATTATAGATACAATTTCTAAATGATTTAATTAACAAAACCAGTTTAATTCTTCAGTTGAAATGAGCAAGGTT     |       |       |       |       |       |       |       | 77896 |
| PolarBear   | TTTGGTATGGTATAACATTATGGTATAAATAGTGCATCATGAAGTATTTTGTAGGTTGTGTTTATTGTA- GAAGACATTT    |       |       |       |       |       |       |       | 37628 |
| Cow         | TTTGGCAG- - - GCAG- ATTCT- TTACCACTGCGCTACCTGGGAAG- - - - - CCAA- GAAAA- - - - G     |       |       |       |       |       |       |       | 74981 |
| Dog         | ----- TAATACAATGTTAATAATAGAG- - - - GGAAA----- A- GGAAA-----                         |       |       |       |       |       |       |       | 68047 |
| BelugaWhale | ----- TACTATTGTATG-----                                                              |       |       |       |       |       |       |       | 67014 |
| Donkey      | TTTTTCAGGATTTATCATTGTGATATAAATAATGCACCATGAAATATTTTGTAGCTTTGTATATTTTAA- TTGTAG- - - C |       |       |       |       |       |       |       | 74659 |
| Cat         | ----- TAGTAATTTTTC- - - - - AC----- A- GAAGA- - - - G                                |       |       |       |       |       |       |       | 72835 |
| Ferret      | TTT- - CAGAATTTACCATTATGGTATAAATAGTGCATTATGAAATATTTTGTAGGTTGTTTTTGTGTA- GGAAACATTT   |       |       |       |       |       |       |       | 75558 |
| Lion        | ----- TGATAGTAATTTTTC- - - - - AG----- A- GAAGA- - - - G                             |       |       |       |       |       |       |       | 70528 |
| Vaquita     | ----- TACTATTGTATG-----                                                              |       |       |       |       |       |       |       | 68331 |
| Pig         | TTTATTTA- - - TTTG- TCTTT- TTGG- GCTGTACC- CACAGCATA- - - - - TGGA- GGTTC- - - - C   |       |       |       |       |       |       |       | 68157 |



Dienstag, 3. Mai 2022 08:40

| Majority    | G T A A C T T T T T T A X - - - - - G X - - G A G T G A G G A A A T A G T G G X A G X X A A G T A X A T G C T A A C X G C A T X A A A G A C A X X G A C         |       |       |       |       |       |       |       |       |
|-------------|-----------------------------------------------------------------------------------------------------------------------------------------------------------------|-------|-------|-------|-------|-------|-------|-------|-------|
|             | 97930                                                                                                                                                           | 97940 | 97950 | 97960 | 97970 | 97980 | 97990 | 98000 |       |
| Human       | A T G A G A A T T T T A G G A G A T T A C T G A G T C A C T C A A A A T G T C T G G G T G A C C C A G C T G A T G A G G G C C A T T T C A C A T G A A A A A G A |       |       |       |       |       |       |       | 78136 |
| PolarBear   | A T A A C T T T T C T A A G T T A T C A - - G C C T G G G G G A G G A A A T A G T G G A A G A A A A G T A T A T G C T A A T G G C A T C A A A G A C A G T G A C |       |       |       |       |       |       |       | 37853 |
| Cow         | G C A A G A T G T T A A - - - - - T A A T G G G G G G A C A G G G G T G C C C A G G - T T A T G G G A A C T T T G G A G A A T G T T T A A T T                   |       |       |       |       |       |       |       | 75147 |
| Dog         | T A A A C T T T A T T A A - - - - - A A A T C A T - - - A G A T A G G G A C A C - C T A T C A G C A G T T G A G - - - - T G C C                                 |       |       |       |       |       |       |       | 68156 |
| BelugaWhale | G T A A G A T A T T A A - - - - - T A A T G G G G G A A A A G G G G T G C C C A G G A T T A T A A G A A C T - - G G A G A A T T C T T A A T T                   |       |       |       |       |       |       |       | 67133 |
| Donkey      | G T A G C T T T T C T A - - - - - A G T T A T C A G C C C T G A G G G A C G A A A T A C A T A T T A G T G A C A T T A A G G A C A G T G A C                     |       |       |       |       |       |       |       | 74875 |
| Cat         | T A A G C T T T T C T A T - - - - - C A - - G C C T G G G G G A G G A T A T A G T G G A A G A G A A C T A C T T G C T A G T G G C A T T A A A G A C A - - G A C |       |       |       |       |       |       |       | 73012 |
| Ferret      | A T A G C T T T T C T A A G T T T T C A - - G C C T G G G G G A G G A A A T A G T G G A A G A A A A G T A C A T G C T A A T T G C A T C A A G G A C A A T G A C |       |       |       |       |       |       |       | 75791 |
| Lion        | T A A G C T T T T C T A T - - - - - C A - - G C A T G G G G G A G G A T A C A G T G G A A G A G A A C T A C T T G C T A G T G G T A T T A A A G A C A - - G A C |       |       |       |       |       |       |       | 70705 |
| Vaquita     | G T A A G A T A T T A A - - - - - T A A T G G G G G A A A A G G G G T G C C C A G G - T T A T A A G A A C T - - G G A G A A T T T T T A A T T                   |       |       |       |       |       |       |       | 68449 |
| Pig         | G C T A G A T C C T T A A - - - - - G C - - C A C T G A G T G G G G C C T G G G A T T G A A C - C T G T G T C C T C A T - G G A T A C T A G C A G A T T         |       |       |       |       |       |       |       | 68323 |

| Majority    | T G C C T T C A T C T C T T A A X X X C T X T X A C - - - - - G C C A T A X T C T G G G C T T C C T A A A A T T A - - - - - A X A A X A X - - - -               |       |       |       |       |       |       |       |       |
|-------------|-----------------------------------------------------------------------------------------------------------------------------------------------------------------|-------|-------|-------|-------|-------|-------|-------|-------|
|             | 98010                                                                                                                                                           | 98020 | 98030 | 98040 | 98050 | 98060 | 98070 | 98080 |       |
| Human       | T T C C T G C A A C A C C T T C T T T T C T T T A G C A C A T G A T C G T T T A T G A A G C T C T T T T A C A T T G T T T T A T C T T T A T A G C A A T C C T C |       |       |       |       |       |       |       | 78216 |
| PolarBear   | T G C C C T A A T C T C T C A A A G T A C T C T T A C - - - - - A C C A T A C T C T G G G C T T C C T A A A A T G A - - - - - A G A A A G A T - - - -           |       |       |       |       |       |       |       | 37914 |
| Cow         | T T T C T A C A A A T C T A A A A - - - - - C T - - - - - G T T C T A A A A T A A G C T T A T T A A A A A T T - - - - - A C A G A T A A - - - -                 |       |       |       |       |       |       |       | 75200 |
| Dog         | T G C C T T C A G C - C C - - - - - A G - - - - - A G C A T G A T C C T G G A G T C C T G G G A T C G - - - - - A T C A A - - - - -                             |       |       |       |       |       |       |       | 68201 |
| BelugaWhale | T T T C T G T A A A T C T A A A A - - - - - C T - - - - - G T T C T A A A G T A A G T T C A T T A A A A A T T - - - - - A T A G A T A A - - - -                 |       |       |       |       |       |       |       | 67186 |
| Donkey      | T G C C T T C A T C T C T T A A A G C A C T C T T G C - - - - - A C T G T A C T C C G G G C T G C C T A A A A T G A - - - - - A G A A G G A T C - - -           |       |       |       |       |       |       |       | 74937 |
| Cat         | T G C C C T C A T C T C T T A A A G T A C T C T T A G - - - - - G C C A T A C C C T G G G C T A C C T A A A A T G A - - - - - A G A A A G A T - - - -           |       |       |       |       |       |       |       | 73073 |
| Ferret      | T G C C C T A A T C T C T T A A A G T A C T C T T A C - - - - - A C C A T A C T C T G G G C G T C C T A A A A T A A - - - - - A A A A A A A A A A A A           |       |       |       |       |       |       |       | 75856 |
| Lion        | T G C C C T C G T C T C T T A A A G T A C T C T T A G - - - - - G C C A T A C C C T G G G C T A C C T A A A A T G A - - - - - A G A A A G A T - - - -           |       |       |       |       |       |       |       | 70766 |
| Vaquita     | T T T C T G T A A A T C T A A A A - - - - - C T - - - - - G T T C T A A A G T A A G C T T A T T A A A A A T T - - - - - A T A G A T A A - - - -                 |       |       |       |       |       |       |       | 68502 |
| Pig         | C G T T T - C C G - - C T C A - - - - - G C C A T G A T G G G A A C T C C T A A A A A A T - - - - - C A G A T A A - - - -                                       |       |       |       |       |       |       |       | 68367 |

Dienstag, 3. Mai 2022 08:40

| Majority    | - AATTGG- - CAXAXGA- TTTAXGATAACTTGT CAXA- - AGCACAGTGGTCC- TT- - - - - T- - - - - CTGXTXA- - AA    |       |       |       |       |       |       |       |       |
|-------------|-----------------------------------------------------------------------------------------------------|-------|-------|-------|-------|-------|-------|-------|-------|
|             | 98090                                                                                               | 98100 | 98110 | 98120 | 98130 | 98140 | 98150 | 98160 |       |
| Human       | AGAATAGATCAAGCTTTTTTTTTTTTTTTTTTTTGGAGATGGAGTCTTGCTCTGTGCGCCAGGCTGGAGTGCAATGGTGCGA                  |       |       |       |       |       |       |       | 78296 |
| PolarBear   | GACTTGG- - TAGGA- - - TATATCATAACCTGACACACTAACACAGTGGCC- AGATTATAAATGGATAAGTGATAATAAA               |       |       |       |       |       |       |       | 37988 |
| Cow         | - AATTGG- - CAAGTGG- TTTAAGAGAAGTTATCAAA- - AACAGTTTAATTC- TTTG- - - - - TT- - - - - CTGTTGT- - GA  |       |       |       |       |       |       |       | 75260 |
| Dog         | - - - - - ATCCCACTTCGGGCTCTCTGCACGG- AGCC- - - - -                                                  |       |       |       |       |       |       |       | 68230 |
| BelugaWhale | - AATTTG- - CAAATGA- TTTAAGATAAGTTATCAAG- - AACAGTTTAATTC- TT- - - - - CAGTTGT- - AA                |       |       |       |       |       |       |       | 67242 |
| Donkey      | - ATTTGA- - CGGAAGACT- - - AGATCACCTGACTTAGTAGTATAGTGGTCTGCTGTTATCACCCTCTGGTGTGATGATAGA             |       |       |       |       |       |       |       | 75011 |
| Cat         | GATTTGG- - CAGAATA- - ACGTTATCACCTGCCAT- - - AGCACAGTGGCC- AGAT- - - - - TG- - - - - GTGATAA- - - A |       |       |       |       |       |       |       | 73131 |
| Ferret      | GACTTGG- - TAGAAGAATATATCATAACCTGACATACTAGCACAGTGGCC- - - - - A- - - - T- - - - - GATAATAAA         |       |       |       |       |       |       |       | 75915 |
| Lion        | GATTTGG- - CAG- - - - - TATCACCTGCCAT- - - AGCACAGTGGCC- AGAT- - - - - TG- - - - - GTGATAATAAA      |       |       |       |       |       |       |       | 70819 |
| Vaquita     | - AATTTG- - CAAATGA- TTTAAGATAAGTTATCAAG- - AACAGTTTAATTC- TT- - - - - CAGTTGT- - AA                |       |       |       |       |       |       |       | 68558 |
| Pig         | - AATTTG- - TAAATGA- TTGAAGATAAATTATCAAA- - AACAGTTTAATTT- TT- - - - - CAGTTAA- - AA                |       |       |       |       |       |       |       | 68423 |

| Majority    | T- - - GG- - - - - AXAAGTTGGGA- - - - GAXGT- XGTGTX- - - - - GCXTCTGXA- - - - TAGTAGTAACXGXXXXXGG-    |       |       |       |       |       |       |       |       |
|-------------|-------------------------------------------------------------------------------------------------------|-------|-------|-------|-------|-------|-------|-------|-------|
|             | 98170                                                                                                 | 98180 | 98190 | 98200 | 98210 | 98220 | 98230 | 98240 |       |
| Human       | TCTCGGCTCACTGCAAACCTCGGCCTCCCGGGTTCGTGCCATTCTTCTGCCTCAGCCTCCCGAGTAGCTGCTACTACAGGT                     |       |       |       |       |       |       |       | 78376 |
| PolarBear   | T- - - GG- - - - - AAAAGTATGGA- - - - GATAT- GAAGTA- - - - - ACATTTGGA- - - - TAGTAGTAACAATAGTGGG-    |       |       |       |       |       |       |       | 38041 |
| Cow         | T- - - GG- - - - - ACAAGG- - - - - AATGTCTGTGT- - - - - GCCTCAGCA- - - - GAATGTGACCTG- - A- - GG-     |       |       |       |       |       |       |       | 75304 |
| Dog         | - - - - - T- - G- - - - - CTTCT- - - - -                                                              |       |       |       |       |       |       |       | 68237 |
| BelugaWhale | T- - - GG- - - - - ACAAGTTAGG- - - - GATGTCTGTGT- - - - - GCCTCAGCA- - - - AAATATGACCTG- - A- - GG-   |       |       |       |       |       |       |       | 67291 |
| Donkey      | T- - - GG- - - - - AAAAGTTGGGA- - - - GACTATGAAATA- - - - - GCATTTGGA- - - - CAGTAGTAAGAACAGTGGG-     |       |       |       |       |       |       |       | 75065 |
| Cat         | T- - - AG- - - - - AAAAGTGGGGA- - - - GACGT- - - - GTA- - - - - TCATTTGGA- - - - TAGTAGTAACAGCAGTGAA- |       |       |       |       |       |       |       | 73181 |
| Ferret      | T- - - GA- - - - - AAAAGTGGGGA- - - - GACATTGAAGTA- - - - - GCATTTGGA- - - - TTGTAGTAACAACAGTGGG-     |       |       |       |       |       |       |       | 75969 |
| Lion        | T- - - AG- - - - - AAAAGTGGGGA- - - - GACGT- - - - ATA- - - - - TCATTTGGA- - - - TAGTAGTAACAGCAGTGAA- |       |       |       |       |       |       |       | 70869 |
| Vaquita     | T- - - GG- - - - - ACAAGTTAGG- - - - GATGTCTGTGT- - - - - GCCTCAGCA- - - - AAATATGACCTG- - A- - GG-   |       |       |       |       |       |       |       | 68607 |
| Pig         | T- - - GG- - - - - ACAAAG- - - - - GG- GTGTCTGT- - - - - GCCTCAGCA- - - - GAATAGGATTTG- - A- - GG-    |       |       |       |       |       |       |       | 68466 |

Dienstag, 3. Mai 2022 08:40

| Majority    | GATCTCAXXAAXTTACAXTTXAXTTTTTTCTAA- - - TCXCXTT- AT- - - - CTCTGTAG- CT- XXXXX- GTX- - - TTGXAT                       |       |
|-------------|----------------------------------------------------------------------------------------------------------------------|-------|
|             | 98250 98260 98270 98280 98290 98300 98310 98320                                                                      |       |
| Human       | GCCTGCCACCACGCCAGCTAATTTTTTTGTATGTTTAGTAGAGATGGGGTTTCATCGTGTTAGCCAGGATGGTCTCGAT                                      | 78456 |
| PolarBear   | GATCTCA- CAGCTTACATTCCACTTTTTGCTAAGCCTCCCATT- AC- - - - CTCCTCACCTTAGAAGGAGGTAAATTGCAT                               | 38115 |
| Cow         | GGATAGAGGG- - - - ATAGATGTATAACTTAAAA- - - TCACTTT- AT- - - - CCCCATGGACT- - - - - - - - - - - - TTGAGT              | 75359 |
| Dog         | - CTCTCT- GCCTGTGTATCTGCCTTCTCTCT- - - - CCTTCCTCT- CT- - - - CTCTCTC- - - - - - - - - - - - TC- - - - T             | 68287 |
| BelugaWhale | GG- TAGAGGGATAGATAGATGCATAAATTTGTAA- - - TCACTTC- AT- - - - CCCTGTGGACT- - - - - - - - - - - - TTGAAT                | 67349 |
| Donkey      | GACCTCC- - - - - - CCGCTTACATTTGTGCTAAACTTCCCATT- AC- - - - TTCCATAA- - TAGAAGGAGGTAAATTGCAT                         | 75131 |
| Cat         | GATCTCAACAGCTTACATTCCACTTTTTGT- - - - - - TCCCGTT- AC- - - - CTCTGTA- - CTAGAAGGCGGTAG- TTGCAT                       | 73248 |
| Ferret      | GCTCTCA- CAATTAACATTTCACTTTTTGCTAAGCTTCACATT- AT- - - - CTCTTTA- - TAGGAAGGAGGTAAATTGTAT                             | 76041 |
| Lion        | GATCTCAACAGCTTACATTCCACTTTTTGT- - - - - - TCCCGTT- AC- - - - CTCCGTA- - CTAGAAGGAGGTAG- TTGCAT                       | 70936 |
| Vaquita     | GA- TAGAGGGATAGATAGATGCATAAATTTGTAG- - - TCACTTC- AT- - - - CCCTGTGGACT- - - - - - - - - - - - TTGAAT                | 68665 |
| Pig         | GG- TAGAGG- - - - - - TAGATAAATAGTTTATA- - - - TCAC- - - - - - - - - - - - CCTGTGGCG- - - - - - - - - - - - TTGAGT   | 68511 |
| Majority    | CTCCT- - - - - - - - - - - - TCXAXCXCAATT- TT- - - CTCACTTGAAAATX- GX- - - - AGTCTTXXXATTACCAA- - GCAG               |       |
|             | 98330 98340 98350 98360 98370 98380 98390 98400                                                                      |       |
| Human       | CTCCTGACCTTGTGATAGATCAAGTATTTTTATCCCTCTCATCAACATGTGTAACAGTTTTTTTCTCACATATCTGCTG                                      | 78536 |
| PolarBear   | CTCCT- - - - - - - - - - - - TTGAGCCCAATT- TT- - - CTCACTAGAAAATTTGC- - - - AGTCTTATTGTTACTAAAGGGCAA                 | 38174 |
| Cow         | CTCTA- - - - - - - - - - - - TCAGATAGA- - - - - - - - TATGTGGCAGT- - - GT- - - - TGCCAT- - - CATTTTCAGT- - - GGGG    | 75406 |
| Dog         | CTCTC- - - - - - - - - - - - TCTCTCTCTCT- CT- - - CTCATGTGAATA- - - - - - - - AATTTT- - - - - - - - TAAAA- - - - - - | 68328 |
| BelugaWhale | CTCTA- - - - - - - - - - - - TCAGATAGATA- GGTACATACATGGCAGT- - - GT- - - - GGCCAT- - - CAGTCTCAG- - - GGAG           | 67403 |
| Donkey      | CTACT- - - - - - - - - - - - TTGAACCCAAAGTTTTCTCATTAGAAGATTAGC- - - - AGTCTTATTTCTTCTAAAACGCAA                       | 75193 |
| Cat         | CTCCT- - - - - - - - - - - - TTGAGCCCAATT- TT- - - CTCACTAGAAAATTAGC- - - - AGTCTTATTTTACCAAAGTGCAA                  | 73307 |
| Ferret      | CTCCT- - - - - - - - - - - - TTGAGCCCAATT- TTT- CTCACTAGAAAATTTGC- - - - AGTCTTACTGTTACTAAAGTGCA                     | 76101 |
| Lion        | CTCCT- - - - - - - - - - - - TTGAGCCCAATT- TT- - - CTCACTAGAAAATTAGC- - - - AGTCTTATTTTACCAAAGTGCAA                  | 70995 |
| Vaquita     | CTCTA- - - - - - - - - - - - TCAGATAGATA- GGTACATACATGGCAGT- - - GT- - - - GGCCAT- - - CAGTCTCAG- - - GGAG           | 68719 |
| Pig         | CTCCA- - - - - - - - - - - - TCAGATAT- - - - - - - - TACATGGCTGT- - - GT- - - - GTCCAT- - - CATGTTTCA                | 68557 |







Dienstag, 3. Mai 2022 08:40

| Majority    | AATAAAGTTTCTTTGAACAAATTTTCTATC- - - - - ACCTTTGAATATTXXGGTGAAGTTTT- CA- - - T- XAGATG- X-      |       |       |       |       |       |       |       |       |
|-------------|------------------------------------------------------------------------------------------------|-------|-------|-------|-------|-------|-------|-------|-------|
|             | 98730                                                                                          | 98740 | 98750 | 98760 | 98770 | 98780 | 98790 | 98800 |       |
| Human       | ATTGGAGAATCTTCAGAGGCTTTAAAAGTCCAGGAAAATCTTAGACTACTCCAGTGATTTAGAACGGTGTAAGATAGCC                |       |       |       |       |       |       |       | 78935 |
| PolarBear   | TTTAAAGTTTCTTTGAACAAATTTTCTATC- - - - - ACCTTTGAATATTTTGGTGAAGTTTT- CA- - - T- GAGATTGTT       |       |       |       |       |       |       |       | 38509 |
| Cow         | GACAGTGTTTTT- - - - - ACAGCATATT- - - - - TGCTACCTTAA- - - - - AGATG- - -                      |       |       |       |       |       |       |       | 75682 |
| Dog         | TTTAAAGTTTCTTTGAACAAATTTTCTATC- - - - - ACCTTTGGATAC- - - - - GGTGAAGTTTTTCA- - - T- GAGGTGGTT |       |       |       |       |       |       |       | 68618 |
| BelugaWhale | AATAGTGTTTTT- - - - - ACAGCATACC- - - - - TGCTGCCTTGA- - - - - AGATG- - -                      |       |       |       |       |       |       |       | 67666 |
| Donkey      | TCTAAAGTTTCTTTGAACAAATGTTCCATC- - - - - ACCTTTGAATATTTTGGTAAAGTTTTTCAT- - - T- - AGATTATT      |       |       |       |       |       |       |       | 75519 |
| Cat         | AATGAAGTTTCTTTGAACAAATTTTCTATC- - - - - ACCTTTGAGTATATTGGTGAAGTTTT- CA- - - T- TAGATCATT       |       |       |       |       |       |       |       | 73616 |
| Ferret      | TTTAAAGTTTCTTTGAAAATATTTTCTGTC- - - - - ACCTTTGAATATTTTGGTGAAGTTTT- CA- - - T- GAGATT- - -     |       |       |       |       |       |       |       | 76415 |
| Lion        | AATGAAGTTTCTTTGAACAAATTTTCTATC- - - - - ACCTTTGAGTATATTGGTGAAGTTTT- CA- - - T- TAGATCAT-       |       |       |       |       |       |       |       | 71307 |
| Vaquita     | - - - AGTGTTTTT- - - - - ACAGCATACC- - - - - TGCTGCCTTGA- - - - - AGATG- - -                   |       |       |       |       |       |       |       | 68960 |
| Pig         | AAGAGTGTTTTTTTGTGTTTTTTTTTTTT- - - - - TTTACAACATACC- - - - - CACTTTCTTAAG- - - TAGAAATG- - -  |       |       |       |       |       |       |       | 68825 |

| Majority    | - - A- TTGTATATTGACATTGTA- - - - - GAGATGTATTTXAGAAGAAGCAXTTCTGTAXAAATGAAGTATTAACCTTAGA       |       |       |       |       |       |       |       |       |
|-------------|-----------------------------------------------------------------------------------------------|-------|-------|-------|-------|-------|-------|-------|-------|
|             | 98810                                                                                         | 98820 | 98830 | 98840 | 98850 | 98860 | 98870 | 98880 |       |
| Human       | TAAGTAGTTTTTCTAAGTTATCAGCCGCGGGGAGGAAATAATGAAAGAGAAATACATACGAGTGGCATTAAAGGACAGGTG             |       |       |       |       |       |       |       | 79015 |
| PolarBear   | GAA- TTGTATATTGACATTGTA- - - - - GGGATGTATTTTCAAGAAGCTTTTCTGCAAAATGAAGTATTAAGCTTAGA           |       |       |       |       |       |       |       | 38582 |
| Cow         | - - - - TTAATCATTCAAATT- - - - - GTTTTC- ACAGCTAAAAGTAATTCATTAGAGGCAATGTGTATACCATGTT          |       |       |       |       |       |       |       | 75746 |
| Dog         | GAA- TTATATATTGACATTGTA- - - - - GAGATGTATTTTCAAGAAGCCTTTTCTGCAAAATTAAGTATTAACCTTAGA          |       |       |       |       |       |       |       | 68691 |
| BelugaWhale | - - - - TAAATCATTAAAATTA- - - - - ATAATTTCTACAGCTAAAAGTAATCCATTAGAGCCAGTGTGCATAACGTGTT        |       |       |       |       |       |       |       | 67736 |
| Donkey      | TAA- TTGTATATTGGCATGGTA- - - - - GAGATATATTTTAGAAGAA- - ACTTCTGCAGAGATGAAGTGTAAACCTTAGA       |       |       |       |       |       |       |       | 75590 |
| Cat         | GAA- TTGTATATTGACATTGTA- - - - - GAGGTGTATTTTCAAGAAGCTTTTTTGA- - - - - GAAATATTAAGCTTAGA      |       |       |       |       |       |       |       | 73689 |
| Ferret      | - - A- TTGTATATTGACATTGTA- - - - - GAGATGTATTTTCAAGAAG- - - CTTT- CTGCAAAATGAAGTATTAAGCTTAGA  |       |       |       |       |       |       |       | 76482 |
| Lion        | - - - - - TGATATATTGACATTGTA- - - - - GAGGTGTATTTTCAAGAAGCTTTTTTGA- - - - - GAAATATTAAGCTTAGA |       |       |       |       |       |       |       | 71376 |
| Vaquita     | - - - - TAAATCGTTAAAATTA- - - - - ATAATTTCTACAGCTAAAAGTAATCCATTAGAGCCAGTGTGCATAACGTGTT        |       |       |       |       |       |       |       | 69030 |
| Pig         | - - - - TAAATCGTTAAAATT- - - - - AATTTCTACAGCTAAAAGTAATCCATTAGAGCCAATGTATAGAACATGTT           |       |       |       |       |       |       |       | 68890 |

Dienstag, 3. Mai 2022 08:40

| Majority    | CTGTCTTGTTTXXXTTTATATATCGAATTTAGGTAATTTGXTATTTTAT- - - - A- - - - - TTTCATG- - AATTAATAATT       |       |       |       |       |       |       |       |       |
|-------------|--------------------------------------------------------------------------------------------------|-------|-------|-------|-------|-------|-------|-------|-------|
|             | 98890                                                                                            | 98900 | 98910 | 98920 | 98930 | 98940 | 98950 | 98960 |       |
| Human       | GTGGCTTCTTTTACCTATTAAAGCATTCTTACACCATACTGTGAACTGTGTAAGGAAGGATCATTGGACATAATAGAT                   |       |       |       |       |       |       |       | 79095 |
| PolarBear   | CTGTCGTGTTTAGATTGATATATCAAATTTAGGTAGATTGGTGTTTTAT- - - - A- - - - - TTTCATG- - AAGTAATAATT       |       |       |       |       |       |       |       | 38650 |
| Cow         | CTATATGTTTT- - - TTTACAAAGAGAAGATAGTGAATGTATTGTTTT- - - - - C- - - - - TCTCAT- - - GGCTAAAAGTT   |       |       |       |       |       |       |       | 75808 |
| Dog         | CTGTGCG- - T- - - - TTAATCTATCAAATTTAGGTAATTTGGTATTTTAT- - - - A- - - - - TTTCATG- - AATTAATAATT |       |       |       |       |       |       |       | 68752 |
| BelugaWhale | TTATATGTTTT- - - TTTACAAAGGGAAGATAGTAAATGTATTTTC- - - - - TCTCAC- - - AGCTAGGAGTT                |       |       |       |       |       |       |       | 67795 |
| Donkey      | CTGTTGTGTTTAGATTGACATATCGAATTTAGGGAGATTGATATTTTAT- - - - ATTATTGTTTCGTG- - AATTAGTAACT           |       |       |       |       |       |       |       | 75664 |
| Cat         | CTGTCATGTTTAGATTTATATATTGAATTTAGGTAGATTGATATTTTAT- - - - A- - - - - TTTCATG- - AATTAATAATA       |       |       |       |       |       |       |       | 73757 |
| Ferret      | CTGTCTTGTTTAGATTGATATGTCAAATTTAGGTAGATTGGTATTTTAT- - - - A- - - - - TTTCATG- - AATTAATAATT       |       |       |       |       |       |       |       | 76550 |
| Lion        | CTGTCATGTTTAGATTTATATATTGAATTTAGGTAGATTGATATTTTAT- - - - A- - - - - TTTCATG- - AATTAATAATA       |       |       |       |       |       |       |       | 71444 |
| Vaquita     | TTATATGTTTT- - - TTTACAAAGGGAAGATAGTAAATGTATTTTC- - - - - TCTCAC- - - AGCTAGGAGTT                |       |       |       |       |       |       |       | 69089 |
| Pig         | TTATATGTTTT- - - TTTTTTTTTTTTTTTTTTTTACAAGAAATG- - - - - TGTTAC- - - AGCTAGGAGTT                 |       |       |       |       |       |       |       | 68949 |

| Majority    | TT- CTTGAAATGTCAACAGGGAAAGACGA- GTAATA- - - - - GATGACTTTXAACTTAXATTCTGXAAGTGT CAGTAG       |       |       |       |       |       |       |       |       |
|-------------|---------------------------------------------------------------------------------------------|-------|-------|-------|-------|-------|-------|-------|-------|
|             | 98970                                                                                       | 98980 | 98990 | 99000 | 99010 | 99020 | 99030 | 99040 |       |
| Human       | TATCTGACAGGGTGGTCCGGAATGGTGGAAAGTAAATCGACAGGTGAGGACACTGAATTAGCATTGAGACAGTGGGGACCT           |       |       |       |       |       |       |       | 79175 |
| PolarBear   | TTCCTTGAAATGTCAACAGGGAAAGACGA- GTAATA- - - - - GATGACTTAGAACCTACGTTCT- - AAGTGT CAGTAG      |       |       |       |       |       |       |       | 38719 |
| Cow         | - - - - - AA- CATTACTATGAAAAATACA- ATACAGA- - - - - ATTTCTTTCCAGAGTTTATTATTACAGTATAAATAG    |       |       |       |       |       |       |       | 75872 |
| Dog         | TTTCTTGAAATGTCAACAGGGAAAGATAA- GTATAAC- - - - - AAGGACTTAGAACTTA- ATTCTGAAAGTGT CAGTAG      |       |       |       |       |       |       |       | 68823 |
| BelugaWhale | - - - - - AA- CATTAAATATGAAAAATACA- GTGCAGA- - - - - ATTCCTTTTCAGAATTCATTAT- - - - - AATAG  |       |       |       |       |       |       |       | 67850 |
| Donkey      | TTTCTTGAAATGTCAAAAGGGAAAGAGGA- GTAGTAG- - - - - GTGACGTAGAACTGTAAGTTTTGGAAGTGT CAGTAG       |       |       |       |       |       |       |       | 75736 |
| Cat         | TTGCTTGAAATGTCAACAAGGAAAGACGA- GTAATA- - - - - GATGACTTCAAACCTTA- ATCCTGGAAGTGT CAGTAC      |       |       |       |       |       |       |       | 73827 |
| Ferret      | TTCCTTGAAATGTCCACAGGGAAAGACGA- GTAATA- - - - - GATGACTTGGAACCTTA- ATTCTGGAAGTGT CAGTAG      |       |       |       |       |       |       |       | 76620 |
| Lion        | TTGCTTGAAATGTCAACAAGGAAAGACGA- GTAATA- - - - - GATGACTTCAGACTTA- ATCCTGGAAGTGT CAGTAC       |       |       |       |       |       |       |       | 71514 |
| Vaquita     | - - - - - AA- CATTAAATATGAAAAATACA- GTGCAGA- - - - - ATTCCTTTTCAGAATTCATTAT- - - - - AATAG  |       |       |       |       |       |       |       | 69144 |
| Pig         | - - - - - AA- TGTTAACATGAAAAA- - - - - TACTGA- - - - - ATTCCTTTTCAGAATTTATCATTATGGTGTAAATAG |       |       |       |       |       |       |       | 69008 |

Dienstag, 3. Mai 2022 08:40

Majority TGTGTAATXTAT- TGT- ATXTCTXA- - - GGTTTTTXXTT- - - X- - - - - - - - - - - - - - - - TTTT- - - - - -

---

99050 99060 99070 99080 99090 99100 99110 99120

---

Human CACACCTTGTAT- TCCCTTTTTTTGGTAAGATTTTTATTACCTCCTTAGAAAGAGGTAAATTCATCTATTTTCGAGCCCAA 79254  
PolarBear TGTGTAATCTATCTGC- ATGTCTCA- - - CGTTCCTTTTTTTCTTA- - - - - - - - - - - TCTTTTTTTTT- - - - - - 38770  
Cow TGCATCATGAAA- - - T- ACTTTGTA- - - GGTTTTTG- - - - - - - - - - - - - - - - - - - - - - TTT- - - - - - 75905  
Dog TGTGTAATCTTGATA- - ATGTCTCA- - - CGTAAAAAA- - - - - - - - - - - - - - - - - - - - - - - 68856  
BelugaWhale TACATCATGAAA- - - T- ACTTCGTA- - - GGTTTTTATA- - - - - - - - - - - - - - - - - - TTTT- - - - - - 67885  
Donkey TGTGTAATACCTGTCATATATTAGAGCATTTCTTTACCTTTCAAATAAATGCTTCTTTTTAAATTTCTT- - - - - - 75806  
Cat TGTGTAATCTAT- TGC- ATGTCTCA- - - TTCTTTGTGTGTGTGTGTGTGTGTGTG- - - - - - - - - - - TGTGTG- - - - - - 73883  
Ferret TTTGTAATCTGTCTGT- GTGTCTCG- - - CATTCTTTTTCTTTTTCTTTCTTTCTTTCTTTTTTTTTTTTT- - - - - - 76686  
Lion TGTGTAATCTAT- TGC- ATGTCTCA- - - TTCTT- GTGTGTGTGTGTGTATCCAT- - - - - - - - - - - CATGTT- - - - - - 71568  
Vaquita TACATCATGAAA- - - T- ACTTTGTA- - - GGTTTTTATA- - - - - - - - - - - - - - - - - - TTTT- - - - - - 69179  
Pig TGCATCATGAAA- - - T- ATTTTTTA- - - GGTTTATAT- - - - - - - - - - - - - - - - - - - - - - TTT- - - - - - 69041

Majority - - - - - AATG- - - - - TAGCXGT- CTATAT- TAX- - - - - - AGATTATTCTTTXAAATA- AATA- A- XTTATCTTT

---

99130 99140 99150 99160 99170 99180 99190 99200

---

Human TTTTTCTGTCTAGAAGATTGGTAGTCTTATTTTTACTAAAGTACAAGATTATTTAGTAAAAGGTAGCATTCTCTGGCTTT 79334  
PolarBear - - - - - AACA- - - - - TAGCCACTTTTAT- TA- - - - - - - - - - - AGCATTTTCTTTGAAATG- AATA- AATGTATTTTT 38823  
Cow - - - - - TATG- - - - - TAGCAG- - - - ACGT- TG- - - - - - - - - - - AGATT- - - - - - - - - - - TACCTGG 75933  
Dog - - - - - AATA- - - - - TACCCAT- TTATAT- TAC- - - - - - - - - - - AGCATTTTCTTTGAAATG- AATA- A- - - TTTTTTT 68906  
BelugaWhale - - - - - TGTG- - - - - TAGCAGA- CAACAC- TG- - - - - - - - - - - AGATTAAACCTAAAAAAA- AAAA- A- - TTACCTTA 67935  
Donkey - - - - - AGTACTTTTTTGGAGCATCGTATGTGTAC- - - - - - - - - - - GAAGCATCATACCAAGTA- TACGTGTAGTGGTTTCG 75868  
Cat - - - - - TGTG- - - - - TGTCCATCATATGT- TAC- - - - - - - - - - - AGCATTTTCTTTTTTGG- AGTG- AATTCTTTTTT 73937  
Ferret - - - - - AATA- - - - - TACCCTAACTCTAT- TAC- - - - - - - - - - - AGCATTTTCTTTGAAATG- AATA- AATGTATCTTT 76740  
Lion - - - - - ACAG- - - - - CATTT- TCTTTTT- GGA- - - - - - - - - - - AGTGAATTCTTTTTTTTT- TTTT- TTTTTTTTTT 71621  
Vaquita - - - - - TGTG- - - - - TAGCAGA- CAACAC- TG- - - - - - - - - - - AGATTAAACCAAAAAAAAA- AAAA- A- - TTACCTTA 69229  
Pig - - - - - AATG- - - - - TAGCAGC- CAACAT- TG- - - - - - - - - - - AGATTATTAACCTAAGA- AAAA- A- - CTACCTGA 69091

Dienstag, 3. Mai 2022 08:40

| Majority    | TT- XATTTXTT- - - - TATTTTTTGGAGA- - - - - ACCAXATATX- - - TGAAX- - - GAXATCGTGGCAAXTATXCXTAG-   |       |       |       |       |       |       |       |       |
|-------------|--------------------------------------------------------------------------------------------------|-------|-------|-------|-------|-------|-------|-------|-------|
|             | 99210                                                                                            | 99220 | 99230 | 99240 | 99250 | 99260 | 99270 | 99280 |       |
| Human       | TTTTTTTTTTTTTTTTAATGTTTCAGATCTGTCACACTAAAAGGGCTTTAGACCAGGTGTTGTGGCTCACACCTGTAAT                  |       |       |       |       |       |       |       | 79414 |
| PolarBear   | TTTAATTCCTTAG- - TATTTCTCAAGA- - - - - ACCACATATGT- ACAAAA- - - AACATCATACCAAGTATACATGG-         |       |       |       |       |       |       |       | 38888 |
| Cow         | TT- GACAGAAT- - - - - TTTTA- GAGA- - - - - AGAATATAC- - - - TGAAG- - - GAAATTGTGGGATCTATCTTCAG-  |       |       |       |       |       |       |       | 75989 |
| Dog         | TTTAATTCCTTAG- - TATTTCTTGGAGA- - - - - AACATACAT- - - - - A- - - - - CATCATACCGAATATACATGG-     |       |       |       |       |       |       |       | 68962 |
| BelugaWhale | TT- GACGAAAT- - - - - TTTTTAGAGA- - - - - AGAATATAC- - - - TGAAG- - - GAAATGGTGGAAACTATCCTTAG-   |       |       |       |       |       |       |       | 67992 |
| Donkey      | CAAAATATTGTCTACAGATCTTTGAGA- - - - - GCCCCTGAGACCNTGAGG- - - GAAATTGTGGAATATGTTCTTAG-            |       |       |       |       |       |       |       | 75936 |
| Cat         | TTCCGATTCTT- - - - TATTTATTGATA- - - - - ACCACAGATGT- ACAAAA- - - - GCATCATACCAAGAATACATGG-      |       |       |       |       |       |       |       | 73998 |
| Ferret      | TT- AATTCTCTTG- - TATTTCTTCAGA- - - - - ACCACATATGA- AAAAA- - - - ACATCATATGAAGTATACATGG-        |       |       |       |       |       |       |       | 76802 |
| Lion        | TCCCAATTCCT- - - - TATTTATTGATA- - - - - ACCACAGATGT- ACAAAA- - - - GCATCATACCAAGAATACATGG-      |       |       |       |       |       |       |       | 71682 |
| Vaquita     | TT- GACAAAAT- - - - - TTTTTAGAGA- - - - - AGAGTATAC- - - - TGAAG- - - GAAATGGTGGAAACTATCCTTAG-   |       |       |       |       |       |       |       | 69286 |
| Pig         | CT- GACAAAAGT- - - - - GATTT- TTTT- - - - - AGAGTATAC- - - - TGAGA- - - GAAATTGTGGAATCTATCCTTAG- |       |       |       |       |       |       |       | 69147 |

| Majority    | - - CAGCTXT- C- - - - - ACAAGXTCXCTAGAGAXC- - - - TCTX- GACTATTCTAAT- - - - - AGATT    |       |       |       |       |       |       |       |       |
|-------------|----------------------------------------------------------------------------------------|-------|-------|-------|-------|-------|-------|-------|-------|
|             | 99290                                                                                  | 99300 | 99310 | 99320 | 99330 | 99340 | 99350 | 99360 |       |
| Human       | CCCAGCACTTTGACAGGTC AAGGTGGGAGGATTGCTGGAGGCCAGGAGTTT GAGACCAGCCTGAGCAACATAGTGAGATC     |       |       |       |       |       |       |       | 79494 |
| PolarBear   | - - CAGTAGT- C- - - - - ACAAATATCTAGAGATC- - - - TCTCGGACTG- - TAACAGT- - - - - TAAAAT |       |       |       |       |       |       |       | 38937 |
| Cow         | - - AGGCTTT- T- - - - - AAAGGTCCAGTAAAAACT- - - - GCAA- GACTATTCTAGT- - - - - GACT     |       |       |       |       |       |       |       | 76035 |
| Dog         | - - CAGTGGTTC- - - - - ACAAAGTATCTGGAGATC- - - - TCTCCGGCTC- - TAAC- - - - - AAAGT     |       |       |       |       |       |       |       | 69008 |
| BelugaWhale | - - AGGCTTT- - - - - AAAAGTCCAATAGAAACC- - - - TCAA- GACTATTCTAGT- - - - - GATT        |       |       |       |       |       |       |       | 68037 |
| Donkey      | - - AGGCTTT- - - - - AAAAGTCCAGTAAAAA- C- - - - TCA- - GACTATTCTAGT- - - - - GATT      |       |       |       |       |       |       |       | 75979 |
| Cat         | - - CAGTGGTTC- - - - - ACAAATGTTT AGAGATC- - - - TCTGGAGGCC- TCTTAGGGTTTCTAACAA- GT    |       |       |       |       |       |       |       | 74055 |
| Ferret      | - - CAGTGGTTC- - - - - ACGGAATATCTGGAGATC- - - - TCTCAGACTC- - TTAG- - - - - CAAAAT    |       |       |       |       |       |       |       | 76849 |
| Lion        | - - CAGTGGTTC- - - - - ACAAATGTTT AGAGATC- - - - TCTGGAGGCCCTCTTAGGGTGTCTAACAAAGT      |       |       |       |       |       |       |       | 71741 |
| Vaquita     | - - AGGCTTT- - - - - AAAAGTCCAATAGAAACC- - - - TCAA- GACTATTCTAGT- - - - - GATT        |       |       |       |       |       |       |       | 69331 |
| Pig         | - - AGGCTTT- - - - - AGAAGTTTAGTAAAAACC- - - - TCA- - GATTATTCTAGT- - - - - GATT       |       |       |       |       |       |       |       | 69191 |



Dienstag, 3. Mai 2022 08:40

| Majority    | - - - - CCXTCXTCTCTTAAAAXAGTTXTT- - - - - XACTTTX- - - - - XXCTCTGGTCTGTCAAAAATGAAGA- AAXATXATT      |       |       |       |       |       |       |       |       |
|-------------|------------------------------------------------------------------------------------------------------|-------|-------|-------|-------|-------|-------|-------|-------|
|             | 99530                                                                                                | 99540 | 99550 | 99560 | 99570 | 99580 | 99590 | 99600 |       |
| Human       | GCAAACCTTGTCTCAAAAATAAAGGGTGGGGAAGCTTTAGCCTAGGCTTTTAATTCTCAATTACCATTATAAATTTATT                      |       |       |       |       |       |       |       | 79734 |
| PolarBear   | - - - - - TCTTTGTAAAACAGGTCTT- - - - - GGCTTTT- - - - - ATTTCTGATATGTTAAATATCAGTT- GATATAACC         |       |       |       |       |       |       |       | 39106 |
| Cow         | - - - - - CCATCTCTGACAGTATTTTT- - - - - CACCAT- - - - - GCTCTGGACTGCCTAAAATGAAGG- AAGATCATT          |       |       |       |       |       |       |       | 76196 |
| Dog         | - - TCTTTTTTTTTTAAATAAAAAGTTCTT- - - - - GATTTTTT- - - - - GTTTCTGGTGTGTTAAATATCAGTT- GATATACCC      |       |       |       |       |       |       |       | 69186 |
| BelugaWhale | - - - - - CCCTCATCTCTTGAAGTACTTTTG- - - - - CATCAT- - - - - GCTCTGGGCTGCCTAAAATGAAGA- AAGAACATT      |       |       |       |       |       |       |       | 68203 |
| Donkey      | - - - - - CCTTCATCTCTTAAAGCACTCTTG- - - - - CACTGT- - - - - ACTCCGGGCTGCCTAAAATGAAGA- AGGATCATT      |       |       |       |       |       |       |       | 76133 |
| Cat         | - - - - - TCTTTTTGAAACAGTTCTT- - - - - GGCTTTA- - - - - ATTTCTGATATGTTAA- - - - - - - - - - ATACAAC  |       |       |       |       |       |       |       | 74210 |
| Ferret      | TGTTCTTGTTCTTTTTAAAACAGTTCTT- - - - - GGTTTTT- - - - - ATTTCTGATGTGTCAA- - - - - - TT- GATATAACT     |       |       |       |       |       |       |       | 77024 |
| Lion        | - - - - - TCATTTTTAAAACAGTTCTT- - - - - GGCTTTA- - - - - ATTTCTGATATGTTAA- - - - - - - - - - ATACAAC |       |       |       |       |       |       |       | 71896 |
| Vaquita     | - - - - - CCCTCATCTCTTGAAGTACTTTTG- - - - - CATCAT- - - - - GCTCTGGGCTGCCTAAAATGAAGA- AAGAACATT      |       |       |       |       |       |       |       | 69497 |
| Pig         | - - - - - CCCTCATCTCTGA- AGTACTTTTG- - - - - CACCATA- - - - - TGCTCCGGGCTGCCTAAAATGAAGA- AAGATCATT   |       |       |       |       |       |       |       | 69357 |

| Majority    | TXACXAXATAAXAGATCATTTGTCTTC- - - - - ATTAGTAATTT- CT- - - - - - XAG- - XXGTGXAAAXXGGTGGXGAXAC                     |       |       |       |       |       |       |       |       |
|-------------|-------------------------------------------------------------------------------------------------------------------|-------|-------|-------|-------|-------|-------|-------|-------|
|             | 99610                                                                                                             | 99620 | 99630 | 99640 | 99650 | 99660 | 99670 | 99680 |       |
| Human       | TTAATTATTAAC TAATTACTTTAATTC- TCAATTACTATTTTTCCATGAAAAGGCTTGATGTTCTAAACAGTATTATACC                                |       |       |       |       |       |       |       | 79813 |
| PolarBear   | CAAATAAACAAAAGGTC- TTTGTGATC- - - - - CTCAGTCATTT- CT- - - - - - - - - - AAG- - - - - AGTGTAAAGGGGTCCTGAGAC       |       |       |       |       |       |       |       | 39169 |
| Cow         | TGGCAAGATGATAGATCATCTGTCTT- - - - - AGTACCAAGTGATC- - - - - - - - - - CAGCATGGTAAGAATAAATGGAGAAAT                 |       |       |       |       |       |       |       | 76263 |
| Dog         | CAAATAAACAAAAGGTC- TTTGTGGTC- - - - - CTCAGTAATTTTCT- - - - - - - - - - AAG- - - - - AGTGTAAAGGGGT- - - - - GAGAC |       |       |       |       |       |       |       | 69247 |
| BelugaWhale | TGGCCAGAGGATAGATCATTTGACTTT- - - - - AGTAGCAAGTGACC- - - - - - - - - - CAGCATGGTGAGAATAAATGGAGAAGT                |       |       |       |       |       |       |       | 68271 |
| Donkey      | TGACGGAAGACTAGATCACCTGACTTAGTAGTATAGTGGTCTGCTGTTATCACCCTCTGGT GATGATAGATGGAAAAGT                                  |       |       |       |       |       |       |       | 76213 |
| Cat         | CATT- - - - - TAAAAGCTG- TTTGTATTC- - - - - TTCAGTAAATT- TT- - - - - - - - - - ACG- - - - - AGTATAAAGGGGTCCTGAGAC |       |       |       |       |       |       |       | 74269 |
| Ferret      | CAAA- - - - - CAAAAGGTC- TTTGTGTTT- - - - - CTCAGTAAATT- CT- - - - - - - - - - AAG- - - - - AGTGTAAAGGGGTCCTGAGAC |       |       |       |       |       |       |       | 77083 |
| Lion        | CATT- - - - - TAAAAGCTG- TTTGTATTC- - - - - TTCAGTAAATT- TT- - - - - - - - - - ACG- - - - - AGTATAAAGGGGTCCTGAGAC |       |       |       |       |       |       |       | 71955 |
| Vaquita     | TGGCAAGAGGATAGATCATTTGACTTT- - - - - AGTAGCAAGTGACC- - - - - - - - - - CAGAATGGTGAGAATAAGTGGAGAAGT                |       |       |       |       |       |       |       | 69565 |
| Pig         | TGGCAGGAAAGTAGATCATCTGACTT- - - - - GGTAGCAAGTAGCC- - - - - - - - - - CAG- ATGGTGAGAATAGATGGAGCCGT                |       |       |       |       |       |       |       | 69423 |

Dienstag, 3. Mai 2022 08:40

| Majority    | AXXAAG- - - - - ACTXTXAAAC- - - - ATTTTXAGXATGGXAATACGAAXTTTGGGAAXA- TXATAGCTTAC- XATTXX     |       |       |       |       |       |       |       |       |
|-------------|----------------------------------------------------------------------------------------------|-------|-------|-------|-------|-------|-------|-------|-------|
|             | 99690                                                                                        | 99700 | 99710 | 99720 | 99730 | 99740 | 99750 | 99760 |       |
| Human       | ACCAAGTTATCTCTACTGGAAAACCCAGATTTCAAGAAAAAATAATGTATTTTGAAAACAATTATGTCTTAAATATTTA              |       |       |       |       |       |       |       | 79893 |
| PolarBear   | CAAAAA- - - - - GATTGAGAAC- - - - TTTTTCAGTGTGGGGATACAAAGTTCAAGATAA- TTCTATTAAATAAATAGG      |       |       |       |       |       |       |       | 39236 |
| Cow         | ATGGAG- - - - - ACTGTGAAGT- - - - AGCATTGGGCAGTAGCAACAACATTGGGGATG- TCACAGCTTAC- - ATTCC     |       |       |       |       |       |       |       | 76328 |
| Dog         | CAAAAA- - - - - GATTAAAAGC- - - - TTTTTCAGTATGGGGATACGAAGTTCAAGGAT- - - - - TTTCA- - AGTA- - |       |       |       |       |       |       |       | 69303 |
| BelugaWhale | AGGGAG- - - - - ATTATGAAGT- - - - AGCATTGGATAGTAGCAAGAACAGTGGGGACC- TCATAGCTTAC- - ATTCC     |       |       |       |       |       |       |       | 68336 |
| Donkey      | TGGGAG- - - - - ACTATGAAAT- - - - AGCATTGGACAGTAGTAAGAACAGTGGGGACC- TCCCCGCTTAC- - ATT- -    |       |       |       |       |       |       |       | 76276 |
| Cat         | TAAAA- - - - - GAAC- - - - ATTTTCATTGTGGG- ATACAAAGTTCAAGACTA- TTCTAGTAGATAAGTAGG            |       |       |       |       |       |       |       | 74328 |
| Ferret      | CTAAAA- - - - - GATTGAGAAC- - - - TTTTTCAGTGTGGGGATACAAAGTTGAAGACAA- TTCTATTAGATAAATAGG      |       |       |       |       |       |       |       | 77150 |
| Lion        | TAAAA- - - - - GAAC- - - - ATTTTCATTGTGGG- ATACAAAGTTCAAGACTA- TTGTAGTAGATAAGTAGG            |       |       |       |       |       |       |       | 72014 |
| Vaquita     | AGGGAG- - - - - ATGATGAAGT- - - - AGCATTGGATAGTAGCAAGAACAGTGGGGACC- TCATAGCTTAC- - ATTCC     |       |       |       |       |       |       |       | 69630 |
| Pig         | GGGGAG- - - - - ACTG- - AAGC- - - - AGCATTCCGACGGTAGCAGCAGCAGTGGGGATC- TCACAGCTCAC- - ATTCC  |       |       |       |       |       |       |       | 69486 |

| Majority    | A- - - CT- TTTTAATAAACTTTAXATXGTCXTCATACTAGA- AGG- AXGTAAAXTGAATA- TXCTTGXGAXCXAXAAAATT     |       |       |       |       |       |       |       |       |
|-------------|---------------------------------------------------------------------------------------------|-------|-------|-------|-------|-------|-------|-------|-------|
|             | 99770                                                                                       | 99780 | 99790 | 99800 | 99810 | 99820 | 99830 | 99840 |       |
| Human       | AAATTCTTTTAAACATGTTTTTAACCATCTTTAAATTTTTTTGGTAAGTAATTTTCATTAGATTGTTAAAATGTATAGTG            |       |       |       |       |       |       |       | 79973 |
| PolarBear   | A- - - GTATTTTAATAAACAGAAAGATGGCGGTAAGAGTCAG- AAG- ATATAAAGGGAATA- TGCTAGGGATATAGGGAATT     |       |       |       |       |       |       |       | 39310 |
| Cow         | A- - - CT- TTTTGCTAAGCTTTCCATTGCTGCTTTACTAGG- AGG- AGGTAAATTGTATT- TGCTTT- GAGTCACAAAATT    |       |       |       |       |       |       |       | 76400 |
| Dog         | - - - - - TTTTAATAAACAGAAAGATGGTGATAAAGAGTT- - - GAG- ATGTACAGAGAAAA- TGCTAGGAAT- TAGGAAATT |       |       |       |       |       |       |       | 69370 |
| BelugaWhale | A- - - CA- TTTTGCTGAGCTTTCCATTATCTCCTTACTAGA- AGG- AGATAAATTGTATC- TACTTG- GAGCCACAAAATT    |       |       |       |       |       |       |       | 68408 |
| Donkey      | - - - - - TGTGCTAAACTTTCCATTACTTCCATAATAGA- AGG- AGGTAAATTGCATC- TACTTTGAACCCA- AAGTTT      |       |       |       |       |       |       |       | 76344 |
| Cat         | A- - - GTATTTTAATGAACA- - AGATGGCAGTGAAGAGTA- - GAG- ATGTACAGGGAAGA- TGCTAGGGAT- TAGG- TCAT |       |       |       |       |       |       |       | 74397 |
| Ferret      | A- - - TTGTTTTAATAAACAGAAAGACGGTGGTAAGAGTCAA- GAG- ATTTACAGGGAATAATGTTAGGGATTTAGG- AATT     |       |       |       |       |       |       |       | 77224 |
| Lion        | A- - - GTATTTTAATGAACA- - AGATGGCAGTGAAGAGTA- - GGG- ATGTACAGGGAATA- - - - - - - - - - - T  |       |       |       |       |       |       |       | 72066 |
| Vaquita     | A- - - CA- TTTTGCTGAGCTTTCCATTATCTCCTTACTAGA- AGG- AGATAAATTGTATC- TACTTG- GAGCCACAAAATT    |       |       |       |       |       |       |       | 69702 |
| Pig         | T- - - CT- CTTTGCTAAGCTTTTTCACTATCTTCTTACTAGA- AGGGAGGTAAAATGTATC- TACTT- - GAGCCACAAAATT   |       |       |       |       |       |       |       | 69558 |



Dienstag, 3. Mai 2022 08:40

| Majority    | TCTCAXA- - - - TTAATXTTAGTAXATAATTATGTTTXATTTTT- ACTAAAGTGTTATGXT- - - - TTAGTAAAACCTGAA               |       |
|-------------|--------------------------------------------------------------------------------------------------------|-------|
|             | 99850 99860 99870 99880 99890 99900 99910 99920                                                        |       |
| Human       | GCACGGTAGGGTTGTATCTCAAGATATGAAGCAGTTTTTTCATAAAAATAAAGTATTAACCTTAGGCTGGTATGTTTAGAT                      | 80053 |
| PolarBear   | TTTTAGA- - - - TTAATTTTGGTATCTAAATATAATTAATT- - - - GTTCAGTTGTTTGGT- - - - TTAGTGAGCCCTGAA             | 39376 |
| Cow         | TCA- - - - - - - - - - - - - - - TGAGAAAATTATTA- GTCTCATTTTT- ACTAAAGTGTAATGTT- - - - TATTTAAAACCTGGC  | 76458 |
| Dog         | TTTTAGA- - - - TGAATTTTGGTAACTAATAACAATTAATTGTTTCAGTTAATTTTTGGGGGG- - - TTAGTCTACCCTGAA                | 69442 |
| BelugaWhale | TCACAAA- - - - TATTT- TCACAAGAAAATTAAGTCTTATTTTT- ACTAAAGTGTAATGTTGT- - TTATTTAAAACGTGGC               | 68479 |
| Donkey      | TCTCA- - - - - - - - - - - - - - - TTAGAAGATTAGCA- GTCTTATTTCT- TCTAAAACGCAATGTTGT- - TTATTTAAAATATGAC | 76407 |
| Cat         | TTTTATA- - - - TTAATGTTGGTAACTAATTCT- - TCAGTT- - - - - - - - - AAATTTTTCTGGC- - - - TTAGTGGGCCCTGAA   | 74459 |
| Ferret      | TTTAATA- - - - TTAATTTTGGTATCTAATTATAATTAGTTC- - - AGTAAATTATTTTGGG- - - - TTAGGAAGACCTAAA             | 77292 |
| Lion        | TTTTATA- - - - TTAATGTTGGTAACTAATTCT- - TCAGTT- - - - - - - - - AAATTTTTCTGGC- - - - TTAGTGGGCCCTGAA   | 72128 |
| Vaquita     | TCACGAA- - - - TATTT- TCACAAGAAAATTAAGTCTTATTTTT- ACTAAAGTGTAATGTTGT- - TTATTTAAAACGTGGC               | 69773 |
| Pig         | TCACTAA- - - - TTTTTTTCAGTAGAAAATT- - GTTTTATTTTT- ACTGAAGAGTAATGTT- - - - - TATTTAAAACAGGAA           | 69625 |

| Majority    | AATX- - - - - - - - - TTTTTTATTAGG- - - - TXGTATTGXAA- XCAGAAA- - XGACTTTGACCTAATXTTTT- - - - - - - - -                          |       |
|-------------|----------------------------------------------------------------------------------------------------------------------------------|-------|
|             | 99930 99940 99950 99960 99970 99980 99990 100000                                                                                 |       |
| Human       | CAATACTGTATTTAAATAGATTGATAATTTTTTATATATTTTATGAATTTATACTTTTTCTTGAGATTTTACAGGAGGGAAA                                               | 80133 |
| PolarBear   | AA- - - - - - - - - TTGGTAG- AAT- - - - - TGGAAATGAAA- - CCAGAAA- - TTAAACTGATTTAATTTTTTTAA- - - - - - - - -                     | 39429 |
| Cow         | - - - - - - - - - - - - - - - CTTAAGTCAGG- - - - - TTTTTTCACACT- TAAAAGG- - GGGCTTTAGCCTAGACTTT- - - - - - - - -                 | 76507 |
| Dog         | AATC- - - - - - - - - GTTTGGTA- - AGT- - - - - TGAAAATGAAA- - CCAGAAA- - TTAAACTGACTTAATTTTTTT- AT- - - - - - - - -              | 69497 |
| BelugaWhale | ATTC- - - - - - - - - TTTTTTTTAAA- - - - - GTCTTTTCACATT- TCAAAAA- - GGGCTTTAGCCTAGTCTCTT- - - - - - - - -                       | 68533 |
| Donkey      | ATTCTCTGGCATTTTTTTTTTAAGGTCTCCGGTCTATCACACTGAAAAA- - GGACTTTAACCTAGACACTT- - - - - - - - -                                       | 76475 |
| Cat         | AATT- - - - - - - - - GTTTCTTGTCTGG- - - - - TAGAATTGAAAAACCAGAAA- - TTTAGCTGATTTAATTTTTTT- - - - - - - - -                      | 74516 |
| Ferret      | AAGT- - - - - - - - - GTTTGGTAG- AGT- - - - - TGGAAATGAAA- - CCAGAAA- - TTAAACTGATTTAATTTTTTG- GT- - - - - - - - -               | 77348 |
| Lion        | AATT- - - - - - - - - GTTTCTTGTCTGG- - - - - TAGAATTGAAAAACCAGAAA- - TGTAGCTGATTTAATTTTTTT- - - - - - - - -                      | 72185 |
| Vaquita     | ATTC- - - - - - - - - TTTTTTTTAA- - - - - GTCTTTTCACACT- TCAAAAA- - GGGCTTTAGCCTAGTCTCTT- - - - - - - - -                        | 69826 |
| Pig         | - - - - - - - - - - - - - - - TACGAATTCGG- - - - - CATTCTCTCA- - - - - - - - - - - - - - - GGACTTTCACCTAGACTTTT- - - - - - - - - | 69666 |





Dienstag, 3. Mai 2022 08:40

|             |                                                                                           |        |        |        |        |        |        |        |  |  |       |
|-------------|-------------------------------------------------------------------------------------------|--------|--------|--------|--------|--------|--------|--------|--|--|-------|
| Majority    | GAGA- - - XATGTTXXAGAAAAAGGGXX- - - - TTCTTTAAAAA- - - - - TGAAGTG- - - - - CCTX          |        |        |        |        |        |        |        |  |  |       |
|             | 100330                                                                                    | 100340 | 100350 | 100360 | 100370 | 100380 | 100390 | 100400 |  |  |       |
| Human       | GTA ACTGA AGGCTA ATAGTATGTGTGTTTATGTGCTTTAAAAAGTTTCGTGGT TTTGGCCAGGCGCAGTGGCTCAGACCTG     |        |        |        |        |        |        |        |  |  | 80533 |
| PolarBear   | GCCAATTA AAGGCAGGGA AACAAGGGAA- - - TGATTTGACAA- - - - - TGT AATG- - - - - CCTA           |        |        |        |        |        |        |        |  |  | 39685 |
| Cow         | GAGA- - - TATATTTT AGAAGAA ACCATT- - - TTCTATAGAAA- - - - - TGAAGCA- - - - - TTTG         |        |        |        |        |        |        |        |  |  | 76766 |
| Dog         | GT- - - - - GAAACAAGGGAA- - - TGATTTGACAG- - - - - CGT AATG- - - - - CCTA                 |        |        |        |        |        |        |        |  |  | 69733 |
| BelugaWhale | GAGA- - - TGTATTTT AGAAGAA ACCGTT- - - TTCTGCAAAAA- - - - - TGAAGTG- - - - - TTT-         |        |        |        |        |        |        |        |  |  | 68785 |
| Donkey      | GAGA- - - TATATTTT AGAAGAA AC- - - - - TTCTGCAGAGA- - - - - TGAAGTG- - - - - TTAA         |        |        |        |        |        |        |        |  |  | 76776 |
| Cat         | GCCAATTA AAGTCAAGGGA AATGAGGAAA- - - TAATTTGACAG- - - - - TGT AATG- - - - - CCTG          |        |        |        |        |        |        |        |  |  | 74774 |
| Ferret      | GCCAATGAAACACAGGGA AACAAGGGAA- - - TGA CTTGACAA- - - - - TGCAATG- - - - - CCTA            |        |        |        |        |        |        |        |  |  | 77598 |
| Lion        | GCCAATTA AAGTCAAGGGA AATGAGGAAA- - - TAATTTGACAG- - - - - TGT AATG- - - - - CCTG          |        |        |        |        |        |        |        |  |  | 72442 |
| Vaquita     | GAGA- - - TGTATTTT AGAAGAA ACCGTT- - - TTCTGCAAAAA- - - - - TGAAGTG- - - - - TTT-         |        |        |        |        |        |        |        |  |  | 70078 |
| Pig         | GAGAG- ATGTGTTT CAGAAGAA ACTGTT- - - TTCTGCAAAAA- - - - - CGAAGTG- - - - - TTC-           |        |        |        |        |        |        |        |  |  | 69915 |
| Majority    | C- - ATCTAGAGT- TTXTG- - - CCAAGATTGAXTAATXGXGTT- - - - - XTGCTAXTTT TAGTT- - GA          |        |        |        |        |        |        |        |  |  |       |
|             | 100410                                                                                    | 100420 | 100430 | 100440 | 100450 | 100460 | 100470 | 100480 |  |  |       |
| Human       | TAATCCCAGCACTTTGGGAGGCTGAGGCAGGTGGATCACCTGAGGTCAGGAGTTC AAGACCAA AACAGCCTGGCC- - - A      |        |        |        |        |        |        |        |  |  | 80610 |
| PolarBear   | C- - ATCTGGAGT- TTCTG- - - CCACTGT CGAATAATTGTGTT- - - - - ATCAACTTTAGTT- - GA            |        |        |        |        |        |        |        |  |  | 39736 |
| Cow         | TTTACCTAGGCTGTTGTG- - - TGTAGACTGATATAGCAAATGTA- - - - - TTGATGTTTTATAC- - AT             |        |        |        |        |        |        |        |  |  | 76823 |
| Dog         | - - - ATCTGGAGT- TTCTG- - - CCACGATTGAATAATTGTGTTTATTTACAATAACAGCACAATAACAGCTTTAGTT- - GA |        |        |        |        |        |        |        |  |  | 69804 |
| BelugaWhale | - - - - - AGACTGTTGTG- - - TTTAGACTGATAAATCAAATGTA- - - - - TTGATGTTTTATAT- - GT          |        |        |        |        |        |        |        |  |  | 68835 |
| Donkey      | C- - CTAGACTGTTGTG- - - TTTAGATTGACATATCGAATTTA- - - - - GGGAGATTGATATTTTATATTATT         |        |        |        |        |        |        |        |  |  | 76838 |
| Cat         | C- - ATCTGGAGT- TTCTG- - - CCAGTGTGAAATAATTGTGTT- - - - - GTCAACTTTAGTT- - GA             |        |        |        |        |        |        |        |  |  | 74825 |
| Ferret      | C- - CTCTAGAGT- TTCTG- - - CCACTATTGAATAATTGTGTT- - - - - ACCGACTTAAGTT- - GA             |        |        |        |        |        |        |        |  |  | 77649 |
| Lion        | C- - ATCTGGAGT- TTCTG- - - CCAGTGTGAAATAATTGTGTT- - - - - GTCAACTTTAGTT- - GA             |        |        |        |        |        |        |        |  |  | 72493 |
| Vaquita     | - - - - - AGACTGTTGTG- - - TTTAGACTGATAAATGTATTGA- - - - - TGT TTTTTTATAT- - GT           |        |        |        |        |        |        |        |  |  | 70126 |
| Pig         | - - - - - A- - - - - GATTTATTTATCAACT- - - - - TTGTTATTTTAT- - - - GT                     |        |        |        |        |        |        |        |  |  | 69946 |

Dienstag, 3. Mai 2022 08:40

| Majority    | ATXTXATGAAXXXTXAXTTT- GCXACAACCTATCAAAA- - - - - AAGAAXXATA- AAGGTA- - - - - XGCTACTTA               |
|-------------|------------------------------------------------------------------------------------------------------|
|             | 100490 100500 100510 100520 100530 100540 100550 100560                                              |
| Human       | ACATGGTGAAACCCCATCTCTACTAAAATACAAAATTAGCCAGGCATGGTAGTGGGTGCCTGTAGTCTCAGCTACTCG 80690                 |
| PolarBear   | ATGCTATGTACATTCA- - - - GCCACAACCTATCTAAA- - - - - AAATACTTTC- AAGGAA- - - - - TGCTAATTA 39793       |
| Cow         | GTTTCATGAATTACTAGTTTTTTCTTGAATTAGCAACA- - - - - AAGAAAAATG- - - - ATA- - - - - AACTACTTA 76882       |
| Dog         | TTGCTATGTACATTGA- - - - GCCACAACCTATCTGAA- - - - - AA- TACTG- - - AAGGAA- - - - - TGATATTTA 69858    |
| BelugaWhale | GTTTCATGAATTAGTAATTTTTCTTGAATATCAACA- - - - - GAGAAAGACAAATGATA- - - - - AGTAACTT- 68897             |
| Donkey      | GTTTCGTGAATTAGTAACTTTTCTTGAATTGTCAAAA- - - - - GGGAAAGAGGAGTAGTA- - - - - GGTGACGTA 76901            |
| Cat         | ATGGTATGTACATTCA- - - - GCCACAGCTAT- - - - - ACTT- - - AAGGAA- - - - - TACTATATT 74871               |
| Ferret      | ATGCTATGTACATTCATTCA- GCCACAACCTATCTGAA- - - - - AAATACTTTC- AAGAAA- - - - - TGATAATTA 77710         |
| Lion        | ATGGTATGTACATTCA- - - - GCCACAGCTATCTGAA- - - - - AA- TACTT- - - AAGGAA- - - - - TACTATATT 72547     |
| Vaquita     | GTTTCATGAATTAGTAATTTTTCTTGAATATCAACA- - - - - GAGAAAGACAAATGATA- - - - - AGTAACTTA 70189             |
| Pig         | ATTTTCATGAATTAGTAATTT- - - - AAAAATATCAACA- - - - - GGGAAAGACA- - - - - ATA- - - - - AGTAACTTA 70001 |

| Majority    | A- - - - - A- - - ATAAG- - - - AXTTGGAGGGG- - - - -                                         |
|-------------|---------------------------------------------------------------------------------------------|
|             | 100570 100580 100590 100600 100610 100620 100630 100640                                     |
| Human       | AGATGCTGAGGCAGGAGAATCACTTGAAGCTGGGAGGTGGAGGTTGCAGTGAGCCAAAATCTCGCCATTACACTCCAGCC 80770      |
| PolarBear   | A- - - - - A- - - GGAGG- - - - AGGGGGAGGG- - - - - 39810                                    |
| Cow         | G- - - - - AACTATAA- - - - TTTGGGAACCT- - - - - 76902                                       |
| Dog         | A- - - - - AG- - AAAGG- - - - ACGAGGAGGGG- - - - - 69877                                    |
| BelugaWhale | - - - - - TATAAG- - - - TTTTGAATCTAA- - - - - 68916                                         |
| Donkey      | G- - - - - AACTGTAAG- - - - TTTTGAAGTGTGAGTAGTGTGTAATATACCTGTCATATATTAGAGCATTCTTTACCT 76970 |
| Cat         | T- - - - - A- - - AAGAA- - - - AGGATGAGGGG- - - - - 74889                                   |
| Ferret      | A- - - - - A- - - AGAGG- - - - AGGGGGAGGGG- - - - - 77728                                   |
| Lion        | T- - - - - A- - - AAGAA- - - - AGGATGAGGGG- - - - - 72565                                   |
| Vaquita     | A- - - - - AACTATAAG- - - - TTTTGAATCTAA- - - - - 70212                                     |
| Pig         | G- - - - - G- - - - - TATTAGAATCT- - - - - 70014                                            |

Dienstag, 3. Mai 2022 08:40

| Majority    | ----- TCATTTCTA- - A- ----- GAGTATGCAAAAACAAAATXAC- - - TGTGA                     |        |        |        |        |        |        |        |  |  |       |
|-------------|-----------------------------------------------------------------------------------|--------|--------|--------|--------|--------|--------|--------|--|--|-------|
|             | 100650                                                                            | 100660 | 100670 | 100680 | 100690 | 100700 | 100710 | 100720 |  |  |       |
| Human       | TGGGGGACAAGAGCAAGACTCCATCTCAAAAAAAAAAAAAAAAAAAGTTATTGGTTTTAATTTTGGAAATGACAACCATTA |        |        |        |        |        |        |        |  |  | 80850 |
| PolarBear   | ----- CCATTTTCTA- - A- ----- GAGTGTGCAAAACCAAATTAC- - - TGTGA                     |        |        |        |        |        |        |        |  |  | 39848 |
| Cow         | ----- ACGTATCTCA- - - ----- GAATATGCAGGAACAAAATGAC- - - TGTGA                     |        |        |        |        |        |        |        |  |  | 76939 |
| Dog         | ----- TCATTTTCTA- - A- ----- GAGTATGAAGAAACAA- - - TAC- - - TGTGA                 |        |        |        |        |        |        |        |  |  | 69912 |
| BelugaWhale | ----- CTACATGTCTAATAA- - - ----- GAGTATGCAAGATCAAATGAC- - - TGTGA                 |        |        |        |        |        |        |        |  |  | 68958 |
| Donkey      | TTCAAATAAATGCTTCTTTTTAATTTCTTAGTACTTTTTGAGCATCGTATGTGTACGAAGCATCATACCAAG- - TATAC |        |        |        |        |        |        |        |  |  | 77047 |
| Cat         | ----- TCACTTTCTA- - A- ----- CAGTATTCAAAAACAAAATTAC- - - TATCA                    |        |        |        |        |        |        |        |  |  | 74927 |
| Ferret      | ----- TCATTTTCTA- - A- ----- GAGTGTTCAAAAACAAAATTAC- - - AGTGA                    |        |        |        |        |        |        |        |  |  | 77766 |
| Lion        | ----- TCACTTTCTA- - A- ----- CAGTATTCAGAAACAAAATTAC- - - TGTTA                    |        |        |        |        |        |        |        |  |  | 72603 |
| Vaquita     | ----- CTACATGTCTAATAA- - - ----- GAGTATGCAAGATCAAATGAC- - - TGTGA                 |        |        |        |        |        |        |        |  |  | 70254 |
| Pig         | ----- ACAGGTCTAA- - - ----- GAGTATGCAAAAACAAAACG- - - - - TGA                     |        |        |        |        |        |        |        |  |  | 70047 |

| Majority    | GTGCA- - - - - TXCCTA- - - - -                                                  |        |        |        |        |        |        |        |  |  |       |
|-------------|---------------------------------------------------------------------------------|--------|--------|--------|--------|--------|--------|--------|--|--|-------|
|             | 100730                                                                          | 100740 | 100750 | 100760 | 100770 | 100780 | 100790 | 100800 |  |  |       |
| Human       | ATAGAACCACATTAGGCCGGGCGCGGTGGCTCATGCCTGTAATCCTAGCACTTTGGGAGGCCGAGACGGGTGGATCACG |        |        |        |        |        |        |        |  |  | 80930 |
| PolarBear   | GTG- - - - -                                                                    |        |        |        |        |        |        |        |  |  | 39851 |
| Cow         | GTACA- - - - - TACCTA- - - - -                                                  |        |        |        |        |        |        |        |  |  | 76950 |
| Dog         | GTGCA- - - - - TGTCTA- - - - -                                                  |        |        |        |        |        |        |        |  |  | 69923 |
| BelugaWhale | GTACA- - - - - TACCTA- - - - -                                                  |        |        |        |        |        |        |        |  |  | 68969 |
| Donkey      | GTGTAGT- - - - - GGTTCGCAAATATTGTCTACAGATCTTTGAGAGCCCCTGAGACCCTCTCTAGAGGTCCA    |        |        |        |        |        |        |        |  |  | 77114 |
| Cat         | GTGCA- - - - - TATCTA- - - - -                                                  |        |        |        |        |        |        |        |  |  | 74938 |
| Ferret      | GTGTA- - - - - TGTGTA- - - - -                                                  |        |        |        |        |        |        |        |  |  | 77777 |
| Lion        | GTGCA- - - - - TACCTA- - - - -                                                  |        |        |        |        |        |        |        |  |  | 72614 |
| Vaquita     | GTACA- - - - - TACCTA- - - - -                                                  |        |        |        |        |        |        |        |  |  | 70265 |
| Pig         | GTACA- - - - - TGCTTA- - - - -                                                  |        |        |        |        |        |        |        |  |  | 70058 |

Dienstag, 3. Mai 2022 08:40

| Majority    | - XG- - - - - AATTAGGAATGTAT- - - - - CXGTXTXCTTG- - - - - AC                        |       |
|-------------|--------------------------------------------------------------------------------------|-------|
|             | 100810 100820 100830 100840 100850 100860 100870 100880                              |       |
| Human       | AGGTCAGGAGATCAAGACCATCTTGGCTAACACGGTGAAACCCCGTTT-CTACTAAAAATACAAAAAATTAGCCGGGCGT     | 81009 |
| PolarBear   | - - - - - ATTTA- - - - -                                                             | 39856 |
| Cow         | - GG- - - - - AATTAGGAATGTAT- - - - - CTTT- - - - - AC                               | 76972 |
| Dog         | - AG- - - - - AACGGGAAATACGT- - - - - CTGTATACTTG- - - - - TC                        | 69952 |
| BelugaWhale | - GG- - - - - AATTAGGAATGTAT- - - - - C- TT- - - - - AC                              | 68990 |
| Donkey      | CAA- - - - - AATCAAAACTATTTTCATGATAATACTAAAATGTTGTTTGCCTTTTGACTCTCATTTTCTCAATAGAATAC | 77188 |
| Cat         | - AG- - - - - AATTGGGAATGTAT- - - - - CCTCATACTTG- - - - - CC                        | 74967 |
| Ferret      | - AG- - - - - AATTGGTAATATAT- - - - - CTGTATACTTG- - - - - TC                        | 77806 |
| Lion        | - AG- - - - - AATTGGGAATGTAT- - - - - CCTCATACTTG- - - - - CC                        | 72643 |
| Vaquita     | - GG- - - - - AATTAGGAATGTAT- - - - - C- TT- - - - - AC                              | 70286 |
| Pig         | - GG- - - - - AATTACGAATTTATAT- - - - - CTGTGTACTTG- - - - - AC                      | 70089 |

| Majority    | ATTGG- - - - - CAGCAAATT- - - AA- - - GAT- - - - -                                  |       |
|-------------|-------------------------------------------------------------------------------------|-------|
|             | 100890 100900 100910 100920 100930 100940 100950 100960                             |       |
| Human       | GTTGGCGGGCGCCTGTAGTCCCAGCTACTTGGGAGGCTGAGGCAGGAGAATGGCATGAACCTGGGAGGCGGAGCTTGCAG    | 81089 |
| PolarBear   | - - - - -                                                                           | 39856 |
| Cow         | ATTGG- - - - - CAGCATTTT- - - AA- - - GAT- - - - -                                  | 76991 |
| Dog         | ATTGG- - - - - CAGCAAATT- - - AA- - - GAT- - - - -                                  | 69971 |
| BelugaWhale | AGTGG- - - - - CAGCATTTT- - - AA- - - GAT- - - - -                                  | 69009 |
| Donkey      | GTTGGAGTTTTCTACATCACTCTGCAAAC- - - AACAGGATGTGTGATCTTGTGTTCCCTGTGCTTTAAAGTTCTTGGTTT | 77265 |
| Cat         | TTTGG- - - - - CAGCAAATT- - - AA- - - GAT- - - - -                                  | 74986 |
| Ferret      | ATTGG- - - - - CAGCAAATT- - - AA- - - GAT- - - - -                                  | 77825 |
| Lion        | ATTGG- - - - - CAGCAAATT- - - AA- - - GAT- - - - -                                  | 72662 |
| Vaquita     | AGTGG- - - - - CAGCATTTT- - - AA- - - GAT- - - - -                                  | 70305 |
| Pig         | TTGGG- - - - - CAGCATATT- - - AA- - - GAT- - - - -                                  | 70108 |

Dienstag, 3. Mai 2022 08:40

| Majority    | ----- ATC----- XATTGAATGT----- TAAAT----- GGAAAC-----                                 |        |        |        |        |        |        |        |  |
|-------------|---------------------------------------------------------------------------------------|--------|--------|--------|--------|--------|--------|--------|--|
|             | 100970                                                                                | 100980 | 100990 | 101000 | 101010 | 101020 | 101030 | 101040 |  |
| Human       | T GAGCCGAGAT CACGCCACT GCACT CCAACCT GAGAGACACAGCGAGACT CCGTCTCGAAAAAAAAAAAAAAAAAAAAA |        |        |        |        |        |        | 81169  |  |
| PolarBear   | -----                                                                                 |        |        |        |        |        |        | 39856  |  |
| Cow         | ----- AGC----- CATTGAATGT----- TAAAT----- GGAAAC-----                                 |        |        |        |        |        |        | 77015  |  |
| Dog         | ----- ATC----- TTTTAAATGT----- TAAAT----- GGAAGT-----                                 |        |        |        |        |        |        | 69995  |  |
| BelugaWhale | ----- ATC----- CATTGAATGT----- TAAAT----- GGAAAC-----                                 |        |        |        |        |        |        | 69033  |  |
| Donkey      | TAATTTCTGATA--- TTTTAAACGTCAGTTGATAGAACCCAAGTAAAC----- AAAAACTCTTTGCAGTCCTCAGT        |        |        |        |        |        |        | 77333  |  |
| Cat         | ----- ATC----- TATTGAATGT----- TAAAT----- GGAAAC-----                                 |        |        |        |        |        |        | 75010  |  |
| Ferret      | ----- ATA----- CATTGAATGT----- TAAAT----- GGAAGC-----                                 |        |        |        |        |        |        | 77849  |  |
| Lion        | ----- ATC----- TATTGAATGT----- TAAAT----- GGAAAC-----                                 |        |        |        |        |        |        | 72686  |  |
| Vaquita     | ----- ACC----- CATTGAATGT----- TAAAT----- GGAAAC-----                                 |        |        |        |        |        |        | 70329  |  |
| Pig         | ----- ATG----- TTTTCAATGT----- TAAAT----- GGAAAC-----                                 |        |        |        |        |        |        | 70132  |  |

| Majority    | - AACCTATA----- AAG- T-- TAA----- T-- GAG                                        |        |        |        |        |        |        |        |  |
|-------------|----------------------------------------------------------------------------------|--------|--------|--------|--------|--------|--------|--------|--|
|             | 101050                                                                           | 101060 | 101070 | 101080 | 101090 | 101100 | 101110 | 101120 |  |
| Human       | GAACCCACATTAACAAAAACTCCTTGTGATTCTCCATAGTTTTAAGACTATAAAGGGGAGCTGAGACCAAAAAGTTTGAG |        |        |        |        |        |        | 81249  |  |
| PolarBear   | -----                                                                            |        |        |        |        |        |        | 39856  |  |
| Cow         | - AACCTATG----- AAG- TATAA----- C-- GGG                                          |        |        |        |        |        |        | 77035  |  |
| Dog         | - AACCTATA----- AAG- TATAA----- T-- GAG                                          |        |        |        |        |        |        | 70015  |  |
| BelugaWhale | - AGCCTATC----- AAA- TGTAA----- T-- GAG                                          |        |        |        |        |        |        | 69053  |  |
| Donkey      | AAGTCTTAA----- GAG- TGTAAAGGGGTCTGAGACCAAAAAGTTTGAG                              |        |        |        |        |        |        | 77377  |  |
| Cat         | - AACCTATG----- AAG- TGTAA----- TCAGAG                                           |        |        |        |        |        |        | 75032  |  |
| Ferret      | - AACCTGTA----- AGG- TATAA----- T-- GAG                                          |        |        |        |        |        |        | 77869  |  |
| Lion        | - AACCTATG----- AAG- TGTAA----- TCATAG                                           |        |        |        |        |        |        | 72708  |  |
| Vaquita     | - AGCCTATC----- AAA- TGTAA----- T-- GAG                                          |        |        |        |        |        |        | 70349  |  |
| Pig         | - AACCTATA----- AAG- TATAA----- C-- GAG                                          |        |        |        |        |        |        | 70152  |  |



Dienstag, 3. Mai 2022 08:40

| Majority    | AGCTA- - - - - TGG- - - - - TATTT- AAC- - - - -                                    |        |        |        |        |        |        |        |       |
|-------------|------------------------------------------------------------------------------------|--------|--------|--------|--------|--------|--------|--------|-------|
|             | 101130                                                                             | 101140 | 101150 | 101160 | 101170 | 101180 | 101190 | 101200 |       |
| Human       | AACTTTTTCACTGTGGGATACAAAGTTGAAGACAATTATAGTTAAATAAGCAGGAGATACAGAGTATTTTAATGAACAGT   |        |        |        |        |        |        |        | 81329 |
| PolarBear   | - - - - - ATTT- AAC- - - - -                                                       |        |        |        |        |        |        |        | 39864 |
| Cow         | ATCTA- - - - - TGG- - - - - TATTT- AAC- - - - -                                    |        |        |        |        |        |        |        | 77052 |
| Dog         | AGCTA- - - - - TGG- - - - - TATTT- ACT- - - - -                                    |        |        |        |        |        |        |        | 70031 |
| BelugaWhale | AGCTA- - - - - TTA- - - - - TATTT- AAC- - - - -                                    |        |        |        |        |        |        |        | 69070 |
| Donkey      | AACTACTTCAATGTGGGATACAAAGTTTAAAGAGAATTCTAATAGATAAGTAGGAGATAGAGGGTTTTTT- AATAAACAGG |        |        |        |        |        |        |        | 77456 |
| Cat         | GGCTA- - - - - TAG- - - - - TATTT- GC- - - - -                                     |        |        |        |        |        |        |        | 75049 |
| Ferret      | AACTA- - - - - CAG- - - - - TATTT- AAA- - - - -                                    |        |        |        |        |        |        |        | 77886 |
| Lion        | GGCTA- - - - - TAG- - - - - TATTT- GACT- - - - -                                   |        |        |        |        |        |        |        | 72725 |
| Vaquita     | AGCTA- - - - - TTA- - - - - TATTT- AAC- - - - -                                    |        |        |        |        |        |        |        | 70366 |
| Pig         | AGCTC- - - - - TGG- - - - - TACAT- AACG- - - - -                                   |        |        |        |        |        |        |        | 70169 |

| Majority    | - - - - - TGGGGAAGTTAGTAATACTATAGA- - - - -                                         |        |        |        |        |        |        |        |       |
|-------------|-------------------------------------------------------------------------------------|--------|--------|--------|--------|--------|--------|--------|-------|
|             | 101210                                                                              | 101220 | 101230 | 101240 | 101250 | 101260 | 101270 | 101280 |       |
| Human       | AGATGGTTATAAGAGTCAAGAGATGTACAGAGAAAATGCTAGTGATTAG- - - AGTTTTTAGATTATTTTAATTTTGGTAA |        |        |        |        |        |        |        | 81406 |
| PolarBear   | - - - - - TGGGGAAGTTTGACATGCTGTAGA- - - - -                                         |        |        |        |        |        |        |        | 39888 |
| Cow         | - - - - - TGGGGAAGTTAGTAATAACCATAGA- - - - -                                        |        |        |        |        |        |        |        | 77076 |
| Dog         | - - - - - GG- - AAGTTTGTAAATGCTGTAGA- - - - -                                       |        |        |        |        |        |        |        | 70052 |
| BelugaWhale | - - - - - TTGAGAAGTTAGTAATAACCATAGA- - - - -                                        |        |        |        |        |        |        |        | 69094 |
| Donkey      | AGATGG- TGGTTGAGTCAAGAGCTATATAGAGAAAATGCTAGGAATTAGGAGACTTTTGAGATTATTTTAATTTTGGTAA   |        |        |        |        |        |        |        | 77535 |
| Cat         | - - - - - TGGGGAAGTTTGTAACTTTAGA- - - - -                                           |        |        |        |        |        |        |        | 75073 |
| Ferret      | - - - - - TGGGGAAGTTTCGACATGCTGTAGA- - - - -                                        |        |        |        |        |        |        |        | 77910 |
| Lion        | - - - - - TGGGGAAGTTTGTAACTGTAGA- - - - -                                           |        |        |        |        |        |        |        | 72749 |
| Vaquita     | - - - - - TTGAGAAGTTAGTAATAACCATAGA- - - - -                                        |        |        |        |        |        |        |        | 70390 |
| Pig         | - - - - - TGC- - - AGTTAGTAATGCTATAGA- - - - -                                      |        |        |        |        |        |        |        | 70190 |

Dienstag, 3. Mai 2022 08:40

| Majority    | - - - - - ATAGTT - - - - - AGTTAAAAAGATT CACACTAATGGGT CCTAAAAGGCATTAAAGAC - - - T - - - - ACTAA - - XX - |                    |                   |                    |                       |                 |        |        |       |
|-------------|-----------------------------------------------------------------------------------------------------------|--------------------|-------------------|--------------------|-----------------------|-----------------|--------|--------|-------|
|             | 101290                                                                                                    | 101300             | 101310            | 101320             | 101330                | 101340          | 101350 | 101360 |       |
| Human       | CTAATTATAATTC-                                                                                            | CTCAGTTAAGATTTTT   | TGGCTTAGTGGGCCCTT | AGAATTACTTCTTCC-   | TGTTAGAATTAAAAGTG     |                 |        |        | 81484 |
| PolarBear   | - - - - - ACAGTT - - - - -                                                                                | GGTTAAAAAGATCC     | CACACTGGTGGATCC   | AAAAAGGCATCAAAGAC- | - - - T - - - -       | ACAAA - - - - - |        |        | 39945 |
| Cow         | - - - - - ATA - - - - -                                                                                   | AAGTGGTA - - - - - | GATCCTAAAAGGTG    | CTAAAGATTACTTAG    | TATGTAT - - - -       | AATAATGATT      |        |        | 77133 |
| Dog         | - - - - - ATAATT - - - - -                                                                                | GGTTAAAAAGATCC     | CACACTGGTGGATCC   | AAAAAGGCATCAAAGAC- | - - - T - - - -       | ACTAA - - - - - |        |        | 70109 |
| BelugaWhale | - - - - - ACAGTTA - - - - -                                                                               | AAGTGGTG - - - - - | GATCCTAAAAGGCA    | CTAAAGTCTATTATG    | CATG - - - - -        | AGTAATTATT      |        |        | 69152 |
| Donkey      | CTAATTATAGTTAG                                                                                            | CTCAGTTAAGTTTT     | CTAGTTTAGTGGGCC   | CTGAGAATCACTTG     | TGCTGTTAGAACTG        | AAAATG          |        |        | 77615 |
| Cat         | - - - - - ATAATT - - - - -                                                                                | GGTTAAAAAGATT      | CACACCGATGGATCC   | AAAAAGGCATCAAAGA-  | - - - - - A - - - - - |                 |        |        | 75124 |
| Ferret      | - - - - - ATAGTT - - - - -                                                                                | GGTTACAAAGATT      | CACACTAGTGAATCC   | AAAAAGGCATCAAAGAC- | - - - T - - - -       | ACTAA - - - - - |        |        | 77967 |
| Lion        | - - - - - ATAATT - - - - -                                                                                | GGTTAAAAAGATT      | CACACCGATGGATCC   | AAAAAGGCATCAAAGA-  | - - - - - A - - - - - |                 |        |        | 72800 |
| Vaquita     | - - - - - ACAGTTA - - - - -                                                                               | AAGTGGTG - - - - - | GATCCTAAAAGGCA    | CTAAAGTCTATTATG    | CATG - - - - -        | AGTAATTATT      |        |        | 70448 |
| Pig         | - - - - - ATAGTTG - - - - -                                                                               | AAGCTCCACCAGT      | GGCTCTAAAAGGCAT   | TAAAGATTGCTGTGC    | AT - - - - -          | AATAATTACT      |        |        | 70253 |

| Majority    | AGACATGAGA - - - - - AGTTTCT - ATT - - - - - TTAAAATT - - - - - AGATCCTTXTTTCT - GG |                         |                      |               |               |                |        |        |       |
|-------------|-------------------------------------------------------------------------------------|-------------------------|----------------------|---------------|---------------|----------------|--------|--------|-------|
|             | 101370                                                                              | 101380                  | 101390               | 101400        | 101410        | 101420         | 101430 | 101440 |       |
| Human       | AAACCAGAAATTA                                                                       | AAGTGATTTAATTT          | TTTTATTGTGGCAA       | AGATCTAGTCCAA | ATATCTTTGATGG | ACTT - TTTGAAA |        |        | 81563 |
| PolarBear   | G- ACATGACA - - - - -                                                               | AGTTTTT - ATT - - - - - | TTAAAATT - - - - -   | AGATACTTGTTT  | CTGGG         |                |        |        | 39989 |
| Cow         | AGACATGAGG - - - - -                                                                | AGTTTCT - GTG - - - - - | TTAAAATT - - - - -   | AGATCCTTATTT  | CT - GC       |                |        |        | 77177 |
| Dog         | AGACATGAGA - - - - -                                                                | AGTTTTT - CTT - - - - - | TAATA - TT - - - - - | AGATCCTTGTTT  | CTTGG         |                |        |        | 70153 |
| BelugaWhale | AGACGTGAGA - - - - -                                                                | AGTTTCT - ATT - - - - - | TTAAAATT - - - - -   | AGATCCTTATTT  | CT - GG       |                |        |        | 69196 |
| Donkey      | AAACCAGAAATTA                                                                       | AACTGATTTTATTT          | TTTTATTGTGGAAA       | AGACGTGGTCAA  | ATTTCTTTGATGG | CTTTTTTTTTTTAG |        |        | 77694 |
| Cat         | - - - CATGAGA - - - - -                                                             | AGTTTCT - ATT - - - - - | TTAAA - - - - -      |               |               |                |        |        | 75146 |
| Ferret      | - - - CGACATA - - - - -                                                             | AGTTTTT - ATT - - - - - | TTAAA - TA - - - - - | T - - - - -   | TTTCTGGG      |                |        |        | 78000 |
| Lion        | - - - CATGAGA - - - - -                                                             | AGTTTCT - ATT - - - - - | TTAAA - - - - -      |               |               |                |        |        | 72822 |
| Vaquita     | AGACGTGAGA - - - - -                                                                | AGTTTCT - ATT - - - - - | TTAAAATT - - - - -   | AGATCCTTATTT  | CT - GG       |                |        |        | 70492 |
| Pig         | AGACATGAGA - - - - -                                                                | AGTGTCT - TT - - - - -  | TAAA - - - - -       | AGGCCCTTATTT  | CT - GG       |                |        |        | 70295 |

Dienstag, 3. Mai 2022 08:40

| Majority    | A- - - - TTTACTTTTAAAA- TAAAATTGGTGAAT- - - - -                                  |       |
|-------------|----------------------------------------------------------------------------------|-------|
|             | 101450 101460 101470 101480 101490 101500 101510 101520                          |       |
| Human       | CAGACTTTATTGTTAAAAAGGGAATTTGAGGCTTGGTACTGAACTTCTTCTGCATGCCATATTGAAGTTGGTGGTTTTTT | 81643 |
| PolarBear   | A- - - - TTTACTTTTAAAA- TAAAA- GGATGAAA- - - - -                                 | 40016 |
| Cow         | A- - - - TTTACTTTTAAAAA- TGAAATTGATGAAT- - - - -                                 | 77205 |
| Dog         | A- - - - TTTACTTTTAAAA- TAAAATTGTTGAAA- - - - -                                  | 70181 |
| BelugaWhale | A- - - - TTTACTTTTAAAAA- TGAAATTTGTGAGT- - - - -                                 | 69224 |
| Donkey      | TCTTTTTTATTCTTAAAAGTCAATTTGAGGAATGATACTGAACTTTTTTCTTCTGCATCACATGAATTTGCAGATGGTGT | 77774 |
| Cat         | - - - - - AG- - TAAAATGGGTGAAT- - - - -                                          | 75162 |
| Ferret      | A- - - - TTTACTTTTAAAA- TAAAAAGGATGAAAGA- - - - -                                | 78030 |
| Lion        | - - - - - AG- - TAAAATGGGTGAAT- - - - -                                          | 72838 |
| Vaquita     | A- - - - TTTACTTTTAAAAA- TGAAATTTGTGAGT- - - - -                                 | 70520 |
| Pig         | A- - - - TTTACTTTTAAAAAATAAACTGGTGAAT- - - - -                                   | 70324 |

| Majority    | - - - - - XAAATGXAACA- - - - -                                                            |       |
|-------------|-------------------------------------------------------------------------------------------|-------|
|             | 101530 101540 101550 101560 101570 101580 101590 101600                                   |       |
| Human       | GTTTGTTTGCCATCAGTG- - - - - GGATCTCATACAGACTATGGAATTTAATAGAATTTTAAAGATACTGTTT- - TTC- - - | 81713 |
| PolarBear   | - - - - - AAATAATAAATACATAAAATGGATGAGTGAAGGAAC- - - - -                                   | 40053 |
| Cow         | - - - - - AGATGAAACA- - - - -                                                             | 77215 |
| Dog         | - - - - - AAATAATAAATAATTAATGAATGA- - - - -                                               | 70207 |
| BelugaWhale | - - - - - AGATACAACA- - - - -                                                             | 69234 |
| Donkey      | TTATTTGCTTGTTTGTGTTTGGGCCATCAACTGGATCCCATTAAAGACGAAGGAACCTAACAGAATTTAAAGTTACTTTTTTC       | 77854 |
| Cat         | - - - - - GGA- TGGAACA- - - - -                                                           | 75172 |
| Ferret      | - - - - - ATAAATAATAAATACATAAAATGGATGAGTGGATGGAAC- - - - -                                | 78069 |
| Lion        | - - - - - GGA- TGGAACA- - - - -                                                           | 72848 |
| Vaquita     | - - - - - AGATACAACA- - - - -                                                             | 70530 |
| Pig         | - - - - - AGATGAAACA- - - - -                                                             | 70334 |

Dienstag, 3. Mai 2022 08:40

| Majority    | ----- AGATTGGCCA----- TGAGTTAATAAT-----                                           |        |        |        |        |        |        |        |       |
|-------------|-----------------------------------------------------------------------------------|--------|--------|--------|--------|--------|--------|--------|-------|
|             | 101610                                                                            | 101620 | 101630 | 101640 | 101650 | 101660 | 101670 | 101680 |       |
| Human       | --CTAAAAGGTAGCTAACTAAAGGCAGGA----- AAATAGAATGATGTAACAATATAATGACTACATCTGGAGTTTCTGC |        |        |        |        |        |        |        | 81786 |
| PolarBear   | ----- AAGATTGGCCAT----- GAGTGCCATGAGTTAATACT-----                                 |        |        |        |        |        |        |        | 40085 |
| Cow         | ----- AGATTGGCCT----- TGAGTTAGTAAT-----                                           |        |        |        |        |        |        |        | 77237 |
| Dog         | ----- AAATTGGCCAC----- CACTACCATGAGTTAATAAT-----                                  |        |        |        |        |        |        |        | 70238 |
| BelugaWhale | ----- CGATTGGCCA----- TGAGTTAATAAT-----                                           |        |        |        |        |        |        |        | 69256 |
| Donkey      | TACTAAAAGGTAGCCAATTAAAGGCAGAAAGAAACAAGGGAATGATTTGATAATGTAAAGGCCTACATCTGGAGTTTCCAC |        |        |        |        |        |        |        | 77934 |
| Cat         | ----- AGATTGGCCA----- TAAATTGGTAAT-----                                           |        |        |        |        |        |        |        | 75194 |
| Ferret      | ----- AAGATTGGCCAT----- GAGTGCCATGAGTTAATACT-----                                 |        |        |        |        |        |        |        | 78101 |
| Lion        | ----- AGATTGGCCA----- TAAGTTGGTAAT-----                                           |        |        |        |        |        |        |        | 72870 |
| Vaquita     | ----- CGATTGGCCA----- TGAGTTAATAAT-----                                           |        |        |        |        |        |        |        | 70552 |
| Pig         | ----- AGATTAGCCA----- TGAGTTAATAAT-----                                           |        |        |        |        |        |        |        | 70356 |

| Majority    | --- TGTTAAACAATTGTGATGGXTACXTGGG----- GTTXGTTATTCT-----                            |        |        |        |        |        |        |        |       |
|-------------|------------------------------------------------------------------------------------|--------|--------|--------|--------|--------|--------|--------|-------|
|             | 101690                                                                             | 101700 | 101710 | 101720 | 101730 | 101740 | 101750 | 101760 |       |
| Human       | TACTAATAAATAATTGTATTGTCAACTTTAGTCAAATATTCTGTGCATT CAGT CAGAGCTATCTGAAAATACTGACGAAT |        |        |        |        |        |        |        | 81866 |
| PolarBear   | --- TGTTAAACCAGTGTGATGGGTATGTGGG----- GTTTGTTATTCT-----                            |        |        |        |        |        |        |        | 40125 |
| Cow         | --- TGTTAAACAGTTATGATGGATACATGGG----- GCTCATTATTCT-----                            |        |        |        |        |        |        |        | 77277 |
| Dog         | --- TGTTAAACCAGCGTGATGG----- TTTGTTATTCT-----                                      |        |        |        |        |        |        |        | 70268 |
| BelugaWhale | --- TGGTAAACAATTGTGGTGGATACATGGG----- GCTCATTATTCT-----                            |        |        |        |        |        |        |        | 69296 |
| Donkey      | CACTGTTAAATAATTGTGGTGTCAACTTTAGTTGAATGCTAGTTGCTTTCAGCCAAAGCTATTTGAAAATACTGAAGAAC   |        |        |        |        |        |        |        | 78014 |
| Cat         | --- TGGTAAACCAGTGTGATGGGTATGTGGG----- ATTTGTTATTGT-----                            |        |        |        |        |        |        |        | 75234 |
| Ferret      | --- TGATAAACCAGTGTGATGGGTATGTGGG----- GTTTGTTATTCT-----                            |        |        |        |        |        |        |        | 78141 |
| Lion        | --- TGGTAAACCAGTGTGATGGGTATGTGGG----- ATTTGTTATTGT-----                            |        |        |        |        |        |        |        | 72910 |
| Vaquita     | --- TGGTAAACAATTGTGGTGGATACATGGG----- GCTCATTATTCT-----                            |        |        |        |        |        |        |        | 70592 |
| Pig         | --- TGTTAAACAATTGTGATGGATACACTGG----- GTCAT--- TCT-----                            |        |        |        |        |        |        |        | 70393 |

Dienstag, 3. Mai 2022 08:40

| Majority    | ----- AGTCTCT- X- ----- ACT- ----- TTTG                                               |        |        |        |        |        |        |        |       |
|-------------|---------------------------------------------------------------------------------------|--------|--------|--------|--------|--------|--------|--------|-------|
|             | 101770                                                                                | 101780 | 101790 | 101800 | 101810 | 101820 | 101830 | 101840 |       |
| Human       | AGTATTACAATATGGG- - - GAGGTCACCTTCTC- - - - - AAGACTGCAAGAAAAAATTGTTGTGTGTAGGAATGTTTG |        |        |        |        |        |        |        | 81936 |
| PolarBear   | ----- AGTCTTT- - - - - TTTTT- - - - - TTTT                                            |        |        |        |        |        |        |        | 40141 |
| Cow         | ----- AGTCTCTGT- - - - - ACT- - - - - TGTG                                            |        |        |        |        |        |        |        | 77293 |
| Dog         | ----- AGTGTCT- - - - - C- - - - - TTTT                                                |        |        |        |        |        |        |        | 70280 |
| BelugaWhale | ----- AGTCTCT- - - - - ACT- - - - - TTTG                                              |        |        |        |        |        |        |        | 69310 |
| Donkey      | AATGTTTAAAGAAAGGAGAAGGGTCGCTTTCTAAGAACAAAATTACTGTGAAAGCATGCCTAGGAGTTAAGACTGTATC       |        |        |        |        |        |        |        | 78094 |
| Cat         | ----- AGACTCTCT- - - - - CTT- - - - - TTTT                                            |        |        |        |        |        |        |        | 75250 |
| Ferret      | ----- AGTGTGTGTCTCTCTCGGTCTCT- - - - - CTCT                                           |        |        |        |        |        |        |        | 78168 |
| Lion        | ----- AGACTCTC- - - - - T- - - - - TTTT                                               |        |        |        |        |        |        |        | 72923 |
| Vaquita     | ----- AGTCTCG- - - - - ACT- - - - - TTTG                                              |        |        |        |        |        |        |        | 70606 |
| Pig         | ----- AGTCCCTCT- - - - - ATT- - - - - TTTG                                            |        |        |        |        |        |        |        | 70409 |

| Majority    | TATATG- - TTGGAXATTTTC- - - CAXAACAA- - - - - AAAGTAAAA- - - - - TCTAAAAA- - - -           |        |        |        |        |        |        |        |       |
|-------------|--------------------------------------------------------------------------------------------|--------|--------|--------|--------|--------|--------|--------|-------|
|             | 101850                                                                                     | 101860 | 101870 | 101880 | 101890 | 101900 | 101910 | 101920 |       |
| Human       | CCTAGGAATTAGGAATGTATACTTGACAACAAGTGAACGTATCCATTGAATGTTAAATGAGAACAACCTTATGGGGAGGAT          |        |        |        |        |        |        |        | 82016 |
| PolarBear   | TTAATG- - TTGGATATTTTC- - - CATAACAA- - - - - AGAGTAAAA- - - - - TCTAAAAA- - - -           |        |        |        |        |        |        |        | 40184 |
| Cow         | TATATG- - TTGGAAATTTTC- - - CAAAACAA- - - - - AGAGTAAAA- - - - - A- - - TCTAAAAA- - - -    |        |        |        |        |        |        |        | 77338 |
| Dog         | TTTATG- - TTGACTATTTTC- - - CGTAACAA- - - - - AGAGTAAAA- - - - - TCTAAAAA- - - -           |        |        |        |        |        |        |        | 70323 |
| BelugaWhale | TATATG- - TTGGAAAATTTTC- - - CAAAACAA- - - - - AAAGTAAAA- - - - - TCTAAAAA- - - -          |        |        |        |        |        |        |        | 69353 |
| Donkey      | TTTATA- - TTTGACATTGGCAG- - CAAATTAAG- - - - ATATCCACTGAGTGTTAAATGAAGCAA- - - CCTATAAAGCTT |        |        |        |        |        |        |        | 78162 |
| Cat         | TCTGTG- - TTGGATATTTTC- - - CATCACAA- - - - - AAAGTAGAA- - - - - TCTAAAAA- - - -           |        |        |        |        |        |        |        | 75293 |
| Ferret      | TTAATG- - TTGGATAATTTTC- - - CATAACA- - - - - GAGTAAAA- - - - - TCTAAAAA- - - -            |        |        |        |        |        |        |        | 78209 |
| Lion        | TATGTG- - TTGGATATTTTC- - - CATCACAA- - - - - AAAGTAGAA- - - - - TCTAAAAA- - - -           |        |        |        |        |        |        |        | 72966 |
| Vaquita     | TATATG- - TTGGAAAATTTTC- - - CAAAACAA- - - - - AAAGTAAAA- - - - - TCTAAAAA- - - -          |        |        |        |        |        |        |        | 70649 |
| Pig         | TATATG- - TTGGAAATTTTC- - - CAAAATAA- - - - - AAAGTAAA- - - - - TCTAAAAA- - - -            |        |        |        |        |        |        |        | 70452 |

Dienstag, 3. Mai 2022 08:40

| Majority    | - ATAAAAX- - - - - TGGAGAAATAAG- - - - - AAAA- - - - - GGGGGGAATC                |       |
|-------------|----------------------------------------------------------------------------------|-------|
|             | 101930 101940 101950 101960 101970 101980 101990 102000                          |       |
| Human       | AGTGAGAGGTATAGTATTTAACATGGAAAAGTTAGTAATATAGTAGAATATTTGGTTGAAAAGATCCACATTGGTGTATT | 82096 |
| PolarBear   | - AGAAAA- - - - - TAGAGAAATAA- - - - - AAA- - - - - AAGGGGAATC                   | 40214 |
| Cow         | - ATAAAAT- - - - - TGAAGAAATAAT- - - - - AAAA- - - - - AGGGGGGACT                | 77371 |
| Dog         | - AGAAAA- - - - - TGGAGAAAGAAG- - - - - AAA- - - - - AAAAGGAATC                  | 70354 |
| BelugaWhale | - ATAAAAG- - - - - TGGAGAAATAAG- - - - - AAAAAAAGATGGGGAGGGAATC                  | 69394 |
| Donkey      | AATGAGAGCTATGGTATTTAACATGGAGAAGTTAGTAATGCCCTGGAATAGTCAGTTAAAAAGATCCACACTGGTGGATC | 78242 |
| Cat         | - ATAAGA- - - - - TGGAGAAATAAA- - - - - AAA- - - - - GGGGGAAATC                  | 75324 |
| Ferret      | - AGAAAA- - - - - TGGAGAAATAAG- - - - - AAAA- - - - - AAGGGGAATC                 | 78241 |
| Lion        | - ATAAGA- - - - - TGGAGAAATAAA- - - - - AAA- - - - - GGGGGAA- TC                 | 72996 |
| Vaquita     | - ATAAAAG- - - - - TGGAGAAATAAA- - - - - AAAAGATGGGGGGGAGGGAATC                  | 70690 |
| Pig         | - AGGAAAG- - - - - TGGAGAGATAAA- - - - - AAAG- - - - - GCGGGGAACC                | 70485 |

| Majority    | CCAAAAA- - - - - G- - TGGGTAA- - - - - A- T- AAGXACT- - - - -                      |       |
|-------------|------------------------------------------------------------------------------------|-------|
|             | 102010 102020 102030 102040 102050 102060 102070 102080                            |       |
| Human       | CAAAGACACACTGAAGACTATTGTGCATTAGTAAGTATTAACATGAGAATTCTTAATTTTAAAATTGGACCCTAATTTC    | 82176 |
| PolarBear   | TGGAAAA- - - - - G- - TGGGCAA- - - - - A- - - AAGCACT- - - - -                     | 40237 |
| Cow         | CCCAAAA- TA- - - - - T- - TGTAT- - - - - TGGGGGAG- - - - -                         | 77394 |
| Dog         | TCGAAAA- - - - - G- - TGGGTAG- - - - - A- - - AAGTACT- - - - -                     | 70377 |
| BelugaWhale | CCCAAAAATG- - - - - G- - TATGTGGAGTGG- - - - - TGGTGGGGGACT- - - - -               | 69429 |
| Donkey      | CAAACAGACTGAAGACTACTATGCG- - TTAGTAAATACCAAACATGAAAGGTTTCTATTTTAAAATTAGATCCTTATTCA | 78320 |
| Cat         | TCAAAAA- - - - - A- - TGGGCAA- - - - - A- - - AAGCACT- - - - -                     | 75347 |
| Ferret      | TGGAAAA- - - - - G- - TGGGCAA- - - - - A- - - AGGCATT- - - - -                     | 78264 |
| Lion        | TCAAAG- - - - - TGGGCAA- - - - - A- - - AAGCACT- - - - -                           | 73017 |
| Vaquita     | CCCAAAAATG- - - - - G- - TATGTGGAGTGG- - - - - TGGTGGGGGACT- - - - -               | 70725 |
| Pig         | CCAAAAAATG- - - - - G- - TGTGTAGAAAAAACCTATAAAATAAACTCATAGGGGAGTTCCCATTTGTGGCG     | 70549 |

Dienstag, 3. Mai 2022 08:40

| Majority    | ----- A- AAAT----- A- -- AXCTC-----                                                  |        |        |        |        |        |        |        |       |
|-------------|--------------------------------------------------------------------------------------|--------|--------|--------|--------|--------|--------|--------|-------|
|             | 102090                                                                               | 102100 | 102110 | 102120 | 102130 | 102140 | 102150 | 102160 |       |
| Human       | TGAGATTTACTTTAAGAATAAAAAGGGGATGAAACGAGATTGGCCATGAGTTGATCATTGTTAAAGTTGGGTGATGGCTAC    |        |        |        |        |        |        |        | 82256 |
| PolarBear   | ----- A- AAG----- CTC-----                                                           |        |        |        |        |        |        |        | 40244 |
| Cow         | ----- AAAAAC----- CTGTA- -- AACTC-----                                               |        |        |        |        |        |        |        | 77410 |
| Dog         | ----- A- AAGT----- A- -- AGCTC-----                                                  |        |        |        |        |        |        |        | 70388 |
| BelugaWhale | ----- ATAAAA----- T- -- A- -- AACTC-----                                             |        |        |        |        |        |        |        | 69442 |
| Donkey      | TGGGATTTACTTTAAAAATAAAATGGGTGAGTGGATGA- - - AACAAAGATTGGCCATTAGTTAATAGTTGTTAAACCAGTG |        |        |        |        |        |        |        | 78397 |
| Cat         | ----- A- AAAT----- A- -- AGCTT-----                                                  |        |        |        |        |        |        |        | 75358 |
| Ferret      | ----- A- AAA----- CTC-----                                                           |        |        |        |        |        |        |        | 78271 |
| Lion        | ----- A- AAAT----- A- -- AGTTT-----                                                  |        |        |        |        |        |        |        | 73028 |
| Vaquita     | ----- ATAAAA----- T- -- A- -- AACTC-----                                             |        |        |        |        |        |        |        | 70738 |
| Pig         | CATCAGAAATGAATCTGACTAGGACCCATGAGGTTGCA- - - AGTTCGATCCCTGGCCTCATTGGGTGAGGTTAAGGATCCA |        |        |        |        |        |        |        | 70626 |

| Majority    | -----                                                                             |        |        |        |        |        |        |        |       |
|-------------|-----------------------------------------------------------------------------------|--------|--------|--------|--------|--------|--------|--------|-------|
|             | 102170                                                                            | 102180 | 102190 | 102200 | 102210 | 102220 | 102230 | 102240 |       |
| Human       | TTAGAGTTGCATTATTTTAGTCACTTTTACTTTTGTATATGTTGGAAATCTTCCAAAACAAAATGTATAGCCATAAAAAA  |        |        |        |        |        |        |        | 82336 |
| PolarBear   | -----                                                                             |        |        |        |        |        |        |        | 40244 |
| Cow         | -----                                                                             |        |        |        |        |        |        |        | 77410 |
| Dog         | -----                                                                             |        |        |        |        |        |        |        | 70388 |
| BelugaWhale | -----                                                                             |        |        |        |        |        |        |        | 69442 |
| Donkey      | TGATGGGTACATGGGGGTTCAATTATTCAAGTCTCTTTACTTTTATGTATGTTGAAAGTTTTCCAAAACAAAAAGTAAAAT |        |        |        |        |        |        |        | 78477 |
| Cat         | -----                                                                             |        |        |        |        |        |        |        | 75358 |
| Ferret      | -----                                                                             |        |        |        |        |        |        |        | 78271 |
| Lion        | -----                                                                             |        |        |        |        |        |        |        | 73028 |
| Vaquita     | -----                                                                             |        |        |        |        |        |        |        | 70738 |
| Pig         | GCATTGCTGTGAGCTGTGGTGTAGGTCACAGCTGTGGCTTGGATCCTATGTTGCTGTGGCGTAGACCGGCAGCTACAGCT  |        |        |        |        |        |        |        | 70706 |

Dienstag, 3. Mai 2022 08:40

| Majority    | ----- ATCCAGAG                                     |                    |                             |                      |        |        |        |        |       |
|-------------|----------------------------------------------------|--------------------|-----------------------------|----------------------|--------|--------|--------|--------|-------|
|             | 102250                                             | 102260             | 102270                      | 102280               | 102290 | 102300 | 102310 | 102320 |       |
| Human       | AAGGGAGCAAAGT                                      | AAGAAAAAAGGAGAGCCT | AAAAAAAAGGTACAGGCAAAAAGGTGT | GAAAAGAAACTCATCAAGAG |        |        |        |        | 82416 |
| PolarBear   | ----- ATCCTCAG                                     |                    |                             |                      |        |        |        |        | 40252 |
| Cow         | ----- ACCCAGAG                                     |                    |                             |                      |        |        |        |        | 77418 |
| Dog         | ----- ATCCACAG                                     |                    |                             |                      |        |        |        |        | 70396 |
| BelugaWhale | ----- ACACAGAG                                     |                    |                             |                      |        |        |        |        | 69450 |
| Donkey      | CTAAAAAGTGGAAAAATAGGGAAAAAGGGGGAT                  | ACCCAAAAATGGT      | GTTGGCAAAACTGTAAAATAAGCTT   | GTTTAGAG             |        |        |        |        | 78557 |
| Cat         | ----- ATCCACAG                                     |                    |                             |                      |        |        |        |        | 75366 |
| Ferret      | ----- ATCCACAA                                     |                    |                             |                      |        |        |        |        | 78279 |
| Lion        | ----- ATCCACAG                                     |                    |                             |                      |        |        |        |        | 73036 |
| Vaquita     | ----- ATACAGAG                                     |                    |                             |                      |        |        |        |        | 70746 |
| Pig         | CCGATTAGACCCCTAGCTTGGGAACCTCCGCATGCCACAGGTGCAGCCCT | AAAAAAAACAAAAAAT   | AAAACACAGAG                 |                      |        |        |        |        | 70786 |

| Majority    | CAAGATTGTAAAAAGAAA- - TATCATTCCACTGTTGGAGTGCTTACT- - - CAGAAAAGATAAAA- - - AAGAAATTGG- AG |                                        |                                            |                           |                       |              |        |        |       |
|-------------|-------------------------------------------------------------------------------------------|----------------------------------------|--------------------------------------------|---------------------------|-----------------------|--------------|--------|--------|-------|
|             | 102330                                                                                    | 102340                                 | 102350                                     | 102360                    | 102370                | 102380       | 102390 | 102400 |       |
| Human       | CAAGAGTATTA                                                                               | AATGAGAAA- CAT-                        | ATGCCACTGACAGAGTTCTCAGAAGAGATAAAGGCTGAATTA | AAAAAGAGATGGAG            |                       |              |        |        | 82494 |
| PolarBear   | AAAGATTGAAAAA-                                                                            | - - - - - TATTATTCCGCTGTTGTACTGCTCAGA- | - - - - - GAGAAGAGATAAAA-                  | - - - - - AAGAAATTGG-     | - - - - - AG          |              |        |        | 40318 |
| Cow         | CTTGAACATATATGAGAAA-                                                                      | - - - - - CACCATTCCACTGATGA-           | - - - - - AAGGTACT-                        | - - - - - CAGTAAAGATCAA-  | - - - - - AGGAAATCTG- | - - - - - AG |        |        | 77487 |
| Dog         | AAAGATTGCAACAAA-                                                                          | - - - - - TATAATTCCACTGTTGAACTGCTCATA- | - - - - - GAGAAGAGAT-                      | - - - - - AAGAAATTGG-     | - - - - - AG          |              |        |        | 70460 |
| BelugaWhale | CAAGAATGTAAGT                                                                             | GAGAAA- CACCATTCTACTGATGGGGGAGGTACT-   | - - - - - CAGAAAAGATAAAA-                  | - - - - - AGGAGATTGGGAG   |                       |              |        |        | 69522 |
| Donkey      | CAAGATTGTAAAGGAGAAACATATCATTCCACTGAAGAA-                                                  | - - - - - T- - - - - ATT-              | - - - - - CAGAAAGATAAAA-                   | - - - - - AGGAGATTGG-     | - - - - - AG          |              |        |        | 78625 |
| Cat         | AAAGATTGAGAAAAA-                                                                          | - - - - - TATCTTTCCACTGTTGGAGTGCTTA-   | - - - - - GAAGAGATACA-                     | - - - - - AAGAAATTGG-     | - - - - - AG          |              |        |        | 75429 |
| Ferret      | AAAGATTGGAAAAA                                                                            | AAAAAAG- TATTATTCCACTGTTGAACTGCTTAGA-  | - - - - - GAGAAAAAATAAAA-                  | - - - - - AAGAAATTGG-     | - - - - - AG          |              |        |        | 78351 |
| Lion        | AAAGATTGAGAAAAA-                                                                          | - - - - - TATCTTTCCACTGTTGGAGTGCTTA-   | - - - - - GAAGAGATACA-                     | - - - - - AAGAAATTGG-     | - - - - - AG          |              |        |        | 73099 |
| Vaquita     | CAAGAATGTAAGT                                                                             | GAGAAA- CACCATTCTACTGATGGGGGAGGTACT-   | - - - - - CAGAAAAGATAAAA-                  | - - - - - AGGAGATTGGGAG   |                       |              |        |        | 70818 |
| Pig         | CAAGAATATAAATTAGAAA-                                                                      | - - - - - CATCATTCCAATGTTAG-           | - - - - - GAA- TACT-                       | - - - - - CAGAAAAGATAAAA- | - - - - - AGGAGATTGG- | - - - - - AG |        |        | 70854 |



Dienstag, 3. Mai 2022 08:40

| Majority    | GGAAAAATTTTGT AAGTCAAAAAC T XAAGAGGTTAAGAATTTGT GAATCTT - AAGAACCTT CAGACTGCCAATGAAAGGT        |        |        |        |        |        |        |        |       |
|-------------|------------------------------------------------------------------------------------------------|--------|--------|--------|--------|--------|--------|--------|-------|
|             | 102410                                                                                         | 102420 | 102430 | 102440 | 102450 | 102460 | 102470 | 102480 |       |
| Human       | GGGAAAGTTTTATAAGTCAAAAAC TTA - - GGTTAAGGTTTTGTGAATATTAAAGAGCGCTTCAGATTGCCAATGAAAGGT           |        |        |        |        |        |        |        | 82571 |
| PolarBear   | GGAAAAAATTTTGT AAGTCAGAAACTGAAGAGATTAAGAATTTTGAATCTT - - - AACCTTTCAGACCATCAATGAAA - - -       |        |        |        |        |        |        |        | 40391 |
| Cow         | GGAAAATTTTTACAAGTCGAAAAC TAAAGAGGTTAAGAATTTGTCAATCCTGAAGAAGC - TTCAGCCTGCCAATAAAAGGT           |        |        |        |        |        |        |        | 77566 |
| Dog         | GGGGAAAATTTTGT AAGTTAGAAACTGAAGAGATTAAGATTTTGTGAATCTT - - - AACCTTTCAGACTATCAATGAAAGAT         |        |        |        |        |        |        |        | 70536 |
| BelugaWhale | GGAAAAATTTTGT AAGTCAAAAAC TAAAGAAGTTAAGAATTTGT CAGTCTTCAAGAGCCGTT CACCCTGCCAATGAAAGGT          |        |        |        |        |        |        |        | 69602 |
| Donkey      | GTAAAAATTTTGT AAGTCAAAAAC TACAGAGGCTAAGAAAAGTGGCTCTTAAAGAACCATT CAGACTGCTAATGAAAGCC            |        |        |        |        |        |        |        | 78705 |
| Cat         | GGAAAAA - - TTAGAAGTCAGAAACTGAAGAGATTAAGAATTTGTGAATCTT - - - AACCTTTTAGACTGTCAGTGAAAGGC        |        |        |        |        |        |        |        | 75503 |
| Ferret      | GGAAAAA - TTTGTA - - - - GGAAC TGAAGAGATTAGGAATTTGTGAATCTC - - - AACCTTTCAGACTGTCAGTGAAA - - - |        |        |        |        |        |        |        | 78418 |
| Lion        | GGAAAAA - - TTAGAAGTCAGAAACTGAAGAGATTAAGAATTTGTGAATCTT - - - AACCTTTTAGACTGTCAGTGAAAGGC        |        |        |        |        |        |        |        | 73173 |
| Vaquita     | GGAAAATTTTGT AAGTCAAAAAC TAAAGAAGTTAAGAATTTGT CAGTCTTCAAGAGCCGTT CACCCTGCCAATGAAAGGT           |        |        |        |        |        |        |        | 70898 |
| Pig         | GAGAAAATTTTATAAGTC - AAAACTAA - GAGGTTAAGAATTTGTTGATCTTCAAGAACCCTT CATACTGCCACTGAAAGGT         |        |        |        |        |        |        |        | 70932 |

| Majority    | CATXATAGTTTCTATAAAGTAAAAAGATTX - AAAAAA - - - - - CTTGGCT - AAAAGATTAA - GXGATCTGAAAC         |        |        |        |        |        |        |        |       |
|-------------|-----------------------------------------------------------------------------------------------|--------|--------|--------|--------|--------|--------|--------|-------|
|             | 102490                                                                                        | 102500 | 102510 | 102520 | 102530 | 102540 | 102550 | 102560 |       |
| Human       | CATAGTAGTTTCTATAAAGTCAAAGATC - - AAAAA - - - - - CTTGACTTAAAAGAGTAA - GATCTCTAAAAC            |        |        |        |        |        |        |        | 82635 |
| PolarBear   | - - TCATAGTTTCTATAAAGTAAAAAAGAAAAAACC AAA - - - - - CTTGGCC - AAAATACTA - - - - GATCTGAAAC    |        |        |        |        |        |        |        | 40458 |
| Cow         | CATAGTAGTTTCTGTAAAGTAAAAACAT - - - - - AAA - - - - - CGTGGCT - AAAAGAGTAA - - - GATCTGACAC    |        |        |        |        |        |        |        | 77624 |
| Dog         | CATCATAGTTTCTATAAAGTAAAAAGATTA AAAAAAAAAA - AAA - - - - - CTTGGCT - AAAATATTAA - GATACCTGAAAC |        |        |        |        |        |        |        | 70607 |
| BelugaWhale | CATAGT - - - TTCTGTAAAGTAAAAAGATAA - ACAA - - - - - CTTGGCT - AAAAGAGTAA - - - CATCTGAAAC     |        |        |        |        |        |        |        | 69661 |
| Donkey      | ATTTATAGTTCCTATAAAGTAAAAAGAT - - - AAAAA - - - - - CTTGGCT - AAAAGAATAA - GGTGTCTGAAAC        |        |        |        |        |        |        |        | 78768 |
| Cat         | CATCATAGTTTCTATAACATAAAAAGACTT AAAAAAAAAA - - - - - CTTGGCT - AAAATATTGA - GAGATCTGAAAC       |        |        |        |        |        |        |        | 75576 |
| Ferret      | - - TCATAGTTTCTATAAAGTAAAAAGATTTT AAAAAA - - - - - CTTGGCT - AAAATATTAAAGAGATCTGAAAC          |        |        |        |        |        |        |        | 78484 |
| Lion        | CATCATAGTTTCTATAACATAAAAAGACTT AAAAAAAAAA AAAAAA AACTTGGCT - AAAATATTGA - GAGATCTGAAAC        |        |        |        |        |        |        |        | 73251 |
| Vaquita     | CATAGT - - - TTCTGTAAAGTAAAAAGATAA - ACAA - - - - - CTTGGCT - AAAAGAGTAA - - - CATCTGAAAC     |        |        |        |        |        |        |        | 70957 |
| Pig         | CATAGTAGTTTCTGTAAAGTAAAAGGATTTT AAAAA - - - - - CTTGGCT - AAAAGATTAA - - - GATCTGAAAC         |        |        |        |        |        |        |        | 70995 |



Dienstag, 3. Mai 2022 08:40

| Majority    | TATCATGGGAAGAAXAAAAA- AACATATAATTCAT- - TTCTTTAGTGAAC TAATATTTATTGAGAAATAAGCTGG- TAT |                                                    |                                                 |                    |        |        |        |        |  |
|-------------|--------------------------------------------------------------------------------------|----------------------------------------------------|-------------------------------------------------|--------------------|--------|--------|--------|--------|--|
|             | 102730                                                                               | 102740                                             | 102750                                          | 102760             | 102770 | 102780 | 102790 | 102800 |  |
| Human       | TATGTTGGGAAGA-                                                                       | TAAAAAGAACATATAATTCGT-                             | - TTCTTGAGTGAACCAGTATTTAT-                      | GAGAAATAAGCTGGGTGT | 82862  |        |        |        |  |
| PolarBear   | TTTCATGGAAGGA-                                                                       | - - - - - GA- AAAATATAATTCAT-                      | - T- - - - - AGTGAAC TAGTATTTATTGAGATATAAACTGG- | TAT                | 40676  |        |        |        |  |
| Cow         | TATCATGGAAAGAAAAA-                                                                   | - - CATGTAATTTGTTTTTTTTT                           | AGTGAAC TAATATTTATTAAGAAATAAGTTAG-              | TAT                | 77847  |        |        |        |  |
| Dog         | TTAATGGGAAGGA-                                                                       | - - - - - GA- AAAATACAATTCAT-                      | - TTCATTAGTGAAC TAACATTTATTGAAATATAAGCTGG-      | TAT                | 70831  |        |        |        |  |
| BelugaWhale | TATCATGAGAAGGAAAAAAGAACATATAACTCAT-                                                  | - TTCTTTAGTAAAC TAATATTTATTGAGAAATAAGCTGG-         | TAT                                             | 69892              |        |        |        |        |  |
| Donkey      | TATCATGGGAAGGAGAAGAAG-                                                               | TACATGTAATTCAT-                                    | - TTCTTTAGTGAAC TA- - - - TATTGAGAAATAAGCTGG-   | TAT                | 78993  |        |        |        |  |
| Cat         | TTTCATGGGAAGAATAAAAGT-                                                               | AACATACAATTTAC-                                    | - TTCATTAGTGAAC TAATATGTATTGAGGAATCAGCTGG-      | TAT                | 75805  |        |        |        |  |
| Ferret      | TTTCATGGGAAG-                                                                        | - - - - - GA- GAAAAATAATTGAT-                      | - T- - - - - AGTGAAC TAGTATTTATTGAGATATAAACTGG- | CAT                | 78702  |        |        |        |  |
| Lion        | TTTCGTGGGAAGAATAAAAGT-                                                               | AACATACAATTTAC-                                    | - TTCATTAGTGAAC TAATATGTATTGAGGAATCAGCTGG-      | TAT                | 73480  |        |        |        |  |
| Vaquita     | TATCATGAGGAGGAAAAAAGAACATATAACTCAT-                                                  | - TTCTTTAGTAAAC TAATATTTATTGAGAAATAAGCTGG-         | TAT                                             | 71188              |        |        |        |        |  |
| Pig         | TATCATGGGAAGAAGAAAAAT-                                                               | - - CGTGTA- - - - - TTCTTTAGTGAAC TAGTATTTATTGAGA- | - - - - AGCTGG-                                 | TAT                | 71211  |        |        |        |  |

| Majority    | GTAAGAATTTAAGGGATGAAAGGATTCCXAGTTTATTXTT- - AATTGAAATGTGGATAAAAGATGCTGAGACAAAAGG- A |                                                 |        |        |        |        |        |        |  |
|-------------|-------------------------------------------------------------------------------------|-------------------------------------------------|--------|--------|--------|--------|--------|--------|--|
|             | 102810                                                                              | 102820                                          | 102830 | 102840 | 102850 | 102860 | 102870 | 102880 |  |
| Human       | GTAAGAATTTAAGGGATGAAAATATTCCAAGTTGATTGGT-                                           | - AATTGAAAAGTAGATGAACGGTGCTAACACAAAAGGGA        | 82940  |        |        |        |        |        |  |
| PolarBear   | GTAAGAATTTAAGGGAGGGAAGGATTTTGAGTTTATTCTT-                                           | - AATTGTAATGTGGATAAAAGATGGTGCGACAAAAGA-         | -      | 40752  |        |        |        |        |  |
| Cow         | GTAAGAATATAAGGAATGAAAGGAATCAAAGTTATTAAT-                                            | - TGTTGAAAAGTAGATTAAGATGCTGAGACAAAGGG-          | A      | 77924  |        |        |        |        |  |
| Dog         | GTAAGAATTTAAGGGATGGAAGGATTTTGAGTTTATTCTT-                                           | - AATTAGAATGTGAATAAAAGATGGTGAGACAAAAGA-         | -      | 70907  |        |        |        |        |  |
| BelugaWhale | GTAAGAATTTAAGGGATGAAAGGAATCCAAGTTTATTGAT-                                           | - AATTGAAATACGGATAAAAGATGCTGAGACAAAGGG-         | A      | 69969  |        |        |        |        |  |
| Donkey      | GTAAGAATTTAAGGAATGAAAGAATTCTGA- TTGCTT-                                             | - - - - AATTGAAAAGTGAATAAAA- ATGTTGAGACAAAAGGGA | 79066  |        |        |        |        |        |  |
| Cat         | GTAAGAATTTAAGGGATGAAAGGATTTAGAGTTCATTCTTTAATTGGAACGTGGATAAAAGATGCTGAGACAAAAGAGA     | 75885                                           |        |        |        |        |        |        |  |
| Ferret      | CTAAGAATTTAAGGGAGGGAAGGATTTGTGGTTTATT-                                              | - - - - AATTACAATGTGGATAAAAAGGTTGAGACAAA-       | - - -  | 78773  |        |        |        |        |  |
| Lion        | GTAAGAATTTAAGGGATGAAAGGATTTAGAGTTCATTCTTTAATTGGAACGTGGATAAAAGATGCTGAGACAAAAGAGA     | 73560                                           |        |        |        |        |        |        |  |
| Vaquita     | GTAAGAATTTAAGGGATGAAAGGAATCCAAGTTTATTGAT-                                           | - AATTGAAATACGGATAAAAGATGCTGAGACAAAGGG-         | A      | 71265  |        |        |        |        |  |
| Pig         | GTAAT- - - - TAA- - - - GAAAGGAATCCAAGTTTATTGGT-                                    | - AATCGAAAAGTGAATAAAAGATGCTGAAACAAAAT-          | A      | 71279  |        |        |        |        |  |

Dienstag, 3. Mai 2022 08:40

| Majority    | ATTCTXTCTAGAA- - TAAATGAA- - - - - GTATCTTAAAGATGATAGAACAACAGTAAGACTGGAAAGTAGAACAATAGA |                               |                       |                  |             |        |        |        |       |
|-------------|----------------------------------------------------------------------------------------|-------------------------------|-----------------------|------------------|-------------|--------|--------|--------|-------|
|             | 102890                                                                                 | 102900                        | 102910                | 102920           | 102930      | 102940 | 102950 | 102960 |       |
| Human       | ATTCTGTCTAGAA- - TAAATGAAAATATGGT                                                      | GACTTAAAGATAGT                | AGGACAGCAAT           | AAGACTGGAAATT    | TAGAACAATA- | A      |        |        | 83017 |
| PolarBear   | ATTCTTTTCGTGAA- - TAAATGACTGGC- -                                                      | ATATCTTAAAGAT                 | GATAGAAGAACAGT        | AAGACTGGAAAAT    | TAGAACAGT   | AGA    |        |        | 40828 |
| Cow         | ATTCTGT- - GGAA- - TAAATGAA- - - - -                                                   | GAATCCTGAAGAT                 | GACAGAGCAAT           | AGTAAGACTGGAAAGT | TAGAACAGT   | AGA    |        |        | 77994 |
| Dog         | ATTCTCTCTAGAGAGCAAATGATTAGC- -                                                         | ATATTTTAAA- - - - - - - - - - | CAACAG- - - -         | ACTGGAAAACA- -   | ACAATAGA    |        |        |        | 70969 |
| BelugaWhale | ATTCCGT- - GGAA- - TAAATGAA- - - - -                                                   | GAATCCTGAAGAT                 | GACAGAACAACAGT        | AAGACTGAAAAGT    | TAGAACAGT   | AGA    |        |        | 70039 |
| Donkey      | ATTCTTTGTAGAA- - TAAGTGAA- - - - -                                                     | GTATCTCAAAGAT                 | GATAAAAACAACAGCAAGACT | GGAAAGTAG- -     | AATTGA      |        |        |        | 79135 |
| Cat         | ATTCTCTCTAGAG- - TGAA- GACTGGC- -                                                      | ATATCTTAAAGAT                 | GATAGAACAACAGT        | AAGACTGGAAAAT    | TAGAACAAT   | AGA    |        |        | 75960 |
| Ferret      | - TTCTCTCTAGAA- - TAAATGAA- - - - -                                                    | GTATCTTAAAGAT                 | GCTAGAACAACAGT        | AAGACTGGAAAGT    | TAGAGCAAC   | AGA    |        |        | 78844 |
| Lion        | ATTCTCTCTAGAG- - TGAA- GACTGGC- -                                                      | ATATCTTAAAGAT                 | GATAGAACAACAGT        | AAGACTGGAAAAT    | TAGAACAAT   | AGA    |        |        | 73635 |
| Vaquita     | ATTCCGT- - GGAA- - TAAATGAA- - - - -                                                   | GAATCCTGAAGAT                 | GACAGAACAACAGT        | AAGACTGGAAAGT    | TAGAACAGT   | AGA    |        |        | 71335 |
| Pig         | ATTCT- - - - TGAA- - TAAATGAG- - - - -                                                 | GAACCCTGAAGAT                 | GATAGAACAACAGT        | AAGACTGGAAAGT    | TAGAACAGT   | AGA    |        |        | 71347 |

| Majority    | AATAAGAAGGAAATGTTAAAA- CTGGTAGGTAAGGATAGG- - - - AAAATACTGAAAGAGAAAAGCXTGTGTGATA- CAG |                                             |                                  |                                      |                             |                              |        |        |       |
|-------------|---------------------------------------------------------------------------------------|---------------------------------------------|----------------------------------|--------------------------------------|-----------------------------|------------------------------|--------|--------|-------|
|             | 102970                                                                                | 102980                                      | 102990                           | 103000                               | 103010                      | 103020                       | 103030 | 103040 |       |
| Human       | AATAAGAAGGAAATGATAACA-                                                                | TAGATTGGGAAAGGATAGG-                        | - - - -                          | AAAATACTGAA-                         | -                           | ACAAAATCTGTGTTGTA-           | TAG    |        | 83088 |
| PolarBear   | AAT- - - AAGGAAATGTTAAAA-                                                             | CTGGTAGGCAAAAAGATAGG-                       | - - - -                          | AAAAGACTGAAAGAGAAAAGCCTTGCATGTTAACAG |                             |                              |        |        | 40899 |
| Cow         | AATAAGAAGGAAATGTTCAAAA-                                                               | CTGGTAGGTAAGGATAGG-                         | - - - -                          | AAAATACTGG-                          | - - - - - - - - - - - - - - | TGTGCTA-                     | TAT    |        | 78054 |
| Dog         | AAT- - - AAAGAAATGTTAAAA-                                                             | CTGGTAGGGGAAAGGAAAA-                        | - - - -                          | GA-                                  | - - - -                     | CTGAAAGAGAAAAGCATGCATGATA-   | CAG    |        | 71035 |
| BelugaWhale | AATAAG- - - GAAATGTTAAAA-                                                             | CTGGTAGGTAAGGATAGG-                         | - - - -                          | AAAATATTGAAAGAGAAAAGCCTTGTGTGATA-    | TAG                         |                              |        |        | 70109 |
| Donkey      | AATAAGAAGGAAATGTTAAAG-                                                                | TTGGTAGGTTAGGTAAGGGTAGAAAAATACTGAAAGAGAAAA- | -                                | TGTGTGATA-                           | CGG                         |                              |        |        | 79211 |
| Cat         | AATGAGAAGGAAATGTTAAAA-                                                                | CTGGTAGGCAAAAATGTGGGG-                      | - - -                            | AAAATACTGAAGGAGAAAAGCCTGTGTGGATACGG  |                             |                              |        |        | 76035 |
| Ferret      | AAT- - - AATGAAATGTTAAAA-                                                             | CTGGTAGGCTAAAGATAGG-                        | - - - -                          | AA-                                  | - - - - -                   | GAAAGAGAAAAGCCTTGTGTATTAACAG |        |        | 78909 |
| Lion        | AATGAGAAGGAAATGTTAAAA-                                                                | CTGGTAGGCAAAAATGTGGG-                       | - - - -                          | AAAATACTGAAGGAGAAAAGCCTGTGTGGATACGG  |                             |                              |        |        | 73709 |
| Vaquita     | AATAAG- - - GAAATGTTAAAA-                                                             | CTGGTAGGTAAGGATAGG-                         | - - - -                          | AAAATATTGAAAGAGAAAAGCCTTGTGTGATA-    | TAG                         |                              |        |        | 71405 |
| Pig         | AATAAG- - - GACATGTTAAAAACTGATGATTAAGGATAGG-                                          | - - - -                                     | ACCATTCTGAAAGAGAAAAGCCTATGCGTTA- | CAG                                  |                             |                              |        |        | 71418 |

Dienstag, 3. Mai 2022 08:40

| Majority    | TGA- CXTTCTCATTCTTTCTACTGGGAAATGTTXTGTTGAGAACTTG- - - TGTTTCAT- - TATAACTACTTGAGTG                 |        |        |        |        |        |        |        |  |  |       |
|-------------|----------------------------------------------------------------------------------------------------|--------|--------|--------|--------|--------|--------|--------|--|--|-------|
|             | 103050                                                                                             | 103060 | 103070 | 103080 | 103090 | 103100 | 103110 | 103120 |  |  |       |
| Human       | TGA- TGGTTTCTTGTTCTTTCAACCGGGAGAGTGTGTGTTGAAGGACTTG- - - TATTCAT- - TTTAATTACTTGAGTG               |        |        |        |        |        |        |        |  |  | 83162 |
| PolarBear   | TGA- CATTTTCTCAATCTTCCTATTGGGAAATGTTGTATTTGAGAGATTTGTTGTGTTTCAT- - - TATAACTACTTGAGTG              |        |        |        |        |        |        |        |  |  | 40976 |
| Cow         | TGA- CTTTCTCTTATTCTTTCTGTGGGGCAAATGTTGTGTTTGAAGACTTA- - - TATT- - - - - ACACCTACCTGAGTA            |        |        |        |        |        |        |        |  |  | 78124 |
| Dog         | TGA- CGTTTTCTCAATCTTCCTACTGGGAAAT- - - - - TTGAGAAATTTGTTGTGTGTGTTACAACACTACATGAGTG                |        |        |        |        |        |        |        |  |  | 71107 |
| BelugaWhale | AGA- CTTTTTCTCATTCTTTCTACGGGGGAAGTGTGTGAATTGAGAACTTG- - - TGTT- - - - - ATACCTATTTGAGTG            |        |        |        |        |        |        |        |  |  | 70179 |
| Donkey      | TGA- TGTTTTCTCATTCTTCCTGCTGGGAAAGTATCATGTTTGGGAACTTG- - - CGTTTCAT- - - TATAACTACTTGAATG           |        |        |        |        |        |        |        |  |  | 79285 |
| Cat         | TGA- CGTTTTCTCATTCTTCCTACTGGGAAATG- - - TGTTTGGAGAAATTTGTTGTGTTTCAT- - - TATGACTGCTTGAATG          |        |        |        |        |        |        |        |  |  | 76109 |
| Ferret      | - - - - - ACTGGGAAATG- - - TGTTTGGAGAAATTTGTTGTGTTTCAT- - - TATAACTACTTGAATG                       |        |        |        |        |        |        |        |  |  | 78962 |
| Lion        | TGA- CATTTTCTCATTCTTCCTACTGGGAAATG- - - TGTTTGGAGAAATTTGTTGTGTTTCAT- - - TATGACTACTTGAATG          |        |        |        |        |        |        |        |  |  | 73783 |
| Vaquita     | AGA- CTTTTTCTCATTCTTTCTACGGGGGAAGTGTGTGAATTGAGAACTTG- - - TGTT- - - - - ATACCTATTTGAGTG            |        |        |        |        |        |        |        |  |  | 71475 |
| Pig         | TGA- ACTTTTTCTCATTGTTTCTACTGGAGGAGTGT- - - TTTTCAAGAACTTA- - - TACTTAG- - - TATAACTACTCAAGTG       |        |        |        |        |        |        |        |  |  | 71490 |
| Majority    | TGGAATTAAG- - - GCAAACAAATTTTGGTAAGATTTTCTTTAGGTCATTTGAATGAATTA- - - AATAATG- ATGTTTCAG            |        |        |        |        |        |        |        |  |  |       |
|             | 103130                                                                                             | 103140 | 103150 | 103160 | 103170 | 103180 | 103190 | 103200 |  |  |       |
| Human       | TATAATTAAGAAGGCAAGCACATTTTGGTAAGATTTTCTTT- - - - - ATTTGCATGAATTA- - - - - AATAATG- ATGTTTCAG      |        |        |        |        |        |        |        |  |  | 83232 |
| PolarBear   | TGAAATTAAG- - - GCAGATAAACTTG- GTAAGATTTTCTTTAGGTCATTTGAATGAATTAATTAATAATG- ATGTTCCG               |        |        |        |        |        |        |        |  |  | 41051 |
| Cow         | TGGAATTAAG- - - GAAAACAAATTTTGGTAAGATTTTCTTTAGGTCAGTTGAATACATTA- - - - - TATAATGTATGTTCAA          |        |        |        |        |        |        |        |  |  | 78197 |
| Dog         | TGAAATTAAG- - - GCAAACAAACTTTGGTAAGGTTTTCTTCAGGTCATTTGAATGAATTA- - - - - AATAAT- - - - - TCAG      |        |        |        |        |        |        |        |  |  | 71174 |
| BelugaWhale | TGGAATTAAG- - - GAAAACAGATTATGGTAAGATTTTCTTTAGGTCAGTTGAATTAATTA- - - - - AATAATG- ATGTTTCAG        |        |        |        |        |        |        |        |  |  | 70251 |
| Donkey      | TGGAATTCAG- - - GCAAACAAATTCTGGTAAGATTTTCTTTAGGTCATTTGAATGAATTA- - - - - AATAATG- ATGTTTCAT        |        |        |        |        |        |        |        |  |  | 79357 |
| Cat         | TGGAATTAAG- - - GCAAACAACTTCTGTAAGATTTTCTTTAAGTCATTTGAATGAA- - - - - ATAATG- ATGTTTCAG             |        |        |        |        |        |        |        |  |  | 76177 |
| Ferret      | TGAAATTAAG- - - GCAAATAAACTTTGGAAGTTTTTCTTTAGGTCATTTGAATGAATTA- - - - - AATAATG- ATGTTCCG          |        |        |        |        |        |        |        |  |  | 79034 |
| Lion        | TGGAATTAAG- - - GCAAACAACTTCTGTAAGATTTTCTTTAAGTCATTTGAATGAATTA- - - - - AATAATG- ATGTTTCAG         |        |        |        |        |        |        |        |  |  | 73855 |
| Vaquita     | TGGAATTAAG- - - GAAAACAGATTATGGTAAGATTTTCTTTAGGTCAGTTGAAT- - - - - TA- - - - - AATAATG- ATGTTTCAG  |        |        |        |        |        |        |        |  |  | 71543 |
| Pig         | TGGAATTAG- - - - - AA- - - - CAAATTTTG- TAAGTTTTTCTTTAGGTCAGTTAATGAATTA- - - - - AATAGTG- AGGTTCAA |        |        |        |        |        |        |        |  |  | 71557 |

Dienstag, 3. Mai 2022 08:40

| Majority    | GGTGATTT- GTCTCTAAGAACTGAAGGACTTAC- - TATATTTGTTTCATAAGCTGTAATT- XTXTG- - - A- TTTCAAGTA |                                                     |                                  |                            |            |           |              |        |       |
|-------------|------------------------------------------------------------------------------------------|-----------------------------------------------------|----------------------------------|----------------------------|------------|-----------|--------------|--------|-------|
|             | 103210                                                                                   | 103220                                              | 103230                           | 103240                     | 103250     | 103260    | 103270       | 103280 |       |
| Human       | AGTGATTT-                                                                                | GTCTCTAGGAGCTGAAAGAC-                               | TAC-                             | TACCTTTGTTTCATAAGCTGTAATT- | ATTTG-     | - - -     | ATTTCAAGTG   |        | 83303 |
| PolarBear   | GGTGATAT-                                                                                | GTCTCCAAGAACAGAAGAACTTAC-                           | TATATT-                          | GTTTCATAAGCTGTAATT-        | GTCTG-     | - - - - - | CAAGTA       |        | 41118 |
| Cow         | GGTGATTT-                                                                                | GTTTCTAAGAAT- GAAGAATTTGC-                          | TATATATGTTTTGTGAGCTATAATT-       | GTCTG-                     | - -        | A-        | TTTCAAGTA    |        | 78268 |
| Dog         | GGTGATGT-                                                                                | GTCTCCAAGAGCTGAAGAACTTAC-                           | GATATGTGTTTCAGAAGCTGTAATT-       | GTCTG-                     | - -        | A- T-     | TTCAAG       |        | 71244 |
| BelugaWhale | GGTGATTTTGTCTCTAAAAAT-                                                                   | GAAGGACTTAC-                                        | TATATATGTTTTGTAAGCTGTAATT-       | ATTTGTCTAATTTCAAGCA        |            |           |              |        | 70327 |
| Donkey      | GGTGATTC-                                                                                | GTCTCTAGGAACTGAAGGACTTAAC-                          | TATATTTGCTTCATAAGCTACTATTTATTTG- | - - -                      | ATTTCAAGTG |           |              |        | 79431 |
| Cat         | GGTGATAG-                                                                                | GTCTCCAAGAACTGAAGGACTTA-                            | - -                              | ACTGTTTGTTTCATAAGCTGTAGCT- | GTCCG-     | - -       | G- TTTCAAGTA |        | 76248 |
| Ferret      | GGTGATAT-                                                                                | GTCCCCAAGAACTGAAGAACTTAT-                           | TATATTTGTTTCATAAGCTGTAAT-        | - - - - -                  | CACATG     |           |              |        | 79096 |
| Lion        | GGTGATAG-                                                                                | GTCTCCAAGAACTGAAGGACTGACTTACTGTTTGTTCATAAACTGTAGCT- | GTCTG-                           | - -                        | G-         | TTTCAAGTA |              |        | 73929 |
| Vaquita     | GGTGATTTTGTCTCTAAAAAT-                                                                   | GAAGGACTTAC-                                        | TATATATGTTTTGTAAGCTGTAATT-       | ATTTGTCTAATTTCAAGCA        |            |           |              |        | 71619 |
| Pig         | GAAGATTT-                                                                                | GTCTCTT- - AAC- GAAA- - -                           | TAC-                             | TGTGTATGTTTTTAAAGCTGAAATT- | ATTTG-     | - -       | A- TTTCAAGTA |        | 71622 |

| Majority    | TGAGTTTATGAAGAAGATAGCACTTGTATAAAAAAXTGT- GAGTTACTGTTXTGTTGAAGATGATXTTTATTTTAGATGT |                                          |                                           |                                     |                  |                  |             |        |       |
|-------------|-----------------------------------------------------------------------------------|------------------------------------------|-------------------------------------------|-------------------------------------|------------------|------------------|-------------|--------|-------|
|             | 103290                                                                            | 103300                                   | 103310                                    | 103320                              | 103330           | 103340           | 103350      | 103360 |       |
| Human       | TGAGTTTATGAAGAAGATAGCACTTGC                                                       | GAAAAAAGT-                               | - -                                       | GAATTACCATTATGTCGAAAGTGATACTTTTTTT- | ACATTT           |                  |             |        | 83379 |
| PolarBear   | TGAGTTTATGAAGAAGATAGCACTTGTATAACAATGTATTGAGTTA-                                   | - - - -                                  | TTGTTGAAGATGAT-                           | - - -                               | ATTTTAGATGT      |                  |             |        | 41189 |
| Cow         | - - AGTTTATGAAGAAGATAGCACTTGTT-                                                   | - - - - -                                | ATTTTTTT-                                 | - - - -                             | TAGATTTGACTCCTC- | - - - -          | ACTAT       |        | 78322 |
| Dog         | TGAGTTTATGAAGAAGATAGCACTTGTCTAAAAAAGTGTTGAGTTA-                                   | - - - -                                  | CTGTTGAAGATGATACTTATTTTTGGATGT            |                                     |                  |                  |             |        | 71319 |
| BelugaWhale | C- - GTTTATAAAGAAGGTAGCACTTGTATAAAAAA-                                            | - GT-                                    | GAGTTACTGTTATGTTGAAGATGATTTTTTTTTTTAGATTT |                                     |                  |                  |             |        | 70402 |
| Donkey      | TGAGTTTATGAAGA-                                                                   | - - TAGCACTTGTGTAACAAT-                  | - -                                       | GAGTTACTGTTATGTTGAAGATGATA-         | -                | TTTTTTAGCTTT     |             |        | 79503 |
| Cat         | TGAGTTTATGAAGATGATAGCACTTGTAGAAAAAAGTGT-                                          | GAGTTACTGTTTTGTTGAAGATGATATTTATTTTAGATGT |                                           |                                     |                  |                  |             |        | 76327 |
| Ferret      | TGAATTTATGAAGAAGATAGCATTGTATAGTA-                                                 | - -                                      | TGTTGAGTTA-                               | - - - -                             | TTGTTGAAGATATTT- | - -              | ATTTTAGATGT |        | 79165 |
| Lion        | TGAGTTTATGAAGATGATAGCACTTGTAGAAAAAAGTGT-                                          | GAGTTACTGTTTTGTTGAAGATGATATTTATTTTAGATGT |                                           |                                     |                  |                  |             |        | 74008 |
| Vaquita     | C- - GTTTATAAAGAAGGTAGCACTTGTATAAAAAA-                                            | - GT-                                    | GAGTTACTGTTATGTTGAAGATGATTTTTTTTTTT-      | AGATTT                              |                  |                  |             |        | 71693 |
| Pig         | TGAGTTTATGAAGAAGACAGCATTGT                                                        | TTTTAAAAA-                               | - GT-                                     | GAGTTACTAT-                         | - - - -          | TGAAGATGACTATTG- | - - - -     | AATAT  | 71689 |

Dienstag, 3. Mai 2022 08:40

| Majority    | GGCTTCTXGCTATAAACCATGGAAGTGAATTTTCAA- - - - GTCTCTGACTTGGAATX- - - - - ATATTCTTTA- TG |                                                       |                              |                 |        |        |        |        |  |
|-------------|---------------------------------------------------------------------------------------|-------------------------------------------------------|------------------------------|-----------------|--------|--------|--------|--------|--|
|             | 103370                                                                                | 103380                                                | 103390                       | 103400          | 103410 | 103420 | 103430 | 103440 |  |
| Human       | GGCCTTTTACTGTAAATCGT                                                                  | GGAAGTGAATTTTCAA- - - -                               | GCCTGTGACTTGGAATT- - - - -   | ATATTTTTCATG    | 83445  |        |        |        |  |
| PolarBear   | GCCTTCTTGCTATAAACCAT                                                                  | GGAAGTGAATTTTCAA- - - -                               | GTTTCTGACTTAGAAAA- - - - -   | TATATTCTTTA- TG | 41256  |        |        |        |  |
| Cow         | G- - - - - - - - - - T                                                                | GAACCATGGAAGTGAATTTTATAA- - - -                       | GTCTCTGACTTGGAAGT- - - - -   | ACATTCTTTT- TG  | 78377  |        |        |        |  |
| Dog         | GATTTCTTGCTGTAAACCAT                                                                  | GGAAGTGAATTTTCAA- - - -                               | GTTTCTGACTTAGAAATA- - - - -  | TCATTCTTTA- TG  | 71386  |        |        |        |  |
| BelugaWhale | GGCTCCTCACTATGAACCAT                                                                  | GGAAGTGAATTTTCAA- - - -                               | GTCTCTGACTTGGAAGT- - - - -   | ATATTCTTTA- TG  | 70468  |        |        |        |  |
| Donkey      | GGCTTCTCACTGTAAACCAT                                                                  | GTAAGTGAATTTTCAA- - - -                               | GTCTCTGACTTGGAATAT- - - - -  | TATATTCTTTG- TG | 79572  |        |        |        |  |
| Cat         | GGCTTCTTGCTATAAACCGT                                                                  | GGAAGTGAATTTTCAA- - - -                               | ATCTCTGATTTAGAAATAT- - - - - | TACATCCTTTA- TG | 76396  |        |        |        |  |
| Ferret      | GCCTACTCGGTATAAACCAT                                                                  | GGAAGTGAATTTTTCAG- - - -                              | GTTTCTGACTTAGAAATAT- - - - - | CATATTCTTTA- TG | 79234  |        |        |        |  |
| Lion        | GGCTTCTTGCTATAAACCGT                                                                  | GGAAGTGAATTTTCAA- - - -                               | ATCTCTGATTTAGAAATAT- - - - - | TACATCCTTTA- TG | 74077  |        |        |        |  |
| Vaquita     | GGCTCCTCACTATGAACCAT                                                                  | GGAAGTGAATTTTCAA- - - -                               | GTCTCTGACTTGGAAGT- - - - -   | ATATTCTTTA- TG  | 71759  |        |        |        |  |
| Pig         | GGGCCTCCCTATAAACCACAGAAGT                                                             | GAATTTTCAAAGTCAGTTTTCCAGTTGAAAGGTTGGAGAAATGTTTTTTTATG | 71769                        |                 |        |        |        |        |  |

| Majority    | CTTTGTTTGCTTTTCCATAGGAAATGGAATATTGTATATTTAATTTTTT- - AACATAATACAGGTATGTACCTTAGTTCT |                                  |        |        |        |        |        |        |  |
|-------------|------------------------------------------------------------------------------------|----------------------------------|--------|--------|--------|--------|--------|--------|--|
|             | 103450                                                                             | 103460                           | 103470 | 103480 | 103490 | 103500 | 103510 | 103520 |  |
| Human       | CTTTGTTTGCTTTTCCAGAGGAAATAGAGTATTATATATTTGATATTTT- -                               | AACATAATACAGGTATGTACTTTAGTTCA    | 83523  |        |        |        |        |        |  |
| PolarBear   | CTTTGTTTGCTTTTCCATAGGAAATGGAATATTGTATATTTAATTTTTT- -                               | AGCATACTACAGGTATGTACCTTAGCCCT    | 41334  |        |        |        |        |        |  |
| Cow         | CTTTGTTTGCTTTTCCATAGGAAATGGAATGTTATATATTTAATTTGT- -                                | GACATAATACAGGTATGTACCTTGGTTCT    | 78454  |        |        |        |        |        |  |
| Dog         | CTT- - - - TGCTTTTCCATAGGAAATGGAATATTGTATATTTAATTTTTT- -                           | AACATACTACAGGTATGTACCTTAGCCCT    | 71460  |        |        |        |        |        |  |
| BelugaWhale | CTGTGTTTGCTTTTCCATAGGAAATGGAATGTTGTATATTTAATTTTTTTTAAACATAATACAGGTATGTACCTTAGTTCT  | 70548                            |        |        |        |        |        |        |  |
| Donkey      | TTTTGTTTGCTTTTCCATAGGAAATGGAATGTTGTATTTAATTTTTT- -                                 | AACATAATACAGGTATGTACCTTAGTTCT    | 79650  |        |        |        |        |        |  |
| Cat         | CTTTGTTTGCTTTTCCATAGGAGATGGAATATGGTATATTTAATTTTTT- -                               | AACATA- - - CAGGTATGTACCTTAGCCCT | 76471  |        |        |        |        |        |  |
| Ferret      | CTTTGTTTGCTTTTCCATAGGAAATGGAATATTGTATTTAATTTTTT- -                                 | AGCATACTACAGGTATGTACCTTAGCCCT    | 79312  |        |        |        |        |        |  |
| Lion        | CTTTGTTTGCTTTTCCATAGGAGATGGAATATGGTATATTTAATTTTTT- -                               | AACATA- - - CAGGTATGTACCTTAGCCCT | 74152  |        |        |        |        |        |  |
| Vaquita     | CTGTGTTTGCTTTTCCATAGGAAATGGAATGTTGTATATTTAATTTTTTTTAAACATAATACAGGTATGTACCTTAGTTCT  | 71839                            |        |        |        |        |        |        |  |
| Pig         | TTTTGTTTGCTTTTCCATAGGAAATGGAATGTTGTATATTTAATTTTTT- -                               | AACATAATACAGGTATGTACCTCAGTTCT    | 71847  |        |        |        |        |        |  |





Dienstag, 3. Mai 2022 08:40

| Majority    | CGACTTGTGTGTGTTTTCGTAAAATATGCTTTATTTTAAAATTAGGGCTTCCTGTTGCAGCTGTTCCAGGAGCTCTGAGTC |        |        |        |        |        |        |        |       |
|-------------|-----------------------------------------------------------------------------------|--------|--------|--------|--------|--------|--------|--------|-------|
|             | 103690                                                                            | 103700 | 103710 | 103720 | 103730 | 103740 | 103750 | 103760 |       |
| Human       | CGACTTGTGTGTGTTTTCGTAAAATATGCTTTATTTTAAAATTAGGGCTTCCTGTTGCAGCTGTTCCAGGAGCTCTGAGTC |        |        |        |        |        |        |        | 83756 |
| PolarBear   | CGACTTGTGTGTGTTTTCGTAAAATATGCTTTATTTTAAAATTAGGGCTTCCTGTTGCAGCTGTTCCAGGAGCTCTGAGTC |        |        |        |        |        |        |        | 41572 |
| Cow         | CGACTTGTGTGTGTTTTCGTAAAATATGCTTTATTTTAAAATTAGGGCTTCCTGTTGCAGCTGTTCCAGGAGCTCTGAGTC |        |        |        |        |        |        |        | 78679 |
| Dog         | CGACTTGTGTGTGTTTTCGTAAAATATGCTTTATTTTAAAATTAGGGCTTCCTGTTGCAGCTGTTCCAGGAGCTCTGAGTC |        |        |        |        |        |        |        | 71699 |
| BelugaWhale | CGACTTGTGTGTGTTTTCGTAAAATATGCTTTATTTTAAAATTAGGGCTTCCTGTTGCAGCTGTTCCAGGAGCTCTGAGTC |        |        |        |        |        |        |        | 70774 |
| Donkey      | CGACTTGTGTGTGTTTTCGTAAAATATGCTTTATTTTAAAATTAGGGCTTCCTGTTGCAGCTGTTCCAGGAGCTCTGAGTC |        |        |        |        |        |        |        | 79888 |
| Cat         | CGACTTGTGTGTGTTTTCGTAAAATATGCTTTATTTTAAAATTAGGGCTTCCTGTTGCAGCTGTTCCAGGAGCTCTGAGTC |        |        |        |        |        |        |        | 76705 |
| Ferret      | CGACTTGTGTGTGTTTTCGTAAAATATGCTTTATTTTAAAATTAGGGCTTCCTGTTGCAGCTGTTCCAGGAGCTCTGAGTC |        |        |        |        |        |        |        | 79546 |
| Lion        | CGACTTGTGTGTGTTTTCGTAAAATATGCTTTATTTTAAAATTAGGGCTTCCTGTTGCAGCTGTTCCAGGAGCTCTGAGTC |        |        |        |        |        |        |        | 74386 |
| Vaquita     | CGACTTGTGTGTGTTTTCGTAAAATATGCTTTATTTTAAAATTAGGGCTTCCTGTTGCAGCTGTTCCAGGAGCTCTGAGTC |        |        |        |        |        |        |        | 72069 |
| Pig         | CGACTTGTGTGTGTTTTCGTAAAATATGCTTTATTTTAAAATTAGGGCTTCCTGTTGCAGCTGTTCCAGGAGCTCTGAGTC |        |        |        |        |        |        |        | 72080 |

| Majority    | CTTTGGCTATTCCAAATGCTGCTGCAGCAGCTGCTGCAGCTGCTGCTGGCCGAGTGGGTATGCCTGGAGTCTCAGCTGGT |        |        |        |        |        |        |        |       |
|-------------|----------------------------------------------------------------------------------|--------|--------|--------|--------|--------|--------|--------|-------|
|             | 103770                                                                           | 103780 | 103790 | 103800 | 103810 | 103820 | 103830 | 103840 |       |
| Human       | CTTTGGCCATTCCAAATGCTGCTGCAGCAGCTGCTGCAGCTGCTGCTGGCCGAGTGGGTATGCCTGGAGTCTCAGCTGGT |        |        |        |        |        |        |        | 83836 |
| PolarBear   | CTTTGGCTATTCCAAATGCTGCTGCAGCAGCTGCTGCAGCTGCTGCTGGCCGAGTGGGTATGCCTGGAGTCTCAGCTGGT |        |        |        |        |        |        |        | 41652 |
| Cow         | CTTTGGCTATTCCAAACGCTGCTGCAGCAGCTGCTGCAGCTGCTGCTGGCCGAGTGGGTATGCCTGGAGTCTCAGCTGGT |        |        |        |        |        |        |        | 78759 |
| Dog         | CTTTGGCTATTCCAAATGCTGCTGCAGCAGCTGCTGCAGCTGCTGCTGGCCGAGTGGGTATGCCTGGAGTCTCAGCTGGT |        |        |        |        |        |        |        | 71779 |
| BelugaWhale | CTTTGGCTATTCCAAATGCTGCTGCAGCAGCTGCTGCAGCTGCTGCTGGCCGAGTGGGTATGCCTGGAGTCTCAGCTGGT |        |        |        |        |        |        |        | 70854 |
| Donkey      | CTTTGGCTATTCCAAATGCTGCTGCAGCAGCTGCTGCAGCCTGCTGGCCGAGTGGGTATGCCTGGAGTCTCAGCTGGT   |        |        |        |        |        |        |        | 79968 |
| Cat         | CTTTGGCTATTCCAAATGCTGCTGCAGCAGCTGCTGCAGCTGCTGCTGGCCGAGTGGGTATGCCTGGAGTCTCAGCTGGT |        |        |        |        |        |        |        | 76785 |
| Ferret      | CTTTGGCTATTCCAAATGCTGCTGCAGCAGCTGCTGCAGCTGCTGCTGGCCGAGTGGGTATGCCTGGAGTCTCAGCTGGT |        |        |        |        |        |        |        | 79626 |
| Lion        | CTTTGGCTATTCCAAATGCTGCTGCAGCAGCTGCTGCAGCTGCTGCTGGCCGAGTGGGTATGCCTGGAGTCTCAGCTGGT |        |        |        |        |        |        |        | 74466 |
| Vaquita     | CTTTGGCTATTCCAAATGCTGCTGCAGCAGCTGCTGCAGCTGCTGCTGGCCGAGTGGGTATGCCTGGAGTCTCAGCTGGT |        |        |        |        |        |        |        | 72149 |
| Pig         | CTTTGGCTATTCCAAACGCTGCTGCAGCAGCTGCTGCAGCTGCTGCTGGCCGAGTGGGTATGCCTGGAGTCTCAGCTGGT |        |        |        |        |        |        |        | 72160 |

Dienstag, 3. Mai 2022 08:40

| Majority    | GGCAATACAGTCCTGTTGGTTAGCAATTTAAATGAAGAGGTTAGTAAAATAATTTTCTAATGTTTATTCTTT- AACTCCA  |        |        |        |        |        |        |        |  |  |       |
|-------------|------------------------------------------------------------------------------------|--------|--------|--------|--------|--------|--------|--------|--|--|-------|
|             | 103850                                                                             | 103860 | 103870 | 103880 | 103890 | 103900 | 103910 | 103920 |  |  |       |
| Human       | GGCAATACAGTCCTGTTGGTTAGCAATTTAAATGAAGAGGTTAGTAAAATAATCT- CTAATGTTTATTCTTT- AACTCCA |        |        |        |        |        |        |        |  |  | 83914 |
| PolarBear   | GGCAATACAGTCCTGTTGGTTAGCAATTTAAATGAAGAGGTTAGTAAAATAATTTTCTAATGTTTATTCTTT- AACTCCA  |        |        |        |        |        |        |        |  |  | 41731 |
| Cow         | GGCAATACAGTCCTGTTGGTTAGCAATTTAAATGAAGAGGTTAGTAAAATAATTTTCTGATGTCTATTTTTT- AACTCCA  |        |        |        |        |        |        |        |  |  | 78838 |
| Dog         | GGCAATACAGTCCTGTTGGTTAGCAATTTAAATGAAGAGGTTAGTAAAATAATTTTCTAATGTTTATTCTTT- AACTCCA  |        |        |        |        |        |        |        |  |  | 71858 |
| BelugaWhale | GGCAATACAGTCCTGTTGGTTAGCAATTTAAATGAAGAGGTTAGTAAAATAATTTTCTAGTGTTTATTTTTT- AACTCCA  |        |        |        |        |        |        |        |  |  | 70933 |
| Donkey      | GGCAATACAGTCCTGTTGGTTAGCAATTTAAATGAAGAGGTTAGTAAAATAATTTTGTAAATGTTTATTCTTT- AACTCCA |        |        |        |        |        |        |        |  |  | 80047 |
| Cat         | GGCAATACAGTCCTGTTGGTTAGCAATTTAAATGAAGAGGTTAGTAAAATAATTTTGTAAATGTTTATTCTTT- AACTCCA |        |        |        |        |        |        |        |  |  | 76864 |
| Ferret      | GGCAATACAGTCCTGTTGGTTAGCAATTTAAATGAAGAGGTTAGTAAAATAATTTTCTAATGTTTATTTTTTAACTCCA    |        |        |        |        |        |        |        |  |  | 79706 |
| Lion        | GGCAATACAGTCCTGTTGGTTAGCAATTTAAATGAAGAGGTTAGTAAAATAATTTTGTAAATGTTTATTCTTT- AACTCCA |        |        |        |        |        |        |        |  |  | 74545 |
| Vaquita     | GGCAATACAGTCCTGTTGGTTAGCAATTTAAATGAAGAGGTTAGTAAAATAATTTTCTAGTGTTTATTTTTT- AACTTCA  |        |        |        |        |        |        |        |  |  | 72228 |
| Pig         | GGCAATACGGTCCTGTTGGTTAGCAATTTAAATGAAGAGGTTAGTAAAATAATTTTCTAGTGTTTATTTTTT- AACTCCA  |        |        |        |        |        |        |        |  |  | 72239 |

| Majority    | TTTCATTTGTGAAAGTTTTTCATGTTTATTTCAATTTGCACTTGCCTTTCTTTTTATGTACATTCATTAGTCAAAGTATT     |        |        |        |        |        |        |        |  |  |       |
|-------------|--------------------------------------------------------------------------------------|--------|--------|--------|--------|--------|--------|--------|--|--|-------|
|             | 103930                                                                               | 103940 | 103950 | 103960 | 103970 | 103980 | 103990 | 104000 |  |  |       |
| Human       | TTTCATTTGTGAAAGTTTTTCATGTTTATTTCAATTTGCACTTGCCTTTCTTTTTATGTACATTCATTAGTCAAAGTATT     |        |        |        |        |        |        |        |  |  | 83994 |
| PolarBear   | TTTCATTTGTGAAAGTTTCTCATGTTTATTTCAATTTGCACTTGCCTTTCTTTTTATGTACATTCATTAGTCAAAGTATT     |        |        |        |        |        |        |        |  |  | 41811 |
| Cow         | TTTCATTTGTGAAAGTTTTTCATGTTTATTTCAATTTGCACTTGCCTTTCTTTTTATGTACATTCATTAGTCAAAGTATT     |        |        |        |        |        |        |        |  |  | 78918 |
| Dog         | TTTCATTTGTGAAAGTTTCTCATGTTTATTTCAATTTGCACTTGCCTTTCTTTTTATGTACATTCATTAGTCAAAGTATT     |        |        |        |        |        |        |        |  |  | 71938 |
| BelugaWhale | TTTCATTTGTGAAAGTTTTTCATGTTTATTTCAATTTGCACTTGCCTTTCTTTTTATGTACATTCATTAGTCAAAGTATT     |        |        |        |        |        |        |        |  |  | 71013 |
| Donkey      | TTTCATTTGTGGAAGTTTTTCATGTTTATTTCAATTTGCACTTGCCTATCTTTTTATGTACATTCATTAGTCAAAGTATT     |        |        |        |        |        |        |        |  |  | 80127 |
| Cat         | TTTCATTTGTGAAAGTTTCTCATGTTTATTTCAATTTGCACTTGCCTTTCTTTTTATGTACATTCATTAGTCAAAGTATT     |        |        |        |        |        |        |        |  |  | 76944 |
| Ferret      | TTTCATTTGTGTAAGTTTCTCATGTTTATTTCAATTTGCACTTGCCTTTCTTTTTATGTACATTCATTAGTCAAAGTATT     |        |        |        |        |        |        |        |  |  | 79786 |
| Lion        | TTTCATTTGTGAAAGTTTCTCATGTTTATTTCAATTTGCACTTGCCTTTCTTTTTATGTACATTCATTAGTCAAAGTATT     |        |        |        |        |        |        |        |  |  | 74625 |
| Vaquita     | TTTCATTTGTGAAAGTTTTTCATGTTTATTTCAATTTGCACTTGCCTTTCTTTTTATGTACATTCATTAGTCAAAGTATT     |        |        |        |        |        |        |        |  |  | 72308 |
| Pig         | TTTCATTTGTGGAAGTTTTTCATGTTTATTTCAATTTGCACTTGCCTTTCTTTTTATGTACATTCATT- G- - AA- GTATT |        |        |        |        |        |        |        |  |  | 72315 |

Dienstag, 3. Mai 2022 08:40

| Majority    | TTCTGTATGTTTCTACTTCTGAATAAAATCTATGTACTTGTTTAGGTAATAAXTTATTTTCCTTAGACAGTCATATCT- - -        |       |
|-------------|--------------------------------------------------------------------------------------------|-------|
|             | 104010 104020 104030 104040 104050 104060 104070 104080                                    |       |
| Human       | TTCTGTATGTTTCTACTTCTGAATAAAATCTACATA- TTGTTTAGGTAATACTTTATTTTCCTTAAACAGTCATGTCT- - -       | 84070 |
| PolarBear   | TTATGTATGTTTCTACTTCTGAATAAAATCTATGTACTTGTTTAGGTAATA- - - - - TTTTCCTTAG- - - TCATATCT- - - | 41879 |
| Cow         | TTCTGTGTGTTTCTACTTCCAAATAAAATCTATGTACTTGTTTAGGTAATACTTTATTTCTGTAGCTAGTCATATCT- - -         | 78995 |
| Dog         | TTCTGTATGTTTCTACTTCTGAATAAAATCTATGTACTTGTTTAGGTAATA- - - - - TTTTCCTTAG- - - TCATATCT- - - | 72006 |
| BelugaWhale | TTCTGTGTGTTTCTACTTCCGAATAAAATCTGTGTACTTGTTTAGGTAATACTTTATTTCCGTAGACAGTCATATCT- - -         | 71090 |
| Donkey      | TTCTGTATGTTTCTACTTCTGAATAAAATCTATGTACTTGTTTAAAGTAATATTTTATTTCTTTAGACAGTCATATCT- - -        | 80204 |
| Cat         | TTCTGTACGTTTCTATTTCTGAATAAAATCTATGTATTTGTTTAGGTAATA- - - - - TTTCCCTAGGCAGTCATATCT- - -    | 77016 |
| Ferret      | TTCTGTATGTTTCTACTTCTGAATAAAATCTATGTATTTGTTTAGGTAATA- - - - - TTTTCCTTAGACAGTCATATCTATC     | 79861 |
| Lion        | TTCTGTACGTTTCTATTTCTGAATAAAATCTATGTATTTGTTTAGGTAATA- - - - - TTTCCCTAGGCAGTCATATCT- - -    | 74697 |
| Vaquita     | TTCTGTGTGTTTCTACTTCCGAATAAAATCTATGTACTTGTTTGGGTAATACTTTATTTCCGTAGACAGTCATATCT- - -         | 72385 |
| Pig         | TTCTGTGTGTTTCTACT- CTGAATAAAATCTATGTACTTGTTTAGGTAATAACCTTATTTTCCTTAGATGGTCATATCT- - -      | 72391 |

| Majority    | - - - CTTTTTATATATATAT- - - - - ATATTTATTXT- - - - - TT- - - - - - - - - - - - - - - - - - - - - - - - - - - TTAACCTAACTACCTATTTTCC |       |
|-------------|-------------------------------------------------------------------------------------------------------------------------------------|-------|
|             | 104090 104100 104110 104120 104130 104140 104150 104160                                                                             |       |
| Human       | - - - - - CTTTATATCTATATCTATATATGTATATT- - - - - TT- - - - - - - - - - - - - - - - - - - - - TTAACCTAA- - - CCTATTTTCC              | 84121 |
| PolarBear   | - - - - - - - - TATATATATATA- - TATAATTATTATTATCATT- - - - - - - - - - - - - - - - - - - - - TTAACCTAACTACCTATTTTCC                 | 41933 |
| Cow         | - - - CTTTTAATATATATAT- - - - - ATATATAT- - - - - - - - - - - - - - - - - - - - - TTAACCTAACTACCTATTTTCC                            | 79044 |
| Dog         | - - - CTTTTTATATATATAAT- - TATTATTATAAATTATTATTATTATT- - - - - - - - - - - - - - - - - - - - - TTTAATGTAACCTACCTATTTTCC             | 72072 |
| BelugaWhale | - - - CTTTTTATATATATAT- - - - - ATATATATA- - - - - - - - - - - - - - - - - - - - - TTAACCTAACTACCTATTTTCC                           | 71140 |
| Donkey      | - - - - - CTTTATATATATAT- - - - - ATA- - TAT- - - - - - - - - - - - - - - - - - - - - TTAACCTAATTACCTATTTTCC                        | 80249 |
| Cat         | - - - CTTTATATATATATAT- - - - - ATATTTATTATTATTATA- TTATTATTAT- - - - - TTTAACCTAACTACCTATTTTCC                                     | 77084 |
| Ferret      | TATCTATCTATATATATATA- - TATATTTACTATTATTATTATTATTATTATTATTTTAACTAACTACCTATTTTCC                                                     | 79939 |
| Lion        | - - - CTTTATATATATATATTATTATTATTATTATTATTATT- ATATTATTAT- - - - - TTTAACCTAACTACCTATTTTCC                                           | 74769 |
| Vaquita     | - - - CTTTATATATATATAT- - - - - ATATTTTTT- - - - - - - - - - - - - - - - - - - - - TTAACCTAACTACCTATTTTCC                           | 72435 |
| Pig         | - - - CTTTTTATATATATAT- - - - - AT- - - TTT- - - - - - - - - - - - - - - - - - - - - TTAACCTAACTACCTATTTTCC                         | 72437 |

Dienstag, 3. Mai 2022 08:40

| Majority    | T A A G A A A A A T A T G G T G A A G T A C T A T A G T X T G G C T T T T T - - C T T T T T G T T G T T C T C A A A - G G C A A A T G T G A T C T A A T T T G C |        |        |        |        |        |        |        |       |
|-------------|-----------------------------------------------------------------------------------------------------------------------------------------------------------------|--------|--------|--------|--------|--------|--------|--------|-------|
|             | 104170                                                                                                                                                          | 104180 | 104190 | 104200 | 104210 | 104220 | 104230 | 104240 |       |
| Human       | T A A G A A A A A T A T G G T G A A G T A C T G T A G T T T G G C T T A T C - - - T T T T T G T T G T T C T C A A A - G G C A A A T G T G A T C T A A T T T G C |        |        |        |        |        |        |        | 84197 |
| PolarBear   | T A A G A A A A A T A T G G T G A A G T A C T A T A G T A T G G C T T T T T - - C T T T T T G T T G T T C T C A A A - G G C A A A T G T G A T C T A A T T T G C |        |        |        |        |        |        |        | 42010 |
| Cow         | T A A G A A A A A T A T G G T G A A G T A C T A T A G T T T G G C T T T T T A T C T T T T T G T T G T T C T C A A A - G G C A A A T - - - A T C T A A T T T G C |        |        |        |        |        |        |        | 79120 |
| Dog         | T A A G A A A A A T A T G G T G A A G T A C T A T A G T A T G G C T T T T T - - C T T T T T G T T G T T C T C A A A - G G C A A A T G T G A T C T A A T T T G C |        |        |        |        |        |        |        | 72149 |
| BelugaWhale | T A A G A A A A A T A T G G T G A A G T A C T G T A G T C T G G C T T T T T A T C T T T T T G T T G T T C T C A A A A G G C A A A T G T G A T C T A A T T T G C |        |        |        |        |        |        |        | 71220 |
| Donkey      | T A A G A A A A A T A T G G T G A A G T A C C A T A G T T T G G C T T T T T A T C G T T T T G T T A C T C T C A A A - G G C A G A T A T G A T C T A A T T T G C |        |        |        |        |        |        |        | 80328 |
| Cat         | T A A G A A A A A T A T G G T G A A G T A C T G T A G T A T G G C T T T T T - - C T T T C T G T T G T T C T C A A A - G G C A A A T G T G A T C T A A T T T G C |        |        |        |        |        |        |        | 77161 |
| Ferret      | T A A G A A A A A T A T G G T G A A G T A C T A T A G T A T T G C T T T T T - - C T T T T T G T T G T T C T C A A A - G G C A A A T G T G A T C T A A T T T G C |        |        |        |        |        |        |        | 80016 |
| Lion        | T A A G A A A A A T A T G G T G A A G T A C T G T A G T A T G G C T T T T T - - C T T T C T G T T G T T C T C A A A - G G C A A A T G T G A T C T A A T T T G C |        |        |        |        |        |        |        | 74846 |
| Vaquita     | T A A G A A A A A T A T G G T G A A G T A C T G T A G T T T G G C T T T T T A T C T T T T T G T T G T T C T C A A A A G G C A A A T G T G A T C T A A T T T G C |        |        |        |        |        |        |        | 72515 |
| Pig         | T A A G A A A A A T A T G G T G A A G T A C T A T A G T T T G G C T T T T T A T C T T T T T G T T G T T C T C A A A - G G C A A A T G T G A T C T A A T T T G C |        |        |        |        |        |        |        | 72516 |

| Majority    | A G A T T T - A A C T G T A A A A C A A T T T T T G C T C T T T G C C T T T T C T A A T T A T T T G C T T G T T C A T T T C A T G C T T A T G T G T C A T T G C A |        |        |        |        |        |        |        |       |
|-------------|-------------------------------------------------------------------------------------------------------------------------------------------------------------------|--------|--------|--------|--------|--------|--------|--------|-------|
|             | 104250                                                                                                                                                            | 104260 | 104270 | 104280 | 104290 | 104300 | 104310 | 104320 |       |
| Human       | A A A T T T - A A C T G T A A A A C A A T T T T T G C T C T T T G C C T T T T C T A A T T A T T T G C T T G T T C A T T T C A T G C T T A T A T G T C A T T G C A |        |        |        |        |        |        |        | 84276 |
| PolarBear   | A G A T T T - A A C T G T A A A A C A A T T T T T G T T C T T T G C C T T T T C T A A T T A T T T G C T T G T T C A T T T C A T G C T T A T G T G T C A T T G C A |        |        |        |        |        |        |        | 42089 |
| Cow         | A G A T G T - A A C T G T A A A A C A A T T T T T G C T C T T T G C C T T T T C T A A T T A T T T G C T T G T T C A T T T C A T G C T T A T G T G T C A T T G C A |        |        |        |        |        |        |        | 79199 |
| Dog         | A G A T T T T A A C T G T A A A A C A A T T T T T G T T C T T T G C C T T T T C T A A T T A T T T G C T T G T T C A T T T C A T G C T T A T G T G T C A T T G C A |        |        |        |        |        |        |        | 72229 |
| BelugaWhale | A G A T G T - A A C T G T A A A A C A A T T T T T G C T C T T T G C C T T T T C T A A T T A T T T G C T T G T T C A T T T C A T G C T T A T G T G T C A T T G C A |        |        |        |        |        |        |        | 71299 |
| Donkey      | A G A T T T - A A C T G T A A A A C A A T T T T T G C T C G T T G C C T T T T C T A A T T A T T T G C T T G T T C A T T T C A T G C T T A T G T G T C A T T G C A |        |        |        |        |        |        |        | 80407 |
| Cat         | A G A T T T - A A C T G T A A A A C A A T T T T T G T T C T T T G C C T T T T C T A A T T A T T T G C T T G T T C A T T T C A T G C T T A T G T G T C A T T G C A |        |        |        |        |        |        |        | 77240 |
| Ferret      | A G A T T T - A A C T G T A A A A C A A T T T T T G T T C T T T G C C T T T T C T A A T T A T T T G C T T G T T C A T T T C A T G C T T A T G T G T C A T T G C A |        |        |        |        |        |        |        | 80095 |
| Lion        | A G A T T T - A A C T G T A A A A C A A T T T T T G T T C T T T G C C T T T T C T A A T T A T T T G C T T G T T C A T T T C A T G C T T A T G T G T C A T T G C A |        |        |        |        |        |        |        | 74925 |
| Vaquita     | A G A T G T - A A C T G T A A A A C A A T T T T T G C T C T T T G C C T T T T C T A A T T A T T T G C T T G T T C A T T T C A T G C T T A T G T G T C A T T G C A |        |        |        |        |        |        |        | 72594 |
| Pig         | A G A T G T - A A C T G T A A A A C A A T T T T T G C T C T T T G C C T T T T C T A A T G A T T T G C T T G T T C A T T T C A T G C T T A T G T G T C A T T G C A |        |        |        |        |        |        |        | 72595 |

Dienstag, 3. Mai 2022 08:40

| Majority    | TTTTTTT- AAATCTTATTTTATGTGAACACTCTAATACATTTTTCTTTGAAGGTTCTTCCAAAGATCTTGACGAGGCAC   |       |
|-------------|------------------------------------------------------------------------------------|-------|
|             | 104330 104340 104350 104360 104370 104380 104390 104400                            |       |
| Human       | TTTTTTTTAAATCTTATTTTATGTGAACACTCTAATACATTTTTCTTTGAAGGTTCTTCCAAAGATCTTGACGAGGCAC    | 84356 |
| PolarBear   | TTTTTTT- AAATCTTATTTTATGTGAACACTCTAATACATTTTTCTTTGAAGGTTCTTCCAAAGATCTTGACGAGGCAC   | 42168 |
| Cow         | TTTTTTT- AAATCTTATTTTATGTGAACACTCTAATACATTTTTCTTTGAAGGTTCTTCCAAAGATCTTGACGAGGCAC   | 79278 |
| Dog         | TTTTTTT- AAATCTTATTTTATGTGAACACTCTAATACATTTTTCTTTGAAGGTTCTTCCAAAGATCTTGACGAGGCAC   | 72308 |
| BelugaWhale | TTTTTTT- AAATCTTATTTTATGTGAACACTCTAATACATTTTTCTTTGAAGGTTCTTCCAAAGATCTTGACGAGGCAC   | 71378 |
| Donkey      | TTTTTTT- - AAATATTATTTTATGTGAACACTCTAATACATTTTTCTTTGAAGGTTCTTCCAAAGATCTTGACGAGGCAC | 80485 |
| Cat         | TTTTTTT- AAATCTTATTTTATGTGAACACTCTAATACATTTTTCTTTGAAGGTTCTTCCAAAGATCTTGACGAGGCAC   | 77319 |
| Ferret      | TTTTTTT- AAATCTTATTTTATGTGAACACTCTAATACATTTTTCTTTGAAGGTTCTTCCAAAGATCTTGACGAGGCAA   | 80174 |
| Lion        | TTTTTTT- AAATCTTATTTTATGTGAACACTCTAATACATTTTTCTTTGAAGGTTCTTCCAAAGATCTTGACGAGGCAC   | 75004 |
| Vaquita     | TTTTTTT- AAATCTTATTTTATGTGAACACTCTAATACATTTTTCTTTGAAGGTTCTTCCAAAGATCTTGACGAGGCAC   | 72673 |
| Pig         | TTTTTTT- AAATCTTATTTTATGTGAACACTCTAATACATTTTTCTTTGAAGGTTCTTCCAAAGATCTTGACGAGGCAC   | 72674 |

| Majority    | TCTTCCAGTCTTTCTTAGTAATTTTTCTTTGCAGTTATTAGTCATTGTCTTCTAAAAATATTTTTCAACTTTATCCCC  |       |
|-------------|---------------------------------------------------------------------------------|-------|
|             | 104410 104420 104430 104440 104450 104460 104470 104480                         |       |
| Human       | TCTTCCCGTCTTTCTTAGTAATTTTTCTTTGCAGTTATTAGTCATTGTCTTCTAAAAATATTTTTTAACTTTATTCCCC | 84436 |
| PolarBear   | TCTTCCAGTCTTTCTTAGTAATTTTTCTTTGCAGTTATTAGTCATTGTCTTCTAAAAATATTTTTCAACTTTATCCCC  | 42248 |
| Cow         | TCTTCCAGTCTTTCTTAGTAATTTTTCTTTGCAGTTATTAGTCATTGTCTTCTAAAAATATTTTTCAACTTTACCTCTC | 79358 |
| Dog         | TCTTCCAGTCTTTCTTAGTAATTTTTCTTTGCAGTTATTAGTCATTGTCTTCTAAAAATATTTTTCAACTTTATCCCCT | 72388 |
| BelugaWhale | TCTTCCAGTCTTTCTTAGTAATTTTTCTTTGCAGTTATTAGTCATTGTCTTCTAAAAATATTTTTCAACTTTACCCCTC | 71458 |
| Donkey      | TCTTCCAGTCTTTCTTAGTAATTTTTCTTTGCAGTTATTAGTCATTGTCTTCTAAAAATATTTTTCAACTTTATTCCCC | 80565 |
| Cat         | TCTTCCAGTCTTTCTTAGTAATTTTTCTTTGCAGTTATTAGTCATTGTCTTCTAAAAATATTTTTCCAAGTTATTCCCC | 77399 |
| Ferret      | TCTTCCAGTCTTTCTTAGTAATTTTTCTTTGCAGTTATTAGTCATTGTCTTCTAAAAATAATTTTTCAACTTTATCCCC | 80254 |
| Lion        | TCTTCCAGTCTTTCTTAGTAATTTTTCTTTGCAGTTATTAGTCATTGTCTTCTAAAAATATTTTTCAACTTTATTCCCC | 75084 |
| Vaquita     | TCTTCCAGTCTTTCTTAGTAATTTTTCTTTGCAGTTATTAGTCATTGTCTTCTAAAAATATTTTTCAACTTTACCCCTC | 72753 |
| Pig         | TCTTCCAGTCTTTCTTAGTAATTTTTCTTTGCAGTTATTAGTCATTGTCTTCTAAAAATATTTTTCAACTTTATCCCC  | 72754 |

Dienstag, 3. Mai 2022 08:40

| Majority    | CC- - - - C- - - - - - - - - - - - CC- - - - - CCCTGTTAAATAAAAATTTATTGCTGAGTTATTTTCTTTAGTTGTACATTTT          |        |        |        |        |        |        |        |  |  |       |
|-------------|--------------------------------------------------------------------------------------------------------------|--------|--------|--------|--------|--------|--------|--------|--|--|-------|
|             | 104490                                                                                                       | 104500 | 104510 | 104520 | 104530 | 104540 | 104550 | 104560 |  |  |       |
| Human       | CACCCCTTCCTTCCTTACCACCCCTCCACCCAGTTAAATAAAAATTTATTGCTAAGTTATTTTCTTTAGTTGTACATTTT                             |        |        |        |        |        |        |        |  |  | 84516 |
| PolarBear   | CC- - - - T- - - - - - - - - - - - T- - - - - - - - - - - - GTTAAATAAAAATTTATTGCTGAGTTATTTTCTTTAGTTGTACATTTT |        |        |        |        |        |        |        |  |  | 42299 |
| Cow         | CCCAAAC- - - - - - - - - - - - CC- CTCCCACCCTGTTAAATAAAAATTTATTGCTGAGTTATTTTCTTTAGTTGTACATTTT                |        |        |        |        |        |        |        |  |  | 79424 |
| Dog         | CC- - - - C- - - - - - - - - - - - CC- - - - - - C- TTGTTAAATAAAAATTTATTGCTGAGTTATTTTCTTTAGTTGTACATTTT       |        |        |        |        |        |        |        |  |  | 72443 |
| BelugaWhale | CCTGAAC- - - - - - - - - - - - CC- CTCCCACCCCTTAAATAAAAGTTTATTGCTGAGTTATTTTCTTTAGTTGTACATTTT                 |        |        |        |        |        |        |        |  |  | 71524 |
| Donkey      | CC- - - - - - - - - - - - - - - - - - - - - - CTTGTTAAATAAAAATTTATTGCTG- - TTATTTTCTTTAGTTGTACATTTT          |        |        |        |        |        |        |        |  |  | 80615 |
| Cat         | CT- - - - C- - - - - - - - - - - - CC- - - - - - CCTTGTTAAATAAAAATTTATTGCTGAGTTATTTTCTTTAGTTGTACATTTT        |        |        |        |        |        |        |        |  |  | 77455 |
| Ferret      | CC- - - - T- - - - - - - - - - - - CC- - - - - - C- CCGTTAAATAAAAATTTATTGCTGAGTTATTTTCTTTAGTTGTACATTTT       |        |        |        |        |        |        |        |  |  | 80309 |
| Lion        | CT- - - - C- - - - - - - - - - - - CC- - - - - - CCTTGTTAAATAAAAATTTATTGCTGAGTTATTTTCTTTAGTTGTACATTTT        |        |        |        |        |        |        |        |  |  | 75140 |
| Vaquita     | CCTGAAC- - - - - - - - - - - - CC- CTCCCACCCCTTAAATAAAAGTTTATTGCTGAGTTATTTTCTTTAGTTGTACATTTT                 |        |        |        |        |        |        |        |  |  | 72819 |
| Pig         | CCCGACC- - - - - - - - - - - - CCACCCCCACCCTGTTAAATAAAAATTTATTGCTGAGTTATTTTCTTTAGTTGTACATTTT                 |        |        |        |        |        |        |        |  |  | 72821 |

| Majority    | ATGTCTGGTATATTTTATTTTGAATGCTATGAAAGCTGGTATGAAATGTGGGAAG- - - CTCAATGTATCAGTTTATAATG |        |        |        |        |        |        |        |       |  |
|-------------|-------------------------------------------------------------------------------------|--------|--------|--------|--------|--------|--------|--------|-------|--|
|             | 104570                                                                              | 104580 | 104590 | 104600 | 104610 | 104620 | 104630 | 104640 |       |  |
| Human       | ATGTCTGGTATATTTTATTTTGAATGCTATGAAAGCTGGTATGAAATGTGGGAAG- - - CTCAGTGTATCAGTTTATGATG |        |        |        |        |        |        |        | 84593 |  |
| PolarBear   | ATGTCTGGTATATTTTATTTTGAATGCTATGAAAGCTGGTATGAAATGTGGGAAG- - - CTCGATGTATCAGTTTACAATG |        |        |        |        |        |        |        | 42376 |  |
| Cow         | ATGTCTGGTATATTTTATTTTGAATGCTATGAAAGCTGGTATGAAATGTGGGAAG- - - CTCAATGTATCAGTTTATGATG |        |        |        |        |        |        |        | 79501 |  |
| Dog         | ATGTCTGGTATATTTTATTTTGAATGCTATGAAAGCTGGTATGAAATGTGGGAAG- - - CTCAGTGTATCAGTTTACAATG |        |        |        |        |        |        |        | 72520 |  |
| BelugaWhale | ATGTCTGGTATATTTTATTTTGAATGCTATGAAAGCTGGTATGAAATGTGGGAAG- - - CTCAGTGTATCAGTTTATGATG |        |        |        |        |        |        |        | 71601 |  |
| Donkey      | ATGTCTGGTATATTTTATTTTGAATGCTATGAAAGCTGGTATGAAATGTGGGAAG- - - CTAAATGTATTAGTTTACAATG |        |        |        |        |        |        |        | 80692 |  |
| Cat         | ATGTCTGGTATATTTTATTTTGAATGCTATGAAAGCTGGTATGAAATGTGGGAAG- - - CTCAGTGTATCAGTTTATAATG |        |        |        |        |        |        |        | 77532 |  |
| Ferret      | ATGTCTGGTATATTTTATTTTGAATGCTATGAAAGCTGGTATGAAATGTGGGAAG- - - CTCAATGTATCAGTTTACAATG |        |        |        |        |        |        |        | 80386 |  |
| Lion        | ATGTCTGGTATATTTTATTTTGAATGCTATGAAAGCTGGTATGAAATGTGGGAAG- - - CTCAGTGTATCAGTTTACAATG |        |        |        |        |        |        |        | 75217 |  |
| Vaquita     | ATGTCTGGTATATTTTATTTTGAATGCTATGAAAGCTGGTATGAAATGTGGGAAG- - - CTCAATGTATCAGTTTATGATG |        |        |        |        |        |        |        | 72896 |  |
| Pig         | ATGTCTGGTATATTTTATTTTGAATGCTGTGAAAGCTGGTATGAAATGTGGGAAGAAGCTCAATGTATCTGTTTCTGATG    |        |        |        |        |        |        |        | 72901 |  |

Dienstag, 3. Mai 2022 08:40

| Majority    | TCTAATTTGAATATTTGTTTCATTTTTAATTGGCCTCTGTTAATACGAACATTAAGCTTATTTTATC- ATTTAATACTAT        |       |
|-------------|------------------------------------------------------------------------------------------|-------|
|             | 104650 104660 104670 104680 104690 104700 104710 104720                                  |       |
| Human       | TCTAATTTGAATATTTGTTTCATTTTTAATTGGCCTCTGTTAATATGAACATTA- GCTTATTTTATCCATTTAATACTAT        | 84672 |
| PolarBear   | TCTAAAT- - - - - ATTTTCATTTTTAATTGGCCTCTGTTAATACGAACATTAAGCTTATTTTATC- ATTTAATACTAT      | 42446 |
| Cow         | TCTAATTTGAA- - - - TATTTTCATTTTTAATTGGCCTCTGTTAATACGAACATTAAGCT- ATTTTATC- ATTTAATACTAT  | 79575 |
| Dog         | TCTAATTTGAATATTTGTTTCATTTTTAATTGGCCTCTGTTAATACGAACATTAAGCTTATTTTATC- ATTTAATACTAT        | 72599 |
| BelugaWhale | TCTAATTTGAA- - - - TATTTTCATTTTTAATTGGCCTCTGTTAATATGAACATTAAGCT- ATTTTATC- ATTTAGTACTAT  | 71675 |
| Donkey      | TCTAATTTGAGTATTTGTTTCATTTTTGATTGGCCTCTGTTAATATGAACATTAAGCTTATTTTATC- ATTTAATACTAT        | 80771 |
| Cat         | TCTAATTTGAATATTTGTTTCATTTTTAATTGGCCTCTGTTAATACGAACATTAAGCTTATTTTATC- ATTTGATACTAT        | 77611 |
| Ferret      | TCCAATTTTAATATTTGTTTCATTTTTAATTGGCCTCTGTTAATACGAACATTAAGCTTATTTTATC- ATTTAATACTGT        | 80465 |
| Lion        | TCTAATTTGAATATTTGTTTCATTTTTAATTGGCCTCTGTTAATACGAACATTAAGCTTATTTTATC- ATTTGATACTAT        | 75296 |
| Vaquita     | TCTAATTTGAA- - - - TATTTTCATTTTTAATTGGCCTCTGTTAATATGAACATTAAGCT- ATTTTATC- ATTTAGTACTAT  | 72970 |
| Pig         | TCCAATTTGAA- - - - TATTTTCATTTTTAATTGGCCTCTGTTAATATGTACATTAAACT- ATTTT- - - ATTTACTACTGT | 72972 |

| Majority    | TGTCATTCACAGTTCTGCATGCTAAAATGTTTGAATCAGAGTGCCTTTGTTTTCTTTTAAGAAATTTTGCCTGCATTTCA    |       |
|-------------|-------------------------------------------------------------------------------------|-------|
|             | 104730 104740 104750 104760 104770 104780 104790 104800                             |       |
| Human       | TATCATTTCACAGTTCTGCATGCTAAAATGTTTGAATCAGAGTGCCTTTGTTTTATTTTAAGACTTTTGCCTGCATTTCA    | 84752 |
| PolarBear   | TGTCATTCACAGTTCTGCATGCTAAAATGTTTGAATCAGAGTGCCTTTGTTTTCTTTTAAGAAATTTTGCCTGCATTTCA    | 42526 |
| Cow         | AGTCATTCACAGTTGTGCATGCTAAAATGTTTGAATCAGAGTGCCTTTGTTTTCTTTTAAGAAATTTTGCCTGCATTTCA    | 79655 |
| Dog         | TGTCATTCACAGTTCTGCATGCTAAAATGTTTGAATCAGAGTGCCTTTGTTTTCTTTTAAGAAATTTTGCCTGCATTTCA    | 72679 |
| BelugaWhale | TGTCATCCACAGTTCTGCATGCTAAAATGTTTGAATCAGAGTGCCTTTGTTTTCTCTTAAGAAATTTTGCCTGCATTTCA    | 71755 |
| Donkey      | TGTCATTCACAGTTCTGCATGCTAAAATGTTTGAATCAGAGTGCCTTTGTTTTCTTTTAAGAAATTTTGCCTGCATTTCA    | 80851 |
| Cat         | TGTCATTCACAGTTCTGCATGCTAAAATGTTTGAATCAGAGTGCCTTTGTTTTCTTTTAAGAAATTTTGCCTGCATTTCA    | 77691 |
| Ferret      | TGTCATTCACAGTTCTGCATGCTAAAATGTTTGAATCAGAGTGCCTTTGTTTTCTTTTAAGAAATTTTGCCTGCATTTCA    | 80545 |
| Lion        | TGTCATTCACAGTTCTGCATGCTAAAATGTTTGAATCAGAGTGCCTTTGTTTTCTTTTAAGAAATTTTGCCTGCATTTCA    | 75376 |
| Vaquita     | TGTCATCCACAGTTCTGCATGCTAAAATGTTTGAATCAGAGTGCCTTTGTTTTCTCTTAAGAAATTTTGCCTGCATTTCA    | 73050 |
| Pig         | TGTCATTCACAGTTCTGCATGCTAAAATGTTTGAATCAGAGTGCCTTTG- - - - TTACAAGAAATTTTGCCTGCATTTCA | 73046 |

Dienstag, 3. Mai 2022 08:40

| Majority    | T AACCAGCCATGCTTATGCAGTT- AAAGTTCAAAGTTT- AAAATTCCTGTGCATGCTTT- CCTTCCCTATGTTGAGATGA |        |        |        |        |        |        |        |       |
|-------------|--------------------------------------------------------------------------------------|--------|--------|--------|--------|--------|--------|--------|-------|
|             | 104810                                                                               | 104820 | 104830 | 104840 | 104850 | 104860 | 104870 | 104880 |       |
| Human       | T AACCAGCCATGCTTATGCAGTT- AAAGTTCAAAGTTT- AAAATTCCTGTGCATGCTTT- CCTTCCCTATGTTGAGATGA |        |        |        |        |        |        |        | 84829 |
| PolarBear   | T AACCAGCCATGCTTATGCAGTT- AAAGTTCAAAGTTT- AAAATTCCTGTGCATGCTTT- CCTTCCCTATGTTGAGATGA |        |        |        |        |        |        |        | 42603 |
| Cow         | T AACCAGCCATGCTTATGCAGTTAAAAGTTCAAAGTTT- AAAATTCCTATGCATGCTTC- CCTTCCCTATGTTGAGATGA  |        |        |        |        |        |        |        | 79733 |
| Dog         | T AACCAGCCATGCTTATGCAGTT- AAAGTTCAAAGTTT- AAAATTCCTGTGCATGCTTTT CCTTCCCTATGTTGAGATGA |        |        |        |        |        |        |        | 72757 |
| BelugaWhale | T AACCAGCCATGCTTATGCAGTT- AAAGTTCAAAGTTT- AAAGTTCCTGTGCATGCTTT- CCTTCCCTATGTTGAGATGA |        |        |        |        |        |        |        | 71832 |
| Donkey      | T AACCAGCCATGCTTATGCAGTG- - AAGTTCAAAGTTTTAAAATTCCTATGCATGCTTT- CCTTCCCTATGTTGAAATGA |        |        |        |        |        |        |        | 80928 |
| Cat         | T AACCAGCCATGCTTATGCAGTT- AAAGTTCAAAGTTT- AAAATTCCTGTGCATGCTTT- CCTTCCCTATGTTGAGATGA |        |        |        |        |        |        |        | 77768 |
| Ferret      | T AACCAGCCATGCTTATGCAGTT- AAAGTTCAAAGTTT- AAAATTCCTGTGCATGCTTT- CCTTCCCTATGTTGAGATGA |        |        |        |        |        |        |        | 80622 |
| Lion        | T AACCAGCCATGCTTATGCAGTT- AAAGTTCAAAGTTT- AAAATTCCTGTGCATGCTTT- CCTTCCCTATGTTGAGATGA |        |        |        |        |        |        |        | 75453 |
| Vaquita     | T AACCAGCCATGCTTATGCAGTT- AAAGTTCAAAGTTT- AAAGTTCCTGTGCATGCTTT- CCTTCCCTATGTTGAGATGA |        |        |        |        |        |        |        | 73127 |
| Pig         | T AACCAGCCATGCTTATGCAGTTTAAAGTTCAAAGTTT- AAA- TTCCTATGCATGCTTT- CCTTCCCTATGTTGAGATGA |        |        |        |        |        |        |        | 73123 |

| Majority    | AATGCTGTAATTTACTCTTTGATATAGATGTA CTTTACCCATATTTGTCTTGGATGACTACATTTTACTCAGTTTTTCTT |        |        |        |        |        |        |        |       |
|-------------|-----------------------------------------------------------------------------------|--------|--------|--------|--------|--------|--------|--------|-------|
|             | 104890                                                                            | 104900 | 104910 | 104920 | 104930 | 104940 | 104950 | 104960 |       |
| Human       | AATGCTGTAATTTACTCTTTGATATAGATGTA CTTTACCCATATTTGTCTTGGATGACTACATTTTACTCAGTTTTTCTT |        |        |        |        |        |        |        | 84909 |
| PolarBear   | AATGCTGTAATTTACTCTTTGATATAGATGTA CTTTACCCATATTTGTCTTGGATGACTACATTTTACTCAGTTTTTCTT |        |        |        |        |        |        |        | 42683 |
| Cow         | AATGCTGTAATTTACTCTTTGATATAGATGTA CTTTACCCATATTTGTCTTGGATGACTACATTTTACTCAGTTTTTCTT |        |        |        |        |        |        |        | 79813 |
| Dog         | AATGCTGTAATTTACTCTTTGATATAGATGTA CTTTACCCATATTTGTCTTGGATGACTACATTTTACTCAGTTTTTCTT |        |        |        |        |        |        |        | 72837 |
| BelugaWhale | AATGCTGTAATTTACTCTTTGATATAGATGTA CTTTACCCATATTTGTCTTGGATGACTACATTTTACTCAGTTTTTCTT |        |        |        |        |        |        |        | 71912 |
| Donkey      | AATGCTGTAATTTACTCTTTGATATAGATGTA CTTTACCCATATTTGTCTTGGATGACTACATTTTACTCAGTTTTTCTT |        |        |        |        |        |        |        | 81008 |
| Cat         | AATGCTGTAATTTACTCTTTGATATAGATGTA CTTTACCCATATTTGTCTTGGATGACTACATTTTACTCAGTTTTTCTT |        |        |        |        |        |        |        | 77848 |
| Ferret      | AATGCTGTAATTTACTCTTTGATATAGATGTA CTTTACCCATATTTGTCTTGGATGACTACATTTTACTCAGTTTTTCTT |        |        |        |        |        |        |        | 80702 |
| Lion        | AATGCTGTAATTTACTCTTTGATATAGATGTA CTTTACCCATATTTGTCTTGGATGACTACATTTTACTCAGTTTTTCTT |        |        |        |        |        |        |        | 75533 |
| Vaquita     | AATGCTGTAATTTACTCTTTGATATAGATGTA CTTTACCCATATTTGTCTTGGATGACTACATTTTACTCAGTTTTTCTT |        |        |        |        |        |        |        | 73207 |
| Pig         | AATGCTGTAATTTACTCTTTGATATAGATGTA CTTTACCCATATTTGTCTTGGATGACTACATTTTACTCAGTTTTTCTT |        |        |        |        |        |        |        | 73203 |



Dienstag, 3. Mai 2022 08:40

| Majority    | GTACAGTACATAAAACCAACCATTTTCTGACCAAATTCTGCATTTCTCTATGTA CTGACCTATATTTTATTTTTTTTTTTT- G   |        |        |        |        |        |        |        |       |
|-------------|-----------------------------------------------------------------------------------------|--------|--------|--------|--------|--------|--------|--------|-------|
|             | 104970                                                                                  | 104980 | 104990 | 105000 | 105010 | 105020 | 105030 | 105040 |       |
| Human       | GTACAGTACATAAAACCAACCATTTTCTGACCAAATTCTGCATTTCTCTATGTA CTGACCTATATTTTATTTTGTTTTT- G     |        |        |        |        |        |        |        | 84988 |
| PolarBear   | GTACAGTACATAAAACCAACCATTTTCTGACCAAATTCTGCATTTCTCTATGTA CTGACCTATATTTTATTTTTTTTTTTT- G   |        |        |        |        |        |        |        | 42762 |
| Cow         | GTACAGTACATAAAACCAACCATTTTCTGACCAAAT- CCTGCATTTCTCTATGTA CTGACCTATATTTTATTTTTTTTTTTTG   |        |        |        |        |        |        |        | 79892 |
| Dog         | GTACAGTACATAAAACCAACCATTTTCTGACCAAATTCTGCATTTCTCTATGTA CTGACCTATATTTTATTTTTTTTTTTT- G   |        |        |        |        |        |        |        | 72916 |
| BelugaWhale | GTACAGTACATAAAACCAACCATTTTCTGACCAAAT- CCTGCATTTCTCTATGTA CTGACCTATATTTTATTTTTTTTTTTT- G |        |        |        |        |        |        |        | 71990 |
| Donkey      | GTACAGTACATAAAACCAACCATTTTCTGACCAAATTCTGCATTTCTCTATGTA CTGACCTATATTTTATTTTTTTTTTTTG     |        |        |        |        |        |        |        | 81088 |
| Cat         | GTACAGTACATAAAACCAACCATTTTCTGACCAAATTCTGCATTTCTCTATGTA CTGACCTATATTTTATTTTTTTTTTTT- G   |        |        |        |        |        |        |        | 77927 |
| Ferret      | GTACAGTACATAAAACCAACCATTTTCTGACCAAATTCTGCATTTCTCTATGTA CTGACCTATATTTTATTTTTTTTTTTT- G   |        |        |        |        |        |        |        | 80781 |
| Lion        | GTACAGTACATAAAACCAACCATTTTCTGACCAAATTCTGCATTTCTCTATGTA CTGACCTATATTTTATTTTTTTTTTTT- G   |        |        |        |        |        |        |        | 75612 |
| Vaquita     | GTACAGTACATAAAACCAACCATTTTCTGACCAAAT- CCTGCATTTCTCTATGTA CTGACCTATATTTTATTTTTTTTTTTT- G |        |        |        |        |        |        |        | 73285 |
| Pig         | GTACAGTACATAAAACCAACCATTTTCTGACCAAAT- CCTGCATTTCTCTATGTA CTGACCTATATTTTATTTTTTTTTTTTG   |        |        |        |        |        |        |        | 73282 |

| Majority    | TTCCCCAATTCCTTATTTTTTCTTCTGCATTGCTGTTCCCTTCCCATTTCATCCTTT- TCCCTGTGTGTTTACCTTC |        |        |        |        |        |        |        |       |
|-------------|--------------------------------------------------------------------------------|--------|--------|--------|--------|--------|--------|--------|-------|
|             | 105050                                                                         | 105060 | 105070 | 105080 | 105090 | 105100 | 105110 | 105120 |       |
| Human       | TTCCCCAATTCCTTATTTTTTCTTCTGCATTGCTGTTCCCTTCCCATTTCATCCTTT- TCCCTGTGTGTTTACCTTC |        |        |        |        |        |        |        | 85067 |
| PolarBear   | TTCCCCAATTCCTTATTTTTTCTTCTGCATTGCTGTTCCCTTCCCATTTCATCCTTTTCCCCTGTGTGTTTACCTTC  |        |        |        |        |        |        |        | 42842 |
| Cow         | TTCCCCGATTCCTTATTTTTTCTTCTGCATTGCTGTTCCCTTCCCATTTCATCCTTT- TCCCTGTGTGTTTACCTTC |        |        |        |        |        |        |        | 79971 |
| Dog         | TTCCCCAATTCCTTATTTTTTCTTCTGCATTGCTGTTCCCTTCCCATTTCATCCTTTTCCCCTGTGTGTTTACCTTC  |        |        |        |        |        |        |        | 72996 |
| BelugaWhale | TTCCCCAATTCCTTATTTTTTCTTCTGCATTGCTGTTCCCTTCCCATTTCATCCTTT- TCCCTGTGTGTTTACCTTC |        |        |        |        |        |        |        | 72069 |
| Donkey      | TTCCCCAATTCCTTATTTTTTCTTCTGCATTGCTGTTCCCTTCCCATTTCATCCTTT- TCCCTGTGTGTTTACCTTC |        |        |        |        |        |        |        | 81167 |
| Cat         | TTCCCCAATTCCTTATTTTTTCTTCTGCATTGCTGTTCCCTTCCCATTTCATCCTTT- TCCTTGTGTGTTTACCTTC |        |        |        |        |        |        |        | 78006 |
| Ferret      | TTCCCCAATTCCTTATTTTTTCTTCTGCATTGCTGTTCCCTTCCCATTTCATCCTTT- CCCCTGTGTGTTTACCTTC |        |        |        |        |        |        |        | 80860 |
| Lion        | TTCCCCAATTCCTTATTTTTTCTTCTGCATTGCTGTTCCCTTCCCATTTCATCCTTT- TCCCTGTGTGTTTACCTTC |        |        |        |        |        |        |        | 75691 |
| Vaquita     | TTCCCCAATTCCTTATTTTTTCTTCTGCATTGCTGTTCCCTTCCCATTTCATCCTTT- TCCCTGTGTGTTTACCTTC |        |        |        |        |        |        |        | 73364 |
| Pig         | TTCCCCGATTCCTTATTTTTTCTTCTGCATTGCTGTTCCCTTCCCATTTCATCCTTT- TCCCTGTGTGTTTACCTTC |        |        |        |        |        |        |        | 73361 |

Dienstag, 3. Mai 2022 08:40

| Majority    | CCTTTCTTGTCTTTTCCCAAATGCCATTCCCTTCCCTGTCTTATCCTTTATTTTCCTTGTCTTGTCTTCATTCCCTG  |        |        |        |        |        |        |        |  |  |       |
|-------------|--------------------------------------------------------------------------------|--------|--------|--------|--------|--------|--------|--------|--|--|-------|
|             | 105130                                                                         | 105140 | 105150 | 105160 | 105170 | 105180 | 105190 | 105200 |  |  |       |
| Human       | CCTTTCTTGTCTTTTCCCAAATGCCATTCCCTTCCCTGTCTTATCCTTTATTTTCCTTGTCTTGTCTTCATTCCCTG  |        |        |        |        |        |        |        |  |  | 85147 |
| PolarBear   | CCTTTCTTGTCTTTTCCCAAATGCCATTCCCTTCCCTGTCTTATCCTTTATTTTCCTTGTCTTGTCTTCATTCCCTG  |        |        |        |        |        |        |        |  |  | 42922 |
| Cow         | CCTTTCTTGTCTTTTCCCAAATGCCATTCCCTTCCCTGTCTTATCCTTTATTTTCCTTGTCTTGTCTTCATTCCCTG  |        |        |        |        |        |        |        |  |  | 80051 |
| Dog         | CCTTTCTTGTCTTTTCCCAAATGCCATTCCCTTCCCTGTCTTATCCTTTATTTTCCTTGTCTTGTCTTCATTCCCTG  |        |        |        |        |        |        |        |  |  | 73076 |
| BelugaWhale | CCTTTCTTGTCTTTTCCCAAATGCCATTCCCTTCCCTGTCTTATCCTTTATTTTCCTTGTCTTGTCTTCATCCCCTG  |        |        |        |        |        |        |        |  |  | 72149 |
| Donkey      | CCTTTCTTGTCTTTTCCCAAATGCCATTCCCTTCCCTGTCTTATCCTTTATTTTCCTTGTCCGTGTCTTCATTCCCTG |        |        |        |        |        |        |        |  |  | 81247 |
| Cat         | CCTTTCTTGTCTTTTCCCAAATGCCATTCCCTTCCCTGTCTTATCCTTTATTTTCCTTGTCTTGTCTTCATTCCCTG  |        |        |        |        |        |        |        |  |  | 78086 |
| Ferret      | CCTTTCTTGTCTTTTCCCAAATGCCATTCCCTTCCCTGTCTTATCCTTTATTTTCCTTGTCTTGTCTTCATTCCCTG  |        |        |        |        |        |        |        |  |  | 80940 |
| Lion        | CCTTTCTTGTCTTTTCCCAAATGCCATTCCCTTCCCTGTCTTATCCTTTATTTTCCTTGTCTTGTCTTCATTCCCTG  |        |        |        |        |        |        |        |  |  | 75771 |
| Vaquita     | CCTTTCTTGTCTTTTCCCAAATGCCATTCCCTTCCCTGTCTTATCCTTTATTTTCCTTGTCTTGTCTTCATCCCCTG  |        |        |        |        |        |        |        |  |  | 73444 |
| Pig         | CCTTTCTTGTCTTCCCAAATGCCATTCCCTTCCCTGTCTTATCCTTTATTTTCCTTGTCTTGTCTTCATTCCCTG    |        |        |        |        |        |        |        |  |  | 73441 |

| Majority    | TCTCCATTCCCTATGTTTCATGCTTCTGTGCTTGAACAAATGTTCTCGGACCAACTTGCCCAATTAACCGCCTTGAACC |        |        |        |        |        |        |        |  |  |       |
|-------------|---------------------------------------------------------------------------------|--------|--------|--------|--------|--------|--------|--------|--|--|-------|
|             | 105210                                                                          | 105220 | 105230 | 105240 | 105250 | 105260 | 105270 | 105280 |  |  |       |
| Human       | TCTCCATTCCCTATGTTTCATGCTTCTGTGCTTGAACAAATGTTCTCGGACCAACTTGCCCAATTAACCGCCTTGAACC |        |        |        |        |        |        |        |  |  | 85227 |
| PolarBear   | TCTCCATTCCCTATGTTTCATGCTTCTGTGCTTGAACAAATGTTCTCGGACCAACTTGCCCAATTAACCGCCTTGAACC |        |        |        |        |        |        |        |  |  | 43002 |
| Cow         | TCTCCATTCCCTATGTTTCATGCTTCTGTGCTTGAACAAATGTTCTCGGACCAACTTGCCCAATTAACCGCCTTGAACC |        |        |        |        |        |        |        |  |  | 80131 |
| Dog         | TCTCCATTCCCTATGTTTCATGCTTCTGTGCTTGAACAAATGTTCTCGGACCAACTTGCCCAATTAACCGCCTTGAACC |        |        |        |        |        |        |        |  |  | 73156 |
| BelugaWhale | TCTCCATTCCCTGTGTTTCATGCTTCTGTGCTTGAACAAATGTTCTCGGACCAACTTGCCCAATTAACCGCCTTGAACC |        |        |        |        |        |        |        |  |  | 72229 |
| Donkey      | TCTCCATTCCCTATGTTTCATGCTTCTGTGCTTGAACAAATGTTCTCGGACCAACTTGCCCAATTAACCGCCTTGAACC |        |        |        |        |        |        |        |  |  | 81327 |
| Cat         | TCTCCATTCCCTATGTTTCATGCTTCTGTGCTTGAACAAATGTTCTCGGACCAACTTGCCCAATTAACCGCCTTGAACC |        |        |        |        |        |        |        |  |  | 78166 |
| Ferret      | TCTCCATTCCCTATGTTTCATGCTTCTGTGCTTGAACAAATGTTCTCGGACCAACTTGCCCAATTAACCGCCTTGAACC |        |        |        |        |        |        |        |  |  | 81020 |
| Lion        | TCTCCATTCCCTATGTTTCATGCTTCTGTGCTTGAACAAATGTTCTCGGACCAACTTGCCCAATTAACCGCCTTGAACC |        |        |        |        |        |        |        |  |  | 75851 |
| Vaquita     | TCTCCATTCCCTGTGTTTCATGCTTCTGTGCTTGAACAAATGTTCTCGGACCAACTTGCCCAATTAACCGCCTTGAACC |        |        |        |        |        |        |        |  |  | 73524 |
| Pig         | TCTCCATTCCCTATGTTTCATGCTTCTGTGCTTGAACAAATGTTCTCGGACCAACTTGCCCAATTAACCGCCTTGAACC |        |        |        |        |        |        |        |  |  | 73521 |

Dienstag, 3. Mai 2022 08:40

| Majority    | ATGATCCATGACCACCTCACCATTCTGCGGGAACCACCCTTCGTTATGGATGATCTGTTTCATCTCCGCTCTTCCTCGACT    |        |        |        |        |        |        |        |       |
|-------------|--------------------------------------------------------------------------------------|--------|--------|--------|--------|--------|--------|--------|-------|
|             | 105290                                                                               | 105300 | 105310 | 105320 | 105330 | 105340 | 105350 | 105360 |       |
| Human       | ATGATCCATGACCACCTCACCATTCTGCGGGAACCACCCTTCGTTATGGATGATCTGTTTCATCTCCGCTCTTCCTCGACT    |        |        |        |        |        |        |        | 85307 |
| PolarBear   | ATGATCCATGACCACCTCACCATTCTGCGGGAACCACCCTTCGTTATGGATGATCTGTTTCATCT- - - - - TCCTCGACT |        |        |        |        |        |        |        | 43075 |
| Cow         | ATGATCCATGACCACCTCACCATTCTGCGGGAACCACCCTTCGTTATGGATGATCTGTTTCATCTCCGCTCTTCCTCGACT    |        |        |        |        |        |        |        | 80211 |
| Dog         | ATGATCCATGACCACCTCACCATTCTGCGGGAACCACCCTTCGTTATGGATGATCTGTTTCATCTCCGCTCTTCCTCGACT    |        |        |        |        |        |        |        | 73236 |
| BelugaWhale | ATGATCCATGACCACCTCACCATTCTGCGGGAACCACCCTTCGTTATGGATGATCTGTTTCATCTCCGCTCTTCCTCGACT    |        |        |        |        |        |        |        | 72309 |
| Donkey      | ATGATCCATGACCACCTCACCATTCTGCGGGAACCACCCTTCGTTATGGATGATCTGTTTCATCTCCGCTCTTCCTCGACT    |        |        |        |        |        |        |        | 81407 |
| Cat         | ATGATCCATGACCACCTCACCATTCTGCGGGAACCACCCTTCGTTATGGATGATCTGTTTCATCTCCGCTCTTCCTCGACT    |        |        |        |        |        |        |        | 78246 |
| Ferret      | ATGATCCATGACCACCTCACCATTCTGCGGGAACCACCCTTCGTTATGGATGATCTGTTTCATCTCCGCTCTTCCTCGACT    |        |        |        |        |        |        |        | 81100 |
| Lion        | ATGATCCATGACCACCTCACCATTCTGCGGGAACCACCCTTCGTTATGGATGATCTGTTTCATCTCCGCTCTTCCTCGACT    |        |        |        |        |        |        |        | 75931 |
| Vaquita     | ATGATCCATGACCACCTCACCATTCTGCGGGAACCACCCTTCGTTATGGATGATCTGTTTCATCTCCGCTCTTCCTCGACT    |        |        |        |        |        |        |        | 73604 |
| Pig         | ATGATCCATGACCACCTCACCATTCTGCGGGAACCACCCTTCGTTATGGATGATCTGTTTCATCTCCGCTCTTCCTCGACT    |        |        |        |        |        |        |        | 73601 |

| Majority    | CTTCTCTCTTCTTGCTTACGCTGCTTGCTCTTCTCTCCTTCTAAAGATGGTTACGCCCCAAAGTCTGTTTACCCTCTTC |        |        |        |        |        |        |        |       |
|-------------|---------------------------------------------------------------------------------|--------|--------|--------|--------|--------|--------|--------|-------|
|             | 105370                                                                          | 105380 | 105390 | 105400 | 105410 | 105420 | 105430 | 105440 |       |
| Human       | CTTCTCTCTTCTTGCTTACGCTGCTTGCTCTTCTCTCCTTCTAAAGATGGTTACGCCCCAAAGTCTGTTTACCCTCTTC |        |        |        |        |        |        |        | 85387 |
| PolarBear   | CTTCTCTCTTCTTGCTTACGCTGCTTGCTCTTCTCTCCTTCTAAAGATGGTTACGCCCCAAAGTCTGTTTACCCTCTTC |        |        |        |        |        |        |        | 43155 |
| Cow         | CTTCTCTCTTCTTGCTTACGCTGCTTGCTCTTCTCTCCTTCTAAAGATGGTTACGCCCCAAAGTCTGTTTACCCTCTTC |        |        |        |        |        |        |        | 80291 |
| Dog         | CTTCTCTCTTCTTGCTTACGCTGCTTGCTCTTCTCTCCTTCTAAAGATGGTTACGCCCCAAAGTCTGTTTACCCTCTTC |        |        |        |        |        |        |        | 73316 |
| BelugaWhale | CTTCTCTCTTCTTGCTTACGCTGCTTGCTCTTCTCTCCTTCTAAAGATGGTTACGCCCCAAAGTCTGTTTACCCTCTTC |        |        |        |        |        |        |        | 72389 |
| Donkey      | CTTCTCTCTTCTTGCTTACGCTGCTTGCTCTTCTCTCCTTCTAAAGATGGTTACGCCCCAAAGTCTGTTTACCCTCTTC |        |        |        |        |        |        |        | 81487 |
| Cat         | CTTCTCTCTTCTTGCTTACGCTGCTTGCTCTTCTCTCCTTCTAAAGATGGTTACGCCCCAAAGTCTGTTTACCCTCTTC |        |        |        |        |        |        |        | 78326 |
| Ferret      | CTTCTCTCTTCTTGCTTACGCTGCTTGCTCTTCTCTCCTTCTAAAGATGGTTACGCCCCAAAGTCTGTTTACCCTCTTC |        |        |        |        |        |        |        | 81180 |
| Lion        | CTTCTCTCTTCTTGCTTACGCTGCTTGCTCTTCTCTCCTTCTAAAGATGGTTACGCCCCAAAGTCTGTTTACCCTCTTC |        |        |        |        |        |        |        | 76011 |
| Vaquita     | CTTCTCTCTTCTTGCTTACGCTGCTTGCTCTTCTCTCCTTCTAAAGATGGTTACGCCCCAAAGTCTGTTTACCCTCTTC |        |        |        |        |        |        |        | 73684 |
| Pig         | CTTCTCTCTTCTTGCTTACGCTGCTTGCTCTTCTCTCCTTCTAAAGATGGTTACGCCCCAAAGTCTGTTTACCCTCTTC |        |        |        |        |        |        |        | 73681 |

Dienstag, 3. Mai 2022 08:40

|             |                                                                                   |       |
|-------------|-----------------------------------------------------------------------------------|-------|
| Majority    | GGTATGTTATTGTTAGCACTATACTTTTATTATTGATTTGATTTTTGTTTACACCTTAATTCTTATTTGTAGCTAGCACTT |       |
|             | 105450 105460 105470 105480 105490 105500 105510 105520                           |       |
| Human       | GGTATGTTATTGTTAGCACTATACTTTTATTATTGATTTGATTTTTGTTTACACCTTAATTCTTATTTGTAGCTAGCACTT | 85467 |
| PolarBear   | GGTATGTTATTGTTAGCACTATACTTTTATTATTGATTTGATTTTTGTTTACACCTTAATTCTTATTTGTAGCTAGCACTT | 43235 |
| Cow         | GGTATGTTATTGTTAGCACTATACTTTTATTATTGATTTGATTTTTGTTTACACCTTAATTCTTATTTGTAGCTAGCACTT | 80371 |
| Dog         | GGTATGTTATTGTTAGCACTATACTTTTATTATTGATTTGATTTTTGTTTACACCTTAATTCTTATTTGTAGCTAGCACTT | 73396 |
| BelugaWhale | GGTATGTTATTGTTAGCACTATACTTTTATTATTGATTTGATTTTTGTTTACACCTTAATTCTTATTTGTAGCTAGCACTT | 72469 |
| Donkey      | GGTATGTTATTGTTAGCACTATACTTTTATTATTGATTTGATTTTTGTTTACACCTTAATTCTTATTTGTAGCTAGCACTT | 81567 |
| Cat         | GGTATGTTATTGTTAGCACTATACTTTTATTATTGATTTGATTTTTGTTTACACCTTAATTCTTATTTGTAGCTAGCACTT | 78406 |
| Ferret      | GGTATGTTATTGTTAGCACTATACTTTTATTATTGATTTGATTTTTGTTTACACCTTAATTCTTATTTGTAGCTAGCACTT | 81260 |
| Lion        | GGTATGTTATTGTTAGCACTATACTTTTATTATTGATTTGATTTTTGTTTACACCTTAATTCTTATTTGTAGCTAGCACTT | 76091 |
| Vaquita     | GGTATGTTATTGTTAGCACTATACTTTTATTATTGATTTGATTTTTGTTTACACCTTAATTCTTATTTGTAGCTAGCACTT | 73764 |
| Pig         | GGTATGTTATTGTTAGCACTATACTTTTATTATTGATTTGATTTTTGTTTACACCTTAATTCTTATTTGTAGCTAGCACTT | 73761 |

|             |                                                                                   |       |
|-------------|-----------------------------------------------------------------------------------|-------|
| Majority    | TGGCTTAAAGTTGAATAGTAAATCTTTTGCTATTTTTCTTTGCTATTTAAAACCTCTCCATAGACACAAAATTTGTTTTAA |       |
|             | 105530 105540 105550 105560 105570 105580 105590 105600                           |       |
| Human       | TGGCTTAAAGTTGAATAGTAAATCTTTTGCTATTTTTCTTTGCTATTTAAAACCTCTCCATAGACACAAAATTTGTTTTAA | 85547 |
| PolarBear   | TGGCTTAAAGTTGAATAGTAAATCTTTTGCTATTTTTCTTTGCTATTTAAAACCTCTCCATAGACACAAAATTTGTTTTAA | 43315 |
| Cow         | TGGCTTAAAGTTGAATAGTAAATCTTTTGCTATTTTTCTTTGCTATTTAAAACCTCTCCATAGACACAAAATTTGTTTTAA | 80451 |
| Dog         | TGGCTTAAAGTTGAATAGTAAATCTTTTGCTATTTTTCTTTGCTATTTAAAACCTCTCCATAGACACAAAATTTGTTTTAA | 73476 |
| BelugaWhale | TGGCTTAAAGTTGAATAGTAAATCTTTTGCTATTTTTCTTTGCTATTTAAAACCTCTCCATAGACACAAAATTTGTTTTAA | 72549 |
| Donkey      | TGGCTTAAAGTTGAATAGTAAATCTTTTGCTATTTTTCTTTGCTATTTAAAACCTCTCCATAGACACAAAATTTGTTTTAA | 81647 |
| Cat         | TGGCTTAAAGTTGAATAGTAAATCTTTTGCTATTTTTCTTTGCTATTTAAAACCTCTCCATAGACACAAAATTTGTTTTAA | 78486 |
| Ferret      | TGGCTTAAAGTTGAATAGTAAATCTTTTGCTATTTTTCTTTGCTATTTAAAACCTCTCCATAGACACAAAATTTGTTTTAA | 81340 |
| Lion        | TGGCTTAAAGTTGAATAGTAAATCTTTTGCTATTTTTCTTTGCTATTTAAAACCTCTCCATAGACACAAAATTTGTTTTAA | 76171 |
| Vaquita     | TGGCTTAAAGTTGAATAGTAAATCTTTTGCTATTTTTCTTTGCTATTTAAAACCTCTCCATAGACACAAAATTTGTTTTAA | 73844 |
| Pig         | TGGCTTAAAGTTGAATAGTAAATCTTTTGCTATTTTTCTTTGCTATTTAAAACCTCTCCATAGACACAAAATTTGTTTTAA | 73841 |

Dienstag, 3. Mai 2022 08:40

| Majority    | TGCATGCTGATTTATTTTGCATGGTCTTTAATTTAAT-ATCATTACATAGCTTTGAGGGTTTATCAAAAATT-ATTCTT  |       |
|-------------|----------------------------------------------------------------------------------|-------|
|             | 105610 105620 105630 105640 105650 105660 105670 105680                          |       |
| Human       | TGCATGCTAATTTATTTTGCATGGTCTTTAATTTAAT-ATCATTACATAGCTTTGAGGGTTTATCAAAAATT-ATTCTT  | 85625 |
| PolarBear   | TGCATGCTGATTTATTTTGCATGGTCTTTAATTTAAT-ATCATTACATAGCTTTGAGGGTTTATCAAAAATT-ATTCTT  | 43393 |
| Cow         | TGCATGCTGATTTATTTTGCATGGTCTTTAATTTAAT-ATCATTACATAGCTTTGAGGGTTTATCAGAAATT-ATTCTT  | 80529 |
| Dog         | TGCATGCTGATTTATTTTGCATGGTCTTTAATTTAAT-ATCATTACATAGCTTTGAGGGTTTATCAAAAAGTT-ATTCTT | 73554 |
| BelugaWhale | TGCATGCTGATTTATTTTGCATGATCTTTAATTTAAT-ATCATTACATAGCTTTGAGGGTTTATCAGAGATT-ATTCTT  | 72627 |
| Donkey      | TGCATGCTGATTTATTTTGCATGGTCTTTAATTTAAT-ATCATTACATAGCTTTGAGGGTTTATCAGAAATT-ATTCTT  | 81725 |
| Cat         | TGCATGCTGATTTATTTTGCATGGTCTTTAATTTAAT-ATCATTACATAGCTTTGAGGGTTTATCAAAAATT-ATTCTT  | 78564 |
| Ferret      | TGCATGCTGATTTATTTTGCATGGTCTTTAATTTAAT-ATCATTACATAGCTTTGAGGGTTTATCAAAAATT-ATTCTT  | 81418 |
| Lion        | TGCATGCTGATTTATTTTGCATGGTCTTTAATTTAAT-ATCATTACATAGCTTTGAGGGTTTATCAAAAATT-ATTCTT  | 76249 |
| Vaquita     | TGCATGCTGATTTATTTTGCATGATCTTTAATTTAAT-ATCATTACATAGCTTTGAGGGTTTATCAGAGATT-ATTCTT  | 73922 |
| Pig         | TGCATGCCGATTTATTTTGCATGGTCTTTAATTTAATTATCATTACATAGCTTTGAGGGTTTATCAAAAATTTATTCTT  | 73921 |

| Majority    | TTCAAAATTCACCTGTTCAAAATCTTGATCTTCTTTATTCAATTTGTGAGAATGATGAGTTTGAATGAGTGATCATGTTGAT   |       |
|-------------|--------------------------------------------------------------------------------------|-------|
|             | 105690 105700 105710 105720 105730 105740 105750 105760                              |       |
| Human       | TTCAAAATTCACCTGTTCAAAATCTTGATCTTCTTTATTCAATTTGTGAGAATGATGAGATTGA- - - GTGATCATGTTGAT | 85701 |
| PolarBear   | TTCAAAATTCACCTGTTCAAAATCTTGATCTTCTTTATTCAATTTGTGAGAATGATGAGTTTGAATGAGTGATCATGTTGAT   | 43473 |
| Cow         | TTCAAAATTCACCTGTTCAAAATCTTGATCTTCTTTATTCAATTTGTGAGAATGATGAGTTTGAATGAGTGATCATGTTGAT   | 80609 |
| Dog         | TTCAAAATTCACCTGTTCAAAATCTTGATCTTCTTTATTCAATTTGTGAGAATGATGAGTTTGAATGCGTGATCATGTTGAT   | 73634 |
| BelugaWhale | TTCAAAATTCACCTGTTCAAAATCTTGATCTTCTTTATTCAATTTGTGAGAATGATGAGTTTGAATGAGTGATCATGTTGAT   | 72707 |
| Donkey      | TTCAAAATTCACCTGTTCAAAATCTTGATCTTCTTTATTCAATTTGTGAGAATGATGAGTTTGAATGGGTGATCATGTTGAT   | 81805 |
| Cat         | TTCAAAATTCACCTGTTCAAAATCTTGATCTTCTTTATTCAATTTGTGAGAATGATGAGTTTGAATGAGTGATCATGTTGAT   | 78644 |
| Ferret      | TTCAAAATTCACCTGTTCAAAATCTTGATCTTCTTTATTCAATTTGTGAGAATGATGAGTTTGAATGAGTGATCATGTTGAT   | 81498 |
| Lion        | TTCAAAATTCACCTGTTCAAAATCTTGATCTTCTTTATTCAATTTGTGAGAATGATGAGTTTGAATGAGTGATCATGTTGAT   | 76329 |
| Vaquita     | TTCAAAATTCACCTGTTCAAAATCTTGATCTTCTTTATTCAATTTGTGAGAATGATGAGTTTGAATGAGTGATCATGTTGAT   | 74002 |
| Pig         | TTCAAAATTCACCTGTTCAAAATCTTGATCTTCTTTATTCAATTTGTGAGAATGATGAGTTTGAATGAGTGATCATGTTGAT   | 74001 |

Dienstag, 3. Mai 2022 08:40

| Majority    | GTCTGAATGTTTCATTAATATGTCAGAAAGATAATCTTTAGCTGACTTGCACGTAAAA- TTAATTCCATTTTTGGATTAC  |        |        |        |        |        |        |        |       |
|-------------|------------------------------------------------------------------------------------|--------|--------|--------|--------|--------|--------|--------|-------|
|             | 105770                                                                             | 105780 | 105790 | 105800 | 105810 | 105820 | 105830 | 105840 |       |
| Human       | GTCTGAATGTTTCATTGATATGTCAGAAAGATAATCTTTAGGTGACTTCCACATAAAA- TTAATTCCATTTTTGGATTAC  |        |        |        |        |        |        |        | 85780 |
| PolarBear   | GTCTGAATGTTTCATTAATATGTCAGAAAGATAATCCTCAGCTGACTTGCATGTAAAA- TTAATTCCATTTTTGGATTAC  |        |        |        |        |        |        |        | 43552 |
| Cow         | GTCTGAATGTTTCATTAATATGTCAGAAAGATAATCTTTAGCTGACTTGCACATAAAAAATTAATTCCATTTTTGGATTAC  |        |        |        |        |        |        |        | 80689 |
| Dog         | GTCTGAATGTTTCATTAATATGTCAGAAAGATAATCTTGAGCTGACTTGCATGTAAAA- TTAATTCCATTTTTGGATTAC  |        |        |        |        |        |        |        | 73713 |
| BelugaWhale | GTCTGAATGTTTCATTAATATGTCAGAAAGATAATCTTTAGCTGACTTGCACGTAAAA- TTAATTCCATTTTTGGATTAC  |        |        |        |        |        |        |        | 72786 |
| Donkey      | GTCTGAATGTTTCATTAATGTGTCAGAAAAATAATCTTTAGCTGACTTGCACATAAAA- TTAATTCCATTTTTGGATTAC  |        |        |        |        |        |        |        | 81884 |
| Cat         | GTCTGAATGTTTCATTAATATGTCAGAAAGATAATCTTCAGCTGACTTGCATGTAAACA- TTAATTCCATTTTTGGATTAC |        |        |        |        |        |        |        | 78723 |
| Ferret      | GTCTGAATGTTTCATTAATATGTCAGAAAGATAATCTTCAGCTGACTTGCATGTAAAA- TTAATTCCATTTTTGGATTAC  |        |        |        |        |        |        |        | 81577 |
| Lion        | GTCTGAATGTTTCATTAATATGTCAGAAAGATAATCTTCAGCTGACTTGCATGTAAACA- TTAATTCCATTTTTGGATTAC |        |        |        |        |        |        |        | 76408 |
| Vaquita     | GTCTGAATGTTTCATTAATATGTCAGAAAGATAATCTTTAGCTGACTTGCACGTAAAA- TTAATTCCATTTTTGGATTAC  |        |        |        |        |        |        |        | 74081 |
| Pig         | GTCTGAATGTTTCATTAATATGTCAGAAAGATAAACTTTCCCTGACTTGCACATAAAA- TTAATTCCGTTTTGGATTAC   |        |        |        |        |        |        |        | 74080 |

| Majority    | CTCTCTGTGGCTCCAAAA- AAGGTGTTTATGGAGATGTGCAGCGTGTGAAGATTTTGTACAATAAGAAAGACAGTGCTCT |        |        |        |        |        |        |        |       |
|-------------|-----------------------------------------------------------------------------------|--------|--------|--------|--------|--------|--------|--------|-------|
|             | 105850                                                                            | 105860 | 105870 | 105880 | 105890 | 105900 | 105910 | 105920 |       |
| Human       | CTCTCTGTGGCTCCAAAA- AAGGTGTTTATGGAGATGTGCAGCGTGTGAAGATTTTATACAATAAGAAAGACAGCGCTCT |        |        |        |        |        |        |        | 85859 |
| PolarBear   | CTCTCTGTGGCTCCAAAA- AAGGTGTTTATGGAGATGTGCAGCGTGTGAAGATTTTGTACAATAAGAAAGACAGTGCTCT |        |        |        |        |        |        |        | 43631 |
| Cow         | CTCTCTGTGGCTCCAAAA- AAGGTGTTTATGGAGATGTGCAGCGTGTGAAGATTTTGTACAATAAGAAAGACAGTGCTCT |        |        |        |        |        |        |        | 80768 |
| Dog         | CTCTCTGTGGCTCCAAAA- AAGGTGTTTATGGAGATGTGCAGCGTGTGAAGATTTTGTACAATAAGAAAGACAGTGCTCT |        |        |        |        |        |        |        | 73792 |
| BelugaWhale | CTCTCTGTGGCTCTAAAATAAGGTGTTTATGGAGATGTGCAGCGTGTGAAGATTTTGTACAACAAGAAAGACAGTGCTCT  |        |        |        |        |        |        |        | 72866 |
| Donkey      | CTCTCTGTGGCTCCAAAA- AAGGTGTTTATGGAGATGTGCAGCGTGTGAAGATTTTGTACAATAAGAAAGACAGTGCTCT |        |        |        |        |        |        |        | 81963 |
| Cat         | CTCTCTGTGGCTCCAAAA- AAGGTGTTTATGGAGATGTGCAGCGTGTGAAGATTTTGTACAATAAGAAAGACAGTGCTCT |        |        |        |        |        |        |        | 78802 |
| Ferret      | CTCTCTGTGGCTCCAAAA- AAGGTGTTTATGGAGATGTGCAGCGTGTGAAGATTTTATACAATAAGAAAGACAGTGCTCT |        |        |        |        |        |        |        | 81656 |
| Lion        | CTCTCTGTGGCTCCAAAA- AAGGTGTTTATGGAGATGTGCAGCGTGTGAAGATTTTGTACAATAAGAAAGACAGTGCTCT |        |        |        |        |        |        |        | 76487 |
| Vaquita     | CTCTCTGTGGCTCTAAAATAAGGTGTTTATGGAGATGTGCAGCGTGTGAAGATTTTGTACAACAAGAAAGACAGTGCTCT  |        |        |        |        |        |        |        | 74161 |
| Pig         | CTCTCTGTGGCTCCAAAA- AAGGTGTTTATGGAGATGTGCAGCGTGTGAAGATTTTGTACAATAAGAAAGACAGTGCTCT |        |        |        |        |        |        |        | 74159 |

Dienstag, 3. Mai 2022 08:40

| Majority    | AATACAGATGGCTGATGGAAACCAATCACAACCTTGGTAAGATTAAGCTATGTGTTATCTAT-ACATCTTTAAATCTGATT     |        |        |        |        |        |        |        |  |  |       |
|-------------|---------------------------------------------------------------------------------------|--------|--------|--------|--------|--------|--------|--------|--|--|-------|
|             | 105930                                                                                | 105940 | 105950 | 105960 | 105970 | 105980 | 105990 | 106000 |  |  |       |
| Human       | AATACAGATGGCTGATGGAAACCAATCACAACCTTGGTAAGATTAAGCTATGTTTTATCTAT-ACATCTTCACTTCTGCTT     |        |        |        |        |        |        |        |  |  | 85938 |
| PolarBear   | GATACAGATGGCCGATGGAAACCAATCACAACCTTGGTAAGATTAAGCTATGTGTTATCTAT-ACATCTTTAAGTCTGAAT     |        |        |        |        |        |        |        |  |  | 43710 |
| Cow         | AATACAGATGGCTGATGGAAACCAATCACAACCTTGGTAAGATTAAGCTATGTGTTATCTAT-ACGCTTCA-ATCTGATT      |        |        |        |        |        |        |        |  |  | 80846 |
| Dog         | GATACAGATGGCTGATGGAAACCAATCACAACCTTGGTAAGATTAAGCTATGTGTTATCTATTACATCTTTAA- - - - - AT |        |        |        |        |        |        |        |  |  | 73866 |
| BelugaWhale | AATACAGATGGCTGATGGAAACCAATCACAACCTTGGTAAGATTAAGCTATGTTATCTGT-ACATCTTTAAATCTGATT       |        |        |        |        |        |        |        |  |  | 72945 |
| Donkey      | AATACAGATGGCTGACGGAAACCAATCACAACCTTGGTAAGATTAAGCTGCGTGATATCTAT-ATGTCTTTAAATCTGATT     |        |        |        |        |        |        |        |  |  | 82042 |
| Cat         | GATACAGATGGCTGATGGAAACCAATCACAGCTTGGTAAGGTTAAACA- - GT- - TACCCAT-ACGTCTATAAATCTGAAT  |        |        |        |        |        |        |        |  |  | 78877 |
| Ferret      | GATACAGATGGCTGATGGAAACCAATCACAACCTTGGTAAGATTAAGCTGTGTGTTAGCTAT-ACATCTTTAAATCTGAAT     |        |        |        |        |        |        |        |  |  | 81735 |
| Lion        | GATACAGATGGCTGATGGAAACCAATCACAGCTTGGTAAGGTTAAACA- - GT- - TACCCAT-ACGTCTATAAATCTGAAT  |        |        |        |        |        |        |        |  |  | 76562 |
| Vaquita     | AATACAGATGGCTGATGGAAACCAATCACAACCTTGGTAAGATTAAGCTATGTTATCTAT-ACATCTTTAAATCTGATT       |        |        |        |        |        |        |        |  |  | 74240 |
| Pig         | AATACAGATGGCCGATGGAAACCAATCACAACCTTGGTAAGATTAAGCTATGTTATCTAT-ACATCTTCAAGATCTGATT      |        |        |        |        |        |        |        |  |  | 74237 |

| Majority    | TCAAATATATAA-XTAAACCTGTGAATAGAAATAAAXACX- - - - - TTT- - - - - ATATTAGTXAGA-       |        |        |        |        |        |        |        |  |  |       |
|-------------|------------------------------------------------------------------------------------|--------|--------|--------|--------|--------|--------|--------|--|--|-------|
|             | 106010                                                                             | 106020 | 106030 | 106040 | 106050 | 106060 | 106070 | 106080 |  |  |       |
| Human       | TCAAATGCATAATGTGAATGTGCGAATAAAAATAAACTCC- - - - - TTT- - - - - ACATCAGTAAGA-       |        |        |        |        |        |        |        |  |  | 85993 |
| PolarBear   | CTGTTAATAAAA-ACAAACCCCTTTATGGCAGTAAGAA- - - - - ACTATTT- - - -                     |        |        |        |        |        |        |        |  |  | 43754 |
| Cow         | TCAAATGTATAATGTAAACCTGTGAATAAAAACAACTCC- - - - - TTT- - - - - ATATCAGTAAGA-        |        |        |        |        |        |        |        |  |  | 80901 |
| Dog         | CTGTTAATAAAA-AAAAACCCCTATTATGGCAGTAAGTG- - - - - ATTCTTT- - - -                    |        |        |        |        |        |        |        |  |  | 73910 |
| BelugaWhale | TCAAATATATAATCTAAACCTGTGAATATAAACAACTC- - - - - TTT- - - - - ATATTAGTAAGA-         |        |        |        |        |        |        |        |  |  | 72999 |
| Donkey      | TCAAATATATAATGTAAATCTGTGAATAGTAAGAAACCATTTGTTTTCTTAATAGCCAGGGCTCAAATGTCATGTTAAT    |        |        |        |        |        |        |        |  |  | 82122 |
| Cat         | CTGTTAATAAAA- TCAAACCCCTTTATGGAAGTAAGAACCCTTTATTTAC- - - - - TCATTCATTGATT         |        |        |        |        |        |        |        |  |  | 78938 |
| Ferret      | CTGTTAATAAAA-ACAAACCCCTTTATGGAAGTAGAAA- - - - - ATCATTC- - - -                     |        |        |        |        |        |        |        |  |  | 81779 |
| Lion        | CTGTTAATAAAA- TCAAACCCCTTTATGGCAGTAAGAACCCTTTATTTAC- - - - - TCATTCATT- - - -      |        |        |        |        |        |        |        |  |  | 76619 |
| Vaquita     | TCAAATATATAATCTAAACCTGTGAATATAAAC- - - - - TTT- - - - - ATATTAGTAAGA-              |        |        |        |        |        |        |        |  |  | 74288 |
| Pig         | TCAAATATATAA- - - - - GTCTATGAATAAAGA- AAAGCCC- - - - - TTT- - - - - ATATCAGTAAGA- |        |        |        |        |        |        |        |  |  | 74286 |

Dienstag, 3. Mai 2022 08:40

| Majority    | ----- AXCXATTTTTTTT-----                                                         |        |        |        |        |        |        |        |       |
|-------------|----------------------------------------------------------------------------------|--------|--------|--------|--------|--------|--------|--------|-------|
|             | 106090                                                                           | 106100 | 106110 | 106120 | 106130 | 106140 | 106150 | 106160 |       |
| Human       | ----- A- ATTATTTT-----                                                           |        |        |        |        |        |        |        | 86002 |
| PolarBear   | ----- TTTTTT-----                                                                |        |        |        |        |        |        |        | 43760 |
| Cow         | ----- AGCTGTTTATT-----                                                           |        |        |        |        |        |        |        | 80912 |
| Dog         | ----- TTTTTTTT-----                                                              |        |        |        |        |        |        |        | 73918 |
| BelugaWhale | ----- AGCCATTTATT-----                                                           |        |        |        |        |        |        |        | 73010 |
| Donkey      | TTTCATGTTGTCTTTTTGGAGGAAGATTAGCCCTGAGCTGACTACTGCCACTCCTCCTCTTTTTGCTGAGGAAGACTGGC |        |        |        |        |        |        |        | 82202 |
| Cat         | CATTCATTCATTTATTTA-----                                                          |        |        |        |        |        |        |        | 78956 |
| Ferret      | ----- TTTTTT-----                                                                |        |        |        |        |        |        |        | 81785 |
| Lion        | CATTCATTTATTTATTTA-----                                                          |        |        |        |        |        |        |        | 76637 |
| Vaquita     | ----- AGCCATTTATT-----                                                           |        |        |        |        |        |        |        | 74299 |
| Pig         | ----- AACCATTTTTTT-----                                                          |        |        |        |        |        |        |        | 74298 |

| Majority    | ----- AATAGCCAG----- GGCTCAA----- AATGTCA                                        |        |        |        |        |        |        |        |       |
|-------------|----------------------------------------------------------------------------------|--------|--------|--------|--------|--------|--------|--------|-------|
|             | 106170                                                                           | 106180 | 106190 | 106200 | 106210 | 106220 | 106230 | 106240 |       |
| Human       | ----- AATGGCCAG----- GGCTCAA----- AATGTCA                                        |        |        |        |        |        |        |        | 86025 |
| PolarBear   | ----- ATAGCTG----- GGCTCAA----- AATGTCA                                          |        |        |        |        |        |        |        | 43781 |
| Cow         | ----- AATAGCCAG----- GGTTCAC----- AGTGTCT                                        |        |        |        |        |        |        |        | 80935 |
| Dog         | ----- TTTTTTTTGATAGCCG----- GGTTCAA----- AATGTCA                                 |        |        |        |        |        |        |        | 73948 |
| BelugaWhale | ----- AATAGCCAG----- GGTTTAA----- AATGTCA                                        |        |        |        |        |        |        |        | 73033 |
| Donkey      | CCTGAGCTAACATCCATACCCATCTTCCTCTACTTTATATGTGGGATGCCTACCACAGCATGGCTTGACAAGTGATGCCA |        |        |        |        |        |        |        | 82282 |
| Cat         | ----- TTATTTTGGATAGCCAA----- GGCTCAA----- AATGGCA                                |        |        |        |        |        |        |        | 78987 |
| Ferret      | ----- ATAGCTG----- AGCTCAA----- AATGTCA                                          |        |        |        |        |        |        |        | 81806 |
| Lion        | ----- TTATTTTGGATAGCCAA----- GGCTCAA----- AATGGCA                                |        |        |        |        |        |        |        | 76668 |
| Vaquita     | ----- AATGGCCAG----- GGTTCAA----- AATGTCA                                        |        |        |        |        |        |        |        | 74322 |
| Pig         | ----- AATAGCCAG----- AGTTCAA----- GATGTCA                                        |        |        |        |        |        |        |        | 74321 |



Dienstag, 3. Mai 2022 08:40

| Majority    | TGT-----                                                                          |                                                         |
|-------------|-----------------------------------------------------------------------------------|---------------------------------------------------------|
|             |                                                                                   | 106250 106260 106270 106280 106290 106300 106310 106320 |
| Human       | TTT-----                                                                          | 86028                                                   |
| PolarBear   | TGT-----                                                                          | 43784                                                   |
| Cow         | TGT-----                                                                          | 80938                                                   |
| Dog         | TGT-----                                                                          | 73951                                                   |
| BelugaWhale | TGT-----                                                                          | 73036                                                   |
| Donkey      | TGTCCGCACCTGGGATCCGAACCGGCGAACCCCTGGGTCAACAAAGCGGAACATGCAAACCTAACATCTGCGCCACTGGGC | 82362                                                   |
| Cat         | CGT-----                                                                          | 78990                                                   |
| Ferret      | TGT-----                                                                          | 81809                                                   |
| Lion        | CGT-----                                                                          | 76671                                                   |
| Vaquita     | TGT-----                                                                          | 74325                                                   |
| Pig         | TTT-----                                                                          | 74324                                                   |

| Majority    | ----- TAATTTTCATATTTTAATGTGAXTXGTTGTACATGATGAACATATTTGTATTTTTCTGCTGTCCTCTTA- CCA    |                                                         |
|-------------|-------------------------------------------------------------------------------------|---------------------------------------------------------|
|             |                                                                                     | 106330 106340 106350 106360 106370 106380 106390 106400 |
| Human       | ----- TAATGTGA-ATA- --- GTTGTATGTGACGAACATATTTGTATTTTTCTGCTATCCTCCTA- CTG           | 86086                                                   |
| PolarBear   | ----- TAATTGTCATATTTTAATGTAT- --- TTATACATGATAAACATGTTTGTA- TATTCTGCTGTCCTCTTA- CCT | 43851                                                   |
| Cow         | ----- TAATTTTCATATTTTAATATGTATAGTTGTACATGATGAACATATTTGTATTTTTGTGCTATTCTCTTA- CCA    | 81010                                                   |
| Dog         | ----- TAATTTTCATATTTTAACATAT- --- TTATACACGATGACCATGTTTGTA- TTTTCTCCTGTCCTCTTA- ACA | 74018                                                   |
| BelugaWhale | ----- TAATTTTCATATTTTAACATGAATAGTTGTACACGATGAACATATTTGTATTTTTCTGCTGTCCTCTTAACCA     | 73109                                                   |
| Donkey      | TGGCCCTTAATTTTCATGTTCTAATGTGAATAGTTGTACATGATGAACATATTTATATTTTTCTGCTATCCTTTTC- CTG   | 82441                                                   |
| Cat         | ----- TAATTTTCGTATTTTAATGC- ----- ATGATGAATATGTTTGTGGTTTTCTGCTGTCCTCTTA- CCA        | 79050                                                   |
| Ferret      | ----- TAATTTTCCTATTTTAATGTAT- --- TTATACATGATGAACATGTTTGCA- TATTCTGCTGTCCTCTTA- CCA | 81876                                                   |
| Lion        | ----- TAACTTTCGTATTTTAATGCGAGTCATTATACATGATGAATATGTTTGTGGTTGTCTGCTGTCCTCTTA- CCA    | 76743                                                   |
| Vaquita     | ----- TAATTTTCATATTTTAACATGAATAGTTGTACATGATGAACATATTTGTATTTTTCTGCTGTCCTCTTAACCA     | 74398                                                   |
| Pig         | ----- TAATTTTCATATTTTAATGTGAATAGTTGTACATGATGAACATATTTGTATTTTTCTGCTTTCCTCTTA- CCA    | 74396                                                   |

Dienstag, 3. Mai 2022 08:40

| Majority    | TTCCTTAAGTACAXTC- TAATGGAAAAAGGTTTT- GGCTCCAAAATTGCAATAACAATTTACATAAGAATT- ATGACAT        |        |        |        |        |        |        |        |       |
|-------------|-------------------------------------------------------------------------------------------|--------|--------|--------|--------|--------|--------|--------|-------|
|             | 106410                                                                                    | 106420 | 106430 | 106440 | 106450 | 106460 | 106470 | 106480 |       |
| Human       | TTTTTCAAATGCACTCATAATAGGAAGAGATTTT- AGCTTCAAATTTGTAATAATAGTTTTACATGAGAATT- ATATCAT        |        |        |        |        |        |        |        | 86164 |
| PolarBear   | AGCCTCAGGTACAATC- TAATGGAAAAAGGTTTTG- GGCTCCAAAATGGCAGTAACAGTTTTACATAATAATG- ATAGCAT      |        |        |        |        |        |        |        | 43928 |
| Cow         | TTTCTTGCTCGGAGTT- TAATGGAAAAAGGTTTT- GGCTTCAAGATTGAAATAACAGTTTTACCTAAGAATT- ATGATAT       |        |        |        |        |        |        |        | 81087 |
| Dog         | ATCCTCAAGTACAATC- TAATGG- - - AAGATTTG- GCCTCCAAAATTGTAGTAATCGTTTTACATAAGAAGG- GTAGCGT    |        |        |        |        |        |        |        | 74092 |
| BelugaWhale | TTTCTTGTGTGAAGTC- TAAGGAAGAAATGTTTT- GGCTTCAAATTTACAATAACAATTTACATAAGAATT- ATGACAT        |        |        |        |        |        |        |        | 73186 |
| Donkey      | TTTCTTAGGTGCAGTC- TAACGGAAAAAGGTTTT- GGCTCCAGAATTGCAGTAACAATTTGCACATAAAGAATTATGATGT       |        |        |        |        |        |        |        | 82519 |
| Cat         | TTCCTCAAGTACAATC- CAGTGGAAAAAGGTTTA- GGCTCCAGAATTGCAATAATAATTTACATAAGAATT- ATGACAT        |        |        |        |        |        |        |        | 79127 |
| Ferret      | ATCCTTAAGTACAATC- TAATGGAAAAAGGTTTTG- GAGTCCAAAATTGCAGTAACAG- - T- - - - AATAATG- ATACTAC |        |        |        |        |        |        |        | 81946 |
| Lion        | TTCCTCAAGTACAATC- CAGTGGAAAAAGGTTTA- GGCTCCAGAATTGCAATAATAATTTACATAAGAATT- ATGACAT        |        |        |        |        |        |        |        | 76820 |
| Vaquita     | TTCCTTGTGTGAAGTC- TAAGGAAGAAATGTTTT- GGCTTCAAATTTACAATAACAATTTACATAAGAATT- ACGACAT        |        |        |        |        |        |        |        | 74475 |
| Pig         | ATTTTTGGGCAGAGTC- TGATGGTAAAAGGTTTTTGGCTCCAAGATTGCAGTAACAATTTACGGAAGAATTTATAACAT          |        |        |        |        |        |        |        | 74475 |

| Majority    | TTATATTA- GATCCTTAGTGTTTTTTCATTCCCTGGTTACTCCCTGT- AATAGAAGTTAACTGTTC- - - - - - ATATA  |        |        |        |        |        |        |        |       |
|-------------|----------------------------------------------------------------------------------------|--------|--------|--------|--------|--------|--------|--------|-------|
|             | 106490                                                                                 | 106500 | 106510 | 106520 | 106530 | 106540 | 106550 | 106560 |       |
| Human       | TTATATTGAA- GATTCATAGTGATTTTTATT- CTAGGTA- CTCTTGTTAATAGAGGCTAACTGTTC- - - - - - ATACA |        |        |        |        |        |        |        | 86233 |
| PolarBear   | TTATATTA- GATCCTTAGTGTATTTCTTTCTGGTTACTCTTTAC- AATAGAAGTTAACTGTTC- - - - - - ATTTG     |        |        |        |        |        |        |        | 43997 |
| Cow         | ATATATTA- GATCCTTAGTGTATTTCTTTCTGGTTACTCCCTAT- AATTGAAGTTAACTGTTC- - - - - - ATATA     |        |        |        |        |        |        |        | 81157 |
| Dog         | TTATATTA- GATCCTTAGTATCTTTCTTTCTGGTTACTCCCTGT- AATAGAAGGTTAACTGTTC- - - - - - ATATA    |        |        |        |        |        |        |        | 74161 |
| BelugaWhale | ACATATTA- GATCCTTAGTGTTTTTTCATTCCCTGGATACTCCTTGT- AATCAAAGTTAACTGTTC- - - - - - ATATA  |        |        |        |        |        |        |        | 73255 |
| Donkey      | TTAAATTA- CATCTTAGTGTTTTTTCATTCCCTGGTTACTGCCTGT- AATATAAGTTAACTGTTTCTGTCGTCCATATA      |        |        |        |        |        |        |        | 82597 |
| Cat         | TTGTATTA- GATCCCTACTGTTTTTTCATTCCCTACTTACTCCCTGT- GATAGAAGTTAACTGCTATGCTAA- - - ATATA  |        |        |        |        |        |        |        | 79202 |
| Ferret      | TTACATTA- GATCTTAGTATTTTTCTTTCTGGTTACTCTCTAT- AATAGAAGTTAACTGTTC- - - - - - ATATA      |        |        |        |        |        |        |        | 82015 |
| Lion        | TTGTATTA- GATCCCTAGTGTTTTTTCATTCCCTACTTATTCTCTGT- GATAGAAGTTAACTGCTAGGCTAA- - - ATATA  |        |        |        |        |        |        |        | 76895 |
| Vaquita     | ACATATTA- GATCCTTAGTGTTTTTTCATTCCCTGGATACTCCTTGT- AATCAAAGTTAACTGTTC- - - - - - ATATA  |        |        |        |        |        |        |        | 74544 |
| Pig         | TTATATTA- GATCCTTAGTGGTTTTTCATTCCAGTTACTCCCTAT- AGTCAAAGTTAACTGTTC- - - - - - ATGTA    |        |        |        |        |        |        |        | 74544 |

Dienstag, 3. Mai 2022 08:40

| Majority    | GTCCATGGAATCCTGATTAATGTTATGTTXTTTTAATTCTTCTAAATTTTTXTXTAAXTTTTXTACT- XAA- - - A- X- - X |                                                    |                                       |                                       |            |        |        |        |       |
|-------------|-----------------------------------------------------------------------------------------|----------------------------------------------------|---------------------------------------|---------------------------------------|------------|--------|--------|--------|-------|
|             | 106570                                                                                  | 106580                                             | 106590                                | 106600                                | 106610     | 106620 | 106630 | 106640 |       |
| Human       | GTCCATAGAATCCTTCTTAATGCCATGTT- - - - -                                                  | - - - - -                                          | ATTT- - - - -                         | TAATTCCTTCTA- - - - -                 |            |        |        |        | 86277 |
| PolarBear   | GTCCATGGAATCCTGGTT- - - - -                                                             | TTAATT- - - - -                                    | ATTCT- - - - -                        | AAGTATTTGTCTAAACTTAGTAATGGAA- - - - - | A- - - - - |        |        |        | 44055 |
| Cow         | GTCCATGGGATCCTGATTAACGCCATGTTAATTTAATTCTTCTAAAGTCATTTGAAAGTATTTGA- - - - -              | ACTTAG                                             |                                       |                                       |            |        |        |        | 81228 |
| Dog         | GTCCATGGAATCCTGATTAATGTGAAATT- - - - -                                                  | TTAATTC A- - - - -                                 | AAATATTTGTCTAAACCTAGTATTGGAA- - - - - | AATGGA                                |            |        |        |        | 74232 |
| BelugaWhale | GTCCACGGAATCCTGATTAACGCTGTGTTATTTAATTCTTCTAAAGTCATTTGCAAGTATTTAACT- - - - -             | AA- - - - -                                        | ACTTAG                                |                                       |            |        |        |        | 73330 |
| Donkey      | GTCCATGGAATCTTGATTAATGTCATGTT- TTTTAATTCTTCTAAATCG- TTTGTAAGGTTTAGGCTAAACTGTGTAATG      |                                                    |                                       |                                       |            |        |        |        | 82675 |
| Cat         | GTCCATGGAGTCCTGATTAATGTGGTGTATCTTAATTCTCCTAGATTTTTG- CTAAACTTAATG- - - - -              | GAA- - - - -                                       | A- - - - -                            |                                       |            |        |        |        | 79270 |
| Ferret      | ATCTATGGAATCCTGATT- - - - -                                                             | TTAATT- - - - -                                    | ATTCT- - - - -                        | AAGTATTTGTCTAAACTTAGTAACGGAG- - - - - | A- - - - - |        |        |        | 82073 |
| Lion        | GTCCATGGAGTCCTGATTAATGTGGTGTATCTTAATTCTCCTAGATTTTTG- CTAAACTTAATAATAGAA- - - - -        | A- - - - -                                         |                                       |                                       |            |        |        |        | 76966 |
| Vaquita     | GTCCATGGAATCCTGATTAACGCTGTGTTATTTAATTCTTCTAAAGTCATTTGCAAGTATTTAACT- - - - -             | AA- - - - -                                        | ACTTAG                                |                                       |            |        |        |        | 74619 |
| Pig         | GTCCATGGAATCCTGATTAACAC- - - - -                                                        | TGTTGTTTCAATTCTTCTAAATTC- CTGTAAGTGTTGACT- - - - - | AA- - - - -                           | ATTTAG                                |            |        |        |        | 74616 |

| Majority    | - AAXGAGTCACATGGAAAATGTATTTTAGAGATACCAGGTTXTT- ACAAATGAAAACTTGTGCCAAATACA- - - - - CC    |                                                                    |                                                      |        |        |        |        |        |       |
|-------------|------------------------------------------------------------------------------------------|--------------------------------------------------------------------|------------------------------------------------------|--------|--------|--------|--------|--------|-------|
|             | 106650                                                                                   | 106660                                                             | 106670                                               | 106680 | 106690 | 106700 | 106710 | 106720 |       |
| Human       | - - - - - AAGTCTTGCG- - - - -                                                            | - - - - -                                                          | ATACCAGGTTCTT- AGAAAATGAAAAGCTTGTGCTAAAAACA- - - - - | CT     |        |        |        |        | 86330 |
| PolarBear   | - - - - - GAATCACATGGAAAATGTATTTTAGAGGTACCAGGTTTCT- ACAAATGAAAACTTGTGCCACATACA- - - - -  | CC                                                                 |                                                      |        |        |        |        |        | 44125 |
| Cow         | TAAAGAGTTACATG- - - - -                                                                  | AGTGTATTTTAGAGATAGCAGGTTACT- ATAAAATGAAAACTTAAACTAAATGCC- - - - -  | CC                                                   |        |        |        |        |        | 81299 |
| Dog         | AAATGAGTCACATGGAAAATGTATTTTAGAGATACCAGATTTTTTACAGAATGAAGAACTTGTGCTAGACAGG- - - - -       | CT                                                                 |                                                      |        |        |        |        |        | 74307 |
| BelugaWhale | TAAAGAGTCACATGGGAAAATGTATTTTAGAGATACCAGGTTCTT- ATAAAATGAAAAATTTACACCAAATACC- - - - -     | CC                                                                 |                                                      |        |        |        |        |        | 73404 |
| Donkey      | GAAAGAGTCAAATGGAAAATGTGTTTTAGAGATACCACGTTCTT- ACGAAATGAAAAATTTACACCAAGTACA- - - - -      | CC                                                                 |                                                      |        |        |        |        |        | 82749 |
| Cat         | - - - - - GAGTCACATGGAAAACGTATTTTAGGGTACTAGGTTTTT- ACAAATGAAAACCTTGTGCCACATACAATACACC    |                                                                    |                                                      |        |        |        |        |        | 79345 |
| Ferret      | - - - - - GAGTCACATGTAAAATGTATTTTAGAGATACTGGGTTTTT- ACAAATGAAAACCTTGTGCCACATATA- - - - - | CC                                                                 |                                                      |        |        |        |        |        | 82143 |
| Lion        | - - - - - GAGTCACATGGAAAACGTATTTTAGGGTACTGGGTTTTT- ACAAATGAAAACCTTGTGCCACATACAATACACC    |                                                                    |                                                      |        |        |        |        |        | 77041 |
| Vaquita     | TAAAGAGTCACATGGGAAAATGTATTTTAGAGATACCAGGTTCTT- ATAAAATGAAAAATTTACACCAAATGCC- - - - -     | CC                                                                 |                                                      |        |        |        |        |        | 74693 |
| Pig         | TAAAGAATCACATGG- - - - -                                                                 | AAAATATTTTAAAGATACCAGGTTCTT- ATAGAAAAGAAAACGTGCTCAAAGTACA- - - - - | TC                                                   |        |        |        |        |        | 74688 |

Dienstag, 3. Mai 2022 08:40

| Majority    | ATTGT- - TAATCCCTTTT GGAATCTTAAAATGTACTTXAGTCAAGTTACACTT- ATATTATTA- CTTAXXTA- - - AATAA  |        |        |        |        |        |        |        |       |
|-------------|-------------------------------------------------------------------------------------------|--------|--------|--------|--------|--------|--------|--------|-------|
|             | 106730                                                                                    | 106740 | 106750 | 106760 | 106770 | 106780 | 106790 | 106800 |       |
| Human       | GTTGT- - TAATCCCTTTTGGGAATCTTAAAAGGCACCTTTAGTCAGGTTACACTTTATATCATT- CTTAAATAAGTAATTG      |        |        |        |        |        |        |        | 86407 |
| PolarBear   | ATTGT- - TAATCCCTTTT GGAATCTTAAAATGTACTTGAGTCAAATTACACAT- ATATTCTTT- CTTAGGTA- - - AATAT  |        |        |        |        |        |        |        | 44198 |
| Cow         | ACTTT- - AATCCTTTTT- GGAACCTTAAAATGTACTTCA- ACAAGTTTCACTT- ACATTATTA- GATAAATAAGTGATCA    |        |        |        |        |        |        |        | 81373 |
| Dog         | GTTGTGTTAATCCCTTTT GGAATCTTAAAATGTACTTAAAGTCCA- TTATACTT- CCATTAAATATTTACGTT- - - AATAA   |        |        |        |        |        |        |        | 74382 |
| BelugaWhale | ACTGT- - TAATCCTTTTTGAAATCTTAAAATGTACTTCAGACAAGTTACACTT- ATACTATTA- GATAAATAATTGATGA      |        |        |        |        |        |        |        | 73480 |
| Donkey      | ATTGT- - TAATCCCATTTGGAATCTTAAAATGTACTTTAGTCACGTTACACTT- AAATTATTA- TTTAGATAAATGATTG      |        |        |        |        |        |        |        | 82825 |
| Cat         | ATTGT- - TAATCCCTTTT GGAATCTTAAAATGTACTGTAGTCAAATTACACTT- ACATTCTTAACTTAGGTA- - - AGTAT   |        |        |        |        |        |        |        | 79419 |
| Ferret      | ATTGG- - TAATCCCTTTT GGAATTTTTAAAATGTACTTGAGTCAAATTACACAT- ATATTCTCTACTTAAGTA- - - AATAA  |        |        |        |        |        |        |        | 82217 |
| Lion        | ATTGT- - TAATCCCTTTT GGAATCTTAAAATGTACTGTAGTCAAATTACACTT- ACATTCTTAACTTAGGTA- - - AGTAT   |        |        |        |        |        |        |        | 77115 |
| Vaquita     | ACTGT- - TAATCCTTTTTGAAATCTTAAAATGTACTTCAGACAAGTTACACTT- ATACTATTA- GATAAATAATTGATGA      |        |        |        |        |        |        |        | 74769 |
| Pig         | ACTGT- - TAATCCCTTT- GCAATCTTAAAATTTACTTCAGACAGGTTACACTT- TTCTTATTA- GATAGTT- - - - GATGA |        |        |        |        |        |        |        | 74759 |

| Majority    | TTTAAT- - - - - TAA- - - TATXTCATTTGACTTCATACACAAAGTCAGATCACATAAATCTGGAATACAXCTGCATATTCA         |        |        |        |        |        |        |        |       |
|-------------|--------------------------------------------------------------------------------------------------|--------|--------|--------|--------|--------|--------|--------|-------|
|             | 106810                                                                                           | 106820 | 106830 | 106840 | 106850 | 106860 | 106870 | 106880 |       |
| Human       | ATTATTTTAATTAACCTTATGTCGTTT GACTTCATACAT- - - CCTCGAATACATAAATCTAGAACACACCTGCACATTCA             |        |        |        |        |        |        |        | 86484 |
| PolarBear   | TTTAA- - - - - - - - - - - TGTACCATTTGACTTTAGATACAAAGTCAGATCACATAAATTTGGAATACAACCTGCATATTCA      |        |        |        |        |        |        |        | 44266 |
| Cow         | CTTAAT- - - - - TAG- - - CATCTCATTCAACTTCATGCATAAAGTCAAATCACATTAATCCAGAAGGTAGTT- - - - - - - - - |        |        |        |        |        |        |        | 81436 |
| Dog         | - - GAA- - - - - - - - - - - TGTATCATTTGATTCTATACACGAAGTCAGATCGCATAAATATGGTATACAGCTATGTATTCA     |        |        |        |        |        |        |        | 74448 |
| BelugaWhale | CTTAAT- - - - - TAA- - - CATCTCGTTTGAATTCATGCACAAAGGCAAATTACATAAATCTAGAAATGTAGCTGCATAGTCA        |        |        |        |        |        |        |        | 73552 |
| Donkey      | ATGATTTTAATTAA- - - TATTGCATTTGACTTCATACACAAAGTCAAATCACATAAATCTAGAAATACAACCTGCAAACCTCA           |        |        |        |        |        |        |        | 82902 |
| Cat         | TTTAATTAATTAA- - - TGCATCATTTGCCTTCATACACAAAGTCAGATCAC- - - AATCTGGAATACAACGACACATTCA            |        |        |        |        |        |        |        | 79494 |
| Ferret      | TTCA- - - - - - - - - - - TGTTCATTTGTCTTTATATACAAAGTCAGATCACATGAATCTGGAATACAACCTGCATATTCA        |        |        |        |        |        |        |        | 82284 |
| Lion        | TTTAATTAATTAA- - - TACATCATTTGCCTTCATACACAAAGTCAGATCACATAAATCTGGAATACAACCTACACATTCA              |        |        |        |        |        |        |        | 77192 |
| Vaquita     | CTTAAT- - - - - TAA- - - CATCTCGTTTGAATTCATGCACAAAGCCAAATCACATAAATCTAGAAATGTAGCTGCATATTCA        |        |        |        |        |        |        |        | 74841 |
| Pig         | TTTAAT- - - - - TAA- - - TATCTCATATGACTTCCTCTGCAAAGGCTGATCAC- TAAATCTGTAGAGTAGCTGCATAATCA        |        |        |        |        |        |        |        | 74830 |

Dienstag, 3. Mai 2022 08:40

| Majority    | CAGT- GTGAT- TGACTGTAAATXTCAGTATGTTCTT- AGCTTATAATTCTGTTCAATTGAGATTCAGGGATGATGGTGCCT  |                                                       |                                            |        |        |        |        |        |  |
|-------------|---------------------------------------------------------------------------------------|-------------------------------------------------------|--------------------------------------------|--------|--------|--------|--------|--------|--|
|             | 106890                                                                                | 106900                                                | 106910                                     | 106920 | 106930 | 106940 | 106950 | 106960 |  |
| Human       | CACCAGT                                                                               | GAT- TGACTGTAAATGCCAGGATGTT- - - - -                  | CTTACATTTCTGTTCAATTGAGATTCAGGGATAATGGTGCCT | 86557  |        |        |        |        |  |
| PolarBear   | CAAT- GTGGTAAGACTGTAAATATCA- - -                                                      | TGTTCTT- AGCTTATAATTCTGTTCAATTGAGATTAACGGATGATGATGCCT | 44341                                      |        |        |        |        |        |  |
| Cow         | - AGT- GTGAT- TGACTGTAAATGTCAGTATGATGTT- AGCTTATAATTCTGTTCAATTAAGATTTGGGGATGATGGTACCT | 81512                                                 |                                            |        |        |        |        |        |  |
| Dog         | CAAT- GTGATACGACTGTAAATATTA- - -                                                      | TGTTCTT- AGCTTATAATTCTGTTCAATTGAGATTTGGGCATGATGATGGCT | 74523                                      |        |        |        |        |        |  |
| BelugaWhale | TGGT- GTGAT- TGACTGTAAA- GTC AATATGTTCTT- AGCTTATAATTCTGTTAGTTGAGATTTGGCGATGATGGTACTT | 73628                                                 |                                            |        |        |        |        |        |  |
| Donkey      | CAAT- GTGAT- TGACTATCAG- - TGG- - - -                                                 | GTTCTC- AGCTTACAGTTCTCTTCATGGAGATTCAGAGATTATGGTGCCT   | 82973                                      |        |        |        |        |        |  |
| Cat         | CAGT- GTGATAAGACTGTAAATATCAGTATGATCTTTAGCTTGT AATTCTGTTCAATTGACATTC- - GG- - - - -    | TGCCT                                                 | 79564                                      |        |        |        |        |        |  |
| Ferret      | CAGT- GAGCTAAGACTGTAAATATCA- - -                                                      | TGTT- - - - -                                         | CTTATAATTCTTTTCATTGAGATTCAGGGATGATGATGCCT  | 82354  |        |        |        |        |  |
| Lion        | CAGT- GTGAGAAGACTGTAAATATCAGTATGATCTTTAGCTTGT AATTCTGTTCAATTGACATTC- - GG- - - - -    | TGCCT                                                 | 77262                                      |        |        |        |        |        |  |
| Vaquita     | TGGT- GTGAT- TGACTGTAAA- GTC AATATGTTCTT- AGCTTATAATTCTGTTAGTTGAGATTTGGCGATGATGGTACTT | 74917                                                 |                                            |        |        |        |        |        |  |
| Pig         | CAGT- ACAAT- TGACTATAAATGTCAGTATGTTCTT- AGATAATAATTCTGTTCAATTGAGATTCAGGGATGATAGTACCT  | 74907                                                 |                                            |        |        |        |        |        |  |

| Majority    | CAGAXTGGTTGTXTTCACXTTGTTAATTTTGAAATTTGCCATTTTGGATGTAAGGACTAGTGTATTTTGGCTCTTA- - TA    |                                                                          |                        |        |        |        |        |        |  |
|-------------|---------------------------------------------------------------------------------------|--------------------------------------------------------------------------|------------------------|--------|--------|--------|--------|--------|--|
|             | 106970                                                                                | 106980                                                                   | 106990                 | 107000 | 107010 | 107020 | 107030 | 107040 |  |
| Human       | CAGACTGATTGTATTCACATTGTTAATTTGTAAATTTGCCATTTTGGATGTAAGGACGAGTGTATTTTGGCTCAGAGATG      | 86637                                                                    |                        |        |        |        |        |        |  |
| PolarBear   | CATATTGGTTGTTTCCACGTTGTTAATTCTGAAATTCGTTATTTTGGATGTAAGGGCGG- TGTATTTTGGCTCTTAA- CA    | 44419                                                                    |                        |        |        |        |        |        |  |
| Cow         | CAGACTGTGTGTA CT CACATCATT AATTTGAAATTTGCCATTTTG- - - - -                             | TGCTGTTA- - TA                                                           | 81568                  |        |        |        |        |        |  |
| Dog         | CAAATTTGGTTGCTTTTCACTTTTTT- - -                                                       | TTT GAAATTTGTCACTTTTGATGTAAGGAC- - -                                     | TGTATTTTGGCTATTA- - CA | 74595  |        |        |        |        |  |
| BelugaWhale | TAGATTGGGTGTA CT CACGTTATTAATTTGAAATTTGCCATTTTGGGGTAAAACTAGTGTATTTTGGCTATTA- - TA     | 73706                                                                    |                        |        |        |        |        |        |  |
| Donkey      | CAGACTA- - -                                                                          | GTGTT CACAGTGTTAATTTGAAAGTTGCTATTTTGGATGTAAGGACTATTGTATTTTGGCTATTA- - CA | 83048                  |        |        |        |        |        |  |
| Cat         | CAGGGTGGTTGTTTTCACGTT- - -                                                            | AATTT CGAAATTTGTCACTTATGACGTAATGACTAGTGTATTTTGGCTCTTA- - TG              | 79639                  |        |        |        |        |        |  |
| Ferret      | CATGTTGCTTGTTTTCACATTGTTAATTCTGAAATTTGTCATTTTTCATGTGAGGGCTA- TGTATTTTCTCTTAG- CA      | 82432                                                                    |                        |        |        |        |        |        |  |
| Lion        | CAGGTTGGTTGTTTTCACGTTGTTAATTT CGAAATTTGTCACTTATGACGTAAGGACTAGTGTATTTTGGCTCTTA- - TG   | 77340                                                                    |                        |        |        |        |        |        |  |
| Vaquita     | TAGACTGGGTGTA CT CACGTTATTAATTTGAAATTTGCCATTTTGGGGTAAAGACTAGTGTATTTTGGCTGTTA- - TA    | 74995                                                                    |                        |        |        |        |        |        |  |
| Pig         | CAGACTAGATATACTCACATCATT AATTTGAAAGTT CGCCATTTTCGATGTAAAACTAGT- TGTTTTTGGCTGTTA- - TA | 74984                                                                    |                        |        |        |        |        |        |  |

Dienstag, 3. Mai 2022 08:40

| Majority    | XCCAGTGAGACTCAX- AAAC TAG- AACATGAT- ATCTGGACCTTTTGGCCTTTGGXAT- - CAGATAGAX- - - TAAGTTTG |        |         |          |             |        |                                |                      |                                                 |       |
|-------------|-------------------------------------------------------------------------------------------|--------|---------|----------|-------------|--------|--------------------------------|----------------------|-------------------------------------------------|-------|
|             | 107050                                                                                    | 107060 | 107070  | 107080   | 107090      | 107100 | 107110                         | 107120               |                                                 |       |
| Human       | AACA                                                                                      | ACTT   | GCTA    | TATT     | AGAC        | CAAT   | TTTT                           | GGCCTTTG             | ACATCACATAGAAAATTTTGAATTTCAAACACAT- AATAGGTTTTG | 86716 |
| PolarBear   | CCCAGT                                                                                    | GAAACT | CA- - - | AACTTG-  | AACA- - - - | GTGT   | GATATATTTGGCCTTTGGTAA-         | - CAGA- - - - -      | AGTAAGTTTTG                                     | 44482 |
| Cow         | TCCAGT                                                                                    | GAGATT | CAC-    | AGACT    | AACA        | ATAT   | GATAAACCAGACCTTTTAGCCTTTGGCAT- | - CAGATAGAA- - - - - | GTTTG                                           | 81639 |
| Dog         | CCCAAT                                                                                    | GAAATT | CAC-    | AGACTTG- | AACG- - - - | GTAT   | GATATATTTGGTCTTTG- - - - -     | GA- - - - -          | AAGTTTTG                                        | 74651 |
| BelugaWhale | TCCAGT                                                                                    | GAGATT | CAC-    | AACTA    | AAGA        | ACAT   | GATGAACTAGACCTTTTAGCCTTTGGAGT- | - CAGAAGTAA- - - - - | GTTTG                                           | 73777 |
| Donkey      | TCCAAT                                                                                    | GAGACT | CAT-    | AAATTA   | AACA        | ACAT   | GAAATACTGGACCTTTTGGCCGTTGGAGT- | - CAGAAGTA- - - - -  | AGTTTTTA                                        | 83120 |
| Cat         | CCCAGT                                                                                    | GGAGGT | CAT-    | AACTTG-  | AACAT       | GAC-   | ATATGGACCTTTTGGCGTTTGGTAT-     | - CAGATAGA- -        | AGTAAATTTG                                      | 79712 |
| Ferret      | CCCAGT                                                                                    | TAAACT | CAT-    | AACTTG-  | AACA- - - - | GTGT   | GATATATTTGGCCTTTGGTAG-         | - CAGATAGAAAAGTAA    | AGTTTTG                                         | 82503 |
| Lion        | CCCAGT                                                                                    | GAAGGT | CAT-    | AACTTG-  | AACAT       | GAC-   | ATATGCACCTTTTGGCATTTTGGTAT-    | - CAGATAGA- -        | AGTAAATTTG                                      | 77413 |
| Vaquita     | TCCAGT                                                                                    | GAGACT | CAC-    | AACTA    | AAGA        | ACAT   | GATGAACTAGACCTTTTAGCCTTTGGAGT- | - CAGAAGTAA- - - - - | GTTTG                                           | 75066 |
| Pig         | TTCTGT                                                                                    | GAGACT | CAC-    | AAGCC    | AGCA        | ACAT   | GATGACCTAGACCTTTTAGCCTTTGGGAT- | - CAGACAGAAA-        | TGAGTTTTG                                       | 75059 |

| Majority    | AATTTTCAGTGTTTCTTACCAGCTATCATGGTAGCTCAGACAAXGTATAAAACT- - ATACATCTGGCTCTCXACTTTTTTAA |          |        |         |         |             |                          |                      |             |       |
|-------------|--------------------------------------------------------------------------------------|----------|--------|---------|---------|-------------|--------------------------|----------------------|-------------|-------|
|             | 107130                                                                               | 107140   | 107150 | 107160  | 107170  | 107180      | 107190                   | 107200               |             |       |
| Human       | AATTTT                                                                               | AGTGTTT  | CTTGG  | CAATAGT | CTTAG   | CAACTCAGAT  | GAGGTATAAAACT- -         | ATCCATCTGGCTGTCCA-   | TTTTTAA     | 86793 |
| PolarBear   | AATTT                                                                                | CATTGTTT | CTTACC | AGCTAT  | CATGGT  | AGCTCAGACA  | ACATATAAAACT- -          | ATACATCTGGCTCTCCACT  | TTTTTAA     | 44560 |
| Cow         | AAATT                                                                                | CAGT- -  | TTCTT  | ACCAGCT | ATTAG   | GGTAG       | CCCAGGCAATG- - - -       | AATTGTCGGCAGCCCACAC- | CAGTACTCTTG | 81711 |
| Dog         | AATTTT                                                                               | CTTGTTT  | CTTAC  | CAACTG  | TATGGT  | AGCTCAGACA  | ACACATAAAACT- -          | ATACATCTGGCTCTTCACT  | TTTTTAA     | 74729 |
| BelugaWhale | AAATT                                                                                | CTGTGTTT | CTTACC | AGCTATT | ATC-    | CGTCTT- - - | TAGTG- - -               | GAAGTTATATAAAAGT-    | - - - - -   | 73833 |
| Donkey      | AATTT                                                                                | CAGTG-   | - T-   | - AACC  | AGCTATT | GTGGT       | AGCTTAGACAGTGTATAAAGCTTT | TATACATCTGGCTGTCTAT  | TTTTTAA     | 83196 |
| Cat         | AATTTT                                                                               | ATTATTT  | CTTACC | AGCTTT  | CATGGT  | AGCTCAGACA  | ACGTATAAAACT- -          | AGACCTCTGGCTCTCTGCT  | TTTTTAA     | 79790 |
| Ferret      | AATTT                                                                                | CATTATTT | CCTACC | AGCTAT  | CATGGT  | AGCTCAGACA  | ACATGTAAACT- -           | ATACATCTGGCTCTCTACT  | TTTTTAA     | 82581 |
| Lion        | AATTTT                                                                               | ATTATTT  | CTTACC | AGCTTT  | CATGGT  | AGCTCAGACA  | ACGTATAAAACT- -          | AGACCTCTGGCTCTCTGCT  | CTTTAA      | 77491 |
| Vaquita     | AAATT                                                                                | CTGTGTTT | CTTACC | AGCTATT | ATC-    | CATCTT- - - | TAGTG- - -               | GAAGTTATATAAAAGT-    | - - - - -   | 75122 |
| Pig         | AAATT                                                                                | CAGTATTT | CTTACC | AGCTATT | ACAGT   | AGCTCAGACA  | AGTGTATAAAACTTT          | TATACGTCTGGCTCTCCACT | TTTGTAA     | 75139 |

Dienstag, 3. Mai 2022 08:40

| Majority    | AATGGAGATATCCATCTTTA- - - - - ATGAAAGATATXTAA- - - - - A- - - - AGTGCTAATCATGTC  |        |        |                          |        |           |                   |        |       |
|-------------|----------------------------------------------------------------------------------|--------|--------|--------------------------|--------|-----------|-------------------|--------|-------|
|             | 107210                                                                           | 107220 | 107230 | 107240                   | 107250 | 107260    | 107270            | 107280 |       |
| Human       | AATGGTGGTATGTGTTTT- - - - -                                                      |        |        | A- AAGAGATACGA- - - - -  |        | A- - - -  | AGTGCTGATTATGTC   |        | 86839 |
| PolarBear   | AATGGAGAGATCTATCTTCA- - - - -                                                    |        |        | ATGAAAGATTTATAA- - - - - |        | A- - - -  | AGTGTTAATCATGTC   |        | 44611 |
| Cow         | GCTGGGAAATCCCATGGAAG- - - - -                                                    |        |        | GAGGAACCTGGT- - - - -    |        | A- - - -  | GGCTCTGGTC- - - C |        | 81755 |
| Dog         | AATGGAGATACCCATCTTTA- - - - -                                                    |        |        | ATGAAAGATATATAA- - - - - |        | ATAAAGAGT | GCTAATCAGGTC      |        | 74785 |
| BelugaWhale | GCTGATGATGTC- - - - -                                                            |        |        | ATAGATGCTAATTAA- - - - - |        | A- - - -  | TCTTTTCTTCT- - -  |        | 73872 |
| Donkey      | AATACAGATATCTGTCTTTAGAAATGTAAAGTGCTATATGAAAGATATGTATGAAAGATATGTAAAGCGCTGACCATATC |        |        |                          |        |           |                   |        | 83276 |
| Cat         | AATGGAGATACCCGTCTTTA- - - - -                                                    |        |        | ATGAAAGATCTGTAA- - - - - |        | A- - -    | AAAGTGCTAATCATGTT |        | 79843 |
| Ferret      | AATGGAGATATCCATCTTCA- - - - -                                                    |        |        | GTGAAAGATTTATAA- - - - - |        | A- - - -  | AGTGCTAATCATGTC   |        | 82632 |
| Lion        | AATGGAGATACCCATCTTTA- - - - -                                                    |        |        | ATGAAAGATGTATAA- - - - - |        | A- - -    | AAAGTGCTAATCAAGTT |        | 77544 |
| Vaquita     | GCTGATGATGTC- - - - -                                                            |        |        | ATAGATGCTAATTAA- - - - - |        | A- - - -  | TCTTTTCTTCT- - -  |        | 75161 |
| Pig         | AATGGAGATACCTATCTTTA- - - - -                                                    |        |        | AAGGAACTTATTTAA- - - - - |        | A- - - -  | CGTGCTGATCTTGTC   |        | 75190 |

| Majority    | CTAGATG- CCTAGTAAATX- - - - - TCCTTCTG- XTGTGTACACTTCTGTACTCTGGTAGGGGTAGTCATTGCCATTG |        |                                                        |                      |        |        |                 |        |       |
|-------------|--------------------------------------------------------------------------------------|--------|--------------------------------------------------------|----------------------|--------|--------|-----------------|--------|-------|
|             | 107290                                                                               | 107300 | 107310                                                 | 107320               | 107330 | 107340 | 107350          | 107360 |       |
| Human       | A- AGATA- CTTAGTACATATTTT- - - - -                                                   |        | CCTCTTTCTCTGTGTGCACTTCTGTACTCTGGTTGGAATAGTCATTGCTGTTG  |                      |        |        |                 |        | 86913 |
| PolarBear   | CTAGATG- CCTACC- - - - -                                                             |        | TTCTGCTG- CTTTGTATACTTCTGTGCTCTGGTAGGGGTAGTCATGGCCATTG |                      |        |        |                 |        | 44676 |
| Cow         | ATG- GTG- TT- GCTAAGAG- - - - -                                                      |        | TC- - - - -                                            | AGACACGACTG- - - - - |        |        | AGCGACTTCC- - - |        | 81794 |
| Dog         | CTAGATG- CCTAGTAAA- - - - -                                                          |        | TCTTTTC- TTCTTTTGCTGTGTGTGCTCTGGTAGAGGTAGTCATGGCCATTG  |                      |        |        |                 |        | 74852 |
| BelugaWhale | - - - - -                                                                            |        | TCCT- CTGCTTGTGTACACTTCTGTACTCTGGTGGGTGTAGTCATTGCCATTG |                      |        |        |                 |        | 73924 |
| Donkey      | ATAGATG- CTTAGTAAATC- - - - -                                                        |        | TTTCTCTGCTTGTGTACACTTCTGTACTCTGCTGGGGGTAGTGATTGCCATT-  |                      |        |        |                 |        | 83346 |
| Cat         | CTGGGTGTCCTCGTAAATCTTTTTTTCTCCCTCTG- CTGTGTATACTTCTGTACTCTGGTAAGGGTAGTCATGGGCATTG    |        |                                                        |                      |        |        |                 |        | 79922 |
| Ferret      | CTAGATG- CCTAATAAATGT- - - - -                                                       |        | TTCTTCTG- CTGTGTGTATGTCTGTGCTCTGGTAGGGGTAGTCATGGCCATT- |                      |        |        |                 |        | 82702 |
| Lion        | CTGGGTGTCCTTGTAAATCTTTTTTTCTCCCTCTG- CTGTGTATACTTCTGTACTCTGGTAAGGGTAGTCATGGCCATTG    |        |                                                        |                      |        |        |                 |        | 77623 |
| Vaquita     | - - - - -                                                                            |        | TCCT- CTGCTTGTGTACACTTCTGTACTCTGGTGGGTGTAGTCATTGCCATTG |                      |        |        |                 |        | 75213 |
| Pig         | ATAAGTG- CTCATTAAATC- - - - -                                                        |        | TCCTTCTGGTTGTATACACTTCTGTACTCTGGTAGA- GTAGTCATTGCCATTG |                      |        |        |                 |        | 75260 |

Dienstag, 3. Mai 2022 08:40

| Majority    | TTTTATATACXTTGTAAGTAGCATTTTA- - - - - X- - TXCAAAGT- GXXAAAGCATTCTCAAATGTTTCATTTTTTTT- |                                                                              |                                                       |                              |        |        |        |        |       |
|-------------|----------------------------------------------------------------------------------------|------------------------------------------------------------------------------|-------------------------------------------------------|------------------------------|--------|--------|--------|--------|-------|
|             | 107370                                                                                 | 107380                                                                       | 107390                                                | 107400                       | 107410 | 107420 | 107430 | 107440 |       |
| Human       | TTTT                                                                                   | CATATATGTTGTAAGTAGCACTTAA- - - CA-                                           | GTACTTCATAATAG- - - GAGTATTCTCAAATATGTCATTTTTTTT-     |                              |        |        |        |        | 86985 |
| PolarBear   | TTTT                                                                                   | TATGTACATTGTAAATAGCATCTTA- - - - - - - - - - -                               | GAAAGC- ATTAAGCTTTCTCAAATGTTTCATTTTTTTT               |                              |        |        |        |        | 44743 |
| Cow         | CTTT                                                                                   | CA- - - CTTTT- - - - - - - - - - -                                           | CACCTT- - - - CATGCATTGTAGAAG- GAAATGGCAACCT- - - - - | ACTCCAGTGTCT-                |        |        |        |        | 81852 |
| Dog         | TTTT                                                                                   | TATATACGTTGTAAGAAGCATTTAA- - - - - - - - - - -                               | CAA- - - - - - - - - - -                              | AGCTTTCTCAACTGTTTCATTTTTTTT  |        |        |        |        | 74911 |
| BelugaWhale | TTTT                                                                                   | TATAAACTTTGCGAGTAGCATTTTACAGTTTTTGTTTCATAGTTGTCAAAGCATTCTTAAATGTTTGATTTTCTT- |                                                       |                              |        |        |        |        | 74003 |
| Donkey      | -                                                                                      | TTTTATATACATTGTAAGTAGCATTTTA- - - CA-                                        | GTGCTTCATAGTTAAACAAAGCATTTCCAAATATTTTTTTTTTCT-        |                              |        |        |        |        | 83420 |
| Cat         | CTTT                                                                                   | TATGTACATTGTAAGTAGCATTTAA- - - - - - - - - - -                               | AAAA- - - - - - - - - - -                             | ATATTTCTCACATGTTTCATTTTTTTT- |        |        |        |        | 79981 |
| Ferret      | - - - - -                                                                              | TGTAAGTAACATTTTA- - - - - - - - - - -                                        | CAAAGC- ATTAAGCTTTCTCAGATGTTTCATTTTTTTT-              |                              |        |        |        |        | 82755 |
| Lion        | CTTT                                                                                   | TATGTACATTGTAAGTAGCATTTAA- - - - - - - - - - -                               | AAAA- - - - - - - - - - -                             | ACATTTCTCAAGTGTTTCATTTGTTT-  |        |        |        |        | 77682 |
| Vaquita     | TTTT                                                                                   | TATAAACTTTGCGAGTAGCATTTTACAGTTTTTGTTTCATAGTTGTCAAAGCATTCTTAAATGTTTGATTTTCTT- |                                                       |                              |        |        |        |        | 75292 |
| Pig         | TTTT                                                                                   | TATATCCTTTGTGAGTAGCATTTT- - - - -                                            | CCCATGCTTCAGAGTTGACAAAACAGTCTCAAATATTTAAATTTTTT-      |                              |        |        |        |        | 75335 |

| Majority    | - - - CATCACT- - - - GTGTGAGCTGTGGGTGGCATTACCCT- CAT- - - - ATAAAGGATAXACAGTCATTATGGTTGAGAAG |                                                   |                                                                     |                                        |             |        |        |        |       |
|-------------|----------------------------------------------------------------------------------------------|---------------------------------------------------|---------------------------------------------------------------------|----------------------------------------|-------------|--------|--------|--------|-------|
|             | 107450                                                                                       | 107460                                            | 107470                                                              | 107480                                 | 107490      | 107500 | 107510 | 107520 |       |
| Human       | - -                                                                                          | CCCTAATT- - - -                                   | GTTTGAGGTATGGGTGGCATTGTGTC- -                                       | ATTTAAATAAGGGATGCATAGTCTTTATGGTTGGTAAT |             |        |        |        | 87057 |
| PolarBear   | -                                                                                            | CTCATACCCACAGTGTGAGCTGTGGGTGGCATTACCCTTCAT- - - - | ATAAAGTATATACAAGCATCATGGTTGAGAAG                                    |                                        |             |        |        |        | 44818 |
| Cow         | - - -                                                                                        | TGCC- - T- - - -                                  | GGAGAAACCCAGGGACGGAGGAGCCT- GGT- - - - - - - - - - -                | GGGCTGC- - - - - - - - - - -           | CGTCTGTGGGG |        |        |        | 81904 |
| Dog         | TCT                                                                                          | CATCAGT- - - -                                    | ATGGGAGCTGTGGG- GGTATTACCCT- CAT- - - -                             | ATAAAGGATATATAGTGGTTATGGTTGGGAAG       |             |        |        |        | 74981 |
| BelugaWhale | - - -                                                                                        | CCTCATT- - - -                                    | GTGTGAGCTGTGGGTGGCATTACCCT- CATGTAATAAAGGATACGTAATCATTACAGTTGAGAAG  |                                        |             |        |        |        | 74075 |
| Donkey      | - - -                                                                                        | CATCACC- - - -                                    | TTATGATCTGTGGGTAACATTTCCCT- CATATAAATAAGGGAT- - - - -               | CATTATGGTTGAGAAG                       |             |        |        |        | 83485 |
| Cat         | -                                                                                            | CTCATCACT- - - -                                  | GTGTGAGCTGTGGATGACATTACCCT- CAT- - - -                              | GTAAAGGATTTACAGTTATCATGGTTAAGAAG       |             |        |        |        | 80051 |
| Ferret      | - - -                                                                                        | CATCACT- - - -                                    | GTGTGAGCTGTGGGTGGCATTACCCTTCAT- - - -                               | ATAAAGGATATATAGGCATCATGGTTGAGAAG       |             |        |        |        | 82824 |
| Lion        | -                                                                                            | CTCATCACT- - - -                                  | GTGTGAGCTGTGGATGACATTACCCT- CAT- - - -                              | GTAAAGGATTTACAGTTATCATGGTTAAGAAG       |             |        |        |        | 77752 |
| Vaquita     | - - -                                                                                        | CCTCATT- - - -                                    | GTGTGAGCTGTGGGTGGCATTACCCT- CATGTAAAGAAAGGATACGCAATCATTACAGTTGAGAAG |                                        |             |        |        |        | 75364 |
| Pig         | - - -                                                                                        | TCTCATT- - - -                                    | GTGTGAGCTATGGGTAGCATTACCCT- CATATAAATAAGGGATGCACAACATTATGTTTGAGAAG  |                                        |             |        |        |        | 75407 |







Dienstag, 3. Mai 2022 08:40

| Majority    | T C- TCTGAGCTCTCTG- - - - XGGTTTCTCTT- - - CTTCTTATAAGGACACTAGTCTTATTGGATXAGGGCCTCAXCCTT               |       |
|-------------|--------------------------------------------------------------------------------------------------------|-------|
|             | 107850 107860 107870 107880 107890 107900 107910 107920                                                |       |
| Human       | T CCACTGTGCAAGCACGTTAAGAGTCTCTT- - - - - CCCCTTGTAAAGGATCCTAGTCTGTGAATCAGGGCTTTACCCTT                  | 87420 |
| PolarBear   | T CCTCTGAGTTCTCTG- - - - - GGTTTCTCTT- - - CCTCTTATAAGGACACTAGTCTAATTGGATGAGGGCCTCATCCGC               | 45138 |
| Cow         | T- - - - - CAGTCCTATA- - - - - TGACTCTTTGC- - - - - AACT- - - - - CCA- - - - - TGGA CTATAGCCT- - - - - | 82110 |
| Dog         | - - - - - T- - - - - CTTCTTATAAGGACACTAGTCTAATTAGATGAGGGCCTCATCCTT                                     | 75103 |
| BelugaWhale | TT- TCTCAGCCTCTGAGGCTCTGATTTCTCTTCTGTACTTATAAGGACACCAGTCTTATTGGATTAGGGCCTCACCCAT                       | 74442 |
| Donkey      | T CCTCTGAGCTCTCTGG- - - - - TATCTTTTCTC- - - - - TTTTATAAGGACACCAGTCTTACTGGATTAGAGCTC- ACCCTT          | 83845 |
| Cat         | T CCTCTGAGCTCTCTG- - - - - GGTTTCTCTTCTCTTCTTCTAAGGACACTGGTCTTACTGGATGAGGGCCTCATCCTT                   | 80370 |
| Ferret      | T- - - - - TGAGCTCACTG- - - - - GGTTTCTCTC- - - - - CCTCTTATAAGGACACTGATCTAACTGAATGAGGACCTCATCCTT      | 83125 |
| Lion        | T CCTCTGAGCTCTCTG- - - - - GGTTTCTCTTCTCTTCTTCTAAGGACACTGGTCTTACTGGATGAGGGCCTCATCCTT                   | 78067 |
| Vaquita     | TT- TCTCAGCCTCTGAGGCTCTGATTTCTCTTCTGTACTTATAAGGACACCAGTCTTATTGGATTAGGGCCTCACCCAT                       | 75725 |
| Pig         | TT- GCTCAGCCTTCGA- - - - - TAGCTCTTCTC- - - - - TACTTGCAAGAACACCAGTCTGTGGATTAGGGCCTCACCCCTT            | 75726 |

| Majority    | A- TGACCTCATTTAACCTTAATTACCTCCTT- AAAGGCCCTGTCTCCAGATA- - GTCACATTG- - GGATTAGAGCTTCAA |       |
|-------------|----------------------------------------------------------------------------------------|-------|
|             | 107930 107940 107950 107960 107970 107980 107990 108000                                |       |
| Human       | AATGACCACATTTAACCTTAATTACCTCCTT- AAAGGTCTGTTTTTAAGTACAGTTACATTG- GGGGTTAGGACTTCAA      | 87498 |
| PolarBear   | A- TGACCTCATTTAGCCTTCATTATCTCTTTAAAAGTCTGGTCTTTTGATG- - GTCATATTGTAGGATTAGAGCTTCAG     | 45215 |
| Cow         | - - - - - ACCAGGCTCCT- - - - - CTGTCCCTGAAAT- - GTTCCA- - - - -                        | 82140 |
| Dog         | A- TGACCTCATTTAACCTTTTCAATTATCTCCCTTAAAGTCCCTGTCTTCAGATG- - GTCATTTTGCAGGATTAGAGCTTCAG | 75180 |
| BelugaWhale | G- TGACCTCATTTAACCTAAATTACCTCCTT- AAAGGCCCTGCCTCCAGGTA- - GTCACATTGAGGGATTAAGCTTCCA    | 74518 |
| Donkey      | A- TGACCTCATTTAACCTTAATTACTTCTT- GAAGGCCCTGTCTCCAAATA- - GTCATGTTGAAGGGTTAGAGATTTAT    | 83921 |
| Cat         | G- TGACCTTATTTAACCTTCA- - - - - CTATCTCCT- - - - - TAGAGCTTCAA                         | 80410 |
| Ferret      | A- TGACCTCATTTAACCTTCA- - - - - AAGTCCCTGTCTTCT- - - - - A- - - - - GGATTAGAGTTTCAG    | 83176 |
| Lion        | G- TGACCTTATTTAACCTTCA- - - - - CTATCTCCT- - - - - TAGAGGTTTCAG                        | 78107 |
| Vaquita     | G- TGACCTCATTTAACCTAAATTACCTCCTT- AAAGGCCCTGCCTCCAGGTA- - GTCACATTGAGGGATTAAGCTTCCA    | 75801 |
| Pig         | A- TGACCTCATTTAACCTAAATTGCCTCCTT- AAAGGCCCTGTCCCCAGATA- - GTCACATTGACAGGTTAGAGCTTTAA   | 75802 |





Dienstag, 3. Mai 2022 08:40

|             |                                                                                                             |       |
|-------------|-------------------------------------------------------------------------------------------------------------|-------|
| Majority    | GAATTTTAAAATTTAGTATGCTTTATTTCTGGGCTCTGTTCTCATTT- - - - TGGTTTTTCATAGGACTCTATTTGAAAT                         |       |
|             | ----- ----- ----- ----- ----- ----- -----                                                                   |       |
|             | 108330      108340      108350      108360      108370      108380      108390      108400                  |       |
| Human       | - - - - - T- - - - CTATGGTGTACT- - ATTTAGTA- TGGTGTACTAA- - - - - AAAGATTATCA- - - AACTTGGTATTTAAAA         | 87842 |
| PolarBear   | GAATTTTAAAATTTAATATGCTTTATTTCTGGGCACTGTTCTTTT- - - - - - - - - GTTTTTCATACGACT- - GTTTGGAAAT                | 45527 |
| Cow         | - - - - - - - - - - - - - - - TATTCTTTTCTTCT- - - TTTTCTGCTTATGTACACTTGTGT- - - - - - - - - ACTCTGGTTAGGGAT | 82341 |
| Dog         | GACATTTGAAAATGTAATATGCTTTATTTTTGGGCCCTATTTTCCTTT- - - - - TGGTTTTTCATAGGACTCTATTTGAAAT                      | 75489 |
| BelugaWhale | AATTTTTTTAAATGTAGTATACGTTTTTTATGGGCTCTGTTCTCATTCTTTTTGATTTTTACGGGACTCTGTTTGGAAAT                            | 74904 |
| Donkey      | GACTTAAAAAATTTTAGTATGCTTTGTTTTCTGGGCTCTGTTCTC- - - - - - - - - TGATTTTCATGGAACCTCTATTTGGAATT                | 84294 |
| Cat         | GAATTTAAAAAATTTAGTATGCTTTGTTTTGGGCCCTGTTCTCCCTT- - - - - TGGTTTTTCATAGGACTCTATTTGAAAT                       | 80743 |
| Ferret      | GAATTTTAAAATTTAATATGCTTTATTTCTGGGCACTGTTCTCCTTT- - - - - TGGTTTTTCATAGGACTCTATTTGGGAGT                      | 83486 |
| Lion        | GAAT- - AAAAATTTAGTATG- - - - - TTTTGGGCCCTGTTCTCCCTT- - - - - TGGTTTTTCATAGGACTCTATTTGAAAAT                | 78433 |
| Vaquita     | AATTTTTTTAAAATGTAGTATACGTTTTTTATGGGCTCTGTTCTCATTCTTTTTGGTTTTTCATGGGACTCTGTTTGGAAAT                          | 76187 |
| Pig         | AACTTAA- AAAATGTAATATGCTTTGTTTTCTGGGCTCTGTTCTCATTCTTACTGGTTTTTATGGGATTCTATTTAAAAAT                          | 76192 |

|             |                                                                                                                                       |       |
|-------------|---------------------------------------------------------------------------------------------------------------------------------------|-------|
| Majority    | ACTCATTGTTTTATGATATAGGCAGA- - - - - - - - - - - - - - - - - - - - - - - - - TXTTTTTAT- - - - - - - - - GCTTAGAAA- - - - - -           |       |
|             | ----- ----- ----- ----- ----- ----- -----                                                                                             |       |
|             | 108410      108420      108430      108440      108450      108460      108470      108480                                            |       |
| Human       | AGTTA- - GCTATAT- - - - - A- - - - - - - - - - - - - - - - - - - - - - - - - C- TTTTTACAAGA- - - - - GACATGTAAAGCAGA- -               | 87882 |
| PolarBear   | ACTCATTGTTTCATGATACAGGTAG- - - - - T- - - - - - - - - - - - - - - - - - - - - - - - - TTTTTTTTTAT- - - - - - - - - GCTTAGGCA- - - - - | 45573 |
| Cow         | AGTCATTGTCAT- - - - - - - - - - - - - - - - - - - - - - - - - TATTTTTAT- - - - - - - - - G- - - - - - - - - - - - -                   | 82363 |
| Dog         | AACT- - CATTTTCATGATATAGGCAGGTTTTT- - - - - - - - - - - - - - - - - - - - - - - - - TTGTTTTTGT- - - - - - - - - TTTTAAATGCCTAGGA      | 75545 |
| BelugaWhale | ACTCATTGTTTTATAATATAGGCAGA- - - - - - - - - - - - - - - - - - - - - - - - - TGTTTTTAT- - - - - - - - - GCTCAGCAA- - - - -             | 74948 |
| Donkey      | ACTCATTGTTTTGTAATTTAAGCAGA- - - - - - - - - - - - - - - - - - - - - - - - - TGTTTTTAT- - - - - - - - - GCTTAGGAA- - - - -             | 84338 |
| Cat         | ACTCATTGTTTTATGGTATAGGCAGATAAATTTTTTTTTTTAATTTTTTTTTTTAACATTTATTTATTTTTGAGACAGAGAG                                                    | 80823 |
| Ferret      | ACAA- - - - - - - CATGAAGGAGCTA- - - - - - - - - - - - - - - - - - - - - - - - - CTACTCTTTGA- - - - - - - - - ACTTTAGTA- - - - -      | 83523 |
| Lion        | ACTCATTGTTTTATGGTATAGGCAGATATATATTTAAAAAAAATTTTTTTTTAACATTTATTTATTTTTGAGACAGAGAG                                                      | 78513 |
| Vaquita     | ACTCATTGTTTTATAATATAGGCAGA- - - - - - - - - - - - - - - - - - - - - - - - - TGTTTTTAT- - - - - - - - - GCTCAGAAA- - - - -             | 76231 |
| Pig         | ACTCATTGTTTTATGATAGAGGCAAA- - - - - - - - - - - - - - - - - - - - - - - - - TGTTTTTAT- - - - - - - - - GCTCAGGAA- - - - -             | 76236 |

Dienstag, 3. Mai 2022 08:40

| Majority    | ----- GTAGTATGGG----- AGAAATAAACAGCATGXTAAAGAGAT- CATAG- - GTATTTAAGTGT |        |                                  |        |                          |        |              |        |       |
|-------------|-------------------------------------------------------------------------|--------|----------------------------------|--------|--------------------------|--------|--------------|--------|-------|
|             | 108490                                                                  | 108500 | 108510                           | 108520 | 108530                   | 108540 | 108550       | 108560 |       |
| Human       | ---- AGAATATGAA-----                                                    |        | A-- GATTGAAAGGAAAAGGATG-         |        | TAAAGAGATACTAAT--        |        | ATACTGGACAGA |        | 87939 |
| PolarBear   | ---- GTGGTATGGG-----                                                    |        | ----- GGAAATAAC- AGAATT---       |        | AAGAGAT- CATA--          |        | GTGTTTAATCGT |        | 45621 |
| Cow         | ---- TACTTT-----                                                        |        | ----- ATAAGAAGCCTTTTACAGTGT      |        | TTTCATAG- - TTGACAAAGCAT |        |              |        | 82409 |
| Dog         | C-- ATAGTATGGG-----                                                     |        | ----- GGAAATAAGGAGAATT---        |        | AAAAGAT- ACTAT--         |        | GGGTTTAAATGT |        | 75596 |
| BelugaWhale | ---- GTAGTATGGG-----                                                    |        | ----- AGAAATAAACGGCAAGGTATAGT--- |        | CAGTA- - GTATACAAGTGT    |        |              |        | 74998 |
| Donkey      | ---- GTAGTATGGG-----                                                    |        | ----- AGAAATAAACAGCAAGGAAA       |        | ACTAAGAGACAATAGTGT       |        | TTTAAATGT    |        | 84394 |
| Cat         | A- - CAGAGCATGAGCAGGGGAGGGT                                             |        | CAGAGAGAGAGGGAGACACAGA           |        | ATCTGAAACAGGC- TCCAG-    |        | ACTCTGAGCTGT |        | 80898 |
| Ferret      | ---- GAAGAATT-----                                                      |        | ----- TT-- AACAGA-- - ATA--      |        | CCATTTAAGGAT             |        |              |        | 83554 |
| Lion        | AGACAGAGCATGAGCAGGGGAGGGT                                               |        | CAGAGAGAGAGGGAGACACAGA           |        | ATCCGAAACAGGC- TCCAG-    |        | GCTTTGAGCTGT |        | 78590 |
| Vaquita     | ---- GCAGTATGGG-----                                                    |        | ----- AGAAATAAACGGCAAGGTATAGT--- |        | CAGTA- - GTATACAAGTGT    |        |              |        | 76281 |
| Pig         | ---- GTAATATGGG-----                                                    |        | ----- AGGAATAAACAGCATGGAAT       |        | ATTGATACATAG- - TTATTCAA |        | ATGT         |        | 76290 |

| Majority    | GAAT- - - GAGATTGTTGCAAATCTTAAAG----- GCC----- ATGTTAAATCATT |              |                       |        |                    |          |                  |        |       |
|-------------|--------------------------------------------------------------|--------------|-----------------------|--------|--------------------|----------|------------------|--------|-------|
|             | 108570                                                       | 108580       | 108590                | 108600 | 108610             | 108620   | 108630           | 108640 |       |
| Human       | TAGT-----                                                    | AAGCAAGACAAA | CTTAAAT-----          |        |                    |          | ACCTTTATTAA--    |        | 87974 |
| PolarBear   | GAAT- - - TAGATTGTTGCAAACCT                                  |              | CAGAG-----            |        |                    | GCC----- | ATGTTAAATCAT- -  |        | 45662 |
| Cow         | -----                                                        | TCTCAA-      | -----                 |        |                    |          | TGTTTGATTTCTT    |        | 82429 |
| Dog         | GAAT- - - GAGATTGTTGCAAACCT                                  |              | TGGAG-----            |        |                    | GCC----- | ATGTTAAATTGGAT   |        | 75639 |
| BelugaWhale | GAAT- - - GGGATTGTTGCAAATCT                                  |              | TAGAG-----            |        |                    | GCC----- | ATGTTAAATCATT    |        | 75041 |
| Donkey      | GAAT- - - GGGATTGTTGCAAGT                                    |              | CCTCTAAG-----         |        | AGA- AGCC-----     |          | ATGTTAAATGATTT   |        | 84441 |
| Cat         | CAGCCCAGAGCCCGATGCGGGGCT                                     |              | CGAACTCAGGGACCGCAAGAT |        | CATGACCTGAGCCGAAGT |          | CGGGCACCCA       |        | 80978 |
| Ferret      | AACA- - - TATACAAATT- -                                      |              | ATTCTTAA-----         |        |                    |          | ACATCGAAT- - - - |        | 83586 |
| Lion        | CAGCCCAGAGCCCGATGCGGGGCT                                     |              | CGAACTCATGGACCGCGAGAT |        | GATGACCTGAGCCGAAGT |          | CGGACACCCA       |        | 78670 |
| Vaquita     | GAAT- - - GGGATTGTTGCAAATCT                                  |              | TAGAG-----            |        |                    | GCC----- | ACGTTAAATCATT    |        | 76324 |
| Pig         | GAAT- - - GGGATTGTTGAAAAT                                    |              | CTTAAAG-----          |        |                    | GCC----- | ATGTTAAATCATCC   |        | 76333 |

Dienstag, 3. Mai 2022 08:40

| Majority    | T-----A-TTTTAAAAXXTA-----TAAACATTAAGATGTTTCAAT                                   |        |        |        |        |        |        |        |       |
|-------------|----------------------------------------------------------------------------------|--------|--------|--------|--------|--------|--------|--------|-------|
|             | 108650                                                                           | 108660 | 108670 | 108680 | 108690 | 108700 | 108710 | 108720 |       |
| Human       | -----CTTAAGACAGAAT-----TGATAAAGGATTTAGTTCACT                                     |        |        |        |        |        |        |        | 88008 |
| PolarBear   | -----TTGAGACCACAGTT-----TTAAAATTTGCAAATATTGAT                                    |        |        |        |        |        |        |        | 45697 |
| Cow         | T-----TTTCTCATTGTG-----TGAAGTGTGGTGGTGTCTGT                                      |        |        |        |        |        |        |        | 82463 |
| Dog         | G-----TTTTAAGAATAATT-----TGTGTATTATTTTAAAATGAC                                   |        |        |        |        |        |        |        | 75675 |
| BelugaWhale | TA-----GA-----CTAGAGTTTTAAAATTTG-----CAAACATTAAGTTGTTTCAAT                       |        |        |        |        |        |        |        | 75084 |
| Donkey      | C-----A----GAGTTTCAAAGTTTG-----TAAATGTTAAGATGTTTCTTT                             |        |        |        |        |        |        |        | 84479 |
| Cat         | G-----GCGCCCCTAGGCAGATATTTTTATGTTTCGGAAGTAGTATGGGGGAAATAAAGAACATTAAGAGATAGT      |        |        |        |        |        |        |        | 81048 |
| Ferret      | -----TTAAGAAAACA-----CTAAAATAGGCATGGTAGAAT                                       |        |        |        |        |        |        |        | 83618 |
| Lion        | GAACCAACCAGGCGCCCCTAGGCAGATATTTTTATGTTTAGGAAGTAGTATGGGGGAAATAAAGAACATTAAGAGATAGT |        |        |        |        |        |        |        | 78750 |
| Vaquita     | TA-----GA-----CTAGAGTTTTAAAATTTG-----CAAACATTAAGATGTTTCAAT                       |        |        |        |        |        |        |        | 76367 |
| Pig         | TA-----GA-----CCAGAGTTTTACAACCTTG-----CCAACATTGAGATGTTTCATT                      |        |        |        |        |        |        |        | 76376 |

| Majority    | T-----TTTAACCT-XTTTAATTXATATXXTAGXGTTTXX-XTAAATTATTTATTTXXXGAXTXATAAAATTTGTA     |        |        |        |        |        |        |        |       |
|-------------|----------------------------------------------------------------------------------|--------|--------|--------|--------|--------|--------|--------|-------|
|             | 108730                                                                           | 108740 | 108750 | 108760 | 108770 | 108780 | 108790 | 108800 |       |
| Human       | A-----GAAAGATATAACAGTTTATGTATATGTGTGCCTAGTGAAATAGCC-----TCAAATATATA              |        |        |        |        |        |        |        | 88066 |
| PolarBear   | T-----TTTT-----TTAATGAAGATTCTACCATCTA--GTGTTTTCTT-----AAATTGG--                  |        |        |        |        |        |        |        | 45741 |
| Cow         | T-----GTTCAGTCGCTA-AGTCGTGTTC-----AGTTCTCTGCATGCCAGGCTCCTCTGTCT-TC               |        |        |        |        |        |        |        | 82517 |
| Dog         | C-----TTTAACAGAATTCTGATAAAATCCCAAGGAGTA--GTAGTTTTTTCATG-----TTAAACTG--           |        |        |        |        |        |        |        | 75731 |
| BelugaWhale | TTCT----ACCACAACCT-ATTTAATTGATA--CTGGAATTTTC-TTAAATTGGATATTTTAGGAATAATATAATTTGTA |        |        |        |        |        |        |        | 75156 |
| Donkey      | A-GTAAACTTTTTACCATAGCTTATTTAATTGATACAGTATTTTCTTAAATCAGATATTTTAGGAATAATATAATTTGTA |        |        |        |        |        |        |        | 84558 |
| Cat         | A-----TGTGAACGAGATTGCTGCAAATCTCAGAGACCATGCTAAATCATTTTAGACCAGAGTTTTAAAATTTGCA     |        |        |        |        |        |        |        | 81119 |
| Ferret      | G-----TTTA-----TTTAAAAAATTCTTAATGTTT--GCAAATCTT-----AAACTGT--                    |        |        |        |        |        |        |        | 83661 |
| Lion        | AGTGTTTAAATGTGAACGAGATTGCTACAAATCTCAGAGGCCATGCTAAATCATTTTAGACCAGAGTTTTAAAATTTGCA |        |        |        |        |        |        |        | 78830 |
| Vaquita     | TTCT----ACCATAACCT-ATTTAATTGATA--CTGGAATTTTC-TTAAATTGGATATTTTAGGAATAATATAATTTGTA |        |        |        |        |        |        |        | 76439 |
| Pig         | TCG----ACCATAGCCT-ATTTAATTGATACACTCGTGTTTTC-TTAAATTGGCTATTTTAGGAGTAATACAATCTGTA  |        |        |        |        |        |        |        | 76449 |



Dienstag, 3. Mai 2022 08:40

| Majority    | AATTATCTTTTGATXTAXT- ATACTGATTCTAAAGGX- T- X- - - - - X- - X- - - AAXXTACCAAAGAGTTGATCXT |                                            |                                |           |           |                      |                        |        |  |
|-------------|------------------------------------------------------------------------------------------|--------------------------------------------|--------------------------------|-----------|-----------|----------------------|------------------------|--------|--|
|             | 108810                                                                                   | 108820                                     | 108830                         | 108840    | 108850    | 108860               | 108870                 | 108880 |  |
| Human       | AATAATAAGTAGATAGA                                                                        | ACTACAGGTAGACTT                            | GAGCA- - - - -                 | - - - - - | - - - - - | AATCTATTATAGT        | GGTGG- - - -           | 88121  |  |
| PolarBear   | - ATGTTTTAATAATTT                                                                        | GTGTATATTATCTTT                            | AAATGA- - - - -                | - - - - - | - - - - - | A- - - -             | CTTTAACAGAAGTTTAA- CAA | 45798  |  |
| Cow         | CACTATCTACCAGAGT- - - -                                                                  | TTGTTCAAATTCACG- - -                       | TCCTTTAAATCAGT- - - - -        | - - - - - | - - - - - | GATGCTAATGATCTCGTCCT |                        | 82582  |  |
| Dog         | - GTTTTTATTTAATGTATAGCTGCTTTCTCAA                                                        | AAGTA- - - - -                             | - - - - -                      | - - - - - | - - - - - | A- - - -             | AGTTACTTAGTTCTTCA- TAA | 75788  |  |
| BelugaWhale | AATTATGTTTTGAAGTAGT- GTACTGATCTTCAATGGT                                                  | TAAAGTAAATGAGTTCTAAGGAAATGTCAAAGAGTAGTTCCT |                                |           |           |                      |                        | 75235  |  |
| Donkey      | AATTATCTTTAAAAATAGT- ATACTGGTCCTTGAAGACTTA- - - - -                                      | - - - - -                                  | GATTCTAGCAAATGCCAAAGAGTAGTTCCT |           |           |                      |                        | 84629  |  |
| Cat         | AACHTTAAGGTGTTTCTTTAATAATCTTTCTACCGTGGCTT- - - - -                                       | - - - - -                                  | ATTTAATTTAGCGTTTTCTTAAATTG     |           |           |                      |                        | 81186  |  |
| Ferret      | - GGTCTCAAGTGATTTA- - -                                                                  | ACATGGCCTCTAAGG- - - - -                   | - - - - -                      | - - - - - | - - - - - | TTTGCAACAATCTCA- TTC |                        | 83710  |  |
| Lion        | AACHTTAAGGTGTTTCTTTAATAATCTTTCTACCATGGCTTTCTACCATGGCTTATTTAATTTAGCGTTTTCTTAAATTG         |                                            |                                |           |           |                      |                        | 78910  |  |
| Vaquita     | AATTATGTTTTGAAGTAGT- GTACTGATCTTCAACGGT                                                  | TAAAGTAAATGAGTTCTAAGGAAATGTCAAAGAGTAGTTCCT |                                |           |           |                      |                        | 76518  |  |
| Pig         | AATTATCTTTAAAAATAGTATAACTGATCTTCAAG- - -                                                 | TAAATAAATCGATTATACCAAATACCAAAGAGTAGTTCCT   |                                |           |           |                      |                        | 76526  |  |

| Majority    | T- - TGTTAAAAX- AATA- - CTAGTTTCTCCXA- TXATATTTTCAA- - - CTGX- - ACAAXAA- XXXX- - - CCATXXTTATT |                                     |                            |                              |                  |                     |           |        |  |
|-------------|-------------------------------------------------------------------------------------------------|-------------------------------------|----------------------------|------------------------------|------------------|---------------------|-----------|--------|--|
|             | 108890                                                                                          | 108900                              | 108910                     | 108920                       | 108930           | 108940              | 108950    | 108960 |  |
| Human       | - - ATTTCA- - - - -                                                                             | A- - - - -                          | TTCACHTTTTCTGAATTACATGTCAA | - - -                        | CTGACC           | AAAAAAGA- - - - -   | CAAATCAAC | 88179  |  |
| PolarBear   | A- - ATACCAAAG- AGTA- -                                                                         | GTAGTTCCTTC- - - - -                | ATGTTAAA- - -              | CTGG- -                      | TTTTTAT- - - - - | - - - - -           | TTA       | 45845  |  |
| Cow         | C- - TGTC                                                                                       | - - - - -                           | CCCCCTTCTCC- - -           | TTTTGCTTTCA- - - - -         | - - - - -        | GTCTTT- CCACATTACCC |           | 82627  |  |
| Dog         | T- - AGTCCTTGA- TCTA- -                                                                         | CTAAGTTATCT- - - - -                | CTCT- - - - -              | C- - - -                     | ACAAAAA- - - - - | - - - - -           | GAT       | 75828  |  |
| BelugaWhale | - - - TGTTAAAAT- AATTATCTTGTTTCTCCAATTCATATTTTCAAGA                                             | ACTACTTACAAGAAAGCCTCAACTGTTCTTATT   |                            |                              |                  |                     |           | 75311  |  |
| Donkey      | TCATGTTAAAAACAATTATCTGGCTTCTCCAATTAATATTTTAAAGCACTGTTTACAAAAATACTC- - -                         | CTGTTTTTATT                         |                            |                              |                  |                     |           | 84706  |  |
| Cat         | T- - TGTTTTAAG- AGTA- -                                                                         | ACGTGTTATCCTA- AATGAACTTTAA- - -    | CAGA- -                    | ATTTTAAACAAAATA- CCAAAGAGTAT |                  |                     |           | 81254  |  |
| Ferret      | A- - CATTTAAAC- ACTA- -                                                                         | CTA- -                              | TCTTTT- - - - -            | AATT- - - - -                | C- - - -         | TCTGTAT- - - - -    | TTC       | 83748  |  |
| Lion        | T- - TGTTTTAAG- AGTA- -                                                                         | ACATATTATCCTA- AATGAACTTTAA- - -    | CAGA- -                    | ATTTTAAACAAAATA- CCAAAGAGTAT |                  |                     |           | 78978  |  |
| Vaquita     | - - - TGTTAAAAT- AATTATCTTGTTTCTCCAATTCATATTTTCAAGA                                             | ACTACTTACAAGAAAGCCTCAACTGTTCTTATT   |                            |                              |                  |                     |           | 76594  |  |
| Pig         | T- - TGTTAAAAT- AATTGTCTTGTTTATCCAGCTCATATTTTCAAGA                                              | ACTACTTA- AAAAAAGCCTTT- TCTTTTTTATT |                            |                              |                  |                     |           | 76601  |  |



Dienstag, 3. Mai 2022 08:40

| Majority    | TTGGCTTTTCACATX- - XACX- X- - XXTGXATAGTGAAGAACTCT- AAGTCGCACTTTXGAGGTATTGCTGXTCTCACAAXA |        |        |        |        |        |        |        |       |
|-------------|------------------------------------------------------------------------------------------|--------|--------|--------|--------|--------|--------|--------|-------|
|             | 109130                                                                                   | 109140 | 109150 | 109160 | 109170 | 109180 | 109190 | 109200 |       |
| Human       | -----                                                                                    |        |        |        |        |        |        |        | 88279 |
| PolarBear   | TTGGCTTTTCACAGAACTACCCTATTCTGAATAGTGAAGAACTCT- CAGTCACACTTTGAGGTCTTGCTGGTCTCCCAAAA       |        |        |        |        |        |        |        | 46070 |
| Cow         | -----                                                                                    |        |        |        |        |        |        |        | 82728 |
| Dog         | TTTATTTATTCATGA- GACACA- - CACAGAGAGAGAGAGATA- GAGAGGCA- - - GAGACACAGGCAAAGAGAGAAGC     |        |        |        |        |        |        |        | 76044 |
| BelugaWhale | TTGGCTTTTCACCTTCTTCATTAC- - TGTGAGTAATGGAGAACTCT- AAGTCGCACTTTGAGGTATTGCTGGTCTCATAGAA    |        |        |        |        |        |        |        | 75531 |
| Donkey      | TTGGCTTTTCACCTTC- - TACTGT- - TATGAATAATGAAGAACTCTTAAGTTGTACTTTGAGGCTTTGCTGGTCTCACAAAA   |        |        |        |        |        |        |        | 84932 |
| Cat         | TTGGCTTTTCACAGAGGAACTGT- - CATGCATAGTGAAGAACTCT- AAGTCACACTTTAGAGGTATTGCTGAGATTTCAAGA    |        |        |        |        |        |        |        | 81489 |
| Ferret      | TTTGTCTTT- TAAG- - TGC- - - - - ATATGGGAATATTTA- CAAAAGCA- - - - - GGCTTCAGTAAAGCAAAGAGT |        |        |        |        |        |        |        | 83919 |
| Lion        | TTGGCTTTTCACAGAGGAAACCGT- - CACACATAGTGAAGAACTCT- AAGTCACACTTTGCGGTATTGCCGAGATTTCAAGA    |        |        |        |        |        |        |        | 79213 |
| Vaquita     | TTGGCTTTTCACCTTCTTCATTAC- - TGTGAGTAATGGAAACTCT- AAGTCGCACTTTGAGGTATTGCTGGTCTCATAGAA     |        |        |        |        |        |        |        | 76808 |
| Pig         | -----                                                                                    |        |        |        |        |        |        |        | 76741 |

| Majority    | GAG- - - - TTCAAXAGAXCXTXTXCXXX- - - - - GA- - - - - AATAGCAAATGXTATGGAGX- TAATG    |        |        |        |        |        |        |        |       |
|-------------|-------------------------------------------------------------------------------------|--------|--------|--------|--------|--------|--------|--------|-------|
|             | 109210                                                                              | 109220 | 109230 | 109240 | 109250 | 109260 | 109270 | 109280 |       |
| Human       | -----                                                                               |        |        |        |        |        |        |        | 88280 |
| PolarBear   | GAGA- - - TTTCAAGAGATCCCCTCCTTCCCCAAGGAGGGA- - - - - AATAGCAAATTGTATGGAGTATAATG     |        |        |        |        |        |        |        | 46134 |
| Cow         | -----                                                                               |        |        |        |        |        |        |        | 82728 |
| Dog         | AGGCTCCACTCAGGGAGCCTGATGCAGGACTTGATCCCAGG- - - - - ACTCCAGGATCACCTAGGGA- TCCC       |        |        |        |        |        |        |        | 76110 |
| BelugaWhale | GGGAGC- TCTCAATAGACCTTCCACCCAAAAAAGTCAAAAAAAGGAGGGAAAAATAGCAAATGATATGGAGA- AAATG    |        |        |        |        |        |        |        | 75609 |
| Donkey      | GAGAA- - TTTCAAGAGGTCTTTCCTCTTAAAGGAAAGGAGG- - - - - GGAAAATAGCAAATGAAATGATGAAAAATA |        |        |        |        |        |        |        | 85001 |
| Cat         | GA- - - - - TTCCCCTCATCCAATGGAGG- - - - - GA- - - - - AATAGCAAATGGTATGGAGTATAATG    |        |        |        |        |        |        |        | 81539 |
| Ferret      | AAGT- - - ATCCTGTAGACCCTATTCTCT- - - - - GTTGCTCAATT- - - TAGAGT- TGATA             |        |        |        |        |        |        |        | 83966 |
| Lion        | GA- - - - - TTCCCCCATCCAGTGGAGG- - - - - GA- - - - - AATAGCAAATGGTATGGAGTATAATG     |        |        |        |        |        |        |        | 79263 |
| Vaquita     | GGGAGC- TCTCAATAGACCTTCCCCAAAAAAGTCAAAAAGAAAGGAGGGAAAAATAGCAAATGATATGGAGA- AAATG    |        |        |        |        |        |        |        | 76886 |
| Pig         | -----                                                                               |        |        |        |        |        |        |        | 76743 |

Dienstag, 3. Mai 2022 08:41

| Majority    | GGGGAAAA-ATAAATTTAAAA-TTATGATA-XAXXTAAGTCCCTATGCATCAATAATAA- - - CAA- - - - - ATGTAAAGG             |        |        |        |        |        |        |        |       |
|-------------|-----------------------------------------------------------------------------------------------------|--------|--------|--------|--------|--------|--------|--------|-------|
|             | 109290                                                                                              | 109300 | 109310 | 109320 | 109330 | 109340 | 109350 | 109360 |       |
| Human       | -----CA-----GTCACAT                                                                                 |        |        |        |        |        |        |        | 88289 |
| PolarBear   | AGGAAACA-ATAAATTTAAAAATTATGATAGAATCTAAATCCCTATGTAGCAATAATAACAACAA- - - - - ATGTAAAGG                |        |        |        |        |        |        |        | 46207 |
| Cow         | -----ATGATGC                                                                                        |        |        |        |        |        |        |        | 82735 |
| Dog         | AGGAAATA-ATAAATTTAAAAATTTATGATAGAATCTAAGTCCCTATGCACCAGTAATAATAGCAACAACA- ATGTAAAGG                  |        |        |        |        |        |        |        | 76188 |
| BelugaWhale | GGGGAAAATAGAAATTTGAAAGTAATGATA-GAATCAAGTCCAGATGTATCAATAATAA- - - CAG- - - - - ATGTAAAGG             |        |        |        |        |        |        |        | 75679 |
| Donkey      | GGGGAAAATATGAATTTAAAA- - - - - TGAAGTCCAGATGCATTAATAATAG- - - CAA- - - - - ATATAAAGG                |        |        |        |        |        |        |        | 85058 |
| Cat         | GGGGAAAATATAAATTTTTAAAATTAAGATAGAATCTAAGTCCCTATACATCAATAATAACAACAACAGCAAATGTAAAGT                   |        |        |        |        |        |        |        | 81619 |
| Ferret      | ACAAAAAG-ATATATTTAGAAATTTCT- - - - - CAATTAAGTACTATACA- - A- - AGTAG- - - - - AT- - - - - ATGTATAGT |        |        |        |        |        |        |        | 84026 |
| Lion        | GGGGAAAATATAAATTTTTAAAATTTATGATAGAATCTAAGTCCCTATACATCAGTAATAACAACAACAACAAATGTAAAGT                  |        |        |        |        |        |        |        | 79343 |
| Vaquita     | GGGGAAAATAGAAATTTGAAAGTAATGATA-GAATCAAGTCCAGATGTATCAATAATAA- - - CAG- - - - - ATGTAAAGG             |        |        |        |        |        |        |        | 76956 |
| Pig         | -----TAA- - - CAG- - - - - ATGTAATGG                                                                |        |        |        |        |        |        |        | 76758 |

| Majority    | AGTAAATTCATCAGTTAAAA- - - - - GATXXGTTTTTTXAT- - AG- CTGATTTT- - - - - TTAAAAGAGTGTTAT- - - -   |        |        |        |        |        |        |        |       |
|-------------|-------------------------------------------------------------------------------------------------|--------|--------|--------|--------|--------|--------|--------|-------|
|             | 109370                                                                                          | 109380 | 109390 | 109400 | 109410 | 109420 | 109430 | 109440 |       |
| Human       | ACTAAA- - - - - CCATAA- - - - - AGCAAGCTTC- - - - - AG- CTAATTTT- - - - - AAAGAGTATCAT- - - -   |        |        |        |        |        |        |        | 88333 |
| PolarBear   | AGTAAATGCATCAGTGAAAA- - - - - GACAGGTTGTCAGAT- - - - - CTGAGTTT- - - - - TTAAAAGTTTATTAC- - - - |        |        |        |        |        |        |        | 46265 |
| Cow         | TTTAATTT- - - - - TTAATAT- - - - - ACTTGTTTT- - - - - AGTCTGCTTG- - - - - GGCTGCCAT- - - -      |        |        |        |        |        |        |        | 82778 |
| Dog         | AGTAAGTGCATCAGTCAAAA- - - - - GATAGGTTGTCAGATC- TGATTTTTTTT- - - - - TTTTAACTGGTTGC- - - -      |        |        |        |        |        |        |        | 76250 |
| BelugaWhale | AGTAAATTCATCAATTTAAAAGA- - - - - CAGATTTGATTTTTTAAA- AGCAACCTATT- - - - - CTTTACAAGAGATGTGAGT   |        |        |        |        |        |        |        | 75749 |
| Donkey      | AGTAAGTTCATCAGTTAAAAGATTGTCAGATTTGATTTTTAAAATGCTATCTCTTTGCTATTTACAAGAGACATATAAAG                |        |        |        |        |        |        |        | 85138 |
| Cat         | AGTAAATGCATCAGTCAAAA- - - - - GACAGGTCGTCAGAT- - - - - CTGATTTT- - - - - TAAAAGTTCTTTAC- - - -  |        |        |        |        |        |        |        | 81677 |
| Ferret      | A- - - - - CAGTGAAAGT- - - - - GGTGGTTTTTTTTT- - - - - TTTTTTTT- - - - - ATAAACATCTGTT- - - - - |        |        |        |        |        |        |        | 84073 |
| Lion        | AGTAAATGCATCAGTCGAAA- - - - - GGCAGGTCGTCAGAT- - - - - CTGATTTT- - - - - TAAAAGTTCTTTAC- - - -  |        |        |        |        |        |        |        | 79401 |
| Vaquita     | AGTAAATTCATCAATTTAAAAGA- - - - - CAGATTTGATTTTTTAAA- AGCCAC- TATT- - - - - CTTTACAAGAGATGTGAGG  |        |        |        |        |        |        |        | 77025 |
| Pig         | ATTAAATTCATCAGTTAAAAG- - - - - ATTTGCTTTTTTAAAAGTTAGCTGTT- - - - - ATTTACGAGTGACATGAAG          |        |        |        |        |        |        |        | 76825 |

Dienstag, 3. Mai 2022 08:41

| Majority    | ----- AAGA----- A- AGATTTAAAGCACAAAGGATATAGAAAXGTTTAAATGAXAAGG----- XATAAACAAAAGAXAACTTT |                                                                        |                            |                  |        |        |        |        |  |
|-------------|------------------------------------------------------------------------------------------|------------------------------------------------------------------------|----------------------------|------------------|--------|--------|--------|--------|--|
|             | 109450                                                                                   | 109460                                                                 | 109470                     | 109480           | 109490 | 109500 | 109510 | 109520 |  |
| Human       | -----                                                                                    | ACAGACCTCATTCTCTATTGCACAAGTAAGTTAGAATTAATAAC-----                      | AAAAAGATG-----             | 88386            |        |        |        |        |  |
| PolarBear   | ----- AAGA-----                                                                          | A- ACACATAAAGCACAAAGA- TGTGGAAAGGTTGAAAGTAAAAGG-----                   | GATATAAAAAAGATAAATTT       | 46331            |        |        |        |        |  |
| Cow         | -----                                                                                    | AGCAAA-----                                                            | ATACAACAAACTGAGTACTAA----- | AACAACAGAAA----- | 82817  |        |        |        |  |
| Dog         | ----- GAGA-----                                                                          | A- ACTTAAAAAGCACAAAGGATGTGGACAGGTTGAAAGAAAAGGGATATATATATAAAAAGATAAATTT | 76320                      |                  |        |        |        |        |  |
| BelugaWhale | TGCAAAGATGTAGAAAAGATTGAAAGTAAAGGGATATAAAAAGGA- TAATTGACAGAT---                           | AATAAGCAAAAAGAAACTTA                                                   | 75825                      |                  |        |        |        |        |  |
| Donkey      | TGCAAGGATGTGGAAAGGTTTATAGTAAAGGGATATAAAAAGATACATTGGGCAA- -                               | TAGTAAGCAAAGAAAAACATA                                                  | 85216                      |                  |        |        |        |        |  |
| Cat         | ----- AAGA-----                                                                          | A- GCATATAAAGCACAAAGAATGTGGAAAGATTGAAAGTAAAGGGATATAGAAAAGATAGATTAATTT  | 81747                      |                  |        |        |        |        |  |
| Ferret      | -----                                                                                    | TTTAT- CCCCAGG- GGTACAGGTCTGTGAATCACCAGG---                            | TTTACACACTTCATAGCACT       | 84129            |        |        |        |        |  |
| Lion        | ----- AAGA-----                                                                          | A- GCATATAAAGCACAAAGAATGTGGAAAATTTGAAAGTAAAGGGATATAGAAAAGATAGATTAATTT  | 79471                      |                  |        |        |        |        |  |
| Vaquita     | TGCAAAGATGTAGAAAAGATTGAAAGTAAAGGGATATAAAAAGGA- TAATTGACAGAT---                           | AATAAGCAAAAAGAAACTTA                                                   | 77101                      |                  |        |        |        |        |  |
| Pig         | TTCAAAGA-----                                                                            | A- AGATTGAAAGTAAAGG- ATATAGAAAAGATTTATTGGCAAGT---                      | AGTGAGCAAAAAGAAACTTC       | 76895            |        |        |        |        |  |

| Majority    | XG- AX- -- CAXCAAX- - AAGATAAAAX- ----- TTTXTTTA- ----- TG- ----- TGXTTTTAXGX |                                          |                                     |                 |            |             |        |        |  |
|-------------|-------------------------------------------------------------------------------|------------------------------------------|-------------------------------------|-----------------|------------|-------------|--------|--------|--|
|             | 109530                                                                        | 109540                                   | 109550                              | 109560          | 109570     | 109580      | 109590 | 109600 |  |
| Human       | -----                                                                         | CAT-----                                 | ATAAAA-----                         | TCTGTAT-----    | CCTG---    | 88406       |        |        |  |
| PolarBear   | AG- AT---                                                                     | CACCAGG- -                               | AAGATAAAA-----                      | GTTTTTTAT-----  | GTG- ----  | TGTGTGTA--  | 46371  |        |  |
| Cow         | -----                                                                         | TTTATTT-----                             | TCTTAAGT                            | 82832           |            |             |        |        |  |
| Dog         | AG- AT---                                                                     | CACCAGG- -                               | AAGATAAAAAG-----                    | AGTTTTTGGT----- | GTG- ----  | TGTATGTTTGG | 76366  |        |  |
| BelugaWhale | TGTACCTATATTCATTTAAGATAAAGATTATTGATAAAAAGATTTATTAGTTACCCAAGAAGATG- ACAAG- -   | TTTTATGT                                 | 75902                               |                 |            |             |        |        |  |
| Donkey      | TG- -                                                                         | CCCATATTAATTGAAGGTAAGATTATTGAGCACAG- - - | ATTTAGTTCAAAGTAAGTTCGAACAGGTTTTATGT | 85290           |            |             |        |        |  |
| Cat         | AG- AT---                                                                     | CACCAGG- -                               | AAAACAAA-----                       | GTTTTATG-----   | TGGGTGTG-- | 81783       |        |        |  |
| Ferret      | -----                                                                         | CACCAA- -                                | AGCACATAC-----                      | CCTCCCA-----    | G- ----    | TGTCCATA--  | 84161  |        |  |
| Lion        | AG- AT---                                                                     | CACCAGG- -                               | AAAATAAAAC-----                     | AGTTTTATG-----  | TGGGTGTG-- | 79509       |        |        |  |
| Vaquita     | TGTACCTATATTCATTTAAGATAAAGATTATTAATAAAAAGATTTATTAGTTACCCAAGAAGATG- ACAAG- -   | CTTTATGT                                 | 77178                               |                 |            |             |        |        |  |
| Pig         | TGCACCTATATTAATTTAAGATAAAGATTATTCATAAAAAGAT- - -                              | TTTGTTTACCAGGAAGATGGACAACGTTCTTATGT      | 76972                               |                 |            |             |        |        |  |

Dienstag, 3. Mai 2022 08:41

| Majority    | - X- X- - GTGCCTAATGAAATAGCCTCAAATATGTAAATCATAAATGAATAGA- - - - ACTGXA- GGGAGAATTGAGCAA |                                                             |                             |              |                   |        |        |        |       |
|-------------|-----------------------------------------------------------------------------------------|-------------------------------------------------------------|-----------------------------|--------------|-------------------|--------|--------|--------|-------|
|             | 109610                                                                                  | 109620                                                      | 109630                      | 109640       | 109650            | 109660 | 109670 | 109680 |       |
| Human       | - - - - -                                                                               | AGATTTAAAAATAAGTCTCAGTATT- - - - -                          | GCATGAGTCAGAAGT- - - - -    | TTG- - - -   | TTTGTTTG- - - - - |        |        |        | 88457 |
| PolarBear   | - - - - -                                                                               | CTCCCTAATGAAATAGCCTCAAATATGTAAATCATAAATGAATAGA- - - -       | ACTAGA- GGGAGACTT           | GAGCAA       |                   |        |        |        | 46440 |
| Cow         | - TCTG-                                                                                 | GAGACTAGT- AATTAG- - - - -                                  | GTGAC- - AACAGA- - - -      | TTTGT- - - - | GTTTCTAGAGAGGA    |        |        |        | 82880 |
| Dog         | GGGGATGCC                                                                               | CCTAATGAAATAGCCTCAAATATATCAATCATAAATGAATAGATAGA             | ACTAGA- GGGACTCTT           | GAGGAAA      |                   |        |        |        | 76445 |
| BelugaWhale | GTATGTGTGC                                                                              | CCTAATGAAATAGCTTCAAATGTGTAAATTATAAATGGATAGA- - - -          | ACTGCA- GGGAGAATT           | GAGCAA       |                   |        |        |        | 75977 |
| Donkey      | ATATATGTGC                                                                              | CCTCATGAAATAGCCTCAAAGATATAAATCCTAAATGGATAGA- - - -          | TCTACA- GGGAAAAT            | GGAGCAA      |                   |        |        |        | 85365 |
| Cat         | - - - - -                                                                               | CCCCTAATGAAATATCCTCAAATATGTAAATCATAAATGAATAAA- - - -        | ACTGGA- GGAAGAATTG- - - - - |              |                   |        |        |        | 81845 |
| Ferret      | - - - - -                                                                               | ATCCNNNNNNNNNNNNNNNNNNNNNNNNNNNNNNNNNNNNNNNNNNNNNNNN- - - - | NNNNNN- NNNNNNNNNNNNNNNNN   |              |                   |        |        |        | 84230 |
| Lion        | - - - - -                                                                               | CCCCTAATGAAATATCCTCAAATATGTAAATCATAAATGAATAGA- - - -        | ACTGGA- GGAAGAATT           | GAGCAA       |                   |        |        |        | 79577 |
| Vaquita     | GTATGTGTGC                                                                              | CCTAATGAAATAGCTTCAAATGTGTAAATTATAAATGGATAGA- - - -          | ACTGCA- GGGAGAATT           | GAGCAA       |                   |        |        |        | 77253 |
| Pig         | ATCTGTGTGC                                                                              | CCTAATGAAATAGCCTCAAACCTCCCCTGTGGT- - GGTAGA- - - -          | TTTGCTCAAATCTCCCT           | GGAGTT       |                   |        |        |        | 77046 |

| Majority    | TXXTCC- TTATTGAGGGAGATTTCAACACACCTTTCTGAATTATGTCAGGCAGA- - - - - CAAAAAA- - - - CAA |                                                                 |                  |                                    |               |        |        |        |       |
|-------------|-------------------------------------------------------------------------------------|-----------------------------------------------------------------|------------------|------------------------------------|---------------|--------|--------|--------|-------|
|             | 109690                                                                              | 109700                                                          | 109710           | 109720                             | 109730        | 109740 | 109750 | 109760 |       |
| Human       | - - -                                                                               | TTTGTTTTTGAGCCAG- - - -                                         | T- - - -         | GTCTTGCTCTGTCCCCAGGGTGGAG- - - - - | TGCAGTGG- - - | T- -   | G      |        | 88510 |
| PolarBear   | TCTTCTCTT                                                                           | TATACAGAGAAATTTCAACACACCTTTCTGAATTATGTCAGGCAGA- - - - -         | CAAAAAGAGTATCAA  |                                    |               |        |        |        | 46509 |
| Cow         | CTTTC- -                                                                            | TTCCTAGCTT- - - - -                                             | GCAGA- - - - -   | CCAG- - - - -                      |               |        |        |        | 82904 |
| Dog         | TCTTCTCTT                                                                           | TATAGGGAGAGATCCCAACACACCTTTCTGAATTAAGTCAGGCAGA- - - - -         | CATAATA- - - -   | CAA                                |               |        |        |        | 76509 |
| BelugaWhale | TTCACC- ACG                                                                         | AATGGAGGTTTTTATACACCTTGCTGGATTATGTCAGGCAGAAACCC- - -            | CTCCCAAAA- - -   | TCA                                |               |        |        |        | 76049 |
| Donkey      | TCCACCATCAT                                                                         | AGTGGGGATTTCA- - ACCCCTTTCTGAATTATGTCAAGCAGAA- - - - -          | CAAAAAAAAAAATCAA |                                    |               |        |        |        | 85433 |
| Cat         | - - - - -                                                                           | TCAACACACCTTTCTGAATTATTTTCAAGGCATA- - - - -                     | CAAAATGATGATCAA  |                                    |               |        |        |        | 81892 |
| Ferret      | NNNNNNNNNNNNNNNNNNNNNNNNNNNNNNNNNNNNNNNNNNNNNNNN- - - - -                           | NNNNNNNNNNNNNNNNNN                                              |                  |                                    |               |        |        |        | 84299 |
| Lion        | TCTTCCATCACA- - - -                                                                 | GAGATGTCAACACACCTTTCTGAATTATTTTCAAGGCATA- - - - -               | CAAAATGAT- - -   | CAA                                |               |        |        |        | 79639 |
| Vaquita     | TTCACC- ACG                                                                         | AATGGAGGTTTTTATACACCTTGCTGAATTATGTCAGGCAGAAACCCCTCCCCCAAAA- - - | TCA              |                                    |               |        |        |        | 77328 |
| Pig         | CTCTCCATTTAT                                                                        | GGTTTATATATTTTAAACATTTT- CTGAATTATGTTAGGCAGA- - - - -           | CAAAAAG- - -     | TTA                                |               |        |        |        | 77110 |

Dienstag, 3. Mai 2022 08:41

| Majority    | CAAAGATACAAATGXXACAACACAATT-----TTATGCAT---AXAXTTACACAT-X                        |                     |        |        |        |                             |        |        |       |
|-------------|----------------------------------------------------------------------------------|---------------------|--------|--------|--------|-----------------------------|--------|--------|-------|
|             | 109770                                                                           | 109780              | 109790 | 109800 | 109810 | 109820                      | 109830 | 109840 |       |
| Human       | CTATTGT-----                                                                     | GGCTCACTGCAGCC----- |        |        |        | TCGACCTCCCAGGCTTAAGCA---    |        |        | 88552 |
| PolarBear   | CAAAGATACAAATGGTAGGACACAATT-----                                                 |                     |        |        |        | ACCTTAAC---AGAATTGCACATGT   |        |        | 46558 |
| Cow         | -----                                                                            | CTCCC-----          |        |        |        | TTCTCCAT---ATGTCCTCACAC--   |        |        | 82929 |
| Dog         | CAAAGATACAGTTACCTTAAAATTAC-----                                                  |                     |        |        |        | ACATGTAT---AGAACTACACACTT   |        |        | 76557 |
| BelugaWhale | GCAAGACGCAAATGATACAGCACAATTAGATTAACAGAATTACACATGTATAGAATTAGGCATCTAATAGTTACACATCC |                     |        |        |        |                             |        |        | 76129 |
| Donkey      | GAAAGATACAACGACAGAATACGATTACCTTAACACAGTTACATATGTACAGAATTATGCATCTAACAGTTATATATCC  |                     |        |        |        |                             |        |        | 85513 |
| Cat         | CAAGGATACAAATGGTACAACACAATG-----                                                 |                     |        |        |        | ACACATGTAT---AGAATTATACATGT |        |        | 81944 |
| Ferret      | NNNNNNNAGGGAGATCATATGATAGTT-----                                                 |                     |        |        |        | GTCTTTCT---CTGCTTG-----     |        |        | 84341 |
| Lion        | CAAGGATACAAATGGTACAACACAATG-----                                                 |                     |        |        |        | ACACATGTAT---AGAATTATACATGT |        |        | 79691 |
| Vaquita     | GCAAGACGCAAATGATACAGCACAATTAGATTAACAGAATTACACATGTATAGAATTAGGCATCTAATAGTTATACATCC |                     |        |        |        |                             |        |        | 77408 |
| Pig         | ACAAGATACAAATGACATAACACACTT-----                                                 |                     |        |        |        | TTATTCATCTAATAGTCACACAT--   |        |        | 77160 |

| Majority    | A-----AXXCTTTT-----ACACTAXGAACXTTTAXGAACATTG-----A-----XTAAAGCAGGCTTCAGTAA        |        |                                |        |        |                            |        |        |       |
|-------------|-----------------------------------------------------------------------------------|--------|--------------------------------|--------|--------|----------------------------|--------|--------|-------|
|             | 109850                                                                            | 109860 | 109870                         | 109880 | 109890 | 109900                     | 109910 | 109920 |       |
| Human       | -----GTCCTT-----                                                                  |        | GCACTTAAG--CCTC-----           |        |        | CAAAGTAG--C----TAG         |        |        | 88583 |
| PolarBear   | ATAGAATTACACATTTAA--CACATTAAGTACATATGGGAACACTT-----                               |        |                                |        |        | A-----TGAAAGCAGGCTTCAATAA  |        |        | 46622 |
| Cow         | -----TGCTTTT-----                                                                 |        | CTGGGAGCCTTCCTCAGCCTC-----     |        |        | TAAGGTGCTGA-TATCTTTTCGTGT  |        |        | 82982 |
| Dog         | A-----ACACTGTT-----                                                               |        | TTTTAAGTACATTGGGAACATTT-----   |        |        | A-----CTAAAGCAGGCTTTCAGTAA |        |        | 76610 |
| BelugaWhale | A---ACACATTCTTTTTAAGTACACAAGGAATGCTTACAGAAAGTGATCACAACTAACTATAAAGCAAGCTTTCAGTAA   |        |                                |        |        |                            |        |        | 76206 |
| Donkey      | A---ACACATTCTTTTTAAGTACACATGGAACGTTTATAG-AACTGATCACATACTAAATTGTAAAGCAGGCTTTCAGGAA |        |                                |        |        |                            |        |        | 85589 |
| Cat         | A-----ACACATTC-----                                                               |        | TTTTTAAGTACA-TAGGGAACATTT----- |        |        | A-----CTAAAGCAGCCCTCTATAA  |        |        | 81997 |
| Ferret      | -----ACTTATTT-----                                                                |        | CGCTAAGCATG-ATACG--CTCTA-----  |        |        | G-----TTCATCCATGTTGTGCGCAA |        |        | 84390 |
| Lion        | A-----ACACATTC-----                                                               |        | TTTTTAAGTACA-TAGGGAACATT-----  |        |        | A-----CTAAAGCAGCCCTCCATAA  |        |        | 79743 |
| Vaquita     | A---ACACATTCTTTTTAAGTACACAAGGAATGCTTACAGAAAGTGATCACAACTAACTATAAAGCAAGCTTTCAGTAA   |        |                                |        |        |                            |        |        | 77485 |
| Pig         | -----TCCTTTTTAAGTACACTGGGAACGTTTACTGAAATTGATCG-----                               |        |                                |        |        | TAAACTATAAA-CAAGCTTTGGTAA  |        |        | 77225 |







Dienstag, 3. Mai 2022 08:41

| Majority    |                                                                                           |
|-------------|-------------------------------------------------------------------------------------------|
|             | 110250 110260 110270 110280 110290 110300 110310 110320                                   |
| Human       | 88778                                                                                     |
| PolarBear   | 46819                                                                                     |
| Cow         | 83132                                                                                     |
| Dog         | 76817                                                                                     |
| BelugaWhale | CTTT CCTGGTGGTGCAGTGGTTAAAAATCTGCCTGCCAATT CAGGAGACACAGGTT CAAGCCCTGGTCCAGGAAGATCCC 76595 |
| Donkey      | 85835                                                                                     |
| Cat         | 82210                                                                                     |
| Ferret      | 84546                                                                                     |
| Lion        | 79957                                                                                     |
| Vaquita     | CTTT CCTCGTGGCGCAGTGGTTAAAAATCTGCCTGCCAATT CAGGAGACACAGGTT CAAGCCCTGGTCCAGGAAGATCCC 77876 |
| Pig         | 77465                                                                                     |

| Majority    |                                                                                         |
|-------------|-----------------------------------------------------------------------------------------|
|             | 110330 110340 110350 110360 110370 110380 110390 110400                                 |
| Human       | 88778                                                                                   |
| PolarBear   | 46819                                                                                   |
| Cow         | 83132                                                                                   |
| Dog         | 76817                                                                                   |
| BelugaWhale | ACGT GCTGAGGAGCAACTAAGCCCGTTCGCCCTAGAGCCCGTGCTCTGCAACAAGAGAAGCCACCGCAATGAGAAGCCCG 76675 |
| Donkey      | 85835                                                                                   |
| Cat         | 82210                                                                                   |
| Ferret      | 84546                                                                                   |
| Lion        | 79957                                                                                   |
| Vaquita     | ACGT GCTGAGGAGCAACTAAGCCCGTTCACCCTAGAGCCCGTGCTCTGCAACAAGAGAAGCCACCGCAATGAGAAGCCCG 77956 |
| Pig         | 77465                                                                                   |



Dienstag, 3. Mai 2022 08:41

| Majority    | ----- ACTT----- TA-----                                                               |        |        |        |        |        |        |        |       |
|-------------|---------------------------------------------------------------------------------------|--------|--------|--------|--------|--------|--------|--------|-------|
|             | 110570                                                                                | 110580 | 110590 | 110600 | 110610 | 110620 | 110630 | 110640 |       |
| Human       | ----- ACTT----- TA-----                                                               |        |        |        |        |        |        |        | 88784 |
| PolarBear   | ----- ACTT----- TA-----                                                               |        |        |        |        |        |        |        | 46825 |
| Cow         | ----- CCT----- A-----                                                                 |        |        |        |        |        |        |        | 83136 |
| Dog         | ----- ACTT----- TA-----                                                               |        |        |        |        |        |        |        | 76823 |
| BelugaWhale | GATCCCACGTGCCGGGAACAAC T GAGCCCATGCGCCACAAC T ATTGAGCCTGCGCTCTAGAGCCTGTGAGCCACAAC T A |        |        |        |        |        |        |        | 76915 |
| Donkey      | ----- ACTTTT----- TA-----                                                             |        |        |        |        |        |        |        | 85843 |
| Cat         | ----- ACTT----- TA-----                                                               |        |        |        |        |        |        |        | 82216 |
| Ferret      | ----- ACTT----- TA-----                                                               |        |        |        |        |        |        |        | 84552 |
| Lion        | ----- ACTT----- TA-----                                                               |        |        |        |        |        |        |        | 79963 |
| Vaquita     | GATCCCACATGCCGGGAACAAC T GAGCCCATGAGCCACAAC T ATTGAGCCTGCGCTCTAGAGCCTGTGAGCCACAAC T A |        |        |        |        |        |        |        | 78196 |
| Pig         | ----- TTT----- A-----                                                                 |        |        |        |        |        |        |        | 77469 |

| Majority    | -----                                                                              |        |        |        |        |        |        |        |       |
|-------------|------------------------------------------------------------------------------------|--------|--------|--------|--------|--------|--------|--------|-------|
|             | 110650                                                                             | 110660 | 110670 | 110680 | 110690 | 110700 | 110710 | 110720 |       |
| Human       | -----                                                                              |        |        |        |        |        |        |        | 88784 |
| PolarBear   | -----                                                                              |        |        |        |        |        |        |        | 46825 |
| Cow         | -----                                                                              |        |        |        |        |        |        |        | 83136 |
| Dog         | -----                                                                              |        |        |        |        |        |        |        | 76823 |
| BelugaWhale | CTGAGCCAACGTGCCACAAC T ACTGAAGCCTGCATGCCTAGAGTCCATGCTCTGCAACAAGACACTGCAATGAGAAGCCT |        |        |        |        |        |        |        | 76995 |
| Donkey      | -----                                                                              |        |        |        |        |        |        |        | 85843 |
| Cat         | -----                                                                              |        |        |        |        |        |        |        | 82216 |
| Ferret      | -----                                                                              |        |        |        |        |        |        |        | 84552 |
| Lion        | -----                                                                              |        |        |        |        |        |        |        | 79963 |
| Vaquita     | CTGA----- A- GCCTGCATGCCTAGAGTCCATGCTCTGCAACAAGACACTGCAATGAGAAGCCT                 |        |        |        |        |        |        |        | 78254 |
| Pig         | -----                                                                              |        |        |        |        |        |        |        | 77469 |

Dienstag, 3. Mai 2022 08:41

Majority -----

|             | 110730                                                                           | 110740 | 110750 | 110760 | 110770 | 110780 | 110790 | 110800 |       |
|-------------|----------------------------------------------------------------------------------|--------|--------|--------|--------|--------|--------|--------|-------|
| Human       | -----                                                                            |        |        |        |        |        |        |        | 88784 |
| PolarBear   | -----                                                                            |        |        |        |        |        |        |        | 46825 |
| Cow         | -----                                                                            |        |        |        |        |        |        |        | 83136 |
| Dog         | -----                                                                            |        |        |        |        |        |        |        | 76823 |
| BelugaWhale | GCGCACGTCAACAAAGAGTAGCCCCCTGCTCGCCGCAACTTGAGAAAGCCCGCACACGGCAACGAAGACCCAACACAGCC |        |        |        |        |        |        |        | 77075 |
| Donkey      | -----                                                                            |        |        |        |        |        |        |        | 85843 |
| Cat         | -----                                                                            |        |        |        |        |        |        |        | 82216 |
| Ferret      | -----                                                                            |        |        |        |        |        |        |        | 84552 |
| Lion        | -----                                                                            |        |        |        |        |        |        |        | 79963 |
| Vaquita     | GCGCACGGCAACAAAGAGCAGCCCCCTGCTCGCCGCAACTTGAGAAAGCCCGCACACGGCAACAAAGACCCAACACAGCC |        |        |        |        |        |        |        | 78334 |
| Pig         | -----                                                                            |        |        |        |        |        |        |        | 77469 |

Majority -----

|             | 110810                                                                                | 110820 | 110830 | 110840 | 110850 | 110860 | 110870 | 110880 |       |
|-------------|---------------------------------------------------------------------------------------|--------|--------|--------|--------|--------|--------|--------|-------|
|             | ----- - AGAATAATGGTATAAACCCAAGGAAAGGA- - - GATAATAA- - - - AGACAA                     |        |        |        |        |        |        |        |       |
| Human       | -----                                                                                 |        |        |        |        |        |        |        | 88827 |
| PolarBear   | -----                                                                                 |        |        |        |        |        |        |        | 46871 |
| Cow         | -----                                                                                 |        |        |        |        |        |        |        | 83157 |
| Dog         | -----                                                                                 |        |        |        |        |        |        |        | 76867 |
| BelugaWhale | AATAAGTAAATAAATAATTTAGAAAAAAAAAGAATAATGGCATAAACCCAAGGAAAAGA- - - GATAATAA- - - AGACAA |        |        |        |        |        |        |        | 77148 |
| Donkey      | -----                                                                                 |        |        |        |        |        |        |        | 85886 |
| Cat         | -----                                                                                 |        |        |        |        |        |        |        | 82257 |
| Ferret      | -----                                                                                 |        |        |        |        |        |        |        | 84600 |
| Lion        | -----                                                                                 |        |        |        |        |        |        |        | 80006 |
| Vaquita     | AATAAGTAAATAAATAATTTAGAAAAAAAAAGAATAATGGCATAAACCCAAGGAAAAGA- - - GATAATAA- - - AGACAA |        |        |        |        |        |        |        | 78407 |
| Pig         | -----                                                                                 |        |        |        |        |        |        |        | 77512 |



Dienstag, 3. Mai 2022 08:41

| Majority    | GGG- - - ATAATTATTGATATAGCTCCAGTT- CCACATTATATAAAC- - - TCCTGTA- - - - - - - - - - - - - - - - - - - TCTATXTAT   |       |
|-------------|------------------------------------------------------------------------------------------------------------------|-------|
|             | 111050 111060 111070 111080 111090 111100 111110 111120                                                          |       |
| Human       | GGG- - - AGAAGCATTGATAAAGCTCCAGTTTCCACATCATATAAACAC- CACTATG- - - - - - - - - - - - - - - - - - - TCTGTAAAT      | 89038 |
| PolarBear   | GGG- - - ATAATTGTTGATATAGCTCCAGTT- CCACATTTTATAAAC- - - TCCTCC- - - - - - - - - - - - - - - - - - - TGTATAAAT    | 47078 |
| Cow         | - - - - - TCACTAA- - - - - AGCTTTGCTT- ACGTACCATGA- - - - - - - - - - - - - - - - - - - GTTTTTTGA                | 83250 |
| Dog         | TTCTCCTGTATATACTGTTATTCATTCATAT- CTTTTTTTGGTAAACAT- TTCTTTATTT- TCT- - - - - - - - - - - - - - TTTATTTAT         | 77088 |
| BelugaWhale | GGG- - - ATAATTATTGATATAGTTCTAGTT- CCACATTATGTAAAC- - - - - - - - - - - - - - - - - - - CGTATTTTTG               | 77351 |
| Donkey      | GAG- - - ATAACTATTGATGTAGCTCCAGTT- CCACACTATATAAACTCTTCCTGTA- - - - - - - - - - - - - - - - - - - TCTTTAAA       | 86095 |
| Cat         | GGT- - - ATAATTGTTGACATAGCTCCATTT- CCACAT- - - - - ATAAACTTGTCCTGTGGCTCTCTCTCTCTCTCTATATAT                       | 82478 |
| Ferret      | GAG- - - ATACTTACTGATA- AACTTCAGTT- CCACATTTTATAAAC- - - TCCTGTATAA- AAA- - - - - - - - - - - - - - TCTATAAAT    | 84807 |
| Lion        | GGT- - - ATAATTGTTGACATAGCTCCATTT- CCACAT- - - - - ATAAACTCGTCCTGTAGCT- - - - - - - - - - - - - - ATATAT         | 80221 |
| Vaquita     | GGG- - - ATAATTATTGATAGAGTTCTAGTT- CCACATTATGTAAAC- - - - - - - - - - - - - - - - - - - CGTTTTTTTT               | 78608 |
| Pig         | GAG- - - ATAATTAT- - - - - - - - - AGCTCCAGTT- TCACATTATATAAGC- - - ATCTGTA- - - - - - - - - - - - - - TCTATCTAT | 77711 |

| Majority    | TTTTXTATA- - - - - - - - - - - - - - - - - - - - - - - - - - - - - - - - - - - - - - - - - - - - - - - - - - - TTTT-           |       |
|-------------|--------------------------------------------------------------------------------------------------------------------------------|-------|
|             | 111130 111140 111150 111160 111170 111180 111190 111200                                                                        |       |
| Human       | TTCTTGAGG- - - - - - - - - - - - - - - - - - - - - - - - - - - - - - - - - - - - - - - - - - - - - - - - - - TCTT              | 89051 |
| PolarBear   | TATTTTTTA- - - - - - - - - - - - - - - - - - - - - - - - - - - - - - - - - - - - - - - - - - - - - - - - - - CCATCTT           | 47094 |
| Cow         | CTATATGTA- - - - - - - - - - - - - - - - - - - - - - - - - - - - - - - - - - - - - - - - - - - - - - - - - - GT- - -           | 83261 |
| Dog         | TTTTCTGAAAGATAAATAAAGCAGAGGGAGCAGCAGAGGGAGGGGGT GAAGCAGGAAGCCCTGACATGGGGCTCTACCCC                                              | 77168 |
| BelugaWhale | TTTACCATC- - - - - - - - - - - - - - - - - - - - - - - - - - - - - - - - - - - - - - - - - - - - - - - - - - TTTT-             | 77364 |
| Donkey      | GTTTTTACA- - - - - - - - - - - - - - - - - - - - - - - - - - - - - - - - - - - - - - - - - - - - - - - - - - TTT-              | 86107 |
| Cat         | ATATATATAA- - - - - - - - - - - - - - - - - - - - - - - - - - - - - - - - - - - - - - - - - - - - - - - - - - C- - - - TTTTTTT | 82496 |
| Ferret      | TTTTTTTTAA- - - - - - - - - - - - - - - - - - - - - - - - - - - - - - - - - - - - - - - - - - - - - - - - - - CCATCTC          | 84823 |
| Lion        | ATATATATA- - - - - - - - - - - - - - - - - - - - - - - - - - - - - - - - - - - - - - - - - - - - - - - - - - TT- - -           | 80232 |
| Vaquita     | TTTACCATC- - - - - - - - - - - - - - - - - - - - - - - - - - - - - - - - - - - - - - - - - - - - - - - - - - TTTT-             | 78621 |
| Pig         | CTATCTCTC- - - - - - - - - - - - - - - - - - - - - - - - - - - - - - - - - - - - - - - - - - - - - - - - - - GTTTT             | 77725 |

Dienstag, 3. Mai 2022 08:41

| Majority    | X- AAXCTTXXTTATT- - - - - CATTAAATATCTTC- - TTCAGAGATTAAGGGAAAAGTAX- - - AA |                                                       |        |        |        |        |        |        |  |
|-------------|-----------------------------------------------------------------------------|-------------------------------------------------------|--------|--------|--------|--------|--------|--------|--|
|             | 111210                                                                      | 111220                                                | 111230 | 111240 | 111250 | 111260 | 111270 | 111280 |  |
| Human       | TTAAAATTTTATTATT- - - - -                                                   | CGTTAATAATCTCTTTCATAGATGGATTAAGGGAAATGTAA- - - AA     | 89111  |        |        |        |        |        |  |
| PolarBear   | TGA- - CTTTCCGTTATT- - - - -                                                | CATTAAATATCTTC- - TTTAGAGGTTAAGGGAAAAGTAA- - - AA     | 47147  |        |        |        |        |        |  |
| Cow         | - - - GGCA- - - - - AATT- - - - -                                           | TCTCATTGCT- - - - - GATAGGTTAG- - - - -               | 83289  |        |        |        |        |        |  |
| Dog         | AGAACCCTTAACCCACTGAGCCCCACCCAGACGCCCCCATTAATACCTTC- -                       | TTCAGAGATAAAGGGAAAAGTAA- - - AC                       | 77243  |        |        |        |        |        |  |
| BelugaWhale | - - - AATTTCTCGTTATT- - - - -                                               | CATTACTATT- - - - - TTCAGAGATAAAGGGAGAGGTAG- - - AA   | 77413  |        |        |        |        |        |  |
| Donkey      | - - - AACTTTTCATTATT- - - - -                                               | CATTAGTATTTTC- - TTCAGAGATGGATTAAGGGAAAG- - GTA       | 86160  |        |        |        |        |        |  |
| Cat         | TTAACCATCTTCTCATTG- - - - -                                                 | TT- CATTAAATATCTTC- - TTCAGAGATTAAGAGAAAAGTAG- - - AA | 82554  |        |        |        |        |        |  |
| Ferret      | - - - - - TTGAATTTGT- - - - -                                               | TTTTAATATCTTC- - TTCAGAGATTAAGGGAAAAGTAA- - - AA      | 84871  |        |        |        |        |        |  |
| Lion        | TTAACCATCTTCTCATTG- - - - -                                                 | TT- CATTGATATCTTC- - TTCAGAGATTAAGGGAAAAGTAG- - - AA  | 80290  |        |        |        |        |        |  |
| Vaquita     | - - - AATTTCTCGTTATT- - - - -                                               | CATTACTATT- - - - - TTCAGAGATAAAGCGAGAGGTAG- - - AA   | 78670  |        |        |        |        |        |  |
| Pig         | TAAACCATCTTTAATT- - - - -                                                   | TCTCATTATTCA- - - TTGATGGATTAAGGGAAAAGTAATGAAA        | 77782  |        |        |        |        |        |  |

| Majority    | AATTATATTCAACCAAAAAT- GCCATTTCCACTGTGCAACATTGACTTTTTXCTCCTTT- - - - - ATCATTGATTGCTTT- |                                            |                  |        |        |        |        |        |  |
|-------------|----------------------------------------------------------------------------------------|--------------------------------------------|------------------|--------|--------|--------|--------|--------|--|
|             | 111290                                                                                 | 111300                                     | 111310           | 111320 | 111330 | 111340 | 111350 | 111360 |  |
| Human       | AATTACATTAATCAAAAAT- GTCATTTCAATTGTGAAACATTGACTTTTTCTC- - - - -                        | TTATT- ATTGCCTT-                           | 89177            |        |        |        |        |        |  |
| PolarBear   | AATTGTATTCAACCAAAACTTGCCATTTACACTGTGCAACATTGGCCTTTTCTCCTTTT- - - - -                   | ATCATTGATTGCTTT-                           | 47221            |        |        |        |        |        |  |
| Cow         | - ATTTTGGCTTCTTGAAGT- - - ATATTTCCATTA- - - AATATGGACTCAC- - - - -                     | ACCATTAAT- GCCTT-                          | 83346            |        |        |        |        |        |  |
| Dog         | AATTACATTCAAACAAAAGT- GCCATTTCCATTGTGCAACATTGGCCTTTTCTCCTTTT- - - - -                  | ATCATTGATGGCTTT-                           | 77316            |        |        |        |        |        |  |
| BelugaWhale | AATAATACTCAACCAAAAAT- GACGTTTCCACCATGCAGCATTGACTTTTTTCTTCTTG- - - - -                  | ATCACTGATTGCTTT-                           | 77486            |        |        |        |        |        |  |
| Donkey      | AATTATATTTAACCAAAAAT- - - - - -                                                        | GCCGT- - - - - TTGACTTTTTCTCCTTTT- - - - - | ATCATTGATTGCTTTT | 86219  |        |        |        |        |  |
| Cat         | AATTATACTCAACCCAAAAGT- GCCATTTCCACTGTGCGACATTGGCCTTTTTCTCTTTTTATCGTTCATTGATTGTTTT-     | 82632                                      |                  |        |        |        |        |        |  |
| Ferret      | GATTATTTTCCACTGAAAGT- GCCATTTCCACTGTGCAACATTGGCCATTTCTCCTTTT- - - - -                  | ATCATTGATTGCTTT-                           | 84944            |        |        |        |        |        |  |
| Lion        | AATTATACTCAACCCAAAAGT- GCCATTTCCACTGTGCGACATTGGCTTTTTTCTCTTTT- ATCGTTAATTGATTGTTTT-    | 80367                                      |                  |        |        |        |        |        |  |
| Vaquita     | AATAATACTCAACCAAAAAT- GACGTTTCCACTATGCAGCATTGACTTTTTTCTTCTTG- - - - -                  | ATCATTGATTGCATT-                           | 78743            |        |        |        |        |        |  |
| Pig         | TATAATGTTCAACCAAAAAT- GACATTTCCACTGC- - GATATTGACTTTCTCCTCT- - - - -                   | ATCGTTGATTGCCTT-                           | 77851            |        |        |        |        |        |  |



Dienstag, 3. Mai 2022 08:41

|             |                                                                                            |       |
|-------------|--------------------------------------------------------------------------------------------|-------|
| Majority    | GTCCATTTATGCCATATTTCTTGXAACAG- - - ATTTCAAGATAT- AGAGTCCTGTTATTT- AAAC TTGATTCATTTTAAA     |       |
|             | 111370 111380 111390 111400 111410 111420 111430 111440                                    |       |
| Human       | GTCCATTTATGCCATATTTCTTGGAATAGGAGAGTTC AAG- TGTAAGATT CACATTGTTTAAAATTTTATTCATTTAAAA        | 89256 |
| PolarBear   | GCCCATTTACACCATATTTCTTATAACTG- - - ATTTCAAGATA- - - GAGTCCTGTTATTT- ATACTTGAATC- - - TTAAA | 47291 |
| Cow         | - - - - - TAAAACAC- - - ACAC- - - - - AAATCC- - - TATGCAAAA                                | 83373 |
| Dog         | GTCCATTTACACCGTATTTCTTGTAACCA- - - GTTTCAGGATATCAGAGTCCTGTTATTT- AAAC TTGGTTT CATCTTAAA    | 77392 |
| BelugaWhale | GTTTCATTGATGCCGTATTTCTTGGAACAG- - - ATTTCAAGATATTAGAGTCCTGTTATTT- AAAC TTGATTCATTTAAAA     | 77562 |
| Donkey      | GTCCATTCATGCCGTATTTTTTTGGAATAG- - - ATTTCAAGATAT- - GAGTCCC- TTTTTT- TAACTTGATTCATTTTGA    | 86292 |
| Cat         | GTCCATTTGTACCATATTTCTTGTAACAG- - - GCTTCAAGATATCAGAGTCCCAATATTT- AAGCTTGATTCATCTTAAA       | 82708 |
| Ferret      | GCCCATTTACCCCATATTTCTTATAACCG- - - ATTTCAAGGTA- - - GAATCCTGTTATTT- AAAC TTGGATT CAGCTTAAA | 85017 |
| Lion        | GTCCATTTATGCCATATTTCTTGTAACAG- - - GCTTCAAGTTATCAGAGTCCAGTATTT- AAAC TTGATTCATCTTAAA       | 80443 |
| Vaquita     | GTTTCATTGATGCCATATTTCTTGGAACAG- - - ATTTCAAGATATTAGAGTCCTGTTATTT- AAAC TTGATTCATTTAAAA     | 78819 |
| Pig         | GTTTCATTGATGACCTATTTCTTAGAGCAG- - - ATTT- - - - - AAAC TTGATTTATTTAAAA                     | 77903 |

|             |                                                                                                  |       |
|-------------|--------------------------------------------------------------------------------------------------|-------|
| Majority    | TTAG- TAATTCAAGTACTCT- - XG- - - TGTTTTGTTAATCATTATG- - T- TXCCTCAGTTTTTTGACAAGXXT- - - - TTT    |       |
|             | 111450 111460 111470 111480 111490 111500 111510 111520                                          |       |
| Human       | TTAG- TAATTCAGGTAATTTCTTTC- - - TGCTCTGTTTACTCCTTGTG- - - TACTTTTCAGTTTTTTGACAAAGCTTTTTGTTT      | 89330 |
| PolarBear   | TTAG- CAATTCAAATAATCCCTGG- - - CAGTTTGTTAATCATTACG- - TGTGCTGCAGTTTTTTGAC- - - - - TTT           | 47355 |
| Cow         | CTAG- GA- - - - - TGTGCTAT- - - - - TGAAAA- - - - - AATA- - - - - AGTGAAACTTTTTTTAA- - - - - TAT | 83418 |
| Dog         | TTAG- TAGTTCAAATAATCTACTG- - - TTTCTTGTTAATCATTATG- - TCTGCTTCAGTTTTTTGACAAG- - - - - CTT        | 77459 |
| BelugaWhale | TTTTTCTAATCATTTCTTTC- - - - - TGCTTTGTTAATCAATATA- - - - TACCTCATTTTTTGACGAGCTT- - - - TTT       | 77627 |
| Donkey      | TTAT- TAATTCAAATACTCTCTTGCCCTTGTTTTGTTAATCATTGTA- - TGTACTTAACTTTTTTGACAGGC- - - - - TTT         | 86363 |
| Cat         | TTAG- TAATTCAGTACTCTTCTG- - - CTTTTTGCTTAATCGTTATG- - TATGCCTTAGTATTTGACAAGGTTTTTCTTTT           | 82782 |
| Ferret      | TTAG- TAATTCAGTAACT- - - G- - - CTTTTTGTAATAATTATTATTGTGCCTCAGTTTTTTGACAAG- - - - - CTT          | 85083 |
| Lion        | TTAG- TAATTCAGTACTCTTCTG- - - CTTTTTGCTTAATCATTATG- - TATGCCTTAGTATTTGACAAGGTTTTTCTTTT           | 80517 |
| Vaquita     | TTTTTCTAATCATTTCTTTC- - - - - TGCTTTGTTAATCAATATA- - - - TACCTCATTTTTTGACGAGCTT- - - - TTT       | 78884 |
| Pig         | TTAT- CAATTTATTTCTTT- - - - - TGCTTTATTTACTCAATA- - - - - ACCTCAATTTTTTTGACAAGGTT- - - - TAT     | 77964 |

Dienstag, 3. Mai 2022 08:41

| Majority    | XTTTTTTXXA- - - - A- T- CTTAAAAACCCTGGTATTCTA- - - - CCCCTCTTCTTCAXCCCTCATCCACTTTAGATTACX |                                                                     |                                            |                                              |        |        |        |        |  |
|-------------|-------------------------------------------------------------------------------------------|---------------------------------------------------------------------|--------------------------------------------|----------------------------------------------|--------|--------|--------|--------|--|
|             | 111530                                                                                    | 111540                                                              | 111550                                     | 111560                                       | 111570 | 111580 | 111590 | 111600 |  |
| Human       | TCTTTTTTA- - - - -                                                                        | CTTAAAAATTTTGGT- - - - -                                            | A- - - -                                   | TTCTAATTATCATCCCCCTTCCCCTTTAGATCACT          | 89390  |        |        |        |  |
| PolarBear   | TTTTGTT- - - - -                                                                          | TTTTAAACCGTGATACTCGA- - - - -                                       | CCCCTCATCTTCA- CCCTCATCCACTTGAGATTACT      | 47417                                        |        |        |        |        |  |
| Cow         | ACTTTGTT- - - - -                                                                         | TATGG- - - - -                                                      | ACTCTGTTCTT- - - - -                       | TTTGGTTTTTCATGGG- - - - -                    | 83457  |        |        |        |  |
| Dog         | TTTTTAAAAA- - - - -                                                                       | AAGTGTTTAGAAATTGTCACACTCAA- - - - -                                 | CCCCTCTTCTTCAGCCCTCATCCATTTGAGATTCCA       | 77531                                        |        |        |        |        |  |
| BelugaWhale | ATTTTTTAA- - - - -                                                                        | TACC- CTTAAAAGCCCCGGTATTCTAATT- - - - -                             | ACCCCTTTCCTTAACCCCCATCCACTTTAAATTTAC       | 77700                                        |        |        |        |        |  |
| Donkey      | CTTTTTTAA- - - - -                                                                        | CTTAAAAATCCTGGTATTCTAATTGTCCCTCCTCCCCAACCCTCATCCACTTTAGATC- - - - - | 86431                                      |                                              |        |        |        |        |  |
| Cat         | CTTTTTTTT- - - - -                                                                        | GAATACTTAAAAACCCTGATATTCTA- - - - -                                 | CCCCTCAACTTCGGCCCTCATCCACTTCATATT- - - - - | 82850                                        |        |        |        |        |  |
| Ferret      | CTTTTTTAAA- - - - -                                                                       | AA- TACTTAAAAACCATGATGCTTGA- - - - -                                | CTCCTCATCTTCAGCCCTCATCCACTTGAGATTACT       | 85154                                        |        |        |        |        |  |
| Lion        | CTTTTTTTTTTTTTTGAATACTTAAAAACCCTGGTACTCTA- - - - -                                        | CCCCTCAACTTCGGCCCTCATCCACTTCATATTACT                                | 80592                                      |                                              |        |        |        |        |  |
| Vaquita     | ATTTTTTAA- - - - -                                                                        | TACC- CTTAAAAGCCCTGGTATTCTAATT- - - - -                             | ACCCCTTTCCTTAACCCCCATCCACTTTAAATTTAC       | 78957                                        |        |        |        |        |  |
| Pig         | ATTTTTTTA- - - - -                                                                        | GCAT- TGTAAGGG- - - - -                                             | TATTCTAATT- - - - -                        | ACCCCGTTTCTCAACCTCCATCCACTTTACGTGGG- - - - - | 78030  |        |        |        |  |

| Majority    | - - - - ATXCTTTTGT CAGGAA- - AGCTGACTAGA- ATXTCTCTCATTACCTGGCTACTTCCCTGAGXTAGCTGTTTGGTTAT    |                                   |        |        |        |        |        |        |  |
|-------------|----------------------------------------------------------------------------------------------|-----------------------------------|--------|--------|--------|--------|--------|--------|--|
|             | 111610                                                                                       | 111620                            | 111630 | 111640 | 111650 | 111660 | 111670 | 111680 |  |
| Human       | TCAGATCCTATTGT CAGCAATCAGCTGGCTAGA- - ACTCTCTTGT TACCTGGCTACTTCCCTGAGGTAGCTGTTTGGTTAT        | 89468                             |        |        |        |        |        |        |  |
| PolarBear   | TCAGATTCTTTTGT CAAGTC- - AGCTGACTAGG- AACTTCTCATTACCTGACT- CTTCCAGAGTTAGCTCTTTGGTTAT         | 47493                             |        |        |        |        |        |        |  |
| Cow         | - - - - A- - CTCTATTTGGGAA- - - - -                                                          | ATACTCAGTTGTTTATAAGCAAAT- - - - - | AT     | 83498  |        |        |        |        |  |
| Dog         | - - - - ATTGTTTTGT CAAGTC- - CGATGACTAGA- ATATTTCTCATTACCT- A- - - TTTCCAGAGGTAGCTCTCTGGTTAT | 77600                             |        |        |        |        |        |        |  |
| BelugaWhale | TCACATCCTTTTATCAGCAATCAGCTGACTAGA- ATCTCCCTTATTACGTGGTTACTTTCTGAGTTAGCTGTTTGGTTGT            | 77779                             |        |        |        |        |        |        |  |
| Donkey      | - - - - - TCTTTTGT CAGAAATCAGCTGACTAGA- ATCTCTCTCATAATCTGGCTATGTCTTGAGGTAGTTGTTT GATTAT      | 86504                             |        |        |        |        |        |        |  |
| Cat         | - - - - - CT TTTTGT CAGGTC- - AGCTGACTCGACATACTTCTCATTACCTGACTACTTCTAGAGATAGCTTTTTTGGTTAT    | 82921                             |        |        |        |        |        |        |  |
| Ferret      | - - - - - GACTAGA- ATACCTCTCATTACCTGACTACTTCCAGAGTTAGCTCTTTGGTTAT                            | 85207                             |        |        |        |        |        |        |  |
| Lion        | TCATATTCTTTTGT CAGGTC- - AGCTGACTTGACATACTTCTCATTACCTGACTACTTCTAGAGATAGCTTTTTTGGTTT          | 80670                             |        |        |        |        |        |        |  |
| Vaquita     | TCACATCCTTTTATCAGCAATCAGCTGACTAGA- ATCTCCCTTATTACGTGGTTACTTTCTGAGTTAGCTGTTTGGTTGT            | 79036                             |        |        |        |        |        |        |  |
| Pig         | - - - - ATCCTTACTCAGCAGTCAGCTGACTAAA- ATCTCTTCTGTACCTGGTTACTTTCTAAGGGAGTTGTTTGGTTAT          | 78105                             |        |        |        |        |        |        |  |

Dienstag, 3. Mai 2022 08:41

|             |                                                                                              |        |        |        |        |        |        |        |
|-------------|----------------------------------------------------------------------------------------------|--------|--------|--------|--------|--------|--------|--------|
| Majority    | TTTGCTTTATTTT- AATCCCATTTCTCT- ATCATCCATCTCCTCTTGGTGCAGGTAC- - - - - TATGCCTAGG              |        |        |        |        |        |        |        |
|             | 111690                                                                                       | 111700 | 111710 | 111720 | 111730 | 111740 | 111750 | 111760 |
| Human       | TTAGCTTTATTTT- AATCCCATTTCTCT- ATCACTCATCTGTTCTGTATGCAGTTAC- - - - - TATGCCTGGG 89533        |        |        |        |        |        |        |        |
| PolarBear   | TTTGCTTTGTTTT- AATACCATTTCTCT- ATCATCCATCTCCTCTTGGTACAGGTAC- - - - - TATGCCTAGG 47558        |        |        |        |        |        |        |        |
| Cow         | TTT- - - - - TATGTTCAGA 83511                                                                |        |        |        |        |        |        |        |
| Dog         | TTTGCTTTATTTT- AATCCCATTTCTCT- ATCATCCATCTCCTCTTGGTACAGGTAC- - - - - TGTCCCTAGG 77665        |        |        |        |        |        |        |        |
| BelugaWhale | TTTGCTTTATTTTTAACCCCATTTCTCT- ATCATCCATCTCCTCTTGGTGCAGTTACTTA- - - - - CTATGCCTAGG 77849     |        |        |        |        |        |        |        |
| Donkey      | TTTGCTTTGTTTT- AACCCCATTTCTGT- ATCATCTATCTCCTCTTTGTACAGTCAC- - - - - TATGCCTAAG 86569        |        |        |        |        |        |        |        |
| Cat         | TTTGCTTTATTTT- AATCCCATTAGTCT- GTTATCCACCTCCTCTTGATGCAGGTGC- - - - - TATTCCTAGG 82986        |        |        |        |        |        |        |        |
| Ferret      | TTTGCTTTATTTA- AATCCCAGTTCTCTTATCATCCATCTCCTCTTCGTACAGGTACATAGTAGAAGTACTGCGCCTAGG 85286      |        |        |        |        |        |        |        |
| Lion        | TTTGCTTTATTTT- AATCCCATTAGTCT- ATTATCCATCTCCTCTTGGTGCAGGTGC- - - - - TATTCCTAGA 80735        |        |        |        |        |        |        |        |
| Vaquita     | TTTGCTTTATTTTTAACCCCATTTCTCT- ATCATCCATCTCCTCTTGGTGCAGTTACTTA- - - - - CTATGCCTAGG 79106     |        |        |        |        |        |        |        |
| Pig         | TTTGCTTTATTTT- AATCCCATGTTCT- CTCATCTGTCTCTCCTTGATGCA- - - - TTTA- - - - - CTGTGTCTAGG 78170 |        |        |        |        |        |        |        |

|             |                                                                                                |        |        |        |        |        |        |        |
|-------------|------------------------------------------------------------------------------------------------|--------|--------|--------|--------|--------|--------|--------|
| Majority    | ACTTTTT- - TGTTTTCTTATTTCTGCCCTTCAGTATCTCAAAGCTCAGCT- - GTTTGTGCAGTCTTTTCATAACTTTTTCA          |        |        |        |        |        |        |        |
|             | 111770                                                                                         | 111780 | 111790 | 111800 | 111810 | 111820 | 111830 | 111840 |
| Human       | ACTT- - - - - ATTTTCTTATTCTTTCCCTCCATTATCTCAAAGCTCTGCT- - GTTTGTGCTGTCTTTTTAT- - - - - 89596   |        |        |        |        |        |        |        |
| PolarBear   | ACTTT- - - - - GTTTTCTTATTTCCGCCCTTCAGTATATCAAAGCTCAGCT- - ATTTGTGCAGTCTTTTCATAACTTTTTCA 47631 |        |        |        |        |        |        |        |
| Cow         | AAGT- - - - - AGTATGGGAGAAATAAA- - - - - TGGCAAGGTATAGTCAGTAATAGTCA 83558                      |        |        |        |        |        |        |        |
| Dog         | ACTTT- - - - - TTATTGTTATTTTACCCTTCAGTGTATCACAGCTCAGCT- - GATTGTGCAATCTTTTCATAACTTTACA 77738   |        |        |        |        |        |        |        |
| BelugaWhale | ACCTCTTG- T- - TTTGTTATTTGTGCCCTTCAGTATCTCAAAGCTCAACTCTGTTTGTGTAGTATTTTTATAACTTTCTCA 77926     |        |        |        |        |        |        |        |
| Donkey      | ACTTACTGTTTTTTTTTTTATTCCCGCCCTTCAGTATCTCAAAGCTCAGCT- - GTTTGCAGTCTTTCCCTAATTTTCCA 86647        |        |        |        |        |        |        |        |
| Cat         | ACTTTTTATTGTTTTCTTATATCTGCTCTTCAGTATCTCAAAGCTCAGCT- - GTTTATGCCGTCTTTTCATGACTTTTTCG 83064      |        |        |        |        |        |        |        |
| Ferret      | AGTTTAT- - TGTTTTCTTATTTCTGCCCTTCATTATATCAAAGCTCAGCT- - GTTTGTGCAGTCTTTTCATAACTTTTTCA 85362    |        |        |        |        |        |        |        |
| Lion        | ACTTTTTATTGTTTTCTTATATCTGCTCTTCAGTATCTCAAAGCTCAGCT- - GTTTATGCCGTCTTTTCATGACTTTTTG 80813       |        |        |        |        |        |        |        |
| Vaquita     | ACCTCTTG- T- - CTTGTTATTTGTGCCCTTCAATATCTCAAAGCTCAACT- - GTTTGTGTAGTATTTTTATAACTTTCTCA 79181   |        |        |        |        |        |        |        |
| Pig         | ACTTTTTG- TGTTTTCTTATTTGTGCTCTTCAGTATCGCAAAGTTTCAGCT- - CTTTGTGCGGTGTTTTTAAACTTTCAA 78247      |        |        |        |        |        |        |        |

Dienstag, 3. Mai 2022 08:41

| Majority    | AA- GCTGAACTAAGACAGCTTTTXXATXACAACCTT- AGTCTACTTCTTTATACCACTTTATTCCCCAGACTCATTCT                  |        |        |        |        |        |        |        |       |
|-------------|---------------------------------------------------------------------------------------------------|--------|--------|--------|--------|--------|--------|--------|-------|
|             | 111850                                                                                            | 111860 | 111870 | 111880 | 111890 | 111900 | 111910 | 111920 |       |
| Human       | - - - - - TTA- GACAGCTTTTTTCTGACAACGTTAAGTCTACTTATTTATATCACTTTATTTCTCAAACCTCACACTT                |        |        |        |        |        |        |        | 89666 |
| PolarBear   | AA- GCTGAACTAAGATAGCTTT- - - - ATAAGAGTCTT- TGTTTACTTCTTTATATCACTTTATTTCCCAGATTCTTTCT             |        |        |        |        |        |        |        | 47705 |
| Cow         | A- - GTGTGAATGGAAT- - TATTGCAAATCTTAG- - - - - AGGC- - - - - C- ATGTTAAATCATTTT- - AGACC- - - - - |        |        |        |        |        |        |        | 83612 |
| Dog         | AA- GCTGAACTAAGCATTCTTT- - - - ATAACAG- - - - - TGTGCTTCCTTATACCACTTTATTCCCTAAATTCTTTCT           |        |        |        |        |        |        |        | 77806 |
| BelugaWhale | AAAGCTGCACTAATACACCTTTTCTTATGACAACCTT- AGACTACTTCTTTATGCCACTTTATTCCCCAAAACCTCATTCT                |        |        |        |        |        |        |        | 78005 |
| Donkey      | AA- GCTAC- CTAGGACAGCTTTCTT- ATGACAGCCTT- AGTGTGCT- - - TTATACCACTTCATCCCCAAGACGTATGCCT           |        |        |        |        |        |        |        | 86720 |
| Cat         | AA- GATGAACAAAGATAGCTTTCTT- ATAACAACCTT- AGTCTACTTCTTTATACCACTTCATTCCC- AGATTCTTTCT               |        |        |        |        |        |        |        | 83140 |
| Ferret      | AA- GCTGAACTAAGACAGCTTTCTTTATAACAGCCTT- AATCTACTTCTTTAAACCACTTTATACCCTAGATTCTTTCT                 |        |        |        |        |        |        |        | 85440 |
| Lion        | AA- GATGAACAAAGATAGCTTTCTT- ATAACAACCTT- AGTCTGCTTCTTTACACCACTTCATTCCC- AGATTCTTTCT               |        |        |        |        |        |        |        | 80889 |
| Vaquita     | AAAGCTGCACTAATACACCTTTTCTTATGACAACCTT- AGACGACTACTTTATGCCACTTTATTCCCCAAAACCTCATTCT                |        |        |        |        |        |        |        | 79260 |
| Pig         | A- - GTTGCCTAAAACACCTTTTCTTATGACAA- - - - - GGTC- - - - - T- ATGTCACATTATTCTCCAAAACCTCATTCT       |        |        |        |        |        |        |        | 78312 |

| Majority    | TATAACACAT- - TTTGTATGAGGTAATAGCACTTTATCATAAGCAAAGTTCTGTTCACTTAA- - - AATA- - - - - ATAGA          |        |        |        |        |        |        |        |       |
|-------------|----------------------------------------------------------------------------------------------------|--------|--------|--------|--------|--------|--------|--------|-------|
|             | 111930                                                                                             | 111940 | 111950 | 111960 | 111970 | 111980 | 111990 | 112000 |       |
| Human       | AATAACACAT- - TTTATCTGAGGTAGT- - - - - TTATC- TAAACAAAAGTTTGTTCACTTAAAATAGTT- - - - - ATAGA        |        |        |        |        |        |        |        | 89731 |
| PolarBear   | TATAACACAT- - - TTGTATGAGCTAAT- - - - - CATAAGCAA- - - - - TAG- - - AATG- - - - - ATAGA            |        |        |        |        |        |        |        | 47750 |
| Cow         | - - - - - AGAA- - TTTT- - AAATTTGCAG- ACATT- - - - - AAAGATGTTTCCATTCT- - - - AC- - - - T- - ATAG- |        |        |        |        |        |        |        | 83661 |
| Dog         | TATAATGCAT- - - TTGTATGAGCTAAGAGTACTTTATCATAAGTAA- - - - - TAG- - - AATG- - - - - ATAGA            |        |        |        |        |        |        |        | 77861 |
| BelugaWhale | TATAACACAT- - TTTGTTTGGGTAATAGCACTTTATTATAAGCAAAGTTCTGTTCACTTAAAACAACA- - ATTAATAGA                |        |        |        |        |        |        |        | 78081 |
| Donkey      | TAAAAACAT- - TTTGTGGGATGGGGCCGGCCCGTGGCCGAGTGG- - - - - TTAAGTTCGCGCGCTCCGCTGCAGGCG                |        |        |        |        |        |        |        | 86791 |
| Cat         | TATAATCCATGCCTTATATGATGTAGTAGCACTTTTTTATAAGCAAAGTACTGTTCACTTAA- - - AACA- - - - - ATAGA            |        |        |        |        |        |        |        | 83211 |
| Ferret      | TAAAAACAT- - - TTGTGTATGCTAATAGCTCTTTATCATAAGCAA- - - - - CAG- - - AATG- - - - - ATAGA             |        |        |        |        |        |        |        | 85495 |
| Lion        | TATAACCCATGCCTTATATGATGTAGTAGCACTTTTTTATAAGCAAAGTACTGTTCACTTAA- - - AACA- - - - - ATAGA            |        |        |        |        |        |        |        | 80960 |
| Vaquita     | TATAACACAT- - TTTGTATGAGGTAATAGCACTTTATTATAAGCAAAGTTCTGTTCACTTAAAACAACAGAATTAATAGA                 |        |        |        |        |        |        |        | 79338 |
| Pig         | TATCATAGAT- - ACTGT- - GAACTAATAGCACTTTCTAATAAGAAAAGTTCTGTTCACTTAAATAGAAT- - - - T- - ATAGA        |        |        |        |        |        |        |        | 78382 |

Dienstag, 3. Mai 2022 08:41

| Majority    | ACTTTAAAAATGT- - - - - TTTATAATTCAAGTAAGTTTTATTATAATAG- - - TTTAT- - - - - ATACCATCTCTA |                                                              |                        |                |              |        |        |        |       |
|-------------|-----------------------------------------------------------------------------------------|--------------------------------------------------------------|------------------------|----------------|--------------|--------|--------|--------|-------|
|             | 112010                                                                                  | 112020                                                       | 112030                 | 112040         | 112050       | 112060 | 112070 | 112080 |       |
| Human       | ACTTTAAAAATT- - - - -                                                                   | TTATAATTC- AGTGGGTTTTATTG                                    | AAAAGGATTTTAT- - - - - | GTACTGTC       | CACTG        |        |        |        | 89791 |
| PolarBear   | ACTTTAAAAATGT- - - - -                                                                  | TTTGTAAATTCAAGTAAGTTTTATTATAATAG- - -                        | TGTAT- - - - -         | GTACCATCTCT-   |              |        |        |        | 47810 |
| Cow         | - CCT- - - - -                                                                          | ATTTAATTAA- - - - -                                          | TATACTAGAATTTTC- -     | TTAA- - -      | ATTAGGTAGTTT |        |        |        | 83705 |
| Dog         | ACTTTAAAAATGT- - - - -                                                                  | TTTGTAAATTCAAGTAAGTTTTA- - -                                 | TAATAG- - -            | CTTAT- - - - - | ATACCATGTCTA |        |        |        | 77919 |
| BelugaWhale | ACCTTAAAAATAT- - - - -                                                                  | TTTATAATTCAAGTAAGCTTTATTATAAAAAG- - -                        | TTTAC- - - - -         | ATACCATCACTA   |              |        |        |        | 78142 |
| Donkey      | GCCC- - -                                                                               | AGTGTTCGTCAGTTCG- AATCCTGGGCACAGACATGGCACTG- - -             | CTCAT- - - - -         | CAAGCCACGCTTA  |              |        |        |        | 86855 |
| Cat         | ATTCTAGAACTTT- - - - -                                                                  | ATTTTATAAATCAAATAAGTTTTATAAAAAGGAG- - -                      | TTTAT- - - - -         | GTACCATCTCT-   |              |        |        |        | 83273 |
| Ferret      | ACTTTAAAAGTGT- - - - -                                                                  | TTTGCAATTCAAGTTAATTTTA- -                                    | ATAGT- - - -           | TTTAT- - - - - | GTACCATCTCTA |        |        |        | 85552 |
| Lion        | ATTCTAGAACTTTGAAAATATTTTATAAATTCAAATAAGTTTTATAAAAAGGAG- - -                             | TTTAT- - - - -                                               | GTACCATCTCT-           |                |              |        |        |        | 81028 |
| Vaquita     | ACCTTAAAAATAT- - - - -                                                                  | TTTATAATTCAAGTAAGCTTTATTATAAAAAGGAGTTTAC- - - - -            | ATACCATCACTA           |                |              |        |        |        | 79402 |
| Pig         | ACCTTAAAAATAT- - - - -                                                                  | TTTATAATTCAAGTAAATTTTATTATAAAAAGGAGTTTACATTAACACACTGGATAATTT |                        |                |              |        |        |        | 78454 |

| Majority    | TGAAT- - - - AATT- - - - - AXTT- GATTTTATAAGTGXX- - - GAAATTTAGXX- AX- - - - - XG- - - - - |                                                               |                                                               |                            |                   |        |        |        |       |
|-------------|--------------------------------------------------------------------------------------------|---------------------------------------------------------------|---------------------------------------------------------------|----------------------------|-------------------|--------|--------|--------|-------|
|             | 112090                                                                                     | 112100                                                        | 112110                                                        | 112120                     | 112130            | 112140 | 112150 | 112160 |       |
| Human       | TAGAT- - - -                                                                               | AATT- - - - -                                                 | GGTTTTACAGGTGTAAGCGTAAATTTGCA- AG- - - - -                    |                            |                   |        |        |        | 89831 |
| PolarBear   | - GAAT- - - -                                                                              | AATT- - - - -                                                 | GATTTTATAAGTG- - - - -                                        | AAAATTTAGAAGTATATGT- - - - | GATGTGCAGGGG- - - |        |        |        | 47862 |
| Cow         | AGG- - - - -                                                                               | AAT- - - - -                                                  | AACAGAATTTGTAAATTATGTTTGAAAT- -                               | AGTGTA- - - - -            | CTGA- - - - -     |        |        |        | 83749 |
| Dog         | TGAGT- - - -                                                                               | AATTG- - - -                                                  | AATTGAATTTTGTAAAGTG- - - -                                    | AAAATTT- - - - -           |                   |        |        |        | 77954 |
| BelugaWhale | TGGAT- - - -                                                                               | AATT- - - - -                                                 | GAGTTGATTTTATAAGTATATGGGAAATACAGTGTAAAGGAGTTAAGGCCTGACAGC- -  | TT                         |                   |        |        |        | 78210 |
| Donkey      | AGAATATACA                                                                                 | ACTATGTACCGGGGGGCTTTGAGGAGAAAAAGGAAAAAAAAAAAAAAAAAGC          | ATTTTGTGGGAGGTAATTGCA                                         |                            |                   |        |        |        | 86935 |
| Cat         | - GAAT- - - -                                                                              | AATGC- - - -                                                  | AGTT- GATTTTGTAAAGTG- - - -                                   | AAAATTT- - - - -           |                   |        |        |        | 83306 |
| Ferret      | TGAAT- - - -                                                                               | AAT- - - - -                                                  | GATTTTATAAGTG- - - -                                          | AAAATT- - - - -            |                   |        |        |        | 85579 |
| Lion        | - GAAT- - - -                                                                              | AATGC- - - -                                                  | AGTT- GATTTTGTAAAGTG- - - -                                   | AAAATTT- - - - -           |                   |        |        |        | 81061 |
| Vaquita     | TGGAT- - - -                                                                               | AATT- - - - -                                                 | GAGTTGATTTTATAAGTATATGCGAAATACAGTGTAAAGGAAGTTAAGGCCTGACAGC- - | TT                         |                   |        |        |        | 79470 |
| Pig         | GAGTT- - - -                                                                               | GATTTTATTAAGTGTAAAGTTTTTAAATGTATGTGAAATGCAGTGTAAAGAAAG- - - - | GGCCTGGAGATGATT                                               |                            |                   |        |        |        | 78526 |



Dienstag, 3. Mai 2022 08:41

| Majority    | T - - XT - - X - - X - - - - - ATXXXATAAAXX - X - X - X - TATXTGTGAAATGCA - - X - GTATAACAAGTGAGAAA - - - |        |        |        |         |         |        |        |   |   |       |
|-------------|-----------------------------------------------------------------------------------------------------------|--------|--------|--------|---------|---------|--------|--------|---|---|-------|
|             | 112330                                                                                                    | 112340 | 112350 | 112360 | 112370  | 112380  | 112390 | 112400 |   |   |       |
| Human       | AGCCT                                                                                                     | -      | -      | -      | -       | -       | -      | -      | - | - | 89973 |
| PolarBear   | TCTGT                                                                                                     | CACATA | AAATAA | ATAAAT | CTTAAAA | AAAAAAA | -      | -      | - | - | 48087 |
| Cow         | TACTTACA                                                                                                  | -      | -      | -      | -       | -       | -      | -      | - | - | 83914 |
| Dog         | -                                                                                                         | -      | -      | -      | -       | -       | -      | -      | - | - | 77991 |
| BelugaWhale | TGTATACATCATGAGTTGATTATCACAGTAAATTTAGTGAACATCCATCATCTCATATACTTATAAAAATAAAAGAAATAG                         |        |        |        |         |         |        |        |   |   | 78448 |
| Donkey      | GTGAATAATTGAGCTGTTTTTATAAGTGTAATTTG                                                                       | -      | -      | -      | -       | -       | -      | -      | - | - | 87117 |
| Cat         | -                                                                                                         | -      | -      | -      | -       | -       | -      | -      | - | - | 83343 |
| Ferret      | -                                                                                                         | -      | -      | -      | -       | -       | -      | -      | - | - | 85613 |
| Lion        | -                                                                                                         | -      | -      | -      | -       | -       | -      | -      | - | - | 81098 |
| Vaquita     | TGTATACATCATGAGTTGATTATCACAGTAAATTTAGTGAACATCCATCATCTCATGTACTTATAAAAATAAAAGAAATAG                         |        |        |        |         |         |        |        |   |   | 79700 |
| Pig         | TACATACATCAAGAAGTGATTATCACATAAATTTAGTGAACATCCATCATCTCAT                                                   | -      | -      | -      | -       | -       | -      | -      | - | - | 78729 |

| Majority    | - - AAATTCAGGCCTGAGAT - - TACTTTTTXT - - - - T - - TCTXTTAGCCTX - AXTT - - - - - ACAAACCTAAXAAAAATA |         |        |          |          |        |        |        |                      |   |       |
|-------------|-----------------------------------------------------------------------------------------------------|---------|--------|----------|----------|--------|--------|--------|----------------------|---|-------|
|             | 112410                                                                                              | 112420  | 112430 | 112440   | 112450   | 112460 | 112470 | 112480 |                      |   |       |
| Human       | -                                                                                                   | -       | -      | -        | -        | -      | -      | -      | -                    | - | 90030 |
| PolarBear   | -                                                                                                   | -       | -      | -        | -        | -      | -      | -      | -                    | - | 48146 |
| Cow         | -                                                                                                   | -       | -      | -        | -        | -      | -      | -      | -                    | - | 83984 |
| Dog         | -                                                                                                   | -       | -      | -        | -        | -      | -      | -      | -                    | - | 78059 |
| BelugaWhale | AAAAAATTTT                                                                                          | -       | -      | -        | -        | -      | -      | -      | -                    | - | 78525 |
| Donkey      | -                                                                                                   | -       | -      | -        | -        | -      | -      | -      | -                    | - | 87176 |
| Cat         | -                                                                                                   | -       | -      | -        | -        | -      | -      | -      | -                    | - | 83406 |
| Ferret      | -                                                                                                   | -       | -      | -        | -        | -      | -      | -      | -                    | - | 85635 |
| Lion        | -                                                                                                   | -       | -      | -        | -        | -      | -      | -      | -                    | - | 81154 |
| Vaquita     | AAAAATTTCT                                                                                          | -       | -      | -        | -        | -      | -      | -      | -                    | - | 79779 |
| Pig         | AAAAATTTTT                                                                                          | GTGTGAT | GAGAAA | ACTCTTAG | GATTTACT | CTCTTA | ACTTTT | CATGTG | TAAACATACATCATTGTTAA | - | 78807 |

Dienstag, 3. Mai 2022 08:41

| Majority    | TATTACAAATXTXT- AACACTACAXXCAXAATAATT- - - - - GGAAGAGTAAACTTGTTTTTACAAATTAG        |                      |                   |           |           |                   |           |           |           |      |       |
|-------------|-------------------------------------------------------------------------------------|----------------------|-------------------|-----------|-----------|-------------------|-----------|-----------|-----------|------|-------|
|             | 112490                                                                              | 112500               | 112510            | 112520    | 112530    | 112540            | 112550    | 112560    |           |      |       |
| Human       | AGTTC- -                                                                            | AATGGCTAGTGGTTA- - - | TCATAATA- - - - - | - - - - - | - - - - - | AGAAAAAT- - - - - | - - - - - | - - - - - | - - - - - | TTAA | 90070 |
| PolarBear   | CATTACAAATACATTAACACTACAGTAAAAACAGTC- - A- - - - - GGAAGAGTAAACTTGTTTTTAAAAATTAG    |                      |                   |           |           |                   |           |           |           |      | 48212 |
| Cow         | TATTTGT CATGT- TGTACATTACATCCTTAGTACCTCTTTATCTTATAACTGGAAGAGTAAATTTGATTTTACAAATTAG  |                      |                   |           |           |                   |           |           |           |      | 84063 |
| Dog         | CATTACAAATATAT- AACACTACAGTAAAAACAGTC- - A- - - - - GGAAGAGTAAGCTTGTTTTTACAAATTAG   |                      |                   |           |           |                   |           |           |           |      | 78124 |
| BelugaWhale | TATTTATCATGT- TGTACGCTACATCCTTAGTATTT- - - ACCTTATAACTGGAATAGTAAACTTATTTTACAAATTAG  |                      |                   |           |           |                   |           |           |           |      | 78600 |
| Donkey      | TATTA AAAATATAT- AGCACTGCA- CTAAAACAATTA- - - - - GAAAGAGGAAGCT- - - TTTTACAAATGAG  |                      |                   |           |           |                   |           |           |           |      | 87237 |
| Cat         | - ATTACAAATACAT- AACACTACAGTAAAA- TAATT- - G- - - - - GGAAGAGTAAACTTGTTTTTACAAATTAG |                      |                   |           |           |                   |           |           |           |      | 83469 |
| Ferret      | - - - - -                                                                           |                      |                   |           |           |                   |           |           |           |      | 85635 |
| Lion        | - ATTACAAATACAT- AACACTACAGTAAAA- GAATT- - G- - - - - GGAAGAGTAAACTTGTTTTTACAAATTAG |                      |                   |           |           |                   |           |           |           |      | 81217 |
| Vaquita     | TATTTATCATGT- TGTACGCTACATCCTTAGTATTT- - - ATCTTATAACTGGAATAGTAAACTTATTTTACAAATTAG  |                      |                   |           |           |                   |           |           |           |      | 79854 |
| Pig         | TTTTTCTCATGT- TGTACATTACATCCCTAATACTTAAATATCTTATAACTGGAAGAGTAAACTTGTTTTTACAATTTAA   |                      |                   |           |           |                   |           |           |           |      | 78886 |

| Majority    | GGAAGCTATAAGTGAAA- AA- - - - - TACXXTTGATTCTTTTCTGAATGGTACCTTA- TACTT XTATAGCATT TTCCTTT |        |        |        |        |        |        |        |  |  |       |
|-------------|------------------------------------------------------------------------------------------|--------|--------|--------|--------|--------|--------|--------|--|--|-------|
|             | 112570                                                                                   | 112580 | 112590 | 112600 | 112610 | 112620 | 112630 | 112640 |  |  |       |
| Human       | GGAAGTTATAGGTAAAATAAGAATTTTACTTTTTGTTTCTTTTCTGAATGGTACCTCA- TATTTT GACAGCATTATCCTTT      |        |        |        |        |        |        |        |  |  | 90149 |
| PolarBear   | GGAAGCTGTAAGTGAAA- AAAGAACA TACTTTT GATTCTTTTCTGAATGGTACCTTA- TACTTTTATAGCATT TTCCTTT    |        |        |        |        |        |        |        |  |  | 48290 |
| Cow         | GGAAGCTATAAATGAAA- AA- - - - - GATTTTTC- - AGAATGGTACCTTA- TACTTTTATAGCATT TTCCTTT       |        |        |        |        |        |        |        |  |  | 84126 |
| Dog         | AGAAGCTACAAGTGAAA- AAAGAAAATACTGTTGGTTCTTTTCTGAATTGTACCTTA- TACTTT CATAGCATT TTCCTTT     |        |        |        |        |        |        |        |  |  | 78202 |
| BelugaWhale | GGAAGCTATAAATGAAA- AA- - - - - GATTTTTT- GGAATGGTACCTTA- TACTTCTATAGCATT TTCCTTT         |        |        |        |        |        |        |        |  |  | 78664 |
| Donkey      | GAAAGCTGTAAGTGAAA- AA- - - - TTTACGTTT GATTCTTTTCTGGATGGTACCTTA- TACTTCCACGGCATT TTCCTCT |        |        |        |        |        |        |        |  |  | 87311 |
| Cat         | AGAAGCTGTAAGTGAAA- TAAGAATTTACTTTTTGAATCTTTTCTGAATGGTACCTTAACACTTCTACAGCATT TTCCTTT      |        |        |        |        |        |        |        |  |  | 83548 |
| Ferret      | - - - - - A- - - - -                                                                     |        |        |        |        |        |        |        |  |  | 85636 |
| Lion        | GGAAGCTGTAAGTGAAA- TAAGAATTTACTTTTTGAATCTTTTCTGAATGGTACCTTAACACTTCTACAGCATT TTCCTTT      |        |        |        |        |        |        |        |  |  | 81296 |
| Vaquita     | GGAAGCTATAAATGAAA- AA- - - - - GATTTTTT- - GGAATGGTACCTTA- TACTTCTATAGCATT TTCCTTT       |        |        |        |        |        |        |        |  |  | 79917 |
| Pig         | GGAAGCTATAAGTGAAA- AA- - - - - GATTTTTT- - GGAATGGTACCTTA- TACTTTTATAGCATT TTCCTTT       |        |        |        |        |        |        |        |  |  | 78949 |



Dienstag, 3. Mai 2022 08:41

| Majority    | T CAGACCTGTTTTAT- - - - - ATTTAACTGGTTTA- - TTCTATACAAGTAAGTATGACAAGATGCATGGATTTAACA |        |        |        |        |        |        |        |       |
|-------------|--------------------------------------------------------------------------------------|--------|--------|--------|--------|--------|--------|--------|-------|
|             | 112650                                                                               | 112660 | 112670 | 112680 | 112690 | 112700 | 112710 | 112720 |       |
| Human       | T CAGATCTGTTTTAT- - - - - ATTTAATTGGTTTA- - - TTATACATGTAAGTATGATTAGATTCATGGATTTAACC |        |        |        |        |        |        |        | 90216 |
| PolarBear   | T CAGACCAATTTTAT- - - - - ATTTAACTGGTTTATATTCTATACAAATAAGTATGACAGGATGCACAGATTTAATA   |        |        |        |        |        |        |        | 48361 |
| Cow         | T CAGACCTGTTTTAT- - - - - ATTTAACTGGTTTG- - TTCTATACAAGTAAGTATGACAAGATGCATGGATTTAACA |        |        |        |        |        |        |        | 84195 |
| Dog         | T CAGACCTGTTTTAT- - - - - ATTTAACTGATTTATGTTCTATACAGGTAAGTATGATAAGATGCATGGGTTTAATA   |        |        |        |        |        |        |        | 78273 |
| BelugaWhale | T CAGACCTGTTTTAT- - - - - ATTTAACTGGTTTA- - TTCTATACAAGTAAGTATGACAAGATGCATGGATTTAACA |        |        |        |        |        |        |        | 78733 |
| Donkey      | T GAGGCATGTTTTAT- - - - - ATTTAACTAGTTTA- - GTCTATGCAAGTAAGTATGTCAAGATGCATGGTTTTAACA |        |        |        |        |        |        |        | 87380 |
| Cat         | T CAGAACTGTTTTATATTTAACTGGTTTAACTGGTTTATATTCTATGTGAGTAAGTAGGAAAAGATGCTTGGATTTAATA    |        |        |        |        |        |        |        | 83628 |
| Ferret      | ----- GATG-----                                                                      |        |        |        |        |        |        |        | 85640 |
| Lion        | T CAGAACTGTTTTAT- - - - - GTTTAACTGGTTTATATTCTATGTGAGTAAGTAGGAAAAGATGCTTGGATTTAATA   |        |        |        |        |        |        |        | 81367 |
| Vaquita     | T CAGACCTGTTTTAT- - - - - ATTTAACTGGTTTA- - TTCTATACAAGTAAGTATGACAAGATGCATGGATTTAACA |        |        |        |        |        |        |        | 79986 |
| Pig         | T CAGACCTGTTTTAT- - - - - GTTTAACTGGTTTA- - TTCTATACAAGTAAGTATGACAAGATGCATGGATTTAACA |        |        |        |        |        |        |        | 79018 |

| Majority    | AATTCTGGGT- ATCTCCTGTGTCAGACTGTGTAAGTATACTAATCAAATTAATA- CATT- TGAGAGTAGGGATTTT      |        |        |        |        |        |        |        |       |
|-------------|--------------------------------------------------------------------------------------|--------|--------|--------|--------|--------|--------|--------|-------|
|             | 112730                                                                               | 112740 | 112750 | 112760 | 112770 | 112780 | 112790 | 112800 |       |
| Human       | AGTTCTTTGT- ATCTTCTGTGTCAAAATGTATACTGTAGTATACTGTTTATATTAGAACTCTTTAAAAGTGGATGTTCT     |        |        |        |        |        |        |        | 90295 |
| PolarBear   | AATTCTGTGT- ATCTCCAGTGTGTCAGACTGTGTAAGTATACTAATCAAATTAATAACATTT- TGAGAGTAGGGATTTT    |        |        |        |        |        |        |        | 48439 |
| Cow         | AGTTCTGGGT- ATCTCCTGTGTCAGACTGTGTAAGTATACTAATCAAATTAATAAACATTT- TGAGAGTAGGGATTTT     |        |        |        |        |        |        |        | 84273 |
| Dog         | AATTCTGTGT- ATCTCTGGTATCAGACTATGTGCTGCAAGTATACTAATCAA- - AAACATTT- TGAGAGTAGGGGTTTT  |        |        |        |        |        |        |        | 78348 |
| BelugaWhale | AATTCCGGGT- ATCTCCTGTGTCAGACTGTGTAAGTATACTAATCAAATTAATA- CATT- TGAGAGTAGGGATTTT      |        |        |        |        |        |        |        | 78810 |
| Donkey      | AATTCTGACT- ATATCCTATGTGTCAGACTGTGTAAGTGTGGTCTACTCATCAAATTAATAAGATTCTGAGGGTAGGAACTCT |        |        |        |        |        |        |        | 87459 |
| Cat         | AATTGGGCAT- ATCTCTGGTGTGTCAGACTGTGTAC- - - - - GACTG- - - - - T- TGTGAGTAGG- ATTTT   |        |        |        |        |        |        |        | 83683 |
| Ferret      | -----                                                                                |        |        |        |        |        |        |        | 85640 |
| Lion        | AATTGTGCAT- TTCTCTGGTGTGTCAGATTGTGTAC- - - - - GACTG- - - - - T- TGTGAGTAGG- ATTTT   |        |        |        |        |        |        |        | 81422 |
| Vaquita     | AATTCCGGGT- ATCTCCTCTGTGTCAGATTGTGTAAGTATACTAATCAAATTAATA- CATT- TGAGAGTAGGGATTTT    |        |        |        |        |        |        |        | 80063 |
| Pig         | AATTTTGGATTATCTCCTGTGTCAGACTGTGTAAGTATACTAATCAAATTAATAAACATTT- TGAGAGTAGGGATTTT      |        |        |        |        |        |        |        | 79097 |

Dienstag, 3. Mai 2022 08:41

| Majority    | GTTCTCAXTTCCCTGCTCTTCCA- XATTGCCTTTAXCTCTC- TGCTGTTAATACTCTAATACTTTGA- - - - GTAGTCAA    |        |        |        |        |        |        |        |       |
|-------------|------------------------------------------------------------------------------------------|--------|--------|--------|--------|--------|--------|--------|-------|
|             | 112810                                                                                   | 112820 | 112830 | 112840 | 112850 | 112860 | 112870 | 112880 |       |
| Human       | ATTCTTAATTTCCCTGATCTTCCA- CATTGTCTTTATCTGTA AACTCTACTGTTTTTTGTTGGTTTTTTGTTTTTGTTTTGAG    |        |        |        |        |        |        |        | 90374 |
| PolarBear   | GTTCTCATTTCCCTGCTCTTCCA- CATTGCCTTTATCTCTC- TGCTGTTAATACTCTAATACTTTGA- - - - GTAGTCAA    |        |        |        |        |        |        |        | 48512 |
| Cow         | GTTCTCAGTTCCCTGCTCTTCCA- TATTGTCTTTACCTCTC- TGTGTTAATACTCTAATACTTTGATTTGAGTAGTCAA        |        |        |        |        |        |        |        | 84351 |
| Dog         | ATTCTCATTTCCCTGCTCTTCCA- TATTGCCTTTATCTCTC- TACTGTTAATACTCTAATACTTTGA- - - - GTAGTCAA    |        |        |        |        |        |        |        | 78421 |
| BelugaWhale | ATTCTCAATTTCCCTGCTCTTCCA- TACTGCCTTTACCTCTC- TGTT- - TAATACTCTAATACTTTGA- - - - GTAGTCAA |        |        |        |        |        |        |        | 78881 |
| Donkey      | - - TCTCAGTTCCCTGCCCTTTCA- CATT- CCTTTACCTCTC- TGCTCTTAATACTCTAATACTGTGATTTGAGCAGTCAA    |        |        |        |        |        |        |        | 87534 |
| Cat         | GTCCTCATTTCCCTTTTCTTCCA- CCTTGCCTTTATCTCTC- TGCTGTTAATACAC- - AACTTGGA- - - - ATAGTCAA   |        |        |        |        |        |        |        | 83754 |
| Ferret      | -----                                                                                    |        |        |        |        |        |        |        | 85640 |
| Lion        | GTCCTCATTTCCCTTTTCTTCCA- CCTTGCCTTTATCTCTC- TGCTGTTAATACAC- - AACTTGGA- - - - GTAGTCAA   |        |        |        |        |        |        |        | 81493 |
| Vaquita     | ATTCTCAATTTCCCTGCTCTTCCA- TACTGCCTTTACCTCTC- TGTT- - TAATACTCTAATACTTTGA- - - - GTAGTCAA |        |        |        |        |        |        |        | 80134 |
| Pig         | GTTCTCAATTTCTCTGCTCCTCCAATATTGCCTTTACCTCTC- TGTGTTAATACTCTAATACTTTGATTTGAGTAATCAA        |        |        |        |        |        |        |        | 79176 |

| Majority    | AT- AGACCTTCAGTTT- - - AGCXAXACTATATGAC- TTATGAAATGGTCTTCTTTAGTTGT- - - - - GACTAGT- GAXTA     |        |        |        |        |        |        |        |       |
|-------------|------------------------------------------------------------------------------------------------|--------|--------|--------|--------|--------|--------|--------|-------|
|             | 112890                                                                                         | 112900 | 112910 | 112920 | 112930 | 112940 | 112950 | 112960 |       |
| Human       | AC- AGAGTCTCGCTCTGTCACCCAGGCTGGAGTGC ACTGTGGCACCATCTCAGCTCACTGTAACCTCCGCCTCCTGGGTA             |        |        |        |        |        |        |        | 90453 |
| PolarBear   | ATCAGACCTTCAGTTT- - - AA- - AGTATATATGAC- TTTTCAAATGGTCTTAAGTTGTTGT- - - - - GACTAGT- GAGTA    |        |        |        |        |        |        |        | 48579 |
| Cow         | AT- AGACGTTTCAGTTT- - - AGCTAAACTATATGAC- TTATGACATGGTTTTCTTCAGTTGT- - - - - GACTACTTGAATA     |        |        |        |        |        |        |        | 84420 |
| Dog         | ATCAGACGTTCCAGTTT- - - AA- - AGTATAT- - GGC- TTACGAAATGGTCTTCAGTTGTTCT- - - - - GACTAGT- GAGTA |        |        |        |        |        |        |        | 78486 |
| BelugaWhale | AT- AGACTTTTCAGTTT- - - AGCTAAACTATATGAC- TTATGACATGGTTTTCTTCAGTTGT- - - - - GACTAGT- GAATA    |        |        |        |        |        |        |        | 78949 |
| Donkey      | ATCAGACCTTCTGTTT- - - AGCTCAAGCATATGAC- TTATGAAATAGTCTTTTTTAGTTGTTGT- - - GACTAAT- GAATA       |        |        |        |        |        |        |        | 87606 |
| Cat         | ATCAGACCTTCAGTTT- - - AA- - AGTATAT- - GAC- TTATAAAATGGTCGTAAGTTGTTGT- - - - - GGCTAGT- GAGTA  |        |        |        |        |        |        |        | 83819 |
| Ferret      | -----                                                                                          |        |        |        |        |        |        |        | 85640 |
| Lion        | ATCAGACCTTCAGTTT- - - AA- - AGTATAT- - GAC- TTATAAAATGGTCGTAAGTTGTTGT- - - - - GACTAGT- GAGTA  |        |        |        |        |        |        |        | 81558 |
| Vaquita     | AT- AGACCTTCAGTTT- - - AGCTAAACTATATGAC- TTATGACATGGTTTTCTTCAGTTGT- - - - - GACTAGT- GAATA     |        |        |        |        |        |        |        | 80202 |
| Pig         | AT- AGACCTTCAGTTT- - - AGCTAAACAGTATGAC- TTATGAAATGGTTTTCTTCAGTTGT- - - - - GACTAGT- GAATA     |        |        |        |        |        |        |        | 79244 |

Dienstag, 3. Mai 2022 08:41

| Majority    | AAACATAAAACXTATA- - ACTGTTCTGTAATCTCAGACCA- GTTCATTTAGTTTAAAAATAACCCAAGTCTXCCTCAAG |                                                  |                                         |           |           |           |           |           |       |
|-------------|------------------------------------------------------------------------------------|--------------------------------------------------|-----------------------------------------|-----------|-----------|-----------|-----------|-----------|-------|
|             | 112970                                                                             | 112980                                           | 112990                                  | 113000    | 113010    | 113020    | 113030    | 113040    |       |
| Human       | CAAGCAATTCTGCCTCAGCCTCCTGAGTAA-                                                    | CTGGGACCACAGGCACGAGCCACCACGCCAGCTAATTTTTGTATTTTT |                                         |           |           |           |           |           | 90532 |
| PolarBear   | AAA- - - - - CATAGAGA                                                              | ACTGTTCTGTAATCTCAGATCA-                          | GTTCATTTAGCTTAAAAATAATCCAAGTCTACTTCAAG  |           |           |           |           |           | 48651 |
| Cow         | AAACATAAAACGTATA-                                                                  | ACTGTTCTCTAATCTCAGACCA-                          | GTTTATTTAGTTCAAAAAGTAACCCAAGTCTGCCTCAAG |           |           |           |           |           | 84497 |
| Dog         | AAATGTGAAACGTAGAGA                                                                 | ACTGTTCTGTAATCTCAGGCCA-                          | GTTCATTTAGCTTAAAAATAACCCAAGTACTTCAAG    |           |           |           |           |           | 78565 |
| BelugaWhale | AAACATAAAACGTATA-                                                                  | ACTGTTCTCTAATCTCAGACCA-                          | GTTCTTTTAGTTGAAAAGTAACCCAAGTCTGCCTCAAG  |           |           |           |           |           | 79026 |
| Donkey      | AAACATATAACATGTT-                                                                  | AACCGTTCTTGAATCTCAGACAA-                         | GTCCATTTAGTTTAAAAATAACCCAACCAGTACCTCAAG |           |           |           |           |           | 87684 |
| Cat         | AAACATAAAACATGTA-                                                                  | ACTTATCTGTAACCTCAGACCA-                          | GTTTCGTTAGTTTAAAAATAACCCAAGTACCGCAGA    |           |           |           |           |           | 83896 |
| Ferret      | - - - - -                                                                          | - - - - -                                        | - - - - -                               | - - - - - | - - - - - | - - - - - | - - - - - | - - - - - | 85640 |
| Lion        | AAACATAAAACATGTA-                                                                  | ACTTATCTGTAACCTCAGACCA-                          | GTTTGCTTAGTTTAAAAATAACCCAAGTACCGCAGA    |           |           |           |           |           | 81635 |
| Vaquita     | AAACATAAAACGTATA-                                                                  | ACTGTTCTCTAATCTCAGACCA-                          | GTTCTTTTAGTTGAAAAGTAACCCAAGTCTGCCTCAAG  |           |           |           |           |           | 80279 |
| Pig         | GAACATAAAACATATATA                                                                 | ACTGTTCTCTAATCTCAGACCA-                          | GTTCATTTAGTTCAAAAATAACCCAGTCTGCCTCAAG   |           |           |           |           |           | 79323 |

| Majority    | AAGTAGGCATGTXAT- - - GTT- CTGTGTTTAGGCACTGTGCTGTGTGCTG- GGGTAGAGACXGTGGTTCCTGCCTTCATG |                |                                                  |                                     |                               |           |           |           |       |
|-------------|---------------------------------------------------------------------------------------|----------------|--------------------------------------------------|-------------------------------------|-------------------------------|-----------|-----------|-----------|-------|
|             | 113050                                                                                | 113060         | 113070                                           | 113080                              | 113090                        | 113100    | 113110    | 113120    |       |
| Human       | A- GTAGAGATGGGGT- - -                                                                 | GTTACCATATT- - | GGC- - CAGGCTG-                                  | GTCTCGAACTCCTAGACCTTGTGATCCGCCACCTC |                               |           |           |           | 90603 |
| PolarBear   | AAGTAGGCATGTAAT- - -                                                                  | GTT- TTGTGTTT  | AAGCACTGTA                                       | CTTTGTGCTG-                         | GAATAAAGACCGTGGTGCCTGCCTTCATG |           |           |           | 48726 |
| Cow         | AAGTAGGCATGTGAT- - -                                                                  | GTT- CTGTGTTT  | AAGCACTGTGCTGTGTGCTG-                            | GGGTAGAGACACTGGTTCCTGCTTCATG        |                               |           |           |           | 84572 |
| Dog         | AATTAGGTATGTAAT- - -                                                                  | GTT- CTGTGTTT  | AAGCACTGTGCTGTGTGCTG-                            | GGATAGAGACCGTGGTTCCTGCCTTCATA       |                               |           |           |           | 78640 |
| BelugaWhale | AAGTAGCTATGTGAT- - -                                                                  | GTT- CTGTGTTT  | AAGCACTGTGCTGTGTGCTGTGGGAGAGACACTGGTTCCTGCTTCATG |                                     |                               |           |           |           | 79102 |
| Donkey      | AAGTAGCCACATAAT- - -                                                                  | GTT- CTGT      | TTTTAGGCATTGTGCTGTGTGCTG-                        | GTGTAGAGACAGTGGTTCCTGCCCTCATG       |                               |           |           |           | 87759 |
| Cat         | AAGTAGGCATGTAATAATGTT-                                                                | CTGTGTT-       | AGGCACTGTGCTGTGTGCTG-                            | GGATAGAGACCGGGGTTTCCTACCTTCATG      |                               |           |           |           | 83973 |
| Ferret      | - - - - -                                                                             | - - - - -      | - - - - -                                        | - - - - -                           | - - - - -                     | - - - - - | - - - - - | - - - - - | 85640 |
| Lion        | AAGTAGGTATGTAATAATGTT-                                                                | CTGTGTT-       | AGGCACTGTGCTGTGTGCTG-                            | GGATAGAGACCGGGGTTTCCTACCTTCATG      |                               |           |           |           | 81712 |
| Vaquita     | AAGTAGCTATGTGAT- - -                                                                  | GTT- CTGTGTTT  | AAGCACTGTGCTGTGTGCTGTGGGAGAGACACTGGTTCCTGCTTCATG |                                     |                               |           |           |           | 80355 |
| Pig         | AAGTAGCCATGTGAT- - -                                                                  | GTT- CTGTGTTT  | AAGCACTGTGCTGTGTGCTG-                            | GGGTAGAGACACTGGTTCCTGCTTCATG        |                               |           |           |           | 79398 |



Dienstag, 3. Mai 2022 08:41

| Majority    | GAXAA- TAGAXTAGGAGGGATAGTGAAGGAGATGXGAAATTGTTATAXATAGAACA- - - - -               |        |        |        |        |        |        |        |       |
|-------------|----------------------------------------------------------------------------------|--------|--------|--------|--------|--------|--------|--------|-------|
|             | 113290                                                                           | 113300 | 113310 | 113320 | 113330 | 113340 | 113350 | 113360 |       |
| Human       | GGTGAATAAAACAT- - ATAAC TTTCTAGCATCAGACCAGTTTCA TTTAGTTTAAAAATGATCCA- - - - -    |        |        |        |        |        |        |        | 90817 |
| PolarBear   | GAGAA- - AGGTTAGGAAAGATAACGAACAAGTTGGGAAATTATTATAGATAGAACA- - - - -              |        |        |        |        |        |        |        | 48913 |
| Cow         | GACAAATAGCTTAGGAAAGATTGTGAAGGAGATAGGAAATCATTATAAGTAGAAAA- - - - -                |        |        |        |        |        |        |        | 84767 |
| Dog         | GAGAA- - AGGCTAGGAGGGATAATGAACAAGATGGGAAACTGGTATAGAT- - - - CA- - - - -          |        |        |        |        |        |        |        | 78784 |
| BelugaWhale | GATAAATAGATTAGGGGGGATAGTGAAGGAGATAAGAAATTGTTATAAATAGAAAATAGTGAAGGAGATAAGACATTGCT |        |        |        |        |        |        |        | 79329 |
| Donkey      | GATGTGTAGACCAGGAGGGACAGTGAAGGAGAT- - - AAATTGTTACAAATAGACCA- - - - -             |        |        |        |        |        |        |        | 87958 |
| Cat         | GAGAA- - AGACTAGGAGGGATAATGACCA- GATGAAAAATTATTGTAGCTAGAACA- - - - -             |        |        |        |        |        |        |        | 84139 |
| Ferret      | - - - - - TTGGGAAATTGTTATACATAGAACA- - - - -                                     |        |        |        |        |        |        |        | 85666 |
| Lion        | GAGAA- - AGACTAGGAGGGATAATGACCA- GATGAAAAATTATTGTAGCTAGAACA- - - - -             |        |        |        |        |        |        |        | 81870 |
| Vaquita     | GATAAATAGATTAGGGGGGATAGTGAAGGAGATAAGA ACTTGTATAAATAGAAAA- - - - -                |        |        |        |        |        |        |        | 80561 |
| Pig         | GAAGAGTAGTAGATTAGGGATGGTAAAGGAGATAGGAAATTGTTATAAATAGAAAA- - - - -                |        |        |        |        |        |        |        | 79588 |

| Majority    | - - - - - GCATGCACACAGGGCTAAA- GGTAAGAAA- - - AACXXXCACGTTAAXGAAAATAGG- TTTTGTATAGC    |        |        |        |        |        |        |        |       |
|-------------|----------------------------------------------------------------------------------------|--------|--------|--------|--------|--------|--------|--------|-------|
|             | 113370                                                                                 | 113380 | 113390 | 113400 | 113410 | 113420 | 113430 | 113440 |       |
| Human       | - - - - - GCAGCTATGTCAAGAAATA- GTCATGTAATGTTCTGTTTTCACACACTGCACTATGTTCTGGGGTAGA        |        |        |        |        |        |        |        | 90884 |
| PolarBear   | - - - - - GCATGCACACAGTGCTAAA- GGTAAGAAA- - - AACAAACATGTCAAGGA- GATAGG- TTTTATATAGC   |        |        |        |        |        |        |        | 48975 |
| Cow         | - - - - - GCATG- - CACCAGGCTAAA- GGTTAAATA- CTAGCATTGT- TTA AAAAAAAAAATG- TTTTGTACACC  |        |        |        |        |        |        |        | 84829 |
| Dog         | - - - - - GCATGCATACAGGGCTAAA- GGTAAGAAA- - - AACTAGCACTTTAAGGA- GATAGG- TTTTATGTAGT   |        |        |        |        |        |        |        | 78846 |
| BelugaWhale | ATAAATAGAAAAGCATGCACACGGGGCTAAA- GGTA AAAAA- - - AA- CTAGTGTTTAAGAAAATACA- TTTTGTACACC |        |        |        |        |        |        |        | 79402 |
| Donkey      | - - - - - GCATGCACACGGGGACTAAA- GGGAAAGAAA- - - AACTGGCAC- TTAAGCAACCATG- TTTTGTATAGC  |        |        |        |        |        |        |        | 88020 |
| Cat         | - - - - - GCATGCACACAGGGCTAAAAGGTAAGAAA- - - AATTGGCACTTCAAGGAAGATAGGGTTTTGTATAGC      |        |        |        |        |        |        |        | 84204 |
| Ferret      | - - - - - GCATACACACAGGGTAAA- GGTGGGAAA- - - AACGAGCATGTCAAGGA- GATAGG- TTTTATATAGC    |        |        |        |        |        |        |        | 85728 |
| Lion        | - - - - - GCATGCACACAGGGCTAAAAGGTAAGAAA- - - AACTGGCACTTCAAGGAAGATAGGGTTTTGTATAGC      |        |        |        |        |        |        |        | 81935 |
| Vaquita     | - - - - - GCATGCACACGGGGCTAAA- GGTA AAAAA- - - AA ACTAGTGTTTAAGAAAATACG- TTTTGTACACC   |        |        |        |        |        |        |        | 80623 |
| Pig         | - - - - - GCACAGACACCGGGCTAAA- GGTA AAAAAACTAGCATTTCGTTTAAGGAATAGG- TTTTGTACAGC        |        |        |        |        |        |        |        | 79654 |



Dienstag, 3. Mai 2022 08:41

| Majority    | AATATATG- TTCAGAGAGGCTGGAGAGAT- ATXTTAGGGTCAGACTGXGAAAXXTXAAAXXGGCATGTTAAAXXTC- - - T     |        |        |        |        |        |        |        |       |
|-------------|-------------------------------------------------------------------------------------------|--------|--------|--------|--------|--------|--------|--------|-------|
|             | 113610                                                                                    | 113620 | 113630 | 113640 | 113650 | 113660 | 113670 | 113680 |       |
| Human       | GATTTCTGCATTAAGGATACTCAACCTGT- - - - - ACAGACTGGGAAAGGT- - ATAAGCCATGTTAAAGAA- - - - T    |        |        |        |        |        |        |        | 91080 |
| PolarBear   | GAAATAC- - TTCCAAGAGGCTAGGGAGAT- - - - - TTCATT- CTTTAACATGGCTT- ATACTTTTC- - - C         |        |        |        |        |        |        |        | 49158 |
| Cow         | AATATTTA- TTCAGGGAGGCTTGAGAAAG- ATGTTAGGGTCAGACTGAGAAATAT- - AGAAGACATGTTGAA- - - - - T   |        |        |        |        |        |        |        | 85024 |
| Dog         | GAAGTATG- TTCAAAGAGGCTGGGGAGAT- - - - - TTTATT- CTTTAACATGGTTT- TTGCCTTTC- - - C          |        |        |        |        |        |        |        | 79029 |
| BelugaWhale | AATGTTTA- TTCAGGGAGGCTTGATAGAG- ATGTTAGGGTCAGACTGAGAAAGGCGCATAAGCCATGTTAAAGAAAGAGT        |        |        |        |        |        |        |        | 79608 |
| Donkey      | AATATCTG- TTCAAAGAGGCTGGAGAGATAAT- TTAGGGTCAGACTGGGAAAGGT- - ACAAGCCATGTTAAAGAA- - - - T  |        |        |        |        |        |        |        | 88217 |
| Cat         | TAAATATG- TTCAGAGATGCTGGGGAGATCAGGATATAGTCCAAATTCATTTCTTCAACATGGCTTTATACCTTTC- - - C      |        |        |        |        |        |        |        | 84403 |
| Ferret      | GAAATATG- TTCAAAGAGGCTGAGGAGAT- - - - - TTCATT- CTTTAATATGGCTT- ATACCTTTC- - - C          |        |        |        |        |        |        |        | 85912 |
| Lion        | TAAATATG- TTCAGAGATGCTGGGGAGATCAGGATATAGTCCAAATTCATTTCTTAAACATGGCTTTATACCTTTC- - - C      |        |        |        |        |        |        |        | 82110 |
| Vaquita     | AATGTTTA- TTCAGGGAGGCTTGATAGAG- ATGTTAGGGTCAGACTGAGAAAGGCGCATAAGCCATGTTAAAGAAAGAGT        |        |        |        |        |        |        |        | 80829 |
| Pig         | AATATCTG- TCCAGGGAAGCTTGAGAGGA- ATATTAGGGTCAGACTGAGAAAGGT- - TTA- GTCATGCTAAAGA- - - - GT |        |        |        |        |        |        |        | 79874 |

| Majority    | TAGTTTGAAC TTX- TCCCTAAGGATTTTAAAG- - CAGGTAATGACAT- - - CAGATTTGTAATTT- ATAGAGGTCATCCAGC  |        |        |        |        |        |        |        |       |
|-------------|--------------------------------------------------------------------------------------------|--------|--------|--------|--------|--------|--------|--------|-------|
|             | 113690                                                                                     | 113700 | 113710 | 113720 | 113730 | 113740 | 113750 | 113760 |       |
| Human       | GAGTTTCAACTTTGTCCTTAAGGGTTTTAAG- - CAGGTATTGACGTGATCAGATTTGTAATTT- ATGAAGGTCATCAAGC        |        |        |        |        |        |        |        | 91157 |
| PolarBear   | TAGTCTGA- - - - - CCTCAAGGATTTTAAAG- - CAGATAATGACAT- - - CAGATTTGTAATTT- ATAGAGTTCATCCAGC |        |        |        |        |        |        |        | 49225 |
| Cow         | AAGTTGAGGCTTCATCCTTAAGGATTTTAAAG- - CAGGTAGTGACAT- - - AGATTTGTA- TAGAACGGAGG- - - - -     |        |        |        |        |        |        |        | 85088 |
| Dog         | TAGTCTGATCT- - GACCTTAACGATTTTAAAG- - CAGGTAATGACAT- - - CAGATTTGCAATTT- ATAGGGCTCATCCAGC  |        |        |        |        |        |        |        | 79101 |
| BelugaWhale | AAGTTTAGACTTTTATCCCTAAGGGTTTTAAG- - CAGGTAGTGACAT- - - AGATTTGTA- TAGAATGGATTG- - - - -    |        |        |        |        |        |        |        | 79673 |
| Donkey      | GAATTTGGACTTTGTCTCTAAGGGTTTTAAG- - CAGGTAATGACATGATCAGATTTGCAATTT- ACAGAGGTCATCCAGC        |        |        |        |        |        |        |        | 88294 |
| Cat         | TAGTCTGA- - - - - CCCTAAGGATTTTAAAG- - CAGGTAATAACAT- - - GAGATTTGCAATTT- ATAGAGGTCATCCAGC |        |        |        |        |        |        |        | 84470 |
| Ferret      | TAGTGTGA- - - - - CCTTAAGGATTTTAAAG- - CAGGTAATGACAT- - - CAGATTTGTAATTT- ATAGAGTTCATCTAGC |        |        |        |        |        |        |        | 85979 |
| Lion        | TAGTCTGA- - - - - CCCTAAGGATTTTAAAG- - CAGGTAATAACAT- - - GAGATTTGCAATTT- ATAGAGGTCATCCAGC |        |        |        |        |        |        |        | 82179 |
| Vaquita     | AAGTTTAGACTTTTATCCCTAAGGGTTTTAAG- - CAGGTAGTGACAT- - - AGATTTGTA- TAGAATGGATTG- - - - -    |        |        |        |        |        |        |        | 80894 |
| Pig         | AAGTTTAGACTTTTATCCATAAGAGTTTTAAG- - CAGATAGCGACTTGGTCAGATTTGTAATTTTACAGAGGTCCTTCTGGC       |        |        |        |        |        |        |        | 79952 |





Dienstag, 3. Mai 2022 08:41

| Majority    | GTATCATAGGACTTGGCAATTAGGATATGGGGCAGAAGGGAGAAAAAGTT - - ACAGATGAGTACTAAGTTTCTTTCT- TG    |        |        |        |        |        |        |        |       |
|-------------|-----------------------------------------------------------------------------------------|--------|--------|--------|--------|--------|--------|--------|-------|
|             | 113930                                                                                  | 113940 | 113950 | 113960 | 113970 | 113980 | 113990 | 114000 |       |
| Human       | CTATCACAAATATTTAGCAATTAGGATGTGTAAACAGAAGGGAGAAAAAGAGCTAGGGATGCTTATTAAGTTTCTTTCTTGT      |        |        |        |        |        |        |        | 91371 |
| PolarBear   | GTATTCTAGGACTTGGCA- - - GGTTGTGGGGCAGAAGGGGAAAAAGTT - - ACAGATGAGTACTAAGTTCCTTTCTGCA    |        |        |        |        |        |        |        | 49440 |
| Cow         | GTTACATAGGACTTGGTAATTAGGATATGGAGCAGAAGGGAGAAAAAGTT - - AAAGTTTCTA- - - - - AAGTTTCT- TG |        |        |        |        |        |        |        | 85273 |
| Dog         | GTATCGTAGGACTTGGGAATTAGGTTATGGGGCAGAAGGGAGAAAAAGTTTATAGATAAGTACTAAGTTTATT- - - CA       |        |        |        |        |        |        |        | 79305 |
| BelugaWhale | GTATGGTAGGACTTGGCAATTAGGATATAGATCAGCAGGGAGAAAATGTT - - ACAGATGAGTATTAAGTTTCTTTCT- TG    |        |        |        |        |        |        |        | 79868 |
| Donkey      | GAGTCATAGGACTTGGCAATTGGGATATGAGGCAGAAAGAAGAAGT - - ACAGATGAGTACTAAGTTTCTTTCTTGG         |        |        |        |        |        |        |        | 88524 |
| Cat         | TTATCGTGGGACTTGGCAGTTAGGTTATGGGGCAGGAGAGAGAAGTTGTT - - ACAGATGAGTACTAAGTTTCTTTCTGTG     |        |        |        |        |        |        |        | 84685 |
| Ferret      | GTATTCTAGGACTTGGCAATTAGGTTGTGGGGCAGAAGGGAGAAAAAGTT - - ATAGATGAGTACGAAGTTTCTTTCTGCA     |        |        |        |        |        |        |        | 86201 |
| Lion        | TTATCATAGGACTTGGCAGTTAGGTTATGGGGCAGGAGAGAGAAGTTGTT - - ACAGATGAGTACTAAGTTTCTTTCTGTG     |        |        |        |        |        |        |        | 82392 |
| Vaquita     | GTATGGTAGGACTTGGCAATTAGGATATAGATCAGCAGGGAGAAAATGTT - - GCAGATGAGTACTAAGTTTCTTTCT- TG    |        |        |        |        |        |        |        | 81095 |
| Pig         | GTATTATAGGACTTGGCAATTAGGATATGGAGCAGAAGCGAGCAAAGGTT - - ACAGATGAGT- - - - - TTCTTTCT- TG |        |        |        |        |        |        |        | 80155 |

| Majority    | GCAACTAAXT- TATGATTTAT- - - CAGGATTGTCAAGGAAGAGAGAGATT CATAATCTGGATTTTCATTCTATGAAAGAA                        |        |        |        |        |        |        |        |       |
|-------------|--------------------------------------------------------------------------------------------------------------|--------|--------|--------|--------|--------|--------|--------|-------|
|             | 114010                                                                                                       | 114020 | 114030 | 114040 | 114050 | 114060 | 114070 | 114080 |       |
| Human       | GTAGCTCACTATACGATTTGTTAGCAGGATTGTTGAGGAAGATAGATATTCATAATCTGGATTTTCATTCTATGAAAGTA                             |        |        |        |        |        |        |        | 91451 |
| PolarBear   | GCAACTAAGTGTATGACTTA- - - GCAGGATTGGCAAGGGAGAGATTGATT CATAATCAGGATTTTCATCCTATGAAAGAA                         |        |        |        |        |        |        |        | 49517 |
| Cow         | GGCATT- - - - - - - - - - - TCAG- - - CAGGACTGTC- - - - - - - - - - - AAGAACTCAT- - TCTGGTTTTCATTCTATGAAAGAA |        |        |        |        |        |        |        | 85330 |
| Dog         | GCAACTAAGTTTATGATTTAT- - - CAGGATTGGCAAGGAAGAGAGAGATT CATAATCAGGATTTACATTTTATGAAAGAA                         |        |        |        |        |        |        |        | 79382 |
| BelugaWhale | GGCATT- - - - - - - - - - - TAG- - - CAGGACTGTCAAGGAAGAGAGAGACTCACATTTTGGATTTTCGTTCTATAAAAGAA                |        |        |        |        |        |        |        | 79933 |
| Donkey      | GCATCTAAGTATATGATTTATCAACAGGATTGTCAAAAAAGAGAGATATTTATAATCTGGATTTTCATTCTATGGGAGAA                             |        |        |        |        |        |        |        | 88604 |
| Cat         | GCATCTA- - - - - - - - - - - TGATTTAT- - - CAGGATTGACAAGGAAGAGA- AGATTCATAATGAGGATTTGCATTCTGTGAAAGAG         |        |        |        |        |        |        |        | 84755 |
| Ferret      | GCAACTAAGTATATGACTTATCAGCAGGATTGGCAAGGAAGAGAGAGATT CATAATCAGGATTTTCATCCTATGACAGAA                            |        |        |        |        |        |        |        | 86281 |
| Lion        | GCATCTAAGTATATGATTTAT- - - CAGGATTGGCAAGGAAGAGA- AGATTCATAATGAGGATTTTCATTCTGTGAAAGAG                         |        |        |        |        |        |        |        | 82468 |
| Vaquita     | GGCATT- - - - - - - - - - - TAG- - - CAGGACTGTCAAGGAAGAGGGAGACTCACATTTTGGATTTTCGTTCTATAAAAGAA                |        |        |        |        |        |        |        | 81160 |
| Pig         | GGCATT- - - - - - - - - - - TCGT- - - CAGGACTGTCTAGGAAGAGAGAAATTCATA- TCTAGATTTTCATTCTGTGGAAGAA              |        |        |        |        |        |        |        | 80221 |



Dienstag, 3. Mai 2022 08:41

| Majority    | 114250                                                                          | 114260 | 114270 | 114280 | 114290 | 114300 | 114310 | 114320 |
|-------------|---------------------------------------------------------------------------------|--------|--------|--------|--------|--------|--------|--------|
| Human       |                                                                                 |        |        |        |        |        |        | 91543  |
| PolarBear   |                                                                                 |        |        |        |        |        |        | 49605  |
| Cow         |                                                                                 |        |        |        |        |        |        | 85414  |
| Dog         |                                                                                 |        |        |        |        |        |        | 79464  |
| BelugaWhale |                                                                                 |        |        |        |        |        |        | 80017  |
| Donkey      |                                                                                 |        |        |        |        |        |        | 88685  |
| Cat         | GTGATCTCACGGTTCGTGAGTCCCAGCCCCTCACTGTCAGCATGCAGCCAGCCTCTCTTTGCCCTCACCTTTTCATGTT |        |        |        |        |        |        | 84987  |
| Ferret      |                                                                                 |        |        |        |        |        |        | 86371  |
| Lion        | GTGATCTCACGGTTCGTGAGTCTCAGCCCCTCACTGTCAGCATGGAGCCAGCCTCTCTTTGCCCTCGCC-TTTCATGTT |        |        |        |        |        |        | 82698  |
| Vaquita     |                                                                                 |        |        |        |        |        |        | 81244  |
| Pig         |                                                                                 |        |        |        |        |        |        | 80297  |

| Majority    | 114330                                                                                | 114340 | 114350 | 114360 | 114370 | 114380                           | 114390 | 114400 |
|-------------|---------------------------------------------------------------------------------------|--------|--------|--------|--------|----------------------------------|--------|--------|
|             |                                                                                       |        |        |        |        | TAAAATCATAG- AAT- - TCAGTTATTTTC |        |        |
| Human       |                                                                                       |        |        |        |        | TAAAATCATAAGAAAATTCAAATTTTTTA    |        | 91571  |
| PolarBear   |                                                                                       |        |        |        | A- - - | AAAATCATAG- AAT- - TTGGTTATTTTC  |        | 49630  |
| Cow         |                                                                                       |        |        |        |        | TAAAACCATAGCAAAA- TTAGGTATTTTC   |        | 85441  |
| Dog         |                                                                                       |        |        |        | A- - - | AAAATCATAG- AAT- - TCAGTTATTTT   |        | 79489  |
| BelugaWhale |                                                                                       |        |        |        |        | TAAAATCATAACAGAATTCAGATATTTTC    |        | 80045  |
| Donkey      |                                                                                       |        |        |        |        | TAAAATCATAAGAGAATTCAGAT- TTTG    |        | 88712  |
| Cat         | CTCGCTCAACATAAATAAGCTTAACCAAAAAAAAAAAAAAAAAAATT- ATTTAAAAATCATGG- AAT- - TCAGTTATTTTC |        |        |        |        |                                  |        | 85063  |
| Ferret      |                                                                                       |        |        |        | A- - - | AAAATCATAG- AAT- - TCAGTTATTTTC  |        | 86396  |
| Lion        | CTCTCTCAACATAAATAAGCTTAACCAAAAAAAAAAAAAAAAAAGATTTATTTAAAAATCATAT- AAT- - TCAGTTATTTTC |        |        |        |        |                                  |        | 82775  |
| Vaquita     |                                                                                       |        |        |        |        | TAAAATCATAACAGAATTCAGATATTTTC    |        | 81272  |
| Pig         |                                                                                       |        |        |        |        | TAAAATCATAGCAAT- - TCAGGTATTTTC  |        | 80323  |

Dienstag, 3. Mai 2022 08:41

| Majority    | AGCTATTCTAAAAGA- - - - AATTATTTTTGCTTTGAACTTTG- - AATATTGTTTTTAATAGGCAT- - - TTCTTTCTTT       |        |        |        |        |        |        |        |       |
|-------------|-----------------------------------------------------------------------------------------------|--------|--------|--------|--------|--------|--------|--------|-------|
|             | 114410                                                                                        | 114420 | 114430 | 114440 | 114450 | 114460 | 114470 | 114480 |       |
| Human       | AACTGTTACGTTAAAAG- - - AATTATGTTTGTGTTGAGCTTTG- - ATATTGTTTGTTAATAGACAT- - - GCTTTCTTT        |        |        |        |        |        |        |        | 91641 |
| PolarBear   | TGTTCTAAAAGAAGA- - - - ATTTTTTTTGCTTTGGACTTTGTTAATACTGTTTTTAATAGGCAT- - - TTTT- CTTT          |        |        |        |        |        |        |        | 49700 |
| Cow         | AACTATTCTAAGAATTATTGTAATATTTTTGCTTTGGATGTTG- - A- TATTGTTTATTAATAGGCAT- - - T- CTTCTCT        |        |        |        |        |        |        |        | 85514 |
| Dog         | AACTATTCTA- - AAA- - - - - A- TTATTTTGTCTTTGAACTGTGTTAATA- - TTTTTTAATAGGCAT- - - TTTTTCTTT   |        |        |        |        |        |        |        | 79555 |
| BelugaWhale | AGCTTATCTAAAA- TGA- - GAATTATTTTTGCTTTGAACCTTG- - A- TACTGTTTTTAATAGGCAT- - - C- CTTCCCCT     |        |        |        |        |        |        |        | 80115 |
| Donkey      | AACTATTCTAAAATATG- - - AATTACTTTTGTCTTTGAACTTTGTTAATGTTG- TTTTAATAGGCAT- - - TCTTTCTTT        |        |        |        |        |        |        |        | 88784 |
| Cat         | AGCTATTCCAAAAGAAG- - - AATTCTTTTTGTTTTGAACTTTGTTAATATTGTTTTTAATAGGCATATTTTTTTCTTT             |        |        |        |        |        |        |        | 85140 |
| Ferret      | TGCTATTCTA- AAGA- - - - - ATTCTTTTTGCTTTTGGACTT- - - - - TGTTTTTAATAAGCAT- - - TTTT- CTTT     |        |        |        |        |        |        |        | 86457 |
| Lion        | GGCTATTCCAAAAGA- - - - - ATTCTTTTTGTTTTGAACTTTGTTAATATTGTTTTTAATAGGCAT- TTTTTTTTCGTT          |        |        |        |        |        |        |        | 82848 |
| Vaquita     | AGCTTATCTAAAA- TGA- - GAATTATTTTTGCTTTGAACCTTG- - A- TACTGTCTTTTAATAGGCAT- - - T- CTTCCCCT    |        |        |        |        |        |        |        | 81342 |
| Pig         | AGCTCCTCTAAAA- - - - - TAATATTTTTGCTTTAAACCTTG- - A- CTTT- - TTAA- AATAAGCAT- - - T- CTTTTTCT |        |        |        |        |        |        |        | 80386 |

| Majority    | TTATAGCCATGAACCATCTTAATGGACAGAAAATGTATGGAAAAATTATTCGTGTTACTCTGTCTAAACATCAGACTGTA |        |        |        |        |        |        |        |       |
|-------------|----------------------------------------------------------------------------------|--------|--------|--------|--------|--------|--------|--------|-------|
|             | 114490                                                                           | 114500 | 114510 | 114520 | 114530 | 114540 | 114550 | 114560 |       |
| Human       | TTATAGCCATGAATCATCTTAATGGACAGAAAATGTATGGAAAAATTATTCGTGTTACTCTGTCTAAACATCAGACTGTA |        |        |        |        |        |        |        | 91721 |
| PolarBear   | TTACAGCCATGAACCATCTTAATGGACAGAAAATGTATGGCAAAATTATTCGTGTTACTCTGTCTAAACATCAGACTGTA |        |        |        |        |        |        |        | 49780 |
| Cow         | TTATAGCCATGAATCATCTTAATGGACAGAAGATGTACGGAAAAATTATTCGTGTTACTCTGTCTAAACATCAGACTGTA |        |        |        |        |        |        |        | 85594 |
| Dog         | TTACAGCCATGAACCATCTTAATGGACAGAAAATGTATGGTAAAATTATTCGTGTTACTCTGTCTAAACATCAGACGGTA |        |        |        |        |        |        |        | 79635 |
| BelugaWhale | TTATAGCCATGAATCATCTTAATGGACAGAAGATGTATGGAAAAATTATTCGTGTTACTCTGTCTAAACATCAGACTGTA |        |        |        |        |        |        |        | 80195 |
| Donkey      | TTATAGCCATGAACCATCTTAATGGACAGAAGATGTATGGAAAAATTATACGTGTTACTTTATCTAAACATCAGACTGTA |        |        |        |        |        |        |        | 88864 |
| Cat         | TTATAGCCATGAACCATCTTAATGGACAGAAAATGTATGGCAAAATTATTCGTGTTACTCTGTCTAAACATCAGACTGTA |        |        |        |        |        |        |        | 85220 |
| Ferret      | TTACAGCCATGAACCATCTTAATGGACAGAAAATGTATGGCAAAATTATTCGTGTTACTCTGTCTAAACATCAGACTGTA |        |        |        |        |        |        |        | 86537 |
| Lion        | TTATAGCCATGAACCATCTTAATGGACAGAAAATGTATGGCAAAATTATTCGTGTTACTCTGTCTAAACATCAGACTGTA |        |        |        |        |        |        |        | 82928 |
| Vaquita     | TTATAGCCATGAATCATCTTAATGGACAGAAGATGTATGGAAAAATTATTCGTGTTACTCTGTCTAAACATCAGACTGTA |        |        |        |        |        |        |        | 81422 |
| Pig         | TTATAGCCATGAATCATCTTAATGGACAGAAAATGTATGGAAAAATTATTCGTGTTACTCTGTCTAAACATCAGACTGTA |        |        |        |        |        |        |        | 80466 |



Dienstag, 3. Mai 2022 08:41

| Majority    | AGT- - - TTATTAA- - GGATATACATTTTAGGAATAAAATATAAAAATTATTATTAATCTT- - TACTCTTTTTTC- - CATC |                 |                   |                 |                 |               |             |        |       |
|-------------|-------------------------------------------------------------------------------------------|-----------------|-------------------|-----------------|-----------------|---------------|-------------|--------|-------|
|             | 114730                                                                                    | 114740          | 114750            | 114760          | 114770          | 114780        | 114790      | 114800 |       |
| Human       | AGT- - - GTATTGA- - -                                                                     | GATACATTCTATTTT | GATAAAATATGAAATTT | ATTCTTAATCTT- - | CACTTTTTCTTC-   | CCATT         |             |        | 91952 |
| PolarBear   | AGT- - - TTTTTAA- -                                                                       | GGGTATACATTTTA  | AAGAATAAAACATA    | AAAATTTATCATT   | AATCTTT- ACT    | TTTTTTTTTCCC  | CATC        |        | 50014 |
| Cow         | AGTAGTTTATTAA- -                                                                          | GGATATACATTTT   | AGGAATAAAATA      | AAAAAATTTTT     | AATAATGTTAT     | TACTCTTTTTT   | CCATC       |        | 85832 |
| Dog         | AGT- - - TTTCTAA- -                                                                       | GGGTATACATTAT   | AGAAATAAAACATA    | AAAATTTATT      | ATTAATCTT- - -  | CTTTTTTTTC-   | CATC        |        | 79863 |
| BelugaWhale | AGTAGTTTATTAA- -                                                                          | GGATATACATTTT   | AGGAAGAAAATATA    | AAACATTTTTT     | TATTA- ATT      | GTTACTCTTTTT  | CT- - - - C |        | 80427 |
| Donkey      | AGG- - - TTATTGA- -                                                                       | GGATATGTGTTTT   | AAGGATAAAATG      | TAAAGTTTATT     | ATTAATATT- -    | TACTTTTTTTC-  | CATC        |        | 89095 |
| Cat         | AGA- - - TTTTTAAAT                                                                        | GGGTATACATTTT   | AGAAATAAAATTT     | GAAAATTATT      | ATTAATCTT- - -  | TACTTTTTTC-   | CATC        |        | 85451 |
| Ferret      | AGT- - - TTTTTAA- -                                                                       | GGGAGTACATTTT   | AAGAGTAAACATA     | AAAATGTATT      | ATTAATCTTT- ACC | TTTTTTTTTC-   | CATC        |        | 86769 |
| Lion        | AGA- - - TTTTTAAAT                                                                        | GGGTATACATTTT   | AGAAATAAAATTT     | GAAAATTATT      | ATTAATCTT- - -  | TACTTTTTTC-   | CATC        |        | 83159 |
| Vaquita     | AGTAGTTTATTAA- -                                                                          | GGATATACATTTT   | AGGAAGAAAATATA    | AAACATTTTTT     | TATTA- ATT      | GTTACTCTTTTT  | CT- - - - C |        | 81654 |
| Pig         | GGT- - - TTATTAA- -                                                                       | GGATATACATTTT   | AGGACTAA- - - -   | AAAAAATGTT      | ATTTCATCTT- -   | TACTCTTTCTTT- | CCGTC       |        | 80693 |

| Majority    | CAATTTTCCTAGTCCTTCAGTAGCAGAAGAGGATCTACGAACACTGTTTGCTAACACTGGGGGCACTGTGAAAGCATTTA |                |              |             |            |           |             |        |       |
|-------------|----------------------------------------------------------------------------------|----------------|--------------|-------------|------------|-----------|-------------|--------|-------|
|             | 114810                                                                           | 114820         | 114830       | 114840      | 114850     | 114860    | 114870      | 114880 |       |
| Human       | CAATTTTCCTAGT                                                                    | CCATCAGTAGCAGA | AAGAGGATCTAC | GAACACTGTT  | CGCTAACACT | GGGGGCACT | GTGAAAGCATT | TA     | 92032 |
| PolarBear   | CAATTTTCCTAGT                                                                    | CCTTCAGTAGCAGA | AAGAGGATCTAC | GAACACTGTT  | GCTAACACT  | GGGGGCACT | GTGAAAGCATT | TA     | 50094 |
| Cow         | TAATTT- CCCAGT                                                                   | CCTTCAGTAGCAGA | AAGAGATCTCC  | GAACACTGTT  | GCTAACACT  | GGGGGCACT | GTGAAAGCATT | TA     | 85911 |
| Dog         | CAATTTTCCTAGT                                                                    | CCTTCGGTAGCAGA | AAGAGGATCTAC | GAACACTGTT  | GCTAACACT  | GGGGGCACT | GTGAAAGCATT | TA     | 79943 |
| BelugaWhale | TAATTTTCCCAGT                                                                    | CCTTCAGTAGCAGA | AAGAGGATCTG  | CGAACACTGTT | GCTAACACT  | GGGGGCACT | GTGAAAGCATT | TA     | 80507 |
| Donkey      | CAATTTTCTAGT                                                                     | CCTTCAGTAGCAGA | AAGAGGATCTAC | GAACACTGTT  | GCTAACACT  | GGGGGCACT | GTGAAAGCATT | TA     | 89175 |
| Cat         | CAATTTTCCTAGT                                                                    | CCTTCAGTAGCAGA | AAGAGGATCTAC | GAACACTGTT  | GCTAACACT  | GGGGGCACT | GTGAAAGCATT | TA     | 85531 |
| Ferret      | CTGTTTTCTAGT                                                                     | CCTTCAGTAGCAGA | AAGAGGATCTG  | CGAACACTGTT | GCTAACACT  | GGGGGCACT | GTGAAAGCATT | TA     | 86849 |
| Lion        | CAATTTTCTAGT                                                                     | CCTTCAGTAGCAGA | AAGAGGATCTAC | GAACACTGTT  | GCTAACACT  | GGGGGCACT | GTGAAAGCATT | TA     | 83239 |
| Vaquita     | TAATTTTCCCAGT                                                                    | CCTTCAGTAGCAGA | AAGAGGATCTAC | GAACACTGTT  | GCTAACACT  | GGGGGCACT | GTGAAAGCATT | TA     | 81734 |
| Pig         | TAATTTTCCCAGT                                                                    | CCTTCAGTAGCAGA | AAGAGGATCTCC | GAAACGCTGTT | GCTAACACT  | GGGGGCACT | GTGAAAGCATT | TA     | 80773 |

Dienstag, 3. Mai 2022 08:41

| Majority    | AGTTTTTTCAGTAAGCAAGCTTT- CTTGTCTTTAAATTAGTGACTTGATAG- AAGTAAAAGTTTTCTTCA- AGTAGTTTT     |        |        |        |        |        |        |        |       |
|-------------|-----------------------------------------------------------------------------------------|--------|--------|--------|--------|--------|--------|--------|-------|
|             | 114890                                                                                  | 114900 | 114910 | 114920 | 114930 | 114940 | 114950 | 114960 |       |
| Human       | AGTTTTTTCAGTAAGCAAGCTTC- CTTATCTTTAAATTAGTGACCT- - - - - GATAAAA- - - TTTTTA- AGTAGTTTT |        |        |        |        |        |        |        | 92099 |
| PolarBear   | AGTTTTTTCAGTAAGCAAGCTTT- CTTGTCTTTAAATTAGTGACTTCATAGAAATTAAGTTGTCTTCATAGTAGTTTT         |        |        |        |        |        |        |        | 50173 |
| Cow         | AGTTTTTTCAGTAAGCAAGCTTT- CTTGTCTTTAAATTAGTGACTTGATAG- AAGTAAAAGTTTTCTCCA- AGTAGTT- -    |        |        |        |        |        |        |        | 85986 |
| Dog         | AGTTTTTTCAGTAAGCAAGCTTT- CTTGTCTCTAAATTAGTGACTTTG- - - - ACAAAAAGTTTTCTTCA- AGTAGTTTT   |        |        |        |        |        |        |        | 80016 |
| BelugaWhale | AGTTTTTTCAGTAAGCAAGCTTT- CTTGTCTTTAAATTAGTGACTTGATAG- AAGTAAAAGTTTTCTTCA- AGTAGTTC-     |        |        |        |        |        |        |        | 80583 |
| Donkey      | AGTTTTTTCAGTAAGCAAGCTTTTCTTGTTTTTAAATTAGTAACTTGATAG- AAGTAAAAATTTTCTTCA- AGTAAATTT      |        |        |        |        |        |        |        | 89253 |
| Cat         | AGTTTTTTCAGTAAGCAAGCTTT- CTTATCTTTAAATTAGTGACTTGATAGAAGTTAAAAATTTTCTTCA- AGTAGTTTT      |        |        |        |        |        |        |        | 85609 |
| Ferret      | AGTTTTTTCAGTAAGCAAGCTTT- CTTGTCTTTAAATTAGTGACTTCATATAAGTTAAAACTGTCTTCATAGTAATTTT        |        |        |        |        |        |        |        | 86928 |
| Lion        | AATTTTTTCAGTAAGCAAGCTTT- CTTATCTTTAAATTAGTGACTTGATAGAAGTTAAAAGTTTTCTTCA- AGTAGTTTT      |        |        |        |        |        |        |        | 83317 |
| Vaquita     | AGTTTTTTCAGTAAGCAAGCTTT- CTTGTCTTTAAATTAGTGACTTGATAG- AAGTAAAAGTTTTCTTCA- AGTAGTTC-     |        |        |        |        |        |        |        | 81810 |
| Pig         | AGTTTTTTCAGTAAGCAAGCTTTTCTTGCTCTAAATTA- - G- - - - - AAGTCAAAGTTTTCTTAA- AGTAGTTTT      |        |        |        |        |        |        |        | 80840 |

| Majority    | TATT- - - - - CTTTTGTTTATAG- AAATTTTT- GATTCTGGAATGGGCAAAA- TTCAAGTATTTAA- - - GCCCT     |        |        |        |        |        |        |        |       |
|-------------|------------------------------------------------------------------------------------------|--------|--------|--------|--------|--------|--------|--------|-------|
|             | 114970                                                                                   | 114980 | 114990 | 115000 | 115010 | 115020 | 115030 | 115040 |       |
| Human       | TGTT- - - - - CTTTTGTTTATAG- AAATTTTT- GATTCCGGAATGGCCAAA- - TTCAAGTATTTAATAAGCCCT       |        |        |        |        |        |        |        | 92165 |
| PolarBear   | TATC- - - - - CTTTTGTTTATGG- AAATT- - - GATTCTGGAATGGGTAAAA- TTCAAGTATTTAA- - - GCCCT    |        |        |        |        |        |        |        | 50234 |
| Cow         | - - - - - GTTTTCATTTCTAG- ATATCTTTT GATCCTGAAATGAGCAAAA- T- - - - - ATTTAA- - - GCCAT    |        |        |        |        |        |        |        | 86041 |
| Dog         | TATC- - - - - TTTTTGTTTATG- - AAATT- - - AATTCTGGAATAGGTGAAA- - TTCAAGTATTTAA- - - GCACT |        |        |        |        |        |        |        | 80075 |
| BelugaWhale | - - - - - TTTTTGTTTCTAG- ACGTCTTT- GATTCTGGAATGGGCAAAA- TT- AAGTATTTAA- - - GCCCT        |        |        |        |        |        |        |        | 80641 |
| Donkey      | TTTTTTTATTTTATTTTTTATTGAAGTTTTT GATTCTGCAATGGGGAAAAATTTCAAGTATTTAA- - - GCCCT            |        |        |        |        |        |        |        | 89330 |
| Cat         | TATT- - - - - CTTTTGTTTATGG- AAATTTTT- GATTCTGTAGTGGGCAAAA- TTCAAGTATTTAA- - - GCCCT     |        |        |        |        |        |        |        | 85673 |
| Ferret      | TACC- - - - - CTTTATGTTTATGG- AAATT- - - GATTCTAGAATGGGTAAAA- TTCAAGTATGTAA- - - GCCCT   |        |        |        |        |        |        |        | 86989 |
| Lion        | TATT- - - - - CTTTTGTTTATGG- AAATTTTT- GATTCTGTAGTGGGCAAAA- TTCAAGTATTT- - - - - - - -   |        |        |        |        |        |        |        | 83374 |
| Vaquita     | - - - - - TTTTTGTTTCTAG- AAGTCTTT- GATTCTGGAATGGGCAAAA- TT- AAGTATTTAA- - - GCCCT        |        |        |        |        |        |        |        | 81868 |
| Pig         | TATG- - - - - ATTTTTGTTTATAG- ACATCTTT- GATTCTGGAATAGGCAGAAG- TT- AAATATTTAA- - - GCCCT  |        |        |        |        |        |        |        | 80903 |

Dienstag, 3. Mai 2022 08:41

| Majority    | T C C T A A T T T T T A T G A A G T A T C T A A T T T C A T A A T T T T G T T T C A G A A G A G A T C A C A A A A T G G C T C T T C T T C A G A T G G C A A C A |        |        |        |        |        |        |        |  |  |       |
|-------------|-----------------------------------------------------------------------------------------------------------------------------------------------------------------|--------|--------|--------|--------|--------|--------|--------|--|--|-------|
|             | 115050                                                                                                                                                          | 115060 | 115070 | 115080 | 115090 | 115100 | 115110 | 115120 |  |  |       |
| Human       | T T C T A A T T T G T A T G A A G T G T C T A A T T T T A T A A T T T T G T T T C A G A A G A G A T C A C A A A A T G G C T C T T C T T C A G A T G G C A A C A |        |        |        |        |        |        |        |  |  | 92245 |
| PolarBear   | T C C T A A T T T T T A T G A A G T A T C T G A T T T C A T A A T T T T G T T T C A G A A G A G A T C A C A A A A T G G C T C T T C T T C A G A T G G C A A C A |        |        |        |        |        |        |        |  |  | 50314 |
| Cow         | T C - T G A T T T T T A T G A A G T A T C T A A T T T C A T A A T T T T G T T T C A G A A G A G A T C A C A A A A T G G C C T T C T T C A G A T G G C G A C A   |        |        |        |        |        |        |        |  |  | 86120 |
| Dog         | T C C T A A T T T T T A T G A A G T A T C T A A T T T C A T A A T T T T G T T T C A G A A G A G A T C A C A A A A T G G C T C T T C T T C A G A T G G C A A C A |        |        |        |        |        |        |        |  |  | 80155 |
| BelugaWhale | T C C T A A T T T T T A T G A A G T A T C T A A T T T C A T A A T T T T G T T T C A G A A G A G A T C A C A A A A T G G C T C T T C T T C A G A T G G C A A C A |        |        |        |        |        |        |        |  |  | 80721 |
| Donkey      | T T C T A A C A T T T A T G A A G T A T C T A A T T T C A T A A T T T T G T T T C A G A A G A G A T C A C A A A A T G G C T C T T C T T C A G A T G G C A A C T |        |        |        |        |        |        |        |  |  | 89410 |
| Cat         | T C C T A A T T T T T A T G A A G T A T C T A A T T T T A T A A T T T T G T T T C A G A A G A G A T C A C A A A A T G G C T C T T C T T C A G A T G G C A A C A |        |        |        |        |        |        |        |  |  | 85753 |
| Ferret      | T C C T A A T T T T T A T G A A G T A T C T A A T T T C A T A A T T T T G T T T C A G A A G A G A T C A C A A A A T G G C T C T T C T T C A G A T G G C A A C A |        |        |        |        |        |        |        |  |  | 87069 |
| Lion        | - - - - - T T T - T A T G A A G T A T C T A A T T T T A T A A T T T T G T T T C A G A A G A G A T C A C A A A A T G G C T C T T C T T C A G A T G G C A A C A   |        |        |        |        |        |        |        |  |  | 83447 |
| Vaquita     | T C C T A A T T T T T A T G A A G T A T C T A A T T T C A T A A T T T T G T T T C A G A A G A G A T C A C A A A A T G G C T C T T C T T C A G A T G G C A A C A |        |        |        |        |        |        |        |  |  | 81948 |
| Pig         | T C C T A A T T T T T A T G A C A T A T C T A A T T T C A T A A T T T T G T T T C A G A A G A G A T C A C A A A A T G G C T C T C T T C A G A T G G C A A C A   |        |        |        |        |        |        |        |  |  | 80983 |

| Majority    | G T G G A A G A A G C T A T C C A G G C C T T G A T T G A T C T T C A T A A T T A T A A C C T T G G T G A A A A C C A T C A T C T G A G A G T G T C T T T C T C |        |        |        |        |        |        |        |  |  |       |
|-------------|-----------------------------------------------------------------------------------------------------------------------------------------------------------------|--------|--------|--------|--------|--------|--------|--------|--|--|-------|
|             | 115130                                                                                                                                                          | 115140 | 115150 | 115160 | 115170 | 115180 | 115190 | 115200 |  |  |       |
| Human       | G T G G A A G A A G C T A T T C A G G C C T T G A T T G A T C T T C A T A A T T A T A A C C T T G G A G A A A A C C A T C A T C T G A G A G T G T C T T T C T C |        |        |        |        |        |        |        |  |  | 92325 |
| PolarBear   | G T G G A A G A A G C T A T C C A G G C C T T G A T T G A T C T T C A T A A T T A C A A C C T T G G T G A A A A C C A T C A T C T G A G A G T G T C T T T C T C |        |        |        |        |        |        |        |  |  | 50394 |
| Cow         | G T G G A A G A A G C T A T T C A G G C C T T G A T T G A T C T T C A T A A T T A T A A C C T T G G T G A A A A C C A T C A T C T G A G A G T G T C T T T C T C |        |        |        |        |        |        |        |  |  | 86200 |
| Dog         | G T G G A A G A A G C T A T C C A G G C C T T G A T T G A T C T T C A T A A T T A C A A C C T T G G T G A A A A C C A T C A T C T G A G A G T G T C T T T C T C |        |        |        |        |        |        |        |  |  | 80235 |
| BelugaWhale | G T G G A A G A A G C T A T T C A G G C C T T G A T T G A T C T T C A T A A T T A T A A C C T T G G T G A A A A C C A T C A T C T G A G A G T G T C T T T C T C |        |        |        |        |        |        |        |  |  | 80801 |
| Donkey      | G T G G A A G A A G C T A T C C A G G C C T T G A T T G A T C T T C A T A A T T A T A A C C T T G G T G A A A A C C A T C A T C T G A G A G T G T C T T T C T C |        |        |        |        |        |        |        |  |  | 89490 |
| Cat         | G T G G A A G A A G C T A T C C A G G C C T T G A T T G A T C T T C A T A A T T A T A A C C T T G G T G A A A A C C A T C A T C T G A G A G T G T C T T T C T C |        |        |        |        |        |        |        |  |  | 85833 |
| Ferret      | G T G G A A G A A G C T A T C C A G G C C T T G A T T G A T C T T C A T A A T T A C A A C C T T G G T G A A A A C C A T C A T C T G A G A G T G T C T T T C T C |        |        |        |        |        |        |        |  |  | 87149 |
| Lion        | G T G G A A G A A G C T A T C C A G G C C T T G A T T G A T C T T C A T A A T T A T A A C C T T G G T G A A A A C C A T C A T C T G A G A G T G T C T T T C T C |        |        |        |        |        |        |        |  |  | 83527 |
| Vaquita     | G T G G A A G A A G C T A T T C A G G C C T T G A T T G A T C T T C A T A A T T A T A A C C T T G G T G A A A A C C A T C A T C T G A G A G T G T C T T T C T C |        |        |        |        |        |        |        |  |  | 82028 |
| Pig         | G T G G A A G A A G C C A T C C A G G C C T T G A T T G A T C T G C A T A A T T A T A A C C T T G G T G A A A A C C A T C A T C T G A G A G T G T C T T T C T C |        |        |        |        |        |        |        |  |  | 81063 |





Dienstag, 3. Mai 2022 08:41

| Majority    | ATTCCTTGGTTATAAAA- T GAAATGGCATATGTAAAGGCAGAGTTGTTAACTGCTXTATTTTCATCTGTTCTATAGGGAAG   |        |        |        |        |        |        |        |       |
|-------------|---------------------------------------------------------------------------------------|--------|--------|--------|--------|--------|--------|--------|-------|
|             | 115370                                                                                | 115380 | 115390 | 115400 | 115410 | 115420 | 115430 | 115440 |       |
| Human       | ATTCCTTGGTTATAAAA- T GAAATGGCATATGTAAAGGCAGAGTTGTTAACTGCTATATTTTCATCTGTTCTATAGGGAAG   |        |        |        |        |        |        |        | 92561 |
| PolarBear   | ATTCCTTGGTTATAAAA- T GAAATGGCATAACATAAAGGCAGAGTTGTTAACTGCTGTATTTTCATCTGTTCTATTGGGAGG  |        |        |        |        |        |        |        | 50619 |
| Cow         | ATTCCTTGGTTATAAAA- T GAAATGGCGTATGTAAAGGCAGAGTTATTAAGTCTCTTTTCATCTGTTCTGTAGGGAAG      |        |        |        |        |        |        |        | 86422 |
| Dog         | ATTCCTTGGTTATAAAA- T GAAATGGCATAACATAAAGGCAGAGTTGTTAACTGCTGTATTTTCATCTGTTCTATAGGTAGG  |        |        |        |        |        |        |        | 80464 |
| BelugaWhale | ATTCCTTGGTTATAAAA- T GAAATGGCATATGTAAAGGCAGAGTTATTAAGTCTCTTTTTTCATCTGTTCTGTAGAGAAG    |        |        |        |        |        |        |        | 81032 |
| Donkey      | ATTCCTTGGTTATAAAA- T GAAATGGCATATGTAAAGGCAGAGTTATTAAGTCTATATTTTCATCTGTTCTATAGGGAAG    |        |        |        |        |        |        |        | 89710 |
| Cat         | ATTCCTTGGTTATAAAA- T GAAATGGCATAACATAAAGGCAGAGT- GTTAACTGCTATATTTTCATCTGTTCTATAGGGAAG |        |        |        |        |        |        |        | 86056 |
| Ferret      | ATTCCTTGGTTATAAAAAATGAAATGGCATAACGTAAAGGCAGAGTTGTTAACTGCTGTATTTTCATCTGTTCTATAGGGAGG   |        |        |        |        |        |        |        | 87375 |
| Lion        | ATTCCTTGGTTATAAAA- T GAAATGGCATAACATAAAGGCAGAGT- GTTAACTGCTATATTTTCATCTGTTCTATAGGGAAG |        |        |        |        |        |        |        | 83751 |
| Vaquita     | ATTCCTTGGTTATAAAA- T GAAATGGCATATGTAAAGGCAGAGTTATTAAGTCTCCTTTTCATCTGTTCTGTAGAGAAG     |        |        |        |        |        |        |        | 82260 |
| Pig         | ATTCCTTGGTTATAAGA- TGAAGTGGCATATGTAAAGGTAGGGTATTAAGTCTATTTTCATCTGTTCTGTAGGGAAG        |        |        |        |        |        |        |        | 81291 |

| Majority    | CCATTTTTATTGTCTGTTTAAAATTTTAGTTTA- - - - - ATTTTACTTTCTTTTT- - - - - CAACTTAGTTGACA     |        |        |        |        |        |        |        |       |
|-------------|-----------------------------------------------------------------------------------------|--------|--------|--------|--------|--------|--------|--------|-------|
|             | 115450                                                                                  | 115460 | 115470 | 115480 | 115490 | 115500 | 115510 | 115520 |       |
| Human       | CCATT- TT- - - GTCTGTTTAAAATTTTAGTTTA- - - - - ATTTTACTTTCTTTTT- - - - - CAACTTAGTTGACA |        |        |        |        |        |        |        | 92637 |
| PolarBear   | CCATTTTTATTGTCTGTTTATAATTTTAGTTTA- - - - - ATTATACTTTCTTTTT- - - - - CAACTTAGTTGACA     |        |        |        |        |        |        |        | 50683 |
| Cow         | CCATTTTT- - - GTCTGTTTAAAATTTTAGTTGA- - - - - ATTTTACTTTCTTTTT- - - - - CAACTTAGTTGACA  |        |        |        |        |        |        |        | 86483 |
| Dog         | CCATTTTTATTGTCTGTTTATAATTTTAGTTTA- - - - - ATTATACTTTCTTTTT- - - - - CAACTTAGTTGACA     |        |        |        |        |        |        |        | 80528 |
| BelugaWhale | CCATTTTTATTGTCTGTTTAAAATTTTAATT- - - - - TTACTTTCTTTTT- - - - - CAACTTAGTTGACA          |        |        |        |        |        |        |        | 81091 |
| Donkey      | CCATTTTTATTGTCTGTTTAAAATTTAAGTTTA- - - - - ATTTTACTTTCTTTTT- - - - - CAACTTAGTTGACA     |        |        |        |        |        |        |        | 89774 |
| Cat         | CCATTATTTTTGTCTGTTTAAAATTTTAGTTTA- - - - - ATTATACTTTCTTTTT- - - - - CAACTTAGTTGACA     |        |        |        |        |        |        |        | 86120 |
| Ferret      | CCATTTTTATTGTCTGTTTATGATTTTAGTTTATAGTTTAAATTATACTTTCTTTTT- - - - - CAACTTAGTTGACA       |        |        |        |        |        |        |        | 87446 |
| Lion        | CCATTTTTATTGTCTGTTTAAAATTTTAGTTTA- - - - - ATTATACTTTCTTTTT- - - - - CAACTTAGTTGACA     |        |        |        |        |        |        |        | 83815 |
| Vaquita     | CCATTTTTATTGTCTGTTTAAAATTTTAATT- - - - - TTACTTTCTTTTT- - - - - CAACTTAGTTGACA          |        |        |        |        |        |        |        | 82319 |
| Pig         | CCATTTTTATTGTCTGTTGAGAATTTTAGTT- A- - - - - ATTTTACTTTCTTTTT- - - - - CAACTTAGTTGACA    |        |        |        |        |        |        |        | 81354 |

Dienstag, 3. Mai 2022 08:41

| Majority    | TA- CGTGCCTTAAAAAGGAAAAGTGTGCTATTGTGCATTTACTAGAAAAAGGAATTGGTTGTCTAGGGCACATTG     |        |        |        |        |        |        |        |  |  |       |
|-------------|----------------------------------------------------------------------------------|--------|--------|--------|--------|--------|--------|--------|--|--|-------|
|             | 115530                                                                           | 115540 | 115550 | 115560 | 115570 | 115580 | 115590 | 115600 |  |  |       |
| Human       | TA- CGTGCCTTAAAAAGGAAAAGTGTGCTATTGTGCATTTACTAGAAAAAGGAATTGGTTGTTTAGGGCACACTG     |        |        |        |        |        |        |        |  |  | 92716 |
| PolarBear   | TA- CGTGCCTTAAAAAGGAAAAGTGTGCTATTGTGCATTTACTAGGAAAAAGGAATTGGTTGTCTAGGGCACATTG    |        |        |        |        |        |        |        |  |  | 50762 |
| Cow         | TA- CGTGCCTTAAAAAGGAAA- CTAGTGTGCTATTGTGCATTTACTAGAAAAAGGAATTGGTTGTCTAGGGCACATTG |        |        |        |        |        |        |        |  |  | 86561 |
| Dog         | TA- CGTGCCTTAAAAAGGAAAAGTGTGCTATTGTGCATTTACTAGGTAAAAGGAATTGGTTGTCTAGGGCACATTG    |        |        |        |        |        |        |        |  |  | 80607 |
| BelugaWhale | TA- CGTGCCTTAAAAAGGAAAAGTGTGCTATTGTGCATTTGCTAGAAGAAAGGAATTGGTTGTCTAGGGCACATTG    |        |        |        |        |        |        |        |  |  | 81170 |
| Donkey      | TAACGTGCCTTAAAAAGGAAAAGTGTGCTATTGTGCATTTACTAGAAAAAGGAATTGGTTTTCTAGGGCACATTG      |        |        |        |        |        |        |        |  |  | 89854 |
| Cat         | TA- CGTGCCTTAAAAAGGAAAAGTGTGCTATTGTGCATTTACTAGGAAAAAGGAATTGGTTGTCTAGGGCACATTG    |        |        |        |        |        |        |        |  |  | 86199 |
| Ferret      | TA- CGTGCCTTAAAAAGGAAAAGTGTGCTATTGTGCATTTACTAGGAAAAAGGAATTGGTTGTCTAGGGCACATTG    |        |        |        |        |        |        |        |  |  | 87525 |
| Lion        | TA- CGTGCCTTAAAAAGGAAAAGTGTGCTATTGTGCATTTACTAGGAAAAAGGAATTGGTTGTCTAGGGCACATTG    |        |        |        |        |        |        |        |  |  | 83894 |
| Vaquita     | TA- CGTGCCTTAAAAAGGAAAAGTGTGCTATTGTGCATTTGCTAGA- GAAAGGAATTGGTTGTCTAGGGCACATTG   |        |        |        |        |        |        |        |  |  | 82397 |
| Pig         | TA- CGTGCCTTACAAAGGAAAAGTGTGCTATTGTGCATTTACTAGAAAAAGGAATTGGTTGTCTAGGGCACACTG     |        |        |        |        |        |        |        |  |  | 81433 |

| Majority    | TTATATGGGAATTA- CAATATGTTTAGGCAGGGGTGTGTA AAAAGG- TTAAGTTTTTGTTC- TCCTGCTTGGA ACTTAT |        |        |        |        |        |        |        |  |  |       |
|-------------|--------------------------------------------------------------------------------------|--------|--------|--------|--------|--------|--------|--------|--|--|-------|
|             | 115610                                                                               | 115620 | 115630 | 115640 | 115650 | 115660 | 115670 | 115680 |  |  |       |
| Human       | TTATATGGGAATTA- AAATATGTTTAGGCAGGGGTGTGTA AAAAGG- TTAAGTTTTTGTTC- TCCTGCTTGGA ACTTAT |        |        |        |        |        |        |        |  |  | 92793 |
| PolarBear   | TTATATGGGAATTA- CAATATGTTTAGGCAGGGGTGTGTA AAAAGG- TTAAGTTTTTGTTC- TCCTGCTTGGA ACTTAT |        |        |        |        |        |        |        |  |  | 50839 |
| Cow         | TTAAATGGGAATTAACAATATGTTTAGGCAGGGGTGTGTA AAAAGG- TTAAGTTTTTTTTTCTCCTGCTTGGA ACTTAT   |        |        |        |        |        |        |        |  |  | 86640 |
| Dog         | TTATATGGGAATTA- CAATATGTTTAGGCAGGGGTGTGTA AAAAGG- TTAAGTTTTTGTTC- TCCTGCTTGGA ACTTAT |        |        |        |        |        |        |        |  |  | 80684 |
| BelugaWhale | TTAAACGGGAATTAACAATATGTTTAGGCAGGGGTGTGTA AAAAGGTTAAGTTTTTGTTC- TCCTGCTTGGA ACTTAT    |        |        |        |        |        |        |        |  |  | 81249 |
| Donkey      | TTATATGGGAATTA- TAATATGTTTAGGCAGGGGTGTGTA AAAAGG- TTAAGTTTTTGTTC- TCCTGCTTGGA ACTTAT |        |        |        |        |        |        |        |  |  | 89931 |
| Cat         | TTATATGGGAATTA- CCATATGTTTAGGCAGGGGTGTGTA AAAAGG- TTAAGTTTTTGTTC- TCCTGCTTGGA ACTTAT |        |        |        |        |        |        |        |  |  | 86276 |
| Ferret      | TTATATGGGAATTA- CAATATGTTTAGGCAGGGGTGTGTA AAAAGG- TTAAGTTTTTGTTC- TCCTGCTTGGA ACTTAT |        |        |        |        |        |        |        |  |  | 87602 |
| Lion        | TTACATGGGAATTA- CCATATGTTTAGGCAGGGGTGTGTA AAAAGG- TTAAGTTTTTGTTC- TCCTGCTTGGA ACTTAT |        |        |        |        |        |        |        |  |  | 83971 |
| Vaquita     | TTAAATGGGAGTTAACAATATGTTTAGGCAGGGGTGTGTA AAAAGGTTAAGTTTTTGTTC- TCCTGCTTGGA ACTTAT    |        |        |        |        |        |        |        |  |  | 82476 |
| Pig         | TTAAATGGAGATTA- CAATATGTTTAGGCAGGGGTGTGTA AAAAGG- TTAAGTTTTTGTTC- TCCTGCTTGGA ACTTAT |        |        |        |        |        |        |        |  |  | 81510 |

Dienstag, 3. Mai 2022 08:41

|             |                                                                                        |        |        |        |        |        |        |        |       |
|-------------|----------------------------------------------------------------------------------------|--------|--------|--------|--------|--------|--------|--------|-------|
| Majority    | TTTGAATTATTGGCTTGT CACATTTCTTTCTATTTAATCAAATAAGATACATGATACTGAAAGAAT- AAAGCAGCATTTT     |        |        |        |        |        |        |        |       |
|             | 115690                                                                                 | 115700 | 115710 | 115720 | 115730 | 115740 | 115750 | 115760 |       |
| Human       | TTTGAATTACTGGCTTGT CACCTTTTTTTCTATTTAATCAAATAAGATACATGATATTGAAAGAAT- AAAGCAGCATTTT     |        |        |        |        |        |        |        | 92872 |
| PolarBear   | TTTGAATTATTGGCTTGT CACATTTCTTTCTATTTAATCAAATAAGATACATGATACTGAAAGAATTAAGCAGCATATT       |        |        |        |        |        |        |        | 50919 |
| Cow         | TTTGAATTATCGGCTTGT CATATTTTTTT - - ATTTAATCAAATAAGATACATGATACGGAAAGAAT- AAAGCAGCTTTTT  |        |        |        |        |        |        |        | 86717 |
| Dog         | TTTGAATTATTGGCTTGT CACATTTCTTTCTATTTAATCAAATAAGATACATGATACTGAAAGAATTAAGCAGCATTTT       |        |        |        |        |        |        |        | 80764 |
| BelugaWhale | TTTGAATTATTGGCTTGT CACATTTCTTTCTATTTAATCAAATAAGATACATGATACTGAAAGAAT- AAAGCAGCATTTT     |        |        |        |        |        |        |        | 81328 |
| Donkey      | TTTGAATTATTGGCTTGT CACATTTCTTTCTATTTAGTCAA- - - GATACATGATATTGAAAGAAT- AAAGCAGCATTTT   |        |        |        |        |        |        |        | 90007 |
| Cat         | TTTGAATTATTGGCTTGT CACATTTCTTTCTATTTACTCAAATAAGATACATGATACTGAGAGAATTAAGCAGCATTTT       |        |        |        |        |        |        |        | 86356 |
| Ferret      | TTTGAATTATTGACTTGT CACATTTCTTTCTATTTAATCAAATAAGATACATGATACTGAAAGAATTAAGCAGCATTTT       |        |        |        |        |        |        |        | 87682 |
| Lion        | TTTGAATTATTGGCTTGT CACATTTCTTTCTATTTACTCAAATAAGATACATGATACTGAGAGAATTAAGCAGCATTTT       |        |        |        |        |        |        |        | 84051 |
| Vaquita     | TTTGAATTATTGGCTTGT CACATTTCTTTCTATTTAATCAAATAAGATACATGATACTGAAAGAAT- AAAGCAGCATTTT     |        |        |        |        |        |        |        | 82555 |
| Pig         | TTTGAATTATTGGCTTGT CACATTTCTTTCTATTTAATCAAATAGGATACATGATA- - - - AAGAAT- AAAGCAGCATTTT |        |        |        |        |        |        |        | 81585 |

|             |                                                                                              |        |        |        |        |        |        |        |       |
|-------------|----------------------------------------------------------------------------------------------|--------|--------|--------|--------|--------|--------|--------|-------|
| Majority    | TT- - - - - - - - - - AGTTTTACTACCTTAGGCTTTATTGCTTTAAAAAAA- CATTGGCCTTTTGTATCTCACAATTCTGG    |        |        |        |        |        |        |        |       |
|             | 115770                                                                                       | 115780 | 115790 | 115800 | 115810 | 115820 | 115830 | 115840 |       |
| Human       | T- - - - - - - - - - AGTTTTACTACCTTAGGCTTTATTGCTTTGAAAACAACATTGGCCTTTTGTATCTCACAATTCTGG      |        |        |        |        |        |        |        | 92940 |
| PolarBear   | TT- - - - - - - - - - AGTTTTACTACCTTAGGCTTTATTGCTTTAAAAAAA- CATTGGCCTTTTGTATCTCACAATTCTGG    |        |        |        |        |        |        |        | 50987 |
| Cow         | TTTTTTTTTTTCCAGTTTCTACTACCTTAGGCTTTATTGCTTTAAAAAAAACATTGGCCTTTTGTATCTCACAATTCTGG             |        |        |        |        |        |        |        | 86797 |
| Dog         | TT- - - - - - - - - - AGTTTTACTACCTTAGGCTTTATTGCTTTAAAAAAA- CATTGGCCTTTTGTATCTCACAATTCTGG    |        |        |        |        |        |        |        | 80832 |
| BelugaWhale | TTT- - - - - - - - - - AGTTTTACTACCTTAGGCTTTATTGCTTTAAAAAAAACATTGGCCTTTTGTATCTCACAATTCTGG    |        |        |        |        |        |        |        | 81398 |
| Donkey      | TT- - - - - - - - - - AGTTT- TACTACCTTAGGCTTTATTGCTTTAAAAAAA- CATTGGCCTTTTGTATCTCACAAT- CTGG |        |        |        |        |        |        |        | 90073 |
| Cat         | TT- - - - - - - - - - AGTTTTACTACCTTAGGCTTTATTGCTTTAAAAAAA- CATTGGCCTTTTGTATCTCACAATTCTGG    |        |        |        |        |        |        |        | 86424 |
| Ferret      | TTTT- - - - - - - - - - AGTTTTACTACCTTAGGCTTTATTGCTTTAAAAAAA- CATTGGCCTTTTGTATCTCACAATTCTGG  |        |        |        |        |        |        |        | 87752 |
| Lion        | TT- - - - - - - - - - AGTTTTACTACCTTAGGCTTTATTGCTTTAAAAAAA- CATTGGCCTTTTGTATCTCACAATTCTGG    |        |        |        |        |        |        |        | 84119 |
| Vaquita     | TTT- - - - - - - - - - AGTTTTACTACCTTAGGCTTTATTGCTTTAAAAAAAACATTGGCCTTTTGTATCTCACAATTCTGG    |        |        |        |        |        |        |        | 82625 |
| Pig         | T- - - - - - - - - - AGTTTTACTACCTTAGACTTTATTGCTTTAAAAAAA- CATTGGCCTTTTGTATCTCACAATTCTGG     |        |        |        |        |        |        |        | 81652 |

Dienstag, 3. Mai 2022 08:41

| Majority    | TCTAGATTCAGTTATGAATGTAGGCATTAGTTAXXXXXXXXXXXXXXXXXXXXXXXXXXXXXXXXXXXXXXXXXXXXXXXXXXXXX |       |
|-------------|----------------------------------------------------------------------------------------|-------|
|             | 115850 115860 115870 115880 115890 115900 115910 115920                                |       |
| Human       | TCTAGATTCAGTTATGAATGTAGGCATTAGTTAAAATTAACAAGATGCAGAGTATTAATTTCTTAAGACAACAAAGTGAT       | 93020 |
| PolarBear   | TCTAGATTCAGTTATGAATGTAGGCATTAGTTAAAATTAACAAGATGCAGAGTATTAATTTCTTAAGACAACAAAGTGAT       | 51067 |
| Cow         | TCTAGATTCAGTTATGAAT                                                                    | 86816 |
| Dog         | TCTAGATTCAGTTATGAATGTAGGCATTAGTTAAAATTAACAAGATGCAGAGTATTAATTTCTTAAGACAACAAAGTGAT       | 80912 |
| BelugaWhale | TCTAGATTCAGTTATGAAT                                                                    | 81417 |
| Donkey      | TCTAGATTCAGTTATGAATGTAGGCATTAGTTA                                                      | 90106 |
| Cat         | TCTAGATTCAGTTATGAATGTAGGC                                                              | 86449 |
| Ferret      | TCTAGATTCAGTT                                                                          | 87765 |
| Lion        | TCTAGATTCAGTTATGAATGTAGG                                                               | 84143 |
| Vaquita     | TCTAGATTCAGTTATGAATGTAGGCATTAGTTAAAATTAACAAGATGCAGAGTATTAATTTCTTAAGACAACAAAGTGAT       | 82705 |
| Pig         | TCTAGATTCAGTTATGAATGTAGGCATTAGTTAAAATTAACAAGATGCAGAGTATTAATTTCTTAAGACAACGAAGTGAT       | 81732 |

| Majority    | XXXXXXXXXXXXXXXXXXXXXXXXXXXXXXXXXXXXXXXXXXXXXXXXXXXXXXXXXXXXXXXXXXXXXXXXXXXXXXXXXXXX |       |
|-------------|--------------------------------------------------------------------------------------|-------|
|             | 115930 115940 115950 115960 115970 115980 115990 116000                              |       |
| Human       | TTCTGTAAGTTTGAGCCCTATGTGGAAAGCATTGTGGAATCTTAACCTTTTCGTACACACTCTTGTGGGACGTATCAT- A    | 93099 |
| PolarBear   | TTCTGTAAGTTTGAGCCCTATGTGGAAAGCATTGTGGAATCTTAACCTTTTGTACACACTCTTGTGGGACGTATCAT- A     | 51146 |
| Cow         |                                                                                      | 86816 |
| Dog         | TTCTGTAAGTTTGAGCCCTACGTGGAAAGCATTGTGGAATCTTAACCTTTTGTACACACTCTTGTGGGACGTATCAT- A     | 80991 |
| BelugaWhale |                                                                                      | 81417 |
| Donkey      |                                                                                      | 90106 |
| Cat         |                                                                                      | 86449 |
| Ferret      |                                                                                      | 87765 |
| Lion        |                                                                                      | 84143 |
| Vaquita     | TTCTGTAAGTTTGAGCCCTATGTGGAAAGCATTGTGGAATCTTAACCTTTTGTACACACTCTTGTGGGACGTATCAT- A     | 82784 |
| Pig         | TTCTGTAAGTTTGAGCCCTATGTGGAAAGCATTGTGGAATCTTAACCTTTTGTACACACTCTTGTGGGACGTATCATT A     | 81812 |

Dienstag, 3. Mai 2022 08:41

| Majority    | XXXXXXXXXXXXXXXXXXXXXXXXXXXXXXXXXXXXXXXXXXXXXXXXXXXXXXXXXXXXXXXXXXXXXXXXXXXXXXXXXXXXXXXXXXXXXXXXXXXXXXXXXXXXXXXXXXXX |        |        |        |        |        |        |        |       |
|-------------|----------------------------------------------------------------------------------------------------------------------|--------|--------|--------|--------|--------|--------|--------|-------|
|             | 116010                                                                                                               | 116020 | 116030 | 116040 | 116050 | 116060 | 116070 | 116080 |       |
| Human       | TAAATGT CAGCACTAAGTAATGTCTTGTTTGTGGCTGAATATTTTTCGTAGATGTTTTTGAAGTTGACATGACTTACGTG                                    |        |        |        |        |        |        |        | 93179 |
| PolarBear   | TAAATGT CAGCACTAAGTAATGTCTTGTTTGTGGCTGAATATTTTTCGTAGATGTTTTTGAAGTTGACATGACTTACGTG                                    |        |        |        |        |        |        |        | 51226 |
| Cow         |                                                                                                                      |        |        |        |        |        |        |        | 86816 |
| Dog         | TAAATGT CAGCACTAAGTAATGTCTTGTTTGTGGCTGAATATTTTTCGTAGATGTTTTTGAAGTTGACATGACTTACGTG                                    |        |        |        |        |        |        |        | 81071 |
| BelugaWhale |                                                                                                                      |        |        |        |        |        |        |        | 81417 |
| Donkey      |                                                                                                                      |        |        |        |        |        |        |        | 90106 |
| Cat         |                                                                                                                      |        |        |        |        |        |        |        | 86449 |
| Ferret      |                                                                                                                      |        |        |        |        |        |        |        | 87765 |
| Lion        |                                                                                                                      |        |        |        |        |        |        |        | 84143 |
| Vaquita     | TAAATGT CAGCACTAAGTAACGTCTTGTTTGTGGCTGAATATTTTTCGTAGATGTTTTTGAAGTTGACATGATTTATGTG                                    |        |        |        |        |        |        |        | 82864 |
| Pig         | TAAATGT CAGCACTAAGTAATGTCTTGTTTGTGGCTGAATATTTTTCGTAGATGTTTTTGAAGTTGACATGACTTATGTG                                    |        |        |        |        |        |        |        | 81892 |

| Majority    | XXXXXXXXXXXXXXXXXXXXXXXXXXXXXXXXXXXXXXXXXXXXXXXXXXXXXXXXXXXXXXXXXXXXXXXXXXXXXXXXXXXXXXXXXXXXXXXXXXXXXXXXXXXXXXXXXXXX |        |        |        |        |        |        |        |       |
|-------------|----------------------------------------------------------------------------------------------------------------------|--------|--------|--------|--------|--------|--------|--------|-------|
|             | 116090                                                                                                               | 116100 | 116110 | 116120 | 116130 | 116140 | 116150 | 116160 |       |
| Human       | CATTTAAATATATATTGCCATCCTTAGTTTGTAAATTAAGATTTGGAATATGGTTGTGGATTTCTGAGCATGTGCAGACTG                                    |        |        |        |        |        |        |        | 93259 |
| PolarBear   | CATTTAAATATATATTGCCATCCTTAGTTTGTAAATTAAGATTTGGAATATGGTTGTGGATTTCTGAGCATGTGCAGACTG                                    |        |        |        |        |        |        |        | 51306 |
| Cow         |                                                                                                                      |        |        |        |        |        |        |        | 86816 |
| Dog         | CATTTAAATATATATTGCCATCCTTAGTTTGTAAATTAAGATTTGGAATATGGTTGTGGATTTCTGAGCATGTGCAGACTG                                    |        |        |        |        |        |        |        | 81151 |
| BelugaWhale |                                                                                                                      |        |        |        |        |        |        |        | 81417 |
| Donkey      |                                                                                                                      |        |        |        |        |        |        |        | 90106 |
| Cat         |                                                                                                                      |        |        |        |        |        |        |        | 86449 |
| Ferret      |                                                                                                                      |        |        |        |        |        |        |        | 87765 |
| Lion        |                                                                                                                      |        |        |        |        |        |        |        | 84143 |
| Vaquita     | CATTTAAATATATATTGCCATCCTTAGTTTGTAAATTAAGATTTGGAATACGGTTGTGGATTTCTGAGCATGTGCAGACTG                                    |        |        |        |        |        |        |        | 82944 |
| Pig         | CATTTAAATATATATTGCCATCCTTAGTTTGTAAATTAAGATTTGGAATATGGTTGTGGATTTCTGAGCATGTGCAGACTG                                    |        |        |        |        |        |        |        | 81972 |

Dienstag, 3. Mai 2022 08:41

| Majority    | XXXXXXXXXXXXXXXXXXXXXXXXXXXXXXXXXXXXXXXXXXXXXXXXXXXXXXXXXXXXXXXXXXXXXXXXXXXX       |        |        |        |        |        |        |        |       |
|-------------|------------------------------------------------------------------------------------|--------|--------|--------|--------|--------|--------|--------|-------|
|             | 116170                                                                             | 116180 | 116190 | 116200 | 116210 | 116220 | 116230 | 116240 |       |
| Human       | GTCTAGCTAGTT CAGGAACTGGTGCATGTATTTTTCAAAGATAAA- GAAAGTGTACTGCGAAAATATGCAGGAAGATTAA |        |        |        |        |        |        |        | 93338 |
| PolarBear   | GTCTAGCTAGTT CAGGAACTGGTGCATGTATTTTTCAAAGATAAA- GAAAGTGTACTGCGAAAATTTGCAGGAAGATTAA |        |        |        |        |        |        |        | 51385 |
| Cow         |                                                                                    |        |        |        |        |        |        |        | 86816 |
| Dog         | GTCTAGCTAGTT CAGGAACTGGTGCATGTATTTTTCAAAGATAAA- GAAAGTGTACTGCGAAAATTTGCAGGAAGATTAA |        |        |        |        |        |        |        | 81230 |
| BelugaWhale |                                                                                    |        |        |        |        |        |        |        | 81417 |
| Donkey      |                                                                                    |        |        |        |        |        |        |        | 90106 |
| Cat         |                                                                                    |        |        |        |        |        |        |        | 86449 |
| Ferret      |                                                                                    |        |        |        |        |        |        |        | 87765 |
| Lion        |                                                                                    |        |        |        |        |        |        |        | 84143 |
| Vaquita     | GTCTAGCTAGTT CAGGAACTGGTGCATGTATTTTTCAAAGATAAAAGAAAGTGTACTGCGAAAATTTGCAGGAAGGTTAA  |        |        |        |        |        |        |        | 83024 |
| Pig         | GTCTAGCTAGTT CAGGAACTGGTGCATGTATTTTTCAAAGATAAAAGAAAGTGTACTGCGAAAATTTGCAGGAAGATTAA  |        |        |        |        |        |        |        | 82052 |

| Majority    | XXXXXXXXXXXXXXXXXXXXXXXXXXXXXXXXXXXXXXXXXXXXXXXXXXXXXXXXXXXXXXXXXXXXXXXXXXXX      |        |        |        |        |        |        |        |       |
|-------------|-----------------------------------------------------------------------------------|--------|--------|--------|--------|--------|--------|--------|-------|
|             | 116250                                                                            | 116260 | 116270 | 116280 | 116290 | 116300 | 116310 | 116320 |       |
| Human       | TTTTGTGGCAGTTTTCTAAAAC TGACAACCAGGTGGGACCAAAGTTTATGTGCCTTTAGTCTTAATTTACCTTGCATTGT |        |        |        |        |        |        |        | 93418 |
| PolarBear   | TTTTGTGGCAGTTTTCTAAAAC TGACAACCAGGTGGGACCAAAGTTTATGTGCCTTTAGTCTTAATTTACCTTGCATTGT |        |        |        |        |        |        |        | 51465 |
| Cow         |                                                                                   |        |        |        |        |        |        |        | 86816 |
| Dog         | TTTTGTGGCAGTTTTCTAAAAC TGACAACCAGGTGGGACCAAAGTTTATGTGCCTTTAGTCTTAATTTACCTTGCATTGT |        |        |        |        |        |        |        | 81310 |
| BelugaWhale |                                                                                   |        |        |        |        |        |        |        | 81417 |
| Donkey      |                                                                                   |        |        |        |        |        |        |        | 90106 |
| Cat         |                                                                                   |        |        |        |        |        |        |        | 86449 |
| Ferret      |                                                                                   |        |        |        |        |        |        |        | 87765 |
| Lion        |                                                                                   |        |        |        |        |        |        |        | 84143 |
| Vaquita     | TTTTGTGGCAGTTTTCTAAAAC TGACAACCAGGTGGGACCAAAGTTTATGTGCCTTTAGTCTTAATTTACCTTGCATTGT |        |        |        |        |        |        |        | 83104 |
| Pig         | TTTTGTGGCAGTTTTCTAAAAC TGACAACCAGGTGGGACCAAAGTTTATGTGCCTTTAGTCTTAATTTACCTTGCATTGT |        |        |        |        |        |        |        | 82132 |

Dienstag, 3. Mai 2022 08:41

| Majority    | XXXXXXXXXXXXXXXXXXXXXXXXXXXXXXXXXXXXXXXXXXXXXXXXXXXXXXXXXXXXXXXXXXXXXXXXXXXXXXXXXXXXXXXXXXXXXXXXXXXXXXXXXXXXXXXXXXXX |        |        |        |        |        |        |        |
|-------------|----------------------------------------------------------------------------------------------------------------------|--------|--------|--------|--------|--------|--------|--------|
|             | 116330                                                                                                               | 116340 | 116350 | 116360 | 116370 | 116380 | 116390 | 116400 |
| Human       | AATATTCAGTTTTAATAAATCTTCAAATATTTTGTATTTAGGAATAGATCTGAC- - - - - TTTAATAAAAACATGGCTC                                  |        |        |        |        |        |        | 93492  |
| PolarBear   | AATATTCAGTTTTAATAAATCTTCAAATATTTTGTATTTAGGAATAGATCTGAC- - - - - TTTAATAAAAACATGGCTC                                  |        |        |        |        |        |        | 51539  |
| Cow         |                                                                                                                      |        |        |        |        |        |        | 86816  |
| Dog         | AATATTCAGTTTTAATAAATCTTCAAATATTTTGTATTTAGGAATAGATCTGAC- - - - - TTTAATAAAAACATGGCTC                                  |        |        |        |        |        |        | 81384  |
| BelugaWhale |                                                                                                                      |        |        |        |        |        |        | 81417  |
| Donkey      |                                                                                                                      |        |        |        |        |        |        | 90106  |
| Cat         |                                                                                                                      |        |        |        |        |        |        | 86449  |
| Ferret      |                                                                                                                      |        |        |        |        |        |        | 87765  |
| Lion        |                                                                                                                      |        |        |        |        |        |        | 84143  |
| Vaquita     | AATATTCAGTTTTAATAAATCTTCAAATATTTTGTATTTAGGAATAGATCTGACTTTGACTTTAATAAAAACATGGCTC                                      |        |        |        |        |        |        | 83184  |
| Pig         | AATATTCAGTTTTAATAAATCTTCAAATATTTTGTATTTAGGAATAGATCTGAC- - - - - TTTAATAAAAACATGGCTC                                  |        |        |        |        |        |        | 82206  |

| Majority    | XXXXXXXXXXXXXXXXXXXXXXXXXXXXXXXXXXXXXXXXXXXXXXXXXXXXXXXXXXXXXXXXXXXXXXXXXXXXXXXXXXXXXXXXXXXXXXXXXXXXXXXXXXXXXXXXXXXX |        |        |        |        |        |        |        |
|-------------|----------------------------------------------------------------------------------------------------------------------|--------|--------|--------|--------|--------|--------|--------|
|             | 116410                                                                                                               | 116420 | 116430 | 116440 | 116450 | 116460 | 116470 | 116480 |
| Human       | AGAATCTACAGGTCAAATTAATTTGAACAGTTCTTGTCAATCCGAATTGTTGATTCTGTTTAAATGACCAATACTTTTTTG                                    |        |        |        |        |        |        | 93572  |
| PolarBear   | AGAATCTACAGGTCAAATTAATTTGAACAGTTCTTGTCAATCTGAATTGTTGATTCTGTTTAAATGACCAATACTTTTTTG                                    |        |        |        |        |        |        | 51619  |
| Cow         |                                                                                                                      |        |        |        |        |        |        | 86816  |
| Dog         | AGAATCTACAGGTCAAATTAATTTGAACAGTTCTTGTCAATCTGAATTGTTGATTCTGTTTAAATGACCAATACTTTTTTG                                    |        |        |        |        |        |        | 81464  |
| BelugaWhale |                                                                                                                      |        |        |        |        |        |        | 81417  |
| Donkey      |                                                                                                                      |        |        |        |        |        |        | 90106  |
| Cat         |                                                                                                                      |        |        |        |        |        |        | 86449  |
| Ferret      |                                                                                                                      |        |        |        |        |        |        | 87765  |
| Lion        |                                                                                                                      |        |        |        |        |        |        | 84143  |
| Vaquita     | AGAATCTACAGGTCAAATTAATTTGAACAGTTCTTGTCAATCTGAATTGTTGATTCTGTTTAAATGACCAATACTTTTTTC                                    |        |        |        |        |        |        | 83264  |
| Pig         | AGAATCTACAGGTCAAATTAATTTGAACAGTTCTTGTCAATCTGAATTGTTGATTCTGTTTAAATGACCAATACTTTTTTG                                    |        |        |        |        |        |        | 82286  |



Dienstag, 3. Mai 2022 08:41

| Majority    | XXXXXXXXXXXXXXXXXXXXXXXXXXXXXXXXXXXXXXXXXXXXXXXXXXXXXXXXXXXXXXXXXXXXXXXXXXXXXXXXXXXXXXXXXXXXXXXXXXXXXXXXXXXXXXXXXXXX |        |        |        |        |        |        |        |       |
|-------------|----------------------------------------------------------------------------------------------------------------------|--------|--------|--------|--------|--------|--------|--------|-------|
|             | 116490                                                                                                               | 116500 | 116510 | 116520 | 116530 | 116540 | 116550 | 116560 |       |
| Human       | AAATTGATGTA CTTAGTTTCAAGATT CATAGATTCTGTTATCTATGTAGACAGAATGGTCATGTATATTTTCTATTAGTT                                   |        |        |        |        |        |        |        | 93652 |
| PolarBear   | AAATTGATGTA CTTAGTTTCAAGATT CATAGATTCTGTTATCTATGTAGACAGAATGGTCATGTATATTTTCTATTAGTT                                   |        |        |        |        |        |        |        | 51699 |
| Cow         |                                                                                                                      |        |        |        |        |        |        |        | 86816 |
| Dog         | AAATTGATGTA CTTAGTTTCAAGATT CATAGATTCTGTTATCTATGTAGACAGAATGGTCATGTATATTTTCTATTAGTT                                   |        |        |        |        |        |        |        | 81544 |
| BelugaWhale |                                                                                                                      |        |        |        |        |        |        |        | 81417 |
| Donkey      |                                                                                                                      |        |        |        |        |        |        |        | 90106 |
| Cat         |                                                                                                                      |        |        |        |        |        |        |        | 86449 |
| Ferret      |                                                                                                                      |        |        |        |        |        |        |        | 87765 |
| Lion        |                                                                                                                      |        |        |        |        |        |        |        | 84143 |
| Vaquita     | AAATTGATGTA CTTAGTTTCAAGGTT CATAGATTCTGTTATCTATGTAGACAGAATGGTCATGTATATTTTCTATTAGTT                                   |        |        |        |        |        |        |        | 83344 |
| Pig         | AAATTGATGTA CTTAGTTTCAAGATT CATAGATTCTGTTATCTATGTAGACAGAATGGTCATGTATATTTTCTATTAGTT                                   |        |        |        |        |        |        |        | 82366 |

| Majority    | XXXXXXXXXXXXXXXXXXXXXXXXXXXXXXXXXXXXXXXXXXXXXXXXXXXXXXXXXXXXXXXXXXXXXXXXXXXXXXXXXXXXXXXXXXXXXXXXXXXXXXXXXXXXXXXXXXXX |        |        |        |        |        |        |        |       |
|-------------|----------------------------------------------------------------------------------------------------------------------|--------|--------|--------|--------|--------|--------|--------|-------|
|             | 116570                                                                                                               | 116580 | 116590 | 116600 | 116610 | 116620 | 116630 | 116640 |       |
| Human       | GAGTTTTTACATCTTTAGAAATGTAAAATTCAGTATAGTTTGAAAGCGGCACAATTA AAAAATTAATTTTCTAACAAAGTT                                   |        |        |        |        |        |        |        | 93732 |
| PolarBear   | GAGTTTTTACATCTTTAGAAATGTAAAATTCAGTATAGTTTGAAAGTGGCACAATTA AAAAATTAATTTTCTAACAAAGTT                                   |        |        |        |        |        |        |        | 51779 |
| Cow         |                                                                                                                      |        |        |        |        |        |        |        | 86816 |
| Dog         | GAGTTTTTACATCTTTAGAAATGTAAAATTCAGTATAGTTTGAAAGCGGCACAATTA AAAAATTAATTTTCTAACAAAGTT                                   |        |        |        |        |        |        |        | 81624 |
| BelugaWhale |                                                                                                                      |        |        |        |        |        |        |        | 81417 |
| Donkey      |                                                                                                                      |        |        |        |        |        |        |        | 90106 |
| Cat         |                                                                                                                      |        |        |        |        |        |        |        | 86449 |
| Ferret      |                                                                                                                      |        |        |        |        |        |        |        | 87765 |
| Lion        |                                                                                                                      |        |        |        |        |        |        |        | 84143 |
| Vaquita     | GAGTTTTTACATCTTTAGAAATGTAAAATTCAGTATAGTTTGAAAGCGGCACAATTA AAAAATTAATTTTCTAACAAAGTT                                   |        |        |        |        |        |        |        | 83424 |
| Pig         | GAGTTTTTACATCTTTAGAAATGTAAAATTCAGTATAGTTTGAAAGCGGCACAATTA AAAAATTAATTTTCTAACAAAGTT                                   |        |        |        |        |        |        |        | 82446 |

Dienstag, 3. Mai 2022 08:41

| Majority    | XXXXXXXXXXXXXXXXXXXXXXXXXXXXXXXXXXXXXXXXXXXXXXXXXXXXXXXXXXXXXXXXXXXXXXXXXXXXXXXXXXXXXXXXXXXXXXXXXXXXXXXXXXXXXXXXXXXX |        |        |        |        |        |        |        |       |
|-------------|----------------------------------------------------------------------------------------------------------------------|--------|--------|--------|--------|--------|--------|--------|-------|
|             | 116650                                                                                                               | 116660 | 116670 | 116680 | 116690 | 116700 | 116710 | 116720 |       |
| Human       | GGGAGGTTTGATGGTTGTTTAATTTCAATTTGTGTGTA CTCTGCTTACCCCTGTAGCATGCTCAATAAACACTTCTGTAG                                    |        |        |        |        |        |        |        | 93812 |
| PolarBear   | GGGAGGTTTGATGGTTGTTTAATTTCTTTTGTGTGTA CTCTGCTTACCTCTGTAGCATGCTCAATAAACACTTCTGTAG                                     |        |        |        |        |        |        |        | 51859 |
| Cow         |                                                                                                                      |        |        |        |        |        |        |        | 86816 |
| Dog         | GGGAGGTTTGATGGTTGTTTAATTTCTTTTGTGTGTA CTCTGCTTACCTCTGTAGCATGCTCAATAAACACTTCTGTAG                                     |        |        |        |        |        |        |        | 81704 |
| BelugaWhale |                                                                                                                      |        |        |        |        |        |        |        | 81417 |
| Donkey      |                                                                                                                      |        |        |        |        |        |        |        | 90106 |
| Cat         |                                                                                                                      |        |        |        |        |        |        |        | 86449 |
| Ferret      |                                                                                                                      |        |        |        |        |        |        |        | 87765 |
| Lion        |                                                                                                                      |        |        |        |        |        |        |        | 84143 |
| Vaquita     | GGGAGGTTTGATGGTTGTTTAATTTCTTTTGTGTGTA CTCTGCTTACCTCTGTAGCATGCTCAATAAACACTTCTGTAG                                     |        |        |        |        |        |        |        | 83504 |
| Pig         | GGGAGGTTTGATGGTTGTTTAATTTCTTTTGTGTGTA CTCTGCTTACCTCTGTAGCATGCTCAATAAACACTTCTGTAG                                     |        |        |        |        |        |        |        | 82526 |

| Majority    | XXXXXXXXXXXXXXXXXXXXXXXXXXXXXXXXXXXXXXXXXXXXXXXXXXXXXXXXXXXXXXXXXXXXXXXXXXXXXXXXXXXXXXXXXXXXXXXXXXXXXXXXXXXXXXXXXXXX |        |        |        |        |        |        |        |       |
|-------------|----------------------------------------------------------------------------------------------------------------------|--------|--------|--------|--------|--------|--------|--------|-------|
|             | 116730                                                                                                               | 116740 | 116750 | 116760 | 116770 | 116780 | 116790 | 116800 |       |
| Human       | CTCTATATTCACCTTTT- CTGTCTTTCTCTGCTGCCTTTTCTCTCTCCTCTTC- TTTGTTTTCACTCCACTGTGCTTCTG                                   |        |        |        |        |        |        |        | 93890 |
| PolarBear   | CTCTGTATTCACCTTTT- CTGTCTTTCTCTGCTGCCTTTTCTCTCTCCTCTTCTTTGTTTTCACTCCACTGTGCTTCTG                                     |        |        |        |        |        |        |        | 51938 |
| Cow         |                                                                                                                      |        |        |        |        |        |        |        | 86816 |
| Dog         | CTCTGTATTCACCTTTT- CTGTCTTTCTCTGCTGCCTTTTCTCTTTCCTCTTCTTTGTTTTCACTCCACTGTGCTTCTG                                     |        |        |        |        |        |        |        | 81783 |
| BelugaWhale |                                                                                                                      |        |        |        |        |        |        |        | 81417 |
| Donkey      |                                                                                                                      |        |        |        |        |        |        |        | 90106 |
| Cat         |                                                                                                                      |        |        |        |        |        |        |        | 86449 |
| Ferret      |                                                                                                                      |        |        |        |        |        |        |        | 87765 |
| Lion        |                                                                                                                      |        |        |        |        |        |        |        | 84143 |
| Vaquita     | CTCTGTATTCACCTTTT- CTGTCTTTCTCTGCTGCCTTTTCTCTCTCTTC- - - TTTGTTTTCACTCCACTGTGCTTCTG                                  |        |        |        |        |        |        |        | 83579 |
| Pig         | CTCTGTATTCACCTTTTTCTGTCTTTCTCTGCTGCCTTTTCTCTCTTTCCTC- TTTGTTTTCACTCCACTGTGCTTCTG                                     |        |        |        |        |        |        |        | 82605 |

Dienstag, 3. Mai 2022 08:41

| Majority    | XXXXXXXXXXXXXXXXXXXXXXXXXXXXXXXXXXXXXXXXXXXXXXXXXXXXXXXXXXXXXXXXXXXXXXXXXXXX      |        |        |        |        |        |        |        |
|-------------|-----------------------------------------------------------------------------------|--------|--------|--------|--------|--------|--------|--------|
|             | 116810                                                                            | 116820 | 116830 | 116840 | 116850 | 116860 | 116870 | 116880 |
| Human       | AATTCATGTTTATTCTCTGCCAGGGTGGGAAAGGAGTAATAA- TATTACAATTCTATGGCTTTATACCATAAATAAATCT |        |        |        |        |        |        | 93969  |
| PolarBear   | AATTCATGTTTATTCTCTGCCAGGGTGGGAAAGGAGTATTA- TATTACAATTCTATGGCTTTATACCATAAATAAATCT  |        |        |        |        |        |        | 52017  |
| Cow         |                                                                                   |        |        |        |        |        |        | 86816  |
| Dog         | AATTCATGTTTATTCTCTGCCAGGGTGGGAAAGGAGTAATAA- TATTATAATTCTATGGCTTTATACCATAAATAAATCT |        |        |        |        |        |        | 81862  |
| BelugaWhale |                                                                                   |        |        |        |        |        |        | 81417  |
| Donkey      |                                                                                   |        |        |        |        |        |        | 90106  |
| Cat         |                                                                                   |        |        |        |        |        |        | 86449  |
| Ferret      |                                                                                   |        |        |        |        |        |        | 87765  |
| Lion        |                                                                                   |        |        |        |        |        |        | 84143  |
| Vaquita     | AATTCATGTTTATTCTCTGCCAGGGTGGGAAAGGAATAATAA- TATTACAATTCTATGGCTTTATACCATAAATAAATCT |        |        |        |        |        |        | 83658  |
| Pig         | AATTCATGTTTATTCTCTGCCAGGGTGGGAAAGGAATAATAAATTACAATTCTATGGCTTTATACCATAAATAAATCT    |        |        |        |        |        |        | 82685  |

| Majority    | XXXXXXXXXXXXXXXXXXXXXXXXXXXXXXXXXXXXXXXXXXXXXXXXXXXXXXXXXXXXXXXXXXXXXXXXXXXX    |        |        |        |        |        |        |        |
|-------------|---------------------------------------------------------------------------------|--------|--------|--------|--------|--------|--------|--------|
|             | 116890                                                                          | 116900 | 116910 | 116920 | 116930 | 116940 | 116950 | 116960 |
| Human       | AGATGCTGTGAAAATATACCAGCTGGTTTTTTTTTA- - ATTTAAA- - - - - AGATGGTAACTGCTTT       |        |        |        |        |        |        | 94027  |
| PolarBear   | AGATGCTATGAAAATATACCAGCTGGTTTTTTTTTTAATTTAAA- - - - - AGATAGCAACTGCTTT          |        |        |        |        |        |        | 52077  |
| Cow         |                                                                                 |        |        |        |        |        |        | 86816  |
| Dog         | AGATGCTGTGAAAATATACCAGCTGGTTTTTTTTT- AATTTAAA- - - - - AGATAGTAACTGCTTT         |        |        |        |        |        |        | 81921  |
| BelugaWhale |                                                                                 |        |        |        |        |        |        | 81417  |
| Donkey      |                                                                                 |        |        |        |        |        |        | 90106  |
| Cat         |                                                                                 |        |        |        |        |        |        | 86449  |
| Ferret      |                                                                                 |        |        |        |        |        |        | 87765  |
| Lion        |                                                                                 |        |        |        |        |        |        | 84143  |
| Vaquita     | AGATGCTGTGAAAATATACCAGCTGGTTTTTTTTTTAATTTGAA- - - - - AGATGGTAACTGCTTT          |        |        |        |        |        |        | 83717  |
| Pig         | AGATGCTGTGAAAATATACCAGCTGTTTTTTTTTTTTGTTTTTTTTTGGTTTTTTTTTAATTTGAAAGATGGTAACTTT |        |        |        |        |        |        | 82765  |

Dienstag, 3. Mai 2022 08:41

| Majority    | XXXXXXXXXXXXXXXXXXXXXXXXXXXXXXXXXXXXXXXXXXXXXXXXXXXXXXXXXXXXXXXXXXXXXXXXXXXXXXXXXXXXXXXXXXXXXXXXXXXXXXXXXXXXXXXXXXXX |        |        |        |        |        |        |        |  |
|-------------|----------------------------------------------------------------------------------------------------------------------|--------|--------|--------|--------|--------|--------|--------|--|
|             | 116970                                                                                                               | 116980 | 116990 | 117000 | 117010 | 117020 | 117030 | 117040 |  |
| Human       | TCAGGAGGACACATATTA AACATTTCCACCCCTGTTATAAATCTACTGCTTTAAAGACATAACTTTTATTGTAGCTTGTTA                                   |        |        |        |        |        |        | 94107  |  |
| PolarBear   | TCAGGAGGACACATATTA AACATTTCCACCCCTGTTA                                                                               |        |        |        |        |        |        | 52114  |  |
| Cow         |                                                                                                                      |        |        |        |        |        |        | 86816  |  |
| Dog         | TCAGGAGGACACATATTA AACATTTCCACCCCTGTTATAAATCTACTGCTTTAAAGACATAACTTTTATTGTATCTTGTTA                                   |        |        |        |        |        |        | 82001  |  |
| BelugaWhale |                                                                                                                      |        |        |        |        |        |        | 81417  |  |
| Donkey      |                                                                                                                      |        |        |        |        |        |        | 90106  |  |
| Cat         |                                                                                                                      |        |        |        |        |        |        | 86449  |  |
| Ferret      |                                                                                                                      |        |        |        |        |        |        | 87765  |  |
| Lion        |                                                                                                                      |        |        |        |        |        |        | 84143  |  |
| Vaquita     | TCAGGAGGACACATATTA AACATTTCCACCCCTGTTATAAATCTACTGCTTTAAAGACATAACTTTTATTGTATCTTGTTA                                   |        |        |        |        |        |        | 83797  |  |
| Pig         | TCAGGAGGACACATATTA AACATTTCCACCCCTGTTATAAATCTACTGCTTTACAGACATAACTCTTACTGTATCTTGTTA                                   |        |        |        |        |        |        | 82845  |  |

| Majority    | XXXXXXXXXXXXXXXXXXXXXXXXXXXXXXXXXXXXXXXXXXXXXXXXXXXXXXXXXXXXXXXXXXXXXXXXXXXXXXXXXXXXXXXXXXXXXXXXXXXXXXXXXXXXXXXXXXXX |        |        |        |        |        |        |        |  |
|-------------|----------------------------------------------------------------------------------------------------------------------|--------|--------|--------|--------|--------|--------|--------|--|
|             | 117050                                                                                                               | 117060 | 117070 | 117080 | 117090 | 117100 | 117110 | 117120 |  |
| Human       | ATTCTATCTCTTTTGTCTTGTGTTTGTGTTTTTTTTTTTTTCCAGTAGATTTATGCACTAATAGATCTTTTGGATTTGCCATG                                  |        |        |        |        |        |        | 94187  |  |
| PolarBear   |                                                                                                                      |        |        |        |        |        |        | 52114  |  |
| Cow         |                                                                                                                      |        |        |        |        |        |        | 86816  |  |
| Dog         | ATTCT- - - - - ATCTCTTTTGTGTTGTGTTTGTGTTTTTTTTTCCAGTAGATTTATGCACTAATAGATCTTTTGGATTTGCCATG                            |        |        |        |        |        |        | 82075  |  |
| BelugaWhale |                                                                                                                      |        |        |        |        |        |        | 81417  |  |
| Donkey      |                                                                                                                      |        |        |        |        |        |        | 90106  |  |
| Cat         |                                                                                                                      |        |        |        |        |        |        | 86449  |  |
| Ferret      |                                                                                                                      |        |        |        |        |        |        | 87765  |  |
| Lion        |                                                                                                                      |        |        |        |        |        |        | 84143  |  |
| Vaquita     | ATTCTTTCT- - ATCTCTTTTGTGTTGTGTTTGTGTTTTTTTTTCCAGTAGATTTATGCACTAATAGATCTTTTGGATTTGCCATG                              |        |        |        |        |        |        | 83875  |  |
| Pig         | ATTCTTTCT- - ATCTCTTTTGTGTTGTGTTTGTGTTTTTTTTTCCAGTAGATTTATGCACTAGTAGATCTTTTGGATTTGCCATG                              |        |        |        |        |        |        | 82923  |  |

Dienstag, 3. Mai 2022 08:41

| Majority    | XXXXXXXXXXXXXXXXXXXXXXXXXXXXXXXXXXXXXXXXXXXXXXXXXXXXXXXXXXXXXXXXXXXXXXXXXXXXXXXXXXXXXXXXXXXXXXXXXXXXXXXXXXXXXXXXXXXX |        |        |        |        |        |        |        |       |
|-------------|----------------------------------------------------------------------------------------------------------------------|--------|--------|--------|--------|--------|--------|--------|-------|
|             | 117130                                                                                                               | 117140 | 117150 | 117160 | 117170 | 117180 | 117190 | 117200 |       |
| Human       | CTCTCTTGCTGCAGTTTCATCTTTTCATCTTTTGTGTCTGCTAAAGATTTCTTACTAATCTTAGACTACCTTGTGAGTTAA                                    |        |        |        |        |        |        |        | 94267 |
| PolarBear   |                                                                                                                      |        |        |        |        |        |        |        | 52114 |
| Cow         |                                                                                                                      |        |        |        |        |        |        |        | 86816 |
| Dog         | CTCTCTTGCTGCAGTTTCATCTTTTCATCTTTTGTGTCTGCTAAAGATTTCTTACTAATCTTAGA- - - - -                                           |        |        |        |        |        |        | TTAC   | 82143 |
| BelugaWhale |                                                                                                                      |        |        |        |        |        |        |        | 81417 |
| Donkey      |                                                                                                                      |        |        |        |        |        |        |        | 90106 |
| Cat         |                                                                                                                      |        |        |        |        |        |        |        | 86449 |
| Ferret      |                                                                                                                      |        |        |        |        |        |        |        | 87765 |
| Lion        |                                                                                                                      |        |        |        |        |        |        |        | 84143 |
| Vaquita     | CTCTCTTGCTGCAGTTTCATCTTTTCATCTTTTGTGTCTGCTAAAGATTTCTTACTAATCTTAGA- - - - -                                           |        |        |        |        |        |        | TTAA   | 83943 |
| Pig         | CTTTCTTGCTGCAGTTTCATCTTTTCATCTTTTGTGTCTGCTAAAGATTTCTTACTAATCTTAGA- - - - -                                           |        |        |        |        |        |        | TTAA   | 82991 |

| Majority    | XXXXXXXXXXXXXXXXXXXXXXXXXXXXXXXXXXXXXXXXXXXXXXXXXXXXXXXXXXXXXXXXXXXXXXXXXXXXXXXXXXXXXXXXXXXXXXXXXXXXXXXXXXXXXXXXXXXX |        |        |        |        |        |        |                               |       |
|-------------|----------------------------------------------------------------------------------------------------------------------|--------|--------|--------|--------|--------|--------|-------------------------------|-------|
|             | 117210                                                                                                               | 117220 | 117230 | 117240 | 117250 | 117260 | 117270 | 117280                        |       |
| Human       | CAAAAAGAACTTGATATTACTGGGAAGAAAGAGCAGCATATCTGCATATCAGCATATCTGCTTTTGCCTTGGGTGGGAAG                                     |        |        |        |        |        |        |                               | 94347 |
| PolarBear   |                                                                                                                      |        |        |        |        |        |        |                               | 52114 |
| Cow         |                                                                                                                      |        |        |        |        |        |        |                               | 86816 |
| Dog         | CTTGCGATTTTTAAACAAAGGGTATTAGGTGTTATTG- - - - -                                                                       |        |        |        |        |        |        | GGAAGAACTTTGTCTTGGGTGGGCAG    | 82206 |
| BelugaWhale |                                                                                                                      |        |        |        |        |        |        |                               | 81417 |
| Donkey      |                                                                                                                      |        |        |        |        |        |        |                               | 90106 |
| Cat         |                                                                                                                      |        |        |        |        |        |        |                               | 86449 |
| Ferret      |                                                                                                                      |        |        |        |        |        |        |                               | 87765 |
| Lion        |                                                                                                                      |        |        |        |        |        |        |                               | 84143 |
| Vaquita     | CAAAGGGTACTTGATGTTACTGGGAAGAAACAGTA- - - - -                                                                         |        |        |        |        |        |        | TACCATCTGCTTTTGCCTTGGGTGGGAAG | 84007 |
| Pig         | CAAAGGGTACTTGATGTTTGGGAAGAGGCAGTATCAT- - - - -                                                                       |        |        |        |        |        |        | CCCATCTGCTTTTGCCTTGGGTGTAAG   | 83057 |

Dienstag, 3. Mai 2022 08:41

| Majority    | XXXXXXXXXXXXXXXXXXXXXXXXXXXXXXXXXXXXXXXXXXXXXXXXXXXXXXXXXXXXXXXXXXXXXXXXXXXXXXXXXXXXXXXXXXXXXXXXXXXXXXXXXXXXXXXXXXXX |        |        |        |        |        |        |        |  |
|-------------|----------------------------------------------------------------------------------------------------------------------|--------|--------|--------|--------|--------|--------|--------|--|
|             | 117290                                                                                                               | 117300 | 117310 | 117320 | 117330 | 117340 | 117350 | 117360 |  |
| Human       | AATGATATACATTCAAGTATTTAAAAACTTAGAGTAATTTGCATTTAACAACTGAGGATGTTACTACTGTAAC TTGTTAA                                    |        |        |        |        |        |        | 94427  |  |
| PolarBear   |                                                                                                                      |        |        |        |        |        |        | 52114  |  |
| Cow         |                                                                                                                      |        |        |        |        |        |        | 86816  |  |
| Dog         | AAGATACATTCAGGTAATTTGTGATGTTATAACTTCCACTTTTTTTTTTTTTTAAAGGAGTTCAGTTAGGGGGCTATTTG                                     |        |        |        |        |        |        | 82286  |  |
| BelugaWhale |                                                                                                                      |        |        |        |        |        |        | 81417  |  |
| Donkey      |                                                                                                                      |        |        |        |        |        |        | 90106  |  |
| Cat         |                                                                                                                      |        |        |        |        |        |        | 86449  |  |
| Ferret      |                                                                                                                      |        |        |        |        |        |        | 87765  |  |
| Lion        |                                                                                                                      |        |        |        |        |        |        | 84143  |  |
| Vaquita     | GAAGATAC                                                                                                             |        |        |        |        |        |        | 84015  |  |
| Pig         | GACGATACACATGCAGATACTGAAAAACCTAAGAGGTATTCGGTGAGGTTACGATTTTACTTTTTTAAAAGATTGCAAT                                      |        |        |        |        |        |        | 83137  |  |

| Majority    | XXXXXXXXXXXXXXXXXXXXXXXXXXXXXXXXXXXXXXXXXXXXXXXXXXXXXXXXXXXXXXXXXXXXXXXXXXXXXXXXXXXXXXXXXXXXXXXXXXXXXXXXXXXXXXXXXXXX |        |        |        |        |        |        |        |  |
|-------------|----------------------------------------------------------------------------------------------------------------------|--------|--------|--------|--------|--------|--------|--------|--|
|             | 117370                                                                                                               | 117380 | 117390 | 117400 | 117410 | 117420 | 117430 | 117440 |  |
| Human       | GCAGTTACAATTAGGGTGCTATTTATATTCAAATATTTCCGGTCAGTTTTTCTAAACAGATATATTGGTATCAAATAACT                                     |        |        |        |        |        |        | 94507  |  |
| PolarBear   |                                                                                                                      |        |        |        |        |        |        | 52114  |  |
| Cow         |                                                                                                                      |        |        |        |        |        |        | 86816  |  |
| Dog         | TGTTATTCATATTTTTGGTTA                                                                                                |        |        |        |        |        |        | 82307  |  |
| BelugaWhale |                                                                                                                      |        |        |        |        |        |        | 81417  |  |
| Donkey      |                                                                                                                      |        |        |        |        |        |        | 90106  |  |
| Cat         |                                                                                                                      |        |        |        |        |        |        | 86449  |  |
| Ferret      |                                                                                                                      |        |        |        |        |        |        | 87765  |  |
| Lion        |                                                                                                                      |        |        |        |        |        |        | 84143  |  |
| Vaquita     |                                                                                                                      |        |        |        |        |        |        | 84015  |  |
| Pig         | TAGGATGTTCAATTTGTATTACTCAGAATATTTTTGGGGGATCACATTTTTTAAACAGGCATATTGGTATCAGATAACT                                      |        |        |        |        |        |        | 83217  |  |

Dienstag, 3. Mai 2022 08:41

|             |                                                                                                              |
|-------------|--------------------------------------------------------------------------------------------------------------|
| Majority    | XXXXXXXXXXXXXXXXXXXXXXXXXXXXXXXXXXXXXXXXXXXXXXXXXXXXXXXXXXXXXXXXXXXXXXXXXXXXXXXXXXXXXXXXXXXXXXXXXXXXXXXXXXXX |
|             | <hr/>                                                                                                        |
|             | 117450      117460      117470      117480      117490      117500      117510      117520                   |
|             | <hr/>                                                                                                        |
| Human       | TTGGAGTTACACATGTTTCTTAGGTTTGTTCTGTTATAAAATATCCCACACTTATGCAAAACCTTACACATAGGATAATAA 94587                      |
| PolarBear   | 52114                                                                                                        |
| Cow         | 86816                                                                                                        |
| Dog         | 82307                                                                                                        |
| BelugaWhale | 81417                                                                                                        |
| Donkey      | 90106                                                                                                        |
| Cat         | 86449                                                                                                        |
| Ferret      | 87765                                                                                                        |
| Lion        | 84143                                                                                                        |
| Vaquita     | 84015                                                                                                        |
| Pig         | CTGCAGTTATACATGTTCCCTAGGTTTGTTCTGTTACAAAATAACTGAA- - TTATGCAAAACCTCATAACATCAGGAAAAGT 83295                   |

|             |                                                                                                              |
|-------------|--------------------------------------------------------------------------------------------------------------|
| Majority    | XXXXXXXXXXXXXXXXXXXXXXXXXXXXXXXXXXXXXXXXXXXXXXXXXXXXXXXXXXXXXXXXXXXXXXXXXXXXXXXXXXXXXXXXXXXXXXXXXXXXXXXXXXXX |
|             | <hr/>                                                                                                        |
|             | 117530      117540      117550      117560      117570      117580      117590      117600                   |
|             | <hr/>                                                                                                        |
| Human       | AAAGTAAATGAAGGAACATAAAATATGTTTTACTATACTTAATGTAGTAATTCAGTTACCTCCAAGAAAGAAGAATATAA 94667                       |
| PolarBear   | 52114                                                                                                        |
| Cow         | 86816                                                                                                        |
| Dog         | 82307                                                                                                        |
| BelugaWhale | 81417                                                                                                        |
| Donkey      | 90106                                                                                                        |
| Cat         | 86449                                                                                                        |
| Ferret      | 87765                                                                                                        |
| Lion        | 84143                                                                                                        |
| Vaquita     | 84015                                                                                                        |
| Pig         | AAAAAGAAAGGGAGTAAATAATACATTTAAGTGTATATTTAATGTATTAATATAATTTTTTTGGTTTTTTTTTTTTTTTT 83375                       |

Dienstag, 3. Mai 2022 08:41

| Majority    | XXXXXXXXXXXXXXXXXXXXXXXXXXXXXXXXXXXXXXXXXXXXXXXXXXXXXXXXXXXXXXXXXXXXXXXXXXXXXXXXXXXXXXXXXXXXXXXXXXXXXXXXXXXXXXXXXXXX |                                                         |
|-------------|----------------------------------------------------------------------------------------------------------------------|---------------------------------------------------------|
|             |                                                                                                                      | 117610 117620 117630 117640 117650 117660 117670 117680 |
| Human       | T AAGTAAAATAATTTTGTTTACACTAGTGTCACTGTTGTCATCTGAAGAAGAACCATTAGAGTCAACAGTCTGGGATGAT                                    | 94747                                                   |
| PolarBear   |                                                                                                                      | 52114                                                   |
| Cow         |                                                                                                                      | 86816                                                   |
| Dog         |                                                                                                                      | 82307                                                   |
| BelugaWhale |                                                                                                                      | 81417                                                   |
| Donkey      |                                                                                                                      | 90106                                                   |
| Cat         |                                                                                                                      | 86449                                                   |
| Ferret      |                                                                                                                      | 87765                                                   |
| Lion        |                                                                                                                      | 84143                                                   |
| Vaquita     |                                                                                                                      | 84015                                                   |
| Pig         | T TTTTTTTTTTTTTTTTTTGTCTTTTAGGGCCGCACCTGTGGCATAGGGAGGTTCAACCAGGTTAGGGGTCTAATTGGAGCT                                  | 83455                                                   |

| Majority    | XXXXXXXXXXXXXXXXXXXXXXXXXXXXXXXXXXXXXXXXXXXXXXXXXXXXXXXXXXXXXXXXXXXXXXXXXXXXXXXXXXXXXXXXXXXXXXXXXXXXXXXXXXXXXXXXXXXX |                                                         |
|-------------|----------------------------------------------------------------------------------------------------------------------|---------------------------------------------------------|
|             |                                                                                                                      | 117690 117700 117710 117720 117730 117740 117750 117760 |
| Human       | T TGG AAGCTAGGTGATCTGTGTTTTTTCTTAAAATAACATCGTAGCACAGAGGAACTCTACCAGCATCAGATAAGTCTA                                    | 94827                                                   |
| PolarBear   |                                                                                                                      | 52114                                                   |
| Cow         |                                                                                                                      | 86816                                                   |
| Dog         |                                                                                                                      | 82307                                                   |
| BelugaWhale |                                                                                                                      | 81417                                                   |
| Donkey      |                                                                                                                      | 90106                                                   |
| Cat         |                                                                                                                      | 86449                                                   |
| Ferret      |                                                                                                                      | 87765                                                   |
| Lion        |                                                                                                                      | 84143                                                   |
| Vaquita     |                                                                                                                      | 84015                                                   |
| Pig         | GTGGCTGCCGGCCTG                                                                                                      | 83470                                                   |



Dienstag, 3. Mai 2022 08:41

|             |                                                                                                                      |       |
|-------------|----------------------------------------------------------------------------------------------------------------------|-------|
| Majority    | XXXXXXXXXXXXXXXXXXXXXXXXXXXXXXXXXXXXXXXXXXXXXXXXXXXXXXXXXXXXXXXXXXXXXXXXXXXXXXXXXXXXXXXXXXXXXXXXXXXXXXXXXXXXXXXXXXXX |       |
|             | ----- ----- ----- ----- ----- ----- -----                                                                            |       |
|             | 117770      117780      117790      117800      117810      117820      117830      117840                           |       |
| Human       | AAGTCTAAAAAACCAATACCAGGGTTAGTGAATAGTAATTGAACAAAGCTTCTCAAGGTGAAGTTTTTCTCAGTAATTAG                                     | 94907 |
| PolarBear   |                                                                                                                      | 52114 |
| Cow         |                                                                                                                      | 86816 |
| Dog         |                                                                                                                      | 82307 |
| BelugaWhale |                                                                                                                      | 81417 |
| Donkey      |                                                                                                                      | 90106 |
| Cat         |                                                                                                                      | 86449 |
| Ferret      |                                                                                                                      | 87765 |
| Lion        |                                                                                                                      | 84143 |
| Vaquita     |                                                                                                                      | 84015 |
| Pig         |                                                                                                                      | 83470 |

|             |                                                                                                                      |       |
|-------------|----------------------------------------------------------------------------------------------------------------------|-------|
| Majority    | XXXXXXXXXXXXXXXXXXXXXXXXXXXXXXXXXXXXXXXXXXXXXXXXXXXXXXXXXXXXXXXXXXXXXXXXXXXXXXXXXXXXXXXXXXXXXXXXXXXXXXXXXXXXXXXXXXXX |       |
|             | ----- ----- ----- ----- ----- -----                                                                                  |       |
|             | 117850      117860      117870      117880      117890      117900      117910      117920                           |       |
| Human       | TGGTGGCTATAATATTTGAAAGTAGGTTCTGTACACCTTTTCAGGTGCTCATTGTGGGTGGGATTGCCTTGGGAAGGAGAA                                    | 94987 |
| PolarBear   |                                                                                                                      | 52114 |
| Cow         |                                                                                                                      | 86816 |
| Dog         |                                                                                                                      | 82307 |
| BelugaWhale |                                                                                                                      | 81417 |
| Donkey      |                                                                                                                      | 90106 |
| Cat         |                                                                                                                      | 86449 |
| Ferret      |                                                                                                                      | 87765 |
| Lion        |                                                                                                                      | 84143 |
| Vaquita     |                                                                                                                      | 84015 |
| Pig         |                                                                                                                      | 83470 |

Dienstag, 3. Mai 2022 08:41

|             |                                                                                                              |       |
|-------------|--------------------------------------------------------------------------------------------------------------|-------|
| Majority    | XXXXXXXXXXXXXXXXXXXXXXXXXXXXXXXXXXXXXXXXXXXXXXXXXXXXXXXXXXXXXXXXXXXXXXXXXXXXXXXXXXXXXXXXXXXXXXXXXXXXXXXXXXXX |       |
|             | ----- ----- ----- ----- ----- ----- ----- ----- ----- ----- -----                                            |       |
|             | 117930      117940      117950      117960      117970      117980      117990      118000                   |       |
| Human       | ACTAAGTCCTGAGCTGTGTGTGGACTTAGTTTGTGCCAGTTGCTAAGCTGGTGGGAGTTCCCAGTCTCCCTAGTGGGA                               | 95067 |
| PolarBear   |                                                                                                              | 52114 |
| Cow         |                                                                                                              | 86816 |
| Dog         |                                                                                                              | 82307 |
| BelugaWhale |                                                                                                              | 81417 |
| Donkey      |                                                                                                              | 90106 |
| Cat         |                                                                                                              | 86449 |
| Ferret      |                                                                                                              | 87765 |
| Lion        |                                                                                                              | 84143 |
| Vaquita     |                                                                                                              | 84015 |
| Pig         |                                                                                                              | 83470 |

|             |                                                                                                              |       |
|-------------|--------------------------------------------------------------------------------------------------------------|-------|
| Majority    | XXXXXXXXXXXXXXXXXXXXXXXXXXXXXXXXXXXXXXXXXXXXXXXXXXXXXXXXXXXXXXXXXXXXXXXXXXXXXXXXXXXXXXXXXXXXXXXXXXXXXXXXXXXX |       |
|             | ----- ----- ----- ----- ----- ----- ----- ----- ----- ----- -----                                            |       |
|             | 118010      118020      118030      118040      118050      118060      118070      118080                   |       |
| Human       | GATAACCAGAAACCAGCTCTTCCTGCCTAAGGACTACAGCAGATTCTATACTGTCTTACAGTATGCCCTAATACGGCCTT                             | 95147 |
| PolarBear   |                                                                                                              | 52114 |
| Cow         |                                                                                                              | 86816 |
| Dog         |                                                                                                              | 82307 |
| BelugaWhale |                                                                                                              | 81417 |
| Donkey      |                                                                                                              | 90106 |
| Cat         |                                                                                                              | 86449 |
| Ferret      |                                                                                                              | 87765 |
| Lion        |                                                                                                              | 84143 |
| Vaquita     |                                                                                                              | 84015 |
| Pig         |                                                                                                              | 83470 |

Dienstag, 3. Mai 2022 08:41

|             |                                                                                                                      |       |
|-------------|----------------------------------------------------------------------------------------------------------------------|-------|
| Majority    | XXXXXXXXXXXXXXXXXXXXXXXXXXXXXXXXXXXXXXXXXXXXXXXXXXXXXXXXXXXXXXXXXXXXXXXXXXXXXXXXXXXXXXXXXXXXXXXXXXXXXXXXXXXXXXXXXXXX |       |
|             | 118090 118100 118110 118120 118130 118140 118150 118160                                                              |       |
| Human       | CCTTCAAAGCACCAAGTCACTAAAGGGGGATTTTGACATTCTAGAATATTTTTAATTCAGTACATCAAATTAACCCAGG                                      | 95227 |
| PolarBear   |                                                                                                                      | 52114 |
| Cow         |                                                                                                                      | 86816 |
| Dog         |                                                                                                                      | 82307 |
| BelugaWhale |                                                                                                                      | 81417 |
| Donkey      |                                                                                                                      | 90106 |
| Cat         |                                                                                                                      | 86449 |
| Ferret      |                                                                                                                      | 87765 |
| Lion        |                                                                                                                      | 84143 |
| Vaquita     |                                                                                                                      | 84015 |
| Pig         |                                                                                                                      | 83470 |

|             |                                                                                                                      |       |
|-------------|----------------------------------------------------------------------------------------------------------------------|-------|
| Majority    | XXXXXXXXXXXXXXXXXXXXXXXXXXXXXXXXXXXXXXXXXXXXXXXXXXXXXXXXXXXXXXXXXXXXXXXXXXXXXXXXXXXXXXXXXXXXXXXXXXXXXXXXXXXXXXXXXXXX |       |
|             | 118170 118180 118190 118200 118210 118220 118230 118240                                                              |       |
| Human       | CCTTGGCATATAGTGAATTGCTTATTAAAAGTTAGGTAAAATAAAACAGCTTTGTCGTATATTAGTACTCTATGACTC                                       | 95307 |
| PolarBear   |                                                                                                                      | 52114 |
| Cow         |                                                                                                                      | 86816 |
| Dog         |                                                                                                                      | 82307 |
| BelugaWhale |                                                                                                                      | 81417 |
| Donkey      |                                                                                                                      | 90106 |
| Cat         |                                                                                                                      | 86449 |
| Ferret      |                                                                                                                      | 87765 |
| Lion        |                                                                                                                      | 84143 |
| Vaquita     |                                                                                                                      | 84015 |
| Pig         |                                                                                                                      | 83470 |

Dienstag, 3. Mai 2022 08:41

| Majority    | XXXXXXXXXXXXXXXXXXXXXXXXXXXXXXXXXXXXXXXXXXXXXXXXXXXXXXXXXXXXXXXXXXXXXXXXXXXXXXXXXXXXXXXXXXXXXXXXXXXXXXXXXXXXXXXXXXXX |
|-------------|----------------------------------------------------------------------------------------------------------------------|
|             | 118250 118260 118270 118280 118290 118300 118310 118320                                                              |
| Human       | TTAGAGTGAACAAGCTAACAAAGTATTCTTAGGACTTAGCTGCTTTGTTAATAGAGGTCTTAAGTTGAATATTTAGAAATA 95387                              |
| PolarBear   | 52114                                                                                                                |
| Cow         | 86816                                                                                                                |
| Dog         | 82307                                                                                                                |
| BelugaWhale | 81417                                                                                                                |
| Donkey      | 90106                                                                                                                |
| Cat         | 86449                                                                                                                |
| Ferret      | 87765                                                                                                                |
| Lion        | 84143                                                                                                                |
| Vaquita     | 84015                                                                                                                |
| Pig         | 83470                                                                                                                |

| Majority    | XXXXXXXXXXXXXXXXXXXXXXXXXXXXXXXXXXXXXXXXXXXXXXXXXXXXXXXXXXXXXXXXXXXXXXXXXXXXXXXXXXXXXXXXXXXXXXXXXXXXXXXXXXXXXXXXXXXX |
|-------------|----------------------------------------------------------------------------------------------------------------------|
|             | 118330 118340 118350 118360 118370 118380 118390 118400                                                              |
| Human       | ATCAGAAAATTATTTTTTGGTATTGAAGATGTATTTTTGGAAATGGGTTTTAAAGTACCTACTTAAGGAAGAGATATCTA 95467                               |
| PolarBear   | 52114                                                                                                                |
| Cow         | 86816                                                                                                                |
| Dog         | 82307                                                                                                                |
| BelugaWhale | 81417                                                                                                                |
| Donkey      | 90106                                                                                                                |
| Cat         | 86449                                                                                                                |
| Ferret      | 87765                                                                                                                |
| Lion        | 84143                                                                                                                |
| Vaquita     | 84015                                                                                                                |
| Pig         | 83470                                                                                                                |

Dienstag, 3. Mai 2022 08:41

| Majority    | XXXXXXXXXXXXXXXXXXXXXXXXXXXXXXXXXXXXXXXXXXXXXXXXXXXXXXXXXXXXXXXXXXXXXXXXXXXXXXXXXXXXXXXXXXXXXXXXXXXXXXXXXXXX                                                                                                                                                                                                                                                                                           |        |        |        |        |        |        |        |        |
|-------------|--------------------------------------------------------------------------------------------------------------------------------------------------------------------------------------------------------------------------------------------------------------------------------------------------------------------------------------------------------------------------------------------------------|--------|--------|--------|--------|--------|--------|--------|--------|
|             | <table border="0"> <tr> <td style="text-align: center;">118410</td> <td style="text-align: center;">118420</td> <td style="text-align: center;">118430</td> <td style="text-align: center;">118440</td> <td style="text-align: center;">118450</td> <td style="text-align: center;">118460</td> <td style="text-align: center;">118470</td> <td style="text-align: center;">118480</td> </tr> </table> | 118410 | 118420 | 118430 | 118440 | 118450 | 118460 | 118470 | 118480 |
| 118410      | 118420                                                                                                                                                                                                                                                                                                                                                                                                 | 118430 | 118440 | 118450 | 118460 | 118470 | 118480 |        |        |
| Human       | CAGTTTATATTTAACGTTAGCATTTGAAAGCAATGAAGAAAATTTTTCCTTAACCAGGAAGTGTAAATGAATCATTATATT 95547                                                                                                                                                                                                                                                                                                                |        |        |        |        |        |        |        |        |
| PolarBear   | 52114                                                                                                                                                                                                                                                                                                                                                                                                  |        |        |        |        |        |        |        |        |
| Cow         | 86816                                                                                                                                                                                                                                                                                                                                                                                                  |        |        |        |        |        |        |        |        |
| Dog         | 82307                                                                                                                                                                                                                                                                                                                                                                                                  |        |        |        |        |        |        |        |        |
| BelugaWhale | 81417                                                                                                                                                                                                                                                                                                                                                                                                  |        |        |        |        |        |        |        |        |
| Donkey      | 90106                                                                                                                                                                                                                                                                                                                                                                                                  |        |        |        |        |        |        |        |        |
| Cat         | 86449                                                                                                                                                                                                                                                                                                                                                                                                  |        |        |        |        |        |        |        |        |
| Ferret      | 87765                                                                                                                                                                                                                                                                                                                                                                                                  |        |        |        |        |        |        |        |        |
| Lion        | 84143                                                                                                                                                                                                                                                                                                                                                                                                  |        |        |        |        |        |        |        |        |
| Vaquita     | 84015                                                                                                                                                                                                                                                                                                                                                                                                  |        |        |        |        |        |        |        |        |
| Pig         | 83470                                                                                                                                                                                                                                                                                                                                                                                                  |        |        |        |        |        |        |        |        |

| Majority    | XXXXXXXXXXXXXXXXXXXXXXXXXXXXXXXXXXXXXXXXXXXXXXXXXXXXXXXXXXXXXXXXXXXXXXXXXXXXXXXXXXXXXXXXXXXXXXXXXXXXXXXXXXXX                                                                                                                                                                                                                                                                                           |        |        |        |        |        |        |        |        |
|-------------|--------------------------------------------------------------------------------------------------------------------------------------------------------------------------------------------------------------------------------------------------------------------------------------------------------------------------------------------------------------------------------------------------------|--------|--------|--------|--------|--------|--------|--------|--------|
|             | <table border="0"> <tr> <td style="text-align: center;">118490</td> <td style="text-align: center;">118500</td> <td style="text-align: center;">118510</td> <td style="text-align: center;">118520</td> <td style="text-align: center;">118530</td> <td style="text-align: center;">118540</td> <td style="text-align: center;">118550</td> <td style="text-align: center;">118560</td> </tr> </table> | 118490 | 118500 | 118510 | 118520 | 118530 | 118540 | 118550 | 118560 |
| 118490      | 118500                                                                                                                                                                                                                                                                                                                                                                                                 | 118510 | 118520 | 118530 | 118540 | 118550 | 118560 |        |        |
| Human       | AGAGATTAAATTAACACTTTTGAAGCATTTTAGCTCCTAGAGTTAAGGTTAGTATAGTGAAATTATGGTGATTAGCTTAA 95627                                                                                                                                                                                                                                                                                                                 |        |        |        |        |        |        |        |        |
| PolarBear   | 52114                                                                                                                                                                                                                                                                                                                                                                                                  |        |        |        |        |        |        |        |        |
| Cow         | 86816                                                                                                                                                                                                                                                                                                                                                                                                  |        |        |        |        |        |        |        |        |
| Dog         | 82307                                                                                                                                                                                                                                                                                                                                                                                                  |        |        |        |        |        |        |        |        |
| BelugaWhale | 81417                                                                                                                                                                                                                                                                                                                                                                                                  |        |        |        |        |        |        |        |        |
| Donkey      | 90106                                                                                                                                                                                                                                                                                                                                                                                                  |        |        |        |        |        |        |        |        |
| Cat         | 86449                                                                                                                                                                                                                                                                                                                                                                                                  |        |        |        |        |        |        |        |        |
| Ferret      | 87765                                                                                                                                                                                                                                                                                                                                                                                                  |        |        |        |        |        |        |        |        |
| Lion        | 84143                                                                                                                                                                                                                                                                                                                                                                                                  |        |        |        |        |        |        |        |        |
| Vaquita     | 84015                                                                                                                                                                                                                                                                                                                                                                                                  |        |        |        |        |        |        |        |        |
| Pig         | 83470                                                                                                                                                                                                                                                                                                                                                                                                  |        |        |        |        |        |        |        |        |

Dienstag, 3. Mai 2022 08:41

| Majority    | XXXXXXXXXXXXXXXXXXXXXXXXXXXXXXXXXXXXXXXXXXXXXXXXXXXXXXXXXXXXXXXXXXXXXXXXXXXXXXXXXXXXXXXXXXXXXXXXXXXXXXXXXXXXXXXXXXXX |
|-------------|----------------------------------------------------------------------------------------------------------------------|
|             | 118570 118580 118590 118600 118610 118620 118630 118640                                                              |
| Human       | TTCATT CATGTACATCTATTTGTATCACCATATAATTACTAGGGAAAGGACAAATCACTTTTCAAAGCCTCAATGTTATT 95707                              |
| PolarBear   | 52114                                                                                                                |
| Cow         | 86816                                                                                                                |
| Dog         | 82307                                                                                                                |
| BelugaWhale | 81417                                                                                                                |
| Donkey      | 90106                                                                                                                |
| Cat         | 86449                                                                                                                |
| Ferret      | 87765                                                                                                                |
| Lion        | 84143                                                                                                                |
| Vaquita     | 84015                                                                                                                |
| Pig         | 83470                                                                                                                |

| Majority    | XXXXXXXXXXXXXXXXXXXXXXXXXXXXXXXXXXXXXXXXXXXXXXXXXXXXXXXXXXXXXXXXXXXXXXXXXXXXXXXXXXXXXXXXXXXXXXXXXXXXXXXXXXXXXXXXXXXX |
|-------------|----------------------------------------------------------------------------------------------------------------------|
|             | 118650 118660 118670 118680 118690 118700 118710 118720                                                              |
| Human       | TGTAAAATGGAGGCAATAAGTTCTGCTCTGCTCCCCTCACAGGATTATTACAGAGGCTCAAATAGGATAAGTGAAGGAAT 95787                               |
| PolarBear   | 52114                                                                                                                |
| Cow         | 86816                                                                                                                |
| Dog         | 82307                                                                                                                |
| BelugaWhale | 81417                                                                                                                |
| Donkey      | 90106                                                                                                                |
| Cat         | 86449                                                                                                                |
| Ferret      | 87765                                                                                                                |
| Lion        | 84143                                                                                                                |
| Vaquita     | 84015                                                                                                                |
| Pig         | 83470                                                                                                                |

Dienstag, 3. Mai 2022 08:41

|             |                                                                                                                                                                                                                                     |       |
|-------------|-------------------------------------------------------------------------------------------------------------------------------------------------------------------------------------------------------------------------------------|-------|
| Majority    | XXXXXXXXXXXXXXXXXXXXXXXXXXXXXXXXXXXXXXXXXXXXXXXXXXXXXXXXXXXXXXXXXXXXXXXXXXXXXXXXXXXXXXXXXXXXXXXXXXXXXXXXXXXXXXXXXXXXXXXXXX                                                                                                          |       |
|             | <div style="display: flex; justify-content: space-between;"> <span>118730</span> <span>118740</span> <span>118750</span> <span>118760</span> <span>118770</span> <span>118780</span> <span>118790</span> <span>118800</span> </div> |       |
| Human       | GCTATGCAATTAGTTAACTAATGCCAGTTCACAGACTGCCAGATTTGCCACAGTAAACTTCATTATCCACAATACATGT                                                                                                                                                     | 95867 |
| PolarBear   |                                                                                                                                                                                                                                     | 52114 |
| Cow         |                                                                                                                                                                                                                                     | 86816 |
| Dog         |                                                                                                                                                                                                                                     | 82307 |
| BelugaWhale |                                                                                                                                                                                                                                     | 81417 |
| Donkey      |                                                                                                                                                                                                                                     | 90106 |
| Cat         |                                                                                                                                                                                                                                     | 86449 |
| Ferret      |                                                                                                                                                                                                                                     | 87765 |
| Lion        |                                                                                                                                                                                                                                     | 84143 |
| Vaquita     |                                                                                                                                                                                                                                     | 84015 |
| Pig         |                                                                                                                                                                                                                                     | 83470 |

|             |                                                                                                                                                                                                                                     |       |
|-------------|-------------------------------------------------------------------------------------------------------------------------------------------------------------------------------------------------------------------------------------|-------|
| Majority    | XXXXXXXXXXXXXXXXXXXXXXXXXXXXXXXXXXXXXXXXXXXXXXXXXXXXXXXXXXXXXXXXXXXXXXXXXXXXXXXXXXXXXXXXXXXXXXXXXXXXXXXXXXXXXXXXXXXXXXXXXX                                                                                                          |       |
|             | <div style="display: flex; justify-content: space-between;"> <span>118810</span> <span>118820</span> <span>118830</span> <span>118840</span> <span>118850</span> <span>118860</span> <span>118870</span> <span>118880</span> </div> |       |
| Human       | TATCCTAATATGTCTTTTTGCTACAAAGAAATACTAATGTTTTAAAATTATTTACTAGTTTCATAAAGCAGAAAGATGTA                                                                                                                                                    | 95947 |
| PolarBear   |                                                                                                                                                                                                                                     | 52114 |
| Cow         |                                                                                                                                                                                                                                     | 86816 |
| Dog         |                                                                                                                                                                                                                                     | 82307 |
| BelugaWhale |                                                                                                                                                                                                                                     | 81417 |
| Donkey      |                                                                                                                                                                                                                                     | 90106 |
| Cat         |                                                                                                                                                                                                                                     | 86449 |
| Ferret      |                                                                                                                                                                                                                                     | 87765 |
| Lion        |                                                                                                                                                                                                                                     | 84143 |
| Vaquita     |                                                                                                                                                                                                                                     | 84015 |
| Pig         |                                                                                                                                                                                                                                     | 83470 |

Dienstag, 3. Mai 2022 08:41

| Majority    | XXXXXXXXXXXXXXXXXXXXXXXXXXXXXXXXXXXXXXXXXXXXXXXXXXXXXXXXXXXXXXXXXXXXXXXXXXXXXXXXXXXXXXXXXXXXXXXXXXXXXXXXXXXXXXXXXXXXXXXXXXXX |
|-------------|------------------------------------------------------------------------------------------------------------------------------|
|             | 118890 118900 118910 118920 118930 118940 118950 118960                                                                      |
| Human       | AAATGCAGTTATAGAGAGCATCCCAAGCCAGATGAAAAGAAACCATGGATTTAGCTTTATATTTTCTGTTTGAACCTTGAT 96027                                      |
| PolarBear   | 52114                                                                                                                        |
| Cow         | 86816                                                                                                                        |
| Dog         | 82307                                                                                                                        |
| BelugaWhale | 81417                                                                                                                        |
| Donkey      | 90106                                                                                                                        |
| Cat         | 86449                                                                                                                        |
| Ferret      | 87765                                                                                                                        |
| Lion        | 84143                                                                                                                        |
| Vaquita     | 84015                                                                                                                        |
| Pig         | 83470                                                                                                                        |

| Majority    | XXXXXXXXXXXXXXXXXXXXXXXXXXXXXXXXXXXXXXXXXXXXXXXXXXXXXXXXXXXXXXXXXXXXXXXXXXXXXXXXXXXXXXXXXXXXXXXXXXXXXXXXXXXXXXXXXXXXXXXXXXXX |
|-------------|------------------------------------------------------------------------------------------------------------------------------|
|             | 118970 118980 118990 119000 119010 119020 119030 119040                                                                      |
| Human       | AGCCAATCATAAAATGCACATATTTAATTATAGACTGCACTTAAGATTT CATATGTATAAAAAAGTTGCTGTGAAACAG 96107                                       |
| PolarBear   | 52114                                                                                                                        |
| Cow         | 86816                                                                                                                        |
| Dog         | 82307                                                                                                                        |
| BelugaWhale | 81417                                                                                                                        |
| Donkey      | 90106                                                                                                                        |
| Cat         | 86449                                                                                                                        |
| Ferret      | 87765                                                                                                                        |
| Lion        | 84143                                                                                                                        |
| Vaquita     | 84015                                                                                                                        |
| Pig         | 83470                                                                                                                        |



Dienstag, 3. Mai 2022 08:41

|             |                                                                                                                                                                                                                                                                                                                                                                                                        |        |        |        |        |        |        |        |        |  |
|-------------|--------------------------------------------------------------------------------------------------------------------------------------------------------------------------------------------------------------------------------------------------------------------------------------------------------------------------------------------------------------------------------------------------------|--------|--------|--------|--------|--------|--------|--------|--------|--|
| Majority    | XXXXXXXXXXXXXXXXXXXXXXXXXXXXXXXXXXXXXXXXXXXXXXXXXXXXXXXXXXXXXXXXXXXXXXXXXXXXXXXXXXXXXXXXXXXXXXXXXXXXXXXXXXXXXXXXXXXXXXXXXXXX                                                                                                                                                                                                                                                                           |        |        |        |        |        |        |        |        |  |
|             | <table border="0"> <tr> <td style="text-align: center;">119050</td> <td style="text-align: center;">119060</td> <td style="text-align: center;">119070</td> <td style="text-align: center;">119080</td> <td style="text-align: center;">119090</td> <td style="text-align: center;">119100</td> <td style="text-align: center;">119110</td> <td style="text-align: center;">119120</td> </tr> </table> | 119050 | 119060 | 119070 | 119080 | 119090 | 119100 | 119110 | 119120 |  |
| 119050      | 119060                                                                                                                                                                                                                                                                                                                                                                                                 | 119070 | 119080 | 119090 | 119100 | 119110 | 119120 |        |        |  |
| Human       | GTAATTTTAACACTCAGGAATTTCAAGGCTAAGGAAGAAAGACATACTCTCATGAGCAGCTCTGAAGCTTCAAACAGGATT                                                                                                                                                                                                                                                                                                                      | 96187  |        |        |        |        |        |        |        |  |
| PolarBear   |                                                                                                                                                                                                                                                                                                                                                                                                        | 52114  |        |        |        |        |        |        |        |  |
| Cow         |                                                                                                                                                                                                                                                                                                                                                                                                        | 86816  |        |        |        |        |        |        |        |  |
| Dog         |                                                                                                                                                                                                                                                                                                                                                                                                        | 82307  |        |        |        |        |        |        |        |  |
| BelugaWhale |                                                                                                                                                                                                                                                                                                                                                                                                        | 81417  |        |        |        |        |        |        |        |  |
| Donkey      |                                                                                                                                                                                                                                                                                                                                                                                                        | 90106  |        |        |        |        |        |        |        |  |
| Cat         |                                                                                                                                                                                                                                                                                                                                                                                                        | 86449  |        |        |        |        |        |        |        |  |
| Ferret      |                                                                                                                                                                                                                                                                                                                                                                                                        | 87765  |        |        |        |        |        |        |        |  |
| Lion        |                                                                                                                                                                                                                                                                                                                                                                                                        | 84143  |        |        |        |        |        |        |        |  |
| Vaquita     |                                                                                                                                                                                                                                                                                                                                                                                                        | 84015  |        |        |        |        |        |        |        |  |
| Pig         |                                                                                                                                                                                                                                                                                                                                                                                                        | 83470  |        |        |        |        |        |        |        |  |

|             |                                                                                                                                                                                                                                                                                                                                                                                                        |        |        |        |        |        |        |        |        |  |
|-------------|--------------------------------------------------------------------------------------------------------------------------------------------------------------------------------------------------------------------------------------------------------------------------------------------------------------------------------------------------------------------------------------------------------|--------|--------|--------|--------|--------|--------|--------|--------|--|
| Majority    | XXXXXXXXXXXXXXXXXXXXXXXXXXXXXXXXXXXXXXXXXXXXXXXXXXXXXXXXXXXXXXXXXXXXXXXXXXXXXXXXXXXXXXXXXXXXXXXXXXXXXXXXXXXXXXXXXXXXXXXXXXXX                                                                                                                                                                                                                                                                           |        |        |        |        |        |        |        |        |  |
|             | <table border="0"> <tr> <td style="text-align: center;">119130</td> <td style="text-align: center;">119140</td> <td style="text-align: center;">119150</td> <td style="text-align: center;">119160</td> <td style="text-align: center;">119170</td> <td style="text-align: center;">119180</td> <td style="text-align: center;">119190</td> <td style="text-align: center;">119200</td> </tr> </table> | 119130 | 119140 | 119150 | 119160 | 119170 | 119180 | 119190 | 119200 |  |
| 119130      | 119140                                                                                                                                                                                                                                                                                                                                                                                                 | 119150 | 119160 | 119170 | 119180 | 119190 | 119200 |        |        |  |
| Human       | TTCTGGCTGCCTTAATATATTAAAATGGAGCCTAAATCTGAAAACGTTTTTTTCATT CAGAAGAAAGTACAGAATTCAGT                                                                                                                                                                                                                                                                                                                      | 96267  |        |        |        |        |        |        |        |  |
| PolarBear   |                                                                                                                                                                                                                                                                                                                                                                                                        | 52114  |        |        |        |        |        |        |        |  |
| Cow         |                                                                                                                                                                                                                                                                                                                                                                                                        | 86816  |        |        |        |        |        |        |        |  |
| Dog         |                                                                                                                                                                                                                                                                                                                                                                                                        | 82307  |        |        |        |        |        |        |        |  |
| BelugaWhale |                                                                                                                                                                                                                                                                                                                                                                                                        | 81417  |        |        |        |        |        |        |        |  |
| Donkey      |                                                                                                                                                                                                                                                                                                                                                                                                        | 90106  |        |        |        |        |        |        |        |  |
| Cat         |                                                                                                                                                                                                                                                                                                                                                                                                        | 86449  |        |        |        |        |        |        |        |  |
| Ferret      |                                                                                                                                                                                                                                                                                                                                                                                                        | 87765  |        |        |        |        |        |        |        |  |
| Lion        |                                                                                                                                                                                                                                                                                                                                                                                                        | 84143  |        |        |        |        |        |        |        |  |
| Vaquita     |                                                                                                                                                                                                                                                                                                                                                                                                        | 84015  |        |        |        |        |        |        |        |  |
| Pig         |                                                                                                                                                                                                                                                                                                                                                                                                        | 83470  |        |        |        |        |        |        |        |  |

Dienstag, 3. Mai 2022 08:41

---

|             |                                                                                                                                                    |       |
|-------------|----------------------------------------------------------------------------------------------------------------------------------------------------|-------|
| Majority    | XXXXXXXXXXXXXXXXXXXXXXXXXXXXXXXXXXXXXXXXXXXXXXXXXXXXXXXXXXXXXXXXXXXXXXXXXXXXXXXXXXXXXXXXXXXXXXXXXXXXXXXXXXXXXXXXXXXX                               |       |
|             |                                                                                                                                                    |       |
|             | 119210              119220              119230              119240              119250              119260              119270              119280 |       |
| Human       | GAAATTGAGTATACTAGGAAATCTGATGGCAAGAATTCAGCAGAAAGTCTTAATTTTAAACCGTAATATTCATTGATTAT                                                                   | 96347 |
| PolarBear   |                                                                                                                                                    | 52114 |
| Cow         |                                                                                                                                                    | 86816 |
| Dog         |                                                                                                                                                    | 82307 |
| BelugaWhale |                                                                                                                                                    | 81417 |
| Donkey      |                                                                                                                                                    | 90106 |
| Cat         |                                                                                                                                                    | 86449 |
| Ferret      |                                                                                                                                                    | 87765 |
| Lion        |                                                                                                                                                    | 84143 |
| Vaquita     |                                                                                                                                                    | 84015 |
| Pig         |                                                                                                                                                    | 83470 |

---

|             |                                                                                                                                                    |       |
|-------------|----------------------------------------------------------------------------------------------------------------------------------------------------|-------|
| Majority    | XXXXXXXXXXXXXXXXXXXXXXXXXXXXXXXXXXXXXXXXXXXXXXXXXXXXXXXXXXXXXXXXXXXXXXXXXXXXXXXXXXXXXXXXXXXXXXXXXXXXXXXXXXXXXXXXXXXX                               |       |
|             |                                                                                                                                                    |       |
|             | 119290              119300              119310              119320              119330              119340              119350              119360 |       |
| Human       | GCAAAACCTTAGTTTTATAGTTATTCTTTGTTATTTTGAATAGCTTCCCTTTAAATTTTCTAGTTTCAGATTTTGCAAAT                                                                   | 96427 |
| PolarBear   |                                                                                                                                                    | 52114 |
| Cow         |                                                                                                                                                    | 86816 |
| Dog         |                                                                                                                                                    | 82307 |
| BelugaWhale |                                                                                                                                                    | 81417 |
| Donkey      |                                                                                                                                                    | 90106 |
| Cat         |                                                                                                                                                    | 86449 |
| Ferret      |                                                                                                                                                    | 87765 |
| Lion        |                                                                                                                                                    | 84143 |
| Vaquita     |                                                                                                                                                    | 84015 |
| Pig         |                                                                                                                                                    | 83470 |

Dienstag, 3. Mai 2022 08:41

|             |                                                                                            |
|-------------|--------------------------------------------------------------------------------------------|
| Majority    | XXXXXXXXXXXXXXXXXXXXXXXXXXXXXXXXXXXXXXXXXXXXXXXXXXXXXXXXXXXXXXXXXXXXXXXXXXXX               |
|             | 119370      119380      119390      119400      119410      119420      119430      119440 |
| Human       | AAAAGTGTACATGTTAAAGTTATAGAGTATTAGATTATTCACATTAAGAAGTGTTCAAATACGCGGAAAAATAAAACCGT 96507     |
| PolarBear   | 52114                                                                                      |
| Cow         | 86816                                                                                      |
| Dog         | 82307                                                                                      |
| BelugaWhale | 81417                                                                                      |
| Donkey      | 90106                                                                                      |
| Cat         | 86449                                                                                      |
| Ferret      | 87765                                                                                      |
| Lion        | 84143                                                                                      |
| Vaquita     | 84015                                                                                      |
| Pig         | 83470                                                                                      |

|             |                                                                                            |
|-------------|--------------------------------------------------------------------------------------------|
| Majority    | XXXXXXXXXXXXXXXXXXXXXXXXXXXXXXXXXXXXXXXXXXXXXXXXXXXXXXXXXXXXXXXXXXXXXXXXXXXX               |
|             | 119450      119460      119470      119480      119490      119500      119510      119520 |
| Human       | AATGAACACCTATGCACTTCACTCAACTATATCACTACCTAACATATTCCATATTTTAAACGTAATTATATATTAGTTGA 96587     |
| PolarBear   | 52114                                                                                      |
| Cow         | 86816                                                                                      |
| Dog         | 82307                                                                                      |
| BelugaWhale | 81417                                                                                      |
| Donkey      | 90106                                                                                      |
| Cat         | 86449                                                                                      |
| Ferret      | 87765                                                                                      |
| Lion        | 84143                                                                                      |
| Vaquita     | 84015                                                                                      |
| Pig         | 83470                                                                                      |

Dienstag, 3. Mai 2022 08:41

| Majority    | XXXXXXXXXXXXXXXXXXXXXXXXXXXXXXXXXXXXXXXXXXXXXXXXXXXXXXXXXXXXXXXXXXXXXXXXXXXXXXXXXXXXXXXXXXXXXXXXXXXXXXXXXXXXXXXXXXXX |                                                                                            |
|-------------|----------------------------------------------------------------------------------------------------------------------|--------------------------------------------------------------------------------------------|
|             |                                                                                                                      | 119530      119540      119550      119560      119570      119580      119590      119600 |
| Human       | AAGAAAACGTTACAGAATGAACTGAAATCCCATATGAACCTCTTTCTGATCTTAGTTCAAACCTTATTCTTTCCCAAGAG                                     | 96667                                                                                      |
| PolarBear   |                                                                                                                      | 52114                                                                                      |
| Cow         |                                                                                                                      | 86816                                                                                      |
| Dog         |                                                                                                                      | 82307                                                                                      |
| BelugaWhale |                                                                                                                      | 81417                                                                                      |
| Donkey      |                                                                                                                      | 90106                                                                                      |
| Cat         |                                                                                                                      | 86449                                                                                      |
| Ferret      |                                                                                                                      | 87765                                                                                      |
| Lion        |                                                                                                                      | 84143                                                                                      |
| Vaquita     |                                                                                                                      | 84015                                                                                      |
| Pig         |                                                                                                                      | 83470                                                                                      |

| Majority    | XXXXXXXXXXXXXXXXXXXXXXXXXXXXXXXXXXXXXXXXXXXXXXXXXXXXXXXXXXXXXXXXXXXXXXXXXXXXXXXXXXXXXXXXXXXXXXXXXXXXXXXXXXXXXXXXXXXX |                                                                                            |
|-------------|----------------------------------------------------------------------------------------------------------------------|--------------------------------------------------------------------------------------------|
|             |                                                                                                                      | 119610      119620      119630      119640      119650      119660      119670      119680 |
| Human       | GTAATTGTTACCTTCAGTTTAGTATTTATTATTTCAGTGGTTGCTTTTCAAGAGGAATTTGTCCTATATTCTGTAGGCTA                                     | 96747                                                                                      |
| PolarBear   |                                                                                                                      | 52114                                                                                      |
| Cow         |                                                                                                                      | 86816                                                                                      |
| Dog         |                                                                                                                      | 82307                                                                                      |
| BelugaWhale |                                                                                                                      | 81417                                                                                      |
| Donkey      |                                                                                                                      | 90106                                                                                      |
| Cat         |                                                                                                                      | 86449                                                                                      |
| Ferret      |                                                                                                                      | 87765                                                                                      |
| Lion        |                                                                                                                      | 84143                                                                                      |
| Vaquita     |                                                                                                                      | 84015                                                                                      |
| Pig         |                                                                                                                      | 83470                                                                                      |

Dienstag, 3. Mai 2022 08:41

| Majority    | XXXXXXXXXXXXXXXXXXXXXXXXXXXXXXXXXXXXXXXXXXXXXXXXXXXXXXXXXXXXXXXXXXXXXXXXXXXXXXXXXXXXXXXXXXXXXXXXXXXXXXXXXXXXXXXXXXXXXXXXXXXX |        |        |        |        |        |        |        |  |
|-------------|------------------------------------------------------------------------------------------------------------------------------|--------|--------|--------|--------|--------|--------|--------|--|
|             | 119690                                                                                                                       | 119700 | 119710 | 119720 | 119730 | 119740 | 119750 | 119760 |  |
| Human       | AATTTCTTGTTTTGCCTAGTTATAAAAATGGCAAATAATATGATATTGGGTGTTTAAATAGTACAATATTGTTCAAACA                                              |        |        |        |        |        |        | 96827  |  |
| PolarBear   |                                                                                                                              |        |        |        |        |        |        | 52114  |  |
| Cow         |                                                                                                                              |        |        |        |        |        |        | 86816  |  |
| Dog         |                                                                                                                              |        |        |        |        |        |        | 82307  |  |
| BelugaWhale |                                                                                                                              |        |        |        |        |        |        | 81417  |  |
| Donkey      |                                                                                                                              |        |        |        |        |        |        | 90106  |  |
| Cat         |                                                                                                                              |        |        |        |        |        |        | 86449  |  |
| Ferret      |                                                                                                                              |        |        |        |        |        |        | 87765  |  |
| Lion        |                                                                                                                              |        |        |        |        |        |        | 84143  |  |
| Vaquita     |                                                                                                                              |        |        |        |        |        |        | 84015  |  |
| Pig         |                                                                                                                              |        |        |        |        |        |        | 83470  |  |

| Majority    | XXXXXXXXXXXXXXXXXXXXXXXXXXXXXXXXXXXXXXXXXXXXXXXXXXXXXXXXXXXXXXXXXXXXXXXXXXXXXXXXXXXXXXXXXXXXXXXXXXXXXXXXXXXXXXXXXXXXXXXXXXXX |        |        |        |        |        |        |        |  |
|-------------|------------------------------------------------------------------------------------------------------------------------------|--------|--------|--------|--------|--------|--------|--------|--|
|             | 119770                                                                                                                       | 119780 | 119790 | 119800 | 119810 | 119820 | 119830 | 119840 |  |
| Human       | CACTTTATAATTTTAAACAGACTGTTTGGACATTGATAATCCCCTATCAAATCTCATGACATTTAACCAATTTTAAACA                                              |        |        |        |        |        |        | 96907  |  |
| PolarBear   |                                                                                                                              |        |        |        |        |        |        | 52114  |  |
| Cow         |                                                                                                                              |        |        |        |        |        |        | 86816  |  |
| Dog         |                                                                                                                              |        |        |        |        |        |        | 82307  |  |
| BelugaWhale |                                                                                                                              |        |        |        |        |        |        | 81417  |  |
| Donkey      |                                                                                                                              |        |        |        |        |        |        | 90106  |  |
| Cat         |                                                                                                                              |        |        |        |        |        |        | 86449  |  |
| Ferret      |                                                                                                                              |        |        |        |        |        |        | 87765  |  |
| Lion        |                                                                                                                              |        |        |        |        |        |        | 84143  |  |
| Vaquita     |                                                                                                                              |        |        |        |        |        |        | 84015  |  |
| Pig         |                                                                                                                              |        |        |        |        |        |        | 83470  |  |

```
Majority      XXXXXXXXXXXXXXXXXXXXXXXXXXXXXXXXXXXXXXXXXXXXXXXXXXXXXXXXXXXXXXXXXXXXXXX
                |           |           |           |           |           |           |
              119850     119860     119870     119880     119890     119900     119910     119920
Human      AGGATTTTAAATTGTGTTTAAAGAAATAAGTCATTTGGGCCTCAGGTTTCTCTTAAGGATGTAACAAGGAGCTATATCAT  96987
PolarBear                               52114
Cow                                             86816
Dog                                             82307
BelugaWhale                               81417
Donkey                                       90106
Cat                                           86449
Ferret                                       87765
Lion                                         84143
Vaquita                                    84015
Pig                                          83470
```

```
Majority      XXXXXXXXXXXXXXXXXXXXXXXXXXXXXXXXXXXXXXXXXXXXXXXXXXXXXXXXXXXXXXXXXXXXXXX
                |           |           |           |           |           |           |
              119930     119940     119950     119960     119970     119980     119990     120000
Human      TGGTATTTTAGACGCTGAATTATGTGTAAGGTCCTTAAATACAAACATACCCTTTGTAGCTTCACAGAGCCACCCGTTTT  97067
PolarBear                               52114
Cow                                             86816
Dog                                             82307
BelugaWhale                               81417
Donkey                                       90106
Cat                                           86449
Ferret                                       87765
Lion                                         84143
Vaquita                                    84015
Pig                                          83470
```

Dienstag, 3. Mai 2022 08:41

|             |                                                                                                                                                                                                                                                                                                                                                                                                        |        |        |        |        |        |        |        |        |  |
|-------------|--------------------------------------------------------------------------------------------------------------------------------------------------------------------------------------------------------------------------------------------------------------------------------------------------------------------------------------------------------------------------------------------------------|--------|--------|--------|--------|--------|--------|--------|--------|--|
| Majority    | XXXXXXXXXXXXXXXXXXXXXXXXXXXXXXXXXXXXXXXXXXXXXXXXXXXXXXXXXXXXXXXXXXXXXXXXXXXXXXXXXXXXXXXXXXXXXXXXXXXXXXXXXXXXXXXXXXXX                                                                                                                                                                                                                                                                                   |        |        |        |        |        |        |        |        |  |
|             | <table border="0"> <tr> <td style="text-align: center;">120010</td> <td style="text-align: center;">120020</td> <td style="text-align: center;">120030</td> <td style="text-align: center;">120040</td> <td style="text-align: center;">120050</td> <td style="text-align: center;">120060</td> <td style="text-align: center;">120070</td> <td style="text-align: center;">120080</td> </tr> </table> | 120010 | 120020 | 120030 | 120040 | 120050 | 120060 | 120070 | 120080 |  |
| 120010      | 120020                                                                                                                                                                                                                                                                                                                                                                                                 | 120030 | 120040 | 120050 | 120060 | 120070 | 120080 |        |        |  |
| Human       | GCAC TTCTCTCGCTTTTCTTCCTCCCTCTTTGGCTCCCATTTCAATGGACAGAAAGACTATGTGGCATCTCTATTTTCAT                                                                                                                                                                                                                                                                                                                      | 97147  |        |        |        |        |        |        |        |  |
| PolarBear   |                                                                                                                                                                                                                                                                                                                                                                                                        | 52114  |        |        |        |        |        |        |        |  |
| Cow         |                                                                                                                                                                                                                                                                                                                                                                                                        | 86816  |        |        |        |        |        |        |        |  |
| Dog         |                                                                                                                                                                                                                                                                                                                                                                                                        | 82307  |        |        |        |        |        |        |        |  |
| BelugaWhale |                                                                                                                                                                                                                                                                                                                                                                                                        | 81417  |        |        |        |        |        |        |        |  |
| Donkey      |                                                                                                                                                                                                                                                                                                                                                                                                        | 90106  |        |        |        |        |        |        |        |  |
| Cat         |                                                                                                                                                                                                                                                                                                                                                                                                        | 86449  |        |        |        |        |        |        |        |  |
| Ferret      |                                                                                                                                                                                                                                                                                                                                                                                                        | 87765  |        |        |        |        |        |        |        |  |
| Lion        |                                                                                                                                                                                                                                                                                                                                                                                                        | 84143  |        |        |        |        |        |        |        |  |
| Vaquita     |                                                                                                                                                                                                                                                                                                                                                                                                        | 84015  |        |        |        |        |        |        |        |  |
| Pig         |                                                                                                                                                                                                                                                                                                                                                                                                        | 83470  |        |        |        |        |        |        |        |  |

|             |                                                                                                                                                                                                                                                                                                                                                                                                        |        |        |        |        |        |        |        |        |  |
|-------------|--------------------------------------------------------------------------------------------------------------------------------------------------------------------------------------------------------------------------------------------------------------------------------------------------------------------------------------------------------------------------------------------------------|--------|--------|--------|--------|--------|--------|--------|--------|--|
| Majority    | XXXXXXXXXXXXXXXXXXXXXXXXXXXXXXXXXXXXXXXXXXXXXXXXXXXXXXXXXXXXXXXXXXXXXXXXXXXXXXXXXXXXXXXXXXXXXXXXXXXXXXXXXXXXXXXXXXXX                                                                                                                                                                                                                                                                                   |        |        |        |        |        |        |        |        |  |
|             | <table border="0"> <tr> <td style="text-align: center;">120090</td> <td style="text-align: center;">120100</td> <td style="text-align: center;">120110</td> <td style="text-align: center;">120120</td> <td style="text-align: center;">120130</td> <td style="text-align: center;">120140</td> <td style="text-align: center;">120150</td> <td style="text-align: center;">120160</td> </tr> </table> | 120090 | 120100 | 120110 | 120120 | 120130 | 120140 | 120150 | 120160 |  |
| 120090      | 120100                                                                                                                                                                                                                                                                                                                                                                                                 | 120110 | 120120 | 120130 | 120140 | 120150 | 120160 |        |        |  |
| Human       | TCACTTGGTTTATTGTCTTGGTATGTTGTATAGGTTTTGAATCAGAAAATTTAACATTTT TAGATATTTCAAACATAC                                                                                                                                                                                                                                                                                                                        | 97227  |        |        |        |        |        |        |        |  |
| PolarBear   |                                                                                                                                                                                                                                                                                                                                                                                                        | 52114  |        |        |        |        |        |        |        |  |
| Cow         |                                                                                                                                                                                                                                                                                                                                                                                                        | 86816  |        |        |        |        |        |        |        |  |
| Dog         |                                                                                                                                                                                                                                                                                                                                                                                                        | 82307  |        |        |        |        |        |        |        |  |
| BelugaWhale |                                                                                                                                                                                                                                                                                                                                                                                                        | 81417  |        |        |        |        |        |        |        |  |
| Donkey      |                                                                                                                                                                                                                                                                                                                                                                                                        | 90106  |        |        |        |        |        |        |        |  |
| Cat         |                                                                                                                                                                                                                                                                                                                                                                                                        | 86449  |        |        |        |        |        |        |        |  |
| Ferret      |                                                                                                                                                                                                                                                                                                                                                                                                        | 87765  |        |        |        |        |        |        |        |  |
| Lion        |                                                                                                                                                                                                                                                                                                                                                                                                        | 84143  |        |        |        |        |        |        |        |  |
| Vaquita     |                                                                                                                                                                                                                                                                                                                                                                                                        | 84015  |        |        |        |        |        |        |        |  |
| Pig         |                                                                                                                                                                                                                                                                                                                                                                                                        | 83470  |        |        |        |        |        |        |        |  |

Dienstag, 3. Mai 2022 08:41

| Majority    | XXXXXXXXXXXXXXXXXXXXXXXXXXXXXXXXXXXXXXXXXXXXXXXXXXXXXXXXXXXXXXXXXXXXXXXXXXXX      |        |        |        |        |        |        |        |       |
|-------------|-----------------------------------------------------------------------------------|--------|--------|--------|--------|--------|--------|--------|-------|
|             | 120170                                                                            | 120180 | 120190 | 120200 | 120210 | 120220 | 120230 | 120240 |       |
| Human       | AAAAAATAGAAGAATATTTAACAAACCCTTGT CAGCTTCAGTTAGCAACTTAGATCTTCCTCGTTTCCTCCACCCAATTC |        |        |        |        |        |        |        | 97307 |
| PolarBear   |                                                                                   |        |        |        |        |        |        |        | 52114 |
| Cow         |                                                                                   |        |        |        |        |        |        |        | 86816 |
| Dog         |                                                                                   |        |        |        |        |        |        |        | 82307 |
| BelugaWhale |                                                                                   |        |        |        |        |        |        |        | 81417 |
| Donkey      |                                                                                   |        |        |        |        |        |        |        | 90106 |
| Cat         |                                                                                   |        |        |        |        |        |        |        | 86449 |
| Ferret      |                                                                                   |        |        |        |        |        |        |        | 87765 |
| Lion        |                                                                                   |        |        |        |        |        |        |        | 84143 |
| Vaquita     |                                                                                   |        |        |        |        |        |        |        | 84015 |
| Pig         |                                                                                   |        |        |        |        |        |        |        | 83470 |

| Majority    | XXXXXXXXXXXXXXXXXXXXXXXXXXXXXXXXXXXXXXXXXXXXXXXXXXXXXXXXXXXXXXXXXXXXXXXXXXXX     |        |        |        |        |        |        |        |  |
|-------------|----------------------------------------------------------------------------------|--------|--------|--------|--------|--------|--------|--------|--|
|             | 120250                                                                           | 120260 | 120270 | 120280 | 120290 | 120300 | 120310 | 120320 |  |
| Human       | TCATCTCCTTTATTAATGCAGATCCCAGATATATTTTATCAAGAAATTTTGTAGCATATATTTGTGTTGTTTATTTCGTG |        |        |        |        |        |        | 97387  |  |
| PolarBear   |                                                                                  |        |        |        |        |        |        | 52114  |  |
| Cow         |                                                                                  |        |        |        |        |        |        | 86816  |  |
| Dog         |                                                                                  |        |        |        |        |        |        | 82307  |  |
| BelugaWhale |                                                                                  |        |        |        |        |        |        | 81417  |  |
| Donkey      |                                                                                  |        |        |        |        |        |        | 90106  |  |
| Cat         |                                                                                  |        |        |        |        |        |        | 86449  |  |
| Ferret      |                                                                                  |        |        |        |        |        |        | 87765  |  |
| Lion        |                                                                                  |        |        |        |        |        |        | 84143  |  |
| Vaquita     |                                                                                  |        |        |        |        |        |        | 84015  |  |
| Pig         |                                                                                  |        |        |        |        |        |        | 83470  |  |



Dienstag, 3. Mai 2022 08:41

|             |                                                                                                                              |                                                         |
|-------------|------------------------------------------------------------------------------------------------------------------------------|---------------------------------------------------------|
| Majority    | XXXXXXXXXXXXXXXXXXXXXXXXXXXXXXXXXXXXXXXXXXXXXXXXXXXXXXXXXXXXXXXXXXXXXXXXXXXXXXXXXXXXXXXXXXXXXXXXXXXXXXXXXXXXXXXXXXXXXXXXXXXX |                                                         |
|             |                                                                                                                              | 120330 120340 120350 120360 120370 120380 120390 120400 |
| Human       | GTCATAGTTGCTTTCTCTAATATCTAGACTAGCCTAGCTGGTCAATACTACTTTTCTTCAAATCCTAGAACCTCCCTATT                                             | 97467                                                   |
| PolarBear   |                                                                                                                              | 52114                                                   |
| Cow         |                                                                                                                              | 86816                                                   |
| Dog         |                                                                                                                              | 82307                                                   |
| BelugaWhale |                                                                                                                              | 81417                                                   |
| Donkey      |                                                                                                                              | 90106                                                   |
| Cat         |                                                                                                                              | 86449                                                   |
| Ferret      |                                                                                                                              | 87765                                                   |
| Lion        |                                                                                                                              | 84143                                                   |
| Vaquita     |                                                                                                                              | 84015                                                   |
| Pig         |                                                                                                                              | 83470                                                   |

|             |                                                                                                                              |                                                         |
|-------------|------------------------------------------------------------------------------------------------------------------------------|---------------------------------------------------------|
| Majority    | XXXXXXXXXXXXXXXXXXXXXXXXXXXXXXXXXXXXXXXXXXXXXXXXXXXXXXXXXXXXXXXXXXXXXXXXXXXXXXXXXXXXXXXXXXXXXXXXXXXXXXXXXXXXXXXXXXXXXXXXXXXX |                                                         |
|             |                                                                                                                              | 120410 120420 120430 120440 120450 120460 120470 120480 |
| Human       | AAAATATAGTCACCAGACCAGTGGCAAATTAGTATCACCTAGGAGTTTATTAGAAACTCAGTCTATGAGCCTACTGAAT                                              | 97547                                                   |
| PolarBear   |                                                                                                                              | 52114                                                   |
| Cow         |                                                                                                                              | 86816                                                   |
| Dog         |                                                                                                                              | 82307                                                   |
| BelugaWhale |                                                                                                                              | 81417                                                   |
| Donkey      |                                                                                                                              | 90106                                                   |
| Cat         |                                                                                                                              | 86449                                                   |
| Ferret      |                                                                                                                              | 87765                                                   |
| Lion        |                                                                                                                              | 84143                                                   |
| Vaquita     |                                                                                                                              | 84015                                                   |
| Pig         |                                                                                                                              | 83470                                                   |

Dienstag, 3. Mai 2022 08:41

|             |                                                                                      |       |
|-------------|--------------------------------------------------------------------------------------|-------|
| Majority    | XXXXXXXXXXXXXXXXXXXXXXXXXXXXXXXXXXXXXXXXXXXXXXXXXXXXXXXXXXXXXXXXXXXXXXXXXXXXXXXXXXXX |       |
|             | ----- ----- ----- ----- ----- ----- ----- -----                                      |       |
|             | 120490 120500 120510 120520 120530 120540 120550 120560                              |       |
| Human       | CTACATTTTGACAAGATTGGCAGGTGATGCATTTGGACATAAGTTGGAGAAGCACTCAATGCATTTTTTCAGTTCATAA      | 97627 |
| PolarBear   |                                                                                      | 52114 |
| Cow         |                                                                                      | 86816 |
| Dog         |                                                                                      | 82307 |
| BelugaWhale |                                                                                      | 81417 |
| Donkey      |                                                                                      | 90106 |
| Cat         |                                                                                      | 86449 |
| Ferret      |                                                                                      | 87765 |
| Lion        |                                                                                      | 84143 |
| Vaquita     |                                                                                      | 84015 |
| Pig         |                                                                                      | 83470 |

|             |                                                                                      |       |
|-------------|--------------------------------------------------------------------------------------|-------|
| Majority    | XXXXXXXXXXXXXXXXXXXXXXXXXXXXXXXXXXXXXXXXXXXXXXXXXXXXXXXXXXXXXXXXXXXXXXXXXXXXXXXXXXXX |       |
|             | ----- ----- ----- ----- ----- ----- ----- -----                                      |       |
|             | 120570 120580 120590 120600 120610 120620 120630 120640                              |       |
| Human       | AAATCAGCTTCAAAGTTTTTCCTGAGTGTGGAAATTATTTCAATTAGTAATTTAAGTTATGCAGATATAGTTAATACCA      | 97707 |
| PolarBear   |                                                                                      | 52114 |
| Cow         |                                                                                      | 86816 |
| Dog         |                                                                                      | 82307 |
| BelugaWhale |                                                                                      | 81417 |
| Donkey      |                                                                                      | 90106 |
| Cat         |                                                                                      | 86449 |
| Ferret      |                                                                                      | 87765 |
| Lion        |                                                                                      | 84143 |
| Vaquita     |                                                                                      | 84015 |
| Pig         |                                                                                      | 83470 |

Dienstag, 3. Mai 2022 08:41

|             |                                                                                                                      |       |
|-------------|----------------------------------------------------------------------------------------------------------------------|-------|
| Majority    | XXXXXXXXXXXXXXXXXXXXXXXXXXXXXXXXXXXXXXXXXXXXXXXXXXXXXXXXXXXXXXXXXXXXXXXXXXXXXXXXXXXXXXXXXXXXXXXXXXXXXXXXXXXXXXXXXXXX |       |
|             | 120650 120660 120670 120680 120690 120700 120710 120720                                                              |       |
| Human       | AGAAATAATTGAACTGAAAAGGAACCCGGATATCTAGTTTTAACCAGCTGTTTTAAAGATAAACAGTTC TAGAGATCAA                                     | 97787 |
| PolarBear   |                                                                                                                      | 52114 |
| Cow         |                                                                                                                      | 86816 |
| Dog         |                                                                                                                      | 82307 |
| BelugaWhale |                                                                                                                      | 81417 |
| Donkey      |                                                                                                                      | 90106 |
| Cat         |                                                                                                                      | 86449 |
| Ferret      |                                                                                                                      | 87765 |
| Lion        |                                                                                                                      | 84143 |
| Vaquita     |                                                                                                                      | 84015 |
| Pig         |                                                                                                                      | 83470 |

|             |                                                                                                                      |       |
|-------------|----------------------------------------------------------------------------------------------------------------------|-------|
| Majority    | XXXXXXXXXXXXXXXXXXXXXXXXXXXXXXXXXXXXXXXXXXXXXXXXXXXXXXXXXXXXXXXXXXXXXXXXXXXXXXXXXXXXXXXXXXXXXXXXXXXXXXXXXXXXXXXXXXXX |       |
|             | 120730 120740 120750 120760 120770 120780 120790 120800                                                              |       |
| Human       | TGAATAGTTTTAGCAACATATTTATTGTAACCTTACCTGTAGTTAGAATCCAAGTCCCTGGCTTCCAATCCAGTCTTCAAT                                    | 97867 |
| PolarBear   |                                                                                                                      | 52114 |
| Cow         |                                                                                                                      | 86816 |
| Dog         |                                                                                                                      | 82307 |
| BelugaWhale |                                                                                                                      | 81417 |
| Donkey      |                                                                                                                      | 90106 |
| Cat         |                                                                                                                      | 86449 |
| Ferret      |                                                                                                                      | 87765 |
| Lion        |                                                                                                                      | 84143 |
| Vaquita     |                                                                                                                      | 84015 |
| Pig         |                                                                                                                      | 83470 |

Dienstag, 3. Mai 2022 08:41

|             |                                                                                                                      |       |
|-------------|----------------------------------------------------------------------------------------------------------------------|-------|
| Majority    | XXXXXXXXXXXXXXXXXXXXXXXXXXXXXXXXXXXXXXXXXXXXXXXXXXXXXXXXXXXXXXXXXXXXXXXXXXXXXXXXXXXXXXXXXXXXXXXXXXXXXXXXXXXXXXXXXXXX |       |
|             | 120810 120820 120830 120840 120850 120860 120870 120880                                                              |       |
| Human       | GTATAACTGATCAAAAGAAATACAGGCCTGCTATTATTCATAAATTTAAACTATTATGTACAAGTTGATAGCTTATAA                                       | 97947 |
| PolarBear   |                                                                                                                      | 52114 |
| Cow         |                                                                                                                      | 86816 |
| Dog         |                                                                                                                      | 82307 |
| BelugaWhale |                                                                                                                      | 81417 |
| Donkey      |                                                                                                                      | 90106 |
| Cat         |                                                                                                                      | 86449 |
| Ferret      |                                                                                                                      | 87765 |
| Lion        |                                                                                                                      | 84143 |
| Vaquita     |                                                                                                                      | 84015 |
| Pig         |                                                                                                                      | 83470 |

|             |                                                                                                                      |       |
|-------------|----------------------------------------------------------------------------------------------------------------------|-------|
| Majority    | XXXXXXXXXXXXXXXXXXXXXXXXXXXXXXXXXXXXXXXXXXXXXXXXXXXXXXXXXXXXXXXXXXXXXXXXXXXXXXXXXXXXXXXXXXXXXXXXXXXXXXXXXXXXXXXXXXXX |       |
|             | 120890 120900 120910 120920 120930 120940 120950 120960                                                              |       |
| Human       | TAGAAATCAGTATGATTAGTGT TAAAAGTCAAATTTAGTCTGACAGGGAAGGAATGTCCATGTGAAGTGATTTTTTTTAA                                    | 98027 |
| PolarBear   |                                                                                                                      | 52114 |
| Cow         |                                                                                                                      | 86816 |
| Dog         |                                                                                                                      | 82307 |
| BelugaWhale |                                                                                                                      | 81417 |
| Donkey      |                                                                                                                      | 90106 |
| Cat         |                                                                                                                      | 86449 |
| Ferret      |                                                                                                                      | 87765 |
| Lion        |                                                                                                                      | 84143 |
| Vaquita     |                                                                                                                      | 84015 |
| Pig         |                                                                                                                      | 83470 |

Dienstag, 3. Mai 2022 08:41

|             |                                                                                                                              |                                                                                            |
|-------------|------------------------------------------------------------------------------------------------------------------------------|--------------------------------------------------------------------------------------------|
| Majority    | XXXXXXXXXXXXXXXXXXXXXXXXXXXXXXXXXXXXXXXXXXXXXXXXXXXXXXXXXXXXXXXXXXXXXXXXXXXXXXXXXXXXXXXXXXXXXXXXXXXXXXXXXXXXXXXXXXXXXXXXXXXX |                                                                                            |
|             |                                                                                                                              | 120970      120980      120990      121000      121010      121020      121030      121040 |
| Human       | TAGAATGCAAATTAATACTCAATTCCTGATTTGTTTATTACATTTTGTGGTTTAATGAAATGATACTCAGGTCATTTTCA                                             | 98107                                                                                      |
| PolarBear   |                                                                                                                              | 52114                                                                                      |
| Cow         |                                                                                                                              | 86816                                                                                      |
| Dog         |                                                                                                                              | 82307                                                                                      |
| BelugaWhale |                                                                                                                              | 81417                                                                                      |
| Donkey      |                                                                                                                              | 90106                                                                                      |
| Cat         |                                                                                                                              | 86449                                                                                      |
| Ferret      |                                                                                                                              | 87765                                                                                      |
| Lion        |                                                                                                                              | 84143                                                                                      |
| Vaquita     |                                                                                                                              | 84015                                                                                      |
| Pig         |                                                                                                                              | 83470                                                                                      |

|             |                                                                                                                              |                                                                                            |
|-------------|------------------------------------------------------------------------------------------------------------------------------|--------------------------------------------------------------------------------------------|
| Majority    | XXXXXXXXXXXXXXXXXXXXXXXXXXXXXXXXXXXXXXXXXXXXXXXXXXXXXXXXXXXXXXXXXXXXXXXXXXXXXXXXXXXXXXXXXXXXXXXXXXXXXXXXXXXXXXXXXXXXXXXXXXXX |                                                                                            |
|             |                                                                                                                              | 121050      121060      121070      121080      121090      121100      121110      121120 |
| Human       | TAAATAGCTTTTCTATTAATGCTTCCTCAGTCACATTCTCTATTTCCTATTGCATAGCACAGTCTAACAGTTGAAATGCCT                                            | 98187                                                                                      |
| PolarBear   |                                                                                                                              | 52114                                                                                      |
| Cow         |                                                                                                                              | 86816                                                                                      |
| Dog         |                                                                                                                              | 82307                                                                                      |
| BelugaWhale |                                                                                                                              | 81417                                                                                      |
| Donkey      |                                                                                                                              | 90106                                                                                      |
| Cat         |                                                                                                                              | 86449                                                                                      |
| Ferret      |                                                                                                                              | 87765                                                                                      |
| Lion        |                                                                                                                              | 84143                                                                                      |
| Vaquita     |                                                                                                                              | 84015                                                                                      |
| Pig         |                                                                                                                              | 83470                                                                                      |

Dienstag, 3. Mai 2022 08:41

|             |                                                                                                                      |                                                         |
|-------------|----------------------------------------------------------------------------------------------------------------------|---------------------------------------------------------|
| Majority    | XXXXXXXXXXXXXXXXXXXXXXXXXXXXXXXXXXXXXXXXXXXXXXXXXXXXXXXXXXXXXXXXXXXXXXXXXXXXXXXXXXXXXXXXXXXXXXXXXXXXXXXXXXXXXXXXXXXX |                                                         |
|             |                                                                                                                      | 121130 121140 121150 121160 121170 121180 121190 121200 |
| Human       | AAGCCTTACTGAATGATGACTGATATTCTCTGTGAGAGTTAGAGCTGTACTATAAATATACATTACCTGTGCAAAGTATG                                     | 98267                                                   |
| PolarBear   |                                                                                                                      | 52114                                                   |
| Cow         |                                                                                                                      | 86816                                                   |
| Dog         |                                                                                                                      | 82307                                                   |
| BelugaWhale |                                                                                                                      | 81417                                                   |
| Donkey      |                                                                                                                      | 90106                                                   |
| Cat         |                                                                                                                      | 86449                                                   |
| Ferret      |                                                                                                                      | 87765                                                   |
| Lion        |                                                                                                                      | 84143                                                   |
| Vaquita     |                                                                                                                      | 84015                                                   |
| Pig         |                                                                                                                      | 83470                                                   |

|             |                                                                                                                      |                                                         |
|-------------|----------------------------------------------------------------------------------------------------------------------|---------------------------------------------------------|
| Majority    | XXXXXXXXXXXXXXXXXXXXXXXXXXXXXXXXXXXXXXXXXXXXXXXXXXXXXXXXXXXXXXXXXXXXXXXXXXXXXXXXXXXXXXXXXXXXXXXXXXXXXXXXXXXXXXXXXXXX |                                                         |
|             |                                                                                                                      | 121210 121220 121230 121240 121250 121260 121270 121280 |
| Human       | CCTTCAGGGGCTATTCCCCAT AACCTTAGCAAAATTTTAAAATATTCTTATGGCTAGCAATCTTATCTATTGTCATGTCT                                    | 98347                                                   |
| PolarBear   |                                                                                                                      | 52114                                                   |
| Cow         |                                                                                                                      | 86816                                                   |
| Dog         |                                                                                                                      | 82307                                                   |
| BelugaWhale |                                                                                                                      | 81417                                                   |
| Donkey      |                                                                                                                      | 90106                                                   |
| Cat         |                                                                                                                      | 86449                                                   |
| Ferret      |                                                                                                                      | 87765                                                   |
| Lion        |                                                                                                                      | 84143                                                   |
| Vaquita     |                                                                                                                      | 84015                                                   |
| Pig         |                                                                                                                      | 83470                                                   |

Dienstag, 3. Mai 2022 08:41

|             |                                                                                     |       |
|-------------|-------------------------------------------------------------------------------------|-------|
| Majority    | XXXXXXXXXXXXXXXXXXXXXXXXXXXXXXXXXXXXXXXXXXXXXXXXXXXXXXXXXXXXXXXXXXXXXXXXXXXX        |       |
|             |                                                                                     |       |
|             | 121290     121300     121310     121320     121330     121340     121350     121360 |       |
|             |                                                                                     |       |
| Human       | TACTATTTCTGCTTACCACCCCATTCTCTCTCAACCTTGTTGCTGCATTAGCTGTCCATCACTTAACACTGTTTATT       | 98427 |
| PolarBear   |                                                                                     | 52114 |
| Cow         |                                                                                     | 86816 |
| Dog         |                                                                                     | 82307 |
| BelugaWhale |                                                                                     | 81417 |
| Donkey      |                                                                                     | 90106 |
| Cat         |                                                                                     | 86449 |
| Ferret      |                                                                                     | 87765 |
| Lion        |                                                                                     | 84143 |
| Vaquita     |                                                                                     | 84015 |
| Pig         |                                                                                     | 83470 |

|             |                                                                                     |       |
|-------------|-------------------------------------------------------------------------------------|-------|
| Majority    | XXXXXXXXXXXXXXXXXXXXXXXXXXXXXXXXXXXXXXXXXXXXXXXXXXXXXXXXXXXXXXXXXXXXXXXXXXXX        |       |
|             |                                                                                     |       |
|             | 121370     121380     121390     121400     121410     121420     121430     121440 |       |
|             |                                                                                     |       |
| Human       | TCTCTGTTTTCTTCCATCATTTCTCTCTTTGCAACTAAATGATTTAGACTTTTTATAACCATAATCAACCAGTTAGATT     | 98507 |
| PolarBear   |                                                                                     | 52114 |
| Cow         |                                                                                     | 86816 |
| Dog         |                                                                                     | 82307 |
| BelugaWhale |                                                                                     | 81417 |
| Donkey      |                                                                                     | 90106 |
| Cat         |                                                                                     | 86449 |
| Ferret      |                                                                                     | 87765 |
| Lion        |                                                                                     | 84143 |
| Vaquita     |                                                                                     | 84015 |
| Pig         |                                                                                     | 83470 |

Dienstag, 3. Mai 2022 08:41

| Majority    | XXXXXXXXXXXXXXXXXXXXXXXXXXXXXXXXXXXXXXXXXXXXXXXXXXXXXXXXXXXXXXXXXXXXXXXXXXXX    |       |
|-------------|---------------------------------------------------------------------------------|-------|
|             | 121450 121460 121470 121480 121490 121500 121510 121520                         |       |
| Human       | CTTTTTATTTGTGGTTATTGAGTTGATAAATGATAGTGCATTTTATGTAATATTCAGGTGTTATGCTATTTTATCTGGT | 98587 |
| PolarBear   |                                                                                 | 52114 |
| Cow         |                                                                                 | 86816 |
| Dog         |                                                                                 | 82307 |
| BelugaWhale |                                                                                 | 81417 |
| Donkey      |                                                                                 | 90106 |
| Cat         |                                                                                 | 86449 |
| Ferret      |                                                                                 | 87765 |
| Lion        |                                                                                 | 84143 |
| Vaquita     |                                                                                 | 84015 |
| Pig         |                                                                                 | 83470 |

| Majority    | XXXXXXXXXXXXXXXXXXXXXXXXXXXXXXXXXXXXXXXXXXXXXXXXXXXXXXXXXXXXXXXXXXXXXXXXXXXX |       |
|-------------|------------------------------------------------------------------------------|-------|
|             | 121530 121540 121550 121560 121570 121580 121590 121600                      |       |
| Human       | TCACTTTAAACCTCCCTCCCCCACTCCCTTTTTTTGTGGTTTTTTTTTATTATTATTATTTTCCAGTTTTGTGTTG | 98667 |
| PolarBear   |                                                                              | 52114 |
| Cow         |                                                                              | 86816 |
| Dog         |                                                                              | 82307 |
| BelugaWhale |                                                                              | 81417 |
| Donkey      |                                                                              | 90106 |
| Cat         |                                                                              | 86449 |
| Ferret      |                                                                              | 87765 |
| Lion        |                                                                              | 84143 |
| Vaquita     |                                                                              | 84015 |
| Pig         |                                                                              | 83470 |



Dienstag, 3. Mai 2022 08:41

|             |                                                                                                                                                                                                                                                                                                                                                                                                                                                                                                                                                                                                                                                                                                                                                                                                                                                                                                                                                                                                                                                                                |        |        |        |        |        |        |        |        |
|-------------|--------------------------------------------------------------------------------------------------------------------------------------------------------------------------------------------------------------------------------------------------------------------------------------------------------------------------------------------------------------------------------------------------------------------------------------------------------------------------------------------------------------------------------------------------------------------------------------------------------------------------------------------------------------------------------------------------------------------------------------------------------------------------------------------------------------------------------------------------------------------------------------------------------------------------------------------------------------------------------------------------------------------------------------------------------------------------------|--------|--------|--------|--------|--------|--------|--------|--------|
| Majority    | XXXXXXXXXXXXXXXXXXXXXXXXXXXXXXXXXXXXXXXXXXXXXXXXXXXXXXXXXXXXXXXXXXXXXXXXXXXXXXXXXXXXXXXXXXXXXXXXXXXXXXXXXXXXXXXXXXXXXXXX                                                                                                                                                                                                                                                                                                                                                                                                                                                                                                                                                                                                                                                                                                                                                                                                                                                                                                                                                       |        |        |        |        |        |        |        |        |
|             | <table border="0" style="width: 100%; border-collapse: collapse;"> <tr> <td style="border-left: 1px solid black; border-right: 1px solid black; width: 12.5%; text-align: center;">121610</td> <td style="border-left: 1px solid black; border-right: 1px solid black; width: 12.5%; text-align: center;">121620</td> <td style="border-left: 1px solid black; border-right: 1px solid black; width: 12.5%; text-align: center;">121630</td> <td style="border-left: 1px solid black; border-right: 1px solid black; width: 12.5%; text-align: center;">121640</td> <td style="border-left: 1px solid black; border-right: 1px solid black; width: 12.5%; text-align: center;">121650</td> <td style="border-left: 1px solid black; border-right: 1px solid black; width: 12.5%; text-align: center;">121660</td> <td style="border-left: 1px solid black; border-right: 1px solid black; width: 12.5%; text-align: center;">121670</td> <td style="border-left: 1px solid black; border-right: 1px solid black; width: 12.5%; text-align: center;">121680</td> </tr> </table> | 121610 | 121620 | 121630 | 121640 | 121650 | 121660 | 121670 | 121680 |
| 121610      | 121620                                                                                                                                                                                                                                                                                                                                                                                                                                                                                                                                                                                                                                                                                                                                                                                                                                                                                                                                                                                                                                                                         | 121630 | 121640 | 121650 | 121660 | 121670 | 121680 |        |        |
| Human       | T T T T G C T T T T T A A C T T C T G A G A T T G C A G T G G T T C C A G A T G G T T G A A A T C A C T A G T A G T G A T T T A C A T G A A G C A T T C A T G T 98747                                                                                                                                                                                                                                                                                                                                                                                                                                                                                                                                                                                                                                                                                                                                                                                                                                                                                                          |        |        |        |        |        |        |        |        |
| PolarBear   | 52114                                                                                                                                                                                                                                                                                                                                                                                                                                                                                                                                                                                                                                                                                                                                                                                                                                                                                                                                                                                                                                                                          |        |        |        |        |        |        |        |        |
| Cow         | 86816                                                                                                                                                                                                                                                                                                                                                                                                                                                                                                                                                                                                                                                                                                                                                                                                                                                                                                                                                                                                                                                                          |        |        |        |        |        |        |        |        |
| Dog         | 82307                                                                                                                                                                                                                                                                                                                                                                                                                                                                                                                                                                                                                                                                                                                                                                                                                                                                                                                                                                                                                                                                          |        |        |        |        |        |        |        |        |
| BelugaWhale | 81417                                                                                                                                                                                                                                                                                                                                                                                                                                                                                                                                                                                                                                                                                                                                                                                                                                                                                                                                                                                                                                                                          |        |        |        |        |        |        |        |        |
| Donkey      | 90106                                                                                                                                                                                                                                                                                                                                                                                                                                                                                                                                                                                                                                                                                                                                                                                                                                                                                                                                                                                                                                                                          |        |        |        |        |        |        |        |        |
| Cat         | 86449                                                                                                                                                                                                                                                                                                                                                                                                                                                                                                                                                                                                                                                                                                                                                                                                                                                                                                                                                                                                                                                                          |        |        |        |        |        |        |        |        |
| Ferret      | 87765                                                                                                                                                                                                                                                                                                                                                                                                                                                                                                                                                                                                                                                                                                                                                                                                                                                                                                                                                                                                                                                                          |        |        |        |        |        |        |        |        |
| Lion        | 84143                                                                                                                                                                                                                                                                                                                                                                                                                                                                                                                                                                                                                                                                                                                                                                                                                                                                                                                                                                                                                                                                          |        |        |        |        |        |        |        |        |
| Vaquita     | 84015                                                                                                                                                                                                                                                                                                                                                                                                                                                                                                                                                                                                                                                                                                                                                                                                                                                                                                                                                                                                                                                                          |        |        |        |        |        |        |        |        |
| Pig         | 83470                                                                                                                                                                                                                                                                                                                                                                                                                                                                                                                                                                                                                                                                                                                                                                                                                                                                                                                                                                                                                                                                          |        |        |        |        |        |        |        |        |

|             |                                                                                                                                                                                                                                                                                                                                                                                                                                                                                                                                                                                                                                                                                                                                                                                                                                                                                                                                                                                                                                                                                |        |        |        |        |        |        |        |        |
|-------------|--------------------------------------------------------------------------------------------------------------------------------------------------------------------------------------------------------------------------------------------------------------------------------------------------------------------------------------------------------------------------------------------------------------------------------------------------------------------------------------------------------------------------------------------------------------------------------------------------------------------------------------------------------------------------------------------------------------------------------------------------------------------------------------------------------------------------------------------------------------------------------------------------------------------------------------------------------------------------------------------------------------------------------------------------------------------------------|--------|--------|--------|--------|--------|--------|--------|--------|
| Majority    | XXXXXXXXXXXXXXXXXXXXXXXXXXXXXXXXXXXXXXXXXXXXXXXXXXXXXXXXXXXXXXXXXXXXXXXXXXXXXXXXXXXXXXXXXXXXXXXXXXXXXXXXXXXXXXXXXXXXXXXX                                                                                                                                                                                                                                                                                                                                                                                                                                                                                                                                                                                                                                                                                                                                                                                                                                                                                                                                                       |        |        |        |        |        |        |        |        |
|             | <table border="0" style="width: 100%; border-collapse: collapse;"> <tr> <td style="border-left: 1px solid black; border-right: 1px solid black; width: 12.5%; text-align: center;">121690</td> <td style="border-left: 1px solid black; border-right: 1px solid black; width: 12.5%; text-align: center;">121700</td> <td style="border-left: 1px solid black; border-right: 1px solid black; width: 12.5%; text-align: center;">121710</td> <td style="border-left: 1px solid black; border-right: 1px solid black; width: 12.5%; text-align: center;">121720</td> <td style="border-left: 1px solid black; border-right: 1px solid black; width: 12.5%; text-align: center;">121730</td> <td style="border-left: 1px solid black; border-right: 1px solid black; width: 12.5%; text-align: center;">121740</td> <td style="border-left: 1px solid black; border-right: 1px solid black; width: 12.5%; text-align: center;">121750</td> <td style="border-left: 1px solid black; border-right: 1px solid black; width: 12.5%; text-align: center;">121760</td> </tr> </table> | 121690 | 121700 | 121710 | 121720 | 121730 | 121740 | 121750 | 121760 |
| 121690      | 121700                                                                                                                                                                                                                                                                                                                                                                                                                                                                                                                                                                                                                                                                                                                                                                                                                                                                                                                                                                                                                                                                         | 121710 | 121720 | 121730 | 121740 | 121750 | 121760 |        |        |
| Human       | A T T T A T T A C T G G T A T A T T C A A C T A T G G T G G A G G G A A A T T G G T C G A A G A A T T A C G G T T A A A G A G C T C C T T T A A A A A G G A G A 98827                                                                                                                                                                                                                                                                                                                                                                                                                                                                                                                                                                                                                                                                                                                                                                                                                                                                                                          |        |        |        |        |        |        |        |        |
| PolarBear   | 52114                                                                                                                                                                                                                                                                                                                                                                                                                                                                                                                                                                                                                                                                                                                                                                                                                                                                                                                                                                                                                                                                          |        |        |        |        |        |        |        |        |
| Cow         | 86816                                                                                                                                                                                                                                                                                                                                                                                                                                                                                                                                                                                                                                                                                                                                                                                                                                                                                                                                                                                                                                                                          |        |        |        |        |        |        |        |        |
| Dog         | 82307                                                                                                                                                                                                                                                                                                                                                                                                                                                                                                                                                                                                                                                                                                                                                                                                                                                                                                                                                                                                                                                                          |        |        |        |        |        |        |        |        |
| BelugaWhale | 81417                                                                                                                                                                                                                                                                                                                                                                                                                                                                                                                                                                                                                                                                                                                                                                                                                                                                                                                                                                                                                                                                          |        |        |        |        |        |        |        |        |
| Donkey      | 90106                                                                                                                                                                                                                                                                                                                                                                                                                                                                                                                                                                                                                                                                                                                                                                                                                                                                                                                                                                                                                                                                          |        |        |        |        |        |        |        |        |
| Cat         | 86449                                                                                                                                                                                                                                                                                                                                                                                                                                                                                                                                                                                                                                                                                                                                                                                                                                                                                                                                                                                                                                                                          |        |        |        |        |        |        |        |        |
| Ferret      | 87765                                                                                                                                                                                                                                                                                                                                                                                                                                                                                                                                                                                                                                                                                                                                                                                                                                                                                                                                                                                                                                                                          |        |        |        |        |        |        |        |        |
| Lion        | 84143                                                                                                                                                                                                                                                                                                                                                                                                                                                                                                                                                                                                                                                                                                                                                                                                                                                                                                                                                                                                                                                                          |        |        |        |        |        |        |        |        |
| Vaquita     | 84015                                                                                                                                                                                                                                                                                                                                                                                                                                                                                                                                                                                                                                                                                                                                                                                                                                                                                                                                                                                                                                                                          |        |        |        |        |        |        |        |        |
| Pig         | 83470                                                                                                                                                                                                                                                                                                                                                                                                                                                                                                                                                                                                                                                                                                                                                                                                                                                                                                                                                                                                                                                                          |        |        |        |        |        |        |        |        |

Dienstag, 3. Mai 2022 08:41

|             |                                                                                    |       |
|-------------|------------------------------------------------------------------------------------|-------|
| Majority    | XXXXXXXXXXXXXXXXXXXXXXXXXXXXXXXXXXXXXXXXXXXXXXXXXXXXXXXXXXXXXXXXXXXXXXXXXXXX       |       |
|             | 121770 121780 121790 121800 121810 121820 121830 121840                            |       |
| Human       | TTTGTAGAATTCTAAAATGTGATTCTGATT CATATAGT CATGATTCTTAGAAATTAGCTACAGGAAGAGATAGAAACATT | 98907 |
| PolarBear   |                                                                                    | 52114 |
| Cow         |                                                                                    | 86816 |
| Dog         |                                                                                    | 82307 |
| BelugaWhale |                                                                                    | 81417 |
| Donkey      |                                                                                    | 90106 |
| Cat         |                                                                                    | 86449 |
| Ferret      |                                                                                    | 87765 |
| Lion        |                                                                                    | 84143 |
| Vaquita     |                                                                                    | 84015 |
| Pig         |                                                                                    | 83470 |

|             |                                                                                  |       |
|-------------|----------------------------------------------------------------------------------|-------|
| Majority    | XXXXXXXXXXXXXXXXXXXXXXXXXXXXXXXXXXXXXXXXXXXXXXXXXXXXXXXXXXXXXXXXXXXXXXXXXXXX     |       |
|             | 121850 121860 121870 121880 121890 121900 121910 121920                          |       |
| Human       | GCTATAGTTGTCTTTGCCCTAAGTTTGGAGTTT TATAGTGTAATATATATAAATAGCTCTAATTATAAATACACTTTTA | 98987 |
| PolarBear   |                                                                                  | 52114 |
| Cow         |                                                                                  | 86816 |
| Dog         |                                                                                  | 82307 |
| BelugaWhale |                                                                                  | 81417 |
| Donkey      |                                                                                  | 90106 |
| Cat         |                                                                                  | 86449 |
| Ferret      |                                                                                  | 87765 |
| Lion        |                                                                                  | 84143 |
| Vaquita     |                                                                                  | 84015 |
| Pig         |                                                                                  | 83470 |

Dienstag, 3. Mai 2022 08:41

|             |                                                                                                                      |       |
|-------------|----------------------------------------------------------------------------------------------------------------------|-------|
| Majority    | XXXXXXXXXXXXXXXXXXXXXXXXXXXXXXXXXXXXXXXXXXXXXXXXXXXXXXXXXXXXXXXXXXXXXXXXXXXXXXXXXXXXXXXXXXXXXXXXXXXXXXXXXXXXXXXXXXXX |       |
|             | 121930 121940 121950 121960 121970 121980 121990 122000                                                              |       |
| Human       | CTCTGGAAAAAGCATAGACATTGACATAAGAGACATTTAAAACCATTATTTTCTCATCTGTAAAATGGAGAGAATTACT                                      | 99067 |
| PolarBear   |                                                                                                                      | 52114 |
| Cow         |                                                                                                                      | 86816 |
| Dog         |                                                                                                                      | 82307 |
| BelugaWhale |                                                                                                                      | 81417 |
| Donkey      |                                                                                                                      | 90106 |
| Cat         |                                                                                                                      | 86449 |
| Ferret      |                                                                                                                      | 87765 |
| Lion        |                                                                                                                      | 84143 |
| Vaquita     |                                                                                                                      | 84015 |
| Pig         |                                                                                                                      | 83470 |

|             |                                                                                                                      |       |
|-------------|----------------------------------------------------------------------------------------------------------------------|-------|
| Majority    | XXXXXXXXXXXXXXXXXXXXXXXXXXXXXXXXXXXXXXXXXXXXXXXXXXXXXXXXXXXXXXXXXXXXXXXXXXXXXXXXXXXXXXXXXXXXXXXXXXXXXXXXXXXXXXXXXXXX |       |
|             | 122010 122020 122030 122040 122050 122060 122070 122080                                                              |       |
| Human       | TCATATGTTCACTTATAAGGATTATGTGAAATACTGTTCCATTCCATTAGTAGTTTTTCTTTTCTCTAATTGGGGGTGG                                      | 99147 |
| PolarBear   |                                                                                                                      | 52114 |
| Cow         |                                                                                                                      | 86816 |
| Dog         |                                                                                                                      | 82307 |
| BelugaWhale |                                                                                                                      | 81417 |
| Donkey      |                                                                                                                      | 90106 |
| Cat         |                                                                                                                      | 86449 |
| Ferret      |                                                                                                                      | 87765 |
| Lion        |                                                                                                                      | 84143 |
| Vaquita     |                                                                                                                      | 84015 |
| Pig         |                                                                                                                      | 83470 |

Dienstag, 3. Mai 2022 08:41

|             |                                                                                                                            |       |
|-------------|----------------------------------------------------------------------------------------------------------------------------|-------|
| Majority    | XXXXXXXXXXXXXXXXXXXXXXXXXXXXXXXXXXXXXXXXXXXXXXXXXXXXXXXXXXXXXXXXXXXXXXXXXXXXXXXXXXXXXXXXXXXXXXXXXXXXXXXXXXXXXXXXXXXXXXXXXX |       |
|             | 122090 122100 122110 122120 122130 122140 122150 122160                                                                    |       |
| Human       | GGGCAGTTTTTGGCATTCTATTTATGGAAGGTGTTTTTCCCTAAGATCATTTTGATGTCTCAGAAGACATTTGCTATG                                             | 99227 |
| PolarBear   |                                                                                                                            | 52114 |
| Cow         |                                                                                                                            | 86816 |
| Dog         |                                                                                                                            | 82307 |
| BelugaWhale |                                                                                                                            | 81417 |
| Donkey      |                                                                                                                            | 90106 |
| Cat         |                                                                                                                            | 86449 |
| Ferret      |                                                                                                                            | 87765 |
| Lion        |                                                                                                                            | 84143 |
| Vaquita     |                                                                                                                            | 84015 |
| Pig         |                                                                                                                            | 83470 |

|             |                                                                                                                            |       |
|-------------|----------------------------------------------------------------------------------------------------------------------------|-------|
| Majority    | XXXXXXXXXXXXXXXXXXXXXXXXXXXXXXXXXXXXXXXXXXXXXXXXXXXXXXXXXXXXXXXXXXXXXXXXXXXXXXXXXXXXXXXXXXXXXXXXXXXXXXXXXXXXXXXXXXXXXXXXXX |       |
|             | 122170 122180 122190 122200 122210 122220 122230 122240                                                                    |       |
| Human       | TACGTTGGACATTTGCCATGTACATTGTAGAGAATACAAAGATAAACAGAACCACAGTACAGCTGGTTCTATTAGACATT                                           | 99307 |
| PolarBear   |                                                                                                                            | 52114 |
| Cow         |                                                                                                                            | 86816 |
| Dog         |                                                                                                                            | 82307 |
| BelugaWhale |                                                                                                                            | 81417 |
| Donkey      |                                                                                                                            | 90106 |
| Cat         |                                                                                                                            | 86449 |
| Ferret      |                                                                                                                            | 87765 |
| Lion        |                                                                                                                            | 84143 |
| Vaquita     |                                                                                                                            | 84015 |
| Pig         |                                                                                                                            | 83470 |

Dienstag, 3. Mai 2022 08:41

| Majority    | XXXXXXXXXXXXXXXXXXXXXXXXXXXXXXXXXXXXXXXXXXXXXXXXXXXXXXXXXXXXXXXXXXXXXXXXXXXXXXXXXXXXXXXXXXXXXXXXXXXXXXXXXXXXXXXXXXXX |        |        |        |        |        |        |        |  |
|-------------|----------------------------------------------------------------------------------------------------------------------|--------|--------|--------|--------|--------|--------|--------|--|
|             | 122250                                                                                                               | 122260 | 122270 | 122280 | 122290 | 122300 | 122310 | 122320 |  |
| Human       | GAAAATGCATATTCTAGCATATTTAATATATTAGGGAACAATTTAAGCATAAATGTGAATTTTCATGTTTACTGAAGATTTTC                                  |        |        |        |        |        |        | 99387  |  |
| PolarBear   |                                                                                                                      |        |        |        |        |        |        | 52114  |  |
| Cow         |                                                                                                                      |        |        |        |        |        |        | 86816  |  |
| Dog         |                                                                                                                      |        |        |        |        |        |        | 82307  |  |
| BelugaWhale |                                                                                                                      |        |        |        |        |        |        | 81417  |  |
| Donkey      |                                                                                                                      |        |        |        |        |        |        | 90106  |  |
| Cat         |                                                                                                                      |        |        |        |        |        |        | 86449  |  |
| Ferret      |                                                                                                                      |        |        |        |        |        |        | 87765  |  |
| Lion        |                                                                                                                      |        |        |        |        |        |        | 84143  |  |
| Vaquita     |                                                                                                                      |        |        |        |        |        |        | 84015  |  |
| Pig         |                                                                                                                      |        |        |        |        |        |        | 83470  |  |

| Majority    | XXXXXXXXXXXXXXXXXXXXXXXXXXXXXXXXXXXXXXXXXXXXXXXXXXXXXXXXXXXXXXXXXXXXXXXXXXXXXXXXXXXXXXXXXXXXXXXXXXXXXXXXXXXXXXXXXXXX |        |        |        |        |        |        |        |  |
|-------------|----------------------------------------------------------------------------------------------------------------------|--------|--------|--------|--------|--------|--------|--------|--|
|             | 122330                                                                                                               | 122340 | 122350 | 122360 | 122370 | 122380 | 122390 | 122400 |  |
| Human       | ATCCTGAGAAACAAATGAAAGCAGAAAATTACAACCAACTGAACCAGCTGTGT AAGAAATATATATATGGTGTGCACACA                                    |        |        |        |        |        |        | 99467  |  |
| PolarBear   |                                                                                                                      |        |        |        |        |        |        | 52114  |  |
| Cow         |                                                                                                                      |        |        |        |        |        |        | 86816  |  |
| Dog         |                                                                                                                      |        |        |        |        |        |        | 82307  |  |
| BelugaWhale |                                                                                                                      |        |        |        |        |        |        | 81417  |  |
| Donkey      |                                                                                                                      |        |        |        |        |        |        | 90106  |  |
| Cat         |                                                                                                                      |        |        |        |        |        |        | 86449  |  |
| Ferret      |                                                                                                                      |        |        |        |        |        |        | 87765  |  |
| Lion        |                                                                                                                      |        |        |        |        |        |        | 84143  |  |
| Vaquita     |                                                                                                                      |        |        |        |        |        |        | 84015  |  |
| Pig         |                                                                                                                      |        |        |        |        |        |        | 83470  |  |

Dienstag, 3. Mai 2022 08:41

|             |                                                                                                                              |                                                         |
|-------------|------------------------------------------------------------------------------------------------------------------------------|---------------------------------------------------------|
| Majority    | XXXXXXXXXXXXXXXXXXXXXXXXXXXXXXXXXXXXXXXXXXXXXXXXXXXXXXXXXXXXXXXXXXXXXXXXXXXXXXXXXXXXXXXXXXXXXXXXXXXXXXXXXXXXXXXXXXXXXXXXXXXX |                                                         |
|             |                                                                                                                              | 122410 122420 122430 122440 122450 122460 122470 122480 |
| Human       | TGTACATACCTCAGACATCTATTAGCATTCTCAGTTTTCCACAAGTTAAAAGCCACGCTCATCCATATCTGGTGCTAATA                                             | 99547                                                   |
| PolarBear   |                                                                                                                              | 52114                                                   |
| Cow         |                                                                                                                              | 86816                                                   |
| Dog         |                                                                                                                              | 82307                                                   |
| BelugaWhale |                                                                                                                              | 81417                                                   |
| Donkey      |                                                                                                                              | 90106                                                   |
| Cat         |                                                                                                                              | 86449                                                   |
| Ferret      |                                                                                                                              | 87765                                                   |
| Lion        |                                                                                                                              | 84143                                                   |
| Vaquita     |                                                                                                                              | 84015                                                   |
| Pig         |                                                                                                                              | 83470                                                   |

|             |                                                                                                                              |                                                         |
|-------------|------------------------------------------------------------------------------------------------------------------------------|---------------------------------------------------------|
| Majority    | XXXXXXXXXXXXXXXXXXXXXXXXXXXXXXXXXXXXXXXXXXXXXXXXXXXXXXXXXXXXXXXXXXXXXXXXXXXXXXXXXXXXXXXXXXXXXXXXXXXXXXXXXXXXXXXXXXXXXXXXXXXX |                                                         |
|             |                                                                                                                              | 122490 122500 122510 122520 122530 122540 122550 122560 |
| Human       | ACTTCCTATCCAATTTTCAGATAGCTGTTTTCAACACATCTGACACCTTCTTTTTTCAAGCAAACCTTCAGGTCTTTTTCA                                            | 99627                                                   |
| PolarBear   |                                                                                                                              | 52114                                                   |
| Cow         |                                                                                                                              | 86816                                                   |
| Dog         |                                                                                                                              | 82307                                                   |
| BelugaWhale |                                                                                                                              | 81417                                                   |
| Donkey      |                                                                                                                              | 90106                                                   |
| Cat         |                                                                                                                              | 86449                                                   |
| Ferret      |                                                                                                                              | 87765                                                   |
| Lion        |                                                                                                                              | 84143                                                   |
| Vaquita     |                                                                                                                              | 84015                                                   |
| Pig         |                                                                                                                              | 83470                                                   |

Dienstag, 3. Mai 2022 08:41

Majority  
XXXXXXXXXXXXXXXXXXXXXXXXXXXXXXXXXXXXXXXXXXXXXXXXXXXXXXXXXXXXXXXXXXXXXXXXXXXXXXXXXXXXXXXXXXXXXXXXXXXXXXXXXXXXXXXXXXXX

122570 122580 122590 122600 122610 122620 122630 122640

Human AGATAAAGTCATTTATAGTAGTGTCTATATATTTCTTAACCATTTAACATGTAAACTGTGCTGCCTTTTAAGAAATTAAT 99707  
PolarBear 52114  
Cow 86816  
Dog 82307  
BelugaWhale 81417  
Donkey 90106  
Cat 86449  
Ferret 87765  
Lion 84143  
Vaquita 84015  
Pig 83470

Majority  
XXXXXXXXXXXXXXXXXXXXXXXXXXXXXXXXXXXXXXXXXXXXXXXXXXXXXXXXXXXXXXXXXXXXXXXXXXXXXXXXXXXXXXXXXXXXXXXXXXXXXXXXXXXXXXXXXXXX

122650 122660 122670 122680 122690 122700 122710 122720

Human TCTATCCTTTT TAGTGT CAGAGTT GAAGATTTT GAGTGT TGTGCCCTAACCTTATCATTTTCCTCATAAGT CCTGTGGTT 99787  
PolarBear 52114  
Cow 86816  
Dog 82307  
BelugaWhale 81417  
Donkey 90106  
Cat 86449  
Ferret 87765  
Lion 84143  
Vaquita 84015  
Pig 83470

Dienstag, 3. Mai 2022 08:41

| Majority    | XXXXXXXXXXXXXXXXXXXXXXXXXXXXXXXXXXXXXXXXXXXXXXXXXXXXXXXXXXXXXXXXXXXXXXXXXXXXXXXXXXXXXXXXXXXXXXXXXXXXXXXXXXXXXXXXXXXX |
|-------------|----------------------------------------------------------------------------------------------------------------------|
|             | 122730      122740      122750      122760      122770      122780      122790      122800                           |
| Human       | TTTATTGTATGATTTTGCATAGTGTGGCAATTCTTGGAAATGCTTATGTTGTGTTATAGTATAACTGACTTACTACTTTC 99867                               |
| PolarBear   | 52114                                                                                                                |
| Cow         | 86816                                                                                                                |
| Dog         | 82307                                                                                                                |
| BelugaWhale | 81417                                                                                                                |
| Donkey      | 90106                                                                                                                |
| Cat         | 86449                                                                                                                |
| Ferret      | 87765                                                                                                                |
| Lion        | 84143                                                                                                                |
| Vaquita     | 84015                                                                                                                |
| Pig         | 83470                                                                                                                |

| Majority    | XXXXXXXXXXXXXXXXXXXXXXXXXXXXXXXXXXXXXXXXXXXXXXXXXXXXXXXXXXXXXXXXXXXXXXXXXXXXXXXXXXXXXXXXXXXXXXXXXXXXXXXXXXXXXXXXXXXX |
|-------------|----------------------------------------------------------------------------------------------------------------------|
|             | 122810      122820      122830      122840      122850      122860      122870      122880                           |
| Human       | AAATAGCTTCTAGTCTGATTCATGTTATGACAGTATACAGTATAGCAAATAAGGACATCAGGGAACAGGAGGCTGAGCA 99947                                |
| PolarBear   | 52114                                                                                                                |
| Cow         | 86816                                                                                                                |
| Dog         | 82307                                                                                                                |
| BelugaWhale | 81417                                                                                                                |
| Donkey      | 90106                                                                                                                |
| Cat         | 86449                                                                                                                |
| Ferret      | 87765                                                                                                                |
| Lion        | 84143                                                                                                                |
| Vaquita     | 84015                                                                                                                |
| Pig         | 83470                                                                                                                |



Dienstag, 3. Mai 2022 08:41

|             |                                                                                                                        |
|-------------|------------------------------------------------------------------------------------------------------------------------|
| Majority    | XXXXXXXXXXXXXXXXXXXXXXXXXXXXXXXXXXXXXXXXXXXXXXXXXXXXXXXXXXXXXXXXXXXXXXXXXXXXXXXXXXXXXXXXXXXXXXXXXXXXXXXXXXXXXXXXXXXX   |
|             | 122890          122900          122910          122920          122930          122940          122950          122960 |
| Human       | TATCACCATTTACCAATGGTAGCTTGAGCAAGGCACTTCATTTATCGAAGTCCATTTTCTCATCTGTACAATGGAGGTGA 100027                                |
| PolarBear   | 52114                                                                                                                  |
| Cow         | 86816                                                                                                                  |
| Dog         | 82307                                                                                                                  |
| BelugaWhale | 81417                                                                                                                  |
| Donkey      | 90106                                                                                                                  |
| Cat         | 86449                                                                                                                  |
| Ferret      | 87765                                                                                                                  |
| Lion        | 84143                                                                                                                  |
| Vaquita     | 84015                                                                                                                  |
| Pig         | 83470                                                                                                                  |

|             |                                                                                                                        |
|-------------|------------------------------------------------------------------------------------------------------------------------|
| Majority    | XXXXXXXXXXXXXXXXXXXXXXXXXXXXXXXXXXXXXXXXXXXXXXXXXXXXXXXXXXXXXXXXXXXXXXXXXXXXXXXXXXXXXXXXXXXXXXXXXXXXXXXXXXXXXXXXXXXX   |
|             | 122970          122980          122990          123000          123010          123020          123030          123040 |
| Human       | TGATAGTACATGTCTTTTCTGTCTTGTGTTATTTGTAGTTTCAAGTAAGATATGAAATATGCTGTAGAAATACAGGGTTG 100107                                |
| PolarBear   | 52114                                                                                                                  |
| Cow         | 86816                                                                                                                  |
| Dog         | 82307                                                                                                                  |
| BelugaWhale | 81417                                                                                                                  |
| Donkey      | 90106                                                                                                                  |
| Cat         | 86449                                                                                                                  |
| Ferret      | 87765                                                                                                                  |
| Lion        | 84143                                                                                                                  |
| Vaquita     | 84015                                                                                                                  |
| Pig         | 83470                                                                                                                  |

Dienstag, 3. Mai 2022 08:41

|             |                                                                                                                      |        |
|-------------|----------------------------------------------------------------------------------------------------------------------|--------|
| Majority    | XXXXXXXXXXXXXXXXXXXXXXXXXXXXXXXXXXXXXXXXXXXXXXXXXXXXXXXXXXXXXXXXXXXXXXXXXXXXXXXXXXXXXXXXXXXXXXXXXXXXXXXXXXXXXXXXXXXX |        |
|             | 123050 123060 123070 123080 123090 123100 123110 123120                                                              |        |
| Human       | GGAATATCTAGTGGTACAAAAATCAACTTTTGGCCCAATTTTAAGGTGAGATAATTATGAGACATTTTTTCGACCTCAAAG                                    | 100187 |
| PolarBear   |                                                                                                                      | 52114  |
| Cow         |                                                                                                                      | 86816  |
| Dog         |                                                                                                                      | 82307  |
| BelugaWhale |                                                                                                                      | 81417  |
| Donkey      |                                                                                                                      | 90106  |
| Cat         |                                                                                                                      | 86449  |
| Ferret      |                                                                                                                      | 87765  |
| Lion        |                                                                                                                      | 84143  |
| Vaquita     |                                                                                                                      | 84015  |
| Pig         |                                                                                                                      | 83470  |

|             |                                                                                                                      |        |
|-------------|----------------------------------------------------------------------------------------------------------------------|--------|
| Majority    | XXXXXXXXXXXXXXXXXXXXXXXXXXXXXXXXXXXXXXXXXXXXXXXXXXXXXXXXXXXXXXXXXXXXXXXXXXXXXXXXXXXXXXXXXXXXXXXXXXXXXXXXXXXXXXXXXXXX |        |
|             | 123130 123140 123150 123160 123170 123180 123190 123200                                                              |        |
| Human       | TCTTTGTTCTTTTCTCTACACCATTGTGAATAACACAGTGTATATATGAGATTAATTTATTACCTCGACTTTCCATTT                                       | 100267 |
| PolarBear   |                                                                                                                      | 52114  |
| Cow         |                                                                                                                      | 86816  |
| Dog         |                                                                                                                      | 82307  |
| BelugaWhale |                                                                                                                      | 81417  |
| Donkey      |                                                                                                                      | 90106  |
| Cat         |                                                                                                                      | 86449  |
| Ferret      |                                                                                                                      | 87765  |
| Lion        |                                                                                                                      | 84143  |
| Vaquita     |                                                                                                                      | 84015  |
| Pig         |                                                                                                                      | 83470  |

Dienstag, 3. Mai 2022 08:41

|             |                                                                                                                      |        |
|-------------|----------------------------------------------------------------------------------------------------------------------|--------|
| Majority    | XXXXXXXXXXXXXXXXXXXXXXXXXXXXXXXXXXXXXXXXXXXXXXXXXXXXXXXXXXXXXXXXXXXXXXXXXXXXXXXXXXXXXXXXXXXXXXXXXXXXXXXXXXXXXXXXXXXX |        |
|             | 123210 123220 123230 123240 123250 123260 123270 123280                                                              |        |
| Human       | TTGTTTTGTAAAGTAGTTTAAATTTTTATATCTATTTATAAAGTTAACTGCAGGAGTGTACCTGCAGTTAACTTTATACA                                     | 100347 |
| PolarBear   |                                                                                                                      | 52114  |
| Cow         |                                                                                                                      | 86816  |
| Dog         |                                                                                                                      | 82307  |
| BelugaWhale |                                                                                                                      | 81417  |
| Donkey      |                                                                                                                      | 90106  |
| Cat         |                                                                                                                      | 86449  |
| Ferret      |                                                                                                                      | 87765  |
| Lion        |                                                                                                                      | 84143  |
| Vaquita     |                                                                                                                      | 84015  |
| Pig         |                                                                                                                      | 83470  |

|             |                                                                                                                      |        |
|-------------|----------------------------------------------------------------------------------------------------------------------|--------|
| Majority    | XXXXXXXXXXXXXXXXXXXXXXXXXXXXXXXXXXXXXXXXXXXXXXXXXXXXXXXXXXXXXXXXXXXXXXXXXXXXXXXXXXXXXXXXXXXXXXXXXXXXXXXXXXXXXXXXXXXX |        |
|             | 123290 123300 123310 123320 123330 123340 123350 123360                                                              |        |
| Human       | GTTAAGAAGAGGTTGGTTTCAGTTTTAAAGATTGTATGTCAGTGTAAAACATCCATTATTATGCTTTCAAGTAAAATAGC                                     | 100427 |
| PolarBear   |                                                                                                                      | 52114  |
| Cow         |                                                                                                                      | 86816  |
| Dog         |                                                                                                                      | 82307  |
| BelugaWhale |                                                                                                                      | 81417  |
| Donkey      |                                                                                                                      | 90106  |
| Cat         |                                                                                                                      | 86449  |
| Ferret      |                                                                                                                      | 87765  |
| Lion        |                                                                                                                      | 84143  |
| Vaquita     |                                                                                                                      | 84015  |
| Pig         |                                                                                                                      | 83470  |

Dienstag, 3. Mai 2022 08:41

|             |                                                                                   |        |
|-------------|-----------------------------------------------------------------------------------|--------|
| Majority    | XXXXXXXXXXXXXXXXXXXXXXXXXXXXXXXXXXXXXXXXXXXXXXXXXXXXXXXXXXXXXXXXXXXXXXXXXXXX      |        |
|             | 123370 123380 123390 123400 123410 123420 123430 123440                           |        |
| Human       | T CCTAAAAATATGGATTACTATCAACTTTCAAGGAAAATAGCTCCTAAAAATATGGATTACTACCAACTTTCAAGGAAAA | 100507 |
| PolarBear   |                                                                                   | 52114  |
| Cow         |                                                                                   | 86816  |
| Dog         |                                                                                   | 82307  |
| BelugaWhale |                                                                                   | 81417  |
| Donkey      |                                                                                   | 90106  |
| Cat         |                                                                                   | 86449  |
| Ferret      |                                                                                   | 87765  |
| Lion        |                                                                                   | 84143  |
| Vaquita     |                                                                                   | 84015  |
| Pig         |                                                                                   | 83470  |

|             |                                                                                      |        |
|-------------|--------------------------------------------------------------------------------------|--------|
| Majority    | XXXXXXXXXXXXXXXXXXXXXXXXXXXXXXXXXXXXXXXXXXXXXXXXXXXXXXXXXXXXXXXXXXXXXXXXXXXX         |        |
|             | 123450 123460 123470 123480 123490 123500 123510 123520                              |        |
| Human       | TAGCTCCTAGAAATATGGATTACTAGCCACATAAATTGCTAACATTTGCTTTTATTATTATTATTATTATTATTATTATTAGAC | 100587 |
| PolarBear   |                                                                                      | 52114  |
| Cow         |                                                                                      | 86816  |
| Dog         |                                                                                      | 82307  |
| BelugaWhale |                                                                                      | 81417  |
| Donkey      |                                                                                      | 90106  |
| Cat         |                                                                                      | 86449  |
| Ferret      |                                                                                      | 87765  |
| Lion        |                                                                                      | 84143  |
| Vaquita     |                                                                                      | 84015  |
| Pig         |                                                                                      | 83470  |

Dienstag, 3. Mai 2022 08:41

|             |                                                                                                                      |        |        |        |        |        |        |        |  |
|-------------|----------------------------------------------------------------------------------------------------------------------|--------|--------|--------|--------|--------|--------|--------|--|
| Majority    | XXXXXXXXXXXXXXXXXXXXXXXXXXXXXXXXXXXXXXXXXXXXXXXXXXXXXXXXXXXXXXXXXXXXXXXXXXXXXXXXXXXXXXXXXXXXXXXXXXXXXXXXXXXXXXXXXXXX |        |        |        |        |        |        |        |  |
|             | 123530                                                                                                               | 123540 | 123550 | 123560 | 123570 | 123580 | 123590 | 123600 |  |
| Human       | ACAGTCTTGCTCTGTACCCAGGCTGGAGTGCAGTGGTATTATCTCGGCTCACTGCAACCTCCACCTCTCGGGTTCAAGC                                      |        |        |        |        |        |        | 100667 |  |
| PolarBear   |                                                                                                                      |        |        |        |        |        |        | 52114  |  |
| Cow         |                                                                                                                      |        |        |        |        |        |        | 86816  |  |
| Dog         |                                                                                                                      |        |        |        |        |        |        | 82307  |  |
| BelugaWhale |                                                                                                                      |        |        |        |        |        |        | 81417  |  |
| Donkey      |                                                                                                                      |        |        |        |        |        |        | 90106  |  |
| Cat         |                                                                                                                      |        |        |        |        |        |        | 86449  |  |
| Ferret      |                                                                                                                      |        |        |        |        |        |        | 87765  |  |
| Lion        |                                                                                                                      |        |        |        |        |        |        | 84143  |  |
| Vaquita     |                                                                                                                      |        |        |        |        |        |        | 84015  |  |
| Pig         |                                                                                                                      |        |        |        |        |        |        | 83470  |  |

|             |                                                                                                                      |        |        |        |        |        |        |        |  |
|-------------|----------------------------------------------------------------------------------------------------------------------|--------|--------|--------|--------|--------|--------|--------|--|
| Majority    | XXXXXXXXXXXXXXXXXXXXXXXXXXXXXXXXXXXXXXXXXXXXXXXXXXXXXXXXXXXXXXXXXXXXXXXXXXXXXXXXXXXXXXXXXXXXXXXXXXXXXXXXXXXXXXXXXXXX |        |        |        |        |        |        |        |  |
|             | 123610                                                                                                               | 123620 | 123630 | 123640 | 123650 | 123660 | 123670 | 123680 |  |
| Human       | AATTCTCCTGCCTCAGCCTTCGAGTAGCTGGAATTACAGGCACCCACCACACCCAGCTAATTTTGTATTTT TAGT                                         |        |        |        |        |        |        | 100747 |  |
| PolarBear   |                                                                                                                      |        |        |        |        |        |        | 52114  |  |
| Cow         |                                                                                                                      |        |        |        |        |        |        | 86816  |  |
| Dog         |                                                                                                                      |        |        |        |        |        |        | 82307  |  |
| BelugaWhale |                                                                                                                      |        |        |        |        |        |        | 81417  |  |
| Donkey      |                                                                                                                      |        |        |        |        |        |        | 90106  |  |
| Cat         |                                                                                                                      |        |        |        |        |        |        | 86449  |  |
| Ferret      |                                                                                                                      |        |        |        |        |        |        | 87765  |  |
| Lion        |                                                                                                                      |        |        |        |        |        |        | 84143  |  |
| Vaquita     |                                                                                                                      |        |        |        |        |        |        | 84015  |  |
| Pig         |                                                                                                                      |        |        |        |        |        |        | 83470  |  |

Dienstag, 3. Mai 2022 08:41

|             |                                                                                            |        |
|-------------|--------------------------------------------------------------------------------------------|--------|
| Majority    | XXXXXXXXXXXXXXXXXXXXXXXXXXXXXXXXXXXXXXXXXXXXXXXXXXXXXXXXXXXXXXXXXXXXXXXXXXXXXXXXXXXX       |        |
|             | ----- ----- ----- ----- ----- ----- ----- ----- ----- -----                                |        |
|             | 123690      123700      123710      123720      123730      123740      123750      123760 |        |
| Human       | AGAGACAGGGTTTTACCATGTGACCAGGCTGGTTTTCGAACTCCTGACCTCAAATGATCCACCTGCCTCAGCCTCCCAAAC          | 100827 |
| PolarBear   |                                                                                            | 52114  |
| Cow         |                                                                                            | 86816  |
| Dog         |                                                                                            | 82307  |
| BelugaWhale |                                                                                            | 81417  |
| Donkey      |                                                                                            | 90106  |
| Cat         |                                                                                            | 86449  |
| Ferret      |                                                                                            | 87765  |
| Lion        |                                                                                            | 84143  |
| Vaquita     |                                                                                            | 84015  |
| Pig         |                                                                                            | 83470  |

|             |                                                                                            |        |
|-------------|--------------------------------------------------------------------------------------------|--------|
| Majority    | XXXXXXXXXXXXXXXXXXXXXXXXXXXXXXXXXXXXXXXXXXXXXXXXXXXXXXXXXXXXXXXXXXXXXXXXXXXXXXXXXXXX       |        |
|             | ----- ----- ----- ----- ----- ----- ----- ----- ----- -----                                |        |
|             | 123770      123780      123790      123800      123810      123820      123830      123840 |        |
| Human       | TGCTGGGATTACAGGTGTGAGCCACCGCTCCCAGCCTATTTGCTAATATTTAACCTCTTGAGAGTCTTTAATTCTTTTT            | 100907 |
| PolarBear   |                                                                                            | 52114  |
| Cow         |                                                                                            | 86816  |
| Dog         |                                                                                            | 82307  |
| BelugaWhale |                                                                                            | 81417  |
| Donkey      |                                                                                            | 90106  |
| Cat         |                                                                                            | 86449  |
| Ferret      |                                                                                            | 87765  |
| Lion        |                                                                                            | 84143  |
| Vaquita     |                                                                                            | 84015  |
| Pig         |                                                                                            | 83470  |

Dienstag, 3. Mai 2022 08:41

| Majority    | XXXXXXXXXXXXXXXXXXXXXXXXXXXXXXXXXXXXXXXXXXXXXXXXXXXXXXXXXXXXXXXXXXXXXXXXXXXXXXXXXXXXXXXXXXXXXXXXXXXXXXXXXXXXXXXXXXXX |        |
|-------------|----------------------------------------------------------------------------------------------------------------------|--------|
|             | 123850 123860 123870 123880 123890 123900 123910 123920                                                              |        |
| Human       | T CAACAAGTGTT CATTACCTGCTATGTGCCAGCTTAGATGCTTTGGATGAAATACAGGTTGGTGCGAAAGTAATTGCGAT                                   | 100987 |
| PolarBear   |                                                                                                                      | 52114  |
| Cow         |                                                                                                                      | 86816  |
| Dog         |                                                                                                                      | 82307  |
| BelugaWhale |                                                                                                                      | 81417  |
| Donkey      |                                                                                                                      | 90106  |
| Cat         |                                                                                                                      | 86449  |
| Ferret      |                                                                                                                      | 87765  |
| Lion        |                                                                                                                      | 84143  |
| Vaquita     |                                                                                                                      | 84015  |
| Pig         |                                                                                                                      | 83470  |

| Majority    | XXXXXXXXXXXXXXXXXXXXXXXXXXXXXXXXXXXXXXXXXXXXXXXXXXXXXXXXXXXXXXXXXXXXXXXXXXXXXXXXXXXXXXXXXXXXXXXXXXXXXXXXXXXXXXXXXXXX |        |
|-------------|----------------------------------------------------------------------------------------------------------------------|--------|
|             | 123930 123940 123950 123960 123970 123980 123990 124000                                                              |        |
| Human       | T TTTGCCGTTAAAATTAGAAAAACCACAATTACTTTTGCACCAACCTAAATAACTAAAACACAATTTCTTCCTATCATGG                                    | 101067 |
| PolarBear   |                                                                                                                      | 52114  |
| Cow         |                                                                                                                      | 86816  |
| Dog         |                                                                                                                      | 82307  |
| BelugaWhale |                                                                                                                      | 81417  |
| Donkey      |                                                                                                                      | 90106  |
| Cat         |                                                                                                                      | 86449  |
| Ferret      |                                                                                                                      | 87765  |
| Lion        |                                                                                                                      | 84143  |
| Vaquita     |                                                                                                                      | 84015  |
| Pig         |                                                                                                                      | 83470  |

Dienstag, 3. Mai 2022 08:41

Majority  
XXXXXXXXXXXXXXXXXXXXXXXXXXXXXXXXXXXXXXXXXXXXXXXXXXXXXXXXXXXXXXXXXXXXXXXXXXXXXXXXXXXXXXXXXXXXXXXXXXXXXXXXXXXXXXXXXXXX

124010 124020 124030 124040 124050 124060 124070 124080

---

Human GGCTTT CAGTT CAGT ATGAGATAAGTAAAGAATTATATGGGTTGATAAATTTTCTGGAGGAACTATTGGGTGTTATTACA 101147  
PolarBear 52114  
Cow 86816  
Dog 82307  
BelugaWhale 81417  
Donkey 90106  
Cat 86449  
Ferret 87765  
Lion 84143  
Vaquita 84015  
Pig 83470

Majority  
XXXXXXXXXXXXXXXXXXXXXXXXXXXXXXXXXXXXXXXXXXXXXXXXXXXXXXXXXXXXXXXXXXXXXXXXXXXXXXXXXXXXXXXXXXXXXXXXXXXXXXXXXXXXXXXXXXXX

124090 124100 124110 124120 124130 124140 124150 124160

---

Human GTGTGCTCAATCTTTAGCAGTTAGGAAAGGATTCTTGAAGGTAGTTGTATTACCTGGGTTGGAGGTAAGTGTTGGGGACA 101227  
PolarBear 52114  
Cow 86816  
Dog 82307  
BelugaWhale 81417  
Donkey 90106  
Cat 86449  
Ferret 87765  
Lion 84143  
Vaquita 84015  
Pig 83470



Dienstag, 3. Mai 2022 08:41

| Majority    | XXXXXXXXXXXXXXXXXXXXXXXXXXXXXXXXXXXXXXXXXXXXXXXXXXXXXXXXXXXXXXXXXXXXXXXXXXXXXXXXXXXXXXXXXXXXXXXXXXXXXXXXXXXXXXXXXXXX |        |        |        |        |        |        |        |
|-------------|----------------------------------------------------------------------------------------------------------------------|--------|--------|--------|--------|--------|--------|--------|
|             | 124170                                                                                                               | 124180 | 124190 | 124200 | 124210 | 124220 | 124230 | 124240 |
| Human       | CAAGTGTTAGAAACAGAACAGTTTGT TTA AAAAGTTGGGGACAAAAAAGGACCAGAATCAAGATTACGGCACCCCTGGAGAA                                 |        |        |        |        |        |        | 101307 |
| PolarBear   |                                                                                                                      |        |        |        |        |        |        | 52114  |
| Cow         |                                                                                                                      |        |        |        |        |        |        | 86816  |
| Dog         |                                                                                                                      |        |        |        |        |        |        | 82307  |
| BelugaWhale |                                                                                                                      |        |        |        |        |        |        | 81417  |
| Donkey      |                                                                                                                      |        |        |        |        |        |        | 90106  |
| Cat         |                                                                                                                      |        |        |        |        |        |        | 86449  |
| Ferret      |                                                                                                                      |        |        |        |        |        |        | 87765  |
| Lion        |                                                                                                                      |        |        |        |        |        |        | 84143  |
| Vaquita     |                                                                                                                      |        |        |        |        |        |        | 84015  |
| Pig         |                                                                                                                      |        |        |        |        |        |        | 83470  |

| Majority    | XXXXXXXXXXXXXXXXXXXXXXXXXXXXXXXXXXXXXXXXXXXXXXXXXXXXXXXXXXXXXXXXXXXXXXXXXXXXXXXXXXXXXXXXXXXXXXXXXXXXXXXXXXXXXXXXXXXX |        |        |        |        |        |        |        |
|-------------|----------------------------------------------------------------------------------------------------------------------|--------|--------|--------|--------|--------|--------|--------|
|             | 124250                                                                                                               | 124260 | 124270 | 124280 | 124290 | 124300 | 124310 | 124320 |
| Human       | AGTTAAGCATGGCTCGGTCATAAATTAGGAGACAAGGAACAAATAGAGAAATACGTTTGGATAGAATAGTCAGATTATAG                                     |        |        |        |        |        |        | 101387 |
| PolarBear   |                                                                                                                      |        |        |        |        |        |        | 52114  |
| Cow         |                                                                                                                      |        |        |        |        |        |        | 86816  |
| Dog         |                                                                                                                      |        |        |        |        |        |        | 82307  |
| BelugaWhale |                                                                                                                      |        |        |        |        |        |        | 81417  |
| Donkey      |                                                                                                                      |        |        |        |        |        |        | 90106  |
| Cat         |                                                                                                                      |        |        |        |        |        |        | 86449  |
| Ferret      |                                                                                                                      |        |        |        |        |        |        | 87765  |
| Lion        |                                                                                                                      |        |        |        |        |        |        | 84143  |
| Vaquita     |                                                                                                                      |        |        |        |        |        |        | 84015  |
| Pig         |                                                                                                                      |        |        |        |        |        |        | 83470  |

Dienstag, 3. Mai 2022 08:41

|             |                                                                                                                      |                                                         |
|-------------|----------------------------------------------------------------------------------------------------------------------|---------------------------------------------------------|
| Majority    | XXXXXXXXXXXXXXXXXXXXXXXXXXXXXXXXXXXXXXXXXXXXXXXXXXXXXXXXXXXXXXXXXXXXXXXXXXXXXXXXXXXXXXXXXXXXXXXXXXXXXXXXXXXXXXXXXXXX |                                                         |
|             |                                                                                                                      | 124330 124340 124350 124360 124370 124380 124390 124400 |
| Human       | GCTGTGCTAAGTTGTTTGGGCTCCACTAGGGTTTCTAAATGCAGTTATTGGTAAACTGGACTTAGGAGAAGGGACAGGGT                                     | 101467                                                  |
| PolarBear   |                                                                                                                      | 52114                                                   |
| Cow         |                                                                                                                      | 86816                                                   |
| Dog         |                                                                                                                      | 82307                                                   |
| BelugaWhale |                                                                                                                      | 81417                                                   |
| Donkey      |                                                                                                                      | 90106                                                   |
| Cat         |                                                                                                                      | 86449                                                   |
| Ferret      |                                                                                                                      | 87765                                                   |
| Lion        |                                                                                                                      | 84143                                                   |
| Vaquita     |                                                                                                                      | 84015                                                   |
| Pig         |                                                                                                                      | 83470                                                   |

|             |                                                                                                                      |                                                         |
|-------------|----------------------------------------------------------------------------------------------------------------------|---------------------------------------------------------|
| Majority    | XXXXXXXXXXXXXXXXXXXXXXXXXXXXXXXXXXXXXXXXXXXXXXXXXXXXXXXXXXXXXXXXXXXXXXXXXXXXXXXXXXXXXXXXXXXXXXXXXXXXXXXXXXXXXXXXXXXX |                                                         |
|             |                                                                                                                      | 124410 124420 124430 124440 124450 124460 124470 124480 |
| Human       | TGACATGACAAATCTAGTGAATTTATGTTCAATAAAATATCCCTTTTGAATTGATTTAGTTTTTGTATGTTTCTTTTTTA                                     | 101547                                                  |
| PolarBear   |                                                                                                                      | 52114                                                   |
| Cow         |                                                                                                                      | 86816                                                   |
| Dog         |                                                                                                                      | 82307                                                   |
| BelugaWhale |                                                                                                                      | 81417                                                   |
| Donkey      |                                                                                                                      | 90106                                                   |
| Cat         |                                                                                                                      | 86449                                                   |
| Ferret      |                                                                                                                      | 87765                                                   |
| Lion        |                                                                                                                      | 84143                                                   |
| Vaquita     |                                                                                                                      | 84015                                                   |
| Pig         |                                                                                                                      | 83470                                                   |

Dienstag, 3. Mai 2022 08:41

|             |                                                                                                                                                                 |                                                         |
|-------------|-----------------------------------------------------------------------------------------------------------------------------------------------------------------|---------------------------------------------------------|
| Majority    | XXXXXXXXXXXXXXXXXXXXXXXXXXXXXXXXXXXXXXXXXXXXXXXXXXXXXXXXXXXXXXXXXXXXXXXXXXXXXXXXXXXXXXXXXXXXXXXXXXXXXXXXXXXXXXXXXXXXXXXXXX                                      |                                                         |
|             |                                                                                                                                                                 | 124490 124500 124510 124520 124530 124540 124550 124560 |
| Human       | T A A T T C C A A A A A A T C A T A C A A A T A A G T T A A A C T T A T C C A T C T A A A A G C T G C A C A C A A A A C T T G A T G T T A G A T T C T T T T A A | 101627                                                  |
| PolarBear   |                                                                                                                                                                 | 52114                                                   |
| Cow         |                                                                                                                                                                 | 86816                                                   |
| Dog         |                                                                                                                                                                 | 82307                                                   |
| BelugaWhale |                                                                                                                                                                 | 81417                                                   |
| Donkey      |                                                                                                                                                                 | 90106                                                   |
| Cat         |                                                                                                                                                                 | 86449                                                   |
| Ferret      |                                                                                                                                                                 | 87765                                                   |
| Lion        |                                                                                                                                                                 | 84143                                                   |
| Vaquita     |                                                                                                                                                                 | 84015                                                   |
| Pig         |                                                                                                                                                                 | 83470                                                   |

|             |                                                                                                                                                                 |                                                         |
|-------------|-----------------------------------------------------------------------------------------------------------------------------------------------------------------|---------------------------------------------------------|
| Majority    | XXXXXXXXXXXXXXXXXXXXXXXXXXXXXXXXXXXXXXXXXXXXXXXXXXXXXXXXXXXXXXXXXXXXXXXXXXXXXXXXXXXXXXXXXXXXXXXXXXXXXXXXXXXXXXXXXXXXXXXXXX                                      |                                                         |
|             |                                                                                                                                                                 | 124570 124580 124590 124600 124610 124620 124630 124640 |
| Human       | A A T T A C A A A A T T A A G A C T T C C A A A A G A A T C T T G T T G A A T A A G A G T A A A A G A A A G A C C C T T A C T C A G T A A A G C T G C G T A A T | 101707                                                  |
| PolarBear   |                                                                                                                                                                 | 52114                                                   |
| Cow         |                                                                                                                                                                 | 86816                                                   |
| Dog         |                                                                                                                                                                 | 82307                                                   |
| BelugaWhale |                                                                                                                                                                 | 81417                                                   |
| Donkey      |                                                                                                                                                                 | 90106                                                   |
| Cat         |                                                                                                                                                                 | 86449                                                   |
| Ferret      |                                                                                                                                                                 | 87765                                                   |
| Lion        |                                                                                                                                                                 | 84143                                                   |
| Vaquita     |                                                                                                                                                                 | 84015                                                   |
| Pig         |                                                                                                                                                                 | 83470                                                   |

Dienstag, 3. Mai 2022 08:41

|             |                                                                                                                              |                                                         |
|-------------|------------------------------------------------------------------------------------------------------------------------------|---------------------------------------------------------|
| Majority    | XXXXXXXXXXXXXXXXXXXXXXXXXXXXXXXXXXXXXXXXXXXXXXXXXXXXXXXXXXXXXXXXXXXXXXXXXXXXXXXXXXXXXXXXXXXXXXXXXXXXXXXXXXXXXXXXXXXXXXXXXXXX |                                                         |
|             |                                                                                                                              | 124650 124660 124670 124680 124690 124700 124710 124720 |
| Human       | ACTTTGGCAGTTTGAACCCATGGCCATGCCTCTCTGTGTGATAAGGATTTGGCAAACCATGGAAGAAACATGCATGTTT                                              | 101787                                                  |
| PolarBear   |                                                                                                                              | 52114                                                   |
| Cow         |                                                                                                                              | 86816                                                   |
| Dog         |                                                                                                                              | 82307                                                   |
| BelugaWhale |                                                                                                                              | 81417                                                   |
| Donkey      |                                                                                                                              | 90106                                                   |
| Cat         |                                                                                                                              | 86449                                                   |
| Ferret      |                                                                                                                              | 87765                                                   |
| Lion        |                                                                                                                              | 84143                                                   |
| Vaquita     |                                                                                                                              | 84015                                                   |
| Pig         |                                                                                                                              | 83470                                                   |

|             |                                                                                                                              |                                                         |
|-------------|------------------------------------------------------------------------------------------------------------------------------|---------------------------------------------------------|
| Majority    | XXXXXXXXXXXXXXXXXXXXXXXXXXXXXXXXXXXXXXXXXXXXXXXXXXXXXXXXXXXXXXXXXXXXXXXXXXXXXXXXXXXXXXXXXXXXXXXXXXXXXXXXXXXXXXXXXXXXXXXXXXXX |                                                         |
|             |                                                                                                                              | 124730 124740 124750 124760 124770 124780 124790 124800 |
| Human       | TTGAATTGTCTTCCATGGTAACTTAAAACATTTTTTTCATGAAACATGGATATATATCCTTAGAAAACATGCAAAACATAA                                            | 101867                                                  |
| PolarBear   |                                                                                                                              | 52114                                                   |
| Cow         |                                                                                                                              | 86816                                                   |
| Dog         |                                                                                                                              | 82307                                                   |
| BelugaWhale |                                                                                                                              | 81417                                                   |
| Donkey      |                                                                                                                              | 90106                                                   |
| Cat         |                                                                                                                              | 86449                                                   |
| Ferret      |                                                                                                                              | 87765                                                   |
| Lion        |                                                                                                                              | 84143                                                   |
| Vaquita     |                                                                                                                              | 84015                                                   |
| Pig         |                                                                                                                              | 83470                                                   |

Dienstag, 3. Mai 2022 08:41

|             |                                                                                   |        |
|-------------|-----------------------------------------------------------------------------------|--------|
| Majority    | XXXXXXXXXXXXXXXXXXXXXXXXXXXXXXXXXXXXXXXXXXXXXXXXXXXXXXXXXXXXXXXXXXXXXXXXXXXX      |        |
|             | 124810 124820 124830 124840 124850 124860 124870 124880                           |        |
| Human       | AGCTTGTAAAGTTATAAGACAAGATTTATCTCTTTTTTTTTTTTTTCTGAGAGAGAGTCTTGCTCTGTTGCCCAGGCCGGA | 101947 |
| PolarBear   |                                                                                   | 52114  |
| Cow         |                                                                                   | 86816  |
| Dog         |                                                                                   | 82307  |
| BelugaWhale |                                                                                   | 81417  |
| Donkey      |                                                                                   | 90106  |
| Cat         |                                                                                   | 86449  |
| Ferret      |                                                                                   | 87765  |
| Lion        |                                                                                   | 84143  |
| Vaquita     |                                                                                   | 84015  |
| Pig         |                                                                                   | 83470  |

|             |                                                                                 |        |
|-------------|---------------------------------------------------------------------------------|--------|
| Majority    | XXXXXXXXXXXXXXXXXXXXXXXXXXXXXXXXXXXXXXXXXXXXXXXXXXXXXXXXXXXXXXXXXXXXXXXXXXXX    |        |
|             | 124890 124900 124910 124920 124930 124940 124950 124960                         |        |
| Human       | GTGCAACAGTGTGATCTCTGCTCACTGCACCCTCCGCCTCCCGGGTCAAGCAATTCTCCTGCCTCAGCCTCCTGAGTAG | 102027 |
| PolarBear   |                                                                                 | 52114  |
| Cow         |                                                                                 | 86816  |
| Dog         |                                                                                 | 82307  |
| BelugaWhale |                                                                                 | 81417  |
| Donkey      |                                                                                 | 90106  |
| Cat         |                                                                                 | 86449  |
| Ferret      |                                                                                 | 87765  |
| Lion        |                                                                                 | 84143  |
| Vaquita     |                                                                                 | 84015  |
| Pig         |                                                                                 | 83470  |

Dienstag, 3. Mai 2022 08:41

| Majority    | XXXXXXXXXXXXXXXXXXXXXXXXXXXXXXXXXXXXXXXXXXXXXXXXXXXXXXXXXXXXXXXXXXXXXXXXXXXXXXXXXXXXXXXXXXXXXXXXXXXXXXXXXXXXXXXXXXXXXXXXXXXX |                                                         |
|-------------|------------------------------------------------------------------------------------------------------------------------------|---------------------------------------------------------|
|             |                                                                                                                              | 124970 124980 124990 125000 125010 125020 125030 125040 |
| Human       | CTGGGACTACAGGCGTGTGCCGCCAAGCCCAGCTAATTTTTTTGTATCTTTAGTAGAGACGGTTTCACCATGTTGGCCAG                                             | 102107                                                  |
| PolarBear   |                                                                                                                              | 52114                                                   |
| Cow         |                                                                                                                              | 86816                                                   |
| Dog         |                                                                                                                              | 82307                                                   |
| BelugaWhale |                                                                                                                              | 81417                                                   |
| Donkey      |                                                                                                                              | 90106                                                   |
| Cat         |                                                                                                                              | 86449                                                   |
| Ferret      |                                                                                                                              | 87765                                                   |
| Lion        |                                                                                                                              | 84143                                                   |
| Vaquita     |                                                                                                                              | 84015                                                   |
| Pig         |                                                                                                                              | 83470                                                   |

| Majority    | XXXXXXXXXXXXXXXXXXXXXXXXXXXXXXXXXXXXXXXXXXXXXXXXXXXXXXXXXXXXXXXXXXXXXXXXXXXXXXXXXXXXXXXXXXXXXXXXXXXXXXXXXXXXXXXXXXXXXXXXXXXX |                                                         |
|-------------|------------------------------------------------------------------------------------------------------------------------------|---------------------------------------------------------|
|             |                                                                                                                              | 125050 125060 125070 125080 125090 125100 125110 125120 |
| Human       | GCTGGTCTCGAACTCCTGACCTCAAGTGATCTACCTGCCTCAGCCTTCTAAAGTGTGGGATTACAGGCATGAGCCATGG                                              | 102187                                                  |
| PolarBear   |                                                                                                                              | 52114                                                   |
| Cow         |                                                                                                                              | 86816                                                   |
| Dog         |                                                                                                                              | 82307                                                   |
| BelugaWhale |                                                                                                                              | 81417                                                   |
| Donkey      |                                                                                                                              | 90106                                                   |
| Cat         |                                                                                                                              | 86449                                                   |
| Ferret      |                                                                                                                              | 87765                                                   |
| Lion        |                                                                                                                              | 84143                                                   |
| Vaquita     |                                                                                                                              | 84015                                                   |
| Pig         |                                                                                                                              | 83470                                                   |

Dienstag, 3. Mai 2022 08:41

|             |                                                                                                                                                                  |        |
|-------------|------------------------------------------------------------------------------------------------------------------------------------------------------------------|--------|
| Majority    | XXXXXXXXXXXXXXXXXXXXXXXXXXXXXXXXXXXXXXXXXXXXXXXXXXXXXXXXXXXXXXXXXXXXXXXXXXXX                                                                                     |        |
|             |                                                                                                                                                                  |        |
|             | 125130                125140                125150                125160                125170                125180                125190                125200 |        |
| Human       | CACCCGGCCAAGATGAAATGTCAAGGCCATTTTAGCCACTATGCTTTTAAGACTACTTAAAGCTGTGCTTTCAGGTCTCC                                                                                 | 102267 |
| PolarBear   |                                                                                                                                                                  | 52114  |
| Cow         |                                                                                                                                                                  | 86816  |
| Dog         |                                                                                                                                                                  | 82307  |
| BelugaWhale |                                                                                                                                                                  | 81417  |
| Donkey      |                                                                                                                                                                  | 90106  |
| Cat         |                                                                                                                                                                  | 86449  |
| Ferret      |                                                                                                                                                                  | 87765  |
| Lion        |                                                                                                                                                                  | 84143  |
| Vaquita     |                                                                                                                                                                  | 84015  |
| Pig         |                                                                                                                                                                  | 83470  |

|             |                                                                                                                                                                  |        |
|-------------|------------------------------------------------------------------------------------------------------------------------------------------------------------------|--------|
| Majority    | XXXXXXXXXXXXXXXXXXXXXXXXXXXXXXXXXXXXXXXXXXXXXXXXXXXXXXXXXXXXXXXXXXXXXXXXXXXX                                                                                     |        |
|             |                                                                                                                                                                  |        |
|             | 125210                125220                125230                125240                125250                125260                125270                125280 |        |
| Human       | CCAGGAATACTTGTTCACTCTATACTATTGCTGCTGCTGTTCTGGCTTGAGAATTTTGAGAATCACTAAGATACAATTTT                                                                                 | 102347 |
| PolarBear   |                                                                                                                                                                  | 52114  |
| Cow         |                                                                                                                                                                  | 86816  |
| Dog         |                                                                                                                                                                  | 82307  |
| BelugaWhale |                                                                                                                                                                  | 81417  |
| Donkey      |                                                                                                                                                                  | 90106  |
| Cat         |                                                                                                                                                                  | 86449  |
| Ferret      |                                                                                                                                                                  | 87765  |
| Lion        |                                                                                                                                                                  | 84143  |
| Vaquita     |                                                                                                                                                                  | 84015  |
| Pig         |                                                                                                                                                                  | 83470  |

Dienstag, 3. Mai 2022 08:41

|             |                                                                                                                              |        |
|-------------|------------------------------------------------------------------------------------------------------------------------------|--------|
| Majority    | XXXXXXXXXXXXXXXXXXXXXXXXXXXXXXXXXXXXXXXXXXXXXXXXXXXXXXXXXXXXXXXXXXXXXXXXXXXXXXXXXXXXXXXXXXXXXXXXXXXXXXXXXXXXXXXXXXXXXXXXXXXX |        |
|             | 125290 125300 125310 125320 125330 125340 125350 125360                                                                      |        |
| Human       | AAGTTTTGACATGTAAATTATTTGGTTGAGTAGAAAGAATTAATGTAGATAAGCAAAAACCCCTTTATAAAAAATGCTTA                                             | 102427 |
| PolarBear   |                                                                                                                              | 52114  |
| Cow         |                                                                                                                              | 86816  |
| Dog         |                                                                                                                              | 82307  |
| BelugaWhale |                                                                                                                              | 81417  |
| Donkey      |                                                                                                                              | 90106  |
| Cat         |                                                                                                                              | 86449  |
| Ferret      |                                                                                                                              | 87765  |
| Lion        |                                                                                                                              | 84143  |
| Vaquita     |                                                                                                                              | 84015  |
| Pig         |                                                                                                                              | 83470  |

|             |                                                                                                                              |        |
|-------------|------------------------------------------------------------------------------------------------------------------------------|--------|
| Majority    | XXXXXXXXXXXXXXXXXXXXXXXXXXXXXXXXXXXXXXXXXXXXXXXXXXXXXXXXXXXXXXXXXXXXXXXXXXXXXXXXXXXXXXXXXXXXXXXXXXXXXXXXXXXXXXXXXXXXXXXXXXXX |        |
|             | 125370 125380 125390 125400 125410 125420 125430 125440                                                                      |        |
| Human       | CCCTTTAAAAAATGTTGAATCCTCACAGTATGATTAAATACTACTTGTAAAAGTGTCTGTTAACCATATAATGTATTTTTTA                                           | 102507 |
| PolarBear   |                                                                                                                              | 52114  |
| Cow         |                                                                                                                              | 86816  |
| Dog         |                                                                                                                              | 82307  |
| BelugaWhale |                                                                                                                              | 81417  |
| Donkey      |                                                                                                                              | 90106  |
| Cat         |                                                                                                                              | 86449  |
| Ferret      |                                                                                                                              | 87765  |
| Lion        |                                                                                                                              | 84143  |
| Vaquita     |                                                                                                                              | 84015  |
| Pig         |                                                                                                                              | 83470  |



Dienstag, 3. Mai 2022 08:41

|             |                                                                                                                      |        |        |        |        |        |        |        |  |
|-------------|----------------------------------------------------------------------------------------------------------------------|--------|--------|--------|--------|--------|--------|--------|--|
| Majority    | XXXXXXXXXXXXXXXXXXXXXXXXXXXXXXXXXXXXXXXXXXXXXXXXXXXXXXXXXXXXXXXXXXXXXXXXXXXXXXXXXXXXXXXXXXXXXXXXXXXXXXXXXXXXXXXXXXXX |        |        |        |        |        |        |        |  |
|             |                                                                                                                      |        |        |        |        |        |        |        |  |
|             | 125450                                                                                                               | 125460 | 125470 | 125480 | 125490 | 125500 | 125510 | 125520 |  |
|             |                                                                                                                      |        |        |        |        |        |        |        |  |
| Human       | GATAATTTGAGTAGAATTATACGTGCAATATATTCTTGAGTTTGTGACCAACAAAGAAACAGATTAATGATTGAAAATTC                                     | 102587 |        |        |        |        |        |        |  |
| PolarBear   |                                                                                                                      | 52114  |        |        |        |        |        |        |  |
| Cow         |                                                                                                                      | 86816  |        |        |        |        |        |        |  |
| Dog         |                                                                                                                      | 82307  |        |        |        |        |        |        |  |
| BelugaWhale |                                                                                                                      | 81417  |        |        |        |        |        |        |  |
| Donkey      |                                                                                                                      | 90106  |        |        |        |        |        |        |  |
| Cat         |                                                                                                                      | 86449  |        |        |        |        |        |        |  |
| Ferret      |                                                                                                                      | 87765  |        |        |        |        |        |        |  |
| Lion        |                                                                                                                      | 84143  |        |        |        |        |        |        |  |
| Vaquita     |                                                                                                                      | 84015  |        |        |        |        |        |        |  |
| Pig         |                                                                                                                      | 83470  |        |        |        |        |        |        |  |

|             |                                                                                                                      |        |        |        |        |        |        |        |  |
|-------------|----------------------------------------------------------------------------------------------------------------------|--------|--------|--------|--------|--------|--------|--------|--|
| Majority    | XXXXXXXXXXXXXXXXXXXXXXXXXXXXXXXXXXXXXXXXXXXXXXXXXXXXXXXXXXXXXXXXXXXXXXXXXXXXXXXXXXXXXXXXXXXXXXXXXXXXXXXXXXXXXXXXXXXX |        |        |        |        |        |        |        |  |
|             |                                                                                                                      |        |        |        |        |        |        |        |  |
|             | 125530                                                                                                               | 125540 | 125550 | 125560 | 125570 | 125580 | 125590 | 125600 |  |
|             |                                                                                                                      |        |        |        |        |        |        |        |  |
| Human       | ACCATACATTACTACCTATGTCTCTCCACCTGCTATCTACTTCCAATTTTTTATATATATAAAAGTCATTAAAGTCATTT                                     | 102667 |        |        |        |        |        |        |  |
| PolarBear   |                                                                                                                      | 52114  |        |        |        |        |        |        |  |
| Cow         |                                                                                                                      | 86816  |        |        |        |        |        |        |  |
| Dog         |                                                                                                                      | 82307  |        |        |        |        |        |        |  |
| BelugaWhale |                                                                                                                      | 81417  |        |        |        |        |        |        |  |
| Donkey      |                                                                                                                      | 90106  |        |        |        |        |        |        |  |
| Cat         |                                                                                                                      | 86449  |        |        |        |        |        |        |  |
| Ferret      |                                                                                                                      | 87765  |        |        |        |        |        |        |  |
| Lion        |                                                                                                                      | 84143  |        |        |        |        |        |        |  |
| Vaquita     |                                                                                                                      | 84015  |        |        |        |        |        |        |  |
| Pig         |                                                                                                                      | 83470  |        |        |        |        |        |        |  |

Dienstag, 3. Mai 2022 08:41

|             |                                                                                                                                                                                                                                                  |        |
|-------------|--------------------------------------------------------------------------------------------------------------------------------------------------------------------------------------------------------------------------------------------------|--------|
| Majority    | XXXXXXXXXXXXXXXXXXXXXXXXXXXXXXXXXXXXXXXXXXXXXXXXXXXXXXXXXXXXXXXXXXXXXXXXXXXXXXXXXXXXXXXXXXXXXXXXXXXXXXXXXXXXXXXXXXXXXXXXXX                                                                                                                       |        |
|             | <div style="display: flex; justify-content: space-between; width: 100%;"> <span>125610</span> <span>125620</span> <span>125630</span> <span>125640</span> <span>125650</span> <span>125660</span> <span>125670</span> <span>125680</span> </div> |        |
| Human       | GTAATTGAGTTTGT TTT TTT TCTTGAGACAGGGTCTCACTCTGTCACCCAGGCTGGAGTGCAAATGGCATGATCACAGC                                                                                                                                                               | 102747 |
| PolarBear   |                                                                                                                                                                                                                                                  | 52114  |
| Cow         |                                                                                                                                                                                                                                                  | 86816  |
| Dog         |                                                                                                                                                                                                                                                  | 82307  |
| BelugaWhale |                                                                                                                                                                                                                                                  | 81417  |
| Donkey      |                                                                                                                                                                                                                                                  | 90106  |
| Cat         |                                                                                                                                                                                                                                                  | 86449  |
| Ferret      |                                                                                                                                                                                                                                                  | 87765  |
| Lion        |                                                                                                                                                                                                                                                  | 84143  |
| Vaquita     |                                                                                                                                                                                                                                                  | 84015  |
| Pig         |                                                                                                                                                                                                                                                  | 83470  |

|             |                                                                                                                                                                                                                                                  |        |
|-------------|--------------------------------------------------------------------------------------------------------------------------------------------------------------------------------------------------------------------------------------------------|--------|
| Majority    | XXXXXXXXXXXXXXXXXXXXXXXXXXXXXXXXXXXXXXXXXXXXXXXXXXXXXXXXXXXXXXXXXXXXXXXXXXXXXXXXXXXXXXXXXXXXXXXXXXXXXXXXXXXXXXXXXXXXXXXXXX                                                                                                                       |        |
|             | <div style="display: flex; justify-content: space-between; width: 100%;"> <span>125690</span> <span>125700</span> <span>125710</span> <span>125720</span> <span>125730</span> <span>125740</span> <span>125750</span> <span>125760</span> </div> |        |
| Human       | TCACTGCAGCCTCAACCTCCCAGGTT CGATAGATCCTCCCACCTCAGTCCCCACAGGCATGCATCACCATGCCTGACTA                                                                                                                                                                 | 102827 |
| PolarBear   |                                                                                                                                                                                                                                                  | 52114  |
| Cow         |                                                                                                                                                                                                                                                  | 86816  |
| Dog         |                                                                                                                                                                                                                                                  | 82307  |
| BelugaWhale |                                                                                                                                                                                                                                                  | 81417  |
| Donkey      |                                                                                                                                                                                                                                                  | 90106  |
| Cat         |                                                                                                                                                                                                                                                  | 86449  |
| Ferret      |                                                                                                                                                                                                                                                  | 87765  |
| Lion        |                                                                                                                                                                                                                                                  | 84143  |
| Vaquita     |                                                                                                                                                                                                                                                  | 84015  |
| Pig         |                                                                                                                                                                                                                                                  | 83470  |

Dienstag, 3. Mai 2022 08:41

|             |                                                                                                                            |                                                         |
|-------------|----------------------------------------------------------------------------------------------------------------------------|---------------------------------------------------------|
| Majority    | XXXXXXXXXXXXXXXXXXXXXXXXXXXXXXXXXXXXXXXXXXXXXXXXXXXXXXXXXXXXXXXXXXXXXXXXXXXXXXXXXXXXXXXXXXXXXXXXXXXXXXXXXXXXXXXXXXXXXXXXXX |                                                         |
|             |                                                                                                                            | 125770 125780 125790 125800 125810 125820 125830 125840 |
| Human       | GT TTTTGT GT TTTT TTTGT AGAGACAAGG TTTT GCCAT GTT GCCCAGACT GGTCTCAA ACTT GGGCCAAAGCCATCCACCT                              | 102907                                                  |
| PolarBear   |                                                                                                                            | 52114                                                   |
| Cow         |                                                                                                                            | 86816                                                   |
| Dog         |                                                                                                                            | 82307                                                   |
| BelugaWhale |                                                                                                                            | 81417                                                   |
| Donkey      |                                                                                                                            | 90106                                                   |
| Cat         |                                                                                                                            | 86449                                                   |
| Ferret      |                                                                                                                            | 87765                                                   |
| Lion        |                                                                                                                            | 84143                                                   |
| Vaquita     |                                                                                                                            | 84015                                                   |
| Pig         |                                                                                                                            | 83470                                                   |

|             |                                                                                                                            |                                                         |
|-------------|----------------------------------------------------------------------------------------------------------------------------|---------------------------------------------------------|
| Majority    | XXXXXXXXXXXXXXXXXXXXXXXXXXXXXXXXXXXXXXXXXXXXXXXXXXXXXXXXXXXXXXXXXXXXXXXXXXXXXXXXXXXXXXXXXXXXXXXXXXXXXXXXXXXXXXXXXXXXXXXXXX |                                                         |
|             |                                                                                                                            | 125850 125860 125870 125880 125890 125900 125910 125920 |
| Human       | GCCTCGGCTTCCCAATGTGCTGGGATTACATGTGTGAGCCACCACCCAGTCATGAGAATTATTTTAAATCAGGTA AAC                                            | 102987                                                  |
| PolarBear   |                                                                                                                            | 52114                                                   |
| Cow         |                                                                                                                            | 86816                                                   |
| Dog         |                                                                                                                            | 82307                                                   |
| BelugaWhale |                                                                                                                            | 81417                                                   |
| Donkey      |                                                                                                                            | 90106                                                   |
| Cat         |                                                                                                                            | 86449                                                   |
| Ferret      |                                                                                                                            | 87765                                                   |
| Lion        |                                                                                                                            | 84143                                                   |
| Vaquita     |                                                                                                                            | 84015                                                   |
| Pig         |                                                                                                                            | 83470                                                   |

Dienstag, 3. Mai 2022 08:41

```
Majority      XXXXXXXXXXXXXXXXXXXXXXXXXXXXXXXXXXXXXXXXXXXXXXXXXXXXXXXXXXXXXXXXXXXXXXXXXXXXXXX
              |-----|-----|-----|-----|-----|-----|-----|-----|
              125930     125940     125950     125960     125970     125980     125990     126000
Human         AAAATGTCTGTGGGAATATTGAGCTTTATGATAGATACCTAAGTTTTCCCAAAAATAATTTGTGTTAGCATTTCAGTGAAT 103067
PolarBear                    52114
Cow                              86816
Dog                               82307
BelugaWhale                      81417
Donkey                            90106
Cat                               86449
Ferret                            87765
Lion                              84143
Vaquita                         84015
Pig                               83470
```

```
Majority      XXXXXXXXXXXXXXXXXXXXXXXXXXXXXXXXXXXXXXXXXXXXXXXXXXXXXXXXXXXXXXXXXXXXXXXXXXXXXXX
              |-----|-----|-----|-----|-----|-----|-----|-----|
              126010     126020     126030     126040     126050     126060     126070     126080
Human         CACTATACTTAACCTAGAAATCTAGGTTACCAATAACAGTCTCTTTCAGGTTTTTTTCTTTTCCTGTGTCTTTCTTTTAA 103147
PolarBear                    52114
Cow                              86816
Dog                               82307
BelugaWhale                      81417
Donkey                            90106
Cat                               86449
Ferret                            87765
Lion                              84143
Vaquita                         84015
Pig                               83470
```

Dienstag, 3. Mai 2022 08:41

```
Majority      XXXXXXXXXXXXXXXXXXXXXXXXXXXXXXXXXXXXXXXXXXXXXXXXXXXXXXXXXXXXXXXXXXXXXXXXXXXX
              |-----|-----|-----|-----|-----|-----|-----|
              126090     126100     126110     126120     126130     126140     126150     126160
Human         CTAAAATCATT CATAACTGGGATGACTTATGGAGTTGATACCTTAGGTCAAATCCCAATTTAGAAACTCCCAAAGCCTG 103227
PolarBear    52114
Cow          86816
Dog          82307
BelugaWhale 81417
Donkey       90106
Cat          86449
Ferret       87765
Lion         84143
Vaquita     84015
Pig          83470
```

```
Majority      XXXXXXXXXXXXXXXXXXXXXXXXXXXXXXXXXXXXXXXXXXXXXXXXXXXXXXXXXXXXXXXXXXXXXXXX
              |-----|-----|-----|-----|
              126170     126180     126190     126200
Human         TCAAATTTTGACACATACTTTAAATGAACTGTTATTGAGTAGATATA 103274
PolarBear    52114
Cow          86816
Dog          82307
BelugaWhale 81417
Donkey       90106
Cat          86449
Ferret       87765
Lion         84143
Vaquita     84015
Pig          83470
```
