# Supplementary material for: PTBP2 – a gene with relevance for both Anorexia nervosa and body weight regulation
Source: PubMed Central journal article supplement (PMC9184595; doi:10.1038/s41398-022-02018-5), 2022-06-09
Supplement: 41398_2022_2018_MOESM5_ESM.pdf [file 41398_2022_2018_MOESM5_ESM.pdf]

Sunday, May 01, 2022 09:43 PM

Majority -----  
 10 20 30 40 50 60 70 80  
 Human TGCCTCCAAATGTTAAACTCCAACCTATTGTAGCATTTTAACACATGGCTCCATTTGTGTCTATTTCCACCTAGCGTATTG 80  
 AsianBonytongue ----- 0  
 Reedfish ----- 0  
 NorthernPike ----- 0  
 SpottedGar ----- 0  
 ParamormyropsKingsLeyae ----- 0

Majority -----  
 90 100 110 120 130 140 150 160  
 Human TGAATATTTTCTACAGGCGCACACTAATCACCAACTGAAGTGAGAATCACATTTTCCTCCACTTGGCTTGGTACTACAGG 160  
 AsianBonytongue ----- 0  
 Reedfish ----- 0  
 NorthernPike ----- 0  
 SpottedGar ----- 0  
 ParamormyropsKingsLeyae ----- 0

Majority -----  
 170 180 190 200 210 220 230 240  
 Human TCTTGAAGCAAAGCCTGTATTTTCAGTCTGAGGAGTTCTACTTGCTTGAGAAAGTACTGTTGTTACCAAGTGGTCTCGTT 240  
 AsianBonytongue ----- 0  
 Reedfish ----- 0  
 NorthernPike ----- 0  
 SpottedGar ----- 0  
 ParamormyropsKingsLeyae ----- 0

Majority -----  
 250 260 270 280 290 300 310 320  
 Human CAGTGGGGTAAAGATTTTGTTTTAGAGGCTGGAGCCGGTCTGCAAATAAAAGATGGCTTAGGAGAAAAGCTATCCAATG 320  
 AsianBonytongue ----- 0  
 Reedfish ----- 0  
 NorthernPike ----- 0  
 SpottedGar ----- 0  
 ParamormyropsKingsLeyae ----- 0

Majority -----  
 330 340 350 360 370 380 390 400  
 Human TTTTTCCTTGGCCCGCATAGGTTGACGGTAGCCAAGCTGGTACTTGGCTTGGAGTGAAGTGGAGGCTGCCTGGGGGC 400  
 AsianBonytongue ----- 0  
 Reedfish ----- 0  
 NorthernPike ----- 0  
 SpottedGar ----- 0  
 ParamormyropsKingsLeyae ----- 0

Majority -----  
 410 420 430 440 450 460 470 480  
 Human GTCCTGCAGTCAGGGCAGAGAGAGTGTGGAGAGCTGTTGGGAGGTGTCCCACCCACGCCCCACAAGGAGGGGAAACCAG 480  
 AsianBonytongue ----- 0  
 Reedfish ----- 0  
 NorthernPike ----- 0  
 SpottedGar ----- 0  
 ParamormyropsKingsLeyae ----- 0

Sunday, May 01, 2022 09:43 PM

Majority -----  
 -----  
 490 500 510 520 530 540 550 560  
 -----  
 Human GTCGCCGCGGTCTGCAGCAGAACGCCAGGTTCCAGAGGACGGCAGGCGGAGGGCGGAGGGAGAAAGGCCGCGGAAGGCGC 560  
 AsianBonytongue ----- 0  
 Reedfish ----- 0  
 NorthernPike ----- 0  
 SpottedGar ----- 0  
 ParamormyropsKingsLeyae ----- 0

Majority -----  
 -----  
 570 580 590 600 610 620 630 640  
 -----  
 Human GGAGGAGGCGTCTGGCTGCGGCGCCCACTCCCCCTAGTCCCAGCGCCCTGCCGCTCGCCTCCCCTGCCGGGCGCCGGCGC 640  
 AsianBonytongue ----- 0  
 Reedfish ----- 0  
 NorthernPike ----- 0  
 SpottedGar ----- 0  
 ParamormyropsKingsLeyae ----- 0

Majority -----  
 -----  
 650 660 670 680 690 700 710 720  
 -----  
 Human GCTCGGCTCTTTCCGCCCGCCGCTGCCGCGCGGTGGCCCGTGCGCCTCGGCACCTTCGGCAATTTCCGTCGGGCCCA 720  
 AsianBonytongue ----- 0  
 Reedfish ----- 0  
 NorthernPike ----- 0  
 SpottedGar ----- 0  
 ParamormyropsKingsLeyae ----- 0

Majority -----  
 -----  
 730 740 750 760 770 780 790 800  
 -----  
 Human GCCGCCATTTCTCGCCGCTTGTTGTGGCTCGCTGGCTGCGTGGCTCGGTTCTTGTGAGCGAAGCTTTGTCCGGTTCGGCA 800  
 AsianBonytongue ----- 0  
 Reedfish ----- 0  
 NorthernPike ----- 0  
 SpottedGar ----- 0  
 ParamormyropsKingsLeyae ----- 0

Majority -----  
 -----  
 810 820 830 840 850 860 870 880  
 -----  
 Human ATGGACGGGTATGTAATCGGGCCGGCGAGAAGGTGTGTGTGAGAGAGGAGTTGGACCGTCCTTCGGCCCGGTCCCGGGCC 880  
 AsianBonytongue ----- 0  
 Reedfish ----- 0  
 NorthernPike ----- 0  
 SpottedGar ----- 0  
 ParamormyropsKingsLeyae ----- 0

Majority -----  
 -----  
 890 900 910 920 930 940 950 960  
 -----  
 Human GGGGAGAAACCCTCCC CGGCCCTCCCAGGGCTGGGCTGCCGTTACCCAACCCCGCCCATCGCACACACCCTCCCT 960  
 AsianBonytongue ----- 0  
 Reedfish ----- 0  
 NorthernPike ----- 0  
 SpottedGar ----- 0  
 ParamormyropsKingsLeyae ----- 0

Sunday, May 01, 2022 09:43 PM

```

Majority -----
          970      980      990      1000      1010      1020      1030      1040
Human      TTGCTTCCCCCGGCGGGCTTTGGTCGAGAAAATGAGAAGAAAGCGGGCTTGGAGGCTGGGGAGGCATAGGGGCGATGGCG 1040
AsianBonytongue ----- 0
Reedfish ----- 0
NorthernPike ----- 0
SpottedGar ----- 0
ParamormyropsKingsLeyae ----- 0
    
```

```

Majority -----
          1050      1060      1070      1080      1090      1100      1110      1120
Human      GGGGTGAGGATCCCGGAGTGGGAGCGGGCACCGGCTTGGCGGCGGGGGATGGGGTGGGAACCCCATACGTCTCCCCGGT 1120
AsianBonytongue ----- 0
Reedfish ----- 0
NorthernPike ----- 0
SpottedGar ----- 0
ParamormyropsKingsLeyae ----- 0
    
```

```

Majority -----
          1130      1140      1150      1160      1170      1180      1190      1200
Human      CTGTCCCTGCCCCCTCTAGGAGCCATTTTCGATCCGTACCTTGGGACCCGACCCTTGGGTTAGCGGTGCCTGTGAGAGCGA 1200
AsianBonytongue ----- 0
Reedfish ----- 0
NorthernPike ----- 0
SpottedGar ----- 0
ParamormyropsKingsLeyae ----- 0
    
```

```

Majority -----
          1210      1220      1230      1240      1250      1260      1270      1280
Human      GTGGGATGGGCAGAGACAGGCCTTTGGATTGGGGGAGCCTCTAGGGGAAGAGGAGAGAGGCACCCCATGTGGACCCACG 1280
AsianBonytongue ----- 0
Reedfish ----- 0
NorthernPike ----- 0
SpottedGar ----- 0
ParamormyropsKingsLeyae ----- 0
    
```

```

Majority -----
          1290      1300      1310      1320      1330      1340      1350      1360
Human      CATGAGCAACCTTCTCCGGCCTCGCCCGGCCCTCCGTGGTCGGGAGAGATGCCGGTGGCGGGAGCTCCGGGAAAGCCTAG 1360
AsianBonytongue ----- 0
Reedfish ----- 0
NorthernPike ----- 0
SpottedGar ----- 0
ParamormyropsKingsLeyae ----- 0
    
```

```

Majority -----
          1370      1380      1390      1400      1410      1420      1430      1440
Human      TGGGAGCCGCTGGGGAAGGGGGGAGGGCGTGCGGCGGGGAGGAAGGGGGAGGGCAGATGTCTACTCCTTTGTTTCA 1440
AsianBonytongue ----- 0
Reedfish ----- 0
NorthernPike ----- 0
SpottedGar ----- 0
ParamormyropsKingsLeyae ----- 0
    
```

Sunday, May 01, 2022 09:43 PM

Majority -----  
 1450 1460 1470 1480 1490 1500 1510 1520  
 Human TTTGAGTCTGGTAGTGGGGCGGGAGGGAGGAAAAAATGCCTTTTTGTGGGGACTGAAAACATTCAAGGCTTGGCAAAG 1520  
 AsianBonytongue ----- 0  
 Reedfish ----- 0  
 NorthernPike ----- 0  
 SpottedGar ----- 0  
 ParamormyropsKingsLeyae ----- 0

Majority -----  
 1530 1540 1550 1560 1570 1580 1590 1600  
 Human GGCCCAAGAAATTAATCATCTAAAAACGAAGTGTGTAAGCCGACATCAGTCACATGGGCAAAGGCCAACAGCAATGGC 1600  
 AsianBonytongue ----- 0  
 Reedfish ----- 0  
 NorthernPike ----- 0  
 SpottedGar ----- 0  
 ParamormyropsKingsLeyae ----- 0

Majority -----  
 1610 1620 1630 1640 1650 1660 1670 1680  
 Human AGAAACAAGAGCAGATAGTCAACAAAGGGCTATCTTTTAGCTACTTTGGTCAGTTTCTGGAAAAACGACTATAAAAACC 1680  
 AsianBonytongue ----- 0  
 Reedfish ----- 0  
 NorthernPike ----- 0  
 SpottedGar ----- 0  
 ParamormyropsKingsLeyae ----- 0

Majority -----  
 1690 1700 1710 1720 1730 1740 1750 1760  
 Human CAGAACCATGCTGCATCTTTGCGAACCTGAGTCAAGACGGAATGCTGAGTGAGGTGAGAGGCAAGACTGTGAAATGGTAG 1760  
 AsianBonytongue ----- 0  
 Reedfish ----- 0  
 NorthernPike ----- 0  
 SpottedGar ----- 0  
 ParamormyropsKingsLeyae ----- 0

Majority -----  
 1770 1780 1790 1800 1810 1820 1830 1840  
 Human GGACCGATGTCTCGCTCATATGCTTCACACCTGAAAAGACTCAGTAATTTAACTCAATGTTAGAAAGGGGGCACGCTTAA 1840  
 AsianBonytongue ----- 0  
 Reedfish ----- 0  
 NorthernPike ----- 0  
 SpottedGar ----- 0  
 ParamormyropsKingsLeyae ----- 0

Majority -----  
 1850 1860 1870 1880 1890 1900 1910 1920  
 Human GGTCAAAAATACAGCAGTATGCAGCTCTTTTGGGAGTGTAACATAGTATCATTTAACAAGTACATTTATTTAAAATCAGT 1920  
 AsianBonytongue ----- 0  
 Reedfish ----- 0  
 NorthernPike ----- 0  
 SpottedGar ----- 0  
 ParamormyropsKingsLeyae ----- 0

Sunday, May 01, 2022 09:43 PM

Majority -----  
 1930 1940 1950 1960 1970 1980 1990 2000  
 Human GAGTATTTGAAGAATCAACAATTTGGTTAAGCGCCTAGAGTTTGGTGTGTTTTTAAAAGGTTACTAAAAACAAGATTTTATA 2000  
 AsianBonytongue ----- 0  
 Reedfish ----- 0  
 NorthernPike ----- 0  
 SpottedGar ----- 0  
 ParamormyropsKingsLeyae ----- 0

Majority -----  
 2010 2020 2030 2040 2050 2060 2070 2080  
 Human AAAGTTAACACAGTCTCACAGAATTCAAATCATCCTAGATGTTACCTAAAGATTATTTTCCAGATGAAACAAATCCAGAG 2080  
 AsianBonytongue ----- 0  
 Reedfish ----- 0  
 NorthernPike ----- 0  
 SpottedGar ----- 0  
 ParamormyropsKingsLeyae ----- 0

Majority -----  
 2090 2100 2110 2120 2130 2140 2150 2160  
 Human AAGTTCAGTATTCACCCAGATCAACACGGAAATTGATGTCAAACCTGCACTAGAAATTCATGTTTCCTGATTCCCTGGTT 2160  
 AsianBonytongue ----- 0  
 Reedfish ----- 0  
 NorthernPike ----- 0  
 SpottedGar ----- 0  
 ParamormyropsKingsLeyae ----- 0

Majority -----  
 2170 2180 2190 2200 2210 2220 2230 2240  
 Human CCTGTGGAGACTACTAAAGAGTTTAAAGCGTTAAATTATTAATCTCAGTATACTGGCATTGTAGAAATGGCATAGTGT TTT 2240  
 AsianBonytongue ----- 0  
 Reedfish ----- 0  
 NorthernPike ----- 0  
 SpottedGar ----- 0  
 ParamormyropsKingsLeyae ----- 0

Majority -----  
 2250 2260 2270 2280 2290 2300 2310 2320  
 Human GGGTTTTGTTCTTTTTGGCTATTGAATGTGTTGTTAAAAAATACCACAAGTTGTCTCACATTTGAAAGTTACTTTTAGAA 2320  
 AsianBonytongue ----- 0  
 Reedfish ----- 0  
 NorthernPike ----- 0  
 SpottedGar ----- 0  
 ParamormyropsKingsLeyae ----- 0

Majority -----  
 2330 2340 2350 2360 2370 2380 2390 2400  
 Human AACCAGGTTGGTAAACAGTACAGGTAAGTCACGGATCATCTGTGGTATTTTTTATCCCCATCTGTGTGTGAGTGGCTGGAA 2400  
 AsianBonytongue ----- 0  
 Reedfish ----- 0  
 NorthernPike ----- 0  
 SpottedGar ----- 0  
 ParamormyropsKingsLeyae ----- 0

Sunday, May 01, 2022 09:43 PM

```

Majority -----
                2410      2420      2430      2440      2450      2460      2470      2480
Human          GATTTATGAATGATGGACTATCCTAAAAAGTTTTAGAGCCAAAGAGTGAGTGATTAGAAGAATAACAGGAGGTTGAAACT 2480
AsianBonytongue ----- 0
Reedfish ----- 0
NorthernPike ----- 0
SpottedGar ----- 0
ParamormyropsKingsLeyae ----- 0
    
```

```

Majority -----
                2490      2500      2510      2520      2530      2540      2550      2560
Human          ACTTATTTTTTCTTTGCAGAATCGTCACTGAGGTTGCAGTTGGCGTGAAGGTAGGAAAATACTATGTTTGAAACTGGGAT 2560
AsianBonytongue ----- 0
Reedfish ----- 0
NorthernPike ----- 0
SpottedGar ----- 0
ParamormyropsKingsLeyae ----- 0
    
```

```

Majority -----
                2570      2580      2590      2600      2610      2620      2630      2640
Human          TGTGGATCTATTATCATAATTACTGGAAAATTTTAGCTTTTGCTTTTGAAAACATAACGTAGCTAACAAAACCCAAGT 2640
AsianBonytongue ----- 0
Reedfish ----- 0
NorthernPike ----- 0
SpottedGar ----- 0
ParamormyropsKingsLeyae ----- 0
    
```

```

Majority -----
                2650      2660      2670      2680      2690      2700      2710      2720
Human          GTAAAATGTTTCCTTTTCATTTGTAAAGTTGGACCATATAAACAGTTTGTAATCACCATAAGTTTTTCTAGAACTGTCAGT 2720
AsianBonytongue ----- 0
Reedfish ----- 0
NorthernPike ----- 0
SpottedGar ----- 0
ParamormyropsKingsLeyae ----- 0
    
```

```

Majority -----
                2730      2740      2750      2760      2770      2780      2790      2800
Human          CTGTAAGAATAACCTTTTAAAGTAAGTATGAATGATCAAGAAATTGAAAATGCTTTCACACATGGCTTCTTGTAATATAA 2800
AsianBonytongue ----- 0
Reedfish ----- 0
NorthernPike ----- 0
SpottedGar ----- 0
ParamormyropsKingsLeyae ----- 0
    
```

```

Majority -----
                2810      2820      2830      2840      2850      2860      2870      2880
Human          AACGATACCCCAATTTTCTGAGGGGAAAATAATGATTTTAAATGGATGGTAAGTGGTTTGACCTATATCTTATAATTTTGT 2880
AsianBonytongue ----- 0
Reedfish ----- 0
NorthernPike ----- 0
SpottedGar ----- 0
ParamormyropsKingsLeyae ----- 0
    
```

Sunday, May 01, 2022 09:43 PM

Majority -----  
 2890 2900 2910 2920 2930 2940 2950 2960  
 Human TAATCTAAGTTTTTTGTTTTTTTATTACTTTTTGTCATGAAAATGAATATATTTTGTTAATAATAAAGCACATTAGAAAT 2960  
 AsianBonytongue ----- 0  
 Reedfish ----- 0  
 NorthernPike ----- 0  
 SpottedGar ----- 0  
 ParamormyropsKingsLeyae ----- 0

Majority -----  
 2970 2980 2990 3000 3010 3020 3030 3040  
 Human GAATTACACTGATCCTTAAAAAGGAAGTTGTTGAGGCAGTTAGCTTCAAATTTGAATTAGAAGTTAAGAGCTGGTTTGTC 3040  
 AsianBonytongue ----- 0  
 Reedfish ----- 0  
 NorthernPike ----- 0  
 SpottedGar ----- 0  
 ParamormyropsKingsLeyae ----- 0

Majority -----  
 3050 3060 3070 3080 3090 3100 3110 3120  
 Human TATTAAAGAAAGTCTTTATGGTAGAGATCCTTTGGAATCCTTCCTTTTTGGCTAAGAAAACACTACTCATCGTTTAAACTTT 3120  
 AsianBonytongue ----- 0  
 Reedfish ----- 0  
 NorthernPike ----- 0  
 SpottedGar ----- 0  
 ParamormyropsKingsLeyae ----- 0

Majority -----  
 3130 3140 3150 3160 3170 3180 3190 3200  
 Human AGTTCTAATGCTTAACATTTTCTTGAGTACTTGCAACTTTTAATGTCATGATGATTGTAATTTTTTTTTGTTTTTTGTT 3200  
 AsianBonytongue ----- 0  
 Reedfish ----- 0  
 NorthernPike ----- 0  
 SpottedGar ----- 0  
 ParamormyropsKingsLeyae ----- 0

Majority -----  
 3210 3220 3230 3240 3250 3260 3270 3280  
 Human TTTTGGAGACGGAGCCTCACTCTGTTGCCAGGCTGGATGCAGTGGCAGCATCTTGGCCCACTGCAACCTCTGCCTCCTG 3280  
 AsianBonytongue ----- 0  
 Reedfish ----- 0  
 NorthernPike ----- 0  
 SpottedGar ----- 0  
 ParamormyropsKingsLeyae ----- 0

Majority -----  
 3290 3300 3310 3320 3330 3340 3350 3360  
 Human GGTTCAGCAGTTCTCTGCCTCAGCCTCCTGAGTAGCTGGGATTACAGGTGCGCACCACCACGCCAGCTAATTTGTAT 3360  
 AsianBonytongue ----- 0  
 Reedfish ----- 0  
 NorthernPike ----- 0  
 SpottedGar ----- 0  
 ParamormyropsKingsLeyae ----- 0

Sunday, May 01, 2022 09:43 PM

```

Majority -----
                |-----|
                |3370|3380|3390|3400|3410|3420|3430|3440|
                |-----|
Human           TTTTAGTAGAAATGGCATTTCACCCCTGTTGGTCAGGCTGGTCTCAAACCTCCTGACCTCATGATCTGCCTGCCTCTTATGA 3440
AsianBonytongue ----- 0
Reedfish       ----- 0
NorthernPike   ----- 0
SpottedGar     ----- 0
ParamormyropsKingsLeyae ----- 0
    
```

```

Majority -----
                |-----|
                |3450|3460|3470|3480|3490|3500|3510|3520|
                |-----|
Human           TCTGCCTGCCTTGACCTCCCAAAGTGCTGGGATTACAAGTGTGAGCCACCGTGCCCGGCTGTATTGTCATTTTTTCATTT 3520
AsianBonytongue ----- 0
Reedfish       ----- 0
NorthernPike   ----- 0
SpottedGar     ----- 0
ParamormyropsKingsLeyae ----- 0
    
```

```

Majority -----
                |-----|
                |3530|3540|3550|3560|3570|3580|3590|3600|
                |-----|
Human           GCAAGCCTCTCTGTCCCTGAGAGGCTTTCTGCTTAGTCCAGTGTGCTGACTGTTCAAACATTTTTTCGAATTCTTAAAAAT 3600
AsianBonytongue ----- 0
Reedfish       ----- 0
NorthernPike   ----- 0
SpottedGar     ----- 0
ParamormyropsKingsLeyae ----- 0
    
```

```

Majority -----
                |-----|
                |3610|3620|3630|3640|3650|3660|3670|3680|
                |-----|
Human           TGTATCCATAATGGGGGGAGGGGGAAGGGATAGCATTGGGAGATATAGGGGGGAGGGGGGAGGGATAGCTTTAGGAGATA 3680
AsianBonytongue ----- 0
Reedfish       ----- 0
NorthernPike   ----- 0
SpottedGar     ----- 0
ParamormyropsKingsLeyae ----- 0
    
```

```

Majority -----
                |-----|
                |3690|3700|3710|3720|3730|3740|3750|3760|
                |-----|
Human           TACCTAATGCTAAATGACAAGTTAATGGGTGCAGCACACCAACATGGCACATGTATACATATGTAACAAACCTGCACGTT 3760
AsianBonytongue ----- 0
Reedfish       ----- 0
NorthernPike   ----- 0
SpottedGar     ----- 0
ParamormyropsKingsLeyae ----- 0
    
```

```

Majority -----
                |-----|
                |3770|3780|3790|3800|3810|3820|3830|3840|
                |-----|
Human           GTACTCATGTACCCTAAAACCTTAAAGTATAATAATGATAATAATAATTTGTATCCATAATGATGTGGTGTCTTTCAAATA 3840
AsianBonytongue ----- 0
Reedfish       ----- 0
NorthernPike   ----- 0
SpottedGar     ----- 0
ParamormyropsKingsLeyae ----- 0
    
```



Sunday, May 01, 2022 09:43 PM

Majority -----  
 |-----|-----|-----|-----|-----|-----|-----|-----|  
 | 3850 | 3860 | 3870 | 3880 | 3890 | 3900 | 3910 | 3920 |  
 |-----|-----|-----|-----|-----|-----|-----|-----|  
 Human CTTTTGGGGATGGTACTGTGTTTTCTTGCTTATTTTCTGTCCTCTTTCCTATAGTGAAATAGATATTTGCCCATTCCTTTA 3920  
 AsianBonytongue ----- 0  
 Reedfish ----- 0  
 NorthernPike ----- 0  
 SpottedGar ----- 0  
 ParamormyropsKingsLeyae ----- 0

Majority -----  
 |-----|-----|-----|-----|-----|-----|-----|-----|  
 | 3930 | 3940 | 3950 | 3960 | 3970 | 3980 | 3990 | 4000 |  
 |-----|-----|-----|-----|-----|-----|-----|-----|  
 Human GGCTTGTTTCTTGAGTTCATTTTGTACAGACTAAAGGAGGAATAATACGCTCTTTTGGTGATAGTATTTTCCAAGTTGA 4000  
 AsianBonytongue ----- 0  
 Reedfish ----- 0  
 NorthernPike ----- 0  
 SpottedGar ----- 0  
 ParamormyropsKingsLeyae ----- 0

Majority -----  
 |-----|-----|-----|-----|-----|-----|-----|-----|  
 | 4010 | 4020 | 4030 | 4040 | 4050 | 4060 | 4070 | 4080 |  
 |-----|-----|-----|-----|-----|-----|-----|-----|  
 Human GTTAGTCATGGGATTTAAAATCAGGAATAGCTAAAGATTGCAAAATGGTAGATGTTGTAGGTTCCATCCAAACAGATTTTC 4080  
 AsianBonytongue ----- 0  
 Reedfish ----- 0  
 NorthernPike ----- 0  
 SpottedGar ----- 0  
 ParamormyropsKingsLeyae ----- 0

Majority -----  
 |-----|-----|-----|-----|-----|-----|-----|-----|  
 | 4090 | 4100 | 4110 | 4120 | 4130 | 4140 | 4150 | 4160 |  
 |-----|-----|-----|-----|-----|-----|-----|-----|  
 Human TGTAATTTTGTAAAAGAATAAATGATACAAGTGTGAGTTGTCGACTGTTAGTGAAAAGGAGAGGAGTTTGTAGACAAG 4160  
 AsianBonytongue ----- 0  
 Reedfish ----- 0  
 NorthernPike ----- 0  
 SpottedGar ----- 0  
 ParamormyropsKingsLeyae ----- 0

Majority -----  
 |-----|-----|-----|-----|-----|-----|-----|-----|  
 | 4170 | 4180 | 4190 | 4200 | 4210 | 4220 | 4230 | 4240 |  
 |-----|-----|-----|-----|-----|-----|-----|-----|  
 Human GCTCAGAATGAGTAGACAGGAAAAAACTGAGGAGACTTGGGAATAGGATGTCCAGGTGTAATGTATTGGTTACACCAGTTT 4240  
 AsianBonytongue ----- 0  
 Reedfish ----- 0  
 NorthernPike ----- 0  
 SpottedGar ----- 0  
 ParamormyropsKingsLeyae ----- 0

Majority -----  
 |-----|-----|-----|-----|-----|-----|-----|-----|  
 | 4250 | 4260 | 4270 | 4280 | 4290 | 4300 | 4310 | 4320 |  
 |-----|-----|-----|-----|-----|-----|-----|-----|  
 Human TTTTTTTTTTTTTTTTGAGACAGAGTCTCACTCTTCGCCCAGGTGGAGTGCAGTGGCACGATCCTGGCTCACTACAAGCTC 4320  
 AsianBonytongue ----- 0  
 Reedfish ----- 0  
 NorthernPike ----- 0  
 SpottedGar ----- 0  
 ParamormyropsKingsLeyae ----- 0

Sunday, May 01, 2022 09:43 PM

Majority -----  
 |-----|  
 | 4330 | 4340 | 4350 | 4360 | 4370 | 4380 | 4390 | 4400 |  
 |-----|  
 Human CGCCTTCCGGGTTCACTCCATTCTTCTGCCTCAGCCTCCCAGTAGCTGGGACTACAGGCGCCACCACCACGCCCGGCT 4400  
 AsianBonytongue ----- 0  
 Reedfish ----- 0  
 NorthernPike ----- 0  
 SpottedGar ----- 0  
 ParamormyropsKingsLeyae ----- 0

Majority -----  
 |-----|  
 | 4410 | 4420 | 4430 | 4440 | 4450 | 4460 | 4470 | 4480 |  
 |-----|  
 Human AATTTTTGTATTTTTAGTAGAGACGGGGTTTCCACGTGTAGCCAGGATGGTCTTGATCTCCTGACCTTGTGGTTACAC 4480  
 AsianBonytongue ----- 0  
 Reedfish ----- 0  
 NorthernPike ----- 0  
 SpottedGar ----- 0  
 ParamormyropsKingsLeyae ----- 0

Majority -----  
 |-----|  
 | 4490 | 4500 | 4510 | 4520 | 4530 | 4540 | 4550 | 4560 |  
 |-----|  
 Human CAGTTTTTGTAGTTGTTGAGGAGAACACTTTAGAAGATGATAAAAAAAAAATTGCAAATCGTTTTTAAAAATCCATTG 4560  
 AsianBonytongue ----- 0  
 Reedfish ----- 0  
 NorthernPike ----- 0  
 SpottedGar ----- 0  
 ParamormyropsKingsLeyae ----- 0

Majority -----  
 |-----|  
 | 4570 | 4580 | 4590 | 4600 | 4610 | 4620 | 4630 | 4640 |  
 |-----|  
 Human TTAAATATAAAAGTCTGAATAATTAAAGTTAATTTAATTTCTGGAATAATGGTTAAGAATTTTGTCTTTGGTGTCCAGGC 4640  
 AsianBonytongue ----- 0  
 Reedfish ----- 0  
 NorthernPike ----- 0  
 SpottedGar ----- 0  
 ParamormyropsKingsLeyae ----- 0

Majority -----  
 |-----|  
 | 4650 | 4660 | 4670 | 4680 | 4690 | 4700 | 4710 | 4720 |  
 |-----|  
 Human CTGTGTACAAGTAATTAAGTGTCTTTAAAACTTAAACATTTGTGAATTTGCTTTAAAGACACTGATGCATGTGCATAT 4720  
 AsianBonytongue ----- 0  
 Reedfish ----- 0  
 NorthernPike ----- 0  
 SpottedGar ----- 0  
 ParamormyropsKingsLeyae ----- 0

Majority -----  
 |-----|  
 | 4730 | 4740 | 4750 | 4760 | 4770 | 4780 | 4790 | 4800 |  
 |-----|  
 Human TTAAAAAATTCAGGCCGGGCGCGGTGGGTCCACACCTGTAATCCCAGCACTTTGGGAGGCCGAGGCGGGCGGATCACGAG 4800  
 AsianBonytongue ----- 0  
 Reedfish ----- 0  
 NorthernPike ----- 0  
 SpottedGar ----- 0  
 ParamormyropsKingsLeyae ----- 0

Sunday, May 01, 2022 09:43 PM

```

Majority -----
      4810      4820      4830      4840      4850      4860      4870      4880
Human   TTCAGGAGAGACCATCCTGGCTAACACGGTGAAACCTGTCTTTACTAAAAATACAAAAATTAGCCGGGTGTGGTGACG 4880
AsianBonytongue ----- 0
Reedfish ----- 0
NorthernPike ----- 0
SpottedGar ----- 0
ParamormyropsKingsLeyae ----- 0

```

```

Majority -----
      4890      4900      4910      4920      4930      4940      4950      4960
Human   GGTGCCTGTAGTCCCAGCTACTCGGGAGGCTGAGGCAGGAGAAATGGCATGAACCTGCGAGGCAGAGGTTGCAGTAAGCGG 4960
AsianBonytongue ----- 0
Reedfish ----- 0
NorthernPike ----- 0
SpottedGar ----- 0
ParamormyropsKingsLeyae ----- 0

```

```

Majority -----
      4970      4980      4990      5000      5010      5020      5030      5040
Human   AGATTGCACCACTGCACTCCAGCCTGGGCGACAGAGACAGACTCTATCTCAAAAAAAAAAAAAAAAAAAAAAAAAAAAAA 5040
AsianBonytongue ----- 0
Reedfish ----- 0
NorthernPike ----- 0
SpottedGar ----- 0
ParamormyropsKingsLeyae ----- 0

```

```

Majority -----
      5050      5060      5070      5080      5090      5100      5110      5120
Human   AAAAAAATTCAAACTGCTTCACAGCTTTTTTTTGCTATTTCTTAGGTGTAGGTAATTGTGTTAAAAATTTTGTGCCTTTTTT 5120
AsianBonytongue ----- 0
Reedfish ----- 0
NorthernPike ----- 0
SpottedGar ----- 0
ParamormyropsKingsLeyae ----- 0

```

```

Majority -----
      5130      5140      5150      5160      5170      5180      5190      5200
Human   CTTGAAATTATTAATTTATATATTAGCACACATATAAACATCTTTATTTACGTGATTGAATTCAAACTATTGTTTTGGCC 5200
AsianBonytongue ----- 0
Reedfish ----- 0
NorthernPike ----- 0
SpottedGar ----- 0
ParamormyropsKingsLeyae ----- 0

```

```

Majority -----
      5210      5220      5230      5240      5250      5260      5270      5280
Human   CACATCTTGCCTTTTTTTTTTTTTTTTGGAGTCGGAGTCTCCCTCTGTCATCAGGCTGGAGTGCAGTGGCATGATCTCGGC 5280
AsianBonytongue ----- 0
Reedfish ----- 0
NorthernPike ----- 0
SpottedGar ----- 0
ParamormyropsKingsLeyae ----- 0

```

Sunday, May 01, 2022 09:43 PM

```

Majority -----
                    |-----|-----|-----|-----|-----|-----|-----|
                    | 5290   | 5300   | 5310   | 5320   | 5330   | 5340   | 5350   | 5360
                    |-----|-----|-----|-----|-----|-----|-----|
Human               |TTACTGCAACCTCTGCCTCCTGGGTTTCAGGCAATTCTCCTGCCTCAGCCTCCCTAGTAGCTGGGACTACAGGCACACGCC| 5360
AsianBonytongue    |-----|-----|-----|-----|-----|-----|-----| 0
Reedfish           |-----|-----|-----|-----|-----|-----|-----| 0
NorthernPike       |-----|-----|-----|-----|-----|-----|-----| 0
SpottedGar         |-----|-----|-----|-----|-----|-----|-----| 0
ParamormyropsKingsLeyae|-----|-----|-----|-----|-----|-----|-----| 0

```

```

Majority -----
                    |-----|-----|-----|-----|-----|-----|-----|
                    | 5370   | 5380   | 5390   | 5400   | 5410   | 5420   | 5430   | 5440
                    |-----|-----|-----|-----|-----|-----|-----|
Human               |GCCATGCCAGACTAATTTTTTTTTTTTTTTTCGAGACGGAGTCTCGCCCGGTCTCCAGGCTGGAGTGCAGTGTCCGCGATC| 5440
AsianBonytongue    |-----|-----|-----|-----|-----|-----|-----| 0
Reedfish           |-----|-----|-----|-----|-----|-----|-----| 0
NorthernPike       |-----|-----|-----|-----|-----|-----|-----| 0
SpottedGar         |-----|-----|-----|-----|-----|-----|-----| 0
ParamormyropsKingsLeyae|-----|-----|-----|-----|-----|-----|-----| 0

```

```

Majority -----
                    |-----|-----|-----|-----|-----|-----|-----|
                    | 5450   | 5460   | 5470   | 5480   | 5490   | 5500   | 5510   | 5520
                    |-----|-----|-----|-----|-----|-----|-----|
Human               |TCTGCTCACTGCAACCTCTGCCTCCTGGGTTTCACGCCATTCTCCTGTCTCAGCCTCCCAAGTAGCTGGGACTACAGGCGC| 5520
AsianBonytongue    |-----|-----|-----|-----|-----|-----|-----| 0
Reedfish           |-----|-----|-----|-----|-----|-----|-----| 0
NorthernPike       |-----|-----|-----|-----|-----|-----|-----| 0
SpottedGar         |-----|-----|-----|-----|-----|-----|-----| 0
ParamormyropsKingsLeyae|-----|-----|-----|-----|-----|-----|-----| 0

```

```

Majority -----
                    |-----|-----|-----|-----|-----|-----|-----|
                    | 5530   | 5540   | 5550   | 5560   | 5570   | 5580   | 5590   | 5600
                    |-----|-----|-----|-----|-----|-----|-----|
Human               |CTGCCACCACGCCTGGCTTCTTTTTTGTATATTCAGTAGAGACAGAGTTTCACCATGTTAGCCAGGATAGTCTCTATCTC| 5600
AsianBonytongue    |-----|-----|-----|-----|-----|-----|-----| 0
Reedfish           |-----|-----|-----|-----|-----|-----|-----| 0
NorthernPike       |-----|-----|-----|-----|-----|-----|-----| 0
SpottedGar         |-----|-----|-----|-----|-----|-----|-----| 0
ParamormyropsKingsLeyae|-----|-----|-----|-----|-----|-----|-----| 0

```

```

Majority -----
                    |-----|-----|-----|-----|-----|-----|-----|
                    | 5610   | 5620   | 5630   | 5640   | 5650   | 5660   | 5670   | 5680
                    |-----|-----|-----|-----|-----|-----|-----|
Human               |CTGACCTCGTGATCTGCCTGCCTCGGCCCTCCCAAAGTGCTGGGATTACAAGCGTGAGCCACCCGCGCTAGCCAAAATGCC| 5680
AsianBonytongue    |-----|-----|-----|-----|-----|-----|-----| 0
Reedfish           |-----|-----|-----|-----|-----|-----|-----| 0
NorthernPike       |-----|-----|-----|-----|-----|-----|-----| 0
SpottedGar         |-----|-----|-----|-----|-----|-----|-----| 0
ParamormyropsKingsLeyae|-----|-----|-----|-----|-----|-----|-----| 0

```

```

Majority -----
                    |-----|-----|-----|-----|-----|-----|-----|
                    | 5690   | 5700   | 5710   | 5720   | 5730   | 5740   | 5750   | 5760
                    |-----|-----|-----|-----|-----|-----|-----|
Human               |AGACTAATTTTTGTATTTTTAGTAGAGACAGGGTTTCACCATTTTGCCAGGATGGTCTTGATCTCTTGACTCCATCATC| 5760
AsianBonytongue    |-----|-----|-----|-----|-----|-----|-----| 0
Reedfish           |-----|-----|-----|-----|-----|-----|-----| 0
NorthernPike       |-----|-----|-----|-----|-----|-----|-----| 0
SpottedGar         |-----|-----|-----|-----|-----|-----|-----| 0
ParamormyropsKingsLeyae|-----|-----|-----|-----|-----|-----|-----| 0

```

Sunday, May 01, 2022 09:43 PM

Majority -----  
 |-----|-----|-----|-----|-----|-----|-----|-----|  
 | 5770 | 5780 | 5790 | 5800 | 5810 | 5820 | 5830 | 5840 |  
 |-----|-----|-----|-----|-----|-----|-----|-----|  
 Human CGCCCGCCTTGACTTCCCAAAGTGTGGGATTACAGGCTTGAGCCACCGCGTCCGGCCATATCTTGCCTTTAAAAAAA 5840  
 AsianBonytongue ----- 0  
 Reedfish ----- 0  
 NorthernPike ----- 0  
 SpottedGar ----- 0  
 ParamormyropsKingsLeyae ----- 0

Majority -----  
 |-----|-----|-----|-----|-----|-----|-----|-----|  
 | 5850 | 5860 | 5870 | 5880 | 5890 | 5900 | 5910 | 5920 |  
 |-----|-----|-----|-----|-----|-----|-----|-----|  
 Human TAGCTTTATTGAGATATAATTTGACATAAAATAAACTACCCATATTAATATAACAATGTTTTATCTCATATATACCCTTG 5920  
 AsianBonytongue ----- 0  
 Reedfish ----- 0  
 NorthernPike ----- 0  
 SpottedGar ----- 0  
 ParamormyropsKingsLeyae ----- 0

Majority -----  
 |-----|-----|-----|-----|-----|-----|-----|-----|  
 | 5930 | 5940 | 5950 | 5960 | 5970 | 5980 | 5990 | 6000 |  
 |-----|-----|-----|-----|-----|-----|-----|-----|  
 Human TGAAACCACTGCAATCAAGATAATGAACATCTATCACTCCCTACAGTATCATCTTGCGCCTTTATAGTCCCTCCTTTCTG 6000  
 AsianBonytongue ----- 0  
 Reedfish ----- 0  
 NorthernPike ----- 0  
 SpottedGar ----- 0  
 ParamormyropsKingsLeyae ----- 0

Majority -----  
 |-----|-----|-----|-----|-----|-----|-----|-----|  
 | 6010 | 6020 | 6030 | 6040 | 6050 | 6060 | 6070 | 6080 |  
 |-----|-----|-----|-----|-----|-----|-----|-----|  
 Human CTTTTCTTTCCCAAGGAACCACTGATCTGCTTTCTGTCACTATAGATTAGTTCACACTTTTTAGAAATTTAGATAAATG 6080  
 AsianBonytongue ----- 0  
 Reedfish ----- 0  
 NorthernPike ----- 0  
 SpottedGar ----- 0  
 ParamormyropsKingsLeyae ----- 0

Majority -----  
 |-----|-----|-----|-----|-----|-----|-----|-----|  
 | 6090 | 6100 | 6110 | 6120 | 6130 | 6140 | 6150 | 6160 |  
 |-----|-----|-----|-----|-----|-----|-----|-----|  
 Human TAATCATATGGTATGTACATTTTGGTCTGGGTTAGTCCACTCAGAATAATTATTTTGAAATTCACCCATGTTGTCTTTC 6160  
 AsianBonytongue ----- 0  
 Reedfish ----- 0  
 NorthernPike ----- 0  
 SpottedGar ----- 0  
 ParamormyropsKingsLeyae ----- 0

Majority -----  
 |-----|-----|-----|-----|-----|-----|-----|-----|  
 | 6170 | 6180 | 6190 | 6200 | 6210 | 6220 | 6230 | 6240 |  
 |-----|-----|-----|-----|-----|-----|-----|-----|  
 Human AATAGTCCATTCTGTTTTATTGCTTAGTAATAGTACACTTTATGGCTATACAGCAATTTGTTAATCCATTCAAGTCTTGA 6240  
 AsianBonytongue ----- 0  
 Reedfish ----- 0  
 NorthernPike ----- 0  
 SpottedGar ----- 0  
 ParamormyropsKingsLeyae ----- 0

Sunday, May 01, 2022 09:43 PM

```

Majority -----
                |-----|
                | 6250   6260   6270   6280   6290   6300   6310   6320
                |-----|
Human           GGGACATTTGTATTGTTTTCCGTTTTGAGCTAATAAAAAATATAGTTGTGAACATTACTGTACAAGTCTTTGTATGGACAT 6320
AsianBonytongue ----- 0
Reedfish       ----- 0
NorthernPike   ----- 0
SpottedGar     ----- 0
ParamormyropsKingsLeyae ----- 0
    
```

```

Majority -----
                |-----|
                | 6330   6340   6350   6360   6370   6380   6390   6400
                |-----|
Human           ATGCTTTCATTTCTCTTGGTGGGGCAGGCTATGATTGGAAAGTCTGGATCATGTGATAGGCATATGTTTAACTTTTTAAG 6400
AsianBonytongue ----- 0
Reedfish       ----- 0
NorthernPike   ----- 0
SpottedGar     ----- 0
ParamormyropsKingsLeyae ----- 0
    
```

```

Majority -----
                |-----|
                | 6410   6420   6430   6440   6450   6460   6470   6480
                |-----|
Human           GAACTGCAAAC TTTTTAAAAGTAGTTGTACCATCTTACATTGCCATCAGCATGGTATGAAATTTCCAGTCCTTCCACATC 6480
AsianBonytongue ----- 0
Reedfish       ----- 0
NorthernPike   ----- 0
SpottedGar     ----- 0
ParamormyropsKingsLeyae ----- 0
    
```

```

Majority -----
                |-----|
                | 6490   6500   6510   6520   6530   6540   6550   6560
                |-----|
Human           CTCTTAAATGCCTGTTATCTTCTGTTTTTGATTATAGATATTGTAGTGATATGAAGTGATATTTCACTGTGGATTTAAT 6560
AsianBonytongue ----- 0
Reedfish       ----- 0
NorthernPike   ----- 0
SpottedGar     ----- 0
ParamormyropsKingsLeyae ----- 0
    
```

```

Majority -----
                |-----|
                | 6570   6580   6590   6600   6610   6620   6630   6640
                |-----|
Human           TTGCATTCCCTCTAATAATCTATGATGTTGGACATCTTTTCGTGTGCTTTTTGTGAGCTGTTATCTTTGGTGAAGTGTCTGT 6640
AsianBonytongue ----- 0
Reedfish       ----- 0
NorthernPike   ----- 0
SpottedGar     ----- 0
ParamormyropsKingsLeyae ----- 0
    
```

```

Majority -----
                |-----|
                | 6650   6660   6670   6680   6690   6700   6710   6720
                |-----|
Human           TTATATCTTTAGCCCAATTTTTATTGGTTATTTATTTTAAATTGAGTTTTGAGAGGCTTCATTGTGGTTACAAGTCC 6720
AsianBonytongue ----- 0
Reedfish       ----- 0
NorthernPike   ----- 0
SpottedGar     ----- 0
ParamormyropsKingsLeyae ----- 0
    
```

Sunday, May 01, 2022 09:43 PM

```

Majority -----
                |-----|
                |6730   6740   6750   6760   6770   6780   6790   6800|
Human           TTTATCAGCCATAAGGCCTGCAAATATTTTCTGCCACTCATCTTCTTATTCTCGCATTGTCTTTTGAAGAGCAACAGTTA 6800
AsianBonytongue ----- 0
Reedfish       ----- 0
NorthernPike   ----- 0
SpottedGar     ----- 0
ParamormyropsKingsLeyae ----- 0

```

```

Majority -----
                |-----|
                |6810   6820   6830   6840   6850   6860   6870   6880|
Human           TTAAATCTGATGGACTCCAGTTTACCAATTTTTTCTTTTATGGATTGTAGTTTGGGGTCTTGTCTGAGCCATTTTTTGCC 6880
AsianBonytongue ----- 0
Reedfish       ----- 0
NorthernPike   ----- 0
SpottedGar     ----- 0
ParamormyropsKingsLeyae ----- 0

```

```

Majority -----
                |-----|
                |6890   6900   6910   6920   6930   6940   6950   6960|
Human           TGACTGTAAGCCATGAAGATTTTTTCCCTTTTGTGTTGTTAATAATAATAATAAATTTTTTTTAGAGACAGGACCTGACTC 6960
AsianBonytongue ----- 0
Reedfish       ----- 0
NorthernPike   ----- 0
SpottedGar     ----- 0
ParamormyropsKingsLeyae ----- 0

```

```

Majority -----
                |-----|
                |6970   6980   6990   7000   7010   7020   7030   7040|
Human           TGTCACCCCAGCTGGAGTGCAGTGGTGC AATCGTAGCTCATGATAACCTTGA ACTCCTGGACACAAGGGCTCCTGCTTCA 7040
AsianBonytongue ----- 0
Reedfish       ----- 0
NorthernPike   ----- 0
SpottedGar     ----- 0
ParamormyropsKingsLeyae ----- 0

```

```

Majority -----
                |-----|
                |7050   7060   7070   7080   7090   7100   7110   7120|
Human           GCCTCCCAAGTAGCTAGGACTATAGGCACACAGCACCATGCCCAGCTAACTTTTAAATTTTTTATAGACCCGGGGTCTCT 7120
AsianBonytongue ----- 0
Reedfish       ----- 0
NorthernPike   ----- 0
SpottedGar     ----- 0
ParamormyropsKingsLeyae ----- 0

```

```

Majority -----
                |-----|
                |7130   7140   7150   7160   7170   7180   7190   7200|
Human           CTGTTTTGCCCAGGCTGGTGTGAACTCCTGGCCTCAAGCGATCTTTCTGCCTCAGCCTTCCAAAGTGTGGGATTAAAG 7200
AsianBonytongue ----- 0
Reedfish       ----- 0
NorthernPike   ----- 0
SpottedGar     ----- 0
ParamormyropsKingsLeyae ----- 0

```

Sunday, May 01, 2022 09:43 PM

Majority -----  
 |-----|-----|-----|-----|-----|-----|-----|-----|  
 | 7210 | 7220 | 7230 | 7240 | 7250 | 7260 | 7270 | 7280 |  
 |-----|-----|-----|-----|-----|-----|-----|-----|  
 Human GCATGAGCCACTACACTTGCCACCTTTGTTTTCTAATAGAAGTTTATACTTTGGTTTAAACATTGGGTCTCTTTCATT 7280  
 AsianBonytongue ----- 0  
 Reedfish ----- 0  
 NorthernPike ----- 0  
 SpottedGar ----- 0  
 ParamormyropsKingsLeyae ----- 0

Majority -----  
 |-----|-----|-----|-----|-----|-----|-----|-----|  
 | 7290 | 7300 | 7310 | 7320 | 7330 | 7340 | 7350 | 7360 |  
 |-----|-----|-----|-----|-----|-----|-----|-----|  
 Human TTGACTTAATATTTTGAATATGGTACAAAGTGTGGGTCAGAAGTATTTGGTTTGCATGGGGATATCCAGTGTTTACAGC 7360  
 AsianBonytongue ----- 0  
 Reedfish ----- 0  
 NorthernPike ----- 0  
 SpottedGar ----- 0  
 ParamormyropsKingsLeyae ----- 0

Majority -----  
 |-----|-----|-----|-----|-----|-----|-----|-----|  
 | 7370 | 7380 | 7390 | 7400 | 7410 | 7420 | 7430 | 7440 |  
 |-----|-----|-----|-----|-----|-----|-----|-----|  
 Human ATCATTGTTGAAAAGACTATCCTTTCTCCATTCACCTTGGCTTTCAGCTTCATGAAAAATCACTTATGTCTGTATGTGT 7440  
 AsianBonytongue ----- 0  
 Reedfish ----- 0  
 NorthernPike ----- 0  
 SpottedGar ----- 0  
 ParamormyropsKingsLeyae ----- 0

Majority -----  
 |-----|-----|-----|-----|-----|-----|-----|-----|  
 | 7450 | 7460 | 7470 | 7480 | 7490 | 7500 | 7510 | 7520 |  
 |-----|-----|-----|-----|-----|-----|-----|-----|  
 Human GATTTTATGTCTGTACTCTTTTTTGTATTGACCCATTTTCCTTTATCTAGATGCTGGAACATACTGTCTTAATCATTGT 7520  
 AsianBonytongue ----- 0  
 Reedfish ----- 0  
 NorthernPike ----- 0  
 SpottedGar ----- 0  
 ParamormyropsKingsLeyae ----- 0

Majority -----  
 |-----|-----|-----|-----|-----|-----|-----|-----|  
 | 7530 | 7540 | 7550 | 7560 | 7570 | 7580 | 7590 | 7600 |  
 |-----|-----|-----|-----|-----|-----|-----|-----|  
 Human AGCTTTATATTGAGTCTTGAAACCACTTACTTAGTCTTGGCCCTCCAACCTCTGTTCTTTTTCAAAGTTGTTTTAACTCT 7600  
 AsianBonytongue ----- 0  
 Reedfish ----- 0  
 NorthernPike ----- 0  
 SpottedGar ----- 0  
 ParamormyropsKingsLeyae ----- 0

Majority -----  
 |-----|-----|-----|-----|-----|-----|-----|-----|  
 | 7610 | 7620 | 7630 | 7640 | 7650 | 7660 | 7670 | 7680 |  
 |-----|-----|-----|-----|-----|-----|-----|-----|  
 Human TCTGAGTCCTTTGTATTTTCATATGAGTCAGTTCCTTAGAAAACTGCTTGGATTTTACTGGATTTGACTTGAATCTGTAG 7680  
 AsianBonytongue ----- 0  
 Reedfish ----- 0  
 NorthernPike ----- 0  
 SpottedGar ----- 0  
 ParamormyropsKingsLeyae ----- 0



Sunday, May 01, 2022 09:43 PM

```

Majority -----
                7690      7700      7710      7720      7730      7740      7750      7760
Human          AGCAAATTTGGGGAAAATTGGCATCATGACTACAATTGATGTCTCTATTAGGTCTTTAATTTCTTTAAGCATTTTTTTTTT 7760
AsianBonytongue ----- 0
Reedfish ----- 0
NorthernPike ----- 0
SpottedGar ----- 0
ParamormyropsKingsLeyae ----- 0
    
```

```

Majority -----
                7770      7780      7790      7800      7810      7820      7830      7840
Human          TTTTTTTCAGTGCACACGTTTTTGTGCATTGTTTGATTAGATTTACCCATAAGTATTTTATGTATTTGAAGTACTGTAAA 7840
AsianBonytongue ----- 0
Reedfish ----- 0
NorthernPike ----- 0
SpottedGar ----- 0
ParamormyropsKingsLeyae ----- 0
    
```

```

Majority -----
                7850      7860      7870      7880      7890      7900      7910      7920
Human          TGATATTTTAAAAACTTAATTTCCAATTGTTTGCTAGTGTATAGAAATGATTATGGCATATTGCTCATATGTTCTGAACC 7920
AsianBonytongue ----- 0
Reedfish ----- 0
NorthernPike ----- 0
SpottedGar ----- 0
ParamormyropsKingsLeyae ----- 0
    
```

```

Majority -----
                7930      7940      7950      7960      7970      7980      7990      8000
Human          TTTGCTAAACTCATTTAGTAGATCTAATAGTTTTTTTTTATATATTTTCATCAGATTTGCTTGAGAGGGAGTCTCAGTCACC 8000
AsianBonytongue ----- 0
Reedfish ----- 0
NorthernPike ----- 0
SpottedGar ----- 0
ParamormyropsKingsLeyae ----- 0
    
```

```

Majority -----
                8010      8020      8030      8040      8050      8060      8070      8080
Human          CAGGCTGGAGTGCAGTGACGTGATCTTGGCTCACTGCAACCTGCACCTCCTGGGTCAAGCAATTCCTGCCTCAGCCTC 8080
AsianBonytongue ----- 0
Reedfish ----- 0
NorthernPike ----- 0
SpottedGar ----- 0
ParamormyropsKingsLeyae ----- 0
    
```

```

Majority -----
                8090      8100      8110      8120      8130      8140      8150      8160
Human          ATAAGTAGCTGGGACTGCAGGTGCACACCACCACGCCAGCTAATTTTTTGCAATTTTCAGTTGAGGCAGGGTTTCACCATG 8160
AsianBonytongue ----- 0
Reedfish ----- 0
NorthernPike ----- 0
SpottedGar ----- 0
ParamormyropsKingsLeyae ----- 0
    
```

Sunday, May 01, 2022 09:43 PM

Majority -----  
 |-----|-----|-----|-----|-----|-----|-----|-----|  
 | 8170 | 8180 | 8190 | 8200 | 8210 | 8220 | 8230 | 8240 |  
 |-----|-----|-----|-----|-----|-----|-----|-----|  
 Human TTGCCAGGCTGGTCTGGAACCTCCTGACCTCAAGTGATACACTTACCTAGGCCTCCCAAAGTGTTAAGATTACAGGCGTG 8240  
 AsianBonytongue ----- 0  
 Reedfish ----- 0  
 NorthernPike ----- 0  
 SpottedGar ----- 0  
 ParamormyropsKingsLeyae ----- 0

Majority -----  
 |-----|-----|-----|-----|-----|-----|-----|-----|  
 | 8250 | 8260 | 8270 | 8280 | 8290 | 8300 | 8310 | 8320 |  
 |-----|-----|-----|-----|-----|-----|-----|-----|  
 Human AGCCACCACCCCAGCCTATGCCATTAATTTTCTACATAGATAATTTATACCCAATGTTTTTAAATAGTTTTCTTTCT 8320  
 AsianBonytongue ----- 0  
 Reedfish ----- 0  
 NorthernPike ----- 0  
 SpottedGar ----- 0  
 ParamormyropsKingsLeyae ----- 0

Majority -----  
 |-----|-----|-----|-----|-----|-----|-----|-----|  
 | 8330 | 8340 | 8350 | 8360 | 8370 | 8380 | 8390 | 8400 |  
 |-----|-----|-----|-----|-----|-----|-----|-----|  
 Human TTTCTATCTGGATGCCATTTTTTGTCTCCTTTTTTGTCTGTGGTATCCAGTACAATGTTTAATAGAAGTGTGAGAGAA 8400  
 AsianBonytongue ----- 0  
 Reedfish ----- 0  
 NorthernPike ----- 0  
 SpottedGar ----- 0  
 ParamormyropsKingsLeyae ----- 0

Majority -----  
 |-----|-----|-----|-----|-----|-----|-----|-----|  
 | 8410 | 8420 | 8430 | 8440 | 8450 | 8460 | 8470 | 8480 |  
 |-----|-----|-----|-----|-----|-----|-----|-----|  
 Human TATCTTTTCCTTGCTCCTGATATTAGGGTGAGAACTCTAAAATTTCTTCTTAACTGACACAGTTCCTACTAGTGAAGCCAT 8480  
 AsianBonytongue ----- 0  
 Reedfish ----- 0  
 NorthernPike ----- 0  
 SpottedGar ----- 0  
 ParamormyropsKingsLeyae ----- 0

Majority -----  
 |-----|-----|-----|-----|-----|-----|-----|-----|  
 | 8490 | 8500 | 8510 | 8520 | 8530 | 8540 | 8550 | 8560 |  
 |-----|-----|-----|-----|-----|-----|-----|-----|  
 Human GTGGGGCCAGATGTTTGTGTTTGTCTCGGGAGGTTTTTAACTACATATTCAACTTATTTAATAGATATAGGGCTATTTCAGTTT 8560  
 AsianBonytongue ----- 0  
 Reedfish ----- 0  
 NorthernPike ----- 0  
 SpottedGar ----- 0  
 ParamormyropsKingsLeyae ----- 0

Majority -----  
 |-----|-----|-----|-----|-----|-----|-----|-----|  
 | 8570 | 8580 | 8590 | 8600 | 8610 | 8620 | 8630 | 8640 |  
 |-----|-----|-----|-----|-----|-----|-----|-----|  
 Human GTTTAGTTCTTCTTGAGTGAACCTTTGGTAATTTGTATCTTCTGTAGAACTAGTCCATTTCTTTAAGTTGCTGAATGTAT 8640  
 AsianBonytongue ----- 0  
 Reedfish ----- 0  
 NorthernPike ----- 0  
 SpottedGar ----- 0  
 ParamormyropsKingsLeyae ----- 0

Sunday, May 01, 2022 09:43 PM

Majority -----  
 |-----|-----|-----|-----|-----|-----|-----|-----|  
 | 8650 | 8660 | 8670 | 8680 | 8690 | 8700 | 8710 | 8720 |  
 |-----|-----|-----|-----|-----|-----|-----|-----|  
 Human TTGTGTAGAGTTGTTTCATGATACTACTATTTTTTTTTTTTTTTTTTTTTTTGAGACGGAGCCTTGCTCTGTCGCCCGGGCT 8720  
 AsianBonytongue ----- 0  
 Reedfish ----- 0  
 NorthernPike ----- 0  
 SpottedGar ----- 0  
 ParamormyropsKingsLeyae ----- 0

Majority -----  
 |-----|-----|-----|-----|-----|-----|-----|-----|  
 | 8730 | 8740 | 8750 | 8760 | 8770 | 8780 | 8790 | 8800 |  
 |-----|-----|-----|-----|-----|-----|-----|-----|  
 Human GGAGTGCAGTGGCACCATCTCGGCTCAATGCAACCTCCACGTCCCGGGTTCACGCGGTTCCTGCTCAGCATCCCAAG 8800  
 AsianBonytongue ----- 0  
 Reedfish ----- 0  
 NorthernPike ----- 0  
 SpottedGar ----- 0  
 ParamormyropsKingsLeyae ----- 0

Majority -----  
 |-----|-----|-----|-----|-----|-----|-----|-----|  
 | 8810 | 8820 | 8830 | 8840 | 8850 | 8860 | 8870 | 8880 |  
 |-----|-----|-----|-----|-----|-----|-----|-----|  
 Human TAGCTGGGATCACAGGCACACACCACCACACCTGGCTAATTTTTTGTATTTTTTAGTAGAGACGGGGTTTCACTATGTTGG 8880  
 AsianBonytongue ----- 0  
 Reedfish ----- 0  
 NorthernPike ----- 0  
 SpottedGar ----- 0  
 ParamormyropsKingsLeyae ----- 0

Majority -----  
 |-----|-----|-----|-----|-----|-----|-----|-----|  
 | 8890 | 8900 | 8910 | 8920 | 8930 | 8940 | 8950 | 8960 |  
 |-----|-----|-----|-----|-----|-----|-----|-----|  
 Human CCAGGTTGGTCTCGAACTTGTGATCTGCCCGCCCTGCCTCACAAAGTGCTGGGATTACAGGCGTGAGCCACTGCGCCAG 8960  
 AsianBonytongue ----- 0  
 Reedfish ----- 0  
 NorthernPike ----- 0  
 SpottedGar ----- 0  
 ParamormyropsKingsLeyae ----- 0

Majority -----  
 |-----|-----|-----|-----|-----|-----|-----|-----|  
 | 8970 | 8980 | 8990 | 9000 | 9010 | 9020 | 9030 | 9040 |  
 |-----|-----|-----|-----|-----|-----|-----|-----|  
 Human CCATGATACTACATTTTTTACACTTTTGGTATCTGTTGAATCCTTAGTGATGTCAGCTTTCTCATTCAGTAGGGATAAT 9040  
 AsianBonytongue ----- 0  
 Reedfish ----- 0  
 NorthernPike ----- 0  
 SpottedGar ----- 0  
 ParamormyropsKingsLeyae ----- 0

Majority -----  
 |-----|-----|-----|-----|-----|-----|-----|-----|  
 | 9050 | 9060 | 9070 | 9080 | 9090 | 9100 | 9110 | 9120 |  
 |-----|-----|-----|-----|-----|-----|-----|-----|  
 Human TTGTGTCATCTTTTTTCCTTGCTGTCTGGATTGAAGTTTATTGATTTTATTAATCTCCAAAATACCAGCTTTTGGTTTG 9120  
 AsianBonytongue ----- 0  
 Reedfish ----- 0  
 NorthernPike ----- 0  
 SpottedGar ----- 0  
 ParamormyropsKingsLeyae ----- 0

Sunday, May 01, 2022 09:43 PM

```

Majority -----
          9130   9140   9150   9160   9170   9180   9190   9200
Human      AGTTTCTCTGCTGTTTTCTGTTTTCTATTTTATTGATTCTGCTATTTTATTTGTTTTGCTTTGTGGTTAGTTGA 9200
AsianBonytongue ----- 0
Reedfish   ----- 0
NorthernPike ----- 0
SpottedGar ----- 0
ParamormyropsKingsLeyae ----- 0

```

```

Majority -----
          9210   9220   9230   9240   9250   9260   9270   9280
Human      TCTTCATTTTCTACTTAGTTAACATTGAAGTTAATGTCATTAACCTTAGTACTTTTACTTATATAGGGATTATTGCTGTA 9280
AsianBonytongue ----- 0
Reedfish   ----- 0
NorthernPike ----- 0
SpottedGar ----- 0
ParamormyropsKingsLeyae ----- 0

```

```

Majority -----
          9290   9300   9310   9320   9330   9340   9350   9360
Human      TGTTCCTTTTAAAGTACCGCTTTCACGGCATTCCCTCAAATTTTGACACGTATATTTTATTCACTTCAAATACTTTTT 9360
AsianBonytongue ----- 0
Reedfish   ----- 0
NorthernPike ----- 0
SpottedGar ----- 0
ParamormyropsKingsLeyae ----- 0

```

```

Majority -----
          9370   9380   9390   9400   9410   9420   9430   9440
Human      TAAATATTTCTTTGACCCATGGGTTATTGGAAAGTATGTTATTTATGTTATTTAATTTCAAATATTTGGAGTTTTCAT 9440
AsianBonytongue ----- 0
Reedfish   ----- 0
NorthernPike ----- 0
SpottedGar ----- 0
ParamormyropsKingsLeyae ----- 0

```

```

Majority -----
          9450   9460   9470   9480   9490   9500   9510   9520
Human      ATATCTTTCTGTTATGTATTTCATAATTTTAGTTTTATTCTGGCCAGAGAACATATTTTCTAAGACTTGGATCTTTGTAAA 9520
AsianBonytongue ----- 0
Reedfish   ----- 0
NorthernPike ----- 0
SpottedGar ----- 0
ParamormyropsKingsLeyae ----- 0

```

```

Majority -----
          9530   9540   9550   9560   9570   9580   9590   9600
Human      CATGGAGACTTGTTTTGTGGTCCAATATATATGTTGTTAAGTATTCACTGAATACTCTGATGATTCTCTGCAGATTGG 9600
AsianBonytongue ----- 0
Reedfish   ----- 0
NorthernPike ----- 0
SpottedGar ----- 0
ParamormyropsKingsLeyae ----- 0

```

Sunday, May 01, 2022 09:43 PM

```

Majority -----
          9610   9620   9630   9640   9650   9660   9670   9680
Human     AGAAATCTCTGTGCAGTTCTTTTCTCTGGTACTTTGACCTGTATGTAAACTCTAGTTACTTTGGTCTTCTCAGGCTCTTG 9680
AsianBonytongue ----- 0
Reedfish ----- 0
NorthernPike ----- 0
SpottedGar ----- 0
ParamormyropsKingsLeyae ----- 0
    
```

```

Majority -----
          9690   9700   9710   9720   9730   9740   9750   9760
Human     GCTCTTTCACAATTAAGTAGTCTTTGAGGCTCAGCCTGCTTTCCTCATAGCTATGCTATGGCCTGGACACTCAAGGGAG 9760
AsianBonytongue ----- 0
Reedfish ----- 0
NorthernPike ----- 0
SpottedGar ----- 0
ParamormyropsKingsLeyae ----- 0
    
```

```

Majority -----
          9770   9780   9790   9800   9810   9820   9830   9840
Human     TATAAGCTGAGGCAAACATGGACTCATTGTGTTTTCTAACTTTCAGGGATTATTGTCCATCATTGCCTGATGTCCAGTGTC 9840
AsianBonytongue ----- 0
Reedfish ----- 0
NorthernPike ----- 0
SpottedGar ----- 0
ParamormyropsKingsLeyae ----- 0
    
```

```

Majority -----
          9850   9860   9870   9880   9890   9900   9910   9920
Human     TTGAAAAGCAATTATTCTGTATAGTTGCTTGATTGTTTGGTGTGTTTCGGCGAGGCAAATCTGGGTCATGTTATTCTGT 9920
AsianBonytongue ----- 0
Reedfish ----- 0
NorthernPike ----- 0
SpottedGar ----- 0
ParamormyropsKingsLeyae ----- 0
    
```

```

Majority -----
          9930   9940   9950   9960   9970   9980   9990  10000
Human     CTTGACTGGAAGTAGAAGTCCACTGTTTTTTTTTAATTACATAAATGGTCTCAGCAGTTGTAGATCTACCTCATTCCTTT 10000
AsianBonytongue ----- 0
Reedfish ----- 0
NorthernPike ----- 0
SpottedGar ----- 0
ParamormyropsKingsLeyae ----- 0
    
```

```

Majority -----
        10010   10020   10030   10040   10050   10060   10070   10080
Human     GTTAATGACAATGGAGGATACTCGTGTGGCTGCACCACAGTGTAGTTACTGGACATACCACAATTTAGTTTCTTACATCG 10080
AsianBonytongue ----- 0
Reedfish ----- 0
NorthernPike ----- 0
SpottedGar ----- 0
ParamormyropsKingsLeyae ----- 0
    
```

Sunday, May 01, 2022 09:43 PM

```

Majority -----
      10090   10100   10110   10120   10130   10140   10150   10160
Human  ATGGACATTTAGGTTTGATTCCAGTTTGTGTTATAACATGTGGACATATTTAGAAATAGAAGTAAAAATGCTGTGTCAAA 10160
AsianBonytongue ----- 0
Reedfish ----- 0
NorthernPike ----- 0
SpottedGar ----- 0
ParamormyropsKingsLeyae ----- 0
    
```

```

Majority -----
      10170   10180   10190   10200   10210   10220   10230   10240
Human  TGAAATTTATACTTAAAGAGTTACTGAAAACCACAATGCCAGAACACTCATTGTGTTTTTCCACAAGTGTGTATGGGAGTGC 10240
AsianBonytongue ----- 0
Reedfish ----- 0
NorthernPike ----- 0
SpottedGar ----- 0
ParamormyropsKingsLeyae ----- 0
    
```

```

Majority -----
      10250   10260   10270   10280   10290   10300   10310   10320
Human  CTATTTTCCATACCCTTGGCAATTCTAGGTTTTATCAAAATTTAAGAATACTAGCTTATTTTACACTAAAAATTATTTT 10320
AsianBonytongue ----- 0
Reedfish ----- 0
NorthernPike ----- 0
SpottedGar ----- 0
ParamormyropsKingsLeyae ----- 0
    
```

```

Majority -----
      10330   10340   10350   10360   10370   10380   10390   10400
Human  GTAATTTATATTTTGAATGGGTGAGGTTTTTCAGATTTGGTTATTTATATTTTCATTTTCTGTGAACTGCCTGTTTGTGT 10400
AsianBonytongue ----- 0
Reedfish ----- 0
NorthernPike ----- 0
SpottedGar ----- 0
ParamormyropsKingsLeyae ----- 0
    
```

```

Majority -----
      10410   10420   10430   10440   10450   10460   10470   10480
Human  ACTGGACCTAGTTAATTCAAATATATATATTTGAATTAAGTGATTTTATTGTTTAAAGTCCATTTGATGTGTAAACATTT 10480
AsianBonytongue ----- 0
Reedfish ----- 0
NorthernPike ----- 0
SpottedGar ----- 0
ParamormyropsKingsLeyae ----- 0
    
```

```

Majority -----
      10490   10500   10510   10520   10530   10540   10550   10560
Human  TTAGCCTCAGCTTCTTCACCTTTTAAATTAGGATTTAATAGTTCACAAACTAGGCTAATGTTAATGTATTTACATTT 10560
AsianBonytongue ----- 0
Reedfish ----- 0
NorthernPike ----- 0
SpottedGar ----- 0
ParamormyropsKingsLeyae ----- 0
    
```

Sunday, May 01, 2022 09:43 PM

```

Majority -----
                10570   10580   10590   10600   10610   10620   10630   10640
Human          AGAATATCCAAGTTTTTATGGCTTTAGGATACAAATGAAATCTCATTTTCCATTATTTTATAAAATTTGCTGTATTCAGCT 10640
AsianBonytongue ----- 0
Reedfish ----- 0
NorthernPike ----- 0
SpottedGar ----- 0
ParamormyropsKingsLeyae ----- 0

```

```

Majority -----
                10650   10660   10670   10680   10690   10700   10710   10720
Human          TTTCTTGATTTTAGACTTTTTTTGTTAGCTCAGTGAGACTATTAAGAAAGAATATTTGTGAGTTTGTAAATAGGAGATTT 10720
AsianBonytongue ----- 0
Reedfish ----- 0
NorthernPike ----- 0
SpottedGar ----- 0
ParamormyropsKingsLeyae ----- 0

```

```

Majority -----
                10730   10740   10750   10760   10770   10780   10790   10800
Human          GTTGCAATTTCTTTAAAATGGCTTTTTATATTCTTCGTAATTTGTAATATCAGGGGTGTCATTTCTGTACTCTTAACCATT 10800
AsianBonytongue ----- 0
Reedfish ----- 0
NorthernPike ----- 0
SpottedGar ----- 0
ParamormyropsKingsLeyae ----- 0

```

```

Majority -----
                10810   10820   10830   10840   10850   10860   10870   10880
Human          TTGCCAATGTGAAATCCTTGCAAAGTAATCGGCCTATTACTTGGGAAGACAGAATTGTATGAAATGACTGTAGAATAATT 10880
AsianBonytongue ----- 0
Reedfish ----- 0
NorthernPike ----- 0
SpottedGar ----- 0
ParamormyropsKingsLeyae ----- 0

```

```

Majority -----
                10890   10900   10910   10920   10930   10940   10950   10960
Human          CAGGATGGTCCCAATACGGTAAAATGTTAACTTTT TAGATGTAGATTTTAAAGTATGGTGAAATTTGTAGCAGTGTCTTT 10960
AsianBonytongue ----- 0
Reedfish ----- 0
NorthernPike ----- 0
SpottedGar ----- 0
ParamormyropsKingsLeyae ----- 0

```

```

Majority -----
                10970   10980   10990   11000   11010   11020   11030   11040
Human          TAGTAAGTTAACTATTAATATATCAAGACCTATAACTGGACAACATAAATAACCTGTTTCTTAAAATGTTAGCTTTTT 11040
AsianBonytongue ----- 0
Reedfish ----- 0
NorthernPike ----- 0
SpottedGar ----- 0
ParamormyropsKingsLeyae ----- 0

```

Sunday, May 01, 2022 09:43 PM

```

Majority -----
                11050      11060      11070      11080      11090      11100      11110      11120
Human          CTAAATATTCTGAAAGTACTGGTTGTAAATTGCTGAACTCACAAATTTAAATTATGATATGACTATTGAATTCATCCTCAT 11120
AsianBonytongue ----- 0
Reedfish ----- 0
NorthernPike ----- 0
SpottedGar ----- 0
ParamormyropsKingsLeyae ----- 0
    
```

```

Majority -----
                11130      11140      11150      11160      11170      11180      11190      11200
Human          TGGCTTGCATAGAAAATTACAATCAAATAATGCTAAATGTAACCTTTTTTGGTAATAGTTGTGTGTAACGGTTGTTTCATT 11200
AsianBonytongue ----- 0
Reedfish ----- 0
NorthernPike ----- 0
SpottedGar ----- 0
ParamormyropsKingsLeyae ----- 0
    
```

```

Majority -----
                11210      11220      11230      11240      11250      11260      11270      11280
Human          ATAGATGTGTTATTCAAACCTTTGGGTTTTTAGGTTTTGACTTTTCTTAAAATACTTTTCTTAAATGCTACTTAATGCTT 11280
AsianBonytongue ----- 0
Reedfish ----- 0
NorthernPike ----- 0
SpottedGar ----- 0
ParamormyropsKingsLeyae ----- 0
    
```

```

Majority -----
                11290      11300      11310      11320      11330      11340      11350      11360
Human          TCTCTAGGGTATTTTTATTAGAATTTCAATTAACAGATATTTTGATGTCTGCGAAATGACAGTACTATGTTAGAAATTGA 11360
AsianBonytongue ----- 0
Reedfish ----- 0
NorthernPike ----- 0
SpottedGar ----- 0
ParamormyropsKingsLeyae ----- 0
    
```

```

Majority -----
                11370      11380      11390      11400      11410      11420      11430      11440
Human          TGTATTGGCTCCTTGAGGGCAGTGACCCTATTTGTTATGTTTGTTCCTCAATCATTAAATAGTACACATATTAATAGTAC 11440
AsianBonytongue ----- 0
Reedfish ----- 0
NorthernPike ----- 0
SpottedGar ----- 0
ParamormyropsKingsLeyae ----- 0
    
```

```

Majority -----
                11450      11460      11470      11480      11490      11500      11510      11520
Human          ATATACACTTAATATTTAATAACTCTTAGAAGTGCATAGGCTTTAATATGCTCATACTCTAATGAGCCATTTATCAATA 11520
AsianBonytongue ----- 0
Reedfish ----- 0
NorthernPike ----- 0
SpottedGar ----- 0
ParamormyropsKingsLeyae ----- 0
    
```





Sunday, May 01, 2022 09:43 PM

```

Majority -----
      12010   12020   12030   12040   12050   12060   12070   12080
Human  AAGTATTATCTTATAGTTTGTAGGTGAGAAATCTGACACAGGTGGGCTAAAATCAAGGTGTTAGCAGGGCTGTGTTCTCT 12080
AsianBonytongue ----- 0
Reedfish ----- 0
NorthernPike ----- 0
SpottedGar ----- 0
ParamormyropsKingsLeyae ----- 0
    
```

```

Majority -----
      12090   12100   12110   12120   12130   12140   12150   12160
Human  TTTTGCAGGATCTGGGGGAATTTGTTTCCTTGACATAACTCGGCTGTTAGCTTCATCTTCAAAGAAGGAATGGCAAAGA 12160
AsianBonytongue ----- 0
Reedfish ----- 0
NorthernPike ----- 0
SpottedGar ----- 0
ParamormyropsKingsLeyae ----- 0
    
```

```

Majority -----
      12170   12180   12190   12200   12210   12220   12230   12240
Human  AGACTCTGTCTCACATCACATCACTCCGACACATTCTTGTGCTCCGTTTCCCACTTACAGGGACCTTGTGATTACAATG 12240
AsianBonytongue ----- 0
Reedfish ----- 0
NorthernPike ----- 0
SpottedGar ----- 0
ParamormyropsKingsLeyae ----- 0
    
```

```

Majority -----
      12250   12260   12270   12280   12290   12300   12310   12320
Human  GGCCCAACTACATAATAGAGGATAAATGTTTAAATTACAAATTAATGAAGTGGCAACTGAAACAAGTTTTAACCTATTCT 12320
AsianBonytongue ----- 0
Reedfish ----- 0
NorthernPike ----- 0
SpottedGar ----- 0
ParamormyropsKingsLeyae ----- 0
    
```

```

Majority -----
      12330   12340   12350   12360   12370   12380   12390   12400
Human  CAAGAAAGGGCTTTGCTGGAATGGTGGCTCACACCTGTAATCCCAGAACTTAGGGAGGCTGAGGCAGGCAGATCACTTGA 12400
AsianBonytongue ----- 0
Reedfish ----- 0
NorthernPike ----- 0
SpottedGar ----- 0
ParamormyropsKingsLeyae ----- 0
    
```

```

Majority -----
      12410   12420   12430   12440   12450   12460   12470   12480
Human  GCCCAGGAGTTTGAGACCAGCCTGGTCCCTCATAGCAAGACCCCATCTCTACAAAACTTTTAAAAATTAGATAGATCTGG 12480
AsianBonytongue ----- 0
Reedfish ----- 0
NorthernPike ----- 0
SpottedGar ----- 0
ParamormyropsKingsLeyae ----- 0
    
```

Sunday, May 01, 2022 09:43 PM

```

Majority -----
      12490   12500   12510   12520   12530   12540   12550   12560
Human    TGGCATGGGCCTGTAGTCCCAGCTACTTGGGAGGCTGAGACAAGAGGATCACCTGAGCCCAGGCGGCAGTGAGCTATGAT 12560
AsianBonytongue ----- 0
Reedfish ----- 0
NorthernPike ----- 0
SpottedGar ----- 0
ParamormyropsKingsLeyae ----- 0
    
```

```

Majority -----
      12570   12580   12590   12600   12610   12620   12630   12640
Human    TGTATCACTACACTCCAGCCTGGGCGAGAGGAGATCCAGTCTCAAAAAAAAAAGGAAAAGGGCTTTCCTGAGGGTCAAATG 12640
AsianBonytongue ----- 0
Reedfish ----- 0
NorthernPike ----- 0
SpottedGar ----- 0
ParamormyropsKingsLeyae ----- 0
    
```

```

Majority -----
      12650   12660   12670   12680   12690   12700   12710   12720
Human    AAGTACAGTTGACCCTTGAACAACATGATTTTGAATTACACAGGTCCACTTATGCATAGATCCACTTATACAGAATTTTC 12720
AsianBonytongue ----- 0
Reedfish ----- 0
NorthernPike ----- 0
SpottedGar ----- 0
ParamormyropsKingsLeyae ----- 0
    
```

```

Majority -----
      12730   12740   12750   12760   12770   12780   12790   12800
Human    TTCTCCCTCTTCCACCCAAGACAGAAAGACCAACTCGTCTCTTTCCTCCTTAGCCTACTCAGCGTGAAGACAGTCAGGAT 12800
AsianBonytongue ----- 0
Reedfish ----- 0
NorthernPike ----- 0
SpottedGar ----- 0
ParamormyropsKingsLeyae ----- 0
    
```

```

Majority -----
      12810   12820   12830   12840   12850   12860   12870   12880
Human    GAAGACCTTTATTATGACTGATCTCCAAAAGATTGGCTTCAGTATTTTCATGGAGTGCTATGAATTAGAATCCTGAGTCT 12880
AsianBonytongue ----- 0
Reedfish ----- 0
NorthernPike ----- 0
SpottedGar ----- 0
ParamormyropsKingsLeyae ----- 0
    
```

```

Majority -----
      12890   12900   12910   12920   12930   12940   12950   12960
Human    CTATATTGTTAATTATTTTAGTCTCTTGGTCTACGTGTGTTCCTAAACTGTAGTAGCTTCTTAATTTAGTTCTAGGCAT 12960
AsianBonytongue ----- 0
Reedfish ----- 0
NorthernPike ----- 0
SpottedGar ----- 0
ParamormyropsKingsLeyae ----- 0
    
```

Sunday, May 01, 2022 09:43 PM

```

Majority -----
      12970   12980   12990   13000   13010   13020   13030   13040
Human  ACTACATTAGGGGATAAGGTGGTTAAGTGATATTTTCACCTTAAAAGTAATAAGGTGTCACAGAAAGTTATCACGAGATT 13040
AsianBonytongue ----- 0
Reedfish ----- 0
NorthernPike ----- 0
SpottedGar ----- 0
ParamormyropsKingsLeyae ----- 0

```

```

Majority -----
      13050   13060   13070   13080   13090   13100   13110   13120
Human  TTTTGTGAGCAGTACTTCTTTTTTAAAAC TATTATAATGAATTTTAGACACAATAGTATCATGAACCATTGTGTATCTATC 13120
AsianBonytongue ----- 0
Reedfish ----- 0
NorthernPike ----- 0
SpottedGar ----- 0
ParamormyropsKingsLeyae ----- 0

```

```

Majority -----
      13130   13140   13150   13160   13170   13180   13190   13200
Human  ATTCAGTCCCCAAAACCATTAGTAACCCATAGCTAAAATGATGATATCCACACTCTGCTTTTCCACTTCTGTTATTTTGA 13200
AsianBonytongue ----- 0
Reedfish ----- 0
NorthernPike ----- 0
SpottedGar ----- 0
ParamormyropsKingsLeyae ----- 0

```

```

Majority -----
      13210   13220   13230   13240   13250   13260   13270   13280
Human  GATAAATTTTCAGATATTCATATGTTTTATCTGTAAAGGCTTCAGTGTATATCTTTAAAGAATAGGGACTCTCCTCTCCT 13280
AsianBonytongue ----- 0
Reedfish ----- 0
NorthernPike ----- 0
SpottedGar ----- 0
ParamormyropsKingsLeyae ----- 0

```

```

Majority -----
      13290   13300   13310   13320   13330   13340   13350   13360
Human  TTTTAAAATATAATCAAAGACTGTTAGGACACACACAAAAGTTACCTCATATTATAAAATGTCAAATTTGTATTTAAA 13360
AsianBonytongue ----- 0
Reedfish ----- 0
NorthernPike ----- 0
SpottedGar ----- 0
ParamormyropsKingsLeyae ----- 0

```

```

Majority -----
      13370   13380   13390   13400   13410   13420   13430   13440
Human  TTTCTAATTGTCTCATAAAAGTCATAGTATTTTTATAGGGTTTTTTTTTTTAGTGGGGGAAGGAGTCACGATAAAATAAG 13440
AsianBonytongue ----- 0
Reedfish ----- 0
NorthernPike ----- 0
SpottedGar ----- 0
ParamormyropsKingsLeyae ----- 0

```

Sunday, May 01, 2022 09:43 PM

| Majority                | -----                                                                           |       |       |       |       |       |       |       |       |
|-------------------------|---------------------------------------------------------------------------------|-------|-------|-------|-------|-------|-------|-------|-------|
|                         | 13450                                                                           | 13460 | 13470 | 13480 | 13490 | 13500 | 13510 | 13520 |       |
| Human                   | ATCAGCAAATTTAACAGGTCGTTATTACCTCTTAAATATCTTTTAAATGTACAAGCTCTCCGTTCTGTTTTTGTTTTTT |       |       |       |       |       |       |       | 13520 |
| AsianBonytongue         | -----                                                                           |       |       |       |       |       |       |       | 0     |
| Reedfish                | -----                                                                           |       |       |       |       |       |       |       | 0     |
| NorthernPike            | -----                                                                           |       |       |       |       |       |       |       | 0     |
| SpottedGar              | -----                                                                           |       |       |       |       |       |       |       | 0     |
| ParamormyropsKingsLeyae | -----                                                                           |       |       |       |       |       |       |       | 0     |

| Majority                | -----                                                                            |       |       |       |       |       |       |       |       |
|-------------------------|----------------------------------------------------------------------------------|-------|-------|-------|-------|-------|-------|-------|-------|
|                         | 13530                                                                            | 13540 | 13550 | 13560 | 13570 | 13580 | 13590 | 13600 |       |
| Human                   | TTTTAAGTTGCATTTTCATTTGTTGAAGAAAACGGTTATTGGTCTTACACAGTTGCCTATAGACTACATTTACTGATTGC |       |       |       |       |       |       |       | 13600 |
| AsianBonytongue         | -----                                                                            |       |       |       |       |       |       |       | 0     |
| Reedfish                | -----                                                                            |       |       |       |       |       |       |       | 0     |
| NorthernPike            | -----                                                                            |       |       |       |       |       |       |       | 0     |
| SpottedGar              | -----                                                                            |       |       |       |       |       |       |       | 0     |
| ParamormyropsKingsLeyae | -----                                                                            |       |       |       |       |       |       |       | 0     |

| Majority                | -----                                                                           |       |       |       |       |       |       |       |       |
|-------------------------|---------------------------------------------------------------------------------|-------|-------|-------|-------|-------|-------|-------|-------|
|                         | 13610                                                                           | 13620 | 13630 | 13640 | 13650 | 13660 | 13670 | 13680 |       |
| Human                   | GTTATGATTTTGTAATTTAGTATGTTTTCCATATTTCCAGTAAATGGTAGTTAGATCTAGAGACTTGCTCAGGGTCTCT |       |       |       |       |       |       |       | 13680 |
| AsianBonytongue         | -----                                                                           |       |       |       |       |       |       |       | 0     |
| Reedfish                | -----                                                                           |       |       |       |       |       |       |       | 0     |
| NorthernPike            | -----                                                                           |       |       |       |       |       |       |       | 0     |
| SpottedGar              | -----                                                                           |       |       |       |       |       |       |       | 0     |
| ParamormyropsKingsLeyae | -----                                                                           |       |       |       |       |       |       |       | 0     |

| Majority                | -----                                                                             |       |       |       |       |       |       |       |       |
|-------------------------|-----------------------------------------------------------------------------------|-------|-------|-------|-------|-------|-------|-------|-------|
|                         | 13690                                                                             | 13700 | 13710 | 13720 | 13730 | 13740 | 13750 | 13760 |       |
| Human                   | ATTTTTTTGGTAATATTTTAAAGTGGTGGGTTTTTATTTCTGTTAGACATGGTTTCTGACTTTTTCGTGTATGTCATGTTT |       |       |       |       |       |       |       | 13760 |
| AsianBonytongue         | -----                                                                             |       |       |       |       |       |       |       | 0     |
| Reedfish                | -----                                                                             |       |       |       |       |       |       |       | 0     |
| NorthernPike            | -----                                                                             |       |       |       |       |       |       |       | 0     |
| SpottedGar              | -----                                                                             |       |       |       |       |       |       |       | 0     |
| ParamormyropsKingsLeyae | -----                                                                             |       |       |       |       |       |       |       | 0     |

| Majority                | -----                                                                         |       |       |       |       |       |       |       |       |
|-------------------------|-------------------------------------------------------------------------------|-------|-------|-------|-------|-------|-------|-------|-------|
|                         | 13770                                                                         | 13780 | 13790 | 13800 | 13810 | 13820 | 13830 | 13840 |       |
| Human                   | TTCCCAGGAACATTTCTTATACTTTACCTTGTTTGCTAGGCATAGTCTGTGCTCAATAATTGCTCTCTTTTTTTTCT |       |       |       |       |       |       |       | 13840 |
| AsianBonytongue         | -----                                                                         |       |       |       |       |       |       |       | 0     |
| Reedfish                | -----                                                                         |       |       |       |       |       |       |       | 0     |
| NorthernPike            | -----                                                                         |       |       |       |       |       |       |       | 0     |
| SpottedGar              | -----                                                                         |       |       |       |       |       |       |       | 0     |
| ParamormyropsKingsLeyae | -----                                                                         |       |       |       |       |       |       |       | 0     |

| Majority                | -----                                                                           |       |       |       |       |       |       |       |       |
|-------------------------|---------------------------------------------------------------------------------|-------|-------|-------|-------|-------|-------|-------|-------|
|                         | 13850                                                                           | 13860 | 13870 | 13880 | 13890 | 13900 | 13910 | 13920 |       |
| Human                   | TTTTTTTTTTTTTTTTTTCCTGCTTTTTGAGAGACAAGAGTCTTGCCCTGTTGCCAGGCTGGAGTGCAGTGGCCCAATC |       |       |       |       |       |       |       | 13920 |
| AsianBonytongue         | -----                                                                           |       |       |       |       |       |       |       | 0     |
| Reedfish                | -----                                                                           |       |       |       |       |       |       |       | 0     |
| NorthernPike            | -----                                                                           |       |       |       |       |       |       |       | 0     |
| SpottedGar              | -----                                                                           |       |       |       |       |       |       |       | 0     |
| ParamormyropsKingsLeyae | -----                                                                           |       |       |       |       |       |       |       | 0     |

Sunday, May 01, 2022 09:43 PM

| Majority                | -----                                                                             |       |       |       |       |       |       |       |       |
|-------------------------|-----------------------------------------------------------------------------------|-------|-------|-------|-------|-------|-------|-------|-------|
|                         | 13930                                                                             | 13940 | 13950 | 13960 | 13970 | 13980 | 13990 | 14000 |       |
| Human                   | TCAGCTCAGTGCAACCTCTGCCTCCCGGATTCAAGCGATTCTCCTGCCTCAGCTTCCCAAGTAGCTGGAACCTACAGGCGC |       |       |       |       |       |       |       | 14000 |
| AsianBonytongue         | -----                                                                             |       |       |       |       |       |       |       | 0     |
| Reedfish                | -----                                                                             |       |       |       |       |       |       |       | 0     |
| NorthernPike            | -----                                                                             |       |       |       |       |       |       |       | 0     |
| SpottedGar              | -----                                                                             |       |       |       |       |       |       |       | 0     |
| ParamormyropsKingsLeyae | -----                                                                             |       |       |       |       |       |       |       | 0     |

| Majority                | -----                                                                             |       |       |       |       |       |       |       |       |
|-------------------------|-----------------------------------------------------------------------------------|-------|-------|-------|-------|-------|-------|-------|-------|
|                         | 14010                                                                             | 14020 | 14030 | 14040 | 14050 | 14060 | 14070 | 14080 |       |
| Human                   | CTGCCACTACACCTGGCTAATTTTTGTGTTTTTAGTAGGGATGGGGTTTCACCACGTTGGCCAGGCTGACTTGGAACCTCC |       |       |       |       |       |       |       | 14080 |
| AsianBonytongue         | -----                                                                             |       |       |       |       |       |       |       | 0     |
| Reedfish                | -----                                                                             |       |       |       |       |       |       |       | 0     |
| NorthernPike            | -----                                                                             |       |       |       |       |       |       |       | 0     |
| SpottedGar              | -----                                                                             |       |       |       |       |       |       |       | 0     |
| ParamormyropsKingsLeyae | -----                                                                             |       |       |       |       |       |       |       | 0     |

| Majority                | -----                                                                          |       |       |       |       |       |       |       |       |
|-------------------------|--------------------------------------------------------------------------------|-------|-------|-------|-------|-------|-------|-------|-------|
|                         | 14090                                                                          | 14100 | 14110 | 14120 | 14130 | 14140 | 14150 | 14160 |       |
| Human                   | TGACCTCAAGTGATCTGCCACCTTGGCTTCCCAAAGTGTGGGATTATAGGCATGAGCCACTGTGCCTGGCCAATAAGT |       |       |       |       |       |       |       | 14160 |
| AsianBonytongue         | -----                                                                          |       |       |       |       |       |       |       | 0     |
| Reedfish                | -----                                                                          |       |       |       |       |       |       |       | 0     |
| NorthernPike            | -----                                                                          |       |       |       |       |       |       |       | 0     |
| SpottedGar              | -----                                                                          |       |       |       |       |       |       |       | 0     |
| ParamormyropsKingsLeyae | -----                                                                          |       |       |       |       |       |       |       | 0     |

| Majority                | -----                                                                           |       |       |       |       |       |       |       |       |
|-------------------------|---------------------------------------------------------------------------------|-------|-------|-------|-------|-------|-------|-------|-------|
|                         | 14170                                                                           | 14180 | 14190 | 14200 | 14210 | 14220 | 14230 | 14240 |       |
| Human                   | GTCTCTTAATGAGTATCTTAAAGGATATCTAAAAAGAAATGTAACCTAAAATTACATAATAGTAATACTATAACAGTAT |       |       |       |       |       |       |       | 14240 |
| AsianBonytongue         | -----                                                                           |       |       |       |       |       |       |       | 0     |
| Reedfish                | -----                                                                           |       |       |       |       |       |       |       | 0     |
| NorthernPike            | -----                                                                           |       |       |       |       |       |       |       | 0     |
| SpottedGar              | -----                                                                           |       |       |       |       |       |       |       | 0     |
| ParamormyropsKingsLeyae | -----                                                                           |       |       |       |       |       |       |       | 0     |

| Majority                | -----                                                                             |       |       |       |       |       |       |       |       |
|-------------------------|-----------------------------------------------------------------------------------|-------|-------|-------|-------|-------|-------|-------|-------|
|                         | 14250                                                                             | 14260 | 14270 | 14280 | 14290 | 14300 | 14310 | 14320 |       |
| Human                   | TAACATTTAATGTAAGTTGGAACCTATTGATGGTGGACAAGAATGTTTTCTTGTCAAGAACATACGATTTAGAATGAAAAG |       |       |       |       |       |       |       | 14320 |
| AsianBonytongue         | -----                                                                             |       |       |       |       |       |       |       | 0     |
| Reedfish                | -----                                                                             |       |       |       |       |       |       |       | 0     |
| NorthernPike            | -----                                                                             |       |       |       |       |       |       |       | 0     |
| SpottedGar              | -----                                                                             |       |       |       |       |       |       |       | 0     |
| ParamormyropsKingsLeyae | -----                                                                             |       |       |       |       |       |       |       | 0     |

| Majority                | -----                                                                             |       |       |       |       |       |       |       |       |
|-------------------------|-----------------------------------------------------------------------------------|-------|-------|-------|-------|-------|-------|-------|-------|
|                         | 14330                                                                             | 14340 | 14350 | 14360 | 14370 | 14380 | 14390 | 14400 |       |
| Human                   | ATGAGGGTTTGACTTTTATAGCATTGAACAGGTTAACCTCTGAGCTTCAGTTTTTATACATTTTTAAATGGTTTCAGTTGT |       |       |       |       |       |       |       | 14400 |
| AsianBonytongue         | -----                                                                             |       |       |       |       |       |       |       | 0     |
| Reedfish                | -----                                                                             |       |       |       |       |       |       |       | 0     |
| NorthernPike            | -----                                                                             |       |       |       |       |       |       |       | 0     |
| SpottedGar              | -----                                                                             |       |       |       |       |       |       |       | 0     |
| ParamormyropsKingsLeyae | -----                                                                             |       |       |       |       |       |       |       | 0     |

Sunday, May 01, 2022 09:43 PM

```

Majority -----
      |-----|
      |14410  14420  14430  14440  14450  14460  14470  14480|
      |-----|
Human  ACCTACTTCCAAAATTATTTTGAATGTTAGATGAGATGAGGAAAAGACTTATGCTGAAAGGATGAGAATGGTTGTTGTTG 14480
AsianBonytongue ----- 0
Reedfish ----- 0
NorthernPike ----- 0
SpottedGar ----- 0
ParamormyropsKingsLeyae ----- 0

```

```

Majority -----
      |-----|
      |14490  14500  14510  14520  14530  14540  14550  14560|
      |-----|
Human  TAGTTCCTTTAATCTGTAAATCTACATTTGGAAGGAACACTTTTATGGAAATCAAATACAGTAAATTAATTTCTAAGAGGT 14560
AsianBonytongue ----- 0
Reedfish ----- 0
NorthernPike ----- 0
SpottedGar ----- 0
ParamormyropsKingsLeyae ----- 0

```

```

Majority -----
      |-----|
      |14570  14580  14590  14600  14610  14620  14630  14640|
      |-----|
Human  CCTGGAGTTCAGGTTAAAAATAGCCTCAGACAGCACTAAATATCTTTATTAGTGAACAAAAATAAAAAATAACTTAGAA 14640
AsianBonytongue ----- 0
Reedfish ----- 0
NorthernPike ----- 0
SpottedGar ----- 0
ParamormyropsKingsLeyae ----- 0

```

```

Majority -----
      |-----|
      |14650  14660  14670  14680  14690  14700  14710  14720|
      |-----|
Human  TTTAGCACAGAGAAGCAAAGAGATGAAAAATAGGAGAAGCGTTAAAAATGTGTTGGAAAGGAAGAGAAAGTTCTAACAAACA 14720
AsianBonytongue ----- 0
Reedfish ----- 0
NorthernPike ----- 0
SpottedGar ----- 0
ParamormyropsKingsLeyae ----- 0

```

```

Majority -----
      |-----|
      |14730  14740  14750  14760  14770  14780  14790  14800|
      |-----|
Human  TCTAATTAGCGTTCAGAAATTAAGATTGCAGAAAGGCCAAAATTTGAAATGCTAAAGGCTGATAATTTTTCAGAATTGG 14800
AsianBonytongue ----- 0
Reedfish ----- 0
NorthernPike ----- 0
SpottedGar ----- 0
ParamormyropsKingsLeyae ----- 0

```

```

Majority -----
      |-----|
      |14810  14820  14830  14840  14850  14860  14870  14880|
      |-----|
Human  TGAGCTATATGAGTTCCTTAGATTTAGGAGGCACAAGAAAACCTGGACACATAACAGTAAAAGAGCAGAGCACCAAGACA 14880
AsianBonytongue ----- 0
Reedfish ----- 0
NorthernPike ----- 0
SpottedGar ----- 0
ParamormyropsKingsLeyae ----- 0

```

Sunday, May 01, 2022 09:43 PM

```

Majority -----
      14890   14900   14910   14920   14930   14940   14950   14960
Human TAGAGATCTTTAAAGCAGCCAGAGAAAATCAGATTCCCTAAAGAATAAGAAGTCTTAATATGCTTCATCAGCA 14960
AsianBonytongue ----- 0
Reedfish ----- 0
NorthernPike ----- 0
SpottedGar ----- 0
ParamormyropsKingsLeyae ----- 0

```

```

Majority -----
      14970   14980   14990   15000   15010   15020   15030   15040
Human TGGGCATCCAGAAGATAGTGGAAATAATATTTCAATGTGTGAGTGAAAATAGCTGCCACCTGTTATTTTATAGCCAGC 15040
AsianBonytongue ----- 0
Reedfish ----- 0
NorthernPike ----- 0
SpottedGar ----- 0
ParamormyropsKingsLeyae ----- 0

```

```

Majority -----
      15050   15060   15070   15080   15090   15100   15110   15120
Human CAAATTATCATATAAGGAGAAGAACAAAATAAAGACACTTTTTGAAACACGTCATTCTGCCTCCAAAAAAGCAATTTAGG 15120
AsianBonytongue ----- 0
Reedfish ----- 0
NorthernPike ----- 0
SpottedGar ----- 0
ParamormyropsKingsLeyae ----- 0

```

```

Majority -----
      15130   15140   15150   15160   15170   15180   15190   15200
Human AAATGTATCAACAGACCCACTGAAGGAATTTCTGGAGTTTGTACTTCAGGAAGAAAGCCAATGACACCAGAAAGGAAGTC 15200
AsianBonytongue ----- 0
Reedfish ----- 0
NorthernPike ----- 0
SpottedGar ----- 0
ParamormyropsKingsLeyae ----- 0

```

```

Majority -----
      15210   15220   15230   15240   15250   15260   15270   15280
Human TGATATAGAAGTGAGGCTAATCAAGAAATTTGGTAGGTCTGTGAGTAAATCTAATTACTGACCATATAAGAATGTAATAGC 15280
AsianBonytongue ----- 0
Reedfish ----- 0
NorthernPike ----- 0
SpottedGar ----- 0
ParamormyropsKingsLeyae ----- 0

```

```

Majority -----
      15290   15300   15310   15320   15330   15340   15350   15360
Human AGTGATTGATAAGGGGTTTAAAAATAGAATTAAAAATATTTAAATCATAACAATATGTGAGAGAGTGGTAGAGACTGGA 15360
AsianBonytongue ----- 0
Reedfish ----- 0
NorthernPike ----- 0
SpottedGar ----- 0
ParamormyropsKingsLeyae ----- 0

```



Sunday, May 01, 2022 09:43 PM

```

Majority -----
      |-----|
      |15370  15380  15390  15400  15410  15420  15430  15440|
      |-----|
Human  GTTTGAGTTCTGATGATCTAGTATTGATTGGAGCTGTGTTGTCAGTTACAGTAGCTACTAGTCATTTGTTACTGAGCACT 15440
AsianBonytongue ----- 0
Reedfish ----- 0
NorthernPike ----- 0
SpottedGar ----- 0
ParamormyropsKingsLeyae ----- 0
    
```

```

Majority -----
      |-----|
      |15450  15460  15470  15480  15490  15500  15510  15520|
      |-----|
Human  TGACATGTATGTAGTTTAAGTTGATCTTCTACTTAAATTGAAAAATACACATTTCTGAGCCTTAGTCTGAAAGAAGAAATGT 15520
AsianBonytongue ----- 0
Reedfish ----- 0
NorthernPike ----- 0
SpottedGar ----- 0
ParamormyropsKingsLeyae ----- 0
    
```

```

Majority -----
      |-----|
      |15530  15540  15550  15560  15570  15580  15590  15600|
      |-----|
Human  AAAATATCCCAAGTTTTTCATATTGGTTACATGTACAGCGGATAATATTTTGGTATTTTGGGTAAATGAAATACATTATG 15600
AsianBonytongue ----- 0
Reedfish ----- 0
NorthernPike ----- 0
SpottedGar ----- 0
ParamormyropsKingsLeyae ----- 0
    
```

```

Majority -----
      |-----|
      |15610  15620  15630  15640  15650  15660  15670  15680|
      |-----|
Human  TGTGTTGCCTTTTCCTCTTTTTTCCTTTCTTTTTTAAGATAGGGTCTTGCTCTGTCCACCAGGCTGGAGTGCCGTGGC 15680
AsianBonytongue ----- 0
Reedfish ----- 0
NorthernPike ----- 0
SpottedGar ----- 0
ParamormyropsKingsLeyae ----- 0
    
```

```

Majority -----
      |-----|
      |15690  15700  15710  15720  15730  15740  15750  15760|
      |-----|
Human  ATGATCATGGCAGCCTCAACCTCCTGGGCTCCAGTGACCCTCCACCTCAGCCTCCCAAGTAGCTGGGACTACAGTTGTG 15760
AsianBonytongue ----- 0
Reedfish ----- 0
NorthernPike ----- 0
SpottedGar ----- 0
ParamormyropsKingsLeyae ----- 0
    
```

```

Majority -----
      |-----|
      |15770  15780  15790  15800  15810  15820  15830  15840|
      |-----|
Human  TGCCACCACACCTGGCTAATTTTTGAGTTTTTTTTTGTAGAGACAGCGTCTCGCTGTATCGCTTAGGCTGGTCTCAAAC 15840
AsianBonytongue ----- 0
Reedfish ----- 0
NorthernPike ----- 0
SpottedGar ----- 0
ParamormyropsKingsLeyae ----- 0
    
```

Sunday, May 01, 2022 09:43 PM

```

Majority -----
                |-----|
                |15850|15860|15870|15880|15890|15900|15910|15920|
                |-----|
Human           CCTGGGCTCAAGTGATCCTCCTGCTTTAGCCTTGCAAAGTGCTGGGATTACAGGACTGAGTCTGGCCACCTTTTCTTTC 15920
AsianBonytongue ----- 0
Reedfish       ----- 0
NorthernPike   ----- 0
SpottedGar     ----- 0
ParamormyropsKingsLeyae ----- 0
    
```

```

Majority -----
                |-----|
                |15930|15940|15950|15960|15970|15980|15990|16000|
                |-----|
Human           TTTCTTTTTTTTTTAGACGGAGTCTCCCTTTGTTGCCAGGCTGGAGTACAGTGGCTCTATCTCTGCTTCCTGCAAGCTC 16000
AsianBonytongue ----- 0
Reedfish       ----- 0
NorthernPike   ----- 0
SpottedGar     ----- 0
ParamormyropsKingsLeyae ----- 0
    
```

```

Majority -----
                |-----|
                |16010|16020|16030|16040|16050|16060|16070|16080|
                |-----|
Human           TGCCTCCTGGGTTACGCCATTCTCCTGCCTCAGCCTCCCGAGTAGCTGGGACTACAGGCGCCTGCCACCACACCCGGCT 16080
AsianBonytongue ----- 0
Reedfish       ----- 0
NorthernPike   ----- 0
SpottedGar     ----- 0
ParamormyropsKingsLeyae ----- 0
    
```

```

Majority -----
                |-----|
                |16090|16100|16110|16120|16130|16140|16150|16160|
                |-----|
Human           AATTTTTTGTATTTTTAGTAGAGATGGGTTTTACCATGGTCTCGATCTCCTGACCTCCTGATCTGCCACCCTGGCCTCC 16160
AsianBonytongue ----- 0
Reedfish       ----- 0
NorthernPike   ----- 0
SpottedGar     ----- 0
ParamormyropsKingsLeyae ----- 0
    
```

```

Majority -----
                |-----|
                |16170|16180|16190|16200|16210|16220|16230|16240|
                |-----|
Human           CAAAGTGCTGGGATTACAGGCGTGAGCCACTGCGACCGGCCACTTTTCTTTTACTTTTAAAAATGTGGCTAATAGAA 16240
AsianBonytongue ----- 0
Reedfish       ----- 0
NorthernPike   ----- 0
SpottedGar     ----- 0
ParamormyropsKingsLeyae ----- 0
    
```

```

Majority -----
                |-----|
                |16250|16260|16270|16280|16290|16300|16310|16320|
                |-----|
Human           ATTTATGAGATTATATTTATGGTTCATACTACGTTTCTTTTGGACAGTGCCAGAGTGAATCAGATAAGCTTGCATTTTAA 16320
AsianBonytongue ----- 0
Reedfish       ----- 0
NorthernPike   ----- 0
SpottedGar     ----- 0
ParamormyropsKingsLeyae ----- 0
    
```

Sunday, May 01, 2022 09:43 PM

```

Majority -----
                |-----|
                |16330|16340|16350|16360|16370|16380|16390|16400|
                |-----|
Human           |AATCCTAAGGGTAAATGCAATAGAGATAGAACGCAAATAATTGGGGAGGGGGGTTGACTGAAATTAAGATGTATAATCC| 16400
AsianBonytongue|-----| 0
Reedfish       |-----| 0
NorthernPike   |-----| 0
SpottedGar     |-----| 0
ParamormyropsKingsLeyae|-----| 0

```

```

Majority -----
                |-----|
                |16410|16420|16430|16440|16450|16460|16470|16480|
                |-----|
Human           |AAAAGAAGGCAAAAAAAAAGGAAAGACACAAAGTGAGCTTATATGTTAATAGCGTGGAAGGTTCTATGAAGGGTTGTTT| 16480
AsianBonytongue|-----| 0
Reedfish       |-----| 0
NorthernPike   |-----| 0
SpottedGar     |-----| 0
ParamormyropsKingsLeyae|-----| 0

```

```

Majority -----
                |-----|
                |16490|16500|16510|16520|16530|16540|16550|16560|
                |-----|
Human           |AGAGCCTTTAAGGGCAAATTTTCTTGCTGCTGGTTGCAGGAAAGAGTGGCATTGTTTTTGTTCACCTTTTAAAGCTACAAAA| 16560
AsianBonytongue|-----| 0
Reedfish       |-----| 0
NorthernPike   |-----| 0
SpottedGar     |-----| 0
ParamormyropsKingsLeyae|-----| 0

```

```

Majority -----
                |-----|
                |16570|16580|16590|16600|16610|16620|16630|16640|
                |-----|
Human           |ACAAGTAATGATGAGGAAAATTTGGGACATGTTGAGGAAGTAAGTAATTTTTTGAATGTAGGTTGAGTTAGAGTAGTAGA| 16640
AsianBonytongue|-----| 0
Reedfish       |-----| 0
NorthernPike   |-----| 0
SpottedGar     |-----| 0
ParamormyropsKingsLeyae|-----| 0

```

```

Majority -----
                |-----|
                |16650|16660|16670|16680|16690|16700|16710|16720|
                |-----|
Human           |AGACAAAATTTAAAAAGTAGTTTTTGACAGTAATATGGAGAGCTTTGAGTGCAAAGGATTTGCAGTGAGGACCTTTGAAA| 16720
AsianBonytongue|-----| 0
Reedfish       |-----| 0
NorthernPike   |-----| 0
SpottedGar     |-----| 0
ParamormyropsKingsLeyae|-----| 0

```

```

Majority -----
                |-----|
                |16730|16740|16750|16760|16770|16780|16790|16800|
                |-----|
Human           |ATTGAACCTGCTTTCTCCTATCAGTATTTATGTTTAAATAAACTTGATTCTTTGTGAGTATTGTTATATATGTTTTTCATA| 16800
AsianBonytongue|-----| 0
Reedfish       |-----| 0
NorthernPike   |-----| 0
SpottedGar     |-----| 0
ParamormyropsKingsLeyae|-----| 0

```

Sunday, May 01, 2022 09:43 PM

```

Majority -----
                16810   16820   16830   16840   16850   16860   16870   16880
Human          ACTACTGTTGTAGTAACGTTTCTTTTTTTTTTACTAGCTTGCTTTCATGCCACGCTGTTGATTAAATATTTATGGGCCATT 16880
AsianBonytongue ----- 0
Reedfish      ----- 0
NorthernPike  ----- 0
SpottedGar    ----- 0
ParamormyropsKingsLeyae ----- 0

```

```

Majority -----
                16890   16900   16910   16920   16930   16940   16950   16960
Human          TTAAGGCTTCTAATCTTCATTTGTGATGAACCTTTTGAGGAAGAGTTAGGTTTTGTAAGTGTGAACTCCAATAAACACAG 16960
AsianBonytongue ----- 0
Reedfish      ----- 0
NorthernPike  ----- 0
SpottedGar    ----- 0
ParamormyropsKingsLeyae ----- 0

```

```

Majority -----
                16970   16980   16990   17000   17010   17020   17030   17040
Human          TTCCACTTTCCTTAACTTCTCAGAAAGATACTTTTGCTATTTGATACAGATAGTTGTCTAGGCAAGCTATTAGCAGGGTTT 17040
AsianBonytongue ----- 0
Reedfish      ----- 0
NorthernPike  ----- 0
SpottedGar    ----- 0
ParamormyropsKingsLeyae ----- 0

```

```

Majority -----
                17050   17060   17070   17080   17090   17100   17110   17120
Human          CAGGTAAGACATATGTGTTTGCTATTTGTTTTAAGCACTCTCCCTCATTATTCAAATTGTAGCAAACATCTACTACAC 17120
AsianBonytongue ----- 0
Reedfish      ----- 0
NorthernPike  ----- 0
SpottedGar    ----- 0
ParamormyropsKingsLeyae ----- 0

```

```

Majority -----
                17130   17140   17150   17160   17170   17180   17190   17200
Human          CCATTTCAGTCTTTGTCTTAATAGTTCAACTATTATAAAAAGGAGTGGTATATATATATAAACTCTTGCTTGGCTT 17200
AsianBonytongue ----- 0
Reedfish      ----- 0
NorthernPike  ----- 0
SpottedGar    ----- 0
ParamormyropsKingsLeyae ----- 0

```

```

Majority -----
                17210   17220   17230   17240   17250   17260   17270   17280
Human          TGGTTTGATTGAATTAATAAGGTGAGTTTTTTTTGTTTGTGTTTTGAGATGGAGTCTCGCTCTGTTGCCAGGCTGGA 17280
AsianBonytongue ----- 0
Reedfish      ----- 0
NorthernPike  ----- 0
SpottedGar    ----- 0
ParamormyropsKingsLeyae ----- 0

```

Sunday, May 01, 2022 09:43 PM

```

Majority -----
      17290   17300   17310   17320   17330   17340   17350   17360
Human  GTGCAGTGGTGGGATCTCGGCTCACTGCAGGCCATTCTCCTGCCTCAGCCTCCCGAGTAGCTGGGACTGCAGGTGCCTGC 17360
AsianBonytongue ----- 0
Reedfish ----- 0
NorthernPike ----- 0
SpottedGar ----- 0
ParamormyropsKingsLeyae ----- 0
    
```

```

Majority -----
      17370   17380   17390   17400   17410   17420   17430   17440
Human  CACCACACCTGGCTAATTTTTTGTATTTTGTAGTAGAGATGGGGTTTACCGTGTTAGCCAGGATGGTCTAGATCTCCTGA 17440
AsianBonytongue ----- 0
Reedfish ----- 0
NorthernPike ----- 0
SpottedGar ----- 0
ParamormyropsKingsLeyae ----- 0
    
```

```

Majority -----
      17450   17460   17470   17480   17490   17500   17510   17520
Human  CCTTGTGATCCGCCCGCCTCGGAAATACTTTGCATTGTTGGATTGATTGGGTTTGAGCCCTGTGTACTTAAGTGATTA 17520
AsianBonytongue ----- 0
Reedfish ----- 0
NorthernPike ----- 0
SpottedGar ----- 0
ParamormyropsKingsLeyae ----- 0
    
```

```

Majority -----
      17530   17540   17550   17560   17570   17580   17590   17600
Human  TGAACAAGTCTTTTATAATCTGAATTTCCCTTTCCTAGTTTGTAAATATTGAGGATAATAATTTCTAACTTGCATGATTGT 17600
AsianBonytongue ----- 0
Reedfish ----- 0
NorthernPike ----- 0
SpottedGar ----- 0
ParamormyropsKingsLeyae ----- 0
    
```

```

Majority -----
      17610   17620   17630   17640   17650   17660   17670   17680
Human  TGTGAAGATTAAATAAGACAATGATATTGGTAGGAGCTCTTTATAATCTTTCTCTCTTATGTACAATTCAAATATATGTC 17680
AsianBonytongue ----- 0
Reedfish ----- 0
NorthernPike ----- 0
SpottedGar ----- 0
ParamormyropsKingsLeyae ----- 0
    
```

```

Majority -----
      17690   17700   17710   17720   17730   17740   17750   17760
Human  GGTTTAAATACCAAAATACCACCTTTAAAAAATCTGGGCTGAAATGGACACTTCTAATGTAGGAGTAGTGCTTTAGAAAAT 17760
AsianBonytongue ----- 0
Reedfish ----- 0
NorthernPike ----- 0
SpottedGar ----- 0
ParamormyropsKingsLeyae ----- 0
    
```

Sunday, May 01, 2022 09:43 PM

```

Majority -----
                |-----|
                |17770|17780|17790|17800|17810|17820|17830|17840|
                |-----|
Human           |AATGCTTTGTTTCGTATTCTTTTCCTAGTATTTTATGTCTAGTAACTCATAAGGAAAAAATGATCAGATAAGTATATTTT| 17840
AsianBonytongue|-----| 0
Reedfish       |-----| 0
NorthernPike   |-----| 0
SpottedGar     |-----| 0
ParamormyropsKingsLeyae|-----| 0

```

```

Majority -----
                |-----|
                |17850|17860|17870|17880|17890|17900|17910|17920|
                |-----|
Human           |TTAGATGCTGATTACAGCATTATTTAAATAGTAGAAATAACAACTGTTTCAGTGATAAGACAATGAATAAAATCTGTTCAT| 17920
AsianBonytongue|-----| 0
Reedfish       |-----| 0
NorthernPike   |-----| 0
SpottedGar     |-----| 0
ParamormyropsKingsLeyae|-----| 0

```

```

Majority -----
                |-----|
                |17930|17940|17950|17960|17970|17980|17990|18000|
                |-----|
Human           |AAACATTACAAATGTTTTTTAAATATTTTTCATATGTGTGAAAAGTAGGATTTAAAATAACTTTGACAAATGCATACAAT| 18000
AsianBonytongue|-----| 0
Reedfish       |-----| 0
NorthernPike   |-----| 0
SpottedGar     |-----| 0
ParamormyropsKingsLeyae|-----| 0

```

```

Majority -----
                |-----|
                |18010|18020|18030|18040|18050|18060|18070|18080|
                |-----|
Human           |TTATATGTGTCCCCAAAAGCTGGAGGGCAGTGTACCAAAATAGAGTAGTTTTTCTCCAGGTTGATGGGATTAGTTTTTTTGT| 18080
AsianBonytongue|-----| 0
Reedfish       |-----| 0
NorthernPike   |-----| 0
SpottedGar     |-----| 0
ParamormyropsKingsLeyae|-----| 0

```

```

Majority -----
                |-----|
                |18090|18100|18110|18120|18130|18140|18150|18160|
                |-----|
Human           |AATTCCTTATATATTTTCTCTATATTTCCACATTTTAAGTATTTTATGATAAAGTTATTAATATTGATAAAGTTATTAATG| 18160
AsianBonytongue|-----| 0
Reedfish       |-----| 0
NorthernPike   |-----| 0
SpottedGar     |-----| 0
ParamormyropsKingsLeyae|-----| 0

```

```

Majority -----
                |-----|
                |18170|18180|18190|18200|18210|18220|18230|18240|
                |-----|
Human           |TTGCTTAATTGATTAAACCCTGATATTTTCTTGTCTTTTAAAAAACGTTGCATAACTTGATATAAATCTTTTAAATTGT| 18240
AsianBonytongue|-----| 0
Reedfish       |-----| 0
NorthernPike   |-----| 0
SpottedGar     |-----| 0
ParamormyropsKingsLeyae|-----| 0

```

Sunday, May 01, 2022 09:43 PM

```

Majority -----
      18250  18260  18270  18280  18290  18300  18310  18320
Human  ACAAAAAAACACATAAAATTTACTATCTTAACCATTTTTAAGTGACTTAAATTGTTAATTATTCTTATACGTACTT 18320
AsianBonytongue ----- 0
Reedfish ----- 0
NorthernPike ----- 0
SpottedGar ----- 0
ParamormyropsKingsLeyae ----- 0

```

```

Majority -----
      18330  18340  18350  18360  18370  18380  18390  18400
Human  AATAATATTACATTGCAAAACCCATCTCCAGAACTTTTTGGAGAAGTAACTCTATACTGATTTTAAAACTCCCTCTTT 18400
AsianBonytongue ----- 0
Reedfish ----- 0
NorthernPike ----- 0
SpottedGar ----- 0
ParamormyropsKingsLeyae ----- 0

```

```

Majority -----
      18410  18420  18430  18440  18450  18460  18470  18480
Human  TGTCTTCTGCTGGTAACCAGCATTCTATTTTCTGTGTCTATGAATTTGACTACTTTAAATACCTCACATAAGTGGGAATT 18480
AsianBonytongue ----- 0
Reedfish ----- 0
NorthernPike ----- 0
SpottedGar ----- 0
ParamormyropsKingsLeyae ----- 0

```

```

Majority -----
      18490  18500  18510  18520  18530  18540  18550  18560
Human  ATACAGTATAGGTTAAGCATCCCTAATCTGAAAATCCAAAGTCTGAATGCTACAAAATCTGAAACTGGTGTGTGTTTTTT 18560
AsianBonytongue ----- 0
Reedfish ----- 0
NorthernPike ----- 0
SpottedGar ----- 0
ParamormyropsKingsLeyae ----- 0

```

```

Majority -----
      18570  18580  18590  18600  18610  18620  18630  18640
Human  TTTTTTTTTTTTTTTTTTTTGAGACGGAGTCTTACTCTGTGCGCCAGGCTGGAGTGCAGTGGCGCGATCTCTGCTCACTG 18640
AsianBonytongue ----- 0
Reedfish ----- 0
NorthernPike ----- 0
SpottedGar ----- 0
ParamormyropsKingsLeyae ----- 0

```

```

Majority -----
      18650  18660  18670  18680  18690  18700  18710  18720
Human  CAAGCTCCACCACCCGGGTTACGCCATCTTCTGAGTAGCTGGGACTACAGGCGCCCGCCACCACGCGCCGGCTAATTTT 18720
AsianBonytongue ----- 0
Reedfish ----- 0
NorthernPike ----- 0
SpottedGar ----- 0
ParamormyropsKingsLeyae ----- 0

```

Sunday, May 01, 2022 09:43 PM

```

Majority -----
                |-----|
                |18730|18740|18750|18760|18770|18780|18790|18800|
                |-----|
Human           |TTGTATATATATATATATATTTTTTAGTAGAGACGGGGTTTCACTGTAGCCAGGATGGACTCTTATCTCCCACCTCGTGAT| 18800
AsianBonytongue|-----| 0
Reedfish       |-----| 0
NorthernPike   |-----| 0
SpottedGar     |-----| 0
ParamormyropsKingsLeyae|-----| 0
    
```

```

Majority -----
                |-----|
                |18810|18820|18830|18840|18850|18860|18870|18880|
                |-----|
Human           |CCGCCTGCCTCGGCCTCCCAAAGTGCTGGGATTACAGGCCTGAGCCACCGCGCCTGGCCAATCTGAAACTTTTTGAGCAC| 18880
AsianBonytongue|-----| 0
Reedfish       |-----| 0
NorthernPike   |-----| 0
SpottedGar     |-----| 0
ParamormyropsKingsLeyae|-----| 0
    
```

```

Majority -----
                |-----|
                |18890|18900|18910|18920|18930|18940|18950|18960|
                |-----|
Human           |TTACTTGATGCTCAAAGGAAGTGCTTAGTGGAGCATTTTGGATTTTAGATTTTCAGATTAGGAATGCTCAGGTTGTGTTT| 18960
AsianBonytongue|-----| 0
Reedfish       |-----| 0
NorthernPike   |-----| 0
SpottedGar     |-----| 0
ParamormyropsKingsLeyae|-----| 0
    
```

```

Majority -----
                |-----|
                |18970|18980|18990|19000|19010|19020|19030|19040|
                |-----|
Human           |GTCCTTTTGTGACTGGCTTATATTCACTTAATATAATGTCCTCAGGGTCCATCCATTTTGTAGCATGTGACAAGATTTC| 19040
AsianBonytongue|-----| 0
Reedfish       |-----| 0
NorthernPike   |-----| 0
SpottedGar     |-----| 0
ParamormyropsKingsLeyae|-----| 0
    
```

```

Majority -----
                |-----|
                |19050|19060|19070|19080|19090|19100|19110|19120|
                |-----|
Human           |TCCCTTTTAAAGGCTACATAGCATTCCATTGTGGTACACAAAAGTTCATTTGAAGCCCCCTGTGTCATAACTCAGACTTC| 19120
AsianBonytongue|-----| 0
Reedfish       |-----| 0
NorthernPike   |-----| 0
SpottedGar     |-----| 0
ParamormyropsKingsLeyae|-----| 0
    
```

```

Majority -----
                |-----|
                |19130|19140|19150|19160|19170|19180|19190|19200|
                |-----|
Human           |CATAACAAAATACCATAGACTGAGTGACTTAAAAACAGAGATTTCGTTTTCTCACAGTTCTGGAAACTGGGAAGTCCAAG| 19200
AsianBonytongue|-----| 0
Reedfish       |-----| 0
NorthernPike   |-----| 0
SpottedGar     |-----| 0
ParamormyropsKingsLeyae|-----| 0
    
```



Sunday, May 01, 2022 09:43 PM

```

Majority -----
                19210   19220   19230   19240   19250   19260   19270   19280
-----|-----|-----|-----|-----|-----|-----|-----|
Human    ATCAAGGTACCAGCAAGGCAACTTTCCTTCTGAGGCCACTTCTCTTGAAGTGAGGCCACCATTTTACTTTGTGTGCCTCA 19280
AsianBonytongue ----- 0
Reedfish ----- 0
NorthernPike ----- 0
SpottedGar ----- 0
ParamormyropsKingsLeyae ----- 0

```

```

Majority -----
                19290   19300   19310   19320   19330   19340   19350   19360
-----|-----|-----|-----|-----|-----|-----|-----|
Human    CATGACCTTTTCTTTGTGAGCACACTTTGGGGGAGTGGGTGGCAGAAGCTCTCTGGTATTTCTTCTCATAAAGGCATTAA 19360
AsianBonytongue ----- 0
Reedfish ----- 0
NorthernPike ----- 0
SpottedGar ----- 0
ParamormyropsKingsLeyae ----- 0

```

```

Majority -----
                19370   19380   19390   19400   19410   19420   19430   19440
-----|-----|-----|-----|-----|-----|-----|-----|
Human    TCCCATCATGAAGGCCTTACTCTCATGATCTCATGAAATCCTCCAGTTAACTCCTAAAGGCCCTGTTTCAAATTCATC 19440
AsianBonytongue ----- 0
Reedfish ----- 0
NorthernPike ----- 0
SpottedGar ----- 0
ParamormyropsKingsLeyae ----- 0

```

```

Majority -----
                19450   19460   19470   19480   19490   19500   19510   19520
-----|-----|-----|-----|-----|-----|-----|-----|
Human    ACATTTGGGGTTAGGACTTCAGCATGTGATTTTTGGGGAAACATAAGCATTGAGTTGATAATACCCTGCATATAGTTGAC 19520
AsianBonytongue ----- 0
Reedfish ----- 0
NorthernPike ----- 0
SpottedGar ----- 0
ParamormyropsKingsLeyae ----- 0

```

```

Majority -----
                19530   19540   19550   19560   19570   19580   19590   19600
-----|-----|-----|-----|-----|-----|-----|-----|
Human    CCATACTTCTCCACTCCAGGTAATTACTATACTAAATTTGATGTTTACCATTCCATAAAATTTCTCATTTACTACATGTT 19600
AsianBonytongue ----- 0
Reedfish ----- 0
NorthernPike ----- 0
SpottedGar ----- 0
ParamormyropsKingsLeyae ----- 0

```

```

Majority -----
                19610   19620   19630   19640   19650   19660   19670   19680
-----|-----|-----|-----|-----|-----|-----|-----|
Human    TATGTATTTTATCTTAAGCAATATATGGTTTTGTTTTGCATGTTTAAACTATAGATGTACTATCATGCTGTATGTATTC 19680
AsianBonytongue ----- 0
Reedfish ----- 0
NorthernPike ----- 0
SpottedGar ----- 0
ParamormyropsKingsLeyae ----- 0

```

Sunday, May 01, 2022 09:43 PM

```

Majority -----
                |-----|
                |19690|19700|19710|19720|19730|19740|19750|19760|
                |-----|
Human           |TGTAATTTGCTTTTCTTGTTTCAGTGTTATTTTGTAAAGTTTATATATATATATATATTTTCATTGCCATATAGTATATGAT| 19760
AsianBonytongue ----- 0
Reedfish       ----- 0
NorthernPike   ----- 0
SpottedGar     ----- 0
ParamormyropsKingsLeyae ----- 0

```

```

Majority -----
                |-----|
                |19770|19780|19790|19800|19810|19820|19830|19840|
                |-----|
Human           |ATATGAATATATCATCTTGACAAATGAGTTAATATTTGACGAGATTGATTGTCAAATATTTTAAATTTTTTCCATTAC| 19840
AsianBonytongue ----- 0
Reedfish       ----- 0
NorthernPike   ----- 0
SpottedGar     ----- 0
ParamormyropsKingsLeyae ----- 0

```

```

Majority -----
                |-----|
                |19850|19860|19870|19880|19890|19900|19910|19920|
                |-----|
Human           |AAACTGCTACTGTAAGCATTAAATATGCATATTCTAACGTGTTAATATTAGAGTTTCTCATAGATTGTGTCTTTTCAAATC| 19920
AsianBonytongue ----- 0
Reedfish       ----- 0
NorthernPike   ----- 0
SpottedGar     ----- 0
ParamormyropsKingsLeyae ----- 0

```

```

Majority -----
                |-----|
                |19930|19940|19950|19960|19970|19980|19990|20000|
                |-----|
Human           |GATTGAATATTAACATATTGCTTTCATAGGTAATTATATTAATTATACTGTTAGCGCTGCATGTAGATTCTTGTTTCTAT| 20000
AsianBonytongue ----- 0
Reedfish       ----- 0
NorthernPike   ----- 0
SpottedGar     ----- 0
ParamormyropsKingsLeyae ----- 0

```

```

Majority -----
                |-----|
                |20010|20020|20030|20040|20050|20060|20070|20080|
                |-----|
Human           |ACATTCTTTGAAAATCGGCATTGTTGGACTTTTTAATTTTGCTGATCAAATGTACATGGGAAGGATATCTTGTGGTTTTTA| 20080
AsianBonytongue ----- 0
Reedfish       ----- 0
NorthernPike   ----- 0
SpottedGar     ----- 0
ParamormyropsKingsLeyae ----- 0

```

```

Majority -----
                |-----|
                |20090|20100|20110|20120|20130|20140|20150|20160|
                |-----|
Human           |ATTTGCATTCCTTATTAATGCAAAAAAAAAAAAAACATTGATTCCTGGGAGTTTTTATATACTGTGCAGACTAATTGTTTT| 20160
AsianBonytongue ----- 0
Reedfish       ----- 0
NorthernPike   ----- 0
SpottedGar     ----- 0
ParamormyropsKingsLeyae ----- 0

```



Sunday, May 01, 2022 09:43 PM

Majority -----  
 20650 20660 20670 20680 20690 20700 20710 20720  
 Human CTTGTGTATTTTATTTTAAAAGTTTAAATTTTGATTTTCACATTTATGGCGTTAATCTACCTGGAATTTATTCTTTGT 20720  
 AsianBonytongue ----- 0  
 Reedfish ----- 0  
 NorthernPike ----- 0  
 SpottedGar ----- 0  
 ParamormyropsKingsLeyae ----- 0

Majority -----  
 20730 20740 20750 20760 20770 20780 20790 20800  
 Human GTAGCATATGTTACAGGTTTAAATTATTTTCTATATGGATAGCAAGCTTAGTATGTACTTGATTGAATAGCTCAGCTTT 20800  
 AsianBonytongue ----- 0  
 Reedfish ----- 0  
 NorthernPike ----- 0  
 SpottedGar ----- 0  
 ParamormyropsKingsLeyae ----- 0

Majority -----  
 20810 20820 20830 20840 20850 20860 20870 20880  
 Human TCTCCAATGATCTGCTTCTCAGCTCTTCAGGTTTCCGTATATTCACAGAACCATTTCTGTGCTATGTCTTGTAGCAGTA 20880  
 AsianBonytongue ----- 0  
 Reedfish ----- 0  
 NorthernPike ----- 0  
 SpottedGar ----- 0  
 ParamormyropsKingsLeyae ----- 0

Majority -----  
 20890 20900 20910 20920 20930 20940 20950 20960  
 Human CAACAGTGTCTTAATTACTTATGGCATCAGCATTAAGTTTGGAACTTGTACAGTGAGTGTCAAACCTTTGTTTTTCAA 20960  
 AsianBonytongue ----- 0  
 Reedfish ----- 0  
 NorthernPike ----- 0  
 SpottedGar ----- 0  
 ParamormyropsKingsLeyae ----- 0

Majority -----  
 20970 20980 20990 21000 21010 21020 21030 21040  
 Human AATTGTCTTGGTGTTTTCTTCACTGCATTTATTTAAGATCATTGGCTAAGTTCTGTGAAGGCTCTTTGGGTCTTATTT 21040  
 AsianBonytongue ----- 0  
 Reedfish ----- 0  
 NorthernPike ----- 0  
 SpottedGar ----- 0  
 ParamormyropsKingsLeyae ----- 0

Majority -----  
 21050 21060 21070 21080 21090 21100 21110 21120  
 Human ATACTGCGCTTAAATTTAGTAGTTAATTGGGAGAACATTATAGCTGCATTATCAAATAAAATGGCAATTTTTTTTGAGC 21120  
 AsianBonytongue ----- 0  
 Reedfish ----- 0  
 NorthernPike ----- 0  
 SpottedGar ----- 0  
 ParamormyropsKingsLeyae ----- 0

Sunday, May 01, 2022 09:43 PM

```

Majority -----
                21130   21140   21150   21160   21170   21180   21190   21200
Human          TGAAAGGCAGAGAACTATAACATTTCTTTGAAGAATTTTCCACTTTCTTCTTCATGGTATTTCCCTAAGAGACATGCTT 21200
AsianBonytongue ----- 0
Reedfish ----- 0
NorthernPike ----- 0
SpottedGar ----- 0
ParamormyropsKingsLeyae ----- 0
    
```

```

Majority -----
                21210   21220   21230   21240   21250   21260   21270   21280
Human          AATGCAGAAAATATATATAAAGGATTTTAAACAGCTTATATGTAAGGGATGAGGGAACAGGGATACTTGGACTAATATTT 21280
AsianBonytongue ----- 0
Reedfish ----- 0
NorthernPike ----- 0
SpottedGar ----- 0
ParamormyropsKingsLeyae ----- 0
    
```

```

Majority -----
                21290   21300   21310   21320   21330   21340   21350   21360
Human          CAATATTTCTAAAATTATTGGTTTATTGAGTACGTTCTTAGAAAACGTGTTTTATTGAAAGCTTCAAATTTCTCAGAATTG 21360
AsianBonytongue ----- 0
Reedfish ----- 0
NorthernPike ----- 0
SpottedGar ----- 0
ParamormyropsKingsLeyae ----- 0
    
```

```

Majority -----
                21370   21380   21390   21400   21410   21420   21430   21440
Human          TATAGCATTTTTGAATTCTCTCTTTTATTACTAATATCAAGCACCTATGTTTTCTCCTATTTCTTGATTGTCTTGTCAC 21440
AsianBonytongue ----- 0
Reedfish ----- 0
NorthernPike ----- 0
SpottedGar ----- 0
ParamormyropsKingsLeyae ----- 0
    
```

```

Majority -----
                21450   21460   21470   21480   21490   21500   21510   21520
Human          AGAATTTATTTTACTGGTCTTTTCAAAGAACCAACCTTTTTACTTGTTTTCTTTTTTGTGGGGCAGTGGAGGGATTCA 21520
AsianBonytongue ----- 0
Reedfish ----- 0
NorthernPike ----- 0
SpottedGar ----- 0
ParamormyropsKingsLeyae ----- 0
    
```

```

Majority -----
                21530   21540   21550   21560   21570   21580   21590   21600
Human          CTTTAATTTGATCCTGAACTCCTTTATTTTCTTTTAAAATGCATTCAAGGTTAAAGGTAATCAGCTGATAGCTTTGGCTT 21600
AsianBonytongue ----- 0
Reedfish ----- 0
NorthernPike ----- 0
SpottedGar ----- 0
ParamormyropsKingsLeyae ----- 0
    
```

Sunday, May 01, 2022 09:43 PM

```

Majority -----
                21610      21620      21630      21640      21650      21660      21670      21680
Human          TTTTTTTTTTTTTTACTTTTAGAGTTCCTTTTTATTGTAAACTTCATTTAAAGGTTTAAAGCTACACAAAAGTAGAGG 21680
AsianBonytongue ----- 0
Reedfish ----- 0
NorthernPike ----- 0
SpottedGar ----- 0
ParamormyropsKingsLeyae ----- 0

```

```

Majority -----
                21690      21700      21710      21720      21730      21740      21750      21760
Human          GAATGGTATATAATACACTTTTTCTGTGGATAATATTAATGCAAATCTCAGATCATTTTCATATAATCTGCAGATATAT 21760
AsianBonytongue ----- 0
Reedfish ----- 0
NorthernPike ----- 0
SpottedGar ----- 0
ParamormyropsKingsLeyae ----- 0

```

```

Majority -----
                21770      21780      21790      21800      21810      21820      21830      21840
Human          CAGAAATGTGTGCTCTCTATTAATGTGACATTGGTACCATTATAAAGTTTAAAATAATTTCTTAATGTCGTCTAATCTC 21840
AsianBonytongue ----- 0
Reedfish ----- 0
NorthernPike ----- 0
SpottedGar ----- 0
ParamormyropsKingsLeyae ----- 0

```

```

Majority -----
                21850      21860      21870      21880      21890      21900      21910      21920
Human          CAGTATTCAGAATACTTTCTTTTCATTATTTTATTTTCTTGCCTTTTCTTTTTTGTGTGTTGTTAGATAAAGTGAGTCAT 21920
AsianBonytongue ----- 0
Reedfish ----- 0
NorthernPike ----- 0
SpottedGar ----- 0
ParamormyropsKingsLeyae ----- 0

```

```

Majority -----
                21930      21940      21950      21960      21970      21980      21990      22000
Human          CTGTACAATTTCCACTTCTGGCTGGGCGTGGTGGCTCACGCCTGTAATCCCAGCACTTCGGGAGGCTGAGGCGGGCAGA 22000
AsianBonytongue ----- 0
Reedfish ----- 0
NorthernPike ----- 0
SpottedGar ----- 0
ParamormyropsKingsLeyae ----- 0

```

```

Majority -----
                22010      22020      22030      22040      22050      22060      22070      22080
Human          TCACGAGGTCAGGAGATCAAGACCATTTTGGCTAACACAGTGAACCTGTCTCTACTAAAAATACGAAAAAATTAGCCA 22080
AsianBonytongue ----- 0
Reedfish ----- 0
NorthernPike ----- 0
SpottedGar ----- 0
ParamormyropsKingsLeyae ----- 0

```

Sunday, May 01, 2022 09:43 PM

```

Majority -----
                22090      22100      22110      22120      22130      22140      22150      22160
Human          GGC GTGGTGGGGGGCACCTGTAGTCCCAGCTACTCGGGAGGCTGAGGCAGGAGAATGGTGTGAACCCGGGAGGCGGAGCT 22160
AsianBonytongue ----- 0
Reedfish ----- 0
NorthernPike ----- 0
SpottedGar ----- 0
ParamormyropsKingsLeyae ----- 0

```

```

Majority -----
                22170      22180      22190      22200      22210      22220      22230      22240
Human          TGCAGTGGCGCCACTGGACTCCAGCCTGGGTGACAGAGCAAGACTCCGTCTTAAAAAAAAAAAAAAAAAATTCCACTTTCTG 22240
AsianBonytongue ----- 0
Reedfish ----- 0
NorthernPike ----- 0
SpottedGar ----- 0
ParamormyropsKingsLeyae ----- 0

```

```

Majority -----
                22250      22260      22270      22280      22290      22300      22310      22320
Human          GATTCTGCTGATTGTACCGCTGTGTTGTCATTTTCATATGTTCTTTCATGTAACAAGTTTACCTGAAATACAGGGGTTTGA 22320
AsianBonytongue ----- 0
Reedfish ----- 0
NorthernPike ----- 0
SpottedGar ----- 0
ParamormyropsKingsLeyae ----- 0

```

```

Majority -----
                22330      22340      22350      22360      22370      22380      22390      22400
Human          TCAGACTCTGGTGTAATTTTTACCAAGAATATTTGCAGATGTACTCTATGTAATTCCTGTTGTATGTCAGCTTGCTCCA 22400
AsianBonytongue ----- 0
Reedfish ----- 0
NorthernPike ----- 0
SpottedGar ----- 0
ParamormyropsKingsLeyae ----- 0

```

```

Majority -----
                22410      22420      22430      22440      22450      22460      22470      22480
Human          TCTATTACAGAGCGCATCATCCTTTCACCTAATAGTTTTTAGTAGCTAATGATTGCATACTTTTATTAGGTATTGCAAAA 22480
AsianBonytongue ----- 0
Reedfish ----- 0
NorthernPike ----- 0
SpottedGar ----- 0
ParamormyropsKingsLeyae ----- 0

```

```

Majority -----
                22490      22500      22510      22520      22530      22540      22550      22560
Human          GTGGCGCTATTCTTTTTTCTGTGTATATTAGAATTCCTTAAGAATTATATCCATCAACTGTTTGGTCATACGTAAGTACC 22560
AsianBonytongue ----- 0
Reedfish ----- 0
NorthernPike ----- 0
SpottedGar ----- 0
ParamormyropsKingsLeyae ----- 0

```

Sunday, May 01, 2022 09:43 PM

```

Majority -----
                22570      22580      22590      22600      22610      22620      22630      22640
Human          TTTTATAAGAAAAGCAGGAGAGAATTTGACTTCTTAAGTTTTCTGATGAGTTGTTACCCTAAAACCTCCAGTATAATCA 22640
AsianBonytongue ----- 0
Reedfish ----- 0
NorthernPike ----- 0
SpottedGar ----- 0
ParamormyropsKingsLeyae ----- 0
    
```

```

Majority -----
                22650      22660      22670      22680      22690      22700      22710      22720
Human          ATATGAGTTCCTTTTTGTGCTGTTAGTATCGTCGCAACAGCAAAGAGTTTAATAACATTTATTTTCTAGTGTATTGCAG 22720
AsianBonytongue ----- 0
Reedfish ----- 0
NorthernPike ----- 0
SpottedGar ----- 0
ParamormyropsKingsLeyae ----- 0
    
```

```

Majority -----
                22730      22740      22750      22760      22770      22780      22790      22800
Human          TAATCATTCTCTTTTTTTTAAATTTCTAAGCTGTTTTATTAATGAAAAGAGAACAATGCTAAGCAGCTTGTATGGTGT 22800
AsianBonytongue ----- 0
Reedfish ----- 0
NorthernPike ----- 0
SpottedGar ----- 0
ParamormyropsKingsLeyae ----- 0
    
```

```

Majority -----
                22810      22820      22830      22840      22850      22860      22870      22880
Human          GTGTGTTGTGTGGGTTTTATTTTGTATGAATGTAAAAACACGGTGGCTAAAGCCTGTAATCCCAGCATTTTGGGAGGC 22880
AsianBonytongue ----- 0
Reedfish ----- 0
NorthernPike ----- 0
SpottedGar ----- 0
ParamormyropsKingsLeyae ----- 0
    
```

```

Majority -----
                22890      22900      22910      22920      22930      22940      22950      22960
Human          CAAGGTGGTTGGATCACAAGGTCAGGAGCTTGAGACCAGCCTGGCTCTACTAAAAATAAAATGTGGTGAAACCCCGTCTC 22960
AsianBonytongue ----- 0
Reedfish ----- 0
NorthernPike ----- 0
SpottedGar ----- 0
ParamormyropsKingsLeyae ----- 0
    
```

```

Majority -----
                22970      22980      22990      23000      23010      23020      23030      23040
Human          TACTAAAAATACAAAAATTAGCCCTTTGTGTGTCACGCGCCTATAGTCCCAGCTACTCGGGAGGCTGAGGCAGAAAAAT 23040
AsianBonytongue ----- 0
Reedfish ----- 0
NorthernPike ----- 0
SpottedGar ----- 0
ParamormyropsKingsLeyae ----- 0
    
```



Sunday, May 01, 2022 09:43 PM

```

Majority -----
                23050   23060   23070   23080   23090   23100   23110   23120
Human          TGCTTGAACCTGGGGAGGCTGAGGCAGAAAAATTACTTGAACCCGGGAGACAGAGGTTGCAGCGAGCCGAGATTGCGCCA 23120
AsianBonytongue ----- 0
Reedfish ----- 0
NorthernPike ----- 0
SpottedGar ----- 0
ParamormyropsKingsLeyae ----- 0
    
```

```

Majority -----
                23130   23140   23150   23160   23170   23180   23190   23200
Human          CTGCACTCCAGCCTGGGCAACAGACTGAGATTCCATCTAAAAACAAAACCATGTATATATGTAAGTTTGAGGAAAAGAGT 23200
AsianBonytongue ----- 0
Reedfish ----- 0
NorthernPike ----- 0
SpottedGar ----- 0
ParamormyropsKingsLeyae ----- 0
    
```

```

Majority -----
                23210   23220   23230   23240   23250   23260   23270   23280
Human          TGTATGAAAATTCAGGATAATTAATAAAAGTAAACGAGAACTTCTTTACATATATATATATTTTTTAATTTTCTCAGTTA 23280
AsianBonytongue ----- 0
Reedfish ----- 0
NorthernPike ----- 0
SpottedGar ----- 0
ParamormyropsKingsLeyae ----- 0
    
```

```

Majority -----
                23290   23300   23310   23320   23330   23340   23350   23360
Human          ATGTTTGAATTTTTTTAACGTAGAAAATGTCAATGGGGTTATCTGGGGAGAAAAGATTATAGTCCATGAGTCCCCCTGTTG 23360
AsianBonytongue ----- 0
Reedfish ----- 0
NorthernPike ----- 0
SpottedGar ----- 0
ParamormyropsKingsLeyae ----- 0
    
```

```

Majority -----
                23370   23380   23390   23400   23410   23420   23430   23440
Human          TATATATACCTGTATTAAAATATGCAATAAATGCTATTTTTAAAAAATGTCTTATTACATAGAACAGAAGACCAGAATACT 23440
AsianBonytongue ----- 0
Reedfish ----- 0
NorthernPike ----- 0
SpottedGar ----- 0
ParamormyropsKingsLeyae ----- 0
    
```

```

Majority -----
                23450   23460   23470   23480   23490   23500   23510   23520
Human          AGCTCTCCACGTCTTATGTCTTGATCAGTGAAGATTAGCTAGCAAAACAACCATAACTTAGGGATAGCTTTATTTGTGGG 23520
AsianBonytongue ----- 0
Reedfish ----- 0
NorthernPike ----- 0
SpottedGar ----- 0
ParamormyropsKingsLeyae ----- 0
    
```

Sunday, May 01, 2022 09:43 PM

```

Majority -----
                23530   23540   23550   23560   23570   23580   23590   23600
Human          AAGTGCATTTAGTATGTCATGTATTAATAAATCATTGTAGTCTTTCAGAGAGCATCTTATCTTTCTTGTAGGTGATAGT 23600
AsianBonytongue ----- 0
Reedfish ----- 0
NorthernPike ----- 0
SpottedGar ----- 0
ParamormyropsKingsLeyae ----- 0

```

```

Majority -----
                23610   23620   23630   23640   23650   23660   23670   23680
Human          ATTGGCTATCTATGTAGTGTCTTAAGTTCTTTAAATTATCCTTATCTTACTTTTTGTGTACATTGTTTATAAAATAATG 23680
AsianBonytongue ----- 0
Reedfish ----- 0
NorthernPike ----- 0
SpottedGar ----- 0
ParamormyropsKingsLeyae ----- 0

```

```

Majority -----
                23690   23700   23710   23720   23730   23740   23750   23760
Human          TGATCATCTTAATCTACCATTTTGATTATGGTTTGATCATCTTTTTACTATTTCCACTTGTTAGCAAAGCCTTTTATACTT 23760
AsianBonytongue ----- 0
Reedfish ----- 0
NorthernPike ----- 0
SpottedGar ----- 0
ParamormyropsKingsLeyae ----- 0

```

```

Majority -----
                23770   23780   23790   23800   23810   23820   23830   23840
Human          ACTAAATTATGATAAAAATGATTATTATAACATGCCCGTTTTACTTAAATGTCTTATTTAAACGTTCTGATTGTTATTC 23840
AsianBonytongue ----- 0
Reedfish ----- 0
NorthernPike ----- 0
SpottedGar ----- 0
ParamormyropsKingsLeyae ----- 0

```

```

Majority -----
                23850   23860   23870   23880   23890   23900   23910   23920
Human          TTTCTTATTCAGGTTTCTTATTGTCATGTTTTATGTCCTGTTTTTCAGGTGTAATTGTCCTCTCACAAATGTATCCCATTTT 23920
AsianBonytongue ----- 0
Reedfish ----- 0
NorthernPike ----- 0
SpottedGar ----- 0
ParamormyropsKingsLeyae ----- 0

```

```

Majority -----
                23930   23940   23950   23960   23970   23980   23990   24000
Human          GGGTGACAAAATACCTGATCACCTTATCCTTATAGTTTTCTCCCTAGAATCTTTTTTGTATATTAATCAAAGTTTATTT 24000
AsianBonytongue ----- 0
Reedfish ----- 0
NorthernPike ----- 0
SpottedGar ----- 0
ParamormyropsKingsLeyae ----- 0

```

Sunday, May 01, 2022 09:43 PM

```

Majority -----
                24010   24020   24030   24040   24050   24060   24070   24080
Human          GTGAGAATGTTATGAAATATAAGAAAATGAACATCATGAACCTGTCACCTCAAATAAAAAAACTTGAATGTTACCAATACT 24080
AsianBonytongue ----- 0
Reedfish      ----- 0
NorthernPike  ----- 0
SpottedGar    ----- 0
ParamormyropsKingsLeyae ----- 0
    
```

```

Majority -----
                24090   24100   24110   24120   24130   24140   24150   24160
Human          ATTGTATATTCATATGCAGCAATATTGCTTTTTTTTTTTTTTAGAGTCTTGCTCTGATACCCACGCTGGAGTGCAGTGGTG 24160
AsianBonytongue ----- 0
Reedfish      ----- 0
NorthernPike  ----- 0
SpottedGar    ----- 0
ParamormyropsKingsLeyae ----- 0
    
```

```

Majority -----
                24170   24180   24190   24200   24210   24220   24230   24240
Human          TCATCTCGGCTCACAGCAAGCTTCGCCTCCCTGGTTCACCCCATTCCTCTGCCTCAGCCTCCCGAGTAGCTGGGACTTCA 24240
AsianBonytongue ----- 0
Reedfish      ----- 0
NorthernPike  ----- 0
SpottedGar    ----- 0
ParamormyropsKingsLeyae ----- 0
    
```

```

Majority -----
                24250   24260   24270   24280   24290   24300   24310   24320
Human          GGCACCCGCCACCACACCCGGCTAATTTTTTTGAATTTTTTAGTAGAGACGGGGTTTCACCCTGTTAGCCAGGATGGTTTTG 24320
AsianBonytongue ----- 0
Reedfish      ----- 0
NorthernPike  ----- 0
SpottedGar    ----- 0
ParamormyropsKingsLeyae ----- 0
    
```

```

Majority -----
                24330   24340   24350   24360   24370   24380   24390   24400
Human          ATCTCATGACCTCGTGATCCGCTGCCTCGGCCTCCCAAAGTGCTGGGATTATAGGTGTGAGCTACTGCGCCCAGCCCAA 24400
AsianBonytongue ----- 0
Reedfish      ----- 0
NorthernPike  ----- 0
SpottedGar    ----- 0
ParamormyropsKingsLeyae ----- 0
    
```

```

Majority -----
                24410   24420   24430   24440   24450   24460   24470   24480
Human          TATTGCTTTTTAATCCCCCTTCTTACCCTGCCATGGGTAGGTGGCTGCCACAACCTTTTGCCTTATTTTTTCAATATGGAT 24480
AsianBonytongue ----- 0
Reedfish      ----- 0
NorthernPike  ----- 0
SpottedGar    ----- 0
ParamormyropsKingsLeyae ----- 0
    
```

Sunday, May 01, 2022 09:43 PM

```

Majority -----
                |-----|
                |24490|  |24500|  |24510|  |24520|  |24530|  |24540|  |24550|  |24560|
                |-----|
Human           |TTTTCATGTAAATGACAAAAATATATTTAGTTTTTTTTTTAGTTTATGGAAACGGTATGCCTATATAATGTTTTCCATGTC| 24560
AsianBonytongue|-----| 0
Reedfish       |-----| 0
NorthernPike   |-----| 0
SpottedGar     |-----| 0
ParamormyropsKingsLeyae|-----| 0
    
```

```

Majority -----
                |-----|
                |24570|  |24580|  |24590|  |24600|  |24610|  |24620|  |24630|  |24640|
                |-----|
Human           |TTGTGTTTTAATTCAATAATGATTCTAATAAATAGCCGTATTTTTTGGATAGTTTTATAATACTCATTGCTGTGATATAC| 24640
AsianBonytongue|-----| 0
Reedfish       |-----| 0
NorthernPike   |-----| 0
SpottedGar     |-----| 0
ParamormyropsKingsLeyae|-----| 0
    
```

```

Majority -----
                |-----|
                |24650|  |24660|  |24670|  |24680|  |24690|  |24700|  |24710|  |24720|
                |-----|
Human           |TCTTTTGTGAAAATACCCATTTTATCTTTTATTGGACATTTGGGTTGATGGACATTTGAATATTTAAAGATTTTGACTTA| 24720
AsianBonytongue|-----| 0
Reedfish       |-----| 0
NorthernPike   |-----| 0
SpottedGar     |-----| 0
ParamormyropsKingsLeyae|-----| 0
    
```

```

Majority -----
                |-----|
                |24730|  |24740|  |24750|  |24760|  |24770|  |24780|  |24790|  |24800|
                |-----|
Human           |GGCCGGGCGTGGTGGCTCAAGCTTGTAATCCCAGCACTTTGGGAGGCCAGGGCGGGCAGATCACAAGGTCAGGAGTTTGA| 24800
AsianBonytongue|-----| 0
Reedfish       |-----| 0
NorthernPike   |-----| 0
SpottedGar     |-----| 0
ParamormyropsKingsLeyae|-----| 0
    
```

```

Majority -----
                |-----|
                |24810|  |24820|  |24830|  |24840|  |24850|  |24860|  |24870|  |24880|
                |-----|
Human           |GACCAGCCTGGCCAACATAGTGAAACCCCATCTCTACTAAAAATACCATAATTAGCGGGGTATGGTGGTGGGTGCCTGT| 24880
AsianBonytongue|-----| 0
Reedfish       |-----| 0
NorthernPike   |-----| 0
SpottedGar     |-----| 0
ParamormyropsKingsLeyae|-----| 0
    
```

```

Majority -----
                |-----|
                |24890|  |24900|  |24910|  |24920|  |24930|  |24940|  |24950|  |24960|
                |-----|
Human           |AGTCCAGCTACTCAGGAGGCTGAGACAGGAGAATCGCTTGAACCCAGGAGGCGGAGGTTGCAGTGAGCTGAGACCGCGC| 24960
AsianBonytongue|-----| 0
Reedfish       |-----| 0
NorthernPike   |-----| 0
SpottedGar     |-----| 0
ParamormyropsKingsLeyae|-----| 0
    
```

Sunday, May 01, 2022 09:43 PM

```

Majority -----
                24970   24980   24990   25000   25010   25020   25030   25040
Human          CATTACACTCCAGCCTGTGTGACAGACTGAGACTCCATCTCAAAAACAAACAAAAAAAAACAACAACAAAAAAGATTTT 25040
AsianBonytongue ----- 0
Reedfish ----- 0
NorthernPike ----- 0
SpottedGar ----- 0
ParamormyropsKingsLeyae ----- 0

```

```

Majority -----
                25050   25060   25070   25080   25090   25100   25110   25120
Human          GACTTTAAGAACAAATACTGCTGTGAACTTCTTTGTACTTGTTCCTGGTGCATTTATGCAAGCGTTTTTGAGAGGGTATA 25120
AsianBonytongue ----- 0
Reedfish ----- 0
NorthernPike ----- 0
SpottedGar ----- 0
ParamormyropsKingsLeyae ----- 0

```

```

Majority -----
                25130   25140   25150   25160   25170   25180   25190   25200
Human          TTTAAAGGTATAGGTATATATTACTAGTGTGTAATAAACTTTATGAGACAGTACTAGATTATTTCCAGTGTATTGTT 25200
AsianBonytongue ----- 0
Reedfish ----- 0
NorthernPike ----- 0
SpottedGar ----- 0
ParamormyropsKingsLeyae ----- 0

```

```

Majority -----
                25210   25220   25230   25240   25250   25260   25270   25280
Human          CCTATTTATGTTCTCACCAGTAGTGCGTAGGAGTTCTTGCTGTTTCAGATCCCCACCAGCACTGGCTAGGTATTTAATT 25280
AsianBonytongue ----- 0
Reedfish ----- 0
NorthernPike ----- 0
SpottedGar ----- 0
ParamormyropsKingsLeyae ----- 0

```

```

Majority -----
                25290   25300   25310   25320   25330   25340   25350   25360
Human          TCTTAATTTTAAACAATTTGGTGTGTAGTATATTCTCTGGTCTTCCTTTGTCTTACCCTGATTATTAATGAGGTCTTACA 25360
AsianBonytongue ----- 0
Reedfish ----- 0
NorthernPike ----- 0
SpottedGar ----- 0
ParamormyropsKingsLeyae ----- 0

```

```

Majority -----
                25370   25380   25390   25400   25410   25420   25430   25440
Human          TCTTTTTTCCCCCACATTTATGGCCATGGATGTTTCTCTTTTGTGAAATTCGTGTAATGCCTATTTGTGTTTTTTGCT 25440
AsianBonytongue ----- 0
Reedfish ----- 0
NorthernPike ----- 0
SpottedGar ----- 0
ParamormyropsKingsLeyae ----- 0

```

Sunday, May 01, 2022 09:43 PM

```

Majority -----
                25450   25460   25470   25480   25490   25500   25510   25520
Human          TGATAAAATGTGAGCTTATTATTTAACTGATTTTGTAGTTTAAAAAATTGCTGGGGCGGTGGCTTGCCTCTGTAATCT 25520
AsianBonytongue ----- 0
Reedfish ----- 0
NorthernPike ----- 0
SpottedGar ----- 0
ParamormyropsKingsLeyae ----- 0

```

```

Majority -----
                25530   25540   25550   25560   25570   25580   25590   25600
Human          CAGCTTTTGGGAGGCTGAAGGAGGAGGATTGCTTGTGGGGCCAGGAGTTTGAGGCTGCAGTGAGCTATGATCGTTCCA 25600
AsianBonytongue ----- 0
Reedfish ----- 0
NorthernPike ----- 0
SpottedGar ----- 0
ParamormyropsKingsLeyae ----- 0

```

```

Majority -----
                25610   25620   25630   25640   25650   25660   25670   25680
Human          TTGCACTCTAGCTTGGTGACAGAGCAAGACTTTGTCTGAAAAAAAAAAAAAAAAAAGTGTGTGTTTTACAGTTACTGATT 25680
AsianBonytongue ----- 0
Reedfish ----- 0
NorthernPike ----- 0
SpottedGar ----- 0
ParamormyropsKingsLeyae ----- 0

```

```

Majority -----
                25690   25700   25710   25720   25730   25740   25750   25760
Human          GTCTTTTGGTTATTTGTGTTGCTGGTGTCTTTTCCCAGTTTGTAGCTTGCCTTGTCACTTCTTTATGCTGTCTTGTCTGT 25760
AsianBonytongue ----- 0
Reedfish ----- 0
NorthernPike ----- 0
SpottedGar ----- 0
ParamormyropsKingsLeyae ----- 0

```

```

Majority -----
                25770   25780   25790   25800   25810   25820   25830   25840
Human          CTGTCGTGTCTCTCCCTCCCTCCCTCCCTCCCTCCCTCCCTCCCTCCCTCCCTCCCTCCCTCCCTCCCTCCCTCCCTCCCT 25840
AsianBonytongue ----- 0
Reedfish ----- 0
NorthernPike ----- 0
SpottedGar ----- 0
ParamormyropsKingsLeyae ----- 0

```

```

Majority -----
                25850   25860   25870   25880   25890   25900   25910   25920
Human          CCCTCCCTCCCTTCCTTCCTTCCTTCCTTCCTTCCTTCCTACTTTACTTTAGATTTCAGGGTTACATGTGCAGGTTTGTTA 25920
AsianBonytongue ----- 0
Reedfish ----- 0
NorthernPike ----- 0
SpottedGar ----- 0
ParamormyropsKingsLeyae ----- 0

```

Sunday, May 01, 2022 09:43 PM

Majority -----  
 |-----|-----|-----|-----|-----|-----|-----|-----|  
 | 25930 | 25940 | 25950 | 25960 | 25970 | 25980 | 25990 | 26000 |  
 |-----|-----|-----|-----|-----|-----|-----|-----|  
 Human CATGGGTATATGGCATGAAGCTGAGGTTTGC AATAACAAGTGATCCTGTCAGCCAGAGAGTGAGCTCAGTACCCAACAGTT 26000  
 AsianBonytongue ----- 0  
 Reedfish ----- 0  
 NorthernPike ----- 0  
 SpottedGar ----- 0  
 ParamormyropsKingsLeyae ----- 0

Majority -----  
 |-----|-----|-----|-----|-----|-----|-----|-----|  
 | 26010 | 26020 | 26030 | 26040 | 26050 | 26060 | 26070 | 26080 |  
 |-----|-----|-----|-----|-----|-----|-----|-----|  
 Human AGATTTACAATCCTTTCTCCCTCCCCCACCAGTCCAGTGCATATTGTTGCGGATTAATACAGATTCTTAAATGTA 26080  
 AsianBonytongue ----- 0  
 Reedfish ----- 0  
 NorthernPike ----- 0  
 SpottedGar ----- 0  
 ParamormyropsKingsLeyae ----- 0

Majority -----  
 |-----|-----|-----|-----|-----|-----|-----|-----|  
 | 26090 | 26100 | 26110 | 26120 | 26130 | 26140 | 26150 | 26160 |  
 |-----|-----|-----|-----|-----|-----|-----|-----|  
 Human TAGTTTTAATGTGGCCACAAATCCCTTTGCATCTTAGATAAAAATAATTTATATGATCCCATTCTTTACACATTCCAAA 26160  
 AsianBonytongue ----- 0  
 Reedfish ----- 0  
 NorthernPike ----- 0  
 SpottedGar ----- 0  
 ParamormyropsKingsLeyae ----- 0

Majority -----  
 |-----|-----|-----|-----|-----|-----|-----|-----|  
 | 26170 | 26180 | 26190 | 26200 | 26210 | 26220 | 26230 | 26240 |  
 |-----|-----|-----|-----|-----|-----|-----|-----|  
 Human TTTTCCTTTGCTCTTCTGGACATCTTCCATGTTGATTGCTGGAAGTCTTGAAGGCAATCCCAAATAACAGTTTTTAGCTT 26240  
 AsianBonytongue ----- 0  
 Reedfish ----- 0  
 NorthernPike ----- 0  
 SpottedGar ----- 0  
 ParamormyropsKingsLeyae ----- 0

Majority -----  
 |-----|-----|-----|-----|-----|-----|-----|-----|  
 | 26250 | 26260 | 26270 | 26280 | 26290 | 26300 | 26310 | 26320 |  
 |-----|-----|-----|-----|-----|-----|-----|-----|  
 Human TTCAACTGTTGCTGTGATACGGTTTCTTATAGAGATTTTGTAGTAGAATTTATCAGTATTTTCTTTCATGTTTCAGTTTT 26320  
 AsianBonytongue ----- 0  
 Reedfish ----- 0  
 NorthernPike ----- 0  
 SpottedGar ----- 0  
 ParamormyropsKingsLeyae ----- 0

Majority -----  
 |-----|-----|-----|-----|-----|-----|-----|-----|  
 | 26330 | 26340 | 26350 | 26360 | 26370 | 26380 | 26390 | 26400 |  
 |-----|-----|-----|-----|-----|-----|-----|-----|  
 Human CTTGTGTCTTAATTTAAAAATCCTTACATACTCAGAGTTCATAAAGATACTATATTTTCTTCTGAAATTTTAAAAAATTT 26400  
 AsianBonytongue ----- 0  
 Reedfish ----- 0  
 NorthernPike ----- 0  
 SpottedGar ----- 0  
 ParamormyropsKingsLeyae ----- 0

Sunday, May 01, 2022 09:43 PM

Majority -----  
 |-----|  
 | 26410 | 26420 | 26430 | 26440 | 26450 | 26460 | 26470 | 26480 |  
 |-----|  
 Human TGCTTTTATATTTATCAGAAAATTATTTTGTGTATTGTATTTAGTAGGGATCTGGTTTCATTTTTTGGCCCTATTAA 26480  
 AsianBonytongue ----- 0  
 Reedfish ----- 0  
 NorthernPike ----- 0  
 SpottedGar ----- 0  
 ParamormyropsKingsLeyae ----- 0

Majority -----  
 |-----|  
 | 26490 | 26500 | 26510 | 26520 | 26530 | 26540 | 26550 | 26560 |  
 |-----|  
 Human GATAGTCAATTAAATGAAATCTCTGTAATGACTTTTTCATATTACAGGTATATATATATCGTAAGGCAAAGGCTGAAAAAA 26560  
 AsianBonytongue ----- 0  
 Reedfish ----- 0  
 NorthernPike ----- 0  
 SpottedGar ----- 0  
 ParamormyropsKingsLeyae ----- 0

Majority -----  
 |-----|  
 | 26570 | 26580 | 26590 | 26600 | 26610 | 26620 | 26630 | 26640 |  
 |-----|  
 Human CTATCATAACAAAATGCAGAATATGGTGGCATAAATAAAAGAGTTTTTTTGTTCCTTTTCTGTCATAGCAGAAGTCCTG 26640  
 AsianBonytongue ----- 0  
 Reedfish ----- 0  
 NorthernPike ----- 0  
 SpottedGar ----- 0  
 ParamormyropsKingsLeyae ----- 0

Majority -----  
 |-----|  
 | 26650 | 26660 | 26670 | 26680 | 26690 | 26700 | 26710 | 26720 |  
 |-----|  
 Human TTGGTATAAGAAAGTGGTATCAGTCTGCTCCATAAGGTTATTCACCTGGCCAAGTTTCTTTCATATTGTTGCTTCACTGA 26720  
 AsianBonytongue ----- 0  
 Reedfish ----- 0  
 NorthernPike ----- 0  
 SpottedGar ----- 0  
 ParamormyropsKingsLeyae ----- 0

Majority -----  
 |-----|  
 | 26730 | 26740 | 26750 | 26760 | 26770 | 26780 | 26790 | 26800 |  
 |-----|  
 Human TCCCTAGGCTTTTGTTCCTGGCTATGTGGTCTGTTGATGTGTGATTGTGCTCTTCTCCTTGTTTAAAAAAAAGTTTCC 26800  
 AsianBonytongue ----- 0  
 Reedfish ----- 0  
 NorthernPike ----- 0  
 SpottedGar ----- 0  
 ParamormyropsKingsLeyae ----- 0

Majority -----  
 |-----|  
 | 26810 | 26820 | 26830 | 26840 | 26850 | 26860 | 26870 | 26880 |  
 |-----|  
 Human CTGTATTTGTGTATTTTCATTGCTTTTTTTTTTAAAGTCAGCTTTTGATTTTACTGATCCTCTTCATTGTACCATTGTTT 26880  
 AsianBonytongue ----- 0  
 Reedfish ----- 0  
 NorthernPike ----- 0  
 SpottedGar ----- 0  
 ParamormyropsKingsLeyae ----- 0



Sunday, May 01, 2022 09:43 PM

```

Majority -----
                26890   26900   26910   26920   26930   26940   26950   26960
Human          TCTCTATTTTATTGGTTGCGTGAGTCAGGGCTTTTGCAAGTCTTTAATAGGTAGGTGGTATTTCAGTCCACTTCTTCATC 26960
AsianBonytongue ----- 0
Reedfish ----- 0
NorthernPike ----- 0
SpottedGar ----- 0
ParamormyropsKingsLeyae ----- 0
    
```

```

Majority -----
                26970   26980   26990   27000   27010   27020   27030   27040
Human          ATCTTGGTGGCACCTCTGTTTAAAGGAGACCAGGAATACTCACCTGGGTACGTACCTTTTCTTCCTCTCTGATAATCTATTT 27040
AsianBonytongue ----- 0
Reedfish ----- 0
NorthernPike ----- 0
SpottedGar ----- 0
ParamormyropsKingsLeyae ----- 0
    
```

```

Majority -----
                27050   27060   27070   27080   27090   27100   27110   27120
Human          TTCCTCAGGAACTTAATATTTGTGTCTTGCCCGGTGTCTTTCTGTGCATGGTTCCTAGGCTGCCATCTCCACAGGAGAA 27120
AsianBonytongue ----- 0
Reedfish ----- 0
NorthernPike ----- 0
SpottedGar ----- 0
ParamormyropsKingsLeyae ----- 0
    
```

```

Majority -----
                27130   27140   27150   27160   27170   27180   27190   27200
Human          AATGTTTGGTTAGTTCTCAGTCCCAAACCATAGCAGAGCCCAGAGACTCTTGTCCACCTCAGCCTTCAGTCTTGGTTGC 27200
AsianBonytongue ----- 0
Reedfish ----- 0
NorthernPike ----- 0
SpottedGar ----- 0
ParamormyropsKingsLeyae ----- 0
    
```

```

Majority -----
                27210   27220   27230   27240   27250   27260   27270   27280
Human          CTTCTTCGCAGACCTGGCAGCTCTCCACCTGAAAGTGATACATGGTATTAATAGTTGGACTAGACTATTATGATAAACA 27280
AsianBonytongue ----- 0
Reedfish ----- 0
NorthernPike ----- 0
SpottedGar ----- 0
ParamormyropsKingsLeyae ----- 0
    
```

```

Majority -----
                27290   27300   27310   27320   27330   27340   27350   27360
Human          GAGTATCTAATAACCATGAGAATAAAAAACAAGAAATTTGTAACATTGAAATGAGTGCTAAATGGCCTTTAATCTGTACT 27360
AsianBonytongue ----- 0
Reedfish ----- 0
NorthernPike ----- 0
SpottedGar ----- 0
ParamormyropsKingsLeyae ----- 0
    
```

Sunday, May 01, 2022 09:43 PM

| Majority                | -----                                                                          |       |       |       |       |       |       |       |       |
|-------------------------|--------------------------------------------------------------------------------|-------|-------|-------|-------|-------|-------|-------|-------|
|                         | 27370                                                                          | 27380 | 27390 | 27400 | 27410 | 27420 | 27430 | 27440 |       |
| Human                   | TGCTTTTGCACATTTTTTTTAAAGTGGTTCTTTCTCTGACGTGTAGAGTGTATCTTCCTATTTCTGAATTTCTTGTTT |       |       |       |       |       |       |       | 27440 |
| AsianBonytongue         | -----                                                                          |       |       |       |       |       |       |       | 0     |
| Reedfish                | -----                                                                          |       |       |       |       |       |       |       | 0     |
| NorthernPike            | -----                                                                          |       |       |       |       |       |       |       | 0     |
| SpottedGar              | -----                                                                          |       |       |       |       |       |       |       | 0     |
| ParamormyropsKingsLeyae | -----                                                                          |       |       |       |       |       |       |       | 0     |

| Majority                | -----                                                                           |       |       |       |       |       |       |       |       |
|-------------------------|---------------------------------------------------------------------------------|-------|-------|-------|-------|-------|-------|-------|-------|
|                         | 27450                                                                           | 27460 | 27470 | 27480 | 27490 | 27500 | 27510 | 27520 |       |
| Human                   | CTGTGGGATGTTAGTTTCTCTTGAATGGTCATTGATATTACTCAGGAAGAAAAGTTTCTGTGGTCAGATTTAATAAGAG |       |       |       |       |       |       |       | 27520 |
| AsianBonytongue         | -----                                                                           |       |       |       |       |       |       |       | 0     |
| Reedfish                | -----                                                                           |       |       |       |       |       |       |       | 0     |
| NorthernPike            | -----                                                                           |       |       |       |       |       |       |       | 0     |
| SpottedGar              | -----                                                                           |       |       |       |       |       |       |       | 0     |
| ParamormyropsKingsLeyae | -----                                                                           |       |       |       |       |       |       |       | 0     |

| Majority                | -----                                                                            |       |       |       |       |       |       |       |       |
|-------------------------|----------------------------------------------------------------------------------|-------|-------|-------|-------|-------|-------|-------|-------|
|                         | 27530                                                                            | 27540 | 27550 | 27560 | 27570 | 27580 | 27590 | 27600 |       |
| Human                   | ATATCTATGCTAGTCTTAACATTTAATTTCTTTTAGTTGAATCTAAAATTGATATCATTCTTAGATTAATTAATAATTTT |       |       |       |       |       |       |       | 27600 |
| AsianBonytongue         | -----                                                                            |       |       |       |       |       |       |       | 0     |
| Reedfish                | -----                                                                            |       |       |       |       |       |       |       | 0     |
| NorthernPike            | -----                                                                            |       |       |       |       |       |       |       | 0     |
| SpottedGar              | -----                                                                            |       |       |       |       |       |       |       | 0     |
| ParamormyropsKingsLeyae | -----                                                                            |       |       |       |       |       |       |       | 0     |

| Majority                | -----                                                                            |       |       |       |       |       |       |       |       |
|-------------------------|----------------------------------------------------------------------------------|-------|-------|-------|-------|-------|-------|-------|-------|
|                         | 27610                                                                            | 27620 | 27630 | 27640 | 27650 | 27660 | 27670 | 27680 |       |
| Human                   | TTAAAGAGCATGTATTCTTTAGTATTTTGATTCTAAGTACCACTAATTTGATTTGTTTCAACAGTCATTAATGTGGGGCA |       |       |       |       |       |       |       | 27680 |
| AsianBonytongue         | -----                                                                            |       |       |       |       |       |       |       | 0     |
| Reedfish                | -----                                                                            |       |       |       |       |       |       |       | 0     |
| NorthernPike            | -----                                                                            |       |       |       |       |       |       |       | 0     |
| SpottedGar              | -----                                                                            |       |       |       |       |       |       |       | 0     |
| ParamormyropsKingsLeyae | -----                                                                            |       |       |       |       |       |       |       | 0     |

| Majority                | -----                                                                            |       |       |       |       |       |       |       |       |
|-------------------------|----------------------------------------------------------------------------------|-------|-------|-------|-------|-------|-------|-------|-------|
|                         | 27690                                                                            | 27700 | 27710 | 27720 | 27730 | 27740 | 27750 | 27760 |       |
| Human                   | GTCATCAATCACTACCATTGATCATTATTTTCATATACATTGTAAGTTAAATGACCAGGCTGAAATAATTCAGATGAAAT |       |       |       |       |       |       |       | 27760 |
| AsianBonytongue         | -----                                                                            |       |       |       |       |       |       |       | 0     |
| Reedfish                | -----                                                                            |       |       |       |       |       |       |       | 0     |
| NorthernPike            | -----                                                                            |       |       |       |       |       |       |       | 0     |
| SpottedGar              | -----                                                                            |       |       |       |       |       |       |       | 0     |
| ParamormyropsKingsLeyae | -----                                                                            |       |       |       |       |       |       |       | 0     |

| Majority                | -----                                                                            |       |       |       |       |       |       |       |       |
|-------------------------|----------------------------------------------------------------------------------|-------|-------|-------|-------|-------|-------|-------|-------|
|                         | 27770                                                                            | 27780 | 27790 | 27800 | 27810 | 27820 | 27830 | 27840 |       |
| Human                   | TATTCTGTCAGTTAATGTGGTAATGTTAACATTTATCAGTAGTGCTGAATCACTTCTTTTGGGCATAATAGTGGTAAGCT |       |       |       |       |       |       |       | 27840 |
| AsianBonytongue         | -----                                                                            |       |       |       |       |       |       |       | 0     |
| Reedfish                | -----                                                                            |       |       |       |       |       |       |       | 0     |
| NorthernPike            | -----                                                                            |       |       |       |       |       |       |       | 0     |
| SpottedGar              | -----                                                                            |       |       |       |       |       |       |       | 0     |
| ParamormyropsKingsLeyae | -----                                                                            |       |       |       |       |       |       |       | 0     |

Sunday, May 01, 2022 09:43 PM

```

Majority -----
                27850   27860   27870   27880   27890   27900   27910   27920
Human          TTTTGCTCAATGCAAAGACAGGCATAAATTGCTTTTTTCAAATAAAAAATGTAATTTGTAAAAATACTCCAGTAATTTTGT 27920
AsianBonytongue ----- 0
Reedfish      ----- 0
NorthernPike  ----- 0
SpottedGar    ----- 0
ParamormyropsKingsLeyae ----- 0

```

```

Majority -----
                27930   27940   27950   27960   27970   27980   27990   28000
Human          AAAATCTCAAATGCAAATAAATTTGACGTTATTCTCAGTAATGAAGGCTGTAAATCTCCTCTTTAACGGCAGGTATG 28000
AsianBonytongue ----- 0
Reedfish      ----- 0
NorthernPike  ----- 0
SpottedGar    ----- 0
ParamormyropsKingsLeyae ----- 0

```

```

Majority -----
                28010   28020   28030   28040   28050   28060   28070   28080
Human          AAATCATTGAGGAAGAAAAAGTTTCATAAATACAAACTTAAAAAAAATGGAAAGACTTTTCCATGCAAAAAGATGCAT 28080
AsianBonytongue ----- 0
Reedfish      ----- 0
NorthernPike  ----- 0
SpottedGar    ----- 0
ParamormyropsKingsLeyae ----- 0

```

```

Majority -----
                28090   28100   28110   28120   28130   28140   28150   28160
Human          TGCAGGAAGGAGGAAGAGTGTCTTCATAGCACACCACAAGTCAGTATTAGAGGCTTGCTTTTCTACTTGAGTAGACCCA 28160
AsianBonytongue ----- 0
Reedfish      ----- 0
NorthernPike  ----- 0
SpottedGar    ----- 0
ParamormyropsKingsLeyae ----- 0

```

```

Majority -----
                28170   28180   28190   28200   28210   28220   28230   28240
Human          AGATTCCCCACCTATCGTCTTCCAAAGTTACTTGTGATCCACTGCAATCACAAGTTTTTACAGTGTGTATACTCTAGGTGT 28240
AsianBonytongue ----- 0
Reedfish      ----- 0
NorthernPike  ----- 0
SpottedGar    ----- 0
ParamormyropsKingsLeyae ----- 0

```

```

Majority -----
                28250   28260   28270   28280   28290   28300   28310   28320
Human          ATGGAAGGATTTGAATTCACAAATAGTCAAACATCAGAAGAATAAGCTGATAATAATACATTTGAAAAGAGGTCAAGTAT 28320
AsianBonytongue ----- 0
Reedfish      ----- 0
NorthernPike  ----- 0
SpottedGar    ----- 0
ParamormyropsKingsLeyae ----- 0

```

Sunday, May 01, 2022 09:43 PM

```

Majority -----
                28330   28340   28350   28360   28370   28380   28390   28400
Human          ATTTTGGAAAAGTAGGAGAGTTAAAGTGTTTTGTGAACTAAGGAACAAATAAGGCATTGACAATATTTTACTTGATTAG 28400
AsianBonytongue ----- 0
Reedfish ----- 0
NorthernPike ----- 0
SpottedGar ----- 0
ParamormyropsKingsLeyae ----- 0
    
```

```

Majority -----
                28410   28420   28430   28440   28450   28460   28470   28480
Human          GAATTTGTTCAGGTGAGTAAACTTTAAGCATCACTTAAGTGTGTTTGTGTTTCTTACTTTTGTAGAAATATCTGATCTGG 28480
AsianBonytongue ----- 0
Reedfish ----- 0
NorthernPike ----- 0
SpottedGar ----- 0
ParamormyropsKingsLeyae ----- 0
    
```

```

Majority -----
                28490   28500   28510   28520   28530   28540   28550   28560
Human          ACTTCTGTGGATTTATGGAAGAGCTGGCTTTATTTCTCTATCCTGTGGGAGGGGCAAACCTTGATTTTGTATGTGGAGTA 28560
AsianBonytongue ----- 0
Reedfish ----- 0
NorthernPike ----- 0
SpottedGar ----- 0
ParamormyropsKingsLeyae ----- 0
    
```

```

Majority -----
                28570   28580   28590   28600   28610   28620   28630   28640
Human          ACTTGACCTTCAGTTTTTTGGTCTGAGAACAAAGGCCAAAAAATATGTAACAGTTAATAACGTAATTCACTTACTTAGT 28640
AsianBonytongue ----- 0
Reedfish ----- 0
NorthernPike ----- 0
SpottedGar ----- 0
ParamormyropsKingsLeyae ----- 0
    
```

```

Majority -----
                28650   28660   28670   28680   28690   28700   28710   28720
Human          CAATAAATATGTGGGGACATTGTACTTGGTTGACACTTGGGAATATGTAGTGAGCACTACTGATGTGAGCCAGGCACCTT 28720
AsianBonytongue ----- 0
Reedfish ----- 0
NorthernPike ----- 0
SpottedGar ----- 0
ParamormyropsKingsLeyae ----- 0
    
```

```

Majority -----
                28730   28740   28750   28760   28770   28780   28790   28800
Human          TGCCTGGTAATCACTGTTCGTGTATAATTTAATCCTAAGGGCTGTGATGTAGATGTTATCCCTGTTTTACAAATAAAGAA 28800
AsianBonytongue ----- 0
Reedfish ----- 0
NorthernPike ----- 0
SpottedGar ----- 0
ParamormyropsKingsLeyae ----- 0
    
```

Sunday, May 01, 2022 09:43 PM

```

Majority -----
                28810   28820   28830   28840   28850   28860   28870   28880
Human          C TTCAGGCTTAGAATGATTAAGTACTGTTACCTAACTGATAAGTGGGAAGCTGAGCTCCAGAGCACCCCTTTCTTAATACAG 28880
AsianBonytongue ----- 0
Reedfish ----- 0
NorthernPike ----- 0
SpottedGar ----- 0
ParamormyropsKingsLeyae ----- 0

```

```

Majority -----
                28890   28900   28910   28920   28930   28940   28950   28960
Human          TATTTTCTACTTGTCATGAAAACATGAAGAAAGCTAGGAAACATTTTCTGTGTTGATAATGAGCCAATAATGTGTATCAG 28960
AsianBonytongue ----- 0
Reedfish ----- 0
NorthernPike ----- 0
SpottedGar ----- 0
ParamormyropsKingsLeyae ----- 0

```

```

Majority -----
                28970   28980   28990   29000   29010   29020   29030   29040
Human          TGGTTCTTAAACTTTAGCATGCATCAGAAACACTTGGGGATTTTTTTTTTTTAAACCTGGGGTTTTTAGATCCCACCCTCA 29040
AsianBonytongue ----- 0
Reedfish ----- 0
NorthernPike ----- 0
SpottedGar ----- 0
ParamormyropsKingsLeyae ----- 0

```

```

Majority -----
                29050   29060   29070   29080   29090   29100   29110   29120
Human          GAGTTTCTTATTTCAGTAGGTCTGGGATTGGACCTGAGAACATATACTGTCTAGTAAGCTTCCAGGTCTAATCTTAGGATTA 29120
AsianBonytongue ----- 0
Reedfish ----- 0
NorthernPike ----- 0
SpottedGar ----- 0
ParamormyropsKingsLeyae ----- 0

```

```

Majority -----
                29130   29140   29150   29160   29170   29180   29190   29200
Human          GGGACCACACTTTGAGAATGATTAGAGTATTCAATTAGATCTTAGGGACTACACTGTGAGAATCAGTAATGTATACAATT 29200
AsianBonytongue ----- 0
Reedfish ----- 0
NorthernPike ----- 0
SpottedGar ----- 0
ParamormyropsKingsLeyae ----- 0

```

```

Majority -----
                29210   29220   29230   29240   29250   29260   29270   29280
Human          CTGCTCATCATGTTCTTATAAAACTATGCCATGCCAGATCTTCCATATCTTGATTAGAAAATTGGTTAAGAAAATTAGGCTT 29280
AsianBonytongue ----- 0
Reedfish ----- 0
NorthernPike ----- 0
SpottedGar ----- 0
ParamormyropsKingsLeyae ----- 0

```

Sunday, May 01, 2022 09:43 PM

```

Majority -----
                29290   29300   29310   29320   29330   29340   29350   29360
Human          GGTGTAAATACAGTATCAATGTGGCTTGAAACTGGTTGTATTTTCTGTTTTTTTTTCTTTGTGCATTGATGCTAAT 29360
AsianBonytongue ----- 0
Reedfish      ----- 0
NorthernPike  ----- 0
SpottedGar    ----- 0
ParamormyropsKingsLeyae ----- 0
    
```

```

Majority -----
                29370   29380   29390   29400   29410   29420   29430   29440
Human          AAGTAGAAAGCTCTTAAATATTTAAGGGAGACAACCTATGGATATCTGTTTACTCTTCTCATATTTGTTGTAATACAGT 29440
AsianBonytongue ----- 0
Reedfish      ----- 0
NorthernPike  ----- 0
SpottedGar    ----- 0
ParamormyropsKingsLeyae ----- 0
    
```

```

Majority -----
                29450   29460   29470   29480   29490   29500   29510   29520
Human          TTATTCATTATGAGTTTAAATACAAATTAGCGTAAAGCTTATGGTTAATTTGGATTTTTTGGACTTTCTGAAATGCTTTG 29520
AsianBonytongue ----- 0
Reedfish      ----- 0
NorthernPike  ----- 0
SpottedGar    ----- 0
ParamormyropsKingsLeyae ----- 0
    
```

```

Majority -----
                29530   29540   29550   29560   29570   29580   29590   29600
Human          ATAATTCATTGCCTCCTTTGCACATTTTTTTCATTTTGATGGTTGCATTTAACTTCTTTGTACTGATTTTTTAAATCAGC 29600
AsianBonytongue ----- 0
Reedfish      ----- 0
NorthernPike  ----- 0
SpottedGar    ----- 0
ParamormyropsKingsLeyae ----- 0
    
```

```

Majority -----
                29610   29620   29630   29640   29650   29660   29670   29680
Human          CAGTATTAATTTAACCTATTTTCAATACTAATATCCATGTATGTAAATATCCATAACTAAGGCAAAACAGTTGATTTTAG 29680
AsianBonytongue ----- 0
Reedfish      ----- 0
NorthernPike  ----- 0
SpottedGar    ----- 0
ParamormyropsKingsLeyae ----- 0
    
```

```

Majority -----
                29690   29700   29710   29720   29730   29740   29750   29760
Human          CTAGTTTAAATATTAGTCCATTCATATTTTTGTAAGTACATAACATTTTCAAATAGCTAAAATGTCACCTGGCTGGTTTG 29760
AsianBonytongue ----- 0
Reedfish      ----- 0
NorthernPike  ----- 0
SpottedGar    ----- 0
ParamormyropsKingsLeyae ----- 0
    
```

Sunday, May 01, 2022 09:43 PM

Majority -----  
 |-----|-----|-----|-----|-----|-----|-----|-----|  
 | 29770 | 29780 | 29790 | 29800 | 29810 | 29820 | 29830 | 29840 |  
 |-----|-----|-----|-----|-----|-----|-----|-----|  
 Human AACAAGTGTGCAGTTACCGAAGAGATGAATGTATAACCTTTTCTGTAAAGAATTTTAAGACATGACCTTATTTTTTTGCA 29840  
 AsianBonytongue ----- 0  
 Reedfish ----- 0  
 NorthernPike ----- 0  
 SpottedGar ----- 0  
 ParamormyropsKingsLeyae ----- 0

Majority -----  
 |-----|-----|-----|-----|-----|-----|-----|-----|  
 | 29850 | 29860 | 29870 | 29880 | 29890 | 29900 | 29910 | 29920 |  
 |-----|-----|-----|-----|-----|-----|-----|-----|  
 Human GAAAGAAATCTCTTCATTCCAAAGATTTTGCCTTTGCTTTTCGGTGTCTAGCCACTGAAGTATATACCTGTTTAATTTTA 29920  
 AsianBonytongue ----- 0  
 Reedfish ----- 0  
 NorthernPike ----- 0  
 SpottedGar ----- 0  
 ParamormyropsKingsLeyae ----- 0

Majority -----  
 |-----|-----|-----|-----|-----|-----|-----|-----|  
 | 29930 | 29940 | 29950 | 29960 | 29970 | 29980 | 29990 | 30000 |  
 |-----|-----|-----|-----|-----|-----|-----|-----|  
 Human ATAATGATGAAGATATTGATATCTAACTACCAGAATGAAGTTCTAATTTTCTAAAGACCTGAATTATCTGGATGAATAA 30000  
 AsianBonytongue ----- 0  
 Reedfish ----- 0  
 NorthernPike ----- 0  
 SpottedGar ----- 0  
 ParamormyropsKingsLeyae ----- 0

Majority -----  
 |-----|-----|-----|-----|-----|-----|-----|-----|  
 | 30010 | 30020 | 30030 | 30040 | 30050 | 30060 | 30070 | 30080 |  
 |-----|-----|-----|-----|-----|-----|-----|-----|  
 Human AGGACCATTGGGATGGAGGATTTATAGAACGTTTCTGAGAAAGTCTAGCTGTTGTGGCTTTGGTTTGTGTTAAACAATT 30080  
 AsianBonytongue ----- 0  
 Reedfish ----- 0  
 NorthernPike ----- 0  
 SpottedGar ----- 0  
 ParamormyropsKingsLeyae ----- 0

Majority -----  
 |-----|-----|-----|-----|-----|-----|-----|-----|  
 | 30090 | 30100 | 30110 | 30120 | 30130 | 30140 | 30150 | 30160 |  
 |-----|-----|-----|-----|-----|-----|-----|-----|  
 Human GAGATAGCTTTCCAAGCTTTTGCTTATAGAATCTAATCACTTTTTCTATTTATTGTCTTTTGGGCTTAGAGTAAAGAAG 30160  
 AsianBonytongue ----- 0  
 Reedfish ----- 0  
 NorthernPike ----- 0  
 SpottedGar ----- 0  
 ParamormyropsKingsLeyae ----- 0

Majority -----  
 |-----|-----|-----|-----|-----|-----|-----|-----|  
 | 30170 | 30180 | 30190 | 30200 | 30210 | 30220 | 30230 | 30240 |  
 |-----|-----|-----|-----|-----|-----|-----|-----|  
 Human GGAAGGGAACACTGTTGCCTTTGTGAGAAATGGGAGAGGGATAGATGGGAGAGTAGAGGGATGAAGTTAATTTTTTATTAT 30240  
 AsianBonytongue ----- 0  
 Reedfish ----- 0  
 NorthernPike ----- 0  
 SpottedGar ----- 0  
 ParamormyropsKingsLeyae ----- 0

Sunday, May 01, 2022 09:43 PM

Majority -----  
 |-----|-----|-----|-----|-----|-----|-----|-----|  
 | 30250 | 30260 | 30270 | 30280 | 30290 | 30300 | 30310 | 30320 |  
 |-----|-----|-----|-----|-----|-----|-----|-----|  
 Human AGGGATTAACATTTTAACTATTCCCAATAGTGTAAACATTTGACATTTAAGTGAAAGGCTTTTAGATTAATATTTTAA 30320  
 AsianBonytongue ----- 0  
 Reedfish ----- 0  
 NorthernPike ----- 0  
 SpottedGar ----- 0  
 ParamormyropsKingsLeyae ----- 0

Majority -----  
 |-----|-----|-----|-----|-----|-----|-----|-----|  
 | 30330 | 30340 | 30350 | 30360 | 30370 | 30380 | 30390 | 30400 |  
 |-----|-----|-----|-----|-----|-----|-----|-----|  
 Human TTAAAGATGTCTTATGCTAATTTGTTTTGTTTTTCATAGAGAGGATCTGACGAACTACTCTCAGGCAGTGTTCAGTA 30400  
 AsianBonytongue ----- 0  
 Reedfish ----- 0  
 NorthernPike ----- 0  
 SpottedGar ----- 0  
 ParamormyropsKingsLeyae ----- 0

Majority -----  
 |-----|-----|-----|-----|-----|-----|-----|-----|  
 | 30410 | 30420 | 30430 | 30440 | 30450 | 30460 | 30470 | 30480 |  
 |-----|-----|-----|-----|-----|-----|-----|-----|  
 Human GTCCGAACTCTAATATGAGCAGCATGGTAGTTACAGGTAAGTGTTACTCTCTTAGCAGTCTGTCATTTGCCATTTTAGGG 30480  
 AsianBonytongue ----- 0  
 Reedfish ----- 0  
 NorthernPike ----- 0  
 SpottedGar ----- 0  
 ParamormyropsKingsLeyae ----- 0

Majority -----  
 |-----|-----|-----|-----|-----|-----|-----|-----|  
 | 30490 | 30500 | 30510 | 30520 | 30530 | 30540 | 30550 | 30560 |  
 |-----|-----|-----|-----|-----|-----|-----|-----|  
 Human GGCAGAATGTAAAACCTCAAATTTAACCCGTGTATACCAGGAAAGCCTTTCTTTTTAAATGCGTGTGAAACATTTTAGA 30560  
 AsianBonytongue ----- 0  
 Reedfish ----- 0  
 NorthernPike ----- 0  
 SpottedGar ----- 0  
 ParamormyropsKingsLeyae ----- 0

Majority -----  
 |-----|-----|-----|-----|-----|-----|-----|-----|  
 | 30570 | 30580 | 30590 | 30600 | 30610 | 30620 | 30630 | 30640 |  
 |-----|-----|-----|-----|-----|-----|-----|-----|  
 Human GTAAATTTTACTAAAGTATATATGAGCCGAGTGGAAAAAAAAAAAAAAAAACCTGAAGCTGGTAACCTTGGTGAACAAGTTAC 30640  
 AsianBonytongue ----- 0  
 Reedfish ----- 0  
 NorthernPike ----- 0  
 SpottedGar ----- 0  
 ParamormyropsKingsLeyae ----- 0

Majority -----  
 |-----|-----|-----|-----|-----|-----|-----|-----|  
 | 30650 | 30660 | 30670 | 30680 | 30690 | 30700 | 30710 | 30720 |  
 |-----|-----|-----|-----|-----|-----|-----|-----|  
 Human TCTTAAATTTGATTGCTTTTCATTTTTGAACCACAAATGTAATTCTGTCTCACATTATAGTCCCTTCATCTGCCCTCTG 30720  
 AsianBonytongue ----- 0  
 Reedfish ----- 0  
 NorthernPike ----- 0  
 SpottedGar ----- 0  
 ParamormyropsKingsLeyae ----- 0



Sunday, May 01, 2022 09:43 PM

Majority -----  
 30730 30740 30750 30760 30770 30780 30790 30800  
 Human GTATTTTATTTTGTTTTATTTTGTGTTGTGTCATATAATATTTTACTTTAAGTATTTATGCCACAAACCCTA 30800  
 AsianBonytongue ----- 0  
 Reedfish ----- 0  
 NorthernPike ----- 0  
 SpottedGar ----- 0  
 ParamormyropsKingsLeyae ----- 0

Majority -----  
 30810 30820 30830 30840 30850 30860 30870 30880  
 Human AAACCCAAATTTTAAAGTAAAAACCGAAGAATTCAGCTACATAGTTGTTTAAAACCATGCAACCATAGTTGCTATGGTTT 30880  
 AsianBonytongue ----- 0  
 Reedfish ----- 0  
 NorthernPike ----- 0  
 SpottedGar ----- 0  
 ParamormyropsKingsLeyae ----- 0

Majority -----  
 30890 30900 30910 30920 30930 30940 30950 30960  
 Human TAACTAATTTTGTGCTGAAACAGTATTTTAAATCTGAGTTGATCCTTTTATGTTGTCTACCTGCATATTTAAGATGATTT 30960  
 AsianBonytongue ----- 0  
 Reedfish ----- 0  
 NorthernPike ----- 0  
 SpottedGar ----- 0  
 ParamormyropsKingsLeyae ----- 0

Majority -----  
 30970 30980 30990 31000 31010 31020 31030 31040  
 Human GTTTTAAATCTTCAAAGTTAGAGTTAAAAAAAATTTGTATATGTCTGAAATAATGTTGTTTGTAGCATCTGTCAGTAAACA 31040  
 AsianBonytongue ----- 0  
 Reedfish ----- 0  
 NorthernPike ----- 0  
 SpottedGar ----- 0  
 ParamormyropsKingsLeyae ----- 0

Majority -----  
 31050 31060 31070 31080 31090 31100 31110 31120  
 Human ATATAGACCAAATTTTAGACCTTAGTTTTATGGCTGATGGCCAAATTTTTTTTGTATTTTGTTTAGTTTTGCTTGAAT 31120  
 AsianBonytongue ----- 0  
 Reedfish ----- 0  
 NorthernPike ----- 0  
 SpottedGar ----- 0  
 ParamormyropsKingsLeyae ----- 0

Majority -----  
 31130 31140 31150 31160 31170 31180 31190 31200  
 Human TGACGTGTTCTCATCTGAATGGCCAAATTTTGAATTTGATTATTATTATTATCAAATGAATTTACCTCACAACCTCCACA 31200  
 AsianBonytongue ----- 0  
 Reedfish ----- 0  
 NorthernPike ----- 0  
 SpottedGar ----- 0  
 ParamormyropsKingsLeyae ----- 0

Sunday, May 01, 2022 09:43 PM

```

Majority -----
                31210   31220   31230   31240   31250   31260   31270   31280
Human          TTTTACATTATTTACCTGAAACCAAAGTTCCTTTTCTGTATTTTAACTTTGAATTATTTGCTTGAAGAACAAATTATAT 31280
AsianBonytongue ----- 0
Reedfish ----- 0
NorthernPike ----- 0
SpottedGar ----- 0
ParamormyropsKingsLeyae ----- 0
    
```

```

Majority -----
                31290   31300   31310   31320   31330   31340   31350   31360
Human          TTGGCAATAAAAAGGATCATGAAAGACTAGAAAGACATTTTGATTTCCTTAGGTAGCTGTGCTTAATGTATACATACATCT 31360
AsianBonytongue ----- 0
Reedfish ----- 0
NorthernPike ----- 0
SpottedGar ----- 0
ParamormyropsKingsLeyae ----- 0
    
```

```

Majority -----
                31370   31380   31390   31400   31410   31420   31430   31440
Human          TGACACACACAAACACAAACACACATCTCTGACAATTCAGTTAACTAAAAATTATAAGGACTTAACAGATAATAGTCATG 31440
AsianBonytongue ----- 0
Reedfish ----- 0
NorthernPike ----- 0
SpottedGar ----- 0
ParamormyropsKingsLeyae ----- 0
    
```

```

Majority -----
                31450   31460   31470   31480   31490   31500   31510   31520
Human          ATGTGAAGATAAAATTTGTCAACAGGTCATTATCATTGATTTTGCTATGTAATGATTACAAAGCAAATCACTGGGCCTTG 31520
AsianBonytongue ----- 0
Reedfish ----- 0
NorthernPike ----- 0
SpottedGar ----- 0
ParamormyropsKingsLeyae ----- 0
    
```

```

Majority -----
                31530   31540   31550   31560   31570   31580   31590   31600
Human          ATTTTGATAGTCAAAGTACCATGTACACATAATTGAACAAATAGGCAGAAGTGTGTAACCTCTGGTTTGTCGGTTTCTCTT 31600
AsianBonytongue ----- 0
Reedfish ----- 0
NorthernPike ----- 0
SpottedGar ----- 0
ParamormyropsKingsLeyae ----- 0
    
```

```

Majority -----
                31610   31620   31630   31640   31650   31660   31670   31680
Human          TTTGTTTTTACAATGCATACTGTGATCGATAATGGGAAATTAATTTGGAATTAATTTCCAATATTTAGGGCTAGTGACA 31680
AsianBonytongue ----- 0
Reedfish ----- 0
NorthernPike ----- 0
SpottedGar ----- 0
ParamormyropsKingsLeyae ----- 0
    
```

Sunday, May 01, 2022 09:43 PM

```

Majority -----
                31690   31700   31710   31720   31730   31740   31750   31760
Human          GAGTAACTAGTAGCAGCCTTGGCCCCTTTTTCAGTCTCCCCCAAACAAAAGTATGTAAGTGAATAAAATACGTGGA 31760
AsianBonytongue ----- 0
Reedfish ----- 0
NorthernPike ----- 0
SpottedGar ----- 0
ParamormyropsKingsLeyae ----- 0

```

```

Majority -----
                31770   31780   31790   31800   31810   31820   31830   31840
Human          ACAACTGTTGTTTGAAGTGATGAGCAGACGGTATAAGATCATCCTTGAGAGAAGGGGTACACGTGAGGTAAGTATCATG 31840
AsianBonytongue ----- 0
Reedfish ----- 0
NorthernPike ----- 0
SpottedGar ----- 0
ParamormyropsKingsLeyae ----- 0

```

```

Majority -----
                31850   31860   31870   31880   31890   31900   31910   31920
Human          AACACTCTGGCTTTCTGTCTTGGACTATTTTACTGCTCTAAACCACAGAGAAGTGAGAGAGCCAGAGTATACAGGTCTCA 31920
AsianBonytongue ----- 0
Reedfish ----- 0
NorthernPike ----- 0
SpottedGar ----- 0
ParamormyropsKingsLeyae ----- 0

```

```

Majority -----
                31930   31940   31950   31960   31970   31980   31990   32000
Human          CTGAGCTGAAGAGACCAAGAGTGGGTGTCAGGGCTGCCCAATCATTTGGAATTTATGGAGAAGTCTGGAGAAAAGAGAG 32000
AsianBonytongue ----- 0
Reedfish ----- 0
NorthernPike ----- 0
SpottedGar ----- 0
ParamormyropsKingsLeyae ----- 0

```

```

Majority -----
                32010   32020   32030   32040   32050   32060   32070   32080
Human          CTGCTTAGGGGTTTAGGAATAGAGCAGGGGGCAGAATTTAGTATGGTCATTTCACTTCATTACAGTTTTGGATAATGAC 32080
AsianBonytongue ----- 0
Reedfish ----- 0
NorthernPike ----- 0
SpottedGar ----- 0
ParamormyropsKingsLeyae ----- 0

```

```

Majority -----
                32090   32100   32110   32120   32130   32140   32150   32160
Human          TTGGTTACATGTGTGCAGGTTGAGGCTTTGCCAGGTCTGTGCAGAAATTGTCTGCTCTGGGGCTAAATGGTGATTCCATAG 32160
AsianBonytongue ----- 0
Reedfish ----- 0
NorthernPike ----- 0
SpottedGar ----- 0
ParamormyropsKingsLeyae ----- 0

```

Sunday, May 01, 2022 09:43 PM

```

Majority -----
                |-----|
                |32170|32180|32190|32200|32210|32220|32230|32240|
                |-----|
Human           |GTTGCACGGTACTCTGAAACATTGGAGTTCTGAGAAGTCAGAATGCAGACATATTGCAGGGTACTTCAAACACTCCATTT| 32240
AsianBonytongue|-----|
Reedfish       |-----|
NorthernPike   |-----|
SpottedGar     |-----|
ParamormyropsKingsLeyae|-----|
    
```

```

Majority -----
                |-----|
                |32250|32260|32270|32280|32290|32300|32310|32320|
                |-----|
Human           |AGACTACAGAAAGCCTGGACCTGAATAGAAAGGATCACACCCTATAGGAAGTGCCATCTATAAGACTGAGATAAAAAACCA| 32320
AsianBonytongue|-----|
Reedfish       |-----|
NorthernPike   |-----|
SpottedGar     |-----|
ParamormyropsKingsLeyae|-----|
    
```

```

Majority -----
                |-----|
                |32330|32340|32350|32360|32370|32380|32390|32400|
                |-----|
Human           |GAAACCTAGCCCGATAGGAAGTGAAGGATTCACCAGTTAATCTAACCAGTAACTGATGAAGGATTAATCAGTAATTTAGT| 32400
AsianBonytongue|-----|
Reedfish       |-----|
NorthernPike   |-----|
SpottedGar     |-----|
ParamormyropsKingsLeyae|-----|
    
```

```

Majority -----
                |-----|
                |32410|32420|32430|32440|32450|32460|32470|32480|
                |-----|
Human           |TGCCTTCCAAAACAAAACAACACCCCCAAGAAAGACATGATATAGTTTTCTGCAACTATCTTCCATAATATCTAGTATA| 32480
AsianBonytongue|-----|
Reedfish       |-----|
NorthernPike   |-----|
SpottedGar     |-----|
ParamormyropsKingsLeyae|-----|
    
```

```

Majority -----
                |-----|
                |32490|32500|32510|32520|32530|32540|32550|32560|
                |-----|
Human           |CCATCAAAAATTACAAGTGATGTGCAGAAGCAGGAAAGTAACCCATGAAATATAAAGAACACATTTAATAGGAACAGATT| 32560
AsianBonytongue|-----|
Reedfish       |-----|
NorthernPike   |-----|
SpottedGar     |-----|
ParamormyropsKingsLeyae|-----|
    
```

```

Majority -----
                |-----|
                |32570|32580|32590|32600|32610|32620|32630|32640|
                |-----|
Human           |CCAAAATGACCTAGAGTTAGAATTAGCAGACAAGGACGATAAGTATTTTAAGCTGTAAAGGAAAAAGATTGAAATAATGAG| 32640
AsianBonytongue|-----|
Reedfish       |-----|
NorthernPike   |-----|
SpottedGar     |-----|
ParamormyropsKingsLeyae|-----|
    
```

Sunday, May 01, 2022 09:43 PM

Majority -----  
 |-----|-----|-----|-----|-----|-----|-----|-----|  
 | 32650 | 32660 | 32670 | 32680 | 32690 | 32700 | 32710 | 32720 |  
 |-----|-----|-----|-----|-----|-----|-----|-----|  
 Human TGATGGAGGAGTGTGTTGAAGAGATAAAAACTATAAAGAAAGCATGTAGAAATATTCCTAATTGAAAAATACAGTTTTTG 32720  
 AsianBonytongue ----- 0  
 Reedfish ----- 0  
 NorthernPike ----- 0  
 SpottedGar ----- 0  
 ParamormyropsKingsLeyae ----- 0

Majority -----  
 |-----|-----|-----|-----|-----|-----|-----|-----|  
 | 32730 | 32740 | 32750 | 32760 | 32770 | 32780 | 32790 | 32800 |  
 |-----|-----|-----|-----|-----|-----|-----|-----|  
 Human AAATAGTTGGGACTGATTCACCTGGTTGGAACTAGTAGCAGATTGGAGACAATAGAAGAAATGTTAGTGAACCTGAATACT 32800  
 AsianBonytongue ----- 0  
 Reedfish ----- 0  
 NorthernPike ----- 0  
 SpottedGar ----- 0  
 ParamormyropsKingsLeyae ----- 0

Majority -----  
 |-----|-----|-----|-----|-----|-----|-----|-----|  
 | 32810 | 32820 | 32830 | 32840 | 32850 | 32860 | 32870 | 32880 |  
 |-----|-----|-----|-----|-----|-----|-----|-----|  
 Human GTTGAATACAGTGATTTAAATCTGTCAGAGAGGAGAAAGTATATCTAATGGACAATGAAGCAGTCTGACATGTAAGTTGAA 32880  
 AsianBonytongue ----- 0  
 Reedfish ----- 0  
 NorthernPike ----- 0  
 SpottedGar ----- 0  
 ParamormyropsKingsLeyae ----- 0

Majority -----  
 |-----|-----|-----|-----|-----|-----|-----|-----|  
 | 32890 | 32900 | 32910 | 32920 | 32930 | 32940 | 32950 | 32960 |  
 |-----|-----|-----|-----|-----|-----|-----|-----|  
 Human TTTCAGAGTGAGAATGTGGGGGAATAAAACATCTATCTGTTTGAGATAGTAATGACTGAGAACTTCTAAAATTTGAATAA 32960  
 AsianBonytongue ----- 0  
 Reedfish ----- 0  
 NorthernPike ----- 0  
 SpottedGar ----- 0  
 ParamormyropsKingsLeyae ----- 0

Majority -----  
 |-----|-----|-----|-----|-----|-----|-----|-----|  
 | 32970 | 32980 | 32990 | 33000 | 33010 | 33020 | 33030 | 33040 |  
 |-----|-----|-----|-----|-----|-----|-----|-----|  
 Human AATATATCAACTTACATTCCTAAGAAGCTCAGGTAAACTCCTCATGTAGGCTAAATAAAAAAGAACCATACTTAGACACAT 33040  
 AsianBonytongue ----- 0  
 Reedfish ----- 0  
 NorthernPike ----- 0  
 SpottedGar ----- 0  
 ParamormyropsKingsLeyae ----- 0

Majority -----  
 |-----|-----|-----|-----|-----|-----|-----|-----|  
 | 33050 | 33060 | 33070 | 33080 | 33090 | 33100 | 33110 | 33120 |  
 |-----|-----|-----|-----|-----|-----|-----|-----|  
 Human AGTAGTCAAAATATTGAAAAC TAGAAATGAAGAGCAAATCTAAACAGCTGCGAAAAAACGCTCTAACAGGAGACCAACAC 33120  
 AsianBonytongue ----- 0  
 Reedfish ----- 0  
 NorthernPike ----- 0  
 SpottedGar ----- 0  
 ParamormyropsKingsLeyae ----- 0

Sunday, May 01, 2022 09:43 PM

```

Majority -----
                |-----|
                |33130| 33140| 33150| 33160| 33170| 33180| 33190| 33200|
                |-----|
Human           |CTCGTATTAAAGGGGGAAAAAAGCGAATTTCTTTAGACTGAATGGCATAACTTGGCTCTACAGGGGATAAGAGGAGTAC| 33200
AsianBonytongue|-----| 0
Reedfish       |-----| 0
NorthernPike   |-----| 0
SpottedGar     |-----| 0
ParamormyropsKingsLeyae|-----| 0
    
```

```

Majority -----
                |-----|
                |33210| 33220| 33230| 33240| 33250| 33260| 33270| 33280|
                |-----|
Human           |TGGGAATGGTTAATATGTGTATAAATTTTAAAAGGGCTCTCTCTTTTCTATCAGTTTCTTTGAAAGCCTTTATGTAAAC| 33280
AsianBonytongue|-----| 0
Reedfish       |-----| 0
NorthernPike   |-----| 0
SpottedGar     |-----| 0
ParamormyropsKingsLeyae|-----| 0
    
```

```

Majority -----
                |-----|
                |33290| 33300| 33310| 33320| 33330| 33340| 33350| 33360|
                |-----|
Human           |AACAACTTTGTATTATGGGGTTTATTATGTAATGGATGTTTATATGACAACAGTTAGTACAAAAGTGAAGATAAATGGAA| 33360
AsianBonytongue|-----| 0
Reedfish       |-----| 0
NorthernPike   |-----| 0
SpottedGar     |-----| 0
ParamormyropsKingsLeyae|-----| 0
    
```

```

Majority -----
                |-----|
                |33370| 33380| 33390| 33400| 33410| 33420| 33430| 33440|
                |-----|
Human           |TTCTTCAGTGGTAAGGTTCTTATATTTTACCTGAAGTGATACAGTGTTAACTCTAACATAAAAAGATTCTGTTAAGGTTG| 33440
AsianBonytongue|-----| 0
Reedfish       |-----| 0
NorthernPike   |-----| 0
SpottedGar     |-----| 0
ParamormyropsKingsLeyae|-----| 0
    
```

```

Majority -----
                |-----|
                |33450| 33460| 33470| 33480| 33490| 33500| 33510| 33520|
                |-----|
Human           |CATATCAAAATTCTAAGTGTAATCTCATTTAAAAAGATAAAAAGAAGTATAACGAAAAGCCAATAGAGGAAAAAATGGAG| 33520
AsianBonytongue|-----| 0
Reedfish       |-----| 0
NorthernPike   |-----| 0
SpottedGar     |-----| 0
ParamormyropsKingsLeyae|-----| 0
    
```

```

Majority -----
                |-----|
                |33530| 33540| 33550| 33560| 33570| 33580| 33590| 33600|
                |-----|
Human           |CATTGACTACCAGTTTTCAAGAATTACTGCAAAGCTACGGTAATTTAAAAATAGCATCATAATAACATAAAGATAAATAGG| 33600
AsianBonytongue|-----| 0
Reedfish       |-----| 0
NorthernPike   |-----| 0
SpottedGar     |-----| 0
ParamormyropsKingsLeyae|-----| 0
    
```

Sunday, May 01, 2022 09:43 PM

```

Majority -----
          |-----|
          |33610|33620|33630|33640|33650|33660|33670|33680|
          |-----|
Human     |TCAGTGAGACAGAGCAGAGAGTTTCAGAAGTTAACTCACACAATTATGGATAACTGATTTTTGACAAAGGTGCAAAGTCAA| 33680
AsianBonytongue ----- 0
Reedfish ----- 0
NorthernPike ----- 0
SpottedGar ----- 0
ParamormyropsKingsLeyae ----- 0
    
```

```

Majority -----
          |-----|
          |33690|33700|33710|33720|33730|33740|33750|33760|
          |-----|
Human     |TTCAGTGGAGAAAAAGTAGACTTCCAACAAAGGGTGCTACAGCAGTTGGAGCTATCCGTATGCAAAAAAATGATCTTGGA| 33760
AsianBonytongue ----- 0
Reedfish ----- 0
NorthernPike ----- 0
SpottedGar ----- 0
ParamormyropsKingsLeyae ----- 0
    
```

```

Majority -----
          |-----|
          |33770|33780|33790|33800|33810|33820|33830|33840|
          |-----|
Human     |TCTGTATCTCACACTGCATATGAAAATTTAACTCCAATGGATCATGGCCTAATGTAAAACCAAAAATTATAAAATCTCTA| 33840
AsianBonytongue ----- 0
Reedfish ----- 0
NorthernPike ----- 0
SpottedGar ----- 0
ParamormyropsKingsLeyae ----- 0
    
```

```

Majority -----
          |-----|
          |33850|33860|33870|33880|33890|33900|33910|33920|
          |-----|
Human     |GAAAAAATACAGAAAATCTTCGTGACTTTGGATTAAGCAGGAATGTATTTGATATGACCCTAAAAGCACAATCTATTAA| 33920
AsianBonytongue ----- 0
Reedfish ----- 0
NorthernPike ----- 0
SpottedGar ----- 0
ParamormyropsKingsLeyae ----- 0
    
```

```

Majority -----
          |-----|
          |33930|33940|33950|33960|33970|33980|33990|34000|
          |-----|
Human     |AAAATGGAATTTGACATCAGAATTAATAATCTTCTGCCATTCAAAAGAAACTGCTAGGGAATGAAAAGACAAGCCATAAAC| 34000
AsianBonytongue ----- 0
Reedfish ----- 0
NorthernPike ----- 0
SpottedGar ----- 0
ParamormyropsKingsLeyae ----- 0
    
```

```

Majority -----
          |-----|
          |34010|34020|34030|34040|34050|34060|34070|34080|
          |-----|
Human     |TGGAAGAACATCATAACAAAGCATATAGCTGATAAAGGACTTCTATCCAGAATATTAAAAGATTTCAGTATATGTAAAATC| 34080
AsianBonytongue ----- 0
Reedfish ----- 0
NorthernPike ----- 0
SpottedGar ----- 0
ParamormyropsKingsLeyae ----- 0
    
```

Sunday, May 01, 2022 09:43 PM

```

Majority -----
      |-----|
      |34090  34100  34110  34120  34130  34140  34150  34160|
      |-----|
Human  AGCAGTCAAGCAACAAACTACTCAATGAATTGGCCAAAATATTTGAACAGGTAGTACAGCACAAAAGATACACAGATGGT 34160
AsianBonytongue ----- 0
Reedfish ----- 0
NorthernPike ----- 0
SpottedGar ----- 0
ParamormyropsKingsLeyae ----- 0
    
```

```

Majority -----
      |-----|
      |34170  34180  34190  34200  34210  34220  34230  34240|
      |-----|
Human  AAGTAAGCACGTGAAAAAGCTGGTCAGCATCATTAGTTATTTAGGGAATGAAAATTTAAACTACAGTGAGATAATATTAC 34240
AsianBonytongue ----- 0
Reedfish ----- 0
NorthernPike ----- 0
SpottedGar ----- 0
ParamormyropsKingsLeyae ----- 0
    
```

```

Majority -----
      |-----|
      |34250  34260  34270  34280  34290  34300  34310  34320|
      |-----|
Human  AAACCTATTAATAGTGACTAAAATTTAAAAGAGTGCCATCTTGGAAAGCATGAGTTGGGAAGAATGTGGAAGAATGTTAA 34320
AsianBonytongue ----- 0
Reedfish ----- 0
NorthernPike ----- 0
SpottedGar ----- 0
ParamormyropsKingsLeyae ----- 0
    
```

```

Majority -----
      |-----|
      |34330  34340  34350  34360  34370  34380  34390  34400|
      |-----|
Human  TATTCACAATACTGCTGATGGGAATGTAAAATCGTAGTACTTTGGAAAACAATCTGGTAGTTTCTCCATGATCCAGGTTA 34400
AsianBonytongue ----- 0
Reedfish ----- 0
NorthernPike ----- 0
SpottedGar ----- 0
ParamormyropsKingsLeyae ----- 0
    
```

```

Majority -----
      |-----|
      |34410  34420  34430  34440  34450  34460  34470  34480|
      |-----|
Human  TTTGTCTCCTAAGCATTACCCAAGAGAAAAGAAGGCATCTATTTCATTAATAAACTCTCATGTTAATGTTTCATAGCCATT 34480
AsianBonytongue ----- 0
Reedfish ----- 0
NorthernPike ----- 0
SpottedGar ----- 0
ParamormyropsKingsLeyae ----- 0
    
```

```

Majority -----
      |-----|
      |34490  34500  34510  34520  34530  34540  34550  34560|
      |-----|
Human  TTATTTGTAATCACCAAAATGTGAAACAAACATTCATCAACAGATGAACTAATAAGTAGATTCTGTGTTTGGCATCATAT 34560
AsianBonytongue ----- 0
Reedfish ----- 0
NorthernPike ----- 0
SpottedGar ----- 0
ParamormyropsKingsLeyae ----- 0
    
```



Sunday, May 01, 2022 09:43 PM

```

Majority -----
      |-----|
      |34570  |34580  |34590  |34600  |34610  |34620  |34630  |34640  |
      |-----|-----|-----|-----|-----|-----|-----|-----|
Human  GCTTTTCCATACAGTGGAAATACAACAGCCATGTAGAATGAGCTATTGATAGACACAACAGCAAGAATGAATCTCCAAACA 34640
AsianBonytongue ----- 0
Reedfish ----- 0
NorthernPike ----- 0
SpottedGar ----- 0
ParamormyropsKingsLeyae ----- 0
    
```

```

Majority -----
      |-----|
      |34650  |34660  |34670  |34680  |34690  |34700  |34710  |34720  |
      |-----|-----|-----|-----|-----|-----|-----|-----|
Human  ATTATGTTATGTAAGATGGGAGAAAAAAGACTACATCCTGTATGATTCCATTTATATAAAACTCTGGGAAATGCAAA 34720
AsianBonytongue ----- 0
Reedfish ----- 0
NorthernPike ----- 0
SpottedGar ----- 0
ParamormyropsKingsLeyae ----- 0
    
```

```

Majority -----
      |-----|
      |34730  |34740  |34750  |34760  |34770  |34780  |34790  |34800  |
      |-----|-----|-----|-----|-----|-----|-----|-----|
Human  CTAATCTAAAGCAAATTCATGGTCTTAGGAGTTTAAAGAGTGGGAAAGGACAGGCAGGAGGGGTGGCAAAGGGACACAGG 34800
AsianBonytongue ----- 0
Reedfish ----- 0
NorthernPike ----- 0
SpottedGar ----- 0
ParamormyropsKingsLeyae ----- 0
    
```

```

Majority -----
      |-----|
      |34810  |34820  |34830  |34840  |34850  |34860  |34870  |34880  |
      |-----|-----|-----|-----|-----|-----|-----|-----|
Human  AAAACTCGGGAGTGATGGACATATAAATTATTGTGATGGTGGTTTTATGGATGTATGCATATGTCAAACCTTGTCAAATT 34880
AsianBonytongue ----- 0
Reedfish ----- 0
NorthernPike ----- 0
SpottedGar ----- 0
ParamormyropsKingsLeyae ----- 0
    
```

```

Majority -----
      |-----|
      |34890  |34900  |34910  |34920  |34930  |34940  |34950  |34960  |
      |-----|-----|-----|-----|-----|-----|-----|-----|
Human  TTATAATTTAAATACATATACATCCTAGAAATGGCCGAACCTTCAGAACATTGATAACACCAAATGCTGGCAAGGATGTG 34960
AsianBonytongue ----- 0
Reedfish ----- 0
NorthernPike ----- 0
SpottedGar ----- 0
ParamormyropsKingsLeyae ----- 0
    
```

```

Majority -----
      |-----|
      |34970  |34980  |34990  |35000  |35010  |35020  |35030  |35040  |
      |-----|-----|-----|-----|-----|-----|-----|-----|
Human  GAGCAACAGGAACTCTCACTTACTGCTCAGTGGAAATGCAGAGTGGTACAGCCACTTTGGAAGACAATTTGGCAATTTCTT 35040
AsianBonytongue ----- 0
Reedfish ----- 0
NorthernPike ----- 0
SpottedGar ----- 0
ParamormyropsKingsLeyae ----- 0
    
```

Sunday, May 01, 2022 09:43 PM

Majority -----  
 |-----|-----|-----|-----|-----|-----|-----|-----|  
 | 35050 | 35060 | 35070 | 35080 | 35090 | 35100 | 35110 | 35120 |  
 |-----|-----|-----|-----|-----|-----|-----|-----|  
 Human AGAAAAC TATACGGCCGGGCACAGTGGCTTACGCCTGTAATCCCAGCGCTTTGGGAAGCCAAGGCAGGCGGATCACCTGA 35120  
 AsianBonytongue ----- 0  
 Reedfish ----- 0  
 NorthernPike ----- 0  
 SpottedGar ----- 0  
 ParamormyropsKingsLeyae ----- 0

Majority -----  
 |-----|-----|-----|-----|-----|-----|-----|-----|  
 | 35130 | 35140 | 35150 | 35160 | 35170 | 35180 | 35190 | 35200 |  
 |-----|-----|-----|-----|-----|-----|-----|-----|  
 Human GGTGAGAAGTTCAAACCAGCCTGGCCAACATGGAGAAACCCGATCTCTACTAAAAAATACAAAATTAGCTAGGCGTGGT 35200  
 AsianBonytongue ----- 0  
 Reedfish ----- 0  
 NorthernPike ----- 0  
 SpottedGar ----- 0  
 ParamormyropsKingsLeyae ----- 0

Majority -----  
 |-----|-----|-----|-----|-----|-----|-----|-----|  
 | 35210 | 35220 | 35230 | 35240 | 35250 | 35260 | 35270 | 35280 |  
 |-----|-----|-----|-----|-----|-----|-----|-----|  
 Human GGTGCATGCCTGTAATCCCAGCCACTCAGGAGGCTGAAGCAGGAGAATTACTTGAACCCAGGAGGTGGAGGTTGCAGTGA 35280  
 AsianBonytongue ----- 0  
 Reedfish ----- 0  
 NorthernPike ----- 0  
 SpottedGar ----- 0  
 ParamormyropsKingsLeyae ----- 0

Majority -----  
 |-----|-----|-----|-----|-----|-----|-----|-----|  
 | 35290 | 35300 | 35310 | 35320 | 35330 | 35340 | 35350 | 35360 |  
 |-----|-----|-----|-----|-----|-----|-----|-----|  
 Human GCCAGGATCACGCCCATTTCACTCCAACCTGGGCAACAAGAGCGAGACTCCATCTCAAATATACTTTCATTTGTATGATCC 35360  
 AsianBonytongue ----- 0  
 Reedfish ----- 0  
 NorthernPike ----- 0  
 SpottedGar ----- 0  
 ParamormyropsKingsLeyae ----- 0

Majority -----  
 |-----|-----|-----|-----|-----|-----|-----|-----|  
 | 35370 | 35380 | 35390 | 35400 | 35410 | 35420 | 35430 | 35440 |  
 |-----|-----|-----|-----|-----|-----|-----|-----|  
 Human AGCAGTTGTGCTCCCTGGTATTTGCCTAAAGGAGTTGAAAACCTTAGTCTGCCGAGAAAGTAGCACATGGATGTTTATAGC 35440  
 AsianBonytongue ----- 0  
 Reedfish ----- 0  
 NorthernPike ----- 0  
 SpottedGar ----- 0  
 ParamormyropsKingsLeyae ----- 0

Majority -----  
 |-----|-----|-----|-----|-----|-----|-----|-----|  
 | 35450 | 35460 | 35470 | 35480 | 35490 | 35500 | 35510 | 35520 |  
 |-----|-----|-----|-----|-----|-----|-----|-----|  
 Human ACCTTCTTTTATAGTTGCCAGAACTTCATAGCAACCAAGAAGTCCCTTTAGGAGGTGAATGGCCAAATAAACTGTGGTGTA 35520  
 AsianBonytongue ----- 0  
 Reedfish ----- 0  
 NorthernPike ----- 0  
 SpottedGar ----- 0  
 ParamormyropsKingsLeyae ----- 0

Sunday, May 01, 2022 09:43 PM

```

Majority -----
                |-----|
                |35530|  |35540|  |35550|  |35560|  |35570|  |35580|  |35590|  |35600|
                |-----|
Human           TATTCAGACAGTATAATGTTAATCAGCACTAAATGGAAATGAGCTATCAAGCCATGGAGAACCTTCAGTGAACATTACTA 35600
AsianBonytongue ----- 0
Reedfish       ----- 0
NorthernPike    ----- 0
SpottedGar      ----- 0
ParamormyropsKingsLeyae ----- 0
    
```

```

Majority -----
                |-----|
                |35610|  |35620|  |35630|  |35640|  |35650|  |35660|  |35670|  |35680|
                |-----|
Human           AATAAAAGAAGCCACTCTGAAAATTCTGCATACCATATGATTCCAACTATATGACATTCTGGAAAAGCAAATTTATGGA 35680
AsianBonytongue ----- 0
Reedfish       ----- 0
NorthernPike    ----- 0
SpottedGar      ----- 0
ParamormyropsKingsLeyae ----- 0
    
```

```

Majority -----
                |-----|
                |35690|  |35700|  |35710|  |35720|  |35730|  |35740|  |35750|  |35760|
                |-----|
Human           GACAGTAAAAATCAGTGGTTGCTAGGGTTTAGGGGTGGAGGGAGGGATGAACTGGTGGAGTACAGAGGATTTTAGGGTAC 35760
AsianBonytongue ----- 0
Reedfish       ----- 0
NorthernPike    ----- 0
SpottedGar      ----- 0
ParamormyropsKingsLeyae ----- 0
    
```

```

Majority -----
                |-----|
                |35770|  |35780|  |35790|  |35800|  |35810|  |35820|  |35830|  |35840|
                |-----|
Human           TGAAAATATTTCTGCATGATACTATAATGATAGATACATGTCATACATTTTTCCAAACCCATAGAATGTAAGACACTTGA 35840
AsianBonytongue ----- 0
Reedfish       ----- 0
NorthernPike    ----- 0
SpottedGar      ----- 0
ParamormyropsKingsLeyae ----- 0
    
```

```

Majority -----
                |-----|
                |35850|  |35860|  |35870|  |35880|  |35890|  |35900|  |35910|  |35920|
                |-----|
Human           GTGAACCTGGAGGTAACACTACAGACTTTGAGTGATTATAATGTGTCAGTGTAGGTTTCATCAGTTGTAACAATGTGCCATCT 35920
AsianBonytongue ----- 0
Reedfish       ----- 0
NorthernPike    ----- 0
SpottedGar      ----- 0
ParamormyropsKingsLeyae ----- 0
    
```

```

Majority -----
                |-----|
                |35930|  |35940|  |35950|  |35960|  |35970|  |35980|  |35990|  |36000|
                |-----|
Human           GGTGGGAGATGTTGATAAAGGGGAGGCTATTTGGGGCAGGAGGCAGGGAAATCTCTCTGCTTTCCTCTCCATTTTGCTGT 36000
AsianBonytongue ----- 0
Reedfish       ----- 0
NorthernPike    ----- 0
SpottedGar      ----- 0
ParamormyropsKingsLeyae ----- 0
    
```

Sunday, May 01, 2022 09:43 PM

```

Majority -----
      36010   36020   36030   36040   36050   36060   36070   36080
Human    GTACCTAAACTTACTCTGAAAAATGTCTTTGAAAATTTACTCATGCGCTTGCATTGCATTTCTTTTGGATATTACTGGTC 36080
AsianBonytongue ----- 0
Reedfish ----- 0
NorthernPike ----- 0
SpottedGar ----- 0
ParamormyropsKingsLeyae ----- 0
    
```

```

Majority -----
      36090   36100   36110   36120   36130   36140   36150   36160
Human    TAAGTAGTCCAGTTAAAAGACAAAGATTGTCAGACTTGATTAAAAAGCAAGGCCTAACTACACTGTCAATACGAGGGTCA 36160
AsianBonytongue ----- 0
Reedfish ----- 0
NorthernPike ----- 0
SpottedGar ----- 0
ParamormyropsKingsLeyae ----- 0
    
```

```

Majority -----
      36170   36180   36190   36200   36210   36220   36230   36240
Human    GGTAGAAATATCAAGATGCAGGTTGAAAGTAAAAAGATGGAAAATGATATTCCGTGCAAACAGTAAGCACAAGAAAGTTG 36240
AsianBonytongue ----- 0
Reedfish ----- 0
NorthernPike ----- 0
SpottedGar ----- 0
ParamormyropsKingsLeyae ----- 0
    
```

```

Majority -----
      36250   36260   36270   36280   36290   36300   36310   36320
Human    ATATGATTATATTACTAGACAGAAAAATTTAAGACAAATATTACCAGATATAAAAAAGCATATTTTCACAATGTTGAAGGG 36320
AsianBonytongue ----- 0
Reedfish ----- 0
NorthernPike ----- 0
SpottedGar ----- 0
ParamormyropsKingsLeyae ----- 0
    
```

```

Majority -----
      36330   36340   36350   36360   36370   36380   36390   36400
Human    TCAGTTTATCAGAAAACATTTCTTAATTTGTATGCCAATAATAACAAATCAAAGTATATTAAGAAAAACATCACAGAACT 36400
AsianBonytongue ----- 0
Reedfish ----- 0
NorthernPike ----- 0
SpottedGar ----- 0
ParamormyropsKingsLeyae ----- 0
    
```

```

Majority -----
      36410   36420   36430   36440   36450   36460   36470   36480
Human    AAGTAGAGAAACAAAAATCCACAATCATAGCCTGGTTTTTTTAAACATAATTTATGGCAATTGATAGGATAGTACAGTCC 36480
AsianBonytongue ----- 0
Reedfish ----- 0
NorthernPike ----- 0
SpottedGar ----- 0
ParamormyropsKingsLeyae ----- 0
    
```

Sunday, May 01, 2022 09:43 PM

```

Majority -----
                |-----|
                |36490|36500|36510|36520|36530|36540|36550|36560|
                |-----|
Human           |TAGCCCCCAAATAAAAAAGATACATAATTTGAAAAGTGCTATCATGTTGGCTTAACTCACATTTATAAAACTATAACCCAGT| 36560
AsianBonytongue|-----|
Reedfish       |-----|
NorthernPike   |-----|
SpottedGar     |-----|
ParamormyropsKingsLeyae|-----|
    
```

```

Majority -----
                |-----|
                |36570|36580|36590|36600|36610|36620|36630|36640|
                |-----|
Human           |AACTGTAAAATAACTTCAAGTGTACATAGAACATTCACAATGATAGACCTTATATTGGATTATAAAAATAACTCAATAAAT| 36640
AsianBonytongue|-----|
Reedfish       |-----|
NorthernPike   |-----|
SpottedGar     |-----|
ParamormyropsKingsLeyae|-----|
    
```

```

Majority -----
                |-----|
                |36650|36660|36670|36680|36690|36700|36710|36720|
                |-----|
Human           |TTCAAATGATTGACAGCTAATGTATCTGACTGACTATAGTGAATTAAATTAGAAATCAAAAATAGACATCTAGGAAAGT| 36720
AsianBonytongue|-----|
Reedfish       |-----|
NorthernPike   |-----|
SpottedGar     |-----|
ParamormyropsKingsLeyae|-----|
    
```

```

Majority -----
                |-----|
                |36730|36740|36750|36760|36770|36780|36790|36800|
                |-----|
Human           |ACTAAATATTTAGAAATTACACAATCGTGAACAATACATGGATTATAGAAGTGTACCACAAGGACATATTTTGGACTGAA| 36800
AsianBonytongue|-----|
Reedfish       |-----|
NorthernPike   |-----|
SpottedGar     |-----|
ParamormyropsKingsLeyae|-----|
    
```

```

Majority -----
                |-----|
                |36810|36820|36830|36840|36850|36860|36870|36880|
                |-----|
Human           |TGAAAATATATCAAAATTTGTTGGATACTACCCAAGGGTGTGTATGGTGAAGTATGTCTTCAAATACCTATATTACAA| 36880
AsianBonytongue|-----|
Reedfish       |-----|
NorthernPike   |-----|
SpottedGar     |-----|
ParamormyropsKingsLeyae|-----|
    
```

```

Majority -----
                |-----|
                |36890|36900|36910|36920|36930|36940|36950|36960|
                |-----|
Human           |AAAAAGGTTTAAACTCCCAATTTAAGACTGACCAAGGAAAAGACATAAATTACCAACTGGAAATCAAGGTCGAGAT| 36960
AsianBonytongue|-----|
Reedfish       |-----|
NorthernPike   |-----|
SpottedGar     |-----|
ParamormyropsKingsLeyae|-----|
    
```

Sunday, May 01, 2022 09:43 PM

```

Majority -----
                |-----|
                |36970|36980|36990|37000|37010|37020|37030|37040|
                |-----|
Human           |AATCACTTTCAGAGAAAGTGGATATATGCAGAGTATAATAGTATAACATAAAATAATATAAAGTGGAGATAGCACTTTCAA| 37040
AsianBonytongue|-----| 0
Reedfish       |-----| 0
NorthernPike   |-----| 0
SpottedGar     |-----| 0
ParamormyropsKingsLeyae|-----| 0
    
```

```

Majority -----
                |-----|
                |37050|37060|37070|37080|37090|37100|37110|37120|
                |-----|
Human           |TAAAAGCAGAGATATATAGAATATAATAGGAAAATAAGTCAATATTAGTAATGTTGTTAAGGCTAACAAATTCAGCAACT| 37120
AsianBonytongue|-----| 0
Reedfish       |-----| 0
NorthernPike   |-----| 0
SpottedGar     |-----| 0
ParamormyropsKingsLeyae|-----| 0
    
```

```

Majority -----
                |-----|
                |37130|37140|37150|37160|37170|37180|37190|37200|
                |-----|
Human           |TAGATGAAAAGTTTCTTGACAAATGCAAAACTGACTTAAGTATATAGCTTAACAGCTATATACTACTGTATTATACAAAT| 37200
AsianBonytongue|-----| 0
Reedfish       |-----| 0
NorthernPike   |-----| 0
SpottedGar     |-----| 0
ParamormyropsKingsLeyae|-----| 0
    
```

```

Majority -----
                |-----|
                |37210|37220|37230|37240|37250|37260|37270|37280|
                |-----|
Human           |TGGAAATTTATAATTAATAAAATCTTTCCACAAAGATTACTCTAGTCATAGATGGTTTCACTATTGAATTTTATGAAATTT| 37280
AsianBonytongue|-----| 0
Reedfish       |-----| 0
NorthernPike   |-----| 0
SpottedGar     |-----| 0
ParamormyropsKingsLeyae|-----| 0
    
```

```

Majority -----
                |-----|
                |37290|37300|37310|37320|37330|37340|37350|37360|
                |-----|
Human           |TAAAGGAATACTAGCTGTCTTTGAAAATGGAGGAGGAATACTACCCTGTTCACTTTATGAAACCACTATAACTGACAGC| 37360
AsianBonytongue|-----| 0
Reedfish       |-----| 0
NorthernPike   |-----| 0
SpottedGar     |-----| 0
ParamormyropsKingsLeyae|-----| 0
    
```

```

Majority -----
                |-----|
                |37370|37380|37390|37400|37410|37420|37430|37440|
                |-----|
Human           |AAACCTGACAAGGGTAATATATCAAGATTTGAGACTAGTATTTCTCATTAACTAAATGCATATATTCTTAAGAAAATG| 37440
AsianBonytongue|-----| 0
Reedfish       |-----| 0
NorthernPike   |-----| 0
SpottedGar     |-----| 0
ParamormyropsKingsLeyae|-----| 0
    
```

Sunday, May 01, 2022 09:43 PM

| Majority                | -----                                                                            |       |       |       |       |       |       |       |       |
|-------------------------|----------------------------------------------------------------------------------|-------|-------|-------|-------|-------|-------|-------|-------|
|                         | 37450                                                                            | 37460 | 37470 | 37480 | 37490 | 37500 | 37510 | 37520 |       |
| Human                   | TTGGTAAATCACCTCCGGTAGAATATGAGAGACAATTCTGAGACTTATCGCAGGATTGTAAGGTTGTTTAAACATTTGAA |       |       |       |       |       |       |       | 37520 |
| AsianBonytongue         | -----                                                                            |       |       |       |       |       |       |       | 0     |
| Reedfish                | -----                                                                            |       |       |       |       |       |       |       | 0     |
| NorthernPike            | -----                                                                            |       |       |       |       |       |       |       | 0     |
| SpottedGar              | -----                                                                            |       |       |       |       |       |       |       | 0     |
| ParamormyropsKingsLeyae | -----                                                                            |       |       |       |       |       |       |       | 0     |

| Majority                | -----                                                                              |       |       |       |       |       |       |       |       |
|-------------------------|------------------------------------------------------------------------------------|-------|-------|-------|-------|-------|-------|-------|-------|
|                         | 37530                                                                              | 37540 | 37550 | 37560 | 37570 | 37580 | 37590 | 37600 |       |
| Human                   | AATGAACTCAGTGTAATTTGTCACAATGATAGAATGAAGAAAGAAGAAATTTCTCTCAGAAAAC TAGGAAGAGAAGGAGCT |       |       |       |       |       |       |       | 37600 |
| AsianBonytongue         | -----                                                                              |       |       |       |       |       |       |       | 0     |
| Reedfish                | -----                                                                              |       |       |       |       |       |       |       | 0     |
| NorthernPike            | -----                                                                              |       |       |       |       |       |       |       | 0     |
| SpottedGar              | -----                                                                              |       |       |       |       |       |       |       | 0     |
| ParamormyropsKingsLeyae | -----                                                                              |       |       |       |       |       |       |       | 0     |

| Majority                | -----                                                                             |       |       |       |       |       |       |       |       |
|-------------------------|-----------------------------------------------------------------------------------|-------|-------|-------|-------|-------|-------|-------|-------|
|                         | 37610                                                                             | 37620 | 37630 | 37640 | 37650 | 37660 | 37670 | 37680 |       |
| Human                   | TTTACAATGTAAATAAGGGGTATCTACTAAGAACCTACAACAAATTTTCATACTTAATGGAGAAATATTGAATGTTTTCTT |       |       |       |       |       |       |       | 37680 |
| AsianBonytongue         | -----                                                                             |       |       |       |       |       |       |       | 0     |
| Reedfish                | -----                                                                             |       |       |       |       |       |       |       | 0     |
| NorthernPike            | -----                                                                             |       |       |       |       |       |       |       | 0     |
| SpottedGar              | -----                                                                             |       |       |       |       |       |       |       | 0     |
| ParamormyropsKingsLeyae | -----                                                                             |       |       |       |       |       |       |       | 0     |

| Majority                | -----                                                                           |       |       |       |       |       |       |       |       |
|-------------------------|---------------------------------------------------------------------------------|-------|-------|-------|-------|-------|-------|-------|-------|
|                         | 37690                                                                           | 37700 | 37710 | 37720 | 37730 | 37740 | 37750 | 37760 |       |
| Human                   | CTTAAAAACAGAAATGAAGCAAGGATGTCTGTTTTCTCAATTTTTCCCTTAGCTTTCTGCTTACATTAAGGCAGGTGAA |       |       |       |       |       |       |       | 37760 |
| AsianBonytongue         | -----                                                                           |       |       |       |       |       |       |       | 0     |
| Reedfish                | -----                                                                           |       |       |       |       |       |       |       | 0     |
| NorthernPike            | -----                                                                           |       |       |       |       |       |       |       | 0     |
| SpottedGar              | -----                                                                           |       |       |       |       |       |       |       | 0     |
| ParamormyropsKingsLeyae | -----                                                                           |       |       |       |       |       |       |       | 0     |

| Majority                | -----                                                                           |       |       |       |       |       |       |       |       |
|-------------------------|---------------------------------------------------------------------------------|-------|-------|-------|-------|-------|-------|-------|-------|
|                         | 37770                                                                           | 37780 | 37790 | 37800 | 37810 | 37820 | 37830 | 37840 |       |
| Human                   | ATAAAAGACATAAAGATTGTAAAGGAAGAAAGAAAAGTGTCTTATTCACCATTCAACATGCTTTTAAAGTAGAAGACCT |       |       |       |       |       |       |       | 37840 |
| AsianBonytongue         | -----                                                                           |       |       |       |       |       |       |       | 0     |
| Reedfish                | -----                                                                           |       |       |       |       |       |       |       | 0     |
| NorthernPike            | -----                                                                           |       |       |       |       |       |       |       | 0     |
| SpottedGar              | -----                                                                           |       |       |       |       |       |       |       | 0     |
| ParamormyropsKingsLeyae | -----                                                                           |       |       |       |       |       |       |       | 0     |

| Majority                | -----                                                                            |       |       |       |       |       |       |       |       |
|-------------------------|----------------------------------------------------------------------------------|-------|-------|-------|-------|-------|-------|-------|-------|
|                         | 37850                                                                            | 37860 | 37870 | 37880 | 37890 | 37900 | 37910 | 37920 |       |
| Human                   | GAAGGACTCTACAACAGATTTGGTAGAACTAATAAGTGAATTTAGATAAATTATAGGATACAAGTTCTATGTACAGAAAT |       |       |       |       |       |       |       | 37920 |
| AsianBonytongue         | -----                                                                            |       |       |       |       |       |       |       | 0     |
| Reedfish                | -----                                                                            |       |       |       |       |       |       |       | 0     |
| NorthernPike            | -----                                                                            |       |       |       |       |       |       |       | 0     |
| SpottedGar              | -----                                                                            |       |       |       |       |       |       |       | 0     |
| ParamormyropsKingsLeyae | -----                                                                            |       |       |       |       |       |       |       | 0     |

Sunday, May 01, 2022 09:43 PM

```

Majority -----
      |-----|
      |37930  |37940  |37950  |37960  |37970  |37980  |37990  |38000  |
      |-----|-----|-----|-----|-----|-----|-----|-----|
Human  AGTCTCCTTATACTTGGCAGCAAATTCTTAGAAAATGAAATTTTAAAAAATCTGTTTATAAAAGTATCAGACAAAATATC 38000
AsianBonytongue ----- 0
Reedfish ----- 0
NorthernPike ----- 0
SpottedGar ----- 0
ParamormyropsKingsLeyae ----- 0
    
```

```

Majority -----
      |-----|
      |38010  |38020  |38030  |38040  |38050  |38060  |38070  |38080  |
      |-----|-----|-----|-----|-----|-----|-----|-----|
Human  AGGAAAAAATTTGACAAAAGATATGTAAGACATCTACACCAATATGAAACACTGCTAAGAGAAGTTTTAAAAAGACTTA 38080
AsianBonytongue ----- 0
Reedfish ----- 0
NorthernPike ----- 0
SpottedGar ----- 0
ParamormyropsKingsLeyae ----- 0
    
```

```

Majority -----
      |-----|
      |38090  |38100  |38110  |38120  |38130  |38140  |38150  |38160  |
      |-----|-----|-----|-----|-----|-----|-----|-----|
Human  CATGAAGACGTAGACCATGTTTCATGAATTAGAAGGCTCAATATGTTAACATGCCAGTTCTCCCTAAATGGGATGGCATT 38160
AsianBonytongue ----- 0
Reedfish ----- 0
NorthernPike ----- 0
SpottedGar ----- 0
ParamormyropsKingsLeyae ----- 0
    
```

```

Majority -----
      |-----|
      |38170  |38180  |38190  |38200  |38210  |38220  |38230  |38240  |
      |-----|-----|-----|-----|-----|-----|-----|-----|
Human  GAATCTATAAAGACTTATAAATGAGAGTACATTCTAAAATTTATGTGGAAATAAAAAGGAGCTAGGACAATTTAAACCA 38240
AsianBonytongue ----- 0
Reedfish ----- 0
NorthernPike ----- 0
SpottedGar ----- 0
ParamormyropsKingsLeyae ----- 0
    
```

```

Majority -----
      |-----|
      |38250  |38260  |38270  |38280  |38290  |38300  |38310  |38320  |
      |-----|-----|-----|-----|-----|-----|-----|-----|
Human  TTTTGAAAAAGTAAATTTTGCCACAGTTCTCAAGACTCACTACAAACCTGTAGTTAATCCAAAACAGTTTACTACTAGCA 38320
AsianBonytongue ----- 0
Reedfish ----- 0
NorthernPike ----- 0
SpottedGar ----- 0
ParamormyropsKingsLeyae ----- 0
    
```

```

Majority -----
      |-----|
      |38330  |38340  |38350  |38360  |38370  |38380  |38390  |38400  |
      |-----|-----|-----|-----|-----|-----|-----|-----|
Human  TAGTTAGTGACACAGAATAGCGTTTCAGGGAATAACTCATGCATTAAAGTTGCCTTGATCACTCAGTGAAGAAAGAGAAGG 38400
AsianBonytongue ----- 0
Reedfish ----- 0
NorthernPike ----- 0
SpottedGar ----- 0
ParamormyropsKingsLeyae ----- 0
    
```



Sunday, May 01, 2022 09:43 PM

```

Majority -----
                |-----|
                |38410|38420|38430|38440|38450|38460|38470|38480|
                |-----|
Human           CCTTTCAACAGATGTGCTAGAACAGCTGAATATACATACAAAAAGCAAAGAACTTAAACCCTACATCATTCTGTATA 38480
AsianBonytongue ----- 0
Reedfish       ----- 0
NorthernPike    ----- 0
SpottedGar      ----- 0
ParamormyropsKingsLeyae ----- 0
    
```

```

Majority -----
                |-----|
                |38490|38500|38510|38520|38530|38540|38550|38560|
                |-----|
Human           AAACAATGAGATTAATTATATAAAAACTAATATATAGAGTTTTTAGGAAAAGCATAGGATATACTTGCAACTTTGGGAT 38560
AsianBonytongue ----- 0
Reedfish       ----- 0
NorthernPike    ----- 0
SpottedGar      ----- 0
ParamormyropsKingsLeyae ----- 0
    
```

```

Majority -----
                |-----|
                |38570|38580|38590|38600|38610|38620|38630|38640|
                |-----|
Human           AAATGAAGATTTCTTAAATAGAAAACTTAAAGGAATATATAAACTTGACTCCATCAAATGGGAAATTTCTGCTTCA 38640
AsianBonytongue ----- 0
Reedfish       ----- 0
NorthernPike    ----- 0
SpottedGar      ----- 0
ParamormyropsKingsLeyae ----- 0
    
```

```

Majority -----
                |-----|
                |38650|38660|38670|38680|38690|38700|38710|38720|
                |-----|
Human           TCAAAAGACATTTGTTAAGACATTTGAAAAGACAAGGCACAGACTTGGAGAATATAATATTTGTGTATCAATACATGCATAT 38720
AsianBonytongue ----- 0
Reedfish       ----- 0
NorthernPike    ----- 0
SpottedGar      ----- 0
ParamormyropsKingsLeyae ----- 0
    
```

```

Majority -----
                |-----|
                |38730|38740|38750|38760|38770|38780|38790|38800|
                |-----|
Human           GACTGTATTAGTCCATTTTCATGCTGCTGATAAAGACGTACCCGAGACTGGGCGGGCAATTTATGAAAGAAACCAGTTTA 38800
AsianBonytongue ----- 0
Reedfish       ----- 0
NorthernPike    ----- 0
SpottedGar      ----- 0
ParamormyropsKingsLeyae ----- 0
    
```

```

Majority -----
                |-----|
                |38810|38820|38830|38840|38850|38860|38870|38880|
                |-----|
Human           ATGAATTTACAATTCTATGTGACTGGGGAAGCCTCATAATCATGGTGAAGGCAAGGAGGAGCAAGTCACATCTTACGTA 38880
AsianBonytongue ----- 0
Reedfish       ----- 0
NorthernPike    ----- 0
SpottedGar      ----- 0
ParamormyropsKingsLeyae ----- 0
    
```

Sunday, May 01, 2022 09:43 PM

```

Majority -----
      |-----|-----|-----|-----|-----|-----|-----|
      | 38890   38900   38910   38920   38930   38940   38950   38960
      |-----|-----|-----|-----|-----|-----|-----|
Human  GATGGCAACAGGCAAAGAAAAGAGAGCTTGTGCGGGGAAACTCTCCCCTTTTTTAAAACCATGAGACTTACTTCACTGTCA 38960
AsianBonytongue ----- 0
Reedfish ----- 0
NorthernPike ----- 0
SpottedGar ----- 0
ParamormyropsKingsLeyae ----- 0
    
```

```

Majority -----
      |-----|-----|-----|-----|-----|-----|-----|
      | 38970   38980   38990   39000   39010   39020   39030   39040
      |-----|-----|-----|-----|-----|-----|-----|
Human  CGAGAACAGCATTGGAAAGACCTGCCCCCATGATTCAGTTAACTCCCACCAGGTCCCTCCCACAACACATGGGAATTCAA 39040
AsianBonytongue ----- 0
Reedfish ----- 0
NorthernPike ----- 0
SpottedGar ----- 0
ParamormyropsKingsLeyae ----- 0
    
```

```

Majority -----
      |-----|-----|-----|-----|-----|-----|-----|
      | 39050   39060   39070   39080   39090   39100   39110   39120
      |-----|-----|-----|-----|-----|-----|-----|
Human  GAGGAGATGTGGGTGGGGACACAGCCAAACCATATCAATGACAAAGGACTTGTATCCCAAAGGACTTGTAATAAAAAAAAAAC 39120
AsianBonytongue ----- 0
Reedfish ----- 0
NorthernPike ----- 0
SpottedGar ----- 0
ParamormyropsKingsLeyae ----- 0
    
```

```

Majority -----
      |-----|-----|-----|-----|-----|-----|-----|
      | 39130   39140   39150   39160   39170   39180   39190   39200
      |-----|-----|-----|-----|-----|-----|-----|
Human  TCCTCCAATCAATAAATATGAGCAGCCCAATTTTTTTTTTAAGTGGCAAAGAAGTGACATTATAAGGATGGGTAACAAGC 39200
AsianBonytongue ----- 0
Reedfish ----- 0
NorthernPike ----- 0
SpottedGar ----- 0
ParamormyropsKingsLeyae ----- 0
    
```

```

Majority -----
      |-----|-----|-----|-----|-----|-----|-----|
      | 39210   39220   39230   39240   39250   39260   39270   39280
      |-----|-----|-----|-----|-----|-----|-----|
Human  ACATGAAAAGATAATGTTAGTCATCAGGTGATCACAAGTCAAACCATTAGAGATAGAATTTACACCAACTAGAATGGCT 39280
AsianBonytongue ----- 0
Reedfish ----- 0
NorthernPike ----- 0
SpottedGar ----- 0
ParamormyropsKingsLeyae ----- 0
    
```

```

Majority -----
      |-----|-----|-----|-----|-----|-----|-----|
      | 39290   39300   39310   39320   39330   39340   39350   39360
      |-----|-----|-----|-----|-----|-----|-----|
Human  AAAATTAAATAGATTGGCAATACCGAATGTTGATGAAGATGTGGAAGTGTCTTTAATTACTGCTGAGTATATAACATAGT 39360
AsianBonytongue ----- 0
Reedfish ----- 0
NorthernPike ----- 0
SpottedGar ----- 0
ParamormyropsKingsLeyae ----- 0
    
```

Sunday, May 01, 2022 09:43 PM

```

Majority -----
          |-----|
          |39370|39380|39390|39400|39410|39420|39430|39440|
          |-----|
Human      |TGGGAAAATAGTTTGCTTTTTTTTTTTTTTTTTTTTTTTTGGAGACAGAGTCTTGCTCTGTCACCAGGCTGGAATGCAGTG| 39440
AsianBonytongue ----- 0
Reedfish  ----- 0
NorthernPike ----- 0
SpottedGar ----- 0
ParamormyropsKingsLeyae ----- 0
    
```

```

Majority -----
          |-----|
          |39450|39460|39470|39480|39490|39500|39510|39520|
          |-----|
Human      |GCATGATCTCAGCTTACTGCAACCTCCGCCTCCTGGGTTCAAGCGATTCTCCTGCCTCAGCCTCCTGAGTAGCTGGAACT| 39520
AsianBonytongue ----- 0
Reedfish  ----- 0
NorthernPike ----- 0
SpottedGar ----- 0
ParamormyropsKingsLeyae ----- 0
    
```

```

Majority -----
          |-----|
          |39530|39540|39550|39560|39570|39580|39590|39600|
          |-----|
Human      |ACAGGTGCACGCCACCACCCCGGCTAATTTTTTGTATTTTATAGTAGAGACTGGGTTTCGCCATGTTGGCCAGGATGGTC| 39600
AsianBonytongue ----- 0
Reedfish  ----- 0
NorthernPike ----- 0
SpottedGar ----- 0
ParamormyropsKingsLeyae ----- 0
    
```

```

Majority -----
          |-----|
          |39610|39620|39630|39640|39650|39660|39670|39680|
          |-----|
Human      |TTGCTCTCTTGACGTTGTGATCTGCCACGTCGGCCTCCCAGAGTGCTGGGATTACAGGCCTGAGCCACTGCGTCTGACC| 39680
AsianBonytongue ----- 0
Reedfish  ----- 0
NorthernPike ----- 0
SpottedGar ----- 0
ParamormyropsKingsLeyae ----- 0
    
```

```

Majority -----
          |-----|
          |39690|39700|39710|39720|39730|39740|39750|39760|
          |-----|
Human      |TAGTTTACTATTTTCTTACGGAGTTAAACATTAACCTATTTTATGGTCCATAACTTCTACTTTTGTAGTTTTTTACCCAGTA| 39760
AsianBonytongue ----- 0
Reedfish  ----- 0
NorthernPike ----- 0
SpottedGar ----- 0
ParamormyropsKingsLeyae ----- 0
    
```

```

Majority -----
          |-----|
          |39770|39780|39790|39800|39810|39820|39830|39840|
          |-----|
Human      |AGAACATGTTTGCTGTAAAACCTGTATGTGTATCAAAAACCTTACTGATAATGGTCCCAAACCTGAAATAACCCAAATGT| 39840
AsianBonytongue ----- 0
Reedfish  ----- 0
NorthernPike ----- 0
SpottedGar ----- 0
ParamormyropsKingsLeyae ----- 0
    
```

Sunday, May 01, 2022 09:43 PM

Majority -----  
 |-----|-----|-----|-----|-----|-----|-----|-----|  
 | 39850 | 39860 | 39870 | 39880 | 39890 | 39900 | 39910 | 39920 |  
 |-----|-----|-----|-----|-----|-----|-----|-----|  
 Human TTATCAACAGGAAAATGGATAAATTGTGGTATAATCATATAGTATATTACTACTTACTAATAACAAAAGAATGGTTAGTA 39920  
 AsianBonytongue ----- 0  
 Reedfish ----- 0  
 NorthernPike ----- 0  
 SpottedGar ----- 0  
 ParamormyropsKingsLeyae ----- 0

Majority -----  
 |-----|-----|-----|-----|-----|-----|-----|-----|  
 | 39930 | 39940 | 39950 | 39960 | 39970 | 39980 | 39990 | 40000 |  
 |-----|-----|-----|-----|-----|-----|-----|-----|  
 Human GTACATGCCAAAACATGGGTGAATAGTAAGCATTGTATGAAGCAAAAGAAACCAGACAGACCTGAAAGAGTACATAGTGT 40000  
 AsianBonytongue ----- 0  
 Reedfish ----- 0  
 NorthernPike ----- 0  
 SpottedGar ----- 0  
 ParamormyropsKingsLeyae ----- 0

Majority -----  
 |-----|-----|-----|-----|-----|-----|-----|-----|  
 | 40010 | 40020 | 40030 | 40040 | 40050 | 40060 | 40070 | 40080 |  
 |-----|-----|-----|-----|-----|-----|-----|-----|  
 Human GATTCCATTTCTTGAAAGTTTAAGAGCAGATCATTAATTTTTTGTTTAGAAACCAGAATGTTGGAGATTAACAGAAAGGG 40080  
 AsianBonytongue ----- 0  
 Reedfish ----- 0  
 NorthernPike ----- 0  
 SpottedGar ----- 0  
 ParamormyropsKingsLeyae ----- 0

Majority -----  
 |-----|-----|-----|-----|-----|-----|-----|-----|  
 | 40090 | 40100 | 40110 | 40120 | 40130 | 40140 | 40150 | 40160 |  
 |-----|-----|-----|-----|-----|-----|-----|-----|  
 Human AATATGGTGGCATT TTTCTGGTGTGATGGAACGTCCTATGTTAATAAACTAAGTTGCAAAACAAATCCAAAAGTTGTTTG 40160  
 AsianBonytongue ----- 0  
 Reedfish ----- 0  
 NorthernPike ----- 0  
 SpottedGar ----- 0  
 ParamormyropsKingsLeyae ----- 0

Majority -----  
 |-----|-----|-----|-----|-----|-----|-----|-----|  
 | 40170 | 40180 | 40190 | 40200 | 40210 | 40220 | 40230 | 40240 |  
 |-----|-----|-----|-----|-----|-----|-----|-----|  
 Human AAGCAGTAGATTATCTCTGAGAACTCTGAATTTCCAGTAGTTGTGTCTTGCTGTAATGAGAAATATGAGATTGGGAATGA 40240  
 AsianBonytongue ----- 0  
 Reedfish ----- 0  
 NorthernPike ----- 0  
 SpottedGar ----- 0  
 ParamormyropsKingsLeyae ----- 0

Majority -----  
 |-----|-----|-----|-----|-----|-----|-----|-----|  
 | 40250 | 40260 | 40270 | 40280 | 40290 | 40300 | 40310 | 40320 |  
 |-----|-----|-----|-----|-----|-----|-----|-----|  
 Human CTAGGTGAGTCCATGTAGCAGGGGCC TAGATGTGGGATTTGATGTGTGTGTGTGTGTGTGTGTGTGTGTGTGTGTGTG 40320  
 AsianBonytongue ----- 0  
 Reedfish ----- 0  
 NorthernPike ----- 0  
 SpottedGar ----- 0  
 ParamormyropsKingsLeyae ----- 0

Sunday, May 01, 2022 09:43 PM

```

Majority -----
                40330   40340   40350   40360   40370   40380   40390   40400
Human          TGTGTAGCTTGGACTTTAACAGATTTACATTTTAGAAAGAATTTTGTTCATTTGTATTTACAGGTAGGATCAGTATT 40400
AsianBonytongue ----- 0
Reedfish ----- 0
NorthernPike ----- 0
SpottedGar ----- 0
ParamormyropsKingsLeyae ----- 0
    
```

```

Majority -----
                40410   40420   40430   40440   40450   40460   40470   40480
Human          GTATAGAGGGGAGAATAGTTTTTAAAACATTACGGTAGTTCATTCCAAAGATACCAAGGTCCTGAATTTTAGGGTCTTGGA 40480
AsianBonytongue ----- 0
Reedfish ----- 0
NorthernPike ----- 0
SpottedGar ----- 0
ParamormyropsKingsLeyae ----- 0
    
```

```

Majority -----
                40490   40500   40510   40520   40530   40540   40550   40560
Human          AGGAGAATGCAGGAAATGATAAAACGAGTTATCTGGAAGAAGACAAGTTTGAATAATATTAAGAGTTTTGTCTTAGAA 40560
AsianBonytongue ----- 0
Reedfish ----- 0
NorthernPike ----- 0
SpottedGar ----- 0
ParamormyropsKingsLeyae ----- 0
    
```

```

Majority -----
                40570   40580   40590   40600   40610   40620   40630   40640
Human          TCACTGGGTTGGTAGAAGATGATGCCATTAACAAAGGGGAAAAGTAGGAAAAGGAGACTCGTTTTTGGTGGGAAAAAAG 40640
AsianBonytongue ----- 0
Reedfish ----- 0
NorthernPike ----- 0
SpottedGar ----- 0
ParamormyropsKingsLeyae ----- 0
    
```

```

Majority -----
                40650   40660   40670   40680   40690   40700   40710   40720
Human          AATAATCCGCTACTGTCTGTTTTTTTTTGTGTTTTTTGTTTTTATTTTTTATTGATCATTCTGGGTGTTTTCTCGC 40720
AsianBonytongue ----- 0
Reedfish ----- 0
NorthernPike ----- 0
SpottedGar ----- 0
ParamormyropsKingsLeyae ----- 0
    
```

```

Majority -----
                40730   40740   40750   40760   40770   40780   40790   40800
Human          AGAGGGGGATTTGGCAGGGTCATAGGACAATAGTGGAGGGAAGGTCAGCAGATAAACAAGTGAACAAAGGTCTCTGGTTT 40800
AsianBonytongue ----- 0
Reedfish ----- 0
NorthernPike ----- 0
SpottedGar ----- 0
ParamormyropsKingsLeyae ----- 0
    
```

Sunday, May 01, 2022 09:43 PM

```

Majority -----
                40810   40820   40830   40840   40850   40860   40870   40880
Human          TCCTAGGCAGAGGACCCTGCGGACTTCCGCAGTGTTTGTGTCCCTGGGTCCTTGAGATTAGGGAGTGGTGATGACTCTTA 40880
AsianBonytongue ----- 0
Reedfish ----- 0
NorthernPike ----- 0
SpottedGar ----- 0
ParamormyropsKingsLeyae ----- 0
    
```

```

Majority -----
                40890   40900   40910   40920   40930   40940   40950   40960
Human          ACGAGCATGCTGCCTTCAAGCATCTGTTTAACAAAGCACATCTTGCAACCGCCCTTAATCCATTTAACCTGAGTGGACAC 40960
AsianBonytongue ----- 0
Reedfish ----- 0
NorthernPike ----- 0
SpottedGar ----- 0
ParamormyropsKingsLeyae ----- 0
    
```

```

Majority -----
                40970   40980   40990   41000   41010   41020   41030   41040
Human          AGCACATGTTTCAGAGAGCACAGGGTTGGGGGTAAGGTCACAGATCAACAGGATAAGAATTTTTCTTAGTACAGAACAAA 41040
AsianBonytongue ----- 0
Reedfish ----- 0
NorthernPike ----- 0
SpottedGar ----- 0
ParamormyropsKingsLeyae ----- 0
    
```

```

Majority -----
                41050   41060   41070   41080   41090   41100   41110   41120
Human          ATGAAAAGTCTCCCATGTCTACCTCTTTCTACACAGACACGGCAACCATCCGATTTCTCAATCTTTTCCCCACCTTTCCC 41120
AsianBonytongue ----- 0
Reedfish ----- 0
NorthernPike ----- 0
SpottedGar ----- 0
ParamormyropsKingsLeyae ----- 0
    
```

```

Majority -----
                41130   41140   41150   41160   41170   41180   41190   41200
Human          CCCTTCTATTCACAAAACCGCCATTGTCATCATGGCCCGTTCTCAATGAGCTGTTGGGTACACCTCCCAGACGGGGTG 41200
AsianBonytongue ----- 0
Reedfish ----- 0
NorthernPike ----- 0
SpottedGar ----- 0
ParamormyropsKingsLeyae ----- 0
    
```

```

Majority -----
                41210   41220   41230   41240   41250   41260   41270   41280
Human          GTGGCCGGGCAGAGGGGCTCCTCACTTCCCAGTAGGGGCGGCCGGGCAGAGGCCCCCTCACTCCCCAGTAGGGGCAGCC 41280
AsianBonytongue ----- 0
Reedfish ----- 0
NorthernPike ----- 0
SpottedGar ----- 0
ParamormyropsKingsLeyae ----- 0
    
```

Sunday, May 01, 2022 09:43 PM

```

Majority -----
          41290   41300   41310   41320   41330   41340   41350   41360
Human      GGGCAGAGGCGCCCCTCACCTCCCGGATGGGGCGGCTGGCCGGGCGGGGGGCTGACCCCCCACCTCCCTCCCGGATGGG 41360
AsianBonytongue ----- 0
Reedfish ----- 0
NorthernPike ----- 0
SpottedGar ----- 0
ParamormyropsKingsLeyae ----- 0

```

```

Majority -----
          41370   41380   41390   41400   41410   41420   41430   41440
Human      GCAGCTGGCCGGGCGGGGGGCTGACCCCCCACCTCCCTCCCGGACGGGGCGGCTGGCCGGGCTGGGGGCTGACCCCCGC 41440
AsianBonytongue ----- 0
Reedfish ----- 0
NorthernPike ----- 0
SpottedGar ----- 0
ParamormyropsKingsLeyae ----- 0

```

```

Majority -----
          41450   41460   41470   41480   41490   41500   41510   41520
Human      CACCTCCCTCCCGGACGGGGCGGCTGGCCGGGCTGGGGGCTGACCCCCGACCTCCTTCCCGGACGGGGCGGCTGGCCGG 41520
AsianBonytongue ----- 0
Reedfish ----- 0
NorthernPike ----- 0
SpottedGar ----- 0
ParamormyropsKingsLeyae ----- 0

```

```

Majority -----
          41530   41540   41550   41560   41570   41580   41590   41600
Human      GCAGAGGGGCTCCTCACTTCCCAGTAGGGGCGGCCGGGCAGAGGCGCCCTCACCTCCCGGAAGGGGCGGCTGGCCGGGC 41600
AsianBonytongue ----- 0
Reedfish ----- 0
NorthernPike ----- 0
SpottedGar ----- 0
ParamormyropsKingsLeyae ----- 0

```

```

Majority -----
          41610   41620   41630   41640   41650   41660   41670   41680
Human      GGGGGTCTGACCCCCCACCTCCCTCCTGGATGGGGCGGCTGGCCTGGCGGGGGCTGACCCCCACCTCCCTCCAGACGG 41680
AsianBonytongue ----- 0
Reedfish ----- 0
NorthernPike ----- 0
SpottedGar ----- 0
ParamormyropsKingsLeyae ----- 0

```

```

Majority -----
          41690   41700   41710   41720   41730   41740   41750   41760
Human      GGTGACTGCCGGGCGGAGACGCTCCTCACTTCCCAGACGGCGTGGCTGCCGGGCGGAGGGGCTCCTCACTTCTCAGATGG 41760
AsianBonytongue ----- 0
Reedfish ----- 0
NorthernPike ----- 0
SpottedGar ----- 0
ParamormyropsKingsLeyae ----- 0

```

Sunday, May 01, 2022 09:43 PM

```

Majority -----
          |-----|
          |         |         |         |         |         |         |         |
          | 41770   | 41780   | 41790   | 41800   | 41810   | 41820   | 41830   | 41840   |
          |-----|-----|-----|-----|-----|-----|-----|-----|
Human     |GGCGGCTGCTGGGCGGAGGGACTCCTCGCTTCTCAGATGGGGCGGCCGGGCCGAGACGCTCCTCACCTCCCAGACGGGGT| 41840
AsianBonytongue |-----|-----|-----|-----|-----|-----|-----|-----|
Reedfish   |-----|-----|-----|-----|-----|-----|-----|-----|
NorthernPike |-----|-----|-----|-----|-----|-----|-----|-----|
SpottedGar  |-----|-----|-----|-----|-----|-----|-----|-----|
ParamormyropsKingsLeyae |-----|-----|-----|-----|-----|-----|-----|-----|
    
```

```

Majority -----
          |-----|
          |         |         |         |         |         |         |         |
          | 41850   | 41860   | 41870   | 41880   | 41890   | 41900   | 41910   | 41920   |
          |-----|-----|-----|-----|-----|-----|-----|-----|
Human     |CGCGGCCGGGTAGAGGCGCTCCTCACATCCCAGACGGGGCGGCCGGGCAGCGGCGCTCCCCACATCTCAGACGATGGGGC| 41920
AsianBonytongue |-----|-----|-----|-----|-----|-----|-----|-----|
Reedfish   |-----|-----|-----|-----|-----|-----|-----|-----|
NorthernPike |-----|-----|-----|-----|-----|-----|-----|-----|
SpottedGar  |-----|-----|-----|-----|-----|-----|-----|-----|
ParamormyropsKingsLeyae |-----|-----|-----|-----|-----|-----|-----|-----|
    
```

```

Majority -----
          |-----|
          |         |         |         |         |         |         |         |
          | 41930   | 41940   | 41950   | 41960   | 41970   | 41980   | 41990   | 42000   |
          |-----|-----|-----|-----|-----|-----|-----|-----|
Human     |GCCGGGCAGAGACGCTCCTCACTTCTTAGATGGGATGGCGGCCGGGAAGAGGCGCTCCTCACTTCTTAGATGGGATGGCG| 42000
AsianBonytongue |-----|-----|-----|-----|-----|-----|-----|-----|
Reedfish   |-----|-----|-----|-----|-----|-----|-----|-----|
NorthernPike |-----|-----|-----|-----|-----|-----|-----|-----|
SpottedGar  |-----|-----|-----|-----|-----|-----|-----|-----|
ParamormyropsKingsLeyae |-----|-----|-----|-----|-----|-----|-----|-----|
    
```

```

Majority -----
          |-----|
          |         |         |         |         |         |         |         |
          | 42010   | 42020   | 42030   | 42040   | 42050   | 42060   | 42070   | 42080   |
          |-----|-----|-----|-----|-----|-----|-----|-----|
Human     |GCCGGGCAGAGACCTCCTTTCTTTCCAGACTGGGCAGCCAGGCAGAGGGGCTCCTCACGTTCCAGACGATGGGCGGCCAG| 42080
AsianBonytongue |-----|-----|-----|-----|-----|-----|-----|-----|
Reedfish   |-----|-----|-----|-----|-----|-----|-----|-----|
NorthernPike |-----|-----|-----|-----|-----|-----|-----|-----|
SpottedGar  |-----|-----|-----|-----|-----|-----|-----|-----|
ParamormyropsKingsLeyae |-----|-----|-----|-----|-----|-----|-----|-----|
    
```

```

Majority -----
          |-----|
          |         |         |         |         |         |         |         |
          | 42090   | 42100   | 42110   | 42120   | 42130   | 42140   | 42150   | 42160   |
          |-----|-----|-----|-----|-----|-----|-----|-----|
Human     |GCAGAGACGCTCCTCACTTCCCAAACGGGGTGGCGGCTGGGCAGAGGCTGCAATCTCGGCACCTTTGGGAGGCCAAGGCAG| 42160
AsianBonytongue |-----|-----|-----|-----|-----|-----|-----|-----|
Reedfish   |-----|-----|-----|-----|-----|-----|-----|-----|
NorthernPike |-----|-----|-----|-----|-----|-----|-----|-----|
SpottedGar  |-----|-----|-----|-----|-----|-----|-----|-----|
ParamormyropsKingsLeyae |-----|-----|-----|-----|-----|-----|-----|-----|
    
```

```

Majority -----
          |-----|
          |         |         |         |         |         |         |         |
          | 42170   | 42180   | 42190   | 42200   | 42210   | 42220   | 42230   | 42240   |
          |-----|-----|-----|-----|-----|-----|-----|-----|
Human     |GCGGCTGGGAGGTGGAGGTTGTAACGAGCCGAGATCACGCCACTGCACTCCAGCCTGGGCACCATTTGAGCACTGAGTGAA| 42240
AsianBonytongue |-----|-----|-----|-----|-----|-----|-----|-----|
Reedfish   |CCTCCCGATCGCTCAGTTTAGATGGCCGCGCCAGCTCTAGGAAGAGTCTGTTGGTGGTTTTGAACTTCTTCCACTTACAGGTG| 80
NorthernPike |-----|-----|-----|-----|-----|-----|-----|-----|
SpottedGar  |-----|-----|-----|-----|-----|-----|-----|-----|
ParamormyropsKingsLeyae |-----|-----|-----|-----|-----|-----|-----|-----|
    
```



Sunday, May 01, 2022 09:43 PM

```

Majority -----
                |-----|
                |42250|42260|42270|42280|42290|42300|42310|42320|
                |-----|
Human           |CCAGACTCCGTCTGCAATTCCGGCACCTCGGGAGGCCGAGGCTGGCGGATCACTCGCGGTTAGGAGCTGCAGACCAGCCC| 42320
AsianBonytongue|-----| 0
Reedfish       |ATGGAGGCCACTGTGCTCATTTGGGACCTTCAAAGAAGCAAAAATTTTCTGTAACTTCCCCAGATTTGTGCTCGAGAC| 160
NorthernPike   |-----| 0
SpottedGar     |-----| 0
ParamormyropsKingsLeyae|-----| 0
    
```

```

Majority -----
                |-----|
                |42330|42340|42350|42360|42370|42380|42390|42400|
                |-----|
Human           |GGCCAACACAGCGAAACCCCGTCTCCACCAAAAAAATACGAAAACCAGTCAGGCGTGGCGGCCGTGCCTGCAATAGCAG| 42400
AsianBonytongue|-----| 0
Reedfish       |AATCCTGTCTCTGAGGTCTACAGACAATTCTTTGACTTCATGCTTGGTTTGTGCTCTGACATGAACTGTCAACTGTGGG| 240
NorthernPike   |-----| 0
SpottedGar     |-----| 0
ParamormyropsKingsLeyae|-----| 0
    
```

```

Majority -----
                |-----|
                |42410|42420|42430|42440|42450|42460|42470|42480|
                |-----|
Human           |GCACTCGGCAGGCTGAGGCAGGAGAATCAGGCAGGGAGGTTGCAGTGAGTCGAGATGGCAGCAGTACAGTCCAGCTTCGG| 42480
AsianBonytongue|-----| 0
Reedfish       |ACCTTATATAGACAGGCGTGTGCCTTTCCAAATCATGTGCAATCAACTGAATTTACCACAGGTGGACTCCAATTAAGCTG| 320
NorthernPike   |-----| 0
SpottedGar     |-----| 0
ParamormyropsKingsLeyae|-----| 0
    
```

```

Majority -----
                |-----|
                |42490|42500|42510|42520|42530|42540|42550|42560|
                |-----|
Human           |CTCGTCATCAGAGGGAGACTGTGGAAAGAGAGGGAGAGGGAGACCGTGGGGAGAGGAGGGAGGGGGAGGGGGAGGGGGAG| 42560
AsianBonytongue|-----| 0
Reedfish       |CAGAAACATCTCAAGGATGATCAGGGGAAACAGGATGCACCTGAGCTCAATTTTGTGCTTCATGGCAAAGGCTGTAAATA| 400
NorthernPike   |-----| 0
SpottedGar     |-----| 0
ParamormyropsKingsLeyae|-----| 0
    
```

```

Majority -----
                |-----|
                |42570|42580|42590|42600|42610|42620|42630|42640|
                |-----|
Human           |GGGGAGGGCTGTTCTGTTTTTTTAACTATGCTTTAGGGATGATATATAATGTACTTTCATGACCAAGGAATCAATCTAATC| 42640
AsianBonytongue|-----| 0
Reedfish       |CATGTGTAATGCATGTGCTGTACATGTGCTTTCTCAGTTTTTTTTTAAATGAATTTGCAAAAATCTCAAGTAAACT| 480
NorthernPike   |-----| 0
SpottedGar     |-----| 0
ParamormyropsKingsLeyae|-----| 0
    
```

```

Majority -----
                |-----|
                |42650|42660|42670|42680|42690|42700|42710|42720|
                |-----|
Human           |TTTTTGTAATGATGGCATAAAATTCCTTTAAGCCTTGTTTTTAATACAAGAAGTCAGTTTATTTAACCTCCATGTACAGAG| 42720
AsianBonytongue|-----| 0
Reedfish       |TTTTTCACGTGTGCATTATGGGATGTTGTGTGTAGAATCTGAGGAAAAAATAAATTTAATCCATTTTGCAATAAGGTT| 560
NorthernPike   |-----| 0
SpottedGar     |-----| 0
ParamormyropsKingsLeyae|-----| 0
    
```

Sunday, May 01, 2022 09:44 PM

| Majority                |  | -----                                                                           |       |       |       |       |       |       |       |       |
|-------------------------|--|---------------------------------------------------------------------------------|-------|-------|-------|-------|-------|-------|-------|-------|
|                         |  | 42730                                                                           | 42740 | 42750 | 42760 | 42770 | 42780 | 42790 | 42800 |       |
| Human                   |  | GAAATACTGAGTTTTAAGATTTTCTATTTTTTCTGACAAAAATGAAAGTCTGCATATATTCTAAGAGACACCAATTT   |       |       |       |       |       |       |       | 42800 |
| AsianBonytongue         |  | -----                                                                           |       |       |       |       |       |       |       | 0     |
| Reedfish                |  | GCAACATAACAAAATGTGGAAAAAGTGATGTGCTGTGAATACTTCCGGATGCACTGTATGTATGTATGATAACCTCCAA |       |       |       |       |       |       |       | 640   |
| NorthernPike            |  | -----                                                                           |       |       |       |       |       |       |       | 0     |
| SpottedGar              |  | -----                                                                           |       |       |       |       |       |       |       | 0     |
| ParamormyropsKingsLeyae |  | -----                                                                           |       |       |       |       |       |       |       | 0     |

| Majority                |  | -----                                                                           |       |       |       |       |       |       |       |       |
|-------------------------|--|---------------------------------------------------------------------------------|-------|-------|-------|-------|-------|-------|-------|-------|
|                         |  | 42810                                                                           | 42820 | 42830 | 42840 | 42850 | 42860 | 42870 | 42880 |       |
| Human                   |  | GAATACTGTTGCTTATAAGAGCAAATAGCATAAAAAGACCTTAAAAATGGTGATTATATTTGCCTGGAAAAATACTCCA |       |       |       |       |       |       |       | 42880 |
| AsianBonytongue         |  | -----                                                                           |       |       |       |       |       |       |       | 0     |
| Reedfish                |  | ACATTTCTTAAACCCATGTATAAGCTCCTTGCATCTTCTGCTGGTAGTTTCTCCAGCTCTTTAGTTCTGGCTCGAGTGC |       |       |       |       |       |       |       | 720   |
| NorthernPike            |  | -----                                                                           |       |       |       |       |       |       |       | 0     |
| SpottedGar              |  | -----                                                                           |       |       |       |       |       |       |       | 0     |
| ParamormyropsKingsLeyae |  | -----                                                                           |       |       |       |       |       |       |       | 0     |

| Majority                |  | -----                                                                           |       |       |       |       |       |       |       |       |
|-------------------------|--|---------------------------------------------------------------------------------|-------|-------|-------|-------|-------|-------|-------|-------|
|                         |  | 42890                                                                           | 42900 | 42910 | 42920 | 42930 | 42940 | 42950 | 42960 |       |
| Human                   |  | TGTAATTCAGATGACTCAAAGGACGTTGGTAGACAATGTTACAAGGACACTTTTATGGTTATCAGATATAGTACAGGAT |       |       |       |       |       |       |       | 42960 |
| AsianBonytongue         |  | -----                                                                           |       |       |       |       |       |       |       | 0     |
| Reedfish                |  | TTGCAGGTATTTGTTTGCAAAAAGCAGATTTTAGCTCCATTCAAGGATGTTTAATTTGGTTAAGATCATGACTGTTTAT |       |       |       |       |       |       |       | 800   |
| NorthernPike            |  | -----                                                                           |       |       |       |       |       |       |       | 0     |
| SpottedGar              |  | -----                                                                           |       |       |       |       |       |       |       | 0     |
| ParamormyropsKingsLeyae |  | -----                                                                           |       |       |       |       |       |       |       | 0     |

| Majority                |  | -----                                                                            |       |       |       |       |       |       |       |       |
|-------------------------|--|----------------------------------------------------------------------------------|-------|-------|-------|-------|-------|-------|-------|-------|
|                         |  | 42970                                                                            | 42980 | 42990 | 43000 | 43010 | 43020 | 43030 | 43040 |       |
| Human                   |  | TTCATTTTTATGTTCCAGCTTCCAGCTTTATCTAAAATATTTCTTGTAATAGATTTTACTGTAGAATTGTTTCCTAAGGC |       |       |       |       |       |       |       | 43040 |
| AsianBonytongue         |  | -----                                                                            |       |       |       |       |       |       |       | 0     |
| Reedfish                |  | CTATACCCAGTGATTTGTTTGATGTTGGCTTTATTTATCTACCAAAAATCTGTCTACTACAATATGTAAAACATTGATT  |       |       |       |       |       |       |       | 880   |
| NorthernPike            |  | -----                                                                            |       |       |       |       |       |       |       | 0     |
| SpottedGar              |  | -----                                                                            |       |       |       |       |       |       |       | 0     |
| ParamormyropsKingsLeyae |  | -----                                                                            |       |       |       |       |       |       |       | 0     |

| Majority                |  | -----                                                                            |       |       |       |       |       |       |       |       |
|-------------------------|--|----------------------------------------------------------------------------------|-------|-------|-------|-------|-------|-------|-------|-------|
|                         |  | 43050                                                                            | 43060 | 43070 | 43080 | 43090 | 43100 | 43110 | 43120 |       |
| Human                   |  | ATCTGTCTCAACAGCCTTTCCCTTATCTGTGCAGACTTTTCTTTCTCTGTACTTGTTGAATAGGTGCTTTTTGTCAAAGA |       |       |       |       |       |       |       | 43120 |
| AsianBonytongue         |  | -----                                                                            |       |       |       |       |       |       |       | 0     |
| Reedfish                |  | ACGTCCTTAAGAGTCTTTATAGATGATGGGAAAGTATTTACTCACATTATGAAAAACATCAATTTCAAATACTTTGCTAG |       |       |       |       |       |       |       | 960   |
| NorthernPike            |  | -----                                                                            |       |       |       |       |       |       |       | 0     |
| SpottedGar              |  | -----                                                                            |       |       |       |       |       |       |       | 0     |
| ParamormyropsKingsLeyae |  | -----                                                                            |       |       |       |       |       |       |       | 0     |

| Majority                |  | -----                                                                           |       |       |       |       |       |       |       |       |
|-------------------------|--|---------------------------------------------------------------------------------|-------|-------|-------|-------|-------|-------|-------|-------|
|                         |  | 43130                                                                           | 43140 | 43150 | 43160 | 43170 | 43180 | 43190 | 43200 |       |
| Human                   |  | AAAAAATAATTTTACAGGTGAAAAATTTTCATGTTATTAGAACTTAATCTCAGGTAAATAAATGTTTAATAAATTGATA |       |       |       |       |       |       |       | 43200 |
| AsianBonytongue         |  | -----                                                                           |       |       |       |       |       |       |       | 0     |
| Reedfish                |  | TTTAGTATCTTTATGTTTAAATGTGCTCTTGCTGTCCTAAAGCACTTGACCTCCTCTTTCTGTATTTAATACTATTTCT |       |       |       |       |       |       |       | 1040  |
| NorthernPike            |  | -----                                                                           |       |       |       |       |       |       |       | 0     |
| SpottedGar              |  | -----                                                                           |       |       |       |       |       |       |       | 0     |
| ParamormyropsKingsLeyae |  | -----                                                                           |       |       |       |       |       |       |       | 0     |

Sunday, May 01, 2022 09:44 PM

Majority -----  
 |-----|-----|-----|-----|-----|-----|-----|-----|  
 | 43210 | 43220 | 43230 | 43240 | 43250 | 43260 | 43270 | 43280 |  
 |-----|-----|-----|-----|-----|-----|-----|-----|  
 Human CAGTAAGGACATTTTCTAATGAATTGGTTCCTTCAAGAGATATAAAAAGTGAAATATTTCAAAAATACAACGTTCCTAAG 43280  
 AsianBonytongue ----- 0  
 Reedfish CTCTAACTACCTTTTAGCATTCTTAATTCAGACACTTCTGTAATAAATACTATTACATAATGTTCTGAGTCTTTCTGGG 1120  
 NorthernPike ----- 0  
 SpottedGar ----- 0  
 ParamormyropsKingsLeyae ----- 0

Majority -----  
 |-----|-----|-----|-----|-----|-----|-----|-----|  
 | 43290 | 43300 | 43310 | 43320 | 43330 | 43340 | 43350 | 43360 |  
 |-----|-----|-----|-----|-----|-----|-----|-----|  
 Human TAGCATTAGAATTTGATTTTGTAAATTTGTAACATTTTAGCAGTGACTATGAGGCTTGACAATTTCTAAGGTACAGTCTC 43360  
 AsianBonytongue ----- 0  
 Reedfish TAACCCTAGTATAATTTTATGTTTGTCTGTTCCCTGTGTGTTTTTAAATAAGAAGGTAATTTTAAAAAGTCTTGCTGGG 1200  
 NorthernPike ----- 0  
 SpottedGar ----- 0  
 ParamormyropsKingsLeyae ----- 0

Majority -----  
 |-----|-----|-----|-----|-----|-----|-----|-----|  
 | 43370 | 43380 | 43390 | 43400 | 43410 | 43420 | 43430 | 43440 |  
 |-----|-----|-----|-----|-----|-----|-----|-----|  
 Human TT-TAATTTTCTAGTGATTTCTTTGTAGCTACGGAACCTGGAATATCCCTTTAGGTATACATATTTCTGCCAGTGGTGATT 43439  
 AsianBonytongue ----- 0  
 Reedfish TAGTAGAATTCATCTTCAGCAACTCTGTATCTAATTCAGTATGACTTTGTCAACAAACATCTTTATATATAATCTTC 1280  
 NorthernPike ----- 0  
 SpottedGar ----- 0  
 ParamormyropsKingsLeyae ----- 0

Majority -----  
 |-----|-----|-----|-----|-----|-----|-----|-----|  
 | 43450 | 43460 | 43470 | 43480 | 43490 | 43500 | 43510 | 43520 |  
 |-----|-----|-----|-----|-----|-----|-----|-----|  
 Human GTTACTCTGTAATAGCAGGATTTTCTGAAAATTATTGCTAAACATGACATTTTGTCTCTACCTGAAAGCAGTTAAACCATT 43519  
 AsianBonytongue ----- 0  
 Reedfish ATTTGGATCTTGATCTTTGTTTGTCCGCGACTTCATGTTCCCTGACACTGCCTTGGTTGTTACTTTTGTTTACAAACAC 1360  
 NorthernPike ----- 0  
 SpottedGar ----- 0  
 ParamormyropsKingsLeyae ----- 0

Majority -----  
 |-----|-----|-----|-----|-----|-----|-----|-----|  
 | 43530 | 43540 | 43550 | 43560 | 43570 | 43580 | 43590 | 43600 |  
 |-----|-----|-----|-----|-----|-----|-----|-----|  
 Human CCATAGAGTCTGGAACATTTTACTTAGAACTCTTTTAAGATTTTCATTTTAACTTTTACAGACATATTTTGGAGGTGATG 43599  
 AsianBonytongue ----- 0  
 Reedfish TGTCGATACCACTCTTTGTGTTTAGATCTGGCGTCGACACCTGCTTATTGTCGAGACTGTGTTTTTTCTGTTTCTATC 1440  
 NorthernPike ----- 0  
 SpottedGar ----- 0  
 ParamormyropsKingsLeyae ----- 0

Majority -----  
 |-----|-----|-----|-----|-----|-----|-----|-----|  
 | 43610 | 43620 | 43630 | 43640 | 43650 | 43660 | 43670 | 43680 |  
 |-----|-----|-----|-----|-----|-----|-----|-----|  
 Human TCATTTCTTTTGGCTATAATGTTTTGAAAGTATTCAGTAGATTATTTTCATAGTTTTACTATTTATAAAGGTTTTAACAAC 43679  
 AsianBonytongue ----- 0  
 Reedfish GACTGTCGTTGGCAGCACTTCGTCAAAATCAAATGTTGACCCGCTTCTTGGAGTCGGCAGTCAGAGTATATAAGTCGGAC 1520  
 NorthernPike ----- 0  
 SpottedGar ----- 0  
 ParamormyropsKingsLeyae ----- 0

Sunday, May 01, 2022 09:44 PM

| Majority                | -----                                                                            |       |       |       |       |       |       |       |       |
|-------------------------|----------------------------------------------------------------------------------|-------|-------|-------|-------|-------|-------|-------|-------|
|                         | 43690                                                                            | 43700 | 43710 | 43720 | 43730 | 43740 | 43750 | 43760 |       |
| Human                   | TCATCTTCTTGCATATAAAGGTAGTGAGAGCCTTATTTTCATAGTGTACTATTTATGAGGGTTTTAACAACTTATCTTCT |       |       |       |       |       |       |       | 43759 |
| AsianBonytongue         | -----                                                                            |       |       |       |       |       |       |       | 0     |
| Reedfish                | ACACTTCTGTGATTTTCCATCAGTCGGCGTTTGGAGTTGAAGAAAGAAGCATTGGTCTCTCCTTACTCTTTGGACTGCCA |       |       |       |       |       |       |       | 1600  |
| NorthernPike            | -----                                                                            |       |       |       |       |       |       |       | 0     |
| SpottedGar              | -----                                                                            |       |       |       |       |       |       |       | 0     |
| ParamormyropsKingsLeyae | -----                                                                            |       |       |       |       |       |       |       | 0     |

| Majority                | -----                                                                            |       |       |       |       |       |       |       |       |
|-------------------------|----------------------------------------------------------------------------------|-------|-------|-------|-------|-------|-------|-------|-------|
|                         | 43770                                                                            | 43780 | 43790 | 43800 | 43810 | 43820 | 43830 | 43840 |       |
| Human                   | TGTATATAAAGGTAGTGAGAGCCTTCTCTAGGTGCCTTCTGTGTTTTTCCAGCTCATGCCTAATATGCTTTTGACAAC   |       |       |       |       |       |       |       | 43839 |
| AsianBonytongue         | -----                                                                            |       |       |       |       |       |       |       | 0     |
| Reedfish                | CAAAGCAACCTGCGAGATTGGAGAAAGGTTGAGAAGAGATCGTGAGAGGAAACGACAGCGTCGTGAAAACGAGACGGACT |       |       |       |       |       |       |       | 1680  |
| NorthernPike            | -----                                                                            |       |       |       |       |       |       |       | 0     |
| SpottedGar              | -----                                                                            |       |       |       |       |       |       |       | 0     |
| ParamormyropsKingsLeyae | -----                                                                            |       |       |       |       |       |       |       | 0     |

| Majority                | -----                                                                             |       |       |       |       |       |       |       |       |
|-------------------------|-----------------------------------------------------------------------------------|-------|-------|-------|-------|-------|-------|-------|-------|
|                         | 43850                                                                             | 43860 | 43870 | 43880 | 43890 | 43900 | 43910 | 43920 |       |
| Human                   | CACCACAACTACTTGAAATACAAGAGTTAATAGTTACCTTTTACGAAACCTGGTGAGGCTTTTTCGCTGGTGGCTG      |       |       |       |       |       |       |       | 43919 |
| AsianBonytongue         | -----                                                                             |       |       |       |       |       |       |       | 0     |
| Reedfish                | GTGAACAGAGACAAGCAGAAATGCTCCTCCACCACCACATAATTACTATTTCGGACAGTGATTCCGAATAGGCCGTTCTTA |       |       |       |       |       |       |       | 1760  |
| NorthernPike            | -----                                                                             |       |       |       |       |       |       |       | 0     |
| SpottedGar              | -----                                                                             |       |       |       |       |       |       |       | 0     |
| ParamormyropsKingsLeyae | -----                                                                             |       |       |       |       |       |       |       | 0     |

| Majority                | -----                                                                           |       |       |       |       |       |       |       |       |
|-------------------------|---------------------------------------------------------------------------------|-------|-------|-------|-------|-------|-------|-------|-------|
|                         | 43930                                                                           | 43940 | 43950 | 43960 | 43970 | 43980 | 43990 | 44000 |       |
| Human                   | TTGCAGAAACAGCCAACAGAATAGCAGAAGTACCACCTATCTGCACCTACCTGCTTTTTTCTCTTTAACTCTTCTTTGG |       |       |       |       |       |       |       | 43999 |
| AsianBonytongue         | -----                                                                           |       |       |       |       |       |       |       | 0     |
| Reedfish                | TCGAATCAATGTCCAAGGGTTTGTGTTGTAATTTGTTTTCCCTTATAAAAAATCATAATGCTGTGCGACGAAGGGCCCA |       |       |       |       |       |       |       | 1840  |
| NorthernPike            | -----                                                                           |       |       |       |       |       |       |       | 0     |
| SpottedGar              | -----                                                                           |       |       |       |       |       |       |       | 0     |
| ParamormyropsKingsLeyae | -----                                                                           |       |       |       |       |       |       |       | 0     |

| Majority                | -----                                                                            |       |       |       |       |       |       |       |       |
|-------------------------|----------------------------------------------------------------------------------|-------|-------|-------|-------|-------|-------|-------|-------|
|                         | 44010                                                                            | 44020 | 44030 | 44040 | 44050 | 44060 | 44070 | 44080 |       |
| Human                   | AATTTGTTTCTCATAACAGAAAGAGTAGCAGCATTCAATTTTTTTTTTCTTAGCTTAGAGTCTTTTATTTTGTTTTTTGT |       |       |       |       |       |       |       | 44079 |
| AsianBonytongue         | -----                                                                            |       |       |       |       |       |       |       | 0     |
| Reedfish                | GTTACGACTGGTAGCCGCTTTAAACAGGGAGCCCTTCACAGACAACCTTTAACACGCGCAACGTAGTCGGGCGCACATG  |       |       |       |       |       |       |       | 1920  |
| NorthernPike            | -----                                                                            |       |       |       |       |       |       |       | 0     |
| SpottedGar              | -----                                                                            |       |       |       |       |       |       |       | 0     |
| ParamormyropsKingsLeyae | -----                                                                            |       |       |       |       |       |       |       | 0     |

| Majority                | -----                                                                          |       |       |       |       |       |       |       |       |
|-------------------------|--------------------------------------------------------------------------------|-------|-------|-------|-------|-------|-------|-------|-------|
|                         | 44090                                                                          | 44100 | 44110 | 44120 | 44130 | 44140 | 44150 | 44160 |       |
| Human                   | TTTTCTAAAGCTAGAAAACACTGC-TTTCCTTGAAGTCTAAAACCTGCTTAGAATTAACCTCTTTGCCTCTCAGTTTC |       |       |       |       |       |       |       | 44158 |
| AsianBonytongue         | -----                                                                          |       |       |       |       |       |       |       | 0     |
| Reedfish                | GCTAGTTTTATAATATTTTGCTATATTTTCTATTTGCAAAAAAATAAAAAAGCTGTACATTCTGACCTACACTTCAA  |       |       |       |       |       |       |       | 2000  |
| NorthernPike            | -----                                                                          |       |       |       |       |       |       |       | 0     |
| SpottedGar              | -----                                                                          |       |       |       |       |       |       |       | 0     |
| ParamormyropsKingsLeyae | -----                                                                          |       |       |       |       |       |       |       | 0     |

Sunday, May 01, 2022 09:44 PM

```

Majority -----
          |-----|
          |44170|44180|44190|44200|44210|44220|44230|44240|
          |-----|
Human      ATATTTGATAAAGAGAGATTAGGAAAAC TTTATAAATGTGTGTCTCTGAAAGACTTGGAGAATGAAGATGTACCTAAGTT 44238
AsianBonytongue ----- 0
Reedfish  ATGTCTTTTGTGCTTTGGTTTCAGAGAGGATCTGATGAAC TCTATCTAGCAGTTTATACAACAGTCCCAACTCTAATAT 2080
NorthernPike ----- 0
SpottedGar ----- 0
ParamormyropsKingsLeyae ----- 0
    
```

```

Majority -----
          |-----|
          |44250|44260|44270|44280|44290|44300|44310|44320|
          |-----|
Human      TTGTCACTGATTTTCATTTGGACAGAAGTATAAGGTTTGGCCGTGTCGTATTTTATATTTGTACACAGTTGAAAGTATAAC 44318
AsianBonytongue ----- 0
Reedfish  GAGTGGAAATGGTGGTAACTGGTAAAGTGTATTTGGCAGTTTTTGTATGTTCTGTAGATCTGACAGTTGGCAAGTCAAATTT 2160
NorthernPike ----- 0
SpottedGar ----- 0
ParamormyropsKingsLeyae ----- 0
    
```

```

Majority -----
          |-----|
          |44330|44340|44350|44360|44370|44380|44390|44400|
          |-----|
Human      GGTGAATGAGTAGGACTAAAATAATTTACAAATTATATGAGAAAGTAGGCCAGGTGCTGTGGCTCATGCCTGTATTTTCAG 44398
AsianBonytongue ----- 0
Reedfish  TAACGGGGTACTAGTGCACAAAAATAGTCTACAGGATTACAAGCAATCTTTTGGCTAAAATATAAATACATTTAAATAA 2240
NorthernPike ----- 0
SpottedGar ----- 0
ParamormyropsKingsLeyae ----- 0
    
```

```

Majority -----
          |-----|
          |44410|44420|44430|44440|44450|44460|44470|44480|
          |-----|
Human      CACTTTGGGAGGCTGAGGCAGGTGGATCACTTGAGGCCAGGAGTTCGAGACCAGCCTGGCCAACATGGTGAAACCCCATC 44478
AsianBonytongue ----- 0
Reedfish  TTATATAGCCAATTACATTTAGAATGCCTTTTGAGCTGTCTAGATTATGAC-ATTTTCCTCTAAATAATGTTTTAATTA 2319
NorthernPike ----- 0
SpottedGar ----- 0
ParamormyropsKingsLeyae ----- 0
    
```

```

Majority -----
          |-----|
          |44490|44500|44510|44520|44530|44540|44550|44560|
          |-----|
Human      TCTACTGAAAATAGAAAATTAGCTGGGTGTGGTGGTGCACACCTGAATTC CAGCTACATGGGAGGCTGTGGCAGCAGAGA 44558
AsianBonytongue ----- 0
Reedfish  TCTGCATATACAGAAAAAACTTAGATGTGGTGTAAATTTTCTCATTCTCCAGCTAATGGAAATGATAGTAAGAAGTT 2399
NorthernPike ----- 0
SpottedGar ----- 0
ParamormyropsKingsLeyae ----- 0
    
```

```

Majority -----
          |-----|
          |44570|44580|44590|44600|44610|44620|44630|44640|
          |-----|
Human      ATCACTTAAACCTGGGAAGTGGAGGTTGTAGTCAACCAAGATCATGCCACTGCACTCCAGCCTGGCAATACAGCAAGACT 44638
AsianBonytongue ----- 0
Reedfish  ACGAGTAGAAGATAGGATGGACTGTCCACCATCACGTGTTCTTCACATCAGAAAGCTGCCTAATGAAGTTTCAGAAACAG 2479
NorthernPike ----- 0
SpottedGar ----- 0
ParamormyropsKingsLeyae ----- 0
    
```

Sunday, May 01, 2022 09:44 PM

| Majority                | 44650                                                                           | 44660 | 44670 | 44680 | 44690 | 44700 | 44710 | 44720 |       |
|-------------------------|---------------------------------------------------------------------------------|-------|-------|-------|-------|-------|-------|-------|-------|
| Human                   | CTGTCCTTAGATAGATAGATAGATAGATAGATAGATAGATAGATAGATACTGTGAAACCCAGTGCTAGAGTGTATATTT |       |       |       |       |       |       |       | 44718 |
| AsianBonytongue         | -----                                                                           |       |       |       |       |       |       |       | 0     |
| Reedfish                | AAGTAATTGCCTTAGGTTTACCATTTGGCAAAGTTACAAATATTCTGATGCTGAAAGGAAAAATCAGGTATGTTAACTA |       |       |       |       |       |       |       | 2559  |
| NorthernPike            | -----                                                                           |       |       |       |       |       |       |       | 0     |
| SpottedGar              | -----                                                                           |       |       |       |       |       |       |       | 0     |
| ParamormyropsKingsLeyae | -----                                                                           |       |       |       |       |       |       |       | 0     |

| Majority                | 44730                                                                             | 44740 | 44750 | 44760 | 44770 | 44780 | 44790 | 44800 |       |
|-------------------------|-----------------------------------------------------------------------------------|-------|-------|-------|-------|-------|-------|-------|-------|
| Human                   | AATAAGTAAAGATAGGTAGAGTATCGGAACAAAAACAGCATGGGAAACTAACAAATTTTGGGGAATGAATGAGTAATCAGG |       |       |       |       |       |       |       | 44798 |
| AsianBonytongue         | -----                                                                             |       |       |       |       |       |       |       | 0     |
| Reedfish                | TACTGTAATTTTTTTTCTTATTAATAAAGTGCTACTGCTTATTGGTAAAATTACATTTTAATTGGGACAGTGACTGGGT   |       |       |       |       |       |       |       | 2639  |
| NorthernPike            | -----                                                                             |       |       |       |       |       |       |       | 0     |
| SpottedGar              | -----                                                                             |       |       |       |       |       |       |       | 0     |
| ParamormyropsKingsLeyae | -----                                                                             |       |       |       |       |       |       |       | 0     |

| Majority                | 44810                                                                             | 44820 | 44830 | 44840 | 44850 | 44860 | 44870 | 44880 |       |
|-------------------------|-----------------------------------------------------------------------------------|-------|-------|-------|-------|-------|-------|-------|-------|
| Human                   | ATTCAAAGCAAGTATCAAATGAGTCGGGAAATTAGAAAAGTAGAAATTGAAGTTTTTAGGGTGCTATTAGAGAAATTC    |       |       |       |       |       |       |       | 44878 |
| AsianBonytongue         | -----                                                                             |       |       |       |       |       |       |       | 0     |
| Reedfish                | GGATATATGCTAATGTAGGTGATATTCAAAGAAAAACAAACTTGGAAATTTAATTATGTTGACATTGGAGCTCATTTGTTG |       |       |       |       |       |       |       | 2719  |
| NorthernPike            | -----                                                                             |       |       |       |       |       |       |       | 0     |
| SpottedGar              | -----                                                                             |       |       |       |       |       |       |       | 0     |
| ParamormyropsKingsLeyae | -----                                                                             |       |       |       |       |       |       |       | 0     |

| Majority                | 44890                                                                           | 44900 | 44910 | 44920 | 44930 | 44940 | 44950 | 44960 |       |
|-------------------------|---------------------------------------------------------------------------------|-------|-------|-------|-------|-------|-------|-------|-------|
| Human                   | GTGAGGAAGAGAGGGTTCACAGTTCCTTGTGACTGATGGATGTGGTGATTTAACAAATTACCCATGATCCTTGCCGACA |       |       |       |       |       |       |       | 44958 |
| AsianBonytongue         | -----                                                                           |       |       |       |       |       |       |       | 0     |
| Reedfish                | ACATTAAATTCACITTTCTGTGATGTTATTAATAATAAGAATTTATTATGTACTAGAATGAATATTACATATATGGAAA |       |       |       |       |       |       |       | 2799  |
| NorthernPike            | -----                                                                           |       |       |       |       |       |       |       | 0     |
| SpottedGar              | -----                                                                           |       |       |       |       |       |       |       | 0     |
| ParamormyropsKingsLeyae | -----                                                                           |       |       |       |       |       |       |       | 0     |

| Majority                | 44970                                                                            | 44980 | 44990 | 45000 | 45010 | 45020 | 45030 | 45040 |       |
|-------------------------|----------------------------------------------------------------------------------|-------|-------|-------|-------|-------|-------|-------|-------|
| Human                   | CCCATTTATGTAAAAATTGCAGGTTAAAGCTAGTGGAGAACAAGGTCAGTCAGCAGGAGAAAAGTGATGTACTGATCAG  |       |       |       |       |       |       |       | 45038 |
| AsianBonytongue         | -----                                                                            |       |       |       |       |       |       |       | 0     |
| Reedfish                | ATTATTAAACACAAAATGTAATCTTATTAGATGCTTAGCAACTTTTGTGTAGCATTCTACATAAAGCATTTTATGCCCTT |       |       |       |       |       |       |       | 2879  |
| NorthernPike            | -----                                                                            |       |       |       |       |       |       |       | 0     |
| SpottedGar              | -----                                                                            |       |       |       |       |       |       |       | 0     |
| ParamormyropsKingsLeyae | -----                                                                            |       |       |       |       |       |       |       | 0     |

| Majority                | 45050                                                                            | 45060 | 45070 | 45080 | 45090 | 45100 | 45110 | 45120 |       |
|-------------------------|----------------------------------------------------------------------------------|-------|-------|-------|-------|-------|-------|-------|-------|
| Human                   | AGGTGAAGATGCTGGCTTTAGAATTGAGGTGAAAACTGGTTTTGAGTTTGGGAAGAGAAGTATTCAAGTAGAAACCATTT |       |       |       |       |       |       |       | 45118 |
| AsianBonytongue         | -----                                                                            |       |       |       |       |       |       |       | 0     |
| Reedfish                | GCAAGCAAGTGTGGTCTCTTTCTCTCTGCACTTTAATGGAGTTGTACTTTGAGTTCAAATTTTCATTGATTTAATTAATC |       |       |       |       |       |       |       | 2959  |
| NorthernPike            | -----                                                                            |       |       |       |       |       |       |       | 0     |
| SpottedGar              | -----                                                                            |       |       |       |       |       |       |       | 0     |
| ParamormyropsKingsLeyae | -----                                                                            |       |       |       |       |       |       |       | 0     |

Sunday, May 01, 2022 09:44 PM

| Majority                |  | -----                                                                            |       |       |       |       |       |       |       |       |
|-------------------------|--|----------------------------------------------------------------------------------|-------|-------|-------|-------|-------|-------|-------|-------|
|                         |  | 45130                                                                            | 45140 | 45150 | 45160 | 45170 | 45180 | 45190 | 45200 |       |
| Human                   |  | TAAAATTTTATTTGCTTTGAATCCGTGATTACATGAACATCTTCCCTAAGCAAGAGGCTTTGAAAGAGTTGAATAATGTA |       |       |       |       |       |       |       | 45198 |
| AsianBonytongue         |  | -----                                                                            |       |       |       |       |       |       |       | 0     |
| Reedfish                |  | AAACAATTTAATTACATTTATGTAGCACTTTTCTAA--CCTACTCAAAGCACTTTACATAGGCAGTGGGGAAGCACCTT  |       |       |       |       |       |       |       | 3036  |
| NorthernPike            |  | -----                                                                            |       |       |       |       |       |       |       | 0     |
| SpottedGar              |  | -----                                                                            |       |       |       |       |       |       |       | 0     |
| ParamormyropsKingsLeyae |  | -----                                                                            |       |       |       |       |       |       |       | 0     |

| Majority                |  | -----                                                                            |       |       |       |       |       |       |       |       |
|-------------------------|--|----------------------------------------------------------------------------------|-------|-------|-------|-------|-------|-------|-------|-------|
|                         |  | 45210                                                                            | 45220 | 45230 | 45240 | 45250 | 45260 | 45270 | 45280 |       |
| Human                   |  | TGGAAAATGGTGTGCTTAAAGATTTTTTACATTCATATACAATGAATAAAATTTATATGCATAAAATAAAGCATTACCTC |       |       |       |       |       |       |       | 45278 |
| AsianBonytongue         |  | -----                                                                            |       |       |       |       |       |       |       | 0     |
| Reedfish                |  | AACCACCAACCAGTATGTGGCATCCACCAGCATGATGCGACCACATACATTCTTGACTTGTATACTTACCACATATTAC  |       |       |       |       |       |       |       | 3116  |
| NorthernPike            |  | -----                                                                            |       |       |       |       |       |       |       | 0     |
| SpottedGar              |  | -----                                                                            |       |       |       |       |       |       |       | 0     |
| ParamormyropsKingsLeyae |  | -----                                                                            |       |       |       |       |       |       |       | 0     |

| Majority                |  | -----                                                                            |       |       |       |       |       |       |       |       |
|-------------------------|--|----------------------------------------------------------------------------------|-------|-------|-------|-------|-------|-------|-------|-------|
|                         |  | 45290                                                                            | 45300 | 45310 | 45320 | 45330 | 45340 | 45350 | 45360 |       |
| Human                   |  | ATGCCTTCTTAACTGAACATAAACATTTGAATTATTACTGGTTTTACACGCCCAAACAAAAGTTCTGGGTTTACTGGAGG |       |       |       |       |       |       |       | 45358 |
| AsianBonytongue         |  | -----                                                                            |       |       |       |       |       |       |       | 0     |
| Reedfish                |  | CTATTAAATGATGAAGGAGTAAATAGCCATTAGAGATAGGGGTGATTAGAATGAACAAGGCCGTGATGGGCAATTTA    |       |       |       |       |       |       |       | 3196  |
| NorthernPike            |  | -----                                                                            |       |       |       |       |       |       |       | 0     |
| SpottedGar              |  | -----                                                                            |       |       |       |       |       |       |       | 0     |
| ParamormyropsKingsLeyae |  | -----                                                                            |       |       |       |       |       |       |       | 0     |

| Majority                |  | -----                                                                             |       |       |       |       |       |       |       |       |
|-------------------------|--|-----------------------------------------------------------------------------------|-------|-------|-------|-------|-------|-------|-------|-------|
|                         |  | 45370                                                                             | 45380 | 45390 | 45400 | 45410 | 45420 | 45430 | 45440 |       |
| Human                   |  | AATGGAAGGGAAAGATCTCTTTTCATTCACCCAGTAAACCTTTCCCATTCAGGATCATGGGAAGATGCTGAAGAATTGTAG |       |       |       |       |       |       |       | 45438 |
| AsianBonytongue         |  | -----                                                                             |       |       |       |       |       |       |       | 0     |
| Reedfish                |  | GCCAGGACATTGGGAAACACCCACTCTCTTCGATCCCTAGGGTTGTTTTATGACCATAGAGAGTCAAGACCTCTGTTTT   |       |       |       |       |       |       |       | 3276  |
| NorthernPike            |  | -----                                                                             |       |       |       |       |       |       |       | 0     |
| SpottedGar              |  | -----                                                                             |       |       |       |       |       |       |       | 0     |
| ParamormyropsKingsLeyae |  | -----                                                                             |       |       |       |       |       |       |       | 0     |

| Majority                |  | -----                                                                          |       |       |       |       |       |       |       |       |
|-------------------------|--|--------------------------------------------------------------------------------|-------|-------|-------|-------|-------|-------|-------|-------|
|                         |  | 45450                                                                          | 45460 | 45470 | 45480 | 45490 | 45500 | 45510 | 45520 |       |
| Human                   |  | AATGTAACACAGGCAGACCTAATGCTTCATAAGCTAATGTTTCCATTTTGGACCCTTTTCGGTGTGCTGGAGTGTG   |       |       |       |       |       |       |       | 45518 |
| AsianBonytongue         |  | -----                                                                          |       |       |       |       |       |       |       | 0     |
| Reedfish                |  | ACATCTCATTCGCATGACAATGCCAATTTTACAGTACAGCATTCCATAATTTCACTGGGGCATTAGGGTTAACACACA |       |       |       |       |       |       |       | 3356  |
| NorthernPike            |  | -----                                                                          |       |       |       |       |       |       |       | 0     |
| SpottedGar              |  | -----                                                                          |       |       |       |       |       |       |       | 0     |
| ParamormyropsKingsLeyae |  | -----                                                                          |       |       |       |       |       |       |       | 0     |

| Majority                |  | -----                                                                            |       |       |       |       |       |       |       |       |
|-------------------------|--|----------------------------------------------------------------------------------|-------|-------|-------|-------|-------|-------|-------|-------|
|                         |  | 45530                                                                            | 45540 | 45550 | 45560 | 45570 | 45580 | 45590 | 45600 |       |
| Human                   |  | TTTATATTTGAAAATAGGCTTTGTTATATTATTAAGGAGCCCCCATTCACAGTTTCACATTCTCATAGTATCATTTATT  |       |       |       |       |       |       |       | 45598 |
| AsianBonytongue         |  | -----                                                                            |       |       |       |       |       |       |       | 0     |
| Reedfish                |  | GACTACAGTGAGAGCCCCCCCCAACCCCCCACTGGCCTAACTAAGATATTTGCTCAATATATGCAATTGCACTTTGAGCA |       |       |       |       |       |       |       | 3436  |
| NorthernPike            |  | -----                                                                            |       |       |       |       |       |       |       | 0     |
| SpottedGar              |  | -----                                                                            |       |       |       |       |       |       |       | 0     |
| ParamormyropsKingsLeyae |  | -----                                                                            |       |       |       |       |       |       |       | 0     |

Sunday, May 01, 2022 09:44 PM

```

Majority -----
                |-----|
                |45610|45620|45630|45640|45650|45660|45670|45680|
                |-----|
Human           TAAAATGAAGACTTTTATAATATTTGGCACTAAGATATGAATACTTAGTAGTCACCTCATGGAAGCTATTAAGTGGGGA 45678
AsianBonytongue ----- 0
Reedfish       TATAAGGCAGAAGTGTCAAACCTAAGGCCTGCATGTTTTTTAAAATGACTTTCATCCTTTTATTAATGTGTTATATACAG 3516
NorthernPike   ----- 0
SpottedGar     ----- 0
ParamormyropsKingsLeyae ----- 0
    
```

```

Majority -----
                |-----|
                |45690|45700|45710|45720|45730|45740|45750|45760|
                |-----|
Human           GTGTCAGGTAGTGTAATGTTGATAGTTTACTACAGTAACTGGCTTGGTCTTTGGGAGAAGAGGACAGATCTTTTTTAGG 45758
AsianBonytongue ----- 0
Reedfish       CCCATTGTCACCTTTTATGTTTTTACAAAACTCTTTGATGTGTGTTTCATATAGATTGTATCGGTATATGATTTAACTAAA 3596
NorthernPike   ----- 0
SpottedGar     ----- 0
ParamormyropsKingsLeyae ----- 0
    
```

```

Majority -----
                |-----|
                |45770|45780|45790|45800|45810|45820|45830|45840|
                |-----|
Human           CAACCTGTATGTAATGTAATGTTTGTTTTTGAGATCCTACTATAGTGTAGTTGTTGAAGAGCACAGACTATGGAATCATG 45838
AsianBonytongue ----- 0
Reedfish       TTACTTTTACACCTGGCATTACAGCACATCTCTAGTGTCCAGTAGCTCAAATCTTCACTCATGGACACCTGTGTTTATG 3676
NorthernPike   ----- 0
SpottedGar     ----- 0
ParamormyropsKingsLeyae ----- 0
    
```

```

Majority -----
                |-----|
                |45850|45860|45870|45880|45890|45900|45910|45920|
                |-----|
Human           CTCCTTGAGTTTAACTCTTCTCTGCTACTTCTGTCTATAACCACTTAGTAACTATCTAATCTTGGGCATTTAACTAATT 45918
AsianBonytongue ----- 0
Reedfish       TAGAACATATATCATATCATTGAGAAATATCTAATTTGATCTAATTTCTGTGTCTAGAGGACACCATAAAAAAGATGGGTT 3756
NorthernPike   ----- 0
SpottedGar     ----- 0
ParamormyropsKingsLeyae ----- 0
    
```

```

Majority -----
                |-----|
                |45930|45940|45950|45960|45970|45980|45990|46000|
                |-----|
Human           GTTACCTGTAAATGGGGTTGATAGGTCATAATGATAGCAATCTGAGAGTTGTAAATTGCCCGGCATGTAGTTAATTAGCA 45998
AsianBonytongue ----- 0
Reedfish       TCAAATCACAGTGACCCCTTTTTTCATTTTATATATTGCTTTGTATTACAATAGTAGTTTTAGGTTGCTGACAGCTAGTAC 3836
NorthernPike   ----- 0
SpottedGar     ----- 0
ParamormyropsKingsLeyae ----- 0
    
```

```

Majority -----
                |-----|
                |46010|46020|46030|46040|46050|46060|46070|46080|
                |-----|
Human           GTGAATATTTAAATATTGATGCAAAAATAAAATTACATCTTTTCTATATTTTTTCCAAGAAGTCAAGATCTTTGTCTTATCC 46078
AsianBonytongue ----- 0
Reedfish       ATTCCAGTGTAAGTTAATATATAGGACATTTTAGCCTTGAGATAATACTAAGACTGAAGCTGATGTTTTTCAGAAATTG 3916
NorthernPike   ----- 0
SpottedGar     ----- 0
ParamormyropsKingsLeyae ----- 0
    
```



Sunday, May 01, 2022 09:44 PM

| Majority                | 46090                                                                           | 46100 | 46110 | 46120 | 46130 | 46140 | 46150 | 46160 |       |
|-------------------------|---------------------------------------------------------------------------------|-------|-------|-------|-------|-------|-------|-------|-------|
| Human                   | TTTGATTCTCAGAAGTTTCCTACGTTCTTTCTGTGTTATTCAGCTATTTTACTTCTGCTTAATATCCACTATCCAGAAA |       |       |       |       |       |       |       | 46158 |
| AsianBonytongue         | -----                                                                           |       |       |       |       |       |       |       | 0     |
| Reedfish                | TTTTGGCTGGAATGTATTTGGCAATGTAACAACACAACCCCTTTAAATGGAATGAATCAGTTGTTAAAAAGCAGCTTA  |       |       |       |       |       |       |       | 3996  |
| NorthernPike            | -----                                                                           |       |       |       |       |       |       |       | 0     |
| SpottedGar              | -----                                                                           |       |       |       |       |       |       |       | 0     |
| ParamormyropsKingsLeyae | -----                                                                           |       |       |       |       |       |       |       | 0     |

| Majority                | 46170                                                                           | 46180 | 46190 | 46200 | 46210 | 46220 | 46230 | 46240 |       |
|-------------------------|---------------------------------------------------------------------------------|-------|-------|-------|-------|-------|-------|-------|-------|
| Human                   | CATCCAACACAAATCCAAAATAAATTATTTAATTTCTTAATAATAGGTTTAGGCAGGCTTTTGCCTTTTGGGAAT-TAT |       |       |       |       |       |       |       | 46237 |
| AsianBonytongue         | -----                                                                           |       |       |       |       |       |       |       | 0     |
| Reedfish                | ATGAATAACGAGGTACTTTGTAATAAATTAATTGATTATATGGTTCACAGATGCTGTAAATAAAATTATGTAAATGTAA |       |       |       |       |       |       |       | 4076  |
| NorthernPike            | -----                                                                           |       |       |       |       |       |       |       | 0     |
| SpottedGar              | -----                                                                           |       |       |       |       |       |       |       | 0     |
| ParamormyropsKingsLeyae | -----                                                                           |       |       |       |       |       |       |       | 0     |

| Majority                | 46250                                                                             | 46260 | 46270 | 46280 | 46290 | 46300 | 46310 | 46320 |       |
|-------------------------|-----------------------------------------------------------------------------------|-------|-------|-------|-------|-------|-------|-------|-------|
| Human                   | TTTTGGAAAATCATTGAAAGGGGAAGCCTTTTTTCTCCTTATGGGTACAGTGATAGGTAGTATCTTTATTGGTCTTTTT   |       |       |       |       |       |       |       | 46317 |
| AsianBonytongue         | -----                                                                             |       |       |       |       |       |       |       | 0     |
| Reedfish                | AGTTGGTCAACTGTTTGGCAAATATTTAAATGTTTACTTCTGTACTTTTTTTACTTCAATTAGGCCTTTTATAGAGCTTGG |       |       |       |       |       |       |       | 4156  |
| NorthernPike            | -----                                                                             |       |       |       |       |       |       |       | 0     |
| SpottedGar              | -----                                                                             |       |       |       |       |       |       |       | 0     |
| ParamormyropsKingsLeyae | -----                                                                             |       |       |       |       |       |       |       | 0     |

| Majority                | 46330                                                                              | 46340 | 46350 | 46360 | 46370 | 46380 | 46390 | 46400 |       |
|-------------------------|------------------------------------------------------------------------------------|-------|-------|-------|-------|-------|-------|-------|-------|
| Human                   | TTTTCTTGTCTTTCTCCCAGAAGGAAAAGGACAGACCAAATTAGGAGAAACTGAAATTTGCTTTTTTGAGTATCCTGAT    |       |       |       |       |       |       |       | 46397 |
| AsianBonytongue         | -----                                                                              |       |       |       |       |       |       |       | 0     |
| Reedfish                | AACAGAAGAAGCTGCAATCACCATGGTTAATTATTACACAGCTGTAACACCTCATGTTTCGTAATGTGCCTGTTTTTCATAC |       |       |       |       |       |       |       | 4236  |
| NorthernPike            | -----                                                                              |       |       |       |       |       |       |       | 0     |
| SpottedGar              | -----                                                                              |       |       |       |       |       |       |       | 0     |
| ParamormyropsKingsLeyae | -----                                                                              |       |       |       |       |       |       |       | 0     |

| Majority                | 46410                                                                           | 46420 | 46430 | 46440 | 46450 | 46460 | 46470 | 46480 |       |
|-------------------------|---------------------------------------------------------------------------------|-------|-------|-------|-------|-------|-------|-------|-------|
| Human                   | ACCATAACTATAACACATGGGGCTTTAGGTTGGATTGTGAAGTATTTGTTCTCGTTATTCAAACAACTAATGAACAAGA |       |       |       |       |       |       |       | 46477 |
| AsianBonytongue         | -----                                                                           |       |       |       |       |       |       |       | 0     |
| Reedfish                | AGTATTCAAATCATAAAGAAGTGAAGACAGACAGTGCTCTCAACCAGGTATGCTTTTATATCAGTAATTCAGTATTGCT |       |       |       |       |       |       |       | 4316  |
| NorthernPike            | -----                                                                           |       |       |       |       |       |       |       | 0     |
| SpottedGar              | -----                                                                           |       |       |       |       |       |       |       | 0     |
| ParamormyropsKingsLeyae | -----                                                                           |       |       |       |       |       |       |       | 0     |

| Majority                | 46490                                                                            | 46500 | 46510 | 46520 | 46530 | 46540 | 46550 | 46560 |       |
|-------------------------|----------------------------------------------------------------------------------|-------|-------|-------|-------|-------|-------|-------|-------|
| Human                   | ACAAATTATCAAGTTTCTGTACTCAGACTGCTTTGTCAAAAAAAGGTCTTAGTCTGTATCAGAATAATATGTGTTCCCTT |       |       |       |       |       |       |       | 46557 |
| AsianBonytongue         | -----                                                                            |       |       |       |       |       |       |       | 0     |
| Reedfish                | ACATTGTACAAAGTAGATAAATTGAAATATTAGACTTGAAATTTTGCACTGAAATATTAATATTTTTGTTTTGTGCAA   |       |       |       |       |       |       |       | 4396  |
| NorthernPike            | -----                                                                            |       |       |       |       |       |       |       | 0     |
| SpottedGar              | -----                                                                            |       |       |       |       |       |       |       | 0     |
| ParamormyropsKingsLeyae | -----                                                                            |       |       |       |       |       |       |       | 0     |

Sunday, May 01, 2022 09:44 PM

```

Majority -----
      |-----|
      |         |         |         |         |         |         |         |
      | 46570   | 46580   | 46590   | 46600   | 46610   | 46620   | 46630   | 46640   |
      |-----|-----|-----|-----|-----|-----|-----|-----|
Human   GTTGACTGATGCCGATTGTTGTGTGTGCCATTATGTGTTTTAAAGTATATGTGTATTTTTGGATTCTGTGCTTTAGCT 46637
AsianBonytongue ----- 0
Reedfish TTACTATCATGTGGTTTGATATTCCTGATGGTTTGTATTTTTACAGATTAGAGGCATAAGCAAGATTTCACTATTTTTTTG 4476
NorthernPike ----- 0
SpottedGar ----- 0
ParamormyropsKingsLeyae ----- 0
    
```

```

Majority -----
      |-----|
      |         |         |         |         |         |         |         |
      | 46650   | 46660   | 46670   | 46680   | 46690   | 46700   | 46710   | 46720   |
      |-----|-----|-----|-----|-----|-----|-----|-----|
Human   TACATTTTCAATTAACGGGCCTAGAGATGATTTTGTAGATAAGATACTACAAAATGCAAAGTTCAGTCTCTTCCTTTTG 46717
AsianBonytongue ----- 0
Reedfish GATAAAGTACTAAACTATCATCGTTTTTGTATGCAAATTAAGGCATTTCAGTGTGTTTGCATTGATCTCAATTAGAATA 4556
NorthernPike ----- 0
SpottedGar ----- 0
ParamormyropsKingsLeyae ----- 0
    
```

```

Majority -----
      |-----|
      |         |         |         |         |         |         |         |
      | 46730   | 46740   | 46750   | 46760   | 46770   | 46780   | 46790   | 46800   |
      |-----|-----|-----|-----|-----|-----|-----|-----|
Human   ACAAATTCAGGTGCCCTGTGCGCACACAAATCTTTGTTCAGTAGTGAAAGGACATGTGATAGCTTCCTGTAGTTTTTTTCAT 46797
AsianBonytongue ----- 0
Reedfish GGACAATGTCTAAAGGAAATTTTCCCTTGATGTGAAATTCAGTTTGTTCACATGCCTTAAAGTTGAACAACAAAACATCA 4636
NorthernPike ----- 0
SpottedGar ----- 0
ParamormyropsKingsLeyae ----- 0
    
```

```

Majority -----
      |-----|
      |         |         |         |         |         |         |         |
      | 46810   | 46820   | 46830   | 46840   | 46850   | 46860   | 46870   | 46880   |
      |-----|-----|-----|-----|-----|-----|-----|-----|
Human   ATTTCTGGAGTGGTGAAGAGCTACCCAGCCAAGATTTTCAGGGCAATATATTCAGAAGCCAGAGCTTACTCTTCTGTACA 46877
AsianBonytongue ----- 0
Reedfish GCCTTTTTGGAAGAGGGCTAAATGCTTTTCTGTTGGTAGAGCACAGTTTGCATTTTATTTCTTTTTGTCCCTTCTAAATTT 4716
NorthernPike ----- 0
SpottedGar ----- 0
ParamormyropsKingsLeyae ----- 0
    
```

```

Majority -----
      |-----|
      |         |         |         |         |         |         |         |
      | 46890   | 46900   | 46910   | 46920   | 46930   | 46940   | 46950   | 46960   |
      |-----|-----|-----|-----|-----|-----|-----|-----|
Human   AAGACAACCTAAGGGGATTTTTAAATGCATTGGCTTGCCGTTCAAGTATATAAACCTAAGTGAAACTCCTAGAGTAAAAAT 46957
AsianBonytongue ----- 0
Reedfish TTATTTTTGCTTTTATTGAGAACTTTGTGTGTATGTGTCTGATTTTGATTTCTGCCCTGGTCCAATAGGTGGATTTAAGA 4796
NorthernPike ----- 0
SpottedGar ----- 0
ParamormyropsKingsLeyae ----- 0
    
```

```

Majority -----
      |-----|
      |         |         |         |         |         |         |         |
      | 46970   | 46980   | 46990   | 47000   | 47010   | 47020   | 47030   | 47040   |
      |-----|-----|-----|-----|-----|-----|-----|-----|
Human   ATGACTTAAGTATAGCTTGAGTCCATATATTATCACTTAGAGATACCTTCTCTGATCATCCAATAAAGTCATTACTACTA 47037
AsianBonytongue ----- 0
Reedfish ATAAATAAATGAATGGAATTTGTTTTTGTAGCTTATCTTAACCCTTTAAACCGCAACTCCCTAAATATCCCCACGCCAGG 4876
NorthernPike ----- 0
SpottedGar ----- 0
ParamormyropsKingsLeyae ----- 0
    
```

Sunday, May 01, 2022 09:44 PM

| Majority                | -----                                                                               |       |       |       |       |       |       |       |       |
|-------------------------|-------------------------------------------------------------------------------------|-------|-------|-------|-------|-------|-------|-------|-------|
|                         | 47050                                                                               | 47060 | 47070 | 47080 | 47090 | 47100 | 47110 | 47120 |       |
| Human                   | TCAATCTTCCAGTCCCTAGACAAAGTAACCTTTTAAGCACATCACTGTTTTACCTCACAGCATATAACCGTAGAAAGTATCTG |       |       |       |       |       |       |       | 47117 |
| AsianBonytongue         | -----                                                                               |       |       |       |       |       |       |       | 0     |
| Reedfish                | CGAAATCTGAACAATTTTCGTTTTTTTACTTTTTTACTGTAAGCGGCCCTCCACAACAATAAACTTTCATCAACTGCAA     |       |       |       |       |       |       |       | 4956  |
| NorthernPike            | -----                                                                               |       |       |       |       |       |       |       | 0     |
| SpottedGar              | -----                                                                               |       |       |       |       |       |       |       | 0     |
| ParamormyropsKingsLeyae | -----                                                                               |       |       |       |       |       |       |       | 0     |

| Majority                | -----                                                                             |       |       |       |       |       |       |       |       |
|-------------------------|-----------------------------------------------------------------------------------|-------|-------|-------|-------|-------|-------|-------|-------|
|                         | 47130                                                                             | 47140 | 47150 | 47160 | 47170 | 47180 | 47190 | 47200 |       |
| Human                   | G TTCAGGTACTAGTTAGTCCAGCTCCCTACTATAAGGTATCAGGAATCATATAATCATCTTGTTCACTCTCTGTACCCTC |       |       |       |       |       |       |       | 47197 |
| AsianBonytongue         | -----                                                                             |       |       |       |       |       |       |       | 0     |
| Reedfish                | CTGACGGTCTGGCATGTAGGGCAACTGAAATGCTTCAAATAAATGATCAATCAAAGGACGTAGCTTGAACAAGCGGTCG   |       |       |       |       |       |       |       | 5036  |
| NorthernPike            | -----                                                                             |       |       |       |       |       |       |       | 0     |
| SpottedGar              | -----                                                                             |       |       |       |       |       |       |       | 0     |
| ParamormyropsKingsLeyae | -----                                                                             |       |       |       |       |       |       |       | 0     |

| Majority                | -----                                                                           |       |       |       |       |       |       |       |       |
|-------------------------|---------------------------------------------------------------------------------|-------|-------|-------|-------|-------|-------|-------|-------|
|                         | 47210                                                                           | 47220 | 47230 | 47240 | 47250 | 47260 | 47270 | 47280 |       |
| Human                   | AGAACGTAAACATTGCTAGACACATCCCTGAATACCCAGTAAATGTTTAAGGAATTAATGAGTGAATTAATTTTGAAGA |       |       |       |       |       |       |       | 47277 |
| AsianBonytongue         | -----                                                                           |       |       |       |       |       |       |       | 0     |
| Reedfish                | CGGTTTGGATCTTCTTATCTGGCTCATTCTGTGTGCATTCAAATGAAAGAATTCAGCAGCAAAGAGAATCGGTTACG   |       |       |       |       |       |       |       | 5116  |
| NorthernPike            | -----                                                                           |       |       |       |       |       |       |       | 0     |
| SpottedGar              | -----                                                                           |       |       |       |       |       |       |       | 0     |
| ParamormyropsKingsLeyae | -----                                                                           |       |       |       |       |       |       |       | 0     |

| Majority                | -----                                                                            |       |       |       |       |       |       |       |       |
|-------------------------|----------------------------------------------------------------------------------|-------|-------|-------|-------|-------|-------|-------|-------|
|                         | 47290                                                                            | 47300 | 47310 | 47320 | 47330 | 47340 | 47350 | 47360 |       |
| Human                   | TACGTTGGAGACCAAGATAATCTGACAGTCTTATAGATGTTGTTGAACATACACAAACACATTATATAGTTTATAGGTTG |       |       |       |       |       |       |       | 47357 |
| AsianBonytongue         | -----                                                                            |       |       |       |       |       |       |       | 0     |
| Reedfish                | TGTCATGACAGCTGCAAAAATAGGTGTTGCATACATAGGATCTGTAGACCAGTACATCTCAATATCTGGTTTTCTGATTA |       |       |       |       |       |       |       | 5196  |
| NorthernPike            | -----                                                                            |       |       |       |       |       |       |       | 0     |
| SpottedGar              | -----                                                                            |       |       |       |       |       |       |       | 0     |
| ParamormyropsKingsLeyae | -----                                                                            |       |       |       |       |       |       |       | 0     |

| Majority                | -----                                                                             |       |       |       |       |       |       |       |       |
|-------------------------|-----------------------------------------------------------------------------------|-------|-------|-------|-------|-------|-------|-------|-------|
|                         | 47370                                                                             | 47380 | 47390 | 47400 | 47410 | 47420 | 47430 | 47440 |       |
| Human                   | TGTTGAATGTTTTAGGAAATACCATAAATTACCTAAAGTTTTATACAAAATGGAGTATACATGTATATTTCTGAATGTGT  |       |       |       |       |       |       |       | 47437 |
| AsianBonytongue         | -----                                                                             |       |       |       |       |       |       |       | 0     |
| Reedfish                | TTCCCATCAACATCAAAATCCAATGAATTTTTTCATTTTCGTTTTTCATCAGTGTCAAACCAAGCACGAACACGGGAATGT |       |       |       |       |       |       |       | 5276  |
| NorthernPike            | -----                                                                             |       |       |       |       |       |       |       | 0     |
| SpottedGar              | -----                                                                             |       |       |       |       |       |       |       | 0     |
| ParamormyropsKingsLeyae | -----                                                                             |       |       |       |       |       |       |       | 0     |

| Majority                | -----                                                                            |       |       |       |       |       |       |       |       |
|-------------------------|----------------------------------------------------------------------------------|-------|-------|-------|-------|-------|-------|-------|-------|
|                         | 47450                                                                            | 47460 | 47470 | 47480 | 47490 | 47500 | 47510 | 47520 |       |
| Human                   | CAAGATCCTTCATTTTAGTCTAGTCTCAGAAATATCCTTGAGATCCTAAAAGACTAAGAACCATTGATCTGGCATAGTAG |       |       |       |       |       |       |       | 47517 |
| AsianBonytongue         | -----                                                                            |       |       |       |       |       |       |       | 0     |
| Reedfish                | GGAGGTAAATGGGATTTTTCTCAATAAACTATGCTGCATACAGATTTGTCTGATGAACAAAATGCTGATCAAATCAGG   |       |       |       |       |       |       |       | 5356  |
| NorthernPike            | -----                                                                            |       |       |       |       |       |       |       | 0     |
| SpottedGar              | -----                                                                            |       |       |       |       |       |       |       | 0     |
| ParamormyropsKingsLeyae | -----                                                                            |       |       |       |       |       |       |       | 0     |

Sunday, May 01, 2022 09:44 PM

```

Majority -----
                |-----|
                |47530|47540|47550|47560|47570|47580|47590|47600|
                |-----|
Human           |ATATACTGCAAGTCCTTCAAACAAGTGTATTTAAATATTACCTATTTTATAGGCATTTTGAATAATATTTTATTTTGTG| 47597
AsianBonytongue|-----| 0
Reedfish       |TGACACAAACAGCTCATAAACTGCTCAGCAGTGAATTGTTTACATCAACAATAAAGCCAGACGTTGCCTCAAACGGAT| 5436
NorthernPike   |-----| 0
SpottedGar     |-----| 0
ParamormyropsKingsLeyae|-----| 0
    
```

```

Majority -----
                |-----|
                |47610|47620|47630|47640|47650|47660|47670|47680|
                |-----|
Human           |GTGAAGTTTTGGAATGAAGACAGTTAACTAATTTGTTGATTGAATTATGTTACTTTACTTTAAATCTCACGGTAACAGAA| 47677
AsianBonytongue|-----| 0
Reedfish       |GCAGAAAAGGTAGTTTCACTCGGGCAGCAGTCCAGCTGAGGTGCTGGGGATACACCCACTCAGCGCCGTCATCCGATGCG| 5516
NorthernPike   |-----| 0
SpottedGar     |-----| 0
ParamormyropsKingsLeyae|-----| 0
    
```

```

Majority -----
                |-----|
                |47690|47700|47710|47720|47730|47740|47750|47760|
                |-----|
Human           |TAAGGTAATTAAGTTCATGAGTGATTTAGAGTATATTGATGTTAATAGTCACAAAATATTAGGTAGTTTACAGCGCAATA| 47757
AsianBonytongue|-----| 0
Reedfish       |TCTTCATTACAGTATCATGCAGCGCACGTTGCTGCTCATCATTGTCGCTAAAATCTTCTTCAGAACTGCTACAATCATG| 5596
NorthernPike   |-----| 0
SpottedGar     |-----| 0
ParamormyropsKingsLeyae|-----| 0
    
```

```

Majority -----
                |-----|
                |47770|47780|47790|47800|47810|47820|47830|47840|
                |-----|
Human           |GTAATATATCAGGAGAGGCTCATTGTAGATAAGCCATAATATGGATTGACTGCATTATCATTTTTATAAACTTTACATTC| 47837
AsianBonytongue|-----| 0
Reedfish       |ATCAGAATTGTCCAAAATCGCTGCAAAGCCTCACTTGAAGTCAGTTTAC-GTTTCGCCATATTCACAGCTGTCACATGC| 5675
NorthernPike   |-----| 0
SpottedGar     |-----| 0
ParamormyropsKingsLeyae|-----| 0
    
```

```

Majority -----
                |-----|
                |47850|47860|47870|47880|47890|47900|47910|47920|
                |-----|
Human           |TTTGATCCCACCTTCAAGTACATTTTTCAAATCAAACAATTTATAATTTCTCAGGTAAAATTATAATCTTCTTAATTTTG| 47917
AsianBonytongue|-----| 0
Reedfish       |GAATCAGTTCACATGACCGCCAAAACAACCACAGACTTGTGCGAAATGCAATGTAGTAATAATACCCACGCCAAACCGTC| 5755
NorthernPike   |-----| 0
SpottedGar     |-----| 0
ParamormyropsKingsLeyae|-----| 0
    
```

```

Majority -----
                |-----|
                |47930|47940|47950|47960|47970|47980|47990|48000|
                |-----|
Human           |GTCAAACCAGTTTTTCACTTTTTAAAAATGTTTCATATTAGTTCATTATAAGATGATTAAATTACAAGATACAGTCATAA| 47997
AsianBonytongue|-----| 0
Reedfish       |AGTTATACTACTTGCCAGGCATTCATATAACCACAGGCAAATGTGCCGGATAAATCCGGCAGTATGGCGTTAGCAATAAA| 5835
NorthernPike   |-----| 0
SpottedGar     |-----| 0
ParamormyropsKingsLeyae|-----| 0
    
```

Sunday, May 01, 2022 09:44 PM

| Majority                | -----                                                                            |       |       |       |       |       |       |       |       |
|-------------------------|----------------------------------------------------------------------------------|-------|-------|-------|-------|-------|-------|-------|-------|
|                         | 48010                                                                            | 48020 | 48030 | 48040 | 48050 | 48060 | 48070 | 48080 |       |
| Human                   | ATCTTGGGGATAGTGATGAGGATACTCTCGGAGAAATGCATTGTTAGGTAATTTTGTCACTGCATAAATGTCATAGAGTA |       |       |       |       |       |       |       | 48077 |
| AsianBonytongue         | -----                                                                            |       |       |       |       |       |       |       | 0     |
| Reedfish                | ACAGCGGTGCCGAGGGGTTAATAGTCATGCTTGAATCCAAGCAAAGTTATAAATGAGACCCCTGGTGTGGAATTTTCCA  |       |       |       |       |       |       |       | 5915  |
| NorthernPike            | -----                                                                            |       |       |       |       |       |       |       | 0     |
| SpottedGar              | -----                                                                            |       |       |       |       |       |       |       | 0     |
| ParamormyropsKingsLeyae | -----                                                                            |       |       |       |       |       |       |       | 0     |

| Majority                | -----                                                                             |       |       |       |       |       |       |       |       |
|-------------------------|-----------------------------------------------------------------------------------|-------|-------|-------|-------|-------|-------|-------|-------|
|                         | 48090                                                                             | 48100 | 48110 | 48120 | 48130 | 48140 | 48150 | 48160 |       |
| Human                   | CATTTGCACAAACCTGCTACACATGTAGGCTATATGGTATATGTAGCCTTTTGTCTTAGGCAACAAATTTGACAGCATG   |       |       |       |       |       |       |       | 48157 |
| AsianBonytongue         | -----                                                                             |       |       |       |       |       |       |       | 0     |
| Reedfish                | CTTGTAGTGTGTTTTTTTTTTTTTTTTTTTTTTTTTGTGTTAGTGTGTTTTTTTTTTTTTGTGTGTGTGTGTGCCATGCAG |       |       |       |       |       |       |       | 5995  |
| NorthernPike            | -----                                                                             |       |       |       |       |       |       |       | 0     |
| SpottedGar              | -----                                                                             |       |       |       |       |       |       |       | 0     |
| ParamormyropsKingsLeyae | -----                                                                             |       |       |       |       |       |       |       | 0     |

| Majority                | -----                                                                            |       |       |       |       |       |       |       |       |
|-------------------------|----------------------------------------------------------------------------------|-------|-------|-------|-------|-------|-------|-------|-------|
|                         | 48170                                                                            | 48180 | 48190 | 48200 | 48210 | 48220 | 48230 | 48240 |       |
| Human                   | TTACTGTTCTGAATACTGGAGGCAGTTGCAACACAGTAATAAGTATTGATG-TATCTAAACAGAAAAGGTACAATAAAAA |       |       |       |       |       |       |       | 48236 |
| AsianBonytongue         | -----                                                                            |       |       |       |       |       |       |       | 0     |
| Reedfish                | CACTCTTGAAAATACATGGGTGTTGTCAATTTGCATGTACAGCATATTGAAACTGTCACATTTTATGGGGATCCCTTTAA |       |       |       |       |       |       |       | 6075  |
| NorthernPike            | -----                                                                            |       |       |       |       |       |       |       | 0     |
| SpottedGar              | -----                                                                            |       |       |       |       |       |       |       | 0     |
| ParamormyropsKingsLeyae | -----                                                                            |       |       |       |       |       |       |       | 0     |

| Majority                | -----                                                                            |       |       |       |       |       |       |       |       |
|-------------------------|----------------------------------------------------------------------------------|-------|-------|-------|-------|-------|-------|-------|-------|
|                         | 48250                                                                            | 48260 | 48270 | 48280 | 48290 | 48300 | 48310 | 48320 |       |
| Human                   | TATGGTATTATAATCTTATGGGACCACCATTGTATATGTGGCCTGTCAATGACCAAAATGTAGTTATGTGGCACATGACT |       |       |       |       |       |       |       | 48316 |
| AsianBonytongue         | -----                                                                            |       |       |       |       |       |       |       | 0     |
| Reedfish                | GCCTCTTTATCCATATAGTTGATTGAGTGATGGTGCTACGTGTTACTCACTACTTCACGAGAGTCCCCAACCCAGTTG   |       |       |       |       |       |       |       | 6155  |
| NorthernPike            | -----                                                                            |       |       |       |       |       |       |       | 0     |
| SpottedGar              | -----                                                                            |       |       |       |       |       |       |       | 0     |
| ParamormyropsKingsLeyae | -----                                                                            |       |       |       |       |       |       |       | 0     |

| Majority                | -----                                                                             |       |       |       |       |       |       |       |       |
|-------------------------|-----------------------------------------------------------------------------------|-------|-------|-------|-------|-------|-------|-------|-------|
|                         | 48330                                                                             | 48340 | 48350 | 48360 | 48370 | 48380 | 48390 | 48400 |       |
| Human                   | GTGATTGTATTCTTTAGTCATTGGACAGTTTCTTTATGAGATTACATTTTAAATGTTGTTGCTTATTAATAATTACTCTTT |       |       |       |       |       |       |       | 48396 |
| AsianBonytongue         | -----                                                                             |       |       |       |       |       |       |       | 0     |
| Reedfish                | TTGATAGCATGTCTTAAATATATATTGTCTCACAGTCCACCCTGCATGGGGAGTGCTTTGAGTAGTGAGAAAAGCACTAT  |       |       |       |       |       |       |       | 6235  |
| NorthernPike            | -----                                                                             |       |       |       |       |       |       |       | 0     |
| SpottedGar              | -----                                                                             |       |       |       |       |       |       |       | 0     |
| ParamormyropsKingsLeyae | -----                                                                             |       |       |       |       |       |       |       | 0     |

| Majority                | -----                                                                            |       |       |       |       |       |       |       |       |
|-------------------------|----------------------------------------------------------------------------------|-------|-------|-------|-------|-------|-------|-------|-------|
|                         | 48410                                                                            | 48420 | 48430 | 48440 | 48450 | 48460 | 48470 | 48480 |       |
| Human                   | ATAATACTGTTAAGAAACATTAACAGCAATCTTAAATAGTTGATAATTT---CATTTAATAATAATAGGTGGATATGATT |       |       |       |       |       |       |       | 48473 |
| AsianBonytongue         | -----                                                                            |       |       |       |       |       |       |       | 0     |
| Reedfish                | ATACAGTGGTGCAAAAAAGTATTTAGTCAGCCACCAATTGTGCAAGTTCTCCCACTTAAAAAGATGAGAGAGGCCTGTAA |       |       |       |       |       |       |       | 6315  |
| NorthernPike            | -----                                                                            |       |       |       |       |       |       |       | 0     |
| SpottedGar              | -----                                                                            |       |       |       |       |       |       |       | 0     |
| ParamormyropsKingsLeyae | -----                                                                            |       |       |       |       |       |       |       | 0     |

Sunday, May 01, 2022 09:44 PM

```

Majority -----
      |-----|
      |         |         |         |         |         |         |         |
      | 48490   | 48500   | 48510   | 48520   | 48530   | 48540   | 48550   | 48560   |
      |-----|-----|-----|-----|-----|-----|-----|-----|
Human   TTATTCCTTTGAAAGCCTGGCATTGAAATTTCAAGAATTATTTAAGTATTCTCAGCTATGTTTTTAAGTCTTTTTTGG 48553
AsianBonytongue ----- 0
Reedfish TTTTCATCATAGGTATACCTCAACTATGAGAGACAAAATGAGAAAAAAATCCAGAAAATCACATTGTCTGATGTTAAAG 6395
NorthernPike ----- 0
SpottedGar ----- 0
ParamormyropsKingsLeyae ----- 0
    
```

```

Majority -----
      |-----|
      |         |         |         |         |         |         |         |
      | 48570   | 48580   | 48590   | 48600   | 48610   | 48620   | 48630   | 48640   |
      |-----|-----|-----|-----|-----|-----|-----|-----|
Human   AATTTGTAGTTTTTTTACACAAATAGGAAAATTCATACATTCTTTTATTGTTGATATATAAGGACTGTTTTTTAATGTCT 48633
AsianBonytongue ----- 0
Reedfish AATTTATTTGCAAATTTATGGTGAAAATACAGTGGGGCAAAAAGTATTTAGTCAGCCACCAATTGTGCAAGTTCTCCCA 6475
NorthernPike ----- 0
SpottedGar ----- 0
ParamormyropsKingsLeyae ----- 0
    
```

```

Majority -----
      |-----|
      |         |         |         |         |         |         |         |
      | 48650   | 48660   | 48670   | 48680   | 48690   | 48700   | 48710   | 48720   |
      |-----|-----|-----|-----|-----|-----|-----|-----|
Human   TTCAGCCAATGGTAATGATAGTAAAAATTTAAAGGAGAAGATAAAAATGGATGGTGCTCCTTCTCGTGTACTTCATATTC 48713
AsianBonytongue ----- 0
Reedfish CTTAAAAAGATGAGAGAGGCCTGTAATTTTCATCATAGGTATACCTCAACTATGAGAGACAAAATGAGAAAAAAATCCA 6555
NorthernPike ----- 0
SpottedGar ----- 0
ParamormyropsKingsLeyae ----- 0
    
```

```

Majority -----
      |-----|
      |         |         |         |         |         |         |         |
      | 48730   | 48740   | 48750   | 48760   | 48770   | 48780   | 48790   | 48800   |
      |-----|-----|-----|-----|-----|-----|-----|-----|
Human   GAAAATTACCTGGGGAAGTAACAGAAACTGAAGTTATTGCTTTAGGCTTACCTTTTGGTAAGGTGACCAACATCCTTATG 48793
AsianBonytongue ----- 0
Reedfish GAAAATCACATTGTCTGATGTTAAAGAATTTATTTGCAAATTTATGGTGAAAATACAGTGGGGCAAAAAGTATTTAGTC 6635
NorthernPike ----- 0
SpottedGar ----- 0
ParamormyropsKingsLeyae ----- 0
    
```

```

Majority -----
      |-----|
      |         |         |         |         |         |         |         |
      | 48810   | 48820   | 48830   | 48840   | 48850   | 48860   | 48870   | 48880   |
      |-----|-----|-----|-----|-----|-----|-----|-----|
Human   CTGAAAGGAAAAAATCAGGTACACTTCTTTCAGGGTTT--A-----TGAAATGTTAAACCCCAAACTATCCAGCAGGTG 48865
AsianBonytongue ----- 0
Reedfish AGCCACCTATTGTGCAAGTTCTCCCACTTAAAAAGATGAGAGATGCCTGTAATTTTCATCATAGGTATACCTCAACTATG 6715
NorthernPike ----- 0
SpottedGar ----- 0
ParamormyropsKingsLeyae ----- 0
    
```

```

Majority -----
      |-----|
      |         |         |         |         |         |         |         |
      | 48890   | 48900   | 48910   | 48920   | 48930   | 48940   | 48950   | 48960   |
      |-----|-----|-----|-----|-----|-----|-----|-----|
Human   TGAATTAATTGTAAGGGAGAAAATAGTAGGTTATTTTTCTTAAAGAACAGAAGTCTTATTCTCACTTTTTTCGAGTAGA 48945
AsianBonytongue ----- 0
Reedfish AGAGACAAAATGAGAAAAAAATTCAGAAAATCACATTGTCTGAGTTTTTAAAGAATTTATTTGCAAATTTATGGTGGA 6795
NorthernPike ----- 0
SpottedGar ----- 0
ParamormyropsKingsLeyae ----- 0
    
```

Sunday, May 01, 2022 09:44 PM

| Majority                | 48970                                                                           | 48980 | 48990 | 49000 | 49010 | 49020 | 49030 | 49040 |       |
|-------------------------|---------------------------------------------------------------------------------|-------|-------|-------|-------|-------|-------|-------|-------|
| Human                   | TGTCTGTGGGAAACTAATGCTAGGTAGCCAAAGTGAGTGAATCACTATAGTTTTTAACTTTGTCTTTTGAATTGACTTT |       |       |       |       |       |       |       | 49025 |
| AsianBonytongue         | -----                                                                           |       |       |       |       |       |       |       | 0     |
| Reedfish                | AATAAGTATTTGGTCACCTACAAACAAGCAAGATTTCTGGCTCTCACAAACCTGTAACCTCTCTGTAAGAGGCTCTCT  |       |       |       |       |       |       |       | 6875  |
| NorthernPike            | -----                                                                           |       |       |       |       |       |       |       | 0     |
| SpottedGar              | -----                                                                           |       |       |       |       |       |       |       | 0     |
| ParamormyropsKingsLeyae | -----                                                                           |       |       |       |       |       |       |       | 0     |

| Majority                | 49050                                                                            | 49060 | 49070 | 49080 | 49090 | 49100 | 49110 | 49120 |       |
|-------------------------|----------------------------------------------------------------------------------|-------|-------|-------|-------|-------|-------|-------|-------|
| Human                   | AGGGCTCTAATTGAATAATTGTATGAAATTGTGGAAAATACAAATGAAGTATTTCTTTTACTGTGGCTCTGTTCTTTGG  |       |       |       |       |       |       |       | 49105 |
| AsianBonytongue         | -----                                                                            |       |       |       |       |       |       |       | 0     |
| Reedfish                | GTCCTCCACTCGTTACCTGTATTAATGGCACCTATTTGAGGTTGTGGACAGGTATCTTTTATATTGATAACGAGTTCAAA |       |       |       |       |       |       |       | 6955  |
| NorthernPike            | -----                                                                            |       |       |       |       |       |       |       | 0     |
| SpottedGar              | -----                                                                            |       |       |       |       |       |       |       | 0     |
| ParamormyropsKingsLeyae | -----                                                                            |       |       |       |       |       |       |       | 0     |

| Majority                | 49130                                                                           | 49140 | 49150 | 49160 | 49170 | 49180 | 49190 | 49200 |       |
|-------------------------|---------------------------------------------------------------------------------|-------|-------|-------|-------|-------|-------|-------|-------|
| Human                   | TA-TCAGAAATCAGCAGGGTACTAGTCGCATCTTTCCTTAAGCTTTATGAGAATATGAAATTTTATTTAAAAATGTTAA |       |       |       |       |       |       |       | 49184 |
| AsianBonytongue         | -----                                                                           |       |       |       |       |       |       |       | 0     |
| Reedfish                | CAGTCACACTCCAAACTCTACTATGGCCAAGACCAAGAGCTGTCAAAGGACACCAGAAACAAAATTGTAGACCTGCACC |       |       |       |       |       |       |       | 7035  |
| NorthernPike            | -----                                                                           |       |       |       |       |       |       |       | 0     |
| SpottedGar              | -----                                                                           |       |       |       |       |       |       |       | 0     |
| ParamormyropsKingsLeyae | -----                                                                           |       |       |       |       |       |       |       | 0     |

| Majority                | 49210                                                                            | 49220 | 49230 | 49240 | 49250 | 49260 | 49270 | 49280 |       |
|-------------------------|----------------------------------------------------------------------------------|-------|-------|-------|-------|-------|-------|-------|-------|
| Human                   | ATGATACCATTTAGAAGAATTTATGAAATTTAACTCCCTTTTATATACTTGAGGTTAATCTGACATTTAATTTGTAAT   |       |       |       |       |       |       |       | 49264 |
| AsianBonytongue         | -----                                                                            |       |       |       |       |       |       |       | 0     |
| Reedfish                | AGGCTGGGAAGACTGAATCTGCAATAGGTAAGCAGCTTGGTGTGAAGAAATCAACTGTGGGAGCAATTATTAGAAAATGG |       |       |       |       |       |       |       | 7115  |
| NorthernPike            | -----                                                                            |       |       |       |       |       |       |       | 0     |
| SpottedGar              | -----                                                                            |       |       |       |       |       |       |       | 0     |
| ParamormyropsKingsLeyae | -----                                                                            |       |       |       |       |       |       |       | 0     |

| Majority                | 49290                                                                            | 49300 | 49310 | 49320 | 49330 | 49340 | 49350 | 49360 |       |
|-------------------------|----------------------------------------------------------------------------------|-------|-------|-------|-------|-------|-------|-------|-------|
| Human                   | TTTGTCTTTGTCTCTATATAATTATACTGCTTTTAAAATGACTTGAAATCTTACATTTCTTAGGGTAGAAGTGGTAAA   |       |       |       |       |       |       |       | 49344 |
| AsianBonytongue         | -----                                                                            |       |       |       |       |       |       |       | 0     |
| Reedfish                | AAGACATATAAGACCACTGATAATCTCCCTCAATCTGGGGCTCCACGCAAGATCTCATCCCGTGGGGTCAAAATGATCAC |       |       |       |       |       |       |       | 7195  |
| NorthernPike            | -----                                                                            |       |       |       |       |       |       |       | 0     |
| SpottedGar              | -----                                                                            |       |       |       |       |       |       |       | 0     |
| ParamormyropsKingsLeyae | -----                                                                            |       |       |       |       |       |       |       | 0     |

| Majority                | 49370                                                                            | 49380 | 49390 | 49400 | 49410 | 49420 | 49430 | 49440 |       |
|-------------------------|----------------------------------------------------------------------------------|-------|-------|-------|-------|-------|-------|-------|-------|
| Human                   | ATTCTGATGCTAGAAAATGTTTACATTTTCTCTAGCATTTGTTGCAAGAATAGATTTGTGGGTGTGAAAAATCATAGGTG |       |       |       |       |       |       |       | 49424 |
| AsianBonytongue         | -----                                                                            |       |       |       |       |       |       |       | 0     |
| Reedfish                | AAGAACGGTGAGCAAAACTCCCAGAACCACAGGGGGGACCTAGTGAATGACCTGCAGAGAGCTGGGACCAAAGTAACAA  |       |       |       |       |       |       |       | 7275  |
| NorthernPike            | -----                                                                            |       |       |       |       |       |       |       | 0     |
| SpottedGar              | -----                                                                            |       |       |       |       |       |       |       | 0     |
| ParamormyropsKingsLeyae | -----                                                                            |       |       |       |       |       |       |       | 0     |

Sunday, May 01, 2022 09:44 PM

```

Majority -----
          |-----|
          |49450|49460|49470|49480|49490|49500|49510|49520|
          |-----|
Human      |GAAGGCAGAAGCAGCGTGTACTCGGTTTTTCT----TCTGAGGTTAGCTTTAACTGTATACCTAAACTTCAACAAGAGATT| 49500
AsianBonytongue |-----| 0
Reedfish   |AGGCTACCATCAGTAACACACTACGCCGCCAGGAATTCAAATCCTGCAGTGCCAGACGTGTCCCCTGCTTAAGCCAGTA| 7355
NorthernPike |-----| 0
SpottedGar  |-----| 0
ParamormyropsKingsLeyae |-----| 0
    
```

```

Majority -----
          |-----|
          |49530|49540|49550|49560|49570|49580|49590|49600|
          |-----|
Human      |TCTAATTCTGCTTATCAGAACATTTAAAAGTAACCTGAAGGATTATATTCTAGATAAATTGATTAAAATCATCTGAATAGA| 49580
AsianBonytongue |-----| 0
Reedfish   |CATGTGCAGGCCCATCTGAAGTTTGCTAGAGAGCATTGGATGATCCAGAAAAGGATTGGGAGAGTGTCCATATGGTCAGA| 7435
NorthernPike |-----| 0
SpottedGar  |-----| 0
ParamormyropsKingsLeyae |-----| 0
    
```

```

Majority -----
          |-----|
          |49610|49620|49630|49640|49650|49660|49670|49680|
          |-----|
Human      |TTGCTTAGATATTAATTTTATTTGAATTTATAGTATTAATAATTGTGCTACTTAAATTTTCAGGCATTTTGGAACTAGC| 49660
AsianBonytongue |-----| 0
Reedfish   |TGAAACCAAAATAGAACTTTTTGGTAAAACTCTACTCGTCGTGTTTGGGAAGAGAACGAATACTGAGTTGCATCCAAAGA| 7515
NorthernPike |-----| 0
SpottedGar  |-----| 0
ParamormyropsKingsLeyae |-----| 0
    
```

```

Majority -----
          |-----|
          |49690|49700|49710|49720|49730|49740|49750|49760|
          |-----|
Human      |AACCGAGGAAGCAGCTATTACTATGGTTAATTACTATTCTGCTGTGACACCTCATCTTCGTAACCAACCAATATATATCC| 49740
AsianBonytongue |-----| 0
Reedfish   |ACACCATACCTACTGTAAAGCATGGGGTGGAACATCATGCTTTGGGGCTGTTTTCTGCAAAGGGACCATGACGACTG| 7595
NorthernPike |-----| 0
SpottedGar  |-----| 0
ParamormyropsKingsLeyae |-----| 0
    
```

```

Majority -----
          |-----|
          |49770|49780|49790|49800|49810|49820|49830|49840|
          |-----|
Human      |AGTACTCGAATCACAAAGAACTAAAGACAGATAATACATTAACCAAGTAAGTATGTGTAGGTACATAAAATAAATGGCC| 49820
AsianBonytongue |-----| 0
Reedfish   |ATCCGTGTAAAGGAAAGAAATGTATGGGTCCATGTATCGTCAGATTTTGAGTGAAAACCTCCATCTCAATGCCCTTGCTG| 7675
NorthernPike |-----| 0
SpottedGar  |-----| 0
ParamormyropsKingsLeyae |-----| 0
    
```

```

Majority -----
          |-----|
          |49850|49860|49870|49880|49890|49900|49910|49920|
          |-----|
Human      |TAGAACATATATGAATCTCATAAACATTAATAGGAAGGAAATGTTTACCTGTTTCAGATGTTCCCTTATAGGCATTTTCTT| 49900
AsianBonytongue |-----| 0
Reedfish   |ATGGAAATGTGGCTGGGTCTTTTCAGCATGACAATGATCCCAAACACACCACCCGGGTAACGAAGGAGTGGCTTCATAAGA| 7755
NorthernPike |-----| 0
SpottedGar  |-----| 0
ParamormyropsKingsLeyae |-----| 0
    
```



Sunday, May 01, 2022 09:44 PM

```

Majority -----
                |-----|
                |49930|49940|49950|49960|49970|49980|49990|50000|
Human           |GTTATTTTAAAGGTATTTTCATGCAGAATGTTTCTAAGTATTAAATACTATGTCATTTTGAATTCCTTTAATCCCCTGGT| 49980
AsianBonytongue |-----| 0
Reedfish        |AGCATTTCAAGGTCCTGGAGCGGCTAACCAGTCTCCAGATCTCAACTCCATGGAAAATCTTTGGAGGGAGTTGAAAGTC| 7835
NorthernPike    |-----| 0
SpottedGar      |-----| 0
ParamormyropsKingsLeyae |-----| 0
    
```

```

Majority -----
                |-----|
                |50010|50020|50030|50040|50050|50060|50070|50080|
Human           |CAAATGTTCTTTTCTTGTGCAAGTTAAAATTTTGTGTAGAACTTATCAGGTAGGATTTATTATTAGCATAAACTGT| 50060
AsianBonytongue |-----| 0
Reedfish        |CATGTTGCCAGCGACAGCCCCAAAACATCACTGCTCTAGAAGAGATCTACATGGAGGAATGGGCCAAAATATCAGCAAC| 7915
NorthernPike    |-----| 0
SpottedGar      |-----| 0
ParamormyropsKingsLeyae |-----| 0
    
```

```

Majority -----
                |-----|
                |50090|50100|50110|50120|50130|50140|50150|50160|
Human           |TTATACAACCTCTCCTGCTTAGAATTTAAGGTAAGAAGTTCAGTGCCTT--TGGTTATTTGATTTTTTTTATAGGTCTTAA| 50138
AsianBonytongue |-----| 0
Reedfish        |AGGGTGTGAAAACCTTGTGAAGACTTACAGAAAACGTTTGACCTCTGTCATTGCCAACAAAGGTATATACAAAATATTG| 7995
NorthernPike    |-----| 0
SpottedGar      |-----| 0
ParamormyropsKingsLeyae |-----| 0
    
```

```

Majority -----
                |-----|
                |50170|50180|50190|50200|50210|50220|50230|50240|
Human           |TTTCTTACGGAAAATTTTTTTTGAAGATGTGTTAATGGTTTTCTGGAAAAGAAATCTTAAGGATGAAGAATATGTGAA| 50218
AsianBonytongue |-----| 0
Reedfish        |AGATGAACCTTTGTATTGACCAAATACTTTTTTCCACCATAATTGCAAATAAATCTTTAAAATCAGACAATGTGAT| 8075
NorthernPike    |-----| 0
SpottedGar      |-----| 0
ParamormyropsKingsLeyae |-----| 0
    
```

```

Majority -----
                |-----|
                |50250|50260|50270|50280|50290|50300|50310|50320|
Human           |TGTATTGATGTTTTAAAAATGTAATATAGAAATATTGTTTAAAATTAATGTATTCAAAAATAGCATTAGAATGTTTTC| 50298
AsianBonytongue |-----| 0
Reedfish        |TTTCTGGATTTTTTTTCTCATTGTTGCTCTCATAGTTGAGGTATACCTATGATGAAAATTACAGGCCTCTCTCATCT| 8155
NorthernPike    |-----| 0
SpottedGar      |-----| 0
ParamormyropsKingsLeyae |-----| 0
    
```

```

Majority -----
                |-----|
                |50330|50340|50350|50360|50370|50380|50390|50400|
Human           |GACCTACATTATAAGACTGCTGTAATGATCTAAAACCTTTAGCTGTTTTAATATAGTTTTAAAACCTAATGATATCTTTCTC| 50378
AsianBonytongue |-----| 0
Reedfish        |TTTTAAGTGGGAGAACTTGACAATTGGTGGCTGACTAAATACTTTTTTGCCCACTGTATGTGAATGTATGGATATTGC| 8235
NorthernPike    |-----| 0
SpottedGar      |-----| 0
ParamormyropsKingsLeyae |-----| 0
    
```

Sunday, May 01, 2022 09:44 PM

```

Majority -----
                    |-----|
                    |50410  50420  50430  50440  50450  50460  50470  50480|
Human                |TGTCAGTAAAATACAAACTTTTCTTAATAAAAAATGTAATGGAAAACCTGTTCTCATAGATTTTGTCACTTTACAAAGT| 50458
AsianBonytongue     |-----| 0
Reedfish            |GGGAGTTTTTCCCTTTACTTTTGTATGAGAGCCGTATATTTGCCTATATTGAAGGTCAGTGCCACAGATATTTGGTTTT| 8315
NorthernPike        |-----| 0
SpottedGar          |-----| 0
ParamormyropsKingsLeyae |-----| 0
    
```

```

Majority -----
                    |-----|
                    |50490  50500  50510  50520  50530  50540  50550  50560|
Human                |GACAAAATCATTTTGTAGTTT---ATGGAAAATAAGCTTGTAACCTTTTACCTAAAAGATAGGACTGAAATTTTCAGC| 50535
AsianBonytongue     |-----| 0
Reedfish            |CTTCAGACCACCTTATTGGTCTGCAGGCTTTTCATAATGTTTTTCGTTAGTATAGCAGCTACTTGCTGAAAATAGTAAA| 8395
NorthernPike        |-----| 0
SpottedGar          |-----| 0
ParamormyropsKingsLeyae |-----| 0
    
```

```

Majority -----
                    |-----|
                    |50570  50580  50590  50600  50610  50620  50630  50640|
Human                |TTTTTTAATTTGATGATGAGTTTTTAATTTCTTTTGAAAAAGAATGTATGCTTCTAATAATTTATCAAGAGGAAGAATAC| 50615
AsianBonytongue     |-----| 0
Reedfish            |CGCATCAATTAAACTTCAATATTTCCCTTAAGCATGAAATACTATTAGCACCTTGTAAGAAGAGCAGCCTGGATGTTAC| 8475
NorthernPike        |-----| 0
SpottedGar          |-----| 0
ParamormyropsKingsLeyae |-----| 0
    
```

```

Majority -----
                    |-----|
                    |50650  50660  50670  50680  50690  50700  50710  50720|
Human                |CAAAAGAAAATATCTGCTCTTCTTTTACTTAGATTTTTTGCATTTTTAACTTATTTTTAACAAATAATTGTTTA| 50695
AsianBonytongue     |-----| 0
Reedfish            |AGTACTTAACTATAGATCCATTTCAAATCTTCCCTTTATAGGTAAGATTATTGAAAAGCTGTCATCTTACAACCAACA| 8555
NorthernPike        |-----| 0
SpottedGar          |-----| 0
ParamormyropsKingsLeyae |-----| 0
    
```

```

Majority -----
                    |-----|
                    |50730  50740  50750  50760  50770  50780  50790  50800|
Human                |TACTTATGGTGTACAATGTGATGTTTTAATACATATATATATGGAATGATCAAATCTGGCTGGTTAACATATTCATCTC| 50775
AsianBonytongue     |-----| 0
Reedfish            |CATTTTTAAACTCCAGTGGCTGCCTTGATGATTTACTCTTGCCTTCTACCAAATTTATAGCACTGAGACAG-CATTTA| 8634
NorthernPike        |-----| 0
SpottedGar          |-----| 0
ParamormyropsKingsLeyae |-----| 0
    
```

```

Majority -----
                    |-----|
                    |50810  50820  50830  50840  50850  50860  50870  50880|
Human                |TTCAGTACTTACAATTTCTTTATGGTAAGAACATTTAAAATTCCTTTAGCTATTTTGGAGTATAACAGTGAATGTGGAA| 50855
AsianBonytongue     |-----| 0
Reedfish            |TTAAAGTTTTAAATGATATTGTTTATACACAGACTGTTTTAAAATAACAGCTGTGGTATTGCTACACCTCAGTGCCTT| 8714
NorthernPike        |-----| 0
SpottedGar          |-----| 0
ParamormyropsKingsLeyae |-----| 0
    
```



Sunday, May 01, 2022 09:44 PM

```

Majority -----
                |-----|
                |51370  |51380  |51390  |51400  |51410  |51420  |51430  |51440  |
                |-----|-----|
Human           |GGAATTTAGAGTTGTATGCCAGGAAATGGGGTTGAGGACCAAATGTCTATTTTACAATGTCACAATACAGTATTATGCAT| 51415
AsianBonytongue|-----|-----|
Reedfish       |AATCTTCAGGTACTIONTCTGGATGCAGATCTTTGTTTCAGTAAGAATATTTAAAGCAATAACTATATCTGCATTCTGTAATGT| 9274
NorthernPike   |-----|-----|
SpottedGar     |-----|-----|
ParamormyropsKingsLeyae|-----|-----|
    
```

```

Majority -----
                |-----|
                |51450  |51460  |51470  |51480  |51490  |51500  |51510  |51520  |
                |-----|-----|
Human           |TACAGTAGTTGCCATGCTGTGCGGTAGATCACCAGAACCTATTCTTCCTGTCTGAAACTTTGTACTTTGACCATCATCAC| 51495
AsianBonytongue|-----|-----|
Reedfish       |GAAAAACATTTCTAAAAGCAGACGCTTGATGTCAAAAACAGATATGAAAAAAATTTATCCATGCCTTTGTTTTTCAGCTGA| 9354
NorthernPike   |-----|-----|
SpottedGar     |-----|-----|
ParamormyropsKingsLeyae|-----|-----|
    
```

```

Majority -----
                |-----|
                |51530  |51540  |51550  |51560  |51570  |51580  |51590  |51600  |
                |-----|-----|
Human           |CCCTTCCCTGTTTCACTCCTCCCTCCCCAGCCTCTGGTGACTATTTTCTACTCTCTACTAATGTGAGTTCAGCTTTTTTT| 51575
AsianBonytongue|-----|-----|
Reedfish       |GTAGATTACTGCAGTGTCTTTTCTCAGGTCTACCTGAAAGAGTCTTAAAGTTGCAATTTGTTTCAGAATGCTGCTGCCAG| 9434
NorthernPike   |-----|-----|
SpottedGar     |-----|-----|
ParamormyropsKingsLeyae|-----|-----|
    
```

```

Majority -----
                |-----|
                |51610  |51620  |51630  |51640  |51650  |51660  |51670  |51680  |
                |-----|-----|
Human           |A--GATTACATATGTAAGTGAGATAATGTGTTATTTGTCTTTCTTTGTTTGACTTATTCACCTTAGCACACACAGTGTCTCT| 51653
AsianBonytongue|-----|-----|
Reedfish       |AATGCTTGCCAAAATTACTCCAGCATTAAAGATCACTACATTGGTTTCCAGTTAGCTGTAGGATTGATTTTTAAGGTAGCAG| 9514
NorthernPike   |-----|-----|
SpottedGar     |-----|-----|
ParamormyropsKingsLeyae|-----|-----|
    
```

```

Majority -----
                |-----|
                |51690  |51700  |51710  |51720  |51730  |51740  |51750  |51760  |
                |-----|-----|
Human           |CTTAAAATGACATTTAATATCCATTTCTAGTTCGTTATTATTTAAGTAATTTGCAAGTACATTCTCATTTTAAAAGATT| 51733
AsianBonytongue|-----|-----|
Reedfish       |TTTTAGTATAACAAGTCACTAAACAACCTTAGGACCAGTAAACCTCTCCGAGATACTAACAGTTTACAAACCTTTTAGATCC| 9594
NorthernPike   |-----|-----|
SpottedGar     |-----|-----|
ParamormyropsKingsLeyae|-----|-----|
    
```

```

Majority -----
                |-----|
                |51770  |51780  |51790  |51800  |51810  |51820  |51830  |51840  |
                |-----|-----|
Human           |AAACGAAAGGAACATGTAAAGAATAAAGCTGGGGCTGGGCTTGGTGGCTTATACTGGTAATCCCAGCACCTTTGGGAGGC| 51813
AsianBonytongue|-----|-----|
Reedfish       |TTAGGCGCTGGGCAGCTGGTTATACTGTGTTATTATTTTATTTTATTTTATGTTATTTTTACTTTCTGCCATTTGACTG| 9674
NorthernPike   |-----|-----|
SpottedGar     |-----|-----|
ParamormyropsKingsLeyae|-----|-----|
    
```

Sunday, May 01, 2022 09:44 PM

| Majority                | 51850                                                                           | 51860 | 51870 | 51880 | 51890 | 51900 | 51910 | 51920 |       |
|-------------------------|---------------------------------------------------------------------------------|-------|-------|-------|-------|-------|-------|-------|-------|
| Human                   | TGAGGCGGGTGGATTACCTGAGGTCAGGAGTTCAAGACCCGCTGACCAACATGGTGAACCCCTGAGTCTACTAAAAATA |       |       |       |       |       |       |       | 51893 |
| AsianBonytongue         | -----                                                                           |       |       |       |       |       |       |       | 0     |
| Reedfish                | TGTTTCTAATTATCTTTTGATTGCAACTTTTTATTGTATTTTATTCTTATTATGTAAAGCACTTTGAATTGCCTAATGG |       |       |       |       |       |       |       | 9754  |
| NorthernPike            | -----                                                                           |       |       |       |       |       |       |       | 0     |
| SpottedGar              | -----                                                                           |       |       |       |       |       |       |       | 0     |
| ParamormyropsKingsLeyae | -----                                                                           |       |       |       |       |       |       |       | 0     |

| Majority                | 51930                                                                            | 51940 | 51950 | 51960 | 51970 | 51980 | 51990 | 52000 |       |
|-------------------------|----------------------------------------------------------------------------------|-------|-------|-------|-------|-------|-------|-------|-------|
| Human                   | CAAAAAAAAAAAAAAATTAGCCAGGCATGGTGCCAGGTGCCTGTAATCCCAGCTACTTGGAGGCTGAGGCAAGAGAGAAT |       |       |       |       |       |       |       | 51973 |
| AsianBonytongue         | -----                                                                            |       |       |       |       |       |       |       | 0     |
| Reedfish                | TATAAAATGTGCTATATAAATAACTTGCTTTGCTTTGTACTGCCTTGCTATGACTATTGTTTTGAGAACCAACCAGTTT  |       |       |       |       |       |       |       | 9834  |
| NorthernPike            | -----                                                                            |       |       |       |       |       |       |       | 0     |
| SpottedGar              | -----                                                                            |       |       |       |       |       |       |       | 0     |
| ParamormyropsKingsLeyae | -----                                                                            |       |       |       |       |       |       |       | 0     |

| Majority                | 52010                                                                             | 52020 | 52030 | 52040 | 52050 | 52060 | 52070 | 52080 |       |
|-------------------------|-----------------------------------------------------------------------------------|-------|-------|-------|-------|-------|-------|-------|-------|
| Human                   | TGCTTGAACCCGGGGGGTGGAGCTTGCGGTGATCCCAGATGCGTCACTGCACTCCAGCCTGGGTGACAGAGCGGAGACTC  |       |       |       |       |       |       |       | 52053 |
| AsianBonytongue         | -----                                                                             |       |       |       |       |       |       |       | 0     |
| Reedfish                | AGCCATTTTTCAAGCTAGCACCAAGTTTATTTTTTAAATATTAATTATCTTTGAGAGCATATACAAGTCTCAAAGATGCCT |       |       |       |       |       |       |       | 9914  |
| NorthernPike            | -----                                                                             |       |       |       |       |       |       |       | 0     |
| SpottedGar              | -----                                                                             |       |       |       |       |       |       |       | 0     |
| ParamormyropsKingsLeyae | -----                                                                             |       |       |       |       |       |       |       | 0     |

| Majority                | 52090                                                                           | 52100 | 52110 | 52120 | 52130 | 52140 | 52150 | 52160 |       |
|-------------------------|---------------------------------------------------------------------------------|-------|-------|-------|-------|-------|-------|-------|-------|
| Human                   | TATCTCAAAAAAAAAAAAAAAAAAAAAAGAGTAAAGCTGAGGCCTACACATGGATGGATGTGGAGGAGGGGCCTTAGG  |       |       |       |       |       |       |       | 52133 |
| AsianBonytongue         | -----                                                                           |       |       |       |       |       |       |       | 0     |
| Reedfish                | TAACATGTTTCCAAGTTTTTAAACTGAGTGATGCACCACTGATACTCTGTGAAAAGCAAACAATGTAGCATGAAACAAA |       |       |       |       |       |       |       | 9994  |
| NorthernPike            | -----                                                                           |       |       |       |       |       |       |       | 0     |
| SpottedGar              | -----                                                                           |       |       |       |       |       |       |       | 0     |
| ParamormyropsKingsLeyae | -----                                                                           |       |       |       |       |       |       |       | 0     |

| Majority                | 52170                                                                             | 52180 | 52190 | 52200 | 52210 | 52220 | 52230 | 52240 |       |
|-------------------------|-----------------------------------------------------------------------------------|-------|-------|-------|-------|-------|-------|-------|-------|
| Human                   | ATGACTAGTGAAGCCCATTTGAGAGGGGATATTTGAATAATGAACTTCAAAGTGGTTAGGGAATAAGCCACTTATTTCCA  |       |       |       |       |       |       |       | 52213 |
| AsianBonytongue         | -----                                                                             |       |       |       |       |       |       |       | 0     |
| Reedfish                | AGTATCAACAACCTGATTTTGAAATGGTTGCAAGAATATAAAATCACCTGAATCACAACATCCCAAGTCTATTGTCAAGTT |       |       |       |       |       |       |       | 10074 |
| NorthernPike            | -----                                                                             |       |       |       |       |       |       |       | 0     |
| SpottedGar              | -----                                                                             |       |       |       |       |       |       |       | 0     |
| ParamormyropsKingsLeyae | -----                                                                             |       |       |       |       |       |       |       | 0     |

| Majority                | 52250                                                                            | 52260 | 52270 | 52280 | 52290 | 52300 | 52310 | 52320 |       |
|-------------------------|----------------------------------------------------------------------------------|-------|-------|-------|-------|-------|-------|-------|-------|
| Human                   | GACAGAAGGAATAATCAATGCAAAGTTCCTTCTGTTGAAAAAATGCTTTTATAATTTTATTTTTTCATCTTCTAAAGCCC |       |       |       |       |       |       |       | 52293 |
| AsianBonytongue         | -----                                                                            |       |       |       |       |       |       |       | 0     |
| Reedfish                | GTATGCAAATAATTTTGCTTGTGTTGATTTATTATTATTAGTTCTATTTTATGCAATGAATAGCATTACTAAGCACACC  |       |       |       |       |       |       |       | 10154 |
| NorthernPike            | -----                                                                            |       |       |       |       |       |       |       | 0     |
| SpottedGar              | -----                                                                            |       |       |       |       |       |       |       | 0     |
| ParamormyropsKingsLeyae | -----                                                                            |       |       |       |       |       |       |       | 0     |

Sunday, May 01, 2022 09:44 PM

| Majority                |  | -----                                                                            |       |       |       |       |       |       |       |       |
|-------------------------|--|----------------------------------------------------------------------------------|-------|-------|-------|-------|-------|-------|-------|-------|
|                         |  | 52330                                                                            | 52340 | 52350 | 52360 | 52370 | 52380 | 52390 | 52400 |       |
| Human                   |  | TTCAGTCTCCTTTGGTCATCTTTTTTTTGTAGTTGGTTATGCCTTAACAACAGTACTTTGAGGATACTAGTTACAGTATT |       |       |       |       |       |       |       | 52373 |
| AsianBonytongue         |  | -----                                                                            |       |       |       |       |       |       |       | 0     |
| Reedfish                |  | ATTGAAATGCCTTTGTGATTACACGTGGGTATTTTAAATGTTTAAAGTTGTAGGAGCTGTAGAATGCCTACTAAAAAAG  |       |       |       |       |       |       |       | 10234 |
| NorthernPike            |  | -----                                                                            |       |       |       |       |       |       |       | 0     |
| SpottedGar              |  | -----                                                                            |       |       |       |       |       |       |       | 0     |
| ParamormyropsKingsLeyae |  | -----                                                                            |       |       |       |       |       |       |       | 0     |

| Majority                |  | -----                                                                           |       |       |       |       |       |       |       |       |
|-------------------------|--|---------------------------------------------------------------------------------|-------|-------|-------|-------|-------|-------|-------|-------|
|                         |  | 52410                                                                           | 52420 | 52430 | 52440 | 52450 | 52460 | 52470 | 52480 |       |
| Human                   |  | TAAAAAATACGTCACATATATGCTGAGTTATTTTTTCAGTGTAGCA-TT-----TATGTTTATCTTGTCTCATTCT    |       |       |       |       |       |       |       | 52444 |
| AsianBonytongue         |  | -----                                                                           |       |       |       |       |       |       |       | 0     |
| Reedfish                |  | ACCCTTTCTTATCGAGGCAACTGTAGTTGCATTACAGTTTAGGCAACACAGCATGCTTAACCTTTTAAATTCATGCTTT |       |       |       |       |       |       |       | 10314 |
| NorthernPike            |  | -----                                                                           |       |       |       |       |       |       |       | 0     |
| SpottedGar              |  | -----                                                                           |       |       |       |       |       |       |       | 0     |
| ParamormyropsKingsLeyae |  | -----                                                                           |       |       |       |       |       |       |       | 0     |

| Majority                |  | -----                                                                            |       |       |       |       |       |       |       |       |
|-------------------------|--|----------------------------------------------------------------------------------|-------|-------|-------|-------|-------|-------|-------|-------|
|                         |  | 52490                                                                            | 52500 | 52510 | 52520 | 52530 | 52540 | 52550 | 52560 |       |
| Human                   |  | CTTCATCCCCCTTTGTGTCTTTTCGTGTTTCAGAATGGACAATTAGATTTTGTAAAGTTGTATGCTTTCCTCTAGGA    |       |       |       |       |       |       |       | 52524 |
| AsianBonytongue         |  | -----                                                                            |       |       |       |       |       |       |       | 0     |
| Reedfish                |  | GGATAAATAACCCTAAATGCAGCATTAAAAATCGCAGGAATTGATCTCCTTGCAAGTAATACATACAAAAAGACCTGTCC |       |       |       |       |       |       |       | 10394 |
| NorthernPike            |  | -----                                                                            |       |       |       |       |       |       |       | 0     |
| SpottedGar              |  | -----                                                                            |       |       |       |       |       |       |       | 0     |
| ParamormyropsKingsLeyae |  | -----                                                                            |       |       |       |       |       |       |       | 0     |

| Majority                |  | -----                                                                          |       |       |       |       |       |       |       |       |
|-------------------------|--|--------------------------------------------------------------------------------|-------|-------|-------|-------|-------|-------|-------|-------|
|                         |  | 52570                                                                          | 52580 | 52590 | 52600 | 52610 | 52620 | 52630 | 52640 |       |
| Human                   |  | TAAAGTAATGAAGAGCGTTTACTAAGCTGTACCCCATTCCCCCAAATACCAAAGAGGCTCTTATTCTGGGTCAACAA  |       |       |       |       |       |       |       | 52604 |
| AsianBonytongue         |  | -----                                                                          |       |       |       |       |       |       |       | 0     |
| Reedfish                |  | TTTCTGTAATCATAGACTAGCTGAAATACCCAGTGTGCCCTGGAGGAAAATGGTGTGTTTTTTTTTTTGTGTTGAGAA |       |       |       |       |       |       |       | 10474 |
| NorthernPike            |  | -----                                                                          |       |       |       |       |       |       |       | 0     |
| SpottedGar              |  | -----                                                                          |       |       |       |       |       |       |       | 0     |
| ParamormyropsKingsLeyae |  | -----                                                                          |       |       |       |       |       |       |       | 0     |

| Majority                |  | -----                                                                              |       |       |       |       |       |       |       |       |
|-------------------------|--|------------------------------------------------------------------------------------|-------|-------|-------|-------|-------|-------|-------|-------|
|                         |  | 52650                                                                              | 52660 | 52670 | 52680 | 52690 | 52700 | 52710 | 52720 |       |
| Human                   |  | AACTCCCTTTAGAAATTTCTGGTACCAGGCTGTGCGTGGTGGCTCACACTTGTAAATCCCAGCACCTTGGGAGGCTGAGGTG |       |       |       |       |       |       |       | 52684 |
| AsianBonytongue         |  | -----                                                                              |       |       |       |       |       |       |       | 0     |
| Reedfish                |  | AAATATACTGTATGTACTCACATATAAGTCGGTCTTGAAATCCAAAAATCGATCATAAAATCAGTCCCCGACTTATAT     |       |       |       |       |       |       |       | 10554 |
| NorthernPike            |  | -----                                                                              |       |       |       |       |       |       |       | 0     |
| SpottedGar              |  | -----                                                                              |       |       |       |       |       |       |       | 0     |
| ParamormyropsKingsLeyae |  | -----                                                                              |       |       |       |       |       |       |       | 0     |

| Majority                |  | -----                                                                            |       |       |       |       |       |       |       |       |
|-------------------------|--|----------------------------------------------------------------------------------|-------|-------|-------|-------|-------|-------|-------|-------|
|                         |  | 52730                                                                            | 52740 | 52750 | 52760 | 52770 | 52780 | 52790 | 52800 |       |
| Human                   |  | GGCGGATCACGAGGTCAGGAGATCGAGACCATGGTGAAACCCCGTCTGTACTAAAAATACGAAAATTAGCTGGGCGTGGT |       |       |       |       |       |       |       | 52764 |
| AsianBonytongue         |  | -----                                                                            |       |       |       |       |       |       |       | 0     |
| Reedfish                |  | GCCTGTTCAAAAATGCTACACTTAAATTTCTACTCCAATCTCGCATCAGTTTCTCAGATGCATTGAATTTTGTGTCAGC  |       |       |       |       |       |       |       | 10634 |
| NorthernPike            |  | -----                                                                            |       |       |       |       |       |       |       | 0     |
| SpottedGar              |  | -----                                                                            |       |       |       |       |       |       |       | 0     |
| ParamormyropsKingsLeyae |  | -----                                                                            |       |       |       |       |       |       |       | 0     |

Sunday, May 01, 2022 09:44 PM

```

Majority -----
                |-----|
                |52810|52820|52830|52840|52850|52860|52870|52880|
-----|-----|-----|-----|-----|-----|-----|-----|
Human      GCGCGGCGCCTGTAGTCCCAGCTACTCGGGAGGCTGAGGCAGGAGAATGGTGCAGACCCAGGAGGCGGAGCTTGCAGTGA 52844
AsianBonytongue ----- 0
Reedfish   AGTGCATTTACCAGTTTCTTTTCGCTGCTTCAGTGACGTTTAATTTAAAACCAGACTTCATATTTTCTTCTGATCGAACGC 10714
NorthernPike ----- 0
SpottedGar ----- 0
ParamormyropsKingsLeyae ----- 0
    
```

```

Majority -----
                |-----|
                |52890|52900|52910|52920|52930|52940|52950|52960|
-----|-----|-----|-----|-----|-----|-----|-----|
Human      GCCGAGATCGCGCCACTGCACTTCAGCCTGGGCGACAGAGCGAGACTCTGTCTCAAAAAAAAAAAAAAAAAAAGAATTCTCT 52924
AsianBonytongue ----- 0
Reedfish   TCCATCGTAGATAAGGGATGCTCTTACAGTAAAGGTGTATGAAGGTGTGAGATACAAAAACACAATCAGTGCAAACGT 10794
NorthernPike ----- 0
SpottedGar ----- 0
ParamormyropsKingsLeyae ----- 0
    
```

```

Majority -----
                |-----|
                |52970|52980|52990|53000|53010|53020|53030|53040|
-----|-----|-----|-----|-----|-----|-----|-----|
Human      GGTACCAGCAGGGCACTTTGGCTCATGCCTGTAATCCCAGCACTTTGAGAAGCTGAGGTAAATTCAGGGCAGCAGTGAAC 53004
AsianBonytongue ----- 0
Reedfish   TGCTTTGGAATAATTTGGGTATTACTGCGTGGTCTGTAGGCACAATAGGGAGAGAGAGAGAGGTTAGGAGAATATACTG 10874
NorthernPike ----- 0
SpottedGar ----- 0
ParamormyropsKingsLeyae ----- 0
    
```

```

Majority -----
                |-----|
                |53050|53060|53070|53080|53090|53100|53110|53120|
-----|-----|-----|-----|-----|-----|-----|-----|
Human      TGGTCACACCACTGCACTCCAGCCTCAGCAACAAAGCAAG--ACACAGTCTCTTAAAAAAAAAAAAAAAAAGGAAGAAATTCT 53081
AsianBonytongue ----- 0
Reedfish   ATACAGCGCAATGCCGACCCACATAGAAAATAAAGGCAGTGTGCTCCGTGGTTACTCTCTCTGGTGAGTGTTAGCATAT 10954
NorthernPike ----- 0
SpottedGar ----- 0
ParamormyropsKingsLeyae ----- 0
    
```

```

Majority -----
                |-----|
                |53130|53140|53150|53160|53170|53180|53190|53200|
-----|-----|-----|-----|-----|-----|-----|-----|
Human      GGTTCCTTTAAGGGAGATTTGTTGTTGTTTCTTCTTTTAAATGGTGAGGGTACAAGTTGGTCACAGGAGGGAGAAGAGAA 53161
AsianBonytongue ----- 0
Reedfish   CATAATTTCTTGACCAATAGCGTGAGTTTCCGCATTGACTTATACGACCACATTATAAAAATACCAGAAATTATACA 11034
NorthernPike ----- 0
SpottedGar ----- 0
ParamormyropsKingsLeyae ----- 0
    
```

```

Majority -----
                |-----|
                |53210|53220|53230|53240|53250|53260|53270|53280|
-----|-----|-----|-----|-----|-----|-----|-----|
Human      ATTTAGTCTTTTGTGAATGAAGTACTTTCTGTTGCTGTTTTTCACCCACTCCCTCCTCTGTGAACCTGCCAATT 53241
AsianBonytongue ----- 0
Reedfish   GTAAAATCAACTCCCGACTTAACCGTGGGAGAACTTATCCGCAAGTATATATGGTAATAAAAAAAAAACACAACCTTTAAAAA 11114
NorthernPike ----- 0
SpottedGar ----- 0
ParamormyropsKingsLeyae ----- 0
    
```

Sunday, May 01, 2022 09:44 PM

```

Majority -----
                    |-----|
                    |53290|53300|53310|53320|53330|53340|53350|53360|
Human      TCTGATTTGGTTCCTGTGGCTGCTACCAGTATAACACCTGTTTGTCTGTGTGTTCACTGTGTCTCCAGTCCATTTGGTTCC 53321
AsianBonytongue ----- 0
Reedfish   AGCACAAAGGAGTGGCTAAGGGACAATGATGAGAAAGTTCTTGAGAATGCACAGTCAGAGCCTGAACCTGTCTCTGTAGA 11194
NorthernPike ----- 0
SpottedGar ----- 0
ParamormyropsKingsLeyae ----- 0
    
```

```

Majority -----
                    |-----|
                    |53370|53380|53390|53400|53410|53420|53430|53440|
Human      ATTCATTTTCTGTGTTCAGGAATTTGATAAAATATTCTCAGCTAATGATAACCTCCCTCCCTCAGTGTGTTGTTTAT 53401
AsianBonytongue ----- 0
Reedfish   GGCCTGAAAAAACCTGACAGAGCTTGAGAGGATCTGCAGAGAAGAAATGGCAGAAAATCTCCAAATCCAGGTTTATGGAG 11274
NorthernPike ----- 0
SpottedGar ----- 0
ParamormyropsKingsLeyae ----- 0
    
```

```

Majority -----
                    |-----|
                    |53450|53460|53470|53480|53490|53500|53510|53520|
Human      TTTATATTCATTCACTTCTAGGCATTTTAATAGAGTTTCATAATAGAAGACATGCAAATGAGTATGCATTAACCATGAAT 53481
AsianBonytongue ----- 0
Reedfish   CTTGCTGCGTCATATCCTAGAACCCCTAGACTGGGGTCGCTACCAAAGGGGCATGAACTA--AATCACTAACTAAAGAT 11352
NorthernPike ----- 0
SpottedGar ----- 0
ParamormyropsKingsLeyae ----- 0
    
```

```

Majority -----
                    |-----|
                    |53530|53540|53550|53560|53570|53580|53590|53600|
Human      TCTTTCACATCCGTTTCATGAAATCACCAGGTCCTATTAGTTCACACTTTTTAATTATCTGCCTGGTTTTCTCCATCTTTC 53561
AsianBonytongue ----- 0
Reedfish   TTGTATAGTTGTGACAAATGTTACATTTGGGTTTTTTAAATTTTATTTTAATACATATCCAGAAATCTAAAATCCTTT 11432
NorthernPike ----- 0
SpottedGar ----- 0
ParamormyropsKingsLeyae ----- 0
    
```

```

Majority -----
                    |-----|
                    |53610|53620|53630|53640|53650|53660|53670|53680|
Human      CTGCTACTTGTATTGCTCAAACACACTCACCTGTTGGCTATATTACTACGACAGTTCTCTTTATAA-ACTACTTTCTTTT 53640
AsianBonytongue ----- 0
Reedfish   TTTCTGTTAGTCATTTTGACGTATTGAGTATTGTTTGTATGAATGGGGGGAAAAAAATAAGATTAGTACAAGGCTGCAAC 11512
NorthernPike ----- 0
SpottedGar ----- 0
ParamormyropsKingsLeyae ----- 0
    
```

```

Majority -----
                    |-----|
                    |53690|53700|53710|53720|53730|53740|53750|53760|
Human      TCTTTTCCCTTCTGGAATTTTTTCTCGCTAGTACAGCCAGTACGTATCTTTCTCAAATGCACATATCTAAGTTACTCCC 53720
AsianBonytongue ----- 0
Reedfish   ATAGCAAATGTGAAAAAGTGAAGGGGCTGAATGTACAGTATGTTACTTTTATACAAATGCAGGTAATAAGTACTGTTT 11592
NorthernPike ----- 0
SpottedGar ----- 0
ParamormyropsKingsLeyae ----- 0
    
```



Sunday, May 01, 2022 09:44 PM

| Majority                | -----                                                                            |       |       |       |       |       |       |       |       |
|-------------------------|----------------------------------------------------------------------------------|-------|-------|-------|-------|-------|-------|-------|-------|
|                         | 53770                                                                            | 53780 | 53790 | 53800 | 53810 | 53820 | 53830 | 53840 |       |
| Human                   | ATGCAGTAGGTCCTGTTCATGCTCAGGCTAAAGGCCCTTTCTGAGCTTACTACTTTTTGTCTTGTCTTATGACTACTCCC |       |       |       |       |       |       |       | 53800 |
| AsianBonytongue         | -----                                                                            |       |       |       |       |       |       |       | 0     |
| Reedfish                | AAGTAAATAAGCAAGTATAAGTGAAAGAGTGAGACAGTAGATAGGAAGACTAGAAGAAAAATCCCCTTTCTCAATCAG   |       |       |       |       |       |       |       | 11672 |
| NorthernPike            | -----                                                                            |       |       |       |       |       |       |       | 0     |
| SpottedGar              | -----                                                                            |       |       |       |       |       |       |       | 0     |
| ParamormyropsKingsLeyae | -----                                                                            |       |       |       |       |       |       |       | 0     |

| Majority                | -----                                                                           |       |       |       |       |       |       |       |       |
|-------------------------|---------------------------------------------------------------------------------|-------|-------|-------|-------|-------|-------|-------|-------|
|                         | 53850                                                                           | 53860 | 53870 | 53880 | 53890 | 53900 | 53910 | 53920 |       |
| Human                   | ACCCTATTTGCTTATGCTTCTGTCCAAAAGTAATGGTGCATCCTGTAACCTGGCATGTTTTCTCTTGATGTCAGTCGTT |       |       |       |       |       |       |       | 53880 |
| AsianBonytongue         | -----                                                                           |       |       |       |       |       |       |       | 0     |
| Reedfish                | TAGTTAAAGTGAAAATAAAAAGGGATGGAGATGGAAGAGTAAATTGAGATTGAAGAAATGGAACTTCCCCTCCTGATG  |       |       |       |       |       |       |       | 11752 |
| NorthernPike            | -----                                                                           |       |       |       |       |       |       |       | 0     |
| SpottedGar              | -----                                                                           |       |       |       |       |       |       |       | 0     |
| ParamormyropsKingsLeyae | -----                                                                           |       |       |       |       |       |       |       | 0     |

| Majority                | -----                                                                            |       |       |       |       |       |       |       |       |
|-------------------------|----------------------------------------------------------------------------------|-------|-------|-------|-------|-------|-------|-------|-------|
|                         | 53930                                                                            | 53940 | 53950 | 53960 | 53970 | 53980 | 53990 | 54000 |       |
| Human                   | TGCTGCCATTATGTCACTGCTCTCATGCATGGAATATTGTGGGTTGGCCTGCCTTTTGCACCACCCTTCCTCCACCTCAC |       |       |       |       |       |       |       | 53960 |
| AsianBonytongue         | -----                                                                            |       |       |       |       |       |       |       | 0     |
| Reedfish                | CAGCCCACGATAGCAGTGTCTTAGCGAACTTTTGCACGTGACAGGACTCTGAGTTGTATTGGAAGTCCAATGTATATAG  |       |       |       |       |       |       |       | 11832 |
| NorthernPike            | -----                                                                            |       |       |       |       |       |       |       | 0     |
| SpottedGar              | -----                                                                            |       |       |       |       |       |       |       | 0     |
| ParamormyropsKingsLeyae | -----                                                                            |       |       |       |       |       |       |       | 0     |

| Majority                | -----                                                                           |       |       |       |       |       |       |       |       |
|-------------------------|---------------------------------------------------------------------------------|-------|-------|-------|-------|-------|-------|-------|-------|
|                         | 54010                                                                           | 54020 | 54030 | 54040 | 54050 | 54060 | 54070 | 54080 |       |
| Human                   | ACTTCACATGGCCAGTGTAAATATCTTGAGGTCCTTTAGCTATTTCTTCTCCTAAAAGCTATCCCCTGATAAGCAA    |       |       |       |       |       |       |       | 54040 |
| AsianBonytongue         | -----                                                                           |       |       |       |       |       |       |       | 0     |
| Reedfish                | GCTGAACAGGACCGGAGAAAGTACAGTCCCCTGCGGCACCTCTGTGTTGCTGACCACAGTGTACACCTGCAGTTCCCGA |       |       |       |       |       |       |       | 11912 |
| NorthernPike            | -----                                                                           |       |       |       |       |       |       |       | 0     |
| SpottedGar              | -----                                                                           |       |       |       |       |       |       |       | 0     |
| ParamormyropsKingsLeyae | -----                                                                           |       |       |       |       |       |       |       | 0     |

| Majority                | -----                                                                            |       |       |       |       |       |       |       |       |
|-------------------------|----------------------------------------------------------------------------------|-------|-------|-------|-------|-------|-------|-------|-------|
|                         | 54090                                                                            | 54100 | 54110 | 54120 | 54130 | 54140 | 54150 | 54160 |       |
| Human                   | AGAGTAGATTAGGTTTGATTGAGAGTGTAACTCCGAATGAGATACTGCTATGCACATAACCAGAGTGGCTAAAAATTAA  |       |       |       |       |       |       |       | 54120 |
| AsianBonytongue         | -----                                                                            |       |       |       |       |       |       |       | 0     |
| Reedfish                | GATGCACATACTGAGGACTGTCTTTAAGATAGTCTACGATCAATGCTACCAGGTATGAATCTACTCCCATCTCTGTCAGC |       |       |       |       |       |       |       | 11992 |
| NorthernPike            | -----                                                                            |       |       |       |       |       |       |       | 0     |
| SpottedGar              | -----                                                                            |       |       |       |       |       |       |       | 0     |
| ParamormyropsKingsLeyae | -----                                                                            |       |       |       |       |       |       |       | 0     |

| Majority                | -----                                                                             |       |       |       |       |       |       |       |       |
|-------------------------|-----------------------------------------------------------------------------------|-------|-------|-------|-------|-------|-------|-------|-------|
|                         | 54170                                                                             | 54180 | 54190 | 54200 | 54210 | 54220 | 54230 | 54240 |       |
| Human                   | AAGGATAGGTAATAAAATACTGGTGACAACCATTTTTGAAAACCTCGAAATATCTACTAAAGTTGAGCATATAGCTATTCT |       |       |       |       |       |       |       | 54200 |
| AsianBonytongue         | -----                                                                             |       |       |       |       |       |       |       | 0     |
| Reedfish                | TTGACCCTAAGGAACAGAGGTTGGATGTTGTTGAAGGTGCTAGAGAAGTCCAGAAACATAATCTTACAGCACCCTGCC    |       |       |       |       |       |       |       | 12072 |
| NorthernPike            | -----                                                                             |       |       |       |       |       |       |       | 0     |
| SpottedGar              | -----                                                                             |       |       |       |       |       |       |       | 0     |
| ParamormyropsKingsLeyae | -----                                                                             |       |       |       |       |       |       |       | 0     |

Sunday, May 01, 2022 09:44 PM

| Majority                |  | -----                                                                            |       |       |       |       |       |       |       |       |
|-------------------------|--|----------------------------------------------------------------------------------|-------|-------|-------|-------|-------|-------|-------|-------|
|                         |  | 54250                                                                            | 54260 | 54270 | 54280 | 54290 | 54300 | 54310 | 54320 |       |
| Human                   |  | TTGATGTAGTAAACTCGCTCCTAGTTAACATACCTGAGAACATGTACATAGGTATGTTAAAAGATATGTACAAGAAAGTT |       |       |       |       |       |       |       | 54280 |
| AsianBonytongue         |  | -----                                                                            |       |       |       |       |       |       |       | 0     |
| Reedfish                |  | TCTGTCCAAGTGGGAGAGGGATCGGTGTAGCATGTAGATGATGGCATCCTCGGCTCCACCTTCTCTGGTATGCGAACT   |       |       |       |       |       |       |       | 12152 |
| NorthernPike            |  | -----                                                                            |       |       |       |       |       |       |       | 0     |
| SpottedGar              |  | -----                                                                            |       |       |       |       |       |       |       | 0     |
| ParamormyropsKingsLeyae |  | -----                                                                            |       |       |       |       |       |       |       | 0     |

| Majority                |  | -----                                                                            |       |       |       |       |       |       |       |       |
|-------------------------|--|----------------------------------------------------------------------------------|-------|-------|-------|-------|-------|-------|-------|-------|
|                         |  | 54330                                                                            | 54340 | 54350 | 54360 | 54370 | 54380 | 54390 | 54400 |       |
| Human                   |  | CATGGAACACTGTATGTAATAGCCAAAAAACTATAAATCATCCAAATGTTCAACAGCAGCAGAATATGTTGTGTTGTAT  |       |       |       |       |       |       |       | 54360 |
| AsianBonytongue         |  | -----                                                                            |       |       |       |       |       |       |       | 0     |
| Reedfish                |  | GCAGAGAGTCGAGAGCGTGGTGGACCTGTGGCCTCAGGTGGTGAAGCAGCAGCCGCTCCATGGTCTTCATCACATGTGAC |       |       |       |       |       |       |       | 12232 |
| NorthernPike            |  | -----                                                                            |       |       |       |       |       |       |       | 0     |
| SpottedGar              |  | -----                                                                            |       |       |       |       |       |       |       | 0     |
| ParamormyropsKingsLeyae |  | -----                                                                            |       |       |       |       |       |       |       | 0     |

| Majority                |  | -----                                                                             |       |       |       |       |       |       |       |       |
|-------------------------|--|-----------------------------------------------------------------------------------|-------|-------|-------|-------|-------|-------|-------|-------|
|                         |  | 54410                                                                             | 54420 | 54430 | 54440 | 54450 | 54460 | 54470 | 54480 |       |
| Human                   |  | TCATTTAGTGAATATTTGTATAGTAATAAAAAATGAACAAGCTACTGCTGCCTGCAAAACATGGGTAGTGTACATCATAAT |       |       |       |       |       |       |       | 54440 |
| AsianBonytongue         |  | -----                                                                             |       |       |       |       |       |       |       | 0     |
| Reedfish                |  | GTCAGAGCGACAGGCCAGAAGTCATTCAGCGCACCTGGACGTGATACCTTTGGGACTGGGGTATGAAAGATGTTTTCCA   |       |       |       |       |       |       |       | 12312 |
| NorthernPike            |  | -----                                                                             |       |       |       |       |       |       |       | 0     |
| SpottedGar              |  | -----                                                                             |       |       |       |       |       |       |       | 0     |
| ParamormyropsKingsLeyae |  | -----                                                                             |       |       |       |       |       |       |       | 0     |

| Majority                |  | -----                                                                            |       |       |       |       |       |       |       |       |
|-------------------------|--|----------------------------------------------------------------------------------|-------|-------|-------|-------|-------|-------|-------|-------|
|                         |  | 54490                                                                            | 54500 | 54510 | 54520 | 54530 | 54540 | 54550 | 54560 |       |
| Human                   |  | TATTGGAAGAAGCCAAACCAAAGTAGAATACATCTGATATGATTCCATTTATGTAACCTGGAGGAAGCGTGAGTATGGCT |       |       |       |       |       |       |       | 54520 |
| AsianBonytongue         |  | -----                                                                            |       |       |       |       |       |       |       | 0     |
| Reedfish                |  | AAGCCTTGGGACTCTCCCTGTTCAGGCTCAGGTTGAAGATGTGCTGTAGAGGACTCCCCAGCTCCAACGCACAGGCT    |       |       |       |       |       |       |       | 12392 |
| NorthernPike            |  | -----                                                                            |       |       |       |       |       |       |       | 0     |
| SpottedGar              |  | -----                                                                            |       |       |       |       |       |       |       | 0     |
| ParamormyropsKingsLeyae |  | -----                                                                            |       |       |       |       |       |       |       | 0     |

| Majority                |  | -----                                                                            |       |       |       |       |       |       |       |       |
|-------------------------|--|----------------------------------------------------------------------------------|-------|-------|-------|-------|-------|-------|-------|-------|
|                         |  | 54570                                                                            | 54580 | 54590 | 54600 | 54610 | 54620 | 54630 | 54640 |       |
| Human                   |  | TCTAGAGTGTGATAATATACTGTTTTTATCTGGGTAATATTTTCACAGAGATGTCCAATTTGTGGTATTTTATGGAGC   |       |       |       |       |       |       |       | 54600 |
| AsianBonytongue         |  | -----                                                                            |       |       |       |       |       |       |       | 0     |
| Reedfish                |  | TCAGCAGTCGTGGCGATACTCCATCTGGACCCGCTGCTTTGCTGGTACAAAGTCTCCTCAGCTCTCTGCTTACCTGGGCC |       |       |       |       |       |       |       | 12472 |
| NorthernPike            |  | -----                                                                            |       |       |       |       |       |       |       | 0     |
| SpottedGar              |  | -----                                                                            |       |       |       |       |       |       |       | 0     |
| ParamormyropsKingsLeyae |  | -----                                                                            |       |       |       |       |       |       |       | 0     |

| Majority                |  | -----                                                                           |       |       |       |       |       |       |       |       |
|-------------------------|--|---------------------------------------------------------------------------------|-------|-------|-------|-------|-------|-------|-------|-------|
|                         |  | 54650                                                                           | 54660 | 54670 | 54680 | 54690 | 54700 | 54710 | 54720 |       |
| Human                   |  | TTTATACTTAGGTTTTGTGTCCTTTTGTGTGTGTGTAATATTTTGATAAGAAGTTTTATTAAAATCTAGGTTTGCAAG  |       |       |       |       |       |       |       | 54680 |
| AsianBonytongue         |  | -----                                                                           |       |       |       |       |       |       |       | 0     |
| Reedfish                |  | GCTGTAATTCGGGTTGGGGTAAACTCTCACCTATGCTGGTATCAGCAGAAGGATGGGTGA-AGAGTGCAGTACTCCGAA |       |       |       |       |       |       |       | 12551 |
| NorthernPike            |  | -----                                                                           |       |       |       |       |       |       |       | 0     |
| SpottedGar              |  | -----                                                                           |       |       |       |       |       |       |       | 0     |
| ParamormyropsKingsLeyae |  | -----                                                                           |       |       |       |       |       |       |       | 0     |

Sunday, May 01, 2022 09:44 PM

| Majority                | -----                                                                            |       |       |       |       |       |       |       |       |
|-------------------------|----------------------------------------------------------------------------------|-------|-------|-------|-------|-------|-------|-------|-------|
|                         | 54730                                                                            | 54740 | 54750 | 54760 | 54770 | 54780 | 54790 | 54800 |       |
| Human                   | CCAACACTGCTCCATGAATTATAAGAAAAATATATGAAGTCATTAATAAATGAAATCATAAAGAAATGTATGAAGTAATT |       |       |       |       |       |       |       | 54760 |
| AsianBonytongue         | -----                                                                            |       |       |       |       |       |       |       | 0     |
| Reedfish                | GTGAGAGTGGGTAAGAGTGGTCAAACCGGTTTAAAAAAAAAAAAAAAAAAGAGGTTTCATCTGGTTTGCTCTCTCCACAT |       |       |       |       |       |       |       | 12631 |
| NorthernPike            | -----                                                                            |       |       |       |       |       |       |       | 0     |
| SpottedGar              | -----                                                                            |       |       |       |       |       |       |       | 0     |
| ParamormyropsKingsLeyae | -----                                                                            |       |       |       |       |       |       |       | 0     |

| Majority                | -----                                                                             |       |       |       |       |       |       |       |       |
|-------------------------|-----------------------------------------------------------------------------------|-------|-------|-------|-------|-------|-------|-------|-------|
|                         | 54810                                                                             | 54820 | 54830 | 54840 | 54850 | 54860 | 54870 | 54880 |       |
| Human                   | TGTTACTGATGTGAGAGAACATGATTGTTAAGCCATAAAAGGAAGATAGAGAACAAATGAATAGTATTAATAAAAAGTATG |       |       |       |       |       |       |       | 54840 |
| AsianBonytongue         | -----                                                                             |       |       |       |       |       |       |       | 0     |
| Reedfish                | CTCTCTTGATGGTGGCGCCCTGCTTCGAACTGCAGCCAGTGATGATCTTCATCCCATCCCACACTTCCTTCATGCTGTTA  |       |       |       |       |       |       |       | 12711 |
| NorthernPike            | -----                                                                             |       |       |       |       |       |       |       | 0     |
| SpottedGar              | -----                                                                             |       |       |       |       |       |       |       | 0     |
| ParamormyropsKingsLeyae | -----                                                                             |       |       |       |       |       |       |       | 0     |

| Majority                | -----                                                                            |       |       |       |       |       |       |       |       |
|-------------------------|----------------------------------------------------------------------------------|-------|-------|-------|-------|-------|-------|-------|-------|
|                         | 54890                                                                            | 54900 | 54910 | 54920 | 54930 | 54940 | 54950 | 54960 |       |
| Human                   | AATAGTATTGAATAAAAAATATGAATAGTATTGAAAAAATACAGACTAAGTATAATATTTATATATATATGCTTGTAGAT |       |       |       |       |       |       |       | 54920 |
| AsianBonytongue         | -----                                                                            |       |       |       |       |       |       |       | 0     |
| Reedfish                | TTCTGCAACTTCTGCTCCTTCGCCACCCTGAGCTGGACTCGGAGTTCCTTCTGCACGCGCTTGAGCTCATGCTGATCACC |       |       |       |       |       |       |       | 12791 |
| NorthernPike            | -----                                                                            |       |       |       |       |       |       |       | 0     |
| SpottedGar              | -----                                                                            |       |       |       |       |       |       |       | 0     |
| ParamormyropsKingsLeyae | -----                                                                            |       |       |       |       |       |       |       | 0     |

| Majority                | -----                                                                            |       |       |       |       |       |       |       |       |
|-------------------------|----------------------------------------------------------------------------------|-------|-------|-------|-------|-------|-------|-------|-------|
|                         | 54970                                                                            | 54980 | 54990 | 55000 | 55010 | 55020 | 55030 | 55040 |       |
| Human                   | GTAGCTAGTATCTCTGGAAGGATATCGAAGATAATACTGTGAGGGGTTGGTAGGGGAAAATAGACTGGGTGACAGAGTTG |       |       |       |       |       |       |       | 55000 |
| AsianBonytongue         | -----                                                                            |       |       |       |       |       |       |       | 0     |
| Reedfish                | GCCTTTAAAAGCCCTTTTTTCTGGTTCAATAGGCCCTTGATATGTCTTGTAATCCATGGCTTGTGT-TAGCATAGCAG   |       |       |       |       |       |       |       | 12870 |
| NorthernPike            | -----                                                                            |       |       |       |       |       |       |       | 0     |
| SpottedGar              | -----                                                                            |       |       |       |       |       |       |       | 0     |
| ParamormyropsKingsLeyae | -----                                                                            |       |       |       |       |       |       |       | 0     |

| Majority                | -----                                                                             |       |       |       |       |       |       |       |       |
|-------------------------|-----------------------------------------------------------------------------------|-------|-------|-------|-------|-------|-------|-------|-------|
|                         | 55050                                                                             | 55060 | 55070 | 55080 | 55090 | 55100 | 55110 | 55120 |       |
| Human                   | CAGGGGAATTTTAAATCTTTAATACCACCTTTTATACCATGATCATGGATTCCATTTTTAGAAAACATTTTATTATTTGAA |       |       |       |       |       |       |       | 55080 |
| AsianBonytongue         | -----                                                                             |       |       |       |       |       |       |       | 0     |
| Reedfish                | TGTATTGTTCTTACTGGAACACTACAATGTCCATACAGAAGTTGATCTAGTCAGTAGTCAGTCAACAACCTCCTCAATGTT |       |       |       |       |       |       |       | 12950 |
| NorthernPike            | -----                                                                             |       |       |       |       |       |       |       | 0     |
| SpottedGar              | -----                                                                             |       |       |       |       |       |       |       | 0     |
| ParamormyropsKingsLeyae | -----                                                                             |       |       |       |       |       |       |       | 0     |

| Majority                | -----                                                                             |       |       |       |       |       |       |       |       |
|-------------------------|-----------------------------------------------------------------------------------|-------|-------|-------|-------|-------|-------|-------|-------|
|                         | 55130                                                                             | 55140 | 55150 | 55160 | 55170 | 55180 | 55190 | 55200 |       |
| Human                   | GCAGATGTTAGTGTTTTTCTAAGTTGTGGTAGTCTATGCTTGTTATTATAGATAAATACAGTAAGAACATGTTCACTAAT  |       |       |       |       |       |       |       | 55160 |
| AsianBonytongue         | -----                                                                             |       |       |       |       |       |       |       | 0     |
| Reedfish                | CTCACTATGTGATCCCTGCAGGATATCCCAGGCCGTAGCTCCAAAGCAGTCTCCTGCTCTGCCTCAGGGGACCACCTCTCT |       |       |       |       |       |       |       | 13030 |
| NorthernPike            | -----                                                                             |       |       |       |       |       |       |       | 0     |
| SpottedGar              | -----                                                                             |       |       |       |       |       |       |       | 0     |
| ParamormyropsKingsLeyae | -----                                                                             |       |       |       |       |       |       |       | 0     |

Sunday, May 01, 2022 09:44 PM

```

Majority -----
                    |-----|
                    |55210|55220|55230|55240|55250|55260|55270|55280|
                    |-----|
Human                |GAAGAAGATAATATTGCAATGAGCTACTTAAAATATTTAAATACATTTAAACATTTGAATAGATACTGCTCTATAAAACT| 55240
AsianBonytongue     |-----| 0
Reedfish            |GAATGAGCATGTTTTTGTAGGTAGCTCCCTCACTCTTGGTTTGTAGTGC GGCTGAAGCACAACCAGGTTATGATCTGCTT| 13110
NorthernPike        |-----| 0
SpottedGar          |-----| 0
ParamormyropsKingsLeyae|-----| 0

```

```

Majority -----
                    |-----|
                    |55290|55300|55310|55320|55330|55340|55350|55360|
                    |-----|
Human                |AATTTTACCAATTTACAATTATTTTTTCAATAATAGTATCAAGATGTCTACTAAAATAATCTATCACATTTCAAATGTT| 55320
AsianBonytongue     |-----| 0
Reedfish            |TCCAAGCGCAGGCAGCGGGTGGAGCTGTATGCGTCTTTAACGTTTGCATACAGTAGGTCGATAGTCTATTTCCCGG| 13190
NorthernPike        |-----| 0
SpottedGar          |-----| 0
ParamormyropsKingsLeyae|-----| 0

```

```

Majority -----
                    |-----|
                    |55370|55380|55390|55400|55410|55420|55430|55440|
                    |-----|
Human                |GAGTTTTAATTAGTAAGTCATTTTGACTAATACATAAAATTTATAGATAAAATTAAGTAGCATTTAAATGATTGTTTAGAT| 55400
AsianBonytongue     |-----| 0
Reedfish            |GTGTTACAATCCACATACTGGGAGAAGGCAGGCAATGTTTTGTCCAGCGTCACATGGTAAAAGTCTCCAGCGATTAGCAC| 13270
NorthernPike        |-----| 0
SpottedGar          |-----| 0
ParamormyropsKingsLeyae|-----| 0

```

```

Majority -----
                    |-----|
                    |55450|55460|55470|55480|55490|55500|55510|55520|
                    |-----|
Human                |ATATATCTGGACTCTCAAGCCGTGTGATCTGTGGTTATATAATATTTTAGTAAAATGACTTTTCTTGTATTCTCCTGA| 55480
AsianBonytongue     |-----| 0
Reedfish            |AAGCGCTCGGGTGTGTGTTTGAATTTAGTAGCTGCGGAATGGATGACATCACCCGCTATCTCCACGTTGCGCTGAG| 13350
NorthernPike        |-----| 0
SpottedGar          |-----| 0
ParamormyropsKingsLeyae|-----| 0

```

```

Majority -----
                    |-----|
                    |55530|55540|55550|55560|55570|55580|55590|55600|
                    |-----|
Human                |GTGTCCTAATCTTTTGTATTCTCTTTTCATTAACCTGTTGATATAGATTTTTCAAACCTGTAACCTATGTATAGGTATTT| 55560
AsianBonytongue     |-----| 0
Reedfish            |GAGGGATGTAAACAGTAGCAACAATGACGTGTCCAACTCTCTGGGCAAGTAATAGGGATGCAGACTTACGGCCAACAGT| 13430
NorthernPike        |-----| 0
SpottedGar          |-----| 0
ParamormyropsKingsLeyae|-----| 0

```

```

Majority -----
                    |-----|
                    |55610|55620|55630|55640|55650|55660|55670|55680|
                    |-----|
Human                |GTGGTATTTGTCATTGTTATATTTTAGAACTATTTGCCTTTGTATGTTTTTTGACCACAGATAAGGTAGAAAGAAATAT| 55640
AsianBonytongue     |-----| 0
Reedfish            |GCGATGTCCCTGCAGCAAGTGGAGATTTTAAACGTTAACATGTCCAGAGTTGCAACACCTTGTATTGCATAGAGTGAAG| 13510
NorthernPike        |-----| 0
SpottedGar          |-----| 0
ParamormyropsKingsLeyae|-----| 0

```

Sunday, May 01, 2022 09:44 PM

Majority -----  
 |-----|-----|-----|-----|-----|-----|-----|-----|  
 | 55690 | 55700 | 55710 | 55720 | 55730 | 55740 | 55750 | 55760 |  
 |-----|-----|-----|-----|-----|-----|-----|-----|  
 Human TTCCTTATCATAGACTGTCATCATAATAACAGGAAAGGGATAATAGTAATAAAGGCAGTCTTTTGGAGCATTTAACATAA 55720  
 AsianBonytongue ----- 0  
 Reedfish TCCTCCTCCTTTGTGCTTCCCAGGACTTGTGTCTCTGTCCGCTCTAACTCTGCTAAACCCGGGTAGCTCCACATTAG 13590  
 NorthernPike ----- 0  
 SpottedGar ----- 0  
 ParamormyropsKingsLeyae ----- 0

Majority -----  
 |-----|-----|-----|-----|-----|-----|-----|-----|  
 | 55770 | 55780 | 55790 | 55800 | 55810 | 55820 | 55830 | 55840 |  
 |-----|-----|-----|-----|-----|-----|-----|-----|  
 Human TATTTGATTGACAGATTTCCTACAAATACTGTGTTTATTCAATTTTATGGGTATATTTTTTCGCATTTTAAAATCTCAGA 55800  
 AsianBonytongue ----- 0  
 Reedfish CATCTAGAATGATAGTTGATTGCCATGTTTCACTAAAACACAACAACTGCATTCTCTGTAGGTCCTGACATTTTTCACA 13670  
 NorthernPike ----- 0  
 SpottedGar ----- 0  
 ParamormyropsKingsLeyae ----- 0

Majority -----  
 |-----|-----|-----|-----|-----|-----|-----|-----|  
 | 55850 | 55860 | 55870 | 55880 | 55890 | 55900 | 55910 | 55920 |  
 |-----|-----|-----|-----|-----|-----|-----|-----|  
 Human AATTTGATGTGTCCTGCAATAGTCTATCTTCCATAGTTCAA--TTGGCAACATCTTATTAGTCATACATAAAAACAATAGT 55878  
 AsianBonytongue ----- 0  
 Reedfish AGTGCAGCCAGTTTCGTCATTTTATTTGGTAGTGAGTTCACATTTCCAGGATCACAGAAGGCACCGAAGGTTTGTAGCG 13750  
 NorthernPike ----- 0  
 SpottedGar ----- 0  
 ParamormyropsKingsLeyae ----- 0

Majority -----  
 |-----|-----|-----|-----|-----|-----|-----|-----|  
 | 55930 | 55940 | 55950 | 55960 | 55970 | 55980 | 55990 | 56000 |  
 |-----|-----|-----|-----|-----|-----|-----|-----|  
 Human GCATTTTATAATTAATGGTGTATTTGATACCATAAAATGTATGGGAAATATTTCTTCATATTATATCTTGAAGTTTACCTG 55958  
 AsianBonytongue ----- 0  
 Reedfish CCACTTTCTCGCTAAACACTTGGCTTTTATCTTAGCACCGGCTCTGCTGTGCGGATACCACCTTCTTACCTCGTCAAGTA 13830  
 NorthernPike ----- 0  
 SpottedGar ----- 0  
 ParamormyropsKingsLeyae ----- 0

Majority -----  
 |-----|-----|-----|-----|-----|-----|-----|-----|  
 | 56010 | 56020 | 56030 | 56040 | 56050 | 56060 | 56070 | 56080 |  
 |-----|-----|-----|-----|-----|-----|-----|-----|  
 Human AGAATTTTGTGGTTTTGGACTAGACTACACGTTGGTTTCTATTCTAAAAATTTTGGTGTGAGAAGTTAAGTGTAGTATGA 56038  
 AsianBonytongue ----- 0  
 Reedfish AATAGGGAACCACTCCGGCGCGGGCATTGTTTCTCAGTGCTTGAAGTTGACTACTTGAATAGACGAGTCTCAGTGTGTAA 13910  
 NorthernPike ----- 0  
 SpottedGar ----- 0  
 ParamormyropsKingsLeyae ----- 0

Majority -----  
 |-----|-----|-----|-----|-----|-----|-----|-----|  
 | 56090 | 56100 | 56110 | 56120 | 56130 | 56140 | 56150 | 56160 |  
 |-----|-----|-----|-----|-----|-----|-----|-----|  
 Human AAAATGTATTTTCTGAATGTTCCATATTTTAAAGATTGTATTAGAAATAATAAGCTTTATGGGAGTTCTTTTGGATAATTCA 56118  
 AsianBonytongue ----- 0  
 Reedfish AAATCCATGTCCATAGTAAAAAGTGTCAGGGAACGAGGTAATAAAAAATGTAGAAAAATAGTCATACCCGGAGCTCCTGGA 13990  
 NorthernPike ----- 0  
 SpottedGar ----- 0  
 ParamormyropsKingsLeyae ----- 0

Sunday, May 01, 2022 09:44 PM

```

Majority -----
                |-----|
                |56170|56180|56190|56200|56210|56220|56230|56240|
-----|-----|-----|-----|-----|-----|-----|-----|
Human      GTAACCCCTTGTGAGATTTACAACGTACCTGTTTTATGGAGTGATTAATGTTAAAGTTGTATTCTCTAAATTTCTGTT 56198
AsianBonytongue ----- 0
Reedfish   ATAGCTGCCACACGCGGCGGCCATTAATTCATTTATGATCAAATCATAAAAATTCATAAAATTTAAAAAAGGATCATT 14070
NorthernPike ----- 0
SpottedGar ----- 0
ParamormyropsKingsLeyae ----- 0
    
```

```

Majority -----
                |-----|
                |56250|56260|56270|56280|56290|56300|56310|56320|
-----|-----|-----|-----|-----|-----|-----|-----|
Human      TAAACATTTTCTGATGGTACATGTATTTATAAACTACATCTTG----TTCTTTTGAGAATAAATTACATATCATACT 56274
AsianBonytongue ----- 0
Reedfish   GCACAGAATTTTACCAGCAACCAGCTGCTTTATATTTCAGGGTACAACACCTGCTGCTTTAGGAAGTCAAACCTTAGTTGAT 14150
NorthernPike ----- 0
SpottedGar ----- 0
ParamormyropsKingsLeyae ----- 0
    
```

```

Majority -----
                |-----|
                |56330|56340|56350|56360|56370|56380|56390|56400|
-----|-----|-----|-----|-----|-----|-----|-----|
Human      TTGCATGTTCAACATTGATCCCAAAGCCTGGATAATTTTTTTGAATGAAATACTAGTAGAATATTTGATTTATTAACAG 56354
AsianBonytongue ----- 0
Reedfish   TTTCTCACTTCTCCTTCTACCAAACAGTATAGGACCATTGGCACTCAACAGTATATTGAGAGATAGTTTCTACTCTTAA 14230
NorthernPike ----- 0
SpottedGar ----- 0
ParamormyropsKingsLeyae ----- 0
    
```

```

Majority -----
                |-----|
                |56410|56420|56430|56440|56450|56460|56470|56480|
-----|-----|-----|-----|-----|-----|-----|-----|
Human      GTAGTACCTGGCTCATGGCAGGTGCTTAAAAATATCTGTTGAGGGGCCATTTAATTTTGTAACTGTGTAAGTTCTAG 56434
AsianBonytongue ----- 0
Reedfish   GTTGTAAAGTTGCTTAAACAGTCATTCATTAATAATTTCTGATATTGGAAGTAATATATGTTGCATGCTGTGTATACTTTAT 14310
NorthernPike ----- 0
SpottedGar ----- 0
ParamormyropsKingsLeyae ----- 0
    
```

```

Majority -----
                |-----|
                |56490|56500|56510|56520|56530|56540|56550|56560|
-----|-----|-----|-----|-----|-----|-----|-----|
Human      GAACAAAGTGAAGTAGTAGTGTAAACAGTTGCAAAGTATGTGACAATAATGGGTATGTTTCTAAACTACATAATCTTAAT 56514
AsianBonytongue ----- 0
Reedfish   TTTTGTGCTGTATTTTAGTTTAGTGTCTCAAGAGGCATGCAAGTAAGAATTCATTATATTAGTTACCAATGACAATA 14390
NorthernPike ----- 0
SpottedGar ----- 0
ParamormyropsKingsLeyae ----- 0
    
```

```

Majority -----
                |-----|
                |56570|56580|56590|56600|56610|56620|56630|56640|
-----|-----|-----|-----|-----|-----|-----|-----|
Human      TTCCAGCGTGCTCAGGCAGTTCTTCAAGCTGTGACAGCTGTCCAGACAGCAAATACTCCTCTTAGTGGCACCACAGTTAG 56594
AsianBonytongue ----- 0
Reedfish   GCCAATACTCTTGACTTGAGAGAGGCTGGAATAGTGTGTTGTTGTATGCAACATCTTCCAACAGGTGCAAGAGTTTTTCT 14470
NorthernPike ----- 0
SpottedGar ----- 0
ParamormyropsKingsLeyae ----- 0
    
```

Sunday, May 01, 2022 09:44 PM

```

Majority -----
                |-----|
                |56650|56660|56670|56680|56690|56700|56710|56720|
                |-----|
Human           CGAGAGTGCAGTGACTCCAGCCCAGAGTCCAGTACTTAGAATAATTTATTGACAACATGTACTACCCTGTAACACTTGATG 56674
AsianBonytongue ----- 0
Reedfish       ACATAGTACCATTTTATGACATGGGAGTTGACAGAATACCTTAAAGAAAAAAAAAAGGTGGAGAAGGAAAAGTAGATTCTG 14550
NorthernPike   ----- 0
SpottedGar     ----- 0
ParamormyropsKingsLeyae ----- 0
    
```

```

Majority -----
                |-----|
                |56730|56740|56750|56760|56770|56780|56790|56800|
                |-----|
Human           TTCTTCACCAAGTAAGTTTAACTCTGCATAATTACCTATAAATTAGAGAAATAATAATATAGTAAATAAGTAATGTTTTGA 56754
AsianBonytongue ----- 0
Reedfish       TAAAGAGCAATTGATGTGTTTTGTGGGAAGGAGGACATAGCCAAATAAGATGGAGAATGGAAAACCAATAGTATAATGTCT 14630
NorthernPike   ----- 0
SpottedGar     ----- 0
ParamormyropsKingsLeyae ----- 0
    
```

```

Majority -----
                |-----|
                |56810|56820|56830|56840|56850|56860|56870|56880|
                |-----|
Human           TTTTAAATGTTTTAACAGATATTTTCTAAGTTTGGTGCTGTATTGAAGATAATCACATTTACAAAAATAACCAGTTTCAA 56834
AsianBonytongue ----- 0
Reedfish       AGGTCAGGAAGAGACACCCAGCACTCAAGTCTGTCACAACTAGGGTTGAATGATTAAGATTAGGTCTCTTACATTCCA 14710
NorthernPike   ----- 0
SpottedGar     ----- 0
ParamormyropsKingsLeyae ----- 0
    
```

```

Majority -----
                |-----|
                |56890|56900|56910|56920|56930|56940|56950|56960|
                |-----|
Human           GCTTTGCTCCAGTATGGTGATCCAGTAAATGCTCAACAAGCAAACCTAGTAAGTCTTTCTTTTGAGATGGTGATTTTTTT 56914
AsianBonytongue ----- 0
Reedfish       AGGAAACTTAAACTGATGACTTCAGCCCAAGAAAGGAGAAAACAGGACCATAGATTGCATGGTGTATACTGCTCATTTT 14790
NorthernPike   ----- 0
SpottedGar     ----- 0
ParamormyropsKingsLeyae ----- 0
    
```

```

Majority -----
                |-----|
                |56970|56980|56990|57000|57010|57020|57030|57040|
                |-----|
Human           TTATTGAAATGTATATGTAGAAAAATATATATATATGTATGTATACTTAATGATATCTTGTAGCATTACAGATAGTAGAA 56994
AsianBonytongue ----- 0
Reedfish       AACAGTGGCAAGATGAGATTGAATAAAGAGAGAAAGCTTAGACCAGGGGTCTTCAACATGTCAGATTGAATAAAGAGAGA 14870
NorthernPike   ----- 0
SpottedGar     ----- 0
ParamormyropsKingsLeyae ----- 0
    
```

```

Majority -----
                |-----|
                |57050|57060|57070|57080|57090|57100|57110|57120|
                |-----|
Human           ATTGATGGCATTAAATATTAAGAAACCTTAATATTTGTCATAAAAGAAATATTTATTTTTAGGAAAATCATAGTTGTAGTT 57074
AsianBonytongue ----- 0
Reedfish       AAGCTTAGACCAGGGGTCTTCAGCATGTCAAGTAGCTCGCCAAAGGGTTAATGAATCCATATAAAATTTGAAAACCTGAT 14950
NorthernPike   ----- 0
SpottedGar     ----- 0
ParamormyropsKingsLeyae ----- 0
    
```

Sunday, May 01, 2022 09:44 PM

| Majority                | 57130                                                                            | 57140 | 57150 | 57160 | 57170 | 57180 | 57190 | 57200 |       |
|-------------------------|----------------------------------------------------------------------------------|-------|-------|-------|-------|-------|-------|-------|-------|
| Human                   | AACCATGATGTGGGTTTCTATTATTTTACTTTTTTTTTTTTTTTTTTAATTTAAGGACAAAAGTTTGTACTCTTAAGAAA |       |       |       |       |       |       |       | 57154 |
| AsianBonytongue         | -----                                                                            |       |       |       |       |       |       |       | 0     |
| Reedfish                | TAGTCAAATTAGGGGTGCGATCTTTCCAAAAAATCATATCACAATCCTTTTAAACACAAAGTCACAATCCACAATCTGA  |       |       |       |       |       |       |       | 15030 |
| NorthernPike            | -----                                                                            |       |       |       |       |       |       |       | 0     |
| SpottedGar              | -----                                                                            |       |       |       |       |       |       |       | 0     |
| ParamormyropsKingsLeyae | -----                                                                            |       |       |       |       |       |       |       | 0     |

| Majority                | 57210                                                                              | 57220 | 57230 | 57240 | 57250 | 57260 | 57270 | 57280 |       |
|-------------------------|------------------------------------------------------------------------------------|-------|-------|-------|-------|-------|-------|-------|-------|
| Human                   | AAGCAGGACTATATTGTGAATGTGCACCAGCATAAGATTTGAAGTGGCTTTTGTCTGGGAATTTCAAAGTAATTAGTTTTTC |       |       |       |       |       |       |       | 57234 |
| AsianBonytongue         | -----                                                                              |       |       |       |       |       |       |       | 0     |
| Reedfish                | ATTGCAATCTATCTTTTCAATGTGTCATACAAGAGAGAATATCCGGACTCAAACCTCATCAAGACCTAAGTAACACTTTAT  |       |       |       |       |       |       |       | 15110 |
| NorthernPike            | -----                                                                              |       |       |       |       |       |       |       | 0     |
| SpottedGar              | -----                                                                              |       |       |       |       |       |       |       | 0     |
| ParamormyropsKingsLeyae | -----                                                                              |       |       |       |       |       |       |       | 0     |

| Majority                | 57290                                                                            | 57300 | 57310 | 57320 | 57330 | 57340 | 57350 | 57360 |       |
|-------------------------|----------------------------------------------------------------------------------|-------|-------|-------|-------|-------|-------|-------|-------|
| Human                   | AAAAGAGTTTGGCTGAAATATACAGATGTGGCTCAAATGCTATGATAGGCTCTCAGTTTATTTAAAACTATATATCTCT  |       |       |       |       |       |       |       | 57314 |
| AsianBonytongue         | -----                                                                            |       |       |       |       |       |       |       | 0     |
| Reedfish                | TTTAAATATCAAACAAAGTTGAATTCAGTTGTTCTCTCGTTCGCTAGCTAAGTGGAGTTAAGGAACACGACCCAAAGCTG |       |       |       |       |       |       |       | 15190 |
| NorthernPike            | -----                                                                            |       |       |       |       |       |       |       | 0     |
| SpottedGar              | -----                                                                            |       |       |       |       |       |       |       | 0     |
| ParamormyropsKingsLeyae | -----                                                                            |       |       |       |       |       |       |       | 0     |

| Majority                | 57370                                                                          | 57380 | 57390 | 57400 | 57410 | 57420 | 57430 | 57440 |       |
|-------------------------|--------------------------------------------------------------------------------|-------|-------|-------|-------|-------|-------|-------|-------|
| Human                   | TTAATGTCTTTTTTTTAAAGGTTTATGAATAGGTTTCTAGTCACTTTTTATTCATATCATTATCTTTTTTGTCAATGT |       |       |       |       |       |       |       | 57394 |
| AsianBonytongue         | -----                                                                          |       |       |       |       |       |       |       | 0     |
| Reedfish                | GCGAGCGAGTGAGGAACGCCCTCCCCTCGGCCACTGCATATTTCCAGATTCGCACAAAGAAATCAGTACCACAAGTG  |       |       |       |       |       |       |       | 15270 |
| NorthernPike            | -----                                                                          |       |       |       |       |       |       |       | 0     |
| SpottedGar              | -----                                                                          |       |       |       |       |       |       |       | 0     |
| ParamormyropsKingsLeyae | -----                                                                          |       |       |       |       |       |       |       | 0     |

| Majority                | 57450                                                                             | 57460 | 57470 | 57480 | 57490 | 57500 | 57510 | 57520 |       |
|-------------------------|-----------------------------------------------------------------------------------|-------|-------|-------|-------|-------|-------|-------|-------|
| Human                   | TACATATGGAGGATGTAAGGTCATTGAGAGATGTAAAATTTCCCATCAAGGCTGCCACTGAAAACCTGCGCACCACATCTT |       |       |       |       |       |       |       | 57474 |
| AsianBonytongue         | -----                                                                             |       |       |       |       |       |       |       | 0     |
| Reedfish                | AACTATGATAAATAGCGAAATAAGAGAAGTCGCAGAATTAACCGGAATGTTCAAGCAGATTATAGAAAAAACCCGCTCT   |       |       |       |       |       |       |       | 15350 |
| NorthernPike            | -----                                                                             |       |       |       |       |       |       |       | 0     |
| SpottedGar              | -----                                                                             |       |       |       |       |       |       |       | 0     |
| ParamormyropsKingsLeyae | -----                                                                             |       |       |       |       |       |       |       | 0     |

| Majority                | 57530                                                                            | 57540 | 57550 | 57560 | 57570 | 57580 | 57590 | 57600 |       |
|-------------------------|----------------------------------------------------------------------------------|-------|-------|-------|-------|-------|-------|-------|-------|
| Human                   | TGCTTCCAAGTACCTTAATCTTCTGTTTGTATATCTTAAATCTACTTTTGCTCTGTCTCTTTAACTTTTTGTGCCATAGT |       |       |       |       |       |       |       | 57554 |
| AsianBonytongue         | -----                                                                            |       |       |       |       |       |       |       | 0     |
| Reedfish                | AAAACCGTTAAGTAGTTCTCTCATGAAAAACAGACAGACATTGGATATTATATATTAGTAAACCTTCAAATAATATG    |       |       |       |       |       |       |       | 15430 |
| NorthernPike            | -----                                                                            |       |       |       |       |       |       |       | 0     |
| SpottedGar              | -----                                                                            |       |       |       |       |       |       |       | 0     |
| ParamormyropsKingsLeyae | -----                                                                            |       |       |       |       |       |       |       | 0     |



Sunday, May 01, 2022 09:44 PM

```

Majority -----
                |-----|
                |57610|57620|57630|57640|57650|57660|57670|57680|
                |-----|
Human            ATCTCATTATTATTACTATTCCATTATTAAGCCATTAAAAATTCATTATTAAGCCATTATTATGAAACCATTTAATAAGC 57634
AsianBonytongue ----- 0
Reedfish        CAGTTAAAGTCTCAATAGCACGCTCAGCATTCTGGAGCTTAGTAGAGCCAGATAACTACAGTATAAGAATCTTCACCAA 15510
NorthernPike    ----- 0
SpottedGar      ----- 0
ParamormyropsKingsLeyae ----- 0
    
```

```

Majority -----
                |-----|
                |57690|57700|57710|57720|57730|57740|57750|57760|
                |-----|
Human            TTACATTTATCTTAAGTGGTTTCTTCCTTTCATTCATTCTTTTACTTTCAGATTAATTATTGTCTCTAATACTTAAATG 57714
AsianBonytongue ----- 0
Reedfish        GCAGCTCTGAAAATGTCTGCTTTGTTTGGGTCTATGTACCTCTGTGAGTCTGCCTTTTAAAGTGGCTACACTCCACCTATA 15590
NorthernPike    ----- 0
SpottedGar      ----- 0
ParamormyropsKingsLeyae ----- 0
    
```

```

Majority -----
                |-----|
                |57770|57780|57790|57800|57810|57820|57830|57840|
                |-----|
Human            CTTCTCCAGATCAAGATTACTTCTGTGGAGCCCAGACCATTTTTTACAATTGTTTCATTGCATTTCATCCACACAACC 57794
AsianBonytongue ----- 0
Reedfish        CACCTCTCTTGCAGTGCCAGTCATCTCACTAACTAAAAACACATCACACATGCAACTGGACATGTGAATACTCTTG--- 15667
NorthernPike    ----- 0
SpottedGar      ----- 0
ParamormyropsKingsLeyae ----- 0
    
```

```

Majority -----
                |-----|
                |57850|57860|57870|57880|57890|57900|57910|57920|
                |-----|
Human            TCATTTTGGGAGCAAAATTAGTTGTAGGTAGCAGAAAGGCTATACAAGTAATAATAGCATAATTGTAATAGTTTACCAAG 57874
AsianBonytongue ----- 0
Reedfish        -TGAAGTGAACCGTGACATGTAACAAAATGAATGACAAATGATTAAGTAATATCTGTGTATTTGTAGTTGCATTGTTTT 15746
NorthernPike    ----- 0
SpottedGar      ----- 0
ParamormyropsKingsLeyae ----- 0
    
```

```

Majority -----
                |-----|
                |57930|57940|57950|57960|57970|57980|57990|58000|
                |-----|
Human            TGCCGTAGTCTCATTTTTTCTGACCACTACTCTATATTGTCAACAAAACAGGGTTTTCCCTGCGTTACAAGAGGATGCT 57954
AsianBonytongue ----- 0
Reedfish        GTTTTAACAGCATTGTTTTTAATCAATAGTGTGAGATACGCTAGAAAGTGCATACAGACATGCAAAAATGTATTTGC 15826
NorthernPike    ----- 0
SpottedGar      ----- 0
ParamormyropsKingsLeyae ----- 0
    
```

```

Majority -----
                |-----|
                |58010|58020|58030|58040|58050|58060|58070|58080|
                |-----|
Human            AAGATTTAAAGAGGTGAATTACTTACAGTGAACACCACCTATAAGGTAGACATTTTTTCAGTCTTAGCCTTTCTCTCCAG 58034
AsianBonytongue ----- 0
Reedfish        AGGTGAACATAAATTTTTGTGATTTTTCTAATGCAAAATGTGAGTTGTGGACACCAACATTTTGTAATGTGCAGGCAA 15906
NorthernPike    ----- 0
SpottedGar      ----- 0
ParamormyropsKingsLeyae ----- 0
    
```

Sunday, May 01, 2022 09:44 PM

| Majority                | -----                                                                            |       |       |       |       |       |       |       |       |
|-------------------------|----------------------------------------------------------------------------------|-------|-------|-------|-------|-------|-------|-------|-------|
|                         | 58090                                                                            | 58100 | 58110 | 58120 | 58130 | 58140 | 58150 | 58160 |       |
| Human                   | TATGCTGCTTCTCACTGGTTCTCGGGTATAATCTAATCTTACTGTGCTTTCGGCTTCAGGCATAGGTTAATAATTAGAAT |       |       |       |       |       |       |       | 58114 |
| AsianBonytongue         | -----                                                                            |       |       |       |       |       |       |       | 0     |
| Reedfish                | AACAAACTCATTTCAGTTTGTGGTTGAAATAAGCTATGAGAATAAACGTTAGAAAACATGAGTAACTCTCGTCCATTT   |       |       |       |       |       |       |       | 15986 |
| NorthernPike            | -----                                                                            |       |       |       |       |       |       |       | 0     |
| SpottedGar              | -----                                                                            |       |       |       |       |       |       |       | 0     |
| ParamormyropsKingsLeyae | -----                                                                            |       |       |       |       |       |       |       | 0     |

| Majority                | -----                                                                           |       |       |       |       |       |       |       |       |
|-------------------------|---------------------------------------------------------------------------------|-------|-------|-------|-------|-------|-------|-------|-------|
|                         | 58170                                                                           | 58180 | 58190 | 58200 | 58210 | 58220 | 58230 | 58240 |       |
| Human                   | TCTTTTTTTTTGTCCAAAAAATGATTATCCTCCTTTCACATGCCCTGGCTACCAAATCAATGTGGTATGAGGTTTTATG |       |       |       |       |       |       |       | 58194 |
| AsianBonytongue         | -----                                                                           |       |       |       |       |       |       |       | 0     |
| Reedfish                | TCATTTTGTAAAGTAGCTCGGGGGATGTTGGAGACCTCTGGTTTAGACCCATTATTAAGAGTTCTTGCATTAGAAAA   |       |       |       |       |       |       |       | 16066 |
| NorthernPike            | -----                                                                           |       |       |       |       |       |       |       | 0     |
| SpottedGar              | -----                                                                           |       |       |       |       |       |       |       | 0     |
| ParamormyropsKingsLeyae | -----                                                                           |       |       |       |       |       |       |       | 0     |

| Majority                | -----                                                                           |       |       |       |       |       |       |       |       |
|-------------------------|---------------------------------------------------------------------------------|-------|-------|-------|-------|-------|-------|-------|-------|
|                         | 58250                                                                           | 58260 | 58270 | 58280 | 58290 | 58300 | 58310 | 58320 |       |
| Human                   | AATAGGAGACAATCTAGAAGTCATGGTTTCTGTGACATTTTTCACAACTTCAAACGTTTAAATATAGTCTACATTTTCT |       |       |       |       |       |       |       | 58274 |
| AsianBonytongue         | -----                                                                           |       |       |       |       |       |       |       | 0     |
| Reedfish                | GACCCAAATGCAGTTATTAAGAATATATCTGAAGATGGAATAGAGAGCTCAACTCTGAAAACCAAATCTGAAACAGGC  |       |       |       |       |       |       |       | 16146 |
| NorthernPike            | -----                                                                           |       |       |       |       |       |       |       | 0     |
| SpottedGar              | -----                                                                           |       |       |       |       |       |       |       | 0     |
| ParamormyropsKingsLeyae | -----                                                                           |       |       |       |       |       |       |       | 0     |

| Majority                | -----                                                                           |       |       |       |       |       |       |       |       |
|-------------------------|---------------------------------------------------------------------------------|-------|-------|-------|-------|-------|-------|-------|-------|
|                         | 58330                                                                           | 58340 | 58350 | 58360 | 58370 | 58380 | 58390 | 58400 |       |
| Human                   | TGGTGTGGAATATTTTCCTTGCTCTTCTGACCCCAAAGAAAAGTATTTGTTAGAGGACCAATTAATGAAATTTGAGTGG |       |       |       |       |       |       |       | 58354 |
| AsianBonytongue         | -----                                                                           |       |       |       |       |       |       |       | 0     |
| Reedfish                | ACAGGAGTAAAAGAGAGGATGGAGCCTTGAGACAAAACCTCTCAGAGGAAAAGGGAGGGTTTAGTCTAATTAATTTTGT |       |       |       |       |       |       |       | 16226 |
| NorthernPike            | -----                                                                           |       |       |       |       |       |       |       | 0     |
| SpottedGar              | -----                                                                           |       |       |       |       |       |       |       | 0     |
| ParamormyropsKingsLeyae | -----                                                                           |       |       |       |       |       |       |       | 0     |

| Majority                | -----                                                                           |       |       |       |       |       |       |       |       |
|-------------------------|---------------------------------------------------------------------------------|-------|-------|-------|-------|-------|-------|-------|-------|
|                         | 58410                                                                           | 58420 | 58430 | 58440 | 58450 | 58460 | 58470 | 58480 |       |
| Human                   | GGATTATACTGTGTTTGAGCTATAATCTTAAGGGGAAAATGTTTATATGTGTATCTTGTCTGAAGTAATACATAGTTA  |       |       |       |       |       |       |       | 58434 |
| AsianBonytongue         | -----                                                                           |       |       |       |       |       |       |       | 0     |
| Reedfish                | ACCACATACAAAGTCCTAAATAGATTTAAATGTGATGGGCATCCTCTGCATATGAGCCTATTATGCTAATTCAGAATTT |       |       |       |       |       |       |       | 16306 |
| NorthernPike            | -----                                                                           |       |       |       |       |       |       |       | 0     |
| SpottedGar              | -----                                                                           |       |       |       |       |       |       |       | 0     |
| ParamormyropsKingsLeyae | -----                                                                           |       |       |       |       |       |       |       | 0     |

| Majority                | -----                                                                          |       |       |       |       |       |       |       |       |
|-------------------------|--------------------------------------------------------------------------------|-------|-------|-------|-------|-------|-------|-------|-------|
|                         | 58490                                                                          | 58500 | 58510 | 58520 | 58530 | 58540 | 58550 | 58560 |       |
| Human                   | CATTAAATCTCATAAAAGTACCTCAATGTGTCAACTGTTTGACATTTTGTTTAATCTTCTGTGAACAGATACTAAGCA |       |       |       |       |       |       |       | 58514 |
| AsianBonytongue         | -----                                                                          |       |       |       |       |       |       |       | 0     |
| Reedfish                | GAACAAGTAATATAAACCGCAAATTTACTTGTCTACTGTTAGTGGTTAAGACATAAATTAAGAGCAGTGGTAAAGAA  |       |       |       |       |       |       |       | 16386 |
| NorthernPike            | -----                                                                          |       |       |       |       |       |       |       | 0     |
| SpottedGar              | -----                                                                          |       |       |       |       |       |       |       | 0     |
| ParamormyropsKingsLeyae | -----                                                                          |       |       |       |       |       |       |       | 0     |

Sunday, May 01, 2022 09:44 PM

| Majority                | -----                                                                             |       |       |       |       |       |       |       |       |
|-------------------------|-----------------------------------------------------------------------------------|-------|-------|-------|-------|-------|-------|-------|-------|
|                         | 58570                                                                             | 58580 | 58590 | 58600 | 58610 | 58620 | 58630 | 58640 |       |
| Human                   | TCCAACTATGATATTGATGTTTGTGCACAGGTATGCACTCAGGTCTTCTTGACAAAGATCTAAAGTTATAAATTCTAAGAG |       |       |       |       |       |       |       | 58594 |
| AsianBonytongue         | -----                                                                             |       |       |       |       |       |       |       | 0     |
| Reedfish                | TGCAGCCTTGCT-TGGCTATTCCTCTGTTAATAGAGAAAGGGCGTGAGATGTTGGAATTATTAAGGCGGTCCATCCCTG   |       |       |       |       |       |       |       | 16465 |
| NorthernPike            | -----                                                                             |       |       |       |       |       |       |       | 0     |
| SpottedGar              | -----                                                                             |       |       |       |       |       |       |       | 0     |
| ParamormyropsKingsLeyae | -----                                                                             |       |       |       |       |       |       |       | 0     |

| Majority                | -----                                                                            |       |       |       |       |       |       |       |       |
|-------------------------|----------------------------------------------------------------------------------|-------|-------|-------|-------|-------|-------|-------|-------|
|                         | 58650                                                                            | 58660 | 58670 | 58680 | 58690 | 58700 | 58710 | 58720 |       |
| Human                   | AGTAGATAAATGTTTTACTAAGTACTTATTCTGGTATCAGAACTCACACTTCACTTATTACAGAAGGAAAAAGAAATTTG |       |       |       |       |       |       |       | 58674 |
| AsianBonytongue         | -----                                                                            |       |       |       |       |       |       |       | 0     |
| Reedfish                | GGGCCTTGCTTATGTTTCATGAGGCCAGCACCTCTGAGTTTAGCTATAGAAAAGTGAATCTAAAATAGAAGCCTCTTTC  |       |       |       |       |       |       |       | 16545 |
| NorthernPike            | -----                                                                            |       |       |       |       |       |       |       | 0     |
| SpottedGar              | -----                                                                            |       |       |       |       |       |       |       | 0     |
| ParamormyropsKingsLeyae | -----                                                                            |       |       |       |       |       |       |       | 0     |

| Majority                | -----                                                                            |       |       |       |       |       |       |       |       |
|-------------------------|----------------------------------------------------------------------------------|-------|-------|-------|-------|-------|-------|-------|-------|
|                         | 58730                                                                            | 58740 | 58750 | 58760 | 58770 | 58780 | 58790 | 58800 |       |
| Human                   | TTTCCTAAACTTGCTTTGCCCCATTACCTTGTAATCTAGACCCTTTGGTAAAATTTGCATTTTTGATAACTACAGTAATG |       |       |       |       |       |       |       | 58754 |
| AsianBonytongue         | -----                                                                            |       |       |       |       |       |       |       | 0     |
| Reedfish                | TCTGTGTGATGTGGAAGGGGACGTTTATCAAGAAATAATCTAATATTAAGGGGCTGGTGCTGAGATAATCACTAAATAA  |       |       |       |       |       |       |       | 16625 |
| NorthernPike            | -----                                                                            |       |       |       |       |       |       |       | 0     |
| SpottedGar              | -----                                                                            |       |       |       |       |       |       |       | 0     |
| ParamormyropsKingsLeyae | -----                                                                            |       |       |       |       |       |       |       | 0     |

| Majority                | -----                                                                               |       |       |       |       |       |       |       |       |
|-------------------------|-------------------------------------------------------------------------------------|-------|-------|-------|-------|-------|-------|-------|-------|
|                         | 58810                                                                               | 58820 | 58830 | 58840 | 58850 | 58860 | 58870 | 58880 |       |
| Human                   | TTCATTTTACTTGCCTGCATCTGGGCTCTACTTAGAGAATATCACATAATATTACATAATCTGACAATGGTACCAGTTT     |       |       |       |       |       |       |       | 58834 |
| AsianBonytongue         | -----                                                                               |       |       |       |       |       |       |       | 0     |
| Reedfish                | TTTGTGTAGTTATTAATAAAAAAAAAAAAAAAAAAATTTGTTGGAGCTGTTTGACATCTAGTTTACATCCTTAATCTGCAGAT |       |       |       |       |       |       |       | 16705 |
| NorthernPike            | -----                                                                               |       |       |       |       |       |       |       | 0     |
| SpottedGar              | -----                                                                               |       |       |       |       |       |       |       | 0     |
| ParamormyropsKingsLeyae | -----                                                                               |       |       |       |       |       |       |       | 0     |

| Majority                | -----                                                                            |       |       |       |       |       |       |       |       |
|-------------------------|----------------------------------------------------------------------------------|-------|-------|-------|-------|-------|-------|-------|-------|
|                         | 58890                                                                            | 58900 | 58910 | 58920 | 58930 | 58940 | 58950 | 58960 |       |
| Human                   | AAATCCATCAACGTCAACTACAAGTAAGCCCTCTACTCTACTTTAAAAATCTCTTCCCATTTCTTCAGTCAACAGTTTTT |       |       |       |       |       |       |       | 58914 |
| AsianBonytongue         | -----                                                                            |       |       |       |       |       |       |       | 0     |
| Reedfish                | TATGTCTAAGCAAATAAGAATCCCGCACATCTTGGATTGAGCAGAGGAATAAGCTGCATCCAATATTTTTTTTTTTTAA  |       |       |       |       |       |       |       | 16785 |
| NorthernPike            | -----                                                                            |       |       |       |       |       |       |       | 0     |
| SpottedGar              | -----                                                                            |       |       |       |       |       |       |       | 0     |
| ParamormyropsKingsLeyae | -----                                                                            |       |       |       |       |       |       |       | 0     |

| Majority                | -----                                                                           |       |       |       |       |       |       |       |       |
|-------------------------|---------------------------------------------------------------------------------|-------|-------|-------|-------|-------|-------|-------|-------|
|                         | 58970                                                                           | 58980 | 58990 | 59000 | 59010 | 59020 | 59030 | 59040 |       |
| Human                   | CTGTTTTTCAATGCCTATGTCAGATAGAAATTTCCCTTCTACCATATCTCTCCTCACTCTCACTTGCTTGAAGAGGA   |       |       |       |       |       |       |       | 58994 |
| AsianBonytongue         | -----                                                                           |       |       |       |       |       |       |       | 0     |
| Reedfish                | CAGATGTGACTCCTGATTTAAGCCATATCAATATTGTGACAGCAGAGAAGGCTGAACATGCTTAAGTGCTGCTGACCAG |       |       |       |       |       |       |       | 16865 |
| NorthernPike            | -----                                                                           |       |       |       |       |       |       |       | 0     |
| SpottedGar              | -----                                                                           |       |       |       |       |       |       |       | 0     |
| ParamormyropsKingsLeyae | -----                                                                           |       |       |       |       |       |       |       | 0     |

Sunday, May 01, 2022 09:44 PM

```

Majority -----
                |-----|
                |59050|59060|59070|59080|59090|59100|59110|59120|
                |-----|
Human           |AAATCACATGGAAGCTTCATCAGCTTTTCTTGCAAATCTGCTAATACTCACACTTGTCTTTCTCTTTTAATAAAAGGCA| 59074
AsianBonytongue|-----| 0
Reedfish       |AGTTAAAATCCCTGACAATCCAGTAAATAATATTAACAAAGCCATAGTCAGTATTAGAAGAGAGGTAGCTACAACAGAA| 16945
NorthernPike   |-----| 0
SpottedGar     |-----| 0
ParamormyropsKingsLeyae|-----| 0
    
```

```

Majority -----
                |-----|
                |59130|59140|59150|59160|59170|59180|59190|59200|
                |-----|
Human           |TAGATGTTTAGTTATCTAAGACCAATAAACACCAAAGCCTATCGTCTTCTGCCTGTCAAGAGACTGCACTATCTGTCATC| 59154
AsianBonytongue|-----| 0
Reedfish       |TATTGAAAACCTTGGGGGAATGAAACTGGTGTATTATGGCACCATATCCAGTGAATTCAAAAATCTACATCCCCGAAGTT| 17025
NorthernPike   |-----| 0
SpottedGar     |-----| 0
ParamormyropsKingsLeyae|-----| 0
    
```

```

Majority -----
                |-----|
                |59210|59220|59230|59240|59250|59260|59270|59280|
                |-----|
Human           |CCCTTCTCATTTATTTCTCTATATTTGGCCACTTTTCACCAGTTTCAAGCATTCTCAGCTTCTTTCATTTTAAATGAA| 59234
AsianBonytongue|-----| 0
Reedfish       |CACTCAACTTAGTTACCATCCCTGATCTATGCCCCAGCTGATACTTCCAAATCTGACTAACCACCAGCAGGAGAAAGG| 17105
NorthernPike   |-----| 0
SpottedGar     |-----| 0
ParamormyropsKingsLeyae|-----| 0
    
```

```

Majority -----
                |-----|
                |59290|59300|59310|59320|59330|59340|59350|59360|
                |-----|
Human           |TTTACCTTCAACTTTCAATCCATCCATCTATAACTCTACGTACTTTCTATCA-----CCCTGCCTCCCCTCTCCCTTTTC| 59309
AsianBonytongue|-----| 0
Reedfish       |CACTCTTTATGTTGTAAAATACTAAGTAACAGTTTATTAGGAAAAACAAGCAATGGCCACAAAAGTACCTCAAATCATTAA| 17185
NorthernPike   |-----| 0
SpottedGar     |-----| 0
ParamormyropsKingsLeyae|-----| 0
    
```

```

Majority -----
                |-----|
                |59370|59380|59390|59400|59410|59420|59430|59440|
                |-----|
Human           |ACTCATAACCAGACTTCTTAAATAGTCTATCTTTGTTGTTTATTATCTCATTTCTCTACTTACTATTATTTGGTTTTAGC| 59389
AsianBonytongue|-----| 0
Reedfish       |ATCCACTCCCATATAATTAAGCACGAGCAATAACCAAATGCCATATTAGAGTACAATGTATGAGTAATGGGCAAATAA| 17265
NorthernPike   |-----| 0
SpottedGar     |-----| 0
ParamormyropsKingsLeyae|-----| 0
    
```

```

Majority -----
                |-----|
                |59450|59460|59470|59480|59490|59500|59510|59520|
                |-----|
Human           |ACTGTTGACCCAAATGCTCTTCTCAGCGTCACCAGCGATTAGTAGAGTAGCTAAATGCTAGTGATATGATTTAGTCTCT| 59469
AsianBonytongue|-----| 0
Reedfish       |ACTGTAACAAATCACAGGATGATATTAATGCAGCATTCAACTATTAAGGTAATGCTGTGATTGTCAAATGGCACCTGC| 17345
NorthernPike   |-----| 0
SpottedGar     |-----| 0
ParamormyropsKingsLeyae|-----| 0
    
```

Sunday, May 01, 2022 09:44 PM

| Majority                | -----                                                                               |       |       |       |       |       |       |       |       |
|-------------------------|-------------------------------------------------------------------------------------|-------|-------|-------|-------|-------|-------|-------|-------|
|                         | 59530                                                                               | 59540 | 59550 | 59560 | 59570 | 59580 | 59590 | 59600 |       |
| Human                   | TGTCTTACTTAATACCTAGATAAATATTTGGCACTGTGCACCATTGTCTTAAAATTCTCTTTCTTCTCCTGGTCTCTGATA-C |       |       |       |       |       |       |       | 59548 |
| AsianBonytongue         | -----                                                                               |       |       |       |       |       |       |       | 0     |
| Reedfish                | TGTAGCCCCTACACCATCCCCAGCCACAAGCCAATATAACAAGAGGAAAAAAAAATAAGGCAGTGGTGTCTAAATTAAC     |       |       |       |       |       |       |       | 17425 |
| NorthernPike            | -----                                                                               |       |       |       |       |       |       |       | 0     |
| SpottedGar              | -----                                                                               |       |       |       |       |       |       |       | 0     |
| ParamormyropsKingsLeyae | -----                                                                               |       |       |       |       |       |       |       | 0     |

| Majority                | -----                                                                             |       |       |       |       |       |       |       |       |
|-------------------------|-----------------------------------------------------------------------------------|-------|-------|-------|-------|-------|-------|-------|-------|
|                         | 59610                                                                             | 59620 | 59630 | 59640 | 59650 | 59660 | 59670 | 59680 |       |
| Human                   | TTCTCACCTGGATTTATCCTACCTCTCTATTTCTTCCTTGCTTTGTAACCTCCCCTTCTACCTGGGAGGCCTCACCTGCTG |       |       |       |       |       |       |       | 59628 |
| AsianBonytongue         | -----                                                                             |       |       |       |       |       |       |       | 0     |
| Reedfish                | ATAGGTGCACAAAATGAAGCATAATACCAAGAATCCATAACAACTAAAGGTATAAAAAGTTAGGACTTTGAAGCAGATC   |       |       |       |       |       |       |       | 17505 |
| NorthernPike            | -----                                                                             |       |       |       |       |       |       |       | 0     |
| SpottedGar              | -----                                                                             |       |       |       |       |       |       |       | 0     |
| ParamormyropsKingsLeyae | -----                                                                             |       |       |       |       |       |       |       | 0     |

| Majority                | -----                                                                             |       |       |       |       |       |       |       |       |
|-------------------------|-----------------------------------------------------------------------------------|-------|-------|-------|-------|-------|-------|-------|-------|
|                         | 59690                                                                             | 59700 | 59710 | 59720 | 59730 | 59740 | 59750 | 59760 |       |
| Human                   | TCACAGCTCCATTAACCTCTTATGATTCAGACAGAGTTCACATCACATTTTCTAGCTCAGACCTCTCCTAAGAGACCCA   |       |       |       |       |       |       |       | 59708 |
| AsianBonytongue         | -----                                                                             |       |       |       |       |       |       |       | 0     |
| Reedfish                | TTAAAATACTAAAGCTGAGGAGTCAGTCAATCTGAAGATAAACGATTGTAAGCTTGGCCACAACCTGAACTAGTTTAAACA |       |       |       |       |       |       |       | 17585 |
| NorthernPike            | -----                                                                             |       |       |       |       |       |       |       | 0     |
| SpottedGar              | -----                                                                             |       |       |       |       |       |       |       | 0     |
| ParamormyropsKingsLeyae | -----                                                                             |       |       |       |       |       |       |       | 0     |

| Majority                | -----                                                                            |       |       |       |       |       |       |       |       |
|-------------------------|----------------------------------------------------------------------------------|-------|-------|-------|-------|-------|-------|-------|-------|
|                         | 59770                                                                            | 59780 | 59790 | 59800 | 59810 | 59820 | 59830 | 59840 |       |
| Human                   | CACTAAGAACCTGGCGGACTAATGAATATCTTCAAACAGTGTGTTCAATCTAGCTCCTGTTTTTGGTGTCCGCTGTGTTA |       |       |       |       |       |       |       | 59788 |
| AsianBonytongue         | -----                                                                            |       |       |       |       |       |       |       | 0     |
| Reedfish                | ACTGAATGAAATAGCTGCTGATAGTGAAGGATAGGTGCTAATTGTAGTGAAATTGTCTGTTTGGGCAAGCGTCTACAGTG |       |       |       |       |       |       |       | 17665 |
| NorthernPike            | -----                                                                            |       |       |       |       |       |       |       | 0     |
| SpottedGar              | -----                                                                            |       |       |       |       |       |       |       | 0     |
| ParamormyropsKingsLeyae | -----                                                                            |       |       |       |       |       |       |       | 0     |

| Majority                | -----                                                                             |       |       |       |       |       |       |       |       |
|-------------------------|-----------------------------------------------------------------------------------|-------|-------|-------|-------|-------|-------|-------|-------|
|                         | 59850                                                                             | 59860 | 59870 | 59880 | 59890 | 59900 | 59910 | 59920 |       |
| Human                   | GGAAAGTGCAAGATACCAACTTCAGTCTCATTAAACAAGCCAGTAAACATGGTATTTTTCCCTTTCCTTCCAACCTGTCAT |       |       |       |       |       |       |       | 59868 |
| AsianBonytongue         | -----                                                                             |       |       |       |       |       |       |       | 0     |
| Reedfish                | GCCAATTGGGGGGCGGGAGTGCCTAATCTGAAAGTTGTTTTTCTCTTTATTAGGACTAAGTGAATATGAAGCTTTAC     |       |       |       |       |       |       |       | 17745 |
| NorthernPike            | -----                                                                             |       |       |       |       |       |       |       | 0     |
| SpottedGar              | -----                                                                             |       |       |       |       |       |       |       | 0     |
| ParamormyropsKingsLeyae | -----                                                                             |       |       |       |       |       |       |       | 0     |

| Majority                | -----                                                                             |       |       |       |       |       |       |       |       |
|-------------------------|-----------------------------------------------------------------------------------|-------|-------|-------|-------|-------|-------|-------|-------|
|                         | 59930                                                                             | 59940 | 59950 | 59960 | 59970 | 59980 | 59990 | 60000 |       |
| Human                   | CAGATATTATTGATTATACCTCCTAAATTTTTGTTGAATCTGGCCTTTTTTCTCCAACCTCTTGCTACCATTGCAGTCTAA |       |       |       |       |       |       |       | 59948 |
| AsianBonytongue         | -----                                                                             |       |       |       |       |       |       |       | 0     |
| Reedfish                | AGACTTTTTTTGACCAGGATGGTAGCATTTCTATATTGGGTCATAATCAGACAAGTCTCGAGCTCCCAATACCCTTCAC   |       |       |       |       |       |       |       | 17825 |
| NorthernPike            | -----                                                                             |       |       |       |       |       |       |       | 0     |
| SpottedGar              | -----                                                                             |       |       |       |       |       |       |       | 0     |
| ParamormyropsKingsLeyae | -----                                                                             |       |       |       |       |       |       |       | 0     |

Sunday, May 01, 2022 09:44 PM

Majority -----  
 -----  
 60010 60020 60030 60040 60050 60060 60070 60080  
 -----  
 Human GCCAGTGTATTCAAGATGCTGGTCTCTCAAGGTAGTAGTGTGTGTCAAACTGAAATCAGCATACTTCTAGCAACAGTAT 60028  
 AsianBonytongue ----- 0  
 Reedfish ATATAATATTCTGAACCTGACACACCTTCAGAATTAAGCCTGCAGTCTGAGAACCTCAGAACTTAATAAAAAGGGCAGGA 17905  
 NorthernPike ----- 0  
 SpottedGar ----- 0  
 ParamormyropsKingsLeyae ----- 0

Majority -----  
 -----  
 60090 60100 60110 60120 60130 60140 60150 60160  
 -----  
 Human GCTTAATGTCAATATTGGCATAAATTTTGACACAGACTTCTTATATTCATGCAGAGTAGCCTGGGCTTCTGGACCGTCAA 60108  
 AsianBonytongue ----- 0  
 Reedfish ACCTGATGAATCTGCACAACCTGTATACACTAATGCACGTGTAATATTGGGGACAAAGTCTGGGAGACTTGGGAAAAACA 17985  
 NorthernPike ----- 0  
 SpottedGar ----- 0  
 ParamormyropsKingsLeyae ----- 0

Majority -----  
 -----  
 60170 60180 60190 60200 60210 60220 60230 60240  
 -----  
 Human TCATAATTTAAGTAGCATTGATGTAGTAATAATTCTCTTTTCATATCTCCACTTCCTTGGCCTTCTGACTGAACTCACCAT 60188  
 AsianBonytongue ----- 0  
 Reedfish ATTTCTGCTTTTTGTATGAGAAAAGAGATCAGATTGTCTTTCCTGGCATCTCTTAAAGCCCTAGAATTGTTAAGTTGTC 18065  
 NorthernPike ----- 0  
 SpottedGar ----- 0  
 ParamormyropsKingsLeyae ----- 0

Majority -----  
 -----  
 60250 60260 60270 60280 60290 60300 60310 60320  
 -----  
 Human TTTGACATCTCCCCTACCTCCATTATTTTCCACAGAGTACTAGGAATCATCTCAACGTCAAGTCATATGCTTCTAAT 60268  
 AsianBonytongue ----- 0  
 Reedfish TTTGGTGAATGCATTCTTCTGATTGATTAATTTGTTTGTATAGTGGCAGCCTCATTATGCAGCACGTTTATTTATAAAT 18145  
 NorthernPike ----- 0  
 SpottedGar ----- 0  
 ParamormyropsKingsLeyae ----- 0

Majority -----  
 -----  
 60330 60340 60350 60360 60370 60380 60390 60400  
 -----  
 Human CACAATACCCTTTAGTGACTTTTTTGTCCTTGCAATAAAGTCCACAGTCCTTATCATGGCTTATAAGACTCTAAATCAGT 60348  
 AsianBonytongue ----- 0  
 Reedfish CATGGCAGCATACTGGATTGCAGAGCCTGATTAATTTTGTCTGCTCCTTAATGCCAGACAGTTCAACACATGTCC 18225  
 NorthernPike ----- 0  
 SpottedGar ----- 0  
 ParamormyropsKingsLeyae ----- 0

Majority -----  
 -----  
 60410 60420 60430 60440 60450 60460 60470 60480  
 -----  
 Human CCTCAGCTTGCCCTCTCCATTCTCTCTCATGCCTTTTTAGCTATATTGGACTTCTTTAAATAGCTTGCATATACTGTATT 60428  
 AsianBonytongue ----- 0  
 Reedfish CTGTAAAGTTGATCAGCATAGTTGATTACTCGTGGTGTATTGTTTAAGAAATTTCTCTTTGAATTTCCCAATATTTATT 18305  
 NorthernPike ----- 0  
 SpottedGar ----- 0  
 ParamormyropsKingsLeyae ----- 0

Sunday, May 01, 2022 09:44 PM

```

Majority -----
                |-----|
                |60490|60500|60510|60520|60530|60540|60550|60560|
                |-----|
Human           |TTCTCTGATGTCTCGATCTTACAGATTGCTGTTCCATTTGCTAATACTATTTTTTCTCTTCATCTCTTTATGCCCAACTT| 60508
AsianBonytongue|-----| 0
Reedfish       |AATGTTTTTGCAGGATTCTGATGATGGGTGCTTTAGCTAAAAAGAAAAAGACTAATTCTTTATGCCTTATGCCAG---T| 18382
NorthernPike   |-----| 0
SpottedGar     |-----| 0
ParamormyropsKingsLeyae|-----| 0
    
```

```

Majority -----
                |-----|
                |60570|60580|60590|60600|60610|60620|60630|60640|
                |-----|
Human           |CTGCTTCTCTTTGTCTTTCAAGTATCAGTTTAGAAGCCTCTTCCTGAGATAAGTCTTCTGTAACATTTCAACTAGATTAG| 60588
AsianBonytongue|-----| 0
Reedfish       |GAGGTTTACCTTCAAACGCATCCTGCTTATTTATCATCACAAACAAGGGCAGCCCCACAACCACATCTGATTCTCTTAGA| 18462
NorthernPike   |-----| 0
SpottedGar     |-----| 0
ParamormyropsKingsLeyae|-----| 0
    
```

```

Majority -----
                |-----|
                |60650|60660|60670|60680|60690|60700|60710|60720|
                |-----|
Human           |ATCCCTTCCTTTCTTAGTTCTCAGTATCACACATAAAATTTATAAATTTGTTAAATGTGTATATTTTCTGTCGGACTGTAA| 60668
AsianBonytongue|-----| 0
Reedfish       |TATTGTCATTTGGTCTGCCAAAGTTGTTAATAATTGACCTGTCTAACTGAATCTACTAAAGCTCATGTCAATATTATGCA| 18542
NorthernPike   |-----| 0
SpottedGar     |-----| 0
ParamormyropsKingsLeyae|-----| 0
    
```

```

Majority -----
                |-----|
                |60730|60740|60750|60760|60770|60780|60790|60800|
                |-----|
Human           |GTTCTGAGTACCATGTCTGCTTTGCTTTTCTGCTGATTTTATTAACATTGACATTCAGGGTGAAAATCAGAAGTCATAGT| 60748
AsianBonytongue|-----| 0
Reedfish       |ATTTTGTGTCATGGGGTATGCCCGCTGCACCATGTCAAATTAACAGCTGAAAATCATAGCCTGTGTTACATTTCCCGATT| 18622
NorthernPike   |-----| 0
SpottedGar     |-----| 0
ParamormyropsKingsLeyae|-----| 0
    
```

```

Majority -----
                |-----|
                |60810|60820|60830|60840|60850|60860|60870|60880|
                |-----|
Human           |AACAATCTTAATTATCAATAAAAAGTATTTTATGCGATCCTCATATTTATTAAGAAAACACCTTAATACCTTTTCAGAAA| 60828
AsianBonytongue|-----| 0
Reedfish       |TGAGCACCAATCTTCCAGTGCTCACCCTTTTTTCTGATAGCTAATGTTCTGTTGCCTGACCAATGCCACTTTACAAATTA| 18702
NorthernPike   |-----| 0
SpottedGar     |-----| 0
ParamormyropsKingsLeyae|-----| 0
    
```

```

Majority -----
                |-----|
                |60890|60900|60910|60920|60930|60940|60950|60960|
                |-----|
Human           |ATCTTGTTTTATTTATTTGAAAGTAGTGTATTAGGCAAAGATGCGTCTTCTCTTGGCTTTCTAATTCAGCTTTTATAATGT| 60908
AsianBonytongue|-----| 0
Reedfish       |ACAGCTGCAGTTAGTTCAGCAGCAATCTGTGCCCTTTATTTTTCTCCTTCTGGTAAGATAAAATATTAGGCATCAGACAC| 18782
NorthernPike   |-----| 0
SpottedGar     |-----| 0
ParamormyropsKingsLeyae|-----| 0
    
```

Sunday, May 01, 2022 09:44 PM

Majority -----  
 |-----|-----|-----|-----|-----|-----|-----|-----|  
 | 60970 | 60980 | 60990 | 61000 | 61010 | 61020 | 61030 | 61040 |  
 |-----|-----|-----|-----|-----|-----|-----|-----|  
 Human TGAGGAATATAATTACTTGATGCATAAAAAATATCAATCTTTTAAATAGTATAATAAGACATATAATGTAATCTCCTTTTC 60988  
 AsianBonytongue ----- 0  
 Reedfish ACAAGATTTAGTTTCAGCTTGTGAAGTTGAAAACAAATGTGTTCCCTTATTCCCTCGAAACTGGATTCTATTCATTGTATTTC 18862  
 NorthernPike ----- 0  
 SpottedGar ----- 0  
 ParamormyropsKingsLeyae ----- 0

Majority -----  
 |-----|-----|-----|-----|-----|-----|-----|-----|  
 | 61050 | 61060 | 61070 | 61080 | 61090 | 61100 | 61110 | 61120 |  
 |-----|-----|-----|-----|-----|-----|-----|-----|  
 Human ACCTGGGATTTAAAAATGTTTTTACATAGTCCCTTACATTATAACACACATAAGTAGGAAATGGTTCTTTTTGGTTTTTG 61068  
 AsianBonytongue ----- 0  
 Reedfish TAGAAAGGAATTCATTCGTTTCATTGGTTGTCGGCACTCTGCATATACAGCCTGCTCCTAGGCTAACTGGAAAATCAA 18942  
 NorthernPike ----- 0  
 SpottedGar ----- 0  
 ParamormyropsKingsLeyae ----- 0

Majority -----  
 |-----|-----|-----|-----|-----|-----|-----|-----|  
 | 61130 | 61140 | 61150 | 61160 | 61170 | 61180 | 61190 | 61200 |  
 |-----|-----|-----|-----|-----|-----|-----|-----|  
 Human TTATTAGAACAGCTTTTCAGAAACATGTCTTTATTAGGAATATCTTTAGTTGACACTGGACAGTATATTGTGTCTTCTG 61148  
 AsianBonytongue ----- 0  
 Reedfish TATATCTAGGCAGGCGCAGACTAGTTGGCCTCAATTCTTAGACATGCCTCATTAGACAATCAGGTTACTGGGAGTGTGAC 19022  
 NorthernPike ----- 0  
 SpottedGar ----- 0  
 ParamormyropsKingsLeyae ----- 0

Majority -----  
 |-----|-----|-----|-----|-----|-----|-----|-----|  
 | 61210 | 61220 | 61230 | 61240 | 61250 | 61260 | 61270 | 61280 |  
 |-----|-----|-----|-----|-----|-----|-----|-----|  
 Human GAAGTCCTGTTTATATGATCATTTTATTTAAACATATAAGTGGGTTGTTTCTTATTCTTTATTTCTCCAGGAGATTCCA 61228  
 AsianBonytongue ----- 0  
 Reedfish TCAGACTGGCCAAGATAATGTAATGTGACATAGGCTTTACTTGCT-TCATAAAATATGTGTTCCCTAGTTGAGCCTTCA 19101  
 NorthernPike ----- 0  
 SpottedGar ----- 0  
 ParamormyropsKingsLeyae ----- 0

Majority -----  
 |-----|-----|-----|-----|-----|-----|-----|-----|  
 | 61290 | 61300 | 61310 | 61320 | 61330 | 61340 | 61350 | 61360 |  
 |-----|-----|-----|-----|-----|-----|-----|-----|  
 Human TTTCATCACTAACTGATAATAAAAAATAAATATGAGATAAAACATTTGCAGCAGTAAGATTATGTCATTTCCTTCTC 61308  
 AsianBonytongue ----- 0  
 Reedfish TCCTTTGTGGTAGAGGGCTTCATTCCAGCAAATGTACAGAGCCTGACAAAAAATATTTATGGTCTGAAGATGACTCC 19181  
 NorthernPike ----- 0  
 SpottedGar ----- 0  
 ParamormyropsKingsLeyae ----- 0

Majority -----  
 |-----|-----|-----|-----|-----|-----|-----|-----|  
 | 61370 | 61380 | 61390 | 61400 | 61410 | 61420 | 61430 | 61440 |  
 |-----|-----|-----|-----|-----|-----|-----|-----|  
 Human ACAGAGTACACATTGCTTTATGCAGATTCTTTGAGAGACCTAATGGAATTATCCTTTGCTAATTTCTGGGCAAAGATTC 61388  
 AsianBonytongue ----- 0  
 Reedfish CAATTTTTTTTTTTTTTAACTTTAGAACTGCAAACGTGCATAATCTCCAGATTAATCATTGAGTAACTGGTTAT 19261  
 NorthernPike ----- 0  
 SpottedGar ----- 0  
 ParamormyropsKingsLeyae ----- 0



Sunday, May 01, 2022 09:44 PM

```

Majority -----
                |-----|
                |61450|61460|61470|61480|61490|61500|61510|61520|
                |-----|
Human           |TCCTTGACATCTGCTTAATTTACAATCTGTATATTTTACATTCATATTAATGGAGAATTTATGATGAAATCAGTGGTTTT| 61468
AsianBonytongue|-----| 0
Reedfish       |TCTTATACATTCTTCAGGTTGGCTACAGGCATGGCATGTACATAATCACATTCATTTATGGTAGTGATGTCTGTTCAGT| 19341
NorthernPike   |-----| 0
SpottedGar     |-----| 0
ParamormyropsKingsLeyae|-----| 0
    
```

```

Majority -----
                |-----|
                |61530|61540|61550|61560|61570|61580|61590|61600|
                |-----|
Human           |AGGATGCTTTTAGGAAAATCCTGCATAATCTACCAGGGTGGGGTTATTTGATATTGGTAAATAATTAGTCTGAAGTATTAC| 61548
AsianBonytongue|-----| 0
Reedfish       |CGGTCACTATTCTAAGTAGGCCAGTTTTTCACACCAAATGACTAAATGTTCTGTAAATCTTAATAACTTTTTTCAGTATCT| 19421
NorthernPike   |-----| 0
SpottedGar     |-----| 0
ParamormyropsKingsLeyae|-----| 0
    
```

```

Majority -----
                |-----|
                |61610|61620|61630|61640|61650|61660|61670|61680|
                |-----|
Human           |ATTAGTATTATAAGCTTAATTTTGTGTTGTTGATTTTGATAATTTTTCATGACTTGCCAAATATTAAAAAGTAGATATTT| 61628
AsianBonytongue|-----| 0
Reedfish       |TTTTTTACAATACGTTGCTGAGGAAGTGCATGTGTACTTTTGCTGTCGGAACCTACTGCAACTCGCTGTATTCTGGGAT| 19501
NorthernPike   |-----| 0
SpottedGar     |-----| 0
ParamormyropsKingsLeyae|-----| 0
    
```

```

Majority -----
                |-----|
                |61690|61700|61710|61720|61730|61740|61750|61760|
                |-----|
Human           |AAAGAATTTGGAAGTTAAGGTTTCTCTCAGTGTGTGTTAAATCTGATCCCCAACAATCTCTTCAAAAAAGTAAGTTATCA| 61708
AsianBonytongue|-----| 0
Reedfish       |TAACAAATCCTTGATACACAGGTTACAGTTGGTACAAAATGCTGCTGCTCGCTTTCTGGTTGGGGCAAGAAAGTATGACT| 19581
NorthernPike   |-----| 0
SpottedGar     |-----| 0
ParamormyropsKingsLeyae|-----| 0
    
```

```

Majority -----
                |-----|
                |61770|61780|61790|61800|61810|61820|61830|61840|
                |-----|
Human           |ATAGTAAACGATGAGAAAAATGAAATAGTTTTATTTTGGCTTTTCATGTTTTTCAGTCCATATGCAGTGTTCATTGTGC| 61788
AsianBonytongue|-----| 0
Reedfish       |CTCTCTCCTATTTTAGCTTCTTTACACTGGCTGCCTGTCAGTTTTTCGAATTGATTTTAAAATCCTGCTGCTAGTTTTTAA| 19661
NorthernPike   |-----| 0
SpottedGar     |-----| 0
ParamormyropsKingsLeyae|-----| 0
    
```

```

Majority -----
                |-----|
                |61850|61860|61870|61880|61890|61900|61910|61920|
                |-----|
Human           |TGCTTTAATTATGCTTTCTGTGCCTAATATCTTTCTGTGTTTTGATTTCCATGTTTTAGCCATAAACTTTAAATTTACA| 61868
AsianBonytongue|-----| 0
Reedfish       |ATTTTACATGGGCTTGCTCCTGCCTATTTATCTGAACTGTGTGTTTTACACCAGCCATCCAGAGTGCTTAGATCTTCTG| 19741
NorthernPike   |-----| 0
SpottedGar     |-----| 0
ParamormyropsKingsLeyae|-----| 0
    
```

Sunday, May 01, 2022 09:44 PM

| Majority                | -----                                                                          |       |       |       |       |       |       |       |       |
|-------------------------|--------------------------------------------------------------------------------|-------|-------|-------|-------|-------|-------|-------|-------|
|                         | 61930                                                                          | 61940 | 61950 | 61960 | 61970 | 61980 | 61990 | 62000 |       |
| Human                   | TGAAACTTTTTTTTCTGATTGTTTTGCTTACTGTCTAAACCTTCACTGTGAGTAGGCACATTTGGAAGGTCTTTCTGC |       |       |       |       |       |       |       | 61948 |
| AsianBonytongue         | -----                                                                          |       |       |       |       |       |       |       | 0     |
| Reedfish                | GTCAGCTGTCTCTGGTTGTCCCTCGTACCAAGTGTAACCAAGGGGGACAGGTCTTTTGCAGCTGTTGCACCTCGCCTG |       |       |       |       |       |       |       | 19821 |
| NorthernPike            | -----                                                                          |       |       |       |       |       |       |       | 0     |
| SpottedGar              | -----                                                                          |       |       |       |       |       |       |       | 0     |
| ParamormyropsKingsLeyae | -----                                                                          |       |       |       |       |       |       |       | 0     |

| Majority                | -----                                                                           |       |       |       |       |       |       |       |       |
|-------------------------|---------------------------------------------------------------------------------|-------|-------|-------|-------|-------|-------|-------|-------|
|                         | 62010                                                                           | 62020 | 62030 | 62040 | 62050 | 62060 | 62070 | 62080 |       |
| Human                   | AAATTATCTTGAGCTTTAATGTCAGAAATCTTTGCTCCAACAAGATCACCACATTCCTGATTGCTGAACCACAGGACTG |       |       |       |       |       |       |       | 62028 |
| AsianBonytongue         | -----                                                                           |       |       |       |       |       |       |       | 0     |
| Reedfish                | TGGAACTCTTTACCTCATCATATAAAGGAGTCGTCTACAATTGAACTGTTTAAACAAGATTAAAGACTCATTTCTACTC |       |       |       |       |       |       |       | 19901 |
| NorthernPike            | -----                                                                           |       |       |       |       |       |       |       | 0     |
| SpottedGar              | -----                                                                           |       |       |       |       |       |       |       | 0     |
| ParamormyropsKingsLeyae | -----                                                                           |       |       |       |       |       |       |       | 0     |

| Majority                | -----                                                                            |       |       |       |       |       |       |       |       |
|-------------------------|----------------------------------------------------------------------------------|-------|-------|-------|-------|-------|-------|-------|-------|
|                         | 62090                                                                            | 62100 | 62110 | 62120 | 62130 | 62140 | 62150 | 62160 |       |
| Human                   | GTTTGTGTGCTACTGCTATTTCTTGGGATTTG-CAAATACATGAGCTTGAAGTGAGCTTGCATATATTTTTTAAATTTG  |       |       |       |       |       |       |       | 62107 |
| AsianBonytongue         | -----                                                                            |       |       |       |       |       |       |       | 0     |
| Reedfish                | ACTTGCATTGAGTTACCTTCAGTAATACTGATGGCTTCCTCTTTGTGATTATATTACATTACTTCTATTTTTTATGTATA |       |       |       |       |       |       |       | 19981 |
| NorthernPike            | -----                                                                            |       |       |       |       |       |       |       | 0     |
| SpottedGar              | -----                                                                            |       |       |       |       |       |       |       | 0     |
| ParamormyropsKingsLeyae | -----                                                                            |       |       |       |       |       |       |       | 0     |

| Majority                | -----                                                                            |       |       |       |       |       |       |       |       |
|-------------------------|----------------------------------------------------------------------------------|-------|-------|-------|-------|-------|-------|-------|-------|
|                         | 62170                                                                            | 62180 | 62190 | 62200 | 62210 | 62220 | 62230 | 62240 |       |
| Human                   | ATTTTACTCCCTTTCTTATTGTTGGTCACCTCCTTTAACCAACTATTTAAATACCTGGATTTTGTCTCATACACCT     |       |       |       |       |       |       |       | 62187 |
| AsianBonytongue         | -----                                                                            |       |       |       |       |       |       |       | 0     |
| Reedfish                | TAACATTACTTCTATTTATTATGTATTTTATTTTATGTTCAAATATTTTATTCTATTTCATGTTTTATGTAAATTTGTTT |       |       |       |       |       |       |       | 20061 |
| NorthernPike            | -----                                                                            |       |       |       |       |       |       |       | 0     |
| SpottedGar              | -----                                                                            |       |       |       |       |       |       |       | 0     |
| ParamormyropsKingsLeyae | -----                                                                            |       |       |       |       |       |       |       | 0     |

| Majority                | -----                                                                         |       |       |       |       |       |       |       |       |
|-------------------------|-------------------------------------------------------------------------------|-------|-------|-------|-------|-------|-------|-------|-------|
|                         | 62250                                                                         | 62260 | 62270 | 62280 | 62290 | 62300 | 62310 | 62320 |       |
| Human                   | CAGTCCTATTTCTTTCTCTTTTGCCAACAGATGATTAATTTACATCTTGTTTGCTTATTTCTCTAGCTCTTGACCTT |       |       |       |       |       |       |       | 62267 |
| AsianBonytongue         | -----                                                                         |       |       |       |       |       |       |       | 0     |
| Reedfish                | TATTTTGTAAAGCACTTTGGCCACAGCATTACTATGTTTGTAAATGTGCTATATAAATAAATTGACATTGACATAAC |       |       |       |       |       |       |       | 20141 |
| NorthernPike            | -----                                                                         |       |       |       |       |       |       |       | 0     |
| SpottedGar              | -----                                                                         |       |       |       |       |       |       |       | 0     |
| ParamormyropsKingsLeyae | -----                                                                         |       |       |       |       |       |       |       | 0     |

| Majority                | -----                                                                            |       |       |       |       |       |       |       |       |
|-------------------------|----------------------------------------------------------------------------------|-------|-------|-------|-------|-------|-------|-------|-------|
|                         | 62330                                                                            | 62340 | 62350 | 62360 | 62370 | 62380 | 62390 | 62400 |       |
| Human                   | AGGTATACTTCTGCATCTTCCACCTACATAAAGTTTTGTTTTGTTTTTAAATGTTTCAGAGGGAAAATTTCAAAGGGTCC |       |       |       |       |       |       |       | 62347 |
| AsianBonytongue         | -----                                                                            |       |       |       |       |       |       |       | 0     |
| Reedfish                | CTGAAAACAGAGCATAACAGGAGAGCGAGAAAAGACTGGAATATTGGCCTTTACATTAACCTTTTAGGGCTAATTTTTTT |       |       |       |       |       |       |       | 20221 |
| NorthernPike            | -----                                                                            |       |       |       |       |       |       |       | 0     |
| SpottedGar              | -----                                                                            |       |       |       |       |       |       |       | 0     |
| ParamormyropsKingsLeyae | -----                                                                            |       |       |       |       |       |       |       | 0     |

Sunday, May 01, 2022 09:44 PM

```

Majority -----
                |-----|
                |62410|62420|62430|62440|62450|62460|62470|62480|
                |-----|
Human           TGGAGGGCTTTCTAACAAATTGGCATATTCATTGTTAGATAAATTTGGCAGTCGGACCTCAGTATTGCTGGGAAAGAATTCA 62427
AsianBonytongue ----- 0
Reedfish       TTTCCATATCTCCCAGGGCTGAATATTTTCCAAAACTAACATTTTAAAAAAGAACACAAAGCAATTGTTTAACATA 20301
NorthernPike   ----- 0
SpottedGar     ----- 0
ParamormyropsKingsLeyae ----- 0
    
```

```

Majority -----
                |-----|
                |62490|62500|62510|62520|62530|62540|62550|62560|
                |-----|
Human           ACTCCTAAAAAACTTAGTGTGTGTTTAGTAATTTTGTATCAGCACTTTTAGCATTAACTAGATACTGTGACTCAAACCC 62507
AsianBonytongue ----- 0
Reedfish       TCAAATCAAATCAACAAAAATATTTACTTTTGACAAATGTTACTGTCTTGCATGTTGTATGAGCCTGCATACTATATAT 20381
NorthernPike   ----- 0
SpottedGar     ----- 0
ParamormyropsKingsLeyae ----- 0
    
```

```

Majority -----
                |-----|
                |62570|62580|62590|62600|62610|62620|62630|62640|
                |-----|
Human           AGCTCTTTTCTCATAAGGTATCATTTTCTCTTTGATAACATTGAAGTAGTCACCTAAGAGTGAATTTTGCTACTTATCTT 62587
AsianBonytongue ----- 0
Reedfish       TTCACATACATATCACATACATTTTACACAGCAAAGTCCTGCAAAGTCTGATCTCGCTCAAAGCAGCCAATTTTCAGTCAT 20461
NorthernPike   ----- 0
SpottedGar     ----- 0
ParamormyropsKingsLeyae ----- 0
    
```

```

Majority -----
                |-----|
                |62650|62660|62670|62680|62690|62700|62710|62720|
                |-----|
Human           TTGATATTTTATCTATTGTGTAGAAACATCAGTTCATTACTTATCTCACATTTTCCCTATAGGAATGCTACATTAGTAAA 62667
AsianBonytongue ----- 0
Reedfish       TGCCCCATTGCACTCCTTACAATATGTGTGCTTTGGTGCCTACTTTTCAATTGTCTGTTGCTGCACTTTTCTCACATATA 20541
NorthernPike   ----- 0
SpottedGar     ----- 0
ParamormyropsKingsLeyae ----- 0
    
```

```

Majority -----
                |-----|
                |62730|62740|62750|62760|62770|62780|62790|62800|
                |-----|
Human           TGAATACCTATCTTCAGTGCTTTCTTTCACCTTTACACCAGGGTATTCAATTAATAGTTATGTTATTCTGGCTGATAAAGT 62747
AsianBonytongue ----- 0
Reedfish       TTGTTAGTGTGACTGTAGAGAGACAAGTCACCCATTTGCCATCGTGCCATGCCACTGCCACCAAGTTTCTGCCCGCAT 20621
NorthernPike   ----- 0
SpottedGar     ----- 0
ParamormyropsKingsLeyae ----- 0
    
```

```

Majority -----
                |-----|
                |62810|62820|62830|62840|62850|62860|62870|62880|
                |-----|
Human           TGATTGATACATGGCTTCCACTTTTATGTGATGATAGGTACCTTGCCCTAACCCAAATGTAATTCAAATCCTGATGTGTAT 62827
AsianBonytongue ----- 0
Reedfish       GAAAACCGGATTGTCACCTCTTTTCATCTTCTGAACTTTTATGAACTTTATGCATGGCATTATAGCCTGGCTCACCCCAT 20701
NorthernPike   ----- 0
SpottedGar     ----- 0
ParamormyropsKingsLeyae ----- 0
    
```

Sunday, May 01, 2022 09:44 PM

Majority -----  
 |-----|-----|-----|-----|-----|-----|-----|-----|  
 | 62890 | 62900 | 62910 | 62920 | 62930 | 62940 | 62950 | 62960 |  
 |-----|-----|-----|-----|-----|-----|-----|-----|  
 Human GAACTCTCTTTTCAGTTTTTACCAGTGTCTGATTGAAGTGGATGAATCTGTGTTGAATTATTTTCTAGGTTAGTTTTTAGG 62907  
 AsianBonytongue ----- 0  
 Reedfish GGGATTTGCTTCTGTTTATTACAGAAGTGAATAAACTTTGCAGCAGCACGTACCTATCACCACGCTGCATAACCTGTCC 20781  
 NorthernPike ----- 0  
 SpottedGar ----- 0  
 ParamormyropsKingsLeyae ----- 0

Majority -----  
 |-----|-----|-----|-----|-----|-----|-----|-----|  
 | 62970 | 62980 | 62990 | 63000 | 63010 | 63020 | 63030 | 63040 |  
 |-----|-----|-----|-----|-----|-----|-----|-----|  
 Human TAGGTAGATTAGTCCATAAAAAAATTCGTATATTAAGAGAAAAGGTTTTATATTTCCAGAGGTGAGAATATTTGAATTAA 62987  
 AsianBonytongue ----- 0  
 Reedfish AAAGCCACTAGGGACAAAGCACGTTTGGACCAATGCTCCCTGAAGTTATATCACCAGTTCTGTCCCATCTCTATTTGTA 20861  
 NorthernPike ----- 0  
 SpottedGar ----- 0  
 ParamormyropsKingsLeyae ----- 0

Majority -----  
 |-----|-----|-----|-----|-----|-----|-----|-----|  
 | 63050 | 63060 | 63070 | 63080 | 63090 | 63100 | 63110 | 63120 |  
 |-----|-----|-----|-----|-----|-----|-----|-----|  
 Human AAGCTTTATATACTTAAGCAACTGTAGAGGTTTACTTTTTCCATAACACGACATGTTTATTCTTCTAATGAAAAGTTAAC 63067  
 AsianBonytongue ----- 0  
 Reedfish ATGCCACAGCAGCTTCATCTCGTCTTTTGTGTGGGTTTCCACTTTGAAAAATGAGAATGCGAAAAACCCGAGCCCGC 20941  
 NorthernPike ----- 0  
 SpottedGar ----- 0  
 ParamormyropsKingsLeyae ----- 0

Majority -----  
 |-----|-----|-----|-----|-----|-----|-----|-----|  
 | 63130 | 63140 | 63150 | 63160 | 63170 | 63180 | 63190 | 63200 |  
 |-----|-----|-----|-----|-----|-----|-----|-----|  
 Human AGTATGTTACCTGTCTCTAGTTTGTTCAGCTTATATCCAGCTGAACTAGAAATGGTGATTATATAGGAGCAGAAAA 63147  
 AsianBonytongue ----- 0  
 Reedfish GATTCAAAAAATTTCTCTGCC-TACCTGTTTGTCTCATCTGACAGTAGCTGAAAAGCAGCATCAGGAGAGAGCAGCCTGA 21020  
 NorthernPike ----- 0  
 SpottedGar ----- 0  
 ParamormyropsKingsLeyae ----- 0

Majority -----  
 |-----|-----|-----|-----|-----|-----|-----|-----|  
 | 63210 | 63220 | 63230 | 63240 | 63250 | 63260 | 63270 | 63280 |  
 |-----|-----|-----|-----|-----|-----|-----|-----|  
 Human AGTACAAGATAATCATAGCGGTAACATAGTCCTTTATAATTCATGATGTATTTTCCACATATGTTGCTTTAATTTACTCC 63227  
 AsianBonytongue ----- 0  
 Reedfish AGTAGTTCAACAGCTGGTGATCTGTCTGTCAGTAGCAAGCCATGCCTTCTTGTGAAGTCAGGTAGCCAGATCGGCTCC 21100  
 NorthernPike ----- 0  
 SpottedGar ----- 0  
 ParamormyropsKingsLeyae ----- 0

Majority -----  
 |-----|-----|-----|-----|-----|-----|-----|-----|  
 | 63290 | 63300 | 63310 | 63320 | 63330 | 63340 | 63350 | 63360 |  
 |-----|-----|-----|-----|-----|-----|-----|-----|  
 Human TCTTAATAACCCCTTGAAGAAGCATGACAGCCATTGTCATCATTCTGTTTTCCCGATTAAGAAATGAGATTGAGAGAGG 63307  
 AsianBonytongue ----- 0  
 Reedfish CATGGATCAATTTCTGGGTATTCTCCCATGCCAACCTTGTCTGATGATGTACCAGCAGCGCAAATGCGCTCAGCTGCCAG 21180  
 NorthernPike ----- 0  
 SpottedGar ----- 0  
 ParamormyropsKingsLeyae ----- 0

Sunday, May 01, 2022 09:44 PM

```

Majority -----
      63370  63380  63390  63400  63410  63420  63430  63440
Human      TCAAATAACTTGCTTAAGATGACCGAAAAGAGTCTAGGCTTTTAAATTAATCCTAGACCTGGCACTCGTCAGTTTCAGAAC 63387
AsianBonytongue ----- 0
Reedfish   CCCGACCAGCTGGGGCGGCATCGGCTGGTCTCCGATCGGCTGATGCCGGCTCCTCAATCTCTTCCCTCAATCTCCTGATCAC 21260
NorthernPike ----- 0
SpottedGar ----- 0
ParamormyropsKingsLeyae ----- 0
    
```

```

Majority -----
      63450  63460  63470  63480  63490  63500  63510  63520
Human      TTTTCGGGAATGACATTGGATTGCTAATTTTCATCAAGATAATCTGATTGGGGGTGAACATTTTCAGGTTAAGGAAAATAC 63467
AsianBonytongue ----- 0
Reedfish   TGTCTATGAAATCC---GACTCTGAAAAATCAGAGTCAGACTCCGCGATAATGCGCAAAATGTCATCTGCCGAGTATTTT 21337
NorthernPike ----- 0
SpottedGar ----- 0
ParamormyropsKingsLeyae ----- 0
    
```

```

Majority -----
      63530  63540  63550  63560  63570  63580  63590  63600
Human      TAGTTTTTTTTCTTTTTGCCTCATTTTATGGGAATTGCTATTATGTGTTAGGATAAATTTGGTTTGAAGCAACTTTGTACA 63547
AsianBonytongue ----- 0
Reedfish   CTTTTCTCGACTCGCTTAGCTCCCTCGTGAGATGTTGATGACATGTTGTCTTTGTTTACATTTTCGCAACTCACGCACACG 21417
NorthernPike ----- 0
SpottedGar ----- 0
ParamormyropsKingsLeyae ----- 0
    
```

```

Majority -----
      63610  63620  63630  63640  63650  63660  63670  63680
Human      ATGTGGCATCAAATAGCAGTTACCTTCTAAAAGTACTGAATCATATAAGTACTGCCATCCAGCAATAAATATATGTAT 63627
AsianBonytongue ----- 0
Reedfish   CAAGGATCATTGTTGAGTCAACGAGTCTAGCATTCCTCCAAGCACAGAGGGAATGCCAGTGACGTGACAATGAGTTTTG 21497
NorthernPike ----- 0
SpottedGar ----- 0
ParamormyropsKingsLeyae ----- 0
    
```

```

Majority -----
      63690  63700  63710  63720  63730  63740  63750  63760
Human      AATAAAATTAACCTTATTGAGCAGAGTAGTGTGGTACTACTTTGGTAGGACTTCTGTGTTGTGATCCTTATTAGTTTTTT 63707
AsianBonytongue ----- 0
Reedfish   TCGCCATTAA---CAGCTGATTGTTGCCCTCTATCCCTGGATGTCAACTTTTGTGACATCCACCCTCAACCCCTCCTGT 21574
NorthernPike ----- 0
SpottedGar ----- 0
ParamormyropsKingsLeyae ----- 0
    
```

```

Majority -----
      63770  63780  63790  63800  63810  63820  63830  63840
Human      TAAAATAACCTATTGCAATTTTAAAAAATAAAAGTATTAGCATGGATGCTTAGCTGGTTGTATTTTAGGTTGAAGTA 63787
AsianBonytongue ----- 0
Reedfish   CGACAAAAGTCGACATCCGCCCTAAAAGAGTTAAAGAAAGTGAAGTAAAATCTCATGAAAAGAAATGATCCTCTGCATA 21654
NorthernPike ----- 0
SpottedGar ----- 0
ParamormyropsKingsLeyae ----- 0
    
```

Sunday, May 01, 2022 09:44 PM

| Majority                |  | -----                                                                            |       |       |       |       |       |       |       |       |
|-------------------------|--|----------------------------------------------------------------------------------|-------|-------|-------|-------|-------|-------|-------|-------|
|                         |  | 63850                                                                            | 63860 | 63870 | 63880 | 63890 | 63900 | 63910 | 63920 |       |
| Human                   |  | GCATTTTCTATTTAAGGAAGATAATATTTGGGGGAAAGTAATACATGGACAGCTGGAACAGCAAATTTGATATATGAAA  |       |       |       |       |       |       |       | 63867 |
| AsianBonytongue         |  | -----                                                                            |       |       |       |       |       |       |       | 0     |
| Reedfish                |  | GAGAGGAACAGCAGATGTATATGTTGTCTGGCTGAAAGATTGAAGAGGTGGAAGAAAAGAGGGTAATCTTTGACAAACAT |       |       |       |       |       |       |       | 21734 |
| NorthernPike            |  | -----                                                                            |       |       |       |       |       |       |       | 0     |
| SpottedGar              |  | -----                                                                            |       |       |       |       |       |       |       | 0     |
| ParamormyropsKingsLeyae |  | -----                                                                            |       |       |       |       |       |       |       | 0     |

| Majority                |  | -----                                                                           |       |       |       |       |       |       |       |       |
|-------------------------|--|---------------------------------------------------------------------------------|-------|-------|-------|-------|-------|-------|-------|-------|
|                         |  | 63930                                                                           | 63940 | 63950 | 63960 | 63970 | 63980 | 63990 | 64000 |       |
| Human                   |  | TTTGAATCCTTTTCCTGGTAGCTTTTAAGTTCGAGTTTTTGTGTTGAGTTTTATTACTAAAATTATACTTTCACAAATT |       |       |       |       |       |       |       | 63947 |
| AsianBonytongue         |  | -----                                                                           |       |       |       |       |       |       |       | 0     |
| Reedfish                |  | TATGAGAAGCTGGTCTAATGAGTTCAGACCTTTTAAATTTGTTCCCTAATATAAATGCATGCTCTGTGTGTGTCAGCAT |       |       |       |       |       |       |       | 21814 |
| NorthernPike            |  | -----                                                                           |       |       |       |       |       |       |       | 0     |
| SpottedGar              |  | -----                                                                           |       |       |       |       |       |       |       | 0     |
| ParamormyropsKingsLeyae |  | -----                                                                           |       |       |       |       |       |       |       | 0     |

| Majority                |  | -----                                                                            |       |       |       |       |       |       |       |       |
|-------------------------|--|----------------------------------------------------------------------------------|-------|-------|-------|-------|-------|-------|-------|-------|
|                         |  | 64010                                                                            | 64020 | 64030 | 64040 | 64050 | 64060 | 64070 | 64080 |       |
| Human                   |  | TTTATTTTTTGTTTAAGATTGCTGATATGCTTTATTCACTTTTACAGGCCCTAGATGGTCAGAATATTTATAATGCCTGC |       |       |       |       |       |       |       | 64027 |
| AsianBonytongue         |  | -----                                                                            |       |       |       |       |       |       |       | 0     |
| Reedfish                |  | GTATGATCTTTATAAATTCCTTATAAACATTTTATTACAATTGTGACTTGTAATTAGGGTTGCCACAATATAAGAACTGT |       |       |       |       |       |       |       | 21894 |
| NorthernPike            |  | -----                                                                            |       |       |       |       |       |       |       | 0     |
| SpottedGar              |  | -----                                                                            |       |       |       |       |       |       |       | 0     |
| ParamormyropsKingsLeyae |  | -----                                                                            |       |       |       |       |       |       |       | 0     |

| Majority                |  | -----                                                                            |       |       |       |       |       |       |       |       |
|-------------------------|--|----------------------------------------------------------------------------------|-------|-------|-------|-------|-------|-------|-------|-------|
|                         |  | 64090                                                                            | 64100 | 64110 | 64120 | 64130 | 64140 | 64150 | 64160 |       |
| Human                   |  | TGTACCCTAAGGATTGATTTTTCCAAACTTGTGAATTTGAATGTAAAATACAACAATGATAAAAGTAGGGATTATACTCG |       |       |       |       |       |       |       | 64107 |
| AsianBonytongue         |  | -----                                                                            |       |       |       |       |       |       |       | 0     |
| Reedfish                |  | AGTAGTCTATGGCAGTACCAGTGAACCTTTCACAATACTAGATATCGTTCAACACCAGTGAACAGCAAGTGGTGGAAATT |       |       |       |       |       |       |       | 21974 |
| NorthernPike            |  | -----                                                                            |       |       |       |       |       |       |       | 0     |
| SpottedGar              |  | -----                                                                            |       |       |       |       |       |       |       | 0     |
| ParamormyropsKingsLeyae |  | -----                                                                            |       |       |       |       |       |       |       | 0     |

| Majority                |  | -----                                                                              |       |       |       |       |       |       |       |       |
|-------------------------|--|------------------------------------------------------------------------------------|-------|-------|-------|-------|-------|-------|-------|-------|
|                         |  | 64170                                                                              | 64180 | 64190 | 64200 | 64210 | 64220 | 64230 | 64240 |       |
| Human                   |  | ACCTGATCTTCCATCTGGGGATGGACAACCTGCATTGGACCCAGCTATTGCTGCAGCATTGCCAAGGAGACATCCCTCT    |       |       |       |       |       |       |       | 64187 |
| AsianBonytongue         |  | -----                                                                              |       |       |       |       |       |       |       | 0     |
| Reedfish                |  | TTATAATGTTGAAGAGATTTTGGCATAGGGCCTATAAAGGATGATATTAGCATGGACTGCTTAGTTCCTACTAGACAGTTAC |       |       |       |       |       |       |       | 22054 |
| NorthernPike            |  | -----                                                                              |       |       |       |       |       |       |       | 0     |
| SpottedGar              |  | -----                                                                              |       |       |       |       |       |       |       | 0     |
| ParamormyropsKingsLeyae |  | -----                                                                              |       |       |       |       |       |       |       | 0     |

| Majority                |  | -----                                                                            |       |       |       |       |       |       |       |       |
|-------------------------|--|----------------------------------------------------------------------------------|-------|-------|-------|-------|-------|-------|-------|-------|
|                         |  | 64250                                                                            | 64260 | 64270 | 64280 | 64290 | 64300 | 64310 | 64320 |       |
| Human                   |  | TAGGTATGATTTTTATTGTCTTAACCACTTTTCTCCCATTTTGCCAAATGGAAAAGTACCAGTAAGTATAATGAATCCCC |       |       |       |       |       |       |       | 64267 |
| AsianBonytongue         |  | -----                                                                            |       |       |       |       |       |       |       | 0     |
| Reedfish                |  | CTTACATGTACACCTTCCATGTTTGTCTCTGACATGTACTTCTCCACTAACTAAAAAATATTGCTTACTAAACATTA    |       |       |       |       |       |       |       | 22134 |
| NorthernPike            |  | -----                                                                            |       |       |       |       |       |       |       | 0     |
| SpottedGar              |  | -----                                                                            |       |       |       |       |       |       |       | 0     |
| ParamormyropsKingsLeyae |  | -----                                                                            |       |       |       |       |       |       |       | 0     |

Sunday, May 01, 2022 09:44 PM

```

Majority -----
                |-----|
                |64330|64340|64350|64360|64370|64380|64390|64400|
                |-----|
Human           |CCATTTGGACCTTACCAAATTGTGTTAGGTTTCGTGAGTTTCTTTTCTCAAGTGAGAAGGCATATGAATACTGTAA| 64347
AsianBonytongue|-----| 0
Reedfish       |GTTTATTAAAGTACAGTTATTCTATCTGTACACCTGGATTTTCTTGAATTCATTTTTCAAGATATTTTAAAT---TGAA| 22210
NorthernPike   |-----| 0
SpottedGar     |-----| 0
ParamormyropsKingsLeyae|-----| 0
    
```

```

Majority -----
                |-----|
                |64410|64420|64430|64440|64450|64460|64470|64480|
                |-----|
Human           |GAAAAACCCAAAGTATCTTTTATAAGTCTAATTTAAATTTATATGTTAGTTTTGTTCCTTTTAATACCTTCAGCTTCTCTT| 64427
AsianBonytongue|-----| 0
Reedfish       |ACATCTTTTAAATCTGTTTTTGTAAACAACATGCTTTTTAAAGCCTGGTTTCTCATGGAGTCACCTATTAGGGTTCTAAT| 22290
NorthernPike   |-----| 0
SpottedGar     |-----| 0
ParamormyropsKingsLeyae|-----| 0
    
```

```

Majority -----
                |-----|
                |64490|64500|64510|64520|64530|64540|64550|64560|
                |-----|
Human           |CCATGCCACTCTCCCAGAACAAAAGAAGAAAAGCTCTAATGAAGAAATACTGTTGAATTCTTAATGCCATATTTTACACTT| 64507
AsianBonytongue|-----| 0
Reedfish       |ATTTGCTAAAGAGTAACAGATAAGTCAAAGTCTCCCTCTTTTTTATTTTTTTTACATTTGTCCAAACCTTTGATTTTCATG| 22370
NorthernPike   |-----| 0
SpottedGar     |-----| 0
ParamormyropsKingsLeyae|-----| 0
    
```

```

Majority -----
                |-----|
                |64570|64580|64590|64600|64610|64620|64630|64640|
                |-----|
Human           |TAAACTTGATGTCACTATGCCTGAGTCTAGGCCTAAAGTTCTTGTGTGTGTTTTTTCAGTGCTGATCTGATGTTTTTAATT| 64587
AsianBonytongue|-----| 0
Reedfish       |TAAGAAATTATCTTGTGACGATTACTTTTAAATCC---ATTATTTTCAGACCACCTGTAAAACACTCTTTGTTTCAGCCATTTT| 22447
NorthernPike   |-----| 0
SpottedGar     |-----| 0
ParamormyropsKingsLeyae|-----| 0
    
```

```

Majority -----
                |-----|
                |64650|64660|64670|64680|64690|64700|64710|64720|
                |-----|
Human           |TAGCATTGCATGGAAACAGTGAATGTTAAGAGACAAAACATACATAATGGGTGGAGGCATATGGGATTTTTTTTGAAGC| 64667
AsianBonytongue|-----| 0
Reedfish       |CAAAGTTTCGTATGTCTTTTTTGTCTTAGCCTGTGTACAAGTCCAGAATTAGAACATTAAGTGGGCCTTTAGTTCAAATGG| 22527
NorthernPike   |-----| 0
SpottedGar     |-----| 0
ParamormyropsKingsLeyae|-----| 0
    
```

```

Majority -----
                |-----|
                |64730|64740|64750|64760|64770|64780|64790|64800|
                |-----|
Human           |ATATTGTAGTGGCCTTTTAAAAAACAATTTAAACTAGAAAGAAATTTCTGTAAAATTAATTTTGTCTATTTCTTTGCATT| 64747
AsianBonytongue|-----| 0
Reedfish       |AAACTACATTATTCTCACAAATGTACCTTTAAATATGACATATGTGCTTTCACTATGTATGTTACATATTTCTGTCTT| 22607
NorthernPike   |-----| 0
SpottedGar     |-----| 0
ParamormyropsKingsLeyae|-----| 0
    
```

Sunday, May 01, 2022 09:44 PM

| Majority                | -----                                                                              |       |       |       |       |       |       |       |       |
|-------------------------|------------------------------------------------------------------------------------|-------|-------|-------|-------|-------|-------|-------|-------|
|                         | 64810                                                                              | 64820 | 64830 | 64840 | 64850 | 64860 | 64870 | 64880 |       |
| Human                   | TTGTCCTTAATCATTTATATTTTACTTTGTACCACAATGGACTTGAGCCACCTAATAAAAAATACAGTGCAAACATATGCAA |       |       |       |       |       |       |       | 64827 |
| AsianBonytongue         | -----                                                                              |       |       |       |       |       |       |       | 0     |
| Reedfish                | TAGCAATGAAGTGTTTCATTTTCGCTCATCCTGCTAACTGGCATAATTCAGTGCTTTGAAGCACTACATTTTATTTTGG    |       |       |       |       |       |       |       | 22687 |
| NorthernPike            | -----                                                                              |       |       |       |       |       |       |       | 0     |
| SpottedGar              | -----                                                                              |       |       |       |       |       |       |       | 0     |
| ParamormyropsKingsLeyae | -----                                                                              |       |       |       |       |       |       |       | 0     |

| Majority                | -----                                                                             |       |       |       |       |       |       |       |       |
|-------------------------|-----------------------------------------------------------------------------------|-------|-------|-------|-------|-------|-------|-------|-------|
|                         | 64890                                                                             | 64900 | 64910 | 64920 | 64930 | 64940 | 64950 | 64960 |       |
| Human                   | CTTATAGTTGATAGCGTGGAATCAAGATGAAGAAAAAATAAGGAAAATCTTACTTTGTAAAGTAAAATGTGCAAAGTGAT  |       |       |       |       |       |       |       | 64907 |
| AsianBonytongue         | -----                                                                             |       |       |       |       |       |       |       | 0     |
| Reedfish                | TATTTAACAACTTGAGCAGCTCGATTTCATCTCCAGTGTAGGCAAGCCAAATAACCACTTTGTTTAGAAACTTACCACAAT |       |       |       |       |       |       |       | 22767 |
| NorthernPike            | -----                                                                             |       |       |       |       |       |       |       | 0     |
| SpottedGar              | -----                                                                             |       |       |       |       |       |       |       | 0     |
| ParamormyropsKingsLeyae | -----                                                                             |       |       |       |       |       |       |       | 0     |

| Majority                | -----                                                                            |       |       |       |       |       |       |       |       |
|-------------------------|----------------------------------------------------------------------------------|-------|-------|-------|-------|-------|-------|-------|-------|
|                         | 64970                                                                            | 64980 | 64990 | 65000 | 65010 | 65020 | 65030 | 65040 |       |
| Human                   | TTATAAGTTAAGATGGAATTTTAGAGTTTCCTTTTATTTGATGTATTTCTTGATTTCTAGTATTGGTAAGATTATCTTTA |       |       |       |       |       |       |       | 64987 |
| AsianBonytongue         | -----                                                                            |       |       |       |       |       |       |       | 0     |
| Reedfish                | TTTTACTTGCTACAGCTGTTTGTGCATTACAGTGCATGTGACATTTCCACGCAACCAAGAAGTGTACAAAACCAGTTAC  |       |       |       |       |       |       |       | 22847 |
| NorthernPike            | -----                                                                            |       |       |       |       |       |       |       | 0     |
| SpottedGar              | -----                                                                            |       |       |       |       |       |       |       | 0     |
| ParamormyropsKingsLeyae | -----                                                                            |       |       |       |       |       |       |       | 0     |

| Majority                | -----                                                                            |       |       |       |       |       |       |       |       |
|-------------------------|----------------------------------------------------------------------------------|-------|-------|-------|-------|-------|-------|-------|-------|
|                         | 65050                                                                            | 65060 | 65070 | 65080 | 65090 | 65100 | 65110 | 65120 |       |
| Human                   | AGTCATGATTTTATATATATGGAACCTCAAATTTGATAGTTGACAACTAGCTTTTACAATTTAGTTTATGTCTGTCATT  |       |       |       |       |       |       |       | 65067 |
| AsianBonytongue         | -----                                                                            |       |       |       |       |       |       |       | 0     |
| Reedfish                | AAAATAGACAGATGCTTAAAGTACATTCGTGGACATGTTTGCATTAATCGGACATGGTTTTAAAAAGCGATTTCATTACA |       |       |       |       |       |       |       | 22927 |
| NorthernPike            | -----                                                                            |       |       |       |       |       |       |       | 0     |
| SpottedGar              | -----                                                                            |       |       |       |       |       |       |       | 0     |
| ParamormyropsKingsLeyae | -----                                                                            |       |       |       |       |       |       |       | 0     |

| Majority                | -----                                                                            |       |       |       |       |       |       |       |       |
|-------------------------|----------------------------------------------------------------------------------|-------|-------|-------|-------|-------|-------|-------|-------|
|                         | 65130                                                                            | 65140 | 65150 | 65160 | 65170 | 65180 | 65190 | 65200 |       |
| Human                   | TCAAAAGAAAAATAGTATAATTAAGTAGTTATTGGAAATATTTACTTCCCAATATATAACAGTCATGCCATCAGTTTGT  |       |       |       |       |       |       |       | 65147 |
| AsianBonytongue         | -----                                                                            |       |       |       |       |       |       |       | 0     |
| Reedfish                | CCTTCATTTTGTCTCCTTTTACAACATCAAGACTGTACAAGTTGAGTGATTAAGACTCAACATCTGATCAGTCACATCAT |       |       |       |       |       |       |       | 23007 |
| NorthernPike            | -----                                                                            |       |       |       |       |       |       |       | 0     |
| SpottedGar              | -----                                                                            |       |       |       |       |       |       |       | 0     |
| ParamormyropsKingsLeyae | -----                                                                            |       |       |       |       |       |       |       | 0     |

| Majority                | -----                                                                            |       |       |       |       |       |       |       |       |
|-------------------------|----------------------------------------------------------------------------------|-------|-------|-------|-------|-------|-------|-------|-------|
|                         | 65210                                                                            | 65220 | 65230 | 65240 | 65250 | 65260 | 65270 | 65280 |       |
| Human                   | GAATATGAAATCTGTAAGTGGTATATATGTAGAGAGAGATACTCTAAGGCAGTTGGTATTTGATTCTGGTAACTAATAAG |       |       |       |       |       |       |       | 65227 |
| AsianBonytongue         | -----                                                                            |       |       |       |       |       |       |       | 0     |
| Reedfish                | GGCACTCGCAAAGCATGCATGAAGCTATTTATGAATTAATCTCTAATGGGATAAAAGAGGAAAATACCAAAGCCTGTGT  |       |       |       |       |       |       |       | 23087 |
| NorthernPike            | -----                                                                            |       |       |       |       |       |       |       | 0     |
| SpottedGar              | -----                                                                            |       |       |       |       |       |       |       | 0     |
| ParamormyropsKingsLeyae | -----                                                                            |       |       |       |       |       |       |       | 0     |



Sunday, May 01, 2022 09:44 PM

```

Majority -----
                |-----|
                |65290|65300|65310|65320|65330|65340|65350|65360|
                |-----|
Human           |AATTAACTACCTGTTAATTCTGGCAGCTGCAAACAAATCTGACCCTTTATTTCGAATTTTCTGGTGTATCCTAGCAGAAGT| 65307
AsianBonytongue|-----| 0
Reedfish       |TTGTGTTTTGACTTTTTTAAAACAATAATAATCATGATTCTTGCAGTCGTGTACTGAAATTCTCCTGTCGTAAGGGCAGT| 23167
NorthernPike   |-----| 0
SpottedGar     |-----| 0
ParamormyropsKingsLeyae|-----| 0
    
```

```

Majority -----
                |-----|
                |65370|65380|65390|65400|65410|65420|65430|65440|
                |-----|
Human           |CATAGTGTTTATTATGACTGTAGTAGATGCTTTAGGTCACCTTACACTCTTTCCTGACAGAATCTCTACTACCTCTGTGTG| 65387
AsianBonytongue|-----| 0
Reedfish       |TTTCTAGATAAGTTTTTTCTTTTGAATATATAGTGTGATCATGGAGTGCTGTATCATCATCACCATGAGCCATTCTGTG| 23247
NorthernPike   |-----| 0
SpottedGar     |-----| 0
ParamormyropsKingsLeyae|-----| 0
    
```

```

Majority -----
                |-----|
                |65450|65460|65470|65480|65490|65500|65510|65520|
                |-----|
Human           |TGCTAGCTTAATTCGTAATTCAGTTAATAAGATTGAATATTTACAGTGTGCAGTTTTTAAAGGCAAAGTCAGGAATG| 65467
AsianBonytongue|-----| 0
Reedfish       |AGGTAGCTCTTATTCACATTTATCTCACATTACTTTGCCTACTGGAATAATTTAAAGTTATTTATTTTCAGCATTTTATG| 23327
NorthernPike   |-----| 0
SpottedGar     |-----| 0
ParamormyropsKingsLeyae|-----| 0
    
```

```

Majority -----
                |-----|
                |65530|65540|65550|65560|65570|65580|65590|65600|
                |-----|
Human           |AAAGAGTGAAACATGGTTTTTGCTTATAATTATTACTATAGATTATTTAAACTCTTTACTGATAGACATTGTTTTAGAAAG| 65547
AsianBonytongue|-----| 0
Reedfish       |TGGTCACTGAACAATAAGCCTACAGAATTTTCATTTTGCTTATTGTAAAAGACAAGGGGTCCCAACAAAGCCTTAACACAC| 23407
NorthernPike   |-----| 0
SpottedGar     |-----| 0
ParamormyropsKingsLeyae|-----| 0
    
```

```

Majority -----
                |-----|
                |65610|65620|65630|65640|65650|65660|65670|65680|
                |-----|
Human           |AATCAAAATTTATTGAGTAGCTTCTAGGTCATATTCATTTCAGCTAGGCACTTGGCAGATACATTACTTTGTTAAAATAGA| 65627
AsianBonytongue|-----| 0
Reedfish       |CACACTAAAACAGTCCCTGGTGTAAAGTAAACATTTTATTTTACAAAATTCCTTTTATACAGACCAATCCACAACCTTC| 23487
NorthernPike   |-----| 0
SpottedGar     |-----| 0
ParamormyropsKingsLeyae|-----| 0
    
```

```

Majority -----
                |-----|
                |65690|65700|65710|65720|65730|65740|65750|65760|
                |-----|
Human           |TGGTCTCATCAAGATTTTACATATAGTTTCTAAGAAGTTGAAAAATTCACATGCAACTCATCAAAGAAACAATTTAAAGA| 65707
AsianBonytongue|-----| 0
Reedfish       |CAGTATGCAGTCCGCTCCATTTGAGCTTTGCCTTCTGCTTCTGACTCTGACTCAACTGGCTGGATGGATTGCTTTTATG| 23567
NorthernPike   |-----| 0
SpottedGar     |-----| 0
ParamormyropsKingsLeyae|-----| 0
    
```

Sunday, May 01, 2022 09:44 PM

| Majority                | 65770                                                                             | 65780 | 65790 | 65800 | 65810 | 65820 | 65830 | 65840 |       |
|-------------------------|-----------------------------------------------------------------------------------|-------|-------|-------|-------|-------|-------|-------|-------|
| Human                   | TAAAATACCAAGAAACTCCAGCTAAAGATAAAAATACCAAGAAACTCCAGCTAGTATTAACAATGGACTACAATAATCACT |       |       |       |       |       |       |       | 65787 |
| AsianBonytongue         | -----                                                                             |       |       |       |       |       |       |       | 0     |
| Reedfish                | TTAGATCCTAGAATACTTCCGGTATCGACATAGCCCAACCAAGCACTTCTGGGTCAAATGGAACCTCTGAAACATGG     |       |       |       |       |       |       |       | 23647 |
| NorthernPike            | -----                                                                             |       |       |       |       |       |       |       | 0     |
| SpottedGar              | -----                                                                             |       |       |       |       |       |       |       | 0     |
| ParamormyropsKingsLeyae | -----                                                                             |       |       |       |       |       |       |       | 0     |

| Majority                | 65850                                                                            | 65860 | 65870 | 65880 | 65890 | 65900 | 65910 | 65920 |       |
|-------------------------|----------------------------------------------------------------------------------|-------|-------|-------|-------|-------|-------|-------|-------|
| Human                   | TCTTTGGACCCTACTGAGGTGTGTGTATTTGCCCATCTGGATATACTTAGATGTGCTTGGATCCTGGGTGGGAGGCTTGG |       |       |       |       |       |       |       | 65867 |
| AsianBonytongue         | -----                                                                            |       |       |       |       |       |       |       | 0     |
| Reedfish                | AGTCCTTCTCTGGCAGTATCCAAAGGCCCGACAAGGTTGTACCTCGGACTACGATTCTTATGAATCCCAGCGGGTGTCT  |       |       |       |       |       |       |       | 23727 |
| NorthernPike            | -----                                                                            |       |       |       |       |       |       |       | 0     |
| SpottedGar              | -----                                                                            |       |       |       |       |       |       |       | 0     |
| ParamormyropsKingsLeyae | -----                                                                            |       |       |       |       |       |       |       | 0     |

| Majority                | 65930                                                                             | 65940 | 65950 | 65960 | 65970 | 65980 | 65990 | 66000 |       |
|-------------------------|-----------------------------------------------------------------------------------|-------|-------|-------|-------|-------|-------|-------|-------|
| Human                   | TTAGAAGTCACGTGGATTCTTCTAGGGAATTTATCACCATTTTTCTTGTGATCTTATGACCTTGCTGAAACTTTTAAAAAC |       |       |       |       |       |       |       | 65947 |
| AsianBonytongue         | -----                                                                             |       |       |       |       |       |       |       | 0     |
| Reedfish                | TATACTGGGTCCAATCCAGCAGAGCACTGCCATCTACTGTACTGGGGGAAGAACTGCTCTTGATGGGCCAACTCCATCAC  |       |       |       |       |       |       |       | 23807 |
| NorthernPike            | -----                                                                             |       |       |       |       |       |       |       | 0     |
| SpottedGar              | -----                                                                             |       |       |       |       |       |       |       | 0     |
| ParamormyropsKingsLeyae | -----                                                                             |       |       |       |       |       |       |       | 0     |

| Majority                | 66010                                                                              | 66020 | 66030 | 66040 | 66050 | 66060 | 66070 | 66080 |       |
|-------------------------|------------------------------------------------------------------------------------|-------|-------|-------|-------|-------|-------|-------|-------|
| Human                   | AATAATAAAGTCATTTTTTTTCTCTTTGAGATGGAATCTCACTCTGTCGCCCGTGTGTCAGAGTGTGGTGGCGCAGTCTCGG |       |       |       |       |       |       |       | 66027 |
| AsianBonytongue         | -----                                                                              |       |       |       |       |       |       |       | 0     |
| Reedfish                | ACTATCTGCTAATTTTTCCCTTTGCATGAGGTATTGATCCAGTCCATCCCGGCTGAGTTATGCCTCCTTCCATACTATC    |       |       |       |       |       |       |       | 23887 |
| NorthernPike            | -----                                                                              |       |       |       |       |       |       |       | 0     |
| SpottedGar              | -----                                                                              |       |       |       |       |       |       |       | 0     |
| ParamormyropsKingsLeyae | -----                                                                              |       |       |       |       |       |       |       | 0     |

| Majority                | 66090                                                                            | 66100 | 66110 | 66120 | 66130 | 66140 | 66150 | 66160 |       |
|-------------------------|----------------------------------------------------------------------------------|-------|-------|-------|-------|-------|-------|-------|-------|
| Human                   | CTCACTGCAACTTCCGCCTCCCGGTTCAAGCGATTCTCCCGCCTCAGCCTCCTGAGCATCTGGGACTACAGGCGTGTAC  |       |       |       |       |       |       |       | 66107 |
| AsianBonytongue         | -----                                                                            |       |       |       |       |       |       |       | 0     |
| Reedfish                | CTTCCGTTATGGCTTCCCGACTGGGAAAGGGTCCAACACCGCTCTTAAATTATAAAACAAGTTTGTA AACCTCTATAAT |       |       |       |       |       |       |       | 23967 |
| NorthernPike            | -----                                                                            |       |       |       |       |       |       |       | 0     |
| SpottedGar              | -----                                                                            |       |       |       |       |       |       |       | 0     |
| ParamormyropsKingsLeyae | -----                                                                            |       |       |       |       |       |       |       | 0     |

| Majority                | 66170                                                                             | 66180 | 66190 | 66200 | 66210 | 66220 | 66230 | 66240 |       |
|-------------------------|-----------------------------------------------------------------------------------|-------|-------|-------|-------|-------|-------|-------|-------|
| Human                   | CACCACCCTGGCTAACTTTTGTCTTTTTTCGTAGAGATGAGATTTACCATGTTGGCCAGGCTGGTCTGGAACCTCTGA    |       |       |       |       |       |       |       | 66187 |
| AsianBonytongue         | -----                                                                             |       |       |       |       |       |       |       | 0     |
| Reedfish                | AGTAAAAATACCAGAGTTAATACCTTAATTGTAGAAGTTAAGGTTAAACATTATTATTACTATAGGAGCTTAGTGTA AAA |       |       |       |       |       |       |       | 24047 |
| NorthernPike            | -----                                                                             |       |       |       |       |       |       |       | 0     |
| SpottedGar              | -----                                                                             |       |       |       |       |       |       |       | 0     |
| ParamormyropsKingsLeyae | -----                                                                             |       |       |       |       |       |       |       | 0     |

Sunday, May 01, 2022 09:44 PM

```

Majority -----
                |-----|
                |66250|66260|66270|66280|66290|66300|66310|66320|
Human          |TCTCAGGTGATCTGCCCGCCTCAGCCTCCCAAAGTGCTGAGATTACAGGTGTGAGCCACCATGCCTGGCCGCTTTTGTTC| 66267
AsianBonytongue|-----|
Reedfish       |AGTCTTAACACTAAAATCCCTGGAGCCTATGAAAAAATCATAATGCCAGGCCACCTCAAATTCCTTCGCACCTCTTCAT| 24127
NorthernPike   |-----|
SpottedGar     |-----|
ParamormyropsKingsLeyae|-----|
    
```

```

Majority -----
                |-----|
                |66330|66340|66350|66360|66370|66380|66390|66400|
Human          |ATTTTTTGAGCGTTGTACATTTTTACATTAAAGGCGTGAAATTAAGTTGCTCGCTTTGCCAAAAAATTGTCTAGTGTCT| 66347
AsianBonytongue|-----|
Reedfish       |CAGCGTCTTTGTTTCGCAAATGTGTCAATCATCACAAGCAGCAAGCAGTTTGTCTGCCATACCTCAGTGACACGGATGA| 24207
NorthernPike   |-----|
SpottedGar     |-----|
ParamormyropsKingsLeyae|-----|
    
```

```

Majority -----
                |-----|
                |66410|66420|66430|66440|66450|66460|66470|66480|
Human          |TTTTCCACTTCTGTGTTGAATTTTTTAGTATAACGCATTTTTGTTTCTTCATCTCTGCCTCATAAGAAAAGGAAAAAGT| 66427
AsianBonytongue|-----|
Reedfish       |AGTGAGATGCAAAGTTCTCCCAGCTCAAGTCTGTTTATCTGGGTGTGAGGTGCCTGGAATTGTATAGGTAAATAATGTA| 24287
NorthernPike   |-----|
SpottedGar     |-----|
ParamormyropsKingsLeyae|-----|
    
```

```

Majority -----
                |-----|
                |66490|66500|66510|66520|66530|66540|66550|66560|
Human          |GTTTAGCCTTTCCTAAGTGACTTCTTTTTTTTATCTGTTTTAATGTTTTTGCATCTTGTATAACTGGGCTTTTTAACTA| 66507
AsianBonytongue|-----|
Reedfish       |TCTTTATTGGAGTACATGCATTTTCATGTCTGTTCCGTGTCTACAATGATCTAGGTAAATGTAGGAGGACAGGAAATGTG| 24367
NorthernPike   |-----|
SpottedGar     |-----|
ParamormyropsKingsLeyae|-----|
    
```

```

Majority -----
                |-----|
                |66570|66580|66590|66600|66610|66620|66630|66640|
Human          |TACTCAAAAATAGGTTAAAAGTAGGTGAGTTAAAGGTTTTAAAAATCAGATAATGGACCCTGGTTTTGATAATTCACAAG| 66587
AsianBonytongue|-----|
Reedfish       |AGGCAAGAAATGTTGAACACATAACTAAAACAACTTTATGTTAGAGTAATAATTACAAAATGCTGACGTGAAGTGATA| 24447
NorthernPike   |-----|
SpottedGar     |-----|
ParamormyropsKingsLeyae|-----|
    
```

```

Majority -----
                |-----|
                |66650|66660|66670|66680|66690|66700|66710|66720|
Human          |AGATAACCATTTATTTTCATATTTTTTATGTAATAACATGTTTCTGTACAAAATAAAATTGCTCTGTATTTGCAGATTT| 66667
AsianBonytongue|-----|
Reedfish       |ATGTTGTAAGACTGATGTCCAAATATCAAGTAAACACTTTCACAAAAGGTATAATGAAACAAGTGTGCTTTTATTCAAGA| 24527
NorthernPike   |-----|
SpottedGar     |-----|
ParamormyropsKingsLeyae|-----|
    
```

Sunday, May 01, 2022 09:44 PM

| Majority                | 66730                                                                            | 66740 | 66750 | 66760 | 66770 | 66780 | 66790 | 66800 |       |
|-------------------------|----------------------------------------------------------------------------------|-------|-------|-------|-------|-------|-------|-------|-------|
| Human                   | GCATTATCTTTTATT-GTAATTGACATTTTACTTAGAATTTGTTTTAAAAGATAGCTTTAATACCTGCGTAGCATGTTCA |       |       |       |       |       |       |       | 66746 |
| AsianBonytongue         | -----                                                                            |       |       |       |       |       |       |       | 0     |
| Reedfish                | AAATAACAAAAGAAAAGGAAATCGTTCAATATGCATATTGATGTCAATGAGTAAAAACCCAAGCCAAATATCAATCATC  |       |       |       |       |       |       |       | 24607 |
| NorthernPike            | -----                                                                            |       |       |       |       |       |       |       | 0     |
| SpottedGar              | -----                                                                            |       |       |       |       |       |       |       | 0     |
| ParamormyropsKingsLeyae | -----                                                                            |       |       |       |       |       |       |       | 0     |

| Majority                | 66810                                                                           | 66820 | 66830 | 66840 | 66850 | 66860 | 66870 | 66880 |       |
|-------------------------|---------------------------------------------------------------------------------|-------|-------|-------|-------|-------|-------|-------|-------|
| Human                   | TGGGTATGCCATACCTTTGAAAGTGGACATGTAGGCTATTCACATACTTTTTATTAAAACACCCTTGACTTTTTGCCTC |       |       |       |       |       |       |       | 66826 |
| AsianBonytongue         | -----                                                                           |       |       |       |       |       |       |       | 0     |
| Reedfish                | AGAAAGCCTGCTTGGTTGTTGCAGAGGTGAGAACTGCTGCCTCATAAGTAAAAGGTTGCAGTTTCGAGCCTGTTTGT   |       |       |       |       |       |       |       | 24687 |
| NorthernPike            | -----                                                                           |       |       |       |       |       |       |       | 0     |
| SpottedGar              | -----                                                                           |       |       |       |       |       |       |       | 0     |
| ParamormyropsKingsLeyae | -----                                                                           |       |       |       |       |       |       |       | 0     |

| Majority                | 66890                                                                           | 66900 | 66910 | 66920 | 66930 | 66940 | 66950 | 66960 |       |
|-------------------------|---------------------------------------------------------------------------------|-------|-------|-------|-------|-------|-------|-------|-------|
| Human                   | TCAAATTTCTTCTTAGACTAGATTCCTAGAATTAGAATTATTGGGTCAAAGAAAATGTTAAAGCCTGTTTACTTTATTT |       |       |       |       |       |       |       | 66906 |
| AsianBonytongue         | -----                                                                           |       |       |       |       |       |       |       | 0     |
| Reedfish                | CCCTGTTTTTCAGTAGTGAGCTGCTATTAGATAGATAGATAGATAGATAGATAGATAGATAGATAGATAGATA       |       |       |       |       |       |       |       | 24767 |
| NorthernPike            | -----                                                                           |       |       |       |       |       |       |       | 0     |
| SpottedGar              | -----                                                                           |       |       |       |       |       |       |       | 0     |
| ParamormyropsKingsLeyae | -----                                                                           |       |       |       |       |       |       |       | 0     |

| Majority                | 66970                                                                            | 66980 | 66990 | 67000 | 67010 | 67020 | 67030 | 67040 |       |
|-------------------------|----------------------------------------------------------------------------------|-------|-------|-------|-------|-------|-------|-------|-------|
| Human                   | GCAAATTTCTTCATCTAAAGGTGATATTAACCTTAACTAACATTAATTATATATGAGGCTGGGTGTCCTACTTTTTCCCC |       |       |       |       |       |       |       | 66986 |
| AsianBonytongue         | -----                                                                            |       |       |       |       |       |       |       | 0     |
| Reedfish                | CTTTATTAATCCCAATGGGAAATTCACATTCTTCAGCAGCAGCATACTGATAACAATAAATAATTAATTAAGAATGA    |       |       |       |       |       |       |       | 24847 |
| NorthernPike            | -----                                                                            |       |       |       |       |       |       |       | 0     |
| SpottedGar              | -----                                                                            |       |       |       |       |       |       |       | 0     |
| ParamormyropsKingsLeyae | -----                                                                            |       |       |       |       |       |       |       | 0     |

| Majority                | 67050                                                                             | 67060 | 67070 | 67080 | 67090 | 67100 | 67110 | 67120 |       |
|-------------------------|-----------------------------------------------------------------------------------|-------|-------|-------|-------|-------|-------|-------|-------|
| Human                   | TGCCAGCATACTATTTTTTAATTTACAAAGATTAATTTGATAGGCAAATGCCTATTTTTAATTTCTGTTAAGATTTAGTTT |       |       |       |       |       |       |       | 67066 |
| AsianBonytongue         | -----                                                                             |       |       |       |       |       |       |       | 0     |
| Reedfish                | TAATAATGCAGGTGAAAACAGACAATAACTATTATATAATAAAAACATACATTTGATTTGAGTCTGTAACACCTGGTGT   |       |       |       |       |       |       |       | 24927 |
| NorthernPike            | -----                                                                             |       |       |       |       |       |       |       | 0     |
| SpottedGar              | -----                                                                             |       |       |       |       |       |       |       | 0     |
| ParamormyropsKingsLeyae | -----                                                                             |       |       |       |       |       |       |       | 0     |

| Majority                | 67130                                                                            | 67140 | 67150 | 67160 | 67170 | 67180 | 67190 | 67200 |       |
|-------------------------|----------------------------------------------------------------------------------|-------|-------|-------|-------|-------|-------|-------|-------|
| Human                   | ACAATCTTTAAATGTTTATTGATAGTCACAATTTGCTAAATTGCTTGCCCTGCATTCTTTCTGTTAGGATGTACGGTAAT |       |       |       |       |       |       |       | 67146 |
| AsianBonytongue         | -----                                                                            |       |       |       |       |       |       |       | 0     |
| Reedfish                | AAATTTTGTACTCTGTAAGTTAGCGATTTTTTTTTTAATTGTTTTATTCTCTGTACATTAACGTAGTACAATGAAC     |       |       |       |       |       |       |       | 25007 |
| NorthernPike            | -----                                                                            |       |       |       |       |       |       |       | 0     |
| SpottedGar              | -----                                                                            |       |       |       |       |       |       |       | 0     |
| ParamormyropsKingsLeyae | -----                                                                            |       |       |       |       |       |       |       | 0     |

Sunday, May 01, 2022 09:44 PM

```

Majority -----
                |-----|
                |67210|67220|67230|67240|67250|67260|67270|67280|
                |-----|
Human           |TCTTATAAAATGCATAGTAAGGATATTAATATGCATATTTTGGATGAGCCAAGCCTTCAGCTTTATTCACTTATGTTAGG| 67226
AsianBonytongue|-----| 0
Reedfish       |TTACCTCTCCCTTAATGAATTGACGATGTTTATCTCCATTCTTTTCACAAGAGCAGTGATGACCACAGTTGCTGCTGTGG| 25087
NorthernPike   |-----| 0
SpottedGar     |-----| 0
ParamormyropsKingsLeyae|-----| 0
    
```

```

Majority -----
                |-----|
                |67290|67300|67310|67320|67330|67340|67350|67360|
                |-----|
Human           |TCAGTTTTTGGAAAAGTATTTTCAATAATCTCTCTTTTTAAATAATTGATCTCAATCCCAAAGTATTCATTTGTAGGAC| 67306
AsianBonytongue|-----| 0
Reedfish       |TTGATGCCTGGTCAGAATTATTTGTTATACCGGCAATCAAATATATGATGCCCGTGACCGCTATCAAGAGTATCATGCA| 25167
NorthernPike   |-----| 0
SpottedGar     |-----| 0
ParamormyropsKingsLeyae|-----| 0
    
```

```

Majority -----
                |-----|
                |67370|67380|67390|67400|67410|67420|67430|67440|
                |-----|
Human           |ATGAAGACACAATTTTCTTCTTCATACGTTTGGTGAATATTTTGGATCTCAGTTTCCACTTCTCTTTTGGCTTTTAAACA| 67386
AsianBonytongue|-----| 0
Reedfish       |TCATTTGCGCTTTGACAACAGACTCCCTTGCAGAATGAGTGAAAAACAACAGATTTGCTGTGATCTCGGACATCAGGCAA| 25247
NorthernPike   |-----| 0
SpottedGar     |-----| 0
ParamormyropsKingsLeyae|-----| 0
    
```

```

Majority -----
                |-----|
                |67450|67460|67470|67480|67490|67500|67510|67520|
                |-----|
Human           |TTGTTTATGGTGATATCCAATATTGCATGAGTGAGGTCATGCCTTTTAGAATAATAACTGAATCTTTTCTCTAATTATT| 67466
AsianBonytongue|-----| 0
Reedfish       |CATTTTGGCTGAGAACTGTGTTTTGAGTTACAACCCAGGTCAACATATTACTGTTGATGGGCTCCTGTTTCCATCCAAGG| 25327
NorthernPike   |-----| 0
SpottedGar     |-----| 0
ParamormyropsKingsLeyae|-----| 0
    
```

```

Majority -----
                |-----|
                |67530|67540|67550|67560|67570|67580|67590|67600|
                |-----|
Human           |TAATCAGATGACTTCAGCAAATAATATTGGTGGGATTAACCTCCTGCTCAGTCTTCCAGTAACAGTACTTGTTCAAAAAT| 67546
AsianBonytongue|-----| 0
Reedfish       |TCAGTTGCTCTTCTTGCAATCTCAACCAAGCCTGACAAATGTGGCATAAAGTTTTGAGTTGCGGCAGATTTGGAGACAA| 25407
NorthernPike   |-----| 0
SpottedGar     |-----| 0
ParamormyropsKingsLeyae|-----| 0
    
```

```

Majority -----
                |-----|
                |67610|67620|67630|67640|67650|67660|67670|67680|
                |-----|
Human           |GAAATAATTGATAGAGTATTTATTTCAAAAATTTTAAAGAACACAAATATAAGGTGATACTCTTTTGCTAAAATTTGTGG| 67626
AsianBonytongue|-----| 0
Reedfish       |AGTACATGTGCAATGCCACACCTCACTTAGGAACAGATCCCAGTTGTCCCAATTCAGTTACATGAAATCAGAGATCAGT| 25487
NorthernPike   |-----| 0
SpottedGar     |-----| 0
ParamormyropsKingsLeyae|-----| 0
    
```

Sunday, May 01, 2022 09:44 PM

| Majority                | 67690                                                                            | 67700 | 67710 | 67720 | 67730 | 67740 | 67750 | 67760 |       |
|-------------------------|----------------------------------------------------------------------------------|-------|-------|-------|-------|-------|-------|-------|-------|
| Human                   | GGGGCTTCACTTTACCTTGTATGATTTTTATATTAGATCTAGCTACTTGACTGAATTTAATTACTTTAGAATCAGTACTA |       |       |       |       |       |       |       | 67706 |
| AsianBonytongue         | -----                                                                            |       |       |       |       |       |       |       | 0     |
| Reedfish                | AGTGATGAG--TGAAC TTCACGCTGTTACCTTGCC TCAAGTTCAGAGAAATCATGAAAGTCTTTATGAATATCACCGA |       |       |       |       |       |       |       | 25564 |
| NorthernPike            | -----                                                                            |       |       |       |       |       |       |       | 0     |
| SpottedGar              | -----                                                                            |       |       |       |       |       |       |       | 0     |
| ParamormyropsKingsLeyae | -----                                                                            |       |       |       |       |       |       |       | 0     |

| Majority                | 67770                                                                            | 67780 | 67790 | 67800 | 67810 | 67820 | 67830 | 67840 |       |
|-------------------------|----------------------------------------------------------------------------------|-------|-------|-------|-------|-------|-------|-------|-------|
| Human                   | TAAATTTTAATTGATTTATTTTACACAGTAATTTTTAAGACTAACATTTATGTCTGGCTTTTCTGTTTCCTTTAATGCT  |       |       |       |       |       |       |       | 67786 |
| AsianBonytongue         | -----                                                                            |       |       |       |       |       |       |       | 0     |
| Reedfish                | ACTTAGCAAAATGGTTTAAAGTCAATGGGGAAGGACTAACTGAACTAGATTTGACTGGATTATAATTGTGCAATCACCTT |       |       |       |       |       |       |       | 25644 |
| NorthernPike            | -----                                                                            |       |       |       |       |       |       |       | 0     |
| SpottedGar              | -----                                                                            |       |       |       |       |       |       |       | 0     |
| ParamormyropsKingsLeyae | -----                                                                            |       |       |       |       |       |       |       | 0     |

| Majority                | 67850                                                                            | 67860 | 67870 | 67880 | 67890 | 67900 | 67910 | 67920 |       |
|-------------------------|----------------------------------------------------------------------------------|-------|-------|-------|-------|-------|-------|-------|-------|
| Human                   | AGGTATCACAGTGTCTCAGAAAATGTAATTTGTTCAAAGAAAGGAGACTGAGTGCTTTGTAATGAGTTTAAAATCTGACA |       |       |       |       |       |       |       | 67866 |
| AsianBonytongue         | -----                                                                            |       |       |       |       |       |       |       | 0     |
| Reedfish                | CTAAATGTCCCTGAGGGCTAGGGAAATGTCTGCCAACTACACTGGACTAATTATTTGGGC AAAAAGTTGACCTGAGCCA |       |       |       |       |       |       |       | 25724 |
| NorthernPike            | -----                                                                            |       |       |       |       |       |       |       | 0     |
| SpottedGar              | -----                                                                            |       |       |       |       |       |       |       | 0     |
| ParamormyropsKingsLeyae | -----                                                                            |       |       |       |       |       |       |       | 0     |

| Majority                | 67930                                                                             | 67940 | 67950 | 67960 | 67970 | 67980 | 67990 | 68000 |       |
|-------------------------|-----------------------------------------------------------------------------------|-------|-------|-------|-------|-------|-------|-------|-------|
| Human                   | TCTAAAATACATAATCACAAATGTGGCCGACTATTAGTCATTCACATATTCTGTTCAAAGAACACAGTGATCAAAAATC   |       |       |       |       |       |       |       | 67946 |
| AsianBonytongue         | -----                                                                             |       |       |       |       |       |       |       | 0     |
| Reedfish                | TGCAGCAACAGTGTGCGACCACTGCACCGCTGTGTCTCAGTGAGATCAAAGAAAAAAGAATGCTGTAAGATGAGCACAATC |       |       |       |       |       |       |       | 25804 |
| NorthernPike            | -----                                                                             |       |       |       |       |       |       |       | 0     |
| SpottedGar              | -----                                                                             |       |       |       |       |       |       |       | 0     |
| ParamormyropsKingsLeyae | -----                                                                             |       |       |       |       |       |       |       | 0     |

| Majority                | 68010                                                                             | 68020 | 68030 | 68040 | 68050 | 68060 | 68070 | 68080 |       |
|-------------------------|-----------------------------------------------------------------------------------|-------|-------|-------|-------|-------|-------|-------|-------|
| Human                   | CTTCAGATTATAAATGAGACATCATTATAATGGATCATTTTATCATGTTAAGAGGTGTAGTTAATTTATTAAGGGGTAG   |       |       |       |       |       |       |       | 68026 |
| AsianBonytongue         | -----                                                                             |       |       |       |       |       |       |       | 0     |
| Reedfish                | ATATATCTCGTCAAACACTGAGCAGAAATGCCAAAATCATAGTCCGTACCTAGGTCTTTTAAAGGCAGAAAATTCAAAGTT |       |       |       |       |       |       |       | 25884 |
| NorthernPike            | -----                                                                             |       |       |       |       |       |       |       | 0     |
| SpottedGar              | -----                                                                             |       |       |       |       |       |       |       | 0     |
| ParamormyropsKingsLeyae | -----                                                                             |       |       |       |       |       |       |       | 0     |

| Majority                | 68090                                                                            | 68100 | 68110 | 68120 | 68130 | 68140 | 68150 | 68160 |       |
|-------------------------|----------------------------------------------------------------------------------|-------|-------|-------|-------|-------|-------|-------|-------|
| Human                   | ATCACTTTTAGAAAAATGCTGGAAGTAATTTTTTCATGATCATGTTATCTACATTCTAAAAATTAGGAGAGAGACTGTGT |       |       |       |       |       |       |       | 68106 |
| AsianBonytongue         | -----                                                                            |       |       |       |       |       |       |       | 0     |
| Reedfish                | GCGTGTCAAGATTGAAACTGCTGACTCTTTTCTTTTATGAAGTTGCTCTGAAGGCTTTCCGGACTGTGCATTATCAAAA  |       |       |       |       |       |       |       | 25964 |
| NorthernPike            | -----TGTCCATCTTAGCGGGACTGTGTATTGTCCCATAGTGGCATCAA                                |       |       |       |       |       |       |       | 44    |
| SpottedGar              | -----                                                                            |       |       |       |       |       |       |       | 0     |
| ParamormyropsKingsLeyae | -----                                                                            |       |       |       |       |       |       |       | 0     |

Sunday, May 01, 2022 09:44 PM

| Majority                | A-A-AGA---T-T-----T---AT---T-A-----T-----T-----                                    |       |
|-------------------------|------------------------------------------------------------------------------------|-------|
|                         | 68170 68180 68190 68200 68210 68220 68230 68240                                    |       |
| Human                   | ACAAAGAGTGTTTATTTTAGAGCTTTCCTTGTATTTCAAATTGAATAACAGGCATTCTCATCATAAAGTTTTTAAAGAA    | 68186 |
| AsianBonytongue         | -----                                                                              | 0     |
| Reedfish                | AGATAGAAATGTCTTGTAAATAATGATTAATCTTTCAGTATTATTTTCATGGGGTCTCCTGTTTTTGTATTTTCAGGCTCCT | 26044 |
| NorthernPike            | ATACAGAACCCTTCTTGGTCAAACATCTCTTCATTAAGATCTCCTCAGACAATCT---ACTTGC GGATGGACATGGTCA   | 121   |
| SpottedGar              | -----                                                                              | 0     |
| ParamormyropsKingsLeyae | -----                                                                              | 0     |

| Majority                | -----T-T-----T---T---T-A-----A-----C-T--A---T--A                                |       |
|-------------------------|---------------------------------------------------------------------------------|-------|
|                         | 68250 68260 68270 68280 68290 68300 68310 68320                                 |       |
| Human                   | AGGCAAAGCAGACTTCTGTAGGAAATCATTGACGTTAAAATAGTTATAATTGTGAACAGATACAACATTTATTCATGAA | 68266 |
| AsianBonytongue         | -----                                                                           | 0     |
| Reedfish                | TCAAGGTTTTTTTTTTTTTAAATCTCCATGTGGCTAATTATGCATATGGCATGCATCTTCTTCGCTTATAAAGATCGA  | 26124 |
| NorthernPike            | ATATTCATCCGTGTGTAAAGTCAGTTTTCTCCTCTCTGATCGACAAACTCAAACAACCTAATGCCATTAATGTTTTA   | 201   |
| SpottedGar              | -----                                                                           | 0     |
| ParamormyropsKingsLeyae | -----                                                                           | 0     |

| Majority                | --T---CA--T-----A-----T---T---T-----T-----T-----A-----G--T-                       |       |
|-------------------------|-----------------------------------------------------------------------------------|-------|
|                         | 68330 68340 68350 68360 68370 68380 68390 68400                                   |       |
| Human                   | GGTAAACATGTAGGTCTTATAGAATATGTTTCTCAAATTTTGCTGCACGTTGAAGTCACCAGATTCTACCCAGGCTG     | 68346 |
| AsianBonytongue         | -----                                                                             | 0     |
| Reedfish                | CCTGCACATTTGATGACAAGCAGATATAAATTTGTACTTATGCTGTATATGTTTCATAAAAAAATTTGAGAACCTGCATT  | 26204 |
| NorthernPike            | CTTGTGCAATGCTTTTTCATTACTTCGTCATAATATCACTATATTTAGCACATTTTCATATCTAGAAGCAAATTAAGAGTA | 281   |
| SpottedGar              | -----                                                                             | 0     |
| ParamormyropsKingsLeyae | -----                                                                             | 0     |

| Majority                | -----A-----T-----T-----C-----                                                    |       |
|-------------------------|----------------------------------------------------------------------------------|-------|
|                         | 68410 68420 68430 68440 68450 68460 68470 68480                                  |       |
| Human                   | AGAATAGTTAAAGAGTGGGTACAGGCATTCCTATGTTTTTAGGATCTCAAGATGGTTTTACTATGTAGCAAGAGTTGAG  | 68426 |
| AsianBonytongue         | -----                                                                            | 0     |
| Reedfish                | ATTTACCTAAGTCCACAGTCTGTAATGCAAATGATCAGCAATATATACGCAGGGACCGTCTTACAGTGTGGCAGT      | 26284 |
| NorthernPike            | CATTTGACCAGAGACAGTATTATCAATACTCCTGAAAGCAAGATCCCCCTTTGGCCCCCTCTAACCTTGATAATAATTTT | 361   |
| SpottedGar              | -----                                                                            | 0     |
| ParamormyropsKingsLeyae | -----                                                                            | 0     |

| Majority                | -----T-----T-----A---AT-----G-----G-----T-----                                    |       |
|-------------------------|-----------------------------------------------------------------------------------|-------|
|                         | 68490 68500 68510 68520 68530 68540 68550 68560                                   |       |
| Human                   | AATTACTGCTACAGAAAAGAGCTTGTAACCTAATGTCATTTAAATCTATTTTTGGTACAGTTCTCCTGGCACAATTTTAAT | 68506 |
| AsianBonytongue         | -----                                                                             | 0     |
| Reedfish                | TTCAGCTCCGGTTGATGATGTACTGGTCTCGCAAAGTATTATGTATAGGGTGTCTCGGGGGAAAAAAGTTCCCTAATCG   | 26364 |
| NorthernPike            | TAATGATGGAAAAACCTGGGGATTAATTCATAAGGGATAGATAGGAAGAAGGAGCTTGCTTGTTCGATTTGCTAAGGG    | 441   |
| SpottedGar              | -----                                                                             | 0     |
| ParamormyropsKingsLeyae | -----                                                                             | 0     |

| Majority                | ---C-----T-----A---T---A-----A-----TG-----T-C--T                                 |       |
|-------------------------|----------------------------------------------------------------------------------|-------|
|                         | 68570 68580 68590 68600 68610 68620 68630 68640                                  |       |
| Human                   | TAGCTGTAAACTGAATTTATAATTTCTATATGTTGTGATACATAAAATTAAGTGGAAACTTTGATTTTCTTTCTTT     | 68586 |
| AsianBonytongue         | -----                                                                            | 0     |
| Reedfish                | AGCCAAATTATCAGTAAATAATTCGACAAACAAGAGTGAACCAAATTCAAATGCAGCAAATTCGCTGCAAATGATCCTTT | 26444 |
| NorthernPike            | AAGCCTTCCCAGAAATATTTGTGATGACTGACATATTACAACTGTAAAAAACAATAAAGCATGTGACAAATACAAT     | 521   |
| SpottedGar              | -----                                                                            | 0     |
| ParamormyropsKingsLeyae | -----                                                                            | 0     |

Sunday, May 01, 2022 09:44 PM

| Majority                | --T--A--T---TG---A-----T-----TT-T--ATT-AAGACA--AGATGGGATCTCATTACTTTATGAATGA       |       |       |       |       |       |       |       |       |
|-------------------------|-----------------------------------------------------------------------------------|-------|-------|-------|-------|-------|-------|-------|-------|
|                         | 68650                                                                             | 68660 | 68670 | 68680 | 68690 | 68700 | 68710 | 68720 |       |
| Human                   | GTTACATTTGTATGGGTATTTCATTTGGTAATATTTATTAATTTATTATTAGAGATTTTCAGCTATTTGCTAATATAATGA |       |       |       |       |       |       |       | 68666 |
| AsianBonytongue         | -----                                                                             |       |       |       |       |       |       |       | 0     |
| Reedfish                | GGTGAATTCGCTGATCAATACTAGTGATCAGTATTGTCCCTAAGAGAAAGTGATTGGGATATCCTTAGTCTATGACTGT   |       |       |       |       |       |       |       | 26524 |
| NorthernPike            | TCTAGATGTTTCATGTCTCAGCATGAATATGTGTATTCTAATGTCCACTCACCATATAAGGTGCAAAACCTTTAGAAAGTA |       |       |       |       |       |       |       | 601   |
| SpottedGar              | -----ACAGAGGACGTAAGAGGGCAACTCAAACCTTGTGGAGAA                                      |       |       |       |       |       |       |       | 40    |
| ParamormyropsKingsLeyae | -----                                                                             |       |       |       |       |       |       |       | 0     |

| Majority                | ATTTTATA-ACATGA-ATCTT-TTTCGACCGAGCTGACATGT-ATCAAATA-ATT-AGCATTTCATTTTTGTTG-AGTAC  |       |       |       |       |       |       |       |       |
|-------------------------|-----------------------------------------------------------------------------------|-------|-------|-------|-------|-------|-------|-------|-------|
|                         | 68730                                                                             | 68740 | 68750 | 68760 | 68770 | 68780 | 68790 | 68800 |       |
| Human                   | ATCCCATACACCTGTCATCTTGGTTCAATAGCGCTGACACTTAGTTTTATCTATTTCAGTTTTTCTTTTGTGTTCTAAAGC |       |       |       |       |       |       |       | 68746 |
| AsianBonytongue         | -----                                                                             |       |       |       |       |       |       |       | 0     |
| Reedfish                | ATTTTAGATAAAGAA-ATGTTTTGGAACAGAGCTATAATGTGAACCAATGCAGTAATCCCTCCTCCATCGGGGGGTTG    |       |       |       |       |       |       |       | 26603 |
| NorthernPike            | AATTACCAATGTGATAACTTCTGCTGTGCATACAGACTTAACAGCAATGAGGTCTCAAATATGTAATCTGCTGCAGTAC   |       |       |       |       |       |       |       | 681   |
| SpottedGar              | CCACTGTAGACATAG-ATTTCACTTCGCCAAGAAAACCGGTATGAAACAATATGAGCATATTCATGTTATGAAAGAAA    |       |       |       |       |       |       |       | 119   |
| ParamormyropsKingsLeyae | -----                                                                             |       |       |       |       |       |       |       | 0     |

| Majority                | -GATCCTTGGTGTT-TGAGAAGTCAGAATATCTATTCTACTAAAACCTCACTTATATAAATA-TTTTTATTACACAATTATA |       |       |       |       |       |       |       |       |
|-------------------------|------------------------------------------------------------------------------------|-------|-------|-------|-------|-------|-------|-------|-------|
|                         | 68810                                                                              | 68820 | 68830 | 68840 | 68850 | 68860 | 68870 | 68880 |       |
| Human                   | AAATCCTTGACATTGTGACATGTCTTCTCAAATATTACCATAGTATCTCTAAAATAAATTACATTTTCTTACCAAACCATA  |       |       |       |       |       |       |       | 68826 |
| AsianBonytongue         | -----                                                                              |       |       |       |       |       |       |       | 0     |
| Reedfish                | CGTTCAGAGCCACCCGCGAAATAAGAAAATCCGCGAAGTAGAAACCATATGTTTATATGGTTATTTTTATATATTTTAA    |       |       |       |       |       |       |       | 26683 |
| NorthernPike            | GAAACCTTGTGTTTAAACACATCAGACTACCTTGTCTCTATCCCTTACTAATAAAAGTATTATTTATACCAGTGTAGTC    |       |       |       |       |       |       |       | 761   |
| SpottedGar              | TGGAACATGGTGGTATCAGAAGTTGCAATGTAATTCATAAAAACGCACATAAAGGGACAACCAACAATGCACCATTATT    |       |       |       |       |       |       |       | 199   |
| ParamormyropsKingsLeyae | -----                                                                              |       |       |       |       |       |       |       | 0     |

| Majority                | GTCTTTTTAT-ACATT--CCATTATT-ACTACGTTTACTTAT-TGATTAAGAATAAGCTTT-ATTAA--TTTTACAAA   |       |       |       |       |       |       |       |       |
|-------------------------|----------------------------------------------------------------------------------|-------|-------|-------|-------|-------|-------|-------|-------|
|                         | 68890                                                                            | 68900 | 68910 | 68920 | 68930 | 68940 | 68950 | 68960 |       |
| Human                   | ATATGATTATTACACTTACCAGAATTGACAATGATTTCTTAATGTCCTCAAATACCCAGCTTACATTAAAATTTCCCCAA |       |       |       |       |       |       |       | 68906 |
| AsianBonytongue         | -----                                                                            |       |       |       |       |       |       |       | 0     |
| Reedfish                | GCCCTTATACTCTCCACACTATTATAAACATTTACGTTACAATATATACAGCATAAACCTTTGTATTCTCTTAGATA    |       |       |       |       |       |       |       | 26763 |
| NorthernPike            | TGCAGGATGTCACCTTAGCTGTATTTCCTGAGCGCTGCTTGACTGATAAACGGTGGTGATTGGTGAGCGTTTGACAAT   |       |       |       |       |       |       |       | 841   |
| SpottedGar              | GTTTTTGTGTGATG--GCTTTGTTCAATACCTTGTAAGACTTAGAATGAGAAATACATTTTAAAAAAGTACATTAAAG   |       |       |       |       |       |       |       | 277   |
| ParamormyropsKingsLeyae | -----                                                                            |       |       |       |       |       |       |       | 0     |

| Majority                | TTATTTTTCTTCATTT-ATCTGTGTGTTTAAATCAG-TCATGTTACCATGGCAGGCCGAGATACT-TATTGGTGTTAG   |       |       |       |       |       |       |       |       |
|-------------------------|----------------------------------------------------------------------------------|-------|-------|-------|-------|-------|-------|-------|-------|
|                         | 68970                                                                            | 68980 | 68990 | 69000 | 69010 | 69020 | 69030 | 69040 |       |
| Human                   | TTATTTTGAATAATGCTTTTAAAGTTTGATTTGTTTCAACAAGGTCCTATGGAGGGCCGCACATAGTATTTGGTTGTTAC |       |       |       |       |       |       |       | 68986 |
| AsianBonytongue         | -----                                                                            |       |       |       |       |       |       |       | 0     |
| Reedfish                | TTAGGTAAGATTTCATTGAAATTATGTATGTAACACAGTTTACATACAGTAAACCTAAATATTTTAAAGATATCGA     |       |       |       |       |       |       |       | 26843 |
| NorthernPike            | TTGCTTATCCCTTCTGCTCAGAGAGCTCTCATCAGCTAATTTCAACATGGCAGGCCGCGGAAGCACAAGTGTGTTG     |       |       |       |       |       |       |       | 921   |
| SpottedGar              | TGTTCTTCTTCAATACATCTATCTCTCGTAGTTTGTCTCTGTTGCTATGCTTCTTACAGATACAGAATTAGATTGAG    |       |       |       |       |       |       |       | 357   |
| ParamormyropsKingsLeyae | -----                                                                            |       |       |       |       |       |       |       | 0     |

| Majority                | GGGTCATT-ATATTTTATTTACTGTA-AAGTCCTTTCAGTCA-TCAATTAGCAATAACTATTTCCTATG-ACGTGAAGTT  |       |       |       |       |       |       |       |       |
|-------------------------|-----------------------------------------------------------------------------------|-------|-------|-------|-------|-------|-------|-------|-------|
|                         | 69050                                                                             | 69060 | 69070 | 69080 | 69090 | 69100 | 69110 | 69120 |       |
| Human                   | ATCTCATTAGTCTGTTTCAGTCTGTAATAGTCTCTCCCTCTCTACTCCCAATCTCTCATTTCATTACTTATGAAGTG     |       |       |       |       |       |       |       | 69066 |
| AsianBonytongue         | -----                                                                             |       |       |       |       |       |       |       | 0     |
| Reedfish                | GCGTCTCCGATATCACATATGTTACAGCCATTACGACAGACAGGCCACCAGCAATAAATACATACAATGCAAGAAAAATT  |       |       |       |       |       |       |       | 26923 |
| NorthernPike            | GGGAAATGTCATTTTAAATTAATCCAGGTCCTTTCAGATAAGCAGTTAGGCATTAATTTACCTAGG-GCGTGAAGTT     |       |       |       |       |       |       |       | 1000  |
| SpottedGar              | GGGGCATTCAAATTTCAATTTACTGTATAAATCCTTTATATCCTTTAATATACAAAAACACATTTCTAGATACTAACCTGG |       |       |       |       |       |       |       | 437   |
| ParamormyropsKingsLeyae | -----                                                                             |       |       |       |       |       |       |       | 0     |



Sunday, May 01, 2022 09:44 PM

|                         |                                                                                     |       |
|-------------------------|-------------------------------------------------------------------------------------|-------|
| Majority                | GTGTATCGTTA-AGATG-TTACCGTGATTCTATTAA-A-TACTTTTTTT-AAAAC TTTAATGCTATATTGATGCTTATTC   |       |
|                         | 69130 69140 69150 69160 69170 69180 69190 69200                                     |       |
| Human                   | ATGTTTCCTTTTAGAAAGTTTCACAGATTAGACTAGTCTGGCTGTTTCTTTAGAGTGCATGTTAACTTGTTCCTCTATC     | 69146 |
| AsianBonytongue         | -----                                                                               | 0     |
| Reedfish                | GTATACAGTAAAATGTGTGTACAGTGACACTAACTATGTACATGTAATAAGTACTGTACGTAATAATTATGGTTACTC      | 27003 |
| NorthernPike            | GTATAGAGCCAGAGTAGCATGACGTATGTCTATCAAGACAAATTATATGCATAAACTCTGTACTATGCCGATCCTTCTAG    | 1080  |
| SpottedGar              | TAGTATCTTTACTAATGATTAACATCATGATATTAACAATAGCTTATTTGCAATCATAAATGCTTTATTAATGCACATTT    | 517   |
| ParamormyropsKingsLeyae | -----                                                                               | 0     |
| Majority                | -ACTATAATGATCTTATGAAATTTATGTTTGTACAGTTTATGTTAA--AATTACA-ATTTTAGCTTTTATAGATCTCA      |       |
|                         | 69210 69220 69230 69240 69250 69260 69270 69280                                     |       |
| Human                   | TGCTGTGTTTCTTATATAAACTTAAAGTTAGTTCCTAAAGGCTTGATAA--GATTTAGAGCCTTTTTTTTTTTTGAAGTGT   | 69224 |
| AsianBonytongue         | -----                                                                               | 0     |
| Reedfish                | ACCAACAATGACACGACGACTTGTCCGATAACGATGAGTTTAAATTTACTGCATAACAAGGATAGCGTTACAGCTCTTC     | 27083 |
| NorthernPike            | CATGAAAAAGATCTTACAGAAGCTTTATGTCTGTCAAGTTTCTATAAT--ACTCCCACATTTTGACAGTGTATTACACA     | 1157  |
| SpottedGar              | GAGTATTAACAGCTTGTGTTAATAATGATTGTTACAGATTTATGAAACACATATTTTATGTTATAGCTTTATCAATAACA    | 597   |
| ParamormyropsKingsLeyae | -----                                                                               | 0     |
| Majority                | TAAAGGTGCTTCTTCTGCGATTCATTAGGAGAGCT-TAATCTTT-TT-GGTCCATATTTAGTAATATTCATAAAGTTAT     |       |
|                         | 69290 69300 69310 69320 69330 69340 69350 69360                                     |       |
| Human                   | TTCTTGTGCTTCCTATTGTGTCTCAGTAGGAGACATCTAATATCTGGTTGCCCACTTTTAGTGATTTTAAATGATGCTTT    | 69304 |
| AsianBonytongue         | -----                                                                               | 0     |
| Reedfish                | TAAAGGAGCCTTTCAGGCGACTGTTTAGCACCGCGTGTCTTCTTCCATCACTCTCAATCCAAATCCCTAAAGCAG         | 27163 |
| NorthernPike            | TATGGTTAGTTGTGAATAGACTACATGCCGATGGATAAATCCATTTTAGGTAATAGTTAGCAATAGACAAACATTTAA      | 1237  |
| SpottedGar              | GAAAGATAATCATGCTTGTCTATGCATTTATGGAGCTTTAAACTTCAGTGTGTACTTAAATAAAGCATAACATAGAGTCAT   | 677   |
| ParamormyropsKingsLeyae | -----                                                                               | 0     |
| Majority                | ATTACAGATTGTATATT-TCTTTTTGCCTCTT-GAATGTTTCGTTTCTTT-CCTTGTGTGAATTGATTGCAGATCTA-AT    |       |
|                         | 69370 69380 69390 69400 69410 69420 69430 69440                                     |       |
| Human                   | AAGACTGATTGTGGATTGGGTGTTGACATTCTGATCCTTTCGTTACTTTTTTTTCTACTAATGATTTTAGTATCCA-AT     | 69383 |
| AsianBonytongue         | -----                                                                               | 0     |
| Reedfish                | ATTCCATCCATACTACTGCCTTATCACGTCCACTTGCAACTCGTTTTGCGCCTGGTTAAAGGAAACTGCAGCCGTAGAT     | 27243 |
| NorthernPike            | GTTACAGGGCAGATTTTCTCTTTTTGAATCTTGGGATGAACCCAGTCTTCAGAAGAGTGCACACTGATTGGACAGCCCTTT   | 1317  |
| SpottedGar              | ATTAATAAATGTAGCTGATTATTTTACCTATTACAATGTTTTAAAAATGTGCCTTGTGGAATTTGATTCCAGATCTA-AT    | 756   |
| ParamormyropsKingsLeyae | -----                                                                               | 0     |
| Majority                | TTTA-ATGCTTCATTAATTAGTTACATAAAAAGCTTGAAGGTCTTGTTTTT-TTCTCAT-GTGACCTTACTT-TTATATA    |       |
|                         | 69450 69460 69470 69480 69490 69500 69510 69520                                     |       |
| Human                   | AATGGTTGCTGCCTTAATTAATTTCACTAGTGGGTTGCAAATATTGCTTTTTTCTCCCTAATTCACATATTCCTTCTCTA    | 69463 |
| AsianBonytongue         | -----                                                                               | 0     |
| Reedfish                | CTTACATGCTTTTCTCCTTTTTTAAATAAAAAGAATCGTGGACTCATTATGCTGTAATGGTGTCTGCAGTGGTGTAGC      | 27323 |
| NorthernPike            | TTTTTCTGGATCACTGATTGGCCAACCTCATCCTCCTGAGGAGTATGACATCACTGTATGACACCATACTTTTTAAATA     | 1397  |
| SpottedGar              | TAAAAATAAATGATTAAAAAGTTGCATAGAAACCTTAAAAGTCAAATAACCTGCACATCTAGAAATAACTGAATATGGT     | 836   |
| ParamormyropsKingsLeyae | -----                                                                               | 0     |
| Majority                | GTTTTATTAGCTTAAACA-TTCAAACGTTGTACTTTTTTTGCTCT-CTTTAAATATCCA-TT-GTGCT-----           |       |
|                         | 69530 69540 69550 69560 69570 69580 69590 69600                                     |       |
| Human                   | CATTAATTAGCTGAAAACTTTTATAAAGTAGAATTTTCTTTCATCAACTAGAAATTATCAACCTTGTAATTCATTTGTGC    | 69543 |
| AsianBonytongue         | -----                                                                               | 0     |
| Reedfish                | CGTTTCCTTCTTCAACATATCCAAAAC TTTTACCTTTTCTGCAATCATTGAACTTCTGTTGGCGCTTGGGCAGGTTA      | 27403 |
| NorthernPike            | GTCTATTTGATTAAAAAATAAATCCATGAAATATCTGAGATCCTTCAGAAATGTCCCATACATGC-----              | 1465  |
| SpottedGar              | GTGTTACTAGCGTATACAGTACTGTACGGTATTTACTACTATTCCTCTGCCTTTAATAAAAAATTTAAAAC TGAATCTTAGA | 916   |
| ParamormyropsKingsLeyae | -----                                                                               | 0     |

Sunday, May 01, 2022 09:44 PM

|                         |                                                                                     |       |
|-------------------------|-------------------------------------------------------------------------------------|-------|
| Majority                | -----GAATAGGTGAGTTTTTACAT----GTGAAATTTGTA-TTCGTGACTTAGCATTGTGTTTACCACCCAGTA-TTTAA   |       |
|                         | 69610      69620      69630      69640      69650      69660      69670      69680  |       |
| Human                   | AGGACAATTAGTTAAATTTCTTGCATTTGTTTGCTAATTTTAAGTTGGTGCCAGCTTTTGTGTTTTCAGGTAAGTACTTAAA  | 69623 |
| AsianBonytongue         | -----                                                                               | 0     |
| Reedfish                | ATGCTGAATGAGTGAGATTACACTTCCTGGTTAATGCAGCACTCCGTCAATGAGCCAATCAGCAGCACACAGGAACTTAA    | 27483 |
| NorthernPike            | -----AAAAAGCTTAGTTCTCACAT----GTGAAATGCATAGATGGGGACCTAATATGTATTTAAATTCACTAATATATG    | 1536  |
| SpottedGar              | GCCTGGTGAATGTGCTGGTGTACCT---GTGGAATTTGCTTTGCCTGCTTTGGGATTTGAAAGCCACCTGTGGTTTCT      | 992   |
| ParamormyropsKingsLeyae | -----                                                                               | 0     |
| Majority                | C-GGGT--TTTGCACGGGTAGAGTATAGGCCTTTTCGCATTTACTGTGTTT-TTTTTAGTTACAGTGAGTC-CTTGTGTGG   |       |
|                         | 69690      69700      69710      69720      69730      69740      69750      69760  |       |
| Human                   | CCAGCT--TATGAACAGGTACAGTATAGATTCTTCCACTGTCTGCTTTAAACTTTTGAAACTGTCAGTTGTTTGCAGGT     | 69701 |
| AsianBonytongue         | -----                                                                               | 0     |
| Reedfish                | CTGCGTGCTCTTATTGGGTAGCTTCTCAGCCATCCGCCAATAGCATCCCTTGTTTGAATTCAAATGCGTCCCTTGTTTGA    | 27563 |
| NorthernPike            | AGCAGTAACTAACAAAAATCGTATTATTGCATGTTGGATTTATATTTTTGTTTCAAGTGCATATAGTACTCTCAAAGTAG    | 1616  |
| SpottedGar              | TAGGCTGACTTGACGGCCACAGGAGTACTGAAGAATGAGCTGTGAGCATTGCCAGTGACAGTTTGTAAAGAAATTTGTGG    | 1072  |
| ParamormyropsKingsLeyae | -----                                                                               | 0     |
| Majority                | TTTCA-ATTGGCGCAT-AATTGTGGAG-TGAAC TTATT-GAGACCTCTGAAATTTATTTATTTTG-GA-TAAACAGCGCTA  |       |
|                         | 69770      69780      69790      69800      69810      69820      69830      69840  |       |
| Human                   | TCTGGTAGCCAGAGTGGTTTGAAATGGTGACCTTAGCCAGAAAGTATGTAATTTATTTAATTTGGCCTTGACCAGTGGCC    | 69781 |
| AsianBonytongue         | -----                                                                               | 0     |
| Reedfish                | ATTCAAATGGGCAAATCAACTGAGGAAACGCACGTACTGTAGACCGCAGACATCCGCGAACCAAGTGAATAATCCGCGATA   | 27643 |
| NorthernPike            | TCACCCCTTTGTGCATTAATTTAAAAC TGAATTAATTAGGATTATTTAATTTTACTAATTTTGCCACTAAACGACTCAA    | 1696  |
| SpottedGar              | ATTCAAGTGTACACACACATTTCTGGCGTTATTAATATCTGACACCTCTGGACATATTTATATTGAGTGTATATATAGCTA   | 1152  |
| ParamormyropsKingsLeyae | -----                                                                               | 0     |
| Majority                | CAAAATCAAAAATGT-TACGTTTAAAATACGACATAAAGAAAATACTCAAAA-TTACAAAATTTTATCTCAGGAGATAAT    |       |
|                         | 69850      69860      69870      69880      69890      69900      69910      69920  |       |
| Human                   | CAAAAAGGAAGGGGGTGGGGTGGATAAAGGACTAAACAAAATTAATTAATAATTTAGAAATTTTCTCTCAGAAGGAATT     | 69861 |
| AsianBonytongue         | -----                                                                               | 0     |
| Reedfish                | TATATTCACATATGCTTACATTTAAAATCCGCGATGGAGTGAAGCCGCGAAAGATGAAGCGCGATATAGCGAGGGATCAC    | 27723 |
| NorthernPike            | CAAAGTCCATAATGTCAAAGTGAATAATCAATCTACAAATTTGTTCTAAACAATTACACATTTTAAACTTAAAATAATGT    | 1776  |
| SpottedGar              | GAACACCAAAAAGATATTCACCTACAGAACTCAGAAAGAAGAAAAGCAAAGCATACAATTTTGAAGATAAGGCCATAAG     | 1232  |
| ParamormyropsKingsLeyae | -----                                                                               | 0     |
| Majority                | AATGCTTATAAATGAAA--ACAG-ATATATTAGTTTATATTGATTATATACATGTTTTTAATTGGT-TTTTTTGT-GTAT    |       |
|                         | 69930      69940      69950      69960      69970      69980      69990      70000  |       |
| Human                   | CATGCCATAAAAACAAAGACCAGGATACATTCGTATTTTATCGGTAATACCAATAGATTATAAATCACTTTTCTCGTAT     | 69941 |
| AsianBonytongue         | -----                                                                               | 0     |
| Reedfish                | TGTATTTGATAGTGGAAATAAAATATATATTTGTTTATCATGAGTTTATTTCATGATTTAATTTGTTTTGAGTTTGTTT     | 27803 |
| NorthernPike            | ATTGACATTAGAATAAAC-ACAAAACAAAGTAAGAAAATGTATTGTCCAGAGGTTGTAGATGGAAAGATTAGAAGAAC      | 1855  |
| SpottedGar              | AAAAC TTATAAATGATAA-GAAGCCTGTTCGAACTGAGATGGATTAGGTGCTTTTATTCCTGTGATGTTGGATGTGATAT   | 1311  |
| ParamormyropsKingsLeyae | -----                                                                               | 0     |
| Majority                | AGATTGTGGTG-ATGCAAAAA-CT-TT-AG-TTTG-TTTTTATTTT-TTCAACTGTAATAATTTTAAAT-GC-CAGGTGTTTT |       |
|                         | 70010      70020      70030      70040      70050      70060      70070      70080  |       |
| Human                   | ACATAAATGTGAAAAAACCATCCAGGTATGCATGTTATTTATTCATTGAGAGGATATACATCTCTCAGGTGTTTT         | 70021 |
| AsianBonytongue         | -----                                                                               | 0     |
| Reedfish                | GGGTGAGTTTCTGCTGAGTTTTTTTTTTTTTTTTTTTTTTTTTTTTTGAACACTTTCCTCATTTAATAGCATTTGAATTTT   | 27883 |
| NorthernPike            | ATCCAGTGGAAGATGCAAAAAGCTGTGACATCTGATGCACAGTCTGAAAGGGCACTACCTTGAGGGACAGAATGAAAT      | 1935  |
| SpottedGar              | TGATTTTGTGTCATGGGAAAACAGCATGAGCTTGAGTTTACAAAGTTCACCTGTATGTTCCATCTGTGCAGATGTGGC      | 1391  |
| ParamormyropsKingsLeyae | -----                                                                               | 0     |

Sunday, May 01, 2022 09:44 PM

|                         |                                                                                     |       |
|-------------------------|-------------------------------------------------------------------------------------|-------|
| Majority                | CA-GCTGTTG-ATTGTTTCAG-GT-GCC-AACAGTTAT-CTTTATTAA-TAGAATA--ACTGTCAGGTAAGATA--TATAT   |       |
|                         | 70090 70100 70110 70120 70130 70140 70150 70160                                     |       |
| Human                   | TTGTCGTATGTGTACTTTTGTGTAGTCTGCCTGTTTATTCTTTTGAATAGGATGATATGTACAATTAATAAAAAATCTTT    | 70101 |
| AsianBonytongue         | -----                                                                               | 0     |
| Reedfish                | CACCTGTGAAAATGATCAGGACGACAGAACACCAAAGCAATAAAATGTGGCATATGACTGTCAGATCAGTTCTGTACAG     | 27963 |
| NorthernPike            | CATGTTAAGTGCTTGCTCAGCAGCAAGCAAAGCTGTAGTTGATTTATTCAACAACAGCTGTATAGCATGGTAGCTTTAT     | 2015  |
| SpottedGar              | CAAGAAGTTGCAAGTTACACAGTTGCCAAACAATAATCCTTAAATAGCAATAATCGCAATCTAAGGAAATAGTCTTACCT    | 1471  |
| ParamormyropsKingsLeyae | -----                                                                               | 0     |
| Majority                | T-TAAATTGTTTTATTTTGCATGCA-TTTTGTATCTTTT-AAAGTGATTTCACTTAAAAATACAATCTCCATTGG-GT      |       |
|                         | 70170 70180 70190 70200 70210 70220 70230 70240                                     |       |
| Human                   | TGTGAAATGTGGTTTTCTTAAATACATTATTGCATTTTCATACACAGTGATGAAGGGAAAAACTACAAAGCTAGACAGATT   | 70181 |
| AsianBonytongue         | -----                                                                               | 0     |
| Reedfish                | ACTTATTTGTTTTACTTCTGCATGCAGTTAGGTTCTCTGTTTGCAGTGGTCCCTTAAAAGACTGCTCTCCATTGGTGC      | 28043 |
| NorthernPike            | TTCAAATAGCTGTGATTTCAAAGTGGCTACTACTAACTTGGAAAACAAATACAATTAAGAATACAAAAGCTATATTTGT     | 2095  |
| SpottedGar              | TACAGGTTGTTTTTAAATGCTTGCAAGTTAATTAACAATTGCATGCTGTTTAACTCTTTCATACAATCTCCTTTGG-AT     | 1550  |
| ParamormyropsKingsLeyae | -----                                                                               | 0     |
| Majority                | A-GTGTTA-TCTTCCACTGGCTAG-TACACTATTTAAC-CTTAATGTTTTCTTTCATTTTAAATGCGTAATCATTC-ATA    |       |
|                         | 70250 70260 70270 70280 70290 70300 70310 70320                                     |       |
| Human                   | GCAAATTAGTATTGCAGTAGTGAGGTAATAGAGCAATACCCAAATGTTTTCTTAAATATATGTAGGTGATGCCTGTGTT     | 70261 |
| AsianBonytongue         | -----                                                                               | 0     |
| Reedfish                | AGGTATTTCTCGTCCCATTGGCTCCATAAACTCTAAACCCTTGTGTTTGTGATATCTTTTTAAATTTGTAATCTTTCAAAA   | 28123 |
| NorthernPike            | CTCTGGTCATTTTTTACAGGCTGGTTGCATTTGTTTCATGCTTTA-GTTTGCCTCCAAGATGAACGCGCATCCATCCCTA    | 2174  |
| SpottedGar              | AAGTGTGATTCAAACTCAACAGCCACACTATTTAACTTGCAATACATTTGGTGATTTTTTCATGCACAGATATTTGAGC     | 1630  |
| ParamormyropsKingsLeyae | -----                                                                               | 0     |
| Majority                | CTTTACTTTTTATGTTTGTGTTTCA-AGTTTTTTCTTACAAGGTT-T-TG-C-GAAATTAGCTATAT-TTCAA-AATTTTGT- |       |
|                         | 70330 70340 70350 70360 70370 70380 70390 70400                                     |       |
| Human                   | CTTTACTTTTTGTGTGTGTGAT--GTGTTTTTAAACAAGATTCATTTGAGTCTTTTAGATATAATTTAATAAATTTAGGC    | 70339 |
| AsianBonytongue         | -----                                                                               | 0     |
| Reedfish                | CACAGCTGATATGTTTCTTTCATATTTTTTCTTCCCTGGTATTATAGCACAAAGTGGCTTTATCTTTTAGAACTCCAG      | 28203 |
| NorthernPike            | CGTCAATTTGATGTCGACTTGAAGCTCTCTATTTATAGGAAATGTGAACGAAATTTACCATGTAGACGATGGGTGTGTT     | 2254  |
| SpottedGar              | CTTTCCCAATAAATGGGGCCATACTTCATTCCATCAAACTGGCAGCCTGTCAGCAATAACAAGTACAACATTTTTTTTA     | 1710  |
| ParamormyropsKingsLeyae | -----                                                                               | 0     |
| Majority                | TATGAATGGTATTCTTATTCTAC-TACTGGCTATTTTA-TATAGTTTTTTGCATGTATTT-TT-TGAGCTTATTATGAT-    |       |
|                         | 70410 70420 70430 70440 70450 70460 70470 70480                                     |       |
| Human                   | TGTTTCAGGTTTTTCAGTATCCTACAAGAAGAAGCTGCTTCTAAGTTTTTGGGTTTCTTGAACCAGAGCTTAGAAAGAAC    | 70419 |
| AsianBonytongue         | -----                                                                               | 0     |
| Reedfish                | TATGTGTGTCATTTTTATTATGCTCAATGAGTATCCAAGCAAAAATATTTACATGTATCACTTGTGTGCCTGTTACTTTG    | 28283 |
| NorthernPike            | CCAGAAAAGTATGCTCATACCATCTACTGGCTGATATGGTTATGTCGATTGCAAGTAATTGTTTTAAACGCATTATGAA-    | 2333  |
| SpottedGar              | TACAACATGATATCCCACTGTACGTACCTACAATTTTA-TATGGTTTTAAAACACATTAATTAATAAATCAATATAATC     | 1789  |
| ParamormyropsKingsLeyae | -----                                                                               | 0     |
| Majority                | ---AT-A-----G--ATTTTCTGTTTTTAGTAAGTCTACTTAGAT-AAATACATTTAATG-CAATGATTTAATAGAG-A     |       |
|                         | 70490 70500 70510 70520 70530 70540 70550 70560                                     |       |
| Human                   | AAAAATATGGCATGGTATTTTCATGGTTTAGTAAGGCTACTTTTAGTTAATTATTGTGATGTAGGCCATTAAGTAGACTT    | 70499 |
| AsianBonytongue         | -----                                                                               | 0     |
| Reedfish                | CACTTCATTTGTACACAAATTTCAACTTTCTCAAGTCTGCTTAGTTAAAATACGTTTAAATCCACTTTTAGCATCTAGCC    | 28363 |
| NorthernPike            | ---AT-----GTGATTGTGTGTTATTAACCATCTGACCTGAATGATTTGGACCCTCAGAAATGAAATAATGGTGAA        | 2402  |
| SpottedGar              | TTCATGAAACTAGACAATTAGCTGTTTTTTCAGTTCTCTGCAAGCTCACATACACTGAATGACTATGGTTTAAACAGCAGA   | 1869  |
| ParamormyropsKingsLeyae | -----                                                                               | 0     |

Sunday, May 01, 2022 09:44 PM

|                         |                                                                                    |       |
|-------------------------|------------------------------------------------------------------------------------|-------|
| Majority                | A-AGAGTAGTA-AACCCTGAGGAGAGGGGCTT-ATATATACATAT-G-TTAAATACAGAGAT-TAATGTT-TT-G-TTTC   |       |
|                         | 70570 70580 70590 70600 70610 70620 70630 70640                                    |       |
| Human                   | TTCTAAAACGAAACCCAGAGGAGAGGGGTTTGAAGATACATATATACTGGTTTCTAAGAACTAATCTTTTGGATCAT      | 70579 |
| AsianBonytongue         | -----                                                                              | 0     |
| Reedfish                | ACAAAGTTGTCTATCATTACGACCTGGGGCCTCATGTATAAACGGTGCATACGTACAAAAATGTTGCGTAAGCCCGTTTC   | 28443 |
| NorthernPike            | AAAGGTTATTTCAACCCTGATAATAGATTCTTGATATATGCTTTTGGGTAAATAACGCATTTAAATGCTGTTACCTTAC    | 2482  |
| SpottedGar              | GGTGAGTGGAAGAAGAAAAGGAGAGGAAAGAAATAACATTGTAACGTTTTAACAGAGGGACAACCTGATTCTCTGTACTC   | 1949  |
| ParamormyropsKingsLeyae | -----                                                                              | 0     |
| Majority                | TGGTTTTAGTAGGCCTTCTATA-AA-GTTTATTT--CC-AAAGCGATTCTGA-TAGA-T-TTGCC-CA-G-TC-GACTTT   |       |
|                         | 70650 70660 70670 70680 70690 70700 70710 70720                                    |       |
| Human                   | TGGTATTGGTAGAAGGGATTTCGCTATGTTTTCTGCCACCATTGGATCTCTGTATAAAGTTTGGCTCCACTATCAAAATGC  | 70659 |
| AsianBonytongue         | -----                                                                              | 0     |
| Reedfish                | CACGCTCAAATCGCGATGTATAAAACCTAAACTTGGCGTAAAGCCACGCACATTTCCACGGTAGCTCCAACCCTGGCGTT   | 28523 |
| NorthernPike            | TGATTTTATCAGGTTTTCTAGATCGAAATAATGAATACAAAACCTGGTTTTTACTCGACTATTTCCGCTGGTTCGACTAT   | 2562  |
| SpottedGar              | CCGGTGGTGTACACCTCCCATAGACGGTTTTATTTTACTGCCATCGATTTCGGCGCAGGTTCCCGTCAGAGGTTCCGCTATG | 2029  |
| ParamormyropsKingsLeyae | -----                                                                              | 0     |
| Majority                | TTCGGCCATTTTCTTCA-ACT-TCTGCCACCATTGTAAAGGCT-GAATACTGTT--CTTAAGA-TTGTTTTTTAGATATC   |       |
|                         | 70730 70740 70750 70760 70770 70780 70790 70800                                    |       |
| Human                   | TTAGATAGATGCCTTTGCAATAGTTGCCACCCTAGGAATAGCTCAAAAATTATTAACCTAATACTGGTTACTTAAATTC    | 70739 |
| AsianBonytongue         | -----                                                                              | 0     |
| Reedfish                | CTCCGCTCTGTTTTGCAAACCTGGCTGCACCCAGTGTCAAAGCAGTGTACTGTCCAGTGTGGTTTCCCTTTTTTAGATC    | 28603 |
| NorthernPike            | TTCCGCCAAGGTCTCCAGTCCCTCCATTTTAGGAGAACAGTGCAGAAATCGGTGTTGTTAAGAAGGATTTTCTGGCAATG   | 2642  |
| SpottedGar              | TTCGGCCATTTCCGCTCTGGTTTCCGCCACCATTTGTGCGACTTGCCTGCAGCTGGCTGAGGTGCTGTACTGTAGATCAC   | 2109  |
| ParamormyropsKingsLeyae | -----                                                                              | 0     |
| Majority                | A-CGT-GATGTTTCGGCTCT-TCAATT-TCTG-TATTTTTTTTTTTTTTTAGTTTGTTAATGTACGCATCT-AATTGTCGTT |       |
|                         | 70810 70820 70830 70840 70850 70860 70870 70880                                    |       |
| Human                   | ACCTCTGTGCTTGGAGTTGTGCTTTTTTTTTTTTTTTTTTTTTTTTGGATAGAGTCTGGCTCTGTCACCCAGGCTGGAG    | 70819 |
| AsianBonytongue         | -----                                                                              | 0     |
| Reedfish                | CGCATCCCAGATGCGGCTCTATAAATACACTGAAATTAACCTGCATATTGTTTATTAGTTTAATGCATCT-GATTGTAATT  | 28682 |
| NorthernPike            | GACGGTATGTATTGGCCATCTTAAATAAAGAACCCGTTTTTGGCTTAAACATGAATGTGCGTGGCG-AGATGTCGTT      | 2721  |
| SpottedGar              | ATCGTAGAGATAGCTAATCCGGCAATGGACGGGTAAGGTGCTTTTTGGTTATGTTAATATAAACATTTTAATTGTCATA    | 2189  |
| ParamormyropsKingsLeyae | -----                                                                              | 0     |
| Majority                | TATTAGCGAAAGCATAAT-G-TTCACTACAGGTTACGCTAA-CTGG-TATGA-CACTCT--TG-GCGTGTACTTTAGCT    |       |
|                         | 70890 70900 70910 70920 70930 70940 70950 70960                                    |       |
| Human                   | TGCAGTGGCATGCAATCTCGGCTCACTGCAAGCTCCGCCTCCTGGGTTACGCCATTTCTCTGCCTCAGCTCCCAAGTA     | 70899 |
| AsianBonytongue         | -----                                                                              | 0     |
| Reedfish                | AACCTGTAACAATATAATGGTCCAAGAATAGTCAAATTAACCTGCATATTGTTTATTAGTTTAATGCATCT-GATTGTAATT | 28762 |
| NorthernPike            | TATTAACCTGAAGAGTATCTACTTCACCTCAGATGCTAGACAGATATCTATGAACACGTTAGCTAGCGAATTACTTTAGCT  | 2801  |
| SpottedGar              | TCTTAGCGATCACTGCAAAGATACAGTAGAGACTAAGATAAACTGGGAATGAGAAGTCGGACGTGCGTGTCCAGTTAACA   | 2269  |
| ParamormyropsKingsLeyae | -----                                                                              | 0     |
| Majority                | ACCGGTCTTTCTGGCTCTTTCCCCCACTTCCGGTAGATGT-GTCATTTTTGGTTTTGTAAATGTCGGGTTTTTTTTTTT-TT |       |
|                         | 70970 70980 70990 71000 71010 71020 71030 71040                                    |       |
| Human                   | GCTGGGACTACAGGCGCACGCCACCACGCCAGCTAATTTCTTCATATTTTTTTTAGTAGAGACGGGTTTTACTGTGTT     | 70979 |
| AsianBonytongue         | -----                                                                              | 0     |
| Reedfish                | ACACCTTCTTCTTCTTCTTCCAGTCTTCCGTTAGGGGTTGCCATAGCAGATCATCTTTTTCCATATTACTCTCACTGC     | 28842 |
| NorthernPike            | AGCTAACTAGCCAGCTAGCTAGCCACTTTAGCGTGGCTAAAGTGAGTTAACGCCTGGCAACATCGGGTGTACTGATAAAT   | 2881  |
| SpottedGar              | AACGGTCTGTGTGTTTTTTTACCCCACTGAGAAAGAAGTATTTTTCTTGGTTATCTGATGTTAGGCTTTTTTTTTTCTC    | 2349  |
| ParamormyropsKingsLeyae | -----                                                                              | 0     |

Sunday, May 01, 2022 09:44 PM

|                         |                                                                                   |       |
|-------------------------|-----------------------------------------------------------------------------------|-------|
| Majority                | ACCAGGGATGTT-TTTATATCGTTAT-TC-TGAACG-G-TA-CTCGGCAAACCAA-TAA--ATTGTTACTAGCATT--AT  |       |
|                         | 71050 71060 71070 71080 71090 71100 71110 71120                                   |       |
| Human                   | AGCCAGGATGGTCTTGATCTCCTGACCTCCTGATCCTCCTGCCTCGGCCTCCCAAAGTCTGGGATTACGGGCGTG--AG   | 71057 |
| AsianBonytongue         | -----                                                                             | 0     |
| Reedfish                | ACCAGTCGGAATATTTATATCGCTGTATC-TGAGTGGGGAATCACAGCTCTACAACAGATGATTGAAAAGAGAATT--AT  | 28919 |
| NorthernPike            | ACGAAGCAAGTTTGCTACACGGCTATTTAGTTAACTAGTTCAATAAGTAAACGAAGTACGCTTTCTAGCTAACATGTAAT  | 2961  |
| SpottedGar              | CTTTGGGTTATAGCGTGAATTGTAAGGGT-TGAAAGCAACAGAGTGTGAAAAATGTTAAAAATGGTTCTTTGTTTT--GT  | 2426  |
| ParamormyropsKingsLeyae | -----                                                                             | 0     |
| Majority                | T-GACAAGTGTATCATGCTTAG-GCTTTTTT-GTAAT-ATTTT-ATTGAAATAGTCTTGTACGACTGTAGCTT-GGAT--  |       |
|                         | 71130 71140 71150 71160 71170 71180 71190 71200                                   |       |
| Human                   | CCACCGCGCTAGCCTGCTTAGAGTTTTTTATGTAATTATTTTGTGACACAAACATTTAAAATACTGTAGCTTAGAATGA   | 71137 |
| AsianBonytongue         | -----                                                                             | 0     |
| Reedfish                | CGGAATACAGCATCAAGCACAC-GCTGCCTCAGCCATGCTGTCTATTGAACTGCTCTCATACGGCAAACACTTCAGAGCC  | 28998 |
| NorthernPike            | TTAGCATGTGTCTAATAGTTTCGTGACTTGTGGCTATCAAGCTAATGAATGTAGTGTGCAATCGTAGGCCGGGGTT      | 3041  |
| SpottedGar              | TAGAGAAATAAGCGTGTATTATGCTGCTTTCGTAGAAAGTAGCGCTGAAAAAGCCCTGGCGTCTCTTGTCTGGATAG     | 2506  |
| ParamormyropsKingsLeyae | -----                                                                             | 0     |
| Majority                | TATTGTG-CAGTT-TAGGAGC-TATTGTTTCATGACTATGGATACTGATTT-AACCGTTTTTTTTATTGC-TCTGGTGCAC |       |
|                         | 71210 71220 71230 71240 71250 71260 71270 71280                                   |       |
| Human                   | AATTGTCTCAATCCTAGGAGCCAAAAGTTTGATGAATATGAATACTAATATTAACCATTTTTGTGTTCTGTGTCAGGCAC  | 71217 |
| AsianBonytongue         | -----                                                                             | 0     |
| Reedfish                | TTTTCTCGCAGTT-CAGAAACAGTTTCATCCCAAGAACTATAAACGCCTCAATCAGTCCATCAAGTCTCCTTGTAGAA    | 29077 |
| NorthernPike            | TGTC AAGCATGAGACTAGGGTGTGTCGCTACTTGTGCGAGGATCTTGAGTTGAATCCTTTGTTGATTGAAAATGGAGCTA | 3121  |
| SpottedGar              | CACTGGGATCATT-TGTGTCTTATTATTTAAACTAAGGTTACGGATTTCTGCCGCACTTTTACAACCTCTGATGCAC     | 2585  |
| ParamormyropsKingsLeyae | -----                                                                             | 0     |
| Majority                | -GTTCTTAGCTATAGA-AGGT-TCGTGTTA-A-CAG-TCCAATCGTCGTTATCTTTCTC-ATCTGATTGACTA-AT-T-T  |       |
|                         | 71290 71300 71310 71320 71330 71340 71350 71360                                   |       |
| Human                   | TGTTCTTAGCCCTTTACAAGTAAGTTAATACATCATCTCTAAATGTAGTTACCATTATCGATCCCATTTTATAGATTTGG  | 71297 |
| AsianBonytongue         | -----                                                                             | 0     |
| Reedfish                | CGCTTTGACTTAAGTACAATTACCTCACTGTAACTTGCAGATGTTATAATATTGCACAACCTGAGCCACTTTATAAAG    | 29157 |
| NorthernPike            | GTGGCTAGCTAACGCTAGCTGTCGGGTCAAAGCCGAAACAATCAGCGCTGTCTAGCTGCAAATCTATGGCTAATTGACT   | 3201  |
| SpottedGar              | AATCCAAACGAATAAAGAGGCTTGGGTTCTACTTGGTCTACCTACAGTTTCTTTCTTTTCCGGTGGAGAGCATCTTT     | 2665  |
| ParamormyropsKingsLeyae | -----                                                                             | 0     |
| Majority                | TGCGTA--GTCATATGGACG--TAGTCTAGTATTTTTTAA-TTAAATGTGGTGAAT-TTTG-ACTGTTA-ATA-GTTGT   |       |
|                         | 71370 71380 71390 71400 71410 71420 71430 71440                                   |       |
| Human                   | AAAGTAGGGTACAAAGAACAGTTTGCCAGATTCCTTTAACTTTTGTAGTGGCCGAGCCCTAGCACTGAAAGCCAGGTAGT  | 71377 |
| AsianBonytongue         | -----                                                                             | 0     |
| Reedfish                | TGCATATTTACATATGATAA--TAATATATCATTTTTAAGATGAAATGCTGGAAAATGTTTATTATGTTATACACATAGA  | 29235 |
| NorthernPike            | TGCACTCCCAAATACCGCTG--TGGTCAATAATTTTAAAGCCAGTGGCCATGTTTTTGTG-ACTGTTTAGTTAGCTAG    | 3278  |
| SpottedGar              | CCTGTCAAGTCACGTAGACG--TATCTTTGACTTTGTAATCTAAATATGGTGTGATATAAGCGGTGCTACATGTGCTTT   | 2743  |
| ParamormyropsKingsLeyae | -----                                                                             | 0     |
| Majority                | TTATTTTAAACTTTTA-GTTGTTATTGATAATAATTGAA-ATGAGATTACACTGTGCT-C-ATTTTAGCCTGTCGT-TG   |       |
|                         | 71450 71460 71470 71480 71490 71500 71510 71520                                   |       |
| Human                   | CTGGTTCCAAAGTCCGTACTCCTGACTAATAAATAGTGGA-ATAAAATTAGATTAGCTTGACATTTTAGCCTGTCGTCTT  | 71456 |
| AsianBonytongue         | -----                                                                             | 0     |
| Reedfish                | TTATTTAAATGCTGTTAGCATTTTATTGTTAATAATTAACATGTGAGGACACTGTGCCACAGTCTAGCAAGGCGCTGG    | 29315 |
| NorthernPike            | CTAATGTAACACATTTGTGTTGGTGTGAAAATAAACGCTTGCTAGATCCTTCTGTGGTTTTATTTTACTATCTAGTAAG   | 3358  |
| SpottedGar              | TTTTCATACAAATTAACGTTGGTCTAATAACAATCAACCTGACATTGCAAAGACCCCGTTATTATACGCTGATGTG      | 2823  |
| ParamormyropsKingsLeyae | -----                                                                             | 0     |

Sunday, May 01, 2022 09:44 PM

|                         |                                                                                 |       |
|-------------------------|---------------------------------------------------------------------------------|-------|
| Majority                | CTCACCTGTTACGTAGTGTTC AAGACTAGCGCTGTAT-----GTATAGAGGACTTTTCAGTGACATAG-T-TAG-    |       |
|                         | 71530 71540 71550 71560 71570 71580 71590 71600                                 |       |
| Human                   | CTCACCTGTAGAATAGTTATCAAGAATAGTAATATAC-----ATATAGTAAAAATTTAAGTCCCATCATTTTTCAGC   | 71526 |
| AsianBonytongue         | -----                                                                           | 0     |
| Reedfish                | CACTCCATTACGGATTGTTCTCCTCAGCTGTATTCTTGCTGGGGCTGGCAGCAGACTGGAAGGATAGATGGATAGA    | 29395 |
| NorthernPike            | CTAGCTTGTAGCTACGGTACAGTAATAGCAATGTAG-CTACTAGCGATGTTGCGCTGTTTACGTTTAGTTAGCTGTGTT | 3437  |
| SpottedGar              | GAAATGAGTTACGCGGTATTGGAGGCCAAGGCCATAT-----GGAAACAGGCCTGTTTCAGTGCGCTGGAGCCAGG    | 2893  |
| ParamormyropsKingsLeyae | -----                                                                           | 0     |

|                         |                                                                                  |       |
|-------------------------|----------------------------------------------------------------------------------|-------|
| Majority                | TT-CTTTTTTTT-GACTACAAAGCTATTTCTTCGTGCTAAGTA-AAACAGTTTTTGACT-GATGTGCTTATTGAAGTAAA |       |
|                         | 71610 71620 71630 71640 71650 71660 71670 71680                                  |       |
| Human                   | TTGCTTTTTTTTACATACTAAGATATTTTTGTTACCAAGTCCATTAAGTATTTAGCCTGATTATCTTATTGATTAAAA   | 71606 |
| AsianBonytongue         | -----                                                                            | 0     |
| Reedfish                | ATAATTAAACATGTACTAAAAAGATATTTCTGAGCGTGAAGTATAAACCGGCCCTAAGTGTAATGGACAATAAAGTTAA  | 29475 |
| NorthernPike            | AGCCGGTTGACTCGTCTACACTGCTGTATCTACGTGCTACATTACAACAGTTGGGGATTCGATGCACATACTGTAGTGAC | 3517  |
| SpottedGar              | TTTATGCCTTTGAGAGTAGGCCCTATTGATTACAGCTGTAGAGGAGTTGTTTTTGTGCAAGTGTGCTTCTCGGAGAAAA  | 2973  |
| ParamormyropsKingsLeyae | -----                                                                            | 0     |

|                         |                                                                                    |       |
|-------------------------|------------------------------------------------------------------------------------|-------|
| Majority                | TT-CATAACTGTA-ATTTTGCATGCTATGTATACA-TTGGGATCCTATCTGAGTTTATATACAACCTCGTTTTATG-TAGTC |       |
|                         | 71690 71700 71710 71720 71730 71740 71750 71760                                    |       |
| Human                   | TACCAAAAATGTGTATTGTTTCATGCATTGATTCAAATTTGGGTACAAAACGGGTAGATATGTAACATGCAAATAATAAAT  | 71686 |
| AsianBonytongue         | -----                                                                              | 0     |
| Reedfish                | TTACTTAACCACAGTTATTGTGACAGATGTAATACCAGAAATATGTCTTTGTTTAAATTACAAATGTTTTGAGTTGGGA    | 29555 |
| NorthernPike            | TTTAAATAACGTTACTTTTGTAGCTGGGTATACAGTCAGGAGCTAAGTGGAGTTGAGGAACCATTTCGTGTATGCATCTC   | 3597  |
| SpottedGar              | GTGGATCTCTGTACATAATACATTTTAAAGATGCTTTTGTAGTGCCTTCTGAGGTTGTATCCAGCGCCATTTAAGCAGTC   | 3053  |
| ParamormyropsKingsLeyae | -----                                                                              | 0     |

|                         |                                                                                  |       |
|-------------------------|----------------------------------------------------------------------------------|-------|
| Majority                | GTAACCTATTAAATCTTTTTTCTCTATCAACTTTTCTAAAATTAAGT-AT-ATTAGGTTATAATTAT-CTTTAATATT   |       |
|                         | 71770 71780 71790 71800 71810 71820 71830 71840                                  |       |
| Human                   | TGAACTTATATTTTTATCTTTTTGACAAAACAACCGTTAAAATTTATGTCAATCTTATTTTTTCAAATCCTTTTCTATA  | 71766 |
| AsianBonytongue         | -----                                                                            | 0     |
| Reedfish                | GTAACAATTAATCTTTTTAACTATATCAATATTTCTTTTATTAAGTTATGTAGAGATAATGAATAAAATTTAATTCT    | 29635 |
| NorthernPike            | CGACGTCACCTGCGAATTTTATAACCAATAGAATTTGCCAAAATGTGTAGATAATTAAGTTATATTTGGTCTGAAATGTT | 3677  |
| SpottedGar              | GTGACGCTCATAAACCTCTCCCTCTGTAATTGCTAGGCTGCGGTGAAGAACAACAAAGGATGTAATTTTTGTAGCAAATA | 3133  |
| ParamormyropsKingsLeyae | -----                                                                            | 0     |

|                         |                                                                                   |       |
|-------------------------|-----------------------------------------------------------------------------------|-------|
| Majority                | TTTGATTA--AAACTAACTCAAGCTG-TTCT-GTCACTGCATTGTA-GAGCCTTTTGAGTTAATATTGACTGATTTTAAA  |       |
|                         | 71850 71860 71870 71880 71890 71900 71910 71920                                   |       |
| Human                   | TTTTATTA--AGACTAATTATAGCAAATAATAGCCATAAAATTAACCAAAAAACTCATCTACTGCAGACATATTTGAAA   | 71844 |
| AsianBonytongue         | -----ATTGTA-GGGCCTGTCAAGTCAAGATTGAATGGTCATGAC                                     | 39    |
| Reedfish                | TTTGAGTTATAAACTTCATTAACCTGCCACTTATTGCAGATTGTTATAAGACTTTGAAATATATAATGGGTGATTTGAAA  | 29715 |
| NorthernPike            | TTTATTTAA-CAAGAATCACATGTTTGTGACGTCAGTCTTCGCGCGCACTCATCGCGGTGTACCCAGATACTCATGCT    | 3756  |
| SpottedGar              | ACTGCCCGTTAACAACCAACAGAGGCTCTCAGACAACACTACATTGTA-GTGCCGTTTGTATAACATTGACCAAATTCAAA | 3212  |
| ParamormyropsKingsLeyae | -----                                                                             | 0     |

|                         |                                                                                  |       |
|-------------------------|----------------------------------------------------------------------------------|-------|
| Majority                | TATTTTAGGTGTTTAAAGCTTCAAGTGGGCATATACTC--TGTATGCTGGA---TTGCAGTATTAT--ATAATGCATTGA |       |
|                         | 71930 71940 71950 71960 71970 71980 71990 72000                                  |       |
| Human                   | GCTGTCCCCCAAGAAAGACCAAGTAATCACACATACCTAAACATGCTAGTATTTCCAGAAATATTAATAATACATAGA   | 71924 |
| AsianBonytongue         | AAATATAGCCCCCCCCACCCCAAGTGGGCTTATACCTT--AGTATTAGGA---TGACAAAGAAAT---CAATGTGTTCA  | 111   |
| Reedfish                | TGTTTTAAGTCTTTAACCTTAAAGAGAGATTCTACCTCC-TGTGTACTAAA---ATGTACGATTTTTAAAAATGTAAAAA | 29791 |
| NorthernPike            | TTATATCGTGTACAGAATTGGTTTTGCTAATGACATTAATAATTGTTTCTTTTTTCAGTATTGGAGATGTTGCAGTTG   | 3836  |
| SpottedGar              | CAGGGCGGTTGCTTAAAGTTACAC-TGGCCAGATGTGTC--TCTAAACTGAG---TTGTAATGGA----TGATGCTTTGT | 3281  |
| ParamormyropsKingsLeyae | -----                                                                            | 0     |

Sunday, May 01, 2022 09:44 PM

| Majority                | TTTTTCAGGAAAGTTCTGGTTTTTAGAGTCA--GAGGACCCTTG--TATTGAGTACTGAATTGTAAAGTTATGTTTCTTT |       |       |       |       |       |       |       |       |
|-------------------------|----------------------------------------------------------------------------------|-------|-------|-------|-------|-------|-------|-------|-------|
|                         | 72010                                                                            | 72020 | 72030 | 72040 | 72050 | 72060 | 72070 | 72080 |       |
| Human                   | TTTTGAAGCACATTGCTGAATGCCATAGTAA--CACCAAATAA--AAAATACATGTAAATTAATAATTTTATT        |       |       |       |       |       |       |       | 72000 |
| AsianBonytongue         | AGTTTCCACAGAGCTCAAGATTTTAAATTC--GAATCCCCTT---TAATAA--ACTGACTAGAAACCTTAAAGTCTGT   |       |       |       |       |       |       |       | 184   |
| Reedfish                | TATATGTTGCATGTTTCATGTTTCAGAACCA--AATGAACATGGA-TATAGATAACAGAACGGCAAAGTAACGTAGATCA |       |       |       |       |       |       |       | 29868 |
| NorthernPike            | GCGTAAAGGTAAGGATTGGTCCATAGCCAAATCCAGGACAAGTAAATGTTGTGACTTGTTTTTAAAGTGTGATGATTT   |       |       |       |       |       |       |       | 3916  |
| SpottedGar              | TTTCTCAGGATAAAGCAGGTTGGTCGCGTGG--GAGGGTCTTTGTTTGCTGGGTACCATACAGTAACACTGACTTCTCC  |       |       |       |       |       |       |       | 3359  |
| ParamormyropsKingsLeyae | -----                                                                            |       |       |       |       |       |       |       | 0     |

| Majority                | TTTTATATAGATGTGTAGTAATCAGTGTGACTGCATATGGTAATAAA-GTTCTGATTATGATTGGTTGTACACGTG---T |       |       |       |       |       |       |       |       |
|-------------------------|----------------------------------------------------------------------------------|-------|-------|-------|-------|-------|-------|-------|-------|
|                         | 72090                                                                            | 72100 | 72110 | 72120 | 72130 | 72140 | 72150 | 72160 |       |
| Human                   | TTCAACATAAATCAGAAATACTTGGTTAGAGGTCACATGATAATACCTGTCCCTAACTGTCCATAACTTCGGCTTTCTCA |       |       |       |       |       |       |       | 72080 |
| AsianBonytongue         | TTTGGTAGAGAAGTTTTGAAATCTGAGTGAATGCTTTTGGCACTGAA-GGTTTGATTCTCACAAGGTGAACAC-----T  |       |       |       |       |       |       |       | 257   |
| Reedfish                | TTGAAAGTATAAATCTAGGAAACAGTACAGCTTTAAAGGTTAATTTA-GTCCAGTGAACGTTGATCAGAACCTGTCCCTT |       |       |       |       |       |       |       | 29947 |
| NorthernPike            | TTTTCTAAAGTTCAGTAGTAATGCTTGTGACTGCTTATTGTTGGAAAAAGTACTGACATGATTGATTGGATATCTG---A |       |       |       |       |       |       |       | 3993  |
| SpottedGar              | TTTTTCTGTGTTGTAGCATTGTCACTGATGTTGCAGTTGGCGTAAAG-GTAAGGATTATTGTTGGTTATAAACGTGTGAT |       |       |       |       |       |       |       | 3438  |
| ParamormyropsKingsLeyae | -----                                                                            |       |       |       |       |       |       |       | 0     |

| Majority                | TTTAATGTTTTTCAATTACTGTGAGGTAGC-TTATTTTTTTGTGGATGCCTATGTGTATATGCAAGTGTCTGCTATGCCG |       |       |       |       |       |       |       |       |
|-------------------------|----------------------------------------------------------------------------------|-------|-------|-------|-------|-------|-------|-------|-------|
|                         | 72170                                                                            | 72180 | 72190 | 72200 | 72210 | 72220 | 72230 | 72240 |       |
| Human                   | TTTCATGTGTTTTAATATCTAAGAAGTAA--AAAATAGTTGGAGCATGCCTCTTTATATGTGCAATTTTAAATTATGTTG |       |       |       |       |       |       |       | 72158 |
| AsianBonytongue         | TTCAGCGTTTTACAATGGTTGGAATGCAGCCTTACAATCTGAAGGTTGCCAGTGTGAATATCACTCTTGTCTGCAGTACC |       |       |       |       |       |       |       | 337   |
| Reedfish                | TTTAATGCCA--TAGTCAGAAGAGGAGAGCAGAAATCTTGTGTGGAAGGACATCTCTCAAAGAGGATTCAATGTATGGTT |       |       |       |       |       |       |       | 30025 |
| NorthernPike            | AATGGGATTGTTCAAATACTGTGTGCTGA--TTGTTTGAAGGCACAACATATGTGGAGTGCCTAGACAGTGTCTAGCCG  |       |       |       |       |       |       |       | 4071  |
| SpottedGar              | TTTAATGTTT-ACACTTCTGTGCCAGGCCTTTATTTTCATGTGAGTGCTCATCTTCACAAAGAAGTGGCTCAAATAACC  |       |       |       |       |       |       |       | 3517  |
| ParamormyropsKingsLeyae | -----                                                                            |       |       |       |       |       |       |       | 0     |

| Majority                | TGGTCTTTAGGTAATTTACCAAACCTGACGTAGCA--TAGAAAATGGTTAATGTGTAATTTGTTAAAT-CTATATTAT    |       |       |       |       |       |       |       |       |
|-------------------------|-----------------------------------------------------------------------------------|-------|-------|-------|-------|-------|-------|-------|-------|
|                         | 72250                                                                             | 72260 | 72270 | 72280 | 72290 | 72300 | 72310 | 72320 |       |
| Human                   | ACTTCTTTGGATTATTGAACTGTCTCTGCTTTGCTA-TAGCTGAATTTTTAAATGTTAATTTTGAAGTCTTAAATGT     |       |       |       |       |       |       |       | 72237 |
| AsianBonytongue         | TTGATT--AAGGCATTTACCATGAACTAACGCAGTA----AAAATACTCTACTGTATAAATGGGTAAAT-CAGTATTAG   |       |       |       |       |       |       |       | 409   |
| Reedfish                | GGCCATTGACATAGATGACAGAAGCCTGAAGTGGCAGGCAGTATAGAAGTTAGTTGTCGGTCACTTGAAGTATATTTTTT  |       |       |       |       |       |       |       | 30105 |
| NorthernPike            | TAGTATATTGGAAATATATCACAACCCGAGATCGTGCTTATAAACCCGGTTACAACCGTAATCAGAGCAGTACAACGTCAT |       |       |       |       |       |       |       | 4151  |
| SpottedGar              | TGCACCCCATGAAGACAAAAAAACTCTCACAACAT-TAGAAAAGTGGTTGAGGCATCACTTGTCTAATGCTTTCTCT     |       |       |       |       |       |       |       | 3596  |
| ParamormyropsKingsLeyae | -----                                                                             |       |       |       |       |       |       |       | 0     |

| Majority                | GTGCAT-TGTACCCAAAATTGAAAGT-G-GACATAGTTAGAGCTTTTAAATGTTAATTTTTTATGATTATAT-GAATTGT  |       |       |       |       |       |       |       |       |
|-------------------------|-----------------------------------------------------------------------------------|-------|-------|-------|-------|-------|-------|-------|-------|
|                         | 72330                                                                             | 72340 | 72350 | 72360 | 72370 | 72380 | 72390 | 72400 |       |
| Human                   | GTCFTT-TGGAAAAACATTGGAAGAGCTAAAGTAGATAGAGTTGTTTCATTTAAATGTTTATTTTTTATTTTATTTTAT   |       |       |       |       |       |       |       | 72316 |
| AsianBonytongue         | ATGCAT---TACCTTAATATGCTAGT---GAAACAATTATAACTATTAACATT---TTTTTTAACTTA---GGAAATG    |       |       |       |       |       |       |       | 476   |
| Reedfish                | ATGGATATTTAAACATAAGAAAAAGTCGGGACACAGTGGGTGCCTAGAATGTTGACTTTTCAAGGAGAATCTTGAGCTAA  |       |       |       |       |       |       |       | 30185 |
| NorthernPike            | GTGATGTCATACCCATGGTATACAGT-ATTACATACCACGACTGTCAGCCAATCATCATTAAGGATTACATACCACCTGGT |       |       |       |       |       |       |       | 4230  |
| SpottedGar              | GTTTCATCTGTAGGCTAAATGTAATTTG-GATGTGGAAGGACTGCTTATGTTAGTTATTTTATGAGTTGTAT-GAACAGG  |       |       |       |       |       |       |       | 3674  |
| ParamormyropsKingsLeyae | -----                                                                             |       |       |       |       |       |       |       | 0     |

| Majority                | TTATTTGGGTAGGTACTG--TTGATGATGTGTTGATTTG----TTGTGGTTTTGTCTTTGAATACAAA--GGTTTAAAGC  |       |       |       |       |       |       |       |       |
|-------------------------|-----------------------------------------------------------------------------------|-------|-------|-------|-------|-------|-------|-------|-------|
|                         | 72410                                                                             | 72420 | 72430 | 72440 | 72450 | 72460 | 72470 | 72480 |       |
| Human                   | TTTTTTTAGTTGGAGTACTGGCTCTGTTGCCGCTGG-AGTGCACTGGCGGGATCTCTGCTCACTGCA-AGCTCCGCC     |       |       |       |       |       |       |       | 72394 |
| AsianBonytongue         | TCAGCCATCTAGGGGCTG--TTGATAATGTTGATTAG-----AGCTATTGCCTTTGGACACAAA--GGTTCAAGG       |       |       |       |       |       |       |       | 544   |
| Reedfish                | TTAATTCGGACTGGAAGAAATCAAGAAGTGTTTAATAA----TTGAGATTGAGACTTGAATAATAACTGATGTAAC      |       |       |       |       |       |       |       | 30260 |
| NorthernPike            | TTATGAGACCATATACCA---TGGGTATGATCTCACATACTTTTTTGTGTTATAGTTGTTGGTAAACATGTTTATTATATC |       |       |       |       |       |       |       | 4307  |
| SpottedGar              | ACAGGTGGATAGGTAATGAATTCAGGTTGAGTTGGTTTGTAAAGTTTGGGTTATGTCGTAGAGTACAAA--GACATAACC  |       |       |       |       |       |       |       | 3752  |
| ParamormyropsKingsLeyae | -----GCCCTGCAATTAAC--TGCTTAGGC                                                    |       |       |       |       |       |       |       | 24    |

Sunday, May 01, 2022 09:44 PM

|                         |                                                                                   |       |
|-------------------------|-----------------------------------------------------------------------------------|-------|
| Majority                | --TTAAATCTTCACCATT-TGCAGCTTCAGTATGCTT-ATATGTTGTAGTTATTTTTGTTAGCTGCTCAACTGTGCTAAT  |       |
|                         | 72490 72500 72510 72520 72530 72540 72550 72560                                   |       |
| Human                   | TCCTGGGTTACGCCATTCTGCCGCTCAGCCTCCTG-AGTAGCTGGGCTACAGGTGCCCTCCACCACACTGGCTAAT      | 72473 |
| AsianBonytongue         | --TTCAAACCTCCCCAA----CAGCTATAGTATGTTT-AAATGAGGTACTTATCCCTAAAAAGTCTCAGCTGTGCAAAAT  | 617   |
| Reedfish                | AATGGAAGAATGGTCATTCTCTAACACCTTCACACTTCATAAGCTATACTAATTTATTTTGAGAAAAAGTAATGCCACATT | 30340 |
| NorthernPike            | A-GTAAGGCTTCATGGTT---CCGTGCATGTATTATTTGAATGTTATGAATAATAATAGGTACTGACTCA---ATGCCAAT | 4380  |
| SpottedGar              | --TTAAATCATCACAGATGTGCACTTAAAATAAGCTT-ATAAAAAGCAGACTTTTGTTCAGATG--TAACTCTCTACT    | 3827  |
| ParamormyropsKingsLeyae | -TTAACTTTACAAGAA---AAAGCATGAATGCGGTT-GTGTGTTTATAGTATGTTTGTACCCG-----ATATTAAT      | 91    |
| Majority                | AATTTTGGTTA--TTAATACT-GCCAGTTGTCTT---GGAAGTTAGGTTAATTTCAATAACTCATTCTAC----CAGTTA  |       |
|                         | 72570 72580 72590 72600 72610 72620 72630 72640                                   |       |
| Human                   | TTTTTTTGTAGTTTTAGTAGAGACAGGCTTTCACCGTGTAGCCAGGATGGTCTCAATCTCCTGACCTCGTGATCCGCC    | 72553 |
| AsianBonytongue         | AATGTAGGTAGATTAACT-GCAAGTTGCTTT---GGAGAAGAGGGTCATCAAACAATAAATGTAA-----GTTA        | 687   |
| Reedfish                | CATCCTGCCCT--CCAAATCTGCCCTTTGTAAC---TACCACTGGACTACTTCTCTGAGCCATTCTATG--CCAGTCA    | 30413 |
| NorthernPike            | T-TCAAGGAGATAGCATTAAATTTCTCTGCCTT-GTGGAAAGTTAGCTGAATCCAACAATTCAGCATTTCTGATCAACTC  | 4458  |
| SpottedGar              | A-TTTTGGTTT--TCACTACT-CACAGTTGTCT----GAGGTGATTTAATTGAAGTGCCCTCGGCTTC-----TTG      | 3890  |
| ParamormyropsKingsLeyae | AAACTACATA--TTAAAC--GCCAACTCTTTA---TTCACTCAAATAAACAGAGCAAATCATTCTAC----CAGCGA     | 160   |
| Majority                | CACT----TAGGCTATTTAGGTGTGTAATAAGAATTTCAAGT--TGCCCTTGAATAGC-GTATAACAAGTTTTTCGGTA   |       |
|                         | 72650 72660 72670 72680 72690 72700 72710 72720                                   |       |
| Human                   | ACCT----TGGTCTCCCAAAGTCTGGGATTACAGTCATGAGC--CAC-CGTGCCCTGGCCTCATTAAAAATTTTTAACA   | 72626 |
| AsianBonytongue         | CAGT----AAAGAATTTTAGATGAGTAAGTGGTGACTCCAAC--TGCCCTGAGGTGT-GTGTACAAGGGGTGCGGTG     | 760   |
| Reedfish                | AAGT----GTAAATAGTAAAGTGGTTGCACAAGCAAGACAAAA--TATTTACTTTAGTGAATGTAATTTTTTTATTTA    | 30487 |
| NorthernPike            | CCCTCTTATAGGCACACTTGCTATGCTGACAAATGCTTTAAAAATCTATATTTAAATCTTTGAAAAAGGGATTTAGATT   | 4538  |
| SpottedGar              | TGCT----TAGTATATCTAGG-ATGTCACTTTCAATTTAAAG---GCCCATGAAGAACAGTAGACAACATTTTTTCGGTG  | 3961  |
| ParamormyropsKingsLeyae | CACC---GCCGCCATTAGC---GCAAATAAGAAACGCGTTT--TGACCTGTATCAC---CAGCAAGCCGGTTCAGCA     | 228   |
| Majority                | ATACAATGAATTTTTGAA--T-----TTGGGTCCT---TTTAAATAGGTTTGGATTACCACTTCGT--A----TGATTTA  |       |
|                         | 72730 72740 72750 72760 72770 72780 72790 72800                                   |       |
| Human                   | CTGGGTAAAATTTTTATT--T-----TTGAGTCAC-----AAATTAATTTGAAGCTGTGTCTTTTAGAG----AGCTTA   | 72689 |
| AsianBonytongue         | ACACAGTGGGT---TGGA-----CCGGTCTGCTCTCCGGTGGGTCTGGGGTTCGAGTCCA-----ACTTG            | 819   |
| Reedfish                | AAAAATCAAGTTTATCAGCAGTCAA-TGGGGTGAT-CGCCCCAAAATATTTTCGATCACCCTTTGTATATCACTATTTAA  | 30565 |
| NorthernPike            | GCACAATGAATACCCTATGTTT---TTCAGTGCT---TGTTGTTAAGCTTGGACAGAAATTGAGTGAAC---TGAATGA   | 4608  |
| SpottedGar              | -TACAATGAATATTTGAAATCAAAGTTTACGTTTTTTATTTTAAAAGTCCCTCTAAAACAACCTCAT-----ATTTA     | 4031  |
| ParamormyropsKingsLeyae | ATAAAAAAAAA-TGTGGA-----CTCGGTCCT---TTAAGCGCTTTGATTTATCGCCCCGC-----TGCTTCG         | 288   |
| Majority                | GGTTGTCTTGAGAGCGATTGTCATTCTGTCTTACTGTGTCTGTTTTTCTTCGT----GAAAGCTTTTTGACATCTTAG    |       |
|                         | 72810 72820 72830 72840 72850 72860 72870 72880                                   |       |
| Human                   | TTCAACTCTTAATCCATTATAAATAATATTTGAATGAATGTGTTTACATCTG----GAATGATTTTTATCATCTGAG     | 72764 |
| AsianBonytongue         | GGGTGCCCTTGCAGCGACTGGCGTCCAGTCCCTGGGTGTGTCCCTCCCTCG-----AGCCTTGTGCCCTCT--G        | 888   |
| Reedfish                | AATTGTAATAAGGGCAATTAATAATATGTCTATATTGACTTTAATTTTATTTAT----TTTCTTTTTTAAACATCTTAG   | 30640 |
| NorthernPike            | TGGCATATAGGAAATGACTGGCACTTTG-CCTGACCATGTCTGCTATTCTTTGTTTAAAGAGAGATGAGTGACACCAGTG  | 4687  |
| SpottedGar              | GCTGGTCCCAACAAAATAGTAATTCTGTCTTACTGTTTCTTACTCTTATCGC----CAAAGCATTACAAAACG--A      | 4104  |
| ParamormyropsKingsLeyae | CATTGAGTCCACAGAGCCGGTCTTCTGCACAAACAGCAGTCTGTCTATCCGGA----GCCAGCATCTGTCAACGTGA     | 363   |
| Majority                | CGGGCGGA---TGTTGGACTGCGGTTTCGT-CCTTCGGTGAATTTGGGACTACCGGTGGAGAAGAAGTG---TTAGTGAG  |       |
|                         | 72890 72900 72910 72920 72930 72940 72950 72960                                   |       |
| Human                   | TAAAGGAAATATGTTTGTAGTGGTGGAACTTTGAAGGTATTACGGGCTACAGATGAGAAAAAATG---TTACTACG      | 72841 |
| AsianBonytongue         | CTGCCG-----GTTAGGCTCCGGTCT---CCCAGCACCCTGATGGGACAAGCGGTTCA---GAAATG---TATGTAAT    | 954   |
| Reedfish                | CGAGCTCA---AGCAGTGTGCAAGCCGTGTGCTGTGCAAGCAGCAAGCACCCTATATCAGGAGCA---GCCGTGAG      | 30714 |
| NorthernPike            | GTGAAGCATGGTGTCTTTCTGTTTGT-CCATCAGTGAATTTATCAAATTTGGTGGAGAAGGGTTGGCTTAACTGAA      | 4766  |
| SpottedGar              | TGGTTG-----GTCGTACACTGTTTC---TGTTAAATCAATTTAAGTTTGTCTGCTGGAA--GAGGTG---TTAGTGGG   | 4171  |
| ParamormyropsKingsLeyae | CGGGCGGAG--AGCAAGACTGAGGATGGCGTGGGGCTGTGAGAGACGGGCGGGGGTACAGTG---TCCGTGGT         | 438   |



Sunday, May 01, 2022 09:44 PM

|                         |                                                                                    |       |
|-------------------------|------------------------------------------------------------------------------------|-------|
| Majority                | TC--TCTGTGATGACA-CCTACCCAGTGCCTTCGT---GTATATGCTTATTGCTTTAGT---ATTCTGGTGT-CTACACTA  |       |
|                         | 72970 72980 72990 73000 73010 73020 73030 73040                                    |       |
| Human                   | TCATTTTCATGTTTACATACTGACCAGCATTTTCAATGAAATAAGCTTATTACTATAGG---ACTATAAAATGTTTTTCAA  | 72918 |
| AsianBonytongue         | TA---CTACAATGATC-CCCACAGGGAAATTCA----GTAAATG--TGATGCTGCATT---GCCCAGGCAT-CAAACCTG   | 1020  |
| Reedfish                | TGAATGTGCAATAACA-CCTGCCCAGAGCCCCGTCTGAGAATAATTATTGACAACAT---GTTCTACCCCTGTTACATTA   | 30790 |
| NorthernPike            | GCCATTCTTGAGTAAAAATGCATACAGTGCCTTCTGTATTCTGACCCCATTCGCTTTATCCTGATTTTGTGTCTTAGACTT  | 4846  |
| SpottedGar              | GC---CAGCAGGGGGCGCTCACCTGTGGTCCAC---GTGGGTCC-TAATGCCCCAGT---ATAGTGATGG-GGACACTA    | 4240  |
| ParamormyropsKingsLeyae | G---CGTGGTGACACACTACTCCACACCCCGA---AAAGAAAAATAATCCCTTGGT---ATCCTCGTGC-CTAAACTG     | 507   |
| Majority                | GGCTT---CTTTCAAG-GCAGTT-TTTATAAGGATTTTATCATTATATGCTTAGTGCTCTG-TGGTCTT---TAAAAATT   |       |
|                         | 73050 73060 73070 73080 73090 73100 73110 73120                                    |       |
| Human                   | AGGTTTAACTGTCCAGGGCAGATACTTAAGACTATCTGATCATCCATTAATAAACTTTTTCACATAGTCTTGCTTAAATGGA | 72998 |
| AsianBonytongue         | GGCCT---CTTACAGG-GCAGGC-----AAGAAATTTTACCACCTGAAGCAGCAGTGCACAGGTATACAT---AAAAAAAT  | 1087  |
| Reedfish                | GATGT---CCTTCAAC---AGGTAAATTTATAGTTTTTATATTTATGCTTTGTGGATG--TGATTTT---CAGTATTT     | 30859 |
| NorthernPike            | AATCT--GTACTTGAATACATTT-TGTATAAGGTTTTCTTCCCTTCAGTTTTTTTGTCTGTTCAGCCT-----TCCCTC    | 4918  |
| SpottedGar              | TACTG---TAAACAGGTGCCGCTCCTCGGATGAGCCGTAACCAGGCTCCTGACTCTCTG-TGGTCAT---TAAAAA-T     | 4312  |
| ParamormyropsKingsLeyae | GCAT---CGCACAAA--TAGA-----AGGGAACCTCAAATTTATGCGACAGTGCCT--T--TC-----AGGGAAG        | 564   |
| Majority                | TTTATGTGTTTATCTA--AAATTGTTGTCGTGTAGCTTTATCATTAAATTTTATTTTTTCTTTCACACTTACTTATTAT    |       |
|                         | 73130 73140 73150 73160 73170 73180 73190 73200                                    |       |
| Human                   | TCCATTATGTTTACCCATTATATTGTTCTCAGCTGTAGTT-TTAAGAAATTTATTTTCATTTGTTAATACTTACTTTCCAT  | 73077 |
| AsianBonytongue         | GTTATTGCATGCAAGTA--AATTTACTGACATGTACATTCATCAATTTAGCTGATGCTTTTCTTCAAATAACTTACAAT    | 1165  |
| Reedfish                | TTGTTTCTAGGTATTG--TTGGTGGTGT-GGGTGTTTTTTAATTTAAGACCTTTTTTTTTCATCTCAAAGAT--ATTTT    | 30934 |
| NorthernPike            | CCTGATTGGTCTCCCCAG-TCCCTGTGCGGAGAAGCATCCCCATAGAATGATGCACTCACCATCATGCTTCACCATAGG    | 4997  |
| SpottedGar              | CCCAGGGCGTTTCTCGA--AAAGAGTAAGGGTGTAAACCCAGCATCCTGGCCAAATTTCCCATTTGGCCCTTACCAATCAT  | 4390  |
| ParamormyropsKingsLeyae | TTAATAAGTTTGATGG--AAACAAACAG-GTGTGACGTTAACATTAATTTGACTTAAATGTTACAGTGTAC--AGTAT     | 639   |
| Majority                | TACCTTCTGGTAATCTCTGTTAACCCATTGGTTCTGTAAGTC-ACTCTCTTTTTCATTTTAACTGAAGTTTCTTGAGCC    |       |
|                         | 73210 73220 73230 73240 73250 73260 73270 73280                                    |       |
| Human                   | TACCTTCCCCTTTTCTGTGACAATCCGTTGATACTTGAAGACCTCTCTGTATTTCATCTTAGGGTTAATAATTTTAAAGGC  | 73157 |
| AsianBonytongue         | ATTAGCCTTTTACACTTATTCACCTCATTTATACAGCTGGGC-ATTTTTTTTTTCTTTTTTAACTGGAGCAACTTAAAGG   | 1244  |
| Reedfish                | CAAAGTTTGGAACTGTCTAAAGATTATTACTTTTACAAAGA-ACAATCAATTTCAAGCTTTACTCCAGTTTGTGACCC     | 31013 |
| NorthernPike            | TATTAGCTGGTGATGAGTGGTACCCCCCACCCTAGTTGTATTGCCTGGTATTACAGGCTTTTACAAACCCGATTCC       | 5077  |
| SpottedGar              | GGCCTCCTAATAATCCCATCTATGAATTGGCTTCACTACTCTGCTCTCCTCCCCTAATAGCTGATGTGTGGTGAGCA      | 4470  |
| ParamormyropsKingsLeyae | GGCCTGTGAAAGCCTCCGGTCCACCTGCGGCTATGACAAAA-----CAAGTCCAATGGAACGGACATGTATAGCGCC      | 713   |
| Majority                | TAAGTAGT---GCTCTATGGTTGTT-ACTGTAGCG---TCCAAGTGAATTTTATACCTGTATGTTT---TTGGCTCA--    |       |
|                         | 73290 73300 73310 73320 73330 73340 73350 73360                                    |       |
| Human                   | CAAACAGCCTAAATCTATGGTAATCAACTCCAGCCTTGTGTAATGAAATCTTCTGCATAAAGATAGG-TTTAAATCAA     | 73236 |
| AsianBonytongue         | TAAGTAGC---ATGCT-CAGATGT--ACTGTACC---TACAAGTGAATTTAAACCTGTAACCTT---TGGGCTCA--      | 1308  |
| Reedfish                | AATG-AAT---GCTCAACAAGCCAA-ACTGGTAAG---TACTTGAGAATTTTATTTTTATTTTTTTT---TTGCCTGT--   | 31079 |
| NorthernPike            | AAAAAAGTTGGGACGCTGTACAAATTGAGTAAAAAAGGAATGGAATAATTTACAAATCTCAAATCTATATTTAATTCACA   | 5157  |
| SpottedGar              | TTC-TGGT---GCACTATGGCTGCC-GTCGCATCA---TCCAGGTGGATGCTGCACATTGGTGGTG---GTGGAGGG--    | 4536  |
| ParamormyropsKingsLeyae | CT--AT---GCAAA-TGGTCGCTCGCCTTAGCG--TCTGTTTGTATGATGGTGCCTGGGGGTT-----AAGGTTA--      | 775   |
| Majority                | -TAGATTTTCATAATTTA--TTAAACGTTTTGTTTTGAGCATCTGATAGTGTAGCTTTTATGAATTG--TCATTATGTTA   |       |
|                         | 73370 73380 73390 73400 73410 73420 73430 73440                                    |       |
| Human                   | TCAGATTGCAGATTTTATTGAAGAAATTTGTGTTTTTAAAGAGTTGACAAATATATGTTGTATGGCTAAAACAAAGAAAATA | 73316 |
| AsianBonytongue         | -CAGGCATCACTACT-----AACCATATGCTGCCAGCTGCCCTTGTCTGAACTGCCGTGTCTT---CCACTGTGTCA      | 1378  |
| Reedfish                | -TCCTGTTTATAATTAAGTTTAAATGCTGCTTTTGTCAAACACATAAAATTAGCTTTGATTATTTT--ACATTTTTTTC    | 31156 |
| NorthernPike            | ATAGAATATAGATAACATATCGAATGTTGAAAGTGAACATTTTGTAAATGTCA--TGCCAAATATTTGGCTCATTTTGGAT  | 5235  |
| SpottedGar              | -GAGACCCCATTACCTG--TAAAGCGCTTTGAGTGCAGTGTCCAGAAGTGAAGCAATTAATTAATTA--TTATTATAATT   | 4611  |
| ParamormyropsKingsLeyae | GGCTTTTCATAGTTTA--TTGGGCAATTAACCTGACCCGAGGAAAGTCTGG--CAGAATGAACTG--TCAGTATCTGA     | 848   |

Sunday, May 01, 2022 09:44 PM

|                         |                                                                                  |       |
|-------------------------|----------------------------------------------------------------------------------|-------|
| Majority                | CTTA-----GTATA-----TAGTTTCACAAAAAGTTCA-TGTCAGATCGCAATACAG-ATATGA-----AAACTA      |       |
|                         | 73450 73460 73470 73480 73490 73500 73510 73520                                  |       |
| Human                   | CTTCTGTTGCTTCTGCATTTAGTAGAAGAAAACTATATATGTTTGTGACCAAAGTATAAAATATGATTCCTTTCCAGGGA | 73396 |
| AsianBonytongue         | CTTA-----GCATG-----TAGAAGCCCAAAGATTTC--TCTAAAATGG-AGTACAGCAGATGA-----CAACTA      | 1435  |
| Reedfish                | ATGAATTAGAAGTTATAGGTGATACTTTTCAGAGGTGGTTTAAATGTCAACCCAGATTTCAG--TGTGG-----AAACTG | 31227 |
| NorthernPike            | TTCA-----TGAGAGCTATACATTCAAAAAAGTTGG--GACAGGTAGCAATAAGAGGCCGAAAAAGTTAAGGATA      | 5304  |
| SpottedGar              | TTTAAAATTACTGCATT-----TTTTTTCACAAAAAGCTCAATCTCAATTCGCAATTCAG-AGATGA-----AGACAG   | 4678  |
| ParamormyropsKingsLeyae | CT-----ATA-----CAGTTTTTCAGAAAATCC--GTGAGACTTTTTTGTAA-CCATTA-----TCAGTA           | 900   |

|                         |                                                                                    |       |
|-------------------------|------------------------------------------------------------------------------------|-------|
| Majority                | TGTTACAGCTGTAGCAA-----TCA-T--AATTTAAAATTTGCAATTC--TTAAGTAATTAGAATGTATAAAATTATAG    |       |
|                         | 73530 73540 73550 73560 73570 73580 73590 73600                                    |       |
| Human                   | GGTAAAGGTTATGCAGAAGATTTTCACTAGCAGCTCTAAAAGGCTACCC--TCAATTAATTGCCATGAAC-ATTTTCATAG  | 73473 |
| AsianBonytongue         | AGTTCAAGCTGTCTCCA-----CTA-T--GATTTAACATTTGGCACTAC--ATATGCACTAAGAATGTATTAACCTCCAG   | 1503  |
| Reedfish                | TCTGAAAAGTGTACAGAATTGGCCT-CAAAAAAAAAAAAAAAAAACATTTT--TCCAGTAGACAAGGACCGGAAGCTGGTAC | 31304 |
| NorthernPike            | AGGAACAGCTGGAGGA-----CC----AATTTGCAACTTATTAATGTCAATTTGGCAACATGATTGGGTATAAATAGAG    | 5372  |
| SpottedGar              | CATTTCCATTTTAGCAACAAC--TTA-TCAAATTAACGTGTGAGGTTC--TTATACAAATAAAATATCTAATATCATAG    | 4753  |
| ParamormyropsKingsLeyae | TTTGACAGCCATAGCAA-----AATTCATATTTGCAATA--ATAAATAGCC-GAAGGAACAAAATGGCAA             | 963   |

|                         |                                                                                  |       |
|-------------------------|----------------------------------------------------------------------------------|-------|
| Majority                | T--TTCAGAAGGGTGTTTGTGTCTT-CAGTATTAGGGTGTATTAGAGT-AAGTCATCCATT---TGTTCATGTTGC--A  |       |
|                         | 73610 73620 73630 73640 73650 73660 73670 73680                                  |       |
| Human                   | C--CCTAGAAGGATGTTGGCTCATTTTCAGTGTCACTCTGGTTTATTCTTTATTGTATTATTTCAGCAGTCATTTTAACT | 73551 |
| AsianBonytongue         | C--TTCAGTGAAGTATGATTTATT-CACTAATAGCATATATTACAGCGAAGTCCGCCATT---TGTTCAGACTAATTA   | 1577  |
| Reedfish                | TCAGTTGGTAATGTGTGCATGGCCTG-CGATTTCCGTTATGTTGACTTGGTACAGCGATCAA-TGACTGTAGTCCGCAA  | 31382 |
| NorthernPike            | CCCTTC--AGAGTGGCAGTGTCTCTCAGAAAGTCAAGATGGGCAGAGG--ATCACCCATT---CCCCAATGCTGC--    | 5440  |
| SpottedGar              | TAGTTCAGATGGGTAGTGTGCTCAG-CATGCGTAGGCTGCAAAGGAAC-AAGTTATAGGTT---TATTCCATGCTGA--A | 4826  |
| ParamormyropsKingsLeyae | T-----GACGATGATTAAGTCTT-CACAAATAAAGTGCATTTTAAAT---GGCATTCGTT---TTTTACCCCTTCC--   | 1027  |

|                         |                                                                                  |       |
|-------------------------|----------------------------------------------------------------------------------|-------|
| Majority                | AT--TAGGCAGATCAGTGGCACAATATGTTG-ACAGTGTTTCTTTTCCATGTGTTTTATAGCTTATGAAGATCATATGA  |       |
|                         | 73690 73700 73710 73720 73730 73740 73750 73760                                  |       |
| Human                   | ATGCTAGACACTTTAGAGATTCAGAAGAGTA-ACAGGGTTTCTGTTCTCATGAAGCTTATCAGAGACAGAAAACATATGA | 73630 |
| AsianBonytongue         | AG--TAGGCAGATCAACAGGTCAAGGCCATAG-AAGGAGCAGTCTTTTCCAC-TGGATTATGTCTTCTGGAG-----TGA | 1647  |
| Reedfish                | AT--CTGACATACCCCCACAATAAAAAGTTGTGCAATGTGATATCTGCTTTA-GTGTGAAAGCGAGTGAATAAAATGCTG | 31459 |
| NorthernPike            | ----GGTAAAAATAGTGGAGCAATATCAG--AAAGGAGTTTCTCAGAGAAAAATTGCAAAGAGTTTGTAGTTATCATCA  | 5514  |
| SpottedGar              | AG--AAAGAAGAAAGAGAACAACGTTTCG-GCCGTGGAGCCTTCTTCAGGTGTGTACACCTGAAGAAGGCTCCACGG    | 4903  |
| ParamormyropsKingsLeyae | -----CACTGTCAATATGTC--ATTATGTTCCCTTTTCTGC--ATTTTGGCAACAAGAAGATCAAACATA           | 1090  |

|                         |                                                                                   |       |
|-------------------------|-----------------------------------------------------------------------------------|-------|
| Majority                | TTTAAATTATATTAT--CTATTTCAAATGTTTTGTGAATATAGTGTAGTTTTTTT-ATTTAATTGTTAGGTCTCTAAAA   |       |
|                         | 73770 73780 73790 73800 73810 73820 73830 73840                                   |       |
| Human                   | GTTAGATCTAATTGGAGGCAAACCTGAAATATATAGTGGAGTTAGTGTGGTTATCAGCACATAAATGAGTGATCCATCAAC | 73710 |
| AsianBonytongue         | GGAAAAGGATGTTAC--GTGTTTTATGTGTTCCATGAATAAAGGGCTGTCAGGTG-ATGTAACAGTTAAGGTCATAA--   | 1721  |
| Reedfish                | TCCTAGTTATCTTACA--CCATATCTGCTCTTTTCTTAATA-AGCCTGCTTCTTTT-GTCTCAGAGCAATTTCTCTGGAT  | 31535 |
| NorthernPike            | TCTACAGTGCATAAT--ATAATTCAAAGATTTCAGAGAATCTGGAACAATCTCTGT-GCGTAAGGGTCAAGGCCGAAAA   | 5590  |
| SpottedGar              | CTGAAACGTTGTGTT--CTCTTCTCTTTTTTTTTCAGCATGGAATAAACCTATT-ACTTGTTCCTTTGCTATCTAACA    | 4979  |
| ParamormyropsKingsLeyae | AAGCACAAAATGA---GAAAGTCAAAGGCTGCATTACTATAATCTAGTTTTTAT-ATTTGATTGTCA--TATTTAA--    | 1161  |

|                         |                                                                                 |       |
|-------------------------|---------------------------------------------------------------------------------|-------|
| Majority                | ACACGTTTAATTTTAG--GGCTTTATT-----ATTTTCATGTAGAAGTGT---ATGATATGTTATGATTC---TGT    |       |
|                         | 73850 73860 73870 73880 73890 73900 73910 73920                                 |       |
| Human                   | AAAAGGAGAAATTTGGAGGGTTTTATGGGCCAAAAACAGCATGATTAATGTGATAGAGTATATGTCATGTTTTAGGTGT | 73790 |
| AsianBonytongue         | --ACGTGTAATGTA---GG-TTCATC-----AAT--CATGTATAACCT-----AAAGTCATATGAACC---TGT      | 1776  |
| Reedfish                | AAGCATTTAGTCCCATTAGCTTTATTT-----TTTTGATGTAGAAGTGAATTTGGTTGATTTAGTGTAAAGTG---ATT | 31605 |
| NorthernPike            | CCATACTGGATGCTCGTATCTTTGGG-----CCCTCAGACGGCACTGC-----ATCACATACAGGAATGATACTGT    | 5657  |
| SpottedGar              | TCATGTCTTGTTTAAG--GGCTTTATTCT----GATTCCTTGAAGGACCCCTTACCAGAAGGTGTTAGGATCC---TGC | 5049  |
| ParamormyropsKingsLeyae | GGCAACTATTATTGA--GGAATGATT-----ATCTTATCGAAAATTGTT-----GAAATGTTTCAGCTTC---ACT    | 1221  |

Sunday, May 01, 2022 09:44 PM

|                         |                                                                                    |       |
|-------------------------|------------------------------------------------------------------------------------|-------|
| Majority                | AATCTAAATCTTATTAT-GTTTAAGTAATACTACTATTGAA-AC---TTTGAGTAACTTATTCCTTGAAATTATTGTA-    |       |
|                         | 73930      73940      73950      73960      73970      73980      73990      74000 |       |
| Human                   | GATGAACATTTCAGTTAT-GTGTGACGAATAGGATAATTGAAAAA--TATGAAAGGCTATGATGCCAGAAAGTATTATG-   | 73866 |
| AsianBonytongue         | AACCTGAAGTTGTTA--GTTCAAGTCTGCTGCTGCTGTA-GCACCTTTGATCAAGGTACTTTCTCAAATTACTIONA-     | 1852  |
| Reedfish                | AAGCA-AACCGCAGTAT-TCCTATAATCAAACACTATAATAGAA---TTCTGTTAATAATACTACAGTTACATTACTATA-  | 31679 |
| NorthernPike            | AATGGAAATCACAACATGGGCTCAGGAATACTCCAGAAAAACAT---TGTTGGTGAACACAATCCACCGTGCCA-TTCGC   | 5733  |
| SpottedGar              | TGCTCTGACCTGAGTAT-GTCTCTCTGTTTCCCAAATGAATGCCCTTCTGAGCAACTGATCTCCATATCAGTATTGTAA    | 5128  |
| ParamormyropsKingsLeyac | CGATT--AATTTATCAG-GATAAAGTAACACTACTATTGCA-----TTGGAGTAAAT-TCTCCTTGTAACATA--GAAA    | 1289  |

|                         |                                                                                    |       |
|-------------------------|------------------------------------------------------------------------------------|-------|
| Majority                | -TGTTGGCAGTTATAACTATTTATGTAACCTATTAATAATTTGTTTAAATATGA-GAAGTTTTTTATGCTTTT--TCTTTTA |       |
|                         | 74010      74020      74030      74040      74050      74060      74070      74080 |       |
| Human                   | --GGACAAGATCTTAAAACCAGTGTACCAGGGAGTATGAATTTAATATGG-GAATCTTAAACTCCTTT--ATGACTG      | 73941 |
| AsianBonytongue         | --GTGG-GAATGCACCGATTCTG-AAATATGCTCAATATGCTTTGCATGCAA-GGAGTCCGCTAAGCAAAC--ACACTCA   | 1925  |
| Reedfish                | -TCTATCTATCAAGTATGCTGATG-ACACTATGGCACTATGGCTAACTATGG-TTAGCTCGTCACTCTTTGGCTCGTTTC   | 31756 |
| NorthernPike            | CGTTGCCGGCTAAAACCTCTATAGGTCAAAAAGAAGCCGTATCTAAACAGGATCCAGAAGCGCAGGCGTTTTCTCTGGGC   | 5813  |
| SpottedGar              | ATGTGA-ATTTGTCTCAGTTGACATAACTGGCTATAAAGTATTAAATAAAA-AATACATCTTAAACTTATT-GCATGCA    | 5205  |
| ParamormyropsKingsLeyac | TTGTAGCAGCTACAATTATTACAGTGGCCCTTTAAAAAATGTTAAATAAAA-CAAGTTATATATCTATGC--ATTTTA     | 1365  |

|                         |                                                                                    |       |
|-------------------------|------------------------------------------------------------------------------------|-------|
| Majority                | AAAGAACAATACTGTTTTGTATGT--CAAGGTTTGAAAAAATTTTGTAGAGGGACGTATAGATAATTA--CTT-CAGTAGAT |       |
|                         | 74090      74100      74110      74120      74130      74140      74150      74160 |       |
| Human                   | GAAGATGAGCATCAGAGTGTCTGC--GACCATTTGATGATATTATGTACCAAGTTTTAGATGTTTG-GCTTTTTTCAGGT   | 74018 |
| AsianBonytongue         | TAAGAGCAACACCGTTTT--CGC--CACGACGCGCGGAAATTTCCGGCCACGTTCCGGCCATTTTC-----CGGCAGAT    | 1994  |
| Reedfish                | ACATCTCATTTCTGTTTGTCAATTAATAAAGAAACGAATCAATTCAGAGGCTGAATCCTTAAAAACAGGGCTATTAATA    | 31836 |
| NorthernPike            | CAAGGATAATTTAAATGGACTGTGGCTAAGTTGAAAAAGTGTCTCTGTGGTCAGACAAATCAAAA--TTTGAAGTTAAT    | 5891  |
| SpottedGar              | AAAGAACTAGACTGTAAAAGATGT--TAAGGTGCCAAAAAGTGTAGAAGGACATACAATAATTAAGCAAACAACAGAA     | 5283  |
| ParamormyropsKingsLeyac | AACAATTTGTCTGATTTGTATGTAACAGGCTCTTAGAGGGCTTAGAGTGGAGGCTGTATTGTTG-----CAGTACAA      | 1439  |

|                         |                                                                                    |       |
|-------------------------|------------------------------------------------------------------------------------|-------|
| Majority                | TTAGAACACATGATGCTTGCTCGAATCCGCACCTTGAGGAGG--TTATTGACTGAAGTT--GATCTGTGTTGAGTACCGAC  |       |
|                         | 74170      74180      74190      74200      74210      74220      74230      74240 |       |
| Human                   | TATGAAAGCGGGGGATGAGTTAAGAACCCTGCTGTGAAGGATTCACTCAACTATTTTTAGGCAGTTGGGTAAAAATGACC   | 74098 |
| AsianBonytongue         | TCCG--CACTCGCTCCGCCTCCATTTTGTCTCTGGATG--TTGTTGGATGAA----GAACCGAAACGAAGA-CGAC       | 2064  |
| Reedfish                | TGAAGGGAAATGAAGTTAACTAGCAGTGGTCACTGATTAGG--AAAAGGTTAGAATGAAACCTGCAGCCACTGCGGCC     | 31914 |
| NorthernPike            | TTTGGAAAACCTGGGACGCCATGTAATCCGGACTAAAGAGGACAAGGACAACCCAGTTGTTATCAGCGCTCAGTTAGAA    | 5971  |
| SpottedGar              | TGAGAATACATGATGCATGGTCACTAGCAGTGAAGCAG--GTATAGTTCGAACC---GGTGTGTGTTGAGGAGCTGG      | 5358  |
| ParamormyropsKingsLeyac | TTAAACCACACCATGGTTG--TGAGTCACTACTGAAGAGG--TCAATGACTTATGCT--ACTCTGTATTTCACCCAC      | 1513  |

|                         |                                                                                    |       |
|-------------------------|------------------------------------------------------------------------------------|-------|
| Majority                | GACTTGGCCTCAGATGATATACTCCTGCATCAGTG-----GGTAGTGTGACTAGACCTCTGGAATGTCAGGTTGGAA      |       |
|                         | 74250      74260      74270      74280      74290      74300      74310      74320 |       |
| Human                   | AATTTAGTTTTAAGAAACTGACTGTGGCTCCAGAGTATGTTGGAGAAGTGAATGAGACTAGGAATAACAGGTGGGAG      | 74178 |
| AsianBonytongue         | GACGTCGC-ACGGA-AATATCCTCCGGCAATGGAC-----GGGTATGTG--TTGCTCTCCGATT-----A             | 2121  |
| Reedfish                | CTCCAGGCCCGAAGTTTACACCCCTGTCTTAGTG-----GGTAGAGAAAAAGACAAGGAGTACTAATGTAAACA         | 31986 |
| NorthernPike            | GCCTGCATCTCTGATGGTATGGGTTGCATGAGTGTGTG--GGTATGGCAGCCTACACATCTGGAAAGGCACCATTAAT     | 6050  |
| SpottedGar              | AAGGTGGCTATGGATGATGTAGTCTGCAGCTTCA-----GGGTGTCTGACTTCACCACTGAAATGCAAGGGGGGGA       | 5430  |
| ParamormyropsKingsLeyac | CCCCATTCCCAACACACACCTTTCATTCACAATA-----GACAGTCTTTTCATGGCCATGGAAGGTCTAGTTGTAA       | 1585  |

|                         |                                                                                    |       |
|-------------------------|------------------------------------------------------------------------------------|-------|
| Majority                | ACTGATCGTTTTAATTATTGTGGAGTACTTA--TTAGTGTAGTAAAGTGAATGGTGTGTGTAAGAAAGAAAGTGATATTG   |       |
|                         | 74330      74340      74350      74360      74370      74380      74390      74400 |       |
| Human                   | ACTATTAGTCTAATTAAGATGTAATTATAAATCTAAGCTAGGAACGTAATGAGAATGCAAAGTAAAGAAACAAATATGG    | 74258 |
| AsianBonytongue         | ATTAACCGTGTGCATATTGTGGGATGCTTC--CTTGAGTATGAGTAGAACGTTTTGTGG--AAGCGAAAGTGACTACTG    | 2195  |
| Reedfish                | ACCAGTAAGTTATTTTTTATGAAGGAGTTAGGGTCAAAAAGGGAGAGAAATATGATTTGTACAGAAAGGAAGTAACTCA    | 32066 |
| NorthernPike            | GCTGACAGTTATATCCAAGTTCATGCTTGGATATGCTCCCATCCAGACGTCGCTCTTTTCAGGGAAGACCTTGCATTTT    | 6130  |
| SpottedGar              | AATGAGCAGGCTAGGAGTGTAGAGAAGTAA--CTACTGAGTAAAGTAGGTTAGTGGGTGAGAAAAGGAAATTTACATAG    | 5507  |
| ParamormyropsKingsLeyac | CACGACCATTTAGCATTTATGAAGCACTT-----GAATAACTGCAGTGGTGTATTGTATGACTGAAAGAGATTTCAT      | 1656  |

Sunday, May 01, 2022 09:44 PM

|                         |                                                                                    |       |
|-------------------------|------------------------------------------------------------------------------------|-------|
| Majority                | CTAAA----TATTACGAAGTTACAGGCTGCAGCA-TTCTGG--ATGTGGCAGACTATAAG-AAGACTGGGGTAGTGTATG   |       |
|                         | 74410 74420 74430 74440 74450 74460 74470 74480                                    |       |
| Human                   | GGAAAATTATATGTAAAAGTAATAGGACTTGCCA-TCTTACTGATGTGATTGATTATGAGAAAAATGAAGCATGTGGAGG   | 74337 |
| AsianBonytongue         | AGAGA----AAACAGGGAGCTCCTGTCTGTGACA-CAGTGC--GTGTCACACAGCGTA---GAGCCGCCGTTCTGTGTG    | 2265  |
| Reedfish                | TTAAC----TATGTCGAGTGTGATCCCTCTATT-TTCTGGCCATGAGGTATCCCTAAC-TGAGCTGCGATAGTATTTG     | 32140 |
| NorthernPike            | CCAACATGACGATGCCAAACCACATACTGCATCAATTACAATGTCTATGGCTGCATAGAAGAAGGATTTGGGTTACTGAAAT | 6210  |
| SpottedGar              | ATAAG----TAACATGAAGTCAGAGGTAGCAGAG-CACTGA--AGACAGCAGTATATAAG-GAGAGAGGGATCATAGGTT   | 5579  |
| ParamormyropsKingsLeyae | GCATA----TTTTAAACAGTTACCCAGTACAGGG-TCATGG--AAGGTAGGGACTGGAGC-ATATCTGAGGCAGTGTAGG   | 1728  |

|                         |                                                                                  |       |
|-------------------------|----------------------------------------------------------------------------------|-------|
| Majority                | AGCC-----GGGTCAGGA--TTTTGCTCAATACATGTGTATTGTTTATGTATTGTTGTCAGATTAGAGGCAAGAGTTGT  |       |
|                         | 74490 74500 74510 74520 74530 74540 74550 74560                                  |       |
| Human                   | AGTCCACTGGACAGTAGGAAATTCAGCCTAAGACTTGGGTAAGAGTCTGTGGAGTTGTGAATTCAGAGGCCAGAGATGT  | 74417 |
| AsianBonytongue         | ATGC-----GCATCACGCCTCTCTGTCTGTGTGTTTTGTTTATTTATTTTGTCTGTGTCGGGGAGGGGGGTGC        | 2339  |
| Reedfish                | AACT-----GGCCAACAG--ACATTGTCAGTCTGGCATACTTTTCCCCAAAGATGCCACATTTCTCTCTACTTTTGT    | 32212 |
| NorthernPike            | GGCCAGCCTGCAGTCCAGATCTTTCCCCCAAAGAAAACATTTGGCAGAGGAAGGTGCAACAAAGAAGACCAAGACAGTT  | 6290  |
| SpottedGar              | GGAT-----GTGTTTTGG----TAGCTAAAGACAAGTGCAAAAGATGAGGGGTTGCTAGCAGAAGAGGGGTATGGATTTT | 5649  |
| ParamormyropsKingsLeyae | ACAC-----AGGGCAGGAGGACGCCTGGACACATGTACAATGGACAATTTAGAAATGCAGAAATTATGCAGAAACTAT   | 1802  |

|                         |                                                                                 |       |
|-------------------------|---------------------------------------------------------------------------------|-------|
| Majority                | G--TTTCAGTATTTGAGTTCTGG-----CAGGTTTAAAGACA-CAT-----TA-AGAGTTATAAATGCAATTTAATCAC |       |
|                         | 74570 74580 74590 74600 74610 74620 74630 74640                                 |       |
| Human                   | GATATTTAAAATTTTGGTTCAAGATTTCCAGGTATAAGAAAGCAAGAGGATTAAGCATTGTAATTAAACTTTAAGCAG  | 74497 |
| AsianBonytongue         | ---CGCGAGTACCTGAGTTTGGG-----CAGGTTTAAAAAA-CT-----GTGTTACACACACAAAATAAACAG       | 2398  |
| Reedfish                | C--TCCCTCCCTTTTGGCTCCTA-----GCGAAGCAACACC-TG-----CAATCAGTCACAGCATCTGG-CAC       | 32271 |
| NorthernPike            | G----AGCTACTAGAAGCCTGTATTAGATAAGATTGGGACAACATT--CCTATTCATAAACTTGAGCAATTTGTCTCC  | 6362  |
| SpottedGar              | A--TTTCCATCCAGAAATCCTGA-----CTAGTTCAATACA-CAATATACCTAAAGTGTTAAAAATGCAAAATCTTTTT | 5720  |
| ParamormyropsKingsLeyae | -----GTATTTGGGCTCAGG-----AGGA---AACACA-CAT-----AGAGCACTGAGAGGAACTCAATCCC        | 1855  |

|                         |                                                                                  |       |
|-------------------------|----------------------------------------------------------------------------------|-------|
| Majority                | TCAAACCTGG---ATATATAAGGTTTGATAGATATCT---GGTCTTCTTTTATTGAAGCAAGCAGTTATAATTTAAGAG  |       |
|                         | 74650 74660 74670 74680 74690 74700 74710 74720                                  |       |
| Human                   | TGCATATTTATGTTATAGATAAGATAAACAAGAAATCTAGGGATCAAATAGGATTAAGATTAAGTATGATCATTCACTAC | 74577 |
| AsianBonytongue         | ATAAA--TAA----ATAAATAATGGCTGTTTTTTTTTT---TTTTTTTTTAACTGAAACTTGTAGGAAGAGAGCAAGAG  | 2469  |
| Reedfish                | CCAAACTTGA---GTTTTTTAGTTTCACTTACCA---CAACTTACTTAATT--AGCCAGCTGCTTTTCCCTTTTGAT    | 32342 |
| NorthernPike            | TCAGTCCCCGAGACGTTTGCAGTCTTTTATAAAAAGAA-GAGGGGATGCCACACAGTGGTAAACATGGACT-TGTCCCAA | 6440  |
| SpottedGar              | TTAAAGTTGG---TGAAATCGAATTTAAAAAACATCA---GGACTTTCCTTGTGCAAAACA-GCAGATAAAATGTAAGAG | 5792  |
| ParamormyropsKingsLeyae | CAACCATGG---AGGTGTGAGGCAACAGCGCTATCT---GCCTTGCCTATATCTGAGCA-GCAGTTATA-TTTAAGA-   | 1925  |

|                         |                                                                                 |       |
|-------------------------|---------------------------------------------------------------------------------|-------|
| Majority                | ATTTTTTTGGATATATTGTTTACCTTGTGATTATAAGTCTTATTATATTTATTTTTAGGTCTAAG-----GGTA      |       |
|                         | 74730 74740 74750 74760 74770 74780 74790 74800                                 |       |
| Human                   | AGTAGTTACGTACTGTTATTACAAGAGTATATAAATCAAATTACAAGGAATTAAGGATATAAACCTGA-TAAGAAAGTA | 74656 |
| AsianBonytongue         | GG-----GAACAGAATGG-AGCAGGTGGCCA-GAGCCCCACTTGAGTTTTTCTTAAGC-----TT               | 2522  |
| Reedfish                | TAGGTTATGTTTTGCATGCAAAATTTGCAATAGCAAAACTTATTATAAACAGGTATTTGGCTTTG-----GGCG      | 32410 |
| NorthernPike            | CTTTTTTGAGATGTGTTGATGCCATGACATTTAAATCAACTTATTTTTCCCTTAAAGTGAAAGATTTTCTCAGTTTAAA | 6520  |
| SpottedGar              | ATCTAAATAAACAATTTTTATCTGATGTTTATAAGTATTTAAACATTTTGTATAGGTCGAGG-----GATT         | 5860  |
| ParamormyropsKingsLeyae | -----AATGGGCCTTGGGAACG-ACGTTTTGCTGGTGGTATTTAAGGAC-----AA                        | 1972  |

|                         |                                                                                   |       |
|-------------------------|-----------------------------------------------------------------------------------|-------|
| Majority                | TGTTTTTTTTTATTGTTAGAGTTTTAAAAATAAATGAGGAGTATT--AATTT-ATGATAAGTTTT---TAAATTGGGAATT |       |
|                         | 74810 74820 74830 74840 74850 74860 74870 74880                                   |       |
| Human                   | TGCACTGTACTCTTTGAGGAAGTTGCCATAGAAAGGAAGAAGA--AATAGGATGGTAGATCAGAAGTAAAGCAGGACCC   | 74734 |
| AsianBonytongue         | TCTTTTTTATTATTTAAAAAATAAATAAAGAGAGAC-----AGTGA-ATGATACCTTGT---TGAGCAGGGAATA       | 2593  |
| Reedfish                | TTTAAAGTTTTTTTTGGGGTGTGTTAAAGAAAAGAGGAGGATTCTCATTTT-CAGTAACTTTT---T-TACTAGTAATA   | 32485 |
| NorthernPike            | CATTTAATGTCATCTGTTGTGTTCTGAATAAAATATAGACATTTTAAACTTACACATTTGTTTTTATTACAATTTGTACAG | 6600  |
| SpottedGar              | TGTTATCTTTTAGTTTCAAAGTTTTAAAAACAATGAGTGATGCCTTAGTAACGCAATTAGTTTAC---CAAATTGGGTGTT | 5937  |
| ParamormyropsKingsLeyae | CCAGCCGCATAATTTCAAAGAAATATAGTTCATGTTTCATT-----ATTTT-----TAAGTTTT---CATTTTGGAAATT  | 2039  |

Sunday, May 01, 2022 09:44 PM

|                         |                                                                                    |       |
|-------------------------|------------------------------------------------------------------------------------|-------|
| Majority                | TGTGTAAT---TTTTTTTAGAATCGCATT-GTGTATAATTATTTTTTTAAG-CATTTTTTATTGTTCTCAGGTTGAGTG    |       |
|                         | 74890 74900 74910 74920 74930 74940 74950 74960                                    |       |
| Human                   | AGTGGGGGAGTGTTCGAGTGAAGCAGT-ATGTATAATCATTTAAACATG--GGTTTGAGTCTCTCAGGTTCCATG        | 74811 |
| AsianBonytongue         | TATGCTCT---TTCACCCATATATTTAAA-GTGAAGGACCATTTCTTCCACATTCCTTTGTTTTGCTCTAGTTAGGCA     | 2669  |
| Reedfish                | AATATCAT---CTTTCTTGAATTTAATTAGTGGGTTATACATTTTATTTATTCAGTATTTATTACAGTAAATTGGAGGA    | 32562 |
| NorthernPike            | TGTCCAAA---CTTTTTTGGAATCGGGTTGTAGTTAGATTTTGGTCTCATGAGACTTGTTAATGTTCTCATGCTCAGAG    | 6677  |
| SpottedGar              | GGTGTAAATAAATTTGTTTAAAAATCCAAATATAATTAAGTAGTTTTTTTTAAC-TATTTCTTCTCAAAAACACATTA--CA | 6014  |
| ParamormyropsKingsLeyac | TTTTTAGTG--CTTATTGTAGACAGCTGT--TATATGATTTCTATTTTTTAAA--GTCTTATGTCGAGCTACGGTTG--TG  | 2111  |

|                         |                                                                                    |       |
|-------------------------|------------------------------------------------------------------------------------|-------|
| Majority                | TTTTCAATGTTTGTCAATGCAATATGCTTTTTAAT--ATAGTTGTTTTTCTCTTTCCA-T-GA-AATG-AGGGTTTTCTTT  |       |
|                         | 74970 74980 74990 75000 75010 75020 75030 75040                                    |       |
| Human                   | TTTGTAAATGGACATAATGATAATAATCCCTTTTCATTTAAGGCTGTTGTGAGGATTAATGTGTTAATGTGCAAATAACTT  | 74891 |
| AsianBonytongue         | GTGCTATTTTTTGCCAGTCCAATATGGTTAGAC--ACAGGTGCTTTTTTTTTT-----TTTTTTT                  | 2729  |
| Reedfish                | ATGTCAGGGTTAG-----CAAATATTTATAAAC--ATAATCCTCATCCTCTCTGCAGTGAACGATT-ACCAGATTATG     | 32633 |
| NorthernPike            | TCCTTCAGGCGGC---ACGTCAATATGCCTTTTACTCAGGAGTGGCTTCTGTCTAGCCGCTCAACCATAAAGGCTGGATTG  | 6754  |
| SpottedGar              | GTATCAATCCTTTTGCATGCATTATGCTCATTTAAA--ATTGTCATTTTTATCTCTCATAACAGA-ACAA-ATAGTTTTCTT | 6090  |
| ParamormyropsKingsLeyac | CTAAGAATTAAGACAATACACTAAGGTTTTTCG---GCTATATGCTGTTCAATGT-----GG-ACCG-GGGGCTTTCCG    | 2180  |

|                         |                                                                                  |       |
|-------------------------|----------------------------------------------------------------------------------|-------|
| Majority                | TCCACGCTAGTCTGGTAT-TGTTATATTTTC-GGCTTGCTGCTAACTATTATT----TTGTATTAAAGAAGATTGGTTCT |       |
|                         | 75050 75060 75070 75080 75090 75100 75110 75120                                  |       |
| Human                   | TACACAGT-GCCTGGTATATAATAAATGCTT--GCTACCTATTAACAGTATT----TGTTTCTAAGGCTAATTTAAGTC  | 74964 |
| AsianBonytongue         | TACACATTAGTCTAGTAT-TGTCATACTT---AGATGTGAGTAAGAGTTTGT----TTG-----AAGAAGATGAGGTTT  | 2795  |
| Reedfish                | TGAACAAGACTCTAATTTATGATGTACAGGTCCACAGTCTGTTATCAATAACC----CCAAATCAAAAAAGCTTTGAAA  | 32709 |
| NorthernPike            | ATGGTGCTGCAGAGATAGTGGTCTCCTGGCAGGTTCTCTGCTGAGAAAGGTTGAAGCTCTGTTAGTGGCCATTGGGTTT  | 6834  |
| SpottedGar              | TCTATGATAAAAAGGGAT-TGATACATTTTCTGAATTGTTTCCAGATATATT----TTGGACTTAAGAACTCTGGGTTT  | 6165  |
| ParamormyropsKingsLeyac | TCATCGCTCGGCTCTGTT-CGTC-TATTTCCGTGCAGGCCCGGCTGCCATT----TTGT-TGCTGACTTGTGGGCTG    | 2253  |

|                         |                                                                                   |       |
|-------------------------|-----------------------------------------------------------------------------------|-------|
| Majority                | TTAGG-----GTTTGTATTTTTAGATTATATT--TAAAGTGGATACTTT----TT-----CTATCAATAGAGAGATGC    |       |
|                         | 75130 75140 75150 75160 75170 75180 75190 75200                                   |       |
| Human                   | CTAGAATT---GATTGCAAGGATTAGATCAGGAG--TATAGTGGACATGTTGGGATTTAAATATTTAAATATAGAGATGC  | 75039 |
| AsianBonytongue         | TT-----TTTTTTTTTAAATTTAAATT--TAAAGCAGTCAGTGG----TT-----CTGAGAAAAGGACTCTTC         | 2853  |
| Reedfish                | ACAAAATTTCCCTTCCCTACCTTTTGTCTAGGCT--TTACATCAACACCTT----TTACACATTAGCGATCAAGAAATGC  | 32783 |
| NorthernPike            | TTGGTCACCTAACTCATTACTTACACATTTCTATTAATAAAAAGAATCCACCTTTCTCCAGCGCTAAACGCTGTGACTGCC | 6914  |
| SpottedGar              | TTAAG-----GTTTCTGGTTTCTTTATCATAAC--TAATGCCACTTGTTT----TT-----CTATTAATAAATGAAAT    | 6228  |
| ParamormyropsKingsLeyac | AGGCG-----CGGTGCTGTAGTTAGCAGGAACC--CAGCGTAGATACGTT----CT-----CCGGCAATGGACGGGTAC   | 2316  |

|                         |                                                                                  |       |
|-------------------------|----------------------------------------------------------------------------------|-------|
| Majority                | TTTTTATGGCTTATGTTG---CCGAGGTGATTTTATAGCAGCTTTTCACGA---TTAGGTCTTTTTGTTGAGCATGTT   |       |
|                         | 75210 75220 75230 75240 75250 75260 75270 75280                                  |       |
| Human                   | TTTTTAGGACCATTGTTAGAACCAGAAGAGATTTTTTACCAAGTTCACACAGAAATGTAGGTGCATTGGCTGGGCATGGT | 75119 |
| AsianBonytongue         | TTGCCATGACTCATGGAG---CAAAGGTGGTCTGACC-CAGCAGTTCAGGA---TGGGGGCTTTTGGATGAACACACA   | 2924  |
| Reedfish                | TTCTCATAATGTTTTTTG---CCATCA-GTTTTCAAATGAATAGGCTGCAG---TCTGCTCTCTCTGTTGAGTGTGTT   | 32854 |
| NorthernPike            | CTGTTCTGGCACATTATG---CTGGGGTGAACCAATCACAAAGCTGTCACAGAACTGATGCCGTTAGTTTAAACATGTT  | 6990  |
| SpottedGar              | AATTTAAAGAATAAGAGC---AGAAGATAAAATATAGCAGCTTATAAAGA---TTAAATGTTTTAATTGTGTTAAA     | 6300  |
| ParamormyropsKingsLeyac | CTATCGAGGTCTGTGTCG---CCGGAG-----ACAGCGGCTCTCA-----TTCGGTTTTATTCTTTGACGCTCTCC     | 2378  |

|                         |                                                                                   |       |
|-------------------------|-----------------------------------------------------------------------------------|-------|
| Majority                | GTCATA-CACTCTCAATATCGGAACCTCGG-AATGTCGCG-TACATGGGTCACTTGG---TGCCAGAAGCTAAACCAGAGC |       |
|                         | 75290 75300 75310 75320 75330 75340 75350 75360                                   |       |
| Human                   | GGCTCA-CACCTGCAATCCCAGCACTTGGGAAGGCTGAGGCAGAAGAACTGCTTGA---GGCCAACATTTTGGAGACCAGC | 75195 |
| AsianBonytongue         | CACACA-CACACACACCATCTGAAACCGC--TTGTCCCA-TACG-GGGTCGCGGGG---AGCCGGAGCCTAGCACAGGGC  | 2996  |
| Reedfish                | ACAATA--TCTATCCATTTTCCAACCCGCTGAATCCGAA-CACA-GGGTCACGGGGTCTGCTGGAGCCAATCCCAGCCA   | 32930 |
| NorthernPike            | GACATT----TCTGGACAGGAAACTCGA-AATTCAACTTTACATGGATCAGTAAA---GGCCAGTAGAAAAGCTAGAGC   | 7062  |
| SpottedGar              | ATTGTATCAGAAGCAATATACAGGTTGATAATCATTGTG-TCCATGGATGATTTTT---TTTCAGTCACTAAATCATATT  | 6376  |
| ParamormyropsKingsLeyac | CTTAAG-CGCTCACAATATAGCCAGTCCG---GTCGCG-AACTTGGGTTACT-----TTTAAAGTGAAACGGCAAT      | 2445  |

Sunday, May 01, 2022 09:44 PM

|                         |                                                                                     |       |
|-------------------------|-------------------------------------------------------------------------------------|-------|
| Majority                | CTGCAGGAC---GGAGGGGACAAATCCAGGTTAGGGGTTTCAGTTTGTCTGAAGGCCG---CC--TAGATGGCAAACCTCA   |       |
|                         | 75370 75380 75390 75400 75410 75420 75430 75440                                     |       |
| Human                   | CTGGGCAACATATTAAGACCCCGTCTCCACCAAAAAAAAAAAAAAAAAAAGAAGTAGGTGCAGAGC--TGGAAGCAGAACCGA | 75273 |
| AsianBonytongue         | GTG-AGGGG---GGAGGGGACAAACCCAGGACGGGACGCCAGTCCGTCGCAAGGCAC---CC--CAAGTGG--GACTCG     | 3064  |
| Reedfish                | ACACAGGGCACAAGGCAGGAAACAATCCTGGGCAGGGTGCCAAACCCACCGCAGGACACACACC--CACACACCAAGCACA   | 33008 |
| NorthernPike            | AAACAACAATGCTGCTAGTGTCTGATTACAGGTTGTTGTTTGAATTTGACTGAGTTTGTCTATCTAGTAGGTGAAAAGATCA  | 7142  |
| SpottedGar              | TTGCAGTAC---AGATGGACTAAAATGAACTTGTAGGTTTCAGTTAATCTTGAA-CGT---CC--CTTATGT--GATTCA    | 6444  |
| ParamormyropsKingsLeyae | CTG-----GA--GGGACACAGCTTGCTTAGCCCTTTAGCATGTTAGCATGCGA---GC--TAGCTGGCCAAACTG         | 2508  |
| Majority                | AACGCCAGCTGTTTTGGAAATCATGATTGCTTAAACCC-A---CTTTTATCTGTGGGTAGACACCCCTCGATGACTGGTG    |       |
|                         | 75450 75460 75470 75480 75490 75500 75510 75520                                     |       |
| Human                   | AATCATCAGTGTACAGTCAATTATTCTTCTGTCCACCATATATGTCTTTATGAAGCAAGGGAGAAAGAAGAACAGATG      | 75353 |
| AsianBonytongue         | AACGCCAGACCCCTGGAGAGCAGGACTCGATCAAACCC-A---CCGCGCCCTGGATGAACAC-----AGTTTTGTGA       | 3135  |
| Reedfish                | CACTAGGGCCAATTTAGAATCGCCAATCCACCTAACCTGCATGTCTTTGGACTGTGGGAGGAAACCCACGCAGACACGGG    | 33088 |
| NorthernPike            | GTAGCCAGCTGCATGGCAACCAGC-TTAAATAGAATTA----ACAATTATTTTCGCATTGCAACATTCAAAAAATAATG     | 7217  |
| SpottedGar              | GA-----ATGTTTTGTGTTCGTTACCTGCTTATTTCCTA---CTGTCATTATAATTAACTGCCTTGATAGTTTATA        | 6515  |
| ParamormyropsKingsLeyae | AACGGAATCTCTCGAAATCATG--CTGGTGGGAGGC-----TT-TTATCGCTGGGAAACGCTGG-GATGGCAGGTG        | 2579  |
| Majority                | AAGTGAATGTGG---TGGCACAAGTTAAGAGCTATG-AATTGAACTTGATCTATTAA--TTATTGGGTAGCT-CGATA      |       |
|                         | 75530 75540 75550 75560 75570 75580 75590 75600                                     |       |
| Human                   | AAAGAAGTGAGGATTTTGAAGTTGGTTGAAAGATTTG--ATTGAATCTGATCTAAAAA--TTATAAGGCACTTGTTTAA     | 75429 |
| AsianBonytongue         | AAAT-AAATTAT---TAGAACAACTAAGAACTATA-AACTG---TTGTACAGATCAA--TAAATGGATAATT-AAATA      | 3203  |
| Reedfish                | GAGAACATGCAAA---CTCCACGCAGGGAGGACCCGGGAACCGAACCCAGGTCTCCAAA--CTGCGAGGCAGCAGCGCTA    | 33163 |
| NorthernPike            | ACCCGGCTGTGTGATTGGCACATGACAAAAGGAATG-AATGAAAATTGTATGAATTGACTTTAATGAAAATCTCCAGT      | 7296  |
| SpottedGar              | GTGTTAAAGTGG---TGGGAGAAGTCAATGTGCATTGCAATTAACCTTTTGGTGTTTAA--TTATTGAATACCT-AGAAA    | 6588  |
| ParamormyropsKingsLeyae | CTGAGCACATGG---TCGTGTAACCTTAATGATAGAAAACAAA----GTACAAGTGC--GTTCTGAG--GCT-CCCGT      | 2646  |
| Majority                | C----CTGTTGCACATAGGATAGTGTATTAT--GT----CTGCACCTGCTTTTTT--GAATTCAGATAGCCCAATTGTTAAT  |       |
|                         | 75610 75620 75630 75640 75650 75660 75670 75680                                     |       |
| Human                   | C----AAGTTGAAAGTAGGAAAGTAGACATAAGA----CTCTACTAGATTTGGGGAACTCTCAAAAATGGACTGGAAAT     | 75501 |
| AsianBonytongue         | C----CTGTAGCAGGTAGTGTACTGTGTA-----GCACTACCCTGT--GTAGTCAAAGGGCTCACGTTTGAAT           | 3266  |
| Reedfish                | C----CCACTGCGC-CACCATGCCGCCCGT--GT----TACAATATGCTTTT--AAATAATTATAATCAAATTCATAAT     | 33229 |
| NorthernPike            | CATTGTTATTTTACATATGTTAAGGTTTTATAAAGGCCCGCAATGCTGTATCATGAATACAGTCAGTCAAATTGTTTGC     | 7376  |
| SpottedGar              | T----TAGCAGTGTAAAATACTTTGATTAT--TG---ATGTAAGTGTTCAT--TTCATCAGATCACATAAGGATTTTT      | 6656  |
| ParamormyropsKingsLeyae | C----CTTTAGCTAATGGGTTAGCGGTTGT--GT----CTGCGATGCGAGCA---GCCGGCGGAGAGCCCGACGGGAGGC    | 2713  |
| Majority                | GTTGCTTATTGT-----ATCTTTTA-TTGTTTATCTAAGGTA-ATTAGCT-TGTGTTTCTTCATTATGCTATTAGTCAA-    |       |
|                         | 75690 75700 75710 75720 75730 75740 75750 75760                                     |       |
| Human                   | TCAGCTAAAAGTGGATAACAAAATATTTCTAGAATTAGCATTTGTGGGGTGTGTGTGTTTCACTCTAGTATTTGTCAAG     | 75581 |
| AsianBonytongue         | GCCACCTCCTGC-----TCTAGTA-TCGTCAATCTAAAGTA-CTTACCC-TGAATTGCTGCAGT-TGAAATTAAGTAAAG    | 3335  |
| Reedfish                | ATTGGTAATTGTAAGAAATCATTTAATGTAAAGCTAAGTTGTTTCATAT-AGACAGTCATCATTTTGACAAGAGTAAT-     | 33307 |
| NorthernPike            | CTGGTCTGGTT---GTTATTGTTTACTTTTTTGTAGGAGGTAGACAACTGTGGGATGTTTTTAGATCCTGTTTTTAGAC     | 7453  |
| SpottedGar              | CTTAAGCATTTCT-----TCTTCCAGTTGGCTGTCTAACATA-ATCTCCC-ACTTATCACACATTATGTTGCTACTCTG-    | 6727  |
| ParamormyropsKingsLeyae | CCGGCGCTCCG-----TCTCGCA--TGCTTTGTTATGG---ATTAGCC-TGGGTTTCTTTGTT-TACTATTGGGAAA-      | 2778  |
| Majority                | --CTATATGAAAGTTTAGTAAGAATTTAGGACTTGGTTTCTTTTGTGTCTGGTATAATGTATTATGTAATGAGTAATAG     |       |
|                         | 75770 75780 75790 75800 75810 75820 75830 75840                                     |       |
| Human                   | C-CCAGATGAAAGCATAGACAGAATGTAAGACTGGAT-TTATCTAAGTCTGGAATTGTGTAACAT-TAAAGGAATAGTAG    | 75658 |
| AsianBonytongue         | --CTGAATGAAGGATAAATAAGTGTAAATAGCTTAAACACAGTTTTATTTAGAGAAAAGAGTAATCTAAATAAGTAAAG     | 3413  |
| Reedfish                | --ATTTAAAAAAAAAAAAAAAAAATCAGGAGTGTGCTCCCTCGATTTTCTGTACTATATACTGAGATAGAGGAAAAG       | 33385 |
| NorthernPike            | CCTTTTACAGTGGGGCTGTTAAACTTAGGTTCTGGGTGGCTTCTGTAGCAGCCAGAATATTTATAAGAAAGTGTGTAC      | 7533  |
| SpottedGar              | --CCATGGCTTCTTTGGCTACGGCACAGACTCTGGTATCTTTCAAGGCTAATATTGTGGATTATGTCAGGATATGATAG     | 6805  |
| ParamormyropsKingsLeyae | -TAAATCCCATTTTAAACATTTATTTTCGATTTTTTTCTCTCTCCCATGTAACACCCCATATCTATTTAAGCAATAA       | 2856  |

Sunday, May 01, 2022 09:44 PM

|                         |                                                                                        |       |       |       |       |       |       |       |
|-------------------------|----------------------------------------------------------------------------------------|-------|-------|-------|-------|-------|-------|-------|
| Majority                | GCAACGAGTAGAGTGTGG--GTTACGCTATGTTTCG----ATCTCACATTTCTCTTTCTGGTTAAAATCA-----GGTCA       |       |       |       |       |       |       |       |
|                         | 75850                                                                                  | 75860 | 75870 | 75880 | 75890 | 75900 | 75910 | 75920 |
| Human                   | CAAATGAGCAGAGTGTGG-CTCAAGCCTAAGCTTG----AGCCTAAGCTTGACTCTATGG-TAAAGTCA-----AGTCA 75727  |       |       |       |       |       |       |       |
| AsianBonytongue         | ATAGCAGGTTGGGTGTAG--GTCACGGCGTGAAC-----ATATAACATGAAGGTAGAAGGTTAAAATCT-----GA--- 3478   |       |       |       |       |       |       |       |
| Reedfish                | GTCACCAGAACCCTTCCA--GTTGCACAATATTTCTCAAATATCATATTTCTGTTTCACGTCATAACTAATTGAGAATA 33463  |       |       |       |       |       |       |       |
| NorthernPike            | TCTGCAAGTTGGCCTCTGGGCATTCTGGTATGTTCTCGTAATCCTAAACGTATCCTACAACCTGTTGAGAAGACTTGGT-- 7611 |       |       |       |       |       |       |       |
| SpottedGar              | GCACTGCACACAGTGTGAG-TATTTCTTAGTATTA-----ATGTCAC-TGCTGTCCAATGGCTCAAATAA-----GACAG 6873  |       |       |       |       |       |       |       |
| ParamormyropsKingsLeyac | GCCACGTTTCGAGGGT-----GTTACCCTATCCCCG----ATTTTCGCTTTTCCCCGCTGGTTGCTGCCG-----AGCCT 2922  |       |       |       |       |       |       |       |

|                         |                                                                                        |       |       |       |       |       |       |       |
|-------------------------|----------------------------------------------------------------------------------------|-------|-------|-------|-------|-------|-------|-------|
| Majority                | TGGAAGTCAGCAATA--ATGCTCCTTTGTATTTTA--CTTTCTTTGTCTGTTATG---AAATTGTTAGTTCACTAATATT       |       |       |       |       |       |       |       |
|                         | 75930                                                                                  | 75940 | 75950 | 75960 | 75970 | 75980 | 75990 | 76000 |
| Human                   | AGGGAGAATAGAAAGGGGGTCAACATAAAGGTCAAAGTGGGTTTAGTGGTTGTGTGGGAATAGGCAGATCAAGAAAA-- 75805  |       |       |       |       |       |       |       |
| AsianBonytongue         | TGGAAGTCTGCTGTG--GTGCTCATCTGAAAGGTA--CTTAATTCGATTATTGTG---AAATTTTCTGTGCAAAAAAATT 3551  |       |       |       |       |       |       |       |
| Reedfish                | TAGATATACATAATATATATTTTTTTTTTTTTTTTGGTCAAAATTTGCTGTAAAACCTCAAAGTCTTGTTCATTGTATT 33543  |       |       |       |       |       |       |       |
| NorthernPike            | ATCAGGTCATCAAGATAAGGCTACATTTTAAAGTTG--TCATTTCTAGCTCTTATG---ATATTAGAGCAACAGTAATTAA 7686 |       |       |       |       |       |       |       |
| SpottedGar              | TAGAAATAAGCAACA--AAACTT-TCAGTATAATA--CATGCTATGAAAGCAAGGC--AAAATAAATTTTACTTAGCCT 6946   |       |       |       |       |       |       |       |
| ParamormyropsKingsLeyac | CGCTGTGAGCC-----CGCCC-GCCGAGCATCA--CTTTCCCCGTCGGTGAGG-----GGCTGCGGCCGTT 2981           |       |       |       |       |       |       |       |

|                         |                                                                                       |       |       |       |       |       |       |       |
|-------------------------|---------------------------------------------------------------------------------------|-------|-------|-------|-------|-------|-------|-------|
| Majority                | TTATGGATTTATGAATGGCCATTTTCAGTATGTTATAAG-C-TGTTCTTGAATGTTAAAGAGTTTTGATTGTGTATACATG     |       |       |       |       |       |       |       |
|                         | 76010                                                                                 | 76020 | 76030 | 76040 | 76050 | 76060 | 76070 | 76080 |
| Human                   | GAATGAAGTTAGGAAAGGAGATATAAGTGTGAATGAC---CATTACAAAAGAGACAGAGGAAAGAA-AAATGAAGATG 75881  |       |       |       |       |       |       |       |
| AsianBonytongue         | GCGTGTATCTATTTACAGTGAATTTGATATGTTTCG-----TATTCGGAAGTTGAAAAAGTGTATGTTA-GCAGAAATA 3625  |       |       |       |       |       |       |       |
| Reedfish                | TAAAAGACACGTGGGGAGCTAATCCAGCCCTTGATAAAAC-AGTGTTCACAGATAAAAGGTTTACTGTGAGTATAAAGT 33622 |       |       |       |       |       |       |       |
| NorthernPike            | ATAGGAAAAACAAGTGTCCATTCAGTTAGGACTAAGCC-TGTTCCCTTTTATAAATGTGTTCTGATCTGTACCCTCC 7765    |       |       |       |       |       |       |       |
| SpottedGar              | TTTCACATGGTGAATAATCATTTTTGTATGCTTTAGTTTTTATTGTTAAAGTTTATAGAACATTAATTGTATAGTCTTG 7026  |       |       |       |       |       |       |       |
| ParamormyropsKingsLeyac | TGTGGGCGGACG---GCCACCTCGACATGACACAGGGC-TGTGCTCGGGTCTCTGTGCTGTTCTGT-TGTCATGCATG 3056   |       |       |       |       |       |       |       |

|                         |                                                                                        |       |       |       |       |       |       |       |
|-------------------------|----------------------------------------------------------------------------------------|-------|-------|-------|-------|-------|-------|-------|
| Majority                | TATTTTATGTTTT--TAAATAGGTGTGTCAGTCTCTATTTTAAAGTA--TTCAC----TGAAACCTTTAT-GTTGCAT         |       |       |       |       |       |       |       |
|                         | 76090                                                                                  | 76100 | 76110 | 76120 | 76130 | 76140 | 76150 | 76160 |
| Human                   | TATCAAAGAAGTTGCTAATATGGATGGCAAAGTAGATGTTTTTAAAGAA--ATCAT-----GAGACCAGAGTCTTGGAAA 75954 |       |       |       |       |       |       |       |
| AsianBonytongue         | TATTTTTTATGTT--TTCAACAGCTTTTTCAGTGT--ATACTAAAGTT--TCAAC-----AGTCTTCACCGCTGCAT 3691     |       |       |       |       |       |       |       |
| Reedfish                | AATTCAGTAGCCTACATAAGAAAGGCATATAAAATCACTTGTGAATGCA--GTCATT-AATGAAACTTGTTT-TTTTCGC 33698 |       |       |       |       |       |       |       |
| NorthernPike            | TAATCC--AGTTGTGTCCAACAACCTGTGTTCTCTCTGCTGCAAAACAAATTAACCTCCTCTGAGGGAAATACTTTTAA 7843   |       |       |       |       |       |       |       |
| SpottedGar              | TATTTTATGATTG--TAAATTAAGTGCATGAGTCATAATGTCAAAATT--CAAAGC-CATAAAACCATCAT-GTAATAT 7099   |       |       |       |       |       |       |       |
| ParamormyropsKingsLeyac | ATGGC-TGTCAT--TTGAATAGTTACGTCGTTTAC-ACATGCATATA--TGAC-----ACGCATAT-GTCGCAG 3120        |       |       |       |       |       |       |       |

|                         |                                                                                       |       |       |       |       |       |       |       |
|-------------------------|---------------------------------------------------------------------------------------|-------|-------|-------|-------|-------|-------|-------|
| Majority                | AATCA-AGGTTGCTGT-GGCAGTTGTTTTT-GAT-AATGAGTGTGGGTGTTTAAATCTTTATTTTATATGAAAT----AG      |       |       |       |       |       |       |       |
|                         | 76170                                                                                 | 76180 | 76190 | 76200 | 76210 | 76220 | 76230 | 76240 |
| Human                   | AGTCATAGGATGATGCAGGGAATGGAGAAGGGGAAATAAAGCCAGGTGCTGAAGTCTTTATGTAATGGGAGGAGATGTT 76034 |       |       |       |       |       |       |       |
| AsianBonytongue         | TCTGG-ACATT-ATGT-AGCACTCATTTT-----GGTACTTTTTGGATTTTCATTCCCATTGTTGATGAATT-----G 3757   |       |       |       |       |       |       |       |
| Reedfish                | AGCTA-TATTTCTGTTTGTACAAGGTTTT-GATTCACCAGTGTGGATGCATTTATTTTAAATTTTGTAAAC----AG 33772   |       |       |       |       |       |       |       |
| NorthernPike            | AAACAAACAGTCCTTT-GATAGTGTATTGGGCTTTGCCTTTGTGTTTATTTAAT-CAATATCCATATCCAAAAGAAGG 7921   |       |       |       |       |       |       |       |
| SpottedGar              | TATCA-AGGGTATGTTAGCAGCTGTTTTT-TAA-AATAAATATGGGTGATTATTTTCTCTGTATATACAGAATCTGGAA 7176  |       |       |       |       |       |       |       |
| ParamormyropsKingsLeyac | AAGTCTGTT-CTGC---CATTTAATTT-----ACGGGTGTGAACAGTTAAT-----ATTTAAAAC----- 3172           |       |       |       |       |       |       |       |

|                         |                                                                                       |       |       |       |       |       |       |       |
|-------------------------|---------------------------------------------------------------------------------------|-------|-------|-------|-------|-------|-------|-------|
| Majority                | TTAGTTGTTTATAATCTGCTTTGCATTGT-TATATTTTTTATACCAGGGTGTACATTGAC---CTAGTCATCCTTCATGA      |       |       |       |       |       |       |       |
|                         | 76250                                                                                 | 76260 | 76270 | 76280 | 76290 | 76300 | 76310 | 76320 |
| Human                   | CCAGTAATCCAATGGCTATTTTG-ATGGGAAAGAGTGTGGTATGATTGGGTGGCATTGACA---TCGGAAGCCATCTCA 76110 |       |       |       |       |       |       |       |
| AsianBonytongue         | CTAGCAGTTTATAATGTGATTGCAGTAT-TATATTTTAAAT-CCAGGATGTTACACTGT---CCAGGTGACCTCAGCAA 3831  |       |       |       |       |       |       |       |
| Reedfish                | GTAAATTTTGTAGAGTCTACTTTAAATTTGTATTATTTGGAGCAAATGTTTTATTGATTAGTTGCTGATCACTGACTA 33852  |       |       |       |       |       |       |       |
| NorthernPike            | TTAGTTTGTATAAATCTTTTACAGT---TTTATTTCCAG-CCCGGGTGTGAGTTAGACCTAGTTGTCACGTTTTATGT 7997   |       |       |       |       |       |       |       |
| SpottedGar              | TTGCCTGTTGATCATCTGAGTT-CATTGC-TGTGGCTCTTTACCAGGACAACATAGATTGGTACCAAACATCTCTCAGAG 7254 |       |       |       |       |       |       |       |
| ParamormyropsKingsLeyac | CTGAACGTGTATAACGTGCTTC-----CCCGCCCAA-CCAGGCCGTTACAGGCG-----GGCCTTCGGGC 3233           |       |       |       |       |       |       |       |

Sunday, May 01, 2022 09:44 PM

|                         |                                                                                    |       |
|-------------------------|------------------------------------------------------------------------------------|-------|
| Majority                | TTGATGTTTTTTCTTAACAGTATT-GTCGTTTTATGGTCCTGTGGGGGA--AGTGGAAGCTCTATTTTGTTTATTTTAT    |       |
|                         | 76330      76340      76350      76360      76370      76380      76390      76400 |       |
| Human                   | TTGATGGTGGTGAACAGCAGTTTGAAGTAACATTGTGCGGTGAGGTAG-AGTGGCACATGATGCATCCTTATTCTTAC     | 76189 |
| AsianBonytongue         | TGACTTTTTTTCTTAACAGCATT-GTCACTGATGTTCTGTGGGTGT--AAAGGTAAGCTCACTTCTGTTTATGTTAA      | 3908  |
| Reedfish                | TCATGTATGTTTTGTTTATAGAATATGGCGTTTGAAGTACAGAAAGTAAACTGTGACATGTTTTAACTTTTTTATTTTTT   | 33932 |
| NorthernPike            | CAAAGACAACTTTATTTCCCGCAAT--TTATTTGTGGACTCATGGCCCCACGGGGTGTCTGTGTTTTATCCACTCTAT     | 8075  |
| SpottedGar              | CTGTCCAATAGTTCTAAGCCCTGTA-GTTCACATGTTCCCTGTAGGAG---AATGATGAGATAAAATTTGGGGAGTGTGT   | 7330  |
| ParamormyropsKingsLeyae | TTGATGGA---TCCTTAACGCATCG-GGCGTGTACGGTCCAGTGATGCA--CGTAGGCAGCTCGACATCGCTTTCTTAA    | 3307  |

|                         |                                                                                    |       |
|-------------------------|------------------------------------------------------------------------------------|-------|
| Majority                | AAATGTAGTAAAG-AAAGGTGTAAGATAAATAGCTTTTCAAAGAG-TTCTGTATGTTTGAT---CGGATTTATTTGGTTA   |       |
|                         | 76410      76420      76430      76440      76450      76460      76470      76480 |       |
| Human                   | CTTTGAGAAAAAGTTGAGGGAGACCAAAAATGACTTTTTGAGGGAATTGTAGAAGTTTCATTAGAAGAAAAGTAAGTTTT   | 76269 |
| AsianBonytongue         | AAAGAAAAAAA--AAAGATGGAAAATAAATAG-TACATAAACAG-TAATGAAGGATTGAC---AGATATCATTAGTTA     | 3981  |
| Reedfish                | TTATCTCTCAAAA-GGCTTTGGATGGTCAGAATATTTACAATGCT-TGCTGTACATTA-----CGCATTGACTTTTCAA    | 34004 |
| NorthernPike            | AAATGTTGTAGTGATAACACATTTCCAACAAAAGCATTTCAAATAAAATGCAATGTTTGGT---AGATTTTTCTTATCT    | 8151  |
| SpottedGar              | AGCTCTAGCTGAC-AAACGTGTAAGCCATACAGGTGCCCAACAAG-TCCTACAGGCCGAA---GAGACTGATGAGGTCA    | 7405  |
| ParamormyropsKingsLeyae | AATTTACGTTTTG-ACAAGTGTATGCTTGCCT---TTCAAAC---TCCTGTGTGTTT--C---CGCCGTGTCTCGGCTC    | 3375  |

|                         |                                                                                    |       |
|-------------------------|------------------------------------------------------------------------------------|-------|
| Majority                | TACTTGTTTAGTTAAATTTGGA-AATATGTATATTTGAATATTCGTGA----GTAGGACTAGAGTTGACTG-ATTACTTA-  |       |
|                         | 76490      76500      76510      76520      76530      76540      76550      76560 |       |
| Human                   | TAATTA AAAAGTTAATCTGAGGAACAGGTAGAATAAAAGTGTAGTTG----TTAGTGGTAGAAGAGAATGGATTCCATA-  | 76344 |
| AsianBonytongue         | CTCTTAGTGAGTGAAATTACA-GAATTGTGGACGGGTTATTTGTGA----ATGGCAGAGCAGTTGCTTG-ATTAA--A-    | 4052  |
| Reedfish                | AACTTGTGAATTTAAATGTGA-AATACAACATGAGAAAAGCCGTGACTATACACGGCCAGAGCTTCTGCAGGAGATG-     | 34082 |
| NorthernPike            | TACCGGGTTTTTAACTAACATGTATCCTTATTTGCAGCAGTGACTTGGGGAGTGATTTGGATAAACTACATTACTCAT     | 8231  |
| SpottedGar              | TACTTGCACAGTCTGGTAGT--GCTCAGCAAGTTGGGATCTACTCGA----GAAGTCTAAAGCTGACTA-ATGATCCA-    | 7477  |
| ParamormyropsKingsLeyae | GTTCGTCTAACCGCATCGGA-ATCTCTTATATTTGATCACGCGCAG----GTTTGACATGACATAGGCG-GTTTCT-A-    | 3447  |

|                         |                                                                                    |       |
|-------------------------|------------------------------------------------------------------------------------|-------|
| Majority                | GTCCATCATAAGTGGCTAAACCTGTAGTTTT---TGTAATGAGGTTTTATTTATTCATAGTAAGT-TAAAGGTATATTT    |       |
|                         | 76570      76580      76590      76600      76610      76620      76630      76640 |       |
| Human                   | GGGCAAAATAAGAACTCAAGGGAAGGTTGGTGGAAAGGGAAGGAGATTGAATTGTTTCAAGAAAGAAATAGCAGTTGTCAT  | 76424 |
| AsianBonytongue         | AGGCAGGACAAGTGGTGATAGTTGAAGTCA-----GTGATGA-----AGCGAATGCACAGTAGGT-CTGAGGTACAGGA    | 4120  |
| Reedfish                | GGCAGCCAGCTATAGATCCATCTGTAGCTGCAGCATTTAATAAGGATTCGTCTCTTCTTGGTAAGAATCAAGGTATAATA   | 34162 |
| NorthernPike            | ATACATTATGGTTGCCTACACCTTGGGATTTG--TTCTAGCAGCCTTTTAGTTACCTGTCATGTGGTCTTACTGCTGCTT   | 8309  |
| SpottedGar              | ATCCAGCAAGAATGACTCAACCTGTACCCTT---TATAATGTCTTTTAAATTTTACAAAAATAAAC-TAAAGGTATATTT   | 7552  |
| ParamormyropsKingsLeyae | CTCAGTCCCACGTGACGGAGCTGATTTTTTT---CGTCATAT-----TTGGCATAACAGACTTAGT-CAAAGTAACGTG    | 3517  |

|                         |                                                                                    |       |
|-------------------------|------------------------------------------------------------------------------------|-------|
| Majority                | TTTTCTTACCAGT----TTTTAAATGTTATATTTAGTAATGTATATATATGCTTTTTTGTTTATTGCATGATATCTGTGTT  |       |
|                         | 76650      76660      76670      76680      76690      76700      76710      76720 |       |
| Human                   | CCTTATGAAAAGTAAAATTTTTATTTTCAAATCAGGAAATGTAATAATGTGCCTTCCAGACCCCTTGGTGGTATACATGGG  | 76504 |
| AsianBonytongue         | ATTCCTTGAGAGC----TTTTAGCGGATATTTTTGTTGTGTATAGAACATAAATTTGTTTTTTGTATGATATTTGTGTT    | 4196  |
| Reedfish                | ATTTTGTTCAAA----TATTAATGTTAGCATCAGAAATGTTTAGTAAGTGATTTCTATTTTTACTTAATAACAGTATC     | 34238 |
| NorthernPike            | CCAGCTAACCTGTGTAATCTAAATAATAAAAAAATAGTTGAGATGAAGTCTGATTAATCGACCAAGCTATGTTTGTA      | 8389  |
| SpottedGar              | TCATCTCGTTTT---TTTCAAAGTTATAGTTTATATGTTATGTTATGTA-TAGTATTTATGGCAAGGTATCCGTGCA      | 7627  |
| ParamormyropsKingsLeyae | TTTTCCG-----TTACAAAACTA-----AATGATTTTGTTTTTCCCTGTT-ACAGCAT--TGTCAGTGAT             | 3576  |

|                         |                                                                                    |       |
|-------------------------|------------------------------------------------------------------------------------|-------|
| Majority                | ATTTCTGTTCTAGAGTGTGGAAGGTGTTATATATATCT-CGTACTATGACCTAATACACAGCAAGGATAGTAATTACCTC   |       |
|                         | 76730      76740      76750      76760      76770      76780      76790      76800 |       |
| Human                   | AGATTGGTCTTAGGACACACAGTCCCATCCCCACC-----CTCTGACCCCATACACCCCTGGATACTCAAATCCAC       | 76579 |
| AsianBonytongue         | ATTTCTCTTCAAAGTATGTAAGAAGTTATTCATAAAC-CGTACAAGAACCTAGCACAAAGCAGGAA-AGCACATGCGTT    | 4274  |
| Reedfish                | AGTCCATTTAAATACTGTGCTGTCTCTTTACATTTCTTTGAAGTATATTTCTAATTTACTTTAATGTAAGGGGTA----    | 34314 |
| NorthernPike            | GTTTCATGACCTGGTATGAGGCTGTTCAATGTATCTTATTTGAAGGGCTCACATTAGAGCAAAGTTATTTGTATCATG     | 8469  |
| SpottedGar              | ATACATGTGC-ATAATGTAGCAGGTATCACATACACATGCAACAGTCACATAAAGCTATGAGTGTATAGTAAGCAGCTC    | 7706  |
| ParamormyropsKingsLeyae | CTTGCTGTG--GAGTG--AAGGTAAGATTTGTTCTCT----CTGTTGCATCACACATAACGATTGAAGTAATTA----     | 3642  |



Sunday, May 01, 2022 09:44 PM

|                         |                                                                                 |                                                 |
|-------------------------|---------------------------------------------------------------------------------|-------------------------------------------------|
| Majority                | TGTTATAGATGGTCTTTGTGT-TGATTTGTTTAGTTTTTTTTTTTCAAGTTTACATATTCCAAATGTTTAATTGAATGT |                                                 |
|                         |                                                                                 | 76810 76820 76830 76840 76850 76860 76870 76880 |
| Human                   | TGATGCTCAAGTTCCTTGCAT-AAAATGGTATAGTGTTCATGTGACCTATACACAACCTCTTATGTGTACTTTAAATC  | 76658                                           |
| AsianBonytongue         | GGTGTTAGAAGAGCTTCGT-----ACATATTTGACAGTGTTTAGCAAGCTTGATAAGGCCCTAGCATGCAGAGAAATGC | 4349                                            |
| Reedfish                | ---TATATCCAGTTTCAGTGT-TGGTTTATTCCATTTTTTTTTTTAAAGAGTATACTTTCCATATTTTCAAATTTATAA | 34390                                           |
| NorthernPike            | TGAGAATGGTAAAGCCAAAGAAATGATTGGCACAGGCAATTCGATTAGGTCGGCTATACCACAGTCTTACATTGAAACA | 8549                                            |
| SpottedGar              | ATTTGTACAGACACTTCATCA-TGATCAGTCCAACATTTTTATTACAATATAATTTTCAGAAAAATTTAAGAGAATGT  | 7785                                            |
| ParamormyropsKingsLeyae | -TTATGGATGGATTGTGTC---GTTAATGTAGATGCATTATTACTGT-TCACTTACTACCAAATGCCAGACTGAATGT  | 3715                                            |

|                         |                                                                                  |                                                 |
|-------------------------|----------------------------------------------------------------------------------|-------------------------------------------------|
| Majority                | TTAAGT-TTT-TTTTA-ATTACAT--TATACAG--TATGCATATTTATGT-A-TTATTGATAGTTCGTTTTAAGTACTG- |                                                 |
|                         |                                                                                  | 76890 76900 76910 76920 76930 76940 76950 76960 |
| Human                   | ATCTCTAGATTACTTATATTACCC--AGTACAA--TATAAAT-GTTATGTAATGGTTGTATAGTGTATTGTTTAGGGA   | 76733                                           |
| AsianBonytongue         | TCA-----TTCA-ATGAAAC--TTTACC---TCTGCGTAGTTATGC-----ACTGACACTAATAATGATGCACTG-     | 4408                                            |
| Reedfish                | TTAAAATTTGAATTTATATTAATAAGTAAACATT-TATGCAAATTAATTTGA-ATATTGATTAACAGTTTTGAACACTT- | 34467                                           |
| NorthernPike            | GTAAGGCTTTGTTTGCATTGCACCTTATAATGCGGAAGACTATTTGTCTCTCTCTGACTGTTTCGATTTTACTGTTG-   | 8628                                            |
| SpottedGar              | TGAGGTGTGACTTTCA-ATACGGT--TTCTCTA--TATGCATTTTTTGTTCATATTGAAAGTTCAGTTCAAGGATTG-   | 7859                                            |
| ParamormyropsKingsLeyae | CTA-----TTG-ATGCTTT--TAAGCAGT-CCTGCTTTTTTGCCT-----GTTGCAAACACC-TTAACATCCCG-      | 3774                                            |

|                         |                                                                                   |                                                 |
|-------------------------|-----------------------------------------------------------------------------------|-------------------------------------------------|
| Majority                | -TAATTTCTAGTATAGCCTGT-GTATATTTTCAGTACAT-ATTATTTTAAACCATAATATTATTGATCTTCAATTTAGTTT |                                                 |
|                         |                                                                                   | 76970 76980 76990 77000 77010 77020 77030 77040 |
| Human                   | ATAATGACAAGAACAACCTTTCTATACATTTGCAGTACACCATTGTTTTACCCCAAATATTTTTGATCCAAGGTTGGTTG  | 76813                                           |
| AsianBonytongue         | -TAATTTATACTATAGCCTGT-GTAAAT-TACAGTACAT-ATTAATTTGGACCCATTGTATTGTTTTTGGTCATCTTGCC  | 4484                                            |
| Reedfish                | -TAACTACTAATTTGTACTGT-ACATGTTTTTTTTATAA-ATATTCAAATTAATCTGGATAGTGACCTTCACAAATACA   | 34544                                           |
| NorthernPike            | -T-GGTTTTAAAAC-GTTTCTTGCAGATTGGCAGGACTATTAAGGGGAACATACAACTGATCATCAGTAATGAAGTAT    | 8705                                            |
| SpottedGar              | -TAACATTTCTGT-GCATAT-GTCTGTCTTCTTCCAT-CTTTGTTCATACAAGGATAGAAGTTCAGCTTACAGAGATG    | 7935                                            |
| ParamormyropsKingsLeyae | GGTGGTCTAGTACAACCTG--ATGGAT--ACAACAGAT-GTTATTTTAAAGCACAGTCTCACC--TGTTGAGTTTACTT   | 3846                                            |

|                         |                                                                                   |                                                 |
|-------------------------|-----------------------------------------------------------------------------------|-------------------------------------------------|
| Majority                | CTTAAAA---C-GAAAGAAACGGCGTACAGATAATCC-TTCAGCATATAAATTTA-AGATATGTAT-AGTGTAAATGTG   |                                                 |
|                         |                                                                                   | 77050 77060 77070 77080 77090 77100 77110 77120 |
| Human                   | AATCGGAA--CCCAGAGATACAGAGGGCTGACTATAC-TTTAAGAATTAGAAATTA--GCTGGGTGT-GGTGGTGGGTG-C | 76886                                           |
| AsianBonytongue         | CCTGAAA----GAAGCAAACGGGTAAGATGTTC-CTCAGTTTTTAGATTTA-AAAAAAAAA-AAAAAAAAATA-G       | 4555                                            |
| Reedfish                | CTTAAAG---CAAATGGTATCCAATAAAGATATTGTACTGAGCACAAAAGTTGAAGAATGTGTATTAATGATAAATGTG   | 34621                                           |
| NorthernPike            | GCTAACT-----ATGAAACACTGTTCAAATAAACCTATCCAATCAGAAAATGTTTGTACAGAA-AATGCGGTTTGTA     | 8777                                            |
| SpottedGar              | CATTTAAATTTCTGGGAGAATCGGCCTTCATGCAATAC-TTCAGCAAATATTTTTA-ATACATGTAT-AGCATTAAAAATG | 8012                                            |
| ParamormyropsKingsLeyae | CTTAAAGA-----AAAGGCATCTAATGCTTAATCC-TGCAGAATGTGATATGCAGAAATGTTT-GGAGTCATGTGAG     | 3918                                            |

|                         |                                                                                   |                                                 |
|-------------------------|-----------------------------------------------------------------------------------|-------------------------------------------------|
| Majority                | CTATTGTGTTTCATCCAGAACATCTG--TTCAACATATATTTAT-A--ACTGGATG--TGATGTTGCACTTTAGGAAAG   |                                                 |
|                         |                                                                                   | 77130 77140 77150 77160 77170 77180 77190 77200 |
| Human                   | CTGTAGTCCCAGCTACTCGGGAGGCTGA-CGCAGGAGAAAGGCGTGAACCCGGGAGG--TGGAGCTTGCAGTGCAGCCGAG | 76963                                           |
| AsianBonytongue         | TTTTTGTGTCCATGTCCGTAACA--TA--TTCAGCATTGTCC-----CTGGATA--TATAATTGCTCTTCTAAAATG     | 4622                                            |
| Reedfish                | AAATATAGTAATAATTAATAACATTTGG-TTCAAATTTCAAATATTACAATTTAAGG--AATGGGTGCATTTTAGGGAAC  | 34698                                           |
| NorthernPike            | GCATGGATTAGAGATTGAGATTATCTGATTGCGACCAATTTCTTTTATTACTTGATAATTCTCACAGTTGCTGGGAAAA   | 8857                                            |
| SpottedGar              | CTATTCTATTTCTTCCAAAGCTACTT--TTTAACACATAGGTAT----ATTGATTG--TGTGGTTATACATTAGAAGGG   | 8084                                            |
| ParamormyropsKingsLeyae | ATATGGAAATCAAACCCGCATA-CCT--CATAACCTTTAATTCT----GCCGGTTT--AGGAAGTACA--AGAGGATC    | 3986                                            |

|                         |                                                                                   |                                                 |
|-------------------------|-----------------------------------------------------------------------------------|-------------------------------------------------|
| Majority                | TTTGTGTTTTTATAGTT--GTTTGATC-CTACCTAGACAATTTGTGTTTGAATAAATTTATTTGTGGTTG-----TAATT  |                                                 |
|                         |                                                                                   | 77210 77220 77230 77240 77250 77260 77270 77280 |
| Human                   | ATCGTGCCACTGCACCTCCAGCCTGGGCGACAGAGCGAGACTCTGTCTCTAAAAAAAAAAAAAAAAAATTAGAAG-GGGCT | 77042                                           |
| AsianBonytongue         | TCT---TTATTTAAATTT--GTTTAAAT-TTACCTGGA-----TTGGGGTAAAGTGTACTTGT-----TT            | 4674                                            |
| Reedfish                | CCTGAAATTTTCTGCCT--TTTTGATCACTGCCAGGACATTTAGTGTCTTGATTTTTTTTTTTTTTGGTTACCTGCTACCT | 34776                                           |
| NorthernPike            | CTTGAAATTTTACAGGTATCTAAGACTAGTCCATAAACAATTTCTGTACCAACAGAATACAATACATCAGTGTCTTCTATT | 8937                                            |
| SpottedGar              | TTTGGGTCAATGTAGTA--AACTACTA-CTGCCAAGAAGATATTGCCTTGAACAAACCTACCAGTGAAG-----TAATT   | 8156                                            |
| ParamormyropsKingsLeyae | GTCTGTATTTAAAG----ACTTAGTC-CTACTTAGT-----AGT---TCTGTG-----TT                      | 4029                                            |

Sunday, May 01, 2022 09:44 PM

| Majority                | ATTTAGTGTTTTT-TGCTGC--ATTTTTT-----TGGCTTGTCTTCAGAAGTTT--ATCCTTAGAA--G-CT-TTA     |       |       |       |       |       |       |       |       |
|-------------------------|----------------------------------------------------------------------------------|-------|-------|-------|-------|-------|-------|-------|-------|
|                         | 77290                                                                            | 77300 | 77310 | 77320 | 77330 | 77340 | 77350 | 77360 |       |
| Human                   | GTCAGGCGTGGTGTCTCATGCCTATAATCCCAGTCATGCCTGTAATCCCAGCACTTTGGGAGGCTAAGGTGGGCATATCA |       |       |       |       |       |       |       | 77122 |
| AsianBonytongue         | GGTTACTGTTAT---TGCTGC--ATTCTTT-----TGCTCTGTTTTTCAAAG-----TCATA-----T-TCA         |       |       |       |       |       |       |       | 4726  |
| Reedfish                | ATTTAGTCCCTTTT-TGCTGC--AGTATGTGGAAGAAAATGTGGTTATCAGCCACATTGAATCCTTGAAAAGCCT-GTG  |       |       |       |       |       |       |       | 34852 |
| NorthernPike            | ACTATGTTTTTTTTAATTTGTCAAATTGTT-----TTGCATTCCACTCACATGAGTGTGATCTATAATCAGGTAACACA  |       |       |       |       |       |       |       | 9011  |
| SpottedGar              | AATGACTGATTTG--TCTTGC--GATTCTT-----TGACTTGGCTAATTAAGGA----GTTCATAAAA----CT-CTA   |       |       |       |       |       |       |       | 8217  |
| ParamormyropsKingsLeyae | ATGCAACGTTGTT--TACCG-----T-----TGGCCTAACGTTTGTATATT---AGCCTTG-----GTG            |       |       |       |       |       |       |       | 4078  |

| Majority                | CTTTTG--TCCTGGTTTAAAGAAGTGT--TCTGT---ACTT--GTTTACAC--ATTTTATTAATAACACTAATGTCA---- |       |       |       |       |       |       |       |       |
|-------------------------|-----------------------------------------------------------------------------------|-------|-------|-------|-------|-------|-------|-------|-------|
|                         | 77370                                                                             | 77380 | 77390 | 77400 | 77410 | 77420 | 77430 | 77440 |       |
| Human                   | CTTGAG-ATCATGAGTTCAAAACCAG--CCTGGCCAACATGGTGAACACTGTCTCTACTAAAAATACAAATATTAGCCA   |       |       |       |       |       |       |       | 77199 |
| AsianBonytongue         | CTTTC-----CTGATTCATAAATGT--TCTA----ATTT--GCCTATTT--GTATAATC--TGCTTTAATGCCA----    |       |       |       |       |       |       |       | 4785  |
| Reedfish                | GTGTCT-ATTTGGGCGTGGGAAGTCTCTTTTAAAGATACTTTAGTTTATGCCCATATTACCAGCCACACAAAGCTCAATT- |       |       |       |       |       |       |       | 34930 |
| NorthernPike            | CTTTATTGTCATACAAAATAAGGGCGGAGCATGAAAATGGGGTCCCCGCCAAGGTAATATTAAGAGTAGGATTG----    |       |       |       |       |       |       |       | 9087  |
| SpottedGar              | ATTTTG--GCAGGTGCAAGAAGGGT--TCTGC---ACTT--GTTAAGAG--ATTTGGTT--TCAGCT-GATGCCA----   |       |       |       |       |       |       |       | 8278  |
| ParamormyropsKingsLeyae | CTGTTG--CCTGGTTTATGAA-----TTTGT--AGTT--GCTCACA--ATGAAGTTCATAACCCCAAT-CCA----      |       |       |       |       |       |       |       | 4137  |

| Majority                | --TATAGGCTTTGGCGTTTC---ATTTTTTACTTATTTTCGTTGACCACAGAACAGTTGT--TTCAACATATGT----AA |       |       |       |       |       |       |       |       |
|-------------------------|----------------------------------------------------------------------------------|-------|-------|-------|-------|-------|-------|-------|-------|
|                         | 77450                                                                            | 77460 | 77470 | 77480 | 77490 | 77500 | 77510 | 77520 |       |
| Human                   | GGTGTGGTGGTGGGCGCCTGTAATCTTAGCTACTCAGGAGGCTGAGT-CAGGAGAATTGC--TTGAACCCAGGAGGTGGA |       |       |       |       |       |       |       | 77276 |
| AsianBonytongue         | --TTTAGTTTTTCAAATTT-----TTCACAACATATTTCTGTAATCAGATGACAGCTGT--TTCAAATAAAT----AT   |       |       |       |       |       |       |       | 4851  |
| Reedfish                | --TATTAACACTAGAATCCCTGAAGCTTATGATTTTTTTTTGTTGTCCTTACCTATTTTT--CCTGACATATGTCAAGAA |       |       |       |       |       |       |       | 35006 |
| NorthernPike            | ---ATAGGGTTAAACTGATTATGACTATTATGCCATTGTATTAATAAACAATTATAGCAGTACAACATCAGTAACCTG   |       |       |       |       |       |       |       | 9164  |
| SpottedGar              | --GGAAGGCCTGTGTGTTA---ATTTGTTACCTCTGTC-ATATCCACACAGCA-CTGT--GCCAGAATGT-----      |       |       |       |       |       |       |       | 8340  |
| ParamormyropsKingsLeyae | -CATCAGCACTGACCTTTC---ATTTCTCCGGTATTTTC--TGAAAACCGAAGTGTCCC--GTTGACATCC-----     |       |       |       |       |       |       |       | 4199  |

| Majority                | GTTTCATCACTGTGCTGAGAGGCTGTT--TATATTGCTAT-TGTGT--TTTTTTGTAAGTCAGTTTGTAGAGGAAAAACA  |       |       |       |       |       |       |       |       |
|-------------------------|-----------------------------------------------------------------------------------|-------|-------|-------|-------|-------|-------|-------|-------|
|                         | 77530                                                                             | 77540 | 77550 | 77560 | 77570 | 77580 | 77590 | 77600 |       |
| Human                   | GGTTGC-AGTGAGCTGAGATCATGCCATTGCACTCCAGCCTGTGTGACAGAGTGAAACTCCATCTCAAAAATACAAAAG   |       |       |       |       |       |       |       | 77355 |
| AsianBonytongue         | GTTACTTATTTAGTTAATGGGCAGT---ATCTTGTAT-TGTGT--CTCTTGTAACTCATTTTTTTTAGAGGAAAAAC-    |       |       |       |       |       |       |       | 4923  |
| Reedfish                | GCTCATAGCTGCGCTAATAATCTTTTTTTGTTTTGCAAA-TGTGTGGTTTATCCGAACACAGCTTGCTACACCCCTCAGCA |       |       |       |       |       |       |       | 35085 |
| NorthernPike            | ATGAACCACTGTTCTTGGTAGTAGTG---ATATTCTGTTTGGCAAATAATGGACTTGTAGACGTAGAACAGGAGAAAA    |       |       |       |       |       |       |       | 9241  |
| SpottedGar              | -TTGATGATTGTGTGAAAGACTGCT--CACAAAGAGAT-TGAGT--TGATAGTAAAGTCAGTGTAGGGTAGGAATATCA   |       |       |       |       |       |       |       | 8414  |
| ParamormyropsKingsLeyae | -TCGTCACCGGCACAGTGGCAGTGG-CTCATTTTCTC-TGTGT--TTTATAATAAGTCTGTTTTAGGGGGTTGTAAT-    |       |       |       |       |       |       |       | 4272  |

| Majority                | ATTTTGT----CTTTACATCCCCC--CATT-----GACGAATACATAAGTCT--ATAA----AGATTATA           |       |       |       |       |       |       |       |       |
|-------------------------|----------------------------------------------------------------------------------|-------|-------|-------|-------|-------|-------|-------|-------|
|                         | 77610                                                                            | 77620 | 77630 | 77640 | 77650 | 77660 | 77670 | 77680 |       |
| Human                   | AATTAGAAAGGGCTTTAGAGTCCCACCCTAATGCTCTTCTGTTTCAGTAGTACACAAGACTA-ATAACTACGAGATGTTA |       |       |       |       |       |       |       | 77434 |
| AsianBonytongue         | -TTTTTT-----TTTT-----CCCCAC--CATT-----AGCGATAAATAATTCT--TTAA----AGTATATA         |       |       |       |       |       |       |       | 4972  |
| Reedfish                | ATTCCCC-----CCCCCCCCCTCCCCCTTTCATTCA-----GATGAAGGCATTGCCCTG-ATGC-----AGTCCTCA    |       |       |       |       |       |       |       | 35145 |
| NorthernPike            | AGTCCCATCTGTCATGACATCCACCCTGCTTGTCTGAGTAATTGACTCATTTCATTGAAAAGGCATGTTCAAATAACA   |       |       |       |       |       |       |       | 9321  |
| SpottedGar              | ATTGTGT----TTTTAAATATCTACC--CATT-----GTTTCATCATATAAAGCT--ATAA----AGATTAAAG       |       |       |       |       |       |       |       | 8469  |
| ParamormyropsKingsLeyae | GGGTGT-----CTGG-----AACGCACCTGGAAGTCA--TTAA----AGCTGAAG                          |       |       |       |       |       |       |       | 4311  |

| Majority                | TGATT----A-TTCAGGTATA-GCACTAAAGCTTATAA---ATTACTTCGGATGG---T-TATATTGGCAATGTGATA    |       |       |       |       |       |       |       |       |
|-------------------------|-----------------------------------------------------------------------------------|-------|-------|-------|-------|-------|-------|-------|-------|
|                         | 77690                                                                             | 77700 | 77710 | 77720 | 77730 | 77740 | 77750 | 77760 |       |
| Human                   | TGAACAGGAAAAGAAGTAAGACCAAAAGAAATCATAA---ATTACTTTGGATGGAACTTTTAGAATGGCAGATGGAGG    |       |       |       |       |       |       |       | 77510 |
| AsianBonytongue         | TTTTT-----TTCAGTT-TA-GCACTGAAGCATTTA-----TTTCAAATGA-----AATATTAGC--TGTGATA        |       |       |       |       |       |       |       | 5027  |
| Reedfish                | CAGTTCAACAGTTCAAGTCTGTGCAGAAGTGTATGTGGCGATACGTTTGTAAACA---TTTATATAGGTAATGAAATG    |       |       |       |       |       |       |       | 35222 |
| NorthernPike            | ACAGTGTGGAGTTAAGTAGA-GGATACAGTCATTTGGTGGAGAAAAGTGGTGTCAATTAATTGTCCATTATCAAGGAAGAA |       |       |       |       |       |       |       | 9400  |
| SpottedGar              | TCAAT-----TTTAGTGTATGGAATAAAGCATATAAGCCTACTGCTCCTCATCG-----TGTTTTGACACTGTTATA     |       |       |       |       |       |       |       | 8537  |
| ParamormyropsKingsLeyae | CGGGC-----TGCAGATATC-CCCCTTCATTTTGTGTA-----TTTCAGGGC-----TGTAGCCTTAAGGCGATC       |       |       |       |       |       |       |       | 4368  |

Sunday, May 01, 2022 09:44 PM

|                         |                                                                                   |       |
|-------------------------|-----------------------------------------------------------------------------------|-------|
| Majority                | GT---ATTTTAATTA-----TTTCACATA-----CGT---AAATGAAATGTCTCTTTTATAAAAATAATATGATTGTATTC |       |
|                         | 77770 77780 77790 77800 77810 77820 77830 77840                                   |       |
| Human                   | GATAAATTTGACATTGTTCAAATCATAGAGTAACTCTCAAAGTAAAGGGGAACCTAAGGAGACAAGATGATTAATGT     | 77590 |
| AsianBonytongue         | -----ATGTAGAGTA-----CTGCAGCAA-----AGT---AAGGAAAATGTCTGTTAATAAACAGCATCTTCCTATTA    | 5088  |
| Reedfish                | CTGTGATTTGAAATGCATACATTTTCATGTGTGGTCCGT---ATCTGCAATGATCTGTGTAAATATAGAATGACAGAGGAC | 35299 |
| NorthernPike            | GA--GATGCAAATG-----TTTCACAAA--A--TGTC--AAAAGATATATTCCTTCTGAATTG--TCCATTCCAAAC     | 9463  |
| SpottedGar              | GG---ATTTTCACTA-----TTTCACCTG-----CTT---TATTCATTGTCTTTGGGCAAATAATATAATTTTGT       | 8600  |
| ParamormyropsKingsLeyae | GT---GTTTTGATT-----TATCACAGA-----CGT---CAAAATCGGGGGGTGATAAAGAACAATTTAGTGGGATTC    | 4430  |

|                         |                                                                                  |       |
|-------------------------|----------------------------------------------------------------------------------|-------|
| Majority                | ATTCTTTGATAGAGTTACTTAATACATTTAAACTTTGGA--GATTGGGGGTATTTTGTTCATGGACTCACGATTGTGAAT |       |
|                         | 77850 77860 77870 77880 77890 77900 77910 77920                                  |       |
| Human                   | AATAGGAGATACTGGAACAACAAAAAGGGACATTAGATGCAATTTGAGGAAATCTGATAATGGACTTTTGTGATTTAT   | 77670 |
| AsianBonytongue         | AAGATGGAAGGGTTTGA-GTGACACATCTTTGCTTTCCA--GATTGGGACAACATAGTTC---ACTAATGATTGAGAAT  | 5161  |
| Reedfish                | ATGCAAGGCAAGAAATGCTGAAACATCTAAAACAGAAAATGTTTTCATATGTTATATTTATAATGACACAATTTTGACA  | 35379 |
| NorthernPike            | ATTGTTTGGAGGAGCAACTTAAGTGGATTAACGCTTGA--TTGGAGGGGAAAATGTATAAAGAAGTGCAGCAAAGTAT   | 9540  |
| SpottedGar              | TTTTTTTACTCACCTCACACAATTGCTTTATCCTTTAGG--GAATGTGTATATGTTTTTCCAGGACTCAGAAAAGTGAAT | 8678  |
| ParamormyropsKingsLeyae | ATTCTCAGACAAAACAGGCATCCAATTAGAAAAGTGA--GATTGCAGCGCCCTGTGC---GCACCCGTCCGTCCTG     | 4504  |

|                         |                                                                                  |       |
|-------------------------|----------------------------------------------------------------------------------|-------|
| Majority                | CTAATGTAGCTGTGT---TCTTAGCTTAAATTTGTT-GCAATTTTCGTA--ATGCTGCTTTATGCGGATAGGAGGG--   |       |
|                         | 77930 77940 77950 77960 77970 77980 77990 78000                                  |       |
| Human                   | CGA--TATTGGTTGATTAATTGCAAGAACTAATAAATT-GTAATACCATAC---TAATGTATGATGCTAATAATGGGGGA | 77744 |
| AsianBonytongue         | CAACTGCTGGCAGGGT---TCTTAGCTTAAATTTGTG-ACAATTTTG-----CTCAATGGAACAGGAC---5222      |       |
| Reedfish                | CAAAGTGAAGATGTGTGAACTGAAGCCAGATATCCAAGAAACACTTTAACAAAATGTGTAACACAACAAGGATGTTT    | 35459 |
| NorthernPike            | AGGATGCTTAGCTAAAA-----TTATATCAAATGCTTT-AAAGCAGCGACAAAAGCTGAAACACCGGATGAAAACG-A   | 9613  |
| SpottedGar              | CTGATTTTGAACCTTGCA--TCTTGGTTTAAATTTGTTTGCACGTTTGAATAGATGCCACTTTATGAGGTTAGGAGGA-- | 8754  |
| ParamormyropsKingsLeyae | CTATCAGTCACTTTTAG---CATCGCCCTGAGCGGGTTCGGCAGCCGCA-----CGTTGTCTGGGGAGGAAG---4567  |       |

|                         |                                                                                    |       |
|-------------------------|------------------------------------------------------------------------------------|-------|
| Majority                | --AGCTAATGCTAAGTTAGATAAGA-AATTGTCTTCTCTGTTAATATGTTG-TAATCCTCAGCTGT----AATAGATAAA   |       |
|                         | 78010 78020 78030 78040 78050 78060 78070 78080                                    |       |
| Human                   | ACTGCGGTTTCCAGGTTATATAAGA-ACTCTGTAATGTCTTAAATTTGTTTGTAAATCTAAACCTTTTAAAATAGCTAAA   | 77823 |
| AsianBonytongue         | ----CTAATGCTAATTAACACAAGA-AATGGCATCATCTATAAATA---A-CGATTGTTGGGTGG----AAAAAT---5285 |       |
| Reedfish                | TTGTTAAAGATTAATAATCGAAGAAA-AAGACACTGCTCAATTCACATATTGTTGAAGCCCAACTATC---ATTCTGTA    | 35535 |
| NorthernPike            | GCAACTACTGCTAAAATTAATAGAAGAATTGTCAGAATGGCCAAGATGCAGCCAGTCAACCTCC--AGAAAGATCAG      | 9690  |
| SpottedGar              | --AGCTGAAGCTAAGCCAGGCTTGA-GGTATTTTCACTGTGGATGACTG-TAGTCTTTAGATGT----AAGAAGTGAA     | 8826  |
| ParamormyropsKingsLeyae | ---GGAGGGGGGGCTTCCGATAA-AATTGGCCTGGCTGGTAATTT-----GACGCATCGGGCAT----GCGAGAT---4630 |       |

|                         |                                                                                  |       |
|-------------------------|----------------------------------------------------------------------------------|-------|
| Majority                | AAATA-AACAATATTTTCTGGATTGTGTTATTACAGGTTTCT-TTT--AACTTATGTTTTTATGGAGAGGTTTTTTTATC |       |
|                         | 78090 78100 78110 78120 78130 78140 78150 78160                                  |       |
| Human                   | AATTATAGATACAATTTCTAAATGATTTAATTAACAAAACAGTTTAATCTTCAGTTGAAATGAGCAAGGTTAGGGATA   | 77903 |
| AsianBonytongue         | -----AACAGGGCTTTAAGGATCATTCTAAAATAGGGT-----GAATTATTTTGTATAGAGAGATTTGAGTCTC       | 5350  |
| Reedfish                | AAAGTAAATGATATTCGCATATGTGTGTTTTGCGTGTTCATTTTCAACCAGTTGTCACAGTGGTAACACTGCTCCATC   | 35615 |
| NorthernPike            | GGATG-ATCTCAAATTACCTGTGAGTGTGTACAGTCA-----AAAGACGTTTGAACGAAGCGGAGTTATCAGC        | 9759  |
| SpottedGar              | CAGTAAAACATTTTTTTCGAAACGTGCTATTACAAATCCCTATTTTCAGTCTACGACATTTTGAAAAGTTTTTTTTTTC  | 8906  |
| ParamormyropsKingsLeyae | -----TAAAACAACATGGCCTGTGTT-TTATGCGCCTGTCTC-----CTCTGCTTTTATGGACAGAGTTGTATTTTC    | 4695  |

|                         |                                                                                    |       |
|-------------------------|------------------------------------------------------------------------------------|-------|
| Majority                | ACAGATCTGCTTTTTTGGTATAATGTCTCATG-TC----CAGAATTCATATTGTAGTATG-TATTACTCCTTCATTGCC    |       |
|                         | 78170 78180 78190 78200 78210 78220 78230 78240                                    |       |
| Human                   | CC---TGTGTGTTTC-AGTGTAATATCTGAAAGGAAA---AGAATAGATAC-ATAATTTA-TACTACTTCTCTCTGGACT   | 77974 |
| AsianBonytongue         | ACAAGTCTGCTTATTTGGGATGCTAACTCTGG-TC----CAG--TCCAAATGTAGTAAA-CAGAAAAATGCTTTGCAT     | 5422  |
| Reedfish                | ACAGATCTGCGCAAATGTCACAGTGAATAAGCTTCAGTTTGTAGTAACTTTGAGATAATAGG-TTTTAAATCCCGCATTGCC | 35694 |
| NorthernPike            | AAAAAGCCCCATTGCTGAAAAAATGGCATTTG-----CAGAAT--AGGTTGAACCTTTGCCAAGGCACATTGATGGCC     | 9830  |
| SpottedGar              | CCAGAAGTCTCTTTTTCATGTAACATCTCAAATG---CGGCATTCACAGTAGCAAAATTTTGTGTTTCACTACAT        | 8982  |
| ParamormyropsKingsLeyae | AC---TCTGTCCAAT-AGGATGCTGCGTCATG-----AG-----AG---AGTATG-CCTTATTCTCTGTGTCAT         | 4752  |

Sunday, May 01, 2022 09:44 PM

|                         |                                                                                        |       |        |        |        |        |        |          |        |        |         |    |       |         |
|-------------------------|----------------------------------------------------------------------------------------|-------|--------|--------|--------|--------|--------|----------|--------|--------|---------|----|-------|---------|
| Majority                | TCCC                                                                                   | G--T  | -TAGTC | GT-TAC | CTTACT | GAGCTT | CTCTAT | TTG-TATT | GTTGAG | GTCTTT | TTAAGAG | TG | GT--- | TTTAATA |
|                         |                                                                                        | 78250 | 78260  | 78270  | 78280  | 78290  | 78300  | 78310    | 78320  |        |         |    |       |         |
| Human                   | TAGGGTCTCTTGTTCATATACATGACTGGGCATCCATCAGCTTCAGTGGAGGAAAGGTTAGGAATAATAGTGTCAAACTA 78054 |       |        |        |        |        |        |          |        |        |         |    |       |         |
| AsianBonytongue         | TCC-----TCGT-TACTGTACAAAGCTCCTGTGTG-TAATGCAGAG-TCTTGTAAAAG-----TA 5475                 |       |        |        |        |        |        |          |        |        |         |    |       |         |
| Reedfish                | CTGCA--TTTAGTGCT-TTGGGTAGTGACCTGCTATTAT-TATTGTACTGTATAATAACATGTT-TGATGAGTCTATTA 35769  |       |        |        |        |        |        |          |        |        |         |    |       |         |
| NorthernPike            | CAAAGAG--AAATGGCGTAACATACTGCGCACTGATGAG-AGTAAGATTGTTCTTTTCGAGTACAGGGGT--CGTTGACA 9905  |       |        |        |        |        |        |          |        |        |         |    |       |         |
| SpottedGar              | TCCAAAGTTAAGCTTT-TGCCTCTGTGAAGTCTATCTA-TAATGTGGAGCTCATACCAATGGGC-TGTT---TCTATA 9056    |       |        |        |        |        |        |          |        |        |         |    |       |         |
| ParamormyropsKingsleyae | TCCC-----TCCC-ACCCCATCAAACCTTTTCTTTT-TGTGGTTCCTCATTTTCAGAGAGGC-----TC 4809             |       |        |        |        |        |        |          |        |        |         |    |       |         |

|                         |                                                                                      |          |         |         |        |          |        |       |         |       |          |         |
|-------------------------|--------------------------------------------------------------------------------------|----------|---------|---------|--------|----------|--------|-------|---------|-------|----------|---------|
| Majority                | ATATGG                                                                               | -AGTT--- | GATATCA | ATGAGTT | -CTTAT | TCTAGCTT | GGGAAC | AGTTT | TGATGAG | GGGAT | TGTACAGT | AGAAATT |
|                         |                                                                                      | 78330    | 78340   | 78350   | 78360  | 78370    | 78380  | 78390 | 78400   |       |          |         |
| Human                   | ACATGAGAATTTTAGGAGATTACTGAGTCACTCAAATGTCTGGGTGACCCAGCTGATGAGGGCCATTTCACATGAAAA 78134 |          |         |         |        |          |        |       |         |       |          |         |
| AsianBonytongue         | AGCTGC-AGTA---AATACCAAATGTTGCTTGTCCAGCCTCAGAAATGGTTTACAGTG--TTGTATAGTAGTTA-T 5547    |          |         |         |        |          |        |       |         |       |          |         |
| Reedfish                | GCGCAGTGATA---AGGAGCTACGAGCTTCTGGCATATGTTAGAAAAACTTGAGGTCAGGGACAGTG-GATAAAAATC 35844 |          |         |         |        |          |        |       |         |       |          |         |
| NorthernPike            | GTACGTGAGAC-----GACCCCGGGTACTGAATTCAGCCACAGAACTGGAGATGAAGGATGGTAGCGCAACGATC 9979     |          |         |         |        |          |        |       |         |       |          |         |
| SpottedGar              | ATGTTG-AGCT---CATGTCAATGGGCT-CTTTCTTTACTTTGAATTAGTTTTCATAAATTCATGCAAGTGGAGCT 9130    |          |         |         |        |          |        |       |         |       |          |         |
| ParamormyropsKingsleyae | AGACG--AGCT---GCTGTGAGGAGCC-ACTACACCAGTCCGAGCACTGGTATGAGTGGGA-TTGTA-ACTGGTAAGG 4880  |          |         |         |        |          |        |       |         |       |          |         |

|                         |                                                                                        |         |       |        |         |        |       |         |        |         |          |       |
|-------------------------|----------------------------------------------------------------------------------------|---------|-------|--------|---------|--------|-------|---------|--------|---------|----------|-------|
| Majority                | ATTGACT                                                                                | GCTGG-- | TTT-- | TTCTTA | ATTTACT | TATTTG | AATAA | AGTTTTT | --AAA- | TAGTTTT | ATTTTTGT | ----- |
|                         |                                                                                        | 78410   | 78420 | 78430  | 78440   | 78450  | 78460 | 78470   | 78480  |         |          |       |
| Human                   | GATTCCTGCAACACCTTCTTTTCTTTAGCACATGATCGTTTATGAAGCTCTTTTACA-TTGTTTTATCTTTAT-----AG 78208 |         |       |        |         |        |       |         |        |         |          |       |
| AsianBonytongue         | ATAGTTCAATGG--TTT--TTACTAATTTACATATTTTAAAG-AGTAGGT--AAA--GGTCTATTTTGGG----- 5611       |         |       |        |         |        |       |         |        |         |          |       |
| Reedfish                | ATAAACTTAAGGCATTTAGTGTAAATTTACTGTATCATCAATACATTTACCAAAAATAGCTTTGTTTTATTCATAAT 35924    |         |       |        |         |        |       |         |        |         |          |       |
| NorthernPike            | GTGGTATGGGGATGTTT--TTCATACTATGGTATGGGCCATGTTATCCTATACCGGGGAACATCAGTTTGAATACGTC 10057   |         |       |        |         |        |       |         |        |         |          |       |
| SpottedGar              | ATTAATGACTGA--TTTGTCTAGTGGTTCATTGACTTGATAATTCAGTTTTT--AAA--ATTCAAATTCCTG----- 9196     |         |       |        |         |        |       |         |        |         |          |       |
| ParamormyropsKingsleyae | AGGACC-CCGT--TTT--TCCTCGATGGGATATTTGATATTGATGTCTGT--ACATTAGTGAATTTGTGT----- 4946       |         |       |        |         |        |       |         |        |         |          |       |

|                         |                                                                                            |           |         |        |        |         |        |        |         |         |         |          |
|-------------------------|--------------------------------------------------------------------------------------------|-----------|---------|--------|--------|---------|--------|--------|---------|---------|---------|----------|
| Majority                | ATATGTT                                                                                    | CAGAAATAA | ATTAT-- | TCATTT | GTTTTT | TATATGT | GGTGAT | TGAGTA | ATTCAAT | GACTTCT | AACATGG | CGGAGCAA |
|                         |                                                                                            | 78490     | 78500   | 78510  | 78520  | 78530   | 78540  | 78550  | 78560   |         |         |          |
| Human                   | CAATCCTCAGAAATAGATCAAGCTTTTCTTTTTTTTTTTTTTTTGGAGATGGAGTCTTGCTCTGTGCCCCAGGCTGGAGTGCAA 78288 |           |         |        |        |         |        |        |         |         |         |          |
| AsianBonytongue         | GTTTATTCTGCATAAACT-----CTTGATGATGAATGTG-----AGTAAT-TAAGGACCTCTTA-ATGTCAAACAA 5675          |           |         |        |        |         |        |        |         |         |         |          |
| Reedfish                | ACTTCTATGGCTTTAAGTCCAGTCCAGTCTTATTATATGTGGGATTTATGTTCTGAAAAACCCAGTGGAAACCGAAAC 36004       |           |         |        |        |         |        |        |         |         |         |          |
| NorthernPike            | AAATACTT-GAAGAGATTGTGCCATATGCCTGAAGATGAAATGCCCTGAAAT--GGTGTTTTCAACAAGATGA-CAA 10133        |           |         |        |        |         |        |        |         |         |         |          |
| SpottedGar              | GCATGTAGAGGAACAACCTTT--GCACTGTTAACAGATTGGTTTCAGAGGAATGCAAAGACTGCTCACATAGCAATTGA 9274       |           |         |        |        |         |        |        |         |         |         |          |
| ParamormyropsKingsleyae | ATATGTGCAAAATCCATGCAT--CCCTTGTATGTTACATCCATAAAAATAAAAGCTATGTTATTTCTAACATGCAAAGTAA 5024     |           |         |        |        |         |        |        |         |         |         |          |

|                         |                                                                                       |         |        |        |           |         |        |       |         |        |        |         |
|-------------------------|---------------------------------------------------------------------------------------|---------|--------|--------|-----------|---------|--------|-------|---------|--------|--------|---------|
| Majority                | TTTGTGA                                                                               | ATCTTGA | -TCTCT | GTGCAT | CCTT----- | CAGTCCA | AACATT | ATTTT | TGGCATA | AAA--- | CTGACG | TAGCTTC |
|                         |                                                                                       | 78570   | 78580  | 78590  | 78600     | 78610   | 78620  | 78630 | 78640   |        |        |         |
| Human                   | TGGTGCATCTCGGCTCACTGCAAAC-TCGGCCTCCCGGGTTCGT-GCCATTCTTCTGCCTCAGCCTCCCAGTAGCTGC 78366  |         |        |        |           |         |        |       |         |        |        |         |
| AsianBonytongue         | CTTGCAAATGTA--TTTCTGTGATATC-----CAGT-----AACAAAATTTTGGCACCA---TAAGACAATATT 5736       |         |        |        |           |         |        |       |         |        |        |         |
| Reedfish                | ATGGTGGACCCTAT-TCTCTGTACATTTTGTACCCTTTACCATA-AACACACATTTGAATAA---CAGAAATCACCTC 36079  |         |        |        |           |         |        |       |         |        |        |         |
| NorthernPike            | CCCCAACACACAAGCAAGTGAAGCAACGTCTGGTTCAGTCAAAAAGGATTTGGAGTGGCCTGCTCAATCCCCTGGCCTC 10213 |         |        |        |           |         |        |       |         |        |        |         |
| SpottedGar              | GTTAATACTCCTG--GCAGTGTGCCACTC-----TAGGCCAA-AATATCATTTTAAAATAAATACTGACTGGTCAATC 9343   |         |        |        |           |         |        |       |         |        |        |         |
| ParamormyropsKingsleyae | ATATGAATTTTGGAGATTGTCATATT-----CAGCCCAA-GAGGTTACATGAAAAGAT-----ATGCAGATTG 5089        |         |        |        |           |         |        |       |         |        |        |         |

|                         |                                                                                         |         |         |       |        |        |        |        |        |        |        |        |         |
|-------------------------|-----------------------------------------------------------------------------------------|---------|---------|-------|--------|--------|--------|--------|--------|--------|--------|--------|---------|
| Majority                | ACCTCTAG                                                                                | GTTAGAA | AGTGTGG | AGTTT | CAGTTT | CATTTT | TGTAGT | ATATTT | -TTATT | GTTGGG | -TTTCT | TAATAT | TTTT--- |
|                         |                                                                                         | 78650   | 78660   | 78670 | 78680  | 78690  | 78700  | 78710  | 78720  |        |        |        |         |
| Human                   | TACTACAGGTGCTGCCACCACGCCAGCTAATTTTTTGTATGTTTAGTAGAGATGGGG-TTTCATCGTGTAGCCAGG 78445      |         |         |       |        |        |        |        |        |        |        |        |         |
| AsianBonytongue         | ACCCTTTCCAAGAAATT-----TTCAGTCCCAGTGTAGTACAAC-TGCCTTTT-----CTTCACATTTCC---- 5797         |         |         |       |        |        |        |        |        |        |        |        |         |
| Reedfish                | AGCTCAACATAGCACATTTGCACCTTAGGTACACTGGCAACATACTT-TCATTATCACTA-TGCTTTGCTATTTTGAAA 36157   |         |         |       |        |        |        |        |        |        |        |        |         |
| NorthernPike            | AACCCCATTGAAAACCTGTGGGTGACATTAATAATACAGTGTCTGAATCAAAAACCCAAAACCTTCTCAAGGACTGTGCAA 10293 |         |         |       |        |        |        |        |        |        |        |        |         |
| SpottedGar              | ATTGCTGGGAGAAAGTGTGACTTGAGTTAAAGGCATAAAATCAAT-ATTCTGTTGAGG-TATTTTAAACATGTT---- 9417     |         |         |       |        |        |        |        |        |        |        |        |         |
| ParamormyropsKingsleyae | CCTTCTTGATACTAAGC-----TT--GTCCCTGTCTGAGGCATTT-TGCTTGTTCAG-----TATTAGTCTAGAT---- 5151    |         |         |       |        |        |        |        |        |        |        |        |         |

Sunday, May 01, 2022 09:44 PM

|                         |                                                                                       |       |       |       |       |       |       |       |
|-------------------------|---------------------------------------------------------------------------------------|-------|-------|-------|-------|-------|-------|-------|
| Majority                | ---ATCACATTCATC-----ATTGCTTTACTA-CTTTATTCTAGATGCCA-ATATTTGTAGAA-----                  |       |       |       |       |       |       |       |
|                         | 78730                                                                                 | 78740 | 78750 | 78760 | 78770 | 78780 | 78790 | 78800 |
| Human                   | ATGGTCTCGATCTCCTGACCTTGTGATAGATCAAGTATTTTTATCCCTCTCATCA-ACATGTGTAACAGTTTTTTCCTC 78524 |       |       |       |       |       |       |       |
| AsianBonytongue         | ---ACCACAGTGAG-----ATTGTTTTG-----TTAATGTTTGATGCAC-ACTTTTATAGTA----- 5845              |       |       |       |       |       |       |       |
| Reedfish                | TTTAATACATTTATCTGA---AAAAGTGATACACAGAGAAAACAGTACATGTA--ATATTTTTAGAACCTGGAGACTTG 36231 |       |       |       |       |       |       |       |
| NorthernPike            | TGTAGTCCAGTCATCC-----TGTGCTGAAATA-CCGGTTTCTAGGTGCCAGAGTTGGTGGAC-----T----- 10352      |       |       |       |       |       |       |       |
| SpottedGar              | ---ACAGGATTTTC-----ACTACTTTACCTGCTTTATTCTAGGTTCCCT-GAATTGATGAAA----- 9470             |       |       |       |       |       |       |       |
| ParamormyropsKingsLeyae | --GTCACATCCAT-----ATTGGTGGAA---TTTCCATACATGGAG-ATATGACCAGGA----- 5200                 |       |       |       |       |       |       |       |

|                         |                                                                                          |       |       |       |       |       |       |       |
|-------------------------|------------------------------------------------------------------------------------------|-------|-------|-------|-------|-------|-------|-------|
| Majority                | -CAATTTAAGTGCTTTTCTTAAACGTTTA---ACCTTTTTTAAATTTAAATAGTTTTATTTAAGAGTTTTTTGTAA             |       |       |       |       |       |       |       |
|                         | 78810                                                                                    | 78820 | 78830 | 78840 | 78850 | 78860 | 78870 | 78880 |
| Human                   | ACATATCTGCTGCCTTAGCTAAAGATGCAAATCATTAAAGTTAAAAATTATAATTTATGTAGCTAAAAGTAATCTGTGTAGA 78604 |       |       |       |       |       |       |       |
| AsianBonytongue         | --AGTTT---TTCTTTTTTAAACTTTT-----CACTTTTTGGAAAGCAAAATAGTTTTCTTTTT---TTTTTTTT--- 5909      |       |       |       |       |       |       |       |
| Reedfish                | TCAACATAAGTCTCAAAGTGAAGTCATTAACCTCCATTGCAAAGCAGAAAGAGAGGTACCTTGGCCCTGTCACCAA 36311       |       |       |       |       |       |       |       |
| NorthernPike            | -CGATGCAA-CGCAGATGCGCAGCAGTTATCAAAAACAAAGGTTATGCAACTAAGTATTAGTTAAGTACTGTTTCAGTGAA 10430  |       |       |       |       |       |       |       |
| SpottedGar              | --AATTTAATTTCTTGGCTTTCAAGTTT-----GCCTTTTTTAAATTTAATGTAGAATTTTTCATGAATTCGCTGTTAG 9543     |       |       |       |       |       |       |       |
| ParamormyropsKingsLeyae | -AATGGGTGAGTTCTGCTGGAACGAT-----GTTCCAGCAAATATAAAGCAGTGTATATGAGGGTGTGTACTTAAG 5271        |       |       |       |       |       |       |       |

|                         |                                                                                         |       |       |       |       |       |       |       |
|-------------------------|-----------------------------------------------------------------------------------------|-------|-------|-------|-------|-------|-------|-------|
| Majority                | G-AGG-----A-----TCACATGTTTTCCATTCTTTTT-----TTGCAGCGTTTTATTGGTTTA-                       |       |       |       |       |       |       |       |
|                         | 78890                                                                                   | 78900 | 78910 | 78920 | 78930 | 78940 | 78950 | 78960 |
| Human                   | GCCAGTGTATAC---AATATGTGTAATATGCTTTCTATAACTTTCTCAAAGGGCCC---TTGGTAAGTTTATTGTTTTCT 78678  |       |       |       |       |       |       |       |
| AsianBonytongue         | -----TCCCTTTCC-----CCCTCCTC-----TCACAGGATCTACTGGTGTA- 5946                              |       |       |       |       |       |       |       |
| Reedfish                | AAAGGAAGGAAGGGAAGCAAAGAGCACATAGTGACCATTCCGGTTTAAAGTAGGAACAGTTGGCAGGGCTTATGAGGTTGA 36391 |       |       |       |       |       |       |       |
| NorthernPike            | GTTGG-----AA-----CTAGAAGATTTGTTTCCGTTTT---A-----TATAGTACATTTTTGGGTTTG- 10482            |       |       |       |       |       |       |       |
| SpottedGar              | GGAC-----TCACTGTTAAACATTTTTTTTT-----CTGCAGCTTACATTGGCTTA- 9590                          |       |       |       |       |       |       |       |
| ParamormyropsKingsLeyae | -----CCAGGTGTT-----TGAACCGTGAATTCGTGAAG 5302                                            |       |       |       |       |       |       |       |

|                         |                                                                                         |       |       |       |       |       |       |       |
|-------------------------|-----------------------------------------------------------------------------------------|-------|-------|-------|-------|-------|-------|-------|
| Majority                | AATTGAGGAAGGTTTC-TAGAATGGAGTTATTTTTTAACTTAAAT--TTATATG---TGTGT---TGTGATCTTCTGAA         |       |       |       |       |       |       |       |
|                         | 78970                                                                                   | 78980 | 78990 | 79000 | 79010 | 79020 | 79030 | 79040 |
| Human                   | CATTTAGCTGGGAGTTAAGAACAGAACTATTTTCTAGAATGTATTAATTATATAAAATAGTGCATCATGAAATATTTTGTA 78758 |       |       |       |       |       |       |       |
| AsianBonytongue         | AGTCGTCAAAGGTTTC-TGTCTGGAGTAACTTTATTACGCTCAAT--TTATTTG---TGGGT---TGTGGCCTTAAG-- 6014    |       |       |       |       |       |       |       |
| Reedfish                | AAGCAGGGGAGATGGGTTGGACGAGATGCCAGCTCGAGTCCCATCC-TTGTACC---TGTCCACCTCTAACATCCCCCA 36467   |       |       |       |       |       |       |       |
| NorthernPike            | AATTGAACAATGTC--CACATTGCAATTTTTTGAACAGCTTAAAT--TC-CCT---TCTCT---TTTGTCTCTGTGAA 10549    |       |       |       |       |       |       |       |
| SpottedGar              | AATCCAGTAAGATT--TAGATTGTAGCTATATTTGACATTTAAAT--TTATATG---TGGGC---TCTGACCTCTG-- 9657     |       |       |       |       |       |       |       |
| ParamormyropsKingsLeyae | AATATGGGTCACTC-TCGAATGGGGTGCCAGGCAACAATTGAA--TAACGC---TGTGT---AATAATCTCACGAC 5371       |       |       |       |       |       |       |       |

|                         |                                                                                          |       |       |       |       |       |       |       |
|-------------------------|------------------------------------------------------------------------------------------|-------|-------|-------|-------|-------|-------|-------|
| Majority                | GGTCTC-ACATTTATTTTATTGTCATCCATAAATAG-----TGTAGCCTATAAATAACA-TTTG-TGTAATCTCTCTTT          |       |       |       |       |       |       |       |
|                         | 79050                                                                                    | 79060 | 79070 | 79080 | 79090 | 79100 | 79110 | 79120 |
| Human                   | GGTTTTTATATTTTTATTGTCAGCAGACAGCATTTAGA-----TTAAACCTAAAAATACCTGATTGACAAAGTAGTTTTTC 78833  |       |       |       |       |       |       |       |
| AsianBonytongue         | GGTCTC-ACATTTAATTTATTGTAACCATAAAAA-----TGTAAGCGATAAAGAACAATTTAGGGGAATTCGCTCAC 6085       |       |       |       |       |       |       |       |
| Reedfish                | GGGTCC-ACTTTCTCACCTTGAAGTTCAGTAGTGATACTCCGCAGCTTCATACAGAAACCTTGTATGACTTTCTCTA 36546      |       |       |       |       |       |       |       |
| NorthernPike            | AGAATA-ACGCAGACGTAATAAAATCCATAAATTAAGGTCTGATATAGCTTTGAAATATGATGTT--TGTAAGTGTTC AAT 10626 |       |       |       |       |       |       |       |
| SpottedGar              | GGGCTT-GCATTTAATTTATTGCTTCCATAAAAAAG-----TGAAGCCTATAAAGAACA-TTTGCAGGAATGCACGCTT 9728     |       |       |       |       |       |       |       |
| ParamormyropsKingsLeyae | CACCGC-CCACATGTGTCGGTGCACACTCGTGCAG-----CACAGCCAGCACAACCA-----GTGATCCTC-CAG 5435         |       |       |       |       |       |       |       |

|                         |                                                                                        |       |       |       |       |       |       |       |
|-------------------------|----------------------------------------------------------------------------------------|-------|-------|-------|-------|-------|-------|-------|
| Majority                | AGATATAAGCA--AGGTGTCATATTGGATGGTCTG-GCGG-TTTCAGTTTCTGTAATAGTGTGTGTTTTACCATCTAT         |       |       |       |       |       |       |       |
|                         | 79130                                                                                  | 79140 | 79150 | 79160 | 79170 | 79180 | 79190 | 79200 |
| Human                   | AGACAAAAGTATATTGAGGGAAATTTGAGAATCTTCAGAGGCTTTAAAAGTCCAGGAAAATCTTAGACTACTCCAGTGAT 78913 |       |       |       |       |       |       |       |
| AsianBonytongue         | AGACACAACCA--AGATGTCCTATTTAAAAAGT-----TAGTCTGTAATGGCCCGCGTTTGGCCATCTGC 6149            |       |       |       |       |       |       |       |
| Reedfish                | GATAGTCTTCT--TGGCACACTACTGGAGGTCATGAGCGACAACGGAGGGCCGATCTGAGTACCTCACTGTACCATCCAA 36624 |       |       |       |       |       |       |       |
| NorthernPike            | TGATAACCAGC--AGGTGTTAGATTGAGTATTTC---G-TTCCGGTTCCTTGATTAGTGTGGGGTCAAACCTTTGTAT 10698   |       |       |       |       |       |       |       |
| SpottedGar              | AGATGAAACTG--AGGTGTCACATTAGATAGTGTA-GTGGATAACACAATTCAGTAGTCAATTTGTGTTTGACCACCAT 9805   |       |       |       |       |       |       |       |
| ParamormyropsKingsLeyae | AATCTAA-----ACGTGTCGTGTCGACAGGTCAG-GCGG-----GTGTTAGTGAACATGCCATGTTTGAAGGTTT 5502       |       |       |       |       |       |       |       |

Sunday, May 01, 2022 09:44 PM

|                         |                                                                                   |       |
|-------------------------|-----------------------------------------------------------------------------------|-------|
| Majority                | TTGTCAGT--CATTGTTTGCTTTGCTTTGGGGGCACTTCTGACTGTATCGGAAACAGTTTGGACGCTTTGAGGAGGACAT  |       |
|                         | 79210 79220 79230 79240 79250 79260 79270 79280                                   |       |
| Human                   | TTAGAA---CGGTGTAAGATAGCCTAAGTAGTTTTTCTAAGT-TATCAGCCGCGGGGAGGAAATAATGAAAGAGAAAT    | 78988 |
| AsianBonytongue         | GCATCAGT--CACTTTTAGCGGTGCTCTGAGCGCACTGCTGACTGCGTTCAGACAGCTTGGGGCCTTTGGGAGAACAG    | 6227  |
| Reedfish                | TTGGTAGAAGCAACGTGTAGTGTGAATAATGGGCAGGGACCTAAGCAGTGTAAAGCTTGTGGCCTGCACCTACTGGGAGAG | 36704 |
| NorthernPike            | TTGAAAGGAAAGCAGTTTTTTTTTTTGTCTTTAAAATCAAATT-GATCAGAAATAGTGTGACATTTTGTTAATGTTGT    | 10777 |
| SpottedGar              | CTATCAGT--CATTTTAAGCACAGCTCTTAG-GAGCTTCTGACTGAAGCAATGACTGTCTGAATCTTTAGGAGAACAT    | 9882  |
| ParamormyropsKingsLeyae | CTGCCAATGCATCGTGTGCCTGGTATCGGGGGTCTGGAGCCTATCCCGAATCAATGGGCACGAGGCAAGGAACAACC     | 5582  |

|                         |                                                                                    |       |
|-------------------------|------------------------------------------------------------------------------------|-------|
| Majority                | AAGTCTGGTTGCA---ATTACA--T-----TCATTGACT-----TTTTTAGA-CATAGACTTACACGTGTAA           |       |
|                         | 79290 79300 79310 79320 79330 79340 79350 79360                                    |       |
| Human                   | ACATACGAGTGGCATTAAAGGACAGGTGGTGGCTTCTTTTACCTATTTAAAGCATTCTTACACCATACTGTGAAGTGTGTAA | 79068 |
| AsianBonytongue         | AGGCTCTGGATGAA---ATTACG-----CCATCTGAC-----ATTCG-----AGACTTGCAGATTAA                | 6278  |
| Reedfish                | GAGTCTGGTTGCC---ATCACAAATATAA--TTCAGGTGGCTTACCTACGCTCTGGTGCCAGGTTTGACACACGTTA      | 36779 |
| NorthernPike            | AAATTATTATTGTA--GCTGGCAACTGCTA---CTTTTAAATG-----GAATATCTATA---TAGGCTTACAGAGGCC     | 10843 |
| SpottedGar              | GAGGTCCAGATGAA---ATTACA-----CCATCTGGTT-----ATTTTAGATCTTAGACTTACAAGATTAA            | 9940  |
| ParamormyropsKingsLeyae | CAGGACAGGAGGCC---AGCCCA-----TCGCAGGACA-----CACTCACA-CATTCACTCACACATGCAC            | 5639  |

|                         |                                                                                  |       |
|-------------------------|----------------------------------------------------------------------------------|-------|
| Majority                | AACAATGG-----ACAATTTGCATTTCAG-GCCGTGTGTTTTATGTCC-----TTATTTCTACGA---ACTGTCT      |       |
|                         | 79370 79380 79390 79400 79410 79420 79430 79440                                  |       |
| Human                   | AAGGAAGGATCATTGGACATAATAGATTATCTG-ACAGGGTGGTCCCGAATGGTGGAAGTAAATCGACAGGTGAGGACAC | 79147 |
| AsianBonytongue         | AACAACAC-----AAAAGGCTGCGATGAAG-CCGGTGT---TTATGTCC-----TCGTTTCTCAA---ACTGTCT      | 6338  |
| Reedfish                | ATCCATTCAGTGT--AGCATTTTGCATTGCAG-CCCCTGATATCTAGCACACAACAGACATTTTTTTTGC---TCAGTCT | 36853 |
| NorthernPike            | ATTATCAG--CAACCATCAGTCTGTGTTCGAATGGCGTGTGTTTGTCTAATCCAAGTTATTATTACAA--AATCCTTT   | 10919 |
| SpottedGar              | AACAGTG-----AAAAGAGAGCAATACAG-GTTGTGTGTTTTATGTCT-----CTCTATCTGTGT---ACTGTCT      | 10002 |
| ParamormyropsKingsLeyae | ACCTATGG-----GCAATTTAGTAACTCCA-ATCAGCTGA-GCATGTC-----TTGTGTCCACG---ACGACAC       | 5699  |

|                         |                                                                                 |       |
|-------------------------|---------------------------------------------------------------------------------|-------|
| Majority                | TG-AGAGAGCTGTTGCACAGT-----CTCATATTTGTTTTT---CTTTTGGGTATGACCGAAGCTGCCTTCTAG-AGAC |       |
|                         | 79450 79460 79470 79480 79490 79500 79510 79520                                 |       |
| Human                   | TG-AATTAGCATTTCAGACAGTGGGGACCTCACACCTGTATTCCTTTTTTGGTAAGATTTTTATTACCTCCTTAGAAAG | 79226 |
| AsianBonytongue         | TG-AGAGAGCTGT-----ATTCATTTT---CTTGCCAGGACAATGGAAGTGTCTTTTAG-----                | 6390  |
| Reedfish                | TACATGGTGTACTGCACGATAAGCTTCTCATAAATGTTTTTG--CTTTTGTGCATGTCCGTAATAGGCACTAGTAGAC  | 36931 |
| NorthernPike            | TGCAATTATGT-TAGCACAG-----CTGAAACTGTGTGTGATTAAGAAGCGACAAAACCGGCCCTCTTTAGACT      | 10991 |
| SpottedGar              | TA-AGAGATCTGTTCAATATTTACGATTTCTATTTACTTTT---TCAGAGAGGATCAGACGAGCTACTGTCTAGCAGTC | 10078 |
| ParamormyropsKingsLeyae | AG-GGAGAAC-----ATGCAAATC---CACACACATGTAACCCAGGCGGAGACTTGA-----                  | 5748  |

|                         |                                                                                   |       |
|-------------------------|-----------------------------------------------------------------------------------|-------|
| Majority                | AGTA-AAT---C-ATCTCGAGCACAAAGTTTTTTTGTCT--A-----GTGATTTTAAGTTAATT-AATTTCTGTAACCCAG |       |
|                         | 79530 79540 79550 79560 79570 79580 79590 79600                                   |       |
| Human                   | AGGTAATTCATCTATTTTCAGCCCAAATTTTTCTGTCTAGAAGATTGGTAGTCTTATTTTTACTAAAGTACAAGATTAT   | 79306 |
| AsianBonytongue         | -----ATGAGTGC-----GTGCTTTAAATTATTT--ATTTCTTTTCCAG                                 | 6428  |
| Reedfish                | AGCA-GGTTTTGCAAAATAGGTTACACATTTTAAATACCAGAAA---AGGGAATCCTGGGAATT-GAATCAGCAAATAG   | 37006 |
| NorthernPike            | AGTGATAT-----ATCTGGAGCACCAGCAGTTTTGAGT-----TCGATTACAGGCTTAAATGTCCAGAAAGAAA        | 11056 |
| SpottedGar              | TGTACAACAGCCCCAACTCTAATATGAGTGGCATGGTTGTAACG---GGTGAAGTAAATCAATTTAAATTTGTGACCCA   | 10155 |
| ParamormyropsKingsLeyae | -----ACCCAGGTCCC-----AGAAATGTGAGGCAACA---GTGCTAACCAC                              | 5787  |

|                         |                                                                                   |       |
|-------------------------|-----------------------------------------------------------------------------------|-------|
| Majority                | TGAGTATCTACTGTAATCTGTTTTGTATTTTTTTTTT---AATATAATAGTGTA-GACTGT---CATTCTCTAAGTATCT  |       |
|                         | 79610 79620 79630 79640 79650 79660 79670 79680                                   |       |
| Human                   | TTAGTAAAAGGTAGCATTCTCTGGCTTTTTTTTTTTTTTTTTTAAATGTTTCAGATCTGT---CACACTAAAAGGGCT    | 79382 |
| AsianBonytongue         | AGAGGATCAGACGAGCTGTCTGGAAGTCTTT-----ATAATAGTCCA-AACT-----CTGGTATAAGCAGTA          | 6492  |
| Reedfish                | TGAGGATATACTGTACTGTTTTT---AAAATCTTACTGTAATATAGAAGTAAATGACTATTTTTCAAAGTCAAAGTGAAC  | 37084 |
| NorthernPike            | GGACTGTCTCTGAAACTCATCAGTCTATTCTTGTCTGAGAAATGAAGGCTATTCCATGCAAGGAATTTCTAAGAACT     | 11136 |
| SpottedGar              | AATAAATTGAACTTAATTTTGTGTTTGTACTTTTTGCTTCAACATTATAGTGAG-GACTGGGTGATCTCTTTAATTTATCG | 10234 |
| ParamormyropsKingsLeyae | AGCACCACCAGTCGGCCCTGT---GTATATATG-----CACCACCAGTC-GGCC-----CTGTATATATGC           | 5846  |

Sunday, May 01, 2022 09:44 PM

Majority TCCGTCCTGGTGTTCCTGTTC---TATATGATTCACCACATTGGCACGGT-A-ATTTAACCATGCATTACTGGGCTGTG

|  |       |       |       |       |       |       |       |       |
|--|-------|-------|-------|-------|-------|-------|-------|-------|
|  | 79690 | 79700 | 79710 | 79720 | 79730 | 79740 | 79750 | 79760 |
|--|-------|-------|-------|-------|-------|-------|-------|-------|

Human TTAGACCAGGTGTTGTGGCTCACACCTGTAATCCCAGCACTTTGACA-GGTC--AAGGTGGGAGG-ATTGCTGGAGGCCA 79458

AsianBonytongue ACGTCTCTGGTATGTCCCTCC---CCCATG---CCCCACAAAATA-----ATTTGATCGTG-ATTACTG----- 6551

Reedfish TTTGTCTATCTCAACCATATACAAGTATACAGATAGACAAAATTGCGAAGCTCAGGGTCCACAGTGAACAACATGATGTG 37164

NorthernPike GAAGATCTCGTGTACGCTTTGTACTACTTGTTTTACAGAACCGCGCATGCTTACTCTAACCACAGAGTCACCGACCCGTC 11216

SpottedGar GCCGTCATGATAATCTGTGTC---TAAATGATTTTTTCAAAGAAAGACAGA-AGATTCAAACAAGCACTACTAACTTTG 10310

ParamormyropsKingsLeyaeACCACCAGGTCGGCCCTGTA---TATATG-CACCACCAGTCGGCCC-----TGTATATATGCACCACCAGG----- 5909

Majority -GT-TTTGACAT-----GTAACATGTTGAAATTTTCAGTAT-----AAATGTAGTAAATAATCAATATATGTTATT

|  |       |       |       |       |       |       |       |       |
|--|-------|-------|-------|-------|-------|-------|-------|-------|
|  | 79770 | 79780 | 79790 | 79800 | 79810 | 79820 | 79830 | 79840 |
|--|-------|-------|-------|-------|-------|-------|-------|-------|

Human GGAGTTTGAGACCAGCCTGAGCAACATAGTGAGATCTCAGTCTCTACTAAAAATAAAAAAATTAGCCATGCCTGGTGGC 79538

AsianBonytongue ----TCTATCT-----GT---ATGTTAAAAGTGCAGAAT-----AACTCTGTG--TGATCAGCATATGT---- 6603

Reedfish CAAATCATAAATTA---AAATAGAATTTTAAATTTTAAATTT-----AAAATTAACACAAACAAGACAAGACATT 37234

NorthernPike GATCTTGGAAGC-----ATTTAAGTCGATCGGAATAGTTT-TCAAAATCAGAGGGAAAAATAAATATATATTTGT 11287

SpottedGar -GTTTTTCACAT-----GTCACATGCAGTAACAACAGTAT-----AATTGGCCAACTGAATAGGATGCTTCATA 10374

ParamormyropsKingsLeyae---TCGGCCCT-----GT---ATATAAAATAAAAAGCAT-----AAATGTAGTT--TAAGTGATAGATGG--- 5961

Majority ATTCATCTGCAATG--AAGTATTAGGAACAATTTGTAGGCATGATATAT-TAGTCCA--ATTTGTAAATAACAG--AGTT

|  |       |       |       |       |       |       |       |       |
|--|-------|-------|-------|-------|-------|-------|-------|-------|
|  | 79850 | 79860 | 79870 | 79880 | 79890 | 79900 | 79910 | 79920 |
|--|-------|-------|-------|-------|-------|-------|-------|-------|

Human ATGTGCTGTAGTCCCAGCTACTTAGTAGGCTGAGGTGGGAGGATTGCCTGAGCCAGAAGATAGAAACAGCAGTGAGCC 79618

AsianBonytongue ATTCATCTGCAAGG--AAGAT-----ATTTGCAGTTAC-----TGTGCAAATAACC---CCTT 6651

Reedfish GTGCAAAGACAAGACAAGAAGTAGCAGCAATATCGATGTGTAAGATATGTAATATA--ATTAATAAATAATAG-ATATA 37311

NorthernPike ATTCATTATTTATT-AATTTAATATGCACCATGTGTGAGCCTATTGTGTGCAGTAAATGGTGTCTAGGGGAGGGAGAGGC 11366

SpottedGar ATTTAGTGGCATT--AAGTCTTAGTAACAATTCATAGACATGAGAGAT-TGTTCCC--ATATCCAAATAAAA---ACTT 10446

ParamormyropsKingsLeyae--CCATCAAACATG--AAATGT-----TTTGTGTGCAT-----TTTG--A-TAAA-----TT 6001

Majority GATATATGGAAATGCGCTGTCGTATTTTT--AAAGTTTTCGCTGTCTTGTACAATATCTGTTGGAGAGGTATTACAAC

|  |       |       |       |       |       |       |       |       |
|--|-------|-------|-------|-------|-------|-------|-------|-------|
|  | 79930 | 79940 | 79950 | 79960 | 79970 | 79980 | 79990 | 80000 |
|--|-------|-------|-------|-------|-------|-------|-------|-------|

Human ATGATCATGCCACTGCACTCTAGCCTGGGTGACAGAGCAAACCTTGTCTCAAAAAATAAAGGGTGGGGAAGCTTTAGCCT 79698

AsianBonytongue GATCTTTGTAGGTGTGACCCACACATG----AAAGTATGCGCCTGAAAGTGAAT-TCTGTGTGCCAGGCATTTCAAT 6726

Reedfish GATAATACAGAAATTATCAGT-GTATGGTA--ATAGTTAAGACATGTGTAACAATAACAGGTCAGAATGTTTCACAGC 37387

NorthernPike TGT-CCAATCAAATAGCCTATAGTTTACATATGAAAAGCTCTCTCTATGTTTTCCGT-TCTGATGGAGTGGTGAC---GC 11441

SpottedGar G-TGTCCTGGAGATCCATTGTCATTCTTAT---AAAATTTGAGTGAACCTGTGTAGTATTTTTGGGAGGAATACTCTGAC 10522

ParamormyropsKingsLeyaeG---GTCTGAAAATAAGT---GCACTTT---AAATTTTCAGTGTTCAT-CACAAC-CCTCAATGACACAAAT---AC 6064

Majority AATCGTGTAAT----ATTACCA--AATAATTTTTTTTGATAATT---TAATGTATTTA--ATACTAATGTAATATATTT

|  |       |       |       |       |       |       |       |       |
|--|-------|-------|-------|-------|-------|-------|-------|-------|
|  | 80010 | 80020 | 80030 | 80040 | 80050 | 80060 | 80070 | 80080 |
|--|-------|-------|-------|-------|-------|-------|-------|-------|

Human AGGCTTTTAATTCTCAATTACCATTATAAATTTATTTTAAATTTAACTAATTACTTTA--ATTCTCAATTACTATTTTT 79776

AsianBonytongue AA-TGTGTA-----TCAGAG--GATAAGCCTTCTGTGTTTT---CAATGATTTT-----CTCTAGAGTGGACTT 6785

Reedfish AGAAATGGAACA---AAATAACT--GCTCCTTTCCTTGGGTCATTGCATAATATATTGAA-ACACCAGTGCAGAGATTT 37461

NorthernPike GTTCATGTAAAC---GGCACCT---AAAAGCTGTCTCAAAGAACCAGCAAAGTAATGATTATGAAAATGTAATAATTT 11515

SpottedGar AACTGTATGCAT---TTTCACTA---AAAAGGATATTGGATATTT---CAAGACTGTTGC-AAAGTTGAAAAAAAACCTC 10593

ParamormyropsKingsLeyaeAATCGTTT-----TACCA--ATTA---TTAGTCCATAACT---TGAGGGACTG-----TAAGCCAGCCTCTTT 6120

Majority GCATGAAATGG--T-ATAGTCTGATT-----TGTATTTTCTGTTTTTTTTTA-TAGAAAGTTAATACTT-ATGAG--AAA

|  |       |       |       |       |       |       |       |       |
|--|-------|-------|-------|-------|-------|-------|-------|-------|
|  | 80090 | 80100 | 80110 | 80120 | 80130 | 80140 | 80150 | 80160 |
|--|-------|-------|-------|-------|-------|-------|-------|-------|

Human CCATGAAAAGGCTTGATGTTCTAAACAGTATTATAACCACCAAGTTATCTCTACTGGAAAACCCAGATTTCAAGAAAAAA 79856

AsianBonytongue GCATGGAA-----ACAGTGTGAA-----AGCTTTCCTGGTTTCTTTTG-TTGTCTTTCTCACTG--TGAG--ACA 6846

Reedfish GTGTTATAACGGAT-ATAATTTGTCTG---TGTAATTTGTTAATTTATTAA-TAAAAATGTCAGTAATTTCACTG--AAT 37533

NorthernPike CAATGAGACGTTTTAATTTGTTTATTAATAAACAAATGTTTTTTTTTGTGTTGGCTGCAAAGATGAAGTTG-ATGATACTGA 11594

SpottedGar TCATCAATTTT--C-ATACTCTGATT-----TGAATATTTCTAATACTTTTTT-AAGAATAGAAATACTACTTGTGA--CAA 10662

ParamormyropsKingsLeyaeGCTCCAGT---C-ACAGCCAGTC-----AGTGTATGTGGTTCGGTTTA-TAGTGAGAAAACACTC-----GGC 6181

Sunday, May 01, 2022 09:44 PM

|                         |                                                                                     |       |
|-------------------------|-------------------------------------------------------------------------------------|-------|
| Majority                | AAATTATTTTAAAAGTATTCATCAC-CATATATTACAAATTTTATTGTGCATAA-GTTGTCAGTCTTTACTTTAAGTCA     |       |
|                         | 80170 80180 80190 80200 80210 80220 80230 80240                                     |       |
| Human                   | AAATGATTTTGGAAACAATTATGTCTTAAATATTTAAATTTCTTTTAAACATGTTTTTAACCATCTTTAAATTTTTTTG     | 79936 |
| AsianBonytongue         | AAGATCATTTTAAATTTGTGTGATCA---GCAAACCTGC-GACGTTAAATGCTGAAA-GTCGGTAGGAACTACTTGAAGTTC  | 6921  |
| Reedfish                | GTGCCAGTCTTATTATAAGCAGTGC-CATATTTAGCAGCTTTCAGTTGAGCCACTATCTTAAGTCACTGCTTTAGGAGA     | 37612 |
| NorthernPike            | CCCCGCATCTTCGCAGAACGCGCCG---GAGAGTTATATACTATTTGTATAATAAATAATTTTGTCTAGTGACTAACAGGCA  | 11671 |
| SpottedGar              | AAAATTTATTTTCAAAGTATTTCTTTACTCATAAATTTACTAAAGGTGATCATAGCAA-GTTGTCACATGTTAAAATAAATCA | 10741 |
| ParamormyropsKingsLeyae | TTATTCCTCCACAATTGCAGTACATGCACATA-TACAATAATCCAGTGCCAGGG-GAAGCCCTTCTCTGGCCTAG--CA     | 6257  |

|                         |                                                                                   |       |
|-------------------------|-----------------------------------------------------------------------------------|-------|
| Majority                | TTAAGTAAAGTTCAATTGAACGTTAAACTG-ATTTTGTCTAGTATTTAAGGC-A-CTTATTATCTTCAGTTACTTTTTATA |       |
|                         | 80250 80260 80270 80280 80290 80300 80310 80320                                   |       |
| Human                   | GTAAGTAATTTTCATTAGATTGTTAAATGTATAGTGGCACGGTAGGGTTGTATCTCAAGATATGAAGCAGTTTTTTCATA  | 80016 |
| AsianBonytongue         | TTAAGCAGAGTGCCATTGGAC-TTAAACT---TCTGAGCTGAATCTGAG-----CCTAGAAAGTCCAGT-ACTTTTTAAA  | 6991  |
| Reedfish                | TTTGTAAACCTAGATGAAACGATTTGTTG-AAATTGTCTATTGTAAGAA-A--GATTTTCTTTTAGGTACTCCATCTG    | 37688 |
| NorthernPike            | ACAAAGAATGTCAAACACATTTGTGGCCTC-GTTTTTTCATAATTTGTTGCAAGTGGTAGATCTTGGTTTACATTTGGAC  | 11750 |
| SpottedGar              | TAAAGAGAAACAAAAGAGATCCTTTGACTA-ATTTTGCCTGCATTTACGGC-ATCTTATTTGCTTAAGTGATTTTTAATG  | 10819 |
| ParamormyropsKingsLeyae | TAGAATCTACCCCGTTACCC---AAACT---CCACACCAGTATGCAAAG-----AATAAGCCCAATTCCTTTGTCTA     | 6325  |

|                         |                                                                                    |       |
|-------------------------|------------------------------------------------------------------------------------|-------|
| Majority                | TTGTTGAATTGTCATACTTTAGCAGAGATGG--ATGTGACT-C--TTATGATCTAGCTTGATAAATTTGAATATGTTTGG   |       |
|                         | 80330 80340 80350 80360 80370 80380 80390 80400                                    |       |
| Human                   | AAAATAAAGTATTAACCTTAGGCTGGTATGTTTGTAGTCAACTACTGTATTTAAATAGATTGATAATTTTTTATATATTTTA | 80096 |
| AsianBonytongue         | C-----AGAAGCTACACATTAATAAAAAAAAAA--AAAAA-----AAAGAACTCCCTGTATAAATTTGACCATATGAAG    | 7057  |
| Reedfish                | GAATTGTACCTTCTTACTCTAGCGGTGGTGG--ATTTCCAT----CTTCCCTGGCTTTGCTCAATCTGCAGGTGCCTAA    | 37762 |
| NorthernPike            | TTGGGATGTGATCTTAGGCTTGAAAAGGTTG---GTGACC-----TCTGCTTAACCAGAATAAAAAGAGTGGGAGGCC     | 11821 |
| SpottedGar              | TTGTCGAATAGCCAGAACTTAGAAAAGATGG--ATGAGATTTCTATGAGAAAAGGACTTTTAATATGTAATATATTTATT   | 10897 |
| ParamormyropsKingsLeyae | CT-----TATGTCACAAATTAGCTGAGTTGG--ATGTTACCTCCACCAAGGTCAAGCTTGCATCAGTTTTGCTTGTCTGAG  | 6398  |

|                         |                                                                                   |       |
|-------------------------|-----------------------------------------------------------------------------------|-------|
| Majority                | TGGTTTTATAATTTATGAAAAAATAAAAATTATTTTCATTGAGTTGGAGACAGATATTTGTTTTAGATTCTTCACGTGTTG |       |
|                         | 80410 80420 80430 80440 80450 80460 80470 80480                                   |       |
| Human                   | TGAATTTATACTTTTTCTGAGATTTTCAGGAGGGAAAAATGAGTAGGAGATGACTGAGAGCTTAAAGTTTGGGAGTGTC   | 80176 |
| AsianBonytongue         | GGGTGCTGAAATAAAAAAAAAAAAAAAAAAGAATTTGACCAAGCTAAAGAAGAATATTTATTTTAAACCTTAACACTTTG  | 7137  |
| Reedfish                | TGTGTTTTACATTGTATGAAAAACAGTTTTTCATTACAA-ATGTTATCATATGCAACTTTTGTATGTTAATCACCAGTAG  | 37841 |
| NorthernPike            | CCGGTGCACAACTGAGCAGGAGAATAAATATTAGTGTCTAGTTTGAGAAACAGATG-TCTCACAGATCCTCAACTGGCAG  | 11900 |
| SpottedGar              | TTTTTTTACAGCTAATGAAATGATAGCAAAAAGTTAA--GAGTTGAAGACAGA-ATGGATTGTCCCCCTTCACGTGTTT   | 10974 |
| ParamormyropsKingsLeyae | CAGACTGGTGCATTCTGGGATACACTATAGTTCTCTCTTTGCTCTGGCAACAGG---TGAAGTTG--TTCTTACACTTT-  | 6472  |

|                         |                                                                                  |       |
|-------------------------|----------------------------------------------------------------------------------|-------|
| Majority                | ATTACTTTAG-AT--TTTTTAATAAATATTCGT--A-----ACATTATTAGTTTTTGTTAGGCGTTTGTGAATGTAAGT  |       |
|                         | 80490 80500 80510 80520 80530 80540 80550 80560                                  |       |
| Human                   | ATTAACCTCAGCAT--TCTTTTAAAAACATGTGTATATATTACAGCATTTCCTTTTATTTTGAAGTGAGTAAATGTATCT | 80254 |
| AsianBonytongue         | ATCACTTTAA-----TTGCTATATAATTTTT-----TTATTAATTTTGGTAATGAAGGTGGATATGTAGCT          | 7198  |
| Reedfish                | GTTAGAGTAGAGTTATTTTTAAATGTGCATACAATTGTGATCATATTATAAGCTGCTGTCAGGGCATTCAAATA-AACT  | 37920 |
| NorthernPike            | CTTCATTAATAA---TACCCGCAAAATACCAGTCT-----CAACATCAGTTGTTAAGAGGCAACTCTGGGAT--GCT    | 11968 |
| SpottedGar              | TCCACATCAGGAA-GCTGCCCAATGAAGTTACAG--AGACAGAAGTTATTGCCTTGGGTTTACCCTTTGGGAAAGTCACT | 11051 |
| ParamormyropsKingsLeyae | ATCATGCAAC-----T-TTTTTATCATTTATC---A-----TTGTTGCTCCATGACATGTTTTCTGGACCTAAAT      | 6533  |

|                         |                                                                                  |       |
|-------------------------|----------------------------------------------------------------------------------|-------|
| Majority                | ATCT-----TTCGTGATAGTTAAGAAGTAAA-ATCGGTAATCATGTCAATTTTGATTTTTATTGTTCT--GAATACA    |       |
|                         | 80570 80580 80590 80600 80610 80620 80630 80640                                  |       |
| Human                   | TTTTAAATTCCTTAGTAATTTTTGAGCACTCCATATGTATAAAGCATGTGAATATTTGGTAGCATTTTACAA-ATGTCCA | 80333 |
| AsianBonytongue         | AAC-----CAC-TGACAGCAAAAAGGTAAG-ACAATTAAGCAAGTTAATGTAGATTTTAACTGGT---GGATACA      | 7264  |
| Reedfish                | AGCT-----TTATCTGCAACAAGAATTACC-AGTGGAAAATTTAGCCAGTCAGCAGTTATGTTGAGCT--ATATCCA    | 37990 |
| NorthernPike            | GGCC-----TTCTAGGCACAGTTGCAAAGAAAA-AGCCGCAACTCGGACTGAGTCAGACTGAGATGGGCAAAAAGAAAAA | 12042 |
| SpottedGar              | AACA-----TTC-TCATGCTTAAAGGAAAAA-ATCAGGTGTGCTTGTCACTTGTGTTTTTTATTATTTTGG-GAAAAA   | 11121 |
| ParamormyropsKingsLeyae | TTTA-----TGCATGATCGTGAAGATGCAACCACAGTTGGTTCGGTTCAGTTTGGAAAG--GGTTGACAT--GAAAAA   | 6602  |



Sunday, May 01, 2022 09:44 PM

|                         |                                                                                  |       |
|-------------------------|----------------------------------------------------------------------------------|-------|
| Majority                | GATATTTGTGTTTGTGTTTCACTGACTGTCTTAGGT-----CAGTCTTGTAATAT-ATTTTATGTTACT-----CGTG   |       |
|                         | 80650 80660 80670 80680 80690 80700 80710 80720                                  |       |
| Human                   | GAGATTTGTGAGAGTTCCTGAGATCTTCATAGGGGGCCCAAAAGTTTAGTAT-TAC-TTTTCACGGTAATACTAAAGTG  | 80411 |
| AsianBonytongue         | GT-----ACACGTACCAGCTCA-----CAGCCTTGCAA-TAT-ATCATACTGTTAC-----CATA                | 7311  |
| Reedfish                | TCTAAATCAGTGTCTCAACCTCGGTCTGGGGA-----CCCCCTGAGGC-TGCAGGTTTTTGTTC-----AAC         | 38055 |
| NorthernPike            | GACACTTTATTTTGTGTTTACTGCCAGAAACATATAGCCTTTTATTTTTTGTAAACGGAAAACCAATCGCGTTTATGGTG | 12122 |
| SpottedGar              | GATCTTCGTGATTCTGACATGTATTGTTTCAAGT-----TAGTGTATAA-TATTATTTAAAGTTACTTGGTCTGA      | 11192 |
| ParamormyropsKingsLeyae | GT-----CAATGACTGTCTG-----GCCTGACAC-CAA-GCTTCTAATGGG-----                         | 6643  |

|                         |                                                                                    |       |
|-------------------------|------------------------------------------------------------------------------------|-------|
| Majority                | TATTTTGCCTATTTTTTGTCT-TACACTTAAAAC-ATA-AGTGG-AACTGTCAGCTGGTATCAATGTTTTTTTTATCTTGCT |       |
|                         | 80730 80740 80750 80760 80770 80780 80790 80800                                    |       |
| Human                   | TATTTTGCCTCTTTTTACTTTTTCTCTTAATAGCATAACAGTGGTAACTGAAGGCTAATAGTA-TGTGTGTTTAT-GTCT   | 80489 |
| AsianBonytongue         | TATTATGTCCATATATTGC---ACAGTT-----GCAA-AGCTCTCAGCTGACATCAAAGTATGCTTGCATTGCT         | 7376  |
| Reedfish                | CAGATTCTTAATCAGTGACAACAC-CTGATAGCACTGATCTCA-TTTAATTAGATGGTATTATTTTTCTTTTATCTCGCA   | 38133 |
| NorthernPike            | TACTCCTCCCTCCTTAAGTCTTGACACCAAACCTGATAGTGGAAACAAAAGTCTGGAGCCAATATTCACATAAATCACC    | 12202 |
| SpottedGar              | TATTTTGTTTTTTTTCTCCTGAATACTTTAGCTGAAAGAGTGA-AACTGTCAGCCATTAGCAAGAATTTTTTATTTAACT   | 11271 |
| ParamormyropsKingsLeyae | GTTCTGCGGATTTGTCAG-----GTAG-AGCAGTGAGCTGGTGTCTACTGTCCCACGGCCGTATC                  | 6701  |

|                         |                                                                                  |       |
|-------------------------|----------------------------------------------------------------------------------|-------|
| Majority                | TT---A-A-CGTAGCTGTAGGCATTCATAATTGGTAAGGCCTTTTTGT-A-AGTACT--TTTTTCAATAGAAGTAAGTGC |       |
|                         | 80810 80820 80830 80840 80850 80860 80870 80880                                  |       |
| Human                   | TTAAAAGTTCGTGGTTTTGGCCAGGCGCAGTGGCTCAGACCTGTAATCCCAGCACT--TTGGGAGGCTGAGGCAGGTGG  | 80567 |
| AsianBonytongue         | T-----CGTAGCTGTAACCCCTTCATAGTGTGTAGTGTATTCTCT-----GGAAGAAGCAC                    | 7426  |
| Reedfish                | TTCAGAAAAGCACAGCAGCATGATTTTTACATTTATAAGACATTTAGAAAATTTCTGCTTTTTCTATAGATTTAAATGC  | 38213 |
| NorthernPike            | AGTGTGACCCTGGTGCCGGGTAAAGCACCAGTGGAAATGCTGCATGAGTGACCCCAAACCTTTTGAATGGTAGTGTATGG | 12282 |
| SpottedGar              | GA-----AATAGACCTTTAAACATTCAAAATAAGTTTGGCCATCTTTTA-AGTAGTGAATGGACAACAGAAGGAAATGC  | 11344 |
| ParamormyropsKingsLeyae | T-----GTTATAAAGAGGTGTCTTTGCTTGGGCTAAGCCTGTGC-----GAATCAGGTAC                     | 6751  |

|                         |                                                                                   |       |
|-------------------------|-----------------------------------------------------------------------------------|-------|
| Majority                | TTTATTTTATTTTTGGCGTT-TTAGAGTTAAACATTTCTTGCTATGTAGT-TCTTCCCTTTTCTGCTAATAGTATTAAT   |       |
|                         | 80890 80900 80910 80920 80930 80940 80950 80960                                   |       |
| Human                   | ATCACCTGAGGTCAGGAGTT-CAAGACAAAACCAGCCTGGCCAACATGGTGAACCCCATCTCTACTAAAAATACAAA     | 80646 |
| AsianBonytongue         | ACTAATTCATTTTT---T-GCACAATTAAGCATT-----TGCATT-TCTTCACGTTACAGCTAATGGAAATGAC        | 7491  |
| Reedfish                | TTAATACTCTTTTGTGATT-TCATCATATTTTGCCCTTTCTCTGTGCAGT-TTTTCCCTTTGT-TTTATCTTATTAAT    | 38290 |
| NorthernPike            | ATGAAAGCAAATTCATCTCTATTGAACCAAAACATTGAGAGAATTTCTAAAGCCCTAATTTGTTGTTGGGAGAGTGTCAAT | 12362 |
| SpottedGar              | TTTTTTTTTTTTTTGGAGCT-GTAGAGTTAAATTTAGATATTCATGTATG-TCTTCATTTTCCC-CCAACAGGCCTTCC   | 11421 |
| ParamormyropsKingsLeyae | CTGTTTGACATGCCGCA-T-TAACGGCTTTGCACCTC-----TGCTGT-AATCACCATCACAGCTAATGGAAATGAT     | 6821  |

|                         |                                                                                  |       |
|-------------------------|----------------------------------------------------------------------------------|-------|
| Majority                | ATTAATT-GAAATTGA-GAGTGAAGACT-ATGGTGGACGCCACTCACTCTG-----CTGTGGCATC---CACATTAGTA  |       |
|                         | 80970 80980 80990 81000 81010 81020 81030 81040                                  |       |
| Human                   | ATTAGCC-AGGCATGG-TAGTGGGTGCCT-GTAGTCTCAGCTACTCGAGATG-----CTGAGGCAGGAGAATCACTTGAA | 80718 |
| AsianBonytongue         | AGTAA---AAAATTAA-GAGTGAAGAA--AGGATGGACTGCCCTCCCTC-----CCGTGTCATC---CACATCCGTA    | 7555  |
| Reedfish                | GAGAAATAAAAATGAG-CAGCGCAGACACTGGCAAACAAAACCTGAATAAG-----CAAAGGCTGCATCTACTTTAGCA  | 38364 |
| NorthernPike            | GTTAATCTGAAATTGCTGAATTCAAAACCAACGGCTGGTGCACCAACTGTGAAAGTCTGTGGCACC---AGCTTCACTA  | 12439 |
| SpottedGar              | TTGAACTTGAAGTGA-GGAAGCAGCTATTACAATGGTTAACTATTACACAG-----CTGTGACTCT--CATGTTCTGA   | 11493 |
| ParamormyropsKingsLeyae | AGCAA---GAACTGA-GAGTGAAGAC--AGAATGGACGCCACCCCTTC-----CCGTGTCCTC---CACATAAGGA     | 6885  |

|                         |                                                                                   |       |
|-------------------------|-----------------------------------------------------------------------------------|-------|
| Majority                | ACGTGCCCATTT-TTATGAAGT-ATTCGATACAGAGCAATTT-A--ACAGTCATTGC-ATA--A-ACTGGGCTTGCCCTCT |       |
|                         | 81050 81060 81070 81080 81090 81100 81110 81120                                   |       |
| Human                   | GCTGGGAGGTGGAGGTTGCACTGAGCCAAAATCTCGCCATTACACTCCAGCCTGGGGGACA--AGAGCAAGACTCCATCT  | 80796 |
| AsianBonytongue         | AATTGCCCA-----ATGAAGT-CTCCGAGACGGAA-----GTCATTGC-----ACTGGGCTTGCCCTTT             | 7607  |
| Reedfish                | TCGGATCCACTAATTAGTAAAT-AATGGATTAATTAACAATTAGAACACCTAGAAAAGTA--G-AATGAAAAT-CAAGA   | 38439 |
| NorthernPike            | AAGTGAAATGTTTGTCTGGAGC-CCTGGATAAAGAGCAATTTGTTCAAATTCACCCACAAAGCAAAAAAGCCTAAGACT   | 12518 |
| SpottedGar              | ATGTGCCCGTTT-TCATCCAGT-ATTCAAATCACAAAGAATTAAGACTGACAATGCTCTT--A-ACCAGGTATGTTCCG   | 11568 |
| ParamormyropsKingsLeyae | AGCTGCCCA-----ATGAAGT-TTCCGAGACGGAG-----GTCATCGC-----CTTGGGCTTACCTTT              | 6937  |

Sunday, May 01, 2022 09:44 PM

|                         |                                                                                  |       |
|-------------------------|----------------------------------------------------------------------------------|-------|
| Majority                | TGGGAATGTTACAAATATC-ATAT----CTAATGCTTCCAGGAAATAACCAGGTATCTAATTGGTCTGTTGTCGAGATTT |       |
|                         | 81130 81140 81150 81160 81170 81180 81190 81200                                  |       |
| Human                   | CAAAAAAAAAAAAAAAAAAGTTATTGGTTTTAATTTTGGAAATGACAACCATTAATAGAACCCACATTAGGCCGGGCGCG | 80876 |
| AsianBonytongue         | TGGGAAAGTTACAAATATC-----CTGACGCTAAAAGGAAAAAATCAGGTGCTTGGCTTGTCTGTGAAGCAGCTTT     | 7678  |
| Reedfish                | TGAAAATATTGTTAAAAAGAAAAAAT-ACATTATTCCCATATAACGTCTTGGTACAT-TTTAATATACAGTATAGATAT  | 38517 |
| NorthernPike            | CAGGCCTGTTTCGATAGTTTCTCTCT---GTAATGACTCCAGGCCTTGCTGACTGTCTCATCAGTCAGTTTTAGCGGTGC | 12594 |
| SpottedGar              | CTAGATTGCTAAAAATGACTAGGACAG-CTAACTCCACCTGCATCTAAAAAGACCTCAAAGTGGTGTGTAACCTAATTA  | 11647 |
| ParamormyropsKingsLeyae | TGGGAAGTCCACCAATATC-----CTGATGCTTAAGGAAAGAATCAGGTAC---GTCGGTCTGCTG-CAAGATGT      | 7004  |

|                         |                                                                                  |       |
|-------------------------|----------------------------------------------------------------------------------|-------|
| Majority                | GTGTATCTTGTCTTTCTT--AA-----TTGTTTGTCAAGATTCGGT-ATATGGCCAAATCAGA---CTTGGGTCATGAC  |       |
|                         | 81210 81220 81230 81240 81250 81260 81270 81280                                  |       |
| Human                   | GTGGCTCATGCCTGTAATCCTAGCACTTTGGGAGGCCGAGACG-GGT-GGATCACGAGGTCAGGAGATCAAGACCATCTT | 80954 |
| AsianBonytongue         | CTGTACAATGCATTTCTG--AA-----TTGTTAGTTAAGATAAGGTAAAGTAATCAAATCAGT---CTTGAGTCTCTCC  | 7747  |
| Reedfish                | ATATATTTTTTCTTTTT--ACCAAGCTTAATTTCTAATTTCTATATTATCCCAAACACAGAACTTGGGAAATAAC      | 38595 |
| NorthernPike            | TTGGAGCATGTCAGCCACCAACTGCAGCCTAACGGACAGAGGACAGC-TCAGAGCCTACCGGGAAGCACTGGGGAATCC  | 12673 |
| SpottedGar              | AGGAATGTCGTATTTAT--AA-----TGGTTTCTTAAGATT-GGTGAATTGTGTTAATCCCG---CTTGCGTCATGAC   | 11714 |
| ParamormyropsKingsLeyae | CACCTTATCTCTATGCT--GG-----ATGTCATTCTGGGCTCCGT-ATCTGGCCCCGTAGTA---ATAGAG--ATGAT   | 7070  |

|                         |                                                                                  |       |
|-------------------------|----------------------------------------------------------------------------------|-------|
| Majority                | TGATAAATT--TTTGCCCTGGATTCT---GAAAA--GCAACATTAGCTTGTATGTAATACTGAATTTTATAGTCAGC-G  |       |
|                         | 81290 81300 81310 81320 81330 81340 81350 81360                                  |       |
| Human                   | GGCTAACACGGTGAAACCCCGTTTCTACTAAAAATACAAAAAATTAGCCGGGCGTGTGGCGGGCGCCTGTAGTCCCA-G  | 81033 |
| AsianBonytongue         | T-ATAGACT--TTTGAATTGG-----GAACT---GTCACCTTAACATGAAGTAAAAATTAATTTTGTCTTCAG---     | 7810  |
| Reedfish                | AGTTCACTTAATTAGCCAGGAGTCCAATTAATA---ACAGAAGCTGGTTGGAACAAAAACCTGCAGCCACAGTGGGTCC  | 38672 |
| NorthernPike            | AGATGAAATGACATGTCTGACATCTT---GAGACTCTGCAAGATTAAGTACGAAACTAGAAAAAGAACCAACCTACCT   | 12750 |
| SpottedGar              | TGATACATT--TTCACGGTAGCGTCTTCAAAACT---GTTATATCTGTTAAATGTACATAATGAGCTTAAAAGTGAAA-- | 11787 |
| ParamormyropsKingsLeyae | --TGATG--TCCACCCGGG-----GAGA---GCCACAGC---TAATGCATATGCTGCATTTTTATGCCAAGCAG       | 7130  |

|                         |                                                                                  |       |
|-------------------------|----------------------------------------------------------------------------------|-------|
| Majority                | GCATTTTTGAGGCTGGG-----GT-----TGACAGAGC-TTGAGGCAGCCGTTACCATGGTGAATTAT             |       |
|                         | 81370 81380 81390 81400 81410 81420 81430 81440                                  |       |
| Human                   | CTACTTGGGAGGCTGAGGCAGGAGAATGGCATGAACCTGGGAGGCGGAGCTTGCAGTGAGCCGAGATCACGCCACTGCAC | 81113 |
| AsianBonytongue         | GCCTTCTTGGAGCTTGG-----GACAGAG---GAAGCAGCCATGACAATGGTCAACTAC                      | 7861  |
| Reedfish                | CCAGGACCGAGGTTGAGAAACTGATCTAAATGGT---GTTGGTATAGC-TTGTATAGTAGTGCCCAAAGTGAATTAT    | 38748 |
| NorthernPike            | GGTGTTTTATGTCTCCCTCCA-----T--TTCCT---CAAAGTGCATAGAGGCTGTATTTTCATTTGCTTTTTTAA     | 12818 |
| SpottedGar              | GAACTATTTACATTTGAT-----GC---AATGACAAAATACTGAGGAAAGTGTACAAATAAAAATTAA             | 11848 |
| ParamormyropsKingsLeyae | GCATTCCTGGAGCTGGG-----GACAGAG---GAAGCCGCCATTACCATGGTGAATTAT                      | 7181  |

|                         |                                                                                     |       |
|-------------------------|-------------------------------------------------------------------------------------|-------|
| Majority                | TACACGGTTGTTGCCACT--GACACCTCATGTCTGT-AAATGAAGATA-AATATACCAGTCTTTATTTATT---ACTC--    |       |
|                         | 81450 81460 81470 81480 81490 81500 81510 81520                                     |       |
| Human                   | TCCAACCTGAGAGACACAGCGAGACTCCGTCTCGAAAAAAAAAAAAAAAAAAAAAAAAAAGAACCCACATTAACAAAACTCCT | 81193 |
| AsianBonytongue         | TACACAGCTGT-----GACACCTCATGTTCGT-AA-----CGTTCCTGTTTTTATTTCAGT---ATTC--              | 7914  |
| Reedfish                | TATTCATTATAACATATGACATAAACAAAAAATTAAGTAAAAATATTATACACAAGACTTTATTTGTTTT-GCTC--       | 38825 |
| NorthernPike            | TGGGCTCTGCTTGTGCA--AACGGAACATGTCTGT-TCTTGGAGAGCCATAACCATAAGCCTTTATCTATTT--GTTTCT    | 12893 |
| SpottedGar              | CGAATGTTTGTGTTGCAATTCGACACCTTTACATGT-AACTGGATAGAATATAATAGAAGTATTTGCA---AATA--       | 11922 |
| ParamormyropsKingsLeyae | TACACGGCCGT-----GACACCTCATGTCCGC-AA-----CGTCCCCGTCTTACATCCAGT---ACTC--              | 7234  |

|                         |                                                                                  |       |
|-------------------------|----------------------------------------------------------------------------------|-------|
| Majority                | ---GATTCTCAATTATCTGAAGACTGACAATG-----CCATCAACTAGGTAATCTTTTACTGTAAAGACTGTGTC      |       |
|                         | 81530 81540 81550 81560 81570 81580 81590 81600                                  |       |
| Human                   | TGTGATTCTCCATAGTTTTAAGACTATAAAGGGGAGCTGAGACCAAAAAGTTTGAAGACTTTTTTACTGTGGGATACAAA | 81273 |
| AsianBonytongue         | ---AAATCACAAGAGCTGAAGACTGACAATG-----CAGGAAACCAGGTAAGGTTTTACTATAAAAGCACATC        | 7981  |
| Reedfish                | ---AAATTTAATTTCCAAACATCACAGT-----CAAACAATAATTAATGTGA-ATGTACGAAGACATAAC           | 38890 |
| NorthernPike            | TGTTTTCTCCTTTCTCCAGAGAGGATCTGATG-----AGCTGTTATCAAGCAGTCTCT-ACAACAGCAGCTCTGAC     | 12963 |
| SpottedGar              | ---GTTTCTCAATATGTGTGTGCTAACCTG-----CAATGGACT--GCCGTCCCTTCCAAAGTGTAGCCTGTC        | 11987 |
| ParamormyropsKingsLeyae | --CAATCACAAGAGCTGAAGACCGATAATG-----CCCTCAACCAGGTGAG-----AGGACCAGTC               | 7289  |

Sunday, May 01, 2022 09:44 PM

| Majority                | CT-----ATATCTGTGGTTAGTTTATCTGGAA-TGTGTGGTGCTCCAATTATCAGTATTTGA-AAGATGTTTAAATAGAA  |       |
|-------------------------|-----------------------------------------------------------------------------------|-------|
|                         | 81610 81620 81630 81640 81650 81660 81670 81680                                   |       |
| Human                   | GTTGAAGACAATTATAGTTAAATAAGCAGGAGATACAGAGTATTTTAAATGAACAGTAGATGGTTATAAGAGTCAAGAGAT | 81353 |
| AsianBonytongue         | CA----CACATTTGTCATTAGTT-----AA-----GAGCGGCAGTTATC-----AAATATCCCAATACCA            | 8032  |
| Reedfish                | AA-----TTTTCTGAGCTTTGCTGATATAGAATTGCTTGGTTATACAATTACTGGGATTCAA-AAGATGTTTATACAGTG  | 38964 |
| NorthernPike            | ATGAGCAGTATCAGTGGTAAGCTTTTTTTTTGGGGTGGGATCCCCCTTTTCTCACTCTGTCA-GCCCAGTCTAAATGGAG  | 13042 |
| SpottedGar              | TTGTGTTTTGTCTGCCCTTTGTTTCGCTGCAACCCTGTTGTGTCTCCAATCGTCTGTATTGGACAAAGTGGTTAAGAATAA | 12067 |
| ParamormyropsKingsLeyac | CG-----A-GCGTGAAGGCAGT-----G-----TCATC-----AGAGG--CTGGCATAA                       | 7325  |

| Majority                | GTG-AGTGAATATGT-TGTGTTTTGAGGATTTGTAATTATAATCATTATATAGTTTTTTAGTTGTTTCTACTTTTGTATGTT |       |
|-------------------------|------------------------------------------------------------------------------------|-------|
|                         | 81690 81700 81710 81720 81730 81740 81750 81760                                    |       |
| Human                   | GTACAGAGAAAATGCTAGTGTATTAGAGTTTTT-AGATTATTTTAAATTTTGGTAACTAATTATAATTCCTCAGTTAAGATT | 81432 |
| AsianBonytongue         | GTG-TGTACCCA-----ATCCAGAGGTGCTCTAGTGAAAATGGTC---AGAGGTTTAAAGCTGATTCCACCTTGCTGTT    | 8101  |
| Reedfish                | GAGGAATAATTATTTGATCCCCGCTGAATTTGTAAGTTTGTCTCACTTACAAAGAAATGAGCAGTCTCTATTTTTATGGT   | 39044 |
| NorthernPike            | ACTTCATGAATGTAT-TTTGATCGGCAAGACAATAAGCAGAAGGATTAATGTATTTGTACGTATTCCTGCGGGGGGATA    | 13121 |
| SpottedGar              | GTG-AATGGACACGGGTGTATTTTGAGACTTGTATTGAAAACCTTTTCAAAGTTTTTAGATGTTGGCATTTTGAAGTC     | 12146 |
| ParamormyropsKingsLeyac | GC--CGTAGCTA---TGTTCTCTGAGGAGC--TGGTCATGCTCGTTTGTTCAGTTCTGTCGTTTTCTTCTCCCTCGTC     | 7397  |

| Majority                | TTTTTG-ATTTTAAATGGAAGCGTGCACAAG-TCAGTCC-----ATCCAGGCTGTACACAGCTGTCCAGGCAGGTGGTAC |       |
|-------------------------|----------------------------------------------------------------------------------|-------|
|                         | 81770 81780 81790 81800 81810 81820 81830 81840                                  |       |
| Human                   | TTTTTG---CTTAGTGGGCCCTTAGAATTACTTCTTCTGTTAGAATTAAAAGTGAACCAGAAATTAAGTGATTTAAT    | 81509 |
| AsianBonytongue         | TTTTG---TTCTGTGGAAGCGTGCACAGG--CTGTCC-----TCCAGGCGGTCTCAGCGGTTCCAGGCAGGTGGCAC    | 8167  |
| Reedfish                | AGTTTC-ATTTTAAATGGAGAGAGACTCAATATCAATCAAA---AATCCAGAAAAAACACATTACATAAAAATTTGTAA  | 39119 |
| NorthernPike            | TTCCGATCTAAATAACTTCAGGCTCTGCATTAGTTTGGCACCCACACACAAGCTAGCATGTTACTGGAATAGTGATGC   | 13201 |
| SpottedGar              | CATTCA-ATTTTCATTGTAGCGTGCAGCAAG--CAGTTC-----TTCAAGCTGTAAGTCTGTCAGGCAGCCAGTAC     | 12215 |
| ParamormyropsKingsLeyac | ATTCT---GTCTTTGGAAGCGTGCACAAG--CGGTCC-----TCCAGGCGTCCAGCTGTCCAGGCAGGAGGCAC       | 7463  |

| Majority                | TCTGTTTTCGGGGACGACTGCTAGTGAGAGTGCG-----TT-----GACTCC---AGCGCCAAGTCTAGTGCTCA-AGAAT |       |
|-------------------------|-----------------------------------------------------------------------------------|-------|
|                         | 81850 81860 81870 81880 81890 81900 81910 81920                                   |       |
| Human                   | TTTTTTATTGTGGCAAAGATCTAGTCCAAATATC----TTTGATGGACTTTTTGAAAACAGACTTTATTGTTAAAAAGGG  | 81585 |
| AsianBonytongue         | GCCCTCTACGGGACGACTGCCAGTGAGAGCGCC----TT-----GACCCC---CGCACCAGCCAGTGTCTCA--GAAT    | 8233  |
| Reedfish                | ATTGATTTGCATGTCAATTGATTGAAATAAGTAT-----TT-----GATCCC---AGCCAGAATACTGGCTCCACAGATT  | 39186 |
| NorthernPike            | TGTGTTCTCTAGGAGGATTTGTCTTTTTAGCACGACCGTGTCTAATCTTTTTAAAGAGGAAAGTATGGTACGTT-AGATC  | 13280 |
| SpottedGar              | CCCAACATCAGGACTACAGCAAGTGAGAGTGCA----TT-----AACACC---AGCTCCAAGTCCAGTGTCTCA--GAAT  | 12281 |
| ParamormyropsKingsLeyac | CCGACGTCGGGACGACGGCCAGCGAGAGTGCG----CT-----GACGCC---GGCGCCAGCCCCGTGCTGC--GGAT     | 7529  |

| Majority                | AATT----AT-TGACA----ATATGTTCTA-----TCCTGTCACTCTGGATGTTCTTCAA-CAGGTATGGCTTTAGTTGT  |       |
|-------------------------|-----------------------------------------------------------------------------------|-------|
|                         | 81930 81940 81950 81960 81970 81980 81990 82000                                   |       |
| Human                   | AATTTGAGGCTTGGTACTGAACCTTCTTCTGCATGCCATATGAAGTTGGTGGTTTTTTGT--TTGTTGGCATCAGTGGG   | 81663 |
| AsianBonytongue         | AATC----AT-TGACA----ACATGTTCTA-----TCCCGTCACTCTGGATGTCCTTCAA-CAGGTACAGGCTGCAATT-- | 8296  |
| Reedfish                | GACT---GTGTGCC---ATATGGCACACAGATTACAATCAGTCAATCAATCAATCAATCACAGATACTCCTGATCTC     | 39258 |
| NorthernPike            | CTGTGGAGATGTTTCATCAGTGTTCATTTTA-----TTCCAAACTTAAAATATTTTGCATTAAGATCCTAATTAGGTTGT  | 13355 |
| SpottedGar              | AATC----AT-TGACA----ATATGTTTTA-----CCCTGTTACACTGGATGTTCTTCCAG-CAGGTAAGTTGGTATTTTA | 12346 |
| ParamormyropsKingsLeyac | AATC----AT-CGACA----ATATGTTCTA-----TCCTGTCACTCTGGACGTCCTTCAA-CAGGTATGGCACTCGTGGT  | 7594  |

| Majority                | CACTCATTATTTCTATCAACTTTAA--G--TGGTTA-----TGTTTATCTTGA--CGTT--AACTTTTTACAGGAAGC   |       |
|-------------------------|----------------------------------------------------------------------------------|-------|
|                         | 82010 82020 82030 82040 82050 82060 82070 82080                                  |       |
| Human                   | ATCTCATACAGACTATGGAATTTAATAGAATTTTTAAGATACTGTTTTTCTAAAAGGTAGCTAACTAAAGGCAGGAAAA  | 81743 |
| AsianBonytongue         | -----ATTTCTGTTTCCCTTC-----C--CTA-----CCTTTATCCTG---CAC---AACTTTTTACAAAAA--       | 8346  |
| Reedfish                | AACTCATTATGTGTATAAAGCAGCCTTG--TCCACA-----GAATCAATTTCTTCCATTCCAACCTTCTCCACCACCATG | 39330 |
| NorthernPike            | CCTAGCCTAATGTTTTAGCTTTAA--A--CACGTATTGGTGGGACTGACTCAATGTGTT--GCCTTCTCCTGAACCTAAC | 13429 |
| SpottedGar              | TACTCTTAACTTTTGTCTGGTTTA-----TGGTTA-----TTTTTAACTTGA--CATTA-AATTTTATTTAGGCAGT    | 12411 |
| ParamormyropsKingsLeyac | CATGCGCCCTCGCTATAAACCACAGAGG--CGGCCG-----CGTTCGTCTTCT--CGT---ATGTGCGGATAGGAAGC   | 7660  |

Sunday, May 01, 2022 09:44 PM

| Majority                | -TTGAAAGATCTAAGAGTTAGATGACATTTTTT-TGACTTGTGTTTTTA---GTACAAGC-TGTATTGGA----G-TGTC  |       |       |       |       |       |       |       |       |
|-------------------------|-----------------------------------------------------------------------------------|-------|-------|-------|-------|-------|-------|-------|-------|
|                         | 82090                                                                             | 82100 | 82110 | 82120 | 82130 | 82140 | 82150 | 82160 |       |
| Human                   | -TAGAATGATGTAACAATAATAATGACTACATCTGGAGTTTCTGCTACTA---ATAAATAATTGTATTGTCAACTTTAGTC |       |       |       |       |       |       |       | 81819 |
| AsianBonytongue         | -----AAATCTAA---CAGATGTCTTTTGCT-TGATTTTTATTTTAA---TAGCAAGC-TGTGCTAG-----GTC       |       |       |       |       |       |       |       | 8403  |
| Reedfish                | --GGCAAGACCAAGAGCTATCAAAGGATTTCCAGGACAAGATTGTAGACCTGCACAAGGCTGGAATGGGCTACAAGACC   |       |       |       |       |       |       |       | 39408 |
| NorthernPike            | TTTTAATGAGTTGTGAGTTTAGTTACATGCTTT--AACTTTGGTACTCA--CCACTACAT-TGTGAGAGA---GCATTC   |       |       |       |       |       |       |       | 13500 |
| SpottedGar              | GTTCTTAGATCCCAAGCACAGGTACCATTTTTTATGTCTTGTCTTTAA---GCACAAGAGTGAATCAGA---GGTGTC    |       |       |       |       |       |       |       | 12484 |
| ParamormyropsKingsLeyae | CAGACGGGGCTGAGGACTGCAAGGCAGTGCTA--GGCCTGGGTACTTA---GTTTATGC-TTTACCAGAA-----TTTC   |       |       |       |       |       |       |       | 7727  |

| Majority                | ATGAAGTCT---CAGTTGTTAATG-----TTATGTGCATAGTTTGACAGATATTTTCAAATG---GAAGACAGTTTT    |       |       |       |       |       |       |       |       |
|-------------------------|----------------------------------------------------------------------------------|-------|-------|-------|-------|-------|-------|-------|-------|
|                         | 82170                                                                            | 82180 | 82190 | 82200 | 82210 | 82220 | 82230 | 82240 |       |
| Human                   | AAATATTCTGTGCATTCAGTCAGAG-----CTATCTGAAAATACTGACGAATAGTATTACAATATGGGGAGGTCACTTCT |       |       |       |       |       |       |       | 81894 |
| AsianBonytongue         | AACCAAGACT---TACTTTCAAAT-----ATTCAAAGAATTTTTTCGAAAT-----AACATTATTTTC             |       |       |       |       |       |       |       | 8457  |
| Reedfish                | ATCAGCAAG---AAGCTTGGTGAGA-----AGTTGAGAAGTGTGGTGTGATTATCCAGAAATG---GAAGAAATATAA   |       |       |       |       |       |       |       | 39476 |
| NorthernPike            | AAGTGGTGTGGGAGTTTCTCAATCGGCCCTTGCTCACTTGGTTTGGCTACACGTAGTAACTATAGAAACATGTCACTTTG |       |       |       |       |       |       |       | 13580 |
| SpottedGar              | ATTAATGT---AGCTTTTCTAACC-----AGACCTGTTTCAATTGACAGATATTTTCAAATTT---TGAACTGTTAT    |       |       |       |       |       |       |       | 12552 |
| ParamormyropsKingsLeyae | ATGGTGTGCG---CAACCAAATGGAG-----TTAGGGACAAAGGATAGCAGATAGTGCCAGTGTG---GGAAGCGGTACA |       |       |       |       |       |       |       | 7795  |

| Majority                | TATGACCGTTA--CATCCTCAAACGTGA-GTCA-TGTGTTTGGCTTTGCATTTGGTGAATGTAATGGTGGATACGGTGAA |       |       |       |       |       |       |       |       |
|-------------------------|----------------------------------------------------------------------------------|-------|-------|-------|-------|-------|-------|-------|-------|
|                         | 82250                                                                            | 82260 | 82270 | 82280 | 82290 | 82300 | 82310 | 82320 |       |
| Human                   | CAAGACTGCAAGAAAAAATTTGTTGTGTGTAGGAATGTTTGCCTAGGAATTAGGAATGTATACTTGACAACAAGTGAAC  |       |       |       |       |       |       |       | 81974 |
| AsianBonytongue         | TACGTGCGTTA--CA-----GACAGCA-GT---GTTT---GTTATGCACCTGCTGCTTTTCATTGGCAGATCTTCT---  |       |       |       |       |       |       |       | 8518  |
| Reedfish                | AATGACCATCAGTCGCCCTCGGTCTGGA-GC-ACCATGCAGGATCTTGCATAGGGTGAGGATGATCATGAGAAAGGTGAG |       |       |       |       |       |       |       | 39554 |
| NorthernPike            | AATGTGAGTGCTAAATCCGCAAAAAGGTAACAATTATGTTT-TCTTTTTAGATGGTACATCTAACGGGAGTGACAGTAAA |       |       |       |       |       |       |       | 13659 |
| SpottedGar              | GAAGATCATTA--CATTCACAAAGAACA-ATCA--GTTTCAAGCTTACTTCAGTTTAATGACCCAGTGAATGCCAGCA   |       |       |       |       |       |       |       | 12627 |
| ParamormyropsKingsLeyae | TAGGGCAGCTA--CAGGTTGAAACTATC-ATCGATGTGTTGGGCAATGTGATGGC--AATGTAACAGTGGAGGGCGCT-- |       |       |       |       |       |       |       | 7868  |

| Majority                | GGCCTAATTGTGAAGTACACGATAGAAACTTGTCACTTTTTATATTC-GAAGATGTGGTGAT-GTGACGAAAGAGACTATT |       |       |       |       |       |       |       |       |
|-------------------------|-----------------------------------------------------------------------------------|-------|-------|-------|-------|-------|-------|-------|-------|
|                         | 82330                                                                             | 82340 | 82350 | 82360 | 82370 | 82380 | 82390 | 82400 |       |
| Human                   | GTATCCATTGAATGTTAAATGAGAACAACCTATGGGGAGGATAGTG-AGAGGTATAGTATTTAACATGGAAAAGTTAGTA  |       |       |       |       |       |       |       | 82053 |
| AsianBonytongue         | --CCAAATTTGGAAGTGT-CAT--GAAAAATCATCACATTTACAAA--GAACAACCAGTTC-----CAAGCTTTACTGC-  |       |       |       |       |       |       |       | 8584  |
| Reedfish                | GGATCAGCCCAAACTACACGGTAGGAGCTTGTTAATGATCTTAAG-GCAGTTGGGACCACAGTCACCAAGAACACCATT   |       |       |       |       |       |       |       | 39633 |
| NorthernPike            | AAGCTGAGAGTGAAGACAGGATGGAGGCTGCTCCCTCTCGTGTCTGCACATCAGAAAAC--TTCCCAATGAAACTACA    |       |       |       |       |       |       |       | 13737 |
| SpottedGar              | AGCCAAATTTGGTGAAGTGA-AGACAGAAAATGGCTATTTTTATGTTT-AAACAGTTGGTGTGCATGTGCAAGAGACTAGC |       |       |       |       |       |       |       | 12705 |
| ParamormyropsKingsLeyae | ATCTGGTCTTGACGGAC-CCACCCAAAATCTCCAAGGTT-TAGTC-AATGACGAGGTGATGGGGACAAAACAAGCCATT   |       |       |       |       |       |       |       | 7944  |

| Majority                | AAGTTATAGATTATTTTCAT---GGTAAATGCAAATTTGGGCTA-T-AAAGCCAGCCTGGTG---ATT-TGCTTTA-TGAGC |       |       |       |       |       |       |       |       |
|-------------------------|------------------------------------------------------------------------------------|-------|-------|-------|-------|-------|-------|-------|-------|
|                         | 82410                                                                              | 82420 | 82430 | 82440 | 82450 | 82460 | 82470 | 82480 |       |
| Human                   | ATATAGTAGAATATTTGGT-TGAAAAGATCCACATTTGGTGTATTCAAAGACACACTGAAGACTATTGTGCATTAGTAAGT  |       |       |       |       |       |       |       | 82132 |
| AsianBonytongue         | -AGTTCAA--TGATCCC-----GTGAATGCCACG-----AAGCCAAACTGGTG---AGT-CGCCTTG-CGTAC          |       |       |       |       |       |       |       | 8640  |
| Reedfish                | -GGCAACACACTACTGCATACAGGCTGTCTTAAGTTTGTCTAGTGAACGTCTAAGTGATTTCAGAGA-AGGCTTG-GGAGA  |       |       |       |       |       |       |       | 39710 |
| NorthernPike            | GAAACGGAGGTCATTGCCT---TGGGGTTACCTTTTGGGAAAGTCACAAATATCCTGACGCTAAAGGGAAAAAACAGGT    |       |       |       |       |       |       |       | 13814 |
| SpottedGar              | AAGTTATG--CTATCTT-----TAAATGCAAATTTGACTT---GATCCAGCATGGTC---AAT-GGCTTTA-AGAAC      |       |       |       |       |       |       |       | 12768 |
| ParamormyropsKingsLeyae | CAGGTACAGTTTATCTAA--AGGTAAGTGCAAACTGAACTG---CTTCATGCGCAGTT---CTT-TGTTTT--TGTGC     |       |       |       |       |       |       |       | 8011  |

| Majority                | ATTTAATGTTAGAATGCTGTAATTGTATT--ATTTGCTGTTAATTGTATATATTTGTTTTAAGT-TATTAGGGGTTATGA  |       |       |       |       |       |       |       |       |
|-------------------------|-----------------------------------------------------------------------------------|-------|-------|-------|-------|-------|-------|-------|-------|
|                         | 82490                                                                             | 82500 | 82510 | 82520 | 82530 | 82540 | 82550 | 82560 |       |
| Human                   | ATTAAACATGAGAATTCT-TAATTTTAAA--ATTGGACCCTAATTTCTGAGATTTACTTTAAGAATAAAAAGGGGATGAAA |       |       |       |       |       |       |       | 82209 |
| AsianBonytongue         | -----AATGCT-TAATTTACT--ACTTGCTGATAAT-GTATATATTTCTTTTGAAT-CCCCAGACTGTATGA          |       |       |       |       |       |       |       | 8703  |
| Reedfish                | AAGTGTGTGAAAGTGTCTCAGATGAAACCAAAATCGATCTCTTTGGAATCAACTTGACCCGCCG-TGTTTGGAGGAAGAG  |       |       |       |       |       |       |       | 39789 |
| NorthernPike            | GAGTGAGAATA-AACGAAGCAGCCATTTTAGAATTTCTGTTACGGACATTCCTTATCACAATATAAACGCAACATGCA    |       |       |       |       |       |       |       | 13893 |
| SpottedGar              | CTTTACTTTTGTATTGTTGCAATTGTATTGATTTAAGATCAATAGTATGTACTTGCCTTAAGT-CATTAGTCTTTTTGG   |       |       |       |       |       |       |       | 12847 |
| ParamormyropsKingsLeyae | ATTTAATGA-GGAAAGTGATGACAGCATC--AGTCCCT--CGTTTGATAGATCTTTTCCAAGT-TCGGAACGGTTCATGA  |       |       |       |       |       |       |       | 8085  |



Sunday, May 01, 2022 09:44 PM

Majority -ACTACGTCAAATGTG---TTATGAAATGTTTCGTGCCATAAAC-ATTCTACACA-GTTTGCT-TGTGATCACTTACATG  
 83050 83060 83070 83080 83090 83100 83110 83120  
 Human GAAGAAATAAAATGTGAACTTATGGAACAAGAGTGCTAAGGGCCTGTTCTACCCAGGTATGTTATGAAATCAAATTCATT 82765  
 AsianBonytongue -AAAAAGTCTAC-----ACATGGAATGTT-----TAAAA-ATGTCTAAGTA-GTTTGCT-TAAGATGACTGACAAA 9147  
 Reedfish -AACACAAGAAACGTC---TTACCAC-TGTGCTTGCCAAAAAGGGTTCTCCACC-AAGTACTAAGTCATGTTTTGCTTG 40308  
 NorthernPike -GCAACGTCCCAGTGT---TCATTCAATACTCCAACCACAAAG-AACTCAAAC--AGATGCT---GGA-AACCAACGGG 14405  
 SpottedGar -ACTTTGCCCGATGTA---AAATGACATGTTTCGTGTTGTAAAC-ATTGTTAAAT--GTTTGCC-AGTGGGCACAAAGAAG 13327  
 ParamormyropsKingsLeyae GCTCGGTGAGGGAGG---GTTTGAGACGAGAGTTGCCTAAACCAATGTTTCCCA-ACCTGCTCTTTGGGCACCCCCAGA 8555

Majority GAGTTAGAATGTTT---TGTTGTGTCAGTG---GGTAAGGATCTTGTAAC-----CTTATGTGAGCCAGTTTATATG  
 83130 83140 83150 83160 83170 83180 83190 83200  
 Human TAGTTTGGGTGTTTGTCTCTTTATGTTGGGAAGATAAAAAAGAACATATAATTCGTTTCTTGAGTGAACCAGTATTTATG 82845  
 AsianBonytongue AAC--ATAATGTT---TGAAGAATCAATA---GGTGAGAAGCATGAAAC-----CGGATTTAGGCTCATTCTCTCT 9211  
 Reedfish GGTATCAAATACTT---ATTTGTCTCAGTGTCAAGGGAATTTATAACT-----TTTATGTAATGCGTTTTTTCTG 40379  
 NorthernPike CCCAGGCAGTCTG--CAGGCAGTGTGACG---GTCCAGGGGGCGGTACC-----CCCACATCAGGC--TCCACAGT 14472  
 SpottedGar GAATGAGAATATAA---TGGAATTTGGGTT---GATTTAAATCTTGCTTCT-----CACACCCAACAAAGTGATAAG 13394  
 ParamormyropsKingsLeyae CAGT--CCATGTTT---TCTTGTGGGAGGG---AGCACAAAGTGTAGACGGT-----CTGGGGGTCCCTGAGGACTGG 8620

Majority GGTATTGGTTTAGTATCTAAAGCTTCTTTGGGGGAA-----TCTAGTGTAGTAATGATTGAAATAT--ATTATACTTG  
 83210 83220 83230 83240 83250 83260 83270 83280  
 Human AGAAATAAGCTGGGTGTGTAAGAATTTAAGGGATGAAAATATTCGAAGTTGATTGGTAATTGAAAAGTAGATGAACGGTG 82925  
 AsianBonytongue ATTTCTTG--CAAACAGCAGAAGCTGCTTAGAGGGAA-----TCTATTGTAGTGCTTGTGAAATTAC--ATTAACCTG 9281  
 Reedfish GGTTTTTGATTTGATATCTGTCTCTCTCCATTAATA-----TGAAACTACCATGAAATTAG--ATACTGTTC 40446  
 NorthernPike AGATCTGGCTCTAACAGCTGCATCCAGCCAGTGTCT-----AGAATAATAATTGACA-ACATGTTCTACCCA 14539  
 SpottedGar GGTAAATGGGTAAGCATTTAAGGAGTCTTTGGGGGAA-----CATAGTGTAGCACTGATTGAAA-----ATTATCCTTG 13463  
 ParamormyropsKingsLeyae GTTCAGAAACCCTGTGTCTAAAGGCTTTTGTGTGAAG-----TATGAAGAAGAAATGAAGATACAGT--ACAGCATATG 8693

Majority TTTGTTTTGTTGGTCTTCATCATATATGTTGGTAGATCTGTATTGAATCTCTGT-CTGTGGACAGAATTTAATGTACA  
 83290 83300 83310 83320 83330 83340 83350 83360  
 Human CTAACACAAAAGGGAATCTGTCTAGAATAA-ATGAAAATATGGTGACTTAAAGAT-AGTAGGACAGCAATAAGACTGGA 83003  
 AsianBonytongue -TGATTTTATTTTTCTCTTTCTGTAATGTGCTAGGCGTGTATAAGATCCTCTG----TGAAAAGAATTTAATGTACA 9355  
 Reedfish TTTGT-TCGTAAGTGAGCAAACATAAATTCAGCAGGAGATCAAATTTATTCCTCA-CTGTACATGTAATGTAACAGG 40524  
 NorthernPike GTCACCTGGATGTACTGCAGCAGGTAGTGT--ACGGTCTCTACCGACTCAGATATGCAGTGCACATTCTTTGTTGCACT 14617  
 SpottedGar GCTGTTGAACTGCTTTCTCACAGTATATGTTGTAGATTTA-ATGGCATTGTCTG----TTAAAAGAATTTAATGTACA 13537  
 ParamormyropsKingsLeyae CTGTG-TGTGCTTCTCAGTCATTGGGTGAGTTACACCTGTGTAGGACTTACTGA-TTGTGACAGAGCTGACCACCC 8771

Majority CATTTTCCCTATGTACTCCATCTGGAATGGTATCTCC--CTGTCTAGTGTGGAGGGTTTCCATCTTCTCTGTGTTT-  
 83370 83380 83390 83400 83410 83420 83430 83440  
 Human AATTAGAACAAATAAAATAAGAAGGAAATGATAACATAGATTGGGAAAGGATAGGAAAATACTGAAACAAAATCTGTGTT- 83082  
 AsianBonytongue CATTTTCCCTCAGGTACTCCATCTGGAATGGTAGCTCC--CTATTCTAGTGGTGGAGGGTTTCCATCTTCTCTGGCTTT- 9432  
 Reedfish TTTTATTAATATTTAATAAAAG-AGTATAATGTGTAG--TAGAAATGTTTTAATAAAGCTTCAGCTTTGTATCAGTCTT- 40600  
 NorthernPike CCGTTGTGC-ATAAATGACAGCTACTTCTGCCCTGAAAGTGGTTTTAATATTGAAATCTTCACAGCTCAGTTGTATTTTC 14696  
 SpottedGar AATTTTCCCTTAGGTACTCTCTGGAATGGTATCTCC--CTATTCTGGCGGTGGAGGGTTTCCATCTCTCTGGTTTT- 13614  
 ParamormyropsKingsLeyae CTCCCTCTAGGAACCTCCATCTGGAATGGTACTCC--CTACACCAGTGGCGGGCATTCCCATCCACCCTCAGCTTT- 8848

Majority -GCACAGGGTGG-----AGGTACTTGTACTTTCATTT---CTGATTTTTTGTTTATGTTGTTTTTA-----TTTG  
 83450 83460 83470 83480 83490 83500 83510 83520  
 Human -GTATAGTGATG-----GTTTCTGTTCTTTCAACCGGGAGAGTGTGTGTTGAAGGAACTTGTAATTCATTTTAATTAC 83155  
 AsianBonytongue -GCACAGGGTGG-----AGGTACTTACTTCCATTT---ATGATTTTTTGTCTTCTGTTGCTAACACCATTCT--TTCA 9501  
 Reedfish -AACATAGTGCTGTGAGGTACGCTTGTAGTGTTA---CTGTTAGTTTGTCTTTGGTCTTTTTTAGAACAGTC--CTTT 40674  
 NorthernPike AATGTGGGGCGAGAGAAAAATCCTGTACTGTTATTT---CCCCTTTGTCTGCAAGATCTTCTCA-----AAG 14762  
 SpottedGar -GCCAGGGTGG-----AGGTACTTGTACTTTCATTT-----ATGGTCTGTTCCAGGCTGTTCTGTG-----TTCA 13671  
 ParamormyropsKingsLeyae GCACAGAGCGG-----AGGTATTTAT-CTTCCATCT---TAAATTTACCTCTTTGTTG-TAATA-----TGTG 8907







Sunday, May 01, 2022 09:44 PM

|                         |                                                                                  |       |       |       |       |       |       |       |
|-------------------------|----------------------------------------------------------------------------------|-------|-------|-------|-------|-------|-------|-------|
| Majority                | GTTATTTATGCTGCAGTAATCGTATCTCTGTTACATCACTCAGAATTTATTTAGACATTATTGGCTT-----         |       |       |       |       |       |       |       |
|                         | 84490                                                                            | 84500 | 84510 | 84520 | 84530 | 84540 | 84550 | 84560 |
| Human                   | ACTTTATTTCCCTTAAACAGTCACTGTCTCT-TTATATCTATATCTATATATGTATATTTTTTAAACCTA-----      |       |       |       |       |       |       |       |
| AsianBonytongue         | AGTATTCACGCTTCAGTTAAAGTAACTTTGCTAAGTTATTTTAAACATAAACCAACAGATTTTCTCG-----         |       |       |       |       |       |       |       |
| Reedfish                | GTTATTTTAAATGT-GTAAACCCATGCTAGTTACATCATTGAGAATTTCTTTAATCTTTATTACCTTAGAGGTTAAACAA |       |       |       |       |       |       |       |
| NorthernPike            | GCAGCTGCTGCTGCAGGGAGGGTGGCCCTGTGAGCCACTCCGGCTCCAGCGGGTGTCTCTGGCTCCAACCTCAACGA    |       |       |       |       |       |       |       |
| SpottedGar              | GTGATGTA-ACTGCATTAATATATATGTGTAGCACATTTCCCAAAAGTGCTTCTGACATAAGGGGCTT-----        |       |       |       |       |       |       |       |
| ParamormyropsKingsLeyae | AACATTCA-----TGAGCACTGCTCTGCAGAAATGCCTCAGCTACCATTTAGTCAGCACTGGCTC-----           |       |       |       |       |       |       |       |

|                         |                                                                                     |       |       |       |       |       |       |       |
|-------------------------|-------------------------------------------------------------------------------------|-------|-------|-------|-------|-------|-------|-------|
| Majority                | --TGCTAAATG-CCTTTGCAATTATCTCTGCAGT---ATTCTAGTTTGTGTC-AACAATCTATTCTGTTAACTTAAACATATA |       |       |       |       |       |       |       |
|                         | 84570                                                                               | 84580 | 84590 | 84600 | 84610 | 84620 | 84630 | 84640 |
| Human                   | --ACCTATTTTTTCTTAAAGAAAATATGGTGAAGT---ACTGTAGTTTGGC--TTATCTT--TTTGTGTCTCAAAGGCA     |       |       |       |       |       |       |       |
| AsianBonytongue         | --TTCTGAAGG-GCTTGGCTTGATCTCTGGAGT---TTTCTATTTTCTCTAACAAATCCATTCTGATATCTTAATGTGAA    |       |       |       |       |       |       |       |
| Reedfish                | TGTGTTAAATGTATTATGTAATTATCCATATCAGGTAATTTAAGTTTATAGTAAAATGCTCTCAGTTAATTTAATCAAAA    |       |       |       |       |       |       |       |
| NorthernPike            | AGAGGTCAGTGCCCCCTCAACTGCCCCACCTC---CACACATAGGCCTAACACCCCTCCCCGCTAGTTCTCATTTG        |       |       |       |       |       |       |       |
| SpottedGar              | --TGCTT-----CTTTGGAATCACCTAAGCAGG---TCTCGGCTTATTC-AACAATATATTACACCCACTTAACTGATA     |       |       |       |       |       |       |       |
| ParamormyropsKingsLeyae | -AGCTAA-----CTCTTCTGACTCACTGATGC---ATTCTAATTTCCC--ATAACAT-TGTTGTTACCAGCCATACA       |       |       |       |       |       |       |       |

|                         |                                                                                 |       |       |       |       |       |       |       |
|-------------------------|---------------------------------------------------------------------------------|-------|-------|-------|-------|-------|-------|-------|
| Majority                | AT---AATTATATAGTTAATTT-TAGCTA-----TTGTTTTTCATTTTTTTGTTTTTTTCAA--TTTTTGCTTTCTTTT |       |       |       |       |       |       |       |
|                         | 84650                                                                           | 84660 | 84670 | 84680 | 84690 | 84700 | 84710 | 84720 |
| Human                   | AATGTGATCTAATTTGCAAAT-TAACTGTA-----AAACAATTTTGTCTTTTGCCTTTTCTA--ATTATTTGCTTGTTT |       |       |       |       |       |       |       |
| AsianBonytongue         | AT---AACT-TATAGATAA-----GTTA-----ATAATGTTTCAGTGGCTTGTTTTTT-----TTTTGGCTTGCTTT   |       |       |       |       |       |       |       |
| Reedfish                | TCCTAAATAAAATAGTAAACT-GTATTAGTTCAATTTTGTCTTCACTTTTTTGTAGTTAAACTGTGTATTTGGTTT    |       |       |       |       |       |       |       |
| NorthernPike            | ATTCCTTCTGAACTCTCTCGCTCGCTCTCTTTGTGTTTCTCTCTTTTTTTTTTCTCTCGCGCTCTCTCTCCCTCGCT   |       |       |       |       |       |       |       |
| SpottedGar              | AC---AAAAATATAGTTGATTG-TAGCTC-----TTGTTGTTTCATGTTTTATTTTCTAAACTATTTTGTGTTGCTTT  |       |       |       |       |       |       |       |
| ParamormyropsKingsLeyae | CG---GATG--ATAGGAAA-----CAA-----TGCGGATTTATTTTCTACCCCTCCA-----TCCCCCACACTC      |       |       |       |       |       |       |       |

|                         |                                                                                    |       |       |       |       |       |       |       |
|-------------------------|------------------------------------------------------------------------------------|-------|-------|-------|-------|-------|-------|-------|
| Majority                | GTTTT--TATGCTTGCAATAT-ATCGTTT-TTGTTAATTTCTTGCTTTTTGG-CTGTTCTACTGAAATCCGTTTTTCTTTT  |       |       |       |       |       |       |       |
|                         | 84730                                                                              | 84740 | 84750 | 84760 | 84770 | 84780 | 84790 | 84800 |
| Human                   | ATTT---CATGCTTATATGTCAATGCAATTTTTTTTAAACTTATTTTATGT---GACTACTCTAATACATTTTTCTTTG    |       |       |       |       |       |       |       |
| AsianBonytongue         | GTTTA--TATGCTGGCACATTAATCGCTT-CTGTCCTTTTCTTGCTTTAAAATGTATTTCTACTGAAATCCGTTTTTCTT-C |       |       |       |       |       |       |       |
| Reedfish                | TTGTTGCTATGCTTGCTTAT-ATCATTGTGTTAACTTTCTGCTTTTTTGTGCTTTCTATTGATGCACATTTTTCTTTT     |       |       |       |       |       |       |       |
| NorthernPike            | CTCTCTTCTGTTTCTCTCTGCTCCATGATGCCAGGCTGCCAGTTGACTGAGCCCTCTCCCCAGATATATCAAA          |       |       |       |       |       |       |       |
| SpottedGar              | GTATT--TGTGCTTACATAT-GTCATAT-TTGTTAAATCTTGGCTTTGTGG-AAATTCATTGAAATACCTCTTTCTTTT    |       |       |       |       |       |       |       |
| ParamormyropsKingsLeyae | ATTT-----TGCTTTCAAAT-AACGTTT-TCATTAAGCTCCAGACTTGTGC-TCGTATATCTTACGTCGGTTTCTTGTCT   |       |       |       |       |       |       |       |

|                         |                                                                                      |       |       |       |       |       |       |       |
|-------------------------|--------------------------------------------------------------------------------------|-------|-------|-------|-------|-------|-------|-------|
| Majority                | AAGGTTCTC-TTCC---AAAAAATTGATGAGGAGCTCTTCCAGTCTT-TTAGC--TGTTTTTTTTC---TTTTTGCCC       |       |       |       |       |       |       |       |
|                         | 84810                                                                                | 84820 | 84830 | 84840 | 84850 | 84860 | 84870 | 84880 |
| Human                   | AAGGTTCT---TCC---AAAGATCTTGACGAGGCACTCTTCCCGTCTTTCTTAGT---AATTTTTTC-----TTTGC--      |       |       |       |       |       |       |       |
| AsianBonytongue         | AAGGTTTTTTC-GTC---AAAAGAATGGATGGGCAGCTCATTTCTAGTCTT-TTAGCCATGGTTTTTTTTTCTTTTTTTTTTCC |       |       |       |       |       |       |       |
| Reedfish                | AAGGGTCCC-CCC---AAAGAGCTTGATGAGGTGCTCTATCCAGTCTT-TTAGT---AGTG--T-TC-----TCTATAC      |       |       |       |       |       |       |       |
| NorthernPike            | AGGGACACAAGTCTATAAACTAATTTGACTTTGACTCCTTTCTAACCTC-TCTGCCATGTTGAACTGACTGAAGCTGGTT     |       |       |       |       |       |       |       |
| SpottedGar              | AAGGTTCTC-TCCC---AAGAGAATTGATGAGGGGCACTTTCCAGTCTC-TTAGC---AGTA--TTT---TCTTTGC--      |       |       |       |       |       |       |       |
| ParamormyropsKingsLeyae | AAACTGTG-TTCA---TGCATGATTCTCAAAGAGGGGACCCCTTCCCTTTGCTCTGTTTTCTTTACAGATTTGACCA        |       |       |       |       |       |       |       |

|                         |                                                                              |       |       |       |       |       |       |       |
|-------------------------|------------------------------------------------------------------------------|-------|-------|-------|-------|-------|-------|-------|
| Majority                | -----T--AGTTTTTGGTCACTGTCTTCTAAACTCATTCTTTTACATTCTT--TTCTTTCTCTATCCTACTT     |       |       |       |       |       |       |       |
|                         | 84890                                                                        | 84900 | 84910 | 84920 | 84930 | 84940 | 84950 | 84960 |
| Human                   | -----AGTTATTAGTCATTGTCTTCTAAATAATTTTTTAACTTTATT--CCCCACCCCTTCTTCTCTT         |       |       |       |       |       |       |       |
| AsianBonytongue         | TTTTTTCTTTCTTTAGCATATTTGGTCACTTTTTTCTAAACACACTCTCACACTCTT--TCCTTCTCTCTCCACTT |       |       |       |       |       |       |       |
| Reedfish                | -----AGATCTTGGTCACTGTCTTTTGTACTCATTCTTTTACACTTG---TTATTAAC-----AAAT          |       |       |       |       |       |       |       |
| NorthernPike            | AACTTTTTTTCTTCTTCTCTAAGCTTTCTATCTGGCTCAATGTGTCATGATGGTTTTGTCTGTCTGAATCACTCTC |       |       |       |       |       |       |       |
| SpottedGar              | -----AGATTTTGGCCACTGTCTTCTAAACTCATCTTCTGTACTCCT---TTTTTTGTC-----AACT         |       |       |       |       |       |       |       |
| ParamormyropsKingsLeyae | CTTTCG-----TCTCATCTTTCTTTGCTGTGATGAACTGACACTTGTAAATCTTGTCTCTCTCTCTATGCTATGT  |       |       |       |       |       |       |       |

Sunday, May 01, 2022 09:44 PM

|                         |                                                                                    |       |
|-------------------------|------------------------------------------------------------------------------------|-------|
| Majority                | TTTACT-CGCTCCTCTTTT-A-ATGTTTTTTCTTTCTATGC-----TCTGGGTCGTTTGCCTTT--ACTCTC-CTGTC     |       |
|                         | 84970 84980 84990 85000 85010 85020 85030 85040                                    |       |
| Human                   | ACCACC-CCCTCCACCCAGTTAAATAAAATTTATTGCTAAGTTA----TTT----TCTTTAGTTGT--ACATTTTATGTC   | 84521 |
| AsianBonytongue         | TTCCCC-TGCTCTGCCTTGT-GTGTACTGCTGCTTGTATGC-----TCTGAATCGTCTGCCTTTGAGCTCTCGCTGGC     | 10874 |
| Reedfish                | CTCTAT-AACTCTTGGTCT-----TTTTCTCTCTCTATGC-----TCT-AGTTATTTGCTTTT--ACTGTC-CTGAT      | 42100 |
| NorthernPike            | ACTATTATTCCTCCGCTTTCATTTTGCAATACATAACTAAACTAAATTTGGTTCCTTTCTCTCTTCTCCTC-CTGGC      | 16213 |
| SpottedGar              | GATACT-CGTTAATCTTG-----GTCTTTTCTCTCTAAGC-----TCT----CGTTTGCCTTT--TCTCTC-CTGAC      | 14888 |
| ParamormyropsKingsLeyae | TTTTTC-CCCCCTCTCTC-A-ATGTCGTGAACATTTATGAAG----TGTTGGACATATGCCTCTC-TCTCTTTCTGTC     | 10121 |
| Majority                | TTT----TCTTTCTCTTTTCT-GTT-GCTATGAACGCTGG-----TATGAAATGTGGGGGCTCATTATTCCCCTTA       |       |
|                         | 85050 85060 85070 85080 85090 85100 85110 85120                                    |       |
| Human                   | TGG-----TATATTTTATTTT-GAATGCTATGAAAGCTGG-----TATGAAATGTGGGAAGCTCAGTGTATCAGTTT      | 84587 |
| AsianBonytongue         | TTTTAACGTCCTGACTCTTCTCT-GT--GATATCAACGCTGG-----TATGAAATGTGGAGGCCACATCACTTTAGAAA    | 10945 |
| Reedfish                | CTC-----TTTCTACTGTTCT-ATT-GCTTTGAAAGCTGG-----TATGAAATGTAGGGTCTTTCTATTGCCATT        | 42165 |
| NorthernPike            | TTGAGCACTCTGTCTCCCTTCCAGTATCAAATCTCCGACGGAGAGACCCTAAATTTGTGTGTATCCATATACACATGC     | 16293 |
| SpottedGar              | TTT-----CTCTACTGTTTCT-GTT-GCTATGAACGCTGG-----TATGAAATGTGGGAGC---GTTACCCCACTTA      | 14951 |
| ParamormyropsKingsLeyae | CTT--GTCTCTCTCTCTCTCT-GTC-TCTCTCTCCCTCCC-----CCCTCCCTTT-----TACCCCCCGGA            | 10180 |
| Majority                | GTGGATTATATGATTTAAATTTGTTATCAT--TTTCCCAAACGCTTGT-GGTTTGTGGATTTAA--CATGATTTGCTTT    |       |
|                         | 85130 85140 85150 85160 85170 85180 85190 85200                                    |       |
| Human                   | ATGATGTCTAATTTGAATATTTGTT-TCAT--TTTTAATTTGGCCTCTGTTAATATGAACATTAGC----TTATTTTATCC  | 84660 |
| AsianBonytongue         | GCAGCAAACCGGATTGAAATTTCTTATTAT--TCCCTCAAAGCCTTG--GGTATCAAATTCGA--TGAGATTTTGTTT     | 11019 |
| Reedfish                | AAAGATTACATGATGTCAGTTTATCATGAT--TGCCCTGAAACCT-----GTTTGTGGAATTTAAA-CATATTCTGCTTT   | 42237 |
| NorthernPike            | AAAGACATTAT-AAATATATTTGCCCTCAT-ATGACCCACATGTACAGT--CTGTCTGTGTTTAA-----CATGACTT     | 16362 |
| SpottedGar              | GGGGTATATCA-ATTTAAATTTGCCATGAT--TTTCCCAAACCTTTTGTGAGTTTGTGGATATAA--CATGATGTGCTTT   | 15026 |
| ParamormyropsKingsLeyae | GTGGATATTACGAGTTGCATTTTCTATCATGATTTCCCAAACGCCCC--GGTTTGTGGATTTAAACATGATGTGCTGT     | 10258 |
| Majority                | GTT-TAATAACATAACTTTGCAAGGTGGTTTT-CATGTCTACACTTGCATGTCTG---AAACGGACTGACCTTGT--CT    |       |
|                         | 85210 85220 85230 85240 85250 85260 85270 85280                                    |       |
| Human                   | ATT-TAATACTATTATCATTCA---CAGTCT-----GCATGCTAAAATGTTTG---AATCAGAGTGCCTTTGT--TT      | 84724 |
| AsianBonytongue         | ATA-CAATGT--TTACTAGGCA---GATTTT-CAAGTCTGCGTCTGCAAG-CCA---AAACCGGCCAAACTTGAGACA     | 11086 |
| Reedfish                | GTTCTGTTACCATAACCTTTCGCAAGGTGGTTTTTCATCAGCACACCTGCATGCTTG---CCGTGTTTGATCCTTGG---   | 42309 |
| NorthernPike            | GTG--AATGCCATAACTCTACCAGGTGGTTTT-ATGTCTGTTCTCTCATGTCCGCTATAAAAAACAGATTTGACTGCT     | 16438 |
| SpottedGar              | GTG-TAGTACCATAACTTTGCAAGGTGGTTTT-CATTTCTACACTTGCATG-CTA---AAACCGATTGAACCAGTG-CA    | 15098 |
| ParamormyropsKingsLeyae | ATA-TACCAT---AACTTCGCAAGGTGGTTTT-CATGTCCAAACCCGCATGTCTG---ACACGGACTGTGCTTGC---     | 10325 |
| Majority                | TGGTCTTTAAA-----ATTTTGCCTGCATTTCACTACTCTG-----CCATGCTTAAGTTGCTAAAT-TTAAAACCTTAATAT |       |
|                         | 85290 85300 85310 85320 85330 85340 85350 85360                                    |       |
| Human                   | TTATTTTAAAGA-----CTTTTGCCTGCATTTCAACCAG-----CCATGCTTATGCAGTTAAAGTTCAAAGTTTAAAAA    | 84794 |
| AsianBonytongue         | TGGCCTTTCA-----AGTTTGCCTGCATTTCACTACTTT-----CTTCGCTTCACTTGTAGATCCTAAAACCTTAAGAT    | 11155 |
| Reedfish                | CAGCTTCAGAATAGTTTATTGTTTGCATTTCACTACTCAG-----CCATGCTTAA---GCAG---TTAAAATT--AAA-    | 42374 |
| NorthernPike            | TGGTCTTTGAC---TAATTTGCTTTCATTTCACTACTCTGTATTGCCACACTTCAGATGACATTTCTGAACGTTAATCT    | 16514 |
| SpottedGar              | CCTTCTTTAAC-----AGTTTGCCTGCATTTCACTACTTTG-----CCATGCTTAA---GCTA---TTAAAACGTCAGAT   | 15161 |
| ParamormyropsKingsLeyae | CAGCCTCGACA-----ATGTGGCTTGCATCCCACTACTCCG-----CTGTGCTGACTTACTAAAT-CTTAAACTGTGTAT   | 10394 |
| Majority                | T----CTTTTGCATGCC-TCCTTCCCTTCATT--GTTAG-----TGTTCTGTA-TTTATTCTTTGATATA-AATGTA-C    |       |
|                         | 85370 85380 85390 85400 85410 85420 85430 85440                                    |       |
| Human                   | T----CCTATGCATGCTT-TCCTTCCCTATGTTGAGATGA-----AATGCTGTAATTTACTCTTTGATATA-GATGTA-C   | 84862 |
| AsianBonytongue         | T----CTGCTGCATACCCTCCCCCCCCCTCATT--ATTACTACATTTATTTGTA-TGTATTCTTTAATATA-AATGTA-C   | 11226 |
| Reedfish                | -----TT-TTGCATGTTA-TTTTCTTTTCACTCAGTCAG-----TGCACTGAA-GGTGTTCTTTAATATA-AATGTA-C    | 42439 |
| NorthernPike            | CTTGCTACTGCATGCGT-TTGTTTTCTTCATT--GCTAGT---TAGTTCATG-ATTACGGTGTGATTTATGATTTGAC     | 16587 |
| SpottedGar              | T----CTTTTGCATGCC-CTTTTCTCTCATT--GTTA-----TATGCTGTA-ATTATTCTTTGATATG-AATGTA-C      | 15225 |
| ParamormyropsKingsLeyae | C----CTATTGCATGCC-TCCTCCCTTCATT--GTTA-----TGCTGTGAT-TTTATTCTTTGATGTG-AATGTAAC      | 10459 |

Sunday, May 01, 2022 09:44 PM

|                         |                            |                             |                            |       |
|-------------------------|----------------------------|-----------------------------|----------------------------|-------|
| Majority                | TTTGCCCATGTTTGTCTTGGG--TGA | CTACATTTTGACAGTTA-TTTTCTTG  | TATA-----A--A-ATACATAAAC   |       |
|                         | 85450                      | 85460                       | 85470                      | 85480 |
|                         | 85490                      | 85500                       | 85510                      | 85520 |
| Human                   | TTTACCCATATTTGTCTTGGG--TGA | CTACATTTTACTCAGTT---TTTCTTG | TACA-----GTACATAAAC        | 84925 |
| AsianBonytongue         | TTTGCCCATGTTTGTCTTGGG--TGA | CTACATTTGGAACACATA-TTTTCTTG | TATAT----AAAAACAACATAAAC   | 11298 |
| Reedfish                | TTTGCCCATGTTTGTCTTGGG--TGA | CTACATTTTGCACTTTT--TTTCTTG  | TAA-----ATACATAAAC         | 42503 |
| NorthernPike            | ATTGA--ATGTTTGTCCAGGGCTTG  | ATTACATTTGTCACAGTTTATTTGCT  | TGTTTAGTTCT-GACTAAGTACATGA | 16664 |
| SpottedGar              | TTTGCCACGTTTGTCTATGGG--TGA | CTACATTTGGCACAATTA-TTTTCTTG | TAAA-----AAACATAAAC        | 15290 |
| ParamormyropsKingsLeyae | CTGCCCCAAGTTTCACTTGGG--TGG | CTACATTTT-TGCAGTTA-ATTTCTCG | TGTGTTTTTAAACGAAAAGAGCAAAC | 10535 |

|                         |                         |                          |                           |                    |
|-------------------------|-------------------------|--------------------------|---------------------------|--------------------|
| Majority                | ---AGCCATTTTCTGACCAAAC  | CTCTGCATTTCCCTATGTACTGAC | CTGTATTTTATTTTT---GTTCCCA | ACTCCTT            |
|                         | 85530                   | 85540                    | 85550                     | 85560              |
|                         | 85570                   | 85580                    | 85590                     | 85600              |
| Human                   | ---AACCATTTTCTGACCAAAT  | CTCTGCATTTCCCTATGTACTGAC | CTATATTTTATTTTGTGTTTTGT   | TCCCAATTCCTT 85002 |
| AsianBonytongue         | ---AGCCATTTTCTGACCAAAT  | CTCTGCATTTCCAGTGTACTGAC  | CTGTATTTTATTTTT-----GTT   | TCCCAACT--- 11365  |
| Reedfish                | ---AGCCATTTTCTGACCAAAC  | CTCTGCATTTCCCTATGTACTGAC | CTATATTTTATTTTT---GTT     | TCCCAACTCCTT 42575 |
| NorthernPike            | ---AGCCAT--TCTGACC---TC | CTGCATTTCCAGTGTACTGAC    | CTGTTTTTTTTGTCCC---CCT    | CCCTTATT-TTT 16729 |
| SpottedGar              | ---AGCCATTTTCTGACCAAAC  | CTCTGCATTTCCCTATGTACTGAC | CTATATTTTATTTTT---GTT     | TCCCTACTCCTT 15362 |
| ParamormyropsKingsLeyae | CAAGCCATTTTCTGACCAAAC   | CTCTGCATTTCCCTATGTACTGAC | CTGTTTTTTATTTTT---GTT     | TCCCCCCACTTT 10609 |

|                         |                         |                          |                          |                        |
|-------------------------|-------------------------|--------------------------|--------------------------|------------------------|
| Majority                | GT---TTTATTTCTGCATTTGCT | GTTCCTTCCCTTC-----CTCCT  | TTTT---CATTCCTTTCCCT---T | TTTTTCT                |
|                         | 85610                   | 85620                    | 85630                    | 85640                  |
|                         | 85650                   | 85660                    | 85670                    | 85680                  |
| Human                   | ATTTTTTCTTCTGCATTTGCTGT | TTCCTTCCCATTTCACTCTTTTCC | CTGTGTTCACCTTCCCTTTCTT   | TGCTTTT 85082          |
| AsianBonytongue         | -----TTTATTTCTGCATTTG   | CTGCCCTCCCTAT-----A-CT   | CCTTTT---CATTCCTCTCTCCT  | -----TTTTTCT 11423     |
| Reedfish                | GT---TTTATTTCTGCATTTGCT | ACTCCCTT-----CCCTTTC     | -----CATACCTTTACCCT---T  | TTTTTTT 42631          |
| NorthernPike            | AT---TTTTTATACATTTGCAT  | TTCCCTCC-----CTCCGTCT    | -----GCCCCGTCCT-----     | CTGTCC 16784           |
| SpottedGar              | GT---TTTATTTCTGCATTTGCT | AACCTT-----CCCTTTC       | -----CATTCCTTTCCCT---C   | CTTTCT 15418           |
| ParamormyropsKingsLeyae | GT---TTTCTTCTGCATTTGCT  | GTTCCTTCCCTTC-----CC     | CTCTTTTTTTTGTTCATTCCTG   | TCCCTCCCGTTTGCTT 10680 |

|                         |                         |                         |                        |                   |
|-------------------------|-------------------------|-------------------------|------------------------|-------------------|
| Majority                | GTCTCTTTGCCCT-T---TTTCT | GTCTTCCCTTCCCTTTTC-CCCT | CTTTCATTATCTT---CCCCCT | CCCC--G           |
|                         | 85690                   | 85700                   | 85710                  | 85720             |
|                         | 85730                   | 85740                   | 85750                  | 85760             |
| Human                   | TCCCAAATGCCCATTCCCTTCC  | CTGTCTTATCCTTTATTTTCTT  | TGCTTTCATTCCCTGTCTCCAT | TCCCTATG 85162    |
| AsianBonytongue         | GCCTCTT-GCCCAT--TATCC   | CTCTATCCCTTCTTTTCC-TCT  | TCTTTACTATCTG--CCCCAC  | CC--CACT--G 11491 |
| Reedfish                | GTC-----ATCCCTTCCCTTTC  | -CCTCTTCAATACCTT---TC   | CTCT-----G             | 42671             |
| NorthernPike            | GTCCGTTTGCTG-----TCT    | GTCTGCCCCCCCCCCCCCTT    | CCCTGTAAC-----CCT      | CT-----G 16842    |
| SpottedGar              | TTCTCTT-GCCCTCTGTTTGC   | CTTGTTCCTTCCCTTC-CCCT   | TTCATTACCTGTCCCCCTCCC  | ---TCCT--G 15491  |
| ParamormyropsKingsLeyae | GTCTTTTTGTTTTGTTTTTTT   | TCCGCCCCCTTTTCTTTAC     | CCCTTCGCCCGACCCCTCC    | CTTTCCCC--G 10758 |

|                         |                          |                       |                  |                            |
|-------------------------|--------------------------|-----------------------|------------------|----------------------------|
| Majority                | TTCATGCTT-TGTGCTTGAACAAA | --TGTT-CCTTGGACCAACTG | ----CCCCAATTA    | ACTGCCTTGAACCATGATCC       |
|                         | 85770                    | 85780                 | 85790            | 85800                      |
|                         | 85810                    | 85820                 | 85830            | 85840                      |
| Human                   | TTCATGCTTCTGTGCTTGAACAAA | --TGTT-CCTCGGACCAACTG | ----CCCCAATTA    | ACCGCTTGAACCATGATCC 85234  |
| AsianBonytongue         | TTCATGCTT-TATGCTTGAACAAA | --TATA-TCTTGGACCAACTG | ----CCCCAATTA    | ACTACCTTGAACCATGATCC 11563 |
| Reedfish                | TTCATGCTT-TGTGCTTGAACAAA | --TGTT-CCTCGGACCAACTG | ----CCCCAATTA    | ACTGCCTTGAACCATGATCC 42744 |
| NorthernPike            | TTCATGCTT-GGTGCTTGAACAAA | ACCTGTTTCCCTTGGACCTAC | CTAAAACCCCAAATTA | ACTGCCTTGAACCATGCTCC 16921 |
| SpottedGar              | TTCATGCTT-TGTGCTTGAACAAA | --TGTT-CCTCGGACCAACTG | ----CCCCAATTA    | ACTGCCTTGAACCATGATCC 15563 |
| ParamormyropsKingsLeyae | TTCATGCTT-TGTGCTTGAACAAA | --TGTT-CCTTGGACCGACTG | ----CCCCAATTA    | ACTGCCTTGAACCATGATCC 10830 |

|                         |                          |                        |                       |                  |
|-------------------------|--------------------------|------------------------|-----------------------|------------------|
| Majority                | ATGACCACCT-CACCATTCTACGG | GAAACCACCTTCGTTATGGATG | ATCTGTTTCATCTCCGCTCTT | -----CCTCG       |
|                         | 85850                    | 85860                  | 85870                 | 85880            |
|                         | 85890                    | 85900                  | 85910                 | 85920            |
| Human                   | ATGACCACCT-CACCATTCTACGG | GAAACCACCTTCGTTATGGATG | ATCTGTTTCATCTCCGCTCTT | -----CCTCG 85304 |
| AsianBonytongue         | ATGACCACCT-CACCATTCTACGG | GAAACCACCTTCGTTATGGATG | ATCTGTTTCATCTCCGCTCTT | -----CCTCG 11634 |
| Reedfish                | ATGACCACCT-CACCATTCTACGG | GAAACCACCTTCGTTATGGATG | ATCTGTTTCATCTCCGCTCTT | -----CCTCG 42815 |
| NorthernPike            | ATGACCACCTTACCATTCTACGG  | GAAACCACCTTCGTTATGGATG | ATCTGTTTCATCTCCGCTCTT | -----CCTCG 17001 |
| SpottedGar              | ATGACCACCT-CACCATTCTACGG | GAAACCACCTTCGTTATGGATG | ATCTGTTTCATCTCCGCTCTT | -----CCTCG 15634 |
| ParamormyropsKingsLeyae | ATGACCACCT-CACCATTCTACGG | GAAACCACCTTCGTTATGGATG | ATCTGTTTCATCTCCGCTCTT | -----CCTCG 10901 |

Sunday, May 01, 2022 09:44 PM

|                         |                                                                                 |       |
|-------------------------|---------------------------------------------------------------------------------|-------|
| Majority                | ACTCTTCT---CTCTTCTGTCTTACGCTGCTTGTCTTCTCTCCTTCTAAAGATGGTTACGCCCCAAAGTCTGTTTAC   |       |
|                         | 85930 85940 85950 85960 85970 85980 85990 86000                                 |       |
| Human                   | ACTCTTCT---CTCTTCTGTCTTACGCTGCTTGTCTTCTCTCCTTCTAAAGATGGTTACGCCCCAAAGTCTGTTTAC   | 85380 |
| AsianBonytongue         | ACTCTTCT---TTCTTCTGTCTTACGCTGCTTGTCTTCTCTCCTTCTAAAGATGGTTACGCCCCAAAGTCTGTTTAC   | 11710 |
| Reedfish                | ACTCTTCT---CTCTTCTGTCTTATGCTGCTTGTCTTCTCTCCTTCTAAAGATGGTTACGCCCCAAAGTCTGTT-AC   | 42890 |
| NorthernPike            | ACTCTTCTACCTCTCTACCTGTCTTCCGCTGCTTGTCTTCTCTCCTTCTAAAGATGGTTACGCCCCAAAGTCTGTTTAC | 17081 |
| SpottedGar              | ACTCTTCT---CTCTTCTGTCTTACGCTGCTTGTCTTCTCTCCTTCTAAAGATGGTTACGCCCCAAAGTCTGTTTAC   | 15710 |
| ParamormyropsKingsLeyae | ACTCTTCT---CTCTTCTGTCTTACGCTGCTTGTCTTCTCTCCTTCTAAAGATGGTTACGCCCCAAAGTCTGTTTAC   | 10977 |

|                         |                                                                                 |       |
|-------------------------|---------------------------------------------------------------------------------|-------|
| Majority                | CCTCTTCGGTATGTTATTGTTAGCACTCTACTTTTT--T-----TTTATTTATTTTA--TTTATTTGTT-ATTCATGTT |       |
|                         | 86010 86020 86030 86040 86050 86060 86070 86080                                 |       |
| Human                   | CCTCTTCGGTATGTTATTGTTAGCACTATACTTTTA-----TTATTGATTGA----TTTTTGT---TTCACCTT      | 85443 |
| AsianBonytongue         | CCTCTTCGGTATGTTATCGTTAGCACTCTACTTTTTATTTA----TTATCTATCTTATGTTTATTTATT-ATTAATGTT | 11785 |
| Reedfish                | CCTCTTCGGTATGTTATCGTTAGCACTATACTTTTTATTTATTTGATTTTTTTTTATTTTATTTTATTTTATTTATTT  | 42970 |
| NorthernPike            | CCTGTTTCGGTATGTTAATGTTAGCTCTCTTTTGATG-----TTTATTTCTGTTA---CAAAGATCATTCAAGGT     | 17149 |
| SpottedGar              | CCTCTTCGGTATGTTATTGTTAGCACTCTACTTTTT-----TTTAT-TATTTT---TTTAAATGTT-TTTCATCTT    | 15776 |
| ParamormyropsKingsLeyae | CCTCTTCGGTATGTTATCATTAGCACTCTACTTTTTATCG----TTTAT--ATCTA-----TATGCGC--ACACACAG  | 11044 |

|                         |                                                                                   |       |
|-------------------------|-----------------------------------------------------------------------------------|-------|
| Majority                | TTCACTTTTTATT-----TTATTGCTAGTATTTTGGCTTG-TAGTTGATTAGTA-----T                      |       |
|                         | 86090 86100 86110 86120 86130 86140 86150 86160                                   |       |
| Human                   | ---AATTCCTTATT-----T-GTAGCTAGCACTTTGGCTTA-AAGTTGAATAGTA-----                      | 85487 |
| AsianBonytongue         | TTCACTTTTTGTCT-----TTATTGGTAGTGTTTTGGCTTG-TAGTTCAATAGTATTTTGTCTATTTTCATTGTTTCTCCT | 11859 |
| Reedfish                | TCCACCTTTAATCTTTCTTATAGCTAGCTTTTGGCTTA-TAGTTGATTGGTAACTCTTTGGCTACTCTCTCTCTCTCT    | 43049 |
| NorthernPike            | T--GTTTTTTTT-----TTCTTCTGTATGTTGGTTGGTCTGTTTTTCAGTC-----T                         | 17197 |
| SpottedGar              | TTGAATTCT-GAT-----TTATACCTAGCATTTTGGCTTA-CAGTT--GTAGTA-----T                      | 15822 |
| ParamormyropsKingsLeyae | CACACGTTTTTACG-----TTAATGTTAATATTAGTGGTTG-GCCTT-GGTACGG-----T                     | 11092 |

|                         |                                                                               |       |
|-------------------------|-------------------------------------------------------------------------------|-------|
| Majority                | CTTTTTTTTTTACTTTTTTTTTTCTTT-----GAA-----ATTTC-----TTCTCCATAGATAGT             |       |
|                         | 86170 86180 86190 86200 86210 86220 86230 86240                               |       |
| Human                   | -AATCTTTTGTCTATTTTCTTTGCTATTTA-----AAA-----CTCTC-----CATAGACACAAAAT           | 85538 |
| AsianBonytongue         | TTTTTTTGTTTTACCTCTATCTCTATCTTTCACTCTCTCTGCTCACAACACACGTTTTCAAATTTCTCCTAGGTAAT | 11939 |
| Reedfish                | CTCTCTTTCTTTTCTCTTTTCTCTCTCTC--TCCTCTTTGCTGTGAA-----ATCTT-----TTCTCCATAGACAGT | 43116 |
| NorthernPike            | CTCTTTAAATGATCCATAGCGTTCTGTTA-----ATGCATGGTAAATGGCA---TGAACAGTAGTTGGA         | 17260 |
| SpottedGar              | CTTTTTTTTTTACTTCTCTCTTTGGCTTT-----AAA-----GTTTC-----TCTCCATAGAAAGT            | 15874 |
| ParamormyropsKingsLeyae | CTTCTCTAIGTTTGTTTTTTTTTTCTTTTT-----GAAATCTCCATCTCC---TTCTCCATTGATGAT          | 11152 |

|                         |                                                                                   |       |
|-------------------------|-----------------------------------------------------------------------------------|-------|
| Majority                | TTATGTTAATGCATGGTTAAATATTTTGCATGTA-T--TTATTTTAACTTTA-TCACA-AAGCTTGTTTT-GGAGGGTT   |       |
|                         | 86250 86260 86270 86280 86290 86300 86310 86320                                   |       |
| Human                   | TTGTTTTAATGCATGCTA-ATTTATTTTGCATGGTCT--TTAATTTAATATCATTCAACA-TAGC---TTT--GAGGGTT  | 85608 |
| AsianBonytongue         | TTATTTTCAAGTGCATGGTTAAATATTTTGCATGTG----TGTTTTTACCAT--TCACA-AAGCTTGTTTT-AAAGGGTG  | 12010 |
| Reedfish                | T-ATGTTAATGCATGGTATACTTATTTTGCATGTAATTTTAAATTTTATCATT-TCATG-TAGC--ATTTCTGAAGGCTT  | 43191 |
| NorthernPike            | TTTGCCAAACATCTCACAAGCTTTTTTAACTTCTTTTCACTCTCCACATACACTCGCACAAGCACACCTTGGAACCTCT   | 17340 |
| SpottedGar              | TTATGTTAATGCATGGTTAAATATTTTGCATGTA----TTTTTTTATCATT--TCACA-AAGCTTGTTTT-GGAGGGTG   | 15945 |
| ParamormyropsKingsLeyae | TTATGTTAATGCATGGTT--ATTATTTTGCATGTAGTGTCTAATTTTACCTTTC-TCATG-AAGCTTGTTTCCGGAGGGTT | 11228 |

|                         |                                                                                  |       |
|-------------------------|----------------------------------------------------------------------------------|-------|
| Majority                | TATCAGAATTTTTCTTT-----TCTCTATTTC-AAATCTTGAT-TTGTTTATTCATTTGGATGAATGTCTCTATCTTTT  |       |
|                         | 86330 86340 86350 86360 86370 86380 86390 86400                                  |       |
| Human                   | TATCAAAAATTAATCTTTTCAAATTCACCTGTTCAAATCTTGATCTCTTTTATTCATTTGTGAGAATGATGAGATTGAG  | 85688 |
| AsianBonytongue         | TACCAGAAGTGTGTTCTC-----TTC-AAATCT-----GTTTATTCCTTTTGGATGAATGTCTCTCTATT           | 12069 |
| Reedfish                | TCTTCCAATCTTTATTTTC-----AAATCTTGAT-TTGTTTATTCATTTGGATGAATGTCTCTCTATCTTTT         | 43253 |
| NorthernPike            | TGTTTATTTTTTGCCAATTTTAA--TTCTGATGAATGATCTCTAT-ATAGCCAGTC-TCTACACTCTCTCTCAATCTTTC | 17416 |
| SpottedGar              | TATCAGAATGTCTCTTCAA---TCTCTATTTC-AAATCTTGAT-TTATTTATTCATTTGGACGAATGTCTCTATCTTTT  | 16019 |
| ParamormyropsKingsLeyae | TATCGCAATAGATTCCGT-----CTCTAAGC-TACTGTTCG---GCTCTATTTGATTGGATGAATGTCTCTTTCTTTT   | 11296 |

Sunday, May 01, 2022 09:44 PM

|                         |                                                                                  |       |
|-------------------------|----------------------------------------------------------------------------------|-------|
| Majority                | C----ACTTTTATGTTTAT-TGTTAGTTTGTGA--T---AACTGT-TTCTATTGAT--CTTCCAC-----TTAA-TTCC  |       |
|                         | 86410 86420 86430 86440 86450 86460 86470 86480                                  |       |
| Human                   | TGATCATGTTGATGTCTGAATGTTTCATTGATATGTCAGAAAGATAATCTTTAGGTGACTTCCACATAAAATTAATTCCA | 85768 |
| AsianBonytongue         | -----ATTTTTAT-TTTGT-TGTTAATTGGT-----CTG--CTAAATTGA---ATTCCA-----TCAT-TTAA        | 12119 |
| Reedfish                | C----ACATTTC--TAAT-----GTTTGT-----CTG---TAAATTGAGAAATTCAC-----TTTAATTCC          | 43302 |
| NorthernPike            | CTACGACTCTTGT-CCTAACTGTT--TTCCTCA-----CTGTCTGCTCTTCTCCCCTCCTCT---CCTCCCTCC       | 17481 |
| SpottedGar              | C----ACTTTGATGTCTATATATCAGTTTCTGAAATGTTAACTG--TTCTCTTAA---CTTCTAA-----TTAA-TTTC  | 16083 |
| ParamormyropsKingsLeyae | ---CACTTTTACGTTGAG-TATCAAATCTGAAGTACTAACTGTTCTCAATCAAT--CCTCTCT-----TTGTGTTC     | 11364 |

|                         |                                                                                   |       |
|-------------------------|-----------------------------------------------------------------------------------|-------|
| Majority                | TTTTTCCCTTGGCTGCTTTTCGCTCCAAAACAGGTGTTTATGGTGATGCTCAGCGTGTGAAGATTCTATAACAATAAGAAA |       |
|                         | 86490 86500 86510 86520 86530 86540 86550 86560                                   |       |
| Human                   | TTTTTGGATTACCTCTCTGTGGCTCCAAAAAAGGTGTTTATGGAGATGTGCAGCGTGTGAAGATTTTATAACAATAAGAAA | 85848 |
| AsianBonytongue         | TTTTTGCTCTGGAACTTTTACCTTCAAAAACAGGCGTTTATGGAGATGCTCAACGTGTGAAGATACTATATAATAAGAAA  | 12199 |
| Reedfish                | CTTTTCATTTAACTGCTTTTCAATCCAAA-AGGTGTTTATGGTGATGCTCAGCGTGTGAAGATTCTCTATAATAAAAA    | 43381 |
| NorthernPike            | GCTTCCTCTTGTCTGCTCTTGGCTTTAACACAGGGGTTTACGGGGATTGCCAGAGGGTGAAGATTCTCTACAATAAAAAAG | 17561 |
| SpottedGar              | TTTTCCCCCTGACTGCTTTTCACTCTGAAA-AGGTGTTTATGGTGATGCTCAGCGCGTGAAGATACTTTACAATAAGAAA  | 16162 |
| ParamormyropsKingsLeyae | CCATCTCCCTGGCCATCTCGCTGGGGGAAAAGGAGTTTACGGCGATGCGCAGCGTGTGAAGATACTATAACAATAAAAA   | 11444 |

|                         |                                                                                  |       |
|-------------------------|----------------------------------------------------------------------------------|-------|
| Majority                | GACAGTGCTCTGATACAGATGGCTGATGGAAATCAAGCTCAGCTTGGTAAGATTT---TATTTTTAAGATATTTAAGATT |       |
|                         | 86570 86580 86590 86600 86610 86620 86630 86640                                  |       |
| Human                   | GACAGCGCTCTAATACAGATGGCTGATGGAAACCAATCACAACTTGGTAAGATTTAACTATGTTTATCTATACATCTTC  | 85928 |
| AsianBonytongue         | GACAGTGCACTCATAACAATGGCTGATGGAAATCAAGCCCAACTGGGTGAGTTGCAGATATTTTTAAATATCTTAAAT   | 12279 |
| Reedfish                | GACAGTGCTCTGATTACAGATGGCAGATGGAAATCAGGCTCAGCTTGGTAAGA-----ATCTAAGGGACCCCTGCAT    | 43452 |
| NorthernPike            | GACAGTGCTCTGATACAGATGGCTGATGCCAACCAAGCCAGCTAGGTAAGATAC---T-CATCCATGATGCTT---C-T  | 17633 |
| SpottedGar              | GACAGTGCTCTGATACAATGGCAGATGCAAATCAAGCTCAGCTTGGTAAGATTT-G--ATTTTTAGGAT-TTTAAGATT  | 16238 |
| ParamormyropsKingsLeyae | CCAGCAGCGCTCATAACAATGGCCGACGCCAATCAAGCACAGCTTGGTGAG--AT-----TGTCGTAGC-----AAAGC  | 11511 |

|                         |                                                                                      |       |
|-------------------------|--------------------------------------------------------------------------------------|-------|
| Majority                | ACTTTTTCTTTATTATATATAATAAAATGATTCTAAGTATCTAACTGTACTG--TTTTTCATTACTATCAAGTTTTTTTCTTGC |       |
|                         | 86650 86660 86670 86680 86690 86700 86710 86720                                      |       |
| Human                   | ACTTCTGCTTTCAAATGCATAATGTGAATGTGCGAATAAAAATAAACTCC-TTTACATCAGTAAGAAATTTTTTAATGG      | 86007 |
| AsianBonytongue         | ACTTTGACCTCAATAAAAAAAAAAAAAAATAAAAGCATTCCACTGGAAGGAAGTAGCATT-CCATCAGGAGTGTTCCTTGC    | 12358 |
| Reedfish                | ACAATATGTATAGGATATCATATAAAATGTTTATGTGAAAGTGTTTATG-TATTCATTTATCTTAAGTACTCGTCTTCT      | 43531 |
| NorthernPike            | GTTTCCCCAACTGTCTGTTCAGAGTGGATCTACATGTCTAATGAATCTC--CACAGGCTAATTTAGTAACGTGTGATGAA     | 17711 |
| SpottedGar              | AAGATTTTTTTGTAGGATTACCAATGATTCTAA--ACCTAAATGAAGG--TTGTCATC-CACCCGAGAAAAAATATGGC      | 16313 |
| ParamormyropsKingsLeyae | ACTTAAATCCCATTAGATTAGCCTCATGCTAA--TGCTGGCTGTCGTG--CTGCCATCGGATCTTGTTTCTTCTGCA        | 11587 |

|                         |                                                                                   |       |
|-------------------------|-----------------------------------------------------------------------------------|-------|
| Majority                | CTTGTGT-CCTGATGTTTTTTTTATTG-----TTGTATGGCAA-----GTATTTTTTTACTATGTTTAATTTGT        |       |
|                         | 86730 86740 86750 86760 86770 86780 86790 86800                                   |       |
| Human                   | CCAGGGCTCAAAATGTCATTTTTAATGTGAATAGTTGTATGTGACGAACATATTTGTATTTTTCTGCTATCCTCCTACTGT | 86087 |
| AsianBonytongue         | CTTGTGT-CCTG-TGCTTTTGTAAATAGG-----TTCCAGACCA-----CCATTACCCTGCATGGTCAAGCAGT        | 12420 |
| Reedfish                | ATAGCATATTTGATCTTTTTTTTTTCCA-----CTGCTTAGCAA-----GGCTAATATAACCTTAAATAATTTAA       | 43596 |
| NorthernPike            | CAGGCTACCGTGTTAGCATGGAATTTGGGTAGTTTGGGGAAA-----TGTATCAGGTTACAACCTATGTTTACT        | 17782 |
| SpottedGar              | CATGTCT-GCAAACGTTTCTTAGATCTG-----AAGTGTATTAA-----CTAGTTTTCCACCATGCGTTAGTTCT       | 16377 |
| ParamormyropsKingsLeyae | CTTATGA-TACAGTATCTTTAATACTTG-----TGGCAGGGAAA-----AAATTTTTTTTTTCTTTTCAGCCATG       | 11651 |

|                         |                                                                                   |       |
|-------------------------|-----------------------------------------------------------------------------------|-------|
| Majority                | TATT-----ACAATAAGGGTAGAAGA-----GGTTTGTAAATTTTATTTC-AGTTTGATCTG-----TGTT           |       |
|                         | 86810 86820 86830 86840 86850 86860 86870 86880                                   |       |
| Human                   | TTTTCAAATGCACTCATAATAGGAAGAGATTTTAGCTTCAAATTTGTAATAATAGTTTTCACATGAGAATTATATCATTTA | 86167 |
| AsianBonytongue         | TGTT-----GCTAATGGTGATAGAATA-----ACTTTGTAATTTTTTCAA-AACTTTACCTGAGG-----TGTT        | 12478 |
| Reedfish                | TACT-----GCACTTAAGGGGGGGGG-----GGTATGTAATTCGTTTTC-TGTGGGTCATAGAGAA-----GTAAT      | 43657 |
| NorthernPike            | TACT-----AAAAAGACAGTAAAAAA-----GTTTACATTTCCATTGTTATTTTCGGTGAT-----TT              | 17834 |
| SpottedGar              | TACC-----ACAATTAAGAATAATAAA-----GGGATGGCATATACTTTC-ATTTCCATTCA-----TGAT           | 16432 |
| ParamormyropsKingsLeyae | AGTC-----ATCTGAATGGCCAGAAGA-----TGTACGGAAAGATAATCC-GGGTGACTCTG-----T---           | 11703 |





Sunday, May 01, 2022 09:44 PM

| Majority                | GTAAGCATTTAAGTTTTTGCA---GTAATTGCCTCTTTAAGAA-C--CAATTTAGATTTTGTA--TTAGGTTGATTAGAG |       |       |       |       |       |       |       |       |
|-------------------------|----------------------------------------------------------------------------------|-------|-------|-------|-------|-------|-------|-------|-------|
|                         | 87850                                                                            | 87860 | 87870 | 87880 | 87890 | 87900 | 87910 | 87920 |       |
| Human                   | GTAATATTTTAAATTTTTTGCCATGCTCGTAGTCTGCTTGGGCTGCTGTAACCAAATACCATAGACTGAGTAGATGAAAC |       |       |       |       |       |       |       | 87201 |
| AsianBonytongue         | GAAAGCCTTCAAGTTTTTTC---GTAAGAGCTTCTTAGGAAAC--CAGTTTGGTGGTTGCA--TTAGGGTAAAGAGAG   |       |       |       |       |       |       |       | 13396 |
| Reedfish                | AATATC--TTAAGTGTGTACTT--TGCATTGCCACTTAAT-----CATTCTAGTGCAT-----TTAGTGTGAGCTGAG   |       |       |       |       |       |       |       | 44622 |
| NorthernPike            | GTGGGGA--ACGGTCTTGGA---ATAAACTACAGTGGTAAACACCTAATAACAAATACTGTGCTTC-----TAGCC     |       |       |       |       |       |       |       | 18758 |
| SpottedGar              | GTTAAAAAGCTATTTTAACCAT--GCAATCCTTATTTAAGTGTT--AAATTTATATTTTGCACATTAGATGGGTTAATT  |       |       |       |       |       |       |       | 17393 |
| ParamormyropsKingsLeyae | GAAAGCATTTAAGTTTTTCCA---GTAAGTGTCTCTTAAA-----CAGCTTTGATTTT-----                  |       |       |       |       |       |       |       | 12529 |

| Majority                | AAAATTCATCTGATTAGACAGAATATT-ACGAGTAAAT-GTCAGGTTTAGCCTGCC--TTG-ATTTCCAAC-ATTG     |       |       |       |       |       |       |       |       |
|-------------------------|----------------------------------------------------------------------------------|-------|-------|-------|-------|-------|-------|-------|-------|
|                         | 87930                                                                            | 87940 | 87950 | 87960 | 87970 | 87980 | 87990 | 88000 |       |
| Human                   | AACAAAAATGTATTTCTTCAAAGTTTTGAGAAATAAACTTTGGGGTCTAGAAGTCCCAGATGAAACTGCTAGCAGATTG  |       |       |       |       |       |       |       | 87281 |
| AsianBonytongue         | AGAATCCAGAAGA-GAGAGAGAAAAT-ACATGTACAAT-GTCAGATGAAGTCAGACAGGGTTA-ATTGGCAGTC-CTTG  |       |       |       |       |       |       |       | 13471 |
| Reedfish                | AAAA--GGCTAGCTAGATATTATTCT-CTGATTTAAAT-GTCAATTCAGAACAGCCAC--TTGCAATTTCCAACA-ACTG |       |       |       |       |       |       |       | 44695 |
| NorthernPike            | ATGAGTCATCTGAACGGTCAGAAAATGTACGGG-AAGGTGATCAGGGTGACCTGTCC-----AAGCACACCTCGGTG    |       |       |       |       |       |       |       | 18830 |
| SpottedGar              | AAAGTTTATTTATGATAAAAATATACT-ACCAAAACATTTGTCCAGTTTAGCATTATTTGCTGCATTTACCATT-AACG  |       |       |       |       |       |       |       | 17471 |
| ParamormyropsKingsLeyae | -----C-----AAT-----TCTCTAACT-CCTG                                                |       |       |       |       |       |       |       | 12546 |

| Majority                | GAACATGTCAAGTATGACC-----A--TGAATTTCTTTGACCTCT-A-CATCTTAGGCTTTTTCACCGTGCATTTTC |       |       |       |       |       |       |       |       |
|-------------------------|-------------------------------------------------------------------------------|-------|-------|-------|-------|-------|-------|-------|-------|
|                         | 88010                                                                         | 88020 | 88030 | 88040 | 88050 | 88060 | 88070 | 88080 |       |
| Human                   | TTTCTGGTGAGGTCCTCTCTTGGCTTGACGCAACCATCTTCCCCTGTGCTCATGTGGCCTTTCCACTGTGCAAGCAC |       |       |       |       |       |       |       | 87361 |
| AsianBonytongue         | GCACAGGTCAAATATGAAC-----ATATGACCACATTTGACTTCTCAGTATTATACGCTTATTTACCTAGCATAAAC |       |       |       |       |       |       |       | 13543 |
| Reedfish                | A---AGACAAGTGTGCAC-----CATATTTCTTCCATTATCTA-TATCTAGCACTTTTCTGTGTGGACTTTC      |       |       |       |       |       |       |       | 44759 |
| NorthernPike            | CAGCTTCCAGGGACGGCC-----TGGATGACCAGGGCTCA---C--CAAAGACTTCCACCAAC---T-----      |       |       |       |       |       |       |       | 18885 |
| SpottedGar              | AAA-ACGTTAATTACCATT-----A-ATGAATTTCTTTAAAAACT-GGCAT-GTAGGCTTTAAAGTCATGCATTTT  |       |       |       |       |       |       |       | 17539 |
| ParamormyropsKingsLeyae | C---ATGTGAATTGTAAC-----TG---GCTTTGACCAAC-----                                 |       |       |       |       |       |       |       | 12575 |

| Majority                | --T--GAATCTCGTTCCCTTTGTA-----CAGGGATCACAGAAT---GGCACTGCTGCAGATGTCCACTGTTGA-----A |       |       |       |       |       |       |       |       |
|-------------------------|----------------------------------------------------------------------------------|-------|-------|-------|-------|-------|-------|-------|-------|
|                         | 88090                                                                            | 88100 | 88110 | 88120 | 88130 | 88140 | 88150 | 88160 |       |
| Human                   | GTAAAGAGTCTCTTCCCCTTGTAAGGATCCTAGTCTGTTGAATCAGGGCTTTACCCTTAATGACCACATTTAACCTTAA  |       |       |       |       |       |       |       | 87441 |
| AsianBonytongue         | AAT--GCATCTTGTCTTTTGCA-----CAGGGATCGCAAAAT---GGCACTGCTGCAGATGTCCACTGTTGA-----A   |       |       |       |       |       |       |       | 13607 |
| Reedfish                | CCT--GGCTCTCACTCATATGTGG----TCCCCTTACATATT---GGTACCCTGATAAAGATGAGTAATCA-----A    |       |       |       |       |       |       |       | 44824 |
| NorthernPike            | -----CCCCGCTCCACCGCTT----CAAGAAGCCCGGCTCCA-AGAACTTCCA-GAACATCTTCCCCTCATCC--A     |       |       |       |       |       |       |       | 18948 |
| SpottedGar              | --T--GAAAACATTTCTTTTAA-----CAGGGATCACAAAAT---GGCACTGCTGCAGATGGCAACTGTTGA-----A   |       |       |       |       |       |       |       | 17601 |
| ParamormyropsKingsLeyae | -----TGTCGTTGCC-----CAGAGACCACAGAAT---GGCACTGCTGCAGATGTCAACGGTGGA-----A          |       |       |       |       |       |       |       | 12628 |

| Majority                | GAAGCG-ATTCAGGCCTTGATTGACCTGTACAATTACA-----ATATGGGTGACA----ACCATCACCTGAGG--GT     |       |       |       |       |       |       |       |       |
|-------------------------|-----------------------------------------------------------------------------------|-------|-------|-------|-------|-------|-------|-------|-------|
|                         | 88170                                                                             | 88180 | 88190 | 88200 | 88210 | 88220 | 88230 | 88240 |       |
| Human                   | TTACCTCCTTAAAGGCTCTGTTTTTAAGTACAGTTACATT--GGGGTTAGGACTTCAAC--ATATAAATTTGGGGAGGA   |       |       |       |       |       |       |       | 87517 |
| AsianBonytongue         | GAGGCG-ATTCAGGCCTTGATTGACCTGCACAATTACA-----ATATGGGTGACA----ACCATCACCTGCGG--GT     |       |       |       |       |       |       |       | 13672 |
| Reedfish                | GATTAATATTCAGTTTTTGGTGGATTACTTTAATCTCACTCTGAAAATATGGGAGAAATCCCACCTTTAACTGAAGTAAC  |       |       |       |       |       |       |       | 44904 |
| NorthernPike            | CCACCC--TCCACCTCTCCAACATCCCGTAAAGTCTACGAC---ACAGCCCAGAGATCAGATATCTGTTCCCCGAAAATAA |       |       |       |       |       |       |       | 19023 |
| SpottedGar              | GAAGCA-ATTCAGGCCTTGATTGACCTTACAATTACA-----ACATGGGAGATA----ATCATCACCTGAGA--GT      |       |       |       |       |       |       |       | 17666 |
| ParamormyropsKingsLeyae | GAAGCG-ATTCAGGCCTTGATCGACCTCCACAATTACA-----ACATGGGTGACA----ACCATCACCTGAGG--GT     |       |       |       |       |       |       |       | 12693 |

| Majority                | CTCC--TTCTCTAAGTCGA---CAATCTGAAAATACTGTTTGGAAAGG-ATTTTTTCTTTTATGG---TCTCTAGAGGC   |       |       |       |       |       |       |       |       |
|-------------------------|-----------------------------------------------------------------------------------|-------|-------|-------|-------|-------|-------|-------|-------|
|                         | 88250                                                                             | 88260 | 88270 | 88280 | 88290 | 88300 | 88310 | 88320 |       |
| Human                   | CACAA--TTCAGTTAATAGTACTTAAATTTGTAA--ATCATTTATCCCAA-ATTTTATAAGATATTG---TCACTAAAGTT |       |       |       |       |       |       |       | 87590 |
| AsianBonytongue         | CTCC--TTCTCCAAGTCAA---CCATCTGAACACACTGACGGGGAAGG-ATTCGTTTCTTTGTGG---TCTCAGGAGGC   |       |       |       |       |       |       |       | 13742 |
| Reedfish                | TTTA--TTCTTAGAAAGAAATCCTAATCAAAAAATAATTTTAAACAAAACCACACATGCCACAATCA---TTTGCAATTAT |       |       |       |       |       |       |       | 44979 |
| NorthernPike            | ATCCTCTGGTTTGGGTTGGCTGTGCACCCGAAAGCTAAGTTGACATGTTGTTTGTCCAGTGCAGATGTAACCGAGGAA    |       |       |       |       |       |       |       | 19103 |
| SpottedGar              | CTCC--TTCTCTAAATCAA---CAATTTGAACATGCTCGCAGGATAAA-ATGTG---TTTACGC---TCTTTAGAAGC    |       |       |       |       |       |       |       | 17732 |
| ParamormyropsKingsLeyae | CTCC--TTCTCGAAGTCGA---CTATCTGAA---CGAGTTGAGAGTGG-CTCCT---CTTAATGC---TTTCGAGTGGC   |       |       |       |       |       |       |       | 12757 |





Sunday, May 01, 2022 09:44 PM

|                         |                                                                                    |       |       |       |       |       |       |       |       |
|-------------------------|------------------------------------------------------------------------------------|-------|-------|-------|-------|-------|-------|-------|-------|
| Majority                | ATTCTTT-CTCCTCAATGTGTAGTCTCT-T-ATTAGCTTTTAG--AATTTAATTTTT--GTGTATTTTTATT-----TTTT  |       |       |       |       |       |       |       |       |
|                         | 88810                                                                              | 88820 | 88830 | 88840 | 88850 | 88860 | 88870 | 88880 |       |
| Human                   | ATATATAAATAATAAGTAGATAGAACTACAGGTAGACTTGAGCAAATCTATTATAGTGGTGGATTCAATTCACCTTTTCT   |       |       |       |       |       |       |       | 88139 |
| AsianBonytongue         | ATTCTG----CCTCAA-GTTTTATTCCT-T-AAAA-----AC--AATTTAATATGA--GTGAGGCTATATT-----TTTT   |       |       |       |       |       |       |       | 14164 |
| Reedfish                | ATCGATAGATACTTCTGACTTGGACTG-TGTTTAGTTCCCG--AGTTGGATCTTT--TCATTTCCGTACTION-----GCTA |       |       |       |       |       |       |       | 45509 |
| NorthernPike            | GTTTCGTT--TACTCTGTCCGGACTCCGATGGACCACATTTTGACTTTTTGACCTCA--TTGT-TTTTCATCTACTTTCT   |       |       |       |       |       |       |       | 19611 |
| SpottedGar              | GTTCTCTACCCCTCAAAGTGTAGTCTCT-T-ACTAGCTGTGAC--TTATTAATTTCT--GCAGATTTCCCTC-----CTTT  |       |       |       |       |       |       |       | 18203 |
| ParamormyropsKingsLeyae | ATGCTTC-CCCTTAA-GTGTAGACC----ATTAACCTAG--AATTCATTTTTTTGTGAATTTTTTCT-----TTTT       |       |       |       |       |       |       |       | 13228 |
| Majority                | GATTTACATCTAAAATTATCTTAATAGTTAAAGACTAAGAAT-A----A-TTGTGGAAGAC-----CTTAGATGAAT      |       |       |       |       |       |       |       |       |
|                         | 88890                                                                              | 88900 | 88910 | 88920 | 88930 | 88940 | 88950 | 88960 |       |
| Human                   | GAATTACATGTCAAACCTGACCAAAAAAGACAAAATCAACAAGATACAAATGATACAATACAAT-TACCTTAACAGAAT    |       |       |       |       |       |       |       | 88218 |
| AsianBonytongue         | GATCTA-----TTTATCTTGGTGTGTATGGAATGAGTAT-----TGGCAGAAGAT-----CTGAGATGAGT            |       |       |       |       |       |       |       | 14220 |
| Reedfish                | GCTTCACAGCAAACTGTCTCTCAAATCCGATGACCACGCATAATTGTAGTTCTGAAGAAG-----TTAATGTGCAA       |       |       |       |       |       |       |       | 45582 |
| NorthernPike            | AAATGTTATCAGTCATTCCTTCAGAGAATCACAAACCTAGAAGAAA--AAAAAACGGGAAATTTTATCCCTTTTCAATTTGA |       |       |       |       |       |       |       | 19689 |
| SpottedGar              | AGTTGAAAATTACATTTTATTTTATTAGTTA-AGATTCAGAGT-----TTTTGTAAGAC-----CTAAGGTGAAC        |       |       |       |       |       |       |       | 18267 |
| ParamormyropsKingsLeyae | TTTTTAG---CAAAGTTCATATGAGGAGTAA-GGACCCACA-----TAGCACCAGGC-----CTGA-ATGGTT          |       |       |       |       |       |       |       | 13286 |
| Majority                | TTTGAATCTA-GTTTTGCAAACATTGAAGTTTTGCGTTTTTATATTGAAC-TT-----ACATTTAGTCATTTCTGTTGTCCG |       |       |       |       |       |       |       |       |
|                         | 88970                                                                              | 88980 | 88990 | 89000 | 89010 | 89020 | 89030 | 89040 |       |
| Human                   | TATGTGTCTAAGTTATGCATCCAACACAGTTTTTAAACGCATATGGAACATTTTTGAAAAATCAGTCACATACTAAACCA   |       |       |       |       |       |       |       | 88298 |
| AsianBonytongue         | TTTGA-----GTTCTCAAACATGGAACCTTTAATTTTTTATGATGA-----TTAGTCATCCTGACAACCA             |       |       |       |       |       |       |       | 14280 |
| Reedfish                | TTTAATTACA-ATATTTAACATGGTGGAAATTAGCCTTTTACATCATAGTTT-----ACATTTATTTACTGAATTGGG     |       |       |       |       |       |       |       | 45656 |
| NorthernPike            | TCCAGACCGATGTGTAAGTCCCATTCCTTATAGAAAGGCAAGCCTTTTCCACCGTCTCCTCATTATGGTGGGTG         |       |       |       |       |       |       |       | 19769 |
| SpottedGar              | AAAGGACATC-GTTCTGCTAAGATTGAGGCTG-GGGTGTATTGA-----TTAATCAGTAAATTGTCAG               |       |       |       |       |       |       |       | 18331 |
| ParamormyropsKingsLeyae | GTGA-----GGAAACAGTGAGTTTA-ACGTCATTTAT                                              |       |       |       |       |       |       |       | 13318 |
| Majority                | TACGGTAAGCTTTTGATGATTTTTTATATTATCGTCAGTGCCTCATTTCTTTTTTTCCCTGTCA-----              |       |       |       |       |       |       |       |       |
|                         | 89050                                                                              | 89060 | 89070 | 89080 | 89090 | 89100 | 89110 | 89120 |       |
| Human                   | TAAAGCAAGCTTTCAGCTAATTTCAAAGAGTATCATACAGACCTCATTTCTTATTGCACAAGTAAAGTTAGAATTAATAACA |       |       |       |       |       |       |       | 88378 |
| AsianBonytongue         | -ACGATAAAGCTTTAATGATGTTTA-ATTTATG--AACGTTTTAATAATTTTTTCTTCTT-----                  |       |       |       |       |       |       |       | 14339 |
| Reedfish                | AACGGGATACTTTTATTTTTGTAGTACTGTACCGTCGGCGCCAAGCACCACAATGGCTCTTTGG-----              |       |       |       |       |       |       |       | 45720 |
| NorthernPike            | GATGAATGGATGTTGGCGCTCTTTTTATTTGTAATAAGTTAAACAAAATGTGCCTTACCTGACAATATCAACTC-T---    |       |       |       |       |       |       |       | 19844 |
| SpottedGar              | TACATTTCTTTTTGATCATTATCGATATCCAGGCCAGTGCATCATTTATTTTTTCCCTCACA-----                |       |       |       |       |       |       |       | 18395 |
| ParamormyropsKingsLeyae |                                                                                    |       |       |       |       |       |       |       | 13318 |
| Majority                | -TAAGGCAGTTACAAATCCT-TACCTCCTGATTTATATATTTGTGTGCTTGTTCATGTGACGTAATGATTTATTTGT      |       |       |       |       |       |       |       |       |
|                         | 89130                                                                              | 89140 | 89150 | 89160 | 89170 | 89180 | 89190 | 89200 |       |
| Human                   | AAAAGATGCATATAAAATCTGTATCCTGAGATTTAAAAATAAGTCTCAGTATTGCATGAGTCAGAAGTTTGTGTTTGT     |       |       |       |       |       |       |       | 88458 |
| AsianBonytongue         | -----TTACACATC---ACCTGCTG-TTAGTGTATTTGTACACGTGTGCTTGTGACTGAATATACTTTAAGTAT         |       |       |       |       |       |       |       | 14405 |
| Reedfish                | -TGGAGGTGCTGGAGAGCCTCGAGGCCAGATCTATATCCTGGAGTGTCTTTTGCACAGCAGTACAGGGATGAAGACGG     |       |       |       |       |       |       |       | 45799 |
| NorthernPike            | -TTTACATCTAAAATATTACATAAATCCCTGCAGTCTGATTTTGGGCACATTAATTTCTGATGTAAGTGTGTTATTTTC    |       |       |       |       |       |       |       | 19923 |
| SpottedGar              | -AAAGGCAGTCACAAATCT--GACATCTTAATTCAAATACATTTGGGTTAGTTAGATGTGGAGCAGATTAATCAACACG    |       |       |       |       |       |       |       | 18472 |
| ParamormyropsKingsLeyae |                                                                                    |       |       |       |       |       |       |       | 13318 |
| Majority                | T-----CCAGAACTGACTCCATTTTTGCGTGTGCATTGCCAT----TFACTTTGTCTTTTGTATTTTAAATTGG         |       |       |       |       |       |       |       |       |
|                         | 89210                                                                              | 89220 | 89230 | 89240 | 89250 | 89260 | 89270 | 89280 |       |
| Human                   | TTGTTTTTGGAGCCAGTGTCTTGCTCTGTCCCCAGGGTGGAGTGCAGTGGTGTCTATTGTGGCTCACTGCAGCCTCGACCT  |       |       |       |       |       |       |       | 88538 |
| AsianBonytongue         | T-----CTTGAACCT---TCCTCTGTGCATTTATACTGCCAT----TFACTTTGTATTTGGTTATTTAAATGG          |       |       |       |       |       |       |       | 14468 |
| Reedfish                | C-----CGAGAACTGCACCAATTTTGCAGGTGCATGGACAA----TGGCAGAGCTTCAGGCTCATGAAATTGG          |       |       |       |       |       |       |       | 45865 |
| NorthernPike            | T-----CCCATGTGTGATTGTATTTTTGTTTTACCACCCAAGATGTTTTGCCTTTTCAATTTTGTCTTAAATTCG        |       |       |       |       |       |       |       | 19993 |
| SpottedGar              | A-----GCATAAAGA--AGCCCAAATAAGAGTACATTACCA-----ACATAGACATTTGTTATCTCTGGCAG           |       |       |       |       |       |       |       | 18532 |
| ParamormyropsKingsLeyae |                                                                                    |       |       |       |       |       |       |       | 13318 |

Sunday, May 01, 2022 09:44 PM

| Majority                | ATGTGGTTTTTGCAGAGCATGTACTTATTGGTCTAATGTTAGTCGTATTA AAAACGGGTATTGTTTGCAC TGTGAATGA   |       |       |       |       |       |       |       |       |
|-------------------------|-------------------------------------------------------------------------------------|-------|-------|-------|-------|-------|-------|-------|-------|
|                         | 89290                                                                               | 89300 | 89310 | 89320 | 89330 | 89340 | 89350 | 89360 |       |
| Human                   | CCCAGGCTTAAGCAGTCCTTGCACTTAAGCCTCCAAAGTAGCTAGGACTAAAAGCATGCACCACCTGCCCGGCTAATTTA    |       |       |       |       |       |       |       | 88618 |
| AsianBonytongue         | ATGTGGTTTTTCC-GAGCATGTACTGACTGGTCTAGT--TAGCCCTGGGTCAAACCTGGTGTTCACATGCAC TGTAAAAAGC |       |       |       |       |       |       |       | 14545 |
| Reedfish                | AGAAAAGTGTGGCAGATCAAATGGCCACTGACCCCAAGTGAGTCGTGAAAAGCAGGGCTGGTGATTAAAAATGCAGAAGGA   |       |       |       |       |       |       |       | 45945 |
| NorthernPike            | CTGTGGTGTGTGGAGTGGGGATCAATAGGAGGTTTGTTCATCAGATGAACAA-ACACATGGTTTGTTCATCTGAATTT      |       |       |       |       |       |       |       | 20072 |
| SpottedGar              | ATAGGGTTTTAGT-TTGCCATAAAGTATTTCCTAATG-CAGGGATATTATTAAGCAAATTATATGGAAGTTGGATGGA      |       |       |       |       |       |       |       | 18610 |
| ParamormyropsKingsLeyae |                                                                                     |       |       |       |       |       |       |       | 13318 |

| Majority                | TTATTTAT-TTAG--TCTGTAGAGTTGTAGTCTCATTCTGTGTACTGAGTGCAGTAATTTTG--GGGTATATAACATAT |       |       |       |       |       |       |       |       |
|-------------------------|---------------------------------------------------------------------------------|-------|-------|-------|-------|-------|-------|-------|-------|
|                         | 89370                                                                           | 89380 | 89390 | 89400 | 89410 | 89420 | 89430 | 89440 |       |
| Human                   | TTATTTATTTATTTTGTAGAGATGAGTTCTCACTGTGTGCCAGACAGAAGTTATTTTAAATGGGAATATAAAAATAC   |       |       |       |       |       |       |       | 88698 |
| AsianBonytongue         | TGACCGAAGTGAG--TCTACAGGAGCGCCATCACATGCCGATTCTGAAGACAGCAACCCGGT-GGGACCAAAGTTTAT  |       |       |       |       |       |       |       | 14622 |
| Reedfish                | CAAGGCAG-----ATCATAGAGGCATTGTGAAGCACTGGTGAAGGGAGAGCAACAAAGTTG--AGATCCAGACCATGA  |       |       |       |       |       |       |       | 46016 |
| NorthernPike            | TTTTTTTTTTTTAACCTTTTTTTTTTTAGATTACTTGGACCATGATGTGTAAAGTTATTTCG--AGACAGACAACCAGT |       |       |       |       |       |       |       | 20150 |
| SpottedGar              | TGGCTTAC-CAAG--CCAGAAGAATAGTAATATGTTGCAGTTGTAATAAGTTTAGTAGTTTGG-TTGTATATAACAGAA |       |       |       |       |       |       |       | 18686 |
| ParamormyropsKingsLeyae |                                                                                 |       |       |       |       |       |       |       | 13318 |

| Majority                | TTGCCATTTAGTGCTAAATTTTCAATATATAAAATTA AAAATAGTTGTACATT---TTGAACTTTTTACCATAAGTTTTA |       |       |       |       |       |       |       |       |
|-------------------------|-----------------------------------------------------------------------------------|-------|-------|-------|-------|-------|-------|-------|-------|
|                         | 89450                                                                             | 89460 | 89470 | 89480 | 89490 | 89500 | 89510 | 89520 |       |
| Human                   | TTAAAATTAAGCGATAAAGTACTATATACAAATTAGATATATGTGGTACAGTGAAAGAGAAGTCTTGACGGGAAGTTTTA  |       |       |       |       |       |       |       | 88778 |
| AsianBonytongue         | GTGCC-TTTAGTCTTAATTTACATTGCATT-GCAAAAAATCAGTTGTA-----TTGAACTTTTTGAAATATTTTGTA     |       |       |       |       |       |       |       | 14692 |
| Reedfish                | ACGTGGTTTGCAGCACCTGTTCATAAATGAAACCGCAAAGAAACGTACATC---TGCACCTCCACACCAGGAGGTTG     |       |       |       |       |       |       |       | 46092 |
| NorthernPike            | GTTCC-TTTAATCCTTTTTTCATATGCCAGTTTAAAAATGTTTCCCATTTTAGTTGACACATCAACCATTTACTAAA     |       |       |       |       |       |       |       | 20229 |
| SpottedGar              | TTGCCATTTCAAGGCAGTCTGATTTAAA---AAAAAAAATAGTTGTGGCTC---TTGAATGTGTTAAAGAAAAGTATA    |       |       |       |       |       |       |       | 18759 |
| ParamormyropsKingsLeyae |                                                                                   |       |       |       |       |       |       |       | 13318 |

| Majority                | TT-TTTAAGTATAACATTTTTTA-A-TGAGGAAAGGTGATTGCTAAACAAAAGTA--ATTACATTGTATTXCAGTTGTT   |       |       |       |       |       |       |       |       |
|-------------------------|-----------------------------------------------------------------------------------|-------|-------|-------|-------|-------|-------|-------|-------|
|                         | 89530                                                                             | 89540 | 89550 | 89560 | 89570 | 89580 | 89590 | 89600 |       |
| Human                   | AC--TTTAAGAATAACAGTGTACCACAGGGAAGGAGATATTAAGACAAGACTGGAATCAATGGTATAAAAGACAGT      |       |       |       |       |       |       |       | 88856 |
| AsianBonytongue         | TT-TCATAAAGACAACATTTATA-----GCAAAAATGACTTGATCAATACAGA---ATTACATAAGGCT---GTTGTA    |       |       |       |       |       |       |       | 14758 |
| Reedfish                | CCTGCTTGCCCTACAGCTGATCAGTATTGAACACACCTACTGCGCCAAACAACAGCAC-AGTACTTAACATCCCGGTTGTG |       |       |       |       |       |       |       | 46171 |
| NorthernPike            | ATAGTCTAAATGTTCAATTCTT-----TATAGGTGTTTTCCTTTCCTTATC-----TGCTTCTATTGCAGTTTAT       |       |       |       |       |       |       |       | 20296 |
| SpottedGar              | TTCTTTTTGGGGTGATGTCTTTAAAATGGGGAAGAAACACTGTGTGCTTAAAAGTATTGTCTTATTGAATTTAAGTTGAG  |       |       |       |       |       |       |       | 18839 |
| ParamormyropsKingsLeyae |                                                                                   |       |       |       |       |       |       |       | 13318 |

| Majority                | TGATGTACCTGCCTGTGCAGCAAGT-GGTTTCCTTAATGTGTACATTCAAATAGCAGGACA--TAAAGAAACATAAAAAA |       |       |       |       |       |       |       |       |
|-------------------------|----------------------------------------------------------------------------------|-------|-------|-------|-------|-------|-------|-------|-------|
|                         | 89610                                                                            | 89620 | 89630 | 89640 | 89650 | 89660 | 89670 | 89680 |       |
| Human                   | TGAGAGAAAAAACATGCCACAAGTTGGATTCTTTGAAAAGACTAAAAAATAGACAAACATCTAAAGATTGATTAAAAA   |       |       |       |       |       |       |       | 88936 |
| AsianBonytongue         | CCATGACCTCACCTGTACATCCCG--GGTTTCAAGAATGGTTACATTCTTGGAACAG-----TGGTCAAACCTTAGACCA |       |       |       |       |       |       |       | 14830 |
| Reedfish                | CCA---CCTGTCAGTGCAGCATGC-AGTATCCCTGCTGTGCCATCTGACAACACAGCACTCCTAAACCTAATGATGAG   |       |       |       |       |       |       |       | 46246 |
| NorthernPike            | TGATGTACATGGGTAGGAAGTGAGT-GGTTTCTAAGCATGTACTGCCTGGTTCATGGA-----ATAAAAAAAAAGACA   |       |       |       |       |       |       |       | 20370 |
| SpottedGar              | TATTGTTCCCTCTTGATATAAT-----GGTGTCAATTAATCAGCACATTAAGAGCAAGATA--TTACGTGACCTAGAAAA |       |       |       |       |       |       |       | 18912 |
| ParamormyropsKingsLeyae |                                                                                  |       |       |       |       |       |       |       | 13318 |

| Majority                | CTGTCACCTGCCTGTGCAGCAAGT-GGTTTCCTTAATGTGTACATTCAAATAGCAGGACA--TAAAGAAACATAAAAAA  |       |       |       |       |       |       |       |       |
|-------------------------|----------------------------------------------------------------------------------|-------|-------|-------|-------|-------|-------|-------|-------|
|                         | 89690                                                                            | 89700 | 89710 | 89720 | 89730 | 89740 | 89750 | 89760 |       |
| Human                   | ATGAGAGTGGTAACACAAAAAATTTTTTGAATTATAAAGGGGAGAAGCATTGATAAAGCTCCAGTTTCCACATCATAT   |       |       |       |       |       |       |       | 89016 |
| AsianBonytongue         | CCCTCACTCCTCACTCT---TGCTGATGGATGT-ACCTAAAATATGGGGG-----GAAAAAAGATCCTGTGTCAA-     |       |       |       |       |       |       |       | 14897 |
| Reedfish                | CCATCAACACTGGCTGCATGACTGAAGCAGGAGGGAAGACCCTCAGCTGTTTCA-CTAGTTTGTGCAC TGTGCAAGG   |       |       |       |       |       |       |       | 46325 |
| NorthernPike            | TTGTGATACTTAACTCAT---TTAAACTATATGTCATCACTGTCATAATTA-----AACATTATGACCATGTTATG-    |       |       |       |       |       |       |       | 20438 |
| SpottedGar              | CTGTCACCTAGCCCTGTATTGTGCTTTCCCATGTTATTTTCATGTATATTGTTCCC-ATAAAATAGAATTTGCCCCACAC |       |       |       |       |       |       |       | 18991 |
| ParamormyropsKingsLeyae |                                                                                  |       |       |       |       |       |       |       | 13318 |

Sunday, May 01, 2022 09:44 PM

|                         |                                                                                     |       |
|-------------------------|-------------------------------------------------------------------------------------|-------|
| Majority                | AGTCATGAGTAGTTCTCTAGGTTTGGTGGGTTTTTATATTTTTTTAAATG--CATAATCTAATACTTTCGAATTTGTATG    |       |
|                         | 89770 89780 89790 89800 89810 89820 89830 89840                                     |       |
| Human                   | AAACACCACATATGTCTGTAAATTTCTTGAGGTCTTTTAAAATTTTTATTATTTCGTTAATAATCTCTTTTCATAGATGGATT | 89096 |
| AsianBonytongue         | AGTCATGTAT-ATTTTCTGTATTAGTTGGGTTTTTACATCTTTACAAATG--TAAAATTTAGTAGTTTGAATTTGGCACG    | 14974 |
| Reedfish                | AGTTGGAAGT-GGCCGCTGGGCACAGTGACTTTGAAGGGAGGGCTAAAAGATCAAATCCCATACAGTCGAAGTGGGAAG     | 46404 |
| NorthernPike            | ----ATGTACAGTTCAAAGGTTTTGCATAATCTTCTGTTCATGCATTGG-AAGAGGCAAACAGGAGAGAACCTGTAGT      | 20513 |
| SpottedGar              | AGTCAGAAGTCATGAAATAAGCATGGAAGGCTTTAAAATTTAATTAATA--CATT-TCTGCTTCCATATCTTCCATATG     | 19068 |
| ParamormyropsKingsLeyae |                                                                                     | 13318 |

|                         |                                                                                   |       |
|-------------------------|-----------------------------------------------------------------------------------|-------|
| Majority                | AATGGTAGTTTAAATG-GGATCTCAAAGATGAAGAATTTGAGATTGGTTTGAATTCTATGTCTATTTCC-TTTATTTTA   |       |
|                         | 89850 89860 89870 89880 89890 89900 89910 89920                                   |       |
| Human                   | AAGGGAAATGTAATAA--AATTACATTAATCAAAAATGTCATTTCAATTGTGAAACATTGACTTTTTCC-TTTATTATT   | 89172 |
| AsianBonytongue         | ATTAAGAGTTGATTT-----TCTAACAAGTTGAGAACTTTGACAGTCTTTGATTTCTCTGTCTGTGTAC-TCTGTTTTA   | 15048 |
| Reedfish                | TATTTCTATCGACAAAGTGGCTCTACAGCTATGAAGAACA-AAGAATTTGTTGGAAATCGAGGTACAAGGCCCTCCCATTA | 46483 |
| NorthernPike            | GATGTCAAATGTGTTCAGTTTACTGAAGAGGGATAACCTGGTTGGGACCAAAGTTTATGTGCCTTTAGTCTTAATTTA    | 20593 |
| SpottedGar              | ACCAGTGGTTTGACCAGGATCCCAAAGATAAAGACTT-GACAATGATTTAAGTATGACACTGATGTTTCATATAATTGG   | 19147 |
| ParamormyropsKingsLeyae |                                                                                   | 13318 |

|                         |                                                                                   |       |
|-------------------------|-----------------------------------------------------------------------------------|-------|
| Majority                | CTTCTGATCATTTACGCAATAAGTACTTGTTTAG-CTGTGTTGATCTGTTTTATTTGTGTTTTTTA-ATCTTCTACTGTA  |       |
|                         | 89930 89940 89950 89960 89970 89980 89990 90000                                   |       |
| Human                   | GCCTTGTCATTTTATGCCATATTTCTTGGAAATAG-GAGAGTTCAAGTGTAAGATTACATTGTTTA-AAATTTTATTCAT  | 89250 |
| AsianBonytongue         | CTTCTG-TAGCATGCTCAATAAACACTTCTGTAG-CTCTGTTACCTCTTCTGTCTGCGCTGCCTC--TCTTCTGTGTG    | 15124 |
| Reedfish                | ACCCACACTATTTACATGTTGAGAACTTGAAAATGCAACGTGGAAATGTTTTACTTTTTCATTTTTGCAGTTTAGGTTGAA | 46563 |
| NorthernPike            | CATTACATCATCAAGGAAAGGAATATAATTTCA--ATAATCTGGTCTTTTGTATATCTGGAAATGAGATCCAGTACCTTA  | 20671 |
| SpottedGar              | ATACTGGTATTTACAGAATATGTACACCCTTT--TTGTGTTGATTTCTTTTATGGAATTTTCTAAACATTCTACAGTA    | 19225 |
| ParamormyropsKingsLeyae |                                                                                   | 13318 |

|                         |                                                                                   |       |
|-------------------------|-----------------------------------------------------------------------------------|-------|
| Majority                | TTCTAATTTGCAATTTGGG--ATTTCAATTTTTTTTTATTTAGTAGTAATGCACCTTTATTTTATGAAAAAGCTTCCAAAA |       |
|                         | 90010 90020 90030 90040 90050 90060 90070 90080                                   |       |
| Human                   | TTAAAATTAGTAATTCAGGTAATTTCTTCTGCTCTGTTTACTCCTTGTGTACTTTTCAGTTTTTGACAAAGCTTTTGTTT  | 89330 |
| AsianBonytongue         | CTCCACCTCACTTTCTG---ATGTCATATTTCTTACAGGGTGGGAAAGCTACACCCTTTATGAAATGGTCCGGAA       | 15200 |
| Reedfish                | GATGAAATGCAAAATGGGGTATTTCAATTTTCAATTTTGCAGCATGAATGCATGTAGACTTTGAAAACGAAATCCAAAA   | 46643 |
| NorthernPike            | TTCTGAAACACAAATCCAC-AGTTATTTTATGCTGATATACATGTCATACCCACTTGTTTTATGAAGAAATCTCACAGC   | 20750 |
| SpottedGar              | GCATACTTTGAATTT-----ATGCAATTTTGTCTTAAAGAAATAACATGAC-TTATTTTCATCAATAGGCCTACAAAA    | 19298 |
| ParamormyropsKingsLeyae |                                                                                   | 13318 |

|                         |                                                                                      |       |
|-------------------------|--------------------------------------------------------------------------------------|-------|
| Majority                | TAAAGTTTGCAATTTACATTTTTTATATTTTAAATTTTCATCACTTTACCCATTTTGTATCA-TTTAAGATCAAATTTGTCTTT |       |
|                         | 90090 90100 90110 90120 90130 90140 90150 90160                                      |       |
| Human                   | TCTTTTTTACTTAAAAATTTTGGTATTCTAATTAATCATCCCTT-TCCCTTTAGATCA-CTTCAGATCCTATTGTGCTG      | 89408 |
| AsianBonytongue         | AA---TTGAACCAAAATGAACAGACTTGACTGCAAAGCACTTT-CCCACCTGTATTA-CTCTGGCTTCTTCTGGTTTT       | 15274 |
| Reedfish                | GAGAGATTGCATTTTCATTTTGTGTTTTTCAATTTTCACTTTTGCAGAAAATGCCTCCCA-TACAGGAACAAAGGTAGCCT    | 46722 |
| NorthernPike            | TCAAGTTTCTGGATAGATGTATCTAAAAAATAAATAAATCAATCAGATTTCTGTCAGTTTAAAGAAAAGTCAATGTA        | 20830 |
| SpottedGar              | TAAC-ATTGAATTTACTGTTTTACTCTCTCTTTTTTATCAAGTTACTTATTTTGTGTTTA-ACTAAAATAAATTAATACAG    | 19376 |
| ParamormyropsKingsLeyae |                                                                                      | 13318 |

|                         |                                                                                   |       |
|-------------------------|-----------------------------------------------------------------------------------|-------|
| Majority                | TATCAG-TGGCTTGGATTTTTTTGCATCTAGCTATTTAGTATGCTTTGAGCCTCTGTTTTT---TTTATATAATCCCA    |       |
|                         | 90170 90180 90190 90200 90210 90220 90230 90240                                   |       |
| Human                   | AATCAGCTGGCTAGAACTCTCTGTTACCTGGCTACTTCTGAGGTAGCTGTTTGGTTATTTAGCTTTATTTTAAATCCCA   | 89488 |
| AsianBonytongue         | TAACCC-TGTTTTGTAC-CTAGCTGTAGCTAC-TAATCAGTCTGCTCTGAGCCTCACTCTTT---TCTTCTGCAATCCA   | 15348 |
| Reedfish                | TGGCAG-GAGCTTGATTTTGTGTTCTTAAACCAATTTCTGTTTGAATTTGGAGATATGTTTTT---TGGATCATTGTC    | 46798 |
| NorthernPike            | TATTTTCTATATTAGTTAATTTTTACATCTAGAAATGTACGATTGAGATATAGTTTGTAAAGTGGCACAATAAAATAAAT  | 20910 |
| SpottedGar              | TGCCAG-TGGAGCAGATATAATTTGCATATGTGTGGGAAGAAAGCATAACAACCTCCAGTTTT---TTTTAACTGGAACCA | 19452 |
| ParamormyropsKingsLeyae |                                                                                   | 13318 |

Sunday, May 01, 2022 09:44 PM

|                         |                                                                                 |       |
|-------------------------|---------------------------------------------------------------------------------|-------|
| Majority                | TTCTTTTATCTTCTATTGTTAGGTTTTGATTTGCTGTTACTGA-A-T-ATTTTCTTTTTCAT-CCTCTTCTCATGTAA  |       |
|                         | 90250 90260 90270 90280 90290 90300 90310 90320                                 |       |
| Human                   | TTCCTCTATCACTCATCTGTCTGTATGCAGTTACTATGCCTGGGACTTATTTTCTTATTCTTTCCCTCCATTATCTCAA | 89568 |
| AsianBonytongue         | -TCTTTCACCTTCTCTCTGCT---TACAGACCCCTTTTACTAA-----ATCCTCTGTCTCAG-CCAATGCTCATAACA  | 15418 |
| Reedfish                | CTGGAAGATAACAACATGACCAGGTTTTAGTTTCTGTCTCAGAGGCAGCCAGATTTAATTTTAA-AATCTCTGGTATTT | 46877 |
| NorthernPike            | TTCTAACAAAGTCGGGAGGTTTGGTCTGACTTGGTTGTG--TGATTTTGATTTTCTTTTCTCCCTCTCTCTCGT      | 20987 |
| SpottedGar              | CTCTGTTACTTAATTTTATTAC-TTTTGATTGGCTATTGCTTA-----ATTTTTGCGTGA---CAGGTGTAATGTAAA  | 19523 |
| ParamormyropsKingsLeyae |                                                                                 | 13318 |

|                         |                                                                                  |       |
|-------------------------|----------------------------------------------------------------------------------|-------|
| Majority                | AXXXXXXXXXXGXXXXCTXXCXXTXAATXAXXXXXXXXXTXTXTXTXAAXXXXTAAAXXXXXXXXXTXAXXXAXTXAXTT |       |
|                         | 90330 90340 90350 90360 90370 90380 90390 90400                                  |       |
| Human                   | AGCTCTGCTGTTTGTGCTGTCTTTTTATTAGACAGCTTTTTTCTGACAACGTTAAGT--CTACTTATTTATATCACTT   | 89646 |
| AsianBonytongue         | ACACGACCAGAGAAACTGACTCTTGAATGAAGCTTTTGTCTTCTCTGA--CCTAAC-----TGTTAAACCATTGT      | 15492 |
| Reedfish                | ATGAAGCCCATGATGCCATGTATCCTAACAAAGTCTTAGGCCCTTTAGAGCTAAAACAGCCCCAGCATCACAGAACA    | 46957 |
| NorthernPike            |                                                                                  | 20987 |
| SpottedGar              | AGGTGAGATTAGTGAATTATCCATACAATGTGTGATTAATCTTTACCTGAAATCTCAATATTTTATAACAGATTA      | 19603 |
| ParamormyropsKingsLeyae |                                                                                  | 13318 |

|                         |                                                                                |       |
|-------------------------|--------------------------------------------------------------------------------|-------|
| Majority                | XXXAXCXXTAXXXXXXAXTTXXXXAXAXAXXTXTCXXXXXAXXTTCXTXAXXXXXXAXXXXXXXTXXXTXXXXAXXGX |       |
|                         | 90410 90420 90430 90440 90450 90460 90470 90480                                |       |
| Human                   | TATTTCTCAAACCTCACACTTAATAACACATTTTATCTGAGGTAGTTTATCTAAACAA-AAGTTTGTTCACCTAA    | 89725 |
| AsianBonytongue         | CCAATT--TATTCTGAATTTAT-TATATA-GTCTTCAAGACCTATTTCTTGG-----ACATTTCTTTCAACTGA     | 15558 |
| Reedfish                | CACACCATTCTTGACGGTGGGATCAGGTTCTTTTTCAGTATAACCATCCTTATACAACCTGAGTTTTTGTG        | 47037 |
| NorthernPike            |                                                                                | 20987 |
| SpottedGar              | TGGACCAGTAGCCAGCAGTTGTACAGATAAGTCTGCCAGGTGAGCTCCCTAAC--ATGCACACATTCAAACAGAA    | 19681 |
| ParamormyropsKingsLeyae |                                                                                | 13318 |

|                         |                                                                            |       |
|-------------------------|----------------------------------------------------------------------------|-------|
| Majority                | TXX-----AXTXXTXXATTTTCAXXXGAXXTXXXXXXX--XXXXTTTGXXXTCCCATTXXTXXATXXXXAXXAX |       |
|                         | 90490 90500 90510 90520 90530 90540 90550 90560                            |       |
| Human                   | TATAGAACTTTAAAATTTATAATTCAGTGGGTTTTATTGTAAAAGGATTTTATGTACTGTCTAGATAATGGTTT | 89805 |
| AsianBonytongue         | T-----ATTTGT--ATTTTCGGCAAAGTTTAAACC-----CTTTGTGATCCCATGGTATACATAAAGTAG     | 15615 |
| Reedfish                | TTC-----AATTTTT-GTTTCATCTGACCATAGAACTGT-TCCATTTAAAGTCCCATTA-GCGTTTAGAAAAT  | 47104 |
| NorthernPike            |                                                                            | 20987 |
| SpottedGar              | TGC-----ATTAGTTCATTTTACTCGAGGATCAGTTGGAG-AGACTTTGACAACCCTTTCTTTATCTCAACAC  | 19750 |
| ParamormyropsKingsLeyae |                                                                            | 13318 |

|                         |                                                                                  |       |
|-------------------------|----------------------------------------------------------------------------------|-------|
| Majority                | XXCAGGXGTXXCXCTX---TAXXXGTXTTTXXXXTTTXXTXXTXXAAXTXXA--XXXXXXXXXAATGXXXXAAXTXXX   |       |
|                         | 90570 90580 90590 90600 90610 90620 90630 90640                                  |       |
| Human                   | TACAGGTGTAAGCGTAAATTTGCAAGTATATGAAATTAAGTATGTGAAATGCAGTGTGAGAAACAAATGAGAAAATTCAG | 89885 |
| AsianBonytongue         | GACAGAATTATGCTT----TAAGGGCATTTGGTGTCTACATAGTAAATTACA---CAA---CTAATGAGGAAAATTTGT  | 15683 |
| Reedfish                | TGCAGGTGCTTACAT----TAAGGCTTTTTTTTTTTTTTTTTTGTGCTGGTGTGTA--CCTTCCAGAAATGCTTGGAGT  | 47176 |
| NorthernPike            |                                                                                  | 20987 |
| SpottedGar              | ATCCTGAGTGCGCCA----TAGCTGTGATTAACATTTTTTCTACTAATTCTT---TGAATCCTAACTTTAGAAACCCA   | 19823 |
| ParamormyropsKingsLeyae |                                                                                  | 13318 |

|                         |                                                                                   |       |
|-------------------------|-----------------------------------------------------------------------------------|-------|
| Majority                | XCXXGTGXXXXXXXXXXXXXXXXXXXXXXXXXXXXXXXXXXXXXXXXXXXXXXXXXXXXXXXXXXXXXXXXXXXXXXXXXX |       |
|                         | 90650 90660 90670 90680 90690 90700 90710 90720                                   |       |
| Human                   | ACTTGTGAGAAGATTGTTTTGTTTTTCTGTGCTTAGCCTTGCGGAAAAATCTGAGAAAATTAATAATATAACT         | 89965 |
| AsianBonytongue         | GCAAGGG                                                                           | 15690 |
| Reedfish                | GGTGGTGTCTGATGGTAGTTATGTATTTCTTCATCAGTGATCTTTAGGGTTTATTTTACTTCTTACTCTGTTCACTGT    | 47256 |
| NorthernPike            |                                                                                   | 20987 |
| SpottedGar              | ACAGATGTTGTGGAATACTGACAGTTTACCTACAGTAGCTTGTGGGACATGGTACCAATCAGTTTCTAATCACAAGGG    | 19903 |
| ParamormyropsKingsLeyae |                                                                                   | 13318 |











Sunday, May 01, 2022 09:44 PM

```

Majority      XXXXXXXXXXXXXXXXXXXXXXXXXXXXXXXXXXXXXXXXXXXXXXXXXXXXXXXXXXXXXXXXXXXXXXXXXXXX
              |-----|-----|-----|-----|-----|-----|-----|-----|
              92650   92660   92670   92680   92690   92700   92710   92720
Human         GTGTA-TTGAGATACATTCTATTTTGATAAAATATGAAATTATTCCTTAATCTTCACCTTTTCTCCCATTC AATTTTCC 91961
AsianBonytongue
Reedfish     AAGGATTTGACTTGCCATAATAACTGTCCCTTTTAGCAGTGGTTTATACAAATTATATCTACTACTACAGTG GAAAAA 49237
NorthernPike
SpottedGar   ATGTAATTACAGGATTTGCAAACAGGAAAAAATAGTAAATGTATCTTTTATAAAAAGTGCATACACTATA ATATTAAG 21886
ParamormyropsKingsLeyae
    
```

```

Majority      XXXXXXXXXXXXXXXXXXXXXXXXXXXXXXXXXXXXXXXXXXXXXXXXXXXXXXXXXXXXXXXXXXXXXXXXXXXX
              |-----|-----|-----|-----|-----|-----|-----|-----|
              92730   92740   92750   92760   92770   92780   92790   92800
Human         TAGTCCATCAGTAGCAGAAGAGGATCTACGAACACTGTTTCGCTAACACTGGGGGCACTGTGAAAGCATTTA AGTTTTTTC 92041
AsianBonytongue
Reedfish     TATAATGCTGTTGTTTATAAAATAAGTTTATTCATTACAGCTTAGATATATGAACCTAGAGTCTATTTGT TATTGCTCT 49317
NorthernPike
SpottedGar   TACTAGGTACTTAGTAGTATAGTCTTTGTGACACTTTGCTGGT--AATGGGTGTGTGCAGAGGCTCATTC ATATATAGAA 21964
ParamormyropsKingsLeyae
    
```

```

Majority      XXXXXXXXXXXXXXXXXXXXXXXXXXXXXXXXXXXXXXXXXXXXXXXXXXXXXXXXXXXXXXXXXXXXXXXXXXXX
              |-----|-----|-----|-----|-----|-----|-----|-----|
              92810   92820   92830   92840   92850   92860   92870   92880
Human         AGTAAGCAAGCTTCCTTATCTTTAAATTAGTGACCTGATAAAATTTTAAAGTAGTTTTTGTCTTTTCGT TTTATAGAAAT 92121
AsianBonytongue
Reedfish     GTGAATTTTTCAAATAGTAAATTTATGTAAAAAGAAGCTTTTGTATTGAAATTTTTATATAGCCTGTT ATAGGTCATT 49397
NorthernPike
SpottedGar   GGTGTATGTGTGGTAGTCCAAGCGTATATAAAGGTAATCTACACTATTTTAGAAGTTTATGAATGTGTG TGTGCACATAG 22044
ParamormyropsKingsLeyae
    
```

```

Majority      XXXXXXXXXXXXXXXXXXXXXXXXXXXXXXXXXXXXXXXXXXXXXXXXXXXXXXXXXXXXXXXXXXXXXXXXXXXX
              |-----|-----|-----|-----|-----|-----|-----|-----|
              92890   92900   92910   92920   92930   92940   92950   92960
Human         TTTTGATTCCGGAATGGCCAAAATTCAGTATTTAATAAGCCCTTTCTAATTTGTATGAAGTGTCTAAT TTTTATAATTTT 92201
AsianBonytongue
Reedfish     GCAATTCCTACTGTTTCATGATGCATTACTTTAGCACTATTTTTTTTTTTTTTTTTTTTTTTCATGGG TTGCGTAACCTTTTAAA 49477
NorthernPike
SpottedGar   ATTGAGGTAGATGGCAAATCAGCCTGCATTTGGAAGTTGGTCACCTATAACTGCCCATGAAGATGTGG AAGTTCATAACTG 22124
ParamormyropsKingsLeyae
    
```

```

Majority      XXXXXXXXXXXXXXXXXXXXXXXXXXXXXXXXXXXXXXXXXXXXXXXXXXXXXXXXXXXXXXXXXXXXXXXXXXXX
              |-----|-----|-----|-----|-----|-----|-----|-----|
              92970   92980   92990   93000   93010   93020   93030   93040
Human         GTTTCAGAAGAGATCACAAAATGGCTCTTCTTCAGATGGCAACAGTGAAGAAGCTATTCAGGCCTTGAT TGATCTTCAT 92281
AsianBonytongue
Reedfish     AATATATTCCAGATTGTGAAATATTCACCTTTTATTTTGT--CAATTAAAAGCCTTGCTCTATTTGCAG AGATCACA 49555
NorthernPike
SpottedGar   GGGGAATGCTGACCGTGCACGGCAAACCTGTGGAACACAAT--GAAGAATAATAGCTGATGCTCAGTG CTTC AAGGTTATC 22202
ParamormyropsKingsLeyae
    
```

```

Majority      XXXXXXXXXXXXXXXXXXXXXXXXXXXXXXXXXXXXXXXXXXXXXXXXXXXXXXXXXXXXXXXXXXXXXXXXXXXX
              |-----|-----|-----|-----|-----|-----|-----|-----|
              93050   93060   93070   93080   93090   93100   93110   93120
Human         AATTATAACCTTGGAGAAAACCATCATCTGAGAGTGTCTTTCTCCAAGTCAACAATTTAAAATGGGAAG ATGAAGATTG 92361
AsianBonytongue
Reedfish     AAATGGCACTTCTCCAGATGTCAACTGTGGAGGAAGCAATTC AAGCCTTGATTGACCTTCATAATTACAATCTCGGAGAT 49635
NorthernPike
SpottedGar   TACTGTATGCTATGGGAATTTTTTTTGTATCAGTCTGCTCAAAAAGGAATACACAAGGATGGCTTTT GGATTTCTTGAATTC 22282
ParamormyropsKingsLeyae
    
```

Sunday, May 01, 2022 09:44 PM

```

Majority      XXXXXXXXXXXXXXXXXXXXXXXXXXXXXXXXXXXXXXXXXXXXXXXXXXXXXXXXXXXXXXXXXXXXXXXXXXXX
              |-----|-----|-----|-----|-----|-----|-----|
              93130    93140    93150    93160    93170    93180    93190    93200
Human         GGGGTGAATCACATTGTTCAATGTCATCACCTATTTGACTGTTTCAGAAAAGTGGGACCAGAGTTTGATTTTTTTTGTTT 92441
AsianBonytongue 15690
Reedfish       AATCACCATCTGAGAGTTTCATCTCTCAAATCTACCATTTAAGCT-TTTCTCCCTTTTTATTTTCTTTTTAAACGC 49714
NorthernPike    20987
SpottedGar     GCCGATTATT--GAGGTATGGAGAAGGGAATCATCTGTCGGAGTT-ATGAGTACTCAAAGAATCTTTGGTTTGCAGTGC 22359
ParamormyropsKingsLeyae 13318
    
```

```

Majority      XXXXXXXXXXXXXXXXXXXXXXXXXXXXXXXXXXXXXXXXXXXXXXXXXXXXXXXXXXXXXXXXXXXXXXXXXXXX
              |-----|-----|-----|-----|-----|-----|-----|
              93210    93220    93230    93240    93250    93260    93270    93280
Human         TTGTTTTTTTGGGGTTCTTTTTTTTTTCCATGCTGTTATCATTCCCTTGGTTATAAAATGAAATGGCATATGTAAAGGCA 92521
AsianBonytongue 15690
Reedfish       TGTTTAGCGTGGCATTACTTGTGACTGTTTCAGACACTGGGACCACAGTTTGGCATATAATTTGAATTTAGTCATTC 49794
NorthernPike    20987
SpottedGar     AATCTTTGATTAAGCGTGGTGATGACAATATGTTTATATGCATACATTTCTCATGACTTGACTAGAAGCATT      22432
ParamormyropsKingsLeyae 13318
    
```

```

Majority      XXXXXXXXXXXXXXXXXXXXXXXXXXXXXXXXXXXXXXXXXXXXXXXXXXXXXXXXXXXXXXXXXXXXXXXXXXXX
              |-----|-----|-----|-----|-----|-----|-----|
              93290    93300    93310    93320    93330    93340    93350    93360
Human         GAGTTGTTAACTGCTATATTTTCATCTGTCTATAGGGAAGCCATTTTGTCTGTTTAAAATTTTCAGTTTAAATTTGCTTTT 92601
AsianBonytongue 15690
Reedfish       CTAATACAATACATTATGGTAAAGCTGTAAATGAAAATATGTTAAAGCCATGATTTGGGGCTTTTATTTCAATGTTTCC 49874
NorthernPike    20987
SpottedGar     22432
ParamormyropsKingsLeyae 13318
    
```

```

Majority      XXXXXXXXXXXXXXXXXXXXXXXXXXXXXXXXXXXXXXXXXXXXXXXXXXXXXXXXXXXXXXXXXXXXXXXXXXXX
              |-----|-----|-----|-----|-----|-----|-----|
              93370    93380    93390    93400    93410    93420    93430    93440
Human         TTTTTTTTTTTTTTTTTCTTTCAACTTAGTTGACATACGTCCTTAAAAAGGAAAAC TAGTGTGTCTATGTGCATTTA 92681
AsianBonytongue 15690
Reedfish       CCTTTACCTATACCATTGGAAAGTCATTAACAATTTTATCACTTTGTAAAAAAGGAGATAATTCATTTCT 49954
NorthernPike    20987
SpottedGar     22432
ParamormyropsKingsLeyae 13318
    
```

```

Majority      XXXXXXXXXXXXXXXXXXXXXXXXXXXXXXXXXXXXXXXXXXXXXXXXXXXXXXXXXXXXXXXXXXXXXXXXXXXX
              |-----|-----|-----|-----|-----|-----|-----|
              93450    93460    93470    93480    93490    93500    93510    93520
Human         CTAGAAAAAGGAATTGGTTGTTTAGGGCACACTGTTATATGGGAATTAAAATATGTTTAGGCAGGGGTGTGAAAAAGG 92761
AsianBonytongue 15690
Reedfish       TTATGATAAACGTACAAGTCGACAAGACGTCCTTACCTGACAAAACAGTATCAACACTTTTCCATTAATGTGTTTGTAT 50034
NorthernPike    20987
SpottedGar     22432
ParamormyropsKingsLeyae 13318
    
```

```

Majority      XXXXXXXXXXXXXXXXXXXXXXXXXXXXXXXXXXXXXXXXXXXXXXXXXXXXXXXXXXXXXXXXXXXXXXXXXXXX
              |-----|-----|-----|-----|-----|-----|-----|
              93530    93540    93550    93560    93570    93580    93590    93600
Human         TTAAGTTTTTGTTCCTCTGCTTGGAACTTATTTTGAATTAAGTGGCTTGTGTCACCTTTTTTCTATTTAATCAAATAAGAT 92841
AsianBonytongue 15690
Reedfish       CAGTTTATTTACAGTTTACAGTTTGGAAATATAGGCACATTTGGTCTGGTATTTAAATGAGTGGCTGTGTGAAAAGGCTT 50114
NorthernPike    20987
SpottedGar     22432
ParamormyropsKingsLeyae 13318
    
```

Sunday, May 01, 2022 09:44 PM

```

Majority      XXXXXXXXXXXXXXXXXXXXXXXXXXXXXXXXXXXXXXXXXXXXXXXXXXXXXXXXXXXXXXXXXXXXXXXXXXXX
              |-----|-----|-----|-----|-----|-----|-----|-----|
              93610   93620   93630   93640   93650   93660   93670   93680
Human         ACATGATATTGAAAGAATAAAGCAGCATTTTCTAGTTTTACTACCTTAGGCTTTATTGCTTTGAAAACAACATTGGCCTT 92921
AsianBonytongue
Reedfish     TTGTTTCCTTTAAGTAATCGTACAGTTTCTAAAGTTGGTAATGCCCTCATAAAGGATATTCATAGTTTTACCTAGTATAA 50194
NorthernPike
SpottedGar
ParamormyropsKingsLeyae

```

```

Majority      XXXXXXXXXXXXXXXXXXXXXXXXXXXXXXXXXXXXXXXXXXXXXXXXXXXXXXXXXXXXXXXXXXXXXXXXXXXX
              |-----|-----|-----|-----|-----|-----|-----|-----|
              93690   93700   93710   93720   93730   93740   93750   93760
Human         TTGTATCTCACAAATCTGGTCTAGATTGAGTTATGAATGTAGGCATTAGTTAAAATTAACAAGATGCAGAGTATTAATTT 93001
AsianBonytongue
Reedfish     TGAAAAATATTAAGTATTTTTGTTTACCATGCTCTATTTTGCCTTTTGGGCAATGTTACAAAACATTTTACCTTCATAA 50274
NorthernPike
SpottedGar
ParamormyropsKingsLeyae

```

```

Majority      XXXXXXXXXXXXXXXXXXXXXXXXXXXXXXXXXXXXXXXXXXXXXXXXXXXXXXXXXXXXXXXXXXXXXXXXXXXX
              |-----|-----|-----|-----|-----|-----|-----|-----|
              93770   93780   93790   93800   93810   93820   93830   93840
Human         CTTAAGACAACAAAGTGATTTCTGTAAGTTTGAGCCCTATGTGGAAAGCATTGTGGAATCTTAACCTTTTCGTACACACT 93081
AsianBonytongue
Reedfish     AACTGCCATCTTTTTTCATTTTTAGATATAACCTGCTTTATCCTATAACCAAGATAAAGCTTTAACCTAGTTATCATT 50354
NorthernPike
SpottedGar
ParamormyropsKingsLeyae

```

```

Majority      XXXXXXXXXXXXXXXXXXXXXXXXXXXXXXXXXXXXXXXXXXXXXXXXXXXXXXXXXXXXXXXXXXXXXXXXXXXX
              |-----|-----|-----|-----|-----|-----|-----|-----|
              93850   93860   93870   93880   93890   93900   93910   93920
Human         CTTGTGGGACGTATCATATAAATGTCAGCACTAAGTAATGTCTTGTGTTGTGGCTGAATATTTTCGTAGATGTTTTTGAA 93161
AsianBonytongue
Reedfish     GTGATCATTGTTACCTTTGTTTGCACAACCACCTGCTGAAGAAGCTGGTATTATTTGAGTAAATATCTTTGTAGCTGTTCT 50434
NorthernPike
SpottedGar
ParamormyropsKingsLeyae

```

```

Majority      XXXXXXXXXXXXXXXXXXXXXXXXXXXXXXXXXXXXXXXXXXXXXXXXXXXXXXXXXXXXXXXXXXXXXXXXXXXX
              |-----|-----|-----|-----|-----|-----|-----|-----|
              93930   93940   93950   93960   93970   93980   93990   94000
Human         GTTGACATGACTTACGTGCATTTAAATATATATTGCCATCCTTAGTTTGTAAATTAAGATTTGGAATATGGTTGTGGATTT 93241
AsianBonytongue
Reedfish     TTGTCATTG---CATATGTGCATTTATTTATATTGCCATCTTTCATTTGTACCTTGAGGATTTAAATGGCTGTGGACTTT 50511
NorthernPike
SpottedGar
ParamormyropsKingsLeyae

```

```

Majority      XXXXXXXXXXXXXXXXXXXXXXXXXXXXXXXXXXXXXXXXXXXXXXXXXXXXXXXXXXXXXXXXXXXXXXXXXXXX
              |-----|-----|-----|-----|-----|-----|-----|-----|
              94010   94020   94030   94040   94050   94060   94070   94080
Human         CTGAGCATGTGCAGACTGGTCTAGCTAGTTCAGGAA-----CTGGTGCATGTATTTTCAAAGATAAAGAAAGTGTACT 93315
AsianBonytongue
Reedfish     CTAAGCATGTACTGACTGGTATACTTAGTTTTGGAAAGACTGCTGTTGCATGCATTTTAAAAGCTAGCAGAAGTGAGCT 50591
NorthernPike
SpottedGar
ParamormyropsKingsLeyae

```



Sunday, May 01, 2022 09:45 PM

| Majority                | XXXXXXXXXXXXXXXXXXXXXXXXXXXXXXXXXXXXXXXXXXXXXXXXXXXXXXXXXXXXXXXXXXXXXXXXXXXXXXXXXXXXXXXXXXXXXXXXXXXXXXXXXXXXXXXXXXXXXXXXXXXX |
|-------------------------|------------------------------------------------------------------------------------------------------------------------------|
|                         | 94570 94580 94590 94600 94610 94620 94630 94640                                                                              |
| Human                   | CCTGTAGCATGCTCAATAAACACTTCTGTAGCTCTATATTCACCTTTTCTGTCTTTCTCTGCTGCCTTTTCTCTCTCCTC 93861                                       |
| AsianBonytongue         | 15690                                                                                                                        |
| Reedfish                | TCTGTAGCATGCTCAATAAACACTTCTGTAGCTCTATATTCACCTCTTCTGTCTCTATGCTGCCTCTCTCTTTTC--- 51148                                         |
| NorthernPike            | 20987                                                                                                                        |
| SpottedGar              | 22432                                                                                                                        |
| ParamormyropsKingsLeyae | 13318                                                                                                                        |

| Majority                | XXXXXXXXXXXXXXXXXXXXXXXXXXXXXXXXXXXXXXXXXXXXXXXXXXXXXXXXXXXXXXXXXXXXXXXXXXXXXXXXXXXXXXXXXXXXXXXXXXXXXXXXXXXXXXXXXXXXXXXXXXXX |
|-------------------------|------------------------------------------------------------------------------------------------------------------------------|
|                         | 94650 94660 94670 94680 94690 94700 94710 94720                                                                              |
| Human                   | TTCTTTGTTTTCACTCCACTGTGCTTCTGAAATTCATGTTTATTCTCTGCCAGGGTGGGAAAGGAGTAATAATATTACAAT 93941                                      |
| AsianBonytongue         | 15690                                                                                                                        |
| Reedfish                | -TCTTATGTTTCACCTCACTTTGCTTCTGAAATTCATGTTCTTTGTCTAGGGTGGGAAATCTTTTCAGATTTTATTTCAT 51227                                       |
| NorthernPike            | 20987                                                                                                                        |
| SpottedGar              | 22432                                                                                                                        |
| ParamormyropsKingsLeyae | 13318                                                                                                                        |

| Majority                | XXXXXXXXXXXXXXXXXXXXXXXXXXXXXXXXXXXXXXXXXXXXXXXXXXXXXXXXXXXXXXXXXXXXXXXXXXXXXXXXXXXXXXXXXXXXXXXXXXXXXXXXXXXXXXXXXXXXXXXXXXXX |
|-------------------------|------------------------------------------------------------------------------------------------------------------------------|
|                         | 94730 94740 94750 94760 94770 94780 94790 94800                                                                              |
| Human                   | TCTATGGCTTTATACCATAAATAAATCTAGATGCTGTGAAAATATACCAGCTGGTTTTTTTAAATTTAAAAGATGGTAAC 94021                                       |
| AsianBonytongue         | 15690                                                                                                                        |
| Reedfish                | TGATTTAAATATTTAAATGACAGTACTTCAAGCTTTGTAAAATCTAACTT-TATTTCCACCCTGTGTTATTCTCCT 51306                                           |
| NorthernPike            | 20987                                                                                                                        |
| SpottedGar              | 22432                                                                                                                        |
| ParamormyropsKingsLeyae | 13318                                                                                                                        |

| Majority                | XXXXXXXXXXXXXXXXXXXXXXXXXXXXXXXXXXXXXXXXXXXXXXXXXXXXXXXXXXXXXXXXXXXXXXXXXXXXXXXXXXXXXXXXXXXXXXXXXXXXXXXXXXXXXXXXXXXXXXXXXXXX |
|-------------------------|------------------------------------------------------------------------------------------------------------------------------|
|                         | 94810 94820 94830 94840 94850 94860 94870 94880                                                                              |
| Human                   | TGCTTTTCAGGAGGACACATATTAACATTTCCACCCTGTATAATCTACTGCTTTTAAAGACATAACTTTTATTGTAGC 94101                                         |
| AsianBonytongue         | 15690                                                                                                                        |
| Reedfish                | TCCAATTATAACTGAGTTCTGTGAACCTTCTTTTCTGTCTGCATAGATGTATCTACCAAATCCGCCTTTCAGGGTTTCAT 51386                                       |
| NorthernPike            | 20987                                                                                                                        |
| SpottedGar              | 22432                                                                                                                        |
| ParamormyropsKingsLeyae | 13318                                                                                                                        |

| Majority                | XXXXXXXXXXXXXXXXXXXXXXXXXXXXXXXXXXXXXXXXXXXXXXXXXXXXXXXXXXXXXXXXXXXXXXXXXXXXXXXXXXXXXXXXXXXXXXXXXXXXXXXXXXXXXXXXXXXXXXXXXXXX |
|-------------------------|------------------------------------------------------------------------------------------------------------------------------|
|                         | 94890 94900 94910 94920 94930 94940 94950 94960                                                                              |
| Human                   | TTGTTAATTCATCTCTTTTGTCTTGTGTTTTTTTTTTTTTTTCCAGTAGATTTATGCACTAATAGATCTTTTGATT 94181                                           |
| AsianBonytongue         | 15690                                                                                                                        |
| Reedfish                | GCTTTCTGTGCAAAATCCATTCTCTCCTTCTGTCTGCTGATAGATACTCTAATCTGTAATGTCTGAAGTGCAATGCC 51466                                          |
| NorthernPike            | 20987                                                                                                                        |
| SpottedGar              | 22432                                                                                                                        |
| ParamormyropsKingsLeyae | 13318                                                                                                                        |

| Majority                | XXXXXXXXXXXXXXXXXXXXXXXXXXXXXXXXXXXXXXXXXXXXXXXXXXXXXXXXXXXXXXXXXXXXXXXXXXXXXXXXXXXXXXXXXXXXXXXXXXXXXXXXXXXXXXXXXXXXXXXXXXXX |
|-------------------------|------------------------------------------------------------------------------------------------------------------------------|
|                         | 94970 94980 94990 95000 95010 95020 95030 95040                                                                              |
| Human                   | GCCATGCTCTCTGTGCTGAGTTTCATCTTTCATCTTTTGTGTCTGCTAAAGATTTCTTACTAATCTTAGACTACCTGTG 94261                                        |
| AsianBonytongue         | 15690                                                                                                                        |
| Reedfish                | AGGTGGATATTTCTTTATATTTCTTAAAGATCCACTATCAAATTTAAGCAAATGTTTAAAGTGAAATAACAACCTAGT 51546                                         |
| NorthernPike            | 20987                                                                                                                        |
| SpottedGar              | 22432                                                                                                                        |
| ParamormyropsKingsLeyae | 13318                                                                                                                        |



Sunday, May 01, 2022 09:45 PM

```

Majority      XXXXXXXXXXXXXXXXXXXXXXXXXXXXXXXXXXXXXXXXXXXXXXXXXXXXXXXXXXXXXXXXXXXXXXXXXXXX
              |-----|-----|-----|-----|-----|-----|-----|
              95530    95540    95550    95560    95570    95580    95590    95600
Human         GATGATTTGGAAGCTAGGTGATCTGTGTTTTTTTCTTAAAATAACATCGTAGCACAGAGGAAGCTCTACCAGCATCAGATA 94821
AsianBonytongue
Reedfish
NorthernPike
SpottedGar
ParamormyropsKingsLeyae
  
```

```

Majority      XXXXXXXXXXXXXXXXXXXXXXXXXXXXXXXXXXXXXXXXXXXXXXXXXXXXXXXXXXXXXXXXXXXXXXXXXXXX
              |-----|-----|-----|-----|-----|-----|-----|
              95610    95620    95630    95640    95650    95660    95670    95680
Human         AGTCTAAAGTCTAAAAAACCAATACCAGGGTTAGTGAATAGTAATTGAACAAAGCTTCTCAAGGTGAAGTTTTTCTCAGT 94901
AsianBonytongue
Reedfish
NorthernPike
SpottedGar
ParamormyropsKingsLeyae
  
```

```

Majority      XXXXXXXXXXXXXXXXXXXXXXXXXXXXXXXXXXXXXXXXXXXXXXXXXXXXXXXXXXXXXXXXXXXXXXXXXXXX
              |-----|-----|-----|-----|-----|-----|-----|
              95690    95700    95710    95720    95730    95740    95750    95760
Human         AATTAGTGGTGGCTATAATATTTGAAAGTAGGTTCTGTACCTTTTCAGGTGCTCATTGTGGGTTGGGATTGCCTTGGGAA 94981
AsianBonytongue
Reedfish
NorthernPike
SpottedGar
ParamormyropsKingsLeyae
  
```

```

Majority      XXXXXXXXXXXXXXXXXXXXXXXXXXXXXXXXXXXXXXXXXXXXXXXXXXXXXXXXXXXXXXXXXXXXXXXXXXXX
              |-----|-----|-----|-----|-----|-----|-----|
              95770    95780    95790    95800    95810    95820    95830    95840
Human         GGAGAAACTAAGTCCTGAGCTGTGTGTGGACTTAGTTTTGTGCCAGTTGCTAAGCTGGTGGGAGTTCACAGTCTCCCTA 95061
AsianBonytongue
Reedfish
NorthernPike
SpottedGar
ParamormyropsKingsLeyae
  
```

```

Majority      XXXXXXXXXXXXXXXXXXXXXXXXXXXXXXXXXXXXXXXXXXXXXXXXXXXXXXXXXXXXXXXXXXXXXXXXXXXX
              |-----|-----|-----|-----|-----|-----|-----|
              95850    95860    95870    95880    95890    95900    95910    95920
Human         GTGGGAGATAACCAGAAACCAGCTCTTCCTGCCTAAGGACTACAGCAGATTCTATACTGTCTTACAGTATGCCCTAATAC 95141
AsianBonytongue
Reedfish
NorthernPike
SpottedGar
ParamormyropsKingsLeyae
  
```

```

Majority      XXXXXXXXXXXXXXXXXXXXXXXXXXXXXXXXXXXXXXXXXXXXXXXXXXXXXXXXXXXXXXXXXXXXXXXXXXXX
              |-----|-----|-----|-----|-----|-----|-----|
              95930    95940    95950    95960    95970    95980    95990    96000
Human         GGCCTTCCTTCCAAAGCACCAAGTCACTAAAGGGGGATTTTGACATTCTAGAATATTTTAAATTCAGTACATCAAATTA 95221
AsianBonytongue
Reedfish
NorthernPike
SpottedGar
ParamormyropsKingsLeyae
  
```



Sunday, May 01, 2022 09:45 PM

```

Majority      XXXXXXXXXXXXXXXXXXXXXXXXXXXXXXXXXXXXXXXXXXXXXXXXXXXXXXXXXXXXXXXXXXXXXXX
              |-----|
              96010   96020   96030   96040   96050   96060   96070   96080
Human         CCCAGGCCTTGGCATATAGTGAATTGCTTATTAAAAGTTAGGTA AAAAATAAAAACAGCTTTGTCGTATATTAGTACTCTA 95301
AsianBonytongue
Reedfish
NorthernPike
SpottedGar
ParamormyropsKingsLeyae
15690
51713
20987
22432
13318

```

```

Majority      XXXXXXXXXXXXXXXXXXXXXXXXXXXXXXXXXXXXXXXXXXXXXXXXXXXXXXXXXXXXXXXXXXXXXXX
              |-----|
              96090   96100   96110   96120   96130   96140   96150   96160
Human         TGACTCTTAGAGTGAACAAGCTAACAAGTATTCTTAGGACTTAGCTGCTTTGTTAATAGAGGTCTTAACTTGAATATTTA 95381
AsianBonytongue
Reedfish
NorthernPike
SpottedGar
ParamormyropsKingsLeyae
15690
51713
20987
22432
13318

```

```

Majority      XXXXXXXXXXXXXXXXXXXXXXXXXXXXXXXXXXXXXXXXXXXXXXXXXXXXXXXXXXXXXXXXXXXXXXX
              |-----|
              96170   96180   96190   96200   96210   96220   96230   96240
Human         GAAATAATCAGAAAAATTATTTTGGTATTGAAGATGTATTTGGAAATGGGTTTTAAAGTACCTACTTAAGGAAGAGA 95461
AsianBonytongue
Reedfish
NorthernPike
SpottedGar
ParamormyropsKingsLeyae
15690
51713
20987
22432
13318

```

```

Majority      XXXXXXXXXXXXXXXXXXXXXXXXXXXXXXXXXXXXXXXXXXXXXXXXXXXXXXXXXXXXXXXXXXXXXXX
              |-----|
              96250   96260   96270   96280   96290   96300   96310   96320
Human         TATCTACAGTTTATATTTAACGTTAGCATTTGAAAGCAATGAAGAAAATTTTTCCTTAACCAGGAAGTGTAAATGAATCAT 95541
AsianBonytongue
Reedfish
NorthernPike
SpottedGar
ParamormyropsKingsLeyae
15690
51713
20987
22432
13318

```

```

Majority      XXXXXXXXXXXXXXXXXXXXXXXXXXXXXXXXXXXXXXXXXXXXXXXXXXXXXXXXXXXXXXXXXXXXXXX
              |-----|
              96330   96340   96350   96360   96370   96380   96390   96400
Human         TATATTAGAGATTAAATTAACACTTTGGAAGCATTTTAGCTCCTAGAGTTAAGGTTAGTATAGTGAAATTATGGTGATTA 95621
AsianBonytongue
Reedfish
NorthernPike
SpottedGar
ParamormyropsKingsLeyae
15690
51713
20987
22432
13318

```

```

Majority      XXXXXXXXXXXXXXXXXXXXXXXXXXXXXXXXXXXXXXXXXXXXXXXXXXXXXXXXXXXXXXXXXXXXXXX
              |-----|
              96410   96420   96430   96440   96450   96460   96470   96480
Human         GCTTAATTCATTCATGTACATCTATTTGTATCACCATATAATTACTAGGGAAAGGACAAATCACTTTTCAAAGCCTCAAT 95701
AsianBonytongue
Reedfish
NorthernPike
SpottedGar
ParamormyropsKingsLeyae
15690
51713
20987
22432
13318

```

Sunday, May 01, 2022 09:45 PM

| Majority                |                                                                                  | XXXXXXXXXXXXXXXXXXXXXXXXXXXXXXXXXXXXXXXXXXXXXXXXXXXXXXXXXXXXXXXXXXXXXXXXXXXXXXXXXXXXXXXXXXXXXXXXXXXXXXXXXXXXXXXXXXXXXXXXXXXX |       |       |       |       |       |       |       |       |
|-------------------------|----------------------------------------------------------------------------------|------------------------------------------------------------------------------------------------------------------------------|-------|-------|-------|-------|-------|-------|-------|-------|
|                         |                                                                                  | 96490                                                                                                                        | 96500 | 96510 | 96520 | 96530 | 96540 | 96550 | 96560 |       |
| Human                   | GTTATTTGTAAAATGGAGGCAATAAGTTCTGCTCTGCTCCCCTCACAGGATTATTACAGAGGCTCAAATAGGATAAGTGA |                                                                                                                              |       |       |       |       |       |       |       | 95781 |
| AsianBonytongue         |                                                                                  |                                                                                                                              |       |       |       |       |       |       |       | 15690 |
| Reedfish                |                                                                                  |                                                                                                                              |       |       |       |       |       |       |       | 51713 |
| NorthernPike            |                                                                                  |                                                                                                                              |       |       |       |       |       |       |       | 20987 |
| SpottedGar              |                                                                                  |                                                                                                                              |       |       |       |       |       |       |       | 22432 |
| ParamormyropsKingsLeyae |                                                                                  |                                                                                                                              |       |       |       |       |       |       |       | 13318 |

| Majority                |                                                                              | XXXXXXXXXXXXXXXXXXXXXXXXXXXXXXXXXXXXXXXXXXXXXXXXXXXXXXXXXXXXXXXXXXXXXXXXXXXXXXXXXXXXXXXXXXXXXXXXXXXXXXXXXXXXXXXXXXXXXXXXXXXX |       |       |       |       |       |       |       |       |
|-------------------------|------------------------------------------------------------------------------|------------------------------------------------------------------------------------------------------------------------------|-------|-------|-------|-------|-------|-------|-------|-------|
|                         |                                                                              | 96570                                                                                                                        | 96580 | 96590 | 96600 | 96610 | 96620 | 96630 | 96640 |       |
| Human                   | AGGAATGCTATGCAATTAGTTAACTAATGCCAGTCCCAGACTGCCAGATTTGCCACAGTAACTTCATATCCACAAT |                                                                                                                              |       |       |       |       |       |       |       | 95861 |
| AsianBonytongue         |                                                                              |                                                                                                                              |       |       |       |       |       |       |       | 15690 |
| Reedfish                |                                                                              |                                                                                                                              |       |       |       |       |       |       |       | 51713 |
| NorthernPike            |                                                                              |                                                                                                                              |       |       |       |       |       |       |       | 20987 |
| SpottedGar              |                                                                              |                                                                                                                              |       |       |       |       |       |       |       | 22432 |
| ParamormyropsKingsLeyae |                                                                              |                                                                                                                              |       |       |       |       |       |       |       | 13318 |

| Majority                |                                                                                  | XXXXXXXXXXXXXXXXXXXXXXXXXXXXXXXXXXXXXXXXXXXXXXXXXXXXXXXXXXXXXXXXXXXXXXXXXXXXXXXXXXXXXXXXXXXXXXXXXXXXXXXXXXXXXXXXXXXXXXXXXXXX |       |       |       |       |       |       |       |       |
|-------------------------|----------------------------------------------------------------------------------|------------------------------------------------------------------------------------------------------------------------------|-------|-------|-------|-------|-------|-------|-------|-------|
|                         |                                                                                  | 96650                                                                                                                        | 96660 | 96670 | 96680 | 96690 | 96700 | 96710 | 96720 |       |
| Human                   | ACATGTTATCCTAATATGTCTTTTTGCTACAAAGAAATACTAATGTTTTAAAATTATTTACTAGTTTCATAAAGCAGAAA |                                                                                                                              |       |       |       |       |       |       |       | 95941 |
| AsianBonytongue         |                                                                                  |                                                                                                                              |       |       |       |       |       |       |       | 15690 |
| Reedfish                |                                                                                  |                                                                                                                              |       |       |       |       |       |       |       | 51713 |
| NorthernPike            |                                                                                  |                                                                                                                              |       |       |       |       |       |       |       | 20987 |
| SpottedGar              |                                                                                  |                                                                                                                              |       |       |       |       |       |       |       | 22432 |
| ParamormyropsKingsLeyae |                                                                                  |                                                                                                                              |       |       |       |       |       |       |       | 13318 |

| Majority                |                                                                                 | XXXXXXXXXXXXXXXXXXXXXXXXXXXXXXXXXXXXXXXXXXXXXXXXXXXXXXXXXXXXXXXXXXXXXXXXXXXXXXXXXXXXXXXXXXXXXXXXXXXXXXXXXXXXXXXXXXXXXXXXXXXX |       |       |       |       |       |       |       |       |
|-------------------------|---------------------------------------------------------------------------------|------------------------------------------------------------------------------------------------------------------------------|-------|-------|-------|-------|-------|-------|-------|-------|
|                         |                                                                                 | 96730                                                                                                                        | 96740 | 96750 | 96760 | 96770 | 96780 | 96790 | 96800 |       |
| Human                   | GATGTAAATGCAGTTATAGAGAGCATCCCAAGCCAGATGAAAAGAAACCATGGATTTAGCTTTATATTTTCTGTTTGAA |                                                                                                                              |       |       |       |       |       |       |       | 96021 |
| AsianBonytongue         |                                                                                 |                                                                                                                              |       |       |       |       |       |       |       | 15690 |
| Reedfish                |                                                                                 |                                                                                                                              |       |       |       |       |       |       |       | 51713 |
| NorthernPike            |                                                                                 |                                                                                                                              |       |       |       |       |       |       |       | 20987 |
| SpottedGar              |                                                                                 |                                                                                                                              |       |       |       |       |       |       |       | 22432 |
| ParamormyropsKingsLeyae |                                                                                 |                                                                                                                              |       |       |       |       |       |       |       | 13318 |

| Majority                |                                                                                    | XXXXXXXXXXXXXXXXXXXXXXXXXXXXXXXXXXXXXXXXXXXXXXXXXXXXXXXXXXXXXXXXXXXXXXXXXXXXXXXXXXXXXXXXXXXXXXXXXXXXXXXXXXXXXXXXXXXXXXXXXXXX |       |       |       |       |       |       |       |       |
|-------------------------|------------------------------------------------------------------------------------|------------------------------------------------------------------------------------------------------------------------------|-------|-------|-------|-------|-------|-------|-------|-------|
|                         |                                                                                    | 96810                                                                                                                        | 96820 | 96830 | 96840 | 96850 | 96860 | 96870 | 96880 |       |
| Human                   | CTTGATAGCCCAATCATAAAATGCACATATTTAATTATAGACTGCACCTTAAGATTTTCATATGTATAAAAAAGTTGCTGTG |                                                                                                                              |       |       |       |       |       |       |       | 96101 |
| AsianBonytongue         |                                                                                    |                                                                                                                              |       |       |       |       |       |       |       | 15690 |
| Reedfish                |                                                                                    |                                                                                                                              |       |       |       |       |       |       |       | 51713 |
| NorthernPike            |                                                                                    |                                                                                                                              |       |       |       |       |       |       |       | 20987 |
| SpottedGar              |                                                                                    |                                                                                                                              |       |       |       |       |       |       |       | 22432 |
| ParamormyropsKingsLeyae |                                                                                    |                                                                                                                              |       |       |       |       |       |       |       | 13318 |

| Majority                |                                                                                  | XXXXXXXXXXXXXXXXXXXXXXXXXXXXXXXXXXXXXXXXXXXXXXXXXXXXXXXXXXXXXXXXXXXXXXXXXXXXXXXXXXXXXXXXXXXXXXXXXXXXXXXXXXXXXXXXXXXXXXXXXXXX |       |       |       |       |       |       |       |       |
|-------------------------|----------------------------------------------------------------------------------|------------------------------------------------------------------------------------------------------------------------------|-------|-------|-------|-------|-------|-------|-------|-------|
|                         |                                                                                  | 96890                                                                                                                        | 96900 | 96910 | 96920 | 96930 | 96940 | 96950 | 96960 |       |
| Human                   | AAACAGGTAATTTTAACACTCAGGAATTTCAAGGCTAAGGAAGAAAGACATACTCTCATGAGCAGCTCTGAACCTCAAAC |                                                                                                                              |       |       |       |       |       |       |       | 96181 |
| AsianBonytongue         |                                                                                  |                                                                                                                              |       |       |       |       |       |       |       | 15690 |
| Reedfish                |                                                                                  |                                                                                                                              |       |       |       |       |       |       |       | 51713 |
| NorthernPike            |                                                                                  |                                                                                                                              |       |       |       |       |       |       |       | 20987 |
| SpottedGar              |                                                                                  |                                                                                                                              |       |       |       |       |       |       |       | 22432 |
| ParamormyropsKingsLeyae |                                                                                  |                                                                                                                              |       |       |       |       |       |       |       | 13318 |

Sunday, May 01, 2022 09:45 PM

```

Majority      XXXXXXXXXXXXXXXXXXXXXXXXXXXXXXXXXXXXXXXXXXXXXXXXXXXXXXXXXXXXXXXXXXXXXXXXXXXX
              |-----|
              96970   96980   96990   97000   97010   97020   97030   97040
Human         AGGATTTTCTGGCTGCCTTAATATATTAAATGGAGCCTAAATCTGAAAACGTTTTTTCATTTCAGAAGAAAGTACAGAA 96261
AsianBonytongue                                     15690
Reedfish                                             51713
NorthernPike                                         20987
SpottedGar                                           22432
ParamormyropsKingsLeyae                             13318
    
```

```

Majority      XXXXXXXXXXXXXXXXXXXXXXXXXXXXXXXXXXXXXXXXXXXXXXXXXXXXXXXXXXXXXXXXXXXXXXXXXXXX
              |-----|
              97050   97060   97070   97080   97090   97100   97110   97120
Human         TTCAGTGAAATTGAGTATACTAGGAAATCTGATGGCAAGAATTTCAGCAGAAAGTCTTAATTTTAAACCGTAATATTCATT 96341
AsianBonytongue                                     15690
Reedfish                                             51713
NorthernPike                                         20987
SpottedGar                                           22432
ParamormyropsKingsLeyae                             13318
    
```

```

Majority      XXXXXXXXXXXXXXXXXXXXXXXXXXXXXXXXXXXXXXXXXXXXXXXXXXXXXXXXXXXXXXXXXXXXXXXXXXXX
              |-----|
              97130   97140   97150   97160   97170   97180   97190   97200
Human         GATTATGCAAAACCTTAGTTTTATAGTTATTCTTTGTTATTTTGAATAGCTTCCTTTAAATTTTCTAGTTTCAGATTTT 96421
AsianBonytongue                                     15690
Reedfish                                             51713
NorthernPike                                         20987
SpottedGar                                           22432
ParamormyropsKingsLeyae                             13318
    
```

```

Majority      XXXXXXXXXXXXXXXXXXXXXXXXXXXXXXXXXXXXXXXXXXXXXXXXXXXXXXXXXXXXXXXXXXXXXXXXXXXX
              |-----|
              97210   97220   97230   97240   97250   97260   97270   97280
Human         GCAAATAAAAGTGTACATGTTAAAGTTATAGAGTATTAGATTATTCACATTAAGAAGTGTCAAATACGCGGAAAAATAA 96501
AsianBonytongue                                     15690
Reedfish                                             51713
NorthernPike                                         20987
SpottedGar                                           22432
ParamormyropsKingsLeyae                             13318
    
```

```

Majority      XXXXXXXXXXXXXXXXXXXXXXXXXXXXXXXXXXXXXXXXXXXXXXXXXXXXXXXXXXXXXXXXXXXXXXXXXXXX
              |-----|
              97290   97300   97310   97320   97330   97340   97350   97360
Human         AACCGTAATGAACACCTATGCACTTCACTCAACTATATCACTACCTAACATATTCATATTTTAAACGTAATTATATATT 96581
AsianBonytongue                                     15690
Reedfish                                             51713
NorthernPike                                         20987
SpottedGar                                           22432
ParamormyropsKingsLeyae                             13318
    
```

```

Majority      XXXXXXXXXXXXXXXXXXXXXXXXXXXXXXXXXXXXXXXXXXXXXXXXXXXXXXXXXXXXXXXXXXXXXXXXXXXX
              |-----|
              97370   97380   97390   97400   97410   97420   97430   97440
Human         AGTTGAAAGAAAACGTTACAGAATGAACTGAAATCCCATATGAACCTCTTCTGATCTTAGTTCAAACCTTATTCTTTCC 96661
AsianBonytongue                                     15690
Reedfish                                             51713
NorthernPike                                         20987
SpottedGar                                           22432
ParamormyropsKingsLeyae                             13318
    
```

Sunday, May 01, 2022 09:45 PM

```
Majority          XXXXXXXXXXXXXXXXXXXXXXXXXXXXXXXXXXXXXXXXXXXXXXXXXXXXXXXXXXXXXXXXXXXXXXXXXXXXXXXXXXXXXXXXXXXXXXXX
                  |-----|-----|-----|-----|-----|-----|-----|-----|
                  97450   97460   97470   97480   97490   97500   97510   97520
Human             CAAGAGGTAATTGTTACCTTCAGTTTAGTATTTTATTATTCAGTGGTGTGCTTTTCAAGAGGAATTTGTCCTATATTTCTGT 96741
AsianBonytongue                               15690
Reedfish                                              51713
NorthernPike                                          20987
SpottedGar                                           22432
ParamormyropsKingsLeyae                          13318
```

```
Majority          XXXXXXXXXXXXXXXXXXXXXXXXXXXXXXXXXXXXXXXXXXXXXXXXXXXXXXXXXXXXXXXXXXXXXXXXXXXXXXXXXXXXXXXXXXXXXXXX
                  |-----|-----|-----|-----|-----|-----|-----|-----|
                  97530   97540   97550   97560   97570   97580   97590   97600
Human             AGGCTAAATTTCTTGTTTGCCTAGTTATAAAAAATGGCAAATAATATGATATTGGGTGTTTAAATAGTACAATATTTGTTTC 96821
AsianBonytongue                               15690
Reedfish                                              51713
NorthernPike                                          20987
SpottedGar                                           22432
ParamormyropsKingsLeyae                          13318
```

```
Majority          XXXXXXXXXXXXXXXXXXXXXXXXXXXXXXXXXXXXXXXXXXXXXXXXXXXXXXXXXXXXXXXXXXXXXXXXXXXXXXXXXXXXXXXXXXXXXXXX
                  |-----|-----|-----|-----|-----|-----|-----|-----|
                  97610   97620   97630   97640   97650   97660   97670   97680
Human             AAAACACACTTTATAATTTTAAACAGACTGTTTGACATTGATAAATCCCTATCAAATCTCATGACATTTAACCAATTT 96901
AsianBonytongue                               15690
Reedfish                                              51713
NorthernPike                                          20987
SpottedGar                                           22432
ParamormyropsKingsLeyae                          13318
```

```
Majority          XXXXXXXXXXXXXXXXXXXXXXXXXXXXXXXXXXXXXXXXXXXXXXXXXXXXXXXXXXXXXXXXXXXXXXXXXXXXXXXXXXXXXXXXXXXXXXXX
                  |-----|-----|-----|-----|-----|-----|-----|-----|
                  97690   97700   97710   97720   97730   97740   97750   97760
Human             TTAACAAGGATTTTAAATTTGTTTAAAGAAATAAGTCATTTGGGCCTCAGGTTTCTCTTAAGGATGTAACAAGGAGCTA 96981
AsianBonytongue                               15690
Reedfish                                              51713
NorthernPike                                          20987
SpottedGar                                           22432
ParamormyropsKingsLeyae                          13318
```

```
Majority          XXXXXXXXXXXXXXXXXXXXXXXXXXXXXXXXXXXXXXXXXXXXXXXXXXXXXXXXXXXXXXXXXXXXXXXXXXXXXXXXXXXXXXXXXXXXXXXX
                  |-----|-----|-----|-----|-----|-----|-----|-----|
                  97770   97780   97790   97800   97810   97820   97830   97840
Human             TATCATTGGTATTTTAGACGCTGAATTATGTGTAAGGTCCCTTAAATACAAACATACCCTTTGTAGCTTCACAGAGCCACC 97061
AsianBonytongue                               15690
Reedfish                                              51713
NorthernPike                                          20987
SpottedGar                                           22432
ParamormyropsKingsLeyae                          13318
```

```
Majority          XXXXXXXXXXXXXXXXXXXXXXXXXXXXXXXXXXXXXXXXXXXXXXXXXXXXXXXXXXXXXXXXXXXXXXXXXXXXXXXXXXXXXXXXXXXXXXXX
                  |-----|-----|-----|-----|-----|-----|-----|-----|
                  97850   97860   97870   97880   97890   97900   97910   97920
Human             CGTTTTGCACCTTCTCTCGCTTTTCTTCCTCCCTCTTTGGCTCCCATTTCAATGGACAGAAAGACTATGTGGCATCTCTAT 97141
AsianBonytongue                               15690
Reedfish                                              51713
NorthernPike                                          20987
SpottedGar                                           22432
ParamormyropsKingsLeyae                          13318
```

Sunday, May 01, 2022 09:45 PM

| Majority                | XXXXXXXXXXXXXXXXXXXXXXXXXXXXXXXXXXXXXXXXXXXXXXXXXXXXXXXXXXXXXXXXXXXXXXXXXXXXXXXXXXXXXXXXXXXXXXXXXXXXXXXXXXXXXXXXXXXXXXXXXX |                                                 |
|-------------------------|----------------------------------------------------------------------------------------------------------------------------|-------------------------------------------------|
|                         |                                                                                                                            | 97930 97940 97950 97960 97970 97980 97990 98000 |
| Human                   | TTTCATTCACCTTGGTTTATTGTCTTGGTATGTTGTATAGGTTTTTGAATCAGAAAATTTTAACATTTTGTAGATATTTCAA                                         | 97221                                           |
| AsianBonytongue         |                                                                                                                            | 15690                                           |
| Reedfish                |                                                                                                                            | 51713                                           |
| NorthernPike            |                                                                                                                            | 20987                                           |
| SpottedGar              |                                                                                                                            | 22432                                           |
| ParamormyropsKingsLeyae |                                                                                                                            | 13318                                           |

| Majority                | XXXXXXXXXXXXXXXXXXXXXXXXXXXXXXXXXXXXXXXXXXXXXXXXXXXXXXXXXXXXXXXXXXXXXXXXXXXXXXXXXXXXXXXXXXXXXXXXXXXXXXXXXXXXXXXXXXXXXXXXXX |                                                 |
|-------------------------|----------------------------------------------------------------------------------------------------------------------------|-------------------------------------------------|
|                         |                                                                                                                            | 98010 98020 98030 98040 98050 98060 98070 98080 |
| Human                   | ACATACAAAAATAGAAGAATATTTAACAAACCCTTGTCAGCTTCAGTTAGCAACTTAGATCTTCTCTCGTTTCCTCCACC                                           | 97301                                           |
| AsianBonytongue         |                                                                                                                            | 15690                                           |
| Reedfish                |                                                                                                                            | 51713                                           |
| NorthernPike            |                                                                                                                            | 20987                                           |
| SpottedGar              |                                                                                                                            | 22432                                           |
| ParamormyropsKingsLeyae |                                                                                                                            | 13318                                           |

| Majority                | XXXXXXXXXXXXXXXXXXXXXXXXXXXXXXXXXXXXXXXXXXXXXXXXXXXXXXXXXXXXXXXXXXXXXXXXXXXXXXXXXXXXXXXXXXXXXXXXXXXXXXXXXXXXXXXXXXXXXXXXXX |                                                 |
|-------------------------|----------------------------------------------------------------------------------------------------------------------------|-------------------------------------------------|
|                         |                                                                                                                            | 98090 98100 98110 98120 98130 98140 98150 98160 |
| Human                   | CAATTCTCATCTCCTTTATTAATGCAGATCCCAGATATATTTTATCAAGAAATTTGTAGCATATATTTGTGTTGTTT                                              | 97381                                           |
| AsianBonytongue         |                                                                                                                            | 15690                                           |
| Reedfish                |                                                                                                                            | 51713                                           |
| NorthernPike            |                                                                                                                            | 20987                                           |
| SpottedGar              |                                                                                                                            | 22432                                           |
| ParamormyropsKingsLeyae |                                                                                                                            | 13318                                           |

| Majority                | XXXXXXXXXXXXXXXXXXXXXXXXXXXXXXXXXXXXXXXXXXXXXXXXXXXXXXXXXXXXXXXXXXXXXXXXXXXXXXXXXXXXXXXXXXXXXXXXXXXXXXXXXXXXXXXXXXXXXXXXXX |                                                 |
|-------------------------|----------------------------------------------------------------------------------------------------------------------------|-------------------------------------------------|
|                         |                                                                                                                            | 98170 98180 98190 98200 98210 98220 98230 98240 |
| Human                   | TTCGTGGTCATAGTTGCTTCTCTAATACTAGACTAGCCTAGCTGGTCAACTACTACTTTTCTTCAAATCCTAGAACCTC                                            | 97461                                           |
| AsianBonytongue         |                                                                                                                            | 15690                                           |
| Reedfish                |                                                                                                                            | 51713                                           |
| NorthernPike            |                                                                                                                            | 20987                                           |
| SpottedGar              |                                                                                                                            | 22432                                           |
| ParamormyropsKingsLeyae |                                                                                                                            | 13318                                           |

| Majority                | XXXXXXXXXXXXXXXXXXXXXXXXXXXXXXXXXXXXXXXXXXXXXXXXXXXXXXXXXXXXXXXXXXXXXXXXXXXXXXXXXXXXXXXXXXXXXXXXXXXXXXXXXXXXXXXXXXXXXXXXXX |                                                 |
|-------------------------|----------------------------------------------------------------------------------------------------------------------------|-------------------------------------------------|
|                         |                                                                                                                            | 98250 98260 98270 98280 98290 98300 98310 98320 |
| Human                   | CCTATTAAAATATAGTCACCAGACCAGTGGCAAATTAGTATCACCTAGGAGTTTATTAGAAACTCAGTCTATGAGCCTA                                            | 97541                                           |
| AsianBonytongue         |                                                                                                                            | 15690                                           |
| Reedfish                |                                                                                                                            | 51713                                           |
| NorthernPike            |                                                                                                                            | 20987                                           |
| SpottedGar              |                                                                                                                            | 22432                                           |
| ParamormyropsKingsLeyae |                                                                                                                            | 13318                                           |

| Majority                | XXXXXXXXXXXXXXXXXXXXXXXXXXXXXXXXXXXXXXXXXXXXXXXXXXXXXXXXXXXXXXXXXXXXXXXXXXXXXXXXXXXXXXXXXXXXXXXXXXXXXXXXXXXXXXXXXXXXXXXXXX |                                                 |
|-------------------------|----------------------------------------------------------------------------------------------------------------------------|-------------------------------------------------|
|                         |                                                                                                                            | 98330 98340 98350 98360 98370 98380 98390 98400 |
| Human                   | CTGAATCTACATTTTGACAAGATTGGCAGGTGATGCATTTGGACATAAGTTGGAGAAGCACTCAATGCATTTTTCAGTT                                            | 97621                                           |
| AsianBonytongue         |                                                                                                                            | 15690                                           |
| Reedfish                |                                                                                                                            | 51713                                           |
| NorthernPike            |                                                                                                                            | 20987                                           |
| SpottedGar              |                                                                                                                            | 22432                                           |
| ParamormyropsKingsLeyae |                                                                                                                            | 13318                                           |

Sunday, May 01, 2022 09:45 PM

```

Majority      XXXXXXXXXXXXXXXXXXXXXXXXXXXXXXXXXXXXXXXXXXXXXXXXXXXXXXXXXXXXXXXXXXXXXXXXXXXX
              |-----|-----|-----|-----|-----|-----|-----|-----|
              98410   98420   98430   98440   98450   98460   98470   98480
Human         CTATAAAAATCAGCTTCAAAGTTTTTCCTGAGTGTGGAAATTATTTCAATTAGTAATTTTAAGTTATGCAGATATAGTTA 97701
AsianBonytongue
Reedfish
NorthernPike
SpottedGar
ParamormyropsKingsLeyae

```

```

Majority      XXXXXXXXXXXXXXXXXXXXXXXXXXXXXXXXXXXXXXXXXXXXXXXXXXXXXXXXXXXXXXXXXXXXXXXXXXXX
              |-----|-----|-----|-----|-----|-----|-----|-----|
              98490   98500   98510   98520   98530   98540   98550   98560
Human         ATACCAAGAAATAATTGAACTGAAAAGGAACCCGGATATCTAGTTTTAACCAGCTGTTTTAAAGATAAACAGTTCTAGAG 97781
AsianBonytongue
Reedfish
NorthernPike
SpottedGar
ParamormyropsKingsLeyae

```

```

Majority      XXXXXXXXXXXXXXXXXXXXXXXXXXXXXXXXXXXXXXXXXXXXXXXXXXXXXXXXXXXXXXXXXXXXXXXXXXXX
              |-----|-----|-----|-----|-----|-----|-----|-----|
              98570   98580   98590   98600   98610   98620   98630   98640
Human         ATCAAATGAATAGTTTTAGCAACATATTTATTGTAACCTACCTGTAGTTAGAATCCAAGTCCCTGGCTTTCCAATCCAGTC 97861
AsianBonytongue
Reedfish
NorthernPike
SpottedGar
ParamormyropsKingsLeyae

```

```

Majority      XXXXXXXXXXXXXXXXXXXXXXXXXXXXXXXXXXXXXXXXXXXXXXXXXXXXXXXXXXXXXXXXXXXXXXXXXXXX
              |-----|-----|-----|-----|-----|-----|-----|-----|
              98650   98660   98670   98680   98690   98700   98710   98720
Human         TTCAATGTATAATACTGATCAAAGAAATACAGGCTGCTATTATTCATAAATTTAAACTATTATGTACAAGTTGATAGC 97941
AsianBonytongue
Reedfish
NorthernPike
SpottedGar
ParamormyropsKingsLeyae

```

```

Majority      XXXXXXXXXXXXXXXXXXXXXXXXXXXXXXXXXXXXXXXXXXXXXXXXXXXXXXXXXXXXXXXXXXXXXXXXXXXX
              |-----|-----|-----|-----|-----|-----|-----|-----|
              98730   98740   98750   98760   98770   98780   98790   98800
Human         TTATAATAGAAATCAGTATGATTAGTGTAAAAGTCAAATTTAGTCTGACAGGGAAGGAATGTCCATGTGAACTGATTTT 98021
AsianBonytongue
Reedfish
NorthernPike
SpottedGar
ParamormyropsKingsLeyae

```

```

Majority      XXXXXXXXXXXXXXXXXXXXXXXXXXXXXXXXXXXXXXXXXXXXXXXXXXXXXXXXXXXXXXXXXXXXXXXXXXXX
              |-----|-----|-----|-----|-----|-----|-----|-----|
              98810   98820   98830   98840   98850   98860   98870   98880
Human         TTTTAATAGAATGCAAATTAATACTCAATTCCTGATTTGTTTATTACATTTTGTGGTTTAAATGAAATGATACTCAGGTCA 98101
AsianBonytongue
Reedfish
NorthernPike
SpottedGar
ParamormyropsKingsLeyae

```

Sunday, May 01, 2022 09:45 PM

```

Majority      XXXXXXXXXXXXXXXXXXXXXXXXXXXXXXXXXXXXXXXXXXXXXXXXXXXXXXXXXXXXXXXXXXXXXXXXXXXX
              |-----|-----|-----|-----|-----|-----|-----|
              98890   98900   98910   98920   98930   98940   98950   98960
Human         TTTTCATAAATAGCTTTTCTATTAATGCTTCCTCAGTCACATTCTCTATTCCCTATTGCATAGCACAGTCTAACAGTTGAA 98181
AsianBonytongue
Reedfish
NorthernPike
SpottedGar
ParamormyropsKingsLeyae

```

```

Majority      XXXXXXXXXXXXXXXXXXXXXXXXXXXXXXXXXXXXXXXXXXXXXXXXXXXXXXXXXXXXXXXXXXXXXXXXXXXX
              |-----|-----|-----|-----|-----|-----|-----|
              98970   98980   98990   99000   99010   99020   99030   99040
Human         ATGCCTAAGCCTTACTGAATGATGACTGATATTCTCTGTGAGAGTTAGAGCTGTACTATAAATATACATTACCTGTGCAA 98261
AsianBonytongue
Reedfish
NorthernPike
SpottedGar
ParamormyropsKingsLeyae

```

```

Majority      XXXXXXXXXXXXXXXXXXXXXXXXXXXXXXXXXXXXXXXXXXXXXXXXXXXXXXXXXXXXXXXXXXXXXXXXXXXX
              |-----|-----|-----|-----|-----|-----|-----|
              99050   99060   99070   99080   99090   99100   99110   99120
Human         AGTATGCCTTCAGGGGCTATTCGCCATAACCTTAGCAAAATTTTAAATATTCTTATGGCTAGCAATCTTATCTATTGTC 98341
AsianBonytongue
Reedfish
NorthernPike
SpottedGar
ParamormyropsKingsLeyae

```

```

Majority      XXXXXXXXXXXXXXXXXXXXXXXXXXXXXXXXXXXXXXXXXXXXXXXXXXXXXXXXXXXXXXXXXXXXXXXXXXXX
              |-----|-----|-----|-----|-----|-----|-----|
              99130   99140   99150   99160   99170   99180   99190   99200
Human         ATGTCTTACTATTTCTGCTTACCACCCCATTTCTCTCTCAACCTTGTTGCTGCATTAGCTGTCCATCACTTAACACTG 98421
AsianBonytongue
Reedfish
NorthernPike
SpottedGar
ParamormyropsKingsLeyae

```

```

Majority      XXXXXXXXXXXXXXXXXXXXXXXXXXXXXXXXXXXXXXXXXXXXXXXXXXXXXXXXXXXXXXXXXXXXXXXXXXXX
              |-----|-----|-----|-----|-----|-----|-----|
              99210   99220   99230   99240   99250   99260   99270   99280
Human         TTTATTTCTCTGTTTTTCTTCCATCATTCTTCTTTGCAACTAAATGATTTAGACTTTTATAACCATAATCAACCAGT 98501
AsianBonytongue
Reedfish
NorthernPike
SpottedGar
ParamormyropsKingsLeyae

```

```

Majority      XXXXXXXXXXXXXXXXXXXXXXXXXXXXXXXXXXXXXXXXXXXXXXXXXXXXXXXXXXXXXXXXXXXXXXXXXXXX
              |-----|-----|-----|-----|-----|-----|-----|
              99290   99300   99310   99320   99330   99340   99350   99360
Human         TAGATTCTTTTATTGTGGTTATTGAGTTGATAAATGATAGTGCATTTTATGTAATATTCAGGTGTTATGCTATTTTTA 98581
AsianBonytongue
Reedfish
NorthernPike
SpottedGar
ParamormyropsKingsLeyae

```

Sunday, May 01, 2022 09:45 PM

```

Majority      XXXXXXXXXXXXXXXXXXXXXXXXXXXXXXXXXXXXXXXXXXXXXXXXXXXXXXXXXXXXXXXXXXXXXXXXXXXX
              |-----|-----|-----|-----|-----|-----|-----|
              99370   99380   99390   99400   99410   99420   99430   99440
Human         TCTGGTTCAC TTTAAAACCTCCCTCCCCCACTCCCTTTTTTTGTGGGT TTTT TTTTATTATTATTTCCAGTTTT 98661
AsianBonytongue
Reedfish
NorthernPike
SpottedGar
ParamormyropsKingsLeyae

```

```

Majority      XXXXXXXXXXXXXXXXXXXXXXXXXXXXXXXXXXXXXXXXXXXXXXXXXXXXXXXXXXXXXXXXXXXXXXXXXXXX
              |-----|-----|-----|-----|-----|-----|-----|
              99450   99460   99470   99480   99490   99500   99510   99520
Human         GTGTGTTTTGCTTTTAACTTCTGAGATTGCAGTGGTTCAGATGGTTGAAATCACTAGTAGTGATTTACATGAAGCAT 98741
AsianBonytongue
Reedfish
NorthernPike
SpottedGar
ParamormyropsKingsLeyae

```

```

Majority      XXXXXXXXXXXXXXXXXXXXXXXXXXXXXXXXXXXXXXXXXXXXXXXXXXXXXXXXXXXXXXXXXXXXXXXXXXXX
              |-----|-----|-----|-----|-----|-----|-----|
              99530   99540   99550   99560   99570   99580   99590   99600
Human         TCATGTATTTATTACTGGTATATTCAACTATGGTGGAGGGAAATTGGTCGAAGAATTACGGTTAAAGAGCTCCTTTAAAA 98821
AsianBonytongue
Reedfish
NorthernPike
SpottedGar
ParamormyropsKingsLeyae

```

```

Majority      XXXXXXXXXXXXXXXXXXXXXXXXXXXXXXXXXXXXXXXXXXXXXXXXXXXXXXXXXXXXXXXXXXXXXXXXXXXX
              |-----|-----|-----|-----|-----|-----|-----|
              99610   99620   99630   99640   99650   99660   99670   99680
Human         AGGAGATTTGTAGAATTCTAAATGTGATTCTGATTCATATAGTCATGATTCTTAGAAATTAGCTACAGGAAGAGATAGA 98901
AsianBonytongue
Reedfish
NorthernPike
SpottedGar
ParamormyropsKingsLeyae

```

```

Majority      XXXXXXXXXXXXXXXXXXXXXXXXXXXXXXXXXXXXXXXXXXXXXXXXXXXXXXXXXXXXXXXXXXXXXXXXXXXX
              |-----|-----|-----|-----|-----|-----|-----|
              99690   99700   99710   99720   99730   99740   99750   99760
Human         AACATGCTATAGTTGTCTTTGCCCTAAGTTTGGAGTTTTTATAGTGAATATATATAAATAGCTCTAATTATAAATACA 98981
AsianBonytongue
Reedfish
NorthernPike
SpottedGar
ParamormyropsKingsLeyae

```

```

Majority      XXXXXXXXXXXXXXXXXXXXXXXXXXXXXXXXXXXXXXXXXXXXXXXXXXXXXXXXXXXXXXXXXXXXXXXXXXXX
              |-----|-----|-----|-----|-----|-----|-----|
              99770   99780   99790   99800   99810   99820   99830   99840
Human         CTTT TACTCTGGAAAAGCATAGACATTGACATAAGAGACATTTAAAACCAT TATTTTCTCATCTGTAAAATGGAGAGA 99061
AsianBonytongue
Reedfish
NorthernPike
SpottedGar
ParamormyropsKingsLeyae

```



Sunday, May 01, 2022 09:45 PM

```

Majority      XXXXXXXXXXXXXXXXXXXXXXXXXXXXXXXXXXXXXXXXXXXXXXXXXXXXXXXXXXXXXXXXXXXXXXXXXXXX
              |-----|-----|-----|-----|-----|-----|-----|-----|
              99850   99860   99870   99880   99890   99900   99910   99920
Human         ATTACTTCATATGTTCACTTATAAGGATTATGTGAAATACTGTTCCATTCCATTAGTAGTTTTTCTTTTCCTCTAATTGG 99141
AsianBonytongue
Reedfish
NorthernPike
SpottedGar
ParamormyropsKingsLeyae

```

```

Majority      XXXXXXXXXXXXXXXXXXXXXXXXXXXXXXXXXXXXXXXXXXXXXXXXXXXXXXXXXXXXXXXXXXXXXXXXXXXX
              |-----|-----|-----|-----|-----|-----|-----|-----|
              99930   99940   99950   99960   99970   99980   99990   100000
Human         GGGTGGGGCAGTTTTTGGCATTCTATTTATGGAAGGTGTTTTTTCCCTAAGATCATTTTGATGTCTCAGAAGACATTT 99221
AsianBonytongue
Reedfish
NorthernPike
SpottedGar
ParamormyropsKingsLeyae

```

```

Majority      XXXXXXXXXXXXXXXXXXXXXXXXXXXXXXXXXXXXXXXXXXXXXXXXXXXXXXXXXXXXXXXXXXXXXXXXXXXX
              |-----|-----|-----|-----|-----|-----|-----|-----|
              100010  100020  100030  100040  100050  100060  100070  100080
Human         GCTATGTACGTTGGACATTTGCCATGTACATTGTAGAGAATACAAAGATAAACAGAACACAGTACAGCTGGTTCTATTA 99301
AsianBonytongue
Reedfish
NorthernPike
SpottedGar
ParamormyropsKingsLeyae

```

```

Majority      XXXXXXXXXXXXXXXXXXXXXXXXXXXXXXXXXXXXXXXXXXXXXXXXXXXXXXXXXXXXXXXXXXXXXXXXXXXX
              |-----|-----|-----|-----|-----|-----|-----|-----|
              100090  100100  100110  100120  100130  100140  100150  100160
Human         GACATTGAAATGCATATTCTAGCATATTTAATATATTAGGAACAATTTAAGCATAATGTGAATTTTCATGTTTACTGAA 99381
AsianBonytongue
Reedfish
NorthernPike
SpottedGar
ParamormyropsKingsLeyae

```

```

Majority      XXXXXXXXXXXXXXXXXXXXXXXXXXXXXXXXXXXXXXXXXXXXXXXXXXXXXXXXXXXXXXXXXXXXXXXXXXXX
              |-----|-----|-----|-----|-----|-----|-----|-----|
              100170  100180  100190  100200  100210  100220  100230  100240
Human         GATTTTCATCCTGAGAAACAAATGAAAGCAGAAAATTACAACCAACTGAACCAGCTGTGTAAGAAATATATATATGGTGTG 99461
AsianBonytongue
Reedfish
NorthernPike
SpottedGar
ParamormyropsKingsLeyae

```

```

Majority      XXXXXXXXXXXXXXXXXXXXXXXXXXXXXXXXXXXXXXXXXXXXXXXXXXXXXXXXXXXXXXXXXXXXXXXXXXXX
              |-----|-----|-----|-----|-----|-----|-----|-----|
              100250  100260  100270  100280  100290  100300  100310  100320
Human         CACACATGTACATACCTCAGACATCTATTAGCATTCTCAGTTTTCCACAAGTTAAAAGCCACGCCTCATCCATATCTGGTG 99541
AsianBonytongue
Reedfish
NorthernPike
SpottedGar
ParamormyropsKingsLeyae

```

Sunday, May 01, 2022 09:45 PM

```

Majority      XXXXXXXXXXXXXXXXXXXXXXXXXXXXXXXXXXXXXXXXXXXXXXXXXXXXXXXXXXXXXXXXXXXXXXXXXXXX
              |-----|-----|-----|-----|-----|-----|-----|-----|
              100330   100340   100350   100360   100370   100380   100390   100400
Human         CTAATAACTTCCTATCCAATTTTCAGATAGCTGTTTTCAACACATCTGACACCTTCTTTTTTCAAGCAAACCTTCAGGTCT 99621
AsianBonytongue
Reedfish
NorthernPike
SpottedGar
ParamormyropsKingsLeyae
  
```

```

Majority      XXXXXXXXXXXXXXXXXXXXXXXXXXXXXXXXXXXXXXXXXXXXXXXXXXXXXXXXXXXXXXXXXXXXXXXXXXXX
              |-----|-----|-----|-----|-----|-----|-----|-----|
              100410   100420   100430   100440   100450   100460   100470   100480
Human         TTTTCAAGATAAAGTCATTTATAGTAGTGCTATATATTTCTTAACCATTTAACATGTAAACTGTGCTGCCTTTTAAGAA 99701
AsianBonytongue
Reedfish
NorthernPike
SpottedGar
ParamormyropsKingsLeyae
  
```

```

Majority      XXXXXXXXXXXXXXXXXXXXXXXXXXXXXXXXXXXXXXXXXXXXXXXXXXXXXXXXXXXXXXXXXXXXXXXXXXXX
              |-----|-----|-----|-----|-----|-----|-----|-----|
              100490   100500   100510   100520   100530   100540   100550   100560
Human         ATTAATTCTATCCTTTTTAGTGTGTCAGAGTTGAAGATTTTGAGTGTGTGCCCTAACCTTATCATTTTCCTCATAAGTCTCT 99781
AsianBonytongue
Reedfish
NorthernPike
SpottedGar
ParamormyropsKingsLeyae
  
```

```

Majority      XXXXXXXXXXXXXXXXXXXXXXXXXXXXXXXXXXXXXXXXXXXXXXXXXXXXXXXXXXXXXXXXXXXXXXXXXXXX
              |-----|-----|-----|-----|-----|-----|-----|-----|
              100570   100580   100590   100600   100610   100620   100630   100640
Human         GTGGTTTTTATGTATGATTTTGCATAGTGTGGCAATTCTTGAAATGCTTATGTTGTGTTATAGTATAACTGACTTACT 99861
AsianBonytongue
Reedfish
NorthernPike
SpottedGar
ParamormyropsKingsLeyae
  
```

```

Majority      XXXXXXXXXXXXXXXXXXXXXXXXXXXXXXXXXXXXXXXXXXXXXXXXXXXXXXXXXXXXXXXXXXXXXXXXXXXX
              |-----|-----|-----|-----|-----|-----|-----|-----|
              100650   100660   100670   100680   100690   100700   100710   100720
Human         ACTTTCAAATAGCTTCTAGTCTGATTCATGTTATGACAGTATACAGTATAGCAAATAAGGACATCAGGGAACAGGAGGC 99941
AsianBonytongue
Reedfish
NorthernPike
SpottedGar
ParamormyropsKingsLeyae
  
```

```

Majority      XXXXXXXXXXXXXXXXXXXXXXXXXXXXXXXXXXXXXXXXXXXXXXXXXXXXXXXXXXXXXXXXXXXXXXXXXXXX
              |-----|-----|-----|-----|-----|-----|-----|-----|
              100730   100740   100750   100760   100770   100780   100790   100800
Human         TGAGCATATCACCATTTACCAATGGTAGCTTGAGCAAGGCACCTTCATTTATCGAAGTCCATTTTCTCATCTGTACAATGG 100021
AsianBonytongue
Reedfish
NorthernPike
SpottedGar
ParamormyropsKingsLeyae
  
```

Sunday, May 01, 2022 09:45 PM

```

Majority      XXXXXXXXXXXXXXXXXXXXXXXXXXXXXXXXXXXXXXXXXXXXXXXXXXXXXXXXXXXXXXXXXXXXXXXXXXXX
              |-----|-----|-----|-----|-----|-----|-----|-----|
              100810  100820  100830  100840  100850  100860  100870  100880
Human         AGGTGATGATAGTACATGTCTTTTCTGTCTTGTGTTATTTGTAGTTTCAAGTAAGATATGAAATATGCTGTAGAAATACA 100101
AsianBonytongue
Reedfish
NorthernPike
SpottedGar
ParamormyropsKingsLeyae

```

```

Majority      XXXXXXXXXXXXXXXXXXXXXXXXXXXXXXXXXXXXXXXXXXXXXXXXXXXXXXXXXXXXXXXXXXXXXXXXXXXX
              |-----|-----|-----|-----|-----|-----|-----|-----|
              100890  100900  100910  100920  100930  100940  100950  100960
Human         GGGTTGGGAATATCTAGTGGTACAAAAATCAACTTTTGGCCCAATTTTAAGGTGAGATAATTATGAGACATTTTTCGACC 100181
AsianBonytongue
Reedfish
NorthernPike
SpottedGar
ParamormyropsKingsLeyae

```

```

Majority      XXXXXXXXXXXXXXXXXXXXXXXXXXXXXXXXXXXXXXXXXXXXXXXXXXXXXXXXXXXXXXXXXXXXXXXXXXXX
              |-----|-----|-----|-----|-----|-----|-----|-----|
              100970  100980  100990  101000  101010  101020  101030  101040
Human         TCAAAGTCTTTGTTCTTTTCTCTCTACACCATTGTGAATAACACAGTGTATATATGAGATTAATTTATTACCTCGACTTT 100261
AsianBonytongue
Reedfish
NorthernPike
SpottedGar
ParamormyropsKingsLeyae

```

```

Majority      XXXXXXXXXXXXXXXXXXXXXXXXXXXXXXXXXXXXXXXXXXXXXXXXXXXXXXXXXXXXXXXXXXXXXXXXXXXX
              |-----|-----|-----|-----|-----|-----|-----|-----|
              101050  101060  101070  101080  101090  101100  101110  101120
Human         CCATTTTGTGTTTGTAAAGTAGTTTAATTTTTTATATCTATTTATAAAGTTAACTGCAGGAGTGACCTGCAGTTAACTT 100341
AsianBonytongue
Reedfish
NorthernPike
SpottedGar
ParamormyropsKingsLeyae

```

```

Majority      XXXXXXXXXXXXXXXXXXXXXXXXXXXXXXXXXXXXXXXXXXXXXXXXXXXXXXXXXXXXXXXXXXXXXXXXXXXX
              |-----|-----|-----|-----|-----|-----|-----|-----|
              101130  101140  101150  101160  101170  101180  101190  101200
Human         TATACAGTTAAGAAGAGGTTGGTTTCAGTTTAAAGATTGTATGTCAGTGTA AACATCCATTATTATGCTTTCAAGTAA 100421
AsianBonytongue
Reedfish
NorthernPike
SpottedGar
ParamormyropsKingsLeyae

```

```

Majority      XXXXXXXXXXXXXXXXXXXXXXXXXXXXXXXXXXXXXXXXXXXXXXXXXXXXXXXXXXXXXXXXXXXXXXXXXXXX
              |-----|-----|-----|-----|-----|-----|-----|-----|
              101210  101220  101230  101240  101250  101260  101270  101280
Human         AATAGCTCCTAAAAATATGGATTACTATCAACTTTCAAGGAAAATAGCTCCTAAAAATATGGATTACTACCAACTTTCAA 100501
AsianBonytongue
Reedfish
NorthernPike
SpottedGar
ParamormyropsKingsLeyae

```

Sunday, May 01, 2022 09:45 PM

```

Majority      XXXXXXXXXXXXXXXXXXXXXXXXXXXXXXXXXXXXXXXXXXXXXXXXXXXXXXXXXXXXXXXXXXXXXXXXXXXXXXXXXXXXXXXXXXXXXXXXXXXXXXXXXXXXXXX
                    |-----|-----|-----|-----|-----|-----|-----|-----|
                    101290  101300  101310  101320  101330  101340  101350  101360
Human         GGAAATAGCTCCTAGAAATATGGATTACTAGCCACATAAATTGCTAACATTTGCTTTTATTATTATTATTATTATTATT  100581
AsianBonytongue 15690
Reedfish       51713
NorthernPike   20987
SpottedGar     22432
ParamormyropsKingsLeyae 13318
    
```

```

Majority      XXXXXXXXXXXXXXXXXXXXXXXXXXXXXXXXXXXXXXXXXXXXXXXXXXXXXXXXXXXXXXXXXXXXXXXXXXXXXXXXXXXXXXXXXXXXXXXXXXXXXXXXXXXXXXX
                    |-----|-----|-----|-----|-----|-----|-----|-----|
                    101370  101380  101390  101400  101410  101420  101430  101440
Human         TTAGACACAGTCTTGCTCTGTCAACCCAGGCTGGAGTGCGGTGGTATTATCTCGGCTCACTGCAACCTCCACCTCTCGGGT  100661
AsianBonytongue 15690
Reedfish       51713
NorthernPike   20987
SpottedGar     22432
ParamormyropsKingsLeyae 13318
    
```

```

Majority      XXXXXXXXXXXXXXXXXXXXXXXXXXXXXXXXXXXXXXXXXXXXXXXXXXXXXXXXXXXXXXXXXXXXXXXXXXXXXXXXXXXXXXXXXXXXXXXXXXXXXXXXXXXXXXX
                    |-----|-----|-----|-----|-----|-----|-----|-----|
                    101450  101460  101470  101480  101490  101500  101510  101520
Human         TCAAGCAATTCTCCTGCCTCAGCCTTCCGAGTAGCTGGAATTACAGGCACCCACCACACCCAGCTAATTTTGTATT  100741
AsianBonytongue 15690
Reedfish       51713
NorthernPike   20987
SpottedGar     22432
ParamormyropsKingsLeyae 13318
    
```

```

Majority      XXXXXXXXXXXXXXXXXXXXXXXXXXXXXXXXXXXXXXXXXXXXXXXXXXXXXXXXXXXXXXXXXXXXXXXXXXXXXXXXXXXXXXXXXXXXXXXXXXXXXXXXXXXXXXX
                    |-----|-----|-----|-----|-----|-----|-----|-----|
                    101530  101540  101550  101560  101570  101580  101590  101600
Human         TTTAGTAGAGACAGGGTTTTACCATGTGACCAGGCTGGTTTCGAACTCCTGACCTCAAATGATCCACCTGCCTCAGCCTC  100821
AsianBonytongue 15690
Reedfish       51713
NorthernPike   20987
SpottedGar     22432
ParamormyropsKingsLeyae 13318
    
```

```

Majority      XXXXXXXXXXXXXXXXXXXXXXXXXXXXXXXXXXXXXXXXXXXXXXXXXXXXXXXXXXXXXXXXXXXXXXXXXXXXXXXXXXXXXXXXXXXXXXXXXXXXXXXXXXXXXXX
                    |-----|-----|-----|-----|-----|-----|-----|-----|
                    101610  101620  101630  101640  101650  101660  101670  101680
Human         CCAAAGTCTGGGATTACAGGTGTGAGCCACCGCTCCAGCCTATTTGCTAATATTTAACCTCTTGAGAGTCTTTAATTC  100901
AsianBonytongue 15690
Reedfish       51713
NorthernPike   20987
SpottedGar     22432
ParamormyropsKingsLeyae 13318
    
```

```

Majority      XXXXXXXXXXXXXXXXXXXXXXXXXXXXXXXXXXXXXXXXXXXXXXXXXXXXXXXXXXXXXXXXXXXXXXXXXXXXXXXXXXXXXXXXXXXXXXXXXXXXXXXXXXXXXXX
                    |-----|-----|-----|-----|-----|-----|-----|-----|
                    101690  101700  101710  101720  101730  101740  101750  101760
Human         TTTTTTTCAACAAGTGTTCATTACCTGCTATGTGCCAGCTTAGATGCTTTGGATGAAATACAGGTTGGTGCGAAAGTAAT  100981
AsianBonytongue 15690
Reedfish       51713
NorthernPike   20987
SpottedGar     22432
ParamormyropsKingsLeyae 13318
    
```

Sunday, May 01, 2022 09:45 PM

```

Majority      XXXXXXXXXXXXXXXXXXXXXXXXXXXXXXXXXXXXXXXXXXXXXXXXXXXXXXXXXXXXXXXXXXXXXXXXXXXX
              |-----|-----|-----|-----|-----|-----|-----|-----|
              101770   101780   101790   101800   101810   101820   101830   101840
Human         TCGCATTTTTGCCGTTAAAATTAGAAAAACCACAATTACTTTTGCACCAACCTAAATAACTAAAAACAATTTCTTCCTA 101061
AsianBonytongue
Reedfish
NorthernPike
SpottedGar
ParamormyropsKingsLeyae

```

```

Majority      XXXXXXXXXXXXXXXXXXXXXXXXXXXXXXXXXXXXXXXXXXXXXXXXXXXXXXXXXXXXXXXXXXXXXXXXXXXX
              |-----|-----|-----|-----|-----|-----|-----|-----|
              101850   101860   101870   101880   101890   101900   101910   101920
Human         TCATGGGGCTTTCAGTTCAGTATGAGATAAGTAAAGAATTATATGGGTTGATAAAATTTCTGGAGGAAC TATTGGGTGTT 101141
AsianBonytongue
Reedfish
NorthernPike
SpottedGar
ParamormyropsKingsLeyae

```

```

Majority      XXXXXXXXXXXXXXXXXXXXXXXXXXXXXXXXXXXXXXXXXXXXXXXXXXXXXXXXXXXXXXXXXXXXXXXXXXXX
              |-----|-----|-----|-----|-----|-----|-----|-----|
              101930   101940   101950   101960   101970   101980   101990   102000
Human         ATTACAGTGTGCTCAATCTTTAGCAGTTAGGAAAGGATTCTTGAAGGTAGTTGTATTACCTGGGTTGGAGGTAAGTGTTG 101221
AsianBonytongue
Reedfish
NorthernPike
SpottedGar
ParamormyropsKingsLeyae

```

```

Majority      XXXXXXXXXXXXXXXXXXXXXXXXXXXXXXXXXXXXXXXXXXXXXXXXXXXXXXXXXXXXXXXXXXXXXXXXXXXX
              |-----|-----|-----|-----|-----|-----|-----|-----|
              102010   102020   102030   102040   102050   102060   102070   102080
Human         GGGACACAAGTGTTAGAAACAGAACAGTTTGTTTAAAAGTTGGGGACAAAAAAGGACCAGAATCAAGATTACGGCACCT 101301
AsianBonytongue
Reedfish
NorthernPike
SpottedGar
ParamormyropsKingsLeyae

```

```

Majority      XXXXXXXXXXXXXXXXXXXXXXXXXXXXXXXXXXXXXXXXXXXXXXXXXXXXXXXXXXXXXXXXXXXXXXXXXXXX
              |-----|-----|-----|-----|-----|-----|-----|-----|
              102090   102100   102110   102120   102130   102140   102150   102160
Human         GGAGAAAGTTAAGCATGGCTCGGTCATAAATTAGGAGACAAGGAACAAATAGAGAAATACGTTTGGATAGAATAGTCAGA 101381
AsianBonytongue
Reedfish
NorthernPike
SpottedGar
ParamormyropsKingsLeyae

```

```

Majority      XXXXXXXXXXXXXXXXXXXXXXXXXXXXXXXXXXXXXXXXXXXXXXXXXXXXXXXXXXXXXXXXXXXXXXXXXXXX
              |-----|-----|-----|-----|-----|-----|-----|-----|
              102170   102180   102190   102200   102210   102220   102230   102240
Human         TTATAGGCTGTGCTAAGTTGTTTGGGCTCCACTAGGGTTTCTAAATGCAGTTATTGGTAAACTGGACTTAGGAGAAGGGA 101461
AsianBonytongue
Reedfish
NorthernPike
SpottedGar
ParamormyropsKingsLeyae

```

Sunday, May 01, 2022 09:45 PM

Majority  
XXXXXXXXXXXXXXXXXXXXXXXXXXXXXXXXXXXXXXXXXXXXXXXXXXXXXXXXXXXXXXXXXXXXXXXXXXXXXXXXXXXXXXXXXXXXXXXXXXXXXXXXXXXXXXXXXXXX

|                         | 102250                                                                          | 102260 | 102270 | 102280 | 102290 | 102300 | 102310 | 102320 |        |
|-------------------------|---------------------------------------------------------------------------------|--------|--------|--------|--------|--------|--------|--------|--------|
| Human                   | CAGGGTTGACATGACAAATCTAGTGAATTATGTTTCATTAAATATCCCTTTTGAATTGATTTAGTTTTTGTATGTTTCT |        |        |        |        |        |        |        | 101541 |
| AsianBonytongue         |                                                                                 |        |        |        |        |        |        |        | 15690  |
| Reedfish                |                                                                                 |        |        |        |        |        |        |        | 51713  |
| NorthernPike            |                                                                                 |        |        |        |        |        |        |        | 20987  |
| SpottedGar              |                                                                                 |        |        |        |        |        |        |        | 22432  |
| ParamormyropsKingsLeyae |                                                                                 |        |        |        |        |        |        |        | 13318  |

Majority  
XXXXXXXXXXXXXXXXXXXXXXXXXXXXXXXXXXXXXXXXXXXXXXXXXXXXXXXXXXXXXXXXXXXXXXXXXXXXXXXXXXXXXXXXXXXXXXXXXXXXXXXXXXXXXXXXXXXX

|                         | 102330                                                                          | 102340 | 102350 | 102360 | 102370 | 102380 | 102390 | 102400 |        |
|-------------------------|---------------------------------------------------------------------------------|--------|--------|--------|--------|--------|--------|--------|--------|
| Human                   | TTTTTATAATTCCAAAAATCATACAATAAGTTAAACTTATCCATCTAAAAGCTGCACACAAAACCTTGATGTTAGATTC |        |        |        |        |        |        |        | 101621 |
| AsianBonytongue         |                                                                                 |        |        |        |        |        |        |        | 15690  |
| Reedfish                |                                                                                 |        |        |        |        |        |        |        | 51713  |
| NorthernPike            |                                                                                 |        |        |        |        |        |        |        | 20987  |
| SpottedGar              |                                                                                 |        |        |        |        |        |        |        | 22432  |
| ParamormyropsKingsLeyae |                                                                                 |        |        |        |        |        |        |        | 13318  |

Majority  
XXXXXXXXXXXXXXXXXXXXXXXXXXXXXXXXXXXXXXXXXXXXXXXXXXXXXXXXXXXXXXXXXXXXXXXXXXXXXXXXXXXXXXXXXXXXXXXXXXXXXXXXXXXXXXXXXXXX

|                         | 102410                                                                            | 102420 | 102430 | 102440 | 102450 | 102460 | 102470 | 102480 |        |
|-------------------------|-----------------------------------------------------------------------------------|--------|--------|--------|--------|--------|--------|--------|--------|
| Human                   | TTTTTAAATTTACAAAATTAAGACTTCCAAAAGAATCTTGTGAATAAGAGTAAAAGAAAGACCCCTTACTCAGTAAAGCTG |        |        |        |        |        |        |        | 101701 |
| AsianBonytongue         |                                                                                   |        |        |        |        |        |        |        | 15690  |
| Reedfish                |                                                                                   |        |        |        |        |        |        |        | 51713  |
| NorthernPike            |                                                                                   |        |        |        |        |        |        |        | 20987  |
| SpottedGar              |                                                                                   |        |        |        |        |        |        |        | 22432  |
| ParamormyropsKingsLeyae |                                                                                   |        |        |        |        |        |        |        | 13318  |

Majority  
XXXXXXXXXXXXXXXXXXXXXXXXXXXXXXXXXXXXXXXXXXXXXXXXXXXXXXXXXXXXXXXXXXXXXXXXXXXXXXXXXXXXXXXXXXXXXXXXXXXXXXXXXXXXXXXXXXXX

|                         | 102490                                                                          | 102500 | 102510 | 102520 | 102530 | 102540 | 102550 | 102560 |        |
|-------------------------|---------------------------------------------------------------------------------|--------|--------|--------|--------|--------|--------|--------|--------|
| Human                   | CGTAATACTTTGGCAGTTTGAACCCATGGCCATGCCTCTCTGTGTGATAAGGATTTGGCAAACCATGGAAGAAACATGC |        |        |        |        |        |        |        | 101781 |
| AsianBonytongue         |                                                                                 |        |        |        |        |        |        |        | 15690  |
| Reedfish                |                                                                                 |        |        |        |        |        |        |        | 51713  |
| NorthernPike            |                                                                                 |        |        |        |        |        |        |        | 20987  |
| SpottedGar              |                                                                                 |        |        |        |        |        |        |        | 22432  |
| ParamormyropsKingsLeyae |                                                                                 |        |        |        |        |        |        |        | 13318  |

Majority  
XXXXXXXXXXXXXXXXXXXXXXXXXXXXXXXXXXXXXXXXXXXXXXXXXXXXXXXXXXXXXXXXXXXXXXXXXXXXXXXXXXXXXXXXXXXXXXXXXXXXXXXXXXXXXXXXXXXX

|                         | 102570                                                                         | 102580 | 102590 | 102600 | 102610 | 102620 | 102630 | 102640 |        |
|-------------------------|--------------------------------------------------------------------------------|--------|--------|--------|--------|--------|--------|--------|--------|
| Human                   | ATGTTTTTGAATTGCTTTCCATGGTAACTTAAACATTTTTTTCATGAAACATGGATATATATCCTTAGAAAACAGCAA |        |        |        |        |        |        |        | 101861 |
| AsianBonytongue         |                                                                                |        |        |        |        |        |        |        | 15690  |
| Reedfish                |                                                                                |        |        |        |        |        |        |        | 51713  |
| NorthernPike            |                                                                                |        |        |        |        |        |        |        | 20987  |
| SpottedGar              |                                                                                |        |        |        |        |        |        |        | 22432  |
| ParamormyropsKingsLeyae |                                                                                |        |        |        |        |        |        |        | 13318  |

Majority  
XXXXXXXXXXXXXXXXXXXXXXXXXXXXXXXXXXXXXXXXXXXXXXXXXXXXXXXXXXXXXXXXXXXXXXXXXXXXXXXXXXXXXXXXXXXXXXXXXXXXXXXXXXXXXXXXXXXX

|                         | 102650                                                                            | 102660 | 102670 | 102680 | 102690 | 102700 | 102710 | 102720 |        |
|-------------------------|-----------------------------------------------------------------------------------|--------|--------|--------|--------|--------|--------|--------|--------|
| Human                   | ACATAAAGCTTGTAAGTTATAAGACAAGATTTATCTCTTTTTTTTTTTTTTTTCTGAGAGAGAGTCTTGCTCTGTTGCCAG |        |        |        |        |        |        |        | 101941 |
| AsianBonytongue         |                                                                                   |        |        |        |        |        |        |        | 15690  |
| Reedfish                |                                                                                   |        |        |        |        |        |        |        | 51713  |
| NorthernPike            |                                                                                   |        |        |        |        |        |        |        | 20987  |
| SpottedGar              |                                                                                   |        |        |        |        |        |        |        | 22432  |
| ParamormyropsKingsLeyae |                                                                                   |        |        |        |        |        |        |        | 13318  |

Sunday, May 01, 2022 09:45 PM

```

Majority      XXXXXXXXXXXXXXXXXXXXXXXXXXXXXXXXXXXXXXXXXXXXXXXXXXXXXXXXXXXXXXXXXXXXXXXXXXXX
              |-----|-----|-----|-----|-----|-----|-----|-----|
              102730  102740  102750  102760  102770  102780  102790  102800
Human         GCCGGAGTGC AACAGTGT GATCTCT GCTCACT GCACCCT CC GCCTCC CGGGTT CAAGCAAT TCTCCT GCCTC AGCCTCT 102021
AsianBonytongue
Reedfish
NorthernPike
SpottedGar
ParamormyropsKingsLeyae

```

```

Majority      XXXXXXXXXXXXXXXXXXXXXXXXXXXXXXXXXXXXXXXXXXXXXXXXXXXXXXXXXXXXXXXXXXXXXXXXXXXX
              |-----|-----|-----|-----|-----|-----|-----|-----|
              102810  102820  102830  102840  102850  102860  102870  102880
Human         GAGTAGCTGG GACTACAG GCGTGTG CCGCCAAG CCCAGCTA ATTTT TTTGTAT CTTTAGT AGAGACG GTTTCAC CATGTT 102101
AsianBonytongue
Reedfish
NorthernPike
SpottedGar
ParamormyropsKingsLeyae

```

```

Majority      XXXXXXXXXXXXXXXXXXXXXXXXXXXXXXXXXXXXXXXXXXXXXXXXXXXXXXXXXXXXXXXXXXXXXXXXXXXX
              |-----|-----|-----|-----|-----|-----|-----|-----|
              102890  102900  102910  102920  102930  102940  102950  102960
Human         GGCCAGGCTGG TCTCGAA CTCTGAC CCAAGTG ATCTAC CTGCCTC AGCCTTCT AAAGTG TTGGGAT TACAGGC ATGAG 102181
AsianBonytongue
Reedfish
NorthernPike
SpottedGar
ParamormyropsKingsLeyae

```

```

Majority      XXXXXXXXXXXXXXXXXXXXXXXXXXXXXXXXXXXXXXXXXXXXXXXXXXXXXXXXXXXXXXXXXXXXXXXXXXXX
              |-----|-----|-----|-----|-----|-----|-----|-----|
              102970  102980  102990  103000  103010  103020  103030  103040
Human         CCATGGCACCC GGC CAAGATG AAATGTCA AGGCCAT TTTTAG CCACTAT GCTTTT AAAGACT ACTTAAAG CTGTGCT TTT CAG 102261
AsianBonytongue
Reedfish
NorthernPike
SpottedGar
ParamormyropsKingsLeyae

```

```

Majority      XXXXXXXXXXXXXXXXXXXXXXXXXXXXXXXXXXXXXXXXXXXXXXXXXXXXXXXXXXXXXXXXXXXXXXXXXXXX
              |-----|-----|-----|-----|-----|-----|-----|-----|
              103050  103060  103070  103080  103090  103100  103110  103120
Human         GTCTCCCAGGA AACTTGT TCACTCT ATACTAT TGTGCTG CTGCTGT TCTGGCTT GAGAATTT TGAGAAT CACTAAG ATAC 102341
AsianBonytongue
Reedfish
NorthernPike
SpottedGar
ParamormyropsKingsLeyae

```

```

Majority      XXXXXXXXXXXXXXXXXXXXXXXXXXXXXXXXXXXXXXXXXXXXXXXXXXXXXXXXXXXXXXXXXXXXXXXXXXXX
              |-----|-----|-----|-----|-----|-----|-----|-----|
              103130  103140  103150  103160  103170  103180  103190  103200
Human         AATTTAAGTTT TGACATG TAAATTAT TTTGGTTG AGTAGAA AGAATTA ATGTAG ATAAGCA AAAACCC CTTTATA AAAAA 102421
AsianBonytongue
Reedfish
NorthernPike
SpottedGar
ParamormyropsKingsLeyae

```

Sunday, May 01, 2022 09:45 PM

```

Majority      XXXXXXXXXXXXXXXXXXXXXXXXXXXXXXXXXXXXXXXXXXXXXXXXXXXXXXXXXXXXXXXXXXXXXXXXXXXX
              |-----|-----|-----|-----|-----|-----|-----|
              103210  103220  103230  103240  103250  103260  103270  103280
Human         TGCTTACCCTTTAAAAAATGTTGAATCCTCACAGTATGATTAAATACTACTTGTAAGTGTCTGTTAACATAATGTAT 102501
AsianBonytongue
Reedfish
NorthernPike
SpottedGar
ParamormyropsKingsLeyae

```

```

Majority      XXXXXXXXXXXXXXXXXXXXXXXXXXXXXXXXXXXXXXXXXXXXXXXXXXXXXXXXXXXXXXXXXXXXXXXXXXXX
              |-----|-----|-----|-----|-----|-----|-----|
              103290  103300  103310  103320  103330  103340  103350  103360
Human         TTTTGTAGATAATTTGAGTAGAATTATACGTGCAATATATCTTGAGTTGTGACCAACAAGAAACAGATTAATGATTGA 102581
AsianBonytongue
Reedfish
NorthernPike
SpottedGar
ParamormyropsKingsLeyae

```

```

Majority      XXXXXXXXXXXXXXXXXXXXXXXXXXXXXXXXXXXXXXXXXXXXXXXXXXXXXXXXXXXXXXXXXXXXXXXXXXXX
              |-----|-----|-----|-----|-----|-----|-----|
              103370  103380  103390  103400  103410  103420  103430  103440
Human         AAATTCACCATACATTACTACCTATGTCCTCCACCTGCTATCTACTTCCAATTTTTTATATATATAAAAGTCATTAAG 102661
AsianBonytongue
Reedfish
NorthernPike
SpottedGar
ParamormyropsKingsLeyae

```

```

Majority      XXXXXXXXXXXXXXXXXXXXXXXXXXXXXXXXXXXXXXXXXXXXXXXXXXXXXXXXXXXXXXXXXXXXXXXXXXXX
              |-----|-----|-----|-----|-----|-----|-----|
              103450  103460  103470  103480  103490  103500  103510  103520
Human         TCATTTGTAATTGAGTTTGTTTTTTTTCTTGAGACAGGGTCTCACTCTGTCACCCAGGCTGGAGTGCAAATGGCATGAT 102741
AsianBonytongue
Reedfish
NorthernPike
SpottedGar
ParamormyropsKingsLeyae

```

```

Majority      XXXXXXXXXXXXXXXXXXXXXXXXXXXXXXXXXXXXXXXXXXXXXXXXXXXXXXXXXXXXXXXXXXXXXXXXXXXX
              |-----|-----|-----|-----|-----|-----|-----|
              103530  103540  103550  103560  103570  103580  103590  103600
Human         CACAGCTCACTGCAGCCTCAACCTCCCAGGTTGCATAGATCCTCCACCTCAGTCCCCACAGGCATGCATCACCATGCC 102821
AsianBonytongue
Reedfish
NorthernPike
SpottedGar
ParamormyropsKingsLeyae

```

```

Majority      XXXXXXXXXXXXXXXXXXXXXXXXXXXXXXXXXXXXXXXXXXXXXXXXXXXXXXXXXXXXXXXXXXXXXXXXXXXX
              |-----|-----|-----|-----|-----|-----|-----|
              103610  103620  103630  103640  103650  103660  103670  103680
Human         TGACTAGTTTTTGTGTTTTTTTGTAGAGACAAGGTTTTGCCATGTTGCCAGACTGGTCTCAAACCTGGGCCAAAGCCAT 102901
AsianBonytongue
Reedfish
NorthernPike
SpottedGar
ParamormyropsKingsLeyae

```
